# Supplementary material for: mQTL-seq delineates functionally relevant candidate gene harbouring a major QTL regulating pod number in chickpea
Source: PubMed Central journal article supplement — DNA Res. 2015 Dec 19;23(1):53–65. doi: 10.1093/dnares/dsv036 (PMC4755527; doi:10.1093/dnares/dsv036), 2015-12-19
Supplement: supp_dsv036_dsv036supp_table4.pdf [file supp_dsv036_dsv036supp_table4.pdf]

**Table S4:** SNPs found common between high and low pod number-containing parental accessions and homozygous bulks of mapping population (Pusa 1103 x ILWC 46) with respect to reference kabuli (CDC Frontier) chickpea genome

| SNPs IDs        | Chromosome IDs | Chromosomes     | Physical positions (bp) | CDC Frontier (Reference genome) | (Pusa 1103 & HPNB) | (ILWC 46 & LPNB) | Sequence Components of genome | Gene accession IDs | Putative functions                      |
|-----------------|----------------|-----------------|-------------------------|---------------------------------|--------------------|------------------|-------------------------------|--------------------|-----------------------------------------|
| SNP_1_A_331     | NC_021160.1    | Ca_Kabuli_Chr01 | 331                     | AA                              | GG                 | GG               | NON_SYNONYMOUS_CODING         | 101497325          | uncharacterized LOC101497325            |
| SNP_2_A_341     | NC_021160.1    | Ca_Kabuli_Chr01 | 341                     | CC                              | AA                 | AA               | NON_SYNONYMOUS_CODING         | 101497325          | uncharacterized LOC101497325            |
| SNP_4_A_7241    | NC_021160.1    | Ca_Kabuli_Chr01 | 7241                    | TT                              | CC                 | CC               | INTERGENIC                    |                    |                                         |
| SNP_5_A_9180    | NC_021160.1    | Ca_Kabuli_Chr01 | 9180                    | CC                              | TT                 | TT               | INTERGENIC                    |                    |                                         |
| SNP_6_A_13915   | NC_021160.1    | Ca_Kabuli_Chr01 | 13915                   | AA                              | GG                 | GG               | INTERGENIC                    |                    |                                         |
| SNP_7_A_17726   | NC_021160.1    | Ca_Kabuli_Chr01 | 17726                   | CC                              | TT                 | TT               | DRR                           | 101488339          | uncharacterized LOC101488339            |
| SNP_8_A_17801   | NC_021160.1    | Ca_Kabuli_Chr01 | 17801                   | TT                              | CC                 | CC               | DRR                           | 101488339          | uncharacterized LOC101488339            |
| SNP_11_A_38902  | NC_021160.1    | Ca_Kabuli_Chr01 | 38902                   | CC                              | TT                 | TT               | URR                           | 101488545          | type 1 phosphatases regulator ypi1-like |
| SNP_12_A_48428  | NC_021160.1    | Ca_Kabuli_Chr01 | 48428                   | GG                              | AA                 | AA               | INTRON                        | 101497647          | uncharacterized protein At5g08430-like  |
| SNP_13_A_84665  | NC_021160.1    | Ca_Kabuli_Chr01 | 84665                   | AA                              | GG                 | GG               | INTERGENIC                    |                    |                                         |
| SNP_14_A_84783  | NC_021160.1    | Ca_Kabuli_Chr01 | 84783                   | CC                              | TT                 | TT               | INTERGENIC                    |                    |                                         |
| SNP_15_A_117177 | NC_021160.1    | Ca_Kabuli_Chr01 | 117177                  | AA                              | TT                 | TT               | INTERGENIC                    |                    |                                         |
| SNP_16_A_117178 | NC_021160.1    | Ca_Kabuli_Chr01 | 117178                  | GG                              | TT                 | TT               | INTERGENIC                    |                    |                                         |
| SNP_17_A_117506 | NC_021160.1    | Ca_Kabuli_Chr01 | 117506                  | AA                              | GG                 | GG               | INTERGENIC                    |                    |                                         |
| SNP_18_A_120210 | NC_021160.1    | Ca_Kabuli_Chr01 | 120210                  | TT                              | CC                 | CC               | INTERGENIC                    |                    |                                         |
| SNP_19_A_124852 | NC_021160.1    | Ca_Kabuli_Chr01 | 124852                  | AA                              | GG                 | GG               | INTERGENIC                    |                    |                                         |
| SNP_20_A_125036 | NC_021160.1    | Ca_Kabuli_Chr01 | 125036                  | AA                              | GG                 | GG               | INTERGENIC                    |                    |                                         |
| SNP_21_A_125491 | NC_021160.1    | Ca_Kabuli_Chr01 | 125491                  | TT                              | CC                 | CC               | INTERGENIC                    |                    |                                         |
| SNP_22_A_137957 | NC_021160.1    | Ca_Kabuli_Chr01 | 137957                  | CC                              | TT                 | TT               | INTERGENIC                    |                    |                                         |
| SNP_23_A_186363 | NC_021160.1    | Ca_Kabuli_Chr01 | 186363                  | AA                              | TT                 | TT               | INTRON                        | 101494203          | uncharacterized LOC101494203            |
| SNP_24_A_186377 | NC_021160.1    | Ca_Kabuli_Chr01 | 186377                  | AA                              | GG                 | GG               | INTRON                        | 101494203          | uncharacterized LOC101494203            |

| SNPs IDs         | Chromosome IDs | Chromosomes     | Physical positions (bp) | CDC Frontier (Reference genome) | (Pusa 1103 & HPNB) | (ILWC 46 & LPNB) | Sequence Components of genome | Gene accession IDs | Putative functions                                         |
|------------------|----------------|-----------------|-------------------------|---------------------------------|--------------------|------------------|-------------------------------|--------------------|------------------------------------------------------------|
| SNP_26_A_186564  | NC_021160.1    | Ca_Kabuli_Chr01 | 186564                  | AA                              | TT                 | TT               | INTRON                        | 101494203          | uncharacterized LOC101494203                               |
| SNP_27_A_186725  | NC_021160.1    | Ca_Kabuli_Chr01 | 186725                  | GG                              | TT                 | TT               | INTRON                        | 101494203          | uncharacterized LOC101494203                               |
| SNP_28_A_186749  | NC_021160.1    | Ca_Kabuli_Chr01 | 186749                  | GG                              | AA                 | AA               | INTRON                        | 101494203          | uncharacterized LOC101494203                               |
| SNP_29_A_226700  | NC_021160.1    | Ca_Kabuli_Chr01 | 226700                  | GG                              | AA                 | AA               | URR                           | 101495904          | ras-related protein RABA2a                                 |
| SNP_32_A_498218  | NC_021160.1    | Ca_Kabuli_Chr01 | 498218                  | AA                              | TT                 | TT               | INTERGENIC                    |                    |                                                            |
| SNP_33_A_797364  | NC_021160.1    | Ca_Kabuli_Chr01 | 797364                  | GG                              | TT                 | TT               | INTERGENIC                    |                    |                                                            |
| SNP_35_A_884497  | NC_021160.1    | Ca_Kabuli_Chr01 | 884497                  | AA                              | GG                 | GG               | DRR                           | 101504195          | phosphatidylserine decarboxylase proenzyme 2-like          |
| SNP_36_A_906464  | NC_021160.1    | Ca_Kabuli_Chr01 | 906464                  | GG                              | AA                 | AA               | URR                           | 101505467          | soyasaponin III rhamnosyltransferase                       |
| SNP_37_A_938637  | NC_021160.1    | Ca_Kabuli_Chr01 | 938637                  | CC                              | GG                 | GG               | INTRON                        | 101506774          | protein RAE1-like                                          |
| SNP_38_A_963595  | NC_021160.1    | Ca_Kabuli_Chr01 | 963595                  | AA                              | TT                 | TT               | INTERGENIC                    |                    |                                                            |
| SNP_39_A_986531  | NC_021160.1    | Ca_Kabuli_Chr01 | 986531                  | AA                              | CC                 | CC               | URR                           | 101508788          | non-specific lipid-transfer protein-like protein At5g64080 |
| SNP_40_A_1041444 | NC_021160.1    | Ca_Kabuli_Chr01 | 1041444                 | CC                              | TT                 | TT               | INTERGENIC                    |                    |                                                            |
| SNP_41_A_1082224 | NC_021160.1    | Ca_Kabuli_Chr01 | 1082224                 | TT                              | AA                 | AA               | INTERGENIC                    |                    |                                                            |
| SNP_44_A_1085672 | NC_021160.1    | Ca_Kabuli_Chr01 | 1085672                 | AA                              | TT                 | TT               | URR                           | 101489115          | metacaspase-3-like                                         |
| SNP_45_A_1088449 | NC_021160.1    | Ca_Kabuli_Chr01 | 1088449                 | AA                              | TT                 | TT               | DRR                           | 101489448          | uncharacterized LOC101489448                               |
| SNP_47_A_1093233 | NC_021160.1    | Ca_Kabuli_Chr01 | 1093233                 | TT                              | CC                 | CC               | START_GAINED                  | 101489448          | uncharacterized LOC101489448                               |
| SNP_48_A_1093234 | NC_021160.1    | Ca_Kabuli_Chr01 | 1093234                 | AA                              | TT                 | TT               | URR                           | 101489448          | uncharacterized LOC101489448                               |
| SNP_49_A_1093258 | NC_021160.1    | Ca_Kabuli_Chr01 | 1093258                 | CC                              | TT                 | TT               | URR                           | 101489448          | uncharacterized LOC101489448                               |
| SNP_50_A_1094211 | NC_021160.1    | Ca_Kabuli_Chr01 | 1094211                 | CC                              | TT                 | TT               | URR                           | 101489448          | uncharacterized LOC101489448                               |
| SNP_51_A_1094212 | NC_021160.1    | Ca_Kabuli_Chr01 | 1094212                 | GG                              | TT                 | TT               | URR                           | 101489448          | uncharacterized LOC101489448                               |
| SNP_52_A_1094337 | NC_021160.1    | Ca_Kabuli_Chr01 | 1094337                 | CC                              | GG                 | GG               | URR                           | 101489448          | uncharacterized LOC101489448                               |
| SNP_53_A_1094345 | NC_021160.1    | Ca_Kabuli_Chr01 | 1094345                 | AA                              | CC                 | CC               | URR                           | 101489448          | uncharacterized LOC101489448                               |

| SNPs IDs         | Chromosome IDs | Chromosomes     | Physical positions (bp) | CDC Frontier (Reference genome) | (Pusa 1103 & HPNB) | (ILWC 46 & LPNB) | Sequence Components of genome | Gene accession IDs | Putative functions                       |
|------------------|----------------|-----------------|-------------------------|---------------------------------|--------------------|------------------|-------------------------------|--------------------|------------------------------------------|
| SNP_54_A_1094434 | NC_021160.1    | Ca_Kabuli_Chr01 | 1094434                 | TT                              | CC                 | CC               | URR                           | 101489448          | uncharacterized LOC101489448             |
| SNP_56_A_1095138 | NC_021160.1    | Ca_Kabuli_Chr01 | 1095138                 | CC                              | TT                 | TT               | URR                           | 101489448          | uncharacterized LOC101489448             |
| SNP_57_A_1095418 | NC_021160.1    | Ca_Kabuli_Chr01 | 1095418                 | TT                              | AA                 | AA               | INTERGENIC                    |                    |                                          |
| SNP_58_A_1099273 | NC_021160.1    | Ca_Kabuli_Chr01 | 1099273                 | CC                              | TT                 | TT               | INTERGENIC                    |                    |                                          |
| SNP_59_A_1099312 | NC_021160.1    | Ca_Kabuli_Chr01 | 1099312                 | TT                              | CC                 | CC               | INTERGENIC                    |                    |                                          |
| SNP_60_A_1099338 | NC_021160.1    | Ca_Kabuli_Chr01 | 1099338                 | AA                              | TT                 | TT               | INTERGENIC                    |                    |                                          |
| SNP_61_A_1099644 | NC_021160.1    | Ca_Kabuli_Chr01 | 1099644                 | CC                              | AA                 | AA               | INTERGENIC                    |                    |                                          |
| SNP_62_A_1100347 | NC_021160.1    | Ca_Kabuli_Chr01 | 1100347                 | TT                              | CC                 | CC               | INTERGENIC                    |                    |                                          |
| SNP_63_A_1100879 | NC_021160.1    | Ca_Kabuli_Chr01 | 1100879                 | AA                              | CC                 | CC               | INTERGENIC                    |                    |                                          |
| SNP_64_A_1100895 | NC_021160.1    | Ca_Kabuli_Chr01 | 1100895                 | AA                              | CC                 | CC               | INTERGENIC                    |                    |                                          |
| SNP_65_A_1100896 | NC_021160.1    | Ca_Kabuli_Chr01 | 1100896                 | TT                              | AA                 | AA               | INTERGENIC                    |                    |                                          |
| SNP_66_A_1100900 | NC_021160.1    | Ca_Kabuli_Chr01 | 1100900                 | AA                              | CC                 | CC               | INTERGENIC                    |                    |                                          |
| SNP_67_A_1100956 | NC_021160.1    | Ca_Kabuli_Chr01 | 1100956                 | GG                              | AA                 | AA               | INTERGENIC                    |                    |                                          |
| SNP_68_A_1100977 | NC_021160.1    | Ca_Kabuli_Chr01 | 1100977                 | TT                              | CC                 | CC               | INTERGENIC                    |                    |                                          |
| SNP_69_A_1100978 | NC_021160.1    | Ca_Kabuli_Chr01 | 1100978                 | GG                              | AA                 | AA               | INTERGENIC                    |                    |                                          |
| SNP_70_A_1101057 | NC_021160.1    | Ca_Kabuli_Chr01 | 1101057                 | TT                              | CC                 | CC               | INTERGENIC                    |                    |                                          |
| SNP_71_A_1102476 | NC_021160.1    | Ca_Kabuli_Chr01 | 1102476                 | AA                              | GG                 | GG               | INTERGENIC                    |                    |                                          |
| SNP_72_A_1102769 | NC_021160.1    | Ca_Kabuli_Chr01 | 1102769                 | GG                              | TT                 | TT               | INTERGENIC                    |                    |                                          |
| SNP_73_A_1102779 | NC_021160.1    | Ca_Kabuli_Chr01 | 1102779                 | CC                              | TT                 | TT               | INTERGENIC                    |                    |                                          |
| SNP_74_A_1159904 | NC_021160.1    | Ca_Kabuli_Chr01 | 1159904                 | TT                              | CC                 | CC               | URR                           | 101504405          | classical arabinogalactan protein 1-like |
| SNP_76_A_1186057 | NC_021160.1    | Ca_Kabuli_Chr01 | 1186057                 | AA                              | GG                 | GG               | SYNONYMOUS_CODING             | 101493012          | pyruvate decarboxylase 1-like            |
| SNP_77_A_1186206 | NC_021160.1    | Ca_Kabuli_Chr01 | 1186206                 | CC                              | GG                 | GG               | SYNONYMOUS_CODING             | 101493012          | pyruvate decarboxylase 1-like            |

| SNPs IDs          | Chromosome IDs | Chromosomes     | Physical positions (bp) | CDC Frontier genome (Reference genome) | (Pusa 1103 & HPNB) | (ILWC 46 & LPNB) | Sequence Components of genome | Gene accession IDs | Putative functions                                                      |
|-------------------|----------------|-----------------|-------------------------|----------------------------------------|--------------------|------------------|-------------------------------|--------------------|-------------------------------------------------------------------------|
| SNP_78_A_1197170  | NC_021160.1    | Ca_Kabuli_Chr01 | 1197170                 | GG                                     | TT                 | TT               | DRR                           | 101505047          | pyruvate decarboxylase 1-like                                           |
| SNP_79_A_1209216  | NC_021160.1    | Ca_Kabuli_Chr01 | 1209216                 | AA                                     | CC                 | CC               | INTRON                        | 101505365          | (3S,6E)-nerolidol synthase 1-like                                       |
| SNP_82_A_1371789  | NC_021160.1    | Ca_Kabuli_Chr01 | 1371789                 | CC                                     | TT                 | TT               | INTERGENIC                    |                    |                                                                         |
| SNP_83_A_1371791  | NC_021160.1    | Ca_Kabuli_Chr01 | 1371791                 | TT                                     | GG                 | GG               | INTERGENIC                    |                    |                                                                         |
| SNP_84_A_1377085  | NC_021160.1    | Ca_Kabuli_Chr01 | 1377085                 | TT                                     | CC                 | CC               | INTRON                        | 101500250          | MADS-box transcription factor 23-like                                   |
| SNP_86_A_1409346  | NC_021160.1    | Ca_Kabuli_Chr01 | 1409346                 | AA                                     | TT                 | TT               | INTERGENIC                    |                    |                                                                         |
| SNP_88_A_1469404  | NC_021160.1    | Ca_Kabuli_Chr01 | 1469404                 | TT                                     | AA                 | AA               | INTERGENIC                    |                    |                                                                         |
| SNP_89_A_1511754  | NC_021160.1    | Ca_Kabuli_Chr01 | 1511754                 | GG                                     | CC                 | CC               | URR                           | 101505805          | aspartic proteinase-like protein 2                                      |
| SNP_91_A_1540564  | NC_021160.1    | Ca_Kabuli_Chr01 | 1540564                 | TT                                     | CC                 | CC               | INTERGENIC                    |                    |                                                                         |
| SNP_92_A_1582825  | NC_021160.1    | Ca_Kabuli_Chr01 | 1582825                 | CC                                     | TT                 | TT               | DRR                           | 101510079          | uncharacterized protein At3g49720-like                                  |
| SNP_93_A_1593940  | NC_021160.1    | Ca_Kabuli_Chr01 | 1593940                 | TT                                     | AA                 | AA               | URR                           | 101507323          | basic form of pathogenesis-related protein 1-like                       |
| SNP_94_A_1605743  | NC_021160.1    | Ca_Kabuli_Chr01 | 1605743                 | AA                                     | GG                 | GG               | URR                           | 101510405          | pathogenesis-related protein 1B-like                                    |
| SNP_96_A_1659441  | NC_021160.1    | Ca_Kabuli_Chr01 | 1659441                 | CC                                     | TT                 | TT               | INTERGENIC                    |                    |                                                                         |
| SNP_97_A_1673567  | NC_021160.1    | Ca_Kabuli_Chr01 | 1673567                 | TT                                     | CC                 | CC               | URR                           | 101513827          | uncharacterized LOC101513827                                            |
| SNP_98_A_1686137  | NC_021160.1    | Ca_Kabuli_Chr01 | 1686137                 | GG                                     | AA                 | AA               | INTERGENIC                    |                    |                                                                         |
| SNP_100_A_1687993 | NC_021160.1    | Ca_Kabuli_Chr01 | 1687993                 | AA                                     | GG                 | GG               | DRR                           | 101515140          | (3S,6E)-nerolidol synthase 1-like                                       |
| SNP_101_A_1708047 | NC_021160.1    | Ca_Kabuli_Chr01 | 1708047                 | CC                                     | TT                 | TT               | INTERGENIC                    |                    |                                                                         |
| SNP_104_A_1731616 | NC_021160.1    | Ca_Kabuli_Chr01 | 1731616                 | GG                                     | CC                 | CC               | INTRON                        | 101507627          | G-type lectin S-receptor-like serine/threonine-protein kinase At4g27290 |
| SNP_105_A_1732756 | NC_021160.1    | Ca_Kabuli_Chr01 | 1732756                 | TT                                     | GG                 | GG               | INTRON                        | 101507627          | G-type lectin S-receptor-like serine/threonine-protein kinase At4g27290 |
| SNP_106_A_1733815 | NC_021160.1    | Ca_Kabuli_Chr01 | 1733815                 | GG                                     | AA                 | AA               | SYNONYMOUS_CODING             | 101507627          | G-type lectin S-receptor-like serine/threonine-protein kinase At4g27290 |
| SNP_107_A_1733817 | NC_021160.1    | Ca_Kabuli_Chr01 | 1733817                 | CC                                     | TT                 | TT               | NON_SYNONYMOUS_CODING         | 101507627          | G-type lectin S-receptor-like serine/threonine-protein kinase At4g27290 |
| SNP_108_A_1737970 | NC_021160.1    | Ca_Kabuli_Chr01 | 1737970                 | CC                                     | TT                 | TT               | DRR                           | 101490837          | receptor-like serine/threonine-protein kinase SD1-8                     |



| SNPs IDs          | Chromosome IDs | Chromosomes     | Physical positions (bp) | CDC Frontier (Reference genome) | (Pusa 1103 & HPNB) | (ILWC 46 & LPNB) | Sequence Components of genome | Gene accession IDs | Putative functions                                  |
|-------------------|----------------|-----------------|-------------------------|---------------------------------|--------------------|------------------|-------------------------------|--------------------|-----------------------------------------------------|
| SNP_109_A_1742621 | NC_021160.1    | Ca_Kabuli_Chr01 | 1742621                 | GG                              | TT                 | TT               | DRR                           | 101490514          | receptor-like serine/threonine-protein kinase SD1-8 |
| SNP_110_A_1745222 | NC_021160.1    | Ca_Kabuli_Chr01 | 1745222                 | AA                              | GG                 | GG               | INTERGENIC                    |                    |                                                     |
| SNP_112_A_1745982 | NC_021160.1    | Ca_Kabuli_Chr01 | 1745982                 | CC                              | TT                 | TT               | INTERGENIC                    |                    |                                                     |
| SNP_113_A_1781811 | NC_021160.1    | Ca_Kabuli_Chr01 | 1781811                 | AA                              | GG                 | GG               | INTERGENIC                    |                    |                                                     |
| SNP_114_A_1781833 | NC_021160.1    | Ca_Kabuli_Chr01 | 1781833                 | AA                              | GG                 | GG               | INTERGENIC                    |                    |                                                     |
| SNP_115_A_1783207 | NC_021160.1    | Ca_Kabuli_Chr01 | 1783207                 | AA                              | GG                 | GG               | INTRON                        | 101493116          | nitric oxide synthase-interacting protein           |
| SNP_116_A_1783388 | NC_021160.1    | Ca_Kabuli_Chr01 | 1783388                 | AA                              | CC                 | CC               | INTRON                        | 101493116          | nitric oxide synthase-interacting protein           |
| SNP_117_A_1783389 | NC_021160.1    | Ca_Kabuli_Chr01 | 1783389                 | GG                              | AA                 | AA               | INTRON                        | 101493116          | nitric oxide synthase-interacting protein           |
| SNP_118_A_1783415 | NC_021160.1    | Ca_Kabuli_Chr01 | 1783415                 | TT                              | CC                 | CC               | INTRON                        | 101493116          | nitric oxide synthase-interacting protein           |
| SNP_119_A_1783736 | NC_021160.1    | Ca_Kabuli_Chr01 | 1783736                 | TT                              | CC                 | CC               | SYNONYMOUS_CODING             | 101493116          | nitric oxide synthase-interacting protein           |
| SNP_120_A_1785122 | NC_021160.1    | Ca_Kabuli_Chr01 | 1785122                 | TT                              | CC                 | CC               | URR                           | 101493116          | nitric oxide synthase-interacting protein           |
| SNP_121_A_1786177 | NC_021160.1    | Ca_Kabuli_Chr01 | 1786177                 | TT                              | GG                 | GG               | DRR                           | 101493445          | protein PLANT CADMIUM RESISTANCE 8-like             |
| SNP_122_A_1786463 | NC_021160.1    | Ca_Kabuli_Chr01 | 1786463                 | GG                              | AA                 | AA               | DRR                           | 101493445          | protein PLANT CADMIUM RESISTANCE 8-like             |
| SNP_123_A_1787949 | NC_021160.1    | Ca_Kabuli_Chr01 | 1787949                 | CC                              | TT                 | TT               | INTERGENIC                    |                    |                                                     |
| SNP_124_A_1792444 | NC_021160.1    | Ca_Kabuli_Chr01 | 1792444                 | GG                              | AA                 | AA               | INTERGENIC                    |                    |                                                     |
| SNP_125_A_1793203 | NC_021160.1    | Ca_Kabuli_Chr01 | 1793203                 | GG                              | AA                 | AA               | INTERGENIC                    |                    |                                                     |
| SNP_126_A_1799951 | NC_021160.1    | Ca_Kabuli_Chr01 | 1799951                 | CC                              | TT                 | TT               | URR                           | 101507948          | cation/H(+) antiporter 15-like                      |
| SNP_128_A_1805624 | NC_021160.1    | Ca_Kabuli_Chr01 | 1805624                 | AA                              | TT                 | TT               | URR                           | 101494303          | equilibrative nucleotide transporter 3-like         |
| SNP_129_A_1807499 | NC_021160.1    | Ca_Kabuli_Chr01 | 1807499                 | GG                              | AA                 | AA               | INTERGENIC                    |                    |                                                     |
| SNP_130_A_1807689 | NC_021160.1    | Ca_Kabuli_Chr01 | 1807689                 | AA                              | GG                 | GG               | INTERGENIC                    |                    |                                                     |
| SNP_131_A_1807694 | NC_021160.1    | Ca_Kabuli_Chr01 | 1807694                 | TT                              | CC                 | CC               | INTERGENIC                    |                    |                                                     |
| SNP_132_A_1807701 | NC_021160.1    | Ca_Kabuli_Chr01 | 1807701                 | TT                              | CC                 | CC               | INTERGENIC                    |                    |                                                     |

| SNPs IDs          | Chromosome IDs | Chromosomes     | Physical positions (bp) | CDC Frontier (Reference genome) | (Pusa 1103 & HPNB) | (ILWC 46 & LPNB) | Sequence Components of genome | Gene accession IDs | Putative functions                                      |
|-------------------|----------------|-----------------|-------------------------|---------------------------------|--------------------|------------------|-------------------------------|--------------------|---------------------------------------------------------|
| SNP_133_A_1807758 | NC_021160.1    | Ca_Kabuli_Chr01 | 1807758                 | CC                              | TT                 | TT               | INTERGENIC                    |                    |                                                         |
| SNP_134_A_1807768 | NC_021160.1    | Ca_Kabuli_Chr01 | 1807768                 | TT                              | CC                 | CC               | INTERGENIC                    |                    |                                                         |
| SNP_135_A_1807806 | NC_021160.1    | Ca_Kabuli_Chr01 | 1807806                 | CC                              | TT                 | TT               | INTERGENIC                    |                    |                                                         |
| SNP_136_A_1813664 | NC_021160.1    | Ca_Kabuli_Chr01 | 1813664                 | AA                              | TT                 | TT               | NON_SYNONYMOUS_CODING         | 101494927          | equilibrative nucleotide transporter 3-like             |
| SNP_137_A_1814033 | NC_021160.1    | Ca_Kabuli_Chr01 | 1814033                 | AA                              | GG                 | GG               | INTRON                        | 101494927          | equilibrative nucleotide transporter 3-like             |
| SNP_139_A_1820550 | NC_021160.1    | Ca_Kabuli_Chr01 | 1820550                 | TT                              | GG                 | GG               | URR                           | 101508262          | Unknown function                                        |
| SNP_140_A_1820724 | NC_021160.1    | Ca_Kabuli_Chr01 | 1820724                 | TT                              | CC                 | CC               | URR                           | 101508262          | Unknown function                                        |
| SNP_141_A_1824611 | NC_021160.1    | Ca_Kabuli_Chr01 | 1824611                 | CC                              | AA                 | AA               | INTRON                        | 101508582          | lysine-specific demethylase JMJ25-like                  |
| SNP_142_A_1825395 | NC_021160.1    | Ca_Kabuli_Chr01 | 1825395                 | AA                              | GG                 | GG               | INTRON                        | 101508582          | lysine-specific demethylase JMJ25-like                  |
| SNP_143_A_1831998 | NC_021160.1    | Ca_Kabuli_Chr01 | 1831998                 | GG                              | TT                 | TT               | INTERGENIC                    |                    |                                                         |
| SNP_146_A_1836863 | NC_021160.1    | Ca_Kabuli_Chr01 | 1836863                 | GG                              | AA                 | AA               | URR                           | 101495478          | uncharacterized aarF domain-containing protein kinase 2 |
| SNP_147_A_1838100 | NC_021160.1    | Ca_Kabuli_Chr01 | 1838100                 | TT                              | CC                 | CC               | INTERGENIC                    |                    |                                                         |
| SNP_148_A_1840799 | NC_021160.1    | Ca_Kabuli_Chr01 | 1840799                 | AA                              | CC                 | CC               | INTERGENIC                    |                    |                                                         |
| SNP_149_A_1840818 | NC_021160.1    | Ca_Kabuli_Chr01 | 1840818                 | CC                              | TT                 | TT               | INTERGENIC                    |                    |                                                         |
| SNP_150_A_1840824 | NC_021160.1    | Ca_Kabuli_Chr01 | 1840824                 | AA                              | GG                 | GG               | INTERGENIC                    |                    |                                                         |
| SNP_151_A_1840901 | NC_021160.1    | Ca_Kabuli_Chr01 | 1840901                 | AA                              | CC                 | CC               | INTERGENIC                    |                    |                                                         |
| SNP_152_A_1840967 | NC_021160.1    | Ca_Kabuli_Chr01 | 1840967                 | CC                              | AA                 | AA               | INTERGENIC                    |                    |                                                         |
| SNP_153_A_1840971 | NC_021160.1    | Ca_Kabuli_Chr01 | 1840971                 | TT                              | CC                 | CC               | INTERGENIC                    |                    |                                                         |
| SNP_154_A_1840980 | NC_021160.1    | Ca_Kabuli_Chr01 | 1840980                 | TT                              | CC                 | CC               | INTERGENIC                    |                    |                                                         |
| SNP_155_A_1841010 | NC_021160.1    | Ca_Kabuli_Chr01 | 1841010                 | AA                              | GG                 | GG               | INTERGENIC                    |                    |                                                         |
| SNP_158_A_1841306 | NC_021160.1    | Ca_Kabuli_Chr01 | 1841306                 | GG                              | TT                 | TT               | INTERGENIC                    |                    |                                                         |
| SNP_159_A_1841321 | NC_021160.1    | Ca_Kabuli_Chr01 | 1841321                 | AA                              | GG                 | GG               | INTERGENIC                    |                    |                                                         |

| SNPs IDs          | Chromosome IDs | Chromosomes     | Physical positions (bp) | CDC Frontier (Reference genome) | (Pusa 1103 & HPNB) | (ILWC 46 & LPNB) | Sequence genome | Components of | Gene accession IDs                               | Putative functions |
|-------------------|----------------|-----------------|-------------------------|---------------------------------|--------------------|------------------|-----------------|---------------|--------------------------------------------------|--------------------|
| SNP_160_A_1841324 | NC_021160.1    | Ca_Kabuli_Chr01 | 1841324                 | TT                              | CC                 | CC               | INTERGENIC      |               |                                                  |                    |
| SNP_161_A_1841325 | NC_021160.1    | Ca_Kabuli_Chr01 | 1841325                 | CC                              | GG                 | GG               | INTERGENIC      |               |                                                  |                    |
| SNP_162_A_1841358 | NC_021160.1    | Ca_Kabuli_Chr01 | 1841358                 | AA                              | CC                 | CC               | INTERGENIC      |               |                                                  |                    |
| SNP_163_A_1841377 | NC_021160.1    | Ca_Kabuli_Chr01 | 1841377                 | TT                              | AA                 | AA               | INTERGENIC      |               |                                                  |                    |
| SNP_165_A_1841497 | NC_021160.1    | Ca_Kabuli_Chr01 | 1841497                 | CC                              | AA                 | AA               | INTERGENIC      |               |                                                  |                    |
| SNP_166_A_1841613 | NC_021160.1    | Ca_Kabuli_Chr01 | 1841613                 | CC                              | TT                 | TT               | INTERGENIC      |               |                                                  |                    |
| SNP_167_A_1843120 | NC_021160.1    | Ca_Kabuli_Chr01 | 1843120                 | TT                              | GG                 | GG               | INTERGENIC      |               |                                                  |                    |
| SNP_168_A_1843376 | NC_021160.1    | Ca_Kabuli_Chr01 | 1843376                 | TT                              | GG                 | GG               | INTERGENIC      |               |                                                  |                    |
| SNP_170_A_1843705 | NC_021160.1    | Ca_Kabuli_Chr01 | 1843705                 | AA                              | TT                 | TT               | INTERGENIC      |               |                                                  |                    |
| SNP_171_A_1848759 | NC_021160.1    | Ca_Kabuli_Chr01 | 1848759                 | TT                              | CC                 | CC               | DRR             | 101495806     | transcription factor MYB39                       |                    |
| SNP_172_A_1848830 | NC_021160.1    | Ca_Kabuli_Chr01 | 1848830                 | TT                              | GG                 | GG               | DRR             | 101495806     | transcription factor MYB39                       |                    |
| SNP_175_A_1852306 | NC_021160.1    | Ca_Kabuli_Chr01 | 1852306                 | GG                              | CC                 | CC               | URR             | 101495806     | transcription factor MYB39                       |                    |
| SNP_176_A_1852332 | NC_021160.1    | Ca_Kabuli_Chr01 | 1852332                 | CC                              | AA                 | AA               | URR             | 101495806     | transcription factor MYB39                       |                    |
| SNP_177_A_1856176 | NC_021160.1    | Ca_Kabuli_Chr01 | 1856176                 | TT                              | CC                 | CC               | DRR             | 101496129     | putative PAP-specific phosphatase, mitochondrial |                    |
| SNP_178_A_1856423 | NC_021160.1    | Ca_Kabuli_Chr01 | 1856423                 | TT                              | AA                 | AA               | DRR             | 101496129     | putative PAP-specific phosphatase, mitochondrial |                    |
| SNP_179_A_1856496 | NC_021160.1    | Ca_Kabuli_Chr01 | 1856496                 | AA                              | CC                 | CC               | DRR             | 101496129     | putative PAP-specific phosphatase, mitochondrial |                    |
| SNP_180_A_1858041 | NC_021160.1    | Ca_Kabuli_Chr01 | 1858041                 | TT                              | AA                 | AA               | INTRON          | 101496129     | putative PAP-specific phosphatase, mitochondrial |                    |
| SNP_181_A_1858064 | NC_021160.1    | Ca_Kabuli_Chr01 | 1858064                 | TT                              | AA                 | AA               | INTRON          | 101496129     | putative PAP-specific phosphatase, mitochondrial |                    |
| SNP_182_A_1858078 | NC_021160.1    | Ca_Kabuli_Chr01 | 1858078                 | CC                              | TT                 | TT               | INTRON          | 101496129     | putative PAP-specific phosphatase, mitochondrial |                    |
| SNP_183_A_1863536 | NC_021160.1    | Ca_Kabuli_Chr01 | 1863536                 | AA                              | GG                 | GG               | DRR             | 101497320     | uncharacterized LOC101497320                     |                    |
| SNP_184_A_1869287 | NC_021160.1    | Ca_Kabuli_Chr01 | 1869287                 | TT                              | CC                 | CC               | INTERGENIC      |               |                                                  |                    |
| SNP_185_A_1869849 | NC_021160.1    | Ca_Kabuli_Chr01 | 1869849                 | TT                              | CC                 | CC               | INTERGENIC      |               |                                                  |                    |

| SNPs IDs          | Chromosome IDs | Chromosomes     | Physical positions (bp) | CDC Frontier genome (Reference genome) | (Pusa 1103 & HPNB) | (ILWC 46 & LPNB) | Sequence Components of genome | Gene accession IDs | Putative functions                                                            |
|-------------------|----------------|-----------------|-------------------------|----------------------------------------|--------------------|------------------|-------------------------------|--------------------|-------------------------------------------------------------------------------|
| SNP_186_A_1869864 | NC_021160.1    | Ca_Kabuli_Chr01 | 1869864                 | CC                                     | AA                 | AA               | INTERGENIC                    |                    |                                                                               |
| SNP_187_A_1869865 | NC_021160.1    | Ca_Kabuli_Chr01 | 1869865                 | AA                                     | GG                 | GG               | INTERGENIC                    |                    |                                                                               |
| SNP_188_A_1870245 | NC_021160.1    | Ca_Kabuli_Chr01 | 1870245                 | TT                                     | AA                 | AA               | INTRON                        | 101508897          | external alternative NAD(P)H-ubiquinone oxidoreductase B2, mitochondrial-like |
| SNP_189_A_1871126 | NC_021160.1    | Ca_Kabuli_Chr01 | 1871126                 | TT                                     | AA                 | AA               | INTRON                        | 101508897          | external alternative NAD(P)H-ubiquinone oxidoreductase B2, mitochondrial-like |
| SNP_190_A_1871129 | NC_021160.1    | Ca_Kabuli_Chr01 | 1871129                 | CC                                     | TT                 | TT               | INTRON                        | 101508897          | external alternative NAD(P)H-ubiquinone oxidoreductase B2, mitochondrial-like |
| SNP_191_A_1874980 | NC_021160.1    | Ca_Kabuli_Chr01 | 1874980                 | GG                                     | AA                 | AA               | INTERGENIC                    |                    |                                                                               |
| SNP_192_A_1874990 | NC_021160.1    | Ca_Kabuli_Chr01 | 1874990                 | TT                                     | CC                 | CC               | INTERGENIC                    |                    |                                                                               |
| SNP_193_A_1875844 | NC_021160.1    | Ca_Kabuli_Chr01 | 1875844                 | CC                                     | TT                 | TT               | INTERGENIC                    |                    |                                                                               |
| SNP_195_A_1877668 | NC_021160.1    | Ca_Kabuli_Chr01 | 1877668                 | GG                                     | AA                 | AA               | INTERGENIC                    |                    |                                                                               |
| SNP_196_A_1881223 | NC_021160.1    | Ca_Kabuli_Chr01 | 1881223                 | TT                                     | CC                 | CC               | URR                           | 101508897          | external alternative NAD(P)H-ubiquinone oxidoreductase B2, mitochondrial-like |
| SNP_198_A_1882710 | NC_021160.1    | Ca_Kabuli_Chr01 | 1882710                 | TT                                     | GG                 | GG               | INTERGENIC                    |                    |                                                                               |
| SNP_200_A_1883070 | NC_021160.1    | Ca_Kabuli_Chr01 | 1883070                 | AA                                     | GG                 | GG               | INTERGENIC                    |                    |                                                                               |
| SNP_202_A_1883120 | NC_021160.1    | Ca_Kabuli_Chr01 | 1883120                 | AA                                     | CC                 | CC               | INTERGENIC                    |                    |                                                                               |
| SNP_203_A_1883132 | NC_021160.1    | Ca_Kabuli_Chr01 | 1883132                 | CC                                     | TT                 | TT               | INTERGENIC                    |                    |                                                                               |
| SNP_205_A_1883200 | NC_021160.1    | Ca_Kabuli_Chr01 | 1883200                 | GG                                     | AA                 | AA               | INTERGENIC                    |                    |                                                                               |
| SNP_207_A_1888214 | NC_021160.1    | Ca_Kabuli_Chr01 | 1888214                 | CC                                     | AA                 | AA               | URR                           | 101497641          | heterogeneous nuclear ribonucleoprotein U-like protein 1                      |
| SNP_208_A_1888299 | NC_021160.1    | Ca_Kabuli_Chr01 | 1888299                 | GG                                     | AA                 | AA               | URR                           | 101497641          | heterogeneous nuclear ribonucleoprotein U-like protein 1                      |
| SNP_209_A_1888583 | NC_021160.1    | Ca_Kabuli_Chr01 | 1888583                 | TT                                     | CC                 | CC               | URR                           | 101497641          | heterogeneous nuclear ribonucleoprotein U-like protein 1                      |
| SNP_210_A_1894845 | NC_021160.1    | Ca_Kabuli_Chr01 | 1894845                 | CC                                     | TT                 | TT               | URR                           | 101509539          | Unknown function                                                              |
| SNP_211_A_1896259 | NC_021160.1    | Ca_Kabuli_Chr01 | 1896259                 | CC                                     | TT                 | TT               | URR                           | 101509539          | Unknown function                                                              |
| SNP_212_A_1896463 | NC_021160.1    | Ca_Kabuli_Chr01 | 1896463                 | AA                                     | GG                 | GG               | URR                           | 101509539          | Unknown function                                                              |
| SNP_213_A_1910806 | NC_021160.1    | Ca_Kabuli_Chr01 | 1910806                 | TT                                     | CC                 | CC               | INTERGENIC                    |                    |                                                                               |

| SNPs IDs          | Chromosome IDs | Chromosomes     | Physical positions (bp) | CDC Frontier (Reference genome) | (Pusa 1103 & HPNB) | (ILWC 46 & LPNB) | Sequence Components of genome | Gene accession IDs | Putative functions                              |
|-------------------|----------------|-----------------|-------------------------|---------------------------------|--------------------|------------------|-------------------------------|--------------------|-------------------------------------------------|
| SNP_214_A_1911831 | NC_021160.1    | Ca_Kabuli_Chr01 | 1911831                 | GG                              | AA                 | AA               | URR                           | 101509862          | putative FBD-associated F-box protein At1g61330 |
| SNP_215_A_1914702 | NC_021160.1    | Ca_Kabuli_Chr01 | 1914702                 | TT                              | CC                 | CC               | INTERGENIC                    |                    |                                                 |
| SNP_218_A_1925057 | NC_021160.1    | Ca_Kabuli_Chr01 | 1925057                 | GG                              | AA                 | AA               | INTRON                        | 101498971          | uncharacterized LOC101498971                    |
| SNP_220_A_1936595 | NC_021160.1    | Ca_Kabuli_Chr01 | 1936595                 | TT                              | AA                 | AA               | INTRON                        | 101499291          | sphingosine kinase 1                            |
| SNP_221_A_1936660 | NC_021160.1    | Ca_Kabuli_Chr01 | 1936660                 | TT                              | CC                 | CC               | INTRON                        | 101499291          | sphingosine kinase 1                            |
| SNP_222_A_1936712 | NC_021160.1    | Ca_Kabuli_Chr01 | 1936712                 | TT                              | AA                 | AA               | INTRON                        | 101499291          | sphingosine kinase 1                            |
| SNP_223_A_1942928 | NC_021160.1    | Ca_Kabuli_Chr01 | 1942928                 | GG                              | CC                 | CC               | URR                           | 101499291          | sphingosine kinase 1                            |
| SNP_224_A_1950336 | NC_021160.1    | Ca_Kabuli_Chr01 | 1950336                 | AA                              | GG                 | GG               | URR                           | 101499608          | uncharacterized LOC101499608                    |
| SNP_225_A_1950353 | NC_021160.1    | Ca_Kabuli_Chr01 | 1950353                 | CC                              | TT                 | TT               | URR                           | 101499608          | uncharacterized LOC101499608                    |
| SNP_226_A_1951646 | NC_021160.1    | Ca_Kabuli_Chr01 | 1951646                 | GG                              | AA                 | AA               | URR                           | 101499608          | uncharacterized LOC101499608                    |
| SNP_227_A_1953902 | NC_021160.1    | Ca_Kabuli_Chr01 | 1953902                 | AA                              | GG                 | GG               | START_GAINED                  | 101500251          | B3 domain-containing protein Os07g0563300-like  |
| SNP_228_A_1953910 | NC_021160.1    | Ca_Kabuli_Chr01 | 1953910                 | GG                              | AA                 | AA               | INTERGENIC                    |                    |                                                 |
| SNP_229_A_1953954 | NC_021160.1    | Ca_Kabuli_Chr01 | 1953954                 | CC                              | GG                 | GG               | INTERGENIC                    |                    |                                                 |
| SNP_230_A_1955370 | NC_021160.1    | Ca_Kabuli_Chr01 | 1955370                 | GG                              | AA                 | AA               | INTRON                        | 101500251          | B3 domain-containing protein Os07g0563300-like  |
| SNP_231_A_1957955 | NC_021160.1    | Ca_Kabuli_Chr01 | 1957955                 | GG                              | TT                 | TT               | INTRON                        | 101500251          | B3 domain-containing protein Os07g0563300-like  |
| SNP_232_A_1958005 | NC_021160.1    | Ca_Kabuli_Chr01 | 1958005                 | AA                              | GG                 | GG               | INTRON                        | 101500251          | B3 domain-containing protein Os07g0563300-like  |
| SNP_233_A_1960845 | NC_021160.1    | Ca_Kabuli_Chr01 | 1960845                 | GG                              | TT                 | TT               | INTRON                        | 101500251          | B3 domain-containing protein Os07g0563300-like  |
| SNP_235_A_1966074 | NC_021160.1    | Ca_Kabuli_Chr01 | 1966074                 | GG                              | AA                 | AA               | INTERGENIC                    |                    |                                                 |
| SNP_237_A_1966277 | NC_021160.1    | Ca_Kabuli_Chr01 | 1966277                 | GG                              | CC                 | CC               | URR                           | 101500566          | syntaxin-124-like                               |
| SNP_239_A_1969232 | NC_021160.1    | Ca_Kabuli_Chr01 | 1969232                 | GG                              | AA                 | AA               | INTERGENIC                    |                    |                                                 |
| SNP_240_A_1969896 | NC_021160.1    | Ca_Kabuli_Chr01 | 1969896                 | AA                              | CC                 | CC               | INTERGENIC                    |                    |                                                 |
| SNP_241_A_1970117 | NC_021160.1    | Ca_Kabuli_Chr01 | 1970117                 | CC                              | TT                 | TT               | INTERGENIC                    |                    |                                                 |

| SNPs IDs          | Chromosome IDs | Chromosomes     | Physical positions (bp) | CDC Frontier (Reference genome) | (Pusa 1103 & HPNB) | (ILWC 46 & LPNB) | Sequence Components of genome | Gene accession IDs | Putative functions               |
|-------------------|----------------|-----------------|-------------------------|---------------------------------|--------------------|------------------|-------------------------------|--------------------|----------------------------------|
| SNP_242_A_1980689 | NC_021160.1    | Ca_Kabuli_Chr01 | 1980689                 | AA                              | GG                 | GG               | URR                           | 101501207          | uncharacterized LOC101501207     |
| SNP_243_A_1982357 | NC_021160.1    | Ca_Kabuli_Chr01 | 1982357                 | AA                              | CC                 | CC               | INTERGENIC                    |                    |                                  |
| SNP_246_A_1990518 | NC_021160.1    | Ca_Kabuli_Chr01 | 1990518                 | TT                              | GG                 | GG               | URR                           | 101502160          | transmembrane protein 184A       |
| SNP_247_A_1990548 | NC_021160.1    | Ca_Kabuli_Chr01 | 1990548                 | AA                              | CC                 | CC               | URR                           | 101502160          | transmembrane protein 184A       |
| SNP_249_A_1994818 | NC_021160.1    | Ca_Kabuli_Chr01 | 1994818                 | CC                              | TT                 | TT               | DRR                           | 101501521          | quinone oxidoreductase PIG3-like |
| SNP_250_A_1995190 | NC_021160.1    | Ca_Kabuli_Chr01 | 1995190                 | AA                              | GG                 | GG               | DRR                           | 101501521          | quinone oxidoreductase PIG3-like |
| SNP_251_A_1995256 | NC_021160.1    | Ca_Kabuli_Chr01 | 1995256                 | TT                              | CC                 | CC               | DRR                           | 101501521          | quinone oxidoreductase PIG3-like |
| SNP_252_A_1995824 | NC_021160.1    | Ca_Kabuli_Chr01 | 1995824                 | GG                              | AA                 | AA               | URR                           | 101501836          | quinone oxidoreductase PIG3-like |
| SNP_253_A_1996164 | NC_021160.1    | Ca_Kabuli_Chr01 | 1996164                 | AA                              | GG                 | GG               | URR                           | 101501836          | quinone oxidoreductase PIG3-like |
| SNP_254_A_1996195 | NC_021160.1    | Ca_Kabuli_Chr01 | 1996195                 | AA                              | GG                 | GG               | URR                           | 101501836          | quinone oxidoreductase PIG3-like |
| SNP_255_A_1996204 | NC_021160.1    | Ca_Kabuli_Chr01 | 1996204                 | TT                              | CC                 | CC               | URR                           | 101501836          | quinone oxidoreductase PIG3-like |
| SNP_256_A_1996210 | NC_021160.1    | Ca_Kabuli_Chr01 | 1996210                 | GG                              | AA                 | AA               | URR                           | 101501836          | quinone oxidoreductase PIG3-like |
| SNP_257_A_1996477 | NC_021160.1    | Ca_Kabuli_Chr01 | 1996477                 | CC                              | TT                 | TT               | URR                           | 101501836          | quinone oxidoreductase PIG3-like |
| SNP_258_A_1997403 | NC_021160.1    | Ca_Kabuli_Chr01 | 1997403                 | GG                              | AA                 | AA               | INTERGENIC                    |                    |                                  |
| SNP_259_A_1999819 | NC_021160.1    | Ca_Kabuli_Chr01 | 1999819                 | TT                              | CC                 | CC               | URR                           | 101501521          | quinone oxidoreductase PIG3-like |
| SNP_260_A_2000396 | NC_021160.1    | Ca_Kabuli_Chr01 | 2000396                 | AA                              | GG                 | GG               | URR                           | 101501521          | quinone oxidoreductase PIG3-like |
| SNP_261_A_2000624 | NC_021160.1    | Ca_Kabuli_Chr01 | 2000624                 | CC                              | AA                 | AA               | URR                           | 101501521          | quinone oxidoreductase PIG3-like |
| SNP_262_A_2000708 | NC_021160.1    | Ca_Kabuli_Chr01 | 2000708                 | AA                              | CC                 | CC               | INTERGENIC                    |                    |                                  |
| SNP_263_A_2000866 | NC_021160.1    | Ca_Kabuli_Chr01 | 2000866                 | TT                              | GG                 | GG               | INTERGENIC                    |                    |                                  |
| SNP_264_A_2000875 | NC_021160.1    | Ca_Kabuli_Chr01 | 2000875                 | AA                              | GG                 | GG               | INTERGENIC                    |                    |                                  |
| SNP_265_A_2000910 | NC_021160.1    | Ca_Kabuli_Chr01 | 2000910                 | TT                              | CC                 | CC               | INTERGENIC                    |                    |                                  |
| SNP_266_A_2001023 | NC_021160.1    | Ca_Kabuli_Chr01 | 2001023                 | TT                              | AA                 | AA               | INTERGENIC                    |                    |                                  |

| SNPs IDs          | Chromosome IDs | Chromosomes     | Physical positions (bp) | CDC Frontier (Reference genome) | (Pusa 1103 & HPNB) | (ILWC 46 & LPNB) | Sequence Components of genome | Gene accession IDs | Putative functions                                   |
|-------------------|----------------|-----------------|-------------------------|---------------------------------|--------------------|------------------|-------------------------------|--------------------|------------------------------------------------------|
| SNP_267_A_2001524 | NC_021160.1    | Ca_Kabuli_Chr01 | 2001524                 | GG                              | AA                 | AA               | DRR                           | 101502477          | 60S ribosomal protein L26-1                          |
| SNP_268_A_2001534 | NC_021160.1    | Ca_Kabuli_Chr01 | 2001534                 | AA                              | GG                 | GG               | DRR                           | 101502477          | 60S ribosomal protein L26-1                          |
| SNP_269_A_2001600 | NC_021160.1    | Ca_Kabuli_Chr01 | 2001600                 | TT                              | CC                 | CC               | DRR                           | 101502477          | 60S ribosomal protein L26-1                          |
| SNP_270_A_2004925 | NC_021160.1    | Ca_Kabuli_Chr01 | 2004925                 | CC                              | TT                 | TT               | URR                           | 101502477          | 60S ribosomal protein L26-1                          |
| SNP_271_A_2007162 | NC_021160.1    | Ca_Kabuli_Chr01 | 2007162                 | GG                              | AA                 | AA               | URR                           | 101502780          | endonuclease 1                                       |
| SNP_272_A_2007163 | NC_021160.1    | Ca_Kabuli_Chr01 | 2007163                 | TT                              | CC                 | CC               | URR                           | 101502780          | endonuclease 1                                       |
| SNP_273_A_2007165 | NC_021160.1    | Ca_Kabuli_Chr01 | 2007165                 | GG                              | AA                 | AA               | URR                           | 101502780          | endonuclease 1                                       |
| SNP_274_A_2007772 | NC_021160.1    | Ca_Kabuli_Chr01 | 2007772                 | TT                              | CC                 | CC               | URR                           | 101502780          | endonuclease 1                                       |
| SNP_275_A_2007791 | NC_021160.1    | Ca_Kabuli_Chr01 | 2007791                 | AA                              | GG                 | GG               | URR                           | 101502780          | endonuclease 1                                       |
| SNP_276_A_2008916 | NC_021160.1    | Ca_Kabuli_Chr01 | 2008916                 | TT                              | AA                 | AA               | INTERGENIC                    |                    |                                                      |
| SNP_277_A_2011968 | NC_021160.1    | Ca_Kabuli_Chr01 | 2011968                 | AA                              | GG                 | GG               | INTRON                        | 101503100          | lysine histidine transporter-like 8                  |
| SNP_279_A_2015657 | NC_021160.1    | Ca_Kabuli_Chr01 | 2015657                 | GG                              | AA                 | AA               | URR                           | 101503100          | lysine histidine transporter-like 8                  |
| SNP_280_A_2015884 | NC_021160.1    | Ca_Kabuli_Chr01 | 2015884                 | AA                              | CC                 | CC               | URR                           | 101503100          | lysine histidine transporter-like 8                  |
| SNP_282_A_2023913 | NC_021160.1    | Ca_Kabuli_Chr01 | 2023913                 | TT                              | GG                 | GG               | URR                           | 101504093          | putative glycine-rich cell wall structural protein 1 |
| SNP_283_A_2023927 | NC_021160.1    | Ca_Kabuli_Chr01 | 2023927                 | TT                              | GG                 | GG               | URR                           | 101504093          | putative glycine-rich cell wall structural protein 1 |
| SNP_284_A_2023933 | NC_021160.1    | Ca_Kabuli_Chr01 | 2023933                 | GG                              | AA                 | AA               | URR                           | 101504093          | putative glycine-rich cell wall structural protein 1 |
| SNP_285_A_2024076 | NC_021160.1    | Ca_Kabuli_Chr01 | 2024076                 | AA                              | GG                 | GG               | URR                           | 101504093          | putative glycine-rich cell wall structural protein 1 |
| SNP_286_A_2028895 | NC_021160.1    | Ca_Kabuli_Chr01 | 2028895                 | AA                              | CC                 | CC               | INTRON                        | 101503765          | secretory carrier-associated membrane protein-like   |
| SNP_287_A_2029179 | NC_021160.1    | Ca_Kabuli_Chr01 | 2029179                 | TT                              | GG                 | GG               | INTRON                        | 101503765          | secretory carrier-associated membrane protein-like   |
| SNP_288_A_2042480 | NC_021160.1    | Ca_Kabuli_Chr01 | 2042480                 | GG                              | AA                 | AA               | INTERGENIC                    |                    |                                                      |
| SNP_289_A_2042810 | NC_021160.1    | Ca_Kabuli_Chr01 | 2042810                 | CC                              | TT                 | TT               | INTERGENIC                    |                    |                                                      |
| SNP_290_A_2043045 | NC_021160.1    | Ca_Kabuli_Chr01 | 2043045                 | CC                              | TT                 | TT               | INTERGENIC                    |                    |                                                      |

| SNPs IDs          | Chromosome IDs | Chromosomes     | Physical positions (bp) | CDC Frontier (Reference genome) | (Pusa 1103 & HPNB) | (ILWC 46 & LPNB) | Sequence Components of genome | Gene accession IDs | Putative functions                                    |
|-------------------|----------------|-----------------|-------------------------|---------------------------------|--------------------|------------------|-------------------------------|--------------------|-------------------------------------------------------|
| SNP_291_A_2043455 | NC_021160.1    | Ca_Kabuli_Chr01 | 2043455                 | AA                              | TT                 | TT               | INTERGENIC                    |                    |                                                       |
| SNP_292_A_2054795 | NC_021160.1    | Ca_Kabuli_Chr01 | 2054795                 | TT                              | GG                 | GG               | INTERGENIC                    |                    |                                                       |
| SNP_293_A_2054811 | NC_021160.1    | Ca_Kabuli_Chr01 | 2054811                 | CC                              | TT                 | TT               | INTERGENIC                    |                    |                                                       |
| SNP_294_A_2054859 | NC_021160.1    | Ca_Kabuli_Chr01 | 2054859                 | TT                              | GG                 | GG               | INTERGENIC                    |                    |                                                       |
| SNP_295_A_2054871 | NC_021160.1    | Ca_Kabuli_Chr01 | 2054871                 | TT                              | CC                 | CC               | INTERGENIC                    |                    |                                                       |
| SNP_296_A_2055343 | NC_021160.1    | Ca_Kabuli_Chr01 | 2055343                 | TT                              | CC                 | CC               | URR                           | 101504943          | putative disease resistance protein At3g14460         |
| SNP_297_A_2055389 | NC_021160.1    | Ca_Kabuli_Chr01 | 2055389                 | CC                              | TT                 | TT               | URR                           | 101504943          | putative disease resistance protein At3g14460         |
| SNP_299_A_2058988 | NC_021160.1    | Ca_Kabuli_Chr01 | 2058988                 | AA                              | GG                 | GG               | DRR                           | 101510509          | uncharacterized LOC101510509                          |
| SNP_300_A_2071879 | NC_021160.1    | Ca_Kabuli_Chr01 | 2071879                 | CC                              | TT                 | TT               | URR                           | 101505362          | secretory carrier-associated membrane protein-like    |
| SNP_301_A_2073955 | NC_021160.1    | Ca_Kabuli_Chr01 | 2073955                 | AA                              | GG                 | GG               | NON_SYNONYMOUS_CODING         | 101505696          | putative disease resistance protein At3g14460         |
| SNP_303_A_2085573 | NC_021160.1    | Ca_Kabuli_Chr01 | 2085573                 | TT                              | GG                 | GG               | URR                           | 101506019          | uncharacterized LOC101506019                          |
| SNP_304_A_2085606 | NC_021160.1    | Ca_Kabuli_Chr01 | 2085606                 | TT                              | CC                 | CC               | URR                           | 101506019          | uncharacterized LOC101506019                          |
| SNP_306_A_2085661 | NC_021160.1    | Ca_Kabuli_Chr01 | 2085661                 | CC                              | TT                 | TT               | URR                           | 101506019          | uncharacterized LOC101506019                          |
| SNP_307_A_2085820 | NC_021160.1    | Ca_Kabuli_Chr01 | 2085820                 | TT                              | CC                 | CC               | URR                           | 101506019          | uncharacterized LOC101506019                          |
| SNP_308_A_2085839 | NC_021160.1    | Ca_Kabuli_Chr01 | 2085839                 | GG                              | AA                 | AA               | URR                           | 101506019          | uncharacterized LOC101506019                          |
| SNP_309_A_2089650 | NC_021160.1    | Ca_Kabuli_Chr01 | 2089650                 | AA                              | GG                 | GG               | INTERGENIC                    |                    |                                                       |
| SNP_310_A_2095538 | NC_021160.1    | Ca_Kabuli_Chr01 | 2095538                 | AA                              | GG                 | GG               | INTRON                        | 101507433          | uncharacterized LOC101507433                          |
| SNP_311_A_2101156 | NC_021160.1    | Ca_Kabuli_Chr01 | 2101156                 | TT                              | AA                 | AA               | DRR                           | 101507740          | katanin p80 WD40 repeat-containing subunit B1 homolog |
| SNP_313_A_2109142 | NC_021160.1    | Ca_Kabuli_Chr01 | 2109142                 | TT                              | CC                 | CC               | INTRON                        | 101507740          | katanin p80 WD40 repeat-containing subunit B1 homolog |
| SNP_314_A_2113196 | NC_021160.1    | Ca_Kabuli_Chr01 | 2113196                 | TT                              | AA                 | AA               | URR                           | 101507740          | katanin p80 WD40 repeat-containing subunit B1 homolog |
| SNP_315_A_2113204 | NC_021160.1    | Ca_Kabuli_Chr01 | 2113204                 | AA                              | GG                 | GG               | URR                           | 101507740          | katanin p80 WD40 repeat-containing subunit B1 homolog |
| SNP_316_A_2113229 | NC_021160.1    | Ca_Kabuli_Chr01 | 2113229                 | AA                              | GG                 | GG               | URR                           | 101507740          | katanin p80 WD40 repeat-containing subunit B1 homolog |



| SNPs IDs          | Chromosome IDs | Chromosomes     | Physical positions (bp) | CDC Frontier genome (Reference genome) | (Pusa 1103 & HPNB) | (ILWC 46 & LPNB) | Sequence genome | Components of | Gene accession IDs                          | Putative functions |
|-------------------|----------------|-----------------|-------------------------|----------------------------------------|--------------------|------------------|-----------------|---------------|---------------------------------------------|--------------------|
| SNP_317_A_2117916 | NC_021160.1    | Ca_Kabuli_Chr01 | 2117916                 | AA                                     | TT                 | TT               | INTERGENIC      |               |                                             |                    |
| SNP_318_A_2120345 | NC_021160.1    | Ca_Kabuli_Chr01 | 2120345                 | AA                                     | TT                 | TT               | INTERGENIC      |               |                                             |                    |
| SNP_319_A_2121207 | NC_021160.1    | Ca_Kabuli_Chr01 | 2121207                 | CC                                     | GG                 | GG               | DRR             | 101508062     | protein STRUBBELIG-RECEPTOR FAMILY 3-like   |                    |
| SNP_320_A_2121211 | NC_021160.1    | Ca_Kabuli_Chr01 | 2121211                 | GG                                     | AA                 | AA               | DRR             | 101508062     | protein STRUBBELIG-RECEPTOR FAMILY 3-like   |                    |
| SNP_321_A_2121216 | NC_021160.1    | Ca_Kabuli_Chr01 | 2121216                 | TT                                     | GG                 | GG               | DRR             | 101508062     | protein STRUBBELIG-RECEPTOR FAMILY 3-like   |                    |
| SNP_322_A_2124581 | NC_021160.1    | Ca_Kabuli_Chr01 | 2124581                 | AA                                     | GG                 | GG               | INTRON          | 101508062     | protein STRUBBELIG-RECEPTOR FAMILY 3-like   |                    |
| SNP_323_A_2131319 | NC_021160.1    | Ca_Kabuli_Chr01 | 2131319                 | CC                                     | GG                 | GG               | URR             | 101508062     | protein STRUBBELIG-RECEPTOR FAMILY 3-like   |                    |
| SNP_324_A_2132052 | NC_021160.1    | Ca_Kabuli_Chr01 | 2132052                 | CC                                     | AA                 | AA               | INTERGENIC      |               |                                             |                    |
| SNP_325_A_2132153 | NC_021160.1    | Ca_Kabuli_Chr01 | 2132153                 | CC                                     | TT                 | TT               | INTERGENIC      |               |                                             |                    |
| SNP_326_A_2134817 | NC_021160.1    | Ca_Kabuli_Chr01 | 2134817                 | AA                                     | TT                 | TT               | INTERGENIC      |               |                                             |                    |
| SNP_327_A_2135080 | NC_021160.1    | Ca_Kabuli_Chr01 | 2135080                 | CC                                     | AA                 | AA               | INTERGENIC      |               |                                             |                    |
| SNP_328_A_2135082 | NC_021160.1    | Ca_Kabuli_Chr01 | 2135082                 | GG                                     | CC                 | CC               | INTERGENIC      |               |                                             |                    |
| SNP_333_A_2466413 | NC_021160.1    | Ca_Kabuli_Chr01 | 2466413                 | CC                                     | TT                 | TT               | INTERGENIC      |               |                                             |                    |
| SNP_334_A_2484031 | NC_021160.1    | Ca_Kabuli_Chr01 | 2484031                 | GG                                     | AA                 | AA               | DRR             | 101498434     | protein RALF-like 19                        |                    |
| SNP_335_A_2560421 | NC_021160.1    | Ca_Kabuli_Chr01 | 2560421                 | GG                                     | CC                 | CC               | INTERGENIC      |               |                                             |                    |
| SNP_336_A_2572677 | NC_021160.1    | Ca_Kabuli_Chr01 | 2572677                 | AA                                     | TT                 | TT               | URR             | 101501208     | dof zinc finger protein DOF1.4              |                    |
| SNP_337_A_2602735 | NC_021160.1    | Ca_Kabuli_Chr01 | 2602735                 | GG                                     | AA                 | AA               | INTERGENIC      |               |                                             |                    |
| SNP_338_A_2622073 | NC_021160.1    | Ca_Kabuli_Chr01 | 2622073                 | GG                                     | AA                 | AA               | URR             | 101502583     | auxin-repressed 12.5 kDa protein            |                    |
| SNP_339_A_2647314 | NC_021160.1    | Ca_Kabuli_Chr01 | 2647314                 | GG                                     | AA                 | AA               | INTERGENIC      |               |                                             |                    |
| SNP_340_A_2651145 | NC_021160.1    | Ca_Kabuli_Chr01 | 2651145                 | GG                                     | AA                 | AA               | URR             | 101504196     | ethylene-responsive transcription factor 12 |                    |
| SNP_341_A_2651437 | NC_021160.1    | Ca_Kabuli_Chr01 | 2651437                 | GG                                     | AA                 | AA               | URR             | 101504196     | ethylene-responsive transcription factor 12 |                    |
| SNP_342_A_2651487 | NC_021160.1    | Ca_Kabuli_Chr01 | 2651487                 | TT                                     | CC                 | CC               | URR             | 101504196     | ethylene-responsive transcription factor 12 |                    |

| SNPs IDs          | Chromosome IDs | Chromosomes     | Physical positions (bp) | CDC Frontier (Reference genome) | (Pusa 1103 & HPNB) | (ILWC 46 & LPNB) | Sequence Components of genome | Gene accession IDs | Putative functions                          |
|-------------------|----------------|-----------------|-------------------------|---------------------------------|--------------------|------------------|-------------------------------|--------------------|---------------------------------------------|
| SNP_343_A_2651532 | NC_021160.1    | Ca_Kabuli_Chr01 | 2651532                 | TT                              | AA                 | AA               | URR                           | 101504196          | ethylene-responsive transcription factor 12 |
| SNP_344_A_2651537 | NC_021160.1    | Ca_Kabuli_Chr01 | 2651537                 | CC                              | TT                 | TT               | URR                           | 101504196          | ethylene-responsive transcription factor 12 |
| SNP_345_A_2652437 | NC_021160.1    | Ca_Kabuli_Chr01 | 2652437                 | AA                              | GG                 | GG               | INTERGENIC                    |                    |                                             |
| SNP_346_A_2652448 | NC_021160.1    | Ca_Kabuli_Chr01 | 2652448                 | AA                              | GG                 | GG               | INTERGENIC                    |                    |                                             |
| SNP_347_A_2652454 | NC_021160.1    | Ca_Kabuli_Chr01 | 2652454                 | CC                              | TT                 | TT               | INTERGENIC                    |                    |                                             |
| SNP_348_A_2652810 | NC_021160.1    | Ca_Kabuli_Chr01 | 2652810                 | GG                              | AA                 | AA               | INTERGENIC                    |                    |                                             |
| SNP_349_A_2652819 | NC_021160.1    | Ca_Kabuli_Chr01 | 2652819                 | TT                              | GG                 | GG               | INTERGENIC                    |                    |                                             |
| SNP_350_A_2653077 | NC_021160.1    | Ca_Kabuli_Chr01 | 2653077                 | GG                              | CC                 | CC               | INTERGENIC                    |                    |                                             |
| SNP_351_A_2653902 | NC_021160.1    | Ca_Kabuli_Chr01 | 2653902                 | TT                              | GG                 | GG               | INTERGENIC                    |                    |                                             |
| SNP_352_A_2655055 | NC_021160.1    | Ca_Kabuli_Chr01 | 2655055                 | AA                              | CC                 | CC               | INTERGENIC                    |                    |                                             |
| SNP_354_A_2660070 | NC_021160.1    | Ca_Kabuli_Chr01 | 2660070                 | TT                              | CC                 | CC               | INTERGENIC                    |                    |                                             |
| SNP_355_A_2662108 | NC_021160.1    | Ca_Kabuli_Chr01 | 2662108                 | TT                              | CC                 | CC               | INTERGENIC                    |                    |                                             |
| SNP_356_A_2662109 | NC_021160.1    | Ca_Kabuli_Chr01 | 2662109                 | CC                              | TT                 | TT               | INTERGENIC                    |                    |                                             |
| SNP_358_A_2664439 | NC_021160.1    | Ca_Kabuli_Chr01 | 2664439                 | GG                              | AA                 | AA               | INTERGENIC                    |                    |                                             |
| SNP_359_A_2666249 | NC_021160.1    | Ca_Kabuli_Chr01 | 2666249                 | TT                              | AA                 | AA               | INTERGENIC                    |                    |                                             |
| SNP_360_A_2668554 | NC_021160.1    | Ca_Kabuli_Chr01 | 2668554                 | AA                              | GG                 | GG               | INTERGENIC                    |                    |                                             |
| SNP_361_A_2673853 | NC_021160.1    | Ca_Kabuli_Chr01 | 2673853                 | CC                              | TT                 | TT               | URR                           | 101504527          | ethylene-responsive transcription factor 4  |
| SNP_362_A_2673896 | NC_021160.1    | Ca_Kabuli_Chr01 | 2673896                 | GG                              | TT                 | TT               | INTERGENIC                    |                    |                                             |
| SNP_363_A_2674501 | NC_021160.1    | Ca_Kabuli_Chr01 | 2674501                 | TT                              | CC                 | CC               | INTERGENIC                    |                    |                                             |
| SNP_365_A_2679942 | NC_021160.1    | Ca_Kabuli_Chr01 | 2679942                 | AA                              | TT                 | TT               | INTERGENIC                    |                    |                                             |
| SNP_367_A_2688717 | NC_021160.1    | Ca_Kabuli_Chr01 | 2688717                 | CC                              | TT                 | TT               | INTERGENIC                    |                    |                                             |
| SNP_368_A_2689482 | NC_021160.1    | Ca_Kabuli_Chr01 | 2689482                 | AA                              | TT                 | TT               | INTERGENIC                    |                    |                                             |

| SNPs IDs          | Chromosome IDs | Chromosomes     | Physical positions (bp) | CDC Frontier genome (Reference genome) | (Pusa 1103 & HPNB) | (ILWC 46 & LPNB) | Sequence genome | Components of | Gene accession IDs                                    | Putative functions |
|-------------------|----------------|-----------------|-------------------------|----------------------------------------|--------------------|------------------|-----------------|---------------|-------------------------------------------------------|--------------------|
| SNP_369_A_2689779 | NC_021160.1    | Ca_Kabuli_Chr01 | 2689779                 | CC                                     | TT                 | TT               | INTERGENIC      |               |                                                       |                    |
| SNP_370_A_2692373 | NC_021160.1    | Ca_Kabuli_Chr01 | 2692373                 | TT                                     | CC                 | CC               | DRR             | 101511791     | uncharacterized protein At3g17950-like                |                    |
| SNP_371_A_2692408 | NC_021160.1    | Ca_Kabuli_Chr01 | 2692408                 | AA                                     | GG                 | GG               | DRR             | 101511791     | uncharacterized protein At3g17950-like                |                    |
| SNP_372_A_2692422 | NC_021160.1    | Ca_Kabuli_Chr01 | 2692422                 | TT                                     | CC                 | CC               | DRR             | 101511791     | uncharacterized protein At3g17950-like                |                    |
| SNP_373_A_2692638 | NC_021160.1    | Ca_Kabuli_Chr01 | 2692638                 | GG                                     | AA                 | AA               | DRR             | 101511791     | uncharacterized protein At3g17950-like                |                    |
| SNP_374_A_2693536 | NC_021160.1    | Ca_Kabuli_Chr01 | 2693536                 | TT                                     | CC                 | CC               | INTRON          | 101511791     | uncharacterized protein At3g17950-like                |                    |
| SNP_375_A_2694190 | NC_021160.1    | Ca_Kabuli_Chr01 | 2694190                 | CC                                     | GG                 | GG               | INTRON          | 101511791     | uncharacterized protein At3g17950-like                |                    |
| SNP_376_A_2694193 | NC_021160.1    | Ca_Kabuli_Chr01 | 2694193                 | TT                                     | CC                 | CC               | INTRON          | 101511791     | uncharacterized protein At3g17950-like                |                    |
| SNP_377_A_2697954 | NC_021160.1    | Ca_Kabuli_Chr01 | 2697954                 | TT                                     | CC                 | CC               | INTERGENIC      |               |                                                       |                    |
| SNP_378_A_2697961 | NC_021160.1    | Ca_Kabuli_Chr01 | 2697961                 | CC                                     | TT                 | TT               | INTERGENIC      |               |                                                       |                    |
| SNP_379_A_2697988 | NC_021160.1    | Ca_Kabuli_Chr01 | 2697988                 | GG                                     | AA                 | AA               | INTERGENIC      |               |                                                       |                    |
| SNP_380_A_2701690 | NC_021160.1    | Ca_Kabuli_Chr01 | 2701690                 | AA                                     | GG                 | GG               | DRR             | 101508259     | protein E6                                            |                    |
| SNP_381_A_2702465 | NC_021160.1    | Ca_Kabuli_Chr01 | 2702465                 | AA                                     | GG                 | GG               | INTERGENIC      |               |                                                       |                    |
| SNP_383_A_2704321 | NC_021160.1    | Ca_Kabuli_Chr01 | 2704321                 | CC                                     | AA                 | AA               | URR             | 101508259     | protein E6                                            |                    |
| SNP_384_A_2707824 | NC_021160.1    | Ca_Kabuli_Chr01 | 2707824                 | CC                                     | GG                 | GG               | DRR             | 101508896     | uncharacterized LOC101508896                          |                    |
| SNP_385_A_2740811 | NC_021160.1    | Ca_Kabuli_Chr01 | 2740811                 | GG                                     | CC                 | CC               | INTRON          | 101510178     | uncharacterized LOC101510178                          |                    |
| SNP_386_A_2744871 | NC_021160.1    | Ca_Kabuli_Chr01 | 2744871                 | AA                                     | GG                 | GG               | DRR             | 101510733     | pentatricopeptide repeat-containing protein At5g46100 |                    |
| SNP_387_A_2745059 | NC_021160.1    | Ca_Kabuli_Chr01 | 2745059                 | TT                                     | AA                 | AA               | DRR             | 101510733     | pentatricopeptide repeat-containing protein At5g46100 |                    |
| SNP_388_A_2745748 | NC_021160.1    | Ca_Kabuli_Chr01 | 2745748                 | TT                                     | CC                 | CC               | URR             | 101510178     | uncharacterized LOC101510178                          |                    |
| SNP_389_A_2762167 | NC_021160.1    | Ca_Kabuli_Chr01 | 2762167                 | TT                                     | CC                 | CC               | INTERGENIC      |               |                                                       |                    |
| SNP_390_A_2764501 | NC_021160.1    | Ca_Kabuli_Chr01 | 2764501                 | AA                                     | GG                 | GG               | INTERGENIC      |               |                                                       |                    |
| SNP_391_A_2765082 | NC_021160.1    | Ca_Kabuli_Chr01 | 2765082                 | TT                                     | CC                 | CC               | INTERGENIC      |               |                                                       |                    |

| SNPs IDs          | Chromosome IDs | Chromosomes     | Physical positions (bp) | CDC Frontier genome (Reference genome) | (Pusa 1103 & HPNB) | (ILWC 46 & LPNB) | Sequence genome | Components of | Gene accession IDs | Putative functions                                                       |
|-------------------|----------------|-----------------|-------------------------|----------------------------------------|--------------------|------------------|-----------------|---------------|--------------------|--------------------------------------------------------------------------|
| SNP_392_A_2765580 | NC_021160.1    | Ca_Kabuli_Chr01 | 2765580                 | GG                                     | AA                 | AA               | INTERGENIC      |               |                    |                                                                          |
| SNP_393_A_2765588 | NC_021160.1    | Ca_Kabuli_Chr01 | 2765588                 | GG                                     | AA                 | AA               | INTERGENIC      |               |                    |                                                                          |
| SNP_394_A_2765595 | NC_021160.1    | Ca_Kabuli_Chr01 | 2765595                 | TT                                     | CC                 | CC               | INTERGENIC      |               |                    |                                                                          |
| SNP_396_A_2769065 | NC_021160.1    | Ca_Kabuli_Chr01 | 2769065                 | AA                                     | GG                 | GG               | INTERGENIC      |               |                    |                                                                          |
| SNP_397_A_2769134 | NC_021160.1    | Ca_Kabuli_Chr01 | 2769134                 | AA                                     | GG                 | GG               | INTERGENIC      |               |                    |                                                                          |
| SNP_399_A_2769374 | NC_021160.1    | Ca_Kabuli_Chr01 | 2769374                 | GG                                     | AA                 | AA               | INTERGENIC      |               |                    |                                                                          |
| SNP_400_A_2776049 | NC_021160.1    | Ca_Kabuli_Chr01 | 2776049                 | GG                                     | AA                 | AA               | INTERGENIC      |               |                    |                                                                          |
| SNP_401_A_2777450 | NC_021160.1    | Ca_Kabuli_Chr01 | 2777450                 | TT                                     | CC                 | CC               | INTERGENIC      |               |                    |                                                                          |
| SNP_402_A_2780466 | NC_021160.1    | Ca_Kabuli_Chr01 | 2780466                 | CC                                     | AA                 | AA               | DRR             |               | 101511692          | receptor-like protein kinase HSL1                                        |
| SNP_403_A_2788788 | NC_021160.1    | Ca_Kabuli_Chr01 | 2788788                 | CC                                     | GG                 | GG               | INTERGENIC      |               |                    |                                                                          |
| SNP_404_A_2789362 | NC_021160.1    | Ca_Kabuli_Chr01 | 2789362                 | TT                                     | AA                 | AA               | URR             |               | 101512237          | tRNA (adenine(58)-N(1))-methyltransferase catalytic subunit TRMT61A-like |
| SNP_405_A_2789372 | NC_021160.1    | Ca_Kabuli_Chr01 | 2789372                 | AA                                     | TT                 | TT               | URR             |               | 101512237          | tRNA (adenine(58)-N(1))-methyltransferase catalytic subunit TRMT61A-like |
| SNP_406_A_2789385 | NC_021160.1    | Ca_Kabuli_Chr01 | 2789385                 | TT                                     | CC                 | CC               | URR             |               | 101512237          | tRNA (adenine(58)-N(1))-methyltransferase catalytic subunit TRMT61A-like |
| SNP_407_A_2789440 | NC_021160.1    | Ca_Kabuli_Chr01 | 2789440                 | CC                                     | TT                 | TT               | URR             |               | 101512237          | tRNA (adenine(58)-N(1))-methyltransferase catalytic subunit TRMT61A-like |
| SNP_408_A_2790247 | NC_021160.1    | Ca_Kabuli_Chr01 | 2790247                 | CC                                     | GG                 | GG               | URR             |               | 101512237          | tRNA (adenine(58)-N(1))-methyltransferase catalytic subunit TRMT61A-like |
| SNP_409_A_2791469 | NC_021160.1    | Ca_Kabuli_Chr01 | 2791469                 | TT                                     | AA                 | AA               | DRR             |               | 101512565          | serine/threonine-protein kinase-like protein ACR4                        |
| SNP_410_A_2791745 | NC_021160.1    | Ca_Kabuli_Chr01 | 2791745                 | GG                                     | AA                 | AA               | DRR             |               | 101512565          | serine/threonine-protein kinase-like protein ACR4                        |
| SNP_411_A_2795873 | NC_021160.1    | Ca_Kabuli_Chr01 | 2795873                 | CC                                     | TT                 | TT               | INTERGENIC      |               |                    |                                                                          |
| SNP_412_A_2795877 | NC_021160.1    | Ca_Kabuli_Chr01 | 2795877                 | CC                                     | AA                 | AA               | INTERGENIC      |               |                    |                                                                          |
| SNP_413_A_2795899 | NC_021160.1    | Ca_Kabuli_Chr01 | 2795899                 | AA                                     | TT                 | TT               | INTERGENIC      |               |                    |                                                                          |
| SNP_414_A_2796205 | NC_021160.1    | Ca_Kabuli_Chr01 | 2796205                 | AA                                     | GG                 | GG               | INTERGENIC      |               |                    |                                                                          |
| SNP_416_A_2797376 | NC_021160.1    | Ca_Kabuli_Chr01 | 2797376                 | CC                                     | TT                 | TT               | INTERGENIC      |               |                    |                                                                          |

| SNPs IDs          | Chromosome IDs | Chromosomes     | Physical positions (bp) | CDC Frontier (Reference genome) | (Pusa 1103 & HPNB) | (ILWC 46 & LPNB) | Sequence Components of genome | Gene accession IDs | Putative functions                            |
|-------------------|----------------|-----------------|-------------------------|---------------------------------|--------------------|------------------|-------------------------------|--------------------|-----------------------------------------------|
| SNP_419_A_2802664 | NC_021160.1    | Ca_Kabuli_Chr01 | 2802664                 | AA                              | GG                 | GG               | INTRON                        | 101512871          | NAC domain-containing protein 73-like         |
| SNP_420_A_2802706 | NC_021160.1    | Ca_Kabuli_Chr01 | 2802706                 | CC                              | TT                 | TT               | INTRON                        | 101512871          | NAC domain-containing protein 73-like         |
| SNP_421_A_2803286 | NC_021160.1    | Ca_Kabuli_Chr01 | 2803286                 | AA                              | GG                 | GG               | SYNONYMOUS_STOP               | 101512871          | NAC domain-containing protein 73-like         |
| SNP_422_A_2803410 | NC_021160.1    | Ca_Kabuli_Chr01 | 2803410                 | TT                              | AA                 | AA               | NON_SYNONYMOUS_CODING         | 101512871          | NAC domain-containing protein 73-like         |
| SNP_423_A_2809873 | NC_021160.1    | Ca_Kabuli_Chr01 | 2809873                 | TT                              | CC                 | CC               | URR                           | 101513197          | putative disease resistance protein At3g14460 |
| SNP_424_A_2814901 | NC_021160.1    | Ca_Kabuli_Chr01 | 2814901                 | CC                              | AA                 | AA               | INTERGENIC                    |                    |                                               |
| SNP_425_A_2814918 | NC_021160.1    | Ca_Kabuli_Chr01 | 2814918                 | TT                              | CC                 | CC               | INTERGENIC                    |                    |                                               |
| SNP_426_A_2814972 | NC_021160.1    | Ca_Kabuli_Chr01 | 2814972                 | TT                              | CC                 | CC               | INTERGENIC                    |                    |                                               |
| SNP_427_A_2814994 | NC_021160.1    | Ca_Kabuli_Chr01 | 2814994                 | TT                              | CC                 | CC               | INTERGENIC                    |                    |                                               |
| SNP_428_A_2815008 | NC_021160.1    | Ca_Kabuli_Chr01 | 2815008                 | AA                              | TT                 | TT               | INTERGENIC                    |                    |                                               |
| SNP_429_A_2815010 | NC_021160.1    | Ca_Kabuli_Chr01 | 2815010                 | AA                              | CC                 | CC               | INTERGENIC                    |                    |                                               |
| SNP_430_A_2815135 | NC_021160.1    | Ca_Kabuli_Chr01 | 2815135                 | TT                              | CC                 | CC               | INTERGENIC                    |                    |                                               |
| SNP_431_A_2815211 | NC_021160.1    | Ca_Kabuli_Chr01 | 2815211                 | CC                              | GG                 | GG               | INTERGENIC                    |                    |                                               |
| SNP_432_A_2815266 | NC_021160.1    | Ca_Kabuli_Chr01 | 2815266                 | TT                              | AA                 | AA               | INTERGENIC                    |                    |                                               |
| SNP_433_A_2830832 | NC_021160.1    | Ca_Kabuli_Chr01 | 2830832                 | AA                              | GG                 | GG               | INTERGENIC                    |                    |                                               |
| SNP_434_A_2830873 | NC_021160.1    | Ca_Kabuli_Chr01 | 2830873                 | TT                              | CC                 | CC               | INTERGENIC                    |                    |                                               |
| SNP_435_A_2836428 | NC_021160.1    | Ca_Kabuli_Chr01 | 2836428                 | AA                              | CC                 | CC               | INTRON                        | 101513952          | auxin response factor 3-like                  |
| SNP_436_A_2836682 | NC_021160.1    | Ca_Kabuli_Chr01 | 2836682                 | GG                              | AA                 | AA               | NON_SYNONYMOUS_CODING         | 101513952          | auxin response factor 3-like                  |
| SNP_438_A_2838540 | NC_021160.1    | Ca_Kabuli_Chr01 | 2838540                 | AA                              | TT                 | TT               | URR                           | 101513952          | auxin response factor 3-like                  |
| SNP_439_A_2844647 | NC_021160.1    | Ca_Kabuli_Chr01 | 2844647                 | TT                              | CC                 | CC               | INTERGENIC                    |                    |                                               |
| SNP_440_A_2844664 | NC_021160.1    | Ca_Kabuli_Chr01 | 2844664                 | TT                              | GG                 | GG               | INTERGENIC                    |                    |                                               |
| SNP_441_A_2844683 | NC_021160.1    | Ca_Kabuli_Chr01 | 2844683                 | CC                              | TT                 | TT               | INTERGENIC                    |                    |                                               |

| SNPs IDs          | Chromosome IDs | Chromosomes     | Physical positions (bp) | CDC Frontier genome (Reference genome) | (Pusa 1103 & HPNB) | (ILWC 46 & LPNB) | Sequence Components of genome | Gene accession IDs | Putative functions                                   |
|-------------------|----------------|-----------------|-------------------------|----------------------------------------|--------------------|------------------|-------------------------------|--------------------|------------------------------------------------------|
| SNP_442_A_2844960 | NC_021160.1    | Ca_Kabuli_Chr01 | 2844960                 | GG                                     | AA                 | AA               | INTERGENIC                    |                    |                                                      |
| SNP_443_A_2844963 | NC_021160.1    | Ca_Kabuli_Chr01 | 2844963                 | AA                                     | GG                 | GG               | INTERGENIC                    |                    |                                                      |
| SNP_444_A_2844978 | NC_021160.1    | Ca_Kabuli_Chr01 | 2844978                 | TT                                     | AA                 | AA               | INTERGENIC                    |                    |                                                      |
| SNP_445_A_2850128 | NC_021160.1    | Ca_Kabuli_Chr01 | 2850128                 | GG                                     | AA                 | AA               | INTERGENIC                    |                    |                                                      |
| SNP_446_A_2850130 | NC_021160.1    | Ca_Kabuli_Chr01 | 2850130                 | GG                                     | AA                 | AA               | INTERGENIC                    |                    |                                                      |
| SNP_447_A_2850472 | NC_021160.1    | Ca_Kabuli_Chr01 | 2850472                 | AA                                     | TT                 | TT               | INTERGENIC                    |                    |                                                      |
| SNP_448_A_2850581 | NC_021160.1    | Ca_Kabuli_Chr01 | 2850581                 | TT                                     | CC                 | CC               | INTERGENIC                    |                    |                                                      |
| SNP_449_A_2850638 | NC_021160.1    | Ca_Kabuli_Chr01 | 2850638                 | AA                                     | GG                 | GG               | INTERGENIC                    |                    |                                                      |
| SNP_451_A_2851137 | NC_021160.1    | Ca_Kabuli_Chr01 | 2851137                 | AA                                     | TT                 | TT               | INTERGENIC                    |                    |                                                      |
| SNP_452_A_2852034 | NC_021160.1    | Ca_Kabuli_Chr01 | 2852034                 | CC                                     | AA                 | AA               | INTERGENIC                    |                    |                                                      |
| SNP_453_A_2860292 | NC_021160.1    | Ca_Kabuli_Chr01 | 2860292                 | GG                                     | AA                 | AA               | DRR                           | 101515038          | OPA3-like protein                                    |
| SNP_455_A_2864271 | NC_021160.1    | Ca_Kabuli_Chr01 | 2864271                 | TT                                     | AA                 | AA               | INTRON                        | 101515038          | OPA3-like protein                                    |
| SNP_456_A_2867393 | NC_021160.1    | Ca_Kabuli_Chr01 | 2867393                 | CC                                     | TT                 | TT               | DRR                           | 101515361          | uncharacterized LOC101515361                         |
| SNP_457_A_2867918 | NC_021160.1    | Ca_Kabuli_Chr01 | 2867918                 | TT                                     | GG                 | GG               | DRR                           | 101515361          | uncharacterized LOC101515361                         |
| SNP_458_A_2867920 | NC_021160.1    | Ca_Kabuli_Chr01 | 2867920                 | GG                                     | TT                 | TT               | DRR                           | 101515361          | uncharacterized LOC101515361                         |
| SNP_459_A_2868942 | NC_021160.1    | Ca_Kabuli_Chr01 | 2868942                 | AA                                     | GG                 | GG               | INTERGENIC                    |                    |                                                      |
| SNP_460_A_2871342 | NC_021160.1    | Ca_Kabuli_Chr01 | 2871342                 | CC                                     | AA                 | AA               | NON_SYNONYMOUS_CODING         | 101515361          | uncharacterized LOC101515361                         |
| SNP_461_A_2872477 | NC_021160.1    | Ca_Kabuli_Chr01 | 2872477                 | AA                                     | GG                 | GG               | NON_SYNONYMOUS_CODING         | 101515361          | uncharacterized LOC101515361                         |
| SNP_462_A_2874401 | NC_021160.1    | Ca_Kabuli_Chr01 | 2874401                 | CC                                     | TT                 | TT               | URR                           | 101515361          | uncharacterized LOC101515361                         |
| SNP_463_A_2874413 | NC_021160.1    | Ca_Kabuli_Chr01 | 2874413                 | GG                                     | TT                 | TT               | URR                           | 101515361          | uncharacterized LOC101515361                         |
| SNP_464_A_2875237 | NC_021160.1    | Ca_Kabuli_Chr01 | 2875237                 | TT                                     | GG                 | GG               | DRR                           | 101515694          | anthocyanidin 3-O-glucoside 2"-O-glucosyltransferase |
| SNP_465_A_2882678 | NC_021160.1    | Ca_Kabuli_Chr01 | 2882678                 | GG                                     | AA                 | AA               | INTERGENIC                    |                    |                                                      |

| SNPs IDs          | Chromosome IDs | Chromosomes     | Physical positions (bp) | CDC Frontier genome (Reference genome) | (Pusa 1103 & HPNB) | (ILWC 46 & LPNB) | Sequence Components of genome | Gene accession IDs | Putative functions                                                  |
|-------------------|----------------|-----------------|-------------------------|----------------------------------------|--------------------|------------------|-------------------------------|--------------------|---------------------------------------------------------------------|
| SNP_466_A_2884713 | NC_021160.1    | Ca_Kabuli_Chr01 | 2884713                 | GG                                     | TT                 | TT               | INTERGENIC                    |                    |                                                                     |
| SNP_467_A_2884747 | NC_021160.1    | Ca_Kabuli_Chr01 | 2884747                 | AA                                     | GG                 | GG               | INTERGENIC                    |                    |                                                                     |
| SNP_468_A_2884748 | NC_021160.1    | Ca_Kabuli_Chr01 | 2884748                 | CC                                     | GG                 | GG               | INTERGENIC                    |                    |                                                                     |
| SNP_469_A_2885175 | NC_021160.1    | Ca_Kabuli_Chr01 | 2885175                 | TT                                     | CC                 | CC               | INTERGENIC                    |                    |                                                                     |
| SNP_470_A_2885242 | NC_021160.1    | Ca_Kabuli_Chr01 | 2885242                 | AA                                     | CC                 | CC               | INTERGENIC                    |                    |                                                                     |
| SNP_471_A_2885262 | NC_021160.1    | Ca_Kabuli_Chr01 | 2885262                 | TT                                     | CC                 | CC               | INTERGENIC                    |                    |                                                                     |
| SNP_473_A_2885395 | NC_021160.1    | Ca_Kabuli_Chr01 | 2885395                 | GG                                     | AA                 | AA               | INTERGENIC                    |                    |                                                                     |
| SNP_474_A_2885580 | NC_021160.1    | Ca_Kabuli_Chr01 | 2885580                 | AA                                     | GG                 | GG               | INTERGENIC                    |                    |                                                                     |
| SNP_475_A_2887372 | NC_021160.1    | Ca_Kabuli_Chr01 | 2887372                 | CC                                     | TT                 | TT               | DRR                           | 101488453          | uncharacterized LOC101488453                                        |
| SNP_476_A_2890399 | NC_021160.1    | Ca_Kabuli_Chr01 | 2890399                 | GG                                     | AA                 | AA               | URR                           | 101488453          | uncharacterized LOC101488453                                        |
| SNP_477_A_2893280 | NC_021160.1    | Ca_Kabuli_Chr01 | 2893280                 | AA                                     | TT                 | TT               | URR                           | 101488789          | 28 kDa heat- and acid-stable phosphoprotein-like                    |
| SNP_478_A_2897359 | NC_021160.1    | Ca_Kabuli_Chr01 | 2897359                 | TT                                     | GG                 | GG               | INTERGENIC                    |                    |                                                                     |
| SNP_479_A_2899962 | NC_021160.1    | Ca_Kabuli_Chr01 | 2899962                 | GG                                     | AA                 | AA               | INTRON                        | 101489119          | probable leucine-rich repeat receptor-like protein kinase At5g49770 |
| SNP_480_A_2899986 | NC_021160.1    | Ca_Kabuli_Chr01 | 2899986                 | CC                                     | TT                 | TT               | INTRON                        | 101489119          | probable leucine-rich repeat receptor-like protein kinase At5g49770 |
| SNP_481_A_2900990 | NC_021160.1    | Ca_Kabuli_Chr01 | 2900990                 | CC                                     | TT                 | TT               | SYNONYMOUS_CODING             | 101489119          | probable leucine-rich repeat receptor-like protein kinase At5g49770 |
| SNP_482_A_2900991 | NC_021160.1    | Ca_Kabuli_Chr01 | 2900991                 | AA                                     | GG                 | GG               | NON_SYNONYMOUS_CODING         | 101489119          | probable leucine-rich repeat receptor-like protein kinase At5g49770 |
| SNP_483_A_2901036 | NC_021160.1    | Ca_Kabuli_Chr01 | 2901036                 | AA                                     | GG                 | GG               | INTRON                        | 101489119          | probable leucine-rich repeat receptor-like protein kinase At5g49770 |
| SNP_484_A_2901128 | NC_021160.1    | Ca_Kabuli_Chr01 | 2901128                 | GG                                     | AA                 | AA               | INTRON                        | 101489119          | probable leucine-rich repeat receptor-like protein kinase At5g49770 |
| SNP_486_A_2903730 | NC_021160.1    | Ca_Kabuli_Chr01 | 2903730                 | TT                                     | AA                 | AA               | INTERGENIC                    |                    |                                                                     |
| SNP_487_A_2909146 | NC_021160.1    | Ca_Kabuli_Chr01 | 2909146                 | CC                                     | TT                 | TT               | INTERGENIC                    |                    |                                                                     |
| SNP_488_A_2916932 | NC_021160.1    | Ca_Kabuli_Chr01 | 2916932                 | AA                                     | CC                 | CC               | INTRON                        | 101490093          | WUSCHEL-related homeobox 9-like                                     |
| SNP_489_A_2916943 | NC_021160.1    | Ca_Kabuli_Chr01 | 2916943                 | CC                                     | TT                 | TT               | INTRON                        | 101490093          | WUSCHEL-related homeobox 9-like                                     |

| SNPs IDs          | Chromosome IDs | Chromosomes     | Physical positions (bp) | CDC Frontier (Reference genome) | (Pusa 1103 & HPNB) | (ILWC 46 & LPNB) | Sequence Components of genome | Gene accession IDs | Putative functions                                                                                  |
|-------------------|----------------|-----------------|-------------------------|---------------------------------|--------------------|------------------|-------------------------------|--------------------|-----------------------------------------------------------------------------------------------------|
| SNP_490_A_2920251 | NC_021160.1    | Ca_Kabuli_Chr01 | 2920251                 | CC                              | TT                 | TT               | URR                           | 101490093          | WUSCHEL-related homeobox 9-like                                                                     |
| SNP_491_A_2921252 | NC_021160.1    | Ca_Kabuli_Chr01 | 2921252                 | GG                              | CC                 | CC               | INTERGENIC                    |                    |                                                                                                     |
| SNP_493_A_2923750 | NC_021160.1    | Ca_Kabuli_Chr01 | 2923750                 | TT                              | CC                 | CC               | INTERGENIC                    |                    |                                                                                                     |
| SNP_494_A_2923803 | NC_021160.1    | Ca_Kabuli_Chr01 | 2923803                 | TT                              | CC                 | CC               | INTERGENIC                    |                    |                                                                                                     |
| SNP_495_A_2923805 | NC_021160.1    | Ca_Kabuli_Chr01 | 2923805                 | AA                              | GG                 | GG               | INTERGENIC                    |                    |                                                                                                     |
| SNP_496_A_2923853 | NC_021160.1    | Ca_Kabuli_Chr01 | 2923853                 | CC                              | GG                 | GG               | INTERGENIC                    |                    |                                                                                                     |
| SNP_497_A_2924591 | NC_021160.1    | Ca_Kabuli_Chr01 | 2924591                 | CC                              | AA                 | AA               | INTERGENIC                    |                    |                                                                                                     |
| SNP_498_A_2925329 | NC_021160.1    | Ca_Kabuli_Chr01 | 2925329                 | CC                              | TT                 | TT               | INTERGENIC                    |                    |                                                                                                     |
| SNP_499_A_2925615 | NC_021160.1    | Ca_Kabuli_Chr01 | 2925615                 | AA                              | CC                 | CC               | INTERGENIC                    |                    |                                                                                                     |
| SNP_500_A_2925694 | NC_021160.1    | Ca_Kabuli_Chr01 | 2925694                 | AA                              | GG                 | GG               | INTERGENIC                    |                    |                                                                                                     |
| SNP_501_A_2926106 | NC_021160.1    | Ca_Kabuli_Chr01 | 2926106                 | AA                              | GG                 | GG               | INTERGENIC                    |                    |                                                                                                     |
| SNP_502_A_2927445 | NC_021160.1    | Ca_Kabuli_Chr01 | 2927445                 | CC                              | TT                 | TT               | INTERGENIC                    |                    |                                                                                                     |
| SNP_503_A_2928022 | NC_021160.1    | Ca_Kabuli_Chr01 | 2928022                 | AA                              | TT                 | TT               | INTERGENIC                    |                    |                                                                                                     |
| SNP_504_A_2933840 | NC_021160.1    | Ca_Kabuli_Chr01 | 2933840                 | AA                              | TT                 | TT               | INTRON                        | 101490634          | 1-(5-phosphoribosyl)-5-[(5-phosphoribosylamino)methylideneamino]carboxamide isomerase, chloroplatic |
| SNP_505_A_2933841 | NC_021160.1    | Ca_Kabuli_Chr01 | 2933841                 | GG                              | AA                 | AA               | INTRON                        | 101490634          | 1-(5-phosphoribosyl)-5-[(5-phosphoribosylamino)methylideneamino]carboxamide isomerase, chloroplatic |
| SNP_506_A_2937902 | NC_021160.1    | Ca_Kabuli_Chr01 | 2937902                 | TT                              | AA                 | AA               | URR                           | 101490634          | 1-(5-phosphoribosyl)-5-[(5-phosphoribosylamino)methylideneamino]carboxamide isomerase, chloroplatic |
| SNP_507_A_2937903 | NC_021160.1    | Ca_Kabuli_Chr01 | 2937903                 | CC                              | AA                 | AA               | URR                           | 101490634          | 1-(5-phosphoribosyl)-5-[(5-phosphoribosylamino)methylideneamino]carboxamide isomerase, chloroplatic |
| SNP_508_A_2938188 | NC_021160.1    | Ca_Kabuli_Chr01 | 2938188                 | TT                              | GG                 | GG               | URR                           | 101490634          | 1-(5-phosphoribosyl)-5-[(5-phosphoribosylamino)methylideneamino]carboxamide isomerase, chloroplatic |
| SNP_509_A_2938226 | NC_021160.1    | Ca_Kabuli_Chr01 | 2938226                 | TT                              | CC                 | CC               | URR                           | 101490634          | 1-(5-phosphoribosyl)-5-[(5-phosphoribosylamino)methylideneamino]carboxamide isomerase, chloroplatic |
| SNP_510_A_2938520 | NC_021160.1    | Ca_Kabuli_Chr01 | 2938520                 | AA                              | TT                 | TT               | URR                           | 101490634          | 1-(5-phosphoribosyl)-5-[(5-phosphoribosylamino)methylideneamino]carboxamide isomerase, chloroplatic |
| SNP_511_A_2938832 | NC_021160.1    | Ca_Kabuli_Chr01 | 2938832                 | TT                              | AA                 | AA               | URR                           | 101490634          | 1-(5-phosphoribosyl)-5-[(5-phosphoribosylamino)methylideneamino]carboxamide isomerase, chloroplatic |
| SNP_512_A_2939100 | NC_021160.1    | Ca_Kabuli_Chr01 | 2939100                 | AA                              | GG                 | GG               | URR                           | 101490634          | 1-(5-phosphoribosyl)-5-[(5-phosphoribosylamino)methylideneamino]carboxamide isomerase, chloroplatic |



| SNPs IDs          | Chromosome IDs | Chromosomes     | Physical positions (bp) | CDC Frontier genome (Reference genome) | (Pusa 1103 & HPNB) | (ILWC 46 & LPNB) | Sequence genome       | Components of | Gene accession IDs | Putative functions                                             |
|-------------------|----------------|-----------------|-------------------------|----------------------------------------|--------------------|------------------|-----------------------|---------------|--------------------|----------------------------------------------------------------|
| SNP_513_A_2939867 | NC_021160.1    | Ca_Kabuli_Chr01 | 2939867                 | TT                                     | CC                 | CC               | INTERGENIC            |               |                    |                                                                |
| SNP_514_A_2944539 | NC_021160.1    | Ca_Kabuli_Chr01 | 2944539                 | GG                                     | AA                 | AA               | INTERGENIC            |               |                    |                                                                |
| SNP_515_A_2944579 | NC_021160.1    | Ca_Kabuli_Chr01 | 2944579                 | GG                                     | AA                 | AA               | INTERGENIC            |               |                    |                                                                |
| SNP_516_A_2944580 | NC_021160.1    | Ca_Kabuli_Chr01 | 2944580                 | TT                                     | AA                 | AA               | INTERGENIC            |               |                    |                                                                |
| SNP_517_A_2945645 | NC_021160.1    | Ca_Kabuli_Chr01 | 2945645                 | TT                                     | CC                 | CC               | INTERGENIC            |               |                    |                                                                |
| SNP_518_A_2945655 | NC_021160.1    | Ca_Kabuli_Chr01 | 2945655                 | GG                                     | AA                 | AA               | INTERGENIC            |               |                    |                                                                |
| SNP_520_A_2949817 | NC_021160.1    | Ca_Kabuli_Chr01 | 2949817                 | TT                                     | CC                 | CC               | URR                   | 101490960     |                    | pathogenesis-related genes transcriptional activator PTI5-like |
| SNP_521_A_2962316 | NC_021160.1    | Ca_Kabuli_Chr01 | 2962316                 | CC                                     | GG                 | GG               | INTERGENIC            |               |                    |                                                                |
| SNP_522_A_2963250 | NC_021160.1    | Ca_Kabuli_Chr01 | 2963250                 | AA                                     | TT                 | TT               | INTERGENIC            |               |                    |                                                                |
| SNP_524_A_2971307 | NC_021160.1    | Ca_Kabuli_Chr01 | 2971307                 | TT                                     | CC                 | CC               | DRR                   | 101491595     |                    | GDSL esterase/lipase At5g45960-like                            |
| SNP_525_A_2971309 | NC_021160.1    | Ca_Kabuli_Chr01 | 2971309                 | TT                                     | AA                 | AA               | DRR                   | 101491595     |                    | GDSL esterase/lipase At5g45960-like                            |
| SNP_526_A_2972695 | NC_021160.1    | Ca_Kabuli_Chr01 | 2972695                 | TT                                     | GG                 | GG               | INTRON                | 101491595     |                    | GDSL esterase/lipase At5g45960-like                            |
| SNP_529_A_2988398 | NC_021160.1    | Ca_Kabuli_Chr01 | 2988398                 | AA                                     | TT                 | TT               | DRR                   | 101491907     |                    | glutamate receptor 2.7-like                                    |
| SNP_530_A_2993257 | NC_021160.1    | Ca_Kabuli_Chr01 | 2993257                 | AA                                     | TT                 | TT               | INTRON                | 101491907     |                    | glutamate receptor 2.7-like                                    |
| SNP_531_A_2993297 | NC_021160.1    | Ca_Kabuli_Chr01 | 2993297                 | CC                                     | TT                 | TT               | NON_SYNONYMOUS_CODING | 101491907     |                    | glutamate receptor 2.7-like                                    |
| SNP_532_A_2994160 | NC_021160.1    | Ca_Kabuli_Chr01 | 2994160                 | TT                                     | GG                 | GG               | DRR                   | 101492787     |                    | probable ATP-dependent RNA helicase DHX35                      |
| SNP_533_A_2997048 | NC_021160.1    | Ca_Kabuli_Chr01 | 2997048                 | TT                                     | GG                 | GG               | INTRON                | DHX35         |                    | Unknown function                                               |
| SNP_534_A_3001747 | NC_021160.1    | Ca_Kabuli_Chr01 | 3001747                 | GG                                     | TT                 | TT               | INTRON                | DHX35         |                    | Unknown function                                               |
| SNP_536_A_3004106 | NC_021160.1    | Ca_Kabuli_Chr01 | 3004106                 | CC                                     | TT                 | TT               | DRR                   | 101493117     |                    | pentatricopeptide repeat-containing protein At4g13850          |
| SNP_537_A_3005367 | NC_021160.1    | Ca_Kabuli_Chr01 | 3005367                 | CC                                     | GG                 | GG               | DOWNSTREAM            | DHX35         |                    | Unknown function                                               |
| SNP_538_A_3007432 | NC_021160.1    | Ca_Kabuli_Chr01 | 3007432                 | AA                                     | GG                 | GG               | INTERGENIC            |               |                    |                                                                |
| SNP_539_A_3010481 | NC_021160.1    | Ca_Kabuli_Chr01 | 3010481                 | GG                                     | CC                 | CC               | DRR                   | 101513083     |                    | uncharacterized LOC101513083                                   |

| SNPs IDs          | Chromosome IDs | Chromosomes     | Physical positions (bp) | CDC Frontier (Reference genome) | (Pusa 1103 & HPNB) | (ILWC 46 & LPNB) | Sequence genome | Components of | Gene accession IDs | Putative functions                                                   |
|-------------------|----------------|-----------------|-------------------------|---------------------------------|--------------------|------------------|-----------------|---------------|--------------------|----------------------------------------------------------------------|
| SNP_540_A_3012542 | NC_021160.1    | Ca_Kabuli_Chr01 | 3012542                 | AA                              | GG                 | GG               | INTERGENIC      |               |                    |                                                                      |
| SNP_541_A_3013626 | NC_021160.1    | Ca_Kabuli_Chr01 | 3013626                 | CC                              | AA                 | AA               | URR             | 101513083     |                    | uncharacterized LOC101513083                                         |
| SNP_542_A_3016414 | NC_021160.1    | Ca_Kabuli_Chr01 | 3016414                 | AA                              | GG                 | GG               | INTERGENIC      |               |                    |                                                                      |
| SNP_543_A_3016434 | NC_021160.1    | Ca_Kabuli_Chr01 | 3016434                 | CC                              | TT                 | TT               | INTERGENIC      |               |                    |                                                                      |
| SNP_544_A_3016436 | NC_021160.1    | Ca_Kabuli_Chr01 | 3016436                 | CC                              | TT                 | TT               | INTERGENIC      |               |                    |                                                                      |
| SNP_546_A_3024912 | NC_021160.1    | Ca_Kabuli_Chr01 | 3024912                 | TT                              | CC                 | CC               | DRR             | 101493447     |                    | protein IQ-DOMAIN 1                                                  |
| SNP_547_A_3027551 | NC_021160.1    | Ca_Kabuli_Chr01 | 3027551                 | TT                              | CC                 | CC               | INTERGENIC      |               |                    |                                                                      |
| SNP_548_A_3027744 | NC_021160.1    | Ca_Kabuli_Chr01 | 3027744                 | AA                              | TT                 | TT               | INTERGENIC      |               |                    |                                                                      |
| SNP_549_A_3028925 | NC_021160.1    | Ca_Kabuli_Chr01 | 3028925                 | GG                              | AA                 | AA               | INTERGENIC      |               |                    |                                                                      |
| SNP_550_A_3029900 | NC_021160.1    | Ca_Kabuli_Chr01 | 3029900                 | CC                              | TT                 | TT               | INTERGENIC      |               |                    |                                                                      |
| SNP_551_A_3033272 | NC_021160.1    | Ca_Kabuli_Chr01 | 3033272                 | TT                              | CC                 | CC               | DRR             | 101494512     |                    | magnesium-chelatase subunit ChII, chloroplastic-like                 |
| SNP_552_A_3034187 | NC_021160.1    | Ca_Kabuli_Chr01 | 3034187                 | TT                              | CC                 | CC               | URR             | 101494205     |                    | nudix hydrolase 15, mitochondrial                                    |
| SNP_553_A_3035394 | NC_021160.1    | Ca_Kabuli_Chr01 | 3035394                 | GG                              | TT                 | TT               | INTERGENIC      |               |                    |                                                                      |
| SNP_554_A_3039110 | NC_021160.1    | Ca_Kabuli_Chr01 | 3039110                 | GG                              | TT                 | TT               | URR             | 101494826     |                    | 3'-N-debenzoyl-2'-deoxytaxol N-benzoyltransferase                    |
| SNP_555_A_3039133 | NC_021160.1    | Ca_Kabuli_Chr01 | 3039133                 | TT                              | CC                 | CC               | URR             | 101494826     |                    | 3'-N-debenzoyl-2'-deoxytaxol N-benzoyltransferase                    |
| SNP_556_A_3040583 | NC_021160.1    | Ca_Kabuli_Chr01 | 3040583                 | AA                              | CC                 | CC               | URR             | 101494826     |                    | 3'-N-debenzoyl-2'-deoxytaxol N-benzoyltransferase                    |
| SNP_558_A_3042449 | NC_021160.1    | Ca_Kabuli_Chr01 | 3042449                 | TT                              | CC                 | CC               | INTERGENIC      |               |                    |                                                                      |
| SNP_560_A_3045315 | NC_021160.1    | Ca_Kabuli_Chr01 | 3045315                 | AA                              | GG                 | GG               | INTERGENIC      |               |                    |                                                                      |
| SNP_561_A_3045381 | NC_021160.1    | Ca_Kabuli_Chr01 | 3045381                 | AA                              | GG                 | GG               | DRR             | 101495155     |                    | GDGL esterase/lipase At5g45920                                       |
| SNP_563_A_3046044 | NC_021160.1    | Ca_Kabuli_Chr01 | 3046044                 | AA                              | GG                 | GG               | DRR             | 101495155     |                    | GDGL esterase/lipase At5g45920                                       |
| SNP_565_A_3055105 | NC_021160.1    | Ca_Kabuli_Chr01 | 3055105                 | AA                              | GG                 | GG               | DRR             | 101496016     |                    | pentatricopeptide repeat-containing protein At1g28690, mitochondrial |
| SNP_566_A_3055137 | NC_021160.1    | Ca_Kabuli_Chr01 | 3055137                 | AA                              | GG                 | GG               | DRR             | 101496016     |                    | pentatricopeptide repeat-containing protein At1g28690, mitochondrial |

| SNPs IDs          | Chromosome IDs | Chromosomes     | Physical positions (bp) | CDC Frontier (Reference genome) | (Pusa 1103 & HPNB) | (ILWC 46 & LPNB) | Sequence Components of genome | Gene accession IDs | Putative functions                                                   |
|-------------------|----------------|-----------------|-------------------------|---------------------------------|--------------------|------------------|-------------------------------|--------------------|----------------------------------------------------------------------|
| SNP_567_A_3055367 | NC_021160.1    | Ca_Kabuli_Chr01 | 3055367                 | GG                              | TT                 | TT               | DRR                           | 101496016          | pentatricopeptide repeat-containing protein At1g28690, mitochondrial |
| SNP_568_A_3066352 | NC_021160.1    | Ca_Kabuli_Chr01 | 3066352                 | AA                              | GG                 | GG               | INTERGENIC                    |                    |                                                                      |
| SNP_569_A_3066367 | NC_021160.1    | Ca_Kabuli_Chr01 | 3066367                 | GG                              | CC                 | CC               | INTERGENIC                    |                    |                                                                      |
| SNP_570_A_3068568 | NC_021160.1    | Ca_Kabuli_Chr01 | 3068568                 | AA                              | TT                 | TT               | INTERGENIC                    |                    |                                                                      |
| SNP_571_A_3068579 | NC_021160.1    | Ca_Kabuli_Chr01 | 3068579                 | AA                              | GG                 | GG               | INTERGENIC                    |                    |                                                                      |
| SNP_572_A_3070744 | NC_021160.1    | Ca_Kabuli_Chr01 | 3070744                 | TT                              | CC                 | CC               | URR                           | 101496685          | pyruvate decarboxylase 1                                             |
| SNP_573_A_3070769 | NC_021160.1    | Ca_Kabuli_Chr01 | 3070769                 | CC                              | GG                 | GG               | URR                           | 101496685          | pyruvate decarboxylase 1                                             |
| SNP_574_A_3072472 | NC_021160.1    | Ca_Kabuli_Chr01 | 3072472                 | CC                              | TT                 | TT               | DRR                           | 101496997          | GDSL esterase/lipase At1g28610-like                                  |
| SNP_575_A_3072474 | NC_021160.1    | Ca_Kabuli_Chr01 | 3072474                 | GG                              | AA                 | AA               | DRR                           | 101496997          | GDSL esterase/lipase At1g28610-like                                  |
| SNP_576_A_3072499 | NC_021160.1    | Ca_Kabuli_Chr01 | 3072499                 | TT                              | CC                 | CC               | DRR                           | 101496997          | GDSL esterase/lipase At1g28610-like                                  |
| SNP_577_A_3072500 | NC_021160.1    | Ca_Kabuli_Chr01 | 3072500                 | CC                              | AA                 | AA               | DRR                           | 101496997          | GDSL esterase/lipase At1g28610-like                                  |
| SNP_579_A_3074596 | NC_021160.1    | Ca_Kabuli_Chr01 | 3074596                 | GG                              | AA                 | AA               | INTERGENIC                    |                    |                                                                      |
| SNP_580_A_3074599 | NC_021160.1    | Ca_Kabuli_Chr01 | 3074599                 | GG                              | TT                 | TT               | INTERGENIC                    |                    |                                                                      |
| SNP_581_A_3075053 | NC_021160.1    | Ca_Kabuli_Chr01 | 3075053                 | TT                              | AA                 | AA               | INTERGENIC                    |                    |                                                                      |
| SNP_582_A_3075170 | NC_021160.1    | Ca_Kabuli_Chr01 | 3075170                 | GG                              | AA                 | AA               | INTERGENIC                    |                    |                                                                      |
| SNP_583_A_3075523 | NC_021160.1    | Ca_Kabuli_Chr01 | 3075523                 | AA                              | GG                 | GG               | INTRON                        | 101496997          | GDSL esterase/lipase At1g28610-like                                  |
| SNP_584_A_3075533 | NC_021160.1    | Ca_Kabuli_Chr01 | 3075533                 | AA                              | TT                 | TT               | INTRON                        | 101496997          | GDSL esterase/lipase At1g28610-like                                  |
| SNP_585_A_3075869 | NC_021160.1    | Ca_Kabuli_Chr01 | 3075869                 | TT                              | GG                 | GG               | INTRON                        | 101496997          | GDSL esterase/lipase At1g28610-like                                  |
| SNP_586_A_3076395 | NC_021160.1    | Ca_Kabuli_Chr01 | 3076395                 | GG                              | AA                 | AA               | INTRON                        | 101496997          | GDSL esterase/lipase At1g28610-like                                  |
| SNP_587_A_3079294 | NC_021160.1    | Ca_Kabuli_Chr01 | 3079294                 | AA                              | GG                 | GG               | DRR                           | 101497322          | GDSL esterase/lipase At2g27360-like                                  |
| SNP_588_A_3079297 | NC_021160.1    | Ca_Kabuli_Chr01 | 3079297                 | TT                              | CC                 | CC               | DRR                           | 101497322          | GDSL esterase/lipase At2g27360-like                                  |
| SNP_589_A_3079319 | NC_021160.1    | Ca_Kabuli_Chr01 | 3079319                 | CC                              | TT                 | TT               | DRR                           | 101497322          | GDSL esterase/lipase At2g27360-like                                  |

| SNPs IDs          | Chromosome IDs | Chromosomes     | Physical positions (bp) | CDC Frontier (Reference genome) | (Pusa 1103 & HPNB) | (ILWC 46 & LPNB) | Sequence Components of genome | Gene accession IDs | Putative functions                  |
|-------------------|----------------|-----------------|-------------------------|---------------------------------|--------------------|------------------|-------------------------------|--------------------|-------------------------------------|
| SNP_590_A_3079368 | NC_021160.1    | Ca_Kabuli_Chr01 | 3079368                 | CC                              | TT                 | TT               | DRR                           | 101497322          | GDSL esterase/lipase At2g27360-like |
| SNP_591_A_3079459 | NC_021160.1    | Ca_Kabuli_Chr01 | 3079459                 | TT                              | CC                 | CC               | DRR                           | 101497322          | GDSL esterase/lipase At2g27360-like |
| SNP_592_A_3080992 | NC_021160.1    | Ca_Kabuli_Chr01 | 3080992                 | TT                              | CC                 | CC               | INTERGENIC                    |                    |                                     |
| SNP_593_A_3081553 | NC_021160.1    | Ca_Kabuli_Chr01 | 3081553                 | TT                              | AA                 | AA               | INTERGENIC                    |                    |                                     |
| SNP_594_A_3081585 | NC_021160.1    | Ca_Kabuli_Chr01 | 3081585                 | GG                              | AA                 | AA               | INTERGENIC                    |                    |                                     |
| SNP_595_A_3082811 | NC_021160.1    | Ca_Kabuli_Chr01 | 3082811                 | CC                              | TT                 | TT               | DRR                           | 101497643          | GDSL esterase/lipase At5g45910-like |
| SNP_596_A_3082818 | NC_021160.1    | Ca_Kabuli_Chr01 | 3082818                 | GG                              | TT                 | TT               | DRR                           | 101497643          | GDSL esterase/lipase At5g45910-like |
| SNP_598_A_3083540 | NC_021160.1    | Ca_Kabuli_Chr01 | 3083540                 | GG                              | AA                 | AA               | DRR                           | 101497643          | GDSL esterase/lipase At5g45910-like |
| SNP_599_A_3084224 | NC_021160.1    | Ca_Kabuli_Chr01 | 3084224                 | CC                              | TT                 | TT               | URR                           | 101497322          | GDSL esterase/lipase At2g27360-like |
| SNP_600_A_3084234 | NC_021160.1    | Ca_Kabuli_Chr01 | 3084234                 | TT                              | AA                 | AA               | URR                           | 101497322          | GDSL esterase/lipase At2g27360-like |
| SNP_601_A_3085065 | NC_021160.1    | Ca_Kabuli_Chr01 | 3085065                 | AA                              | GG                 | GG               | URR                           | 101497322          | GDSL esterase/lipase At2g27360-like |
| SNP_602_A_3085149 | NC_021160.1    | Ca_Kabuli_Chr01 | 3085149                 | CC                              | TT                 | TT               | URR                           | 101497322          | GDSL esterase/lipase At2g27360-like |
| SNP_603_A_3085252 | NC_021160.1    | Ca_Kabuli_Chr01 | 3085252                 | CC                              | TT                 | TT               | URR                           | 101497322          | GDSL esterase/lipase At2g27360-like |
| SNP_604_A_3085718 | NC_021160.1    | Ca_Kabuli_Chr01 | 3085718                 | GG                              | AA                 | AA               | INTERGENIC                    |                    |                                     |
| SNP_605_A_3086160 | NC_021160.1    | Ca_Kabuli_Chr01 | 3086160                 | AA                              | TT                 | TT               | INTERGENIC                    |                    |                                     |
| SNP_606_A_3086211 | NC_021160.1    | Ca_Kabuli_Chr01 | 3086211                 | TT                              | CC                 | CC               | INTERGENIC                    |                    |                                     |
| SNP_607_A_3086434 | NC_021160.1    | Ca_Kabuli_Chr01 | 3086434                 | AA                              | TT                 | TT               | INTERGENIC                    |                    |                                     |
| SNP_608_A_3088072 | NC_021160.1    | Ca_Kabuli_Chr01 | 3088072                 | TT                              | AA                 | AA               | URR                           | 101497643          | GDSL esterase/lipase At5g45910-like |
| SNP_609_A_3088219 | NC_021160.1    | Ca_Kabuli_Chr01 | 3088219                 | AA                              | CC                 | CC               | URR                           | 101497643          | GDSL esterase/lipase At5g45910-like |
| SNP_610_A_3088814 | NC_021160.1    | Ca_Kabuli_Chr01 | 3088814                 | GG                              | CC                 | CC               | INTERGENIC                    |                    |                                     |
| SNP_611_A_3089223 | NC_021160.1    | Ca_Kabuli_Chr01 | 3089223                 | AA                              | TT                 | TT               | URR                           | 101497979          | 40S ribosomal protein S27-2-like    |
| SNP_613_A_3091639 | NC_021160.1    | Ca_Kabuli_Chr01 | 3091639                 | CC                              | GG                 | GG               | INTERGENIC                    |                    |                                     |

| SNPs IDs          | Chromosome IDs | Chromosomes     | Physical positions (bp) | CDC Frontier genome (Reference genome) | (Pusa 1103 & HPNB) | (ILWC 46 & LPNB) | Sequence Components of genome | Gene accession IDs | Putative functions                       |
|-------------------|----------------|-----------------|-------------------------|----------------------------------------|--------------------|------------------|-------------------------------|--------------------|------------------------------------------|
| SNP_615_A_3096336 | NC_021160.1    | Ca_Kabuli_Chr01 | 3096336                 | GG                                     | AA                 | AA               | INTERGENIC                    |                    |                                          |
| SNP_616_A_3100100 | NC_021160.1    | Ca_Kabuli_Chr01 | 3100100                 | CC                                     | GG                 | GG               | INTERGENIC                    |                    |                                          |
| SNP_617_A_3100353 | NC_021160.1    | Ca_Kabuli_Chr01 | 3100353                 | AA                                     | GG                 | GG               | INTERGENIC                    |                    |                                          |
| SNP_618_A_3100382 | NC_021160.1    | Ca_Kabuli_Chr01 | 3100382                 | CC                                     | GG                 | GG               | INTERGENIC                    |                    |                                          |
| SNP_619_A_3100514 | NC_021160.1    | Ca_Kabuli_Chr01 | 3100514                 | TT                                     | GG                 | GG               | INTERGENIC                    |                    |                                          |
| SNP_620_A_3100557 | NC_021160.1    | Ca_Kabuli_Chr01 | 3100557                 | CC                                     | TT                 | TT               | INTERGENIC                    |                    |                                          |
| SNP_621_A_3102387 | NC_021160.1    | Ca_Kabuli_Chr01 | 3102387                 | CC                                     | TT                 | TT               | INTERGENIC                    |                    |                                          |
| SNP_623_A_3107490 | NC_021160.1    | Ca_Kabuli_Chr01 | 3107490                 | CC                                     | AA                 | AA               | URR                           | 101513411          | galactose oxidase-like                   |
| SNP_624_A_3111069 | NC_021160.1    | Ca_Kabuli_Chr01 | 3111069                 | CC                                     | AA                 | AA               | INTERGENIC                    |                    |                                          |
| SNP_625_A_3113477 | NC_021160.1    | Ca_Kabuli_Chr01 | 3113477                 | TT                                     | AA                 | AA               | INTERGENIC                    |                    |                                          |
| SNP_626_A_3113534 | NC_021160.1    | Ca_Kabuli_Chr01 | 3113534                 | GG                                     | AA                 | AA               | INTERGENIC                    |                    |                                          |
| SNP_628_A_3119612 | NC_021160.1    | Ca_Kabuli_Chr01 | 3119612                 | GG                                     | AA                 | AA               | INTERGENIC                    |                    |                                          |
| SNP_630_A_3132980 | NC_021160.1    | Ca_Kabuli_Chr01 | 3132980                 | TT                                     | AA                 | AA               | DRR                           | 101410577          | transfer RNA alanine (anticodon UGC)     |
| SNP_631_A_3133394 | NC_021160.1    | Ca_Kabuli_Chr01 | 3133394                 | GG                                     | TT                 | TT               | DRR                           | 101410577          | transfer RNA alanine (anticodon UGC)     |
| SNP_632_A_3136229 | NC_021160.1    | Ca_Kabuli_Chr01 | 3136229                 | GG                                     | TT                 | TT               | URR                           | 101499293          | 50S ribosomal protein L34, chloroplastic |
| SNP_633_A_3137051 | NC_021160.1    | Ca_Kabuli_Chr01 | 3137051                 | CC                                     | TT                 | TT               | URR                           | 101499293          | 50S ribosomal protein L34, chloroplastic |
| SNP_634_A_3137080 | NC_021160.1    | Ca_Kabuli_Chr01 | 3137080                 | TT                                     | CC                 | CC               | URR                           | 101499293          | 50S ribosomal protein L34, chloroplastic |
| SNP_636_A_3150341 | NC_021160.1    | Ca_Kabuli_Chr01 | 3150341                 | TT                                     | CC                 | CC               | DRR                           | 101500253          | U-box domain-containing protein 7        |
| SNP_637_A_3150356 | NC_021160.1    | Ca_Kabuli_Chr01 | 3150356                 | GG                                     | AA                 | AA               | DRR                           | 101500253          | U-box domain-containing protein 7        |
| SNP_638_A_3150360 | NC_021160.1    | Ca_Kabuli_Chr01 | 3150360                 | GG                                     | AA                 | AA               | DRR                           | 101500253          | U-box domain-containing protein 7        |
| SNP_639_A_3150362 | NC_021160.1    | Ca_Kabuli_Chr01 | 3150362                 | CC                                     | TT                 | TT               | DRR                           | 101500253          | U-box domain-containing protein 7        |
| SNP_640_A_3150381 | NC_021160.1    | Ca_Kabuli_Chr01 | 3150381                 | TT                                     | GG                 | GG               | DRR                           | 101500253          | U-box domain-containing protein 7        |

| SNPs IDs          | Chromosome IDs | Chromosomes     | Physical positions (bp) | CDC Frontier (Reference genome) | (Pusa 1103 & HPNB) | (ILWC 46 & LPNB) | Sequence Components of genome | Gene accession IDs | Putative functions                                                   |
|-------------------|----------------|-----------------|-------------------------|---------------------------------|--------------------|------------------|-------------------------------|--------------------|----------------------------------------------------------------------|
| SNP_641_A_3150386 | NC_021160.1    | Ca_Kabuli_Chr01 | 3150386                 | TT                              | GG                 | GG               | DRR                           | 101500253          | U-box domain-containing protein 7                                    |
| SNP_642_A_3150568 | NC_021160.1    | Ca_Kabuli_Chr01 | 3150568                 | TT                              | CC                 | CC               | DRR                           | 101500253          | U-box domain-containing protein 7                                    |
| SNP_643_A_3150611 | NC_021160.1    | Ca_Kabuli_Chr01 | 3150611                 | GG                              | AA                 | AA               | DRR                           | 101500253          | U-box domain-containing protein 7                                    |
| SNP_644_A_3150639 | NC_021160.1    | Ca_Kabuli_Chr01 | 3150639                 | TT                              | AA                 | AA               | DRR                           | 101500253          | U-box domain-containing protein 7                                    |
| SNP_645_A_3150664 | NC_021160.1    | Ca_Kabuli_Chr01 | 3150664                 | CC                              | TT                 | TT               | DRR                           | 101500253          | U-box domain-containing protein 7                                    |
| SNP_646_A_3150683 | NC_021160.1    | Ca_Kabuli_Chr01 | 3150683                 | AA                              | TT                 | TT               | DRR                           | 101500253          | U-box domain-containing protein 7                                    |
| SNP_647_A_3150707 | NC_021160.1    | Ca_Kabuli_Chr01 | 3150707                 | AA                              | TT                 | TT               | DRR                           | 101500253          | U-box domain-containing protein 7                                    |
| SNP_648_A_3153199 | NC_021160.1    | Ca_Kabuli_Chr01 | 3153199                 | GG                              | CC                 | CC               | INTRON                        | 101500253          | U-box domain-containing protein 7                                    |
| SNP_649_A_3153321 | NC_021160.1    | Ca_Kabuli_Chr01 | 3153321                 | GG                              | TT                 | TT               | INTRON                        | 101500253          | U-box domain-containing protein 7                                    |
| SNP_650_A_3153944 | NC_021160.1    | Ca_Kabuli_Chr01 | 3153944                 | AA                              | GG                 | GG               | INTRON                        | 101500253          | U-box domain-containing protein 7                                    |
| SNP_651_A_3153957 | NC_021160.1    | Ca_Kabuli_Chr01 | 3153957                 | TT                              | AA                 | AA               | INTRON                        | 101500253          | U-box domain-containing protein 7                                    |
| SNP_653_A_3206317 | NC_021160.1    | Ca_Kabuli_Chr01 | 3206317                 | TT                              | CC                 | CC               | INTERGENIC                    |                    |                                                                      |
| SNP_654_A_3289718 | NC_021160.1    | Ca_Kabuli_Chr01 | 3289718                 | TT                              | GG                 | GG               | INTERGENIC                    |                    |                                                                      |
| SNP_655_A_3289719 | NC_021160.1    | Ca_Kabuli_Chr01 | 3289719                 | AA                              | TT                 | TT               | INTERGENIC                    |                    |                                                                      |
| SNP_656_A_3314071 | NC_021160.1    | Ca_Kabuli_Chr01 | 3314071                 | GG                              | TT                 | TT               | DRR                           | 101506657          | CBL-interacting serine/threonine-protein kinase 12-like              |
| SNP_657_A_3319400 | NC_021160.1    | Ca_Kabuli_Chr01 | 3319400                 | AA                              | TT                 | TT               | INTERGENIC                    |                    |                                                                      |
| SNP_658_A_3355199 | NC_021160.1    | Ca_Kabuli_Chr01 | 3355199                 | TT                              | AA                 | AA               | INTERGENIC                    |                    |                                                                      |
| SNP_659_A_3355203 | NC_021160.1    | Ca_Kabuli_Chr01 | 3355203                 | AA                              | TT                 | TT               | INTERGENIC                    |                    |                                                                      |
| SNP_660_A_3355472 | NC_021160.1    | Ca_Kabuli_Chr01 | 3355472                 | CC                              | GG                 | GG               | DRR                           | 101508483          | shaggy-related protein kinase eta                                    |
| SNP_661_A_3367513 | NC_021160.1    | Ca_Kabuli_Chr01 | 3367513                 | GG                              | CC                 | CC               | URR                           | 101508790          | probable LRR receptor-like serine/threonine-protein kinase At5g45780 |
| SNP_663_A_3518649 | NC_021160.1    | Ca_Kabuli_Chr01 | 3518649                 | GG                              | AA                 | AA               | URR                           | 101515364          | transcription repressor OFP5-like                                    |
| SNP_664_A_3518891 | NC_021160.1    | Ca_Kabuli_Chr01 | 3518891                 | GG                              | CC                 | CC               | URR                           | 101515698          | uncharacterized LOC101515698                                         |

| SNPs IDs          | Chromosome IDs | Chromosomes     | Physical positions (bp) | CDC Frontier genome (Reference genome) | (Pusa 1103 & HPNB) | (ILWC 46 & LPNB) | Sequence Components of genome | Gene accession IDs | Putative functions                  |
|-------------------|----------------|-----------------|-------------------------|----------------------------------------|--------------------|------------------|-------------------------------|--------------------|-------------------------------------|
| SNP_665_A_3529016 | NC_021160.1    | Ca_Kabuli_Chr01 | 3529016                 | CC                                     | GG                 | GG               | INTERGENIC                    |                    |                                     |
| SNP_666_A_3577102 | NC_021160.1    | Ca_Kabuli_Chr01 | 3577102                 | CC                                     | TT                 | TT               | URR                           | 101490316          | nodulin-26-like                     |
| SNP_667_A_3629038 | NC_021160.1    | Ca_Kabuli_Chr01 | 3629038                 | AA                                     | GG                 | GG               | INTERGENIC                    |                    |                                     |
| SNP_669_A_3665792 | NC_021160.1    | Ca_Kabuli_Chr01 | 3665792                 | TT                                     | GG                 | GG               | INTRON                        | 101495032          | GDSL esterase/lipase At1g29660-like |
| SNP_670_A_3754974 | NC_021160.1    | Ca_Kabuli_Chr01 | 3754974                 | CC                                     | AA                 | AA               | URR                           | 101497980          | PITH domain-containing protein 1    |
| SNP_671_A_3754986 | NC_021160.1    | Ca_Kabuli_Chr01 | 3754986                 | CC                                     | TT                 | TT               | URR                           | 101497980          | PITH domain-containing protein 1    |
| SNP_672_A_3754989 | NC_021160.1    | Ca_Kabuli_Chr01 | 3754989                 | CC                                     | AA                 | AA               | URR                           | 101497980          | PITH domain-containing protein 1    |
| SNP_673_A_3758069 | NC_021160.1    | Ca_Kabuli_Chr01 | 3758069                 | CC                                     | TT                 | TT               | INTERGENIC                    |                    |                                     |
| SNP_674_A_3758370 | NC_021160.1    | Ca_Kabuli_Chr01 | 3758370                 | GG                                     | TT                 | TT               | INTERGENIC                    |                    |                                     |
| SNP_675_A_3758532 | NC_021160.1    | Ca_Kabuli_Chr01 | 3758532                 | GG                                     | AA                 | AA               | INTERGENIC                    |                    |                                     |
| SNP_676_A_3782047 | NC_021160.1    | Ca_Kabuli_Chr01 | 3782047                 | GG                                     | TT                 | TT               | INTERGENIC                    |                    |                                     |
| SNP_677_A_3782556 | NC_021160.1    | Ca_Kabuli_Chr01 | 3782556                 | GG                                     | TT                 | TT               | INTERGENIC                    |                    |                                     |
| SNP_678_A_3783144 | NC_021160.1    | Ca_Kabuli_Chr01 | 3783144                 | AA                                     | CC                 | CC               | INTERGENIC                    |                    |                                     |
| SNP_679_A_3783527 | NC_021160.1    | Ca_Kabuli_Chr01 | 3783527                 | TT                                     | AA                 | AA               | INTERGENIC                    |                    |                                     |
| SNP_681_A_3783646 | NC_021160.1    | Ca_Kabuli_Chr01 | 3783646                 | GG                                     | TT                 | TT               | INTERGENIC                    |                    |                                     |
| SNP_683_A_3879160 | NC_021160.1    | Ca_Kabuli_Chr01 | 3879160                 | CC                                     | TT                 | TT               | INTRON                        | 101501722          | uncharacterized LOC101501722        |
| SNP_684_A_3966049 | NC_021160.1    | Ca_Kabuli_Chr01 | 3966049                 | CC                                     | TT                 | TT               | INTERGENIC                    |                    |                                     |
| SNP_685_A_3990811 | NC_021160.1    | Ca_Kabuli_Chr01 | 3990811                 | TT                                     | AA                 | AA               | INTERGENIC                    |                    |                                     |
| SNP_688_A_4119576 | NC_021160.1    | Ca_Kabuli_Chr01 | 4119576                 | TT                                     | CC                 | CC               | INTERGENIC                    |                    |                                     |
| SNP_691_A_4159378 | NC_021160.1    | Ca_Kabuli_Chr01 | 4159378                 | TT                                     | GG                 | GG               | INTERGENIC                    |                    |                                     |
| SNP_692_A_4160339 | NC_021160.1    | Ca_Kabuli_Chr01 | 4160339                 | GG                                     | AA                 | AA               | INTERGENIC                    |                    |                                     |
| SNP_694_A_4218349 | NC_021160.1    | Ca_Kabuli_Chr01 | 4218349                 | CC                                     | TT                 | TT               | INTERGENIC                    |                    |                                     |

| SNPs IDs          | Chromosome IDs | Chromosomes     | Physical positions (bp) | CDC Frontier (Reference genome) | (Pusa 1103 & HPNB) | (ILWC 46 & LPNB) | Sequence Components of genome | Gene accession IDs | Putative functions                                           |
|-------------------|----------------|-----------------|-------------------------|---------------------------------|--------------------|------------------|-------------------------------|--------------------|--------------------------------------------------------------|
| SNP_695_A_4229220 | NC_021160.1    | Ca_Kabuli_Chr01 | 4229220                 | CC                              | TT                 | TT               | INTRON                        | 101488455          | uncharacterized LOC101488455                                 |
| SNP_696_A_4229231 | NC_021160.1    | Ca_Kabuli_Chr01 | 4229231                 | CC                              | TT                 | TT               | INTRON                        | 101488455          | uncharacterized LOC101488455                                 |
| SNP_698_A_4234957 | NC_021160.1    | Ca_Kabuli_Chr01 | 4234957                 | TT                              | CC                 | CC               | URR                           | 101488455          | uncharacterized LOC101488455                                 |
| SNP_699_A_4241084 | NC_021160.1    | Ca_Kabuli_Chr01 | 4241084                 | GG                              | AA                 | AA               | INTERGENIC                    |                    |                                                              |
| SNP_700_A_4241099 | NC_021160.1    | Ca_Kabuli_Chr01 | 4241099                 | AA                              | GG                 | GG               | INTERGENIC                    |                    |                                                              |
| SNP_701_A_4241155 | NC_021160.1    | Ca_Kabuli_Chr01 | 4241155                 | GG                              | TT                 | TT               | INTERGENIC                    |                    |                                                              |
| SNP_702_A_4241204 | NC_021160.1    | Ca_Kabuli_Chr01 | 4241204                 | TT                              | CC                 | CC               | INTERGENIC                    |                    |                                                              |
| SNP_703_A_4246715 | NC_021160.1    | Ca_Kabuli_Chr01 | 4246715                 | TT                              | AA                 | AA               | URR                           | 101493347          | probable F-box protein At4g22030                             |
| SNP_704_A_4252781 | NC_021160.1    | Ca_Kabuli_Chr01 | 4252781                 | TT                              | AA                 | AA               | URR                           | 101488792          | la-related protein 6A                                        |
| SNP_705_A_4287878 | NC_021160.1    | Ca_Kabuli_Chr01 | 4287878                 | CC                              | GG                 | GG               | INTERGENIC                    |                    |                                                              |
| SNP_706_A_4288598 | NC_021160.1    | Ca_Kabuli_Chr01 | 4288598                 | CC                              | AA                 | AA               | DRR                           | 101490317          | 60S ribosomal protein L18a                                   |
| SNP_707_A_4291926 | NC_021160.1    | Ca_Kabuli_Chr01 | 4291926                 | TT                              | CC                 | CC               | URR                           | 101490317          | 60S ribosomal protein L18a                                   |
| SNP_708_A_4314640 | NC_021160.1    | Ca_Kabuli_Chr01 | 4314640                 | TT                              | CC                 | CC               | INTERGENIC                    |                    |                                                              |
| SNP_709_A_4435104 | NC_021160.1    | Ca_Kabuli_Chr01 | 4435104                 | GG                              | AA                 | AA               | INTERGENIC                    |                    |                                                              |
| SNP_710_A_4435290 | NC_021160.1    | Ca_Kabuli_Chr01 | 4435290                 | TT                              | CC                 | CC               | INTERGENIC                    |                    |                                                              |
| SNP_711_A_4435322 | NC_021160.1    | Ca_Kabuli_Chr01 | 4435322                 | AA                              | GG                 | GG               | INTERGENIC                    |                    |                                                              |
| SNP_713_A_4515753 | NC_021160.1    | Ca_Kabuli_Chr01 | 4515753                 | GG                              | AA                 | AA               | URR                           | 101499294          | tubby-like F-box protein 3                                   |
| SNP_715_A_4719711 | NC_021160.1    | Ca_Kabuli_Chr01 | 4719711                 | GG                              | AA                 | AA               | DRR                           | 101505157          | receptor-like cytosolic serine/threonine-protein kinase RBK2 |
| SNP_716_A_4721544 | NC_021160.1    | Ca_Kabuli_Chr01 | 4721544                 | AA                              | TT                 | TT               | URR                           | 101504842          | probable prolyl 4-hydroxylase 4                              |
| SNP_717_A_4722850 | NC_021160.1    | Ca_Kabuli_Chr01 | 4722850                 | AA                              | GG                 | GG               | INTERGENIC                    |                    |                                                              |
| SNP_718_A_4722855 | NC_021160.1    | Ca_Kabuli_Chr01 | 4722855                 | TT                              | CC                 | CC               | INTERGENIC                    |                    |                                                              |
| SNP_719_A_4738116 | NC_021160.1    | Ca_Kabuli_Chr01 | 4738116                 | TT                              | AA                 | AA               | INTRON                        | 101497222          | F-box/kelch-repeat protein At3g23880-like                    |



| SNPs IDs          | Chromosome IDs | Chromosomes     | Physical positions (bp) | CDC Frontier (Reference genome) | (Pusa 1103 & HPNB) | (ILWC 46 & LPNB) | Sequence Components of genome | Gene accession IDs | Putative functions                               |
|-------------------|----------------|-----------------|-------------------------|---------------------------------|--------------------|------------------|-------------------------------|--------------------|--------------------------------------------------|
| SNP_721_A_4743825 | NC_021160.1    | Ca_Kabuli_Chr01 | 4743825                 | AA                              | GG                 | GG               | INTERGENIC                    |                    |                                                  |
| SNP_722_A_4772934 | NC_021160.1    | Ca_Kabuli_Chr01 | 4772934                 | TT                              | CC                 | CC               | INTERGENIC                    |                    |                                                  |
| SNP_723_A_4900727 | NC_021160.1    | Ca_Kabuli_Chr01 | 4900727                 | CC                              | TT                 | TT               | DRR                           | 101497883          | putative disease resistance RPP13-like protein 1 |
| SNP_724_A_4906252 | NC_021160.1    | Ca_Kabuli_Chr01 | 4906252                 | GG                              | CC                 | CC               | INTRON                        | 101498201          | Unknown function                                 |
| SNP_725_A_4929240 | NC_021160.1    | Ca_Kabuli_Chr01 | 4929240                 | CC                              | TT                 | TT               | URR                           | 101511058          | glutamine synthetase leaf isozyme, chloroplastic |
| SNP_726_A_4929280 | NC_021160.1    | Ca_Kabuli_Chr01 | 4929280                 | CC                              | TT                 | TT               | URR                           | 101511058          | glutamine synthetase leaf isozyme, chloroplastic |
| SNP_728_A_4933963 | NC_021160.1    | Ca_Kabuli_Chr01 | 4933963                 | CC                              | GG                 | GG               | INTERGENIC                    |                    |                                                  |
| SNP_729_A_4933982 | NC_021160.1    | Ca_Kabuli_Chr01 | 4933982                 | CC                              | GG                 | GG               | INTERGENIC                    |                    |                                                  |
| SNP_730_A_4933983 | NC_021160.1    | Ca_Kabuli_Chr01 | 4933983                 | CC                              | GG                 | GG               | INTERGENIC                    |                    |                                                  |
| SNP_731_A_4934187 | NC_021160.1    | Ca_Kabuli_Chr01 | 4934187                 | AA                              | GG                 | GG               | INTERGENIC                    |                    |                                                  |
| SNP_732_A_4934210 | NC_021160.1    | Ca_Kabuli_Chr01 | 4934210                 | TT                              | GG                 | GG               | INTERGENIC                    |                    |                                                  |
| SNP_733_A_4935000 | NC_021160.1    | Ca_Kabuli_Chr01 | 4935000                 | CC                              | TT                 | TT               | INTERGENIC                    |                    |                                                  |
| SNP_734_A_4935017 | NC_021160.1    | Ca_Kabuli_Chr01 | 4935017                 | GG                              | TT                 | TT               | INTERGENIC                    |                    |                                                  |
| SNP_735_A_5014284 | NC_021160.1    | Ca_Kabuli_Chr01 | 5014284                 | TT                              | CC                 | CC               | INTERGENIC                    |                    |                                                  |
| SNP_736_A_5026204 | NC_021160.1    | Ca_Kabuli_Chr01 | 5026204                 | AA                              | GG                 | GG               | INTERGENIC                    |                    |                                                  |
| SNP_737_A_5031346 | NC_021160.1    | Ca_Kabuli_Chr01 | 5031346                 | TT                              | AA                 | AA               | INTERGENIC                    |                    |                                                  |
| SNP_738_A_5031347 | NC_021160.1    | Ca_Kabuli_Chr01 | 5031347                 | CC                              | AA                 | AA               | INTERGENIC                    |                    |                                                  |
| SNP_739_A_5031348 | NC_021160.1    | Ca_Kabuli_Chr01 | 5031348                 | CC                              | AA                 | AA               | INTERGENIC                    |                    |                                                  |
| SNP_740_A_5040537 | NC_021160.1    | Ca_Kabuli_Chr01 | 5040537                 | TT                              | CC                 | CC               | INTRON                        | 101498871          | uncharacterized protein At5g19025-like           |
| SNP_741_A_5040725 | NC_021160.1    | Ca_Kabuli_Chr01 | 5040725                 | GG                              | AA                 | AA               | INTRON                        | 101498871          | uncharacterized protein At5g19025-like           |
| SNP_742_A_5040908 | NC_021160.1    | Ca_Kabuli_Chr01 | 5040908                 | CC                              | TT                 | TT               | INTRON                        | 101498871          | uncharacterized protein At5g19025-like           |
| SNP_743_A_5040942 | NC_021160.1    | Ca_Kabuli_Chr01 | 5040942                 | CC                              | TT                 | TT               | INTRON                        | 101498871          | uncharacterized protein At5g19025-like           |

| SNPs IDs          | Chromosome IDs | Chromosomes     | Physical positions (bp) | CDC Frontier genome (Reference genome) | (Pusa 1103 & HPNB) | (ILWC 46 & LPNB) | Sequence Components of genome | Gene accession IDs | Putative functions                                     |
|-------------------|----------------|-----------------|-------------------------|----------------------------------------|--------------------|------------------|-------------------------------|--------------------|--------------------------------------------------------|
| SNP_745_A_5183735 | NC_021160.1    | Ca_Kabuli_Chr01 | 5183735                 | CC                                     | TT                 | TT               | INTRON                        | 101499193          | Unknown function                                       |
| SNP_746_A_5197154 | NC_021160.1    | Ca_Kabuli_Chr01 | 5197154                 | CC                                     | GG                 | GG               | URR                           | 101499193          | Unknown function                                       |
| SNP_747_A_5229265 | NC_021160.1    | Ca_Kabuli_Chr01 | 5229265                 | AA                                     | CC                 | CC               | URR                           | 101495910          | basic 7S globulin-like                                 |
| SNP_748_A_5271867 | NC_021160.1    | Ca_Kabuli_Chr01 | 5271867                 | CC                                     | AA                 | AA               | INTERGENIC                    |                    |                                                        |
| SNP_749_A_5273285 | NC_021160.1    | Ca_Kabuli_Chr01 | 5273285                 | TT                                     | AA                 | AA               | INTERGENIC                    |                    |                                                        |
| SNP_750_A_5312691 | NC_021160.1    | Ca_Kabuli_Chr01 | 5312691                 | GG                                     | AA                 | AA               | INTERGENIC                    |                    |                                                        |
| SNP_751_A_5324741 | NC_021160.1    | Ca_Kabuli_Chr01 | 5324741                 | TT                                     | CC                 | CC               | DRR                           | 101499096          | transmembrane protein 64-like                          |
| SNP_752_A_5342310 | NC_021160.1    | Ca_Kabuli_Chr01 | 5342310                 | AA                                     | GG                 | GG               | DRR                           | 101499412          | adenylate isopentenyltransferase 5, chloroplastic-like |
| SNP_753_A_5345214 | NC_021160.1    | Ca_Kabuli_Chr01 | 5345214                 | AA                                     | GG                 | GG               | URR                           | 101499412          | adenylate isopentenyltransferase 5, chloroplastic-like |
| SNP_754_A_5345310 | NC_021160.1    | Ca_Kabuli_Chr01 | 5345310                 | AA                                     | GG                 | GG               | URR                           | 101499412          | adenylate isopentenyltransferase 5, chloroplastic-like |
| SNP_755_A_5347334 | NC_021160.1    | Ca_Kabuli_Chr01 | 5347334                 | TT                                     | CC                 | CC               | INTERGENIC                    |                    |                                                        |
| SNP_756_A_5348871 | NC_021160.1    | Ca_Kabuli_Chr01 | 5348871                 | GG                                     | AA                 | AA               | INTERGENIC                    |                    |                                                        |
| SNP_757_A_5348883 | NC_021160.1    | Ca_Kabuli_Chr01 | 5348883                 | AA                                     | GG                 | GG               | INTERGENIC                    |                    |                                                        |
| SNP_758_A_5349091 | NC_021160.1    | Ca_Kabuli_Chr01 | 5349091                 | GG                                     | TT                 | TT               | INTERGENIC                    |                    |                                                        |
| SNP_759_A_5349107 | NC_021160.1    | Ca_Kabuli_Chr01 | 5349107                 | CC                                     | AA                 | AA               | INTERGENIC                    |                    |                                                        |
| SNP_760_A_5351063 | NC_021160.1    | Ca_Kabuli_Chr01 | 5351063                 | GG                                     | AA                 | AA               | INTERGENIC                    |                    |                                                        |
| SNP_761_A_5351302 | NC_021160.1    | Ca_Kabuli_Chr01 | 5351302                 | AA                                     | TT                 | TT               | INTERGENIC                    |                    |                                                        |
| SNP_762_A_5357420 | NC_021160.1    | Ca_Kabuli_Chr01 | 5357420                 | TT                                     | GG                 | GG               | INTERGENIC                    |                    |                                                        |
| SNP_763_A_5358092 | NC_021160.1    | Ca_Kabuli_Chr01 | 5358092                 | TT                                     | GG                 | GG               | INTERGENIC                    |                    |                                                        |
| SNP_764_A_5358383 | NC_021160.1    | Ca_Kabuli_Chr01 | 5358383                 | CC                                     | AA                 | AA               | INTERGENIC                    |                    |                                                        |
| SNP_765_A_5358401 | NC_021160.1    | Ca_Kabuli_Chr01 | 5358401                 | GG                                     | TT                 | TT               | INTERGENIC                    |                    |                                                        |
| SNP_766_A_5372383 | NC_021160.1    | Ca_Kabuli_Chr01 | 5372383                 | CC                                     | TT                 | TT               | URR                           | 101499717          | DUF21 domain-containing protein At4g14240-like         |

| SNPs IDs          | Chromosome IDs | Chromosomes     | Physical positions (bp) | CDC Frontier genome (Reference genome) | (Pusa 1103 & HPNB) | (ILWC 46 & LPNB) | Sequence Components of genome | Gene accession IDs | Putative functions           |
|-------------------|----------------|-----------------|-------------------------|----------------------------------------|--------------------|------------------|-------------------------------|--------------------|------------------------------|
| SNP_767_A_5375278 | NC_021160.1    | Ca_Kabuli_Chr01 | 5375278                 | CC                                     | GG                 | GG               | URR                           | 101500029          | Unknown function             |
| SNP_769_A_5376237 | NC_021160.1    | Ca_Kabuli_Chr01 | 5376237                 | CC                                     | TT                 | TT               | INTERGENIC                    |                    |                              |
| SNP_770_A_5376248 | NC_021160.1    | Ca_Kabuli_Chr01 | 5376248                 | AA                                     | CC                 | CC               | INTERGENIC                    |                    |                              |
| SNP_771_A_5377199 | NC_021160.1    | Ca_Kabuli_Chr01 | 5377199                 | TT                                     | GG                 | GG               | DRR                           | 101500367          | probable serine incorporator |
| SNP_772_A_5377202 | NC_021160.1    | Ca_Kabuli_Chr01 | 5377202                 | AA                                     | GG                 | GG               | DRR                           | 101500367          | probable serine incorporator |
| SNP_773_A_5382883 | NC_021160.1    | Ca_Kabuli_Chr01 | 5382883                 | GG                                     | TT                 | TT               | INTERGENIC                    |                    |                              |
| SNP_774_A_5398095 | NC_021160.1    | Ca_Kabuli_Chr01 | 5398095                 | AA                                     | TT                 | TT               | INTERGENIC                    |                    |                              |
| SNP_775_A_5398271 | NC_021160.1    | Ca_Kabuli_Chr01 | 5398271                 | CC                                     | TT                 | TT               | INTERGENIC                    |                    |                              |
| SNP_776_A_5398291 | NC_021160.1    | Ca_Kabuli_Chr01 | 5398291                 | CC                                     | TT                 | TT               | INTERGENIC                    |                    |                              |
| SNP_777_A_5398297 | NC_021160.1    | Ca_Kabuli_Chr01 | 5398297                 | TT                                     | CC                 | CC               | INTERGENIC                    |                    |                              |
| SNP_778_A_5398304 | NC_021160.1    | Ca_Kabuli_Chr01 | 5398304                 | TT                                     | CC                 | CC               | INTERGENIC                    |                    |                              |
| SNP_779_A_5403473 | NC_021160.1    | Ca_Kabuli_Chr01 | 5403473                 | TT                                     | CC                 | CC               | INTERGENIC                    |                    |                              |
| SNP_780_A_5403781 | NC_021160.1    | Ca_Kabuli_Chr01 | 5403781                 | AA                                     | TT                 | TT               | INTERGENIC                    |                    |                              |
| SNP_782_A_5403957 | NC_021160.1    | Ca_Kabuli_Chr01 | 5403957                 | TT                                     | AA                 | AA               | INTERGENIC                    |                    |                              |
| SNP_783_A_5413337 | NC_021160.1    | Ca_Kabuli_Chr01 | 5413337                 | AA                                     | GG                 | GG               | INTERGENIC                    |                    |                              |
| SNP_784_A_5413396 | NC_021160.1    | Ca_Kabuli_Chr01 | 5413396                 | CC                                     | TT                 | TT               | INTERGENIC                    |                    |                              |
| SNP_785_A_5420673 | NC_021160.1    | Ca_Kabuli_Chr01 | 5420673                 | AA                                     | CC                 | CC               | INTERGENIC                    |                    |                              |
| SNP_786_A_5421652 | NC_021160.1    | Ca_Kabuli_Chr01 | 5421652                 | AA                                     | GG                 | GG               | INTERGENIC                    |                    |                              |
| SNP_789_A_5429079 | NC_021160.1    | Ca_Kabuli_Chr01 | 5429079                 | GG                                     | AA                 | AA               | INTERGENIC                    |                    |                              |
| SNP_790_A_5429637 | NC_021160.1    | Ca_Kabuli_Chr01 | 5429637                 | GG                                     | AA                 | AA               | DRR                           | 101500992          | uncharacterized LOC101500992 |
| SNP_791_A_5431653 | NC_021160.1    | Ca_Kabuli_Chr01 | 5431653                 | CC                                     | GG                 | GG               | INTERGENIC                    |                    |                              |
| SNP_792_A_5431662 | NC_021160.1    | Ca_Kabuli_Chr01 | 5431662                 | CC                                     | AA                 | AA               | INTERGENIC                    |                    |                              |

| SNPs IDs          | Chromosome IDs | Chromosomes     | Physical positions (bp) | CDC Frontier genome (Reference genome) | (Pusa 1103 & HPNB) | (ILWC 46 & LPNB) | Sequence Components of genome | Gene accession IDs | Putative functions                                 |
|-------------------|----------------|-----------------|-------------------------|----------------------------------------|--------------------|------------------|-------------------------------|--------------------|----------------------------------------------------|
| SNP_793_A_5432995 | NC_021160.1    | Ca_Kabuli_Chr01 | 5432995                 | AA                                     | GG                 | GG               | URR                           | 101500992          | uncharacterized LOC101500992                       |
| SNP_794_A_5433037 | NC_021160.1    | Ca_Kabuli_Chr01 | 5433037                 | CC                                     | TT                 | TT               | URR                           | 101500992          | uncharacterized LOC101500992                       |
| SNP_795_A_5433066 | NC_021160.1    | Ca_Kabuli_Chr01 | 5433066                 | AA                                     | GG                 | GG               | URR                           | 101500992          | uncharacterized LOC101500992                       |
| SNP_796_A_5433254 | NC_021160.1    | Ca_Kabuli_Chr01 | 5433254                 | TT                                     | CC                 | CC               | URR                           | 101500992          | uncharacterized LOC101500992                       |
| SNP_797_A_5433307 | NC_021160.1    | Ca_Kabuli_Chr01 | 5433307                 | GG                                     | AA                 | AA               | URR                           | 101500992          | uncharacterized LOC101500992                       |
| SNP_798_A_5443935 | NC_021160.1    | Ca_Kabuli_Chr01 | 5443935                 | CC                                     | TT                 | TT               | NON_SYNONYMOUS_CODING         | 101501306          | ATP-dependent (S)-NAD(P)H-hydrate dehydratase-like |
| SNP_799_A_5457729 | NC_021160.1    | Ca_Kabuli_Chr01 | 5457729                 | AA                                     | GG                 | GG               | INTERGENIC                    |                    |                                                    |
| SNP_800_A_5457860 | NC_021160.1    | Ca_Kabuli_Chr01 | 5457860                 | GG                                     | AA                 | AA               | INTERGENIC                    |                    |                                                    |
| SNP_801_A_5457923 | NC_021160.1    | Ca_Kabuli_Chr01 | 5457923                 | CC                                     | TT                 | TT               | INTERGENIC                    |                    |                                                    |
| SNP_802_A_5457941 | NC_021160.1    | Ca_Kabuli_Chr01 | 5457941                 | CC                                     | AA                 | AA               | INTERGENIC                    |                    |                                                    |
| SNP_803_A_5460841 | NC_021160.1    | Ca_Kabuli_Chr01 | 5460841                 | TT                                     | AA                 | AA               | INTERGENIC                    |                    |                                                    |
| SNP_804_A_5463941 | NC_021160.1    | Ca_Kabuli_Chr01 | 5463941                 | GG                                     | AA                 | AA               | INTERGENIC                    |                    |                                                    |
| SNP_805_A_5464054 | NC_021160.1    | Ca_Kabuli_Chr01 | 5464054                 | TT                                     | CC                 | CC               | INTERGENIC                    |                    |                                                    |
| SNP_806_A_5464062 | NC_021160.1    | Ca_Kabuli_Chr01 | 5464062                 | CC                                     | TT                 | TT               | INTERGENIC                    |                    |                                                    |
| SNP_807_A_5464161 | NC_021160.1    | Ca_Kabuli_Chr01 | 5464161                 | TT                                     | GG                 | GG               | INTERGENIC                    |                    |                                                    |
| SNP_808_A_5464196 | NC_021160.1    | Ca_Kabuli_Chr01 | 5464196                 | TT                                     | CC                 | CC               | INTERGENIC                    |                    |                                                    |
| SNP_809_A_5464228 | NC_021160.1    | Ca_Kabuli_Chr01 | 5464228                 | CC                                     | TT                 | TT               | INTERGENIC                    |                    |                                                    |
| SNP_810_A_5464264 | NC_021160.1    | Ca_Kabuli_Chr01 | 5464264                 | TT                                     | CC                 | CC               | INTERGENIC                    |                    |                                                    |
| SNP_811_A_5464267 | NC_021160.1    | Ca_Kabuli_Chr01 | 5464267                 | AA                                     | GG                 | GG               | INTERGENIC                    |                    |                                                    |
| SNP_812_A_5464274 | NC_021160.1    | Ca_Kabuli_Chr01 | 5464274                 | CC                                     | TT                 | TT               | INTERGENIC                    |                    |                                                    |
| SNP_813_A_5464342 | NC_021160.1    | Ca_Kabuli_Chr01 | 5464342                 | AA                                     | GG                 | GG               | INTERGENIC                    |                    |                                                    |
| SNP_814_A_5464360 | NC_021160.1    | Ca_Kabuli_Chr01 | 5464360                 | GG                                     | CC                 | CC               | INTERGENIC                    |                    |                                                    |

| SNPs IDs          | Chromosome IDs | Chromosomes     | Physical positions (bp) | CDC Frontier (Reference genome) | (Pusa 1103 & HPNB) | (ILWC 46 & LPNB) | Sequence Components of genome | Gene accession IDs | Putative functions                                 |
|-------------------|----------------|-----------------|-------------------------|---------------------------------|--------------------|------------------|-------------------------------|--------------------|----------------------------------------------------|
| SNP_815_A_5468591 | NC_021160.1    | Ca_Kabuli_Chr01 | 5468591                 | CC                              | TT                 | TT               | DRR                           | 101501937          | peptidyl-prolyl cis-trans isomerase CYP57          |
| SNP_816_A_5478222 | NC_021160.1    | Ca_Kabuli_Chr01 | 5478222                 | TT                              | GG                 | GG               | INTRON                        | 101501937          | peptidyl-prolyl cis-trans isomerase CYP57          |
| SNP_817_A_5482284 | NC_021160.1    | Ca_Kabuli_Chr01 | 5482284                 | GG                              | AA                 | AA               | URR                           | 101501724          | probable inactive receptor kinase At2g26730        |
| SNP_818_A_5483445 | NC_021160.1    | Ca_Kabuli_Chr01 | 5483445                 | CC                              | AA                 | AA               | URR                           | 101501724          | probable inactive receptor kinase At2g26730        |
| SNP_820_A_5499062 | NC_021160.1    | Ca_Kabuli_Chr01 | 5499062                 | GG                              | AA                 | AA               | URR                           | 101502783          | ATP synthase gamma chain, chloroplastic            |
| SNP_821_A_5499105 | NC_021160.1    | Ca_Kabuli_Chr01 | 5499105                 | GG                              | AA                 | AA               | URR                           | 101502783          | ATP synthase gamma chain, chloroplastic            |
| SNP_823_A_5513214 | NC_021160.1    | Ca_Kabuli_Chr01 | 5513214                 | GG                              | AA                 | AA               | INTRON                        | 101503104          | starch synthase 3, chloroplastic/amyloplastic      |
| SNP_824_A_5514098 | NC_021160.1    | Ca_Kabuli_Chr01 | 5514098                 | AA                              | GG                 | GG               | INTRON                        | 101503104          | starch synthase 3, chloroplastic/amyloplastic      |
| SNP_825_A_5514856 | NC_021160.1    | Ca_Kabuli_Chr01 | 5514856                 | CC                              | GG                 | GG               | INTERGENIC                    |                    |                                                    |
| SNP_826_A_5528774 | NC_021160.1    | Ca_Kabuli_Chr01 | 5528774                 | GG                              | CC                 | CC               | INTERGENIC                    |                    |                                                    |
| SNP_827_A_5544156 | NC_021160.1    | Ca_Kabuli_Chr01 | 5544156                 | GG                              | AA                 | AA               | INTERGENIC                    |                    |                                                    |
| SNP_828_A_5547439 | NC_021160.1    | Ca_Kabuli_Chr01 | 5547439                 | TT                              | CC                 | CC               | INTERGENIC                    |                    |                                                    |
| SNP_830_A_5613941 | NC_021160.1    | Ca_Kabuli_Chr01 | 5613941                 | GG                              | CC                 | CC               | DRR                           | 101505807          | glycine-rich cell wall structural protein 1.0-like |
| SNP_831_A_5784428 | NC_021160.1    | Ca_Kabuli_Chr01 | 5784428                 | CC                              | AA                 | AA               | INTERGENIC                    |                    |                                                    |
| SNP_832_A_5803240 | NC_021160.1    | Ca_Kabuli_Chr01 | 5803240                 | CC                              | TT                 | TT               | INTRON                        | 101513200          | katanin p60 ATPase-containing subunit A1           |
| SNP_833_A_5803260 | NC_021160.1    | Ca_Kabuli_Chr01 | 5803260                 | GG                              | AA                 | AA               | INTRON                        | 101513200          | katanin p60 ATPase-containing subunit A1           |
| SNP_834_A_5803429 | NC_021160.1    | Ca_Kabuli_Chr01 | 5803429                 | TT                              | AA                 | AA               | INTRON                        | 101513200          | katanin p60 ATPase-containing subunit A1           |
| SNP_835_A_5803435 | NC_021160.1    | Ca_Kabuli_Chr01 | 5803435                 | AA                              | CC                 | CC               | INTRON                        | 101513200          | katanin p60 ATPase-containing subunit A1           |
| SNP_837_A_5803850 | NC_021160.1    | Ca_Kabuli_Chr01 | 5803850                 | GG                              | AA                 | AA               | INTRON                        | 101513200          | katanin p60 ATPase-containing subunit A1           |
| SNP_838_A_5803933 | NC_021160.1    | Ca_Kabuli_Chr01 | 5803933                 | GG                              | AA                 | AA               | INTRON                        | 101513200          | katanin p60 ATPase-containing subunit A1           |
| SNP_839_A_5804028 | NC_021160.1    | Ca_Kabuli_Chr01 | 5804028                 | GG                              | AA                 | AA               | NON_SYNONYMOUS_CODING         | 101513200          | katanin p60 ATPase-containing subunit A1           |
| SNP_841_A_5804227 | NC_021160.1    | Ca_Kabuli_Chr01 | 5804227                 | GG                              | AA                 | AA               | INTRON                        | 101513200          | katanin p60 ATPase-containing subunit A1           |

| SNPs IDs          | Chromosome IDs | Chromosomes     | Physical positions (bp) | CDC Frontier (Reference genome) | (Pusa 1103 & HPNB) | (ILWC 46 & LPNB) | Sequence Components of genome | Gene accession IDs | Putative functions                       |
|-------------------|----------------|-----------------|-------------------------|---------------------------------|--------------------|------------------|-------------------------------|--------------------|------------------------------------------|
| SNP_842_A_5804381 | NC_021160.1    | Ca_Kabuli_Chr01 | 5804381                 | TT                              | AA                 | AA               | INTRON                        | 101513200          | katanin p60 ATPase-containing subunit A1 |
| SNP_843_A_5859645 | NC_021160.1    | Ca_Kabuli_Chr01 | 5859645                 | CC                              | TT                 | TT               | INTERGENIC                    |                    |                                          |
| SNP_844_A_5897722 | NC_021160.1    | Ca_Kabuli_Chr01 | 5897722                 | TT                              | CC                 | CC               | INTERGENIC                    |                    |                                          |
| SNP_845_A_5897738 | NC_021160.1    | Ca_Kabuli_Chr01 | 5897738                 | GG                              | TT                 | TT               | INTERGENIC                    |                    |                                          |
| SNP_846_A_5897855 | NC_021160.1    | Ca_Kabuli_Chr01 | 5897855                 | AA                              | GG                 | GG               | INTERGENIC                    |                    |                                          |
| SNP_848_A_5961350 | NC_021160.1    | Ca_Kabuli_Chr01 | 5961350                 | CC                              | GG                 | GG               | URR                           | 101489543          | uncharacterized LOC101489543             |
| SNP_849_A_5986521 | NC_021160.1    | Ca_Kabuli_Chr01 | 5986521                 | AA                              | TT                 | TT               | INTERGENIC                    |                    |                                          |
| SNP_850_A_5986857 | NC_021160.1    | Ca_Kabuli_Chr01 | 5986857                 | CC                              | TT                 | TT               | INTERGENIC                    |                    |                                          |
| SNP_851_A_5988183 | NC_021160.1    | Ca_Kabuli_Chr01 | 5988183                 | TT                              | AA                 | AA               | DRR                           | 101505256          | uncharacterized LOC101505256             |
| SNP_852_A_6106315 | NC_021160.1    | Ca_Kabuli_Chr01 | 6106315                 | CC                              | TT                 | TT               | INTERGENIC                    |                    |                                          |
| SNP_853_A_6106328 | NC_021160.1    | Ca_Kabuli_Chr01 | 6106328                 | TT                              | CC                 | CC               | INTERGENIC                    |                    |                                          |
| SNP_854_A_6106338 | NC_021160.1    | Ca_Kabuli_Chr01 | 6106338                 | AA                              | TT                 | TT               | INTERGENIC                    |                    |                                          |
| SNP_855_A_6106339 | NC_021160.1    | Ca_Kabuli_Chr01 | 6106339                 | GG                              | CC                 | CC               | INTERGENIC                    |                    |                                          |
| SNP_856_A_6106350 | NC_021160.1    | Ca_Kabuli_Chr01 | 6106350                 | TT                              | CC                 | CC               | INTERGENIC                    |                    |                                          |
| SNP_857_A_6106351 | NC_021160.1    | Ca_Kabuli_Chr01 | 6106351                 | AA                              | TT                 | TT               | INTERGENIC                    |                    |                                          |
| SNP_858_A_6106563 | NC_021160.1    | Ca_Kabuli_Chr01 | 6106563                 | TT                              | GG                 | GG               | INTERGENIC                    |                    |                                          |
| SNP_859_A_6106564 | NC_021160.1    | Ca_Kabuli_Chr01 | 6106564                 | AA                              | GG                 | GG               | INTERGENIC                    |                    |                                          |
| SNP_860_A_6123548 | NC_021160.1    | Ca_Kabuli_Chr01 | 6123548                 | AA                              | TT                 | TT               | NON_SYNONYMOUS_CODING         | 101495362          | tonoplast dicarboxylate transporter      |
| SNP_861_A_6128144 | NC_021160.1    | Ca_Kabuli_Chr01 | 6128144                 | CC                              | TT                 | TT               | URR                           | 101495690          | 60S ribosomal protein L23                |
| SNP_862_A_6128572 | NC_021160.1    | Ca_Kabuli_Chr01 | 6128572                 | GG                              | AA                 | AA               | URR                           | 101495690          | 60S ribosomal protein L23                |
| SNP_863_A_6137073 | NC_021160.1    | Ca_Kabuli_Chr01 | 6137073                 | TT                              | AA                 | AA               | INTERGENIC                    |                    |                                          |
| SNP_864_A_6137078 | NC_021160.1    | Ca_Kabuli_Chr01 | 6137078                 | CC                              | AA                 | AA               | INTERGENIC                    |                    |                                          |

| SNPs IDs          | Chromosome IDs | Chromosomes     | Physical positions (bp) | CDC Frontier genome (Reference genome) | (Pusa 1103 & HPNB) | (ILWC 46 & LPNB) | Sequence Components of genome | Gene accession IDs | Putative functions                   |
|-------------------|----------------|-----------------|-------------------------|----------------------------------------|--------------------|------------------|-------------------------------|--------------------|--------------------------------------|
| SNP_866_A_6138175 | NC_021160.1    | Ca_Kabuli_Chr01 | 6138175                 | TT                                     | CC                 | CC               | INTERGENIC                    |                    |                                      |
| SNP_867_A_6138210 | NC_021160.1    | Ca_Kabuli_Chr01 | 6138210                 | CC                                     | TT                 | TT               | INTERGENIC                    |                    |                                      |
| SNP_868_A_6138510 | NC_021160.1    | Ca_Kabuli_Chr01 | 6138510                 | GG                                     | TT                 | TT               | INTERGENIC                    |                    |                                      |
| SNP_869_A_6138577 | NC_021160.1    | Ca_Kabuli_Chr01 | 6138577                 | TT                                     | CC                 | CC               | INTERGENIC                    |                    |                                      |
| SNP_870_A_6148799 | NC_021160.1    | Ca_Kabuli_Chr01 | 6148799                 | TT                                     | CC                 | CC               | URR                           | 101496357          | putative MO25-like protein At5g47540 |
| SNP_871_A_6148850 | NC_021160.1    | Ca_Kabuli_Chr01 | 6148850                 | AA                                     | GG                 | GG               | URR                           | 101496357          | putative MO25-like protein At5g47540 |
| SNP_872_A_6149652 | NC_021160.1    | Ca_Kabuli_Chr01 | 6149652                 | CC                                     | AA                 | AA               | INTERGENIC                    |                    |                                      |
| SNP_873_A_6151771 | NC_021160.1    | Ca_Kabuli_Chr01 | 6151771                 | AA                                     | TT                 | TT               | INTERGENIC                    |                    |                                      |
| SNP_874_A_6156008 | NC_021160.1    | Ca_Kabuli_Chr01 | 6156008                 | AA                                     | GG                 | GG               | URR                           | 101496687          | inositol-phosphate phosphatase-like  |
| SNP_875_A_6156297 | NC_021160.1    | Ca_Kabuli_Chr01 | 6156297                 | TT                                     | CC                 | CC               | URR                           | 101496687          | inositol-phosphate phosphatase-like  |
| SNP_876_A_6157514 | NC_021160.1    | Ca_Kabuli_Chr01 | 6157514                 | AA                                     | GG                 | GG               | URR                           | 101496687          | inositol-phosphate phosphatase-like  |
| SNP_877_A_6174191 | NC_021160.1    | Ca_Kabuli_Chr01 | 6174191                 | GG                                     | AA                 | AA               | INTERGENIC                    |                    |                                      |
| SNP_878_A_6174419 | NC_021160.1    | Ca_Kabuli_Chr01 | 6174419                 | TT                                     | CC                 | CC               | INTERGENIC                    |                    |                                      |
| SNP_879_A_6174575 | NC_021160.1    | Ca_Kabuli_Chr01 | 6174575                 | GG                                     | CC                 | CC               | INTERGENIC                    |                    |                                      |
| SNP_881_A_6176916 | NC_021160.1    | Ca_Kabuli_Chr01 | 6176916                 | CC                                     | TT                 | TT               | INTERGENIC                    |                    |                                      |
| SNP_883_A_6177982 | NC_021160.1    | Ca_Kabuli_Chr01 | 6177982                 | CC                                     | TT                 | TT               | INTERGENIC                    |                    |                                      |
| SNP_884_A_6178237 | NC_021160.1    | Ca_Kabuli_Chr01 | 6178237                 | TT                                     | AA                 | AA               | INTERGENIC                    |                    |                                      |
| SNP_885_A_6178270 | NC_021160.1    | Ca_Kabuli_Chr01 | 6178270                 | GG                                     | AA                 | AA               | INTERGENIC                    |                    |                                      |
| SNP_886_A_6193249 | NC_021160.1    | Ca_Kabuli_Chr01 | 6193249                 | GG                                     | AA                 | AA               | INTERGENIC                    |                    |                                      |
| SNP_887_A_6202343 | NC_021160.1    | Ca_Kabuli_Chr01 | 6202343                 | AA                                     | CC                 | CC               | INTERGENIC                    |                    |                                      |
| SNP_889_A_6202766 | NC_021160.1    | Ca_Kabuli_Chr01 | 6202766                 | TT                                     | AA                 | AA               | INTERGENIC                    |                    |                                      |
| SNP_891_A_6204360 | NC_021160.1    | Ca_Kabuli_Chr01 | 6204360                 | GG                                     | AA                 | AA               | INTERGENIC                    |                    |                                      |

| SNPs IDs          | Chromosome IDs | Chromosomes     | Physical positions (bp) | CDC Frontier (Reference genome) | (Pusa 1103 & HPNB) | (ILWC 46 & LPNB) | Sequence Components of genome | Gene accession IDs | Putative functions                                                 |
|-------------------|----------------|-----------------|-------------------------|---------------------------------|--------------------|------------------|-------------------------------|--------------------|--------------------------------------------------------------------|
| SNP_893_A_6205079 | NC_021160.1    | Ca_Kabuli_Chr01 | 6205079                 | AA                              | GG                 | GG               | DRR                           | 101499612          | cytochrome b561 and DOMON domain-containing protein At5g47530-like |
| SNP_895_A_6205421 | NC_021160.1    | Ca_Kabuli_Chr01 | 6205421                 | AA                              | GG                 | GG               | DRR                           | 101499612          | cytochrome b561 and DOMON domain-containing protein At5g47530-like |
| SNP_896_A_6205630 | NC_021160.1    | Ca_Kabuli_Chr01 | 6205630                 | GG                              | AA                 | AA               | DRR                           | 101499612          | cytochrome b561 and DOMON domain-containing protein At5g47530-like |
| SNP_897_A_6206224 | NC_021160.1    | Ca_Kabuli_Chr01 | 6206224                 | AA                              | GG                 | GG               | SYNONYMOUS_CODING             | 101499612          | cytochrome b561 and DOMON domain-containing protein At5g47530-like |
| SNP_898_A_6206387 | NC_021160.1    | Ca_Kabuli_Chr01 | 6206387                 | GG                              | AA                 | AA               | URR                           | 101499612          | cytochrome b561 and DOMON domain-containing protein At5g47530-like |
| SNP_899_A_6206426 | NC_021160.1    | Ca_Kabuli_Chr01 | 6206426                 | CC                              | TT                 | TT               | URR                           | 101499612          | cytochrome b561 and DOMON domain-containing protein At5g47530-like |
| SNP_900_A_6206449 | NC_021160.1    | Ca_Kabuli_Chr01 | 6206449                 | CC                              | TT                 | TT               | URR                           | 101499612          | cytochrome b561 and DOMON domain-containing protein At5g47530-like |
| SNP_901_A_6206458 | NC_021160.1    | Ca_Kabuli_Chr01 | 6206458                 | GG                              | AA                 | AA               | URR                           | 101499612          | cytochrome b561 and DOMON domain-containing protein At5g47530-like |
| SNP_902_A_6206465 | NC_021160.1    | Ca_Kabuli_Chr01 | 6206465                 | CC                              | TT                 | TT               | URR                           | 101499612          | cytochrome b561 and DOMON domain-containing protein At5g47530-like |
| SNP_903_A_6206495 | NC_021160.1    | Ca_Kabuli_Chr01 | 6206495                 | TT                              | CC                 | CC               | URR                           | 101499612          | cytochrome b561 and DOMON domain-containing protein At5g47530-like |
| SNP_904_A_6206543 | NC_021160.1    | Ca_Kabuli_Chr01 | 6206543                 | AA                              | CC                 | CC               | URR                           | 101499612          | cytochrome b561 and DOMON domain-containing protein At5g47530-like |
| SNP_906_A_6206629 | NC_021160.1    | Ca_Kabuli_Chr01 | 6206629                 | CC                              | AA                 | AA               | URR                           | 101499612          | cytochrome b561 and DOMON domain-containing protein At5g47530-like |
| SNP_907_A_6206630 | NC_021160.1    | Ca_Kabuli_Chr01 | 6206630                 | CC                              | TT                 | TT               | URR                           | 101499612          | cytochrome b561 and DOMON domain-containing protein At5g47530-like |
| SNP_908_A_6206660 | NC_021160.1    | Ca_Kabuli_Chr01 | 6206660                 | AA                              | CC                 | CC               | URR                           | 101499612          | cytochrome b561 and DOMON domain-containing protein At5g47530-like |
| SNP_909_A_6206661 | NC_021160.1    | Ca_Kabuli_Chr01 | 6206661                 | AA                              | TT                 | TT               | URR                           | 101499612          | cytochrome b561 and DOMON domain-containing protein At5g47530-like |
| SNP_911_A_6219089 | NC_021160.1    | Ca_Kabuli_Chr01 | 6219089                 | CC                              | TT                 | TT               | INTERGENIC                    |                    |                                                                    |
| SNP_913_A_6231831 | NC_021160.1    | Ca_Kabuli_Chr01 | 6231831                 | AA                              | TT                 | TT               | INTRON                        | 101510835          | inositol transporter 4                                             |
| SNP_914_A_6260388 | NC_021160.1    | Ca_Kabuli_Chr01 | 6260388                 | AA                              | TT                 | TT               | URR                           | 101499919          | thymidine kinase-like                                              |
| SNP_915_A_6263170 | NC_021160.1    | Ca_Kabuli_Chr01 | 6263170                 | CC                              | AA                 | AA               | INTERGENIC                    |                    |                                                                    |
| SNP_916_A_6265693 | NC_021160.1    | Ca_Kabuli_Chr01 | 6265693                 | GG                              | CC                 | CC               | URR                           | 101512242          | serine/threonine-protein kinase pakA                               |
| SNP_918_A_6267212 | NC_021160.1    | Ca_Kabuli_Chr01 | 6267212                 | AA                              | GG                 | GG               | INTERGENIC                    |                    |                                                                    |
| SNP_919_A_6267217 | NC_021160.1    | Ca_Kabuli_Chr01 | 6267217                 | TT                              | CC                 | CC               | INTERGENIC                    |                    |                                                                    |



| SNPs IDs          | Chromosome IDs | Chromosomes     | Physical positions (bp) | CDC Frontier genome (Reference genome) | (Pusa 1103 & HPNB) | (ILWC 46 & LPNB) | Sequence Components of genome | Gene accession IDs | Putative functions           |
|-------------------|----------------|-----------------|-------------------------|----------------------------------------|--------------------|------------------|-------------------------------|--------------------|------------------------------|
| SNP_920_A_6270340 | NC_021160.1    | Ca_Kabuli_Chr01 | 6270340                 | AA                                     | CC                 | CC               | URR                           | 101512755          | scarecrow-like protein 21    |
| SNP_921_A_6270956 | NC_021160.1    | Ca_Kabuli_Chr01 | 6270956                 | GG                                     | AA                 | AA               | URR                           | 101512755          | scarecrow-like protein 21    |
| SNP_922_A_6284185 | NC_021160.1    | Ca_Kabuli_Chr01 | 6284185                 | AA                                     | GG                 | GG               | DRR                           | 101500259          | uncharacterized LOC101500259 |
| SNP_923_A_6288779 | NC_021160.1    | Ca_Kabuli_Chr01 | 6288779                 | GG                                     | AA                 | AA               | URR                           | 101500574          | uncharacterized LOC101500574 |
| SNP_924_A_6291418 | NC_021160.1    | Ca_Kabuli_Chr01 | 6291418                 | TT                                     | AA                 | AA               | INTERGENIC                    |                    |                              |
| SNP_925_A_6291480 | NC_021160.1    | Ca_Kabuli_Chr01 | 6291480                 | AA                                     | GG                 | GG               | INTERGENIC                    |                    |                              |
| SNP_926_A_6291650 | NC_021160.1    | Ca_Kabuli_Chr01 | 6291650                 | GG                                     | CC                 | CC               | INTERGENIC                    |                    |                              |
| SNP_927_A_6291928 | NC_021160.1    | Ca_Kabuli_Chr01 | 6291928                 | CC                                     | AA                 | AA               | INTERGENIC                    |                    |                              |
| SNP_929_A_6298006 | NC_021160.1    | Ca_Kabuli_Chr01 | 6298006                 | TT                                     | CC                 | CC               | INTERGENIC                    |                    |                              |
| SNP_930_A_6298028 | NC_021160.1    | Ca_Kabuli_Chr01 | 6298028                 | GG                                     | TT                 | TT               | INTERGENIC                    |                    |                              |
| SNP_931_A_6298160 | NC_021160.1    | Ca_Kabuli_Chr01 | 6298160                 | AA                                     | TT                 | TT               | URR                           | 101513412          | CASP-like protein 2B1        |
| SNP_932_A_6298191 | NC_021160.1    | Ca_Kabuli_Chr01 | 6298191                 | AA                                     | TT                 | TT               | URR                           | 101513412          | CASP-like protein 2B1        |
| SNP_933_A_6299193 | NC_021160.1    | Ca_Kabuli_Chr01 | 6299193                 | GG                                     | AA                 | AA               | URR                           | 101513412          | CASP-like protein 2B1        |
| SNP_934_A_6299231 | NC_021160.1    | Ca_Kabuli_Chr01 | 6299231                 | AA                                     | GG                 | GG               | URR                           | 101513412          | CASP-like protein 2B1        |
| SNP_935_A_6299234 | NC_021160.1    | Ca_Kabuli_Chr01 | 6299234                 | CC                                     | TT                 | TT               | URR                           | 101513412          | CASP-like protein 2B1        |
| SNP_936_A_6299236 | NC_021160.1    | Ca_Kabuli_Chr01 | 6299236                 | CC                                     | TT                 | TT               | URR                           | 101513412          | CASP-like protein 2B1        |
| SNP_937_A_6299237 | NC_021160.1    | Ca_Kabuli_Chr01 | 6299237                 | CC                                     | TT                 | TT               | URR                           | 101513412          | CASP-like protein 2B1        |
| SNP_938_A_6299258 | NC_021160.1    | Ca_Kabuli_Chr01 | 6299258                 | TT                                     | CC                 | CC               | URR                           | 101513412          | CASP-like protein 2B1        |
| SNP_939_A_6299279 | NC_021160.1    | Ca_Kabuli_Chr01 | 6299279                 | AA                                     | GG                 | GG               | URR                           | 101513412          | CASP-like protein 2B1        |
| SNP_940_A_6299314 | NC_021160.1    | Ca_Kabuli_Chr01 | 6299314                 | AA                                     | GG                 | GG               | URR                           | 101513412          | CASP-like protein 2B1        |
| SNP_941_A_6299322 | NC_021160.1    | Ca_Kabuli_Chr01 | 6299322                 | CC                                     | TT                 | TT               | URR                           | 101513412          | CASP-like protein 2B1        |
| SNP_942_A_6303459 | NC_021160.1    | Ca_Kabuli_Chr01 | 6303459                 | TT                                     | CC                 | CC               | DRR                           | 101514061          | uncharacterized LOC101514061 |

| SNPs IDs          | Chromosome IDs | Chromosomes     | Physical positions (bp) | CDC Frontier genome (Reference genome) | (Pusa 1103 & HPNB) | (ILWC 46 & LPNB) | Sequence Components of genome | Gene accession IDs | Putative functions                                                        |
|-------------------|----------------|-----------------|-------------------------|----------------------------------------|--------------------|------------------|-------------------------------|--------------------|---------------------------------------------------------------------------|
| SNP_943_A_6303696 | NC_021160.1    | Ca_Kabuli_Chr01 | 6303696                 | TT                                     | AA                 | AA               | DRR                           | 101514061          | uncharacterized LOC101514061                                              |
| SNP_944_A_6305407 | NC_021160.1    | Ca_Kabuli_Chr01 | 6305407                 | CC                                     | GG                 | GG               | INTERGENIC                    |                    |                                                                           |
| SNP_945_A_6312790 | NC_021160.1    | Ca_Kabuli_Chr01 | 6312790                 | CC                                     | TT                 | TT               | INTERGENIC                    |                    |                                                                           |
| SNP_946_A_6313974 | NC_021160.1    | Ca_Kabuli_Chr01 | 6313974                 | AA                                     | TT                 | TT               | DRR                           | 101514613          | transcriptional adapter ADA2b                                             |
| SNP_948_A_6328244 | NC_021160.1    | Ca_Kabuli_Chr01 | 6328244                 | AA                                     | GG                 | GG               | DRR                           | 101515146          | uncharacterized LOC101515146                                              |
| SNP_949_A_6328801 | NC_021160.1    | Ca_Kabuli_Chr01 | 6328801                 | AA                                     | TT                 | TT               | DRR                           | 101515146          | uncharacterized LOC101515146                                              |
| SNP_950_A_6330948 | NC_021160.1    | Ca_Kabuli_Chr01 | 6330948                 | AA                                     | CC                 | CC               | INTRON                        | 101515146          | uncharacterized LOC101515146                                              |
| SNP_951_A_6331188 | NC_021160.1    | Ca_Kabuli_Chr01 | 6331188                 | TT                                     | CC                 | CC               | INTRON                        | 101515146          | uncharacterized LOC101515146                                              |
| SNP_952_A_6331210 | NC_021160.1    | Ca_Kabuli_Chr01 | 6331210                 | AA                                     | GG                 | GG               | INTRON                        | 101515146          | uncharacterized LOC101515146                                              |
| SNP_953_A_6337502 | NC_021160.1    | Ca_Kabuli_Chr01 | 6337502                 | TT                                     | AA                 | AA               | INTERGENIC                    |                    |                                                                           |
| SNP_954_A_6337517 | NC_021160.1    | Ca_Kabuli_Chr01 | 6337517                 | AA                                     | CC                 | CC               | INTERGENIC                    |                    |                                                                           |
| SNP_955_A_6337870 | NC_021160.1    | Ca_Kabuli_Chr01 | 6337870                 | GG                                     | AA                 | AA               | INTERGENIC                    |                    |                                                                           |
| SNP_957_A_6361098 | NC_021160.1    | Ca_Kabuli_Chr01 | 6361098                 | CC                                     | AA                 | AA               | DRR                           | 101488898          | CASP-like protein 2B1                                                     |
| SNP_958_A_6361109 | NC_021160.1    | Ca_Kabuli_Chr01 | 6361109                 | AA                                     | GG                 | GG               | DRR                           | 101488898          | CASP-like protein 2B1                                                     |
| SNP_959_A_6363821 | NC_021160.1    | Ca_Kabuli_Chr01 | 6363821                 | CC                                     | TT                 | TT               | INTRON                        | 101488898          | CASP-like protein 2B1                                                     |
| SNP_960_A_6364945 | NC_021160.1    | Ca_Kabuli_Chr01 | 6364945                 | AA                                     | GG                 | GG               | INTRON                        | 101488898          | CASP-like protein 2B1                                                     |
| SNP_961_A_6367941 | NC_021160.1    | Ca_Kabuli_Chr01 | 6367941                 | TT                                     | CC                 | CC               | INTRON                        | 101488898          | CASP-like protein 2B1                                                     |
| SNP_962_A_6367961 | NC_021160.1    | Ca_Kabuli_Chr01 | 6367961                 | GG                                     | AA                 | AA               | INTRON                        | 101488898          | CASP-like protein 2B1                                                     |
| SNP_963_A_6368257 | NC_021160.1    | Ca_Kabuli_Chr01 | 6368257                 | TT                                     | CC                 | CC               | INTRON                        | 101488898          | CASP-like protein 2B1                                                     |
| SNP_964_A_6368263 | NC_021160.1    | Ca_Kabuli_Chr01 | 6368263                 | TT                                     | GG                 | GG               | INTRON                        | 101488898          | CASP-like protein 2B1                                                     |
| SNP_965_A_6384877 | NC_021160.1    | Ca_Kabuli_Chr01 | 6384877                 | CC                                     | TT                 | TT               | INTERGENIC                    |                    |                                                                           |
| SNP_966_A_6394311 | NC_021160.1    | Ca_Kabuli_Chr01 | 6394311                 | CC                                     | TT                 | TT               | URR                           | 101489546          | pentatricopeptide repeat-containing protein At4g16390, chloroplastic-like |

| SNPs IDs          | Chromosome IDs | Chromosomes     | Physical positions (bp) | CDC Frontier (Reference genome) | (Pusa 1103 & HPNB) | (ILWC 46 & LPNB) | Sequence Components of genome | Gene accession IDs | Putative functions                                                        |
|-------------------|----------------|-----------------|-------------------------|---------------------------------|--------------------|------------------|-------------------------------|--------------------|---------------------------------------------------------------------------|
| SNP_967_A_6394314 | NC_021160.1    | Ca_Kabuli_Chr01 | 6394314                 | AA                              | GG                 | GG               | URR                           | 101489546          | pentatricopeptide repeat-containing protein chloroplastic-like At4g16390, |
| SNP_968_A_6394333 | NC_021160.1    | Ca_Kabuli_Chr01 | 6394333                 | GG                              | AA                 | AA               | URR                           | 101489546          | pentatricopeptide repeat-containing protein chloroplastic-like At4g16390, |
| SNP_969_A_6394347 | NC_021160.1    | Ca_Kabuli_Chr01 | 6394347                 | TT                              | CC                 | CC               | URR                           | 101489546          | pentatricopeptide repeat-containing protein chloroplastic-like At4g16390, |
| SNP_970_A_6394370 | NC_021160.1    | Ca_Kabuli_Chr01 | 6394370                 | CC                              | TT                 | TT               | URR                           | 101489546          | pentatricopeptide repeat-containing protein chloroplastic-like At4g16390, |
| SNP_971_A_6394389 | NC_021160.1    | Ca_Kabuli_Chr01 | 6394389                 | TT                              | CC                 | CC               | URR                           | 101489546          | pentatricopeptide repeat-containing protein chloroplastic-like At4g16390, |
| SNP_972_A_6394401 | NC_021160.1    | Ca_Kabuli_Chr01 | 6394401                 | TT                              | CC                 | CC               | URR                           | 101489546          | pentatricopeptide repeat-containing protein chloroplastic-like At4g16390, |
| SNP_973_A_6394552 | NC_021160.1    | Ca_Kabuli_Chr01 | 6394552                 | GG                              | AA                 | AA               | URR                           | 101489546          | pentatricopeptide repeat-containing protein chloroplastic-like At4g16390, |
| SNP_974_A_6394568 | NC_021160.1    | Ca_Kabuli_Chr01 | 6394568                 | AA                              | GG                 | GG               | URR                           | 101489546          | pentatricopeptide repeat-containing protein chloroplastic-like At4g16390, |
| SNP_975_A_6394600 | NC_021160.1    | Ca_Kabuli_Chr01 | 6394600                 | TT                              | CC                 | CC               | URR                           | 101489546          | pentatricopeptide repeat-containing protein chloroplastic-like At4g16390, |
| SNP_976_A_6394606 | NC_021160.1    | Ca_Kabuli_Chr01 | 6394606                 | AA                              | GG                 | GG               | URR                           | 101489546          | pentatricopeptide repeat-containing protein chloroplastic-like At4g16390, |
| SNP_977_A_6394706 | NC_021160.1    | Ca_Kabuli_Chr01 | 6394706                 | TT                              | CC                 | CC               | URR                           | 101489546          | pentatricopeptide repeat-containing protein chloroplastic-like At4g16390, |
| SNP_978_A_6394725 | NC_021160.1    | Ca_Kabuli_Chr01 | 6394725                 | AA                              | CC                 | CC               | URR                           | 101489546          | pentatricopeptide repeat-containing protein chloroplastic-like At4g16390, |
| SNP_979_A_6394742 | NC_021160.1    | Ca_Kabuli_Chr01 | 6394742                 | AA                              | CC                 | CC               | URR                           | 101489546          | pentatricopeptide repeat-containing protein chloroplastic-like At4g16390, |
| SNP_980_A_6399252 | NC_021160.1    | Ca_Kabuli_Chr01 | 6399252                 | CC                              | TT                 | TT               | INTERGENIC                    |                    |                                                                           |
| SNP_981_A_6399990 | NC_021160.1    | Ca_Kabuli_Chr01 | 6399990                 | AA                              | TT                 | TT               | INTERGENIC                    |                    |                                                                           |
| SNP_982_A_6400401 | NC_021160.1    | Ca_Kabuli_Chr01 | 6400401                 | CC                              | TT                 | TT               | INTERGENIC                    |                    |                                                                           |
| SNP_983_A_6400609 | NC_021160.1    | Ca_Kabuli_Chr01 | 6400609                 | TT                              | CC                 | CC               | INTERGENIC                    |                    |                                                                           |
| SNP_984_A_6400628 | NC_021160.1    | Ca_Kabuli_Chr01 | 6400628                 | GG                              | AA                 | AA               | INTERGENIC                    |                    |                                                                           |
| SNP_985_A_6408090 | NC_021160.1    | Ca_Kabuli_Chr01 | 6408090                 | CC                              | GG                 | GG               | URR                           | 101489861          | pollen-specific leucine-rich repeat extensin-like protein 2               |
| SNP_986_A_6408298 | NC_021160.1    | Ca_Kabuli_Chr01 | 6408298                 | TT                              | AA                 | AA               | URR                           | 101489861          | pollen-specific leucine-rich repeat extensin-like protein 2               |
| SNP_987_A_6415141 | NC_021160.1    | Ca_Kabuli_Chr01 | 6415141                 | GG                              | CC                 | CC               | INTRON                        | 101490195          | FK506-binding protein 5-like                                              |
| SNP_988_A_6415194 | NC_021160.1    | Ca_Kabuli_Chr01 | 6415194                 | TT                              | CC                 | CC               | INTRON                        | 101490195          | FK506-binding protein 5-like                                              |

| SNPs IDs           | Chromosome IDs | Chromosomes     | Physical positions (bp) | CDC Frontier (Reference genome) | (Pusa 1103 & HPNB) | (ILWC 46 & LPNB) | Sequence Components of genome | Gene accession IDs | Putative functions                              |
|--------------------|----------------|-----------------|-------------------------|---------------------------------|--------------------|------------------|-------------------------------|--------------------|-------------------------------------------------|
| SNP_989_A_6415896  | NC_021160.1    | Ca_Kabuli_Chr01 | 6415896                 | GG                              | TT                 | TT               | INTRON                        | 101490195          | FK506-binding protein 5-like                    |
| SNP_990_A_6415913  | NC_021160.1    | Ca_Kabuli_Chr01 | 6415913                 | AA                              | TT                 | TT               | INTRON                        | 101490195          | FK506-binding protein 5-like                    |
| SNP_991_A_6426704  | NC_021160.1    | Ca_Kabuli_Chr01 | 6426704                 | CC                              | TT                 | TT               | DRR                           | 101490518          | nuclear transcription factor Y subunit B-3-like |
| SNP_992_A_6428031  | NC_021160.1    | Ca_Kabuli_Chr01 | 6428031                 | GG                              | AA                 | AA               | URR                           | 101490518          | nuclear transcription factor Y subunit B-3-like |
| SNP_993_A_6430867  | NC_021160.1    | Ca_Kabuli_Chr01 | 6430867                 | GG                              | CC                 | CC               | INTERGENIC                    |                    |                                                 |
| SNP_994_A_6431203  | NC_021160.1    | Ca_Kabuli_Chr01 | 6431203                 | CC                              | TT                 | TT               | INTERGENIC                    |                    |                                                 |
| SNP_995_A_6432942  | NC_021160.1    | Ca_Kabuli_Chr01 | 6432942                 | AA                              | TT                 | TT               | DRR                           | 101491381          | nudix hydrolase 2-like                          |
| SNP_996_A_6434732  | NC_021160.1    | Ca_Kabuli_Chr01 | 6434732                 | CC                              | TT                 | TT               | INTRON                        | 101491381          | nudix hydrolase 2-like                          |
| SNP_997_A_6434740  | NC_021160.1    | Ca_Kabuli_Chr01 | 6434740                 | GG                              | CC                 | CC               | INTRON                        | 101491381          | nudix hydrolase 2-like                          |
| SNP_998_A_6436317  | NC_021160.1    | Ca_Kabuli_Chr01 | 6436317                 | CC                              | GG                 | GG               | INTRON                        | 101491381          | nudix hydrolase 2-like                          |
| SNP_999_A_6439285  | NC_021160.1    | Ca_Kabuli_Chr01 | 6439285                 | AA                              | GG                 | GG               | DRR                           | 101490841          | trihelix transcription factor GT-2              |
| SNP_1000_A_6439344 | NC_021160.1    | Ca_Kabuli_Chr01 | 6439344                 | CC                              | AA                 | AA               | DRR                           | 101490841          | trihelix transcription factor GT-2              |
| SNP_1001_A_6441997 | NC_021160.1    | Ca_Kabuli_Chr01 | 6441997                 | GG                              | TT                 | TT               | INTRON                        | 101490841          | trihelix transcription factor GT-2              |
| SNP_1002_A_6441998 | NC_021160.1    | Ca_Kabuli_Chr01 | 6441998                 | TT                              | GG                 | GG               | INTRON                        | 101490841          | trihelix transcription factor GT-2              |
| SNP_1003_A_6442051 | NC_021160.1    | Ca_Kabuli_Chr01 | 6442051                 | AA                              | TT                 | TT               | INTRON                        | 101490841          | trihelix transcription factor GT-2              |
| SNP_1004_A_6444385 | NC_021160.1    | Ca_Kabuli_Chr01 | 6444385                 | CC                              | AA                 | AA               | URR                           | 101490841          | trihelix transcription factor GT-2              |
| SNP_1006_A_6454387 | NC_021160.1    | Ca_Kabuli_Chr01 | 6454387                 | TT                              | CC                 | CC               | URR                           | 101491913          | 14 kDa proline-rich protein DC2.15-like         |
| SNP_1007_A_6462152 | NC_021160.1    | Ca_Kabuli_Chr01 | 6462152                 | CC                              | TT                 | TT               | INTERGENIC                    |                    |                                                 |
| SNP_1008_A_6462225 | NC_021160.1    | Ca_Kabuli_Chr01 | 6462225                 | AA                              | GG                 | GG               | INTERGENIC                    |                    |                                                 |
| SNP_1009_A_6462234 | NC_021160.1    | Ca_Kabuli_Chr01 | 6462234                 | CC                              | GG                 | GG               | INTERGENIC                    |                    |                                                 |
| SNP_1010_A_6462474 | NC_021160.1    | Ca_Kabuli_Chr01 | 6462474                 | AA                              | GG                 | GG               | INTERGENIC                    |                    |                                                 |
| SNP_1011_A_6466231 | NC_021160.1    | Ca_Kabuli_Chr01 | 6466231                 | GG                              | AA                 | AA               | INTERGENIC                    |                    |                                                 |

| SNPs IDs           | Chromosome IDs | Chromosomes     | Physical positions (bp) | CDC Frontier genome (Reference genome) | (Pusa 1103 & HPNB) | (ILWC 46 & LPNB) | Sequence Components of genome | Gene accession IDs | Putative functions                                 |
|--------------------|----------------|-----------------|-------------------------|----------------------------------------|--------------------|------------------|-------------------------------|--------------------|----------------------------------------------------|
| SNP_1012_A_6466984 | NC_021160.1    | Ca_Kabuli_Chr01 | 6466984                 | AA                                     | GG                 | GG               | INTERGENIC                    |                    |                                                    |
| SNP_1013_A_6466988 | NC_021160.1    | Ca_Kabuli_Chr01 | 6466988                 | TT                                     | CC                 | CC               | INTERGENIC                    |                    |                                                    |
| SNP_1014_A_6466990 | NC_021160.1    | Ca_Kabuli_Chr01 | 6466990                 | AA                                     | GG                 | GG               | INTERGENIC                    |                    |                                                    |
| SNP_1015_A_6466995 | NC_021160.1    | Ca_Kabuli_Chr01 | 6466995                 | GG                                     | AA                 | AA               | INTERGENIC                    |                    |                                                    |
| SNP_1016_A_6467010 | NC_021160.1    | Ca_Kabuli_Chr01 | 6467010                 | GG                                     | TT                 | TT               | INTERGENIC                    |                    |                                                    |
| SNP_1018_A_6476660 | NC_021160.1    | Ca_Kabuli_Chr01 | 6476660                 | GG                                     | AA                 | AA               | DRR                           | 101492582          | sister chromatid cohesion protein PDS5 homolog B-A |
| SNP_1019_A_6481077 | NC_021160.1    | Ca_Kabuli_Chr01 | 6481077                 | CC                                     | TT                 | TT               | INTRON                        | 101492582          | sister chromatid cohesion protein PDS5 homolog B-A |
| SNP_1020_A_6481131 | NC_021160.1    | Ca_Kabuli_Chr01 | 6481131                 | TT                                     | CC                 | CC               | INTRON                        | 101492582          | sister chromatid cohesion protein PDS5 homolog B-A |
| SNP_1021_A_6482699 | NC_021160.1    | Ca_Kabuli_Chr01 | 6482699                 | TT                                     | CC                 | CC               | INTRON                        | 101492582          | sister chromatid cohesion protein PDS5 homolog B-A |
| SNP_1022_A_6484016 | NC_021160.1    | Ca_Kabuli_Chr01 | 6484016                 | AA                                     | CC                 | CC               | INTRON                        | 101492582          | sister chromatid cohesion protein PDS5 homolog B-A |
| SNP_1023_A_6484030 | NC_021160.1    | Ca_Kabuli_Chr01 | 6484030                 | TT                                     | CC                 | CC               | INTRON                        | 101492582          | sister chromatid cohesion protein PDS5 homolog B-A |
| SNP_1024_A_6484033 | NC_021160.1    | Ca_Kabuli_Chr01 | 6484033                 | TT                                     | CC                 | CC               | INTRON                        | 101492582          | sister chromatid cohesion protein PDS5 homolog B-A |
| SNP_1025_A_6484065 | NC_021160.1    | Ca_Kabuli_Chr01 | 6484065                 | CC                                     | TT                 | TT               | INTRON                        | 101492582          | sister chromatid cohesion protein PDS5 homolog B-A |
| SNP_1026_A_6484545 | NC_021160.1    | Ca_Kabuli_Chr01 | 6484545                 | GG                                     | CC                 | CC               | SYNONYMOUS_CODING             | 101492582          | sister chromatid cohesion protein PDS5 homolog B-A |
| SNP_1027_A_6485675 | NC_021160.1    | Ca_Kabuli_Chr01 | 6485675                 | GG                                     | CC                 | CC               | NON_SYNONYMOUS_CODING         | 101492582          | sister chromatid cohesion protein PDS5 homolog B-A |
| SNP_1028_A_6486350 | NC_021160.1    | Ca_Kabuli_Chr01 | 6486350                 | TT                                     | CC                 | CC               | INTRON                        | 101492582          | sister chromatid cohesion protein PDS5 homolog B-A |
| SNP_1029_A_6487673 | NC_021160.1    | Ca_Kabuli_Chr01 | 6487673                 | GG                                     | AA                 | AA               | INTRON                        | 101492582          | sister chromatid cohesion protein PDS5 homolog B-A |
| SNP_1030_A_6487686 | NC_021160.1    | Ca_Kabuli_Chr01 | 6487686                 | CC                                     | AA                 | AA               | INTRON                        | 101492582          | sister chromatid cohesion protein PDS5 homolog B-A |
| SNP_1031_A_6487687 | NC_021160.1    | Ca_Kabuli_Chr01 | 6487687                 | AA                                     | GG                 | GG               | INTRON                        | 101492582          | sister chromatid cohesion protein PDS5 homolog B-A |
| SNP_1032_A_6489712 | NC_021160.1    | Ca_Kabuli_Chr01 | 6489712                 | GG                                     | AA                 | AA               | INTRON                        | 101492582          | sister chromatid cohesion protein PDS5 homolog B-A |
| SNP_1033_A_6516991 | NC_021160.1    | Ca_Kabuli_Chr01 | 6516991                 | GG                                     | TT                 | TT               | INTERGENIC                    |                    |                                                    |
| SNP_1034_A_6516994 | NC_021160.1    | Ca_Kabuli_Chr01 | 6516994                 | AA                                     | GG                 | GG               | INTERGENIC                    |                    |                                                    |

| SNPs IDs           | Chromosome IDs | Chromosomes     | Physical positions (bp) | CDC Frontier genome (Reference genome) | (Pusa 1103 & HPNB) | (ILWC 46 & LPNB) | Sequence Components of genome | Gene accession IDs | Putative functions                                             |
|--------------------|----------------|-----------------|-------------------------|----------------------------------------|--------------------|------------------|-------------------------------|--------------------|----------------------------------------------------------------|
| SNP_1035_A_6517013 | NC_021160.1    | Ca_Kabuli_Chr01 | 6517013                 | GG                                     | AA                 | AA               | INTERGENIC                    |                    |                                                                |
| SNP_1036_A_6517022 | NC_021160.1    | Ca_Kabuli_Chr01 | 6517022                 | GG                                     | AA                 | AA               | INTERGENIC                    |                    |                                                                |
| SNP_1037_A_6518585 | NC_021160.1    | Ca_Kabuli_Chr01 | 6518585                 | CC                                     | TT                 | TT               | URR                           | 101494093          | alpha-ketoglutarate-dependent dioxygenase alkB homolog 2       |
| SNP_1038_A_6518597 | NC_021160.1    | Ca_Kabuli_Chr01 | 6518597                 | AA                                     | GG                 | GG               | URR                           | 101494093          | alpha-ketoglutarate-dependent dioxygenase alkB homolog 2       |
| SNP_1039_A_6518620 | NC_021160.1    | Ca_Kabuli_Chr01 | 6518620                 | CC                                     | TT                 | TT               | URR                           | 101494093          | alpha-ketoglutarate-dependent dioxygenase alkB homolog 2       |
| SNP_1040_A_6523375 | NC_021160.1    | Ca_Kabuli_Chr01 | 6523375                 | AA                                     | GG                 | GG               | URR                           | 101494401          | WEB family protein At1g12150-like                              |
| SNP_1041_A_6523815 | NC_021160.1    | Ca_Kabuli_Chr01 | 6523815                 | TT                                     | AA                 | AA               | URR                           | 101494401          | WEB family protein At1g12150-like                              |
| SNP_1042_A_6528285 | NC_021160.1    | Ca_Kabuli_Chr01 | 6528285                 | AA                                     | GG                 | GG               | URR                           | 101494713          | phosphatidylinositol/phosphatidylcholine transfer protein SFH2 |
| SNP_1043_A_6532048 | NC_021160.1    | Ca_Kabuli_Chr01 | 6532048                 | TT                                     | CC                 | CC               | INTERGENIC                    |                    |                                                                |
| SNP_1045_A_6538849 | NC_021160.1    | Ca_Kabuli_Chr01 | 6538849                 | TT                                     | CC                 | CC               | DRR                           | 101495364          | serine/threonine-protein kinase D6PK                           |
| SNP_1046_A_6538850 | NC_021160.1    | Ca_Kabuli_Chr01 | 6538850                 | TT                                     | GG                 | GG               | DRR                           | 101495364          | serine/threonine-protein kinase D6PK                           |
| SNP_1047_A_6541781 | NC_021160.1    | Ca_Kabuli_Chr01 | 6541781                 | GG                                     | AA                 | AA               | INTERGENIC                    |                    |                                                                |
| SNP_1048_A_6546955 | NC_021160.1    | Ca_Kabuli_Chr01 | 6546955                 | CC                                     | TT                 | TT               | INTERGENIC                    |                    |                                                                |
| SNP_1049_A_6546958 | NC_021160.1    | Ca_Kabuli_Chr01 | 6546958                 | CC                                     | TT                 | TT               | INTERGENIC                    |                    |                                                                |
| SNP_1050_A_6546978 | NC_021160.1    | Ca_Kabuli_Chr01 | 6546978                 | CC                                     | TT                 | TT               | INTERGENIC                    |                    |                                                                |
| SNP_1051_A_6546988 | NC_021160.1    | Ca_Kabuli_Chr01 | 6546988                 | AA                                     | GG                 | GG               | INTERGENIC                    |                    |                                                                |
| SNP_1052_A_6559343 | NC_021160.1    | Ca_Kabuli_Chr01 | 6559343                 | GG                                     | AA                 | AA               | INTERGENIC                    |                    |                                                                |
| SNP_1053_A_6578799 | NC_021160.1    | Ca_Kabuli_Chr01 | 6578799                 | TT                                     | CC                 | CC               | INTERGENIC                    |                    |                                                                |
| SNP_1054_A_6646161 | NC_021160.1    | Ca_Kabuli_Chr01 | 6646161                 | TT                                     | CC                 | CC               | URR                           | 101501843          | uncharacterized LOC101501843                                   |
| SNP_1055_A_6646178 | NC_021160.1    | Ca_Kabuli_Chr01 | 6646178                 | TT                                     | CC                 | CC               | URR                           | 101501843          | uncharacterized LOC101501843                                   |
| SNP_1056_A_6646179 | NC_021160.1    | Ca_Kabuli_Chr01 | 6646179                 | GG                                     | CC                 | CC               | URR                           | 101501843          | uncharacterized LOC101501843                                   |
| SNP_1057_A_6761564 | NC_021160.1    | Ca_Kabuli_Chr01 | 6761564                 | AA                                     | CC                 | CC               | URR                           | 101505258          | uncharacterized LOC101505258                                   |

| SNPs IDs           | Chromosome IDs | Chromosomes     | Physical positions (bp) | CDC Frontier genome (Reference genome) | (Pusa 1103 & HPNB) | (ILWC 46 & LPNB) | Sequence Components of genome | Gene accession IDs | Putative functions                                          |
|--------------------|----------------|-----------------|-------------------------|----------------------------------------|--------------------|------------------|-------------------------------|--------------------|-------------------------------------------------------------|
| SNP_1058_A_6778168 | NC_021160.1    | Ca_Kabuli_Chr01 | 6778168                 | CC                                     | TT                 | TT               | URR                           | 101503107          | Unknown function                                            |
| SNP_1059_A_6779880 | NC_021160.1    | Ca_Kabuli_Chr01 | 6779880                 | AA                                     | GG                 | GG               | URR                           | 101503107          | Unknown function                                            |
| SNP_1060_A_6810807 | NC_021160.1    | Ca_Kabuli_Chr01 | 6810807                 | AA                                     | GG                 | GG               | DRR                           | 101508486          | protein ENDOSPERM DEFECTIVE 1-like                          |
| SNP_1061_A_6856963 | NC_021160.1    | Ca_Kabuli_Chr01 | 6856963                 | AA                                     | CC                 | CC               | INTERGENIC                    |                    |                                                             |
| SNP_1062_A_6858819 | NC_021160.1    | Ca_Kabuli_Chr01 | 6858819                 | TT                                     | AA                 | AA               | INTERGENIC                    |                    |                                                             |
| SNP_1063_A_6869736 | NC_021160.1    | Ca_Kabuli_Chr01 | 6869736                 | CC                                     | GG                 | GG               | INTERGENIC                    |                    |                                                             |
| SNP_1066_A_7074565 | NC_021160.1    | Ca_Kabuli_Chr01 | 7074565                 | CC                                     | TT                 | TT               | INTERGENIC                    |                    |                                                             |
| SNP_1067_A_7076158 | NC_021160.1    | Ca_Kabuli_Chr01 | 7076158                 | TT                                     | AA                 | AA               | INTERGENIC                    |                    |                                                             |
| SNP_1068_A_7076159 | NC_021160.1    | Ca_Kabuli_Chr01 | 7076159                 | CC                                     | AA                 | AA               | INTERGENIC                    |                    |                                                             |
| SNP_1069_A_7116283 | NC_021160.1    | Ca_Kabuli_Chr01 | 7116283                 | TT                                     | GG                 | GG               | INTERGENIC                    |                    |                                                             |
| SNP_1070_A_7137250 | NC_021160.1    | Ca_Kabuli_Chr01 | 7137250                 | GG                                     | AA                 | AA               | INTRON                        | 101491602          | exocyst complex component SEC8                              |
| SNP_1071_A_7154857 | NC_021160.1    | Ca_Kabuli_Chr01 | 7154857                 | TT                                     | CC                 | CC               | INTRON                        | 101491602          | exocyst complex component SEC8                              |
| SNP_1073_A_7244279 | NC_021160.1    | Ca_Kabuli_Chr01 | 7244279                 | AA                                     | GG                 | GG               | INTERGENIC                    |                    |                                                             |
| SNP_1074_A_7267507 | NC_021160.1    | Ca_Kabuli_Chr01 | 7267507                 | AA                                     | TT                 | TT               | INTRON                        | id7011             | Unknown function                                            |
| SNP_1075_A_7272062 | NC_021160.1    | Ca_Kabuli_Chr01 | 7272062                 | AA                                     | CC                 | CC               | INTERGENIC                    |                    |                                                             |
| SNP_1076_A_7294737 | NC_021160.1    | Ca_Kabuli_Chr01 | 7294737                 | CC                                     | TT                 | TT               | DRR                           | 101493774          | uncharacterized LOC101493774                                |
| SNP_1077_A_7298873 | NC_021160.1    | Ca_Kabuli_Chr01 | 7298873                 | AA                                     | GG                 | GG               | INTRON                        | 101493774          | uncharacterized LOC101493774                                |
| SNP_1078_A_7385381 | NC_021160.1    | Ca_Kabuli_Chr01 | 7385381                 | GG                                     | TT                 | TT               | INTERGENIC                    |                    |                                                             |
| SNP_1079_A_7405971 | NC_021160.1    | Ca_Kabuli_Chr01 | 7405971                 | TT                                     | GG                 | GG               | URR                           | 101506663          | pollen-specific leucine-rich repeat extensin-like protein 1 |
| SNP_1080_A_7406219 | NC_021160.1    | Ca_Kabuli_Chr01 | 7406219                 | AA                                     | CC                 | CC               | URR                           | 101506663          | pollen-specific leucine-rich repeat extensin-like protein 1 |
| SNP_1081_A_7406228 | NC_021160.1    | Ca_Kabuli_Chr01 | 7406228                 | TT                                     | CC                 | CC               | URR                           | 101506663          | pollen-specific leucine-rich repeat extensin-like protein 1 |
| SNP_1083_A_7470104 | NC_021160.1    | Ca_Kabuli_Chr01 | 7470104                 | AA                                     | GG                 | GG               | INTERGENIC                    |                    |                                                             |

| SNPs IDs           | Chromosome IDs | Chromosomes     | Physical positions (bp) | CDC Frontier genome (Reference genome) | (Pusa 1103 & HPNB) | (ILWC 46 & LPNB) | Sequence Components of genome | Gene accession IDs | Putative functions                         |
|--------------------|----------------|-----------------|-------------------------|----------------------------------------|--------------------|------------------|-------------------------------|--------------------|--------------------------------------------|
| SNP_1084_A_7470105 | NC_021160.1    | Ca_Kabuli_Chr01 | 7470105                 | GG                                     | TT                 | TT               | INTERGENIC                    |                    |                                            |
| SNP_1085_A_7518441 | NC_021160.1    | Ca_Kabuli_Chr01 | 7518441                 | TT                                     | CC                 | CC               | INTERGENIC                    |                    |                                            |
| SNP_1086_A_7588852 | NC_021160.1    | Ca_Kabuli_Chr01 | 7588852                 | GG                                     | CC                 | CC               | INTRON                        | 101506998          | homeobox-leucine zipper protein HDG11-like |
| SNP_1087_A_7590999 | NC_021160.1    | Ca_Kabuli_Chr01 | 7590999                 | GG                                     | TT                 | TT               | NON_SYNONYMOUS_CODING         | 101506998          | homeobox-leucine zipper protein HDG11-like |
| SNP_1088_A_7591009 | NC_021160.1    | Ca_Kabuli_Chr01 | 7591009                 | CC                                     | TT                 | TT               | SYNONYMOUS_CODING             | 101506998          | homeobox-leucine zipper protein HDG11-like |
| SNP_1089_A_7591010 | NC_021160.1    | Ca_Kabuli_Chr01 | 7591010                 | CC                                     | TT                 | TT               | STOP_GAINED                   | 101506998          | homeobox-leucine zipper protein HDG11-like |
| SNP_1090_A_7591025 | NC_021160.1    | Ca_Kabuli_Chr01 | 7591025                 | TT                                     | GG                 | GG               | NON_SYNONYMOUS_CODING         | 101506998          | homeobox-leucine zipper protein HDG11-like |
| SNP_1091_A_7591189 | NC_021160.1    | Ca_Kabuli_Chr01 | 7591189                 | AA                                     | CC                 | CC               | INTRON                        | 101506998          | homeobox-leucine zipper protein HDG11-like |
| SNP_1092_A_7591201 | NC_021160.1    | Ca_Kabuli_Chr01 | 7591201                 | AA                                     | TT                 | TT               | INTRON                        | 101506998          | homeobox-leucine zipper protein HDG11-like |
| SNP_1093_A_7591206 | NC_021160.1    | Ca_Kabuli_Chr01 | 7591206                 | GG                                     | AA                 | AA               | INTRON                        | 101506998          | homeobox-leucine zipper protein HDG11-like |
| SNP_1094_A_7591307 | NC_021160.1    | Ca_Kabuli_Chr01 | 7591307                 | TT                                     | CC                 | CC               | SYNONYMOUS_CODING             | 101506998          | homeobox-leucine zipper protein HDG11-like |
| SNP_1095_A_7591311 | NC_021160.1    | Ca_Kabuli_Chr01 | 7591311                 | GG                                     | TT                 | TT               | STOP_GAINED                   | 101506998          | homeobox-leucine zipper protein HDG11-like |
| SNP_1096_A_7591327 | NC_021160.1    | Ca_Kabuli_Chr01 | 7591327                 | CC                                     | TT                 | TT               | NON_SYNONYMOUS_CODING         | 101506998          | homeobox-leucine zipper protein HDG11-like |
| SNP_1097_A_7591542 | NC_021160.1    | Ca_Kabuli_Chr01 | 7591542                 | GG                                     | AA                 | AA               | INTRON                        | 101506998          | homeobox-leucine zipper protein HDG11-like |
| SNP_1098_A_7591548 | NC_021160.1    | Ca_Kabuli_Chr01 | 7591548                 | GG                                     | CC                 | CC               | INTRON                        | 101506998          | homeobox-leucine zipper protein HDG11-like |
| SNP_1099_A_7591589 | NC_021160.1    | Ca_Kabuli_Chr01 | 7591589                 | GG                                     | AA                 | AA               | NON_SYNONYMOUS_CODING         | 101506998          | homeobox-leucine zipper protein HDG11-like |
| SNP_1100_A_7591623 | NC_021160.1    | Ca_Kabuli_Chr01 | 7591623                 | CC                                     | TT                 | TT               | NON_SYNONYMOUS_CODING         | 101506998          | homeobox-leucine zipper protein HDG11-like |
| SNP_1101_A_7591627 | NC_021160.1    | Ca_Kabuli_Chr01 | 7591627                 | GG                                     | AA                 | AA               | SYNONYMOUS_CODING             | 101506998          | homeobox-leucine zipper protein HDG11-like |
| SNP_1102_A_7591850 | NC_021160.1    | Ca_Kabuli_Chr01 | 7591850                 | GG                                     | TT                 | TT               | NON_SYNONYMOUS_CODING         | 101506998          | homeobox-leucine zipper protein HDG11-like |
| SNP_1103_A_7596953 | NC_021160.1    | Ca_Kabuli_Chr01 | 7596953                 | GG                                     | AA                 | AA               | DRR                           | 101507325          | homeobox-leucine zipper protein HDG11-like |
| SNP_1104_A_7618748 | NC_021160.1    | Ca_Kabuli_Chr01 | 7618748                 | CC                                     | TT                 | TT               | INTERGENIC                    |                    |                                            |
| SNP_1105_A_7627213 | NC_021160.1    | Ca_Kabuli_Chr01 | 7627213                 | CC                                     | TT                 | TT               | INTERGENIC                    |                    |                                            |



| SNPs IDs           | Chromosome IDs | Chromosomes     | Physical positions (bp) | CDC Frontier genome (Reference genome) | (Pusa 1103 & HPNB) | (ILWC 46 & LPNB) | Sequence Components of genome | Gene accession IDs | Putative functions                 |
|--------------------|----------------|-----------------|-------------------------|----------------------------------------|--------------------|------------------|-------------------------------|--------------------|------------------------------------|
| SNP_1108_A_7635942 | NC_021160.1    | Ca_Kabuli_Chr01 | 7635942                 | AA                                     | GG                 | GG               | INTERGENIC                    |                    |                                    |
| SNP_1109_A_7639341 | NC_021160.1    | Ca_Kabuli_Chr01 | 7639341                 | CC                                     | AA                 | AA               | INTERGENIC                    |                    |                                    |
| SNP_1110_A_7639348 | NC_021160.1    | Ca_Kabuli_Chr01 | 7639348                 | TT                                     | CC                 | CC               | INTERGENIC                    |                    |                                    |
| SNP_1111_A_7649607 | NC_021160.1    | Ca_Kabuli_Chr01 | 7649607                 | TT                                     | CC                 | CC               | DRR                           | 101504198          | tubulin beta chain                 |
| SNP_1112_A_7652089 | NC_021160.1    | Ca_Kabuli_Chr01 | 7652089                 | CC                                     | TT                 | TT               | INTRON                        | 101504198          | tubulin beta chain                 |
| SNP_1113_A_7656292 | NC_021160.1    | Ca_Kabuli_Chr01 | 7656292                 | AA                                     | GG                 | GG               | INTERGENIC                    |                    |                                    |
| SNP_1114_A_7656300 | NC_021160.1    | Ca_Kabuli_Chr01 | 7656300                 | TT                                     | AA                 | AA               | INTERGENIC                    |                    |                                    |
| SNP_1115_A_7657903 | NC_021160.1    | Ca_Kabuli_Chr01 | 7657903                 | AA                                     | CC                 | CC               | INTERGENIC                    |                    |                                    |
| SNP_1116_A_7657905 | NC_021160.1    | Ca_Kabuli_Chr01 | 7657905                 | GG                                     | TT                 | TT               | INTERGENIC                    |                    |                                    |
| SNP_1117_A_7660222 | NC_021160.1    | Ca_Kabuli_Chr01 | 7660222                 | TT                                     | AA                 | AA               | INTERGENIC                    |                    |                                    |
| SNP_1118_A_7661355 | NC_021160.1    | Ca_Kabuli_Chr01 | 7661355                 | AA                                     | GG                 | GG               | INTERGENIC                    |                    |                                    |
| SNP_1119_A_7661375 | NC_021160.1    | Ca_Kabuli_Chr01 | 7661375                 | CC                                     | TT                 | TT               | INTERGENIC                    |                    |                                    |
| SNP_1120_A_7661387 | NC_021160.1    | Ca_Kabuli_Chr01 | 7661387                 | TT                                     | CC                 | CC               | INTERGENIC                    |                    |                                    |
| SNP_1121_A_7661799 | NC_021160.1    | Ca_Kabuli_Chr01 | 7661799                 | CC                                     | AA                 | AA               | INTERGENIC                    |                    |                                    |
| SNP_1122_A_7661826 | NC_021160.1    | Ca_Kabuli_Chr01 | 7661826                 | AA                                     | TT                 | TT               | INTERGENIC                    |                    |                                    |
| SNP_1123_A_7663858 | NC_021160.1    | Ca_Kabuli_Chr01 | 7663858                 | CC                                     | TT                 | TT               | DRR                           | 101504530          | uncharacterized LOC101504530       |
| SNP_1124_A_7664958 | NC_021160.1    | Ca_Kabuli_Chr01 | 7664958                 | GG                                     | CC                 | CC               | NON_SYNONYMOUS_CODING         | 101504530          | uncharacterized LOC101504530       |
| SNP_1125_A_7676955 | NC_021160.1    | Ca_Kabuli_Chr01 | 7676955                 | TT                                     | CC                 | CC               | INTERGENIC                    |                    |                                    |
| SNP_1126_A_7676963 | NC_021160.1    | Ca_Kabuli_Chr01 | 7676963                 | CC                                     | TT                 | TT               | INTERGENIC                    |                    |                                    |
| SNP_1127_A_7676964 | NC_021160.1    | Ca_Kabuli_Chr01 | 7676964                 | CC                                     | TT                 | TT               | INTERGENIC                    |                    |                                    |
| SNP_1129_A_7690044 | NC_021160.1    | Ca_Kabuli_Chr01 | 7690044                 | AA                                     | GG                 | GG               | INTERGENIC                    |                    |                                    |
| SNP_1130_A_7699539 | NC_021160.1    | Ca_Kabuli_Chr01 | 7699539                 | TT                                     | CC                 | CC               | URR                           | 101506453          | cannabidiolic acid synthase-like 1 |

| SNPs IDs           | Chromosome IDs | Chromosomes     | Physical positions (bp) | CDC Frontier genome (Reference genome) | (Pusa 1103 & HPNB) | (ILWC 46 & LPNB) | Sequence Components of genome | Gene accession IDs | Putative functions                       |
|--------------------|----------------|-----------------|-------------------------|----------------------------------------|--------------------|------------------|-------------------------------|--------------------|------------------------------------------|
| SNP_1131_A_7699983 | NC_021160.1    | Ca_Kabuli_Chr01 | 7699983                 | CC                                     | TT                 | TT               | URR                           | 101506453          | cannabidiolic acid synthase-like 1       |
| SNP_1132_A_7699986 | NC_021160.1    | Ca_Kabuli_Chr01 | 7699986                 | TT                                     | CC                 | CC               | URR                           | 101506453          | cannabidiolic acid synthase-like 1       |
| SNP_1133_A_7700003 | NC_021160.1    | Ca_Kabuli_Chr01 | 7700003                 | AA                                     | TT                 | TT               | URR                           | 101506453          | cannabidiolic acid synthase-like 1       |
| SNP_1134_A_7700312 | NC_021160.1    | Ca_Kabuli_Chr01 | 7700312                 | TT                                     | AA                 | AA               | URR                           | 101506453          | cannabidiolic acid synthase-like 1       |
| SNP_1135_A_7700313 | NC_021160.1    | Ca_Kabuli_Chr01 | 7700313                 | CC                                     | TT                 | TT               | URR                           | 101506453          | cannabidiolic acid synthase-like 1       |
| SNP_1136_A_7700320 | NC_021160.1    | Ca_Kabuli_Chr01 | 7700320                 | AA                                     | TT                 | TT               | URR                           | 101506453          | cannabidiolic acid synthase-like 1       |
| SNP_1137_A_7700342 | NC_021160.1    | Ca_Kabuli_Chr01 | 7700342                 | CC                                     | TT                 | TT               | URR                           | 101506453          | cannabidiolic acid synthase-like 1       |
| SNP_1138_A_7700383 | NC_021160.1    | Ca_Kabuli_Chr01 | 7700383                 | GG                                     | AA                 | AA               | URR                           | 101506453          | cannabidiolic acid synthase-like 1       |
| SNP_1139_A_7700924 | NC_021160.1    | Ca_Kabuli_Chr01 | 7700924                 | GG                                     | TT                 | TT               | URR                           | 101506453          | cannabidiolic acid synthase-like 1       |
| SNP_1140_A_7708021 | NC_021160.1    | Ca_Kabuli_Chr01 | 7708021                 | CC                                     | TT                 | TT               | DRR                           | 101506123          | transcription factor IIIB 70 kDa subunit |
| SNP_1141_A_7711886 | NC_021160.1    | Ca_Kabuli_Chr01 | 7711886                 | AA                                     | TT                 | TT               | URR                           | 101506123          | transcription factor IIIB 70 kDa subunit |
| SNP_1142_A_7713352 | NC_021160.1    | Ca_Kabuli_Chr01 | 7713352                 | GG                                     | TT                 | TT               | INTERGENIC                    |                    |                                          |
| SNP_1143_A_7713353 | NC_021160.1    | Ca_Kabuli_Chr01 | 7713353                 | TT                                     | AA                 | AA               | INTERGENIC                    |                    |                                          |
| SNP_1144_A_7713372 | NC_021160.1    | Ca_Kabuli_Chr01 | 7713372                 | TT                                     | AA                 | AA               | INTERGENIC                    |                    |                                          |
| SNP_1145_A_7727288 | NC_021160.1    | Ca_Kabuli_Chr01 | 7727288                 | TT                                     | CC                 | CC               | INTRON                        | 101508264          | reticuline oxidase-like protein          |
| SNP_1146_A_7727328 | NC_021160.1    | Ca_Kabuli_Chr01 | 7727328                 | CC                                     | TT                 | TT               | INTRON                        | 101508264          | reticuline oxidase-like protein          |
| SNP_1147_A_7729033 | NC_021160.1    | Ca_Kabuli_Chr01 | 7729033                 | TT                                     | CC                 | CC               | INTRON                        | 101508264          | reticuline oxidase-like protein          |
| SNP_1148_A_7729034 | NC_021160.1    | Ca_Kabuli_Chr01 | 7729034                 | GG                                     | TT                 | TT               | INTRON                        | 101508264          | reticuline oxidase-like protein          |
| SNP_1149_A_7729038 | NC_021160.1    | Ca_Kabuli_Chr01 | 7729038                 | GG                                     | AA                 | AA               | INTRON                        | 101508264          | reticuline oxidase-like protein          |
| SNP_1150_A_7729076 | NC_021160.1    | Ca_Kabuli_Chr01 | 7729076                 | GG                                     | AA                 | AA               | INTRON                        | 101508264          | reticuline oxidase-like protein          |
| SNP_1151_A_7729697 | NC_021160.1    | Ca_Kabuli_Chr01 | 7729697                 | GG                                     | AA                 | AA               | INTRON                        | 101508264          | reticuline oxidase-like protein          |
| SNP_1152_A_7732997 | NC_021160.1    | Ca_Kabuli_Chr01 | 7732997                 | CC                                     | TT                 | TT               | INTRON                        | 101508264          | reticuline oxidase-like protein          |

| SNPs IDs           | Chromosome IDs | Chromosomes     | Physical positions (bp) | CDC Frontier (Reference genome) | (Pusa 1103 & HPNB) | (ILWC 46 & LPNB) | Sequence Components of genome | Gene accession IDs | Putative functions              |
|--------------------|----------------|-----------------|-------------------------|---------------------------------|--------------------|------------------|-------------------------------|--------------------|---------------------------------|
| SNP_1153_A_7733274 | NC_021160.1    | Ca_Kabuli_Chr01 | 7733274                 | TT                              | AA                 | AA               | INTRON                        | 101508264          | reticuline oxidase-like protein |
| SNP_1154_A_7733291 | NC_021160.1    | Ca_Kabuli_Chr01 | 7733291                 | TT                              | CC                 | CC               | INTRON                        | 101508264          | reticuline oxidase-like protein |
| SNP_1155_A_7733470 | NC_021160.1    | Ca_Kabuli_Chr01 | 7733470                 | GG                              | AA                 | AA               | INTRON                        | 101508264          | reticuline oxidase-like protein |
| SNP_1156_A_7745785 | NC_021160.1    | Ca_Kabuli_Chr01 | 7745785                 | AA                              | GG                 | GG               | NON_SYNONYMOUS_CODING         | 101508264          | reticuline oxidase-like protein |
| SNP_1157_A_7746050 | NC_021160.1    | Ca_Kabuli_Chr01 | 7746050                 | CC                              | AA                 | AA               | NON_SYNONYMOUS_CODING         | 101508264          | reticuline oxidase-like protein |
| SNP_1158_A_7746285 | NC_021160.1    | Ca_Kabuli_Chr01 | 7746285                 | AA                              | CC                 | CC               | SYNONYMOUS_CODING             | 101508264          | reticuline oxidase-like protein |
| SNP_1159_A_7746358 | NC_021160.1    | Ca_Kabuli_Chr01 | 7746358                 | TT                              | CC                 | CC               | SYNONYMOUS_CODING             | 101508264          | reticuline oxidase-like protein |
| SNP_1160_A_7746363 | NC_021160.1    | Ca_Kabuli_Chr01 | 7746363                 | GG                              | CC                 | CC               | SYNONYMOUS_CODING             | 101508264          | reticuline oxidase-like protein |
| SNP_1161_A_7746536 | NC_021160.1    | Ca_Kabuli_Chr01 | 7746536                 | TT                              | GG                 | GG               | URR                           | 101508264          | reticuline oxidase-like protein |
| SNP_1162_A_7746553 | NC_021160.1    | Ca_Kabuli_Chr01 | 7746553                 | TT                              | GG                 | GG               | URR                           | 101508264          | reticuline oxidase-like protein |
| SNP_1163_A_7746639 | NC_021160.1    | Ca_Kabuli_Chr01 | 7746639                 | AA                              | GG                 | GG               | URR                           | 101508264          | reticuline oxidase-like protein |
| SNP_1164_A_7746786 | NC_021160.1    | Ca_Kabuli_Chr01 | 7746786                 | AA                              | GG                 | GG               | URR                           | 101508264          | reticuline oxidase-like protein |
| SNP_1165_A_7752977 | NC_021160.1    | Ca_Kabuli_Chr01 | 7752977                 | GG                              | AA                 | AA               | URR                           | 101506778          | reticuline oxidase-like protein |
| SNP_1166_A_7753010 | NC_021160.1    | Ca_Kabuli_Chr01 | 7753010                 | TT                              | AA                 | AA               | URR                           | 101506778          | reticuline oxidase-like protein |
| SNP_1167_A_7753188 | NC_021160.1    | Ca_Kabuli_Chr01 | 7753188                 | TT                              | CC                 | CC               | URR                           | 101506778          | reticuline oxidase-like protein |
| SNP_1168_A_7753225 | NC_021160.1    | Ca_Kabuli_Chr01 | 7753225                 | AA                              | GG                 | GG               | URR                           | 101506778          | reticuline oxidase-like protein |
| SNP_1169_A_7753501 | NC_021160.1    | Ca_Kabuli_Chr01 | 7753501                 | TT                              | CC                 | CC               | URR                           | 101506778          | reticuline oxidase-like protein |
| SNP_1170_A_7754442 | NC_021160.1    | Ca_Kabuli_Chr01 | 7754442                 | CC                              | TT                 | TT               | INTERGENIC                    |                    |                                 |
| SNP_1171_A_7756038 | NC_021160.1    | Ca_Kabuli_Chr01 | 7756038                 | AA                              | GG                 | GG               | INTERGENIC                    |                    |                                 |
| SNP_1172_A_7756080 | NC_021160.1    | Ca_Kabuli_Chr01 | 7756080                 | TT                              | CC                 | CC               | INTERGENIC                    |                    |                                 |
| SNP_1173_A_7756213 | NC_021160.1    | Ca_Kabuli_Chr01 | 7756213                 | TT                              | AA                 | AA               | INTERGENIC                    |                    |                                 |
| SNP_1174_A_7760833 | NC_021160.1    | Ca_Kabuli_Chr01 | 7760833                 | AA                              | CC                 | CC               | INTERGENIC                    |                    |                                 |

| SNPs IDs           | Chromosome IDs | Chromosomes     | Physical positions (bp) | CDC Frontier (Reference genome) | (Pusa 1103 & HPNB) | (ILWC 46 & LPNB) | Sequence Components of genome | Gene accession IDs | Putative functions              |
|--------------------|----------------|-----------------|-------------------------|---------------------------------|--------------------|------------------|-------------------------------|--------------------|---------------------------------|
| SNP_1175_A_7762216 | NC_021160.1    | Ca_Kabuli_Chr01 | 7762216                 | GG                              | TT                 | TT               | INTERGENIC                    |                    |                                 |
| SNP_1176_A_7762250 | NC_021160.1    | Ca_Kabuli_Chr01 | 7762250                 | TT                              | CC                 | CC               | INTERGENIC                    |                    |                                 |
| SNP_1177_A_7764171 | NC_021160.1    | Ca_Kabuli_Chr01 | 7764171                 | CC                              | TT                 | TT               | INTERGENIC                    |                    |                                 |
| SNP_1178_A_7774815 | NC_021160.1    | Ca_Kabuli_Chr01 | 7774815                 | GG                              | AA                 | AA               | INTERGENIC                    |                    |                                 |
| SNP_1179_A_7774982 | NC_021160.1    | Ca_Kabuli_Chr01 | 7774982                 | GG                              | AA                 | AA               | INTERGENIC                    |                    |                                 |
| SNP_1181_A_7775162 | NC_021160.1    | Ca_Kabuli_Chr01 | 7775162                 | CC                              | TT                 | TT               | INTERGENIC                    |                    |                                 |
| SNP_1182_A_7775191 | NC_021160.1    | Ca_Kabuli_Chr01 | 7775191                 | CC                              | AA                 | AA               | INTERGENIC                    |                    |                                 |
| SNP_1183_A_7775342 | NC_021160.1    | Ca_Kabuli_Chr01 | 7775342                 | GG                              | TT                 | TT               | INTERGENIC                    |                    |                                 |
| SNP_1184_A_7775385 | NC_021160.1    | Ca_Kabuli_Chr01 | 7775385                 | TT                              | GG                 | GG               | INTERGENIC                    |                    |                                 |
| SNP_1185_A_7776525 | NC_021160.1    | Ca_Kabuli_Chr01 | 7776525                 | AA                              | TT                 | TT               | INTERGENIC                    |                    |                                 |
| SNP_1186_A_7776709 | NC_021160.1    | Ca_Kabuli_Chr01 | 7776709                 | TT                              | CC                 | CC               | INTERGENIC                    |                    |                                 |
| SNP_1187_A_7777585 | NC_021160.1    | Ca_Kabuli_Chr01 | 7777585                 | AA                              | TT                 | TT               | DRR                           | 101507115          | reticuline oxidase-like protein |
| SNP_1188_A_7777649 | NC_021160.1    | Ca_Kabuli_Chr01 | 7777649                 | TT                              | CC                 | CC               | DRR                           | 101507115          | reticuline oxidase-like protein |
| SNP_1189_A_7777658 | NC_021160.1    | Ca_Kabuli_Chr01 | 7777658                 | GG                              | TT                 | TT               | DRR                           | 101507115          | reticuline oxidase-like protein |
| SNP_1190_A_7777823 | NC_021160.1    | Ca_Kabuli_Chr01 | 7777823                 | AA                              | TT                 | TT               | DRR                           | 101507115          | reticuline oxidase-like protein |
| SNP_1191_A_7777845 | NC_021160.1    | Ca_Kabuli_Chr01 | 7777845                 | AA                              | GG                 | GG               | DRR                           | 101507115          | reticuline oxidase-like protein |
| SNP_1192_A_7778082 | NC_021160.1    | Ca_Kabuli_Chr01 | 7778082                 | AA                              | GG                 | GG               | DRR                           | 101507115          | reticuline oxidase-like protein |
| SNP_1193_A_7778083 | NC_021160.1    | Ca_Kabuli_Chr01 | 7778083                 | CC                              | TT                 | TT               | DRR                           | 101507115          | reticuline oxidase-like protein |
| SNP_1194_A_7778084 | NC_021160.1    | Ca_Kabuli_Chr01 | 7778084                 | TT                              | CC                 | CC               | DRR                           | 101507115          | reticuline oxidase-like protein |
| SNP_1195_A_7778098 | NC_021160.1    | Ca_Kabuli_Chr01 | 7778098                 | AA                              | TT                 | TT               | DRR                           | 101507115          | reticuline oxidase-like protein |
| SNP_1196_A_7778120 | NC_021160.1    | Ca_Kabuli_Chr01 | 7778120                 | CC                              | TT                 | TT               | DRR                           | 101507115          | reticuline oxidase-like protein |
| SNP_1197_A_7778186 | NC_021160.1    | Ca_Kabuli_Chr01 | 7778186                 | TT                              | CC                 | CC               | DRR                           | 101507115          | reticuline oxidase-like protein |

| SNPs IDs           | Chromosome IDs | Chromosomes     | Physical positions (bp) | CDC Frontier (Reference genome) | (Pusa 1103 & HPNB) | (ILWC 46 & LPNB) | Sequence Components of genome | Gene accession IDs | Putative functions                     |
|--------------------|----------------|-----------------|-------------------------|---------------------------------|--------------------|------------------|-------------------------------|--------------------|----------------------------------------|
| SNP_1199_A_7778800 | NC_021160.1    | Ca_Kabuli_Chr01 | 7778800                 | CC                              | GG                 | GG               | NON_SYNONYMOUS_CODING         | 101507115          | reticuline oxidase-like protein        |
| SNP_1200_A_7780276 | NC_021160.1    | Ca_Kabuli_Chr01 | 7780276                 | TT                              | CC                 | CC               | URR                           | 101507115          | reticuline oxidase-like protein        |
| SNP_1201_A_7784053 | NC_021160.1    | Ca_Kabuli_Chr01 | 7784053                 | AA                              | GG                 | GG               | INTERGENIC                    |                    |                                        |
| SNP_1202_A_7784078 | NC_021160.1    | Ca_Kabuli_Chr01 | 7784078                 | AA                              | CC                 | CC               | INTERGENIC                    |                    |                                        |
| SNP_1203_A_7784085 | NC_021160.1    | Ca_Kabuli_Chr01 | 7784085                 | GG                              | CC                 | CC               | INTERGENIC                    |                    |                                        |
| SNP_1204_A_7785060 | NC_021160.1    | Ca_Kabuli_Chr01 | 7785060                 | TT                              | CC                 | CC               | INTERGENIC                    |                    |                                        |
| SNP_1205_A_7787702 | NC_021160.1    | Ca_Kabuli_Chr01 | 7787702                 | AA                              | CC                 | CC               | INTERGENIC                    |                    |                                        |
| SNP_1206_A_7788799 | NC_021160.1    | Ca_Kabuli_Chr01 | 7788799                 | TT                              | CC                 | CC               | INTERGENIC                    |                    |                                        |
| SNP_1207_A_7790461 | NC_021160.1    | Ca_Kabuli_Chr01 | 7790461                 | TT                              | CC                 | CC               | INTERGENIC                    |                    |                                        |
| SNP_1209_A_7793072 | NC_021160.1    | Ca_Kabuli_Chr01 | 7793072                 | AA                              | GG                 | GG               | INTERGENIC                    |                    |                                        |
| SNP_1210_A_7793094 | NC_021160.1    | Ca_Kabuli_Chr01 | 7793094                 | AA                              | CC                 | CC               | INTERGENIC                    |                    |                                        |
| SNP_1211_A_7802961 | NC_021160.1    | Ca_Kabuli_Chr01 | 7802961                 | TT                              | CC                 | CC               | INTERGENIC                    |                    |                                        |
| SNP_1212_A_7809854 | NC_021160.1    | Ca_Kabuli_Chr01 | 7809854                 | GG                              | AA                 | AA               | URR                           | 101507437          | wall-associated receptor kinase-like 8 |
| SNP_1213_A_7810543 | NC_021160.1    | Ca_Kabuli_Chr01 | 7810543                 | GG                              | AA                 | AA               | URR                           | 101507437          | wall-associated receptor kinase-like 8 |
| SNP_1214_A_7810588 | NC_021160.1    | Ca_Kabuli_Chr01 | 7810588                 | AA                              | CC                 | CC               | URR                           | 101507437          | wall-associated receptor kinase-like 8 |
| SNP_1216_A_7819432 | NC_021160.1    | Ca_Kabuli_Chr01 | 7819432                 | CC                              | TT                 | TT               | URR                           | 101507742          | uncharacterized LOC101507742           |
| SNP_1217_A_7819750 | NC_021160.1    | Ca_Kabuli_Chr01 | 7819750                 | CC                              | TT                 | TT               | URR                           | 101507742          | uncharacterized LOC101507742           |
| SNP_1218_A_7820043 | NC_021160.1    | Ca_Kabuli_Chr01 | 7820043                 | CC                              | TT                 | TT               | INTRON                        | 101508066          | alpha-glucosidase                      |
| SNP_1219_A_7824724 | NC_021160.1    | Ca_Kabuli_Chr01 | 7824724                 | AA                              | GG                 | GG               | URR                           | 101508066          | alpha-glucosidase                      |
| SNP_1220_A_7836859 | NC_021160.1    | Ca_Kabuli_Chr01 | 7836859                 | GG                              | TT                 | TT               | INTERGENIC                    |                    |                                        |
| SNP_1221_A_7845921 | NC_021160.1    | Ca_Kabuli_Chr01 | 7845921                 | AA                              | CC                 | CC               | INTERGENIC                    |                    |                                        |
| SNP_1222_A_7865938 | NC_021160.1    | Ca_Kabuli_Chr01 | 7865938                 | GG                              | CC                 | CC               | INTERGENIC                    |                    |                                        |

| SNPs IDs           | Chromosome IDs | Chromosomes     | Physical positions (bp) | CDC Frontier (Reference genome) | (Pusa 1103 & HPNB) | (ILWC 46 & LPNB) | Sequence Components of genome | Gene accession IDs | Putative functions                       |
|--------------------|----------------|-----------------|-------------------------|---------------------------------|--------------------|------------------|-------------------------------|--------------------|------------------------------------------|
| SNP_1223_A_7874781 | NC_021160.1    | Ca_Kabuli_Chr01 | 7874781                 | AA                              | TT                 | TT               | URR                           | 101508899          | reticuline oxidase-like protein          |
| SNP_1224_A_7888856 | NC_021160.1    | Ca_Kabuli_Chr01 | 7888856                 | TT                              | CC                 | CC               | INTERGENIC                    |                    |                                          |
| SNP_1225_A_7889796 | NC_021160.1    | Ca_Kabuli_Chr01 | 7889796                 | TT                              | CC                 | CC               | INTERGENIC                    |                    |                                          |
| SNP_1226_A_7889980 | NC_021160.1    | Ca_Kabuli_Chr01 | 7889980                 | TT                              | CC                 | CC               | INTERGENIC                    |                    |                                          |
| SNP_1227_A_7893284 | NC_021160.1    | Ca_Kabuli_Chr01 | 7893284                 | CC                              | TT                 | TT               | INTERGENIC                    |                    |                                          |
| SNP_1228_A_7893331 | NC_021160.1    | Ca_Kabuli_Chr01 | 7893331                 | GG                              | AA                 | AA               | INTERGENIC                    |                    |                                          |
| SNP_1229_A_7893388 | NC_021160.1    | Ca_Kabuli_Chr01 | 7893388                 | TT                              | CC                 | CC               | INTERGENIC                    |                    |                                          |
| SNP_1230_A_7893413 | NC_021160.1    | Ca_Kabuli_Chr01 | 7893413                 | CC                              | TT                 | TT               | INTERGENIC                    |                    |                                          |
| SNP_1231_A_7893415 | NC_021160.1    | Ca_Kabuli_Chr01 | 7893415                 | AA                              | GG                 | GG               | INTERGENIC                    |                    |                                          |
| SNP_1232_A_7893439 | NC_021160.1    | Ca_Kabuli_Chr01 | 7893439                 | CC                              | TT                 | TT               | INTERGENIC                    |                    |                                          |
| SNP_1233_A_7893446 | NC_021160.1    | Ca_Kabuli_Chr01 | 7893446                 | AA                              | GG                 | GG               | INTERGENIC                    |                    |                                          |
| SNP_1235_A_7900343 | NC_021160.1    | Ca_Kabuli_Chr01 | 7900343                 | AA                              | GG                 | GG               | URR                           | 101509540          | uncharacterized LOC101509540             |
| SNP_1236_A_7901383 | NC_021160.1    | Ca_Kabuli_Chr01 | 7901383                 | GG                              | AA                 | AA               | INTERGENIC                    |                    |                                          |
| SNP_1237_A_7902044 | NC_021160.1    | Ca_Kabuli_Chr01 | 7902044                 | GG                              | CC                 | CC               | INTERGENIC                    |                    |                                          |
| SNP_1238_A_7905478 | NC_021160.1    | Ca_Kabuli_Chr01 | 7905478                 | TT                              | GG                 | GG               | INTRON                        | 101510295          | primase homolog protein                  |
| SNP_1239_A_7916745 | NC_021160.1    | Ca_Kabuli_Chr01 | 7916745                 | CC                              | GG                 | GG               | SYNONYMOUS_CODING             | 101510836          | 50S ribosomal protein L12, chloroplastic |
| SNP_1240_A_7923757 | NC_021160.1    | Ca_Kabuli_Chr01 | 7923757                 | GG                              | AA                 | AA               | SYNONYMOUS_CODING             | 101511158          | probable folate-biopterin transporter 7  |
| SNP_1241_A_7923804 | NC_021160.1    | Ca_Kabuli_Chr01 | 7923804                 | GG                              | AA                 | AA               | INTRON                        | 101511158          | probable folate-biopterin transporter 7  |
| SNP_1242_A_7923854 | NC_021160.1    | Ca_Kabuli_Chr01 | 7923854                 | GG                              | TT                 | TT               | INTRON                        | 101511158          | probable folate-biopterin transporter 7  |
| SNP_1243_A_7927909 | NC_021160.1    | Ca_Kabuli_Chr01 | 7927909                 | CC                              | TT                 | TT               | URR                           | 101511158          | probable folate-biopterin transporter 7  |
| SNP_1244_A_7930977 | NC_021160.1    | Ca_Kabuli_Chr01 | 7930977                 | AA                              | TT                 | TT               | INTERGENIC                    |                    |                                          |
| SNP_1245_A_7932311 | NC_021160.1    | Ca_Kabuli_Chr01 | 7932311                 | GG                              | AA                 | AA               | INTERGENIC                    |                    |                                          |

| SNPs IDs           | Chromosome IDs | Chromosomes     | Physical positions (bp) | CDC Frontier (Reference genome) | (Pusa 1103 & HPNB) | (ILWC 46 & LPNB) | Sequence Components of genome | Gene accession IDs | Putative functions                       |
|--------------------|----------------|-----------------|-------------------------|---------------------------------|--------------------|------------------|-------------------------------|--------------------|------------------------------------------|
| SNP_1246_A_7932318 | NC_021160.1    | Ca_Kabuli_Chr01 | 7932318                 | GG                              | AA                 | AA               | INTERGENIC                    |                    |                                          |
| SNP_1247_A_7937895 | NC_021160.1    | Ca_Kabuli_Chr01 | 7937895                 | TT                              | GG                 | GG               | INTERGENIC                    |                    |                                          |
| SNP_1248_A_7943201 | NC_021160.1    | Ca_Kabuli_Chr01 | 7943201                 | AA                              | GG                 | GG               | INTERGENIC                    |                    |                                          |
| SNP_1249_A_7943419 | NC_021160.1    | Ca_Kabuli_Chr01 | 7943419                 | GG                              | AA                 | AA               | INTERGENIC                    |                    |                                          |
| SNP_1250_A_7943440 | NC_021160.1    | Ca_Kabuli_Chr01 | 7943440                 | AA                              | CC                 | CC               | INTERGENIC                    |                    |                                          |
| SNP_1251_A_7945204 | NC_021160.1    | Ca_Kabuli_Chr01 | 7945204                 | AA                              | TT                 | TT               | INTERGENIC                    |                    |                                          |
| SNP_1252_A_7945914 | NC_021160.1    | Ca_Kabuli_Chr01 | 7945914                 | CC                              | TT                 | TT               | URR                           | 101511470          | ent-kaurenoic acid oxidase 2-like        |
| SNP_1253_A_7946151 | NC_021160.1    | Ca_Kabuli_Chr01 | 7946151                 | CC                              | TT                 | TT               | URR                           | 101511470          | ent-kaurenoic acid oxidase 2-like        |
| SNP_1254_A_7946179 | NC_021160.1    | Ca_Kabuli_Chr01 | 7946179                 | TT                              | CC                 | CC               | URR                           | 101511470          | ent-kaurenoic acid oxidase 2-like        |
| SNP_1256_A_7948539 | NC_021160.1    | Ca_Kabuli_Chr01 | 7948539                 | TT                              | AA                 | AA               | DRR                           | 101512107          | ent-kaurenoic acid oxidase 2-like        |
| SNP_1257_A_7955248 | NC_021160.1    | Ca_Kabuli_Chr01 | 7955248                 | AA                              | GG                 | GG               | INTRON                        | 101512107          | ent-kaurenoic acid oxidase 2-like        |
| SNP_1258_A_7955303 | NC_021160.1    | Ca_Kabuli_Chr01 | 7955303                 | AA                              | GG                 | GG               | INTRON                        | 101512107          | ent-kaurenoic acid oxidase 2-like        |
| SNP_1259_A_7958254 | NC_021160.1    | Ca_Kabuli_Chr01 | 7958254                 | GG                              | AA                 | AA               | URR                           | 101512107          | ent-kaurenoic acid oxidase 2-like        |
| SNP_1260_A_7962897 | NC_021160.1    | Ca_Kabuli_Chr01 | 7962897                 | CC                              | AA                 | AA               | INTERGENIC                    |                    |                                          |
| SNP_1261_A_7963175 | NC_021160.1    | Ca_Kabuli_Chr01 | 7963175                 | AA                              | GG                 | GG               | INTERGENIC                    |                    |                                          |
| SNP_1262_A_7963349 | NC_021160.1    | Ca_Kabuli_Chr01 | 7963349                 | AA                              | TT                 | TT               | INTERGENIC                    |                    |                                          |
| SNP_1263_A_7975597 | NC_021160.1    | Ca_Kabuli_Chr01 | 7975597                 | GG                              | AA                 | AA               | INTERGENIC                    |                    |                                          |
| SNP_1264_A_7979596 | NC_021160.1    | Ca_Kabuli_Chr01 | 7979596                 | AA                              | TT                 | TT               | INTRON                        | 101513202          | uncharacterized oxidoreductase C24B10.20 |
| SNP_1265_A_7982103 | NC_021160.1    | Ca_Kabuli_Chr01 | 7982103                 | AA                              | GG                 | GG               | URR                           | 101513202          | uncharacterized oxidoreductase C24B10.20 |
| SNP_1266_A_7983016 | NC_021160.1    | Ca_Kabuli_Chr01 | 7983016                 | GG                              | TT                 | TT               | URR                           | 101513202          | uncharacterized oxidoreductase C24B10.20 |
| SNP_1267_A_7991980 | NC_021160.1    | Ca_Kabuli_Chr01 | 7991980                 | CC                              | GG                 | GG               | INTRON                        | 101513524          | probable WRKY transcription factor 14    |
| SNP_1269_A_7998097 | NC_021160.1    | Ca_Kabuli_Chr01 | 7998097                 | AA                              | CC                 | CC               | INTERGENIC                    |                    |                                          |

| SNPs IDs           | Chromosome IDs | Chromosomes     | Physical positions (bp) | CDC Frontier (Reference genome) | (Pusa 1103 & HPNB) | (ILWC 46 & LPNB) | Sequence genome | Components of | Gene accession IDs                        | Putative functions |
|--------------------|----------------|-----------------|-------------------------|---------------------------------|--------------------|------------------|-----------------|---------------|-------------------------------------------|--------------------|
| SNP_1270_A_7998363 | NC_021160.1    | Ca_Kabuli_Chr01 | 7998363                 | AA                              | GG                 | GG               | INTERGENIC      |               |                                           |                    |
| SNP_1271_A_7998365 | NC_021160.1    | Ca_Kabuli_Chr01 | 7998365                 | TT                              | CC                 | CC               | INTERGENIC      |               |                                           |                    |
| SNP_1272_A_8000843 | NC_021160.1    | Ca_Kabuli_Chr01 | 8000843                 | TT                              | CC                 | CC               | INTERGENIC      |               |                                           |                    |
| SNP_1274_A_8002262 | NC_021160.1    | Ca_Kabuli_Chr01 | 8002262                 | TT                              | AA                 | AA               | INTERGENIC      |               |                                           |                    |
| SNP_1275_A_8002265 | NC_021160.1    | Ca_Kabuli_Chr01 | 8002265                 | AA                              | TT                 | TT               | INTERGENIC      |               |                                           |                    |
| SNP_1276_A_8002686 | NC_021160.1    | Ca_Kabuli_Chr01 | 8002686                 | TT                              | CC                 | CC               | INTERGENIC      |               |                                           |                    |
| SNP_1277_A_8002723 | NC_021160.1    | Ca_Kabuli_Chr01 | 8002723                 | TT                              | CC                 | CC               | INTERGENIC      |               |                                           |                    |
| SNP_1278_A_8002932 | NC_021160.1    | Ca_Kabuli_Chr01 | 8002932                 | TT                              | CC                 | CC               | INTERGENIC      |               |                                           |                    |
| SNP_1279_A_8003081 | NC_021160.1    | Ca_Kabuli_Chr01 | 8003081                 | TT                              | CC                 | CC               | INTERGENIC      |               |                                           |                    |
| SNP_1280_A_8005303 | NC_021160.1    | Ca_Kabuli_Chr01 | 8005303                 | AA                              | TT                 | TT               | INTERGENIC      |               |                                           |                    |
| SNP_1281_A_8005312 | NC_021160.1    | Ca_Kabuli_Chr01 | 8005312                 | TT                              | CC                 | CC               | INTERGENIC      |               |                                           |                    |
| SNP_1283_A_8007126 | NC_021160.1    | Ca_Kabuli_Chr01 | 8007126                 | AA                              | CC                 | CC               | INTERGENIC      |               |                                           |                    |
| SNP_1284_A_8007185 | NC_021160.1    | Ca_Kabuli_Chr01 | 8007185                 | GG                              | AA                 | AA               | INTERGENIC      |               |                                           |                    |
| SNP_1285_A_8007479 | NC_021160.1    | Ca_Kabuli_Chr01 | 8007479                 | CC                              | TT                 | TT               | INTERGENIC      |               |                                           |                    |
| SNP_1286_A_8008484 | NC_021160.1    | Ca_Kabuli_Chr01 | 8008484                 | GG                              | AA                 | AA               | INTERGENIC      |               |                                           |                    |
| SNP_1287_A_8008754 | NC_021160.1    | Ca_Kabuli_Chr01 | 8008754                 | TT                              | CC                 | CC               | INTERGENIC      |               |                                           |                    |
| SNP_1288_A_8009080 | NC_021160.1    | Ca_Kabuli_Chr01 | 8009080                 | CC                              | TT                 | TT               | DRR             | 101513831     | cell division control protein 2 homolog 1 |                    |
| SNP_1289_A_8009096 | NC_021160.1    | Ca_Kabuli_Chr01 | 8009096                 | AA                              | GG                 | GG               | DRR             | 101513831     | cell division control protein 2 homolog 1 |                    |
| SNP_1290_A_8009103 | NC_021160.1    | Ca_Kabuli_Chr01 | 8009103                 | GG                              | TT                 | TT               | DRR             | 101513831     | cell division control protein 2 homolog 1 |                    |
| SNP_1291_A_8021535 | NC_021160.1    | Ca_Kabuli_Chr01 | 8021535                 | AA                              | GG                 | GG               | INTERGENIC      |               |                                           |                    |
| SNP_1292_A_8021855 | NC_021160.1    | Ca_Kabuli_Chr01 | 8021855                 | AA                              | CC                 | CC               | INTERGENIC      |               |                                           |                    |
| SNP_1293_A_8025088 | NC_021160.1    | Ca_Kabuli_Chr01 | 8025088                 | GG                              | TT                 | TT               | INTERGENIC      |               |                                           |                    |



| SNPs IDs           | Chromosome IDs | Chromosomes     | Physical positions (bp) | CDC Frontier (Reference genome) | (Pusa 1103 & HPNB) | (ILWC 46 & LPNB) | Sequence Components of genome | Gene accession IDs | Putative functions              |
|--------------------|----------------|-----------------|-------------------------|---------------------------------|--------------------|------------------|-------------------------------|--------------------|---------------------------------|
| SNP_1294_A_8025764 | NC_021160.1    | Ca_Kabuli_Chr01 | 8025764                 | TT                              | CC                 | CC               | INTERGENIC                    |                    |                                 |
| SNP_1295_A_8028325 | NC_021160.1    | Ca_Kabuli_Chr01 | 8028325                 | TT                              | CC                 | CC               | INTERGENIC                    |                    |                                 |
| SNP_1296_A_8029980 | NC_021160.1    | Ca_Kabuli_Chr01 | 8029980                 | CC                              | TT                 | TT               | INTERGENIC                    |                    |                                 |
| SNP_1297_A_8030798 | NC_021160.1    | Ca_Kabuli_Chr01 | 8030798                 | GG                              | AA                 | AA               | INTERGENIC                    |                    |                                 |
| SNP_1298_A_8030807 | NC_021160.1    | Ca_Kabuli_Chr01 | 8030807                 | GG                              | AA                 | AA               | INTERGENIC                    |                    |                                 |
| SNP_1299_A_8030943 | NC_021160.1    | Ca_Kabuli_Chr01 | 8030943                 | TT                              | CC                 | CC               | INTERGENIC                    |                    |                                 |
| SNP_1300_A_8031611 | NC_021160.1    | Ca_Kabuli_Chr01 | 8031611                 | TT                              | CC                 | CC               | INTERGENIC                    |                    |                                 |
| SNP_1301_A_8031631 | NC_021160.1    | Ca_Kabuli_Chr01 | 8031631                 | CC                              | TT                 | TT               | INTERGENIC                    |                    |                                 |
| SNP_1302_A_8033179 | NC_021160.1    | Ca_Kabuli_Chr01 | 8033179                 | CC                              | TT                 | TT               | URR                           | 101514177          | UDP-arabinose 4-epimerase 1     |
| SNP_1304_A_8035538 | NC_021160.1    | Ca_Kabuli_Chr01 | 8035538                 | AA                              | GG                 | GG               | INTRON                        | 101514177          | UDP-arabinose 4-epimerase 1     |
| SNP_1305_A_8038356 | NC_021160.1    | Ca_Kabuli_Chr01 | 8038356                 | TT                              | GG                 | GG               | URR                           | 101514177          | UDP-arabinose 4-epimerase 1     |
| SNP_1306_A_8038407 | NC_021160.1    | Ca_Kabuli_Chr01 | 8038407                 | TT                              | AA                 | AA               | URR                           | 101514177          | UDP-arabinose 4-epimerase 1     |
| SNP_1307_A_8038695 | NC_021160.1    | Ca_Kabuli_Chr01 | 8038695                 | AA                              | GG                 | GG               | URR                           | 101514177          | UDP-arabinose 4-epimerase 1     |
| SNP_1308_A_8038700 | NC_021160.1    | Ca_Kabuli_Chr01 | 8038700                 | AA                              | GG                 | GG               | URR                           | 101514177          | UDP-arabinose 4-epimerase 1     |
| SNP_1309_A_8039862 | NC_021160.1    | Ca_Kabuli_Chr01 | 8039862                 | AA                              | TT                 | TT               | URR                           | 101514177          | UDP-arabinose 4-epimerase 1     |
| SNP_1310_A_8041316 | NC_021160.1    | Ca_Kabuli_Chr01 | 8041316                 | GG                              | CC                 | CC               | URR                           | 101509215          | Unknown function                |
| SNP_1311_A_8042483 | NC_021160.1    | Ca_Kabuli_Chr01 | 8042483                 | GG                              | AA                 | AA               | URR                           | 101509215          | Unknown function                |
| SNP_1312_A_8042489 | NC_021160.1    | Ca_Kabuli_Chr01 | 8042489                 | AA                              | GG                 | GG               | URR                           | 101509215          | Unknown function                |
| SNP_1313_A_8042633 | NC_021160.1    | Ca_Kabuli_Chr01 | 8042633                 | AA                              | GG                 | GG               | URR                           | 101509215          | Unknown function                |
| SNP_1314_A_8045915 | NC_021160.1    | Ca_Kabuli_Chr01 | 8045915                 | AA                              | GG                 | GG               | INTRON                        | 101514501          | coatomer subunit epsilon-1-like |
| SNP_1315_A_8047547 | NC_021160.1    | Ca_Kabuli_Chr01 | 8047547                 | TT                              | CC                 | CC               | INTRON                        | 101514501          | coatomer subunit epsilon-1-like |
| SNP_1316_A_8050267 | NC_021160.1    | Ca_Kabuli_Chr01 | 8050267                 | CC                              | GG                 | GG               | URR                           | 101514501          | coatomer subunit epsilon-1-like |

| SNPs IDs           | Chromosome IDs | Chromosomes     | Physical positions (bp) | CDC Frontier (Reference genome) | (Pusa 1103 & HPNB) | (ILWC 46 & LPNB) | Sequence Components of genome | Gene accession IDs | Putative functions                      |
|--------------------|----------------|-----------------|-------------------------|---------------------------------|--------------------|------------------|-------------------------------|--------------------|-----------------------------------------|
| SNP_1317_A_8062380 | NC_021160.1    | Ca_Kabuli_Chr01 | 8062380                 | TT                              | CC                 | CC               | DRR                           | 101514822          | heat shock cognate 70 kDa protein-like  |
| SNP_1318_A_8062653 | NC_021160.1    | Ca_Kabuli_Chr01 | 8062653                 | CC                              | TT                 | TT               | DRR                           | 101514822          | heat shock cognate 70 kDa protein-like  |
| SNP_1319_A_8075270 | NC_021160.1    | Ca_Kabuli_Chr01 | 8075270                 | TT                              | CC                 | CC               | INTERGENIC                    |                    |                                         |
| SNP_1320_A_8095501 | NC_021160.1    | Ca_Kabuli_Chr01 | 8095501                 | GG                              | CC                 | CC               | INTERGENIC                    |                    |                                         |
| SNP_1321_A_8097630 | NC_021160.1    | Ca_Kabuli_Chr01 | 8097630                 | TT                              | CC                 | CC               | INTERGENIC                    |                    |                                         |
| SNP_1322_A_8098025 | NC_021160.1    | Ca_Kabuli_Chr01 | 8098025                 | TT                              | CC                 | CC               | INTERGENIC                    |                    |                                         |
| SNP_1323_A_8102329 | NC_021160.1    | Ca_Kabuli_Chr01 | 8102329                 | CC                              | TT                 | TT               | INTRON                        | 101515467          | solute carrier family 25 member 44-like |
| SNP_1324_A_8106672 | NC_021160.1    | Ca_Kabuli_Chr01 | 8106672                 | AA                              | GG                 | GG               | DRR                           | 101488221          | DEAD-box ATP-dependent RNA helicase 46  |
| SNP_1325_A_8106699 | NC_021160.1    | Ca_Kabuli_Chr01 | 8106699                 | GG                              | AA                 | AA               | DRR                           | 101488221          | DEAD-box ATP-dependent RNA helicase 46  |
| SNP_1326_A_8106909 | NC_021160.1    | Ca_Kabuli_Chr01 | 8106909                 | TT                              | GG                 | GG               | DRR                           | 101488221          | DEAD-box ATP-dependent RNA helicase 46  |
| SNP_1327_A_8106999 | NC_021160.1    | Ca_Kabuli_Chr01 | 8106999                 | CC                              | TT                 | TT               | DRR                           | 101488221          | DEAD-box ATP-dependent RNA helicase 46  |
| SNP_1328_A_8107001 | NC_021160.1    | Ca_Kabuli_Chr01 | 8107001                 | AA                              | GG                 | GG               | DRR                           | 101488221          | DEAD-box ATP-dependent RNA helicase 46  |
| SNP_1329_A_8111844 | NC_021160.1    | Ca_Kabuli_Chr01 | 8111844                 | AA                              | GG                 | GG               | INTRON                        | 101488221          | DEAD-box ATP-dependent RNA helicase 46  |
| SNP_1330_A_8111871 | NC_021160.1    | Ca_Kabuli_Chr01 | 8111871                 | GG                              | CC                 | CC               | INTRON                        | 101488221          | DEAD-box ATP-dependent RNA helicase 46  |
| SNP_1331_A_8111876 | NC_021160.1    | Ca_Kabuli_Chr01 | 8111876                 | CC                              | GG                 | GG               | INTRON                        | 101488221          | DEAD-box ATP-dependent RNA helicase 46  |
| SNP_1332_A_8116736 | NC_021160.1    | Ca_Kabuli_Chr01 | 8116736                 | GG                              | AA                 | AA               | INTERGENIC                    |                    |                                         |
| SNP_1333_A_8116801 | NC_021160.1    | Ca_Kabuli_Chr01 | 8116801                 | AA                              | TT                 | TT               | INTERGENIC                    |                    |                                         |
| SNP_1334_A_8119398 | NC_021160.1    | Ca_Kabuli_Chr01 | 8119398                 | CC                              | GG                 | GG               | INTRON                        | 101488552          | uncharacterized LOC101488552            |
| SNP_1335_A_8124043 | NC_021160.1    | Ca_Kabuli_Chr01 | 8124043                 | AA                              | GG                 | GG               | URR                           | 101488552          | uncharacterized LOC101488552            |
| SNP_1336_A_8124667 | NC_021160.1    | Ca_Kabuli_Chr01 | 8124667                 | TT                              | CC                 | CC               | URR                           | 101488552          | uncharacterized LOC101488552            |
| SNP_1339_A_8128878 | NC_021160.1    | Ca_Kabuli_Chr01 | 8128878                 | CC                              | AA                 | AA               | INTERGENIC                    |                    |                                         |
| SNP_1340_A_8128886 | NC_021160.1    | Ca_Kabuli_Chr01 | 8128886                 | CC                              | TT                 | TT               | INTERGENIC                    |                    |                                         |

| SNPs IDs           | Chromosome IDs | Chromosomes     | Physical positions (bp) | CDC Frontier (Reference genome) | (Pusa 1103 & HPNB) | (ILWC 46 & LPNB) | Sequence Components of genome | Gene accession IDs | Putative functions                        |
|--------------------|----------------|-----------------|-------------------------|---------------------------------|--------------------|------------------|-------------------------------|--------------------|-------------------------------------------|
| SNP_1341_A_8129262 | NC_021160.1    | Ca_Kabuli_Chr01 | 8129262                 | TT                              | GG                 | GG               | INTERGENIC                    |                    |                                           |
| SNP_1342_A_8136977 | NC_021160.1    | Ca_Kabuli_Chr01 | 8136977                 | CC                              | TT                 | TT               | DRR                           | 101489863          | polygalacturonase At1g48100-like          |
| SNP_1343_A_8159812 | NC_021160.1    | Ca_Kabuli_Chr01 | 8159812                 | AA                              | CC                 | CC               | INTERGENIC                    |                    |                                           |
| SNP_1344_A_8170936 | NC_021160.1    | Ca_Kabuli_Chr01 | 8170936                 | TT                              | CC                 | CC               | INTERGENIC                    |                    |                                           |
| SNP_1345_A_8186042 | NC_021160.1    | Ca_Kabuli_Chr01 | 8186042                 | CC                              | TT                 | TT               | INTERGENIC                    |                    |                                           |
| SNP_1346_A_8309120 | NC_021160.1    | Ca_Kabuli_Chr01 | 8309120                 | AA                              | CC                 | CC               | INTERGENIC                    |                    |                                           |
| SNP_1347_A_8309126 | NC_021160.1    | Ca_Kabuli_Chr01 | 8309126                 | TT                              | GG                 | GG               | INTERGENIC                    |                    |                                           |
| SNP_1348_A_8318379 | NC_021160.1    | Ca_Kabuli_Chr01 | 8318379                 | GG                              | AA                 | AA               | URR                           | 101510837          | Unknown function                          |
| SNP_1349_A_8319459 | NC_021160.1    | Ca_Kabuli_Chr01 | 8319459                 | AA                              | GG                 | GG               | URR                           | 101510837          | Unknown function                          |
| SNP_1350_A_8334996 | NC_021160.1    | Ca_Kabuli_Chr01 | 8334996                 | AA                              | GG                 | GG               | INTERGENIC                    |                    |                                           |
| SNP_1352_A_8415316 | NC_021160.1    | Ca_Kabuli_Chr01 | 8415316                 | CC                              | GG                 | GG               | DRR                           | 101511159          | desiccation-related protein PCC13-62-like |
| SNP_1353_A_8415326 | NC_021160.1    | Ca_Kabuli_Chr01 | 8415326                 | GG                              | TT                 | TT               | DRR                           | 101511159          | desiccation-related protein PCC13-62-like |
| SNP_1354_A_8415385 | NC_021160.1    | Ca_Kabuli_Chr01 | 8415385                 | AA                              | GG                 | GG               | DRR                           | 101511159          | desiccation-related protein PCC13-62-like |
| SNP_1355_A_8415394 | NC_021160.1    | Ca_Kabuli_Chr01 | 8415394                 | CC                              | TT                 | TT               | DRR                           | 101511159          | desiccation-related protein PCC13-62-like |
| SNP_1357_A_8428211 | NC_021160.1    | Ca_Kabuli_Chr01 | 8428211                 | CC                              | TT                 | TT               | INTERGENIC                    |                    |                                           |
| SNP_1358_A_8434873 | NC_021160.1    | Ca_Kabuli_Chr01 | 8434873                 | CC                              | TT                 | TT               | INTERGENIC                    |                    |                                           |
| SNP_1359_A_8434909 | NC_021160.1    | Ca_Kabuli_Chr01 | 8434909                 | GG                              | TT                 | TT               | INTERGENIC                    |                    |                                           |
| SNP_1360_A_8434995 | NC_021160.1    | Ca_Kabuli_Chr01 | 8434995                 | AA                              | GG                 | GG               | DRR                           | 101512756          | uncharacterized LOC101512756              |
| SNP_1361_A_8435015 | NC_021160.1    | Ca_Kabuli_Chr01 | 8435015                 | GG                              | AA                 | AA               | DRR                           | 101512756          | uncharacterized LOC101512756              |
| SNP_1362_A_8435018 | NC_021160.1    | Ca_Kabuli_Chr01 | 8435018                 | AA                              | GG                 | GG               | DRR                           | 101512756          | uncharacterized LOC101512756              |
| SNP_1363_A_8435167 | NC_021160.1    | Ca_Kabuli_Chr01 | 8435167                 | GG                              | AA                 | AA               | DRR                           | 101512756          | uncharacterized LOC101512756              |
| SNP_1364_A_8435168 | NC_021160.1    | Ca_Kabuli_Chr01 | 8435168                 | AA                              | GG                 | GG               | DRR                           | 101512756          | uncharacterized LOC101512756              |

| SNPs IDs           | Chromosome IDs | Chromosomes     | Physical positions (bp) | CDC Frontier genome (Reference genome) | (Pusa 1103 & HPNB) | (ILWC 46 & LPNB) | Sequence Components of genome | Gene accession IDs | Putative functions                                    |
|--------------------|----------------|-----------------|-------------------------|----------------------------------------|--------------------|------------------|-------------------------------|--------------------|-------------------------------------------------------|
| SNP_1365_A_8439624 | NC_021160.1    | Ca_Kabuli_Chr01 | 8439624                 | CC                                     | AA                 | AA               | INTERGENIC                    |                    |                                                       |
| SNP_1366_A_8470859 | NC_021160.1    | Ca_Kabuli_Chr01 | 8470859                 | CC                                     | AA                 | AA               | DRR                           | 101495694          | cell wall / vacuolar inhibitor of fructosidase 1-like |
| SNP_1367_A_8472739 | NC_021160.1    | Ca_Kabuli_Chr01 | 8472739                 | AA                                     | TT                 | TT               | URR                           | 101495694          | cell wall / vacuolar inhibitor of fructosidase 1-like |
| SNP_1368_A_8558584 | NC_021160.1    | Ca_Kabuli_Chr01 | 8558584                 | TT                                     | AA                 | AA               | INTERGENIC                    |                    |                                                       |
| SNP_1369_A_8577594 | NC_021160.1    | Ca_Kabuli_Chr01 | 8577594                 | AA                                     | GG                 | GG               | INTERGENIC                    |                    |                                                       |
| SNP_1370_A_8594261 | NC_021160.1    | Ca_Kabuli_Chr01 | 8594261                 | GG                                     | AA                 | AA               | INTERGENIC                    |                    |                                                       |
| SNP_1371_A_8628950 | NC_021160.1    | Ca_Kabuli_Chr01 | 8628950                 | CC                                     | TT                 | TT               | INTERGENIC                    |                    |                                                       |
| SNP_1372_A_8637537 | NC_021160.1    | Ca_Kabuli_Chr01 | 8637537                 | GG                                     | CC                 | CC               | INTRON                        | 101499297          | uncharacterized LOC101499297                          |
| SNP_1373_A_8659176 | NC_021160.1    | Ca_Kabuli_Chr01 | 8659176                 | TT                                     | CC                 | CC               | INTERGENIC                    |                    |                                                       |
| SNP_1374_A_8659427 | NC_021160.1    | Ca_Kabuli_Chr01 | 8659427                 | TT                                     | CC                 | CC               | INTERGENIC                    |                    |                                                       |
| SNP_1375_A_8659443 | NC_021160.1    | Ca_Kabuli_Chr01 | 8659443                 | GG                                     | TT                 | TT               | INTERGENIC                    |                    |                                                       |
| SNP_1376_A_8659875 | NC_021160.1    | Ca_Kabuli_Chr01 | 8659875                 | GG                                     | AA                 | AA               | INTERGENIC                    |                    |                                                       |
| SNP_1377_A_8660773 | NC_021160.1    | Ca_Kabuli_Chr01 | 8660773                 | CC                                     | TT                 | TT               | INTERGENIC                    |                    |                                                       |
| SNP_1378_A_8661179 | NC_021160.1    | Ca_Kabuli_Chr01 | 8661179                 | AA                                     | GG                 | GG               | INTERGENIC                    |                    |                                                       |
| SNP_1379_A_8661470 | NC_021160.1    | Ca_Kabuli_Chr01 | 8661470                 | GG                                     | TT                 | TT               | INTERGENIC                    |                    |                                                       |
| SNP_1380_A_8714406 | NC_021160.1    | Ca_Kabuli_Chr01 | 8714406                 | TT                                     | AA                 | AA               | DRR                           | 101490520          | pectinesterase 3-like                                 |
| SNP_1381_A_8756934 | NC_021160.1    | Ca_Kabuli_Chr01 | 8756934                 | CC                                     | TT                 | TT               | INTERGENIC                    |                    |                                                       |
| SNP_1382_A_8797893 | NC_021160.1    | Ca_Kabuli_Chr01 | 8797893                 | TT                                     | AA                 | AA               | URR                           | 101494716          | galactoside 2-alpha-L-fucosyltransferase-like         |
| SNP_1383_A_8797898 | NC_021160.1    | Ca_Kabuli_Chr01 | 8797898                 | CC                                     | TT                 | TT               | URR                           | 101494716          | galactoside 2-alpha-L-fucosyltransferase-like         |
| SNP_1385_A_8833526 | NC_021160.1    | Ca_Kabuli_Chr01 | 8833526                 | AA                                     | CC                 | CC               | INTERGENIC                    |                    |                                                       |
| SNP_1386_A_8863822 | NC_021160.1    | Ca_Kabuli_Chr01 | 8863822                 | TT                                     | AA                 | AA               | INTRON                        | 101497779          | cinnamoyl-CoA reductase 1                             |
| SNP_1387_A_8878277 | NC_021160.1    | Ca_Kabuli_Chr01 | 8878277                 | TT                                     | CC                 | CC               | DRR                           | 101499298          | Golgi SNAP receptor complex member 1-1                |

| SNPs IDs           | Chromosome IDs | Chromosomes     | Physical positions (bp) | CDC Frontier (Reference genome) | (Pusa 1103 & HPNB) | (ILWC 46 & LPNB) | Sequence Components of genome | Gene accession IDs | Putative functions                                |
|--------------------|----------------|-----------------|-------------------------|---------------------------------|--------------------|------------------|-------------------------------|--------------------|---------------------------------------------------|
| SNP_1388_A_8878281 | NC_021160.1    | Ca_Kabuli_Chr01 | 8878281                 | TT                              | GG                 | GG               | DRR                           | 101499298          | Golgi SNAP receptor complex member 1-1            |
| SNP_1390_A_8909430 | NC_021160.1    | Ca_Kabuli_Chr01 | 8909430                 | AA                              | CC                 | CC               | INTERGENIC                    |                    |                                                   |
| SNP_1391_A_8909441 | NC_021160.1    | Ca_Kabuli_Chr01 | 8909441                 | AA                              | CC                 | CC               | INTERGENIC                    |                    |                                                   |
| SNP_1392_A_9055723 | NC_021160.1    | Ca_Kabuli_Chr01 | 9055723                 | TT                              | CC                 | CC               | INTERGENIC                    |                    |                                                   |
| SNP_1393_A_9082410 | NC_021160.1    | Ca_Kabuli_Chr01 | 9082410                 | GG                              | AA                 | AA               | DRR                           | 101511160          | PTI1-like tyrosine-protein kinase At3g15890       |
| SNP_1394_A_9166643 | NC_021160.1    | Ca_Kabuli_Chr01 | 9166643                 | AA                              | TT                 | TT               | INTERGENIC                    |                    |                                                   |
| SNP_1395_A_9177673 | NC_021160.1    | Ca_Kabuli_Chr01 | 9177673                 | TT                              | CC                 | CC               | URR                           | 101515366          | uncharacterized LOC101515366                      |
| SNP_1396_A_9183850 | NC_021160.1    | Ca_Kabuli_Chr01 | 9183850                 | AA                              | GG                 | GG               | URR                           | 101515699          | probable polygalacturonase At3g15720              |
| SNP_1397_A_9183851 | NC_021160.1    | Ca_Kabuli_Chr01 | 9183851                 | TT                              | GG                 | GG               | URR                           | 101515699          | probable polygalacturonase At3g15720              |
| SNP_1398_A_9188607 | NC_021160.1    | Ca_Kabuli_Chr01 | 9188607                 | AA                              | GG                 | GG               | DRR                           | 101489124          | signal peptidase complex catalytic subunit SEC11C |
| SNP_1399_A_9188608 | NC_021160.1    | Ca_Kabuli_Chr01 | 9188608                 | AA                              | GG                 | GG               | DRR                           | 101489124          | signal peptidase complex catalytic subunit SEC11C |
| SNP_1400_A_9232975 | NC_021160.1    | Ca_Kabuli_Chr01 | 9232975                 | TT                              | CC                 | CC               | INTERGENIC                    |                    |                                                   |
| SNP_1401_A_9232992 | NC_021160.1    | Ca_Kabuli_Chr01 | 9232992                 | GG                              | AA                 | AA               | INTERGENIC                    |                    |                                                   |
| SNP_1402_A_9232994 | NC_021160.1    | Ca_Kabuli_Chr01 | 9232994                 | CC                              | TT                 | TT               | INTERGENIC                    |                    |                                                   |
| SNP_1403_A_9233030 | NC_021160.1    | Ca_Kabuli_Chr01 | 9233030                 | AA                              | CC                 | CC               | INTERGENIC                    |                    |                                                   |
| SNP_1404_A_9233050 | NC_021160.1    | Ca_Kabuli_Chr01 | 9233050                 | TT                              | CC                 | CC               | INTERGENIC                    |                    |                                                   |
| SNP_1405_A_9233058 | NC_021160.1    | Ca_Kabuli_Chr01 | 9233058                 | TT                              | CC                 | CC               | INTERGENIC                    |                    |                                                   |
| SNP_1406_A_9233276 | NC_021160.1    | Ca_Kabuli_Chr01 | 9233276                 | CC                              | TT                 | TT               | INTERGENIC                    |                    |                                                   |
| SNP_1407_A_9233284 | NC_021160.1    | Ca_Kabuli_Chr01 | 9233284                 | CC                              | TT                 | TT               | INTERGENIC                    |                    |                                                   |
| SNP_1408_A_9233305 | NC_021160.1    | Ca_Kabuli_Chr01 | 9233305                 | CC                              | TT                 | TT               | INTERGENIC                    |                    |                                                   |
| SNP_1409_A_9233316 | NC_021160.1    | Ca_Kabuli_Chr01 | 9233316                 | TT                              | CC                 | CC               | INTERGENIC                    |                    |                                                   |
| SNP_1410_A_9233391 | NC_021160.1    | Ca_Kabuli_Chr01 | 9233391                 | TT                              | CC                 | CC               | INTERGENIC                    |                    |                                                   |

| SNPs IDs            | Chromosome IDs | Chromosomes     | Physical positions (bp) | CDC Frontier genome (Reference genome) | (Pusa 1103 & HPNB) | (ILWC 46 & LPNB) | Sequence Components of genome | Gene accession IDs | Putative functions                                                        |
|---------------------|----------------|-----------------|-------------------------|----------------------------------------|--------------------|------------------|-------------------------------|--------------------|---------------------------------------------------------------------------|
| SNP_1411_A_9233445  | NC_021160.1    | Ca_Kabuli_Chr01 | 9233445                 | AA                                     | TT                 | TT               | INTERGENIC                    |                    |                                                                           |
| SNP_1412_A_9233489  | NC_021160.1    | Ca_Kabuli_Chr01 | 9233489                 | GG                                     | AA                 | AA               | INTERGENIC                    |                    |                                                                           |
| SNP_1413_A_9233679  | NC_021160.1    | Ca_Kabuli_Chr01 | 9233679                 | GG                                     | AA                 | AA               | INTERGENIC                    |                    |                                                                           |
| SNP_1414_A_9233682  | NC_021160.1    | Ca_Kabuli_Chr01 | 9233682                 | GG                                     | TT                 | TT               | INTERGENIC                    |                    |                                                                           |
| SNP_1416_A_9233913  | NC_021160.1    | Ca_Kabuli_Chr01 | 9233913                 | TT                                     | AA                 | AA               | INTERGENIC                    |                    |                                                                           |
| SNP_1417_A_9233918  | NC_021160.1    | Ca_Kabuli_Chr01 | 9233918                 | TT                                     | AA                 | AA               | INTERGENIC                    |                    |                                                                           |
| SNP_1418_A_9404407  | NC_021160.1    | Ca_Kabuli_Chr01 | 9404407                 | AA                                     | GG                 | GG               | URR                           | 101495040          | cytochrome c oxidase subunit 5b-2, mitochondrial-like                     |
| SNP_1419_A_9456458  | NC_021160.1    | Ca_Kabuli_Chr01 | 9456458                 | GG                                     | AA                 | AA               | URR                           | 101496896          | uncharacterized LOC101496896                                              |
| SNP_1420_A_9526474  | NC_021160.1    | Ca_Kabuli_Chr01 | 9526474                 | TT                                     | GG                 | GG               | INTERGENIC                    |                    |                                                                           |
| SNP_1421_A_9541936  | NC_021160.1    | Ca_Kabuli_Chr01 | 9541936                 | CC                                     | TT                 | TT               | INTERGENIC                    |                    |                                                                           |
| SNP_1422_A_9562882  | NC_021160.1    | Ca_Kabuli_Chr01 | 9562882                 | CC                                     | AA                 | AA               | INTERGENIC                    |                    |                                                                           |
| SNP_1423_A_9601892  | NC_021160.1    | Ca_Kabuli_Chr01 | 9601892                 | GG                                     | AA                 | AA               | INTRON                        | 101502055          | coatamer subunit beta'-2-like                                             |
| SNP_1424_A_9643590  | NC_021160.1    | Ca_Kabuli_Chr01 | 9643590                 | GG                                     | AA                 | AA               | INTERGENIC                    |                    |                                                                           |
| SNP_1425_A_9665632  | NC_021160.1    | Ca_Kabuli_Chr01 | 9665632                 | GG                                     | AA                 | AA               | URR                           | 101504534          | pentatricopeptide repeat-containing protein At3g16010                     |
| SNP_1426_A_9776580  | NC_021160.1    | Ca_Kabuli_Chr01 | 9776580                 | CC                                     | TT                 | TT               | INTERGENIC                    |                    |                                                                           |
| SNP_1427_A_9807459  | NC_021160.1    | Ca_Kabuli_Chr01 | 9807459                 | AA                                     | TT                 | TT               | INTRON                        | 101513527          | golgin candidate 5                                                        |
| SNP_1428_A_9807461  | NC_021160.1    | Ca_Kabuli_Chr01 | 9807461                 | AA                                     | TT                 | TT               | INTRON                        | 101513527          | golgin candidate 5                                                        |
| SNP_1430_A_9872004  | NC_021160.1    | Ca_Kabuli_Chr01 | 9872004                 | GG                                     | TT                 | TT               | DRR                           | 101488669          | pentatricopeptide repeat-containing protein At3g22470, mitochondrial-like |
| SNP_1431_A_9872258  | NC_021160.1    | Ca_Kabuli_Chr01 | 9872258                 | CC                                     | TT                 | TT               | DRR                           | 101488669          | pentatricopeptide repeat-containing protein At3g22470, mitochondrial-like |
| SNP_1432_A_9906333  | NC_021160.1    | Ca_Kabuli_Chr01 | 9906333                 | GG                                     | AA                 | AA               | INTERGENIC                    |                    |                                                                           |
| SNP_1434_A_10044738 | NC_021160.1    | Ca_Kabuli_Chr01 | 10044738                | TT                                     | GG                 | GG               | DRR                           | 101496461          | clavamate synthase-like protein At3g21360                                 |
| SNP_1437_A_10072267 | NC_021160.1    | Ca_Kabuli_Chr01 | 10072267                | GG                                     | AA                 | AA               | INTERGENIC                    |                    |                                                                           |

| SNPs IDs            | Chromosome IDs | Chromosomes     | Physical positions (bp) | CDC Frontier (Reference genome) | (Pusa 1103 & HPNB) | (ILWC 46 & LPNB) | Sequence Components of genome | Gene accession IDs | Putative functions                                       |
|---------------------|----------------|-----------------|-------------------------|---------------------------------|--------------------|------------------|-------------------------------|--------------------|----------------------------------------------------------|
| SNP_1438_A_10086414 | NC_021160.1    | Ca_Kabuli_Chr01 | 10086414                | TT                              | CC                 | CC               | INTRON                        | 101497112          | inorganic pyrophosphatase 2-like                         |
| SNP_1439_A_10099221 | NC_021160.1    | Ca_Kabuli_Chr01 | 10099221                | TT                              | GG                 | GG               | INTERGENIC                    |                    |                                                          |
| SNP_1440_A_10099223 | NC_021160.1    | Ca_Kabuli_Chr01 | 10099223                | TT                              | GG                 | GG               | INTERGENIC                    |                    |                                                          |
| SNP_1441_A_10102140 | NC_021160.1    | Ca_Kabuli_Chr01 | 10102140                | AA                              | GG                 | GG               | INTERGENIC                    |                    |                                                          |
| SNP_1442_A_10116310 | NC_021160.1    | Ca_Kabuli_Chr01 | 10116310                | AA                              | GG                 | GG               | URR                           | 101497780          | 60S ribosomal protein L27-like                           |
| SNP_1443_A_10116349 | NC_021160.1    | Ca_Kabuli_Chr01 | 10116349                | TT                              | CC                 | CC               | URR                           | 101497780          | 60S ribosomal protein L27-like                           |
| SNP_1444_A_10116353 | NC_021160.1    | Ca_Kabuli_Chr01 | 10116353                | AA                              | GG                 | GG               | URR                           | 101497780          | 60S ribosomal protein L27-like                           |
| SNP_1445_A_10203903 | NC_021160.1    | Ca_Kabuli_Chr01 | 10203903                | CC                              | TT                 | TT               | INTERGENIC                    |                    |                                                          |
| SNP_1446_A_10236797 | NC_021160.1    | Ca_Kabuli_Chr01 | 10236797                | TT                              | CC                 | CC               | URR                           | 101497451          | inorganic pyrophosphatase 2-like                         |
| SNP_1447_A_10236814 | NC_021160.1    | Ca_Kabuli_Chr01 | 10236814                | AA                              | CC                 | CC               | URR                           | 101497451          | inorganic pyrophosphatase 2-like                         |
| SNP_1448_A_10236815 | NC_021160.1    | Ca_Kabuli_Chr01 | 10236815                | AA                              | GG                 | GG               | URR                           | 101497451          | inorganic pyrophosphatase 2-like                         |
| SNP_1449_A_10285446 | NC_021160.1    | Ca_Kabuli_Chr01 | 10285446                | CC                              | TT                 | TT               | URR                           | 101506781          | phospholipase D epsilon                                  |
| SNP_1451_A_10368207 | NC_021160.1    | Ca_Kabuli_Chr01 | 10368207                | AA                              | GG                 | GG               | INTERGENIC                    |                    |                                                          |
| SNP_1455_A_10502225 | NC_021160.1    | Ca_Kabuli_Chr01 | 10502225                | CC                              | TT                 | TT               | INTERGENIC                    |                    |                                                          |
| SNP_1457_A_10572591 | NC_021160.1    | Ca_Kabuli_Chr01 | 10572591                | GG                              | AA                 | AA               | INTERGENIC                    |                    |                                                          |
| SNP_1458_A_10577389 | NC_021160.1    | Ca_Kabuli_Chr01 | 10577389                | TT                              | CC                 | CC               | INTRON                        | 101493247          | polyadenylate-binding protein-interacting protein 3-like |
| SNP_1459_A_10577503 | NC_021160.1    | Ca_Kabuli_Chr01 | 10577503                | CC                              | GG                 | GG               | INTRON                        | 101493247          | polyadenylate-binding protein-interacting protein 3-like |
| SNP_1460_A_10626385 | NC_021160.1    | Ca_Kabuli_Chr01 | 10626385                | AA                              | GG                 | GG               | INTERGENIC                    |                    |                                                          |
| SNP_1461_A_10829197 | NC_021160.1    | Ca_Kabuli_Chr01 | 10829197                | AA                              | GG                 | GG               | INTERGENIC                    |                    |                                                          |
| SNP_1462_A_10829213 | NC_021160.1    | Ca_Kabuli_Chr01 | 10829213                | TT                              | CC                 | CC               | INTERGENIC                    |                    |                                                          |
| SNP_1463_A_10850187 | NC_021160.1    | Ca_Kabuli_Chr01 | 10850187                | GG                              | AA                 | AA               | INTERGENIC                    |                    |                                                          |
| SNP_1464_A_10850974 | NC_021160.1    | Ca_Kabuli_Chr01 | 10850974                | AA                              | GG                 | GG               | INTERGENIC                    |                    |                                                          |

| SNPs IDs            | Chromosome IDs | Chromosomes     | Physical positions (bp) | CDC Frontier (Reference genome) | (Pusa 1103 & HPNB) | (ILWC 46 & LPNB) | Sequence Components of genome | Gene accession IDs | Putative functions                |
|---------------------|----------------|-----------------|-------------------------|---------------------------------|--------------------|------------------|-------------------------------|--------------------|-----------------------------------|
| SNP_1465_A_10855340 | NC_021160.1    | Ca_Kabuli_Chr01 | 10855340                | TT                              | AA                 | AA               | INTRON                        | 101513835          | beta-glucosidase 12-like          |
| SNP_1466_A_10856482 | NC_021160.1    | Ca_Kabuli_Chr01 | 10856482                | TT                              | CC                 | CC               | INTRON                        | 101513835          | beta-glucosidase 12-like          |
| SNP_1467_A_10856490 | NC_021160.1    | Ca_Kabuli_Chr01 | 10856490                | AA                              | GG                 | GG               | INTRON                        | 101513835          | beta-glucosidase 12-like          |
| SNP_1468_A_10856593 | NC_021160.1    | Ca_Kabuli_Chr01 | 10856593                | AA                              | GG                 | GG               | INTRON                        | 101513835          | beta-glucosidase 12-like          |
| SNP_1469_A_10856616 | NC_021160.1    | Ca_Kabuli_Chr01 | 10856616                | TT                              | GG                 | GG               | INTRON                        | 101513835          | beta-glucosidase 12-like          |
| SNP_1470_A_10916013 | NC_021160.1    | Ca_Kabuli_Chr01 | 10916013                | TT                              | CC                 | CC               | URR                           | 101501944          | G2/mitotic-specific cyclin-1-like |
| SNP_1471_A_10916473 | NC_021160.1    | Ca_Kabuli_Chr01 | 10916473                | TT                              | CC                 | CC               | URR                           | 101501944          | G2/mitotic-specific cyclin-1-like |
| SNP_1472_A_10916477 | NC_021160.1    | Ca_Kabuli_Chr01 | 10916477                | TT                              | AA                 | AA               | URR                           | 101501944          | G2/mitotic-specific cyclin-1-like |
| SNP_1473_A_10936167 | NC_021160.1    | Ca_Kabuli_Chr01 | 10936167                | AA                              | TT                 | TT               | INTERGENIC                    |                    |                                   |
| SNP_1475_A_10947396 | NC_021160.1    | Ca_Kabuli_Chr01 | 10947396                | CC                              | TT                 | TT               | INTERGENIC                    |                    |                                   |
| SNP_1476_A_10947414 | NC_021160.1    | Ca_Kabuli_Chr01 | 10947414                | AA                              | GG                 | GG               | INTERGENIC                    |                    |                                   |
| SNP_1477_A_10986668 | NC_021160.1    | Ca_Kabuli_Chr01 | 10986668                | TT                              | CC                 | CC               | INTERGENIC                    |                    |                                   |
| SNP_1478_A_10995244 | NC_021160.1    | Ca_Kabuli_Chr01 | 10995244                | TT                              | CC                 | CC               | URR                           | 101490641          | protein FAR1-RELATED SEQUENCE 4   |
| SNP_1479_A_11023123 | NC_021160.1    | Ca_Kabuli_Chr01 | 11023123                | CC                              | TT                 | TT               | INTERGENIC                    |                    |                                   |
| SNP_1481_A_11112572 | NC_021160.1    | Ca_Kabuli_Chr01 | 11112572                | AA                              | CC                 | CC               | URR                           | 101494934          | Unknown function                  |
| SNP_1483_A_11148321 | NC_021160.1    | Ca_Kabuli_Chr01 | 11148321                | GG                              | AA                 | AA               | INTERGENIC                    |                    |                                   |
| SNP_1485_A_11169380 | NC_021160.1    | Ca_Kabuli_Chr01 | 11169380                | CC                              | TT                 | TT               | INTERGENIC                    |                    |                                   |
| SNP_1487_A_11176118 | NC_021160.1    | Ca_Kabuli_Chr01 | 11176118                | CC                              | AA                 | AA               | URR                           | 101498980          | uncharacterized LOC101498980      |
| SNP_1489_A_11217866 | NC_021160.1    | Ca_Kabuli_Chr01 | 11217866                | TT                              | GG                 | GG               | INTERGENIC                    |                    |                                   |
| SNP_1490_A_11218110 | NC_021160.1    | Ca_Kabuli_Chr01 | 11218110                | CC                              | TT                 | TT               | INTERGENIC                    |                    |                                   |
| SNP_1491_A_11218149 | NC_021160.1    | Ca_Kabuli_Chr01 | 11218149                | TT                              | CC                 | CC               | INTERGENIC                    |                    |                                   |
| SNP_1493_A_11340986 | NC_021160.1    | Ca_Kabuli_Chr01 | 11340986                | CC                              | TT                 | TT               | INTERGENIC                    |                    |                                   |



| SNPs IDs            | Chromosome IDs | Chromosomes     | Physical positions (bp) | CDC Frontier genome (Reference genome) | (Pusa 1103 & HPNB) | (ILWC 46 & LPNB) | Sequence Components of genome | Gene accession IDs | Putative functions                          |
|---------------------|----------------|-----------------|-------------------------|----------------------------------------|--------------------|------------------|-------------------------------|--------------------|---------------------------------------------|
| SNP_1494_A_11341016 | NC_021160.1    | Ca_Kabuli_Chr01 | 11341016                | CC                                     | TT                 | TT               | INTERGENIC                    |                    |                                             |
| SNP_1495_A_11341253 | NC_021160.1    | Ca_Kabuli_Chr01 | 11341253                | GG                                     | AA                 | AA               | INTERGENIC                    |                    |                                             |
| SNP_1496_A_11341264 | NC_021160.1    | Ca_Kabuli_Chr01 | 11341264                | TT                                     | AA                 | AA               | INTERGENIC                    |                    |                                             |
| SNP_1497_A_11341309 | NC_021160.1    | Ca_Kabuli_Chr01 | 11341309                | GG                                     | TT                 | TT               | INTERGENIC                    |                    |                                             |
| SNP_1498_A_11341341 | NC_021160.1    | Ca_Kabuli_Chr01 | 11341341                | GG                                     | AA                 | AA               | INTERGENIC                    |                    |                                             |
| SNP_1499_A_11383103 | NC_021160.1    | Ca_Kabuli_Chr01 | 11383103                | AA                                     | GG                 | GG               | INTERGENIC                    |                    |                                             |
| SNP_1500_A_11420695 | NC_021160.1    | Ca_Kabuli_Chr01 | 11420695                | AA                                     | GG                 | GG               | DRR                           | 101510629          | putative E3 ubiquitin-protein ligase XBAT31 |
| SNP_1501_A_11440130 | NC_021160.1    | Ca_Kabuli_Chr01 | 11440130                | AA                                     | TT                 | TT               | INTERGENIC                    |                    |                                             |
| SNP_1503_A_11466924 | NC_021160.1    | Ca_Kabuli_Chr01 | 11466924                | TT                                     | CC                 | CC               | INTRON                        | 101504850          | uncharacterized LOC101504850                |
| SNP_1504_A_11735094 | NC_021160.1    | Ca_Kabuli_Chr01 | 11735094                | GG                                     | AA                 | AA               | INTERGENIC                    |                    |                                             |
| SNP_1505_A_11735134 | NC_021160.1    | Ca_Kabuli_Chr01 | 11735134                | GG                                     | AA                 | AA               | INTERGENIC                    |                    |                                             |
| SNP_1506_A_11738501 | NC_021160.1    | Ca_Kabuli_Chr01 | 11738501                | TT                                     | GG                 | GG               | INTERGENIC                    |                    |                                             |
| SNP_1509_A_11978359 | NC_021160.1    | Ca_Kabuli_Chr01 | 11978359                | TT                                     | CC                 | CC               | INTERGENIC                    |                    |                                             |
| SNP_1510_A_11978387 | NC_021160.1    | Ca_Kabuli_Chr01 | 11978387                | AA                                     | CC                 | CC               | INTERGENIC                    |                    |                                             |
| SNP_1511_A_12004345 | NC_021160.1    | Ca_Kabuli_Chr01 | 12004345                | CC                                     | TT                 | TT               | INTRON                        | 101507124          | Unknown function                            |
| SNP_1512_A_12004822 | NC_021160.1    | Ca_Kabuli_Chr01 | 12004822                | GG                                     | AA                 | AA               | INTRON                        | 101507124          | Unknown function                            |
| SNP_1513_A_12072453 | NC_021160.1    | Ca_Kabuli_Chr01 | 12072453                | GG                                     | AA                 | AA               | INTERGENIC                    |                    |                                             |
| SNP_1514_A_12172747 | NC_021160.1    | Ca_Kabuli_Chr01 | 12172747                | TT                                     | CC                 | CC               | INTRON                        | 101510630          | homeobox-leucine zipper protein REVOLUTA    |
| SNP_1516_A_12307202 | NC_021160.1    | Ca_Kabuli_Chr01 | 12307202                | CC                                     | TT                 | TT               | URR                           | 101490972          | fasciclin-like arabinogalactan protein 12   |
| SNP_1517_A_12360095 | NC_021160.1    | Ca_Kabuli_Chr01 | 12360095                | GG                                     | AA                 | AA               | INTERGENIC                    |                    |                                             |
| SNP_1518_A_12372536 | NC_021160.1    | Ca_Kabuli_Chr01 | 12372536                | TT                                     | CC                 | CC               | INTERGENIC                    |                    |                                             |
| SNP_1519_A_12409024 | NC_021160.1    | Ca_Kabuli_Chr01 | 12409024                | AA                                     | TT                 | TT               | INTERGENIC                    |                    |                                             |

| SNPs IDs            | Chromosome IDs | Chromosomes     | Physical positions (bp) | CDC Frontier (Reference genome) | (Pusa 1103 & HPNB) | (ILWC 46 & LPNB) | Sequence Components of genome | Gene accession IDs | Putative functions                                   |
|---------------------|----------------|-----------------|-------------------------|---------------------------------|--------------------|------------------|-------------------------------|--------------------|------------------------------------------------------|
| SNP_1521_A_12422536 | NC_021160.1    | Ca_Kabuli_Chr01 | 12422536                | TT                              | CC                 | CC               | INTERGENIC                    |                    |                                                      |
| SNP_1522_A_12438262 | NC_021160.1    | Ca_Kabuli_Chr01 | 12438262                | CC                              | TT                 | TT               | INTERGENIC                    |                    |                                                      |
| SNP_1523_A_12464321 | NC_021160.1    | Ca_Kabuli_Chr01 | 12464321                | TT                              | CC                 | CC               | URR                           | 101496025          | protein BCCIP homolog                                |
| SNP_1524_A_12465301 | NC_021160.1    | Ca_Kabuli_Chr01 | 12465301                | CC                              | TT                 | TT               | URR                           | 101496025          | protein BCCIP homolog                                |
| SNP_1525_A_12466673 | NC_021160.1    | Ca_Kabuli_Chr01 | 12466673                | GG                              | TT                 | TT               | INTERGENIC                    |                    |                                                      |
| SNP_1526_A_12506298 | NC_021160.1    | Ca_Kabuli_Chr01 | 12506298                | CC                              | TT                 | TT               | STOP_GAINED                   | 101509015          | Unknown function                                     |
| SNP_1527_A_12531507 | NC_021160.1    | Ca_Kabuli_Chr01 | 12531507                | AA                              | TT                 | TT               | INTRON                        | 101497653          | ethylene-responsive transcription factor RAP2-7-like |
| SNP_1529_A_12552458 | NC_021160.1    | Ca_Kabuli_Chr01 | 12552458                | AA                              | GG                 | GG               | INTERGENIC                    |                    |                                                      |
| SNP_1530_A_12580161 | NC_021160.1    | Ca_Kabuli_Chr01 | 12580161                | AA                              | GG                 | GG               | INTERGENIC                    |                    |                                                      |
| SNP_1532_A_12616999 | NC_021160.1    | Ca_Kabuli_Chr01 | 12616999                | GG                              | TT                 | TT               | INTERGENIC                    |                    |                                                      |
| SNP_1533_A_12645042 | NC_021160.1    | Ca_Kabuli_Chr01 | 12645042                | CC                              | TT                 | TT               | INTERGENIC                    |                    |                                                      |
| SNP_1534_A_12645047 | NC_021160.1    | Ca_Kabuli_Chr01 | 12645047                | AA                              | GG                 | GG               | INTERGENIC                    |                    |                                                      |
| SNP_1535_A_12650325 | NC_021160.1    | Ca_Kabuli_Chr01 | 12650325                | AA                              | GG                 | GG               | DRR                           | 101509980          | flagellar attachment zone protein 1                  |
| SNP_1537_A_12727661 | NC_021160.1    | Ca_Kabuli_Chr01 | 12727661                | TT                              | CC                 | CC               | INTERGENIC                    |                    |                                                      |
| SNP_1538_A_12740700 | NC_021160.1    | Ca_Kabuli_Chr01 | 12740700                | GG                              | AA                 | AA               | URR                           | 101510301          | uncharacterized LOC101510301                         |
| SNP_1539_A_12767427 | NC_021160.1    | Ca_Kabuli_Chr01 | 12767427                | GG                              | TT                 | TT               | INTERGENIC                    |                    |                                                      |
| SNP_1540_A_12767631 | NC_021160.1    | Ca_Kabuli_Chr01 | 12767631                | TT                              | CC                 | CC               | INTERGENIC                    |                    |                                                      |
| SNP_1541_A_12767754 | NC_021160.1    | Ca_Kabuli_Chr01 | 12767754                | TT                              | AA                 | AA               | INTERGENIC                    |                    |                                                      |
| SNP_1542_A_12769564 | NC_021160.1    | Ca_Kabuli_Chr01 | 12769564                | CC                              | AA                 | AA               | INTERGENIC                    |                    |                                                      |
| SNP_1543_A_12773616 | NC_021160.1    | Ca_Kabuli_Chr01 | 12773616                | TT                              | AA                 | AA               | INTERGENIC                    |                    |                                                      |
| SNP_1544_A_12783183 | NC_021160.1    | Ca_Kabuli_Chr01 | 12783183                | CC                              | AA                 | AA               | INTRON                        | 101506032          | transcription factor TCP4-like                       |
| SNP_1545_A_12791661 | NC_021160.1    | Ca_Kabuli_Chr01 | 12791661                | AA                              | GG                 | GG               | URR                           | 101507221          | RING-H2 finger protein ATL40-like                    |

| SNPs IDs            | Chromosome IDs | Chromosomes     | Physical positions (bp) | CDC Frontier genome (Reference genome) | (Pusa 1103 & HPNB) | (ILWC 46 & LPNB) | Sequence genome | Components of | Gene accession IDs | Putative functions |
|---------------------|----------------|-----------------|-------------------------|----------------------------------------|--------------------|------------------|-----------------|---------------|--------------------|--------------------|
| SNP_1546_A_12792034 | NC_021160.1    | Ca_Kabuli_Chr01 | 12792034                | CC                                     | TT                 | TT               | INTERGENIC      |               |                    |                    |
| SNP_1547_A_12792039 | NC_021160.1    | Ca_Kabuli_Chr01 | 12792039                | AA                                     | TT                 | TT               | INTERGENIC      |               |                    |                    |
| SNP_1548_A_12947096 | NC_021160.1    | Ca_Kabuli_Chr01 | 12947096                | AA                                     | GG                 | GG               | INTERGENIC      |               |                    |                    |
| SNP_1549_A_12947368 | NC_021160.1    | Ca_Kabuli_Chr01 | 12947368                | CC                                     | TT                 | TT               | INTERGENIC      |               |                    |                    |
| SNP_1550_A_12947398 | NC_021160.1    | Ca_Kabuli_Chr01 | 12947398                | GG                                     | AA                 | AA               | INTERGENIC      |               |                    |                    |
| SNP_1551_A_12947448 | NC_021160.1    | Ca_Kabuli_Chr01 | 12947448                | CC                                     | TT                 | TT               | INTERGENIC      |               |                    |                    |
| SNP_1552_A_12947468 | NC_021160.1    | Ca_Kabuli_Chr01 | 12947468                | CC                                     | TT                 | TT               | INTERGENIC      |               |                    |                    |
| SNP_1553_A_12947486 | NC_021160.1    | Ca_Kabuli_Chr01 | 12947486                | AA                                     | GG                 | GG               | INTERGENIC      |               |                    |                    |
| SNP_1554_A_12947534 | NC_021160.1    | Ca_Kabuli_Chr01 | 12947534                | CC                                     | TT                 | TT               | INTERGENIC      |               |                    |                    |
| SNP_1555_A_12947539 | NC_021160.1    | Ca_Kabuli_Chr01 | 12947539                | GG                                     | AA                 | AA               | INTERGENIC      |               |                    |                    |
| SNP_1556_A_12947557 | NC_021160.1    | Ca_Kabuli_Chr01 | 12947557                | AA                                     | GG                 | GG               | INTERGENIC      |               |                    |                    |
| SNP_1558_A_12947755 | NC_021160.1    | Ca_Kabuli_Chr01 | 12947755                | TT                                     | CC                 | CC               | INTERGENIC      |               |                    |                    |
| SNP_1559_A_12947981 | NC_021160.1    | Ca_Kabuli_Chr01 | 12947981                | AA                                     | GG                 | GG               | INTERGENIC      |               |                    |                    |
| SNP_1560_A_12948038 | NC_021160.1    | Ca_Kabuli_Chr01 | 12948038                | TT                                     | CC                 | CC               | INTERGENIC      |               |                    |                    |
| SNP_1561_A_12955860 | NC_021160.1    | Ca_Kabuli_Chr01 | 12955860                | AA                                     | GG                 | GG               | INTERGENIC      |               |                    |                    |
| SNP_1564_A_12956156 | NC_021160.1    | Ca_Kabuli_Chr01 | 12956156                | CC                                     | AA                 | AA               | INTERGENIC      |               |                    |                    |
| SNP_1565_A_12956336 | NC_021160.1    | Ca_Kabuli_Chr01 | 12956336                | GG                                     | AA                 | AA               | INTERGENIC      |               |                    |                    |
| SNP_1566_A_12956354 | NC_021160.1    | Ca_Kabuli_Chr01 | 12956354                | AA                                     | GG                 | GG               | INTERGENIC      |               |                    |                    |
| SNP_1568_A_12956950 | NC_021160.1    | Ca_Kabuli_Chr01 | 12956950                | CC                                     | TT                 | TT               | INTERGENIC      |               |                    |                    |
| SNP_1569_A_12979201 | NC_021160.1    | Ca_Kabuli_Chr01 | 12979201                | CC                                     | AA                 | AA               | DRR             | 101489663     | Unknown function   |                    |
| SNP_1570_A_12979286 | NC_021160.1    | Ca_Kabuli_Chr01 | 12979286                | CC                                     | TT                 | TT               | DRR             | 101489663     | Unknown function   |                    |
| SNP_1571_A_12979534 | NC_021160.1    | Ca_Kabuli_Chr01 | 12979534                | TT                                     | CC                 | CC               | DRR             | 101489663     | Unknown function   |                    |

| SNPs IDs            | Chromosome IDs | Chromosomes     | Physical positions (bp) | CDC Frontier genome (Reference genome) | (Pusa 1103 & HPNB) | (ILWC 46 & LPNB) | Sequence genome | Components of | Gene accession IDs | Putative functions |
|---------------------|----------------|-----------------|-------------------------|----------------------------------------|--------------------|------------------|-----------------|---------------|--------------------|--------------------|
| SNP_1572_A_12984099 | NC_021160.1    | Ca_Kabuli_Chr01 | 12984099                | CC                                     | TT                 | TT               | INTERGENIC      |               |                    |                    |
| SNP_1573_A_12984100 | NC_021160.1    | Ca_Kabuli_Chr01 | 12984100                | GG                                     | AA                 | AA               | INTERGENIC      |               |                    |                    |
| SNP_1574_A_12984194 | NC_021160.1    | Ca_Kabuli_Chr01 | 12984194                | GG                                     | AA                 | AA               | INTERGENIC      |               |                    |                    |
| SNP_1575_A_12984258 | NC_021160.1    | Ca_Kabuli_Chr01 | 12984258                | GG                                     | AA                 | AA               | INTERGENIC      |               |                    |                    |
| SNP_1576_A_12985914 | NC_021160.1    | Ca_Kabuli_Chr01 | 12985914                | CC                                     | TT                 | TT               | INTERGENIC      |               |                    |                    |
| SNP_1578_A_12991478 | NC_021160.1    | Ca_Kabuli_Chr01 | 12991478                | TT                                     | AA                 | AA               | INTERGENIC      |               |                    |                    |
| SNP_1579_A_13005732 | NC_021160.1    | Ca_Kabuli_Chr01 | 13005732                | GG                                     | AA                 | AA               | INTERGENIC      |               |                    |                    |
| SNP_1580_A_13005847 | NC_021160.1    | Ca_Kabuli_Chr01 | 13005847                | GG                                     | AA                 | AA               | INTERGENIC      |               |                    |                    |
| SNP_1582_A_13006291 | NC_021160.1    | Ca_Kabuli_Chr01 | 13006291                | CC                                     | TT                 | TT               | INTERGENIC      |               |                    |                    |
| SNP_1583_A_13007082 | NC_021160.1    | Ca_Kabuli_Chr01 | 13007082                | AA                                     | GG                 | GG               | INTERGENIC      |               |                    |                    |
| SNP_1584_A_13007215 | NC_021160.1    | Ca_Kabuli_Chr01 | 13007215                | AA                                     | GG                 | GG               | INTERGENIC      |               |                    |                    |
| SNP_1585_A_13007244 | NC_021160.1    | Ca_Kabuli_Chr01 | 13007244                | AA                                     | GG                 | GG               | INTERGENIC      |               |                    |                    |
| SNP_1586_A_13007294 | NC_021160.1    | Ca_Kabuli_Chr01 | 13007294                | CC                                     | GG                 | GG               | INTERGENIC      |               |                    |                    |
| SNP_1587_A_13007347 | NC_021160.1    | Ca_Kabuli_Chr01 | 13007347                | TT                                     | AA                 | AA               | INTERGENIC      |               |                    |                    |
| SNP_1588_A_13007352 | NC_021160.1    | Ca_Kabuli_Chr01 | 13007352                | AA                                     | GG                 | GG               | INTERGENIC      |               |                    |                    |
| SNP_1589_A_13007480 | NC_021160.1    | Ca_Kabuli_Chr01 | 13007480                | GG                                     | AA                 | AA               | INTERGENIC      |               |                    |                    |
| SNP_1591_A_13007533 | NC_021160.1    | Ca_Kabuli_Chr01 | 13007533                | GG                                     | AA                 | AA               | INTERGENIC      |               |                    |                    |
| SNP_1592_A_13007590 | NC_021160.1    | Ca_Kabuli_Chr01 | 13007590                | CC                                     | AA                 | AA               | INTERGENIC      |               |                    |                    |
| SNP_1593_A_13007861 | NC_021160.1    | Ca_Kabuli_Chr01 | 13007861                | TT                                     | GG                 | GG               | INTERGENIC      |               |                    |                    |
| SNP_1594_A_13008096 | NC_021160.1    | Ca_Kabuli_Chr01 | 13008096                | CC                                     | TT                 | TT               | INTERGENIC      |               |                    |                    |
| SNP_1595_A_13008103 | NC_021160.1    | Ca_Kabuli_Chr01 | 13008103                | CC                                     | TT                 | TT               | INTERGENIC      |               |                    |                    |
| SNP_1596_A_13008184 | NC_021160.1    | Ca_Kabuli_Chr01 | 13008184                | TT                                     | CC                 | CC               | INTERGENIC      |               |                    |                    |

| SNPs IDs            | Chromosome IDs | Chromosomes     | Physical positions (bp) | CDC Frontier genome (Reference genome) | (Pusa 1103 & HPNB) | (ILWC 46 & LPNB) | Sequence Components of genome | Gene accession IDs | Putative functions                   |
|---------------------|----------------|-----------------|-------------------------|----------------------------------------|--------------------|------------------|-------------------------------|--------------------|--------------------------------------|
| SNP_1597_A_13008220 | NC_021160.1    | Ca_Kabuli_Chr01 | 13008220                | CC                                     | TT                 | TT               | INTERGENIC                    |                    |                                      |
| SNP_1598_A_13008592 | NC_021160.1    | Ca_Kabuli_Chr01 | 13008592                | CC                                     | AA                 | AA               | INTERGENIC                    |                    |                                      |
| SNP_1599_A_13008669 | NC_021160.1    | Ca_Kabuli_Chr01 | 13008669                | TT                                     | CC                 | CC               | INTERGENIC                    |                    |                                      |
| SNP_1600_A_13008740 | NC_021160.1    | Ca_Kabuli_Chr01 | 13008740                | CC                                     | GG                 | GG               | INTERGENIC                    |                    |                                      |
| SNP_1601_A_13008816 | NC_021160.1    | Ca_Kabuli_Chr01 | 13008816                | TT                                     | CC                 | CC               | INTERGENIC                    |                    |                                      |
| SNP_1602_A_13009516 | NC_021160.1    | Ca_Kabuli_Chr01 | 13009516                | AA                                     | GG                 | GG               | INTERGENIC                    |                    |                                      |
| SNP_1603_A_13009592 | NC_021160.1    | Ca_Kabuli_Chr01 | 13009592                | GG                                     | AA                 | AA               | INTERGENIC                    |                    |                                      |
| SNP_1604_A_13012551 | NC_021160.1    | Ca_Kabuli_Chr01 | 13012551                | CC                                     | TT                 | TT               | INTERGENIC                    |                    |                                      |
| SNP_1605_A_13012574 | NC_021160.1    | Ca_Kabuli_Chr01 | 13012574                | TT                                     | CC                 | CC               | INTERGENIC                    |                    |                                      |
| SNP_1606_A_13012935 | NC_021160.1    | Ca_Kabuli_Chr01 | 13012935                | AA                                     | TT                 | TT               | INTERGENIC                    |                    |                                      |
| SNP_1607_A_13014342 | NC_021160.1    | Ca_Kabuli_Chr01 | 13014342                | AA                                     | TT                 | TT               | INTERGENIC                    |                    |                                      |
| SNP_1608_A_13014360 | NC_021160.1    | Ca_Kabuli_Chr01 | 13014360                | AA                                     | GG                 | GG               | INTERGENIC                    |                    |                                      |
| SNP_1609_A_13014373 | NC_021160.1    | Ca_Kabuli_Chr01 | 13014373                | TT                                     | CC                 | CC               | INTERGENIC                    |                    |                                      |
| SNP_1610_A_13014374 | NC_021160.1    | Ca_Kabuli_Chr01 | 13014374                | TT                                     | GG                 | GG               | INTERGENIC                    |                    |                                      |
| SNP_1611_A_13103791 | NC_021160.1    | Ca_Kabuli_Chr01 | 13103791                | AA                                     | GG                 | GG               | URR                           | 101410605          | transfer RNA glycine (anticodon GCC) |
| SNP_1614_A_13135717 | NC_021160.1    | Ca_Kabuli_Chr01 | 13135717                | TT                                     | CC                 | CC               | INTERGENIC                    |                    |                                      |
| SNP_1616_A_13135724 | NC_021160.1    | Ca_Kabuli_Chr01 | 13135724                | AA                                     | CC                 | CC               | INTERGENIC                    |                    |                                      |
| SNP_1617_A_13135725 | NC_021160.1    | Ca_Kabuli_Chr01 | 13135725                | TT                                     | AA                 | AA               | INTERGENIC                    |                    |                                      |
| SNP_1618_A_13303775 | NC_021160.1    | Ca_Kabuli_Chr01 | 13303775                | CC                                     | TT                 | TT               | URR                           | 101500038          | uncharacterized LOC101500038         |
| SNP_1619_A_13303779 | NC_021160.1    | Ca_Kabuli_Chr01 | 13303779                | TT                                     | AA                 | AA               | URR                           | 101500038          | uncharacterized LOC101500038         |
| SNP_1620_A_13338812 | NC_021160.1    | Ca_Kabuli_Chr01 | 13338812                | TT                                     | AA                 | AA               | INTERGENIC                    |                    |                                      |
| SNP_1621_A_13472034 | NC_021160.1    | Ca_Kabuli_Chr01 | 13472034                | AA                                     | TT                 | TT               | INTERGENIC                    |                    |                                      |

| SNPs IDs            | Chromosome IDs | Chromosomes     | Physical positions (bp) | CDC Frontier genome (Reference genome) | (Pusa 1103 & HPNB) | (ILWC 46 & LPNB) | Sequence Components of genome | Gene accession IDs | Putative functions                                         |
|---------------------|----------------|-----------------|-------------------------|----------------------------------------|--------------------|------------------|-------------------------------|--------------------|------------------------------------------------------------|
| SNP_1622_A_13532860 | NC_021160.1    | Ca_Kabuli_Chr01 | 13532860                | CC                                     | TT                 | TT               | INTERGENIC                    |                    |                                                            |
| SNP_1623_A_13547739 | NC_021160.1    | Ca_Kabuli_Chr01 | 13547739                | AA                                     | GG                 | GG               | INTERGENIC                    |                    |                                                            |
| SNP_1624_A_13548660 | NC_021160.1    | Ca_Kabuli_Chr01 | 13548660                | CC                                     | AA                 | AA               | DRR                           | 101512670          | kinesin-like protein KIF19                                 |
| SNP_1625_A_13548671 | NC_021160.1    | Ca_Kabuli_Chr01 | 13548671                | GG                                     | AA                 | AA               | DRR                           | 101512670          | kinesin-like protein KIF19                                 |
| SNP_1626_A_13548973 | NC_021160.1    | Ca_Kabuli_Chr01 | 13548973                | AA                                     | CC                 | CC               | DRR                           | 101512670          | kinesin-like protein KIF19                                 |
| SNP_1627_A_13549000 | NC_021160.1    | Ca_Kabuli_Chr01 | 13549000                | AA                                     | TT                 | TT               | DRR                           | 101512670          | kinesin-like protein KIF19                                 |
| SNP_1628_A_13570702 | NC_021160.1    | Ca_Kabuli_Chr01 | 13570702                | TT                                     | AA                 | AA               | INTERGENIC                    |                    |                                                            |
| SNP_1629_A_13571040 | NC_021160.1    | Ca_Kabuli_Chr01 | 13571040                | AA                                     | GG                 | GG               | INTERGENIC                    |                    |                                                            |
| SNP_1630_A_13661038 | NC_021160.1    | Ca_Kabuli_Chr01 | 13661038                | TT                                     | CC                 | CC               | INTERGENIC                    |                    |                                                            |
| SNP_1631_A_13661039 | NC_021160.1    | Ca_Kabuli_Chr01 | 13661039                | TT                                     | CC                 | CC               | INTERGENIC                    |                    |                                                            |
| SNP_1633_A_13661061 | NC_021160.1    | Ca_Kabuli_Chr01 | 13661061                | TT                                     | CC                 | CC               | INTERGENIC                    |                    |                                                            |
| SNP_1634_A_13671385 | NC_021160.1    | Ca_Kabuli_Chr01 | 13671385                | CC                                     | TT                 | TT               | URR                           | 101488349          | fasciclin-like arabinogalactan protein 21                  |
| SNP_1635_A_13671762 | NC_021160.1    | Ca_Kabuli_Chr01 | 13671762                | CC                                     | AA                 | AA               | URR                           | 101488349          | fasciclin-like arabinogalactan protein 21                  |
| SNP_1636_A_13671867 | NC_021160.1    | Ca_Kabuli_Chr01 | 13671867                | GG                                     | AA                 | AA               | URR                           | 101488349          | fasciclin-like arabinogalactan protein 21                  |
| SNP_1637_A_13674032 | NC_021160.1    | Ca_Kabuli_Chr01 | 13674032                | TT                                     | AA                 | AA               | INTERGENIC                    |                    |                                                            |
| SNP_1639_A_13674433 | NC_021160.1    | Ca_Kabuli_Chr01 | 13674433                | GG                                     | AA                 | AA               | INTERGENIC                    |                    |                                                            |
| SNP_1640_A_13675523 | NC_021160.1    | Ca_Kabuli_Chr01 | 13675523                | AA                                     | GG                 | GG               | INTERGENIC                    |                    |                                                            |
| SNP_1641_A_13675950 | NC_021160.1    | Ca_Kabuli_Chr01 | 13675950                | TT                                     | AA                 | AA               | INTERGENIC                    |                    |                                                            |
| SNP_1642_A_13676158 | NC_021160.1    | Ca_Kabuli_Chr01 | 13676158                | CC                                     | TT                 | TT               | INTERGENIC                    |                    |                                                            |
| SNP_1644_A_13677284 | NC_021160.1    | Ca_Kabuli_Chr01 | 13677284                | TT                                     | AA                 | AA               | INTERGENIC                    |                    |                                                            |
| SNP_1645_A_13677583 | NC_021160.1    | Ca_Kabuli_Chr01 | 13677583                | GG                                     | AA                 | AA               | INTERGENIC                    |                    |                                                            |
| SNP_1647_A_13683240 | NC_021160.1    | Ca_Kabuli_Chr01 | 13683240                | TT                                     | CC                 | CC               | URR                           | 101488673          | putative dehydration-responsive element-binding protein 2H |

| SNPs IDs            | Chromosome IDs | Chromosomes     | Physical positions (bp) | CDC Frontier (Reference genome) | (Pusa 1103 & HPNB) | (ILWC 46 & LPNB) | Sequence Components of genome | Gene accession IDs | Putative functions                                       |
|---------------------|----------------|-----------------|-------------------------|---------------------------------|--------------------|------------------|-------------------------------|--------------------|----------------------------------------------------------|
| SNP_1648_A_13683826 | NC_021160.1    | Ca_Kabuli_Chr01 | 13683826                | CC                              | TT                 | TT               | DRR                           | 101489665          | xyloglucan endotransglucosylase/hydrolase protein 9-like |
| SNP_1650_A_13686412 | NC_021160.1    | Ca_Kabuli_Chr01 | 13686412                | TT                              | CC                 | CC               | INTRON                        | 101489665          | xyloglucan endotransglucosylase/hydrolase protein 9-like |
| SNP_1651_A_13690437 | NC_021160.1    | Ca_Kabuli_Chr01 | 13690437                | GG                              | AA                 | AA               | INTERGENIC                    |                    |                                                          |
| SNP_1653_A_13691347 | NC_021160.1    | Ca_Kabuli_Chr01 | 13691347                | GG                              | AA                 | AA               | INTERGENIC                    |                    |                                                          |
| SNP_1655_A_13692774 | NC_021160.1    | Ca_Kabuli_Chr01 | 13692774                | GG                              | AA                 | AA               | INTERGENIC                    |                    |                                                          |
| SNP_1656_A_13692843 | NC_021160.1    | Ca_Kabuli_Chr01 | 13692843                | AA                              | GG                 | GG               | INTERGENIC                    |                    |                                                          |
| SNP_1657_A_13693320 | NC_021160.1    | Ca_Kabuli_Chr01 | 13693320                | CC                              | TT                 | TT               | INTERGENIC                    |                    |                                                          |
| SNP_1658_A_13693323 | NC_021160.1    | Ca_Kabuli_Chr01 | 13693323                | AA                              | GG                 | GG               | INTERGENIC                    |                    |                                                          |
| SNP_1659_A_13693339 | NC_021160.1    | Ca_Kabuli_Chr01 | 13693339                | TT                              | AA                 | AA               | INTERGENIC                    |                    |                                                          |
| SNP_1661_A_13695729 | NC_021160.1    | Ca_Kabuli_Chr01 | 13695729                | AA                              | TT                 | TT               | INTERGENIC                    |                    |                                                          |
| SNP_1663_A_13697332 | NC_021160.1    | Ca_Kabuli_Chr01 | 13697332                | TT                              | CC                 | CC               | INTERGENIC                    |                    |                                                          |
| SNP_1664_A_13699617 | NC_021160.1    | Ca_Kabuli_Chr01 | 13699617                | TT                              | AA                 | AA               | INTRON                        | 101489988          | probable terpene synthase 11                             |
| SNP_1665_A_13704129 | NC_021160.1    | Ca_Kabuli_Chr01 | 13704129                | AA                              | CC                 | CC               | INTRON                        | 101489988          | probable terpene synthase 11                             |
| SNP_1666_A_13704568 | NC_021160.1    | Ca_Kabuli_Chr01 | 13704568                | TT                              | CC                 | CC               | INTRON                        | 101489988          | probable terpene synthase 11                             |
| SNP_1667_A_13704587 | NC_021160.1    | Ca_Kabuli_Chr01 | 13704587                | AA                              | TT                 | TT               | INTRON                        | 101489988          | probable terpene synthase 11                             |
| SNP_1668_A_13704631 | NC_021160.1    | Ca_Kabuli_Chr01 | 13704631                | CC                              | TT                 | TT               | INTRON                        | 101489988          | probable terpene synthase 11                             |
| SNP_1669_A_13745197 | NC_021160.1    | Ca_Kabuli_Chr01 | 13745197                | CC                              | TT                 | TT               | INTERGENIC                    |                    |                                                          |
| SNP_1670_A_13960731 | NC_021160.1    | Ca_Kabuli_Chr01 | 13960731                | GG                              | AA                 | AA               | INTERGENIC                    |                    |                                                          |
| SNP_1671_A_13960994 | NC_021160.1    | Ca_Kabuli_Chr01 | 13960994                | GG                              | TT                 | TT               | INTERGENIC                    |                    |                                                          |
| SNP_1672_A_13961023 | NC_021160.1    | Ca_Kabuli_Chr01 | 13961023                | GG                              | AA                 | AA               | INTERGENIC                    |                    |                                                          |
| SNP_1673_A_13961089 | NC_021160.1    | Ca_Kabuli_Chr01 | 13961089                | AA                              | GG                 | GG               | INTERGENIC                    |                    |                                                          |
| SNP_1674_A_13966040 | NC_021160.1    | Ca_Kabuli_Chr01 | 13966040                | AA                              | GG                 | GG               | INTRON                        | 101503002          | RING-box protein 1a-like                                 |

| SNPs IDs            | Chromosome IDs | Chromosomes     | Physical positions (bp) | CDC Frontier (Reference genome) | (Pusa 1103 & HPNB) | (ILWC 46 & LPNB) | Sequence Components of genome | Gene accession IDs | Putative functions                           |
|---------------------|----------------|-----------------|-------------------------|---------------------------------|--------------------|------------------|-------------------------------|--------------------|----------------------------------------------|
| SNP_1675_A_13991104 | NC_021160.1    | Ca_Kabuli_Chr01 | 13991104                | AA                              | GG                 | GG               | NON_SYNONYMOUS_CODING         | 101504635          | homeobox-leucine zipper protein HDG2         |
| SNP_1676_A_14062041 | NC_021160.1    | Ca_Kabuli_Chr01 | 14062041                | TT                              | CC                 | CC               | INTERGENIC                    |                    |                                              |
| SNP_1677_A_14106609 | NC_021160.1    | Ca_Kabuli_Chr01 | 14106609                | AA                              | TT                 | TT               | INTERGENIC                    |                    |                                              |
| SNP_1678_A_14126072 | NC_021160.1    | Ca_Kabuli_Chr01 | 14126072                | TT                              | CC                 | CC               | DRR                           | 101509447          | 2-alkenal reductase (NADP(+)-dependent)-like |
| SNP_1679_A_14207015 | NC_021160.1    | Ca_Kabuli_Chr01 | 14207015                | AA                              | GG                 | GG               | INTERGENIC                    |                    |                                              |
| SNP_1680_A_14207229 | NC_021160.1    | Ca_Kabuli_Chr01 | 14207229                | AA                              | TT                 | TT               | INTERGENIC                    |                    |                                              |
| SNP_1681_A_14207527 | NC_021160.1    | Ca_Kabuli_Chr01 | 14207527                | GG                              | AA                 | AA               | INTERGENIC                    |                    |                                              |
| SNP_1682_A_14209671 | NC_021160.1    | Ca_Kabuli_Chr01 | 14209671                | AA                              | GG                 | GG               | INTERGENIC                    |                    |                                              |
| SNP_1683_A_14209683 | NC_021160.1    | Ca_Kabuli_Chr01 | 14209683                | TT                              | AA                 | AA               | INTERGENIC                    |                    |                                              |
| SNP_1684_A_14209762 | NC_021160.1    | Ca_Kabuli_Chr01 | 14209762                | TT                              | GG                 | GG               | INTERGENIC                    |                    |                                              |
| SNP_1685_A_14209764 | NC_021160.1    | Ca_Kabuli_Chr01 | 14209764                | GG                              | AA                 | AA               | INTERGENIC                    |                    |                                              |
| SNP_1686_A_14209774 | NC_021160.1    | Ca_Kabuli_Chr01 | 14209774                | GG                              | AA                 | AA               | INTERGENIC                    |                    |                                              |
| SNP_1687_A_14209786 | NC_021160.1    | Ca_Kabuli_Chr01 | 14209786                | AA                              | GG                 | GG               | INTERGENIC                    |                    |                                              |
| SNP_1688_A_14209815 | NC_021160.1    | Ca_Kabuli_Chr01 | 14209815                | AA                              | GG                 | GG               | INTERGENIC                    |                    |                                              |
| SNP_1689_A_14209821 | NC_021160.1    | Ca_Kabuli_Chr01 | 14209821                | CC                              | GG                 | GG               | INTERGENIC                    |                    |                                              |
| SNP_1690_A_14209825 | NC_021160.1    | Ca_Kabuli_Chr01 | 14209825                | TT                              | GG                 | GG               | INTERGENIC                    |                    |                                              |
| SNP_1691_A_14209903 | NC_021160.1    | Ca_Kabuli_Chr01 | 14209903                | AA                              | GG                 | GG               | INTERGENIC                    |                    |                                              |
| SNP_1692_A_14209905 | NC_021160.1    | Ca_Kabuli_Chr01 | 14209905                | GG                              | TT                 | TT               | INTERGENIC                    |                    |                                              |
| SNP_1693_A_14209940 | NC_021160.1    | Ca_Kabuli_Chr01 | 14209940                | AA                              | TT                 | TT               | INTERGENIC                    |                    |                                              |
| SNP_1694_A_14209943 | NC_021160.1    | Ca_Kabuli_Chr01 | 14209943                | TT                              | AA                 | AA               | INTERGENIC                    |                    |                                              |
| SNP_1695_A_14210042 | NC_021160.1    | Ca_Kabuli_Chr01 | 14210042                | AA                              | CC                 | CC               | INTERGENIC                    |                    |                                              |
| SNP_1696_A_14210121 | NC_021160.1    | Ca_Kabuli_Chr01 | 14210121                | AA                              | TT                 | TT               | INTERGENIC                    |                    |                                              |



| SNPs IDs            | Chromosome IDs | Chromosomes     | Physical positions (bp) | CDC Frontier (Reference genome) | (Pusa 1103 & HPNB) | (ILWC 46 & LPNB) | Sequence Components of genome | Gene accession IDs | Putative functions               |
|---------------------|----------------|-----------------|-------------------------|---------------------------------|--------------------|------------------|-------------------------------|--------------------|----------------------------------|
| SNP_1697_A_14210192 | NC_021160.1    | Ca_Kabuli_Chr01 | 14210192                | AA                              | CC                 | CC               | INTERGENIC                    |                    |                                  |
| SNP_1698_A_14210194 | NC_021160.1    | Ca_Kabuli_Chr01 | 14210194                | CC                              | TT                 | TT               | INTERGENIC                    |                    |                                  |
| SNP_1699_A_14210195 | NC_021160.1    | Ca_Kabuli_Chr01 | 14210195                | AA                              | GG                 | GG               | INTERGENIC                    |                    |                                  |
| SNP_1700_A_14210197 | NC_021160.1    | Ca_Kabuli_Chr01 | 14210197                | AA                              | GG                 | GG               | INTERGENIC                    |                    |                                  |
| SNP_1701_A_14210206 | NC_021160.1    | Ca_Kabuli_Chr01 | 14210206                | GG                              | AA                 | AA               | INTERGENIC                    |                    |                                  |
| SNP_1702_A_14210210 | NC_021160.1    | Ca_Kabuli_Chr01 | 14210210                | CC                              | GG                 | GG               | INTERGENIC                    |                    |                                  |
| SNP_1703_A_14210278 | NC_021160.1    | Ca_Kabuli_Chr01 | 14210278                | CC                              | TT                 | TT               | INTERGENIC                    |                    |                                  |
| SNP_1704_A_14211713 | NC_021160.1    | Ca_Kabuli_Chr01 | 14211713                | CC                              | TT                 | TT               | INTERGENIC                    |                    |                                  |
| SNP_1705_A_14279875 | NC_021160.1    | Ca_Kabuli_Chr01 | 14279875                | GG                              | TT                 | TT               | INTRON                        | 101514721          | phragmoplast orienting kinesin 2 |
| SNP_1706_A_14339192 | NC_021160.1    | Ca_Kabuli_Chr01 | 14339192                | TT                              | GG                 | GG               | INTERGENIC                    |                    |                                  |
| SNP_1707_A_14382276 | NC_021160.1    | Ca_Kabuli_Chr01 | 14382276                | GG                              | TT                 | TT               | INTERGENIC                    |                    |                                  |
| SNP_1708_A_14382327 | NC_021160.1    | Ca_Kabuli_Chr01 | 14382327                | GG                              | AA                 | AA               | INTERGENIC                    |                    |                                  |
| SNP_1709_A_14382367 | NC_021160.1    | Ca_Kabuli_Chr01 | 14382367                | TT                              | CC                 | CC               | INTERGENIC                    |                    |                                  |
| SNP_1710_A_14382370 | NC_021160.1    | Ca_Kabuli_Chr01 | 14382370                | TT                              | CC                 | CC               | INTERGENIC                    |                    |                                  |
| SNP_1711_A_14382402 | NC_021160.1    | Ca_Kabuli_Chr01 | 14382402                | CC                              | TT                 | TT               | INTERGENIC                    |                    |                                  |
| SNP_1712_A_14382606 | NC_021160.1    | Ca_Kabuli_Chr01 | 14382606                | GG                              | AA                 | AA               | INTERGENIC                    |                    |                                  |
| SNP_1713_A_14382659 | NC_021160.1    | Ca_Kabuli_Chr01 | 14382659                | CC                              | TT                 | TT               | INTERGENIC                    |                    |                                  |
| SNP_1717_A_14797462 | NC_021160.1    | Ca_Kabuli_Chr01 | 14797462                | CC                              | TT                 | TT               | INTERGENIC                    |                    |                                  |
| SNP_1718_A_14842803 | NC_021160.1    | Ca_Kabuli_Chr01 | 14842803                | AA                              | CC                 | CC               | INTERGENIC                    |                    |                                  |
| SNP_1719_A_14843027 | NC_021160.1    | Ca_Kabuli_Chr01 | 14843027                | TT                              | AA                 | AA               | INTERGENIC                    |                    |                                  |
| SNP_1720_A_14891375 | NC_021160.1    | Ca_Kabuli_Chr01 | 14891375                | TT                              | GG                 | GG               | INTERGENIC                    |                    |                                  |
| SNP_1722_A_14991023 | NC_021160.1    | Ca_Kabuli_Chr01 | 14991023                | AA                              | GG                 | GG               | INTERGENIC                    |                    |                                  |

| SNPs IDs            | Chromosome IDs | Chromosomes     | Physical positions (bp) | CDC Frontier genome (Reference genome) | (Pusa 1103 & HPNB) | (ILWC 46 & LPNB) | Sequence Components of genome | Gene accession IDs | Putative functions                                                                                            |
|---------------------|----------------|-----------------|-------------------------|----------------------------------------|--------------------|------------------|-------------------------------|--------------------|---------------------------------------------------------------------------------------------------------------|
| SNP_1723_A_14995683 | NC_021160.1    | Ca_Kabuli_Chr01 | 14995683                | TT                                     | GG                 | GG               | INTERGENIC                    |                    |                                                                                                               |
| SNP_1725_A_14996172 | NC_021160.1    | Ca_Kabuli_Chr01 | 14996172                | GG                                     | TT                 | TT               | INTERGENIC                    |                    |                                                                                                               |
| SNP_1726_A_15065805 | NC_021160.1    | Ca_Kabuli_Chr01 | 15065805                | AA                                     | TT                 | TT               | INTRON                        | 101488464          | protein TIC 100                                                                                               |
| SNP_1727_A_15065815 | NC_021160.1    | Ca_Kabuli_Chr01 | 15065815                | CC                                     | TT                 | TT               | INTRON                        | 101488464          | protein TIC 100                                                                                               |
| SNP_1728_A_15065859 | NC_021160.1    | Ca_Kabuli_Chr01 | 15065859                | TT                                     | AA                 | AA               | INTRON                        | 101488464          | protein TIC 100                                                                                               |
| SNP_1729_A_15065889 | NC_021160.1    | Ca_Kabuli_Chr01 | 15065889                | CC                                     | TT                 | TT               | INTRON                        | 101488464          | protein TIC 100                                                                                               |
| SNP_1730_A_15065907 | NC_021160.1    | Ca_Kabuli_Chr01 | 15065907                | AA                                     | TT                 | TT               | INTRON                        | 101488464          | protein TIC 100                                                                                               |
| SNP_1731_A_15066012 | NC_021160.1    | Ca_Kabuli_Chr01 | 15066012                | AA                                     | CC                 | CC               | INTRON                        | 101488464          | protein TIC 100                                                                                               |
| SNP_1732_A_15134847 | NC_021160.1    | Ca_Kabuli_Chr01 | 15134847                | CC                                     | AA                 | AA               | URR                           | 101490528          | putative SWI/SNF-related matrix-associated actin-dependent regulator of chromatin subfamily A member 3-like 2 |
| SNP_1733_A_15134848 | NC_021160.1    | Ca_Kabuli_Chr01 | 15134848                | AA                                     | GG                 | GG               | URR                           | 101490528          | putative SWI/SNF-related matrix-associated actin-dependent regulator of chromatin subfamily A member 3-like 2 |
| SNP_1734_A_15245564 | NC_021160.1    | Ca_Kabuli_Chr01 | 15245564                | TT                                     | CC                 | CC               | INTERGENIC                    |                    |                                                                                                               |
| SNP_1735_A_15245605 | NC_021160.1    | Ca_Kabuli_Chr01 | 15245605                | CC                                     | AA                 | AA               | INTERGENIC                    |                    |                                                                                                               |
| SNP_1736_A_15247299 | NC_021160.1    | Ca_Kabuli_Chr01 | 15247299                | TT                                     | CC                 | CC               | INTERGENIC                    |                    |                                                                                                               |
| SNP_1737_A_15247304 | NC_021160.1    | Ca_Kabuli_Chr01 | 15247304                | AA                                     | GG                 | GG               | INTERGENIC                    |                    |                                                                                                               |
| SNP_1738_A_15247352 | NC_021160.1    | Ca_Kabuli_Chr01 | 15247352                | AA                                     | CC                 | CC               | INTERGENIC                    |                    |                                                                                                               |
| SNP_1739_A_15247385 | NC_021160.1    | Ca_Kabuli_Chr01 | 15247385                | GG                                     | AA                 | AA               | INTERGENIC                    |                    |                                                                                                               |
| SNP_1740_A_15247732 | NC_021160.1    | Ca_Kabuli_Chr01 | 15247732                | AA                                     | TT                 | TT               | INTERGENIC                    |                    |                                                                                                               |
| SNP_1741_A_15247807 | NC_021160.1    | Ca_Kabuli_Chr01 | 15247807                | TT                                     | CC                 | CC               | INTERGENIC                    |                    |                                                                                                               |
| SNP_1742_A_15247820 | NC_021160.1    | Ca_Kabuli_Chr01 | 15247820                | GG                                     | AA                 | AA               | INTERGENIC                    |                    |                                                                                                               |
| SNP_1743_A_15251856 | NC_021160.1    | Ca_Kabuli_Chr01 | 15251856                | TT                                     | CC                 | CC               | INTERGENIC                    |                    |                                                                                                               |
| SNP_1744_A_15277853 | NC_021160.1    | Ca_Kabuli_Chr01 | 15277853                | AA                                     | TT                 | TT               | INTERGENIC                    |                    |                                                                                                               |
| SNP_1746_A_15449971 | NC_021160.1    | Ca_Kabuli_Chr01 | 15449971                | AA                                     | GG                 | GG               | URR                           | 101500041          | putative two-component response regulator ARR21                                                               |

| SNPs IDs            | Chromosome IDs | Chromosomes     | Physical positions (bp) | CDC Frontier genome (Reference genome) | (Pusa 1103 & HPNB) | (ILWC 46 & LPNB) | Sequence Components of genome | Gene accession IDs | Putative functions                                         |
|---------------------|----------------|-----------------|-------------------------|----------------------------------------|--------------------|------------------|-------------------------------|--------------------|------------------------------------------------------------|
| SNP_1747_A_15453335 | NC_021160.1    | Ca_Kabuli_Chr01 | 15453335                | TT                                     | AA                 | AA               | INTERGENIC                    |                    |                                                            |
| SNP_1748_A_15468523 | NC_021160.1    | Ca_Kabuli_Chr01 | 15468523                | CC                                     | TT                 | TT               | INTERGENIC                    |                    |                                                            |
| SNP_1749_A_15572467 | NC_021160.1    | Ca_Kabuli_Chr01 | 15572467                | TT                                     | CC                 | CC               | INTERGENIC                    |                    |                                                            |
| SNP_1750_A_15572488 | NC_021160.1    | Ca_Kabuli_Chr01 | 15572488                | CC                                     | TT                 | TT               | INTERGENIC                    |                    |                                                            |
| SNP_1752_A_15615459 | NC_021160.1    | Ca_Kabuli_Chr01 | 15615459                | GG                                     | AA                 | AA               | URR                           | 101504539          | ras-related protein Rab11D                                 |
| SNP_1753_A_15618937 | NC_021160.1    | Ca_Kabuli_Chr01 | 15618937                | TT                                     | AA                 | AA               | INTERGENIC                    |                    |                                                            |
| SNP_1754_A_15618946 | NC_021160.1    | Ca_Kabuli_Chr01 | 15618946                | AA                                     | TT                 | TT               | INTERGENIC                    |                    |                                                            |
| SNP_1755_A_15651074 | NC_021160.1    | Ca_Kabuli_Chr01 | 15651074                | TT                                     | CC                 | CC               | URR                           | 101505166          | anthocyanidin 3-O-glucoside 2''-O-glucosyltransferase-like |
| SNP_1756_A_15667428 | NC_021160.1    | Ca_Kabuli_Chr01 | 15667428                | TT                                     | CC                 | CC               | INTERGENIC                    |                    |                                                            |
| SNP_1757_A_15667528 | NC_021160.1    | Ca_Kabuli_Chr01 | 15667528                | AA                                     | CC                 | CC               | INTERGENIC                    |                    |                                                            |
| SNP_1758_A_15667544 | NC_021160.1    | Ca_Kabuli_Chr01 | 15667544                | AA                                     | GG                 | GG               | INTERGENIC                    |                    |                                                            |
| SNP_1759_A_15667668 | NC_021160.1    | Ca_Kabuli_Chr01 | 15667668                | TT                                     | GG                 | GG               | INTERGENIC                    |                    |                                                            |
| SNP_1760_A_15672190 | NC_021160.1    | Ca_Kabuli_Chr01 | 15672190                | TT                                     | GG                 | GG               | URR                           | 101505816          | anthocyanidin 3-O-glucoside 2''-O-glucosyltransferase-like |
| SNP_1761_A_15697413 | NC_021160.1    | Ca_Kabuli_Chr01 | 15697413                | AA                                     | TT                 | TT               | DRR                           | 101506461          | anthocyanidin 3-O-glucoside 2''-O-glucosyltransferase      |
| SNP_1762_A_15700246 | NC_021160.1    | Ca_Kabuli_Chr01 | 15700246                | TT                                     | CC                 | CC               | URR                           | 101506461          | anthocyanidin 3-O-glucoside 2''-O-glucosyltransferase      |
| SNP_1763_A_15716165 | NC_021160.1    | Ca_Kabuli_Chr01 | 15716165                | AA                                     | CC                 | CC               | INTERGENIC                    |                    |                                                            |
| SNP_1764_A_15716166 | NC_021160.1    | Ca_Kabuli_Chr01 | 15716166                | TT                                     | CC                 | CC               | INTERGENIC                    |                    |                                                            |
| SNP_1766_A_15821184 | NC_021160.1    | Ca_Kabuli_Chr01 | 15821184                | CC                                     | TT                 | TT               | INTERGENIC                    |                    |                                                            |
| SNP_1767_A_15821213 | NC_021160.1    | Ca_Kabuli_Chr01 | 15821213                | TT                                     | CC                 | CC               | INTERGENIC                    |                    |                                                            |
| SNP_1769_A_15848457 | NC_021160.1    | Ca_Kabuli_Chr01 | 15848457                | TT                                     | CC                 | CC               | INTERGENIC                    |                    |                                                            |
| SNP_1770_A_15848552 | NC_021160.1    | Ca_Kabuli_Chr01 | 15848552                | AA                                     | GG                 | GG               | INTERGENIC                    |                    |                                                            |
| SNP_1772_A_15864552 | NC_021160.1    | Ca_Kabuli_Chr01 | 15864552                | TT                                     | CC                 | CC               | INTRON                        | 101510845          | gibberellin 2-beta-dioxygenase 8-like                      |

| SNPs IDs            | Chromosome IDs | Chromosomes     | Physical positions (bp) | CDC Frontier (Reference genome) | (Pusa 1103 & HPNB) | (ILWC 46 & LPNB) | Sequence Components of genome | Gene accession IDs | Putative functions                                                                   |
|---------------------|----------------|-----------------|-------------------------|---------------------------------|--------------------|------------------|-------------------------------|--------------------|--------------------------------------------------------------------------------------|
| SNP_1773_A_15871782 | NC_021160.1    | Ca_Kabuli_Chr01 | 15871782                | TT                              | GG                 | GG               | INTERGENIC                    |                    |                                                                                      |
| SNP_1774_A_15876582 | NC_021160.1    | Ca_Kabuli_Chr01 | 15876582                | TT                              | AA                 | AA               | INTERGENIC                    |                    |                                                                                      |
| SNP_1775_A_15897879 | NC_021160.1    | Ca_Kabuli_Chr01 | 15897879                | GG                              | AA                 | AA               | INTERGENIC                    |                    |                                                                                      |
| SNP_1776_A_15929229 | NC_021160.1    | Ca_Kabuli_Chr01 | 15929229                | AA                              | GG                 | GG               | INTERGENIC                    |                    |                                                                                      |
| SNP_1777_A_15963327 | NC_021160.1    | Ca_Kabuli_Chr01 | 15963327                | CC                              | TT                 | TT               | DRR                           | 101514826          | transcription factor ILR3-like                                                       |
| SNP_1778_A_16044834 | NC_021160.1    | Ca_Kabuli_Chr01 | 16044834                | AA                              | CC                 | CC               | URR                           | 101490852          | probable leucine-rich repeat receptor-like serine/threonine-protein kinase At5g15730 |
| SNP_1780_A_16085438 | NC_021160.1    | Ca_Kabuli_Chr01 | 16085438                | TT                              | GG                 | GG               | INTERGENIC                    |                    |                                                                                      |
| SNP_1781_A_16092575 | NC_021160.1    | Ca_Kabuli_Chr01 | 16092575                | AA                              | GG                 | GG               | INTERGENIC                    |                    |                                                                                      |
| SNP_1782_A_16092581 | NC_021160.1    | Ca_Kabuli_Chr01 | 16092581                | GG                              | AA                 | AA               | INTERGENIC                    |                    |                                                                                      |
| SNP_1783_A_16092595 | NC_021160.1    | Ca_Kabuli_Chr01 | 16092595                | CC                              | AA                 | AA               | INTERGENIC                    |                    |                                                                                      |
| SNP_1784_A_16092638 | NC_021160.1    | Ca_Kabuli_Chr01 | 16092638                | GG                              | AA                 | AA               | INTERGENIC                    |                    |                                                                                      |
| SNP_1785_A_16092672 | NC_021160.1    | Ca_Kabuli_Chr01 | 16092672                | CC                              | TT                 | TT               | INTERGENIC                    |                    |                                                                                      |
| SNP_1786_A_16092679 | NC_021160.1    | Ca_Kabuli_Chr01 | 16092679                | GG                              | AA                 | AA               | INTERGENIC                    |                    |                                                                                      |
| SNP_1788_A_16097168 | NC_021160.1    | Ca_Kabuli_Chr01 | 16097168                | CC                              | AA                 | AA               | INTERGENIC                    |                    |                                                                                      |
| SNP_1789_A_16105536 | NC_021160.1    | Ca_Kabuli_Chr01 | 16105536                | AA                              | GG                 | GG               | INTERGENIC                    |                    |                                                                                      |
| SNP_1790_A_16105861 | NC_021160.1    | Ca_Kabuli_Chr01 | 16105861                | CC                              | GG                 | GG               | INTERGENIC                    |                    |                                                                                      |
| SNP_1791_A_16106056 | NC_021160.1    | Ca_Kabuli_Chr01 | 16106056                | TT                              | CC                 | CC               | INTERGENIC                    |                    |                                                                                      |
| SNP_1792_A_16107649 | NC_021160.1    | Ca_Kabuli_Chr01 | 16107649                | AA                              | TT                 | TT               | INTERGENIC                    |                    |                                                                                      |
| SNP_1793_A_16111152 | NC_021160.1    | Ca_Kabuli_Chr01 | 16111152                | CC                              | TT                 | TT               | INTRON                        | 101492466          | organic cation/carnitine transporter 4                                               |
| SNP_1794_A_16111167 | NC_021160.1    | Ca_Kabuli_Chr01 | 16111167                | AA                              | GG                 | GG               | INTRON                        | 101492466          | organic cation/carnitine transporter 4                                               |
| SNP_1795_A_16111212 | NC_021160.1    | Ca_Kabuli_Chr01 | 16111212                | AA                              | CC                 | CC               | INTRON                        | 101492466          | organic cation/carnitine transporter 4                                               |
| SNP_1796_A_16111352 | NC_021160.1    | Ca_Kabuli_Chr01 | 16111352                | TT                              | GG                 | GG               | INTRON                        | 101492466          | organic cation/carnitine transporter 4                                               |

| SNPs IDs            | Chromosome IDs | Chromosomes     | Physical positions (bp) | CDC Frontier (Reference genome) | (Pusa 1103 & HPNB) | (ILWC 46 & LPNB) | Sequence Components of genome | Gene accession IDs | Putative functions                          |
|---------------------|----------------|-----------------|-------------------------|---------------------------------|--------------------|------------------|-------------------------------|--------------------|---------------------------------------------|
| SNP_1797_A_16111358 | NC_021160.1    | Ca_Kabuli_Chr01 | 16111358                | TT                              | AA                 | AA               | INTRON                        | 101492466          | organic cation/carnitine transporter 4      |
| SNP_1798_A_16111907 | NC_021160.1    | Ca_Kabuli_Chr01 | 16111907                | AA                              | GG                 | GG               | INTRON                        | 101492466          | organic cation/carnitine transporter 4      |
| SNP_1799_A_16112871 | NC_021160.1    | Ca_Kabuli_Chr01 | 16112871                | GG                              | CC                 | CC               | INTRON                        | 101492466          | organic cation/carnitine transporter 4      |
| SNP_1800_A_16113229 | NC_021160.1    | Ca_Kabuli_Chr01 | 16113229                | TT                              | AA                 | AA               | INTRON                        | 101492466          | organic cation/carnitine transporter 4      |
| SNP_1801_A_16116268 | NC_021160.1    | Ca_Kabuli_Chr01 | 16116268                | GG                              | CC                 | CC               | URR                           | 101492466          | organic cation/carnitine transporter 4      |
| SNP_1802_A_16116422 | NC_021160.1    | Ca_Kabuli_Chr01 | 16116422                | GG                              | AA                 | AA               | URR                           | 101492466          | organic cation/carnitine transporter 4      |
| SNP_1804_A_16116445 | NC_021160.1    | Ca_Kabuli_Chr01 | 16116445                | TT                              | CC                 | CC               | URR                           | 101492466          | organic cation/carnitine transporter 4      |
| SNP_1805_A_16118204 | NC_021160.1    | Ca_Kabuli_Chr01 | 16118204                | CC                              | AA                 | AA               | INTERGENIC                    |                    |                                             |
| SNP_1806_A_16154431 | NC_021160.1    | Ca_Kabuli_Chr01 | 16154431                | AA                              | TT                 | TT               | INTERGENIC                    |                    |                                             |
| SNP_1807_A_16154992 | NC_021160.1    | Ca_Kabuli_Chr01 | 16154992                | TT                              | CC                 | CC               | INTERGENIC                    |                    |                                             |
| SNP_1808_A_16155141 | NC_021160.1    | Ca_Kabuli_Chr01 | 16155141                | AA                              | GG                 | GG               | INTERGENIC                    |                    |                                             |
| SNP_1809_A_16155779 | NC_021160.1    | Ca_Kabuli_Chr01 | 16155779                | AA                              | TT                 | TT               | INTERGENIC                    |                    |                                             |
| SNP_1811_A_16155803 | NC_021160.1    | Ca_Kabuli_Chr01 | 16155803                | GG                              | CC                 | CC               | INTERGENIC                    |                    |                                             |
| SNP_1812_A_16156033 | NC_021160.1    | Ca_Kabuli_Chr01 | 16156033                | AA                              | CC                 | CC               | INTERGENIC                    |                    |                                             |
| SNP_1813_A_16156044 | NC_021160.1    | Ca_Kabuli_Chr01 | 16156044                | GG                              | CC                 | CC               | INTERGENIC                    |                    |                                             |
| SNP_1814_A_16157440 | NC_021160.1    | Ca_Kabuli_Chr01 | 16157440                | TT                              | CC                 | CC               | INTERGENIC                    |                    |                                             |
| SNP_1815_A_16157526 | NC_021160.1    | Ca_Kabuli_Chr01 | 16157526                | AA                              | GG                 | GG               | INTERGENIC                    |                    |                                             |
| SNP_1816_A_16157943 | NC_021160.1    | Ca_Kabuli_Chr01 | 16157943                | TT                              | AA                 | AA               | INTERGENIC                    |                    |                                             |
| SNP_1820_A_16162073 | NC_021160.1    | Ca_Kabuli_Chr01 | 16162073                | TT                              | GG                 | GG               | INTRON                        | 101503246          | organic cation/carnitine transporter 4-like |
| SNP_1821_A_16165159 | NC_021160.1    | Ca_Kabuli_Chr01 | 16165159                | AA                              | CC                 | CC               | URR                           | 101503246          | organic cation/carnitine transporter 4-like |
| SNP_1822_A_16166802 | NC_021160.1    | Ca_Kabuli_Chr01 | 16166802                | TT                              | CC                 | CC               | URR                           | 101503246          | organic cation/carnitine transporter 4-like |
| SNP_1823_A_16166835 | NC_021160.1    | Ca_Kabuli_Chr01 | 16166835                | CC                              | TT                 | TT               | URR                           | 101503246          | organic cation/carnitine transporter 4-like |

| SNPs IDs            | Chromosome IDs | Chromosomes     | Physical positions (bp) | CDC Frontier genome (Reference genome) | (Pusa 1103 & HPNB) | (ILWC 46 & LPNB) | Sequence genome | Components of | Gene accession IDs                               | Putative functions |
|---------------------|----------------|-----------------|-------------------------|----------------------------------------|--------------------|------------------|-----------------|---------------|--------------------------------------------------|--------------------|
| SNP_1825_A_16167158 | NC_021160.1    | Ca_Kabuli_Chr01 | 16167158                | TT                                     | AA                 | AA               | INTERGENIC      |               |                                                  |                    |
| SNP_1826_A_16171692 | NC_021160.1    | Ca_Kabuli_Chr01 | 16171692                | AA                                     | GG                 | GG               | INTERGENIC      |               |                                                  |                    |
| SNP_1827_A_16173410 | NC_021160.1    | Ca_Kabuli_Chr01 | 16173410                | AA                                     | CC                 | CC               | INTERGENIC      |               |                                                  |                    |
| SNP_1828_A_16173692 | NC_021160.1    | Ca_Kabuli_Chr01 | 16173692                | CC                                     | GG                 | GG               | INTERGENIC      |               |                                                  |                    |
| SNP_1829_A_16173741 | NC_021160.1    | Ca_Kabuli_Chr01 | 16173741                | AA                                     | CC                 | CC               | INTERGENIC      |               |                                                  |                    |
| SNP_1830_A_16174345 | NC_021160.1    | Ca_Kabuli_Chr01 | 16174345                | GG                                     | CC                 | CC               | INTERGENIC      |               |                                                  |                    |
| SNP_1831_A_16174400 | NC_021160.1    | Ca_Kabuli_Chr01 | 16174400                | TT                                     | CC                 | CC               | INTERGENIC      |               |                                                  |                    |
| SNP_1832_A_16174430 | NC_021160.1    | Ca_Kabuli_Chr01 | 16174430                | GG                                     | CC                 | CC               | INTERGENIC      |               |                                                  |                    |
| SNP_1833_A_16174433 | NC_021160.1    | Ca_Kabuli_Chr01 | 16174433                | CC                                     | TT                 | TT               | INTERGENIC      |               |                                                  |                    |
| SNP_1834_A_16177529 | NC_021160.1    | Ca_Kabuli_Chr01 | 16177529                | TT                                     | CC                 | CC               | INTERGENIC      |               |                                                  |                    |
| SNP_1835_A_16177591 | NC_021160.1    | Ca_Kabuli_Chr01 | 16177591                | GG                                     | TT                 | TT               | INTERGENIC      |               |                                                  |                    |
| SNP_1836_A_16177854 | NC_021160.1    | Ca_Kabuli_Chr01 | 16177854                | CC                                     | TT                 | TT               | INTERGENIC      |               |                                                  |                    |
| SNP_1837_A_16177865 | NC_021160.1    | Ca_Kabuli_Chr01 | 16177865                | CC                                     | TT                 | TT               | INTERGENIC      |               |                                                  |                    |
| SNP_1838_A_16177952 | NC_021160.1    | Ca_Kabuli_Chr01 | 16177952                | TT                                     | CC                 | CC               | INTERGENIC      |               |                                                  |                    |
| SNP_1839_A_16177969 | NC_021160.1    | Ca_Kabuli_Chr01 | 16177969                | AA                                     | GG                 | GG               | INTERGENIC      |               |                                                  |                    |
| SNP_1841_A_16187557 | NC_021160.1    | Ca_Kabuli_Chr01 | 16187557                | CC                                     | GG                 | GG               | URR             | 101492800     | indole-3-acetic acid-amido synthetase GH3.6-like |                    |
| SNP_1842_A_16189785 | NC_021160.1    | Ca_Kabuli_Chr01 | 16189785                | GG                                     | AA                 | AA               | INTERGENIC      |               |                                                  |                    |
| SNP_1843_A_16190599 | NC_021160.1    | Ca_Kabuli_Chr01 | 16190599                | CC                                     | AA                 | AA               | INTERGENIC      |               |                                                  |                    |
| SNP_1844_A_16190689 | NC_021160.1    | Ca_Kabuli_Chr01 | 16190689                | TT                                     | AA                 | AA               | INTERGENIC      |               |                                                  |                    |
| SNP_1845_A_16190865 | NC_021160.1    | Ca_Kabuli_Chr01 | 16190865                | TT                                     | CC                 | CC               | INTERGENIC      |               |                                                  |                    |
| SNP_1846_A_16193056 | NC_021160.1    | Ca_Kabuli_Chr01 | 16193056                | AA                                     | TT                 | TT               | INTERGENIC      |               |                                                  |                    |
| SNP_1847_A_16193412 | NC_021160.1    | Ca_Kabuli_Chr01 | 16193412                | CC                                     | AA                 | AA               | INTERGENIC      |               |                                                  |                    |

| SNPs IDs            | Chromosome IDs | Chromosomes     | Physical positions (bp) | CDC Frontier (Reference genome) | (Pusa 1103 & HPNB) | (ILWC 46 & LPNB) | Sequence genome | Components of | Gene accession IDs | Putative functions |
|---------------------|----------------|-----------------|-------------------------|---------------------------------|--------------------|------------------|-----------------|---------------|--------------------|--------------------|
| SNP_1848_A_16197144 | NC_021160.1    | Ca_Kabuli_Chr01 | 16197144                | TT                              | CC                 | CC               | INTERGENIC      |               |                    |                    |
| SNP_1849_A_16197158 | NC_021160.1    | Ca_Kabuli_Chr01 | 16197158                | GG                              | CC                 | CC               | INTERGENIC      |               |                    |                    |
| SNP_1850_A_16197161 | NC_021160.1    | Ca_Kabuli_Chr01 | 16197161                | TT                              | CC                 | CC               | INTERGENIC      |               |                    |                    |
| SNP_1851_A_16197175 | NC_021160.1    | Ca_Kabuli_Chr01 | 16197175                | AA                              | GG                 | GG               | INTERGENIC      |               |                    |                    |
| SNP_1852_A_16197358 | NC_021160.1    | Ca_Kabuli_Chr01 | 16197358                | TT                              | AA                 | AA               | INTERGENIC      |               |                    |                    |
| SNP_1853_A_16197366 | NC_021160.1    | Ca_Kabuli_Chr01 | 16197366                | TT                              | AA                 | AA               | INTERGENIC      |               |                    |                    |
| SNP_1854_A_16197381 | NC_021160.1    | Ca_Kabuli_Chr01 | 16197381                | GG                              | CC                 | CC               | INTERGENIC      |               |                    |                    |
| SNP_1855_A_16197388 | NC_021160.1    | Ca_Kabuli_Chr01 | 16197388                | CC                              | TT                 | TT               | INTERGENIC      |               |                    |                    |
| SNP_1856_A_16197390 | NC_021160.1    | Ca_Kabuli_Chr01 | 16197390                | CC                              | GG                 | GG               | INTERGENIC      |               |                    |                    |
| SNP_1857_A_16197391 | NC_021160.1    | Ca_Kabuli_Chr01 | 16197391                | AA                              | GG                 | GG               | INTERGENIC      |               |                    |                    |
| SNP_1858_A_16197402 | NC_021160.1    | Ca_Kabuli_Chr01 | 16197402                | TT                              | AA                 | AA               | INTERGENIC      |               |                    |                    |
| SNP_1859_A_16197855 | NC_021160.1    | Ca_Kabuli_Chr01 | 16197855                | CC                              | TT                 | TT               | INTERGENIC      |               |                    |                    |
| SNP_1860_A_16199424 | NC_021160.1    | Ca_Kabuli_Chr01 | 16199424                | GG                              | AA                 | AA               | INTERGENIC      |               |                    |                    |
| SNP_1861_A_16199433 | NC_021160.1    | Ca_Kabuli_Chr01 | 16199433                | CC                              | TT                 | TT               | INTERGENIC      |               |                    |                    |
| SNP_1862_A_16199449 | NC_021160.1    | Ca_Kabuli_Chr01 | 16199449                | AA                              | GG                 | GG               | INTERGENIC      |               |                    |                    |
| SNP_1863_A_16202692 | NC_021160.1    | Ca_Kabuli_Chr01 | 16202692                | AA                              | TT                 | TT               | INTERGENIC      |               |                    |                    |
| SNP_1865_A_16203117 | NC_021160.1    | Ca_Kabuli_Chr01 | 16203117                | AA                              | GG                 | GG               | INTERGENIC      |               |                    |                    |
| SNP_1866_A_16203357 | NC_021160.1    | Ca_Kabuli_Chr01 | 16203357                | AA                              | GG                 | GG               | INTERGENIC      |               |                    |                    |
| SNP_1867_A_16203412 | NC_021160.1    | Ca_Kabuli_Chr01 | 16203412                | AA                              | TT                 | TT               | INTERGENIC      |               |                    |                    |
| SNP_1868_A_16203497 | NC_021160.1    | Ca_Kabuli_Chr01 | 16203497                | TT                              | CC                 | CC               | INTERGENIC      |               |                    |                    |
| SNP_1869_A_16205276 | NC_021160.1    | Ca_Kabuli_Chr01 | 16205276                | CC                              | TT                 | TT               | INTERGENIC      |               |                    |                    |
| SNP_1870_A_16205771 | NC_021160.1    | Ca_Kabuli_Chr01 | 16205771                | CC                              | TT                 | TT               | INTERGENIC      |               |                    |                    |

| SNPs IDs            | Chromosome IDs | Chromosomes     | Physical positions (bp) | CDC Frontier (Reference genome) | (Pusa 1103 & HPNB) | (ILWC 46 & LPNB) | Sequence Components of genome | Gene accession IDs | Putative functions                              |
|---------------------|----------------|-----------------|-------------------------|---------------------------------|--------------------|------------------|-------------------------------|--------------------|-------------------------------------------------|
| SNP_1871_A_16207472 | NC_021160.1    | Ca_Kabuli_Chr01 | 16207472                | AA                              | GG                 | GG               | INTERGENIC                    |                    |                                                 |
| SNP_1872_A_16207474 | NC_021160.1    | Ca_Kabuli_Chr01 | 16207474                | AA                              | GG                 | GG               | INTERGENIC                    |                    |                                                 |
| SNP_1873_A_16207536 | NC_021160.1    | Ca_Kabuli_Chr01 | 16207536                | TT                              | GG                 | GG               | INTERGENIC                    |                    |                                                 |
| SNP_1874_A_16208424 | NC_021160.1    | Ca_Kabuli_Chr01 | 16208424                | AA                              | CC                 | CC               | INTERGENIC                    |                    |                                                 |
| SNP_1875_A_16208440 | NC_021160.1    | Ca_Kabuli_Chr01 | 16208440                | TT                              | AA                 | AA               | INTERGENIC                    |                    |                                                 |
| SNP_1876_A_16209230 | NC_021160.1    | Ca_Kabuli_Chr01 | 16209230                | GG                              | AA                 | AA               | INTERGENIC                    |                    |                                                 |
| SNP_1877_A_16209237 | NC_021160.1    | Ca_Kabuli_Chr01 | 16209237                | AA                              | GG                 | GG               | INTERGENIC                    |                    |                                                 |
| SNP_1878_A_16210756 | NC_021160.1    | Ca_Kabuli_Chr01 | 16210756                | CC                              | TT                 | TT               | DRR                           | 101493128          | transcription factor bHLH123-like               |
| SNP_1879_A_16211644 | NC_021160.1    | Ca_Kabuli_Chr01 | 16211644                | CC                              | TT                 | TT               | SYNONYMOUS_CODING             | 101493128          | transcription factor bHLH123-like               |
| SNP_1880_A_16212996 | NC_021160.1    | Ca_Kabuli_Chr01 | 16212996                | GG                              | AA                 | AA               | INTRON                        | 101493128          | transcription factor bHLH123-like               |
| SNP_1881_A_16214016 | NC_021160.1    | Ca_Kabuli_Chr01 | 16214016                | TT                              | AA                 | AA               | INTRON                        | 101493128          | transcription factor bHLH123-like               |
| SNP_1882_A_16214030 | NC_021160.1    | Ca_Kabuli_Chr01 | 16214030                | CC                              | TT                 | TT               | INTRON                        | 101493128          | transcription factor bHLH123-like               |
| SNP_1883_A_16219286 | NC_021160.1    | Ca_Kabuli_Chr01 | 16219286                | TT                              | CC                 | CC               | INTERGENIC                    |                    |                                                 |
| SNP_1884_A_16254495 | NC_021160.1    | Ca_Kabuli_Chr01 | 16254495                | GG                              | CC                 | CC               | DRR                           | 101503561          | nuclear transcription factor Y subunit C-3-like |
| SNP_1885_A_16267416 | NC_021160.1    | Ca_Kabuli_Chr01 | 16267416                | GG                              | AA                 | AA               | INTERGENIC                    |                    |                                                 |
| SNP_1886_A_16301159 | NC_021160.1    | Ca_Kabuli_Chr01 | 16301159                | AA                              | GG                 | GG               | INTERGENIC                    |                    |                                                 |
| SNP_1887_A_16303632 | NC_021160.1    | Ca_Kabuli_Chr01 | 16303632                | GG                              | AA                 | AA               | INTERGENIC                    |                    |                                                 |
| SNP_1888_A_16303650 | NC_021160.1    | Ca_Kabuli_Chr01 | 16303650                | TT                              | CC                 | CC               | INTERGENIC                    |                    |                                                 |
| SNP_1889_A_16369876 | NC_021160.1    | Ca_Kabuli_Chr01 | 16369876                | GG                              | TT                 | TT               | INTERGENIC                    |                    |                                                 |
| SNP_1890_A_16442395 | NC_021160.1    | Ca_Kabuli_Chr01 | 16442395                | TT                              | GG                 | GG               | INTERGENIC                    |                    |                                                 |
| SNP_1891_A_16479727 | NC_021160.1    | Ca_Kabuli_Chr01 | 16479727                | GG                              | AA                 | AA               | INTERGENIC                    |                    |                                                 |
| SNP_1892_A_16497577 | NC_021160.1    | Ca_Kabuli_Chr01 | 16497577                | TT                              | CC                 | CC               | INTERGENIC                    |                    |                                                 |



| SNPs IDs            | Chromosome IDs | Chromosomes     | Physical positions (bp) | CDC Frontier (Reference genome) | (Pusa 1103 & HPNB) | (ILWC 46 & LPNB) | Sequence Components of genome | Gene accession IDs | Putative functions               |
|---------------------|----------------|-----------------|-------------------------|---------------------------------|--------------------|------------------|-------------------------------|--------------------|----------------------------------|
| SNP_1894_A_16620872 | NC_021160.1    | Ca_Kabuli_Chr01 | 16620872                | AA                              | TT                 | TT               | DRR                           | 101505712          | uncharacterized LOC101505712     |
| SNP_1896_A_16636021 | NC_021160.1    | Ca_Kabuli_Chr01 | 16636021                | AA                              | TT                 | TT               | NON_SYNONYMOUS_CODING         | 101506350          | NAC transcription factor 25-like |
| SNP_1898_A_16859108 | NC_021160.1    | Ca_Kabuli_Chr01 | 16859108                | AA                              | TT                 | TT               | INTERGENIC                    |                    |                                  |
| SNP_1899_A_16907598 | NC_021160.1    | Ca_Kabuli_Chr01 | 16907598                | AA                              | GG                 | GG               | INTRON                        | 101511064          | MLO-like protein 11              |
| SNP_1900_A_16915478 | NC_021160.1    | Ca_Kabuli_Chr01 | 16915478                | TT                              | GG                 | GG               | INTRON                        | 101511064          | MLO-like protein 11              |
| SNP_1901_A_16935128 | NC_021160.1    | Ca_Kabuli_Chr01 | 16935128                | GG                              | AA                 | AA               | URR                           | 101511704          | nucleolar protein 58             |
| SNP_1902_A_16935314 | NC_021160.1    | Ca_Kabuli_Chr01 | 16935314                | GG                              | TT                 | TT               | URR                           | 101511704          | nucleolar protein 58             |
| SNP_1903_A_17116929 | NC_021160.1    | Ca_Kabuli_Chr01 | 17116929                | CC                              | AA                 | AA               | INTERGENIC                    |                    |                                  |
| SNP_1904_A_17116950 | NC_021160.1    | Ca_Kabuli_Chr01 | 17116950                | CC                              | GG                 | GG               | INTERGENIC                    |                    |                                  |
| SNP_1905_A_17120514 | NC_021160.1    | Ca_Kabuli_Chr01 | 17120514                | GG                              | TT                 | TT               | INTERGENIC                    |                    |                                  |
| SNP_1906_A_17120713 | NC_021160.1    | Ca_Kabuli_Chr01 | 17120713                | TT                              | GG                 | GG               | INTERGENIC                    |                    |                                  |
| SNP_1907_A_17120780 | NC_021160.1    | Ca_Kabuli_Chr01 | 17120780                | AA                              | GG                 | GG               | INTERGENIC                    |                    |                                  |
| SNP_1908_A_17120887 | NC_021160.1    | Ca_Kabuli_Chr01 | 17120887                | CC                              | AA                 | AA               | INTERGENIC                    |                    |                                  |
| SNP_1909_A_17121025 | NC_021160.1    | Ca_Kabuli_Chr01 | 17121025                | TT                              | CC                 | CC               | INTERGENIC                    |                    |                                  |
| SNP_1910_A_17121056 | NC_021160.1    | Ca_Kabuli_Chr01 | 17121056                | GG                              | AA                 | AA               | INTERGENIC                    |                    |                                  |
| SNP_1911_A_17122274 | NC_021160.1    | Ca_Kabuli_Chr01 | 17122274                | TT                              | GG                 | GG               | INTERGENIC                    |                    |                                  |
| SNP_1912_A_17127920 | NC_021160.1    | Ca_Kabuli_Chr01 | 17127920                | GG                              | CC                 | CC               | INTERGENIC                    |                    |                                  |
| SNP_1913_A_17127940 | NC_021160.1    | Ca_Kabuli_Chr01 | 17127940                | GG                              | AA                 | AA               | INTERGENIC                    |                    |                                  |
| SNP_1914_A_17127942 | NC_021160.1    | Ca_Kabuli_Chr01 | 17127942                | GG                              | AA                 | AA               | INTERGENIC                    |                    |                                  |
| SNP_1915_A_17128204 | NC_021160.1    | Ca_Kabuli_Chr01 | 17128204                | TT                              | AA                 | AA               | INTERGENIC                    |                    |                                  |
| SNP_1916_A_17128237 | NC_021160.1    | Ca_Kabuli_Chr01 | 17128237                | TT                              | GG                 | GG               | INTERGENIC                    |                    |                                  |
| SNP_1917_A_17128352 | NC_021160.1    | Ca_Kabuli_Chr01 | 17128352                | GG                              | AA                 | AA               | INTERGENIC                    |                    |                                  |

| SNPs IDs            | Chromosome IDs | Chromosomes     | Physical positions (bp) | CDC Frontier (Reference genome) | (Pusa 1103 & HPNB) | (ILWC 46 & LPNB) | Sequence Components of genome | Gene accession IDs | Putative functions                                          |
|---------------------|----------------|-----------------|-------------------------|---------------------------------|--------------------|------------------|-------------------------------|--------------------|-------------------------------------------------------------|
| SNP_1918_A_17128370 | NC_021160.1    | Ca_Kabuli_Chr01 | 17128370                | CC                              | TT                 | TT               | INTERGENIC                    |                    |                                                             |
| SNP_1920_A_17187067 | NC_021160.1    | Ca_Kabuli_Chr01 | 17187067                | AA                              | TT                 | TT               | INTERGENIC                    |                    |                                                             |
| SNP_1921_A_17187542 | NC_021160.1    | Ca_Kabuli_Chr01 | 17187542                | CC                              | GG                 | GG               | INTERGENIC                    |                    |                                                             |
| SNP_1922_A_17187605 | NC_021160.1    | Ca_Kabuli_Chr01 | 17187605                | TT                              | CC                 | CC               | INTERGENIC                    |                    |                                                             |
| SNP_1923_A_17187619 | NC_021160.1    | Ca_Kabuli_Chr01 | 17187619                | GG                              | AA                 | AA               | INTERGENIC                    |                    |                                                             |
| SNP_1924_A_17187857 | NC_021160.1    | Ca_Kabuli_Chr01 | 17187857                | CC                              | TT                 | TT               | DRR                           | 101512989          | probable pectinesterase/pectinesterase inhibitor 58         |
| SNP_1925_A_17188094 | NC_021160.1    | Ca_Kabuli_Chr01 | 17188094                | GG                              | TT                 | TT               | DRR                           | 101512989          | probable pectinesterase/pectinesterase inhibitor 58         |
| SNP_1926_A_17188104 | NC_021160.1    | Ca_Kabuli_Chr01 | 17188104                | GG                              | AA                 | AA               | DRR                           | 101512989          | probable pectinesterase/pectinesterase inhibitor 58         |
| SNP_1927_A_17222402 | NC_021160.1    | Ca_Kabuli_Chr01 | 17222402                | TT                              | CC                 | CC               | INTERGENIC                    |                    |                                                             |
| SNP_1928_A_17244304 | NC_021160.1    | Ca_Kabuli_Chr01 | 17244304                | AA                              | GG                 | GG               | INTERGENIC                    |                    |                                                             |
| SNP_1929_A_17254528 | NC_021160.1    | Ca_Kabuli_Chr01 | 17254528                | CC                              | TT                 | TT               | INTERGENIC                    |                    |                                                             |
| SNP_1930_A_17255068 | NC_021160.1    | Ca_Kabuli_Chr01 | 17255068                | TT                              | CC                 | CC               | INTERGENIC                    |                    |                                                             |
| SNP_1931_A_17255346 | NC_021160.1    | Ca_Kabuli_Chr01 | 17255346                | AA                              | GG                 | GG               | INTERGENIC                    |                    |                                                             |
| SNP_1932_A_17371107 | NC_021160.1    | Ca_Kabuli_Chr01 | 17371107                | AA                              | GG                 | GG               | INTRON                        | 101490977          | serine/threonine-protein phosphatase 4 regulatory subunit 3 |
| SNP_1933_A_17431627 | NC_021160.1    | Ca_Kabuli_Chr01 | 17431627                | GG                              | AA                 | AA               | INTERGENIC                    |                    |                                                             |
| SNP_1934_A_17470916 | NC_021160.1    | Ca_Kabuli_Chr01 | 17470916                | GG                              | AA                 | AA               | INTERGENIC                    |                    |                                                             |
| SNP_1935_A_17543041 | NC_021160.1    | Ca_Kabuli_Chr01 | 17543041                | TT                              | CC                 | CC               | INTERGENIC                    |                    |                                                             |
| SNP_1936_A_17588008 | NC_021160.1    | Ca_Kabuli_Chr01 | 17588008                | CC                              | AA                 | AA               | URR                           | 101499736          | disease resistance response protein DRRG49-C                |
| SNP_1937_A_17613544 | NC_021160.1    | Ca_Kabuli_Chr01 | 17613544                | AA                              | GG                 | GG               | INTERGENIC                    |                    |                                                             |
| SNP_1938_A_17621755 | NC_021160.1    | Ca_Kabuli_Chr01 | 17621755                | TT                              | CC                 | CC               | INTERGENIC                    |                    |                                                             |
| SNP_1939_A_17623909 | NC_021160.1    | Ca_Kabuli_Chr01 | 17623909                | TT                              | CC                 | CC               | URR                           | 101502062          | protein LIR18B-like                                         |
| SNP_1940_A_17630677 | NC_021160.1    | Ca_Kabuli_Chr01 | 17630677                | GG                              | AA                 | AA               | DRR                           | 101502390          | protein LIR18B-like                                         |

| SNPs IDs            | Chromosome IDs | Chromosomes     | Physical positions (bp) | CDC Frontier (Reference genome) | (Pusa 1103 & HPNB) | (ILWC 46 & LPNB) | Sequence Components of genome | Gene accession IDs | Putative functions                                                      |
|---------------------|----------------|-----------------|-------------------------|---------------------------------|--------------------|------------------|-------------------------------|--------------------|-------------------------------------------------------------------------|
| SNP_1941_A_17630951 | NC_021160.1    | Ca_Kabuli_Chr01 | 17630951                | GG                              | CC                 | CC               | URR                           | 101502695          | uncharacterized LOC101502695                                            |
| SNP_1942_A_17630953 | NC_021160.1    | Ca_Kabuli_Chr01 | 17630953                | GG                              | TT                 | TT               | URR                           | 101502695          | uncharacterized LOC101502695                                            |
| SNP_1943_A_17719641 | NC_021160.1    | Ca_Kabuli_Chr01 | 17719641                | TT                              | GG                 | GG               | INTERGENIC                    |                    |                                                                         |
| SNP_1944_A_17729370 | NC_021160.1    | Ca_Kabuli_Chr01 | 17729370                | AA                              | CC                 | CC               | INTERGENIC                    |                    |                                                                         |
| SNP_1945_A_17801346 | NC_021160.1    | Ca_Kabuli_Chr01 | 17801346                | CC                              | AA                 | AA               | URR                           | 101505168          | ethylene-responsive transcription factor RAP2-3                         |
| SNP_1946_A_17803977 | NC_021160.1    | Ca_Kabuli_Chr01 | 17803977                | AA                              | CC                 | CC               | INTERGENIC                    |                    |                                                                         |
| SNP_1947_A_17809889 | NC_021160.1    | Ca_Kabuli_Chr01 | 17809889                | CC                              | AA                 | AA               | INTERGENIC                    |                    |                                                                         |
| SNP_1948_A_17898217 | NC_021160.1    | Ca_Kabuli_Chr01 | 17898217                | CC                              | TT                 | TT               | INTERGENIC                    |                    |                                                                         |
| SNP_1949_A_17902566 | NC_021160.1    | Ca_Kabuli_Chr01 | 17902566                | TT                              | GG                 | GG               | DRR                           | 101508272          | uncharacterized LOC101508272                                            |
| SNP_1950_A_17902570 | NC_021160.1    | Ca_Kabuli_Chr01 | 17902570                | AA                              | GG                 | GG               | DRR                           | 101508272          | uncharacterized LOC101508272                                            |
| SNP_1951_A_17936117 | NC_021160.1    | Ca_Kabuli_Chr01 | 17936117                | AA                              | GG                 | GG               | INTERGENIC                    |                    |                                                                         |
| SNP_1952_A_17958840 | NC_021160.1    | Ca_Kabuli_Chr01 | 17958840                | AA                              | GG                 | GG               | DRR                           | 101509552          | peroxisomal fatty acid beta-oxidation multifunctional protein MFP2-like |
| SNP_1953_A_18121671 | NC_021160.1    | Ca_Kabuli_Chr01 | 18121671                | TT                              | AA                 | AA               | INTERGENIC                    |                    |                                                                         |
| SNP_1954_A_18122007 | NC_021160.1    | Ca_Kabuli_Chr01 | 18122007                | TT                              | CC                 | CC               | INTERGENIC                    |                    |                                                                         |
| SNP_1955_A_18122013 | NC_021160.1    | Ca_Kabuli_Chr01 | 18122013                | TT                              | CC                 | CC               | INTERGENIC                    |                    |                                                                         |
| SNP_1956_A_18122058 | NC_021160.1    | Ca_Kabuli_Chr01 | 18122058                | TT                              | GG                 | GG               | INTERGENIC                    |                    |                                                                         |
| SNP_1958_A_18271170 | NC_021160.1    | Ca_Kabuli_Chr01 | 18271170                | AA                              | TT                 | TT               | INTERGENIC                    |                    |                                                                         |
| SNP_1959_A_18279887 | NC_021160.1    | Ca_Kabuli_Chr01 | 18279887                | GG                              | AA                 | AA               | INTERGENIC                    |                    |                                                                         |
| SNP_1960_A_18295544 | NC_021160.1    | Ca_Kabuli_Chr01 | 18295544                | TT                              | CC                 | CC               | INTERGENIC                    |                    |                                                                         |
| SNP_1961_A_18295584 | NC_021160.1    | Ca_Kabuli_Chr01 | 18295584                | AA                              | GG                 | GG               | INTERGENIC                    |                    |                                                                         |
| SNP_1962_A_18296907 | NC_021160.1    | Ca_Kabuli_Chr01 | 18296907                | GG                              | CC                 | CC               | INTERGENIC                    |                    |                                                                         |
| SNP_1963_A_18296916 | NC_021160.1    | Ca_Kabuli_Chr01 | 18296916                | CC                              | AA                 | AA               | INTERGENIC                    |                    |                                                                         |

| SNPs IDs            | Chromosome IDs | Chromosomes     | Physical positions (bp) | CDC Frontier (Reference genome) | (Pusa 1103 & HPNB) | (ILWC 46 & LPNB) | Sequence genome | Components of | Gene accession IDs | Putative functions |
|---------------------|----------------|-----------------|-------------------------|---------------------------------|--------------------|------------------|-----------------|---------------|--------------------|--------------------|
| SNP_1964_A_18297153 | NC_021160.1    | Ca_Kabuli_Chr01 | 18297153                | GG                              | AA                 | AA               | INTERGENIC      |               |                    |                    |
| SNP_1965_A_18297178 | NC_021160.1    | Ca_Kabuli_Chr01 | 18297178                | TT                              | CC                 | CC               | INTERGENIC      |               |                    |                    |
| SNP_1966_A_18297273 | NC_021160.1    | Ca_Kabuli_Chr01 | 18297273                | CC                              | TT                 | TT               | INTERGENIC      |               |                    |                    |
| SNP_1967_A_18298262 | NC_021160.1    | Ca_Kabuli_Chr01 | 18298262                | AA                              | TT                 | TT               | INTERGENIC      |               |                    |                    |
| SNP_1968_A_18299945 | NC_021160.1    | Ca_Kabuli_Chr01 | 18299945                | AA                              | CC                 | CC               | INTERGENIC      |               |                    |                    |
| SNP_1969_A_18299962 | NC_021160.1    | Ca_Kabuli_Chr01 | 18299962                | TT                              | CC                 | CC               | INTERGENIC      |               |                    |                    |
| SNP_1970_A_18299987 | NC_021160.1    | Ca_Kabuli_Chr01 | 18299987                | TT                              | CC                 | CC               | INTERGENIC      |               |                    |                    |
| SNP_1971_A_18300031 | NC_021160.1    | Ca_Kabuli_Chr01 | 18300031                | TT                              | AA                 | AA               | INTERGENIC      |               |                    |                    |
| SNP_1972_A_18300032 | NC_021160.1    | Ca_Kabuli_Chr01 | 18300032                | AA                              | GG                 | GG               | INTERGENIC      |               |                    |                    |
| SNP_1973_A_18300065 | NC_021160.1    | Ca_Kabuli_Chr01 | 18300065                | AA                              | GG                 | GG               | INTERGENIC      |               |                    |                    |
| SNP_1974_A_18300162 | NC_021160.1    | Ca_Kabuli_Chr01 | 18300162                | TT                              | CC                 | CC               | INTERGENIC      |               |                    |                    |
| SNP_1975_A_18300561 | NC_021160.1    | Ca_Kabuli_Chr01 | 18300561                | TT                              | GG                 | GG               | INTERGENIC      |               |                    |                    |
| SNP_1976_A_18300596 | NC_021160.1    | Ca_Kabuli_Chr01 | 18300596                | CC                              | TT                 | TT               | INTERGENIC      |               |                    |                    |
| SNP_1978_A_18301160 | NC_021160.1    | Ca_Kabuli_Chr01 | 18301160                | TT                              | AA                 | AA               | INTERGENIC      |               |                    |                    |
| SNP_1979_A_18301178 | NC_021160.1    | Ca_Kabuli_Chr01 | 18301178                | GG                              | AA                 | AA               | INTERGENIC      |               |                    |                    |
| SNP_1980_A_18301228 | NC_021160.1    | Ca_Kabuli_Chr01 | 18301228                | AA                              | GG                 | GG               | INTERGENIC      |               |                    |                    |
| SNP_1981_A_18301275 | NC_021160.1    | Ca_Kabuli_Chr01 | 18301275                | GG                              | CC                 | CC               | INTERGENIC      |               |                    |                    |
| SNP_1982_A_18301292 | NC_021160.1    | Ca_Kabuli_Chr01 | 18301292                | TT                              | CC                 | CC               | INTERGENIC      |               |                    |                    |
| SNP_1983_A_18301295 | NC_021160.1    | Ca_Kabuli_Chr01 | 18301295                | TT                              | CC                 | CC               | INTERGENIC      |               |                    |                    |
| SNP_1985_A_18301900 | NC_021160.1    | Ca_Kabuli_Chr01 | 18301900                | CC                              | TT                 | TT               | INTERGENIC      |               |                    |                    |
| SNP_1986_A_18302162 | NC_021160.1    | Ca_Kabuli_Chr01 | 18302162                | CC                              | TT                 | TT               | INTERGENIC      |               |                    |                    |
| SNP_1987_A_18302187 | NC_021160.1    | Ca_Kabuli_Chr01 | 18302187                | GG                              | AA                 | AA               | INTERGENIC      |               |                    |                    |

| SNPs IDs            | Chromosome IDs | Chromosomes     | Physical positions (bp) | CDC Frontier genome (Reference genome) | (Pusa 1103 & HPNB) | (ILWC 46 & LPNB) | Sequence genome | Components of | Gene accession IDs | Putative functions |
|---------------------|----------------|-----------------|-------------------------|----------------------------------------|--------------------|------------------|-----------------|---------------|--------------------|--------------------|
| SNP_1988_A_18302201 | NC_021160.1    | Ca_Kabuli_Chr01 | 18302201                | TT                                     | CC                 | CC               | INTERGENIC      |               |                    |                    |
| SNP_1989_A_18302220 | NC_021160.1    | Ca_Kabuli_Chr01 | 18302220                | GG                                     | TT                 | TT               | INTERGENIC      |               |                    |                    |
| SNP_1990_A_18317626 | NC_021160.1    | Ca_Kabuli_Chr01 | 18317626                | TT                                     | CC                 | CC               | INTERGENIC      |               |                    |                    |
| SNP_1992_A_18317939 | NC_021160.1    | Ca_Kabuli_Chr01 | 18317939                | GG                                     | AA                 | AA               | INTERGENIC      |               |                    |                    |
| SNP_1993_A_18325295 | NC_021160.1    | Ca_Kabuli_Chr01 | 18325295                | GG                                     | AA                 | AA               | INTERGENIC      |               |                    |                    |
| SNP_1995_A_18325628 | NC_021160.1    | Ca_Kabuli_Chr01 | 18325628                | GG                                     | TT                 | TT               | INTERGENIC      |               |                    |                    |
| SNP_1996_A_18326588 | NC_021160.1    | Ca_Kabuli_Chr01 | 18326588                | AA                                     | TT                 | TT               | INTERGENIC      |               |                    |                    |
| SNP_1997_A_18326649 | NC_021160.1    | Ca_Kabuli_Chr01 | 18326649                | AA                                     | GG                 | GG               | INTERGENIC      |               |                    |                    |
| SNP_1998_A_18326831 | NC_021160.1    | Ca_Kabuli_Chr01 | 18326831                | GG                                     | AA                 | AA               | INTERGENIC      |               |                    |                    |
| SNP_1999_A_18327300 | NC_021160.1    | Ca_Kabuli_Chr01 | 18327300                | TT                                     | AA                 | AA               | INTERGENIC      |               |                    |                    |
| SNP_2000_A_18327304 | NC_021160.1    | Ca_Kabuli_Chr01 | 18327304                | AA                                     | GG                 | GG               | INTERGENIC      |               |                    |                    |
| SNP_2001_A_18327379 | NC_021160.1    | Ca_Kabuli_Chr01 | 18327379                | GG                                     | CC                 | CC               | INTERGENIC      |               |                    |                    |
| SNP_2002_A_18327549 | NC_021160.1    | Ca_Kabuli_Chr01 | 18327549                | CC                                     | AA                 | AA               | INTERGENIC      |               |                    |                    |
| SNP_2003_A_18327571 | NC_021160.1    | Ca_Kabuli_Chr01 | 18327571                | GG                                     | AA                 | AA               | INTERGENIC      |               |                    |                    |
| SNP_2004_A_18327577 | NC_021160.1    | Ca_Kabuli_Chr01 | 18327577                | AA                                     | GG                 | GG               | INTERGENIC      |               |                    |                    |
| SNP_2005_A_18327618 | NC_021160.1    | Ca_Kabuli_Chr01 | 18327618                | CC                                     | TT                 | TT               | INTERGENIC      |               |                    |                    |
| SNP_2006_A_18327623 | NC_021160.1    | Ca_Kabuli_Chr01 | 18327623                | GG                                     | AA                 | AA               | INTERGENIC      |               |                    |                    |
| SNP_2007_A_18327706 | NC_021160.1    | Ca_Kabuli_Chr01 | 18327706                | CC                                     | AA                 | AA               | INTERGENIC      |               |                    |                    |
| SNP_2008_A_18327724 | NC_021160.1    | Ca_Kabuli_Chr01 | 18327724                | AA                                     | GG                 | GG               | INTERGENIC      |               |                    |                    |
| SNP_2009_A_18327732 | NC_021160.1    | Ca_Kabuli_Chr01 | 18327732                | AA                                     | CC                 | CC               | INTERGENIC      |               |                    |                    |
| SNP_2010_A_18327747 | NC_021160.1    | Ca_Kabuli_Chr01 | 18327747                | TT                                     | CC                 | CC               | INTERGENIC      |               |                    |                    |
| SNP_2011_A_18327797 | NC_021160.1    | Ca_Kabuli_Chr01 | 18327797                | AA                                     | CC                 | CC               | INTERGENIC      |               |                    |                    |

| SNPs IDs            | Chromosome IDs | Chromosomes     | Physical positions (bp) | CDC Frontier genome (Reference genome) | (Pusa 1103 & HPNB) | (ILWC 46 & LPNB) | Sequence genome | Components of | Gene accession IDs | Putative functions |
|---------------------|----------------|-----------------|-------------------------|----------------------------------------|--------------------|------------------|-----------------|---------------|--------------------|--------------------|
| SNP_2012_A_18327852 | NC_021160.1    | Ca_Kabuli_Chr01 | 18327852                | CC                                     | TT                 | TT               | INTERGENIC      |               |                    |                    |
| SNP_2013_A_18327889 | NC_021160.1    | Ca_Kabuli_Chr01 | 18327889                | GG                                     | AA                 | AA               | INTERGENIC      |               |                    |                    |
| SNP_2014_A_18327944 | NC_021160.1    | Ca_Kabuli_Chr01 | 18327944                | TT                                     | AA                 | AA               | INTERGENIC      |               |                    |                    |
| SNP_2015_A_18327945 | NC_021160.1    | Ca_Kabuli_Chr01 | 18327945                | CC                                     | TT                 | TT               | INTERGENIC      |               |                    |                    |
| SNP_2016_A_18327946 | NC_021160.1    | Ca_Kabuli_Chr01 | 18327946                | GG                                     | AA                 | AA               | INTERGENIC      |               |                    |                    |
| SNP_2017_A_18327969 | NC_021160.1    | Ca_Kabuli_Chr01 | 18327969                | TT                                     | CC                 | CC               | INTERGENIC      |               |                    |                    |
| SNP_2018_A_18328012 | NC_021160.1    | Ca_Kabuli_Chr01 | 18328012                | AA                                     | TT                 | TT               | INTERGENIC      |               |                    |                    |
| SNP_2019_A_18328084 | NC_021160.1    | Ca_Kabuli_Chr01 | 18328084                | GG                                     | TT                 | TT               | INTERGENIC      |               |                    |                    |
| SNP_2021_A_18328245 | NC_021160.1    | Ca_Kabuli_Chr01 | 18328245                | GG                                     | AA                 | AA               | INTERGENIC      |               |                    |                    |
| SNP_2022_A_18328288 | NC_021160.1    | Ca_Kabuli_Chr01 | 18328288                | AA                                     | TT                 | TT               | INTERGENIC      |               |                    |                    |
| SNP_2023_A_18328374 | NC_021160.1    | Ca_Kabuli_Chr01 | 18328374                | GG                                     | AA                 | AA               | INTERGENIC      |               |                    |                    |
| SNP_2024_A_18328423 | NC_021160.1    | Ca_Kabuli_Chr01 | 18328423                | CC                                     | TT                 | TT               | INTERGENIC      |               |                    |                    |
| SNP_2025_A_18363608 | NC_021160.1    | Ca_Kabuli_Chr01 | 18363608                | GG                                     | AA                 | AA               | INTERGENIC      |               |                    |                    |
| SNP_2026_A_18363694 | NC_021160.1    | Ca_Kabuli_Chr01 | 18363694                | AA                                     | GG                 | GG               | INTERGENIC      |               |                    |                    |
| SNP_2027_A_18363764 | NC_021160.1    | Ca_Kabuli_Chr01 | 18363764                | GG                                     | AA                 | AA               | INTERGENIC      |               |                    |                    |
| SNP_2028_A_18363894 | NC_021160.1    | Ca_Kabuli_Chr01 | 18363894                | AA                                     | CC                 | CC               | INTERGENIC      |               |                    |                    |
| SNP_2029_A_18363926 | NC_021160.1    | Ca_Kabuli_Chr01 | 18363926                | CC                                     | TT                 | TT               | INTERGENIC      |               |                    |                    |
| SNP_2030_A_18363952 | NC_021160.1    | Ca_Kabuli_Chr01 | 18363952                | CC                                     | TT                 | TT               | INTERGENIC      |               |                    |                    |
| SNP_2031_A_18363986 | NC_021160.1    | Ca_Kabuli_Chr01 | 18363986                | GG                                     | AA                 | AA               | INTERGENIC      |               |                    |                    |
| SNP_2032_A_18363995 | NC_021160.1    | Ca_Kabuli_Chr01 | 18363995                | GG                                     | AA                 | AA               | INTERGENIC      |               |                    |                    |
| SNP_2033_A_18364006 | NC_021160.1    | Ca_Kabuli_Chr01 | 18364006                | AA                                     | TT                 | TT               | INTERGENIC      |               |                    |                    |
| SNP_2034_A_18364007 | NC_021160.1    | Ca_Kabuli_Chr01 | 18364007                | AA                                     | GG                 | GG               | INTERGENIC      |               |                    |                    |

| SNPs IDs            | Chromosome IDs | Chromosomes     | Physical positions (bp) | CDC Frontier genome (Reference genome) | (Pusa 1103 & HPNB) | (ILWC 46 & LPNB) | Sequence genome | Components of | Gene accession IDs | Putative functions |
|---------------------|----------------|-----------------|-------------------------|----------------------------------------|--------------------|------------------|-----------------|---------------|--------------------|--------------------|
| SNP_2035_A_18364025 | NC_021160.1    | Ca_Kabuli_Chr01 | 18364025                | AA                                     | CC                 | CC               | INTERGENIC      |               |                    |                    |
| SNP_2037_A_18364099 | NC_021160.1    | Ca_Kabuli_Chr01 | 18364099                | CC                                     | GG                 | GG               | INTERGENIC      |               |                    |                    |
| SNP_2038_A_18364106 | NC_021160.1    | Ca_Kabuli_Chr01 | 18364106                | CC                                     | AA                 | AA               | INTERGENIC      |               |                    |                    |
| SNP_2039_A_18364147 | NC_021160.1    | Ca_Kabuli_Chr01 | 18364147                | GG                                     | AA                 | AA               | INTERGENIC      |               |                    |                    |
| SNP_2040_A_18364161 | NC_021160.1    | Ca_Kabuli_Chr01 | 18364161                | AA                                     | GG                 | GG               | INTERGENIC      |               |                    |                    |
| SNP_2041_A_18368634 | NC_021160.1    | Ca_Kabuli_Chr01 | 18368634                | GG                                     | TT                 | TT               | INTERGENIC      |               |                    |                    |
| SNP_2042_A_18368747 | NC_021160.1    | Ca_Kabuli_Chr01 | 18368747                | CC                                     | TT                 | TT               | INTERGENIC      |               |                    |                    |
| SNP_2043_A_18368773 | NC_021160.1    | Ca_Kabuli_Chr01 | 18368773                | AA                                     | GG                 | GG               | INTERGENIC      |               |                    |                    |
| SNP_2044_A_18368817 | NC_021160.1    | Ca_Kabuli_Chr01 | 18368817                | CC                                     | GG                 | GG               | INTERGENIC      |               |                    |                    |
| SNP_2045_A_18403695 | NC_021160.1    | Ca_Kabuli_Chr01 | 18403695                | CC                                     | TT                 | TT               | INTERGENIC      |               |                    |                    |
| SNP_2046_A_18407748 | NC_021160.1    | Ca_Kabuli_Chr01 | 18407748                | CC                                     | TT                 | TT               | INTERGENIC      |               |                    |                    |
| SNP_2047_A_18407938 | NC_021160.1    | Ca_Kabuli_Chr01 | 18407938                | GG                                     | AA                 | AA               | INTERGENIC      |               |                    |                    |
| SNP_2048_A_18408133 | NC_021160.1    | Ca_Kabuli_Chr01 | 18408133                | GG                                     | AA                 | AA               | INTERGENIC      |               |                    |                    |
| SNP_2049_A_18418963 | NC_021160.1    | Ca_Kabuli_Chr01 | 18418963                | CC                                     | TT                 | TT               | INTERGENIC      |               |                    |                    |
| SNP_2050_A_18418967 | NC_021160.1    | Ca_Kabuli_Chr01 | 18418967                | CC                                     | TT                 | TT               | INTERGENIC      |               |                    |                    |
| SNP_2051_A_18425388 | NC_021160.1    | Ca_Kabuli_Chr01 | 18425388                | TT                                     | CC                 | CC               | INTERGENIC      |               |                    |                    |
| SNP_2052_A_18425471 | NC_021160.1    | Ca_Kabuli_Chr01 | 18425471                | TT                                     | AA                 | AA               | INTERGENIC      |               |                    |                    |
| SNP_2054_A_18451233 | NC_021160.1    | Ca_Kabuli_Chr01 | 18451233                | GG                                     | AA                 | AA               | INTERGENIC      |               |                    |                    |
| SNP_2055_A_18466077 | NC_021160.1    | Ca_Kabuli_Chr01 | 18466077                | TT                                     | CC                 | CC               | INTERGENIC      |               |                    |                    |
| SNP_2056_A_18466093 | NC_021160.1    | Ca_Kabuli_Chr01 | 18466093                | TT                                     | CC                 | CC               | INTERGENIC      |               |                    |                    |
| SNP_2058_A_18527941 | NC_021160.1    | Ca_Kabuli_Chr01 | 18527941                | TT                                     | CC                 | CC               | INTERGENIC      |               |                    |                    |
| SNP_2059_A_18528184 | NC_021160.1    | Ca_Kabuli_Chr01 | 18528184                | TT                                     | AA                 | AA               | INTERGENIC      |               |                    |                    |

| SNPs IDs            | Chromosome IDs | Chromosomes     | Physical positions (bp) | CDC Frontier (Reference genome) | (Pusa 1103 & HPNB) | (ILWC 46 & LPNB) | Sequence genome | Components of | Gene accession IDs           | Putative functions |
|---------------------|----------------|-----------------|-------------------------|---------------------------------|--------------------|------------------|-----------------|---------------|------------------------------|--------------------|
| SNP_2060_A_18552339 | NC_021160.1    | Ca_Kabuli_Chr01 | 18552339                | GG                              | AA                 | AA               | INTERGENIC      |               |                              |                    |
| SNP_2061_A_18575931 | NC_021160.1    | Ca_Kabuli_Chr01 | 18575931                | AA                              | GG                 | GG               | INTERGENIC      |               |                              |                    |
| SNP_2062_A_18575933 | NC_021160.1    | Ca_Kabuli_Chr01 | 18575933                | AA                              | GG                 | GG               | INTERGENIC      |               |                              |                    |
| SNP_2063_A_18581148 | NC_021160.1    | Ca_Kabuli_Chr01 | 18581148                | AA                              | GG                 | GG               | INTERGENIC      |               |                              |                    |
| SNP_2064_A_18581151 | NC_021160.1    | Ca_Kabuli_Chr01 | 18581151                | TT                              | AA                 | AA               | INTERGENIC      |               |                              |                    |
| SNP_2065_A_18637998 | NC_021160.1    | Ca_Kabuli_Chr01 | 18637998                | GG                              | TT                 | TT               | INTERGENIC      |               |                              |                    |
| SNP_2066_A_18637999 | NC_021160.1    | Ca_Kabuli_Chr01 | 18637999                | GG                              | AA                 | AA               | INTERGENIC      |               |                              |                    |
| SNP_2067_A_18665684 | NC_021160.1    | Ca_Kabuli_Chr01 | 18665684                | TT                              | CC                 | CC               | INTERGENIC      |               |                              |                    |
| SNP_2068_A_18665687 | NC_021160.1    | Ca_Kabuli_Chr01 | 18665687                | AA                              | CC                 | CC               | INTERGENIC      |               |                              |                    |
| SNP_2069_A_18665964 | NC_021160.1    | Ca_Kabuli_Chr01 | 18665964                | AA                              | TT                 | TT               | INTERGENIC      |               |                              |                    |
| SNP_2070_A_18688504 | NC_021160.1    | Ca_Kabuli_Chr01 | 18688504                | AA                              | GG                 | GG               | INTERGENIC      |               |                              |                    |
| SNP_2072_A_18740378 | NC_021160.1    | Ca_Kabuli_Chr01 | 18740378                | GG                              | AA                 | AA               | INTERGENIC      |               |                              |                    |
| SNP_2073_A_18824205 | NC_021160.1    | Ca_Kabuli_Chr01 | 18824205                | TT                              | CC                 | CC               | INTERGENIC      |               |                              |                    |
| SNP_2074_A_18824447 | NC_021160.1    | Ca_Kabuli_Chr01 | 18824447                | CC                              | TT                 | TT               | DRR             | 101499111     | uncharacterized LOC101499111 |                    |
| SNP_2075_A_18824483 | NC_021160.1    | Ca_Kabuli_Chr01 | 18824483                | AA                              | GG                 | GG               | DRR             | 101499111     | uncharacterized LOC101499111 |                    |
| SNP_2076_A_18824489 | NC_021160.1    | Ca_Kabuli_Chr01 | 18824489                | TT                              | CC                 | CC               | DRR             | 101499111     | uncharacterized LOC101499111 |                    |
| SNP_2077_A_18824543 | NC_021160.1    | Ca_Kabuli_Chr01 | 18824543                | TT                              | CC                 | CC               | DRR             | 101499111     | uncharacterized LOC101499111 |                    |
| SNP_2078_A_18868457 | NC_021160.1    | Ca_Kabuli_Chr01 | 18868457                | AA                              | TT                 | TT               | INTERGENIC      |               |                              |                    |
| SNP_2079_A_18868484 | NC_021160.1    | Ca_Kabuli_Chr01 | 18868484                | GG                              | AA                 | AA               | INTERGENIC      |               |                              |                    |
| SNP_2080_A_18868557 | NC_021160.1    | Ca_Kabuli_Chr01 | 18868557                | TT                              | CC                 | CC               | INTERGENIC      |               |                              |                    |
| SNP_2082_A_18868667 | NC_021160.1    | Ca_Kabuli_Chr01 | 18868667                | AA                              | GG                 | GG               | INTERGENIC      |               |                              |                    |
| SNP_2083_A_18868679 | NC_021160.1    | Ca_Kabuli_Chr01 | 18868679                | AA                              | GG                 | GG               | INTERGENIC      |               |                              |                    |



| SNPs IDs            | Chromosome IDs | Chromosomes     | Physical positions (bp) | CDC Frontier genome (Reference genome) | (Pusa 1103 & HPNB) | (ILWC 46 & LPNB) | Sequence genome | Components of | Gene accession IDs | Putative functions |
|---------------------|----------------|-----------------|-------------------------|----------------------------------------|--------------------|------------------|-----------------|---------------|--------------------|--------------------|
| SNP_2084_A_18868684 | NC_021160.1    | Ca_Kabuli_Chr01 | 18868684                | CC                                     | TT                 | TT               | INTERGENIC      |               |                    |                    |
| SNP_2085_A_18870627 | NC_021160.1    | Ca_Kabuli_Chr01 | 18870627                | GG                                     | AA                 | AA               | INTERGENIC      |               |                    |                    |
| SNP_2086_A_18880655 | NC_021160.1    | Ca_Kabuli_Chr01 | 18880655                | TT                                     | CC                 | CC               | INTERGENIC      |               |                    |                    |
| SNP_2087_A_18881034 | NC_021160.1    | Ca_Kabuli_Chr01 | 18881034                | GG                                     | AA                 | AA               | INTERGENIC      |               |                    |                    |
| SNP_2090_A_18933634 | NC_021160.1    | Ca_Kabuli_Chr01 | 18933634                | TT                                     | AA                 | AA               | INTERGENIC      |               |                    |                    |
| SNP_2091_A_19022718 | NC_021160.1    | Ca_Kabuli_Chr01 | 19022718                | AA                                     | GG                 | GG               | INTERGENIC      |               |                    |                    |
| SNP_2092_A_19025172 | NC_021160.1    | Ca_Kabuli_Chr01 | 19025172                | CC                                     | AA                 | AA               | INTERGENIC      |               |                    |                    |
| SNP_2093_A_19025173 | NC_021160.1    | Ca_Kabuli_Chr01 | 19025173                | TT                                     | AA                 | AA               | INTERGENIC      |               |                    |                    |
| SNP_2094_A_19025177 | NC_021160.1    | Ca_Kabuli_Chr01 | 19025177                | TT                                     | CC                 | CC               | INTERGENIC      |               |                    |                    |
| SNP_2095_A_19089115 | NC_021160.1    | Ca_Kabuli_Chr01 | 19089115                | AA                                     | TT                 | TT               | INTERGENIC      |               |                    |                    |
| SNP_2096_A_19111747 | NC_021160.1    | Ca_Kabuli_Chr01 | 19111747                | TT                                     | CC                 | CC               | INTERGENIC      |               |                    |                    |
| SNP_2097_A_19137424 | NC_021160.1    | Ca_Kabuli_Chr01 | 19137424                | GG                                     | AA                 | AA               | INTERGENIC      |               |                    |                    |
| SNP_2098_A_19150701 | NC_021160.1    | Ca_Kabuli_Chr01 | 19150701                | CC                                     | AA                 | AA               | INTERGENIC      |               |                    |                    |
| SNP_2100_A_19151000 | NC_021160.1    | Ca_Kabuli_Chr01 | 19151000                | TT                                     | CC                 | CC               | INTERGENIC      |               |                    |                    |
| SNP_2101_A_19151002 | NC_021160.1    | Ca_Kabuli_Chr01 | 19151002                | CC                                     | AA                 | AA               | INTERGENIC      |               |                    |                    |
| SNP_2102_A_19151031 | NC_021160.1    | Ca_Kabuli_Chr01 | 19151031                | AA                                     | TT                 | TT               | INTERGENIC      |               |                    |                    |
| SNP_2103_A_19151037 | NC_021160.1    | Ca_Kabuli_Chr01 | 19151037                | TT                                     | AA                 | AA               | INTERGENIC      |               |                    |                    |
| SNP_2104_A_19151103 | NC_021160.1    | Ca_Kabuli_Chr01 | 19151103                | GG                                     | AA                 | AA               | INTERGENIC      |               |                    |                    |
| SNP_2105_A_19151112 | NC_021160.1    | Ca_Kabuli_Chr01 | 19151112                | AA                                     | GG                 | GG               | INTERGENIC      |               |                    |                    |
| SNP_2106_A_19151134 | NC_021160.1    | Ca_Kabuli_Chr01 | 19151134                | TT                                     | CC                 | CC               | INTERGENIC      |               |                    |                    |
| SNP_2107_A_19307885 | NC_021160.1    | Ca_Kabuli_Chr01 | 19307885                | TT                                     | CC                 | CC               | INTERGENIC      |               |                    |                    |
| SNP_2108_A_19308243 | NC_021160.1    | Ca_Kabuli_Chr01 | 19308243                | AA                                     | GG                 | GG               | INTERGENIC      |               |                    |                    |

| SNPs IDs            | Chromosome IDs | Chromosomes     | Physical positions (bp) | CDC Frontier (Reference genome) | (Pusa 1103 & HPNB) | (ILWC 46 & LPNB) | Sequence Components of genome | Gene accession IDs | Putative functions           |
|---------------------|----------------|-----------------|-------------------------|---------------------------------|--------------------|------------------|-------------------------------|--------------------|------------------------------|
| SNP_2109_A_19320543 | NC_021160.1    | Ca_Kabuli_Chr01 | 19320543                | TT                              | CC                 | CC               | URR                           | 101493132          | uncharacterized LOC101493132 |
| SNP_2110_A_19376030 | NC_021160.1    | Ca_Kabuli_Chr01 | 19376030                | AA                              | CC                 | CC               | INTERGENIC                    |                    |                              |
| SNP_2111_A_19392054 | NC_021160.1    | Ca_Kabuli_Chr01 | 19392054                | TT                              | AA                 | AA               | INTERGENIC                    |                    |                              |
| SNP_2112_A_19422853 | NC_021160.1    | Ca_Kabuli_Chr01 | 19422853                | TT                              | CC                 | CC               | INTERGENIC                    |                    |                              |
| SNP_2113_A_19423123 | NC_021160.1    | Ca_Kabuli_Chr01 | 19423123                | CC                              | TT                 | TT               | INTERGENIC                    |                    |                              |
| SNP_2114_A_19423192 | NC_021160.1    | Ca_Kabuli_Chr01 | 19423192                | TT                              | CC                 | CC               | INTERGENIC                    |                    |                              |
| SNP_2115_A_19423310 | NC_021160.1    | Ca_Kabuli_Chr01 | 19423310                | TT                              | GG                 | GG               | INTERGENIC                    |                    |                              |
| SNP_2116_A_19427104 | NC_021160.1    | Ca_Kabuli_Chr01 | 19427104                | TT                              | CC                 | CC               | INTERGENIC                    |                    |                              |
| SNP_2117_A_19427159 | NC_021160.1    | Ca_Kabuli_Chr01 | 19427159                | AA                              | GG                 | GG               | INTERGENIC                    |                    |                              |
| SNP_2118_A_19427178 | NC_021160.1    | Ca_Kabuli_Chr01 | 19427178                | GG                              | TT                 | TT               | INTERGENIC                    |                    |                              |
| SNP_2119_A_19427623 | NC_021160.1    | Ca_Kabuli_Chr01 | 19427623                | TT                              | CC                 | CC               | INTERGENIC                    |                    |                              |
| SNP_2120_A_19431345 | NC_021160.1    | Ca_Kabuli_Chr01 | 19431345                | GG                              | AA                 | AA               | INTERGENIC                    |                    |                              |
| SNP_2121_A_19431349 | NC_021160.1    | Ca_Kabuli_Chr01 | 19431349                | GG                              | AA                 | AA               | INTERGENIC                    |                    |                              |
| SNP_2122_A_19431381 | NC_021160.1    | Ca_Kabuli_Chr01 | 19431381                | TT                              | CC                 | CC               | INTERGENIC                    |                    |                              |
| SNP_2123_A_19431426 | NC_021160.1    | Ca_Kabuli_Chr01 | 19431426                | CC                              | GG                 | GG               | INTERGENIC                    |                    |                              |
| SNP_2124_A_19458248 | NC_021160.1    | Ca_Kabuli_Chr01 | 19458248                | TT                              | CC                 | CC               | INTERGENIC                    |                    |                              |
| SNP_2126_A_19499108 | NC_021160.1    | Ca_Kabuli_Chr01 | 19499108                | AA                              | CC                 | CC               | INTERGENIC                    |                    |                              |
| SNP_2127_A_19499140 | NC_021160.1    | Ca_Kabuli_Chr01 | 19499140                | CC                              | GG                 | GG               | INTERGENIC                    |                    |                              |
| SNP_2128_A_19499186 | NC_021160.1    | Ca_Kabuli_Chr01 | 19499186                | AA                              | CC                 | CC               | INTERGENIC                    |                    |                              |
| SNP_2129_A_19499194 | NC_021160.1    | Ca_Kabuli_Chr01 | 19499194                | GG                              | TT                 | TT               | INTERGENIC                    |                    |                              |
| SNP_2130_A_19507308 | NC_021160.1    | Ca_Kabuli_Chr01 | 19507308                | TT                              | CC                 | CC               | INTERGENIC                    |                    |                              |
| SNP_2131_A_19619453 | NC_021160.1    | Ca_Kabuli_Chr01 | 19619453                | GG                              | CC                 | CC               | INTERGENIC                    |                    |                              |

| SNPs IDs            | Chromosome IDs | Chromosomes     | Physical positions (bp) | CDC Frontier (Reference genome) | (Pusa 1103 & HPNB) | (ILWC 46 & LPNB) | Sequence genome | Components of | Gene accession IDs | Putative functions |
|---------------------|----------------|-----------------|-------------------------|---------------------------------|--------------------|------------------|-----------------|---------------|--------------------|--------------------|
| SNP_2132_A_19619792 | NC_021160.1    | Ca_Kabuli_Chr01 | 19619792                | AA                              | GG                 | GG               | INTERGENIC      |               |                    |                    |
| SNP_2133_A_19619861 | NC_021160.1    | Ca_Kabuli_Chr01 | 19619861                | TT                              | CC                 | CC               | INTERGENIC      |               |                    |                    |
| SNP_2134_A_19619866 | NC_021160.1    | Ca_Kabuli_Chr01 | 19619866                | AA                              | CC                 | CC               | INTERGENIC      |               |                    |                    |
| SNP_2135_A_19619915 | NC_021160.1    | Ca_Kabuli_Chr01 | 19619915                | TT                              | CC                 | CC               | INTERGENIC      |               |                    |                    |
| SNP_2136_A_19619921 | NC_021160.1    | Ca_Kabuli_Chr01 | 19619921                | TT                              | CC                 | CC               | INTERGENIC      |               |                    |                    |
| SNP_2137_A_19626514 | NC_021160.1    | Ca_Kabuli_Chr01 | 19626514                | AA                              | GG                 | GG               | INTERGENIC      |               |                    |                    |
| SNP_2138_A_19627951 | NC_021160.1    | Ca_Kabuli_Chr01 | 19627951                | TT                              | CC                 | CC               | INTERGENIC      |               |                    |                    |
| SNP_2139_A_19639531 | NC_021160.1    | Ca_Kabuli_Chr01 | 19639531                | AA                              | CC                 | CC               | INTERGENIC      |               |                    |                    |
| SNP_2140_A_19639534 | NC_021160.1    | Ca_Kabuli_Chr01 | 19639534                | AA                              | CC                 | CC               | INTERGENIC      |               |                    |                    |
| SNP_2141_A_19649710 | NC_021160.1    | Ca_Kabuli_Chr01 | 19649710                | CC                              | TT                 | TT               | INTERGENIC      |               |                    |                    |
| SNP_2142_A_19672199 | NC_021160.1    | Ca_Kabuli_Chr01 | 19672199                | AA                              | TT                 | TT               | INTERGENIC      |               |                    |                    |
| SNP_2143_A_19672200 | NC_021160.1    | Ca_Kabuli_Chr01 | 19672200                | AA                              | CC                 | CC               | INTERGENIC      |               |                    |                    |
| SNP_2144_A_19697200 | NC_021160.1    | Ca_Kabuli_Chr01 | 19697200                | AA                              | GG                 | GG               | INTERGENIC      |               |                    |                    |
| SNP_2145_A_19697357 | NC_021160.1    | Ca_Kabuli_Chr01 | 19697357                | TT                              | CC                 | CC               | INTERGENIC      |               |                    |                    |
| SNP_2146_A_19697538 | NC_021160.1    | Ca_Kabuli_Chr01 | 19697538                | CC                              | TT                 | TT               | INTERGENIC      |               |                    |                    |
| SNP_2147_A_19697674 | NC_021160.1    | Ca_Kabuli_Chr01 | 19697674                | AA                              | GG                 | GG               | INTERGENIC      |               |                    |                    |
| SNP_2148_A_19720994 | NC_021160.1    | Ca_Kabuli_Chr01 | 19720994                | AA                              | GG                 | GG               | INTERGENIC      |               |                    |                    |
| SNP_2149_A_19742632 | NC_021160.1    | Ca_Kabuli_Chr01 | 19742632                | CC                              | TT                 | TT               | INTERGENIC      |               |                    |                    |
| SNP_2150_A_19742669 | NC_021160.1    | Ca_Kabuli_Chr01 | 19742669                | GG                              | TT                 | TT               | INTERGENIC      |               |                    |                    |
| SNP_2151_A_19742684 | NC_021160.1    | Ca_Kabuli_Chr01 | 19742684                | CC                              | TT                 | TT               | INTERGENIC      |               |                    |                    |
| SNP_2152_A_19742713 | NC_021160.1    | Ca_Kabuli_Chr01 | 19742713                | GG                              | AA                 | AA               | INTERGENIC      |               |                    |                    |
| SNP_2153_A_19742720 | NC_021160.1    | Ca_Kabuli_Chr01 | 19742720                | GG                              | TT                 | TT               | INTERGENIC      |               |                    |                    |

| SNPs IDs            | Chromosome IDs | Chromosomes     | Physical positions (bp) | CDC Frontier genome (Reference genome) | (Pusa 1103 & HPNB) | (ILWC 46 & LPNB) | Sequence Components of genome | Gene accession IDs | Putative functions                          |
|---------------------|----------------|-----------------|-------------------------|----------------------------------------|--------------------|------------------|-------------------------------|--------------------|---------------------------------------------|
| SNP_2154_A_19764066 | NC_021160.1    | Ca_Kabuli_Chr01 | 19764066                | TT                                     | CC                 | CC               | INTERGENIC                    |                    |                                             |
| SNP_2155_A_19800544 | NC_021160.1    | Ca_Kabuli_Chr01 | 19800544                | GG                                     | TT                 | TT               | INTERGENIC                    |                    |                                             |
| SNP_2156_A_19812981 | NC_021160.1    | Ca_Kabuli_Chr01 | 19812981                | TT                                     | CC                 | CC               | INTERGENIC                    |                    |                                             |
| SNP_2157_A_19812997 | NC_021160.1    | Ca_Kabuli_Chr01 | 19812997                | CC                                     | TT                 | TT               | INTERGENIC                    |                    |                                             |
| SNP_2158_A_19813034 | NC_021160.1    | Ca_Kabuli_Chr01 | 19813034                | TT                                     | CC                 | CC               | INTERGENIC                    |                    |                                             |
| SNP_2159_A_19813041 | NC_021160.1    | Ca_Kabuli_Chr01 | 19813041                | CC                                     | TT                 | TT               | INTERGENIC                    |                    |                                             |
| SNP_2161_A_19909020 | NC_021160.1    | Ca_Kabuli_Chr01 | 19909020                | GG                                     | AA                 | AA               | URR                           | 101507754          | DNA-directed RNA polymerase I subunit rpa49 |
| SNP_2163_A_19938927 | NC_021160.1    | Ca_Kabuli_Chr01 | 19938927                | TT                                     | AA                 | AA               | INTERGENIC                    |                    |                                             |
| SNP_2164_A_19952894 | NC_021160.1    | Ca_Kabuli_Chr01 | 19952894                | CC                                     | TT                 | TT               | INTERGENIC                    |                    |                                             |
| SNP_2165_A_19968815 | NC_021160.1    | Ca_Kabuli_Chr01 | 19968815                | AA                                     | GG                 | GG               | INTERGENIC                    |                    |                                             |
| SNP_2166_A_20072771 | NC_021160.1    | Ca_Kabuli_Chr01 | 20072771                | TT                                     | AA                 | AA               | DRR                           | 101512446          | DNA ligase 4                                |
| SNP_2167_A_20085134 | NC_021160.1    | Ca_Kabuli_Chr01 | 20085134                | GG                                     | TT                 | TT               | URR                           | 101512120          | polyadenylate-binding protein RBP45-like    |
| SNP_2169_A_21570909 | NC_021160.1    | Ca_Kabuli_Chr01 | 21570909                | GG                                     | AA                 | AA               | INTERGENIC                    |                    |                                             |
| SNP_2170_A_21572248 | NC_021160.1    | Ca_Kabuli_Chr01 | 21572248                | CC                                     | TT                 | TT               | INTERGENIC                    |                    |                                             |
| SNP_2171_A_21657089 | NC_021160.1    | Ca_Kabuli_Chr01 | 21657089                | AA                                     | GG                 | GG               | INTERGENIC                    |                    |                                             |
| SNP_2172_A_21657102 | NC_021160.1    | Ca_Kabuli_Chr01 | 21657102                | AA                                     | CC                 | CC               | INTERGENIC                    |                    |                                             |
| SNP_2173_A_21657337 | NC_021160.1    | Ca_Kabuli_Chr01 | 21657337                | AA                                     | TT                 | TT               | INTERGENIC                    |                    |                                             |
| SNP_2174_A_21657432 | NC_021160.1    | Ca_Kabuli_Chr01 | 21657432                | TT                                     | CC                 | CC               | INTERGENIC                    |                    |                                             |
| SNP_2175_A_21657436 | NC_021160.1    | Ca_Kabuli_Chr01 | 21657436                | AA                                     | GG                 | GG               | INTERGENIC                    |                    |                                             |
| SNP_2176_A_21657610 | NC_021160.1    | Ca_Kabuli_Chr01 | 21657610                | AA                                     | GG                 | GG               | INTERGENIC                    |                    |                                             |
| SNP_2177_A_21657625 | NC_021160.1    | Ca_Kabuli_Chr01 | 21657625                | AA                                     | GG                 | GG               | INTERGENIC                    |                    |                                             |
| SNP_2178_A_21657643 | NC_021160.1    | Ca_Kabuli_Chr01 | 21657643                | TT                                     | GG                 | GG               | INTERGENIC                    |                    |                                             |

| SNPs IDs            | Chromosome IDs | Chromosomes     | Physical positions (bp) | CDC Frontier genome (Reference genome) | (Pusa 1103 & HPNB) | (ILWC 46 & LPNB) | Sequence genome | Components of | Gene accession IDs | Putative functions                                  |
|---------------------|----------------|-----------------|-------------------------|----------------------------------------|--------------------|------------------|-----------------|---------------|--------------------|-----------------------------------------------------|
| SNP_2179_A_21657661 | NC_021160.1    | Ca_Kabuli_Chr01 | 21657661                | GG                                     | TT                 | TT               | INTERGENIC      |               |                    |                                                     |
| SNP_2180_A_21657667 | NC_021160.1    | Ca_Kabuli_Chr01 | 21657667                | GG                                     | AA                 | AA               | INTERGENIC      |               |                    |                                                     |
| SNP_2181_A_21657697 | NC_021160.1    | Ca_Kabuli_Chr01 | 21657697                | AA                                     | GG                 | GG               | INTERGENIC      |               |                    |                                                     |
| SNP_2182_A_21657714 | NC_021160.1    | Ca_Kabuli_Chr01 | 21657714                | GG                                     | AA                 | AA               | INTERGENIC      |               |                    |                                                     |
| SNP_2184_A_21657732 | NC_021160.1    | Ca_Kabuli_Chr01 | 21657732                | AA                                     | GG                 | GG               | INTERGENIC      |               |                    |                                                     |
| SNP_2185_A_21657733 | NC_021160.1    | Ca_Kabuli_Chr01 | 21657733                | GG                                     | AA                 | AA               | INTERGENIC      |               |                    |                                                     |
| SNP_2186_A_21657769 | NC_021160.1    | Ca_Kabuli_Chr01 | 21657769                | GG                                     | AA                 | AA               | INTERGENIC      |               |                    |                                                     |
| SNP_2187_A_21657787 | NC_021160.1    | Ca_Kabuli_Chr01 | 21657787                | AA                                     | TT                 | TT               | INTERGENIC      |               |                    |                                                     |
| SNP_2188_A_21657811 | NC_021160.1    | Ca_Kabuli_Chr01 | 21657811                | AA                                     | GG                 | GG               | INTERGENIC      |               |                    |                                                     |
| SNP_2189_A_21657817 | NC_021160.1    | Ca_Kabuli_Chr01 | 21657817                | GG                                     | AA                 | AA               | INTERGENIC      |               |                    |                                                     |
| SNP_2190_A_21657838 | NC_021160.1    | Ca_Kabuli_Chr01 | 21657838                | TT                                     | CC                 | CC               | INTERGENIC      |               |                    |                                                     |
| SNP_2191_A_21657847 | NC_021160.1    | Ca_Kabuli_Chr01 | 21657847                | TT                                     | AA                 | AA               | INTERGENIC      |               |                    |                                                     |
| SNP_2192_A_21657850 | NC_021160.1    | Ca_Kabuli_Chr01 | 21657850                | AA                                     | TT                 | TT               | INTERGENIC      |               |                    |                                                     |
| SNP_2193_A_21699390 | NC_021160.1    | Ca_Kabuli_Chr01 | 21699390                | CC                                     | TT                 | TT               | INTERGENIC      |               |                    |                                                     |
| SNP_2194_A_21699877 | NC_021160.1    | Ca_Kabuli_Chr01 | 21699877                | AA                                     | GG                 | GG               | INTERGENIC      |               |                    |                                                     |
| SNP_2195_A_21703194 | NC_021160.1    | Ca_Kabuli_Chr01 | 21703194                | AA                                     | TT                 | TT               | INTERGENIC      |               |                    |                                                     |
| SNP_2196_A_21703195 | NC_021160.1    | Ca_Kabuli_Chr01 | 21703195                | AA                                     | TT                 | TT               | INTERGENIC      |               |                    |                                                     |
| SNP_2198_A_21769564 | NC_021160.1    | Ca_Kabuli_Chr01 | 21769564                | AA                                     | TT                 | TT               | INTERGENIC      |               |                    |                                                     |
| SNP_2200_A_21777841 | NC_021160.1    | Ca_Kabuli_Chr01 | 21777841                | CC                                     | AA                 | AA               | URR             |               | 101491077          | Unknown function                                    |
| SNP_2201_A_21831338 | NC_021160.1    | Ca_Kabuli_Chr01 | 21831338                | GG                                     | AA                 | AA               | URR             |               | 101492023          | 60S ribosomal protein L7-4-like                     |
| SNP_2202_A_21919134 | NC_021160.1    | Ca_Kabuli_Chr01 | 21919134                | TT                                     | CC                 | CC               | INTRON          |               | 101492361          | calcium-transporting ATPase 8, plasma membrane-type |
| SNP_2203_A_22065235 | NC_021160.1    | Ca_Kabuli_Chr01 | 22065235                | AA                                     | TT                 | TT               | INTERGENIC      |               |                    |                                                     |

| SNPs IDs            | Chromosome IDs | Chromosomes     | Physical positions (bp) | CDC Frontier (Reference genome) | (Pusa 1103 & HPNB) | (ILWC 46 & LPNB) | Sequence genome | Components of | Gene accession IDs | Putative functions |
|---------------------|----------------|-----------------|-------------------------|---------------------------------|--------------------|------------------|-----------------|---------------|--------------------|--------------------|
| SNP_2204_A_22069336 | NC_021160.1    | Ca_Kabuli_Chr01 | 22069336                | GG                              | AA                 | AA               | INTERGENIC      |               |                    |                    |
| SNP_2205_A_22069342 | NC_021160.1    | Ca_Kabuli_Chr01 | 22069342                | CC                              | AA                 | AA               | INTERGENIC      |               |                    |                    |
| SNP_2206_A_22070133 | NC_021160.1    | Ca_Kabuli_Chr01 | 22070133                | GG                              | TT                 | TT               | INTERGENIC      |               |                    |                    |
| SNP_2207_A_22070192 | NC_021160.1    | Ca_Kabuli_Chr01 | 22070192                | AA                              | TT                 | TT               | INTERGENIC      |               |                    |                    |
| SNP_2208_A_22070203 | NC_021160.1    | Ca_Kabuli_Chr01 | 22070203                | AA                              | TT                 | TT               | INTERGENIC      |               |                    |                    |
| SNP_2209_A_22070437 | NC_021160.1    | Ca_Kabuli_Chr01 | 22070437                | AA                              | GG                 | GG               | INTERGENIC      |               |                    |                    |
| SNP_2210_A_22070637 | NC_021160.1    | Ca_Kabuli_Chr01 | 22070637                | AA                              | TT                 | TT               | INTERGENIC      |               |                    |                    |
| SNP_2211_A_22070706 | NC_021160.1    | Ca_Kabuli_Chr01 | 22070706                | AA                              | TT                 | TT               | INTERGENIC      |               |                    |                    |
| SNP_2212_A_22070725 | NC_021160.1    | Ca_Kabuli_Chr01 | 22070725                | TT                              | GG                 | GG               | INTERGENIC      |               |                    |                    |
| SNP_2213_A_22070779 | NC_021160.1    | Ca_Kabuli_Chr01 | 22070779                | TT                              | GG                 | GG               | INTERGENIC      |               |                    |                    |
| SNP_2214_A_22071007 | NC_021160.1    | Ca_Kabuli_Chr01 | 22071007                | GG                              | CC                 | CC               | INTERGENIC      |               |                    |                    |
| SNP_2215_A_22071039 | NC_021160.1    | Ca_Kabuli_Chr01 | 22071039                | TT                              | AA                 | AA               | INTERGENIC      |               |                    |                    |
| SNP_2216_A_22071052 | NC_021160.1    | Ca_Kabuli_Chr01 | 22071052                | CC                              | AA                 | AA               | INTERGENIC      |               |                    |                    |
| SNP_2217_A_22071071 | NC_021160.1    | Ca_Kabuli_Chr01 | 22071071                | CC                              | TT                 | TT               | INTERGENIC      |               |                    |                    |
| SNP_2218_A_22071314 | NC_021160.1    | Ca_Kabuli_Chr01 | 22071314                | CC                              | TT                 | TT               | INTERGENIC      |               |                    |                    |
| SNP_2219_A_22071320 | NC_021160.1    | Ca_Kabuli_Chr01 | 22071320                | CC                              | TT                 | TT               | INTERGENIC      |               |                    |                    |
| SNP_2220_A_22071361 | NC_021160.1    | Ca_Kabuli_Chr01 | 22071361                | AA                              | GG                 | GG               | INTERGENIC      |               |                    |                    |
| SNP_2221_A_22071366 | NC_021160.1    | Ca_Kabuli_Chr01 | 22071366                | AA                              | GG                 | GG               | INTERGENIC      |               |                    |                    |
| SNP_2222_A_22071381 | NC_021160.1    | Ca_Kabuli_Chr01 | 22071381                | GG                              | AA                 | AA               | INTERGENIC      |               |                    |                    |
| SNP_2223_A_22071565 | NC_021160.1    | Ca_Kabuli_Chr01 | 22071565                | AA                              | GG                 | GG               | INTERGENIC      |               |                    |                    |
| SNP_2224_A_22071614 | NC_021160.1    | Ca_Kabuli_Chr01 | 22071614                | AA                              | TT                 | TT               | INTERGENIC      |               |                    |                    |
| SNP_2225_A_22071805 | NC_021160.1    | Ca_Kabuli_Chr01 | 22071805                | GG                              | AA                 | AA               | INTERGENIC      |               |                    |                    |

| SNPs IDs            | Chromosome IDs | Chromosomes     | Physical positions (bp) | CDC Frontier genome (Reference genome) | (Pusa 1103 & HPNB) | (ILWC 46 & LPNB) | Sequence genome | Components of | Gene accession IDs | Putative functions |
|---------------------|----------------|-----------------|-------------------------|----------------------------------------|--------------------|------------------|-----------------|---------------|--------------------|--------------------|
| SNP_2226_A_22131043 | NC_021160.1    | Ca_Kabuli_Chr01 | 22131043                | CC                                     | TT                 | TT               | INTERGENIC      |               |                    |                    |
| SNP_2227_A_22131124 | NC_021160.1    | Ca_Kabuli_Chr01 | 22131124                | CC                                     | TT                 | TT               | INTERGENIC      |               |                    |                    |
| SNP_2228_A_22131225 | NC_021160.1    | Ca_Kabuli_Chr01 | 22131225                | CC                                     | AA                 | AA               | INTERGENIC      |               |                    |                    |
| SNP_2230_A_22131347 | NC_021160.1    | Ca_Kabuli_Chr01 | 22131347                | AA                                     | GG                 | GG               | INTERGENIC      |               |                    |                    |
| SNP_2231_A_22131419 | NC_021160.1    | Ca_Kabuli_Chr01 | 22131419                | GG                                     | AA                 | AA               | INTERGENIC      |               |                    |                    |
| SNP_2232_A_22131488 | NC_021160.1    | Ca_Kabuli_Chr01 | 22131488                | CC                                     | TT                 | TT               | INTERGENIC      |               |                    |                    |
| SNP_2234_A_22131677 | NC_021160.1    | Ca_Kabuli_Chr01 | 22131677                | AA                                     | GG                 | GG               | INTERGENIC      |               |                    |                    |
| SNP_2235_A_22131740 | NC_021160.1    | Ca_Kabuli_Chr01 | 22131740                | TT                                     | CC                 | CC               | INTERGENIC      |               |                    |                    |
| SNP_2236_A_22131743 | NC_021160.1    | Ca_Kabuli_Chr01 | 22131743                | TT                                     | CC                 | CC               | INTERGENIC      |               |                    |                    |
| SNP_2237_A_22131861 | NC_021160.1    | Ca_Kabuli_Chr01 | 22131861                | GG                                     | AA                 | AA               | INTERGENIC      |               |                    |                    |
| SNP_2238_A_22132010 | NC_021160.1    | Ca_Kabuli_Chr01 | 22132010                | AA                                     | CC                 | CC               | INTERGENIC      |               |                    |                    |
| SNP_2240_A_22132229 | NC_021160.1    | Ca_Kabuli_Chr01 | 22132229                | CC                                     | TT                 | TT               | INTERGENIC      |               |                    |                    |
| SNP_2241_A_22132495 | NC_021160.1    | Ca_Kabuli_Chr01 | 22132495                | AA                                     | GG                 | GG               | INTERGENIC      |               |                    |                    |
| SNP_2242_A_22132506 | NC_021160.1    | Ca_Kabuli_Chr01 | 22132506                | CC                                     | TT                 | TT               | INTERGENIC      |               |                    |                    |
| SNP_2243_A_22132542 | NC_021160.1    | Ca_Kabuli_Chr01 | 22132542                | AA                                     | GG                 | GG               | INTERGENIC      |               |                    |                    |
| SNP_2244_A_22132550 | NC_021160.1    | Ca_Kabuli_Chr01 | 22132550                | AA                                     | TT                 | TT               | INTERGENIC      |               |                    |                    |
| SNP_2245_A_22132578 | NC_021160.1    | Ca_Kabuli_Chr01 | 22132578                | CC                                     | TT                 | TT               | INTERGENIC      |               |                    |                    |
| SNP_2246_A_22132899 | NC_021160.1    | Ca_Kabuli_Chr01 | 22132899                | AA                                     | GG                 | GG               | INTERGENIC      |               |                    |                    |
| SNP_2247_A_22132980 | NC_021160.1    | Ca_Kabuli_Chr01 | 22132980                | AA                                     | GG                 | GG               | INTERGENIC      |               |                    |                    |
| SNP_2248_A_22133069 | NC_021160.1    | Ca_Kabuli_Chr01 | 22133069                | GG                                     | AA                 | AA               | INTERGENIC      |               |                    |                    |
| SNP_2249_A_22133117 | NC_021160.1    | Ca_Kabuli_Chr01 | 22133117                | CC                                     | TT                 | TT               | INTERGENIC      |               |                    |                    |
| SNP_2250_A_22133125 | NC_021160.1    | Ca_Kabuli_Chr01 | 22133125                | GG                                     | AA                 | AA               | INTERGENIC      |               |                    |                    |

| SNPs IDs            | Chromosome IDs | Chromosomes     | Physical positions (bp) | CDC Frontier (Reference genome) | (Pusa 1103 & HPNB) | (ILWC 46 & LPNB) | Sequence Components of genome | Gene accession IDs | Putative functions                        |
|---------------------|----------------|-----------------|-------------------------|---------------------------------|--------------------|------------------|-------------------------------|--------------------|-------------------------------------------|
| SNP_2251_A_22133130 | NC_021160.1    | Ca_Kabuli_Chr01 | 22133130                | AA                              | TT                 | TT               | INTERGENIC                    |                    |                                           |
| SNP_2252_A_22133140 | NC_021160.1    | Ca_Kabuli_Chr01 | 22133140                | TT                              | AA                 | AA               | INTERGENIC                    |                    |                                           |
| SNP_2253_A_22133171 | NC_021160.1    | Ca_Kabuli_Chr01 | 22133171                | GG                              | AA                 | AA               | INTERGENIC                    |                    |                                           |
| SNP_2254_A_22133214 | NC_021160.1    | Ca_Kabuli_Chr01 | 22133214                | TT                              | CC                 | CC               | INTERGENIC                    |                    |                                           |
| SNP_2255_A_22133611 | NC_021160.1    | Ca_Kabuli_Chr01 | 22133611                | GG                              | AA                 | AA               | INTERGENIC                    |                    |                                           |
| SNP_2256_A_22171785 | NC_021160.1    | Ca_Kabuli_Chr01 | 22171785                | GG                              | AA                 | AA               | URR                           | 101509228          | homeobox-leucine zipper protein HAT2-like |
| SNP_2257_A_22200846 | NC_021160.1    | Ca_Kabuli_Chr01 | 22200846                | TT                              | GG                 | GG               | INTERGENIC                    |                    |                                           |
| SNP_2258_A_22201071 | NC_021160.1    | Ca_Kabuli_Chr01 | 22201071                | CC                              | AA                 | AA               | INTERGENIC                    |                    |                                           |
| SNP_2259_A_22226915 | NC_021160.1    | Ca_Kabuli_Chr01 | 22226915                | AA                              | GG                 | GG               | INTERGENIC                    |                    |                                           |
| SNP_2260_A_22241501 | NC_021160.1    | Ca_Kabuli_Chr01 | 22241501                | CC                              | GG                 | GG               | INTERGENIC                    |                    |                                           |
| SNP_2261_A_22241534 | NC_021160.1    | Ca_Kabuli_Chr01 | 22241534                | TT                              | CC                 | CC               | INTERGENIC                    |                    |                                           |
| SNP_2262_A_22241602 | NC_021160.1    | Ca_Kabuli_Chr01 | 22241602                | GG                              | AA                 | AA               | INTERGENIC                    |                    |                                           |
| SNP_2263_A_22241634 | NC_021160.1    | Ca_Kabuli_Chr01 | 22241634                | GG                              | AA                 | AA               | INTERGENIC                    |                    |                                           |
| SNP_2264_A_22241848 | NC_021160.1    | Ca_Kabuli_Chr01 | 22241848                | TT                              | AA                 | AA               | INTERGENIC                    |                    |                                           |
| SNP_2265_A_22242083 | NC_021160.1    | Ca_Kabuli_Chr01 | 22242083                | AA                              | CC                 | CC               | INTERGENIC                    |                    |                                           |
| SNP_2266_A_22244563 | NC_021160.1    | Ca_Kabuli_Chr01 | 22244563                | CC                              | GG                 | GG               | INTERGENIC                    |                    |                                           |
| SNP_2267_A_22244565 | NC_021160.1    | Ca_Kabuli_Chr01 | 22244565                | CC                              | TT                 | TT               | INTERGENIC                    |                    |                                           |
| SNP_2268_A_22244596 | NC_021160.1    | Ca_Kabuli_Chr01 | 22244596                | TT                              | AA                 | AA               | INTERGENIC                    |                    |                                           |
| SNP_2269_A_22244601 | NC_021160.1    | Ca_Kabuli_Chr01 | 22244601                | GG                              | AA                 | AA               | INTERGENIC                    |                    |                                           |
| SNP_2270_A_22244666 | NC_021160.1    | Ca_Kabuli_Chr01 | 22244666                | TT                              | AA                 | AA               | INTERGENIC                    |                    |                                           |
| SNP_2271_A_22244724 | NC_021160.1    | Ca_Kabuli_Chr01 | 22244724                | AA                              | GG                 | GG               | INTERGENIC                    |                    |                                           |
| SNP_2272_A_22244729 | NC_021160.1    | Ca_Kabuli_Chr01 | 22244729                | TT                              | GG                 | GG               | INTERGENIC                    |                    |                                           |



| SNPs IDs            | Chromosome IDs | Chromosomes     | Physical positions (bp) | CDC Frontier genome (Reference genome) | (Pusa 1103 & HPNB) | (ILWC 46 & LPNB) | Sequence genome | Components of | Gene accession IDs | Putative functions |
|---------------------|----------------|-----------------|-------------------------|----------------------------------------|--------------------|------------------|-----------------|---------------|--------------------|--------------------|
| SNP_2273_A_22244797 | NC_021160.1    | Ca_Kabuli_Chr01 | 22244797                | AA                                     | TT                 | TT               | INTERGENIC      |               |                    |                    |
| SNP_2274_A_22244937 | NC_021160.1    | Ca_Kabuli_Chr01 | 22244937                | GG                                     | AA                 | AA               | INTERGENIC      |               |                    |                    |
| SNP_2275_A_22244999 | NC_021160.1    | Ca_Kabuli_Chr01 | 22244999                | TT                                     | AA                 | AA               | INTERGENIC      |               |                    |                    |
| SNP_2276_A_22245000 | NC_021160.1    | Ca_Kabuli_Chr01 | 22245000                | TT                                     | GG                 | GG               | INTERGENIC      |               |                    |                    |
| SNP_2277_A_22245001 | NC_021160.1    | Ca_Kabuli_Chr01 | 22245001                | TT                                     | GG                 | GG               | INTERGENIC      |               |                    |                    |
| SNP_2278_A_22245002 | NC_021160.1    | Ca_Kabuli_Chr01 | 22245002                | GG                                     | CC                 | CC               | INTERGENIC      |               |                    |                    |
| SNP_2279_A_22245071 | NC_021160.1    | Ca_Kabuli_Chr01 | 22245071                | GG                                     | AA                 | AA               | INTERGENIC      |               |                    |                    |
| SNP_2280_A_22245076 | NC_021160.1    | Ca_Kabuli_Chr01 | 22245076                | CC                                     | AA                 | AA               | INTERGENIC      |               |                    |                    |
| SNP_2281_A_22245077 | NC_021160.1    | Ca_Kabuli_Chr01 | 22245077                | CC                                     | TT                 | TT               | INTERGENIC      |               |                    |                    |
| SNP_2282_A_22245096 | NC_021160.1    | Ca_Kabuli_Chr01 | 22245096                | CC                                     | TT                 | TT               | INTERGENIC      |               |                    |                    |
| SNP_2283_A_22247047 | NC_021160.1    | Ca_Kabuli_Chr01 | 22247047                | TT                                     | CC                 | CC               | INTERGENIC      |               |                    |                    |
| SNP_2284_A_22250762 | NC_021160.1    | Ca_Kabuli_Chr01 | 22250762                | AA                                     | CC                 | CC               | INTERGENIC      |               |                    |                    |
| SNP_2285_A_22251031 | NC_021160.1    | Ca_Kabuli_Chr01 | 22251031                | TT                                     | CC                 | CC               | INTERGENIC      |               |                    |                    |
| SNP_2286_A_22251041 | NC_021160.1    | Ca_Kabuli_Chr01 | 22251041                | GG                                     | AA                 | AA               | INTERGENIC      |               |                    |                    |
| SNP_2287_A_22252009 | NC_021160.1    | Ca_Kabuli_Chr01 | 22252009                | AA                                     | GG                 | GG               | INTERGENIC      |               |                    |                    |
| SNP_2288_A_22252044 | NC_021160.1    | Ca_Kabuli_Chr01 | 22252044                | AA                                     | TT                 | TT               | INTERGENIC      |               |                    |                    |
| SNP_2289_A_22252093 | NC_021160.1    | Ca_Kabuli_Chr01 | 22252093                | TT                                     | CC                 | CC               | INTERGENIC      |               |                    |                    |
| SNP_2290_A_22252131 | NC_021160.1    | Ca_Kabuli_Chr01 | 22252131                | AA                                     | GG                 | GG               | INTERGENIC      |               |                    |                    |
| SNP_2291_A_22252597 | NC_021160.1    | Ca_Kabuli_Chr01 | 22252597                | TT                                     | CC                 | CC               | INTERGENIC      |               |                    |                    |
| SNP_2292_A_22252695 | NC_021160.1    | Ca_Kabuli_Chr01 | 22252695                | AA                                     | GG                 | GG               | INTERGENIC      |               |                    |                    |
| SNP_2293_A_22252740 | NC_021160.1    | Ca_Kabuli_Chr01 | 22252740                | AA                                     | GG                 | GG               | INTERGENIC      |               |                    |                    |
| SNP_2294_A_22252884 | NC_021160.1    | Ca_Kabuli_Chr01 | 22252884                | TT                                     | CC                 | CC               | INTERGENIC      |               |                    |                    |

| SNPs IDs            | Chromosome IDs | Chromosomes     | Physical positions (bp) | CDC Frontier genome (Reference genome) | (Pusa 1103 & HPNB) | (ILWC 46 & LPNB) | Sequence genome | Components of | Gene accession IDs      | Putative functions |
|---------------------|----------------|-----------------|-------------------------|----------------------------------------|--------------------|------------------|-----------------|---------------|-------------------------|--------------------|
| SNP_2295_A_22252961 | NC_021160.1    | Ca_Kabuli_Chr01 | 22252961                | GG                                     | AA                 | AA               | INTERGENIC      |               |                         |                    |
| SNP_2296_A_22252990 | NC_021160.1    | Ca_Kabuli_Chr01 | 22252990                | AA                                     | GG                 | GG               | INTERGENIC      |               |                         |                    |
| SNP_2297_A_22253274 | NC_021160.1    | Ca_Kabuli_Chr01 | 22253274                | AA                                     | GG                 | GG               | INTERGENIC      |               |                         |                    |
| SNP_2298_A_22253288 | NC_021160.1    | Ca_Kabuli_Chr01 | 22253288                | TT                                     | CC                 | CC               | INTERGENIC      |               |                         |                    |
| SNP_2299_A_22253605 | NC_021160.1    | Ca_Kabuli_Chr01 | 22253605                | TT                                     | CC                 | CC               | INTERGENIC      |               |                         |                    |
| SNP_2300_A_22253626 | NC_021160.1    | Ca_Kabuli_Chr01 | 22253626                | TT                                     | AA                 | AA               | INTERGENIC      |               |                         |                    |
| SNP_2301_A_22253664 | NC_021160.1    | Ca_Kabuli_Chr01 | 22253664                | GG                                     | AA                 | AA               | INTERGENIC      |               |                         |                    |
| SNP_2302_A_22253669 | NC_021160.1    | Ca_Kabuli_Chr01 | 22253669                | GG                                     | AA                 | AA               | INTERGENIC      |               |                         |                    |
| SNP_2303_A_22253708 | NC_021160.1    | Ca_Kabuli_Chr01 | 22253708                | TT                                     | GG                 | GG               | INTERGENIC      |               |                         |                    |
| SNP_2304_A_22253936 | NC_021160.1    | Ca_Kabuli_Chr01 | 22253936                | CC                                     | TT                 | TT               | INTERGENIC      |               |                         |                    |
| SNP_2305_A_22254325 | NC_021160.1    | Ca_Kabuli_Chr01 | 22254325                | TT                                     | GG                 | GG               | INTERGENIC      |               |                         |                    |
| SNP_2306_A_22277145 | NC_021160.1    | Ca_Kabuli_Chr01 | 22277145                | AA                                     | TT                 | TT               | INTERGENIC      |               |                         |                    |
| SNP_2307_A_22285649 | NC_021160.1    | Ca_Kabuli_Chr01 | 22285649                | CC                                     | TT                 | TT               | URR             | 101500381     | beta-galactosidase-like |                    |
| SNP_2308_A_22285729 | NC_021160.1    | Ca_Kabuli_Chr01 | 22285729                | TT                                     | CC                 | CC               | URR             | 101500381     | beta-galactosidase-like |                    |
| SNP_2309_A_22285765 | NC_021160.1    | Ca_Kabuli_Chr01 | 22285765                | TT                                     | CC                 | CC               | URR             | 101500381     | beta-galactosidase-like |                    |
| SNP_2310_A_22285879 | NC_021160.1    | Ca_Kabuli_Chr01 | 22285879                | TT                                     | GG                 | GG               | URR             | 101500381     | beta-galactosidase-like |                    |
| SNP_2311_A_22286007 | NC_021160.1    | Ca_Kabuli_Chr01 | 22286007                | AA                                     | GG                 | GG               | URR             | 101500381     | beta-galactosidase-like |                    |
| SNP_2312_A_22286009 | NC_021160.1    | Ca_Kabuli_Chr01 | 22286009                | AA                                     | GG                 | GG               | URR             | 101500381     | beta-galactosidase-like |                    |
| SNP_2313_A_22286011 | NC_021160.1    | Ca_Kabuli_Chr01 | 22286011                | GG                                     | AA                 | AA               | URR             | 101500381     | beta-galactosidase-like |                    |
| SNP_2314_A_22286032 | NC_021160.1    | Ca_Kabuli_Chr01 | 22286032                | TT                                     | CC                 | CC               | URR             | 101500381     | beta-galactosidase-like |                    |
| SNP_2315_A_22293517 | NC_021160.1    | Ca_Kabuli_Chr01 | 22293517                | AA                                     | CC                 | CC               | INTERGENIC      |               |                         |                    |
| SNP_2316_A_22293654 | NC_021160.1    | Ca_Kabuli_Chr01 | 22293654                | AA                                     | CC                 | CC               | INTERGENIC      |               |                         |                    |

| SNPs IDs            | Chromosome IDs | Chromosomes     | Physical positions (bp) | CDC Frontier genome (Reference genome) | (Pusa 1103 & HPNB) | (ILWC 46 & LPNB) | Sequence Components of genome | Gene accession IDs | Putative functions                                 |
|---------------------|----------------|-----------------|-------------------------|----------------------------------------|--------------------|------------------|-------------------------------|--------------------|----------------------------------------------------|
| SNP_2317_A_22322944 | NC_021160.1    | Ca_Kabuli_Chr01 | 22322944                | TT                                     | CC                 | CC               | INTERGENIC                    |                    |                                                    |
| SNP_2318_A_22329273 | NC_021160.1    | Ca_Kabuli_Chr01 | 22329273                | TT                                     | CC                 | CC               | INTERGENIC                    |                    |                                                    |
| SNP_2320_A_22329691 | NC_021160.1    | Ca_Kabuli_Chr01 | 22329691                | CC                                     | TT                 | TT               | INTERGENIC                    |                    |                                                    |
| SNP_2321_A_22329707 | NC_021160.1    | Ca_Kabuli_Chr01 | 22329707                | TT                                     | AA                 | AA               | INTERGENIC                    |                    |                                                    |
| SNP_2322_A_22378727 | NC_021160.1    | Ca_Kabuli_Chr01 | 22378727                | GG                                     | CC                 | CC               | INTRON                        | 101501639          | receptor-like serine/threonine-protein kinase ALE2 |
| SNP_2324_A_22385207 | NC_021160.1    | Ca_Kabuli_Chr01 | 22385207                | TT                                     | CC                 | CC               | URR                           | 101501639          | receptor-like serine/threonine-protein kinase ALE2 |
| SNP_2325_A_22392386 | NC_021160.1    | Ca_Kabuli_Chr01 | 22392386                | GG                                     | AA                 | AA               | INTERGENIC                    |                    |                                                    |
| SNP_2326_A_22434884 | NC_021160.1    | Ca_Kabuli_Chr01 | 22434884                | AA                                     | GG                 | GG               | INTERGENIC                    |                    |                                                    |
| SNP_2327_A_22478565 | NC_021160.1    | Ca_Kabuli_Chr01 | 22478565                | AA                                     | GG                 | GG               | INTRON                        | 101511173          | cytokinin dehydrogenase 2-like                     |
| SNP_2328_A_22500884 | NC_021160.1    | Ca_Kabuli_Chr01 | 22500884                | AA                                     | CC                 | CC               | INTERGENIC                    |                    |                                                    |
| SNP_2329_A_22547058 | NC_021160.1    | Ca_Kabuli_Chr01 | 22547058                | TT                                     | CC                 | CC               | URR                           | 101511810          | cytokinin dehydrogenase 4-like                     |
| SNP_2330_A_22547065 | NC_021160.1    | Ca_Kabuli_Chr01 | 22547065                | TT                                     | AA                 | AA               | URR                           | 101511810          | cytokinin dehydrogenase 4-like                     |
| SNP_2331_A_22547089 | NC_021160.1    | Ca_Kabuli_Chr01 | 22547089                | CC                                     | TT                 | TT               | URR                           | 101511810          | cytokinin dehydrogenase 4-like                     |
| SNP_2332_A_22547522 | NC_021160.1    | Ca_Kabuli_Chr01 | 22547522                | TT                                     | CC                 | CC               | URR                           | 101511810          | cytokinin dehydrogenase 4-like                     |
| SNP_2333_A_22547524 | NC_021160.1    | Ca_Kabuli_Chr01 | 22547524                | TT                                     | CC                 | CC               | INTERGENIC                    |                    |                                                    |
| SNP_2334_A_22554027 | NC_021160.1    | Ca_Kabuli_Chr01 | 22554027                | TT                                     | CC                 | CC               | INTERGENIC                    |                    |                                                    |
| SNP_2335_A_22554028 | NC_021160.1    | Ca_Kabuli_Chr01 | 22554028                | TT                                     | CC                 | CC               | INTERGENIC                    |                    |                                                    |
| SNP_2336_A_22554053 | NC_021160.1    | Ca_Kabuli_Chr01 | 22554053                | CC                                     | TT                 | TT               | INTERGENIC                    |                    |                                                    |
| SNP_2337_A_22554093 | NC_021160.1    | Ca_Kabuli_Chr01 | 22554093                | TT                                     | GG                 | GG               | INTERGENIC                    |                    |                                                    |
| SNP_2338_A_22554103 | NC_021160.1    | Ca_Kabuli_Chr01 | 22554103                | AA                                     | GG                 | GG               | INTERGENIC                    |                    |                                                    |
| SNP_2339_A_22554122 | NC_021160.1    | Ca_Kabuli_Chr01 | 22554122                | CC                                     | TT                 | TT               | INTERGENIC                    |                    |                                                    |
| SNP_2340_A_22554135 | NC_021160.1    | Ca_Kabuli_Chr01 | 22554135                | TT                                     | CC                 | CC               | INTERGENIC                    |                    |                                                    |

| SNPs IDs            | Chromosome IDs | Chromosomes     | Physical positions (bp) | CDC Frontier genome (Reference genome) | (Pusa 1103 & HPNB) | (ILWC 46 & LPNB) | Sequence Components of genome | Gene accession IDs | Putative functions                   |
|---------------------|----------------|-----------------|-------------------------|----------------------------------------|--------------------|------------------|-------------------------------|--------------------|--------------------------------------|
| SNP_2341_A_22554161 | NC_021160.1    | Ca_Kabuli_Chr01 | 22554161                | TT                                     | AA                 | AA               | INTERGENIC                    |                    |                                      |
| SNP_2342_A_22554299 | NC_021160.1    | Ca_Kabuli_Chr01 | 22554299                | TT                                     | GG                 | GG               | INTERGENIC                    |                    |                                      |
| SNP_2343_A_22554325 | NC_021160.1    | Ca_Kabuli_Chr01 | 22554325                | GG                                     | TT                 | TT               | INTERGENIC                    |                    |                                      |
| SNP_2344_A_22554347 | NC_021160.1    | Ca_Kabuli_Chr01 | 22554347                | CC                                     | GG                 | GG               | INTERGENIC                    |                    |                                      |
| SNP_2345_A_22554399 | NC_021160.1    | Ca_Kabuli_Chr01 | 22554399                | GG                                     | AA                 | AA               | INTERGENIC                    |                    |                                      |
| SNP_2346_A_22554419 | NC_021160.1    | Ca_Kabuli_Chr01 | 22554419                | GG                                     | AA                 | AA               | INTERGENIC                    |                    |                                      |
| SNP_2347_A_22554467 | NC_021160.1    | Ca_Kabuli_Chr01 | 22554467                | TT                                     | CC                 | CC               | INTERGENIC                    |                    |                                      |
| SNP_2348_A_22554476 | NC_021160.1    | Ca_Kabuli_Chr01 | 22554476                | GG                                     | AA                 | AA               | INTERGENIC                    |                    |                                      |
| SNP_2349_A_22554513 | NC_021160.1    | Ca_Kabuli_Chr01 | 22554513                | AA                                     | GG                 | GG               | INTERGENIC                    |                    |                                      |
| SNP_2350_A_22587621 | NC_021160.1    | Ca_Kabuli_Chr01 | 22587621                | TT                                     | CC                 | CC               | INTERGENIC                    |                    |                                      |
| SNP_2351_A_22599322 | NC_021160.1    | Ca_Kabuli_Chr01 | 22599322                | CC                                     | TT                 | TT               | INTERGENIC                    |                    |                                      |
| SNP_2352_A_22653976 | NC_021160.1    | Ca_Kabuli_Chr01 | 22653976                | CC                                     | TT                 | TT               | INTERGENIC                    |                    |                                      |
| SNP_2353_A_22661495 | NC_021160.1    | Ca_Kabuli_Chr01 | 22661495                | CC                                     | AA                 | AA               | INTRON                        | 101513095          | uncharacterized LOC101513095         |
| SNP_2354_A_22663991 | NC_021160.1    | Ca_Kabuli_Chr01 | 22663991                | TT                                     | CC                 | CC               | INTRON                        | 101513095          | uncharacterized LOC101513095         |
| SNP_2355_A_22664001 | NC_021160.1    | Ca_Kabuli_Chr01 | 22664001                | AA                                     | CC                 | CC               | INTRON                        | 101513095          | uncharacterized LOC101513095         |
| SNP_2356_A_22664003 | NC_021160.1    | Ca_Kabuli_Chr01 | 22664003                | AA                                     | CC                 | CC               | INTRON                        | 101513095          | uncharacterized LOC101513095         |
| SNP_2357_A_22664245 | NC_021160.1    | Ca_Kabuli_Chr01 | 22664245                | GG                                     | AA                 | AA               | INTRON                        | 101513095          | uncharacterized LOC101513095         |
| SNP_2358_A_22682652 | NC_021160.1    | Ca_Kabuli_Chr01 | 22682652                | TT                                     | AA                 | AA               | INTERGENIC                    |                    |                                      |
| SNP_2359_A_22719491 | NC_021160.1    | Ca_Kabuli_Chr01 | 22719491                | AA                                     | TT                 | TT               | DRR                           | 101506897          | nucleosome assembly protein 1;3-like |
| SNP_2360_A_22720507 | NC_021160.1    | Ca_Kabuli_Chr01 | 22720507                | CC                                     | GG                 | GG               | INTRON                        | 101506897          | nucleosome assembly protein 1;3-like |
| SNP_2363_A_22805096 | NC_021160.1    | Ca_Kabuli_Chr01 | 22805096                | GG                                     | AA                 | AA               | INTERGENIC                    |                    |                                      |
| SNP_2364_A_22805906 | NC_021160.1    | Ca_Kabuli_Chr01 | 22805906                | AA                                     | GG                 | GG               | INTERGENIC                    |                    |                                      |

| SNPs IDs            | Chromosome IDs | Chromosomes     | Physical positions (bp) | CDC Frontier genome (Reference genome) | (Pusa 1103 & HPNB) | (ILWC 46 & LPNB) | Sequence genome | Components of | Gene accession IDs | Putative functions |
|---------------------|----------------|-----------------|-------------------------|----------------------------------------|--------------------|------------------|-----------------|---------------|--------------------|--------------------|
| SNP_2365_A_22828051 | NC_021160.1    | Ca_Kabuli_Chr01 | 22828051                | AA                                     | GG                 | GG               | INTERGENIC      |               |                    |                    |
| SNP_2366_A_22828068 | NC_021160.1    | Ca_Kabuli_Chr01 | 22828068                | GG                                     | AA                 | AA               | INTERGENIC      |               |                    |                    |
| SNP_2367_A_22828108 | NC_021160.1    | Ca_Kabuli_Chr01 | 22828108                | AA                                     | TT                 | TT               | INTERGENIC      |               |                    |                    |
| SNP_2368_A_22835168 | NC_021160.1    | Ca_Kabuli_Chr01 | 22835168                | AA                                     | CC                 | CC               | INTERGENIC      |               |                    |                    |
| SNP_2369_A_22835176 | NC_021160.1    | Ca_Kabuli_Chr01 | 22835176                | AA                                     | TT                 | TT               | INTERGENIC      |               |                    |                    |
| SNP_2370_A_22853248 | NC_021160.1    | Ca_Kabuli_Chr01 | 22853248                | TT                                     | CC                 | CC               | INTERGENIC      |               |                    |                    |
| SNP_2371_A_22853300 | NC_021160.1    | Ca_Kabuli_Chr01 | 22853300                | AA                                     | GG                 | GG               | INTERGENIC      |               |                    |                    |
| SNP_2372_A_22863489 | NC_021160.1    | Ca_Kabuli_Chr01 | 22863489                | CC                                     | TT                 | TT               | INTERGENIC      |               |                    |                    |
| SNP_2373_A_22865415 | NC_021160.1    | Ca_Kabuli_Chr01 | 22865415                | TT                                     | CC                 | CC               | INTERGENIC      |               |                    |                    |
| SNP_2374_A_22884757 | NC_021160.1    | Ca_Kabuli_Chr01 | 22884757                | AA                                     | GG                 | GG               | INTERGENIC      |               |                    |                    |
| SNP_2375_A_22885790 | NC_021160.1    | Ca_Kabuli_Chr01 | 22885790                | AA                                     | TT                 | TT               | INTERGENIC      |               |                    |                    |
| SNP_2376_A_22885881 | NC_021160.1    | Ca_Kabuli_Chr01 | 22885881                | TT                                     | AA                 | AA               | INTERGENIC      |               |                    |                    |
| SNP_2377_A_22886030 | NC_021160.1    | Ca_Kabuli_Chr01 | 22886030                | GG                                     | AA                 | AA               | INTERGENIC      |               |                    |                    |
| SNP_2378_A_22886047 | NC_021160.1    | Ca_Kabuli_Chr01 | 22886047                | CC                                     | TT                 | TT               | INTERGENIC      |               |                    |                    |
| SNP_2380_A_22886144 | NC_021160.1    | Ca_Kabuli_Chr01 | 22886144                | AA                                     | GG                 | GG               | INTERGENIC      |               |                    |                    |
| SNP_2381_A_22886154 | NC_021160.1    | Ca_Kabuli_Chr01 | 22886154                | AA                                     | TT                 | TT               | INTERGENIC      |               |                    |                    |
| SNP_2382_A_22886166 | NC_021160.1    | Ca_Kabuli_Chr01 | 22886166                | AA                                     | GG                 | GG               | INTERGENIC      |               |                    |                    |
| SNP_2383_A_22886176 | NC_021160.1    | Ca_Kabuli_Chr01 | 22886176                | AA                                     | GG                 | GG               | INTERGENIC      |               |                    |                    |
| SNP_2384_A_22886280 | NC_021160.1    | Ca_Kabuli_Chr01 | 22886280                | TT                                     | CC                 | CC               | INTERGENIC      |               |                    |                    |
| SNP_2385_A_22886301 | NC_021160.1    | Ca_Kabuli_Chr01 | 22886301                | GG                                     | AA                 | AA               | INTERGENIC      |               |                    |                    |
| SNP_2386_A_22886319 | NC_021160.1    | Ca_Kabuli_Chr01 | 22886319                | TT                                     | CC                 | CC               | INTERGENIC      |               |                    |                    |
| SNP_2387_A_22887337 | NC_021160.1    | Ca_Kabuli_Chr01 | 22887337                | AA                                     | GG                 | GG               | INTERGENIC      |               |                    |                    |

| SNPs IDs            | Chromosome IDs | Chromosomes     | Physical positions (bp) | CDC Frontier (Reference genome) | (Pusa 1103 & HPNB) | (ILWC 46 & LPNB) | Sequence genome | Components of | Gene accession IDs | Putative functions |
|---------------------|----------------|-----------------|-------------------------|---------------------------------|--------------------|------------------|-----------------|---------------|--------------------|--------------------|
| SNP_2388_A_22896672 | NC_021160.1    | Ca_Kabuli_Chr01 | 22896672                | AA                              | CC                 | CC               | INTERGENIC      |               |                    |                    |
| SNP_2389_A_22896744 | NC_021160.1    | Ca_Kabuli_Chr01 | 22896744                | CC                              | TT                 | TT               | INTERGENIC      |               |                    |                    |
| SNP_2391_A_22896931 | NC_021160.1    | Ca_Kabuli_Chr01 | 22896931                | GG                              | TT                 | TT               | INTERGENIC      |               |                    |                    |
| SNP_2392_A_22896981 | NC_021160.1    | Ca_Kabuli_Chr01 | 22896981                | TT                              | GG                 | GG               | INTERGENIC      |               |                    |                    |
| SNP_2393_A_22897036 | NC_021160.1    | Ca_Kabuli_Chr01 | 22897036                | CC                              | GG                 | GG               | INTERGENIC      |               |                    |                    |
| SNP_2394_A_22897071 | NC_021160.1    | Ca_Kabuli_Chr01 | 22897071                | TT                              | CC                 | CC               | INTERGENIC      |               |                    |                    |
| SNP_2395_A_22897090 | NC_021160.1    | Ca_Kabuli_Chr01 | 22897090                | GG                              | AA                 | AA               | INTERGENIC      |               |                    |                    |
| SNP_2396_A_22897110 | NC_021160.1    | Ca_Kabuli_Chr01 | 22897110                | TT                              | GG                 | GG               | INTERGENIC      |               |                    |                    |
| SNP_2397_A_22897113 | NC_021160.1    | Ca_Kabuli_Chr01 | 22897113                | AA                              | GG                 | GG               | INTERGENIC      |               |                    |                    |
| SNP_2398_A_22897129 | NC_021160.1    | Ca_Kabuli_Chr01 | 22897129                | GG                              | AA                 | AA               | INTERGENIC      |               |                    |                    |
| SNP_2399_A_22897143 | NC_021160.1    | Ca_Kabuli_Chr01 | 22897143                | GG                              | CC                 | CC               | INTERGENIC      |               |                    |                    |
| SNP_2400_A_22897164 | NC_021160.1    | Ca_Kabuli_Chr01 | 22897164                | CC                              | AA                 | AA               | INTERGENIC      |               |                    |                    |
| SNP_2401_A_22897196 | NC_021160.1    | Ca_Kabuli_Chr01 | 22897196                | TT                              | CC                 | CC               | INTERGENIC      |               |                    |                    |
| SNP_2402_A_22897222 | NC_021160.1    | Ca_Kabuli_Chr01 | 22897222                | CC                              | GG                 | GG               | INTERGENIC      |               |                    |                    |
| SNP_2403_A_22897393 | NC_021160.1    | Ca_Kabuli_Chr01 | 22897393                | AA                              | TT                 | TT               | INTERGENIC      |               |                    |                    |
| SNP_2404_A_22897398 | NC_021160.1    | Ca_Kabuli_Chr01 | 22897398                | GG                              | AA                 | AA               | INTERGENIC      |               |                    |                    |
| SNP_2405_A_22897462 | NC_021160.1    | Ca_Kabuli_Chr01 | 22897462                | CC                              | TT                 | TT               | INTERGENIC      |               |                    |                    |
| SNP_2406_A_22897719 | NC_021160.1    | Ca_Kabuli_Chr01 | 22897719                | TT                              | GG                 | GG               | INTERGENIC      |               |                    |                    |
| SNP_2407_A_22906068 | NC_021160.1    | Ca_Kabuli_Chr01 | 22906068                | CC                              | TT                 | TT               | INTERGENIC      |               |                    |                    |
| SNP_2408_A_22943723 | NC_021160.1    | Ca_Kabuli_Chr01 | 22943723                | CC                              | GG                 | GG               | INTERGENIC      |               |                    |                    |
| SNP_2409_A_22943735 | NC_021160.1    | Ca_Kabuli_Chr01 | 22943735                | TT                              | GG                 | GG               | INTERGENIC      |               |                    |                    |
| SNP_2411_A_22944208 | NC_021160.1    | Ca_Kabuli_Chr01 | 22944208                | AA                              | GG                 | GG               | INTERGENIC      |               |                    |                    |

| SNPs IDs            | Chromosome IDs | Chromosomes     | Physical positions (bp) | CDC Frontier (Reference genome) | (Pusa 1103 & HPNB) | (ILWC 46 & LPNB) | Sequence genome | Components of | Gene accession IDs | Putative functions |
|---------------------|----------------|-----------------|-------------------------|---------------------------------|--------------------|------------------|-----------------|---------------|--------------------|--------------------|
| SNP_2412_A_22944221 | NC_021160.1    | Ca_Kabuli_Chr01 | 22944221                | GG                              | CC                 | CC               | INTERGENIC      |               |                    |                    |
| SNP_2413_A_22963769 | NC_021160.1    | Ca_Kabuli_Chr01 | 22963769                | CC                              | TT                 | TT               | INTERGENIC      |               |                    |                    |
| SNP_2414_A_22971265 | NC_021160.1    | Ca_Kabuli_Chr01 | 22971265                | TT                              | CC                 | CC               | INTERGENIC      |               |                    |                    |
| SNP_2415_A_22992303 | NC_021160.1    | Ca_Kabuli_Chr01 | 22992303                | GG                              | TT                 | TT               | INTERGENIC      |               |                    |                    |
| SNP_2416_A_23005996 | NC_021160.1    | Ca_Kabuli_Chr01 | 23005996                | GG                              | AA                 | AA               | INTERGENIC      |               |                    |                    |
| SNP_2417_A_23006480 | NC_021160.1    | Ca_Kabuli_Chr01 | 23006480                | GG                              | AA                 | AA               | INTERGENIC      |               |                    |                    |
| SNP_2418_A_23007228 | NC_021160.1    | Ca_Kabuli_Chr01 | 23007228                | TT                              | GG                 | GG               | INTERGENIC      |               |                    |                    |
| SNP_2419_A_23011673 | NC_021160.1    | Ca_Kabuli_Chr01 | 23011673                | AA                              | GG                 | GG               | INTERGENIC      |               |                    |                    |
| SNP_2420_A_23037969 | NC_021160.1    | Ca_Kabuli_Chr01 | 23037969                | GG                              | AA                 | AA               | INTERGENIC      |               |                    |                    |
| SNP_2421_A_23058281 | NC_021160.1    | Ca_Kabuli_Chr01 | 23058281                | AA                              | TT                 | TT               | INTERGENIC      |               |                    |                    |
| SNP_2422_A_23079034 | NC_021160.1    | Ca_Kabuli_Chr01 | 23079034                | CC                              | TT                 | TT               | INTERGENIC      |               |                    |                    |
| SNP_2423_A_23081166 | NC_021160.1    | Ca_Kabuli_Chr01 | 23081166                | CC                              | TT                 | TT               | INTERGENIC      |               |                    |                    |
| SNP_2424_A_23087877 | NC_021160.1    | Ca_Kabuli_Chr01 | 23087877                | GG                              | CC                 | CC               | INTERGENIC      |               |                    |                    |
| SNP_2425_A_23087966 | NC_021160.1    | Ca_Kabuli_Chr01 | 23087966                | TT                              | CC                 | CC               | INTERGENIC      |               |                    |                    |
| SNP_2426_A_23087987 | NC_021160.1    | Ca_Kabuli_Chr01 | 23087987                | TT                              | CC                 | CC               | INTERGENIC      |               |                    |                    |
| SNP_2427_A_23106643 | NC_021160.1    | Ca_Kabuli_Chr01 | 23106643                | TT                              | CC                 | CC               | INTERGENIC      |               |                    |                    |
| SNP_2428_A_23144997 | NC_021160.1    | Ca_Kabuli_Chr01 | 23144997                | TT                              | CC                 | CC               | INTERGENIC      |               |                    |                    |
| SNP_2429_A_23167910 | NC_021160.1    | Ca_Kabuli_Chr01 | 23167910                | AA                              | GG                 | GG               | INTERGENIC      |               |                    |                    |
| SNP_2430_A_23183689 | NC_021160.1    | Ca_Kabuli_Chr01 | 23183689                | TT                              | CC                 | CC               | INTERGENIC      |               |                    |                    |
| SNP_2432_A_23206931 | NC_021160.1    | Ca_Kabuli_Chr01 | 23206931                | TT                              | CC                 | CC               | INTERGENIC      |               |                    |                    |
| SNP_2433_A_23215975 | NC_021160.1    | Ca_Kabuli_Chr01 | 23215975                | CC                              | TT                 | TT               | INTERGENIC      |               |                    |                    |
| SNP_2434_A_23250577 | NC_021160.1    | Ca_Kabuli_Chr01 | 23250577                | CC                              | TT                 | TT               | INTERGENIC      |               |                    |                    |

| SNPs IDs            | Chromosome IDs | Chromosomes     | Physical positions (bp) | CDC Frontier (Reference genome) | (Pusa 1103 & HPNB) | (ILWC 46 & LPNB) | Sequence Components of genome | Gene accession IDs | Putative functions           |
|---------------------|----------------|-----------------|-------------------------|---------------------------------|--------------------|------------------|-------------------------------|--------------------|------------------------------|
| SNP_2435_A_23270236 | NC_021160.1    | Ca_Kabuli_Chr01 | 23270236                | AA                              | GG                 | GG               | INTERGENIC                    |                    |                              |
| SNP_2436_A_23363088 | NC_021160.1    | Ca_Kabuli_Chr01 | 23363088                | AA                              | GG                 | GG               | INTERGENIC                    |                    |                              |
| SNP_2437_A_23363090 | NC_021160.1    | Ca_Kabuli_Chr01 | 23363090                | AA                              | GG                 | GG               | INTERGENIC                    |                    |                              |
| SNP_2439_A_23421052 | NC_021160.1    | Ca_Kabuli_Chr01 | 23421052                | TT                              | AA                 | AA               | INTERGENIC                    |                    |                              |
| SNP_2440_A_23426167 | NC_021160.1    | Ca_Kabuli_Chr01 | 23426167                | TT                              | AA                 | AA               | INTERGENIC                    |                    |                              |
| SNP_2441_A_23426452 | NC_021160.1    | Ca_Kabuli_Chr01 | 23426452                | CC                              | TT                 | TT               | INTERGENIC                    |                    |                              |
| SNP_2442_A_23426725 | NC_021160.1    | Ca_Kabuli_Chr01 | 23426725                | TT                              | CC                 | CC               | INTERGENIC                    |                    |                              |
| SNP_2443_A_23427002 | NC_021160.1    | Ca_Kabuli_Chr01 | 23427002                | CC                              | TT                 | TT               | INTERGENIC                    |                    |                              |
| SNP_2444_A_23446222 | NC_021160.1    | Ca_Kabuli_Chr01 | 23446222                | AA                              | GG                 | GG               | INTERGENIC                    |                    |                              |
| SNP_2448_A_23580360 | NC_021160.1    | Ca_Kabuli_Chr01 | 23580360                | TT                              | CC                 | CC               | URR                           | 101503007          | uncharacterized LOC101503007 |
| SNP_2449_A_23630879 | NC_021160.1    | Ca_Kabuli_Chr01 | 23630879                | AA                              | GG                 | GG               | INTERGENIC                    |                    |                              |
| SNP_2450_A_23643816 | NC_021160.1    | Ca_Kabuli_Chr01 | 23643816                | CC                              | GG                 | GG               | INTERGENIC                    |                    |                              |
| SNP_2451_A_23643868 | NC_021160.1    | Ca_Kabuli_Chr01 | 23643868                | TT                              | AA                 | AA               | INTERGENIC                    |                    |                              |
| SNP_2452_A_23643871 | NC_021160.1    | Ca_Kabuli_Chr01 | 23643871                | TT                              | CC                 | CC               | INTERGENIC                    |                    |                              |
| SNP_2453_A_23643873 | NC_021160.1    | Ca_Kabuli_Chr01 | 23643873                | TT                              | AA                 | AA               | INTERGENIC                    |                    |                              |
| SNP_2454_A_23653897 | NC_021160.1    | Ca_Kabuli_Chr01 | 23653897                | TT                              | AA                 | AA               | INTERGENIC                    |                    |                              |
| SNP_2455_A_23654286 | NC_021160.1    | Ca_Kabuli_Chr01 | 23654286                | CC                              | TT                 | TT               | INTERGENIC                    |                    |                              |
| SNP_2456_A_23654306 | NC_021160.1    | Ca_Kabuli_Chr01 | 23654306                | TT                              | CC                 | CC               | INTERGENIC                    |                    |                              |
| SNP_2457_A_23654331 | NC_021160.1    | Ca_Kabuli_Chr01 | 23654331                | TT                              | CC                 | CC               | INTERGENIC                    |                    |                              |
| SNP_2458_A_23654338 | NC_021160.1    | Ca_Kabuli_Chr01 | 23654338                | TT                              | GG                 | GG               | INTERGENIC                    |                    |                              |
| SNP_2459_A_23659173 | NC_021160.1    | Ca_Kabuli_Chr01 | 23659173                | GG                              | AA                 | AA               | INTERGENIC                    |                    |                              |
| SNP_2460_A_23697682 | NC_021160.1    | Ca_Kabuli_Chr01 | 23697682                | CC                              | TT                 | TT               | INTERGENIC                    |                    |                              |



| SNPs IDs            | Chromosome IDs | Chromosomes     | Physical positions (bp) | CDC Frontier (Reference genome) | (Pusa 1103 & HPNB) | (ILWC 46 & LPNB) | Sequence genome | Components of | Gene accession IDs | Putative functions |
|---------------------|----------------|-----------------|-------------------------|---------------------------------|--------------------|------------------|-----------------|---------------|--------------------|--------------------|
| SNP_2461_A_23707079 | NC_021160.1    | Ca_Kabuli_Chr01 | 23707079                | TT                              | CC                 | CC               | INTERGENIC      |               |                    |                    |
| SNP_2462_A_23720983 | NC_021160.1    | Ca_Kabuli_Chr01 | 23720983                | AA                              | CC                 | CC               | INTERGENIC      |               |                    |                    |
| SNP_2463_A_23721196 | NC_021160.1    | Ca_Kabuli_Chr01 | 23721196                | TT                              | CC                 | CC               | INTERGENIC      |               |                    |                    |
| SNP_2464_A_23721197 | NC_021160.1    | Ca_Kabuli_Chr01 | 23721197                | TT                              | AA                 | AA               | INTERGENIC      |               |                    |                    |
| SNP_2465_A_23722450 | NC_021160.1    | Ca_Kabuli_Chr01 | 23722450                | TT                              | GG                 | GG               | INTERGENIC      |               |                    |                    |
| SNP_2466_A_23722738 | NC_021160.1    | Ca_Kabuli_Chr01 | 23722738                | GG                              | TT                 | TT               | INTERGENIC      |               |                    |                    |
| SNP_2467_A_23722746 | NC_021160.1    | Ca_Kabuli_Chr01 | 23722746                | GG                              | CC                 | CC               | INTERGENIC      |               |                    |                    |
| SNP_2468_A_23748032 | NC_021160.1    | Ca_Kabuli_Chr01 | 23748032                | AA                              | GG                 | GG               | INTERGENIC      |               |                    |                    |
| SNP_2469_A_23755516 | NC_021160.1    | Ca_Kabuli_Chr01 | 23755516                | CC                              | TT                 | TT               | INTERGENIC      |               |                    |                    |
| SNP_2470_A_23782421 | NC_021160.1    | Ca_Kabuli_Chr01 | 23782421                | AA                              | GG                 | GG               | INTERGENIC      |               |                    |                    |
| SNP_2471_A_23782439 | NC_021160.1    | Ca_Kabuli_Chr01 | 23782439                | TT                              | CC                 | CC               | INTERGENIC      |               |                    |                    |
| SNP_2472_A_23782451 | NC_021160.1    | Ca_Kabuli_Chr01 | 23782451                | TT                              | CC                 | CC               | INTERGENIC      |               |                    |                    |
| SNP_2473_A_23782467 | NC_021160.1    | Ca_Kabuli_Chr01 | 23782467                | TT                              | GG                 | GG               | INTERGENIC      |               |                    |                    |
| SNP_2474_A_23784928 | NC_021160.1    | Ca_Kabuli_Chr01 | 23784928                | GG                              | AA                 | AA               | INTERGENIC      |               |                    |                    |
| SNP_2476_A_23784996 | NC_021160.1    | Ca_Kabuli_Chr01 | 23784996                | GG                              | AA                 | AA               | INTERGENIC      |               |                    |                    |
| SNP_2477_A_23785030 | NC_021160.1    | Ca_Kabuli_Chr01 | 23785030                | GG                              | CC                 | CC               | INTERGENIC      |               |                    |                    |
| SNP_2478_A_23804661 | NC_021160.1    | Ca_Kabuli_Chr01 | 23804661                | GG                              | AA                 | AA               | INTERGENIC      |               |                    |                    |
| SNP_2479_A_23823272 | NC_021160.1    | Ca_Kabuli_Chr01 | 23823272                | CC                              | GG                 | GG               | INTRON          | id18672       | Unknown function   |                    |
| SNP_2480_A_23823286 | NC_021160.1    | Ca_Kabuli_Chr01 | 23823286                | TT                              | CC                 | CC               | INTRON          | id18672       | Unknown function   |                    |
| SNP_2481_A_23823296 | NC_021160.1    | Ca_Kabuli_Chr01 | 23823296                | GG                              | CC                 | CC               | INTRON          | id18672       | Unknown function   |                    |
| SNP_2482_A_23823316 | NC_021160.1    | Ca_Kabuli_Chr01 | 23823316                | AA                              | GG                 | GG               | INTRON          | id18672       | Unknown function   |                    |
| SNP_2483_A_23824100 | NC_021160.1    | Ca_Kabuli_Chr01 | 23824100                | TT                              | GG                 | GG               | INTRON          | id18672       | Unknown function   |                    |

| SNPs IDs            | Chromosome IDs | Chromosomes     | Physical positions (bp) | CDC Frontier genome (Reference genome) | (Pusa 1103 & HPNB) | (ILWC 46 & LPNB) | Sequence Components of genome | Gene accession IDs | Putative functions                                   |
|---------------------|----------------|-----------------|-------------------------|----------------------------------------|--------------------|------------------|-------------------------------|--------------------|------------------------------------------------------|
| SNP_2484_A_23838600 | NC_021160.1    | Ca_Kabuli_Chr01 | 23838600                | TT                                     | CC                 | CC               | INTERGENIC                    |                    |                                                      |
| SNP_2488_A_23876941 | NC_021160.1    | Ca_Kabuli_Chr01 | 23876941                | CC                                     | GG                 | GG               | URR                           | 101496910          | ethylene-responsive transcription factor ERF017-like |
| SNP_2489_A_23962578 | NC_021160.1    | Ca_Kabuli_Chr01 | 23962578                | AA                                     | CC                 | CC               | INTERGENIC                    |                    |                                                      |
| SNP_2490_A_23966400 | NC_021160.1    | Ca_Kabuli_Chr01 | 23966400                | CC                                     | TT                 | TT               | INTERGENIC                    |                    |                                                      |
| SNP_2491_A_23966406 | NC_021160.1    | Ca_Kabuli_Chr01 | 23966406                | CC                                     | TT                 | TT               | INTERGENIC                    |                    |                                                      |
| SNP_2492_A_23966471 | NC_021160.1    | Ca_Kabuli_Chr01 | 23966471                | AA                                     | GG                 | GG               | INTERGENIC                    |                    |                                                      |
| SNP_2493_A_23966748 | NC_021160.1    | Ca_Kabuli_Chr01 | 23966748                | CC                                     | TT                 | TT               | INTERGENIC                    |                    |                                                      |
| SNP_2495_A_24025269 | NC_021160.1    | Ca_Kabuli_Chr01 | 24025269                | TT                                     | CC                 | CC               | INTERGENIC                    |                    |                                                      |
| SNP_2496_A_24026714 | NC_021160.1    | Ca_Kabuli_Chr01 | 24026714                | CC                                     | AA                 | AA               | INTERGENIC                    |                    |                                                      |
| SNP_2497_A_24030435 | NC_021160.1    | Ca_Kabuli_Chr01 | 24030435                | GG                                     | CC                 | CC               | INTERGENIC                    |                    |                                                      |
| SNP_2499_A_24030538 | NC_021160.1    | Ca_Kabuli_Chr01 | 24030538                | TT                                     | GG                 | GG               | INTERGENIC                    |                    |                                                      |
| SNP_2500_A_24030577 | NC_021160.1    | Ca_Kabuli_Chr01 | 24030577                | CC                                     | TT                 | TT               | INTERGENIC                    |                    |                                                      |
| SNP_2501_A_24030796 | NC_021160.1    | Ca_Kabuli_Chr01 | 24030796                | CC                                     | TT                 | TT               | INTERGENIC                    |                    |                                                      |
| SNP_2502_A_24031098 | NC_021160.1    | Ca_Kabuli_Chr01 | 24031098                | AA                                     | GG                 | GG               | INTERGENIC                    |                    |                                                      |
| SNP_2503_A_24031141 | NC_021160.1    | Ca_Kabuli_Chr01 | 24031141                | CC                                     | TT                 | TT               | INTERGENIC                    |                    |                                                      |
| SNP_2504_A_24031144 | NC_021160.1    | Ca_Kabuli_Chr01 | 24031144                | TT                                     | CC                 | CC               | INTERGENIC                    |                    |                                                      |
| SNP_2505_A_24031378 | NC_021160.1    | Ca_Kabuli_Chr01 | 24031378                | AA                                     | GG                 | GG               | INTERGENIC                    |                    |                                                      |
| SNP_2506_A_24035057 | NC_021160.1    | Ca_Kabuli_Chr01 | 24035057                | AA                                     | TT                 | TT               | INTERGENIC                    |                    |                                                      |
| SNP_2507_A_24035417 | NC_021160.1    | Ca_Kabuli_Chr01 | 24035417                | AA                                     | GG                 | GG               | INTERGENIC                    |                    |                                                      |
| SNP_2508_A_24035478 | NC_021160.1    | Ca_Kabuli_Chr01 | 24035478                | AA                                     | GG                 | GG               | INTERGENIC                    |                    |                                                      |
| SNP_2509_A_24035483 | NC_021160.1    | Ca_Kabuli_Chr01 | 24035483                | TT                                     | CC                 | CC               | INTERGENIC                    |                    |                                                      |
| SNP_2510_A_24035488 | NC_021160.1    | Ca_Kabuli_Chr01 | 24035488                | AA                                     | GG                 | GG               | INTERGENIC                    |                    |                                                      |

| SNPs IDs            | Chromosome IDs | Chromosomes     | Physical positions (bp) | CDC Frontier (Reference genome) | (Pusa 1103 & HPNB) | (ILWC 46 & LPNB) | Sequence genome | Components of | Gene accession IDs | Putative functions |
|---------------------|----------------|-----------------|-------------------------|---------------------------------|--------------------|------------------|-----------------|---------------|--------------------|--------------------|
| SNP_2511_A_24035503 | NC_021160.1    | Ca_Kabuli_Chr01 | 24035503                | CC                              | GG                 | GG               | INTERGENIC      |               |                    |                    |
| SNP_2512_A_24035508 | NC_021160.1    | Ca_Kabuli_Chr01 | 24035508                | CC                              | TT                 | TT               | INTERGENIC      |               |                    |                    |
| SNP_2513_A_24035521 | NC_021160.1    | Ca_Kabuli_Chr01 | 24035521                | AA                              | CC                 | CC               | INTERGENIC      |               |                    |                    |
| SNP_2514_A_24035609 | NC_021160.1    | Ca_Kabuli_Chr01 | 24035609                | AA                              | TT                 | TT               | INTERGENIC      |               |                    |                    |
| SNP_2515_A_24035676 | NC_021160.1    | Ca_Kabuli_Chr01 | 24035676                | TT                              | CC                 | CC               | INTERGENIC      |               |                    |                    |
| SNP_2516_A_24082724 | NC_021160.1    | Ca_Kabuli_Chr01 | 24082724                | TT                              | CC                 | CC               | INTERGENIC      |               |                    |                    |
| SNP_2518_A_24113340 | NC_021160.1    | Ca_Kabuli_Chr01 | 24113340                | AA                              | GG                 | GG               | INTERGENIC      |               |                    |                    |
| SNP_2519_A_24147430 | NC_021160.1    | Ca_Kabuli_Chr01 | 24147430                | CC                              | TT                 | TT               | INTERGENIC      |               |                    |                    |
| SNP_2521_A_24194303 | NC_021160.1    | Ca_Kabuli_Chr01 | 24194303                | AA                              | GG                 | GG               | INTERGENIC      |               |                    |                    |
| SNP_2522_A_24194394 | NC_021160.1    | Ca_Kabuli_Chr01 | 24194394                | TT                              | GG                 | GG               | INTERGENIC      |               |                    |                    |
| SNP_2523_A_24194399 | NC_021160.1    | Ca_Kabuli_Chr01 | 24194399                | CC                              | TT                 | TT               | INTERGENIC      |               |                    |                    |
| SNP_2524_A_24194706 | NC_021160.1    | Ca_Kabuli_Chr01 | 24194706                | AA                              | CC                 | CC               | INTERGENIC      |               |                    |                    |
| SNP_2525_A_24194751 | NC_021160.1    | Ca_Kabuli_Chr01 | 24194751                | TT                              | CC                 | CC               | INTERGENIC      |               |                    |                    |
| SNP_2526_A_24194761 | NC_021160.1    | Ca_Kabuli_Chr01 | 24194761                | AA                              | GG                 | GG               | INTERGENIC      |               |                    |                    |
| SNP_2528_A_24256222 | NC_021160.1    | Ca_Kabuli_Chr01 | 24256222                | AA                              | CC                 | CC               | INTERGENIC      |               |                    |                    |
| SNP_2529_A_24294815 | NC_021160.1    | Ca_Kabuli_Chr01 | 24294815                | CC                              | TT                 | TT               | INTERGENIC      |               |                    |                    |
| SNP_2530_A_24294832 | NC_021160.1    | Ca_Kabuli_Chr01 | 24294832                | TT                              | GG                 | GG               | INTERGENIC      |               |                    |                    |
| SNP_2531_A_24305536 | NC_021160.1    | Ca_Kabuli_Chr01 | 24305536                | TT                              | CC                 | CC               | INTERGENIC      |               |                    |                    |
| SNP_2532_A_24331330 | NC_021160.1    | Ca_Kabuli_Chr01 | 24331330                | TT                              | CC                 | CC               | INTERGENIC      |               |                    |                    |
| SNP_2533_A_24331349 | NC_021160.1    | Ca_Kabuli_Chr01 | 24331349                | TT                              | CC                 | CC               | INTERGENIC      |               |                    |                    |
| SNP_2534_A_24331376 | NC_021160.1    | Ca_Kabuli_Chr01 | 24331376                | AA                              | GG                 | GG               | INTERGENIC      |               |                    |                    |
| SNP_2535_A_24331583 | NC_021160.1    | Ca_Kabuli_Chr01 | 24331583                | AA                              | GG                 | GG               | INTERGENIC      |               |                    |                    |

| SNPs IDs            | Chromosome IDs | Chromosomes     | Physical positions (bp) | CDC Frontier (Reference genome) | (Pusa 1103 & HPNB) | (ILWC 46 & LPNB) | Sequence genome | Components of | Gene accession IDs | Putative functions                        |
|---------------------|----------------|-----------------|-------------------------|---------------------------------|--------------------|------------------|-----------------|---------------|--------------------|-------------------------------------------|
| SNP_2536_A_24331593 | NC_021160.1    | Ca_Kabuli_Chr01 | 24331593                | GG                              | AA                 | AA               | INTERGENIC      |               |                    |                                           |
| SNP_2537_A_24388437 | NC_021160.1    | Ca_Kabuli_Chr01 | 24388437                | GG                              | AA                 | AA               | INTERGENIC      |               |                    |                                           |
| SNP_2538_A_24405943 | NC_021160.1    | Ca_Kabuli_Chr01 | 24405943                | CC                              | TT                 | TT               | INTERGENIC      |               |                    |                                           |
| SNP_2539_A_24405945 | NC_021160.1    | Ca_Kabuli_Chr01 | 24405945                | TT                              | CC                 | CC               | INTERGENIC      |               |                    |                                           |
| SNP_2540_A_24474539 | NC_021160.1    | Ca_Kabuli_Chr01 | 24474539                | TT                              | GG                 | GG               | INTERGENIC      |               |                    |                                           |
| SNP_2541_A_24502323 | NC_021160.1    | Ca_Kabuli_Chr01 | 24502323                | TT                              | CC                 | CC               | INTRON          | 101507755     |                    | sterol 3-beta-glucosyltransferase UGT80A2 |
| SNP_2542_A_24522080 | NC_021160.1    | Ca_Kabuli_Chr01 | 24522080                | CC                              | TT                 | TT               | INTERGENIC      |               |                    |                                           |
| SNP_2543_A_24543871 | NC_021160.1    | Ca_Kabuli_Chr01 | 24543871                | TT                              | GG                 | GG               | INTERGENIC      |               |                    |                                           |
| SNP_2544_A_24592227 | NC_021160.1    | Ca_Kabuli_Chr01 | 24592227                | AA                              | GG                 | GG               | INTERGENIC      |               |                    |                                           |
| SNP_2545_A_24592252 | NC_021160.1    | Ca_Kabuli_Chr01 | 24592252                | AA                              | TT                 | TT               | INTERGENIC      |               |                    |                                           |
| SNP_2546_A_24607540 | NC_021160.1    | Ca_Kabuli_Chr01 | 24607540                | TT                              | CC                 | CC               | INTERGENIC      |               |                    |                                           |
| SNP_2547_A_24607544 | NC_021160.1    | Ca_Kabuli_Chr01 | 24607544                | AA                              | TT                 | TT               | INTERGENIC      |               |                    |                                           |
| SNP_2548_A_24607546 | NC_021160.1    | Ca_Kabuli_Chr01 | 24607546                | AA                              | GG                 | GG               | INTERGENIC      |               |                    |                                           |
| SNP_2550_A_24629988 | NC_021160.1    | Ca_Kabuli_Chr01 | 24629988                | AA                              | CC                 | CC               | INTERGENIC      |               |                    |                                           |
| SNP_2551_A_24634696 | NC_021160.1    | Ca_Kabuli_Chr01 | 24634696                | CC                              | AA                 | AA               | INTERGENIC      |               |                    |                                           |
| SNP_2552_A_24778301 | NC_021160.1    | Ca_Kabuli_Chr01 | 24778301                | TT                              | GG                 | GG               | INTERGENIC      |               |                    |                                           |
| SNP_2553_A_24778303 | NC_021160.1    | Ca_Kabuli_Chr01 | 24778303                | TT                              | AA                 | AA               | INTERGENIC      |               |                    |                                           |
| SNP_2554_A_24850715 | NC_021160.1    | Ca_Kabuli_Chr01 | 24850715                | CC                              | TT                 | TT               | INTERGENIC      |               |                    |                                           |
| SNP_2555_A_24916365 | NC_021160.1    | Ca_Kabuli_Chr01 | 24916365                | TT                              | GG                 | GG               | INTERGENIC      |               |                    |                                           |
| SNP_2556_A_24932901 | NC_021160.1    | Ca_Kabuli_Chr01 | 24932901                | AA                              | GG                 | GG               | INTERGENIC      |               |                    |                                           |
| SNP_2557_A_25014520 | NC_021160.1    | Ca_Kabuli_Chr01 | 25014520                | AA                              | GG                 | GG               | INTERGENIC      |               |                    |                                           |
| SNP_2558_A_25037706 | NC_021160.1    | Ca_Kabuli_Chr01 | 25037706                | AA                              | GG                 | GG               | INTERGENIC      |               |                    |                                           |

| SNPs IDs            | Chromosome IDs | Chromosomes     | Physical positions (bp) | CDC Frontier (Reference genome) | (Pusa 1103 & HPNB) | (ILWC 46 & LPNB) | Sequence Components of genome | Gene accession IDs | Putative functions                                 |
|---------------------|----------------|-----------------|-------------------------|---------------------------------|--------------------|------------------|-------------------------------|--------------------|----------------------------------------------------|
| SNP_2559_A_25058069 | NC_021160.1    | Ca_Kabuli_Chr01 | 25058069                | GG                              | AA                 | AA               | INTRON                        | 101494944          | pectinesterase/pectinesterase inhibitor PPE8B-like |
| SNP_2560_A_25058117 | NC_021160.1    | Ca_Kabuli_Chr01 | 25058117                | GG                              | AA                 | AA               | INTRON                        | 101494944          | pectinesterase/pectinesterase inhibitor PPE8B-like |
| SNP_2561_A_25058248 | NC_021160.1    | Ca_Kabuli_Chr01 | 25058248                | AA                              | GG                 | GG               | INTRON                        | 101494944          | pectinesterase/pectinesterase inhibitor PPE8B-like |
| SNP_2562_A_25058249 | NC_021160.1    | Ca_Kabuli_Chr01 | 25058249                | AA                              | GG                 | GG               | INTRON                        | 101494944          | pectinesterase/pectinesterase inhibitor PPE8B-like |
| SNP_2564_A_25058332 | NC_021160.1    | Ca_Kabuli_Chr01 | 25058332                | AA                              | GG                 | GG               | INTRON                        | 101494944          | pectinesterase/pectinesterase inhibitor PPE8B-like |
| SNP_2565_A_25058362 | NC_021160.1    | Ca_Kabuli_Chr01 | 25058362                | AA                              | CC                 | CC               | INTRON                        | 101494944          | pectinesterase/pectinesterase inhibitor PPE8B-like |
| SNP_2566_A_25058373 | NC_021160.1    | Ca_Kabuli_Chr01 | 25058373                | TT                              | AA                 | AA               | INTRON                        | 101494944          | pectinesterase/pectinesterase inhibitor PPE8B-like |
| SNP_2567_A_25058473 | NC_021160.1    | Ca_Kabuli_Chr01 | 25058473                | AA                              | GG                 | GG               | INTRON                        | 101494944          | pectinesterase/pectinesterase inhibitor PPE8B-like |
| SNP_2568_A_25058475 | NC_021160.1    | Ca_Kabuli_Chr01 | 25058475                | AA                              | TT                 | TT               | INTRON                        | 101494944          | pectinesterase/pectinesterase inhibitor PPE8B-like |
| SNP_2569_A_25209678 | NC_021160.1    | Ca_Kabuli_Chr01 | 25209678                | TT                              | CC                 | CC               | INTERGENIC                    |                    |                                                    |
| SNP_2570_A_25209980 | NC_021160.1    | Ca_Kabuli_Chr01 | 25209980                | GG                              | TT                 | TT               | INTERGENIC                    |                    |                                                    |
| SNP_2571_A_25233425 | NC_021160.1    | Ca_Kabuli_Chr01 | 25233425                | AA                              | GG                 | GG               | INTERGENIC                    |                    |                                                    |
| SNP_2572_A_25234184 | NC_021160.1    | Ca_Kabuli_Chr01 | 25234184                | TT                              | CC                 | CC               | INTERGENIC                    |                    |                                                    |
| SNP_2573_A_25234279 | NC_021160.1    | Ca_Kabuli_Chr01 | 25234279                | TT                              | CC                 | CC               | INTERGENIC                    |                    |                                                    |
| SNP_2574_A_25234352 | NC_021160.1    | Ca_Kabuli_Chr01 | 25234352                | GG                              | AA                 | AA               | INTERGENIC                    |                    |                                                    |
| SNP_2575_A_25250231 | NC_021160.1    | Ca_Kabuli_Chr01 | 25250231                | TT                              | AA                 | AA               | INTERGENIC                    |                    |                                                    |
| SNP_2576_A_25250337 | NC_021160.1    | Ca_Kabuli_Chr01 | 25250337                | GG                              | AA                 | AA               | INTERGENIC                    |                    |                                                    |
| SNP_2577_A_25283905 | NC_021160.1    | Ca_Kabuli_Chr01 | 25283905                | AA                              | GG                 | GG               | INTERGENIC                    |                    |                                                    |
| SNP_2578_A_25296114 | NC_021160.1    | Ca_Kabuli_Chr01 | 25296114                | TT                              | CC                 | CC               | INTERGENIC                    |                    |                                                    |
| SNP_2579_A_25296398 | NC_021160.1    | Ca_Kabuli_Chr01 | 25296398                | TT                              | GG                 | GG               | INTERGENIC                    |                    |                                                    |
| SNP_2580_A_25296409 | NC_021160.1    | Ca_Kabuli_Chr01 | 25296409                | CC                              | TT                 | TT               | INTERGENIC                    |                    |                                                    |
| SNP_2581_A_25296532 | NC_021160.1    | Ca_Kabuli_Chr01 | 25296532                | CC                              | TT                 | TT               | INTERGENIC                    |                    |                                                    |

| SNPs IDs            | Chromosome IDs | Chromosomes     | Physical positions (bp) | CDC Frontier genome (Reference genome) | (Pusa 1103 & HPNB) | (ILWC 46 & LPNB) | Sequence genome | Components of | Gene accession IDs | Putative functions |
|---------------------|----------------|-----------------|-------------------------|----------------------------------------|--------------------|------------------|-----------------|---------------|--------------------|--------------------|
| SNP_2582_A_25312617 | NC_021160.1    | Ca_Kabuli_Chr01 | 25312617                | TT                                     | GG                 | GG               | INTERGENIC      |               |                    |                    |
| SNP_2583_A_25353631 | NC_021160.1    | Ca_Kabuli_Chr01 | 25353631                | AA                                     | TT                 | TT               | INTERGENIC      |               |                    |                    |
| SNP_2584_A_25373788 | NC_021160.1    | Ca_Kabuli_Chr01 | 25373788                | GG                                     | TT                 | TT               | INTERGENIC      |               |                    |                    |
| SNP_2585_A_25373824 | NC_021160.1    | Ca_Kabuli_Chr01 | 25373824                | AA                                     | GG                 | GG               | INTERGENIC      |               |                    |                    |
| SNP_2586_A_25374026 | NC_021160.1    | Ca_Kabuli_Chr01 | 25374026                | GG                                     | TT                 | TT               | INTERGENIC      |               |                    |                    |
| SNP_2587_A_25380923 | NC_021160.1    | Ca_Kabuli_Chr01 | 25380923                | CC                                     | AA                 | AA               | INTERGENIC      |               |                    |                    |
| SNP_2588_A_25381737 | NC_021160.1    | Ca_Kabuli_Chr01 | 25381737                | CC                                     | TT                 | TT               | INTERGENIC      |               |                    |                    |
| SNP_2589_A_25381860 | NC_021160.1    | Ca_Kabuli_Chr01 | 25381860                | TT                                     | CC                 | CC               | INTERGENIC      |               |                    |                    |
| SNP_2591_A_25382445 | NC_021160.1    | Ca_Kabuli_Chr01 | 25382445                | GG                                     | TT                 | TT               | INTERGENIC      |               |                    |                    |
| SNP_2592_A_25382447 | NC_021160.1    | Ca_Kabuli_Chr01 | 25382447                | TT                                     | CC                 | CC               | INTERGENIC      |               |                    |                    |
| SNP_2593_A_25429412 | NC_021160.1    | Ca_Kabuli_Chr01 | 25429412                | TT                                     | CC                 | CC               | INTERGENIC      |               |                    |                    |
| SNP_2595_A_25461607 | NC_021160.1    | Ca_Kabuli_Chr01 | 25461607                | AA                                     | TT                 | TT               | INTERGENIC      |               |                    |                    |
| SNP_2596_A_25461626 | NC_021160.1    | Ca_Kabuli_Chr01 | 25461626                | GG                                     | TT                 | TT               | INTERGENIC      |               |                    |                    |
| SNP_2597_A_25507440 | NC_021160.1    | Ca_Kabuli_Chr01 | 25507440                | CC                                     | AA                 | AA               | INTERGENIC      |               |                    |                    |
| SNP_2600_A_25571921 | NC_021160.1    | Ca_Kabuli_Chr01 | 25571921                | CC                                     | TT                 | TT               | INTERGENIC      |               |                    |                    |
| SNP_2601_A_25571924 | NC_021160.1    | Ca_Kabuli_Chr01 | 25571924                | GG                                     | AA                 | AA               | INTERGENIC      |               |                    |                    |
| SNP_2602_A_25571968 | NC_021160.1    | Ca_Kabuli_Chr01 | 25571968                | AA                                     | GG                 | GG               | INTERGENIC      |               |                    |                    |
| SNP_2603_A_25572027 | NC_021160.1    | Ca_Kabuli_Chr01 | 25572027                | AA                                     | GG                 | GG               | INTERGENIC      |               |                    |                    |
| SNP_2604_A_25575174 | NC_021160.1    | Ca_Kabuli_Chr01 | 25575174                | TT                                     | GG                 | GG               | INTERGENIC      |               |                    |                    |
| SNP_2605_A_25590389 | NC_021160.1    | Ca_Kabuli_Chr01 | 25590389                | GG                                     | TT                 | TT               | INTERGENIC      |               |                    |                    |
| SNP_2606_A_25612830 | NC_021160.1    | Ca_Kabuli_Chr01 | 25612830                | TT                                     | AA                 | AA               | INTERGENIC      |               |                    |                    |
| SNP_2607_A_25612893 | NC_021160.1    | Ca_Kabuli_Chr01 | 25612893                | GG                                     | CC                 | CC               | INTERGENIC      |               |                    |                    |

| SNPs IDs            | Chromosome IDs | Chromosomes     | Physical positions (bp) | CDC Frontier (Reference genome) | (Pusa 1103 & HPNB) | (ILWC 46 & LPNB) | Sequence genome | Components of | Gene accession IDs        | Putative functions |
|---------------------|----------------|-----------------|-------------------------|---------------------------------|--------------------|------------------|-----------------|---------------|---------------------------|--------------------|
| SNP_2608_A_25613107 | NC_021160.1    | Ca_Kabuli_Chr01 | 25613107                | AA                              | GG                 | GG               | INTERGENIC      |               |                           |                    |
| SNP_2609_A_25613205 | NC_021160.1    | Ca_Kabuli_Chr01 | 25613205                | AA                              | CC                 | CC               | INTERGENIC      |               |                           |                    |
| SNP_2611_A_25693933 | NC_021160.1    | Ca_Kabuli_Chr01 | 25693933                | AA                              | GG                 | GG               | INTERGENIC      |               |                           |                    |
| SNP_2612_A_25693936 | NC_021160.1    | Ca_Kabuli_Chr01 | 25693936                | GG                              | TT                 | TT               | INTERGENIC      |               |                           |                    |
| SNP_2613_A_25693960 | NC_021160.1    | Ca_Kabuli_Chr01 | 25693960                | AA                              | GG                 | GG               | INTERGENIC      |               |                           |                    |
| SNP_2614_A_25693961 | NC_021160.1    | Ca_Kabuli_Chr01 | 25693961                | GG                              | AA                 | AA               | INTERGENIC      |               |                           |                    |
| SNP_2615_A_25693968 | NC_021160.1    | Ca_Kabuli_Chr01 | 25693968                | TT                              | GG                 | GG               | INTERGENIC      |               |                           |                    |
| SNP_2616_A_25693986 | NC_021160.1    | Ca_Kabuli_Chr01 | 25693986                | CC                              | AA                 | AA               | INTERGENIC      |               |                           |                    |
| SNP_2617_A_25693987 | NC_021160.1    | Ca_Kabuli_Chr01 | 25693987                | TT                              | CC                 | CC               | INTERGENIC      |               |                           |                    |
| SNP_2618_A_25720536 | NC_021160.1    | Ca_Kabuli_Chr01 | 25720536                | TT                              | CC                 | CC               | INTERGENIC      |               |                           |                    |
| SNP_2619_A_25769069 | NC_021160.1    | Ca_Kabuli_Chr01 | 25769069                | TT                              | CC                 | CC               | INTERGENIC      |               |                           |                    |
| SNP_2620_A_25774824 | NC_021160.1    | Ca_Kabuli_Chr01 | 25774824                | TT                              | CC                 | CC               | INTERGENIC      |               |                           |                    |
| SNP_2621_A_25774825 | NC_021160.1    | Ca_Kabuli_Chr01 | 25774825                | TT                              | AA                 | AA               | INTERGENIC      |               |                           |                    |
| SNP_2622_A_25774829 | NC_021160.1    | Ca_Kabuli_Chr01 | 25774829                | TT                              | AA                 | AA               | INTERGENIC      |               |                           |                    |
| SNP_2623_A_25786513 | NC_021160.1    | Ca_Kabuli_Chr01 | 25786513                | GG                              | AA                 | AA               | INTERGENIC      |               |                           |                    |
| SNP_2624_A_25786531 | NC_021160.1    | Ca_Kabuli_Chr01 | 25786531                | CC                              | GG                 | GG               | INTERGENIC      |               |                           |                    |
| SNP_2625_A_25786534 | NC_021160.1    | Ca_Kabuli_Chr01 | 25786534                | TT                              | AA                 | AA               | INTERGENIC      |               |                           |                    |
| SNP_2626_A_25796122 | NC_021160.1    | Ca_Kabuli_Chr01 | 25796122                | GG                              | AA                 | AA               | INTERGENIC      |               |                           |                    |
| SNP_2627_A_25802448 | NC_021160.1    | Ca_Kabuli_Chr01 | 25802448                | GG                              | AA                 | AA               | INTERGENIC      |               |                           |                    |
| SNP_2628_A_25802460 | NC_021160.1    | Ca_Kabuli_Chr01 | 25802460                | GG                              | AA                 | AA               | INTERGENIC      |               |                           |                    |
| SNP_2629_A_25802461 | NC_021160.1    | Ca_Kabuli_Chr01 | 25802461                | AA                              | GG                 | GG               | INTERGENIC      |               |                           |                    |
| SNP_2630_A_25806142 | NC_021160.1    | Ca_Kabuli_Chr01 | 25806142                | GG                              | AA                 | AA               | DRR             | 101501107     | novel plant SNARE 13-like |                    |

| SNPs IDs            | Chromosome IDs | Chromosomes     | Physical positions (bp) | CDC Frontier (Reference genome) | (Pusa 1103 & HPNB) | (ILWC 46 & LPNB) | Sequence genome | Components of | Gene accession IDs | Putative functions |
|---------------------|----------------|-----------------|-------------------------|---------------------------------|--------------------|------------------|-----------------|---------------|--------------------|--------------------|
| SNP_2631_A_25824861 | NC_021160.1    | Ca_Kabuli_Chr01 | 25824861                | TT                              | GG                 | GG               | INTERGENIC      |               |                    |                    |
| SNP_2632_A_25824956 | NC_021160.1    | Ca_Kabuli_Chr01 | 25824956                | TT                              | CC                 | CC               | INTERGENIC      |               |                    |                    |
| SNP_2633_A_25824984 | NC_021160.1    | Ca_Kabuli_Chr01 | 25824984                | GG                              | TT                 | TT               | INTERGENIC      |               |                    |                    |
| SNP_2634_A_25825009 | NC_021160.1    | Ca_Kabuli_Chr01 | 25825009                | TT                              | GG                 | GG               | INTERGENIC      |               |                    |                    |
| SNP_2635_A_25825037 | NC_021160.1    | Ca_Kabuli_Chr01 | 25825037                | CC                              | TT                 | TT               | INTERGENIC      |               |                    |                    |
| SNP_2636_A_25825062 | NC_021160.1    | Ca_Kabuli_Chr01 | 25825062                | AA                              | GG                 | GG               | INTERGENIC      |               |                    |                    |
| SNP_2637_A_25829030 | NC_021160.1    | Ca_Kabuli_Chr01 | 25829030                | TT                              | AA                 | AA               | INTERGENIC      |               |                    |                    |
| SNP_2638_A_25832940 | NC_021160.1    | Ca_Kabuli_Chr01 | 25832940                | TT                              | CC                 | CC               | INTERGENIC      |               |                    |                    |
| SNP_2639_A_25832941 | NC_021160.1    | Ca_Kabuli_Chr01 | 25832941                | TT                              | GG                 | GG               | INTERGENIC      |               |                    |                    |
| SNP_2640_A_25837497 | NC_021160.1    | Ca_Kabuli_Chr01 | 25837497                | TT                              | CC                 | CC               | INTERGENIC      |               |                    |                    |
| SNP_2641_A_25837634 | NC_021160.1    | Ca_Kabuli_Chr01 | 25837634                | AA                              | GG                 | GG               | INTERGENIC      |               |                    |                    |
| SNP_2642_A_25837652 | NC_021160.1    | Ca_Kabuli_Chr01 | 25837652                | TT                              | CC                 | CC               | INTERGENIC      |               |                    |                    |
| SNP_2643_A_25898798 | NC_021160.1    | Ca_Kabuli_Chr01 | 25898798                | AA                              | TT                 | TT               | INTERGENIC      |               |                    |                    |
| SNP_2644_A_25913633 | NC_021160.1    | Ca_Kabuli_Chr01 | 25913633                | GG                              | AA                 | AA               | INTERGENIC      |               |                    |                    |
| SNP_2645_A_25913651 | NC_021160.1    | Ca_Kabuli_Chr01 | 25913651                | CC                              | AA                 | AA               | INTERGENIC      |               |                    |                    |
| SNP_2646_A_26014195 | NC_021160.1    | Ca_Kabuli_Chr01 | 26014195                | TT                              | AA                 | AA               | INTERGENIC      |               |                    |                    |
| SNP_2647_A_26014210 | NC_021160.1    | Ca_Kabuli_Chr01 | 26014210                | TT                              | CC                 | CC               | INTERGENIC      |               |                    |                    |
| SNP_2648_A_26049366 | NC_021160.1    | Ca_Kabuli_Chr01 | 26049366                | AA                              | TT                 | TT               | INTERGENIC      |               |                    |                    |
| SNP_2649_A_26063598 | NC_021160.1    | Ca_Kabuli_Chr01 | 26063598                | GG                              | AA                 | AA               | INTERGENIC      |               |                    |                    |
| SNP_2650_A_26074517 | NC_021160.1    | Ca_Kabuli_Chr01 | 26074517                | AA                              | GG                 | GG               | INTRON          |               | 101509778          | Unknown function   |
| SNP_2651_A_26075262 | NC_021160.1    | Ca_Kabuli_Chr01 | 26075262                | AA                              | GG                 | GG               | INTRON          |               | 101509778          | Unknown function   |
| SNP_2652_A_26075501 | NC_021160.1    | Ca_Kabuli_Chr01 | 26075501                | CC                              | TT                 | TT               | INTRON          |               | 101509778          | Unknown function   |



| SNPs IDs            | Chromosome IDs | Chromosomes     | Physical positions (bp) | CDC Frontier (Reference genome) | (Pusa 1103 & HPNB) | (ILWC 46 & LPNB) | Sequence Components of genome | Gene accession IDs | Putative functions                                         |
|---------------------|----------------|-----------------|-------------------------|---------------------------------|--------------------|------------------|-------------------------------|--------------------|------------------------------------------------------------|
| SNP_2653_A_26075503 | NC_021160.1    | Ca_Kabuli_Chr01 | 26075503                | TT                              | CC                 | CC               | INTRON                        | 101509778          | Unknown function                                           |
| SNP_2655_A_26077437 | NC_021160.1    | Ca_Kabuli_Chr01 | 26077437                | AA                              | GG                 | GG               | INTRON                        | 101509778          | Unknown function                                           |
| SNP_2656_A_26077443 | NC_021160.1    | Ca_Kabuli_Chr01 | 26077443                | GG                              | AA                 | AA               | INTRON                        | 101509778          | Unknown function                                           |
| SNP_2657_A_26077524 | NC_021160.1    | Ca_Kabuli_Chr01 | 26077524                | TT                              | CC                 | CC               | INTRON                        | 101509778          | Unknown function                                           |
| SNP_2658_A_26085859 | NC_021160.1    | Ca_Kabuli_Chr01 | 26085859                | CC                              | TT                 | TT               | INTERGENIC                    |                    |                                                            |
| SNP_2659_A_26091944 | NC_021160.1    | Ca_Kabuli_Chr01 | 26091944                | GG                              | AA                 | AA               | INTERGENIC                    |                    |                                                            |
| SNP_2660_A_26108615 | NC_021160.1    | Ca_Kabuli_Chr01 | 26108615                | CC                              | AA                 | AA               | INTERGENIC                    |                    |                                                            |
| SNP_2661_A_26125747 | NC_021160.1    | Ca_Kabuli_Chr01 | 26125747                | AA                              | GG                 | GG               | INTERGENIC                    |                    |                                                            |
| SNP_2662_A_26125777 | NC_021160.1    | Ca_Kabuli_Chr01 | 26125777                | GG                              | CC                 | CC               | INTERGENIC                    |                    |                                                            |
| SNP_2663_A_26125826 | NC_021160.1    | Ca_Kabuli_Chr01 | 26125826                | TT                              | GG                 | GG               | INTERGENIC                    |                    |                                                            |
| SNP_2664_A_26125855 | NC_021160.1    | Ca_Kabuli_Chr01 | 26125855                | AA                              | GG                 | GG               | INTERGENIC                    |                    |                                                            |
| SNP_2665_A_26125886 | NC_021160.1    | Ca_Kabuli_Chr01 | 26125886                | AA                              | GG                 | GG               | INTERGENIC                    |                    |                                                            |
| SNP_2667_A_26142774 | NC_021160.1    | Ca_Kabuli_Chr01 | 26142774                | AA                              | CC                 | CC               | SYNONYMOUS_CODING             | 101504545          | pentatricopeptide repeat-containing protein At2g44880-like |
| SNP_2668_A_26143694 | NC_021160.1    | Ca_Kabuli_Chr01 | 26143694                | GG                              | AA                 | AA               | URR                           | 101504545          | pentatricopeptide repeat-containing protein At2g44880-like |
| SNP_2669_A_26143696 | NC_021160.1    | Ca_Kabuli_Chr01 | 26143696                | GG                              | AA                 | AA               | URR                           | 101504545          | pentatricopeptide repeat-containing protein At2g44880-like |
| SNP_2670_A_26202344 | NC_021160.1    | Ca_Kabuli_Chr01 | 26202344                | TT                              | CC                 | CC               | INTERGENIC                    |                    |                                                            |
| SNP_2671_A_26202942 | NC_021160.1    | Ca_Kabuli_Chr01 | 26202942                | CC                              | TT                 | TT               | INTERGENIC                    |                    |                                                            |
| SNP_2673_A_26220810 | NC_021160.1    | Ca_Kabuli_Chr01 | 26220810                | AA                              | GG                 | GG               | INTERGENIC                    |                    |                                                            |
| SNP_2674_A_26220815 | NC_021160.1    | Ca_Kabuli_Chr01 | 26220815                | TT                              | AA                 | AA               | INTERGENIC                    |                    |                                                            |
| SNP_2675_A_26224039 | NC_021160.1    | Ca_Kabuli_Chr01 | 26224039                | GG                              | AA                 | AA               | INTERGENIC                    |                    |                                                            |
| SNP_2676_A_26224106 | NC_021160.1    | Ca_Kabuli_Chr01 | 26224106                | CC                              | TT                 | TT               | INTERGENIC                    |                    |                                                            |
| SNP_2677_A_26224154 | NC_021160.1    | Ca_Kabuli_Chr01 | 26224154                | AA                              | TT                 | TT               | INTERGENIC                    |                    |                                                            |

| SNPs IDs            | Chromosome IDs | Chromosomes     | Physical positions (bp) | CDC Frontier genome (Reference genome) | (Pusa 1103 & HPNB) | (ILWC 46 & LPNB) | Sequence genome | Components of | Gene accession IDs                           | Putative functions |
|---------------------|----------------|-----------------|-------------------------|----------------------------------------|--------------------|------------------|-----------------|---------------|----------------------------------------------|--------------------|
| SNP_2678_A_26230618 | NC_021160.1    | Ca_Kabuli_Chr01 | 26230618                | TT                                     | CC                 | CC               | INTERGENIC      |               |                                              |                    |
| SNP_2679_A_26245860 | NC_021160.1    | Ca_Kabuli_Chr01 | 26245860                | TT                                     | CC                 | CC               | INTERGENIC      |               |                                              |                    |
| SNP_2680_A_26245915 | NC_021160.1    | Ca_Kabuli_Chr01 | 26245915                | TT                                     | CC                 | CC               | INTERGENIC      |               |                                              |                    |
| SNP_2681_A_26245928 | NC_021160.1    | Ca_Kabuli_Chr01 | 26245928                | GG                                     | AA                 | AA               | INTERGENIC      |               |                                              |                    |
| SNP_2682_A_26246189 | NC_021160.1    | Ca_Kabuli_Chr01 | 26246189                | CC                                     | TT                 | TT               | INTERGENIC      |               |                                              |                    |
| SNP_2683_A_26246231 | NC_021160.1    | Ca_Kabuli_Chr01 | 26246231                | AA                                     | GG                 | GG               | INTERGENIC      |               |                                              |                    |
| SNP_2684_A_26246535 | NC_021160.1    | Ca_Kabuli_Chr01 | 26246535                | GG                                     | AA                 | AA               | INTERGENIC      |               |                                              |                    |
| SNP_2685_A_26246604 | NC_021160.1    | Ca_Kabuli_Chr01 | 26246604                | TT                                     | CC                 | CC               | INTERGENIC      |               |                                              |                    |
| SNP_2686_A_26246629 | NC_021160.1    | Ca_Kabuli_Chr01 | 26246629                | GG                                     | CC                 | CC               | INTERGENIC      |               |                                              |                    |
| SNP_2687_A_26246636 | NC_021160.1    | Ca_Kabuli_Chr01 | 26246636                | AA                                     | CC                 | CC               | INTERGENIC      |               |                                              |                    |
| SNP_2688_A_26246699 | NC_021160.1    | Ca_Kabuli_Chr01 | 26246699                | TT                                     | CC                 | CC               | INTERGENIC      |               |                                              |                    |
| SNP_2689_A_26246714 | NC_021160.1    | Ca_Kabuli_Chr01 | 26246714                | TT                                     | AA                 | AA               | INTERGENIC      |               |                                              |                    |
| SNP_2690_A_26247149 | NC_021160.1    | Ca_Kabuli_Chr01 | 26247149                | CC                                     | TT                 | TT               | INTERGENIC      |               |                                              |                    |
| SNP_2691_A_26247152 | NC_021160.1    | Ca_Kabuli_Chr01 | 26247152                | AA                                     | TT                 | TT               | INTERGENIC      |               |                                              |                    |
| SNP_2692_A_26247157 | NC_021160.1    | Ca_Kabuli_Chr01 | 26247157                | TT                                     | CC                 | CC               | INTERGENIC      |               |                                              |                    |
| SNP_2693_A_26247165 | NC_021160.1    | Ca_Kabuli_Chr01 | 26247165                | GG                                     | AA                 | AA               | INTERGENIC      |               |                                              |                    |
| SNP_2694_A_26252281 | NC_021160.1    | Ca_Kabuli_Chr01 | 26252281                | AA                                     | CC                 | CC               | INTERGENIC      |               |                                              |                    |
| SNP_2695_A_26259718 | NC_021160.1    | Ca_Kabuli_Chr01 | 26259718                | TT                                     | AA                 | AA               | URR             | 101505172     | anthocyanidin 3-O-glucosyltransferase 2-like |                    |
| SNP_2697_A_26264392 | NC_021160.1    | Ca_Kabuli_Chr01 | 26264392                | AA                                     | GG                 | GG               | INTERGENIC      |               |                                              |                    |
| SNP_2698_A_26291618 | NC_021160.1    | Ca_Kabuli_Chr01 | 26291618                | AA                                     | GG                 | GG               | INTERGENIC      |               |                                              |                    |
| SNP_2699_A_26291639 | NC_021160.1    | Ca_Kabuli_Chr01 | 26291639                | GG                                     | CC                 | CC               | INTERGENIC      |               |                                              |                    |
| SNP_2700_A_26291644 | NC_021160.1    | Ca_Kabuli_Chr01 | 26291644                | AA                                     | TT                 | TT               | INTERGENIC      |               |                                              |                    |

| SNPs IDs            | Chromosome IDs | Chromosomes     | Physical positions (bp) | CDC Frontier (Reference genome) | (Pusa 1103 & HPNB) | (ILWC 46 & LPNB) | Sequence genome       | Components of | Gene accession IDs                  | Putative functions |
|---------------------|----------------|-----------------|-------------------------|---------------------------------|--------------------|------------------|-----------------------|---------------|-------------------------------------|--------------------|
| SNP_2701_A_26298196 | NC_021160.1    | Ca_Kabuli_Chr01 | 26298196                | TT                              | CC                 | CC               | INTERGENIC            |               |                                     |                    |
| SNP_2702_A_26298198 | NC_021160.1    | Ca_Kabuli_Chr01 | 26298198                | GG                              | AA                 | AA               | INTERGENIC            |               |                                     |                    |
| SNP_2703_A_26298211 | NC_021160.1    | Ca_Kabuli_Chr01 | 26298211                | TT                              | AA                 | AA               | INTERGENIC            |               |                                     |                    |
| SNP_2704_A_26298217 | NC_021160.1    | Ca_Kabuli_Chr01 | 26298217                | TT                              | GG                 | GG               | INTERGENIC            |               |                                     |                    |
| SNP_2705_A_26298223 | NC_021160.1    | Ca_Kabuli_Chr01 | 26298223                | CC                              | TT                 | TT               | INTERGENIC            |               |                                     |                    |
| SNP_2706_A_26298226 | NC_021160.1    | Ca_Kabuli_Chr01 | 26298226                | AA                              | TT                 | TT               | INTERGENIC            |               |                                     |                    |
| SNP_2707_A_26301931 | NC_021160.1    | Ca_Kabuli_Chr01 | 26301931                | CC                              | TT                 | TT               | INTERGENIC            |               |                                     |                    |
| SNP_2708_A_26302138 | NC_021160.1    | Ca_Kabuli_Chr01 | 26302138                | CC                              | TT                 | TT               | INTERGENIC            |               |                                     |                    |
| SNP_2709_A_26302144 | NC_021160.1    | Ca_Kabuli_Chr01 | 26302144                | CC                              | GG                 | GG               | INTERGENIC            |               |                                     |                    |
| SNP_2710_A_26303196 | NC_021160.1    | Ca_Kabuli_Chr01 | 26303196                | TT                              | CC                 | CC               | INTERGENIC            |               |                                     |                    |
| SNP_2711_A_26306039 | NC_021160.1    | Ca_Kabuli_Chr01 | 26306039                | GG                              | AA                 | AA               | NON_SYNONYMOUS_CODING | 101510417     | Unknown function                    |                    |
| SNP_2713_A_26309217 | NC_021160.1    | Ca_Kabuli_Chr01 | 26309217                | GG                              | CC                 | CC               | INTERGENIC            |               |                                     |                    |
| SNP_2714_A_26309225 | NC_021160.1    | Ca_Kabuli_Chr01 | 26309225                | TT                              | AA                 | AA               | INTERGENIC            |               |                                     |                    |
| SNP_2715_A_26309302 | NC_021160.1    | Ca_Kabuli_Chr01 | 26309302                | TT                              | GG                 | GG               | INTERGENIC            |               |                                     |                    |
| SNP_2716_A_26309347 | NC_021160.1    | Ca_Kabuli_Chr01 | 26309347                | AA                              | GG                 | GG               | INTERGENIC            |               |                                     |                    |
| SNP_2717_A_26309355 | NC_021160.1    | Ca_Kabuli_Chr01 | 26309355                | CC                              | GG                 | GG               | INTERGENIC            |               |                                     |                    |
| SNP_2718_A_26325883 | NC_021160.1    | Ca_Kabuli_Chr01 | 26325883                | TT                              | CC                 | CC               | DRR                   | 101505487     | lysine histidine transporter 1-like |                    |
| SNP_2719_A_26331153 | NC_021160.1    | Ca_Kabuli_Chr01 | 26331153                | AA                              | GG                 | GG               | URR                   | 101505487     | lysine histidine transporter 1-like |                    |
| SNP_2721_A_26362603 | NC_021160.1    | Ca_Kabuli_Chr01 | 26362603                | TT                              | CC                 | CC               | INTERGENIC            |               |                                     |                    |
| SNP_2722_A_26400057 | NC_021160.1    | Ca_Kabuli_Chr01 | 26400057                | GG                              | AA                 | AA               | INTERGENIC            |               |                                     |                    |
| SNP_2723_A_26400092 | NC_021160.1    | Ca_Kabuli_Chr01 | 26400092                | AA                              | GG                 | GG               | INTERGENIC            |               |                                     |                    |
| SNP_2724_A_26407562 | NC_021160.1    | Ca_Kabuli_Chr01 | 26407562                | TT                              | GG                 | GG               | INTERGENIC            |               |                                     |                    |

| SNPs IDs            | Chromosome IDs | Chromosomes     | Physical positions (bp) | CDC Frontier genome (Reference genome) | (Pusa 1103 & HPNB) | (ILWC 46 & LPNB) | Sequence Components of genome | Gene accession IDs | Putative functions                 |
|---------------------|----------------|-----------------|-------------------------|----------------------------------------|--------------------|------------------|-------------------------------|--------------------|------------------------------------|
| SNP_2725_A_26538448 | NC_021160.1    | Ca_Kabuli_Chr01 | 26538448                | CC                                     | TT                 | TT               | URR                           | 101511708          | Unknown function                   |
| SNP_2726_A_26570111 | NC_021160.1    | Ca_Kabuli_Chr01 | 26570111                | CC                                     | AA                 | AA               | INTERGENIC                    |                    |                                    |
| SNP_2727_A_26570187 | NC_021160.1    | Ca_Kabuli_Chr01 | 26570187                | CC                                     | TT                 | TT               | INTERGENIC                    |                    |                                    |
| SNP_2729_A_26592066 | NC_021160.1    | Ca_Kabuli_Chr01 | 26592066                | GG                                     | TT                 | TT               | INTERGENIC                    |                    |                                    |
| SNP_2731_A_26656981 | NC_021160.1    | Ca_Kabuli_Chr01 | 26656981                | AA                                     | GG                 | GG               | INTERGENIC                    |                    |                                    |
| SNP_2732_A_26657116 | NC_021160.1    | Ca_Kabuli_Chr01 | 26657116                | AA                                     | GG                 | GG               | INTERGENIC                    |                    |                                    |
| SNP_2733_A_26660661 | NC_021160.1    | Ca_Kabuli_Chr01 | 26660661                | CC                                     | TT                 | TT               | INTERGENIC                    |                    |                                    |
| SNP_2734_A_26683310 | NC_021160.1    | Ca_Kabuli_Chr01 | 26683310                | TT                                     | CC                 | CC               | NON_SYNONYMOUS_CODING         | 101508496          | Unknown function                   |
| SNP_2736_A_26710960 | NC_021160.1    | Ca_Kabuli_Chr01 | 26710960                | CC                                     | TT                 | TT               | DRR                           | 101513318          | DDB1- and CUL4-associated factor 4 |
| SNP_2738_A_26820177 | NC_021160.1    | Ca_Kabuli_Chr01 | 26820177                | GG                                     | CC                 | CC               | URR                           | 101488564          | probable purine permease 4         |
| SNP_2739_A_26864178 | NC_021160.1    | Ca_Kabuli_Chr01 | 26864178                | TT                                     | CC                 | CC               | INTERGENIC                    |                    |                                    |
| SNP_2740_A_26864258 | NC_021160.1    | Ca_Kabuli_Chr01 | 26864258                | TT                                     | GG                 | GG               | INTERGENIC                    |                    |                                    |
| SNP_2742_A_26868620 | NC_021160.1    | Ca_Kabuli_Chr01 | 26868620                | AA                                     | CC                 | CC               | INTERGENIC                    |                    |                                    |
| SNP_2744_A_26939336 | NC_021160.1    | Ca_Kabuli_Chr01 | 26939336                | TT                                     | AA                 | AA               | INTERGENIC                    |                    |                                    |
| SNP_2746_A_26997552 | NC_021160.1    | Ca_Kabuli_Chr01 | 26997552                | GG                                     | AA                 | AA               | INTERGENIC                    |                    |                                    |
| SNP_2747_A_27000965 | NC_021160.1    | Ca_Kabuli_Chr01 | 27000965                | CC                                     | TT                 | TT               | INTERGENIC                    |                    |                                    |
| SNP_2748_A_27034560 | NC_021160.1    | Ca_Kabuli_Chr01 | 27034560                | TT                                     | AA                 | AA               | INTERGENIC                    |                    |                                    |
| SNP_2749_A_27039048 | NC_021160.1    | Ca_Kabuli_Chr01 | 27039048                | CC                                     | TT                 | TT               | INTERGENIC                    |                    |                                    |
| SNP_2750_A_27058978 | NC_021160.1    | Ca_Kabuli_Chr01 | 27058978                | AA                                     | CC                 | CC               | URR                           | 101491710          | uncharacterized LOC101491710       |
| SNP_2751_A_27059202 | NC_021160.1    | Ca_Kabuli_Chr01 | 27059202                | TT                                     | GG                 | GG               | URR                           | 101491710          | uncharacterized LOC101491710       |
| SNP_2752_A_27059448 | NC_021160.1    | Ca_Kabuli_Chr01 | 27059448                | TT                                     | AA                 | AA               | URR                           | 101491710          | uncharacterized LOC101491710       |
| SNP_2753_A_27073573 | NC_021160.1    | Ca_Kabuli_Chr01 | 27073573                | CC                                     | TT                 | TT               | INTERGENIC                    |                    |                                    |

| SNPs IDs            | Chromosome IDs | Chromosomes     | Physical positions (bp) | CDC Frontier genome (Reference genome) | (Pusa 1103 & HPNB) | (ILWC 46 & LPNB) | Sequence Components of genome | Gene accession IDs | Putative functions           |
|---------------------|----------------|-----------------|-------------------------|----------------------------------------|--------------------|------------------|-------------------------------|--------------------|------------------------------|
| SNP_2754_A_27103668 | NC_021160.1    | Ca_Kabuli_Chr01 | 27103668                | GG                                     | AA                 | AA               | URR                           | 101493462          | uncharacterized LOC101493462 |
| SNP_2755_A_27107180 | NC_021160.1    | Ca_Kabuli_Chr01 | 27107180                | AA                                     | GG                 | GG               | INTERGENIC                    |                    |                              |
| SNP_2756_A_27107189 | NC_021160.1    | Ca_Kabuli_Chr01 | 27107189                | AA                                     | TT                 | TT               | INTERGENIC                    |                    |                              |
| SNP_2757_A_27107208 | NC_021160.1    | Ca_Kabuli_Chr01 | 27107208                | GG                                     | AA                 | AA               | INTERGENIC                    |                    |                              |
| SNP_2758_A_27107363 | NC_021160.1    | Ca_Kabuli_Chr01 | 27107363                | GG                                     | TT                 | TT               | INTERGENIC                    |                    |                              |
| SNP_2759_A_27118666 | NC_021160.1    | Ca_Kabuli_Chr01 | 27118666                | CC                                     | TT                 | TT               | DRR                           | 101494840          | uncharacterized LOC101494840 |
| SNP_2760_A_27126034 | NC_021160.1    | Ca_Kabuli_Chr01 | 27126034                | GG                                     | AA                 | AA               | INTRON                        | 101493784          | uncharacterized LOC101493784 |
| SNP_2761_A_27126100 | NC_021160.1    | Ca_Kabuli_Chr01 | 27126100                | GG                                     | AA                 | AA               | INTRON                        | 101493784          | uncharacterized LOC101493784 |
| SNP_2762_A_27126126 | NC_021160.1    | Ca_Kabuli_Chr01 | 27126126                | AA                                     | GG                 | GG               | INTRON                        | 101493784          | uncharacterized LOC101493784 |
| SNP_2763_A_27135175 | NC_021160.1    | Ca_Kabuli_Chr01 | 27135175                | GG                                     | CC                 | CC               | URR                           | 101494522          | Unknown function             |
| SNP_2764_A_27139918 | NC_021160.1    | Ca_Kabuli_Chr01 | 27139918                | AA                                     | TT                 | TT               | URR                           | 101493784          | uncharacterized LOC101493784 |
| SNP_2765_A_27139972 | NC_021160.1    | Ca_Kabuli_Chr01 | 27139972                | TT                                     | GG                 | GG               | URR                           | 101493784          | uncharacterized LOC101493784 |
| SNP_2766_A_27160411 | NC_021160.1    | Ca_Kabuli_Chr01 | 27160411                | CC                                     | AA                 | AA               | INTERGENIC                    |                    |                              |
| SNP_2767_A_27160445 | NC_021160.1    | Ca_Kabuli_Chr01 | 27160445                | TT                                     | CC                 | CC               | INTERGENIC                    |                    |                              |
| SNP_2768_A_27160710 | NC_021160.1    | Ca_Kabuli_Chr01 | 27160710                | GG                                     | AA                 | AA               | INTERGENIC                    |                    |                              |
| SNP_2769_A_27160730 | NC_021160.1    | Ca_Kabuli_Chr01 | 27160730                | TT                                     | CC                 | CC               | INTERGENIC                    |                    |                              |
| SNP_2770_A_27161988 | NC_021160.1    | Ca_Kabuli_Chr01 | 27161988                | AA                                     | TT                 | TT               | INTERGENIC                    |                    |                              |
| SNP_2771_A_27189103 | NC_021160.1    | Ca_Kabuli_Chr01 | 27189103                | GG                                     | AA                 | AA               | INTERGENIC                    |                    |                              |
| SNP_2772_A_27200564 | NC_021160.1    | Ca_Kabuli_Chr01 | 27200564                | GG                                     | AA                 | AA               | INTERGENIC                    |                    |                              |
| SNP_2773_A_27203799 | NC_021160.1    | Ca_Kabuli_Chr01 | 27203799                | AA                                     | GG                 | GG               | INTERGENIC                    |                    |                              |
| SNP_2774_A_27226169 | NC_021160.1    | Ca_Kabuli_Chr01 | 27226169                | AA                                     | GG                 | GG               | INTERGENIC                    |                    |                              |
| SNP_2775_A_27226196 | NC_021160.1    | Ca_Kabuli_Chr01 | 27226196                | AA                                     | GG                 | GG               | INTERGENIC                    |                    |                              |

| SNPs IDs            | Chromosome IDs | Chromosomes     | Physical positions (bp) | CDC Frontier genome (Reference genome) | (Pusa 1103 & HPNB) | (ILWC 46 & LPNB) | Sequence genome | Components of | Gene accession IDs | Putative functions |
|---------------------|----------------|-----------------|-------------------------|----------------------------------------|--------------------|------------------|-----------------|---------------|--------------------|--------------------|
| SNP_2776_A_27232179 | NC_021160.1    | Ca_Kabuli_Chr01 | 27232179                | CC                                     | TT                 | TT               | INTERGENIC      |               |                    |                    |
| SNP_2777_A_27254703 | NC_021160.1    | Ca_Kabuli_Chr01 | 27254703                | AA                                     | GG                 | GG               | INTERGENIC      |               |                    |                    |
| SNP_2778_A_27254710 | NC_021160.1    | Ca_Kabuli_Chr01 | 27254710                | TT                                     | CC                 | CC               | INTERGENIC      |               |                    |                    |
| SNP_2779_A_27254727 | NC_021160.1    | Ca_Kabuli_Chr01 | 27254727                | AA                                     | GG                 | GG               | INTERGENIC      |               |                    |                    |
| SNP_2780_A_27254732 | NC_021160.1    | Ca_Kabuli_Chr01 | 27254732                | TT                                     | CC                 | CC               | INTERGENIC      |               |                    |                    |
| SNP_2781_A_27263704 | NC_021160.1    | Ca_Kabuli_Chr01 | 27263704                | AA                                     | GG                 | GG               | INTERGENIC      |               |                    |                    |
| SNP_2782_A_27263791 | NC_021160.1    | Ca_Kabuli_Chr01 | 27263791                | CC                                     | TT                 | TT               | INTERGENIC      |               |                    |                    |
| SNP_2783_A_27263915 | NC_021160.1    | Ca_Kabuli_Chr01 | 27263915                | TT                                     | CC                 | CC               | INTERGENIC      |               |                    |                    |
| SNP_2784_A_27263955 | NC_021160.1    | Ca_Kabuli_Chr01 | 27263955                | AA                                     | CC                 | CC               | INTERGENIC      |               |                    |                    |
| SNP_2785_A_27263988 | NC_021160.1    | Ca_Kabuli_Chr01 | 27263988                | TT                                     | CC                 | CC               | INTERGENIC      |               |                    |                    |
| SNP_2786_A_27264040 | NC_021160.1    | Ca_Kabuli_Chr01 | 27264040                | AA                                     | GG                 | GG               | INTERGENIC      |               |                    |                    |
| SNP_2787_A_27264069 | NC_021160.1    | Ca_Kabuli_Chr01 | 27264069                | AA                                     | CC                 | CC               | INTERGENIC      |               |                    |                    |
| SNP_2788_A_27264125 | NC_021160.1    | Ca_Kabuli_Chr01 | 27264125                | TT                                     | CC                 | CC               | INTERGENIC      |               |                    |                    |
| SNP_2789_A_27282619 | NC_021160.1    | Ca_Kabuli_Chr01 | 27282619                | AA                                     | TT                 | TT               | INTERGENIC      |               |                    |                    |
| SNP_2790_A_27282641 | NC_021160.1    | Ca_Kabuli_Chr01 | 27282641                | TT                                     | GG                 | GG               | INTERGENIC      |               |                    |                    |
| SNP_2791_A_27282654 | NC_021160.1    | Ca_Kabuli_Chr01 | 27282654                | AA                                     | GG                 | GG               | INTERGENIC      |               |                    |                    |
| SNP_2792_A_27282683 | NC_021160.1    | Ca_Kabuli_Chr01 | 27282683                | TT                                     | CC                 | CC               | INTERGENIC      |               |                    |                    |
| SNP_2793_A_27282716 | NC_021160.1    | Ca_Kabuli_Chr01 | 27282716                | CC                                     | TT                 | TT               | INTERGENIC      |               |                    |                    |
| SNP_2795_A_27282961 | NC_021160.1    | Ca_Kabuli_Chr01 | 27282961                | CC                                     | TT                 | TT               | INTERGENIC      |               |                    |                    |
| SNP_2796_A_27282970 | NC_021160.1    | Ca_Kabuli_Chr01 | 27282970                | AA                                     | TT                 | TT               | INTERGENIC      |               |                    |                    |
| SNP_2797_A_27292057 | NC_021160.1    | Ca_Kabuli_Chr01 | 27292057                | GG                                     | AA                 | AA               | INTERGENIC      |               |                    |                    |
| SNP_2798_A_27292089 | NC_021160.1    | Ca_Kabuli_Chr01 | 27292089                | TT                                     | CC                 | CC               | INTERGENIC      |               |                    |                    |

| SNPs IDs            | Chromosome IDs | Chromosomes     | Physical positions (bp) | CDC Frontier (Reference genome) | (Pusa 1103 & HPNB) | (ILWC 46 & LPNB) | Sequence genome       | Components of | Gene accession IDs | Putative functions |
|---------------------|----------------|-----------------|-------------------------|---------------------------------|--------------------|------------------|-----------------------|---------------|--------------------|--------------------|
| SNP_2799_A_27300848 | NC_021160.1    | Ca_Kabuli_Chr01 | 27300848                | TT                              | CC                 | CC               | INTERGENIC            |               |                    |                    |
| SNP_2800_A_27301072 | NC_021160.1    | Ca_Kabuli_Chr01 | 27301072                | AA                              | GG                 | GG               | INTERGENIC            |               |                    |                    |
| SNP_2801_A_27301079 | NC_021160.1    | Ca_Kabuli_Chr01 | 27301079                | TT                              | CC                 | CC               | INTERGENIC            |               |                    |                    |
| SNP_2802_A_27301390 | NC_021160.1    | Ca_Kabuli_Chr01 | 27301390                | AA                              | GG                 | GG               | INTERGENIC            |               |                    |                    |
| SNP_2803_A_27301438 | NC_021160.1    | Ca_Kabuli_Chr01 | 27301438                | GG                              | TT                 | TT               | INTERGENIC            |               |                    |                    |
| SNP_2804_A_27320006 | NC_021160.1    | Ca_Kabuli_Chr01 | 27320006                | AA                              | GG                 | GG               | INTERGENIC            |               |                    |                    |
| SNP_2805_A_27320641 | NC_021160.1    | Ca_Kabuli_Chr01 | 27320641                | TT                              | CC                 | CC               | INTERGENIC            |               |                    |                    |
| SNP_2806_A_27320650 | NC_021160.1    | Ca_Kabuli_Chr01 | 27320650                | GG                              | AA                 | AA               | INTERGENIC            |               |                    |                    |
| SNP_2807_A_27320987 | NC_021160.1    | Ca_Kabuli_Chr01 | 27320987                | AA                              | GG                 | GG               | INTERGENIC            |               |                    |                    |
| SNP_2808_A_27366182 | NC_021160.1    | Ca_Kabuli_Chr01 | 27366182                | CC                              | AA                 | AA               | INTERGENIC            |               |                    |                    |
| SNP_2809_A_27403500 | NC_021160.1    | Ca_Kabuli_Chr01 | 27403500                | AA                              | CC                 | CC               | INTERGENIC            |               |                    |                    |
| SNP_2810_A_27430057 | NC_021160.1    | Ca_Kabuli_Chr01 | 27430057                | GG                              | TT                 | TT               | INTERGENIC            |               |                    |                    |
| SNP_2811_A_27468660 | NC_021160.1    | Ca_Kabuli_Chr01 | 27468660                | AA                              | GG                 | GG               | NON_SYNONYMOUS_CODING | 101501007     |                    | Unknown function   |
| SNP_2812_A_27489981 | NC_021160.1    | Ca_Kabuli_Chr01 | 27489981                | TT                              | CC                 | CC               | INTERGENIC            |               |                    |                    |
| SNP_2813_A_27519595 | NC_021160.1    | Ca_Kabuli_Chr01 | 27519595                | CC                              | TT                 | TT               | INTERGENIC            |               |                    |                    |
| SNP_2814_A_27519596 | NC_021160.1    | Ca_Kabuli_Chr01 | 27519596                | GG                              | AA                 | AA               | INTERGENIC            |               |                    |                    |
| SNP_2815_A_27521200 | NC_021160.1    | Ca_Kabuli_Chr01 | 27521200                | GG                              | AA                 | AA               | INTERGENIC            |               |                    |                    |
| SNP_2816_A_27523314 | NC_021160.1    | Ca_Kabuli_Chr01 | 27523314                | CC                              | TT                 | TT               | INTERGENIC            |               |                    |                    |
| SNP_2817_A_27529186 | NC_021160.1    | Ca_Kabuli_Chr01 | 27529186                | TT                              | GG                 | GG               | INTERGENIC            |               |                    |                    |
| SNP_2818_A_27529205 | NC_021160.1    | Ca_Kabuli_Chr01 | 27529205                | GG                              | AA                 | AA               | INTERGENIC            |               |                    |                    |
| SNP_2819_A_27534551 | NC_021160.1    | Ca_Kabuli_Chr01 | 27534551                | CC                              | TT                 | TT               | INTERGENIC            |               |                    |                    |
| SNP_2820_A_27534555 | NC_021160.1    | Ca_Kabuli_Chr01 | 27534555                | AA                              | TT                 | TT               | INTERGENIC            |               |                    |                    |

| SNPs IDs            | Chromosome IDs | Chromosomes     | Physical positions (bp) | CDC Frontier (Reference genome) | (Pusa 1103 & HPNB) | (ILWC 46 & LPNB) | Sequence genome | Components of | Gene accession IDs | Putative functions |
|---------------------|----------------|-----------------|-------------------------|---------------------------------|--------------------|------------------|-----------------|---------------|--------------------|--------------------|
| SNP_2821_A_27597008 | NC_021160.1    | Ca_Kabuli_Chr01 | 27597008                | GG                              | TT                 | TT               | INTERGENIC      |               |                    |                    |
| SNP_2822_A_27597542 | NC_021160.1    | Ca_Kabuli_Chr01 | 27597542                | GG                              | CC                 | CC               | INTERGENIC      |               |                    |                    |
| SNP_2823_A_27597550 | NC_021160.1    | Ca_Kabuli_Chr01 | 27597550                | TT                              | CC                 | CC               | INTERGENIC      |               |                    |                    |
| SNP_2824_A_27617562 | NC_021160.1    | Ca_Kabuli_Chr01 | 27617562                | GG                              | AA                 | AA               | INTERGENIC      |               |                    |                    |
| SNP_2825_A_27637343 | NC_021160.1    | Ca_Kabuli_Chr01 | 27637343                | TT                              | AA                 | AA               | INTERGENIC      |               |                    |                    |
| SNP_2826_A_27637415 | NC_021160.1    | Ca_Kabuli_Chr01 | 27637415                | GG                              | AA                 | AA               | INTERGENIC      |               |                    |                    |
| SNP_2827_A_27637424 | NC_021160.1    | Ca_Kabuli_Chr01 | 27637424                | TT                              | AA                 | AA               | INTERGENIC      |               |                    |                    |
| SNP_2828_A_27637644 | NC_021160.1    | Ca_Kabuli_Chr01 | 27637644                | TT                              | AA                 | AA               | INTERGENIC      |               |                    |                    |
| SNP_2829_A_27637675 | NC_021160.1    | Ca_Kabuli_Chr01 | 27637675                | TT                              | CC                 | CC               | INTERGENIC      |               |                    |                    |
| SNP_2830_A_27665428 | NC_021160.1    | Ca_Kabuli_Chr01 | 27665428                | AA                              | GG                 | GG               | INTERGENIC      |               |                    |                    |
| SNP_2831_A_27668010 | NC_021160.1    | Ca_Kabuli_Chr01 | 27668010                | AA                              | TT                 | TT               | INTERGENIC      |               |                    |                    |
| SNP_2832_A_27689037 | NC_021160.1    | Ca_Kabuli_Chr01 | 27689037                | GG                              | AA                 | AA               | INTERGENIC      |               |                    |                    |
| SNP_2833_A_27689038 | NC_021160.1    | Ca_Kabuli_Chr01 | 27689038                | TT                              | AA                 | AA               | INTERGENIC      |               |                    |                    |
| SNP_2834_A_27689073 | NC_021160.1    | Ca_Kabuli_Chr01 | 27689073                | GG                              | TT                 | TT               | INTERGENIC      |               |                    |                    |
| SNP_2835_A_27689109 | NC_021160.1    | Ca_Kabuli_Chr01 | 27689109                | CC                              | TT                 | TT               | INTERGENIC      |               |                    |                    |
| SNP_2836_A_27689121 | NC_021160.1    | Ca_Kabuli_Chr01 | 27689121                | CC                              | TT                 | TT               | INTERGENIC      |               |                    |                    |
| SNP_2837_A_27689283 | NC_021160.1    | Ca_Kabuli_Chr01 | 27689283                | AA                              | TT                 | TT               | INTERGENIC      |               |                    |                    |
| SNP_2838_A_27689308 | NC_021160.1    | Ca_Kabuli_Chr01 | 27689308                | AA                              | CC                 | CC               | INTERGENIC      |               |                    |                    |
| SNP_2839_A_27689443 | NC_021160.1    | Ca_Kabuli_Chr01 | 27689443                | TT                              | AA                 | AA               | INTERGENIC      |               |                    |                    |
| SNP_2840_A_27689654 | NC_021160.1    | Ca_Kabuli_Chr01 | 27689654                | TT                              | CC                 | CC               | INTERGENIC      |               |                    |                    |
| SNP_2841_A_27719726 | NC_021160.1    | Ca_Kabuli_Chr01 | 27719726                | AA                              | GG                 | GG               | INTERGENIC      |               |                    |                    |
| SNP_2842_A_27772990 | NC_021160.1    | Ca_Kabuli_Chr01 | 27772990                | AA                              | CC                 | CC               | INTERGENIC      |               |                    |                    |



| SNPs IDs            | Chromosome IDs | Chromosomes     | Physical positions (bp) | CDC Frontier genome (Reference genome) | (Pusa 1103 & HPNB) | (ILWC 46 & LPNB) | Sequence genome | Components of | Gene accession IDs | Putative functions |
|---------------------|----------------|-----------------|-------------------------|----------------------------------------|--------------------|------------------|-----------------|---------------|--------------------|--------------------|
| SNP_2843_A_27773061 | NC_021160.1    | Ca_Kabuli_Chr01 | 27773061                | GG                                     | AA                 | AA               | INTERGENIC      |               |                    |                    |
| SNP_2844_A_27773141 | NC_021160.1    | Ca_Kabuli_Chr01 | 27773141                | CC                                     | TT                 | TT               | INTERGENIC      |               |                    |                    |
| SNP_2845_A_27773147 | NC_021160.1    | Ca_Kabuli_Chr01 | 27773147                | TT                                     | CC                 | CC               | INTERGENIC      |               |                    |                    |
| SNP_2846_A_27773318 | NC_021160.1    | Ca_Kabuli_Chr01 | 27773318                | TT                                     | CC                 | CC               | INTERGENIC      |               |                    |                    |
| SNP_2847_A_27773686 | NC_021160.1    | Ca_Kabuli_Chr01 | 27773686                | TT                                     | AA                 | AA               | INTERGENIC      |               |                    |                    |
| SNP_2848_A_27818999 | NC_021160.1    | Ca_Kabuli_Chr01 | 27818999                | AA                                     | TT                 | TT               | INTERGENIC      |               |                    |                    |
| SNP_2849_A_27819057 | NC_021160.1    | Ca_Kabuli_Chr01 | 27819057                | AA                                     | CC                 | CC               | INTERGENIC      |               |                    |                    |
| SNP_2850_A_27819248 | NC_021160.1    | Ca_Kabuli_Chr01 | 27819248                | TT                                     | CC                 | CC               | INTERGENIC      |               |                    |                    |
| SNP_2851_A_27819303 | NC_021160.1    | Ca_Kabuli_Chr01 | 27819303                | TT                                     | CC                 | CC               | INTERGENIC      |               |                    |                    |
| SNP_2852_A_27819896 | NC_021160.1    | Ca_Kabuli_Chr01 | 27819896                | GG                                     | CC                 | CC               | INTERGENIC      |               |                    |                    |
| SNP_2853_A_27855795 | NC_021160.1    | Ca_Kabuli_Chr01 | 27855795                | TT                                     | GG                 | GG               | INTERGENIC      |               |                    |                    |
| SNP_2854_A_27895706 | NC_021160.1    | Ca_Kabuli_Chr01 | 27895706                | CC                                     | TT                 | TT               | INTERGENIC      |               |                    |                    |
| SNP_2855_A_27910226 | NC_021160.1    | Ca_Kabuli_Chr01 | 27910226                | TT                                     | AA                 | AA               | INTERGENIC      |               |                    |                    |
| SNP_2856_A_27927473 | NC_021160.1    | Ca_Kabuli_Chr01 | 27927473                | AA                                     | TT                 | TT               | INTERGENIC      |               |                    |                    |
| SNP_2857_A_27927475 | NC_021160.1    | Ca_Kabuli_Chr01 | 27927475                | TT                                     | AA                 | AA               | INTERGENIC      |               |                    |                    |
| SNP_2858_A_27976219 | NC_021160.1    | Ca_Kabuli_Chr01 | 27976219                | CC                                     | TT                 | TT               | INTERGENIC      |               |                    |                    |
| SNP_2859_A_27998371 | NC_021160.1    | Ca_Kabuli_Chr01 | 27998371                | TT                                     | CC                 | CC               | INTERGENIC      |               |                    |                    |
| SNP_2860_A_27998387 | NC_021160.1    | Ca_Kabuli_Chr01 | 27998387                | TT                                     | CC                 | CC               | INTERGENIC      |               |                    |                    |
| SNP_2861_A_28009886 | NC_021160.1    | Ca_Kabuli_Chr01 | 28009886                | AA                                     | CC                 | CC               | DRR             | 101515602     | Unknown function   |                    |
| SNP_2862_A_28010557 | NC_021160.1    | Ca_Kabuli_Chr01 | 28010557                | GG                                     | AA                 | AA               | INTERGENIC      |               |                    |                    |
| SNP_2863_A_28010612 | NC_021160.1    | Ca_Kabuli_Chr01 | 28010612                | TT                                     | CC                 | CC               | INTERGENIC      |               |                    |                    |
| SNP_2864_A_28010626 | NC_021160.1    | Ca_Kabuli_Chr01 | 28010626                | CC                                     | TT                 | TT               | INTERGENIC      |               |                    |                    |

| SNPs IDs            | Chromosome IDs | Chromosomes     | Physical positions (bp) | CDC Frontier genome (Reference genome) | (Pusa 1103 & HPNB) | (ILWC 46 & LPNB) | Sequence genome | Components of | Gene accession IDs | Putative functions           |
|---------------------|----------------|-----------------|-------------------------|----------------------------------------|--------------------|------------------|-----------------|---------------|--------------------|------------------------------|
| SNP_2865_A_28010806 | NC_021160.1    | Ca_Kabuli_Chr01 | 28010806                | GG                                     | AA                 | AA               | INTERGENIC      |               |                    |                              |
| SNP_2866_A_28010833 | NC_021160.1    | Ca_Kabuli_Chr01 | 28010833                | TT                                     | CC                 | CC               | INTERGENIC      |               |                    |                              |
| SNP_2867_A_28011473 | NC_021160.1    | Ca_Kabuli_Chr01 | 28011473                | AA                                     | CC                 | CC               | INTERGENIC      |               |                    |                              |
| SNP_2868_A_28044290 | NC_021160.1    | Ca_Kabuli_Chr01 | 28044290                | AA                                     | GG                 | GG               | INTERGENIC      |               |                    |                              |
| SNP_2869_A_28044320 | NC_021160.1    | Ca_Kabuli_Chr01 | 28044320                | CC                                     | TT                 | TT               | INTERGENIC      |               |                    |                              |
| SNP_2870_A_28057086 | NC_021160.1    | Ca_Kabuli_Chr01 | 28057086                | AA                                     | GG                 | GG               | INTERGENIC      |               |                    |                              |
| SNP_2871_A_28058331 | NC_021160.1    | Ca_Kabuli_Chr01 | 28058331                | AA                                     | GG                 | GG               | INTERGENIC      |               |                    |                              |
| SNP_2872_A_28058341 | NC_021160.1    | Ca_Kabuli_Chr01 | 28058341                | CC                                     | TT                 | TT               | INTERGENIC      |               |                    |                              |
| SNP_2873_A_28095427 | NC_021160.1    | Ca_Kabuli_Chr01 | 28095427                | TT                                     | GG                 | GG               | INTERGENIC      |               |                    |                              |
| SNP_2874_A_28095479 | NC_021160.1    | Ca_Kabuli_Chr01 | 28095479                | AA                                     | GG                 | GG               | INTERGENIC      |               |                    |                              |
| SNP_2875_A_28096172 | NC_021160.1    | Ca_Kabuli_Chr01 | 28096172                | GG                                     | AA                 | AA               | INTERGENIC      |               |                    |                              |
| SNP_2876_A_28096207 | NC_021160.1    | Ca_Kabuli_Chr01 | 28096207                | AA                                     | GG                 | GG               | INTERGENIC      |               |                    |                              |
| SNP_2877_A_28096208 | NC_021160.1    | Ca_Kabuli_Chr01 | 28096208                | AA                                     | TT                 | TT               | INTERGENIC      |               |                    |                              |
| SNP_2878_A_28096240 | NC_021160.1    | Ca_Kabuli_Chr01 | 28096240                | CC                                     | AA                 | AA               | INTERGENIC      |               |                    |                              |
| SNP_2879_A_28096256 | NC_021160.1    | Ca_Kabuli_Chr01 | 28096256                | TT                                     | CC                 | CC               | INTERGENIC      |               |                    |                              |
| SNP_2880_A_28096304 | NC_021160.1    | Ca_Kabuli_Chr01 | 28096304                | GG                                     | AA                 | AA               | INTERGENIC      |               |                    |                              |
| SNP_2881_A_28306843 | NC_021160.1    | Ca_Kabuli_Chr01 | 28306843                | TT                                     | AA                 | AA               | INTERGENIC      |               |                    |                              |
| SNP_2882_A_28316555 | NC_021160.1    | Ca_Kabuli_Chr01 | 28316555                | TT                                     | CC                 | CC               | INTERGENIC      |               |                    |                              |
| SNP_2883_A_28316575 | NC_021160.1    | Ca_Kabuli_Chr01 | 28316575                | TT                                     | CC                 | CC               | INTERGENIC      |               |                    |                              |
| SNP_2884_A_28316690 | NC_021160.1    | Ca_Kabuli_Chr01 | 28316690                | TT                                     | CC                 | CC               | INTERGENIC      |               |                    |                              |
| SNP_2885_A_28316910 | NC_021160.1    | Ca_Kabuli_Chr01 | 28316910                | AA                                     | GG                 | GG               | INTERGENIC      |               |                    |                              |
| SNP_2887_A_28346379 | NC_021160.1    | Ca_Kabuli_Chr01 | 28346379                | CC                                     | TT                 | TT               | INTRON          | 101505921     | 101505921          | uncharacterized LOC101505921 |

| SNPs IDs            | Chromosome IDs | Chromosomes     | Physical positions (bp) | CDC Frontier genome (Reference genome) | (Pusa 1103 & HPNB) | (ILWC 46 & LPNB) | Sequence Components of genome | Gene accession IDs | Putative functions                                     |
|---------------------|----------------|-----------------|-------------------------|----------------------------------------|--------------------|------------------|-------------------------------|--------------------|--------------------------------------------------------|
| SNP_2888_A_28387979 | NC_021160.1    | Ca_Kabuli_Chr01 | 28387979                | GG                                     | AA                 | AA               | INTERGENIC                    |                    |                                                        |
| SNP_2889_A_28447780 | NC_021160.1    | Ca_Kabuli_Chr01 | 28447780                | TT                                     | GG                 | GG               | URR                           | 101489995          | cell division cycle 20.3, cofactor of APC complex-like |
| SNP_2891_A_28449322 | NC_021160.1    | Ca_Kabuli_Chr01 | 28449322                | AA                                     | GG                 | GG               | DRR                           | 101490650          | Unknown function                                       |
| SNP_2892_A_28449331 | NC_021160.1    | Ca_Kabuli_Chr01 | 28449331                | AA                                     | GG                 | GG               | DRR                           | 101490650          | Unknown function                                       |
| SNP_2893_A_28449352 | NC_021160.1    | Ca_Kabuli_Chr01 | 28449352                | TT                                     | GG                 | GG               | DRR                           | 101490650          | Unknown function                                       |
| SNP_2894_A_28449457 | NC_021160.1    | Ca_Kabuli_Chr01 | 28449457                | AA                                     | GG                 | GG               | URR                           | 101490331          | Unknown function                                       |
| SNP_2895_A_28449474 | NC_021160.1    | Ca_Kabuli_Chr01 | 28449474                | TT                                     | CC                 | CC               | URR                           | 101490331          | Unknown function                                       |
| SNP_2896_A_28449562 | NC_021160.1    | Ca_Kabuli_Chr01 | 28449562                | AA                                     | GG                 | GG               | URR                           | 101490331          | Unknown function                                       |
| SNP_2897_A_28449597 | NC_021160.1    | Ca_Kabuli_Chr01 | 28449597                | AA                                     | CC                 | CC               | URR                           | 101490331          | Unknown function                                       |
| SNP_2898_A_28449611 | NC_021160.1    | Ca_Kabuli_Chr01 | 28449611                | AA                                     | GG                 | GG               | URR                           | 101490331          | Unknown function                                       |
| SNP_2899_A_28449676 | NC_021160.1    | Ca_Kabuli_Chr01 | 28449676                | AA                                     | GG                 | GG               | URR                           | 101490331          | Unknown function                                       |
| SNP_2900_A_28449773 | NC_021160.1    | Ca_Kabuli_Chr01 | 28449773                | TT                                     | CC                 | CC               | URR                           | 101490331          | Unknown function                                       |
| SNP_2901_A_28449779 | NC_021160.1    | Ca_Kabuli_Chr01 | 28449779                | AA                                     | GG                 | GG               | URR                           | 101490331          | Unknown function                                       |
| SNP_2902_A_28449806 | NC_021160.1    | Ca_Kabuli_Chr01 | 28449806                | CC                                     | GG                 | GG               | URR                           | 101490331          | Unknown function                                       |
| SNP_2903_A_28449869 | NC_021160.1    | Ca_Kabuli_Chr01 | 28449869                | TT                                     | CC                 | CC               | URR                           | 101490331          | Unknown function                                       |
| SNP_2904_A_28468082 | NC_021160.1    | Ca_Kabuli_Chr01 | 28468082                | GG                                     | AA                 | AA               | INTERGENIC                    |                    |                                                        |
| SNP_2905_A_28468089 | NC_021160.1    | Ca_Kabuli_Chr01 | 28468089                | GG                                     | AA                 | AA               | INTERGENIC                    |                    |                                                        |
| SNP_2906_A_28468135 | NC_021160.1    | Ca_Kabuli_Chr01 | 28468135                | CC                                     | AA                 | AA               | INTERGENIC                    |                    |                                                        |
| SNP_2907_A_28468299 | NC_021160.1    | Ca_Kabuli_Chr01 | 28468299                | CC                                     | AA                 | AA               | INTERGENIC                    |                    |                                                        |
| SNP_2908_A_28468483 | NC_021160.1    | Ca_Kabuli_Chr01 | 28468483                | TT                                     | CC                 | CC               | INTERGENIC                    |                    |                                                        |
| SNP_2909_A_28519793 | NC_021160.1    | Ca_Kabuli_Chr01 | 28519793                | CC                                     | TT                 | TT               | INTERGENIC                    |                    |                                                        |
| SNP_2911_A_28550166 | NC_021160.1    | Ca_Kabuli_Chr01 | 28550166                | CC                                     | AA                 | AA               | INTERGENIC                    |                    |                                                        |

| SNPs IDs            | Chromosome IDs | Chromosomes     | Physical positions (bp) | CDC Frontier (Reference genome) | (Pusa 1103 & HPNB) | (ILWC 46 & LPNB) | Sequence Components of genome | Gene accession IDs | Putative functions           |
|---------------------|----------------|-----------------|-------------------------|---------------------------------|--------------------|------------------|-------------------------------|--------------------|------------------------------|
| SNP_2913_A_28550290 | NC_021160.1    | Ca_Kabuli_Chr01 | 28550290                | TT                              | CC                 | CC               | INTERGENIC                    |                    |                              |
| SNP_2914_A_28550467 | NC_021160.1    | Ca_Kabuli_Chr01 | 28550467                | AA                              | TT                 | TT               | INTERGENIC                    |                    |                              |
| SNP_2915_A_28550468 | NC_021160.1    | Ca_Kabuli_Chr01 | 28550468                | TT                              | CC                 | CC               | INTERGENIC                    |                    |                              |
| SNP_2916_A_28550494 | NC_021160.1    | Ca_Kabuli_Chr01 | 28550494                | AA                              | CC                 | CC               | INTERGENIC                    |                    |                              |
| SNP_2917_A_28550517 | NC_021160.1    | Ca_Kabuli_Chr01 | 28550517                | TT                              | CC                 | CC               | INTERGENIC                    |                    |                              |
| SNP_2918_A_28585900 | NC_021160.1    | Ca_Kabuli_Chr01 | 28585900                | GG                              | TT                 | TT               | INTERGENIC                    |                    |                              |
| SNP_2919_A_28598863 | NC_021160.1    | Ca_Kabuli_Chr01 | 28598863                | AA                              | GG                 | GG               | INTERGENIC                    |                    |                              |
| SNP_2920_A_28670672 | NC_021160.1    | Ca_Kabuli_Chr01 | 28670672                | AA                              | CC                 | CC               | INTERGENIC                    |                    |                              |
| SNP_2921_A_28670674 | NC_021160.1    | Ca_Kabuli_Chr01 | 28670674                | AA                              | GG                 | GG               | INTERGENIC                    |                    |                              |
| SNP_2923_A_28796506 | NC_021160.1    | Ca_Kabuli_Chr01 | 28796506                | TT                              | CC                 | CC               | INTERGENIC                    |                    |                              |
| SNP_2924_A_28807520 | NC_021160.1    | Ca_Kabuli_Chr01 | 28807520                | AA                              | TT                 | TT               | URR                           | 101511378          | uncharacterized LOC101511378 |
| SNP_2925_A_28807607 | NC_021160.1    | Ca_Kabuli_Chr01 | 28807607                | AA                              | TT                 | TT               | URR                           | 101511378          | uncharacterized LOC101511378 |
| SNP_2926_A_28826413 | NC_021160.1    | Ca_Kabuli_Chr01 | 28826413                | TT                              | AA                 | AA               | INTERGENIC                    |                    |                              |
| SNP_2927_A_28840344 | NC_021160.1    | Ca_Kabuli_Chr01 | 28840344                | AA                              | CC                 | CC               | DRR                           | 101512451          | uncharacterized LOC101512451 |
| SNP_2928_A_28866701 | NC_021160.1    | Ca_Kabuli_Chr01 | 28866701                | AA                              | GG                 | GG               | INTERGENIC                    |                    |                              |
| SNP_2929_A_28870318 | NC_021160.1    | Ca_Kabuli_Chr01 | 28870318                | CC                              | GG                 | GG               | INTERGENIC                    |                    |                              |
| SNP_2930_A_28870895 | NC_021160.1    | Ca_Kabuli_Chr01 | 28870895                | CC                              | TT                 | TT               | INTERGENIC                    |                    |                              |
| SNP_2931_A_28870898 | NC_021160.1    | Ca_Kabuli_Chr01 | 28870898                | GG                              | TT                 | TT               | INTERGENIC                    |                    |                              |
| SNP_2932_A_28871603 | NC_021160.1    | Ca_Kabuli_Chr01 | 28871603                | TT                              | CC                 | CC               | INTERGENIC                    |                    |                              |
| SNP_2933_A_28891037 | NC_021160.1    | Ca_Kabuli_Chr01 | 28891037                | TT                              | CC                 | CC               | INTERGENIC                    |                    |                              |
| SNP_2934_A_28891060 | NC_021160.1    | Ca_Kabuli_Chr01 | 28891060                | AA                              | GG                 | GG               | INTERGENIC                    |                    |                              |
| SNP_2935_A_28891076 | NC_021160.1    | Ca_Kabuli_Chr01 | 28891076                | AA                              | GG                 | GG               | INTERGENIC                    |                    |                              |

| SNPs IDs            | Chromosome IDs | Chromosomes     | Physical positions (bp) | CDC Frontier (Reference genome) | (Pusa 1103 & HPNB) | (ILWC 46 & LPNB) | Sequence genome | Components of | Gene accession IDs | Putative functions |
|---------------------|----------------|-----------------|-------------------------|---------------------------------|--------------------|------------------|-----------------|---------------|--------------------|--------------------|
| SNP_2936_A_28891079 | NC_021160.1    | Ca_Kabuli_Chr01 | 28891079                | GG                              | TT                 | TT               | INTERGENIC      |               |                    |                    |
| SNP_2937_A_28891083 | NC_021160.1    | Ca_Kabuli_Chr01 | 28891083                | AA                              | GG                 | GG               | INTERGENIC      |               |                    |                    |
| SNP_2938_A_28891118 | NC_021160.1    | Ca_Kabuli_Chr01 | 28891118                | TT                              | AA                 | AA               | INTERGENIC      |               |                    |                    |
| SNP_2939_A_28905200 | NC_021160.1    | Ca_Kabuli_Chr01 | 28905200                | GG                              | TT                 | TT               | INTERGENIC      |               |                    |                    |
| SNP_2940_A_28905217 | NC_021160.1    | Ca_Kabuli_Chr01 | 28905217                | GG                              | AA                 | AA               | INTERGENIC      |               |                    |                    |
| SNP_2941_A_28905278 | NC_021160.1    | Ca_Kabuli_Chr01 | 28905278                | TT                              | AA                 | AA               | INTERGENIC      |               |                    |                    |
| SNP_2942_A_28905307 | NC_021160.1    | Ca_Kabuli_Chr01 | 28905307                | GG                              | AA                 | AA               | INTERGENIC      |               |                    |                    |
| SNP_2943_A_28905318 | NC_021160.1    | Ca_Kabuli_Chr01 | 28905318                | AA                              | TT                 | TT               | INTERGENIC      |               |                    |                    |
| SNP_2944_A_28905393 | NC_021160.1    | Ca_Kabuli_Chr01 | 28905393                | TT                              | CC                 | CC               | INTERGENIC      |               |                    |                    |
| SNP_2945_A_28905422 | NC_021160.1    | Ca_Kabuli_Chr01 | 28905422                | AA                              | GG                 | GG               | INTERGENIC      |               |                    |                    |
| SNP_2946_A_28905426 | NC_021160.1    | Ca_Kabuli_Chr01 | 28905426                | GG                              | AA                 | AA               | INTERGENIC      |               |                    |                    |
| SNP_2947_A_28905467 | NC_021160.1    | Ca_Kabuli_Chr01 | 28905467                | AA                              | CC                 | CC               | INTERGENIC      |               |                    |                    |
| SNP_2948_A_28905490 | NC_021160.1    | Ca_Kabuli_Chr01 | 28905490                | CC                              | AA                 | AA               | INTERGENIC      |               |                    |                    |
| SNP_2949_A_28905531 | NC_021160.1    | Ca_Kabuli_Chr01 | 28905531                | CC                              | TT                 | TT               | INTERGENIC      |               |                    |                    |
| SNP_2950_A_28905542 | NC_021160.1    | Ca_Kabuli_Chr01 | 28905542                | TT                              | CC                 | CC               | INTERGENIC      |               |                    |                    |
| SNP_2951_A_28905606 | NC_021160.1    | Ca_Kabuli_Chr01 | 28905606                | AA                              | GG                 | GG               | INTERGENIC      |               |                    |                    |
| SNP_2952_A_28905638 | NC_021160.1    | Ca_Kabuli_Chr01 | 28905638                | GG                              | AA                 | AA               | INTERGENIC      |               |                    |                    |
| SNP_2953_A_28905681 | NC_021160.1    | Ca_Kabuli_Chr01 | 28905681                | CC                              | TT                 | TT               | INTERGENIC      |               |                    |                    |
| SNP_2954_A_28905770 | NC_021160.1    | Ca_Kabuli_Chr01 | 28905770                | TT                              | GG                 | GG               | INTERGENIC      |               |                    |                    |
| SNP_2955_A_28905795 | NC_021160.1    | Ca_Kabuli_Chr01 | 28905795                | GG                              | AA                 | AA               | INTERGENIC      |               |                    |                    |
| SNP_2956_A_28905952 | NC_021160.1    | Ca_Kabuli_Chr01 | 28905952                | CC                              | AA                 | AA               | INTERGENIC      |               |                    |                    |
| SNP_2957_A_28905958 | NC_021160.1    | Ca_Kabuli_Chr01 | 28905958                | AA                              | TT                 | TT               | INTERGENIC      |               |                    |                    |

| SNPs IDs            | Chromosome IDs | Chromosomes     | Physical positions (bp) | CDC Frontier (Reference genome) | (Pusa 1103 & HPNB) | (ILWC 46 & LPNB) | Sequence Components of genome | Gene accession IDs | Putative functions             |
|---------------------|----------------|-----------------|-------------------------|---------------------------------|--------------------|------------------|-------------------------------|--------------------|--------------------------------|
| SNP_2958_A_28906046 | NC_021160.1    | Ca_Kabuli_Chr01 | 28906046                | TT                              | AA                 | AA               | INTERGENIC                    |                    |                                |
| SNP_2959_A_28906083 | NC_021160.1    | Ca_Kabuli_Chr01 | 28906083                | TT                              | GG                 | GG               | INTERGENIC                    |                    |                                |
| SNP_2960_A_28906209 | NC_021160.1    | Ca_Kabuli_Chr01 | 28906209                | TT                              | AA                 | AA               | INTERGENIC                    |                    |                                |
| SNP_2961_A_28906216 | NC_021160.1    | Ca_Kabuli_Chr01 | 28906216                | GG                              | TT                 | TT               | INTERGENIC                    |                    |                                |
| SNP_2962_A_28906260 | NC_021160.1    | Ca_Kabuli_Chr01 | 28906260                | AA                              | GG                 | GG               | INTERGENIC                    |                    |                                |
| SNP_2963_A_28906588 | NC_021160.1    | Ca_Kabuli_Chr01 | 28906588                | AA                              | TT                 | TT               | DRR                           | 101493891          | sugar transport protein 1-like |
| SNP_2964_A_28906605 | NC_021160.1    | Ca_Kabuli_Chr01 | 28906605                | AA                              | TT                 | TT               | DRR                           | 101493891          | sugar transport protein 1-like |
| SNP_2965_A_28906642 | NC_021160.1    | Ca_Kabuli_Chr01 | 28906642                | AA                              | GG                 | GG               | DRR                           | 101493891          | sugar transport protein 1-like |
| SNP_2967_A_28906731 | NC_021160.1    | Ca_Kabuli_Chr01 | 28906731                | AA                              | GG                 | GG               | DRR                           | 101493891          | sugar transport protein 1-like |
| SNP_2968_A_28906864 | NC_021160.1    | Ca_Kabuli_Chr01 | 28906864                | TT                              | CC                 | CC               | DRR                           | 101493891          | sugar transport protein 1-like |
| SNP_2969_A_28906869 | NC_021160.1    | Ca_Kabuli_Chr01 | 28906869                | AA                              | CC                 | CC               | DRR                           | 101493891          | sugar transport protein 1-like |
| SNP_2970_A_28906886 | NC_021160.1    | Ca_Kabuli_Chr01 | 28906886                | CC                              | AA                 | AA               | DRR                           | 101493891          | sugar transport protein 1-like |
| SNP_2971_A_28906892 | NC_021160.1    | Ca_Kabuli_Chr01 | 28906892                | CC                              | GG                 | GG               | DRR                           | 101493891          | sugar transport protein 1-like |
| SNP_2972_A_28906919 | NC_021160.1    | Ca_Kabuli_Chr01 | 28906919                | AA                              | GG                 | GG               | DRR                           | 101493891          | sugar transport protein 1-like |
| SNP_2973_A_28906929 | NC_021160.1    | Ca_Kabuli_Chr01 | 28906929                | GG                              | AA                 | AA               | DRR                           | 101493891          | sugar transport protein 1-like |
| SNP_2974_A_28906961 | NC_021160.1    | Ca_Kabuli_Chr01 | 28906961                | AA                              | GG                 | GG               | DRR                           | 101493891          | sugar transport protein 1-like |
| SNP_2975_A_28909932 | NC_021160.1    | Ca_Kabuli_Chr01 | 28909932                | AA                              | CC                 | CC               | URR                           | 101493891          | sugar transport protein 1-like |
| SNP_2976_A_28910026 | NC_021160.1    | Ca_Kabuli_Chr01 | 28910026                | CC                              | AA                 | AA               | URR                           | 101493891          | sugar transport protein 1-like |
| SNP_2977_A_28910058 | NC_021160.1    | Ca_Kabuli_Chr01 | 28910058                | GG                              | TT                 | TT               | URR                           | 101493891          | sugar transport protein 1-like |
| SNP_2978_A_28910069 | NC_021160.1    | Ca_Kabuli_Chr01 | 28910069                | CC                              | AA                 | AA               | URR                           | 101493891          | sugar transport protein 1-like |
| SNP_2979_A_28910152 | NC_021160.1    | Ca_Kabuli_Chr01 | 28910152                | GG                              | TT                 | TT               | URR                           | 101493891          | sugar transport protein 1-like |
| SNP_2980_A_28910235 | NC_021160.1    | Ca_Kabuli_Chr01 | 28910235                | GG                              | CC                 | CC               | URR                           | 101493891          | sugar transport protein 1-like |

| SNPs IDs            | Chromosome IDs | Chromosomes     | Physical positions (bp) | CDC Frontier genome (Reference genome) | (Pusa 1103 & HPNB) | (ILWC 46 & LPNB) | Sequence Components of genome | Gene accession IDs | Putative functions             |
|---------------------|----------------|-----------------|-------------------------|----------------------------------------|--------------------|------------------|-------------------------------|--------------------|--------------------------------|
| SNP_2981_A_28910243 | NC_021160.1    | Ca_Kabuli_Chr01 | 28910243                | CC                                     | TT                 | TT               | URR                           | 101493891          | sugar transport protein 1-like |
| SNP_2985_A_28910512 | NC_021160.1    | Ca_Kabuli_Chr01 | 28910512                | TT                                     | CC                 | CC               | URR                           | 101493891          | sugar transport protein 1-like |
| SNP_2986_A_28910677 | NC_021160.1    | Ca_Kabuli_Chr01 | 28910677                | AA                                     | GG                 | GG               | URR                           | 101493891          | sugar transport protein 1-like |
| SNP_2987_A_28910700 | NC_021160.1    | Ca_Kabuli_Chr01 | 28910700                | AA                                     | GG                 | GG               | URR                           | 101493891          | sugar transport protein 1-like |
| SNP_2988_A_28910757 | NC_021160.1    | Ca_Kabuli_Chr01 | 28910757                | TT                                     | GG                 | GG               | URR                           | 101493891          | sugar transport protein 1-like |
| SNP_2989_A_28910779 | NC_021160.1    | Ca_Kabuli_Chr01 | 28910779                | AA                                     | TT                 | TT               | URR                           | 101493891          | sugar transport protein 1-like |
| SNP_2990_A_28910836 | NC_021160.1    | Ca_Kabuli_Chr01 | 28910836                | AA                                     | GG                 | GG               | URR                           | 101493891          | sugar transport protein 1-like |
| SNP_2991_A_28910980 | NC_021160.1    | Ca_Kabuli_Chr01 | 28910980                | CC                                     | AA                 | AA               | URR                           | 101493891          | sugar transport protein 1-like |
| SNP_2992_A_28910998 | NC_021160.1    | Ca_Kabuli_Chr01 | 28910998                | AA                                     | TT                 | TT               | URR                           | 101493891          | sugar transport protein 1-like |
| SNP_2993_A_28911004 | NC_021160.1    | Ca_Kabuli_Chr01 | 28911004                | TT                                     | CC                 | CC               | URR                           | 101493891          | sugar transport protein 1-like |
| SNP_2994_A_28911062 | NC_021160.1    | Ca_Kabuli_Chr01 | 28911062                | CC                                     | TT                 | TT               | URR                           | 101493891          | sugar transport protein 1-like |
| SNP_2995_A_28911072 | NC_021160.1    | Ca_Kabuli_Chr01 | 28911072                | AA                                     | CC                 | CC               | URR                           | 101493891          | sugar transport protein 1-like |
| SNP_2996_A_28911098 | NC_021160.1    | Ca_Kabuli_Chr01 | 28911098                | GG                                     | CC                 | CC               | URR                           | 101493891          | sugar transport protein 1-like |
| SNP_2997_A_28911365 | NC_021160.1    | Ca_Kabuli_Chr01 | 28911365                | AA                                     | GG                 | GG               | URR                           | 101493891          | sugar transport protein 1-like |
| SNP_2998_A_28911419 | NC_021160.1    | Ca_Kabuli_Chr01 | 28911419                | TT                                     | AA                 | AA               | URR                           | 101493891          | sugar transport protein 1-like |
| SNP_2999_A_28911448 | NC_021160.1    | Ca_Kabuli_Chr01 | 28911448                | CC                                     | TT                 | TT               | INTERGENIC                    |                    |                                |
| SNP_3000_A_28911562 | NC_021160.1    | Ca_Kabuli_Chr01 | 28911562                | CC                                     | TT                 | TT               | INTERGENIC                    |                    |                                |
| SNP_3001_A_28913149 | NC_021160.1    | Ca_Kabuli_Chr01 | 28913149                | CC                                     | TT                 | TT               | INTERGENIC                    |                    |                                |
| SNP_3002_A_28915328 | NC_021160.1    | Ca_Kabuli_Chr01 | 28915328                | TT                                     | CC                 | CC               | INTERGENIC                    |                    |                                |
| SNP_3003_A_28915440 | NC_021160.1    | Ca_Kabuli_Chr01 | 28915440                | GG                                     | AA                 | AA               | INTERGENIC                    |                    |                                |
| SNP_3004_A_28915453 | NC_021160.1    | Ca_Kabuli_Chr01 | 28915453                | CC                                     | TT                 | TT               | INTERGENIC                    |                    |                                |
| SNP_3005_A_28915623 | NC_021160.1    | Ca_Kabuli_Chr01 | 28915623                | GG                                     | AA                 | AA               | INTERGENIC                    |                    |                                |

| SNPs IDs            | Chromosome IDs | Chromosomes     | Physical positions (bp) | CDC Frontier genome (Reference genome) | (Pusa 1103 & HPNB) | (ILWC 46 & LPNB) | Sequence genome | Components of | Gene accession IDs | Putative functions |
|---------------------|----------------|-----------------|-------------------------|----------------------------------------|--------------------|------------------|-----------------|---------------|--------------------|--------------------|
| SNP_3006_A_28916425 | NC_021160.1    | Ca_Kabuli_Chr01 | 28916425                | AA                                     | CC                 | CC               | INTERGENIC      |               |                    |                    |
| SNP_3007_A_28916514 | NC_021160.1    | Ca_Kabuli_Chr01 | 28916514                | CC                                     | AA                 | AA               | INTERGENIC      |               |                    |                    |
| SNP_3008_A_28916526 | NC_021160.1    | Ca_Kabuli_Chr01 | 28916526                | TT                                     | GG                 | GG               | INTERGENIC      |               |                    |                    |
| SNP_3009_A_28916548 | NC_021160.1    | Ca_Kabuli_Chr01 | 28916548                | AA                                     | CC                 | CC               | INTERGENIC      |               |                    |                    |
| SNP_3010_A_28916651 | NC_021160.1    | Ca_Kabuli_Chr01 | 28916651                | TT                                     | CC                 | CC               | INTERGENIC      |               |                    |                    |
| SNP_3011_A_28916679 | NC_021160.1    | Ca_Kabuli_Chr01 | 28916679                | AA                                     | CC                 | CC               | INTERGENIC      |               |                    |                    |
| SNP_3012_A_28916692 | NC_021160.1    | Ca_Kabuli_Chr01 | 28916692                | CC                                     | TT                 | TT               | INTERGENIC      |               |                    |                    |
| SNP_3013_A_28916753 | NC_021160.1    | Ca_Kabuli_Chr01 | 28916753                | GG                                     | AA                 | AA               | INTERGENIC      |               |                    |                    |
| SNP_3014_A_28916786 | NC_021160.1    | Ca_Kabuli_Chr01 | 28916786                | TT                                     | CC                 | CC               | INTERGENIC      |               |                    |                    |
| SNP_3015_A_28916813 | NC_021160.1    | Ca_Kabuli_Chr01 | 28916813                | GG                                     | AA                 | AA               | INTERGENIC      |               |                    |                    |
| SNP_3016_A_28916839 | NC_021160.1    | Ca_Kabuli_Chr01 | 28916839                | CC                                     | GG                 | GG               | INTERGENIC      |               |                    |                    |
| SNP_3017_A_28916864 | NC_021160.1    | Ca_Kabuli_Chr01 | 28916864                | AA                                     | CC                 | CC               | INTERGENIC      |               |                    |                    |
| SNP_3018_A_28916867 | NC_021160.1    | Ca_Kabuli_Chr01 | 28916867                | TT                                     | CC                 | CC               | INTERGENIC      |               |                    |                    |
| SNP_3019_A_28917064 | NC_021160.1    | Ca_Kabuli_Chr01 | 28917064                | CC                                     | TT                 | TT               | INTERGENIC      |               |                    |                    |
| SNP_3020_A_28917766 | NC_021160.1    | Ca_Kabuli_Chr01 | 28917766                | TT                                     | CC                 | CC               | INTERGENIC      |               |                    |                    |
| SNP_3021_A_28917820 | NC_021160.1    | Ca_Kabuli_Chr01 | 28917820                | TT                                     | GG                 | GG               | INTERGENIC      |               |                    |                    |
| SNP_3022_A_28917886 | NC_021160.1    | Ca_Kabuli_Chr01 | 28917886                | TT                                     | CC                 | CC               | INTERGENIC      |               |                    |                    |
| SNP_3023_A_28927984 | NC_021160.1    | Ca_Kabuli_Chr01 | 28927984                | AA                                     | TT                 | TT               | INTERGENIC      |               |                    |                    |
| SNP_3024_A_28928016 | NC_021160.1    | Ca_Kabuli_Chr01 | 28928016                | GG                                     | AA                 | AA               | INTERGENIC      |               |                    |                    |
| SNP_3025_A_28929247 | NC_021160.1    | Ca_Kabuli_Chr01 | 28929247                | CC                                     | TT                 | TT               | INTERGENIC      |               |                    |                    |
| SNP_3026_A_28929562 | NC_021160.1    | Ca_Kabuli_Chr01 | 28929562                | AA                                     | CC                 | CC               | INTERGENIC      |               |                    |                    |
| SNP_3027_A_28929642 | NC_021160.1    | Ca_Kabuli_Chr01 | 28929642                | GG                                     | AA                 | AA               | INTERGENIC      |               |                    |                    |



| SNPs IDs            | Chromosome IDs | Chromosomes     | Physical positions (bp) | CDC Frontier (Reference genome) | (Pusa 1103 & HPNB) | (ILWC 46 & LPNB) | Sequence genome | Components of | Gene accession IDs | Putative functions |
|---------------------|----------------|-----------------|-------------------------|---------------------------------|--------------------|------------------|-----------------|---------------|--------------------|--------------------|
| SNP_3028_A_28929684 | NC_021160.1    | Ca_Kabuli_Chr01 | 28929684                | TT                              | AA                 | AA               | INTERGENIC      |               |                    |                    |
| SNP_3029_A_28929764 | NC_021160.1    | Ca_Kabuli_Chr01 | 28929764                | CC                              | TT                 | TT               | INTERGENIC      |               |                    |                    |
| SNP_3030_A_28929809 | NC_021160.1    | Ca_Kabuli_Chr01 | 28929809                | GG                              | AA                 | AA               | INTERGENIC      |               |                    |                    |
| SNP_3031_A_28929823 | NC_021160.1    | Ca_Kabuli_Chr01 | 28929823                | CC                              | GG                 | GG               | INTERGENIC      |               |                    |                    |
| SNP_3032_A_28929995 | NC_021160.1    | Ca_Kabuli_Chr01 | 28929995                | CC                              | TT                 | TT               | INTERGENIC      |               |                    |                    |
| SNP_3033_A_28930070 | NC_021160.1    | Ca_Kabuli_Chr01 | 28930070                | TT                              | AA                 | AA               | INTERGENIC      |               |                    |                    |
| SNP_3034_A_28930079 | NC_021160.1    | Ca_Kabuli_Chr01 | 28930079                | AA                              | GG                 | GG               | INTERGENIC      |               |                    |                    |
| SNP_3035_A_28930093 | NC_021160.1    | Ca_Kabuli_Chr01 | 28930093                | AA                              | GG                 | GG               | INTERGENIC      |               |                    |                    |
| SNP_3036_A_28930140 | NC_021160.1    | Ca_Kabuli_Chr01 | 28930140                | AA                              | GG                 | GG               | INTERGENIC      |               |                    |                    |
| SNP_3037_A_28930225 | NC_021160.1    | Ca_Kabuli_Chr01 | 28930225                | GG                              | TT                 | TT               | INTERGENIC      |               |                    |                    |
| SNP_3038_A_28930252 | NC_021160.1    | Ca_Kabuli_Chr01 | 28930252                | AA                              | GG                 | GG               | INTERGENIC      |               |                    |                    |
| SNP_3039_A_28930310 | NC_021160.1    | Ca_Kabuli_Chr01 | 28930310                | CC                              | TT                 | TT               | INTERGENIC      |               |                    |                    |
| SNP_3040_A_28930318 | NC_021160.1    | Ca_Kabuli_Chr01 | 28930318                | CC                              | GG                 | GG               | INTERGENIC      |               |                    |                    |
| SNP_3041_A_28930718 | NC_021160.1    | Ca_Kabuli_Chr01 | 28930718                | GG                              | AA                 | AA               | INTERGENIC      |               |                    |                    |
| SNP_3044_A_28935849 | NC_021160.1    | Ca_Kabuli_Chr01 | 28935849                | AA                              | GG                 | GG               | INTERGENIC      |               |                    |                    |
| SNP_3045_A_28935858 | NC_021160.1    | Ca_Kabuli_Chr01 | 28935858                | AA                              | GG                 | GG               | INTERGENIC      |               |                    |                    |
| SNP_3046_A_28935914 | NC_021160.1    | Ca_Kabuli_Chr01 | 28935914                | GG                              | AA                 | AA               | INTERGENIC      |               |                    |                    |
| SNP_3047_A_28935939 | NC_021160.1    | Ca_Kabuli_Chr01 | 28935939                | CC                              | TT                 | TT               | INTERGENIC      |               |                    |                    |
| SNP_3048_A_28935940 | NC_021160.1    | Ca_Kabuli_Chr01 | 28935940                | AA                              | TT                 | TT               | INTERGENIC      |               |                    |                    |
| SNP_3049_A_28935993 | NC_021160.1    | Ca_Kabuli_Chr01 | 28935993                | TT                              | AA                 | AA               | INTERGENIC      |               |                    |                    |
| SNP_3050_A_28936044 | NC_021160.1    | Ca_Kabuli_Chr01 | 28936044                | CC                              | AA                 | AA               | INTERGENIC      |               |                    |                    |
| SNP_3051_A_28936045 | NC_021160.1    | Ca_Kabuli_Chr01 | 28936045                | AA                              | TT                 | TT               | INTERGENIC      |               |                    |                    |

| SNPs IDs            | Chromosome IDs | Chromosomes     | Physical positions (bp) | CDC Frontier genome (Reference genome) | (Pusa 1103 & HPNB) | (ILWC 46 & LPNB) | Sequence genome | Components of | Gene accession IDs | Putative functions |
|---------------------|----------------|-----------------|-------------------------|----------------------------------------|--------------------|------------------|-----------------|---------------|--------------------|--------------------|
| SNP_3052_A_28936061 | NC_021160.1    | Ca_Kabuli_Chr01 | 28936061                | CC                                     | TT                 | TT               | INTERGENIC      |               |                    |                    |
| SNP_3054_A_28936166 | NC_021160.1    | Ca_Kabuli_Chr01 | 28936166                | AA                                     | GG                 | GG               | INTERGENIC      |               |                    |                    |
| SNP_3055_A_28936174 | NC_021160.1    | Ca_Kabuli_Chr01 | 28936174                | AA                                     | GG                 | GG               | INTERGENIC      |               |                    |                    |
| SNP_3057_A_28936283 | NC_021160.1    | Ca_Kabuli_Chr01 | 28936283                | CC                                     | TT                 | TT               | INTERGENIC      |               |                    |                    |
| SNP_3058_A_28936319 | NC_021160.1    | Ca_Kabuli_Chr01 | 28936319                | TT                                     | CC                 | CC               | INTERGENIC      |               |                    |                    |
| SNP_3059_A_28939208 | NC_021160.1    | Ca_Kabuli_Chr01 | 28939208                | TT                                     | AA                 | AA               | INTERGENIC      |               |                    |                    |
| SNP_3060_A_28939209 | NC_021160.1    | Ca_Kabuli_Chr01 | 28939209                | CC                                     | AA                 | AA               | INTERGENIC      |               |                    |                    |
| SNP_3061_A_28939299 | NC_021160.1    | Ca_Kabuli_Chr01 | 28939299                | CC                                     | TT                 | TT               | INTERGENIC      |               |                    |                    |
| SNP_3062_A_28939389 | NC_021160.1    | Ca_Kabuli_Chr01 | 28939389                | TT                                     | AA                 | AA               | INTERGENIC      |               |                    |                    |
| SNP_3064_A_28939493 | NC_021160.1    | Ca_Kabuli_Chr01 | 28939493                | GG                                     | AA                 | AA               | INTERGENIC      |               |                    |                    |
| SNP_3065_A_28939505 | NC_021160.1    | Ca_Kabuli_Chr01 | 28939505                | GG                                     | CC                 | CC               | INTERGENIC      |               |                    |                    |
| SNP_3066_A_28939509 | NC_021160.1    | Ca_Kabuli_Chr01 | 28939509                | GG                                     | AA                 | AA               | INTERGENIC      |               |                    |                    |
| SNP_3067_A_28939530 | NC_021160.1    | Ca_Kabuli_Chr01 | 28939530                | CC                                     | AA                 | AA               | INTERGENIC      |               |                    |                    |
| SNP_3068_A_28939552 | NC_021160.1    | Ca_Kabuli_Chr01 | 28939552                | GG                                     | AA                 | AA               | INTERGENIC      |               |                    |                    |
| SNP_3069_A_28939588 | NC_021160.1    | Ca_Kabuli_Chr01 | 28939588                | CC                                     | AA                 | AA               | INTERGENIC      |               |                    |                    |
| SNP_3070_A_28939628 | NC_021160.1    | Ca_Kabuli_Chr01 | 28939628                | GG                                     | CC                 | CC               | INTERGENIC      |               |                    |                    |
| SNP_3071_A_28939679 | NC_021160.1    | Ca_Kabuli_Chr01 | 28939679                | AA                                     | TT                 | TT               | INTERGENIC      |               |                    |                    |
| SNP_3072_A_28939701 | NC_021160.1    | Ca_Kabuli_Chr01 | 28939701                | TT                                     | CC                 | CC               | INTERGENIC      |               |                    |                    |
| SNP_3073_A_28939756 | NC_021160.1    | Ca_Kabuli_Chr01 | 28939756                | AA                                     | GG                 | GG               | INTERGENIC      |               |                    |                    |
| SNP_3074_A_28939777 | NC_021160.1    | Ca_Kabuli_Chr01 | 28939777                | CC                                     | AA                 | AA               | INTERGENIC      |               |                    |                    |
| SNP_3075_A_28939817 | NC_021160.1    | Ca_Kabuli_Chr01 | 28939817                | AA                                     | GG                 | GG               | INTERGENIC      |               |                    |                    |
| SNP_3076_A_28939983 | NC_021160.1    | Ca_Kabuli_Chr01 | 28939983                | AA                                     | TT                 | TT               | INTERGENIC      |               |                    |                    |

| SNPs IDs            | Chromosome IDs | Chromosomes     | Physical positions (bp) | CDC Frontier (Reference genome) | (Pusa 1103 & HPNB) | (ILWC 46 & LPNB) | Sequence genome | Components of | Gene accession IDs | Putative functions |
|---------------------|----------------|-----------------|-------------------------|---------------------------------|--------------------|------------------|-----------------|---------------|--------------------|--------------------|
| SNP_3077_A_28940012 | NC_021160.1    | Ca_Kabuli_Chr01 | 28940012                | AA                              | GG                 | GG               | INTERGENIC      |               |                    |                    |
| SNP_3078_A_28940049 | NC_021160.1    | Ca_Kabuli_Chr01 | 28940049                | TT                              | GG                 | GG               | INTERGENIC      |               |                    |                    |
| SNP_3079_A_28940078 | NC_021160.1    | Ca_Kabuli_Chr01 | 28940078                | GG                              | CC                 | CC               | INTERGENIC      |               |                    |                    |
| SNP_3080_A_28940085 | NC_021160.1    | Ca_Kabuli_Chr01 | 28940085                | TT                              | CC                 | CC               | INTERGENIC      |               |                    |                    |
| SNP_3081_A_28940760 | NC_021160.1    | Ca_Kabuli_Chr01 | 28940760                | AA                              | GG                 | GG               | INTERGENIC      |               |                    |                    |
| SNP_3082_A_28940997 | NC_021160.1    | Ca_Kabuli_Chr01 | 28940997                | GG                              | TT                 | TT               | INTERGENIC      |               |                    |                    |
| SNP_3083_A_28941193 | NC_021160.1    | Ca_Kabuli_Chr01 | 28941193                | CC                              | AA                 | AA               | INTERGENIC      |               |                    |                    |
| SNP_3084_A_28941278 | NC_021160.1    | Ca_Kabuli_Chr01 | 28941278                | TT                              | GG                 | GG               | INTERGENIC      |               |                    |                    |
| SNP_3085_A_28941379 | NC_021160.1    | Ca_Kabuli_Chr01 | 28941379                | CC                              | TT                 | TT               | INTERGENIC      |               |                    |                    |
| SNP_3086_A_28941429 | NC_021160.1    | Ca_Kabuli_Chr01 | 28941429                | GG                              | AA                 | AA               | INTERGENIC      |               |                    |                    |
| SNP_3087_A_28941466 | NC_021160.1    | Ca_Kabuli_Chr01 | 28941466                | CC                              | TT                 | TT               | INTERGENIC      |               |                    |                    |
| SNP_3089_A_28941659 | NC_021160.1    | Ca_Kabuli_Chr01 | 28941659                | CC                              | AA                 | AA               | INTERGENIC      |               |                    |                    |
| SNP_3090_A_28941662 | NC_021160.1    | Ca_Kabuli_Chr01 | 28941662                | CC                              | TT                 | TT               | INTERGENIC      |               |                    |                    |
| SNP_3091_A_28941663 | NC_021160.1    | Ca_Kabuli_Chr01 | 28941663                | AA                              | GG                 | GG               | INTERGENIC      |               |                    |                    |
| SNP_3092_A_28941670 | NC_021160.1    | Ca_Kabuli_Chr01 | 28941670                | TT                              | AA                 | AA               | INTERGENIC      |               |                    |                    |
| SNP_3093_A_28941742 | NC_021160.1    | Ca_Kabuli_Chr01 | 28941742                | CC                              | AA                 | AA               | INTERGENIC      |               |                    |                    |
| SNP_3094_A_28941762 | NC_021160.1    | Ca_Kabuli_Chr01 | 28941762                | TT                              | CC                 | CC               | INTERGENIC      |               |                    |                    |
| SNP_3095_A_28941771 | NC_021160.1    | Ca_Kabuli_Chr01 | 28941771                | CC                              | TT                 | TT               | INTERGENIC      |               |                    |                    |
| SNP_3096_A_28942004 | NC_021160.1    | Ca_Kabuli_Chr01 | 28942004                | GG                              | AA                 | AA               | INTERGENIC      |               |                    |                    |
| SNP_3097_A_28942045 | NC_021160.1    | Ca_Kabuli_Chr01 | 28942045                | GG                              | TT                 | TT               | INTERGENIC      |               |                    |                    |
| SNP_3098_A_28942266 | NC_021160.1    | Ca_Kabuli_Chr01 | 28942266                | AA                              | GG                 | GG               | INTERGENIC      |               |                    |                    |
| SNP_3099_A_28943316 | NC_021160.1    | Ca_Kabuli_Chr01 | 28943316                | AA                              | TT                 | TT               | INTERGENIC      |               |                    |                    |

| SNPs IDs            | Chromosome IDs | Chromosomes     | Physical positions (bp) | CDC Frontier genome (Reference genome) | (Pusa 1103 & HPNB) | (ILWC 46 & LPNB) | Sequence genome | Components of | Gene accession IDs | Putative functions |
|---------------------|----------------|-----------------|-------------------------|----------------------------------------|--------------------|------------------|-----------------|---------------|--------------------|--------------------|
| SNP_3100_A_28943419 | NC_021160.1    | Ca_Kabuli_Chr01 | 28943419                | GG                                     | AA                 | AA               | INTERGENIC      |               |                    |                    |
| SNP_3101_A_28943420 | NC_021160.1    | Ca_Kabuli_Chr01 | 28943420                | GG                                     | AA                 | AA               | INTERGENIC      |               |                    |                    |
| SNP_3102_A_28943535 | NC_021160.1    | Ca_Kabuli_Chr01 | 28943535                | AA                                     | TT                 | TT               | INTERGENIC      |               |                    |                    |
| SNP_3103_A_28943538 | NC_021160.1    | Ca_Kabuli_Chr01 | 28943538                | AA                                     | GG                 | GG               | INTERGENIC      |               |                    |                    |
| SNP_3105_A_28943569 | NC_021160.1    | Ca_Kabuli_Chr01 | 28943569                | TT                                     | CC                 | CC               | INTERGENIC      |               |                    |                    |
| SNP_3106_A_28943671 | NC_021160.1    | Ca_Kabuli_Chr01 | 28943671                | CC                                     | AA                 | AA               | INTERGENIC      |               |                    |                    |
| SNP_3107_A_28943789 | NC_021160.1    | Ca_Kabuli_Chr01 | 28943789                | AA                                     | TT                 | TT               | INTERGENIC      |               |                    |                    |
| SNP_3108_A_28943893 | NC_021160.1    | Ca_Kabuli_Chr01 | 28943893                | CC                                     | TT                 | TT               | INTERGENIC      |               |                    |                    |
| SNP_3109_A_28944007 | NC_021160.1    | Ca_Kabuli_Chr01 | 28944007                | GG                                     | AA                 | AA               | INTERGENIC      |               |                    |                    |
| SNP_3110_A_28944080 | NC_021160.1    | Ca_Kabuli_Chr01 | 28944080                | GG                                     | TT                 | TT               | INTERGENIC      |               |                    |                    |
| SNP_3111_A_28944126 | NC_021160.1    | Ca_Kabuli_Chr01 | 28944126                | AA                                     | TT                 | TT               | INTERGENIC      |               |                    |                    |
| SNP_3112_A_28944156 | NC_021160.1    | Ca_Kabuli_Chr01 | 28944156                | GG                                     | AA                 | AA               | INTERGENIC      |               |                    |                    |
| SNP_3113_A_28944300 | NC_021160.1    | Ca_Kabuli_Chr01 | 28944300                | TT                                     | CC                 | CC               | INTERGENIC      |               |                    |                    |
| SNP_3114_A_28944329 | NC_021160.1    | Ca_Kabuli_Chr01 | 28944329                | GG                                     | TT                 | TT               | INTERGENIC      |               |                    |                    |
| SNP_3115_A_28944369 | NC_021160.1    | Ca_Kabuli_Chr01 | 28944369                | AA                                     | TT                 | TT               | INTERGENIC      |               |                    |                    |
| SNP_3116_A_28944413 | NC_021160.1    | Ca_Kabuli_Chr01 | 28944413                | AA                                     | TT                 | TT               | INTERGENIC      |               |                    |                    |
| SNP_3117_A_28944414 | NC_021160.1    | Ca_Kabuli_Chr01 | 28944414                | CC                                     | AA                 | AA               | INTERGENIC      |               |                    |                    |
| SNP_3119_A_28944579 | NC_021160.1    | Ca_Kabuli_Chr01 | 28944579                | AA                                     | GG                 | GG               | INTERGENIC      |               |                    |                    |
| SNP_3120_A_28944675 | NC_021160.1    | Ca_Kabuli_Chr01 | 28944675                | AA                                     | GG                 | GG               | INTERGENIC      |               |                    |                    |
| SNP_3121_A_28944714 | NC_021160.1    | Ca_Kabuli_Chr01 | 28944714                | GG                                     | TT                 | TT               | INTERGENIC      |               |                    |                    |
| SNP_3123_A_28988227 | NC_021160.1    | Ca_Kabuli_Chr01 | 28988227                | CC                                     | TT                 | TT               | INTERGENIC      |               |                    |                    |
| SNP_3124_A_29029054 | NC_021160.1    | Ca_Kabuli_Chr01 | 29029054                | TT                                     | CC                 | CC               | INTERGENIC      |               |                    |                    |

| SNPs IDs            | Chromosome IDs | Chromosomes     | Physical positions (bp) | CDC Frontier (Reference genome) | (Pusa 1103 & HPNB) | (ILWC 46 & LPNB) | Sequence Components of genome | Gene accession IDs | Putative functions                                         |
|---------------------|----------------|-----------------|-------------------------|---------------------------------|--------------------|------------------|-------------------------------|--------------------|------------------------------------------------------------|
| SNP_3125_A_29071928 | NC_021160.1    | Ca_Kabuli_Chr01 | 29071928                | TT                              | AA                 | AA               | INTERGENIC                    |                    |                                                            |
| SNP_3126_A_29106568 | NC_021160.1    | Ca_Kabuli_Chr01 | 29106568                | GG                              | AA                 | AA               | INTERGENIC                    |                    |                                                            |
| SNP_3127_A_29106572 | NC_021160.1    | Ca_Kabuli_Chr01 | 29106572                | TT                              | GG                 | GG               | INTERGENIC                    |                    |                                                            |
| SNP_3128_A_29106592 | NC_021160.1    | Ca_Kabuli_Chr01 | 29106592                | TT                              | GG                 | GG               | INTERGENIC                    |                    |                                                            |
| SNP_3130_A_29144384 | NC_021160.1    | Ca_Kabuli_Chr01 | 29144384                | GG                              | AA                 | AA               | INTERGENIC                    |                    |                                                            |
| SNP_3131_A_29163335 | NC_021160.1    | Ca_Kabuli_Chr01 | 29163335                | CC                              | TT                 | TT               | INTERGENIC                    |                    |                                                            |
| SNP_3132_A_29163338 | NC_021160.1    | Ca_Kabuli_Chr01 | 29163338                | GG                              | AA                 | AA               | INTERGENIC                    |                    |                                                            |
| SNP_3133_A_29163398 | NC_021160.1    | Ca_Kabuli_Chr01 | 29163398                | CC                              | TT                 | TT               | INTERGENIC                    |                    |                                                            |
| SNP_3134_A_29163405 | NC_021160.1    | Ca_Kabuli_Chr01 | 29163405                | GG                              | CC                 | CC               | INTERGENIC                    |                    |                                                            |
| SNP_3135_A_29172831 | NC_021160.1    | Ca_Kabuli_Chr01 | 29172831                | CC                              | AA                 | AA               | URR                           | 101495595          | pentatricopeptide repeat-containing protein At2g30780-like |
| SNP_3136_A_29176618 | NC_021160.1    | Ca_Kabuli_Chr01 | 29176618                | TT                              | CC                 | CC               | INTERGENIC                    |                    |                                                            |
| SNP_3137_A_29176852 | NC_021160.1    | Ca_Kabuli_Chr01 | 29176852                | AA                              | GG                 | GG               | INTERGENIC                    |                    |                                                            |
| SNP_3138_A_29190516 | NC_021160.1    | Ca_Kabuli_Chr01 | 29190516                | TT                              | CC                 | CC               | INTERGENIC                    |                    |                                                            |
| SNP_3139_A_29207639 | NC_021160.1    | Ca_Kabuli_Chr01 | 29207639                | TT                              | GG                 | GG               | INTERGENIC                    |                    |                                                            |
| SNP_3140_A_29266383 | NC_021160.1    | Ca_Kabuli_Chr01 | 29266383                | GG                              | CC                 | CC               | NON_SYNONYMOUS_CODING         | 101501422          | uncharacterized LOC101501422                               |
| SNP_3141_A_29274953 | NC_021160.1    | Ca_Kabuli_Chr01 | 29274953                | AA                              | TT                 | TT               | INTERGENIC                    |                    |                                                            |
| SNP_3142_A_29307986 | NC_021160.1    | Ca_Kabuli_Chr01 | 29307986                | TT                              | AA                 | AA               | INTERGENIC                    |                    |                                                            |
| SNP_3143_A_29335376 | NC_021160.1    | Ca_Kabuli_Chr01 | 29335376                | TT                              | GG                 | GG               | INTERGENIC                    |                    |                                                            |
| SNP_3144_A_29343994 | NC_021160.1    | Ca_Kabuli_Chr01 | 29343994                | GG                              | AA                 | AA               | INTERGENIC                    |                    |                                                            |
| SNP_3145_A_29386800 | NC_021160.1    | Ca_Kabuli_Chr01 | 29386800                | AA                              | GG                 | GG               | URR                           | 101498449          | uncharacterized LOC101498449                               |
| SNP_3146_A_29386833 | NC_021160.1    | Ca_Kabuli_Chr01 | 29386833                | TT                              | AA                 | AA               | URR                           | 101498449          | uncharacterized LOC101498449                               |
| SNP_3147_A_29391717 | NC_021160.1    | Ca_Kabuli_Chr01 | 29391717                | TT                              | CC                 | CC               | INTERGENIC                    |                    |                                                            |

| SNPs IDs            | Chromosome IDs | Chromosomes     | Physical positions (bp) | CDC Frontier genome (Reference genome) | (Pusa 1103 & HPNB) | (ILWC 46 & LPNB) | Sequence genome | Components of | Gene accession IDs           | Putative functions |
|---------------------|----------------|-----------------|-------------------------|----------------------------------------|--------------------|------------------|-----------------|---------------|------------------------------|--------------------|
| SNP_3148_A_29395292 | NC_021160.1    | Ca_Kabuli_Chr01 | 29395292                | AA                                     | TT                 | TT               | INTERGENIC      |               |                              |                    |
| SNP_3149_A_29420976 | NC_021160.1    | Ca_Kabuli_Chr01 | 29420976                | GG                                     | TT                 | TT               | INTERGENIC      |               |                              |                    |
| SNP_3150_A_29436114 | NC_021160.1    | Ca_Kabuli_Chr01 | 29436114                | CC                                     | GG                 | GG               | INTERGENIC      |               |                              |                    |
| SNP_3151_A_29483963 | NC_021160.1    | Ca_Kabuli_Chr01 | 29483963                | AA                                     | CC                 | CC               | INTERGENIC      |               |                              |                    |
| SNP_3152_A_29505805 | NC_021160.1    | Ca_Kabuli_Chr01 | 29505805                | TT                                     | AA                 | AA               | INTERGENIC      |               |                              |                    |
| SNP_3153_A_29505832 | NC_021160.1    | Ca_Kabuli_Chr01 | 29505832                | CC                                     | TT                 | TT               | INTERGENIC      |               |                              |                    |
| SNP_3154_A_29505833 | NC_021160.1    | Ca_Kabuli_Chr01 | 29505833                | AA                                     | GG                 | GG               | INTERGENIC      |               |                              |                    |
| SNP_3155_A_29523803 | NC_021160.1    | Ca_Kabuli_Chr01 | 29523803                | GG                                     | TT                 | TT               | INTERGENIC      |               |                              |                    |
| SNP_3156_A_29524402 | NC_021160.1    | Ca_Kabuli_Chr01 | 29524402                | AA                                     | GG                 | GG               | INTERGENIC      |               |                              |                    |
| SNP_3157_A_29525971 | NC_021160.1    | Ca_Kabuli_Chr01 | 29525971                | GG                                     | AA                 | AA               | INTERGENIC      |               |                              |                    |
| SNP_3158_A_29526338 | NC_021160.1    | Ca_Kabuli_Chr01 | 29526338                | AA                                     | TT                 | TT               | INTERGENIC      |               |                              |                    |
| SNP_3159_A_29526889 | NC_021160.1    | Ca_Kabuli_Chr01 | 29526889                | CC                                     | AA                 | AA               | INTERGENIC      |               |                              |                    |
| SNP_3160_A_29526966 | NC_021160.1    | Ca_Kabuli_Chr01 | 29526966                | TT                                     | CC                 | CC               | INTERGENIC      |               |                              |                    |
| SNP_3161_A_29527779 | NC_021160.1    | Ca_Kabuli_Chr01 | 29527779                | AA                                     | GG                 | GG               | INTERGENIC      |               |                              |                    |
| SNP_3162_A_29538987 | NC_021160.1    | Ca_Kabuli_Chr01 | 29538987                | AA                                     | GG                 | GG               | INTERGENIC      |               |                              |                    |
| SNP_3163_A_29539159 | NC_021160.1    | Ca_Kabuli_Chr01 | 29539159                | GG                                     | AA                 | AA               | INTERGENIC      |               |                              |                    |
| SNP_3164_A_29572102 | NC_021160.1    | Ca_Kabuli_Chr01 | 29572102                | TT                                     | GG                 | GG               | URR             | 101503250     | uncharacterized LOC101503250 |                    |
| SNP_3165_A_29572184 | NC_021160.1    | Ca_Kabuli_Chr01 | 29572184                | GG                                     | AA                 | AA               | URR             | 101503250     | uncharacterized LOC101503250 |                    |
| SNP_3166_A_29572206 | NC_021160.1    | Ca_Kabuli_Chr01 | 29572206                | AA                                     | GG                 | GG               | URR             | 101503250     | uncharacterized LOC101503250 |                    |
| SNP_3167_A_29572311 | NC_021160.1    | Ca_Kabuli_Chr01 | 29572311                | TT                                     | CC                 | CC               | URR             | 101503250     | uncharacterized LOC101503250 |                    |
| SNP_3168_A_29587375 | NC_021160.1    | Ca_Kabuli_Chr01 | 29587375                | GG                                     | AA                 | AA               | INTERGENIC      |               |                              |                    |
| SNP_3169_A_29587399 | NC_021160.1    | Ca_Kabuli_Chr01 | 29587399                | GG                                     | AA                 | AA               | INTERGENIC      |               |                              |                    |

| SNPs IDs            | Chromosome IDs | Chromosomes     | Physical positions (bp) | CDC Frontier genome (Reference genome) | (Pusa 1103 & HPNB) | (ILWC 46 & LPNB) | Sequence genome | Components of | Gene accession IDs | Putative functions           |
|---------------------|----------------|-----------------|-------------------------|----------------------------------------|--------------------|------------------|-----------------|---------------|--------------------|------------------------------|
| SNP_3170_A_29601480 | NC_021160.1    | Ca_Kabuli_Chr01 | 29601480                | CC                                     | AA                 | AA               | INTERGENIC      |               |                    |                              |
| SNP_3171_A_29601481 | NC_021160.1    | Ca_Kabuli_Chr01 | 29601481                | CC                                     | AA                 | AA               | INTERGENIC      |               |                    |                              |
| SNP_3172_A_29618095 | NC_021160.1    | Ca_Kabuli_Chr01 | 29618095                | CC                                     | TT                 | TT               | DRR             | 101502600     |                    | uncharacterized LOC101502600 |
| SNP_3173_A_29618108 | NC_021160.1    | Ca_Kabuli_Chr01 | 29618108                | AA                                     | GG                 | GG               | DRR             | 101502600     |                    | uncharacterized LOC101502600 |
| SNP_3174_A_29619593 | NC_021160.1    | Ca_Kabuli_Chr01 | 29619593                | CC                                     | AA                 | AA               | INTRON          | 101502600     |                    | uncharacterized LOC101502600 |
| SNP_3175_A_29619830 | NC_021160.1    | Ca_Kabuli_Chr01 | 29619830                | AA                                     | CC                 | CC               | URR             | 101502600     |                    | uncharacterized LOC101502600 |
| SNP_3176_A_29632122 | NC_021160.1    | Ca_Kabuli_Chr01 | 29632122                | AA                                     | GG                 | GG               | INTERGENIC      |               |                    |                              |
| SNP_3177_A_29634964 | NC_021160.1    | Ca_Kabuli_Chr01 | 29634964                | TT                                     | AA                 | AA               | INTRON          | id20232       |                    | Unknown function             |
| SNP_3178_A_29634977 | NC_021160.1    | Ca_Kabuli_Chr01 | 29634977                | AA                                     | CC                 | CC               | INTRON          | id20232       |                    | Unknown function             |
| SNP_3179_A_29634980 | NC_021160.1    | Ca_Kabuli_Chr01 | 29634980                | CC                                     | AA                 | AA               | INTRON          | id20232       |                    | Unknown function             |
| SNP_3180_A_29634982 | NC_021160.1    | Ca_Kabuli_Chr01 | 29634982                | TT                                     | AA                 | AA               | INTRON          | id20232       |                    | Unknown function             |
| SNP_3182_A_29636959 | NC_021160.1    | Ca_Kabuli_Chr01 | 29636959                | AA                                     | GG                 | GG               | URR             | 101502393     |                    | uncharacterized LOC101502393 |
| SNP_3184_A_29637110 | NC_021160.1    | Ca_Kabuli_Chr01 | 29637110                | CC                                     | TT                 | TT               | URR             | 101502393     |                    | uncharacterized LOC101502393 |
| SNP_3185_A_29637157 | NC_021160.1    | Ca_Kabuli_Chr01 | 29637157                | AA                                     | GG                 | GG               | URR             | 101502393     |                    | uncharacterized LOC101502393 |
| SNP_3186_A_29637342 | NC_021160.1    | Ca_Kabuli_Chr01 | 29637342                | AA                                     | GG                 | GG               | URR             | 101502393     |                    | uncharacterized LOC101502393 |
| SNP_3187_A_29643475 | NC_021160.1    | Ca_Kabuli_Chr01 | 29643475                | TT                                     | CC                 | CC               | INTERGENIC      |               |                    |                              |
| SNP_3188_A_29643488 | NC_021160.1    | Ca_Kabuli_Chr01 | 29643488                | TT                                     | CC                 | CC               | INTERGENIC      |               |                    |                              |
| SNP_3189_A_29649889 | NC_021160.1    | Ca_Kabuli_Chr01 | 29649889                | AA                                     | GG                 | GG               | INTERGENIC      |               |                    |                              |
| SNP_3190_A_29650240 | NC_021160.1    | Ca_Kabuli_Chr01 | 29650240                | AA                                     | GG                 | GG               | INTERGENIC      |               |                    |                              |
| SNP_3191_A_29651010 | NC_021160.1    | Ca_Kabuli_Chr01 | 29651010                | AA                                     | GG                 | GG               | INTERGENIC      |               |                    |                              |
| SNP_3192_A_29651019 | NC_021160.1    | Ca_Kabuli_Chr01 | 29651019                | TT                                     | CC                 | CC               | INTERGENIC      |               |                    |                              |
| SNP_3193_A_29651022 | NC_021160.1    | Ca_Kabuli_Chr01 | 29651022                | CC                                     | TT                 | TT               | INTERGENIC      |               |                    |                              |

| SNPs IDs            | Chromosome IDs | Chromosomes     | Physical positions (bp) | CDC Frontier (Reference genome) | (Pusa 1103 & HPNB) | (ILWC 46 & LPNB) | Sequence genome | Components of | Gene accession IDs | Putative functions |
|---------------------|----------------|-----------------|-------------------------|---------------------------------|--------------------|------------------|-----------------|---------------|--------------------|--------------------|
| SNP_3195_A_29681676 | NC_021160.1    | Ca_Kabuli_Chr01 | 29681676                | AA                              | GG                 | GG               | INTERGENIC      |               |                    |                    |
| SNP_3196_A_29681704 | NC_021160.1    | Ca_Kabuli_Chr01 | 29681704                | TT                              | CC                 | CC               | INTERGENIC      |               |                    |                    |
| SNP_3197_A_29707055 | NC_021160.1    | Ca_Kabuli_Chr01 | 29707055                | TT                              | CC                 | CC               | INTERGENIC      |               |                    |                    |
| SNP_3198_A_29708430 | NC_021160.1    | Ca_Kabuli_Chr01 | 29708430                | GG                              | AA                 | AA               | INTERGENIC      |               |                    |                    |
| SNP_3199_A_29708494 | NC_021160.1    | Ca_Kabuli_Chr01 | 29708494                | CC                              | TT                 | TT               | INTERGENIC      |               |                    |                    |
| SNP_3200_A_29709019 | NC_021160.1    | Ca_Kabuli_Chr01 | 29709019                | GG                              | AA                 | AA               | INTERGENIC      |               |                    |                    |
| SNP_3202_A_29712296 | NC_021160.1    | Ca_Kabuli_Chr01 | 29712296                | GG                              | AA                 | AA               | INTERGENIC      |               |                    |                    |
| SNP_3204_A_29748203 | NC_021160.1    | Ca_Kabuli_Chr01 | 29748203                | TT                              | AA                 | AA               | INTERGENIC      |               |                    |                    |
| SNP_3205_A_29748251 | NC_021160.1    | Ca_Kabuli_Chr01 | 29748251                | TT                              | GG                 | GG               | INTERGENIC      |               |                    |                    |
| SNP_3206_A_29749936 | NC_021160.1    | Ca_Kabuli_Chr01 | 29749936                | CC                              | GG                 | GG               | INTERGENIC      |               |                    |                    |
| SNP_3207_A_29764452 | NC_021160.1    | Ca_Kabuli_Chr01 | 29764452                | AA                              | GG                 | GG               | INTERGENIC      |               |                    |                    |
| SNP_3208_A_29781690 | NC_021160.1    | Ca_Kabuli_Chr01 | 29781690                | AA                              | GG                 | GG               | INTERGENIC      |               |                    |                    |
| SNP_3209_A_29781733 | NC_021160.1    | Ca_Kabuli_Chr01 | 29781733                | GG                              | AA                 | AA               | INTERGENIC      |               |                    |                    |
| SNP_3210_A_29781810 | NC_021160.1    | Ca_Kabuli_Chr01 | 29781810                | TT                              | CC                 | CC               | INTERGENIC      |               |                    |                    |
| SNP_3211_A_29781963 | NC_021160.1    | Ca_Kabuli_Chr01 | 29781963                | AA                              | CC                 | CC               | INTERGENIC      |               |                    |                    |
| SNP_3212_A_29781970 | NC_021160.1    | Ca_Kabuli_Chr01 | 29781970                | TT                              | CC                 | CC               | INTERGENIC      |               |                    |                    |
| SNP_3213_A_29782008 | NC_021160.1    | Ca_Kabuli_Chr01 | 29782008                | GG                              | AA                 | AA               | INTERGENIC      |               |                    |                    |
| SNP_3214_A_29782054 | NC_021160.1    | Ca_Kabuli_Chr01 | 29782054                | TT                              | CC                 | CC               | INTERGENIC      |               |                    |                    |
| SNP_3215_A_29782086 | NC_021160.1    | Ca_Kabuli_Chr01 | 29782086                | AA                              | TT                 | TT               | INTERGENIC      |               |                    |                    |
| SNP_3217_A_29791470 | NC_021160.1    | Ca_Kabuli_Chr01 | 29791470                | AA                              | TT                 | TT               | INTERGENIC      |               |                    |                    |
| SNP_3218_A_29792284 | NC_021160.1    | Ca_Kabuli_Chr01 | 29792284                | GG                              | AA                 | AA               | INTERGENIC      |               |                    |                    |
| SNP_3219_A_29792735 | NC_021160.1    | Ca_Kabuli_Chr01 | 29792735                | GG                              | AA                 | AA               | INTERGENIC      |               |                    |                    |



| SNPs IDs            | Chromosome IDs | Chromosomes     | Physical positions (bp) | CDC Frontier genome (Reference genome) | (Pusa 1103 & HPNB) | (ILWC 46 & LPNB) | Sequence genome | Components of | Gene accession IDs | Putative functions |
|---------------------|----------------|-----------------|-------------------------|----------------------------------------|--------------------|------------------|-----------------|---------------|--------------------|--------------------|
| SNP_3220_A_29796606 | NC_021160.1    | Ca_Kabuli_Chr01 | 29796606                | CC                                     | TT                 | TT               | INTERGENIC      |               |                    |                    |
| SNP_3221_A_29817437 | NC_021160.1    | Ca_Kabuli_Chr01 | 29817437                | CC                                     | AA                 | AA               | INTERGENIC      |               |                    |                    |
| SNP_3222_A_29817460 | NC_021160.1    | Ca_Kabuli_Chr01 | 29817460                | AA                                     | GG                 | GG               | INTERGENIC      |               |                    |                    |
| SNP_3223_A_29817514 | NC_021160.1    | Ca_Kabuli_Chr01 | 29817514                | CC                                     | AA                 | AA               | INTERGENIC      |               |                    |                    |
| SNP_3224_A_29817516 | NC_021160.1    | Ca_Kabuli_Chr01 | 29817516                | TT                                     | CC                 | CC               | INTERGENIC      |               |                    |                    |
| SNP_3225_A_29817658 | NC_021160.1    | Ca_Kabuli_Chr01 | 29817658                | CC                                     | TT                 | TT               | INTERGENIC      |               |                    |                    |
| SNP_3226_A_29817901 | NC_021160.1    | Ca_Kabuli_Chr01 | 29817901                | TT                                     | CC                 | CC               | INTERGENIC      |               |                    |                    |
| SNP_3227_A_29817948 | NC_021160.1    | Ca_Kabuli_Chr01 | 29817948                | GG                                     | AA                 | AA               | INTERGENIC      |               |                    |                    |
| SNP_3228_A_29817982 | NC_021160.1    | Ca_Kabuli_Chr01 | 29817982                | CC                                     | TT                 | TT               | INTERGENIC      |               |                    |                    |
| SNP_3229_A_29818025 | NC_021160.1    | Ca_Kabuli_Chr01 | 29818025                | TT                                     | CC                 | CC               | INTERGENIC      |               |                    |                    |
| SNP_3230_A_29818196 | NC_021160.1    | Ca_Kabuli_Chr01 | 29818196                | CC                                     | AA                 | AA               | INTERGENIC      |               |                    |                    |
| SNP_3231_A_29818233 | NC_021160.1    | Ca_Kabuli_Chr01 | 29818233                | AA                                     | GG                 | GG               | INTERGENIC      |               |                    |                    |
| SNP_3232_A_29818311 | NC_021160.1    | Ca_Kabuli_Chr01 | 29818311                | TT                                     | CC                 | CC               | INTERGENIC      |               |                    |                    |
| SNP_3233_A_29818367 | NC_021160.1    | Ca_Kabuli_Chr01 | 29818367                | AA                                     | GG                 | GG               | INTERGENIC      |               |                    |                    |
| SNP_3234_A_29818390 | NC_021160.1    | Ca_Kabuli_Chr01 | 29818390                | AA                                     | GG                 | GG               | INTERGENIC      |               |                    |                    |
| SNP_3235_A_29818474 | NC_021160.1    | Ca_Kabuli_Chr01 | 29818474                | AA                                     | GG                 | GG               | INTERGENIC      |               |                    |                    |
| SNP_3236_A_29818597 | NC_021160.1    | Ca_Kabuli_Chr01 | 29818597                | TT                                     | CC                 | CC               | INTERGENIC      |               |                    |                    |
| SNP_3237_A_29818601 | NC_021160.1    | Ca_Kabuli_Chr01 | 29818601                | AA                                     | GG                 | GG               | INTERGENIC      |               |                    |                    |
| SNP_3238_A_29818605 | NC_021160.1    | Ca_Kabuli_Chr01 | 29818605                | AA                                     | CC                 | CC               | INTERGENIC      |               |                    |                    |
| SNP_3239_A_29818615 | NC_021160.1    | Ca_Kabuli_Chr01 | 29818615                | TT                                     | CC                 | CC               | INTERGENIC      |               |                    |                    |
| SNP_3240_A_29821705 | NC_021160.1    | Ca_Kabuli_Chr01 | 29821705                | AA                                     | CC                 | CC               | INTERGENIC      |               |                    |                    |
| SNP_3241_A_29823411 | NC_021160.1    | Ca_Kabuli_Chr01 | 29823411                | GG                                     | AA                 | AA               | INTERGENIC      |               |                    |                    |

| SNPs IDs            | Chromosome IDs | Chromosomes     | Physical positions (bp) | CDC Frontier genome (Reference genome) | (Pusa 1103 & HPNB) | (ILWC 46 & LPNB) | Sequence genome | Components of | Gene accession IDs | Putative functions |
|---------------------|----------------|-----------------|-------------------------|----------------------------------------|--------------------|------------------|-----------------|---------------|--------------------|--------------------|
| SNP_3242_A_29823495 | NC_021160.1    | Ca_Kabuli_Chr01 | 29823495                | AA                                     | TT                 | TT               | INTERGENIC      |               |                    |                    |
| SNP_3243_A_29823496 | NC_021160.1    | Ca_Kabuli_Chr01 | 29823496                | TT                                     | CC                 | CC               | INTERGENIC      |               |                    |                    |
| SNP_3244_A_29823570 | NC_021160.1    | Ca_Kabuli_Chr01 | 29823570                | CC                                     | TT                 | TT               | INTERGENIC      |               |                    |                    |
| SNP_3245_A_29823595 | NC_021160.1    | Ca_Kabuli_Chr01 | 29823595                | CC                                     | TT                 | TT               | INTERGENIC      |               |                    |                    |
| SNP_3246_A_29823812 | NC_021160.1    | Ca_Kabuli_Chr01 | 29823812                | CC                                     | AA                 | AA               | INTERGENIC      |               |                    |                    |
| SNP_3247_A_29824286 | NC_021160.1    | Ca_Kabuli_Chr01 | 29824286                | CC                                     | TT                 | TT               | INTERGENIC      |               |                    |                    |
| SNP_3248_A_29824320 | NC_021160.1    | Ca_Kabuli_Chr01 | 29824320                | TT                                     | AA                 | AA               | INTERGENIC      |               |                    |                    |
| SNP_3249_A_29824668 | NC_021160.1    | Ca_Kabuli_Chr01 | 29824668                | TT                                     | CC                 | CC               | INTERGENIC      |               |                    |                    |
| SNP_3250_A_29824738 | NC_021160.1    | Ca_Kabuli_Chr01 | 29824738                | GG                                     | AA                 | AA               | INTERGENIC      |               |                    |                    |
| SNP_3251_A_29824753 | NC_021160.1    | Ca_Kabuli_Chr01 | 29824753                | AA                                     | TT                 | TT               | INTERGENIC      |               |                    |                    |
| SNP_3252_A_29824798 | NC_021160.1    | Ca_Kabuli_Chr01 | 29824798                | CC                                     | TT                 | TT               | INTERGENIC      |               |                    |                    |
| SNP_3253_A_29824840 | NC_021160.1    | Ca_Kabuli_Chr01 | 29824840                | TT                                     | CC                 | CC               | INTERGENIC      |               |                    |                    |
| SNP_3254_A_29824861 | NC_021160.1    | Ca_Kabuli_Chr01 | 29824861                | GG                                     | TT                 | TT               | INTERGENIC      |               |                    |                    |
| SNP_3255_A_29824933 | NC_021160.1    | Ca_Kabuli_Chr01 | 29824933                | GG                                     | AA                 | AA               | INTERGENIC      |               |                    |                    |
| SNP_3256_A_29824987 | NC_021160.1    | Ca_Kabuli_Chr01 | 29824987                | GG                                     | AA                 | AA               | INTERGENIC      |               |                    |                    |
| SNP_3257_A_29825002 | NC_021160.1    | Ca_Kabuli_Chr01 | 29825002                | CC                                     | TT                 | TT               | INTERGENIC      |               |                    |                    |
| SNP_3258_A_29825092 | NC_021160.1    | Ca_Kabuli_Chr01 | 29825092                | GG                                     | AA                 | AA               | INTERGENIC      |               |                    |                    |
| SNP_3259_A_29825125 | NC_021160.1    | Ca_Kabuli_Chr01 | 29825125                | GG                                     | AA                 | AA               | INTERGENIC      |               |                    |                    |
| SNP_3260_A_29825128 | NC_021160.1    | Ca_Kabuli_Chr01 | 29825128                | TT                                     | GG                 | GG               | INTERGENIC      |               |                    |                    |
| SNP_3261_A_29825588 | NC_021160.1    | Ca_Kabuli_Chr01 | 29825588                | AA                                     | TT                 | TT               | INTERGENIC      |               |                    |                    |
| SNP_3262_A_29830227 | NC_021160.1    | Ca_Kabuli_Chr01 | 29830227                | TT                                     | GG                 | GG               | INTERGENIC      |               |                    |                    |
| SNP_3263_A_29841456 | NC_021160.1    | Ca_Kabuli_Chr01 | 29841456                | TT                                     | CC                 | CC               | INTERGENIC      |               |                    |                    |

| SNPs IDs            | Chromosome IDs | Chromosomes     | Physical positions (bp) | CDC Frontier genome (Reference genome) | (Pusa 1103 & HPNB) | (ILWC 46 & LPNB) | Sequence genome | Components of | Gene accession IDs | Putative functions |
|---------------------|----------------|-----------------|-------------------------|----------------------------------------|--------------------|------------------|-----------------|---------------|--------------------|--------------------|
| SNP_3264_A_29841629 | NC_021160.1    | Ca_Kabuli_Chr01 | 29841629                | AA                                     | CC                 | CC               | INTERGENIC      |               |                    |                    |
| SNP_3265_A_29841835 | NC_021160.1    | Ca_Kabuli_Chr01 | 29841835                | CC                                     | TT                 | TT               | INTERGENIC      |               |                    |                    |
| SNP_3266_A_29841895 | NC_021160.1    | Ca_Kabuli_Chr01 | 29841895                | AA                                     | GG                 | GG               | INTERGENIC      |               |                    |                    |
| SNP_3267_A_29841949 | NC_021160.1    | Ca_Kabuli_Chr01 | 29841949                | CC                                     | AA                 | AA               | INTERGENIC      |               |                    |                    |
| SNP_3268_A_29842165 | NC_021160.1    | Ca_Kabuli_Chr01 | 29842165                | TT                                     | CC                 | CC               | INTERGENIC      |               |                    |                    |
| SNP_3269_A_29842268 | NC_021160.1    | Ca_Kabuli_Chr01 | 29842268                | AA                                     | GG                 | GG               | INTERGENIC      |               |                    |                    |
| SNP_3270_A_29842342 | NC_021160.1    | Ca_Kabuli_Chr01 | 29842342                | TT                                     | AA                 | AA               | INTERGENIC      |               |                    |                    |
| SNP_3271_A_29842394 | NC_021160.1    | Ca_Kabuli_Chr01 | 29842394                | AA                                     | GG                 | GG               | INTERGENIC      |               |                    |                    |
| SNP_3272_A_29842411 | NC_021160.1    | Ca_Kabuli_Chr01 | 29842411                | TT                                     | GG                 | GG               | INTERGENIC      |               |                    |                    |
| SNP_3274_A_29842636 | NC_021160.1    | Ca_Kabuli_Chr01 | 29842636                | TT                                     | CC                 | CC               | INTERGENIC      |               |                    |                    |
| SNP_3275_A_29842637 | NC_021160.1    | Ca_Kabuli_Chr01 | 29842637                | TT                                     | CC                 | CC               | INTERGENIC      |               |                    |                    |
| SNP_3276_A_29842658 | NC_021160.1    | Ca_Kabuli_Chr01 | 29842658                | TT                                     | AA                 | AA               | INTERGENIC      |               |                    |                    |
| SNP_3277_A_29842683 | NC_021160.1    | Ca_Kabuli_Chr01 | 29842683                | AA                                     | CC                 | CC               | INTERGENIC      |               |                    |                    |
| SNP_3278_A_29842732 | NC_021160.1    | Ca_Kabuli_Chr01 | 29842732                | TT                                     | CC                 | CC               | INTERGENIC      |               |                    |                    |
| SNP_3279_A_29842772 | NC_021160.1    | Ca_Kabuli_Chr01 | 29842772                | AA                                     | GG                 | GG               | INTERGENIC      |               |                    |                    |
| SNP_3280_A_29843494 | NC_021160.1    | Ca_Kabuli_Chr01 | 29843494                | CC                                     | AA                 | AA               | INTERGENIC      |               |                    |                    |
| SNP_3281_A_29843549 | NC_021160.1    | Ca_Kabuli_Chr01 | 29843549                | CC                                     | TT                 | TT               | INTERGENIC      |               |                    |                    |
| SNP_3282_A_29843748 | NC_021160.1    | Ca_Kabuli_Chr01 | 29843748                | AA                                     | TT                 | TT               | INTERGENIC      |               |                    |                    |
| SNP_3283_A_29843889 | NC_021160.1    | Ca_Kabuli_Chr01 | 29843889                | TT                                     | CC                 | CC               | INTERGENIC      |               |                    |                    |
| SNP_3284_A_29844046 | NC_021160.1    | Ca_Kabuli_Chr01 | 29844046                | AA                                     | GG                 | GG               | INTERGENIC      |               |                    |                    |
| SNP_3285_A_29844512 | NC_021160.1    | Ca_Kabuli_Chr01 | 29844512                | TT                                     | GG                 | GG               | INTERGENIC      |               |                    |                    |
| SNP_3286_A_29844537 | NC_021160.1    | Ca_Kabuli_Chr01 | 29844537                | GG                                     | CC                 | CC               | INTERGENIC      |               |                    |                    |

| SNPs IDs            | Chromosome IDs | Chromosomes     | Physical positions (bp) | CDC Frontier genome (Reference genome) | (Pusa 1103 & HPNB) | (ILWC 46 & LPNB) | Sequence genome | Components of | Gene accession IDs | Putative functions |
|---------------------|----------------|-----------------|-------------------------|----------------------------------------|--------------------|------------------|-----------------|---------------|--------------------|--------------------|
| SNP_3287_A_29844633 | NC_021160.1    | Ca_Kabuli_Chr01 | 29844633                | CC                                     | TT                 | TT               | INTERGENIC      |               |                    |                    |
| SNP_3288_A_29845069 | NC_021160.1    | Ca_Kabuli_Chr01 | 29845069                | TT                                     | GG                 | GG               | INTERGENIC      |               |                    |                    |
| SNP_3289_A_29845249 | NC_021160.1    | Ca_Kabuli_Chr01 | 29845249                | AA                                     | TT                 | TT               | INTERGENIC      |               |                    |                    |
| SNP_3290_A_29845517 | NC_021160.1    | Ca_Kabuli_Chr01 | 29845517                | TT                                     | AA                 | AA               | INTERGENIC      |               |                    |                    |
| SNP_3291_A_29845533 | NC_021160.1    | Ca_Kabuli_Chr01 | 29845533                | TT                                     | CC                 | CC               | INTERGENIC      |               |                    |                    |
| SNP_3292_A_29845806 | NC_021160.1    | Ca_Kabuli_Chr01 | 29845806                | AA                                     | CC                 | CC               | INTERGENIC      |               |                    |                    |
| SNP_3293_A_29845918 | NC_021160.1    | Ca_Kabuli_Chr01 | 29845918                | TT                                     | CC                 | CC               | INTERGENIC      |               |                    |                    |
| SNP_3294_A_29845923 | NC_021160.1    | Ca_Kabuli_Chr01 | 29845923                | AA                                     | TT                 | TT               | INTERGENIC      |               |                    |                    |
| SNP_3295_A_29846237 | NC_021160.1    | Ca_Kabuli_Chr01 | 29846237                | TT                                     | CC                 | CC               | INTERGENIC      |               |                    |                    |
| SNP_3296_A_29846270 | NC_021160.1    | Ca_Kabuli_Chr01 | 29846270                | GG                                     | AA                 | AA               | INTERGENIC      |               |                    |                    |
| SNP_3297_A_29846295 | NC_021160.1    | Ca_Kabuli_Chr01 | 29846295                | TT                                     | CC                 | CC               | INTERGENIC      |               |                    |                    |
| SNP_3298_A_29846392 | NC_021160.1    | Ca_Kabuli_Chr01 | 29846392                | TT                                     | GG                 | GG               | INTERGENIC      |               |                    |                    |
| SNP_3299_A_29846428 | NC_021160.1    | Ca_Kabuli_Chr01 | 29846428                | CC                                     | AA                 | AA               | INTERGENIC      |               |                    |                    |
| SNP_3300_A_29846434 | NC_021160.1    | Ca_Kabuli_Chr01 | 29846434                | TT                                     | GG                 | GG               | INTERGENIC      |               |                    |                    |
| SNP_3302_A_29846574 | NC_021160.1    | Ca_Kabuli_Chr01 | 29846574                | TT                                     | AA                 | AA               | INTERGENIC      |               |                    |                    |
| SNP_3305_A_29847045 | NC_021160.1    | Ca_Kabuli_Chr01 | 29847045                | AA                                     | TT                 | TT               | INTERGENIC      |               |                    |                    |
| SNP_3306_A_29847336 | NC_021160.1    | Ca_Kabuli_Chr01 | 29847336                | AA                                     | GG                 | GG               | INTERGENIC      |               |                    |                    |
| SNP_3307_A_29847500 | NC_021160.1    | Ca_Kabuli_Chr01 | 29847500                | TT                                     | CC                 | CC               | INTERGENIC      |               |                    |                    |
| SNP_3308_A_29847534 | NC_021160.1    | Ca_Kabuli_Chr01 | 29847534                | CC                                     | TT                 | TT               | INTERGENIC      |               |                    |                    |
| SNP_3309_A_29847570 | NC_021160.1    | Ca_Kabuli_Chr01 | 29847570                | TT                                     | CC                 | CC               | INTERGENIC      |               |                    |                    |
| SNP_3310_A_29847608 | NC_021160.1    | Ca_Kabuli_Chr01 | 29847608                | GG                                     | AA                 | AA               | INTERGENIC      |               |                    |                    |
| SNP_3311_A_29847781 | NC_021160.1    | Ca_Kabuli_Chr01 | 29847781                | CC                                     | GG                 | GG               | INTERGENIC      |               |                    |                    |

| SNPs IDs            | Chromosome IDs | Chromosomes     | Physical positions (bp) | CDC Frontier genome (Reference genome) | (Pusa 1103 & HPNB) | (ILWC 46 & LPNB) | Sequence genome | Components of | Gene accession IDs | Putative functions |
|---------------------|----------------|-----------------|-------------------------|----------------------------------------|--------------------|------------------|-----------------|---------------|--------------------|--------------------|
| SNP_3312_A_29847831 | NC_021160.1    | Ca_Kabuli_Chr01 | 29847831                | AA                                     | GG                 | GG               | INTERGENIC      |               |                    |                    |
| SNP_3313_A_29847918 | NC_021160.1    | Ca_Kabuli_Chr01 | 29847918                | GG                                     | TT                 | TT               | INTERGENIC      |               |                    |                    |
| SNP_3315_A_29848169 | NC_021160.1    | Ca_Kabuli_Chr01 | 29848169                | CC                                     | TT                 | TT               | INTERGENIC      |               |                    |                    |
| SNP_3316_A_29848317 | NC_021160.1    | Ca_Kabuli_Chr01 | 29848317                | AA                                     | TT                 | TT               | INTERGENIC      |               |                    |                    |
| SNP_3317_A_29848320 | NC_021160.1    | Ca_Kabuli_Chr01 | 29848320                | TT                                     | CC                 | CC               | INTERGENIC      |               |                    |                    |
| SNP_3318_A_29848428 | NC_021160.1    | Ca_Kabuli_Chr01 | 29848428                | CC                                     | AA                 | AA               | INTERGENIC      |               |                    |                    |
| SNP_3319_A_29848466 | NC_021160.1    | Ca_Kabuli_Chr01 | 29848466                | GG                                     | AA                 | AA               | INTERGENIC      |               |                    |                    |
| SNP_3320_A_29848512 | NC_021160.1    | Ca_Kabuli_Chr01 | 29848512                | GG                                     | TT                 | TT               | INTERGENIC      |               |                    |                    |
| SNP_3321_A_29848826 | NC_021160.1    | Ca_Kabuli_Chr01 | 29848826                | TT                                     | CC                 | CC               | INTERGENIC      |               |                    |                    |
| SNP_3322_A_29848856 | NC_021160.1    | Ca_Kabuli_Chr01 | 29848856                | GG                                     | AA                 | AA               | INTERGENIC      |               |                    |                    |
| SNP_3323_A_29848868 | NC_021160.1    | Ca_Kabuli_Chr01 | 29848868                | GG                                     | AA                 | AA               | INTERGENIC      |               |                    |                    |
| SNP_3324_A_29848871 | NC_021160.1    | Ca_Kabuli_Chr01 | 29848871                | GG                                     | AA                 | AA               | INTERGENIC      |               |                    |                    |
| SNP_3325_A_29848880 | NC_021160.1    | Ca_Kabuli_Chr01 | 29848880                | GG                                     | AA                 | AA               | INTERGENIC      |               |                    |                    |
| SNP_3326_A_29849049 | NC_021160.1    | Ca_Kabuli_Chr01 | 29849049                | GG                                     | AA                 | AA               | INTERGENIC      |               |                    |                    |
| SNP_3327_A_29849116 | NC_021160.1    | Ca_Kabuli_Chr01 | 29849116                | CC                                     | TT                 | TT               | INTERGENIC      |               |                    |                    |
| SNP_3328_A_29849121 | NC_021160.1    | Ca_Kabuli_Chr01 | 29849121                | TT                                     | CC                 | CC               | INTERGENIC      |               |                    |                    |
| SNP_3329_A_29849234 | NC_021160.1    | Ca_Kabuli_Chr01 | 29849234                | GG                                     | AA                 | AA               | INTERGENIC      |               |                    |                    |
| SNP_3330_A_29849255 | NC_021160.1    | Ca_Kabuli_Chr01 | 29849255                | GG                                     | AA                 | AA               | INTERGENIC      |               |                    |                    |
| SNP_3331_A_29849257 | NC_021160.1    | Ca_Kabuli_Chr01 | 29849257                | GG                                     | CC                 | CC               | INTERGENIC      |               |                    |                    |
| SNP_3332_A_29849342 | NC_021160.1    | Ca_Kabuli_Chr01 | 29849342                | CC                                     | TT                 | TT               | INTERGENIC      |               |                    |                    |
| SNP_3333_A_29849362 | NC_021160.1    | Ca_Kabuli_Chr01 | 29849362                | CC                                     | TT                 | TT               | INTERGENIC      |               |                    |                    |
| SNP_3334_A_29849441 | NC_021160.1    | Ca_Kabuli_Chr01 | 29849441                | CC                                     | AA                 | AA               | INTERGENIC      |               |                    |                    |

| SNPs IDs            | Chromosome IDs | Chromosomes     | Physical positions (bp) | CDC Frontier genome (Reference genome) | (Pusa 1103 & HPNB) | (ILWC 46 & LPNB) | Sequence genome | Components of | Gene accession IDs | Putative functions |
|---------------------|----------------|-----------------|-------------------------|----------------------------------------|--------------------|------------------|-----------------|---------------|--------------------|--------------------|
| SNP_3335_A_29849553 | NC_021160.1    | Ca_Kabuli_Chr01 | 29849553                | GG                                     | AA                 | AA               | INTERGENIC      |               |                    |                    |
| SNP_3336_A_29849617 | NC_021160.1    | Ca_Kabuli_Chr01 | 29849617                | AA                                     | GG                 | GG               | INTERGENIC      |               |                    |                    |
| SNP_3337_A_29849659 | NC_021160.1    | Ca_Kabuli_Chr01 | 29849659                | GG                                     | AA                 | AA               | INTERGENIC      |               |                    |                    |
| SNP_3338_A_29852030 | NC_021160.1    | Ca_Kabuli_Chr01 | 29852030                | TT                                     | CC                 | CC               | INTERGENIC      |               |                    |                    |
| SNP_3339_A_29852340 | NC_021160.1    | Ca_Kabuli_Chr01 | 29852340                | TT                                     | CC                 | CC               | INTERGENIC      |               |                    |                    |
| SNP_3340_A_29852469 | NC_021160.1    | Ca_Kabuli_Chr01 | 29852469                | TT                                     | GG                 | GG               | INTERGENIC      |               |                    |                    |
| SNP_3341_A_29852480 | NC_021160.1    | Ca_Kabuli_Chr01 | 29852480                | AA                                     | GG                 | GG               | INTERGENIC      |               |                    |                    |
| SNP_3342_A_29852482 | NC_021160.1    | Ca_Kabuli_Chr01 | 29852482                | AA                                     | TT                 | TT               | INTERGENIC      |               |                    |                    |
| SNP_3343_A_29852517 | NC_021160.1    | Ca_Kabuli_Chr01 | 29852517                | TT                                     | CC                 | CC               | INTERGENIC      |               |                    |                    |
| SNP_3344_A_29852946 | NC_021160.1    | Ca_Kabuli_Chr01 | 29852946                | AA                                     | CC                 | CC               | INTERGENIC      |               |                    |                    |
| SNP_3345_A_29852947 | NC_021160.1    | Ca_Kabuli_Chr01 | 29852947                | TT                                     | AA                 | AA               | INTERGENIC      |               |                    |                    |
| SNP_3346_A_29853003 | NC_021160.1    | Ca_Kabuli_Chr01 | 29853003                | TT                                     | AA                 | AA               | INTERGENIC      |               |                    |                    |
| SNP_3348_A_29853554 | NC_021160.1    | Ca_Kabuli_Chr01 | 29853554                | AA                                     | CC                 | CC               | INTERGENIC      |               |                    |                    |
| SNP_3350_A_29853836 | NC_021160.1    | Ca_Kabuli_Chr01 | 29853836                | CC                                     | AA                 | AA               | INTERGENIC      |               |                    |                    |
| SNP_3351_A_29853930 | NC_021160.1    | Ca_Kabuli_Chr01 | 29853930                | AA                                     | CC                 | CC               | INTERGENIC      |               |                    |                    |
| SNP_3352_A_29854080 | NC_021160.1    | Ca_Kabuli_Chr01 | 29854080                | CC                                     | AA                 | AA               | INTERGENIC      |               |                    |                    |
| SNP_3353_A_29854109 | NC_021160.1    | Ca_Kabuli_Chr01 | 29854109                | AA                                     | GG                 | GG               | INTERGENIC      |               |                    |                    |
| SNP_3354_A_29854145 | NC_021160.1    | Ca_Kabuli_Chr01 | 29854145                | CC                                     | AA                 | AA               | INTERGENIC      |               |                    |                    |
| SNP_3355_A_29854146 | NC_021160.1    | Ca_Kabuli_Chr01 | 29854146                | AA                                     | CC                 | CC               | INTERGENIC      |               |                    |                    |
| SNP_3356_A_29854233 | NC_021160.1    | Ca_Kabuli_Chr01 | 29854233                | AA                                     | GG                 | GG               | INTERGENIC      |               |                    |                    |
| SNP_3357_A_29854356 | NC_021160.1    | Ca_Kabuli_Chr01 | 29854356                | GG                                     | AA                 | AA               | INTERGENIC      |               |                    |                    |
| SNP_3358_A_29854408 | NC_021160.1    | Ca_Kabuli_Chr01 | 29854408                | TT                                     | AA                 | AA               | INTERGENIC      |               |                    |                    |

| SNPs IDs            | Chromosome IDs | Chromosomes     | Physical positions (bp) | CDC Frontier genome (Reference genome) | (Pusa 1103 & HPNB) | (ILWC 46 & LPNB) | Sequence genome | Components of | Gene accession IDs | Putative functions |
|---------------------|----------------|-----------------|-------------------------|----------------------------------------|--------------------|------------------|-----------------|---------------|--------------------|--------------------|
| SNP_3359_A_29854484 | NC_021160.1    | Ca_Kabuli_Chr01 | 29854484                | TT                                     | AA                 | AA               | INTERGENIC      |               |                    |                    |
| SNP_3360_A_29854489 | NC_021160.1    | Ca_Kabuli_Chr01 | 29854489                | AA                                     | GG                 | GG               | INTERGENIC      |               |                    |                    |
| SNP_3361_A_29854493 | NC_021160.1    | Ca_Kabuli_Chr01 | 29854493                | AA                                     | GG                 | GG               | INTERGENIC      |               |                    |                    |
| SNP_3362_A_29854515 | NC_021160.1    | Ca_Kabuli_Chr01 | 29854515                | CC                                     | TT                 | TT               | INTERGENIC      |               |                    |                    |
| SNP_3363_A_29854518 | NC_021160.1    | Ca_Kabuli_Chr01 | 29854518                | AA                                     | TT                 | TT               | INTERGENIC      |               |                    |                    |
| SNP_3364_A_29854835 | NC_021160.1    | Ca_Kabuli_Chr01 | 29854835                | GG                                     | TT                 | TT               | INTERGENIC      |               |                    |                    |
| SNP_3365_A_29854972 | NC_021160.1    | Ca_Kabuli_Chr01 | 29854972                | AA                                     | CC                 | CC               | INTERGENIC      |               |                    |                    |
| SNP_3366_A_29854973 | NC_021160.1    | Ca_Kabuli_Chr01 | 29854973                | TT                                     | AA                 | AA               | INTERGENIC      |               |                    |                    |
| SNP_3367_A_29855106 | NC_021160.1    | Ca_Kabuli_Chr01 | 29855106                | CC                                     | GG                 | GG               | INTERGENIC      |               |                    |                    |
| SNP_3368_A_29855124 | NC_021160.1    | Ca_Kabuli_Chr01 | 29855124                | TT                                     | CC                 | CC               | INTERGENIC      |               |                    |                    |
| SNP_3369_A_29855139 | NC_021160.1    | Ca_Kabuli_Chr01 | 29855139                | CC                                     | TT                 | TT               | INTERGENIC      |               |                    |                    |
| SNP_3370_A_29855200 | NC_021160.1    | Ca_Kabuli_Chr01 | 29855200                | TT                                     | GG                 | GG               | INTERGENIC      |               |                    |                    |
| SNP_3371_A_29855353 | NC_021160.1    | Ca_Kabuli_Chr01 | 29855353                | TT                                     | CC                 | CC               | INTERGENIC      |               |                    |                    |
| SNP_3372_A_29855477 | NC_021160.1    | Ca_Kabuli_Chr01 | 29855477                | CC                                     | TT                 | TT               | INTERGENIC      |               |                    |                    |
| SNP_3373_A_29855594 | NC_021160.1    | Ca_Kabuli_Chr01 | 29855594                | AA                                     | GG                 | GG               | INTERGENIC      |               |                    |                    |
| SNP_3374_A_29855951 | NC_021160.1    | Ca_Kabuli_Chr01 | 29855951                | GG                                     | CC                 | CC               | INTERGENIC      |               |                    |                    |
| SNP_3375_A_29856030 | NC_021160.1    | Ca_Kabuli_Chr01 | 29856030                | CC                                     | TT                 | TT               | INTERGENIC      |               |                    |                    |
| SNP_3376_A_29856064 | NC_021160.1    | Ca_Kabuli_Chr01 | 29856064                | TT                                     | GG                 | GG               | INTERGENIC      |               |                    |                    |
| SNP_3377_A_29856202 | NC_021160.1    | Ca_Kabuli_Chr01 | 29856202                | CC                                     | GG                 | GG               | INTERGENIC      |               |                    |                    |
| SNP_3378_A_29856247 | NC_021160.1    | Ca_Kabuli_Chr01 | 29856247                | CC                                     | TT                 | TT               | INTERGENIC      |               |                    |                    |
| SNP_3379_A_29856319 | NC_021160.1    | Ca_Kabuli_Chr01 | 29856319                | TT                                     | GG                 | GG               | INTERGENIC      |               |                    |                    |
| SNP_3380_A_29856405 | NC_021160.1    | Ca_Kabuli_Chr01 | 29856405                | GG                                     | AA                 | AA               | INTERGENIC      |               |                    |                    |

| SNPs IDs            | Chromosome IDs | Chromosomes     | Physical positions (bp) | CDC Frontier genome (Reference genome) | (Pusa 1103 & HPNB) | (ILWC 46 & LPNB) | Sequence genome | Components of | Gene accession IDs           | Putative functions |
|---------------------|----------------|-----------------|-------------------------|----------------------------------------|--------------------|------------------|-----------------|---------------|------------------------------|--------------------|
| SNP_3381_A_29856439 | NC_021160.1    | Ca_Kabuli_Chr01 | 29856439                | GG                                     | AA                 | AA               | INTERGENIC      |               |                              |                    |
| SNP_3383_A_29856845 | NC_021160.1    | Ca_Kabuli_Chr01 | 29856845                | AA                                     | TT                 | TT               | INTERGENIC      |               |                              |                    |
| SNP_3384_A_29856986 | NC_021160.1    | Ca_Kabuli_Chr01 | 29856986                | TT                                     | CC                 | CC               | INTERGENIC      |               |                              |                    |
| SNP_3385_A_29857084 | NC_021160.1    | Ca_Kabuli_Chr01 | 29857084                | AA                                     | TT                 | TT               | INTERGENIC      |               |                              |                    |
| SNP_3386_A_29857164 | NC_021160.1    | Ca_Kabuli_Chr01 | 29857164                | TT                                     | GG                 | GG               | INTERGENIC      |               |                              |                    |
| SNP_3387_A_29857237 | NC_021160.1    | Ca_Kabuli_Chr01 | 29857237                | CC                                     | TT                 | TT               | INTERGENIC      |               |                              |                    |
| SNP_3388_A_29861701 | NC_021160.1    | Ca_Kabuli_Chr01 | 29861701                | TT                                     | AA                 | AA               | INTERGENIC      |               |                              |                    |
| SNP_3389_A_29862080 | NC_021160.1    | Ca_Kabuli_Chr01 | 29862080                | GG                                     | AA                 | AA               | INTERGENIC      |               |                              |                    |
| SNP_3390_A_29862089 | NC_021160.1    | Ca_Kabuli_Chr01 | 29862089                | GG                                     | TT                 | TT               | INTERGENIC      |               |                              |                    |
| SNP_3392_A_29882289 | NC_021160.1    | Ca_Kabuli_Chr01 | 29882289                | GG                                     | TT                 | TT               | INTERGENIC      |               |                              |                    |
| SNP_3393_A_29889195 | NC_021160.1    | Ca_Kabuli_Chr01 | 29889195                | TT                                     | CC                 | CC               | DRR             | 101505173     | uncharacterized LOC101505173 |                    |
| SNP_3394_A_29922062 | NC_021160.1    | Ca_Kabuli_Chr01 | 29922062                | AA                                     | TT                 | TT               | INTERGENIC      |               |                              |                    |
| SNP_3395_A_29932522 | NC_021160.1    | Ca_Kabuli_Chr01 | 29932522                | AA                                     | GG                 | GG               | INTERGENIC      |               |                              |                    |
| SNP_3396_A_29932765 | NC_021160.1    | Ca_Kabuli_Chr01 | 29932765                | TT                                     | GG                 | GG               | INTERGENIC      |               |                              |                    |
| SNP_3397_A_29932794 | NC_021160.1    | Ca_Kabuli_Chr01 | 29932794                | CC                                     | TT                 | TT               | INTERGENIC      |               |                              |                    |
| SNP_3398_A_29936628 | NC_021160.1    | Ca_Kabuli_Chr01 | 29936628                | AA                                     | TT                 | TT               | INTERGENIC      |               |                              |                    |
| SNP_3399_A_29936738 | NC_021160.1    | Ca_Kabuli_Chr01 | 29936738                | TT                                     | CC                 | CC               | INTERGENIC      |               |                              |                    |
| SNP_3400_A_29936749 | NC_021160.1    | Ca_Kabuli_Chr01 | 29936749                | TT                                     | CC                 | CC               | INTERGENIC      |               |                              |                    |
| SNP_3401_A_29936754 | NC_021160.1    | Ca_Kabuli_Chr01 | 29936754                | GG                                     | AA                 | AA               | INTERGENIC      |               |                              |                    |
| SNP_3402_A_29936769 | NC_021160.1    | Ca_Kabuli_Chr01 | 29936769                | CC                                     | AA                 | AA               | INTERGENIC      |               |                              |                    |
| SNP_3403_A_29980806 | NC_021160.1    | Ca_Kabuli_Chr01 | 29980806                | TT                                     | AA                 | AA               | INTERGENIC      |               |                              |                    |
| SNP_3404_A_29984997 | NC_021160.1    | Ca_Kabuli_Chr01 | 29984997                | CC                                     | TT                 | TT               | INTERGENIC      |               |                              |                    |



| SNPs IDs            | Chromosome IDs | Chromosomes     | Physical positions (bp) | CDC Frontier (Reference genome) | (Pusa 1103 & HPNB) | (ILWC 46 & LPNB) | Sequence Components of genome | Gene accession IDs | Putative functions                          |
|---------------------|----------------|-----------------|-------------------------|---------------------------------|--------------------|------------------|-------------------------------|--------------------|---------------------------------------------|
| SNP_3405_A_30001520 | NC_021160.1    | Ca_Kabuli_Chr01 | 30001520                | AA                              | CC                 | CC               | INTERGENIC                    |                    |                                             |
| SNP_3406_A_30007816 | NC_021160.1    | Ca_Kabuli_Chr01 | 30007816                | CC                              | TT                 | TT               | INTERGENIC                    |                    |                                             |
| SNP_3407_A_30008062 | NC_021160.1    | Ca_Kabuli_Chr01 | 30008062                | TT                              | GG                 | GG               | INTERGENIC                    |                    |                                             |
| SNP_3408_A_30038464 | NC_021160.1    | Ca_Kabuli_Chr01 | 30038464                | AA                              | CC                 | CC               | INTERGENIC                    |                    |                                             |
| SNP_3409_A_30064386 | NC_021160.1    | Ca_Kabuli_Chr01 | 30064386                | GG                              | AA                 | AA               | INTERGENIC                    |                    |                                             |
| SNP_3410_A_30064552 | NC_021160.1    | Ca_Kabuli_Chr01 | 30064552                | CC                              | TT                 | TT               | INTERGENIC                    |                    |                                             |
| SNP_3411_A_30111260 | NC_021160.1    | Ca_Kabuli_Chr01 | 30111260                | AA                              | TT                 | TT               | INTERGENIC                    |                    |                                             |
| SNP_3412_A_30111434 | NC_021160.1    | Ca_Kabuli_Chr01 | 30111434                | AA                              | GG                 | GG               | INTERGENIC                    |                    |                                             |
| SNP_3413_A_30111441 | NC_021160.1    | Ca_Kabuli_Chr01 | 30111441                | TT                              | GG                 | GG               | INTERGENIC                    |                    |                                             |
| SNP_3414_A_30111444 | NC_021160.1    | Ca_Kabuli_Chr01 | 30111444                | CC                              | TT                 | TT               | INTERGENIC                    |                    |                                             |
| SNP_3415_A_30117305 | NC_021160.1    | Ca_Kabuli_Chr01 | 30117305                | GG                              | TT                 | TT               | INTERGENIC                    |                    |                                             |
| SNP_3416_A_30117422 | NC_021160.1    | Ca_Kabuli_Chr01 | 30117422                | TT                              | GG                 | GG               | INTERGENIC                    |                    |                                             |
| SNP_3417_A_30125855 | NC_021160.1    | Ca_Kabuli_Chr01 | 30125855                | AA                              | GG                 | GG               | INTERGENIC                    |                    |                                             |
| SNP_3418_A_30138450 | NC_021160.1    | Ca_Kabuli_Chr01 | 30138450                | GG                              | AA                 | AA               | INTERGENIC                    |                    |                                             |
| SNP_3419_A_30150535 | NC_021160.1    | Ca_Kabuli_Chr01 | 30150535                | TT                              | AA                 | AA               | INTERGENIC                    |                    |                                             |
| SNP_3420_A_30151130 | NC_021160.1    | Ca_Kabuli_Chr01 | 30151130                | AA                              | GG                 | GG               | INTERGENIC                    |                    |                                             |
| SNP_3421_A_30157130 | NC_021160.1    | Ca_Kabuli_Chr01 | 30157130                | TT                              | CC                 | CC               | INTRON                        | 101512774          | uncharacterized LOC101512774                |
| SNP_3422_A_30161334 | NC_021160.1    | Ca_Kabuli_Chr01 | 30161334                | GG                              | TT                 | TT               | URR                           | 101512774          | uncharacterized LOC101512774                |
| SNP_3423_A_30162973 | NC_021160.1    | Ca_Kabuli_Chr01 | 30162973                | TT                              | CC                 | CC               | INTERGENIC                    |                    |                                             |
| SNP_3424_A_30175876 | NC_021160.1    | Ca_Kabuli_Chr01 | 30175876                | TT                              | CC                 | CC               | NON_SYNONYMOUS_CODING         | 101507131          | putative phospholipid-transporting ATPase 9 |
| SNP_3425_A_30181097 | NC_021160.1    | Ca_Kabuli_Chr01 | 30181097                | GG                              | AA                 | AA               | INTRON                        | 101507131          | putative phospholipid-transporting ATPase 9 |
| SNP_3426_A_30183436 | NC_021160.1    | Ca_Kabuli_Chr01 | 30183436                | AA                              | CC                 | CC               | INTRON                        | 101507131          | putative phospholipid-transporting ATPase 9 |

| SNPs IDs            | Chromosome IDs | Chromosomes     | Physical positions (bp) | CDC Frontier genome (Reference genome) | (Pusa 1103 & HPNB) | (ILWC 46 & LPNB) | Sequence Components of genome | Gene accession IDs | Putative functions         |
|---------------------|----------------|-----------------|-------------------------|----------------------------------------|--------------------|------------------|-------------------------------|--------------------|----------------------------|
| SNP_3427_A_30196462 | NC_021160.1    | Ca_Kabuli_Chr01 | 30196462                | GG                                     | AA                 | AA               | INTRON                        | 101513098          | sialidase-like             |
| SNP_3428_A_30196760 | NC_021160.1    | Ca_Kabuli_Chr01 | 30196760                | GG                                     | AA                 | AA               | INTRON                        | 101513098          | sialidase-like             |
| SNP_3429_A_30196805 | NC_021160.1    | Ca_Kabuli_Chr01 | 30196805                | GG                                     | AA                 | AA               | INTRON                        | 101513098          | sialidase-like             |
| SNP_3431_A_30197070 | NC_021160.1    | Ca_Kabuli_Chr01 | 30197070                | GG                                     | TT                 | TT               | NON_SYNONYMOUS_CODING         | 101513098          | sialidase-like             |
| SNP_3432_A_30219772 | NC_021160.1    | Ca_Kabuli_Chr01 | 30219772                | CC                                     | AA                 | AA               | INTERGENIC                    |                    |                            |
| SNP_3433_A_30219780 | NC_021160.1    | Ca_Kabuli_Chr01 | 30219780                | GG                                     | TT                 | TT               | INTERGENIC                    |                    |                            |
| SNP_3434_A_30255590 | NC_021160.1    | Ca_Kabuli_Chr01 | 30255590                | AA                                     | CC                 | CC               | INTERGENIC                    |                    |                            |
| SNP_3435_A_30259303 | NC_021160.1    | Ca_Kabuli_Chr01 | 30259303                | CC                                     | TT                 | TT               | INTERGENIC                    |                    |                            |
| SNP_3436_A_30259491 | NC_021160.1    | Ca_Kabuli_Chr01 | 30259491                | GG                                     | TT                 | TT               | DRR                           | 101508275          | kinesin-like protein KIF19 |
| SNP_3437_A_30259549 | NC_021160.1    | Ca_Kabuli_Chr01 | 30259549                | AA                                     | GG                 | GG               | DRR                           | 101508275          | kinesin-like protein KIF19 |
| SNP_3438_A_30259838 | NC_021160.1    | Ca_Kabuli_Chr01 | 30259838                | GG                                     | AA                 | AA               | DRR                           | 101508275          | kinesin-like protein KIF19 |
| SNP_3439_A_30259902 | NC_021160.1    | Ca_Kabuli_Chr01 | 30259902                | CC                                     | AA                 | AA               | DRR                           | 101508275          | kinesin-like protein KIF19 |
| SNP_3440_A_30263986 | NC_021160.1    | Ca_Kabuli_Chr01 | 30263986                | TT                                     | CC                 | CC               | URR                           | 101508275          | kinesin-like protein KIF19 |
| SNP_3441_A_30263994 | NC_021160.1    | Ca_Kabuli_Chr01 | 30263994                | CC                                     | GG                 | GG               | URR                           | 101508275          | kinesin-like protein KIF19 |
| SNP_3442_A_30264021 | NC_021160.1    | Ca_Kabuli_Chr01 | 30264021                | GG                                     | AA                 | AA               | URR                           | 101508275          | kinesin-like protein KIF19 |
| SNP_3443_A_30264023 | NC_021160.1    | Ca_Kabuli_Chr01 | 30264023                | CC                                     | AA                 | AA               | URR                           | 101508275          | kinesin-like protein KIF19 |
| SNP_3444_A_30264672 | NC_021160.1    | Ca_Kabuli_Chr01 | 30264672                | AA                                     | TT                 | TT               | URR                           | 101508275          | kinesin-like protein KIF19 |
| SNP_3445_A_30273201 | NC_021160.1    | Ca_Kabuli_Chr01 | 30273201                | CC                                     | TT                 | TT               | INTERGENIC                    |                    |                            |
| SNP_3446_A_30284934 | NC_021160.1    | Ca_Kabuli_Chr01 | 30284934                | AA                                     | TT                 | TT               | INTERGENIC                    |                    |                            |
| SNP_3447_A_30293710 | NC_021160.1    | Ca_Kabuli_Chr01 | 30293710                | TT                                     | CC                 | CC               | INTERGENIC                    |                    |                            |
| SNP_3448_A_30305191 | NC_021160.1    | Ca_Kabuli_Chr01 | 30305191                | CC                                     | TT                 | TT               | INTERGENIC                    |                    |                            |
| SNP_3449_A_30323434 | NC_021160.1    | Ca_Kabuli_Chr01 | 30323434                | TT                                     | CC                 | CC               | INTERGENIC                    |                    |                            |

| SNPs IDs            | Chromosome IDs | Chromosomes     | Physical positions (bp) | CDC Frontier (Reference genome) | (Pusa 1103 & HPNB) | (ILWC 46 & LPNB) | Sequence genome | Components of | Gene accession IDs | Putative functions |
|---------------------|----------------|-----------------|-------------------------|---------------------------------|--------------------|------------------|-----------------|---------------|--------------------|--------------------|
| SNP_3450_A_30424150 | NC_021160.1    | Ca_Kabuli_Chr01 | 30424150                | TT                              | CC                 | CC               | INTERGENIC      |               |                    |                    |
| SNP_3452_A_30446785 | NC_021160.1    | Ca_Kabuli_Chr01 | 30446785                | CC                              | TT                 | TT               | INTERGENIC      |               |                    |                    |
| SNP_3454_A_30460857 | NC_021160.1    | Ca_Kabuli_Chr01 | 30460857                | TT                              | CC                 | CC               | INTERGENIC      |               |                    |                    |
| SNP_3455_A_30460891 | NC_021160.1    | Ca_Kabuli_Chr01 | 30460891                | GG                              | TT                 | TT               | INTERGENIC      |               |                    |                    |
| SNP_3456_A_30460892 | NC_021160.1    | Ca_Kabuli_Chr01 | 30460892                | TT                              | CC                 | CC               | INTERGENIC      |               |                    |                    |
| SNP_3457_A_30460933 | NC_021160.1    | Ca_Kabuli_Chr01 | 30460933                | TT                              | CC                 | CC               | INTERGENIC      |               |                    |                    |
| SNP_3458_A_30460953 | NC_021160.1    | Ca_Kabuli_Chr01 | 30460953                | AA                              | GG                 | GG               | INTERGENIC      |               |                    |                    |
| SNP_3459_A_30461178 | NC_021160.1    | Ca_Kabuli_Chr01 | 30461178                | GG                              | AA                 | AA               | INTERGENIC      |               |                    |                    |
| SNP_3460_A_30461207 | NC_021160.1    | Ca_Kabuli_Chr01 | 30461207                | TT                              | CC                 | CC               | INTERGENIC      |               |                    |                    |
| SNP_3461_A_30461279 | NC_021160.1    | Ca_Kabuli_Chr01 | 30461279                | GG                              | AA                 | AA               | INTERGENIC      |               |                    |                    |
| SNP_3462_A_30461292 | NC_021160.1    | Ca_Kabuli_Chr01 | 30461292                | AA                              | TT                 | TT               | INTERGENIC      |               |                    |                    |
| SNP_3463_A_30461297 | NC_021160.1    | Ca_Kabuli_Chr01 | 30461297                | GG                              | AA                 | AA               | INTERGENIC      |               |                    |                    |
| SNP_3464_A_30461336 | NC_021160.1    | Ca_Kabuli_Chr01 | 30461336                | CC                              | TT                 | TT               | INTERGENIC      |               |                    |                    |
| SNP_3465_A_30475446 | NC_021160.1    | Ca_Kabuli_Chr01 | 30475446                | AA                              | GG                 | GG               | INTERGENIC      |               |                    |                    |
| SNP_3466_A_30475485 | NC_021160.1    | Ca_Kabuli_Chr01 | 30475485                | AA                              | GG                 | GG               | INTERGENIC      |               |                    |                    |
| SNP_3467_A_30475502 | NC_021160.1    | Ca_Kabuli_Chr01 | 30475502                | CC                              | TT                 | TT               | INTERGENIC      |               |                    |                    |
| SNP_3469_A_30475540 | NC_021160.1    | Ca_Kabuli_Chr01 | 30475540                | TT                              | CC                 | CC               | INTERGENIC      |               |                    |                    |
| SNP_3470_A_30475581 | NC_021160.1    | Ca_Kabuli_Chr01 | 30475581                | TT                              | AA                 | AA               | INTERGENIC      |               |                    |                    |
| SNP_3471_A_30508804 | NC_021160.1    | Ca_Kabuli_Chr01 | 30508804                | AA                              | TT                 | TT               | INTERGENIC      |               |                    |                    |
| SNP_3472_A_30508821 | NC_021160.1    | Ca_Kabuli_Chr01 | 30508821                | AA                              | TT                 | TT               | INTERGENIC      |               |                    |                    |
| SNP_3473_A_30509164 | NC_021160.1    | Ca_Kabuli_Chr01 | 30509164                | AA                              | CC                 | CC               | INTERGENIC      |               |                    |                    |
| SNP_3474_A_30509351 | NC_021160.1    | Ca_Kabuli_Chr01 | 30509351                | GG                              | CC                 | CC               | INTERGENIC      |               |                    |                    |

| SNPs IDs            | Chromosome IDs | Chromosomes     | Physical positions (bp) | CDC Frontier genome (Reference genome) | (Pusa 1103 & HPNB) | (ILWC 46 & LPNB) | Sequence Components of genome | Gene accession IDs | Putative functions                           |
|---------------------|----------------|-----------------|-------------------------|----------------------------------------|--------------------|------------------|-------------------------------|--------------------|----------------------------------------------|
| SNP_3475_A_30543426 | NC_021160.1    | Ca_Kabuli_Chr01 | 30543426                | TT                                     | AA                 | AA               | INTERGENIC                    |                    |                                              |
| SNP_3476_A_30585458 | NC_021160.1    | Ca_Kabuli_Chr01 | 30585458                | AA                                     | GG                 | GG               | INTERGENIC                    |                    |                                              |
| SNP_3477_A_30591180 | NC_021160.1    | Ca_Kabuli_Chr01 | 30591180                | GG                                     | AA                 | AA               | INTERGENIC                    |                    |                                              |
| SNP_3479_A_30663367 | NC_021160.1    | Ca_Kabuli_Chr01 | 30663367                | GG                                     | AA                 | AA               | INTERGENIC                    |                    |                                              |
| SNP_3481_A_30725547 | NC_021160.1    | Ca_Kabuli_Chr01 | 30725547                | TT                                     | GG                 | GG               | INTERGENIC                    |                    |                                              |
| SNP_3482_A_30725845 | NC_021160.1    | Ca_Kabuli_Chr01 | 30725845                | AA                                     | GG                 | GG               | INTERGENIC                    |                    |                                              |
| SNP_3483_A_30738524 | NC_021160.1    | Ca_Kabuli_Chr01 | 30738524                | CC                                     | AA                 | AA               | INTERGENIC                    |                    |                                              |
| SNP_3485_A_30740232 | NC_021160.1    | Ca_Kabuli_Chr01 | 30740232                | GG                                     | TT                 | TT               | DRR                           | 101488811          | serine carboxypeptidase-like 45              |
| SNP_3486_A_30740325 | NC_021160.1    | Ca_Kabuli_Chr01 | 30740325                | CC                                     | AA                 | AA               | DRR                           | 101488811          | serine carboxypeptidase-like 45              |
| SNP_3487_A_30740326 | NC_021160.1    | Ca_Kabuli_Chr01 | 30740326                | GG                                     | CC                 | CC               | DRR                           | 101488811          | serine carboxypeptidase-like 45              |
| SNP_3488_A_30740444 | NC_021160.1    | Ca_Kabuli_Chr01 | 30740444                | TT                                     | CC                 | CC               | DRR                           | 101488811          | serine carboxypeptidase-like 45              |
| SNP_3489_A_30740872 | NC_021160.1    | Ca_Kabuli_Chr01 | 30740872                | CC                                     | TT                 | TT               | INTRON                        | 101488811          | serine carboxypeptidase-like 45              |
| SNP_3490_A_30741262 | NC_021160.1    | Ca_Kabuli_Chr01 | 30741262                | AA                                     | GG                 | GG               | INTRON                        | 101488811          | serine carboxypeptidase-like 45              |
| SNP_3491_A_30745398 | NC_021160.1    | Ca_Kabuli_Chr01 | 30745398                | TT                                     | CC                 | CC               | URR                           | 101488811          | serine carboxypeptidase-like 45              |
| SNP_3493_A_30745732 | NC_021160.1    | Ca_Kabuli_Chr01 | 30745732                | TT                                     | CC                 | CC               | URR                           | 101488811          | serine carboxypeptidase-like 45              |
| SNP_3494_A_30745796 | NC_021160.1    | Ca_Kabuli_Chr01 | 30745796                | GG                                     | TT                 | TT               | URR                           | 101488811          | serine carboxypeptidase-like 45              |
| SNP_3495_A_30746111 | NC_021160.1    | Ca_Kabuli_Chr01 | 30746111                | CC                                     | AA                 | AA               | URR                           | 101488811          | serine carboxypeptidase-like 45              |
| SNP_3496_A_30754969 | NC_021160.1    | Ca_Kabuli_Chr01 | 30754969                | GG                                     | AA                 | AA               | INTERGENIC                    |                    |                                              |
| SNP_3497_A_30756962 | NC_021160.1    | Ca_Kabuli_Chr01 | 30756962                | CC                                     | AA                 | AA               | INTERGENIC                    |                    |                                              |
| SNP_3498_A_30762238 | NC_021160.1    | Ca_Kabuli_Chr01 | 30762238                | CC                                     | TT                 | TT               | URR                           | 101511274          | 2-alkenal reductase (NADP(+)-dependent)-like |
| SNP_3499_A_30762343 | NC_021160.1    | Ca_Kabuli_Chr01 | 30762343                | TT                                     | CC                 | CC               | URR                           | 101511274          | 2-alkenal reductase (NADP(+)-dependent)-like |
| SNP_3500_A_30762370 | NC_021160.1    | Ca_Kabuli_Chr01 | 30762370                | CC                                     | TT                 | TT               | URR                           | 101511274          | 2-alkenal reductase (NADP(+)-dependent)-like |

| SNPs IDs            | Chromosome IDs | Chromosomes     | Physical positions (bp) | CDC Frontier (Reference genome) | (Pusa 1103 & HPNB) | (ILWC 46 & LPNB) | Sequence Components of genome | Gene accession IDs | Putative functions                                        |
|---------------------|----------------|-----------------|-------------------------|---------------------------------|--------------------|------------------|-------------------------------|--------------------|-----------------------------------------------------------|
| SNP_3501_A_30762386 | NC_021160.1    | Ca_Kabuli_Chr01 | 30762386                | GG                              | AA                 | AA               | URR                           | 101511274          | 2-alkenal reductase (NADP(+)-dependent)-like              |
| SNP_3502_A_30762418 | NC_021160.1    | Ca_Kabuli_Chr01 | 30762418                | AA                              | GG                 | GG               | URR                           | 101511274          | 2-alkenal reductase (NADP(+)-dependent)-like              |
| SNP_3503_A_30762645 | NC_021160.1    | Ca_Kabuli_Chr01 | 30762645                | TT                              | GG                 | GG               | URR                           | 101511274          | 2-alkenal reductase (NADP(+)-dependent)-like              |
| SNP_3504_A_30762737 | NC_021160.1    | Ca_Kabuli_Chr01 | 30762737                | AA                              | GG                 | GG               | URR                           | 101511274          | 2-alkenal reductase (NADP(+)-dependent)-like              |
| SNP_3505_A_30762750 | NC_021160.1    | Ca_Kabuli_Chr01 | 30762750                | GG                              | TT                 | TT               | URR                           | 101511274          | 2-alkenal reductase (NADP(+)-dependent)-like              |
| SNP_3506_A_30762761 | NC_021160.1    | Ca_Kabuli_Chr01 | 30762761                | GG                              | TT                 | TT               | URR                           | 101511274          | 2-alkenal reductase (NADP(+)-dependent)-like              |
| SNP_3507_A_30762791 | NC_021160.1    | Ca_Kabuli_Chr01 | 30762791                | CC                              | AA                 | AA               | URR                           | 101511274          | 2-alkenal reductase (NADP(+)-dependent)-like              |
| SNP_3508_A_30762935 | NC_021160.1    | Ca_Kabuli_Chr01 | 30762935                | TT                              | AA                 | AA               | URR                           | 101511274          | 2-alkenal reductase (NADP(+)-dependent)-like              |
| SNP_3509_A_30766734 | NC_021160.1    | Ca_Kabuli_Chr01 | 30766734                | CC                              | TT                 | TT               | INTERGENIC                    |                    |                                                           |
| SNP_3510_A_30770137 | NC_021160.1    | Ca_Kabuli_Chr01 | 30770137                | CC                              | TT                 | TT               | DRR                           | 101512127          | probable sugar phosphate/phosphate translocator At4g32390 |
| SNP_3512_A_30770392 | NC_021160.1    | Ca_Kabuli_Chr01 | 30770392                | GG                              | AA                 | AA               | DRR                           | 101512127          | probable sugar phosphate/phosphate translocator At4g32390 |
| SNP_3513_A_30770958 | NC_021160.1    | Ca_Kabuli_Chr01 | 30770958                | CC                              | GG                 | GG               | INTERGENIC                    |                    |                                                           |
| SNP_3514_A_30771037 | NC_021160.1    | Ca_Kabuli_Chr01 | 30771037                | GG                              | TT                 | TT               | INTERGENIC                    |                    |                                                           |
| SNP_3515_A_30771411 | NC_021160.1    | Ca_Kabuli_Chr01 | 30771411                | GG                              | AA                 | AA               | INTERGENIC                    |                    |                                                           |
| SNP_3517_A_30786197 | NC_021160.1    | Ca_Kabuli_Chr01 | 30786197                | GG                              | AA                 | AA               | INTERGENIC                    |                    |                                                           |
| SNP_3518_A_30786220 | NC_021160.1    | Ca_Kabuli_Chr01 | 30786220                | AA                              | GG                 | GG               | INTERGENIC                    |                    |                                                           |
| SNP_3519_A_30786534 | NC_021160.1    | Ca_Kabuli_Chr01 | 30786534                | GG                              | TT                 | TT               | INTERGENIC                    |                    |                                                           |
| SNP_3520_A_30786883 | NC_021160.1    | Ca_Kabuli_Chr01 | 30786883                | GG                              | TT                 | TT               | INTERGENIC                    |                    |                                                           |
| SNP_3521_A_30786974 | NC_021160.1    | Ca_Kabuli_Chr01 | 30786974                | CC                              | TT                 | TT               | INTERGENIC                    |                    |                                                           |
| SNP_3523_A_30790976 | NC_021160.1    | Ca_Kabuli_Chr01 | 30790976                | TT                              | AA                 | AA               | INTERGENIC                    |                    |                                                           |
| SNP_3524_A_30792345 | NC_021160.1    | Ca_Kabuli_Chr01 | 30792345                | CC                              | AA                 | AA               | INTERGENIC                    |                    |                                                           |
| SNP_3525_A_30792409 | NC_021160.1    | Ca_Kabuli_Chr01 | 30792409                | TT                              | CC                 | CC               | INTERGENIC                    |                    |                                                           |

| SNPs IDs            | Chromosome IDs | Chromosomes     | Physical positions (bp) | CDC Frontier genome (Reference genome) | (Pusa 1103 & HPNB) | (ILWC 46 & LPNB) | Sequence Components of genome | Gene accession IDs | Putative functions  |
|---------------------|----------------|-----------------|-------------------------|----------------------------------------|--------------------|------------------|-------------------------------|--------------------|---------------------|
| SNP_3526_A_30801120 | NC_021160.1    | Ca_Kabuli_Chr01 | 30801120                | TT                                     | AA                 | AA               | INTERGENIC                    |                    |                     |
| SNP_3527_A_30801153 | NC_021160.1    | Ca_Kabuli_Chr01 | 30801153                | TT                                     | CC                 | CC               | INTERGENIC                    |                    |                     |
| SNP_3528_A_30808058 | NC_021160.1    | Ca_Kabuli_Chr01 | 30808058                | AA                                     | CC                 | CC               | INTERGENIC                    |                    |                     |
| SNP_3529_A_30808062 | NC_021160.1    | Ca_Kabuli_Chr01 | 30808062                | AA                                     | TT                 | TT               | INTERGENIC                    |                    |                     |
| SNP_3530_A_30821504 | NC_021160.1    | Ca_Kabuli_Chr01 | 30821504                | GG                                     | TT                 | TT               | INTERGENIC                    |                    |                     |
| SNP_3531_A_30821740 | NC_021160.1    | Ca_Kabuli_Chr01 | 30821740                | CC                                     | TT                 | TT               | INTERGENIC                    |                    |                     |
| SNP_3532_A_30823413 | NC_021160.1    | Ca_Kabuli_Chr01 | 30823413                | AA                                     | GG                 | GG               | DRR                           | 101489136          | tetraspanin-11-like |
| SNP_3533_A_30824547 | NC_021160.1    | Ca_Kabuli_Chr01 | 30824547                | CC                                     | GG                 | GG               | INTRON                        | 101489136          | tetraspanin-11-like |
| SNP_3534_A_30829880 | NC_021160.1    | Ca_Kabuli_Chr01 | 30829880                | TT                                     | CC                 | CC               | INTERGENIC                    |                    |                     |
| SNP_3535_A_30831400 | NC_021160.1    | Ca_Kabuli_Chr01 | 30831400                | TT                                     | CC                 | CC               | INTERGENIC                    |                    |                     |
| SNP_3536_A_30845574 | NC_021160.1    | Ca_Kabuli_Chr01 | 30845574                | AA                                     | GG                 | GG               | INTERGENIC                    |                    |                     |
| SNP_3537_A_30849118 | NC_021160.1    | Ca_Kabuli_Chr01 | 30849118                | GG                                     | AA                 | AA               | INTERGENIC                    |                    |                     |
| SNP_3538_A_30859503 | NC_021160.1    | Ca_Kabuli_Chr01 | 30859503                | CC                                     | TT                 | TT               | INTERGENIC                    |                    |                     |
| SNP_3539_A_30862784 | NC_021160.1    | Ca_Kabuli_Chr01 | 30862784                | AA                                     | TT                 | TT               | INTERGENIC                    |                    |                     |
| SNP_3540_A_30863196 | NC_021160.1    | Ca_Kabuli_Chr01 | 30863196                | TT                                     | GG                 | GG               | INTERGENIC                    |                    |                     |
| SNP_3541_A_30863253 | NC_021160.1    | Ca_Kabuli_Chr01 | 30863253                | AA                                     | GG                 | GG               | INTERGENIC                    |                    |                     |
| SNP_3542_A_30863813 | NC_021160.1    | Ca_Kabuli_Chr01 | 30863813                | TT                                     | AA                 | AA               | INTERGENIC                    |                    |                     |
| SNP_3544_A_30887888 | NC_021160.1    | Ca_Kabuli_Chr01 | 30887888                | CC                                     | TT                 | TT               | INTERGENIC                    |                    |                     |
| SNP_3545_A_30887907 | NC_021160.1    | Ca_Kabuli_Chr01 | 30887907                | GG                                     | TT                 | TT               | INTERGENIC                    |                    |                     |
| SNP_3546_A_30889303 | NC_021160.1    | Ca_Kabuli_Chr01 | 30889303                | AA                                     | GG                 | GG               | INTERGENIC                    |                    |                     |
| SNP_3547_A_30889349 | NC_021160.1    | Ca_Kabuli_Chr01 | 30889349                | AA                                     | GG                 | GG               | INTERGENIC                    |                    |                     |
| SNP_3548_A_30889430 | NC_021160.1    | Ca_Kabuli_Chr01 | 30889430                | AA                                     | CC                 | CC               | INTERGENIC                    |                    |                     |

| SNPs IDs            | Chromosome IDs | Chromosomes     | Physical positions (bp) | CDC Frontier genome (Reference genome) | (Pusa 1103 & HPNB) | (ILWC 46 & LPNB) | Sequence Components of genome | Gene accession IDs | Putative functions |
|---------------------|----------------|-----------------|-------------------------|----------------------------------------|--------------------|------------------|-------------------------------|--------------------|--------------------|
| SNP_3549_A_30889823 | NC_021160.1    | Ca_Kabuli_Chr01 | 30889823                | CC                                     | TT                 | TT               | INTERGENIC                    |                    |                    |
| SNP_3550_A_30890087 | NC_021160.1    | Ca_Kabuli_Chr01 | 30890087                | TT                                     | GG                 | GG               | INTERGENIC                    |                    |                    |
| SNP_3551_A_30918686 | NC_021160.1    | Ca_Kabuli_Chr01 | 30918686                | GG                                     | CC                 | CC               | INTERGENIC                    |                    |                    |
| SNP_3552_A_30929899 | NC_021160.1    | Ca_Kabuli_Chr01 | 30929899                | GG                                     | AA                 | AA               | SPLICE_SITE_REGION            | 101490433          | Unknown function   |
| SNP_3553_A_30934025 | NC_021160.1    | Ca_Kabuli_Chr01 | 30934025                | TT                                     | CC                 | CC               | INTRON                        | 101490433          | Unknown function   |
| SNP_3554_A_30934372 | NC_021160.1    | Ca_Kabuli_Chr01 | 30934372                | GG                                     | TT                 | TT               | INTRON                        | 101490433          | Unknown function   |
| SNP_3555_A_30934451 | NC_021160.1    | Ca_Kabuli_Chr01 | 30934451                | AA                                     | GG                 | GG               | INTRON                        | 101490433          | Unknown function   |
| SNP_3556_A_30934491 | NC_021160.1    | Ca_Kabuli_Chr01 | 30934491                | GG                                     | TT                 | TT               | INTRON                        | 101490433          | Unknown function   |
| SNP_3557_A_30934585 | NC_021160.1    | Ca_Kabuli_Chr01 | 30934585                | TT                                     | CC                 | CC               | INTRON                        | 101490433          | Unknown function   |
| SNP_3558_A_30935572 | NC_021160.1    | Ca_Kabuli_Chr01 | 30935572                | GG                                     | AA                 | AA               | INTRON                        | 101490433          | Unknown function   |
| SNP_3559_A_30938094 | NC_021160.1    | Ca_Kabuli_Chr01 | 30938094                | TT                                     | CC                 | CC               | INTRON                        | 101490433          | Unknown function   |
| SNP_3560_A_30938106 | NC_021160.1    | Ca_Kabuli_Chr01 | 30938106                | TT                                     | CC                 | CC               | INTRON                        | 101490433          | Unknown function   |
| SNP_3561_A_30938125 | NC_021160.1    | Ca_Kabuli_Chr01 | 30938125                | GG                                     | TT                 | TT               | INTRON                        | 101490433          | Unknown function   |
| SNP_3562_A_30938197 | NC_021160.1    | Ca_Kabuli_Chr01 | 30938197                | AA                                     | GG                 | GG               | INTRON                        | 101490433          | Unknown function   |
| SNP_3563_A_30938199 | NC_021160.1    | Ca_Kabuli_Chr01 | 30938199                | TT                                     | CC                 | CC               | INTRON                        | 101490433          | Unknown function   |
| SNP_3564_A_30938583 | NC_021160.1    | Ca_Kabuli_Chr01 | 30938583                | TT                                     | AA                 | AA               | INTRON                        | 101490433          | Unknown function   |
| SNP_3565_A_30938607 | NC_021160.1    | Ca_Kabuli_Chr01 | 30938607                | CC                                     | TT                 | TT               | INTRON                        | 101490433          | Unknown function   |
| SNP_3566_A_30945972 | NC_021160.1    | Ca_Kabuli_Chr01 | 30945972                | GG                                     | AA                 | AA               | INTRON                        | 101490433          | Unknown function   |
| SNP_3567_A_30956335 | NC_021160.1    | Ca_Kabuli_Chr01 | 30956335                | GG                                     | TT                 | TT               | INTRON                        | 101490433          | Unknown function   |
| SNP_3568_A_30956632 | NC_021160.1    | Ca_Kabuli_Chr01 | 30956632                | AA                                     | GG                 | GG               | INTRON                        | 101490433          | Unknown function   |
| SNP_3569_A_30956643 | NC_021160.1    | Ca_Kabuli_Chr01 | 30956643                | TT                                     | CC                 | CC               | INTRON                        | 101490433          | Unknown function   |
| SNP_3570_A_30957000 | NC_021160.1    | Ca_Kabuli_Chr01 | 30957000                | GG                                     | CC                 | CC               | INTRON                        | 101490433          | Unknown function   |

| SNPs IDs            | Chromosome IDs | Chromosomes     | Physical positions (bp) | CDC Frontier (Reference genome) | (Pusa 1103 & HPNB) | (ILWC 46 & LPNB) | Sequence Components of genome | Gene accession IDs | Putative functions |
|---------------------|----------------|-----------------|-------------------------|---------------------------------|--------------------|------------------|-------------------------------|--------------------|--------------------|
| SNP_3571_A_30960535 | NC_021160.1    | Ca_Kabuli_Chr01 | 30960535                | AA                              | CC                 | CC               | INTRON                        | 101490433          | Unknown function   |
| SNP_3572_A_30979410 | NC_021160.1    | Ca_Kabuli_Chr01 | 30979410                | GG                              | AA                 | AA               | INTERGENIC                    |                    |                    |
| SNP_3574_A_30996914 | NC_021160.1    | Ca_Kabuli_Chr01 | 30996914                | GG                              | AA                 | AA               | INTERGENIC                    |                    |                    |
| SNP_3575_A_31010293 | NC_021160.1    | Ca_Kabuli_Chr01 | 31010293                | AA                              | TT                 | TT               | INTERGENIC                    |                    |                    |
| SNP_3576_A_31012213 | NC_021160.1    | Ca_Kabuli_Chr01 | 31012213                | GG                              | AA                 | AA               | INTERGENIC                    |                    |                    |
| SNP_3577_A_31013722 | NC_021160.1    | Ca_Kabuli_Chr01 | 31013722                | AA                              | GG                 | GG               | INTERGENIC                    |                    |                    |
| SNP_3578_A_31022049 | NC_021160.1    | Ca_Kabuli_Chr01 | 31022049                | GG                              | AA                 | AA               | INTERGENIC                    |                    |                    |
| SNP_3579_A_31022078 | NC_021160.1    | Ca_Kabuli_Chr01 | 31022078                | TT                              | CC                 | CC               | INTERGENIC                    |                    |                    |
| SNP_3580_A_31022085 | NC_021160.1    | Ca_Kabuli_Chr01 | 31022085                | AA                              | GG                 | GG               | INTERGENIC                    |                    |                    |
| SNP_3581_A_31022122 | NC_021160.1    | Ca_Kabuli_Chr01 | 31022122                | TT                              | CC                 | CC               | INTERGENIC                    |                    |                    |
| SNP_3582_A_31022235 | NC_021160.1    | Ca_Kabuli_Chr01 | 31022235                | TT                              | CC                 | CC               | INTERGENIC                    |                    |                    |
| SNP_3583_A_31022238 | NC_021160.1    | Ca_Kabuli_Chr01 | 31022238                | AA                              | GG                 | GG               | INTERGENIC                    |                    |                    |
| SNP_3584_A_31022254 | NC_021160.1    | Ca_Kabuli_Chr01 | 31022254                | CC                              | TT                 | TT               | INTERGENIC                    |                    |                    |
| SNP_3585_A_31022266 | NC_021160.1    | Ca_Kabuli_Chr01 | 31022266                | AA                              | GG                 | GG               | INTERGENIC                    |                    |                    |
| SNP_3586_A_31022285 | NC_021160.1    | Ca_Kabuli_Chr01 | 31022285                | TT                              | CC                 | CC               | INTERGENIC                    |                    |                    |
| SNP_3587_A_31022299 | NC_021160.1    | Ca_Kabuli_Chr01 | 31022299                | TT                              | AA                 | AA               | INTERGENIC                    |                    |                    |
| SNP_3588_A_31022314 | NC_021160.1    | Ca_Kabuli_Chr01 | 31022314                | AA                              | CC                 | CC               | INTERGENIC                    |                    |                    |
| SNP_3589_A_31050802 | NC_021160.1    | Ca_Kabuli_Chr01 | 31050802                | CC                              | TT                 | TT               | INTERGENIC                    |                    |                    |
| SNP_3590_A_31050832 | NC_021160.1    | Ca_Kabuli_Chr01 | 31050832                | CC                              | AA                 | AA               | INTERGENIC                    |                    |                    |
| SNP_3591_A_31050853 | NC_021160.1    | Ca_Kabuli_Chr01 | 31050853                | CC                              | TT                 | TT               | INTERGENIC                    |                    |                    |
| SNP_3592_A_31050900 | NC_021160.1    | Ca_Kabuli_Chr01 | 31050900                | TT                              | CC                 | CC               | INTERGENIC                    |                    |                    |
| SNP_3593_A_31051182 | NC_021160.1    | Ca_Kabuli_Chr01 | 31051182                | TT                              | CC                 | CC               | INTERGENIC                    |                    |                    |



| SNPs IDs            | Chromosome IDs | Chromosomes     | Physical positions (bp) | CDC Frontier (Reference genome) | (Pusa 1103 & HPNB) | (ILWC 46 & LPNB) | Sequence genome | Components of | Gene accession IDs       | Putative functions |
|---------------------|----------------|-----------------|-------------------------|---------------------------------|--------------------|------------------|-----------------|---------------|--------------------------|--------------------|
| SNP_3594_A_31051246 | NC_021160.1    | Ca_Kabuli_Chr01 | 31051246                | CC                              | TT                 | TT               | INTERGENIC      |               |                          |                    |
| SNP_3595_A_31057076 | NC_021160.1    | Ca_Kabuli_Chr01 | 31057076                | GG                              | AA                 | AA               | INTERGENIC      |               |                          |                    |
| SNP_3597_A_31064947 | NC_021160.1    | Ca_Kabuli_Chr01 | 31064947                | TT                              | AA                 | AA               | INTERGENIC      |               |                          |                    |
| SNP_3598_A_31072851 | NC_021160.1    | Ca_Kabuli_Chr01 | 31072851                | TT                              | CC                 | CC               | INTERGENIC      |               |                          |                    |
| SNP_3599_A_31076097 | NC_021160.1    | Ca_Kabuli_Chr01 | 31076097                | CC                              | TT                 | TT               | INTERGENIC      |               |                          |                    |
| SNP_3600_A_31078820 | NC_021160.1    | Ca_Kabuli_Chr01 | 31078820                | AA                              | TT                 | TT               | DRR             | 101489467     | enolase 1, chloroplastic |                    |
| SNP_3602_A_31095691 | NC_021160.1    | Ca_Kabuli_Chr01 | 31095691                | AA                              | TT                 | TT               | INTERGENIC      |               |                          |                    |
| SNP_3603_A_31095692 | NC_021160.1    | Ca_Kabuli_Chr01 | 31095692                | AA                              | CC                 | CC               | INTERGENIC      |               |                          |                    |
| SNP_3605_A_31134462 | NC_021160.1    | Ca_Kabuli_Chr01 | 31134462                | TT                              | AA                 | AA               | INTERGENIC      |               |                          |                    |
| SNP_3606_A_31134660 | NC_021160.1    | Ca_Kabuli_Chr01 | 31134660                | AA                              | GG                 | GG               | INTERGENIC      |               |                          |                    |
| SNP_3608_A_31142428 | NC_021160.1    | Ca_Kabuli_Chr01 | 31142428                | GG                              | AA                 | AA               | INTERGENIC      |               |                          |                    |
| SNP_3609_A_31144251 | NC_021160.1    | Ca_Kabuli_Chr01 | 31144251                | GG                              | CC                 | CC               | INTERGENIC      |               |                          |                    |
| SNP_3611_A_31162897 | NC_021160.1    | Ca_Kabuli_Chr01 | 31162897                | AA                              | TT                 | TT               | INTERGENIC      |               |                          |                    |
| SNP_3612_A_31162909 | NC_021160.1    | Ca_Kabuli_Chr01 | 31162909                | AA                              | TT                 | TT               | INTERGENIC      |               |                          |                    |
| SNP_3613_A_31162917 | NC_021160.1    | Ca_Kabuli_Chr01 | 31162917                | AA                              | CC                 | CC               | INTERGENIC      |               |                          |                    |
| SNP_3614_A_31162948 | NC_021160.1    | Ca_Kabuli_Chr01 | 31162948                | GG                              | AA                 | AA               | INTERGENIC      |               |                          |                    |
| SNP_3615_A_31162952 | NC_021160.1    | Ca_Kabuli_Chr01 | 31162952                | CC                              | GG                 | GG               | INTERGENIC      |               |                          |                    |
| SNP_3617_A_31163570 | NC_021160.1    | Ca_Kabuli_Chr01 | 31163570                | TT                              | CC                 | CC               | INTERGENIC      |               |                          |                    |
| SNP_3618_A_31173355 | NC_021160.1    | Ca_Kabuli_Chr01 | 31173355                | CC                              | GG                 | GG               | INTERGENIC      |               |                          |                    |
| SNP_3619_A_31185950 | NC_021160.1    | Ca_Kabuli_Chr01 | 31185950                | TT                              | CC                 | CC               | INTERGENIC      |               |                          |                    |
| SNP_3620_A_31185962 | NC_021160.1    | Ca_Kabuli_Chr01 | 31185962                | AA                              | GG                 | GG               | INTERGENIC      |               |                          |                    |
| SNP_3621_A_31185981 | NC_021160.1    | Ca_Kabuli_Chr01 | 31185981                | TT                              | CC                 | CC               | INTERGENIC      |               |                          |                    |

| SNPs IDs            | Chromosome IDs | Chromosomes     | Physical positions (bp) | CDC Frontier genome (Reference genome) | (Pusa 1103 & HPNB) | (ILWC 46 & LPNB) | Sequence Components of genome | Gene accession IDs | Putative functions                             |
|---------------------|----------------|-----------------|-------------------------|----------------------------------------|--------------------|------------------|-------------------------------|--------------------|------------------------------------------------|
| SNP_3622_A_31187159 | NC_021160.1    | Ca_Kabuli_Chr01 | 31187159                | AA                                     | TT                 | TT               | INTERGENIC                    |                    |                                                |
| SNP_3623_A_31188525 | NC_021160.1    | Ca_Kabuli_Chr01 | 31188525                | CC                                     | TT                 | TT               | INTERGENIC                    |                    |                                                |
| SNP_3624_A_31189899 | NC_021160.1    | Ca_Kabuli_Chr01 | 31189899                | AA                                     | GG                 | GG               | INTERGENIC                    |                    |                                                |
| SNP_3625_A_31200591 | NC_021160.1    | Ca_Kabuli_Chr01 | 31200591                | GG                                     | AA                 | AA               | INTERGENIC                    |                    |                                                |
| SNP_3626_A_31201249 | NC_021160.1    | Ca_Kabuli_Chr01 | 31201249                | TT                                     | AA                 | AA               | INTERGENIC                    |                    |                                                |
| SNP_3627_A_31211547 | NC_021160.1    | Ca_Kabuli_Chr01 | 31211547                | AA                                     | GG                 | GG               | INTERGENIC                    |                    |                                                |
| SNP_3628_A_31217269 | NC_021160.1    | Ca_Kabuli_Chr01 | 31217269                | AA                                     | TT                 | TT               | INTERGENIC                    |                    |                                                |
| SNP_3629_A_31217731 | NC_021160.1    | Ca_Kabuli_Chr01 | 31217731                | AA                                     | GG                 | GG               | INTERGENIC                    |                    |                                                |
| SNP_3630_A_31217742 | NC_021160.1    | Ca_Kabuli_Chr01 | 31217742                | AA                                     | CC                 | CC               | INTERGENIC                    |                    |                                                |
| SNP_3631_A_31218110 | NC_021160.1    | Ca_Kabuli_Chr01 | 31218110                | AA                                     | GG                 | GG               | INTERGENIC                    |                    |                                                |
| SNP_3632_A_31218387 | NC_021160.1    | Ca_Kabuli_Chr01 | 31218387                | TT                                     | AA                 | AA               | INTERGENIC                    |                    |                                                |
| SNP_3633_A_31218396 | NC_021160.1    | Ca_Kabuli_Chr01 | 31218396                | GG                                     | TT                 | TT               | INTERGENIC                    |                    |                                                |
| SNP_3634_A_31218464 | NC_021160.1    | Ca_Kabuli_Chr01 | 31218464                | CC                                     | AA                 | AA               | INTERGENIC                    |                    |                                                |
| SNP_3635_A_31218761 | NC_021160.1    | Ca_Kabuli_Chr01 | 31218761                | GG                                     | TT                 | TT               | INTERGENIC                    |                    |                                                |
| SNP_3637_A_31218869 | NC_021160.1    | Ca_Kabuli_Chr01 | 31218869                | AA                                     | GG                 | GG               | INTERGENIC                    |                    |                                                |
| SNP_3638_A_31223636 | NC_021160.1    | Ca_Kabuli_Chr01 | 31223636                | CC                                     | TT                 | TT               | URR                           | 101492696          | cx9C motif-containing protein 4, mitochondrial |
| SNP_3639_A_31232804 | NC_021160.1    | Ca_Kabuli_Chr01 | 31232804                | CC                                     | TT                 | TT               | INTERGENIC                    |                    |                                                |
| SNP_3640_A_31233459 | NC_021160.1    | Ca_Kabuli_Chr01 | 31233459                | AA                                     | GG                 | GG               | DRR                           | 101497008          | Unknown function                               |
| SNP_3641_A_31234137 | NC_021160.1    | Ca_Kabuli_Chr01 | 31234137                | GG                                     | AA                 | AA               | DRR                           | 101497008          | Unknown function                               |
| SNP_3643_A_31253242 | NC_021160.1    | Ca_Kabuli_Chr01 | 31253242                | TT                                     | CC                 | CC               | INTERGENIC                    |                    |                                                |
| SNP_3644_A_31280968 | NC_021160.1    | Ca_Kabuli_Chr01 | 31280968                | TT                                     | CC                 | CC               | INTERGENIC                    |                    |                                                |
| SNP_3645_A_31305194 | NC_021160.1    | Ca_Kabuli_Chr01 | 31305194                | CC                                     | AA                 | AA               | INTERGENIC                    |                    |                                                |

| SNPs IDs            | Chromosome IDs | Chromosomes     | Physical positions (bp) | CDC Frontier (Reference genome) | (Pusa 1103 & HPNB) | (ILWC 46 & LPNB) | Sequence Components of genome | Gene accession IDs | Putative functions           |
|---------------------|----------------|-----------------|-------------------------|---------------------------------|--------------------|------------------|-------------------------------|--------------------|------------------------------|
| SNP_3646_A_31307549 | NC_021160.1    | Ca_Kabuli_Chr01 | 31307549                | AA                              | GG                 | GG               | INTERGENIC                    |                    |                              |
| SNP_3647_A_31307700 | NC_021160.1    | Ca_Kabuli_Chr01 | 31307700                | AA                              | GG                 | GG               | INTERGENIC                    |                    |                              |
| SNP_3648_A_31309226 | NC_021160.1    | Ca_Kabuli_Chr01 | 31309226                | CC                              | GG                 | GG               | INTERGENIC                    |                    |                              |
| SNP_3649_A_31310323 | NC_021160.1    | Ca_Kabuli_Chr01 | 31310323                | TT                              | GG                 | GG               | INTERGENIC                    |                    |                              |
| SNP_3650_A_31310412 | NC_021160.1    | Ca_Kabuli_Chr01 | 31310412                | CC                              | TT                 | TT               | INTERGENIC                    |                    |                              |
| SNP_3651_A_31310535 | NC_021160.1    | Ca_Kabuli_Chr01 | 31310535                | AA                              | GG                 | GG               | INTERGENIC                    |                    |                              |
| SNP_3652_A_31320091 | NC_021160.1    | Ca_Kabuli_Chr01 | 31320091                | CC                              | TT                 | TT               | INTERGENIC                    |                    |                              |
| SNP_3653_A_31337119 | NC_021160.1    | Ca_Kabuli_Chr01 | 31337119                | CC                              | TT                 | TT               | INTERGENIC                    |                    |                              |
| SNP_3654_A_31338132 | NC_021160.1    | Ca_Kabuli_Chr01 | 31338132                | CC                              | AA                 | AA               | DRR                           | 101498322          | cystatin-1-like              |
| SNP_3655_A_31357801 | NC_021160.1    | Ca_Kabuli_Chr01 | 31357801                | TT                              | AA                 | AA               | INTERGENIC                    |                    |                              |
| SNP_3656_A_31398241 | NC_021160.1    | Ca_Kabuli_Chr01 | 31398241                | TT                              | CC                 | CC               | URR                           | 101494842          | polygalacturonase-like       |
| SNP_3657_A_31399682 | NC_021160.1    | Ca_Kabuli_Chr01 | 31399682                | GG                              | AA                 | AA               | INTERGENIC                    |                    |                              |
| SNP_3658_A_31407621 | NC_021160.1    | Ca_Kabuli_Chr01 | 31407621                | GG                              | AA                 | AA               | INTERGENIC                    |                    |                              |
| SNP_3660_A_31428870 | NC_021160.1    | Ca_Kabuli_Chr01 | 31428870                | GG                              | TT                 | TT               | INTERGENIC                    |                    |                              |
| SNP_3661_A_31440934 | NC_021160.1    | Ca_Kabuli_Chr01 | 31440934                | CC                              | TT                 | TT               | INTERGENIC                    |                    |                              |
| SNP_3662_A_31443967 | NC_021160.1    | Ca_Kabuli_Chr01 | 31443967                | TT                              | CC                 | CC               | INTERGENIC                    |                    |                              |
| SNP_3663_A_31443968 | NC_021160.1    | Ca_Kabuli_Chr01 | 31443968                | TT                              | CC                 | CC               | INTERGENIC                    |                    |                              |
| SNP_3664_A_31448115 | NC_021160.1    | Ca_Kabuli_Chr01 | 31448115                | AA                              | TT                 | TT               | INTERGENIC                    |                    |                              |
| SNP_3665_A_31455089 | NC_021160.1    | Ca_Kabuli_Chr01 | 31455089                | GG                              | AA                 | AA               | DRR                           | 101495708          | uncharacterized LOC101495708 |
| SNP_3666_A_31455568 | NC_021160.1    | Ca_Kabuli_Chr01 | 31455568                | CC                              | TT                 | TT               | URR                           | 101495171          | uncharacterized LOC101495171 |
| SNP_3667_A_31466789 | NC_021160.1    | Ca_Kabuli_Chr01 | 31466789                | TT                              | CC                 | CC               | INTERGENIC                    |                    |                              |
| SNP_3668_A_31482201 | NC_021160.1    | Ca_Kabuli_Chr01 | 31482201                | TT                              | CC                 | CC               | INTERGENIC                    |                    |                              |

| SNPs IDs            | Chromosome IDs | Chromosomes     | Physical positions (bp) | CDC Frontier (Reference genome) | (Pusa 1103 & HPNB) | (ILWC 46 & LPNB) | Sequence Components of genome | Gene accession IDs | Putative functions                     |
|---------------------|----------------|-----------------|-------------------------|---------------------------------|--------------------|------------------|-------------------------------|--------------------|----------------------------------------|
| SNP_3669_A_31482686 | NC_021160.1    | Ca_Kabuli_Chr01 | 31482686                | TT                              | GG                 | GG               | INTERGENIC                    |                    |                                        |
| SNP_3670_A_31491125 | NC_021160.1    | Ca_Kabuli_Chr01 | 31491125                | AA                              | GG                 | GG               | URR                           | 101500270          | uncharacterized LOC101500270           |
| SNP_3671_A_31493683 | NC_021160.1    | Ca_Kabuli_Chr01 | 31493683                | TT                              | CC                 | CC               | INTERGENIC                    |                    |                                        |
| SNP_3672_A_31494120 | NC_021160.1    | Ca_Kabuli_Chr01 | 31494120                | AA                              | CC                 | CC               | INTERGENIC                    |                    |                                        |
| SNP_3673_A_31494217 | NC_021160.1    | Ca_Kabuli_Chr01 | 31494217                | GG                              | AA                 | AA               | INTERGENIC                    |                    |                                        |
| SNP_3674_A_31495076 | NC_021160.1    | Ca_Kabuli_Chr01 | 31495076                | CC                              | TT                 | TT               | INTERGENIC                    |                    |                                        |
| SNP_3675_A_31499014 | NC_021160.1    | Ca_Kabuli_Chr01 | 31499014                | AA                              | GG                 | GG               | INTERGENIC                    |                    |                                        |
| SNP_3676_A_31512866 | NC_021160.1    | Ca_Kabuli_Chr01 | 31512866                | AA                              | GG                 | GG               | INTERGENIC                    |                    |                                        |
| SNP_3677_A_31526252 | NC_021160.1    | Ca_Kabuli_Chr01 | 31526252                | CC                              | AA                 | AA               | INTERGENIC                    |                    |                                        |
| SNP_3678_A_31544294 | NC_021160.1    | Ca_Kabuli_Chr01 | 31544294                | GG                              | TT                 | TT               | INTERGENIC                    |                    |                                        |
| SNP_3679_A_31565055 | NC_021160.1    | Ca_Kabuli_Chr01 | 31565055                | CC                              | TT                 | TT               | DRR                           | 101501228          | Unknown function                       |
| SNP_3680_A_31568011 | NC_021160.1    | Ca_Kabuli_Chr01 | 31568011                | TT                              | AA                 | AA               | URR                           | 101501228          | Unknown function                       |
| SNP_3681_A_31568012 | NC_021160.1    | Ca_Kabuli_Chr01 | 31568012                | GG                              | TT                 | TT               | URR                           | 101501228          | Unknown function                       |
| SNP_3682_A_31584731 | NC_021160.1    | Ca_Kabuli_Chr01 | 31584731                | GG                              | AA                 | AA               | INTERGENIC                    |                    |                                        |
| SNP_3683_A_31585042 | NC_021160.1    | Ca_Kabuli_Chr01 | 31585042                | TT                              | CC                 | CC               | INTERGENIC                    |                    |                                        |
| SNP_3684_A_31585048 | NC_021160.1    | Ca_Kabuli_Chr01 | 31585048                | CC                              | TT                 | TT               | INTERGENIC                    |                    |                                        |
| SNP_3685_A_31586184 | NC_021160.1    | Ca_Kabuli_Chr01 | 31586184                | GG                              | TT                 | TT               | INTERGENIC                    |                    |                                        |
| SNP_3686_A_31592077 | NC_021160.1    | Ca_Kabuli_Chr01 | 31592077                | GG                              | CC                 | CC               | NON_SYNONYMOUS_CODING         | 101496695          | uridine 5'-monophosphate synthase-like |
| SNP_3689_A_31592502 | NC_021160.1    | Ca_Kabuli_Chr01 | 31592502                | AA                              | CC                 | CC               | INTRON                        | 101496695          | uridine 5'-monophosphate synthase-like |
| SNP_3690_A_31592541 | NC_021160.1    | Ca_Kabuli_Chr01 | 31592541                | GG                              | AA                 | AA               | INTRON                        | 101496695          | uridine 5'-monophosphate synthase-like |
| SNP_3691_A_31592670 | NC_021160.1    | Ca_Kabuli_Chr01 | 31592670                | AA                              | GG                 | GG               | INTRON                        | 101496695          | uridine 5'-monophosphate synthase-like |
| SNP_3692_A_31592787 | NC_021160.1    | Ca_Kabuli_Chr01 | 31592787                | TT                              | CC                 | CC               | NON_SYNONYMOUS_CODING         | 101496695          | uridine 5'-monophosphate synthase-like |

| SNPs IDs            | Chromosome IDs | Chromosomes     | Physical positions (bp) | CDC Frontier (Reference genome) | (Pusa 1103 & HPNB) | (ILWC 46 & LPNB) | Sequence genome | Components of | Gene accession IDs | Putative functions |
|---------------------|----------------|-----------------|-------------------------|---------------------------------|--------------------|------------------|-----------------|---------------|--------------------|--------------------|
| SNP_3693_A_31599512 | NC_021160.1    | Ca_Kabuli_Chr01 | 31599512                | TT                              | CC                 | CC               | INTERGENIC      |               |                    |                    |
| SNP_3694_A_31599546 | NC_021160.1    | Ca_Kabuli_Chr01 | 31599546                | TT                              | GG                 | GG               | INTERGENIC      |               |                    |                    |
| SNP_3695_A_31599560 | NC_021160.1    | Ca_Kabuli_Chr01 | 31599560                | TT                              | CC                 | CC               | INTERGENIC      |               |                    |                    |
| SNP_3696_A_31599582 | NC_021160.1    | Ca_Kabuli_Chr01 | 31599582                | TT                              | AA                 | AA               | INTERGENIC      |               |                    |                    |
| SNP_3697_A_31599612 | NC_021160.1    | Ca_Kabuli_Chr01 | 31599612                | TT                              | GG                 | GG               | INTERGENIC      |               |                    |                    |
| SNP_3698_A_31599834 | NC_021160.1    | Ca_Kabuli_Chr01 | 31599834                | CC                              | GG                 | GG               | INTERGENIC      |               |                    |                    |
| SNP_3699_A_31600395 | NC_021160.1    | Ca_Kabuli_Chr01 | 31600395                | AA                              | GG                 | GG               | INTERGENIC      |               |                    |                    |
| SNP_3700_A_31600409 | NC_021160.1    | Ca_Kabuli_Chr01 | 31600409                | CC                              | TT                 | TT               | INTERGENIC      |               |                    |                    |
| SNP_3701_A_31600501 | NC_021160.1    | Ca_Kabuli_Chr01 | 31600501                | GG                              | AA                 | AA               | INTERGENIC      |               |                    |                    |
| SNP_3702_A_31600637 | NC_021160.1    | Ca_Kabuli_Chr01 | 31600637                | TT                              | AA                 | AA               | INTERGENIC      |               |                    |                    |
| SNP_3704_A_31601426 | NC_021160.1    | Ca_Kabuli_Chr01 | 31601426                | GG                              | AA                 | AA               | INTERGENIC      |               |                    |                    |
| SNP_3705_A_31610509 | NC_021160.1    | Ca_Kabuli_Chr01 | 31610509                | AA                              | TT                 | TT               | INTERGENIC      |               |                    |                    |
| SNP_3706_A_31612047 | NC_021160.1    | Ca_Kabuli_Chr01 | 31612047                | CC                              | TT                 | TT               | INTERGENIC      |               |                    |                    |
| SNP_3707_A_31612973 | NC_021160.1    | Ca_Kabuli_Chr01 | 31612973                | TT                              | GG                 | GG               | INTERGENIC      |               |                    |                    |
| SNP_3708_A_31612988 | NC_021160.1    | Ca_Kabuli_Chr01 | 31612988                | TT                              | GG                 | GG               | INTERGENIC      |               |                    |                    |
| SNP_3709_A_31626511 | NC_021160.1    | Ca_Kabuli_Chr01 | 31626511                | GG                              | AA                 | AA               | INTERGENIC      |               |                    |                    |
| SNP_3710_A_31627019 | NC_021160.1    | Ca_Kabuli_Chr01 | 31627019                | AA                              | CC                 | CC               | INTERGENIC      |               |                    |                    |
| SNP_3711_A_31627028 | NC_021160.1    | Ca_Kabuli_Chr01 | 31627028                | AA                              | GG                 | GG               | INTERGENIC      |               |                    |                    |
| SNP_3712_A_31627067 | NC_021160.1    | Ca_Kabuli_Chr01 | 31627067                | GG                              | CC                 | CC               | INTERGENIC      |               |                    |                    |
| SNP_3713_A_31627102 | NC_021160.1    | Ca_Kabuli_Chr01 | 31627102                | CC                              | TT                 | TT               | INTERGENIC      |               |                    |                    |
| SNP_3714_A_31627342 | NC_021160.1    | Ca_Kabuli_Chr01 | 31627342                | CC                              | TT                 | TT               | INTERGENIC      |               |                    |                    |
| SNP_3715_A_31627429 | NC_021160.1    | Ca_Kabuli_Chr01 | 31627429                | CC                              | TT                 | TT               | INTERGENIC      |               |                    |                    |

| SNPs IDs            | Chromosome IDs | Chromosomes     | Physical positions (bp) | CDC Frontier (Reference genome) | (Pusa 1103 & HPNB) | (ILWC 46 & LPNB) | Sequence genome       | Components of | Gene accession IDs | Putative functions           |
|---------------------|----------------|-----------------|-------------------------|---------------------------------|--------------------|------------------|-----------------------|---------------|--------------------|------------------------------|
| SNP_3716_A_31627507 | NC_021160.1    | Ca_Kabuli_Chr01 | 31627507                | CC                              | TT                 | TT               | INTERGENIC            |               |                    |                              |
| SNP_3717_A_31627508 | NC_021160.1    | Ca_Kabuli_Chr01 | 31627508                | CC                              | TT                 | TT               | INTERGENIC            |               |                    |                              |
| SNP_3718_A_31627512 | NC_021160.1    | Ca_Kabuli_Chr01 | 31627512                | AA                              | GG                 | GG               | INTERGENIC            |               |                    |                              |
| SNP_3719_A_31627522 | NC_021160.1    | Ca_Kabuli_Chr01 | 31627522                | TT                              | GG                 | GG               | INTERGENIC            |               |                    |                              |
| SNP_3720_A_31627536 | NC_021160.1    | Ca_Kabuli_Chr01 | 31627536                | CC                              | TT                 | TT               | INTERGENIC            |               |                    |                              |
| SNP_3721_A_31627537 | NC_021160.1    | Ca_Kabuli_Chr01 | 31627537                | AA                              | GG                 | GG               | INTERGENIC            |               |                    |                              |
| SNP_3722_A_31627547 | NC_021160.1    | Ca_Kabuli_Chr01 | 31627547                | GG                              | TT                 | TT               | INTERGENIC            |               |                    |                              |
| SNP_3723_A_31627619 | NC_021160.1    | Ca_Kabuli_Chr01 | 31627619                | CC                              | GG                 | GG               | INTERGENIC            |               |                    |                              |
| SNP_3724_A_31627621 | NC_021160.1    | Ca_Kabuli_Chr01 | 31627621                | GG                              | TT                 | TT               | INTERGENIC            |               |                    |                              |
| SNP_3725_A_31627689 | NC_021160.1    | Ca_Kabuli_Chr01 | 31627689                | AA                              | GG                 | GG               | INTERGENIC            |               |                    |                              |
| SNP_3726_A_31627733 | NC_021160.1    | Ca_Kabuli_Chr01 | 31627733                | TT                              | CC                 | CC               | INTERGENIC            |               |                    |                              |
| SNP_3727_A_31627736 | NC_021160.1    | Ca_Kabuli_Chr01 | 31627736                | CC                              | TT                 | TT               | INTERGENIC            |               |                    |                              |
| SNP_3728_A_31627791 | NC_021160.1    | Ca_Kabuli_Chr01 | 31627791                | AA                              | TT                 | TT               | INTERGENIC            |               |                    |                              |
| SNP_3729_A_31627793 | NC_021160.1    | Ca_Kabuli_Chr01 | 31627793                | AA                              | CC                 | CC               | INTERGENIC            |               |                    |                              |
| SNP_3730_A_31627843 | NC_021160.1    | Ca_Kabuli_Chr01 | 31627843                | AA                              | TT                 | TT               | INTERGENIC            |               |                    |                              |
| SNP_3731_A_31641374 | NC_021160.1    | Ca_Kabuli_Chr01 | 31641374                | AA                              | GG                 | GG               | NON_SYNONYMOUS_CODING | 101501539     |                    | uncharacterized LOC101501539 |
| SNP_3732_A_31641660 | NC_021160.1    | Ca_Kabuli_Chr01 | 31641660                | AA                              | TT                 | TT               | URR                   | 101501539     |                    | uncharacterized LOC101501539 |
| SNP_3733_A_31648781 | NC_021160.1    | Ca_Kabuli_Chr01 | 31648781                | TT                              | CC                 | CC               | INTERGENIC            |               |                    |                              |
| SNP_3734_A_31654854 | NC_021160.1    | Ca_Kabuli_Chr01 | 31654854                | AA                              | CC                 | CC               | INTERGENIC            |               |                    |                              |
| SNP_3735_A_31667537 | NC_021160.1    | Ca_Kabuli_Chr01 | 31667537                | TT                              | AA                 | AA               | INTERGENIC            |               |                    |                              |
| SNP_3736_A_31669446 | NC_021160.1    | Ca_Kabuli_Chr01 | 31669446                | CC                              | GG                 | GG               | INTERGENIC            |               |                    |                              |
| SNP_3737_A_31695425 | NC_021160.1    | Ca_Kabuli_Chr01 | 31695425                | AA                              | GG                 | GG               | INTERGENIC            |               |                    |                              |

| SNPs IDs            | Chromosome IDs | Chromosomes     | Physical positions (bp) | CDC Frontier (Reference genome) | (Pusa 1103 & HPNB) | (ILWC 46 & LPNB) | Sequence genome | Components of | Gene accession IDs | Putative functions |
|---------------------|----------------|-----------------|-------------------------|---------------------------------|--------------------|------------------|-----------------|---------------|--------------------|--------------------|
| SNP_3738_A_31695485 | NC_021160.1    | Ca_Kabuli_Chr01 | 31695485                | AA                              | CC                 | CC               | INTERGENIC      |               |                    |                    |
| SNP_3739_A_31710522 | NC_021160.1    | Ca_Kabuli_Chr01 | 31710522                | GG                              | AA                 | AA               | INTERGENIC      |               |                    |                    |
| SNP_3740_A_31710532 | NC_021160.1    | Ca_Kabuli_Chr01 | 31710532                | GG                              | TT                 | TT               | INTERGENIC      |               |                    |                    |
| SNP_3741_A_31710552 | NC_021160.1    | Ca_Kabuli_Chr01 | 31710552                | GG                              | TT                 | TT               | INTERGENIC      |               |                    |                    |
| SNP_3742_A_31716139 | NC_021160.1    | Ca_Kabuli_Chr01 | 31716139                | TT                              | CC                 | CC               | INTERGENIC      |               |                    |                    |
| SNP_3743_A_31716183 | NC_021160.1    | Ca_Kabuli_Chr01 | 31716183                | TT                              | AA                 | AA               | INTERGENIC      |               |                    |                    |
| SNP_3745_A_31716482 | NC_021160.1    | Ca_Kabuli_Chr01 | 31716482                | AA                              | GG                 | GG               | INTERGENIC      |               |                    |                    |
| SNP_3746_A_31716618 | NC_021160.1    | Ca_Kabuli_Chr01 | 31716618                | CC                              | GG                 | GG               | INTERGENIC      |               |                    |                    |
| SNP_3747_A_31716633 | NC_021160.1    | Ca_Kabuli_Chr01 | 31716633                | GG                              | TT                 | TT               | INTERGENIC      |               |                    |                    |
| SNP_3748_A_31716642 | NC_021160.1    | Ca_Kabuli_Chr01 | 31716642                | TT                              | CC                 | CC               | INTERGENIC      |               |                    |                    |
| SNP_3749_A_31722244 | NC_021160.1    | Ca_Kabuli_Chr01 | 31722244                | AA                              | TT                 | TT               | INTERGENIC      |               |                    |                    |
| SNP_3750_A_31725871 | NC_021160.1    | Ca_Kabuli_Chr01 | 31725871                | CC                              | TT                 | TT               | INTERGENIC      |               |                    |                    |
| SNP_3751_A_31726016 | NC_021160.1    | Ca_Kabuli_Chr01 | 31726016                | TT                              | CC                 | CC               | INTERGENIC      |               |                    |                    |
| SNP_3752_A_31726022 | NC_021160.1    | Ca_Kabuli_Chr01 | 31726022                | CC                              | TT                 | TT               | INTERGENIC      |               |                    |                    |
| SNP_3753_A_31726028 | NC_021160.1    | Ca_Kabuli_Chr01 | 31726028                | AA                              | GG                 | GG               | INTERGENIC      |               |                    |                    |
| SNP_3754_A_31726050 | NC_021160.1    | Ca_Kabuli_Chr01 | 31726050                | TT                              | CC                 | CC               | INTERGENIC      |               |                    |                    |
| SNP_3755_A_31726067 | NC_021160.1    | Ca_Kabuli_Chr01 | 31726067                | CC                              | AA                 | AA               | INTERGENIC      |               |                    |                    |
| SNP_3756_A_31726091 | NC_021160.1    | Ca_Kabuli_Chr01 | 31726091                | CC                              | TT                 | TT               | INTERGENIC      |               |                    |                    |
| SNP_3757_A_31726096 | NC_021160.1    | Ca_Kabuli_Chr01 | 31726096                | AA                              | CC                 | CC               | INTERGENIC      |               |                    |                    |
| SNP_3758_A_31726166 | NC_021160.1    | Ca_Kabuli_Chr01 | 31726166                | TT                              | CC                 | CC               | INTERGENIC      |               |                    |                    |
| SNP_3759_A_31726241 | NC_021160.1    | Ca_Kabuli_Chr01 | 31726241                | GG                              | AA                 | AA               | INTERGENIC      |               |                    |                    |
| SNP_3760_A_31726262 | NC_021160.1    | Ca_Kabuli_Chr01 | 31726262                | GG                              | AA                 | AA               | INTERGENIC      |               |                    |                    |

| SNPs IDs            | Chromosome IDs | Chromosomes     | Physical positions (bp) | CDC Frontier (Reference genome) | (Pusa 1103 & HPNB) | (ILWC 46 & LPNB) | Sequence genome | Components of | Gene accession IDs | Putative functions |
|---------------------|----------------|-----------------|-------------------------|---------------------------------|--------------------|------------------|-----------------|---------------|--------------------|--------------------|
| SNP_3761_A_31753794 | NC_021160.1    | Ca_Kabuli_Chr01 | 31753794                | AA                              | GG                 | GG               | INTERGENIC      |               |                    |                    |
| SNP_3762_A_31753828 | NC_021160.1    | Ca_Kabuli_Chr01 | 31753828                | AA                              | TT                 | TT               | INTERGENIC      |               |                    |                    |
| SNP_3763_A_31753830 | NC_021160.1    | Ca_Kabuli_Chr01 | 31753830                | TT                              | AA                 | AA               | INTERGENIC      |               |                    |                    |
| SNP_3764_A_31753831 | NC_021160.1    | Ca_Kabuli_Chr01 | 31753831                | AA                              | TT                 | TT               | INTERGENIC      |               |                    |                    |
| SNP_3767_A_31778693 | NC_021160.1    | Ca_Kabuli_Chr01 | 31778693                | TT                              | AA                 | AA               | INTERGENIC      |               |                    |                    |
| SNP_3768_A_31778803 | NC_021160.1    | Ca_Kabuli_Chr01 | 31778803                | AA                              | TT                 | TT               | INTERGENIC      |               |                    |                    |
| SNP_3769_A_31778865 | NC_021160.1    | Ca_Kabuli_Chr01 | 31778865                | AA                              | GG                 | GG               | INTERGENIC      |               |                    |                    |
| SNP_3770_A_31778898 | NC_021160.1    | Ca_Kabuli_Chr01 | 31778898                | CC                              | GG                 | GG               | INTERGENIC      |               |                    |                    |
| SNP_3771_A_31778976 | NC_021160.1    | Ca_Kabuli_Chr01 | 31778976                | AA                              | GG                 | GG               | INTERGENIC      |               |                    |                    |
| SNP_3772_A_31778982 | NC_021160.1    | Ca_Kabuli_Chr01 | 31778982                | CC                              | TT                 | TT               | INTERGENIC      |               |                    |                    |
| SNP_3773_A_31779039 | NC_021160.1    | Ca_Kabuli_Chr01 | 31779039                | TT                              | CC                 | CC               | INTERGENIC      |               |                    |                    |
| SNP_3774_A_31779046 | NC_021160.1    | Ca_Kabuli_Chr01 | 31779046                | TT                              | CC                 | CC               | INTERGENIC      |               |                    |                    |
| SNP_3775_A_31779048 | NC_021160.1    | Ca_Kabuli_Chr01 | 31779048                | AA                              | GG                 | GG               | INTERGENIC      |               |                    |                    |
| SNP_3776_A_31779054 | NC_021160.1    | Ca_Kabuli_Chr01 | 31779054                | GG                              | AA                 | AA               | INTERGENIC      |               |                    |                    |
| SNP_3777_A_31779306 | NC_021160.1    | Ca_Kabuli_Chr01 | 31779306                | GG                              | TT                 | TT               | INTERGENIC      |               |                    |                    |
| SNP_3778_A_31779376 | NC_021160.1    | Ca_Kabuli_Chr01 | 31779376                | AA                              | GG                 | GG               | INTERGENIC      |               |                    |                    |
| SNP_3779_A_31779547 | NC_021160.1    | Ca_Kabuli_Chr01 | 31779547                | TT                              | GG                 | GG               | INTERGENIC      |               |                    |                    |
| SNP_3780_A_31779587 | NC_021160.1    | Ca_Kabuli_Chr01 | 31779587                | CC                              | TT                 | TT               | INTERGENIC      |               |                    |                    |
| SNP_3781_A_31779601 | NC_021160.1    | Ca_Kabuli_Chr01 | 31779601                | TT                              | CC                 | CC               | INTERGENIC      |               |                    |                    |
| SNP_3782_A_31779617 | NC_021160.1    | Ca_Kabuli_Chr01 | 31779617                | AA                              | CC                 | CC               | INTERGENIC      |               |                    |                    |
| SNP_3783_A_31779693 | NC_021160.1    | Ca_Kabuli_Chr01 | 31779693                | TT                              | AA                 | AA               | INTERGENIC      |               |                    |                    |
| SNP_3784_A_31779720 | NC_021160.1    | Ca_Kabuli_Chr01 | 31779720                | TT                              | AA                 | AA               | INTERGENIC      |               |                    |                    |



| SNPs IDs            | Chromosome IDs | Chromosomes     | Physical positions (bp) | CDC Frontier (Reference genome) | (Pusa 1103 & HPNB) | (ILWC 46 & LPNB) | Sequence genome | Components of | Gene accession IDs | Putative functions |
|---------------------|----------------|-----------------|-------------------------|---------------------------------|--------------------|------------------|-----------------|---------------|--------------------|--------------------|
| SNP_3785_A_31779764 | NC_021160.1    | Ca_Kabuli_Chr01 | 31779764                | AA                              | TT                 | TT               | INTERGENIC      |               |                    |                    |
| SNP_3786_A_31779946 | NC_021160.1    | Ca_Kabuli_Chr01 | 31779946                | TT                              | CC                 | CC               | INTERGENIC      |               |                    |                    |
| SNP_3787_A_31780000 | NC_021160.1    | Ca_Kabuli_Chr01 | 31780000                | TT                              | GG                 | GG               | INTERGENIC      |               |                    |                    |
| SNP_3788_A_31780017 | NC_021160.1    | Ca_Kabuli_Chr01 | 31780017                | AA                              | TT                 | TT               | INTERGENIC      |               |                    |                    |
| SNP_3789_A_31780018 | NC_021160.1    | Ca_Kabuli_Chr01 | 31780018                | AA                              | GG                 | GG               | INTERGENIC      |               |                    |                    |
| SNP_3790_A_31780036 | NC_021160.1    | Ca_Kabuli_Chr01 | 31780036                | TT                              | GG                 | GG               | INTERGENIC      |               |                    |                    |
| SNP_3791_A_31780045 | NC_021160.1    | Ca_Kabuli_Chr01 | 31780045                | CC                              | AA                 | AA               | INTERGENIC      |               |                    |                    |
| SNP_3792_A_31780047 | NC_021160.1    | Ca_Kabuli_Chr01 | 31780047                | CC                              | TT                 | TT               | INTERGENIC      |               |                    |                    |
| SNP_3793_A_31780136 | NC_021160.1    | Ca_Kabuli_Chr01 | 31780136                | AA                              | CC                 | CC               | INTERGENIC      |               |                    |                    |
| SNP_3794_A_31781531 | NC_021160.1    | Ca_Kabuli_Chr01 | 31781531                | TT                              | AA                 | AA               | INTERGENIC      |               |                    |                    |
| SNP_3796_A_31783648 | NC_021160.1    | Ca_Kabuli_Chr01 | 31783648                | CC                              | GG                 | GG               | INTERGENIC      |               |                    |                    |
| SNP_3797_A_31783653 | NC_021160.1    | Ca_Kabuli_Chr01 | 31783653                | CC                              | TT                 | TT               | INTERGENIC      |               |                    |                    |
| SNP_3798_A_31783700 | NC_021160.1    | Ca_Kabuli_Chr01 | 31783700                | GG                              | AA                 | AA               | INTERGENIC      |               |                    |                    |
| SNP_3799_A_31783867 | NC_021160.1    | Ca_Kabuli_Chr01 | 31783867                | GG                              | TT                 | TT               | INTERGENIC      |               |                    |                    |
| SNP_3800_A_31783910 | NC_021160.1    | Ca_Kabuli_Chr01 | 31783910                | GG                              | AA                 | AA               | INTERGENIC      |               |                    |                    |
| SNP_3801_A_31784053 | NC_021160.1    | Ca_Kabuli_Chr01 | 31784053                | TT                              | AA                 | AA               | INTERGENIC      |               |                    |                    |
| SNP_3802_A_31784055 | NC_021160.1    | Ca_Kabuli_Chr01 | 31784055                | TT                              | AA                 | AA               | INTERGENIC      |               |                    |                    |
| SNP_3803_A_31784244 | NC_021160.1    | Ca_Kabuli_Chr01 | 31784244                | GG                              | AA                 | AA               | INTERGENIC      |               |                    |                    |
| SNP_3804_A_31784411 | NC_021160.1    | Ca_Kabuli_Chr01 | 31784411                | GG                              | AA                 | AA               | INTERGENIC      |               |                    |                    |
| SNP_3805_A_31784441 | NC_021160.1    | Ca_Kabuli_Chr01 | 31784441                | TT                              | CC                 | CC               | INTERGENIC      |               |                    |                    |
| SNP_3806_A_31784486 | NC_021160.1    | Ca_Kabuli_Chr01 | 31784486                | TT                              | CC                 | CC               | INTERGENIC      |               |                    |                    |
| SNP_3807_A_31784665 | NC_021160.1    | Ca_Kabuli_Chr01 | 31784665                | GG                              | AA                 | AA               | INTERGENIC      |               |                    |                    |

| SNPs IDs            | Chromosome IDs | Chromosomes     | Physical positions (bp) | CDC Frontier (Reference genome) | (Pusa 1103 & HPNB) | (ILWC 46 & LPNB) | Sequence genome | Components of | Gene accession IDs | Putative functions |
|---------------------|----------------|-----------------|-------------------------|---------------------------------|--------------------|------------------|-----------------|---------------|--------------------|--------------------|
| SNP_3808_A_31784718 | NC_021160.1    | Ca_Kabuli_Chr01 | 31784718                | CC                              | GG                 | GG               | INTERGENIC      |               |                    |                    |
| SNP_3809_A_31784851 | NC_021160.1    | Ca_Kabuli_Chr01 | 31784851                | TT                              | CC                 | CC               | INTERGENIC      |               |                    |                    |
| SNP_3810_A_31784886 | NC_021160.1    | Ca_Kabuli_Chr01 | 31784886                | CC                              | TT                 | TT               | INTERGENIC      |               |                    |                    |
| SNP_3811_A_31785061 | NC_021160.1    | Ca_Kabuli_Chr01 | 31785061                | AA                              | GG                 | GG               | INTERGENIC      |               |                    |                    |
| SNP_3812_A_31785115 | NC_021160.1    | Ca_Kabuli_Chr01 | 31785115                | AA                              | TT                 | TT               | INTERGENIC      |               |                    |                    |
| SNP_3813_A_31785154 | NC_021160.1    | Ca_Kabuli_Chr01 | 31785154                | AA                              | TT                 | TT               | INTERGENIC      |               |                    |                    |
| SNP_3814_A_31785186 | NC_021160.1    | Ca_Kabuli_Chr01 | 31785186                | CC                              | GG                 | GG               | INTERGENIC      |               |                    |                    |
| SNP_3815_A_31785187 | NC_021160.1    | Ca_Kabuli_Chr01 | 31785187                | CC                              | TT                 | TT               | INTERGENIC      |               |                    |                    |
| SNP_3816_A_31785298 | NC_021160.1    | Ca_Kabuli_Chr01 | 31785298                | TT                              | GG                 | GG               | INTERGENIC      |               |                    |                    |
| SNP_3817_A_31785322 | NC_021160.1    | Ca_Kabuli_Chr01 | 31785322                | CC                              | TT                 | TT               | INTERGENIC      |               |                    |                    |
| SNP_3818_A_31785336 | NC_021160.1    | Ca_Kabuli_Chr01 | 31785336                | GG                              | AA                 | AA               | INTERGENIC      |               |                    |                    |
| SNP_3819_A_31785386 | NC_021160.1    | Ca_Kabuli_Chr01 | 31785386                | GG                              | AA                 | AA               | INTERGENIC      |               |                    |                    |
| SNP_3820_A_31785396 | NC_021160.1    | Ca_Kabuli_Chr01 | 31785396                | AA                              | TT                 | TT               | INTERGENIC      |               |                    |                    |
| SNP_3821_A_31785448 | NC_021160.1    | Ca_Kabuli_Chr01 | 31785448                | TT                              | GG                 | GG               | INTERGENIC      |               |                    |                    |
| SNP_3822_A_31785449 | NC_021160.1    | Ca_Kabuli_Chr01 | 31785449                | AA                              | TT                 | TT               | INTERGENIC      |               |                    |                    |
| SNP_3823_A_31785496 | NC_021160.1    | Ca_Kabuli_Chr01 | 31785496                | CC                              | TT                 | TT               | INTERGENIC      |               |                    |                    |
| SNP_3824_A_31785537 | NC_021160.1    | Ca_Kabuli_Chr01 | 31785537                | GG                              | AA                 | AA               | INTERGENIC      |               |                    |                    |
| SNP_3825_A_31785582 | NC_021160.1    | Ca_Kabuli_Chr01 | 31785582                | TT                              | CC                 | CC               | INTERGENIC      |               |                    |                    |
| SNP_3826_A_31785585 | NC_021160.1    | Ca_Kabuli_Chr01 | 31785585                | GG                              | CC                 | CC               | INTERGENIC      |               |                    |                    |
| SNP_3827_A_31785628 | NC_021160.1    | Ca_Kabuli_Chr01 | 31785628                | CC                              | AA                 | AA               | INTERGENIC      |               |                    |                    |
| SNP_3828_A_31785648 | NC_021160.1    | Ca_Kabuli_Chr01 | 31785648                | TT                              | GG                 | GG               | INTERGENIC      |               |                    |                    |
| SNP_3829_A_31785664 | NC_021160.1    | Ca_Kabuli_Chr01 | 31785664                | AA                              | CC                 | CC               | INTERGENIC      |               |                    |                    |

| SNPs IDs            | Chromosome IDs | Chromosomes     | Physical positions (bp) | CDC Frontier genome (Reference genome) | (Pusa 1103 & HPNB) | (ILWC 46 & LPNB) | Sequence genome | Components of | Gene accession IDs | Putative functions |
|---------------------|----------------|-----------------|-------------------------|----------------------------------------|--------------------|------------------|-----------------|---------------|--------------------|--------------------|
| SNP_3830_A_31785704 | NC_021160.1    | Ca_Kabuli_Chr01 | 31785704                | GG                                     | AA                 | AA               | INTERGENIC      |               |                    |                    |
| SNP_3831_A_31785864 | NC_021160.1    | Ca_Kabuli_Chr01 | 31785864                | AA                                     | CC                 | CC               | INTERGENIC      |               |                    |                    |
| SNP_3832_A_31785905 | NC_021160.1    | Ca_Kabuli_Chr01 | 31785905                | CC                                     | TT                 | TT               | INTERGENIC      |               |                    |                    |
| SNP_3833_A_31786108 | NC_021160.1    | Ca_Kabuli_Chr01 | 31786108                | AA                                     | CC                 | CC               | INTERGENIC      |               |                    |                    |
| SNP_3834_A_31786136 | NC_021160.1    | Ca_Kabuli_Chr01 | 31786136                | TT                                     | CC                 | CC               | INTERGENIC      |               |                    |                    |
| SNP_3835_A_31786181 | NC_021160.1    | Ca_Kabuli_Chr01 | 31786181                | AA                                     | TT                 | TT               | INTERGENIC      |               |                    |                    |
| SNP_3836_A_31786269 | NC_021160.1    | Ca_Kabuli_Chr01 | 31786269                | AA                                     | TT                 | TT               | INTERGENIC      |               |                    |                    |
| SNP_3837_A_31786303 | NC_021160.1    | Ca_Kabuli_Chr01 | 31786303                | TT                                     | AA                 | AA               | INTERGENIC      |               |                    |                    |
| SNP_3838_A_31786347 | NC_021160.1    | Ca_Kabuli_Chr01 | 31786347                | AA                                     | GG                 | GG               | INTERGENIC      |               |                    |                    |
| SNP_3839_A_31786402 | NC_021160.1    | Ca_Kabuli_Chr01 | 31786402                | CC                                     | AA                 | AA               | INTERGENIC      |               |                    |                    |
| SNP_3840_A_31786406 | NC_021160.1    | Ca_Kabuli_Chr01 | 31786406                | AA                                     | TT                 | TT               | INTERGENIC      |               |                    |                    |
| SNP_3841_A_31786452 | NC_021160.1    | Ca_Kabuli_Chr01 | 31786452                | CC                                     | TT                 | TT               | INTERGENIC      |               |                    |                    |
| SNP_3842_A_31786475 | NC_021160.1    | Ca_Kabuli_Chr01 | 31786475                | TT                                     | CC                 | CC               | INTERGENIC      |               |                    |                    |
| SNP_3843_A_31786479 | NC_021160.1    | Ca_Kabuli_Chr01 | 31786479                | AA                                     | TT                 | TT               | INTERGENIC      |               |                    |                    |
| SNP_3844_A_31786709 | NC_021160.1    | Ca_Kabuli_Chr01 | 31786709                | TT                                     | AA                 | AA               | INTERGENIC      |               |                    |                    |
| SNP_3845_A_31786725 | NC_021160.1    | Ca_Kabuli_Chr01 | 31786725                | AA                                     | GG                 | GG               | INTERGENIC      |               |                    |                    |
| SNP_3846_A_31792717 | NC_021160.1    | Ca_Kabuli_Chr01 | 31792717                | AA                                     | CC                 | CC               | INTERGENIC      |               |                    |                    |
| SNP_3847_A_31795436 | NC_021160.1    | Ca_Kabuli_Chr01 | 31795436                | GG                                     | AA                 | AA               | INTERGENIC      |               |                    |                    |
| SNP_3848_A_31795456 | NC_021160.1    | Ca_Kabuli_Chr01 | 31795456                | GG                                     | AA                 | AA               | INTERGENIC      |               |                    |                    |
| SNP_3849_A_31795537 | NC_021160.1    | Ca_Kabuli_Chr01 | 31795537                | AA                                     | CC                 | CC               | INTERGENIC      |               |                    |                    |
| SNP_3850_A_31795559 | NC_021160.1    | Ca_Kabuli_Chr01 | 31795559                | GG                                     | TT                 | TT               | INTERGENIC      |               |                    |                    |
| SNP_3851_A_31795631 | NC_021160.1    | Ca_Kabuli_Chr01 | 31795631                | TT                                     | GG                 | GG               | INTERGENIC      |               |                    |                    |

| SNPs IDs            | Chromosome IDs | Chromosomes     | Physical positions (bp) | CDC Frontier genome (Reference genome) | (Pusa 1103 & HPNB) | (ILWC 46 & LPNB) | Sequence genome | Components of | Gene accession IDs | Putative functions           |
|---------------------|----------------|-----------------|-------------------------|----------------------------------------|--------------------|------------------|-----------------|---------------|--------------------|------------------------------|
| SNP_3852_A_31795655 | NC_021160.1    | Ca_Kabuli_Chr01 | 31795655                | TT                                     | AA                 | AA               | INTERGENIC      |               |                    |                              |
| SNP_3853_A_31795660 | NC_021160.1    | Ca_Kabuli_Chr01 | 31795660                | AA                                     | TT                 | TT               | INTERGENIC      |               |                    |                              |
| SNP_3854_A_31795682 | NC_021160.1    | Ca_Kabuli_Chr01 | 31795682                | CC                                     | TT                 | TT               | INTERGENIC      |               |                    |                              |
| SNP_3855_A_31795690 | NC_021160.1    | Ca_Kabuli_Chr01 | 31795690                | GG                                     | AA                 | AA               | INTERGENIC      |               |                    |                              |
| SNP_3856_A_31795695 | NC_021160.1    | Ca_Kabuli_Chr01 | 31795695                | GG                                     | AA                 | AA               | INTERGENIC      |               |                    |                              |
| SNP_3857_A_31795739 | NC_021160.1    | Ca_Kabuli_Chr01 | 31795739                | CC                                     | AA                 | AA               | INTERGENIC      |               |                    |                              |
| SNP_3858_A_31795858 | NC_021160.1    | Ca_Kabuli_Chr01 | 31795858                | AA                                     | GG                 | GG               | INTERGENIC      |               |                    |                              |
| SNP_3859_A_31795940 | NC_021160.1    | Ca_Kabuli_Chr01 | 31795940                | GG                                     | TT                 | TT               | INTERGENIC      |               |                    |                              |
| SNP_3861_A_31806090 | NC_021160.1    | Ca_Kabuli_Chr01 | 31806090                | AA                                     | GG                 | GG               | INTERGENIC      |               |                    |                              |
| SNP_3862_A_31806321 | NC_021160.1    | Ca_Kabuli_Chr01 | 31806321                | TT                                     | CC                 | CC               | INTERGENIC      |               |                    |                              |
| SNP_3863_A_31833625 | NC_021160.1    | Ca_Kabuli_Chr01 | 31833625                | AA                                     | GG                 | GG               | INTERGENIC      |               |                    |                              |
| SNP_3864_A_31833630 | NC_021160.1    | Ca_Kabuli_Chr01 | 31833630                | TT                                     | CC                 | CC               | INTERGENIC      |               |                    |                              |
| SNP_3865_A_31833632 | NC_021160.1    | Ca_Kabuli_Chr01 | 31833632                | GG                                     | TT                 | TT               | INTERGENIC      |               |                    |                              |
| SNP_3866_A_31833779 | NC_021160.1    | Ca_Kabuli_Chr01 | 31833779                | TT                                     | CC                 | CC               | INTERGENIC      |               |                    |                              |
| SNP_3867_A_31833781 | NC_021160.1    | Ca_Kabuli_Chr01 | 31833781                | CC                                     | TT                 | TT               | INTERGENIC      |               |                    |                              |
| SNP_3868_A_31847886 | NC_021160.1    | Ca_Kabuli_Chr01 | 31847886                | AA                                     | TT                 | TT               | INTERGENIC      |               |                    |                              |
| SNP_3869_A_31847891 | NC_021160.1    | Ca_Kabuli_Chr01 | 31847891                | AA                                     | GG                 | GG               | INTERGENIC      |               |                    |                              |
| SNP_3870_A_31847905 | NC_021160.1    | Ca_Kabuli_Chr01 | 31847905                | TT                                     | GG                 | GG               | INTERGENIC      |               |                    |                              |
| SNP_3871_A_31858770 | NC_021160.1    | Ca_Kabuli_Chr01 | 31858770                | TT                                     | CC                 | CC               | INTERGENIC      |               |                    |                              |
| SNP_3872_A_31858790 | NC_021160.1    | Ca_Kabuli_Chr01 | 31858790                | TT                                     | CC                 | CC               | INTERGENIC      |               |                    |                              |
| SNP_3873_A_31868664 | NC_021160.1    | Ca_Kabuli_Chr01 | 31868664                | CC                                     | GG                 | GG               | INTERGENIC      |               |                    |                              |
| SNP_3874_A_31904644 | NC_021160.1    | Ca_Kabuli_Chr01 | 31904644                | CC                                     | TT                 | TT               | INTRON          | 101503118     | 101503118          | uncharacterized LOC101503118 |

| SNPs IDs            | Chromosome IDs | Chromosomes     | Physical positions (bp) | CDC Frontier (Reference genome) | (Pusa 1103 & HPNB) | (ILWC 46 & LPNB) | Sequence Components of genome | Gene accession IDs | Putative functions           |
|---------------------|----------------|-----------------|-------------------------|---------------------------------|--------------------|------------------|-------------------------------|--------------------|------------------------------|
| SNP_3875_A_31926842 | NC_021160.1    | Ca_Kabuli_Chr01 | 31926842                | AA                              | GG                 | GG               | INTRON                        | 101503118          | uncharacterized LOC101503118 |
| SNP_3876_A_31930547 | NC_021160.1    | Ca_Kabuli_Chr01 | 31930547                | AA                              | GG                 | GG               | INTRON                        | 101503118          | uncharacterized LOC101503118 |
| SNP_3877_A_31944788 | NC_021160.1    | Ca_Kabuli_Chr01 | 31944788                | GG                              | AA                 | AA               | INTRON                        | 101503118          | uncharacterized LOC101503118 |
| SNP_3878_A_31946706 | NC_021160.1    | Ca_Kabuli_Chr01 | 31946706                | AA                              | GG                 | GG               | INTRON                        | 101503118          | uncharacterized LOC101503118 |
| SNP_3879_A_31946717 | NC_021160.1    | Ca_Kabuli_Chr01 | 31946717                | AA                              | GG                 | GG               | INTRON                        | 101503118          | uncharacterized LOC101503118 |
| SNP_3880_A_31946725 | NC_021160.1    | Ca_Kabuli_Chr01 | 31946725                | AA                              | TT                 | TT               | INTRON                        | 101503118          | uncharacterized LOC101503118 |
| SNP_3881_A_31946746 | NC_021160.1    | Ca_Kabuli_Chr01 | 31946746                | TT                              | GG                 | GG               | INTRON                        | 101503118          | uncharacterized LOC101503118 |
| SNP_3882_A_31952883 | NC_021160.1    | Ca_Kabuli_Chr01 | 31952883                | CC                              | TT                 | TT               | INTRON                        | 101503118          | uncharacterized LOC101503118 |
| SNP_3883_A_31994687 | NC_021160.1    | Ca_Kabuli_Chr01 | 31994687                | AA                              | GG                 | GG               | INTERGENIC                    |                    |                              |
| SNP_3884_A_31995364 | NC_021160.1    | Ca_Kabuli_Chr01 | 31995364                | TT                              | GG                 | GG               | INTERGENIC                    |                    |                              |
| SNP_3885_A_31995371 | NC_021160.1    | Ca_Kabuli_Chr01 | 31995371                | TT                              | GG                 | GG               | INTERGENIC                    |                    |                              |
| SNP_3886_A_31995388 | NC_021160.1    | Ca_Kabuli_Chr01 | 31995388                | CC                              | TT                 | TT               | INTERGENIC                    |                    |                              |
| SNP_3887_A_31995397 | NC_021160.1    | Ca_Kabuli_Chr01 | 31995397                | TT                              | AA                 | AA               | INTERGENIC                    |                    |                              |
| SNP_3888_A_31995400 | NC_021160.1    | Ca_Kabuli_Chr01 | 31995400                | TT                              | CC                 | CC               | INTERGENIC                    |                    |                              |
| SNP_3889_A_31995426 | NC_021160.1    | Ca_Kabuli_Chr01 | 31995426                | TT                              | CC                 | CC               | INTERGENIC                    |                    |                              |
| SNP_3891_A_31995540 | NC_021160.1    | Ca_Kabuli_Chr01 | 31995540                | AA                              | TT                 | TT               | INTERGENIC                    |                    |                              |
| SNP_3892_A_31995565 | NC_021160.1    | Ca_Kabuli_Chr01 | 31995565                | AA                              | GG                 | GG               | INTERGENIC                    |                    |                              |
| SNP_3893_A_31995597 | NC_021160.1    | Ca_Kabuli_Chr01 | 31995597                | CC                              | TT                 | TT               | INTERGENIC                    |                    |                              |
| SNP_3894_A_31995619 | NC_021160.1    | Ca_Kabuli_Chr01 | 31995619                | TT                              | CC                 | CC               | INTERGENIC                    |                    |                              |
| SNP_3895_A_31995700 | NC_021160.1    | Ca_Kabuli_Chr01 | 31995700                | GG                              | AA                 | AA               | INTERGENIC                    |                    |                              |
| SNP_3896_A_31995757 | NC_021160.1    | Ca_Kabuli_Chr01 | 31995757                | CC                              | TT                 | TT               | INTERGENIC                    |                    |                              |
| SNP_3899_A_32037059 | NC_021160.1    | Ca_Kabuli_Chr01 | 32037059                | AA                              | GG                 | GG               | URR                           | 101504104          | uncharacterized LOC101504104 |

| SNPs IDs            | Chromosome IDs | Chromosomes     | Physical positions (bp) | CDC Frontier (Reference genome) | (Pusa 1103 & HPNB) | (ILWC 46 & LPNB) | Sequence Components of genome | Gene accession IDs | Putative functions           |
|---------------------|----------------|-----------------|-------------------------|---------------------------------|--------------------|------------------|-------------------------------|--------------------|------------------------------|
| SNP_3900_A_32037065 | NC_021160.1    | Ca_Kabuli_Chr01 | 32037065                | CC                              | TT                 | TT               | URR                           | 101504104          | uncharacterized LOC101504104 |
| SNP_3901_A_32037081 | NC_021160.1    | Ca_Kabuli_Chr01 | 32037081                | AA                              | TT                 | TT               | URR                           | 101504104          | uncharacterized LOC101504104 |
| SNP_3902_A_32037112 | NC_021160.1    | Ca_Kabuli_Chr01 | 32037112                | TT                              | CC                 | CC               | URR                           | 101504104          | uncharacterized LOC101504104 |
| SNP_3903_A_32037139 | NC_021160.1    | Ca_Kabuli_Chr01 | 32037139                | CC                              | TT                 | TT               | URR                           | 101504104          | uncharacterized LOC101504104 |
| SNP_3904_A_32037156 | NC_021160.1    | Ca_Kabuli_Chr01 | 32037156                | GG                              | AA                 | AA               | URR                           | 101504104          | uncharacterized LOC101504104 |
| SNP_3906_A_32037275 | NC_021160.1    | Ca_Kabuli_Chr01 | 32037275                | CC                              | TT                 | TT               | URR                           | 101504104          | uncharacterized LOC101504104 |
| SNP_3909_A_32037390 | NC_021160.1    | Ca_Kabuli_Chr01 | 32037390                | GG                              | TT                 | TT               | URR                           | 101504104          | uncharacterized LOC101504104 |
| SNP_3910_A_32037412 | NC_021160.1    | Ca_Kabuli_Chr01 | 32037412                | GG                              | AA                 | AA               | URR                           | 101504104          | uncharacterized LOC101504104 |
| SNP_3911_A_32038775 | NC_021160.1    | Ca_Kabuli_Chr01 | 32038775                | TT                              | CC                 | CC               | INTERGENIC                    |                    |                              |
| SNP_3912_A_32038856 | NC_021160.1    | Ca_Kabuli_Chr01 | 32038856                | GG                              | TT                 | TT               | INTERGENIC                    |                    |                              |
| SNP_3914_A_32043856 | NC_021160.1    | Ca_Kabuli_Chr01 | 32043856                | CC                              | AA                 | AA               | INTERGENIC                    |                    |                              |
| SNP_3915_A_32055948 | NC_021160.1    | Ca_Kabuli_Chr01 | 32055948                | TT                              | CC                 | CC               | INTERGENIC                    |                    |                              |
| SNP_3916_A_32079534 | NC_021160.1    | Ca_Kabuli_Chr01 | 32079534                | CC                              | TT                 | TT               | INTERGENIC                    |                    |                              |
| SNP_3917_A_32079596 | NC_021160.1    | Ca_Kabuli_Chr01 | 32079596                | TT                              | AA                 | AA               | INTERGENIC                    |                    |                              |
| SNP_3918_A_32079599 | NC_021160.1    | Ca_Kabuli_Chr01 | 32079599                | TT                              | CC                 | CC               | INTERGENIC                    |                    |                              |
| SNP_3919_A_32079617 | NC_021160.1    | Ca_Kabuli_Chr01 | 32079617                | TT                              | AA                 | AA               | INTERGENIC                    |                    |                              |
| SNP_3920_A_32079661 | NC_021160.1    | Ca_Kabuli_Chr01 | 32079661                | AA                              | GG                 | GG               | INTERGENIC                    |                    |                              |
| SNP_3921_A_32079675 | NC_021160.1    | Ca_Kabuli_Chr01 | 32079675                | AA                              | CC                 | CC               | INTERGENIC                    |                    |                              |
| SNP_3922_A_32079717 | NC_021160.1    | Ca_Kabuli_Chr01 | 32079717                | TT                              | CC                 | CC               | INTERGENIC                    |                    |                              |
| SNP_3923_A_32079786 | NC_021160.1    | Ca_Kabuli_Chr01 | 32079786                | TT                              | CC                 | CC               | INTERGENIC                    |                    |                              |
| SNP_3924_A_32079800 | NC_021160.1    | Ca_Kabuli_Chr01 | 32079800                | AA                              | GG                 | GG               | INTERGENIC                    |                    |                              |
| SNP_3925_A_32079816 | NC_021160.1    | Ca_Kabuli_Chr01 | 32079816                | AA                              | GG                 | GG               | INTERGENIC                    |                    |                              |

| SNPs IDs            | Chromosome IDs | Chromosomes     | Physical positions (bp) | CDC Frontier (Reference genome) | (Pusa 1103 & HPNB) | (ILWC 46 & LPNB) | Sequence Components of genome | Gene accession IDs | Putative functions           |
|---------------------|----------------|-----------------|-------------------------|---------------------------------|--------------------|------------------|-------------------------------|--------------------|------------------------------|
| SNP_3926_A_32079823 | NC_021160.1    | Ca_Kabuli_Chr01 | 32079823                | TT                              | CC                 | CC               | INTERGENIC                    |                    |                              |
| SNP_3927_A_32079914 | NC_021160.1    | Ca_Kabuli_Chr01 | 32079914                | TT                              | GG                 | GG               | INTERGENIC                    |                    |                              |
| SNP_3928_A_32079987 | NC_021160.1    | Ca_Kabuli_Chr01 | 32079987                | TT                              | CC                 | CC               | INTERGENIC                    |                    |                              |
| SNP_3929_A_32080004 | NC_021160.1    | Ca_Kabuli_Chr01 | 32080004                | AA                              | GG                 | GG               | INTERGENIC                    |                    |                              |
| SNP_3930_A_32080019 | NC_021160.1    | Ca_Kabuli_Chr01 | 32080019                | TT                              | CC                 | CC               | INTERGENIC                    |                    |                              |
| SNP_3931_A_32080028 | NC_021160.1    | Ca_Kabuli_Chr01 | 32080028                | TT                              | CC                 | CC               | INTERGENIC                    |                    |                              |
| SNP_3932_A_32080067 | NC_021160.1    | Ca_Kabuli_Chr01 | 32080067                | AA                              | GG                 | GG               | INTERGENIC                    |                    |                              |
| SNP_3934_A_32080139 | NC_021160.1    | Ca_Kabuli_Chr01 | 32080139                | AA                              | GG                 | GG               | INTERGENIC                    |                    |                              |
| SNP_3935_A_32080153 | NC_021160.1    | Ca_Kabuli_Chr01 | 32080153                | TT                              | CC                 | CC               | INTERGENIC                    |                    |                              |
| SNP_3937_A_32080263 | NC_021160.1    | Ca_Kabuli_Chr01 | 32080263                | TT                              | CC                 | CC               | INTERGENIC                    |                    |                              |
| SNP_3938_A_32080264 | NC_021160.1    | Ca_Kabuli_Chr01 | 32080264                | AA                              | GG                 | GG               | INTERGENIC                    |                    |                              |
| SNP_3940_A_32080352 | NC_021160.1    | Ca_Kabuli_Chr01 | 32080352                | TT                              | CC                 | CC               | INTERGENIC                    |                    |                              |
| SNP_3941_A_32080356 | NC_021160.1    | Ca_Kabuli_Chr01 | 32080356                | AA                              | GG                 | GG               | INTERGENIC                    |                    |                              |
| SNP_3942_A_32080665 | NC_021160.1    | Ca_Kabuli_Chr01 | 32080665                | TT                              | AA                 | AA               | URR                           | 101504415          | Unknown function             |
| SNP_3943_A_32080696 | NC_021160.1    | Ca_Kabuli_Chr01 | 32080696                | AA                              | GG                 | GG               | URR                           | 101504415          | Unknown function             |
| SNP_3944_A_32082275 | NC_021160.1    | Ca_Kabuli_Chr01 | 32082275                | CC                              | TT                 | TT               | DRR                           | 101504735          | uncharacterized LOC101504735 |
| SNP_3945_A_32083938 | NC_021160.1    | Ca_Kabuli_Chr01 | 32083938                | CC                              | TT                 | TT               | NON_SYNONYMOUS_CODING         | 101504735          | uncharacterized LOC101504735 |
| SNP_3946_A_32124624 | NC_021160.1    | Ca_Kabuli_Chr01 | 32124624                | CC                              | TT                 | TT               | INTERGENIC                    |                    |                              |
| SNP_3947_A_32124810 | NC_021160.1    | Ca_Kabuli_Chr01 | 32124810                | TT                              | GG                 | GG               | INTERGENIC                    |                    |                              |
| SNP_3948_A_32125358 | NC_021160.1    | Ca_Kabuli_Chr01 | 32125358                | GG                              | AA                 | AA               | INTERGENIC                    |                    |                              |
| SNP_3949_A_32126767 | NC_021160.1    | Ca_Kabuli_Chr01 | 32126767                | CC                              | AA                 | AA               | INTERGENIC                    |                    |                              |
| SNP_3950_A_32126860 | NC_021160.1    | Ca_Kabuli_Chr01 | 32126860                | TT                              | GG                 | GG               | INTERGENIC                    |                    |                              |

| SNPs IDs            | Chromosome IDs | Chromosomes     | Physical positions (bp) | CDC Frontier genome (Reference genome) | (Pusa 1103 & HPNB) | (ILWC 46 & LPNB) | Sequence genome | Components of | Gene accession IDs | Putative functions |
|---------------------|----------------|-----------------|-------------------------|----------------------------------------|--------------------|------------------|-----------------|---------------|--------------------|--------------------|
| SNP_3951_A_32126900 | NC_021160.1    | Ca_Kabuli_Chr01 | 32126900                | CC                                     | TT                 | TT               | INTERGENIC      |               |                    |                    |
| SNP_3952_A_32128231 | NC_021160.1    | Ca_Kabuli_Chr01 | 32128231                | GG                                     | AA                 | AA               | INTERGENIC      |               |                    |                    |
| SNP_3953_A_32139298 | NC_021160.1    | Ca_Kabuli_Chr01 | 32139298                | AA                                     | TT                 | TT               | INTERGENIC      |               |                    |                    |
| SNP_3954_A_32139790 | NC_021160.1    | Ca_Kabuli_Chr01 | 32139790                | GG                                     | AA                 | AA               | INTERGENIC      |               |                    |                    |
| SNP_3955_A_32141350 | NC_021160.1    | Ca_Kabuli_Chr01 | 32141350                | TT                                     | CC                 | CC               | INTERGENIC      |               |                    |                    |
| SNP_3956_A_32141365 | NC_021160.1    | Ca_Kabuli_Chr01 | 32141365                | TT                                     | CC                 | CC               | INTERGENIC      |               |                    |                    |
| SNP_3957_A_32141519 | NC_021160.1    | Ca_Kabuli_Chr01 | 32141519                | CC                                     | AA                 | AA               | INTERGENIC      |               |                    |                    |
| SNP_3958_A_32141597 | NC_021160.1    | Ca_Kabuli_Chr01 | 32141597                | GG                                     | TT                 | TT               | INTERGENIC      |               |                    |                    |
| SNP_3959_A_32141775 | NC_021160.1    | Ca_Kabuli_Chr01 | 32141775                | AA                                     | CC                 | CC               | INTERGENIC      |               |                    |                    |
| SNP_3960_A_32145583 | NC_021160.1    | Ca_Kabuli_Chr01 | 32145583                | CC                                     | TT                 | TT               | INTERGENIC      |               |                    |                    |
| SNP_3961_A_32145938 | NC_021160.1    | Ca_Kabuli_Chr01 | 32145938                | GG                                     | AA                 | AA               | INTERGENIC      |               |                    |                    |
| SNP_3962_A_32146643 | NC_021160.1    | Ca_Kabuli_Chr01 | 32146643                | CC                                     | AA                 | AA               | INTERGENIC      |               |                    |                    |
| SNP_3963_A_32147267 | NC_021160.1    | Ca_Kabuli_Chr01 | 32147267                | TT                                     | CC                 | CC               | INTERGENIC      |               |                    |                    |
| SNP_3964_A_32148709 | NC_021160.1    | Ca_Kabuli_Chr01 | 32148709                | TT                                     | AA                 | AA               | INTERGENIC      |               |                    |                    |
| SNP_3965_A_32150355 | NC_021160.1    | Ca_Kabuli_Chr01 | 32150355                | GG                                     | AA                 | AA               | INTERGENIC      |               |                    |                    |
| SNP_3966_A_32150510 | NC_021160.1    | Ca_Kabuli_Chr01 | 32150510                | AA                                     | GG                 | GG               | INTERGENIC      |               |                    |                    |
| SNP_3967_A_32150603 | NC_021160.1    | Ca_Kabuli_Chr01 | 32150603                | TT                                     | CC                 | CC               | INTERGENIC      |               |                    |                    |
| SNP_3968_A_32150639 | NC_021160.1    | Ca_Kabuli_Chr01 | 32150639                | CC                                     | AA                 | AA               | INTERGENIC      |               |                    |                    |
| SNP_3969_A_32150819 | NC_021160.1    | Ca_Kabuli_Chr01 | 32150819                | GG                                     | AA                 | AA               | INTERGENIC      |               |                    |                    |
| SNP_3970_A_32150953 | NC_021160.1    | Ca_Kabuli_Chr01 | 32150953                | GG                                     | CC                 | CC               | INTERGENIC      |               |                    |                    |
| SNP_3972_A_32151737 | NC_021160.1    | Ca_Kabuli_Chr01 | 32151737                | TT                                     | GG                 | GG               | INTERGENIC      |               |                    |                    |
| SNP_3973_A_32152033 | NC_021160.1    | Ca_Kabuli_Chr01 | 32152033                | GG                                     | AA                 | AA               | INTERGENIC      |               |                    |                    |



| SNPs IDs            | Chromosome IDs | Chromosomes     | Physical positions (bp) | CDC Frontier genome (Reference genome) | (Pusa 1103 & HPNB) | (ILWC 46 & LPNB) | Sequence genome | Components of | Gene accession IDs | Putative functions |
|---------------------|----------------|-----------------|-------------------------|----------------------------------------|--------------------|------------------|-----------------|---------------|--------------------|--------------------|
| SNP_3974_A_32152241 | NC_021160.1    | Ca_Kabuli_Chr01 | 32152241                | CC                                     | TT                 | TT               | INTERGENIC      |               |                    |                    |
| SNP_3975_A_32152688 | NC_021160.1    | Ca_Kabuli_Chr01 | 32152688                | TT                                     | CC                 | CC               | INTERGENIC      |               |                    |                    |
| SNP_3978_A_32154397 | NC_021160.1    | Ca_Kabuli_Chr01 | 32154397                | TT                                     | GG                 | GG               | INTERGENIC      |               |                    |                    |
| SNP_3979_A_32154669 | NC_021160.1    | Ca_Kabuli_Chr01 | 32154669                | CC                                     | TT                 | TT               | INTERGENIC      |               |                    |                    |
| SNP_3980_A_32154834 | NC_021160.1    | Ca_Kabuli_Chr01 | 32154834                | AA                                     | CC                 | CC               | INTERGENIC      |               |                    |                    |
| SNP_3981_A_32154876 | NC_021160.1    | Ca_Kabuli_Chr01 | 32154876                | AA                                     | CC                 | CC               | INTERGENIC      |               |                    |                    |
| SNP_3982_A_32155025 | NC_021160.1    | Ca_Kabuli_Chr01 | 32155025                | CC                                     | TT                 | TT               | INTERGENIC      |               |                    |                    |
| SNP_3983_A_32155031 | NC_021160.1    | Ca_Kabuli_Chr01 | 32155031                | TT                                     | CC                 | CC               | INTERGENIC      |               |                    |                    |
| SNP_3984_A_32155622 | NC_021160.1    | Ca_Kabuli_Chr01 | 32155622                | AA                                     | TT                 | TT               | INTERGENIC      |               |                    |                    |
| SNP_3985_A_32156378 | NC_021160.1    | Ca_Kabuli_Chr01 | 32156378                | GG                                     | CC                 | CC               | INTERGENIC      |               |                    |                    |
| SNP_3986_A_32157968 | NC_021160.1    | Ca_Kabuli_Chr01 | 32157968                | AA                                     | GG                 | GG               | INTERGENIC      |               |                    |                    |
| SNP_3987_A_32158328 | NC_021160.1    | Ca_Kabuli_Chr01 | 32158328                | AA                                     | GG                 | GG               | INTERGENIC      |               |                    |                    |
| SNP_3988_A_32159110 | NC_021160.1    | Ca_Kabuli_Chr01 | 32159110                | GG                                     | AA                 | AA               | INTERGENIC      |               |                    |                    |
| SNP_3989_A_32159539 | NC_021160.1    | Ca_Kabuli_Chr01 | 32159539                | TT                                     | CC                 | CC               | INTERGENIC      |               |                    |                    |
| SNP_3990_A_32160754 | NC_021160.1    | Ca_Kabuli_Chr01 | 32160754                | TT                                     | CC                 | CC               | INTERGENIC      |               |                    |                    |
| SNP_3991_A_32170044 | NC_021160.1    | Ca_Kabuli_Chr01 | 32170044                | GG                                     | AA                 | AA               | INTERGENIC      |               |                    |                    |
| SNP_3992_A_32174616 | NC_021160.1    | Ca_Kabuli_Chr01 | 32174616                | TT                                     | CC                 | CC               | INTERGENIC      |               |                    |                    |
| SNP_3993_A_32174647 | NC_021160.1    | Ca_Kabuli_Chr01 | 32174647                | GG                                     | TT                 | TT               | INTERGENIC      |               |                    |                    |
| SNP_3994_A_32174678 | NC_021160.1    | Ca_Kabuli_Chr01 | 32174678                | GG                                     | AA                 | AA               | INTERGENIC      |               |                    |                    |
| SNP_3995_A_32174965 | NC_021160.1    | Ca_Kabuli_Chr01 | 32174965                | CC                                     | AA                 | AA               | INTERGENIC      |               |                    |                    |
| SNP_3996_A_32174991 | NC_021160.1    | Ca_Kabuli_Chr01 | 32174991                | AA                                     | GG                 | GG               | INTERGENIC      |               |                    |                    |
| SNP_3997_A_32175687 | NC_021160.1    | Ca_Kabuli_Chr01 | 32175687                | AA                                     | TT                 | TT               | INTERGENIC      |               |                    |                    |

| SNPs IDs            | Chromosome IDs | Chromosomes     | Physical positions (bp) | CDC Frontier (Reference genome) | (Pusa 1103 & HPNB) | (ILWC 46 & LPNB) | Sequence Components of genome | Gene accession IDs | Putative functions         |
|---------------------|----------------|-----------------|-------------------------|---------------------------------|--------------------|------------------|-------------------------------|--------------------|----------------------------|
| SNP_3998_A_32179696 | NC_021160.1    | Ca_Kabuli_Chr01 | 32179696                | AA                              | TT                 | TT               | URR                           | 101506137          | Unknown function           |
| SNP_3999_A_32179980 | NC_021160.1    | Ca_Kabuli_Chr01 | 32179980                | CC                              | TT                 | TT               | URR                           | 101506137          | Unknown function           |
| SNP_4000_A_32179993 | NC_021160.1    | Ca_Kabuli_Chr01 | 32179993                | TT                              | AA                 | AA               | URR                           | 101506137          | Unknown function           |
| SNP_4001_A_32183849 | NC_021160.1    | Ca_Kabuli_Chr01 | 32183849                | TT                              | CC                 | CC               | INTERGENIC                    |                    |                            |
| SNP_4002_A_32183878 | NC_021160.1    | Ca_Kabuli_Chr01 | 32183878                | GG                              | AA                 | AA               | INTERGENIC                    |                    |                            |
| SNP_4003_A_32186837 | NC_021160.1    | Ca_Kabuli_Chr01 | 32186837                | TT                              | CC                 | CC               | DRR                           | 101506469          | cytochrome P450 714A2-like |
| SNP_4004_A_32186878 | NC_021160.1    | Ca_Kabuli_Chr01 | 32186878                | AA                              | GG                 | GG               | DRR                           | 101506469          | cytochrome P450 714A2-like |
| SNP_4005_A_32189161 | NC_021160.1    | Ca_Kabuli_Chr01 | 32189161                | TT                              | CC                 | CC               | URR                           | 101506469          | cytochrome P450 714A2-like |
| SNP_4006_A_32190806 | NC_021160.1    | Ca_Kabuli_Chr01 | 32190806                | GG                              | AA                 | AA               | INTERGENIC                    |                    |                            |
| SNP_4007_A_32194186 | NC_021160.1    | Ca_Kabuli_Chr01 | 32194186                | GG                              | AA                 | AA               | INTERGENIC                    |                    |                            |
| SNP_4008_A_32194875 | NC_021160.1    | Ca_Kabuli_Chr01 | 32194875                | AA                              | CC                 | CC               | INTERGENIC                    |                    |                            |
| SNP_4009_A_32195318 | NC_021160.1    | Ca_Kabuli_Chr01 | 32195318                | CC                              | GG                 | GG               | INTERGENIC                    |                    |                            |
| SNP_4010_A_32196274 | NC_021160.1    | Ca_Kabuli_Chr01 | 32196274                | CC                              | TT                 | TT               | INTERGENIC                    |                    |                            |
| SNP_4011_A_32200292 | NC_021160.1    | Ca_Kabuli_Chr01 | 32200292                | TT                              | CC                 | CC               | INTERGENIC                    |                    |                            |
| SNP_4012_A_32200597 | NC_021160.1    | Ca_Kabuli_Chr01 | 32200597                | AA                              | CC                 | CC               | INTERGENIC                    |                    |                            |
| SNP_4013_A_32203387 | NC_021160.1    | Ca_Kabuli_Chr01 | 32203387                | AA                              | GG                 | GG               | INTERGENIC                    |                    |                            |
| SNP_4014_A_32204436 | NC_021160.1    | Ca_Kabuli_Chr01 | 32204436                | GG                              | AA                 | AA               | INTERGENIC                    |                    |                            |
| SNP_4015_A_32222246 | NC_021160.1    | Ca_Kabuli_Chr01 | 32222246                | AA                              | GG                 | GG               | INTERGENIC                    |                    |                            |
| SNP_4017_A_32254312 | NC_021160.1    | Ca_Kabuli_Chr01 | 32254312                | AA                              | TT                 | TT               | INTERGENIC                    |                    |                            |
| SNP_4018_A_32261029 | NC_021160.1    | Ca_Kabuli_Chr01 | 32261029                | TT                              | GG                 | GG               | INTERGENIC                    |                    |                            |
| SNP_4019_A_32261420 | NC_021160.1    | Ca_Kabuli_Chr01 | 32261420                | TT                              | CC                 | CC               | INTERGENIC                    |                    |                            |
| SNP_4020_A_32261812 | NC_021160.1    | Ca_Kabuli_Chr01 | 32261812                | GG                              | AA                 | AA               | INTERGENIC                    |                    |                            |

| SNPs IDs            | Chromosome IDs | Chromosomes     | Physical positions (bp) | CDC Frontier (Reference genome) | (Pusa 1103 & HPNB) | (ILWC 46 & LPNB) | Sequence Components of genome | Gene accession IDs | Putative functions         |
|---------------------|----------------|-----------------|-------------------------|---------------------------------|--------------------|------------------|-------------------------------|--------------------|----------------------------|
| SNP_4021_A_32264928 | NC_021160.1    | Ca_Kabuli_Chr01 | 32264928                | TT                              | GG                 | GG               | DRR                           | 101505060          | cytochrome P450 714A1-like |
| SNP_4023_A_32267993 | NC_021160.1    | Ca_Kabuli_Chr01 | 32267993                | AA                              | TT                 | TT               | INTRON                        | 101505060          | cytochrome P450 714A1-like |
| SNP_4024_A_32268013 | NC_021160.1    | Ca_Kabuli_Chr01 | 32268013                | TT                              | CC                 | CC               | INTRON                        | 101505060          | cytochrome P450 714A1-like |
| SNP_4025_A_32268645 | NC_021160.1    | Ca_Kabuli_Chr01 | 32268645                | AA                              | TT                 | TT               | INTRON                        | 101505060          | cytochrome P450 714A1-like |
| SNP_4026_A_32282193 | NC_021160.1    | Ca_Kabuli_Chr01 | 32282193                | GG                              | AA                 | AA               | DRR                           | 101506795          | SKP1-like protein 19       |
| SNP_4027_A_32282463 | NC_021160.1    | Ca_Kabuli_Chr01 | 32282463                | GG                              | AA                 | AA               | DRR                           | 101506795          | SKP1-like protein 19       |
| SNP_4028_A_32282784 | NC_021160.1    | Ca_Kabuli_Chr01 | 32282784                | AA                              | GG                 | GG               | DRR                           | 101506795          | SKP1-like protein 19       |
| SNP_4029_A_32286534 | NC_021160.1    | Ca_Kabuli_Chr01 | 32286534                | GG                              | CC                 | CC               | INTERGENIC                    |                    |                            |
| SNP_4030_A_32286535 | NC_021160.1    | Ca_Kabuli_Chr01 | 32286535                | GG                              | AA                 | AA               | INTERGENIC                    |                    |                            |
| SNP_4031_A_32286555 | NC_021160.1    | Ca_Kabuli_Chr01 | 32286555                | TT                              | CC                 | CC               | INTERGENIC                    |                    |                            |
| SNP_4032_A_32287044 | NC_021160.1    | Ca_Kabuli_Chr01 | 32287044                | TT                              | GG                 | GG               | INTERGENIC                    |                    |                            |
| SNP_4033_A_32300319 | NC_021160.1    | Ca_Kabuli_Chr01 | 32300319                | CC                              | TT                 | TT               | INTERGENIC                    |                    |                            |
| SNP_4034_A_32300935 | NC_021160.1    | Ca_Kabuli_Chr01 | 32300935                | TT                              | CC                 | CC               | INTERGENIC                    |                    |                            |
| SNP_4035_A_32301217 | NC_021160.1    | Ca_Kabuli_Chr01 | 32301217                | CC                              | TT                 | TT               | INTERGENIC                    |                    |                            |
| SNP_4036_A_32301267 | NC_021160.1    | Ca_Kabuli_Chr01 | 32301267                | TT                              | CC                 | CC               | INTERGENIC                    |                    |                            |
| SNP_4037_A_32301541 | NC_021160.1    | Ca_Kabuli_Chr01 | 32301541                | AA                              | TT                 | TT               | INTERGENIC                    |                    |                            |
| SNP_4038_A_32312424 | NC_021160.1    | Ca_Kabuli_Chr01 | 32312424                | TT                              | CC                 | CC               | INTERGENIC                    |                    |                            |
| SNP_4039_A_32355317 | NC_021160.1    | Ca_Kabuli_Chr01 | 32355317                | AA                              | GG                 | GG               | INTERGENIC                    |                    |                            |
| SNP_4040_A_32367996 | NC_021160.1    | Ca_Kabuli_Chr01 | 32367996                | AA                              | GG                 | GG               | INTERGENIC                    |                    |                            |
| SNP_4041_A_32386180 | NC_021160.1    | Ca_Kabuli_Chr01 | 32386180                | CC                              | AA                 | AA               | INTERGENIC                    |                    |                            |
| SNP_4042_A_32412585 | NC_021160.1    | Ca_Kabuli_Chr01 | 32412585                | TT                              | CC                 | CC               | INTERGENIC                    |                    |                            |
| SNP_4043_A_32453880 | NC_021160.1    | Ca_Kabuli_Chr01 | 32453880                | CC                              | AA                 | AA               | INTERGENIC                    |                    |                            |

| SNPs IDs            | Chromosome IDs | Chromosomes     | Physical positions (bp) | CDC Frontier (Reference genome) | (Pusa 1103 & HPNB) | (ILWC 46 & LPNB) | Sequence genome | Components of | Gene accession IDs | Putative functions |
|---------------------|----------------|-----------------|-------------------------|---------------------------------|--------------------|------------------|-----------------|---------------|--------------------|--------------------|
| SNP_4045_A_32537880 | NC_021160.1    | Ca_Kabuli_Chr01 | 32537880                | AA                              | CC                 | CC               | INTERGENIC      |               |                    |                    |
| SNP_4046_A_32572914 | NC_021160.1    | Ca_Kabuli_Chr01 | 32572914                | TT                              | CC                 | CC               | INTERGENIC      |               |                    |                    |
| SNP_4047_A_32572922 | NC_021160.1    | Ca_Kabuli_Chr01 | 32572922                | CC                              | TT                 | TT               | INTERGENIC      |               |                    |                    |
| SNP_4049_A_32758491 | NC_021160.1    | Ca_Kabuli_Chr01 | 32758491                | AA                              | GG                 | GG               | INTERGENIC      |               |                    |                    |
| SNP_4050_A_32758587 | NC_021160.1    | Ca_Kabuli_Chr01 | 32758587                | AA                              | TT                 | TT               | INTERGENIC      |               |                    |                    |
| SNP_4051_A_32758692 | NC_021160.1    | Ca_Kabuli_Chr01 | 32758692                | GG                              | AA                 | AA               | INTERGENIC      |               |                    |                    |
| SNP_4052_A_32758715 | NC_021160.1    | Ca_Kabuli_Chr01 | 32758715                | GG                              | CC                 | CC               | INTERGENIC      |               |                    |                    |
| SNP_4053_A_32758718 | NC_021160.1    | Ca_Kabuli_Chr01 | 32758718                | AA                              | GG                 | GG               | INTERGENIC      |               |                    |                    |
| SNP_4054_A_32758734 | NC_021160.1    | Ca_Kabuli_Chr01 | 32758734                | TT                              | AA                 | AA               | INTERGENIC      |               |                    |                    |
| SNP_4055_A_32758770 | NC_021160.1    | Ca_Kabuli_Chr01 | 32758770                | GG                              | AA                 | AA               | INTERGENIC      |               |                    |                    |
| SNP_4056_A_32758773 | NC_021160.1    | Ca_Kabuli_Chr01 | 32758773                | AA                              | GG                 | GG               | INTERGENIC      |               |                    |                    |
| SNP_4057_A_32758781 | NC_021160.1    | Ca_Kabuli_Chr01 | 32758781                | CC                              | TT                 | TT               | INTERGENIC      |               |                    |                    |
| SNP_4058_A_32758861 | NC_021160.1    | Ca_Kabuli_Chr01 | 32758861                | TT                              | AA                 | AA               | INTERGENIC      |               |                    |                    |
| SNP_4059_A_32766394 | NC_021160.1    | Ca_Kabuli_Chr01 | 32766394                | AA                              | GG                 | GG               | INTERGENIC      |               |                    |                    |
| SNP_4060_A_32796080 | NC_021160.1    | Ca_Kabuli_Chr01 | 32796080                | TT                              | GG                 | GG               | INTERGENIC      |               |                    |                    |
| SNP_4061_A_32796086 | NC_021160.1    | Ca_Kabuli_Chr01 | 32796086                | TT                              | CC                 | CC               | INTERGENIC      |               |                    |                    |
| SNP_4062_A_32798758 | NC_021160.1    | Ca_Kabuli_Chr01 | 32798758                | CC                              | TT                 | TT               | INTERGENIC      |               |                    |                    |
| SNP_4063_A_32798760 | NC_021160.1    | Ca_Kabuli_Chr01 | 32798760                | AA                              | CC                 | CC               | INTERGENIC      |               |                    |                    |
| SNP_4064_A_32804258 | NC_021160.1    | Ca_Kabuli_Chr01 | 32804258                | GG                              | AA                 | AA               | INTERGENIC      |               |                    |                    |
| SNP_4065_A_32808441 | NC_021160.1    | Ca_Kabuli_Chr01 | 32808441                | TT                              | AA                 | AA               | INTERGENIC      |               |                    |                    |
| SNP_4066_A_32814184 | NC_021160.1    | Ca_Kabuli_Chr01 | 32814184                | GG                              | AA                 | AA               | INTERGENIC      |               |                    |                    |
| SNP_4067_A_32819072 | NC_021160.1    | Ca_Kabuli_Chr01 | 32819072                | AA                              | GG                 | GG               | INTERGENIC      |               |                    |                    |

| SNPs IDs            | Chromosome IDs | Chromosomes     | Physical positions (bp) | CDC Frontier (Reference genome) | (Pusa 1103 & HPNB) | (ILWC 46 & LPNB) | Sequence Components of genome | Gene accession IDs | Putative functions                  |
|---------------------|----------------|-----------------|-------------------------|---------------------------------|--------------------|------------------|-------------------------------|--------------------|-------------------------------------|
| SNP_4068_A_32823244 | NC_021160.1    | Ca_Kabuli_Chr01 | 32823244                | GG                              | TT                 | TT               | INTERGENIC                    |                    |                                     |
| SNP_4069_A_32844132 | NC_021160.1    | Ca_Kabuli_Chr01 | 32844132                | CC                              | GG                 | GG               | INTERGENIC                    |                    |                                     |
| SNP_4070_A_32849558 | NC_021160.1    | Ca_Kabuli_Chr01 | 32849558                | TT                              | CC                 | CC               | INTERGENIC                    |                    |                                     |
| SNP_4071_A_32852770 | NC_021160.1    | Ca_Kabuli_Chr01 | 32852770                | CC                              | TT                 | TT               | INTERGENIC                    |                    |                                     |
| SNP_4072_A_32852776 | NC_021160.1    | Ca_Kabuli_Chr01 | 32852776                | AA                              | GG                 | GG               | INTERGENIC                    |                    |                                     |
| SNP_4073_A_32855328 | NC_021160.1    | Ca_Kabuli_Chr01 | 32855328                | GG                              | CC                 | CC               | INTERGENIC                    |                    |                                     |
| SNP_4074_A_32867899 | NC_021160.1    | Ca_Kabuli_Chr01 | 32867899                | AA                              | CC                 | CC               | INTERGENIC                    |                    |                                     |
| SNP_4075_A_32868520 | NC_021160.1    | Ca_Kabuli_Chr01 | 32868520                | AA                              | TT                 | TT               | INTERGENIC                    |                    |                                     |
| SNP_4076_A_32868553 | NC_021160.1    | Ca_Kabuli_Chr01 | 32868553                | CC                              | GG                 | GG               | INTERGENIC                    |                    |                                     |
| SNP_4077_A_32885517 | NC_021160.1    | Ca_Kabuli_Chr01 | 32885517                | AA                              | GG                 | GG               | INTERGENIC                    |                    |                                     |
| SNP_4078_A_32889499 | NC_021160.1    | Ca_Kabuli_Chr01 | 32889499                | AA                              | GG                 | GG               | INTERGENIC                    |                    |                                     |
| SNP_4079_A_32906362 | NC_021160.1    | Ca_Kabuli_Chr01 | 32906362                | AA                              | CC                 | CC               | DRR                           | 101508706          | dof zinc finger protein DOF5.4-like |
| SNP_4081_A_32922715 | NC_021160.1    | Ca_Kabuli_Chr01 | 32922715                | GG                              | TT                 | TT               | INTERGENIC                    |                    |                                     |
| SNP_4082_A_32941061 | NC_021160.1    | Ca_Kabuli_Chr01 | 32941061                | AA                              | GG                 | GG               | INTERGENIC                    |                    |                                     |
| SNP_4083_A_32941984 | NC_021160.1    | Ca_Kabuli_Chr01 | 32941984                | TT                              | CC                 | CC               | INTERGENIC                    |                    |                                     |
| SNP_4084_A_32942009 | NC_021160.1    | Ca_Kabuli_Chr01 | 32942009                | AA                              | GG                 | GG               | INTERGENIC                    |                    |                                     |
| SNP_4085_A_32942011 | NC_021160.1    | Ca_Kabuli_Chr01 | 32942011                | TT                              | AA                 | AA               | INTERGENIC                    |                    |                                     |
| SNP_4086_A_32946560 | NC_021160.1    | Ca_Kabuli_Chr01 | 32946560                | AA                              | GG                 | GG               | INTERGENIC                    |                    |                                     |
| SNP_4087_A_32950833 | NC_021160.1    | Ca_Kabuli_Chr01 | 32950833                | TT                              | CC                 | CC               | INTERGENIC                    |                    |                                     |
| SNP_4088_A_32957652 | NC_021160.1    | Ca_Kabuli_Chr01 | 32957652                | TT                              | CC                 | CC               | INTERGENIC                    |                    |                                     |
| SNP_4089_A_32957728 | NC_021160.1    | Ca_Kabuli_Chr01 | 32957728                | AA                              | GG                 | GG               | INTERGENIC                    |                    |                                     |
| SNP_4090_A_32966684 | NC_021160.1    | Ca_Kabuli_Chr01 | 32966684                | TT                              | AA                 | AA               | INTERGENIC                    |                    |                                     |

| SNPs IDs            | Chromosome IDs | Chromosomes     | Physical positions (bp) | CDC Frontier (Reference genome) | (Pusa 1103 & HPNB) | (ILWC 46 & LPNB) | Sequence Components of genome | Gene accession IDs | Putative functions           |
|---------------------|----------------|-----------------|-------------------------|---------------------------------|--------------------|------------------|-------------------------------|--------------------|------------------------------|
| SNP_4091_A_32971286 | NC_021160.1    | Ca_Kabuli_Chr01 | 32971286                | AA                              | GG                 | GG               | INTERGENIC                    |                    |                              |
| SNP_4092_A_32974240 | NC_021160.1    | Ca_Kabuli_Chr01 | 32974240                | CC                              | TT                 | TT               | INTERGENIC                    |                    |                              |
| SNP_4093_A_32984083 | NC_021160.1    | Ca_Kabuli_Chr01 | 32984083                | GG                              | TT                 | TT               | INTERGENIC                    |                    |                              |
| SNP_4094_A_32984121 | NC_021160.1    | Ca_Kabuli_Chr01 | 32984121                | AA                              | GG                 | GG               | INTERGENIC                    |                    |                              |
| SNP_4095_A_32984151 | NC_021160.1    | Ca_Kabuli_Chr01 | 32984151                | TT                              | AA                 | AA               | INTERGENIC                    |                    |                              |
| SNP_4096_A_32984173 | NC_021160.1    | Ca_Kabuli_Chr01 | 32984173                | TT                              | CC                 | CC               | INTERGENIC                    |                    |                              |
| SNP_4097_A_33019147 | NC_021160.1    | Ca_Kabuli_Chr01 | 33019147                | AA                              | CC                 | CC               | INTERGENIC                    |                    |                              |
| SNP_4098_A_33019157 | NC_021160.1    | Ca_Kabuli_Chr01 | 33019157                | AA                              | GG                 | GG               | INTERGENIC                    |                    |                              |
| SNP_4099_A_33019214 | NC_021160.1    | Ca_Kabuli_Chr01 | 33019214                | CC                              | TT                 | TT               | INTERGENIC                    |                    |                              |
| SNP_4100_A_33019614 | NC_021160.1    | Ca_Kabuli_Chr01 | 33019614                | CC                              | TT                 | TT               | INTERGENIC                    |                    |                              |
| SNP_4101_A_33019665 | NC_021160.1    | Ca_Kabuli_Chr01 | 33019665                | AA                              | GG                 | GG               | INTERGENIC                    |                    |                              |
| SNP_4102_A_33045531 | NC_021160.1    | Ca_Kabuli_Chr01 | 33045531                | GG                              | AA                 | AA               | INTERGENIC                    |                    |                              |
| SNP_4103_A_33047247 | NC_021160.1    | Ca_Kabuli_Chr01 | 33047247                | GG                              | AA                 | AA               | INTERGENIC                    |                    |                              |
| SNP_4104_A_33075482 | NC_021160.1    | Ca_Kabuli_Chr01 | 33075482                | GG                              | TT                 | TT               | INTERGENIC                    |                    |                              |
| SNP_4105_A_33086335 | NC_021160.1    | Ca_Kabuli_Chr01 | 33086335                | GG                              | AA                 | AA               | INTERGENIC                    |                    |                              |
| SNP_4107_A_33109665 | NC_021160.1    | Ca_Kabuli_Chr01 | 33109665                | GG                              | AA                 | AA               | INTERGENIC                    |                    |                              |
| SNP_4108_A_33112399 | NC_021160.1    | Ca_Kabuli_Chr01 | 33112399                | CC                              | TT                 | TT               | INTRON                        | 101511379          | uncharacterized LOC101511379 |
| SNP_4109_A_33112701 | NC_021160.1    | Ca_Kabuli_Chr01 | 33112701                | CC                              | TT                 | TT               | INTRON                        | 101511379          | uncharacterized LOC101511379 |
| SNP_4110_A_33119286 | NC_021160.1    | Ca_Kabuli_Chr01 | 33119286                | GG                              | CC                 | CC               | INTERGENIC                    |                    |                              |
| SNP_4111_A_33120433 | NC_021160.1    | Ca_Kabuli_Chr01 | 33120433                | GG                              | CC                 | CC               | INTERGENIC                    |                    |                              |
| SNP_4112_A_33129493 | NC_021160.1    | Ca_Kabuli_Chr01 | 33129493                | GG                              | TT                 | TT               | INTERGENIC                    |                    |                              |
| SNP_4113_A_33129762 | NC_021160.1    | Ca_Kabuli_Chr01 | 33129762                | TT                              | CC                 | CC               | INTERGENIC                    |                    |                              |

| SNPs IDs            | Chromosome IDs | Chromosomes     | Physical positions (bp) | CDC Frontier (Reference genome) | (Pusa 1103 & HPNB) | (ILWC 46 & LPNB) | Sequence Components of genome | Gene accession IDs | Putative functions                   |
|---------------------|----------------|-----------------|-------------------------|---------------------------------|--------------------|------------------|-------------------------------|--------------------|--------------------------------------|
| SNP_4114_A_33129995 | NC_021160.1    | Ca_Kabuli_Chr01 | 33129995                | GG                              | AA                 | AA               | INTERGENIC                    |                    |                                      |
| SNP_4115_A_33140839 | NC_021160.1    | Ca_Kabuli_Chr01 | 33140839                | TT                              | GG                 | GG               | INTERGENIC                    |                    |                                      |
| SNP_4116_A_33141209 | NC_021160.1    | Ca_Kabuli_Chr01 | 33141209                | AA                              | GG                 | CC               | INTERGENIC                    |                    |                                      |
| SNP_4117_A_33142146 | NC_021160.1    | Ca_Kabuli_Chr01 | 33142146                | TT                              | CC                 | CC               | INTERGENIC                    |                    |                                      |
| SNP_4119_A_33154299 | NC_021160.1    | Ca_Kabuli_Chr01 | 33154299                | GG                              | AA                 | AA               | INTERGENIC                    |                    |                                      |
| SNP_4120_A_33159046 | NC_021160.1    | Ca_Kabuli_Chr01 | 33159046                | AA                              | GG                 | GG               | INTERGENIC                    |                    |                                      |
| SNP_4121_A_33160509 | NC_021160.1    | Ca_Kabuli_Chr01 | 33160509                | CC                              | AA                 | AA               | INTERGENIC                    |                    |                                      |
| SNP_4122_A_33161893 | NC_021160.1    | Ca_Kabuli_Chr01 | 33161893                | CC                              | TT                 | TT               | INTERGENIC                    |                    |                                      |
| SNP_4123_A_33199610 | NC_021160.1    | Ca_Kabuli_Chr01 | 33199610                | TT                              | CC                 | CC               | INTRON                        | 101511069          | putative ATP-dependent helicase hrq1 |
| SNP_4124_A_33207771 | NC_021160.1    | Ca_Kabuli_Chr01 | 33207771                | GG                              | AA                 | AA               | INTRON                        | 101511069          | putative ATP-dependent helicase hrq1 |
| SNP_4125_A_33207820 | NC_021160.1    | Ca_Kabuli_Chr01 | 33207820                | TT                              | GG                 | GG               | INTRON                        | 101511069          | putative ATP-dependent helicase hrq1 |
| SNP_4126_A_33237205 | NC_021160.1    | Ca_Kabuli_Chr01 | 33237205                | CC                              | AA                 | AA               | INTERGENIC                    |                    |                                      |
| SNP_4127_A_33244781 | NC_021160.1    | Ca_Kabuli_Chr01 | 33244781                | TT                              | GG                 | GG               | INTERGENIC                    |                    |                                      |
| SNP_4128_A_33244795 | NC_021160.1    | Ca_Kabuli_Chr01 | 33244795                | GG                              | TT                 | TT               | INTERGENIC                    |                    |                                      |
| SNP_4129_A_33248055 | NC_021160.1    | Ca_Kabuli_Chr01 | 33248055                | AA                              | GG                 | GG               | INTERGENIC                    |                    |                                      |
| SNP_4130_A_33275169 | NC_021160.1    | Ca_Kabuli_Chr01 | 33275169                | TT                              | CC                 | CC               | INTERGENIC                    |                    |                                      |
| SNP_4131_A_33291530 | NC_021160.1    | Ca_Kabuli_Chr01 | 33291530                | CC                              | TT                 | TT               | INTERGENIC                    |                    |                                      |
| SNP_4132_A_33293699 | NC_021160.1    | Ca_Kabuli_Chr01 | 33293699                | TT                              | CC                 | CC               | INTERGENIC                    |                    |                                      |
| SNP_4133_A_33307490 | NC_021160.1    | Ca_Kabuli_Chr01 | 33307490                | AA                              | TT                 | TT               | INTERGENIC                    |                    |                                      |
| SNP_4134_A_33307771 | NC_021160.1    | Ca_Kabuli_Chr01 | 33307771                | AA                              | CC                 | CC               | INTERGENIC                    |                    |                                      |
| SNP_4135_A_33307784 | NC_021160.1    | Ca_Kabuli_Chr01 | 33307784                | GG                              | AA                 | AA               | INTERGENIC                    |                    |                                      |
| SNP_4136_A_33307920 | NC_021160.1    | Ca_Kabuli_Chr01 | 33307920                | AA                              | GG                 | GG               | INTERGENIC                    |                    |                                      |

| SNPs IDs            | Chromosome IDs | Chromosomes     | Physical positions (bp) | CDC Frontier (Reference genome) | (Pusa 1103 & HPNB) | (ILWC 46 & LPNB) | Sequence Components of genome | Gene accession IDs | Putative functions                                |
|---------------------|----------------|-----------------|-------------------------|---------------------------------|--------------------|------------------|-------------------------------|--------------------|---------------------------------------------------|
| SNP_4137_A_33307984 | NC_021160.1    | Ca_Kabuli_Chr01 | 33307984                | AA                              | GG                 | GG               | INTERGENIC                    |                    |                                                   |
| SNP_4139_A_33342503 | NC_021160.1    | Ca_Kabuli_Chr01 | 33342503                | CC                              | AA                 | AA               | INTERGENIC                    |                    |                                                   |
| SNP_4140_A_33352113 | NC_021160.1    | Ca_Kabuli_Chr01 | 33352113                | TT                              | GG                 | GG               | INTERGENIC                    |                    |                                                   |
| SNP_4141_A_33357648 | NC_021160.1    | Ca_Kabuli_Chr01 | 33357648                | TT                              | GG                 | GG               | INTERGENIC                    |                    |                                                   |
| SNP_4142_A_33357708 | NC_021160.1    | Ca_Kabuli_Chr01 | 33357708                | TT                              | GG                 | GG               | INTERGENIC                    |                    |                                                   |
| SNP_4143_A_33366853 | NC_021160.1    | Ca_Kabuli_Chr01 | 33366853                | CC                              | TT                 | TT               | DRR                           | 101510419          | truncated transcription factor CAULIFLOWER A-like |
| SNP_4144_A_33377349 | NC_021160.1    | Ca_Kabuli_Chr01 | 33377349                | AA                              | CC                 | CC               | INTRON                        | 101510419          | truncated transcription factor CAULIFLOWER A-like |
| SNP_4145_A_33402115 | NC_021160.1    | Ca_Kabuli_Chr01 | 33402115                | TT                              | CC                 | CC               | INTERGENIC                    |                    |                                                   |
| SNP_4146_A_33407796 | NC_021160.1    | Ca_Kabuli_Chr01 | 33407796                | AA                              | GG                 | GG               | INTERGENIC                    |                    |                                                   |
| SNP_4147_A_33419936 | NC_021160.1    | Ca_Kabuli_Chr01 | 33419936                | CC                              | TT                 | TT               | NON_SYNONYMOUS_CODING         | 101489137          | Unknown function                                  |
| SNP_4148_A_33421704 | NC_021160.1    | Ca_Kabuli_Chr01 | 33421704                | TT                              | AA                 | AA               | URR                           | 101489137          | Unknown function                                  |
| SNP_4149_A_33442314 | NC_021160.1    | Ca_Kabuli_Chr01 | 33442314                | GG                              | AA                 | AA               | INTERGENIC                    |                    |                                                   |
| SNP_4150_A_33459119 | NC_021160.1    | Ca_Kabuli_Chr01 | 33459119                | AA                              | GG                 | GG               | INTERGENIC                    |                    |                                                   |
| SNP_4151_A_33459195 | NC_021160.1    | Ca_Kabuli_Chr01 | 33459195                | AA                              | GG                 | GG               | INTERGENIC                    |                    |                                                   |
| SNP_4152_A_33459219 | NC_021160.1    | Ca_Kabuli_Chr01 | 33459219                | CC                              | AA                 | AA               | INTERGENIC                    |                    |                                                   |
| SNP_4153_A_33459232 | NC_021160.1    | Ca_Kabuli_Chr01 | 33459232                | TT                              | CC                 | CC               | INTERGENIC                    |                    |                                                   |
| SNP_4154_A_33488462 | NC_021160.1    | Ca_Kabuli_Chr01 | 33488462                | AA                              | TT                 | TT               | INTERGENIC                    |                    |                                                   |
| SNP_4155_A_33488548 | NC_021160.1    | Ca_Kabuli_Chr01 | 33488548                | CC                              | AA                 | AA               | INTERGENIC                    |                    |                                                   |
| SNP_4156_A_33488565 | NC_021160.1    | Ca_Kabuli_Chr01 | 33488565                | AA                              | GG                 | GG               | INTERGENIC                    |                    |                                                   |
| SNP_4157_A_33488663 | NC_021160.1    | Ca_Kabuli_Chr01 | 33488663                | TT                              | CC                 | CC               | INTERGENIC                    |                    |                                                   |
| SNP_4158_A_33488691 | NC_021160.1    | Ca_Kabuli_Chr01 | 33488691                | AA                              | CC                 | CC               | INTERGENIC                    |                    |                                                   |
| SNP_4159_A_33488965 | NC_021160.1    | Ca_Kabuli_Chr01 | 33488965                | TT                              | GG                 | GG               | INTERGENIC                    |                    |                                                   |



| SNPs IDs            | Chromosome IDs | Chromosomes     | Physical positions (bp) | CDC Frontier (Reference genome) | (Pusa 1103 & HPNB) | (ILWC 46 & LPNB) | Sequence Components of genome | Gene accession IDs | Putative functions |
|---------------------|----------------|-----------------|-------------------------|---------------------------------|--------------------|------------------|-------------------------------|--------------------|--------------------|
| SNP_4160_A_33489005 | NC_021160.1    | Ca_Kabuli_Chr01 | 33489005                | TT                              | GG                 | GG               | INTERGENIC                    |                    |                    |
| SNP_4161_A_33506013 | NC_021160.1    | Ca_Kabuli_Chr01 | 33506013                | AA                              | GG                 | GG               | NON_SYNONYMOUS_CODING         | 101490435          | Unknown function   |
| SNP_4162_A_33506059 | NC_021160.1    | Ca_Kabuli_Chr01 | 33506059                | TT                              | GG                 | GG               | NON_SYNONYMOUS_CODING         | 101490435          | Unknown function   |
| SNP_4163_A_33506072 | NC_021160.1    | Ca_Kabuli_Chr01 | 33506072                | AA                              | CC                 | CC               | NON_SYNONYMOUS_CODING         | 101490435          | Unknown function   |
| SNP_4164_A_33506486 | NC_021160.1    | Ca_Kabuli_Chr01 | 33506486                | TT                              | CC                 | CC               | SYNONYMOUS_CODING             | 101490435          | Unknown function   |
| SNP_4165_A_33531447 | NC_021160.1    | Ca_Kabuli_Chr01 | 33531447                | GG                              | AA                 | AA               | INTERGENIC                    |                    |                    |
| SNP_4166_A_33549910 | NC_021160.1    | Ca_Kabuli_Chr01 | 33549910                | CC                              | TT                 | TT               | INTERGENIC                    |                    |                    |
| SNP_4167_A_33553897 | NC_021160.1    | Ca_Kabuli_Chr01 | 33553897                | TT                              | AA                 | AA               | INTERGENIC                    |                    |                    |
| SNP_4168_A_33553937 | NC_021160.1    | Ca_Kabuli_Chr01 | 33553937                | AA                              | GG                 | GG               | INTERGENIC                    |                    |                    |
| SNP_4169_A_33562137 | NC_021160.1    | Ca_Kabuli_Chr01 | 33562137                | GG                              | AA                 | AA               | INTERGENIC                    |                    |                    |
| SNP_4170_A_33565641 | NC_021160.1    | Ca_Kabuli_Chr01 | 33565641                | AA                              | GG                 | GG               | INTERGENIC                    |                    |                    |
| SNP_4171_A_33565811 | NC_021160.1    | Ca_Kabuli_Chr01 | 33565811                | TT                              | CC                 | CC               | INTERGENIC                    |                    |                    |
| SNP_4172_A_33569402 | NC_021160.1    | Ca_Kabuli_Chr01 | 33569402                | TT                              | CC                 | CC               | INTERGENIC                    |                    |                    |
| SNP_4173_A_33569947 | NC_021160.1    | Ca_Kabuli_Chr01 | 33569947                | CC                              | GG                 | GG               | INTERGENIC                    |                    |                    |
| SNP_4174_A_33571449 | NC_021160.1    | Ca_Kabuli_Chr01 | 33571449                | TT                              | CC                 | CC               | INTERGENIC                    |                    |                    |
| SNP_4175_A_33596887 | NC_021160.1    | Ca_Kabuli_Chr01 | 33596887                | CC                              | TT                 | TT               | INTERGENIC                    |                    |                    |
| SNP_4176_A_33630870 | NC_021160.1    | Ca_Kabuli_Chr01 | 33630870                | AA                              | GG                 | GG               | INTERGENIC                    |                    |                    |
| SNP_4177_A_33630883 | NC_021160.1    | Ca_Kabuli_Chr01 | 33630883                | TT                              | CC                 | CC               | INTERGENIC                    |                    |                    |
| SNP_4178_A_33633612 | NC_021160.1    | Ca_Kabuli_Chr01 | 33633612                | CC                              | GG                 | GG               | INTERGENIC                    |                    |                    |
| SNP_4179_A_33639307 | NC_021160.1    | Ca_Kabuli_Chr01 | 33639307                | TT                              | CC                 | CC               | INTERGENIC                    |                    |                    |
| SNP_4180_A_33639313 | NC_021160.1    | Ca_Kabuli_Chr01 | 33639313                | TT                              | CC                 | CC               | INTERGENIC                    |                    |                    |
| SNP_4181_A_33639426 | NC_021160.1    | Ca_Kabuli_Chr01 | 33639426                | AA                              | GG                 | GG               | INTERGENIC                    |                    |                    |

| SNPs IDs            | Chromosome IDs | Chromosomes     | Physical positions (bp) | CDC Frontier (Reference genome) | (Pusa 1103 & HPNB) | (ILWC 46 & LPNB) | Sequence Components of genome | Gene accession IDs | Putative functions                        |
|---------------------|----------------|-----------------|-------------------------|---------------------------------|--------------------|------------------|-------------------------------|--------------------|-------------------------------------------|
| SNP_4182_A_33639686 | NC_021160.1    | Ca_Kabuli_Chr01 | 33639686                | TT                              | AA                 | AA               | INTERGENIC                    |                    |                                           |
| SNP_4184_A_33640416 | NC_021160.1    | Ca_Kabuli_Chr01 | 33640416                | GG                              | AA                 | AA               | INTERGENIC                    |                    |                                           |
| SNP_4185_A_33640674 | NC_021160.1    | Ca_Kabuli_Chr01 | 33640674                | TT                              | AA                 | AA               | INTERGENIC                    |                    |                                           |
| SNP_4186_A_33679524 | NC_021160.1    | Ca_Kabuli_Chr01 | 33679524                | TT                              | GG                 | GG               | INTERGENIC                    |                    |                                           |
| SNP_4187_A_33688936 | NC_021160.1    | Ca_Kabuli_Chr01 | 33688936                | TT                              | CC                 | CC               | INTERGENIC                    |                    |                                           |
| SNP_4188_A_33688947 | NC_021160.1    | Ca_Kabuli_Chr01 | 33688947                | TT                              | AA                 | GG               | INTERGENIC                    |                    |                                           |
| SNP_4189_A_33688956 | NC_021160.1    | Ca_Kabuli_Chr01 | 33688956                | CC                              | AA                 | AA               | INTERGENIC                    |                    |                                           |
| SNP_4190_A_33699652 | NC_021160.1    | Ca_Kabuli_Chr01 | 33699652                | AA                              | TT                 | TT               | URR                           | 101512579          | COBRA-like protein 4                      |
| SNP_4191_A_33700032 | NC_021160.1    | Ca_Kabuli_Chr01 | 33700032                | GG                              | AA                 | AA               | INTERGENIC                    |                    |                                           |
| SNP_4192_A_33700035 | NC_021160.1    | Ca_Kabuli_Chr01 | 33700035                | TT                              | CC                 | CC               | INTERGENIC                    |                    |                                           |
| SNP_4193_A_33700042 | NC_021160.1    | Ca_Kabuli_Chr01 | 33700042                | AA                              | CC                 | CC               | INTERGENIC                    |                    |                                           |
| SNP_4194_A_33700050 | NC_021160.1    | Ca_Kabuli_Chr01 | 33700050                | CC                              | AA                 | AA               | INTERGENIC                    |                    |                                           |
| SNP_4196_A_33747276 | NC_021160.1    | Ca_Kabuli_Chr01 | 33747276                | TT                              | GG                 | GG               | INTERGENIC                    |                    |                                           |
| SNP_4197_A_33749811 | NC_021160.1    | Ca_Kabuli_Chr01 | 33749811                | GG                              | AA                 | AA               | INTERGENIC                    |                    |                                           |
| SNP_4198_A_33754289 | NC_021160.1    | Ca_Kabuli_Chr01 | 33754289                | GG                              | AA                 | AA               | INTRON                        | 101513424          | protein COBRA                             |
| SNP_4200_A_33767885 | NC_021160.1    | Ca_Kabuli_Chr01 | 33767885                | TT                              | GG                 | GG               | INTERGENIC                    |                    |                                           |
| SNP_4202_A_33780296 | NC_021160.1    | Ca_Kabuli_Chr01 | 33780296                | TT                              | CC                 | CC               | INTERGENIC                    |                    |                                           |
| SNP_4203_A_33782240 | NC_021160.1    | Ca_Kabuli_Chr01 | 33782240                | AA                              | GG                 | GG               | INTERGENIC                    |                    |                                           |
| SNP_4204_A_33792558 | NC_021160.1    | Ca_Kabuli_Chr01 | 33792558                | AA                              | GG                 | GG               | INTERGENIC                    |                    |                                           |
| SNP_4205_A_33799460 | NC_021160.1    | Ca_Kabuli_Chr01 | 33799460                | AA                              | GG                 | GG               | DRR                           | 101492368          | F-box/kelch-repeat protein At3g06240-like |
| SNP_4206_A_33802965 | NC_021160.1    | Ca_Kabuli_Chr01 | 33802965                | AA                              | TT                 | TT               | URR                           | 101492368          | F-box/kelch-repeat protein At3g06240-like |
| SNP_4207_A_33803294 | NC_021160.1    | Ca_Kabuli_Chr01 | 33803294                | GG                              | AA                 | AA               | INTERGENIC                    |                    |                                           |

| SNPs IDs            | Chromosome IDs | Chromosomes     | Physical positions (bp) | CDC Frontier (Reference genome) | (Pusa 1103 & HPNB) | (ILWC 46 & LPNB) | Sequence genome | Components of | Gene accession IDs | Putative functions |
|---------------------|----------------|-----------------|-------------------------|---------------------------------|--------------------|------------------|-----------------|---------------|--------------------|--------------------|
| SNP_4208_A_33803416 | NC_021160.1    | Ca_Kabuli_Chr01 | 33803416                | CC                              | TT                 | TT               | INTERGENIC      |               |                    |                    |
| SNP_4209_A_33803812 | NC_021160.1    | Ca_Kabuli_Chr01 | 33803812                | GG                              | CC                 | CC               | INTERGENIC      |               |                    |                    |
| SNP_4210_A_33803813 | NC_021160.1    | Ca_Kabuli_Chr01 | 33803813                | AA                              | CC                 | CC               | INTERGENIC      |               |                    |                    |
| SNP_4212_A_33844839 | NC_021160.1    | Ca_Kabuli_Chr01 | 33844839                | TT                              | CC                 | CC               | INTERGENIC      |               |                    |                    |
| SNP_4213_A_33844879 | NC_021160.1    | Ca_Kabuli_Chr01 | 33844879                | AA                              | GG                 | GG               | INTERGENIC      |               |                    |                    |
| SNP_4214_A_33844940 | NC_021160.1    | Ca_Kabuli_Chr01 | 33844940                | AA                              | CC                 | CC               | INTERGENIC      |               |                    |                    |
| SNP_4215_A_33845092 | NC_021160.1    | Ca_Kabuli_Chr01 | 33845092                | TT                              | AA                 | AA               | INTERGENIC      |               |                    |                    |
| SNP_4216_A_33845586 | NC_021160.1    | Ca_Kabuli_Chr01 | 33845586                | AA                              | GG                 | GG               | INTERGENIC      |               |                    |                    |
| SNP_4217_A_33852245 | NC_021160.1    | Ca_Kabuli_Chr01 | 33852245                | GG                              | AA                 | AA               | INTERGENIC      |               |                    |                    |
| SNP_4218_A_33863185 | NC_021160.1    | Ca_Kabuli_Chr01 | 33863185                | TT                              | GG                 | GG               | INTERGENIC      |               |                    |                    |
| SNP_4219_A_33916007 | NC_021160.1    | Ca_Kabuli_Chr01 | 33916007                | AA                              | GG                 | GG               | INTERGENIC      |               |                    |                    |
| SNP_4220_A_33916761 | NC_021160.1    | Ca_Kabuli_Chr01 | 33916761                | GG                              | CC                 | CC               | INTERGENIC      |               |                    |                    |
| SNP_4221_A_33916794 | NC_021160.1    | Ca_Kabuli_Chr01 | 33916794                | GG                              | AA                 | AA               | INTERGENIC      |               |                    |                    |
| SNP_4222_A_34019850 | NC_021160.1    | Ca_Kabuli_Chr01 | 34019850                | TT                              | AA                 | AA               | INTERGENIC      |               |                    |                    |
| SNP_4223_A_34019852 | NC_021160.1    | Ca_Kabuli_Chr01 | 34019852                | TT                              | AA                 | AA               | INTERGENIC      |               |                    |                    |
| SNP_4224_A_34042898 | NC_021160.1    | Ca_Kabuli_Chr01 | 34042898                | GG                              | TT                 | TT               | INTERGENIC      |               |                    |                    |
| SNP_4225_A_34042922 | NC_021160.1    | Ca_Kabuli_Chr01 | 34042922                | AA                              | GG                 | GG               | INTERGENIC      |               |                    |                    |
| SNP_4226_A_34043332 | NC_021160.1    | Ca_Kabuli_Chr01 | 34043332                | GG                              | AA                 | AA               | INTERGENIC      |               |                    |                    |
| SNP_4227_A_34043402 | NC_021160.1    | Ca_Kabuli_Chr01 | 34043402                | CC                              | TT                 | TT               | INTERGENIC      |               |                    |                    |
| SNP_4229_A_34128194 | NC_021160.1    | Ca_Kabuli_Chr01 | 34128194                | TT                              | AA                 | AA               | INTERGENIC      |               |                    |                    |
| SNP_4230_A_34128206 | NC_021160.1    | Ca_Kabuli_Chr01 | 34128206                | AA                              | GG                 | GG               | INTERGENIC      |               |                    |                    |
| SNP_4231_A_34129173 | NC_021160.1    | Ca_Kabuli_Chr01 | 34129173                | AA                              | GG                 | GG               | INTERGENIC      |               |                    |                    |

| SNPs IDs            | Chromosome IDs | Chromosomes     | Physical positions (bp) | CDC Frontier (Reference genome) | (Pusa 1103 & HPNB) | (ILWC 46 & LPNB) | Sequence Components of genome | Gene accession IDs | Putative functions                    |
|---------------------|----------------|-----------------|-------------------------|---------------------------------|--------------------|------------------|-------------------------------|--------------------|---------------------------------------|
| SNP_4232_A_34129408 | NC_021160.1    | Ca_Kabuli_Chr01 | 34129408                | TT                              | AA                 | AA               | INTERGENIC                    |                    |                                       |
| SNP_4233_A_34129410 | NC_021160.1    | Ca_Kabuli_Chr01 | 34129410                | GG                              | TT                 | TT               | INTERGENIC                    |                    |                                       |
| SNP_4234_A_34130310 | NC_021160.1    | Ca_Kabuli_Chr01 | 34130310                | AA                              | GG                 | GG               | INTERGENIC                    |                    |                                       |
| SNP_4235_A_34131628 | NC_021160.1    | Ca_Kabuli_Chr01 | 34131628                | TT                              | CC                 | CC               | INTERGENIC                    |                    |                                       |
| SNP_4236_A_34134045 | NC_021160.1    | Ca_Kabuli_Chr01 | 34134045                | AA                              | TT                 | TT               | INTERGENIC                    |                    |                                       |
| SNP_4237_A_34136299 | NC_021160.1    | Ca_Kabuli_Chr01 | 34136299                | GG                              | AA                 | AA               | INTERGENIC                    |                    |                                       |
| SNP_4238_A_34136370 | NC_021160.1    | Ca_Kabuli_Chr01 | 34136370                | CC                              | TT                 | TT               | INTERGENIC                    |                    |                                       |
| SNP_4239_A_34136774 | NC_021160.1    | Ca_Kabuli_Chr01 | 34136774                | CC                              | TT                 | TT               | DRR                           | 101498882          | cytochrome P450 714A1-like            |
| SNP_4240_A_34136789 | NC_021160.1    | Ca_Kabuli_Chr01 | 34136789                | TT                              | CC                 | CC               | DRR                           | 101498882          | cytochrome P450 714A1-like            |
| SNP_4241_A_34136809 | NC_021160.1    | Ca_Kabuli_Chr01 | 34136809                | TT                              | GG                 | GG               | DRR                           | 101498882          | cytochrome P450 714A1-like            |
| SNP_4242_A_34143081 | NC_021160.1    | Ca_Kabuli_Chr01 | 34143081                | GG                              | TT                 | TT               | INTERGENIC                    |                    |                                       |
| SNP_4243_A_34143695 | NC_021160.1    | Ca_Kabuli_Chr01 | 34143695                | TT                              | CC                 | CC               | INTERGENIC                    |                    |                                       |
| SNP_4244_A_34143708 | NC_021160.1    | Ca_Kabuli_Chr01 | 34143708                | TT                              | CC                 | CC               | INTERGENIC                    |                    |                                       |
| SNP_4245_A_34145315 | NC_021160.1    | Ca_Kabuli_Chr01 | 34145315                | TT                              | CC                 | CC               | INTERGENIC                    |                    |                                       |
| SNP_4246_A_34146008 | NC_021160.1    | Ca_Kabuli_Chr01 | 34146008                | GG                              | AA                 | AA               | INTERGENIC                    |                    |                                       |
| SNP_4248_A_34158702 | NC_021160.1    | Ca_Kabuli_Chr01 | 34158702                | TT                              | CC                 | CC               | INTERGENIC                    |                    |                                       |
| SNP_4249_A_34158707 | NC_021160.1    | Ca_Kabuli_Chr01 | 34158707                | GG                              | AA                 | AA               | INTERGENIC                    |                    |                                       |
| SNP_4250_A_34159136 | NC_021160.1    | Ca_Kabuli_Chr01 | 34159136                | AA                              | TT                 | TT               | DRR                           | 101495597          | E3 ubiquitin-protein ligase bri2-like |
| SNP_4251_A_34163574 | NC_021160.1    | Ca_Kabuli_Chr01 | 34163574                | CC                              | TT                 | TT               | URR                           | 101495597          | E3 ubiquitin-protein ligase bri2-like |
| SNP_4252_A_34163588 | NC_021160.1    | Ca_Kabuli_Chr01 | 34163588                | CC                              | TT                 | TT               | URR                           | 101495597          | E3 ubiquitin-protein ligase bri2-like |
| SNP_4253_A_34165475 | NC_021160.1    | Ca_Kabuli_Chr01 | 34165475                | TT                              | CC                 | CC               | INTERGENIC                    |                    |                                       |
| SNP_4254_A_34165493 | NC_021160.1    | Ca_Kabuli_Chr01 | 34165493                | GG                              | AA                 | AA               | INTERGENIC                    |                    |                                       |

| SNPs IDs            | Chromosome IDs | Chromosomes     | Physical positions (bp) | CDC Frontier (Reference genome) | (Pusa 1103 & HPNB) | (ILWC 46 & LPNB) | Sequence Components of genome | Gene accession IDs | Putative functions      |
|---------------------|----------------|-----------------|-------------------------|---------------------------------|--------------------|------------------|-------------------------------|--------------------|-------------------------|
| SNP_4255_A_34167116 | NC_021160.1    | Ca_Kabuli_Chr01 | 34167116                | AA                              | CC                 | CC               | INTERGENIC                    |                    |                         |
| SNP_4256_A_34177942 | NC_021160.1    | Ca_Kabuli_Chr01 | 34177942                | TT                              | CC                 | CC               | INTERGENIC                    |                    |                         |
| SNP_4257_A_34178403 | NC_021160.1    | Ca_Kabuli_Chr01 | 34178403                | AA                              | GG                 | GG               | INTERGENIC                    |                    |                         |
| SNP_4258_A_34194598 | NC_021160.1    | Ca_Kabuli_Chr01 | 34194598                | AA                              | TT                 | TT               | INTERGENIC                    |                    |                         |
| SNP_4259_A_34195950 | NC_021160.1    | Ca_Kabuli_Chr01 | 34195950                | CC                              | TT                 | TT               | INTERGENIC                    |                    |                         |
| SNP_4260_A_34196252 | NC_021160.1    | Ca_Kabuli_Chr01 | 34196252                | GG                              | AA                 | AA               | INTERGENIC                    |                    |                         |
| SNP_4261_A_34196279 | NC_021160.1    | Ca_Kabuli_Chr01 | 34196279                | CC                              | AA                 | AA               | INTERGENIC                    |                    |                         |
| SNP_4262_A_34196795 | NC_021160.1    | Ca_Kabuli_Chr01 | 34196795                | GG                              | AA                 | AA               | INTERGENIC                    |                    |                         |
| SNP_4263_A_34197105 | NC_021160.1    | Ca_Kabuli_Chr01 | 34197105                | CC                              | AA                 | AA               | INTERGENIC                    |                    |                         |
| SNP_4264_A_34201410 | NC_021160.1    | Ca_Kabuli_Chr01 | 34201410                | AA                              | CC                 | CC               | INTERGENIC                    |                    |                         |
| SNP_4265_A_34205408 | NC_021160.1    | Ca_Kabuli_Chr01 | 34205408                | CC                              | TT                 | TT               | INTERGENIC                    |                    |                         |
| SNP_4266_A_34214982 | NC_021160.1    | Ca_Kabuli_Chr01 | 34214982                | AA                              | GG                 | GG               | INTERGENIC                    |                    |                         |
| SNP_4267_A_34215462 | NC_021160.1    | Ca_Kabuli_Chr01 | 34215462                | TT                              | CC                 | CC               | INTERGENIC                    |                    |                         |
| SNP_4268_A_34221227 | NC_021160.1    | Ca_Kabuli_Chr01 | 34221227                | GG                              | TT                 | TT               | INTERGENIC                    |                    |                         |
| SNP_4269_A_34221442 | NC_021160.1    | Ca_Kabuli_Chr01 | 34221442                | AA                              | CC                 | CC               | INTERGENIC                    |                    |                         |
| SNP_4270_A_34228109 | NC_021160.1    | Ca_Kabuli_Chr01 | 34228109                | TT                              | GG                 | GG               | INTERGENIC                    |                    |                         |
| SNP_4271_A_34230790 | NC_021160.1    | Ca_Kabuli_Chr01 | 34230790                | TT                              | CC                 | CC               | INTERGENIC                    |                    |                         |
| SNP_4272_A_34260814 | NC_021160.1    | Ca_Kabuli_Chr01 | 34260814                | GG                              | AA                 | AA               | INTRON                        | 101496366          | callose synthase 2-like |
| SNP_4273_A_34280805 | NC_021160.1    | Ca_Kabuli_Chr01 | 34280805                | GG                              | TT                 | TT               | INTERGENIC                    |                    |                         |
| SNP_4274_A_34283298 | NC_021160.1    | Ca_Kabuli_Chr01 | 34283298                | TT                              | CC                 | CC               | INTERGENIC                    |                    |                         |
| SNP_4276_A_34293573 | NC_021160.1    | Ca_Kabuli_Chr01 | 34293573                | TT                              | GG                 | GG               | INTERGENIC                    |                    |                         |
| SNP_4277_A_34294326 | NC_021160.1    | Ca_Kabuli_Chr01 | 34294326                | TT                              | CC                 | CC               | INTERGENIC                    |                    |                         |

| SNPs IDs            | Chromosome IDs | Chromosomes     | Physical positions (bp) | CDC Frontier (Reference genome) | (Pusa 1103 & HPNB) | (ILWC 46 & LPNB) | Sequence Components of genome | Gene accession IDs | Putative functions                                             |
|---------------------|----------------|-----------------|-------------------------|---------------------------------|--------------------|------------------|-------------------------------|--------------------|----------------------------------------------------------------|
| SNP_4278_A_34302483 | NC_021160.1    | Ca_Kabuli_Chr01 | 34302483                | GG                              | AA                 | AA               | INTRON                        | 101497563          | uncharacterized LOC101497563                                   |
| SNP_4279_A_34306393 | NC_021160.1    | Ca_Kabuli_Chr01 | 34306393                | AA                              | CC                 | CC               | DRR                           | 101497895          | putative pentatricopeptide repeat-containing protein At1g03510 |
| SNP_4280_A_34319023 | NC_021160.1    | Ca_Kabuli_Chr01 | 34319023                | AA                              | GG                 | GG               | URR                           | 101498216          | DAR GTPase 2, mitochondrial                                    |
| SNP_4282_A_34332286 | NC_021160.1    | Ca_Kabuli_Chr01 | 34332286                | AA                              | GG                 | GG               | INTERGENIC                    |                    |                                                                |
| SNP_4283_A_34332891 | NC_021160.1    | Ca_Kabuli_Chr01 | 34332891                | GG                              | TT                 | TT               | INTERGENIC                    |                    |                                                                |
| SNP_4284_A_34339435 | NC_021160.1    | Ca_Kabuli_Chr01 | 34339435                | TT                              | CC                 | CC               | INTERGENIC                    |                    |                                                                |
| SNP_4285_A_34357482 | NC_021160.1    | Ca_Kabuli_Chr01 | 34357482                | CC                              | TT                 | TT               | INTRON                        | 101500473          | keratin, type I cytoskeletal 10-like                           |
| SNP_4286_A_34360282 | NC_021160.1    | Ca_Kabuli_Chr01 | 34360282                | CC                              | TT                 | TT               | INTRON                        | 101500473          | keratin, type I cytoskeletal 10-like                           |
| SNP_4287_A_34364939 | NC_021160.1    | Ca_Kabuli_Chr01 | 34364939                | AA                              | GG                 | GG               | URR                           | 101500473          | keratin, type I cytoskeletal 10-like                           |
| SNP_4288_A_34370084 | NC_021160.1    | Ca_Kabuli_Chr01 | 34370084                | AA                              | TT                 | TT               | INTERGENIC                    |                    |                                                                |
| SNP_4290_A_34372823 | NC_021160.1    | Ca_Kabuli_Chr01 | 34372823                | CC                              | TT                 | TT               | INTERGENIC                    |                    |                                                                |
| SNP_4291_A_34372909 | NC_021160.1    | Ca_Kabuli_Chr01 | 34372909                | TT                              | AA                 | AA               | INTERGENIC                    |                    |                                                                |
| SNP_4293_A_34392521 | NC_021160.1    | Ca_Kabuli_Chr01 | 34392521                | AA                              | GG                 | GG               | INTERGENIC                    |                    |                                                                |
| SNP_4294_A_34405257 | NC_021160.1    | Ca_Kabuli_Chr01 | 34405257                | GG                              | AA                 | AA               | INTERGENIC                    |                    |                                                                |
| SNP_4295_A_34407795 | NC_021160.1    | Ca_Kabuli_Chr01 | 34407795                | AA                              | GG                 | GG               | INTERGENIC                    |                    |                                                                |
| SNP_4296_A_34415017 | NC_021160.1    | Ca_Kabuli_Chr01 | 34415017                | TT                              | GG                 | GG               | INTERGENIC                    |                    |                                                                |
| SNP_4297_A_34415094 | NC_021160.1    | Ca_Kabuli_Chr01 | 34415094                | AA                              | TT                 | TT               | INTERGENIC                    |                    |                                                                |
| SNP_4298_A_34415174 | NC_021160.1    | Ca_Kabuli_Chr01 | 34415174                | TT                              | CC                 | CC               | INTERGENIC                    |                    |                                                                |
| SNP_4299_A_34419017 | NC_021160.1    | Ca_Kabuli_Chr01 | 34419017                | CC                              | AA                 | AA               | INTERGENIC                    |                    |                                                                |
| SNP_4300_A_34419019 | NC_021160.1    | Ca_Kabuli_Chr01 | 34419019                | AA                              | GG                 | GG               | INTERGENIC                    |                    |                                                                |
| SNP_4301_A_34426047 | NC_021160.1    | Ca_Kabuli_Chr01 | 34426047                | CC                              | TT                 | TT               | INTERGENIC                    |                    |                                                                |
| SNP_4302_A_34432148 | NC_021160.1    | Ca_Kabuli_Chr01 | 34432148                | GG                              | AA                 | AA               | INTERGENIC                    |                    |                                                                |

| SNPs IDs            | Chromosome IDs | Chromosomes     | Physical positions (bp) | CDC Frontier (Reference genome) | (Pusa 1103 & HPNB) | (ILWC 46 & LPNB) | Sequence Components of genome | Gene accession IDs | Putative functions                                                            |
|---------------------|----------------|-----------------|-------------------------|---------------------------------|--------------------|------------------|-------------------------------|--------------------|-------------------------------------------------------------------------------|
| SNP_4303_A_34432498 | NC_021160.1    | Ca_Kabuli_Chr01 | 34432498                | AA                              | GG                 | GG               | DRR                           | 101501110          | putative pentatricopeptide repeat-containing protein At1g12700, mitochondrial |
| SNP_4304_A_34433020 | NC_021160.1    | Ca_Kabuli_Chr01 | 34433020                | TT                              | CC                 | CC               | DRR                           | 101501110          | putative pentatricopeptide repeat-containing protein At1g12700, mitochondrial |
| SNP_4305_A_34433033 | NC_021160.1    | Ca_Kabuli_Chr01 | 34433033                | CC                              | TT                 | TT               | DRR                           | 101501110          | putative pentatricopeptide repeat-containing protein At1g12700, mitochondrial |
| SNP_4306_A_34433056 | NC_021160.1    | Ca_Kabuli_Chr01 | 34433056                | TT                              | CC                 | CC               | DRR                           | 101501110          | putative pentatricopeptide repeat-containing protein At1g12700, mitochondrial |
| SNP_4307_A_34487148 | NC_021160.1    | Ca_Kabuli_Chr01 | 34487148                | TT                              | CC                 | CC               | INTERGENIC                    |                    |                                                                               |
| SNP_4308_A_34513699 | NC_021160.1    | Ca_Kabuli_Chr01 | 34513699                | TT                              | CC                 | CC               | INTRON                        | 101501739          | uncharacterized methyltransferase At2g41040, chloroplastic                    |
| SNP_4309_A_34583634 | NC_021160.1    | Ca_Kabuli_Chr01 | 34583634                | GG                              | AA                 | AA               | URR                           | 101507454          | Unknown function                                                              |
| SNP_4310_A_34628803 | NC_021160.1    | Ca_Kabuli_Chr01 | 34628803                | CC                              | TT                 | TT               | INTERGENIC                    |                    |                                                                               |
| SNP_4311_A_34642495 | NC_021160.1    | Ca_Kabuli_Chr01 | 34642495                | CC                              | GG                 | GG               | INTERGENIC                    |                    |                                                                               |
| SNP_4315_A_34675273 | NC_021160.1    | Ca_Kabuli_Chr01 | 34675273                | GG                              | AA                 | AA               | INTERGENIC                    |                    |                                                                               |
| SNP_4316_A_34682957 | NC_021160.1    | Ca_Kabuli_Chr01 | 34682957                | AA                              | GG                 | GG               | INTERGENIC                    |                    |                                                                               |
| SNP_4317_A_34683011 | NC_021160.1    | Ca_Kabuli_Chr01 | 34683011                | TT                              | GG                 | GG               | INTERGENIC                    |                    |                                                                               |
| SNP_4318_A_34687730 | NC_021160.1    | Ca_Kabuli_Chr01 | 34687730                | TT                              | CC                 | CC               | INTERGENIC                    |                    |                                                                               |
| SNP_4319_A_34691216 | NC_021160.1    | Ca_Kabuli_Chr01 | 34691216                | AA                              | GG                 | GG               | INTERGENIC                    |                    |                                                                               |
| SNP_4320_A_34691598 | NC_021160.1    | Ca_Kabuli_Chr01 | 34691598                | TT                              | CC                 | CC               | INTERGENIC                    |                    |                                                                               |
| SNP_4321_A_34694836 | NC_021160.1    | Ca_Kabuli_Chr01 | 34694836                | TT                              | AA                 | AA               | INTERGENIC                    |                    |                                                                               |
| SNP_4322_A_34701641 | NC_021160.1    | Ca_Kabuli_Chr01 | 34701641                | GG                              | AA                 | AA               | INTERGENIC                    |                    |                                                                               |
| SNP_4323_A_34702486 | NC_021160.1    | Ca_Kabuli_Chr01 | 34702486                | GG                              | AA                 | AA               | INTERGENIC                    |                    |                                                                               |
| SNP_4324_A_34762675 | NC_021160.1    | Ca_Kabuli_Chr01 | 34762675                | GG                              | AA                 | AA               | INTERGENIC                    |                    |                                                                               |
| SNP_4325_A_34774678 | NC_021160.1    | Ca_Kabuli_Chr01 | 34774678                | AA                              | CC                 | CC               | INTERGENIC                    |                    |                                                                               |
| SNP_4326_A_34800493 | NC_021160.1    | Ca_Kabuli_Chr01 | 34800493                | CC                              | TT                 | TT               | INTERGENIC                    |                    |                                                                               |
| SNP_4327_A_34800495 | NC_021160.1    | Ca_Kabuli_Chr01 | 34800495                | AA                              | CC                 | CC               | INTERGENIC                    |                    |                                                                               |

| SNPs IDs            | Chromosome IDs | Chromosomes     | Physical positions (bp) | CDC Frontier (Reference genome) | (Pusa 1103 & HPNB) | (ILWC 46 & LPNB) | Sequence Components of genome | Gene accession IDs | Putative functions              |
|---------------------|----------------|-----------------|-------------------------|---------------------------------|--------------------|------------------|-------------------------------|--------------------|---------------------------------|
| SNP_4328_A_34800566 | NC_021160.1    | Ca_Kabuli_Chr01 | 34800566                | CC                              | TT                 | TT               | INTERGENIC                    |                    |                                 |
| SNP_4330_A_34821969 | NC_021160.1    | Ca_Kabuli_Chr01 | 34821969                | GG                              | AA                 | AA               | INTERGENIC                    |                    |                                 |
| SNP_4331_A_34842853 | NC_021160.1    | Ca_Kabuli_Chr01 | 34842853                | AA                              | GG                 | GG               | INTERGENIC                    |                    |                                 |
| SNP_4332_A_34844886 | NC_021160.1    | Ca_Kabuli_Chr01 | 34844886                | TT                              | CC                 | CC               | INTERGENIC                    |                    |                                 |
| SNP_4333_A_34855579 | NC_021160.1    | Ca_Kabuli_Chr01 | 34855579                | AA                              | CC                 | CC               | INTERGENIC                    |                    |                                 |
| SNP_4334_A_34886314 | NC_021160.1    | Ca_Kabuli_Chr01 | 34886314                | AA                              | GG                 | GG               | INTERGENIC                    |                    |                                 |
| SNP_4335_A_34920470 | NC_021160.1    | Ca_Kabuli_Chr01 | 34920470                | AA                              | GG                 | GG               | INTERGENIC                    |                    |                                 |
| SNP_4336_A_34935136 | NC_021160.1    | Ca_Kabuli_Chr01 | 34935136                | TT                              | GG                 | GG               | INTERGENIC                    |                    |                                 |
| SNP_4337_A_34951368 | NC_021160.1    | Ca_Kabuli_Chr01 | 34951368                | CC                              | TT                 | TT               | URR                           | 101505383          | proteasome subunit alpha type-6 |
| SNP_4338_A_34956974 | NC_021160.1    | Ca_Kabuli_Chr01 | 34956974                | GG                              | AA                 | AA               | INTERGENIC                    |                    |                                 |
| SNP_4339_A_34970094 | NC_021160.1    | Ca_Kabuli_Chr01 | 34970094                | GG                              | TT                 | TT               | URR                           | 101510643          | uncharacterized LOC101510643    |
| SNP_4340_A_34970986 | NC_021160.1    | Ca_Kabuli_Chr01 | 34970986                | GG                              | AA                 | AA               | URR                           | 101510643          | uncharacterized LOC101510643    |
| SNP_4341_A_34970993 | NC_021160.1    | Ca_Kabuli_Chr01 | 34970993                | AA                              | TT                 | TT               | URR                           | 101510643          | uncharacterized LOC101510643    |
| SNP_4343_A_34971488 | NC_021160.1    | Ca_Kabuli_Chr01 | 34971488                | GG                              | AA                 | AA               | INTERGENIC                    |                    |                                 |
| SNP_4345_A_34989057 | NC_021160.1    | Ca_Kabuli_Chr01 | 34989057                | TT                              | CC                 | CC               | INTERGENIC                    |                    |                                 |
| SNP_4346_A_34989064 | NC_021160.1    | Ca_Kabuli_Chr01 | 34989064                | AA                              | GG                 | GG               | INTERGENIC                    |                    |                                 |
| SNP_4347_A_34989079 | NC_021160.1    | Ca_Kabuli_Chr01 | 34989079                | AA                              | CC                 | CC               | INTERGENIC                    |                    |                                 |
| SNP_4348_A_34989095 | NC_021160.1    | Ca_Kabuli_Chr01 | 34989095                | TT                              | CC                 | CC               | INTERGENIC                    |                    |                                 |
| SNP_4349_A_34989128 | NC_021160.1    | Ca_Kabuli_Chr01 | 34989128                | GG                              | AA                 | AA               | INTERGENIC                    |                    |                                 |
| SNP_4350_A_34989194 | NC_021160.1    | Ca_Kabuli_Chr01 | 34989194                | AA                              | GG                 | GG               | INTERGENIC                    |                    |                                 |
| SNP_4351_A_34989197 | NC_021160.1    | Ca_Kabuli_Chr01 | 34989197                | GG                              | AA                 | AA               | INTERGENIC                    |                    |                                 |
| SNP_4352_A_34989206 | NC_021160.1    | Ca_Kabuli_Chr01 | 34989206                | GG                              | AA                 | AA               | INTERGENIC                    |                    |                                 |



| SNPs IDs            | Chromosome IDs | Chromosomes     | Physical positions (bp) | CDC Frontier genome (Reference genome) | (Pusa 1103 & HPNB) | (ILWC 46 & LPNB) | Sequence Components of genome | Gene accession IDs | Putative functions           |
|---------------------|----------------|-----------------|-------------------------|----------------------------------------|--------------------|------------------|-------------------------------|--------------------|------------------------------|
| SNP_4353_A_34989329 | NC_021160.1    | Ca_Kabuli_Chr01 | 34989329                | CC                                     | GG                 | GG               | INTERGENIC                    |                    |                              |
| SNP_4354_A_34991149 | NC_021160.1    | Ca_Kabuli_Chr01 | 34991149                | TT                                     | CC                 | CC               | INTERGENIC                    |                    |                              |
| SNP_4355_A_34991785 | NC_021160.1    | Ca_Kabuli_Chr01 | 34991785                | AA                                     | GG                 | GG               | INTERGENIC                    |                    |                              |
| SNP_4356_A_34991825 | NC_021160.1    | Ca_Kabuli_Chr01 | 34991825                | CC                                     | TT                 | TT               | INTERGENIC                    |                    |                              |
| SNP_4357_A_34992129 | NC_021160.1    | Ca_Kabuli_Chr01 | 34992129                | TT                                     | AA                 | AA               | INTERGENIC                    |                    |                              |
| SNP_4358_A_34994977 | NC_021160.1    | Ca_Kabuli_Chr01 | 34994977                | CC                                     | TT                 | TT               | INTERGENIC                    |                    |                              |
| SNP_4359_A_34996722 | NC_021160.1    | Ca_Kabuli_Chr01 | 34996722                | CC                                     | AA                 | AA               | INTERGENIC                    |                    |                              |
| SNP_4360_A_34996723 | NC_021160.1    | Ca_Kabuli_Chr01 | 34996723                | CC                                     | TT                 | TT               | INTERGENIC                    |                    |                              |
| SNP_4361_A_34996725 | NC_021160.1    | Ca_Kabuli_Chr01 | 34996725                | AA                                     | GG                 | GG               | INTERGENIC                    |                    |                              |
| SNP_4362_A_34996732 | NC_021160.1    | Ca_Kabuli_Chr01 | 34996732                | CC                                     | TT                 | TT               | INTERGENIC                    |                    |                              |
| SNP_4363_A_34996761 | NC_021160.1    | Ca_Kabuli_Chr01 | 34996761                | TT                                     | CC                 | CC               | INTERGENIC                    |                    |                              |
| SNP_4364_A_34996814 | NC_021160.1    | Ca_Kabuli_Chr01 | 34996814                | AA                                     | TT                 | TT               | INTERGENIC                    |                    |                              |
| SNP_4365_A_34996912 | NC_021160.1    | Ca_Kabuli_Chr01 | 34996912                | CC                                     | TT                 | TT               | INTERGENIC                    |                    |                              |
| SNP_4366_A_34996925 | NC_021160.1    | Ca_Kabuli_Chr01 | 34996925                | GG                                     | TT                 | TT               | INTERGENIC                    |                    |                              |
| SNP_4367_A_34996946 | NC_021160.1    | Ca_Kabuli_Chr01 | 34996946                | TT                                     | AA                 | AA               | INTERGENIC                    |                    |                              |
| SNP_4368_A_35007373 | NC_021160.1    | Ca_Kabuli_Chr01 | 35007373                | TT                                     | AA                 | AA               | INTERGENIC                    |                    |                              |
| SNP_4369_A_35007713 | NC_021160.1    | Ca_Kabuli_Chr01 | 35007713                | GG                                     | TT                 | TT               | INTERGENIC                    |                    |                              |
| SNP_4370_A_35011571 | NC_021160.1    | Ca_Kabuli_Chr01 | 35011571                | TT                                     | AA                 | AA               | INTERGENIC                    |                    |                              |
| SNP_4371_A_35024174 | NC_021160.1    | Ca_Kabuli_Chr01 | 35024174                | CC                                     | TT                 | TT               | INTERGENIC                    |                    |                              |
| SNP_4372_A_35033868 | NC_021160.1    | Ca_Kabuli_Chr01 | 35033868                | AA                                     | TT                 | TT               | INTRON                        | 101506470          | uncharacterized LOC101506470 |
| SNP_4373_A_35062255 | NC_021160.1    | Ca_Kabuli_Chr01 | 35062255                | TT                                     | AA                 | AA               | INTERGENIC                    |                    |                              |
| SNP_4374_A_35071591 | NC_021160.1    | Ca_Kabuli_Chr01 | 35071591                | AA                                     | GG                 | GG               | INTERGENIC                    |                    |                              |

| SNPs IDs            | Chromosome IDs | Chromosomes     | Physical positions (bp) | CDC Frontier (Reference genome) | (Pusa 1103 & HPNB) | (ILWC 46 & LPNB) | Sequence genome | Components of | Gene accession IDs                         | Putative functions |
|---------------------|----------------|-----------------|-------------------------|---------------------------------|--------------------|------------------|-----------------|---------------|--------------------------------------------|--------------------|
| SNP_4375_A_35078734 | NC_021160.1    | Ca_Kabuli_Chr01 | 35078734                | AA                              | CC                 | CC               | INTERGENIC      |               |                                            |                    |
| SNP_4376_A_35081150 | NC_021160.1    | Ca_Kabuli_Chr01 | 35081150                | AA                              | GG                 | GG               | INTERGENIC      |               |                                            |                    |
| SNP_4377_A_35082413 | NC_021160.1    | Ca_Kabuli_Chr01 | 35082413                | CC                              | TT                 | TT               | INTERGENIC      |               |                                            |                    |
| SNP_4379_A_35097234 | NC_021160.1    | Ca_Kabuli_Chr01 | 35097234                | AA                              | GG                 | GG               | INTERGENIC      |               |                                            |                    |
| SNP_4380_A_35111629 | NC_021160.1    | Ca_Kabuli_Chr01 | 35111629                | CC                              | TT                 | TT               | DRR             | 101506796     | homeobox-leucine zipper protein HOX11-like |                    |
| SNP_4381_A_35111633 | NC_021160.1    | Ca_Kabuli_Chr01 | 35111633                | TT                              | CC                 | CC               | DRR             | 101506796     | homeobox-leucine zipper protein HOX11-like |                    |
| SNP_4382_A_35111639 | NC_021160.1    | Ca_Kabuli_Chr01 | 35111639                | TT                              | CC                 | CC               | DRR             | 101506796     | homeobox-leucine zipper protein HOX11-like |                    |
| SNP_4383_A_35111644 | NC_021160.1    | Ca_Kabuli_Chr01 | 35111644                | AA                              | GG                 | GG               | DRR             | 101506796     | homeobox-leucine zipper protein HOX11-like |                    |
| SNP_4384_A_35124764 | NC_021160.1    | Ca_Kabuli_Chr01 | 35124764                | AA                              | GG                 | GG               | INTERGENIC      |               |                                            |                    |
| SNP_4385_A_35124773 | NC_021160.1    | Ca_Kabuli_Chr01 | 35124773                | AA                              | GG                 | GG               | INTERGENIC      |               |                                            |                    |
| SNP_4386_A_35139998 | NC_021160.1    | Ca_Kabuli_Chr01 | 35139998                | AA                              | TT                 | TT               | INTERGENIC      |               |                                            |                    |
| SNP_4387_A_35143451 | NC_021160.1    | Ca_Kabuli_Chr01 | 35143451                | TT                              | GG                 | GG               | INTERGENIC      |               |                                            |                    |
| SNP_4388_A_35145687 | NC_021160.1    | Ca_Kabuli_Chr01 | 35145687                | GG                              | AA                 | AA               | INTERGENIC      |               |                                            |                    |
| SNP_4389_A_35145877 | NC_021160.1    | Ca_Kabuli_Chr01 | 35145877                | TT                              | AA                 | AA               | INTERGENIC      |               |                                            |                    |
| SNP_4390_A_35146891 | NC_021160.1    | Ca_Kabuli_Chr01 | 35146891                | AA                              | TT                 | TT               | INTERGENIC      |               |                                            |                    |
| SNP_4391_A_35148190 | NC_021160.1    | Ca_Kabuli_Chr01 | 35148190                | AA                              | GG                 | GG               | INTERGENIC      |               |                                            |                    |
| SNP_4392_A_35148246 | NC_021160.1    | Ca_Kabuli_Chr01 | 35148246                | CC                              | AA                 | AA               | INTERGENIC      |               |                                            |                    |
| SNP_4393_A_35148475 | NC_021160.1    | Ca_Kabuli_Chr01 | 35148475                | AA                              | GG                 | GG               | INTERGENIC      |               |                                            |                    |
| SNP_4394_A_35149534 | NC_021160.1    | Ca_Kabuli_Chr01 | 35149534                | GG                              | AA                 | AA               | INTERGENIC      |               |                                            |                    |
| SNP_4395_A_35152895 | NC_021160.1    | Ca_Kabuli_Chr01 | 35152895                | AA                              | TT                 | TT               | INTERGENIC      |               |                                            |                    |
| SNP_4396_A_35152911 | NC_021160.1    | Ca_Kabuli_Chr01 | 35152911                | AA                              | GG                 | GG               | INTERGENIC      |               |                                            |                    |
| SNP_4397_A_35152941 | NC_021160.1    | Ca_Kabuli_Chr01 | 35152941                | CC                              | TT                 | TT               | INTERGENIC      |               |                                            |                    |

| SNPs IDs            | Chromosome IDs | Chromosomes     | Physical positions (bp) | CDC Frontier genome (Reference genome) | (Pusa 1103 & HPNB) | (ILWC 46 & LPNB) | Sequence genome | Components of | Gene accession IDs | Putative functions |
|---------------------|----------------|-----------------|-------------------------|----------------------------------------|--------------------|------------------|-----------------|---------------|--------------------|--------------------|
| SNP_4398_A_35153042 | NC_021160.1    | Ca_Kabuli_Chr01 | 35153042                | GG                                     | AA                 | AA               | INTERGENIC      |               |                    |                    |
| SNP_4399_A_35153096 | NC_021160.1    | Ca_Kabuli_Chr01 | 35153096                | TT                                     | AA                 | AA               | INTERGENIC      |               |                    |                    |
| SNP_4400_A_35153405 | NC_021160.1    | Ca_Kabuli_Chr01 | 35153405                | CC                                     | AA                 | AA               | INTERGENIC      |               |                    |                    |
| SNP_4402_A_35153471 | NC_021160.1    | Ca_Kabuli_Chr01 | 35153471                | CC                                     | TT                 | TT               | INTERGENIC      |               |                    |                    |
| SNP_4403_A_35154630 | NC_021160.1    | Ca_Kabuli_Chr01 | 35154630                | GG                                     | TT                 | TT               | INTERGENIC      |               |                    |                    |
| SNP_4404_A_35154631 | NC_021160.1    | Ca_Kabuli_Chr01 | 35154631                | TT                                     | AA                 | AA               | INTERGENIC      |               |                    |                    |
| SNP_4405_A_35158720 | NC_021160.1    | Ca_Kabuli_Chr01 | 35158720                | AA                                     | TT                 | TT               | INTERGENIC      |               |                    |                    |
| SNP_4406_A_35165890 | NC_021160.1    | Ca_Kabuli_Chr01 | 35165890                | CC                                     | TT                 | TT               | INTERGENIC      |               |                    |                    |
| SNP_4408_A_35167719 | NC_021160.1    | Ca_Kabuli_Chr01 | 35167719                | CC                                     | AA                 | AA               | INTERGENIC      |               |                    |                    |
| SNP_4409_A_35167723 | NC_021160.1    | Ca_Kabuli_Chr01 | 35167723                | GG                                     | AA                 | AA               | INTERGENIC      |               |                    |                    |
| SNP_4410_A_35167775 | NC_021160.1    | Ca_Kabuli_Chr01 | 35167775                | GG                                     | AA                 | AA               | INTERGENIC      |               |                    |                    |
| SNP_4411_A_35168035 | NC_021160.1    | Ca_Kabuli_Chr01 | 35168035                | CC                                     | TT                 | TT               | INTERGENIC      |               |                    |                    |
| SNP_4412_A_35177862 | NC_021160.1    | Ca_Kabuli_Chr01 | 35177862                | GG                                     | AA                 | AA               | INTERGENIC      |               |                    |                    |
| SNP_4413_A_35178408 | NC_021160.1    | Ca_Kabuli_Chr01 | 35178408                | AA                                     | TT                 | TT               | INTERGENIC      |               |                    |                    |
| SNP_4414_A_35178587 | NC_021160.1    | Ca_Kabuli_Chr01 | 35178587                | AA                                     | TT                 | TT               | INTERGENIC      |               |                    |                    |
| SNP_4415_A_35179126 | NC_021160.1    | Ca_Kabuli_Chr01 | 35179126                | CC                                     | TT                 | TT               | INTERGENIC      |               |                    |                    |
| SNP_4416_A_35181651 | NC_021160.1    | Ca_Kabuli_Chr01 | 35181651                | AA                                     | CC                 | CC               | INTERGENIC      |               |                    |                    |
| SNP_4417_A_35184708 | NC_021160.1    | Ca_Kabuli_Chr01 | 35184708                | TT                                     | AA                 | AA               | INTERGENIC      |               |                    |                    |
| SNP_4418_A_35185489 | NC_021160.1    | Ca_Kabuli_Chr01 | 35185489                | TT                                     | CC                 | CC               | INTERGENIC      |               |                    |                    |
| SNP_4419_A_35185844 | NC_021160.1    | Ca_Kabuli_Chr01 | 35185844                | AA                                     | GG                 | GG               | INTERGENIC      |               |                    |                    |
| SNP_4420_A_35185876 | NC_021160.1    | Ca_Kabuli_Chr01 | 35185876                | AA                                     | GG                 | GG               | INTERGENIC      |               |                    |                    |
| SNP_4421_A_35215654 | NC_021160.1    | Ca_Kabuli_Chr01 | 35215654                | CC                                     | TT                 | TT               | INTERGENIC      |               |                    |                    |

| SNPs IDs            | Chromosome IDs | Chromosomes     | Physical positions (bp) | CDC Frontier (Reference genome) | (Pusa 1103 & HPNB) | (ILWC 46 & LPNB) | Sequence Components of genome | Gene accession IDs | Putative functions         |
|---------------------|----------------|-----------------|-------------------------|---------------------------------|--------------------|------------------|-------------------------------|--------------------|----------------------------|
| SNP_4422_A_35221466 | NC_021160.1    | Ca_Kabuli_Chr01 | 35221466                | AA                              | TT                 | TT               | INTERGENIC                    |                    |                            |
| SNP_4423_A_35225438 | NC_021160.1    | Ca_Kabuli_Chr01 | 35225438                | CC                              | TT                 | TT               | INTERGENIC                    |                    |                            |
| SNP_4424_A_35226709 | NC_021160.1    | Ca_Kabuli_Chr01 | 35226709                | GG                              | TT                 | TT               | INTERGENIC                    |                    |                            |
| SNP_4425_A_35230196 | NC_021160.1    | Ca_Kabuli_Chr01 | 35230196                | CC                              | AA                 | AA               | INTERGENIC                    |                    |                            |
| SNP_4426_A_35236755 | NC_021160.1    | Ca_Kabuli_Chr01 | 35236755                | TT                              | CC                 | CC               | INTERGENIC                    |                    |                            |
| SNP_4427_A_35236807 | NC_021160.1    | Ca_Kabuli_Chr01 | 35236807                | CC                              | TT                 | TT               | INTERGENIC                    |                    |                            |
| SNP_4428_A_35240162 | NC_021160.1    | Ca_Kabuli_Chr01 | 35240162                | AA                              | GG                 | GG               | INTERGENIC                    |                    |                            |
| SNP_4429_A_35240163 | NC_021160.1    | Ca_Kabuli_Chr01 | 35240163                | TT                              | CC                 | CC               | INTERGENIC                    |                    |                            |
| SNP_4430_A_35240424 | NC_021160.1    | Ca_Kabuli_Chr01 | 35240424                | AA                              | TT                 | TT               | DRR                           | 101511709          | cytochrome P450 714A2-like |
| SNP_4431_A_35240455 | NC_021160.1    | Ca_Kabuli_Chr01 | 35240455                | GG                              | TT                 | TT               | DRR                           | 101511709          | cytochrome P450 714A2-like |
| SNP_4432_A_35240562 | NC_021160.1    | Ca_Kabuli_Chr01 | 35240562                | AA                              | CC                 | CC               | DRR                           | 101511709          | cytochrome P450 714A2-like |
| SNP_4433_A_35243540 | NC_021160.1    | Ca_Kabuli_Chr01 | 35243540                | AA                              | GG                 | GG               | URR                           | 101511709          | cytochrome P450 714A2-like |
| SNP_4434_A_35243678 | NC_021160.1    | Ca_Kabuli_Chr01 | 35243678                | AA                              | TT                 | TT               | URR                           | 101511709          | cytochrome P450 714A2-like |
| SNP_4435_A_35258788 | NC_021160.1    | Ca_Kabuli_Chr01 | 35258788                | AA                              | TT                 | TT               | INTERGENIC                    |                    |                            |
| SNP_4436_A_35260848 | NC_021160.1    | Ca_Kabuli_Chr01 | 35260848                | AA                              | GG                 | GG               | INTERGENIC                    |                    |                            |
| SNP_4437_A_35260874 | NC_021160.1    | Ca_Kabuli_Chr01 | 35260874                | CC                              | TT                 | TT               | INTERGENIC                    |                    |                            |
| SNP_4438_A_35261045 | NC_021160.1    | Ca_Kabuli_Chr01 | 35261045                | GG                              | TT                 | TT               | INTERGENIC                    |                    |                            |
| SNP_4440_A_35261858 | NC_021160.1    | Ca_Kabuli_Chr01 | 35261858                | AA                              | CC                 | CC               | INTERGENIC                    |                    |                            |
| SNP_4441_A_35262110 | NC_021160.1    | Ca_Kabuli_Chr01 | 35262110                | TT                              | CC                 | CC               | INTERGENIC                    |                    |                            |
| SNP_4442_A_35264546 | NC_021160.1    | Ca_Kabuli_Chr01 | 35264546                | GG                              | AA                 | AA               | INTERGENIC                    |                    |                            |
| SNP_4443_A_35265150 | NC_021160.1    | Ca_Kabuli_Chr01 | 35265150                | CC                              | TT                 | TT               | INTERGENIC                    |                    |                            |
| SNP_4444_A_35265780 | NC_021160.1    | Ca_Kabuli_Chr01 | 35265780                | AA                              | GG                 | GG               | INTERGENIC                    |                    |                            |

| SNPs IDs            | Chromosome IDs | Chromosomes     | Physical positions (bp) | CDC Frontier (Reference genome) | (Pusa 1103 & HPNB) | (ILWC 46 & LPNB) | Sequence Components of genome | Gene accession IDs | Putative functions         |
|---------------------|----------------|-----------------|-------------------------|---------------------------------|--------------------|------------------|-------------------------------|--------------------|----------------------------|
| SNP_4445_A_35265815 | NC_021160.1    | Ca_Kabuli_Chr01 | 35265815                | TT                              | CC                 | CC               | INTERGENIC                    |                    |                            |
| SNP_4446_A_35265887 | NC_021160.1    | Ca_Kabuli_Chr01 | 35265887                | AA                              | TT                 | TT               | INTERGENIC                    |                    |                            |
| SNP_4447_A_35266005 | NC_021160.1    | Ca_Kabuli_Chr01 | 35266005                | CC                              | GG                 | GG               | INTERGENIC                    |                    |                            |
| SNP_4448_A_35266006 | NC_021160.1    | Ca_Kabuli_Chr01 | 35266006                | AA                              | GG                 | GG               | INTERGENIC                    |                    |                            |
| SNP_4449_A_35266060 | NC_021160.1    | Ca_Kabuli_Chr01 | 35266060                | AA                              | TT                 | TT               | INTERGENIC                    |                    |                            |
| SNP_4450_A_35266213 | NC_021160.1    | Ca_Kabuli_Chr01 | 35266213                | GG                              | CC                 | CC               | INTERGENIC                    |                    |                            |
| SNP_4452_A_35266253 | NC_021160.1    | Ca_Kabuli_Chr01 | 35266253                | AA                              | GG                 | GG               | INTERGENIC                    |                    |                            |
| SNP_4453_A_35266267 | NC_021160.1    | Ca_Kabuli_Chr01 | 35266267                | CC                              | AA                 | AA               | INTERGENIC                    |                    |                            |
| SNP_4454_A_35272700 | NC_021160.1    | Ca_Kabuli_Chr01 | 35272700                | AA                              | GG                 | GG               | INTERGENIC                    |                    |                            |
| SNP_4455_A_35281147 | NC_021160.1    | Ca_Kabuli_Chr01 | 35281147                | GG                              | CC                 | CC               | INTRON                        | 101512027          | cytochrome P450 714A2-like |
| SNP_4456_A_35281461 | NC_021160.1    | Ca_Kabuli_Chr01 | 35281461                | AA                              | GG                 | GG               | INTRON                        | 101512027          | cytochrome P450 714A2-like |
| SNP_4457_A_35281532 | NC_021160.1    | Ca_Kabuli_Chr01 | 35281532                | AA                              | CC                 | CC               | INTRON                        | 101512027          | cytochrome P450 714A2-like |
| SNP_4459_A_35281605 | NC_021160.1    | Ca_Kabuli_Chr01 | 35281605                | AA                              | GG                 | GG               | INTRON                        | 101512027          | cytochrome P450 714A2-like |
| SNP_4460_A_35281863 | NC_021160.1    | Ca_Kabuli_Chr01 | 35281863                | CC                              | AA                 | AA               | INTRON                        | 101512027          | cytochrome P450 714A2-like |
| SNP_4461_A_35281869 | NC_021160.1    | Ca_Kabuli_Chr01 | 35281869                | AA                              | GG                 | GG               | INTRON                        | 101512027          | cytochrome P450 714A2-like |
| SNP_4463_A_35281954 | NC_021160.1    | Ca_Kabuli_Chr01 | 35281954                | TT                              | AA                 | AA               | INTRON                        | 101512027          | cytochrome P450 714A2-like |
| SNP_4464_A_35281965 | NC_021160.1    | Ca_Kabuli_Chr01 | 35281965                | AA                              | CC                 | CC               | INTRON                        | 101512027          | cytochrome P450 714A2-like |
| SNP_4465_A_35282203 | NC_021160.1    | Ca_Kabuli_Chr01 | 35282203                | GG                              | AA                 | AA               | INTRON                        | 101512027          | cytochrome P450 714A2-like |
| SNP_4466_A_35282547 | NC_021160.1    | Ca_Kabuli_Chr01 | 35282547                | AA                              | GG                 | GG               | SYNONYMOUS_CODING             | 101512027          | cytochrome P450 714A2-like |
| SNP_4467_A_35283409 | NC_021160.1    | Ca_Kabuli_Chr01 | 35283409                | AA                              | GG                 | GG               | URR                           | 101512027          | cytochrome P450 714A2-like |
| SNP_4468_A_35283430 | NC_021160.1    | Ca_Kabuli_Chr01 | 35283430                | CC                              | GG                 | GG               | URR                           | 101512027          | cytochrome P450 714A2-like |
| SNP_4469_A_35283521 | NC_021160.1    | Ca_Kabuli_Chr01 | 35283521                | GG                              | TT                 | TT               | URR                           | 101512027          | cytochrome P450 714A2-like |

| SNPs IDs            | Chromosome IDs | Chromosomes     | Physical positions (bp) | CDC Frontier (Reference genome) | (Pusa 1103 & HPNB) | (ILWC 46 & LPNB) | Sequence Components of genome | Gene accession IDs | Putative functions         |
|---------------------|----------------|-----------------|-------------------------|---------------------------------|--------------------|------------------|-------------------------------|--------------------|----------------------------|
| SNP_4470_A_35283676 | NC_021160.1    | Ca_Kabuli_Chr01 | 35283676                | AA                              | TT                 | TT               | URR                           | 101512027          | cytochrome P450 714A2-like |
| SNP_4471_A_35283677 | NC_021160.1    | Ca_Kabuli_Chr01 | 35283677                | AA                              | CC                 | CC               | URR                           | 101512027          | cytochrome P450 714A2-like |
| SNP_4472_A_35283729 | NC_021160.1    | Ca_Kabuli_Chr01 | 35283729                | AA                              | CC                 | CC               | URR                           | 101512027          | cytochrome P450 714A2-like |
| SNP_4475_A_35284024 | NC_021160.1    | Ca_Kabuli_Chr01 | 35284024                | CC                              | TT                 | TT               | URR                           | 101512027          | cytochrome P450 714A2-like |
| SNP_4477_A_35284347 | NC_021160.1    | Ca_Kabuli_Chr01 | 35284347                | AA                              | TT                 | TT               | URR                           | 101512027          | cytochrome P450 714A2-like |
| SNP_4478_A_35284364 | NC_021160.1    | Ca_Kabuli_Chr01 | 35284364                | TT                              | AA                 | AA               | URR                           | 101512027          | cytochrome P450 714A2-like |
| SNP_4479_A_35284469 | NC_021160.1    | Ca_Kabuli_Chr01 | 35284469                | GG                              | TT                 | TT               | URR                           | 101512027          | cytochrome P450 714A2-like |
| SNP_4480_A_35284485 | NC_021160.1    | Ca_Kabuli_Chr01 | 35284485                | GG                              | AA                 | AA               | URR                           | 101512027          | cytochrome P450 714A2-like |
| SNP_4481_A_35284628 | NC_021160.1    | Ca_Kabuli_Chr01 | 35284628                | AA                              | CC                 | CC               | URR                           | 101512027          | cytochrome P450 714A2-like |
| SNP_4482_A_35284680 | NC_021160.1    | Ca_Kabuli_Chr01 | 35284680                | AA                              | GG                 | GG               | URR                           | 101512027          | cytochrome P450 714A2-like |
| SNP_4483_A_35284918 | NC_021160.1    | Ca_Kabuli_Chr01 | 35284918                | GG                              | TT                 | TT               | INTERGENIC                    |                    |                            |
| SNP_4484_A_35284987 | NC_021160.1    | Ca_Kabuli_Chr01 | 35284987                | TT                              | GG                 | GG               | INTERGENIC                    |                    |                            |
| SNP_4485_A_35285040 | NC_021160.1    | Ca_Kabuli_Chr01 | 35285040                | AA                              | CC                 | CC               | INTERGENIC                    |                    |                            |
| SNP_4486_A_35285510 | NC_021160.1    | Ca_Kabuli_Chr01 | 35285510                | AA                              | GG                 | GG               | INTERGENIC                    |                    |                            |
| SNP_4487_A_35287912 | NC_021160.1    | Ca_Kabuli_Chr01 | 35287912                | CC                              | TT                 | TT               | INTERGENIC                    |                    |                            |
| SNP_4488_A_35289106 | NC_021160.1    | Ca_Kabuli_Chr01 | 35289106                | GG                              | AA                 | AA               | SYNONYMOUS_CODING             | 101512351          | Unknown function           |
| SNP_4489_A_35292640 | NC_021160.1    | Ca_Kabuli_Chr01 | 35292640                | AA                              | GG                 | GG               | INTRON                        | 101512351          | Unknown function           |
| SNP_4490_A_35292647 | NC_021160.1    | Ca_Kabuli_Chr01 | 35292647                | CC                              | AA                 | AA               | INTRON                        | 101512351          | Unknown function           |
| SNP_4491_A_35292652 | NC_021160.1    | Ca_Kabuli_Chr01 | 35292652                | TT                              | GG                 | GG               | INTRON                        | 101512351          | Unknown function           |
| SNP_4492_A_35292881 | NC_021160.1    | Ca_Kabuli_Chr01 | 35292881                | CC                              | TT                 | TT               | INTRON                        | 101512351          | Unknown function           |
| SNP_4493_A_35293027 | NC_021160.1    | Ca_Kabuli_Chr01 | 35293027                | AA                              | GG                 | GG               | INTRON                        | 101512351          | Unknown function           |
| SNP_4494_A_35293034 | NC_021160.1    | Ca_Kabuli_Chr01 | 35293034                | GG                              | CC                 | CC               | INTRON                        | 101512351          | Unknown function           |

| SNPs IDs            | Chromosome IDs | Chromosomes     | Physical positions (bp) | CDC Frontier (Reference genome) | (Pusa 1103 & HPNB) | (ILWC 46 & LPNB) | Sequence genome | Components of | Gene accession IDs | Putative functions |
|---------------------|----------------|-----------------|-------------------------|---------------------------------|--------------------|------------------|-----------------|---------------|--------------------|--------------------|
| SNP_4496_A_35305259 | NC_021160.1    | Ca_Kabuli_Chr01 | 35305259                | CC                              | TT                 | TT               | INTERGENIC      |               |                    |                    |
| SNP_4497_A_35310583 | NC_021160.1    | Ca_Kabuli_Chr01 | 35310583                | TT                              | GG                 | GG               | INTERGENIC      |               |                    |                    |
| SNP_4498_A_35310603 | NC_021160.1    | Ca_Kabuli_Chr01 | 35310603                | AA                              | GG                 | GG               | INTERGENIC      |               |                    |                    |
| SNP_4499_A_35310607 | NC_021160.1    | Ca_Kabuli_Chr01 | 35310607                | TT                              | CC                 | CC               | INTERGENIC      |               |                    |                    |
| SNP_4500_A_35310692 | NC_021160.1    | Ca_Kabuli_Chr01 | 35310692                | TT                              | AA                 | AA               | INTERGENIC      |               |                    |                    |
| SNP_4501_A_35310767 | NC_021160.1    | Ca_Kabuli_Chr01 | 35310767                | AA                              | TT                 | TT               | INTERGENIC      |               |                    |                    |
| SNP_4502_A_35310793 | NC_021160.1    | Ca_Kabuli_Chr01 | 35310793                | TT                              | AA                 | AA               | INTERGENIC      |               |                    |                    |
| SNP_4503_A_35310825 | NC_021160.1    | Ca_Kabuli_Chr01 | 35310825                | GG                              | AA                 | AA               | INTERGENIC      |               |                    |                    |
| SNP_4504_A_35310887 | NC_021160.1    | Ca_Kabuli_Chr01 | 35310887                | AA                              | GG                 | GG               | INTERGENIC      |               |                    |                    |
| SNP_4505_A_35310944 | NC_021160.1    | Ca_Kabuli_Chr01 | 35310944                | TT                              | GG                 | GG               | INTERGENIC      |               |                    |                    |
| SNP_4506_A_35310991 | NC_021160.1    | Ca_Kabuli_Chr01 | 35310991                | AA                              | GG                 | GG               | INTERGENIC      |               |                    |                    |
| SNP_4507_A_35311016 | NC_021160.1    | Ca_Kabuli_Chr01 | 35311016                | CC                              | GG                 | GG               | INTERGENIC      |               |                    |                    |
| SNP_4508_A_35311017 | NC_021160.1    | Ca_Kabuli_Chr01 | 35311017                | TT                              | CC                 | CC               | INTERGENIC      |               |                    |                    |
| SNP_4509_A_35311039 | NC_021160.1    | Ca_Kabuli_Chr01 | 35311039                | CC                              | TT                 | TT               | INTERGENIC      |               |                    |                    |
| SNP_4510_A_35311057 | NC_021160.1    | Ca_Kabuli_Chr01 | 35311057                | CC                              | GG                 | GG               | INTERGENIC      |               |                    |                    |
| SNP_4511_A_35311085 | NC_021160.1    | Ca_Kabuli_Chr01 | 35311085                | TT                              | CC                 | CC               | INTERGENIC      |               |                    |                    |
| SNP_4512_A_35311758 | NC_021160.1    | Ca_Kabuli_Chr01 | 35311758                | TT                              | CC                 | CC               | INTERGENIC      |               |                    |                    |
| SNP_4513_A_35311798 | NC_021160.1    | Ca_Kabuli_Chr01 | 35311798                | AA                              | TT                 | TT               | INTERGENIC      |               |                    |                    |
| SNP_4514_A_35316899 | NC_021160.1    | Ca_Kabuli_Chr01 | 35316899                | TT                              | CC                 | CC               | INTERGENIC      |               |                    |                    |
| SNP_4515_A_35316903 | NC_021160.1    | Ca_Kabuli_Chr01 | 35316903                | TT                              | CC                 | CC               | INTERGENIC      |               |                    |                    |
| SNP_4516_A_35316931 | NC_021160.1    | Ca_Kabuli_Chr01 | 35316931                | AA                              | CC                 | CC               | INTERGENIC      |               |                    |                    |
| SNP_4517_A_35317003 | NC_021160.1    | Ca_Kabuli_Chr01 | 35317003                | AA                              | GG                 | GG               | INTERGENIC      |               |                    |                    |

| SNPs IDs            | Chromosome IDs | Chromosomes     | Physical positions (bp) | CDC Frontier (Reference genome) | (Pusa 1103 & HPNB) | (ILWC 46 & LPNB) | Sequence Components of genome | Gene accession IDs | Putative functions           |
|---------------------|----------------|-----------------|-------------------------|---------------------------------|--------------------|------------------|-------------------------------|--------------------|------------------------------|
| SNP_4518_A_35317034 | NC_021160.1    | Ca_Kabuli_Chr01 | 35317034                | CC                              | TT                 | TT               | INTERGENIC                    |                    |                              |
| SNP_4519_A_35317036 | NC_021160.1    | Ca_Kabuli_Chr01 | 35317036                | AA                              | GG                 | GG               | INTERGENIC                    |                    |                              |
| SNP_4520_A_35317039 | NC_021160.1    | Ca_Kabuli_Chr01 | 35317039                | CC                              | TT                 | TT               | INTERGENIC                    |                    |                              |
| SNP_4521_A_35317049 | NC_021160.1    | Ca_Kabuli_Chr01 | 35317049                | GG                              | AA                 | AA               | INTERGENIC                    |                    |                              |
| SNP_4522_A_35317066 | NC_021160.1    | Ca_Kabuli_Chr01 | 35317066                | TT                              | CC                 | CC               | INTERGENIC                    |                    |                              |
| SNP_4523_A_35317067 | NC_021160.1    | Ca_Kabuli_Chr01 | 35317067                | AA                              | TT                 | TT               | INTERGENIC                    |                    |                              |
| SNP_4524_A_35320773 | NC_021160.1    | Ca_Kabuli_Chr01 | 35320773                | TT                              | CC                 | CC               | INTRON                        | 101512993          | cytochrome P450 714A2-like   |
| SNP_4526_A_35321178 | NC_021160.1    | Ca_Kabuli_Chr01 | 35321178                | TT                              | GG                 | GG               | INTRON                        | 101512993          | cytochrome P450 714A2-like   |
| SNP_4527_A_35321418 | NC_021160.1    | Ca_Kabuli_Chr01 | 35321418                | AA                              | TT                 | TT               | INTRON                        | 101512993          | cytochrome P450 714A2-like   |
| SNP_4528_A_35324638 | NC_021160.1    | Ca_Kabuli_Chr01 | 35324638                | GG                              | AA                 | AA               | INTERGENIC                    |                    |                              |
| SNP_4529_A_35324639 | NC_021160.1    | Ca_Kabuli_Chr01 | 35324639                | TT                              | AA                 | AA               | INTERGENIC                    |                    |                              |
| SNP_4530_A_35334551 | NC_021160.1    | Ca_Kabuli_Chr01 | 35334551                | AA                              | TT                 | TT               | INTERGENIC                    |                    |                              |
| SNP_4531_A_35335592 | NC_021160.1    | Ca_Kabuli_Chr01 | 35335592                | AA                              | TT                 | TT               | INTERGENIC                    |                    |                              |
| SNP_4532_A_35335889 | NC_021160.1    | Ca_Kabuli_Chr01 | 35335889                | TT                              | CC                 | CC               | INTERGENIC                    |                    |                              |
| SNP_4533_A_35339318 | NC_021160.1    | Ca_Kabuli_Chr01 | 35339318                | GG                              | AA                 | AA               | INTERGENIC                    |                    |                              |
| SNP_4534_A_35354341 | NC_021160.1    | Ca_Kabuli_Chr01 | 35354341                | TT                              | CC                 | CC               | INTERGENIC                    |                    |                              |
| SNP_4535_A_35355040 | NC_021160.1    | Ca_Kabuli_Chr01 | 35355040                | TT                              | CC                 | CC               | INTERGENIC                    |                    |                              |
| SNP_4536_A_35361074 | NC_021160.1    | Ca_Kabuli_Chr01 | 35361074                | AA                              | GG                 | GG               | INTRON                        | id21392            | Unknown function             |
| SNP_4537_A_35363371 | NC_021160.1    | Ca_Kabuli_Chr01 | 35363371                | CC                              | TT                 | TT               | SYNONYMOUS_CODING             | id21392            | Unknown function             |
| SNP_4538_A_35372327 | NC_021160.1    | Ca_Kabuli_Chr01 | 35372327                | AA                              | GG                 | GG               | NON_SYNONYMOUS_CODING         | id21392            | Unknown function             |
| SNP_4539_A_35374449 | NC_021160.1    | Ca_Kabuli_Chr01 | 35374449                | AA                              | TT                 | TT               | INTRON                        | id21392            | Unknown function             |
| SNP_4540_A_35377166 | NC_021160.1    | Ca_Kabuli_Chr01 | 35377166                | GG                              | AA                 | AA               | URR                           | 101511487          | uncharacterized LOC101511487 |



| SNPs IDs            | Chromosome IDs | Chromosomes     | Physical positions (bp) | CDC Frontier genome (Reference genome) | (Pusa 1103 & HPNB) | (ILWC 46 & LPNB) | Sequence genome | Components of | Gene accession IDs | Putative functions |
|---------------------|----------------|-----------------|-------------------------|----------------------------------------|--------------------|------------------|-----------------|---------------|--------------------|--------------------|
| SNP_4541_A_35403061 | NC_021160.1    | Ca_Kabuli_Chr01 | 35403061                | TT                                     | GG                 | GG               | INTERGENIC      |               |                    |                    |
| SNP_4542_A_35403063 | NC_021160.1    | Ca_Kabuli_Chr01 | 35403063                | GG                                     | AA                 | AA               | INTERGENIC      |               |                    |                    |
| SNP_4543_A_35403394 | NC_021160.1    | Ca_Kabuli_Chr01 | 35403394                | AA                                     | GG                 | GG               | INTERGENIC      |               |                    |                    |
| SNP_4544_A_35404262 | NC_021160.1    | Ca_Kabuli_Chr01 | 35404262                | TT                                     | AA                 | AA               | INTERGENIC      |               |                    |                    |
| SNP_4545_A_35404812 | NC_021160.1    | Ca_Kabuli_Chr01 | 35404812                | AA                                     | TT                 | TT               | INTERGENIC      |               |                    |                    |
| SNP_4546_A_35405422 | NC_021160.1    | Ca_Kabuli_Chr01 | 35405422                | AA                                     | GG                 | GG               | INTERGENIC      |               |                    |                    |
| SNP_4547_A_35405446 | NC_021160.1    | Ca_Kabuli_Chr01 | 35405446                | AA                                     | TT                 | TT               | INTERGENIC      |               |                    |                    |
| SNP_4548_A_35405496 | NC_021160.1    | Ca_Kabuli_Chr01 | 35405496                | GG                                     | AA                 | AA               | INTERGENIC      |               |                    |                    |
| SNP_4549_A_35425339 | NC_021160.1    | Ca_Kabuli_Chr01 | 35425339                | AA                                     | GG                 | GG               | INTERGENIC      |               |                    |                    |
| SNP_4550_A_35432996 | NC_021160.1    | Ca_Kabuli_Chr01 | 35432996                | TT                                     | CC                 | CC               | INTERGENIC      |               |                    |                    |
| SNP_4551_A_35433001 | NC_021160.1    | Ca_Kabuli_Chr01 | 35433001                | TT                                     | CC                 | CC               | INTERGENIC      |               |                    |                    |
| SNP_4552_A_35435453 | NC_021160.1    | Ca_Kabuli_Chr01 | 35435453                | CC                                     | TT                 | TT               | INTERGENIC      |               |                    |                    |
| SNP_4553_A_35438956 | NC_021160.1    | Ca_Kabuli_Chr01 | 35438956                | AA                                     | CC                 | CC               | INTERGENIC      |               |                    |                    |
| SNP_4554_A_35475880 | NC_021160.1    | Ca_Kabuli_Chr01 | 35475880                | TT                                     | AA                 | AA               | INTERGENIC      |               |                    |                    |
| SNP_4555_A_35480090 | NC_021160.1    | Ca_Kabuli_Chr01 | 35480090                | AA                                     | GG                 | GG               | INTERGENIC      |               |                    |                    |
| SNP_4556_A_35482465 | NC_021160.1    | Ca_Kabuli_Chr01 | 35482465                | AA                                     | TT                 | TT               | INTERGENIC      |               |                    |                    |
| SNP_4557_A_35482479 | NC_021160.1    | Ca_Kabuli_Chr01 | 35482479                | TT                                     | CC                 | CC               | INTERGENIC      |               |                    |                    |
| SNP_4558_A_35491005 | NC_021160.1    | Ca_Kabuli_Chr01 | 35491005                | TT                                     | GG                 | GG               | INTERGENIC      |               |                    |                    |
| SNP_4559_A_35493642 | NC_021160.1    | Ca_Kabuli_Chr01 | 35493642                | CC                                     | TT                 | TT               | INTERGENIC      |               |                    |                    |
| SNP_4560_A_35510336 | NC_021160.1    | Ca_Kabuli_Chr01 | 35510336                | AA                                     | CC                 | CC               | INTERGENIC      |               |                    |                    |
| SNP_4561_A_35525161 | NC_021160.1    | Ca_Kabuli_Chr01 | 35525161                | TT                                     | CC                 | CC               | INTERGENIC      |               |                    |                    |
| SNP_4563_A_35560843 | NC_021160.1    | Ca_Kabuli_Chr01 | 35560843                | TT                                     | AA                 | AA               | INTERGENIC      |               |                    |                    |

| SNPs IDs            | Chromosome IDs | Chromosomes     | Physical positions (bp) | CDC Frontier (Reference genome) | (Pusa 1103 & HPNB) | (ILWC 46 & LPNB) | Sequence genome | Components of | Gene accession IDs | Putative functions |
|---------------------|----------------|-----------------|-------------------------|---------------------------------|--------------------|------------------|-----------------|---------------|--------------------|--------------------|
| SNP_4564_A_35560889 | NC_021160.1    | Ca_Kabuli_Chr01 | 35560889                | AA                              | GG                 | GG               | INTERGENIC      |               |                    |                    |
| SNP_4565_A_35565066 | NC_021160.1    | Ca_Kabuli_Chr01 | 35565066                | GG                              | AA                 | AA               | INTERGENIC      |               |                    |                    |
| SNP_4566_A_35580402 | NC_021160.1    | Ca_Kabuli_Chr01 | 35580402                | AA                              | TT                 | TT               | INTERGENIC      |               |                    |                    |
| SNP_4567_A_35599172 | NC_021160.1    | Ca_Kabuli_Chr01 | 35599172                | AA                              | CC                 | CC               | INTERGENIC      |               |                    |                    |
| SNP_4568_A_35600276 | NC_021160.1    | Ca_Kabuli_Chr01 | 35600276                | TT                              | CC                 | CC               | INTERGENIC      |               |                    |                    |
| SNP_4569_A_35606185 | NC_021160.1    | Ca_Kabuli_Chr01 | 35606185                | CC                              | AA                 | AA               | INTERGENIC      |               |                    |                    |
| SNP_4570_A_35606594 | NC_021160.1    | Ca_Kabuli_Chr01 | 35606594                | GG                              | AA                 | AA               | INTERGENIC      |               |                    |                    |
| SNP_4571_A_35613888 | NC_021160.1    | Ca_Kabuli_Chr01 | 35613888                | CC                              | TT                 | TT               | INTERGENIC      |               |                    |                    |
| SNP_4572_A_35614152 | NC_021160.1    | Ca_Kabuli_Chr01 | 35614152                | TT                              | CC                 | CC               | INTERGENIC      |               |                    |                    |
| SNP_4573_A_35614164 | NC_021160.1    | Ca_Kabuli_Chr01 | 35614164                | AA                              | GG                 | GG               | INTERGENIC      |               |                    |                    |
| SNP_4574_A_35614173 | NC_021160.1    | Ca_Kabuli_Chr01 | 35614173                | CC                              | TT                 | TT               | INTERGENIC      |               |                    |                    |
| SNP_4575_A_35614265 | NC_021160.1    | Ca_Kabuli_Chr01 | 35614265                | GG                              | AA                 | AA               | INTERGENIC      |               |                    |                    |
| SNP_4576_A_35614312 | NC_021160.1    | Ca_Kabuli_Chr01 | 35614312                | CC                              | TT                 | TT               | INTERGENIC      |               |                    |                    |
| SNP_4577_A_35614370 | NC_021160.1    | Ca_Kabuli_Chr01 | 35614370                | CC                              | AA                 | AA               | INTERGENIC      |               |                    |                    |
| SNP_4578_A_35621987 | NC_021160.1    | Ca_Kabuli_Chr01 | 35621987                | CC                              | AA                 | AA               | INTERGENIC      |               |                    |                    |
| SNP_4579_A_35622123 | NC_021160.1    | Ca_Kabuli_Chr01 | 35622123                | GG                              | AA                 | AA               | INTERGENIC      |               |                    |                    |
| SNP_4580_A_35624353 | NC_021160.1    | Ca_Kabuli_Chr01 | 35624353                | TT                              | GG                 | CC               | INTERGENIC      |               |                    |                    |
| SNP_4581_A_35631968 | NC_021160.1    | Ca_Kabuli_Chr01 | 35631968                | TT                              | CC                 | CC               | INTERGENIC      |               |                    |                    |
| SNP_4582_A_35633174 | NC_021160.1    | Ca_Kabuli_Chr01 | 35633174                | TT                              | CC                 | CC               | INTERGENIC      |               |                    |                    |
| SNP_4583_A_35647110 | NC_021160.1    | Ca_Kabuli_Chr01 | 35647110                | CC                              | TT                 | TT               | INTERGENIC      |               |                    |                    |
| SNP_4584_A_35662135 | NC_021160.1    | Ca_Kabuli_Chr01 | 35662135                | CC                              | AA                 | AA               | INTERGENIC      |               |                    |                    |
| SNP_4585_A_35662165 | NC_021160.1    | Ca_Kabuli_Chr01 | 35662165                | AA                              | GG                 | GG               | INTERGENIC      |               |                    |                    |

| SNPs IDs            | Chromosome IDs | Chromosomes     | Physical positions (bp) | CDC Frontier genome (Reference genome) | (Pusa 1103 & HPNB) | (ILWC 46 & LPNB) | Sequence Components of genome | Gene accession IDs | Putative functions                                           |
|---------------------|----------------|-----------------|-------------------------|----------------------------------------|--------------------|------------------|-------------------------------|--------------------|--------------------------------------------------------------|
| SNP_4586_A_35679254 | NC_021160.1    | Ca_Kabuli_Chr01 | 35679254                | TT                                     | AA                 | AA               | INTERGENIC                    |                    |                                                              |
| SNP_4588_A_35681072 | NC_021160.1    | Ca_Kabuli_Chr01 | 35681072                | GG                                     | TT                 | TT               | INTERGENIC                    |                    |                                                              |
| SNP_4589_A_35681443 | NC_021160.1    | Ca_Kabuli_Chr01 | 35681443                | GG                                     | AA                 | AA               | INTERGENIC                    |                    |                                                              |
| SNP_4590_A_35682644 | NC_021160.1    | Ca_Kabuli_Chr01 | 35682644                | GG                                     | AA                 | AA               | INTERGENIC                    |                    |                                                              |
| SNP_4591_A_35684787 | NC_021160.1    | Ca_Kabuli_Chr01 | 35684787                | AA                                     | TT                 | TT               | INTERGENIC                    |                    |                                                              |
| SNP_4592_A_35684789 | NC_021160.1    | Ca_Kabuli_Chr01 | 35684789                | AA                                     | GG                 | GG               | INTERGENIC                    |                    |                                                              |
| SNP_4593_A_35684795 | NC_021160.1    | Ca_Kabuli_Chr01 | 35684795                | AA                                     | TT                 | TT               | INTERGENIC                    |                    |                                                              |
| SNP_4594_A_35699275 | NC_021160.1    | Ca_Kabuli_Chr01 | 35699275                | TT                                     | CC                 | CC               | INTERGENIC                    |                    |                                                              |
| SNP_4595_A_35710849 | NC_021160.1    | Ca_Kabuli_Chr01 | 35710849                | CC                                     | TT                 | TT               | INTRON                        | 101514628          | mediator of RNA polymerase II transcription subunit 10b-like |
| SNP_4596_A_35712548 | NC_021160.1    | Ca_Kabuli_Chr01 | 35712548                | GG                                     | AA                 | AA               | URR                           | 101514628          | mediator of RNA polymerase II transcription subunit 10b-like |
| SNP_4597_A_35712561 | NC_021160.1    | Ca_Kabuli_Chr01 | 35712561                | GG                                     | TT                 | TT               | URR                           | 101514628          | mediator of RNA polymerase II transcription subunit 10b-like |
| SNP_4598_A_35712566 | NC_021160.1    | Ca_Kabuli_Chr01 | 35712566                | AA                                     | GG                 | GG               | URR                           | 101514628          | mediator of RNA polymerase II transcription subunit 10b-like |
| SNP_4599_A_35715118 | NC_021160.1    | Ca_Kabuli_Chr01 | 35715118                | TT                                     | CC                 | CC               | INTERGENIC                    |                    |                                                              |
| SNP_4600_A_35715120 | NC_021160.1    | Ca_Kabuli_Chr01 | 35715120                | AA                                     | GG                 | GG               | INTERGENIC                    |                    |                                                              |
| SNP_4601_A_35715139 | NC_021160.1    | Ca_Kabuli_Chr01 | 35715139                | TT                                     | CC                 | CC               | INTERGENIC                    |                    |                                                              |
| SNP_4602_A_35724941 | NC_021160.1    | Ca_Kabuli_Chr01 | 35724941                | TT                                     | CC                 | CC               | INTERGENIC                    |                    |                                                              |
| SNP_4603_A_35725361 | NC_021160.1    | Ca_Kabuli_Chr01 | 35725361                | CC                                     | AA                 | AA               | INTERGENIC                    |                    |                                                              |
| SNP_4604_A_35727409 | NC_021160.1    | Ca_Kabuli_Chr01 | 35727409                | CC                                     | TT                 | TT               | INTERGENIC                    |                    |                                                              |
| SNP_4605_A_35744228 | NC_021160.1    | Ca_Kabuli_Chr01 | 35744228                | TT                                     | GG                 | GG               | URR                           | 101514959          | zinc finger HIT domain-containing protein 1 homolog          |
| SNP_4606_A_35751600 | NC_021160.1    | Ca_Kabuli_Chr01 | 35751600                | TT                                     | AA                 | AA               | INTERGENIC                    |                    |                                                              |
| SNP_4607_A_35767281 | NC_021160.1    | Ca_Kabuli_Chr01 | 35767281                | AA                                     | GG                 | GG               | INTERGENIC                    |                    |                                                              |
| SNP_4608_A_35769448 | NC_021160.1    | Ca_Kabuli_Chr01 | 35769448                | AA                                     | TT                 | TT               | INTERGENIC                    |                    |                                                              |

| SNPs IDs            | Chromosome IDs | Chromosomes     | Physical positions (bp) | CDC Frontier (Reference genome) | (Pusa 1103 & HPNB) | (ILWC 46 & LPNB) | Sequence Components of genome | Gene accession IDs | Putative functions |
|---------------------|----------------|-----------------|-------------------------|---------------------------------|--------------------|------------------|-------------------------------|--------------------|--------------------|
| SNP_4609_A_35788472 | NC_021160.1    | Ca_Kabuli_Chr01 | 35788472                | TT                              | GG                 | GG               | INTERGENIC                    |                    |                    |
| SNP_4610_A_35788485 | NC_021160.1    | Ca_Kabuli_Chr01 | 35788485                | CC                              | TT                 | TT               | INTERGENIC                    |                    |                    |
| SNP_4611_A_35791597 | NC_021160.1    | Ca_Kabuli_Chr01 | 35791597                | GG                              | CC                 | CC               | URR                           | 101488681          | Unknown function   |
| SNP_4612_A_35813415 | NC_021160.1    | Ca_Kabuli_Chr01 | 35813415                | TT                              | CC                 | CC               | INTERGENIC                    |                    |                    |
| SNP_4613_A_35828111 | NC_021160.1    | Ca_Kabuli_Chr01 | 35828111                | TT                              | CC                 | CC               | INTERGENIC                    |                    |                    |
| SNP_4614_A_35832179 | NC_021160.1    | Ca_Kabuli_Chr01 | 35832179                | AA                              | GG                 | GG               | INTERGENIC                    |                    |                    |
| SNP_4615_A_35842140 | NC_021160.1    | Ca_Kabuli_Chr01 | 35842140                | AA                              | TT                 | TT               | INTERGENIC                    |                    |                    |
| SNP_4616_A_35842997 | NC_021160.1    | Ca_Kabuli_Chr01 | 35842997                | CC                              | TT                 | TT               | INTERGENIC                    |                    |                    |
| SNP_4617_A_35856259 | NC_021160.1    | Ca_Kabuli_Chr01 | 35856259                | GG                              | AA                 | AA               | INTERGENIC                    |                    |                    |
| SNP_4618_A_35856328 | NC_021160.1    | Ca_Kabuli_Chr01 | 35856328                | TT                              | CC                 | CC               | INTERGENIC                    |                    |                    |
| SNP_4619_A_35856355 | NC_021160.1    | Ca_Kabuli_Chr01 | 35856355                | GG                              | AA                 | AA               | INTERGENIC                    |                    |                    |
| SNP_4620_A_35856373 | NC_021160.1    | Ca_Kabuli_Chr01 | 35856373                | TT                              | AA                 | AA               | INTERGENIC                    |                    |                    |
| SNP_4621_A_35856424 | NC_021160.1    | Ca_Kabuli_Chr01 | 35856424                | GG                              | CC                 | CC               | INTERGENIC                    |                    |                    |
| SNP_4622_A_35856427 | NC_021160.1    | Ca_Kabuli_Chr01 | 35856427                | GG                              | AA                 | AA               | INTERGENIC                    |                    |                    |
| SNP_4623_A_35856635 | NC_021160.1    | Ca_Kabuli_Chr01 | 35856635                | GG                              | CC                 | CC               | INTERGENIC                    |                    |                    |
| SNP_4624_A_35856779 | NC_021160.1    | Ca_Kabuli_Chr01 | 35856779                | CC                              | TT                 | TT               | INTERGENIC                    |                    |                    |
| SNP_4625_A_35865971 | NC_021160.1    | Ca_Kabuli_Chr01 | 35865971                | TT                              | CC                 | CC               | INTERGENIC                    |                    |                    |
| SNP_4626_A_35874522 | NC_021160.1    | Ca_Kabuli_Chr01 | 35874522                | TT                              | CC                 | CC               | INTERGENIC                    |                    |                    |
| SNP_4629_A_35903016 | NC_021160.1    | Ca_Kabuli_Chr01 | 35903016                | TT                              | CC                 | CC               | INTERGENIC                    |                    |                    |
| SNP_4630_A_35907431 | NC_021160.1    | Ca_Kabuli_Chr01 | 35907431                | AA                              | GG                 | GG               | INTERGENIC                    |                    |                    |
| SNP_4631_A_35908939 | NC_021160.1    | Ca_Kabuli_Chr01 | 35908939                | TT                              | CC                 | CC               | INTERGENIC                    |                    |                    |
| SNP_4632_A_35910525 | NC_021160.1    | Ca_Kabuli_Chr01 | 35910525                | CC                              | TT                 | TT               | INTERGENIC                    |                    |                    |

| SNPs IDs            | Chromosome IDs | Chromosomes     | Physical positions (bp) | CDC Frontier (Reference genome) | (Pusa 1103 & HPNB) | (ILWC 46 & LPNB) | Sequence genome | Components of | Gene accession IDs | Putative functions |
|---------------------|----------------|-----------------|-------------------------|---------------------------------|--------------------|------------------|-----------------|---------------|--------------------|--------------------|
| SNP_4633_A_35924222 | NC_021160.1    | Ca_Kabuli_Chr01 | 35924222                | AA                              | CC                 | CC               | INTERGENIC      |               |                    |                    |
| SNP_4634_A_35946059 | NC_021160.1    | Ca_Kabuli_Chr01 | 35946059                | AA                              | GG                 | GG               | INTERGENIC      |               |                    |                    |
| SNP_4635_A_35946076 | NC_021160.1    | Ca_Kabuli_Chr01 | 35946076                | AA                              | TT                 | TT               | INTERGENIC      |               |                    |                    |
| SNP_4636_A_35946082 | NC_021160.1    | Ca_Kabuli_Chr01 | 35946082                | CC                              | GG                 | GG               | INTERGENIC      |               |                    |                    |
| SNP_4637_A_35946766 | NC_021160.1    | Ca_Kabuli_Chr01 | 35946766                | GG                              | AA                 | AA               | INTERGENIC      |               |                    |                    |
| SNP_4638_A_35946836 | NC_021160.1    | Ca_Kabuli_Chr01 | 35946836                | TT                              | CC                 | CC               | INTERGENIC      |               |                    |                    |
| SNP_4639_A_35946837 | NC_021160.1    | Ca_Kabuli_Chr01 | 35946837                | GG                              | AA                 | AA               | INTERGENIC      |               |                    |                    |
| SNP_4640_A_35946876 | NC_021160.1    | Ca_Kabuli_Chr01 | 35946876                | CC                              | GG                 | GG               | INTERGENIC      |               |                    |                    |
| SNP_4641_A_35946951 | NC_021160.1    | Ca_Kabuli_Chr01 | 35946951                | AA                              | GG                 | GG               | INTERGENIC      |               |                    |                    |
| SNP_4642_A_35946984 | NC_021160.1    | Ca_Kabuli_Chr01 | 35946984                | AA                              | GG                 | GG               | INTERGENIC      |               |                    |                    |
| SNP_4643_A_35947016 | NC_021160.1    | Ca_Kabuli_Chr01 | 35947016                | AA                              | GG                 | GG               | INTERGENIC      |               |                    |                    |
| SNP_4645_A_35947059 | NC_021160.1    | Ca_Kabuli_Chr01 | 35947059                | TT                              | GG                 | GG               | INTERGENIC      |               |                    |                    |
| SNP_4646_A_35947087 | NC_021160.1    | Ca_Kabuli_Chr01 | 35947087                | AA                              | GG                 | GG               | INTERGENIC      |               |                    |                    |
| SNP_4647_A_35947330 | NC_021160.1    | Ca_Kabuli_Chr01 | 35947330                | GG                              | AA                 | AA               | INTERGENIC      |               |                    |                    |
| SNP_4648_A_35947341 | NC_021160.1    | Ca_Kabuli_Chr01 | 35947341                | AA                              | TT                 | TT               | INTERGENIC      |               |                    |                    |
| SNP_4650_A_35977337 | NC_021160.1    | Ca_Kabuli_Chr01 | 35977337                | AA                              | GG                 | GG               | INTERGENIC      |               |                    |                    |
| SNP_4651_A_35977371 | NC_021160.1    | Ca_Kabuli_Chr01 | 35977371                | CC                              | TT                 | TT               | INTERGENIC      |               |                    |                    |
| SNP_4653_A_35978414 | NC_021160.1    | Ca_Kabuli_Chr01 | 35978414                | TT                              | CC                 | CC               | INTERGENIC      |               |                    |                    |
| SNP_4654_A_36012893 | NC_021160.1    | Ca_Kabuli_Chr01 | 36012893                | GG                              | AA                 | AA               | INTERGENIC      |               |                    |                    |
| SNP_4655_A_36012896 | NC_021160.1    | Ca_Kabuli_Chr01 | 36012896                | TT                              | AA                 | AA               | INTERGENIC      |               |                    |                    |
| SNP_4656_A_36012953 | NC_021160.1    | Ca_Kabuli_Chr01 | 36012953                | AA                              | CC                 | CC               | INTERGENIC      |               |                    |                    |
| SNP_4657_A_36012956 | NC_021160.1    | Ca_Kabuli_Chr01 | 36012956                | TT                              | AA                 | AA               | INTERGENIC      |               |                    |                    |

| SNPs IDs            | Chromosome IDs | Chromosomes     | Physical positions (bp) | CDC Frontier genome (Reference genome) | (Pusa 1103 & HPNB) | (ILWC 46 & LPNB) | Sequence genome | Components of | Gene accession IDs | Putative functions |
|---------------------|----------------|-----------------|-------------------------|----------------------------------------|--------------------|------------------|-----------------|---------------|--------------------|--------------------|
| SNP_4658_A_36012985 | NC_021160.1    | Ca_Kabuli_Chr01 | 36012985                | AA                                     | GG                 | GG               | INTERGENIC      |               |                    |                    |
| SNP_4659_A_36012995 | NC_021160.1    | Ca_Kabuli_Chr01 | 36012995                | AA                                     | GG                 | GG               | INTERGENIC      |               |                    |                    |
| SNP_4660_A_36012998 | NC_021160.1    | Ca_Kabuli_Chr01 | 36012998                | CC                                     | TT                 | TT               | INTERGENIC      |               |                    |                    |
| SNP_4661_A_36013001 | NC_021160.1    | Ca_Kabuli_Chr01 | 36013001                | AA                                     | CC                 | CC               | INTERGENIC      |               |                    |                    |
| SNP_4662_A_36013071 | NC_021160.1    | Ca_Kabuli_Chr01 | 36013071                | GG                                     | TT                 | TT               | INTERGENIC      |               |                    |                    |
| SNP_4663_A_36013119 | NC_021160.1    | Ca_Kabuli_Chr01 | 36013119                | TT                                     | CC                 | CC               | INTERGENIC      |               |                    |                    |
| SNP_4664_A_36013344 | NC_021160.1    | Ca_Kabuli_Chr01 | 36013344                | CC                                     | TT                 | TT               | INTERGENIC      |               |                    |                    |
| SNP_4665_A_36013359 | NC_021160.1    | Ca_Kabuli_Chr01 | 36013359                | TT                                     | AA                 | AA               | INTERGENIC      |               |                    |                    |
| SNP_4666_A_36013365 | NC_021160.1    | Ca_Kabuli_Chr01 | 36013365                | AA                                     | CC                 | CC               | INTERGENIC      |               |                    |                    |
| SNP_4667_A_36013368 | NC_021160.1    | Ca_Kabuli_Chr01 | 36013368                | TT                                     | CC                 | CC               | INTERGENIC      |               |                    |                    |
| SNP_4668_A_36041340 | NC_021160.1    | Ca_Kabuli_Chr01 | 36041340                | TT                                     | CC                 | CC               | INTERGENIC      |               |                    |                    |
| SNP_4671_A_36068882 | NC_021160.1    | Ca_Kabuli_Chr01 | 36068882                | CC                                     | TT                 | TT               | INTERGENIC      |               |                    |                    |
| SNP_4672_A_36081441 | NC_021160.1    | Ca_Kabuli_Chr01 | 36081441                | AA                                     | GG                 | GG               | INTERGENIC      |               |                    |                    |
| SNP_4673_A_36081457 | NC_021160.1    | Ca_Kabuli_Chr01 | 36081457                | AA                                     | GG                 | GG               | INTERGENIC      |               |                    |                    |
| SNP_4674_A_36081496 | NC_021160.1    | Ca_Kabuli_Chr01 | 36081496                | AA                                     | GG                 | GG               | INTERGENIC      |               |                    |                    |
| SNP_4675_A_36081559 | NC_021160.1    | Ca_Kabuli_Chr01 | 36081559                | AA                                     | TT                 | TT               | INTERGENIC      |               |                    |                    |
| SNP_4676_A_36081589 | NC_021160.1    | Ca_Kabuli_Chr01 | 36081589                | AA                                     | GG                 | GG               | INTERGENIC      |               |                    |                    |
| SNP_4677_A_36081590 | NC_021160.1    | Ca_Kabuli_Chr01 | 36081590                | CC                                     | TT                 | TT               | INTERGENIC      |               |                    |                    |
| SNP_4678_A_36081851 | NC_021160.1    | Ca_Kabuli_Chr01 | 36081851                | TT                                     | CC                 | CC               | INTERGENIC      |               |                    |                    |
| SNP_4679_A_36081988 | NC_021160.1    | Ca_Kabuli_Chr01 | 36081988                | AA                                     | CC                 | CC               | INTERGENIC      |               |                    |                    |
| SNP_4680_A_36082048 | NC_021160.1    | Ca_Kabuli_Chr01 | 36082048                | TT                                     | GG                 | GG               | INTERGENIC      |               |                    |                    |
| SNP_4681_A_36082060 | NC_021160.1    | Ca_Kabuli_Chr01 | 36082060                | GG                                     | AA                 | AA               | INTERGENIC      |               |                    |                    |

| SNPs IDs            | Chromosome IDs | Chromosomes     | Physical positions (bp) | CDC Frontier genome (Reference genome) | (Pusa 1103 & HPNB) | (ILWC 46 & LPNB) | Sequence Components of genome | Gene accession IDs | Putative functions           |
|---------------------|----------------|-----------------|-------------------------|----------------------------------------|--------------------|------------------|-------------------------------|--------------------|------------------------------|
| SNP_4682_A_36104755 | NC_021160.1    | Ca_Kabuli_Chr01 | 36104755                | AA                                     | CC                 | CC               | INTERGENIC                    |                    |                              |
| SNP_4683_A_36117902 | NC_021160.1    | Ca_Kabuli_Chr01 | 36117902                | GG                                     | AA                 | AA               | DRR                           | 101494844          | uncharacterized LOC101494844 |
| SNP_4685_A_36171498 | NC_021160.1    | Ca_Kabuli_Chr01 | 36171498                | TT                                     | CC                 | CC               | INTERGENIC                    |                    |                              |
| SNP_4686_A_36172019 | NC_021160.1    | Ca_Kabuli_Chr01 | 36172019                | GG                                     | TT                 | TT               | INTERGENIC                    |                    |                              |
| SNP_4687_A_36225691 | NC_021160.1    | Ca_Kabuli_Chr01 | 36225691                | AA                                     | GG                 | GG               | INTERGENIC                    |                    |                              |
| SNP_4688_A_36249351 | NC_021160.1    | Ca_Kabuli_Chr01 | 36249351                | AA                                     | CC                 | CC               | INTERGENIC                    |                    |                              |
| SNP_4689_A_36249358 | NC_021160.1    | Ca_Kabuli_Chr01 | 36249358                | CC                                     | AA                 | AA               | INTERGENIC                    |                    |                              |
| SNP_4690_A_36268874 | NC_021160.1    | Ca_Kabuli_Chr01 | 36268874                | TT                                     | CC                 | CC               | INTERGENIC                    |                    |                              |
| SNP_4691_A_36282959 | NC_021160.1    | Ca_Kabuli_Chr01 | 36282959                | GG                                     | AA                 | AA               | INTERGENIC                    |                    |                              |
| SNP_4692_A_36283052 | NC_021160.1    | Ca_Kabuli_Chr01 | 36283052                | CC                                     | GG                 | GG               | INTERGENIC                    |                    |                              |
| SNP_4693_A_36283366 | NC_021160.1    | Ca_Kabuli_Chr01 | 36283366                | TT                                     | GG                 | GG               | INTERGENIC                    |                    |                              |
| SNP_4694_A_36292448 | NC_021160.1    | Ca_Kabuli_Chr01 | 36292448                | CC                                     | TT                 | TT               | INTERGENIC                    |                    |                              |
| SNP_4695_A_36297212 | NC_021160.1    | Ca_Kabuli_Chr01 | 36297212                | CC                                     | TT                 | TT               | INTERGENIC                    |                    |                              |
| SNP_4696_A_36297225 | NC_021160.1    | Ca_Kabuli_Chr01 | 36297225                | CC                                     | TT                 | TT               | INTERGENIC                    |                    |                              |
| SNP_4697_A_36297248 | NC_021160.1    | Ca_Kabuli_Chr01 | 36297248                | GG                                     | AA                 | AA               | INTERGENIC                    |                    |                              |
| SNP_4698_A_36297251 | NC_021160.1    | Ca_Kabuli_Chr01 | 36297251                | AA                                     | TT                 | TT               | INTERGENIC                    |                    |                              |
| SNP_4699_A_36297274 | NC_021160.1    | Ca_Kabuli_Chr01 | 36297274                | TT                                     | GG                 | GG               | INTERGENIC                    |                    |                              |
| SNP_4700_A_36300734 | NC_021160.1    | Ca_Kabuli_Chr01 | 36300734                | CC                                     | AA                 | AA               | INTERGENIC                    |                    |                              |
| SNP_4701_A_36300739 | NC_021160.1    | Ca_Kabuli_Chr01 | 36300739                | CC                                     | GG                 | GG               | INTERGENIC                    |                    |                              |
| SNP_4702_A_36304182 | NC_021160.1    | Ca_Kabuli_Chr01 | 36304182                | CC                                     | AA                 | AA               | INTERGENIC                    |                    |                              |
| SNP_4703_A_36319209 | NC_021160.1    | Ca_Kabuli_Chr01 | 36319209                | CC                                     | TT                 | TT               | INTERGENIC                    |                    |                              |
| SNP_4704_A_36319226 | NC_021160.1    | Ca_Kabuli_Chr01 | 36319226                | CC                                     | TT                 | TT               | INTERGENIC                    |                    |                              |

| SNPs IDs            | Chromosome IDs | Chromosomes     | Physical positions (bp) | CDC Frontier genome (Reference genome) | (Pusa 1103 & HPNB) | (ILWC 46 & LPNB) | Sequence Components of genome | Gene accession IDs | Putative functions                                  |
|---------------------|----------------|-----------------|-------------------------|----------------------------------------|--------------------|------------------|-------------------------------|--------------------|-----------------------------------------------------|
| SNP_4705_A_36342208 | NC_021160.1    | Ca_Kabuli_Chr01 | 36342208                | GG                                     | TT                 | TT               | INTERGENIC                    |                    |                                                     |
| SNP_4706_A_36346299 | NC_021160.1    | Ca_Kabuli_Chr01 | 36346299                | GG                                     | AA                 | AA               | INTERGENIC                    |                    |                                                     |
| SNP_4707_A_36410091 | NC_021160.1    | Ca_Kabuli_Chr01 | 36410091                | TT                                     | GG                 | GG               | URR                           | 101490332          | NEDD8 ultimate buster 1                             |
| SNP_4708_A_36410221 | NC_021160.1    | Ca_Kabuli_Chr01 | 36410221                | AA                                     | GG                 | GG               | URR                           | 101490332          | NEDD8 ultimate buster 1                             |
| SNP_4709_A_36542372 | NC_021160.1    | Ca_Kabuli_Chr01 | 36542372                | AA                                     | CC                 | CC               | INTRON                        | 101492030          | origin of replication complex subunit 3             |
| SNP_4710_A_36572256 | NC_021160.1    | Ca_Kabuli_Chr01 | 36572256                | TT                                     | CC                 | CC               | DRR                           | 101492369          | uncharacterized LOC101492369                        |
| SNP_4711_A_36630372 | NC_021160.1    | Ca_Kabuli_Chr01 | 36630372                | TT                                     | CC                 | CC               | INTERGENIC                    |                    |                                                     |
| SNP_4712_A_36661470 | NC_021160.1    | Ca_Kabuli_Chr01 | 36661470                | GG                                     | AA                 | AA               | INTERGENIC                    |                    |                                                     |
| SNP_4713_A_36661471 | NC_021160.1    | Ca_Kabuli_Chr01 | 36661471                | GG                                     | AA                 | AA               | INTERGENIC                    |                    |                                                     |
| SNP_4714_A_36711602 | NC_021160.1    | Ca_Kabuli_Chr01 | 36711602                | CC                                     | TT                 | TT               | INTERGENIC                    |                    |                                                     |
| SNP_4715_A_36720129 | NC_021160.1    | Ca_Kabuli_Chr01 | 36720129                | CC                                     | TT                 | TT               | INTRON                        | 101497127          | probable pectinesterase/pectinesterase inhibitor 32 |
| SNP_4716_A_36720238 | NC_021160.1    | Ca_Kabuli_Chr01 | 36720238                | TT                                     | GG                 | GG               | NON_SYNONYMOUS_CODING         | 101497127          | probable pectinesterase/pectinesterase inhibitor 32 |
| SNP_4717_A_36720362 | NC_021160.1    | Ca_Kabuli_Chr01 | 36720362                | CC                                     | GG                 | GG               | SYNONYMOUS_CODING             | 101497127          | probable pectinesterase/pectinesterase inhibitor 32 |
| SNP_4718_A_36720469 | NC_021160.1    | Ca_Kabuli_Chr01 | 36720469                | TT                                     | CC                 | CC               | NON_SYNONYMOUS_CODING         | 101497127          | probable pectinesterase/pectinesterase inhibitor 32 |
| SNP_4719_A_36720512 | NC_021160.1    | Ca_Kabuli_Chr01 | 36720512                | AA                                     | CC                 | CC               | NON_SYNONYMOUS_CODING         | 101497127          | probable pectinesterase/pectinesterase inhibitor 32 |
| SNP_4720_A_36720676 | NC_021160.1    | Ca_Kabuli_Chr01 | 36720676                | CC                                     | TT                 | TT               | INTRON                        | 101497127          | probable pectinesterase/pectinesterase inhibitor 32 |
| SNP_4721_A_36720726 | NC_021160.1    | Ca_Kabuli_Chr01 | 36720726                | AA                                     | TT                 | TT               | INTRON                        | 101497127          | probable pectinesterase/pectinesterase inhibitor 32 |
| SNP_4722_A_36720753 | NC_021160.1    | Ca_Kabuli_Chr01 | 36720753                | AA                                     | GG                 | GG               | INTRON                        | 101497127          | probable pectinesterase/pectinesterase inhibitor 32 |
| SNP_4723_A_36720797 | NC_021160.1    | Ca_Kabuli_Chr01 | 36720797                | TT                                     | CC                 | CC               | INTRON                        | 101497127          | probable pectinesterase/pectinesterase inhibitor 32 |
| SNP_4724_A_36721516 | NC_021160.1    | Ca_Kabuli_Chr01 | 36721516                | AA                                     | GG                 | GG               | NON_SYNONYMOUS_CODING         | 101497127          | probable pectinesterase/pectinesterase inhibitor 32 |
| SNP_4725_A_36721673 | NC_021160.1    | Ca_Kabuli_Chr01 | 36721673                | CC                                     | TT                 | TT               | SYNONYMOUS_CODING             | 101497127          | probable pectinesterase/pectinesterase inhibitor 32 |
| SNP_4726_A_36721753 | NC_021160.1    | Ca_Kabuli_Chr01 | 36721753                | CC                                     | TT                 | TT               | NON_SYNONYMOUS_CODING         | 101497127          | probable pectinesterase/pectinesterase inhibitor 32 |



| SNPs IDs            | Chromosome IDs | Chromosomes     | Physical positions (bp) | CDC Frontier (Reference genome) | (Pusa 1103 & HPNB) | (ILWC 46 & LPNB) | Sequence Components of genome | Gene accession IDs | Putative functions                                  |
|---------------------|----------------|-----------------|-------------------------|---------------------------------|--------------------|------------------|-------------------------------|--------------------|-----------------------------------------------------|
| SNP_4727_A_36722074 | NC_021160.1    | Ca_Kabuli_Chr01 | 36722074                | AA                              | GG                 | GG               | URR                           | 101497127          | probable pectinesterase/pectinesterase inhibitor 32 |
| SNP_4728_A_36722108 | NC_021160.1    | Ca_Kabuli_Chr01 | 36722108                | TT                              | GG                 | GG               | URR                           | 101497127          | probable pectinesterase/pectinesterase inhibitor 32 |
| SNP_4729_A_36724411 | NC_021160.1    | Ca_Kabuli_Chr01 | 36724411                | TT                              | GG                 | GG               | INTERGENIC                    |                    |                                                     |
| SNP_4730_A_36724418 | NC_021160.1    | Ca_Kabuli_Chr01 | 36724418                | GG                              | TT                 | TT               | INTERGENIC                    |                    |                                                     |
| SNP_4731_A_36724484 | NC_021160.1    | Ca_Kabuli_Chr01 | 36724484                | CC                              | AA                 | AA               | INTERGENIC                    |                    |                                                     |
| SNP_4732_A_36724490 | NC_021160.1    | Ca_Kabuli_Chr01 | 36724490                | TT                              | AA                 | AA               | INTERGENIC                    |                    |                                                     |
| SNP_4733_A_36724560 | NC_021160.1    | Ca_Kabuli_Chr01 | 36724560                | GG                              | AA                 | AA               | INTERGENIC                    |                    |                                                     |
| SNP_4734_A_36724627 | NC_021160.1    | Ca_Kabuli_Chr01 | 36724627                | AA                              | GG                 | GG               | INTERGENIC                    |                    |                                                     |
| SNP_4735_A_36724684 | NC_021160.1    | Ca_Kabuli_Chr01 | 36724684                | TT                              | AA                 | AA               | INTERGENIC                    |                    |                                                     |
| SNP_4736_A_36724691 | NC_021160.1    | Ca_Kabuli_Chr01 | 36724691                | GG                              | TT                 | TT               | INTERGENIC                    |                    |                                                     |
| SNP_4737_A_36724696 | NC_021160.1    | Ca_Kabuli_Chr01 | 36724696                | GG                              | CC                 | CC               | INTERGENIC                    |                    |                                                     |
| SNP_4738_A_36724698 | NC_021160.1    | Ca_Kabuli_Chr01 | 36724698                | TT                              | CC                 | CC               | INTERGENIC                    |                    |                                                     |
| SNP_4739_A_36724701 | NC_021160.1    | Ca_Kabuli_Chr01 | 36724701                | CC                              | TT                 | TT               | INTERGENIC                    |                    |                                                     |
| SNP_4740_A_36724815 | NC_021160.1    | Ca_Kabuli_Chr01 | 36724815                | GG                              | AA                 | AA               | INTERGENIC                    |                    |                                                     |
| SNP_4741_A_36724912 | NC_021160.1    | Ca_Kabuli_Chr01 | 36724912                | AA                              | TT                 | TT               | INTERGENIC                    |                    |                                                     |
| SNP_4742_A_36725129 | NC_021160.1    | Ca_Kabuli_Chr01 | 36725129                | TT                              | CC                 | CC               | INTERGENIC                    |                    |                                                     |
| SNP_4743_A_36725172 | NC_021160.1    | Ca_Kabuli_Chr01 | 36725172                | TT                              | CC                 | CC               | INTERGENIC                    |                    |                                                     |
| SNP_4744_A_36725211 | NC_021160.1    | Ca_Kabuli_Chr01 | 36725211                | TT                              | CC                 | CC               | INTERGENIC                    |                    |                                                     |
| SNP_4745_A_36725374 | NC_021160.1    | Ca_Kabuli_Chr01 | 36725374                | TT                              | GG                 | GG               | INTERGENIC                    |                    |                                                     |
| SNP_4746_A_36725414 | NC_021160.1    | Ca_Kabuli_Chr01 | 36725414                | TT                              | CC                 | CC               | INTERGENIC                    |                    |                                                     |
| SNP_4747_A_36725466 | NC_021160.1    | Ca_Kabuli_Chr01 | 36725466                | AA                              | GG                 | GG               | INTERGENIC                    |                    |                                                     |
| SNP_4748_A_36725513 | NC_021160.1    | Ca_Kabuli_Chr01 | 36725513                | CC                              | TT                 | TT               | INTERGENIC                    |                    |                                                     |

| SNPs IDs            | Chromosome IDs | Chromosomes     | Physical positions (bp) | CDC Frontier (Reference genome) | (Pusa 1103 & HPNB) | (ILWC 46 & LPNB) | Sequence genome | Components of | Gene accession IDs | Putative functions |
|---------------------|----------------|-----------------|-------------------------|---------------------------------|--------------------|------------------|-----------------|---------------|--------------------|--------------------|
| SNP_4749_A_36725615 | NC_021160.1    | Ca_Kabuli_Chr01 | 36725615                | CC                              | GG                 | GG               | INTERGENIC      |               |                    |                    |
| SNP_4750_A_36725674 | NC_021160.1    | Ca_Kabuli_Chr01 | 36725674                | TT                              | CC                 | CC               | INTERGENIC      |               |                    |                    |
| SNP_4751_A_36725740 | NC_021160.1    | Ca_Kabuli_Chr01 | 36725740                | GG                              | TT                 | TT               | INTERGENIC      |               |                    |                    |
| SNP_4752_A_36725879 | NC_021160.1    | Ca_Kabuli_Chr01 | 36725879                | TT                              | AA                 | AA               | INTERGENIC      |               |                    |                    |
| SNP_4753_A_36725954 | NC_021160.1    | Ca_Kabuli_Chr01 | 36725954                | GG                              | TT                 | TT               | INTERGENIC      |               |                    |                    |
| SNP_4754_A_36725986 | NC_021160.1    | Ca_Kabuli_Chr01 | 36725986                | AA                              | GG                 | GG               | INTERGENIC      |               |                    |                    |
| SNP_4755_A_36726144 | NC_021160.1    | Ca_Kabuli_Chr01 | 36726144                | CC                              | TT                 | TT               | INTERGENIC      |               |                    |                    |
| SNP_4756_A_36726147 | NC_021160.1    | Ca_Kabuli_Chr01 | 36726147                | TT                              | CC                 | CC               | INTERGENIC      |               |                    |                    |
| SNP_4757_A_36726178 | NC_021160.1    | Ca_Kabuli_Chr01 | 36726178                | CC                              | AA                 | AA               | INTERGENIC      |               |                    |                    |
| SNP_4758_A_36726188 | NC_021160.1    | Ca_Kabuli_Chr01 | 36726188                | AA                              | CC                 | CC               | INTERGENIC      |               |                    |                    |
| SNP_4759_A_36726213 | NC_021160.1    | Ca_Kabuli_Chr01 | 36726213                | CC                              | TT                 | TT               | INTERGENIC      |               |                    |                    |
| SNP_4760_A_36726216 | NC_021160.1    | Ca_Kabuli_Chr01 | 36726216                | CC                              | AA                 | AA               | INTERGENIC      |               |                    |                    |
| SNP_4761_A_36726228 | NC_021160.1    | Ca_Kabuli_Chr01 | 36726228                | AA                              | GG                 | GG               | INTERGENIC      |               |                    |                    |
| SNP_4762_A_36726281 | NC_021160.1    | Ca_Kabuli_Chr01 | 36726281                | AA                              | GG                 | GG               | INTERGENIC      |               |                    |                    |
| SNP_4763_A_36726312 | NC_021160.1    | Ca_Kabuli_Chr01 | 36726312                | AA                              | CC                 | CC               | INTERGENIC      |               |                    |                    |
| SNP_4764_A_36726451 | NC_021160.1    | Ca_Kabuli_Chr01 | 36726451                | TT                              | CC                 | CC               | INTERGENIC      |               |                    |                    |
| SNP_4765_A_36726454 | NC_021160.1    | Ca_Kabuli_Chr01 | 36726454                | AA                              | CC                 | CC               | INTERGENIC      |               |                    |                    |
| SNP_4767_A_36726518 | NC_021160.1    | Ca_Kabuli_Chr01 | 36726518                | AA                              | GG                 | GG               | INTERGENIC      |               |                    |                    |
| SNP_4768_A_36726535 | NC_021160.1    | Ca_Kabuli_Chr01 | 36726535                | CC                              | TT                 | TT               | INTERGENIC      |               |                    |                    |
| SNP_4769_A_36726641 | NC_021160.1    | Ca_Kabuli_Chr01 | 36726641                | GG                              | AA                 | AA               | INTERGENIC      |               |                    |                    |
| SNP_4770_A_36726647 | NC_021160.1    | Ca_Kabuli_Chr01 | 36726647                | TT                              | CC                 | CC               | INTERGENIC      |               |                    |                    |
| SNP_4771_A_36726731 | NC_021160.1    | Ca_Kabuli_Chr01 | 36726731                | TT                              | CC                 | CC               | INTERGENIC      |               |                    |                    |

| SNPs IDs            | Chromosome IDs | Chromosomes     | Physical positions (bp) | CDC Frontier genome (Reference genome) | (Pusa 1103 & HPNB) | (ILWC 46 & LPNB) | Sequence Components of genome | Gene accession IDs | Putative functions                                 |
|---------------------|----------------|-----------------|-------------------------|----------------------------------------|--------------------|------------------|-------------------------------|--------------------|----------------------------------------------------|
| SNP_4773_A_36727840 | NC_021160.1    | Ca_Kabuli_Chr01 | 36727840                | GG                                     | AA                 | AA               | INTERGENIC                    |                    |                                                    |
| SNP_4774_A_36727843 | NC_021160.1    | Ca_Kabuli_Chr01 | 36727843                | GG                                     | CC                 | CC               | INTERGENIC                    |                    |                                                    |
| SNP_4775_A_36727911 | NC_021160.1    | Ca_Kabuli_Chr01 | 36727911                | TT                                     | CC                 | CC               | INTERGENIC                    |                    |                                                    |
| SNP_4776_A_36727949 | NC_021160.1    | Ca_Kabuli_Chr01 | 36727949                | CC                                     | GG                 | GG               | INTERGENIC                    |                    |                                                    |
| SNP_4777_A_36728056 | NC_021160.1    | Ca_Kabuli_Chr01 | 36728056                | AA                                     | CC                 | CC               | INTERGENIC                    |                    |                                                    |
| SNP_4778_A_36728086 | NC_021160.1    | Ca_Kabuli_Chr01 | 36728086                | GG                                     | TT                 | TT               | INTERGENIC                    |                    |                                                    |
| SNP_4779_A_36728207 | NC_021160.1    | Ca_Kabuli_Chr01 | 36728207                | GG                                     | AA                 | AA               | INTERGENIC                    |                    |                                                    |
| SNP_4780_A_36728235 | NC_021160.1    | Ca_Kabuli_Chr01 | 36728235                | AA                                     | TT                 | TT               | INTERGENIC                    |                    |                                                    |
| SNP_4781_A_36728412 | NC_021160.1    | Ca_Kabuli_Chr01 | 36728412                | CC                                     | TT                 | TT               | INTERGENIC                    |                    |                                                    |
| SNP_4782_A_36737930 | NC_021160.1    | Ca_Kabuli_Chr01 | 36737930                | AA                                     | GG                 | GG               | INTRON                        | 101493574          | CBL-interacting serine/threonine-protein kinase 23 |
| SNP_4783_A_36738279 | NC_021160.1    | Ca_Kabuli_Chr01 | 36738279                | CC                                     | AA                 | AA               | INTRON                        | 101493574          | CBL-interacting serine/threonine-protein kinase 23 |
| SNP_4784_A_36766234 | NC_021160.1    | Ca_Kabuli_Chr01 | 36766234                | TT                                     | CC                 | CC               | INTERGENIC                    |                    |                                                    |
| SNP_4785_A_36833990 | NC_021160.1    | Ca_Kabuli_Chr01 | 36833990                | TT                                     | CC                 | CC               | INTERGENIC                    |                    |                                                    |
| SNP_4786_A_36842671 | NC_021160.1    | Ca_Kabuli_Chr01 | 36842671                | CC                                     | TT                 | TT               | INTERGENIC                    |                    |                                                    |
| SNP_4787_A_36842679 | NC_021160.1    | Ca_Kabuli_Chr01 | 36842679                | GG                                     | AA                 | AA               | INTERGENIC                    |                    |                                                    |
| SNP_4788_A_36846500 | NC_021160.1    | Ca_Kabuli_Chr01 | 36846500                | CC                                     | GG                 | GG               | INTERGENIC                    |                    |                                                    |
| SNP_4789_A_36846642 | NC_021160.1    | Ca_Kabuli_Chr01 | 36846642                | CC                                     | TT                 | TT               | INTERGENIC                    |                    |                                                    |
| SNP_4790_A_36846677 | NC_021160.1    | Ca_Kabuli_Chr01 | 36846677                | TT                                     | CC                 | CC               | INTERGENIC                    |                    |                                                    |
| SNP_4791_A_36848218 | NC_021160.1    | Ca_Kabuli_Chr01 | 36848218                | TT                                     | CC                 | CC               | INTERGENIC                    |                    |                                                    |
| SNP_4792_A_36848226 | NC_021160.1    | Ca_Kabuli_Chr01 | 36848226                | TT                                     | CC                 | CC               | INTERGENIC                    |                    |                                                    |
| SNP_4793_A_36869020 | NC_021160.1    | Ca_Kabuli_Chr01 | 36869020                | AA                                     | GG                 | GG               | INTERGENIC                    |                    |                                                    |
| SNP_4794_A_36869134 | NC_021160.1    | Ca_Kabuli_Chr01 | 36869134                | GG                                     | TT                 | TT               | INTERGENIC                    |                    |                                                    |

| SNPs IDs            | Chromosome IDs | Chromosomes     | Physical positions (bp) | CDC Frontier (Reference genome) | (Pusa 1103 & HPNB) | (ILWC 46 & LPNB) | Sequence genome | Components of | Gene accession IDs | Putative functions |
|---------------------|----------------|-----------------|-------------------------|---------------------------------|--------------------|------------------|-----------------|---------------|--------------------|--------------------|
| SNP_4795_A_36869170 | NC_021160.1    | Ca_Kabuli_Chr01 | 36869170                | TT                              | GG                 | GG               | INTERGENIC      |               |                    |                    |
| SNP_4796_A_36869173 | NC_021160.1    | Ca_Kabuli_Chr01 | 36869173                | AA                              | GG                 | CC               | INTERGENIC      |               |                    |                    |
| SNP_4797_A_36869204 | NC_021160.1    | Ca_Kabuli_Chr01 | 36869204                | TT                              | AA                 | AA               | INTERGENIC      |               |                    |                    |
| SNP_4798_A_36869208 | NC_021160.1    | Ca_Kabuli_Chr01 | 36869208                | TT                              | CC                 | CC               | INTERGENIC      |               |                    |                    |
| SNP_4799_A_36869213 | NC_021160.1    | Ca_Kabuli_Chr01 | 36869213                | GG                              | AA                 | AA               | INTERGENIC      |               |                    |                    |
| SNP_4800_A_36869214 | NC_021160.1    | Ca_Kabuli_Chr01 | 36869214                | TT                              | GG                 | GG               | INTERGENIC      |               |                    |                    |
| SNP_4801_A_36869217 | NC_021160.1    | Ca_Kabuli_Chr01 | 36869217                | AA                              | GG                 | GG               | INTERGENIC      |               |                    |                    |
| SNP_4802_A_36869355 | NC_021160.1    | Ca_Kabuli_Chr01 | 36869355                | GG                              | AA                 | AA               | INTERGENIC      |               |                    |                    |
| SNP_4803_A_36876884 | NC_021160.1    | Ca_Kabuli_Chr01 | 36876884                | CC                              | TT                 | TT               | INTERGENIC      |               |                    |                    |
| SNP_4804_A_36876926 | NC_021160.1    | Ca_Kabuli_Chr01 | 36876926                | GG                              | TT                 | TT               | INTERGENIC      |               |                    |                    |
| SNP_4805_A_36900394 | NC_021160.1    | Ca_Kabuli_Chr01 | 36900394                | AA                              | TT                 | TT               | INTERGENIC      |               |                    |                    |
| SNP_4806_A_36949227 | NC_021160.1    | Ca_Kabuli_Chr01 | 36949227                | TT                              | GG                 | GG               | INTERGENIC      |               |                    |                    |
| SNP_4807_A_36949242 | NC_021160.1    | Ca_Kabuli_Chr01 | 36949242                | TT                              | CC                 | CC               | INTERGENIC      |               |                    |                    |
| SNP_4808_A_36950139 | NC_021160.1    | Ca_Kabuli_Chr01 | 36950139                | TT                              | CC                 | CC               | INTERGENIC      |               |                    |                    |
| SNP_4809_A_36950141 | NC_021160.1    | Ca_Kabuli_Chr01 | 36950141                | CC                              | GG                 | GG               | INTERGENIC      |               |                    |                    |
| SNP_4810_A_36950145 | NC_021160.1    | Ca_Kabuli_Chr01 | 36950145                | AA                              | TT                 | TT               | INTERGENIC      |               |                    |                    |
| SNP_4811_A_36950146 | NC_021160.1    | Ca_Kabuli_Chr01 | 36950146                | CC                              | GG                 | GG               | INTERGENIC      |               |                    |                    |
| SNP_4812_A_36950150 | NC_021160.1    | Ca_Kabuli_Chr01 | 36950150                | CC                              | GG                 | GG               | INTERGENIC      |               |                    |                    |
| SNP_4813_A_36950222 | NC_021160.1    | Ca_Kabuli_Chr01 | 36950222                | CC                              | TT                 | TT               | INTERGENIC      |               |                    |                    |
| SNP_4814_A_36950225 | NC_021160.1    | Ca_Kabuli_Chr01 | 36950225                | TT                              | GG                 | GG               | INTERGENIC      |               |                    |                    |
| SNP_4815_A_36950252 | NC_021160.1    | Ca_Kabuli_Chr01 | 36950252                | GG                              | AA                 | AA               | INTERGENIC      |               |                    |                    |
| SNP_4816_A_36950600 | NC_021160.1    | Ca_Kabuli_Chr01 | 36950600                | TT                              | GG                 | GG               | INTERGENIC      |               |                    |                    |

| SNPs IDs            | Chromosome IDs | Chromosomes     | Physical positions (bp) | CDC Frontier genome (Reference genome) | (Pusa 1103 & HPNB) | (ILWC 46 & LPNB) | Sequence Components of genome | Gene accession IDs | Putative functions                     |
|---------------------|----------------|-----------------|-------------------------|----------------------------------------|--------------------|------------------|-------------------------------|--------------------|----------------------------------------|
| SNP_4817_A_37032238 | NC_021160.1    | Ca_Kabuli_Chr01 | 37032238                | CC                                     | TT                 | TT               | INTERGENIC                    |                    |                                        |
| SNP_4818_A_37032712 | NC_021160.1    | Ca_Kabuli_Chr01 | 37032712                | TT                                     | GG                 | GG               | INTERGENIC                    |                    |                                        |
| SNP_4819_A_37037162 | NC_021160.1    | Ca_Kabuli_Chr01 | 37037162                | AA                                     | GG                 | GG               | INTERGENIC                    |                    |                                        |
| SNP_4820_A_37037862 | NC_021160.1    | Ca_Kabuli_Chr01 | 37037862                | TT                                     | CC                 | CC               | INTERGENIC                    |                    |                                        |
| SNP_4821_A_37050927 | NC_021160.1    | Ca_Kabuli_Chr01 | 37050927                | TT                                     | CC                 | CC               | INTRON                        | 101502181          | nudix hydrolase 19, chloroplastic-like |
| SNP_4822_A_37050940 | NC_021160.1    | Ca_Kabuli_Chr01 | 37050940                | TT                                     | CC                 | CC               | INTRON                        | 101502181          | nudix hydrolase 19, chloroplastic-like |
| SNP_4823_A_37051242 | NC_021160.1    | Ca_Kabuli_Chr01 | 37051242                | TT                                     | AA                 | AA               | INTRON                        | 101502181          | nudix hydrolase 19, chloroplastic-like |
| SNP_4824_A_37054623 | NC_021160.1    | Ca_Kabuli_Chr01 | 37054623                | CC                                     | AA                 | AA               | INTRON                        | 101502181          | nudix hydrolase 19, chloroplastic-like |
| SNP_4825_A_37054693 | NC_021160.1    | Ca_Kabuli_Chr01 | 37054693                | TT                                     | CC                 | CC               | INTRON                        | 101502181          | nudix hydrolase 19, chloroplastic-like |
| SNP_4826_A_37054956 | NC_021160.1    | Ca_Kabuli_Chr01 | 37054956                | CC                                     | TT                 | TT               | INTRON                        | 101502181          | nudix hydrolase 19, chloroplastic-like |
| SNP_4827_A_37055062 | NC_021160.1    | Ca_Kabuli_Chr01 | 37055062                | CC                                     | TT                 | TT               | INTRON                        | 101502181          | nudix hydrolase 19, chloroplastic-like |
| SNP_4830_A_37078520 | NC_021160.1    | Ca_Kabuli_Chr01 | 37078520                | CC                                     | TT                 | TT               | INTERGENIC                    |                    |                                        |
| SNP_4831_A_37078526 | NC_021160.1    | Ca_Kabuli_Chr01 | 37078526                | GG                                     | AA                 | AA               | INTERGENIC                    |                    |                                        |
| SNP_4832_A_37078539 | NC_021160.1    | Ca_Kabuli_Chr01 | 37078539                | TT                                     | CC                 | CC               | INTERGENIC                    |                    |                                        |
| SNP_4833_A_37078596 | NC_021160.1    | Ca_Kabuli_Chr01 | 37078596                | GG                                     | AA                 | AA               | INTERGENIC                    |                    |                                        |
| SNP_4834_A_37078606 | NC_021160.1    | Ca_Kabuli_Chr01 | 37078606                | TT                                     | GG                 | GG               | INTERGENIC                    |                    |                                        |
| SNP_4835_A_37078640 | NC_021160.1    | Ca_Kabuli_Chr01 | 37078640                | CC                                     | TT                 | TT               | INTERGENIC                    |                    |                                        |
| SNP_4836_A_37078663 | NC_021160.1    | Ca_Kabuli_Chr01 | 37078663                | AA                                     | TT                 | TT               | INTERGENIC                    |                    |                                        |
| SNP_4837_A_37078668 | NC_021160.1    | Ca_Kabuli_Chr01 | 37078668                | AA                                     | GG                 | GG               | INTERGENIC                    |                    |                                        |
| SNP_4838_A_37078718 | NC_021160.1    | Ca_Kabuli_Chr01 | 37078718                | CC                                     | AA                 | AA               | INTERGENIC                    |                    |                                        |
| SNP_4839_A_37078784 | NC_021160.1    | Ca_Kabuli_Chr01 | 37078784                | AA                                     | TT                 | TT               | INTERGENIC                    |                    |                                        |
| SNP_4840_A_37078790 | NC_021160.1    | Ca_Kabuli_Chr01 | 37078790                | AA                                     | GG                 | GG               | INTERGENIC                    |                    |                                        |

| SNPs IDs            | Chromosome IDs | Chromosomes     | Physical positions (bp) | CDC Frontier genome (Reference genome) | (Pusa 1103 & HPNB) | (ILWC 46 & LPNB) | Sequence Components of genome | Gene accession IDs | Putative functions |
|---------------------|----------------|-----------------|-------------------------|----------------------------------------|--------------------|------------------|-------------------------------|--------------------|--------------------|
| SNP_4841_A_37078851 | NC_021160.1    | Ca_Kabuli_Chr01 | 37078851                | TT                                     | CC                 | CC               | INTERGENIC                    |                    |                    |
| SNP_4842_A_37078862 | NC_021160.1    | Ca_Kabuli_Chr01 | 37078862                | AA                                     | TT                 | TT               | INTERGENIC                    |                    |                    |
| SNP_4844_A_37078986 | NC_021160.1    | Ca_Kabuli_Chr01 | 37078986                | CC                                     | AA                 | AA               | INTERGENIC                    |                    |                    |
| SNP_4845_A_37079023 | NC_021160.1    | Ca_Kabuli_Chr01 | 37079023                | TT                                     | CC                 | CC               | INTERGENIC                    |                    |                    |
| SNP_4846_A_37079031 | NC_021160.1    | Ca_Kabuli_Chr01 | 37079031                | AA                                     | CC                 | CC               | INTERGENIC                    |                    |                    |
| SNP_4847_A_37079038 | NC_021160.1    | Ca_Kabuli_Chr01 | 37079038                | CC                                     | GG                 | GG               | INTERGENIC                    |                    |                    |
| SNP_4848_A_37079093 | NC_021160.1    | Ca_Kabuli_Chr01 | 37079093                | CC                                     | TT                 | TT               | INTERGENIC                    |                    |                    |
| SNP_4849_A_37081722 | NC_021160.1    | Ca_Kabuli_Chr01 | 37081722                | CC                                     | TT                 | TT               | INTERGENIC                    |                    |                    |
| SNP_4850_A_37082115 | NC_021160.1    | Ca_Kabuli_Chr01 | 37082115                | TT                                     | CC                 | CC               | INTERGENIC                    |                    |                    |
| SNP_4851_A_37112912 | NC_021160.1    | Ca_Kabuli_Chr01 | 37112912                | AA                                     | GG                 | GG               | NON_SYNONYMOUS_CODING         | 101503120          | Unknown function   |
| SNP_4852_A_37120760 | NC_021160.1    | Ca_Kabuli_Chr01 | 37120760                | TT                                     | AA                 | AA               | INTERGENIC                    |                    |                    |
| SNP_4853_A_37120833 | NC_021160.1    | Ca_Kabuli_Chr01 | 37120833                | AA                                     | CC                 | CC               | INTERGENIC                    |                    |                    |
| SNP_4854_A_37120844 | NC_021160.1    | Ca_Kabuli_Chr01 | 37120844                | GG                                     | TT                 | TT               | INTERGENIC                    |                    |                    |
| SNP_4855_A_37120867 | NC_021160.1    | Ca_Kabuli_Chr01 | 37120867                | TT                                     | AA                 | AA               | INTERGENIC                    |                    |                    |
| SNP_4856_A_37120925 | NC_021160.1    | Ca_Kabuli_Chr01 | 37120925                | AA                                     | GG                 | GG               | INTERGENIC                    |                    |                    |
| SNP_4857_A_37120966 | NC_021160.1    | Ca_Kabuli_Chr01 | 37120966                | AA                                     | GG                 | GG               | INTERGENIC                    |                    |                    |
| SNP_4858_A_37120967 | NC_021160.1    | Ca_Kabuli_Chr01 | 37120967                | TT                                     | GG                 | GG               | INTERGENIC                    |                    |                    |
| SNP_4859_A_37121059 | NC_021160.1    | Ca_Kabuli_Chr01 | 37121059                | AA                                     | GG                 | GG               | INTERGENIC                    |                    |                    |
| SNP_4860_A_37121094 | NC_021160.1    | Ca_Kabuli_Chr01 | 37121094                | TT                                     | CC                 | CC               | INTERGENIC                    |                    |                    |
| SNP_4861_A_37121100 | NC_021160.1    | Ca_Kabuli_Chr01 | 37121100                | GG                                     | AA                 | AA               | INTERGENIC                    |                    |                    |
| SNP_4862_A_37121121 | NC_021160.1    | Ca_Kabuli_Chr01 | 37121121                | TT                                     | CC                 | CC               | INTERGENIC                    |                    |                    |
| SNP_4863_A_37121152 | NC_021160.1    | Ca_Kabuli_Chr01 | 37121152                | GG                                     | AA                 | AA               | INTERGENIC                    |                    |                    |

| SNPs IDs            | Chromosome IDs | Chromosomes     | Physical positions (bp) | CDC Frontier genome (Reference genome) | (Pusa 1103 & HPNB) | (ILWC 46 & LPNB) | Sequence genome | Components of | Gene accession IDs | Putative functions |
|---------------------|----------------|-----------------|-------------------------|----------------------------------------|--------------------|------------------|-----------------|---------------|--------------------|--------------------|
| SNP_4864_A_37121213 | NC_021160.1    | Ca_Kabuli_Chr01 | 37121213                | TT                                     | AA                 | AA               | INTERGENIC      |               |                    |                    |
| SNP_4865_A_37121228 | NC_021160.1    | Ca_Kabuli_Chr01 | 37121228                | GG                                     | AA                 | AA               | INTERGENIC      |               |                    |                    |
| SNP_4866_A_37121360 | NC_021160.1    | Ca_Kabuli_Chr01 | 37121360                | AA                                     | GG                 | GG               | INTERGENIC      |               |                    |                    |
| SNP_4867_A_37121548 | NC_021160.1    | Ca_Kabuli_Chr01 | 37121548                | CC                                     | TT                 | TT               | INTERGENIC      |               |                    |                    |
| SNP_4868_A_37121638 | NC_021160.1    | Ca_Kabuli_Chr01 | 37121638                | TT                                     | AA                 | AA               | INTERGENIC      |               |                    |                    |
| SNP_4869_A_37121663 | NC_021160.1    | Ca_Kabuli_Chr01 | 37121663                | GG                                     | AA                 | AA               | INTERGENIC      |               |                    |                    |
| SNP_4870_A_37121682 | NC_021160.1    | Ca_Kabuli_Chr01 | 37121682                | TT                                     | CC                 | CC               | INTERGENIC      |               |                    |                    |
| SNP_4871_A_37121704 | NC_021160.1    | Ca_Kabuli_Chr01 | 37121704                | AA                                     | TT                 | TT               | INTERGENIC      |               |                    |                    |
| SNP_4872_A_37121762 | NC_021160.1    | Ca_Kabuli_Chr01 | 37121762                | TT                                     | CC                 | CC               | INTERGENIC      |               |                    |                    |
| SNP_4873_A_37121830 | NC_021160.1    | Ca_Kabuli_Chr01 | 37121830                | CC                                     | TT                 | TT               | INTERGENIC      |               |                    |                    |
| SNP_4874_A_37121835 | NC_021160.1    | Ca_Kabuli_Chr01 | 37121835                | CC                                     | AA                 | AA               | INTERGENIC      |               |                    |                    |
| SNP_4875_A_37121858 | NC_021160.1    | Ca_Kabuli_Chr01 | 37121858                | TT                                     | CC                 | CC               | INTERGENIC      |               |                    |                    |
| SNP_4876_A_37121872 | NC_021160.1    | Ca_Kabuli_Chr01 | 37121872                | GG                                     | AA                 | AA               | INTERGENIC      |               |                    |                    |
| SNP_4877_A_37121893 | NC_021160.1    | Ca_Kabuli_Chr01 | 37121893                | GG                                     | AA                 | AA               | INTERGENIC      |               |                    |                    |
| SNP_4878_A_37121901 | NC_021160.1    | Ca_Kabuli_Chr01 | 37121901                | AA                                     | GG                 | GG               | INTERGENIC      |               |                    |                    |
| SNP_4879_A_37121996 | NC_021160.1    | Ca_Kabuli_Chr01 | 37121996                | TT                                     | CC                 | CC               | INTERGENIC      |               |                    |                    |
| SNP_4882_A_37122241 | NC_021160.1    | Ca_Kabuli_Chr01 | 37122241                | CC                                     | TT                 | TT               | INTERGENIC      |               |                    |                    |
| SNP_4883_A_37122245 | NC_021160.1    | Ca_Kabuli_Chr01 | 37122245                | AA                                     | CC                 | CC               | INTERGENIC      |               |                    |                    |
| SNP_4884_A_37122252 | NC_021160.1    | Ca_Kabuli_Chr01 | 37122252                | CC                                     | TT                 | TT               | INTERGENIC      |               |                    |                    |
| SNP_4885_A_37122254 | NC_021160.1    | Ca_Kabuli_Chr01 | 37122254                | AA                                     | TT                 | TT               | INTERGENIC      |               |                    |                    |
| SNP_4886_A_37122278 | NC_021160.1    | Ca_Kabuli_Chr01 | 37122278                | AA                                     | CC                 | CC               | INTERGENIC      |               |                    |                    |
| SNP_4887_A_37122355 | NC_021160.1    | Ca_Kabuli_Chr01 | 37122355                | GG                                     | AA                 | AA               | INTERGENIC      |               |                    |                    |

| SNPs IDs            | Chromosome IDs | Chromosomes     | Physical positions (bp) | CDC Frontier genome (Reference genome) | (Pusa 1103 & HPNB) | (ILWC 46 & LPNB) | Sequence genome | Components of | Gene accession IDs | Putative functions |
|---------------------|----------------|-----------------|-------------------------|----------------------------------------|--------------------|------------------|-----------------|---------------|--------------------|--------------------|
| SNP_4888_A_37122468 | NC_021160.1    | Ca_Kabuli_Chr01 | 37122468                | GG                                     | CC                 | CC               | INTERGENIC      |               |                    |                    |
| SNP_4889_A_37122479 | NC_021160.1    | Ca_Kabuli_Chr01 | 37122479                | TT                                     | AA                 | AA               | INTERGENIC      |               |                    |                    |
| SNP_4891_A_37122545 | NC_021160.1    | Ca_Kabuli_Chr01 | 37122545                | GG                                     | AA                 | AA               | INTERGENIC      |               |                    |                    |
| SNP_4892_A_37122670 | NC_021160.1    | Ca_Kabuli_Chr01 | 37122670                | AA                                     | TT                 | TT               | INTERGENIC      |               |                    |                    |
| SNP_4893_A_37122693 | NC_021160.1    | Ca_Kabuli_Chr01 | 37122693                | AA                                     | GG                 | GG               | INTERGENIC      |               |                    |                    |
| SNP_4895_A_37122755 | NC_021160.1    | Ca_Kabuli_Chr01 | 37122755                | TT                                     | GG                 | GG               | INTERGENIC      |               |                    |                    |
| SNP_4896_A_37122764 | NC_021160.1    | Ca_Kabuli_Chr01 | 37122764                | TT                                     | CC                 | CC               | INTERGENIC      |               |                    |                    |
| SNP_4897_A_37122783 | NC_021160.1    | Ca_Kabuli_Chr01 | 37122783                | GG                                     | AA                 | AA               | INTERGENIC      |               |                    |                    |
| SNP_4898_A_37122797 | NC_021160.1    | Ca_Kabuli_Chr01 | 37122797                | CC                                     | TT                 | TT               | INTERGENIC      |               |                    |                    |
| SNP_4900_A_37122903 | NC_021160.1    | Ca_Kabuli_Chr01 | 37122903                | TT                                     | CC                 | CC               | INTERGENIC      |               |                    |                    |
| SNP_4901_A_37122921 | NC_021160.1    | Ca_Kabuli_Chr01 | 37122921                | AA                                     | GG                 | GG               | INTERGENIC      |               |                    |                    |
| SNP_4902_A_37122932 | NC_021160.1    | Ca_Kabuli_Chr01 | 37122932                | AA                                     | GG                 | GG               | INTERGENIC      |               |                    |                    |
| SNP_4903_A_37122983 | NC_021160.1    | Ca_Kabuli_Chr01 | 37122983                | TT                                     | CC                 | CC               | INTERGENIC      |               |                    |                    |
| SNP_4904_A_37122986 | NC_021160.1    | Ca_Kabuli_Chr01 | 37122986                | GG                                     | TT                 | TT               | INTERGENIC      |               |                    |                    |
| SNP_4905_A_37122993 | NC_021160.1    | Ca_Kabuli_Chr01 | 37122993                | GG                                     | AA                 | AA               | INTERGENIC      |               |                    |                    |
| SNP_4906_A_37123014 | NC_021160.1    | Ca_Kabuli_Chr01 | 37123014                | TT                                     | CC                 | CC               | INTERGENIC      |               |                    |                    |
| SNP_4907_A_37123110 | NC_021160.1    | Ca_Kabuli_Chr01 | 37123110                | AA                                     | TT                 | TT               | INTERGENIC      |               |                    |                    |
| SNP_4909_A_37126557 | NC_021160.1    | Ca_Kabuli_Chr01 | 37126557                | GG                                     | AA                 | AA               | INTERGENIC      |               |                    |                    |
| SNP_4910_A_37128375 | NC_021160.1    | Ca_Kabuli_Chr01 | 37128375                | CC                                     | TT                 | TT               | INTERGENIC      |               |                    |                    |
| SNP_4912_A_37128912 | NC_021160.1    | Ca_Kabuli_Chr01 | 37128912                | AA                                     | TT                 | TT               | INTERGENIC      |               |                    |                    |
| SNP_4913_A_37128921 | NC_021160.1    | Ca_Kabuli_Chr01 | 37128921                | AA                                     | CC                 | CC               | INTERGENIC      |               |                    |                    |
| SNP_4914_A_37128931 | NC_021160.1    | Ca_Kabuli_Chr01 | 37128931                | TT                                     | CC                 | CC               | INTERGENIC      |               |                    |                    |



| SNPs IDs            | Chromosome IDs | Chromosomes     | Physical positions (bp) | CDC Frontier (Reference genome) | (Pusa 1103 & HPNB) | (ILWC 46 & LPNB) | Sequence Components of genome | Gene accession IDs | Putative functions                |
|---------------------|----------------|-----------------|-------------------------|---------------------------------|--------------------|------------------|-------------------------------|--------------------|-----------------------------------|
| SNP_4915_A_37128964 | NC_021160.1    | Ca_Kabuli_Chr01 | 37128964                | TT                              | CC                 | CC               | INTERGENIC                    |                    |                                   |
| SNP_4916_A_37129025 | NC_021160.1    | Ca_Kabuli_Chr01 | 37129025                | TT                              | CC                 | CC               | INTERGENIC                    |                    |                                   |
| SNP_4917_A_37129151 | NC_021160.1    | Ca_Kabuli_Chr01 | 37129151                | GG                              | AA                 | AA               | INTERGENIC                    |                    |                                   |
| SNP_4918_A_37130856 | NC_021160.1    | Ca_Kabuli_Chr01 | 37130856                | TT                              | AA                 | AA               | INTERGENIC                    |                    |                                   |
| SNP_4919_A_37157298 | NC_021160.1    | Ca_Kabuli_Chr01 | 37157298                | TT                              | CC                 | CC               | INTERGENIC                    |                    |                                   |
| SNP_4920_A_37157493 | NC_021160.1    | Ca_Kabuli_Chr01 | 37157493                | AA                              | GG                 | GG               | INTERGENIC                    |                    |                                   |
| SNP_4921_A_37176084 | NC_021160.1    | Ca_Kabuli_Chr01 | 37176084                | GG                              | AA                 | AA               | INTERGENIC                    |                    |                                   |
| SNP_4922_A_37183863 | NC_021160.1    | Ca_Kabuli_Chr01 | 37183863                | GG                              | AA                 | AA               | INTERGENIC                    |                    |                                   |
| SNP_4923_A_37197508 | NC_021160.1    | Ca_Kabuli_Chr01 | 37197508                | GG                              | TT                 | TT               | URR                           | 101498115          | nudix hydrolase 19, chloroplastic |
| SNP_4924_A_37216257 | NC_021160.1    | Ca_Kabuli_Chr01 | 37216257                | AA                              | CC                 | CC               | INTERGENIC                    |                    |                                   |
| SNP_4925_A_37243095 | NC_021160.1    | Ca_Kabuli_Chr01 | 37243095                | AA                              | GG                 | GG               | INTERGENIC                    |                    |                                   |
| SNP_4926_A_37251834 | NC_021160.1    | Ca_Kabuli_Chr01 | 37251834                | GG                              | CC                 | CC               | INTERGENIC                    |                    |                                   |
| SNP_4928_A_37353715 | NC_021160.1    | Ca_Kabuli_Chr01 | 37353715                | TT                              | CC                 | CC               | INTERGENIC                    |                    |                                   |
| SNP_4930_A_37392862 | NC_021160.1    | Ca_Kabuli_Chr01 | 37392862                | AA                              | TT                 | TT               | INTERGENIC                    |                    |                                   |
| SNP_4931_A_37406232 | NC_021160.1    | Ca_Kabuli_Chr01 | 37406232                | AA                              | CC                 | CC               | INTERGENIC                    |                    |                                   |
| SNP_4932_A_37406352 | NC_021160.1    | Ca_Kabuli_Chr01 | 37406352                | TT                              | CC                 | CC               | INTERGENIC                    |                    |                                   |
| SNP_4933_A_37406566 | NC_021160.1    | Ca_Kabuli_Chr01 | 37406566                | CC                              | TT                 | TT               | INTERGENIC                    |                    |                                   |
| SNP_4934_A_37406575 | NC_021160.1    | Ca_Kabuli_Chr01 | 37406575                | TT                              | AA                 | AA               | INTERGENIC                    |                    |                                   |
| SNP_4935_A_37406586 | NC_021160.1    | Ca_Kabuli_Chr01 | 37406586                | TT                              | CC                 | CC               | INTERGENIC                    |                    |                                   |
| SNP_4936_A_37409727 | NC_021160.1    | Ca_Kabuli_Chr01 | 37409727                | TT                              | GG                 | GG               | INTERGENIC                    |                    |                                   |
| SNP_4937_A_37409796 | NC_021160.1    | Ca_Kabuli_Chr01 | 37409796                | GG                              | AA                 | AA               | INTERGENIC                    |                    |                                   |
| SNP_4938_A_37409823 | NC_021160.1    | Ca_Kabuli_Chr01 | 37409823                | GG                              | AA                 | AA               | INTERGENIC                    |                    |                                   |

| SNPs IDs            | Chromosome IDs | Chromosomes     | Physical positions (bp) | CDC Frontier genome (Reference genome) | (Pusa 1103 & HPNB) | (ILWC 46 & LPNB) | Sequence genome | Components of | Gene accession IDs | Putative functions |
|---------------------|----------------|-----------------|-------------------------|----------------------------------------|--------------------|------------------|-----------------|---------------|--------------------|--------------------|
| SNP_4939_A_37409842 | NC_021160.1    | Ca_Kabuli_Chr01 | 37409842                | GG                                     | AA                 | AA               | INTERGENIC      |               |                    |                    |
| SNP_4940_A_37409886 | NC_021160.1    | Ca_Kabuli_Chr01 | 37409886                | GG                                     | AA                 | AA               | INTERGENIC      |               |                    |                    |
| SNP_4941_A_37409918 | NC_021160.1    | Ca_Kabuli_Chr01 | 37409918                | TT                                     | CC                 | CC               | INTERGENIC      |               |                    |                    |
| SNP_4942_A_37409960 | NC_021160.1    | Ca_Kabuli_Chr01 | 37409960                | TT                                     | CC                 | CC               | INTERGENIC      |               |                    |                    |
| SNP_4943_A_37409983 | NC_021160.1    | Ca_Kabuli_Chr01 | 37409983                | AA                                     | GG                 | GG               | INTERGENIC      |               |                    |                    |
| SNP_4944_A_37410020 | NC_021160.1    | Ca_Kabuli_Chr01 | 37410020                | TT                                     | CC                 | CC               | INTERGENIC      |               |                    |                    |
| SNP_4945_A_37410040 | NC_021160.1    | Ca_Kabuli_Chr01 | 37410040                | TT                                     | CC                 | CC               | INTERGENIC      |               |                    |                    |
| SNP_4946_A_37410061 | NC_021160.1    | Ca_Kabuli_Chr01 | 37410061                | GG                                     | AA                 | AA               | INTERGENIC      |               |                    |                    |
| SNP_4947_A_37410106 | NC_021160.1    | Ca_Kabuli_Chr01 | 37410106                | AA                                     | GG                 | GG               | INTERGENIC      |               |                    |                    |
| SNP_4948_A_37410115 | NC_021160.1    | Ca_Kabuli_Chr01 | 37410115                | TT                                     | CC                 | CC               | INTERGENIC      |               |                    |                    |
| SNP_4949_A_37410117 | NC_021160.1    | Ca_Kabuli_Chr01 | 37410117                | AA                                     | GG                 | GG               | INTERGENIC      |               |                    |                    |
| SNP_4950_A_37410118 | NC_021160.1    | Ca_Kabuli_Chr01 | 37410118                | TT                                     | AA                 | AA               | INTERGENIC      |               |                    |                    |
| SNP_4951_A_37410140 | NC_021160.1    | Ca_Kabuli_Chr01 | 37410140                | GG                                     | AA                 | AA               | INTERGENIC      |               |                    |                    |
| SNP_4952_A_37410145 | NC_021160.1    | Ca_Kabuli_Chr01 | 37410145                | GG                                     | TT                 | TT               | INTERGENIC      |               |                    |                    |
| SNP_4953_A_37410194 | NC_021160.1    | Ca_Kabuli_Chr01 | 37410194                | AA                                     | GG                 | GG               | INTERGENIC      |               |                    |                    |
| SNP_4954_A_37410203 | NC_021160.1    | Ca_Kabuli_Chr01 | 37410203                | GG                                     | AA                 | AA               | INTERGENIC      |               |                    |                    |
| SNP_4955_A_37410247 | NC_021160.1    | Ca_Kabuli_Chr01 | 37410247                | TT                                     | GG                 | GG               | INTERGENIC      |               |                    |                    |
| SNP_4956_A_37410269 | NC_021160.1    | Ca_Kabuli_Chr01 | 37410269                | TT                                     | CC                 | CC               | INTERGENIC      |               |                    |                    |
| SNP_4957_A_37410277 | NC_021160.1    | Ca_Kabuli_Chr01 | 37410277                | GG                                     | CC                 | CC               | INTERGENIC      |               |                    |                    |
| SNP_4958_A_37410353 | NC_021160.1    | Ca_Kabuli_Chr01 | 37410353                | CC                                     | GG                 | GG               | INTERGENIC      |               |                    |                    |
| SNP_4959_A_37410355 | NC_021160.1    | Ca_Kabuli_Chr01 | 37410355                | AA                                     | GG                 | GG               | INTERGENIC      |               |                    |                    |
| SNP_4961_A_37410514 | NC_021160.1    | Ca_Kabuli_Chr01 | 37410514                | GG                                     | TT                 | TT               | INTERGENIC      |               |                    |                    |

| SNPs IDs            | Chromosome IDs | Chromosomes     | Physical positions (bp) | CDC Frontier (Reference genome) | (Pusa 1103 & HPNB) | (ILWC 46 & LPNB) | Sequence Components of genome | Gene accession IDs | Putative functions                                         |
|---------------------|----------------|-----------------|-------------------------|---------------------------------|--------------------|------------------|-------------------------------|--------------------|------------------------------------------------------------|
| SNP_4962_A_37411891 | NC_021160.1    | Ca_Kabuli_Chr01 | 37411891                | TT                              | CC                 | CC               | DRR                           | 101500587          | pentatricopeptide repeat-containing protein At5g66520-like |
| SNP_4963_A_37411921 | NC_021160.1    | Ca_Kabuli_Chr01 | 37411921                | AA                              | CC                 | CC               | DRR                           | 101500587          | pentatricopeptide repeat-containing protein At5g66520-like |
| SNP_4964_A_37411929 | NC_021160.1    | Ca_Kabuli_Chr01 | 37411929                | TT                              | CC                 | CC               | DRR                           | 101500587          | pentatricopeptide repeat-containing protein At5g66520-like |
| SNP_4965_A_37412205 | NC_021160.1    | Ca_Kabuli_Chr01 | 37412205                | CC                              | AA                 | AA               | DRR                           | 101500587          | pentatricopeptide repeat-containing protein At5g66520-like |
| SNP_4967_A_37412352 | NC_021160.1    | Ca_Kabuli_Chr01 | 37412352                | CC                              | AA                 | AA               | DRR                           | 101500587          | pentatricopeptide repeat-containing protein At5g66520-like |
| SNP_4968_A_37419467 | NC_021160.1    | Ca_Kabuli_Chr01 | 37419467                | AA                              | GG                 | GG               | INTRON                        | 101504417          | NADP-dependent alkenal double bond reductase P1-like       |
| SNP_4969_A_37419739 | NC_021160.1    | Ca_Kabuli_Chr01 | 37419739                | AA                              | GG                 | GG               | NON_SYNONYMOUS_CODING         | 101504417          | NADP-dependent alkenal double bond reductase P1-like       |
| SNP_4970_A_37420129 | NC_021160.1    | Ca_Kabuli_Chr01 | 37420129                | TT                              | CC                 | CC               | URR                           | 101504417          | NADP-dependent alkenal double bond reductase P1-like       |
| SNP_4971_A_37420247 | NC_021160.1    | Ca_Kabuli_Chr01 | 37420247                | GG                              | TT                 | TT               | URR                           | 101504417          | NADP-dependent alkenal double bond reductase P1-like       |
| SNP_4972_A_37420266 | NC_021160.1    | Ca_Kabuli_Chr01 | 37420266                | AA                              | CC                 | CC               | URR                           | 101504417          | NADP-dependent alkenal double bond reductase P1-like       |
| SNP_4973_A_37420521 | NC_021160.1    | Ca_Kabuli_Chr01 | 37420521                | CC                              | AA                 | AA               | URR                           | 101504417          | NADP-dependent alkenal double bond reductase P1-like       |
| SNP_4974_A_37420570 | NC_021160.1    | Ca_Kabuli_Chr01 | 37420570                | TT                              | GG                 | GG               | URR                           | 101504417          | NADP-dependent alkenal double bond reductase P1-like       |
| SNP_4976_A_37420606 | NC_021160.1    | Ca_Kabuli_Chr01 | 37420606                | GG                              | AA                 | AA               | URR                           | 101504417          | NADP-dependent alkenal double bond reductase P1-like       |
| SNP_4977_A_37420696 | NC_021160.1    | Ca_Kabuli_Chr01 | 37420696                | GG                              | AA                 | AA               | URR                           | 101504417          | NADP-dependent alkenal double bond reductase P1-like       |
| SNP_4978_A_37420702 | NC_021160.1    | Ca_Kabuli_Chr01 | 37420702                | CC                              | TT                 | TT               | URR                           | 101504417          | NADP-dependent alkenal double bond reductase P1-like       |
| SNP_4979_A_37421049 | NC_021160.1    | Ca_Kabuli_Chr01 | 37421049                | AA                              | CC                 | CC               | URR                           | 101504417          | NADP-dependent alkenal double bond reductase P1-like       |
| SNP_4981_A_37421134 | NC_021160.1    | Ca_Kabuli_Chr01 | 37421134                | GG                              | AA                 | AA               | URR                           | 101504417          | NADP-dependent alkenal double bond reductase P1-like       |
| SNP_4982_A_37422380 | NC_021160.1    | Ca_Kabuli_Chr01 | 37422380                | TT                              | AA                 | AA               | INTERGENIC                    |                    |                                                            |
| SNP_4983_A_37422419 | NC_021160.1    | Ca_Kabuli_Chr01 | 37422419                | TT                              | AA                 | AA               | INTERGENIC                    |                    |                                                            |
| SNP_4984_A_37422473 | NC_021160.1    | Ca_Kabuli_Chr01 | 37422473                | GG                              | AA                 | AA               | INTERGENIC                    |                    |                                                            |
| SNP_4985_A_37422561 | NC_021160.1    | Ca_Kabuli_Chr01 | 37422561                | AA                              | TT                 | TT               | INTERGENIC                    |                    |                                                            |
| SNP_4986_A_37422569 | NC_021160.1    | Ca_Kabuli_Chr01 | 37422569                | AA                              | TT                 | TT               | INTERGENIC                    |                    |                                                            |

| SNPs IDs            | Chromosome IDs | Chromosomes     | Physical positions (bp) | CDC Frontier genome (Reference genome) | (Pusa 1103 & HPNB) | (ILWC 46 & LPNB) | Sequence genome | Components of | Gene accession IDs | Putative functions |
|---------------------|----------------|-----------------|-------------------------|----------------------------------------|--------------------|------------------|-----------------|---------------|--------------------|--------------------|
| SNP_4987_A_37422692 | NC_021160.1    | Ca_Kabuli_Chr01 | 37422692                | CC                                     | TT                 | TT               | INTERGENIC      |               |                    |                    |
| SNP_4988_A_37422872 | NC_021160.1    | Ca_Kabuli_Chr01 | 37422872                | AA                                     | GG                 | GG               | INTERGENIC      |               |                    |                    |
| SNP_4989_A_37422996 | NC_021160.1    | Ca_Kabuli_Chr01 | 37422996                | CC                                     | GG                 | GG               | INTERGENIC      |               |                    |                    |
| SNP_4990_A_37423210 | NC_021160.1    | Ca_Kabuli_Chr01 | 37423210                | TT                                     | CC                 | CC               | INTERGENIC      |               |                    |                    |
| SNP_4991_A_37424235 | NC_021160.1    | Ca_Kabuli_Chr01 | 37424235                | TT                                     | GG                 | GG               | INTERGENIC      |               |                    |                    |
| SNP_4992_A_37424240 | NC_021160.1    | Ca_Kabuli_Chr01 | 37424240                | CC                                     | TT                 | TT               | INTERGENIC      |               |                    |                    |
| SNP_4994_A_37424411 | NC_021160.1    | Ca_Kabuli_Chr01 | 37424411                | GG                                     | TT                 | CC               | INTERGENIC      |               |                    |                    |
| SNP_4995_A_37424486 | NC_021160.1    | Ca_Kabuli_Chr01 | 37424486                | CC                                     | GG                 | GG               | INTERGENIC      |               |                    |                    |
| SNP_4996_A_37424513 | NC_021160.1    | Ca_Kabuli_Chr01 | 37424513                | TT                                     | GG                 | GG               | INTERGENIC      |               |                    |                    |
| SNP_4997_A_37424550 | NC_021160.1    | Ca_Kabuli_Chr01 | 37424550                | CC                                     | TT                 | TT               | INTERGENIC      |               |                    |                    |
| SNP_4998_A_37424582 | NC_021160.1    | Ca_Kabuli_Chr01 | 37424582                | GG                                     | TT                 | TT               | INTERGENIC      |               |                    |                    |
| SNP_4999_A_37424592 | NC_021160.1    | Ca_Kabuli_Chr01 | 37424592                | TT                                     | CC                 | CC               | INTERGENIC      |               |                    |                    |
| SNP_5000_A_37424599 | NC_021160.1    | Ca_Kabuli_Chr01 | 37424599                | TT                                     | GG                 | GG               | INTERGENIC      |               |                    |                    |
| SNP_5001_A_37424646 | NC_021160.1    | Ca_Kabuli_Chr01 | 37424646                | AA                                     | GG                 | GG               | INTERGENIC      |               |                    |                    |
| SNP_5002_A_37424797 | NC_021160.1    | Ca_Kabuli_Chr01 | 37424797                | TT                                     | GG                 | GG               | INTERGENIC      |               |                    |                    |
| SNP_5003_A_37424857 | NC_021160.1    | Ca_Kabuli_Chr01 | 37424857                | CC                                     | TT                 | TT               | INTERGENIC      |               |                    |                    |
| SNP_5004_A_37424873 | NC_021160.1    | Ca_Kabuli_Chr01 | 37424873                | GG                                     | TT                 | TT               | INTERGENIC      |               |                    |                    |
| SNP_5005_A_37424903 | NC_021160.1    | Ca_Kabuli_Chr01 | 37424903                | GG                                     | AA                 | AA               | INTERGENIC      |               |                    |                    |
| SNP_5006_A_37424945 | NC_021160.1    | Ca_Kabuli_Chr01 | 37424945                | GG                                     | TT                 | TT               | INTERGENIC      |               |                    |                    |
| SNP_5008_A_37424995 | NC_021160.1    | Ca_Kabuli_Chr01 | 37424995                | AA                                     | GG                 | GG               | INTERGENIC      |               |                    |                    |
| SNP_5009_A_37425011 | NC_021160.1    | Ca_Kabuli_Chr01 | 37425011                | AA                                     | GG                 | GG               | INTERGENIC      |               |                    |                    |
| SNP_5010_A_37425061 | NC_021160.1    | Ca_Kabuli_Chr01 | 37425061                | TT                                     | GG                 | GG               | INTERGENIC      |               |                    |                    |

| SNPs IDs            | Chromosome IDs | Chromosomes     | Physical positions (bp) | CDC Frontier (Reference genome) | (Pusa 1103 & HPNB) | (ILWC 46 & LPNB) | Sequence Components of genome | Gene accession IDs | Putative functions              |
|---------------------|----------------|-----------------|-------------------------|---------------------------------|--------------------|------------------|-------------------------------|--------------------|---------------------------------|
| SNP_5011_A_37425092 | NC_021160.1    | Ca_Kabuli_Chr01 | 37425092                | CC                              | TT                 | TT               | INTERGENIC                    |                    |                                 |
| SNP_5013_A_37425240 | NC_021160.1    | Ca_Kabuli_Chr01 | 37425240                | TT                              | GG                 | GG               | INTERGENIC                    |                    |                                 |
| SNP_5014_A_37425536 | NC_021160.1    | Ca_Kabuli_Chr01 | 37425536                | CC                              | AA                 | AA               | INTERGENIC                    |                    |                                 |
| SNP_5015_A_37425559 | NC_021160.1    | Ca_Kabuli_Chr01 | 37425559                | TT                              | GG                 | GG               | INTERGENIC                    |                    |                                 |
| SNP_5016_A_37425566 | NC_021160.1    | Ca_Kabuli_Chr01 | 37425566                | CC                              | TT                 | TT               | INTERGENIC                    |                    |                                 |
| SNP_5017_A_37425577 | NC_021160.1    | Ca_Kabuli_Chr01 | 37425577                | AA                              | GG                 | GG               | INTERGENIC                    |                    |                                 |
| SNP_5019_A_37425690 | NC_021160.1    | Ca_Kabuli_Chr01 | 37425690                | TT                              | CC                 | CC               | INTERGENIC                    |                    |                                 |
| SNP_5020_A_37426467 | NC_021160.1    | Ca_Kabuli_Chr01 | 37426467                | TT                              | CC                 | CC               | DRR                           | 101504737          | serine carboxypeptidase-like 45 |
| SNP_5021_A_37426517 | NC_021160.1    | Ca_Kabuli_Chr01 | 37426517                | AA                              | CC                 | CC               | DRR                           | 101504737          | serine carboxypeptidase-like 45 |
| SNP_5023_A_37426557 | NC_021160.1    | Ca_Kabuli_Chr01 | 37426557                | AA                              | TT                 | TT               | DRR                           | 101504737          | serine carboxypeptidase-like 45 |
| SNP_5024_A_37432797 | NC_021160.1    | Ca_Kabuli_Chr01 | 37432797                | GG                              | TT                 | TT               | INTERGENIC                    |                    |                                 |
| SNP_5025_A_37433005 | NC_021160.1    | Ca_Kabuli_Chr01 | 37433005                | AA                              | TT                 | TT               | INTERGENIC                    |                    |                                 |
| SNP_5026_A_37433074 | NC_021160.1    | Ca_Kabuli_Chr01 | 37433074                | TT                              | CC                 | CC               | INTERGENIC                    |                    |                                 |
| SNP_5027_A_37433112 | NC_021160.1    | Ca_Kabuli_Chr01 | 37433112                | TT                              | AA                 | AA               | INTERGENIC                    |                    |                                 |
| SNP_5028_A_37433340 | NC_021160.1    | Ca_Kabuli_Chr01 | 37433340                | TT                              | AA                 | AA               | INTERGENIC                    |                    |                                 |
| SNP_5029_A_37433354 | NC_021160.1    | Ca_Kabuli_Chr01 | 37433354                | CC                              | TT                 | TT               | INTERGENIC                    |                    |                                 |
| SNP_5031_A_37433394 | NC_021160.1    | Ca_Kabuli_Chr01 | 37433394                | CC                              | AA                 | AA               | INTERGENIC                    |                    |                                 |
| SNP_5032_A_37433505 | NC_021160.1    | Ca_Kabuli_Chr01 | 37433505                | TT                              | CC                 | CC               | INTERGENIC                    |                    |                                 |
| SNP_5034_A_37433622 | NC_021160.1    | Ca_Kabuli_Chr01 | 37433622                | CC                              | TT                 | TT               | INTERGENIC                    |                    |                                 |
| SNP_5035_A_37433639 | NC_021160.1    | Ca_Kabuli_Chr01 | 37433639                | AA                              | GG                 | GG               | INTERGENIC                    |                    |                                 |
| SNP_5036_A_37433751 | NC_021160.1    | Ca_Kabuli_Chr01 | 37433751                | GG                              | TT                 | TT               | INTERGENIC                    |                    |                                 |
| SNP_5037_A_37446163 | NC_021160.1    | Ca_Kabuli_Chr01 | 37446163                | GG                              | AA                 | AA               | INTERGENIC                    |                    |                                 |

| SNPs IDs            | Chromosome IDs | Chromosomes     | Physical positions (bp) | CDC Frontier (Reference genome) | (Pusa 1103 & HPNB) | (ILWC 46 & LPNB) | Sequence genome | Components of | Gene accession IDs | Putative functions |
|---------------------|----------------|-----------------|-------------------------|---------------------------------|--------------------|------------------|-----------------|---------------|--------------------|--------------------|
| SNP_5038_A_37450211 | NC_021160.1    | Ca_Kabuli_Chr01 | 37450211                | CC                              | TT                 | TT               | INTERGENIC      |               |                    |                    |
| SNP_5039_A_37450284 | NC_021160.1    | Ca_Kabuli_Chr01 | 37450284                | GG                              | CC                 | CC               | INTERGENIC      |               |                    |                    |
| SNP_5040_A_37450558 | NC_021160.1    | Ca_Kabuli_Chr01 | 37450558                | AA                              | CC                 | CC               | INTERGENIC      |               |                    |                    |
| SNP_5041_A_37450596 | NC_021160.1    | Ca_Kabuli_Chr01 | 37450596                | CC                              | TT                 | TT               | INTERGENIC      |               |                    |                    |
| SNP_5042_A_37450636 | NC_021160.1    | Ca_Kabuli_Chr01 | 37450636                | GG                              | CC                 | CC               | INTERGENIC      |               |                    |                    |
| SNP_5043_A_37450647 | NC_021160.1    | Ca_Kabuli_Chr01 | 37450647                | AA                              | CC                 | CC               | INTERGENIC      |               |                    |                    |
| SNP_5044_A_37450648 | NC_021160.1    | Ca_Kabuli_Chr01 | 37450648                | CC                              | AA                 | AA               | INTERGENIC      |               |                    |                    |
| SNP_5045_A_37450660 | NC_021160.1    | Ca_Kabuli_Chr01 | 37450660                | GG                              | TT                 | TT               | INTERGENIC      |               |                    |                    |
| SNP_5046_A_37450706 | NC_021160.1    | Ca_Kabuli_Chr01 | 37450706                | CC                              | TT                 | TT               | INTERGENIC      |               |                    |                    |
| SNP_5047_A_37450734 | NC_021160.1    | Ca_Kabuli_Chr01 | 37450734                | TT                              | AA                 | AA               | INTERGENIC      |               |                    |                    |
| SNP_5048_A_37468434 | NC_021160.1    | Ca_Kabuli_Chr01 | 37468434                | CC                              | TT                 | TT               | INTERGENIC      |               |                    |                    |
| SNP_5049_A_37468439 | NC_021160.1    | Ca_Kabuli_Chr01 | 37468439                | TT                              | GG                 | GG               | INTERGENIC      |               |                    |                    |
| SNP_5050_A_37468753 | NC_021160.1    | Ca_Kabuli_Chr01 | 37468753                | TT                              | AA                 | AA               | INTERGENIC      |               |                    |                    |
| SNP_5051_A_37468852 | NC_021160.1    | Ca_Kabuli_Chr01 | 37468852                | AA                              | TT                 | TT               | INTERGENIC      |               |                    |                    |
| SNP_5052_A_37469153 | NC_021160.1    | Ca_Kabuli_Chr01 | 37469153                | TT                              | AA                 | AA               | INTERGENIC      |               |                    |                    |
| SNP_5053_A_37469168 | NC_021160.1    | Ca_Kabuli_Chr01 | 37469168                | AA                              | GG                 | GG               | INTERGENIC      |               |                    |                    |
| SNP_5054_A_37469180 | NC_021160.1    | Ca_Kabuli_Chr01 | 37469180                | TT                              | AA                 | AA               | INTERGENIC      |               |                    |                    |
| SNP_5055_A_37469189 | NC_021160.1    | Ca_Kabuli_Chr01 | 37469189                | CC                              | AA                 | AA               | INTERGENIC      |               |                    |                    |
| SNP_5056_A_37489456 | NC_021160.1    | Ca_Kabuli_Chr01 | 37489456                | GG                              | AA                 | AA               | INTERGENIC      |               |                    |                    |
| SNP_5057_A_37489596 | NC_021160.1    | Ca_Kabuli_Chr01 | 37489596                | TT                              | AA                 | AA               | INTERGENIC      |               |                    |                    |
| SNP_5058_A_37489703 | NC_021160.1    | Ca_Kabuli_Chr01 | 37489703                | CC                              | AA                 | AA               | INTERGENIC      |               |                    |                    |
| SNP_5059_A_37489857 | NC_021160.1    | Ca_Kabuli_Chr01 | 37489857                | TT                              | CC                 | CC               | INTERGENIC      |               |                    |                    |

| SNPs IDs            | Chromosome IDs | Chromosomes     | Physical positions (bp) | CDC Frontier (Reference genome) | (Pusa 1103 & HPNB) | (ILWC 46 & LPNB) | Sequence Components of genome | Gene accession IDs | Putative functions                                  |
|---------------------|----------------|-----------------|-------------------------|---------------------------------|--------------------|------------------|-------------------------------|--------------------|-----------------------------------------------------|
| SNP_5060_A_37489902 | NC_021160.1    | Ca_Kabuli_Chr01 | 37489902                | AA                              | GG                 | GG               | INTERGENIC                    |                    |                                                     |
| SNP_5061_A_37489910 | NC_021160.1    | Ca_Kabuli_Chr01 | 37489910                | AA                              | GG                 | GG               | INTERGENIC                    |                    |                                                     |
| SNP_5063_A_37489981 | NC_021160.1    | Ca_Kabuli_Chr01 | 37489981                | TT                              | CC                 | CC               | INTERGENIC                    |                    |                                                     |
| SNP_5064_A_37490042 | NC_021160.1    | Ca_Kabuli_Chr01 | 37490042                | AA                              | TT                 | TT               | INTERGENIC                    |                    |                                                     |
| SNP_5066_A_37506284 | NC_021160.1    | Ca_Kabuli_Chr01 | 37506284                | AA                              | CC                 | CC               | INTERGENIC                    |                    |                                                     |
| SNP_5067_A_37506703 | NC_021160.1    | Ca_Kabuli_Chr01 | 37506703                | TT                              | AA                 | AA               | INTERGENIC                    |                    |                                                     |
| SNP_5068_A_37506708 | NC_021160.1    | Ca_Kabuli_Chr01 | 37506708                | CC                              | AA                 | AA               | INTERGENIC                    |                    |                                                     |
| SNP_5069_A_37506715 | NC_021160.1    | Ca_Kabuli_Chr01 | 37506715                | TT                              | GG                 | GG               | INTERGENIC                    |                    |                                                     |
| SNP_5070_A_37507986 | NC_021160.1    | Ca_Kabuli_Chr01 | 37507986                | TT                              | CC                 | CC               | INTERGENIC                    |                    |                                                     |
| SNP_5072_A_37517211 | NC_021160.1    | Ca_Kabuli_Chr01 | 37517211                | AA                              | GG                 | GG               | INTERGENIC                    |                    |                                                     |
| SNP_5073_A_37584848 | NC_021160.1    | Ca_Kabuli_Chr01 | 37584848                | CC                              | TT                 | TT               | INTERGENIC                    |                    |                                                     |
| SNP_5074_A_37634076 | NC_021160.1    | Ca_Kabuli_Chr01 | 37634076                | AA                              | GG                 | GG               | DRR                           | 101410575          | transfer RNA alanine (anticodon AGC)                |
| SNP_5075_A_37634077 | NC_021160.1    | Ca_Kabuli_Chr01 | 37634077                | AA                              | CC                 | CC               | DRR                           | 101410575          | transfer RNA alanine (anticodon AGC)                |
| SNP_5076_A_37646989 | NC_021160.1    | Ca_Kabuli_Chr01 | 37646989                | CC                              | GG                 | GG               | INTRON                        | 101506901          | succinate-semialdehyde dehydrogenase, mitochondrial |
| SNP_5077_A_37696015 | NC_021160.1    | Ca_Kabuli_Chr01 | 37696015                | CC                              | TT                 | TT               | INTERGENIC                    |                    |                                                     |
| SNP_5078_A_37698045 | NC_021160.1    | Ca_Kabuli_Chr01 | 37698045                | AA                              | GG                 | GG               | INTERGENIC                    |                    |                                                     |
| SNP_5079_A_37698053 | NC_021160.1    | Ca_Kabuli_Chr01 | 37698053                | TT                              | AA                 | AA               | INTERGENIC                    |                    |                                                     |
| SNP_5080_A_37703235 | NC_021160.1    | Ca_Kabuli_Chr01 | 37703235                | CC                              | AA                 | AA               | INTERGENIC                    |                    |                                                     |
| SNP_5081_A_37704970 | NC_021160.1    | Ca_Kabuli_Chr01 | 37704970                | AA                              | GG                 | GG               | INTERGENIC                    |                    |                                                     |
| SNP_5083_A_37716462 | NC_021160.1    | Ca_Kabuli_Chr01 | 37716462                | CC                              | TT                 | TT               | INTERGENIC                    |                    |                                                     |
| SNP_5084_A_37717256 | NC_021160.1    | Ca_Kabuli_Chr01 | 37717256                | CC                              | TT                 | TT               | INTERGENIC                    |                    |                                                     |
| SNP_5085_A_37717264 | NC_021160.1    | Ca_Kabuli_Chr01 | 37717264                | GG                              | AA                 | AA               | INTERGENIC                    |                    |                                                     |

| SNPs IDs            | Chromosome IDs | Chromosomes     | Physical positions (bp) | CDC Frontier genome (Reference genome) | (Pusa 1103 & HPNB) | (ILWC 46 & LPNB) | Sequence Components of genome | Gene accession IDs | Putative functions           |
|---------------------|----------------|-----------------|-------------------------|----------------------------------------|--------------------|------------------|-------------------------------|--------------------|------------------------------|
| SNP_5086_A_37720826 | NC_021160.1    | Ca_Kabuli_Chr01 | 37720826                | CC                                     | TT                 | TT               | INTERGENIC                    |                    |                              |
| SNP_5087_A_37721336 | NC_021160.1    | Ca_Kabuli_Chr01 | 37721336                | CC                                     | TT                 | TT               | DRR                           | 101508083          | uncharacterized LOC101508083 |
| SNP_5088_A_37724912 | NC_021160.1    | Ca_Kabuli_Chr01 | 37724912                | AA                                     | CC                 | CC               | INTRON                        | 101508083          | uncharacterized LOC101508083 |
| SNP_5090_A_37732701 | NC_021160.1    | Ca_Kabuli_Chr01 | 37732701                | TT                                     | CC                 | CC               | INTERGENIC                    |                    |                              |
| SNP_5091_A_37744228 | NC_021160.1    | Ca_Kabuli_Chr01 | 37744228                | TT                                     | CC                 | CC               | URR                           | 101510526          | uncharacterized LOC101510526 |
| SNP_5092_A_37745428 | NC_021160.1    | Ca_Kabuli_Chr01 | 37745428                | TT                                     | CC                 | CC               | INTERGENIC                    |                    |                              |
| SNP_5093_A_37747823 | NC_021160.1    | Ca_Kabuli_Chr01 | 37747823                | AA                                     | TT                 | TT               | INTERGENIC                    |                    |                              |
| SNP_5094_A_37756131 | NC_021160.1    | Ca_Kabuli_Chr01 | 37756131                | GG                                     | AA                 | AA               | INTERGENIC                    |                    |                              |
| SNP_5095_A_37756135 | NC_021160.1    | Ca_Kabuli_Chr01 | 37756135                | GG                                     | AA                 | AA               | INTERGENIC                    |                    |                              |
| SNP_5096_A_37758328 | NC_021160.1    | Ca_Kabuli_Chr01 | 37758328                | AA                                     | GG                 | GG               | INTERGENIC                    |                    |                              |
| SNP_5097_A_37758363 | NC_021160.1    | Ca_Kabuli_Chr01 | 37758363                | CC                                     | TT                 | TT               | INTERGENIC                    |                    |                              |
| SNP_5098_A_37758384 | NC_021160.1    | Ca_Kabuli_Chr01 | 37758384                | TT                                     | CC                 | CC               | INTERGENIC                    |                    |                              |
| SNP_5099_A_37758465 | NC_021160.1    | Ca_Kabuli_Chr01 | 37758465                | TT                                     | AA                 | AA               | INTERGENIC                    |                    |                              |
| SNP_5101_A_37767248 | NC_021160.1    | Ca_Kabuli_Chr01 | 37767248                | TT                                     | CC                 | CC               | URR                           | 101508397          | transcription factor MYB86   |
| SNP_5102_A_37767291 | NC_021160.1    | Ca_Kabuli_Chr01 | 37767291                | TT                                     | CC                 | CC               | URR                           | 101508397          | transcription factor MYB86   |
| SNP_5103_A_37769324 | NC_021160.1    | Ca_Kabuli_Chr01 | 37769324                | GG                                     | TT                 | TT               | INTERGENIC                    |                    |                              |
| SNP_5105_A_37775083 | NC_021160.1    | Ca_Kabuli_Chr01 | 37775083                | CC                                     | GG                 | GG               | INTERGENIC                    |                    |                              |
| SNP_5106_A_37776114 | NC_021160.1    | Ca_Kabuli_Chr01 | 37776114                | TT                                     | AA                 | AA               | INTERGENIC                    |                    |                              |
| SNP_5107_A_37776647 | NC_021160.1    | Ca_Kabuli_Chr01 | 37776647                | GG                                     | AA                 | AA               | INTERGENIC                    |                    |                              |
| SNP_5108_A_37776653 | NC_021160.1    | Ca_Kabuli_Chr01 | 37776653                | TT                                     | GG                 | GG               | INTERGENIC                    |                    |                              |
| SNP_5109_A_37777024 | NC_021160.1    | Ca_Kabuli_Chr01 | 37777024                | TT                                     | GG                 | GG               | INTERGENIC                    |                    |                              |
| SNP_5110_A_37780926 | NC_021160.1    | Ca_Kabuli_Chr01 | 37780926                | GG                                     | TT                 | TT               | INTERGENIC                    |                    |                              |



| SNPs IDs            | Chromosome IDs | Chromosomes     | Physical positions (bp) | CDC Frontier (Reference genome) | (Pusa 1103 & HPNB) | (ILWC 46 & LPNB) | Sequence Components of genome | Gene accession IDs | Putative functions                     |
|---------------------|----------------|-----------------|-------------------------|---------------------------------|--------------------|------------------|-------------------------------|--------------------|----------------------------------------|
| SNP_5111_A_37780945 | NC_021160.1    | Ca_Kabuli_Chr01 | 37780945                | AA                              | CC                 | CC               | INTERGENIC                    |                    |                                        |
| SNP_5112_A_37783960 | NC_021160.1    | Ca_Kabuli_Chr01 | 37783960                | CC                              | AA                 | AA               | INTERGENIC                    |                    |                                        |
| SNP_5113_A_37785413 | NC_021160.1    | Ca_Kabuli_Chr01 | 37785413                | TT                              | CC                 | CC               | INTERGENIC                    |                    |                                        |
| SNP_5114_A_37796034 | NC_021160.1    | Ca_Kabuli_Chr01 | 37796034                | GG                              | TT                 | TT               | INTRON                        | 101508708          | NAC domain-containing protein 45       |
| SNP_5115_A_37797935 | NC_021160.1    | Ca_Kabuli_Chr01 | 37797935                | AA                              | GG                 | GG               | INTRON                        | 101508708          | NAC domain-containing protein 45       |
| SNP_5116_A_37797980 | NC_021160.1    | Ca_Kabuli_Chr01 | 37797980                | AA                              | TT                 | TT               | INTRON                        | 101508708          | NAC domain-containing protein 45       |
| SNP_5117_A_37801510 | NC_021160.1    | Ca_Kabuli_Chr01 | 37801510                | CC                              | TT                 | TT               | URR                           | 101508708          | NAC domain-containing protein 45       |
| SNP_5118_A_37801976 | NC_021160.1    | Ca_Kabuli_Chr01 | 37801976                | AA                              | GG                 | GG               | INTERGENIC                    |                    |                                        |
| SNP_5119_A_37802015 | NC_021160.1    | Ca_Kabuli_Chr01 | 37802015                | CC                              | TT                 | TT               | INTERGENIC                    |                    |                                        |
| SNP_5120_A_37802365 | NC_021160.1    | Ca_Kabuli_Chr01 | 37802365                | CC                              | TT                 | TT               | INTERGENIC                    |                    |                                        |
| SNP_5121_A_37803304 | NC_021160.1    | Ca_Kabuli_Chr01 | 37803304                | AA                              | GG                 | GG               | INTERGENIC                    |                    |                                        |
| SNP_5122_A_37806382 | NC_021160.1    | Ca_Kabuli_Chr01 | 37806382                | AA                              | GG                 | GG               | INTERGENIC                    |                    |                                        |
| SNP_5123_A_37807014 | NC_021160.1    | Ca_Kabuli_Chr01 | 37807014                | CC                              | AA                 | AA               | INTERGENIC                    |                    |                                        |
| SNP_5124_A_37808998 | NC_021160.1    | Ca_Kabuli_Chr01 | 37808998                | AA                              | GG                 | GG               | INTERGENIC                    |                    |                                        |
| SNP_5125_A_37809205 | NC_021160.1    | Ca_Kabuli_Chr01 | 37809205                | TT                              | CC                 | CC               | INTERGENIC                    |                    |                                        |
| SNP_5126_A_37809246 | NC_021160.1    | Ca_Kabuli_Chr01 | 37809246                | GG                              | TT                 | TT               | INTERGENIC                    |                    |                                        |
| SNP_5128_A_37811840 | NC_021160.1    | Ca_Kabuli_Chr01 | 37811840                | TT                              | AA                 | AA               | INTERGENIC                    |                    |                                        |
| SNP_5129_A_37812349 | NC_021160.1    | Ca_Kabuli_Chr01 | 37812349                | CC                              | TT                 | TT               | INTERGENIC                    |                    |                                        |
| SNP_5130_A_37829414 | NC_021160.1    | Ca_Kabuli_Chr01 | 37829414                | TT                              | CC                 | CC               | SYNONYMOUS_CODING             | 101510851          | Unknown function                       |
| SNP_5131_A_37831145 | NC_021160.1    | Ca_Kabuli_Chr01 | 37831145                | GG                              | AA                 | AA               | URR                           | 101510851          | Unknown function                       |
| SNP_5132_A_37838783 | NC_021160.1    | Ca_Kabuli_Chr01 | 37838783                | TT                              | CC                 | CC               | URR                           | 101509024          | uncharacterized LOC101509024           |
| SNP_5134_A_37846331 | NC_021160.1    | Ca_Kabuli_Chr01 | 37846331                | GG                              | TT                 | TT               | INTRON                        | 101509230          | E3 ubiquitin-protein ligase RGLG2-like |

| SNPs IDs            | Chromosome IDs | Chromosomes     | Physical positions (bp) | CDC Frontier (Reference genome) | (Pusa 1103 & HPNB) | (ILWC 46 & LPNB) | Sequence genome | Components of | Gene accession IDs | Putative functions                     |
|---------------------|----------------|-----------------|-------------------------|---------------------------------|--------------------|------------------|-----------------|---------------|--------------------|----------------------------------------|
| SNP_5135_A_37848333 | NC_021160.1    | Ca_Kabuli_Chr01 | 37848333                | TT                              | CC                 | CC               | INTRON          |               | 101509230          | E3 ubiquitin-protein ligase RGLG2-like |
| SNP_5136_A_37848361 | NC_021160.1    | Ca_Kabuli_Chr01 | 37848361                | TT                              | CC                 | CC               | INTRON          |               | 101509230          | E3 ubiquitin-protein ligase RGLG2-like |
| SNP_5137_A_37848751 | NC_021160.1    | Ca_Kabuli_Chr01 | 37848751                | GG                              | TT                 | TT               | INTRON          |               | 101509230          | E3 ubiquitin-protein ligase RGLG2-like |
| SNP_5138_A_37848789 | NC_021160.1    | Ca_Kabuli_Chr01 | 37848789                | GG                              | TT                 | TT               | INTRON          |               | 101509230          | E3 ubiquitin-protein ligase RGLG2-like |
| SNP_5139_A_37849018 | NC_021160.1    | Ca_Kabuli_Chr01 | 37849018                | GG                              | AA                 | AA               | INTRON          |               | 101509230          | E3 ubiquitin-protein ligase RGLG2-like |
| SNP_5141_A_37852804 | NC_021160.1    | Ca_Kabuli_Chr01 | 37852804                | AA                              | CC                 | CC               | URR             |               | 101509230          | E3 ubiquitin-protein ligase RGLG2-like |
| SNP_5142_A_37854840 | NC_021160.1    | Ca_Kabuli_Chr01 | 37854840                | AA                              | CC                 | CC               | INTERGENIC      |               |                    |                                        |
| SNP_5143_A_37855517 | NC_021160.1    | Ca_Kabuli_Chr01 | 37855517                | GG                              | AA                 | AA               | INTERGENIC      |               |                    |                                        |
| SNP_5144_A_37856459 | NC_021160.1    | Ca_Kabuli_Chr01 | 37856459                | TT                              | AA                 | AA               | INTERGENIC      |               |                    |                                        |
| SNP_5145_A_37864258 | NC_021160.1    | Ca_Kabuli_Chr01 | 37864258                | GG                              | AA                 | AA               | INTRON          |               | SBNO1              | Unknown function                       |
| SNP_5146_A_37864344 | NC_021160.1    | Ca_Kabuli_Chr01 | 37864344                | GG                              | TT                 | TT               | INTRON          |               | SBNO1              | Unknown function                       |
| SNP_5147_A_37864364 | NC_021160.1    | Ca_Kabuli_Chr01 | 37864364                | AA                              | CC                 | CC               | INTRON          |               | SBNO1              | Unknown function                       |
| SNP_5148_A_37868745 | NC_021160.1    | Ca_Kabuli_Chr01 | 37868745                | TT                              | GG                 | GG               | INTRON          |               | SBNO1              | Unknown function                       |
| SNP_5149_A_37868922 | NC_021160.1    | Ca_Kabuli_Chr01 | 37868922                | TT                              | GG                 | GG               | INTRON          |               | SBNO1              | Unknown function                       |
| SNP_5150_A_37869694 | NC_021160.1    | Ca_Kabuli_Chr01 | 37869694                | AA                              | GG                 | GG               | INTRON          |               | SBNO1              | Unknown function                       |
| SNP_5151_A_37869723 | NC_021160.1    | Ca_Kabuli_Chr01 | 37869723                | CC                              | TT                 | TT               | INTRON          |               | SBNO1              | Unknown function                       |
| SNP_5152_A_37879061 | NC_021160.1    | Ca_Kabuli_Chr01 | 37879061                | CC                              | AA                 | AA               | INTRON          |               | SBNO1              | Unknown function                       |
| SNP_5153_A_37880440 | NC_021160.1    | Ca_Kabuli_Chr01 | 37880440                | GG                              | AA                 | AA               | INTRON          |               | SBNO1              | Unknown function                       |
| SNP_5154_A_37885843 | NC_021160.1    | Ca_Kabuli_Chr01 | 37885843                | CC                              | TT                 | TT               | INTRON          |               | SBNO1              | Unknown function                       |
| SNP_5155_A_37901776 | NC_021160.1    | Ca_Kabuli_Chr01 | 37901776                | GG                              | AA                 | AA               | URR             |               | 101509874          | protein strawberry notch homolog 1     |
| SNP_5156_A_37911895 | NC_021160.1    | Ca_Kabuli_Chr01 | 37911895                | TT                              | AA                 | AA               | INTERGENIC      |               |                    |                                        |
| SNP_5157_A_37913600 | NC_021160.1    | Ca_Kabuli_Chr01 | 37913600                | TT                              | AA                 | AA               | INTERGENIC      |               |                    |                                        |

| SNPs IDs            | Chromosome IDs | Chromosomes     | Physical positions (bp) | CDC Frontier genome (Reference genome) | (Pusa 1103 & HPNB) | (ILWC 46 & LPNB) | Sequence genome | Components of | Gene accession IDs | Putative functions |
|---------------------|----------------|-----------------|-------------------------|----------------------------------------|--------------------|------------------|-----------------|---------------|--------------------|--------------------|
| SNP_5158_A_37913690 | NC_021160.1    | Ca_Kabuli_Chr01 | 37913690                | AA                                     | CC                 | CC               | INTERGENIC      |               |                    |                    |
| SNP_5160_A_37917411 | NC_021160.1    | Ca_Kabuli_Chr01 | 37917411                | GG                                     | AA                 | AA               | INTERGENIC      |               |                    |                    |
| SNP_5161_A_37917571 | NC_021160.1    | Ca_Kabuli_Chr01 | 37917571                | GG                                     | AA                 | AA               | INTERGENIC      |               |                    |                    |
| SNP_5162_A_37917767 | NC_021160.1    | Ca_Kabuli_Chr01 | 37917767                | AA                                     | TT                 | TT               | INTERGENIC      |               |                    |                    |
| SNP_5163_A_37917770 | NC_021160.1    | Ca_Kabuli_Chr01 | 37917770                | AA                                     | GG                 | GG               | INTERGENIC      |               |                    |                    |
| SNP_5164_A_37917886 | NC_021160.1    | Ca_Kabuli_Chr01 | 37917886                | AA                                     | TT                 | TT               | INTERGENIC      |               |                    |                    |
| SNP_5165_A_37917962 | NC_021160.1    | Ca_Kabuli_Chr01 | 37917962                | GG                                     | CC                 | CC               | INTERGENIC      |               |                    |                    |
| SNP_5167_A_37918086 | NC_021160.1    | Ca_Kabuli_Chr01 | 37918086                | TT                                     | CC                 | CC               | INTERGENIC      |               |                    |                    |
| SNP_5168_A_37918173 | NC_021160.1    | Ca_Kabuli_Chr01 | 37918173                | AA                                     | CC                 | CC               | INTERGENIC      |               |                    |                    |
| SNP_5169_A_37918296 | NC_021160.1    | Ca_Kabuli_Chr01 | 37918296                | CC                                     | TT                 | TT               | INTERGENIC      |               |                    |                    |
| SNP_5170_A_37918364 | NC_021160.1    | Ca_Kabuli_Chr01 | 37918364                | GG                                     | AA                 | AA               | INTERGENIC      |               |                    |                    |
| SNP_5171_A_37921380 | NC_021160.1    | Ca_Kabuli_Chr01 | 37921380                | TT                                     | CC                 | CC               | INTERGENIC      |               |                    |                    |
| SNP_5172_A_37925953 | NC_021160.1    | Ca_Kabuli_Chr01 | 37925953                | AA                                     | GG                 | GG               | INTERGENIC      |               |                    |                    |
| SNP_5173_A_37925988 | NC_021160.1    | Ca_Kabuli_Chr01 | 37925988                | TT                                     | CC                 | CC               | INTERGENIC      |               |                    |                    |
| SNP_5174_A_37926211 | NC_021160.1    | Ca_Kabuli_Chr01 | 37926211                | AA                                     | CC                 | CC               | INTERGENIC      |               |                    |                    |
| SNP_5175_A_37926526 | NC_021160.1    | Ca_Kabuli_Chr01 | 37926526                | CC                                     | GG                 | GG               | INTERGENIC      |               |                    |                    |
| SNP_5176_A_37926983 | NC_021160.1    | Ca_Kabuli_Chr01 | 37926983                | CC                                     | GG                 | GG               | INTERGENIC      |               |                    |                    |
| SNP_5177_A_37927055 | NC_021160.1    | Ca_Kabuli_Chr01 | 37927055                | GG                                     | AA                 | AA               | INTERGENIC      |               |                    |                    |
| SNP_5178_A_37927127 | NC_021160.1    | Ca_Kabuli_Chr01 | 37927127                | TT                                     | CC                 | CC               | INTERGENIC      |               |                    |                    |
| SNP_5179_A_37927207 | NC_021160.1    | Ca_Kabuli_Chr01 | 37927207                | GG                                     | AA                 | AA               | INTERGENIC      |               |                    |                    |
| SNP_5180_A_37927227 | NC_021160.1    | Ca_Kabuli_Chr01 | 37927227                | GG                                     | AA                 | AA               | INTERGENIC      |               |                    |                    |
| SNP_5181_A_37927230 | NC_021160.1    | Ca_Kabuli_Chr01 | 37927230                | AA                                     | GG                 | GG               | INTERGENIC      |               |                    |                    |

| SNPs IDs            | Chromosome IDs | Chromosomes     | Physical positions (bp) | CDC Frontier (Reference genome) | (Pusa 1103 & HPNB) | (ILWC 46 & LPNB) | Sequence genome | Components of | Gene accession IDs | Putative functions |
|---------------------|----------------|-----------------|-------------------------|---------------------------------|--------------------|------------------|-----------------|---------------|--------------------|--------------------|
| SNP_5182_A_37927234 | NC_021160.1    | Ca_Kabuli_Chr01 | 37927234                | AA                              | GG                 | GG               | INTERGENIC      |               |                    |                    |
| SNP_5183_A_37927235 | NC_021160.1    | Ca_Kabuli_Chr01 | 37927235                | AA                              | GG                 | GG               | INTERGENIC      |               |                    |                    |
| SNP_5184_A_37927252 | NC_021160.1    | Ca_Kabuli_Chr01 | 37927252                | TT                              | CC                 | CC               | INTERGENIC      |               |                    |                    |
| SNP_5185_A_37927306 | NC_021160.1    | Ca_Kabuli_Chr01 | 37927306                | CC                              | GG                 | GG               | INTERGENIC      |               |                    |                    |
| SNP_5187_A_37927384 | NC_021160.1    | Ca_Kabuli_Chr01 | 37927384                | GG                              | CC                 | CC               | INTERGENIC      |               |                    |                    |
| SNP_5188_A_37927393 | NC_021160.1    | Ca_Kabuli_Chr01 | 37927393                | TT                              | AA                 | AA               | INTERGENIC      |               |                    |                    |
| SNP_5189_A_37927577 | NC_021160.1    | Ca_Kabuli_Chr01 | 37927577                | CC                              | GG                 | GG               | INTERGENIC      |               |                    |                    |
| SNP_5190_A_37927609 | NC_021160.1    | Ca_Kabuli_Chr01 | 37927609                | CC                              | GG                 | GG               | INTERGENIC      |               |                    |                    |
| SNP_5191_A_37927658 | NC_021160.1    | Ca_Kabuli_Chr01 | 37927658                | TT                              | AA                 | AA               | INTERGENIC      |               |                    |                    |
| SNP_5192_A_37927679 | NC_021160.1    | Ca_Kabuli_Chr01 | 37927679                | TT                              | CC                 | CC               | INTERGENIC      |               |                    |                    |
| SNP_5193_A_37927711 | NC_021160.1    | Ca_Kabuli_Chr01 | 37927711                | TT                              | AA                 | AA               | INTERGENIC      |               |                    |                    |
| SNP_5194_A_37927731 | NC_021160.1    | Ca_Kabuli_Chr01 | 37927731                | AA                              | CC                 | CC               | INTERGENIC      |               |                    |                    |
| SNP_5195_A_37927772 | NC_021160.1    | Ca_Kabuli_Chr01 | 37927772                | AA                              | GG                 | GG               | INTERGENIC      |               |                    |                    |
| SNP_5196_A_37927801 | NC_021160.1    | Ca_Kabuli_Chr01 | 37927801                | AA                              | GG                 | GG               | INTERGENIC      |               |                    |                    |
| SNP_5197_A_37927829 | NC_021160.1    | Ca_Kabuli_Chr01 | 37927829                | AA                              | TT                 | TT               | INTERGENIC      |               |                    |                    |
| SNP_5199_A_37928063 | NC_021160.1    | Ca_Kabuli_Chr01 | 37928063                | TT                              | GG                 | GG               | INTERGENIC      |               |                    |                    |
| SNP_5200_A_37928138 | NC_021160.1    | Ca_Kabuli_Chr01 | 37928138                | CC                              | TT                 | TT               | INTERGENIC      |               |                    |                    |
| SNP_5201_A_37928144 | NC_021160.1    | Ca_Kabuli_Chr01 | 37928144                | CC                              | TT                 | TT               | INTERGENIC      |               |                    |                    |
| SNP_5202_A_37928164 | NC_021160.1    | Ca_Kabuli_Chr01 | 37928164                | AA                              | TT                 | TT               | INTERGENIC      |               |                    |                    |
| SNP_5203_A_37928246 | NC_021160.1    | Ca_Kabuli_Chr01 | 37928246                | TT                              | GG                 | GG               | INTERGENIC      |               |                    |                    |
| SNP_5204_A_37928262 | NC_021160.1    | Ca_Kabuli_Chr01 | 37928262                | AA                              | GG                 | GG               | INTERGENIC      |               |                    |                    |
| SNP_5205_A_37928384 | NC_021160.1    | Ca_Kabuli_Chr01 | 37928384                | GG                              | AA                 | AA               | INTERGENIC      |               |                    |                    |

| SNPs IDs            | Chromosome IDs | Chromosomes     | Physical positions (bp) | CDC Frontier (Reference genome) | (Pusa 1103 & HPNB) | (ILWC 46 & LPNB) | Sequence genome | Components of | Gene accession IDs | Putative functions |
|---------------------|----------------|-----------------|-------------------------|---------------------------------|--------------------|------------------|-----------------|---------------|--------------------|--------------------|
| SNP_5206_A_37928398 | NC_021160.1    | Ca_Kabuli_Chr01 | 37928398                | AA                              | GG                 | GG               | INTERGENIC      |               |                    |                    |
| SNP_5207_A_37928560 | NC_021160.1    | Ca_Kabuli_Chr01 | 37928560                | TT                              | GG                 | GG               | INTERGENIC      |               |                    |                    |
| SNP_5208_A_37928576 | NC_021160.1    | Ca_Kabuli_Chr01 | 37928576                | AA                              | GG                 | GG               | INTERGENIC      |               |                    |                    |
| SNP_5209_A_37928617 | NC_021160.1    | Ca_Kabuli_Chr01 | 37928617                | CC                              | AA                 | AA               | INTERGENIC      |               |                    |                    |
| SNP_5210_A_37928712 | NC_021160.1    | Ca_Kabuli_Chr01 | 37928712                | AA                              | GG                 | GG               | INTERGENIC      |               |                    |                    |
| SNP_5211_A_37928849 | NC_021160.1    | Ca_Kabuli_Chr01 | 37928849                | TT                              | CC                 | CC               | INTERGENIC      |               |                    |                    |
| SNP_5213_A_37928887 | NC_021160.1    | Ca_Kabuli_Chr01 | 37928887                | CC                              | TT                 | TT               | INTERGENIC      |               |                    |                    |
| SNP_5214_A_37928919 | NC_021160.1    | Ca_Kabuli_Chr01 | 37928919                | AA                              | CC                 | CC               | INTERGENIC      |               |                    |                    |
| SNP_5215_A_37929028 | NC_021160.1    | Ca_Kabuli_Chr01 | 37929028                | GG                              | TT                 | TT               | INTERGENIC      |               |                    |                    |
| SNP_5216_A_37929139 | NC_021160.1    | Ca_Kabuli_Chr01 | 37929139                | TT                              | AA                 | AA               | INTERGENIC      |               |                    |                    |
| SNP_5217_A_37929152 | NC_021160.1    | Ca_Kabuli_Chr01 | 37929152                | CC                              | GG                 | GG               | INTERGENIC      |               |                    |                    |
| SNP_5218_A_37929215 | NC_021160.1    | Ca_Kabuli_Chr01 | 37929215                | CC                              | TT                 | TT               | INTERGENIC      |               |                    |                    |
| SNP_5219_A_37929221 | NC_021160.1    | Ca_Kabuli_Chr01 | 37929221                | CC                              | GG                 | GG               | INTERGENIC      |               |                    |                    |
| SNP_5220_A_37929247 | NC_021160.1    | Ca_Kabuli_Chr01 | 37929247                | GG                              | TT                 | TT               | INTERGENIC      |               |                    |                    |
| SNP_5221_A_37929322 | NC_021160.1    | Ca_Kabuli_Chr01 | 37929322                | GG                              | TT                 | TT               | INTERGENIC      |               |                    |                    |
| SNP_5222_A_37929621 | NC_021160.1    | Ca_Kabuli_Chr01 | 37929621                | CC                              | AA                 | AA               | INTERGENIC      |               |                    |                    |
| SNP_5223_A_37929639 | NC_021160.1    | Ca_Kabuli_Chr01 | 37929639                | CC                              | GG                 | GG               | INTERGENIC      |               |                    |                    |
| SNP_5225_A_37929865 | NC_021160.1    | Ca_Kabuli_Chr01 | 37929865                | TT                              | CC                 | CC               | INTERGENIC      |               |                    |                    |
| SNP_5226_A_37929884 | NC_021160.1    | Ca_Kabuli_Chr01 | 37929884                | GG                              | AA                 | AA               | INTERGENIC      |               |                    |                    |
| SNP_5227_A_37929913 | NC_021160.1    | Ca_Kabuli_Chr01 | 37929913                | AA                              | TT                 | TT               | INTERGENIC      |               |                    |                    |
| SNP_5228_A_37930064 | NC_021160.1    | Ca_Kabuli_Chr01 | 37930064                | CC                              | AA                 | AA               | INTERGENIC      |               |                    |                    |
| SNP_5229_A_37930199 | NC_021160.1    | Ca_Kabuli_Chr01 | 37930199                | AA                              | TT                 | TT               | INTERGENIC      |               |                    |                    |

| SNPs IDs            | Chromosome IDs | Chromosomes     | Physical positions (bp) | CDC Frontier genome (Reference genome) | (Pusa 1103 & HPNB) | (ILWC 46 & LPNB) | Sequence Components of genome | Gene accession IDs | Putative functions |
|---------------------|----------------|-----------------|-------------------------|----------------------------------------|--------------------|------------------|-------------------------------|--------------------|--------------------|
| SNP_5230_A_37930205 | NC_021160.1    | Ca_Kabuli_Chr01 | 37930205                | CC                                     | TT                 | TT               | INTERGENIC                    |                    |                    |
| SNP_5231_A_37936129 | NC_021160.1    | Ca_Kabuli_Chr01 | 37936129                | GG                                     | TT                 | TT               | INTERGENIC                    |                    |                    |
| SNP_5232_A_37948651 | NC_021160.1    | Ca_Kabuli_Chr01 | 37948651                | AA                                     | TT                 | TT               | INTERGENIC                    |                    |                    |
| SNP_5233_A_37953737 | NC_021160.1    | Ca_Kabuli_Chr01 | 37953737                | CC                                     | TT                 | TT               | INTERGENIC                    |                    |                    |
| SNP_5234_A_37954400 | NC_021160.1    | Ca_Kabuli_Chr01 | 37954400                | CC                                     | TT                 | TT               | INTERGENIC                    |                    |                    |
| SNP_5235_A_37954519 | NC_021160.1    | Ca_Kabuli_Chr01 | 37954519                | TT                                     | AA                 | AA               | INTERGENIC                    |                    |                    |
| SNP_5236_A_37954566 | NC_021160.1    | Ca_Kabuli_Chr01 | 37954566                | CC                                     | TT                 | TT               | INTERGENIC                    |                    |                    |
| SNP_5237_A_37954586 | NC_021160.1    | Ca_Kabuli_Chr01 | 37954586                | AA                                     | GG                 | GG               | INTERGENIC                    |                    |                    |
| SNP_5238_A_37993340 | NC_021160.1    | Ca_Kabuli_Chr01 | 37993340                | GG                                     | AA                 | AA               | INTERGENIC                    |                    |                    |
| SNP_5239_A_37993382 | NC_021160.1    | Ca_Kabuli_Chr01 | 37993382                | CC                                     | TT                 | TT               | INTERGENIC                    |                    |                    |
| SNP_5240_A_37993407 | NC_021160.1    | Ca_Kabuli_Chr01 | 37993407                | AA                                     | GG                 | GG               | INTERGENIC                    |                    |                    |
| SNP_5241_A_37993447 | NC_021160.1    | Ca_Kabuli_Chr01 | 37993447                | CC                                     | TT                 | TT               | INTERGENIC                    |                    |                    |
| SNP_5243_A_37993864 | NC_021160.1    | Ca_Kabuli_Chr01 | 37993864                | AA                                     | CC                 | CC               | INTERGENIC                    |                    |                    |
| SNP_5244_A_38022106 | NC_021160.1    | Ca_Kabuli_Chr01 | 38022106                | AA                                     | GG                 | GG               | INTRON                        | 101514834          | Unknown function   |
| SNP_5245_A_38022128 | NC_021160.1    | Ca_Kabuli_Chr01 | 38022128                | AA                                     | GG                 | GG               | INTRON                        | 101514834          | Unknown function   |
| SNP_5246_A_38022160 | NC_021160.1    | Ca_Kabuli_Chr01 | 38022160                | GG                                     | AA                 | AA               | INTRON                        | 101514834          | Unknown function   |
| SNP_5247_A_38022172 | NC_021160.1    | Ca_Kabuli_Chr01 | 38022172                | GG                                     | AA                 | AA               | INTRON                        | 101514834          | Unknown function   |
| SNP_5248_A_38022212 | NC_021160.1    | Ca_Kabuli_Chr01 | 38022212                | GG                                     | AA                 | AA               | INTRON                        | 101514834          | Unknown function   |
| SNP_5249_A_38022324 | NC_021160.1    | Ca_Kabuli_Chr01 | 38022324                | AA                                     | GG                 | GG               | INTRON                        | 101514834          | Unknown function   |
| SNP_5250_A_38022500 | NC_021160.1    | Ca_Kabuli_Chr01 | 38022500                | CC                                     | TT                 | TT               | SYNONYMOUS_CODING             | 101514834          | Unknown function   |
| SNP_5251_A_38022517 | NC_021160.1    | Ca_Kabuli_Chr01 | 38022517                | CC                                     | TT                 | TT               | SYNONYMOUS_CODING             | 101514834          | Unknown function   |
| SNP_5252_A_38022519 | NC_021160.1    | Ca_Kabuli_Chr01 | 38022519                | GG                                     | AA                 | AA               | NON_SYNONYMOUS_CODING         | 101514834          | Unknown function   |

| SNPs IDs            | Chromosome IDs | Chromosomes     | Physical positions (bp) | CDC Frontier genome (Reference genome) | (Pusa 1103 & HPNB) | (ILWC 46 & LPNB) | Sequence Components of genome | Gene accession IDs | Putative functions                         |
|---------------------|----------------|-----------------|-------------------------|----------------------------------------|--------------------|------------------|-------------------------------|--------------------|--------------------------------------------|
| SNP_5253_A_38022535 | NC_021160.1    | Ca_Kabuli_Chr01 | 38022535                | GG                                     | TT                 | TT               | NON_SYNONYMOUS_CODING         | 101514834          | Unknown function                           |
| SNP_5254_A_38022536 | NC_021160.1    | Ca_Kabuli_Chr01 | 38022536                | CC                                     | GG                 | GG               | NON_SYNONYMOUS_CODING         | 101514834          | Unknown function                           |
| SNP_5255_A_38022542 | NC_021160.1    | Ca_Kabuli_Chr01 | 38022542                | CC                                     | AA                 | AA               | NON_SYNONYMOUS_CODING         | 101514834          | Unknown function                           |
| SNP_5256_A_38022554 | NC_021160.1    | Ca_Kabuli_Chr01 | 38022554                | CC                                     | TT                 | TT               | SYNONYMOUS_CODING             | 101514834          | Unknown function                           |
| SNP_5257_A_38023332 | NC_021160.1    | Ca_Kabuli_Chr01 | 38023332                | GG                                     | TT                 | TT               | URR                           | 101514834          | Unknown function                           |
| SNP_5258_A_38023677 | NC_021160.1    | Ca_Kabuli_Chr01 | 38023677                | CC                                     | TT                 | TT               | URR                           | 101514834          | Unknown function                           |
| SNP_5259_A_38024863 | NC_021160.1    | Ca_Kabuli_Chr01 | 38024863                | AA                                     | GG                 | GG               | INTERGENIC                    |                    |                                            |
| SNP_5261_A_38024954 | NC_021160.1    | Ca_Kabuli_Chr01 | 38024954                | GG                                     | AA                 | AA               | INTERGENIC                    |                    |                                            |
| SNP_5263_A_38060296 | NC_021160.1    | Ca_Kabuli_Chr01 | 38060296                | CC                                     | TT                 | TT               | INTERGENIC                    |                    |                                            |
| SNP_5264_A_38060299 | NC_021160.1    | Ca_Kabuli_Chr01 | 38060299                | CC                                     | TT                 | TT               | INTERGENIC                    |                    |                                            |
| SNP_5266_A_38065005 | NC_021160.1    | Ca_Kabuli_Chr01 | 38065005                | GG                                     | AA                 | AA               | INTERGENIC                    |                    |                                            |
| SNP_5267_A_38065284 | NC_021160.1    | Ca_Kabuli_Chr01 | 38065284                | TT                                     | CC                 | CC               | DRR                           | 101410590          | transfer RNA aspartic acid (anticodon GUC) |
| SNP_5268_A_38065291 | NC_021160.1    | Ca_Kabuli_Chr01 | 38065291                | GG                                     | TT                 | TT               | DRR                           | 101410590          | transfer RNA aspartic acid (anticodon GUC) |
| SNP_5269_A_38066127 | NC_021160.1    | Ca_Kabuli_Chr01 | 38066127                | CC                                     | GG                 | GG               | DRR                           | 101410555          | transfer RNA isoleucine (anticodon AAU)    |
| SNP_5270_A_38066224 | NC_021160.1    | Ca_Kabuli_Chr01 | 38066224                | GG                                     | AA                 | AA               | URR                           | 101410590          | transfer RNA aspartic acid (anticodon GUC) |
| SNP_5271_A_38066629 | NC_021160.1    | Ca_Kabuli_Chr01 | 38066629                | TT                                     | GG                 | GG               | URR                           | 101410590          | transfer RNA aspartic acid (anticodon GUC) |
| SNP_5272_A_38066745 | NC_021160.1    | Ca_Kabuli_Chr01 | 38066745                | TT                                     | CC                 | CC               | URR                           | 101410590          | transfer RNA aspartic acid (anticodon GUC) |
| SNP_5273_A_38067082 | NC_021160.1    | Ca_Kabuli_Chr01 | 38067082                | GG                                     | AA                 | AA               | URR                           | 101410590          | transfer RNA aspartic acid (anticodon GUC) |
| SNP_5274_A_38067092 | NC_021160.1    | Ca_Kabuli_Chr01 | 38067092                | AA                                     | GG                 | GG               | URR                           | 101410590          | transfer RNA aspartic acid (anticodon GUC) |
| SNP_5275_A_38067177 | NC_021160.1    | Ca_Kabuli_Chr01 | 38067177                | AA                                     | TT                 | TT               | URR                           | 101410590          | transfer RNA aspartic acid (anticodon GUC) |
| SNP_5276_A_38067288 | NC_021160.1    | Ca_Kabuli_Chr01 | 38067288                | AA                                     | CC                 | CC               | URR                           | 101410590          | transfer RNA aspartic acid (anticodon GUC) |
| SNP_5277_A_38067743 | NC_021160.1    | Ca_Kabuli_Chr01 | 38067743                | GG                                     | AA                 | AA               | URR                           | 101410590          | transfer RNA aspartic acid (anticodon GUC) |

| SNPs IDs            | Chromosome IDs | Chromosomes     | Physical positions (bp) | CDC Frontier genome (Reference genome) | (Pusa 1103 & HPNB) | (ILWC 46 & LPNB) | Sequence genome | Components of | Gene accession IDs | Putative functions |
|---------------------|----------------|-----------------|-------------------------|----------------------------------------|--------------------|------------------|-----------------|---------------|--------------------|--------------------|
| SNP_5278_A_38069516 | NC_021160.1    | Ca_Kabuli_Chr01 | 38069516                | GG                                     | AA                 | AA               | INTERGENIC      |               |                    |                    |
| SNP_5279_A_38069719 | NC_021160.1    | Ca_Kabuli_Chr01 | 38069719                | GG                                     | TT                 | TT               | INTERGENIC      |               |                    |                    |
| SNP_5280_A_38069896 | NC_021160.1    | Ca_Kabuli_Chr01 | 38069896                | CC                                     | TT                 | TT               | INTERGENIC      |               |                    |                    |
| SNP_5281_A_38069917 | NC_021160.1    | Ca_Kabuli_Chr01 | 38069917                | AA                                     | GG                 | GG               | INTERGENIC      |               |                    |                    |
| SNP_5282_A_38070062 | NC_021160.1    | Ca_Kabuli_Chr01 | 38070062                | AA                                     | TT                 | TT               | INTERGENIC      |               |                    |                    |
| SNP_5283_A_38070565 | NC_021160.1    | Ca_Kabuli_Chr01 | 38070565                | TT                                     | CC                 | CC               | INTERGENIC      |               |                    |                    |
| SNP_5284_A_38070572 | NC_021160.1    | Ca_Kabuli_Chr01 | 38070572                | CC                                     | GG                 | GG               | INTERGENIC      |               |                    |                    |
| SNP_5285_A_38070584 | NC_021160.1    | Ca_Kabuli_Chr01 | 38070584                | TT                                     | GG                 | GG               | INTERGENIC      |               |                    |                    |
| SNP_5287_A_38070843 | NC_021160.1    | Ca_Kabuli_Chr01 | 38070843                | TT                                     | CC                 | CC               | INTERGENIC      |               |                    |                    |
| SNP_5289_A_38071457 | NC_021160.1    | Ca_Kabuli_Chr01 | 38071457                | CC                                     | TT                 | TT               | INTERGENIC      |               |                    |                    |
| SNP_5291_A_38071652 | NC_021160.1    | Ca_Kabuli_Chr01 | 38071652                | TT                                     | CC                 | CC               | INTERGENIC      |               |                    |                    |
| SNP_5292_A_38087711 | NC_021160.1    | Ca_Kabuli_Chr01 | 38087711                | GG                                     | AA                 | AA               | INTERGENIC      |               |                    |                    |
| SNP_5293_A_38087733 | NC_021160.1    | Ca_Kabuli_Chr01 | 38087733                | GG                                     | AA                 | AA               | INTERGENIC      |               |                    |                    |
| SNP_5294_A_38087796 | NC_021160.1    | Ca_Kabuli_Chr01 | 38087796                | TT                                     | AA                 | AA               | INTERGENIC      |               |                    |                    |
| SNP_5295_A_38089084 | NC_021160.1    | Ca_Kabuli_Chr01 | 38089084                | AA                                     | GG                 | GG               | INTERGENIC      |               |                    |                    |
| SNP_5296_A_38089659 | NC_021160.1    | Ca_Kabuli_Chr01 | 38089659                | AA                                     | GG                 | GG               | INTERGENIC      |               |                    |                    |
| SNP_5297_A_38104193 | NC_021160.1    | Ca_Kabuli_Chr01 | 38104193                | CC                                     | TT                 | TT               | INTERGENIC      |               |                    |                    |
| SNP_5298_A_38108575 | NC_021160.1    | Ca_Kabuli_Chr01 | 38108575                | GG                                     | AA                 | AA               | INTERGENIC      |               |                    |                    |
| SNP_5299_A_38108589 | NC_021160.1    | Ca_Kabuli_Chr01 | 38108589                | GG                                     | AA                 | AA               | INTERGENIC      |               |                    |                    |
| SNP_5300_A_38108641 | NC_021160.1    | Ca_Kabuli_Chr01 | 38108641                | AA                                     | GG                 | GG               | INTERGENIC      |               |                    |                    |
| SNP_5301_A_38110722 | NC_021160.1    | Ca_Kabuli_Chr01 | 38110722                | GG                                     | AA                 | AA               | INTERGENIC      |               |                    |                    |
| SNP_5302_A_38110736 | NC_021160.1    | Ca_Kabuli_Chr01 | 38110736                | CC                                     | TT                 | TT               | INTERGENIC      |               |                    |                    |



| SNPs IDs            | Chromosome IDs | Chromosomes     | Physical positions (bp) | CDC Frontier genome (Reference genome) | (Pusa 1103 & HPNB) | (ILWC 46 & LPNB) | Sequence Components of genome | Gene accession IDs | Putative functions   |
|---------------------|----------------|-----------------|-------------------------|----------------------------------------|--------------------|------------------|-------------------------------|--------------------|----------------------|
| SNP_5304_A_38113610 | NC_021160.1    | Ca_Kabuli_Chr01 | 38113610                | CC                                     | GG                 | GG               | INTERGENIC                    |                    |                      |
| SNP_5305_A_38114895 | NC_021160.1    | Ca_Kabuli_Chr01 | 38114895                | TT                                     | CC                 | CC               | INTERGENIC                    |                    |                      |
| SNP_5306_A_38126227 | NC_021160.1    | Ca_Kabuli_Chr01 | 38126227                | TT                                     | CC                 | CC               | INTERGENIC                    |                    |                      |
| SNP_5307_A_38127001 | NC_021160.1    | Ca_Kabuli_Chr01 | 38127001                | TT                                     | CC                 | CC               | DRR                           | 101504214          | endochitinase A-like |
| SNP_5308_A_38127610 | NC_021160.1    | Ca_Kabuli_Chr01 | 38127610                | AA                                     | GG                 | GG               | NON_SYNONYMOUS_CODING         | 101504214          | endochitinase A-like |
| SNP_5310_A_38131615 | NC_021160.1    | Ca_Kabuli_Chr01 | 38131615                | TT                                     | AA                 | AA               | INTERGENIC                    |                    |                      |
| SNP_5311_A_38134270 | NC_021160.1    | Ca_Kabuli_Chr01 | 38134270                | AA                                     | GG                 | GG               | INTERGENIC                    |                    |                      |
| SNP_5312_A_38139744 | NC_021160.1    | Ca_Kabuli_Chr01 | 38139744                | AA                                     | GG                 | GG               | INTERGENIC                    |                    |                      |
| SNP_5313_A_38142218 | NC_021160.1    | Ca_Kabuli_Chr01 | 38142218                | CC                                     | TT                 | TT               | INTERGENIC                    |                    |                      |
| SNP_5314_A_38143625 | NC_021160.1    | Ca_Kabuli_Chr01 | 38143625                | TT                                     | CC                 | CC               | INTERGENIC                    |                    |                      |
| SNP_5315_A_38143897 | NC_021160.1    | Ca_Kabuli_Chr01 | 38143897                | TT                                     | CC                 | CC               | INTERGENIC                    |                    |                      |
| SNP_5316_A_38145006 | NC_021160.1    | Ca_Kabuli_Chr01 | 38145006                | AA                                     | GG                 | GG               | INTERGENIC                    |                    |                      |
| SNP_5317_A_38148421 | NC_021160.1    | Ca_Kabuli_Chr01 | 38148421                | CC                                     | TT                 | TT               | INTERGENIC                    |                    |                      |
| SNP_5318_A_38150454 | NC_021160.1    | Ca_Kabuli_Chr01 | 38150454                | GG                                     | AA                 | AA               | INTERGENIC                    |                    |                      |
| SNP_5319_A_38150496 | NC_021160.1    | Ca_Kabuli_Chr01 | 38150496                | AA                                     | TT                 | TT               | INTERGENIC                    |                    |                      |
| SNP_5320_A_38150525 | NC_021160.1    | Ca_Kabuli_Chr01 | 38150525                | AA                                     | CC                 | CC               | INTERGENIC                    |                    |                      |
| SNP_5321_A_38180103 | NC_021160.1    | Ca_Kabuli_Chr01 | 38180103                | AA                                     | TT                 | TT               | INTERGENIC                    |                    |                      |
| SNP_5322_A_38180783 | NC_021160.1    | Ca_Kabuli_Chr01 | 38180783                | AA                                     | CC                 | CC               | INTERGENIC                    |                    |                      |
| SNP_5323_A_38181987 | NC_021160.1    | Ca_Kabuli_Chr01 | 38181987                | AA                                     | TT                 | TT               | INTERGENIC                    |                    |                      |
| SNP_5324_A_38182506 | NC_021160.1    | Ca_Kabuli_Chr01 | 38182506                | TT                                     | AA                 | AA               | INTERGENIC                    |                    |                      |
| SNP_5325_A_38183215 | NC_021160.1    | Ca_Kabuli_Chr01 | 38183215                | GG                                     | TT                 | TT               | INTERGENIC                    |                    |                      |
| SNP_5326_A_38183238 | NC_021160.1    | Ca_Kabuli_Chr01 | 38183238                | TT                                     | GG                 | GG               | INTERGENIC                    |                    |                      |

| SNPs IDs            | Chromosome IDs | Chromosomes     | Physical positions (bp) | CDC Frontier (Reference genome) | (Pusa 1103 & HPNB) | (ILWC 46 & LPNB) | Sequence Components of genome | Gene accession IDs | Putative functions                                        |
|---------------------|----------------|-----------------|-------------------------|---------------------------------|--------------------|------------------|-------------------------------|--------------------|-----------------------------------------------------------|
| SNP_5327_A_38187713 | NC_021160.1    | Ca_Kabuli_Chr01 | 38187713                | TT                              | CC                 | CC               | INTERGENIC                    |                    |                                                           |
| SNP_5328_A_38188804 | NC_021160.1    | Ca_Kabuli_Chr01 | 38188804                | TT                              | CC                 | CC               | INTERGENIC                    |                    |                                                           |
| SNP_5329_A_38192727 | NC_021160.1    | Ca_Kabuli_Chr01 | 38192727                | GG                              | AA                 | AA               | INTERGENIC                    |                    |                                                           |
| SNP_5331_A_38198450 | NC_021160.1    | Ca_Kabuli_Chr01 | 38198450                | AA                              | GG                 | GG               | URR                           | 101504550          | apoptosis-enhancing nuclease-like                         |
| SNP_5332_A_38217297 | NC_021160.1    | Ca_Kabuli_Chr01 | 38217297                | TT                              | CC                 | CC               | SYNONYMOUS_CODING             | 101488359          | cyclic pyranopterin monophosphate synthase, mitochondrial |
| SNP_5333_A_38226440 | NC_021160.1    | Ca_Kabuli_Chr01 | 38226440                | AA                              | GG                 | GG               | URR                           | 101488683          | VQ motif-containing protein 25-like                       |
| SNP_5334_A_38227463 | NC_021160.1    | Ca_Kabuli_Chr01 | 38227463                | CC                              | GG                 | GG               | INTERGENIC                    |                    |                                                           |
| SNP_5335_A_38228696 | NC_021160.1    | Ca_Kabuli_Chr01 | 38228696                | GG                              | CC                 | CC               | INTERGENIC                    |                    |                                                           |
| SNP_5336_A_38228698 | NC_021160.1    | Ca_Kabuli_Chr01 | 38228698                | TT                              | GG                 | GG               | INTERGENIC                    |                    |                                                           |
| SNP_5337_A_38228986 | NC_021160.1    | Ca_Kabuli_Chr01 | 38228986                | TT                              | AA                 | AA               | INTERGENIC                    |                    |                                                           |
| SNP_5338_A_38229007 | NC_021160.1    | Ca_Kabuli_Chr01 | 38229007                | AA                              | CC                 | CC               | INTERGENIC                    |                    |                                                           |
| SNP_5339_A_38233851 | NC_021160.1    | Ca_Kabuli_Chr01 | 38233851                | GG                              | AA                 | AA               | INTERGENIC                    |                    |                                                           |
| SNP_5340_A_38242219 | NC_021160.1    | Ca_Kabuli_Chr01 | 38242219                | CC                              | TT                 | TT               | INTERGENIC                    |                    |                                                           |
| SNP_5341_A_38246933 | NC_021160.1    | Ca_Kabuli_Chr01 | 38246933                | AA                              | GG                 | GG               | INTERGENIC                    |                    |                                                           |
| SNP_5342_A_38249451 | NC_021160.1    | Ca_Kabuli_Chr01 | 38249451                | TT                              | CC                 | CC               | INTERGENIC                    |                    |                                                           |
| SNP_5343_A_38250749 | NC_021160.1    | Ca_Kabuli_Chr01 | 38250749                | CC                              | AA                 | AA               | INTERGENIC                    |                    |                                                           |
| SNP_5344_A_38251077 | NC_021160.1    | Ca_Kabuli_Chr01 | 38251077                | GG                              | TT                 | TT               | INTERGENIC                    |                    |                                                           |
| SNP_5345_A_38252809 | NC_021160.1    | Ca_Kabuli_Chr01 | 38252809                | GG                              | AA                 | AA               | INTERGENIC                    |                    |                                                           |
| SNP_5346_A_38262450 | NC_021160.1    | Ca_Kabuli_Chr01 | 38262450                | TT                              | CC                 | CC               | INTERGENIC                    |                    |                                                           |
| SNP_5347_A_38267328 | NC_021160.1    | Ca_Kabuli_Chr01 | 38267328                | AA                              | GG                 | GG               | URR                           | 101489021          | uncharacterized LOC101489021                              |
| SNP_5349_A_38274278 | NC_021160.1    | Ca_Kabuli_Chr01 | 38274278                | AA                              | TT                 | TT               | URR                           | 101489349          | E3 ubiquitin-protein ligase RING1-like                    |
| SNP_5350_A_38274292 | NC_021160.1    | Ca_Kabuli_Chr01 | 38274292                | TT                              | GG                 | GG               | URR                           | 101489349          | E3 ubiquitin-protein ligase RING1-like                    |

| SNPs IDs            | Chromosome IDs | Chromosomes     | Physical positions (bp) | CDC Frontier genome (Reference genome) | (Pusa 1103 & HPNB) | (ILWC 46 & LPNB) | Sequence Components of genome | Gene accession IDs | Putative functions                              |
|---------------------|----------------|-----------------|-------------------------|----------------------------------------|--------------------|------------------|-------------------------------|--------------------|-------------------------------------------------|
| SNP_5351_A_38277904 | NC_021160.1    | Ca_Kabuli_Chr01 | 38277904                | AA                                     | CC                 | CC               | INTERGENIC                    |                    |                                                 |
| SNP_5352_A_38279468 | NC_021160.1    | Ca_Kabuli_Chr01 | 38279468                | TT                                     | GG                 | GG               | DRR                           | 101489676          | cell division control protein 48 homolog C-like |
| SNP_5354_A_38284286 | NC_021160.1    | Ca_Kabuli_Chr01 | 38284286                | TT                                     | CC                 | CC               | INTERGENIC                    |                    |                                                 |
| SNP_5355_A_38284373 | NC_021160.1    | Ca_Kabuli_Chr01 | 38284373                | GG                                     | TT                 | TT               | INTERGENIC                    |                    |                                                 |
| SNP_5356_A_38284375 | NC_021160.1    | Ca_Kabuli_Chr01 | 38284375                | GG                                     | AA                 | AA               | INTERGENIC                    |                    |                                                 |
| SNP_5357_A_38284506 | NC_021160.1    | Ca_Kabuli_Chr01 | 38284506                | AA                                     | TT                 | TT               | INTERGENIC                    |                    |                                                 |
| SNP_5358_A_38338703 | NC_021160.1    | Ca_Kabuli_Chr01 | 38338703                | AA                                     | GG                 | GG               | URR                           | 101490214          | uncharacterized LOC101490214                    |
| SNP_5359_A_38339214 | NC_021160.1    | Ca_Kabuli_Chr01 | 38339214                | CC                                     | TT                 | TT               | URR                           | 101490214          | uncharacterized LOC101490214                    |
| SNP_5360_A_38339425 | NC_021160.1    | Ca_Kabuli_Chr01 | 38339425                | GG                                     | AA                 | AA               | URR                           | 101490214          | uncharacterized LOC101490214                    |
| SNP_5361_A_38341429 | NC_021160.1    | Ca_Kabuli_Chr01 | 38341429                | TT                                     | GG                 | GG               | INTERGENIC                    |                    |                                                 |
| SNP_5362_A_38341430 | NC_021160.1    | Ca_Kabuli_Chr01 | 38341430                | GG                                     | AA                 | AA               | INTERGENIC                    |                    |                                                 |
| SNP_5363_A_38341720 | NC_021160.1    | Ca_Kabuli_Chr01 | 38341720                | CC                                     | TT                 | TT               | INTERGENIC                    |                    |                                                 |
| SNP_5364_A_38342570 | NC_021160.1    | Ca_Kabuli_Chr01 | 38342570                | GG                                     | TT                 | TT               | INTERGENIC                    |                    |                                                 |
| SNP_5365_A_38346054 | NC_021160.1    | Ca_Kabuli_Chr01 | 38346054                | TT                                     | GG                 | GG               | URR                           | 101490534          | uncharacterized LOC101490534                    |
| SNP_5366_A_38346059 | NC_021160.1    | Ca_Kabuli_Chr01 | 38346059                | TT                                     | GG                 | GG               | URR                           | 101490534          | uncharacterized LOC101490534                    |
| SNP_5367_A_38346087 | NC_021160.1    | Ca_Kabuli_Chr01 | 38346087                | CC                                     | TT                 | TT               | URR                           | 101490534          | uncharacterized LOC101490534                    |
| SNP_5368_A_38346134 | NC_021160.1    | Ca_Kabuli_Chr01 | 38346134                | CC                                     | TT                 | TT               | URR                           | 101490534          | uncharacterized LOC101490534                    |
| SNP_5369_A_38346178 | NC_021160.1    | Ca_Kabuli_Chr01 | 38346178                | TT                                     | CC                 | CC               | URR                           | 101490534          | uncharacterized LOC101490534                    |
| SNP_5370_A_38346500 | NC_021160.1    | Ca_Kabuli_Chr01 | 38346500                | CC                                     | TT                 | TT               | URR                           | 101490534          | uncharacterized LOC101490534                    |
| SNP_5371_A_38347645 | NC_021160.1    | Ca_Kabuli_Chr01 | 38347645                | CC                                     | TT                 | TT               | URR                           | 101490534          | uncharacterized LOC101490534                    |
| SNP_5372_A_38347717 | NC_021160.1    | Ca_Kabuli_Chr01 | 38347717                | AA                                     | GG                 | GG               | URR                           | 101490534          | uncharacterized LOC101490534                    |
| SNP_5374_A_38360381 | NC_021160.1    | Ca_Kabuli_Chr01 | 38360381                | CC                                     | AA                 | AA               | INTERGENIC                    |                    |                                                 |

| SNPs IDs            | Chromosome IDs | Chromosomes     | Physical positions (bp) | CDC Frontier (Reference genome) | (Pusa 1103 & HPNB) | (ILWC 46 & LPNB) | Sequence Components of genome | Gene accession IDs | Putative functions                                              |
|---------------------|----------------|-----------------|-------------------------|---------------------------------|--------------------|------------------|-------------------------------|--------------------|-----------------------------------------------------------------|
| SNP_5375_A_38360386 | NC_021160.1    | Ca_Kabuli_Chr01 | 38360386                | TT                              | CC                 | CC               | INTERGENIC                    |                    |                                                                 |
| SNP_5376_A_38363892 | NC_021160.1    | Ca_Kabuli_Chr01 | 38363892                | GG                              | CC                 | CC               | INTERGENIC                    |                    |                                                                 |
| SNP_5378_A_38363963 | NC_021160.1    | Ca_Kabuli_Chr01 | 38363963                | TT                              | CC                 | CC               | INTERGENIC                    |                    |                                                                 |
| SNP_5379_A_38363964 | NC_021160.1    | Ca_Kabuli_Chr01 | 38363964                | CC                              | AA                 | AA               | INTERGENIC                    |                    |                                                                 |
| SNP_5380_A_38363967 | NC_021160.1    | Ca_Kabuli_Chr01 | 38363967                | GG                              | AA                 | AA               | INTERGENIC                    |                    |                                                                 |
| SNP_5381_A_38367311 | NC_021160.1    | Ca_Kabuli_Chr01 | 38367311                | GG                              | AA                 | AA               | INTERGENIC                    |                    |                                                                 |
| SNP_5382_A_38395345 | NC_021160.1    | Ca_Kabuli_Chr01 | 38395345                | CC                              | AA                 | AA               | INTRON                        | 101505825          | Unknown function                                                |
| SNP_5383_A_38395799 | NC_021160.1    | Ca_Kabuli_Chr01 | 38395799                | AA                              | GG                 | GG               | INTRON                        | 101505825          | Unknown function                                                |
| SNP_5384_A_38426687 | NC_021160.1    | Ca_Kabuli_Chr01 | 38426687                | AA                              | GG                 | GG               | URR                           | 101505825          | Unknown function                                                |
| SNP_5385_A_38428808 | NC_021160.1    | Ca_Kabuli_Chr01 | 38428808                | TT                              | CC                 | CC               | INTERGENIC                    |                    |                                                                 |
| SNP_5386_A_38437252 | NC_021160.1    | Ca_Kabuli_Chr01 | 38437252                | TT                              | CC                 | CC               | URR                           | 101490858          | major facilitator superfamily domain-containing protein 12-like |
| SNP_5387_A_38449894 | NC_021160.1    | Ca_Kabuli_Chr01 | 38449894                | AA                              | GG                 | GG               | INTERGENIC                    |                    |                                                                 |
| SNP_5388_A_38460160 | NC_021160.1    | Ca_Kabuli_Chr01 | 38460160                | CC                              | TT                 | TT               | INTERGENIC                    |                    |                                                                 |
| SNP_5389_A_38465776 | NC_021160.1    | Ca_Kabuli_Chr01 | 38465776                | AA                              | CC                 | CC               | INTERGENIC                    |                    |                                                                 |
| SNP_5390_A_38466106 | NC_021160.1    | Ca_Kabuli_Chr01 | 38466106                | AA                              | TT                 | TT               | INTERGENIC                    |                    |                                                                 |
| SNP_5395_A_38499863 | NC_021160.1    | Ca_Kabuli_Chr01 | 38499863                | AA                              | TT                 | TT               | INTERGENIC                    |                    |                                                                 |
| SNP_5396_A_38514033 | NC_021160.1    | Ca_Kabuli_Chr01 | 38514033                | TT                              | CC                 | CC               | URR                           | 101493036          | uncharacterized LOC101493036                                    |
| SNP_5397_A_38520698 | NC_021160.1    | Ca_Kabuli_Chr01 | 38520698                | AA                              | GG                 | GG               | INTERGENIC                    |                    |                                                                 |
| SNP_5398_A_38527391 | NC_021160.1    | Ca_Kabuli_Chr01 | 38527391                | AA                              | GG                 | GG               | INTERGENIC                    |                    |                                                                 |
| SNP_5399_A_38529243 | NC_021160.1    | Ca_Kabuli_Chr01 | 38529243                | GG                              | TT                 | TT               | INTERGENIC                    |                    |                                                                 |
| SNP_5400_A_38535455 | NC_021160.1    | Ca_Kabuli_Chr01 | 38535455                | GG                              | AA                 | AA               | INTERGENIC                    |                    |                                                                 |
| SNP_5401_A_38535843 | NC_021160.1    | Ca_Kabuli_Chr01 | 38535843                | TT                              | CC                 | CC               | INTERGENIC                    |                    |                                                                 |

| SNPs IDs            | Chromosome IDs | Chromosomes     | Physical positions (bp) | CDC Frontier (Reference genome) | (Pusa 1103 & HPNB) | (ILWC 46 & LPNB) | Sequence Components of genome | Gene accession IDs | Putative functions                   |
|---------------------|----------------|-----------------|-------------------------|---------------------------------|--------------------|------------------|-------------------------------|--------------------|--------------------------------------|
| SNP_5402_A_38560871 | NC_021160.1    | Ca_Kabuli_Chr01 | 38560871                | AA                              | GG                 | GG               | NON_SYNONYMOUS_CODING         | 101506797          | disease resistance protein RGA2-like |
| SNP_5403_A_38563493 | NC_021160.1    | Ca_Kabuli_Chr01 | 38563493                | TT                              | CC                 | CC               | URR                           | 101506797          | disease resistance protein RGA2-like |
| SNP_5404_A_38564217 | NC_021160.1    | Ca_Kabuli_Chr01 | 38564217                | TT                              | CC                 | CC               | URR                           | 101506797          | disease resistance protein RGA2-like |
| SNP_5405_A_38564223 | NC_021160.1    | Ca_Kabuli_Chr01 | 38564223                | AA                              | GG                 | GG               | URR                           | 101506797          | disease resistance protein RGA2-like |
| SNP_5406_A_38564224 | NC_021160.1    | Ca_Kabuli_Chr01 | 38564224                | AA                              | GG                 | GG               | URR                           | 101506797          | disease resistance protein RGA2-like |
| SNP_5407_A_38564228 | NC_021160.1    | Ca_Kabuli_Chr01 | 38564228                | AA                              | GG                 | GG               | URR                           | 101506797          | disease resistance protein RGA2-like |
| SNP_5408_A_38564933 | NC_021160.1    | Ca_Kabuli_Chr01 | 38564933                | TT                              | CC                 | CC               | INTERGENIC                    |                    |                                      |
| SNP_5409_A_38564944 | NC_021160.1    | Ca_Kabuli_Chr01 | 38564944                | TT                              | CC                 | CC               | INTERGENIC                    |                    |                                      |
| SNP_5410_A_38566207 | NC_021160.1    | Ca_Kabuli_Chr01 | 38566207                | AA                              | GG                 | GG               | INTERGENIC                    |                    |                                      |
| SNP_5411_A_38568671 | NC_021160.1    | Ca_Kabuli_Chr01 | 38568671                | GG                              | AA                 | AA               | INTERGENIC                    |                    |                                      |
| SNP_5412_A_38568677 | NC_021160.1    | Ca_Kabuli_Chr01 | 38568677                | GG                              | CC                 | CC               | INTERGENIC                    |                    |                                      |
| SNP_5413_A_38569793 | NC_021160.1    | Ca_Kabuli_Chr01 | 38569793                | AA                              | GG                 | GG               | INTERGENIC                    |                    |                                      |
| SNP_5414_A_38569850 | NC_021160.1    | Ca_Kabuli_Chr01 | 38569850                | TT                              | CC                 | CC               | INTERGENIC                    |                    |                                      |
| SNP_5415_A_38571054 | NC_021160.1    | Ca_Kabuli_Chr01 | 38571054                | CC                              | TT                 | TT               | INTERGENIC                    |                    |                                      |
| SNP_5416_A_38572557 | NC_021160.1    | Ca_Kabuli_Chr01 | 38572557                | GG                              | AA                 | AA               | INTERGENIC                    |                    |                                      |
| SNP_5417_A_38572606 | NC_021160.1    | Ca_Kabuli_Chr01 | 38572606                | TT                              | CC                 | CC               | INTERGENIC                    |                    |                                      |
| SNP_5418_A_38572635 | NC_021160.1    | Ca_Kabuli_Chr01 | 38572635                | AA                              | GG                 | GG               | INTERGENIC                    |                    |                                      |
| SNP_5419_A_38572681 | NC_021160.1    | Ca_Kabuli_Chr01 | 38572681                | CC                              | TT                 | TT               | INTERGENIC                    |                    |                                      |
| SNP_5420_A_38572828 | NC_021160.1    | Ca_Kabuli_Chr01 | 38572828                | AA                              | GG                 | GG               | INTERGENIC                    |                    |                                      |
| SNP_5421_A_38574477 | NC_021160.1    | Ca_Kabuli_Chr01 | 38574477                | TT                              | GG                 | GG               | INTERGENIC                    |                    |                                      |
| SNP_5422_A_38574810 | NC_021160.1    | Ca_Kabuli_Chr01 | 38574810                | TT                              | GG                 | GG               | INTERGENIC                    |                    |                                      |
| SNP_5423_A_38575989 | NC_021160.1    | Ca_Kabuli_Chr01 | 38575989                | GG                              | AA                 | AA               | INTERGENIC                    |                    |                                      |

| SNPs IDs            | Chromosome IDs | Chromosomes     | Physical positions (bp) | CDC Frontier genome (Reference genome) | (Pusa 1103 & HPNB) | (ILWC 46 & LPNB) | Sequence genome | Components of | Gene accession IDs | Putative functions |
|---------------------|----------------|-----------------|-------------------------|----------------------------------------|--------------------|------------------|-----------------|---------------|--------------------|--------------------|
| SNP_5425_A_38577566 | NC_021160.1    | Ca_Kabuli_Chr01 | 38577566                | AA                                     | TT                 | TT               | INTERGENIC      |               |                    |                    |
| SNP_5426_A_38577803 | NC_021160.1    | Ca_Kabuli_Chr01 | 38577803                | TT                                     | CC                 | CC               | INTERGENIC      |               |                    |                    |
| SNP_5427_A_38577825 | NC_021160.1    | Ca_Kabuli_Chr01 | 38577825                | GG                                     | TT                 | TT               | INTERGENIC      |               |                    |                    |
| SNP_5428_A_38578045 | NC_021160.1    | Ca_Kabuli_Chr01 | 38578045                | CC                                     | TT                 | TT               | INTERGENIC      |               |                    |                    |
| SNP_5429_A_38578212 | NC_021160.1    | Ca_Kabuli_Chr01 | 38578212                | TT                                     | CC                 | CC               | INTERGENIC      |               |                    |                    |
| SNP_5430_A_38580389 | NC_021160.1    | Ca_Kabuli_Chr01 | 38580389                | TT                                     | CC                 | CC               | INTERGENIC      |               |                    |                    |
| SNP_5431_A_38580394 | NC_021160.1    | Ca_Kabuli_Chr01 | 38580394                | CC                                     | TT                 | TT               | INTERGENIC      |               |                    |                    |
| SNP_5432_A_38584228 | NC_021160.1    | Ca_Kabuli_Chr01 | 38584228                | CC                                     | TT                 | TT               | INTERGENIC      |               |                    |                    |
| SNP_5433_A_38592156 | NC_021160.1    | Ca_Kabuli_Chr01 | 38592156                | CC                                     | TT                 | TT               | INTERGENIC      |               |                    |                    |
| SNP_5434_A_38592211 | NC_021160.1    | Ca_Kabuli_Chr01 | 38592211                | AA                                     | TT                 | TT               | INTERGENIC      |               |                    |                    |
| SNP_5435_A_38592251 | NC_021160.1    | Ca_Kabuli_Chr01 | 38592251                | AA                                     | GG                 | GG               | INTERGENIC      |               |                    |                    |
| SNP_5436_A_38592280 | NC_021160.1    | Ca_Kabuli_Chr01 | 38592280                | AA                                     | TT                 | TT               | INTERGENIC      |               |                    |                    |
| SNP_5437_A_38592305 | NC_021160.1    | Ca_Kabuli_Chr01 | 38592305                | CC                                     | TT                 | TT               | INTERGENIC      |               |                    |                    |
| SNP_5438_A_38592642 | NC_021160.1    | Ca_Kabuli_Chr01 | 38592642                | AA                                     | GG                 | GG               | INTERGENIC      |               |                    |                    |
| SNP_5439_A_38594659 | NC_021160.1    | Ca_Kabuli_Chr01 | 38594659                | TT                                     | CC                 | CC               | INTERGENIC      |               |                    |                    |
| SNP_5441_A_38605815 | NC_021160.1    | Ca_Kabuli_Chr01 | 38605815                | GG                                     | AA                 | AA               | INTERGENIC      |               |                    |                    |
| SNP_5442_A_38610190 | NC_021160.1    | Ca_Kabuli_Chr01 | 38610190                | TT                                     | GG                 | GG               | INTERGENIC      |               |                    |                    |
| SNP_5443_A_38615144 | NC_021160.1    | Ca_Kabuli_Chr01 | 38615144                | AA                                     | GG                 | GG               | INTERGENIC      |               |                    |                    |
| SNP_5444_A_38615781 | NC_021160.1    | Ca_Kabuli_Chr01 | 38615781                | TT                                     | GG                 | GG               | INTERGENIC      |               |                    |                    |
| SNP_5445_A_38621188 | NC_021160.1    | Ca_Kabuli_Chr01 | 38621188                | CC                                     | AA                 | AA               | INTERGENIC      |               |                    |                    |
| SNP_5446_A_38621212 | NC_021160.1    | Ca_Kabuli_Chr01 | 38621212                | AA                                     | CC                 | CC               | INTERGENIC      |               |                    |                    |
| SNP_5447_A_38627479 | NC_021160.1    | Ca_Kabuli_Chr01 | 38627479                | GG                                     | AA                 | AA               | INTERGENIC      |               |                    |                    |

| SNPs IDs            | Chromosome IDs | Chromosomes     | Physical positions (bp) | CDC Frontier genome (Reference genome) | (Pusa 1103 & HPNB) | (ILWC 46 & LPNB) | Sequence genome | Components of | Gene accession IDs | Putative functions |
|---------------------|----------------|-----------------|-------------------------|----------------------------------------|--------------------|------------------|-----------------|---------------|--------------------|--------------------|
| SNP_5448_A_38629300 | NC_021160.1    | Ca_Kabuli_Chr01 | 38629300                | GG                                     | AA                 | AA               | INTERGENIC      |               |                    |                    |
| SNP_5449_A_38650826 | NC_021160.1    | Ca_Kabuli_Chr01 | 38650826                | TT                                     | GG                 | GG               | INTERGENIC      |               |                    |                    |
| SNP_5450_A_38651048 | NC_021160.1    | Ca_Kabuli_Chr01 | 38651048                | TT                                     | CC                 | CC               | INTERGENIC      |               |                    |                    |
| SNP_5451_A_38651082 | NC_021160.1    | Ca_Kabuli_Chr01 | 38651082                | CC                                     | TT                 | TT               | INTERGENIC      |               |                    |                    |
| SNP_5452_A_38651092 | NC_021160.1    | Ca_Kabuli_Chr01 | 38651092                | AA                                     | GG                 | GG               | INTERGENIC      |               |                    |                    |
| SNP_5453_A_38651098 | NC_021160.1    | Ca_Kabuli_Chr01 | 38651098                | AA                                     | CC                 | CC               | INTERGENIC      |               |                    |                    |
| SNP_5454_A_38651197 | NC_021160.1    | Ca_Kabuli_Chr01 | 38651197                | CC                                     | AA                 | AA               | INTERGENIC      |               |                    |                    |
| SNP_5455_A_38660082 | NC_021160.1    | Ca_Kabuli_Chr01 | 38660082                | CC                                     | TT                 | TT               | INTERGENIC      |               |                    |                    |
| SNP_5456_A_38671155 | NC_021160.1    | Ca_Kabuli_Chr01 | 38671155                | AA                                     | GG                 | GG               | INTERGENIC      |               |                    |                    |
| SNP_5457_A_38671666 | NC_021160.1    | Ca_Kabuli_Chr01 | 38671666                | TT                                     | AA                 | AA               | INTERGENIC      |               |                    |                    |
| SNP_5458_A_38672586 | NC_021160.1    | Ca_Kabuli_Chr01 | 38672586                | GG                                     | AA                 | AA               | INTERGENIC      |               |                    |                    |
| SNP_5459_A_38673403 | NC_021160.1    | Ca_Kabuli_Chr01 | 38673403                | GG                                     | AA                 | AA               | INTERGENIC      |               |                    |                    |
| SNP_5460_A_38677127 | NC_021160.1    | Ca_Kabuli_Chr01 | 38677127                | TT                                     | CC                 | CC               | INTERGENIC      |               |                    |                    |
| SNP_5461_A_38677343 | NC_021160.1    | Ca_Kabuli_Chr01 | 38677343                | AA                                     | CC                 | CC               | INTERGENIC      |               |                    |                    |
| SNP_5462_A_38677399 | NC_021160.1    | Ca_Kabuli_Chr01 | 38677399                | CC                                     | GG                 | GG               | INTERGENIC      |               |                    |                    |
| SNP_5463_A_38677402 | NC_021160.1    | Ca_Kabuli_Chr01 | 38677402                | AA                                     | CC                 | CC               | INTERGENIC      |               |                    |                    |
| SNP_5464_A_38677414 | NC_021160.1    | Ca_Kabuli_Chr01 | 38677414                | CC                                     | TT                 | TT               | INTERGENIC      |               |                    |                    |
| SNP_5465_A_38677420 | NC_021160.1    | Ca_Kabuli_Chr01 | 38677420                | GG                                     | AA                 | AA               | INTERGENIC      |               |                    |                    |
| SNP_5466_A_38677476 | NC_021160.1    | Ca_Kabuli_Chr01 | 38677476                | AA                                     | GG                 | GG               | INTERGENIC      |               |                    |                    |
| SNP_5467_A_38677496 | NC_021160.1    | Ca_Kabuli_Chr01 | 38677496                | AA                                     | CC                 | CC               | INTERGENIC      |               |                    |                    |
| SNP_5468_A_38677514 | NC_021160.1    | Ca_Kabuli_Chr01 | 38677514                | AA                                     | GG                 | GG               | INTERGENIC      |               |                    |                    |
| SNP_5469_A_38677534 | NC_021160.1    | Ca_Kabuli_Chr01 | 38677534                | GG                                     | AA                 | AA               | INTERGENIC      |               |                    |                    |

| SNPs IDs            | Chromosome IDs | Chromosomes     | Physical positions (bp) | CDC Frontier (Reference genome) | (Pusa 1103 & HPNB) | (ILWC 46 & LPNB) | Sequence Components of genome | Gene accession IDs | Putative functions           |
|---------------------|----------------|-----------------|-------------------------|---------------------------------|--------------------|------------------|-------------------------------|--------------------|------------------------------|
| SNP_5470_A_38677577 | NC_021160.1    | Ca_Kabuli_Chr01 | 38677577                | AA                              | GG                 | GG               | INTERGENIC                    |                    |                              |
| SNP_5471_A_38677591 | NC_021160.1    | Ca_Kabuli_Chr01 | 38677591                | AA                              | GG                 | GG               | INTERGENIC                    |                    |                              |
| SNP_5472_A_38677622 | NC_021160.1    | Ca_Kabuli_Chr01 | 38677622                | AA                              | CC                 | CC               | INTERGENIC                    |                    |                              |
| SNP_5473_A_38677646 | NC_021160.1    | Ca_Kabuli_Chr01 | 38677646                | TT                              | CC                 | CC               | INTERGENIC                    |                    |                              |
| SNP_5474_A_38680210 | NC_021160.1    | Ca_Kabuli_Chr01 | 38680210                | AA                              | GG                 | GG               | INTERGENIC                    |                    |                              |
| SNP_5475_A_38699194 | NC_021160.1    | Ca_Kabuli_Chr01 | 38699194                | AA                              | GG                 | GG               | INTERGENIC                    |                    |                              |
| SNP_5476_A_38704480 | NC_021160.1    | Ca_Kabuli_Chr01 | 38704480                | CC                              | TT                 | TT               | INTERGENIC                    |                    |                              |
| SNP_5477_A_38709606 | NC_021160.1    | Ca_Kabuli_Chr01 | 38709606                | TT                              | GG                 | GG               | INTERGENIC                    |                    |                              |
| SNP_5478_A_38737767 | NC_021160.1    | Ca_Kabuli_Chr01 | 38737767                | AA                              | TT                 | TT               | DRR                           | 101493684          | uncharacterized LOC101493684 |
| SNP_5479_A_38738653 | NC_021160.1    | Ca_Kabuli_Chr01 | 38738653                | TT                              | GG                 | GG               | NON_SYNONYMOUS_CODING         | 101493684          | uncharacterized LOC101493684 |
| SNP_5480_A_38747973 | NC_021160.1    | Ca_Kabuli_Chr01 | 38747973                | GG                              | AA                 | AA               | INTERGENIC                    |                    |                              |
| SNP_5481_A_38750098 | NC_021160.1    | Ca_Kabuli_Chr01 | 38750098                | CC                              | TT                 | TT               | INTERGENIC                    |                    |                              |
| SNP_5482_A_38750207 | NC_021160.1    | Ca_Kabuli_Chr01 | 38750207                | AA                              | GG                 | GG               | INTERGENIC                    |                    |                              |
| SNP_5483_A_38750232 | NC_021160.1    | Ca_Kabuli_Chr01 | 38750232                | CC                              | TT                 | TT               | INTERGENIC                    |                    |                              |
| SNP_5484_A_38750266 | NC_021160.1    | Ca_Kabuli_Chr01 | 38750266                | AA                              | CC                 | CC               | INTERGENIC                    |                    |                              |
| SNP_5485_A_38750293 | NC_021160.1    | Ca_Kabuli_Chr01 | 38750293                | AA                              | GG                 | GG               | INTERGENIC                    |                    |                              |
| SNP_5486_A_38750311 | NC_021160.1    | Ca_Kabuli_Chr01 | 38750311                | GG                              | AA                 | AA               | INTERGENIC                    |                    |                              |
| SNP_5487_A_38750318 | NC_021160.1    | Ca_Kabuli_Chr01 | 38750318                | TT                              | CC                 | CC               | INTERGENIC                    |                    |                              |
| SNP_5488_A_38752269 | NC_021160.1    | Ca_Kabuli_Chr01 | 38752269                | GG                              | AA                 | AA               | INTERGENIC                    |                    |                              |
| SNP_5489_A_38756945 | NC_021160.1    | Ca_Kabuli_Chr01 | 38756945                | GG                              | AA                 | AA               | URR                           | 101508398          | Unknown function             |
| SNP_5491_A_38767601 | NC_021160.1    | Ca_Kabuli_Chr01 | 38767601                | GG                              | AA                 | AA               | INTERGENIC                    |                    |                              |
| SNP_5492_A_38790275 | NC_021160.1    | Ca_Kabuli_Chr01 | 38790275                | GG                              | AA                 | AA               | URR                           | 101494001          | uncharacterized LOC101494001 |



| SNPs IDs            | Chromosome IDs | Chromosomes     | Physical positions (bp) | CDC Frontier genome (Reference genome) | (Pusa 1103 & HPNB) | (ILWC 46 & LPNB) | Sequence genome | Components of | Gene accession IDs | Putative functions |
|---------------------|----------------|-----------------|-------------------------|----------------------------------------|--------------------|------------------|-----------------|---------------|--------------------|--------------------|
| SNP_5494_A_38796380 | NC_021160.1    | Ca_Kabuli_Chr01 | 38796380                | TT                                     | CC                 | CC               | INTERGENIC      |               |                    |                    |
| SNP_5495_A_38796491 | NC_021160.1    | Ca_Kabuli_Chr01 | 38796491                | AA                                     | CC                 | CC               | INTERGENIC      |               |                    |                    |
| SNP_5496_A_38798899 | NC_021160.1    | Ca_Kabuli_Chr01 | 38798899                | TT                                     | CC                 | CC               | INTERGENIC      |               |                    |                    |
| SNP_5497_A_38801393 | NC_021160.1    | Ca_Kabuli_Chr01 | 38801393                | TT                                     | CC                 | CC               | INTERGENIC      |               |                    |                    |
| SNP_5498_A_38801607 | NC_021160.1    | Ca_Kabuli_Chr01 | 38801607                | TT                                     | AA                 | AA               | INTERGENIC      |               |                    |                    |
| SNP_5499_A_38801616 | NC_021160.1    | Ca_Kabuli_Chr01 | 38801616                | CC                                     | TT                 | TT               | INTERGENIC      |               |                    |                    |
| SNP_5500_A_38801643 | NC_021160.1    | Ca_Kabuli_Chr01 | 38801643                | CC                                     | AA                 | AA               | INTERGENIC      |               |                    |                    |
| SNP_5501_A_38801675 | NC_021160.1    | Ca_Kabuli_Chr01 | 38801675                | CC                                     | TT                 | TT               | INTERGENIC      |               |                    |                    |
| SNP_5502_A_38801967 | NC_021160.1    | Ca_Kabuli_Chr01 | 38801967                | GG                                     | TT                 | TT               | INTERGENIC      |               |                    |                    |
| SNP_5503_A_38814836 | NC_021160.1    | Ca_Kabuli_Chr01 | 38814836                | TT                                     | CC                 | CC               | URR             | 101509026     | Unknown function   |                    |
| SNP_5504_A_38814968 | NC_021160.1    | Ca_Kabuli_Chr01 | 38814968                | CC                                     | AA                 | AA               | INTERGENIC      |               |                    |                    |
| SNP_5505_A_38814974 | NC_021160.1    | Ca_Kabuli_Chr01 | 38814974                | CC                                     | TT                 | TT               | INTERGENIC      |               |                    |                    |
| SNP_5506_A_38815010 | NC_021160.1    | Ca_Kabuli_Chr01 | 38815010                | CC                                     | TT                 | TT               | INTERGENIC      |               |                    |                    |
| SNP_5507_A_38817327 | NC_021160.1    | Ca_Kabuli_Chr01 | 38817327                | GG                                     | AA                 | AA               | INTERGENIC      |               |                    |                    |
| SNP_5508_A_38846982 | NC_021160.1    | Ca_Kabuli_Chr01 | 38846982                | TT                                     | CC                 | CC               | INTERGENIC      |               |                    |                    |
| SNP_5509_A_38847382 | NC_021160.1    | Ca_Kabuli_Chr01 | 38847382                | AA                                     | TT                 | TT               | INTERGENIC      |               |                    |                    |
| SNP_5510_A_38847407 | NC_021160.1    | Ca_Kabuli_Chr01 | 38847407                | TT                                     | CC                 | CC               | INTERGENIC      |               |                    |                    |
| SNP_5511_A_38850400 | NC_021160.1    | Ca_Kabuli_Chr01 | 38850400                | TT                                     | CC                 | CC               | INTERGENIC      |               |                    |                    |
| SNP_5512_A_38853570 | NC_021160.1    | Ca_Kabuli_Chr01 | 38853570                | TT                                     | CC                 | CC               | INTERGENIC      |               |                    |                    |
| SNP_5513_A_38874013 | NC_021160.1    | Ca_Kabuli_Chr01 | 38874013                | CC                                     | TT                 | TT               | INTERGENIC      |               |                    |                    |
| SNP_5514_A_38885298 | NC_021160.1    | Ca_Kabuli_Chr01 | 38885298                | AA                                     | TT                 | TT               | INTERGENIC      |               |                    |                    |
| SNP_5516_A_38887090 | NC_021160.1    | Ca_Kabuli_Chr01 | 38887090                | AA                                     | TT                 | TT               | INTERGENIC      |               |                    |                    |

| SNPs IDs            | Chromosome IDs | Chromosomes     | Physical positions (bp) | CDC Frontier genome (Reference genome) | (Pusa 1103 & HPNB) | (ILWC 46 & LPNB) | Sequence Components of genome | Gene accession IDs | Putative functions |
|---------------------|----------------|-----------------|-------------------------|----------------------------------------|--------------------|------------------|-------------------------------|--------------------|--------------------|
| SNP_5517_A_38918108 | NC_021160.1    | Ca_Kabuli_Chr01 | 38918108                | GG                                     | AA                 | AA               | INTERGENIC                    |                    |                    |
| SNP_5518_A_38921725 | NC_021160.1    | Ca_Kabuli_Chr01 | 38921725                | GG                                     | TT                 | TT               | INTERGENIC                    |                    |                    |
| SNP_5519_A_38943517 | NC_021160.1    | Ca_Kabuli_Chr01 | 38943517                | AA                                     | GG                 | GG               | INTERGENIC                    |                    |                    |
| SNP_5520_A_38945691 | NC_021160.1    | Ca_Kabuli_Chr01 | 38945691                | AA                                     | TT                 | TT               | INTERGENIC                    |                    |                    |
| SNP_5521_A_38948592 | NC_021160.1    | Ca_Kabuli_Chr01 | 38948592                | AA                                     | GG                 | GG               | INTERGENIC                    |                    |                    |
| SNP_5522_A_38948627 | NC_021160.1    | Ca_Kabuli_Chr01 | 38948627                | TT                                     | AA                 | AA               | INTERGENIC                    |                    |                    |
| SNP_5523_A_38948675 | NC_021160.1    | Ca_Kabuli_Chr01 | 38948675                | GG                                     | AA                 | AA               | INTERGENIC                    |                    |                    |
| SNP_5524_A_38948680 | NC_021160.1    | Ca_Kabuli_Chr01 | 38948680                | AA                                     | GG                 | GG               | INTERGENIC                    |                    |                    |
| SNP_5525_A_38948734 | NC_021160.1    | Ca_Kabuli_Chr01 | 38948734                | TT                                     | CC                 | CC               | INTERGENIC                    |                    |                    |
| SNP_5526_A_38948736 | NC_021160.1    | Ca_Kabuli_Chr01 | 38948736                | AA                                     | GG                 | GG               | INTERGENIC                    |                    |                    |
| SNP_5527_A_38951967 | NC_021160.1    | Ca_Kabuli_Chr01 | 38951967                | GG                                     | CC                 | CC               | INTERGENIC                    |                    |                    |
| SNP_5528_A_38952364 | NC_021160.1    | Ca_Kabuli_Chr01 | 38952364                | TT                                     | CC                 | CC               | INTERGENIC                    |                    |                    |
| SNP_5529_A_38952721 | NC_021160.1    | Ca_Kabuli_Chr01 | 38952721                | TT                                     | CC                 | CC               | INTERGENIC                    |                    |                    |
| SNP_5530_A_38955809 | NC_021160.1    | Ca_Kabuli_Chr01 | 38955809                | GG                                     | CC                 | CC               | DRR                           | 101510966          | Unknown function   |
| SNP_5531_A_38955864 | NC_021160.1    | Ca_Kabuli_Chr01 | 38955864                | CC                                     | AA                 | AA               | NON_SYNONYMOUS_CODING         | 101510966          | Unknown function   |
| SNP_5532_A_38955875 | NC_021160.1    | Ca_Kabuli_Chr01 | 38955875                | CC                                     | AA                 | AA               | NON_SYNONYMOUS_CODING         | 101510966          | Unknown function   |
| SNP_5533_A_38956681 | NC_021160.1    | Ca_Kabuli_Chr01 | 38956681                | TT                                     | CC                 | CC               | URR                           | 101510966          | Unknown function   |
| SNP_5534_A_38961654 | NC_021160.1    | Ca_Kabuli_Chr01 | 38961654                | CC                                     | TT                 | TT               | INTERGENIC                    |                    |                    |
| SNP_5535_A_38962007 | NC_021160.1    | Ca_Kabuli_Chr01 | 38962007                | TT                                     | CC                 | CC               | INTERGENIC                    |                    |                    |
| SNP_5536_A_38965180 | NC_021160.1    | Ca_Kabuli_Chr01 | 38965180                | TT                                     | CC                 | CC               | INTERGENIC                    |                    |                    |
| SNP_5537_A_38970186 | NC_021160.1    | Ca_Kabuli_Chr01 | 38970186                | AA                                     | GG                 | GG               | INTERGENIC                    |                    |                    |
| SNP_5538_A_38970300 | NC_021160.1    | Ca_Kabuli_Chr01 | 38970300                | AA                                     | GG                 | GG               | INTERGENIC                    |                    |                    |

| SNPs IDs            | Chromosome IDs | Chromosomes     | Physical positions (bp) | CDC Frontier (Reference genome) | (Pusa 1103 & HPNB) | (ILWC 46 & LPNB) | Sequence genome | Components of | Gene accession IDs | Putative functions |
|---------------------|----------------|-----------------|-------------------------|---------------------------------|--------------------|------------------|-----------------|---------------|--------------------|--------------------|
| SNP_5539_A_38970731 | NC_021160.1    | Ca_Kabuli_Chr01 | 38970731                | TT                              | GG                 | GG               | INTERGENIC      |               |                    |                    |
| SNP_5540_A_38971367 | NC_021160.1    | Ca_Kabuli_Chr01 | 38971367                | CC                              | TT                 | TT               | INTERGENIC      |               |                    |                    |
| SNP_5541_A_38971380 | NC_021160.1    | Ca_Kabuli_Chr01 | 38971380                | GG                              | TT                 | TT               | INTERGENIC      |               |                    |                    |
| SNP_5542_A_39005442 | NC_021160.1    | Ca_Kabuli_Chr01 | 39005442                | CC                              | TT                 | TT               | INTERGENIC      |               |                    |                    |
| SNP_5543_A_39008598 | NC_021160.1    | Ca_Kabuli_Chr01 | 39008598                | AA                              | CC                 | CC               | INTERGENIC      |               |                    |                    |
| SNP_5544_A_39010888 | NC_021160.1    | Ca_Kabuli_Chr01 | 39010888                | TT                              | AA                 | AA               | INTERGENIC      |               |                    |                    |
| SNP_5545_A_39011196 | NC_021160.1    | Ca_Kabuli_Chr01 | 39011196                | TT                              | GG                 | GG               | INTERGENIC      |               |                    |                    |
| SNP_5546_A_39012684 | NC_021160.1    | Ca_Kabuli_Chr01 | 39012684                | CC                              | AA                 | AA               | INTERGENIC      |               |                    |                    |
| SNP_5547_A_39014737 | NC_021160.1    | Ca_Kabuli_Chr01 | 39014737                | TT                              | CC                 | CC               | INTERGENIC      |               |                    |                    |
| SNP_5548_A_39020771 | NC_021160.1    | Ca_Kabuli_Chr01 | 39020771                | GG                              | AA                 | AA               | INTERGENIC      |               |                    |                    |
| SNP_5549_A_39021807 | NC_021160.1    | Ca_Kabuli_Chr01 | 39021807                | TT                              | AA                 | AA               | INTERGENIC      |               |                    |                    |
| SNP_5550_A_39023777 | NC_021160.1    | Ca_Kabuli_Chr01 | 39023777                | TT                              | CC                 | CC               | INTERGENIC      |               |                    |                    |
| SNP_5551_A_39024062 | NC_021160.1    | Ca_Kabuli_Chr01 | 39024062                | AA                              | GG                 | GG               | INTERGENIC      |               |                    |                    |
| SNP_5552_A_39024236 | NC_021160.1    | Ca_Kabuli_Chr01 | 39024236                | GG                              | TT                 | TT               | INTERGENIC      |               |                    |                    |
| SNP_5554_A_39031897 | NC_021160.1    | Ca_Kabuli_Chr01 | 39031897                | GG                              | AA                 | AA               | INTERGENIC      |               |                    |                    |
| SNP_5555_A_39031916 | NC_021160.1    | Ca_Kabuli_Chr01 | 39031916                | CC                              | TT                 | TT               | INTERGENIC      |               |                    |                    |
| SNP_5557_A_39039838 | NC_021160.1    | Ca_Kabuli_Chr01 | 39039838                | AA                              | GG                 | GG               | INTERGENIC      |               |                    |                    |
| SNP_5558_A_39040994 | NC_021160.1    | Ca_Kabuli_Chr01 | 39040994                | GG                              | TT                 | TT               | INTERGENIC      |               |                    |                    |
| SNP_5559_A_39043130 | NC_021160.1    | Ca_Kabuli_Chr01 | 39043130                | TT                              | CC                 | CC               | INTERGENIC      |               |                    |                    |
| SNP_5560_A_39051000 | NC_021160.1    | Ca_Kabuli_Chr01 | 39051000                | AA                              | GG                 | GG               | INTERGENIC      |               |                    |                    |
| SNP_5561_A_39051141 | NC_021160.1    | Ca_Kabuli_Chr01 | 39051141                | AA                              | GG                 | GG               | INTERGENIC      |               |                    |                    |
| SNP_5562_A_39051202 | NC_021160.1    | Ca_Kabuli_Chr01 | 39051202                | TT                              | CC                 | CC               | INTERGENIC      |               |                    |                    |

| SNPs IDs            | Chromosome IDs | Chromosomes     | Physical positions (bp) | CDC Frontier genome (Reference genome) | (Pusa 1103 & HPNB) | (ILWC 46 & LPNB) | Sequence genome | Components of | Gene accession IDs | Putative functions |
|---------------------|----------------|-----------------|-------------------------|----------------------------------------|--------------------|------------------|-----------------|---------------|--------------------|--------------------|
| SNP_5563_A_39051233 | NC_021160.1    | Ca_Kabuli_Chr01 | 39051233                | TT                                     | CC                 | CC               | INTERGENIC      |               |                    |                    |
| SNP_5564_A_39051236 | NC_021160.1    | Ca_Kabuli_Chr01 | 39051236                | AA                                     | GG                 | GG               | INTERGENIC      |               |                    |                    |
| SNP_5565_A_39051244 | NC_021160.1    | Ca_Kabuli_Chr01 | 39051244                | AA                                     | CC                 | CC               | INTERGENIC      |               |                    |                    |
| SNP_5566_A_39051247 | NC_021160.1    | Ca_Kabuli_Chr01 | 39051247                | AA                                     | CC                 | CC               | INTERGENIC      |               |                    |                    |
| SNP_5567_A_39051277 | NC_021160.1    | Ca_Kabuli_Chr01 | 39051277                | AA                                     | GG                 | GG               | INTERGENIC      |               |                    |                    |
| SNP_5568_A_39051318 | NC_021160.1    | Ca_Kabuli_Chr01 | 39051318                | TT                                     | GG                 | GG               | INTERGENIC      |               |                    |                    |
| SNP_5569_A_39051336 | NC_021160.1    | Ca_Kabuli_Chr01 | 39051336                | GG                                     | TT                 | TT               | INTERGENIC      |               |                    |                    |
| SNP_5570_A_39051420 | NC_021160.1    | Ca_Kabuli_Chr01 | 39051420                | TT                                     | AA                 | AA               | INTERGENIC      |               |                    |                    |
| SNP_5571_A_39051434 | NC_021160.1    | Ca_Kabuli_Chr01 | 39051434                | AA                                     | CC                 | CC               | INTERGENIC      |               |                    |                    |
| SNP_5572_A_39051438 | NC_021160.1    | Ca_Kabuli_Chr01 | 39051438                | GG                                     | AA                 | AA               | INTERGENIC      |               |                    |                    |
| SNP_5573_A_39051466 | NC_021160.1    | Ca_Kabuli_Chr01 | 39051466                | CC                                     | AA                 | AA               | INTERGENIC      |               |                    |                    |
| SNP_5574_A_39051468 | NC_021160.1    | Ca_Kabuli_Chr01 | 39051468                | GG                                     | TT                 | TT               | INTERGENIC      |               |                    |                    |
| SNP_5575_A_39051498 | NC_021160.1    | Ca_Kabuli_Chr01 | 39051498                | TT                                     | CC                 | CC               | INTERGENIC      |               |                    |                    |
| SNP_5576_A_39057976 | NC_021160.1    | Ca_Kabuli_Chr01 | 39057976                | CC                                     | TT                 | TT               | INTERGENIC      |               |                    |                    |
| SNP_5577_A_39061505 | NC_021160.1    | Ca_Kabuli_Chr01 | 39061505                | GG                                     | AA                 | AA               | INTERGENIC      |               |                    |                    |
| SNP_5578_A_39061815 | NC_021160.1    | Ca_Kabuli_Chr01 | 39061815                | GG                                     | AA                 | AA               | INTERGENIC      |               |                    |                    |
| SNP_5579_A_39066551 | NC_021160.1    | Ca_Kabuli_Chr01 | 39066551                | GG                                     | AA                 | AA               | INTERGENIC      |               |                    |                    |
| SNP_5580_A_39070899 | NC_021160.1    | Ca_Kabuli_Chr01 | 39070899                | CC                                     | TT                 | TT               | INTERGENIC      |               |                    |                    |
| SNP_5581_A_39072735 | NC_021160.1    | Ca_Kabuli_Chr01 | 39072735                | AA                                     | TT                 | TT               | INTERGENIC      |               |                    |                    |
| SNP_5582_A_39072875 | NC_021160.1    | Ca_Kabuli_Chr01 | 39072875                | AA                                     | TT                 | TT               | INTERGENIC      |               |                    |                    |
| SNP_5583_A_39074058 | NC_021160.1    | Ca_Kabuli_Chr01 | 39074058                | GG                                     | AA                 | AA               | INTERGENIC      |               |                    |                    |
| SNP_5584_A_39074428 | NC_021160.1    | Ca_Kabuli_Chr01 | 39074428                | GG                                     | AA                 | AA               | INTERGENIC      |               |                    |                    |

| SNPs IDs            | Chromosome IDs | Chromosomes     | Physical positions (bp) | CDC Frontier (Reference genome) | (Pusa 1103 & HPNB) | (ILWC 46 & LPNB) | Sequence genome | Components of | Gene accession IDs | Putative functions |
|---------------------|----------------|-----------------|-------------------------|---------------------------------|--------------------|------------------|-----------------|---------------|--------------------|--------------------|
| SNP_5585_A_39074793 | NC_021160.1    | Ca_Kabuli_Chr01 | 39074793                | TT                              | CC                 | CC               | INTERGENIC      |               |                    |                    |
| SNP_5586_A_39074798 | NC_021160.1    | Ca_Kabuli_Chr01 | 39074798                | AA                              | CC                 | CC               | INTERGENIC      |               |                    |                    |
| SNP_5587_A_39075192 | NC_021160.1    | Ca_Kabuli_Chr01 | 39075192                | CC                              | TT                 | TT               | INTERGENIC      |               |                    |                    |
| SNP_5588_A_39076821 | NC_021160.1    | Ca_Kabuli_Chr01 | 39076821                | AA                              | CC                 | CC               | INTERGENIC      |               |                    |                    |
| SNP_5589_A_39079167 | NC_021160.1    | Ca_Kabuli_Chr01 | 39079167                | TT                              | GG                 | GG               | INTERGENIC      |               |                    |                    |
| SNP_5590_A_39082060 | NC_021160.1    | Ca_Kabuli_Chr01 | 39082060                | TT                              | GG                 | GG               | INTERGENIC      |               |                    |                    |
| SNP_5591_A_39082090 | NC_021160.1    | Ca_Kabuli_Chr01 | 39082090                | CC                              | TT                 | TT               | INTERGENIC      |               |                    |                    |
| SNP_5592_A_39100867 | NC_021160.1    | Ca_Kabuli_Chr01 | 39100867                | CC                              | AA                 | AA               | INTERGENIC      |               |                    |                    |
| SNP_5593_A_39105122 | NC_021160.1    | Ca_Kabuli_Chr01 | 39105122                | GG                              | AA                 | AA               | INTERGENIC      |               |                    |                    |
| SNP_5594_A_39105157 | NC_021160.1    | Ca_Kabuli_Chr01 | 39105157                | AA                              | CC                 | CC               | INTERGENIC      |               |                    |                    |
| SNP_5595_A_39105183 | NC_021160.1    | Ca_Kabuli_Chr01 | 39105183                | GG                              | CC                 | CC               | INTERGENIC      |               |                    |                    |
| SNP_5596_A_39105217 | NC_021160.1    | Ca_Kabuli_Chr01 | 39105217                | TT                              | CC                 | CC               | INTERGENIC      |               |                    |                    |
| SNP_5597_A_39105246 | NC_021160.1    | Ca_Kabuli_Chr01 | 39105246                | AA                              | GG                 | GG               | INTERGENIC      |               |                    |                    |
| SNP_5598_A_39105251 | NC_021160.1    | Ca_Kabuli_Chr01 | 39105251                | TT                              | CC                 | CC               | INTERGENIC      |               |                    |                    |
| SNP_5599_A_39115907 | NC_021160.1    | Ca_Kabuli_Chr01 | 39115907                | CC                              | TT                 | TT               | INTERGENIC      |               |                    |                    |
| SNP_5600_A_39118819 | NC_021160.1    | Ca_Kabuli_Chr01 | 39118819                | TT                              | GG                 | GG               | INTERGENIC      |               |                    |                    |
| SNP_5601_A_39118834 | NC_021160.1    | Ca_Kabuli_Chr01 | 39118834                | TT                              | CC                 | CC               | INTERGENIC      |               |                    |                    |
| SNP_5602_A_39133613 | NC_021160.1    | Ca_Kabuli_Chr01 | 39133613                | GG                              | AA                 | AA               | INTERGENIC      |               |                    |                    |
| SNP_5603_A_39133990 | NC_021160.1    | Ca_Kabuli_Chr01 | 39133990                | CC                              | TT                 | TT               | INTERGENIC      |               |                    |                    |
| SNP_5604_A_39133992 | NC_021160.1    | Ca_Kabuli_Chr01 | 39133992                | AA                              | GG                 | GG               | INTERGENIC      |               |                    |                    |
| SNP_5605_A_39139080 | NC_021160.1    | Ca_Kabuli_Chr01 | 39139080                | AA                              | TT                 | TT               | INTERGENIC      |               |                    |                    |
| SNP_5606_A_39140654 | NC_021160.1    | Ca_Kabuli_Chr01 | 39140654                | CC                              | TT                 | TT               | INTERGENIC      |               |                    |                    |

| SNPs IDs            | Chromosome IDs | Chromosomes     | Physical positions (bp) | CDC Frontier genome (Reference genome) | (Pusa 1103 & HPNB) | (ILWC 46 & LPNB) | Sequence Components of genome | Gene accession IDs | Putative functions                    |
|---------------------|----------------|-----------------|-------------------------|----------------------------------------|--------------------|------------------|-------------------------------|--------------------|---------------------------------------|
| SNP_5607_A_39140797 | NC_021160.1    | Ca_Kabuli_Chr01 | 39140797                | TT                                     | AA                 | AA               | INTERGENIC                    |                    |                                       |
| SNP_5608_A_39140802 | NC_021160.1    | Ca_Kabuli_Chr01 | 39140802                | CC                                     | AA                 | AA               | INTERGENIC                    |                    |                                       |
| SNP_5609_A_39144792 | NC_021160.1    | Ca_Kabuli_Chr01 | 39144792                | TT                                     | GG                 | GG               | DRR                           | 101494633          | non-specific lipid-transfer protein 8 |
| SNP_5612_A_39149669 | NC_021160.1    | Ca_Kabuli_Chr01 | 39149669                | AA                                     | GG                 | GG               | INTERGENIC                    |                    |                                       |
| SNP_5613_A_39149899 | NC_021160.1    | Ca_Kabuli_Chr01 | 39149899                | AA                                     | CC                 | CC               | INTERGENIC                    |                    |                                       |
| SNP_5614_A_39149905 | NC_021160.1    | Ca_Kabuli_Chr01 | 39149905                | AA                                     | TT                 | TT               | INTERGENIC                    |                    |                                       |
| SNP_5615_A_39149919 | NC_021160.1    | Ca_Kabuli_Chr01 | 39149919                | AA                                     | CC                 | CC               | INTERGENIC                    |                    |                                       |
| SNP_5616_A_39149980 | NC_021160.1    | Ca_Kabuli_Chr01 | 39149980                | TT                                     | CC                 | CC               | INTERGENIC                    |                    |                                       |
| SNP_5617_A_39149999 | NC_021160.1    | Ca_Kabuli_Chr01 | 39149999                | AA                                     | CC                 | CC               | INTERGENIC                    |                    |                                       |
| SNP_5618_A_39150007 | NC_021160.1    | Ca_Kabuli_Chr01 | 39150007                | TT                                     | GG                 | GG               | INTERGENIC                    |                    |                                       |
| SNP_5619_A_39150039 | NC_021160.1    | Ca_Kabuli_Chr01 | 39150039                | TT                                     | CC                 | CC               | INTERGENIC                    |                    |                                       |
| SNP_5620_A_39166535 | NC_021160.1    | Ca_Kabuli_Chr01 | 39166535                | GG                                     | AA                 | AA               | INTERGENIC                    |                    |                                       |
| SNP_5621_A_39166570 | NC_021160.1    | Ca_Kabuli_Chr01 | 39166570                | AA                                     | TT                 | TT               | INTERGENIC                    |                    |                                       |
| SNP_5622_A_39166600 | NC_021160.1    | Ca_Kabuli_Chr01 | 39166600                | CC                                     | AA                 | AA               | INTERGENIC                    |                    |                                       |
| SNP_5623_A_39166603 | NC_021160.1    | Ca_Kabuli_Chr01 | 39166603                | CC                                     | AA                 | AA               | INTERGENIC                    |                    |                                       |
| SNP_5624_A_39166634 | NC_021160.1    | Ca_Kabuli_Chr01 | 39166634                | CC                                     | GG                 | GG               | INTERGENIC                    |                    |                                       |
| SNP_5625_A_39166823 | NC_021160.1    | Ca_Kabuli_Chr01 | 39166823                | CC                                     | TT                 | TT               | INTERGENIC                    |                    |                                       |
| SNP_5626_A_39166827 | NC_021160.1    | Ca_Kabuli_Chr01 | 39166827                | CC                                     | TT                 | TT               | INTERGENIC                    |                    |                                       |
| SNP_5627_A_39166929 | NC_021160.1    | Ca_Kabuli_Chr01 | 39166929                | CC                                     | TT                 | TT               | INTERGENIC                    |                    |                                       |
| SNP_5628_A_39166940 | NC_021160.1    | Ca_Kabuli_Chr01 | 39166940                | TT                                     | CC                 | CC               | INTERGENIC                    |                    |                                       |
| SNP_5629_A_39166942 | NC_021160.1    | Ca_Kabuli_Chr01 | 39166942                | CC                                     | TT                 | TT               | INTERGENIC                    |                    |                                       |
| SNP_5630_A_39166944 | NC_021160.1    | Ca_Kabuli_Chr01 | 39166944                | CC                                     | TT                 | TT               | INTERGENIC                    |                    |                                       |

| SNPs IDs            | Chromosome IDs | Chromosomes     | Physical positions (bp) | CDC Frontier (Reference genome) | (Pusa 1103 & HPNB) | (ILWC 46 & LPNB) | Sequence genome | Components of | Gene accession IDs | Putative functions |
|---------------------|----------------|-----------------|-------------------------|---------------------------------|--------------------|------------------|-----------------|---------------|--------------------|--------------------|
| SNP_5631_A_39166949 | NC_021160.1    | Ca_Kabuli_Chr01 | 39166949                | CC                              | GG                 | GG               | INTERGENIC      |               |                    |                    |
| SNP_5632_A_39166953 | NC_021160.1    | Ca_Kabuli_Chr01 | 39166953                | AA                              | GG                 | GG               | INTERGENIC      |               |                    |                    |
| SNP_5633_A_39166960 | NC_021160.1    | Ca_Kabuli_Chr01 | 39166960                | TT                              | CC                 | CC               | INTERGENIC      |               |                    |                    |
| SNP_5634_A_39166980 | NC_021160.1    | Ca_Kabuli_Chr01 | 39166980                | AA                              | GG                 | GG               | INTERGENIC      |               |                    |                    |
| SNP_5635_A_39226230 | NC_021160.1    | Ca_Kabuli_Chr01 | 39226230                | GG                              | TT                 | TT               | INTERGENIC      |               |                    |                    |
| SNP_5636_A_39227909 | NC_021160.1    | Ca_Kabuli_Chr01 | 39227909                | TT                              | AA                 | AA               | INTERGENIC      |               |                    |                    |
| SNP_5637_A_39251073 | NC_021160.1    | Ca_Kabuli_Chr01 | 39251073                | CC                              | TT                 | TT               | INTERGENIC      |               |                    |                    |
| SNP_5638_A_39261348 | NC_021160.1    | Ca_Kabuli_Chr01 | 39261348                | AA                              | GG                 | GG               | INTERGENIC      |               |                    |                    |
| SNP_5639_A_39261356 | NC_021160.1    | Ca_Kabuli_Chr01 | 39261356                | GG                              | AA                 | AA               | INTERGENIC      |               |                    |                    |
| SNP_5640_A_39261423 | NC_021160.1    | Ca_Kabuli_Chr01 | 39261423                | TT                              | AA                 | AA               | INTERGENIC      |               |                    |                    |
| SNP_5641_A_39261477 | NC_021160.1    | Ca_Kabuli_Chr01 | 39261477                | GG                              | TT                 | TT               | INTERGENIC      |               |                    |                    |
| SNP_5642_A_39261622 | NC_021160.1    | Ca_Kabuli_Chr01 | 39261622                | GG                              | AA                 | AA               | INTERGENIC      |               |                    |                    |
| SNP_5643_A_39261781 | NC_021160.1    | Ca_Kabuli_Chr01 | 39261781                | GG                              | AA                 | AA               | INTERGENIC      |               |                    |                    |
| SNP_5644_A_39261802 | NC_021160.1    | Ca_Kabuli_Chr01 | 39261802                | TT                              | AA                 | AA               | INTERGENIC      |               |                    |                    |
| SNP_5645_A_39261821 | NC_021160.1    | Ca_Kabuli_Chr01 | 39261821                | GG                              | CC                 | CC               | INTERGENIC      |               |                    |                    |
| SNP_5646_A_39261875 | NC_021160.1    | Ca_Kabuli_Chr01 | 39261875                | GG                              | AA                 | AA               | INTERGENIC      |               |                    |                    |
| SNP_5647_A_39261924 | NC_021160.1    | Ca_Kabuli_Chr01 | 39261924                | CC                              | AA                 | AA               | INTERGENIC      |               |                    |                    |
| SNP_5648_A_39261967 | NC_021160.1    | Ca_Kabuli_Chr01 | 39261967                | GG                              | AA                 | AA               | INTERGENIC      |               |                    |                    |
| SNP_5650_A_39262032 | NC_021160.1    | Ca_Kabuli_Chr01 | 39262032                | AA                              | GG                 | GG               | INTERGENIC      |               |                    |                    |
| SNP_5651_A_39262095 | NC_021160.1    | Ca_Kabuli_Chr01 | 39262095                | CC                              | GG                 | GG               | INTERGENIC      |               |                    |                    |
| SNP_5652_A_39262114 | NC_021160.1    | Ca_Kabuli_Chr01 | 39262114                | AA                              | TT                 | TT               | INTERGENIC      |               |                    |                    |
| SNP_5653_A_39262138 | NC_021160.1    | Ca_Kabuli_Chr01 | 39262138                | AA                              | TT                 | TT               | INTERGENIC      |               |                    |                    |

| SNPs IDs            | Chromosome IDs | Chromosomes     | Physical positions (bp) | CDC Frontier genome (Reference genome) | (Pusa 1103 & HPNB) | (ILWC 46 & LPNB) | Sequence Components of genome | Gene accession IDs | Putative functions           |
|---------------------|----------------|-----------------|-------------------------|----------------------------------------|--------------------|------------------|-------------------------------|--------------------|------------------------------|
| SNP_5654_A_39262440 | NC_021160.1    | Ca_Kabuli_Chr01 | 39262440                | GG                                     | AA                 | AA               | INTERGENIC                    |                    |                              |
| SNP_5655_A_39262576 | NC_021160.1    | Ca_Kabuli_Chr01 | 39262576                | GG                                     | AA                 | AA               | INTERGENIC                    |                    |                              |
| SNP_5656_A_39262591 | NC_021160.1    | Ca_Kabuli_Chr01 | 39262591                | TT                                     | GG                 | GG               | INTERGENIC                    |                    |                              |
| SNP_5657_A_39264722 | NC_021160.1    | Ca_Kabuli_Chr01 | 39264722                | AA                                     | CC                 | CC               | INTERGENIC                    |                    |                              |
| SNP_5658_A_39264744 | NC_021160.1    | Ca_Kabuli_Chr01 | 39264744                | GG                                     | CC                 | CC               | INTERGENIC                    |                    |                              |
| SNP_5659_A_39264780 | NC_021160.1    | Ca_Kabuli_Chr01 | 39264780                | CC                                     | GG                 | GG               | INTERGENIC                    |                    |                              |
| SNP_5660_A_39264950 | NC_021160.1    | Ca_Kabuli_Chr01 | 39264950                | TT                                     | CC                 | CC               | INTERGENIC                    |                    |                              |
| SNP_5661_A_39265224 | NC_021160.1    | Ca_Kabuli_Chr01 | 39265224                | CC                                     | GG                 | GG               | INTERGENIC                    |                    |                              |
| SNP_5662_A_39265303 | NC_021160.1    | Ca_Kabuli_Chr01 | 39265303                | CC                                     | TT                 | TT               | INTERGENIC                    |                    |                              |
| SNP_5663_A_39294439 | NC_021160.1    | Ca_Kabuli_Chr01 | 39294439                | TT                                     | GG                 | GG               | INTERGENIC                    |                    |                              |
| SNP_5664_A_39319951 | NC_021160.1    | Ca_Kabuli_Chr01 | 39319951                | TT                                     | CC                 | CC               | INTERGENIC                    |                    |                              |
| SNP_5665_A_39320333 | NC_021160.1    | Ca_Kabuli_Chr01 | 39320333                | CC                                     | TT                 | TT               | INTERGENIC                    |                    |                              |
| SNP_5666_A_39334579 | NC_021160.1    | Ca_Kabuli_Chr01 | 39334579                | TT                                     | CC                 | CC               | INTERGENIC                    |                    |                              |
| SNP_5668_A_39334823 | NC_021160.1    | Ca_Kabuli_Chr01 | 39334823                | AA                                     | CC                 | CC               | INTERGENIC                    |                    |                              |
| SNP_5669_A_39334831 | NC_021160.1    | Ca_Kabuli_Chr01 | 39334831                | AA                                     | CC                 | CC               | INTERGENIC                    |                    |                              |
| SNP_5670_A_39334835 | NC_021160.1    | Ca_Kabuli_Chr01 | 39334835                | AA                                     | TT                 | TT               | INTERGENIC                    |                    |                              |
| SNP_5671_A_39334869 | NC_021160.1    | Ca_Kabuli_Chr01 | 39334869                | CC                                     | TT                 | TT               | INTERGENIC                    |                    |                              |
| SNP_5672_A_39334906 | NC_021160.1    | Ca_Kabuli_Chr01 | 39334906                | GG                                     | TT                 | TT               | INTERGENIC                    |                    |                              |
| SNP_5673_A_39334907 | NC_021160.1    | Ca_Kabuli_Chr01 | 39334907                | GG                                     | CC                 | CC               | INTERGENIC                    |                    |                              |
| SNP_5674_A_39342492 | NC_021160.1    | Ca_Kabuli_Chr01 | 39342492                | AA                                     | GG                 | GG               | INTERGENIC                    |                    |                              |
| SNP_5675_A_39346879 | NC_021160.1    | Ca_Kabuli_Chr01 | 39346879                | CC                                     | TT                 | TT               | INTRON                        | 101495276          | uncharacterized LOC101495276 |
| SNP_5676_A_39366712 | NC_021160.1    | Ca_Kabuli_Chr01 | 39366712                | TT                                     | CC                 | CC               | INTRON                        | 101512250          | Unknown function             |



| SNPs IDs            | Chromosome IDs | Chromosomes     | Physical positions (bp) | CDC Frontier genome (Reference genome) | (Pusa 1103 & HPNB) | (ILWC 46 & LPNB) | Sequence Components of genome | Gene accession IDs | Putative functions           |
|---------------------|----------------|-----------------|-------------------------|----------------------------------------|--------------------|------------------|-------------------------------|--------------------|------------------------------|
| SNP_5678_A_39391956 | NC_021160.1    | Ca_Kabuli_Chr01 | 39391956                | AA                                     | GG                 | GG               | INTERGENIC                    |                    |                              |
| SNP_5679_A_39391982 | NC_021160.1    | Ca_Kabuli_Chr01 | 39391982                | CC                                     | TT                 | TT               | INTERGENIC                    |                    |                              |
| SNP_5680_A_39407700 | NC_021160.1    | Ca_Kabuli_Chr01 | 39407700                | TT                                     | GG                 | GG               | URR                           | 101512886          | uncharacterized LOC101512886 |
| SNP_5681_A_39418829 | NC_021160.1    | Ca_Kabuli_Chr01 | 39418829                | CC                                     | AA                 | AA               | URR                           | 101513214          | Unknown function             |
| SNP_5682_A_39418866 | NC_021160.1    | Ca_Kabuli_Chr01 | 39418866                | TT                                     | CC                 | CC               | URR                           | 101513214          | Unknown function             |
| SNP_5683_A_39419600 | NC_021160.1    | Ca_Kabuli_Chr01 | 39419600                | TT                                     | CC                 | CC               | URR                           | 101513214          | Unknown function             |
| SNP_5684_A_39419947 | NC_021160.1    | Ca_Kabuli_Chr01 | 39419947                | CC                                     | TT                 | TT               | INTERGENIC                    |                    |                              |
| SNP_5685_A_39427232 | NC_021160.1    | Ca_Kabuli_Chr01 | 39427232                | AA                                     | TT                 | TT               | INTERGENIC                    |                    |                              |
| SNP_5686_A_39430459 | NC_021160.1    | Ca_Kabuli_Chr01 | 39430459                | CC                                     | GG                 | GG               | INTERGENIC                    |                    |                              |
| SNP_5687_A_39430704 | NC_021160.1    | Ca_Kabuli_Chr01 | 39430704                | GG                                     | TT                 | TT               | INTERGENIC                    |                    |                              |
| SNP_5688_A_39431178 | NC_021160.1    | Ca_Kabuli_Chr01 | 39431178                | AA                                     | GG                 | GG               | INTERGENIC                    |                    |                              |
| SNP_5689_A_39436454 | NC_021160.1    | Ca_Kabuli_Chr01 | 39436454                | CC                                     | AA                 | AA               | INTRON                        | 101495600          | myosin-12                    |
| SNP_5690_A_39436699 | NC_021160.1    | Ca_Kabuli_Chr01 | 39436699                | GG                                     | CC                 | CC               | INTRON                        | 101495600          | myosin-12                    |
| SNP_5691_A_39437645 | NC_021160.1    | Ca_Kabuli_Chr01 | 39437645                | GG                                     | TT                 | TT               | INTRON                        | 101495600          | myosin-12                    |
| SNP_5692_A_39438196 | NC_021160.1    | Ca_Kabuli_Chr01 | 39438196                | GG                                     | AA                 | AA               | INTRON                        | 101495600          | myosin-12                    |
| SNP_5693_A_39438204 | NC_021160.1    | Ca_Kabuli_Chr01 | 39438204                | TT                                     | CC                 | CC               | INTRON                        | 101495600          | myosin-12                    |
| SNP_5694_A_39438206 | NC_021160.1    | Ca_Kabuli_Chr01 | 39438206                | TT                                     | CC                 | CC               | INTRON                        | 101495600          | myosin-12                    |
| SNP_5695_A_39438365 | NC_021160.1    | Ca_Kabuli_Chr01 | 39438365                | GG                                     | CC                 | CC               | SYNONYMOUS_CODING             | 101495600          | myosin-12                    |
| SNP_5696_A_39442555 | NC_021160.1    | Ca_Kabuli_Chr01 | 39442555                | AA                                     | CC                 | CC               | INTRON                        | 101495600          | myosin-12                    |
| SNP_5697_A_39444109 | NC_021160.1    | Ca_Kabuli_Chr01 | 39444109                | GG                                     | AA                 | AA               | INTRON                        | 101495600          | myosin-12                    |
| SNP_5699_A_39445185 | NC_021160.1    | Ca_Kabuli_Chr01 | 39445185                | CC                                     | TT                 | TT               | INTRON                        | 101495600          | myosin-12                    |
| SNP_5700_A_39445314 | NC_021160.1    | Ca_Kabuli_Chr01 | 39445314                | CC                                     | TT                 | TT               | INTRON                        | 101495600          | myosin-12                    |

| SNPs IDs            | Chromosome IDs | Chromosomes     | Physical positions (bp) | CDC Frontier (Reference genome) | (Pusa 1103 & HPNB) | (ILWC 46 & LPNB) | Sequence Components of genome | Gene accession IDs | Putative functions |
|---------------------|----------------|-----------------|-------------------------|---------------------------------|--------------------|------------------|-------------------------------|--------------------|--------------------|
| SNP_5701_A_39448054 | NC_021160.1    | Ca_Kabuli_Chr01 | 39448054                | CC                              | AA                 | AA               | URR                           | 101495600          | myosin-12          |
| SNP_5702_A_39448069 | NC_021160.1    | Ca_Kabuli_Chr01 | 39448069                | GG                              | AA                 | AA               | URR                           | 101495600          | myosin-12          |
| SNP_5703_A_39448111 | NC_021160.1    | Ca_Kabuli_Chr01 | 39448111                | TT                              | AA                 | AA               | URR                           | 101495600          | myosin-12          |
| SNP_5704_A_39448545 | NC_021160.1    | Ca_Kabuli_Chr01 | 39448545                | GG                              | AA                 | AA               | INTERGENIC                    |                    |                    |
| SNP_5705_A_39448592 | NC_021160.1    | Ca_Kabuli_Chr01 | 39448592                | GG                              | AA                 | AA               | INTERGENIC                    |                    |                    |
| SNP_5706_A_39450923 | NC_021160.1    | Ca_Kabuli_Chr01 | 39450923                | CC                              | AA                 | AA               | INTERGENIC                    |                    |                    |
| SNP_5707_A_39482600 | NC_021160.1    | Ca_Kabuli_Chr01 | 39482600                | AA                              | GG                 | GG               | INTERGENIC                    |                    |                    |
| SNP_5708_A_39482603 | NC_021160.1    | Ca_Kabuli_Chr01 | 39482603                | AA                              | CC                 | CC               | INTERGENIC                    |                    |                    |
| SNP_5709_A_39496503 | NC_021160.1    | Ca_Kabuli_Chr01 | 39496503                | CC                              | TT                 | TT               | INTERGENIC                    |                    |                    |
| SNP_5710_A_39514784 | NC_021160.1    | Ca_Kabuli_Chr01 | 39514784                | TT                              | AA                 | AA               | INTERGENIC                    |                    |                    |
| SNP_5711_A_39516171 | NC_021160.1    | Ca_Kabuli_Chr01 | 39516171                | TT                              | CC                 | CC               | INTERGENIC                    |                    |                    |
| SNP_5712_A_39524259 | NC_021160.1    | Ca_Kabuli_Chr01 | 39524259                | AA                              | GG                 | GG               | INTERGENIC                    |                    |                    |
| SNP_5713_A_39540943 | NC_021160.1    | Ca_Kabuli_Chr01 | 39540943                | TT                              | CC                 | CC               | INTERGENIC                    |                    |                    |
| SNP_5714_A_39552305 | NC_021160.1    | Ca_Kabuli_Chr01 | 39552305                | AA                              | CC                 | CC               | INTERGENIC                    |                    |                    |
| SNP_5716_A_39552408 | NC_021160.1    | Ca_Kabuli_Chr01 | 39552408                | TT                              | CC                 | CC               | INTERGENIC                    |                    |                    |
| SNP_5717_A_39552452 | NC_021160.1    | Ca_Kabuli_Chr01 | 39552452                | AA                              | GG                 | GG               | INTERGENIC                    |                    |                    |
| SNP_5718_A_39552748 | NC_021160.1    | Ca_Kabuli_Chr01 | 39552748                | TT                              | CC                 | CC               | INTERGENIC                    |                    |                    |
| SNP_5719_A_39552759 | NC_021160.1    | Ca_Kabuli_Chr01 | 39552759                | TT                              | CC                 | CC               | INTERGENIC                    |                    |                    |
| SNP_5720_A_39552989 | NC_021160.1    | Ca_Kabuli_Chr01 | 39552989                | CC                              | GG                 | GG               | INTERGENIC                    |                    |                    |
| SNP_5721_A_39560279 | NC_021160.1    | Ca_Kabuli_Chr01 | 39560279                | TT                              | CC                 | CC               | INTERGENIC                    |                    |                    |
| SNP_5722_A_39560281 | NC_021160.1    | Ca_Kabuli_Chr01 | 39560281                | TT                              | CC                 | CC               | INTERGENIC                    |                    |                    |
| SNP_5723_A_39560315 | NC_021160.1    | Ca_Kabuli_Chr01 | 39560315                | AA                              | TT                 | TT               | INTERGENIC                    |                    |                    |

| SNPs IDs            | Chromosome IDs | Chromosomes     | Physical positions (bp) | CDC Frontier genome (Reference genome) | (Pusa 1103 & HPNB) | (ILWC 46 & LPNB) | Sequence genome | Components of | Gene accession IDs                               | Putative functions |
|---------------------|----------------|-----------------|-------------------------|----------------------------------------|--------------------|------------------|-----------------|---------------|--------------------------------------------------|--------------------|
| SNP_5724_A_39560321 | NC_021160.1    | Ca_Kabuli_Chr01 | 39560321                | TT                                     | CC                 | CC               | INTERGENIC      |               |                                                  |                    |
| SNP_5725_A_39567244 | NC_021160.1    | Ca_Kabuli_Chr01 | 39567244                | GG                                     | TT                 | TT               | INTERGENIC      |               |                                                  |                    |
| SNP_5726_A_39569143 | NC_021160.1    | Ca_Kabuli_Chr01 | 39569143                | AA                                     | TT                 | TT               | INTERGENIC      |               |                                                  |                    |
| SNP_5727_A_39584001 | NC_021160.1    | Ca_Kabuli_Chr01 | 39584001                | GG                                     | TT                 | TT               | INTERGENIC      |               |                                                  |                    |
| SNP_5728_A_39588776 | NC_021160.1    | Ca_Kabuli_Chr01 | 39588776                | TT                                     | CC                 | CC               | INTERGENIC      |               |                                                  |                    |
| SNP_5729_A_39597400 | NC_021160.1    | Ca_Kabuli_Chr01 | 39597400                | GG                                     | AA                 | AA               | INTERGENIC      |               |                                                  |                    |
| SNP_5731_A_39601051 | NC_021160.1    | Ca_Kabuli_Chr01 | 39601051                | GG                                     | CC                 | CC               | INTERGENIC      |               |                                                  |                    |
| SNP_5732_A_39601079 | NC_021160.1    | Ca_Kabuli_Chr01 | 39601079                | TT                                     | CC                 | CC               | INTERGENIC      |               |                                                  |                    |
| SNP_5733_A_39609095 | NC_021160.1    | Ca_Kabuli_Chr01 | 39609095                | GG                                     | TT                 | TT               | INTERGENIC      |               |                                                  |                    |
| SNP_5735_A_39609332 | NC_021160.1    | Ca_Kabuli_Chr01 | 39609332                | CC                                     | TT                 | TT               | INTERGENIC      |               |                                                  |                    |
| SNP_5736_A_39619156 | NC_021160.1    | Ca_Kabuli_Chr01 | 39619156                | AA                                     | TT                 | TT               | URR             | 101497236     | CTP synthase-like                                |                    |
| SNP_5737_A_39619755 | NC_021160.1    | Ca_Kabuli_Chr01 | 39619755                | CC                                     | TT                 | TT               | URR             | 101497236     | CTP synthase-like                                |                    |
| SNP_5738_A_39623093 | NC_021160.1    | Ca_Kabuli_Chr01 | 39623093                | AA                                     | CC                 | CC               | INTERGENIC      |               |                                                  |                    |
| SNP_5739_A_39639027 | NC_021160.1    | Ca_Kabuli_Chr01 | 39639027                | CC                                     | AA                 | AA               | INTERGENIC      |               |                                                  |                    |
| SNP_5740_A_39641956 | NC_021160.1    | Ca_Kabuli_Chr01 | 39641956                | AA                                     | GG                 | GG               | INTERGENIC      |               |                                                  |                    |
| SNP_5741_A_39642517 | NC_021160.1    | Ca_Kabuli_Chr01 | 39642517                | GG                                     | AA                 | AA               | INTERGENIC      |               |                                                  |                    |
| SNP_5742_A_39644306 | NC_021160.1    | Ca_Kabuli_Chr01 | 39644306                | GG                                     | AA                 | AA               | INTERGENIC      |               |                                                  |                    |
| SNP_5743_A_39655165 | NC_021160.1    | Ca_Kabuli_Chr01 | 39655165                | AA                                     | GG                 | GG               | INTERGENIC      |               |                                                  |                    |
| SNP_5744_A_39667688 | NC_021160.1    | Ca_Kabuli_Chr01 | 39667688                | GG                                     | AA                 | AA               | URR             | 101497996     | ABC transporter D family member 2, chloroplastic |                    |
| SNP_5746_A_39685887 | NC_021160.1    | Ca_Kabuli_Chr01 | 39685887                | AA                                     | GG                 | GG               | INTERGENIC      |               |                                                  |                    |
| SNP_5747_A_39686205 | NC_021160.1    | Ca_Kabuli_Chr01 | 39686205                | GG                                     | TT                 | TT               | INTERGENIC      |               |                                                  |                    |
| SNP_5748_A_39698316 | NC_021160.1    | Ca_Kabuli_Chr01 | 39698316                | GG                                     | AA                 | AA               | INTERGENIC      |               |                                                  |                    |

| SNPs IDs            | Chromosome IDs | Chromosomes     | Physical positions (bp) | CDC Frontier (Reference genome) | (Pusa 1103 & HPNB) | (ILWC 46 & LPNB) | Sequence Components of genome | Gene accession IDs | Putative functions                   |
|---------------------|----------------|-----------------|-------------------------|---------------------------------|--------------------|------------------|-------------------------------|--------------------|--------------------------------------|
| SNP_5749_A_39718612 | NC_021160.1    | Ca_Kabuli_Chr01 | 39718612                | AA                              | TT                 | TT               | START_GAINED                  | 101498989          | isocitrate dehydrogenase [NADP]-like |
| SNP_5750_A_39724930 | NC_021160.1    | Ca_Kabuli_Chr01 | 39724930                | GG                              | TT                 | TT               | INTRON                        | 101498989          | isocitrate dehydrogenase [NADP]-like |
| SNP_5751_A_39731821 | NC_021160.1    | Ca_Kabuli_Chr01 | 39731821                | GG                              | AA                 | AA               | INTERGENIC                    |                    |                                      |
| SNP_5752_A_39737803 | NC_021160.1    | Ca_Kabuli_Chr01 | 39737803                | TT                              | CC                 | CC               | URR                           | 101499310          | serine/threonine-protein kinase RHS3 |
| SNP_5753_A_39741358 | NC_021160.1    | Ca_Kabuli_Chr01 | 39741358                | CC                              | TT                 | TT               | INTERGENIC                    |                    |                                      |
| SNP_5754_A_39741364 | NC_021160.1    | Ca_Kabuli_Chr01 | 39741364                | TT                              | CC                 | CC               | INTERGENIC                    |                    |                                      |
| SNP_5755_A_39741367 | NC_021160.1    | Ca_Kabuli_Chr01 | 39741367                | CC                              | AA                 | AA               | INTERGENIC                    |                    |                                      |
| SNP_5756_A_39754493 | NC_021160.1    | Ca_Kabuli_Chr01 | 39754493                | AA                              | GG                 | GG               | INTERGENIC                    |                    |                                      |
| SNP_5757_A_39763595 | NC_021160.1    | Ca_Kabuli_Chr01 | 39763595                | CC                              | AA                 | AA               | INTERGENIC                    |                    |                                      |
| SNP_5758_A_39763613 | NC_021160.1    | Ca_Kabuli_Chr01 | 39763613                | TT                              | GG                 | GG               | INTERGENIC                    |                    |                                      |
| SNP_5759_A_39763643 | NC_021160.1    | Ca_Kabuli_Chr01 | 39763643                | AA                              | TT                 | TT               | INTERGENIC                    |                    |                                      |
| SNP_5760_A_39773692 | NC_021160.1    | Ca_Kabuli_Chr01 | 39773692                | AA                              | CC                 | CC               | INTERGENIC                    |                    |                                      |
| SNP_5761_A_39779559 | NC_021160.1    | Ca_Kabuli_Chr01 | 39779559                | TT                              | GG                 | GG               | INTERGENIC                    |                    |                                      |
| SNP_5762_A_39792197 | NC_021160.1    | Ca_Kabuli_Chr01 | 39792197                | GG                              | TT                 | TT               | INTERGENIC                    |                    |                                      |
| SNP_5763_A_39793266 | NC_021160.1    | Ca_Kabuli_Chr01 | 39793266                | GG                              | AA                 | AA               | INTERGENIC                    |                    |                                      |
| SNP_5764_A_39802075 | NC_021160.1    | Ca_Kabuli_Chr01 | 39802075                | TT                              | CC                 | CC               | INTERGENIC                    |                    |                                      |
| SNP_5765_A_39809618 | NC_021160.1    | Ca_Kabuli_Chr01 | 39809618                | AA                              | GG                 | GG               | INTRON                        | 101488237          | Unknown function                     |
| SNP_5766_A_39837538 | NC_021160.1    | Ca_Kabuli_Chr01 | 39837538                | CC                              | TT                 | TT               | INTERGENIC                    |                    |                                      |
| SNP_5767_A_39837554 | NC_021160.1    | Ca_Kabuli_Chr01 | 39837554                | GG                              | TT                 | TT               | INTERGENIC                    |                    |                                      |
| SNP_5768_A_39837555 | NC_021160.1    | Ca_Kabuli_Chr01 | 39837555                | CC                              | TT                 | TT               | INTERGENIC                    |                    |                                      |
| SNP_5769_A_39837556 | NC_021160.1    | Ca_Kabuli_Chr01 | 39837556                | TT                              | CC                 | CC               | INTERGENIC                    |                    |                                      |
| SNP_5770_A_39837561 | NC_021160.1    | Ca_Kabuli_Chr01 | 39837561                | AA                              | CC                 | CC               | INTERGENIC                    |                    |                                      |

| SNPs IDs            | Chromosome IDs | Chromosomes     | Physical positions (bp) | CDC Frontier genome (Reference genome) | (Pusa 1103 & HPNB) | (ILWC 46 & LPNB) | Sequence Components of genome | Gene accession IDs | Putative functions |
|---------------------|----------------|-----------------|-------------------------|----------------------------------------|--------------------|------------------|-------------------------------|--------------------|--------------------|
| SNP_5771_A_39842458 | NC_021160.1    | Ca_Kabuli_Chr01 | 39842458                | GG                                     | AA                 | AA               | INTERGENIC                    |                    |                    |
| SNP_5772_A_39842509 | NC_021160.1    | Ca_Kabuli_Chr01 | 39842509                | CC                                     | GG                 | GG               | INTERGENIC                    |                    |                    |
| SNP_5773_A_39843039 | NC_021160.1    | Ca_Kabuli_Chr01 | 39843039                | CC                                     | AA                 | AA               | INTERGENIC                    |                    |                    |
| SNP_5774_A_39868270 | NC_021160.1    | Ca_Kabuli_Chr01 | 39868270                | TT                                     | CC                 | CC               | INTERGENIC                    |                    |                    |
| SNP_5775_A_39868277 | NC_021160.1    | Ca_Kabuli_Chr01 | 39868277                | CC                                     | TT                 | TT               | INTERGENIC                    |                    |                    |
| SNP_5777_A_39923444 | NC_021160.1    | Ca_Kabuli_Chr01 | 39923444                | GG                                     | AA                 | AA               | INTERGENIC                    |                    |                    |
| SNP_5778_A_39927198 | NC_021160.1    | Ca_Kabuli_Chr01 | 39927198                | AA                                     | TT                 | TT               | INTRON                        | 101488910          | Unknown function   |
| SNP_5779_A_39928120 | NC_021160.1    | Ca_Kabuli_Chr01 | 39928120                | CC                                     | AA                 | AA               | SYNONYMOUS_CODING             | 101488910          | Unknown function   |
| SNP_5780_A_39933322 | NC_021160.1    | Ca_Kabuli_Chr01 | 39933322                | TT                                     | CC                 | CC               | URR                           | 101488910          | Unknown function   |
| SNP_5781_A_39949001 | NC_021160.1    | Ca_Kabuli_Chr01 | 39949001                | CC                                     | TT                 | TT               | INTERGENIC                    |                    |                    |
| SNP_5782_A_39949069 | NC_021160.1    | Ca_Kabuli_Chr01 | 39949069                | TT                                     | AA                 | AA               | INTERGENIC                    |                    |                    |
| SNP_5783_A_39966964 | NC_021160.1    | Ca_Kabuli_Chr01 | 39966964                | GG                                     | AA                 | AA               | INTERGENIC                    |                    |                    |
| SNP_5784_A_39967000 | NC_021160.1    | Ca_Kabuli_Chr01 | 39967000                | CC                                     | TT                 | TT               | INTERGENIC                    |                    |                    |
| SNP_5785_A_39968746 | NC_021160.1    | Ca_Kabuli_Chr01 | 39968746                | TT                                     | AA                 | AA               | INTERGENIC                    |                    |                    |
| SNP_5786_A_39975093 | NC_021160.1    | Ca_Kabuli_Chr01 | 39975093                | GG                                     | CC                 | CC               | INTERGENIC                    |                    |                    |
| SNP_5788_A_39979187 | NC_021160.1    | Ca_Kabuli_Chr01 | 39979187                | CC                                     | TT                 | TT               | INTERGENIC                    |                    |                    |
| SNP_5789_A_39979238 | NC_021160.1    | Ca_Kabuli_Chr01 | 39979238                | TT                                     | CC                 | CC               | INTERGENIC                    |                    |                    |
| SNP_5790_A_39981452 | NC_021160.1    | Ca_Kabuli_Chr01 | 39981452                | CC                                     | TT                 | TT               | INTERGENIC                    |                    |                    |
| SNP_5791_A_40000642 | NC_021160.1    | Ca_Kabuli_Chr01 | 40000642                | CC                                     | TT                 | TT               | INTERGENIC                    |                    |                    |
| SNP_5792_A_40019321 | NC_021160.1    | Ca_Kabuli_Chr01 | 40019321                | GG                                     | CC                 | CC               | INTERGENIC                    |                    |                    |
| SNP_5793_A_40022489 | NC_021160.1    | Ca_Kabuli_Chr01 | 40022489                | TT                                     | GG                 | GG               | INTERGENIC                    |                    |                    |
| SNP_5794_A_40036838 | NC_021160.1    | Ca_Kabuli_Chr01 | 40036838                | CC                                     | TT                 | TT               | INTERGENIC                    |                    |                    |

| SNPs IDs            | Chromosome IDs | Chromosomes     | Physical positions (bp) | CDC Frontier (Reference genome) | (Pusa 1103 & HPNB) | (ILWC 46 & LPNB) | Sequence genome   | Components of | Gene accession IDs | Putative functions |
|---------------------|----------------|-----------------|-------------------------|---------------------------------|--------------------|------------------|-------------------|---------------|--------------------|--------------------|
| SNP_5795_A_40052456 | NC_021160.1    | Ca_Kabuli_Chr01 | 40052456                | TT                              | GG                 | GG               | INTERGENIC        |               |                    |                    |
| SNP_5796_A_40052535 | NC_021160.1    | Ca_Kabuli_Chr01 | 40052535                | GG                              | AA                 | AA               | INTERGENIC        |               |                    |                    |
| SNP_5797_A_40053152 | NC_021160.1    | Ca_Kabuli_Chr01 | 40053152                | AA                              | TT                 | TT               | INTERGENIC        |               |                    |                    |
| SNP_5798_A_40056643 | NC_021160.1    | Ca_Kabuli_Chr01 | 40056643                | AA                              | CC                 | CC               | INTERGENIC        |               |                    |                    |
| SNP_5799_A_40056793 | NC_021160.1    | Ca_Kabuli_Chr01 | 40056793                | CC                              | GG                 | GG               | INTERGENIC        |               |                    |                    |
| SNP_5800_A_40063944 | NC_021160.1    | Ca_Kabuli_Chr01 | 40063944                | AA                              | GG                 | GG               | SYNONYMOUS_CODING | 101489234     | Unknown function   |                    |
| SNP_5801_A_40068317 | NC_021160.1    | Ca_Kabuli_Chr01 | 40068317                | GG                              | AA                 | AA               | INTERGENIC        |               |                    |                    |
| SNP_5802_A_40068371 | NC_021160.1    | Ca_Kabuli_Chr01 | 40068371                | GG                              | TT                 | TT               | INTERGENIC        |               |                    |                    |
| SNP_5803_A_40068408 | NC_021160.1    | Ca_Kabuli_Chr01 | 40068408                | TT                              | GG                 | GG               | INTERGENIC        |               |                    |                    |
| SNP_5804_A_40068727 | NC_021160.1    | Ca_Kabuli_Chr01 | 40068727                | TT                              | CC                 | CC               | INTERGENIC        |               |                    |                    |
| SNP_5805_A_40068875 | NC_021160.1    | Ca_Kabuli_Chr01 | 40068875                | CC                              | AA                 | AA               | INTERGENIC        |               |                    |                    |
| SNP_5806_A_40079749 | NC_021160.1    | Ca_Kabuli_Chr01 | 40079749                | TT                              | AA                 | AA               | INTERGENIC        |               |                    |                    |
| SNP_5807_A_40097188 | NC_021160.1    | Ca_Kabuli_Chr01 | 40097188                | GG                              | AA                 | AA               | INTERGENIC        |               |                    |                    |
| SNP_5808_A_40099136 | NC_021160.1    | Ca_Kabuli_Chr01 | 40099136                | GG                              | AA                 | AA               | INTERGENIC        |               |                    |                    |
| SNP_5809_A_40099243 | NC_021160.1    | Ca_Kabuli_Chr01 | 40099243                | AA                              | CC                 | CC               | INTERGENIC        |               |                    |                    |
| SNP_5810_A_40099932 | NC_021160.1    | Ca_Kabuli_Chr01 | 40099932                | CC                              | TT                 | TT               | INTERGENIC        |               |                    |                    |
| SNP_5811_A_40115382 | NC_021160.1    | Ca_Kabuli_Chr01 | 40115382                | TT                              | CC                 | CC               | INTERGENIC        |               |                    |                    |
| SNP_5812_A_40122698 | NC_021160.1    | Ca_Kabuli_Chr01 | 40122698                | CC                              | AA                 | AA               | INTERGENIC        |               |                    |                    |
| SNP_5813_A_40122704 | NC_021160.1    | Ca_Kabuli_Chr01 | 40122704                | AA                              | GG                 | GG               | INTERGENIC        |               |                    |                    |
| SNP_5814_A_40123481 | NC_021160.1    | Ca_Kabuli_Chr01 | 40123481                | CC                              | TT                 | TT               | INTERGENIC        |               |                    |                    |
| SNP_5815_A_40125171 | NC_021160.1    | Ca_Kabuli_Chr01 | 40125171                | CC                              | TT                 | TT               | INTERGENIC        |               |                    |                    |
| SNP_5816_A_40134782 | NC_021160.1    | Ca_Kabuli_Chr01 | 40134782                | GG                              | AA                 | AA               | INTERGENIC        |               |                    |                    |

| SNPs IDs            | Chromosome IDs | Chromosomes     | Physical positions (bp) | CDC Frontier genome (Reference genome) | (Pusa 1103 & HPNB) | (ILWC 46 & LPNB) | Sequence genome | Components of | Gene accession IDs | Putative functions |
|---------------------|----------------|-----------------|-------------------------|----------------------------------------|--------------------|------------------|-----------------|---------------|--------------------|--------------------|
| SNP_5817_A_40141831 | NC_021160.1    | Ca_Kabuli_Chr01 | 40141831                | AA                                     | GG                 | GG               | INTERGENIC      |               |                    |                    |
| SNP_5818_A_40141836 | NC_021160.1    | Ca_Kabuli_Chr01 | 40141836                | CC                                     | GG                 | GG               | INTERGENIC      |               |                    |                    |
| SNP_5819_A_40141855 | NC_021160.1    | Ca_Kabuli_Chr01 | 40141855                | TT                                     | AA                 | AA               | INTERGENIC      |               |                    |                    |
| SNP_5820_A_40142140 | NC_021160.1    | Ca_Kabuli_Chr01 | 40142140                | TT                                     | GG                 | GG               | INTERGENIC      |               |                    |                    |
| SNP_5821_A_40142148 | NC_021160.1    | Ca_Kabuli_Chr01 | 40142148                | AA                                     | GG                 | GG               | INTERGENIC      |               |                    |                    |
| SNP_5822_A_40142184 | NC_021160.1    | Ca_Kabuli_Chr01 | 40142184                | TT                                     | CC                 | CC               | INTERGENIC      |               |                    |                    |
| SNP_5823_A_40142188 | NC_021160.1    | Ca_Kabuli_Chr01 | 40142188                | AA                                     | GG                 | GG               | INTERGENIC      |               |                    |                    |
| SNP_5824_A_40142220 | NC_021160.1    | Ca_Kabuli_Chr01 | 40142220                | GG                                     | AA                 | AA               | INTERGENIC      |               |                    |                    |
| SNP_5825_A_40142251 | NC_021160.1    | Ca_Kabuli_Chr01 | 40142251                | TT                                     | CC                 | CC               | INTERGENIC      |               |                    |                    |
| SNP_5826_A_40142259 | NC_021160.1    | Ca_Kabuli_Chr01 | 40142259                | TT                                     | CC                 | CC               | INTERGENIC      |               |                    |                    |
| SNP_5827_A_40142261 | NC_021160.1    | Ca_Kabuli_Chr01 | 40142261                | GG                                     | AA                 | AA               | INTERGENIC      |               |                    |                    |
| SNP_5828_A_40142688 | NC_021160.1    | Ca_Kabuli_Chr01 | 40142688                | AA                                     | CC                 | CC               | INTERGENIC      |               |                    |                    |
| SNP_5829_A_40144678 | NC_021160.1    | Ca_Kabuli_Chr01 | 40144678                | AA                                     | GG                 | GG               | INTERGENIC      |               |                    |                    |
| SNP_5830_A_40144701 | NC_021160.1    | Ca_Kabuli_Chr01 | 40144701                | AA                                     | GG                 | GG               | INTERGENIC      |               |                    |                    |
| SNP_5831_A_40145898 | NC_021160.1    | Ca_Kabuli_Chr01 | 40145898                | AA                                     | GG                 | GG               | INTERGENIC      |               |                    |                    |
| SNP_5832_A_40158294 | NC_021160.1    | Ca_Kabuli_Chr01 | 40158294                | TT                                     | GG                 | GG               | INTERGENIC      |               |                    |                    |
| SNP_5833_A_40162086 | NC_021160.1    | Ca_Kabuli_Chr01 | 40162086                | CC                                     | TT                 | TT               | INTERGENIC      |               |                    |                    |
| SNP_5834_A_40163362 | NC_021160.1    | Ca_Kabuli_Chr01 | 40163362                | AA                                     | TT                 | TT               | INTERGENIC      |               |                    |                    |
| SNP_5835_A_40165567 | NC_021160.1    | Ca_Kabuli_Chr01 | 40165567                | TT                                     | CC                 | CC               | INTERGENIC      |               |                    |                    |
| SNP_5836_A_40165771 | NC_021160.1    | Ca_Kabuli_Chr01 | 40165771                | AA                                     | GG                 | GG               | INTERGENIC      |               |                    |                    |
| SNP_5837_A_40178289 | NC_021160.1    | Ca_Kabuli_Chr01 | 40178289                | TT                                     | AA                 | AA               | INTERGENIC      |               |                    |                    |
| SNP_5838_A_40180155 | NC_021160.1    | Ca_Kabuli_Chr01 | 40180155                | GG                                     | AA                 | AA               | INTERGENIC      |               |                    |                    |

| SNPs IDs            | Chromosome IDs | Chromosomes     | Physical positions (bp) | CDC Frontier genome (Reference genome) | (Pusa 1103 & HPNB) | (ILWC 46 & LPNB) | Sequence Components of genome | Gene accession IDs | Putative functions                        |
|---------------------|----------------|-----------------|-------------------------|----------------------------------------|--------------------|------------------|-------------------------------|--------------------|-------------------------------------------|
| SNP_5839_A_40180814 | NC_021160.1    | Ca_Kabuli_Chr01 | 40180814                | CC                                     | TT                 | TT               | INTERGENIC                    |                    |                                           |
| SNP_5840_A_40180815 | NC_021160.1    | Ca_Kabuli_Chr01 | 40180815                | AA                                     | TT                 | TT               | INTERGENIC                    |                    |                                           |
| SNP_5841_A_40180823 | NC_021160.1    | Ca_Kabuli_Chr01 | 40180823                | AA                                     | GG                 | GG               | INTERGENIC                    |                    |                                           |
| SNP_5842_A_40185201 | NC_021160.1    | Ca_Kabuli_Chr01 | 40185201                | AA                                     | GG                 | GG               | INTRON                        | 101503011          | protein ASPARTIC PROTEASE IN GUARD CELL 1 |
| SNP_5843_A_40188688 | NC_021160.1    | Ca_Kabuli_Chr01 | 40188688                | TT                                     | CC                 | CC               | URR                           | 101503011          | protein ASPARTIC PROTEASE IN GUARD CELL 1 |
| SNP_5844_A_40194162 | NC_021160.1    | Ca_Kabuli_Chr01 | 40194162                | CC                                     | TT                 | TT               | INTERGENIC                    |                    |                                           |
| SNP_5845_A_40206927 | NC_021160.1    | Ca_Kabuli_Chr01 | 40206927                | AA                                     | GG                 | GG               | INTERGENIC                    |                    |                                           |
| SNP_5846_A_40207091 | NC_021160.1    | Ca_Kabuli_Chr01 | 40207091                | AA                                     | GG                 | GG               | INTERGENIC                    |                    |                                           |
| SNP_5847_A_40209145 | NC_021160.1    | Ca_Kabuli_Chr01 | 40209145                | AA                                     | GG                 | GG               | INTERGENIC                    |                    |                                           |
| SNP_5848_A_40209170 | NC_021160.1    | Ca_Kabuli_Chr01 | 40209170                | TT                                     | GG                 | GG               | INTERGENIC                    |                    |                                           |
| SNP_5849_A_40209225 | NC_021160.1    | Ca_Kabuli_Chr01 | 40209225                | TT                                     | CC                 | CC               | INTERGENIC                    |                    |                                           |
| SNP_5850_A_40209291 | NC_021160.1    | Ca_Kabuli_Chr01 | 40209291                | GG                                     | AA                 | AA               | INTERGENIC                    |                    |                                           |
| SNP_5851_A_40209296 | NC_021160.1    | Ca_Kabuli_Chr01 | 40209296                | TT                                     | CC                 | CC               | INTERGENIC                    |                    |                                           |
| SNP_5852_A_40209315 | NC_021160.1    | Ca_Kabuli_Chr01 | 40209315                | TT                                     | CC                 | CC               | INTERGENIC                    |                    |                                           |
| SNP_5853_A_40209338 | NC_021160.1    | Ca_Kabuli_Chr01 | 40209338                | AA                                     | GG                 | GG               | INTERGENIC                    |                    |                                           |
| SNP_5854_A_40209340 | NC_021160.1    | Ca_Kabuli_Chr01 | 40209340                | CC                                     | AA                 | AA               | INTERGENIC                    |                    |                                           |
| SNP_5855_A_40209454 | NC_021160.1    | Ca_Kabuli_Chr01 | 40209454                | AA                                     | GG                 | GG               | INTERGENIC                    |                    |                                           |
| SNP_5856_A_40209469 | NC_021160.1    | Ca_Kabuli_Chr01 | 40209469                | TT                                     | GG                 | GG               | INTERGENIC                    |                    |                                           |
| SNP_5857_A_40209499 | NC_021160.1    | Ca_Kabuli_Chr01 | 40209499                | TT                                     | CC                 | CC               | INTERGENIC                    |                    |                                           |
| SNP_5858_A_40209500 | NC_021160.1    | Ca_Kabuli_Chr01 | 40209500                | GG                                     | CC                 | CC               | INTERGENIC                    |                    |                                           |
| SNP_5859_A_40209507 | NC_021160.1    | Ca_Kabuli_Chr01 | 40209507                | AA                                     | CC                 | CC               | INTERGENIC                    |                    |                                           |
| SNP_5860_A_40224173 | NC_021160.1    | Ca_Kabuli_Chr01 | 40224173                | AA                                     | CC                 | CC               | INTERGENIC                    |                    |                                           |



| SNPs IDs            | Chromosome IDs | Chromosomes     | Physical positions (bp) | CDC Frontier genome (Reference genome) | (Pusa 1103 & HPNB) | (ILWC 46 & LPNB) | Sequence Components of genome | Gene accession IDs | Putative functions                     |
|---------------------|----------------|-----------------|-------------------------|----------------------------------------|--------------------|------------------|-------------------------------|--------------------|----------------------------------------|
| SNP_5862_A_40248694 | NC_021160.1    | Ca_Kabuli_Chr01 | 40248694                | AA                                     | GG                 | GG               | INTERGENIC                    |                    |                                        |
| SNP_5863_A_40248934 | NC_021160.1    | Ca_Kabuli_Chr01 | 40248934                | AA                                     | GG                 | GG               | INTERGENIC                    |                    |                                        |
| SNP_5864_A_40272449 | NC_021160.1    | Ca_Kabuli_Chr01 | 40272449                | GG                                     | AA                 | AA               | INTERGENIC                    |                    |                                        |
| SNP_5865_A_40277739 | NC_021160.1    | Ca_Kabuli_Chr01 | 40277739                | TT                                     | AA                 | AA               | INTERGENIC                    |                    |                                        |
| SNP_5866_A_40278067 | NC_021160.1    | Ca_Kabuli_Chr01 | 40278067                | CC                                     | GG                 | GG               | INTERGENIC                    |                    |                                        |
| SNP_5867_A_40278965 | NC_021160.1    | Ca_Kabuli_Chr01 | 40278965                | CC                                     | AA                 | AA               | INTERGENIC                    |                    |                                        |
| SNP_5868_A_40279274 | NC_021160.1    | Ca_Kabuli_Chr01 | 40279274                | AA                                     | CC                 | CC               | INTERGENIC                    |                    |                                        |
| SNP_5869_A_40296840 | NC_021160.1    | Ca_Kabuli_Chr01 | 40296840                | GG                                     | AA                 | AA               | INTERGENIC                    |                    |                                        |
| SNP_5870_A_40296999 | NC_021160.1    | Ca_Kabuli_Chr01 | 40296999                | GG                                     | AA                 | AA               | INTERGENIC                    |                    |                                        |
| SNP_5871_A_40297522 | NC_021160.1    | Ca_Kabuli_Chr01 | 40297522                | AA                                     | GG                 | GG               | INTERGENIC                    |                    |                                        |
| SNP_5872_A_40300246 | NC_021160.1    | Ca_Kabuli_Chr01 | 40300246                | TT                                     | GG                 | GG               | INTERGENIC                    |                    |                                        |
| SNP_5873_A_40302644 | NC_021160.1    | Ca_Kabuli_Chr01 | 40302644                | GG                                     | TT                 | TT               | DRR                           | 101490536          | Unknown function                       |
| SNP_5874_A_40312397 | NC_021160.1    | Ca_Kabuli_Chr01 | 40312397                | TT                                     | GG                 | GG               | DRR                           | 101503337          | YTH domain-containing family protein 2 |
| SNP_5875_A_40312399 | NC_021160.1    | Ca_Kabuli_Chr01 | 40312399                | AA                                     | GG                 | GG               | DRR                           | 101503337          | YTH domain-containing family protein 2 |
| SNP_5876_A_40315119 | NC_021160.1    | Ca_Kabuli_Chr01 | 40315119                | CC                                     | TT                 | TT               | INTRON                        | 101503337          | YTH domain-containing family protein 2 |
| SNP_5877_A_40319163 | NC_021160.1    | Ca_Kabuli_Chr01 | 40319163                | AA                                     | GG                 | GG               | URR                           | 101503337          | YTH domain-containing family protein 2 |
| SNP_5878_A_40320981 | NC_021160.1    | Ca_Kabuli_Chr01 | 40320981                | TT                                     | GG                 | GG               | INTERGENIC                    |                    |                                        |
| SNP_5879_A_40322436 | NC_021160.1    | Ca_Kabuli_Chr01 | 40322436                | TT                                     | AA                 | AA               | INTERGENIC                    |                    |                                        |
| SNP_5880_A_40325034 | NC_021160.1    | Ca_Kabuli_Chr01 | 40325034                | GG                                     | AA                 | AA               | INTERGENIC                    |                    |                                        |
| SNP_5881_A_40327106 | NC_021160.1    | Ca_Kabuli_Chr01 | 40327106                | TT                                     | AA                 | AA               | INTERGENIC                    |                    |                                        |
| SNP_5882_A_40327346 | NC_021160.1    | Ca_Kabuli_Chr01 | 40327346                | AA                                     | GG                 | GG               | INTERGENIC                    |                    |                                        |
| SNP_5883_A_40337695 | NC_021160.1    | Ca_Kabuli_Chr01 | 40337695                | CC                                     | AA                 | AA               | INTRON                        | 101503894          | nuclear-pore anchor                    |

| SNPs IDs            | Chromosome IDs | Chromosomes     | Physical positions (bp) | CDC Frontier genome (Reference genome) | (Pusa 1103 & HPNB) | (ILWC 46 & LPNB) | Sequence Components of genome | Gene accession IDs | Putative functions  |
|---------------------|----------------|-----------------|-------------------------|----------------------------------------|--------------------|------------------|-------------------------------|--------------------|---------------------|
| SNP_5884_A_40340645 | NC_021160.1    | Ca_Kabuli_Chr01 | 40340645                | CC                                     | TT                 | TT               | SYNONYMOUS_CODING             | 101503894          | nuclear-pore anchor |
| SNP_5885_A_40343424 | NC_021160.1    | Ca_Kabuli_Chr01 | 40343424                | AA                                     | CC                 | CC               | INTRON                        | 101503894          | nuclear-pore anchor |
| SNP_5886_A_40350169 | NC_021160.1    | Ca_Kabuli_Chr01 | 40350169                | AA                                     | GG                 | GG               | INTRON                        | 101503894          | nuclear-pore anchor |
| SNP_5887_A_40355864 | NC_021160.1    | Ca_Kabuli_Chr01 | 40355864                | GG                                     | CC                 | CC               | INTRON                        | 101503894          | nuclear-pore anchor |
| SNP_5888_A_40356019 | NC_021160.1    | Ca_Kabuli_Chr01 | 40356019                | CC                                     | TT                 | TT               | INTRON                        | 101503894          | nuclear-pore anchor |
| SNP_5889_A_40359240 | NC_021160.1    | Ca_Kabuli_Chr01 | 40359240                | TT                                     | AA                 | AA               | INTRON                        | 101503894          | nuclear-pore anchor |
| SNP_5890_A_40359244 | NC_021160.1    | Ca_Kabuli_Chr01 | 40359244                | CC                                     | TT                 | TT               | INTRON                        | 101503894          | nuclear-pore anchor |
| SNP_5891_A_40359450 | NC_021160.1    | Ca_Kabuli_Chr01 | 40359450                | TT                                     | CC                 | CC               | NON_SYNONYMOUS_CODING         | 101503894          | nuclear-pore anchor |
| SNP_5892_A_40359525 | NC_021160.1    | Ca_Kabuli_Chr01 | 40359525                | TT                                     | AA                 | AA               | INTRON                        | 101503894          | nuclear-pore anchor |
| SNP_5893_A_40365778 | NC_021160.1    | Ca_Kabuli_Chr01 | 40365778                | TT                                     | CC                 | CC               | INTRON                        | 101503894          | nuclear-pore anchor |
| SNP_5896_A_40391637 | NC_021160.1    | Ca_Kabuli_Chr01 | 40391637                | CC                                     | GG                 | GG               | INTERGENIC                    |                    |                     |
| SNP_5897_A_40391814 | NC_021160.1    | Ca_Kabuli_Chr01 | 40391814                | GG                                     | AA                 | AA               | INTERGENIC                    |                    |                     |
| SNP_5898_A_40391821 | NC_021160.1    | Ca_Kabuli_Chr01 | 40391821                | TT                                     | CC                 | CC               | INTERGENIC                    |                    |                     |
| SNP_5899_A_40396751 | NC_021160.1    | Ca_Kabuli_Chr01 | 40396751                | TT                                     | AA                 | AA               | INTERGENIC                    |                    |                     |
| SNP_5900_A_40397798 | NC_021160.1    | Ca_Kabuli_Chr01 | 40397798                | TT                                     | AA                 | AA               | INTERGENIC                    |                    |                     |
| SNP_5901_A_40398405 | NC_021160.1    | Ca_Kabuli_Chr01 | 40398405                | AA                                     | CC                 | CC               | INTERGENIC                    |                    |                     |
| SNP_5902_A_40402105 | NC_021160.1    | Ca_Kabuli_Chr01 | 40402105                | TT                                     | CC                 | CC               | INTERGENIC                    |                    |                     |
| SNP_5903_A_40402129 | NC_021160.1    | Ca_Kabuli_Chr01 | 40402129                | GG                                     | AA                 | AA               | INTERGENIC                    |                    |                     |
| SNP_5904_A_40406226 | NC_021160.1    | Ca_Kabuli_Chr01 | 40406226                | AA                                     | GG                 | GG               | INTERGENIC                    |                    |                     |
| SNP_5905_A_40412065 | NC_021160.1    | Ca_Kabuli_Chr01 | 40412065                | AA                                     | GG                 | GG               | INTERGENIC                    |                    |                     |
| SNP_5906_A_40412460 | NC_021160.1    | Ca_Kabuli_Chr01 | 40412460                | TT                                     | CC                 | CC               | INTERGENIC                    |                    |                     |
| SNP_5907_A_40417256 | NC_021160.1    | Ca_Kabuli_Chr01 | 40417256                | TT                                     | CC                 | CC               | INTERGENIC                    |                    |                     |

| SNPs IDs            | Chromosome IDs | Chromosomes     | Physical positions (bp) | CDC Frontier genome (Reference genome) | (Pusa 1103 & HPNB) | (ILWC 46 & LPNB) | Sequence Components of genome | Gene accession IDs | Putative functions                           |
|---------------------|----------------|-----------------|-------------------------|----------------------------------------|--------------------|------------------|-------------------------------|--------------------|----------------------------------------------|
| SNP_5908_A_40417670 | NC_021160.1    | Ca_Kabuli_Chr01 | 40417670                | GG                                     | AA                 | AA               | INTERGENIC                    |                    |                                              |
| SNP_5909_A_40418030 | NC_021160.1    | Ca_Kabuli_Chr01 | 40418030                | AA                                     | GG                 | GG               | INTERGENIC                    |                    |                                              |
| SNP_5910_A_40421608 | NC_021160.1    | Ca_Kabuli_Chr01 | 40421608                | GG                                     | AA                 | AA               | INTRON                        | 101491491          | probable CCR4-associated factor 1 homolog 11 |
| SNP_5911_A_40422400 | NC_021160.1    | Ca_Kabuli_Chr01 | 40422400                | GG                                     | CC                 | CC               | NON_SYNONYMOUS_CODING         | 101491491          | probable CCR4-associated factor 1 homolog 11 |
| SNP_5914_A_40427989 | NC_021160.1    | Ca_Kabuli_Chr01 | 40427989                | AA                                     | GG                 | GG               | URR                           | 101491491          | probable CCR4-associated factor 1 homolog 11 |
| SNP_5915_A_40433926 | NC_021160.1    | Ca_Kabuli_Chr01 | 40433926                | TT                                     | AA                 | AA               | INTERGENIC                    |                    |                                              |
| SNP_5916_A_40445006 | NC_021160.1    | Ca_Kabuli_Chr01 | 40445006                | TT                                     | CC                 | CC               | INTERGENIC                    |                    |                                              |
| SNP_5917_A_40483777 | NC_021160.1    | Ca_Kabuli_Chr01 | 40483777                | AA                                     | GG                 | GG               | INTERGENIC                    |                    |                                              |
| SNP_5918_A_40488465 | NC_021160.1    | Ca_Kabuli_Chr01 | 40488465                | TT                                     | AA                 | AA               | INTRON                        | 101492924          | interactor of constitutive active ROPs 4     |
| SNP_5919_A_40506799 | NC_021160.1    | Ca_Kabuli_Chr01 | 40506799                | TT                                     | GG                 | GG               | INTERGENIC                    |                    |                                              |
| SNP_5923_A_40538329 | NC_021160.1    | Ca_Kabuli_Chr01 | 40538329                | AA                                     | GG                 | GG               | INTERGENIC                    |                    |                                              |
| SNP_5924_A_40725472 | NC_021160.1    | Ca_Kabuli_Chr01 | 40725472                | TT                                     | CC                 | CC               | INTERGENIC                    |                    |                                              |
| SNP_5925_A_40754028 | NC_021160.1    | Ca_Kabuli_Chr01 | 40754028                | TT                                     | AA                 | AA               | INTERGENIC                    |                    |                                              |
| SNP_5926_A_40785094 | NC_021160.1    | Ca_Kabuli_Chr01 | 40785094                | TT                                     | CC                 | CC               | INTERGENIC                    |                    |                                              |
| SNP_5927_A_40785395 | NC_021160.1    | Ca_Kabuli_Chr01 | 40785395                | TT                                     | CC                 | CC               | INTERGENIC                    |                    |                                              |
| SNP_5928_A_40790003 | NC_021160.1    | Ca_Kabuli_Chr01 | 40790003                | GG                                     | AA                 | AA               | INTERGENIC                    |                    |                                              |
| SNP_5929_A_40790038 | NC_021160.1    | Ca_Kabuli_Chr01 | 40790038                | GG                                     | AA                 | AA               | INTERGENIC                    |                    |                                              |
| SNP_5931_A_40814731 | NC_021160.1    | Ca_Kabuli_Chr01 | 40814731                | GG                                     | AA                 | AA               | INTERGENIC                    |                    |                                              |
| SNP_5932_A_40814750 | NC_021160.1    | Ca_Kabuli_Chr01 | 40814750                | GG                                     | AA                 | AA               | INTERGENIC                    |                    |                                              |
| SNP_5933_A_40814759 | NC_021160.1    | Ca_Kabuli_Chr01 | 40814759                | TT                                     | CC                 | CC               | INTERGENIC                    |                    |                                              |
| SNP_5934_A_40814760 | NC_021160.1    | Ca_Kabuli_Chr01 | 40814760                | TT                                     | CC                 | CC               | INTERGENIC                    |                    |                                              |
| SNP_5935_A_40814778 | NC_021160.1    | Ca_Kabuli_Chr01 | 40814778                | GG                                     | TT                 | TT               | INTERGENIC                    |                    |                                              |

| SNPs IDs            | Chromosome IDs | Chromosomes     | Physical positions (bp) | CDC Frontier (Reference genome) | (Pusa 1103 & HPNB) | (ILWC 46 & LPNB) | Sequence Components of genome | Gene accession IDs | Putative functions |
|---------------------|----------------|-----------------|-------------------------|---------------------------------|--------------------|------------------|-------------------------------|--------------------|--------------------|
| SNP_5936_A_40814811 | NC_021160.1    | Ca_Kabuli_Chr01 | 40814811                | AA                              | GG                 | GG               | INTERGENIC                    |                    |                    |
| SNP_5937_A_40814815 | NC_021160.1    | Ca_Kabuli_Chr01 | 40814815                | GG                              | AA                 | AA               | INTERGENIC                    |                    |                    |
| SNP_5938_A_40814833 | NC_021160.1    | Ca_Kabuli_Chr01 | 40814833                | TT                              | CC                 | CC               | INTERGENIC                    |                    |                    |
| SNP_5939_A_40814834 | NC_021160.1    | Ca_Kabuli_Chr01 | 40814834                | AA                              | GG                 | GG               | INTERGENIC                    |                    |                    |
| SNP_5940_A_40814899 | NC_021160.1    | Ca_Kabuli_Chr01 | 40814899                | AA                              | GG                 | GG               | INTERGENIC                    |                    |                    |
| SNP_5941_A_40814942 | NC_021160.1    | Ca_Kabuli_Chr01 | 40814942                | TT                              | GG                 | GG               | INTERGENIC                    |                    |                    |
| SNP_5942_A_40814943 | NC_021160.1    | Ca_Kabuli_Chr01 | 40814943                | GG                              | TT                 | TT               | INTERGENIC                    |                    |                    |
| SNP_5943_A_40827843 | NC_021160.1    | Ca_Kabuli_Chr01 | 40827843                | CC                              | GG                 | GG               | INTERGENIC                    |                    |                    |
| SNP_5944_A_40838269 | NC_021160.1    | Ca_Kabuli_Chr01 | 40838269                | TT                              | AA                 | AA               | INTERGENIC                    |                    |                    |
| SNP_5945_A_40838282 | NC_021160.1    | Ca_Kabuli_Chr01 | 40838282                | GG                              | TT                 | TT               | INTERGENIC                    |                    |                    |
| SNP_5946_A_40838350 | NC_021160.1    | Ca_Kabuli_Chr01 | 40838350                | TT                              | CC                 | CC               | INTERGENIC                    |                    |                    |
| SNP_5947_A_40838510 | NC_021160.1    | Ca_Kabuli_Chr01 | 40838510                | GG                              | AA                 | AA               | INTERGENIC                    |                    |                    |
| SNP_5948_A_40839972 | NC_021160.1    | Ca_Kabuli_Chr01 | 40839972                | AA                              | GG                 | GG               | INTERGENIC                    |                    |                    |
| SNP_5950_A_40862017 | NC_021160.1    | Ca_Kabuli_Chr01 | 40862017                | AA                              | GG                 | GG               | INTERGENIC                    |                    |                    |
| SNP_5951_A_40870128 | NC_021160.1    | Ca_Kabuli_Chr01 | 40870128                | AA                              | GG                 | GG               | INTERGENIC                    |                    |                    |
| SNP_5952_A_40870156 | NC_021160.1    | Ca_Kabuli_Chr01 | 40870156                | TT                              | CC                 | CC               | INTERGENIC                    |                    |                    |
| SNP_5953_A_40871861 | NC_021160.1    | Ca_Kabuli_Chr01 | 40871861                | CC                              | TT                 | TT               | DRR                           | 101499524          | chitinase 2-like   |
| SNP_5954_A_40871869 | NC_021160.1    | Ca_Kabuli_Chr01 | 40871869                | AA                              | CC                 | CC               | DRR                           | 101499524          | chitinase 2-like   |
| SNP_5955_A_40872330 | NC_021160.1    | Ca_Kabuli_Chr01 | 40872330                | AA                              | GG                 | GG               | DRR                           | 101499524          | chitinase 2-like   |
| SNP_5956_A_40872333 | NC_021160.1    | Ca_Kabuli_Chr01 | 40872333                | CC                              | TT                 | TT               | DRR                           | 101499524          | chitinase 2-like   |
| SNP_5957_A_40872354 | NC_021160.1    | Ca_Kabuli_Chr01 | 40872354                | TT                              | GG                 | GG               | DRR                           | 101499524          | chitinase 2-like   |
| SNP_5958_A_40872402 | NC_021160.1    | Ca_Kabuli_Chr01 | 40872402                | AA                              | GG                 | GG               | DRR                           | 101499524          | chitinase 2-like   |

| SNPs IDs            | Chromosome IDs | Chromosomes     | Physical positions (bp) | CDC Frontier (Reference genome) | (Pusa 1103 & HPNB) | (ILWC 46 & LPNB) | Sequence Components of genome | Gene accession IDs | Putative functions |
|---------------------|----------------|-----------------|-------------------------|---------------------------------|--------------------|------------------|-------------------------------|--------------------|--------------------|
| SNP_5959_A_40872406 | NC_021160.1    | Ca_Kabuli_Chr01 | 40872406                | AA                              | GG                 | GG               | DRR                           | 101499524          | chitinase 2-like   |
| SNP_5960_A_40872426 | NC_021160.1    | Ca_Kabuli_Chr01 | 40872426                | AA                              | GG                 | GG               | DRR                           | 101499524          | chitinase 2-like   |
| SNP_5961_A_40872442 | NC_021160.1    | Ca_Kabuli_Chr01 | 40872442                | TT                              | CC                 | CC               | DRR                           | 101499524          | chitinase 2-like   |
| SNP_5962_A_40872459 | NC_021160.1    | Ca_Kabuli_Chr01 | 40872459                | AA                              | CC                 | CC               | DRR                           | 101499524          | chitinase 2-like   |
| SNP_5963_A_40881506 | NC_021160.1    | Ca_Kabuli_Chr01 | 40881506                | CC                              | TT                 | TT               | INTERGENIC                    |                    |                    |
| SNP_5964_A_40885580 | NC_021160.1    | Ca_Kabuli_Chr01 | 40885580                | GG                              | AA                 | AA               | DRR                           | 101499824          | chitinase 2-like   |
| SNP_5965_A_40887554 | NC_021160.1    | Ca_Kabuli_Chr01 | 40887554                | CC                              | TT                 | TT               | URR                           | 101499824          | chitinase 2-like   |
| SNP_5966_A_40887877 | NC_021160.1    | Ca_Kabuli_Chr01 | 40887877                | TT                              | CC                 | CC               | URR                           | 101499824          | chitinase 2-like   |
| SNP_5967_A_40887975 | NC_021160.1    | Ca_Kabuli_Chr01 | 40887975                | GG                              | AA                 | AA               | URR                           | 101499824          | chitinase 2-like   |
| SNP_5968_A_40889660 | NC_021160.1    | Ca_Kabuli_Chr01 | 40889660                | GG                              | TT                 | TT               | INTERGENIC                    |                    |                    |
| SNP_5969_A_40889662 | NC_021160.1    | Ca_Kabuli_Chr01 | 40889662                | AA                              | TT                 | TT               | INTERGENIC                    |                    |                    |
| SNP_5970_A_40889664 | NC_021160.1    | Ca_Kabuli_Chr01 | 40889664                | CC                              | TT                 | TT               | INTERGENIC                    |                    |                    |
| SNP_5971_A_40889742 | NC_021160.1    | Ca_Kabuli_Chr01 | 40889742                | AA                              | GG                 | GG               | INTERGENIC                    |                    |                    |
| SNP_5973_A_40889817 | NC_021160.1    | Ca_Kabuli_Chr01 | 40889817                | TT                              | AA                 | AA               | INTERGENIC                    |                    |                    |
| SNP_5974_A_40890118 | NC_021160.1    | Ca_Kabuli_Chr01 | 40890118                | GG                              | CC                 | CC               | INTERGENIC                    |                    |                    |
| SNP_5975_A_40890134 | NC_021160.1    | Ca_Kabuli_Chr01 | 40890134                | CC                              | AA                 | AA               | INTERGENIC                    |                    |                    |
| SNP_5976_A_40890162 | NC_021160.1    | Ca_Kabuli_Chr01 | 40890162                | GG                              | TT                 | TT               | INTERGENIC                    |                    |                    |
| SNP_5977_A_40890181 | NC_021160.1    | Ca_Kabuli_Chr01 | 40890181                | AA                              | TT                 | TT               | INTERGENIC                    |                    |                    |
| SNP_5978_A_40890183 | NC_021160.1    | Ca_Kabuli_Chr01 | 40890183                | TT                              | CC                 | CC               | INTERGENIC                    |                    |                    |
| SNP_5979_A_40890201 | NC_021160.1    | Ca_Kabuli_Chr01 | 40890201                | TT                              | CC                 | CC               | INTERGENIC                    |                    |                    |
| SNP_5980_A_40890259 | NC_021160.1    | Ca_Kabuli_Chr01 | 40890259                | TT                              | AA                 | AA               | INTERGENIC                    |                    |                    |
| SNP_5981_A_40890260 | NC_021160.1    | Ca_Kabuli_Chr01 | 40890260                | TT                              | AA                 | AA               | INTERGENIC                    |                    |                    |

| SNPs IDs            | Chromosome IDs | Chromosomes     | Physical positions (bp) | CDC Frontier (Reference genome) | (Pusa 1103 & HPNB) | (ILWC 46 & LPNB) | Sequence Components of genome | Gene accession IDs | Putative functions               |
|---------------------|----------------|-----------------|-------------------------|---------------------------------|--------------------|------------------|-------------------------------|--------------------|----------------------------------|
| SNP_5982_A_40890357 | NC_021160.1    | Ca_Kabuli_Chr01 | 40890357                | AA                              | GG                 | GG               | INTERGENIC                    |                    |                                  |
| SNP_5983_A_40890419 | NC_021160.1    | Ca_Kabuli_Chr01 | 40890419                | CC                              | TT                 | TT               | INTERGENIC                    |                    |                                  |
| SNP_5984_A_40890432 | NC_021160.1    | Ca_Kabuli_Chr01 | 40890432                | CC                              | TT                 | TT               | INTERGENIC                    |                    |                                  |
| SNP_5985_A_40890452 | NC_021160.1    | Ca_Kabuli_Chr01 | 40890452                | AA                              | GG                 | GG               | INTERGENIC                    |                    |                                  |
| SNP_5986_A_40890472 | NC_021160.1    | Ca_Kabuli_Chr01 | 40890472                | GG                              | AA                 | AA               | INTERGENIC                    |                    |                                  |
| SNP_5987_A_40890650 | NC_021160.1    | Ca_Kabuli_Chr01 | 40890650                | AA                              | TT                 | TT               | INTERGENIC                    |                    |                                  |
| SNP_5988_A_40890656 | NC_021160.1    | Ca_Kabuli_Chr01 | 40890656                | TT                              | CC                 | CC               | INTERGENIC                    |                    |                                  |
| SNP_5989_A_40895239 | NC_021160.1    | Ca_Kabuli_Chr01 | 40895239                | TT                              | CC                 | CC               | INTERGENIC                    |                    |                                  |
| SNP_5991_A_41076406 | NC_021160.1    | Ca_Kabuli_Chr01 | 41076406                | GG                              | TT                 | TT               | INTERGENIC                    |                    |                                  |
| SNP_5992_A_41103408 | NC_021160.1    | Ca_Kabuli_Chr01 | 41103408                | AA                              | GG                 | GG               | INTERGENIC                    |                    |                                  |
| SNP_5993_A_41103731 | NC_021160.1    | Ca_Kabuli_Chr01 | 41103731                | TT                              | CC                 | CC               | INTERGENIC                    |                    |                                  |
| SNP_5994_A_41103766 | NC_021160.1    | Ca_Kabuli_Chr01 | 41103766                | TT                              | CC                 | CC               | INTERGENIC                    |                    |                                  |
| SNP_5995_A_41136378 | NC_021160.1    | Ca_Kabuli_Chr01 | 41136378                | AA                              | GG                 | GG               | INTERGENIC                    |                    |                                  |
| SNP_5996_A_41237292 | NC_021160.1    | Ca_Kabuli_Chr01 | 41237292                | TT                              | CC                 | CC               | URR                           | 101507760          | albumin-2-like                   |
| SNP_5998_A_41415741 | NC_021160.1    | Ca_Kabuli_Chr01 | 41415741                | GG                              | TT                 | TT               | INTRON                        | 101488911          | glutathione S-transferase 3-like |
| SNP_5999_A_41416739 | NC_021160.1    | Ca_Kabuli_Chr01 | 41416739                | AA                              | CC                 | CC               | INTRON                        | 101488911          | glutathione S-transferase 3-like |
| SNP_6000_A_41422585 | NC_021160.1    | Ca_Kabuli_Chr01 | 41422585                | GG                              | AA                 | AA               | INTRON                        | 101488911          | glutathione S-transferase 3-like |
| SNP_6001_A_41429140 | NC_021160.1    | Ca_Kabuli_Chr01 | 41429140                | TT                              | CC                 | CC               | INTERGENIC                    |                    |                                  |
| SNP_6002_A_41450818 | NC_021160.1    | Ca_Kabuli_Chr01 | 41450818                | CC                              | TT                 | TT               | INTERGENIC                    |                    |                                  |
| SNP_6003_A_41450840 | NC_021160.1    | Ca_Kabuli_Chr01 | 41450840                | TT                              | GG                 | GG               | INTERGENIC                    |                    |                                  |
| SNP_6004_A_41450916 | NC_021160.1    | Ca_Kabuli_Chr01 | 41450916                | GG                              | AA                 | AA               | INTERGENIC                    |                    |                                  |
| SNP_6005_A_41452788 | NC_021160.1    | Ca_Kabuli_Chr01 | 41452788                | CC                              | AA                 | AA               | INTERGENIC                    |                    |                                  |

| SNPs IDs            | Chromosome IDs | Chromosomes     | Physical positions (bp) | CDC Frontier (Reference genome) | (Pusa 1103 & HPNB) | (ILWC 46 & LPNB) | Sequence genome | Components of | Gene accession IDs | Putative functions |
|---------------------|----------------|-----------------|-------------------------|---------------------------------|--------------------|------------------|-----------------|---------------|--------------------|--------------------|
| SNP_6006_A_41452800 | NC_021160.1    | Ca_Kabuli_Chr01 | 41452800                | TT                              | CC                 | CC               | INTERGENIC      |               |                    |                    |
| SNP_6007_A_41452813 | NC_021160.1    | Ca_Kabuli_Chr01 | 41452813                | CC                              | AA                 | AA               | INTERGENIC      |               |                    |                    |
| SNP_6009_A_41504108 | NC_021160.1    | Ca_Kabuli_Chr01 | 41504108                | TT                              | GG                 | GG               | INTERGENIC      |               |                    |                    |
| SNP_6010_A_41504109 | NC_021160.1    | Ca_Kabuli_Chr01 | 41504109                | GG                              | AA                 | AA               | INTERGENIC      |               |                    |                    |
| SNP_6011_A_41504113 | NC_021160.1    | Ca_Kabuli_Chr01 | 41504113                | GG                              | AA                 | AA               | INTERGENIC      |               |                    |                    |
| SNP_6012_A_41504309 | NC_021160.1    | Ca_Kabuli_Chr01 | 41504309                | AA                              | TT                 | TT               | INTERGENIC      |               |                    |                    |
| SNP_6013_A_41504387 | NC_021160.1    | Ca_Kabuli_Chr01 | 41504387                | TT                              | CC                 | CC               | INTERGENIC      |               |                    |                    |
| SNP_6014_A_41597667 | NC_021160.1    | Ca_Kabuli_Chr01 | 41597667                | TT                              | CC                 | CC               | INTERGENIC      |               |                    |                    |
| SNP_6015_A_41617666 | NC_021160.1    | Ca_Kabuli_Chr01 | 41617666                | GG                              | TT                 | TT               | INTERGENIC      |               |                    |                    |
| SNP_6016_A_41672934 | NC_021160.1    | Ca_Kabuli_Chr01 | 41672934                | AA                              | CC                 | CC               | INTERGENIC      |               |                    |                    |
| SNP_6017_A_41672936 | NC_021160.1    | Ca_Kabuli_Chr01 | 41672936                | AA                              | CC                 | CC               | INTERGENIC      |               |                    |                    |
| SNP_6019_A_41694808 | NC_021160.1    | Ca_Kabuli_Chr01 | 41694808                | TT                              | CC                 | CC               | INTERGENIC      |               |                    |                    |
| SNP_6020_A_41694942 | NC_021160.1    | Ca_Kabuli_Chr01 | 41694942                | GG                              | TT                 | TT               | INTERGENIC      |               |                    |                    |
| SNP_6021_A_41694965 | NC_021160.1    | Ca_Kabuli_Chr01 | 41694965                | AA                              | GG                 | GG               | INTERGENIC      |               |                    |                    |
| SNP_6022_A_41694968 | NC_021160.1    | Ca_Kabuli_Chr01 | 41694968                | CC                              | GG                 | GG               | INTERGENIC      |               |                    |                    |
| SNP_6023_A_41694969 | NC_021160.1    | Ca_Kabuli_Chr01 | 41694969                | CC                              | TT                 | TT               | INTERGENIC      |               |                    |                    |
| SNP_6024_A_41694972 | NC_021160.1    | Ca_Kabuli_Chr01 | 41694972                | CC                              | TT                 | TT               | INTERGENIC      |               |                    |                    |
| SNP_6025_A_41694997 | NC_021160.1    | Ca_Kabuli_Chr01 | 41694997                | CC                              | TT                 | TT               | INTERGENIC      |               |                    |                    |
| SNP_6026_A_41695044 | NC_021160.1    | Ca_Kabuli_Chr01 | 41695044                | GG                              | AA                 | AA               | INTERGENIC      |               |                    |                    |
| SNP_6027_A_41695164 | NC_021160.1    | Ca_Kabuli_Chr01 | 41695164                | TT                              | CC                 | CC               | INTERGENIC      |               |                    |                    |
| SNP_6028_A_41695348 | NC_021160.1    | Ca_Kabuli_Chr01 | 41695348                | AA                              | GG                 | GG               | INTERGENIC      |               |                    |                    |
| SNP_6030_A_41695682 | NC_021160.1    | Ca_Kabuli_Chr01 | 41695682                | TT                              | AA                 | AA               | INTERGENIC      |               |                    |                    |

| SNPs IDs            | Chromosome IDs | Chromosomes     | Physical positions (bp) | CDC Frontier (Reference genome) | (Pusa 1103 & HPNB) | (ILWC 46 & LPNB) | Sequence genome | Components of | Gene accession IDs           | Putative functions |
|---------------------|----------------|-----------------|-------------------------|---------------------------------|--------------------|------------------|-----------------|---------------|------------------------------|--------------------|
| SNP_6031_A_41695683 | NC_021160.1    | Ca_Kabuli_Chr01 | 41695683                | TT                              | AA                 | AA               | INTERGENIC      |               |                              |                    |
| SNP_6032_A_41696840 | NC_021160.1    | Ca_Kabuli_Chr01 | 41696840                | TT                              | CC                 | CC               | INTERGENIC      |               |                              |                    |
| SNP_6033_A_41697272 | NC_021160.1    | Ca_Kabuli_Chr01 | 41697272                | GG                              | TT                 | TT               | INTERGENIC      |               |                              |                    |
| SNP_6034_A_41704228 | NC_021160.1    | Ca_Kabuli_Chr01 | 41704228                | GG                              | TT                 | TT               | INTERGENIC      |               |                              |                    |
| SNP_6035_A_41704268 | NC_021160.1    | Ca_Kabuli_Chr01 | 41704268                | GG                              | AA                 | AA               | INTERGENIC      |               |                              |                    |
| SNP_6036_A_41704301 | NC_021160.1    | Ca_Kabuli_Chr01 | 41704301                | TT                              | GG                 | GG               | INTERGENIC      |               |                              |                    |
| SNP_6037_A_41704316 | NC_021160.1    | Ca_Kabuli_Chr01 | 41704316                | GG                              | AA                 | AA               | INTERGENIC      |               |                              |                    |
| SNP_6038_A_41704385 | NC_021160.1    | Ca_Kabuli_Chr01 | 41704385                | CC                              | AA                 | AA               | INTERGENIC      |               |                              |                    |
| SNP_6039_A_41704411 | NC_021160.1    | Ca_Kabuli_Chr01 | 41704411                | AA                              | GG                 | GG               | INTERGENIC      |               |                              |                    |
| SNP_6042_A_41704553 | NC_021160.1    | Ca_Kabuli_Chr01 | 41704553                | AA                              | TT                 | TT               | INTERGENIC      |               |                              |                    |
| SNP_6043_A_41704603 | NC_021160.1    | Ca_Kabuli_Chr01 | 41704603                | AA                              | TT                 | TT               | INTERGENIC      |               |                              |                    |
| SNP_6044_A_41704624 | NC_021160.1    | Ca_Kabuli_Chr01 | 41704624                | TT                              | AA                 | AA               | INTERGENIC      |               |                              |                    |
| SNP_6045_A_41704633 | NC_021160.1    | Ca_Kabuli_Chr01 | 41704633                | CC                              | TT                 | TT               | INTERGENIC      |               |                              |                    |
| SNP_6046_A_41705237 | NC_021160.1    | Ca_Kabuli_Chr01 | 41705237                | TT                              | GG                 | GG               | INTERGENIC      |               |                              |                    |
| SNP_6047_A_41705392 | NC_021160.1    | Ca_Kabuli_Chr01 | 41705392                | CC                              | TT                 | TT               | INTERGENIC      |               |                              |                    |
| SNP_6048_A_41705604 | NC_021160.1    | Ca_Kabuli_Chr01 | 41705604                | TT                              | AA                 | AA               | INTERGENIC      |               |                              |                    |
| SNP_6050_A_41708687 | NC_021160.1    | Ca_Kabuli_Chr01 | 41708687                | AA                              | CC                 | CC               | INTERGENIC      |               |                              |                    |
| SNP_6051_A_41708828 | NC_021160.1    | Ca_Kabuli_Chr01 | 41708828                | GG                              | AA                 | AA               | INTERGENIC      |               |                              |                    |
| SNP_6052_A_41709837 | NC_021160.1    | Ca_Kabuli_Chr01 | 41709837                | AA                              | TT                 | TT               | INTERGENIC      |               |                              |                    |
| SNP_6053_A_41709855 | NC_021160.1    | Ca_Kabuli_Chr01 | 41709855                | TT                              | GG                 | GG               | INTERGENIC      |               |                              |                    |
| SNP_6054_A_41712203 | NC_021160.1    | Ca_Kabuli_Chr01 | 41712203                | GG                              | AA                 | AA               | DRR             | 101501741     | uncharacterized LOC101501741 |                    |
| SNP_6055_A_41712529 | NC_021160.1    | Ca_Kabuli_Chr01 | 41712529                | GG                              | AA                 | AA               | DRR             | 101501741     | uncharacterized LOC101501741 |                    |



| SNPs IDs            | Chromosome IDs | Chromosomes     | Physical positions (bp) | CDC Frontier (Reference genome) | (Pusa 1103 & HPNB) | (ILWC 46 & LPNB) | Sequence Components of genome | Gene accession IDs | Putative functions           |
|---------------------|----------------|-----------------|-------------------------|---------------------------------|--------------------|------------------|-------------------------------|--------------------|------------------------------|
| SNP_6056_A_41712745 | NC_021160.1    | Ca_Kabuli_Chr01 | 41712745                | GG                              | TT                 | TT               | DRR                           | 101501741          | uncharacterized LOC101501741 |
| SNP_6057_A_41718481 | NC_021160.1    | Ca_Kabuli_Chr01 | 41718481                | CC                              | TT                 | TT               | INTRON                        | 101501741          | uncharacterized LOC101501741 |
| SNP_6058_A_41718553 | NC_021160.1    | Ca_Kabuli_Chr01 | 41718553                | AA                              | GG                 | GG               | INTRON                        | 101501741          | uncharacterized LOC101501741 |
| SNP_6059_A_41718571 | NC_021160.1    | Ca_Kabuli_Chr01 | 41718571                | AA                              | TT                 | TT               | INTRON                        | 101501741          | uncharacterized LOC101501741 |
| SNP_6060_A_41718619 | NC_021160.1    | Ca_Kabuli_Chr01 | 41718619                | AA                              | TT                 | TT               | INTRON                        | 101501741          | uncharacterized LOC101501741 |
| SNP_6061_A_41718683 | NC_021160.1    | Ca_Kabuli_Chr01 | 41718683                | CC                              | GG                 | GG               | INTRON                        | 101501741          | uncharacterized LOC101501741 |
| SNP_6062_A_41718744 | NC_021160.1    | Ca_Kabuli_Chr01 | 41718744                | CC                              | AA                 | AA               | INTRON                        | 101501741          | uncharacterized LOC101501741 |
| SNP_6064_A_41718886 | NC_021160.1    | Ca_Kabuli_Chr01 | 41718886                | GG                              | AA                 | AA               | INTRON                        | 101501741          | uncharacterized LOC101501741 |
| SNP_6065_A_41718896 | NC_021160.1    | Ca_Kabuli_Chr01 | 41718896                | AA                              | TT                 | TT               | INTRON                        | 101501741          | uncharacterized LOC101501741 |
| SNP_6066_A_41718997 | NC_021160.1    | Ca_Kabuli_Chr01 | 41718997                | TT                              | CC                 | CC               | INTRON                        | 101501741          | uncharacterized LOC101501741 |
| SNP_6068_A_41721885 | NC_021160.1    | Ca_Kabuli_Chr01 | 41721885                | AA                              | TT                 | TT               | INTRON                        | 101501741          | uncharacterized LOC101501741 |
| SNP_6069_A_41721895 | NC_021160.1    | Ca_Kabuli_Chr01 | 41721895                | AA                              | GG                 | GG               | INTRON                        | 101501741          | uncharacterized LOC101501741 |
| SNP_6070_A_41721944 | NC_021160.1    | Ca_Kabuli_Chr01 | 41721944                | TT                              | GG                 | GG               | INTRON                        | 101501741          | uncharacterized LOC101501741 |
| SNP_6071_A_41721981 | NC_021160.1    | Ca_Kabuli_Chr01 | 41721981                | GG                              | AA                 | AA               | INTRON                        | 101501741          | uncharacterized LOC101501741 |
| SNP_6072_A_41722330 | NC_021160.1    | Ca_Kabuli_Chr01 | 41722330                | AA                              | TT                 | TT               | INTRON                        | 101501741          | uncharacterized LOC101501741 |
| SNP_6073_A_41722360 | NC_021160.1    | Ca_Kabuli_Chr01 | 41722360                | TT                              | AA                 | AA               | INTRON                        | 101501741          | uncharacterized LOC101501741 |
| SNP_6074_A_41722369 | NC_021160.1    | Ca_Kabuli_Chr01 | 41722369                | AA                              | TT                 | TT               | INTRON                        | 101501741          | uncharacterized LOC101501741 |
| SNP_6075_A_41722411 | NC_021160.1    | Ca_Kabuli_Chr01 | 41722411                | TT                              | AA                 | AA               | INTRON                        | 101501741          | uncharacterized LOC101501741 |
| SNP_6076_A_41727867 | NC_021160.1    | Ca_Kabuli_Chr01 | 41727867                | TT                              | CC                 | CC               | INTERGENIC                    |                    |                              |
| SNP_6077_A_41727885 | NC_021160.1    | Ca_Kabuli_Chr01 | 41727885                | AA                              | CC                 | CC               | INTERGENIC                    |                    |                              |
| SNP_6078_A_41727906 | NC_021160.1    | Ca_Kabuli_Chr01 | 41727906                | AA                              | CC                 | CC               | INTERGENIC                    |                    |                              |
| SNP_6079_A_41728074 | NC_021160.1    | Ca_Kabuli_Chr01 | 41728074                | AA                              | CC                 | CC               | INTERGENIC                    |                    |                              |

| SNPs IDs            | Chromosome IDs | Chromosomes     | Physical positions (bp) | CDC Frontier (Reference genome) | (Pusa 1103 & HPNB) | (ILWC 46 & LPNB) | Sequence Components of genome | Gene accession IDs | Putative functions       |
|---------------------|----------------|-----------------|-------------------------|---------------------------------|--------------------|------------------|-------------------------------|--------------------|--------------------------|
| SNP_6080_A_41735128 | NC_021160.1    | Ca_Kabuli_Chr01 | 41735128                | CC                              | TT                 | TT               | DRR                           | 101502067          | protein GRIM REAPER-like |
| SNP_6081_A_41738957 | NC_021160.1    | Ca_Kabuli_Chr01 | 41738957                | CC                              | TT                 | TT               | URR                           | 101494412          | protein GRIM REAPER-like |
| SNP_6082_A_41747633 | NC_021160.1    | Ca_Kabuli_Chr01 | 41747633                | TT                              | CC                 | CC               | INTERGENIC                    |                    |                          |
| SNP_6083_A_41748103 | NC_021160.1    | Ca_Kabuli_Chr01 | 41748103                | CC                              | TT                 | TT               | INTERGENIC                    |                    |                          |
| SNP_6084_A_41801228 | NC_021160.1    | Ca_Kabuli_Chr01 | 41801228                | CC                              | TT                 | TT               | INTERGENIC                    |                    |                          |
| SNP_6085_A_41955732 | NC_021160.1    | Ca_Kabuli_Chr01 | 41955732                | CC                              | TT                 | TT               | INTERGENIC                    |                    |                          |
| SNP_6086_A_41962214 | NC_021160.1    | Ca_Kabuli_Chr01 | 41962214                | GG                              | AA                 | AA               | INTERGENIC                    |                    |                          |
| SNP_6087_A_42021047 | NC_021160.1    | Ca_Kabuli_Chr01 | 42021047                | TT                              | AA                 | AA               | INTERGENIC                    |                    |                          |
| SNP_6088_A_42021427 | NC_021160.1    | Ca_Kabuli_Chr01 | 42021427                | TT                              | AA                 | AA               | INTERGENIC                    |                    |                          |
| SNP_6089_A_42021460 | NC_021160.1    | Ca_Kabuli_Chr01 | 42021460                | TT                              | CC                 | CC               | INTERGENIC                    |                    |                          |
| SNP_6090_A_42086632 | NC_021160.1    | Ca_Kabuli_Chr01 | 42086632                | AA                              | TT                 | TT               | INTERGENIC                    |                    |                          |
| SNP_6091_A_42098222 | NC_021160.1    | Ca_Kabuli_Chr01 | 42098222                | AA                              | TT                 | TT               | INTERGENIC                    |                    |                          |
| SNP_6092_A_42102351 | NC_021160.1    | Ca_Kabuli_Chr01 | 42102351                | AA                              | TT                 | TT               | INTERGENIC                    |                    |                          |
| SNP_6093_A_42167043 | NC_021160.1    | Ca_Kabuli_Chr01 | 42167043                | TT                              | CC                 | CC               | INTERGENIC                    |                    |                          |
| SNP_6094_A_42203543 | NC_021160.1    | Ca_Kabuli_Chr01 | 42203543                | CC                              | TT                 | TT               | INTERGENIC                    |                    |                          |
| SNP_6095_A_42203772 | NC_021160.1    | Ca_Kabuli_Chr01 | 42203772                | CC                              | TT                 | TT               | INTERGENIC                    |                    |                          |
| SNP_6096_A_42203780 | NC_021160.1    | Ca_Kabuli_Chr01 | 42203780                | CC                              | TT                 | TT               | INTERGENIC                    |                    |                          |
| SNP_6097_A_42206131 | NC_021160.1    | Ca_Kabuli_Chr01 | 42206131                | TT                              | CC                 | CC               | INTERGENIC                    |                    |                          |
| SNP_6098_A_42206158 | NC_021160.1    | Ca_Kabuli_Chr01 | 42206158                | GG                              | CC                 | CC               | INTERGENIC                    |                    |                          |
| SNP_6099_A_42206163 | NC_021160.1    | Ca_Kabuli_Chr01 | 42206163                | AA                              | TT                 | TT               | INTERGENIC                    |                    |                          |
| SNP_6100_A_42206182 | NC_021160.1    | Ca_Kabuli_Chr01 | 42206182                | CC                              | GG                 | GG               | INTERGENIC                    |                    |                          |
| SNP_6101_A_42206185 | NC_021160.1    | Ca_Kabuli_Chr01 | 42206185                | TT                              | AA                 | AA               | INTERGENIC                    |                    |                          |

| SNPs IDs            | Chromosome IDs | Chromosomes     | Physical positions (bp) | CDC Frontier (Reference genome) | (Pusa 1103 & HPNB) | (ILWC 46 & LPNB) | Sequence genome | Components of | Gene accession IDs | Putative functions |
|---------------------|----------------|-----------------|-------------------------|---------------------------------|--------------------|------------------|-----------------|---------------|--------------------|--------------------|
| SNP_6102_A_42206796 | NC_021160.1    | Ca_Kabuli_Chr01 | 42206796                | CC                              | AA                 | AA               | INTERGENIC      |               |                    |                    |
| SNP_6104_A_42239519 | NC_021160.1    | Ca_Kabuli_Chr01 | 42239519                | AA                              | GG                 | GG               | INTERGENIC      |               |                    |                    |
| SNP_6105_A_42243850 | NC_021160.1    | Ca_Kabuli_Chr01 | 42243850                | GG                              | AA                 | AA               | INTERGENIC      |               |                    |                    |
| SNP_6106_A_42244193 | NC_021160.1    | Ca_Kabuli_Chr01 | 42244193                | TT                              | CC                 | CC               | INTERGENIC      |               |                    |                    |
| SNP_6107_A_42244244 | NC_021160.1    | Ca_Kabuli_Chr01 | 42244244                | CC                              | TT                 | TT               | INTERGENIC      |               |                    |                    |
| SNP_6108_A_42244275 | NC_021160.1    | Ca_Kabuli_Chr01 | 42244275                | TT                              | GG                 | GG               | INTERGENIC      |               |                    |                    |
| SNP_6109_A_42244312 | NC_021160.1    | Ca_Kabuli_Chr01 | 42244312                | TT                              | AA                 | AA               | INTERGENIC      |               |                    |                    |
| SNP_6110_A_42244339 | NC_021160.1    | Ca_Kabuli_Chr01 | 42244339                | TT                              | CC                 | CC               | INTERGENIC      |               |                    |                    |
| SNP_6111_A_42244347 | NC_021160.1    | Ca_Kabuli_Chr01 | 42244347                | GG                              | TT                 | TT               | INTERGENIC      |               |                    |                    |
| SNP_6112_A_42244358 | NC_021160.1    | Ca_Kabuli_Chr01 | 42244358                | AA                              | TT                 | TT               | INTERGENIC      |               |                    |                    |
| SNP_6113_A_42244442 | NC_021160.1    | Ca_Kabuli_Chr01 | 42244442                | TT                              | CC                 | CC               | INTERGENIC      |               |                    |                    |
| SNP_6114_A_42312884 | NC_021160.1    | Ca_Kabuli_Chr01 | 42312884                | GG                              | AA                 | AA               | INTERGENIC      |               |                    |                    |
| SNP_6115_A_42332407 | NC_021160.1    | Ca_Kabuli_Chr01 | 42332407                | AA                              | GG                 | GG               | INTERGENIC      |               |                    |                    |
| SNP_6116_A_42332483 | NC_021160.1    | Ca_Kabuli_Chr01 | 42332483                | TT                              | AA                 | AA               | INTERGENIC      |               |                    |                    |
| SNP_6117_A_42332579 | NC_021160.1    | Ca_Kabuli_Chr01 | 42332579                | TT                              | CC                 | CC               | INTERGENIC      |               |                    |                    |
| SNP_6118_A_42350962 | NC_021160.1    | Ca_Kabuli_Chr01 | 42350962                | GG                              | TT                 | TT               | INTERGENIC      |               |                    |                    |
| SNP_6119_A_42377341 | NC_021160.1    | Ca_Kabuli_Chr01 | 42377341                | AA                              | TT                 | TT               | INTERGENIC      |               |                    |                    |
| SNP_6120_A_42379521 | NC_021160.1    | Ca_Kabuli_Chr01 | 42379521                | AA                              | CC                 | CC               | INTERGENIC      |               |                    |                    |
| SNP_6121_A_42405362 | NC_021160.1    | Ca_Kabuli_Chr01 | 42405362                | GG                              | AA                 | AA               | INTERGENIC      |               |                    |                    |
| SNP_6122_A_42405386 | NC_021160.1    | Ca_Kabuli_Chr01 | 42405386                | TT                              | CC                 | CC               | INTERGENIC      |               |                    |                    |
| SNP_6123_A_42411108 | NC_021160.1    | Ca_Kabuli_Chr01 | 42411108                | AA                              | CC                 | CC               | INTERGENIC      |               |                    |                    |
| SNP_6124_A_42411139 | NC_021160.1    | Ca_Kabuli_Chr01 | 42411139                | AA                              | GG                 | GG               | INTERGENIC      |               |                    |                    |

| SNPs IDs            | Chromosome IDs | Chromosomes     | Physical positions (bp) | CDC Frontier genome (Reference genome) | (Pusa 1103 & HPNB) | (ILWC 46 & LPNB) | Sequence Components of genome | Gene accession IDs | Putative functions               |
|---------------------|----------------|-----------------|-------------------------|----------------------------------------|--------------------|------------------|-------------------------------|--------------------|----------------------------------|
| SNP_6125_A_42411155 | NC_021160.1    | Ca_Kabuli_Chr01 | 42411155                | CC                                     | TT                 | TT               | INTERGENIC                    |                    |                                  |
| SNP_6126_A_42411173 | NC_021160.1    | Ca_Kabuli_Chr01 | 42411173                | GG                                     | AA                 | AA               | INTERGENIC                    |                    |                                  |
| SNP_6127_A_42411186 | NC_021160.1    | Ca_Kabuli_Chr01 | 42411186                | AA                                     | CC                 | CC               | INTERGENIC                    |                    |                                  |
| SNP_6128_A_42411196 | NC_021160.1    | Ca_Kabuli_Chr01 | 42411196                | AA                                     | GG                 | GG               | INTERGENIC                    |                    |                                  |
| SNP_6129_A_42411235 | NC_021160.1    | Ca_Kabuli_Chr01 | 42411235                | AA                                     | CC                 | CC               | INTERGENIC                    |                    |                                  |
| SNP_6130_A_42415656 | NC_021160.1    | Ca_Kabuli_Chr01 | 42415656                | AA                                     | CC                 | CC               | INTERGENIC                    |                    |                                  |
| SNP_6132_A_42530415 | NC_021160.1    | Ca_Kabuli_Chr01 | 42530415                | TT                                     | CC                 | CC               | INTERGENIC                    |                    |                                  |
| SNP_6133_A_42550438 | NC_021160.1    | Ca_Kabuli_Chr01 | 42550438                | TT                                     | CC                 | CC               | INTERGENIC                    |                    |                                  |
| SNP_6134_A_42550527 | NC_021160.1    | Ca_Kabuli_Chr01 | 42550527                | AA                                     | GG                 | GG               | INTERGENIC                    |                    |                                  |
| SNP_6135_A_42550717 | NC_021160.1    | Ca_Kabuli_Chr01 | 42550717                | TT                                     | CC                 | CC               | INTERGENIC                    |                    |                                  |
| SNP_6136_A_42572593 | NC_021160.1    | Ca_Kabuli_Chr01 | 42572593                | GG                                     | AA                 | AA               | INTERGENIC                    |                    |                                  |
| SNP_6137_A_42595961 | NC_021160.1    | Ca_Kabuli_Chr01 | 42595961                | TT                                     | AA                 | AA               | INTRON                        | 101509455          | uncharacterized LOC101509455     |
| SNP_6138_A_42615257 | NC_021160.1    | Ca_Kabuli_Chr01 | 42615257                | AA                                     | GG                 | GG               | URR                           | 101510097          | transcription factor bHLH52-like |
| SNP_6139_A_42615258 | NC_021160.1    | Ca_Kabuli_Chr01 | 42615258                | AA                                     | CC                 | CC               | URR                           | 101510097          | transcription factor bHLH52-like |
| SNP_6140_A_42635991 | NC_021160.1    | Ca_Kabuli_Chr01 | 42635991                | TT                                     | CC                 | CC               | INTERGENIC                    |                    |                                  |
| SNP_6141_A_42635995 | NC_021160.1    | Ca_Kabuli_Chr01 | 42635995                | TT                                     | CC                 | AA               | INTERGENIC                    |                    |                                  |
| SNP_6142_A_42636014 | NC_021160.1    | Ca_Kabuli_Chr01 | 42636014                | CC                                     | TT                 | TT               | INTERGENIC                    |                    |                                  |
| SNP_6143_A_42636017 | NC_021160.1    | Ca_Kabuli_Chr01 | 42636017                | TT                                     | AA                 | AA               | INTERGENIC                    |                    |                                  |
| SNP_6144_A_42641920 | NC_021160.1    | Ca_Kabuli_Chr01 | 42641920                | GG                                     | AA                 | AA               | INTERGENIC                    |                    |                                  |
| SNP_6145_A_42721203 | NC_021160.1    | Ca_Kabuli_Chr01 | 42721203                | AA                                     | GG                 | GG               | INTERGENIC                    |                    |                                  |
| SNP_6146_A_42749171 | NC_021160.1    | Ca_Kabuli_Chr01 | 42749171                | GG                                     | AA                 | AA               | INTRON                        | 101510750          | Unknown function                 |
| SNP_6147_A_42793548 | NC_021160.1    | Ca_Kabuli_Chr01 | 42793548                | TT                                     | CC                 | CC               | INTERGENIC                    |                    |                                  |

| SNPs IDs            | Chromosome IDs | Chromosomes     | Physical positions (bp) | CDC Frontier (Reference genome) | (Pusa 1103 & HPNB) | (ILWC 46 & LPNB) | Sequence Components of genome | Gene accession IDs | Putative functions           |
|---------------------|----------------|-----------------|-------------------------|---------------------------------|--------------------|------------------|-------------------------------|--------------------|------------------------------|
| SNP_6148_A_42793576 | NC_021160.1    | Ca_Kabuli_Chr01 | 42793576                | TT                              | CC                 | CC               | INTERGENIC                    |                    |                              |
| SNP_6149_A_42793885 | NC_021160.1    | Ca_Kabuli_Chr01 | 42793885                | AA                              | TT                 | TT               | INTERGENIC                    |                    |                              |
| SNP_6150_A_42793937 | NC_021160.1    | Ca_Kabuli_Chr01 | 42793937                | TT                              | CC                 | CC               | INTERGENIC                    |                    |                              |
| SNP_6151_A_42880940 | NC_021160.1    | Ca_Kabuli_Chr01 | 42880940                | AA                              | GG                 | GG               | DRR                           | 101488912          | uncharacterized LOC101488912 |
| SNP_6152_A_42915868 | NC_021160.1    | Ca_Kabuli_Chr01 | 42915868                | AA                              | GG                 | GG               | INTERGENIC                    |                    |                              |
| SNP_6153_A_42980037 | NC_021160.1    | Ca_Kabuli_Chr01 | 42980037                | GG                              | CC                 | CC               | INTERGENIC                    |                    |                              |
| SNP_6154_A_42980750 | NC_021160.1    | Ca_Kabuli_Chr01 | 42980750                | CC                              | TT                 | TT               | INTERGENIC                    |                    |                              |
| SNP_6155_A_43050329 | NC_021160.1    | Ca_Kabuli_Chr01 | 43050329                | TT                              | CC                 | CC               | INTERGENIC                    |                    |                              |
| SNP_6156_A_43065715 | NC_021160.1    | Ca_Kabuli_Chr01 | 43065715                | GG                              | AA                 | AA               | INTERGENIC                    |                    |                              |
| SNP_6157_A_43065724 | NC_021160.1    | Ca_Kabuli_Chr01 | 43065724                | CC                              | GG                 | GG               | INTERGENIC                    |                    |                              |
| SNP_6158_A_43065746 | NC_021160.1    | Ca_Kabuli_Chr01 | 43065746                | AA                              | GG                 | GG               | INTERGENIC                    |                    |                              |
| SNP_6159_A_43065779 | NC_021160.1    | Ca_Kabuli_Chr01 | 43065779                | AA                              | GG                 | GG               | INTERGENIC                    |                    |                              |
| SNP_6160_A_43065792 | NC_021160.1    | Ca_Kabuli_Chr01 | 43065792                | GG                              | CC                 | CC               | INTERGENIC                    |                    |                              |
| SNP_6161_A_43065818 | NC_021160.1    | Ca_Kabuli_Chr01 | 43065818                | AA                              | TT                 | TT               | INTERGENIC                    |                    |                              |
| SNP_6162_A_43066111 | NC_021160.1    | Ca_Kabuli_Chr01 | 43066111                | AA                              | GG                 | GG               | INTERGENIC                    |                    |                              |
| SNP_6163_A_43066179 | NC_021160.1    | Ca_Kabuli_Chr01 | 43066179                | TT                              | GG                 | GG               | INTERGENIC                    |                    |                              |
| SNP_6164_A_43066267 | NC_021160.1    | Ca_Kabuli_Chr01 | 43066267                | TT                              | CC                 | CC               | INTERGENIC                    |                    |                              |
| SNP_6166_A_43123535 | NC_021160.1    | Ca_Kabuli_Chr01 | 43123535                | TT                              | CC                 | CC               | INTERGENIC                    |                    |                              |
| SNP_6167_A_43222523 | NC_021160.1    | Ca_Kabuli_Chr01 | 43222523                | TT                              | CC                 | CC               | INTERGENIC                    |                    |                              |
| SNP_6168_A_43225898 | NC_021160.1    | Ca_Kabuli_Chr01 | 43225898                | CC                              | TT                 | TT               | INTERGENIC                    |                    |                              |
| SNP_6169_A_43255625 | NC_021160.1    | Ca_Kabuli_Chr01 | 43255625                | CC                              | AA                 | AA               | INTERGENIC                    |                    |                              |
| SNP_6170_A_43300400 | NC_021160.1    | Ca_Kabuli_Chr01 | 43300400                | TT                              | GG                 | GG               | INTERGENIC                    |                    |                              |

| SNPs IDs            | Chromosome IDs | Chromosomes     | Physical positions (bp) | CDC Frontier (Reference genome) | (Pusa 1103 & HPNB) | (ILWC 46 & LPNB) | Sequence Components of genome | Gene accession IDs | Putative functions              |
|---------------------|----------------|-----------------|-------------------------|---------------------------------|--------------------|------------------|-------------------------------|--------------------|---------------------------------|
| SNP_6171_A_43300876 | NC_021160.1    | Ca_Kabuli_Chr01 | 43300876                | AA                              | GG                 | GG               | INTERGENIC                    |                    |                                 |
| SNP_6173_A_43393150 | NC_021160.1    | Ca_Kabuli_Chr01 | 43393150                | CC                              | AA                 | AA               | INTERGENIC                    |                    |                                 |
| SNP_6174_A_43409423 | NC_021160.1    | Ca_Kabuli_Chr01 | 43409423                | GG                              | TT                 | TT               | INTERGENIC                    |                    |                                 |
| SNP_6175_A_43411837 | NC_021160.1    | Ca_Kabuli_Chr01 | 43411837                | AA                              | TT                 | TT               | INTERGENIC                    |                    |                                 |
| SNP_6176_A_43411855 | NC_021160.1    | Ca_Kabuli_Chr01 | 43411855                | TT                              | CC                 | CC               | INTERGENIC                    |                    |                                 |
| SNP_6177_A_43430370 | NC_021160.1    | Ca_Kabuli_Chr01 | 43430370                | AA                              | GG                 | GG               | URR                           | 101492597          | LOB domain-containing protein 4 |
| SNP_6178_A_43430695 | NC_021160.1    | Ca_Kabuli_Chr01 | 43430695                | TT                              | CC                 | CC               | URR                           | 101492597          | LOB domain-containing protein 4 |
| SNP_6179_A_43438272 | NC_021160.1    | Ca_Kabuli_Chr01 | 43438272                | GG                              | AA                 | AA               | INTERGENIC                    |                    |                                 |
| SNP_6180_A_43438378 | NC_021160.1    | Ca_Kabuli_Chr01 | 43438378                | GG                              | AA                 | AA               | INTERGENIC                    |                    |                                 |
| SNP_6181_A_43438629 | NC_021160.1    | Ca_Kabuli_Chr01 | 43438629                | TT                              | CC                 | CC               | INTERGENIC                    |                    |                                 |
| SNP_6182_A_43440899 | NC_021160.1    | Ca_Kabuli_Chr01 | 43440899                | GG                              | AA                 | AA               | INTERGENIC                    |                    |                                 |
| SNP_6184_A_43474265 | NC_021160.1    | Ca_Kabuli_Chr01 | 43474265                | GG                              | AA                 | AA               | INTERGENIC                    |                    |                                 |
| SNP_6185_A_43474269 | NC_021160.1    | Ca_Kabuli_Chr01 | 43474269                | AA                              | GG                 | GG               | INTERGENIC                    |                    |                                 |
| SNP_6186_A_43489680 | NC_021160.1    | Ca_Kabuli_Chr01 | 43489680                | GG                              | AA                 | AA               | INTERGENIC                    |                    |                                 |
| SNP_6187_A_43569231 | NC_021160.1    | Ca_Kabuli_Chr01 | 43569231                | AA                              | CC                 | CC               | INTERGENIC                    |                    |                                 |
| SNP_6188_A_43569283 | NC_021160.1    | Ca_Kabuli_Chr01 | 43569283                | AA                              | GG                 | GG               | INTERGENIC                    |                    |                                 |
| SNP_6189_A_43569311 | NC_021160.1    | Ca_Kabuli_Chr01 | 43569311                | AA                              | TT                 | TT               | INTERGENIC                    |                    |                                 |
| SNP_6190_A_43610374 | NC_021160.1    | Ca_Kabuli_Chr01 | 43610374                | AA                              | CC                 | CC               | INTERGENIC                    |                    |                                 |
| SNP_6191_A_43610378 | NC_021160.1    | Ca_Kabuli_Chr01 | 43610378                | TT                              | GG                 | GG               | INTERGENIC                    |                    |                                 |
| SNP_6193_A_43690265 | NC_021160.1    | Ca_Kabuli_Chr01 | 43690265                | CC                              | TT                 | TT               | INTERGENIC                    |                    |                                 |
| SNP_6194_A_43690272 | NC_021160.1    | Ca_Kabuli_Chr01 | 43690272                | CC                              | TT                 | TT               | INTERGENIC                    |                    |                                 |
| SNP_6195_A_43690281 | NC_021160.1    | Ca_Kabuli_Chr01 | 43690281                | AA                              | TT                 | TT               | INTERGENIC                    |                    |                                 |

| SNPs IDs            | Chromosome IDs | Chromosomes     | Physical positions (bp) | CDC Frontier (Reference genome) | (Pusa 1103 & HPNB) | (ILWC 46 & LPNB) | Sequence Components of genome | Gene accession IDs | Putative functions                          |
|---------------------|----------------|-----------------|-------------------------|---------------------------------|--------------------|------------------|-------------------------------|--------------------|---------------------------------------------|
| SNP_6196_A_43715207 | NC_021160.1    | Ca_Kabuli_Chr01 | 43715207                | AA                              | GG                 | GG               | INTERGENIC                    |                    |                                             |
| SNP_6197_A_43774895 | NC_021160.1    | Ca_Kabuli_Chr01 | 43774895                | AA                              | GG                 | GG               | DRR                           | 101489025          | uncharacterized LOC101489025                |
| SNP_6198_A_43792565 | NC_021160.1    | Ca_Kabuli_Chr01 | 43792565                | GG                              | AA                 | AA               | INTERGENIC                    |                    |                                             |
| SNP_6199_A_43806423 | NC_021160.1    | Ca_Kabuli_Chr01 | 43806423                | CC                              | TT                 | TT               | URR                           | 101501643          | BTB/POZ domain-containing protein At1g04390 |
| SNP_6200_A_43826357 | NC_021160.1    | Ca_Kabuli_Chr01 | 43826357                | TT                              | CC                 | CC               | URR                           | 101490654          | glutathione S-transferase F10-like          |
| SNP_6201_A_43830031 | NC_021160.1    | Ca_Kabuli_Chr01 | 43830031                | GG                              | AA                 | AA               | INTERGENIC                    |                    |                                             |
| SNP_6202_A_43834226 | NC_021160.1    | Ca_Kabuli_Chr01 | 43834226                | CC                              | AA                 | AA               | INTERGENIC                    |                    |                                             |
| SNP_6204_A_43896328 | NC_021160.1    | Ca_Kabuli_Chr01 | 43896328                | TT                              | CC                 | CC               | URR                           | 101503252          | rho GTPase-activating protein gacF          |
| SNP_6205_A_43896329 | NC_021160.1    | Ca_Kabuli_Chr01 | 43896329                | AA                              | GG                 | GG               | URR                           | 101503252          | rho GTPase-activating protein gacF          |
| SNP_6206_A_43903801 | NC_021160.1    | Ca_Kabuli_Chr01 | 43903801                | CC                              | TT                 | TT               | INTERGENIC                    |                    |                                             |
| SNP_6207_A_43903806 | NC_021160.1    | Ca_Kabuli_Chr01 | 43903806                | GG                              | AA                 | AA               | INTERGENIC                    |                    |                                             |
| SNP_6208_A_43903927 | NC_021160.1    | Ca_Kabuli_Chr01 | 43903927                | TT                              | CC                 | CC               | INTERGENIC                    |                    |                                             |
| SNP_6209_A_43907347 | NC_021160.1    | Ca_Kabuli_Chr01 | 43907347                | AA                              | GG                 | GG               | INTERGENIC                    |                    |                                             |
| SNP_6210_A_43920712 | NC_021160.1    | Ca_Kabuli_Chr01 | 43920712                | AA                              | GG                 | GG               | INTRON                        | 101503568          | protein RRNAD1                              |
| SNP_6211_A_43975572 | NC_021160.1    | Ca_Kabuli_Chr01 | 43975572                | TT                              | CC                 | CC               | INTERGENIC                    |                    |                                             |
| SNP_6212_A_44050708 | NC_021160.1    | Ca_Kabuli_Chr01 | 44050708                | CC                              | TT                 | TT               | INTERGENIC                    |                    |                                             |
| SNP_6214_A_44186152 | NC_021160.1    | Ca_Kabuli_Chr01 | 44186152                | TT                              | CC                 | CC               | INTERGENIC                    |                    |                                             |
| SNP_6215_A_44186159 | NC_021160.1    | Ca_Kabuli_Chr01 | 44186159                | GG                              | AA                 | AA               | INTERGENIC                    |                    |                                             |
| SNP_6216_A_44186219 | NC_021160.1    | Ca_Kabuli_Chr01 | 44186219                | TT                              | AA                 | AA               | INTERGENIC                    |                    |                                             |
| SNP_6217_A_44186222 | NC_021160.1    | Ca_Kabuli_Chr01 | 44186222                | TT                              | GG                 | GG               | INTERGENIC                    |                    |                                             |
| SNP_6218_A_44187293 | NC_021160.1    | Ca_Kabuli_Chr01 | 44187293                | CC                              | AA                 | AA               | INTERGENIC                    |                    |                                             |
| SNP_6219_A_44187342 | NC_021160.1    | Ca_Kabuli_Chr01 | 44187342                | TT                              | CC                 | CC               | INTERGENIC                    |                    |                                             |

| SNPs IDs            | Chromosome IDs | Chromosomes     | Physical positions (bp) | CDC Frontier (Reference genome) | (Pusa 1103 & HPNB) | (ILWC 46 & LPNB) | Sequence genome | Components of | Gene accession IDs | Putative functions |
|---------------------|----------------|-----------------|-------------------------|---------------------------------|--------------------|------------------|-----------------|---------------|--------------------|--------------------|
| SNP_6220_A_44187597 | NC_021160.1    | Ca_Kabuli_Chr01 | 44187597                | CC                              | AA                 | AA               | INTERGENIC      |               |                    |                    |
| SNP_6221_A_44190155 | NC_021160.1    | Ca_Kabuli_Chr01 | 44190155                | GG                              | TT                 | TT               | INTERGENIC      |               |                    |                    |
| SNP_6222_A_44204318 | NC_021160.1    | Ca_Kabuli_Chr01 | 44204318                | TT                              | CC                 | CC               | INTERGENIC      |               |                    |                    |
| SNP_6223_A_44204372 | NC_021160.1    | Ca_Kabuli_Chr01 | 44204372                | TT                              | CC                 | CC               | INTERGENIC      |               |                    |                    |
| SNP_6224_A_44205722 | NC_021160.1    | Ca_Kabuli_Chr01 | 44205722                | GG                              | AA                 | AA               | INTERGENIC      |               |                    |                    |
| SNP_6225_A_44205954 | NC_021160.1    | Ca_Kabuli_Chr01 | 44205954                | AA                              | GG                 | GG               | INTERGENIC      |               |                    |                    |
| SNP_6226_A_44205988 | NC_021160.1    | Ca_Kabuli_Chr01 | 44205988                | CC                              | TT                 | TT               | INTERGENIC      |               |                    |                    |
| SNP_6227_A_44206007 | NC_021160.1    | Ca_Kabuli_Chr01 | 44206007                | AA                              | TT                 | TT               | INTERGENIC      |               |                    |                    |
| SNP_6229_A_44206056 | NC_021160.1    | Ca_Kabuli_Chr01 | 44206056                | AA                              | TT                 | TT               | INTERGENIC      |               |                    |                    |
| SNP_6230_A_44206057 | NC_021160.1    | Ca_Kabuli_Chr01 | 44206057                | TT                              | CC                 | CC               | INTERGENIC      |               |                    |                    |
| SNP_6231_A_44206965 | NC_021160.1    | Ca_Kabuli_Chr01 | 44206965                | AA                              | GG                 | GG               | INTERGENIC      |               |                    |                    |
| SNP_6232_A_44207095 | NC_021160.1    | Ca_Kabuli_Chr01 | 44207095                | AA                              | TT                 | TT               | INTERGENIC      |               |                    |                    |
| SNP_6233_A_44207345 | NC_021160.1    | Ca_Kabuli_Chr01 | 44207345                | AA                              | TT                 | TT               | INTERGENIC      |               |                    |                    |
| SNP_6234_A_44207557 | NC_021160.1    | Ca_Kabuli_Chr01 | 44207557                | AA                              | TT                 | TT               | INTERGENIC      |               |                    |                    |
| SNP_6235_A_44209494 | NC_021160.1    | Ca_Kabuli_Chr01 | 44209494                | GG                              | CC                 | CC               | INTERGENIC      |               |                    |                    |
| SNP_6236_A_44209551 | NC_021160.1    | Ca_Kabuli_Chr01 | 44209551                | TT                              | CC                 | CC               | INTERGENIC      |               |                    |                    |
| SNP_6238_A_44267811 | NC_021160.1    | Ca_Kabuli_Chr01 | 44267811                | CC                              | TT                 | TT               | INTERGENIC      |               |                    |                    |
| SNP_6239_A_44268647 | NC_021160.1    | Ca_Kabuli_Chr01 | 44268647                | AA                              | GG                 | GG               | INTERGENIC      |               |                    |                    |
| SNP_6240_A_44275936 | NC_021160.1    | Ca_Kabuli_Chr01 | 44275936                | TT                              | GG                 | GG               | INTERGENIC      |               |                    |                    |
| SNP_6241_A_44275972 | NC_021160.1    | Ca_Kabuli_Chr01 | 44275972                | AA                              | CC                 | CC               | INTERGENIC      |               |                    |                    |
| SNP_6242_A_44276332 | NC_021160.1    | Ca_Kabuli_Chr01 | 44276332                | CC                              | TT                 | TT               | INTERGENIC      |               |                    |                    |
| SNP_6244_A_44369616 | NC_021160.1    | Ca_Kabuli_Chr01 | 44369616                | CC                              | TT                 | TT               | INTERGENIC      |               |                    |                    |



| SNPs IDs            | Chromosome IDs | Chromosomes     | Physical positions (bp) | CDC Frontier (Reference genome) | (Pusa 1103 & HPNB) | (ILWC 46 & LPNB) | Sequence genome | Components of | Gene accession IDs | Putative functions |
|---------------------|----------------|-----------------|-------------------------|---------------------------------|--------------------|------------------|-----------------|---------------|--------------------|--------------------|
| SNP_6245_A_44371103 | NC_021160.1    | Ca_Kabuli_Chr01 | 44371103                | TT                              | CC                 | CC               | INTERGENIC      |               |                    |                    |
| SNP_6246_A_44374524 | NC_021160.1    | Ca_Kabuli_Chr01 | 44374524                | AA                              | CC                 | CC               | INTERGENIC      |               |                    |                    |
| SNP_6247_A_44374687 | NC_021160.1    | Ca_Kabuli_Chr01 | 44374687                | TT                              | CC                 | CC               | INTERGENIC      |               |                    |                    |
| SNP_6248_A_44374697 | NC_021160.1    | Ca_Kabuli_Chr01 | 44374697                | TT                              | AA                 | AA               | INTERGENIC      |               |                    |                    |
| SNP_6249_A_44374702 | NC_021160.1    | Ca_Kabuli_Chr01 | 44374702                | CC                              | TT                 | TT               | INTERGENIC      |               |                    |                    |
| SNP_6250_A_44376340 | NC_021160.1    | Ca_Kabuli_Chr01 | 44376340                | CC                              | GG                 | GG               | INTERGENIC      |               |                    |                    |
| SNP_6251_A_44376356 | NC_021160.1    | Ca_Kabuli_Chr01 | 44376356                | AA                              | GG                 | GG               | INTERGENIC      |               |                    |                    |
| SNP_6252_A_44376380 | NC_021160.1    | Ca_Kabuli_Chr01 | 44376380                | GG                              | AA                 | AA               | INTERGENIC      |               |                    |                    |
| SNP_6253_A_44376383 | NC_021160.1    | Ca_Kabuli_Chr01 | 44376383                | AA                              | GG                 | GG               | INTERGENIC      |               |                    |                    |
| SNP_6254_A_44376431 | NC_021160.1    | Ca_Kabuli_Chr01 | 44376431                | AA                              | CC                 | CC               | INTERGENIC      |               |                    |                    |
| SNP_6255_A_44376461 | NC_021160.1    | Ca_Kabuli_Chr01 | 44376461                | TT                              | CC                 | CC               | INTERGENIC      |               |                    |                    |
| SNP_6256_A_44376467 | NC_021160.1    | Ca_Kabuli_Chr01 | 44376467                | TT                              | CC                 | CC               | INTERGENIC      |               |                    |                    |
| SNP_6257_A_44376488 | NC_021160.1    | Ca_Kabuli_Chr01 | 44376488                | CC                              | TT                 | TT               | INTERGENIC      |               |                    |                    |
| SNP_6258_A_44376506 | NC_021160.1    | Ca_Kabuli_Chr01 | 44376506                | TT                              | CC                 | CC               | INTERGENIC      |               |                    |                    |
| SNP_6259_A_44376512 | NC_021160.1    | Ca_Kabuli_Chr01 | 44376512                | GG                              | AA                 | AA               | INTERGENIC      |               |                    |                    |
| SNP_6260_A_44376690 | NC_021160.1    | Ca_Kabuli_Chr01 | 44376690                | AA                              | GG                 | GG               | INTERGENIC      |               |                    |                    |
| SNP_6261_A_44384701 | NC_021160.1    | Ca_Kabuli_Chr01 | 44384701                | CC                              | TT                 | TT               | INTERGENIC      |               |                    |                    |
| SNP_6262_A_44384708 | NC_021160.1    | Ca_Kabuli_Chr01 | 44384708                | TT                              | AA                 | AA               | INTERGENIC      |               |                    |                    |
| SNP_6263_A_44385027 | NC_021160.1    | Ca_Kabuli_Chr01 | 44385027                | AA                              | TT                 | TT               | INTERGENIC      |               |                    |                    |
| SNP_6264_A_44393372 | NC_021160.1    | Ca_Kabuli_Chr01 | 44393372                | AA                              | CC                 | CC               | INTERGENIC      |               |                    |                    |
| SNP_6265_A_44403045 | NC_021160.1    | Ca_Kabuli_Chr01 | 44403045                | TT                              | CC                 | CC               | INTERGENIC      |               |                    |                    |
| SNP_6266_A_44403376 | NC_021160.1    | Ca_Kabuli_Chr01 | 44403376                | GG                              | AA                 | AA               | INTERGENIC      |               |                    |                    |

| SNPs IDs            | Chromosome IDs | Chromosomes     | Physical positions (bp) | CDC Frontier (Reference genome) | (Pusa 1103 & HPNB) | (ILWC 46 & LPNB) | Sequence Components of genome | Gene accession IDs | Putative functions           |
|---------------------|----------------|-----------------|-------------------------|---------------------------------|--------------------|------------------|-------------------------------|--------------------|------------------------------|
| SNP_6267_A_44427211 | NC_021160.1    | Ca_Kabuli_Chr01 | 44427211                | CC                              | AA                 | AA               | INTERGENIC                    |                    |                              |
| SNP_6268_A_44427725 | NC_021160.1    | Ca_Kabuli_Chr01 | 44427725                | GG                              | AA                 | AA               | INTERGENIC                    |                    |                              |
| SNP_6269_A_44427728 | NC_021160.1    | Ca_Kabuli_Chr01 | 44427728                | GG                              | AA                 | AA               | INTERGENIC                    |                    |                              |
| SNP_6270_A_44428187 | NC_021160.1    | Ca_Kabuli_Chr01 | 44428187                | AA                              | GG                 | GG               | INTERGENIC                    |                    |                              |
| SNP_6271_A_44428567 | NC_021160.1    | Ca_Kabuli_Chr01 | 44428567                | TT                              | GG                 | GG               | INTERGENIC                    |                    |                              |
| SNP_6273_A_44467579 | NC_021160.1    | Ca_Kabuli_Chr01 | 44467579                | TT                              | CC                 | CC               | INTERGENIC                    |                    |                              |
| SNP_6274_A_44468715 | NC_021160.1    | Ca_Kabuli_Chr01 | 44468715                | TT                              | GG                 | GG               | INTERGENIC                    |                    |                              |
| SNP_6275_A_44503554 | NC_021160.1    | Ca_Kabuli_Chr01 | 44503554                | AA                              | TT                 | TT               | INTERGENIC                    |                    |                              |
| SNP_6276_A_44506293 | NC_021160.1    | Ca_Kabuli_Chr01 | 44506293                | TT                              | CC                 | CC               | INTERGENIC                    |                    |                              |
| SNP_6277_A_44537559 | NC_021160.1    | Ca_Kabuli_Chr01 | 44537559                | AA                              | GG                 | GG               | URR                           | 101495929          | uncharacterized LOC101495929 |
| SNP_6278_A_44537587 | NC_021160.1    | Ca_Kabuli_Chr01 | 44537587                | TT                              | AA                 | AA               | URR                           | 101495929          | uncharacterized LOC101495929 |
| SNP_6279_A_44537599 | NC_021160.1    | Ca_Kabuli_Chr01 | 44537599                | CC                              | GG                 | GG               | URR                           | 101495929          | uncharacterized LOC101495929 |
| SNP_6280_A_44537611 | NC_021160.1    | Ca_Kabuli_Chr01 | 44537611                | GG                              | AA                 | AA               | URR                           | 101495929          | uncharacterized LOC101495929 |
| SNP_6281_A_44537671 | NC_021160.1    | Ca_Kabuli_Chr01 | 44537671                | TT                              | CC                 | CC               | URR                           | 101495929          | uncharacterized LOC101495929 |
| SNP_6282_A_44537679 | NC_021160.1    | Ca_Kabuli_Chr01 | 44537679                | AA                              | GG                 | GG               | URR                           | 101495929          | uncharacterized LOC101495929 |
| SNP_6283_A_44537704 | NC_021160.1    | Ca_Kabuli_Chr01 | 44537704                | TT                              | CC                 | CC               | URR                           | 101495929          | uncharacterized LOC101495929 |
| SNP_6284_A_44537714 | NC_021160.1    | Ca_Kabuli_Chr01 | 44537714                | CC                              | AA                 | AA               | URR                           | 101495929          | uncharacterized LOC101495929 |
| SNP_6285_A_44537725 | NC_021160.1    | Ca_Kabuli_Chr01 | 44537725                | GG                              | AA                 | AA               | URR                           | 101495929          | uncharacterized LOC101495929 |
| SNP_6286_A_44537791 | NC_021160.1    | Ca_Kabuli_Chr01 | 44537791                | TT                              | CC                 | CC               | URR                           | 101495929          | uncharacterized LOC101495929 |
| SNP_6287_A_44543353 | NC_021160.1    | Ca_Kabuli_Chr01 | 44543353                | TT                              | CC                 | CC               | INTERGENIC                    |                    |                              |
| SNP_6288_A_44560144 | NC_021160.1    | Ca_Kabuli_Chr01 | 44560144                | CC                              | TT                 | TT               | INTERGENIC                    |                    |                              |
| SNP_6289_A_44588933 | NC_021160.1    | Ca_Kabuli_Chr01 | 44588933                | AA                              | GG                 | GG               | INTERGENIC                    |                    |                              |

| SNPs IDs            | Chromosome IDs | Chromosomes     | Physical positions (bp) | CDC Frontier (Reference genome) | (Pusa 1103 & HPNB) | (ILWC 46 & LPNB) | Sequence genome | Components of | Gene accession IDs | Putative functions |
|---------------------|----------------|-----------------|-------------------------|---------------------------------|--------------------|------------------|-----------------|---------------|--------------------|--------------------|
| SNP_6290_A_44588947 | NC_021160.1    | Ca_Kabuli_Chr01 | 44588947                | TT                              | CC                 | CC               | INTERGENIC      |               |                    |                    |
| SNP_6291_A_44588951 | NC_021160.1    | Ca_Kabuli_Chr01 | 44588951                | AA                              | CC                 | CC               | INTERGENIC      |               |                    |                    |
| SNP_6292_A_44588986 | NC_021160.1    | Ca_Kabuli_Chr01 | 44588986                | AA                              | GG                 | GG               | INTERGENIC      |               |                    |                    |
| SNP_6293_A_44588988 | NC_021160.1    | Ca_Kabuli_Chr01 | 44588988                | CC                              | TT                 | TT               | INTERGENIC      |               |                    |                    |
| SNP_6294_A_44589027 | NC_021160.1    | Ca_Kabuli_Chr01 | 44589027                | TT                              | GG                 | GG               | INTERGENIC      |               |                    |                    |
| SNP_6295_A_44592279 | NC_021160.1    | Ca_Kabuli_Chr01 | 44592279                | GG                              | AA                 | AA               | INTERGENIC      |               |                    |                    |
| SNP_6296_A_44592395 | NC_021160.1    | Ca_Kabuli_Chr01 | 44592395                | AA                              | CC                 | CC               | INTERGENIC      |               |                    |                    |
| SNP_6297_A_44592398 | NC_021160.1    | Ca_Kabuli_Chr01 | 44592398                | AA                              | CC                 | CC               | INTERGENIC      |               |                    |                    |
| SNP_6298_A_44592416 | NC_021160.1    | Ca_Kabuli_Chr01 | 44592416                | TT                              | GG                 | GG               | INTERGENIC      |               |                    |                    |
| SNP_6299_A_44592476 | NC_021160.1    | Ca_Kabuli_Chr01 | 44592476                | GG                              | AA                 | AA               | INTERGENIC      |               |                    |                    |
| SNP_6301_A_44592562 | NC_021160.1    | Ca_Kabuli_Chr01 | 44592562                | AA                              | GG                 | GG               | INTERGENIC      |               |                    |                    |
| SNP_6302_A_44592563 | NC_021160.1    | Ca_Kabuli_Chr01 | 44592563                | AA                              | GG                 | GG               | INTERGENIC      |               |                    |                    |
| SNP_6303_A_44592574 | NC_021160.1    | Ca_Kabuli_Chr01 | 44592574                | CC                              | AA                 | AA               | INTERGENIC      |               |                    |                    |
| SNP_6305_A_44592606 | NC_021160.1    | Ca_Kabuli_Chr01 | 44592606                | TT                              | CC                 | CC               | INTERGENIC      |               |                    |                    |
| SNP_6306_A_44592626 | NC_021160.1    | Ca_Kabuli_Chr01 | 44592626                | TT                              | CC                 | CC               | INTERGENIC      |               |                    |                    |
| SNP_6307_A_44592641 | NC_021160.1    | Ca_Kabuli_Chr01 | 44592641                | GG                              | AA                 | AA               | INTERGENIC      |               |                    |                    |
| SNP_6308_A_44592660 | NC_021160.1    | Ca_Kabuli_Chr01 | 44592660                | TT                              | CC                 | CC               | INTERGENIC      |               |                    |                    |
| SNP_6309_A_44592673 | NC_021160.1    | Ca_Kabuli_Chr01 | 44592673                | AA                              | GG                 | GG               | INTERGENIC      |               |                    |                    |
| SNP_6310_A_44592807 | NC_021160.1    | Ca_Kabuli_Chr01 | 44592807                | CC                              | TT                 | TT               | INTERGENIC      |               |                    |                    |
| SNP_6311_A_44649226 | NC_021160.1    | Ca_Kabuli_Chr01 | 44649226                | GG                              | AA                 | AA               | INTERGENIC      |               |                    |                    |
| SNP_6312_A_44650041 | NC_021160.1    | Ca_Kabuli_Chr01 | 44650041                | TT                              | GG                 | GG               | INTERGENIC      |               |                    |                    |
| SNP_6313_A_44650125 | NC_021160.1    | Ca_Kabuli_Chr01 | 44650125                | GG                              | TT                 | TT               | INTERGENIC      |               |                    |                    |

| SNPs IDs            | Chromosome IDs | Chromosomes     | Physical positions (bp) | CDC Frontier genome (Reference genome) | (Pusa 1103 & HPNB) | (ILWC 46 & LPNB) | Sequence genome | Components of | Gene accession IDs | Putative functions |
|---------------------|----------------|-----------------|-------------------------|----------------------------------------|--------------------|------------------|-----------------|---------------|--------------------|--------------------|
| SNP_6315_A_44650377 | NC_021160.1    | Ca_Kabuli_Chr01 | 44650377                | CC                                     | TT                 | TT               | INTERGENIC      |               |                    |                    |
| SNP_6316_A_44650459 | NC_021160.1    | Ca_Kabuli_Chr01 | 44650459                | GG                                     | CC                 | CC               | INTERGENIC      |               |                    |                    |
| SNP_6317_A_44650756 | NC_021160.1    | Ca_Kabuli_Chr01 | 44650756                | AA                                     | CC                 | CC               | INTERGENIC      |               |                    |                    |
| SNP_6318_A_44650825 | NC_021160.1    | Ca_Kabuli_Chr01 | 44650825                | AA                                     | GG                 | GG               | INTERGENIC      |               |                    |                    |
| SNP_6319_A_44650855 | NC_021160.1    | Ca_Kabuli_Chr01 | 44650855                | CC                                     | TT                 | TT               | INTERGENIC      |               |                    |                    |
| SNP_6320_A_44770448 | NC_021160.1    | Ca_Kabuli_Chr01 | 44770448                | TT                                     | GG                 | GG               | INTERGENIC      |               |                    |                    |
| SNP_6322_A_44778653 | NC_021160.1    | Ca_Kabuli_Chr01 | 44778653                | AA                                     | CC                 | CC               | INTERGENIC      |               |                    |                    |
| SNP_6323_A_44784003 | NC_021160.1    | Ca_Kabuli_Chr01 | 44784003                | CC                                     | TT                 | TT               | INTERGENIC      |               |                    |                    |
| SNP_6324_A_44785467 | NC_021160.1    | Ca_Kabuli_Chr01 | 44785467                | CC                                     | AA                 | AA               | INTERGENIC      |               |                    |                    |
| SNP_6325_A_44786318 | NC_021160.1    | Ca_Kabuli_Chr01 | 44786318                | GG                                     | TT                 | TT               | INTERGENIC      |               |                    |                    |
| SNP_6326_A_44787874 | NC_021160.1    | Ca_Kabuli_Chr01 | 44787874                | GG                                     | TT                 | TT               | INTERGENIC      |               |                    |                    |
| SNP_6327_A_44822591 | NC_021160.1    | Ca_Kabuli_Chr01 | 44822591                | GG                                     | CC                 | CC               | INTERGENIC      |               |                    |                    |
| SNP_6328_A_44824726 | NC_021160.1    | Ca_Kabuli_Chr01 | 44824726                | TT                                     | AA                 | AA               | INTERGENIC      |               |                    |                    |
| SNP_6329_A_44847075 | NC_021160.1    | Ca_Kabuli_Chr01 | 44847075                | CC                                     | TT                 | TT               | INTERGENIC      |               |                    |                    |
| SNP_6331_A_44847118 | NC_021160.1    | Ca_Kabuli_Chr01 | 44847118                | TT                                     | AA                 | AA               | INTERGENIC      |               |                    |                    |
| SNP_6332_A_44847153 | NC_021160.1    | Ca_Kabuli_Chr01 | 44847153                | TT                                     | AA                 | AA               | INTERGENIC      |               |                    |                    |
| SNP_6333_A_44847154 | NC_021160.1    | Ca_Kabuli_Chr01 | 44847154                | TT                                     | AA                 | AA               | INTERGENIC      |               |                    |                    |
| SNP_6334_A_44847222 | NC_021160.1    | Ca_Kabuli_Chr01 | 44847222                | CC                                     | AA                 | AA               | INTERGENIC      |               |                    |                    |
| SNP_6336_A_44847307 | NC_021160.1    | Ca_Kabuli_Chr01 | 44847307                | TT                                     | CC                 | CC               | INTERGENIC      |               |                    |                    |
| SNP_6338_A_44847540 | NC_021160.1    | Ca_Kabuli_Chr01 | 44847540                | AA                                     | CC                 | CC               | INTERGENIC      |               |                    |                    |
| SNP_6339_A_44848477 | NC_021160.1    | Ca_Kabuli_Chr01 | 44848477                | CC                                     | TT                 | TT               | INTERGENIC      |               |                    |                    |
| SNP_6340_A_44848538 | NC_021160.1    | Ca_Kabuli_Chr01 | 44848538                | AA                                     | GG                 | GG               | INTERGENIC      |               |                    |                    |

| SNPs IDs            | Chromosome IDs | Chromosomes     | Physical positions (bp) | CDC Frontier (Reference genome) | (Pusa 1103 & HPNB) | (ILWC 46 & LPNB) | Sequence Components of genome | Gene accession IDs | Putative functions                      |
|---------------------|----------------|-----------------|-------------------------|---------------------------------|--------------------|------------------|-------------------------------|--------------------|-----------------------------------------|
| SNP_6341_A_44848563 | NC_021160.1    | Ca_Kabuli_Chr01 | 44848563                | CC                              | TT                 | TT               | INTERGENIC                    |                    |                                         |
| SNP_6342_A_44852882 | NC_021160.1    | Ca_Kabuli_Chr01 | 44852882                | GG                              | CC                 | CC               | INTERGENIC                    |                    |                                         |
| SNP_6343_A_44852912 | NC_021160.1    | Ca_Kabuli_Chr01 | 44852912                | GG                              | AA                 | AA               | INTERGENIC                    |                    |                                         |
| SNP_6345_A_44921633 | NC_021160.1    | Ca_Kabuli_Chr01 | 44921633                | CC                              | TT                 | TT               | INTERGENIC                    |                    |                                         |
| SNP_6346_A_44921666 | NC_021160.1    | Ca_Kabuli_Chr01 | 44921666                | TT                              | CC                 | CC               | INTERGENIC                    |                    |                                         |
| SNP_6347_A_44925115 | NC_021160.1    | Ca_Kabuli_Chr01 | 44925115                | GG                              | AA                 | AA               | INTERGENIC                    |                    |                                         |
| SNP_6350_A_45057840 | NC_021160.1    | Ca_Kabuli_Chr01 | 45057840                | GG                              | AA                 | AA               | INTERGENIC                    |                    |                                         |
| SNP_6351_A_45057853 | NC_021160.1    | Ca_Kabuli_Chr01 | 45057853                | GG                              | TT                 | TT               | INTERGENIC                    |                    |                                         |
| SNP_6352_A_45058032 | NC_021160.1    | Ca_Kabuli_Chr01 | 45058032                | AA                              | GG                 | GG               | INTERGENIC                    |                    |                                         |
| SNP_6354_A_45058373 | NC_021160.1    | Ca_Kabuli_Chr01 | 45058373                | TT                              | CC                 | CC               | INTERGENIC                    |                    |                                         |
| SNP_6355_A_45058381 | NC_021160.1    | Ca_Kabuli_Chr01 | 45058381                | TT                              | GG                 | GG               | INTERGENIC                    |                    |                                         |
| SNP_6356_A_45058454 | NC_021160.1    | Ca_Kabuli_Chr01 | 45058454                | GG                              | AA                 | AA               | INTERGENIC                    |                    |                                         |
| SNP_6357_A_45090520 | NC_021160.1    | Ca_Kabuli_Chr01 | 45090520                | CC                              | TT                 | TT               | URR                           | 101508176          | uncharacterized protein At2g33490-like  |
| SNP_6359_A_45126382 | NC_021160.1    | Ca_Kabuli_Chr01 | 45126382                | CC                              | TT                 | TT               | INTERGENIC                    |                    |                                         |
| SNP_6360_A_45169375 | NC_021160.1    | Ca_Kabuli_Chr01 | 45169375                | CC                              | TT                 | TT               | INTERGENIC                    |                    |                                         |
| SNP_6361_A_45231878 | NC_021160.1    | Ca_Kabuli_Chr01 | 45231878                | TT                              | GG                 | GG               | DRR                           | 101511596          | Unknown function                        |
| SNP_6362_A_45232277 | NC_021160.1    | Ca_Kabuli_Chr01 | 45232277                | CC                              | GG                 | GG               | DRR                           | 101511596          | Unknown function                        |
| SNP_6363_A_45232327 | NC_021160.1    | Ca_Kabuli_Chr01 | 45232327                | AA                              | GG                 | GG               | DRR                           | 101511596          | Unknown function                        |
| SNP_6364_A_45241677 | NC_021160.1    | Ca_Kabuli_Chr01 | 45241677                | CC                              | GG                 | GG               | URR                           | 101410558          | transfer RNA methionine (anticodon CAU) |
| SNP_6365_A_45241764 | NC_021160.1    | Ca_Kabuli_Chr01 | 45241764                | AA                              | GG                 | GG               | URR                           | 101410558          | transfer RNA methionine (anticodon CAU) |
| SNP_6366_A_45241791 | NC_021160.1    | Ca_Kabuli_Chr01 | 45241791                | TT                              | CC                 | CC               | URR                           | 101410558          | transfer RNA methionine (anticodon CAU) |
| SNP_6368_A_45242303 | NC_021160.1    | Ca_Kabuli_Chr01 | 45242303                | TT                              | GG                 | GG               | URR                           | 101512582          | Unknown function                        |

| SNPs IDs            | Chromosome IDs | Chromosomes     | Physical positions (bp) | CDC Frontier (Reference genome) | (Pusa 1103 & HPNB) | (ILWC 46 & LPNB) | Sequence Components of genome | Gene accession IDs | Putative functions                       |
|---------------------|----------------|-----------------|-------------------------|---------------------------------|--------------------|------------------|-------------------------------|--------------------|------------------------------------------|
| SNP_6369_A_45242478 | NC_021160.1    | Ca_Kabuli_Chr01 | 45242478                | CC                              | TT                 | TT               | URR                           | 101512582          | Unknown function                         |
| SNP_6370_A_45243778 | NC_021160.1    | Ca_Kabuli_Chr01 | 45243778                | AA                              | CC                 | CC               | DRR                           | 101513217          | putative protein TIC 214 N-terminal part |
| SNP_6372_A_45243808 | NC_021160.1    | Ca_Kabuli_Chr01 | 45243808                | GG                              | CC                 | CC               | DRR                           | 101513217          | putative protein TIC 214 N-terminal part |
| SNP_6373_A_45243814 | NC_021160.1    | Ca_Kabuli_Chr01 | 45243814                | GG                              | CC                 | CC               | DRR                           | 101513217          | putative protein TIC 214 N-terminal part |
| SNP_6374_A_45243855 | NC_021160.1    | Ca_Kabuli_Chr01 | 45243855                | TT                              | CC                 | CC               | DRR                           | 101513217          | putative protein TIC 214 N-terminal part |
| SNP_6375_A_45244149 | NC_021160.1    | Ca_Kabuli_Chr01 | 45244149                | CC                              | TT                 | TT               | DRR                           | 101513217          | putative protein TIC 214 N-terminal part |
| SNP_6376_A_45244166 | NC_021160.1    | Ca_Kabuli_Chr01 | 45244166                | TT                              | CC                 | CC               | DRR                           | 101513217          | putative protein TIC 214 N-terminal part |
| SNP_6378_A_45265524 | NC_021160.1    | Ca_Kabuli_Chr01 | 45265524                | TT                              | AA                 | AA               | INTERGENIC                    |                    |                                          |
| SNP_6379_A_45265546 | NC_021160.1    | Ca_Kabuli_Chr01 | 45265546                | CC                              | TT                 | TT               | INTERGENIC                    |                    |                                          |
| SNP_6380_A_45265548 | NC_021160.1    | Ca_Kabuli_Chr01 | 45265548                | CC                              | TT                 | TT               | INTERGENIC                    |                    |                                          |
| SNP_6381_A_45267181 | NC_021160.1    | Ca_Kabuli_Chr01 | 45267181                | GG                              | AA                 | AA               | INTERGENIC                    |                    |                                          |
| SNP_6382_A_45298883 | NC_021160.1    | Ca_Kabuli_Chr01 | 45298883                | TT                              | CC                 | CC               | INTERGENIC                    |                    |                                          |
| SNP_6383_A_45332478 | NC_021160.1    | Ca_Kabuli_Chr01 | 45332478                | GG                              | TT                 | TT               | INTERGENIC                    |                    |                                          |
| SNP_6384_A_45332489 | NC_021160.1    | Ca_Kabuli_Chr01 | 45332489                | TT                              | AA                 | AA               | INTERGENIC                    |                    |                                          |
| SNP_6385_A_45332531 | NC_021160.1    | Ca_Kabuli_Chr01 | 45332531                | AA                              | GG                 | GG               | INTERGENIC                    |                    |                                          |
| SNP_6386_A_45332532 | NC_021160.1    | Ca_Kabuli_Chr01 | 45332532                | TT                              | GG                 | GG               | INTERGENIC                    |                    |                                          |
| SNP_6387_A_45332635 | NC_021160.1    | Ca_Kabuli_Chr01 | 45332635                | AA                              | CC                 | CC               | INTERGENIC                    |                    |                                          |
| SNP_6388_A_45332718 | NC_021160.1    | Ca_Kabuli_Chr01 | 45332718                | CC                              | TT                 | TT               | INTERGENIC                    |                    |                                          |
| SNP_6390_A_45332745 | NC_021160.1    | Ca_Kabuli_Chr01 | 45332745                | TT                              | CC                 | CC               | INTERGENIC                    |                    |                                          |
| SNP_6391_A_45332796 | NC_021160.1    | Ca_Kabuli_Chr01 | 45332796                | CC                              | TT                 | TT               | INTERGENIC                    |                    |                                          |
| SNP_6392_A_45333122 | NC_021160.1    | Ca_Kabuli_Chr01 | 45333122                | TT                              | CC                 | CC               | INTERGENIC                    |                    |                                          |
| SNP_6393_A_45337020 | NC_021160.1    | Ca_Kabuli_Chr01 | 45337020                | AA                              | GG                 | GG               | INTERGENIC                    |                    |                                          |

| SNPs IDs            | Chromosome IDs | Chromosomes     | Physical positions (bp) | CDC Frontier (Reference genome) | (Pusa 1103 & HPNB) | (ILWC 46 & LPNB) | Sequence genome | Components of | Gene accession IDs | Putative functions |
|---------------------|----------------|-----------------|-------------------------|---------------------------------|--------------------|------------------|-----------------|---------------|--------------------|--------------------|
| SNP_6394_A_45337762 | NC_021160.1    | Ca_Kabuli_Chr01 | 45337762                | AA                              | CC                 | CC               | INTERGENIC      |               |                    |                    |
| SNP_6396_A_45372170 | NC_021160.1    | Ca_Kabuli_Chr01 | 45372170                | TT                              | CC                 | CC               | INTERGENIC      |               |                    |                    |
| SNP_6397_A_45372518 | NC_021160.1    | Ca_Kabuli_Chr01 | 45372518                | TT                              | CC                 | CC               | INTERGENIC      |               |                    |                    |
| SNP_6398_A_45372535 | NC_021160.1    | Ca_Kabuli_Chr01 | 45372535                | TT                              | GG                 | GG               | INTERGENIC      |               |                    |                    |
| SNP_6399_A_45372537 | NC_021160.1    | Ca_Kabuli_Chr01 | 45372537                | TT                              | GG                 | GG               | INTERGENIC      |               |                    |                    |
| SNP_6400_A_45372615 | NC_021160.1    | Ca_Kabuli_Chr01 | 45372615                | CC                              | TT                 | TT               | INTERGENIC      |               |                    |                    |
| SNP_6401_A_45372626 | NC_021160.1    | Ca_Kabuli_Chr01 | 45372626                | TT                              | CC                 | CC               | INTERGENIC      |               |                    |                    |
| SNP_6402_A_45392293 | NC_021160.1    | Ca_Kabuli_Chr01 | 45392293                | AA                              | CC                 | CC               | INTERGENIC      |               |                    |                    |
| SNP_6403_A_45392490 | NC_021160.1    | Ca_Kabuli_Chr01 | 45392490                | GG                              | CC                 | CC               | INTERGENIC      |               |                    |                    |
| SNP_6404_A_45392526 | NC_021160.1    | Ca_Kabuli_Chr01 | 45392526                | CC                              | TT                 | TT               | INTERGENIC      |               |                    |                    |
| SNP_6405_A_45392575 | NC_021160.1    | Ca_Kabuli_Chr01 | 45392575                | TT                              | AA                 | AA               | INTERGENIC      |               |                    |                    |
| SNP_6406_A_45392606 | NC_021160.1    | Ca_Kabuli_Chr01 | 45392606                | AA                              | TT                 | TT               | INTERGENIC      |               |                    |                    |
| SNP_6407_A_45392660 | NC_021160.1    | Ca_Kabuli_Chr01 | 45392660                | AA                              | GG                 | GG               | INTERGENIC      |               |                    |                    |
| SNP_6408_A_45392721 | NC_021160.1    | Ca_Kabuli_Chr01 | 45392721                | CC                              | TT                 | TT               | INTERGENIC      |               |                    |                    |
| SNP_6409_A_45438348 | NC_021160.1    | Ca_Kabuli_Chr01 | 45438348                | GG                              | AA                 | AA               | INTERGENIC      |               |                    |                    |
| SNP_6410_A_45496998 | NC_021160.1    | Ca_Kabuli_Chr01 | 45496998                | TT                              | GG                 | GG               | INTERGENIC      |               |                    |                    |
| SNP_6411_A_45497016 | NC_021160.1    | Ca_Kabuli_Chr01 | 45497016                | CC                              | TT                 | TT               | INTERGENIC      |               |                    |                    |
| SNP_6412_A_45497025 | NC_021160.1    | Ca_Kabuli_Chr01 | 45497025                | GG                              | AA                 | AA               | INTERGENIC      |               |                    |                    |
| SNP_6413_A_45497049 | NC_021160.1    | Ca_Kabuli_Chr01 | 45497049                | AA                              | GG                 | GG               | INTERGENIC      |               |                    |                    |
| SNP_6415_A_45497213 | NC_021160.1    | Ca_Kabuli_Chr01 | 45497213                | CC                              | AA                 | AA               | INTERGENIC      |               |                    |                    |
| SNP_6416_A_45497309 | NC_021160.1    | Ca_Kabuli_Chr01 | 45497309                | TT                              | CC                 | CC               | INTERGENIC      |               |                    |                    |
| SNP_6417_A_45497346 | NC_021160.1    | Ca_Kabuli_Chr01 | 45497346                | AA                              | CC                 | CC               | INTERGENIC      |               |                    |                    |

| SNPs IDs            | Chromosome IDs | Chromosomes     | Physical positions (bp) | CDC Frontier genome (Reference genome) | (Pusa 1103 & HPNB) | (ILWC 46 & LPNB) | Sequence Components of genome | Gene accession IDs | Putative functions                                      |
|---------------------|----------------|-----------------|-------------------------|----------------------------------------|--------------------|------------------|-------------------------------|--------------------|---------------------------------------------------------|
| SNP_6418_A_45497483 | NC_021160.1    | Ca_Kabuli_Chr01 | 45497483                | CC                                     | GG                 | GG               | INTERGENIC                    |                    |                                                         |
| SNP_6419_A_45497510 | NC_021160.1    | Ca_Kabuli_Chr01 | 45497510                | TT                                     | CC                 | CC               | INTERGENIC                    |                    |                                                         |
| SNP_6420_A_45499313 | NC_021160.1    | Ca_Kabuli_Chr01 | 45499313                | GG                                     | AA                 | AA               | INTERGENIC                    |                    |                                                         |
| SNP_6421_A_45524852 | NC_021160.1    | Ca_Kabuli_Chr01 | 45524852                | TT                                     | GG                 | GG               | URR                           | 101488689          | alpha/beta hydrolase domain-containing protein 17C-like |
| SNP_6422_A_45553145 | NC_021160.1    | Ca_Kabuli_Chr01 | 45553145                | AA                                     | GG                 | GG               | INTERGENIC                    |                    |                                                         |
| SNP_6423_A_45553150 | NC_021160.1    | Ca_Kabuli_Chr01 | 45553150                | TT                                     | CC                 | CC               | INTERGENIC                    |                    |                                                         |
| SNP_6424_A_45553165 | NC_021160.1    | Ca_Kabuli_Chr01 | 45553165                | CC                                     | TT                 | TT               | INTERGENIC                    |                    |                                                         |
| SNP_6425_A_45553168 | NC_021160.1    | Ca_Kabuli_Chr01 | 45553168                | CC                                     | AA                 | AA               | INTERGENIC                    |                    |                                                         |
| SNP_6426_A_45553220 | NC_021160.1    | Ca_Kabuli_Chr01 | 45553220                | TT                                     | CC                 | CC               | INTERGENIC                    |                    |                                                         |
| SNP_6427_A_45553262 | NC_021160.1    | Ca_Kabuli_Chr01 | 45553262                | CC                                     | TT                 | TT               | INTERGENIC                    |                    |                                                         |
| SNP_6428_A_45553283 | NC_021160.1    | Ca_Kabuli_Chr01 | 45553283                | AA                                     | GG                 | GG               | INTERGENIC                    |                    |                                                         |
| SNP_6429_A_45553545 | NC_021160.1    | Ca_Kabuli_Chr01 | 45553545                | TT                                     | CC                 | CC               | INTERGENIC                    |                    |                                                         |
| SNP_6430_A_45553595 | NC_021160.1    | Ca_Kabuli_Chr01 | 45553595                | CC                                     | AA                 | AA               | INTERGENIC                    |                    |                                                         |
| SNP_6431_A_45568196 | NC_021160.1    | Ca_Kabuli_Chr01 | 45568196                | TT                                     | CC                 | CC               | URR                           | 101490981          | Unknown function                                        |
| SNP_6432_A_45568212 | NC_021160.1    | Ca_Kabuli_Chr01 | 45568212                | GG                                     | AA                 | AA               | URR                           | 101490981          | Unknown function                                        |
| SNP_6433_A_45570975 | NC_021160.1    | Ca_Kabuli_Chr01 | 45570975                | GG                                     | AA                 | AA               | INTERGENIC                    |                    |                                                         |
| SNP_6434_A_45593052 | NC_021160.1    | Ca_Kabuli_Chr01 | 45593052                | AA                                     | GG                 | GG               | INTERGENIC                    |                    |                                                         |
| SNP_6435_A_45593053 | NC_021160.1    | Ca_Kabuli_Chr01 | 45593053                | AA                                     | GG                 | GG               | INTERGENIC                    |                    |                                                         |
| SNP_6436_A_45593070 | NC_021160.1    | Ca_Kabuli_Chr01 | 45593070                | GG                                     | TT                 | TT               | INTERGENIC                    |                    |                                                         |
| SNP_6437_A_45593076 | NC_021160.1    | Ca_Kabuli_Chr01 | 45593076                | CC                                     | GG                 | GG               | INTERGENIC                    |                    |                                                         |
| SNP_6438_A_45593089 | NC_021160.1    | Ca_Kabuli_Chr01 | 45593089                | CC                                     | TT                 | TT               | INTERGENIC                    |                    |                                                         |
| SNP_6439_A_45593118 | NC_021160.1    | Ca_Kabuli_Chr01 | 45593118                | TT                                     | CC                 | CC               | INTERGENIC                    |                    |                                                         |



| SNPs IDs            | Chromosome IDs | Chromosomes     | Physical positions (bp) | CDC Frontier (Reference genome) | (Pusa 1103 & HPNB) | (ILWC 46 & LPNB) | Sequence Components of genome | Gene accession IDs | Putative functions                  |
|---------------------|----------------|-----------------|-------------------------|---------------------------------|--------------------|------------------|-------------------------------|--------------------|-------------------------------------|
| SNP_6441_A_45609371 | NC_021160.1    | Ca_Kabuli_Chr01 | 45609371                | CC                              | TT                 | TT               | URR                           | 101410564          | transfer RNA serine (anticodon GGA) |
| SNP_6442_A_45617871 | NC_021160.1    | Ca_Kabuli_Chr01 | 45617871                | GG                              | AA                 | AA               | INTERGENIC                    |                    |                                     |
| SNP_6444_A_45653927 | NC_021160.1    | Ca_Kabuli_Chr01 | 45653927                | GG                              | AA                 | AA               | INTERGENIC                    |                    |                                     |
| SNP_6445_A_45662723 | NC_021160.1    | Ca_Kabuli_Chr01 | 45662723                | GG                              | AA                 | AA               | INTERGENIC                    |                    |                                     |
| SNP_6446_A_45662781 | NC_021160.1    | Ca_Kabuli_Chr01 | 45662781                | AA                              | GG                 | GG               | INTERGENIC                    |                    |                                     |
| SNP_6447_A_45662788 | NC_021160.1    | Ca_Kabuli_Chr01 | 45662788                | CC                              | AA                 | AA               | INTERGENIC                    |                    |                                     |
| SNP_6448_A_45662789 | NC_021160.1    | Ca_Kabuli_Chr01 | 45662789                | CC                              | TT                 | TT               | INTERGENIC                    |                    |                                     |
| SNP_6449_A_45662799 | NC_021160.1    | Ca_Kabuli_Chr01 | 45662799                | AA                              | TT                 | TT               | INTERGENIC                    |                    |                                     |
| SNP_6450_A_45662862 | NC_021160.1    | Ca_Kabuli_Chr01 | 45662862                | CC                              | TT                 | TT               | INTERGENIC                    |                    |                                     |
| SNP_6451_A_45663330 | NC_021160.1    | Ca_Kabuli_Chr01 | 45663330                | CC                              | TT                 | TT               | INTERGENIC                    |                    |                                     |
| SNP_6452_A_45663431 | NC_021160.1    | Ca_Kabuli_Chr01 | 45663431                | TT                              | GG                 | GG               | INTERGENIC                    |                    |                                     |
| SNP_6454_A_45788085 | NC_021160.1    | Ca_Kabuli_Chr01 | 45788085                | CC                              | TT                 | TT               | INTERGENIC                    |                    |                                     |
| SNP_6455_A_45810901 | NC_021160.1    | Ca_Kabuli_Chr01 | 45810901                | GG                              | AA                 | AA               | INTERGENIC                    |                    |                                     |
| SNP_6456_A_45815096 | NC_021160.1    | Ca_Kabuli_Chr01 | 45815096                | AA                              | GG                 | GG               | INTERGENIC                    |                    |                                     |
| SNP_6457_A_45815103 | NC_021160.1    | Ca_Kabuli_Chr01 | 45815103                | AA                              | CC                 | CC               | INTERGENIC                    |                    |                                     |
| SNP_6459_A_45850381 | NC_021160.1    | Ca_Kabuli_Chr01 | 45850381                | GG                              | TT                 | TT               | INTERGENIC                    |                    |                                     |
| SNP_6460_A_45913072 | NC_021160.1    | Ca_Kabuli_Chr01 | 45913072                | CC                              | TT                 | TT               | INTERGENIC                    |                    |                                     |
| SNP_6461_A_45913987 | NC_021160.1    | Ca_Kabuli_Chr01 | 45913987                | TT                              | AA                 | AA               | INTERGENIC                    |                    |                                     |
| SNP_6462_A_45913992 | NC_021160.1    | Ca_Kabuli_Chr01 | 45913992                | CC                              | TT                 | TT               | INTERGENIC                    |                    |                                     |
| SNP_6463_A_45913996 | NC_021160.1    | Ca_Kabuli_Chr01 | 45913996                | GG                              | AA                 | AA               | INTERGENIC                    |                    |                                     |
| SNP_6464_A_45914354 | NC_021160.1    | Ca_Kabuli_Chr01 | 45914354                | TT                              | CC                 | CC               | INTERGENIC                    |                    |                                     |
| SNP_6465_A_45914436 | NC_021160.1    | Ca_Kabuli_Chr01 | 45914436                | TT                              | CC                 | CC               | INTERGENIC                    |                    |                                     |

| SNPs IDs            | Chromosome IDs | Chromosomes     | Physical positions (bp) | CDC Frontier genome (Reference genome) | (Pusa 1103 & HPNB) | (ILWC 46 & LPNB) | Sequence genome | Components of | Gene accession IDs | Putative functions |
|---------------------|----------------|-----------------|-------------------------|----------------------------------------|--------------------|------------------|-----------------|---------------|--------------------|--------------------|
| SNP_6466_A_45930051 | NC_021160.1    | Ca_Kabuli_Chr01 | 45930051                | GG                                     | AA                 | AA               | INTERGENIC      |               |                    |                    |
| SNP_6469_A_45958214 | NC_021160.1    | Ca_Kabuli_Chr01 | 45958214                | AA                                     | TT                 | TT               | INTERGENIC      |               |                    |                    |
| SNP_6471_A_46055727 | NC_021160.1    | Ca_Kabuli_Chr01 | 46055727                | AA                                     | GG                 | GG               | INTERGENIC      |               |                    |                    |
| SNP_6472_A_46065868 | NC_021160.1    | Ca_Kabuli_Chr01 | 46065868                | CC                                     | TT                 | TT               | INTERGENIC      |               |                    |                    |
| SNP_6473_A_46066109 | NC_021160.1    | Ca_Kabuli_Chr01 | 46066109                | AA                                     | CC                 | CC               | INTERGENIC      |               |                    |                    |
| SNP_6474_A_46066179 | NC_021160.1    | Ca_Kabuli_Chr01 | 46066179                | AA                                     | CC                 | CC               | INTERGENIC      |               |                    |                    |
| SNP_6475_A_46066233 | NC_021160.1    | Ca_Kabuli_Chr01 | 46066233                | CC                                     | TT                 | TT               | INTERGENIC      |               |                    |                    |
| SNP_6476_A_46066296 | NC_021160.1    | Ca_Kabuli_Chr01 | 46066296                | GG                                     | AA                 | AA               | INTERGENIC      |               |                    |                    |
| SNP_6477_A_46066302 | NC_021160.1    | Ca_Kabuli_Chr01 | 46066302                | GG                                     | TT                 | TT               | INTERGENIC      |               |                    |                    |
| SNP_6478_A_46066347 | NC_021160.1    | Ca_Kabuli_Chr01 | 46066347                | GG                                     | TT                 | TT               | INTERGENIC      |               |                    |                    |
| SNP_6479_A_46083394 | NC_021160.1    | Ca_Kabuli_Chr01 | 46083394                | CC                                     | TT                 | TT               | INTERGENIC      |               |                    |                    |
| SNP_6480_A_46083409 | NC_021160.1    | Ca_Kabuli_Chr01 | 46083409                | CC                                     | AA                 | AA               | INTERGENIC      |               |                    |                    |
| SNP_6481_A_46086816 | NC_021160.1    | Ca_Kabuli_Chr01 | 46086816                | GG                                     | TT                 | TT               | INTERGENIC      |               |                    |                    |
| SNP_6482_A_46087996 | NC_021160.1    | Ca_Kabuli_Chr01 | 46087996                | GG                                     | AA                 | AA               | INTERGENIC      |               |                    |                    |
| SNP_6483_A_46088009 | NC_021160.1    | Ca_Kabuli_Chr01 | 46088009                | AA                                     | GG                 | GG               | INTERGENIC      |               |                    |                    |
| SNP_6484_A_46088061 | NC_021160.1    | Ca_Kabuli_Chr01 | 46088061                | CC                                     | TT                 | TT               | INTERGENIC      |               |                    |                    |
| SNP_6486_A_46121642 | NC_021160.1    | Ca_Kabuli_Chr01 | 46121642                | TT                                     | GG                 | GG               | INTERGENIC      |               |                    |                    |
| SNP_6487_A_46166441 | NC_021160.1    | Ca_Kabuli_Chr01 | 46166441                | GG                                     | AA                 | AA               | INTERGENIC      |               |                    |                    |
| SNP_6488_A_46171346 | NC_021160.1    | Ca_Kabuli_Chr01 | 46171346                | AA                                     | GG                 | GG               | INTERGENIC      |               |                    |                    |
| SNP_6489_A_46171497 | NC_021160.1    | Ca_Kabuli_Chr01 | 46171497                | TT                                     | AA                 | AA               | INTERGENIC      |               |                    |                    |
| SNP_6490_A_46171677 | NC_021160.1    | Ca_Kabuli_Chr01 | 46171677                | CC                                     | TT                 | TT               | INTERGENIC      |               |                    |                    |
| SNP_6491_A_46171753 | NC_021160.1    | Ca_Kabuli_Chr01 | 46171753                | TT                                     | CC                 | CC               | INTERGENIC      |               |                    |                    |

| SNPs IDs            | Chromosome IDs | Chromosomes     | Physical positions (bp) | CDC Frontier (Reference genome) | (Pusa 1103 & HPNB) | (ILWC 46 & LPNB) | Sequence genome | Components of | Gene accession IDs | Putative functions |
|---------------------|----------------|-----------------|-------------------------|---------------------------------|--------------------|------------------|-----------------|---------------|--------------------|--------------------|
| SNP_6492_A_46171756 | NC_021160.1    | Ca_Kabuli_Chr01 | 46171756                | AA                              | TT                 | TT               | INTERGENIC      |               |                    |                    |
| SNP_6493_A_46174087 | NC_021160.1    | Ca_Kabuli_Chr01 | 46174087                | TT                              | CC                 | CC               | INTERGENIC      |               |                    |                    |
| SNP_6494_A_46174172 | NC_021160.1    | Ca_Kabuli_Chr01 | 46174172                | TT                              | CC                 | CC               | INTERGENIC      |               |                    |                    |
| SNP_6495_A_46174560 | NC_021160.1    | Ca_Kabuli_Chr01 | 46174560                | AA                              | TT                 | TT               | INTERGENIC      |               |                    |                    |
| SNP_6496_A_46174605 | NC_021160.1    | Ca_Kabuli_Chr01 | 46174605                | AA                              | GG                 | GG               | INTERGENIC      |               |                    |                    |
| SNP_6497_A_46176362 | NC_021160.1    | Ca_Kabuli_Chr01 | 46176362                | GG                              | TT                 | TT               | INTERGENIC      |               |                    |                    |
| SNP_6498_A_46178302 | NC_021160.1    | Ca_Kabuli_Chr01 | 46178302                | CC                              | TT                 | TT               | INTERGENIC      |               |                    |                    |
| SNP_6499_A_46179595 | NC_021160.1    | Ca_Kabuli_Chr01 | 46179595                | AA                              | GG                 | GG               | DRR             | 101493686     | Unknown function   |                    |
| SNP_6501_A_46192223 | NC_021160.1    | Ca_Kabuli_Chr01 | 46192223                | AA                              | TT                 | TT               | INTERGENIC      |               |                    |                    |
| SNP_6502_A_46192281 | NC_021160.1    | Ca_Kabuli_Chr01 | 46192281                | TT                              | CC                 | CC               | INTERGENIC      |               |                    |                    |
| SNP_6503_A_46192333 | NC_021160.1    | Ca_Kabuli_Chr01 | 46192333                | AA                              | GG                 | GG               | INTERGENIC      |               |                    |                    |
| SNP_6504_A_46192350 | NC_021160.1    | Ca_Kabuli_Chr01 | 46192350                | TT                              | CC                 | CC               | INTERGENIC      |               |                    |                    |
| SNP_6505_A_46192432 | NC_021160.1    | Ca_Kabuli_Chr01 | 46192432                | TT                              | CC                 | CC               | INTERGENIC      |               |                    |                    |
| SNP_6506_A_46192576 | NC_021160.1    | Ca_Kabuli_Chr01 | 46192576                | TT                              | GG                 | GG               | INTERGENIC      |               |                    |                    |
| SNP_6507_A_46259556 | NC_021160.1    | Ca_Kabuli_Chr01 | 46259556                | AA                              | TT                 | TT               | INTERGENIC      |               |                    |                    |
| SNP_6508_A_46278110 | NC_021160.1    | Ca_Kabuli_Chr01 | 46278110                | TT                              | GG                 | GG               | INTERGENIC      |               |                    |                    |
| SNP_6509_A_46278154 | NC_021160.1    | Ca_Kabuli_Chr01 | 46278154                | GG                              | TT                 | TT               | INTERGENIC      |               |                    |                    |
| SNP_6510_A_46278391 | NC_021160.1    | Ca_Kabuli_Chr01 | 46278391                | GG                              | AA                 | AA               | INTERGENIC      |               |                    |                    |
| SNP_6512_A_46279213 | NC_021160.1    | Ca_Kabuli_Chr01 | 46279213                | TT                              | AA                 | AA               | INTERGENIC      |               |                    |                    |
| SNP_6513_A_46279214 | NC_021160.1    | Ca_Kabuli_Chr01 | 46279214                | TT                              | AA                 | AA               | INTERGENIC      |               |                    |                    |
| SNP_6514_A_46279263 | NC_021160.1    | Ca_Kabuli_Chr01 | 46279263                | TT                              | CC                 | CC               | INTERGENIC      |               |                    |                    |
| SNP_6515_A_46279303 | NC_021160.1    | Ca_Kabuli_Chr01 | 46279303                | AA                              | CC                 | CC               | INTERGENIC      |               |                    |                    |

| SNPs IDs            | Chromosome IDs | Chromosomes     | Physical positions (bp) | CDC Frontier (Reference genome) | (Pusa 1103 & HPNB) | (ILWC 46 & LPNB) | Sequence genome | Components of | Gene accession IDs | Putative functions |
|---------------------|----------------|-----------------|-------------------------|---------------------------------|--------------------|------------------|-----------------|---------------|--------------------|--------------------|
| SNP_6516_A_46279420 | NC_021160.1    | Ca_Kabuli_Chr01 | 46279420                | TT                              | CC                 | CC               | INTERGENIC      |               |                    |                    |
| SNP_6517_A_46279552 | NC_021160.1    | Ca_Kabuli_Chr01 | 46279552                | CC                              | TT                 | TT               | INTERGENIC      |               |                    |                    |
| SNP_6518_A_46279881 | NC_021160.1    | Ca_Kabuli_Chr01 | 46279881                | TT                              | CC                 | CC               | INTERGENIC      |               |                    |                    |
| SNP_6519_A_46279986 | NC_021160.1    | Ca_Kabuli_Chr01 | 46279986                | CC                              | TT                 | TT               | INTERGENIC      |               |                    |                    |
| SNP_6520_A_46280136 | NC_021160.1    | Ca_Kabuli_Chr01 | 46280136                | AA                              | CC                 | CC               | INTERGENIC      |               |                    |                    |
| SNP_6521_A_46280421 | NC_021160.1    | Ca_Kabuli_Chr01 | 46280421                | AA                              | GG                 | GG               | INTERGENIC      |               |                    |                    |
| SNP_6522_A_46280423 | NC_021160.1    | Ca_Kabuli_Chr01 | 46280423                | TT                              | CC                 | CC               | INTERGENIC      |               |                    |                    |
| SNP_6523_A_46280468 | NC_021160.1    | Ca_Kabuli_Chr01 | 46280468                | AA                              | CC                 | CC               | INTERGENIC      |               |                    |                    |
| SNP_6524_A_46280526 | NC_021160.1    | Ca_Kabuli_Chr01 | 46280526                | GG                              | AA                 | AA               | INTERGENIC      |               |                    |                    |
| SNP_6525_A_46280783 | NC_021160.1    | Ca_Kabuli_Chr01 | 46280783                | TT                              | GG                 | GG               | INTERGENIC      |               |                    |                    |
| SNP_6526_A_46281110 | NC_021160.1    | Ca_Kabuli_Chr01 | 46281110                | TT                              | CC                 | CC               | INTERGENIC      |               |                    |                    |
| SNP_6527_A_46282795 | NC_021160.1    | Ca_Kabuli_Chr01 | 46282795                | AA                              | TT                 | TT               | INTERGENIC      |               |                    |                    |
| SNP_6528_A_46283478 | NC_021160.1    | Ca_Kabuli_Chr01 | 46283478                | GG                              | TT                 | TT               | INTERGENIC      |               |                    |                    |
| SNP_6529_A_46284112 | NC_021160.1    | Ca_Kabuli_Chr01 | 46284112                | CC                              | TT                 | TT               | INTERGENIC      |               |                    |                    |
| SNP_6530_A_46284673 | NC_021160.1    | Ca_Kabuli_Chr01 | 46284673                | GG                              | AA                 | AA               | INTERGENIC      |               |                    |                    |
| SNP_6531_A_46284997 | NC_021160.1    | Ca_Kabuli_Chr01 | 46284997                | CC                              | TT                 | TT               | INTERGENIC      |               |                    |                    |
| SNP_6532_A_46285294 | NC_021160.1    | Ca_Kabuli_Chr01 | 46285294                | CC                              | TT                 | TT               | INTERGENIC      |               |                    |                    |
| SNP_6533_A_46285302 | NC_021160.1    | Ca_Kabuli_Chr01 | 46285302                | GG                              | AA                 | AA               | INTERGENIC      |               |                    |                    |
| SNP_6534_A_46285622 | NC_021160.1    | Ca_Kabuli_Chr01 | 46285622                | GG                              | TT                 | TT               | INTERGENIC      |               |                    |                    |
| SNP_6535_A_46285789 | NC_021160.1    | Ca_Kabuli_Chr01 | 46285789                | GG                              | CC                 | CC               | INTERGENIC      |               |                    |                    |
| SNP_6536_A_46285870 | NC_021160.1    | Ca_Kabuli_Chr01 | 46285870                | GG                              | CC                 | CC               | INTERGENIC      |               |                    |                    |
| SNP_6537_A_46286015 | NC_021160.1    | Ca_Kabuli_Chr01 | 46286015                | TT                              | GG                 | GG               | INTERGENIC      |               |                    |                    |

| SNPs IDs            | Chromosome IDs | Chromosomes     | Physical positions (bp) | CDC Frontier (Reference genome) | (Pusa 1103 & HPNB) | (ILWC 46 & LPNB) | Sequence Components of genome | Gene accession IDs | Putative functions           |
|---------------------|----------------|-----------------|-------------------------|---------------------------------|--------------------|------------------|-------------------------------|--------------------|------------------------------|
| SNP_6538_A_46286059 | NC_021160.1    | Ca_Kabuli_Chr01 | 46286059                | GG                              | TT                 | TT               | INTERGENIC                    |                    |                              |
| SNP_6539_A_46286066 | NC_021160.1    | Ca_Kabuli_Chr01 | 46286066                | AA                              | GG                 | GG               | INTERGENIC                    |                    |                              |
| SNP_6540_A_46286530 | NC_021160.1    | Ca_Kabuli_Chr01 | 46286530                | TT                              | GG                 | GG               | INTERGENIC                    |                    |                              |
| SNP_6541_A_46286560 | NC_021160.1    | Ca_Kabuli_Chr01 | 46286560                | GG                              | CC                 | CC               | INTERGENIC                    |                    |                              |
| SNP_6544_A_46286732 | NC_021160.1    | Ca_Kabuli_Chr01 | 46286732                | TT                              | GG                 | GG               | INTERGENIC                    |                    |                              |
| SNP_6545_A_46324394 | NC_021160.1    | Ca_Kabuli_Chr01 | 46324394                | TT                              | GG                 | GG               | INTERGENIC                    |                    |                              |
| SNP_6546_A_46327410 | NC_021160.1    | Ca_Kabuli_Chr01 | 46327410                | CC                              | TT                 | TT               | INTRON                        | 101501118          | uncharacterized LOC101501118 |
| SNP_6547_A_46342508 | NC_021160.1    | Ca_Kabuli_Chr01 | 46342508                | CC                              | TT                 | TT               | INTRON                        | 101501118          | uncharacterized LOC101501118 |
| SNP_6548_A_46351682 | NC_021160.1    | Ca_Kabuli_Chr01 | 46351682                | GG                              | AA                 | AA               | INTRON                        | 101501118          | uncharacterized LOC101501118 |
| SNP_6549_A_46351707 | NC_021160.1    | Ca_Kabuli_Chr01 | 46351707                | TT                              | AA                 | AA               | INTRON                        | 101501118          | uncharacterized LOC101501118 |
| SNP_6550_A_46351742 | NC_021160.1    | Ca_Kabuli_Chr01 | 46351742                | AA                              | CC                 | CC               | INTRON                        | 101501118          | uncharacterized LOC101501118 |
| SNP_6551_A_46351774 | NC_021160.1    | Ca_Kabuli_Chr01 | 46351774                | CC                              | TT                 | TT               | INTRON                        | 101501118          | uncharacterized LOC101501118 |
| SNP_6552_A_46351864 | NC_021160.1    | Ca_Kabuli_Chr01 | 46351864                | TT                              | CC                 | CC               | INTRON                        | 101501118          | uncharacterized LOC101501118 |
| SNP_6553_A_46351929 | NC_021160.1    | Ca_Kabuli_Chr01 | 46351929                | TT                              | CC                 | CC               | INTRON                        | 101501118          | uncharacterized LOC101501118 |
| SNP_6554_A_46352020 | NC_021160.1    | Ca_Kabuli_Chr01 | 46352020                | AA                              | GG                 | GG               | INTRON                        | 101501118          | uncharacterized LOC101501118 |
| SNP_6555_A_46352041 | NC_021160.1    | Ca_Kabuli_Chr01 | 46352041                | GG                              | TT                 | TT               | INTRON                        | 101501118          | uncharacterized LOC101501118 |
| SNP_6556_A_46352044 | NC_021160.1    | Ca_Kabuli_Chr01 | 46352044                | GG                              | AA                 | AA               | INTRON                        | 101501118          | uncharacterized LOC101501118 |
| SNP_6557_A_46352057 | NC_021160.1    | Ca_Kabuli_Chr01 | 46352057                | AA                              | CC                 | CC               | INTRON                        | 101501118          | uncharacterized LOC101501118 |
| SNP_6558_A_46352070 | NC_021160.1    | Ca_Kabuli_Chr01 | 46352070                | AA                              | GG                 | GG               | INTRON                        | 101501118          | uncharacterized LOC101501118 |
| SNP_6559_A_46352104 | NC_021160.1    | Ca_Kabuli_Chr01 | 46352104                | AA                              | GG                 | GG               | INTRON                        | 101501118          | uncharacterized LOC101501118 |
| SNP_6561_A_46352220 | NC_021160.1    | Ca_Kabuli_Chr01 | 46352220                | TT                              | GG                 | GG               | INTRON                        | 101501118          | uncharacterized LOC101501118 |
| SNP_6562_A_46352257 | NC_021160.1    | Ca_Kabuli_Chr01 | 46352257                | CC                              | GG                 | GG               | INTRON                        | 101501118          | uncharacterized LOC101501118 |

| SNPs IDs            | Chromosome IDs | Chromosomes     | Physical positions (bp) | CDC Frontier (Reference genome) | (Pusa 1103 & HPNB) | (ILWC 46 & LPNB) | Sequence Components of genome | Gene accession IDs | Putative functions                                   |
|---------------------|----------------|-----------------|-------------------------|---------------------------------|--------------------|------------------|-------------------------------|--------------------|------------------------------------------------------|
| SNP_6563_A_46352262 | NC_021160.1    | Ca_Kabuli_Chr01 | 46352262                | TT                              | CC                 | CC               | INTRON                        | 101501118          | uncharacterized LOC101501118                         |
| SNP_6564_A_46392133 | NC_021160.1    | Ca_Kabuli_Chr01 | 46392133                | TT                              | GG                 | GG               | INTERGENIC                    |                    |                                                      |
| SNP_6565_A_46392135 | NC_021160.1    | Ca_Kabuli_Chr01 | 46392135                | TT                              | CC                 | CC               | INTERGENIC                    |                    |                                                      |
| SNP_6566_A_46404508 | NC_021160.1    | Ca_Kabuli_Chr01 | 46404508                | TT                              | CC                 | CC               | INTERGENIC                    |                    |                                                      |
| SNP_6567_A_46449950 | NC_021160.1    | Ca_Kabuli_Chr01 | 46449950                | TT                              | GG                 | GG               | INTERGENIC                    |                    |                                                      |
| SNP_6568_A_46456567 | NC_021160.1    | Ca_Kabuli_Chr01 | 46456567                | GG                              | AA                 | AA               | SYNONYMOUS_CODING             | 101496916          | sugar transport protein 7-like                       |
| SNP_6570_A_46499682 | NC_021160.1    | Ca_Kabuli_Chr01 | 46499682                | GG                              | AA                 | AA               | INTRON                        | 101501431          | serine carboxypeptidase-like 45                      |
| SNP_6571_A_46499742 | NC_021160.1    | Ca_Kabuli_Chr01 | 46499742                | GG                              | TT                 | TT               | INTRON                        | 101501431          | serine carboxypeptidase-like 45                      |
| SNP_6572_A_46500251 | NC_021160.1    | Ca_Kabuli_Chr01 | 46500251                | CC                              | TT                 | TT               | INTRON                        | 101501431          | serine carboxypeptidase-like 45                      |
| SNP_6573_A_46500252 | NC_021160.1    | Ca_Kabuli_Chr01 | 46500252                | CC                              | TT                 | TT               | INTRON                        | 101501431          | serine carboxypeptidase-like 45                      |
| SNP_6574_A_46523221 | NC_021160.1    | Ca_Kabuli_Chr01 | 46523221                | TT                              | CC                 | CC               | NON_SYNONYMOUS_CODING         | 101501746          | ethylene-responsive transcription factor ERF027-like |
| SNP_6575_A_46523387 | NC_021160.1    | Ca_Kabuli_Chr01 | 46523387                | TT                              | GG                 | GG               | URR                           | 101501746          | ethylene-responsive transcription factor ERF027-like |
| SNP_6577_A_46523582 | NC_021160.1    | Ca_Kabuli_Chr01 | 46523582                | AA                              | CC                 | CC               | URR                           | 101501746          | ethylene-responsive transcription factor ERF027-like |
| SNP_6579_A_46524525 | NC_021160.1    | Ca_Kabuli_Chr01 | 46524525                | TT                              | GG                 | GG               | URR                           | 101501746          | ethylene-responsive transcription factor ERF027-like |
| SNP_6580_A_46524638 | NC_021160.1    | Ca_Kabuli_Chr01 | 46524638                | TT                              | CC                 | CC               | URR                           | 101501746          | ethylene-responsive transcription factor ERF027-like |
| SNP_6581_A_46524689 | NC_021160.1    | Ca_Kabuli_Chr01 | 46524689                | CC                              | TT                 | TT               | URR                           | 101501746          | ethylene-responsive transcription factor ERF027-like |
| SNP_6582_A_46524696 | NC_021160.1    | Ca_Kabuli_Chr01 | 46524696                | CC                              | GG                 | GG               | URR                           | 101501746          | ethylene-responsive transcription factor ERF027-like |
| SNP_6583_A_46524740 | NC_021160.1    | Ca_Kabuli_Chr01 | 46524740                | GG                              | TT                 | TT               | URR                           | 101501746          | ethylene-responsive transcription factor ERF027-like |
| SNP_6584_A_46525525 | NC_021160.1    | Ca_Kabuli_Chr01 | 46525525                | GG                              | AA                 | AA               | INTERGENIC                    |                    |                                                      |
| SNP_6586_A_46526227 | NC_021160.1    | Ca_Kabuli_Chr01 | 46526227                | AA                              | GG                 | GG               | INTERGENIC                    |                    |                                                      |
| SNP_6587_A_46526315 | NC_021160.1    | Ca_Kabuli_Chr01 | 46526315                | TT                              | CC                 | CC               | INTERGENIC                    |                    |                                                      |
| SNP_6589_A_46527736 | NC_021160.1    | Ca_Kabuli_Chr01 | 46527736                | CC                              | TT                 | TT               | INTERGENIC                    |                    |                                                      |

| SNPs IDs            | Chromosome IDs | Chromosomes     | Physical positions (bp) | CDC Frontier genome (Reference genome) | (Pusa 1103 & HPNB) | (ILWC 46 & LPNB) | Sequence genome | Components of | Gene accession IDs           | Putative functions |
|---------------------|----------------|-----------------|-------------------------|----------------------------------------|--------------------|------------------|-----------------|---------------|------------------------------|--------------------|
| SNP_6590_A_46527737 | NC_021160.1    | Ca_Kabuli_Chr01 | 46527737                | CC                                     | TT                 | TT               | INTERGENIC      |               |                              |                    |
| SNP_6591_A_46527842 | NC_021160.1    | Ca_Kabuli_Chr01 | 46527842                | GG                                     | TT                 | TT               | INTERGENIC      |               |                              |                    |
| SNP_6592_A_46527914 | NC_021160.1    | Ca_Kabuli_Chr01 | 46527914                | CC                                     | TT                 | TT               | INTERGENIC      |               |                              |                    |
| SNP_6593_A_46528070 | NC_021160.1    | Ca_Kabuli_Chr01 | 46528070                | TT                                     | CC                 | CC               | INTERGENIC      |               |                              |                    |
| SNP_6594_A_46528205 | NC_021160.1    | Ca_Kabuli_Chr01 | 46528205                | TT                                     | CC                 | CC               | INTERGENIC      |               |                              |                    |
| SNP_6596_A_46528669 | NC_021160.1    | Ca_Kabuli_Chr01 | 46528669                | CC                                     | TT                 | TT               | INTERGENIC      |               |                              |                    |
| SNP_6597_A_46528715 | NC_021160.1    | Ca_Kabuli_Chr01 | 46528715                | AA                                     | GG                 | GG               | INTERGENIC      |               |                              |                    |
| SNP_6598_A_46528767 | NC_021160.1    | Ca_Kabuli_Chr01 | 46528767                | AA                                     | GG                 | GG               | INTERGENIC      |               |                              |                    |
| SNP_6599_A_46529096 | NC_021160.1    | Ca_Kabuli_Chr01 | 46529096                | TT                                     | CC                 | CC               | INTERGENIC      |               |                              |                    |
| SNP_6600_A_46529312 | NC_021160.1    | Ca_Kabuli_Chr01 | 46529312                | AA                                     | GG                 | GG               | INTERGENIC      |               |                              |                    |
| SNP_6601_A_46529335 | NC_021160.1    | Ca_Kabuli_Chr01 | 46529335                | TT                                     | CC                 | CC               | INTERGENIC      |               |                              |                    |
| SNP_6602_A_46529554 | NC_021160.1    | Ca_Kabuli_Chr01 | 46529554                | AA                                     | GG                 | GG               | INTERGENIC      |               |                              |                    |
| SNP_6603_A_46529691 | NC_021160.1    | Ca_Kabuli_Chr01 | 46529691                | GG                                     | AA                 | AA               | INTERGENIC      |               |                              |                    |
| SNP_6604_A_46529764 | NC_021160.1    | Ca_Kabuli_Chr01 | 46529764                | TT                                     | GG                 | GG               | INTERGENIC      |               |                              |                    |
| SNP_6605_A_46529892 | NC_021160.1    | Ca_Kabuli_Chr01 | 46529892                | AA                                     | CC                 | CC               | INTERGENIC      |               |                              |                    |
| SNP_6606_A_46529977 | NC_021160.1    | Ca_Kabuli_Chr01 | 46529977                | CC                                     | TT                 | TT               | INTERGENIC      |               |                              |                    |
| SNP_6607_A_46530174 | NC_021160.1    | Ca_Kabuli_Chr01 | 46530174                | AA                                     | GG                 | GG               | INTERGENIC      |               |                              |                    |
| SNP_6608_A_46530275 | NC_021160.1    | Ca_Kabuli_Chr01 | 46530275                | GG                                     | AA                 | AA               | INTERGENIC      |               |                              |                    |
| SNP_6609_A_46530475 | NC_021160.1    | Ca_Kabuli_Chr01 | 46530475                | CC                                     | GG                 | GG               | INTERGENIC      |               |                              |                    |
| SNP_6610_A_46530546 | NC_021160.1    | Ca_Kabuli_Chr01 | 46530546                | GG                                     | AA                 | AA               | DRR             | 101497567     | uncharacterized LOC101497567 |                    |
| SNP_6611_A_46530766 | NC_021160.1    | Ca_Kabuli_Chr01 | 46530766                | AA                                     | GG                 | GG               | DRR             | 101497567     | uncharacterized LOC101497567 |                    |
| SNP_6612_A_46530832 | NC_021160.1    | Ca_Kabuli_Chr01 | 46530832                | GG                                     | AA                 | AA               | DRR             | 101497567     | uncharacterized LOC101497567 |                    |

| SNPs IDs            | Chromosome IDs | Chromosomes     | Physical positions (bp) | CDC Frontier (Reference genome) | (Pusa 1103 & HPNB) | (ILWC 46 & LPNB) | Sequence Components of genome | Gene accession IDs | Putative functions                            |
|---------------------|----------------|-----------------|-------------------------|---------------------------------|--------------------|------------------|-------------------------------|--------------------|-----------------------------------------------|
| SNP_6615_A_46531318 | NC_021160.1    | Ca_Kabuli_Chr01 | 46531318                | AA                              | GG                 | GG               | DRR                           | 101497567          | uncharacterized LOC101497567                  |
| SNP_6616_A_46538684 | NC_021160.1    | Ca_Kabuli_Chr01 | 46538684                | AA                              | TT                 | TT               | INTERGENIC                    |                    |                                               |
| SNP_6617_A_46538685 | NC_021160.1    | Ca_Kabuli_Chr01 | 46538685                | CC                              | GG                 | GG               | INTERGENIC                    |                    |                                               |
| SNP_6618_A_46538708 | NC_021160.1    | Ca_Kabuli_Chr01 | 46538708                | CC                              | GG                 | GG               | INTERGENIC                    |                    |                                               |
| SNP_6619_A_46538713 | NC_021160.1    | Ca_Kabuli_Chr01 | 46538713                | CC                              | TT                 | TT               | INTERGENIC                    |                    |                                               |
| SNP_6620_A_46538715 | NC_021160.1    | Ca_Kabuli_Chr01 | 46538715                | AA                              | GG                 | GG               | INTERGENIC                    |                    |                                               |
| SNP_6621_A_46538857 | NC_021160.1    | Ca_Kabuli_Chr01 | 46538857                | GG                              | TT                 | TT               | INTERGENIC                    |                    |                                               |
| SNP_6622_A_46538858 | NC_021160.1    | Ca_Kabuli_Chr01 | 46538858                | TT                              | CC                 | CC               | INTERGENIC                    |                    |                                               |
| SNP_6623_A_46539156 | NC_021160.1    | Ca_Kabuli_Chr01 | 46539156                | AA                              | GG                 | GG               | INTERGENIC                    |                    |                                               |
| SNP_6625_A_46565798 | NC_021160.1    | Ca_Kabuli_Chr01 | 46565798                | TT                              | CC                 | CC               | INTERGENIC                    |                    |                                               |
| SNP_6626_A_46567314 | NC_021160.1    | Ca_Kabuli_Chr01 | 46567314                | TT                              | CC                 | CC               | INTERGENIC                    |                    |                                               |
| SNP_6627_A_46568271 | NC_021160.1    | Ca_Kabuli_Chr01 | 46568271                | CC                              | TT                 | TT               | INTERGENIC                    |                    |                                               |
| SNP_6628_A_46568457 | NC_021160.1    | Ca_Kabuli_Chr01 | 46568457                | GG                              | AA                 | AA               | INTERGENIC                    |                    |                                               |
| SNP_6630_A_46619680 | NC_021160.1    | Ca_Kabuli_Chr01 | 46619680                | CC                              | TT                 | TT               | URR                           | 101502070          | omega-hydroxypalmitate O-feruloyl transferase |
| SNP_6631_A_46635536 | NC_021160.1    | Ca_Kabuli_Chr01 | 46635536                | TT                              | CC                 | CC               | INTERGENIC                    |                    |                                               |
| SNP_6632_A_46660539 | NC_021160.1    | Ca_Kabuli_Chr01 | 46660539                | AA                              | CC                 | CC               | INTERGENIC                    |                    |                                               |
| SNP_6633_A_46661580 | NC_021160.1    | Ca_Kabuli_Chr01 | 46661580                | TT                              | CC                 | CC               | INTERGENIC                    |                    |                                               |
| SNP_6634_A_46661658 | NC_021160.1    | Ca_Kabuli_Chr01 | 46661658                | TT                              | CC                 | CC               | INTERGENIC                    |                    |                                               |
| SNP_6635_A_46661756 | NC_021160.1    | Ca_Kabuli_Chr01 | 46661756                | GG                              | CC                 | CC               | INTERGENIC                    |                    |                                               |
| SNP_6636_A_46661822 | NC_021160.1    | Ca_Kabuli_Chr01 | 46661822                | TT                              | GG                 | GG               | INTERGENIC                    |                    |                                               |
| SNP_6637_A_46662080 | NC_021160.1    | Ca_Kabuli_Chr01 | 46662080                | CC                              | TT                 | TT               | DRR                           | 101502701          | uncharacterized LOC101502701                  |
| SNP_6638_A_46699362 | NC_021160.1    | Ca_Kabuli_Chr01 | 46699362                | GG                              | AA                 | AA               | INTERGENIC                    |                    |                                               |



| SNPs IDs            | Chromosome IDs | Chromosomes     | Physical positions (bp) | CDC Frontier (Reference genome) | (Pusa 1103 & HPNB) | (ILWC 46 & LPNB) | Sequence Components of genome | Gene accession IDs | Putative functions           |
|---------------------|----------------|-----------------|-------------------------|---------------------------------|--------------------|------------------|-------------------------------|--------------------|------------------------------|
| SNP_6639_A_46699365 | NC_021160.1    | Ca_Kabuli_Chr01 | 46699365                | TT                              | AA                 | AA               | INTERGENIC                    |                    |                              |
| SNP_6640_A_46699381 | NC_021160.1    | Ca_Kabuli_Chr01 | 46699381                | TT                              | CC                 | CC               | INTERGENIC                    |                    |                              |
| SNP_6641_A_46699386 | NC_021160.1    | Ca_Kabuli_Chr01 | 46699386                | GG                              | AA                 | AA               | INTERGENIC                    |                    |                              |
| SNP_6642_A_46699389 | NC_021160.1    | Ca_Kabuli_Chr01 | 46699389                | CC                              | AA                 | AA               | INTERGENIC                    |                    |                              |
| SNP_6643_A_46700995 | NC_021160.1    | Ca_Kabuli_Chr01 | 46700995                | TT                              | CC                 | CC               | INTERGENIC                    |                    |                              |
| SNP_6644_A_46701093 | NC_021160.1    | Ca_Kabuli_Chr01 | 46701093                | CC                              | TT                 | TT               | INTERGENIC                    |                    |                              |
| SNP_6645_A_46701149 | NC_021160.1    | Ca_Kabuli_Chr01 | 46701149                | AA                              | TT                 | TT               | INTERGENIC                    |                    |                              |
| SNP_6646_A_46701278 | NC_021160.1    | Ca_Kabuli_Chr01 | 46701278                | AA                              | GG                 | GG               | INTERGENIC                    |                    |                              |
| SNP_6647_A_46742835 | NC_021160.1    | Ca_Kabuli_Chr01 | 46742835                | GG                              | AA                 | AA               | INTRON                        | 101503998          | uncharacterized LOC101503998 |
| SNP_6648_A_46773138 | NC_021160.1    | Ca_Kabuli_Chr01 | 46773138                | CC                              | AA                 | AA               | INTERGENIC                    |                    |                              |
| SNP_6649_A_46801179 | NC_021160.1    | Ca_Kabuli_Chr01 | 46801179                | AA                              | GG                 | GG               | INTERGENIC                    |                    |                              |
| SNP_6650_A_46801543 | NC_021160.1    | Ca_Kabuli_Chr01 | 46801543                | TT                              | AA                 | AA               | INTERGENIC                    |                    |                              |
| SNP_6651_A_46801706 | NC_021160.1    | Ca_Kabuli_Chr01 | 46801706                | CC                              | AA                 | AA               | INTERGENIC                    |                    |                              |
| SNP_6652_A_46812020 | NC_021160.1    | Ca_Kabuli_Chr01 | 46812020                | TT                              | CC                 | CC               | INTERGENIC                    |                    |                              |
| SNP_6653_A_46819052 | NC_021160.1    | Ca_Kabuli_Chr01 | 46819052                | CC                              | TT                 | TT               | INTRON                        | id24556            | Unknown function             |
| SNP_6654_A_46819079 | NC_021160.1    | Ca_Kabuli_Chr01 | 46819079                | TT                              | AA                 | AA               | INTRON                        | id24556            | Unknown function             |
| SNP_6655_A_46819853 | NC_021160.1    | Ca_Kabuli_Chr01 | 46819853                | CC                              | TT                 | TT               | INTRON                        | id24556            | Unknown function             |
| SNP_6656_A_46819949 | NC_021160.1    | Ca_Kabuli_Chr01 | 46819949                | GG                              | AA                 | AA               | INTRON                        | id24556            | Unknown function             |
| SNP_6657_A_46822788 | NC_021160.1    | Ca_Kabuli_Chr01 | 46822788                | CC                              | TT                 | TT               | INTRON                        | id24556            | Unknown function             |
| SNP_6658_A_46831609 | NC_021160.1    | Ca_Kabuli_Chr01 | 46831609                | TT                              | GG                 | GG               | INTERGENIC                    |                    |                              |
| SNP_6659_A_46831616 | NC_021160.1    | Ca_Kabuli_Chr01 | 46831616                | GG                              | CC                 | CC               | INTERGENIC                    |                    |                              |
| SNP_6660_A_46831661 | NC_021160.1    | Ca_Kabuli_Chr01 | 46831661                | AA                              | TT                 | TT               | INTERGENIC                    |                    |                              |

| SNPs IDs            | Chromosome IDs | Chromosomes     | Physical positions (bp) | CDC Frontier (Reference genome) | (Pusa 1103 & HPNB) | (ILWC 46 & LPNB) | Sequence genome | Components of | Gene accession IDs | Putative functions |
|---------------------|----------------|-----------------|-------------------------|---------------------------------|--------------------|------------------|-----------------|---------------|--------------------|--------------------|
| SNP_6661_A_46831922 | NC_021160.1    | Ca_Kabuli_Chr01 | 46831922                | GG                              | AA                 | AA               | INTERGENIC      |               |                    |                    |
| SNP_6663_A_46831978 | NC_021160.1    | Ca_Kabuli_Chr01 | 46831978                | AA                              | GG                 | GG               | INTERGENIC      |               |                    |                    |
| SNP_6664_A_46831997 | NC_021160.1    | Ca_Kabuli_Chr01 | 46831997                | GG                              | AA                 | AA               | INTERGENIC      |               |                    |                    |
| SNP_6665_A_46832007 | NC_021160.1    | Ca_Kabuli_Chr01 | 46832007                | CC                              | AA                 | AA               | INTERGENIC      |               |                    |                    |
| SNP_6666_A_46832039 | NC_021160.1    | Ca_Kabuli_Chr01 | 46832039                | AA                              | GG                 | GG               | INTERGENIC      |               |                    |                    |
| SNP_6667_A_46832040 | NC_021160.1    | Ca_Kabuli_Chr01 | 46832040                | TT                              | GG                 | GG               | INTERGENIC      |               |                    |                    |
| SNP_6668_A_46851438 | NC_021160.1    | Ca_Kabuli_Chr01 | 46851438                | GG                              | TT                 | TT               | URR             | 101507455     | Unknown function   |                    |
| SNP_6669_A_46851810 | NC_021160.1    | Ca_Kabuli_Chr01 | 46851810                | AA                              | GG                 | GG               | URR             | 101507455     | Unknown function   |                    |
| SNP_6670_A_46856129 | NC_021160.1    | Ca_Kabuli_Chr01 | 46856129                | TT                              | CC                 | CC               | INTERGENIC      |               |                    |                    |
| SNP_6671_A_46856301 | NC_021160.1    | Ca_Kabuli_Chr01 | 46856301                | TT                              | GG                 | GG               | INTERGENIC      |               |                    |                    |
| SNP_6672_A_46856337 | NC_021160.1    | Ca_Kabuli_Chr01 | 46856337                | CC                              | TT                 | TT               | INTERGENIC      |               |                    |                    |
| SNP_6674_A_46856656 | NC_021160.1    | Ca_Kabuli_Chr01 | 46856656                | CC                              | TT                 | TT               | INTERGENIC      |               |                    |                    |
| SNP_6675_A_46856683 | NC_021160.1    | Ca_Kabuli_Chr01 | 46856683                | TT                              | CC                 | CC               | INTERGENIC      |               |                    |                    |
| SNP_6676_A_46869159 | NC_021160.1    | Ca_Kabuli_Chr01 | 46869159                | GG                              | AA                 | AA               | INTERGENIC      |               |                    |                    |
| SNP_6677_A_46890619 | NC_021160.1    | Ca_Kabuli_Chr01 | 46890619                | CC                              | TT                 | TT               | INTERGENIC      |               |                    |                    |
| SNP_6678_A_46894736 | NC_021160.1    | Ca_Kabuli_Chr01 | 46894736                | AA                              | CC                 | CC               | INTERGENIC      |               |                    |                    |
| SNP_6681_A_47058323 | NC_021160.1    | Ca_Kabuli_Chr01 | 47058323                | TT                              | AA                 | AA               | INTERGENIC      |               |                    |                    |
| SNP_6682_A_47058329 | NC_021160.1    | Ca_Kabuli_Chr01 | 47058329                | TT                              | GG                 | GG               | INTERGENIC      |               |                    |                    |
| SNP_6683_A_47058684 | NC_021160.1    | Ca_Kabuli_Chr01 | 47058684                | TT                              | GG                 | GG               | INTERGENIC      |               |                    |                    |
| SNP_6684_A_47058840 | NC_021160.1    | Ca_Kabuli_Chr01 | 47058840                | GG                              | CC                 | CC               | INTERGENIC      |               |                    |                    |
| SNP_6685_A_47059122 | NC_021160.1    | Ca_Kabuli_Chr01 | 47059122                | AA                              | GG                 | GG               | INTERGENIC      |               |                    |                    |
| SNP_6686_A_47059137 | NC_021160.1    | Ca_Kabuli_Chr01 | 47059137                | CC                              | GG                 | GG               | INTERGENIC      |               |                    |                    |

| SNPs IDs            | Chromosome IDs | Chromosomes     | Physical positions (bp) | CDC Frontier (Reference genome) | (Pusa 1103 & HPNB) | (ILWC 46 & LPNB) | Sequence Components of genome | Gene accession IDs | Putative functions                                                                   |
|---------------------|----------------|-----------------|-------------------------|---------------------------------|--------------------|------------------|-------------------------------|--------------------|--------------------------------------------------------------------------------------|
| SNP_6687_A_47059138 | NC_021160.1    | Ca_Kabuli_Chr01 | 47059138                | TT                              | CC                 | CC               | INTERGENIC                    |                    |                                                                                      |
| SNP_6688_A_47059186 | NC_021160.1    | Ca_Kabuli_Chr01 | 47059186                | AA                              | CC                 | CC               | INTERGENIC                    |                    |                                                                                      |
| SNP_6689_A_47059206 | NC_021160.1    | Ca_Kabuli_Chr01 | 47059206                | TT                              | CC                 | CC               | INTERGENIC                    |                    |                                                                                      |
| SNP_6690_A_47059222 | NC_021160.1    | Ca_Kabuli_Chr01 | 47059222                | AA                              | GG                 | GG               | INTERGENIC                    |                    |                                                                                      |
| SNP_6691_A_47059330 | NC_021160.1    | Ca_Kabuli_Chr01 | 47059330                | GG                              | TT                 | TT               | INTERGENIC                    |                    |                                                                                      |
| SNP_6692_A_47061570 | NC_021160.1    | Ca_Kabuli_Chr01 | 47061570                | GG                              | AA                 | AA               | INTERGENIC                    |                    |                                                                                      |
| SNP_6694_A_47146186 | NC_021160.1    | Ca_Kabuli_Chr01 | 47146186                | TT                              | AA                 | AA               | INTRON                        | 101513977          | probable leucine-rich repeat receptor-like serine/threonine-protein kinase At3g14840 |
| SNP_6695_A_47146187 | NC_021160.1    | Ca_Kabuli_Chr01 | 47146187                | TT                              | AA                 | AA               | INTRON                        | 101513977          | probable leucine-rich repeat receptor-like serine/threonine-protein kinase At3g14840 |
| SNP_6696_A_47227447 | NC_021160.1    | Ca_Kabuli_Chr01 | 47227447                | GG                              | AA                 | AA               | URR                           | 101511820          | Unknown function                                                                     |
| SNP_6697_A_47245108 | NC_021160.1    | Ca_Kabuli_Chr01 | 47245108                | TT                              | AA                 | AA               | INTERGENIC                    |                    |                                                                                      |
| SNP_6698_A_47280588 | NC_021160.1    | Ca_Kabuli_Chr01 | 47280588                | GG                              | AA                 | AA               | URR                           | 101515283          | uncharacterized LOC101515283                                                         |
| SNP_6699_A_47292438 | NC_021160.1    | Ca_Kabuli_Chr01 | 47292438                | AA                              | CC                 | CC               | INTRON                        | 101488568          | BES1/BZR1 homolog protein 4-like                                                     |
| SNP_6700_A_47369190 | NC_021160.1    | Ca_Kabuli_Chr01 | 47369190                | TT                              | CC                 | CC               | INTERGENIC                    |                    |                                                                                      |
| SNP_6701_A_47372707 | NC_021160.1    | Ca_Kabuli_Chr01 | 47372707                | AA                              | CC                 | CC               | INTERGENIC                    |                    |                                                                                      |
| SNP_6702_A_47397614 | NC_021160.1    | Ca_Kabuli_Chr01 | 47397614                | GG                              | AA                 | AA               | INTERGENIC                    |                    |                                                                                      |
| SNP_6703_A_47413388 | NC_021160.1    | Ca_Kabuli_Chr01 | 47413388                | AA                              | GG                 | GG               | INTERGENIC                    |                    |                                                                                      |
| SNP_6704_A_47424362 | NC_021160.1    | Ca_Kabuli_Chr01 | 47424362                | AA                              | CC                 | CC               | INTERGENIC                    |                    |                                                                                      |
| SNP_6706_A_47434211 | NC_021160.1    | Ca_Kabuli_Chr01 | 47434211                | CC                              | GG                 | GG               | URR                           | 101490861          | gamma-glutamyl hydrolase 2-like                                                      |
| SNP_6708_A_47493697 | NC_021160.1    | Ca_Kabuli_Chr01 | 47493697                | AA                              | GG                 | GG               | INTERGENIC                    |                    |                                                                                      |
| SNP_6709_A_47510077 | NC_021160.1    | Ca_Kabuli_Chr01 | 47510077                | TT                              | GG                 | GG               | INTERGENIC                    |                    |                                                                                      |
| SNP_6710_A_47522165 | NC_021160.1    | Ca_Kabuli_Chr01 | 47522165                | GG                              | TT                 | TT               | INTERGENIC                    |                    |                                                                                      |
| SNP_6711_A_47541711 | NC_021160.1    | Ca_Kabuli_Chr01 | 47541711                | TT                              | GG                 | GG               | INTERGENIC                    |                    |                                                                                      |

| SNPs IDs            | Chromosome IDs | Chromosomes     | Physical positions (bp) | CDC Frontier (Reference genome) | (Pusa 1103 & HPNB) | (ILWC 46 & LPNB) | Sequence Components of genome | Gene accession IDs | Putative functions           |
|---------------------|----------------|-----------------|-------------------------|---------------------------------|--------------------|------------------|-------------------------------|--------------------|------------------------------|
| SNP_6712_A_47542702 | NC_021160.1    | Ca_Kabuli_Chr01 | 47542702                | TT                              | AA                 | AA               | INTERGENIC                    |                    |                              |
| SNP_6713_A_47542797 | NC_021160.1    | Ca_Kabuli_Chr01 | 47542797                | CC                              | TT                 | TT               | INTERGENIC                    |                    |                              |
| SNP_6714_A_47562557 | NC_021160.1    | Ca_Kabuli_Chr01 | 47562557                | CC                              | TT                 | TT               | INTERGENIC                    |                    |                              |
| SNP_6715_A_47630049 | NC_021160.1    | Ca_Kabuli_Chr01 | 47630049                | AA                              | GG                 | GG               | SYNONYMOUS_CODING             | 101514729          | uncharacterized LOC101514729 |
| SNP_6716_A_47630050 | NC_021160.1    | Ca_Kabuli_Chr01 | 47630050                | CC                              | AA                 | AA               | NON_SYNONYMOUS_CODING         | 101514729          | uncharacterized LOC101514729 |
| SNP_6717_A_47630499 | NC_021160.1    | Ca_Kabuli_Chr01 | 47630499                | TT                              | CC                 | CC               | NON_SYNONYMOUS_CODING         | 101514729          | uncharacterized LOC101514729 |
| SNP_6718_A_47630502 | NC_021160.1    | Ca_Kabuli_Chr01 | 47630502                | CC                              | AA                 | AA               | STOP_GAINED                   | 101514729          | uncharacterized LOC101514729 |
| SNP_6720_A_47630795 | NC_021160.1    | Ca_Kabuli_Chr01 | 47630795                | AA                              | GG                 | GG               | URR                           | 101514729          | uncharacterized LOC101514729 |
| SNP_6722_A_47633064 | NC_021160.1    | Ca_Kabuli_Chr01 | 47633064                | GG                              | AA                 | AA               | INTERGENIC                    |                    |                              |
| SNP_6723_A_47633364 | NC_021160.1    | Ca_Kabuli_Chr01 | 47633364                | CC                              | TT                 | TT               | INTERGENIC                    |                    |                              |
| SNP_6724_A_47662878 | NC_021160.1    | Ca_Kabuli_Chr01 | 47662878                | AA                              | TT                 | TT               | INTERGENIC                    |                    |                              |
| SNP_6725_A_47667542 | NC_021160.1    | Ca_Kabuli_Chr01 | 47667542                | GG                              | TT                 | TT               | INTERGENIC                    |                    |                              |
| SNP_6726_A_47671970 | NC_021160.1    | Ca_Kabuli_Chr01 | 47671970                | CC                              | TT                 | TT               | DRR                           | 101493688          | pathogen-related protein     |
| SNP_6728_A_47753877 | NC_021160.1    | Ca_Kabuli_Chr01 | 47753877                | TT                              | AA                 | AA               | INTERGENIC                    |                    |                              |
| SNP_6729_A_47838359 | NC_021160.1    | Ca_Kabuli_Chr01 | 47838359                | TT                              | CC                 | CC               | INTERGENIC                    |                    |                              |
| SNP_6730_A_47838374 | NC_021160.1    | Ca_Kabuli_Chr01 | 47838374                | AA                              | GG                 | GG               | INTERGENIC                    |                    |                              |
| SNP_6731_A_47838380 | NC_021160.1    | Ca_Kabuli_Chr01 | 47838380                | GG                              | AA                 | AA               | INTERGENIC                    |                    |                              |
| SNP_6732_A_47838384 | NC_021160.1    | Ca_Kabuli_Chr01 | 47838384                | AA                              | GG                 | GG               | INTERGENIC                    |                    |                              |
| SNP_6733_A_47839097 | NC_021160.1    | Ca_Kabuli_Chr01 | 47839097                | TT                              | CC                 | CC               | INTERGENIC                    |                    |                              |
| SNP_6734_A_47839585 | NC_021160.1    | Ca_Kabuli_Chr01 | 47839585                | AA                              | GG                 | GG               | INTERGENIC                    |                    |                              |
| SNP_6735_A_47839624 | NC_021160.1    | Ca_Kabuli_Chr01 | 47839624                | AA                              | GG                 | GG               | INTERGENIC                    |                    |                              |
| SNP_6736_A_47839636 | NC_021160.1    | Ca_Kabuli_Chr01 | 47839636                | AA                              | GG                 | GG               | INTERGENIC                    |                    |                              |

| SNPs IDs            | Chromosome IDs | Chromosomes     | Physical positions (bp) | CDC Frontier (Reference genome) | (Pusa 1103 & HPNB) | (ILWC 46 & LPNB) | Sequence Components of genome | Gene accession IDs | Putative functions          |
|---------------------|----------------|-----------------|-------------------------|---------------------------------|--------------------|------------------|-------------------------------|--------------------|-----------------------------|
| SNP_6737_A_47868030 | NC_021160.1    | Ca_Kabuli_Chr01 | 47868030                | TT                              | CC                 | CC               | INTERGENIC                    |                    |                             |
| SNP_6738_A_47871288 | NC_021160.1    | Ca_Kabuli_Chr01 | 47871288                | CC                              | TT                 | TT               | INTERGENIC                    |                    |                             |
| SNP_6739_A_47875035 | NC_021160.1    | Ca_Kabuli_Chr01 | 47875035                | GG                              | TT                 | TT               | INTERGENIC                    |                    |                             |
| SNP_6740_A_47875121 | NC_021160.1    | Ca_Kabuli_Chr01 | 47875121                | GG                              | AA                 | AA               | INTERGENIC                    |                    |                             |
| SNP_6741_A_47875173 | NC_021160.1    | Ca_Kabuli_Chr01 | 47875173                | AA                              | GG                 | GG               | INTERGENIC                    |                    |                             |
| SNP_6742_A_47875192 | NC_021160.1    | Ca_Kabuli_Chr01 | 47875192                | TT                              | AA                 | AA               | INTERGENIC                    |                    |                             |
| SNP_6744_A_47875218 | NC_021160.1    | Ca_Kabuli_Chr01 | 47875218                | AA                              | TT                 | TT               | INTERGENIC                    |                    |                             |
| SNP_6745_A_47875223 | NC_021160.1    | Ca_Kabuli_Chr01 | 47875223                | AA                              | GG                 | GG               | INTERGENIC                    |                    |                             |
| SNP_6746_A_47875314 | NC_021160.1    | Ca_Kabuli_Chr01 | 47875314                | GG                              | TT                 | TT               | INTERGENIC                    |                    |                             |
| SNP_6747_A_47875521 | NC_021160.1    | Ca_Kabuli_Chr01 | 47875521                | AA                              | GG                 | GG               | INTERGENIC                    |                    |                             |
| SNP_6750_A_47990928 | NC_021160.1    | Ca_Kabuli_Chr01 | 47990928                | CC                              | TT                 | TT               | INTERGENIC                    |                    |                             |
| SNP_6751_A_47992361 | NC_021160.1    | Ca_Kabuli_Chr01 | 47992361                | CC                              | TT                 | TT               | INTERGENIC                    |                    |                             |
| SNP_6752_A_47999360 | NC_021160.1    | Ca_Kabuli_Chr01 | 47999360                | TT                              | AA                 | AA               | INTRON                        | 101501119          | increased DNA methylation 1 |
| SNP_6753_A_48011820 | NC_021160.1    | Ca_Kabuli_Chr01 | 48011820                | CC                              | TT                 | TT               | INTERGENIC                    |                    |                             |
| SNP_6755_A_48069650 | NC_021160.1    | Ca_Kabuli_Chr01 | 48069650                | AA                              | CC                 | CC               | INTERGENIC                    |                    |                             |
| SNP_6756_A_48071249 | NC_021160.1    | Ca_Kabuli_Chr01 | 48071249                | AA                              | GG                 | GG               | INTERGENIC                    |                    |                             |
| SNP_6757_A_48071258 | NC_021160.1    | Ca_Kabuli_Chr01 | 48071258                | AA                              | CC                 | CC               | INTERGENIC                    |                    |                             |
| SNP_6758_A_48071260 | NC_021160.1    | Ca_Kabuli_Chr01 | 48071260                | AA                              | GG                 | GG               | INTERGENIC                    |                    |                             |
| SNP_6759_A_48071274 | NC_021160.1    | Ca_Kabuli_Chr01 | 48071274                | AA                              | GG                 | GG               | INTERGENIC                    |                    |                             |
| SNP_6760_A_48071289 | NC_021160.1    | Ca_Kabuli_Chr01 | 48071289                | GG                              | AA                 | AA               | INTERGENIC                    |                    |                             |
| SNP_6761_A_48071290 | NC_021160.1    | Ca_Kabuli_Chr01 | 48071290                | TT                              | GG                 | GG               | INTERGENIC                    |                    |                             |
| SNP_6762_A_48071479 | NC_021160.1    | Ca_Kabuli_Chr01 | 48071479                | TT                              | CC                 | CC               | INTERGENIC                    |                    |                             |

| SNPs IDs            | Chromosome IDs | Chromosomes     | Physical positions (bp) | CDC Frontier (Reference genome) | (Pusa 1103 & HPNB) | (ILWC 46 & LPNB) | Sequence Components of genome | Gene accession IDs | Putative functions                              |
|---------------------|----------------|-----------------|-------------------------|---------------------------------|--------------------|------------------|-------------------------------|--------------------|-------------------------------------------------|
| SNP_6763_A_48082383 | NC_021160.1    | Ca_Kabuli_Chr01 | 48082383                | TT                              | CC                 | CC               | INTERGENIC                    |                    |                                                 |
| SNP_6764_A_48091753 | NC_021160.1    | Ca_Kabuli_Chr01 | 48091753                | TT                              | CC                 | CC               | INTERGENIC                    |                    |                                                 |
| SNP_6767_A_48142657 | NC_021160.1    | Ca_Kabuli_Chr01 | 48142657                | TT                              | CC                 | CC               | INTERGENIC                    |                    |                                                 |
| SNP_6768_A_48169600 | NC_021160.1    | Ca_Kabuli_Chr01 | 48169600                | AA                              | TT                 | TT               | INTERGENIC                    |                    |                                                 |
| SNP_6770_A_48213164 | NC_021160.1    | Ca_Kabuli_Chr01 | 48213164                | GG                              | AA                 | AA               | INTERGENIC                    |                    |                                                 |
| SNP_6772_A_48290803 | NC_021160.1    | Ca_Kabuli_Chr01 | 48290803                | AA                              | GG                 | GG               | INTRON                        | 101491086          | uncharacterized LOC101491086                    |
| SNP_6773_A_48299999 | NC_021160.1    | Ca_Kabuli_Chr01 | 48299999                | GG                              | AA                 | AA               | INTERGENIC                    |                    |                                                 |
| SNP_6774_A_48322674 | NC_021160.1    | Ca_Kabuli_Chr01 | 48322674                | TT                              | AA                 | AA               | INTERGENIC                    |                    |                                                 |
| SNP_6775_A_48350294 | NC_021160.1    | Ca_Kabuli_Chr01 | 48350294                | TT                              | CC                 | CC               | INTERGENIC                    |                    |                                                 |
| SNP_6776_A_48350321 | NC_021160.1    | Ca_Kabuli_Chr01 | 48350321                | AA                              | TT                 | TT               | INTERGENIC                    |                    |                                                 |
| SNP_6777_A_42046    | NC_021161.1    | Ca_Kabuli_Chr02 | 42046                   | CC                              | TT                 | TT               | INTERGENIC                    |                    |                                                 |
| SNP_6778_A_42119    | NC_021161.1    | Ca_Kabuli_Chr02 | 42119                   | GG                              | TT                 | TT               | INTERGENIC                    |                    |                                                 |
| SNP_6780_A_42433    | NC_021161.1    | Ca_Kabuli_Chr02 | 42433                   | AA                              | GG                 | GG               | INTERGENIC                    |                    |                                                 |
| SNP_6781_A_42678    | NC_021161.1    | Ca_Kabuli_Chr02 | 42678                   | AA                              | GG                 | GG               | INTERGENIC                    |                    |                                                 |
| SNP_6782_A_42752    | NC_021161.1    | Ca_Kabuli_Chr02 | 42752                   | CC                              | AA                 | AA               | INTERGENIC                    |                    |                                                 |
| SNP_6783_A_42907    | NC_021161.1    | Ca_Kabuli_Chr02 | 42907                   | AA                              | CC                 | CC               | INTERGENIC                    |                    |                                                 |
| SNP_6784_A_49284    | NC_021161.1    | Ca_Kabuli_Chr02 | 49284                   | CC                              | AA                 | AA               | INTERGENIC                    |                    |                                                 |
| SNP_6786_A_70724    | NC_021161.1    | Ca_Kabuli_Chr02 | 70724                   | CC                              | TT                 | TT               | INTERGENIC                    |                    |                                                 |
| SNP_6787_A_70737    | NC_021161.1    | Ca_Kabuli_Chr02 | 70737                   | TT                              | CC                 | CC               | INTERGENIC                    |                    |                                                 |
| SNP_6788_A_77417    | NC_021161.1    | Ca_Kabuli_Chr02 | 77417                   | AA                              | GG                 | GG               | INTERGENIC                    |                    |                                                 |
| SNP_6789_A_88119    | NC_021161.1    | Ca_Kabuli_Chr02 | 88119                   | TT                              | CC                 | CC               | URR                           | 101493466          | cationic amino acid transporter 9, chloroplatic |
| SNP_6790_A_151695   | NC_021161.1    | Ca_Kabuli_Chr02 | 151695                  | CC                              | TT                 | TT               | URR                           | 101495602          | UPF0565 protein C2orf69 homolog                 |

| SNPs IDs          | Chromosome IDs | Chromosomes     | Physical positions (bp) | CDC Frontier (Reference genome) | (Pusa 1103 & HPNB) | (ILWC 46 & LPNB) | Sequence Components of genome | Gene accession IDs | Putative functions                |
|-------------------|----------------|-----------------|-------------------------|---------------------------------|--------------------|------------------|-------------------------------|--------------------|-----------------------------------|
| SNP_6791_A_176189 | NC_021161.1    | Ca_Kabuli_Chr02 | 176189                  | AA                              | GG                 | GG               | INTERGENIC                    |                    |                                   |
| SNP_6792_A_183396 | NC_021161.1    | Ca_Kabuli_Chr02 | 183396                  | TT                              | CC                 | CC               | INTERGENIC                    |                    |                                   |
| SNP_6794_A_272691 | NC_021161.1    | Ca_Kabuli_Chr02 | 272691                  | CC                              | TT                 | TT               | INTERGENIC                    |                    |                                   |
| SNP_6795_A_277335 | NC_021161.1    | Ca_Kabuli_Chr02 | 277335                  | AA                              | GG                 | GG               | INTERGENIC                    |                    |                                   |
| SNP_6797_A_298435 | NC_021161.1    | Ca_Kabuli_Chr02 | 298435                  | GG                              | TT                 | TT               | INTERGENIC                    |                    |                                   |
| SNP_6798_A_304092 | NC_021161.1    | Ca_Kabuli_Chr02 | 304092                  | TT                              | CC                 | CC               | INTERGENIC                    |                    |                                   |
| SNP_6799_A_311641 | NC_021161.1    | Ca_Kabuli_Chr02 | 311641                  | GG                              | TT                 | TT               | INTERGENIC                    |                    |                                   |
| SNP_6800_A_323509 | NC_021161.1    | Ca_Kabuli_Chr02 | 323509                  | TT                              | CC                 | CC               | INTERGENIC                    |                    |                                   |
| SNP_6801_A_333624 | NC_021161.1    | Ca_Kabuli_Chr02 | 333624                  | CC                              | TT                 | TT               | INTERGENIC                    |                    |                                   |
| SNP_6802_A_417338 | NC_021161.1    | Ca_Kabuli_Chr02 | 417338                  | AA                              | TT                 | TT               | INTERGENIC                    |                    |                                   |
| SNP_6804_A_458340 | NC_021161.1    | Ca_Kabuli_Chr02 | 458340                  | CC                              | TT                 | TT               | INTERGENIC                    |                    |                                   |
| SNP_6806_A_478241 | NC_021161.1    | Ca_Kabuli_Chr02 | 478241                  | TT                              | AA                 | AA               | DRR                           | 101501121          | uncharacterized LOC101501121      |
| SNP_6807_A_499218 | NC_021161.1    | Ca_Kabuli_Chr02 | 499218                  | CC                              | AA                 | AA               | INTERGENIC                    |                    |                                   |
| SNP_6808_A_541470 | NC_021161.1    | Ca_Kabuli_Chr02 | 541470                  | AA                              | TT                 | TT               | INTRON                        | 101501748          | HEAT repeat-containing protein 5B |
| SNP_6809_A_600871 | NC_021161.1    | Ca_Kabuli_Chr02 | 600871                  | AA                              | TT                 | TT               | INTERGENIC                    |                    |                                   |
| SNP_6810_A_602864 | NC_021161.1    | Ca_Kabuli_Chr02 | 602864                  | GG                              | AA                 | AA               | INTERGENIC                    |                    |                                   |
| SNP_6811_A_628541 | NC_021161.1    | Ca_Kabuli_Chr02 | 628541                  | GG                              | AA                 | AA               | INTERGENIC                    |                    |                                   |
| SNP_6812_A_636222 | NC_021161.1    | Ca_Kabuli_Chr02 | 636222                  | GG                              | TT                 | TT               | INTERGENIC                    |                    |                                   |
| SNP_6814_A_636312 | NC_021161.1    | Ca_Kabuli_Chr02 | 636312                  | AA                              | GG                 | GG               | INTERGENIC                    |                    |                                   |
| SNP_6815_A_636607 | NC_021161.1    | Ca_Kabuli_Chr02 | 636607                  | CC                              | TT                 | TT               | INTERGENIC                    |                    |                                   |
| SNP_6816_A_642840 | NC_021161.1    | Ca_Kabuli_Chr02 | 642840                  | TT                              | CC                 | CC               | INTERGENIC                    |                    |                                   |
| SNP_6817_A_652602 | NC_021161.1    | Ca_Kabuli_Chr02 | 652602                  | CC                              | TT                 | TT               | INTERGENIC                    |                    |                                   |

| SNPs IDs           | Chromosome IDs | Chromosomes     | Physical positions (bp) | CDC Frontier (Reference genome) | (Pusa 1103 & HPNB) | (ILWC 46 & LPNB) | Sequence Components of genome | Gene accession IDs | Putative functions                        |
|--------------------|----------------|-----------------|-------------------------|---------------------------------|--------------------|------------------|-------------------------------|--------------------|-------------------------------------------|
| SNP_6818_A_661280  | NC_021161.1    | Ca_Kabuli_Chr02 | 661280                  | AA                              | CC                 | CC               | INTERGENIC                    |                    |                                           |
| SNP_6819_A_661282  | NC_021161.1    | Ca_Kabuli_Chr02 | 661282                  | TT                              | CC                 | CC               | INTERGENIC                    |                    |                                           |
| SNP_6820_A_661283  | NC_021161.1    | Ca_Kabuli_Chr02 | 661283                  | TT                              | AA                 | AA               | INTERGENIC                    |                    |                                           |
| SNP_6821_A_665904  | NC_021161.1    | Ca_Kabuli_Chr02 | 665904                  | GG                              | AA                 | AA               | INTERGENIC                    |                    |                                           |
| SNP_6823_A_745283  | NC_021161.1    | Ca_Kabuli_Chr02 | 745283                  | AA                              | GG                 | GG               | INTRON                        | 101504964          | uncharacterized LOC101504964              |
| SNP_6825_A_759188  | NC_021161.1    | Ca_Kabuli_Chr02 | 759188                  | GG                              | AA                 | AA               | INTERGENIC                    |                    |                                           |
| SNP_6826_A_776733  | NC_021161.1    | Ca_Kabuli_Chr02 | 776733                  | GG                              | AA                 | AA               | NON_SYNONYMOUS_CODING         | 101505276          | protein FLOWERING LOCUS T-like            |
| SNP_6828_A_857157  | NC_021161.1    | Ca_Kabuli_Chr02 | 857157                  | AA                              | GG                 | GG               | INTERGENIC                    |                    |                                           |
| SNP_6829_A_857169  | NC_021161.1    | Ca_Kabuli_Chr02 | 857169                  | TT                              | AA                 | AA               | INTERGENIC                    |                    |                                           |
| SNP_6831_A_1041083 | NC_021161.1    | Ca_Kabuli_Chr02 | 1041083                 | CC                              | TT                 | TT               | INTRON                        | SKIV2L2            | Unknown function                          |
| SNP_6832_A_1041112 | NC_021161.1    | Ca_Kabuli_Chr02 | 1041112                 | AA                              | GG                 | GG               | INTRON                        | SKIV2L2            | Unknown function                          |
| SNP_6833_A_1041136 | NC_021161.1    | Ca_Kabuli_Chr02 | 1041136                 | TT                              | AA                 | AA               | INTRON                        | SKIV2L2            | Unknown function                          |
| SNP_6834_A_1041205 | NC_021161.1    | Ca_Kabuli_Chr02 | 1041205                 | AA                              | GG                 | GG               | INTRON                        | SKIV2L2            | Unknown function                          |
| SNP_6835_A_1041366 | NC_021161.1    | Ca_Kabuli_Chr02 | 1041366                 | GG                              | AA                 | AA               | NON_SYNONYMOUS_CODING         | SKIV2L2            | Unknown function                          |
| SNP_6836_A_1041434 | NC_021161.1    | Ca_Kabuli_Chr02 | 1041434                 | AA                              | GG                 | GG               | INTRON                        | SKIV2L2            | Unknown function                          |
| SNP_6837_A_1041900 | NC_021161.1    | Ca_Kabuli_Chr02 | 1041900                 | AA                              | TT                 | TT               | INTRON                        | SKIV2L2            | Unknown function                          |
| SNP_6838_A_1047568 | NC_021161.1    | Ca_Kabuli_Chr02 | 1047568                 | CC                              | AA                 | AA               | NON_SYNONYMOUS_CODING         | SKIV2L2            | Unknown function                          |
| SNP_6839_A_1048661 | NC_021161.1    | Ca_Kabuli_Chr02 | 1048661                 | CC                              | GG                 | GG               | URR                           | 101507765          | superkiller viralicidic activity 2-like 2 |
| SNP_6840_A_1048681 | NC_021161.1    | Ca_Kabuli_Chr02 | 1048681                 | TT                              | AA                 | AA               | URR                           | 101507765          | superkiller viralicidic activity 2-like 2 |
| SNP_6841_A_1048683 | NC_021161.1    | Ca_Kabuli_Chr02 | 1048683                 | TT                              | AA                 | AA               | URR                           | 101507765          | superkiller viralicidic activity 2-like 2 |
| SNP_6842_A_1048684 | NC_021161.1    | Ca_Kabuli_Chr02 | 1048684                 | TT                              | AA                 | AA               | URR                           | 101507765          | superkiller viralicidic activity 2-like 2 |
| SNP_6843_A_1048696 | NC_021161.1    | Ca_Kabuli_Chr02 | 1048696                 | TT                              | CC                 | CC               | URR                           | 101507765          | superkiller viralicidic activity 2-like 2 |



| SNPs IDs           | Chromosome IDs | Chromosomes     | Physical positions (bp) | CDC Frontier (Reference genome) | (Pusa 1103 & HPNB) | (ILWC 46 & LPNB) | Sequence Components of genome | Gene accession IDs | Putative functions                                                              |
|--------------------|----------------|-----------------|-------------------------|---------------------------------|--------------------|------------------|-------------------------------|--------------------|---------------------------------------------------------------------------------|
| SNP_6844_A_1049048 | NC_021161.1    | Ca_Kabuli_Chr02 | 1049048                 | TT                              | AA                 | AA               | URR                           | 101507765          | superkiller viralicidic activity 2-like 2                                       |
| SNP_6845_A_1049331 | NC_021161.1    | Ca_Kabuli_Chr02 | 1049331                 | TT                              | CC                 | CC               | URR                           | 101507765          | superkiller viralicidic activity 2-like 2                                       |
| SNP_6846_A_1049430 | NC_021161.1    | Ca_Kabuli_Chr02 | 1049430                 | CC                              | AA                 | AA               | URR                           | 101507765          | superkiller viralicidic activity 2-like 2                                       |
| SNP_6847_A_1049431 | NC_021161.1    | Ca_Kabuli_Chr02 | 1049431                 | CC                              | TT                 | TT               | URR                           | 101507765          | superkiller viralicidic activity 2-like 2                                       |
| SNP_6848_A_1073874 | NC_021161.1    | Ca_Kabuli_Chr02 | 1073874                 | TT                              | AA                 | AA               | INTERGENIC                    |                    |                                                                                 |
| SNP_6849_A_1074897 | NC_021161.1    | Ca_Kabuli_Chr02 | 1074897                 | TT                              | CC                 | CC               | INTERGENIC                    |                    |                                                                                 |
| SNP_6850_A_1075026 | NC_021161.1    | Ca_Kabuli_Chr02 | 1075026                 | GG                              | TT                 | TT               | INTERGENIC                    |                    |                                                                                 |
| SNP_6851_A_1098025 | NC_021161.1    | Ca_Kabuli_Chr02 | 1098025                 | AA                              | TT                 | TT               | INTRON                        | 101489028          | aldose 1-epimerase-like                                                         |
| SNP_6852_A_1098029 | NC_021161.1    | Ca_Kabuli_Chr02 | 1098029                 | CC                              | GG                 | GG               | INTRON                        | 101489028          | aldose 1-epimerase-like                                                         |
| SNP_6853_A_1134133 | NC_021161.1    | Ca_Kabuli_Chr02 | 1134133                 | AA                              | TT                 | TT               | INTERGENIC                    |                    |                                                                                 |
| SNP_6854_A_1159789 | NC_021161.1    | Ca_Kabuli_Chr02 | 1159789                 | AA                              | GG                 | GG               | INTERGENIC                    |                    |                                                                                 |
| SNP_6855_A_1177921 | NC_021161.1    | Ca_Kabuli_Chr02 | 1177921                 | CC                              | TT                 | TT               | INTRON                        | 101490658          | beta-galactosidase 11-like                                                      |
| SNP_6856_A_1182813 | NC_021161.1    | Ca_Kabuli_Chr02 | 1182813                 | GG                              | AA                 | AA               | INTRON                        | 101490658          | beta-galactosidase 11-like                                                      |
| SNP_6857_A_1197290 | NC_021161.1    | Ca_Kabuli_Chr02 | 1197290                 | AA                              | TT                 | TT               | INTERGENIC                    |                    |                                                                                 |
| SNP_6858_A_1204400 | NC_021161.1    | Ca_Kabuli_Chr02 | 1204400                 | TT                              | CC                 | CC               | INTERGENIC                    |                    |                                                                                 |
| SNP_6859_A_1204786 | NC_021161.1    | Ca_Kabuli_Chr02 | 1204786                 | GG                              | CC                 | CC               | INTERGENIC                    |                    |                                                                                 |
| SNP_6860_A_1209240 | NC_021161.1    | Ca_Kabuli_Chr02 | 1209240                 | CC                              | TT                 | TT               | DRR                           | 101490983          | Unknown function                                                                |
| SNP_6861_A_1230714 | NC_021161.1    | Ca_Kabuli_Chr02 | 1230714                 | TT                              | CC                 | CC               | INTRON                        | 101491178          | inositol hexakisphosphate and diphosphoinositol-pentakisphosphate kinase 2-like |
| SNP_6862_A_1230720 | NC_021161.1    | Ca_Kabuli_Chr02 | 1230720                 | TT                              | CC                 | CC               | INTRON                        | 101491178          | inositol hexakisphosphate and diphosphoinositol-pentakisphosphate kinase 2-like |
| SNP_6863_A_1230723 | NC_021161.1    | Ca_Kabuli_Chr02 | 1230723                 | TT                              | CC                 | CC               | INTRON                        | 101491178          | inositol hexakisphosphate and diphosphoinositol-pentakisphosphate kinase 2-like |
| SNP_6864_A_1231618 | NC_021161.1    | Ca_Kabuli_Chr02 | 1231618                 | GG                              | AA                 | AA               | INTRON                        | 101491178          | inositol hexakisphosphate and diphosphoinositol-pentakisphosphate kinase 2-like |
| SNP_6866_A_1257716 | NC_021161.1    | Ca_Kabuli_Chr02 | 1257716                 | AA                              | TT                 | TT               | INTRON                        | 101491178          | inositol hexakisphosphate and diphosphoinositol-pentakisphosphate kinase 2-like |

| SNPs IDs           | Chromosome IDs | Chromosomes     | Physical positions (bp) | CDC Frontier genome (Reference genome) | (Pusa 1103 & HPNB) | (ILWC 46 & LPNB) | Sequence genome | Components of | Gene accession IDs | Putative functions                              |
|--------------------|----------------|-----------------|-------------------------|----------------------------------------|--------------------|------------------|-----------------|---------------|--------------------|-------------------------------------------------|
| SNP_6867_A_1303231 | NC_021161.1    | Ca_Kabuli_Chr02 | 1303231                 | TT                                     | GG                 | GG               | INTERGENIC      |               |                    |                                                 |
| SNP_6868_A_1303281 | NC_021161.1    | Ca_Kabuli_Chr02 | 1303281                 | AA                                     | GG                 | GG               | INTERGENIC      |               |                    |                                                 |
| SNP_6869_A_1303466 | NC_021161.1    | Ca_Kabuli_Chr02 | 1303466                 | TT                                     | GG                 | GG               | INTERGENIC      |               |                    |                                                 |
| SNP_6870_A_1303601 | NC_021161.1    | Ca_Kabuli_Chr02 | 1303601                 | GG                                     | AA                 | AA               | INTERGENIC      |               |                    |                                                 |
| SNP_6871_A_1313350 | NC_021161.1    | Ca_Kabuli_Chr02 | 1313350                 | GG                                     | AA                 | AA               | URR             | 101491808     |                    | probable receptor-like protein kinase At5g15080 |
| SNP_6872_A_1335737 | NC_021161.1    | Ca_Kabuli_Chr02 | 1335737                 | TT                                     | AA                 | AA               | INTERGENIC      |               |                    |                                                 |
| SNP_6873_A_1387180 | NC_021161.1    | Ca_Kabuli_Chr02 | 1387180                 | CC                                     | TT                 | TT               | DRR             | 101494636     |                    | uncharacterized LOC101494636                    |
| SNP_6874_A_1461064 | NC_021161.1    | Ca_Kabuli_Chr02 | 1461064                 | TT                                     | AA                 | AA               | INTERGENIC      |               |                    |                                                 |
| SNP_6875_A_1461130 | NC_021161.1    | Ca_Kabuli_Chr02 | 1461130                 | GG                                     | AA                 | AA               | INTERGENIC      |               |                    |                                                 |
| SNP_6876_A_1461166 | NC_021161.1    | Ca_Kabuli_Chr02 | 1461166                 | AA                                     | TT                 | TT               | INTERGENIC      |               |                    |                                                 |
| SNP_6877_A_1461498 | NC_021161.1    | Ca_Kabuli_Chr02 | 1461498                 | AA                                     | GG                 | GG               | INTERGENIC      |               |                    |                                                 |
| SNP_6878_A_1461565 | NC_021161.1    | Ca_Kabuli_Chr02 | 1461565                 | CC                                     | AA                 | AA               | INTERGENIC      |               |                    |                                                 |
| SNP_6879_A_1461633 | NC_021161.1    | Ca_Kabuli_Chr02 | 1461633                 | AA                                     | GG                 | GG               | INTERGENIC      |               |                    |                                                 |
| SNP_6880_A_1462240 | NC_021161.1    | Ca_Kabuli_Chr02 | 1462240                 | AA                                     | GG                 | GG               | INTERGENIC      |               |                    |                                                 |
| SNP_6881_A_1462255 | NC_021161.1    | Ca_Kabuli_Chr02 | 1462255                 | AA                                     | TT                 | TT               | INTERGENIC      |               |                    |                                                 |
| SNP_6882_A_1462257 | NC_021161.1    | Ca_Kabuli_Chr02 | 1462257                 | CC                                     | TT                 | TT               | INTERGENIC      |               |                    |                                                 |
| SNP_6883_A_1462422 | NC_021161.1    | Ca_Kabuli_Chr02 | 1462422                 | AA                                     | GG                 | GG               | INTERGENIC      |               |                    |                                                 |
| SNP_6884_A_1462573 | NC_021161.1    | Ca_Kabuli_Chr02 | 1462573                 | GG                                     | AA                 | AA               | INTERGENIC      |               |                    |                                                 |
| SNP_6885_A_1486798 | NC_021161.1    | Ca_Kabuli_Chr02 | 1486798                 | TT                                     | GG                 | GG               | INTERGENIC      |               |                    |                                                 |
| SNP_6886_A_1486814 | NC_021161.1    | Ca_Kabuli_Chr02 | 1486814                 | CC                                     | GG                 | GG               | INTERGENIC      |               |                    |                                                 |
| SNP_6887_A_1487076 | NC_021161.1    | Ca_Kabuli_Chr02 | 1487076                 | AA                                     | GG                 | GG               | INTERGENIC      |               |                    |                                                 |
| SNP_6888_A_1487116 | NC_021161.1    | Ca_Kabuli_Chr02 | 1487116                 | CC                                     | GG                 | GG               | INTERGENIC      |               |                    |                                                 |

| SNPs IDs           | Chromosome IDs | Chromosomes     | Physical positions (bp) | CDC Frontier genome (Reference genome) | (Pusa 1103 & HPNB) | (ILWC 46 & LPNB) | Sequence Components of genome | Gene accession IDs | Putative functions                         |
|--------------------|----------------|-----------------|-------------------------|----------------------------------------|--------------------|------------------|-------------------------------|--------------------|--------------------------------------------|
| SNP_6889_A_1487149 | NC_021161.1    | Ca_Kabuli_Chr02 | 1487149                 | TT                                     | GG                 | GG               | INTERGENIC                    |                    |                                            |
| SNP_6890_A_1487155 | NC_021161.1    | Ca_Kabuli_Chr02 | 1487155                 | AA                                     | CC                 | CC               | INTERGENIC                    |                    |                                            |
| SNP_6891_A_1556527 | NC_021161.1    | Ca_Kabuli_Chr02 | 1556527                 | GG                                     | AA                 | AA               | INTERGENIC                    |                    |                                            |
| SNP_6893_A_1639786 | NC_021161.1    | Ca_Kabuli_Chr02 | 1639786                 | AA                                     | TT                 | TT               | INTERGENIC                    |                    |                                            |
| SNP_6894_A_1640042 | NC_021161.1    | Ca_Kabuli_Chr02 | 1640042                 | GG                                     | TT                 | TT               | INTERGENIC                    |                    |                                            |
| SNP_6895_A_1640052 | NC_021161.1    | Ca_Kabuli_Chr02 | 1640052                 | GG                                     | TT                 | TT               | INTERGENIC                    |                    |                                            |
| SNP_6897_A_1640387 | NC_021161.1    | Ca_Kabuli_Chr02 | 1640387                 | GG                                     | TT                 | TT               | INTERGENIC                    |                    |                                            |
| SNP_6898_A_1640440 | NC_021161.1    | Ca_Kabuli_Chr02 | 1640440                 | TT                                     | AA                 | AA               | INTERGENIC                    |                    |                                            |
| SNP_6899_A_1640449 | NC_021161.1    | Ca_Kabuli_Chr02 | 1640449                 | CC                                     | TT                 | TT               | INTERGENIC                    |                    |                                            |
| SNP_6900_A_1640511 | NC_021161.1    | Ca_Kabuli_Chr02 | 1640511                 | TT                                     | AA                 | AA               | INTERGENIC                    |                    |                                            |
| SNP_6901_A_1640532 | NC_021161.1    | Ca_Kabuli_Chr02 | 1640532                 | AA                                     | TT                 | TT               | INTERGENIC                    |                    |                                            |
| SNP_6902_A_1640552 | NC_021161.1    | Ca_Kabuli_Chr02 | 1640552                 | TT                                     | CC                 | CC               | INTERGENIC                    |                    |                                            |
| SNP_6903_A_1640907 | NC_021161.1    | Ca_Kabuli_Chr02 | 1640907                 | CC                                     | GG                 | GG               | INTERGENIC                    |                    |                                            |
| SNP_6904_A_1640937 | NC_021161.1    | Ca_Kabuli_Chr02 | 1640937                 | TT                                     | AA                 | AA               | INTERGENIC                    |                    |                                            |
| SNP_6905_A_1640955 | NC_021161.1    | Ca_Kabuli_Chr02 | 1640955                 | TT                                     | CC                 | CC               | INTERGENIC                    |                    |                                            |
| SNP_6906_A_1640961 | NC_021161.1    | Ca_Kabuli_Chr02 | 1640961                 | CC                                     | TT                 | TT               | INTERGENIC                    |                    |                                            |
| SNP_6907_A_1640970 | NC_021161.1    | Ca_Kabuli_Chr02 | 1640970                 | CC                                     | TT                 | TT               | INTERGENIC                    |                    |                                            |
| SNP_6908_A_1650078 | NC_021161.1    | Ca_Kabuli_Chr02 | 1650078                 | AA                                     | GG                 | GG               | URR                           | 101501749          | 2-hydroxyacyl-CoA lyase                    |
| SNP_6909_A_1650101 | NC_021161.1    | Ca_Kabuli_Chr02 | 1650101                 | AA                                     | TT                 | TT               | URR                           | 101501749          | 2-hydroxyacyl-CoA lyase                    |
| SNP_6910_A_1650670 | NC_021161.1    | Ca_Kabuli_Chr02 | 1650670                 | AA                                     | TT                 | TT               | URR                           | 101501749          | 2-hydroxyacyl-CoA lyase                    |
| SNP_6911_A_1702706 | NC_021161.1    | Ca_Kabuli_Chr02 | 1702706                 | GG                                     | AA                 | AA               | DRR                           | 101503341          | glucuronokinase 1                          |
| SNP_6913_A_1735043 | NC_021161.1    | Ca_Kabuli_Chr02 | 1735043                 | CC                                     | TT                 | TT               | URR                           | 101505491          | DNA (cytosine-5)-methyltransferase 1B-like |

| SNPs IDs           | Chromosome IDs | Chromosomes     | Physical positions (bp) | CDC Frontier (Reference genome) | (Pusa 1103 & HPNB) | (ILWC 46 & LPNB) | Sequence Components of genome | Gene accession IDs | Putative functions                                              |
|--------------------|----------------|-----------------|-------------------------|---------------------------------|--------------------|------------------|-------------------------------|--------------------|-----------------------------------------------------------------|
| SNP_6916_A_1881737 | NC_021161.1    | Ca_Kabuli_Chr02 | 1881737                 | GG                              | AA                 | AA               | INTRON                        | 101513429          | nuclear pore complex protein GP210                              |
| SNP_6918_A_1985810 | NC_021161.1    | Ca_Kabuli_Chr02 | 1985810                 | CC                              | AA                 | AA               | INTRON                        | 101512134          | putative clathrin assembly protein At5g57200                    |
| SNP_6919_A_2060943 | NC_021161.1    | Ca_Kabuli_Chr02 | 2060943                 | TT                              | AA                 | AA               | INTERGENIC                    |                    |                                                                 |
| SNP_6920_A_2072808 | NC_021161.1    | Ca_Kabuli_Chr02 | 2072808                 | TT                              | GG                 | GG               | INTERGENIC                    |                    |                                                                 |
| SNP_6921_A_2073018 | NC_021161.1    | Ca_Kabuli_Chr02 | 2073018                 | AA                              | GG                 | GG               | INTERGENIC                    |                    |                                                                 |
| SNP_6922_A_2078375 | NC_021161.1    | Ca_Kabuli_Chr02 | 2078375                 | CC                              | TT                 | TT               | STOP_GAINED                   | 101495058          | ATPase family AAA domain-containing protein 3-B-like            |
| SNP_6923_A_2078731 | NC_021161.1    | Ca_Kabuli_Chr02 | 2078731                 | CC                              | AA                 | AA               | NON_SYNONYMOUS_CODING         | 101495058          | ATPase family AAA domain-containing protein 3-B-like            |
| SNP_6924_A_2081555 | NC_021161.1    | Ca_Kabuli_Chr02 | 2081555                 | AA                              | GG                 | GG               | URR                           | 101495058          | ATPase family AAA domain-containing protein 3-B-like            |
| SNP_6927_A_2169178 | NC_021161.1    | Ca_Kabuli_Chr02 | 2169178                 | CC                              | TT                 | TT               | INTERGENIC                    |                    |                                                                 |
| SNP_6928_A_2169207 | NC_021161.1    | Ca_Kabuli_Chr02 | 2169207                 | AA                              | GG                 | GG               | INTERGENIC                    |                    |                                                                 |
| SNP_6930_A_2278749 | NC_021161.1    | Ca_Kabuli_Chr02 | 2278749                 | GG                              | AA                 | AA               | DRR                           | 101503017          | deoxynucleoside triphosphate triphosphohydrolase SAMHD1 homolog |
| SNP_6931_A_2317588 | NC_021161.1    | Ca_Kabuli_Chr02 | 2317588                 | CC                              | GG                 | GG               | URR                           | 101504743          | deoxynucleoside triphosphate triphosphohydrolase SAMHD1 homolog |
| SNP_6932_A_2326382 | NC_021161.1    | Ca_Kabuli_Chr02 | 2326382                 | TT                              | CC                 | CC               | INTERGENIC                    |                    |                                                                 |
| SNP_6933_A_2338678 | NC_021161.1    | Ca_Kabuli_Chr02 | 2338678                 | AA                              | CC                 | CC               | INTRON                        | 101489473          | disease resistance protein RGA2-like                            |
| SNP_6935_A_2504134 | NC_021161.1    | Ca_Kabuli_Chr02 | 2504134                 | TT                              | CC                 | CC               | SYNONYMOUS_CODING             | 101509558          | WAT1-related protein At3g28050-like                             |
| SNP_6937_A_2561827 | NC_021161.1    | Ca_Kabuli_Chr02 | 2561827                 | AA                              | GG                 | GG               | INTRON                        | 101514313          | protein ALTERED XYLOGLUCAN 4-like                               |
| SNP_6938_A_2568155 | NC_021161.1    | Ca_Kabuli_Chr02 | 2568155                 | AA                              | GG                 | GG               | URR                           | 101514313          | protein ALTERED XYLOGLUCAN 4-like                               |
| SNP_6940_A_2628676 | NC_021161.1    | Ca_Kabuli_Chr02 | 2628676                 | GG                              | TT                 | TT               | INTERGENIC                    |                    |                                                                 |
| SNP_6943_A_2811083 | NC_021161.1    | Ca_Kabuli_Chr02 | 2811083                 | AA                              | TT                 | TT               | INTRON                        | 101501233          | ABC transporter B family member 15-like                         |
| SNP_6944_A_2852365 | NC_021161.1    | Ca_Kabuli_Chr02 | 2852365                 | TT                              | CC                 | CC               | URR                           | 101502187          | glucose-6-phosphate isomerase, cytosolic                        |
| SNP_6945_A_2886782 | NC_021161.1    | Ca_Kabuli_Chr02 | 2886782                 | AA                              | GG                 | GG               | INTERGENIC                    |                    |                                                                 |
| SNP_6946_A_2886789 | NC_021161.1    | Ca_Kabuli_Chr02 | 2886789                 | AA                              | GG                 | GG               | INTERGENIC                    |                    |                                                                 |

| SNPs IDs           | Chromosome IDs | Chromosomes     | Physical positions (bp) | CDC Frontier genome (Reference genome) | (Pusa 1103 & HPNB) | (ILWC 46 & LPNB) | Sequence Components of genome | Gene accession IDs | Putative functions                      |
|--------------------|----------------|-----------------|-------------------------|----------------------------------------|--------------------|------------------|-------------------------------|--------------------|-----------------------------------------|
| SNP_6947_A_2910745 | NC_021161.1    | Ca_Kabuli_Chr02 | 2910745                 | GG                                     | TT                 | TT               | DRR                           | 101488368          | Unknown function                        |
| SNP_6948_A_2930153 | NC_021161.1    | Ca_Kabuli_Chr02 | 2930153                 | TT                                     | CC                 | CC               | URR                           | 101504553          | Unknown function                        |
| SNP_6949_A_2934659 | NC_021161.1    | Ca_Kabuli_Chr02 | 2934659                 | AA                                     | GG                 | GG               | INTRON                        | 101489030          | probable mitochondrial chaperone BCS1-A |
| SNP_6950_A_2941365 | NC_021161.1    | Ca_Kabuli_Chr02 | 2941365                 | CC                                     | AA                 | AA               | INTERGENIC                    |                    |                                         |
| SNP_6951_A_2941557 | NC_021161.1    | Ca_Kabuli_Chr02 | 2941557                 | TT                                     | CC                 | CC               | INTERGENIC                    |                    |                                         |
| SNP_6952_A_2941609 | NC_021161.1    | Ca_Kabuli_Chr02 | 2941609                 | CC                                     | TT                 | TT               | INTERGENIC                    |                    |                                         |
| SNP_6953_A_2950321 | NC_021161.1    | Ca_Kabuli_Chr02 | 2950321                 | AA                                     | CC                 | CC               | INTERGENIC                    |                    |                                         |
| SNP_6954_A_2960483 | NC_021161.1    | Ca_Kabuli_Chr02 | 2960483                 | CC                                     | TT                 | TT               | INTRON                        | 101505277          | probable mitochondrial chaperone BCS1-A |
| SNP_6955_A_2974843 | NC_021161.1    | Ca_Kabuli_Chr02 | 2974843                 | AA                                     | GG                 | GG               | NON_SYNONYMOUS_CODING         | 101505605          | probable mitochondrial chaperone BCS1-A |
| SNP_6956_A_2974865 | NC_021161.1    | Ca_Kabuli_Chr02 | 2974865                 | GG                                     | TT                 | TT               | URR                           | 101505605          | probable mitochondrial chaperone BCS1-A |
| SNP_6957_A_2974900 | NC_021161.1    | Ca_Kabuli_Chr02 | 2974900                 | GG                                     | AA                 | AA               | URR                           | 101505605          | probable mitochondrial chaperone BCS1-A |
| SNP_6960_A_2978074 | NC_021161.1    | Ca_Kabuli_Chr02 | 2978074                 | AA                                     | CC                 | CC               | INTERGENIC                    |                    |                                         |
| SNP_6961_A_2984326 | NC_021161.1    | Ca_Kabuli_Chr02 | 2984326                 | CC                                     | AA                 | AA               | INTERGENIC                    |                    |                                         |
| SNP_6964_A_2984433 | NC_021161.1    | Ca_Kabuli_Chr02 | 2984433                 | AA                                     | TT                 | TT               | INTERGENIC                    |                    |                                         |
| SNP_6965_A_2984676 | NC_021161.1    | Ca_Kabuli_Chr02 | 2984676                 | GG                                     | AA                 | AA               | INTERGENIC                    |                    |                                         |
| SNP_6966_A_2984693 | NC_021161.1    | Ca_Kabuli_Chr02 | 2984693                 | CC                                     | TT                 | TT               | INTERGENIC                    |                    |                                         |
| SNP_6968_A_2985826 | NC_021161.1    | Ca_Kabuli_Chr02 | 2985826                 | TT                                     | CC                 | CC               | INTERGENIC                    |                    |                                         |
| SNP_6969_A_2985893 | NC_021161.1    | Ca_Kabuli_Chr02 | 2985893                 | TT                                     | AA                 | AA               | INTERGENIC                    |                    |                                         |
| SNP_6970_A_2985894 | NC_021161.1    | Ca_Kabuli_Chr02 | 2985894                 | TT                                     | CC                 | CC               | INTERGENIC                    |                    |                                         |
| SNP_6973_A_2998171 | NC_021161.1    | Ca_Kabuli_Chr02 | 2998171                 | GG                                     | AA                 | AA               | INTERGENIC                    |                    |                                         |
| SNP_6974_A_2998207 | NC_021161.1    | Ca_Kabuli_Chr02 | 2998207                 | TT                                     | AA                 | AA               | INTERGENIC                    |                    |                                         |
| SNP_6975_A_2998278 | NC_021161.1    | Ca_Kabuli_Chr02 | 2998278                 | AA                                     | TT                 | TT               | INTERGENIC                    |                    |                                         |

| SNPs IDs           | Chromosome IDs | Chromosomes     | Physical positions (bp) | CDC Frontier genome (Reference genome) | (Pusa 1103 & HPNB) | (ILWC 46 & LPNB) | Sequence Components of genome | Gene accession IDs | Putative functions |
|--------------------|----------------|-----------------|-------------------------|----------------------------------------|--------------------|------------------|-------------------------------|--------------------|--------------------|
| SNP_6976_A_2998285 | NC_021161.1    | Ca_Kabuli_Chr02 | 2998285                 | GG                                     | AA                 | AA               | INTERGENIC                    |                    |                    |
| SNP_6978_A_3000657 | NC_021161.1    | Ca_Kabuli_Chr02 | 3000657                 | AA                                     | GG                 | GG               | INTERGENIC                    |                    |                    |
| SNP_6979_A_3000668 | NC_021161.1    | Ca_Kabuli_Chr02 | 3000668                 | CC                                     | TT                 | TT               | INTERGENIC                    |                    |                    |
| SNP_6980_A_3001619 | NC_021161.1    | Ca_Kabuli_Chr02 | 3001619                 | AA                                     | GG                 | GG               | INTERGENIC                    |                    |                    |
| SNP_6981_A_3001666 | NC_021161.1    | Ca_Kabuli_Chr02 | 3001666                 | GG                                     | AA                 | AA               | INTERGENIC                    |                    |                    |
| SNP_6983_A_3001719 | NC_021161.1    | Ca_Kabuli_Chr02 | 3001719                 | TT                                     | CC                 | CC               | INTERGENIC                    |                    |                    |
| SNP_6984_A_3005029 | NC_021161.1    | Ca_Kabuli_Chr02 | 3005029                 | GG                                     | AA                 | AA               | INTERGENIC                    |                    |                    |
| SNP_6985_A_3005843 | NC_021161.1    | Ca_Kabuli_Chr02 | 3005843                 | AA                                     | GG                 | GG               | INTERGENIC                    |                    |                    |
| SNP_6986_A_3006049 | NC_021161.1    | Ca_Kabuli_Chr02 | 3006049                 | CC                                     | AA                 | AA               | INTERGENIC                    |                    |                    |
| SNP_6987_A_3006438 | NC_021161.1    | Ca_Kabuli_Chr02 | 3006438                 | CC                                     | GG                 | GG               | INTERGENIC                    |                    |                    |
| SNP_6988_A_3007660 | NC_021161.1    | Ca_Kabuli_Chr02 | 3007660                 | TT                                     | CC                 | CC               | DRR                           | 101506242          | xylosyltransferase |
| SNP_6989_A_3008277 | NC_021161.1    | Ca_Kabuli_Chr02 | 3008277                 | TT                                     | CC                 | CC               | SYNONYMOUS_CODING             | 101506242          | xylosyltransferase |
| SNP_6992_A_3012640 | NC_021161.1    | Ca_Kabuli_Chr02 | 3012640                 | AA                                     | CC                 | CC               | URR                           | 101506242          | xylosyltransferase |
| SNP_6994_A_3022822 | NC_021161.1    | Ca_Kabuli_Chr02 | 3022822                 | GG                                     | TT                 | TT               | INTERGENIC                    |                    |                    |
| SNP_6997_A_3025502 | NC_021161.1    | Ca_Kabuli_Chr02 | 3025502                 | CC                                     | TT                 | TT               | INTERGENIC                    |                    |                    |
| SNP_6998_A_3026635 | NC_021161.1    | Ca_Kabuli_Chr02 | 3026635                 | TT                                     | GG                 | GG               | INTERGENIC                    |                    |                    |
| SNP_6999_A_3026636 | NC_021161.1    | Ca_Kabuli_Chr02 | 3026636                 | AA                                     | GG                 | GG               | INTERGENIC                    |                    |                    |
| SNP_7000_A_3026654 | NC_021161.1    | Ca_Kabuli_Chr02 | 3026654                 | TT                                     | AA                 | AA               | INTERGENIC                    |                    |                    |
| SNP_7001_A_3026656 | NC_021161.1    | Ca_Kabuli_Chr02 | 3026656                 | AA                                     | TT                 | TT               | INTERGENIC                    |                    |                    |
| SNP_7002_A_3026947 | NC_021161.1    | Ca_Kabuli_Chr02 | 3026947                 | GG                                     | AA                 | AA               | DRR                           | 101490345          | Unknown function   |
| SNP_7003_A_3029358 | NC_021161.1    | Ca_Kabuli_Chr02 | 3029358                 | TT                                     | GG                 | GG               | URR                           | 101490345          | Unknown function   |
| SNP_7005_A_3029479 | NC_021161.1    | Ca_Kabuli_Chr02 | 3029479                 | AA                                     | TT                 | TT               | URR                           | 101490345          | Unknown function   |

| SNPs IDs           | Chromosome IDs | Chromosomes     | Physical positions (bp) | CDC Frontier (Reference genome) | (Pusa 1103 & HPNB) | (ILWC 46 & LPNB) | Sequence Components of genome | Gene accession IDs | Putative functions           |
|--------------------|----------------|-----------------|-------------------------|---------------------------------|--------------------|------------------|-------------------------------|--------------------|------------------------------|
| SNP_7006_A_3029714 | NC_021161.1    | Ca_Kabuli_Chr02 | 3029714                 | GG                              | CC                 | CC               | URR                           | 101490345          | Unknown function             |
| SNP_7007_A_3029821 | NC_021161.1    | Ca_Kabuli_Chr02 | 3029821                 | AA                              | GG                 | GG               | URR                           | 101490345          | Unknown function             |
| SNP_7009_A_3030953 | NC_021161.1    | Ca_Kabuli_Chr02 | 3030953                 | GG                              | CC                 | CC               | INTERGENIC                    |                    |                              |
| SNP_7010_A_3031173 | NC_021161.1    | Ca_Kabuli_Chr02 | 3031173                 | GG                              | AA                 | AA               | INTERGENIC                    |                    |                              |
| SNP_7011_A_3031197 | NC_021161.1    | Ca_Kabuli_Chr02 | 3031197                 | GG                              | CC                 | CC               | INTERGENIC                    |                    |                              |
| SNP_7013_A_3031310 | NC_021161.1    | Ca_Kabuli_Chr02 | 3031310                 | TT                              | AA                 | AA               | INTERGENIC                    |                    |                              |
| SNP_7014_A_3031347 | NC_021161.1    | Ca_Kabuli_Chr02 | 3031347                 | GG                              | AA                 | AA               | INTERGENIC                    |                    |                              |
| SNP_7015_A_3031361 | NC_021161.1    | Ca_Kabuli_Chr02 | 3031361                 | GG                              | CC                 | CC               | INTERGENIC                    |                    |                              |
| SNP_7016_A_3031624 | NC_021161.1    | Ca_Kabuli_Chr02 | 3031624                 | AA                              | CC                 | CC               | INTERGENIC                    |                    |                              |
| SNP_7017_A_3031697 | NC_021161.1    | Ca_Kabuli_Chr02 | 3031697                 | AA                              | GG                 | GG               | INTERGENIC                    |                    |                              |
| SNP_7018_A_3031726 | NC_021161.1    | Ca_Kabuli_Chr02 | 3031726                 | GG                              | AA                 | AA               | INTERGENIC                    |                    |                              |
| SNP_7020_A_3033169 | NC_021161.1    | Ca_Kabuli_Chr02 | 3033169                 | AA                              | TT                 | TT               | INTERGENIC                    |                    |                              |
| SNP_7021_A_3034643 | NC_021161.1    | Ca_Kabuli_Chr02 | 3034643                 | GG                              | TT                 | TT               | DRR                           | 101506571          | uncharacterized LOC101506571 |
| SNP_7022_A_3037165 | NC_021161.1    | Ca_Kabuli_Chr02 | 3037165                 | CC                              | TT                 | TT               | INTRON                        | 101506571          | uncharacterized LOC101506571 |
| SNP_7024_A_3041980 | NC_021161.1    | Ca_Kabuli_Chr02 | 3041980                 | AA                              | GG                 | GG               | INTERGENIC                    |                    |                              |
| SNP_7025_A_3042020 | NC_021161.1    | Ca_Kabuli_Chr02 | 3042020                 | CC                              | TT                 | TT               | INTERGENIC                    |                    |                              |
| SNP_7027_A_3045020 | NC_021161.1    | Ca_Kabuli_Chr02 | 3045020                 | TT                              | AA                 | AA               | INTRON                        | 101506908          | uncharacterized LOC101506908 |
| SNP_7028_A_3047089 | NC_021161.1    | Ca_Kabuli_Chr02 | 3047089                 | TT                              | AA                 | AA               | INTRON                        | 101506908          | uncharacterized LOC101506908 |
| SNP_7029_A_3047102 | NC_021161.1    | Ca_Kabuli_Chr02 | 3047102                 | CC                              | AA                 | AA               | INTRON                        | 101506908          | uncharacterized LOC101506908 |
| SNP_7031_A_3047241 | NC_021161.1    | Ca_Kabuli_Chr02 | 3047241                 | CC                              | TT                 | TT               | INTRON                        | 101506908          | uncharacterized LOC101506908 |
| SNP_7032_A_3047449 | NC_021161.1    | Ca_Kabuli_Chr02 | 3047449                 | AA                              | GG                 | GG               | INTRON                        | 101506908          | uncharacterized LOC101506908 |
| SNP_7033_A_3047579 | NC_021161.1    | Ca_Kabuli_Chr02 | 3047579                 | GG                              | CC                 | CC               | INTRON                        | 101506908          | uncharacterized LOC101506908 |

| SNPs IDs           | Chromosome IDs | Chromosomes     | Physical positions (bp) | CDC Frontier (Reference genome) | (Pusa 1103 & HPNB) | (ILWC 46 & LPNB) | Sequence Components of genome | Gene accession IDs | Putative functions                                                              |
|--------------------|----------------|-----------------|-------------------------|---------------------------------|--------------------|------------------|-------------------------------|--------------------|---------------------------------------------------------------------------------|
| SNP_7034_A_3047580 | NC_021161.1    | Ca_Kabuli_Chr02 | 3047580                 | AA                              | CC                 | CC               | INTRON                        | 101506908          | uncharacterized LOC101506908                                                    |
| SNP_7035_A_3047601 | NC_021161.1    | Ca_Kabuli_Chr02 | 3047601                 | AA                              | TT                 | TT               | INTRON                        | 101506908          | uncharacterized LOC101506908                                                    |
| SNP_7037_A_3050295 | NC_021161.1    | Ca_Kabuli_Chr02 | 3050295                 | AA                              | GG                 | GG               | INTERGENIC                    |                    |                                                                                 |
| SNP_7038_A_3050871 | NC_021161.1    | Ca_Kabuli_Chr02 | 3050871                 | CC                              | TT                 | TT               | DRR                           | 101507767          | inositol hexakisphosphate and diphosphoinositol-pentakisphosphate kinase 2-like |
| SNP_7039_A_3052253 | NC_021161.1    | Ca_Kabuli_Chr02 | 3052253                 | GG                              | CC                 | CC               | INTERGENIC                    |                    |                                                                                 |
| SNP_7040_A_3052305 | NC_021161.1    | Ca_Kabuli_Chr02 | 3052305                 | CC                              | GG                 | GG               | INTERGENIC                    |                    |                                                                                 |
| SNP_7041_A_3052312 | NC_021161.1    | Ca_Kabuli_Chr02 | 3052312                 | TT                              | CC                 | CC               | INTERGENIC                    |                    |                                                                                 |
| SNP_7042_A_3052350 | NC_021161.1    | Ca_Kabuli_Chr02 | 3052350                 | CC                              | TT                 | TT               | INTERGENIC                    |                    |                                                                                 |
| SNP_7043_A_3087744 | NC_021161.1    | Ca_Kabuli_Chr02 | 3087744                 | GG                              | AA                 | AA               | URR                           | 101507767          | inositol hexakisphosphate and diphosphoinositol-pentakisphosphate kinase 2-like |
| SNP_7044_A_3088783 | NC_021161.1    | Ca_Kabuli_Chr02 | 3088783                 | CC                              | TT                 | TT               | URR                           | 101490661          | Unknown function                                                                |
| SNP_7045_A_3089832 | NC_021161.1    | Ca_Kabuli_Chr02 | 3089832                 | AA                              | CC                 | CC               | DRR                           | 101508090          | probable receptor-like protein kinase At5g15080                                 |
| SNP_7046_A_3090550 | NC_021161.1    | Ca_Kabuli_Chr02 | 3090550                 | TT                              | GG                 | GG               | INTERGENIC                    |                    |                                                                                 |
| SNP_7048_A_3091460 | NC_021161.1    | Ca_Kabuli_Chr02 | 3091460                 | GG                              | TT                 | TT               | INTRON                        | 101508090          | probable receptor-like protein kinase At5g15080                                 |
| SNP_7050_A_3098030 | NC_021161.1    | Ca_Kabuli_Chr02 | 3098030                 | GG                              | CC                 | CC               | DRR                           | 101508404          | hypersensitive-induced response protein 2-like                                  |
| SNP_7051_A_3098043 | NC_021161.1    | Ca_Kabuli_Chr02 | 3098043                 | CC                              | AA                 | AA               | DRR                           | 101508404          | hypersensitive-induced response protein 2-like                                  |
| SNP_7053_A_3099236 | NC_021161.1    | Ca_Kabuli_Chr02 | 3099236                 | GG                              | AA                 | AA               | INTERGENIC                    |                    |                                                                                 |
| SNP_7054_A_3099384 | NC_021161.1    | Ca_Kabuli_Chr02 | 3099384                 | CC                              | TT                 | TT               | INTERGENIC                    |                    |                                                                                 |
| SNP_7056_A_3100116 | NC_021161.1    | Ca_Kabuli_Chr02 | 3100116                 | AA                              | GG                 | GG               | INTERGENIC                    |                    |                                                                                 |
| SNP_7057_A_3100573 | NC_021161.1    | Ca_Kabuli_Chr02 | 3100573                 | CC                              | TT                 | TT               | INTERGENIC                    |                    |                                                                                 |
| SNP_7058_A_3100960 | NC_021161.1    | Ca_Kabuli_Chr02 | 3100960                 | CC                              | TT                 | TT               | INTERGENIC                    |                    |                                                                                 |
| SNP_7059_A_3102145 | NC_021161.1    | Ca_Kabuli_Chr02 | 3102145                 | GG                              | AA                 | AA               | INTERGENIC                    |                    |                                                                                 |
| SNP_7060_A_3102146 | NC_021161.1    | Ca_Kabuli_Chr02 | 3102146                 | AA                              | GG                 | GG               | INTERGENIC                    |                    |                                                                                 |



| SNPs IDs           | Chromosome IDs | Chromosomes     | Physical positions (bp) | CDC Frontier genome (Reference genome) | (Pusa 1103 & HPNB) | (ILWC 46 & LPNB) | Sequence Components of genome | Gene accession IDs | Putative functions                             |
|--------------------|----------------|-----------------|-------------------------|----------------------------------------|--------------------|------------------|-------------------------------|--------------------|------------------------------------------------|
| SNP_7061_A_3102154 | NC_021161.1    | Ca_Kabuli_Chr02 | 3102154                 | TT                                     | CC                 | CC               | INTERGENIC                    |                    |                                                |
| SNP_7062_A_3102483 | NC_021161.1    | Ca_Kabuli_Chr02 | 3102483                 | TT                                     | GG                 | GG               | URR                           | 101508404          | hypersensitive-induced response protein 2-like |
| SNP_7063_A_3102504 | NC_021161.1    | Ca_Kabuli_Chr02 | 3102504                 | CC                                     | TT                 | TT               | URR                           | 101508404          | hypersensitive-induced response protein 2-like |
| SNP_7064_A_3104093 | NC_021161.1    | Ca_Kabuli_Chr02 | 3104093                 | AA                                     | TT                 | TT               | DRR                           | 101508714          | outer plastidial membrane protein porin-like   |
| SNP_7066_A_3107490 | NC_021161.1    | Ca_Kabuli_Chr02 | 3107490                 | CC                                     | TT                 | TT               | INTERGENIC                    |                    |                                                |
| SNP_7067_A_3107521 | NC_021161.1    | Ca_Kabuli_Chr02 | 3107521                 | GG                                     | AA                 | AA               | INTERGENIC                    |                    |                                                |
| SNP_7068_A_3108778 | NC_021161.1    | Ca_Kabuli_Chr02 | 3108778                 | AA                                     | GG                 | GG               | URR                           | 101508714          | outer plastidial membrane protein porin-like   |
| SNP_7069_A_3108928 | NC_021161.1    | Ca_Kabuli_Chr02 | 3108928                 | CC                                     | TT                 | TT               | URR                           | 101508714          | outer plastidial membrane protein porin-like   |
| SNP_7070_A_3108938 | NC_021161.1    | Ca_Kabuli_Chr02 | 3108938                 | CC                                     | AA                 | AA               | URR                           | 101508714          | outer plastidial membrane protein porin-like   |
| SNP_7071_A_3108947 | NC_021161.1    | Ca_Kabuli_Chr02 | 3108947                 | TT                                     | CC                 | CC               | URR                           | 101508714          | outer plastidial membrane protein porin-like   |
| SNP_7072_A_3111727 | NC_021161.1    | Ca_Kabuli_Chr02 | 3111727                 | GG                                     | AA                 | AA               | INTRON                        | 101509031          | putative auxin efflux carrier component 5      |
| SNP_7073_A_3112429 | NC_021161.1    | Ca_Kabuli_Chr02 | 3112429                 | CC                                     | TT                 | TT               | INTRON                        | 101509031          | putative auxin efflux carrier component 5      |
| SNP_7074_A_3112433 | NC_021161.1    | Ca_Kabuli_Chr02 | 3112433                 | TT                                     | CC                 | CC               | INTRON                        | 101509031          | putative auxin efflux carrier component 5      |
| SNP_7075_A_3112470 | NC_021161.1    | Ca_Kabuli_Chr02 | 3112470                 | GG                                     | AA                 | AA               | INTRON                        | 101509031          | putative auxin efflux carrier component 5      |
| SNP_7077_A_3113514 | NC_021161.1    | Ca_Kabuli_Chr02 | 3113514                 | GG                                     | AA                 | AA               | INTERGENIC                    |                    |                                                |
| SNP_7078_A_3117588 | NC_021161.1    | Ca_Kabuli_Chr02 | 3117588                 | CC                                     | TT                 | TT               | DRR                           | 101509352          | pectate lyase-like                             |
| SNP_7079_A_3117638 | NC_021161.1    | Ca_Kabuli_Chr02 | 3117638                 | AA                                     | GG                 | GG               | DRR                           | 101509352          | pectate lyase-like                             |
| SNP_7080_A_3117648 | NC_021161.1    | Ca_Kabuli_Chr02 | 3117648                 | AA                                     | GG                 | GG               | DRR                           | 101509352          | pectate lyase-like                             |
| SNP_7081_A_3117667 | NC_021161.1    | Ca_Kabuli_Chr02 | 3117667                 | TT                                     | CC                 | CC               | DRR                           | 101509352          | pectate lyase-like                             |
| SNP_7083_A_3120012 | NC_021161.1    | Ca_Kabuli_Chr02 | 3120012                 | AA                                     | TT                 | TT               | INTERGENIC                    |                    |                                                |
| SNP_7084_A_3121183 | NC_021161.1    | Ca_Kabuli_Chr02 | 3121183                 | AA                                     | TT                 | TT               | DRR                           | 101509674          | CRIB domain-containing protein RIC10-like      |
| SNP_7085_A_3121241 | NC_021161.1    | Ca_Kabuli_Chr02 | 3121241                 | GG                                     | CC                 | CC               | DRR                           | 101509674          | CRIB domain-containing protein RIC10-like      |

| SNPs IDs           | Chromosome IDs | Chromosomes     | Physical positions (bp) | CDC Frontier (Reference genome) | (Pusa 1103 & HPNB) | (ILWC 46 & LPNB) | Sequence Components of genome | Gene accession IDs | Putative functions                                          |
|--------------------|----------------|-----------------|-------------------------|---------------------------------|--------------------|------------------|-------------------------------|--------------------|-------------------------------------------------------------|
| SNP_7086_A_3121253 | NC_021161.1    | Ca_Kabuli_Chr02 | 3121253                 | TT                              | AA                 | AA               | DRR                           | 101509674          | CRIB domain-containing protein RIC10-like                   |
| SNP_7087_A_3123557 | NC_021161.1    | Ca_Kabuli_Chr02 | 3123557                 | CC                              | TT                 | TT               | INTRON                        | 101509674          | CRIB domain-containing protein RIC10-like                   |
| SNP_7088_A_3123865 | NC_021161.1    | Ca_Kabuli_Chr02 | 3123865                 | TT                              | CC                 | CC               | INTRON                        | 101509674          | CRIB domain-containing protein RIC10-like                   |
| SNP_7089_A_3124797 | NC_021161.1    | Ca_Kabuli_Chr02 | 3124797                 | GG                              | TT                 | TT               | INTRON                        | 101509674          | CRIB domain-containing protein RIC10-like                   |
| SNP_7090_A_3125888 | NC_021161.1    | Ca_Kabuli_Chr02 | 3125888                 | CC                              | TT                 | TT               | URR                           | 101509674          | CRIB domain-containing protein RIC10-like                   |
| SNP_7091_A_3125920 | NC_021161.1    | Ca_Kabuli_Chr02 | 3125920                 | AA                              | GG                 | GG               | URR                           | 101509674          | CRIB domain-containing protein RIC10-like                   |
| SNP_7092_A_3125934 | NC_021161.1    | Ca_Kabuli_Chr02 | 3125934                 | CC                              | TT                 | TT               | URR                           | 101509674          | CRIB domain-containing protein RIC10-like                   |
| SNP_7093_A_3125966 | NC_021161.1    | Ca_Kabuli_Chr02 | 3125966                 | CC                              | TT                 | TT               | URR                           | 101509674          | CRIB domain-containing protein RIC10-like                   |
| SNP_7094_A_3125972 | NC_021161.1    | Ca_Kabuli_Chr02 | 3125972                 | CC                              | AA                 | AA               | URR                           | 101509674          | CRIB domain-containing protein RIC10-like                   |
| SNP_7095_A_3125975 | NC_021161.1    | Ca_Kabuli_Chr02 | 3125975                 | GG                              | AA                 | AA               | URR                           | 101509674          | CRIB domain-containing protein RIC10-like                   |
| SNP_7097_A_3129170 | NC_021161.1    | Ca_Kabuli_Chr02 | 3129170                 | AA                              | GG                 | GG               | INTERGENIC                    |                    |                                                             |
| SNP_7098_A_3129216 | NC_021161.1    | Ca_Kabuli_Chr02 | 3129216                 | TT                              | GG                 | GG               | INTERGENIC                    |                    |                                                             |
| SNP_7099_A_3129220 | NC_021161.1    | Ca_Kabuli_Chr02 | 3129220                 | GG                              | AA                 | AA               | INTERGENIC                    |                    |                                                             |
| SNP_7100_A_3132579 | NC_021161.1    | Ca_Kabuli_Chr02 | 3132579                 | CC                              | AA                 | AA               | INTRON                        | 101509997          | polyadenylation and cleavage factor homolog 4               |
| SNP_7101_A_3137235 | NC_021161.1    | Ca_Kabuli_Chr02 | 3137235                 | AA                              | GG                 | GG               | DRR                           | 101510315          | uncharacterized LOC101510315                                |
| SNP_7102_A_3137510 | NC_021161.1    | Ca_Kabuli_Chr02 | 3137510                 | TT                              | CC                 | CC               | DRR                           | 101510315          | uncharacterized LOC101510315                                |
| SNP_7103_A_3138991 | NC_021161.1    | Ca_Kabuli_Chr02 | 3138991                 | CC                              | TT                 | TT               | INTERGENIC                    |                    |                                                             |
| SNP_7104_A_3139284 | NC_021161.1    | Ca_Kabuli_Chr02 | 3139284                 | GG                              | AA                 | AA               | INTERGENIC                    |                    |                                                             |
| SNP_7105_A_3143625 | NC_021161.1    | Ca_Kabuli_Chr02 | 3143625                 | CC                              | TT                 | TT               | INTERGENIC                    |                    |                                                             |
| SNP_7106_A_3143724 | NC_021161.1    | Ca_Kabuli_Chr02 | 3143724                 | AA                              | GG                 | GG               | INTERGENIC                    |                    |                                                             |
| SNP_7107_A_3145752 | NC_021161.1    | Ca_Kabuli_Chr02 | 3145752                 | GG                              | CC                 | CC               | URR                           | 101510651          | AP2-like ethylene-responsive transcription factor At1g79700 |
| SNP_7108_A_3146068 | NC_021161.1    | Ca_Kabuli_Chr02 | 3146068                 | TT                              | AA                 | AA               | URR                           | 101510651          | AP2-like ethylene-responsive transcription factor At1g79700 |

| SNPs IDs           | Chromosome IDs | Chromosomes     | Physical positions (bp) | CDC Frontier (Reference genome) | (Pusa 1103 & HPNB) | (ILWC 46 & LPNB) | Sequence Components of genome | Gene accession IDs | Putative functions                                          |
|--------------------|----------------|-----------------|-------------------------|---------------------------------|--------------------|------------------|-------------------------------|--------------------|-------------------------------------------------------------|
| SNP_7109_A_3146075 | NC_021161.1    | Ca_Kabuli_Chr02 | 3146075                 | AA                              | GG                 | GG               | URR                           | 101510651          | AP2-like ethylene-responsive transcription factor At1g79700 |
| SNP_7110_A_3147488 | NC_021161.1    | Ca_Kabuli_Chr02 | 3147488                 | GG                              | AA                 | AA               | URR                           | 101510651          | AP2-like ethylene-responsive transcription factor At1g79700 |
| SNP_7111_A_3147498 | NC_021161.1    | Ca_Kabuli_Chr02 | 3147498                 | CC                              | TT                 | TT               | URR                           | 101510651          | AP2-like ethylene-responsive transcription factor At1g79700 |
| SNP_7112_A_3147555 | NC_021161.1    | Ca_Kabuli_Chr02 | 3147555                 | GG                              | AA                 | AA               | URR                           | 101510651          | AP2-like ethylene-responsive transcription factor At1g79700 |
| SNP_7113_A_3147616 | NC_021161.1    | Ca_Kabuli_Chr02 | 3147616                 | TT                              | CC                 | CC               | URR                           | 101510651          | AP2-like ethylene-responsive transcription factor At1g79700 |
| SNP_7114_A_3147672 | NC_021161.1    | Ca_Kabuli_Chr02 | 3147672                 | TT                              | CC                 | CC               | INTERGENIC                    |                    |                                                             |
| SNP_7115_A_3148385 | NC_021161.1    | Ca_Kabuli_Chr02 | 3148385                 | TT                              | CC                 | CC               | DRR                           | 101510972          | F-box/WD repeat-containing protein 7-like                   |
| SNP_7116_A_3148387 | NC_021161.1    | Ca_Kabuli_Chr02 | 3148387                 | TT                              | AA                 | AA               | DRR                           | 101510972          | F-box/WD repeat-containing protein 7-like                   |
| SNP_7117_A_3149277 | NC_021161.1    | Ca_Kabuli_Chr02 | 3149277                 | AA                              | GG                 | GG               | INTRON                        | 101510972          | F-box/WD repeat-containing protein 7-like                   |
| SNP_7120_A_3156912 | NC_021161.1    | Ca_Kabuli_Chr02 | 3156912                 | CC                              | AA                 | AA               | INTERGENIC                    |                    |                                                             |
| SNP_7121_A_3157524 | NC_021161.1    | Ca_Kabuli_Chr02 | 3157524                 | CC                              | TT                 | TT               | INTERGENIC                    |                    |                                                             |
| SNP_7124_A_3161104 | NC_021161.1    | Ca_Kabuli_Chr02 | 3161104                 | TT                              | CC                 | CC               | INTRON                        | 101511281          | plant cysteine oxidase 2                                    |
| SNP_7125_A_3161106 | NC_021161.1    | Ca_Kabuli_Chr02 | 3161106                 | AA                              | GG                 | GG               | INTRON                        | 101511281          | plant cysteine oxidase 2                                    |
| SNP_7126_A_3161178 | NC_021161.1    | Ca_Kabuli_Chr02 | 3161178                 | AA                              | TT                 | TT               | INTRON                        | 101511281          | plant cysteine oxidase 2                                    |
| SNP_7128_A_3164807 | NC_021161.1    | Ca_Kabuli_Chr02 | 3164807                 | TT                              | CC                 | CC               | URR                           | 101511281          | plant cysteine oxidase 2                                    |
| SNP_7129_A_3164839 | NC_021161.1    | Ca_Kabuli_Chr02 | 3164839                 | CC                              | TT                 | TT               | URR                           | 101511281          | plant cysteine oxidase 2                                    |
| SNP_7130_A_3166152 | NC_021161.1    | Ca_Kabuli_Chr02 | 3166152                 | CC                              | AA                 | AA               | URR                           | 101511281          | plant cysteine oxidase 2                                    |
| SNP_7133_A_3170478 | NC_021161.1    | Ca_Kabuli_Chr02 | 3170478                 | CC                              | TT                 | TT               | INTRON                        | 101490985          | aldose 1-epimerase-like                                     |
| SNP_7134_A_3170790 | NC_021161.1    | Ca_Kabuli_Chr02 | 3170790                 | AA                              | GG                 | GG               | INTRON                        | 101490985          | aldose 1-epimerase-like                                     |
| SNP_7135_A_3171224 | NC_021161.1    | Ca_Kabuli_Chr02 | 3171224                 | AA                              | GG                 | GG               | NON_SYNONYMOUS_CODING         | 101490985          | aldose 1-epimerase-like                                     |
| SNP_7136_A_3171310 | NC_021161.1    | Ca_Kabuli_Chr02 | 3171310                 | AA                              | TT                 | TT               | INTRON                        | 101490985          | aldose 1-epimerase-like                                     |
| SNP_7137_A_3171311 | NC_021161.1    | Ca_Kabuli_Chr02 | 3171311                 | TT                              | CC                 | CC               | INTRON                        | 101490985          | aldose 1-epimerase-like                                     |

| SNPs IDs           | Chromosome IDs | Chromosomes     | Physical positions (bp) | CDC Frontier (Reference genome) | (Pusa 1103 & HPNB) | (ILWC 46 & LPNB) | Sequence Components of genome | Gene accession IDs | Putative functions                           |
|--------------------|----------------|-----------------|-------------------------|---------------------------------|--------------------|------------------|-------------------------------|--------------------|----------------------------------------------|
| SNP_7138_A_3171506 | NC_021161.1    | Ca_Kabuli_Chr02 | 3171506                 | TT                              | CC                 | CC               | INTRON                        | 101490985          | aldose 1-epimerase-like                      |
| SNP_7139_A_3173362 | NC_021161.1    | Ca_Kabuli_Chr02 | 3173362                 | GG                              | AA                 | AA               | URR                           | 101490985          | aldose 1-epimerase-like                      |
| SNP_7140_A_3174113 | NC_021161.1    | Ca_Kabuli_Chr02 | 3174113                 | AA                              | GG                 | GG               | DRR                           | 101511600          | uncharacterized LOC101511600                 |
| SNP_7141_A_3174131 | NC_021161.1    | Ca_Kabuli_Chr02 | 3174131                 | AA                              | GG                 | GG               | DRR                           | 101511600          | uncharacterized LOC101511600                 |
| SNP_7142_A_3174160 | NC_021161.1    | Ca_Kabuli_Chr02 | 3174160                 | AA                              | TT                 | TT               | DRR                           | 101511600          | uncharacterized LOC101511600                 |
| SNP_7143_A_3174264 | NC_021161.1    | Ca_Kabuli_Chr02 | 3174264                 | AA                              | GG                 | GG               | DRR                           | 101511600          | uncharacterized LOC101511600                 |
| SNP_7144_A_3175693 | NC_021161.1    | Ca_Kabuli_Chr02 | 3175693                 | GG                              | AA                 | AA               | INTERGENIC                    |                    |                                              |
| SNP_7145_A_3175724 | NC_021161.1    | Ca_Kabuli_Chr02 | 3175724                 | TT                              | CC                 | CC               | INTERGENIC                    |                    |                                              |
| SNP_7146_A_3175731 | NC_021161.1    | Ca_Kabuli_Chr02 | 3175731                 | GG                              | AA                 | AA               | INTERGENIC                    |                    |                                              |
| SNP_7147_A_3182395 | NC_021161.1    | Ca_Kabuli_Chr02 | 3182395                 | TT                              | AA                 | AA               | DRR                           | 101491297          | probable serine/threonine-protein kinase NAK |
| SNP_7148_A_3182415 | NC_021161.1    | Ca_Kabuli_Chr02 | 3182415                 | AA                              | CC                 | CC               | DRR                           | 101491297          | probable serine/threonine-protein kinase NAK |
| SNP_7149_A_3183425 | NC_021161.1    | Ca_Kabuli_Chr02 | 3183425                 | TT                              | CC                 | CC               | INTERGENIC                    |                    |                                              |
| SNP_7150_A_3183432 | NC_021161.1    | Ca_Kabuli_Chr02 | 3183432                 | TT                              | CC                 | CC               | INTERGENIC                    |                    |                                              |
| SNP_7151_A_3183456 | NC_021161.1    | Ca_Kabuli_Chr02 | 3183456                 | AA                              | GG                 | GG               | INTERGENIC                    |                    |                                              |
| SNP_7152_A_3183493 | NC_021161.1    | Ca_Kabuli_Chr02 | 3183493                 | GG                              | AA                 | AA               | INTERGENIC                    |                    |                                              |
| SNP_7153_A_3183500 | NC_021161.1    | Ca_Kabuli_Chr02 | 3183500                 | GG                              | AA                 | AA               | INTERGENIC                    |                    |                                              |
| SNP_7154_A_3183511 | NC_021161.1    | Ca_Kabuli_Chr02 | 3183511                 | CC                              | TT                 | TT               | INTERGENIC                    |                    |                                              |
| SNP_7155_A_3183689 | NC_021161.1    | Ca_Kabuli_Chr02 | 3183689                 | TT                              | AA                 | AA               | INTERGENIC                    |                    |                                              |
| SNP_7156_A_3183697 | NC_021161.1    | Ca_Kabuli_Chr02 | 3183697                 | TT                              | AA                 | AA               | INTERGENIC                    |                    |                                              |
| SNP_7157_A_3183717 | NC_021161.1    | Ca_Kabuli_Chr02 | 3183717                 | AA                              | GG                 | GG               | INTERGENIC                    |                    |                                              |
| SNP_7159_A_3184428 | NC_021161.1    | Ca_Kabuli_Chr02 | 3184428                 | GG                              | AA                 | AA               | INTRON                        | 101491297          | probable serine/threonine-protein kinase NAK |
| SNP_7160_A_3184822 | NC_021161.1    | Ca_Kabuli_Chr02 | 3184822                 | CC                              | TT                 | TT               | SYNONYMOUS_CODING             | 101491297          | probable serine/threonine-protein kinase NAK |

| SNPs IDs           | Chromosome IDs | Chromosomes     | Physical positions (bp) | CDC Frontier (Reference genome) | (Pusa 1103 & HPNB) | (ILWC 46 & LPNB) | Sequence Components of genome | Gene accession IDs | Putative functions                           |
|--------------------|----------------|-----------------|-------------------------|---------------------------------|--------------------|------------------|-------------------------------|--------------------|----------------------------------------------|
| SNP_7161_A_3185205 | NC_021161.1    | Ca_Kabuli_Chr02 | 3185205                 | AA                              | CC                 | CC               | INTRON                        | 101491297          | probable serine/threonine-protein kinase NAK |
| SNP_7163_A_3186566 | NC_021161.1    | Ca_Kabuli_Chr02 | 3186566                 | AA                              | TT                 | TT               | INTRON                        | 101491297          | probable serine/threonine-protein kinase NAK |
| SNP_7164_A_3186568 | NC_021161.1    | Ca_Kabuli_Chr02 | 3186568                 | TT                              | GG                 | GG               | INTRON                        | 101491297          | probable serine/threonine-protein kinase NAK |
| SNP_7165_A_3186572 | NC_021161.1    | Ca_Kabuli_Chr02 | 3186572                 | AA                              | TT                 | TT               | INTRON                        | 101491297          | probable serine/threonine-protein kinase NAK |
| SNP_7166_A_3188243 | NC_021161.1    | Ca_Kabuli_Chr02 | 3188243                 | TT                              | AA                 | AA               | URR                           | 101491297          | probable serine/threonine-protein kinase NAK |
| SNP_7167_A_3188279 | NC_021161.1    | Ca_Kabuli_Chr02 | 3188279                 | CC                              | AA                 | AA               | URR                           | 101491297          | probable serine/threonine-protein kinase NAK |
| SNP_7168_A_3188421 | NC_021161.1    | Ca_Kabuli_Chr02 | 3188421                 | TT                              | AA                 | AA               | URR                           | 101491297          | probable serine/threonine-protein kinase NAK |
| SNP_7169_A_3189023 | NC_021161.1    | Ca_Kabuli_Chr02 | 3189023                 | TT                              | GG                 | GG               | URR                           | 101491297          | probable serine/threonine-protein kinase NAK |
| SNP_7170_A_3189048 | NC_021161.1    | Ca_Kabuli_Chr02 | 3189048                 | TT                              | CC                 | CC               | URR                           | 101491297          | probable serine/threonine-protein kinase NAK |
| SNP_7171_A_3191737 | NC_021161.1    | Ca_Kabuli_Chr02 | 3191737                 | CC                              | GG                 | GG               | INTERGENIC                    |                    |                                              |
| SNP_7174_A_3200309 | NC_021161.1    | Ca_Kabuli_Chr02 | 3200309                 | CC                              | TT                 | TT               | INTERGENIC                    |                    |                                              |
| SNP_7175_A_3200332 | NC_021161.1    | Ca_Kabuli_Chr02 | 3200332                 | CC                              | TT                 | TT               | INTERGENIC                    |                    |                                              |
| SNP_7176_A_3200351 | NC_021161.1    | Ca_Kabuli_Chr02 | 3200351                 | TT                              | AA                 | AA               | INTERGENIC                    |                    |                                              |
| SNP_7177_A_3200359 | NC_021161.1    | Ca_Kabuli_Chr02 | 3200359                 | AA                              | GG                 | GG               | INTERGENIC                    |                    |                                              |
| SNP_7181_A_3201015 | NC_021161.1    | Ca_Kabuli_Chr02 | 3201015                 | GG                              | AA                 | AA               | DRR                           | 101511925          | homeobox-leucine zipper protein HAT7-like    |
| SNP_7182_A_3201089 | NC_021161.1    | Ca_Kabuli_Chr02 | 3201089                 | GG                              | AA                 | AA               | DRR                           | 101511925          | homeobox-leucine zipper protein HAT7-like    |
| SNP_7183_A_3201396 | NC_021161.1    | Ca_Kabuli_Chr02 | 3201396                 | TT                              | CC                 | CC               | DRR                           | 101511925          | homeobox-leucine zipper protein HAT7-like    |
| SNP_7184_A_3202075 | NC_021161.1    | Ca_Kabuli_Chr02 | 3202075                 | AA                              | TT                 | TT               | DRR                           | 101511925          | homeobox-leucine zipper protein HAT7-like    |
| SNP_7186_A_3203078 | NC_021161.1    | Ca_Kabuli_Chr02 | 3203078                 | AA                              | TT                 | TT               | INTRON                        | 101511925          | homeobox-leucine zipper protein HAT7-like    |
| SNP_7187_A_3204099 | NC_021161.1    | Ca_Kabuli_Chr02 | 3204099                 | GG                              | AA                 | AA               | SYNONYMOUS_CODING             | 101511925          | homeobox-leucine zipper protein HAT7-like    |
| SNP_7188_A_3204247 | NC_021161.1    | Ca_Kabuli_Chr02 | 3204247                 | TT                              | GG                 | GG               | INTRON                        | 101511925          | homeobox-leucine zipper protein HAT7-like    |
| SNP_7189_A_3204280 | NC_021161.1    | Ca_Kabuli_Chr02 | 3204280                 | GG                              | AA                 | AA               | INTRON                        | 101511925          | homeobox-leucine zipper protein HAT7-like    |

| SNPs IDs           | Chromosome IDs | Chromosomes     | Physical positions (bp) | CDC Frontier (Reference genome) | (Pusa 1103 & HPNB) | (ILWC 46 & LPNB) | Sequence Components of genome | Gene accession IDs | Putative functions                                             |
|--------------------|----------------|-----------------|-------------------------|---------------------------------|--------------------|------------------|-------------------------------|--------------------|----------------------------------------------------------------|
| SNP_7191_A_3220986 | NC_021161.1    | Ca_Kabuli_Chr02 | 3220986                 | AA                              | TT                 | TT               | INTERGENIC                    |                    |                                                                |
| SNP_7192_A_3229240 | NC_021161.1    | Ca_Kabuli_Chr02 | 3229240                 | AA                              | CC                 | CC               | INTERGENIC                    |                    |                                                                |
| SNP_7193_A_3243096 | NC_021161.1    | Ca_Kabuli_Chr02 | 3243096                 | TT                              | CC                 | CC               | INTERGENIC                    |                    |                                                                |
| SNP_7194_A_3312376 | NC_021161.1    | Ca_Kabuli_Chr02 | 3312376                 | AA                              | TT                 | TT               | INTERGENIC                    |                    |                                                                |
| SNP_7195_A_3312380 | NC_021161.1    | Ca_Kabuli_Chr02 | 3312380                 | TT                              | GG                 | GG               | INTERGENIC                    |                    |                                                                |
| SNP_7196_A_3321731 | NC_021161.1    | Ca_Kabuli_Chr02 | 3321731                 | TT                              | CC                 | CC               | INTRON                        | 101514404          | protease Do-like 8, chloroplastic                              |
| SNP_7197_A_3403853 | NC_021161.1    | Ca_Kabuli_Chr02 | 3403853                 | CC                              | AA                 | AA               | INTERGENIC                    |                    |                                                                |
| SNP_7198_A_3403860 | NC_021161.1    | Ca_Kabuli_Chr02 | 3403860                 | CC                              | TT                 | TT               | INTERGENIC                    |                    |                                                                |
| SNP_7199_A_3404047 | NC_021161.1    | Ca_Kabuli_Chr02 | 3404047                 | GG                              | AA                 | AA               | INTERGENIC                    |                    |                                                                |
| SNP_7200_A_3464758 | NC_021161.1    | Ca_Kabuli_Chr02 | 3464758                 | TT                              | CC                 | CC               | INTERGENIC                    |                    |                                                                |
| SNP_7201_A_3464830 | NC_021161.1    | Ca_Kabuli_Chr02 | 3464830                 | GG                              | AA                 | AA               | INTERGENIC                    |                    |                                                                |
| SNP_7202_A_3465184 | NC_021161.1    | Ca_Kabuli_Chr02 | 3465184                 | TT                              | CC                 | CC               | INTERGENIC                    |                    |                                                                |
| SNP_7203_A_3465368 | NC_021161.1    | Ca_Kabuli_Chr02 | 3465368                 | TT                              | CC                 | CC               | INTERGENIC                    |                    |                                                                |
| SNP_7204_A_3465370 | NC_021161.1    | Ca_Kabuli_Chr02 | 3465370                 | CC                              | TT                 | TT               | INTERGENIC                    |                    |                                                                |
| SNP_7205_A_3465379 | NC_021161.1    | Ca_Kabuli_Chr02 | 3465379                 | GG                              | AA                 | AA               | INTERGENIC                    |                    |                                                                |
| SNP_7206_A_3465395 | NC_021161.1    | Ca_Kabuli_Chr02 | 3465395                 | CC                              | AA                 | AA               | INTERGENIC                    |                    |                                                                |
| SNP_7207_A_3465396 | NC_021161.1    | Ca_Kabuli_Chr02 | 3465396                 | GG                              | CC                 | CC               | INTERGENIC                    |                    |                                                                |
| SNP_7208_A_3532699 | NC_021161.1    | Ca_Kabuli_Chr02 | 3532699                 | AA                              | GG                 | GG               | DRR                           | 101492037          | KH domain-containing protein At4g18375                         |
| SNP_7209_A_3541973 | NC_021161.1    | Ca_Kabuli_Chr02 | 3541973                 | AA                              | GG                 | GG               | DRR                           | 101492811          | uncharacterized LOC101492811                                   |
| SNP_7210_A_3576278 | NC_021161.1    | Ca_Kabuli_Chr02 | 3576278                 | TT                              | AA                 | AA               | INTERGENIC                    |                    |                                                                |
| SNP_7212_A_3667385 | NC_021161.1    | Ca_Kabuli_Chr02 | 3667385                 | AA                              | TT                 | TT               | URR                           | 101496701          | vesicle transport v-SNARE 13                                   |
| SNP_7213_A_3704030 | NC_021161.1    | Ca_Kabuli_Chr02 | 3704030                 | AA                              | TT                 | TT               | URR                           | 101497668          | SNF1-related protein kinase catalytic subunit alpha KIN10-like |

| SNPs IDs           | Chromosome IDs | Chromosomes     | Physical positions (bp) | CDC Frontier (Reference genome) | (Pusa 1103 & HPNB) | (ILWC 46 & LPNB) | Sequence Components of genome | Gene accession IDs | Putative functions                                             |
|--------------------|----------------|-----------------|-------------------------|---------------------------------|--------------------|------------------|-------------------------------|--------------------|----------------------------------------------------------------|
| SNP_7214_A_3704522 | NC_021161.1    | Ca_Kabuli_Chr02 | 3704522                 | GG                              | CC                 | CC               | URR                           | 101497668          | SNF1-related protein kinase catalytic subunit alpha KIN10-like |
| SNP_7215_A_3705840 | NC_021161.1    | Ca_Kabuli_Chr02 | 3705840                 | CC                              | AA                 | AA               | DRR                           | 101497998          | probable serine/threonine-protein kinase At1g54610             |
| SNP_7216_A_3707733 | NC_021161.1    | Ca_Kabuli_Chr02 | 3707733                 | GG                              | AA                 | AA               | INTRON                        | 101497998          | probable serine/threonine-protein kinase At1g54610             |
| SNP_7217_A_3709479 | NC_021161.1    | Ca_Kabuli_Chr02 | 3709479                 | CC                              | TT                 | TT               | INTRON                        | 101497998          | probable serine/threonine-protein kinase At1g54610             |
| SNP_7218_A_3709480 | NC_021161.1    | Ca_Kabuli_Chr02 | 3709480                 | GG                              | CC                 | CC               | INTRON                        | 101497998          | probable serine/threonine-protein kinase At1g54610             |
| SNP_7219_A_3710706 | NC_021161.1    | Ca_Kabuli_Chr02 | 3710706                 | CC                              | TT                 | TT               | URR                           | 101497998          | probable serine/threonine-protein kinase At1g54610             |
| SNP_7220_A_3710711 | NC_021161.1    | Ca_Kabuli_Chr02 | 3710711                 | AA                              | GG                 | GG               | URR                           | 101497998          | probable serine/threonine-protein kinase At1g54610             |
| SNP_7221_A_3711293 | NC_021161.1    | Ca_Kabuli_Chr02 | 3711293                 | AA                              | CC                 | CC               | URR                           | 101497998          | probable serine/threonine-protein kinase At1g54610             |
| SNP_7222_A_3711410 | NC_021161.1    | Ca_Kabuli_Chr02 | 3711410                 | TT                              | CC                 | CC               | URR                           | 101497998          | probable serine/threonine-protein kinase At1g54610             |
| SNP_7223_A_3718775 | NC_021161.1    | Ca_Kabuli_Chr02 | 3718775                 | AA                              | CC                 | CC               | INTERGENIC                    |                    |                                                                |
| SNP_7224_A_3722214 | NC_021161.1    | Ca_Kabuli_Chr02 | 3722214                 | AA                              | CC                 | CC               | INTERGENIC                    |                    |                                                                |
| SNP_7225_A_3722217 | NC_021161.1    | Ca_Kabuli_Chr02 | 3722217                 | TT                              | AA                 | AA               | INTERGENIC                    |                    |                                                                |
| SNP_7228_A_3724401 | NC_021161.1    | Ca_Kabuli_Chr02 | 3724401                 | GG                              | CC                 | CC               | INTERGENIC                    |                    |                                                                |
| SNP_7229_A_3724462 | NC_021161.1    | Ca_Kabuli_Chr02 | 3724462                 | GG                              | AA                 | AA               | INTERGENIC                    |                    |                                                                |
| SNP_7230_A_3732353 | NC_021161.1    | Ca_Kabuli_Chr02 | 3732353                 | TT                              | CC                 | CC               | INTRON                        | 101498327          | purple acid phosphatase 23                                     |
| SNP_7231_A_3732386 | NC_021161.1    | Ca_Kabuli_Chr02 | 3732386                 | AA                              | CC                 | CC               | INTRON                        | 101498327          | purple acid phosphatase 23                                     |
| SNP_7232_A_3732407 | NC_021161.1    | Ca_Kabuli_Chr02 | 3732407                 | TT                              | CC                 | CC               | INTRON                        | 101498327          | purple acid phosphatase 23                                     |
| SNP_7233_A_3732411 | NC_021161.1    | Ca_Kabuli_Chr02 | 3732411                 | AA                              | GG                 | GG               | INTRON                        | 101498327          | purple acid phosphatase 23                                     |
| SNP_7234_A_3732413 | NC_021161.1    | Ca_Kabuli_Chr02 | 3732413                 | AA                              | GG                 | GG               | INTRON                        | 101498327          | purple acid phosphatase 23                                     |
| SNP_7236_A_3733560 | NC_021161.1    | Ca_Kabuli_Chr02 | 3733560                 | TT                              | CC                 | CC               | INTERGENIC                    |                    |                                                                |
| SNP_7237_A_3737231 | NC_021161.1    | Ca_Kabuli_Chr02 | 3737231                 | TT                              | CC                 | CC               | DRR                           | 101498671          | uncharacterized LOC101498671                                   |
| SNP_7238_A_3737233 | NC_021161.1    | Ca_Kabuli_Chr02 | 3737233                 | GG                              | TT                 | TT               | DRR                           | 101498671          | uncharacterized LOC101498671                                   |

| SNPs IDs           | Chromosome IDs | Chromosomes     | Physical positions (bp) | CDC Frontier genome (Reference genome) | (Pusa 1103 & HPNB) | (ILWC 46 & LPNB) | Sequence Components of genome | Gene accession IDs | Putative functions           |
|--------------------|----------------|-----------------|-------------------------|----------------------------------------|--------------------|------------------|-------------------------------|--------------------|------------------------------|
| SNP_7239_A_3739381 | NC_021161.1    | Ca_Kabuli_Chr02 | 3739381                 | CC                                     | AA                 | AA               | INTERGENIC                    |                    |                              |
| SNP_7240_A_3739407 | NC_021161.1    | Ca_Kabuli_Chr02 | 3739407                 | AA                                     | CC                 | CC               | INTERGENIC                    |                    |                              |
| SNP_7241_A_3739947 | NC_021161.1    | Ca_Kabuli_Chr02 | 3739947                 | CC                                     | AA                 | AA               | INTERGENIC                    |                    |                              |
| SNP_7242_A_3740208 | NC_021161.1    | Ca_Kabuli_Chr02 | 3740208                 | AA                                     | GG                 | GG               | INTERGENIC                    |                    |                              |
| SNP_7243_A_3740226 | NC_021161.1    | Ca_Kabuli_Chr02 | 3740226                 | GG                                     | AA                 | AA               | INTERGENIC                    |                    |                              |
| SNP_7245_A_3742492 | NC_021161.1    | Ca_Kabuli_Chr02 | 3742492                 | CC                                     | TT                 | TT               | URR                           | 101498671          | uncharacterized LOC101498671 |
| SNP_7247_A_3743148 | NC_021161.1    | Ca_Kabuli_Chr02 | 3743148                 | CC                                     | AA                 | AA               | URR                           | 101498671          | uncharacterized LOC101498671 |
| SNP_7248_A_3743188 | NC_021161.1    | Ca_Kabuli_Chr02 | 3743188                 | TT                                     | AA                 | AA               | INTRON                        | 101499436          | lamin-like protein           |
| SNP_7249_A_3743313 | NC_021161.1    | Ca_Kabuli_Chr02 | 3743313                 | GG                                     | TT                 | TT               | INTRON                        | 101499436          | lamin-like protein           |
| SNP_7250_A_3743499 | NC_021161.1    | Ca_Kabuli_Chr02 | 3743499                 | TT                                     | CC                 | CC               | INTRON                        | 101499436          | lamin-like protein           |
| SNP_7251_A_3743510 | NC_021161.1    | Ca_Kabuli_Chr02 | 3743510                 | TT                                     | CC                 | CC               | INTRON                        | 101499436          | lamin-like protein           |
| SNP_7252_A_3743626 | NC_021161.1    | Ca_Kabuli_Chr02 | 3743626                 | AA                                     | CC                 | CC               | INTRON                        | 101499436          | lamin-like protein           |
| SNP_7253_A_3743810 | NC_021161.1    | Ca_Kabuli_Chr02 | 3743810                 | GG                                     | CC                 | CC               | INTRON                        | 101499436          | lamin-like protein           |
| SNP_7255_A_3744075 | NC_021161.1    | Ca_Kabuli_Chr02 | 3744075                 | TT                                     | AA                 | AA               | INTRON                        | 101499436          | lamin-like protein           |
| SNP_7256_A_3744414 | NC_021161.1    | Ca_Kabuli_Chr02 | 3744414                 | TT                                     | CC                 | CC               | INTRON                        | 101499436          | lamin-like protein           |
| SNP_7257_A_3744443 | NC_021161.1    | Ca_Kabuli_Chr02 | 3744443                 | CC                                     | TT                 | TT               | INTRON                        | 101499436          | lamin-like protein           |
| SNP_7258_A_3745135 | NC_021161.1    | Ca_Kabuli_Chr02 | 3745135                 | AA                                     | TT                 | TT               | URR                           | 101499436          | lamin-like protein           |
| SNP_7261_A_3746515 | NC_021161.1    | Ca_Kabuli_Chr02 | 3746515                 | AA                                     | GG                 | GG               | URR                           | 101499436          | lamin-like protein           |
| SNP_7262_A_3746960 | NC_021161.1    | Ca_Kabuli_Chr02 | 3746960                 | CC                                     | TT                 | TT               | INTERGENIC                    |                    |                              |
| SNP_7263_A_3746969 | NC_021161.1    | Ca_Kabuli_Chr02 | 3746969                 | GG                                     | AA                 | AA               | INTERGENIC                    |                    |                              |
| SNP_7264_A_3746972 | NC_021161.1    | Ca_Kabuli_Chr02 | 3746972                 | CC                                     | TT                 | TT               | INTERGENIC                    |                    |                              |
| SNP_7266_A_3755011 | NC_021161.1    | Ca_Kabuli_Chr02 | 3755011                 | GG                                     | AA                 | AA               | URR                           | 101499743          | uncharacterized LOC101499743 |



| SNPs IDs           | Chromosome IDs | Chromosomes     | Physical positions (bp) | CDC Frontier genome (Reference genome) | (Pusa 1103 & HPNB) | (ILWC 46 & LPNB) | Sequence Components of genome | Gene accession IDs | Putative functions                                                              |
|--------------------|----------------|-----------------|-------------------------|----------------------------------------|--------------------|------------------|-------------------------------|--------------------|---------------------------------------------------------------------------------|
| SNP_7267_A_3759776 | NC_021161.1    | Ca_Kabuli_Chr02 | 3759776                 | AA                                     | GG                 | GG               | INTERGENIC                    |                    |                                                                                 |
| SNP_7269_A_3761723 | NC_021161.1    | Ca_Kabuli_Chr02 | 3761723                 | TT                                     | AA                 | AA               | URR                           | 101500389          | lamin-like protein                                                              |
| SNP_7270_A_3761948 | NC_021161.1    | Ca_Kabuli_Chr02 | 3761948                 | CC                                     | AA                 | AA               | URR                           | 101500389          | lamin-like protein                                                              |
| SNP_7271_A_3762991 | NC_021161.1    | Ca_Kabuli_Chr02 | 3762991                 | GG                                     | AA                 | AA               | URR                           | 101500389          | lamin-like protein                                                              |
| SNP_7272_A_3764253 | NC_021161.1    | Ca_Kabuli_Chr02 | 3764253                 | AA                                     | TT                 | TT               | INTERGENIC                    |                    |                                                                                 |
| SNP_7273_A_3766359 | NC_021161.1    | Ca_Kabuli_Chr02 | 3766359                 | TT                                     | AA                 | AA               | INTERGENIC                    |                    |                                                                                 |
| SNP_7275_A_3768314 | NC_021161.1    | Ca_Kabuli_Chr02 | 3768314                 | CC                                     | TT                 | TT               | INTERGENIC                    |                    |                                                                                 |
| SNP_7276_A_3768654 | NC_021161.1    | Ca_Kabuli_Chr02 | 3768654                 | TT                                     | AA                 | AA               | INTERGENIC                    |                    |                                                                                 |
| SNP_7277_A_3769397 | NC_021161.1    | Ca_Kabuli_Chr02 | 3769397                 | CC                                     | AA                 | AA               | INTERGENIC                    |                    |                                                                                 |
| SNP_7278_A_3770009 | NC_021161.1    | Ca_Kabuli_Chr02 | 3770009                 | GG                                     | AA                 | AA               | INTERGENIC                    |                    |                                                                                 |
| SNP_7280_A_3771455 | NC_021161.1    | Ca_Kabuli_Chr02 | 3771455                 | TT                                     | GG                 | GG               | DRR                           | 101500698          | chorismate mutase 1, chloroplastic                                              |
| SNP_7281_A_3771456 | NC_021161.1    | Ca_Kabuli_Chr02 | 3771456                 | GG                                     | AA                 | AA               | DRR                           | 101500698          | chorismate mutase 1, chloroplastic                                              |
| SNP_7283_A_3777364 | NC_021161.1    | Ca_Kabuli_Chr02 | 3777364                 | CC                                     | GG                 | GG               | URR                           | 101500698          | chorismate mutase 1, chloroplastic                                              |
| SNP_7285_A_3782227 | NC_021161.1    | Ca_Kabuli_Chr02 | 3782227                 | TT                                     | CC                 | CC               | INTERGENIC                    |                    |                                                                                 |
| SNP_7286_A_3782235 | NC_021161.1    | Ca_Kabuli_Chr02 | 3782235                 | AA                                     | GG                 | GG               | INTERGENIC                    |                    |                                                                                 |
| SNP_7288_A_3783183 | NC_021161.1    | Ca_Kabuli_Chr02 | 3783183                 | AA                                     | TT                 | TT               | INTERGENIC                    |                    |                                                                                 |
| SNP_7289_A_3783193 | NC_021161.1    | Ca_Kabuli_Chr02 | 3783193                 | GG                                     | TT                 | TT               | INTERGENIC                    |                    |                                                                                 |
| SNP_7290_A_3783654 | NC_021161.1    | Ca_Kabuli_Chr02 | 3783654                 | AA                                     | TT                 | TT               | INTERGENIC                    |                    |                                                                                 |
| SNP_7291_A_3784954 | NC_021161.1    | Ca_Kabuli_Chr02 | 3784954                 | TT                                     | AA                 | AA               | DRR                           | 101501012          | probable mitochondrial saccharopine dehydrogenase-like oxidoreductase At5g39410 |
| SNP_7292_A_3786217 | NC_021161.1    | Ca_Kabuli_Chr02 | 3786217                 | GG                                     | CC                 | CC               | INTERGENIC                    |                    |                                                                                 |
| SNP_7293_A_3786243 | NC_021161.1    | Ca_Kabuli_Chr02 | 3786243                 | GG                                     | TT                 | TT               | INTERGENIC                    |                    |                                                                                 |
| SNP_7294_A_3787010 | NC_021161.1    | Ca_Kabuli_Chr02 | 3787010                 | GG                                     | AA                 | AA               | INTERGENIC                    |                    |                                                                                 |

| SNPs IDs           | Chromosome IDs | Chromosomes     | Physical positions (bp) | CDC Frontier genome (Reference genome) | (Pusa 1103 & HPNB) | (ILWC 46 & LPNB) | Sequence Components of genome | Gene accession IDs | Putative functions                       |
|--------------------|----------------|-----------------|-------------------------|----------------------------------------|--------------------|------------------|-------------------------------|--------------------|------------------------------------------|
| SNP_7295_A_3787011 | NC_021161.1    | Ca_Kabuli_Chr02 | 3787011                 | CC                                     | TT                 | TT               | INTERGENIC                    |                    |                                          |
| SNP_7296_A_3790658 | NC_021161.1    | Ca_Kabuli_Chr02 | 3790658                 | TT                                     | CC                 | CC               | INTERGENIC                    |                    |                                          |
| SNP_7297_A_3790724 | NC_021161.1    | Ca_Kabuli_Chr02 | 3790724                 | CC                                     | TT                 | TT               | INTERGENIC                    |                    |                                          |
| SNP_7298_A_3792522 | NC_021161.1    | Ca_Kabuli_Chr02 | 3792522                 | TT                                     | CC                 | CC               | INTERGENIC                    |                    |                                          |
| SNP_7299_A_3792552 | NC_021161.1    | Ca_Kabuli_Chr02 | 3792552                 | TT                                     | AA                 | AA               | INTERGENIC                    |                    |                                          |
| SNP_7300_A_3793759 | NC_021161.1    | Ca_Kabuli_Chr02 | 3793759                 | AA                                     | TT                 | TT               | INTRON                        | 101501326          | probable ubiquitin conjugation factor E4 |
| SNP_7301_A_3793773 | NC_021161.1    | Ca_Kabuli_Chr02 | 3793773                 | AA                                     | GG                 | GG               | INTRON                        | 101501326          | probable ubiquitin conjugation factor E4 |
| SNP_7302_A_3794046 | NC_021161.1    | Ca_Kabuli_Chr02 | 3794046                 | CC                                     | AA                 | AA               | INTRON                        | 101501326          | probable ubiquitin conjugation factor E4 |
| SNP_7303_A_3794060 | NC_021161.1    | Ca_Kabuli_Chr02 | 3794060                 | GG                                     | AA                 | AA               | INTRON                        | 101501326          | probable ubiquitin conjugation factor E4 |
| SNP_7304_A_3794310 | NC_021161.1    | Ca_Kabuli_Chr02 | 3794310                 | CC                                     | GG                 | GG               | INTRON                        | 101501326          | probable ubiquitin conjugation factor E4 |
| SNP_7305_A_3794341 | NC_021161.1    | Ca_Kabuli_Chr02 | 3794341                 | CC                                     | TT                 | TT               | INTRON                        | 101501326          | probable ubiquitin conjugation factor E4 |
| SNP_7306_A_3794373 | NC_021161.1    | Ca_Kabuli_Chr02 | 3794373                 | CC                                     | AA                 | AA               | INTRON                        | 101501326          | probable ubiquitin conjugation factor E4 |
| SNP_7307_A_3795688 | NC_021161.1    | Ca_Kabuli_Chr02 | 3795688                 | AA                                     | CC                 | CC               | INTRON                        | 101501326          | probable ubiquitin conjugation factor E4 |
| SNP_7308_A_3795689 | NC_021161.1    | Ca_Kabuli_Chr02 | 3795689                 | CC                                     | GG                 | GG               | INTRON                        | 101501326          | probable ubiquitin conjugation factor E4 |
| SNP_7309_A_3795698 | NC_021161.1    | Ca_Kabuli_Chr02 | 3795698                 | GG                                     | AA                 | AA               | INTRON                        | 101501326          | probable ubiquitin conjugation factor E4 |
| SNP_7310_A_3795963 | NC_021161.1    | Ca_Kabuli_Chr02 | 3795963                 | GG                                     | TT                 | TT               | INTRON                        | 101501326          | probable ubiquitin conjugation factor E4 |
| SNP_7311_A_3798525 | NC_021161.1    | Ca_Kabuli_Chr02 | 3798525                 | TT                                     | AA                 | AA               | URR                           | 101501326          | probable ubiquitin conjugation factor E4 |
| SNP_7312_A_3798529 | NC_021161.1    | Ca_Kabuli_Chr02 | 3798529                 | CC                                     | TT                 | TT               | URR                           | 101501326          | probable ubiquitin conjugation factor E4 |
| SNP_7313_A_3799323 | NC_021161.1    | Ca_Kabuli_Chr02 | 3799323                 | CC                                     | GG                 | GG               | DRR                           | 101501645          | uncharacterized LOC101501645             |
| SNP_7314_A_3799362 | NC_021161.1    | Ca_Kabuli_Chr02 | 3799362                 | TT                                     | CC                 | CC               | DRR                           | 101501645          | uncharacterized LOC101501645             |
| SNP_7315_A_3799652 | NC_021161.1    | Ca_Kabuli_Chr02 | 3799652                 | AA                                     | GG                 | GG               | DRR                           | 101501645          | uncharacterized LOC101501645             |
| SNP_7317_A_3800800 | NC_021161.1    | Ca_Kabuli_Chr02 | 3800800                 | GG                                     | AA                 | AA               | INTRON                        | 101501645          | uncharacterized LOC101501645             |

| SNPs IDs           | Chromosome IDs | Chromosomes     | Physical positions (bp) | CDC Frontier genome (Reference genome) | (Pusa 1103 & HPNB) | (ILWC 46 & LPNB) | Sequence Components of genome | Gene accession IDs | Putative functions                   |
|--------------------|----------------|-----------------|-------------------------|----------------------------------------|--------------------|------------------|-------------------------------|--------------------|--------------------------------------|
| SNP_7318_A_3800905 | NC_021161.1    | Ca_Kabuli_Chr02 | 3800905                 | AA                                     | GG                 | GG               | INTRON                        | 101501645          | uncharacterized LOC101501645         |
| SNP_7319_A_3800968 | NC_021161.1    | Ca_Kabuli_Chr02 | 3800968                 | AA                                     | TT                 | TT               | INTRON                        | 101501645          | uncharacterized LOC101501645         |
| SNP_7320_A_3801004 | NC_021161.1    | Ca_Kabuli_Chr02 | 3801004                 | GG                                     | TT                 | TT               | INTRON                        | 101501645          | uncharacterized LOC101501645         |
| SNP_7321_A_3804198 | NC_021161.1    | Ca_Kabuli_Chr02 | 3804198                 | AA                                     | GG                 | GG               | DRR                           | 101501957          | uncharacterized LOC101501957         |
| SNP_7322_A_3804247 | NC_021161.1    | Ca_Kabuli_Chr02 | 3804247                 | GG                                     | AA                 | AA               | DRR                           | 101501957          | uncharacterized LOC101501957         |
| SNP_7323_A_3805273 | NC_021161.1    | Ca_Kabuli_Chr02 | 3805273                 | GG                                     | TT                 | TT               | URR                           | 101501645          | uncharacterized LOC101501645         |
| SNP_7324_A_3805755 | NC_021161.1    | Ca_Kabuli_Chr02 | 3805755                 | TT                                     | AA                 | AA               | INTERGENIC                    |                    |                                      |
| SNP_7325_A_3805756 | NC_021161.1    | Ca_Kabuli_Chr02 | 3805756                 | AA                                     | GG                 | GG               | INTERGENIC                    |                    |                                      |
| SNP_7326_A_3805757 | NC_021161.1    | Ca_Kabuli_Chr02 | 3805757                 | CC                                     | TT                 | TT               | INTERGENIC                    |                    |                                      |
| SNP_7327_A_3805758 | NC_021161.1    | Ca_Kabuli_Chr02 | 3805758                 | TT                                     | AA                 | AA               | INTERGENIC                    |                    |                                      |
| SNP_7328_A_3805984 | NC_021161.1    | Ca_Kabuli_Chr02 | 3805984                 | CC                                     | TT                 | TT               | INTERGENIC                    |                    |                                      |
| SNP_7330_A_3806017 | NC_021161.1    | Ca_Kabuli_Chr02 | 3806017                 | AA                                     | GG                 | GG               | INTERGENIC                    |                    |                                      |
| SNP_7331_A_3809943 | NC_021161.1    | Ca_Kabuli_Chr02 | 3809943                 | CC                                     | AA                 | AA               | URR                           | 101501957          | uncharacterized LOC101501957         |
| SNP_7333_A_3812578 | NC_021161.1    | Ca_Kabuli_Chr02 | 3812578                 | CC                                     | AA                 | AA               | INTERGENIC                    |                    |                                      |
| SNP_7334_A_3813559 | NC_021161.1    | Ca_Kabuli_Chr02 | 3813559                 | GG                                     | AA                 | AA               | INTERGENIC                    |                    |                                      |
| SNP_7335_A_3813561 | NC_021161.1    | Ca_Kabuli_Chr02 | 3813561                 | AA                                     | TT                 | TT               | INTERGENIC                    |                    |                                      |
| SNP_7336_A_3813575 | NC_021161.1    | Ca_Kabuli_Chr02 | 3813575                 | TT                                     | CC                 | CC               | INTERGENIC                    |                    |                                      |
| SNP_7337_A_3813577 | NC_021161.1    | Ca_Kabuli_Chr02 | 3813577                 | TT                                     | CC                 | CC               | INTERGENIC                    |                    |                                      |
| SNP_7339_A_3813909 | NC_021161.1    | Ca_Kabuli_Chr02 | 3813909                 | TT                                     | GG                 | GG               | INTERGENIC                    |                    |                                      |
| SNP_7340_A_3814203 | NC_021161.1    | Ca_Kabuli_Chr02 | 3814203                 | TT                                     | AA                 | AA               | INTERGENIC                    |                    |                                      |
| SNP_7341_A_3816762 | NC_021161.1    | Ca_Kabuli_Chr02 | 3816762                 | CC                                     | TT                 | TT               | INTERGENIC                    |                    |                                      |
| SNP_7342_A_3884999 | NC_021161.1    | Ca_Kabuli_Chr02 | 3884999                 | CC                                     | TT                 | TT               | URR                           | 101505493          | 7-deoxyloganetin glucosyltransferase |

| SNPs IDs           | Chromosome IDs | Chromosomes     | Physical positions (bp) | CDC Frontier (Reference genome) | (Pusa 1103 & HPNB) | (ILWC 46 & LPNB) | Sequence Components of genome | Gene accession IDs | Putative functions                                                         |
|--------------------|----------------|-----------------|-------------------------|---------------------------------|--------------------|------------------|-------------------------------|--------------------|----------------------------------------------------------------------------|
| SNP_7343_A_3901640 | NC_021161.1    | Ca_Kabuli_Chr02 | 3901640                 | TT                              | CC                 | CC               | URR                           | 101506144          | alpha-1,4 glucan phosphorylase L isozyme, chloroplastic/amyloplastic       |
| SNP_7344_A_3901712 | NC_021161.1    | Ca_Kabuli_Chr02 | 3901712                 | AA                              | CC                 | CC               | URR                           | 101506144          | alpha-1,4 glucan phosphorylase L isozyme, chloroplastic/amyloplastic       |
| SNP_7345_A_3901717 | NC_021161.1    | Ca_Kabuli_Chr02 | 3901717                 | TT                              | GG                 | GG               | URR                           | 101506144          | alpha-1,4 glucan phosphorylase L isozyme, chloroplastic/amyloplastic       |
| SNP_7346_A_3901729 | NC_021161.1    | Ca_Kabuli_Chr02 | 3901729                 | CC                              | AA                 | AA               | URR                           | 101506144          | alpha-1,4 glucan phosphorylase L isozyme, chloroplastic/amyloplastic       |
| SNP_7348_A_3919050 | NC_021161.1    | Ca_Kabuli_Chr02 | 3919050                 | AA                              | GG                 | GG               | URR                           | 101507139          | biotin carboxyl carrier protein of acetyl-CoA carboxylase 1, chloroplastic |
| SNP_7351_A_4034450 | NC_021161.1    | Ca_Kabuli_Chr02 | 4034450                 | CC                              | TT                 | TT               | DRR                           | 101511385          | transcription factor TCP13                                                 |
| SNP_7352_A_4037454 | NC_021161.1    | Ca_Kabuli_Chr02 | 4037454                 | GG                              | AA                 | AA               | URR                           | 101511385          | transcription factor TCP13                                                 |
| SNP_7356_A_4130561 | NC_021161.1    | Ca_Kabuli_Chr02 | 4130561                 | CC                              | TT                 | TT               | DRR                           | 101512894          | uncharacterized LOC101512894                                               |
| SNP_7357_A_4146644 | NC_021161.1    | Ca_Kabuli_Chr02 | 4146644                 | TT                              | GG                 | GG               | INTERGENIC                    |                    |                                                                            |
| SNP_7358_A_4156064 | NC_021161.1    | Ca_Kabuli_Chr02 | 4156064                 | AA                              | GG                 | GG               | URR                           | 101513432          | Unknown function                                                           |
| SNP_7359_A_4186842 | NC_021161.1    | Ca_Kabuli_Chr02 | 4186842                 | GG                              | AA                 | AA               | INTERGENIC                    |                    |                                                                            |
| SNP_7360_A_4187331 | NC_021161.1    | Ca_Kabuli_Chr02 | 4187331                 | AA                              | GG                 | GG               | INTERGENIC                    |                    |                                                                            |
| SNP_7361_A_4187362 | NC_021161.1    | Ca_Kabuli_Chr02 | 4187362                 | TT                              | CC                 | CC               | INTERGENIC                    |                    |                                                                            |
| SNP_7362_A_4187773 | NC_021161.1    | Ca_Kabuli_Chr02 | 4187773                 | AA                              | GG                 | GG               | INTERGENIC                    |                    |                                                                            |
| SNP_7363_A_4187799 | NC_021161.1    | Ca_Kabuli_Chr02 | 4187799                 | TT                              | CC                 | CC               | INTERGENIC                    |                    |                                                                            |
| SNP_7364_A_4187840 | NC_021161.1    | Ca_Kabuli_Chr02 | 4187840                 | GG                              | AA                 | AA               | INTERGENIC                    |                    |                                                                            |
| SNP_7365_A_4192094 | NC_021161.1    | Ca_Kabuli_Chr02 | 4192094                 | AA                              | TT                 | TT               | INTERGENIC                    |                    |                                                                            |
| SNP_7366_A_4192148 | NC_021161.1    | Ca_Kabuli_Chr02 | 4192148                 | AA                              | GG                 | GG               | INTERGENIC                    |                    |                                                                            |
| SNP_7367_A_4192158 | NC_021161.1    | Ca_Kabuli_Chr02 | 4192158                 | AA                              | CC                 | CC               | INTERGENIC                    |                    |                                                                            |
| SNP_7368_A_4192171 | NC_021161.1    | Ca_Kabuli_Chr02 | 4192171                 | CC                              | TT                 | TT               | INTERGENIC                    |                    |                                                                            |
| SNP_7369_A_4192211 | NC_021161.1    | Ca_Kabuli_Chr02 | 4192211                 | AA                              | GG                 | GG               | INTERGENIC                    |                    |                                                                            |
| SNP_7370_A_4192590 | NC_021161.1    | Ca_Kabuli_Chr02 | 4192590                 | GG                              | AA                 | AA               | INTERGENIC                    |                    |                                                                            |

| SNPs IDs           | Chromosome IDs | Chromosomes     | Physical positions (bp) | CDC Frontier (Reference genome) | (Pusa 1103 & HPNB) | (ILWC 46 & LPNB) | Sequence Components of genome | Gene accession IDs | Putative functions                                                            |
|--------------------|----------------|-----------------|-------------------------|---------------------------------|--------------------|------------------|-------------------------------|--------------------|-------------------------------------------------------------------------------|
| SNP_7372_A_4239436 | NC_021161.1    | Ca_Kabuli_Chr02 | 4239436                 | GG                              | TT                 | TT               | INTRON                        | 101506573          | GDSL esterase/lipase At5g45910-like                                           |
| SNP_7373_A_4242635 | NC_021161.1    | Ca_Kabuli_Chr02 | 4242635                 | AA                              | GG                 | GG               | INTRON                        | 101506573          | GDSL esterase/lipase At5g45910-like                                           |
| SNP_7374_A_4242997 | NC_021161.1    | Ca_Kabuli_Chr02 | 4242997                 | CC                              | TT                 | TT               | INTRON                        | 101506573          | GDSL esterase/lipase At5g45910-like                                           |
| SNP_7375_A_4243037 | NC_021161.1    | Ca_Kabuli_Chr02 | 4243037                 | GG                              | TT                 | TT               | INTRON                        | 101506573          | GDSL esterase/lipase At5g45910-like                                           |
| SNP_7376_A_4252998 | NC_021161.1    | Ca_Kabuli_Chr02 | 4252998                 | AA                              | GG                 | GG               | INTRON                        | 101496375          | biotin carboxyl carrier protein of acetyl-CoA carboxylase, chloroplastic-like |
| SNP_7377_A_4277749 | NC_021161.1    | Ca_Kabuli_Chr02 | 4277749                 | CC                              | TT                 | TT               | INTERGENIC                    |                    |                                                                               |
| SNP_7378_A_4277755 | NC_021161.1    | Ca_Kabuli_Chr02 | 4277755                 | GG                              | TT                 | TT               | INTERGENIC                    |                    |                                                                               |
| SNP_7379_A_4277777 | NC_021161.1    | Ca_Kabuli_Chr02 | 4277777                 | TT                              | GG                 | GG               | INTERGENIC                    |                    |                                                                               |
| SNP_7380_A_4277908 | NC_021161.1    | Ca_Kabuli_Chr02 | 4277908                 | AA                              | CC                 | CC               | INTERGENIC                    |                    |                                                                               |
| SNP_7381_A_4277915 | NC_021161.1    | Ca_Kabuli_Chr02 | 4277915                 | GG                              | TT                 | TT               | INTERGENIC                    |                    |                                                                               |
| SNP_7382_A_4277948 | NC_021161.1    | Ca_Kabuli_Chr02 | 4277948                 | GG                              | AA                 | AA               | INTERGENIC                    |                    |                                                                               |
| SNP_7383_A_4278175 | NC_021161.1    | Ca_Kabuli_Chr02 | 4278175                 | TT                              | CC                 | CC               | INTERGENIC                    |                    |                                                                               |
| SNP_7384_A_4278192 | NC_021161.1    | Ca_Kabuli_Chr02 | 4278192                 | AA                              | GG                 | GG               | INTERGENIC                    |                    |                                                                               |
| SNP_7385_A_4278253 | NC_021161.1    | Ca_Kabuli_Chr02 | 4278253                 | TT                              | CC                 | CC               | INTERGENIC                    |                    |                                                                               |
| SNP_7387_A_4353937 | NC_021161.1    | Ca_Kabuli_Chr02 | 4353937                 | AA                              | GG                 | GG               | INTERGENIC                    |                    |                                                                               |
| SNP_7388_A_4517083 | NC_021161.1    | Ca_Kabuli_Chr02 | 4517083                 | AA                              | GG                 | GG               | INTERGENIC                    |                    |                                                                               |
| SNP_7390_A_4550633 | NC_021161.1    | Ca_Kabuli_Chr02 | 4550633                 | AA                              | GG                 | GG               | INTERGENIC                    |                    |                                                                               |
| SNP_7391_A_4551277 | NC_021161.1    | Ca_Kabuli_Chr02 | 4551277                 | TT                              | AA                 | AA               | INTERGENIC                    |                    |                                                                               |
| SNP_7392_A_4551279 | NC_021161.1    | Ca_Kabuli_Chr02 | 4551279                 | TT                              | GG                 | GG               | INTERGENIC                    |                    |                                                                               |
| SNP_7393_A_4557347 | NC_021161.1    | Ca_Kabuli_Chr02 | 4557347                 | CC                              | TT                 | TT               | INTERGENIC                    |                    |                                                                               |
| SNP_7394_A_4557615 | NC_021161.1    | Ca_Kabuli_Chr02 | 4557615                 | CC                              | AA                 | AA               | INTERGENIC                    |                    |                                                                               |
| SNP_7395_A_4620728 | NC_021161.1    | Ca_Kabuli_Chr02 | 4620728                 | GG                              | AA                 | AA               | INTERGENIC                    |                    |                                                                               |

| SNPs IDs           | Chromosome IDs | Chromosomes     | Physical positions (bp) | CDC Frontier (Reference genome) | (Pusa 1103 & HPNB) | (ILWC 46 & LPNB) | Sequence genome       | Components of | Gene accession IDs                           | Putative functions |
|--------------------|----------------|-----------------|-------------------------|---------------------------------|--------------------|------------------|-----------------------|---------------|----------------------------------------------|--------------------|
| SNP_7396_A_4620809 | NC_021161.1    | Ca_Kabuli_Chr02 | 4620809                 | AA                              | TT                 | TT               | INTERGENIC            |               |                                              |                    |
| SNP_7397_A_4621147 | NC_021161.1    | Ca_Kabuli_Chr02 | 4621147                 | TT                              | CC                 | CC               | INTERGENIC            |               |                                              |                    |
| SNP_7398_A_4670595 | NC_021161.1    | Ca_Kabuli_Chr02 | 4670595                 | TT                              | CC                 | CC               | INTERGENIC            |               |                                              |                    |
| SNP_7399_A_4677963 | NC_021161.1    | Ca_Kabuli_Chr02 | 4677963                 | AA                              | GG                 | GG               | INTERGENIC            |               |                                              |                    |
| SNP_7400_A_4677973 | NC_021161.1    | Ca_Kabuli_Chr02 | 4677973                 | CC                              | TT                 | TT               | INTERGENIC            |               |                                              |                    |
| SNP_7401_A_4677999 | NC_021161.1    | Ca_Kabuli_Chr02 | 4677999                 | CC                              | TT                 | TT               | INTERGENIC            |               |                                              |                    |
| SNP_7402_A_4678016 | NC_021161.1    | Ca_Kabuli_Chr02 | 4678016                 | CC                              | TT                 | TT               | INTERGENIC            |               |                                              |                    |
| SNP_7403_A_4678270 | NC_021161.1    | Ca_Kabuli_Chr02 | 4678270                 | CC                              | TT                 | TT               | INTERGENIC            |               |                                              |                    |
| SNP_7404_A_4678358 | NC_021161.1    | Ca_Kabuli_Chr02 | 4678358                 | CC                              | TT                 | TT               | INTERGENIC            |               |                                              |                    |
| SNP_7406_A_4715001 | NC_021161.1    | Ca_Kabuli_Chr02 | 4715001                 | TT                              | CC                 | CC               | INTERGENIC            |               |                                              |                    |
| SNP_7407_A_4746281 | NC_021161.1    | Ca_Kabuli_Chr02 | 4746281                 | GG                              | AA                 | AA               | INTERGENIC            |               |                                              |                    |
| SNP_7408_A_4747812 | NC_021161.1    | Ca_Kabuli_Chr02 | 4747812                 | AA                              | TT                 | TT               | INTERGENIC            |               |                                              |                    |
| SNP_7409_A_4766516 | NC_021161.1    | Ca_Kabuli_Chr02 | 4766516                 | TT                              | CC                 | CC               | DRR                   | 101509463     | Unknown function                             |                    |
| SNP_7410_A_4766566 | NC_021161.1    | Ca_Kabuli_Chr02 | 4766566                 | TT                              | AA                 | AA               | DRR                   | 101509463     | Unknown function                             |                    |
| SNP_7411_A_4767165 | NC_021161.1    | Ca_Kabuli_Chr02 | 4767165                 | AA                              | CC                 | CC               | NON_SYNONYMOUS_CODING | 101509463     | Unknown function                             |                    |
| SNP_7412_A_4769404 | NC_021161.1    | Ca_Kabuli_Chr02 | 4769404                 | GG                              | TT                 | TT               | URR                   | 101509463     | Unknown function                             |                    |
| SNP_7413_A_4770709 | NC_021161.1    | Ca_Kabuli_Chr02 | 4770709                 | TT                              | GG                 | GG               | INTERGENIC            |               |                                              |                    |
| SNP_7414_A_4805041 | NC_021161.1    | Ca_Kabuli_Chr02 | 4805041                 | CC                              | TT                 | TT               | NON_SYNONYMOUS_CODING | 101504745     | putative G3BP-like protein                   |                    |
| SNP_7415_A_4812595 | NC_021161.1    | Ca_Kabuli_Chr02 | 4812595                 | CC                              | TT                 | TT               | INTRON                | 101505279     | phenolic glucoside malonyltransferase 1-like |                    |
| SNP_7416_A_4812788 | NC_021161.1    | Ca_Kabuli_Chr02 | 4812788                 | AA                              | GG                 | GG               | INTRON                | 101505279     | phenolic glucoside malonyltransferase 1-like |                    |
| SNP_7418_A_4812950 | NC_021161.1    | Ca_Kabuli_Chr02 | 4812950                 | GG                              | TT                 | TT               | INTRON                | 101505279     | phenolic glucoside malonyltransferase 1-like |                    |
| SNP_7419_A_4812979 | NC_021161.1    | Ca_Kabuli_Chr02 | 4812979                 | GG                              | AA                 | AA               | INTRON                | 101505279     | phenolic glucoside malonyltransferase 1-like |                    |

| SNPs IDs           | Chromosome IDs | Chromosomes     | Physical positions (bp) | CDC Frontier (Reference genome) | (Pusa 1103 & HPNB) | (ILWC 46 & LPNB) | Sequence Components of genome | Gene accession IDs | Putative functions                           |
|--------------------|----------------|-----------------|-------------------------|---------------------------------|--------------------|------------------|-------------------------------|--------------------|----------------------------------------------|
| SNP_7420_A_4813128 | NC_021161.1    | Ca_Kabuli_Chr02 | 4813128                 | AA                              | GG                 | GG               | INTRON                        | 101505279          | phenolic glucoside malonyltransferase 1-like |
| SNP_7421_A_4818877 | NC_021161.1    | Ca_Kabuli_Chr02 | 4818877                 | GG                              | AA                 | AA               | INTERGENIC                    |                    |                                              |
| SNP_7422_A_4819571 | NC_021161.1    | Ca_Kabuli_Chr02 | 4819571                 | CC                              | TT                 | TT               | INTERGENIC                    |                    |                                              |
| SNP_7423_A_4829772 | NC_021161.1    | Ca_Kabuli_Chr02 | 4829772                 | TT                              | CC                 | CC               | INTERGENIC                    |                    |                                              |
| SNP_7424_A_4890866 | NC_021161.1    | Ca_Kabuli_Chr02 | 4890866                 | GG                              | TT                 | TT               | INTERGENIC                    |                    |                                              |
| SNP_7425_A_4890869 | NC_021161.1    | Ca_Kabuli_Chr02 | 4890869                 | TT                              | GG                 | GG               | INTERGENIC                    |                    |                                              |
| SNP_7426_A_4890893 | NC_021161.1    | Ca_Kabuli_Chr02 | 4890893                 | GG                              | TT                 | TT               | INTERGENIC                    |                    |                                              |
| SNP_7427_A_4891402 | NC_021161.1    | Ca_Kabuli_Chr02 | 4891402                 | GG                              | AA                 | AA               | INTERGENIC                    |                    |                                              |
| SNP_7428_A_4891487 | NC_021161.1    | Ca_Kabuli_Chr02 | 4891487                 | AA                              | GG                 | GG               | INTERGENIC                    |                    |                                              |
| SNP_7429_A_4892429 | NC_021161.1    | Ca_Kabuli_Chr02 | 4892429                 | CC                              | TT                 | TT               | INTERGENIC                    |                    |                                              |
| SNP_7430_A_4892489 | NC_021161.1    | Ca_Kabuli_Chr02 | 4892489                 | AA                              | CC                 | CC               | INTERGENIC                    |                    |                                              |
| SNP_7431_A_4892541 | NC_021161.1    | Ca_Kabuli_Chr02 | 4892541                 | TT                              | AA                 | AA               | INTERGENIC                    |                    |                                              |
| SNP_7433_A_4892894 | NC_021161.1    | Ca_Kabuli_Chr02 | 4892894                 | AA                              | TT                 | TT               | INTERGENIC                    |                    |                                              |
| SNP_7434_A_4893002 | NC_021161.1    | Ca_Kabuli_Chr02 | 4893002                 | TT                              | GG                 | GG               | INTERGENIC                    |                    |                                              |
| SNP_7435_A_4893011 | NC_021161.1    | Ca_Kabuli_Chr02 | 4893011                 | CC                              | TT                 | TT               | INTERGENIC                    |                    |                                              |
| SNP_7436_A_4893058 | NC_021161.1    | Ca_Kabuli_Chr02 | 4893058                 | CC                              | TT                 | TT               | INTERGENIC                    |                    |                                              |
| SNP_7437_A_4893356 | NC_021161.1    | Ca_Kabuli_Chr02 | 4893356                 | AA                              | GG                 | GG               | INTERGENIC                    |                    |                                              |
| SNP_7438_A_4893489 | NC_021161.1    | Ca_Kabuli_Chr02 | 4893489                 | TT                              | AA                 | AA               | INTERGENIC                    |                    |                                              |
| SNP_7439_A_4893522 | NC_021161.1    | Ca_Kabuli_Chr02 | 4893522                 | CC                              | AA                 | AA               | INTERGENIC                    |                    |                                              |
| SNP_7440_A_4893783 | NC_021161.1    | Ca_Kabuli_Chr02 | 4893783                 | GG                              | AA                 | AA               | INTERGENIC                    |                    |                                              |
| SNP_7441_A_4893902 | NC_021161.1    | Ca_Kabuli_Chr02 | 4893902                 | CC                              | TT                 | TT               | INTERGENIC                    |                    |                                              |
| SNP_7442_A_4893941 | NC_021161.1    | Ca_Kabuli_Chr02 | 4893941                 | AA                              | GG                 | GG               | INTERGENIC                    |                    |                                              |

| SNPs IDs           | Chromosome IDs | Chromosomes     | Physical positions (bp) | CDC Frontier genome (Reference genome) | (Pusa 1103 & HPNB) | (ILWC 46 & LPNB) | Sequence genome | Components of | Gene accession IDs | Putative functions |
|--------------------|----------------|-----------------|-------------------------|----------------------------------------|--------------------|------------------|-----------------|---------------|--------------------|--------------------|
| SNP_7443_A_4894008 | NC_021161.1    | Ca_Kabuli_Chr02 | 4894008                 | AA                                     | TT                 | TT               | INTERGENIC      |               |                    |                    |
| SNP_7444_A_4894056 | NC_021161.1    | Ca_Kabuli_Chr02 | 4894056                 | GG                                     | AA                 | AA               | INTERGENIC      |               |                    |                    |
| SNP_7446_A_4894250 | NC_021161.1    | Ca_Kabuli_Chr02 | 4894250                 | CC                                     | AA                 | AA               | INTERGENIC      |               |                    |                    |
| SNP_7447_A_4894639 | NC_021161.1    | Ca_Kabuli_Chr02 | 4894639                 | GG                                     | TT                 | TT               | INTERGENIC      |               |                    |                    |
| SNP_7448_A_4894701 | NC_021161.1    | Ca_Kabuli_Chr02 | 4894701                 | CC                                     | AA                 | AA               | INTERGENIC      |               |                    |                    |
| SNP_7449_A_4895463 | NC_021161.1    | Ca_Kabuli_Chr02 | 4895463                 | CC                                     | TT                 | TT               | INTERGENIC      |               |                    |                    |
| SNP_7450_A_4895476 | NC_021161.1    | Ca_Kabuli_Chr02 | 4895476                 | CC                                     | AA                 | AA               | INTERGENIC      |               |                    |                    |
| SNP_7451_A_4895477 | NC_021161.1    | Ca_Kabuli_Chr02 | 4895477                 | GG                                     | AA                 | AA               | INTERGENIC      |               |                    |                    |
| SNP_7452_A_4895494 | NC_021161.1    | Ca_Kabuli_Chr02 | 4895494                 | AA                                     | GG                 | GG               | INTERGENIC      |               |                    |                    |
| SNP_7453_A_4895497 | NC_021161.1    | Ca_Kabuli_Chr02 | 4895497                 | CC                                     | TT                 | TT               | INTERGENIC      |               |                    |                    |
| SNP_7454_A_4895508 | NC_021161.1    | Ca_Kabuli_Chr02 | 4895508                 | GG                                     | AA                 | AA               | INTERGENIC      |               |                    |                    |
| SNP_7455_A_4895614 | NC_021161.1    | Ca_Kabuli_Chr02 | 4895614                 | TT                                     | CC                 | CC               | INTERGENIC      |               |                    |                    |
| SNP_7456_A_4895622 | NC_021161.1    | Ca_Kabuli_Chr02 | 4895622                 | TT                                     | CC                 | CC               | INTERGENIC      |               |                    |                    |
| SNP_7457_A_4895627 | NC_021161.1    | Ca_Kabuli_Chr02 | 4895627                 | AA                                     | GG                 | GG               | INTERGENIC      |               |                    |                    |
| SNP_7458_A_4895637 | NC_021161.1    | Ca_Kabuli_Chr02 | 4895637                 | TT                                     | CC                 | CC               | INTERGENIC      |               |                    |                    |
| SNP_7459_A_4895642 | NC_021161.1    | Ca_Kabuli_Chr02 | 4895642                 | GG                                     | AA                 | AA               | INTERGENIC      |               |                    |                    |
| SNP_7461_A_4895718 | NC_021161.1    | Ca_Kabuli_Chr02 | 4895718                 | GG                                     | AA                 | AA               | INTERGENIC      |               |                    |                    |
| SNP_7462_A_4895750 | NC_021161.1    | Ca_Kabuli_Chr02 | 4895750                 | AA                                     | GG                 | GG               | INTERGENIC      |               |                    |                    |
| SNP_7464_A_4919060 | NC_021161.1    | Ca_Kabuli_Chr02 | 4919060                 | AA                                     | TT                 | TT               | INTERGENIC      |               |                    |                    |
| SNP_7465_A_4919097 | NC_021161.1    | Ca_Kabuli_Chr02 | 4919097                 | TT                                     | CC                 | CC               | INTERGENIC      |               |                    |                    |
| SNP_7466_A_4919101 | NC_021161.1    | Ca_Kabuli_Chr02 | 4919101                 | AA                                     | TT                 | TT               | INTERGENIC      |               |                    |                    |
| SNP_7467_A_4919126 | NC_021161.1    | Ca_Kabuli_Chr02 | 4919126                 | CC                                     | TT                 | TT               | INTERGENIC      |               |                    |                    |



| SNPs IDs           | Chromosome IDs | Chromosomes     | Physical positions (bp) | CDC Frontier genome (Reference genome) | (Pusa 1103 & HPNB) | (ILWC 46 & LPNB) | Sequence Components of genome | Gene accession IDs | Putative functions                                                                               |
|--------------------|----------------|-----------------|-------------------------|----------------------------------------|--------------------|------------------|-------------------------------|--------------------|--------------------------------------------------------------------------------------------------|
| SNP_7468_A_4919161 | NC_021161.1    | Ca_Kabuli_Chr02 | 4919161                 | CC                                     | AA                 | AA               | INTERGENIC                    |                    |                                                                                                  |
| SNP_7469_A_4919162 | NC_021161.1    | Ca_Kabuli_Chr02 | 4919162                 | GG                                     | AA                 | AA               | INTERGENIC                    |                    |                                                                                                  |
| SNP_7470_A_4974322 | NC_021161.1    | Ca_Kabuli_Chr02 | 4974322                 | AA                                     | GG                 | GG               | INTRON                        | 101505725          | DNA ligase 1-like                                                                                |
| SNP_7471_A_4981626 | NC_021161.1    | Ca_Kabuli_Chr02 | 4981626                 | AA                                     | GG                 | GG               | INTERGENIC                    |                    |                                                                                                  |
| SNP_7472_A_5062602 | NC_021161.1    | Ca_Kabuli_Chr02 | 5062602                 | GG                                     | AA                 | AA               | URR                           | 101513652          | GD5L esterase/lipase LTL1-like                                                                   |
| SNP_7473_A_5096256 | NC_021161.1    | Ca_Kabuli_Chr02 | 5096256                 | AA                                     | TT                 | TT               | URR                           | 101514845          | pre-rRNA-processing protein ESF2                                                                 |
| SNP_7475_A_5104471 | NC_021161.1    | Ca_Kabuli_Chr02 | 5104471                 | AA                                     | CC                 | CC               | INTRON                        | 101515168          | ras-related protein RABB1b                                                                       |
| SNP_7476_A_5104472 | NC_021161.1    | Ca_Kabuli_Chr02 | 5104472                 | AA                                     | CC                 | CC               | INTRON                        | 101515168          | ras-related protein RABB1b                                                                       |
| SNP_7477_A_5112758 | NC_021161.1    | Ca_Kabuli_Chr02 | 5112758                 | AA                                     | GG                 | GG               | INTERGENIC                    |                    |                                                                                                  |
| SNP_7478_A_5135328 | NC_021161.1    | Ca_Kabuli_Chr02 | 5135328                 | AA                                     | CC                 | CC               | INTERGENIC                    |                    |                                                                                                  |
| SNP_7479_A_5135343 | NC_021161.1    | Ca_Kabuli_Chr02 | 5135343                 | AA                                     | GG                 | GG               | INTERGENIC                    |                    |                                                                                                  |
| SNP_7480_A_5135366 | NC_021161.1    | Ca_Kabuli_Chr02 | 5135366                 | AA                                     | CC                 | CC               | INTERGENIC                    |                    |                                                                                                  |
| SNP_7483_A_5169707 | NC_021161.1    | Ca_Kabuli_Chr02 | 5169707                 | GG                                     | AA                 | AA               | INTRON                        | 101488572          | glycerol-3-phosphate dehydrogenase [NAD(+)]-like                                                 |
| SNP_7484_A_5238450 | NC_021161.1    | Ca_Kabuli_Chr02 | 5238450                 | AA                                     | GG                 | GG               | INTRON                        | 101507647          | cystinosin homolog                                                                               |
| SNP_7485_A_5265502 | NC_021161.1    | Ca_Kabuli_Chr02 | 5265502                 | AA                                     | GG                 | GG               | URR                           | 101492930          | uncharacterized LOC101492930                                                                     |
| SNP_7487_A_5407966 | NC_021161.1    | Ca_Kabuli_Chr02 | 5407966                 | GG                                     | AA                 | AA               | DRR                           | 101508604          | uncharacterized LOC101508604                                                                     |
| SNP_7488_A_5407992 | NC_021161.1    | Ca_Kabuli_Chr02 | 5407992                 | TT                                     | CC                 | CC               | DRR                           | 101508604          | uncharacterized LOC101508604                                                                     |
| SNP_7489_A_5408008 | NC_021161.1    | Ca_Kabuli_Chr02 | 5408008                 | TT                                     | CC                 | CC               | DRR                           | 101508604          | uncharacterized LOC101508604                                                                     |
| SNP_7490_A_5408021 | NC_021161.1    | Ca_Kabuli_Chr02 | 5408021                 | TT                                     | CC                 | CC               | DRR                           | 101508604          | uncharacterized LOC101508604                                                                     |
| SNP_7491_A_5467531 | NC_021161.1    | Ca_Kabuli_Chr02 | 5467531                 | GG                                     | AA                 | AA               | URR                           | 101499532          | ribulose-1,5 bisphosphate carboxylase/oxygenase large subunit N-methyltransferase, chloroplastic |
| SNP_7492_A_5522756 | NC_021161.1    | Ca_Kabuli_Chr02 | 5522756                 | GG                                     | AA                 | AA               | INTERGENIC                    |                    |                                                                                                  |
| SNP_7493_A_5522765 | NC_021161.1    | Ca_Kabuli_Chr02 | 5522765                 | GG                                     | AA                 | AA               | INTERGENIC                    |                    |                                                                                                  |

| SNPs IDs           | Chromosome IDs | Chromosomes     | Physical positions (bp) | CDC Frontier (Reference genome) | (Pusa 1103 & HPNB) | (ILWC 46 & LPNB) | Sequence genome | Components of | Gene accession IDs | Putative functions |
|--------------------|----------------|-----------------|-------------------------|---------------------------------|--------------------|------------------|-----------------|---------------|--------------------|--------------------|
| SNP_7494_A_5522912 | NC_021161.1    | Ca_Kabuli_Chr02 | 5522912                 | AA                              | GG                 | GG               | INTERGENIC      |               |                    |                    |
| SNP_7495_A_5522930 | NC_021161.1    | Ca_Kabuli_Chr02 | 5522930                 | GG                              | TT                 | TT               | INTERGENIC      |               |                    |                    |
| SNP_7496_A_5522950 | NC_021161.1    | Ca_Kabuli_Chr02 | 5522950                 | AA                              | GG                 | GG               | INTERGENIC      |               |                    |                    |
| SNP_7497_A_5524339 | NC_021161.1    | Ca_Kabuli_Chr02 | 5524339                 | TT                              | GG                 | GG               | INTERGENIC      |               |                    |                    |
| SNP_7498_A_5524431 | NC_021161.1    | Ca_Kabuli_Chr02 | 5524431                 | AA                              | GG                 | GG               | INTERGENIC      |               |                    |                    |
| SNP_7499_A_5524436 | NC_021161.1    | Ca_Kabuli_Chr02 | 5524436                 | GG                              | AA                 | AA               | INTERGENIC      |               |                    |                    |
| SNP_7500_A_5524465 | NC_021161.1    | Ca_Kabuli_Chr02 | 5524465                 | AA                              | TT                 | TT               | INTERGENIC      |               |                    |                    |
| SNP_7501_A_5524636 | NC_021161.1    | Ca_Kabuli_Chr02 | 5524636                 | TT                              | AA                 | AA               | INTERGENIC      |               |                    |                    |
| SNP_7502_A_5524663 | NC_021161.1    | Ca_Kabuli_Chr02 | 5524663                 | TT                              | CC                 | CC               | INTERGENIC      |               |                    |                    |
| SNP_7503_A_5524726 | NC_021161.1    | Ca_Kabuli_Chr02 | 5524726                 | TT                              | CC                 | CC               | INTERGENIC      |               |                    |                    |
| SNP_7504_A_5547003 | NC_021161.1    | Ca_Kabuli_Chr02 | 5547003                 | CC                              | TT                 | TT               | INTERGENIC      |               |                    |                    |
| SNP_7508_A_5703482 | NC_021161.1    | Ca_Kabuli_Chr02 | 5703482                 | TT                              | CC                 | CC               | INTERGENIC      |               |                    |                    |
| SNP_7509_A_5703508 | NC_021161.1    | Ca_Kabuli_Chr02 | 5703508                 | TT                              | CC                 | CC               | INTERGENIC      |               |                    |                    |
| SNP_7510_A_5703750 | NC_021161.1    | Ca_Kabuli_Chr02 | 5703750                 | GG                              | AA                 | AA               | INTERGENIC      |               |                    |                    |
| SNP_7511_A_5706302 | NC_021161.1    | Ca_Kabuli_Chr02 | 5706302                 | AA                              | GG                 | GG               | INTERGENIC      |               |                    |                    |
| SNP_7512_A_5706327 | NC_021161.1    | Ca_Kabuli_Chr02 | 5706327                 | CC                              | AA                 | AA               | INTERGENIC      |               |                    |                    |
| SNP_7513_A_5706414 | NC_021161.1    | Ca_Kabuli_Chr02 | 5706414                 | AA                              | TT                 | TT               | INTERGENIC      |               |                    |                    |
| SNP_7514_A_5706478 | NC_021161.1    | Ca_Kabuli_Chr02 | 5706478                 | GG                              | CC                 | CC               | INTERGENIC      |               |                    |                    |
| SNP_7515_A_5706482 | NC_021161.1    | Ca_Kabuli_Chr02 | 5706482                 | AA                              | CC                 | CC               | INTERGENIC      |               |                    |                    |
| SNP_7516_A_5706552 | NC_021161.1    | Ca_Kabuli_Chr02 | 5706552                 | AA                              | GG                 | GG               | INTERGENIC      |               |                    |                    |
| SNP_7517_A_5710878 | NC_021161.1    | Ca_Kabuli_Chr02 | 5710878                 | TT                              | CC                 | CC               | INTERGENIC      |               |                    |                    |
| SNP_7518_A_5712010 | NC_021161.1    | Ca_Kabuli_Chr02 | 5712010                 | TT                              | CC                 | CC               | INTERGENIC      |               |                    |                    |

| SNPs IDs           | Chromosome IDs | Chromosomes     | Physical positions (bp) | CDC Frontier genome (Reference genome) | (Pusa 1103 & HPNB) | (ILWC 46 & LPNB) | Sequence genome | Components of | Gene accession IDs | Putative functions           |
|--------------------|----------------|-----------------|-------------------------|----------------------------------------|--------------------|------------------|-----------------|---------------|--------------------|------------------------------|
| SNP_7519_A_5712018 | NC_021161.1    | Ca_Kabuli_Chr02 | 5712018                 | GG                                     | AA                 | AA               | INTERGENIC      |               |                    |                              |
| SNP_7520_A_5712020 | NC_021161.1    | Ca_Kabuli_Chr02 | 5712020                 | CC                                     | TT                 | TT               | INTERGENIC      |               |                    |                              |
| SNP_7521_A_5720055 | NC_021161.1    | Ca_Kabuli_Chr02 | 5720055                 | CC                                     | TT                 | TT               | INTERGENIC      |               |                    |                              |
| SNP_7522_A_5720149 | NC_021161.1    | Ca_Kabuli_Chr02 | 5720149                 | GG                                     | AA                 | AA               | INTERGENIC      |               |                    |                              |
| SNP_7523_A_5720340 | NC_021161.1    | Ca_Kabuli_Chr02 | 5720340                 | TT                                     | CC                 | CC               | INTERGENIC      |               |                    |                              |
| SNP_7524_A_5728899 | NC_021161.1    | Ca_Kabuli_Chr02 | 5728899                 | GG                                     | CC                 | CC               | URR             | 101509881     |                    | uncharacterized LOC101509881 |
| SNP_7525_A_5752891 | NC_021161.1    | Ca_Kabuli_Chr02 | 5752891                 | CC                                     | TT                 | TT               | INTERGENIC      |               |                    |                              |
| SNP_7526_A_5753041 | NC_021161.1    | Ca_Kabuli_Chr02 | 5753041                 | AA                                     | TT                 | TT               | INTERGENIC      |               |                    |                              |
| SNP_7527_A_5753111 | NC_021161.1    | Ca_Kabuli_Chr02 | 5753111                 | TT                                     | AA                 | AA               | INTERGENIC      |               |                    |                              |
| SNP_7528_A_5753113 | NC_021161.1    | Ca_Kabuli_Chr02 | 5753113                 | GG                                     | CC                 | CC               | INTERGENIC      |               |                    |                              |
| SNP_7529_A_5753212 | NC_021161.1    | Ca_Kabuli_Chr02 | 5753212                 | TT                                     | CC                 | CC               | INTERGENIC      |               |                    |                              |
| SNP_7530_A_5753292 | NC_021161.1    | Ca_Kabuli_Chr02 | 5753292                 | TT                                     | GG                 | GG               | INTERGENIC      |               |                    |                              |
| SNP_7531_A_5753293 | NC_021161.1    | Ca_Kabuli_Chr02 | 5753293                 | CC                                     | AA                 | AA               | INTERGENIC      |               |                    |                              |
| SNP_7532_A_5753309 | NC_021161.1    | Ca_Kabuli_Chr02 | 5753309                 | GG                                     | CC                 | CC               | INTERGENIC      |               |                    |                              |
| SNP_7533_A_5753476 | NC_021161.1    | Ca_Kabuli_Chr02 | 5753476                 | CC                                     | TT                 | TT               | INTERGENIC      |               |                    |                              |
| SNP_7534_A_5767942 | NC_021161.1    | Ca_Kabuli_Chr02 | 5767942                 | TT                                     | GG                 | GG               | INTERGENIC      |               |                    |                              |
| SNP_7535_A_5768066 | NC_021161.1    | Ca_Kabuli_Chr02 | 5768066                 | TT                                     | GG                 | GG               | INTERGENIC      |               |                    |                              |
| SNP_7536_A_5768122 | NC_021161.1    | Ca_Kabuli_Chr02 | 5768122                 | TT                                     | GG                 | GG               | INTERGENIC      |               |                    |                              |
| SNP_7537_A_5768761 | NC_021161.1    | Ca_Kabuli_Chr02 | 5768761                 | GG                                     | AA                 | AA               | INTERGENIC      |               |                    |                              |
| SNP_7538_A_5768805 | NC_021161.1    | Ca_Kabuli_Chr02 | 5768805                 | TT                                     | CC                 | CC               | INTERGENIC      |               |                    |                              |
| SNP_7539_A_5768826 | NC_021161.1    | Ca_Kabuli_Chr02 | 5768826                 | CC                                     | AA                 | AA               | INTERGENIC      |               |                    |                              |
| SNP_7540_A_5843139 | NC_021161.1    | Ca_Kabuli_Chr02 | 5843139                 | AA                                     | TT                 | TT               | INTERGENIC      |               |                    |                              |

| SNPs IDs           | Chromosome IDs | Chromosomes     | Physical positions (bp) | CDC Frontier (Reference genome) | (Pusa 1103 & HPNB) | (ILWC 46 & LPNB) | Sequence Components of genome | Gene accession IDs | Putative functions                                                    |
|--------------------|----------------|-----------------|-------------------------|---------------------------------|--------------------|------------------|-------------------------------|--------------------|-----------------------------------------------------------------------|
| SNP_7541_A_5888010 | NC_021161.1    | Ca_Kabuli_Chr02 | 5888010                 | TT                              | CC                 | CC               | DRR                           | 101515382          | regulation of nuclear pre-mRNA domain-containing protein 1A-like      |
| SNP_7542_A_6020369 | NC_021161.1    | Ca_Kabuli_Chr02 | 6020369                 | AA                              | GG                 | GG               | INTERGENIC                    |                    |                                                                       |
| SNP_7543_A_6075388 | NC_021161.1    | Ca_Kabuli_Chr02 | 6075388                 | AA                              | GG                 | GG               | SYNONYMOUS_CODING             | 101498001          | Unknown function                                                      |
| SNP_7544_A_6075504 | NC_021161.1    | Ca_Kabuli_Chr02 | 6075504                 | TT                              | CC                 | CC               | INTRON                        | 101498001          | Unknown function                                                      |
| SNP_7545_A_6075580 | NC_021161.1    | Ca_Kabuli_Chr02 | 6075580                 | AA                              | GG                 | GG               | INTRON                        | 101498001          | Unknown function                                                      |
| SNP_7546_A_6075737 | NC_021161.1    | Ca_Kabuli_Chr02 | 6075737                 | AA                              | GG                 | GG               | NON_SYNONYMOUS_CODING         | 101498001          | Unknown function                                                      |
| SNP_7547_A_6075939 | NC_021161.1    | Ca_Kabuli_Chr02 | 6075939                 | CC                              | GG                 | GG               | INTRON                        | 101498001          | Unknown function                                                      |
| SNP_7548_A_6085175 | NC_021161.1    | Ca_Kabuli_Chr02 | 6085175                 | GG                              | AA                 | AA               | INTERGENIC                    |                    |                                                                       |
| SNP_7549_A_6180711 | NC_021161.1    | Ca_Kabuli_Chr02 | 6180711                 | GG                              | AA                 | AA               | INTERGENIC                    |                    |                                                                       |
| SNP_7550_A_6264703 | NC_021161.1    | Ca_Kabuli_Chr02 | 6264703                 | TT                              | CC                 | CC               | INTERGENIC                    |                    |                                                                       |
| SNP_7551_A_6314721 | NC_021161.1    | Ca_Kabuli_Chr02 | 6314721                 | AA                              | GG                 | GG               | INTERGENIC                    |                    |                                                                       |
| SNP_7553_A_6323269 | NC_021161.1    | Ca_Kabuli_Chr02 | 6323269                 | AA                              | GG                 | GG               | INTERGENIC                    |                    |                                                                       |
| SNP_7554_A_6334362 | NC_021161.1    | Ca_Kabuli_Chr02 | 6334362                 | CC                              | AA                 | AA               | URR                           | 101506364          | shikimate O-hydroxycinnamoyltransferase-like                          |
| SNP_7555_A_6334365 | NC_021161.1    | Ca_Kabuli_Chr02 | 6334365                 | TT                              | CC                 | CC               | URR                           | 101506364          | shikimate O-hydroxycinnamoyltransferase-like                          |
| SNP_7556_A_6334367 | NC_021161.1    | Ca_Kabuli_Chr02 | 6334367                 | GG                              | AA                 | AA               | URR                           | 101506364          | shikimate O-hydroxycinnamoyltransferase-like                          |
| SNP_7557_A_6334408 | NC_021161.1    | Ca_Kabuli_Chr02 | 6334408                 | TT                              | GG                 | GG               | URR                           | 101506364          | shikimate O-hydroxycinnamoyltransferase-like                          |
| SNP_7558_A_6394550 | NC_021161.1    | Ca_Kabuli_Chr02 | 6394550                 | AA                              | TT                 | TT               | DRR                           | 101500594          | 5-methyltetrahydropteroyltryglutamate--homocysteine methyltransferase |
| SNP_7559_A_6394551 | NC_021161.1    | Ca_Kabuli_Chr02 | 6394551                 | AA                              | GG                 | GG               | DRR                           | 101500594          | 5-methyltetrahydropteroyltryglutamate--homocysteine methyltransferase |
| SNP_7560_A_6468927 | NC_021161.1    | Ca_Kabuli_Chr02 | 6468927                 | GG                              | AA                 | AA               | NON_SYNONYMOUS_CODING         | 101507341          | lysosomal beta glucosidase-like                                       |
| SNP_7563_A_6618242 | NC_021161.1    | Ca_Kabuli_Chr02 | 6618242                 | CC                              | AA                 | AA               | INTERGENIC                    |                    |                                                                       |
| SNP_7564_A_6618263 | NC_021161.1    | Ca_Kabuli_Chr02 | 6618263                 | GG                              | TT                 | TT               | INTERGENIC                    |                    |                                                                       |
| SNP_7565_A_6618334 | NC_021161.1    | Ca_Kabuli_Chr02 | 6618334                 | GG                              | AA                 | AA               | INTERGENIC                    |                    |                                                                       |

| SNPs IDs           | Chromosome IDs | Chromosomes     | Physical positions (bp) | CDC Frontier (Reference genome) | (Pusa 1103 & HPNB) | (ILWC 46 & LPNB) | Sequence Components of genome | Gene accession IDs | Putative functions |
|--------------------|----------------|-----------------|-------------------------|---------------------------------|--------------------|------------------|-------------------------------|--------------------|--------------------|
| SNP_7566_A_6618369 | NC_021161.1    | Ca_Kabuli_Chr02 | 6618369                 | AA                              | GG                 | GG               | INTERGENIC                    |                    |                    |
| SNP_7567_A_6618376 | NC_021161.1    | Ca_Kabuli_Chr02 | 6618376                 | AA                              | CC                 | CC               | INTERGENIC                    |                    |                    |
| SNP_7568_A_6618378 | NC_021161.1    | Ca_Kabuli_Chr02 | 6618378                 | TT                              | CC                 | CC               | INTERGENIC                    |                    |                    |
| SNP_7569_A_6638603 | NC_021161.1    | Ca_Kabuli_Chr02 | 6638603                 | AA                              | GG                 | GG               | URR                           | 101493586          | Unknown function   |
| SNP_7570_A_6638793 | NC_021161.1    | Ca_Kabuli_Chr02 | 6638793                 | GG                              | AA                 | AA               | INTERGENIC                    |                    |                    |
| SNP_7571_A_6639137 | NC_021161.1    | Ca_Kabuli_Chr02 | 6639137                 | GG                              | AA                 | AA               | INTERGENIC                    |                    |                    |
| SNP_7572_A_6639244 | NC_021161.1    | Ca_Kabuli_Chr02 | 6639244                 | AA                              | CC                 | CC               | INTERGENIC                    |                    |                    |
| SNP_7573_A_6639593 | NC_021161.1    | Ca_Kabuli_Chr02 | 6639593                 | AA                              | TT                 | TT               | INTERGENIC                    |                    |                    |
| SNP_7575_A_6640408 | NC_021161.1    | Ca_Kabuli_Chr02 | 6640408                 | AA                              | CC                 | CC               | INTERGENIC                    |                    |                    |
| SNP_7577_A_6640498 | NC_021161.1    | Ca_Kabuli_Chr02 | 6640498                 | AA                              | CC                 | CC               | INTERGENIC                    |                    |                    |
| SNP_7578_A_6640533 | NC_021161.1    | Ca_Kabuli_Chr02 | 6640533                 | CC                              | TT                 | TT               | INTERGENIC                    |                    |                    |
| SNP_7579_A_6640540 | NC_021161.1    | Ca_Kabuli_Chr02 | 6640540                 | CC                              | TT                 | TT               | INTERGENIC                    |                    |                    |
| SNP_7580_A_6640571 | NC_021161.1    | Ca_Kabuli_Chr02 | 6640571                 | AA                              | GG                 | GG               | INTERGENIC                    |                    |                    |
| SNP_7581_A_6640625 | NC_021161.1    | Ca_Kabuli_Chr02 | 6640625                 | CC                              | TT                 | TT               | INTERGENIC                    |                    |                    |
| SNP_7582_A_6640702 | NC_021161.1    | Ca_Kabuli_Chr02 | 6640702                 | CC                              | TT                 | TT               | INTERGENIC                    |                    |                    |
| SNP_7583_A_6640760 | NC_021161.1    | Ca_Kabuli_Chr02 | 6640760                 | AA                              | GG                 | GG               | INTERGENIC                    |                    |                    |
| SNP_7584_A_6640779 | NC_021161.1    | Ca_Kabuli_Chr02 | 6640779                 | CC                              | TT                 | TT               | INTERGENIC                    |                    |                    |
| SNP_7585_A_6640852 | NC_021161.1    | Ca_Kabuli_Chr02 | 6640852                 | CC                              | TT                 | TT               | INTERGENIC                    |                    |                    |
| SNP_7586_A_6640889 | NC_021161.1    | Ca_Kabuli_Chr02 | 6640889                 | AA                              | TT                 | TT               | INTERGENIC                    |                    |                    |
| SNP_7587_A_6641068 | NC_021161.1    | Ca_Kabuli_Chr02 | 6641068                 | AA                              | GG                 | GG               | INTERGENIC                    |                    |                    |
| SNP_7588_A_6641252 | NC_021161.1    | Ca_Kabuli_Chr02 | 6641252                 | GG                              | AA                 | AA               | INTERGENIC                    |                    |                    |
| SNP_7589_A_6641353 | NC_021161.1    | Ca_Kabuli_Chr02 | 6641353                 | TT                              | CC                 | CC               | INTERGENIC                    |                    |                    |

| SNPs IDs           | Chromosome IDs | Chromosomes     | Physical positions (bp) | CDC Frontier genome (Reference genome) | (Pusa 1103 & HPNB) | (ILWC 46 & LPNB) | Sequence genome | Components of | Gene accession IDs | Putative functions |
|--------------------|----------------|-----------------|-------------------------|----------------------------------------|--------------------|------------------|-----------------|---------------|--------------------|--------------------|
| SNP_7590_A_6641462 | NC_021161.1    | Ca_Kabuli_Chr02 | 6641462                 | CC                                     | AA                 | AA               | INTERGENIC      |               |                    |                    |
| SNP_7591_A_6641550 | NC_021161.1    | Ca_Kabuli_Chr02 | 6641550                 | AA                                     | TT                 | TT               | INTERGENIC      |               |                    |                    |
| SNP_7592_A_6641696 | NC_021161.1    | Ca_Kabuli_Chr02 | 6641696                 | GG                                     | TT                 | TT               | INTERGENIC      |               |                    |                    |
| SNP_7594_A_6641754 | NC_021161.1    | Ca_Kabuli_Chr02 | 6641754                 | TT                                     | CC                 | CC               | INTERGENIC      |               |                    |                    |
| SNP_7595_A_6641774 | NC_021161.1    | Ca_Kabuli_Chr02 | 6641774                 | GG                                     | AA                 | AA               | INTERGENIC      |               |                    |                    |
| SNP_7596_A_6641798 | NC_021161.1    | Ca_Kabuli_Chr02 | 6641798                 | CC                                     | TT                 | TT               | INTERGENIC      |               |                    |                    |
| SNP_7597_A_6641836 | NC_021161.1    | Ca_Kabuli_Chr02 | 6641836                 | CC                                     | TT                 | TT               | INTERGENIC      |               |                    |                    |
| SNP_7599_A_6642051 | NC_021161.1    | Ca_Kabuli_Chr02 | 6642051                 | GG                                     | TT                 | TT               | INTERGENIC      |               |                    |                    |
| SNP_7600_A_6642168 | NC_021161.1    | Ca_Kabuli_Chr02 | 6642168                 | CC                                     | AA                 | AA               | INTERGENIC      |               |                    |                    |
| SNP_7601_A_6642216 | NC_021161.1    | Ca_Kabuli_Chr02 | 6642216                 | AA                                     | GG                 | GG               | INTERGENIC      |               |                    |                    |
| SNP_7602_A_6642298 | NC_021161.1    | Ca_Kabuli_Chr02 | 6642298                 | GG                                     | TT                 | TT               | INTERGENIC      |               |                    |                    |
| SNP_7603_A_6642359 | NC_021161.1    | Ca_Kabuli_Chr02 | 6642359                 | AA                                     | CC                 | CC               | INTERGENIC      |               |                    |                    |
| SNP_7604_A_6642448 | NC_021161.1    | Ca_Kabuli_Chr02 | 6642448                 | GG                                     | TT                 | TT               | INTERGENIC      |               |                    |                    |
| SNP_7605_A_6642481 | NC_021161.1    | Ca_Kabuli_Chr02 | 6642481                 | GG                                     | AA                 | AA               | INTERGENIC      |               |                    |                    |
| SNP_7607_A_6642564 | NC_021161.1    | Ca_Kabuli_Chr02 | 6642564                 | CC                                     | AA                 | AA               | INTERGENIC      |               |                    |                    |
| SNP_7608_A_6642720 | NC_021161.1    | Ca_Kabuli_Chr02 | 6642720                 | CC                                     | TT                 | TT               | INTERGENIC      |               |                    |                    |
| SNP_7609_A_6642729 | NC_021161.1    | Ca_Kabuli_Chr02 | 6642729                 | TT                                     | AA                 | AA               | INTERGENIC      |               |                    |                    |
| SNP_7610_A_6642762 | NC_021161.1    | Ca_Kabuli_Chr02 | 6642762                 | GG                                     | TT                 | TT               | INTERGENIC      |               |                    |                    |
| SNP_7611_A_6642785 | NC_021161.1    | Ca_Kabuli_Chr02 | 6642785                 | AA                                     | TT                 | TT               | INTERGENIC      |               |                    |                    |
| SNP_7612_A_6643061 | NC_021161.1    | Ca_Kabuli_Chr02 | 6643061                 | CC                                     | GG                 | GG               | INTERGENIC      |               |                    |                    |
| SNP_7613_A_6643125 | NC_021161.1    | Ca_Kabuli_Chr02 | 6643125                 | CC                                     | GG                 | GG               | INTERGENIC      |               |                    |                    |
| SNP_7614_A_6643264 | NC_021161.1    | Ca_Kabuli_Chr02 | 6643264                 | TT                                     | AA                 | AA               | INTERGENIC      |               |                    |                    |

| SNPs IDs           | Chromosome IDs | Chromosomes     | Physical positions (bp) | CDC Frontier genome (Reference genome) | (Pusa 1103 & HPNB) | (ILWC 46 & LPNB) | Sequence genome | Components of | Gene accession IDs | Putative functions |
|--------------------|----------------|-----------------|-------------------------|----------------------------------------|--------------------|------------------|-----------------|---------------|--------------------|--------------------|
| SNP_7615_A_6643272 | NC_021161.1    | Ca_Kabuli_Chr02 | 6643272                 | AA                                     | CC                 | CC               | INTERGENIC      |               |                    |                    |
| SNP_7616_A_6643331 | NC_021161.1    | Ca_Kabuli_Chr02 | 6643331                 | CC                                     | AA                 | AA               | INTERGENIC      |               |                    |                    |
| SNP_7617_A_6643355 | NC_021161.1    | Ca_Kabuli_Chr02 | 6643355                 | AA                                     | GG                 | GG               | INTERGENIC      |               |                    |                    |
| SNP_7618_A_6643418 | NC_021161.1    | Ca_Kabuli_Chr02 | 6643418                 | CC                                     | TT                 | TT               | INTERGENIC      |               |                    |                    |
| SNP_7619_A_6643563 | NC_021161.1    | Ca_Kabuli_Chr02 | 6643563                 | AA                                     | TT                 | TT               | INTERGENIC      |               |                    |                    |
| SNP_7620_A_6643589 | NC_021161.1    | Ca_Kabuli_Chr02 | 6643589                 | CC                                     | TT                 | TT               | INTERGENIC      |               |                    |                    |
| SNP_7622_A_6643784 | NC_021161.1    | Ca_Kabuli_Chr02 | 6643784                 | CC                                     | TT                 | TT               | INTERGENIC      |               |                    |                    |
| SNP_7624_A_6644903 | NC_021161.1    | Ca_Kabuli_Chr02 | 6644903                 | AA                                     | CC                 | CC               | INTERGENIC      |               |                    |                    |
| SNP_7625_A_6644904 | NC_021161.1    | Ca_Kabuli_Chr02 | 6644904                 | CC                                     | TT                 | TT               | INTERGENIC      |               |                    |                    |
| SNP_7626_A_6644964 | NC_021161.1    | Ca_Kabuli_Chr02 | 6644964                 | TT                                     | CC                 | CC               | INTERGENIC      |               |                    |                    |
| SNP_7627_A_6645276 | NC_021161.1    | Ca_Kabuli_Chr02 | 6645276                 | AA                                     | GG                 | GG               | INTERGENIC      |               |                    |                    |
| SNP_7628_A_6645291 | NC_021161.1    | Ca_Kabuli_Chr02 | 6645291                 | AA                                     | GG                 | GG               | INTERGENIC      |               |                    |                    |
| SNP_7629_A_6645326 | NC_021161.1    | Ca_Kabuli_Chr02 | 6645326                 | CC                                     | AA                 | AA               | INTERGENIC      |               |                    |                    |
| SNP_7630_A_6645327 | NC_021161.1    | Ca_Kabuli_Chr02 | 6645327                 | CC                                     | TT                 | TT               | INTERGENIC      |               |                    |                    |
| SNP_7631_A_6645440 | NC_021161.1    | Ca_Kabuli_Chr02 | 6645440                 | AA                                     | GG                 | GG               | INTERGENIC      |               |                    |                    |
| SNP_7632_A_6645522 | NC_021161.1    | Ca_Kabuli_Chr02 | 6645522                 | TT                                     | CC                 | CC               | INTERGENIC      |               |                    |                    |
| SNP_7633_A_6645608 | NC_021161.1    | Ca_Kabuli_Chr02 | 6645608                 | AA                                     | GG                 | GG               | INTERGENIC      |               |                    |                    |
| SNP_7634_A_6645737 | NC_021161.1    | Ca_Kabuli_Chr02 | 6645737                 | CC                                     | GG                 | GG               | INTERGENIC      |               |                    |                    |
| SNP_7635_A_6645747 | NC_021161.1    | Ca_Kabuli_Chr02 | 6645747                 | TT                                     | AA                 | AA               | INTERGENIC      |               |                    |                    |
| SNP_7636_A_6646210 | NC_021161.1    | Ca_Kabuli_Chr02 | 6646210                 | GG                                     | AA                 | AA               | INTERGENIC      |               |                    |                    |
| SNP_7637_A_6648078 | NC_021161.1    | Ca_Kabuli_Chr02 | 6648078                 | TT                                     | CC                 | CC               | INTERGENIC      |               |                    |                    |
| SNP_7638_A_6648216 | NC_021161.1    | Ca_Kabuli_Chr02 | 6648216                 | TT                                     | CC                 | CC               | INTERGENIC      |               |                    |                    |

| SNPs IDs           | Chromosome IDs | Chromosomes     | Physical positions (bp) | CDC Frontier (Reference genome) | (Pusa 1103 & HPNB) | (ILWC 46 & LPNB) | Sequence genome | Components of | Gene accession IDs | Putative functions |
|--------------------|----------------|-----------------|-------------------------|---------------------------------|--------------------|------------------|-----------------|---------------|--------------------|--------------------|
| SNP_7640_A_6648858 | NC_021161.1    | Ca_Kabuli_Chr02 | 6648858                 | AA                              | GG                 | GG               | INTERGENIC      |               |                    |                    |
| SNP_7642_A_6649839 | NC_021161.1    | Ca_Kabuli_Chr02 | 6649839                 | AA                              | TT                 | TT               | INTERGENIC      |               |                    |                    |
| SNP_7643_A_6650404 | NC_021161.1    | Ca_Kabuli_Chr02 | 6650404                 | GG                              | AA                 | AA               | INTERGENIC      |               |                    |                    |
| SNP_7644_A_6650405 | NC_021161.1    | Ca_Kabuli_Chr02 | 6650405                 | CC                              | TT                 | TT               | INTERGENIC      |               |                    |                    |
| SNP_7645_A_6656012 | NC_021161.1    | Ca_Kabuli_Chr02 | 6656012                 | AA                              | GG                 | GG               | INTERGENIC      |               |                    |                    |
| SNP_7646_A_6656227 | NC_021161.1    | Ca_Kabuli_Chr02 | 6656227                 | TT                              | GG                 | GG               | INTERGENIC      |               |                    |                    |
| SNP_7647_A_6656417 | NC_021161.1    | Ca_Kabuli_Chr02 | 6656417                 | CC                              | TT                 | TT               | INTERGENIC      |               |                    |                    |
| SNP_7648_A_6657739 | NC_021161.1    | Ca_Kabuli_Chr02 | 6657739                 | TT                              | AA                 | AA               | INTERGENIC      |               |                    |                    |
| SNP_7649_A_6657743 | NC_021161.1    | Ca_Kabuli_Chr02 | 6657743                 | CC                              | TT                 | TT               | INTERGENIC      |               |                    |                    |
| SNP_7650_A_6657746 | NC_021161.1    | Ca_Kabuli_Chr02 | 6657746                 | TT                              | CC                 | CC               | INTERGENIC      |               |                    |                    |
| SNP_7651_A_6657747 | NC_021161.1    | Ca_Kabuli_Chr02 | 6657747                 | TT                              | AA                 | AA               | INTERGENIC      |               |                    |                    |
| SNP_7652_A_6657748 | NC_021161.1    | Ca_Kabuli_Chr02 | 6657748                 | TT                              | AA                 | AA               | INTERGENIC      |               |                    |                    |
| SNP_7653_A_6657947 | NC_021161.1    | Ca_Kabuli_Chr02 | 6657947                 | TT                              | AA                 | AA               | INTERGENIC      |               |                    |                    |
| SNP_7654_A_6659142 | NC_021161.1    | Ca_Kabuli_Chr02 | 6659142                 | TT                              | GG                 | GG               | INTERGENIC      |               |                    |                    |
| SNP_7655_A_6659310 | NC_021161.1    | Ca_Kabuli_Chr02 | 6659310                 | GG                              | AA                 | AA               | INTERGENIC      |               |                    |                    |
| SNP_7656_A_6668360 | NC_021161.1    | Ca_Kabuli_Chr02 | 6668360                 | TT                              | CC                 | CC               | INTERGENIC      |               |                    |                    |
| SNP_7657_A_6670897 | NC_021161.1    | Ca_Kabuli_Chr02 | 6670897                 | TT                              | AA                 | AA               | INTERGENIC      |               |                    |                    |
| SNP_7658_A_6681008 | NC_021161.1    | Ca_Kabuli_Chr02 | 6681008                 | GG                              | TT                 | TT               | INTERGENIC      |               |                    |                    |
| SNP_7659_A_6681207 | NC_021161.1    | Ca_Kabuli_Chr02 | 6681207                 | CC                              | TT                 | TT               | INTERGENIC      |               |                    |                    |
| SNP_7660_A_6681280 | NC_021161.1    | Ca_Kabuli_Chr02 | 6681280                 | GG                              | AA                 | AA               | INTERGENIC      |               |                    |                    |
| SNP_7661_A_6681481 | NC_021161.1    | Ca_Kabuli_Chr02 | 6681481                 | AA                              | TT                 | TT               | INTERGENIC      |               |                    |                    |
| SNP_7662_A_6687463 | NC_021161.1    | Ca_Kabuli_Chr02 | 6687463                 | CC                              | TT                 | TT               | INTERGENIC      |               |                    |                    |



| SNPs IDs           | Chromosome IDs | Chromosomes     | Physical positions (bp) | CDC Frontier genome (Reference genome) | (Pusa 1103 & HPNB) | (ILWC 46 & LPNB) | Sequence genome | Components of | Gene accession IDs | Putative functions |
|--------------------|----------------|-----------------|-------------------------|----------------------------------------|--------------------|------------------|-----------------|---------------|--------------------|--------------------|
| SNP_7663_A_6687519 | NC_021161.1    | Ca_Kabuli_Chr02 | 6687519                 | AA                                     | TT                 | TT               | INTERGENIC      |               |                    |                    |
| SNP_7664_A_6687523 | NC_021161.1    | Ca_Kabuli_Chr02 | 6687523                 | CC                                     | TT                 | TT               | INTERGENIC      |               |                    |                    |
| SNP_7665_A_6687530 | NC_021161.1    | Ca_Kabuli_Chr02 | 6687530                 | TT                                     | GG                 | GG               | INTERGENIC      |               |                    |                    |
| SNP_7666_A_6687606 | NC_021161.1    | Ca_Kabuli_Chr02 | 6687606                 | CC                                     | TT                 | TT               | INTERGENIC      |               |                    |                    |
| SNP_7667_A_6687616 | NC_021161.1    | Ca_Kabuli_Chr02 | 6687616                 | AA                                     | GG                 | GG               | INTERGENIC      |               |                    |                    |
| SNP_7668_A_6687638 | NC_021161.1    | Ca_Kabuli_Chr02 | 6687638                 | TT                                     | GG                 | GG               | INTERGENIC      |               |                    |                    |
| SNP_7669_A_6687791 | NC_021161.1    | Ca_Kabuli_Chr02 | 6687791                 | AA                                     | GG                 | GG               | INTERGENIC      |               |                    |                    |
| SNP_7670_A_6689904 | NC_021161.1    | Ca_Kabuli_Chr02 | 6689904                 | TT                                     | CC                 | CC               | INTERGENIC      |               |                    |                    |
| SNP_7671_A_6690146 | NC_021161.1    | Ca_Kabuli_Chr02 | 6690146                 | GG                                     | AA                 | AA               | INTERGENIC      |               |                    |                    |
| SNP_7672_A_6691892 | NC_021161.1    | Ca_Kabuli_Chr02 | 6691892                 | TT                                     | GG                 | GG               | INTERGENIC      |               |                    |                    |
| SNP_7673_A_6691903 | NC_021161.1    | Ca_Kabuli_Chr02 | 6691903                 | AA                                     | GG                 | GG               | INTERGENIC      |               |                    |                    |
| SNP_7674_A_6691922 | NC_021161.1    | Ca_Kabuli_Chr02 | 6691922                 | AA                                     | GG                 | GG               | INTERGENIC      |               |                    |                    |
| SNP_7675_A_6691932 | NC_021161.1    | Ca_Kabuli_Chr02 | 6691932                 | GG                                     | AA                 | AA               | INTERGENIC      |               |                    |                    |
| SNP_7676_A_6691939 | NC_021161.1    | Ca_Kabuli_Chr02 | 6691939                 | GG                                     | TT                 | TT               | INTERGENIC      |               |                    |                    |
| SNP_7677_A_6691990 | NC_021161.1    | Ca_Kabuli_Chr02 | 6691990                 | GG                                     | AA                 | AA               | INTERGENIC      |               |                    |                    |
| SNP_7678_A_6691997 | NC_021161.1    | Ca_Kabuli_Chr02 | 6691997                 | AA                                     | GG                 | GG               | INTERGENIC      |               |                    |                    |
| SNP_7680_A_6774438 | NC_021161.1    | Ca_Kabuli_Chr02 | 6774438                 | GG                                     | AA                 | AA               | INTERGENIC      |               |                    |                    |
| SNP_7681_A_6782056 | NC_021161.1    | Ca_Kabuli_Chr02 | 6782056                 | GG                                     | AA                 | AA               | INTERGENIC      |               |                    |                    |
| SNP_7683_A_6815088 | NC_021161.1    | Ca_Kabuli_Chr02 | 6815088                 | AA                                     | CC                 | CC               | INTERGENIC      |               |                    |                    |
| SNP_7684_A_6815091 | NC_021161.1    | Ca_Kabuli_Chr02 | 6815091                 | TT                                     | CC                 | CC               | INTERGENIC      |               |                    |                    |
| SNP_7685_A_6815464 | NC_021161.1    | Ca_Kabuli_Chr02 | 6815464                 | TT                                     | CC                 | CC               | INTERGENIC      |               |                    |                    |
| SNP_7686_A_6815526 | NC_021161.1    | Ca_Kabuli_Chr02 | 6815526                 | GG                                     | AA                 | AA               | INTERGENIC      |               |                    |                    |

| SNPs IDs           | Chromosome IDs | Chromosomes     | Physical positions (bp) | CDC Frontier (Reference genome) | (Pusa 1103 & HPNB) | (ILWC 46 & LPNB) | Sequence Components of genome | Gene accession IDs | Putative functions                            |
|--------------------|----------------|-----------------|-------------------------|---------------------------------|--------------------|------------------|-------------------------------|--------------------|-----------------------------------------------|
| SNP_7687_A_6820527 | NC_021161.1    | Ca_Kabuli_Chr02 | 6820527                 | AA                              | CC                 | CC               | INTERGENIC                    |                    |                                               |
| SNP_7688_A_6828384 | NC_021161.1    | Ca_Kabuli_Chr02 | 6828384                 | CC                              | TT                 | TT               | INTERGENIC                    |                    |                                               |
| SNP_7689_A_6828416 | NC_021161.1    | Ca_Kabuli_Chr02 | 6828416                 | GG                              | AA                 | AA               | INTERGENIC                    |                    |                                               |
| SNP_7692_A_7002435 | NC_021161.1    | Ca_Kabuli_Chr02 | 7002435                 | AA                              | GG                 | GG               | INTERGENIC                    |                    |                                               |
| SNP_7693_A_7002762 | NC_021161.1    | Ca_Kabuli_Chr02 | 7002762                 | AA                              | CC                 | CC               | INTERGENIC                    |                    |                                               |
| SNP_7694_A_7002766 | NC_021161.1    | Ca_Kabuli_Chr02 | 7002766                 | GG                              | AA                 | AA               | INTERGENIC                    |                    |                                               |
| SNP_7695_A_7002783 | NC_021161.1    | Ca_Kabuli_Chr02 | 7002783                 | TT                              | GG                 | GG               | INTERGENIC                    |                    |                                               |
| SNP_7696_A_7002821 | NC_021161.1    | Ca_Kabuli_Chr02 | 7002821                 | CC                              | TT                 | TT               | INTERGENIC                    |                    |                                               |
| SNP_7697_A_7062743 | NC_021161.1    | Ca_Kabuli_Chr02 | 7062743                 | TT                              | GG                 | GG               | INTRON                        | 101489147          | protein S-acyltransferase 8-like              |
| SNP_7698_A_7075498 | NC_021161.1    | Ca_Kabuli_Chr02 | 7075498                 | GG                              | TT                 | TT               | INTERGENIC                    |                    |                                               |
| SNP_7699_A_7075601 | NC_021161.1    | Ca_Kabuli_Chr02 | 7075601                 | AA                              | GG                 | GG               | INTERGENIC                    |                    |                                               |
| SNP_7700_A_7075735 | NC_021161.1    | Ca_Kabuli_Chr02 | 7075735                 | TT                              | CC                 | CC               | INTERGENIC                    |                    |                                               |
| SNP_7701_A_7075939 | NC_021161.1    | Ca_Kabuli_Chr02 | 7075939                 | AA                              | GG                 | GG               | INTERGENIC                    |                    |                                               |
| SNP_7702_A_7126937 | NC_021161.1    | Ca_Kabuli_Chr02 | 7126937                 | GG                              | AA                 | AA               | INTRON                        | 101493266          | uncharacterized oxidoreductase At4g09670-like |
| SNP_7704_A_7171728 | NC_021161.1    | Ca_Kabuli_Chr02 | 7171728                 | AA                              | CC                 | CC               | INTERGENIC                    |                    |                                               |
| SNP_7707_A_7171984 | NC_021161.1    | Ca_Kabuli_Chr02 | 7171984                 | TT                              | CC                 | CC               | INTERGENIC                    |                    |                                               |
| SNP_7710_A_7172745 | NC_021161.1    | Ca_Kabuli_Chr02 | 7172745                 | CC                              | TT                 | TT               | DRR                           | 101497470          | ruBisCO-associated protein-like               |
| SNP_7711_A_7173097 | NC_021161.1    | Ca_Kabuli_Chr02 | 7173097                 | AA                              | TT                 | TT               | DRR                           | 101497470          | ruBisCO-associated protein-like               |
| SNP_7713_A_7177569 | NC_021161.1    | Ca_Kabuli_Chr02 | 7177569                 | GG                              | CC                 | CC               | INTERGENIC                    |                    |                                               |
| SNP_7714_A_7189794 | NC_021161.1    | Ca_Kabuli_Chr02 | 7189794                 | GG                              | AA                 | AA               | INTERGENIC                    |                    |                                               |
| SNP_7715_A_7226335 | NC_021161.1    | Ca_Kabuli_Chr02 | 7226335                 | CC                              | GG                 | GG               | INTERGENIC                    |                    |                                               |
| SNP_7716_A_7243217 | NC_021161.1    | Ca_Kabuli_Chr02 | 7243217                 | AA                              | GG                 | GG               | INTERGENIC                    |                    |                                               |

| SNPs IDs           | Chromosome IDs | Chromosomes     | Physical positions (bp) | CDC Frontier (Reference genome) | (Pusa 1103 & HPNB) | (ILWC 46 & LPNB) | Sequence Components of genome | Gene accession IDs | Putative functions           |
|--------------------|----------------|-----------------|-------------------------|---------------------------------|--------------------|------------------|-------------------------------|--------------------|------------------------------|
| SNP_7717_A_7256769 | NC_021161.1    | Ca_Kabuli_Chr02 | 7256769                 | TT                              | CC                 | CC               | URR                           | 101497806          | uncharacterized LOC101497806 |
| SNP_7718_A_7261353 | NC_021161.1    | Ca_Kabuli_Chr02 | 7261353                 | GG                              | AA                 | AA               | SYNONYMOUS_CODING             | 101498999          | uncharacterized LOC101498999 |
| SNP_7719_A_7261687 | NC_021161.1    | Ca_Kabuli_Chr02 | 7261687                 | CC                              | AA                 | AA               | URR                           | 101498999          | uncharacterized LOC101498999 |
| SNP_7720_A_7275018 | NC_021161.1    | Ca_Kabuli_Chr02 | 7275018                 | AA                              | TT                 | TT               | INTERGENIC                    |                    |                              |
| SNP_7721_A_7275026 | NC_021161.1    | Ca_Kabuli_Chr02 | 7275026                 | AA                              | GG                 | GG               | INTERGENIC                    |                    |                              |
| SNP_7723_A_7279611 | NC_021161.1    | Ca_Kabuli_Chr02 | 7279611                 | TT                              | CC                 | CC               | INTERGENIC                    |                    |                              |
| SNP_7724_A_7280160 | NC_021161.1    | Ca_Kabuli_Chr02 | 7280160                 | AA                              | GG                 | GG               | INTERGENIC                    |                    |                              |
| SNP_7725_A_7280227 | NC_021161.1    | Ca_Kabuli_Chr02 | 7280227                 | GG                              | AA                 | AA               | INTERGENIC                    |                    |                              |
| SNP_7726_A_7280301 | NC_021161.1    | Ca_Kabuli_Chr02 | 7280301                 | GG                              | AA                 | AA               | INTERGENIC                    |                    |                              |
| SNP_7728_A_7321905 | NC_021161.1    | Ca_Kabuli_Chr02 | 7321905                 | AA                              | GG                 | GG               | INTERGENIC                    |                    |                              |
| SNP_7729_A_7339716 | NC_021161.1    | Ca_Kabuli_Chr02 | 7339716                 | GG                              | AA                 | AA               | INTERGENIC                    |                    |                              |
| SNP_7730_A_7339768 | NC_021161.1    | Ca_Kabuli_Chr02 | 7339768                 | TT                              | CC                 | CC               | INTERGENIC                    |                    |                              |
| SNP_7731_A_7340814 | NC_021161.1    | Ca_Kabuli_Chr02 | 7340814                 | TT                              | GG                 | GG               | INTERGENIC                    |                    |                              |
| SNP_7732_A_7340822 | NC_021161.1    | Ca_Kabuli_Chr02 | 7340822                 | AA                              | GG                 | GG               | INTERGENIC                    |                    |                              |
| SNP_7734_A_7340976 | NC_021161.1    | Ca_Kabuli_Chr02 | 7340976                 | GG                              | AA                 | AA               | INTERGENIC                    |                    |                              |
| SNP_7735_A_7349219 | NC_021161.1    | Ca_Kabuli_Chr02 | 7349219                 | GG                              | CC                 | CC               | INTERGENIC                    |                    |                              |
| SNP_7736_A_7362480 | NC_021161.1    | Ca_Kabuli_Chr02 | 7362480                 | TT                              | CC                 | CC               | INTERGENIC                    |                    |                              |
| SNP_7737_A_7369667 | NC_021161.1    | Ca_Kabuli_Chr02 | 7369667                 | CC                              | TT                 | TT               | INTERGENIC                    |                    |                              |
| SNP_7738_A_7446120 | NC_021161.1    | Ca_Kabuli_Chr02 | 7446120                 | GG                              | AA                 | AA               | INTERGENIC                    |                    |                              |
| SNP_7739_A_7458602 | NC_021161.1    | Ca_Kabuli_Chr02 | 7458602                 | GG                              | TT                 | TT               | INTERGENIC                    |                    |                              |
| SNP_7740_A_7524633 | NC_021161.1    | Ca_Kabuli_Chr02 | 7524633                 | TT                              | CC                 | CC               | INTERGENIC                    |                    |                              |
| SNP_7741_A_7524642 | NC_021161.1    | Ca_Kabuli_Chr02 | 7524642                 | TT                              | CC                 | CC               | INTERGENIC                    |                    |                              |

| SNPs IDs           | Chromosome IDs | Chromosomes     | Physical positions (bp) | CDC Frontier genome (Reference genome) | (Pusa 1103 & HPNB) | (ILWC 46 & LPNB) | Sequence genome | Components of | Gene accession IDs           | Putative functions |
|--------------------|----------------|-----------------|-------------------------|----------------------------------------|--------------------|------------------|-----------------|---------------|------------------------------|--------------------|
| SNP_7742_A_7524675 | NC_021161.1    | Ca_Kabuli_Chr02 | 7524675                 | CC                                     | TT                 | TT               | INTERGENIC      |               |                              |                    |
| SNP_7743_A_7524676 | NC_021161.1    | Ca_Kabuli_Chr02 | 7524676                 | AA                                     | GG                 | GG               | INTERGENIC      |               |                              |                    |
| SNP_7744_A_7524781 | NC_021161.1    | Ca_Kabuli_Chr02 | 7524781                 | TT                                     | GG                 | GG               | INTERGENIC      |               |                              |                    |
| SNP_7745_A_7524804 | NC_021161.1    | Ca_Kabuli_Chr02 | 7524804                 | CC                                     | TT                 | TT               | INTERGENIC      |               |                              |                    |
| SNP_7746_A_7524835 | NC_021161.1    | Ca_Kabuli_Chr02 | 7524835                 | AA                                     | GG                 | GG               | INTERGENIC      |               |                              |                    |
| SNP_7747_A_7524991 | NC_021161.1    | Ca_Kabuli_Chr02 | 7524991                 | TT                                     | CC                 | CC               | INTERGENIC      |               |                              |                    |
| SNP_7748_A_7525000 | NC_021161.1    | Ca_Kabuli_Chr02 | 7525000                 | AA                                     | TT                 | TT               | INTERGENIC      |               |                              |                    |
| SNP_7749_A_7525006 | NC_021161.1    | Ca_Kabuli_Chr02 | 7525006                 | CC                                     | TT                 | TT               | INTERGENIC      |               |                              |                    |
| SNP_7750_A_7525096 | NC_021161.1    | Ca_Kabuli_Chr02 | 7525096                 | TT                                     | CC                 | CC               | INTERGENIC      |               |                              |                    |
| SNP_7751_A_7525134 | NC_021161.1    | Ca_Kabuli_Chr02 | 7525134                 | TT                                     | CC                 | CC               | INTERGENIC      |               |                              |                    |
| SNP_7752_A_7525144 | NC_021161.1    | Ca_Kabuli_Chr02 | 7525144                 | CC                                     | GG                 | GG               | INTERGENIC      |               |                              |                    |
| SNP_7753_A_7525216 | NC_021161.1    | Ca_Kabuli_Chr02 | 7525216                 | TT                                     | AA                 | AA               | INTERGENIC      |               |                              |                    |
| SNP_7754_A_7525247 | NC_021161.1    | Ca_Kabuli_Chr02 | 7525247                 | AA                                     | GG                 | GG               | INTERGENIC      |               |                              |                    |
| SNP_7755_A_7525264 | NC_021161.1    | Ca_Kabuli_Chr02 | 7525264                 | TT                                     | CC                 | CC               | INTERGENIC      |               |                              |                    |
| SNP_7759_A_7574703 | NC_021161.1    | Ca_Kabuli_Chr02 | 7574703                 | AA                                     | GG                 | GG               | INTERGENIC      |               |                              |                    |
| SNP_7760_A_7590313 | NC_021161.1    | Ca_Kabuli_Chr02 | 7590313                 | AA                                     | CC                 | CC               | INTERGENIC      |               |                              |                    |
| SNP_7761_A_7593520 | NC_021161.1    | Ca_Kabuli_Chr02 | 7593520                 | TT                                     | GG                 | GG               | DRR             | 101515170     | uncharacterized LOC101515170 |                    |
| SNP_7762_A_7611680 | NC_021161.1    | Ca_Kabuli_Chr02 | 7611680                 | CC                                     | TT                 | TT               | INTERGENIC      |               |                              |                    |
| SNP_7764_A_7614769 | NC_021161.1    | Ca_Kabuli_Chr02 | 7614769                 | TT                                     | CC                 | CC               | INTERGENIC      |               |                              |                    |
| SNP_7766_A_7654191 | NC_021161.1    | Ca_Kabuli_Chr02 | 7654191                 | AA                                     | CC                 | CC               | INTERGENIC      |               |                              |                    |
| SNP_7767_A_7654206 | NC_021161.1    | Ca_Kabuli_Chr02 | 7654206                 | GG                                     | AA                 | AA               | INTERGENIC      |               |                              |                    |
| SNP_7768_A_7654222 | NC_021161.1    | Ca_Kabuli_Chr02 | 7654222                 | TT                                     | CC                 | CC               | INTERGENIC      |               |                              |                    |

| SNPs IDs           | Chromosome IDs | Chromosomes     | Physical positions (bp) | CDC Frontier genome (Reference genome) | (Pusa 1103 & HPNB) | (ILWC 46 & LPNB) | Sequence Components of genome | Gene accession IDs | Putative functions                |
|--------------------|----------------|-----------------|-------------------------|----------------------------------------|--------------------|------------------|-------------------------------|--------------------|-----------------------------------|
| SNP_7769_A_7654622 | NC_021161.1    | Ca_Kabuli_Chr02 | 7654622                 | TT                                     | AA                 | AA               | INTERGENIC                    |                    |                                   |
| SNP_7770_A_7654623 | NC_021161.1    | Ca_Kabuli_Chr02 | 7654623                 | TT                                     | AA                 | AA               | INTERGENIC                    |                    |                                   |
| SNP_7771_A_7654634 | NC_021161.1    | Ca_Kabuli_Chr02 | 7654634                 | AA                                     | TT                 | TT               | INTERGENIC                    |                    |                                   |
| SNP_7773_A_7657166 | NC_021161.1    | Ca_Kabuli_Chr02 | 7657166                 | TT                                     | CC                 | CC               | INTERGENIC                    |                    |                                   |
| SNP_7774_A_7657220 | NC_021161.1    | Ca_Kabuli_Chr02 | 7657220                 | TT                                     | CC                 | CC               | INTERGENIC                    |                    |                                   |
| SNP_7775_A_7657226 | NC_021161.1    | Ca_Kabuli_Chr02 | 7657226                 | GG                                     | AA                 | AA               | INTERGENIC                    |                    |                                   |
| SNP_7776_A_7657264 | NC_021161.1    | Ca_Kabuli_Chr02 | 7657264                 | CC                                     | TT                 | TT               | INTERGENIC                    |                    |                                   |
| SNP_7777_A_7657272 | NC_021161.1    | Ca_Kabuli_Chr02 | 7657272                 | AA                                     | GG                 | GG               | INTERGENIC                    |                    |                                   |
| SNP_7778_A_7657664 | NC_021161.1    | Ca_Kabuli_Chr02 | 7657664                 | GG                                     | AA                 | AA               | INTERGENIC                    |                    |                                   |
| SNP_7779_A_7657665 | NC_021161.1    | Ca_Kabuli_Chr02 | 7657665                 | GG                                     | CC                 | CC               | INTERGENIC                    |                    |                                   |
| SNP_7780_A_7665815 | NC_021161.1    | Ca_Kabuli_Chr02 | 7665815                 | TT                                     | AA                 | AA               | INTERGENIC                    |                    |                                   |
| SNP_7781_A_7673873 | NC_021161.1    | Ca_Kabuli_Chr02 | 7673873                 | GG                                     | TT                 | TT               | INTERGENIC                    |                    |                                   |
| SNP_7782_A_7673908 | NC_021161.1    | Ca_Kabuli_Chr02 | 7673908                 | CC                                     | TT                 | TT               | INTERGENIC                    |                    |                                   |
| SNP_7783_A_7674197 | NC_021161.1    | Ca_Kabuli_Chr02 | 7674197                 | AA                                     | GG                 | GG               | INTERGENIC                    |                    |                                   |
| SNP_7785_A_7675907 | NC_021161.1    | Ca_Kabuli_Chr02 | 7675907                 | AA                                     | GG                 | GG               | INTERGENIC                    |                    |                                   |
| SNP_7786_A_7675927 | NC_021161.1    | Ca_Kabuli_Chr02 | 7675927                 | GG                                     | AA                 | AA               | INTERGENIC                    |                    |                                   |
| SNP_7787_A_7676100 | NC_021161.1    | Ca_Kabuli_Chr02 | 7676100                 | AA                                     | GG                 | GG               | INTERGENIC                    |                    |                                   |
| SNP_7788_A_7676799 | NC_021161.1    | Ca_Kabuli_Chr02 | 7676799                 | TT                                     | AA                 | AA               | INTERGENIC                    |                    |                                   |
| SNP_7789_A_7677215 | NC_021161.1    | Ca_Kabuli_Chr02 | 7677215                 | GG                                     | AA                 | AA               | INTERGENIC                    |                    |                                   |
| SNP_7790_A_7677277 | NC_021161.1    | Ca_Kabuli_Chr02 | 7677277                 | AA                                     | GG                 | GG               | INTERGENIC                    |                    |                                   |
| SNP_7791_A_7678243 | NC_021161.1    | Ca_Kabuli_Chr02 | 7678243                 | GG                                     | TT                 | TT               | DRR                           | 101503133          | protein TRANSPARENT TESTA 12-like |
| SNP_7792_A_7680689 | NC_021161.1    | Ca_Kabuli_Chr02 | 7680689                 | CC                                     | TT                 | TT               | INTRON                        | 101503133          | protein TRANSPARENT TESTA 12-like |

| SNPs IDs           | Chromosome IDs | Chromosomes     | Physical positions (bp) | CDC Frontier (Reference genome) | (Pusa 1103 & HPNB) | (ILWC 46 & LPNB) | Sequence Components of genome | Gene accession IDs | Putative functions                      |
|--------------------|----------------|-----------------|-------------------------|---------------------------------|--------------------|------------------|-------------------------------|--------------------|-----------------------------------------|
| SNP_7795_A_7682100 | NC_021161.1    | Ca_Kabuli_Chr02 | 7682100                 | AA                              | CC                 | CC               | INTRON                        | 101503133          | protein TRANSPARENT TESTA 12-like       |
| SNP_7796_A_7682310 | NC_021161.1    | Ca_Kabuli_Chr02 | 7682310                 | AA                              | CC                 | CC               | INTRON                        | 101503133          | protein TRANSPARENT TESTA 12-like       |
| SNP_7797_A_7684146 | NC_021161.1    | Ca_Kabuli_Chr02 | 7684146                 | GG                              | AA                 | AA               | URR                           | 101503133          | protein TRANSPARENT TESTA 12-like       |
| SNP_7798_A_7685067 | NC_021161.1    | Ca_Kabuli_Chr02 | 7685067                 | TT                              | CC                 | CC               | URR                           | 101503133          | protein TRANSPARENT TESTA 12-like       |
| SNP_7799_A_7688019 | NC_021161.1    | Ca_Kabuli_Chr02 | 7688019                 | TT                              | CC                 | CC               | INTERGENIC                    |                    |                                         |
| SNP_7800_A_7691410 | NC_021161.1    | Ca_Kabuli_Chr02 | 7691410                 | GG                              | TT                 | TT               | INTERGENIC                    |                    |                                         |
| SNP_7801_A_7691414 | NC_021161.1    | Ca_Kabuli_Chr02 | 7691414                 | CC                              | GG                 | GG               | INTERGENIC                    |                    |                                         |
| SNP_7802_A_7691415 | NC_021161.1    | Ca_Kabuli_Chr02 | 7691415                 | TT                              | CC                 | CC               | INTERGENIC                    |                    |                                         |
| SNP_7803_A_7691418 | NC_021161.1    | Ca_Kabuli_Chr02 | 7691418                 | AA                              | GG                 | GG               | INTERGENIC                    |                    |                                         |
| SNP_7804_A_7691448 | NC_021161.1    | Ca_Kabuli_Chr02 | 7691448                 | TT                              | CC                 | CC               | INTERGENIC                    |                    |                                         |
| SNP_7805_A_7691458 | NC_021161.1    | Ca_Kabuli_Chr02 | 7691458                 | GG                              | AA                 | AA               | INTERGENIC                    |                    |                                         |
| SNP_7806_A_7691463 | NC_021161.1    | Ca_Kabuli_Chr02 | 7691463                 | TT                              | CC                 | CC               | INTERGENIC                    |                    |                                         |
| SNP_7807_A_7691578 | NC_021161.1    | Ca_Kabuli_Chr02 | 7691578                 | TT                              | CC                 | CC               | INTERGENIC                    |                    |                                         |
| SNP_7811_A_7703082 | NC_021161.1    | Ca_Kabuli_Chr02 | 7703082                 | AA                              | GG                 | GG               | INTRON                        | 101503455          | protein TRANSPARENT TESTA 12-like       |
| SNP_7813_A_7704045 | NC_021161.1    | Ca_Kabuli_Chr02 | 7704045                 | GG                              | TT                 | TT               | URR                           | 101503455          | protein TRANSPARENT TESTA 12-like       |
| SNP_7814_A_7704288 | NC_021161.1    | Ca_Kabuli_Chr02 | 7704288                 | TT                              | AA                 | AA               | URR                           | 101503455          | protein TRANSPARENT TESTA 12-like       |
| SNP_7816_A_7709844 | NC_021161.1    | Ca_Kabuli_Chr02 | 7709844                 | TT                              | GG                 | GG               | INTERGENIC                    |                    |                                         |
| SNP_7818_A_7711949 | NC_021161.1    | Ca_Kabuli_Chr02 | 7711949                 | TT                              | GG                 | GG               | DRR                           | 101410558          | transfer RNA methionine (anticodon CAU) |
| SNP_7819_A_7712262 | NC_021161.1    | Ca_Kabuli_Chr02 | 7712262                 | AA                              | GG                 | GG               | DRR                           | 101410558          | transfer RNA methionine (anticodon CAU) |
| SNP_7820_A_7712313 | NC_021161.1    | Ca_Kabuli_Chr02 | 7712313                 | TT                              | CC                 | CC               | DRR                           | 101410558          | transfer RNA methionine (anticodon CAU) |
| SNP_7821_A_7713953 | NC_021161.1    | Ca_Kabuli_Chr02 | 7713953                 | GG                              | AA                 | AA               | URR                           | 101410558          | transfer RNA methionine (anticodon CAU) |
| SNP_7822_A_7713962 | NC_021161.1    | Ca_Kabuli_Chr02 | 7713962                 | CC                              | GG                 | GG               | URR                           | 101410558          | transfer RNA methionine (anticodon CAU) |

| SNPs IDs           | Chromosome IDs | Chromosomes     | Physical positions (bp) | CDC Frontier genome (Reference genome) | (Pusa 1103 & HPNB) | (ILWC 46 & LPNB) | Sequence Components of genome | Gene accession IDs | Putative functions                         |
|--------------------|----------------|-----------------|-------------------------|----------------------------------------|--------------------|------------------|-------------------------------|--------------------|--------------------------------------------|
| SNP_7823_A_7714061 | NC_021161.1    | Ca_Kabuli_Chr02 | 7714061                 | TT                                     | AA                 | AA               | URR                           | 101410558          | transfer RNA methionine (anticodon CAU)    |
| SNP_7824_A_7715365 | NC_021161.1    | Ca_Kabuli_Chr02 | 7715365                 | CC                                     | TT                 | TT               | URR                           | 101410591          | transfer RNA glutamic acid (anticodon UUC) |
| SNP_7825_A_7715429 | NC_021161.1    | Ca_Kabuli_Chr02 | 7715429                 | AA                                     | GG                 | GG               | INTRON                        | 101503794          | uncharacterized LOC101503794               |
| SNP_7826_A_7715446 | NC_021161.1    | Ca_Kabuli_Chr02 | 7715446                 | AA                                     | GG                 | GG               | INTRON                        | 101503794          | uncharacterized LOC101503794               |
| SNP_7827_A_7715484 | NC_021161.1    | Ca_Kabuli_Chr02 | 7715484                 | GG                                     | TT                 | TT               | INTRON                        | 101503794          | uncharacterized LOC101503794               |
| SNP_7829_A_7717641 | NC_021161.1    | Ca_Kabuli_Chr02 | 7717641                 | TT                                     | CC                 | CC               | URR                           | 101503794          | uncharacterized LOC101503794               |
| SNP_7831_A_7718535 | NC_021161.1    | Ca_Kabuli_Chr02 | 7718535                 | GG                                     | AA                 | AA               | URR                           | 101503794          | uncharacterized LOC101503794               |
| SNP_7833_A_7720380 | NC_021161.1    | Ca_Kabuli_Chr02 | 7720380                 | CC                                     | GG                 | GG               | INTERGENIC                    |                    |                                            |
| SNP_7834_A_7720385 | NC_021161.1    | Ca_Kabuli_Chr02 | 7720385                 | CC                                     | AA                 | AA               | INTERGENIC                    |                    |                                            |
| SNP_7835_A_7720436 | NC_021161.1    | Ca_Kabuli_Chr02 | 7720436                 | GG                                     | AA                 | AA               | INTERGENIC                    |                    |                                            |
| SNP_7836_A_7720447 | NC_021161.1    | Ca_Kabuli_Chr02 | 7720447                 | GG                                     | AA                 | AA               | INTERGENIC                    |                    |                                            |
| SNP_7837_A_7720450 | NC_021161.1    | Ca_Kabuli_Chr02 | 7720450                 | CC                                     | GG                 | GG               | INTERGENIC                    |                    |                                            |
| SNP_7840_A_7721979 | NC_021161.1    | Ca_Kabuli_Chr02 | 7721979                 | CC                                     | TT                 | TT               | INTERGENIC                    |                    |                                            |
| SNP_7841_A_7723918 | NC_021161.1    | Ca_Kabuli_Chr02 | 7723918                 | CC                                     | TT                 | TT               | INTERGENIC                    |                    |                                            |
| SNP_7844_A_7726783 | NC_021161.1    | Ca_Kabuli_Chr02 | 7726783                 | GG                                     | CC                 | CC               | INTERGENIC                    |                    |                                            |
| SNP_7845_A_7729144 | NC_021161.1    | Ca_Kabuli_Chr02 | 7729144                 | GG                                     | TT                 | TT               | INTERGENIC                    |                    |                                            |
| SNP_7846_A_7729195 | NC_021161.1    | Ca_Kabuli_Chr02 | 7729195                 | CC                                     | TT                 | TT               | INTERGENIC                    |                    |                                            |
| SNP_7847_A_7729388 | NC_021161.1    | Ca_Kabuli_Chr02 | 7729388                 | TT                                     | CC                 | CC               | INTERGENIC                    |                    |                                            |
| SNP_7848_A_7729528 | NC_021161.1    | Ca_Kabuli_Chr02 | 7729528                 | TT                                     | CC                 | CC               | INTERGENIC                    |                    |                                            |
| SNP_7850_A_7738423 | NC_021161.1    | Ca_Kabuli_Chr02 | 7738423                 | CC                                     | GG                 | GG               | INTERGENIC                    |                    |                                            |
| SNP_7851_A_7738557 | NC_021161.1    | Ca_Kabuli_Chr02 | 7738557                 | AA                                     | GG                 | GG               | INTERGENIC                    |                    |                                            |
| SNP_7852_A_7738558 | NC_021161.1    | Ca_Kabuli_Chr02 | 7738558                 | TT                                     | CC                 | CC               | INTERGENIC                    |                    |                                            |

| SNPs IDs           | Chromosome IDs | Chromosomes     | Physical positions (bp) | CDC Frontier genome (Reference genome) | (Pusa 1103 & HPNB) | (ILWC 46 & LPNB) | Sequence Components of genome | Gene accession IDs | Putative functions                                       |
|--------------------|----------------|-----------------|-------------------------|----------------------------------------|--------------------|------------------|-------------------------------|--------------------|----------------------------------------------------------|
| SNP_7853_A_7738604 | NC_021161.1    | Ca_Kabuli_Chr02 | 7738604                 | GG                                     | AA                 | AA               | INTERGENIC                    |                    |                                                          |
| SNP_7854_A_7738763 | NC_021161.1    | Ca_Kabuli_Chr02 | 7738763                 | TT                                     | GG                 | GG               | INTERGENIC                    |                    |                                                          |
| SNP_7855_A_7743347 | NC_021161.1    | Ca_Kabuli_Chr02 | 7743347                 | GG                                     | AA                 | AA               | INTERGENIC                    |                    |                                                          |
| SNP_7859_A_7748362 | NC_021161.1    | Ca_Kabuli_Chr02 | 7748362                 | AA                                     | TT                 | TT               | INTERGENIC                    |                    |                                                          |
| SNP_7860_A_7748987 | NC_021161.1    | Ca_Kabuli_Chr02 | 7748987                 | TT                                     | CC                 | CC               | INTERGENIC                    |                    |                                                          |
| SNP_7861_A_7753063 | NC_021161.1    | Ca_Kabuli_Chr02 | 7753063                 | TT                                     | CC                 | CC               | INTERGENIC                    |                    |                                                          |
| SNP_7862_A_7753353 | NC_021161.1    | Ca_Kabuli_Chr02 | 7753353                 | AA                                     | CC                 | CC               | INTERGENIC                    |                    |                                                          |
| SNP_7864_A_7758232 | NC_021161.1    | Ca_Kabuli_Chr02 | 7758232                 | GG                                     | AA                 | AA               | URR                           | 101504323          | uncharacterized LOC101504323                             |
| SNP_7865_A_7758237 | NC_021161.1    | Ca_Kabuli_Chr02 | 7758237                 | GG                                     | AA                 | AA               | URR                           | 101504323          | uncharacterized LOC101504323                             |
| SNP_7867_A_7772441 | NC_021161.1    | Ca_Kabuli_Chr02 | 7772441                 | AA                                     | TT                 | TT               | INTERGENIC                    |                    |                                                          |
| SNP_7868_A_7772503 | NC_021161.1    | Ca_Kabuli_Chr02 | 7772503                 | TT                                     | GG                 | GG               | INTERGENIC                    |                    |                                                          |
| SNP_7870_A_7773310 | NC_021161.1    | Ca_Kabuli_Chr02 | 7773310                 | AA                                     | GG                 | GG               | INTERGENIC                    |                    |                                                          |
| SNP_7871_A_7773429 | NC_021161.1    | Ca_Kabuli_Chr02 | 7773429                 | TT                                     | CC                 | CC               | INTERGENIC                    |                    |                                                          |
| SNP_7872_A_7773454 | NC_021161.1    | Ca_Kabuli_Chr02 | 7773454                 | TT                                     | CC                 | CC               | INTERGENIC                    |                    |                                                          |
| SNP_7873_A_7773483 | NC_021161.1    | Ca_Kabuli_Chr02 | 7773483                 | TT                                     | AA                 | AA               | INTERGENIC                    |                    |                                                          |
| SNP_7875_A_7774583 | NC_021161.1    | Ca_Kabuli_Chr02 | 7774583                 | GG                                     | AA                 | AA               | INTERGENIC                    |                    |                                                          |
| SNP_7876_A_7774783 | NC_021161.1    | Ca_Kabuli_Chr02 | 7774783                 | AA                                     | CC                 | CC               | INTERGENIC                    |                    |                                                          |
| SNP_7877_A_7774815 | NC_021161.1    | Ca_Kabuli_Chr02 | 7774815                 | AA                                     | TT                 | TT               | INTERGENIC                    |                    |                                                          |
| SNP_7878_A_7774816 | NC_021161.1    | Ca_Kabuli_Chr02 | 7774816                 | GG                                     | AA                 | AA               | INTERGENIC                    |                    |                                                          |
| SNP_7879_A_7774830 | NC_021161.1    | Ca_Kabuli_Chr02 | 7774830                 | CC                                     | TT                 | TT               | INTERGENIC                    |                    |                                                          |
| SNP_7880_A_7774844 | NC_021161.1    | Ca_Kabuli_Chr02 | 7774844                 | GG                                     | AA                 | AA               | INTERGENIC                    |                    |                                                          |
| SNP_7884_A_7783419 | NC_021161.1    | Ca_Kabuli_Chr02 | 7783419                 | AA                                     | CC                 | CC               | DRR                           | 101515490          | serine/threonine-protein phosphatase 7 long form homolog |



| SNPs IDs           | Chromosome IDs | Chromosomes     | Physical positions (bp) | CDC Frontier genome (Reference genome) | (Pusa 1103 & HPNB) | (ILWC 46 & LPNB) | Sequence Components of genome | Gene accession IDs | Putative functions                                       |
|--------------------|----------------|-----------------|-------------------------|----------------------------------------|--------------------|------------------|-------------------------------|--------------------|----------------------------------------------------------|
| SNP_7885_A_7783481 | NC_021161.1    | Ca_Kabuli_Chr02 | 7783481                 | CC                                     | TT                 | TT               | DRR                           | 101515490          | serine/threonine-protein phosphatase 7 long form homolog |
| SNP_7886_A_7784015 | NC_021161.1    | Ca_Kabuli_Chr02 | 7784015                 | TT                                     | CC                 | CC               | SYNONYMOUS_CODING             | 101515490          | serine/threonine-protein phosphatase 7 long form homolog |
| SNP_7887_A_7784050 | NC_021161.1    | Ca_Kabuli_Chr02 | 7784050                 | CC                                     | AA                 | AA               | NON_SYNONYMOUS_CODING         | 101515490          | serine/threonine-protein phosphatase 7 long form homolog |
| SNP_7889_A_7788954 | NC_021161.1    | Ca_Kabuli_Chr02 | 7788954                 | GG                                     | AA                 | AA               | INTERGENIC                    |                    |                                                          |
| SNP_7891_A_7789483 | NC_021161.1    | Ca_Kabuli_Chr02 | 7789483                 | TT                                     | CC                 | CC               | INTERGENIC                    |                    |                                                          |
| SNP_7893_A_7793083 | NC_021161.1    | Ca_Kabuli_Chr02 | 7793083                 | CC                                     | TT                 | TT               | INTERGENIC                    |                    |                                                          |
| SNP_7894_A_7793558 | NC_021161.1    | Ca_Kabuli_Chr02 | 7793558                 | AA                                     | GG                 | GG               | INTERGENIC                    |                    |                                                          |
| SNP_7895_A_7796274 | NC_021161.1    | Ca_Kabuli_Chr02 | 7796274                 | TT                                     | AA                 | AA               | INTERGENIC                    |                    |                                                          |
| SNP_7896_A_7796756 | NC_021161.1    | Ca_Kabuli_Chr02 | 7796756                 | TT                                     | AA                 | AA               | INTERGENIC                    |                    |                                                          |
| SNP_7897_A_7796837 | NC_021161.1    | Ca_Kabuli_Chr02 | 7796837                 | TT                                     | CC                 | CC               | INTERGENIC                    |                    |                                                          |
| SNP_7898_A_7796953 | NC_021161.1    | Ca_Kabuli_Chr02 | 7796953                 | AA                                     | GG                 | GG               | INTERGENIC                    |                    |                                                          |
| SNP_7899_A_7797026 | NC_021161.1    | Ca_Kabuli_Chr02 | 7797026                 | AA                                     | TT                 | TT               | INTERGENIC                    |                    |                                                          |
| SNP_7900_A_7797202 | NC_021161.1    | Ca_Kabuli_Chr02 | 7797202                 | TT                                     | AA                 | AA               | INTERGENIC                    |                    |                                                          |
| SNP_7901_A_7798746 | NC_021161.1    | Ca_Kabuli_Chr02 | 7798746                 | CC                                     | TT                 | TT               | INTERGENIC                    |                    |                                                          |
| SNP_7902_A_7800228 | NC_021161.1    | Ca_Kabuli_Chr02 | 7800228                 | TT                                     | AA                 | AA               | SYNONYMOUS_CODING             | 101504970          | ethylene-responsive transcription factor ESR2-like       |
| SNP_7903_A_7800234 | NC_021161.1    | Ca_Kabuli_Chr02 | 7800234                 | TT                                     | CC                 | CC               | SYNONYMOUS_CODING             | 101504970          | ethylene-responsive transcription factor ESR2-like       |
| SNP_7904_A_7800256 | NC_021161.1    | Ca_Kabuli_Chr02 | 7800256                 | GG                                     | AA                 | AA               | NON_SYNONYMOUS_CODING         | 101504970          | ethylene-responsive transcription factor ESR2-like       |
| SNP_7905_A_7813579 | NC_021161.1    | Ca_Kabuli_Chr02 | 7813579                 | GG                                     | AA                 | AA               | INTERGENIC                    |                    |                                                          |
| SNP_7906_A_7813584 | NC_021161.1    | Ca_Kabuli_Chr02 | 7813584                 | AA                                     | GG                 | GG               | INTERGENIC                    |                    |                                                          |
| SNP_7907_A_7814767 | NC_021161.1    | Ca_Kabuli_Chr02 | 7814767                 | CC                                     | TT                 | TT               | INTERGENIC                    |                    |                                                          |
| SNP_7909_A_7822447 | NC_021161.1    | Ca_Kabuli_Chr02 | 7822447                 | GG                                     | AA                 | AA               | URR                           | 101505281          | flavonol synthase/flavanone 3-hydroxylase-like           |
| SNP_7910_A_7823729 | NC_021161.1    | Ca_Kabuli_Chr02 | 7823729                 | TT                                     | CC                 | CC               | URR                           | 101505608          | plant intracellular Ras-group-related LRR protein 3      |

| SNPs IDs           | Chromosome IDs | Chromosomes     | Physical positions (bp) | CDC Frontier (Reference genome) | (Pusa 1103 & HPNB) | (ILWC 46 & LPNB) | Sequence Components of genome | Gene accession IDs | Putative functions                                  |
|--------------------|----------------|-----------------|-------------------------|---------------------------------|--------------------|------------------|-------------------------------|--------------------|-----------------------------------------------------|
| SNP_7912_A_7825320 | NC_021161.1    | Ca_Kabuli_Chr02 | 7825320                 | CC                              | GG                 | GG               | URR                           | 101505608          | plant intracellular Ras-group-related LRR protein 3 |
| SNP_7913_A_7825518 | NC_021161.1    | Ca_Kabuli_Chr02 | 7825518                 | GG                              | AA                 | AA               | INTERGENIC                    |                    |                                                     |
| SNP_7914_A_7825520 | NC_021161.1    | Ca_Kabuli_Chr02 | 7825520                 | GG                              | AA                 | AA               | INTERGENIC                    |                    |                                                     |
| SNP_7915_A_7834968 | NC_021161.1    | Ca_Kabuli_Chr02 | 7834968                 | TT                              | AA                 | AA               | INTERGENIC                    |                    |                                                     |
| SNP_7916_A_7880835 | NC_021161.1    | Ca_Kabuli_Chr02 | 7880835                 | AA                              | GG                 | GG               | INTERGENIC                    |                    |                                                     |
| SNP_7917_A_7880952 | NC_021161.1    | Ca_Kabuli_Chr02 | 7880952                 | TT                              | CC                 | CC               | INTERGENIC                    |                    |                                                     |
| SNP_7918_A_7880954 | NC_021161.1    | Ca_Kabuli_Chr02 | 7880954                 | CC                              | AA                 | AA               | INTERGENIC                    |                    |                                                     |
| SNP_7919_A_7880957 | NC_021161.1    | Ca_Kabuli_Chr02 | 7880957                 | GG                              | AA                 | AA               | INTERGENIC                    |                    |                                                     |
| SNP_7920_A_7880984 | NC_021161.1    | Ca_Kabuli_Chr02 | 7880984                 | CC                              | TT                 | TT               | INTERGENIC                    |                    |                                                     |
| SNP_7923_A_7881340 | NC_021161.1    | Ca_Kabuli_Chr02 | 7881340                 | AA                              | GG                 | GG               | INTERGENIC                    |                    |                                                     |
| SNP_7924_A_7881360 | NC_021161.1    | Ca_Kabuli_Chr02 | 7881360                 | TT                              | CC                 | CC               | INTERGENIC                    |                    |                                                     |
| SNP_7926_A_7881864 | NC_021161.1    | Ca_Kabuli_Chr02 | 7881864                 | GG                              | AA                 | AA               | INTERGENIC                    |                    |                                                     |
| SNP_7927_A_7881894 | NC_021161.1    | Ca_Kabuli_Chr02 | 7881894                 | TT                              | AA                 | AA               | INTERGENIC                    |                    |                                                     |
| SNP_7928_A_7881914 | NC_021161.1    | Ca_Kabuli_Chr02 | 7881914                 | TT                              | AA                 | AA               | INTERGENIC                    |                    |                                                     |
| SNP_7929_A_7881916 | NC_021161.1    | Ca_Kabuli_Chr02 | 7881916                 | GG                              | TT                 | TT               | INTERGENIC                    |                    |                                                     |
| SNP_7930_A_7882633 | NC_021161.1    | Ca_Kabuli_Chr02 | 7882633                 | CC                              | AA                 | AA               | DRR                           | 101507976          | uncharacterized LOC101507976                        |
| SNP_7931_A_7883069 | NC_021161.1    | Ca_Kabuli_Chr02 | 7883069                 | GG                              | AA                 | AA               | DRR                           | 101507976          | uncharacterized LOC101507976                        |
| SNP_7932_A_7883096 | NC_021161.1    | Ca_Kabuli_Chr02 | 7883096                 | CC                              | TT                 | TT               | INTERGENIC                    |                    |                                                     |
| SNP_7934_A_7887376 | NC_021161.1    | Ca_Kabuli_Chr02 | 7887376                 | GG                              | AA                 | AA               | DRR                           | 101508288          | glutamate--glyoxylate aminotransferase 2            |
| SNP_7936_A_7887555 | NC_021161.1    | Ca_Kabuli_Chr02 | 7887555                 | TT                              | CC                 | CC               | DRR                           | 101508288          | glutamate--glyoxylate aminotransferase 2            |
| SNP_7937_A_7887634 | NC_021161.1    | Ca_Kabuli_Chr02 | 7887634                 | AA                              | GG                 | GG               | DRR                           | 101508288          | glutamate--glyoxylate aminotransferase 2            |
| SNP_7939_A_7887860 | NC_021161.1    | Ca_Kabuli_Chr02 | 7887860                 | CC                              | TT                 | TT               | DRR                           | 101508288          | glutamate--glyoxylate aminotransferase 2            |

| SNPs IDs           | Chromosome IDs | Chromosomes     | Physical positions (bp) | CDC Frontier (Reference genome) | (Pusa 1103 & HPNB) | (ILWC 46 & LPNB) | Sequence Components of genome | Gene accession IDs | Putative functions                       |
|--------------------|----------------|-----------------|-------------------------|---------------------------------|--------------------|------------------|-------------------------------|--------------------|------------------------------------------|
| SNP_7940_A_7889549 | NC_021161.1    | Ca_Kabuli_Chr02 | 7889549                 | TT                              | CC                 | CC               | INTRON                        | 101508288          | glutamate--glyoxylate aminotransferase 2 |
| SNP_7941_A_7889578 | NC_021161.1    | Ca_Kabuli_Chr02 | 7889578                 | AA                              | GG                 | GG               | INTRON                        | 101508288          | glutamate--glyoxylate aminotransferase 2 |
| SNP_7942_A_7892992 | NC_021161.1    | Ca_Kabuli_Chr02 | 7892992                 | TT                              | GG                 | GG               | INTERGENIC                    |                    |                                          |
| SNP_7943_A_7893005 | NC_021161.1    | Ca_Kabuli_Chr02 | 7893005                 | TT                              | CC                 | CC               | INTERGENIC                    |                    |                                          |
| SNP_7944_A_7893009 | NC_021161.1    | Ca_Kabuli_Chr02 | 7893009                 | TT                              | CC                 | CC               | INTERGENIC                    |                    |                                          |
| SNP_7945_A_7893021 | NC_021161.1    | Ca_Kabuli_Chr02 | 7893021                 | TT                              | GG                 | GG               | INTERGENIC                    |                    |                                          |
| SNP_7946_A_7893090 | NC_021161.1    | Ca_Kabuli_Chr02 | 7893090                 | TT                              | AA                 | AA               | INTERGENIC                    |                    |                                          |
| SNP_7947_A_7894280 | NC_021161.1    | Ca_Kabuli_Chr02 | 7894280                 | CC                              | TT                 | TT               | URR                           | 101508288          | glutamate--glyoxylate aminotransferase 2 |
| SNP_7948_A_7895282 | NC_021161.1    | Ca_Kabuli_Chr02 | 7895282                 | AA                              | TT                 | TT               | URR                           | 101508288          | glutamate--glyoxylate aminotransferase 2 |
| SNP_7949_A_7895292 | NC_021161.1    | Ca_Kabuli_Chr02 | 7895292                 | TT                              | CC                 | CC               | URR                           | 101508288          | glutamate--glyoxylate aminotransferase 2 |
| SNP_7950_A_7895605 | NC_021161.1    | Ca_Kabuli_Chr02 | 7895605                 | CC                              | TT                 | TT               | URR                           | 101508288          | glutamate--glyoxylate aminotransferase 2 |
| SNP_7951_A_7895606 | NC_021161.1    | Ca_Kabuli_Chr02 | 7895606                 | TT                              | CC                 | CC               | URR                           | 101508288          | glutamate--glyoxylate aminotransferase 2 |
| SNP_7952_A_7895768 | NC_021161.1    | Ca_Kabuli_Chr02 | 7895768                 | CC                              | GG                 | GG               | URR                           | 101508288          | glutamate--glyoxylate aminotransferase 2 |
| SNP_7953_A_7895928 | NC_021161.1    | Ca_Kabuli_Chr02 | 7895928                 | CC                              | TT                 | TT               | URR                           | 101508288          | glutamate--glyoxylate aminotransferase 2 |
| SNP_7954_A_7895946 | NC_021161.1    | Ca_Kabuli_Chr02 | 7895946                 | AA                              | TT                 | TT               | URR                           | 101508288          | glutamate--glyoxylate aminotransferase 2 |
| SNP_7955_A_7895970 | NC_021161.1    | Ca_Kabuli_Chr02 | 7895970                 | TT                              | GG                 | GG               | URR                           | 101508288          | glutamate--glyoxylate aminotransferase 2 |
| SNP_7956_A_7896101 | NC_021161.1    | Ca_Kabuli_Chr02 | 7896101                 | AA                              | GG                 | GG               | URR                           | 101508288          | glutamate--glyoxylate aminotransferase 2 |
| SNP_7957_A_7896139 | NC_021161.1    | Ca_Kabuli_Chr02 | 7896139                 | GG                              | CC                 | CC               | DRR                           | 101488573          | uncharacterized LOC101488573             |
| SNP_7958_A_7896160 | NC_021161.1    | Ca_Kabuli_Chr02 | 7896160                 | AA                              | GG                 | GG               | DRR                           | 101488573          | uncharacterized LOC101488573             |
| SNP_7959_A_7896439 | NC_021161.1    | Ca_Kabuli_Chr02 | 7896439                 | TT                              | CC                 | CC               | DRR                           | 101488573          | uncharacterized LOC101488573             |
| SNP_7960_A_7909411 | NC_021161.1    | Ca_Kabuli_Chr02 | 7909411                 | TT                              | CC                 | CC               | INTERGENIC                    |                    |                                          |
| SNP_7961_A_7909420 | NC_021161.1    | Ca_Kabuli_Chr02 | 7909420                 | CC                              | TT                 | TT               | INTERGENIC                    |                    |                                          |

| SNPs IDs           | Chromosome IDs | Chromosomes     | Physical positions (bp) | CDC Frontier genome (Reference genome) | (Pusa 1103 & HPNB) | (ILWC 46 & LPNB) | Sequence Components of genome | Gene accession IDs | Putative functions                   |
|--------------------|----------------|-----------------|-------------------------|----------------------------------------|--------------------|------------------|-------------------------------|--------------------|--------------------------------------|
| SNP_7962_A_7909428 | NC_021161.1    | Ca_Kabuli_Chr02 | 7909428                 | GG                                     | CC                 | CC               | INTERGENIC                    |                    |                                      |
| SNP_7963_A_7909439 | NC_021161.1    | Ca_Kabuli_Chr02 | 7909439                 | AA                                     | GG                 | GG               | INTERGENIC                    |                    |                                      |
| SNP_7964_A_7909455 | NC_021161.1    | Ca_Kabuli_Chr02 | 7909455                 | TT                                     | CC                 | CC               | INTERGENIC                    |                    |                                      |
| SNP_7965_A_7909716 | NC_021161.1    | Ca_Kabuli_Chr02 | 7909716                 | CC                                     | TT                 | TT               | INTERGENIC                    |                    |                                      |
| SNP_7966_A_7909717 | NC_021161.1    | Ca_Kabuli_Chr02 | 7909717                 | CC                                     | TT                 | TT               | INTERGENIC                    |                    |                                      |
| SNP_7967_A_7909724 | NC_021161.1    | Ca_Kabuli_Chr02 | 7909724                 | AA                                     | GG                 | GG               | INTERGENIC                    |                    |                                      |
| SNP_7968_A_7913577 | NC_021161.1    | Ca_Kabuli_Chr02 | 7913577                 | TT                                     | CC                 | CC               | URR                           | 101508816          | ribose-phosphate pyrophosphokinase 4 |
| SNP_7969_A_7915813 | NC_021161.1    | Ca_Kabuli_Chr02 | 7915813                 | AA                                     | CC                 | CC               | URR                           | 101509139          | peroxidase 57-like                   |
| SNP_7970_A_7915827 | NC_021161.1    | Ca_Kabuli_Chr02 | 7915827                 | GG                                     | AA                 | AA               | URR                           | 101509139          | peroxidase 57-like                   |
| SNP_7971_A_7915838 | NC_021161.1    | Ca_Kabuli_Chr02 | 7915838                 | TT                                     | CC                 | CC               | URR                           | 101509139          | peroxidase 57-like                   |
| SNP_7973_A_7916017 | NC_021161.1    | Ca_Kabuli_Chr02 | 7916017                 | TT                                     | CC                 | CC               | URR                           | 101509139          | peroxidase 57-like                   |
| SNP_7974_A_7916150 | NC_021161.1    | Ca_Kabuli_Chr02 | 7916150                 | AA                                     | GG                 | GG               | URR                           | 101509139          | peroxidase 57-like                   |
| SNP_7975_A_7916212 | NC_021161.1    | Ca_Kabuli_Chr02 | 7916212                 | CC                                     | TT                 | TT               | URR                           | 101509139          | peroxidase 57-like                   |
| SNP_7976_A_7916221 | NC_021161.1    | Ca_Kabuli_Chr02 | 7916221                 | AA                                     | CC                 | CC               | URR                           | 101509139          | peroxidase 57-like                   |
| SNP_7977_A_7919434 | NC_021161.1    | Ca_Kabuli_Chr02 | 7919434                 | TT                                     | CC                 | CC               | INTRON                        | 101509466          | lysM domain receptor-like kinase 3   |
| SNP_7978_A_7919447 | NC_021161.1    | Ca_Kabuli_Chr02 | 7919447                 | GG                                     | CC                 | CC               | INTRON                        | 101509466          | lysM domain receptor-like kinase 3   |
| SNP_7979_A_7919456 | NC_021161.1    | Ca_Kabuli_Chr02 | 7919456                 | TT                                     | CC                 | CC               | INTRON                        | 101509466          | lysM domain receptor-like kinase 3   |
| SNP_7980_A_7919605 | NC_021161.1    | Ca_Kabuli_Chr02 | 7919605                 | AA                                     | TT                 | TT               | INTRON                        | 101509466          | lysM domain receptor-like kinase 3   |
| SNP_7981_A_7920611 | NC_021161.1    | Ca_Kabuli_Chr02 | 7920611                 | CC                                     | GG                 | GG               | INTRON                        | 101509466          | lysM domain receptor-like kinase 3   |
| SNP_7982_A_7920613 | NC_021161.1    | Ca_Kabuli_Chr02 | 7920613                 | TT                                     | GG                 | GG               | INTRON                        | 101509466          | lysM domain receptor-like kinase 3   |
| SNP_7984_A_7922668 | NC_021161.1    | Ca_Kabuli_Chr02 | 7922668                 | CC                                     | GG                 | GG               | INTERGENIC                    |                    |                                      |
| SNP_7985_A_7922974 | NC_021161.1    | Ca_Kabuli_Chr02 | 7922974                 | AA                                     | TT                 | TT               | URR                           | 101509466          | lysM domain receptor-like kinase 3   |

| SNPs IDs           | Chromosome IDs | Chromosomes     | Physical positions (bp) | CDC Frontier (Reference genome) | (Pusa 1103 & HPNB) | (ILWC 46 & LPNB) | Sequence Components of genome | Gene accession IDs | Putative functions                                 |
|--------------------|----------------|-----------------|-------------------------|---------------------------------|--------------------|------------------|-------------------------------|--------------------|----------------------------------------------------|
| SNP_7986_A_7922988 | NC_021161.1    | Ca_Kabuli_Chr02 | 7922988                 | CC                              | TT                 | TT               | URR                           | 101509466          | lysM domain receptor-like kinase 3                 |
| SNP_7987_A_7923512 | NC_021161.1    | Ca_Kabuli_Chr02 | 7923512                 | TT                              | CC                 | CC               | URR                           | 101509466          | lysM domain receptor-like kinase 3                 |
| SNP_7988_A_7925819 | NC_021161.1    | Ca_Kabuli_Chr02 | 7925819                 | AA                              | GG                 | GG               | INTERGENIC                    |                    |                                                    |
| SNP_7989_A_7929005 | NC_021161.1    | Ca_Kabuli_Chr02 | 7929005                 | CC                              | TT                 | TT               | INTERGENIC                    |                    |                                                    |
| SNP_7990_A_7929010 | NC_021161.1    | Ca_Kabuli_Chr02 | 7929010                 | TT                              | CC                 | CC               | INTERGENIC                    |                    |                                                    |
| SNP_7991_A_7931910 | NC_021161.1    | Ca_Kabuli_Chr02 | 7931910                 | GG                              | TT                 | TT               | INTERGENIC                    |                    |                                                    |
| SNP_7992_A_7932072 | NC_021161.1    | Ca_Kabuli_Chr02 | 7932072                 | TT                              | CC                 | CC               | INTERGENIC                    |                    |                                                    |
| SNP_7993_A_7932116 | NC_021161.1    | Ca_Kabuli_Chr02 | 7932116                 | CC                              | TT                 | TT               | INTERGENIC                    |                    |                                                    |
| SNP_7994_A_7932126 | NC_021161.1    | Ca_Kabuli_Chr02 | 7932126                 | TT                              | AA                 | AA               | INTERGENIC                    |                    |                                                    |
| SNP_7995_A_7932405 | NC_021161.1    | Ca_Kabuli_Chr02 | 7932405                 | AA                              | GG                 | GG               | INTERGENIC                    |                    |                                                    |
| SNP_7996_A_7932626 | NC_021161.1    | Ca_Kabuli_Chr02 | 7932626                 | GG                              | AA                 | AA               | INTERGENIC                    |                    |                                                    |
| SNP_7997_A_7932774 | NC_021161.1    | Ca_Kabuli_Chr02 | 7932774                 | GG                              | AA                 | AA               | INTERGENIC                    |                    |                                                    |
| SNP_7998_A_7933219 | NC_021161.1    | Ca_Kabuli_Chr02 | 7933219                 | GG                              | AA                 | AA               | INTERGENIC                    |                    |                                                    |
| SNP_7999_A_7933221 | NC_021161.1    | Ca_Kabuli_Chr02 | 7933221                 | AA                              | TT                 | TT               | INTERGENIC                    |                    |                                                    |
| SNP_8000_A_7933588 | NC_021161.1    | Ca_Kabuli_Chr02 | 7933588                 | TT                              | AA                 | AA               | INTERGENIC                    |                    |                                                    |
| SNP_8001_A_7933888 | NC_021161.1    | Ca_Kabuli_Chr02 | 7933888                 | CC                              | TT                 | TT               | INTERGENIC                    |                    |                                                    |
| SNP_8003_A_7933957 | NC_021161.1    | Ca_Kabuli_Chr02 | 7933957                 | GG                              | AA                 | AA               | INTERGENIC                    |                    |                                                    |
| SNP_8004_A_7933983 | NC_021161.1    | Ca_Kabuli_Chr02 | 7933983                 | AA                              | TT                 | TT               | INTERGENIC                    |                    |                                                    |
| SNP_8005_A_7934238 | NC_021161.1    | Ca_Kabuli_Chr02 | 7934238                 | CC                              | AA                 | AA               | INTERGENIC                    |                    |                                                    |
| SNP_8006_A_7936071 | NC_021161.1    | Ca_Kabuli_Chr02 | 7936071                 | GG                              | AA                 | AA               | INTRON                        | 101489241          | tryptophan aminotransferase-related protein 1-like |
| SNP_8007_A_7936286 | NC_021161.1    | Ca_Kabuli_Chr02 | 7936286                 | CC                              | GG                 | GG               | INTRON                        | 101489241          | tryptophan aminotransferase-related protein 1-like |
| SNP_8008_A_7936395 | NC_021161.1    | Ca_Kabuli_Chr02 | 7936395                 | TT                              | CC                 | CC               | INTRON                        | 101489241          | tryptophan aminotransferase-related protein 1-like |

| SNPs IDs           | Chromosome IDs | Chromosomes     | Physical positions (bp) | CDC Frontier genome (Reference genome) | (Pusa 1103 & HPNB) | (ILWC 46 & LPNB) | Sequence Components of genome | Gene accession IDs | Putative functions                                 |
|--------------------|----------------|-----------------|-------------------------|----------------------------------------|--------------------|------------------|-------------------------------|--------------------|----------------------------------------------------|
| SNP_8009_A_7936399 | NC_021161.1    | Ca_Kabuli_Chr02 | 7936399                 | CC                                     | AA                 | AA               | INTRON                        | 101489241          | tryptophan aminotransferase-related protein 1-like |
| SNP_8010_A_7936402 | NC_021161.1    | Ca_Kabuli_Chr02 | 7936402                 | AA                                     | GG                 | GG               | INTRON                        | 101489241          | tryptophan aminotransferase-related protein 1-like |
| SNP_8011_A_7936438 | NC_021161.1    | Ca_Kabuli_Chr02 | 7936438                 | AA                                     | GG                 | GG               | INTRON                        | 101489241          | tryptophan aminotransferase-related protein 1-like |
| SNP_8012_A_7936481 | NC_021161.1    | Ca_Kabuli_Chr02 | 7936481                 | CC                                     | TT                 | TT               | INTRON                        | 101489241          | tryptophan aminotransferase-related protein 1-like |
| SNP_8013_A_7936493 | NC_021161.1    | Ca_Kabuli_Chr02 | 7936493                 | CC                                     | TT                 | TT               | INTRON                        | 101489241          | tryptophan aminotransferase-related protein 1-like |
| SNP_8014_A_7937328 | NC_021161.1    | Ca_Kabuli_Chr02 | 7937328                 | AA                                     | GG                 | GG               | NON_SYNONYMOUS_CODING         | 101489241          | tryptophan aminotransferase-related protein 1-like |
| SNP_8016_A_7947469 | NC_021161.1    | Ca_Kabuli_Chr02 | 7947469                 | TT                                     | CC                 | CC               | INTRON                        | 101510107          | uncharacterized LOC101510107                       |
| SNP_8017_A_7948681 | NC_021161.1    | Ca_Kabuli_Chr02 | 7948681                 | AA                                     | GG                 | GG               | INTRON                        | 101510107          | uncharacterized LOC101510107                       |
| SNP_8018_A_7948722 | NC_021161.1    | Ca_Kabuli_Chr02 | 7948722                 | TT                                     | CC                 | CC               | INTRON                        | 101510107          | uncharacterized LOC101510107                       |
| SNP_8019_A_7948735 | NC_021161.1    | Ca_Kabuli_Chr02 | 7948735                 | AA                                     | GG                 | GG               | INTRON                        | 101510107          | uncharacterized LOC101510107                       |
| SNP_8020_A_7948747 | NC_021161.1    | Ca_Kabuli_Chr02 | 7948747                 | TT                                     | GG                 | GG               | INTRON                        | 101510107          | uncharacterized LOC101510107                       |
| SNP_8021_A_7965248 | NC_021161.1    | Ca_Kabuli_Chr02 | 7965248                 | TT                                     | AA                 | AA               | INTERGENIC                    |                    |                                                    |
| SNP_8022_A_7970383 | NC_021161.1    | Ca_Kabuli_Chr02 | 7970383                 | CC                                     | TT                 | TT               | DRR                           | 101510432          | uncharacterized LOC101510432                       |
| SNP_8023_A_7972947 | NC_021161.1    | Ca_Kabuli_Chr02 | 7972947                 | GG                                     | AA                 | AA               | INTRON                        | 101510432          | uncharacterized LOC101510432                       |
| SNP_8024_A_7985112 | NC_021161.1    | Ca_Kabuli_Chr02 | 7985112                 | AA                                     | TT                 | TT               | INTERGENIC                    |                    |                                                    |
| SNP_8025_A_8005074 | NC_021161.1    | Ca_Kabuli_Chr02 | 8005074                 | TT                                     | CC                 | CC               | INTERGENIC                    |                    |                                                    |
| SNP_8026_A_8005076 | NC_021161.1    | Ca_Kabuli_Chr02 | 8005076                 | GG                                     | AA                 | AA               | INTERGENIC                    |                    |                                                    |
| SNP_8027_A_8005445 | NC_021161.1    | Ca_Kabuli_Chr02 | 8005445                 | AA                                     | TT                 | TT               | INTERGENIC                    |                    |                                                    |
| SNP_8028_A_8005487 | NC_021161.1    | Ca_Kabuli_Chr02 | 8005487                 | GG                                     | AA                 | AA               | INTERGENIC                    |                    |                                                    |
| SNP_8029_A_8005500 | NC_021161.1    | Ca_Kabuli_Chr02 | 8005500                 | AA                                     | GG                 | GG               | INTERGENIC                    |                    |                                                    |
| SNP_8030_A_8005534 | NC_021161.1    | Ca_Kabuli_Chr02 | 8005534                 | GG                                     | AA                 | AA               | INTERGENIC                    |                    |                                                    |
| SNP_8031_A_8005544 | NC_021161.1    | Ca_Kabuli_Chr02 | 8005544                 | AA                                     | GG                 | GG               | INTERGENIC                    |                    |                                                    |

| SNPs IDs           | Chromosome IDs | Chromosomes     | Physical positions (bp) | CDC Frontier (Reference genome) | (Pusa 1103 & HPNB) | (ILWC 46 & LPNB) | Sequence genome | Components of | Gene accession IDs               | Putative functions |
|--------------------|----------------|-----------------|-------------------------|---------------------------------|--------------------|------------------|-----------------|---------------|----------------------------------|--------------------|
| SNP_8032_A_8005614 | NC_021161.1    | Ca_Kabuli_Chr02 | 8005614                 | TT                              | AA                 | AA               | INTERGENIC      |               |                                  |                    |
| SNP_8033_A_8005624 | NC_021161.1    | Ca_Kabuli_Chr02 | 8005624                 | TT                              | CC                 | CC               | INTERGENIC      |               |                                  |                    |
| SNP_8034_A_8005637 | NC_021161.1    | Ca_Kabuli_Chr02 | 8005637                 | AA                              | CC                 | CC               | INTERGENIC      |               |                                  |                    |
| SNP_8035_A_8005661 | NC_021161.1    | Ca_Kabuli_Chr02 | 8005661                 | AA                              | GG                 | GG               | INTERGENIC      |               |                                  |                    |
| SNP_8036_A_8005704 | NC_021161.1    | Ca_Kabuli_Chr02 | 8005704                 | AA                              | CC                 | CC               | INTERGENIC      |               |                                  |                    |
| SNP_8037_A_8005747 | NC_021161.1    | Ca_Kabuli_Chr02 | 8005747                 | AA                              | GG                 | GG               | INTERGENIC      |               |                                  |                    |
| SNP_8038_A_8006030 | NC_021161.1    | Ca_Kabuli_Chr02 | 8006030                 | TT                              | CC                 | CC               | INTERGENIC      |               |                                  |                    |
| SNP_8039_A_8006201 | NC_021161.1    | Ca_Kabuli_Chr02 | 8006201                 | AA                              | GG                 | GG               | INTERGENIC      |               |                                  |                    |
| SNP_8040_A_8046116 | NC_021161.1    | Ca_Kabuli_Chr02 | 8046116                 | CC                              | TT                 | TT               | INTERGENIC      |               |                                  |                    |
| SNP_8041_A_8163129 | NC_021161.1    | Ca_Kabuli_Chr02 | 8163129                 | CC                              | AA                 | AA               | INTERGENIC      |               |                                  |                    |
| SNP_8042_A_8163190 | NC_021161.1    | Ca_Kabuli_Chr02 | 8163190                 | TT                              | CC                 | CC               | INTERGENIC      |               |                                  |                    |
| SNP_8043_A_8163210 | NC_021161.1    | Ca_Kabuli_Chr02 | 8163210                 | GG                              | AA                 | AA               | INTERGENIC      |               |                                  |                    |
| SNP_8044_A_8163246 | NC_021161.1    | Ca_Kabuli_Chr02 | 8163246                 | CC                              | TT                 | TT               | INTERGENIC      |               |                                  |                    |
| SNP_8046_A_8215634 | NC_021161.1    | Ca_Kabuli_Chr02 | 8215634                 | TT                              | AA                 | AA               | INTERGENIC      |               |                                  |                    |
| SNP_8047_A_8215635 | NC_021161.1    | Ca_Kabuli_Chr02 | 8215635                 | TT                              | AA                 | AA               | INTERGENIC      |               |                                  |                    |
| SNP_8048_A_8228432 | NC_021161.1    | Ca_Kabuli_Chr02 | 8228432                 | CC                              | TT                 | TT               | INTERGENIC      |               |                                  |                    |
| SNP_8049_A_8228471 | NC_021161.1    | Ca_Kabuli_Chr02 | 8228471                 | AA                              | GG                 | GG               | INTERGENIC      |               |                                  |                    |
| SNP_8050_A_8228505 | NC_021161.1    | Ca_Kabuli_Chr02 | 8228505                 | CC                              | TT                 | TT               | INTERGENIC      |               |                                  |                    |
| SNP_8051_A_8228561 | NC_021161.1    | Ca_Kabuli_Chr02 | 8228561                 | GG                              | AA                 | AA               | INTERGENIC      |               |                                  |                    |
| SNP_8052_A_8324933 | NC_021161.1    | Ca_Kabuli_Chr02 | 8324933                 | AA                              | GG                 | GG               | DRR             | 101495607     | polygalacturonase At1g48100-like |                    |
| SNP_8055_A_8420051 | NC_021161.1    | Ca_Kabuli_Chr02 | 8420051                 | GG                              | AA                 | AA               | INTERGENIC      |               |                                  |                    |
| SNP_8057_A_8420560 | NC_021161.1    | Ca_Kabuli_Chr02 | 8420560                 | AA                              | CC                 | CC               | INTERGENIC      |               |                                  |                    |

| SNPs IDs           | Chromosome IDs | Chromosomes     | Physical positions (bp) | CDC Frontier genome (Reference genome) | (Pusa 1103 & HPNB) | (ILWC 46 & LPNB) | Sequence Components of genome | Gene accession IDs | Putative functions           |
|--------------------|----------------|-----------------|-------------------------|----------------------------------------|--------------------|------------------|-------------------------------|--------------------|------------------------------|
| SNP_8058_A_8420671 | NC_021161.1    | Ca_Kabuli_Chr02 | 8420671                 | TT                                     | AA                 | AA               | INTERGENIC                    |                    |                              |
| SNP_8059_A_8425858 | NC_021161.1    | Ca_Kabuli_Chr02 | 8425858                 | AA                                     | TT                 | TT               | INTRON                        | 101499637          | Unknown function             |
| SNP_8060_A_8425870 | NC_021161.1    | Ca_Kabuli_Chr02 | 8425870                 | TT                                     | AA                 | AA               | INTRON                        | 101499637          | Unknown function             |
| SNP_8061_A_8425871 | NC_021161.1    | Ca_Kabuli_Chr02 | 8425871                 | TT                                     | CC                 | CC               | INTRON                        | 101499637          | Unknown function             |
| SNP_8062_A_8434653 | NC_021161.1    | Ca_Kabuli_Chr02 | 8434653                 | AA                                     | TT                 | TT               | URR                           | 101499940          | Unknown function             |
| SNP_8063_A_8462481 | NC_021161.1    | Ca_Kabuli_Chr02 | 8462481                 | CC                                     | GG                 | GG               | INTRON                        | 101500596          | uncharacterized LOC101500596 |
| SNP_8064_A_8462487 | NC_021161.1    | Ca_Kabuli_Chr02 | 8462487                 | TT                                     | CC                 | CC               | INTRON                        | 101500596          | uncharacterized LOC101500596 |
| SNP_8065_A_8478740 | NC_021161.1    | Ca_Kabuli_Chr02 | 8478740                 | AA                                     | CC                 | CC               | INTERGENIC                    |                    |                              |
| SNP_8067_A_8478860 | NC_021161.1    | Ca_Kabuli_Chr02 | 8478860                 | GG                                     | CC                 | CC               | INTERGENIC                    |                    |                              |
| SNP_8068_A_8478862 | NC_021161.1    | Ca_Kabuli_Chr02 | 8478862                 | GG                                     | TT                 | TT               | INTERGENIC                    |                    |                              |
| SNP_8070_A_8478939 | NC_021161.1    | Ca_Kabuli_Chr02 | 8478939                 | CC                                     | AA                 | AA               | INTERGENIC                    |                    |                              |
| SNP_8071_A_8479011 | NC_021161.1    | Ca_Kabuli_Chr02 | 8479011                 | GG                                     | AA                 | AA               | INTERGENIC                    |                    |                              |
| SNP_8072_A_8479012 | NC_021161.1    | Ca_Kabuli_Chr02 | 8479012                 | TT                                     | AA                 | AA               | INTERGENIC                    |                    |                              |
| SNP_8073_A_8479119 | NC_021161.1    | Ca_Kabuli_Chr02 | 8479119                 | TT                                     | AA                 | AA               | INTERGENIC                    |                    |                              |
| SNP_8074_A_8479141 | NC_021161.1    | Ca_Kabuli_Chr02 | 8479141                 | TT                                     | AA                 | AA               | INTERGENIC                    |                    |                              |
| SNP_8075_A_8479455 | NC_021161.1    | Ca_Kabuli_Chr02 | 8479455                 | CC                                     | TT                 | TT               | INTERGENIC                    |                    |                              |
| SNP_8076_A_8479579 | NC_021161.1    | Ca_Kabuli_Chr02 | 8479579                 | CC                                     | TT                 | TT               | INTERGENIC                    |                    |                              |
| SNP_8077_A_8479616 | NC_021161.1    | Ca_Kabuli_Chr02 | 8479616                 | GG                                     | AA                 | AA               | INTERGENIC                    |                    |                              |
| SNP_8078_A_8479622 | NC_021161.1    | Ca_Kabuli_Chr02 | 8479622                 | GG                                     | CC                 | CC               | INTERGENIC                    |                    |                              |
| SNP_8079_A_8479643 | NC_021161.1    | Ca_Kabuli_Chr02 | 8479643                 | AA                                     | GG                 | GG               | INTERGENIC                    |                    |                              |
| SNP_8080_A_8479662 | NC_021161.1    | Ca_Kabuli_Chr02 | 8479662                 | GG                                     | AA                 | AA               | INTERGENIC                    |                    |                              |
| SNP_8081_A_8479675 | NC_021161.1    | Ca_Kabuli_Chr02 | 8479675                 | GG                                     | AA                 | AA               | INTERGENIC                    |                    |                              |



| SNPs IDs           | Chromosome IDs | Chromosomes     | Physical positions (bp) | CDC Frontier genome (Reference genome) | (Pusa 1103 & HPNB) | (ILWC 46 & LPNB) | Sequence genome | Components of | Gene accession IDs                  | Putative functions |
|--------------------|----------------|-----------------|-------------------------|----------------------------------------|--------------------|------------------|-----------------|---------------|-------------------------------------|--------------------|
| SNP_8082_A_8479746 | NC_021161.1    | Ca_Kabuli_Chr02 | 8479746                 | AA                                     | GG                 | GG               | INTERGENIC      |               |                                     |                    |
| SNP_8083_A_8479768 | NC_021161.1    | Ca_Kabuli_Chr02 | 8479768                 | GG                                     | AA                 | AA               | INTERGENIC      |               |                                     |                    |
| SNP_8084_A_8479795 | NC_021161.1    | Ca_Kabuli_Chr02 | 8479795                 | AA                                     | GG                 | GG               | INTERGENIC      |               |                                     |                    |
| SNP_8085_A_8479829 | NC_021161.1    | Ca_Kabuli_Chr02 | 8479829                 | TT                                     | CC                 | CC               | INTERGENIC      |               |                                     |                    |
| SNP_8086_A_8479895 | NC_021161.1    | Ca_Kabuli_Chr02 | 8479895                 | AA                                     | TT                 | TT               | INTERGENIC      |               |                                     |                    |
| SNP_8087_A_8479927 | NC_021161.1    | Ca_Kabuli_Chr02 | 8479927                 | TT                                     | CC                 | CC               | INTERGENIC      |               |                                     |                    |
| SNP_8088_A_8483614 | NC_021161.1    | Ca_Kabuli_Chr02 | 8483614                 | TT                                     | AA                 | AA               | INTERGENIC      |               |                                     |                    |
| SNP_8089_A_8483642 | NC_021161.1    | Ca_Kabuli_Chr02 | 8483642                 | GG                                     | CC                 | CC               | INTERGENIC      |               |                                     |                    |
| SNP_8090_A_8483645 | NC_021161.1    | Ca_Kabuli_Chr02 | 8483645                 | AA                                     | GG                 | GG               | INTERGENIC      |               |                                     |                    |
| SNP_8091_A_8483648 | NC_021161.1    | Ca_Kabuli_Chr02 | 8483648                 | GG                                     | CC                 | CC               | INTERGENIC      |               |                                     |                    |
| SNP_8092_A_8495119 | NC_021161.1    | Ca_Kabuli_Chr02 | 8495119                 | GG                                     | AA                 | AA               | INTERGENIC      |               |                                     |                    |
| SNP_8093_A_8506866 | NC_021161.1    | Ca_Kabuli_Chr02 | 8506866                 | GG                                     | AA                 | AA               | INTERGENIC      |               |                                     |                    |
| SNP_8094_A_8553269 | NC_021161.1    | Ca_Kabuli_Chr02 | 8553269                 | CC                                     | TT                 | TT               | INTERGENIC      |               |                                     |                    |
| SNP_8095_A_8565046 | NC_021161.1    | Ca_Kabuli_Chr02 | 8565046                 | TT                                     | CC                 | CC               | INTERGENIC      |               |                                     |                    |
| SNP_8096_A_8664225 | NC_021161.1    | Ca_Kabuli_Chr02 | 8664225                 | TT                                     | GG                 | GG               | INTERGENIC      |               |                                     |                    |
| SNP_8097_A_8699947 | NC_021161.1    | Ca_Kabuli_Chr02 | 8699947                 | AA                                     | TT                 | TT               | URR             | 101505728     | uncharacterized LOC101505728        |                    |
| SNP_8099_A_8723907 | NC_021161.1    | Ca_Kabuli_Chr02 | 8723907                 | GG                                     | CC                 | CC               | INTRON          | 101506366     | AP-1 complex subunit gamma-2-like   |                    |
| SNP_8100_A_8723944 | NC_021161.1    | Ca_Kabuli_Chr02 | 8723944                 | TT                                     | CC                 | CC               | INTRON          | 101506366     | AP-1 complex subunit gamma-2-like   |                    |
| SNP_8101_A_8724174 | NC_021161.1    | Ca_Kabuli_Chr02 | 8724174                 | AA                                     | GG                 | GG               | INTRON          | 101506366     | AP-1 complex subunit gamma-2-like   |                    |
| SNP_8104_A_8843031 | NC_021161.1    | Ca_Kabuli_Chr02 | 8843031                 | CC                                     | GG                 | GG               | URR             | 101507769     | WAT1-related protein At3g28050-like |                    |
| SNP_8107_A_9312311 | NC_021161.1    | Ca_Kabuli_Chr02 | 9312311                 | AA                                     | GG                 | GG               | INTERGENIC      |               |                                     |                    |
| SNP_8108_A_9343456 | NC_021161.1    | Ca_Kabuli_Chr02 | 9343456                 | GG                                     | CC                 | CC               | INTERGENIC      |               |                                     |                    |

| SNPs IDs           | Chromosome IDs | Chromosomes     | Physical positions (bp) | CDC Frontier (Reference genome) | (Pusa 1103 & HPNB) | (ILWC 46 & LPNB) | Sequence genome | Components of | Gene accession IDs           | Putative functions |
|--------------------|----------------|-----------------|-------------------------|---------------------------------|--------------------|------------------|-----------------|---------------|------------------------------|--------------------|
| SNP_8109_A_9360125 | NC_021161.1    | Ca_Kabuli_Chr02 | 9360125                 | AA                              | GG                 | GG               | INTERGENIC      |               |                              |                    |
| SNP_8110_A_9373186 | NC_021161.1    | Ca_Kabuli_Chr02 | 9373186                 | AA                              | GG                 | GG               | INTERGENIC      |               |                              |                    |
| SNP_8111_A_9373188 | NC_021161.1    | Ca_Kabuli_Chr02 | 9373188                 | AA                              | CC                 | CC               | INTERGENIC      |               |                              |                    |
| SNP_8112_A_9389837 | NC_021161.1    | Ca_Kabuli_Chr02 | 9389837                 | TT                              | AA                 | AA               | INTERGENIC      |               |                              |                    |
| SNP_8113_A_9401911 | NC_021161.1    | Ca_Kabuli_Chr02 | 9401911                 | CC                              | GG                 | GG               | INTERGENIC      |               |                              |                    |
| SNP_8114_A_9408298 | NC_021161.1    | Ca_Kabuli_Chr02 | 9408298                 | TT                              | CC                 | CC               | INTERGENIC      |               |                              |                    |
| SNP_8116_A_9411578 | NC_021161.1    | Ca_Kabuli_Chr02 | 9411578                 | GG                              | AA                 | AA               | INTERGENIC      |               |                              |                    |
| SNP_8119_A_9494121 | NC_021161.1    | Ca_Kabuli_Chr02 | 9494121                 | AA                              | GG                 | GG               | INTERGENIC      |               |                              |                    |
| SNP_8120_A_9494137 | NC_021161.1    | Ca_Kabuli_Chr02 | 9494137                 | TT                              | GG                 | GG               | INTERGENIC      |               |                              |                    |
| SNP_8121_A_9494217 | NC_021161.1    | Ca_Kabuli_Chr02 | 9494217                 | CC                              | TT                 | TT               | INTERGENIC      |               |                              |                    |
| SNP_8122_A_9494277 | NC_021161.1    | Ca_Kabuli_Chr02 | 9494277                 | AA                              | GG                 | GG               | INTERGENIC      |               |                              |                    |
| SNP_8123_A_9494297 | NC_021161.1    | Ca_Kabuli_Chr02 | 9494297                 | GG                              | AA                 | AA               | INTERGENIC      |               |                              |                    |
| SNP_8124_A_9494348 | NC_021161.1    | Ca_Kabuli_Chr02 | 9494348                 | AA                              | CC                 | CC               | INTERGENIC      |               |                              |                    |
| SNP_8125_A_9494377 | NC_021161.1    | Ca_Kabuli_Chr02 | 9494377                 | TT                              | CC                 | CC               | INTERGENIC      |               |                              |                    |
| SNP_8126_A_9494399 | NC_021161.1    | Ca_Kabuli_Chr02 | 9494399                 | CC                              | GG                 | GG               | INTERGENIC      |               |                              |                    |
| SNP_8127_A_9494402 | NC_021161.1    | Ca_Kabuli_Chr02 | 9494402                 | CC                              | AA                 | AA               | INTERGENIC      |               |                              |                    |
| SNP_8128_A_9498620 | NC_021161.1    | Ca_Kabuli_Chr02 | 9498620                 | TT                              | CC                 | CC               | DRR             | 101490118     | uncharacterized LOC101490118 |                    |
| SNP_8129_A_9498827 | NC_021161.1    | Ca_Kabuli_Chr02 | 9498827                 | TT                              | CC                 | CC               | DRR             | 101490118     | uncharacterized LOC101490118 |                    |
| SNP_8130_A_9498863 | NC_021161.1    | Ca_Kabuli_Chr02 | 9498863                 | TT                              | AA                 | AA               | DRR             | 101490118     | uncharacterized LOC101490118 |                    |
| SNP_8131_A_9498915 | NC_021161.1    | Ca_Kabuli_Chr02 | 9498915                 | TT                              | CC                 | CC               | DRR             | 101490118     | uncharacterized LOC101490118 |                    |
| SNP_8132_A_9498963 | NC_021161.1    | Ca_Kabuli_Chr02 | 9498963                 | GG                              | AA                 | AA               | DRR             | 101490118     | uncharacterized LOC101490118 |                    |
| SNP_8133_A_9498966 | NC_021161.1    | Ca_Kabuli_Chr02 | 9498966                 | AA                              | GG                 | GG               | DRR             | 101490118     | uncharacterized LOC101490118 |                    |

| SNPs IDs           | Chromosome IDs | Chromosomes     | Physical positions (bp) | CDC Frontier (Reference genome) | (Pusa 1103 & HPNB) | (ILWC 46 & LPNB) | Sequence Components of genome | Gene accession IDs | Putative functions           |
|--------------------|----------------|-----------------|-------------------------|---------------------------------|--------------------|------------------|-------------------------------|--------------------|------------------------------|
| SNP_8134_A_9499135 | NC_021161.1    | Ca_Kabuli_Chr02 | 9499135                 | TT                              | AA                 | AA               | DRR                           | 101490118          | uncharacterized LOC101490118 |
| SNP_8135_A_9499244 | NC_021161.1    | Ca_Kabuli_Chr02 | 9499244                 | AA                              | GG                 | GG               | URR                           | 101491932          | uncharacterized LOC101491932 |
| SNP_8136_A_9500194 | NC_021161.1    | Ca_Kabuli_Chr02 | 9500194                 | AA                              | CC                 | CC               | NON_SYNONYMOUS_CODING         | id30839            | Unknown function             |
| SNP_8138_A_9500251 | NC_021161.1    | Ca_Kabuli_Chr02 | 9500251                 | TT                              | CC                 | CC               | NON_SYNONYMOUS_CODING         | id30839            | Unknown function             |
| SNP_8139_A_9599697 | NC_021161.1    | Ca_Kabuli_Chr02 | 9599697                 | CC                              | TT                 | TT               | INTERGENIC                    |                    |                              |
| SNP_8141_A_9600785 | NC_021161.1    | Ca_Kabuli_Chr02 | 9600785                 | AA                              | GG                 | GG               | INTERGENIC                    |                    |                              |
| SNP_8142_A_9600789 | NC_021161.1    | Ca_Kabuli_Chr02 | 9600789                 | AA                              | GG                 | GG               | INTERGENIC                    |                    |                              |
| SNP_8143_A_9605674 | NC_021161.1    | Ca_Kabuli_Chr02 | 9605674                 | TT                              | CC                 | CC               | INTERGENIC                    |                    |                              |
| SNP_8144_A_9605675 | NC_021161.1    | Ca_Kabuli_Chr02 | 9605675                 | GG                              | TT                 | TT               | INTERGENIC                    |                    |                              |
| SNP_8145_A_9612949 | NC_021161.1    | Ca_Kabuli_Chr02 | 9612949                 | GG                              | AA                 | AA               | INTERGENIC                    |                    |                              |
| SNP_8146_A_9612958 | NC_021161.1    | Ca_Kabuli_Chr02 | 9612958                 | AA                              | CC                 | CC               | INTERGENIC                    |                    |                              |
| SNP_8147_A_9612976 | NC_021161.1    | Ca_Kabuli_Chr02 | 9612976                 | TT                              | CC                 | CC               | INTERGENIC                    |                    |                              |
| SNP_8148_A_9613046 | NC_021161.1    | Ca_Kabuli_Chr02 | 9613046                 | AA                              | GG                 | GG               | INTERGENIC                    |                    |                              |
| SNP_8149_A_9613070 | NC_021161.1    | Ca_Kabuli_Chr02 | 9613070                 | TT                              | CC                 | CC               | INTERGENIC                    |                    |                              |
| SNP_8150_A_9613077 | NC_021161.1    | Ca_Kabuli_Chr02 | 9613077                 | TT                              | CC                 | CC               | INTERGENIC                    |                    |                              |
| SNP_8151_A_9613101 | NC_021161.1    | Ca_Kabuli_Chr02 | 9613101                 | GG                              | AA                 | AA               | INTERGENIC                    |                    |                              |
| SNP_8152_A_9613228 | NC_021161.1    | Ca_Kabuli_Chr02 | 9613228                 | TT                              | CC                 | CC               | INTERGENIC                    |                    |                              |
| SNP_8153_A_9613235 | NC_021161.1    | Ca_Kabuli_Chr02 | 9613235                 | AA                              | GG                 | GG               | INTERGENIC                    |                    |                              |
| SNP_8154_A_9613251 | NC_021161.1    | Ca_Kabuli_Chr02 | 9613251                 | TT                              | GG                 | GG               | INTERGENIC                    |                    |                              |
| SNP_8155_A_9613259 | NC_021161.1    | Ca_Kabuli_Chr02 | 9613259                 | TT                              | CC                 | CC               | INTERGENIC                    |                    |                              |
| SNP_8156_A_9613266 | NC_021161.1    | Ca_Kabuli_Chr02 | 9613266                 | CC                              | TT                 | TT               | INTERGENIC                    |                    |                              |
| SNP_8157_A_9613284 | NC_021161.1    | Ca_Kabuli_Chr02 | 9613284                 | TT                              | GG                 | GG               | INTERGENIC                    |                    |                              |

| SNPs IDs           | Chromosome IDs | Chromosomes     | Physical positions (bp) | CDC Frontier genome (Reference genome) | (Pusa 1103 & HPNB) | (ILWC 46 & LPNB) | Sequence Components of genome | Gene accession IDs | Putative functions                           |
|--------------------|----------------|-----------------|-------------------------|----------------------------------------|--------------------|------------------|-------------------------------|--------------------|----------------------------------------------|
| SNP_8158_A_9613343 | NC_021161.1    | Ca_Kabuli_Chr02 | 9613343                 | AA                                     | GG                 | GG               | INTERGENIC                    |                    |                                              |
| SNP_8159_A_9613360 | NC_021161.1    | Ca_Kabuli_Chr02 | 9613360                 | TT                                     | CC                 | CC               | INTERGENIC                    |                    |                                              |
| SNP_8160_A_9613372 | NC_021161.1    | Ca_Kabuli_Chr02 | 9613372                 | AA                                     | GG                 | GG               | INTERGENIC                    |                    |                                              |
| SNP_8161_A_9614779 | NC_021161.1    | Ca_Kabuli_Chr02 | 9614779                 | CC                                     | TT                 | TT               | INTERGENIC                    |                    |                                              |
| SNP_8162_A_9615125 | NC_021161.1    | Ca_Kabuli_Chr02 | 9615125                 | AA                                     | TT                 | TT               | INTERGENIC                    |                    |                                              |
| SNP_8163_A_9615136 | NC_021161.1    | Ca_Kabuli_Chr02 | 9615136                 | CC                                     | GG                 | GG               | INTERGENIC                    |                    |                                              |
| SNP_8164_A_9615137 | NC_021161.1    | Ca_Kabuli_Chr02 | 9615137                 | AA                                     | TT                 | TT               | INTERGENIC                    |                    |                                              |
| SNP_8165_A_9615150 | NC_021161.1    | Ca_Kabuli_Chr02 | 9615150                 | TT                                     | CC                 | CC               | INTERGENIC                    |                    |                                              |
| SNP_8166_A_9615155 | NC_021161.1    | Ca_Kabuli_Chr02 | 9615155                 | AA                                     | CC                 | CC               | INTERGENIC                    |                    |                                              |
| SNP_8167_A_9615167 | NC_021161.1    | Ca_Kabuli_Chr02 | 9615167                 | TT                                     | CC                 | CC               | INTERGENIC                    |                    |                                              |
| SNP_8168_A_9616545 | NC_021161.1    | Ca_Kabuli_Chr02 | 9616545                 | AA                                     | GG                 | GG               | INTERGENIC                    |                    |                                              |
| SNP_8169_A_9647556 | NC_021161.1    | Ca_Kabuli_Chr02 | 9647556                 | GG                                     | AA                 | AA               | INTRON                        | 101495609          | uncharacterized LOC101495609                 |
| SNP_8170_A_9647583 | NC_021161.1    | Ca_Kabuli_Chr02 | 9647583                 | AA                                     | TT                 | TT               | INTRON                        | 101495609          | uncharacterized LOC101495609                 |
| SNP_8171_A_9647585 | NC_021161.1    | Ca_Kabuli_Chr02 | 9647585                 | TT                                     | AA                 | AA               | INTRON                        | 101495609          | uncharacterized LOC101495609                 |
| SNP_8172_A_9647622 | NC_021161.1    | Ca_Kabuli_Chr02 | 9647622                 | TT                                     | CC                 | CC               | NON_SYNONYMOUS_CODING         | 101495609          | uncharacterized LOC101495609                 |
| SNP_8173_A_9647627 | NC_021161.1    | Ca_Kabuli_Chr02 | 9647627                 | CC                                     | AA                 | AA               | NON_SYNONYMOUS_CODING         | 101495609          | uncharacterized LOC101495609                 |
| SNP_8174_A_9647633 | NC_021161.1    | Ca_Kabuli_Chr02 | 9647633                 | GG                                     | TT                 | TT               | SYNONYMOUS_CODING             | 101495609          | uncharacterized LOC101495609                 |
| SNP_8175_A_9647944 | NC_021161.1    | Ca_Kabuli_Chr02 | 9647944                 | TT                                     | GG                 | GG               | NON_SYNONYMOUS_CODING         | 101495609          | uncharacterized LOC101495609                 |
| SNP_8177_A_9689649 | NC_021161.1    | Ca_Kabuli_Chr02 | 9689649                 | TT                                     | CC                 | CC               | URR                           | 101493694          | paired amphipathic helix protein Sin3-like 4 |
| SNP_8178_A_9693977 | NC_021161.1    | Ca_Kabuli_Chr02 | 9693977                 | GG                                     | AA                 | AA               | INTERGENIC                    |                    |                                              |
| SNP_8179_A_9707865 | NC_021161.1    | Ca_Kabuli_Chr02 | 9707865                 | GG                                     | AA                 | AA               | INTERGENIC                    |                    |                                              |
| SNP_8180_A_9737183 | NC_021161.1    | Ca_Kabuli_Chr02 | 9737183                 | TT                                     | GG                 | GG               | INTERGENIC                    |                    |                                              |

| SNPs IDs            | Chromosome IDs | Chromosomes     | Physical positions (bp) | CDC Frontier genome (Reference genome) | (Pusa 1103 & HPNB) | (ILWC 46 & LPNB) | Sequence genome | Components of | Gene accession IDs | Putative functions                  |
|---------------------|----------------|-----------------|-------------------------|----------------------------------------|--------------------|------------------|-----------------|---------------|--------------------|-------------------------------------|
| SNP_8181_A_9776583  | NC_021161.1    | Ca_Kabuli_Chr02 | 9776583                 | TT                                     | CC                 | CC               | INTERGENIC      |               |                    |                                     |
| SNP_8182_A_9776726  | NC_021161.1    | Ca_Kabuli_Chr02 | 9776726                 | GG                                     | TT                 | TT               | INTERGENIC      |               |                    |                                     |
| SNP_8183_A_9779395  | NC_021161.1    | Ca_Kabuli_Chr02 | 9779395                 | CC                                     | TT                 | TT               | INTERGENIC      |               |                    |                                     |
| SNP_8184_A_9782825  | NC_021161.1    | Ca_Kabuli_Chr02 | 9782825                 | AA                                     | GG                 | GG               | INTERGENIC      |               |                    |                                     |
| SNP_8185_A_9881706  | NC_021161.1    | Ca_Kabuli_Chr02 | 9881706                 | TT                                     | CC                 | CC               | INTERGENIC      |               |                    |                                     |
| SNP_8187_A_9898941  | NC_021161.1    | Ca_Kabuli_Chr02 | 9898941                 | TT                                     | GG                 | GG               | URR             | 101498677     |                    | ras-related protein Rab7            |
| SNP_8188_A_9929836  | NC_021161.1    | Ca_Kabuli_Chr02 | 9929836                 | AA                                     | CC                 | CC               | INTERGENIC      |               |                    |                                     |
| SNP_8189_A_9929845  | NC_021161.1    | Ca_Kabuli_Chr02 | 9929845                 | AA                                     | GG                 | GG               | INTERGENIC      |               |                    |                                     |
| SNP_8190_A_9931474  | NC_021161.1    | Ca_Kabuli_Chr02 | 9931474                 | GG                                     | AA                 | AA               | INTERGENIC      |               |                    |                                     |
| SNP_8191_A_9935370  | NC_021161.1    | Ca_Kabuli_Chr02 | 9935370                 | TT                                     | CC                 | CC               | INTERGENIC      |               |                    |                                     |
| SNP_8192_A_9979301  | NC_021161.1    | Ca_Kabuli_Chr02 | 9979301                 | AA                                     | CC                 | CC               | INTERGENIC      |               |                    |                                     |
| SNP_8193_A_9979302  | NC_021161.1    | Ca_Kabuli_Chr02 | 9979302                 | AA                                     | CC                 | CC               | INTERGENIC      |               |                    |                                     |
| SNP_8194_A_10013817 | NC_021161.1    | Ca_Kabuli_Chr02 | 10013817                | TT                                     | CC                 | CC               | URR             | 101503678     |                    | cytochrome P450 82A1-like           |
| SNP_8197_A_10073896 | NC_021161.1    | Ca_Kabuli_Chr02 | 10073896                | TT                                     | CC                 | CC               | INTERGENIC      |               |                    |                                     |
| SNP_8198_A_10104782 | NC_021161.1    | Ca_Kabuli_Chr02 | 10104782                | AA                                     | GG                 | GG               | URR             | 101507143     |                    | nucleolar complex protein 2 homolog |
| SNP_8199_A_10112872 | NC_021161.1    | Ca_Kabuli_Chr02 | 10112872                | TT                                     | CC                 | CC               | INTERGENIC      |               |                    |                                     |
| SNP_8200_A_10113145 | NC_021161.1    | Ca_Kabuli_Chr02 | 10113145                | CC                                     | TT                 | TT               | INTERGENIC      |               |                    |                                     |
| SNP_8201_A_10116758 | NC_021161.1    | Ca_Kabuli_Chr02 | 10116758                | AA                                     | TT                 | TT               | INTERGENIC      |               |                    |                                     |
| SNP_8202_A_10138199 | NC_021161.1    | Ca_Kabuli_Chr02 | 10138199                | CC                                     | AA                 | AA               | INTERGENIC      |               |                    |                                     |
| SNP_8203_A_10175093 | NC_021161.1    | Ca_Kabuli_Chr02 | 10175093                | CC                                     | TT                 | TT               | INTERGENIC      |               |                    |                                     |
| SNP_8205_A_10192125 | NC_021161.1    | Ca_Kabuli_Chr02 | 10192125                | GG                                     | TT                 | TT               | INTERGENIC      |               |                    |                                     |
| SNP_8206_A_10202073 | NC_021161.1    | Ca_Kabuli_Chr02 | 10202073                | TT                                     | AA                 | AA               | INTERGENIC      |               |                    |                                     |

| SNPs IDs            | Chromosome IDs | Chromosomes     | Physical positions (bp) | CDC Frontier (Reference genome) | (Pusa 1103 & HPNB) | (ILWC 46 & LPNB) | Sequence Components of genome | Gene accession IDs | Putative functions                 |
|---------------------|----------------|-----------------|-------------------------|---------------------------------|--------------------|------------------|-------------------------------|--------------------|------------------------------------|
| SNP_8207_A_10240226 | NC_021161.1    | Ca_Kabuli_Chr02 | 10240226                | GG                              | TT                 | TT               | INTERGENIC                    |                    |                                    |
| SNP_8208_A_10362062 | NC_021161.1    | Ca_Kabuli_Chr02 | 10362062                | AA                              | GG                 | TT               | INTERGENIC                    |                    |                                    |
| SNP_8209_A_10362088 | NC_021161.1    | Ca_Kabuli_Chr02 | 10362088                | TT                              | CC                 | CC               | INTERGENIC                    |                    |                                    |
| SNP_8210_A_10362144 | NC_021161.1    | Ca_Kabuli_Chr02 | 10362144                | AA                              | GG                 | GG               | INTERGENIC                    |                    |                                    |
| SNP_8211_A_10362505 | NC_021161.1    | Ca_Kabuli_Chr02 | 10362505                | TT                              | GG                 | GG               | URR                           | 101513982          | shootin-1                          |
| SNP_8212_A_10395809 | NC_021161.1    | Ca_Kabuli_Chr02 | 10395809                | AA                              | TT                 | TT               | DRR                           | 101496483          | basic 7S globulin 2-like           |
| SNP_8213_A_10395813 | NC_021161.1    | Ca_Kabuli_Chr02 | 10395813                | TT                              | AA                 | AA               | DRR                           | 101496483          | basic 7S globulin 2-like           |
| SNP_8214_A_10432638 | NC_021161.1    | Ca_Kabuli_Chr02 | 10432638                | CC                              | TT                 | TT               | DRR                           | 101488245          | glutathione S-transferase U17-like |
| SNP_8215_A_10491320 | NC_021161.1    | Ca_Kabuli_Chr02 | 10491320                | CC                              | TT                 | TT               | INTERGENIC                    |                    |                                    |
| SNP_8217_A_10501769 | NC_021161.1    | Ca_Kabuli_Chr02 | 10501769                | AA                              | GG                 | GG               | INTERGENIC                    |                    |                                    |
| SNP_8218_A_10540543 | NC_021161.1    | Ca_Kabuli_Chr02 | 10540543                | TT                              | CC                 | CC               | INTERGENIC                    |                    |                                    |
| SNP_8219_A_10540607 | NC_021161.1    | Ca_Kabuli_Chr02 | 10540607                | CC                              | GG                 | GG               | INTERGENIC                    |                    |                                    |
| SNP_8220_A_10540612 | NC_021161.1    | Ca_Kabuli_Chr02 | 10540612                | TT                              | CC                 | CC               | INTERGENIC                    |                    |                                    |
| SNP_8221_A_10540622 | NC_021161.1    | Ca_Kabuli_Chr02 | 10540622                | GG                              | CC                 | CC               | INTERGENIC                    |                    |                                    |
| SNP_8222_A_10540822 | NC_021161.1    | Ca_Kabuli_Chr02 | 10540822                | TT                              | CC                 | CC               | INTERGENIC                    |                    |                                    |
| SNP_8223_A_10541017 | NC_021161.1    | Ca_Kabuli_Chr02 | 10541017                | TT                              | GG                 | GG               | INTERGENIC                    |                    |                                    |
| SNP_8224_A_10541135 | NC_021161.1    | Ca_Kabuli_Chr02 | 10541135                | AA                              | TT                 | TT               | INTERGENIC                    |                    |                                    |
| SNP_8225_A_10541144 | NC_021161.1    | Ca_Kabuli_Chr02 | 10541144                | AA                              | GG                 | GG               | INTERGENIC                    |                    |                                    |
| SNP_8226_A_10541157 | NC_021161.1    | Ca_Kabuli_Chr02 | 10541157                | AA                              | GG                 | GG               | INTERGENIC                    |                    |                                    |
| SNP_8227_A_10541166 | NC_021161.1    | Ca_Kabuli_Chr02 | 10541166                | AA                              | CC                 | CC               | INTERGENIC                    |                    |                                    |
| SNP_8228_A_10541193 | NC_021161.1    | Ca_Kabuli_Chr02 | 10541193                | AA                              | GG                 | GG               | INTERGENIC                    |                    |                                    |
| SNP_8229_A_10541203 | NC_021161.1    | Ca_Kabuli_Chr02 | 10541203                | GG                              | AA                 | AA               | INTERGENIC                    |                    |                                    |

| SNPs IDs            | Chromosome IDs | Chromosomes     | Physical positions (bp) | CDC Frontier (Reference genome) | (Pusa 1103 & HPNB) | (ILWC 46 & LPNB) | Sequence Components of genome | Gene accession IDs | Putative functions           |
|---------------------|----------------|-----------------|-------------------------|---------------------------------|--------------------|------------------|-------------------------------|--------------------|------------------------------|
| SNP_8230_A_10541535 | NC_021161.1    | Ca_Kabuli_Chr02 | 10541535                | CC                              | GG                 | GG               | INTERGENIC                    |                    |                              |
| SNP_8231_A_10544398 | NC_021161.1    | Ca_Kabuli_Chr02 | 10544398                | AA                              | TT                 | TT               | INTERGENIC                    |                    |                              |
| SNP_8232_A_10544629 | NC_021161.1    | Ca_Kabuli_Chr02 | 10544629                | GG                              | AA                 | AA               | INTERGENIC                    |                    |                              |
| SNP_8233_A_10544789 | NC_021161.1    | Ca_Kabuli_Chr02 | 10544789                | TT                              | AA                 | GG               | INTERGENIC                    |                    |                              |
| SNP_8234_A_10598618 | NC_021161.1    | Ca_Kabuli_Chr02 | 10598618                | CC                              | TT                 | TT               | URR                           | 101491183          | thioredoxin H2-like          |
| SNP_8235_A_10599713 | NC_021161.1    | Ca_Kabuli_Chr02 | 10599713                | AA                              | CC                 | CC               | INTERGENIC                    |                    |                              |
| SNP_8236_A_10599714 | NC_021161.1    | Ca_Kabuli_Chr02 | 10599714                | AA                              | TT                 | TT               | INTERGENIC                    |                    |                              |
| SNP_8237_A_10664264 | NC_021161.1    | Ca_Kabuli_Chr02 | 10664264                | GG                              | CC                 | CC               | INTERGENIC                    |                    |                              |
| SNP_8238_A_10664624 | NC_021161.1    | Ca_Kabuli_Chr02 | 10664624                | TT                              | AA                 | AA               | DRR                           | 101497809          | uncharacterized LOC101497809 |
| SNP_8239_A_10664667 | NC_021161.1    | Ca_Kabuli_Chr02 | 10664667                | AA                              | GG                 | GG               | DRR                           | 101497809          | uncharacterized LOC101497809 |
| SNP_8240_A_10714151 | NC_021161.1    | Ca_Kabuli_Chr02 | 10714151                | TT                              | CC                 | CC               | INTERGENIC                    |                    |                              |
| SNP_8241_A_10719924 | NC_021161.1    | Ca_Kabuli_Chr02 | 10719924                | TT                              | CC                 | CC               | INTERGENIC                    |                    |                              |
| SNP_8242_A_10719935 | NC_021161.1    | Ca_Kabuli_Chr02 | 10719935                | GG                              | AA                 | AA               | INTERGENIC                    |                    |                              |
| SNP_8243_A_10759163 | NC_021161.1    | Ca_Kabuli_Chr02 | 10759163                | AA                              | TT                 | TT               | URR                           | 101492936          | ultraviolet-B receptor UVR8  |
| SNP_8244_A_10766997 | NC_021161.1    | Ca_Kabuli_Chr02 | 10766997                | CC                              | AA                 | AA               | INTERGENIC                    |                    |                              |
| SNP_8245_A_10767213 | NC_021161.1    | Ca_Kabuli_Chr02 | 10767213                | AA                              | GG                 | GG               | INTERGENIC                    |                    |                              |
| SNP_8246_A_10767437 | NC_021161.1    | Ca_Kabuli_Chr02 | 10767437                | CC                              | TT                 | TT               | INTERGENIC                    |                    |                              |
| SNP_8247_A_10767446 | NC_021161.1    | Ca_Kabuli_Chr02 | 10767446                | GG                              | AA                 | AA               | INTERGENIC                    |                    |                              |
| SNP_8248_A_10767447 | NC_021161.1    | Ca_Kabuli_Chr02 | 10767447                | GG                              | AA                 | AA               | INTERGENIC                    |                    |                              |
| SNP_8249_A_10767568 | NC_021161.1    | Ca_Kabuli_Chr02 | 10767568                | GG                              | AA                 | AA               | INTERGENIC                    |                    |                              |
| SNP_8250_A_10767569 | NC_021161.1    | Ca_Kabuli_Chr02 | 10767569                | AA                              | GG                 | GG               | INTERGENIC                    |                    |                              |
| SNP_8251_A_10767573 | NC_021161.1    | Ca_Kabuli_Chr02 | 10767573                | GG                              | AA                 | AA               | INTERGENIC                    |                    |                              |

| SNPs IDs            | Chromosome IDs | Chromosomes     | Physical positions (bp) | CDC Frontier (Reference genome) | (Pusa 1103 & HPNB) | (ILWC 46 & LPNB) | Sequence genome | Components of | Gene accession IDs | Putative functions |
|---------------------|----------------|-----------------|-------------------------|---------------------------------|--------------------|------------------|-----------------|---------------|--------------------|--------------------|
| SNP_8252_A_10767614 | NC_021161.1    | Ca_Kabuli_Chr02 | 10767614                | TT                              | CC                 | CC               | INTERGENIC      |               |                    |                    |
| SNP_8253_A_10767631 | NC_021161.1    | Ca_Kabuli_Chr02 | 10767631                | TT                              | AA                 | AA               | INTERGENIC      |               |                    |                    |
| SNP_8254_A_10777352 | NC_021161.1    | Ca_Kabuli_Chr02 | 10777352                | TT                              | CC                 | CC               | INTERGENIC      |               |                    |                    |
| SNP_8255_A_10777357 | NC_021161.1    | Ca_Kabuli_Chr02 | 10777357                | TT                              | CC                 | CC               | INTERGENIC      |               |                    |                    |
| SNP_8256_A_10777359 | NC_021161.1    | Ca_Kabuli_Chr02 | 10777359                | GG                              | AA                 | AA               | INTERGENIC      |               |                    |                    |
| SNP_8257_A_10777409 | NC_021161.1    | Ca_Kabuli_Chr02 | 10777409                | GG                              | AA                 | AA               | INTERGENIC      |               |                    |                    |
| SNP_8258_A_10777423 | NC_021161.1    | Ca_Kabuli_Chr02 | 10777423                | TT                              | GG                 | GG               | INTERGENIC      |               |                    |                    |
| SNP_8259_A_10777636 | NC_021161.1    | Ca_Kabuli_Chr02 | 10777636                | TT                              | CC                 | CC               | INTERGENIC      |               |                    |                    |
| SNP_8260_A_10777643 | NC_021161.1    | Ca_Kabuli_Chr02 | 10777643                | GG                              | TT                 | TT               | INTERGENIC      |               |                    |                    |
| SNP_8261_A_10778495 | NC_021161.1    | Ca_Kabuli_Chr02 | 10778495                | TT                              | CC                 | CC               | INTERGENIC      |               |                    |                    |
| SNP_8262_A_10778986 | NC_021161.1    | Ca_Kabuli_Chr02 | 10778986                | CC                              | TT                 | TT               | INTERGENIC      |               |                    |                    |
| SNP_8263_A_10779028 | NC_021161.1    | Ca_Kabuli_Chr02 | 10779028                | CC                              | TT                 | TT               | INTERGENIC      |               |                    |                    |
| SNP_8264_A_10779054 | NC_021161.1    | Ca_Kabuli_Chr02 | 10779054                | TT                              | CC                 | CC               | INTERGENIC      |               |                    |                    |
| SNP_8265_A_10779060 | NC_021161.1    | Ca_Kabuli_Chr02 | 10779060                | GG                              | AA                 | AA               | INTERGENIC      |               |                    |                    |
| SNP_8266_A_10779069 | NC_021161.1    | Ca_Kabuli_Chr02 | 10779069                | TT                              | CC                 | CC               | INTERGENIC      |               |                    |                    |
| SNP_8268_A_10779156 | NC_021161.1    | Ca_Kabuli_Chr02 | 10779156                | TT                              | CC                 | CC               | INTERGENIC      |               |                    |                    |
| SNP_8269_A_10779159 | NC_021161.1    | Ca_Kabuli_Chr02 | 10779159                | GG                              | AA                 | AA               | INTERGENIC      |               |                    |                    |
| SNP_8270_A_10779270 | NC_021161.1    | Ca_Kabuli_Chr02 | 10779270                | GG                              | TT                 | TT               | INTERGENIC      |               |                    |                    |
| SNP_8271_A_10779304 | NC_021161.1    | Ca_Kabuli_Chr02 | 10779304                | TT                              | AA                 | AA               | INTERGENIC      |               |                    |                    |
| SNP_8272_A_10779312 | NC_021161.1    | Ca_Kabuli_Chr02 | 10779312                | TT                              | CC                 | CC               | INTERGENIC      |               |                    |                    |
| SNP_8273_A_10779338 | NC_021161.1    | Ca_Kabuli_Chr02 | 10779338                | CC                              | TT                 | TT               | INTERGENIC      |               |                    |                    |
| SNP_8274_A_10779374 | NC_021161.1    | Ca_Kabuli_Chr02 | 10779374                | TT                              | CC                 | CC               | INTERGENIC      |               |                    |                    |



| SNPs IDs            | Chromosome IDs | Chromosomes     | Physical positions (bp) | CDC Frontier (Reference genome) | (Pusa 1103 & HPNB) | (ILWC 46 & LPNB) | Sequence Components of genome | Gene accession IDs | Putative functions           |
|---------------------|----------------|-----------------|-------------------------|---------------------------------|--------------------|------------------|-------------------------------|--------------------|------------------------------|
| SNP_8275_A_10779384 | NC_021161.1    | Ca_Kabuli_Chr02 | 10779384                | TT                              | CC                 | CC               | INTERGENIC                    |                    |                              |
| SNP_8276_A_10779528 | NC_021161.1    | Ca_Kabuli_Chr02 | 10779528                | CC                              | TT                 | TT               | INTERGENIC                    |                    |                              |
| SNP_8277_A_10779600 | NC_021161.1    | Ca_Kabuli_Chr02 | 10779600                | GG                              | CC                 | CC               | INTERGENIC                    |                    |                              |
| SNP_8278_A_10780048 | NC_021161.1    | Ca_Kabuli_Chr02 | 10780048                | TT                              | AA                 | AA               | INTERGENIC                    |                    |                              |
| SNP_8279_A_10789842 | NC_021161.1    | Ca_Kabuli_Chr02 | 10789842                | TT                              | CC                 | CC               | INTERGENIC                    |                    |                              |
| SNP_8280_A_10789973 | NC_021161.1    | Ca_Kabuli_Chr02 | 10789973                | AA                              | GG                 | GG               | INTERGENIC                    |                    |                              |
| SNP_8281_A_10790042 | NC_021161.1    | Ca_Kabuli_Chr02 | 10790042                | AA                              | GG                 | GG               | INTERGENIC                    |                    |                              |
| SNP_8282_A_10794596 | NC_021161.1    | Ca_Kabuli_Chr02 | 10794596                | GG                              | AA                 | AA               | INTERGENIC                    |                    |                              |
| SNP_8283_A_10794634 | NC_021161.1    | Ca_Kabuli_Chr02 | 10794634                | AA                              | TT                 | TT               | INTERGENIC                    |                    |                              |
| SNP_8284_A_10794943 | NC_021161.1    | Ca_Kabuli_Chr02 | 10794943                | AA                              | TT                 | TT               | INTERGENIC                    |                    |                              |
| SNP_8285_A_10795042 | NC_021161.1    | Ca_Kabuli_Chr02 | 10795042                | TT                              | CC                 | CC               | INTERGENIC                    |                    |                              |
| SNP_8286_A_10795817 | NC_021161.1    | Ca_Kabuli_Chr02 | 10795817                | CC                              | TT                 | TT               | INTERGENIC                    |                    |                              |
| SNP_8287_A_10795820 | NC_021161.1    | Ca_Kabuli_Chr02 | 10795820                | AA                              | GG                 | GG               | INTERGENIC                    |                    |                              |
| SNP_8288_A_10796699 | NC_021161.1    | Ca_Kabuli_Chr02 | 10796699                | GG                              | AA                 | AA               | INTERGENIC                    |                    |                              |
| SNP_8289_A_10809971 | NC_021161.1    | Ca_Kabuli_Chr02 | 10809971                | AA                              | GG                 | GG               | INTERGENIC                    |                    |                              |
| SNP_8290_A_10823190 | NC_021161.1    | Ca_Kabuli_Chr02 | 10823190                | AA                              | CC                 | CC               | NON_SYNONYMOUS_CODING         | 101498803          | uncharacterized LOC101498803 |
| SNP_8291_A_10834714 | NC_021161.1    | Ca_Kabuli_Chr02 | 10834714                | CC                              | TT                 | TT               | INTERGENIC                    |                    |                              |
| SNP_8292_A_10834756 | NC_021161.1    | Ca_Kabuli_Chr02 | 10834756                | TT                              | CC                 | CC               | INTERGENIC                    |                    |                              |
| SNP_8293_A_10834792 | NC_021161.1    | Ca_Kabuli_Chr02 | 10834792                | TT                              | CC                 | CC               | INTERGENIC                    |                    |                              |
| SNP_8294_A_10834801 | NC_021161.1    | Ca_Kabuli_Chr02 | 10834801                | GG                              | AA                 | AA               | INTERGENIC                    |                    |                              |
| SNP_8295_A_10834837 | NC_021161.1    | Ca_Kabuli_Chr02 | 10834837                | CC                              | TT                 | TT               | INTERGENIC                    |                    |                              |
| SNP_8296_A_10834846 | NC_021161.1    | Ca_Kabuli_Chr02 | 10834846                | TT                              | CC                 | CC               | INTERGENIC                    |                    |                              |

| SNPs IDs            | Chromosome IDs | Chromosomes     | Physical positions (bp) | CDC Frontier genome (Reference genome) | (Pusa 1103 & HPNB) | (ILWC 46 & LPNB) | Sequence genome | Components of | Gene accession IDs | Putative functions |
|---------------------|----------------|-----------------|-------------------------|----------------------------------------|--------------------|------------------|-----------------|---------------|--------------------|--------------------|
| SNP_8297_A_10834867 | NC_021161.1    | Ca_Kabuli_Chr02 | 10834867                | CC                                     | TT                 | TT               | INTERGENIC      |               |                    |                    |
| SNP_8298_A_10834879 | NC_021161.1    | Ca_Kabuli_Chr02 | 10834879                | TT                                     | CC                 | CC               | INTERGENIC      |               |                    |                    |
| SNP_8299_A_10834882 | NC_021161.1    | Ca_Kabuli_Chr02 | 10834882                | GG                                     | AA                 | AA               | INTERGENIC      |               |                    |                    |
| SNP_8300_A_10834891 | NC_021161.1    | Ca_Kabuli_Chr02 | 10834891                | TT                                     | CC                 | CC               | INTERGENIC      |               |                    |                    |
| SNP_8301_A_10834957 | NC_021161.1    | Ca_Kabuli_Chr02 | 10834957                | TT                                     | CC                 | CC               | INTERGENIC      |               |                    |                    |
| SNP_8302_A_10835017 | NC_021161.1    | Ca_Kabuli_Chr02 | 10835017                | AA                                     | GG                 | GG               | INTERGENIC      |               |                    |                    |
| SNP_8303_A_10835065 | NC_021161.1    | Ca_Kabuli_Chr02 | 10835065                | TT                                     | CC                 | CC               | INTERGENIC      |               |                    |                    |
| SNP_8304_A_10835113 | NC_021161.1    | Ca_Kabuli_Chr02 | 10835113                | GG                                     | AA                 | AA               | INTERGENIC      |               |                    |                    |
| SNP_8305_A_10835167 | NC_021161.1    | Ca_Kabuli_Chr02 | 10835167                | TT                                     | CC                 | CC               | INTERGENIC      |               |                    |                    |
| SNP_8306_A_10835173 | NC_021161.1    | Ca_Kabuli_Chr02 | 10835173                | CC                                     | TT                 | TT               | INTERGENIC      |               |                    |                    |
| SNP_8307_A_10835179 | NC_021161.1    | Ca_Kabuli_Chr02 | 10835179                | AA                                     | GG                 | GG               | INTERGENIC      |               |                    |                    |
| SNP_8308_A_10840879 | NC_021161.1    | Ca_Kabuli_Chr02 | 10840879                | AA                                     | GG                 | GG               | INTERGENIC      |               |                    |                    |
| SNP_8309_A_10840939 | NC_021161.1    | Ca_Kabuli_Chr02 | 10840939                | AA                                     | GG                 | GG               | INTERGENIC      |               |                    |                    |
| SNP_8310_A_10840950 | NC_021161.1    | Ca_Kabuli_Chr02 | 10840950                | GG                                     | AA                 | AA               | INTERGENIC      |               |                    |                    |
| SNP_8311_A_10850021 | NC_021161.1    | Ca_Kabuli_Chr02 | 10850021                | AA                                     | CC                 | CC               | INTERGENIC      |               |                    |                    |
| SNP_8312_A_10851085 | NC_021161.1    | Ca_Kabuli_Chr02 | 10851085                | GG                                     | AA                 | AA               | INTERGENIC      |               |                    |                    |
| SNP_8313_A_10851271 | NC_021161.1    | Ca_Kabuli_Chr02 | 10851271                | GG                                     | AA                 | AA               | INTERGENIC      |               |                    |                    |
| SNP_8315_A_10878855 | NC_021161.1    | Ca_Kabuli_Chr02 | 10878855                | AA                                     | GG                 | GG               | INTERGENIC      |               |                    |                    |
| SNP_8316_A_10878921 | NC_021161.1    | Ca_Kabuli_Chr02 | 10878921                | AA                                     | GG                 | GG               | INTERGENIC      |               |                    |                    |
| SNP_8317_A_10880648 | NC_021161.1    | Ca_Kabuli_Chr02 | 10880648                | TT                                     | CC                 | CC               | INTERGENIC      |               |                    |                    |
| SNP_8318_A_10893974 | NC_021161.1    | Ca_Kabuli_Chr02 | 10893974                | TT                                     | CC                 | CC               | INTERGENIC      |               |                    |                    |
| SNP_8319_A_10894291 | NC_021161.1    | Ca_Kabuli_Chr02 | 10894291                | TT                                     | CC                 | CC               | INTERGENIC      |               |                    |                    |

| SNPs IDs            | Chromosome IDs | Chromosomes     | Physical positions (bp) | CDC Frontier (Reference genome) | (Pusa 1103 & HPNB) | (ILWC 46 & LPNB) | Sequence genome | Components of | Gene accession IDs | Putative functions |
|---------------------|----------------|-----------------|-------------------------|---------------------------------|--------------------|------------------|-----------------|---------------|--------------------|--------------------|
| SNP_8320_A_10894299 | NC_021161.1    | Ca_Kabuli_Chr02 | 10894299                | TT                              | CC                 | CC               | INTERGENIC      |               |                    |                    |
| SNP_8321_A_10894374 | NC_021161.1    | Ca_Kabuli_Chr02 | 10894374                | TT                              | CC                 | CC               | INTERGENIC      |               |                    |                    |
| SNP_8322_A_10896405 | NC_021161.1    | Ca_Kabuli_Chr02 | 10896405                | GG                              | AA                 | AA               | INTERGENIC      |               |                    |                    |
| SNP_8323_A_10896412 | NC_021161.1    | Ca_Kabuli_Chr02 | 10896412                | CC                              | TT                 | TT               | INTERGENIC      |               |                    |                    |
| SNP_8324_A_10904384 | NC_021161.1    | Ca_Kabuli_Chr02 | 10904384                | CC                              | GG                 | GG               | INTERGENIC      |               |                    |                    |
| SNP_8325_A_10905352 | NC_021161.1    | Ca_Kabuli_Chr02 | 10905352                | GG                              | AA                 | AA               | INTERGENIC      |               |                    |                    |
| SNP_8328_A_11010144 | NC_021161.1    | Ca_Kabuli_Chr02 | 11010144                | CC                              | AA                 | AA               | INTERGENIC      |               |                    |                    |
| SNP_8329_A_11010146 | NC_021161.1    | Ca_Kabuli_Chr02 | 11010146                | GG                              | AA                 | AA               | INTERGENIC      |               |                    |                    |
| SNP_8330_A_11010275 | NC_021161.1    | Ca_Kabuli_Chr02 | 11010275                | TT                              | AA                 | AA               | INTERGENIC      |               |                    |                    |
| SNP_8331_A_11031144 | NC_021161.1    | Ca_Kabuli_Chr02 | 11031144                | GG                              | TT                 | TT               | INTERGENIC      |               |                    |                    |
| SNP_8332_A_11031221 | NC_021161.1    | Ca_Kabuli_Chr02 | 11031221                | AA                              | CC                 | CC               | INTERGENIC      |               |                    |                    |
| SNP_8333_A_11055805 | NC_021161.1    | Ca_Kabuli_Chr02 | 11055805                | AA                              | TT                 | TT               | INTERGENIC      |               |                    |                    |
| SNP_8334_A_11055863 | NC_021161.1    | Ca_Kabuli_Chr02 | 11055863                | GG                              | AA                 | AA               | INTERGENIC      |               |                    |                    |
| SNP_8335_A_11056104 | NC_021161.1    | Ca_Kabuli_Chr02 | 11056104                | AA                              | GG                 | GG               | INTERGENIC      |               |                    |                    |
| SNP_8336_A_11056114 | NC_021161.1    | Ca_Kabuli_Chr02 | 11056114                | TT                              | CC                 | CC               | INTERGENIC      |               |                    |                    |
| SNP_8337_A_11056205 | NC_021161.1    | Ca_Kabuli_Chr02 | 11056205                | AA                              | GG                 | GG               | INTERGENIC      |               |                    |                    |
| SNP_8338_A_11056210 | NC_021161.1    | Ca_Kabuli_Chr02 | 11056210                | TT                              | AA                 | AA               | INTERGENIC      |               |                    |                    |
| SNP_8339_A_11056215 | NC_021161.1    | Ca_Kabuli_Chr02 | 11056215                | AA                              | GG                 | GG               | INTERGENIC      |               |                    |                    |
| SNP_8340_A_11056299 | NC_021161.1    | Ca_Kabuli_Chr02 | 11056299                | AA                              | GG                 | GG               | INTERGENIC      |               |                    |                    |
| SNP_8341_A_11056309 | NC_021161.1    | Ca_Kabuli_Chr02 | 11056309                | AA                              | GG                 | GG               | INTERGENIC      |               |                    |                    |
| SNP_8342_A_11056315 | NC_021161.1    | Ca_Kabuli_Chr02 | 11056315                | TT                              | CC                 | CC               | INTERGENIC      |               |                    |                    |
| SNP_8343_A_11056356 | NC_021161.1    | Ca_Kabuli_Chr02 | 11056356                | AA                              | TT                 | TT               | INTERGENIC      |               |                    |                    |

| SNPs IDs            | Chromosome IDs | Chromosomes     | Physical positions (bp) | CDC Frontier genome (Reference genome) | (Pusa 1103 & HPNB) | (ILWC 46 & LPNB) | Sequence genome | Components of | Gene accession IDs | Putative functions |
|---------------------|----------------|-----------------|-------------------------|----------------------------------------|--------------------|------------------|-----------------|---------------|--------------------|--------------------|
| SNP_8344_A_11056375 | NC_021161.1    | Ca_Kabuli_Chr02 | 11056375                | GG                                     | AA                 | AA               | INTERGENIC      |               |                    |                    |
| SNP_8345_A_11061813 | NC_021161.1    | Ca_Kabuli_Chr02 | 11061813                | TT                                     | AA                 | AA               | INTERGENIC      |               |                    |                    |
| SNP_8346_A_11063567 | NC_021161.1    | Ca_Kabuli_Chr02 | 11063567                | CC                                     | AA                 | AA               | INTERGENIC      |               |                    |                    |
| SNP_8347_A_11063568 | NC_021161.1    | Ca_Kabuli_Chr02 | 11063568                | TT                                     | AA                 | AA               | INTERGENIC      |               |                    |                    |
| SNP_8348_A_11063613 | NC_021161.1    | Ca_Kabuli_Chr02 | 11063613                | TT                                     | CC                 | CC               | INTERGENIC      |               |                    |                    |
| SNP_8349_A_11063643 | NC_021161.1    | Ca_Kabuli_Chr02 | 11063643                | CC                                     | AA                 | AA               | INTERGENIC      |               |                    |                    |
| SNP_8350_A_11106050 | NC_021161.1    | Ca_Kabuli_Chr02 | 11106050                | TT                                     | AA                 | AA               | INTERGENIC      |               |                    |                    |
| SNP_8351_A_11109122 | NC_021161.1    | Ca_Kabuli_Chr02 | 11109122                | GG                                     | AA                 | AA               | INTERGENIC      |               |                    |                    |
| SNP_8352_A_11128224 | NC_021161.1    | Ca_Kabuli_Chr02 | 11128224                | TT                                     | CC                 | CC               | INTERGENIC      |               |                    |                    |
| SNP_8353_A_11128228 | NC_021161.1    | Ca_Kabuli_Chr02 | 11128228                | TT                                     | AA                 | AA               | INTERGENIC      |               |                    |                    |
| SNP_8354_A_11144035 | NC_021161.1    | Ca_Kabuli_Chr02 | 11144035                | AA                                     | GG                 | GG               | INTERGENIC      |               |                    |                    |
| SNP_8355_A_11144068 | NC_021161.1    | Ca_Kabuli_Chr02 | 11144068                | TT                                     | CC                 | CC               | INTERGENIC      |               |                    |                    |
| SNP_8356_A_11144093 | NC_021161.1    | Ca_Kabuli_Chr02 | 11144093                | GG                                     | AA                 | AA               | INTERGENIC      |               |                    |                    |
| SNP_8357_A_11144114 | NC_021161.1    | Ca_Kabuli_Chr02 | 11144114                | TT                                     | CC                 | CC               | INTERGENIC      |               |                    |                    |
| SNP_8358_A_11144153 | NC_021161.1    | Ca_Kabuli_Chr02 | 11144153                | TT                                     | CC                 | CC               | INTERGENIC      |               |                    |                    |
| SNP_8359_A_11144181 | NC_021161.1    | Ca_Kabuli_Chr02 | 11144181                | AA                                     | GG                 | GG               | INTERGENIC      |               |                    |                    |
| SNP_8360_A_11144339 | NC_021161.1    | Ca_Kabuli_Chr02 | 11144339                | AA                                     | GG                 | GG               | INTERGENIC      |               |                    |                    |
| SNP_8361_A_11195496 | NC_021161.1    | Ca_Kabuli_Chr02 | 11195496                | CC                                     | TT                 | TT               | INTERGENIC      |               |                    |                    |
| SNP_8363_A_11239855 | NC_021161.1    | Ca_Kabuli_Chr02 | 11239855                | AA                                     | GG                 | GG               | INTERGENIC      |               |                    |                    |
| SNP_8364_A_11240139 | NC_021161.1    | Ca_Kabuli_Chr02 | 11240139                | GG                                     | TT                 | TT               | INTERGENIC      |               |                    |                    |
| SNP_8365_A_11240143 | NC_021161.1    | Ca_Kabuli_Chr02 | 11240143                | GG                                     | AA                 | AA               | INTERGENIC      |               |                    |                    |
| SNP_8367_A_11242396 | NC_021161.1    | Ca_Kabuli_Chr02 | 11242396                | AA                                     | GG                 | GG               | INTERGENIC      |               |                    |                    |

| SNPs IDs            | Chromosome IDs | Chromosomes     | Physical positions (bp) | CDC Frontier genome (Reference genome) | (Pusa 1103 & HPNB) | (ILWC 46 & LPNB) | Sequence Components of genome | Gene accession IDs | Putative functions                 |
|---------------------|----------------|-----------------|-------------------------|----------------------------------------|--------------------|------------------|-------------------------------|--------------------|------------------------------------|
| SNP_8368_A_11246336 | NC_021161.1    | Ca_Kabuli_Chr02 | 11246336                | TT                                     | GG                 | GG               | INTERGENIC                    |                    |                                    |
| SNP_8369_A_11246358 | NC_021161.1    | Ca_Kabuli_Chr02 | 11246358                | AA                                     | GG                 | GG               | INTERGENIC                    |                    |                                    |
| SNP_8370_A_11246385 | NC_021161.1    | Ca_Kabuli_Chr02 | 11246385                | CC                                     | TT                 | TT               | INTERGENIC                    |                    |                                    |
| SNP_8371_A_11246576 | NC_021161.1    | Ca_Kabuli_Chr02 | 11246576                | TT                                     | CC                 | CC               | INTERGENIC                    |                    |                                    |
| SNP_8372_A_11246612 | NC_021161.1    | Ca_Kabuli_Chr02 | 11246612                | AA                                     | GG                 | GG               | INTERGENIC                    |                    |                                    |
| SNP_8373_A_11246915 | NC_021161.1    | Ca_Kabuli_Chr02 | 11246915                | TT                                     | GG                 | GG               | INTERGENIC                    |                    |                                    |
| SNP_8374_A_11363905 | NC_021161.1    | Ca_Kabuli_Chr02 | 11363905                | GG                                     | AA                 | AA               | INTERGENIC                    |                    |                                    |
| SNP_8375_A_11398170 | NC_021161.1    | Ca_Kabuli_Chr02 | 11398170                | CC                                     | TT                 | TT               | INTERGENIC                    |                    |                                    |
| SNP_8376_A_11507000 | NC_021161.1    | Ca_Kabuli_Chr02 | 11507000                | CC                                     | TT                 | TT               | INTERGENIC                    |                    |                                    |
| SNP_8377_A_11535694 | NC_021161.1    | Ca_Kabuli_Chr02 | 11535694                | GG                                     | TT                 | TT               | INTERGENIC                    |                    |                                    |
| SNP_8378_A_11536047 | NC_021161.1    | Ca_Kabuli_Chr02 | 11536047                | TT                                     | CC                 | CC               | INTERGENIC                    |                    |                                    |
| SNP_8379_A_11539468 | NC_021161.1    | Ca_Kabuli_Chr02 | 11539468                | CC                                     | AA                 | AA               | INTERGENIC                    |                    |                                    |
| SNP_8380_A_11611169 | NC_021161.1    | Ca_Kabuli_Chr02 | 11611169                | TT                                     | CC                 | CC               | URR                           | 101508608          | transcriptional activator Myb-like |
| SNP_8383_A_11671192 | NC_021161.1    | Ca_Kabuli_Chr02 | 11671192                | CC                                     | TT                 | TT               | INTERGENIC                    |                    |                                    |
| SNP_8384_A_11671404 | NC_021161.1    | Ca_Kabuli_Chr02 | 11671404                | TT                                     | CC                 | CC               | INTERGENIC                    |                    |                                    |
| SNP_8385_A_11671632 | NC_021161.1    | Ca_Kabuli_Chr02 | 11671632                | GG                                     | AA                 | AA               | INTERGENIC                    |                    |                                    |
| SNP_8386_A_11671642 | NC_021161.1    | Ca_Kabuli_Chr02 | 11671642                | AA                                     | GG                 | GG               | INTERGENIC                    |                    |                                    |
| SNP_8387_A_11686699 | NC_021161.1    | Ca_Kabuli_Chr02 | 11686699                | GG                                     | AA                 | AA               | URR                           | 101509999          | binding partner of ACD11.1         |
| SNP_8389_A_11722912 | NC_021161.1    | Ca_Kabuli_Chr02 | 11722912                | TT                                     | AA                 | AA               | INTERGENIC                    |                    |                                    |
| SNP_8390_A_11726208 | NC_021161.1    | Ca_Kabuli_Chr02 | 11726208                | CC                                     | AA                 | AA               | INTRON                        | 101492937          | uncharacterized LOC101492937       |
| SNP_8391_A_11726460 | NC_021161.1    | Ca_Kabuli_Chr02 | 11726460                | AA                                     | TT                 | TT               | INTRON                        | 101492937          | uncharacterized LOC101492937       |
| SNP_8392_A_11728372 | NC_021161.1    | Ca_Kabuli_Chr02 | 11728372                | CC                                     | TT                 | TT               | URR                           | 101492937          | uncharacterized LOC101492937       |

| SNPs IDs            | Chromosome IDs | Chromosomes     | Physical positions (bp) | CDC Frontier (Reference genome) | (Pusa 1103 & HPNB) | (ILWC 46 & LPNB) | Sequence Components of genome | Gene accession IDs | Putative functions           |
|---------------------|----------------|-----------------|-------------------------|---------------------------------|--------------------|------------------|-------------------------------|--------------------|------------------------------|
| SNP_8393_A_11728460 | NC_021161.1    | Ca_Kabuli_Chr02 | 11728460                | TT                              | GG                 | GG               | URR                           | 101492937          | uncharacterized LOC101492937 |
| SNP_8394_A_11769132 | NC_021161.1    | Ca_Kabuli_Chr02 | 11769132                | CC                              | TT                 | TT               | INTERGENIC                    |                    |                              |
| SNP_8395_A_11783988 | NC_021161.1    | Ca_Kabuli_Chr02 | 11783988                | AA                              | CC                 | CC               | INTERGENIC                    |                    |                              |
| SNP_8396_A_11786744 | NC_021161.1    | Ca_Kabuli_Chr02 | 11786744                | TT                              | AA                 | AA               | INTERGENIC                    |                    |                              |
| SNP_8397_A_11787137 | NC_021161.1    | Ca_Kabuli_Chr02 | 11787137                | TT                              | GG                 | GG               | INTERGENIC                    |                    |                              |
| SNP_8398_A_11787198 | NC_021161.1    | Ca_Kabuli_Chr02 | 11787198                | AA                              | GG                 | GG               | INTERGENIC                    |                    |                              |
| SNP_8399_A_11815119 | NC_021161.1    | Ca_Kabuli_Chr02 | 11815119                | GG                              | AA                 | AA               | INTERGENIC                    |                    |                              |
| SNP_8400_A_11830657 | NC_021161.1    | Ca_Kabuli_Chr02 | 11830657                | CC                              | TT                 | TT               | INTERGENIC                    |                    |                              |
| SNP_8401_A_11896134 | NC_021161.1    | Ca_Kabuli_Chr02 | 11896134                | TT                              | AA                 | AA               | INTERGENIC                    |                    |                              |
| SNP_8402_A_11897400 | NC_021161.1    | Ca_Kabuli_Chr02 | 11897400                | TT                              | CC                 | CC               | INTERGENIC                    |                    |                              |
| SNP_8403_A_11940829 | NC_021161.1    | Ca_Kabuli_Chr02 | 11940829                | TT                              | AA                 | AA               | INTERGENIC                    |                    |                              |
| SNP_8404_A_11950101 | NC_021161.1    | Ca_Kabuli_Chr02 | 11950101                | GG                              | AA                 | AA               | INTERGENIC                    |                    |                              |
| SNP_8405_A_12040143 | NC_021161.1    | Ca_Kabuli_Chr02 | 12040143                | GG                              | TT                 | TT               | INTERGENIC                    |                    |                              |
| SNP_8406_A_12040168 | NC_021161.1    | Ca_Kabuli_Chr02 | 12040168                | TT                              | AA                 | AA               | INTERGENIC                    |                    |                              |
| SNP_8408_A_12040288 | NC_021161.1    | Ca_Kabuli_Chr02 | 12040288                | CC                              | TT                 | TT               | INTERGENIC                    |                    |                              |
| SNP_8409_A_12040331 | NC_021161.1    | Ca_Kabuli_Chr02 | 12040331                | AA                              | GG                 | GG               | INTERGENIC                    |                    |                              |
| SNP_8410_A_12040406 | NC_021161.1    | Ca_Kabuli_Chr02 | 12040406                | AA                              | TT                 | TT               | INTERGENIC                    |                    |                              |
| SNP_8411_A_12040465 | NC_021161.1    | Ca_Kabuli_Chr02 | 12040465                | AA                              | TT                 | TT               | INTERGENIC                    |                    |                              |
| SNP_8412_A_12040471 | NC_021161.1    | Ca_Kabuli_Chr02 | 12040471                | TT                              | AA                 | AA               | INTERGENIC                    |                    |                              |
| SNP_8413_A_12040480 | NC_021161.1    | Ca_Kabuli_Chr02 | 12040480                | AA                              | TT                 | TT               | INTERGENIC                    |                    |                              |
| SNP_8414_A_12040488 | NC_021161.1    | Ca_Kabuli_Chr02 | 12040488                | AA                              | TT                 | TT               | INTERGENIC                    |                    |                              |
| SNP_8416_A_12040578 | NC_021161.1    | Ca_Kabuli_Chr02 | 12040578                | AA                              | TT                 | TT               | INTERGENIC                    |                    |                              |

| SNPs IDs            | Chromosome IDs | Chromosomes     | Physical positions (bp) | CDC Frontier (Reference genome) | (Pusa 1103 & HPNB) | (ILWC 46 & LPNB) | Sequence genome | Components of | Gene accession IDs | Putative functions |
|---------------------|----------------|-----------------|-------------------------|---------------------------------|--------------------|------------------|-----------------|---------------|--------------------|--------------------|
| SNP_8417_A_12040608 | NC_021161.1    | Ca_Kabuli_Chr02 | 12040608                | AA                              | GG                 | GG               | INTERGENIC      |               |                    |                    |
| SNP_8418_A_12040614 | NC_021161.1    | Ca_Kabuli_Chr02 | 12040614                | CC                              | AA                 | AA               | INTERGENIC      |               |                    |                    |
| SNP_8419_A_12041119 | NC_021161.1    | Ca_Kabuli_Chr02 | 12041119                | TT                              | CC                 | CC               | INTERGENIC      |               |                    |                    |
| SNP_8420_A_12041529 | NC_021161.1    | Ca_Kabuli_Chr02 | 12041529                | GG                              | AA                 | AA               | INTERGENIC      |               |                    |                    |
| SNP_8421_A_12041583 | NC_021161.1    | Ca_Kabuli_Chr02 | 12041583                | TT                              | CC                 | CC               | INTERGENIC      |               |                    |                    |
| SNP_8422_A_12041593 | NC_021161.1    | Ca_Kabuli_Chr02 | 12041593                | CC                              | GG                 | GG               | INTERGENIC      |               |                    |                    |
| SNP_8423_A_12041627 | NC_021161.1    | Ca_Kabuli_Chr02 | 12041627                | TT                              | CC                 | CC               | INTERGENIC      |               |                    |                    |
| SNP_8424_A_12041729 | NC_021161.1    | Ca_Kabuli_Chr02 | 12041729                | GG                              | AA                 | AA               | INTERGENIC      |               |                    |                    |
| SNP_8425_A_12041778 | NC_021161.1    | Ca_Kabuli_Chr02 | 12041778                | CC                              | TT                 | TT               | INTERGENIC      |               |                    |                    |
| SNP_8426_A_12041789 | NC_021161.1    | Ca_Kabuli_Chr02 | 12041789                | CC                              | GG                 | GG               | INTERGENIC      |               |                    |                    |
| SNP_8427_A_12041794 | NC_021161.1    | Ca_Kabuli_Chr02 | 12041794                | CC                              | TT                 | TT               | INTERGENIC      |               |                    |                    |
| SNP_8428_A_12041886 | NC_021161.1    | Ca_Kabuli_Chr02 | 12041886                | CC                              | AA                 | AA               | INTERGENIC      |               |                    |                    |
| SNP_8429_A_12041951 | NC_021161.1    | Ca_Kabuli_Chr02 | 12041951                | TT                              | CC                 | CC               | INTERGENIC      |               |                    |                    |
| SNP_8430_A_12042070 | NC_021161.1    | Ca_Kabuli_Chr02 | 12042070                | TT                              | CC                 | CC               | INTERGENIC      |               |                    |                    |
| SNP_8431_A_12042071 | NC_021161.1    | Ca_Kabuli_Chr02 | 12042071                | CC                              | AA                 | AA               | INTERGENIC      |               |                    |                    |
| SNP_8432_A_12048433 | NC_021161.1    | Ca_Kabuli_Chr02 | 12048433                | TT                              | CC                 | CC               | INTERGENIC      |               |                    |                    |
| SNP_8433_A_12048443 | NC_021161.1    | Ca_Kabuli_Chr02 | 12048443                | GG                              | AA                 | AA               | INTERGENIC      |               |                    |                    |
| SNP_8434_A_12048453 | NC_021161.1    | Ca_Kabuli_Chr02 | 12048453                | TT                              | AA                 | AA               | INTERGENIC      |               |                    |                    |
| SNP_8435_A_12048552 | NC_021161.1    | Ca_Kabuli_Chr02 | 12048552                | TT                              | CC                 | CC               | INTERGENIC      |               |                    |                    |
| SNP_8436_A_12048553 | NC_021161.1    | Ca_Kabuli_Chr02 | 12048553                | CC                              | AA                 | AA               | INTERGENIC      |               |                    |                    |
| SNP_8437_A_12048571 | NC_021161.1    | Ca_Kabuli_Chr02 | 12048571                | CC                              | TT                 | TT               | INTERGENIC      |               |                    |                    |
| SNP_8439_A_12048735 | NC_021161.1    | Ca_Kabuli_Chr02 | 12048735                | TT                              | AA                 | AA               | INTERGENIC      |               |                    |                    |

| SNPs IDs            | Chromosome IDs | Chromosomes     | Physical positions (bp) | CDC Frontier (Reference genome) | (Pusa 1103 & HPNB) | (ILWC 46 & LPNB) | Sequence Components of genome | Gene accession IDs | Putative functions                                        |
|---------------------|----------------|-----------------|-------------------------|---------------------------------|--------------------|------------------|-------------------------------|--------------------|-----------------------------------------------------------|
| SNP_8440_A_12048736 | NC_021161.1    | Ca_Kabuli_Chr02 | 12048736                | TT                              | AA                 | AA               | INTERGENIC                    |                    |                                                           |
| SNP_8441_A_12048759 | NC_021161.1    | Ca_Kabuli_Chr02 | 12048759                | CC                              | TT                 | TT               | INTERGENIC                    |                    |                                                           |
| SNP_8442_A_12071720 | NC_021161.1    | Ca_Kabuli_Chr02 | 12071720                | GG                              | AA                 | AA               | INTERGENIC                    |                    |                                                           |
| SNP_8443_A_12114602 | NC_021161.1    | Ca_Kabuli_Chr02 | 12114602                | AA                              | GG                 | GG               | INTERGENIC                    |                    |                                                           |
| SNP_8444_A_12116765 | NC_021161.1    | Ca_Kabuli_Chr02 | 12116765                | GG                              | AA                 | AA               | INTERGENIC                    |                    |                                                           |
| SNP_8445_A_12128653 | NC_021161.1    | Ca_Kabuli_Chr02 | 12128653                | AA                              | GG                 | GG               | INTERGENIC                    |                    |                                                           |
| SNP_8446_A_12220454 | NC_021161.1    | Ca_Kabuli_Chr02 | 12220454                | GG                              | TT                 | TT               | INTRON                        | 101509885          | glutathione S-transferase U10-like                        |
| SNP_8447_A_12220529 | NC_021161.1    | Ca_Kabuli_Chr02 | 12220529                | AA                              | GG                 | GG               | INTRON                        | 101509885          | glutathione S-transferase U10-like                        |
| SNP_8448_A_12220537 | NC_021161.1    | Ca_Kabuli_Chr02 | 12220537                | TT                              | GG                 | GG               | INTRON                        | 101509885          | glutathione S-transferase U10-like                        |
| SNP_8449_A_12220549 | NC_021161.1    | Ca_Kabuli_Chr02 | 12220549                | AA                              | GG                 | GG               | INTRON                        | 101509885          | glutathione S-transferase U10-like                        |
| SNP_8450_A_12221306 | NC_021161.1    | Ca_Kabuli_Chr02 | 12221306                | TT                              | CC                 | CC               | INTRON                        | 101509885          | glutathione S-transferase U10-like                        |
| SNP_8451_A_12261576 | NC_021161.1    | Ca_Kabuli_Chr02 | 12261576                | CC                              | TT                 | TT               | INTERGENIC                    |                    |                                                           |
| SNP_8452_A_12303588 | NC_021161.1    | Ca_Kabuli_Chr02 | 12303588                | CC                              | TT                 | TT               | INTERGENIC                    |                    |                                                           |
| SNP_8454_A_12310529 | NC_021161.1    | Ca_Kabuli_Chr02 | 12310529                | AA                              | GG                 | GG               | INTERGENIC                    |                    |                                                           |
| SNP_8455_A_12321229 | NC_021161.1    | Ca_Kabuli_Chr02 | 12321229                | TT                              | CC                 | CC               | INTRON                        | 101497674          | acetolactate synthase small subunit 2, chloroplastic-like |
| SNP_8456_A_12321261 | NC_021161.1    | Ca_Kabuli_Chr02 | 12321261                | CC                              | TT                 | TT               | INTRON                        | 101497674          | acetolactate synthase small subunit 2, chloroplastic-like |
| SNP_8457_A_12326658 | NC_021161.1    | Ca_Kabuli_Chr02 | 12326658                | AA                              | GG                 | GG               | DRR                           | 101510202          | sugar transport protein 14-like                           |
| SNP_8458_A_12326757 | NC_021161.1    | Ca_Kabuli_Chr02 | 12326757                | CC                              | TT                 | TT               | DRR                           | 101510202          | sugar transport protein 14-like                           |
| SNP_8459_A_12326927 | NC_021161.1    | Ca_Kabuli_Chr02 | 12326927                | AA                              | GG                 | GG               | DRR                           | 101510202          | sugar transport protein 14-like                           |
| SNP_8460_A_12326986 | NC_021161.1    | Ca_Kabuli_Chr02 | 12326986                | GG                              | AA                 | AA               | DRR                           | 101510202          | sugar transport protein 14-like                           |
| SNP_8461_A_12327040 | NC_021161.1    | Ca_Kabuli_Chr02 | 12327040                | AA                              | GG                 | GG               | DRR                           | 101510202          | sugar transport protein 14-like                           |
| SNP_8462_A_12333162 | NC_021161.1    | Ca_Kabuli_Chr02 | 12333162                | AA                              | TT                 | TT               | INTERGENIC                    |                    |                                                           |



| SNPs IDs            | Chromosome IDs | Chromosomes     | Physical positions (bp) | CDC Frontier genome (Reference genome) | (Pusa 1103 & HPNB) | (ILWC 46 & LPNB) | Sequence genome | Components of | Gene accession IDs                | Putative functions |
|---------------------|----------------|-----------------|-------------------------|----------------------------------------|--------------------|------------------|-----------------|---------------|-----------------------------------|--------------------|
| SNP_8463_A_12333163 | NC_021161.1    | Ca_Kabuli_Chr02 | 12333163                | TT                                     | CC                 | CC               | INTERGENIC      |               |                                   |                    |
| SNP_8464_A_12333259 | NC_021161.1    | Ca_Kabuli_Chr02 | 12333259                | TT                                     | GG                 | GG               | INTERGENIC      |               |                                   |                    |
| SNP_8466_A_12380121 | NC_021161.1    | Ca_Kabuli_Chr02 | 12380121                | TT                                     | CC                 | CC               | INTERGENIC      |               |                                   |                    |
| SNP_8467_A_12380198 | NC_021161.1    | Ca_Kabuli_Chr02 | 12380198                | TT                                     | CC                 | CC               | INTERGENIC      |               |                                   |                    |
| SNP_8468_A_12380209 | NC_021161.1    | Ca_Kabuli_Chr02 | 12380209                | TT                                     | CC                 | CC               | INTERGENIC      |               |                                   |                    |
| SNP_8470_A_12380263 | NC_021161.1    | Ca_Kabuli_Chr02 | 12380263                | AA                                     | GG                 | GG               | INTERGENIC      |               |                                   |                    |
| SNP_8471_A_12380293 | NC_021161.1    | Ca_Kabuli_Chr02 | 12380293                | GG                                     | AA                 | AA               | INTERGENIC      |               |                                   |                    |
| SNP_8472_A_12380295 | NC_021161.1    | Ca_Kabuli_Chr02 | 12380295                | GG                                     | CC                 | CC               | INTERGENIC      |               |                                   |                    |
| SNP_8473_A_12380303 | NC_021161.1    | Ca_Kabuli_Chr02 | 12380303                | CC                                     | TT                 | TT               | INTERGENIC      |               |                                   |                    |
| SNP_8474_A_12380323 | NC_021161.1    | Ca_Kabuli_Chr02 | 12380323                | TT                                     | CC                 | CC               | INTERGENIC      |               |                                   |                    |
| SNP_8475_A_12380339 | NC_021161.1    | Ca_Kabuli_Chr02 | 12380339                | AA                                     | GG                 | GG               | INTERGENIC      |               |                                   |                    |
| SNP_8476_A_12380340 | NC_021161.1    | Ca_Kabuli_Chr02 | 12380340                | CC                                     | TT                 | TT               | INTERGENIC      |               |                                   |                    |
| SNP_8477_A_12380341 | NC_021161.1    | Ca_Kabuli_Chr02 | 12380341                | AA                                     | CC                 | CC               | INTERGENIC      |               |                                   |                    |
| SNP_8478_A_12384534 | NC_021161.1    | Ca_Kabuli_Chr02 | 12384534                | AA                                     | TT                 | TT               | INTERGENIC      |               |                                   |                    |
| SNP_8479_A_12384683 | NC_021161.1    | Ca_Kabuli_Chr02 | 12384683                | GG                                     | AA                 | AA               | INTERGENIC      |               |                                   |                    |
| SNP_8480_A_12435222 | NC_021161.1    | Ca_Kabuli_Chr02 | 12435222                | AA                                     | CC                 | CC               | INTERGENIC      |               |                                   |                    |
| SNP_8481_A_12469533 | NC_021161.1    | Ca_Kabuli_Chr02 | 12469533                | CC                                     | GG                 | GG               | URR             | 101499836     | beta-1,3-galactosyltransferase 15 |                    |
| SNP_8482_A_12469564 | NC_021161.1    | Ca_Kabuli_Chr02 | 12469564                | TT                                     | CC                 | CC               | URR             | 101499836     | beta-1,3-galactosyltransferase 15 |                    |
| SNP_8483_A_12469783 | NC_021161.1    | Ca_Kabuli_Chr02 | 12469783                | CC                                     | AA                 | AA               | URR             | 101499836     | beta-1,3-galactosyltransferase 15 |                    |
| SNP_8484_A_12473336 | NC_021161.1    | Ca_Kabuli_Chr02 | 12473336                | AA                                     | CC                 | CC               | INTERGENIC      |               |                                   |                    |
| SNP_8485_A_12473362 | NC_021161.1    | Ca_Kabuli_Chr02 | 12473362                | TT                                     | AA                 | AA               | INTERGENIC      |               |                                   |                    |
| SNP_8486_A_12473364 | NC_021161.1    | Ca_Kabuli_Chr02 | 12473364                | GG                                     | TT                 | TT               | INTERGENIC      |               |                                   |                    |

| SNPs IDs            | Chromosome IDs | Chromosomes     | Physical positions (bp) | CDC Frontier (Reference genome) | (Pusa 1103 & HPNB) | (ILWC 46 & LPNB) | Sequence Components of genome | Gene accession IDs | Putative functions           |
|---------------------|----------------|-----------------|-------------------------|---------------------------------|--------------------|------------------|-------------------------------|--------------------|------------------------------|
| SNP_8487_A_12473365 | NC_021161.1    | Ca_Kabuli_Chr02 | 12473365                | CC                              | GG                 | GG               | INTERGENIC                    |                    |                              |
| SNP_8488_A_12496953 | NC_021161.1    | Ca_Kabuli_Chr02 | 12496953                | TT                              | CC                 | CC               | INTERGENIC                    |                    |                              |
| SNP_8490_A_12581699 | NC_021161.1    | Ca_Kabuli_Chr02 | 12581699                | AA                              | GG                 | GG               | URR                           | 101504118          | uncharacterized LOC101504118 |
| SNP_8491_A_12581718 | NC_021161.1    | Ca_Kabuli_Chr02 | 12581718                | CC                              | AA                 | AA               | URR                           | 101504118          | uncharacterized LOC101504118 |
| SNP_8492_A_12581742 | NC_021161.1    | Ca_Kabuli_Chr02 | 12581742                | AA                              | GG                 | GG               | URR                           | 101504118          | uncharacterized LOC101504118 |
| SNP_8493_A_12581754 | NC_021161.1    | Ca_Kabuli_Chr02 | 12581754                | GG                              | AA                 | AA               | URR                           | 101504118          | uncharacterized LOC101504118 |
| SNP_8494_A_12585027 | NC_021161.1    | Ca_Kabuli_Chr02 | 12585027                | CC                              | TT                 | TT               | INTERGENIC                    |                    |                              |
| SNP_8495_A_12629079 | NC_021161.1    | Ca_Kabuli_Chr02 | 12629079                | TT                              | AA                 | AA               | DRR                           | 101504973          | expansin-A15-like            |
| SNP_8496_A_12680957 | NC_021161.1    | Ca_Kabuli_Chr02 | 12680957                | TT                              | GG                 | GG               | INTERGENIC                    |                    |                              |
| SNP_8497_A_12689842 | NC_021161.1    | Ca_Kabuli_Chr02 | 12689842                | AA                              | TT                 | TT               | INTERGENIC                    |                    |                              |
| SNP_8498_A_12689901 | NC_021161.1    | Ca_Kabuli_Chr02 | 12689901                | CC                              | TT                 | TT               | INTERGENIC                    |                    |                              |
| SNP_8499_A_12689932 | NC_021161.1    | Ca_Kabuli_Chr02 | 12689932                | GG                              | AA                 | AA               | INTERGENIC                    |                    |                              |
| SNP_8500_A_12690161 | NC_021161.1    | Ca_Kabuli_Chr02 | 12690161                | AA                              | GG                 | GG               | INTERGENIC                    |                    |                              |
| SNP_8501_A_12690235 | NC_021161.1    | Ca_Kabuli_Chr02 | 12690235                | TT                              | CC                 | CC               | INTERGENIC                    |                    |                              |
| SNP_8503_A_12785232 | NC_021161.1    | Ca_Kabuli_Chr02 | 12785232                | GG                              | AA                 | AA               | INTERGENIC                    |                    |                              |
| SNP_8504_A_12785408 | NC_021161.1    | Ca_Kabuli_Chr02 | 12785408                | AA                              | TT                 | TT               | INTERGENIC                    |                    |                              |
| SNP_8505_A_12785412 | NC_021161.1    | Ca_Kabuli_Chr02 | 12785412                | GG                              | AA                 | AA               | INTERGENIC                    |                    |                              |
| SNP_8506_A_12785471 | NC_021161.1    | Ca_Kabuli_Chr02 | 12785471                | TT                              | CC                 | CC               | INTERGENIC                    |                    |                              |
| SNP_8507_A_12785480 | NC_021161.1    | Ca_Kabuli_Chr02 | 12785480                | AA                              | GG                 | GG               | INTERGENIC                    |                    |                              |
| SNP_8508_A_12785520 | NC_021161.1    | Ca_Kabuli_Chr02 | 12785520                | GG                              | AA                 | AA               | INTERGENIC                    |                    |                              |
| SNP_8509_A_12785522 | NC_021161.1    | Ca_Kabuli_Chr02 | 12785522                | GG                              | AA                 | AA               | INTERGENIC                    |                    |                              |
| SNP_8510_A_12837488 | NC_021161.1    | Ca_Kabuli_Chr02 | 12837488                | CC                              | TT                 | TT               | INTERGENIC                    |                    |                              |

| SNPs IDs            | Chromosome IDs | Chromosomes     | Physical positions (bp) | CDC Frontier (Reference genome) | (Pusa 1103 & HPNB) | (ILWC 46 & LPNB) | Sequence genome | Components of | Gene accession IDs | Putative functions |
|---------------------|----------------|-----------------|-------------------------|---------------------------------|--------------------|------------------|-----------------|---------------|--------------------|--------------------|
| SNP_8511_A_12919750 | NC_021161.1    | Ca_Kabuli_Chr02 | 12919750                | AA                              | CC                 | CC               | INTERGENIC      |               |                    |                    |
| SNP_8512_A_12931829 | NC_021161.1    | Ca_Kabuli_Chr02 | 12931829                | AA                              | CC                 | CC               | INTERGENIC      |               |                    |                    |
| SNP_8513_A_12931949 | NC_021161.1    | Ca_Kabuli_Chr02 | 12931949                | AA                              | TT                 | TT               | INTERGENIC      |               |                    |                    |
| SNP_8514_A_12932069 | NC_021161.1    | Ca_Kabuli_Chr02 | 12932069                | AA                              | GG                 | GG               | INTERGENIC      |               |                    |                    |
| SNP_8515_A_12932254 | NC_021161.1    | Ca_Kabuli_Chr02 | 12932254                | TT                              | AA                 | AA               | INTERGENIC      |               |                    |                    |
| SNP_8516_A_12932440 | NC_021161.1    | Ca_Kabuli_Chr02 | 12932440                | GG                              | TT                 | TT               | INTERGENIC      |               |                    |                    |
| SNP_8517_A_12932512 | NC_021161.1    | Ca_Kabuli_Chr02 | 12932512                | GG                              | AA                 | AA               | INTERGENIC      |               |                    |                    |
| SNP_8518_A_12932557 | NC_021161.1    | Ca_Kabuli_Chr02 | 12932557                | TT                              | AA                 | AA               | INTERGENIC      |               |                    |                    |
| SNP_8519_A_12932646 | NC_021161.1    | Ca_Kabuli_Chr02 | 12932646                | AA                              | CC                 | CC               | INTERGENIC      |               |                    |                    |
| SNP_8520_A_12932706 | NC_021161.1    | Ca_Kabuli_Chr02 | 12932706                | AA                              | GG                 | GG               | INTERGENIC      |               |                    |                    |
| SNP_8521_A_12932725 | NC_021161.1    | Ca_Kabuli_Chr02 | 12932725                | CC                              | TT                 | TT               | INTERGENIC      |               |                    |                    |
| SNP_8522_A_12932783 | NC_021161.1    | Ca_Kabuli_Chr02 | 12932783                | AA                              | GG                 | GG               | INTERGENIC      |               |                    |                    |
| SNP_8523_A_12932795 | NC_021161.1    | Ca_Kabuli_Chr02 | 12932795                | AA                              | GG                 | GG               | INTERGENIC      |               |                    |                    |
| SNP_8524_A_12932856 | NC_021161.1    | Ca_Kabuli_Chr02 | 12932856                | AA                              | GG                 | GG               | INTERGENIC      |               |                    |                    |
| SNP_8525_A_12932903 | NC_021161.1    | Ca_Kabuli_Chr02 | 12932903                | GG                              | CC                 | CC               | INTERGENIC      |               |                    |                    |
| SNP_8526_A_12933069 | NC_021161.1    | Ca_Kabuli_Chr02 | 12933069                | GG                              | AA                 | AA               | INTERGENIC      |               |                    |                    |
| SNP_8527_A_12933101 | NC_021161.1    | Ca_Kabuli_Chr02 | 12933101                | CC                              | TT                 | TT               | INTERGENIC      |               |                    |                    |
| SNP_8529_A_12933135 | NC_021161.1    | Ca_Kabuli_Chr02 | 12933135                | GG                              | AA                 | AA               | INTERGENIC      |               |                    |                    |
| SNP_8530_A_12933149 | NC_021161.1    | Ca_Kabuli_Chr02 | 12933149                | AA                              | GG                 | GG               | INTERGENIC      |               |                    |                    |
| SNP_8531_A_12933198 | NC_021161.1    | Ca_Kabuli_Chr02 | 12933198                | TT                              | CC                 | CC               | INTERGENIC      |               |                    |                    |
| SNP_8532_A_12933215 | NC_021161.1    | Ca_Kabuli_Chr02 | 12933215                | AA                              | TT                 | TT               | INTERGENIC      |               |                    |                    |
| SNP_8533_A_12933258 | NC_021161.1    | Ca_Kabuli_Chr02 | 12933258                | GG                              | CC                 | CC               | INTERGENIC      |               |                    |                    |

| SNPs IDs            | Chromosome IDs | Chromosomes     | Physical positions (bp) | CDC Frontier (Reference genome) | (Pusa 1103 & HPNB) | (ILWC 46 & LPNB) | Sequence genome | Components of | Gene accession IDs | Putative functions |
|---------------------|----------------|-----------------|-------------------------|---------------------------------|--------------------|------------------|-----------------|---------------|--------------------|--------------------|
| SNP_8534_A_12933374 | NC_021161.1    | Ca_Kabuli_Chr02 | 12933374                | CC                              | GG                 | GG               | INTERGENIC      |               |                    |                    |
| SNP_8535_A_12933548 | NC_021161.1    | Ca_Kabuli_Chr02 | 12933548                | AA                              | CC                 | CC               | INTERGENIC      |               |                    |                    |
| SNP_8536_A_12933568 | NC_021161.1    | Ca_Kabuli_Chr02 | 12933568                | CC                              | TT                 | TT               | INTERGENIC      |               |                    |                    |
| SNP_8538_A_12933627 | NC_021161.1    | Ca_Kabuli_Chr02 | 12933627                | AA                              | GG                 | GG               | INTERGENIC      |               |                    |                    |
| SNP_8539_A_12933751 | NC_021161.1    | Ca_Kabuli_Chr02 | 12933751                | AA                              | TT                 | TT               | INTERGENIC      |               |                    |                    |
| SNP_8540_A_12933779 | NC_021161.1    | Ca_Kabuli_Chr02 | 12933779                | CC                              | TT                 | TT               | INTERGENIC      |               |                    |                    |
| SNP_8541_A_12933915 | NC_021161.1    | Ca_Kabuli_Chr02 | 12933915                | CC                              | GG                 | GG               | INTERGENIC      |               |                    |                    |
| SNP_8542_A_12934183 | NC_021161.1    | Ca_Kabuli_Chr02 | 12934183                | TT                              | AA                 | AA               | INTERGENIC      |               |                    |                    |
| SNP_8544_A_12934365 | NC_021161.1    | Ca_Kabuli_Chr02 | 12934365                | AA                              | GG                 | GG               | INTERGENIC      |               |                    |                    |
| SNP_8545_A_12934382 | NC_021161.1    | Ca_Kabuli_Chr02 | 12934382                | AA                              | CC                 | CC               | INTERGENIC      |               |                    |                    |
| SNP_8546_A_12934444 | NC_021161.1    | Ca_Kabuli_Chr02 | 12934444                | TT                              | CC                 | CC               | INTERGENIC      |               |                    |                    |
| SNP_8547_A_12934497 | NC_021161.1    | Ca_Kabuli_Chr02 | 12934497                | GG                              | AA                 | AA               | INTERGENIC      |               |                    |                    |
| SNP_8548_A_12934572 | NC_021161.1    | Ca_Kabuli_Chr02 | 12934572                | TT                              | GG                 | GG               | INTERGENIC      |               |                    |                    |
| SNP_8549_A_12934749 | NC_021161.1    | Ca_Kabuli_Chr02 | 12934749                | TT                              | AA                 | AA               | INTERGENIC      |               |                    |                    |
| SNP_8550_A_12934776 | NC_021161.1    | Ca_Kabuli_Chr02 | 12934776                | AA                              | CC                 | CC               | INTERGENIC      |               |                    |                    |
| SNP_8551_A_12935031 | NC_021161.1    | Ca_Kabuli_Chr02 | 12935031                | GG                              | TT                 | TT               | INTERGENIC      |               |                    |                    |
| SNP_8552_A_12935442 | NC_021161.1    | Ca_Kabuli_Chr02 | 12935442                | TT                              | GG                 | GG               | INTERGENIC      |               |                    |                    |
| SNP_8553_A_12935449 | NC_021161.1    | Ca_Kabuli_Chr02 | 12935449                | CC                              | TT                 | TT               | INTERGENIC      |               |                    |                    |
| SNP_8554_A_12935515 | NC_021161.1    | Ca_Kabuli_Chr02 | 12935515                | GG                              | TT                 | TT               | INTERGENIC      |               |                    |                    |
| SNP_8555_A_12935582 | NC_021161.1    | Ca_Kabuli_Chr02 | 12935582                | CC                              | TT                 | TT               | INTERGENIC      |               |                    |                    |
| SNP_8556_A_12935639 | NC_021161.1    | Ca_Kabuli_Chr02 | 12935639                | AA                              | GG                 | GG               | INTERGENIC      |               |                    |                    |
| SNP_8557_A_12935645 | NC_021161.1    | Ca_Kabuli_Chr02 | 12935645                | AA                              | GG                 | GG               | INTERGENIC      |               |                    |                    |

| SNPs IDs            | Chromosome IDs | Chromosomes     | Physical positions (bp) | CDC Frontier (Reference genome) | (Pusa 1103 & HPNB) | (ILWC 46 & LPNB) | Sequence genome | Components of | Gene accession IDs | Putative functions |
|---------------------|----------------|-----------------|-------------------------|---------------------------------|--------------------|------------------|-----------------|---------------|--------------------|--------------------|
| SNP_8558_A_12935664 | NC_021161.1    | Ca_Kabuli_Chr02 | 12935664                | GG                              | AA                 | AA               | INTERGENIC      |               |                    |                    |
| SNP_8559_A_12935805 | NC_021161.1    | Ca_Kabuli_Chr02 | 12935805                | GG                              | AA                 | AA               | INTERGENIC      |               |                    |                    |
| SNP_8560_A_12935932 | NC_021161.1    | Ca_Kabuli_Chr02 | 12935932                | TT                              | GG                 | GG               | INTERGENIC      |               |                    |                    |
| SNP_8561_A_12935948 | NC_021161.1    | Ca_Kabuli_Chr02 | 12935948                | TT                              | CC                 | CC               | INTERGENIC      |               |                    |                    |
| SNP_8562_A_12936060 | NC_021161.1    | Ca_Kabuli_Chr02 | 12936060                | CC                              | TT                 | TT               | INTERGENIC      |               |                    |                    |
| SNP_8563_A_12936096 | NC_021161.1    | Ca_Kabuli_Chr02 | 12936096                | TT                              | AA                 | AA               | INTERGENIC      |               |                    |                    |
| SNP_8564_A_12936329 | NC_021161.1    | Ca_Kabuli_Chr02 | 12936329                | GG                              | TT                 | TT               | INTERGENIC      |               |                    |                    |
| SNP_8565_A_12936542 | NC_021161.1    | Ca_Kabuli_Chr02 | 12936542                | CC                              | TT                 | TT               | INTERGENIC      |               |                    |                    |
| SNP_8566_A_12936559 | NC_021161.1    | Ca_Kabuli_Chr02 | 12936559                | TT                              | AA                 | AA               | INTERGENIC      |               |                    |                    |
| SNP_8567_A_12936657 | NC_021161.1    | Ca_Kabuli_Chr02 | 12936657                | CC                              | TT                 | TT               | INTERGENIC      |               |                    |                    |
| SNP_8568_A_12936658 | NC_021161.1    | Ca_Kabuli_Chr02 | 12936658                | AA                              | GG                 | GG               | INTERGENIC      |               |                    |                    |
| SNP_8569_A_12936662 | NC_021161.1    | Ca_Kabuli_Chr02 | 12936662                | GG                              | AA                 | AA               | INTERGENIC      |               |                    |                    |
| SNP_8570_A_12936741 | NC_021161.1    | Ca_Kabuli_Chr02 | 12936741                | AA                              | GG                 | GG               | INTERGENIC      |               |                    |                    |
| SNP_8571_A_12937028 | NC_021161.1    | Ca_Kabuli_Chr02 | 12937028                | AA                              | GG                 | GG               | INTERGENIC      |               |                    |                    |
| SNP_8572_A_12937051 | NC_021161.1    | Ca_Kabuli_Chr02 | 12937051                | CC                              | TT                 | TT               | INTERGENIC      |               |                    |                    |
| SNP_8573_A_12937059 | NC_021161.1    | Ca_Kabuli_Chr02 | 12937059                | CC                              | AA                 | AA               | INTERGENIC      |               |                    |                    |
| SNP_8574_A_12937070 | NC_021161.1    | Ca_Kabuli_Chr02 | 12937070                | TT                              | AA                 | AA               | INTERGENIC      |               |                    |                    |
| SNP_8575_A_12937071 | NC_021161.1    | Ca_Kabuli_Chr02 | 12937071                | GG                              | AA                 | AA               | INTERGENIC      |               |                    |                    |
| SNP_8576_A_12937177 | NC_021161.1    | Ca_Kabuli_Chr02 | 12937177                | CC                              | TT                 | TT               | INTERGENIC      |               |                    |                    |
| SNP_8577_A_12937180 | NC_021161.1    | Ca_Kabuli_Chr02 | 12937180                | AA                              | TT                 | TT               | INTERGENIC      |               |                    |                    |
| SNP_8578_A_12937185 | NC_021161.1    | Ca_Kabuli_Chr02 | 12937185                | CC                              | TT                 | TT               | INTERGENIC      |               |                    |                    |
| SNP_8579_A_12937265 | NC_021161.1    | Ca_Kabuli_Chr02 | 12937265                | TT                              | AA                 | AA               | INTERGENIC      |               |                    |                    |

| SNPs IDs            | Chromosome IDs | Chromosomes     | Physical positions (bp) | CDC Frontier genome (Reference genome) | (Pusa 1103 & HPNB) | (ILWC 46 & LPNB) | Sequence genome | Components of | Gene accession IDs | Putative functions |
|---------------------|----------------|-----------------|-------------------------|----------------------------------------|--------------------|------------------|-----------------|---------------|--------------------|--------------------|
| SNP_8580_A_12937368 | NC_021161.1    | Ca_Kabuli_Chr02 | 12937368                | AA                                     | GG                 | GG               | INTERGENIC      |               |                    |                    |
| SNP_8581_A_12937377 | NC_021161.1    | Ca_Kabuli_Chr02 | 12937377                | TT                                     | CC                 | CC               | INTERGENIC      |               |                    |                    |
| SNP_8582_A_12937379 | NC_021161.1    | Ca_Kabuli_Chr02 | 12937379                | AA                                     | TT                 | TT               | INTERGENIC      |               |                    |                    |
| SNP_8583_A_12937426 | NC_021161.1    | Ca_Kabuli_Chr02 | 12937426                | CC                                     | AA                 | AA               | INTERGENIC      |               |                    |                    |
| SNP_8584_A_12937445 | NC_021161.1    | Ca_Kabuli_Chr02 | 12937445                | CC                                     | AA                 | AA               | INTERGENIC      |               |                    |                    |
| SNP_8585_A_12937451 | NC_021161.1    | Ca_Kabuli_Chr02 | 12937451                | CC                                     | AA                 | AA               | INTERGENIC      |               |                    |                    |
| SNP_8586_A_12937472 | NC_021161.1    | Ca_Kabuli_Chr02 | 12937472                | CC                                     | TT                 | TT               | INTERGENIC      |               |                    |                    |
| SNP_8587_A_12937522 | NC_021161.1    | Ca_Kabuli_Chr02 | 12937522                | TT                                     | AA                 | AA               | INTERGENIC      |               |                    |                    |
| SNP_8588_A_12937572 | NC_021161.1    | Ca_Kabuli_Chr02 | 12937572                | AA                                     | CC                 | CC               | INTERGENIC      |               |                    |                    |
| SNP_8590_A_12937663 | NC_021161.1    | Ca_Kabuli_Chr02 | 12937663                | AA                                     | CC                 | CC               | INTERGENIC      |               |                    |                    |
| SNP_8591_A_12937683 | NC_021161.1    | Ca_Kabuli_Chr02 | 12937683                | CC                                     | TT                 | TT               | INTERGENIC      |               |                    |                    |
| SNP_8592_A_12937684 | NC_021161.1    | Ca_Kabuli_Chr02 | 12937684                | TT                                     | CC                 | CC               | INTERGENIC      |               |                    |                    |
| SNP_8593_A_12937693 | NC_021161.1    | Ca_Kabuli_Chr02 | 12937693                | CC                                     | TT                 | TT               | INTERGENIC      |               |                    |                    |
| SNP_8594_A_12937825 | NC_021161.1    | Ca_Kabuli_Chr02 | 12937825                | AA                                     | TT                 | TT               | INTERGENIC      |               |                    |                    |
| SNP_8595_A_12937896 | NC_021161.1    | Ca_Kabuli_Chr02 | 12937896                | AA                                     | GG                 | GG               | INTERGENIC      |               |                    |                    |
| SNP_8596_A_12937966 | NC_021161.1    | Ca_Kabuli_Chr02 | 12937966                | TT                                     | AA                 | AA               | INTERGENIC      |               |                    |                    |
| SNP_8597_A_12938879 | NC_021161.1    | Ca_Kabuli_Chr02 | 12938879                | TT                                     | GG                 | GG               | INTERGENIC      |               |                    |                    |
| SNP_8598_A_12939274 | NC_021161.1    | Ca_Kabuli_Chr02 | 12939274                | GG                                     | CC                 | CC               | INTERGENIC      |               |                    |                    |
| SNP_8599_A_12939296 | NC_021161.1    | Ca_Kabuli_Chr02 | 12939296                | CC                                     | GG                 | GG               | INTERGENIC      |               |                    |                    |
| SNP_8601_A_12939751 | NC_021161.1    | Ca_Kabuli_Chr02 | 12939751                | AA                                     | TT                 | TT               | INTERGENIC      |               |                    |                    |
| SNP_8602_A_12940554 | NC_021161.1    | Ca_Kabuli_Chr02 | 12940554                | GG                                     | CC                 | CC               | INTERGENIC      |               |                    |                    |
| SNP_8603_A_12940590 | NC_021161.1    | Ca_Kabuli_Chr02 | 12940590                | AA                                     | GG                 | GG               | INTERGENIC      |               |                    |                    |

| SNPs IDs            | Chromosome IDs | Chromosomes     | Physical positions (bp) | CDC Frontier (Reference genome) | (Pusa 1103 & HPNB) | (ILWC 46 & LPNB) | Sequence genome | Components of | Gene accession IDs | Putative functions |
|---------------------|----------------|-----------------|-------------------------|---------------------------------|--------------------|------------------|-----------------|---------------|--------------------|--------------------|
| SNP_8604_A_12940634 | NC_021161.1    | Ca_Kabuli_Chr02 | 12940634                | TT                              | AA                 | AA               | INTERGENIC      |               |                    |                    |
| SNP_8605_A_12940666 | NC_021161.1    | Ca_Kabuli_Chr02 | 12940666                | GG                              | AA                 | AA               | INTERGENIC      |               |                    |                    |
| SNP_8606_A_12940667 | NC_021161.1    | Ca_Kabuli_Chr02 | 12940667                | TT                              | CC                 | CC               | INTERGENIC      |               |                    |                    |
| SNP_8607_A_12940985 | NC_021161.1    | Ca_Kabuli_Chr02 | 12940985                | TT                              | CC                 | CC               | INTERGENIC      |               |                    |                    |
| SNP_8608_A_12941032 | NC_021161.1    | Ca_Kabuli_Chr02 | 12941032                | GG                              | AA                 | AA               | INTERGENIC      |               |                    |                    |
| SNP_8609_A_12941052 | NC_021161.1    | Ca_Kabuli_Chr02 | 12941052                | AA                              | GG                 | GG               | INTERGENIC      |               |                    |                    |
| SNP_8610_A_12941108 | NC_021161.1    | Ca_Kabuli_Chr02 | 12941108                | TT                              | AA                 | AA               | INTERGENIC      |               |                    |                    |
| SNP_8611_A_12941162 | NC_021161.1    | Ca_Kabuli_Chr02 | 12941162                | AA                              | GG                 | GG               | INTERGENIC      |               |                    |                    |
| SNP_8613_A_12941376 | NC_021161.1    | Ca_Kabuli_Chr02 | 12941376                | AA                              | CC                 | CC               | INTERGENIC      |               |                    |                    |
| SNP_8614_A_12941452 | NC_021161.1    | Ca_Kabuli_Chr02 | 12941452                | AA                              | TT                 | TT               | INTERGENIC      |               |                    |                    |
| SNP_8615_A_12941535 | NC_021161.1    | Ca_Kabuli_Chr02 | 12941535                | AA                              | GG                 | GG               | INTERGENIC      |               |                    |                    |
| SNP_8616_A_12941537 | NC_021161.1    | Ca_Kabuli_Chr02 | 12941537                | GG                              | CC                 | CC               | INTERGENIC      |               |                    |                    |
| SNP_8617_A_12941742 | NC_021161.1    | Ca_Kabuli_Chr02 | 12941742                | CC                              | AA                 | AA               | INTERGENIC      |               |                    |                    |
| SNP_8619_A_12941838 | NC_021161.1    | Ca_Kabuli_Chr02 | 12941838                | CC                              | TT                 | TT               | INTERGENIC      |               |                    |                    |
| SNP_8620_A_12941843 | NC_021161.1    | Ca_Kabuli_Chr02 | 12941843                | TT                              | CC                 | CC               | INTERGENIC      |               |                    |                    |
| SNP_8621_A_12941877 | NC_021161.1    | Ca_Kabuli_Chr02 | 12941877                | AA                              | CC                 | CC               | INTERGENIC      |               |                    |                    |
| SNP_8622_A_12941902 | NC_021161.1    | Ca_Kabuli_Chr02 | 12941902                | GG                              | AA                 | AA               | INTERGENIC      |               |                    |                    |
| SNP_8623_A_12942072 | NC_021161.1    | Ca_Kabuli_Chr02 | 12942072                | GG                              | TT                 | TT               | INTERGENIC      |               |                    |                    |
| SNP_8624_A_12942158 | NC_021161.1    | Ca_Kabuli_Chr02 | 12942158                | AA                              | GG                 | GG               | INTERGENIC      |               |                    |                    |
| SNP_8625_A_12942218 | NC_021161.1    | Ca_Kabuli_Chr02 | 12942218                | TT                              | GG                 | GG               | INTERGENIC      |               |                    |                    |
| SNP_8626_A_12942223 | NC_021161.1    | Ca_Kabuli_Chr02 | 12942223                | GG                              | AA                 | AA               | INTERGENIC      |               |                    |                    |
| SNP_8627_A_12942224 | NC_021161.1    | Ca_Kabuli_Chr02 | 12942224                | CC                              | TT                 | TT               | INTERGENIC      |               |                    |                    |

| SNPs IDs            | Chromosome IDs | Chromosomes     | Physical positions (bp) | CDC Frontier genome (Reference genome) | (Pusa 1103 & HPNB) | (ILWC 46 & LPNB) | Sequence genome | Components of | Gene accession IDs | Putative functions |
|---------------------|----------------|-----------------|-------------------------|----------------------------------------|--------------------|------------------|-----------------|---------------|--------------------|--------------------|
| SNP_8628_A_12942260 | NC_021161.1    | Ca_Kabuli_Chr02 | 12942260                | AA                                     | CC                 | CC               | INTERGENIC      |               |                    |                    |
| SNP_8629_A_12942542 | NC_021161.1    | Ca_Kabuli_Chr02 | 12942542                | GG                                     | AA                 | AA               | INTERGENIC      |               |                    |                    |
| SNP_8630_A_12942565 | NC_021161.1    | Ca_Kabuli_Chr02 | 12942565                | GG                                     | AA                 | AA               | INTERGENIC      |               |                    |                    |
| SNP_8631_A_12947194 | NC_021161.1    | Ca_Kabuli_Chr02 | 12947194                | AA                                     | TT                 | TT               | INTERGENIC      |               |                    |                    |
| SNP_8633_A_12948047 | NC_021161.1    | Ca_Kabuli_Chr02 | 12948047                | CC                                     | TT                 | TT               | INTERGENIC      |               |                    |                    |
| SNP_8634_A_12948167 | NC_021161.1    | Ca_Kabuli_Chr02 | 12948167                | AA                                     | GG                 | GG               | INTERGENIC      |               |                    |                    |
| SNP_8635_A_12948328 | NC_021161.1    | Ca_Kabuli_Chr02 | 12948328                | GG                                     | TT                 | TT               | INTERGENIC      |               |                    |                    |
| SNP_8636_A_12948329 | NC_021161.1    | Ca_Kabuli_Chr02 | 12948329                | TT                                     | AA                 | AA               | INTERGENIC      |               |                    |                    |
| SNP_8637_A_12948606 | NC_021161.1    | Ca_Kabuli_Chr02 | 12948606                | CC                                     | TT                 | TT               | INTERGENIC      |               |                    |                    |
| SNP_8638_A_12948609 | NC_021161.1    | Ca_Kabuli_Chr02 | 12948609                | CC                                     | TT                 | TT               | INTERGENIC      |               |                    |                    |
| SNP_8639_A_12949123 | NC_021161.1    | Ca_Kabuli_Chr02 | 12949123                | AA                                     | TT                 | TT               | INTERGENIC      |               |                    |                    |
| SNP_8640_A_12949132 | NC_021161.1    | Ca_Kabuli_Chr02 | 12949132                | GG                                     | AA                 | AA               | INTERGENIC      |               |                    |                    |
| SNP_8641_A_12949188 | NC_021161.1    | Ca_Kabuli_Chr02 | 12949188                | GG                                     | AA                 | AA               | INTERGENIC      |               |                    |                    |
| SNP_8642_A_12949192 | NC_021161.1    | Ca_Kabuli_Chr02 | 12949192                | GG                                     | TT                 | TT               | INTERGENIC      |               |                    |                    |
| SNP_8643_A_12949603 | NC_021161.1    | Ca_Kabuli_Chr02 | 12949603                | CC                                     | TT                 | TT               | INTERGENIC      |               |                    |                    |
| SNP_8644_A_12949628 | NC_021161.1    | Ca_Kabuli_Chr02 | 12949628                | CC                                     | TT                 | TT               | INTERGENIC      |               |                    |                    |
| SNP_8645_A_12949637 | NC_021161.1    | Ca_Kabuli_Chr02 | 12949637                | CC                                     | TT                 | TT               | INTERGENIC      |               |                    |                    |
| SNP_8646_A_12949881 | NC_021161.1    | Ca_Kabuli_Chr02 | 12949881                | GG                                     | AA                 | AA               | INTERGENIC      |               |                    |                    |
| SNP_8647_A_12950095 | NC_021161.1    | Ca_Kabuli_Chr02 | 12950095                | CC                                     | TT                 | TT               | INTERGENIC      |               |                    |                    |
| SNP_8648_A_12950357 | NC_021161.1    | Ca_Kabuli_Chr02 | 12950357                | TT                                     | AA                 | AA               | INTERGENIC      |               |                    |                    |
| SNP_8649_A_12950375 | NC_021161.1    | Ca_Kabuli_Chr02 | 12950375                | AA                                     | CC                 | CC               | INTERGENIC      |               |                    |                    |
| SNP_8650_A_12951649 | NC_021161.1    | Ca_Kabuli_Chr02 | 12951649                | TT                                     | CC                 | CC               | INTERGENIC      |               |                    |                    |



| SNPs IDs            | Chromosome IDs | Chromosomes     | Physical positions (bp) | CDC Frontier (Reference genome) | (Pusa 1103 & HPNB) | (ILWC 46 & LPNB) | Sequence genome | Components of | Gene accession IDs | Putative functions |
|---------------------|----------------|-----------------|-------------------------|---------------------------------|--------------------|------------------|-----------------|---------------|--------------------|--------------------|
| SNP_8651_A_12951955 | NC_021161.1    | Ca_Kabuli_Chr02 | 12951955                | GG                              | AA                 | AA               | INTERGENIC      |               |                    |                    |
| SNP_8652_A_12952122 | NC_021161.1    | Ca_Kabuli_Chr02 | 12952122                | TT                              | AA                 | AA               | INTERGENIC      |               |                    |                    |
| SNP_8653_A_12952300 | NC_021161.1    | Ca_Kabuli_Chr02 | 12952300                | TT                              | GG                 | GG               | INTERGENIC      |               |                    |                    |
| SNP_8654_A_12952375 | NC_021161.1    | Ca_Kabuli_Chr02 | 12952375                | TT                              | CC                 | CC               | INTERGENIC      |               |                    |                    |
| SNP_8655_A_12952438 | NC_021161.1    | Ca_Kabuli_Chr02 | 12952438                | GG                              | AA                 | AA               | INTERGENIC      |               |                    |                    |
| SNP_8657_A_12952924 | NC_021161.1    | Ca_Kabuli_Chr02 | 12952924                | GG                              | AA                 | AA               | INTERGENIC      |               |                    |                    |
| SNP_8659_A_12953136 | NC_021161.1    | Ca_Kabuli_Chr02 | 12953136                | TT                              | CC                 | CC               | INTERGENIC      |               |                    |                    |
| SNP_8660_A_12959961 | NC_021161.1    | Ca_Kabuli_Chr02 | 12959961                | AA                              | GG                 | GG               | INTERGENIC      |               |                    |                    |
| SNP_8661_A_12959975 | NC_021161.1    | Ca_Kabuli_Chr02 | 12959975                | CC                              | AA                 | AA               | INTERGENIC      |               |                    |                    |
| SNP_8662_A_12960179 | NC_021161.1    | Ca_Kabuli_Chr02 | 12960179                | TT                              | AA                 | AA               | INTERGENIC      |               |                    |                    |
| SNP_8663_A_12960197 | NC_021161.1    | Ca_Kabuli_Chr02 | 12960197                | CC                              | TT                 | TT               | INTERGENIC      |               |                    |                    |
| SNP_8664_A_12960530 | NC_021161.1    | Ca_Kabuli_Chr02 | 12960530                | CC                              | GG                 | GG               | INTERGENIC      |               |                    |                    |
| SNP_8665_A_12960568 | NC_021161.1    | Ca_Kabuli_Chr02 | 12960568                | AA                              | GG                 | GG               | INTERGENIC      |               |                    |                    |
| SNP_8666_A_12960947 | NC_021161.1    | Ca_Kabuli_Chr02 | 12960947                | GG                              | CC                 | CC               | INTERGENIC      |               |                    |                    |
| SNP_8667_A_12972950 | NC_021161.1    | Ca_Kabuli_Chr02 | 12972950                | AA                              | CC                 | CC               | INTERGENIC      |               |                    |                    |
| SNP_8668_A_12987750 | NC_021161.1    | Ca_Kabuli_Chr02 | 12987750                | AA                              | GG                 | GG               | INTERGENIC      |               |                    |                    |
| SNP_8669_A_12994069 | NC_021161.1    | Ca_Kabuli_Chr02 | 12994069                | CC                              | AA                 | AA               | INTERGENIC      |               |                    |                    |
| SNP_8670_A_12994214 | NC_021161.1    | Ca_Kabuli_Chr02 | 12994214                | GG                              | AA                 | AA               | INTERGENIC      |               |                    |                    |
| SNP_8671_A_12994250 | NC_021161.1    | Ca_Kabuli_Chr02 | 12994250                | AA                              | TT                 | TT               | INTERGENIC      |               |                    |                    |
| SNP_8672_A_12994277 | NC_021161.1    | Ca_Kabuli_Chr02 | 12994277                | AA                              | GG                 | GG               | INTERGENIC      |               |                    |                    |
| SNP_8673_A_12994278 | NC_021161.1    | Ca_Kabuli_Chr02 | 12994278                | AA                              | CC                 | CC               | INTERGENIC      |               |                    |                    |
| SNP_8674_A_13010933 | NC_021161.1    | Ca_Kabuli_Chr02 | 13010933                | AA                              | GG                 | GG               | INTERGENIC      |               |                    |                    |

| SNPs IDs            | Chromosome IDs | Chromosomes     | Physical positions (bp) | CDC Frontier genome (Reference genome) | (Pusa 1103 & HPNB) | (ILWC 46 & LPNB) | Sequence genome | Components of | Gene accession IDs | Putative functions                    |
|---------------------|----------------|-----------------|-------------------------|----------------------------------------|--------------------|------------------|-----------------|---------------|--------------------|---------------------------------------|
| SNP_8675_A_13021057 | NC_021161.1    | Ca_Kabuli_Chr02 | 13021057                | AA                                     | GG                 | GG               | INTERGENIC      |               |                    |                                       |
| SNP_8676_A_13021394 | NC_021161.1    | Ca_Kabuli_Chr02 | 13021394                | TT                                     | CC                 | CC               | INTERGENIC      |               |                    |                                       |
| SNP_8677_A_13026234 | NC_021161.1    | Ca_Kabuli_Chr02 | 13026234                | AA                                     | CC                 | CC               | INTERGENIC      |               |                    |                                       |
| SNP_8678_A_13026247 | NC_021161.1    | Ca_Kabuli_Chr02 | 13026247                | TT                                     | AA                 | AA               | INTERGENIC      |               |                    |                                       |
| SNP_8679_A_13026251 | NC_021161.1    | Ca_Kabuli_Chr02 | 13026251                | GG                                     | CC                 | CC               | INTERGENIC      |               |                    |                                       |
| SNP_8680_A_13026254 | NC_021161.1    | Ca_Kabuli_Chr02 | 13026254                | CC                                     | TT                 | TT               | INTERGENIC      |               |                    |                                       |
| SNP_8681_A_13026257 | NC_021161.1    | Ca_Kabuli_Chr02 | 13026257                | CC                                     | TT                 | TT               | INTERGENIC      |               |                    |                                       |
| SNP_8682_A_13026512 | NC_021161.1    | Ca_Kabuli_Chr02 | 13026512                | CC                                     | TT                 | TT               | INTERGENIC      |               |                    |                                       |
| SNP_8683_A_13026514 | NC_021161.1    | Ca_Kabuli_Chr02 | 13026514                | AA                                     | GG                 | GG               | INTERGENIC      |               |                    |                                       |
| SNP_8684_A_13026530 | NC_021161.1    | Ca_Kabuli_Chr02 | 13026530                | GG                                     | AA                 | AA               | INTERGENIC      |               |                    |                                       |
| SNP_8685_A_13026537 | NC_021161.1    | Ca_Kabuli_Chr02 | 13026537                | GG                                     | AA                 | AA               | INTERGENIC      |               |                    |                                       |
| SNP_8686_A_13026554 | NC_021161.1    | Ca_Kabuli_Chr02 | 13026554                | CC                                     | AA                 | AA               | INTERGENIC      |               |                    |                                       |
| SNP_8687_A_13026563 | NC_021161.1    | Ca_Kabuli_Chr02 | 13026563                | AA                                     | TT                 | TT               | INTERGENIC      |               |                    |                                       |
| SNP_8688_A_13026571 | NC_021161.1    | Ca_Kabuli_Chr02 | 13026571                | AA                                     | GG                 | GG               | INTERGENIC      |               |                    |                                       |
| SNP_8689_A_13026595 | NC_021161.1    | Ca_Kabuli_Chr02 | 13026595                | TT                                     | GG                 | GG               | INTERGENIC      |               |                    |                                       |
| SNP_8690_A_13026605 | NC_021161.1    | Ca_Kabuli_Chr02 | 13026605                | TT                                     | AA                 | AA               | INTERGENIC      |               |                    |                                       |
| SNP_8691_A_13027643 | NC_021161.1    | Ca_Kabuli_Chr02 | 13027643                | GG                                     | AA                 | AA               | INTERGENIC      |               |                    |                                       |
| SNP_8692_A_13048591 | NC_021161.1    | Ca_Kabuli_Chr02 | 13048591                | CC                                     | AA                 | AA               | INTERGENIC      |               |                    |                                       |
| SNP_8693_A_13061125 | NC_021161.1    | Ca_Kabuli_Chr02 | 13061125                | AA                                     | TT                 | TT               | DRR             | 101507022     |                    | NAC domain-containing protein 19-like |
| SNP_8694_A_13061126 | NC_021161.1    | Ca_Kabuli_Chr02 | 13061126                | AA                                     | TT                 | TT               | DRR             | 101507022     |                    | NAC domain-containing protein 19-like |
| SNP_8695_A_13115023 | NC_021161.1    | Ca_Kabuli_Chr02 | 13115023                | CC                                     | AA                 | AA               | INTERGENIC      |               |                    |                                       |
| SNP_8696_A_13141700 | NC_021161.1    | Ca_Kabuli_Chr02 | 13141700                | GG                                     | AA                 | AA               | INTERGENIC      |               |                    |                                       |

| SNPs IDs            | Chromosome IDs | Chromosomes     | Physical positions (bp) | CDC Frontier (Reference genome) | (Pusa 1103 & HPNB) | (ILWC 46 & LPNB) | Sequence Components of genome | Gene accession IDs | Putative functions                                       |
|---------------------|----------------|-----------------|-------------------------|---------------------------------|--------------------|------------------|-------------------------------|--------------------|----------------------------------------------------------|
| SNP_8697_A_13142649 | NC_021161.1    | Ca_Kabuli_Chr02 | 13142649                | TT                              | CC                 | CC               | INTERGENIC                    |                    |                                                          |
| SNP_8698_A_13142651 | NC_021161.1    | Ca_Kabuli_Chr02 | 13142651                | TT                              | CC                 | CC               | INTERGENIC                    |                    |                                                          |
| SNP_8699_A_13188741 | NC_021161.1    | Ca_Kabuli_Chr02 | 13188741                | AA                              | GG                 | GG               | INTERGENIC                    |                    |                                                          |
| SNP_8701_A_13265328 | NC_021161.1    | Ca_Kabuli_Chr02 | 13265328                | GG                              | AA                 | AA               | INTERGENIC                    |                    |                                                          |
| SNP_8702_A_13270171 | NC_021161.1    | Ca_Kabuli_Chr02 | 13270171                | AA                              | GG                 | GG               | INTERGENIC                    |                    |                                                          |
| SNP_8703_A_13270501 | NC_021161.1    | Ca_Kabuli_Chr02 | 13270501                | GG                              | AA                 | AA               | INTERGENIC                    |                    |                                                          |
| SNP_8704_A_13297849 | NC_021161.1    | Ca_Kabuli_Chr02 | 13297849                | TT                              | CC                 | CC               | INTERGENIC                    |                    |                                                          |
| SNP_8705_A_13347443 | NC_021161.1    | Ca_Kabuli_Chr02 | 13347443                | GG                              | AA                 | AA               | INTERGENIC                    |                    |                                                          |
| SNP_8706_A_13365414 | NC_021161.1    | Ca_Kabuli_Chr02 | 13365414                | CC                              | AA                 | AA               | URR                           | 101508292          | serine/threonine-protein phosphatase 7 long form homolog |
| SNP_8707_A_13365438 | NC_021161.1    | Ca_Kabuli_Chr02 | 13365438                | AA                              | GG                 | GG               | URR                           | 101508292          | serine/threonine-protein phosphatase 7 long form homolog |
| SNP_8708_A_13365478 | NC_021161.1    | Ca_Kabuli_Chr02 | 13365478                | TT                              | CC                 | CC               | URR                           | 101508292          | serine/threonine-protein phosphatase 7 long form homolog |
| SNP_8709_A_13365628 | NC_021161.1    | Ca_Kabuli_Chr02 | 13365628                | AA                              | GG                 | GG               | URR                           | 101508292          | serine/threonine-protein phosphatase 7 long form homolog |
| SNP_8710_A_13365650 | NC_021161.1    | Ca_Kabuli_Chr02 | 13365650                | AA                              | TT                 | TT               | URR                           | 101508292          | serine/threonine-protein phosphatase 7 long form homolog |
| SNP_8711_A_13365688 | NC_021161.1    | Ca_Kabuli_Chr02 | 13365688                | TT                              | AA                 | AA               | URR                           | 101508292          | serine/threonine-protein phosphatase 7 long form homolog |
| SNP_8712_A_13365950 | NC_021161.1    | Ca_Kabuli_Chr02 | 13365950                | AA                              | GG                 | GG               | URR                           | 101508292          | serine/threonine-protein phosphatase 7 long form homolog |
| SNP_8713_A_13369480 | NC_021161.1    | Ca_Kabuli_Chr02 | 13369480                | GG                              | AA                 | AA               | INTERGENIC                    |                    |                                                          |
| SNP_8714_A_13373149 | NC_021161.1    | Ca_Kabuli_Chr02 | 13373149                | TT                              | CC                 | CC               | INTERGENIC                    |                    |                                                          |
| SNP_8715_A_13385338 | NC_021161.1    | Ca_Kabuli_Chr02 | 13385338                | AA                              | TT                 | TT               | INTERGENIC                    |                    |                                                          |
| SNP_8716_A_13444691 | NC_021161.1    | Ca_Kabuli_Chr02 | 13444691                | AA                              | TT                 | TT               | DRR                           | 101493143          | uncharacterized LOC101493143                             |
| SNP_8717_A_13444693 | NC_021161.1    | Ca_Kabuli_Chr02 | 13444693                | AA                              | TT                 | TT               | DRR                           | 101493143          | uncharacterized LOC101493143                             |
| SNP_8718_A_13572577 | NC_021161.1    | Ca_Kabuli_Chr02 | 13572577                | TT                              | CC                 | CC               | DRR                           | 101510540          | uncharacterized LOC101510540                             |
| SNP_8719_A_13572581 | NC_021161.1    | Ca_Kabuli_Chr02 | 13572581                | TT                              | CC                 | CC               | DRR                           | 101510540          | uncharacterized LOC101510540                             |

| SNPs IDs            | Chromosome IDs | Chromosomes     | Physical positions (bp) | CDC Frontier genome (Reference genome) | (Pusa 1103 & HPNB) | (ILWC 46 & LPNB) | Sequence genome       | Components of | Gene accession IDs                     | Putative functions |
|---------------------|----------------|-----------------|-------------------------|----------------------------------------|--------------------|------------------|-----------------------|---------------|----------------------------------------|--------------------|
| SNP_8720_A_13584155 | NC_021161.1    | Ca_Kabuli_Chr02 | 13584155                | GG                                     | AA                 | AA               | INTERGENIC            |               |                                        |                    |
| SNP_8721_A_13694933 | NC_021161.1    | Ca_Kabuli_Chr02 | 13694933                | TT                                     | GG                 | GG               | INTERGENIC            |               |                                        |                    |
| SNP_8722_A_13694970 | NC_021161.1    | Ca_Kabuli_Chr02 | 13694970                | CC                                     | TT                 | TT               | INTERGENIC            |               |                                        |                    |
| SNP_8723_A_13695383 | NC_021161.1    | Ca_Kabuli_Chr02 | 13695383                | AA                                     | GG                 | GG               | INTERGENIC            |               |                                        |                    |
| SNP_8724_A_13695415 | NC_021161.1    | Ca_Kabuli_Chr02 | 13695415                | TT                                     | GG                 | GG               | INTERGENIC            |               |                                        |                    |
| SNP_8725_A_13695430 | NC_021161.1    | Ca_Kabuli_Chr02 | 13695430                | TT                                     | GG                 | GG               | INTERGENIC            |               |                                        |                    |
| SNP_8726_A_13807594 | NC_021161.1    | Ca_Kabuli_Chr02 | 13807594                | GG                                     | AA                 | AA               | INTERGENIC            |               |                                        |                    |
| SNP_8727_A_13840564 | NC_021161.1    | Ca_Kabuli_Chr02 | 13840564                | TT                                     | GG                 | GG               | INTERGENIC            |               |                                        |                    |
| SNP_8728_A_13881577 | NC_021161.1    | Ca_Kabuli_Chr02 | 13881577                | CC                                     | TT                 | TT               | INTRON                | 101511826     | uncharacterized protein A14g04775-like |                    |
| SNP_8729_A_13909449 | NC_021161.1    | Ca_Kabuli_Chr02 | 13909449                | AA                                     | TT                 | TT               | INTERGENIC            |               |                                        |                    |
| SNP_8730_A_13909466 | NC_021161.1    | Ca_Kabuli_Chr02 | 13909466                | TT                                     | CC                 | CC               | INTERGENIC            |               |                                        |                    |
| SNP_8731_A_13909471 | NC_021161.1    | Ca_Kabuli_Chr02 | 13909471                | CC                                     | GG                 | GG               | INTERGENIC            |               |                                        |                    |
| SNP_8732_A_13909473 | NC_021161.1    | Ca_Kabuli_Chr02 | 13909473                | CC                                     | TT                 | TT               | INTERGENIC            |               |                                        |                    |
| SNP_8733_A_13909481 | NC_021161.1    | Ca_Kabuli_Chr02 | 13909481                | TT                                     | AA                 | AA               | INTERGENIC            |               |                                        |                    |
| SNP_8734_A_13913898 | NC_021161.1    | Ca_Kabuli_Chr02 | 13913898                | GG                                     | AA                 | AA               | INTERGENIC            |               |                                        |                    |
| SNP_8735_A_13922631 | NC_021161.1    | Ca_Kabuli_Chr02 | 13922631                | CC                                     | AA                 | AA               | DRR                   | 101512138     | Unknown function                       |                    |
| SNP_8736_A_13922853 | NC_021161.1    | Ca_Kabuli_Chr02 | 13922853                | AA                                     | GG                 | GG               | DRR                   | 101512138     | Unknown function                       |                    |
| SNP_8737_A_13923342 | NC_021161.1    | Ca_Kabuli_Chr02 | 13923342                | TT                                     | GG                 | GG               | NON_SYNONYMOUS_CODING | 101512138     | Unknown function                       |                    |
| SNP_8738_A_13923419 | NC_021161.1    | Ca_Kabuli_Chr02 | 13923419                | GG                                     | CC                 | CC               | SYNONYMOUS_CODING     | 101512138     | Unknown function                       |                    |
| SNP_8739_A_13923648 | NC_021161.1    | Ca_Kabuli_Chr02 | 13923648                | GG                                     | CC                 | CC               | INTRON                | 101512138     | Unknown function                       |                    |
| SNP_8740_A_13923891 | NC_021161.1    | Ca_Kabuli_Chr02 | 13923891                | AA                                     | CC                 | CC               | INTRON                | 101512138     | Unknown function                       |                    |
| SNP_8741_A_13925091 | NC_021161.1    | Ca_Kabuli_Chr02 | 13925091                | CC                                     | GG                 | GG               | NON_SYNONYMOUS_CODING | 101512138     | Unknown function                       |                    |

| SNPs IDs            | Chromosome IDs | Chromosomes     | Physical positions (bp) | CDC Frontier genome (Reference genome) | (Pusa 1103 & HPNB) | (ILWC 46 & LPNB) | Sequence Components of genome | Gene accession IDs | Putative functions                          |
|---------------------|----------------|-----------------|-------------------------|----------------------------------------|--------------------|------------------|-------------------------------|--------------------|---------------------------------------------|
| SNP_8742_A_13955242 | NC_021161.1    | Ca_Kabuli_Chr02 | 13955242                | TT                                     | AA                 | AA               | INTERGENIC                    |                    |                                             |
| SNP_8744_A_13957910 | NC_021161.1    | Ca_Kabuli_Chr02 | 13957910                | CC                                     | AA                 | AA               | INTERGENIC                    |                    |                                             |
| SNP_8745_A_13957982 | NC_021161.1    | Ca_Kabuli_Chr02 | 13957982                | AA                                     | CC                 | CC               | INTERGENIC                    |                    |                                             |
| SNP_8748_A_13989506 | NC_021161.1    | Ca_Kabuli_Chr02 | 13989506                | GG                                     | AA                 | AA               | INTERGENIC                    |                    |                                             |
| SNP_8749_A_14025834 | NC_021161.1    | Ca_Kabuli_Chr02 | 14025834                | TT                                     | AA                 | AA               | INTERGENIC                    |                    |                                             |
| SNP_8750_A_14041852 | NC_021161.1    | Ca_Kabuli_Chr02 | 14041852                | GG                                     | AA                 | AA               | INTERGENIC                    |                    |                                             |
| SNP_8751_A_14044779 | NC_021161.1    | Ca_Kabuli_Chr02 | 14044779                | TT                                     | CC                 | CC               | INTERGENIC                    |                    |                                             |
| SNP_8752_A_14071035 | NC_021161.1    | Ca_Kabuli_Chr02 | 14071035                | AA                                     | GG                 | GG               | INTERGENIC                    |                    |                                             |
| SNP_8753_A_14085862 | NC_021161.1    | Ca_Kabuli_Chr02 | 14085862                | CC                                     | TT                 | TT               | INTERGENIC                    |                    |                                             |
| SNP_8754_A_14085910 | NC_021161.1    | Ca_Kabuli_Chr02 | 14085910                | AA                                     | GG                 | GG               | INTERGENIC                    |                    |                                             |
| SNP_8755_A_14086093 | NC_021161.1    | Ca_Kabuli_Chr02 | 14086093                | TT                                     | CC                 | CC               | INTERGENIC                    |                    |                                             |
| SNP_8756_A_14086103 | NC_021161.1    | Ca_Kabuli_Chr02 | 14086103                | AA                                     | GG                 | GG               | INTERGENIC                    |                    |                                             |
| SNP_8758_A_14086162 | NC_021161.1    | Ca_Kabuli_Chr02 | 14086162                | TT                                     | CC                 | CC               | INTERGENIC                    |                    |                                             |
| SNP_8759_A_14086408 | NC_021161.1    | Ca_Kabuli_Chr02 | 14086408                | AA                                     | GG                 | GG               | INTERGENIC                    |                    |                                             |
| SNP_8760_A_14086411 | NC_021161.1    | Ca_Kabuli_Chr02 | 14086411                | TT                                     | CC                 | CC               | INTERGENIC                    |                    |                                             |
| SNP_8761_A_14171622 | NC_021161.1    | Ca_Kabuli_Chr02 | 14171622                | CC                                     | TT                 | TT               | INTERGENIC                    |                    |                                             |
| SNP_8763_A_14195976 | NC_021161.1    | Ca_Kabuli_Chr02 | 14195976                | CC                                     | GG                 | GG               | INTERGENIC                    |                    |                                             |
| SNP_8764_A_14196053 | NC_021161.1    | Ca_Kabuli_Chr02 | 14196053                | TT                                     | GG                 | GG               | INTERGENIC                    |                    |                                             |
| SNP_8765_A_14197785 | NC_021161.1    | Ca_Kabuli_Chr02 | 14197785                | GG                                     | AA                 | AA               | INTERGENIC                    |                    |                                             |
| SNP_8766_A_14213141 | NC_021161.1    | Ca_Kabuli_Chr02 | 14213141                | TT                                     | AA                 | AA               | INTERGENIC                    |                    |                                             |
| SNP_8767_A_15153776 | NC_021161.1    | Ca_Kabuli_Chr02 | 15153776                | TT                                     | CC                 | CC               | INTERGENIC                    |                    |                                             |
| SNP_8768_A_15175597 | NC_021161.1    | Ca_Kabuli_Chr02 | 15175597                | GG                                     | AA                 | AA               | INTRON                        | 101489567          | probable inactive purple acid phosphatase 1 |

| SNPs IDs            | Chromosome IDs | Chromosomes     | Physical positions (bp) | CDC Frontier genome (Reference genome) | (Pusa 1103 & HPNB) | (ILWC 46 & LPNB) | Sequence Components of genome | Gene accession IDs | Putative functions                     |
|---------------------|----------------|-----------------|-------------------------|----------------------------------------|--------------------|------------------|-------------------------------|--------------------|----------------------------------------|
| SNP_8769_A_15200367 | NC_021161.1    | Ca_Kabuli_Chr02 | 15200367                | AA                                     | CC                 | CC               | INTERGENIC                    |                    |                                        |
| SNP_8770_A_15200378 | NC_021161.1    | Ca_Kabuli_Chr02 | 15200378                | AA                                     | GG                 | GG               | INTERGENIC                    |                    |                                        |
| SNP_8771_A_15351556 | NC_021161.1    | Ca_Kabuli_Chr02 | 15351556                | GG                                     | CC                 | CC               | INTERGENIC                    |                    |                                        |
| SNP_8772_A_15363526 | NC_021161.1    | Ca_Kabuli_Chr02 | 15363526                | AA                                     | GG                 | GG               | URR                           | 101500166          | uncharacterized protein At4g04775-like |
| SNP_8773_A_15401206 | NC_021161.1    | Ca_Kabuli_Chr02 | 15401206                | AA                                     | CC                 | CC               | INTERGENIC                    |                    |                                        |
| SNP_8774_A_15406925 | NC_021161.1    | Ca_Kabuli_Chr02 | 15406925                | AA                                     | GG                 | GG               | INTERGENIC                    |                    |                                        |
| SNP_8775_A_15453885 | NC_021161.1    | Ca_Kabuli_Chr02 | 15453885                | GG                                     | TT                 | TT               | INTERGENIC                    |                    |                                        |
| SNP_8776_A_15454027 | NC_021161.1    | Ca_Kabuli_Chr02 | 15454027                | AA                                     | GG                 | GG               | INTERGENIC                    |                    |                                        |
| SNP_8777_A_15454074 | NC_021161.1    | Ca_Kabuli_Chr02 | 15454074                | GG                                     | CC                 | CC               | INTERGENIC                    |                    |                                        |
| SNP_8779_A_15454328 | NC_021161.1    | Ca_Kabuli_Chr02 | 15454328                | TT                                     | AA                 | AA               | INTERGENIC                    |                    |                                        |
| SNP_8780_A_15454350 | NC_021161.1    | Ca_Kabuli_Chr02 | 15454350                | TT                                     | CC                 | CC               | INTERGENIC                    |                    |                                        |
| SNP_8782_A_15520903 | NC_021161.1    | Ca_Kabuli_Chr02 | 15520903                | TT                                     | CC                 | CC               | INTERGENIC                    |                    |                                        |
| SNP_8783_A_15521011 | NC_021161.1    | Ca_Kabuli_Chr02 | 15521011                | CC                                     | TT                 | TT               | INTERGENIC                    |                    |                                        |
| SNP_8784_A_15521218 | NC_021161.1    | Ca_Kabuli_Chr02 | 15521218                | CC                                     | AA                 | AA               | INTERGENIC                    |                    |                                        |
| SNP_8785_A_15550249 | NC_021161.1    | Ca_Kabuli_Chr02 | 15550249                | GG                                     | AA                 | AA               | INTERGENIC                    |                    |                                        |
| SNP_8787_A_15577620 | NC_021161.1    | Ca_Kabuli_Chr02 | 15577620                | GG                                     | AA                 | AA               | INTERGENIC                    |                    |                                        |
| SNP_8788_A_15588772 | NC_021161.1    | Ca_Kabuli_Chr02 | 15588772                | AA                                     | GG                 | GG               | INTERGENIC                    |                    |                                        |
| SNP_8790_A_15589189 | NC_021161.1    | Ca_Kabuli_Chr02 | 15589189                | CC                                     | TT                 | TT               | INTERGENIC                    |                    |                                        |
| SNP_8791_A_15589406 | NC_021161.1    | Ca_Kabuli_Chr02 | 15589406                | CC                                     | AA                 | AA               | INTERGENIC                    |                    |                                        |
| SNP_8792_A_15589436 | NC_021161.1    | Ca_Kabuli_Chr02 | 15589436                | GG                                     | CC                 | CC               | INTERGENIC                    |                    |                                        |
| SNP_8793_A_15589603 | NC_021161.1    | Ca_Kabuli_Chr02 | 15589603                | CC                                     | AA                 | AA               | INTERGENIC                    |                    |                                        |
| SNP_8794_A_15591982 | NC_021161.1    | Ca_Kabuli_Chr02 | 15591982                | AA                                     | CC                 | CC               | INTRON                        | 101502080          | Unknown function                       |

| SNPs IDs            | Chromosome IDs | Chromosomes     | Physical positions (bp) | CDC Frontier (Reference genome) | (Pusa 1103 & HPNB) | (ILWC 46 & LPNB) | Sequence genome | Components of | Gene accession IDs           | Putative functions |
|---------------------|----------------|-----------------|-------------------------|---------------------------------|--------------------|------------------|-----------------|---------------|------------------------------|--------------------|
| SNP_8795_A_15596867 | NC_021161.1    | Ca_Kabuli_Chr02 | 15596867                | TT                              | CC                 | CC               | INTERGENIC      |               |                              |                    |
| SNP_8796_A_15598338 | NC_021161.1    | Ca_Kabuli_Chr02 | 15598338                | TT                              | CC                 | CC               | INTERGENIC      |               |                              |                    |
| SNP_8797_A_15598998 | NC_021161.1    | Ca_Kabuli_Chr02 | 15598998                | GG                              | TT                 | TT               | INTERGENIC      |               |                              |                    |
| SNP_8798_A_15599098 | NC_021161.1    | Ca_Kabuli_Chr02 | 15599098                | AA                              | GG                 | GG               | INTERGENIC      |               |                              |                    |
| SNP_8799_A_15600141 | NC_021161.1    | Ca_Kabuli_Chr02 | 15600141                | TT                              | GG                 | GG               | INTERGENIC      |               |                              |                    |
| SNP_8801_A_15658097 | NC_021161.1    | Ca_Kabuli_Chr02 | 15658097                | TT                              | CC                 | CC               | INTERGENIC      |               |                              |                    |
| SNP_8802_A_15675728 | NC_021161.1    | Ca_Kabuli_Chr02 | 15675728                | CC                              | TT                 | TT               | INTERGENIC      |               |                              |                    |
| SNP_8804_A_15717500 | NC_021161.1    | Ca_Kabuli_Chr02 | 15717500                | CC                              | AA                 | AA               | DRR             | 101502407     | uncharacterized LOC101502407 |                    |
| SNP_8805_A_15737675 | NC_021161.1    | Ca_Kabuli_Chr02 | 15737675                | AA                              | GG                 | GG               | INTERGENIC      |               |                              |                    |
| SNP_8806_A_15737706 | NC_021161.1    | Ca_Kabuli_Chr02 | 15737706                | CC                              | TT                 | TT               | INTERGENIC      |               |                              |                    |
| SNP_8807_A_15737710 | NC_021161.1    | Ca_Kabuli_Chr02 | 15737710                | GG                              | AA                 | AA               | INTERGENIC      |               |                              |                    |
| SNP_8808_A_15737719 | NC_021161.1    | Ca_Kabuli_Chr02 | 15737719                | TT                              | CC                 | CC               | INTERGENIC      |               |                              |                    |
| SNP_8809_A_15737734 | NC_021161.1    | Ca_Kabuli_Chr02 | 15737734                | TT                              | CC                 | CC               | INTERGENIC      |               |                              |                    |
| SNP_8810_A_15737738 | NC_021161.1    | Ca_Kabuli_Chr02 | 15737738                | GG                              | CC                 | CC               | INTERGENIC      |               |                              |                    |
| SNP_8811_A_15737746 | NC_021161.1    | Ca_Kabuli_Chr02 | 15737746                | AA                              | TT                 | TT               | INTERGENIC      |               |                              |                    |
| SNP_8812_A_15737781 | NC_021161.1    | Ca_Kabuli_Chr02 | 15737781                | TT                              | CC                 | CC               | INTERGENIC      |               |                              |                    |
| SNP_8813_A_15737782 | NC_021161.1    | Ca_Kabuli_Chr02 | 15737782                | TT                              | CC                 | CC               | INTERGENIC      |               |                              |                    |
| SNP_8814_A_15746710 | NC_021161.1    | Ca_Kabuli_Chr02 | 15746710                | AA                              | GG                 | GG               | INTERGENIC      |               |                              |                    |
| SNP_8815_A_15902864 | NC_021161.1    | Ca_Kabuli_Chr02 | 15902864                | GG                              | CC                 | CC               | INTERGENIC      |               |                              |                    |
| SNP_8816_A_15903634 | NC_021161.1    | Ca_Kabuli_Chr02 | 15903634                | TT                              | CC                 | CC               | INTERGENIC      |               |                              |                    |
| SNP_8817_A_15903989 | NC_021161.1    | Ca_Kabuli_Chr02 | 15903989                | TT                              | CC                 | CC               | INTERGENIC      |               |                              |                    |
| SNP_8818_A_15912641 | NC_021161.1    | Ca_Kabuli_Chr02 | 15912641                | GG                              | AA                 | AA               | INTERGENIC      |               |                              |                    |

| SNPs IDs            | Chromosome IDs | Chromosomes     | Physical positions (bp) | CDC Frontier (Reference genome) | (Pusa 1103 & HPNB) | (ILWC 46 & LPNB) | Sequence Components of genome | Gene accession IDs | Putative functions         |
|---------------------|----------------|-----------------|-------------------------|---------------------------------|--------------------|------------------|-------------------------------|--------------------|----------------------------|
| SNP_8819_A_15915967 | NC_021161.1    | Ca_Kabuli_Chr02 | 15915967                | AA                              | CC                 | CC               | INTERGENIC                    |                    |                            |
| SNP_8820_A_15915973 | NC_021161.1    | Ca_Kabuli_Chr02 | 15915973                | CC                              | TT                 | TT               | INTERGENIC                    |                    |                            |
| SNP_8821_A_15917479 | NC_021161.1    | Ca_Kabuli_Chr02 | 15917479                | CC                              | AA                 | AA               | INTERGENIC                    |                    |                            |
| SNP_8822_A_15917494 | NC_021161.1    | Ca_Kabuli_Chr02 | 15917494                | GG                              | TT                 | TT               | INTERGENIC                    |                    |                            |
| SNP_8823_A_15941138 | NC_021161.1    | Ca_Kabuli_Chr02 | 15941138                | TT                              | CC                 | CC               | INTERGENIC                    |                    |                            |
| SNP_8824_A_15941156 | NC_021161.1    | Ca_Kabuli_Chr02 | 15941156                | GG                              | AA                 | AA               | INTERGENIC                    |                    |                            |
| SNP_8825_A_15941158 | NC_021161.1    | Ca_Kabuli_Chr02 | 15941158                | TT                              | AA                 | AA               | INTERGENIC                    |                    |                            |
| SNP_8826_A_15941176 | NC_021161.1    | Ca_Kabuli_Chr02 | 15941176                | TT                              | GG                 | GG               | INTERGENIC                    |                    |                            |
| SNP_8827_A_15941182 | NC_021161.1    | Ca_Kabuli_Chr02 | 15941182                | TT                              | CC                 | CC               | INTERGENIC                    |                    |                            |
| SNP_8828_A_16003171 | NC_021161.1    | Ca_Kabuli_Chr02 | 16003171                | CC                              | GG                 | GG               | INTERGENIC                    |                    |                            |
| SNP_8829_A_16013606 | NC_021161.1    | Ca_Kabuli_Chr02 | 16013606                | AA                              | GG                 | GG               | INTRON                        | 101504006          | MADS-box protein CMB1-like |
| SNP_8830_A_16032180 | NC_021161.1    | Ca_Kabuli_Chr02 | 16032180                | GG                              | AA                 | AA               | INTRON                        | 101504006          | MADS-box protein CMB1-like |
| SNP_8831_A_16062345 | NC_021161.1    | Ca_Kabuli_Chr02 | 16062345                | TT                              | CC                 | CC               | INTERGENIC                    |                    |                            |
| SNP_8832_A_16086219 | NC_021161.1    | Ca_Kabuli_Chr02 | 16086219                | CC                              | GG                 | GG               | INTERGENIC                    |                    |                            |
| SNP_8833_A_16171088 | NC_021161.1    | Ca_Kabuli_Chr02 | 16171088                | CC                              | GG                 | GG               | INTERGENIC                    |                    |                            |
| SNP_8834_A_16171632 | NC_021161.1    | Ca_Kabuli_Chr02 | 16171632                | AA                              | GG                 | GG               | INTERGENIC                    |                    |                            |
| SNP_8835_A_16220849 | NC_021161.1    | Ca_Kabuli_Chr02 | 16220849                | CC                              | TT                 | TT               | INTERGENIC                    |                    |                            |
| SNP_8836_A_16220938 | NC_021161.1    | Ca_Kabuli_Chr02 | 16220938                | CC                              | TT                 | TT               | INTERGENIC                    |                    |                            |
| SNP_8837_A_16250878 | NC_021161.1    | Ca_Kabuli_Chr02 | 16250878                | TT                              | CC                 | CC               | INTERGENIC                    |                    |                            |
| SNP_8838_A_16252132 | NC_021161.1    | Ca_Kabuli_Chr02 | 16252132                | AA                              | GG                 | GG               | INTERGENIC                    |                    |                            |
| SNP_8839_A_16252175 | NC_021161.1    | Ca_Kabuli_Chr02 | 16252175                | TT                              | AA                 | AA               | INTERGENIC                    |                    |                            |
| SNP_8840_A_16252501 | NC_021161.1    | Ca_Kabuli_Chr02 | 16252501                | TT                              | CC                 | CC               | INTERGENIC                    |                    |                            |



| SNPs IDs            | Chromosome IDs | Chromosomes     | Physical positions (bp) | CDC Frontier (Reference genome) | (Pusa 1103 & HPNB) | (ILWC 46 & LPNB) | Sequence Components of genome | Gene accession IDs | Putative functions                        |
|---------------------|----------------|-----------------|-------------------------|---------------------------------|--------------------|------------------|-------------------------------|--------------------|-------------------------------------------|
| SNP_8841_A_16252603 | NC_021161.1    | Ca_Kabuli_Chr02 | 16252603                | TT                              | CC                 | CC               | INTERGENIC                    |                    |                                           |
| SNP_8842_A_16335402 | NC_021161.1    | Ca_Kabuli_Chr02 | 16335402                | AA                              | GG                 | GG               | INTERGENIC                    |                    |                                           |
| SNP_8843_A_16335418 | NC_021161.1    | Ca_Kabuli_Chr02 | 16335418                | GG                              | AA                 | AA               | INTERGENIC                    |                    |                                           |
| SNP_8844_A_16341392 | NC_021161.1    | Ca_Kabuli_Chr02 | 16341392                | TT                              | GG                 | GG               | INTERGENIC                    |                    |                                           |
| SNP_8845_A_16365662 | NC_021161.1    | Ca_Kabuli_Chr02 | 16365662                | TT                              | CC                 | CC               | INTRON                        | 101510111          | clavamate synthase-like protein At3g21360 |
| SNP_8846_A_16368219 | NC_021161.1    | Ca_Kabuli_Chr02 | 16368219                | CC                              | AA                 | AA               | URR                           | 101510111          | clavamate synthase-like protein At3g21360 |
| SNP_8847_A_16433264 | NC_021161.1    | Ca_Kabuli_Chr02 | 16433264                | TT                              | CC                 | CC               | INTERGENIC                    |                    |                                           |
| SNP_8848_A_16433654 | NC_021161.1    | Ca_Kabuli_Chr02 | 16433654                | AA                              | GG                 | GG               | INTERGENIC                    |                    |                                           |
| SNP_8849_A_16456475 | NC_021161.1    | Ca_Kabuli_Chr02 | 16456475                | TT                              | CC                 | CC               | INTERGENIC                    |                    |                                           |
| SNP_8850_A_16456492 | NC_021161.1    | Ca_Kabuli_Chr02 | 16456492                | GG                              | AA                 | AA               | INTERGENIC                    |                    |                                           |
| SNP_8851_A_16456500 | NC_021161.1    | Ca_Kabuli_Chr02 | 16456500                | AA                              | GG                 | GG               | INTERGENIC                    |                    |                                           |
| SNP_8852_A_16456508 | NC_021161.1    | Ca_Kabuli_Chr02 | 16456508                | AA                              | CC                 | CC               | INTERGENIC                    |                    |                                           |
| SNP_8854_A_16456587 | NC_021161.1    | Ca_Kabuli_Chr02 | 16456587                | AA                              | GG                 | GG               | INTERGENIC                    |                    |                                           |
| SNP_8855_A_16456591 | NC_021161.1    | Ca_Kabuli_Chr02 | 16456591                | CC                              | TT                 | TT               | INTERGENIC                    |                    |                                           |
| SNP_8856_A_16456800 | NC_021161.1    | Ca_Kabuli_Chr02 | 16456800                | TT                              | CC                 | CC               | INTERGENIC                    |                    |                                           |
| SNP_8857_A_16458241 | NC_021161.1    | Ca_Kabuli_Chr02 | 16458241                | CC                              | TT                 | TT               | INTERGENIC                    |                    |                                           |
| SNP_8858_A_16466141 | NC_021161.1    | Ca_Kabuli_Chr02 | 16466141                | CC                              | TT                 | TT               | INTERGENIC                    |                    |                                           |
| SNP_8859_A_16489672 | NC_021161.1    | Ca_Kabuli_Chr02 | 16489672                | GG                              | AA                 | AA               | INTERGENIC                    |                    |                                           |
| SNP_8860_A_16507755 | NC_021161.1    | Ca_Kabuli_Chr02 | 16507755                | AA                              | TT                 | TT               | INTERGENIC                    |                    |                                           |
| SNP_8861_A_16508350 | NC_021161.1    | Ca_Kabuli_Chr02 | 16508350                | AA                              | GG                 | GG               | INTERGENIC                    |                    |                                           |
| SNP_8862_A_16508367 | NC_021161.1    | Ca_Kabuli_Chr02 | 16508367                | AA                              | TT                 | TT               | INTERGENIC                    |                    |                                           |
| SNP_8863_A_16508483 | NC_021161.1    | Ca_Kabuli_Chr02 | 16508483                | TT                              | CC                 | CC               | INTERGENIC                    |                    |                                           |

| SNPs IDs            | Chromosome IDs | Chromosomes     | Physical positions (bp) | CDC Frontier (Reference genome) | (Pusa 1103 & HPNB) | (ILWC 46 & LPNB) | Sequence Components of genome | Gene accession IDs | Putative functions           |
|---------------------|----------------|-----------------|-------------------------|---------------------------------|--------------------|------------------|-------------------------------|--------------------|------------------------------|
| SNP_8864_A_16508537 | NC_021161.1    | Ca_Kabuli_Chr02 | 16508537                | CC                              | GG                 | GG               | INTERGENIC                    |                    |                              |
| SNP_8865_A_16508764 | NC_021161.1    | Ca_Kabuli_Chr02 | 16508764                | CC                              | TT                 | TT               | INTERGENIC                    |                    |                              |
| SNP_8866_A_16509102 | NC_021161.1    | Ca_Kabuli_Chr02 | 16509102                | TT                              | CC                 | CC               | INTERGENIC                    |                    |                              |
| SNP_8867_A_16509249 | NC_021161.1    | Ca_Kabuli_Chr02 | 16509249                | GG                              | AA                 | AA               | INTERGENIC                    |                    |                              |
| SNP_8868_A_16509316 | NC_021161.1    | Ca_Kabuli_Chr02 | 16509316                | TT                              | CC                 | CC               | INTERGENIC                    |                    |                              |
| SNP_8869_A_16509586 | NC_021161.1    | Ca_Kabuli_Chr02 | 16509586                | CC                              | TT                 | TT               | INTERGENIC                    |                    |                              |
| SNP_8870_A_16509591 | NC_021161.1    | Ca_Kabuli_Chr02 | 16509591                | TT                              | CC                 | CC               | INTERGENIC                    |                    |                              |
| SNP_8871_A_16511747 | NC_021161.1    | Ca_Kabuli_Chr02 | 16511747                | GG                              | AA                 | AA               | INTERGENIC                    |                    |                              |
| SNP_8872_A_16514195 | NC_021161.1    | Ca_Kabuli_Chr02 | 16514195                | AA                              | GG                 | GG               | INTERGENIC                    |                    |                              |
| SNP_8873_A_16565488 | NC_021161.1    | Ca_Kabuli_Chr02 | 16565488                | TT                              | CC                 | CC               | URR                           | 101511284          | uncharacterized LOC101511284 |
| SNP_8874_A_16589786 | NC_021161.1    | Ca_Kabuli_Chr02 | 16589786                | CC                              | TT                 | TT               | INTERGENIC                    |                    |                              |
| SNP_8875_A_16602863 | NC_021161.1    | Ca_Kabuli_Chr02 | 16602863                | TT                              | CC                 | CC               | URR                           | 101488483          | uncharacterized LOC101488483 |
| SNP_8876_A_16604893 | NC_021161.1    | Ca_Kabuli_Chr02 | 16604893                | GG                              | AA                 | AA               | INTERGENIC                    |                    |                              |
| SNP_8877_A_16604909 | NC_021161.1    | Ca_Kabuli_Chr02 | 16604909                | TT                              | CC                 | CC               | INTERGENIC                    |                    |                              |
| SNP_8878_A_16650062 | NC_021161.1    | Ca_Kabuli_Chr02 | 16650062                | TT                              | CC                 | CC               | INTERGENIC                    |                    |                              |
| SNP_8879_A_16650071 | NC_021161.1    | Ca_Kabuli_Chr02 | 16650071                | CC                              | TT                 | TT               | INTERGENIC                    |                    |                              |
| SNP_8880_A_16650158 | NC_021161.1    | Ca_Kabuli_Chr02 | 16650158                | AA                              | GG                 | GG               | INTERGENIC                    |                    |                              |
| SNP_8881_A_16666695 | NC_021161.1    | Ca_Kabuli_Chr02 | 16666695                | TT                              | GG                 | GG               | INTERGENIC                    |                    |                              |
| SNP_8882_A_16697585 | NC_021161.1    | Ca_Kabuli_Chr02 | 16697585                | CC                              | TT                 | TT               | INTERGENIC                    |                    |                              |
| SNP_8883_A_16715349 | NC_021161.1    | Ca_Kabuli_Chr02 | 16715349                | TT                              | GG                 | GG               | NON_SYNONYMOUS_CODING         | 101488826          | Unknown function             |
| SNP_8884_A_16864507 | NC_021161.1    | Ca_Kabuli_Chr02 | 16864507                | CC                              | AA                 | AA               | INTERGENIC                    |                    |                              |
| SNP_8885_A_16864702 | NC_021161.1    | Ca_Kabuli_Chr02 | 16864702                | AA                              | GG                 | GG               | INTERGENIC                    |                    |                              |

| SNPs IDs            | Chromosome IDs | Chromosomes     | Physical positions (bp) | CDC Frontier genome (Reference genome) | (Pusa 1103 & HPNB) | (ILWC 46 & LPNB) | Sequence genome       | Components of | Gene accession IDs | Putative functions                     |
|---------------------|----------------|-----------------|-------------------------|----------------------------------------|--------------------|------------------|-----------------------|---------------|--------------------|----------------------------------------|
| SNP_8886_A_16864729 | NC_021161.1    | Ca_Kabuli_Chr02 | 16864729                | TT                                     | CC                 | CC               | INTERGENIC            |               |                    |                                        |
| SNP_8887_A_16864811 | NC_021161.1    | Ca_Kabuli_Chr02 | 16864811                | GG                                     | AA                 | AA               | INTERGENIC            |               |                    |                                        |
| SNP_8888_A_16938675 | NC_021161.1    | Ca_Kabuli_Chr02 | 16938675                | TT                                     | AA                 | AA               | INTERGENIC            |               |                    |                                        |
| SNP_8889_A_16938676 | NC_021161.1    | Ca_Kabuli_Chr02 | 16938676                | GG                                     | CC                 | CC               | INTERGENIC            |               |                    |                                        |
| SNP_8890_A_16938680 | NC_021161.1    | Ca_Kabuli_Chr02 | 16938680                | CC                                     | TT                 | TT               | INTERGENIC            |               |                    |                                        |
| SNP_8891_A_16938681 | NC_021161.1    | Ca_Kabuli_Chr02 | 16938681                | GG                                     | AA                 | AA               | INTERGENIC            |               |                    |                                        |
| SNP_8892_A_16991367 | NC_021161.1    | Ca_Kabuli_Chr02 | 16991367                | CC                                     | GG                 | GG               | INTERGENIC            |               |                    |                                        |
| SNP_8893_A_16991372 | NC_021161.1    | Ca_Kabuli_Chr02 | 16991372                | CC                                     | TT                 | TT               | INTERGENIC            |               |                    |                                        |
| SNP_8894_A_16991409 | NC_021161.1    | Ca_Kabuli_Chr02 | 16991409                | GG                                     | AA                 | AA               | INTERGENIC            |               |                    |                                        |
| SNP_8895_A_17030318 | NC_021161.1    | Ca_Kabuli_Chr02 | 17030318                | CC                                     | AA                 | AA               | INTERGENIC            |               |                    |                                        |
| SNP_8896_A_17030590 | NC_021161.1    | Ca_Kabuli_Chr02 | 17030590                | CC                                     | AA                 | AA               | INTERGENIC            |               |                    |                                        |
| SNP_8897_A_17031821 | NC_021161.1    | Ca_Kabuli_Chr02 | 17031821                | CC                                     | AA                 | AA               | INTERGENIC            |               |                    |                                        |
| SNP_8899_A_17050215 | NC_021161.1    | Ca_Kabuli_Chr02 | 17050215                | TT                                     | CC                 | CC               | INTERGENIC            |               |                    |                                        |
| SNP_8900_A_17050245 | NC_021161.1    | Ca_Kabuli_Chr02 | 17050245                | AA                                     | GG                 | GG               | INTERGENIC            |               |                    |                                        |
| SNP_8901_A_17050342 | NC_021161.1    | Ca_Kabuli_Chr02 | 17050342                | GG                                     | AA                 | AA               | INTERGENIC            |               |                    |                                        |
| SNP_8902_A_17050371 | NC_021161.1    | Ca_Kabuli_Chr02 | 17050371                | TT                                     | GG                 | GG               | INTERGENIC            |               |                    |                                        |
| SNP_8903_A_17051495 | NC_021161.1    | Ca_Kabuli_Chr02 | 17051495                | GG                                     | AA                 | AA               | INTERGENIC            |               |                    |                                        |
| SNP_8905_A_17061666 | NC_021161.1    | Ca_Kabuli_Chr02 | 17061666                | TT                                     | CC                 | CC               | INTERGENIC            |               |                    |                                        |
| SNP_8907_A_17061686 | NC_021161.1    | Ca_Kabuli_Chr02 | 17061686                | GG                                     | AA                 | AA               | INTERGENIC            |               |                    |                                        |
| SNP_8908_A_17062079 | NC_021161.1    | Ca_Kabuli_Chr02 | 17062079                | AA                                     | GG                 | GG               | INTERGENIC            |               |                    |                                        |
| SNP_8909_A_17106692 | NC_021161.1    | Ca_Kabuli_Chr02 | 17106692                | TT                                     | GG                 | GG               | URR                   | 101511500     |                    | zinc finger MYM-type protein 1-like    |
| SNP_8910_A_17161727 | NC_021161.1    | Ca_Kabuli_Chr02 | 17161727                | TT                                     | CC                 | CC               | NON_SYNONYMOUS_CODING | 101494422     |                    | phosphoenolpyruvate carboxylase 4-like |

| SNPs IDs            | Chromosome IDs | Chromosomes     | Physical positions (bp) | CDC Frontier (Reference genome) | (Pusa 1103 & HPNB) | (ILWC 46 & LPNB) | Sequence Components of genome | Gene accession IDs | Putative functions                        |
|---------------------|----------------|-----------------|-------------------------|---------------------------------|--------------------|------------------|-------------------------------|--------------------|-------------------------------------------|
| SNP_8911_A_17195458 | NC_021161.1    | Ca_Kabuli_Chr02 | 17195458                | GG                              | AA                 | AA               | INTERGENIC                    |                    |                                           |
| SNP_8912_A_17203676 | NC_021161.1    | Ca_Kabuli_Chr02 | 17203676                | GG                              | TT                 | TT               | NON_SYNONYMOUS_CODING         | 101512465          | metal-nicotianamine transporter YSL3-like |
| SNP_8913_A_17203869 | NC_021161.1    | Ca_Kabuli_Chr02 | 17203869                | GG                              | AA                 | AA               | NON_SYNONYMOUS_CODING         | 101512465          | metal-nicotianamine transporter YSL3-like |
| SNP_8914_A_17208715 | NC_021161.1    | Ca_Kabuli_Chr02 | 17208715                | CC                              | TT                 | TT               | INTERGENIC                    |                    |                                           |
| SNP_8915_A_17208801 | NC_021161.1    | Ca_Kabuli_Chr02 | 17208801                | AA                              | GG                 | GG               | INTERGENIC                    |                    |                                           |
| SNP_8916_A_17208837 | NC_021161.1    | Ca_Kabuli_Chr02 | 17208837                | TT                              | GG                 | GG               | INTERGENIC                    |                    |                                           |
| SNP_8917_A_17208855 | NC_021161.1    | Ca_Kabuli_Chr02 | 17208855                | AA                              | GG                 | GG               | INTERGENIC                    |                    |                                           |
| SNP_8918_A_17209000 | NC_021161.1    | Ca_Kabuli_Chr02 | 17209000                | AA                              | GG                 | GG               | INTERGENIC                    |                    |                                           |
| SNP_8919_A_17209014 | NC_021161.1    | Ca_Kabuli_Chr02 | 17209014                | TT                              | CC                 | CC               | INTERGENIC                    |                    |                                           |
| SNP_8920_A_17209030 | NC_021161.1    | Ca_Kabuli_Chr02 | 17209030                | TT                              | CC                 | CC               | INTERGENIC                    |                    |                                           |
| SNP_8921_A_17209221 | NC_021161.1    | Ca_Kabuli_Chr02 | 17209221                | CC                              | TT                 | TT               | INTERGENIC                    |                    |                                           |
| SNP_8922_A_17209236 | NC_021161.1    | Ca_Kabuli_Chr02 | 17209236                | TT                              | CC                 | CC               | INTERGENIC                    |                    |                                           |
| SNP_8924_A_17209271 | NC_021161.1    | Ca_Kabuli_Chr02 | 17209271                | TT                              | AA                 | AA               | INTERGENIC                    |                    |                                           |
| SNP_8925_A_17209272 | NC_021161.1    | Ca_Kabuli_Chr02 | 17209272                | AA                              | CC                 | CC               | INTERGENIC                    |                    |                                           |
| SNP_8926_A_17209316 | NC_021161.1    | Ca_Kabuli_Chr02 | 17209316                | GG                              | AA                 | AA               | INTERGENIC                    |                    |                                           |
| SNP_8927_A_17243366 | NC_021161.1    | Ca_Kabuli_Chr02 | 17243366                | AA                              | GG                 | GG               | INTRON                        | 101496043          | HD domain-containing protein C4G3.17      |
| SNP_8928_A_17256354 | NC_021161.1    | Ca_Kabuli_Chr02 | 17256354                | TT                              | CC                 | CC               | INTERGENIC                    |                    |                                           |
| SNP_8929_A_17257270 | NC_021161.1    | Ca_Kabuli_Chr02 | 17257270                | TT                              | GG                 | GG               | INTERGENIC                    |                    |                                           |
| SNP_8930_A_17257480 | NC_021161.1    | Ca_Kabuli_Chr02 | 17257480                | AA                              | GG                 | GG               | INTERGENIC                    |                    |                                           |
| SNP_8931_A_17385384 | NC_021161.1    | Ca_Kabuli_Chr02 | 17385384                | CC                              | TT                 | TT               | INTERGENIC                    |                    |                                           |
| SNP_8932_A_17386057 | NC_021161.1    | Ca_Kabuli_Chr02 | 17386057                | TT                              | AA                 | AA               | INTERGENIC                    |                    |                                           |
| SNP_8933_A_17387281 | NC_021161.1    | Ca_Kabuli_Chr02 | 17387281                | GG                              | AA                 | AA               | INTERGENIC                    |                    |                                           |

| SNPs IDs            | Chromosome IDs | Chromosomes     | Physical positions (bp) | CDC Frontier genome (Reference genome) | (Pusa 1103 & HPNB) | (ILWC 46 & LPNB) | Sequence Components of genome | Gene accession IDs | Putative functions                 |
|---------------------|----------------|-----------------|-------------------------|----------------------------------------|--------------------|------------------|-------------------------------|--------------------|------------------------------------|
| SNP_8934_A_17387294 | NC_021161.1    | Ca_Kabuli_Chr02 | 17387294                | TT                                     | CC                 | CC               | INTERGENIC                    |                    |                                    |
| SNP_8935_A_17387698 | NC_021161.1    | Ca_Kabuli_Chr02 | 17387698                | TT                                     | AA                 | AA               | INTERGENIC                    |                    |                                    |
| SNP_8936_A_17402394 | NC_021161.1    | Ca_Kabuli_Chr02 | 17402394                | AA                                     | GG                 | GG               | NON_SYNONYMOUS_CODING         | 101513439          | Unknown function                   |
| SNP_8937_A_17406919 | NC_021161.1    | Ca_Kabuli_Chr02 | 17406919                | AA                                     | GG                 | GG               | INTERGENIC                    |                    |                                    |
| SNP_8938_A_17407152 | NC_021161.1    | Ca_Kabuli_Chr02 | 17407152                | TT                                     | CC                 | CC               | INTERGENIC                    |                    |                                    |
| SNP_8939_A_17407191 | NC_021161.1    | Ca_Kabuli_Chr02 | 17407191                | TT                                     | CC                 | CC               | INTERGENIC                    |                    |                                    |
| SNP_8940_A_17407192 | NC_021161.1    | Ca_Kabuli_Chr02 | 17407192                | TT                                     | AA                 | AA               | INTERGENIC                    |                    |                                    |
| SNP_8941_A_17407228 | NC_021161.1    | Ca_Kabuli_Chr02 | 17407228                | TT                                     | CC                 | CC               | INTERGENIC                    |                    |                                    |
| SNP_8942_A_17407243 | NC_021161.1    | Ca_Kabuli_Chr02 | 17407243                | TT                                     | CC                 | CC               | INTERGENIC                    |                    |                                    |
| SNP_8943_A_17407306 | NC_021161.1    | Ca_Kabuli_Chr02 | 17407306                | TT                                     | CC                 | CC               | INTERGENIC                    |                    |                                    |
| SNP_8944_A_17463776 | NC_021161.1    | Ca_Kabuli_Chr02 | 17463776                | TT                                     | CC                 | CC               | URR                           | 101497018          | importin-9                         |
| SNP_8945_A_17491116 | NC_021161.1    | Ca_Kabuli_Chr02 | 17491116                | TT                                     | CC                 | CC               | INTERGENIC                    |                    |                                    |
| SNP_8946_A_17491346 | NC_021161.1    | Ca_Kabuli_Chr02 | 17491346                | TT                                     | CC                 | CC               | INTERGENIC                    |                    |                                    |
| SNP_8947_A_17551350 | NC_021161.1    | Ca_Kabuli_Chr02 | 17551350                | AA                                     | CC                 | CC               | INTRON                        | 101514090          | uncharacterized LOC101514090       |
| SNP_8948_A_17551479 | NC_021161.1    | Ca_Kabuli_Chr02 | 17551479                | CC                                     | TT                 | TT               | NON_SYNONYMOUS_CODING         | 101514090          | uncharacterized LOC101514090       |
| SNP_8949_A_17551577 | NC_021161.1    | Ca_Kabuli_Chr02 | 17551577                | AA                                     | CC                 | CC               | DRR                           | 101514415          | cytosolic sulfotransferase 14-like |
| SNP_8950_A_17551656 | NC_021161.1    | Ca_Kabuli_Chr02 | 17551656                | AA                                     | GG                 | GG               | DRR                           | 101514415          | cytosolic sulfotransferase 14-like |
| SNP_8952_A_17551859 | NC_021161.1    | Ca_Kabuli_Chr02 | 17551859                | AA                                     | CC                 | CC               | DRR                           | 101514415          | cytosolic sulfotransferase 14-like |
| SNP_8954_A_17595233 | NC_021161.1    | Ca_Kabuli_Chr02 | 17595233                | AA                                     | GG                 | GG               | INTERGENIC                    |                    |                                    |
| SNP_8955_A_17704886 | NC_021161.1    | Ca_Kabuli_Chr02 | 17704886                | GG                                     | AA                 | AA               | INTERGENIC                    |                    |                                    |
| SNP_8956_A_17704901 | NC_021161.1    | Ca_Kabuli_Chr02 | 17704901                | GG                                     | AA                 | AA               | INTERGENIC                    |                    |                                    |
| SNP_8957_A_17704922 | NC_021161.1    | Ca_Kabuli_Chr02 | 17704922                | CC                                     | TT                 | TT               | INTERGENIC                    |                    |                                    |

| SNPs IDs            | Chromosome IDs | Chromosomes     | Physical positions (bp) | CDC Frontier (Reference genome) | (Pusa 1103 & HPNB) | (ILWC 46 & LPNB) | Sequence Components of genome | Gene accession IDs | Putative functions                          |
|---------------------|----------------|-----------------|-------------------------|---------------------------------|--------------------|------------------|-------------------------------|--------------------|---------------------------------------------|
| SNP_8958_A_17704934 | NC_021161.1    | Ca_Kabuli_Chr02 | 17704934                | CC                              | TT                 | TT               | INTERGENIC                    |                    |                                             |
| SNP_8959_A_17724750 | NC_021161.1    | Ca_Kabuli_Chr02 | 17724750                | TT                              | CC                 | CC               | INTERGENIC                    |                    |                                             |
| SNP_8960_A_17728738 | NC_021161.1    | Ca_Kabuli_Chr02 | 17728738                | TT                              | CC                 | CC               | URR                           | 101410582          | transfer RNA histidine(anticodon GUG)       |
| SNP_8961_A_17765814 | NC_021161.1    | Ca_Kabuli_Chr02 | 17765814                | GG                              | TT                 | TT               | INTERGENIC                    |                    |                                             |
| SNP_8962_A_17770501 | NC_021161.1    | Ca_Kabuli_Chr02 | 17770501                | CC                              | TT                 | TT               | INTERGENIC                    |                    |                                             |
| SNP_8963_A_17772698 | NC_021161.1    | Ca_Kabuli_Chr02 | 17772698                | CC                              | TT                 | TT               | INTERGENIC                    |                    |                                             |
| SNP_8964_A_17816837 | NC_021161.1    | Ca_Kabuli_Chr02 | 17816837                | GG                              | AA                 | AA               | INTERGENIC                    |                    |                                             |
| SNP_8965_A_17854200 | NC_021161.1    | Ca_Kabuli_Chr02 | 17854200                | TT                              | CC                 | CC               | URR                           | 101500487          | F-box/FBD/LRR-repeat protein At1g13570-like |
| SNP_8966_A_17854201 | NC_021161.1    | Ca_Kabuli_Chr02 | 17854201                | TT                              | CC                 | CC               | URR                           | 101500487          | F-box/FBD/LRR-repeat protein At1g13570-like |
| SNP_8967_A_17876349 | NC_021161.1    | Ca_Kabuli_Chr02 | 17876349                | AA                              | CC                 | CC               | INTERGENIC                    |                    |                                             |
| SNP_8968_A_17876351 | NC_021161.1    | Ca_Kabuli_Chr02 | 17876351                | AA                              | GG                 | GG               | INTERGENIC                    |                    |                                             |
| SNP_8969_A_17892640 | NC_021161.1    | Ca_Kabuli_Chr02 | 17892640                | AA                              | GG                 | GG               | INTERGENIC                    |                    |                                             |
| SNP_8970_A_17893072 | NC_021161.1    | Ca_Kabuli_Chr02 | 17893072                | TT                              | CC                 | CC               | INTERGENIC                    |                    |                                             |
| SNP_8971_A_17893077 | NC_021161.1    | Ca_Kabuli_Chr02 | 17893077                | AA                              | TT                 | TT               | INTERGENIC                    |                    |                                             |
| SNP_8972_A_17904336 | NC_021161.1    | Ca_Kabuli_Chr02 | 17904336                | CC                              | TT                 | TT               | INTRON                        | 101501129          | uncharacterized LOC101501129                |
| SNP_8973_A_17915721 | NC_021161.1    | Ca_Kabuli_Chr02 | 17915721                | TT                              | CC                 | CC               | INTERGENIC                    |                    |                                             |
| SNP_8974_A_17922398 | NC_021161.1    | Ca_Kabuli_Chr02 | 17922398                | TT                              | CC                 | CC               | INTERGENIC                    |                    |                                             |
| SNP_8975_A_17981432 | NC_021161.1    | Ca_Kabuli_Chr02 | 17981432                | CC                              | TT                 | TT               | INTERGENIC                    |                    |                                             |
| SNP_8976_A_17995602 | NC_021161.1    | Ca_Kabuli_Chr02 | 17995602                | AA                              | GG                 | GG               | INTERGENIC                    |                    |                                             |
| SNP_8977_A_17997684 | NC_021161.1    | Ca_Kabuli_Chr02 | 17997684                | TT                              | CC                 | CC               | INTERGENIC                    |                    |                                             |
| SNP_8978_A_17997689 | NC_021161.1    | Ca_Kabuli_Chr02 | 17997689                | CC                              | TT                 | TT               | INTERGENIC                    |                    |                                             |
| SNP_8979_A_17997753 | NC_021161.1    | Ca_Kabuli_Chr02 | 17997753                | CC                              | GG                 | GG               | INTERGENIC                    |                    |                                             |

| SNPs IDs            | Chromosome IDs | Chromosomes     | Physical positions (bp) | CDC Frontier genome (Reference genome) | (Pusa 1103 & HPNB) | (ILWC 46 & LPNB) | Sequence genome | Components of | Gene accession IDs | Putative functions |
|---------------------|----------------|-----------------|-------------------------|----------------------------------------|--------------------|------------------|-----------------|---------------|--------------------|--------------------|
| SNP_8980_A_17997757 | NC_021161.1    | Ca_Kabuli_Chr02 | 17997757                | CC                                     | TT                 | TT               | INTERGENIC      |               |                    |                    |
| SNP_8981_A_17997822 | NC_021161.1    | Ca_Kabuli_Chr02 | 17997822                | TT                                     | CC                 | CC               | INTERGENIC      |               |                    |                    |
| SNP_8982_A_17997827 | NC_021161.1    | Ca_Kabuli_Chr02 | 17997827                | GG                                     | AA                 | AA               | INTERGENIC      |               |                    |                    |
| SNP_8983_A_18101286 | NC_021161.1    | Ca_Kabuli_Chr02 | 18101286                | TT                                     | CC                 | CC               | INTERGENIC      |               |                    |                    |
| SNP_8984_A_18101647 | NC_021161.1    | Ca_Kabuli_Chr02 | 18101647                | CC                                     | TT                 | TT               | INTERGENIC      |               |                    |                    |
| SNP_8985_A_18125117 | NC_021161.1    | Ca_Kabuli_Chr02 | 18125117                | CC                                     | TT                 | TT               | INTERGENIC      |               |                    |                    |
| SNP_8986_A_18125123 | NC_021161.1    | Ca_Kabuli_Chr02 | 18125123                | CC                                     | AA                 | AA               | INTERGENIC      |               |                    |                    |
| SNP_8987_A_18169995 | NC_021161.1    | Ca_Kabuli_Chr02 | 18169995                | TT                                     | CC                 | CC               | INTERGENIC      |               |                    |                    |
| SNP_8988_A_18170071 | NC_021161.1    | Ca_Kabuli_Chr02 | 18170071                | TT                                     | AA                 | AA               | INTERGENIC      |               |                    |                    |
| SNP_8989_A_18211752 | NC_021161.1    | Ca_Kabuli_Chr02 | 18211752                | TT                                     | CC                 | CC               | INTERGENIC      |               |                    |                    |
| SNP_8990_A_18211753 | NC_021161.1    | Ca_Kabuli_Chr02 | 18211753                | CC                                     | TT                 | TT               | INTERGENIC      |               |                    |                    |
| SNP_8992_A_18326572 | NC_021161.1    | Ca_Kabuli_Chr02 | 18326572                | AA                                     | GG                 | GG               | INTERGENIC      |               |                    |                    |
| SNP_8993_A_18326632 | NC_021161.1    | Ca_Kabuli_Chr02 | 18326632                | TT                                     | GG                 | GG               | INTERGENIC      |               |                    |                    |
| SNP_8995_A_18409050 | NC_021161.1    | Ca_Kabuli_Chr02 | 18409050                | CC                                     | TT                 | TT               | INTERGENIC      |               |                    |                    |
| SNP_8996_A_18438386 | NC_021161.1    | Ca_Kabuli_Chr02 | 18438386                | GG                                     | AA                 | AA               | INTERGENIC      |               |                    |                    |
| SNP_8997_A_18438391 | NC_021161.1    | Ca_Kabuli_Chr02 | 18438391                | GG                                     | AA                 | AA               | INTERGENIC      |               |                    |                    |
| SNP_8998_A_18523391 | NC_021161.1    | Ca_Kabuli_Chr02 | 18523391                | GG                                     | AA                 | AA               | INTERGENIC      |               |                    |                    |
| SNP_9000_A_18587020 | NC_021161.1    | Ca_Kabuli_Chr02 | 18587020                | TT                                     | CC                 | CC               | INTERGENIC      |               |                    |                    |
| SNP_9001_A_18587041 | NC_021161.1    | Ca_Kabuli_Chr02 | 18587041                | CC                                     | TT                 | TT               | INTERGENIC      |               |                    |                    |
| SNP_9002_A_18587045 | NC_021161.1    | Ca_Kabuli_Chr02 | 18587045                | TT                                     | CC                 | CC               | INTERGENIC      |               |                    |                    |
| SNP_9003_A_18587092 | NC_021161.1    | Ca_Kabuli_Chr02 | 18587092                | AA                                     | TT                 | TT               | INTERGENIC      |               |                    |                    |
| SNP_9004_A_18592936 | NC_021161.1    | Ca_Kabuli_Chr02 | 18592936                | CC                                     | TT                 | TT               | INTERGENIC      |               |                    |                    |

| SNPs IDs            | Chromosome IDs | Chromosomes     | Physical positions (bp) | CDC Frontier (Reference genome) | (Pusa 1103 & HPNB) | (ILWC 46 & LPNB) | Sequence genome | Components of | Gene accession IDs | Putative functions |
|---------------------|----------------|-----------------|-------------------------|---------------------------------|--------------------|------------------|-----------------|---------------|--------------------|--------------------|
| SNP_9006_A_18611627 | NC_021161.1    | Ca_Kabuli_Chr02 | 18611627                | TT                              | CC                 | CC               | INTERGENIC      |               |                    |                    |
| SNP_9007_A_18611652 | NC_021161.1    | Ca_Kabuli_Chr02 | 18611652                | CC                              | GG                 | GG               | INTERGENIC      |               |                    |                    |
| SNP_9008_A_18699680 | NC_021161.1    | Ca_Kabuli_Chr02 | 18699680                | TT                              | CC                 | CC               | INTERGENIC      |               |                    |                    |
| SNP_9009_A_18699681 | NC_021161.1    | Ca_Kabuli_Chr02 | 18699681                | GG                              | AA                 | AA               | INTERGENIC      |               |                    |                    |
| SNP_9010_A_18707456 | NC_021161.1    | Ca_Kabuli_Chr02 | 18707456                | GG                              | AA                 | AA               | INTERGENIC      |               |                    |                    |
| SNP_9011_A_18711952 | NC_021161.1    | Ca_Kabuli_Chr02 | 18711952                | CC                              | AA                 | AA               | INTERGENIC      |               |                    |                    |
| SNP_9012_A_18711955 | NC_021161.1    | Ca_Kabuli_Chr02 | 18711955                | CC                              | GG                 | GG               | INTERGENIC      |               |                    |                    |
| SNP_9014_A_18755446 | NC_021161.1    | Ca_Kabuli_Chr02 | 18755446                | CC                              | GG                 | GG               | INTERGENIC      |               |                    |                    |
| SNP_9016_A_18776229 | NC_021161.1    | Ca_Kabuli_Chr02 | 18776229                | TT                              | CC                 | CC               | INTERGENIC      |               |                    |                    |
| SNP_9017_A_18776586 | NC_021161.1    | Ca_Kabuli_Chr02 | 18776586                | AA                              | GG                 | GG               | INTERGENIC      |               |                    |                    |
| SNP_9018_A_18776591 | NC_021161.1    | Ca_Kabuli_Chr02 | 18776591                | AA                              | TT                 | TT               | INTERGENIC      |               |                    |                    |
| SNP_9019_A_18776632 | NC_021161.1    | Ca_Kabuli_Chr02 | 18776632                | TT                              | GG                 | GG               | INTERGENIC      |               |                    |                    |
| SNP_9020_A_18776637 | NC_021161.1    | Ca_Kabuli_Chr02 | 18776637                | CC                              | TT                 | TT               | INTERGENIC      |               |                    |                    |
| SNP_9021_A_18776649 | NC_021161.1    | Ca_Kabuli_Chr02 | 18776649                | GG                              | AA                 | AA               | INTERGENIC      |               |                    |                    |
| SNP_9022_A_18776675 | NC_021161.1    | Ca_Kabuli_Chr02 | 18776675                | AA                              | TT                 | TT               | INTERGENIC      |               |                    |                    |
| SNP_9023_A_18777244 | NC_021161.1    | Ca_Kabuli_Chr02 | 18777244                | CC                              | GG                 | GG               | INTERGENIC      |               |                    |                    |
| SNP_9024_A_18777261 | NC_021161.1    | Ca_Kabuli_Chr02 | 18777261                | CC                              | TT                 | TT               | INTERGENIC      |               |                    |                    |
| SNP_9026_A_18835324 | NC_021161.1    | Ca_Kabuli_Chr02 | 18835324                | TT                              | CC                 | CC               | INTERGENIC      |               |                    |                    |
| SNP_9027_A_18854188 | NC_021161.1    | Ca_Kabuli_Chr02 | 18854188                | TT                              | CC                 | CC               | INTERGENIC      |               |                    |                    |
| SNP_9029_A_19000030 | NC_021161.1    | Ca_Kabuli_Chr02 | 19000030                | GG                              | AA                 | AA               | INTERGENIC      |               |                    |                    |
| SNP_9030_A_19000040 | NC_021161.1    | Ca_Kabuli_Chr02 | 19000040                | AA                              | TT                 | TT               | INTERGENIC      |               |                    |                    |
| SNP_9031_A_19000059 | NC_021161.1    | Ca_Kabuli_Chr02 | 19000059                | TT                              | CC                 | CC               | INTERGENIC      |               |                    |                    |



| SNPs IDs            | Chromosome IDs | Chromosomes     | Physical positions (bp) | CDC Frontier (Reference genome) | (Pusa 1103 & HPNB) | (ILWC 46 & LPNB) | Sequence Components of genome | Gene accession IDs | Putative functions          |
|---------------------|----------------|-----------------|-------------------------|---------------------------------|--------------------|------------------|-------------------------------|--------------------|-----------------------------|
| SNP_9032_A_19008963 | NC_021161.1    | Ca_Kabuli_Chr02 | 19008963                | AA                              | GG                 | GG               | INTRON                        | 101511182          | probable terpene synthase 2 |
| SNP_9034_A_19008991 | NC_021161.1    | Ca_Kabuli_Chr02 | 19008991                | GG                              | TT                 | TT               | INTRON                        | 101511182          | probable terpene synthase 2 |
| SNP_9035_A_19009078 | NC_021161.1    | Ca_Kabuli_Chr02 | 19009078                | GG                              | AA                 | AA               | INTRON                        | 101511182          | probable terpene synthase 2 |
| SNP_9036_A_19009219 | NC_021161.1    | Ca_Kabuli_Chr02 | 19009219                | GG                              | AA                 | AA               | INTRON                        | 101511182          | probable terpene synthase 2 |
| SNP_9037_A_19009234 | NC_021161.1    | Ca_Kabuli_Chr02 | 19009234                | AA                              | CC                 | CC               | INTRON                        | 101511182          | probable terpene synthase 2 |
| SNP_9038_A_19009310 | NC_021161.1    | Ca_Kabuli_Chr02 | 19009310                | TT                              | GG                 | GG               | INTRON                        | 101511182          | probable terpene synthase 2 |
| SNP_9039_A_19015885 | NC_021161.1    | Ca_Kabuli_Chr02 | 19015885                | CC                              | TT                 | TT               | INTERGENIC                    |                    |                             |
| SNP_9040_A_19015940 | NC_021161.1    | Ca_Kabuli_Chr02 | 19015940                | GG                              | TT                 | TT               | INTERGENIC                    |                    |                             |
| SNP_9041_A_19016117 | NC_021161.1    | Ca_Kabuli_Chr02 | 19016117                | GG                              | AA                 | AA               | INTERGENIC                    |                    |                             |
| SNP_9042_A_19016130 | NC_021161.1    | Ca_Kabuli_Chr02 | 19016130                | TT                              | CC                 | CC               | INTERGENIC                    |                    |                             |
| SNP_9043_A_19016165 | NC_021161.1    | Ca_Kabuli_Chr02 | 19016165                | TT                              | CC                 | CC               | INTERGENIC                    |                    |                             |
| SNP_9044_A_19016276 | NC_021161.1    | Ca_Kabuli_Chr02 | 19016276                | TT                              | GG                 | GG               | INTERGENIC                    |                    |                             |
| SNP_9045_A_19016301 | NC_021161.1    | Ca_Kabuli_Chr02 | 19016301                | TT                              | CC                 | CC               | INTERGENIC                    |                    |                             |
| SNP_9046_A_19016333 | NC_021161.1    | Ca_Kabuli_Chr02 | 19016333                | CC                              | AA                 | AA               | INTERGENIC                    |                    |                             |
| SNP_9047_A_19016382 | NC_021161.1    | Ca_Kabuli_Chr02 | 19016382                | CC                              | TT                 | TT               | INTERGENIC                    |                    |                             |
| SNP_9048_A_19025596 | NC_021161.1    | Ca_Kabuli_Chr02 | 19025596                | GG                              | TT                 | TT               | NON_SYNONYMOUS_CODING         | 101494014          | probable terpene synthase 2 |
| SNP_9049_A_19093570 | NC_021161.1    | Ca_Kabuli_Chr02 | 19093570                | GG                              | AA                 | AA               | INTERGENIC                    |                    |                             |
| SNP_9050_A_19101582 | NC_021161.1    | Ca_Kabuli_Chr02 | 19101582                | AA                              | CC                 | CC               | INTERGENIC                    |                    |                             |
| SNP_9051_A_19101628 | NC_021161.1    | Ca_Kabuli_Chr02 | 19101628                | TT                              | GG                 | GG               | INTERGENIC                    |                    |                             |
| SNP_9052_A_19101835 | NC_021161.1    | Ca_Kabuli_Chr02 | 19101835                | TT                              | CC                 | CC               | INTERGENIC                    |                    |                             |
| SNP_9053_A_19101837 | NC_021161.1    | Ca_Kabuli_Chr02 | 19101837                | AA                              | GG                 | GG               | INTERGENIC                    |                    |                             |
| SNP_9054_A_19101914 | NC_021161.1    | Ca_Kabuli_Chr02 | 19101914                | TT                              | GG                 | GG               | INTERGENIC                    |                    |                             |

| SNPs IDs            | Chromosome IDs | Chromosomes     | Physical positions (bp) | CDC Frontier genome (Reference genome) | (Pusa 1103 & HPNB) | (ILWC 46 & LPNB) | Sequence genome | Components of | Gene accession IDs | Putative functions |
|---------------------|----------------|-----------------|-------------------------|----------------------------------------|--------------------|------------------|-----------------|---------------|--------------------|--------------------|
| SNP_9055_A_19123710 | NC_021161.1    | Ca_Kabuli_Chr02 | 19123710                | AA                                     | TT                 | TT               | INTERGENIC      |               |                    |                    |
| SNP_9057_A_19135943 | NC_021161.1    | Ca_Kabuli_Chr02 | 19135943                | AA                                     | GG                 | GG               | INTERGENIC      |               |                    |                    |
| SNP_9058_A_19139071 | NC_021161.1    | Ca_Kabuli_Chr02 | 19139071                | TT                                     | CC                 | CC               | INTERGENIC      |               |                    |                    |
| SNP_9059_A_19139107 | NC_021161.1    | Ca_Kabuli_Chr02 | 19139107                | TT                                     | CC                 | CC               | INTERGENIC      |               |                    |                    |
| SNP_9060_A_19139815 | NC_021161.1    | Ca_Kabuli_Chr02 | 19139815                | GG                                     | AA                 | AA               | INTERGENIC      |               |                    |                    |
| SNP_9062_A_19180136 | NC_021161.1    | Ca_Kabuli_Chr02 | 19180136                | TT                                     | AA                 | AA               | INTERGENIC      |               |                    |                    |
| SNP_9063_A_19193739 | NC_021161.1    | Ca_Kabuli_Chr02 | 19193739                | GG                                     | AA                 | AA               | INTERGENIC      |               |                    |                    |
| SNP_9064_A_19193780 | NC_021161.1    | Ca_Kabuli_Chr02 | 19193780                | GG                                     | TT                 | TT               | INTERGENIC      |               |                    |                    |
| SNP_9065_A_19198037 | NC_021161.1    | Ca_Kabuli_Chr02 | 19198037                | CC                                     | GG                 | GG               | INTERGENIC      |               |                    |                    |
| SNP_9066_A_19198280 | NC_021161.1    | Ca_Kabuli_Chr02 | 19198280                | AA                                     | GG                 | GG               | INTERGENIC      |               |                    |                    |
| SNP_9068_A_19215675 | NC_021161.1    | Ca_Kabuli_Chr02 | 19215675                | TT                                     | CC                 | CC               | INTERGENIC      |               |                    |                    |
| SNP_9069_A_19215695 | NC_021161.1    | Ca_Kabuli_Chr02 | 19215695                | TT                                     | CC                 | CC               | INTERGENIC      |               |                    |                    |
| SNP_9070_A_19216133 | NC_021161.1    | Ca_Kabuli_Chr02 | 19216133                | TT                                     | AA                 | AA               | INTERGENIC      |               |                    |                    |
| SNP_9071_A_19216149 | NC_021161.1    | Ca_Kabuli_Chr02 | 19216149                | GG                                     | AA                 | AA               | INTERGENIC      |               |                    |                    |
| SNP_9073_A_19219073 | NC_021161.1    | Ca_Kabuli_Chr02 | 19219073                | GG                                     | AA                 | AA               | INTERGENIC      |               |                    |                    |
| SNP_9074_A_19219080 | NC_021161.1    | Ca_Kabuli_Chr02 | 19219080                | GG                                     | TT                 | TT               | INTERGENIC      |               |                    |                    |
| SNP_9075_A_19222622 | NC_021161.1    | Ca_Kabuli_Chr02 | 19222622                | CC                                     | AA                 | AA               | INTERGENIC      |               |                    |                    |
| SNP_9076_A_19225388 | NC_021161.1    | Ca_Kabuli_Chr02 | 19225388                | CC                                     | TT                 | TT               | INTERGENIC      |               |                    |                    |
| SNP_9077_A_19251580 | NC_021161.1    | Ca_Kabuli_Chr02 | 19251580                | AA                                     | TT                 | TT               | INTERGENIC      |               |                    |                    |
| SNP_9078_A_19251940 | NC_021161.1    | Ca_Kabuli_Chr02 | 19251940                | GG                                     | AA                 | AA               | INTERGENIC      |               |                    |                    |
| SNP_9079_A_19281257 | NC_021161.1    | Ca_Kabuli_Chr02 | 19281257                | AA                                     | CC                 | CC               | INTERGENIC      |               |                    |                    |
| SNP_9080_A_19283963 | NC_021161.1    | Ca_Kabuli_Chr02 | 19283963                | TT                                     | CC                 | CC               | INTERGENIC      |               |                    |                    |

| SNPs IDs            | Chromosome IDs | Chromosomes     | Physical positions (bp) | CDC Frontier (Reference genome) | (Pusa 1103 & HPNB) | (ILWC 46 & LPNB) | Sequence Components of genome | Gene accession IDs | Putative functions  |
|---------------------|----------------|-----------------|-------------------------|---------------------------------|--------------------|------------------|-------------------------------|--------------------|---------------------|
| SNP_9081_A_19312593 | NC_021161.1    | Ca_Kabuli_Chr02 | 19312593                | AA                              | CC                 | CC               | INTERGENIC                    |                    |                     |
| SNP_9082_A_19314605 | NC_021161.1    | Ca_Kabuli_Chr02 | 19314605                | TT                              | AA                 | AA               | INTERGENIC                    |                    |                     |
| SNP_9083_A_19314641 | NC_021161.1    | Ca_Kabuli_Chr02 | 19314641                | AA                              | GG                 | GG               | INTERGENIC                    |                    |                     |
| SNP_9084_A_19314681 | NC_021161.1    | Ca_Kabuli_Chr02 | 19314681                | TT                              | GG                 | GG               | INTERGENIC                    |                    |                     |
| SNP_9085_A_19326528 | NC_021161.1    | Ca_Kabuli_Chr02 | 19326528                | CC                              | AA                 | AA               | INTERGENIC                    |                    |                     |
| SNP_9086_A_19326624 | NC_021161.1    | Ca_Kabuli_Chr02 | 19326624                | TT                              | CC                 | CC               | INTERGENIC                    |                    |                     |
| SNP_9087_A_19327297 | NC_021161.1    | Ca_Kabuli_Chr02 | 19327297                | GG                              | AA                 | AA               | INTERGENIC                    |                    |                     |
| SNP_9088_A_19402736 | NC_021161.1    | Ca_Kabuli_Chr02 | 19402736                | GG                              | CC                 | CC               | INTERGENIC                    |                    |                     |
| SNP_9089_A_19447731 | NC_021161.1    | Ca_Kabuli_Chr02 | 19447731                | CC                              | AA                 | AA               | INTERGENIC                    |                    |                     |
| SNP_9090_A_19461456 | NC_021161.1    | Ca_Kabuli_Chr02 | 19461456                | CC                              | TT                 | TT               | INTERGENIC                    |                    |                     |
| SNP_9091_A_19465833 | NC_021161.1    | Ca_Kabuli_Chr02 | 19465833                | GG                              | TT                 | TT               | DRR                           | 101495721          | aminoacylase-1-like |
| SNP_9092_A_19483164 | NC_021161.1    | Ca_Kabuli_Chr02 | 19483164                | CC                              | GG                 | GG               | INTERGENIC                    |                    |                     |
| SNP_9093_A_19500858 | NC_021161.1    | Ca_Kabuli_Chr02 | 19500858                | CC                              | GG                 | GG               | INTERGENIC                    |                    |                     |
| SNP_9094_A_19501270 | NC_021161.1    | Ca_Kabuli_Chr02 | 19501270                | AA                              | CC                 | CC               | INTERGENIC                    |                    |                     |
| SNP_9095_A_19501464 | NC_021161.1    | Ca_Kabuli_Chr02 | 19501464                | GG                              | TT                 | TT               | INTERGENIC                    |                    |                     |
| SNP_9096_A_19501669 | NC_021161.1    | Ca_Kabuli_Chr02 | 19501669                | TT                              | AA                 | AA               | INTERGENIC                    |                    |                     |
| SNP_9097_A_19501682 | NC_021161.1    | Ca_Kabuli_Chr02 | 19501682                | TT                              | AA                 | AA               | INTERGENIC                    |                    |                     |
| SNP_9098_A_19516490 | NC_021161.1    | Ca_Kabuli_Chr02 | 19516490                | AA                              | TT                 | TT               | INTERGENIC                    |                    |                     |
| SNP_9099_A_19516537 | NC_021161.1    | Ca_Kabuli_Chr02 | 19516537                | TT                              | CC                 | CC               | INTERGENIC                    |                    |                     |
| SNP_9100_A_19516614 | NC_021161.1    | Ca_Kabuli_Chr02 | 19516614                | CC                              | AA                 | AA               | INTERGENIC                    |                    |                     |
| SNP_9101_A_19516618 | NC_021161.1    | Ca_Kabuli_Chr02 | 19516618                | GG                              | AA                 | AA               | INTERGENIC                    |                    |                     |
| SNP_9102_A_19516682 | NC_021161.1    | Ca_Kabuli_Chr02 | 19516682                | TT                              | AA                 | AA               | INTERGENIC                    |                    |                     |

| SNPs IDs            | Chromosome IDs | Chromosomes     | Physical positions (bp) | CDC Frontier genome (Reference genome) | (Pusa 1103 & HPNB) | (ILWC 46 & LPNB) | Sequence genome | Components of | Gene accession IDs | Putative functions |
|---------------------|----------------|-----------------|-------------------------|----------------------------------------|--------------------|------------------|-----------------|---------------|--------------------|--------------------|
| SNP_9103_A_19516714 | NC_021161.1    | Ca_Kabuli_Chr02 | 19516714                | AA                                     | GG                 | GG               | INTERGENIC      |               |                    |                    |
| SNP_9104_A_19516732 | NC_021161.1    | Ca_Kabuli_Chr02 | 19516732                | AA                                     | TT                 | TT               | INTERGENIC      |               |                    |                    |
| SNP_9105_A_19516741 | NC_021161.1    | Ca_Kabuli_Chr02 | 19516741                | CC                                     | AA                 | AA               | INTERGENIC      |               |                    |                    |
| SNP_9106_A_19516742 | NC_021161.1    | Ca_Kabuli_Chr02 | 19516742                | AA                                     | TT                 | TT               | INTERGENIC      |               |                    |                    |
| SNP_9107_A_19516771 | NC_021161.1    | Ca_Kabuli_Chr02 | 19516771                | AA                                     | CC                 | CC               | INTERGENIC      |               |                    |                    |
| SNP_9108_A_19517140 | NC_021161.1    | Ca_Kabuli_Chr02 | 19517140                | GG                                     | AA                 | AA               | INTERGENIC      |               |                    |                    |
| SNP_9109_A_19517421 | NC_021161.1    | Ca_Kabuli_Chr02 | 19517421                | CC                                     | AA                 | AA               | INTERGENIC      |               |                    |                    |
| SNP_9110_A_19517439 | NC_021161.1    | Ca_Kabuli_Chr02 | 19517439                | AA                                     | TT                 | TT               | INTERGENIC      |               |                    |                    |
| SNP_9111_A_19518007 | NC_021161.1    | Ca_Kabuli_Chr02 | 19518007                | TT                                     | AA                 | AA               | INTERGENIC      |               |                    |                    |
| SNP_9112_A_19524025 | NC_021161.1    | Ca_Kabuli_Chr02 | 19524025                | CC                                     | TT                 | TT               | INTERGENIC      |               |                    |                    |
| SNP_9113_A_19528664 | NC_021161.1    | Ca_Kabuli_Chr02 | 19528664                | GG                                     | AA                 | AA               | INTERGENIC      |               |                    |                    |
| SNP_9114_A_19530036 | NC_021161.1    | Ca_Kabuli_Chr02 | 19530036                | GG                                     | AA                 | AA               | INTERGENIC      |               |                    |                    |
| SNP_9115_A_19538493 | NC_021161.1    | Ca_Kabuli_Chr02 | 19538493                | GG                                     | CC                 | CC               | INTERGENIC      |               |                    |                    |
| SNP_9116_A_19559046 | NC_021161.1    | Ca_Kabuli_Chr02 | 19559046                | TT                                     | AA                 | AA               | INTERGENIC      |               |                    |                    |
| SNP_9117_A_19570572 | NC_021161.1    | Ca_Kabuli_Chr02 | 19570572                | AA                                     | CC                 | CC               | INTERGENIC      |               |                    |                    |
| SNP_9118_A_19570589 | NC_021161.1    | Ca_Kabuli_Chr02 | 19570589                | TT                                     | CC                 | CC               | INTERGENIC      |               |                    |                    |
| SNP_9119_A_19570811 | NC_021161.1    | Ca_Kabuli_Chr02 | 19570811                | AA                                     | GG                 | GG               | INTERGENIC      |               |                    |                    |
| SNP_9120_A_19571170 | NC_021161.1    | Ca_Kabuli_Chr02 | 19571170                | GG                                     | TT                 | TT               | INTERGENIC      |               |                    |                    |
| SNP_9121_A_19590210 | NC_021161.1    | Ca_Kabuli_Chr02 | 19590210                | TT                                     | CC                 | CC               | INTERGENIC      |               |                    |                    |
| SNP_9122_A_19590522 | NC_021161.1    | Ca_Kabuli_Chr02 | 19590522                | GG                                     | CC                 | CC               | INTERGENIC      |               |                    |                    |
| SNP_9123_A_19602728 | NC_021161.1    | Ca_Kabuli_Chr02 | 19602728                | CC                                     | GG                 | GG               | INTERGENIC      |               |                    |                    |
| SNP_9124_A_19602794 | NC_021161.1    | Ca_Kabuli_Chr02 | 19602794                | CC                                     | TT                 | TT               | INTERGENIC      |               |                    |                    |

| SNPs IDs            | Chromosome IDs | Chromosomes     | Physical positions (bp) | CDC Frontier genome (Reference genome) | (Pusa 1103 & HPNB) | (ILWC 46 & LPNB) | Sequence genome | Components of | Gene accession IDs | Putative functions |
|---------------------|----------------|-----------------|-------------------------|----------------------------------------|--------------------|------------------|-----------------|---------------|--------------------|--------------------|
| SNP_9125_A_19602813 | NC_021161.1    | Ca_Kabuli_Chr02 | 19602813                | GG                                     | TT                 | TT               | INTERGENIC      |               |                    |                    |
| SNP_9126_A_19602862 | NC_021161.1    | Ca_Kabuli_Chr02 | 19602862                | TT                                     | AA                 | AA               | INTERGENIC      |               |                    |                    |
| SNP_9127_A_19603085 | NC_021161.1    | Ca_Kabuli_Chr02 | 19603085                | GG                                     | AA                 | AA               | INTERGENIC      |               |                    |                    |
| SNP_9128_A_19603097 | NC_021161.1    | Ca_Kabuli_Chr02 | 19603097                | GG                                     | AA                 | AA               | INTERGENIC      |               |                    |                    |
| SNP_9129_A_19603219 | NC_021161.1    | Ca_Kabuli_Chr02 | 19603219                | AA                                     | GG                 | GG               | INTERGENIC      |               |                    |                    |
| SNP_9130_A_19603231 | NC_021161.1    | Ca_Kabuli_Chr02 | 19603231                | TT                                     | CC                 | CC               | INTERGENIC      |               |                    |                    |
| SNP_9131_A_19603243 | NC_021161.1    | Ca_Kabuli_Chr02 | 19603243                | TT                                     | CC                 | CC               | INTERGENIC      |               |                    |                    |
| SNP_9132_A_19604640 | NC_021161.1    | Ca_Kabuli_Chr02 | 19604640                | AA                                     | TT                 | TT               | INTERGENIC      |               |                    |                    |
| SNP_9133_A_19614819 | NC_021161.1    | Ca_Kabuli_Chr02 | 19614819                | AA                                     | CC                 | CC               | INTERGENIC      |               |                    |                    |
| SNP_9134_A_19617390 | NC_021161.1    | Ca_Kabuli_Chr02 | 19617390                | AA                                     | GG                 | GG               | INTERGENIC      |               |                    |                    |
| SNP_9135_A_19620942 | NC_021161.1    | Ca_Kabuli_Chr02 | 19620942                | TT                                     | GG                 | GG               | INTERGENIC      |               |                    |                    |
| SNP_9136_A_19646159 | NC_021161.1    | Ca_Kabuli_Chr02 | 19646159                | TT                                     | AA                 | AA               | INTERGENIC      |               |                    |                    |
| SNP_9137_A_19646162 | NC_021161.1    | Ca_Kabuli_Chr02 | 19646162                | TT                                     | CC                 | CC               | INTERGENIC      |               |                    |                    |
| SNP_9138_A_19652479 | NC_021161.1    | Ca_Kabuli_Chr02 | 19652479                | TT                                     | CC                 | CC               | INTERGENIC      |               |                    |                    |
| SNP_9139_A_19652501 | NC_021161.1    | Ca_Kabuli_Chr02 | 19652501                | TT                                     | CC                 | CC               | INTERGENIC      |               |                    |                    |
| SNP_9140_A_19652524 | NC_021161.1    | Ca_Kabuli_Chr02 | 19652524                | CC                                     | TT                 | TT               | INTERGENIC      |               |                    |                    |
| SNP_9141_A_19652935 | NC_021161.1    | Ca_Kabuli_Chr02 | 19652935                | TT                                     | CC                 | CC               | INTERGENIC      |               |                    |                    |
| SNP_9142_A_19653215 | NC_021161.1    | Ca_Kabuli_Chr02 | 19653215                | GG                                     | AA                 | AA               | INTERGENIC      |               |                    |                    |
| SNP_9143_A_19667301 | NC_021161.1    | Ca_Kabuli_Chr02 | 19667301                | GG                                     | AA                 | AA               | INTERGENIC      |               |                    |                    |
| SNP_9145_A_19706030 | NC_021161.1    | Ca_Kabuli_Chr02 | 19706030                | AA                                     | CC                 | CC               | INTERGENIC      |               |                    |                    |
| SNP_9146_A_19728633 | NC_021161.1    | Ca_Kabuli_Chr02 | 19728633                | GG                                     | AA                 | AA               | INTERGENIC      |               |                    |                    |
| SNP_9147_A_19728776 | NC_021161.1    | Ca_Kabuli_Chr02 | 19728776                | AA                                     | GG                 | GG               | INTERGENIC      |               |                    |                    |

| SNPs IDs            | Chromosome IDs | Chromosomes     | Physical positions (bp) | CDC Frontier genome (Reference genome) | (Pusa 1103 & HPNB) | (ILWC 46 & LPNB) | Sequence Components of genome | Gene accession IDs | Putative functions |
|---------------------|----------------|-----------------|-------------------------|----------------------------------------|--------------------|------------------|-------------------------------|--------------------|--------------------|
| SNP_9148_A_19767952 | NC_021161.1    | Ca_Kabuli_Chr02 | 19767952                | AA                                     | GG                 | GG               | INTERGENIC                    |                    |                    |
| SNP_9149_A_19768096 | NC_021161.1    | Ca_Kabuli_Chr02 | 19768096                | TT                                     | AA                 | AA               | INTERGENIC                    |                    |                    |
| SNP_9150_A_19768142 | NC_021161.1    | Ca_Kabuli_Chr02 | 19768142                | CC                                     | TT                 | TT               | INTERGENIC                    |                    |                    |
| SNP_9151_A_19768217 | NC_021161.1    | Ca_Kabuli_Chr02 | 19768217                | AA                                     | GG                 | GG               | INTERGENIC                    |                    |                    |
| SNP_9152_A_19768394 | NC_021161.1    | Ca_Kabuli_Chr02 | 19768394                | AA                                     | GG                 | GG               | INTERGENIC                    |                    |                    |
| SNP_9153_A_19769243 | NC_021161.1    | Ca_Kabuli_Chr02 | 19769243                | AA                                     | GG                 | GG               | DRR                           | 101501018          | Unknown function   |
| SNP_9154_A_19769320 | NC_021161.1    | Ca_Kabuli_Chr02 | 19769320                | AA                                     | CC                 | CC               | DRR                           | 101501018          | Unknown function   |
| SNP_9155_A_19769347 | NC_021161.1    | Ca_Kabuli_Chr02 | 19769347                | CC                                     | TT                 | TT               | DRR                           | 101501018          | Unknown function   |
| SNP_9156_A_19769453 | NC_021161.1    | Ca_Kabuli_Chr02 | 19769453                | GG                                     | AA                 | AA               | DRR                           | 101501018          | Unknown function   |
| SNP_9157_A_19769456 | NC_021161.1    | Ca_Kabuli_Chr02 | 19769456                | CC                                     | TT                 | TT               | DRR                           | 101501018          | Unknown function   |
| SNP_9158_A_19769528 | NC_021161.1    | Ca_Kabuli_Chr02 | 19769528                | GG                                     | AA                 | AA               | DRR                           | 101501018          | Unknown function   |
| SNP_9160_A_19769771 | NC_021161.1    | Ca_Kabuli_Chr02 | 19769771                | GG                                     | AA                 | AA               | DRR                           | 101501018          | Unknown function   |
| SNP_9161_A_19772423 | NC_021161.1    | Ca_Kabuli_Chr02 | 19772423                | TT                                     | CC                 | CC               | URR                           | 101501018          | Unknown function   |
| SNP_9162_A_19772482 | NC_021161.1    | Ca_Kabuli_Chr02 | 19772482                | CC                                     | TT                 | TT               | URR                           | 101501018          | Unknown function   |
| SNP_9163_A_19772550 | NC_021161.1    | Ca_Kabuli_Chr02 | 19772550                | AA                                     | CC                 | CC               | URR                           | 101501018          | Unknown function   |
| SNP_9164_A_19772773 | NC_021161.1    | Ca_Kabuli_Chr02 | 19772773                | TT                                     | GG                 | GG               | URR                           | 101501018          | Unknown function   |
| SNP_9165_A_19772802 | NC_021161.1    | Ca_Kabuli_Chr02 | 19772802                | AA                                     | GG                 | GG               | URR                           | 101501018          | Unknown function   |
| SNP_9166_A_19791497 | NC_021161.1    | Ca_Kabuli_Chr02 | 19791497                | TT                                     | GG                 | GG               | INTERGENIC                    |                    |                    |
| SNP_9168_A_19791817 | NC_021161.1    | Ca_Kabuli_Chr02 | 19791817                | TT                                     | GG                 | GG               | INTERGENIC                    |                    |                    |
| SNP_9169_A_19792024 | NC_021161.1    | Ca_Kabuli_Chr02 | 19792024                | CC                                     | AA                 | AA               | INTERGENIC                    |                    |                    |
| SNP_9170_A_19792025 | NC_021161.1    | Ca_Kabuli_Chr02 | 19792025                | AA                                     | CC                 | CC               | INTERGENIC                    |                    |                    |
| SNP_9171_A_19792187 | NC_021161.1    | Ca_Kabuli_Chr02 | 19792187                | CC                                     | TT                 | TT               | INTERGENIC                    |                    |                    |

| SNPs IDs            | Chromosome IDs | Chromosomes     | Physical positions (bp) | CDC Frontier genome (Reference genome) | (Pusa 1103 & HPNB) | (ILWC 46 & LPNB) | Sequence genome | Components of | Gene accession IDs | Putative functions |
|---------------------|----------------|-----------------|-------------------------|----------------------------------------|--------------------|------------------|-----------------|---------------|--------------------|--------------------|
| SNP_9172_A_19792192 | NC_021161.1    | Ca_Kabuli_Chr02 | 19792192                | TT                                     | GG                 | GG               | INTERGENIC      |               |                    |                    |
| SNP_9173_A_19792205 | NC_021161.1    | Ca_Kabuli_Chr02 | 19792205                | AA                                     | TT                 | TT               | INTERGENIC      |               |                    |                    |
| SNP_9174_A_19792206 | NC_021161.1    | Ca_Kabuli_Chr02 | 19792206                | AA                                     | GG                 | GG               | INTERGENIC      |               |                    |                    |
| SNP_9175_A_19825207 | NC_021161.1    | Ca_Kabuli_Chr02 | 19825207                | TT                                     | GG                 | GG               | INTERGENIC      |               |                    |                    |
| SNP_9176_A_19872860 | NC_021161.1    | Ca_Kabuli_Chr02 | 19872860                | AA                                     | TT                 | TT               | INTERGENIC      |               |                    |                    |
| SNP_9179_A_19894336 | NC_021161.1    | Ca_Kabuli_Chr02 | 19894336                | GG                                     | CC                 | CC               | INTERGENIC      |               |                    |                    |
| SNP_9180_A_19894346 | NC_021161.1    | Ca_Kabuli_Chr02 | 19894346                | GG                                     | AA                 | AA               | INTERGENIC      |               |                    |                    |
| SNP_9181_A_19894353 | NC_021161.1    | Ca_Kabuli_Chr02 | 19894353                | AA                                     | GG                 | GG               | INTERGENIC      |               |                    |                    |
| SNP_9182_A_19904010 | NC_021161.1    | Ca_Kabuli_Chr02 | 19904010                | CC                                     | TT                 | TT               | INTERGENIC      |               |                    |                    |
| SNP_9183_A_19927064 | NC_021161.1    | Ca_Kabuli_Chr02 | 19927064                | AA                                     | TT                 | TT               | INTERGENIC      |               |                    |                    |
| SNP_9184_A_19927081 | NC_021161.1    | Ca_Kabuli_Chr02 | 19927081                | TT                                     | CC                 | CC               | INTERGENIC      |               |                    |                    |
| SNP_9185_A_19927263 | NC_021161.1    | Ca_Kabuli_Chr02 | 19927263                | CC                                     | TT                 | TT               | INTERGENIC      |               |                    |                    |
| SNP_9186_A_19927534 | NC_021161.1    | Ca_Kabuli_Chr02 | 19927534                | TT                                     | CC                 | CC               | INTERGENIC      |               |                    |                    |
| SNP_9187_A_19971784 | NC_021161.1    | Ca_Kabuli_Chr02 | 19971784                | CC                                     | TT                 | TT               | INTERGENIC      |               |                    |                    |
| SNP_9188_A_20069520 | NC_021161.1    | Ca_Kabuli_Chr02 | 20069520                | AA                                     | GG                 | GG               | INTERGENIC      |               |                    |                    |
| SNP_9189_A_20069535 | NC_021161.1    | Ca_Kabuli_Chr02 | 20069535                | AA                                     | GG                 | GG               | INTERGENIC      |               |                    |                    |
| SNP_9190_A_20069542 | NC_021161.1    | Ca_Kabuli_Chr02 | 20069542                | AA                                     | CC                 | CC               | INTERGENIC      |               |                    |                    |
| SNP_9192_A_20069645 | NC_021161.1    | Ca_Kabuli_Chr02 | 20069645                | GG                                     | AA                 | AA               | INTERGENIC      |               |                    |                    |
| SNP_9193_A_20069702 | NC_021161.1    | Ca_Kabuli_Chr02 | 20069702                | GG                                     | AA                 | AA               | INTERGENIC      |               |                    |                    |
| SNP_9194_A_20074904 | NC_021161.1    | Ca_Kabuli_Chr02 | 20074904                | GG                                     | AA                 | AA               | INTERGENIC      |               |                    |                    |
| SNP_9195_A_20074944 | NC_021161.1    | Ca_Kabuli_Chr02 | 20074944                | CC                                     | TT                 | TT               | INTERGENIC      |               |                    |                    |
| SNP_9196_A_20078275 | NC_021161.1    | Ca_Kabuli_Chr02 | 20078275                | GG                                     | AA                 | AA               | INTERGENIC      |               |                    |                    |

| SNPs IDs            | Chromosome IDs | Chromosomes     | Physical positions (bp) | CDC Frontier genome (Reference genome) | (Pusa 1103 & HPNB) | (ILWC 46 & LPNB) | Sequence genome | Components of | Gene accession IDs | Putative functions |
|---------------------|----------------|-----------------|-------------------------|----------------------------------------|--------------------|------------------|-----------------|---------------|--------------------|--------------------|
| SNP_9197_A_20084229 | NC_021161.1    | Ca_Kabuli_Chr02 | 20084229                | TT                                     | AA                 | AA               | INTERGENIC      |               |                    |                    |
| SNP_9198_A_20085991 | NC_021161.1    | Ca_Kabuli_Chr02 | 20085991                | AA                                     | GG                 | GG               | INTERGENIC      |               |                    |                    |
| SNP_9199_A_20087699 | NC_021161.1    | Ca_Kabuli_Chr02 | 20087699                | AA                                     | GG                 | GG               | INTERGENIC      |               |                    |                    |
| SNP_9200_A_20088019 | NC_021161.1    | Ca_Kabuli_Chr02 | 20088019                | GG                                     | AA                 | AA               | INTERGENIC      |               |                    |                    |
| SNP_9201_A_20088108 | NC_021161.1    | Ca_Kabuli_Chr02 | 20088108                | AA                                     | GG                 | GG               | INTERGENIC      |               |                    |                    |
| SNP_9202_A_20088146 | NC_021161.1    | Ca_Kabuli_Chr02 | 20088146                | TT                                     | CC                 | CC               | INTERGENIC      |               |                    |                    |
| SNP_9203_A_20088176 | NC_021161.1    | Ca_Kabuli_Chr02 | 20088176                | CC                                     | AA                 | AA               | INTERGENIC      |               |                    |                    |
| SNP_9204_A_20088479 | NC_021161.1    | Ca_Kabuli_Chr02 | 20088479                | AA                                     | GG                 | GG               | INTERGENIC      |               |                    |                    |
| SNP_9205_A_20144409 | NC_021161.1    | Ca_Kabuli_Chr02 | 20144409                | CC                                     | GG                 | GG               | INTERGENIC      |               |                    |                    |
| SNP_9206_A_20150952 | NC_021161.1    | Ca_Kabuli_Chr02 | 20150952                | GG                                     | AA                 | AA               | INTERGENIC      |               |                    |                    |
| SNP_9207_A_20151212 | NC_021161.1    | Ca_Kabuli_Chr02 | 20151212                | TT                                     | AA                 | AA               | INTERGENIC      |               |                    |                    |
| SNP_9208_A_20151779 | NC_021161.1    | Ca_Kabuli_Chr02 | 20151779                | GG                                     | AA                 | AA               | INTERGENIC      |               |                    |                    |
| SNP_9209_A_20151811 | NC_021161.1    | Ca_Kabuli_Chr02 | 20151811                | TT                                     | AA                 | AA               | INTERGENIC      |               |                    |                    |
| SNP_9210_A_20151849 | NC_021161.1    | Ca_Kabuli_Chr02 | 20151849                | AA                                     | GG                 | GG               | INTERGENIC      |               |                    |                    |
| SNP_9211_A_20151865 | NC_021161.1    | Ca_Kabuli_Chr02 | 20151865                | GG                                     | AA                 | AA               | INTERGENIC      |               |                    |                    |
| SNP_9212_A_20151878 | NC_021161.1    | Ca_Kabuli_Chr02 | 20151878                | AA                                     | TT                 | TT               | INTERGENIC      |               |                    |                    |
| SNP_9213_A_20151988 | NC_021161.1    | Ca_Kabuli_Chr02 | 20151988                | TT                                     | CC                 | CC               | INTERGENIC      |               |                    |                    |
| SNP_9214_A_20152532 | NC_021161.1    | Ca_Kabuli_Chr02 | 20152532                | GG                                     | TT                 | TT               | INTERGENIC      |               |                    |                    |
| SNP_9215_A_20153101 | NC_021161.1    | Ca_Kabuli_Chr02 | 20153101                | GG                                     | AA                 | AA               | INTERGENIC      |               |                    |                    |
| SNP_9216_A_20153487 | NC_021161.1    | Ca_Kabuli_Chr02 | 20153487                | CC                                     | TT                 | TT               | INTERGENIC      |               |                    |                    |
| SNP_9217_A_20153803 | NC_021161.1    | Ca_Kabuli_Chr02 | 20153803                | CC                                     | TT                 | TT               | INTERGENIC      |               |                    |                    |
| SNP_9218_A_20155366 | NC_021161.1    | Ca_Kabuli_Chr02 | 20155366                | AA                                     | TT                 | TT               | INTERGENIC      |               |                    |                    |



| SNPs IDs            | Chromosome IDs | Chromosomes     | Physical positions (bp) | CDC Frontier (Reference genome) | (Pusa 1103 & HPNB) | (ILWC 46 & LPNB) | Sequence genome | Components of | Gene accession IDs | Putative functions |
|---------------------|----------------|-----------------|-------------------------|---------------------------------|--------------------|------------------|-----------------|---------------|--------------------|--------------------|
| SNP_9219_A_20166203 | NC_021161.1    | Ca_Kabuli_Chr02 | 20166203                | AA                              | GG                 | GG               | INTERGENIC      |               |                    |                    |
| SNP_9220_A_20171788 | NC_021161.1    | Ca_Kabuli_Chr02 | 20171788                | AA                              | TT                 | TT               | INTERGENIC      |               |                    |                    |
| SNP_9221_A_20171798 | NC_021161.1    | Ca_Kabuli_Chr02 | 20171798                | TT                              | AA                 | AA               | INTERGENIC      |               |                    |                    |
| SNP_9222_A_20171807 | NC_021161.1    | Ca_Kabuli_Chr02 | 20171807                | CC                              | TT                 | TT               | INTERGENIC      |               |                    |                    |
| SNP_9223_A_20176382 | NC_021161.1    | Ca_Kabuli_Chr02 | 20176382                | GG                              | AA                 | AA               | INTERGENIC      |               |                    |                    |
| SNP_9224_A_20177692 | NC_021161.1    | Ca_Kabuli_Chr02 | 20177692                | TT                              | CC                 | CC               | INTERGENIC      |               |                    |                    |
| SNP_9225_A_20177903 | NC_021161.1    | Ca_Kabuli_Chr02 | 20177903                | CC                              | TT                 | TT               | INTERGENIC      |               |                    |                    |
| SNP_9226_A_20178169 | NC_021161.1    | Ca_Kabuli_Chr02 | 20178169                | GG                              | CC                 | CC               | INTERGENIC      |               |                    |                    |
| SNP_9227_A_20191468 | NC_021161.1    | Ca_Kabuli_Chr02 | 20191468                | TT                              | CC                 | CC               | INTERGENIC      |               |                    |                    |
| SNP_9228_A_20191667 | NC_021161.1    | Ca_Kabuli_Chr02 | 20191667                | AA                              | CC                 | CC               | INTERGENIC      |               |                    |                    |
| SNP_9229_A_20191716 | NC_021161.1    | Ca_Kabuli_Chr02 | 20191716                | AA                              | GG                 | GG               | INTERGENIC      |               |                    |                    |
| SNP_9230_A_20191809 | NC_021161.1    | Ca_Kabuli_Chr02 | 20191809                | TT                              | CC                 | CC               | INTERGENIC      |               |                    |                    |
| SNP_9231_A_20191906 | NC_021161.1    | Ca_Kabuli_Chr02 | 20191906                | TT                              | CC                 | CC               | INTERGENIC      |               |                    |                    |
| SNP_9232_A_20191911 | NC_021161.1    | Ca_Kabuli_Chr02 | 20191911                | GG                              | AA                 | AA               | INTERGENIC      |               |                    |                    |
| SNP_9233_A_20192073 | NC_021161.1    | Ca_Kabuli_Chr02 | 20192073                | GG                              | AA                 | AA               | INTERGENIC      |               |                    |                    |
| SNP_9234_A_20192087 | NC_021161.1    | Ca_Kabuli_Chr02 | 20192087                | CC                              | TT                 | TT               | INTERGENIC      |               |                    |                    |
| SNP_9235_A_20192088 | NC_021161.1    | Ca_Kabuli_Chr02 | 20192088                | GG                              | TT                 | TT               | INTERGENIC      |               |                    |                    |
| SNP_9236_A_20192175 | NC_021161.1    | Ca_Kabuli_Chr02 | 20192175                | TT                              | CC                 | CC               | INTERGENIC      |               |                    |                    |
| SNP_9237_A_20192176 | NC_021161.1    | Ca_Kabuli_Chr02 | 20192176                | TT                              | CC                 | CC               | INTERGENIC      |               |                    |                    |
| SNP_9238_A_20192196 | NC_021161.1    | Ca_Kabuli_Chr02 | 20192196                | GG                              | TT                 | TT               | INTERGENIC      |               |                    |                    |
| SNP_9239_A_20197084 | NC_021161.1    | Ca_Kabuli_Chr02 | 20197084                | CC                              | AA                 | AA               | INTERGENIC      |               |                    |                    |
| SNP_9240_A_20208394 | NC_021161.1    | Ca_Kabuli_Chr02 | 20208394                | CC                              | TT                 | TT               | INTERGENIC      |               |                    |                    |

| SNPs IDs            | Chromosome IDs | Chromosomes     | Physical positions (bp) | CDC Frontier genome (Reference genome) | (Pusa 1103 & HPNB) | (ILWC 46 & LPNB) | Sequence Components of genome | Gene accession IDs | Putative functions |
|---------------------|----------------|-----------------|-------------------------|----------------------------------------|--------------------|------------------|-------------------------------|--------------------|--------------------|
| SNP_9241_A_20210466 | NC_021161.1    | Ca_Kabuli_Chr02 | 20210466                | CC                                     | TT                 | TT               | INTERGENIC                    |                    |                    |
| SNP_9242_A_20210728 | NC_021161.1    | Ca_Kabuli_Chr02 | 20210728                | TT                                     | AA                 | AA               | INTERGENIC                    |                    |                    |
| SNP_9243_A_20235128 | NC_021161.1    | Ca_Kabuli_Chr02 | 20235128                | AA                                     | TT                 | TT               | INTERGENIC                    |                    |                    |
| SNP_9245_A_20321668 | NC_021161.1    | Ca_Kabuli_Chr02 | 20321668                | AA                                     | TT                 | TT               | INTERGENIC                    |                    |                    |
| SNP_9246_A_20353213 | NC_021161.1    | Ca_Kabuli_Chr02 | 20353213                | CC                                     | TT                 | TT               | INTERGENIC                    |                    |                    |
| SNP_9247_A_20353217 | NC_021161.1    | Ca_Kabuli_Chr02 | 20353217                | TT                                     | AA                 | AA               | INTERGENIC                    |                    |                    |
| SNP_9248_A_20353233 | NC_021161.1    | Ca_Kabuli_Chr02 | 20353233                | AA                                     | GG                 | GG               | INTERGENIC                    |                    |                    |
| SNP_9249_A_20353286 | NC_021161.1    | Ca_Kabuli_Chr02 | 20353286                | AA                                     | GG                 | GG               | INTERGENIC                    |                    |                    |
| SNP_9250_A_20353565 | NC_021161.1    | Ca_Kabuli_Chr02 | 20353565                | CC                                     | GG                 | GG               | INTERGENIC                    |                    |                    |
| SNP_9252_A_20424450 | NC_021161.1    | Ca_Kabuli_Chr02 | 20424450                | CC                                     | TT                 | TT               | INTERGENIC                    |                    |                    |
| SNP_9253_A_20424875 | NC_021161.1    | Ca_Kabuli_Chr02 | 20424875                | AA                                     | GG                 | GG               | INTERGENIC                    |                    |                    |
| SNP_9255_A_20453797 | NC_021161.1    | Ca_Kabuli_Chr02 | 20453797                | GG                                     | AA                 | AA               | INTRON                        | 101504223          | nodulin-26-like    |
| SNP_9256_A_20453798 | NC_021161.1    | Ca_Kabuli_Chr02 | 20453798                | TT                                     | CC                 | CC               | INTRON                        | 101504223          | nodulin-26-like    |
| SNP_9257_A_20453806 | NC_021161.1    | Ca_Kabuli_Chr02 | 20453806                | GG                                     | AA                 | AA               | INTRON                        | 101504223          | nodulin-26-like    |
| SNP_9258_A_20474582 | NC_021161.1    | Ca_Kabuli_Chr02 | 20474582                | AA                                     | CC                 | CC               | INTERGENIC                    |                    |                    |
| SNP_9259_A_20474887 | NC_021161.1    | Ca_Kabuli_Chr02 | 20474887                | CC                                     | GG                 | GG               | INTERGENIC                    |                    |                    |
| SNP_9260_A_20479799 | NC_021161.1    | Ca_Kabuli_Chr02 | 20479799                | TT                                     | CC                 | CC               | INTERGENIC                    |                    |                    |
| SNP_9261_A_20490380 | NC_021161.1    | Ca_Kabuli_Chr02 | 20490380                | GG                                     | AA                 | AA               | INTERGENIC                    |                    |                    |
| SNP_9262_A_20490402 | NC_021161.1    | Ca_Kabuli_Chr02 | 20490402                | AA                                     | GG                 | GG               | INTERGENIC                    |                    |                    |
| SNP_9263_A_20490410 | NC_021161.1    | Ca_Kabuli_Chr02 | 20490410                | TT                                     | CC                 | CC               | INTERGENIC                    |                    |                    |
| SNP_9264_A_20490458 | NC_021161.1    | Ca_Kabuli_Chr02 | 20490458                | AA                                     | GG                 | GG               | INTERGENIC                    |                    |                    |
| SNP_9265_A_20490474 | NC_021161.1    | Ca_Kabuli_Chr02 | 20490474                | TT                                     | CC                 | CC               | INTERGENIC                    |                    |                    |

| SNPs IDs            | Chromosome IDs | Chromosomes     | Physical positions (bp) | CDC Frontier genome (Reference genome) | (Pusa 1103 & HPNB) | (ILWC 46 & LPNB) | Sequence genome | Components of | Gene accession IDs | Putative functions |
|---------------------|----------------|-----------------|-------------------------|----------------------------------------|--------------------|------------------|-----------------|---------------|--------------------|--------------------|
| SNP_9266_A_20490476 | NC_021161.1    | Ca_Kabuli_Chr02 | 20490476                | AA                                     | GG                 | GG               | INTERGENIC      |               |                    |                    |
| SNP_9267_A_20490485 | NC_021161.1    | Ca_Kabuli_Chr02 | 20490485                | TT                                     | CC                 | CC               | INTERGENIC      |               |                    |                    |
| SNP_9268_A_20490509 | NC_021161.1    | Ca_Kabuli_Chr02 | 20490509                | AA                                     | TT                 | TT               | INTERGENIC      |               |                    |                    |
| SNP_9269_A_20490515 | NC_021161.1    | Ca_Kabuli_Chr02 | 20490515                | GG                                     | AA                 | AA               | INTERGENIC      |               |                    |                    |
| SNP_9270_A_20490587 | NC_021161.1    | Ca_Kabuli_Chr02 | 20490587                | AA                                     | GG                 | GG               | INTERGENIC      |               |                    |                    |
| SNP_9271_A_20490601 | NC_021161.1    | Ca_Kabuli_Chr02 | 20490601                | AA                                     | GG                 | GG               | INTERGENIC      |               |                    |                    |
| SNP_9272_A_20490794 | NC_021161.1    | Ca_Kabuli_Chr02 | 20490794                | CC                                     | TT                 | TT               | INTERGENIC      |               |                    |                    |
| SNP_9273_A_20490840 | NC_021161.1    | Ca_Kabuli_Chr02 | 20490840                | GG                                     | AA                 | AA               | INTERGENIC      |               |                    |                    |
| SNP_9274_A_20490963 | NC_021161.1    | Ca_Kabuli_Chr02 | 20490963                | AA                                     | TT                 | TT               | INTERGENIC      |               |                    |                    |
| SNP_9275_A_20490971 | NC_021161.1    | Ca_Kabuli_Chr02 | 20490971                | CC                                     | AA                 | AA               | INTERGENIC      |               |                    |                    |
| SNP_9276_A_20493637 | NC_021161.1    | Ca_Kabuli_Chr02 | 20493637                | CC                                     | TT                 | TT               | INTERGENIC      |               |                    |                    |
| SNP_9277_A_20493772 | NC_021161.1    | Ca_Kabuli_Chr02 | 20493772                | CC                                     | TT                 | TT               | INTERGENIC      |               |                    |                    |
| SNP_9278_A_20493778 | NC_021161.1    | Ca_Kabuli_Chr02 | 20493778                | TT                                     | CC                 | CC               | INTERGENIC      |               |                    |                    |
| SNP_9279_A_20493782 | NC_021161.1    | Ca_Kabuli_Chr02 | 20493782                | AA                                     | GG                 | GG               | INTERGENIC      |               |                    |                    |
| SNP_9280_A_20493784 | NC_021161.1    | Ca_Kabuli_Chr02 | 20493784                | AA                                     | GG                 | GG               | INTERGENIC      |               |                    |                    |
| SNP_9281_A_20563210 | NC_021161.1    | Ca_Kabuli_Chr02 | 20563210                | TT                                     | AA                 | AA               | INTERGENIC      |               |                    |                    |
| SNP_9282_A_20579482 | NC_021161.1    | Ca_Kabuli_Chr02 | 20579482                | AA                                     | TT                 | TT               | INTERGENIC      |               |                    |                    |
| SNP_9283_A_20579513 | NC_021161.1    | Ca_Kabuli_Chr02 | 20579513                | TT                                     | GG                 | GG               | INTERGENIC      |               |                    |                    |
| SNP_9284_A_20579556 | NC_021161.1    | Ca_Kabuli_Chr02 | 20579556                | CC                                     | AA                 | AA               | INTERGENIC      |               |                    |                    |
| SNP_9285_A_20587506 | NC_021161.1    | Ca_Kabuli_Chr02 | 20587506                | CC                                     | TT                 | TT               | INTERGENIC      |               |                    |                    |
| SNP_9286_A_20587737 | NC_021161.1    | Ca_Kabuli_Chr02 | 20587737                | TT                                     | AA                 | AA               | INTERGENIC      |               |                    |                    |
| SNP_9287_A_20587744 | NC_021161.1    | Ca_Kabuli_Chr02 | 20587744                | TT                                     | CC                 | CC               | INTERGENIC      |               |                    |                    |

| SNPs IDs            | Chromosome IDs | Chromosomes     | Physical positions (bp) | CDC Frontier (Reference genome) | (Pusa 1103 & HPNB) | (ILWC 46 & LPNB) | Sequence genome | Components of | Gene accession IDs | Putative functions |
|---------------------|----------------|-----------------|-------------------------|---------------------------------|--------------------|------------------|-----------------|---------------|--------------------|--------------------|
| SNP_9288_A_20587746 | NC_021161.1    | Ca_Kabuli_Chr02 | 20587746                | AA                              | TT                 | TT               | INTERGENIC      |               |                    |                    |
| SNP_9289_A_20617151 | NC_021161.1    | Ca_Kabuli_Chr02 | 20617151                | TT                              | AA                 | AA               | INTERGENIC      |               |                    |                    |
| SNP_9290_A_20617156 | NC_021161.1    | Ca_Kabuli_Chr02 | 20617156                | CC                              | AA                 | AA               | INTERGENIC      |               |                    |                    |
| SNP_9291_A_20617171 | NC_021161.1    | Ca_Kabuli_Chr02 | 20617171                | TT                              | CC                 | CC               | INTERGENIC      |               |                    |                    |
| SNP_9292_A_20620733 | NC_021161.1    | Ca_Kabuli_Chr02 | 20620733                | CC                              | GG                 | GG               | INTERGENIC      |               |                    |                    |
| SNP_9293_A_20620745 | NC_021161.1    | Ca_Kabuli_Chr02 | 20620745                | GG                              | CC                 | CC               | INTERGENIC      |               |                    |                    |
| SNP_9294_A_20620782 | NC_021161.1    | Ca_Kabuli_Chr02 | 20620782                | TT                              | GG                 | GG               | INTERGENIC      |               |                    |                    |
| SNP_9295_A_20621016 | NC_021161.1    | Ca_Kabuli_Chr02 | 20621016                | TT                              | CC                 | CC               | INTERGENIC      |               |                    |                    |
| SNP_9296_A_20621082 | NC_021161.1    | Ca_Kabuli_Chr02 | 20621082                | GG                              | AA                 | AA               | INTERGENIC      |               |                    |                    |
| SNP_9297_A_20622755 | NC_021161.1    | Ca_Kabuli_Chr02 | 20622755                | CC                              | TT                 | TT               | INTERGENIC      |               |                    |                    |
| SNP_9298_A_20622774 | NC_021161.1    | Ca_Kabuli_Chr02 | 20622774                | GG                              | TT                 | TT               | INTERGENIC      |               |                    |                    |
| SNP_9299_A_20622781 | NC_021161.1    | Ca_Kabuli_Chr02 | 20622781                | AA                              | CC                 | CC               | INTERGENIC      |               |                    |                    |
| SNP_9300_A_20622995 | NC_021161.1    | Ca_Kabuli_Chr02 | 20622995                | AA                              | GG                 | GG               | INTERGENIC      |               |                    |                    |
| SNP_9301_A_20623125 | NC_021161.1    | Ca_Kabuli_Chr02 | 20623125                | CC                              | TT                 | TT               | INTERGENIC      |               |                    |                    |
| SNP_9302_A_20623137 | NC_021161.1    | Ca_Kabuli_Chr02 | 20623137                | TT                              | GG                 | GG               | INTERGENIC      |               |                    |                    |
| SNP_9303_A_20645086 | NC_021161.1    | Ca_Kabuli_Chr02 | 20645086                | GG                              | TT                 | TT               | INTERGENIC      |               |                    |                    |
| SNP_9306_A_20650162 | NC_021161.1    | Ca_Kabuli_Chr02 | 20650162                | TT                              | GG                 | GG               | INTERGENIC      |               |                    |                    |
| SNP_9307_A_20650197 | NC_021161.1    | Ca_Kabuli_Chr02 | 20650197                | CC                              | TT                 | TT               | INTERGENIC      |               |                    |                    |
| SNP_9308_A_20650234 | NC_021161.1    | Ca_Kabuli_Chr02 | 20650234                | TT                              | CC                 | CC               | INTERGENIC      |               |                    |                    |
| SNP_9309_A_20651446 | NC_021161.1    | Ca_Kabuli_Chr02 | 20651446                | GG                              | CC                 | CC               | INTERGENIC      |               |                    |                    |
| SNP_9310_A_20658258 | NC_021161.1    | Ca_Kabuli_Chr02 | 20658258                | AA                              | CC                 | CC               | INTERGENIC      |               |                    |                    |
| SNP_9311_A_20658668 | NC_021161.1    | Ca_Kabuli_Chr02 | 20658668                | AA                              | GG                 | GG               | INTERGENIC      |               |                    |                    |

| SNPs IDs            | Chromosome IDs | Chromosomes     | Physical positions (bp) | CDC Frontier (Reference genome) | (Pusa 1103 & HPNB) | (ILWC 46 & LPNB) | Sequence Components of genome | Gene accession IDs | Putative functions          |
|---------------------|----------------|-----------------|-------------------------|---------------------------------|--------------------|------------------|-------------------------------|--------------------|-----------------------------|
| SNP_9312_A_20669243 | NC_021161.1    | Ca_Kabuli_Chr02 | 20669243                | TT                              | AA                 | AA               | INTERGENIC                    |                    |                             |
| SNP_9313_A_20680434 | NC_021161.1    | Ca_Kabuli_Chr02 | 20680434                | GG                              | AA                 | AA               | INTERGENIC                    |                    |                             |
| SNP_9314_A_20716088 | NC_021161.1    | Ca_Kabuli_Chr02 | 20716088                | TT                              | GG                 | GG               | INTERGENIC                    |                    |                             |
| SNP_9315_A_20716111 | NC_021161.1    | Ca_Kabuli_Chr02 | 20716111                | AA                              | CC                 | CC               | INTERGENIC                    |                    |                             |
| SNP_9316_A_20716113 | NC_021161.1    | Ca_Kabuli_Chr02 | 20716113                | TT                              | AA                 | AA               | INTERGENIC                    |                    |                             |
| SNP_9317_A_20716119 | NC_021161.1    | Ca_Kabuli_Chr02 | 20716119                | AA                              | GG                 | GG               | INTERGENIC                    |                    |                             |
| SNP_9318_A_20731139 | NC_021161.1    | Ca_Kabuli_Chr02 | 20731139                | AA                              | GG                 | GG               | DRR                           | 101505179          | RNA-binding protein 12-like |
| SNP_9319_A_20779805 | NC_021161.1    | Ca_Kabuli_Chr02 | 20779805                | AA                              | TT                 | TT               | INTERGENIC                    |                    |                             |
| SNP_9320_A_20799481 | NC_021161.1    | Ca_Kabuli_Chr02 | 20799481                | TT                              | CC                 | CC               | INTERGENIC                    |                    |                             |
| SNP_9321_A_20799577 | NC_021161.1    | Ca_Kabuli_Chr02 | 20799577                | AA                              | TT                 | TT               | INTERGENIC                    |                    |                             |
| SNP_9322_A_20816778 | NC_021161.1    | Ca_Kabuli_Chr02 | 20816778                | CC                              | TT                 | TT               | INTERGENIC                    |                    |                             |
| SNP_9323_A_20907724 | NC_021161.1    | Ca_Kabuli_Chr02 | 20907724                | GG                              | TT                 | TT               | INTERGENIC                    |                    |                             |
| SNP_9324_A_20911258 | NC_021161.1    | Ca_Kabuli_Chr02 | 20911258                | AA                              | GG                 | GG               | INTERGENIC                    |                    |                             |
| SNP_9325_A_20931075 | NC_021161.1    | Ca_Kabuli_Chr02 | 20931075                | GG                              | AA                 | AA               | INTERGENIC                    |                    |                             |
| SNP_9326_A_20970084 | NC_021161.1    | Ca_Kabuli_Chr02 | 20970084                | GG                              | CC                 | CC               | INTERGENIC                    |                    |                             |
| SNP_9327_A_20970782 | NC_021161.1    | Ca_Kabuli_Chr02 | 20970782                | AA                              | CC                 | CC               | INTERGENIC                    |                    |                             |
| SNP_9328_A_20970848 | NC_021161.1    | Ca_Kabuli_Chr02 | 20970848                | TT                              | AA                 | AA               | INTERGENIC                    |                    |                             |
| SNP_9330_A_20971702 | NC_021161.1    | Ca_Kabuli_Chr02 | 20971702                | GG                              | AA                 | AA               | INTERGENIC                    |                    |                             |
| SNP_9331_A_20971706 | NC_021161.1    | Ca_Kabuli_Chr02 | 20971706                | TT                              | CC                 | CC               | INTERGENIC                    |                    |                             |
| SNP_9332_A_21000336 | NC_021161.1    | Ca_Kabuli_Chr02 | 21000336                | CC                              | TT                 | TT               | INTERGENIC                    |                    |                             |
| SNP_9333_A_21000385 | NC_021161.1    | Ca_Kabuli_Chr02 | 21000385                | AA                              | GG                 | GG               | INTERGENIC                    |                    |                             |
| SNP_9334_A_21000433 | NC_021161.1    | Ca_Kabuli_Chr02 | 21000433                | TT                              | CC                 | CC               | INTERGENIC                    |                    |                             |

| SNPs IDs            | Chromosome IDs | Chromosomes     | Physical positions (bp) | CDC Frontier (Reference genome) | (Pusa 1103 & HPNB) | (ILWC 46 & LPNB) | Sequence genome | Components of | Gene accession IDs | Putative functions |
|---------------------|----------------|-----------------|-------------------------|---------------------------------|--------------------|------------------|-----------------|---------------|--------------------|--------------------|
| SNP_9335_A_21000680 | NC_021161.1    | Ca_Kabuli_Chr02 | 21000680                | CC                              | GG                 | GG               | INTERGENIC      |               |                    |                    |
| SNP_9336_A_21000717 | NC_021161.1    | Ca_Kabuli_Chr02 | 21000717                | TT                              | GG                 | GG               | INTERGENIC      |               |                    |                    |
| SNP_9337_A_21044845 | NC_021161.1    | Ca_Kabuli_Chr02 | 21044845                | CC                              | TT                 | TT               | INTERGENIC      |               |                    |                    |
| SNP_9338_A_21044895 | NC_021161.1    | Ca_Kabuli_Chr02 | 21044895                | AA                              | TT                 | TT               | INTERGENIC      |               |                    |                    |
| SNP_9339_A_21084012 | NC_021161.1    | Ca_Kabuli_Chr02 | 21084012                | AA                              | GG                 | GG               | INTERGENIC      |               |                    |                    |
| SNP_9340_A_21084394 | NC_021161.1    | Ca_Kabuli_Chr02 | 21084394                | TT                              | CC                 | CC               | INTERGENIC      |               |                    |                    |
| SNP_9341_A_21084405 | NC_021161.1    | Ca_Kabuli_Chr02 | 21084405                | TT                              | CC                 | CC               | INTERGENIC      |               |                    |                    |
| SNP_9342_A_21084433 | NC_021161.1    | Ca_Kabuli_Chr02 | 21084433                | TT                              | CC                 | CC               | INTERGENIC      |               |                    |                    |
| SNP_9343_A_21085708 | NC_021161.1    | Ca_Kabuli_Chr02 | 21085708                | GG                              | TT                 | TT               | INTERGENIC      |               |                    |                    |
| SNP_9345_A_21140208 | NC_021161.1    | Ca_Kabuli_Chr02 | 21140208                | AA                              | GG                 | GG               | INTERGENIC      |               |                    |                    |
| SNP_9346_A_21140210 | NC_021161.1    | Ca_Kabuli_Chr02 | 21140210                | AA                              | GG                 | GG               | INTERGENIC      |               |                    |                    |
| SNP_9347_A_21140224 | NC_021161.1    | Ca_Kabuli_Chr02 | 21140224                | GG                              | AA                 | AA               | INTERGENIC      |               |                    |                    |
| SNP_9348_A_21140225 | NC_021161.1    | Ca_Kabuli_Chr02 | 21140225                | AA                              | GG                 | GG               | INTERGENIC      |               |                    |                    |
| SNP_9349_A_21140699 | NC_021161.1    | Ca_Kabuli_Chr02 | 21140699                | TT                              | AA                 | AA               | INTERGENIC      |               |                    |                    |
| SNP_9350_A_21204788 | NC_021161.1    | Ca_Kabuli_Chr02 | 21204788                | TT                              | CC                 | CC               | INTERGENIC      |               |                    |                    |
| SNP_9351_A_21204817 | NC_021161.1    | Ca_Kabuli_Chr02 | 21204817                | TT                              | CC                 | CC               | INTERGENIC      |               |                    |                    |
| SNP_9352_A_21205272 | NC_021161.1    | Ca_Kabuli_Chr02 | 21205272                | TT                              | GG                 | GG               | INTERGENIC      |               |                    |                    |
| SNP_9353_A_21205324 | NC_021161.1    | Ca_Kabuli_Chr02 | 21205324                | AA                              | GG                 | GG               | INTERGENIC      |               |                    |                    |
| SNP_9354_A_21208370 | NC_021161.1    | Ca_Kabuli_Chr02 | 21208370                | TT                              | CC                 | CC               | INTERGENIC      |               |                    |                    |
| SNP_9355_A_21208376 | NC_021161.1    | Ca_Kabuli_Chr02 | 21208376                | CC                              | TT                 | TT               | INTERGENIC      |               |                    |                    |
| SNP_9356_A_21208380 | NC_021161.1    | Ca_Kabuli_Chr02 | 21208380                | TT                              | CC                 | CC               | INTERGENIC      |               |                    |                    |
| SNP_9357_A_21208385 | NC_021161.1    | Ca_Kabuli_Chr02 | 21208385                | TT                              | AA                 | AA               | INTERGENIC      |               |                    |                    |

| SNPs IDs            | Chromosome IDs | Chromosomes     | Physical positions (bp) | CDC Frontier (Reference genome) | (Pusa 1103 & HPNB) | (ILWC 46 & LPNB) | Sequence genome | Components of | Gene accession IDs | Putative functions |
|---------------------|----------------|-----------------|-------------------------|---------------------------------|--------------------|------------------|-----------------|---------------|--------------------|--------------------|
| SNP_9358_A_21208418 | NC_021161.1    | Ca_Kabuli_Chr02 | 21208418                | CC                              | TT                 | TT               | INTERGENIC      |               |                    |                    |
| SNP_9359_A_21208427 | NC_021161.1    | Ca_Kabuli_Chr02 | 21208427                | GG                              | AA                 | AA               | INTERGENIC      |               |                    |                    |
| SNP_9360_A_21208463 | NC_021161.1    | Ca_Kabuli_Chr02 | 21208463                | GG                              | AA                 | AA               | INTERGENIC      |               |                    |                    |
| SNP_9361_A_21208475 | NC_021161.1    | Ca_Kabuli_Chr02 | 21208475                | CC                              | TT                 | TT               | INTERGENIC      |               |                    |                    |
| SNP_9362_A_21208629 | NC_021161.1    | Ca_Kabuli_Chr02 | 21208629                | AA                              | GG                 | GG               | INTERGENIC      |               |                    |                    |
| SNP_9363_A_21208635 | NC_021161.1    | Ca_Kabuli_Chr02 | 21208635                | TT                              | CC                 | CC               | INTERGENIC      |               |                    |                    |
| SNP_9364_A_21208655 | NC_021161.1    | Ca_Kabuli_Chr02 | 21208655                | TT                              | CC                 | CC               | INTERGENIC      |               |                    |                    |
| SNP_9365_A_21208656 | NC_021161.1    | Ca_Kabuli_Chr02 | 21208656                | CC                              | TT                 | TT               | INTERGENIC      |               |                    |                    |
| SNP_9366_A_21208658 | NC_021161.1    | Ca_Kabuli_Chr02 | 21208658                | GG                              | AA                 | AA               | INTERGENIC      |               |                    |                    |
| SNP_9367_A_21208665 | NC_021161.1    | Ca_Kabuli_Chr02 | 21208665                | AA                              | GG                 | GG               | INTERGENIC      |               |                    |                    |
| SNP_9368_A_21208697 | NC_021161.1    | Ca_Kabuli_Chr02 | 21208697                | GG                              | AA                 | AA               | INTERGENIC      |               |                    |                    |
| SNP_9370_A_21208805 | NC_021161.1    | Ca_Kabuli_Chr02 | 21208805                | AA                              | GG                 | GG               | INTERGENIC      |               |                    |                    |
| SNP_9371_A_21208895 | NC_021161.1    | Ca_Kabuli_Chr02 | 21208895                | AA                              | TT                 | TT               | INTERGENIC      |               |                    |                    |
| SNP_9372_A_21247209 | NC_021161.1    | Ca_Kabuli_Chr02 | 21247209                | AA                              | CC                 | CC               | INTERGENIC      |               |                    |                    |
| SNP_9373_A_21271920 | NC_021161.1    | Ca_Kabuli_Chr02 | 21271920                | AA                              | GG                 | GG               | URR             |               | 101514204          | Unknown function   |
| SNP_9374_A_21272137 | NC_021161.1    | Ca_Kabuli_Chr02 | 21272137                | AA                              | TT                 | TT               | URR             |               | 101514204          | Unknown function   |
| SNP_9375_A_21272140 | NC_021161.1    | Ca_Kabuli_Chr02 | 21272140                | TT                              | AA                 | AA               | URR             |               | 101514204          | Unknown function   |
| SNP_9376_A_21272263 | NC_021161.1    | Ca_Kabuli_Chr02 | 21272263                | AA                              | GG                 | GG               | URR             |               | 101514204          | Unknown function   |
| SNP_9377_A_21303216 | NC_021161.1    | Ca_Kabuli_Chr02 | 21303216                | TT                              | AA                 | AA               | INTERGENIC      |               |                    |                    |
| SNP_9378_A_21303226 | NC_021161.1    | Ca_Kabuli_Chr02 | 21303226                | AA                              | GG                 | GG               | INTERGENIC      |               |                    |                    |
| SNP_9379_A_21303281 | NC_021161.1    | Ca_Kabuli_Chr02 | 21303281                | AA                              | TT                 | TT               | INTERGENIC      |               |                    |                    |
| SNP_9380_A_21303308 | NC_021161.1    | Ca_Kabuli_Chr02 | 21303308                | AA                              | GG                 | GG               | INTERGENIC      |               |                    |                    |

| SNPs IDs            | Chromosome IDs | Chromosomes     | Physical positions (bp) | CDC Frontier (Reference genome) | (Pusa 1103 & HPNB) | (ILWC 46 & LPNB) | Sequence genome | Components of | Gene accession IDs | Putative functions |
|---------------------|----------------|-----------------|-------------------------|---------------------------------|--------------------|------------------|-----------------|---------------|--------------------|--------------------|
| SNP_9381_A_21303360 | NC_021161.1    | Ca_Kabuli_Chr02 | 21303360                | AA                              | GG                 | GG               | INTERGENIC      |               |                    |                    |
| SNP_9382_A_21303416 | NC_021161.1    | Ca_Kabuli_Chr02 | 21303416                | TT                              | GG                 | GG               | INTERGENIC      |               |                    |                    |
| SNP_9383_A_21303447 | NC_021161.1    | Ca_Kabuli_Chr02 | 21303447                | CC                              | TT                 | TT               | INTERGENIC      |               |                    |                    |
| SNP_9384_A_21303507 | NC_021161.1    | Ca_Kabuli_Chr02 | 21303507                | CC                              | TT                 | TT               | INTERGENIC      |               |                    |                    |
| SNP_9385_A_21303510 | NC_021161.1    | Ca_Kabuli_Chr02 | 21303510                | GG                              | AA                 | AA               | INTERGENIC      |               |                    |                    |
| SNP_9386_A_21303865 | NC_021161.1    | Ca_Kabuli_Chr02 | 21303865                | GG                              | AA                 | AA               | INTERGENIC      |               |                    |                    |
| SNP_9387_A_21305085 | NC_021161.1    | Ca_Kabuli_Chr02 | 21305085                | GG                              | AA                 | AA               | INTERGENIC      |               |                    |                    |
| SNP_9388_A_21305115 | NC_021161.1    | Ca_Kabuli_Chr02 | 21305115                | TT                              | AA                 | AA               | INTERGENIC      |               |                    |                    |
| SNP_9389_A_21305146 | NC_021161.1    | Ca_Kabuli_Chr02 | 21305146                | GG                              | AA                 | AA               | INTERGENIC      |               |                    |                    |
| SNP_9390_A_21305156 | NC_021161.1    | Ca_Kabuli_Chr02 | 21305156                | GG                              | AA                 | AA               | INTERGENIC      |               |                    |                    |
| SNP_9391_A_21305159 | NC_021161.1    | Ca_Kabuli_Chr02 | 21305159                | CC                              | TT                 | TT               | INTERGENIC      |               |                    |                    |
| SNP_9392_A_21305163 | NC_021161.1    | Ca_Kabuli_Chr02 | 21305163                | AA                              | GG                 | GG               | INTERGENIC      |               |                    |                    |
| SNP_9393_A_21305174 | NC_021161.1    | Ca_Kabuli_Chr02 | 21305174                | AA                              | GG                 | GG               | INTERGENIC      |               |                    |                    |
| SNP_9394_A_21305674 | NC_021161.1    | Ca_Kabuli_Chr02 | 21305674                | AA                              | CC                 | CC               | INTERGENIC      |               |                    |                    |
| SNP_9396_A_21308765 | NC_021161.1    | Ca_Kabuli_Chr02 | 21308765                | TT                              | GG                 | GG               | INTERGENIC      |               |                    |                    |
| SNP_9397_A_21308797 | NC_021161.1    | Ca_Kabuli_Chr02 | 21308797                | GG                              | AA                 | AA               | INTERGENIC      |               |                    |                    |
| SNP_9398_A_21308948 | NC_021161.1    | Ca_Kabuli_Chr02 | 21308948                | CC                              | TT                 | TT               | INTERGENIC      |               |                    |                    |
| SNP_9399_A_21309174 | NC_021161.1    | Ca_Kabuli_Chr02 | 21309174                | AA                              | TT                 | TT               | INTERGENIC      |               |                    |                    |
| SNP_9400_A_21309198 | NC_021161.1    | Ca_Kabuli_Chr02 | 21309198                | AA                              | CC                 | CC               | INTERGENIC      |               |                    |                    |
| SNP_9401_A_21309378 | NC_021161.1    | Ca_Kabuli_Chr02 | 21309378                | CC                              | AA                 | AA               | INTERGENIC      |               |                    |                    |
| SNP_9402_A_21309467 | NC_021161.1    | Ca_Kabuli_Chr02 | 21309467                | AA                              | TT                 | TT               | INTERGENIC      |               |                    |                    |
| SNP_9403_A_21309512 | NC_021161.1    | Ca_Kabuli_Chr02 | 21309512                | TT                              | CC                 | CC               | INTERGENIC      |               |                    |                    |



| SNPs IDs            | Chromosome IDs | Chromosomes     | Physical positions (bp) | CDC Frontier (Reference genome) | (Pusa 1103 & HPNB) | (ILWC 46 & LPNB) | Sequence genome | Components of | Gene accession IDs | Putative functions |
|---------------------|----------------|-----------------|-------------------------|---------------------------------|--------------------|------------------|-----------------|---------------|--------------------|--------------------|
| SNP_9404_A_21309613 | NC_021161.1    | Ca_Kabuli_Chr02 | 21309613                | AA                              | GG                 | GG               | INTERGENIC      |               |                    |                    |
| SNP_9405_A_21310027 | NC_021161.1    | Ca_Kabuli_Chr02 | 21310027                | TT                              | CC                 | CC               | INTERGENIC      |               |                    |                    |
| SNP_9406_A_21310041 | NC_021161.1    | Ca_Kabuli_Chr02 | 21310041                | TT                              | CC                 | CC               | INTERGENIC      |               |                    |                    |
| SNP_9407_A_21310066 | NC_021161.1    | Ca_Kabuli_Chr02 | 21310066                | GG                              | AA                 | AA               | INTERGENIC      |               |                    |                    |
| SNP_9408_A_21310088 | NC_021161.1    | Ca_Kabuli_Chr02 | 21310088                | TT                              | CC                 | CC               | INTERGENIC      |               |                    |                    |
| SNP_9409_A_21310624 | NC_021161.1    | Ca_Kabuli_Chr02 | 21310624                | TT                              | AA                 | AA               | INTERGENIC      |               |                    |                    |
| SNP_9410_A_21310638 | NC_021161.1    | Ca_Kabuli_Chr02 | 21310638                | CC                              | TT                 | TT               | INTERGENIC      |               |                    |                    |
| SNP_9411_A_21312134 | NC_021161.1    | Ca_Kabuli_Chr02 | 21312134                | GG                              | AA                 | AA               | INTERGENIC      |               |                    |                    |
| SNP_9413_A_21313567 | NC_021161.1    | Ca_Kabuli_Chr02 | 21313567                | AA                              | CC                 | CC               | INTERGENIC      |               |                    |                    |
| SNP_9414_A_21314076 | NC_021161.1    | Ca_Kabuli_Chr02 | 21314076                | GG                              | CC                 | CC               | INTERGENIC      |               |                    |                    |
| SNP_9415_A_21314192 | NC_021161.1    | Ca_Kabuli_Chr02 | 21314192                | CC                              | TT                 | TT               | INTERGENIC      |               |                    |                    |
| SNP_9417_A_21314644 | NC_021161.1    | Ca_Kabuli_Chr02 | 21314644                | TT                              | GG                 | GG               | INTERGENIC      |               |                    |                    |
| SNP_9418_A_21314952 | NC_021161.1    | Ca_Kabuli_Chr02 | 21314952                | AA                              | TT                 | TT               | INTERGENIC      |               |                    |                    |
| SNP_9419_A_21314992 | NC_021161.1    | Ca_Kabuli_Chr02 | 21314992                | AA                              | TT                 | TT               | INTERGENIC      |               |                    |                    |
| SNP_9420_A_21315061 | NC_021161.1    | Ca_Kabuli_Chr02 | 21315061                | AA                              | TT                 | TT               | INTERGENIC      |               |                    |                    |
| SNP_9421_A_21315322 | NC_021161.1    | Ca_Kabuli_Chr02 | 21315322                | AA                              | GG                 | GG               | INTERGENIC      |               |                    |                    |
| SNP_9422_A_21315386 | NC_021161.1    | Ca_Kabuli_Chr02 | 21315386                | TT                              | AA                 | AA               | INTERGENIC      |               |                    |                    |
| SNP_9423_A_21315644 | NC_021161.1    | Ca_Kabuli_Chr02 | 21315644                | AA                              | TT                 | TT               | INTERGENIC      |               |                    |                    |
| SNP_9424_A_21317521 | NC_021161.1    | Ca_Kabuli_Chr02 | 21317521                | AA                              | GG                 | GG               | INTERGENIC      |               |                    |                    |
| SNP_9425_A_21318214 | NC_021161.1    | Ca_Kabuli_Chr02 | 21318214                | TT                              | CC                 | CC               | INTERGENIC      |               |                    |                    |
| SNP_9426_A_21318506 | NC_021161.1    | Ca_Kabuli_Chr02 | 21318506                | TT                              | GG                 | GG               | INTERGENIC      |               |                    |                    |
| SNP_9427_A_21318936 | NC_021161.1    | Ca_Kabuli_Chr02 | 21318936                | TT                              | AA                 | AA               | INTERGENIC      |               |                    |                    |

| SNPs IDs            | Chromosome IDs | Chromosomes     | Physical positions (bp) | CDC Frontier (Reference genome) | (Pusa 1103 & HPNB) | (ILWC 46 & LPNB) | Sequence Components of genome | Gene accession IDs | Putative functions                      |
|---------------------|----------------|-----------------|-------------------------|---------------------------------|--------------------|------------------|-------------------------------|--------------------|-----------------------------------------|
| SNP_9428_A_21319310 | NC_021161.1    | Ca_Kabuli_Chr02 | 21319310                | CC                              | AA                 | AA               | INTERGENIC                    |                    |                                         |
| SNP_9429_A_21321298 | NC_021161.1    | Ca_Kabuli_Chr02 | 21321298                | AA                              | CC                 | CC               | INTERGENIC                    |                    |                                         |
| SNP_9430_A_21321583 | NC_021161.1    | Ca_Kabuli_Chr02 | 21321583                | GG                              | AA                 | AA               | INTERGENIC                    |                    |                                         |
| SNP_9431_A_21321727 | NC_021161.1    | Ca_Kabuli_Chr02 | 21321727                | AA                              | GG                 | GG               | INTERGENIC                    |                    |                                         |
| SNP_9432_A_21324561 | NC_021161.1    | Ca_Kabuli_Chr02 | 21324561                | AA                              | GG                 | GG               | INTERGENIC                    |                    |                                         |
| SNP_9433_A_21324564 | NC_021161.1    | Ca_Kabuli_Chr02 | 21324564                | GG                              | AA                 | AA               | INTERGENIC                    |                    |                                         |
| SNP_9434_A_21366242 | NC_021161.1    | Ca_Kabuli_Chr02 | 21366242                | TT                              | CC                 | CC               | INTRON                        | 101512369          | chaperone protein dnaJ 1, mitochondrial |
| SNP_9435_A_21494900 | NC_021161.1    | Ca_Kabuli_Chr02 | 21494900                | CC                              | AA                 | AA               | INTERGENIC                    |                    |                                         |
| SNP_9436_A_21524332 | NC_021161.1    | Ca_Kabuli_Chr02 | 21524332                | CC                              | GG                 | GG               | INTERGENIC                    |                    |                                         |
| SNP_9437_A_21524427 | NC_021161.1    | Ca_Kabuli_Chr02 | 21524427                | TT                              | GG                 | GG               | INTERGENIC                    |                    |                                         |
| SNP_9438_A_21524440 | NC_021161.1    | Ca_Kabuli_Chr02 | 21524440                | AA                              | GG                 | GG               | INTERGENIC                    |                    |                                         |
| SNP_9439_A_21524454 | NC_021161.1    | Ca_Kabuli_Chr02 | 21524454                | GG                              | CC                 | CC               | INTERGENIC                    |                    |                                         |
| SNP_9440_A_21528182 | NC_021161.1    | Ca_Kabuli_Chr02 | 21528182                | AA                              | GG                 | GG               | INTERGENIC                    |                    |                                         |
| SNP_9441_A_21536027 | NC_021161.1    | Ca_Kabuli_Chr02 | 21536027                | GG                              | AA                 | AA               | INTERGENIC                    |                    |                                         |
| SNP_9442_A_21536461 | NC_021161.1    | Ca_Kabuli_Chr02 | 21536461                | AA                              | GG                 | GG               | INTERGENIC                    |                    |                                         |
| SNP_9443_A_21537510 | NC_021161.1    | Ca_Kabuli_Chr02 | 21537510                | CC                              | TT                 | TT               | INTERGENIC                    |                    |                                         |
| SNP_9444_A_21537511 | NC_021161.1    | Ca_Kabuli_Chr02 | 21537511                | TT                              | CC                 | CC               | INTERGENIC                    |                    |                                         |
| SNP_9445_A_21537513 | NC_021161.1    | Ca_Kabuli_Chr02 | 21537513                | CC                              | TT                 | TT               | INTERGENIC                    |                    |                                         |
| SNP_9446_A_21537517 | NC_021161.1    | Ca_Kabuli_Chr02 | 21537517                | GG                              | AA                 | AA               | INTERGENIC                    |                    |                                         |
| SNP_9447_A_21537521 | NC_021161.1    | Ca_Kabuli_Chr02 | 21537521                | CC                              | TT                 | TT               | INTERGENIC                    |                    |                                         |
| SNP_9448_A_21537524 | NC_021161.1    | Ca_Kabuli_Chr02 | 21537524                | TT                              | GG                 | GG               | INTERGENIC                    |                    |                                         |
| SNP_9449_A_21537922 | NC_021161.1    | Ca_Kabuli_Chr02 | 21537922                | AA                              | TT                 | TT               | INTERGENIC                    |                    |                                         |

| SNPs IDs            | Chromosome IDs | Chromosomes     | Physical positions (bp) | CDC Frontier (Reference genome) | (Pusa 1103 & HPNB) | (ILWC 46 & LPNB) | Sequence Components of genome | Gene accession IDs | Putative functions                          |
|---------------------|----------------|-----------------|-------------------------|---------------------------------|--------------------|------------------|-------------------------------|--------------------|---------------------------------------------|
| SNP_9450_A_21537944 | NC_021161.1    | Ca_Kabuli_Chr02 | 21537944                | AA                              | GG                 | GG               | INTERGENIC                    |                    |                                             |
| SNP_9451_A_21538526 | NC_021161.1    | Ca_Kabuli_Chr02 | 21538526                | AA                              | GG                 | GG               | INTERGENIC                    |                    |                                             |
| SNP_9452_A_21538559 | NC_021161.1    | Ca_Kabuli_Chr02 | 21538559                | AA                              | GG                 | GG               | INTERGENIC                    |                    |                                             |
| SNP_9453_A_21538652 | NC_021161.1    | Ca_Kabuli_Chr02 | 21538652                | AA                              | GG                 | GG               | INTERGENIC                    |                    |                                             |
| SNP_9454_A_21574236 | NC_021161.1    | Ca_Kabuli_Chr02 | 21574236                | TT                              | CC                 | CC               | INTERGENIC                    |                    |                                             |
| SNP_9455_A_21578262 | NC_021161.1    | Ca_Kabuli_Chr02 | 21578262                | AA                              | GG                 | GG               | INTERGENIC                    |                    |                                             |
| SNP_9456_A_21582401 | NC_021161.1    | Ca_Kabuli_Chr02 | 21582401                | TT                              | CC                 | CC               | INTERGENIC                    |                    |                                             |
| SNP_9457_A_21582437 | NC_021161.1    | Ca_Kabuli_Chr02 | 21582437                | GG                              | AA                 | AA               | INTERGENIC                    |                    |                                             |
| SNP_9458_A_21594951 | NC_021161.1    | Ca_Kabuli_Chr02 | 21594951                | AA                              | TT                 | TT               | URR                           | 101488248          | uncharacterized LOC101488248                |
| SNP_9459_A_21594955 | NC_021161.1    | Ca_Kabuli_Chr02 | 21594955                | TT                              | AA                 | AA               | URR                           | 101488248          | uncharacterized LOC101488248                |
| SNP_9461_A_21607736 | NC_021161.1    | Ca_Kabuli_Chr02 | 21607736                | CC                              | TT                 | TT               | INTERGENIC                    |                    |                                             |
| SNP_9463_A_21757833 | NC_021161.1    | Ca_Kabuli_Chr02 | 21757833                | CC                              | AA                 | AA               | URR                           | 101492386          | Unknown function                            |
| SNP_9464_A_21757845 | NC_021161.1    | Ca_Kabuli_Chr02 | 21757845                | CC                              | TT                 | TT               | URR                           | 101492386          | Unknown function                            |
| SNP_9465_A_21757881 | NC_021161.1    | Ca_Kabuli_Chr02 | 21757881                | TT                              | AA                 | AA               | URR                           | 101492386          | Unknown function                            |
| SNP_9466_A_21767611 | NC_021161.1    | Ca_Kabuli_Chr02 | 21767611                | CC                              | TT                 | TT               | INTRON                        | 101489245          | ribosomal RNA processing protein 36 homolog |
| SNP_9467_A_21767641 | NC_021161.1    | Ca_Kabuli_Chr02 | 21767641                | TT                              | AA                 | AA               | NON_SYNONYMOUS_CODING         | 101489245          | ribosomal RNA processing protein 36 homolog |
| SNP_9468_A_21774772 | NC_021161.1    | Ca_Kabuli_Chr02 | 21774772                | AA                              | GG                 | GG               | INTERGENIC                    |                    |                                             |
| SNP_9469_A_21774779 | NC_021161.1    | Ca_Kabuli_Chr02 | 21774779                | CC                              | TT                 | TT               | INTERGENIC                    |                    |                                             |
| SNP_9470_A_21777813 | NC_021161.1    | Ca_Kabuli_Chr02 | 21777813                | CC                              | TT                 | TT               | INTERGENIC                    |                    |                                             |
| SNP_9471_A_21777815 | NC_021161.1    | Ca_Kabuli_Chr02 | 21777815                | CC                              | TT                 | TT               | INTERGENIC                    |                    |                                             |
| SNP_9472_A_21778640 | NC_021161.1    | Ca_Kabuli_Chr02 | 21778640                | TT                              | CC                 | CC               | INTERGENIC                    |                    |                                             |
| SNP_9474_A_21801809 | NC_021161.1    | Ca_Kabuli_Chr02 | 21801809                | AA                              | GG                 | GG               | INTERGENIC                    |                    |                                             |

| SNPs IDs            | Chromosome IDs | Chromosomes     | Physical positions (bp) | CDC Frontier genome (Reference genome) | (Pusa 1103 & HPNB) | (ILWC 46 & LPNB) | Sequence Components of genome | Gene accession IDs | Putative functions           |
|---------------------|----------------|-----------------|-------------------------|----------------------------------------|--------------------|------------------|-------------------------------|--------------------|------------------------------|
| SNP_9475_A_21902569 | NC_021161.1    | Ca_Kabuli_Chr02 | 21902569                | GG                                     | AA                 | AA               | INTERGENIC                    |                    |                              |
| SNP_9476_A_21902586 | NC_021161.1    | Ca_Kabuli_Chr02 | 21902586                | TT                                     | AA                 | AA               | INTERGENIC                    |                    |                              |
| SNP_9477_A_21902833 | NC_021161.1    | Ca_Kabuli_Chr02 | 21902833                | AA                                     | GG                 | GG               | INTERGENIC                    |                    |                              |
| SNP_9478_A_21902887 | NC_021161.1    | Ca_Kabuli_Chr02 | 21902887                | AA                                     | GG                 | GG               | INTERGENIC                    |                    |                              |
| SNP_9479_A_21902926 | NC_021161.1    | Ca_Kabuli_Chr02 | 21902926                | TT                                     | CC                 | CC               | INTERGENIC                    |                    |                              |
| SNP_9480_A_21928424 | NC_021161.1    | Ca_Kabuli_Chr02 | 21928424                | AA                                     | CC                 | CC               | INTERGENIC                    |                    |                              |
| SNP_9481_A_21929045 | NC_021161.1    | Ca_Kabuli_Chr02 | 21929045                | TT                                     | AA                 | AA               | INTERGENIC                    |                    |                              |
| SNP_9483_A_21956077 | NC_021161.1    | Ca_Kabuli_Chr02 | 21956077                | TT                                     | CC                 | CC               | INTERGENIC                    |                    |                              |
| SNP_9484_A_21956120 | NC_021161.1    | Ca_Kabuli_Chr02 | 21956120                | TT                                     | CC                 | CC               | INTERGENIC                    |                    |                              |
| SNP_9485_A_21956372 | NC_021161.1    | Ca_Kabuli_Chr02 | 21956372                | CC                                     | AA                 | AA               | INTERGENIC                    |                    |                              |
| SNP_9486_A_21998821 | NC_021161.1    | Ca_Kabuli_Chr02 | 21998821                | GG                                     | AA                 | AA               | INTRON                        | 101494329          | uncharacterized LOC101494329 |
| SNP_9487_A_21999067 | NC_021161.1    | Ca_Kabuli_Chr02 | 21999067                | GG                                     | AA                 | AA               | INTRON                        | 101494329          | uncharacterized LOC101494329 |
| SNP_9488_A_21999324 | NC_021161.1    | Ca_Kabuli_Chr02 | 21999324                | GG                                     | AA                 | AA               | INTRON                        | 101494329          | uncharacterized LOC101494329 |
| SNP_9489_A_21999325 | NC_021161.1    | Ca_Kabuli_Chr02 | 21999325                | TT                                     | CC                 | CC               | INTRON                        | 101494329          | uncharacterized LOC101494329 |
| SNP_9490_A_21999343 | NC_021161.1    | Ca_Kabuli_Chr02 | 21999343                | TT                                     | AA                 | AA               | INTRON                        | 101494329          | uncharacterized LOC101494329 |
| SNP_9491_A_22039146 | NC_021161.1    | Ca_Kabuli_Chr02 | 22039146                | CC                                     | TT                 | TT               | DRR                           | 101490764          | bet1-like protein At4g14600  |
| SNP_9492_A_22065261 | NC_021161.1    | Ca_Kabuli_Chr02 | 22065261                | GG                                     | AA                 | AA               | INTERGENIC                    |                    |                              |
| SNP_9493_A_22065308 | NC_021161.1    | Ca_Kabuli_Chr02 | 22065308                | GG                                     | CC                 | CC               | INTERGENIC                    |                    |                              |
| SNP_9494_A_22069095 | NC_021161.1    | Ca_Kabuli_Chr02 | 22069095                | CC                                     | AA                 | AA               | INTERGENIC                    |                    |                              |
| SNP_9495_A_22069827 | NC_021161.1    | Ca_Kabuli_Chr02 | 22069827                | GG                                     | AA                 | AA               | INTERGENIC                    |                    |                              |
| SNP_9496_A_22195131 | NC_021161.1    | Ca_Kabuli_Chr02 | 22195131                | GG                                     | AA                 | AA               | INTERGENIC                    |                    |                              |
| SNP_9497_A_22195132 | NC_021161.1    | Ca_Kabuli_Chr02 | 22195132                | TT                                     | CC                 | CC               | INTERGENIC                    |                    |                              |

| SNPs IDs            | Chromosome IDs | Chromosomes     | Physical positions (bp) | CDC Frontier (Reference genome) | (Pusa 1103 & HPNB) | (ILWC 46 & LPNB) | Sequence genome | Components of | Gene accession IDs | Putative functions |
|---------------------|----------------|-----------------|-------------------------|---------------------------------|--------------------|------------------|-----------------|---------------|--------------------|--------------------|
| SNP_9498_A_22195346 | NC_021161.1    | Ca_Kabuli_Chr02 | 22195346                | AA                              | GG                 | GG               | INTERGENIC      |               |                    |                    |
| SNP_9499_A_22196671 | NC_021161.1    | Ca_Kabuli_Chr02 | 22196671                | TT                              | AA                 | AA               | INTERGENIC      |               |                    |                    |
| SNP_9500_A_22202179 | NC_021161.1    | Ca_Kabuli_Chr02 | 22202179                | AA                              | GG                 | GG               | INTERGENIC      |               |                    |                    |
| SNP_9501_A_22202206 | NC_021161.1    | Ca_Kabuli_Chr02 | 22202206                | GG                              | AA                 | AA               | INTERGENIC      |               |                    |                    |
| SNP_9502_A_22202207 | NC_021161.1    | Ca_Kabuli_Chr02 | 22202207                | CC                              | AA                 | AA               | INTERGENIC      |               |                    |                    |
| SNP_9503_A_22202209 | NC_021161.1    | Ca_Kabuli_Chr02 | 22202209                | TT                              | GG                 | GG               | INTERGENIC      |               |                    |                    |
| SNP_9504_A_22202215 | NC_021161.1    | Ca_Kabuli_Chr02 | 22202215                | CC                              | GG                 | GG               | INTERGENIC      |               |                    |                    |
| SNP_9505_A_22202230 | NC_021161.1    | Ca_Kabuli_Chr02 | 22202230                | CC                              | TT                 | TT               | INTERGENIC      |               |                    |                    |
| SNP_9506_A_22202240 | NC_021161.1    | Ca_Kabuli_Chr02 | 22202240                | TT                              | GG                 | GG               | INTERGENIC      |               |                    |                    |
| SNP_9507_A_22202266 | NC_021161.1    | Ca_Kabuli_Chr02 | 22202266                | TT                              | CC                 | CC               | INTERGENIC      |               |                    |                    |
| SNP_9508_A_22202282 | NC_021161.1    | Ca_Kabuli_Chr02 | 22202282                | TT                              | CC                 | CC               | INTERGENIC      |               |                    |                    |
| SNP_9509_A_22202550 | NC_021161.1    | Ca_Kabuli_Chr02 | 22202550                | CC                              | TT                 | TT               | INTERGENIC      |               |                    |                    |
| SNP_9510_A_22202590 | NC_021161.1    | Ca_Kabuli_Chr02 | 22202590                | CC                              | AA                 | AA               | INTERGENIC      |               |                    |                    |
| SNP_9511_A_22202596 | NC_021161.1    | Ca_Kabuli_Chr02 | 22202596                | CC                              | TT                 | TT               | INTERGENIC      |               |                    |                    |
| SNP_9513_A_22284811 | NC_021161.1    | Ca_Kabuli_Chr02 | 22284811                | AA                              | GG                 | GG               | INTERGENIC      |               |                    |                    |
| SNP_9514_A_22284879 | NC_021161.1    | Ca_Kabuli_Chr02 | 22284879                | CC                              | TT                 | TT               | INTERGENIC      |               |                    |                    |
| SNP_9515_A_22285145 | NC_021161.1    | Ca_Kabuli_Chr02 | 22285145                | TT                              | CC                 | CC               | INTERGENIC      |               |                    |                    |
| SNP_9517_A_22301313 | NC_021161.1    | Ca_Kabuli_Chr02 | 22301313                | TT                              | AA                 | AA               | INTERGENIC      |               |                    |                    |
| SNP_9518_A_22334910 | NC_021161.1    | Ca_Kabuli_Chr02 | 22334910                | AA                              | GG                 | GG               | INTERGENIC      |               |                    |                    |
| SNP_9519_A_22359602 | NC_021161.1    | Ca_Kabuli_Chr02 | 22359602                | GG                              | CC                 | CC               | INTERGENIC      |               |                    |                    |
| SNP_9520_A_22359953 | NC_021161.1    | Ca_Kabuli_Chr02 | 22359953                | TT                              | CC                 | CC               | INTERGENIC      |               |                    |                    |
| SNP_9521_A_22360291 | NC_021161.1    | Ca_Kabuli_Chr02 | 22360291                | TT                              | GG                 | GG               | INTERGENIC      |               |                    |                    |

| SNPs IDs            | Chromosome IDs | Chromosomes     | Physical positions (bp) | CDC Frontier (Reference genome) | (Pusa 1103 & HPNB) | (ILWC 46 & LPNB) | Sequence Components of genome | Gene accession IDs | Putative functions                              |
|---------------------|----------------|-----------------|-------------------------|---------------------------------|--------------------|------------------|-------------------------------|--------------------|-------------------------------------------------|
| SNP_9522_A_22412192 | NC_021161.1    | Ca_Kabuli_Chr02 | 22412192                | TT                              | CC                 | CC               | INTERGENIC                    |                    |                                                 |
| SNP_9523_A_22412195 | NC_021161.1    | Ca_Kabuli_Chr02 | 22412195                | GG                              | AA                 | AA               | INTERGENIC                    |                    |                                                 |
| SNP_9524_A_22412209 | NC_021161.1    | Ca_Kabuli_Chr02 | 22412209                | TT                              | GG                 | GG               | INTERGENIC                    |                    |                                                 |
| SNP_9525_A_22429924 | NC_021161.1    | Ca_Kabuli_Chr02 | 22429924                | CC                              | TT                 | TT               | INTRON                        | 101515389          | proline-rich receptor-like protein kinase PERK9 |
| SNP_9526_A_22436069 | NC_021161.1    | Ca_Kabuli_Chr02 | 22436069                | AA                              | TT                 | TT               | INTRON                        | 101515389          | proline-rich receptor-like protein kinase PERK9 |
| SNP_9527_A_22455658 | NC_021161.1    | Ca_Kabuli_Chr02 | 22455658                | TT                              | CC                 | CC               | INTERGENIC                    |                    |                                                 |
| SNP_9528_A_22480535 | NC_021161.1    | Ca_Kabuli_Chr02 | 22480535                | AA                              | TT                 | TT               | INTERGENIC                    |                    |                                                 |
| SNP_9529_A_22482091 | NC_021161.1    | Ca_Kabuli_Chr02 | 22482091                | AA                              | GG                 | GG               | INTERGENIC                    |                    |                                                 |
| SNP_9530_A_22482461 | NC_021161.1    | Ca_Kabuli_Chr02 | 22482461                | TT                              | GG                 | GG               | INTERGENIC                    |                    |                                                 |
| SNP_9531_A_22482510 | NC_021161.1    | Ca_Kabuli_Chr02 | 22482510                | TT                              | CC                 | CC               | INTERGENIC                    |                    |                                                 |
| SNP_9532_A_22482511 | NC_021161.1    | Ca_Kabuli_Chr02 | 22482511                | GG                              | AA                 | AA               | INTERGENIC                    |                    |                                                 |
| SNP_9533_A_22482541 | NC_021161.1    | Ca_Kabuli_Chr02 | 22482541                | TT                              | GG                 | GG               | INTERGENIC                    |                    |                                                 |
| SNP_9534_A_22482559 | NC_021161.1    | Ca_Kabuli_Chr02 | 22482559                | CC                              | AA                 | AA               | INTERGENIC                    |                    |                                                 |
| SNP_9535_A_22482563 | NC_021161.1    | Ca_Kabuli_Chr02 | 22482563                | TT                              | AA                 | AA               | INTERGENIC                    |                    |                                                 |
| SNP_9536_A_22482569 | NC_021161.1    | Ca_Kabuli_Chr02 | 22482569                | TT                              | CC                 | CC               | INTERGENIC                    |                    |                                                 |
| SNP_9537_A_22482573 | NC_021161.1    | Ca_Kabuli_Chr02 | 22482573                | GG                              | AA                 | AA               | INTERGENIC                    |                    |                                                 |
| SNP_9538_A_22482889 | NC_021161.1    | Ca_Kabuli_Chr02 | 22482889                | TT                              | CC                 | CC               | INTERGENIC                    |                    |                                                 |
| SNP_9539_A_22489239 | NC_021161.1    | Ca_Kabuli_Chr02 | 22489239                | GG                              | TT                 | TT               | INTERGENIC                    |                    |                                                 |
| SNP_9540_A_22489240 | NC_021161.1    | Ca_Kabuli_Chr02 | 22489240                | TT                              | CC                 | CC               | INTERGENIC                    |                    |                                                 |
| SNP_9541_A_22489244 | NC_021161.1    | Ca_Kabuli_Chr02 | 22489244                | AA                              | GG                 | GG               | INTERGENIC                    |                    |                                                 |
| SNP_9542_A_22565512 | NC_021161.1    | Ca_Kabuli_Chr02 | 22565512                | AA                              | TT                 | TT               | INTERGENIC                    |                    |                                                 |
| SNP_9543_A_22579529 | NC_021161.1    | Ca_Kabuli_Chr02 | 22579529                | TT                              | AA                 | AA               | INTERGENIC                    |                    |                                                 |

| SNPs IDs            | Chromosome IDs | Chromosomes     | Physical positions (bp) | CDC Frontier (Reference genome) | (Pusa 1103 & HPNB) | (ILWC 46 & LPNB) | Sequence genome | Components of | Gene accession IDs | Putative functions |
|---------------------|----------------|-----------------|-------------------------|---------------------------------|--------------------|------------------|-----------------|---------------|--------------------|--------------------|
| SNP_9544_A_22584989 | NC_021161.1    | Ca_Kabuli_Chr02 | 22584989                | AA                              | CC                 | CC               | INTERGENIC      |               |                    |                    |
| SNP_9545_A_22584995 | NC_021161.1    | Ca_Kabuli_Chr02 | 22584995                | TT                              | CC                 | CC               | INTERGENIC      |               |                    |                    |
| SNP_9546_A_22585014 | NC_021161.1    | Ca_Kabuli_Chr02 | 22585014                | AA                              | GG                 | GG               | INTERGENIC      |               |                    |                    |
| SNP_9548_A_22585057 | NC_021161.1    | Ca_Kabuli_Chr02 | 22585057                | TT                              | CC                 | CC               | INTERGENIC      |               |                    |                    |
| SNP_9549_A_22585312 | NC_021161.1    | Ca_Kabuli_Chr02 | 22585312                | TT                              | CC                 | CC               | INTERGENIC      |               |                    |                    |
| SNP_9550_A_22585356 | NC_021161.1    | Ca_Kabuli_Chr02 | 22585356                | AA                              | GG                 | GG               | INTERGENIC      |               |                    |                    |
| SNP_9551_A_22585358 | NC_021161.1    | Ca_Kabuli_Chr02 | 22585358                | AA                              | GG                 | GG               | INTERGENIC      |               |                    |                    |
| SNP_9552_A_22585363 | NC_021161.1    | Ca_Kabuli_Chr02 | 22585363                | TT                              | CC                 | CC               | INTERGENIC      |               |                    |                    |
| SNP_9553_A_22588899 | NC_021161.1    | Ca_Kabuli_Chr02 | 22588899                | TT                              | CC                 | CC               | INTERGENIC      |               |                    |                    |
| SNP_9554_A_22608411 | NC_021161.1    | Ca_Kabuli_Chr02 | 22608411                | AA                              | GG                 | GG               | INTERGENIC      |               |                    |                    |
| SNP_9555_A_22608439 | NC_021161.1    | Ca_Kabuli_Chr02 | 22608439                | TT                              | CC                 | CC               | INTERGENIC      |               |                    |                    |
| SNP_9556_A_22642479 | NC_021161.1    | Ca_Kabuli_Chr02 | 22642479                | AA                              | GG                 | GG               | INTERGENIC      |               |                    |                    |
| SNP_9557_A_22642541 | NC_021161.1    | Ca_Kabuli_Chr02 | 22642541                | GG                              | AA                 | AA               | INTERGENIC      |               |                    |                    |
| SNP_9558_A_22643930 | NC_021161.1    | Ca_Kabuli_Chr02 | 22643930                | CC                              | TT                 | TT               | INTERGENIC      |               |                    |                    |
| SNP_9559_A_22643977 | NC_021161.1    | Ca_Kabuli_Chr02 | 22643977                | GG                              | TT                 | TT               | INTERGENIC      |               |                    |                    |
| SNP_9560_A_22643998 | NC_021161.1    | Ca_Kabuli_Chr02 | 22643998                | TT                              | CC                 | CC               | INTERGENIC      |               |                    |                    |
| SNP_9561_A_22644007 | NC_021161.1    | Ca_Kabuli_Chr02 | 22644007                | AA                              | TT                 | TT               | INTERGENIC      |               |                    |                    |
| SNP_9562_A_22644177 | NC_021161.1    | Ca_Kabuli_Chr02 | 22644177                | AA                              | GG                 | GG               | INTERGENIC      |               |                    |                    |
| SNP_9563_A_22644231 | NC_021161.1    | Ca_Kabuli_Chr02 | 22644231                | AA                              | GG                 | GG               | INTERGENIC      |               |                    |                    |
| SNP_9564_A_22644238 | NC_021161.1    | Ca_Kabuli_Chr02 | 22644238                | TT                              | GG                 | GG               | INTERGENIC      |               |                    |                    |
| SNP_9565_A_22644358 | NC_021161.1    | Ca_Kabuli_Chr02 | 22644358                | CC                              | TT                 | TT               | INTERGENIC      |               |                    |                    |
| SNP_9566_A_22644374 | NC_021161.1    | Ca_Kabuli_Chr02 | 22644374                | TT                              | CC                 | CC               | INTERGENIC      |               |                    |                    |

| SNPs IDs            | Chromosome IDs | Chromosomes     | Physical positions (bp) | CDC Frontier genome (Reference genome) | (Pusa 1103 & HPNB) | (ILWC 46 & LPNB) | Sequence Components of genome | Gene accession IDs | Putative functions |
|---------------------|----------------|-----------------|-------------------------|----------------------------------------|--------------------|------------------|-------------------------------|--------------------|--------------------|
| SNP_9567_A_22644407 | NC_021161.1    | Ca_Kabuli_Chr02 | 22644407                | TT                                     | AA                 | AA               | INTERGENIC                    |                    |                    |
| SNP_9568_A_22644431 | NC_021161.1    | Ca_Kabuli_Chr02 | 22644431                | AA                                     | GG                 | GG               | INTERGENIC                    |                    |                    |
| SNP_9569_A_22646750 | NC_021161.1    | Ca_Kabuli_Chr02 | 22646750                | GG                                     | AA                 | AA               | INTERGENIC                    |                    |                    |
| SNP_9570_A_22646767 | NC_021161.1    | Ca_Kabuli_Chr02 | 22646767                | AA                                     | GG                 | GG               | INTERGENIC                    |                    |                    |
| SNP_9571_A_22650562 | NC_021161.1    | Ca_Kabuli_Chr02 | 22650562                | CC                                     | TT                 | TT               | INTERGENIC                    |                    |                    |
| SNP_9572_A_22650614 | NC_021161.1    | Ca_Kabuli_Chr02 | 22650614                | TT                                     | AA                 | AA               | INTERGENIC                    |                    |                    |
| SNP_9574_A_22650687 | NC_021161.1    | Ca_Kabuli_Chr02 | 22650687                | AA                                     | GG                 | GG               | INTERGENIC                    |                    |                    |
| SNP_9575_A_22650734 | NC_021161.1    | Ca_Kabuli_Chr02 | 22650734                | TT                                     | CC                 | CC               | INTERGENIC                    |                    |                    |
| SNP_9576_A_22650764 | NC_021161.1    | Ca_Kabuli_Chr02 | 22650764                | AA                                     | GG                 | GG               | INTERGENIC                    |                    |                    |
| SNP_9577_A_22650848 | NC_021161.1    | Ca_Kabuli_Chr02 | 22650848                | CC                                     | TT                 | TT               | INTERGENIC                    |                    |                    |
| SNP_9578_A_22651022 | NC_021161.1    | Ca_Kabuli_Chr02 | 22651022                | AA                                     | TT                 | TT               | INTERGENIC                    |                    |                    |
| SNP_9579_A_22651023 | NC_021161.1    | Ca_Kabuli_Chr02 | 22651023                | TT                                     | GG                 | GG               | INTERGENIC                    |                    |                    |
| SNP_9580_A_22651843 | NC_021161.1    | Ca_Kabuli_Chr02 | 22651843                | TT                                     | CC                 | CC               | INTERGENIC                    |                    |                    |
| SNP_9581_A_22667743 | NC_021161.1    | Ca_Kabuli_Chr02 | 22667743                | AA                                     | GG                 | GG               | INTERGENIC                    |                    |                    |
| SNP_9582_A_22667756 | NC_021161.1    | Ca_Kabuli_Chr02 | 22667756                | TT                                     | CC                 | CC               | INTERGENIC                    |                    |                    |
| SNP_9583_A_22677321 | NC_021161.1    | Ca_Kabuli_Chr02 | 22677321                | TT                                     | AA                 | AA               | INTERGENIC                    |                    |                    |
| SNP_9584_A_22677327 | NC_021161.1    | Ca_Kabuli_Chr02 | 22677327                | AA                                     | TT                 | TT               | INTERGENIC                    |                    |                    |
| SNP_9585_A_22681889 | NC_021161.1    | Ca_Kabuli_Chr02 | 22681889                | GG                                     | TT                 | TT               | INTERGENIC                    |                    |                    |
| SNP_9586_A_22681899 | NC_021161.1    | Ca_Kabuli_Chr02 | 22681899                | GG                                     | AA                 | AA               | INTERGENIC                    |                    |                    |
| SNP_9587_A_22749216 | NC_021161.1    | Ca_Kabuli_Chr02 | 22749216                | TT                                     | CC                 | CC               | INTRON                        | 101489154          | Unknown function   |
| SNP_9588_A_22749340 | NC_021161.1    | Ca_Kabuli_Chr02 | 22749340                | GG                                     | AA                 | AA               | NON_SYNONYMOUS_CODING         | 101489154          | Unknown function   |
| SNP_9589_A_22749381 | NC_021161.1    | Ca_Kabuli_Chr02 | 22749381                | AA                                     | GG                 | GG               | SYNONYMOUS_CODING             | 101489154          | Unknown function   |



| SNPs IDs            | Chromosome IDs | Chromosomes     | Physical positions (bp) | CDC Frontier (Reference genome) | (Pusa 1103 & HPNB) | (ILWC 46 & LPNB) | Sequence Components of genome | Gene accession IDs | Putative functions |
|---------------------|----------------|-----------------|-------------------------|---------------------------------|--------------------|------------------|-------------------------------|--------------------|--------------------|
| SNP_9590_A_22749410 | NC_021161.1    | Ca_Kabuli_Chr02 | 22749410                | TT                              | CC                 | CC               | NON_SYNONYMOUS_CODING         | 101489154          | Unknown function   |
| SNP_9591_A_22749428 | NC_021161.1    | Ca_Kabuli_Chr02 | 22749428                | GG                              | AA                 | AA               | NON_SYNONYMOUS_CODING         | 101489154          | Unknown function   |
| SNP_9592_A_22749453 | NC_021161.1    | Ca_Kabuli_Chr02 | 22749453                | TT                              | GG                 | GG               | NON_SYNONYMOUS_CODING         | 101489154          | Unknown function   |
| SNP_9593_A_22749469 | NC_021161.1    | Ca_Kabuli_Chr02 | 22749469                | TT                              | GG                 | GG               | NON_SYNONYMOUS_CODING         | 101489154          | Unknown function   |
| SNP_9594_A_22749566 | NC_021161.1    | Ca_Kabuli_Chr02 | 22749566                | TT                              | AA                 | AA               | INTRON                        | 101489154          | Unknown function   |
| SNP_9595_A_22749590 | NC_021161.1    | Ca_Kabuli_Chr02 | 22749590                | GG                              | AA                 | AA               | INTRON                        | 101489154          | Unknown function   |
| SNP_9596_A_22749984 | NC_021161.1    | Ca_Kabuli_Chr02 | 22749984                | AA                              | GG                 | GG               | SYNONYMOUS_CODING             | 101489154          | Unknown function   |
| SNP_9597_A_22750344 | NC_021161.1    | Ca_Kabuli_Chr02 | 22750344                | GG                              | AA                 | AA               | URR                           | 101489154          | Unknown function   |
| SNP_9598_A_22750367 | NC_021161.1    | Ca_Kabuli_Chr02 | 22750367                | CC                              | TT                 | TT               | URR                           | 101489154          | Unknown function   |
| SNP_9599_A_22750462 | NC_021161.1    | Ca_Kabuli_Chr02 | 22750462                | AA                              | GG                 | GG               | URR                           | 101489154          | Unknown function   |
| SNP_9600_A_22750493 | NC_021161.1    | Ca_Kabuli_Chr02 | 22750493                | AA                              | GG                 | GG               | URR                           | 101489154          | Unknown function   |
| SNP_9601_A_22755943 | NC_021161.1    | Ca_Kabuli_Chr02 | 22755943                | TT                              | AA                 | AA               | URR                           | 101489483          | Unknown function   |
| SNP_9602_A_22779117 | NC_021161.1    | Ca_Kabuli_Chr02 | 22779117                | TT                              | GG                 | GG               | INTERGENIC                    |                    |                    |
| SNP_9603_A_22779399 | NC_021161.1    | Ca_Kabuli_Chr02 | 22779399                | TT                              | CC                 | CC               | INTERGENIC                    |                    |                    |
| SNP_9604_A_22779437 | NC_021161.1    | Ca_Kabuli_Chr02 | 22779437                | GG                              | AA                 | AA               | INTERGENIC                    |                    |                    |
| SNP_9605_A_22779440 | NC_021161.1    | Ca_Kabuli_Chr02 | 22779440                | AA                              | GG                 | GG               | INTERGENIC                    |                    |                    |
| SNP_9606_A_22779491 | NC_021161.1    | Ca_Kabuli_Chr02 | 22779491                | AA                              | CC                 | CC               | INTERGENIC                    |                    |                    |
| SNP_9607_A_22779611 | NC_021161.1    | Ca_Kabuli_Chr02 | 22779611                | TT                              | CC                 | CC               | INTERGENIC                    |                    |                    |
| SNP_9608_A_22779644 | NC_021161.1    | Ca_Kabuli_Chr02 | 22779644                | GG                              | AA                 | AA               | INTERGENIC                    |                    |                    |
| SNP_9609_A_22782712 | NC_021161.1    | Ca_Kabuli_Chr02 | 22782712                | TT                              | AA                 | AA               | INTERGENIC                    |                    |                    |
| SNP_9610_A_22783022 | NC_021161.1    | Ca_Kabuli_Chr02 | 22783022                | AA                              | TT                 | TT               | INTERGENIC                    |                    |                    |
| SNP_9611_A_22811468 | NC_021161.1    | Ca_Kabuli_Chr02 | 22811468                | CC                              | TT                 | TT               | INTERGENIC                    |                    |                    |

| SNPs IDs            | Chromosome IDs | Chromosomes     | Physical positions (bp) | CDC Frontier genome (Reference genome) | (Pusa 1103 & HPNB) | (ILWC 46 & LPNB) | Sequence genome | Components of | Gene accession IDs | Putative functions |
|---------------------|----------------|-----------------|-------------------------|----------------------------------------|--------------------|------------------|-----------------|---------------|--------------------|--------------------|
| SNP_9612_A_22812347 | NC_021161.1    | Ca_Kabuli_Chr02 | 22812347                | CC                                     | AA                 | AA               | INTERGENIC      |               |                    |                    |
| SNP_9613_A_22827739 | NC_021161.1    | Ca_Kabuli_Chr02 | 22827739                | TT                                     | CC                 | CC               | INTERGENIC      |               |                    |                    |
| SNP_9615_A_22889825 | NC_021161.1    | Ca_Kabuli_Chr02 | 22889825                | TT                                     | AA                 | AA               | INTERGENIC      |               |                    |                    |
| SNP_9617_A_22929718 | NC_021161.1    | Ca_Kabuli_Chr02 | 22929718                | AA                                     | GG                 | GG               | INTERGENIC      |               |                    |                    |
| SNP_9618_A_22974296 | NC_021161.1    | Ca_Kabuli_Chr02 | 22974296                | CC                                     | TT                 | TT               | INTERGENIC      |               |                    |                    |
| SNP_9619_A_23006738 | NC_021161.1    | Ca_Kabuli_Chr02 | 23006738                | TT                                     | GG                 | GG               | INTERGENIC      |               |                    |                    |
| SNP_9620_A_23041233 | NC_021161.1    | Ca_Kabuli_Chr02 | 23041233                | CC                                     | AA                 | AA               | INTERGENIC      |               |                    |                    |
| SNP_9621_A_23041249 | NC_021161.1    | Ca_Kabuli_Chr02 | 23041249                | GG                                     | AA                 | AA               | INTERGENIC      |               |                    |                    |
| SNP_9622_A_23041316 | NC_021161.1    | Ca_Kabuli_Chr02 | 23041316                | AA                                     | TT                 | TT               | INTERGENIC      |               |                    |                    |
| SNP_9623_A_23041325 | NC_021161.1    | Ca_Kabuli_Chr02 | 23041325                | AA                                     | GG                 | GG               | INTERGENIC      |               |                    |                    |
| SNP_9624_A_23041337 | NC_021161.1    | Ca_Kabuli_Chr02 | 23041337                | CC                                     | TT                 | TT               | INTERGENIC      |               |                    |                    |
| SNP_9625_A_23041642 | NC_021161.1    | Ca_Kabuli_Chr02 | 23041642                | GG                                     | TT                 | TT               | INTERGENIC      |               |                    |                    |
| SNP_9627_A_23067648 | NC_021161.1    | Ca_Kabuli_Chr02 | 23067648                | AA                                     | GG                 | GG               | INTERGENIC      |               |                    |                    |
| SNP_9628_A_23068006 | NC_021161.1    | Ca_Kabuli_Chr02 | 23068006                | TT                                     | CC                 | CC               | INTERGENIC      |               |                    |                    |
| SNP_9629_A_23068080 | NC_021161.1    | Ca_Kabuli_Chr02 | 23068080                | CC                                     | GG                 | GG               | INTERGENIC      |               |                    |                    |
| SNP_9630_A_23155532 | NC_021161.1    | Ca_Kabuli_Chr02 | 23155532                | AA                                     | GG                 | GG               | INTERGENIC      |               |                    |                    |
| SNP_9631_A_23155564 | NC_021161.1    | Ca_Kabuli_Chr02 | 23155564                | GG                                     | TT                 | TT               | INTERGENIC      |               |                    |                    |
| SNP_9632_A_23155919 | NC_021161.1    | Ca_Kabuli_Chr02 | 23155919                | CC                                     | TT                 | TT               | INTERGENIC      |               |                    |                    |
| SNP_9633_A_23192938 | NC_021161.1    | Ca_Kabuli_Chr02 | 23192938                | CC                                     | TT                 | TT               | INTERGENIC      |               |                    |                    |
| SNP_9634_A_23192976 | NC_021161.1    | Ca_Kabuli_Chr02 | 23192976                | AA                                     | GG                 | GG               | INTERGENIC      |               |                    |                    |
| SNP_9635_A_23193053 | NC_021161.1    | Ca_Kabuli_Chr02 | 23193053                | TT                                     | AA                 | AA               | INTERGENIC      |               |                    |                    |
| SNP_9636_A_23193061 | NC_021161.1    | Ca_Kabuli_Chr02 | 23193061                | AA                                     | CC                 | CC               | INTERGENIC      |               |                    |                    |

| SNPs IDs            | Chromosome IDs | Chromosomes     | Physical positions (bp) | CDC Frontier (Reference genome) | (Pusa 1103 & HPNB) | (ILWC 46 & LPNB) | Sequence genome | Components of | Gene accession IDs | Putative functions |
|---------------------|----------------|-----------------|-------------------------|---------------------------------|--------------------|------------------|-----------------|---------------|--------------------|--------------------|
| SNP_9637_A_23193078 | NC_021161.1    | Ca_Kabuli_Chr02 | 23193078                | TT                              | CC                 | CC               | INTERGENIC      |               |                    |                    |
| SNP_9638_A_23193083 | NC_021161.1    | Ca_Kabuli_Chr02 | 23193083                | CC                              | TT                 | TT               | INTERGENIC      |               |                    |                    |
| SNP_9640_A_23193636 | NC_021161.1    | Ca_Kabuli_Chr02 | 23193636                | GG                              | AA                 | AA               | INTERGENIC      |               |                    |                    |
| SNP_9641_A_23253132 | NC_021161.1    | Ca_Kabuli_Chr02 | 23253132                | CC                              | GG                 | GG               | INTERGENIC      |               |                    |                    |
| SNP_9642_A_23253135 | NC_021161.1    | Ca_Kabuli_Chr02 | 23253135                | CC                              | TT                 | TT               | INTERGENIC      |               |                    |                    |
| SNP_9643_A_23253178 | NC_021161.1    | Ca_Kabuli_Chr02 | 23253178                | GG                              | TT                 | TT               | INTERGENIC      |               |                    |                    |
| SNP_9644_A_23254004 | NC_021161.1    | Ca_Kabuli_Chr02 | 23254004                | CC                              | AA                 | AA               | INTERGENIC      |               |                    |                    |
| SNP_9645_A_23254030 | NC_021161.1    | Ca_Kabuli_Chr02 | 23254030                | CC                              | TT                 | TT               | INTERGENIC      |               |                    |                    |
| SNP_9646_A_23260170 | NC_021161.1    | Ca_Kabuli_Chr02 | 23260170                | GG                              | TT                 | TT               | INTERGENIC      |               |                    |                    |
| SNP_9647_A_23362429 | NC_021161.1    | Ca_Kabuli_Chr02 | 23362429                | AA                              | GG                 | GG               | INTERGENIC      |               |                    |                    |
| SNP_9648_A_23362644 | NC_021161.1    | Ca_Kabuli_Chr02 | 23362644                | CC                              | GG                 | GG               | INTERGENIC      |               |                    |                    |
| SNP_9649_A_23371303 | NC_021161.1    | Ca_Kabuli_Chr02 | 23371303                | GG                              | CC                 | CC               | INTERGENIC      |               |                    |                    |
| SNP_9650_A_23371404 | NC_021161.1    | Ca_Kabuli_Chr02 | 23371404                | AA                              | GG                 | GG               | INTERGENIC      |               |                    |                    |
| SNP_9651_A_23371561 | NC_021161.1    | Ca_Kabuli_Chr02 | 23371561                | CC                              | TT                 | TT               | INTERGENIC      |               |                    |                    |
| SNP_9652_A_23371798 | NC_021161.1    | Ca_Kabuli_Chr02 | 23371798                | AA                              | GG                 | GG               | INTERGENIC      |               |                    |                    |
| SNP_9653_A_23400995 | NC_021161.1    | Ca_Kabuli_Chr02 | 23400995                | TT                              | AA                 | AA               | INTERGENIC      |               |                    |                    |
| SNP_9654_A_23401508 | NC_021161.1    | Ca_Kabuli_Chr02 | 23401508                | GG                              | AA                 | AA               | INTERGENIC      |               |                    |                    |
| SNP_9656_A_23408503 | NC_021161.1    | Ca_Kabuli_Chr02 | 23408503                | TT                              | CC                 | CC               | INTERGENIC      |               |                    |                    |
| SNP_9659_A_23513867 | NC_021161.1    | Ca_Kabuli_Chr02 | 23513867                | GG                              | AA                 | AA               | INTERGENIC      |               |                    |                    |
| SNP_9660_A_23539436 | NC_021161.1    | Ca_Kabuli_Chr02 | 23539436                | CC                              | TT                 | TT               | INTERGENIC      |               |                    |                    |
| SNP_9661_A_23544794 | NC_021161.1    | Ca_Kabuli_Chr02 | 23544794                | AA                              | GG                 | GG               | INTERGENIC      |               |                    |                    |
| SNP_9662_A_23544816 | NC_021161.1    | Ca_Kabuli_Chr02 | 23544816                | AA                              | GG                 | GG               | INTERGENIC      |               |                    |                    |

| SNPs IDs            | Chromosome IDs | Chromosomes     | Physical positions (bp) | CDC Frontier (Reference genome) | (Pusa 1103 & HPNB) | (ILWC 46 & LPNB) | Sequence genome | Components of | Gene accession IDs | Putative functions |
|---------------------|----------------|-----------------|-------------------------|---------------------------------|--------------------|------------------|-----------------|---------------|--------------------|--------------------|
| SNP_9663_A_23544842 | NC_021161.1    | Ca_Kabuli_Chr02 | 23544842                | TT                              | CC                 | CC               | INTERGENIC      |               |                    |                    |
| SNP_9664_A_23544950 | NC_021161.1    | Ca_Kabuli_Chr02 | 23544950                | TT                              | CC                 | CC               | INTERGENIC      |               |                    |                    |
| SNP_9665_A_23545017 | NC_021161.1    | Ca_Kabuli_Chr02 | 23545017                | TT                              | CC                 | CC               | INTERGENIC      |               |                    |                    |
| SNP_9666_A_23545023 | NC_021161.1    | Ca_Kabuli_Chr02 | 23545023                | AA                              | GG                 | GG               | INTERGENIC      |               |                    |                    |
| SNP_9667_A_23545059 | NC_021161.1    | Ca_Kabuli_Chr02 | 23545059                | TT                              | AA                 | AA               | INTERGENIC      |               |                    |                    |
| SNP_9668_A_23545121 | NC_021161.1    | Ca_Kabuli_Chr02 | 23545121                | AA                              | CC                 | CC               | INTERGENIC      |               |                    |                    |
| SNP_9669_A_23545134 | NC_021161.1    | Ca_Kabuli_Chr02 | 23545134                | TT                              | CC                 | CC               | INTERGENIC      |               |                    |                    |
| SNP_9670_A_23624316 | NC_021161.1    | Ca_Kabuli_Chr02 | 23624316                | GG                              | AA                 | AA               | INTERGENIC      |               |                    |                    |
| SNP_9671_A_23624340 | NC_021161.1    | Ca_Kabuli_Chr02 | 23624340                | TT                              | AA                 | AA               | INTERGENIC      |               |                    |                    |
| SNP_9672_A_23624347 | NC_021161.1    | Ca_Kabuli_Chr02 | 23624347                | GG                              | TT                 | TT               | INTERGENIC      |               |                    |                    |
| SNP_9673_A_23624352 | NC_021161.1    | Ca_Kabuli_Chr02 | 23624352                | CC                              | TT                 | TT               | INTERGENIC      |               |                    |                    |
| SNP_9674_A_23624369 | NC_021161.1    | Ca_Kabuli_Chr02 | 23624369                | TT                              | AA                 | AA               | INTERGENIC      |               |                    |                    |
| SNP_9675_A_23624373 | NC_021161.1    | Ca_Kabuli_Chr02 | 23624373                | TT                              | GG                 | GG               | INTERGENIC      |               |                    |                    |
| SNP_9676_A_23624376 | NC_021161.1    | Ca_Kabuli_Chr02 | 23624376                | AA                              | GG                 | GG               | INTERGENIC      |               |                    |                    |
| SNP_9677_A_23624385 | NC_021161.1    | Ca_Kabuli_Chr02 | 23624385                | AA                              | GG                 | GG               | INTERGENIC      |               |                    |                    |
| SNP_9678_A_23624388 | NC_021161.1    | Ca_Kabuli_Chr02 | 23624388                | GG                              | CC                 | CC               | INTERGENIC      |               |                    |                    |
| SNP_9679_A_23624393 | NC_021161.1    | Ca_Kabuli_Chr02 | 23624393                | AA                              | GG                 | GG               | INTERGENIC      |               |                    |                    |
| SNP_9680_A_23624400 | NC_021161.1    | Ca_Kabuli_Chr02 | 23624400                | TT                              | CC                 | CC               | INTERGENIC      |               |                    |                    |
| SNP_9681_A_23624409 | NC_021161.1    | Ca_Kabuli_Chr02 | 23624409                | AA                              | GG                 | GG               | INTERGENIC      |               |                    |                    |
| SNP_9682_A_23624519 | NC_021161.1    | Ca_Kabuli_Chr02 | 23624519                | AA                              | TT                 | TT               | INTERGENIC      |               |                    |                    |
| SNP_9683_A_23624536 | NC_021161.1    | Ca_Kabuli_Chr02 | 23624536                | CC                              | TT                 | TT               | INTERGENIC      |               |                    |                    |
| SNP_9684_A_23624570 | NC_021161.1    | Ca_Kabuli_Chr02 | 23624570                | GG                              | AA                 | AA               | INTERGENIC      |               |                    |                    |

| SNPs IDs            | Chromosome IDs | Chromosomes     | Physical positions (bp) | CDC Frontier genome (Reference genome) | (Pusa 1103 & HPNB) | (ILWC 46 & LPNB) | Sequence Components of genome | Gene accession IDs | Putative functions                           |
|---------------------|----------------|-----------------|-------------------------|----------------------------------------|--------------------|------------------|-------------------------------|--------------------|----------------------------------------------|
| SNP_9685_A_23691594 | NC_021161.1    | Ca_Kabuli_Chr02 | 23691594                | TT                                     | CC                 | CC               | INTERGENIC                    |                    |                                              |
| SNP_9686_A_23695520 | NC_021161.1    | Ca_Kabuli_Chr02 | 23695520                | AA                                     | CC                 | CC               | INTERGENIC                    |                    |                                              |
| SNP_9687_A_23752740 | NC_021161.1    | Ca_Kabuli_Chr02 | 23752740                | TT                                     | AA                 | AA               | INTRON                        | 10151184           | U3 small nucleolar RNA-associated protein 25 |
| SNP_9688_A_23753103 | NC_021161.1    | Ca_Kabuli_Chr02 | 23753103                | CC                                     | TT                 | TT               | INTRON                        | 10151184           | U3 small nucleolar RNA-associated protein 25 |
| SNP_9689_A_23753178 | NC_021161.1    | Ca_Kabuli_Chr02 | 23753178                | GG                                     | AA                 | AA               | INTRON                        | 10151184           | U3 small nucleolar RNA-associated protein 25 |
| SNP_9690_A_23753259 | NC_021161.1    | Ca_Kabuli_Chr02 | 23753259                | GG                                     | AA                 | AA               | INTRON                        | 10151184           | U3 small nucleolar RNA-associated protein 25 |
| SNP_9691_A_23760728 | NC_021161.1    | Ca_Kabuli_Chr02 | 23760728                | AA                                     | GG                 | GG               | INTERGENIC                    |                    |                                              |
| SNP_9692_A_23760738 | NC_021161.1    | Ca_Kabuli_Chr02 | 23760738                | CC                                     | TT                 | TT               | INTERGENIC                    |                    |                                              |
| SNP_9694_A_23794272 | NC_021161.1    | Ca_Kabuli_Chr02 | 23794272                | TT                                     | CC                 | CC               | INTERGENIC                    |                    |                                              |
| SNP_9697_A_23853810 | NC_021161.1    | Ca_Kabuli_Chr02 | 23853810                | TT                                     | CC                 | CC               | INTERGENIC                    |                    |                                              |
| SNP_9698_A_23854420 | NC_021161.1    | Ca_Kabuli_Chr02 | 23854420                | TT                                     | CC                 | CC               | INTERGENIC                    |                    |                                              |
| SNP_9699_A_23854451 | NC_021161.1    | Ca_Kabuli_Chr02 | 23854451                | TT                                     | CC                 | CC               | INTERGENIC                    |                    |                                              |
| SNP_9700_A_23854457 | NC_021161.1    | Ca_Kabuli_Chr02 | 23854457                | TT                                     | CC                 | CC               | INTERGENIC                    |                    |                                              |
| SNP_9701_A_23894990 | NC_021161.1    | Ca_Kabuli_Chr02 | 23894990                | AA                                     | GG                 | GG               | INTERGENIC                    |                    |                                              |
| SNP_9702_A_23910380 | NC_021161.1    | Ca_Kabuli_Chr02 | 23910380                | TT                                     | CC                 | CC               | INTRON                        | 101512687          | tripeptidyl-peptidase 2-like                 |
| SNP_9703_A_23910913 | NC_021161.1    | Ca_Kabuli_Chr02 | 23910913                | CC                                     | AA                 | AA               | NON_SYNONYMOUS_CODING         | 101512687          | tripeptidyl-peptidase 2-like                 |
| SNP_9704_A_23911358 | NC_021161.1    | Ca_Kabuli_Chr02 | 23911358                | CC                                     | TT                 | TT               | INTRON                        | 101512687          | tripeptidyl-peptidase 2-like                 |
| SNP_9705_A_23912417 | NC_021161.1    | Ca_Kabuli_Chr02 | 23912417                | TT                                     | CC                 | CC               | INTRON                        | 101512687          | tripeptidyl-peptidase 2-like                 |
| SNP_9706_A_23912432 | NC_021161.1    | Ca_Kabuli_Chr02 | 23912432                | CC                                     | TT                 | TT               | INTRON                        | 101512687          | tripeptidyl-peptidase 2-like                 |
| SNP_9707_A_23912510 | NC_021161.1    | Ca_Kabuli_Chr02 | 23912510                | AA                                     | GG                 | GG               | INTRON                        | 101512687          | tripeptidyl-peptidase 2-like                 |
| SNP_9708_A_23912698 | NC_021161.1    | Ca_Kabuli_Chr02 | 23912698                | AA                                     | TT                 | TT               | INTRON                        | 101512687          | tripeptidyl-peptidase 2-like                 |
| SNP_9709_A_23925718 | NC_021161.1    | Ca_Kabuli_Chr02 | 23925718                | AA                                     | CC                 | CC               | INTRON                        | 101512687          | tripeptidyl-peptidase 2-like                 |

| SNPs IDs            | Chromosome IDs | Chromosomes     | Physical positions (bp) | CDC Frontier genome (Reference genome) | (Pusa 1103 & HPNB) | (ILWC 46 & LPNB) | Sequence Components of genome | Gene accession IDs | Putative functions           |
|---------------------|----------------|-----------------|-------------------------|----------------------------------------|--------------------|------------------|-------------------------------|--------------------|------------------------------|
| SNP_9710_A_23925725 | NC_021161.1    | Ca_Kabuli_Chr02 | 23925725                | CC                                     | TT                 | TT               | INTRON                        | 101512687          | tripeptidyl-peptidase 2-like |
| SNP_9711_A_23925946 | NC_021161.1    | Ca_Kabuli_Chr02 | 23925946                | CC                                     | TT                 | TT               | INTRON                        | 101512687          | tripeptidyl-peptidase 2-like |
| SNP_9712_A_23926393 | NC_021161.1    | Ca_Kabuli_Chr02 | 23926393                | GG                                     | AA                 | AA               | INTRON                        | 101512687          | tripeptidyl-peptidase 2-like |
| SNP_9713_A_23926501 | NC_021161.1    | Ca_Kabuli_Chr02 | 23926501                | GG                                     | CC                 | CC               | INTRON                        | 101512687          | tripeptidyl-peptidase 2-like |
| SNP_9714_A_23926521 | NC_021161.1    | Ca_Kabuli_Chr02 | 23926521                | GG                                     | AA                 | AA               | INTRON                        | 101512687          | tripeptidyl-peptidase 2-like |
| SNP_9715_A_23926769 | NC_021161.1    | Ca_Kabuli_Chr02 | 23926769                | AA                                     | GG                 | GG               | INTRON                        | 101512687          | tripeptidyl-peptidase 2-like |
| SNP_9716_A_23926813 | NC_021161.1    | Ca_Kabuli_Chr02 | 23926813                | TT                                     | GG                 | GG               | INTRON                        | 101512687          | tripeptidyl-peptidase 2-like |
| SNP_9717_A_23926996 | NC_021161.1    | Ca_Kabuli_Chr02 | 23926996                | GG                                     | CC                 | CC               | SYNONYMOUS_CODING             | 101512687          | tripeptidyl-peptidase 2-like |
| SNP_9718_A_23927105 | NC_021161.1    | Ca_Kabuli_Chr02 | 23927105                | AA                                     | GG                 | GG               | INTERGENIC                    |                    |                              |
| SNP_9719_A_23927240 | NC_021161.1    | Ca_Kabuli_Chr02 | 23927240                | GG                                     | AA                 | AA               | URR                           | 101512687          | tripeptidyl-peptidase 2-like |
| SNP_9720_A_23931668 | NC_021161.1    | Ca_Kabuli_Chr02 | 23931668                | GG                                     | AA                 | AA               | INTERGENIC                    |                    |                              |
| SNP_9721_A_23931990 | NC_021161.1    | Ca_Kabuli_Chr02 | 23931990                | GG                                     | AA                 | AA               | INTERGENIC                    |                    |                              |
| SNP_9722_A_23932205 | NC_021161.1    | Ca_Kabuli_Chr02 | 23932205                | TT                                     | GG                 | GG               | INTERGENIC                    |                    |                              |
| SNP_9724_A_23934055 | NC_021161.1    | Ca_Kabuli_Chr02 | 23934055                | CC                                     | GG                 | GG               | URR                           | 101513227          | Unknown function             |
| SNP_9725_A_23934184 | NC_021161.1    | Ca_Kabuli_Chr02 | 23934184                | AA                                     | GG                 | GG               | URR                           | 101513227          | Unknown function             |
| SNP_9726_A_23934307 | NC_021161.1    | Ca_Kabuli_Chr02 | 23934307                | TT                                     | CC                 | CC               | URR                           | 101513227          | Unknown function             |
| SNP_9727_A_23972237 | NC_021161.1    | Ca_Kabuli_Chr02 | 23972237                | CC                                     | TT                 | TT               | INTERGENIC                    |                    |                              |
| SNP_9729_A_23990162 | NC_021161.1    | Ca_Kabuli_Chr02 | 23990162                | CC                                     | AA                 | AA               | INTERGENIC                    |                    |                              |
| SNP_9730_A_23990169 | NC_021161.1    | Ca_Kabuli_Chr02 | 23990169                | CC                                     | TT                 | TT               | INTERGENIC                    |                    |                              |
| SNP_9732_A_24004915 | NC_021161.1    | Ca_Kabuli_Chr02 | 24004915                | CC                                     | TT                 | TT               | INTERGENIC                    |                    |                              |
| SNP_9733_A_24033600 | NC_021161.1    | Ca_Kabuli_Chr02 | 24033600                | GG                                     | AA                 | AA               | INTERGENIC                    |                    |                              |
| SNP_9735_A_24151165 | NC_021161.1    | Ca_Kabuli_Chr02 | 24151165                | TT                                     | CC                 | CC               | INTERGENIC                    |                    |                              |

| SNPs IDs            | Chromosome IDs | Chromosomes     | Physical positions (bp) | CDC Frontier (Reference genome) | (Pusa 1103 & HPNB) | (ILWC 46 & LPNB) | Sequence genome | Components of | Gene accession IDs | Putative functions |
|---------------------|----------------|-----------------|-------------------------|---------------------------------|--------------------|------------------|-----------------|---------------|--------------------|--------------------|
| SNP_9736_A_24151209 | NC_021161.1    | Ca_Kabuli_Chr02 | 24151209                | CC                              | TT                 | TT               | INTERGENIC      |               |                    |                    |
| SNP_9737_A_24151257 | NC_021161.1    | Ca_Kabuli_Chr02 | 24151257                | GG                              | AA                 | AA               | INTERGENIC      |               |                    |                    |
| SNP_9738_A_24151519 | NC_021161.1    | Ca_Kabuli_Chr02 | 24151519                | TT                              | CC                 | CC               | INTERGENIC      |               |                    |                    |
| SNP_9739_A_24151673 | NC_021161.1    | Ca_Kabuli_Chr02 | 24151673                | AA                              | GG                 | GG               | INTERGENIC      |               |                    |                    |
| SNP_9740_A_24151922 | NC_021161.1    | Ca_Kabuli_Chr02 | 24151922                | AA                              | GG                 | GG               | INTERGENIC      |               |                    |                    |
| SNP_9741_A_24151956 | NC_021161.1    | Ca_Kabuli_Chr02 | 24151956                | CC                              | TT                 | TT               | INTERGENIC      |               |                    |                    |
| SNP_9742_A_24152174 | NC_021161.1    | Ca_Kabuli_Chr02 | 24152174                | GG                              | TT                 | TT               | INTERGENIC      |               |                    |                    |
| SNP_9743_A_24152184 | NC_021161.1    | Ca_Kabuli_Chr02 | 24152184                | AA                              | GG                 | GG               | INTERGENIC      |               |                    |                    |
| SNP_9744_A_24152531 | NC_021161.1    | Ca_Kabuli_Chr02 | 24152531                | AA                              | GG                 | GG               | INTERGENIC      |               |                    |                    |
| SNP_9745_A_24251742 | NC_021161.1    | Ca_Kabuli_Chr02 | 24251742                | GG                              | CC                 | CC               | INTERGENIC      |               |                    |                    |
| SNP_9746_A_24251902 | NC_021161.1    | Ca_Kabuli_Chr02 | 24251902                | AA                              | GG                 | GG               | INTERGENIC      |               |                    |                    |
| SNP_9747_A_24252104 | NC_021161.1    | Ca_Kabuli_Chr02 | 24252104                | TT                              | CC                 | CC               | INTERGENIC      |               |                    |                    |
| SNP_9748_A_24252119 | NC_021161.1    | Ca_Kabuli_Chr02 | 24252119                | TT                              | CC                 | CC               | INTERGENIC      |               |                    |                    |
| SNP_9749_A_24252122 | NC_021161.1    | Ca_Kabuli_Chr02 | 24252122                | CC                              | TT                 | TT               | INTERGENIC      |               |                    |                    |
| SNP_9751_A_24252154 | NC_021161.1    | Ca_Kabuli_Chr02 | 24252154                | CC                              | TT                 | TT               | INTERGENIC      |               |                    |                    |
| SNP_9752_A_24252157 | NC_021161.1    | Ca_Kabuli_Chr02 | 24252157                | TT                              | CC                 | CC               | INTERGENIC      |               |                    |                    |
| SNP_9753_A_24252159 | NC_021161.1    | Ca_Kabuli_Chr02 | 24252159                | AA                              | CC                 | CC               | INTERGENIC      |               |                    |                    |
| SNP_9754_A_24252193 | NC_021161.1    | Ca_Kabuli_Chr02 | 24252193                | TT                              | CC                 | CC               | INTERGENIC      |               |                    |                    |
| SNP_9755_A_24257034 | NC_021161.1    | Ca_Kabuli_Chr02 | 24257034                | TT                              | CC                 | CC               | INTERGENIC      |               |                    |                    |
| SNP_9756_A_24257042 | NC_021161.1    | Ca_Kabuli_Chr02 | 24257042                | TT                              | CC                 | CC               | INTERGENIC      |               |                    |                    |
| SNP_9757_A_24257234 | NC_021161.1    | Ca_Kabuli_Chr02 | 24257234                | TT                              | CC                 | CC               | INTERGENIC      |               |                    |                    |
| SNP_9758_A_24257329 | NC_021161.1    | Ca_Kabuli_Chr02 | 24257329                | AA                              | GG                 | GG               | INTERGENIC      |               |                    |                    |

| SNPs IDs            | Chromosome IDs | Chromosomes     | Physical positions (bp) | CDC Frontier (Reference genome) | (Pusa 1103 & HPNB) | (ILWC 46 & LPNB) | Sequence Components of genome | Gene accession IDs | Putative functions           |
|---------------------|----------------|-----------------|-------------------------|---------------------------------|--------------------|------------------|-------------------------------|--------------------|------------------------------|
| SNP_9759_A_24259566 | NC_021161.1    | Ca_Kabuli_Chr02 | 24259566                | CC                              | TT                 | TT               | INTERGENIC                    |                    |                              |
| SNP_9760_A_24259679 | NC_021161.1    | Ca_Kabuli_Chr02 | 24259679                | AA                              | CC                 | CC               | INTERGENIC                    |                    |                              |
| SNP_9761_A_24259686 | NC_021161.1    | Ca_Kabuli_Chr02 | 24259686                | TT                              | AA                 | AA               | INTERGENIC                    |                    |                              |
| SNP_9762_A_24259697 | NC_021161.1    | Ca_Kabuli_Chr02 | 24259697                | TT                              | GG                 | GG               | INTERGENIC                    |                    |                              |
| SNP_9763_A_24259766 | NC_021161.1    | Ca_Kabuli_Chr02 | 24259766                | TT                              | CC                 | CC               | INTERGENIC                    |                    |                              |
| SNP_9764_A_24259775 | NC_021161.1    | Ca_Kabuli_Chr02 | 24259775                | AA                              | TT                 | TT               | INTERGENIC                    |                    |                              |
| SNP_9765_A_24259802 | NC_021161.1    | Ca_Kabuli_Chr02 | 24259802                | GG                              | TT                 | TT               | INTERGENIC                    |                    |                              |
| SNP_9766_A_24259831 | NC_021161.1    | Ca_Kabuli_Chr02 | 24259831                | AA                              | TT                 | TT               | INTERGENIC                    |                    |                              |
| SNP_9767_A_24310031 | NC_021161.1    | Ca_Kabuli_Chr02 | 24310031                | CC                              | AA                 | AA               | INTERGENIC                    |                    |                              |
| SNP_9768_A_24310033 | NC_021161.1    | Ca_Kabuli_Chr02 | 24310033                | GG                              | CC                 | CC               | INTERGENIC                    |                    |                              |
| SNP_9769_A_24310160 | NC_021161.1    | Ca_Kabuli_Chr02 | 24310160                | GG                              | AA                 | AA               | INTERGENIC                    |                    |                              |
| SNP_9770_A_24310198 | NC_021161.1    | Ca_Kabuli_Chr02 | 24310198                | CC                              | TT                 | TT               | INTERGENIC                    |                    |                              |
| SNP_9771_A_24310223 | NC_021161.1    | Ca_Kabuli_Chr02 | 24310223                | CC                              | TT                 | TT               | INTERGENIC                    |                    |                              |
| SNP_9772_A_24310265 | NC_021161.1    | Ca_Kabuli_Chr02 | 24310265                | AA                              | CC                 | CC               | INTERGENIC                    |                    |                              |
| SNP_9773_A_24310574 | NC_021161.1    | Ca_Kabuli_Chr02 | 24310574                | CC                              | TT                 | TT               | INTERGENIC                    |                    |                              |
| SNP_9774_A_24317985 | NC_021161.1    | Ca_Kabuli_Chr02 | 24317985                | TT                              | CC                 | CC               | INTERGENIC                    |                    |                              |
| SNP_9775_A_24318078 | NC_021161.1    | Ca_Kabuli_Chr02 | 24318078                | TT                              | AA                 | AA               | INTERGENIC                    |                    |                              |
| SNP_9776_A_24318773 | NC_021161.1    | Ca_Kabuli_Chr02 | 24318773                | AA                              | GG                 | GG               | INTERGENIC                    |                    |                              |
| SNP_9777_A_24391986 | NC_021161.1    | Ca_Kabuli_Chr02 | 24391986                | CC                              | TT                 | TT               | INTERGENIC                    |                    |                              |
| SNP_9778_A_24433676 | NC_021161.1    | Ca_Kabuli_Chr02 | 24433676                | TT                              | AA                 | AA               | URR                           | 101504558          | uncharacterized LOC101504558 |
| SNP_9779_A_24434042 | NC_021161.1    | Ca_Kabuli_Chr02 | 24434042                | TT                              | GG                 | GG               | URR                           | 101504558          | uncharacterized LOC101504558 |
| SNP_9780_A_24441498 | NC_021161.1    | Ca_Kabuli_Chr02 | 24441498                | CC                              | TT                 | TT               | INTERGENIC                    |                    |                              |



| SNPs IDs            | Chromosome IDs | Chromosomes     | Physical positions (bp) | CDC Frontier (Reference genome) | (Pusa 1103 & HPNB) | (ILWC 46 & LPNB) | Sequence Components of genome | Gene accession IDs | Putative functions                                           |
|---------------------|----------------|-----------------|-------------------------|---------------------------------|--------------------|------------------|-------------------------------|--------------------|--------------------------------------------------------------|
| SNP_9781_A_24457542 | NC_021161.1    | Ca_Kabuli_Chr02 | 24457542                | CC                              | GG                 | GG               | INTERGENIC                    |                    |                                                              |
| SNP_9782_A_24476920 | NC_021161.1    | Ca_Kabuli_Chr02 | 24476920                | GG                              | AA                 | AA               | INTERGENIC                    |                    |                                                              |
| SNP_9783_A_24557332 | NC_021161.1    | Ca_Kabuli_Chr02 | 24557332                | TT                              | CC                 | CC               | INTERGENIC                    |                    |                                                              |
| SNP_9785_A_24574708 | NC_021161.1    | Ca_Kabuli_Chr02 | 24574708                | TT                              | AA                 | AA               | INTERGENIC                    |                    |                                                              |
| SNP_9786_A_24575383 | NC_021161.1    | Ca_Kabuli_Chr02 | 24575383                | TT                              | CC                 | CC               | INTERGENIC                    |                    |                                                              |
| SNP_9787_A_24575682 | NC_021161.1    | Ca_Kabuli_Chr02 | 24575682                | GG                              | TT                 | TT               | INTERGENIC                    |                    |                                                              |
| SNP_9788_A_24575705 | NC_021161.1    | Ca_Kabuli_Chr02 | 24575705                | TT                              | CC                 | CC               | INTERGENIC                    |                    |                                                              |
| SNP_9789_A_24589411 | NC_021161.1    | Ca_Kabuli_Chr02 | 24589411                | AA                              | GG                 | GG               | URR                           | 101506150          | zinc finger with UFM1-specific peptidase domain protein-like |
| SNP_9790_A_24597768 | NC_021161.1    | Ca_Kabuli_Chr02 | 24597768                | GG                              | AA                 | AA               | INTRON                        | 101512140          | uncharacterized protein PB18E9.04c-like                      |
| SNP_9791_A_24597954 | NC_021161.1    | Ca_Kabuli_Chr02 | 24597954                | AA                              | GG                 | GG               | INTRON                        | 101512140          | uncharacterized protein PB18E9.04c-like                      |
| SNP_9792_A_24667605 | NC_021161.1    | Ca_Kabuli_Chr02 | 24667605                | TT                              | CC                 | CC               | URR                           | 101506482          | uncharacterized LOC101506482                                 |
| SNP_9794_A_24756400 | NC_021161.1    | Ca_Kabuli_Chr02 | 24756400                | TT                              | AA                 | AA               | INTERGENIC                    |                    |                                                              |
| SNP_9795_A_24774596 | NC_021161.1    | Ca_Kabuli_Chr02 | 24774596                | TT                              | GG                 | GG               | INTERGENIC                    |                    |                                                              |
| SNP_9796_A_24774604 | NC_021161.1    | Ca_Kabuli_Chr02 | 24774604                | TT                              | CC                 | CC               | INTERGENIC                    |                    |                                                              |
| SNP_9797_A_24774612 | NC_021161.1    | Ca_Kabuli_Chr02 | 24774612                | AA                              | GG                 | GG               | INTERGENIC                    |                    |                                                              |
| SNP_9798_A_24774613 | NC_021161.1    | Ca_Kabuli_Chr02 | 24774613                | TT                              | CC                 | CC               | INTERGENIC                    |                    |                                                              |
| SNP_9799_A_24774622 | NC_021161.1    | Ca_Kabuli_Chr02 | 24774622                | TT                              | CC                 | CC               | INTERGENIC                    |                    |                                                              |
| SNP_9800_A_24818309 | NC_021161.1    | Ca_Kabuli_Chr02 | 24818309                | AA                              | GG                 | GG               | NON_SYNONYMOUS_CODING         | 101489037          | serine/threonine-protein phosphatase 7 long form homolog     |
| SNP_9801_A_24818341 | NC_021161.1    | Ca_Kabuli_Chr02 | 24818341                | GG                              | AA                 | AA               | SYNONYMOUS_CODING             | 101489037          | serine/threonine-protein phosphatase 7 long form homolog     |
| SNP_9802_A_24818354 | NC_021161.1    | Ca_Kabuli_Chr02 | 24818354                | TT                              | GG                 | GG               | NON_SYNONYMOUS_CODING         | 101489037          | serine/threonine-protein phosphatase 7 long form homolog     |
| SNP_9803_A_24818399 | NC_021161.1    | Ca_Kabuli_Chr02 | 24818399                | AA                              | GG                 | GG               | NON_SYNONYMOUS_CODING         | 101489037          | serine/threonine-protein phosphatase 7 long form homolog     |
| SNP_9804_A_24893923 | NC_021161.1    | Ca_Kabuli_Chr02 | 24893923                | CC                              | AA                 | AA               | INTERGENIC                    |                    |                                                              |

| SNPs IDs            | Chromosome IDs | Chromosomes     | Physical positions (bp) | CDC Frontier (Reference genome) | (Pusa 1103 & HPNB) | (ILWC 46 & LPNB) | Sequence genome | Components of | Gene accession IDs           | Putative functions |
|---------------------|----------------|-----------------|-------------------------|---------------------------------|--------------------|------------------|-----------------|---------------|------------------------------|--------------------|
| SNP_9805_A_24893995 | NC_021161.1    | Ca_Kabuli_Chr02 | 24893995                | TT                              | CC                 | CC               | INTERGENIC      |               |                              |                    |
| SNP_9806_A_24893998 | NC_021161.1    | Ca_Kabuli_Chr02 | 24893998                | TT                              | CC                 | CC               | INTERGENIC      |               |                              |                    |
| SNP_9807_A_24894023 | NC_021161.1    | Ca_Kabuli_Chr02 | 24894023                | TT                              | GG                 | GG               | INTERGENIC      |               |                              |                    |
| SNP_9808_A_24894039 | NC_021161.1    | Ca_Kabuli_Chr02 | 24894039                | TT                              | CC                 | CC               | INTERGENIC      |               |                              |                    |
| SNP_9809_A_24894055 | NC_021161.1    | Ca_Kabuli_Chr02 | 24894055                | AA                              | GG                 | GG               | INTERGENIC      |               |                              |                    |
| SNP_9810_A_24894092 | NC_021161.1    | Ca_Kabuli_Chr02 | 24894092                | TT                              | AA                 | AA               | INTERGENIC      |               |                              |                    |
| SNP_9811_A_24894093 | NC_021161.1    | Ca_Kabuli_Chr02 | 24894093                | AA                              | GG                 | GG               | INTERGENIC      |               |                              |                    |
| SNP_9812_A_24894104 | NC_021161.1    | Ca_Kabuli_Chr02 | 24894104                | CC                              | GG                 | GG               | INTERGENIC      |               |                              |                    |
| SNP_9813_A_24894105 | NC_021161.1    | Ca_Kabuli_Chr02 | 24894105                | TT                              | AA                 | AA               | INTERGENIC      |               |                              |                    |
| SNP_9814_A_24894115 | NC_021161.1    | Ca_Kabuli_Chr02 | 24894115                | AA                              | GG                 | GG               | INTERGENIC      |               |                              |                    |
| SNP_9815_A_24894128 | NC_021161.1    | Ca_Kabuli_Chr02 | 24894128                | GG                              | AA                 | AA               | INTERGENIC      |               |                              |                    |
| SNP_9816_A_24894181 | NC_021161.1    | Ca_Kabuli_Chr02 | 24894181                | TT                              | CC                 | CC               | INTERGENIC      |               |                              |                    |
| SNP_9817_A_24940478 | NC_021161.1    | Ca_Kabuli_Chr02 | 24940478                | GG                              | TT                 | TT               | INTERGENIC      |               |                              |                    |
| SNP_9818_A_24940499 | NC_021161.1    | Ca_Kabuli_Chr02 | 24940499                | TT                              | GG                 | GG               | INTERGENIC      |               |                              |                    |
| SNP_9819_A_24940505 | NC_021161.1    | Ca_Kabuli_Chr02 | 24940505                | CC                              | TT                 | TT               | INTERGENIC      |               |                              |                    |
| SNP_9820_A_24940640 | NC_021161.1    | Ca_Kabuli_Chr02 | 24940640                | TT                              | CC                 | CC               | INTERGENIC      |               |                              |                    |
| SNP_9821_A_24940736 | NC_021161.1    | Ca_Kabuli_Chr02 | 24940736                | AA                              | GG                 | GG               | INTERGENIC      |               |                              |                    |
| SNP_9822_A_24941234 | NC_021161.1    | Ca_Kabuli_Chr02 | 24941234                | AA                              | TT                 | TT               | INTERGENIC      |               |                              |                    |
| SNP_9823_A_24941241 | NC_021161.1    | Ca_Kabuli_Chr02 | 24941241                | TT                              | CC                 | CC               | INTERGENIC      |               |                              |                    |
| SNP_9824_A_24943018 | NC_021161.1    | Ca_Kabuli_Chr02 | 24943018                | TT                              | GG                 | GG               | DRR             | 101489692     | uncharacterized LOC101489692 |                    |
| SNP_9825_A_24943056 | NC_021161.1    | Ca_Kabuli_Chr02 | 24943056                | GG                              | TT                 | TT               | DRR             | 101489692     | uncharacterized LOC101489692 |                    |
| SNP_9826_A_24943092 | NC_021161.1    | Ca_Kabuli_Chr02 | 24943092                | AA                              | GG                 | GG               | DRR             | 101489692     | uncharacterized LOC101489692 |                    |

| SNPs IDs            | Chromosome IDs | Chromosomes     | Physical positions (bp) | CDC Frontier genome (Reference genome) | (Pusa 1103 & HPNB) | (ILWC 46 & LPNB) | Sequence Components of genome | Gene accession IDs | Putative functions           |
|---------------------|----------------|-----------------|-------------------------|----------------------------------------|--------------------|------------------|-------------------------------|--------------------|------------------------------|
| SNP_9827_A_24943095 | NC_021161.1    | Ca_Kabuli_Chr02 | 24943095                | CC                                     | TT                 | TT               | DRR                           | 101489692          | uncharacterized LOC101489692 |
| SNP_9829_A_24943435 | NC_021161.1    | Ca_Kabuli_Chr02 | 24943435                | TT                                     | CC                 | CC               | NON_SYNONYMOUS_CODING         | 101489692          | uncharacterized LOC101489692 |
| SNP_9830_A_24943497 | NC_021161.1    | Ca_Kabuli_Chr02 | 24943497                | AA                                     | GG                 | GG               | NON_SYNONYMOUS_CODING         | 101489692          | uncharacterized LOC101489692 |
| SNP_9831_A_24947810 | NC_021161.1    | Ca_Kabuli_Chr02 | 24947810                | CC                                     | TT                 | TT               | INTERGENIC                    |                    |                              |
| SNP_9832_A_24947830 | NC_021161.1    | Ca_Kabuli_Chr02 | 24947830                | CC                                     | TT                 | TT               | INTERGENIC                    |                    |                              |
| SNP_9833_A_24947843 | NC_021161.1    | Ca_Kabuli_Chr02 | 24947843                | TT                                     | AA                 | AA               | INTERGENIC                    |                    |                              |
| SNP_9834_A_24947844 | NC_021161.1    | Ca_Kabuli_Chr02 | 24947844                | GG                                     | AA                 | AA               | INTERGENIC                    |                    |                              |
| SNP_9835_A_24947849 | NC_021161.1    | Ca_Kabuli_Chr02 | 24947849                | GG                                     | AA                 | AA               | INTERGENIC                    |                    |                              |
| SNP_9836_A_24947882 | NC_021161.1    | Ca_Kabuli_Chr02 | 24947882                | CC                                     | TT                 | TT               | INTERGENIC                    |                    |                              |
| SNP_9837_A_24948010 | NC_021161.1    | Ca_Kabuli_Chr02 | 24948010                | AA                                     | GG                 | GG               | INTERGENIC                    |                    |                              |
| SNP_9838_A_24948150 | NC_021161.1    | Ca_Kabuli_Chr02 | 24948150                | AA                                     | GG                 | GG               | INTERGENIC                    |                    |                              |
| SNP_9840_A_24948285 | NC_021161.1    | Ca_Kabuli_Chr02 | 24948285                | TT                                     | CC                 | CC               | INTERGENIC                    |                    |                              |
| SNP_9841_A_24948318 | NC_021161.1    | Ca_Kabuli_Chr02 | 24948318                | CC                                     | TT                 | TT               | INTERGENIC                    |                    |                              |
| SNP_9842_A_24968941 | NC_021161.1    | Ca_Kabuli_Chr02 | 24968941                | TT                                     | GG                 | GG               | INTERGENIC                    |                    |                              |
| SNP_9843_A_24968950 | NC_021161.1    | Ca_Kabuli_Chr02 | 24968950                | GG                                     | CC                 | CC               | INTERGENIC                    |                    |                              |
| SNP_9844_A_24968984 | NC_021161.1    | Ca_Kabuli_Chr02 | 24968984                | AA                                     | GG                 | GG               | INTERGENIC                    |                    |                              |
| SNP_9845_A_24969062 | NC_021161.1    | Ca_Kabuli_Chr02 | 24969062                | TT                                     | CC                 | CC               | INTERGENIC                    |                    |                              |
| SNP_9846_A_24969076 | NC_021161.1    | Ca_Kabuli_Chr02 | 24969076                | TT                                     | AA                 | AA               | INTERGENIC                    |                    |                              |
| SNP_9847_A_24969312 | NC_021161.1    | Ca_Kabuli_Chr02 | 24969312                | CC                                     | AA                 | GG               | INTERGENIC                    |                    |                              |
| SNP_9848_A_24969409 | NC_021161.1    | Ca_Kabuli_Chr02 | 24969409                | AA                                     | GG                 | GG               | INTERGENIC                    |                    |                              |
| SNP_9849_A_24969413 | NC_021161.1    | Ca_Kabuli_Chr02 | 24969413                | GG                                     | CC                 | CC               | INTERGENIC                    |                    |                              |
| SNP_9850_A_24984432 | NC_021161.1    | Ca_Kabuli_Chr02 | 24984432                | GG                                     | AA                 | AA               | URR                           | 101490993          | cucumis-in-like              |

| SNPs IDs            | Chromosome IDs | Chromosomes     | Physical positions (bp) | CDC Frontier genome (Reference genome) | (Pusa 1103 & HPNB) | (ILWC 46 & LPNB) | Sequence Components of genome | Gene accession IDs | Putative functions                       |
|---------------------|----------------|-----------------|-------------------------|----------------------------------------|--------------------|------------------|-------------------------------|--------------------|------------------------------------------|
| SNP_9851_A_25025190 | NC_021161.1    | Ca_Kabuli_Chr02 | 25025190                | CC                                     | TT                 | TT               | INTRON                        | 101491305          | zinc finger protein CONSTANS-LIKE 9-like |
| SNP_9852_A_25025200 | NC_021161.1    | Ca_Kabuli_Chr02 | 25025200                | CC                                     | TT                 | TT               | INTRON                        | 101491305          | zinc finger protein CONSTANS-LIKE 9-like |
| SNP_9853_A_25025240 | NC_021161.1    | Ca_Kabuli_Chr02 | 25025240                | GG                                     | AA                 | AA               | INTRON                        | 101491305          | zinc finger protein CONSTANS-LIKE 9-like |
| SNP_9854_A_25025294 | NC_021161.1    | Ca_Kabuli_Chr02 | 25025294                | CC                                     | TT                 | TT               | INTRON                        | 101491305          | zinc finger protein CONSTANS-LIKE 9-like |
| SNP_9855_A_25025358 | NC_021161.1    | Ca_Kabuli_Chr02 | 25025358                | GG                                     | AA                 | AA               | INTRON                        | 101491305          | zinc finger protein CONSTANS-LIKE 9-like |
| SNP_9856_A_25136031 | NC_021161.1    | Ca_Kabuli_Chr02 | 25136031                | CC                                     | TT                 | TT               | URR                           | 101489694          | zinc finger MYM-type protein 1-like      |
| SNP_9857_A_25157194 | NC_021161.1    | Ca_Kabuli_Chr02 | 25157194                | CC                                     | TT                 | TT               | INTRON                        | 101494644          | lysosomal beta glucosidase-like          |
| SNP_9858_A_25157274 | NC_021161.1    | Ca_Kabuli_Chr02 | 25157274                | TT                                     | CC                 | CC               | INTRON                        | 101494644          | lysosomal beta glucosidase-like          |
| SNP_9859_A_25157289 | NC_021161.1    | Ca_Kabuli_Chr02 | 25157289                | TT                                     | CC                 | CC               | INTRON                        | 101494644          | lysosomal beta glucosidase-like          |
| SNP_9861_A_25179084 | NC_021161.1    | Ca_Kabuli_Chr02 | 25179084                | GG                                     | AA                 | AA               | INTERGENIC                    |                    |                                          |
| SNP_9862_A_25205271 | NC_021161.1    | Ca_Kabuli_Chr02 | 25205271                | CC                                     | GG                 | GG               | INTERGENIC                    |                    |                                          |
| SNP_9863_A_25224365 | NC_021161.1    | Ca_Kabuli_Chr02 | 25224365                | GG                                     | AA                 | AA               | INTERGENIC                    |                    |                                          |
| SNP_9864_A_25224450 | NC_021161.1    | Ca_Kabuli_Chr02 | 25224450                | CC                                     | TT                 | TT               | INTERGENIC                    |                    |                                          |
| SNP_9865_A_25224717 | NC_021161.1    | Ca_Kabuli_Chr02 | 25224717                | GG                                     | AA                 | AA               | INTERGENIC                    |                    |                                          |
| SNP_9866_A_25224723 | NC_021161.1    | Ca_Kabuli_Chr02 | 25224723                | AA                                     | GG                 | GG               | INTERGENIC                    |                    |                                          |
| SNP_9867_A_25224724 | NC_021161.1    | Ca_Kabuli_Chr02 | 25224724                | CC                                     | TT                 | TT               | INTERGENIC                    |                    |                                          |
| SNP_9868_A_25224736 | NC_021161.1    | Ca_Kabuli_Chr02 | 25224736                | TT                                     | CC                 | CC               | INTERGENIC                    |                    |                                          |
| SNP_9870_A_25241620 | NC_021161.1    | Ca_Kabuli_Chr02 | 25241620                | GG                                     | TT                 | TT               | INTERGENIC                    |                    |                                          |
| SNP_9873_A_25435361 | NC_021161.1    | Ca_Kabuli_Chr02 | 25435361                | TT                                     | CC                 | CC               | INTERGENIC                    |                    |                                          |
| SNP_9874_A_25435818 | NC_021161.1    | Ca_Kabuli_Chr02 | 25435818                | TT                                     | CC                 | CC               | INTERGENIC                    |                    |                                          |
| SNP_9875_A_25445650 | NC_021161.1    | Ca_Kabuli_Chr02 | 25445650                | TT                                     | CC                 | CC               | INTRON                        | 101502297          | cytochrome P450 CYP736A12-like           |
| SNP_9876_A_25445656 | NC_021161.1    | Ca_Kabuli_Chr02 | 25445656                | TT                                     | GG                 | GG               | INTRON                        | 101502297          | cytochrome P450 CYP736A12-like           |

| SNPs IDs            | Chromosome IDs | Chromosomes     | Physical positions (bp) | CDC Frontier genome (Reference genome) | (Pusa 1103 & HPNB) | (ILWC 46 & LPNB) | Sequence Components of genome | Gene accession IDs | Putative functions             |
|---------------------|----------------|-----------------|-------------------------|----------------------------------------|--------------------|------------------|-------------------------------|--------------------|--------------------------------|
| SNP_9877_A_25445667 | NC_021161.1    | Ca_Kabuli_Chr02 | 25445667                | TT                                     | CC                 | CC               | INTRON                        | 101502297          | cytochrome P450 CYP736A12-like |
| SNP_9878_A_25450223 | NC_021161.1    | Ca_Kabuli_Chr02 | 25450223                | AA                                     | GG                 | GG               | INTRON                        | 101502297          | cytochrome P450 CYP736A12-like |
| SNP_9879_A_25450913 | NC_021161.1    | Ca_Kabuli_Chr02 | 25450913                | TT                                     | CC                 | CC               | INTRON                        | 101502297          | cytochrome P450 CYP736A12-like |
| SNP_9880_A_25450945 | NC_021161.1    | Ca_Kabuli_Chr02 | 25450945                | AA                                     | CC                 | CC               | INTRON                        | 101502297          | cytochrome P450 CYP736A12-like |
| SNP_9881_A_25450986 | NC_021161.1    | Ca_Kabuli_Chr02 | 25450986                | TT                                     | CC                 | CC               | INTRON                        | 101502297          | cytochrome P450 CYP736A12-like |
| SNP_9882_A_25451015 | NC_021161.1    | Ca_Kabuli_Chr02 | 25451015                | AA                                     | GG                 | GG               | INTRON                        | 101502297          | cytochrome P450 CYP736A12-like |
| SNP_9883_A_25451041 | NC_021161.1    | Ca_Kabuli_Chr02 | 25451041                | AA                                     | GG                 | GG               | INTRON                        | 101502297          | cytochrome P450 CYP736A12-like |
| SNP_9884_A_25451293 | NC_021161.1    | Ca_Kabuli_Chr02 | 25451293                | GG                                     | TT                 | TT               | INTRON                        | 101502297          | cytochrome P450 CYP736A12-like |
| SNP_9885_A_25453083 | NC_021161.1    | Ca_Kabuli_Chr02 | 25453083                | AA                                     | TT                 | TT               | INTRON                        | 101502297          | cytochrome P450 CYP736A12-like |
| SNP_9886_A_25493895 | NC_021161.1    | Ca_Kabuli_Chr02 | 25493895                | CC                                     | TT                 | TT               | NON_SYNONYMOUS_CODING         | 101503259          | uncharacterized LOC101503259   |
| SNP_9887_A_25501987 | NC_021161.1    | Ca_Kabuli_Chr02 | 25501987                | GG                                     | AA                 | AA               | INTERGENIC                    |                    |                                |
| SNP_9888_A_25528650 | NC_021161.1    | Ca_Kabuli_Chr02 | 25528650                | TT                                     | CC                 | CC               | INTERGENIC                    |                    |                                |
| SNP_9889_A_25528653 | NC_021161.1    | Ca_Kabuli_Chr02 | 25528653                | AA                                     | GG                 | GG               | INTERGENIC                    |                    |                                |
| SNP_9890_A_25528675 | NC_021161.1    | Ca_Kabuli_Chr02 | 25528675                | AA                                     | GG                 | GG               | INTERGENIC                    |                    |                                |
| SNP_9891_A_25528937 | NC_021161.1    | Ca_Kabuli_Chr02 | 25528937                | GG                                     | CC                 | CC               | URR                           | 101503905          | Unknown function               |
| SNP_9892_A_25528945 | NC_021161.1    | Ca_Kabuli_Chr02 | 25528945                | TT                                     | GG                 | GG               | URR                           | 101503905          | Unknown function               |
| SNP_9893_A_25528955 | NC_021161.1    | Ca_Kabuli_Chr02 | 25528955                | CC                                     | AA                 | AA               | URR                           | 101503905          | Unknown function               |
| SNP_9894_A_25528977 | NC_021161.1    | Ca_Kabuli_Chr02 | 25528977                | CC                                     | TT                 | TT               | URR                           | 101503905          | Unknown function               |
| SNP_9895_A_25529031 | NC_021161.1    | Ca_Kabuli_Chr02 | 25529031                | TT                                     | AA                 | AA               | URR                           | 101503905          | Unknown function               |
| SNP_9896_A_25529039 | NC_021161.1    | Ca_Kabuli_Chr02 | 25529039                | AA                                     | GG                 | GG               | URR                           | 101503905          | Unknown function               |
| SNP_9897_A_25529052 | NC_021161.1    | Ca_Kabuli_Chr02 | 25529052                | TT                                     | CC                 | CC               | URR                           | 101503905          | Unknown function               |
| SNP_9898_A_25529104 | NC_021161.1    | Ca_Kabuli_Chr02 | 25529104                | AA                                     | CC                 | CC               | URR                           | 101503905          | Unknown function               |

| SNPs IDs            | Chromosome IDs | Chromosomes     | Physical positions (bp) | CDC Frontier (Reference genome) | (Pusa 1103 & HPNB) | (ILWC 46 & LPNB) | Sequence Components of genome | Gene accession IDs | Putative functions                    |
|---------------------|----------------|-----------------|-------------------------|---------------------------------|--------------------|------------------|-------------------------------|--------------------|---------------------------------------|
| SNP_9899_A_25529130 | NC_021161.1    | Ca_Kabuli_Chr02 | 25529130                | TT                              | CC                 | CC               | URR                           | 101503905          | Unknown function                      |
| SNP_9900_A_25529148 | NC_021161.1    | Ca_Kabuli_Chr02 | 25529148                | TT                              | CC                 | CC               | URR                           | 101503905          | Unknown function                      |
| SNP_9901_A_25529480 | NC_021161.1    | Ca_Kabuli_Chr02 | 25529480                | AA                              | GG                 | GG               | URR                           | 101503905          | Unknown function                      |
| SNP_9902_A_25529527 | NC_021161.1    | Ca_Kabuli_Chr02 | 25529527                | AA                              | CC                 | CC               | URR                           | 101503905          | Unknown function                      |
| SNP_9903_A_25529546 | NC_021161.1    | Ca_Kabuli_Chr02 | 25529546                | AA                              | TT                 | TT               | URR                           | 101503905          | Unknown function                      |
| SNP_9904_A_25529552 | NC_021161.1    | Ca_Kabuli_Chr02 | 25529552                | GG                              | AA                 | AA               | URR                           | 101503905          | Unknown function                      |
| SNP_9905_A_25529641 | NC_021161.1    | Ca_Kabuli_Chr02 | 25529641                | TT                              | GG                 | GG               | URR                           | 101503905          | Unknown function                      |
| SNP_9906_A_25529643 | NC_021161.1    | Ca_Kabuli_Chr02 | 25529643                | TT                              | CC                 | CC               | URR                           | 101503905          | Unknown function                      |
| SNP_9907_A_25529816 | NC_021161.1    | Ca_Kabuli_Chr02 | 25529816                | CC                              | TT                 | TT               | URR                           | 101503905          | Unknown function                      |
| SNP_9908_A_25529824 | NC_021161.1    | Ca_Kabuli_Chr02 | 25529824                | CC                              | TT                 | TT               | URR                           | 101503905          | Unknown function                      |
| SNP_9909_A_25529836 | NC_021161.1    | Ca_Kabuli_Chr02 | 25529836                | CC                              | TT                 | TT               | URR                           | 101503905          | Unknown function                      |
| SNP_9910_A_25529914 | NC_021161.1    | Ca_Kabuli_Chr02 | 25529914                | AA                              | GG                 | GG               | URR                           | 101503905          | Unknown function                      |
| SNP_9911_A_25529920 | NC_021161.1    | Ca_Kabuli_Chr02 | 25529920                | TT                              | GG                 | GG               | URR                           | 101503905          | Unknown function                      |
| SNP_9912_A_25529937 | NC_021161.1    | Ca_Kabuli_Chr02 | 25529937                | TT                              | CC                 | CC               | URR                           | 101503905          | Unknown function                      |
| SNP_9913_A_25529979 | NC_021161.1    | Ca_Kabuli_Chr02 | 25529979                | CC                              | TT                 | TT               | URR                           | 101503905          | Unknown function                      |
| SNP_9914_A_25534719 | NC_021161.1    | Ca_Kabuli_Chr02 | 25534719                | TT                              | GG                 | GG               | DRR                           | 101410594          | transfer RNA cysteine (anticodon GCA) |
| SNP_9916_A_25535135 | NC_021161.1    | Ca_Kabuli_Chr02 | 25535135                | TT                              | CC                 | CC               | URR                           | 101410594          | transfer RNA cysteine (anticodon GCA) |
| SNP_9917_A_25535151 | NC_021161.1    | Ca_Kabuli_Chr02 | 25535151                | TT                              | CC                 | CC               | URR                           | 101410594          | transfer RNA cysteine (anticodon GCA) |
| SNP_9918_A_25535154 | NC_021161.1    | Ca_Kabuli_Chr02 | 25535154                | TT                              | GG                 | GG               | URR                           | 101410594          | transfer RNA cysteine (anticodon GCA) |
| SNP_9919_A_25535166 | NC_021161.1    | Ca_Kabuli_Chr02 | 25535166                | TT                              | CC                 | CC               | URR                           | 101410594          | transfer RNA cysteine (anticodon GCA) |
| SNP_9920_A_25587772 | NC_021161.1    | Ca_Kabuli_Chr02 | 25587772                | TT                              | CC                 | CC               | INTERGENIC                    |                    |                                       |
| SNP_9921_A_25603355 | NC_021161.1    | Ca_Kabuli_Chr02 | 25603355                | TT                              | CC                 | CC               | INTERGENIC                    |                    |                                       |

| SNPs IDs            | Chromosome IDs | Chromosomes     | Physical positions (bp) | CDC Frontier genome (Reference genome) | (Pusa 1103 & HPNB) | (ILWC 46 & LPNB) | Sequence Components of genome | Gene accession IDs | Putative functions          |
|---------------------|----------------|-----------------|-------------------------|----------------------------------------|--------------------|------------------|-------------------------------|--------------------|-----------------------------|
| SNP_9922_A_25603551 | NC_021161.1    | Ca_Kabuli_Chr02 | 25603551                | AA                                     | GG                 | GG               | INTERGENIC                    |                    |                             |
| SNP_9924_A_25604012 | NC_021161.1    | Ca_Kabuli_Chr02 | 25604012                | GG                                     | AA                 | AA               | INTERGENIC                    |                    |                             |
| SNP_9925_A_25604058 | NC_021161.1    | Ca_Kabuli_Chr02 | 25604058                | CC                                     | GG                 | GG               | INTERGENIC                    |                    |                             |
| SNP_9926_A_25609623 | NC_021161.1    | Ca_Kabuli_Chr02 | 25609623                | CC                                     | AA                 | AA               | INTERGENIC                    |                    |                             |
| SNP_9927_A_25609728 | NC_021161.1    | Ca_Kabuli_Chr02 | 25609728                | AA                                     | CC                 | CC               | INTERGENIC                    |                    |                             |
| SNP_9928_A_25609926 | NC_021161.1    | Ca_Kabuli_Chr02 | 25609926                | CC                                     | AA                 | AA               | INTERGENIC                    |                    |                             |
| SNP_9929_A_25610036 | NC_021161.1    | Ca_Kabuli_Chr02 | 25610036                | CC                                     | TT                 | TT               | INTERGENIC                    |                    |                             |
| SNP_9931_A_25680174 | NC_021161.1    | Ca_Kabuli_Chr02 | 25680174                | CC                                     | TT                 | TT               | INTRON                        | 101491629          | plasma membrane ATPase-like |
| SNP_9932_A_25680504 | NC_021161.1    | Ca_Kabuli_Chr02 | 25680504                | AA                                     | TT                 | TT               | INTRON                        | 101491629          | plasma membrane ATPase-like |
| SNP_9933_A_25680570 | NC_021161.1    | Ca_Kabuli_Chr02 | 25680570                | AA                                     | GG                 | GG               | INTRON                        | 101491629          | plasma membrane ATPase-like |
| SNP_9934_A_25680581 | NC_021161.1    | Ca_Kabuli_Chr02 | 25680581                | CC                                     | TT                 | TT               | INTRON                        | 101491629          | plasma membrane ATPase-like |
| SNP_9935_A_25680583 | NC_021161.1    | Ca_Kabuli_Chr02 | 25680583                | TT                                     | CC                 | CC               | INTRON                        | 101491629          | plasma membrane ATPase-like |
| SNP_9936_A_25680670 | NC_021161.1    | Ca_Kabuli_Chr02 | 25680670                | AA                                     | GG                 | GG               | INTRON                        | 101491629          | plasma membrane ATPase-like |
| SNP_9937_A_25683026 | NC_021161.1    | Ca_Kabuli_Chr02 | 25683026                | TT                                     | CC                 | CC               | URR                           | 101491629          | plasma membrane ATPase-like |
| SNP_9938_A_25683074 | NC_021161.1    | Ca_Kabuli_Chr02 | 25683074                | CC                                     | TT                 | TT               | URR                           | 101491629          | plasma membrane ATPase-like |
| SNP_9939_A_25683303 | NC_021161.1    | Ca_Kabuli_Chr02 | 25683303                | TT                                     | CC                 | CC               | URR                           | 101491629          | plasma membrane ATPase-like |
| SNP_9940_A_25683306 | NC_021161.1    | Ca_Kabuli_Chr02 | 25683306                | TT                                     | CC                 | CC               | URR                           | 101491629          | plasma membrane ATPase-like |
| SNP_9941_A_25708432 | NC_021161.1    | Ca_Kabuli_Chr02 | 25708432                | GG                                     | TT                 | TT               | INTERGENIC                    |                    |                             |
| SNP_9942_A_25708546 | NC_021161.1    | Ca_Kabuli_Chr02 | 25708546                | CC                                     | TT                 | TT               | INTERGENIC                    |                    |                             |
| SNP_9943_A_25708789 | NC_021161.1    | Ca_Kabuli_Chr02 | 25708789                | CC                                     | TT                 | TT               | INTERGENIC                    |                    |                             |
| SNP_9944_A_25708805 | NC_021161.1    | Ca_Kabuli_Chr02 | 25708805                | TT                                     | CC                 | CC               | INTERGENIC                    |                    |                             |
| SNP_9945_A_25708835 | NC_021161.1    | Ca_Kabuli_Chr02 | 25708835                | AA                                     | GG                 | GG               | INTERGENIC                    |                    |                             |

| SNPs IDs            | Chromosome IDs | Chromosomes     | Physical positions (bp) | CDC Frontier genome (Reference genome) | (Pusa 1103 & HPNB) | (ILWC 46 & LPNB) | Sequence Components of genome | Gene accession IDs | Putative functions                                   |
|---------------------|----------------|-----------------|-------------------------|----------------------------------------|--------------------|------------------|-------------------------------|--------------------|------------------------------------------------------|
| SNP_9946_A_25708961 | NC_021161.1    | Ca_Kabuli_Chr02 | 25708961                | GG                                     | AA                 | AA               | INTERGENIC                    |                    |                                                      |
| SNP_9947_A_25708994 | NC_021161.1    | Ca_Kabuli_Chr02 | 25708994                | GG                                     | CC                 | CC               | INTERGENIC                    |                    |                                                      |
| SNP_9948_A_25708995 | NC_021161.1    | Ca_Kabuli_Chr02 | 25708995                | TT                                     | CC                 | CC               | INTERGENIC                    |                    |                                                      |
| SNP_9949_A_25709761 | NC_021161.1    | Ca_Kabuli_Chr02 | 25709761                | TT                                     | AA                 | AA               | INTERGENIC                    |                    |                                                      |
| SNP_9950_A_25709777 | NC_021161.1    | Ca_Kabuli_Chr02 | 25709777                | AA                                     | GG                 | GG               | INTERGENIC                    |                    |                                                      |
| SNP_9951_A_25712940 | NC_021161.1    | Ca_Kabuli_Chr02 | 25712940                | TT                                     | CC                 | CC               | INTERGENIC                    |                    |                                                      |
| SNP_9952_A_25712955 | NC_021161.1    | Ca_Kabuli_Chr02 | 25712955                | AA                                     | CC                 | CC               | INTERGENIC                    |                    |                                                      |
| SNP_9953_A_25713199 | NC_021161.1    | Ca_Kabuli_Chr02 | 25713199                | GG                                     | TT                 | TT               | INTERGENIC                    |                    |                                                      |
| SNP_9954_A_25713222 | NC_021161.1    | Ca_Kabuli_Chr02 | 25713222                | GG                                     | AA                 | AA               | INTERGENIC                    |                    |                                                      |
| SNP_9955_A_25713261 | NC_021161.1    | Ca_Kabuli_Chr02 | 25713261                | CC                                     | GG                 | GG               | INTERGENIC                    |                    |                                                      |
| SNP_9956_A_25713295 | NC_021161.1    | Ca_Kabuli_Chr02 | 25713295                | AA                                     | TT                 | TT               | INTERGENIC                    |                    |                                                      |
| SNP_9957_A_25713308 | NC_021161.1    | Ca_Kabuli_Chr02 | 25713308                | GG                                     | AA                 | AA               | INTERGENIC                    |                    |                                                      |
| SNP_9958_A_25732058 | NC_021161.1    | Ca_Kabuli_Chr02 | 25732058                | AA                                     | GG                 | GG               | INTERGENIC                    |                    |                                                      |
| SNP_9959_A_25747193 | NC_021161.1    | Ca_Kabuli_Chr02 | 25747193                | CC                                     | TT                 | TT               | INTERGENIC                    |                    |                                                      |
| SNP_9960_A_25767696 | NC_021161.1    | Ca_Kabuli_Chr02 | 25767696                | GG                                     | AA                 | AA               | INTRON                        | 101507775          | beta-glucosidase 12-like                             |
| SNP_9962_A_25944720 | NC_021161.1    | Ca_Kabuli_Chr02 | 25944720                | AA                                     | GG                 | GG               | URR                           | 101510322          | 6-phosphofructo-2-kinase/fructose-2,6-bisphosphatase |
| SNP_9963_A_25953217 | NC_021161.1    | Ca_Kabuli_Chr02 | 25953217                | TT                                     | AA                 | AA               | INTERGENIC                    |                    |                                                      |
| SNP_9964_A_26416126 | NC_021161.1    | Ca_Kabuli_Chr02 | 26416126                | GG                                     | AA                 | AA               | DRR                           | 101495723          | UDP-glycosyltransferase 87A1                         |
| SNP_9965_A_26426885 | NC_021161.1    | Ca_Kabuli_Chr02 | 26426885                | AA                                     | TT                 | TT               | INTRON                        | 101507661          | UDP-glycosyltransferase 87A1                         |
| SNP_9966_A_26438856 | NC_021161.1    | Ca_Kabuli_Chr02 | 26438856                | AA                                     | GG                 | GG               | URR                           | 101507984          | protein FAR1-RELATED SEQUENCE 5-like                 |
| SNP_9967_A_26448592 | NC_021161.1    | Ca_Kabuli_Chr02 | 26448592                | AA                                     | GG                 | GG               | INTERGENIC                    |                    |                                                      |
| SNP_9968_A_26448599 | NC_021161.1    | Ca_Kabuli_Chr02 | 26448599                | AA                                     | GG                 | GG               | INTERGENIC                    |                    |                                                      |



| SNPs IDs            | Chromosome IDs | Chromosomes     | Physical positions (bp) | CDC Frontier genome (Reference genome) | (Pusa 1103 & HPNB) | (ILWC 46 & LPNB) | Sequence Components of genome | Gene accession IDs | Putative functions |
|---------------------|----------------|-----------------|-------------------------|----------------------------------------|--------------------|------------------|-------------------------------|--------------------|--------------------|
| SNP_9969_A_26449543 | NC_021161.1    | Ca_Kabuli_Chr02 | 26449543                | GG                                     | AA                 | AA               | INTERGENIC                    |                    |                    |
| SNP_9970_A_26449547 | NC_021161.1    | Ca_Kabuli_Chr02 | 26449547                | AA                                     | TT                 | TT               | INTERGENIC                    |                    |                    |
| SNP_9971_A_26450291 | NC_021161.1    | Ca_Kabuli_Chr02 | 26450291                | GG                                     | TT                 | TT               | INTERGENIC                    |                    |                    |
| SNP_9972_A_26452106 | NC_021161.1    | Ca_Kabuli_Chr02 | 26452106                | GG                                     | AA                 | AA               | INTERGENIC                    |                    |                    |
| SNP_9973_A_26480423 | NC_021161.1    | Ca_Kabuli_Chr02 | 26480423                | CC                                     | AA                 | AA               | INTERGENIC                    |                    |                    |
| SNP_9974_A_26480444 | NC_021161.1    | Ca_Kabuli_Chr02 | 26480444                | TT                                     | AA                 | AA               | INTERGENIC                    |                    |                    |
| SNP_9975_A_26488078 | NC_021161.1    | Ca_Kabuli_Chr02 | 26488078                | CC                                     | AA                 | AA               | INTERGENIC                    |                    |                    |
| SNP_9976_A_26488177 | NC_021161.1    | Ca_Kabuli_Chr02 | 26488177                | AA                                     | GG                 | GG               | INTERGENIC                    |                    |                    |
| SNP_9977_A_26488211 | NC_021161.1    | Ca_Kabuli_Chr02 | 26488211                | CC                                     | TT                 | TT               | INTERGENIC                    |                    |                    |
| SNP_9978_A_26488224 | NC_021161.1    | Ca_Kabuli_Chr02 | 26488224                | GG                                     | TT                 | TT               | INTERGENIC                    |                    |                    |
| SNP_9979_A_26488307 | NC_021161.1    | Ca_Kabuli_Chr02 | 26488307                | CC                                     | TT                 | TT               | INTERGENIC                    |                    |                    |
| SNP_9980_A_26488330 | NC_021161.1    | Ca_Kabuli_Chr02 | 26488330                | GG                                     | AA                 | AA               | INTERGENIC                    |                    |                    |
| SNP_9981_A_26488361 | NC_021161.1    | Ca_Kabuli_Chr02 | 26488361                | AA                                     | GG                 | GG               | INTERGENIC                    |                    |                    |
| SNP_9982_A_26488372 | NC_021161.1    | Ca_Kabuli_Chr02 | 26488372                | AA                                     | GG                 | GG               | INTERGENIC                    |                    |                    |
| SNP_9983_A_26488397 | NC_021161.1    | Ca_Kabuli_Chr02 | 26488397                | AA                                     | CC                 | CC               | INTERGENIC                    |                    |                    |
| SNP_9984_A_26488454 | NC_021161.1    | Ca_Kabuli_Chr02 | 26488454                | AA                                     | GG                 | GG               | INTERGENIC                    |                    |                    |
| SNP_9985_A_26488465 | NC_021161.1    | Ca_Kabuli_Chr02 | 26488465                | CC                                     | TT                 | TT               | INTERGENIC                    |                    |                    |
| SNP_9986_A_26488649 | NC_021161.1    | Ca_Kabuli_Chr02 | 26488649                | GG                                     | AA                 | AA               | INTERGENIC                    |                    |                    |
| SNP_9987_A_26504149 | NC_021161.1    | Ca_Kabuli_Chr02 | 26504149                | AA                                     | GG                 | GG               | URR                           | 101497680          | Unknown function   |
| SNP_9989_A_26504510 | NC_021161.1    | Ca_Kabuli_Chr02 | 26504510                | TT                                     | CC                 | CC               | URR                           | 101497680          | Unknown function   |
| SNP_9990_A_26504558 | NC_021161.1    | Ca_Kabuli_Chr02 | 26504558                | AA                                     | GG                 | GG               | URR                           | 101497680          | Unknown function   |
| SNP_9991_A_26705771 | NC_021161.1    | Ca_Kabuli_Chr02 | 26705771                | GG                                     | AA                 | AA               | INTERGENIC                    |                    |                    |

| SNPs IDs             | Chromosome IDs | Chromosomes     | Physical positions (bp) | CDC Frontier (Reference genome) | (Pusa 1103 & HPNB) | (ILWC 46 & LPNB) | Sequence Components of genome | Gene accession IDs | Putative functions                            |
|----------------------|----------------|-----------------|-------------------------|---------------------------------|--------------------|------------------|-------------------------------|--------------------|-----------------------------------------------|
| SNP_9992_A_26772330  | NC_021161.1    | Ca_Kabuli_Chr02 | 26772330                | TT                              | AA                 | AA               | URR                           | 101511504          | exocyst complex component EXO70B1-like        |
| SNP_9993_A_26777540  | NC_021161.1    | Ca_Kabuli_Chr02 | 26777540                | CC                              | TT                 | TT               | INTERGENIC                    |                    |                                               |
| SNP_9994_A_26893007  | NC_021161.1    | Ca_Kabuli_Chr02 | 26893007                | AA                              | GG                 | GG               | INTERGENIC                    |                    |                                               |
| SNP_9995_A_26908899  | NC_021161.1    | Ca_Kabuli_Chr02 | 26908899                | TT                              | CC                 | CC               | INTERGENIC                    |                    |                                               |
| SNP_9996_A_26909733  | NC_021161.1    | Ca_Kabuli_Chr02 | 26909733                | AA                              | GG                 | GG               | INTERGENIC                    |                    |                                               |
| SNP_9997_A_26909837  | NC_021161.1    | Ca_Kabuli_Chr02 | 26909837                | AA                              | GG                 | GG               | INTERGENIC                    |                    |                                               |
| SNP_9998_A_26909867  | NC_021161.1    | Ca_Kabuli_Chr02 | 26909867                | AA                              | GG                 | GG               | INTERGENIC                    |                    |                                               |
| SNP_9999_A_26909876  | NC_021161.1    | Ca_Kabuli_Chr02 | 26909876                | TT                              | CC                 | CC               | INTERGENIC                    |                    |                                               |
| SNP_10000_A_26909886 | NC_021161.1    | Ca_Kabuli_Chr02 | 26909886                | AA                              | GG                 | GG               | INTERGENIC                    |                    |                                               |
| SNP_10001_A_26910130 | NC_021161.1    | Ca_Kabuli_Chr02 | 26910130                | AA                              | GG                 | GG               | INTERGENIC                    |                    |                                               |
| SNP_10002_A_26910131 | NC_021161.1    | Ca_Kabuli_Chr02 | 26910131                | AA                              | TT                 | TT               | INTERGENIC                    |                    |                                               |
| SNP_10003_A_26910244 | NC_021161.1    | Ca_Kabuli_Chr02 | 26910244                | AA                              | GG                 | GG               | INTERGENIC                    |                    |                                               |
| SNP_10004_A_26925135 | NC_021161.1    | Ca_Kabuli_Chr02 | 26925135                | CC                              | TT                 | TT               | INTERGENIC                    |                    |                                               |
| SNP_10005_A_26925586 | NC_021161.1    | Ca_Kabuli_Chr02 | 26925586                | TT                              | CC                 | CC               | INTERGENIC                    |                    |                                               |
| SNP_10006_A_26925591 | NC_021161.1    | Ca_Kabuli_Chr02 | 26925591                | CC                              | TT                 | TT               | INTERGENIC                    |                    |                                               |
| SNP_10007_A_26925599 | NC_021161.1    | Ca_Kabuli_Chr02 | 26925599                | TT                              | AA                 | AA               | INTERGENIC                    |                    |                                               |
| SNP_10008_A_26925601 | NC_021161.1    | Ca_Kabuli_Chr02 | 26925601                | TT                              | AA                 | AA               | INTERGENIC                    |                    |                                               |
| SNP_10009_A_26925604 | NC_021161.1    | Ca_Kabuli_Chr02 | 26925604                | TT                              | AA                 | AA               | INTERGENIC                    |                    |                                               |
| SNP_10010_A_26937004 | NC_021161.1    | Ca_Kabuli_Chr02 | 26937004                | CC                              | GG                 | GG               | URR                           | 101512142          | trans-resveratrol di-O-methyltransferase-like |
| SNP_10011_A_26940527 | NC_021161.1    | Ca_Kabuli_Chr02 | 26940527                | CC                              | TT                 | TT               | INTERGENIC                    |                    |                                               |
| SNP_10012_A_26940828 | NC_021161.1    | Ca_Kabuli_Chr02 | 26940828                | AA                              | GG                 | GG               | INTERGENIC                    |                    |                                               |
| SNP_10013_A_27020889 | NC_021161.1    | Ca_Kabuli_Chr02 | 27020889                | AA                              | TT                 | TT               | DRR                           | 101512787          | trans-resveratrol di-O-methyltransferase-like |

| SNPs IDs             | Chromosome IDs | Chromosomes     | Physical positions (bp) | CDC Frontier genome (Reference genome) | (Pusa 1103 & HPNB) | (ILWC 46 & LPNB) | Sequence Components of genome | Gene accession IDs | Putative functions                            |
|----------------------|----------------|-----------------|-------------------------|----------------------------------------|--------------------|------------------|-------------------------------|--------------------|-----------------------------------------------|
| SNP_10014_A_27020891 | NC_021161.1    | Ca_Kabuli_Chr02 | 27020891                | AA                                     | TT                 | TT               | DRR                           | 101512787          | trans-resveratrol di-O-methyltransferase-like |
| SNP_10015_A_27023525 | NC_021161.1    | Ca_Kabuli_Chr02 | 27023525                | TT                                     | CC                 | CC               | URR                           | 101512787          | trans-resveratrol di-O-methyltransferase-like |
| SNP_10016_A_27027081 | NC_021161.1    | Ca_Kabuli_Chr02 | 27027081                | TT                                     | AA                 | AA               | INTERGENIC                    |                    |                                               |
| SNP_10017_A_27053456 | NC_021161.1    | Ca_Kabuli_Chr02 | 27053456                | TT                                     | CC                 | CC               | INTRON                        | 101505942          | uncharacterized LOC101505942                  |
| SNP_10018_A_27053680 | NC_021161.1    | Ca_Kabuli_Chr02 | 27053680                | GG                                     | AA                 | AA               | NON_SYNONYMOUS_CODING         | 101505942          | uncharacterized LOC101505942                  |
| SNP_10019_A_27130308 | NC_021161.1    | Ca_Kabuli_Chr02 | 27130308                | AA                                     | GG                 | GG               | INTRON                        | 101514968          | LOB domain-containing protein 13              |
| SNP_10020_A_27135083 | NC_021161.1    | Ca_Kabuli_Chr02 | 27135083                | TT                                     | CC                 | CC               | DRR                           | 101506582          | uncharacterized LOC101506582                  |
| SNP_10021_A_27137088 | NC_021161.1    | Ca_Kabuli_Chr02 | 27137088                | GG                                     | AA                 | AA               | DRR                           | 101506917          | extensin-like                                 |
| SNP_10022_A_27137386 | NC_021161.1    | Ca_Kabuli_Chr02 | 27137386                | GG                                     | AA                 | AA               | URR                           | 101506256          | uncharacterized LOC101506256                  |
| SNP_10023_A_27141371 | NC_021161.1    | Ca_Kabuli_Chr02 | 27141371                | CC                                     | TT                 | TT               | URR                           | 101506917          | extensin-like                                 |
| SNP_10024_A_27141395 | NC_021161.1    | Ca_Kabuli_Chr02 | 27141395                | AA                                     | GG                 | GG               | URR                           | 101506917          | extensin-like                                 |
| SNP_10026_A_27192465 | NC_021161.1    | Ca_Kabuli_Chr02 | 27192465                | GG                                     | AA                 | AA               | INTERGENIC                    |                    |                                               |
| SNP_10027_A_27192751 | NC_021161.1    | Ca_Kabuli_Chr02 | 27192751                | CC                                     | TT                 | TT               | INTERGENIC                    |                    |                                               |
| SNP_10028_A_27192757 | NC_021161.1    | Ca_Kabuli_Chr02 | 27192757                | AA                                     | GG                 | GG               | INTERGENIC                    |                    |                                               |
| SNP_10029_A_27192778 | NC_021161.1    | Ca_Kabuli_Chr02 | 27192778                | AA                                     | TT                 | TT               | INTERGENIC                    |                    |                                               |
| SNP_10030_A_27192952 | NC_021161.1    | Ca_Kabuli_Chr02 | 27192952                | CC                                     | GG                 | GG               | INTERGENIC                    |                    |                                               |
| SNP_10031_A_27197823 | NC_021161.1    | Ca_Kabuli_Chr02 | 27197823                | AA                                     | TT                 | TT               | INTERGENIC                    |                    |                                               |
| SNP_10032_A_27237390 | NC_021161.1    | Ca_Kabuli_Chr02 | 27237390                | CC                                     | TT                 | TT               | INTERGENIC                    |                    |                                               |
| SNP_10033_A_27247289 | NC_021161.1    | Ca_Kabuli_Chr02 | 27247289                | GG                                     | AA                 | AA               | INTERGENIC                    |                    |                                               |
| SNP_10034_A_27251797 | NC_021161.1    | Ca_Kabuli_Chr02 | 27251797                | GG                                     | AA                 | AA               | INTERGENIC                    |                    |                                               |
| SNP_10035_A_27251825 | NC_021161.1    | Ca_Kabuli_Chr02 | 27251825                | AA                                     | GG                 | GG               | INTERGENIC                    |                    |                                               |
| SNP_10036_A_27254094 | NC_021161.1    | Ca_Kabuli_Chr02 | 27254094                | AA                                     | TT                 | TT               | INTERGENIC                    |                    |                                               |

| SNPs IDs             | Chromosome IDs | Chromosomes     | Physical positions (bp) | CDC Frontier (Reference genome) | (Pusa 1103 & HPNB) | (ILWC 46 & LPNB) | Sequence genome | Components of | Gene accession IDs           | Putative functions |
|----------------------|----------------|-----------------|-------------------------|---------------------------------|--------------------|------------------|-----------------|---------------|------------------------------|--------------------|
| SNP_10037_A_27254223 | NC_021161.1    | Ca_Kabuli_Chr02 | 27254223                | AA                              | GG                 | GG               | INTERGENIC      |               |                              |                    |
| SNP_10038_A_27254252 | NC_021161.1    | Ca_Kabuli_Chr02 | 27254252                | TT                              | CC                 | CC               | INTERGENIC      |               |                              |                    |
| SNP_10039_A_27254309 | NC_021161.1    | Ca_Kabuli_Chr02 | 27254309                | CC                              | TT                 | TT               | INTERGENIC      |               |                              |                    |
| SNP_10040_A_27254339 | NC_021161.1    | Ca_Kabuli_Chr02 | 27254339                | AA                              | GG                 | GG               | INTERGENIC      |               |                              |                    |
| SNP_10041_A_27254377 | NC_021161.1    | Ca_Kabuli_Chr02 | 27254377                | TT                              | CC                 | CC               | INTERGENIC      |               |                              |                    |
| SNP_10042_A_27254394 | NC_021161.1    | Ca_Kabuli_Chr02 | 27254394                | TT                              | AA                 | AA               | INTERGENIC      |               |                              |                    |
| SNP_10043_A_27261691 | NC_021161.1    | Ca_Kabuli_Chr02 | 27261691                | TT                              | GG                 | GG               | INTERGENIC      |               |                              |                    |
| SNP_10044_A_27278091 | NC_021161.1    | Ca_Kabuli_Chr02 | 27278091                | CC                              | TT                 | TT               | URR             | 101489571     | transcription repressor OFP4 |                    |
| SNP_10045_A_27348121 | NC_021161.1    | Ca_Kabuli_Chr02 | 27348121                | TT                              | CC                 | CC               | INTERGENIC      |               |                              |                    |
| SNP_10047_A_27411076 | NC_021161.1    | Ca_Kabuli_Chr02 | 27411076                | TT                              | AA                 | AA               | INTERGENIC      |               |                              |                    |
| SNP_10048_A_27412849 | NC_021161.1    | Ca_Kabuli_Chr02 | 27412849                | GG                              | CC                 | CC               | INTERGENIC      |               |                              |                    |
| SNP_10050_A_27491694 | NC_021161.1    | Ca_Kabuli_Chr02 | 27491694                | AA                              | GG                 | GG               | INTERGENIC      |               |                              |                    |
| SNP_10051_A_27491695 | NC_021161.1    | Ca_Kabuli_Chr02 | 27491695                | AA                              | GG                 | GG               | INTERGENIC      |               |                              |                    |
| SNP_10052_A_27491742 | NC_021161.1    | Ca_Kabuli_Chr02 | 27491742                | AA                              | TT                 | TT               | INTERGENIC      |               |                              |                    |
| SNP_10053_A_27509627 | NC_021161.1    | Ca_Kabuli_Chr02 | 27509627                | CC                              | TT                 | TT               | INTERGENIC      |               |                              |                    |
| SNP_10054_A_27509671 | NC_021161.1    | Ca_Kabuli_Chr02 | 27509671                | GG                              | TT                 | TT               | INTERGENIC      |               |                              |                    |
| SNP_10055_A_27525855 | NC_021161.1    | Ca_Kabuli_Chr02 | 27525855                | GG                              | AA                 | AA               | INTERGENIC      |               |                              |                    |
| SNP_10056_A_27528183 | NC_021161.1    | Ca_Kabuli_Chr02 | 27528183                | AA                              | GG                 | GG               | INTERGENIC      |               |                              |                    |
| SNP_10057_A_27528290 | NC_021161.1    | Ca_Kabuli_Chr02 | 27528290                | AA                              | CC                 | CC               | INTERGENIC      |               |                              |                    |
| SNP_10058_A_27528421 | NC_021161.1    | Ca_Kabuli_Chr02 | 27528421                | TT                              | AA                 | AA               | INTERGENIC      |               |                              |                    |
| SNP_10059_A_27528453 | NC_021161.1    | Ca_Kabuli_Chr02 | 27528453                | TT                              | AA                 | AA               | INTERGENIC      |               |                              |                    |
| SNP_10060_A_27528463 | NC_021161.1    | Ca_Kabuli_Chr02 | 27528463                | TT                              | CC                 | CC               | INTERGENIC      |               |                              |                    |

| SNPs IDs             | Chromosome IDs | Chromosomes     | Physical positions (bp) | CDC Frontier (Reference genome) | (Pusa 1103 & HPNB) | (ILWC 46 & LPNB) | Sequence Components of genome | Gene accession IDs | Putative functions           |
|----------------------|----------------|-----------------|-------------------------|---------------------------------|--------------------|------------------|-------------------------------|--------------------|------------------------------|
| SNP_10061_A_27528474 | NC_021161.1    | Ca_Kabuli_Chr02 | 27528474                | AA                              | GG                 | GG               | INTERGENIC                    |                    |                              |
| SNP_10062_A_27528479 | NC_021161.1    | Ca_Kabuli_Chr02 | 27528479                | TT                              | CC                 | CC               | INTERGENIC                    |                    |                              |
| SNP_10063_A_27528487 | NC_021161.1    | Ca_Kabuli_Chr02 | 27528487                | AA                              | TT                 | TT               | INTERGENIC                    |                    |                              |
| SNP_10064_A_27528525 | NC_021161.1    | Ca_Kabuli_Chr02 | 27528525                | CC                              | AA                 | AA               | INTERGENIC                    |                    |                              |
| SNP_10065_A_27528562 | NC_021161.1    | Ca_Kabuli_Chr02 | 27528562                | TT                              | CC                 | CC               | INTERGENIC                    |                    |                              |
| SNP_10066_A_27528563 | NC_021161.1    | Ca_Kabuli_Chr02 | 27528563                | AA                              | GG                 | GG               | INTERGENIC                    |                    |                              |
| SNP_10067_A_27528579 | NC_021161.1    | Ca_Kabuli_Chr02 | 27528579                | TT                              | AA                 | AA               | INTERGENIC                    |                    |                              |
| SNP_10068_A_27531571 | NC_021161.1    | Ca_Kabuli_Chr02 | 27531571                | GG                              | AA                 | AA               | INTERGENIC                    |                    |                              |
| SNP_10069_A_27539342 | NC_021161.1    | Ca_Kabuli_Chr02 | 27539342                | TT                              | AA                 | AA               | INTRON                        | 101493054          | kinesin-3-like               |
| SNP_10070_A_27539447 | NC_021161.1    | Ca_Kabuli_Chr02 | 27539447                | AA                              | TT                 | TT               | INTRON                        | id36247            | Unknown function             |
| SNP_10071_A_27539605 | NC_021161.1    | Ca_Kabuli_Chr02 | 27539605                | TT                              | CC                 | CC               | INTRON                        | id36247            | Unknown function             |
| SNP_10072_A_27539976 | NC_021161.1    | Ca_Kabuli_Chr02 | 27539976                | TT                              | CC                 | CC               | INTRON                        | id36247            | Unknown function             |
| SNP_10073_A_27556796 | NC_021161.1    | Ca_Kabuli_Chr02 | 27556796                | TT                              | GG                 | GG               | INTERGENIC                    |                    |                              |
| SNP_10074_A_27556798 | NC_021161.1    | Ca_Kabuli_Chr02 | 27556798                | TT                              | CC                 | CC               | INTERGENIC                    |                    |                              |
| SNP_10075_A_27556801 | NC_021161.1    | Ca_Kabuli_Chr02 | 27556801                | AA                              | TT                 | TT               | INTERGENIC                    |                    |                              |
| SNP_10077_A_27596537 | NC_021161.1    | Ca_Kabuli_Chr02 | 27596537                | CC                              | GG                 | GG               | INTERGENIC                    |                    |                              |
| SNP_10078_A_27609583 | NC_021161.1    | Ca_Kabuli_Chr02 | 27609583                | TT                              | CC                 | CC               | URR                           | 101509145          | uncharacterized LOC101509145 |
| SNP_10080_A_27632016 | NC_021161.1    | Ca_Kabuli_Chr02 | 27632016                | AA                              | GG                 | GG               | INTERGENIC                    |                    |                              |
| SNP_10081_A_27647448 | NC_021161.1    | Ca_Kabuli_Chr02 | 27647448                | AA                              | GG                 | GG               | INTERGENIC                    |                    |                              |
| SNP_10082_A_27647823 | NC_021161.1    | Ca_Kabuli_Chr02 | 27647823                | AA                              | GG                 | GG               | INTERGENIC                    |                    |                              |
| SNP_10083_A_27647856 | NC_021161.1    | Ca_Kabuli_Chr02 | 27647856                | TT                              | CC                 | CC               | INTERGENIC                    |                    |                              |
| SNP_10084_A_27647985 | NC_021161.1    | Ca_Kabuli_Chr02 | 27647985                | TT                              | CC                 | CC               | INTERGENIC                    |                    |                              |

| SNPs IDs             | Chromosome IDs | Chromosomes     | Physical positions (bp) | CDC Frontier genome (Reference genome) | (Pusa 1103 & HPNB) | (ILWC 46 & LPNB) | Sequence Components of genome | Gene accession IDs | Putative functions                   |
|----------------------|----------------|-----------------|-------------------------|----------------------------------------|--------------------|------------------|-------------------------------|--------------------|--------------------------------------|
| SNP_10085_A_27647999 | NC_021161.1    | Ca_Kabuli_Chr02 | 27647999                | TT                                     | CC                 | CC               | INTERGENIC                    |                    |                                      |
| SNP_10087_A_27701351 | NC_021161.1    | Ca_Kabuli_Chr02 | 27701351                | GG                                     | AA                 | AA               | INTERGENIC                    |                    |                                      |
| SNP_10088_A_27730523 | NC_021161.1    | Ca_Kabuli_Chr02 | 27730523                | CC                                     | TT                 | TT               | INTERGENIC                    |                    |                                      |
| SNP_10089_A_27742973 | NC_021161.1    | Ca_Kabuli_Chr02 | 27742973                | TT                                     | GG                 | GG               | INTERGENIC                    |                    |                                      |
| SNP_10090_A_27786380 | NC_021161.1    | Ca_Kabuli_Chr02 | 27786380                | CC                                     | TT                 | TT               | INTERGENIC                    |                    |                                      |
| SNP_10092_A_27805999 | NC_021161.1    | Ca_Kabuli_Chr02 | 27805999                | TT                                     | CC                 | CC               | URR                           | 101500064          | uncharacterized LOC101500064         |
| SNP_10093_A_27887836 | NC_021161.1    | Ca_Kabuli_Chr02 | 27887836                | TT                                     | CC                 | CC               | INTERGENIC                    |                    |                                      |
| SNP_10094_A_27888404 | NC_021161.1    | Ca_Kabuli_Chr02 | 27888404                | AA                                     | CC                 | CC               | INTERGENIC                    |                    |                                      |
| SNP_10095_A_27888412 | NC_021161.1    | Ca_Kabuli_Chr02 | 27888412                | AA                                     | CC                 | CC               | INTERGENIC                    |                    |                                      |
| SNP_10096_A_27930997 | NC_021161.1    | Ca_Kabuli_Chr02 | 27930997                | GG                                     | AA                 | AA               | SYNONYMOUS_CODING             | 101510114          | protein FAR1-RELATED SEQUENCE 5-like |
| SNP_10097_A_27964916 | NC_021161.1    | Ca_Kabuli_Chr02 | 27964916                | CC                                     | TT                 | TT               | INTERGENIC                    |                    |                                      |
| SNP_10098_A_27964957 | NC_021161.1    | Ca_Kabuli_Chr02 | 27964957                | AA                                     | GG                 | GG               | INTERGENIC                    |                    |                                      |
| SNP_10099_A_27965072 | NC_021161.1    | Ca_Kabuli_Chr02 | 27965072                | TT                                     | CC                 | CC               | INTERGENIC                    |                    |                                      |
| SNP_10100_A_27965149 | NC_021161.1    | Ca_Kabuli_Chr02 | 27965149                | GG                                     | CC                 | CC               | INTERGENIC                    |                    |                                      |
| SNP_10101_A_27965204 | NC_021161.1    | Ca_Kabuli_Chr02 | 27965204                | GG                                     | AA                 | AA               | INTERGENIC                    |                    |                                      |
| SNP_10102_A_27965255 | NC_021161.1    | Ca_Kabuli_Chr02 | 27965255                | GG                                     | TT                 | TT               | INTERGENIC                    |                    |                                      |
| SNP_10103_A_27965264 | NC_021161.1    | Ca_Kabuli_Chr02 | 27965264                | AA                                     | GG                 | GG               | INTERGENIC                    |                    |                                      |
| SNP_10104_A_27965291 | NC_021161.1    | Ca_Kabuli_Chr02 | 27965291                | TT                                     | CC                 | CC               | INTERGENIC                    |                    |                                      |
| SNP_10105_A_27965332 | NC_021161.1    | Ca_Kabuli_Chr02 | 27965332                | AA                                     | CC                 | CC               | INTERGENIC                    |                    |                                      |
| SNP_10106_A_27965344 | NC_021161.1    | Ca_Kabuli_Chr02 | 27965344                | CC                                     | TT                 | TT               | INTERGENIC                    |                    |                                      |
| SNP_10107_A_27965347 | NC_021161.1    | Ca_Kabuli_Chr02 | 27965347                | GG                                     | AA                 | AA               | INTERGENIC                    |                    |                                      |
| SNP_10108_A_27965363 | NC_021161.1    | Ca_Kabuli_Chr02 | 27965363                | TT                                     | CC                 | CC               | INTERGENIC                    |                    |                                      |

| SNPs IDs             | Chromosome IDs | Chromosomes     | Physical positions (bp) | CDC Frontier genome (Reference genome) | (Pusa 1103 & HPNB) | (ILWC 46 & LPNB) | Sequence Components of genome | Gene accession IDs | Putative functions                 |
|----------------------|----------------|-----------------|-------------------------|----------------------------------------|--------------------|------------------|-------------------------------|--------------------|------------------------------------|
| SNP_10109_A_28038040 | NC_021161.1    | Ca_Kabuli_Chr02 | 28038040                | AA                                     | TT                 | TT               | INTERGENIC                    |                    |                                    |
| SNP_10110_A_28089609 | NC_021161.1    | Ca_Kabuli_Chr02 | 28089609                | TT                                     | CC                 | CC               | URR                           | 101513117          | phytoene synthase 2, chloroplastic |
| SNP_10111_A_28143723 | NC_021161.1    | Ca_Kabuli_Chr02 | 28143723                | CC                                     | TT                 | TT               | INTERGENIC                    |                    |                                    |
| SNP_10112_A_28144081 | NC_021161.1    | Ca_Kabuli_Chr02 | 28144081                | AA                                     | GG                 | GG               | INTERGENIC                    |                    |                                    |
| SNP_10113_A_28148586 | NC_021161.1    | Ca_Kabuli_Chr02 | 28148586                | CC                                     | TT                 | TT               | INTERGENIC                    |                    |                                    |
| SNP_10115_A_28163192 | NC_021161.1    | Ca_Kabuli_Chr02 | 28163192                | AA                                     | TT                 | TT               | URR                           | 101488702          | protein REVEILLE 2                 |
| SNP_10116_A_28174253 | NC_021161.1    | Ca_Kabuli_Chr02 | 28174253                | TT                                     | AA                 | AA               | INTERGENIC                    |                    |                                    |
| SNP_10117_A_28174254 | NC_021161.1    | Ca_Kabuli_Chr02 | 28174254                | GG                                     | TT                 | TT               | INTERGENIC                    |                    |                                    |
| SNP_10119_A_28240429 | NC_021161.1    | Ca_Kabuli_Chr02 | 28240429                | CC                                     | AA                 | AA               | INTERGENIC                    |                    |                                    |
| SNP_10120_A_28252190 | NC_021161.1    | Ca_Kabuli_Chr02 | 28252190                | CC                                     | TT                 | TT               | INTERGENIC                    |                    |                                    |
| SNP_10121_A_28252192 | NC_021161.1    | Ca_Kabuli_Chr02 | 28252192                | CC                                     | AA                 | AA               | INTERGENIC                    |                    |                                    |
| SNP_10122_A_28252213 | NC_021161.1    | Ca_Kabuli_Chr02 | 28252213                | CC                                     | GG                 | GG               | INTERGENIC                    |                    |                                    |
| SNP_10123_A_28252259 | NC_021161.1    | Ca_Kabuli_Chr02 | 28252259                | TT                                     | AA                 | AA               | INTERGENIC                    |                    |                                    |
| SNP_10124_A_28252263 | NC_021161.1    | Ca_Kabuli_Chr02 | 28252263                | AA                                     | GG                 | GG               | INTERGENIC                    |                    |                                    |
| SNP_10125_A_28252265 | NC_021161.1    | Ca_Kabuli_Chr02 | 28252265                | AA                                     | TT                 | TT               | INTERGENIC                    |                    |                                    |
| SNP_10126_A_28252267 | NC_021161.1    | Ca_Kabuli_Chr02 | 28252267                | AA                                     | TT                 | TT               | INTERGENIC                    |                    |                                    |
| SNP_10127_A_28252269 | NC_021161.1    | Ca_Kabuli_Chr02 | 28252269                | TT                                     | CC                 | CC               | INTERGENIC                    |                    |                                    |
| SNP_10128_A_28252537 | NC_021161.1    | Ca_Kabuli_Chr02 | 28252537                | GG                                     | AA                 | AA               | INTERGENIC                    |                    |                                    |
| SNP_10129_A_28252574 | NC_021161.1    | Ca_Kabuli_Chr02 | 28252574                | TT                                     | GG                 | GG               | INTERGENIC                    |                    |                                    |
| SNP_10130_A_28252608 | NC_021161.1    | Ca_Kabuli_Chr02 | 28252608                | CC                                     | TT                 | TT               | INTERGENIC                    |                    |                                    |
| SNP_10131_A_28252622 | NC_021161.1    | Ca_Kabuli_Chr02 | 28252622                | CC                                     | TT                 | TT               | INTERGENIC                    |                    |                                    |
| SNP_10132_A_28252635 | NC_021161.1    | Ca_Kabuli_Chr02 | 28252635                | GG                                     | AA                 | AA               | INTERGENIC                    |                    |                                    |

| SNPs IDs             | Chromosome IDs | Chromosomes     | Physical positions (bp) | CDC Frontier genome (Reference genome) | (Pusa 1103 & HPNB) | (ILWC 46 & LPNB) | Sequence genome | Components of | Gene accession IDs | Putative functions |
|----------------------|----------------|-----------------|-------------------------|----------------------------------------|--------------------|------------------|-----------------|---------------|--------------------|--------------------|
| SNP_10133_A_28252662 | NC_021161.1    | Ca_Kabuli_Chr02 | 28252662                | AA                                     | TT                 | TT               | INTERGENIC      |               |                    |                    |
| SNP_10134_A_28252782 | NC_021161.1    | Ca_Kabuli_Chr02 | 28252782                | TT                                     | AA                 | AA               | INTERGENIC      |               |                    |                    |
| SNP_10135_A_28255397 | NC_021161.1    | Ca_Kabuli_Chr02 | 28255397                | CC                                     | TT                 | TT               | INTERGENIC      |               |                    |                    |
| SNP_10136_A_28255405 | NC_021161.1    | Ca_Kabuli_Chr02 | 28255405                | TT                                     | CC                 | CC               | INTERGENIC      |               |                    |                    |
| SNP_10137_A_28259766 | NC_021161.1    | Ca_Kabuli_Chr02 | 28259766                | CC                                     | AA                 | AA               | INTERGENIC      |               |                    |                    |
| SNP_10138_A_28262543 | NC_021161.1    | Ca_Kabuli_Chr02 | 28262543                | AA                                     | CC                 | CC               | INTERGENIC      |               |                    |                    |
| SNP_10139_A_28262677 | NC_021161.1    | Ca_Kabuli_Chr02 | 28262677                | GG                                     | TT                 | TT               | INTERGENIC      |               |                    |                    |
| SNP_10140_A_28262687 | NC_021161.1    | Ca_Kabuli_Chr02 | 28262687                | GG                                     | TT                 | TT               | INTERGENIC      |               |                    |                    |
| SNP_10141_A_28262741 | NC_021161.1    | Ca_Kabuli_Chr02 | 28262741                | CC                                     | AA                 | AA               | INTERGENIC      |               |                    |                    |
| SNP_10142_A_28262742 | NC_021161.1    | Ca_Kabuli_Chr02 | 28262742                | TT                                     | CC                 | CC               | INTERGENIC      |               |                    |                    |
| SNP_10143_A_28262743 | NC_021161.1    | Ca_Kabuli_Chr02 | 28262743                | GG                                     | AA                 | AA               | INTERGENIC      |               |                    |                    |
| SNP_10144_A_28262908 | NC_021161.1    | Ca_Kabuli_Chr02 | 28262908                | CC                                     | AA                 | AA               | INTERGENIC      |               |                    |                    |
| SNP_10145_A_28262956 | NC_021161.1    | Ca_Kabuli_Chr02 | 28262956                | TT                                     | GG                 | GG               | INTERGENIC      |               |                    |                    |
| SNP_10146_A_28262999 | NC_021161.1    | Ca_Kabuli_Chr02 | 28262999                | TT                                     | GG                 | GG               | INTERGENIC      |               |                    |                    |
| SNP_10147_A_28263061 | NC_021161.1    | Ca_Kabuli_Chr02 | 28263061                | AA                                     | GG                 | GG               | INTERGENIC      |               |                    |                    |
| SNP_10148_A_28263068 | NC_021161.1    | Ca_Kabuli_Chr02 | 28263068                | TT                                     | GG                 | GG               | INTERGENIC      |               |                    |                    |
| SNP_10149_A_28263130 | NC_021161.1    | Ca_Kabuli_Chr02 | 28263130                | GG                                     | AA                 | AA               | INTERGENIC      |               |                    |                    |
| SNP_10150_A_28263142 | NC_021161.1    | Ca_Kabuli_Chr02 | 28263142                | TT                                     | CC                 | CC               | INTERGENIC      |               |                    |                    |
| SNP_10151_A_28263153 | NC_021161.1    | Ca_Kabuli_Chr02 | 28263153                | TT                                     | CC                 | CC               | INTERGENIC      |               |                    |                    |
| SNP_10152_A_28284395 | NC_021161.1    | Ca_Kabuli_Chr02 | 28284395                | GG                                     | TT                 | TT               | INTERGENIC      |               |                    |                    |
| SNP_10153_A_28338566 | NC_021161.1    | Ca_Kabuli_Chr02 | 28338566                | CC                                     | TT                 | TT               | INTERGENIC      |               |                    |                    |
| SNP_10154_A_28392565 | NC_021161.1    | Ca_Kabuli_Chr02 | 28392565                | TT                                     | GG                 | GG               | INTERGENIC      |               |                    |                    |



| SNPs IDs             | Chromosome IDs | Chromosomes     | Physical positions (bp) | CDC Frontier genome (Reference genome) | (Pusa 1103 & HPNB) | (ILWC 46 & LPNB) | Sequence genome | Components of | Gene accession IDs | Putative functions |
|----------------------|----------------|-----------------|-------------------------|----------------------------------------|--------------------|------------------|-----------------|---------------|--------------------|--------------------|
| SNP_10155_A_28392605 | NC_021161.1    | Ca_Kabuli_Chr02 | 28392605                | TT                                     | CC                 | CC               | INTERGENIC      |               |                    |                    |
| SNP_10156_A_28395901 | NC_021161.1    | Ca_Kabuli_Chr02 | 28395901                | AA                                     | TT                 | TT               | INTERGENIC      |               |                    |                    |
| SNP_10157_A_28395975 | NC_021161.1    | Ca_Kabuli_Chr02 | 28395975                | AA                                     | GG                 | GG               | INTERGENIC      |               |                    |                    |
| SNP_10158_A_28396018 | NC_021161.1    | Ca_Kabuli_Chr02 | 28396018                | CC                                     | GG                 | GG               | INTERGENIC      |               |                    |                    |
| SNP_10159_A_28396088 | NC_021161.1    | Ca_Kabuli_Chr02 | 28396088                | GG                                     | AA                 | AA               | INTERGENIC      |               |                    |                    |
| SNP_10160_A_28396172 | NC_021161.1    | Ca_Kabuli_Chr02 | 28396172                | GG                                     | AA                 | AA               | INTERGENIC      |               |                    |                    |
| SNP_10161_A_28396257 | NC_021161.1    | Ca_Kabuli_Chr02 | 28396257                | GG                                     | AA                 | AA               | INTERGENIC      |               |                    |                    |
| SNP_10162_A_28396288 | NC_021161.1    | Ca_Kabuli_Chr02 | 28396288                | AA                                     | TT                 | TT               | INTERGENIC      |               |                    |                    |
| SNP_10163_A_28396386 | NC_021161.1    | Ca_Kabuli_Chr02 | 28396386                | GG                                     | CC                 | CC               | INTERGENIC      |               |                    |                    |
| SNP_10164_A_28396403 | NC_021161.1    | Ca_Kabuli_Chr02 | 28396403                | CC                                     | TT                 | TT               | INTERGENIC      |               |                    |                    |
| SNP_10165_A_28416560 | NC_021161.1    | Ca_Kabuli_Chr02 | 28416560                | AA                                     | GG                 | GG               | INTERGENIC      |               |                    |                    |
| SNP_10166_A_28465218 | NC_021161.1    | Ca_Kabuli_Chr02 | 28465218                | AA                                     | GG                 | GG               | INTERGENIC      |               |                    |                    |
| SNP_10168_A_28465280 | NC_021161.1    | Ca_Kabuli_Chr02 | 28465280                | AA                                     | CC                 | CC               | INTERGENIC      |               |                    |                    |
| SNP_10169_A_28465321 | NC_021161.1    | Ca_Kabuli_Chr02 | 28465321                | AA                                     | GG                 | GG               | INTERGENIC      |               |                    |                    |
| SNP_10171_A_28465397 | NC_021161.1    | Ca_Kabuli_Chr02 | 28465397                | TT                                     | CC                 | CC               | INTERGENIC      |               |                    |                    |
| SNP_10173_A_28465525 | NC_021161.1    | Ca_Kabuli_Chr02 | 28465525                | AA                                     | GG                 | GG               | INTERGENIC      |               |                    |                    |
| SNP_10175_A_28465638 | NC_021161.1    | Ca_Kabuli_Chr02 | 28465638                | GG                                     | AA                 | AA               | INTERGENIC      |               |                    |                    |
| SNP_10176_A_28465687 | NC_021161.1    | Ca_Kabuli_Chr02 | 28465687                | GG                                     | AA                 | AA               | INTERGENIC      |               |                    |                    |
| SNP_10177_A_28498024 | NC_021161.1    | Ca_Kabuli_Chr02 | 28498024                | TT                                     | CC                 | CC               | INTERGENIC      |               |                    |                    |
| SNP_10178_A_28498108 | NC_021161.1    | Ca_Kabuli_Chr02 | 28498108                | AA                                     | TT                 | TT               | INTERGENIC      |               |                    |                    |
| SNP_10179_A_28498136 | NC_021161.1    | Ca_Kabuli_Chr02 | 28498136                | AA                                     | GG                 | GG               | INTERGENIC      |               |                    |                    |
| SNP_10180_A_28498478 | NC_021161.1    | Ca_Kabuli_Chr02 | 28498478                | TT                                     | CC                 | CC               | INTERGENIC      |               |                    |                    |

| SNPs IDs             | Chromosome IDs | Chromosomes     | Physical positions (bp) | CDC Frontier (Reference genome) | (Pusa 1103 & HPNB) | (ILWC 46 & LPNB) | Sequence Components of genome | Gene accession IDs | Putative functions           |
|----------------------|----------------|-----------------|-------------------------|---------------------------------|--------------------|------------------|-------------------------------|--------------------|------------------------------|
| SNP_10181_A_28501064 | NC_021161.1    | Ca_Kabuli_Chr02 | 28501064                | AA                              | CC                 | CC               | INTERGENIC                    |                    |                              |
| SNP_10182_A_28501122 | NC_021161.1    | Ca_Kabuli_Chr02 | 28501122                | TT                              | CC                 | CC               | INTERGENIC                    |                    |                              |
| SNP_10183_A_28501160 | NC_021161.1    | Ca_Kabuli_Chr02 | 28501160                | GG                              | CC                 | CC               | INTERGENIC                    |                    |                              |
| SNP_10184_A_28501554 | NC_021161.1    | Ca_Kabuli_Chr02 | 28501554                | AA                              | GG                 | GG               | INTERGENIC                    |                    |                              |
| SNP_10185_A_28501588 | NC_021161.1    | Ca_Kabuli_Chr02 | 28501588                | TT                              | CC                 | CC               | INTERGENIC                    |                    |                              |
| SNP_10186_A_28512929 | NC_021161.1    | Ca_Kabuli_Chr02 | 28512929                | CC                              | TT                 | TT               | INTERGENIC                    |                    |                              |
| SNP_10189_A_28569292 | NC_021161.1    | Ca_Kabuli_Chr02 | 28569292                | GG                              | AA                 | AA               | INTERGENIC                    |                    |                              |
| SNP_10190_A_28583283 | NC_021161.1    | Ca_Kabuli_Chr02 | 28583283                | CC                              | TT                 | TT               | INTERGENIC                    |                    |                              |
| SNP_10191_A_28583316 | NC_021161.1    | Ca_Kabuli_Chr02 | 28583316                | TT                              | CC                 | CC               | INTERGENIC                    |                    |                              |
| SNP_10193_A_28623169 | NC_021161.1    | Ca_Kabuli_Chr02 | 28623169                | CC                              | TT                 | TT               | INTERGENIC                    |                    |                              |
| SNP_10194_A_28630905 | NC_021161.1    | Ca_Kabuli_Chr02 | 28630905                | CC                              | TT                 | TT               | INTERGENIC                    |                    |                              |
| SNP_10195_A_28632092 | NC_021161.1    | Ca_Kabuli_Chr02 | 28632092                | AA                              | TT                 | TT               | INTERGENIC                    |                    |                              |
| SNP_10196_A_28632168 | NC_021161.1    | Ca_Kabuli_Chr02 | 28632168                | CC                              | GG                 | GG               | INTERGENIC                    |                    |                              |
| SNP_10197_A_28632202 | NC_021161.1    | Ca_Kabuli_Chr02 | 28632202                | TT                              | CC                 | CC               | INTERGENIC                    |                    |                              |
| SNP_10198_A_28632223 | NC_021161.1    | Ca_Kabuli_Chr02 | 28632223                | GG                              | AA                 | AA               | INTERGENIC                    |                    |                              |
| SNP_10199_A_28667586 | NC_021161.1    | Ca_Kabuli_Chr02 | 28667586                | TT                              | GG                 | GG               | INTRON                        | 101509363          | uncharacterized LOC101509363 |
| SNP_10200_A_28669556 | NC_021161.1    | Ca_Kabuli_Chr02 | 28669556                | CC                              | TT                 | TT               | INTRON                        | 101509363          | uncharacterized LOC101509363 |
| SNP_10201_A_28669585 | NC_021161.1    | Ca_Kabuli_Chr02 | 28669585                | TT                              | CC                 | CC               | INTRON                        | 101509363          | uncharacterized LOC101509363 |
| SNP_10202_A_28676502 | NC_021161.1    | Ca_Kabuli_Chr02 | 28676502                | GG                              | TT                 | TT               | INTRON                        | 101509363          | uncharacterized LOC101509363 |
| SNP_10203_A_28736389 | NC_021161.1    | Ca_Kabuli_Chr02 | 28736389                | TT                              | CC                 | CC               | INTERGENIC                    |                    |                              |
| SNP_10204_A_28740282 | NC_021161.1    | Ca_Kabuli_Chr02 | 28740282                | TT                              | AA                 | AA               | INTERGENIC                    |                    |                              |
| SNP_10205_A_28751373 | NC_021161.1    | Ca_Kabuli_Chr02 | 28751373                | TT                              | CC                 | CC               | INTERGENIC                    |                    |                              |

| SNPs IDs             | Chromosome IDs | Chromosomes     | Physical positions (bp) | CDC Frontier (Reference genome) | (Pusa 1103 & HPNB) | (ILWC 46 & LPNB) | Sequence genome | Components of | Gene accession IDs | Putative functions |
|----------------------|----------------|-----------------|-------------------------|---------------------------------|--------------------|------------------|-----------------|---------------|--------------------|--------------------|
| SNP_10206_A_28794499 | NC_021161.1    | Ca_Kabuli_Chr02 | 28794499                | GG                              | AA                 | AA               | INTERGENIC      |               |                    |                    |
| SNP_10207_A_28817962 | NC_021161.1    | Ca_Kabuli_Chr02 | 28817962                | CC                              | TT                 | TT               | INTERGENIC      |               |                    |                    |
| SNP_10208_A_28832285 | NC_021161.1    | Ca_Kabuli_Chr02 | 28832285                | TT                              | CC                 | CC               | INTERGENIC      |               |                    |                    |
| SNP_10209_A_28833707 | NC_021161.1    | Ca_Kabuli_Chr02 | 28833707                | GG                              | AA                 | AA               | INTERGENIC      |               |                    |                    |
| SNP_10211_A_28889331 | NC_021161.1    | Ca_Kabuli_Chr02 | 28889331                | CC                              | TT                 | TT               | INTERGENIC      |               |                    |                    |
| SNP_10212_A_28889354 | NC_021161.1    | Ca_Kabuli_Chr02 | 28889354                | TT                              | CC                 | CC               | INTERGENIC      |               |                    |                    |
| SNP_10213_A_28889400 | NC_021161.1    | Ca_Kabuli_Chr02 | 28889400                | AA                              | GG                 | GG               | INTERGENIC      |               |                    |                    |
| SNP_10214_A_28889456 | NC_021161.1    | Ca_Kabuli_Chr02 | 28889456                | TT                              | CC                 | CC               | INTERGENIC      |               |                    |                    |
| SNP_10215_A_28889475 | NC_021161.1    | Ca_Kabuli_Chr02 | 28889475                | TT                              | CC                 | CC               | INTERGENIC      |               |                    |                    |
| SNP_10216_A_28889479 | NC_021161.1    | Ca_Kabuli_Chr02 | 28889479                | AA                              | GG                 | GG               | INTERGENIC      |               |                    |                    |
| SNP_10217_A_28889522 | NC_021161.1    | Ca_Kabuli_Chr02 | 28889522                | AA                              | GG                 | GG               | INTERGENIC      |               |                    |                    |
| SNP_10218_A_28889590 | NC_021161.1    | Ca_Kabuli_Chr02 | 28889590                | AA                              | GG                 | GG               | INTERGENIC      |               |                    |                    |
| SNP_10219_A_28889615 | NC_021161.1    | Ca_Kabuli_Chr02 | 28889615                | AA                              | GG                 | GG               | INTERGENIC      |               |                    |                    |
| SNP_10220_A_28890143 | NC_021161.1    | Ca_Kabuli_Chr02 | 28890143                | CC                              | TT                 | TT               | INTERGENIC      |               |                    |                    |
| SNP_10221_A_28891721 | NC_021161.1    | Ca_Kabuli_Chr02 | 28891721                | TT                              | GG                 | GG               | INTERGENIC      |               |                    |                    |
| SNP_10222_A_28897834 | NC_021161.1    | Ca_Kabuli_Chr02 | 28897834                | AA                              | TT                 | TT               | INTERGENIC      |               |                    |                    |
| SNP_10223_A_28954760 | NC_021161.1    | Ca_Kabuli_Chr02 | 28954760                | GG                              | AA                 | AA               | INTERGENIC      |               |                    |                    |
| SNP_10224_A_28979907 | NC_021161.1    | Ca_Kabuli_Chr02 | 28979907                | CC                              | AA                 | AA               | INTERGENIC      |               |                    |                    |
| SNP_10225_A_29019288 | NC_021161.1    | Ca_Kabuli_Chr02 | 29019288                | AA                              | GG                 | GG               | INTERGENIC      |               |                    |                    |
| SNP_10226_A_29059832 | NC_021161.1    | Ca_Kabuli_Chr02 | 29059832                | TT                              | CC                 | CC               | INTERGENIC      |               |                    |                    |
| SNP_10227_A_29059856 | NC_021161.1    | Ca_Kabuli_Chr02 | 29059856                | AA                              | GG                 | GG               | INTERGENIC      |               |                    |                    |
| SNP_10228_A_29060081 | NC_021161.1    | Ca_Kabuli_Chr02 | 29060081                | AA                              | TT                 | TT               | INTERGENIC      |               |                    |                    |

| SNPs IDs             | Chromosome IDs | Chromosomes     | Physical positions (bp) | CDC Frontier genome (Reference genome) | (Pusa 1103 & HPNB) | (ILWC 46 & LPNB) | Sequence genome | Components of | Gene accession IDs | Putative functions |
|----------------------|----------------|-----------------|-------------------------|----------------------------------------|--------------------|------------------|-----------------|---------------|--------------------|--------------------|
| SNP_10229_A_29060172 | NC_021161.1    | Ca_Kabuli_Chr02 | 29060172                | TT                                     | GG                 | GG               | INTERGENIC      |               |                    |                    |
| SNP_10230_A_29060284 | NC_021161.1    | Ca_Kabuli_Chr02 | 29060284                | TT                                     | GG                 | GG               | INTERGENIC      |               |                    |                    |
| SNP_10231_A_29060325 | NC_021161.1    | Ca_Kabuli_Chr02 | 29060325                | GG                                     | TT                 | TT               | INTERGENIC      |               |                    |                    |
| SNP_10232_A_29060339 | NC_021161.1    | Ca_Kabuli_Chr02 | 29060339                | TT                                     | AA                 | AA               | INTERGENIC      |               |                    |                    |
| SNP_10233_A_29060396 | NC_021161.1    | Ca_Kabuli_Chr02 | 29060396                | CC                                     | TT                 | TT               | INTERGENIC      |               |                    |                    |
| SNP_10234_A_29060407 | NC_021161.1    | Ca_Kabuli_Chr02 | 29060407                | AA                                     | TT                 | TT               | INTERGENIC      |               |                    |                    |
| SNP_10235_A_29060422 | NC_021161.1    | Ca_Kabuli_Chr02 | 29060422                | GG                                     | TT                 | TT               | INTERGENIC      |               |                    |                    |
| SNP_10236_A_29068989 | NC_021161.1    | Ca_Kabuli_Chr02 | 29068989                | CC                                     | TT                 | TT               | INTERGENIC      |               |                    |                    |
| SNP_10237_A_29069016 | NC_021161.1    | Ca_Kabuli_Chr02 | 29069016                | TT                                     | CC                 | CC               | INTERGENIC      |               |                    |                    |
| SNP_10238_A_29070802 | NC_021161.1    | Ca_Kabuli_Chr02 | 29070802                | AA                                     | CC                 | CC               | INTERGENIC      |               |                    |                    |
| SNP_10239_A_29071105 | NC_021161.1    | Ca_Kabuli_Chr02 | 29071105                | TT                                     | CC                 | CC               | INTERGENIC      |               |                    |                    |
| SNP_10240_A_29071270 | NC_021161.1    | Ca_Kabuli_Chr02 | 29071270                | TT                                     | CC                 | CC               | INTERGENIC      |               |                    |                    |
| SNP_10241_A_29071303 | NC_021161.1    | Ca_Kabuli_Chr02 | 29071303                | GG                                     | CC                 | CC               | INTERGENIC      |               |                    |                    |
| SNP_10242_A_29071501 | NC_021161.1    | Ca_Kabuli_Chr02 | 29071501                | TT                                     | GG                 | GG               | INTERGENIC      |               |                    |                    |
| SNP_10243_A_29071803 | NC_021161.1    | Ca_Kabuli_Chr02 | 29071803                | TT                                     | CC                 | CC               | INTERGENIC      |               |                    |                    |
| SNP_10244_A_29128863 | NC_021161.1    | Ca_Kabuli_Chr02 | 29128863                | CC                                     | TT                 | TT               | INTERGENIC      |               |                    |                    |
| SNP_10245_A_29129330 | NC_021161.1    | Ca_Kabuli_Chr02 | 29129330                | TT                                     | GG                 | GG               | INTERGENIC      |               |                    |                    |
| SNP_10246_A_29129342 | NC_021161.1    | Ca_Kabuli_Chr02 | 29129342                | GG                                     | TT                 | TT               | INTERGENIC      |               |                    |                    |
| SNP_10247_A_29129348 | NC_021161.1    | Ca_Kabuli_Chr02 | 29129348                | GG                                     | AA                 | AA               | INTERGENIC      |               |                    |                    |
| SNP_10248_A_29129366 | NC_021161.1    | Ca_Kabuli_Chr02 | 29129366                | AA                                     | GG                 | GG               | INTERGENIC      |               |                    |                    |
| SNP_10249_A_29129398 | NC_021161.1    | Ca_Kabuli_Chr02 | 29129398                | AA                                     | TT                 | TT               | INTERGENIC      |               |                    |                    |
| SNP_10250_A_29129407 | NC_021161.1    | Ca_Kabuli_Chr02 | 29129407                | AA                                     | GG                 | GG               | INTERGENIC      |               |                    |                    |

| SNPs IDs             | Chromosome IDs | Chromosomes     | Physical positions (bp) | CDC Frontier (Reference genome) | (Pusa 1103 & HPNB) | (ILWC 46 & LPNB) | Sequence Components of genome | Gene accession IDs | Putative functions     |
|----------------------|----------------|-----------------|-------------------------|---------------------------------|--------------------|------------------|-------------------------------|--------------------|------------------------|
| SNP_10251_A_29129421 | NC_021161.1    | Ca_Kabuli_Chr02 | 29129421                | TT                              | AA                 | AA               | INTERGENIC                    |                    |                        |
| SNP_10252_A_29129441 | NC_021161.1    | Ca_Kabuli_Chr02 | 29129441                | CC                              | GG                 | GG               | INTERGENIC                    |                    |                        |
| SNP_10253_A_29129442 | NC_021161.1    | Ca_Kabuli_Chr02 | 29129442                | TT                              | AA                 | AA               | INTERGENIC                    |                    |                        |
| SNP_10254_A_29129774 | NC_021161.1    | Ca_Kabuli_Chr02 | 29129774                | GG                              | CC                 | CC               | INTERGENIC                    |                    |                        |
| SNP_10255_A_29129795 | NC_021161.1    | Ca_Kabuli_Chr02 | 29129795                | GG                              | TT                 | TT               | INTERGENIC                    |                    |                        |
| SNP_10256_A_29170479 | NC_021161.1    | Ca_Kabuli_Chr02 | 29170479                | AA                              | GG                 | GG               | INTERGENIC                    |                    |                        |
| SNP_10257_A_29181246 | NC_021161.1    | Ca_Kabuli_Chr02 | 29181246                | AA                              | GG                 | GG               | INTRON                        | 101506152          | potassium channel SKOR |
| SNP_10258_A_29215192 | NC_021161.1    | Ca_Kabuli_Chr02 | 29215192                | TT                              | CC                 | CC               | INTERGENIC                    |                    |                        |
| SNP_10259_A_29215239 | NC_021161.1    | Ca_Kabuli_Chr02 | 29215239                | TT                              | CC                 | CC               | INTERGENIC                    |                    |                        |
| SNP_10260_A_29215729 | NC_021161.1    | Ca_Kabuli_Chr02 | 29215729                | CC                              | TT                 | TT               | INTERGENIC                    |                    |                        |
| SNP_10261_A_29215730 | NC_021161.1    | Ca_Kabuli_Chr02 | 29215730                | CC                              | TT                 | TT               | INTERGENIC                    |                    |                        |
| SNP_10262_A_29215736 | NC_021161.1    | Ca_Kabuli_Chr02 | 29215736                | AA                              | GG                 | GG               | INTERGENIC                    |                    |                        |
| SNP_10263_A_29215751 | NC_021161.1    | Ca_Kabuli_Chr02 | 29215751                | CC                              | GG                 | GG               | INTERGENIC                    |                    |                        |
| SNP_10268_A_29238615 | NC_021161.1    | Ca_Kabuli_Chr02 | 29238615                | CC                              | TT                 | TT               | INTERGENIC                    |                    |                        |
| SNP_10269_A_29238681 | NC_021161.1    | Ca_Kabuli_Chr02 | 29238681                | CC                              | TT                 | TT               | INTERGENIC                    |                    |                        |
| SNP_10270_A_29238699 | NC_021161.1    | Ca_Kabuli_Chr02 | 29238699                | CC                              | GG                 | GG               | INTERGENIC                    |                    |                        |
| SNP_10271_A_29238721 | NC_021161.1    | Ca_Kabuli_Chr02 | 29238721                | AA                              | TT                 | TT               | INTERGENIC                    |                    |                        |
| SNP_10272_A_29238778 | NC_021161.1    | Ca_Kabuli_Chr02 | 29238778                | AA                              | GG                 | GG               | INTERGENIC                    |                    |                        |
| SNP_10273_A_29239071 | NC_021161.1    | Ca_Kabuli_Chr02 | 29239071                | CC                              | TT                 | TT               | INTERGENIC                    |                    |                        |
| SNP_10274_A_29239142 | NC_021161.1    | Ca_Kabuli_Chr02 | 29239142                | GG                              | TT                 | TT               | INTERGENIC                    |                    |                        |
| SNP_10275_A_29239175 | NC_021161.1    | Ca_Kabuli_Chr02 | 29239175                | AA                              | GG                 | GG               | INTERGENIC                    |                    |                        |
| SNP_10276_A_29239219 | NC_021161.1    | Ca_Kabuli_Chr02 | 29239219                | TT                              | CC                 | CC               | INTERGENIC                    |                    |                        |

| SNPs IDs             | Chromosome IDs | Chromosomes     | Physical positions (bp) | CDC Frontier genome (Reference genome) | (Pusa 1103 & HPNB) | (ILWC 46 & LPNB) | Sequence genome | Components of | Gene accession IDs | Putative functions |
|----------------------|----------------|-----------------|-------------------------|----------------------------------------|--------------------|------------------|-----------------|---------------|--------------------|--------------------|
| SNP_10277_A_29239294 | NC_021161.1    | Ca_Kabuli_Chr02 | 29239294                | AA                                     | CC                 | CC               | INTERGENIC      |               |                    |                    |
| SNP_10278_A_29239467 | NC_021161.1    | Ca_Kabuli_Chr02 | 29239467                | GG                                     | AA                 | AA               | INTERGENIC      |               |                    |                    |
| SNP_10279_A_29239557 | NC_021161.1    | Ca_Kabuli_Chr02 | 29239557                | GG                                     | AA                 | AA               | INTERGENIC      |               |                    |                    |
| SNP_10280_A_29239560 | NC_021161.1    | Ca_Kabuli_Chr02 | 29239560                | GG                                     | AA                 | AA               | INTERGENIC      |               |                    |                    |
| SNP_10281_A_29239612 | NC_021161.1    | Ca_Kabuli_Chr02 | 29239612                | GG                                     | AA                 | AA               | INTERGENIC      |               |                    |                    |
| SNP_10282_A_29239722 | NC_021161.1    | Ca_Kabuli_Chr02 | 29239722                | CC                                     | TT                 | TT               | INTERGENIC      |               |                    |                    |
| SNP_10283_A_29239727 | NC_021161.1    | Ca_Kabuli_Chr02 | 29239727                | AA                                     | GG                 | GG               | INTERGENIC      |               |                    |                    |
| SNP_10284_A_29239857 | NC_021161.1    | Ca_Kabuli_Chr02 | 29239857                | TT                                     | CC                 | CC               | INTERGENIC      |               |                    |                    |
| SNP_10285_A_29239937 | NC_021161.1    | Ca_Kabuli_Chr02 | 29239937                | AA                                     | GG                 | GG               | INTERGENIC      |               |                    |                    |
| SNP_10287_A_29240105 | NC_021161.1    | Ca_Kabuli_Chr02 | 29240105                | CC                                     | TT                 | TT               | INTERGENIC      |               |                    |                    |
| SNP_10289_A_29240164 | NC_021161.1    | Ca_Kabuli_Chr02 | 29240164                | TT                                     | CC                 | CC               | INTERGENIC      |               |                    |                    |
| SNP_10290_A_29240168 | NC_021161.1    | Ca_Kabuli_Chr02 | 29240168                | TT                                     | GG                 | GG               | INTERGENIC      |               |                    |                    |
| SNP_10291_A_29240179 | NC_021161.1    | Ca_Kabuli_Chr02 | 29240179                | GG                                     | AA                 | AA               | INTERGENIC      |               |                    |                    |
| SNP_10294_A_29240394 | NC_021161.1    | Ca_Kabuli_Chr02 | 29240394                | CC                                     | TT                 | TT               | INTERGENIC      |               |                    |                    |
| SNP_10295_A_29240445 | NC_021161.1    | Ca_Kabuli_Chr02 | 29240445                | TT                                     | CC                 | CC               | INTERGENIC      |               |                    |                    |
| SNP_10296_A_29240513 | NC_021161.1    | Ca_Kabuli_Chr02 | 29240513                | TT                                     | CC                 | CC               | INTERGENIC      |               |                    |                    |
| SNP_10297_A_29240527 | NC_021161.1    | Ca_Kabuli_Chr02 | 29240527                | AA                                     | GG                 | GG               | INTERGENIC      |               |                    |                    |
| SNP_10298_A_29240641 | NC_021161.1    | Ca_Kabuli_Chr02 | 29240641                | GG                                     | TT                 | TT               | INTERGENIC      |               |                    |                    |
| SNP_10299_A_29240647 | NC_021161.1    | Ca_Kabuli_Chr02 | 29240647                | GG                                     | AA                 | AA               | INTERGENIC      |               |                    |                    |
| SNP_10300_A_29240660 | NC_021161.1    | Ca_Kabuli_Chr02 | 29240660                | AA                                     | GG                 | GG               | INTERGENIC      |               |                    |                    |
| SNP_10301_A_29240674 | NC_021161.1    | Ca_Kabuli_Chr02 | 29240674                | GG                                     | AA                 | AA               | INTERGENIC      |               |                    |                    |
| SNP_10302_A_29240808 | NC_021161.1    | Ca_Kabuli_Chr02 | 29240808                | AA                                     | TT                 | TT               | INTERGENIC      |               |                    |                    |

| SNPs IDs             | Chromosome IDs | Chromosomes     | Physical positions (bp) | CDC Frontier genome (Reference genome) | (Pusa 1103 & HPNB) | (ILWC 46 & LPNB) | Sequence Components of genome | Gene accession IDs | Putative functions |
|----------------------|----------------|-----------------|-------------------------|----------------------------------------|--------------------|------------------|-------------------------------|--------------------|--------------------|
| SNP_10303_A_29241002 | NC_021161.1    | Ca_Kabuli_Chr02 | 29241002                | TT                                     | AA                 | AA               | INTERGENIC                    |                    |                    |
| SNP_10304_A_29241003 | NC_021161.1    | Ca_Kabuli_Chr02 | 29241003                | GG                                     | TT                 | TT               | INTERGENIC                    |                    |                    |
| SNP_10306_A_29253002 | NC_021161.1    | Ca_Kabuli_Chr02 | 29253002                | GG                                     | AA                 | AA               | INTERGENIC                    |                    |                    |
| SNP_10308_A_29253155 | NC_021161.1    | Ca_Kabuli_Chr02 | 29253155                | CC                                     | TT                 | TT               | DRR                           | 101513862          | Unknown function   |
| SNP_10309_A_29276614 | NC_021161.1    | Ca_Kabuli_Chr02 | 29276614                | CC                                     | AA                 | AA               | INTERGENIC                    |                    |                    |
| SNP_10310_A_29278625 | NC_021161.1    | Ca_Kabuli_Chr02 | 29278625                | GG                                     | AA                 | AA               | INTERGENIC                    |                    |                    |
| SNP_10311_A_29278681 | NC_021161.1    | Ca_Kabuli_Chr02 | 29278681                | GG                                     | AA                 | AA               | INTERGENIC                    |                    |                    |
| SNP_10312_A_29278940 | NC_021161.1    | Ca_Kabuli_Chr02 | 29278940                | TT                                     | AA                 | AA               | INTERGENIC                    |                    |                    |
| SNP_10313_A_29279508 | NC_021161.1    | Ca_Kabuli_Chr02 | 29279508                | TT                                     | CC                 | CC               | INTERGENIC                    |                    |                    |
| SNP_10314_A_29289263 | NC_021161.1    | Ca_Kabuli_Chr02 | 29289263                | AA                                     | GG                 | GG               | INTERGENIC                    |                    |                    |
| SNP_10315_A_29289300 | NC_021161.1    | Ca_Kabuli_Chr02 | 29289300                | TT                                     | CC                 | CC               | INTERGENIC                    |                    |                    |
| SNP_10316_A_29289590 | NC_021161.1    | Ca_Kabuli_Chr02 | 29289590                | AA                                     | GG                 | GG               | INTERGENIC                    |                    |                    |
| SNP_10318_A_29408888 | NC_021161.1    | Ca_Kabuli_Chr02 | 29408888                | CC                                     | TT                 | TT               | INTERGENIC                    |                    |                    |
| SNP_10319_A_29409210 | NC_021161.1    | Ca_Kabuli_Chr02 | 29409210                | TT                                     | CC                 | CC               | INTERGENIC                    |                    |                    |
| SNP_10320_A_29410077 | NC_021161.1    | Ca_Kabuli_Chr02 | 29410077                | AA                                     | GG                 | GG               | INTERGENIC                    |                    |                    |
| SNP_10321_A_29412093 | NC_021161.1    | Ca_Kabuli_Chr02 | 29412093                | AA                                     | GG                 | GG               | INTERGENIC                    |                    |                    |
| SNP_10322_A_29416805 | NC_021161.1    | Ca_Kabuli_Chr02 | 29416805                | AA                                     | TT                 | TT               | INTERGENIC                    |                    |                    |
| SNP_10323_A_29416838 | NC_021161.1    | Ca_Kabuli_Chr02 | 29416838                | AA                                     | GG                 | GG               | INTERGENIC                    |                    |                    |
| SNP_10324_A_29416868 | NC_021161.1    | Ca_Kabuli_Chr02 | 29416868                | GG                                     | AA                 | AA               | INTERGENIC                    |                    |                    |
| SNP_10325_A_29417235 | NC_021161.1    | Ca_Kabuli_Chr02 | 29417235                | GG                                     | TT                 | TT               | INTERGENIC                    |                    |                    |
| SNP_10326_A_29444196 | NC_021161.1    | Ca_Kabuli_Chr02 | 29444196                | AA                                     | GG                 | GG               | INTERGENIC                    |                    |                    |
| SNP_10328_A_29444490 | NC_021161.1    | Ca_Kabuli_Chr02 | 29444490                | AA                                     | GG                 | GG               | INTERGENIC                    |                    |                    |

| SNPs IDs             | Chromosome IDs | Chromosomes     | Physical positions (bp) | CDC Frontier genome (Reference genome) | (Pusa 1103 & HPNB) | (ILWC 46 & LPNB) | Sequence genome | Components of | Gene accession IDs   | Putative functions |
|----------------------|----------------|-----------------|-------------------------|----------------------------------------|--------------------|------------------|-----------------|---------------|----------------------|--------------------|
| SNP_10329_A_29444608 | NC_021161.1    | Ca_Kabuli_Chr02 | 29444608                | AA                                     | CC                 | CC               | INTERGENIC      |               |                      |                    |
| SNP_10330_A_29445576 | NC_021161.1    | Ca_Kabuli_Chr02 | 29445576                | AA                                     | TT                 | TT               | INTERGENIC      |               |                      |                    |
| SNP_10331_A_29445605 | NC_021161.1    | Ca_Kabuli_Chr02 | 29445605                | GG                                     | CC                 | CC               | INTERGENIC      |               |                      |                    |
| SNP_10332_A_29445618 | NC_021161.1    | Ca_Kabuli_Chr02 | 29445618                | GG                                     | CC                 | CC               | INTERGENIC      |               |                      |                    |
| SNP_10334_A_29445770 | NC_021161.1    | Ca_Kabuli_Chr02 | 29445770                | AA                                     | GG                 | GG               | INTERGENIC      |               |                      |                    |
| SNP_10336_A_29446081 | NC_021161.1    | Ca_Kabuli_Chr02 | 29446081                | AA                                     | GG                 | GG               | INTERGENIC      |               |                      |                    |
| SNP_10337_A_29446159 | NC_021161.1    | Ca_Kabuli_Chr02 | 29446159                | GG                                     | TT                 | TT               | INTERGENIC      |               |                      |                    |
| SNP_10338_A_29446260 | NC_021161.1    | Ca_Kabuli_Chr02 | 29446260                | TT                                     | CC                 | CC               | INTERGENIC      |               |                      |                    |
| SNP_10339_A_29446261 | NC_021161.1    | Ca_Kabuli_Chr02 | 29446261                | GG                                     | TT                 | TT               | INTERGENIC      |               |                      |                    |
| SNP_10340_A_29446272 | NC_021161.1    | Ca_Kabuli_Chr02 | 29446272                | CC                                     | AA                 | AA               | INTERGENIC      |               |                      |                    |
| SNP_10341_A_29447633 | NC_021161.1    | Ca_Kabuli_Chr02 | 29447633                | CC                                     | TT                 | TT               | INTERGENIC      |               |                      |                    |
| SNP_10342_A_29504254 | NC_021161.1    | Ca_Kabuli_Chr02 | 29504254                | TT                                     | CC                 | CC               | INTERGENIC      |               |                      |                    |
| SNP_10344_A_29607919 | NC_021161.1    | Ca_Kabuli_Chr02 | 29607919                | GG                                     | AA                 | AA               | INTERGENIC      |               |                      |                    |
| SNP_10346_A_29609575 | NC_021161.1    | Ca_Kabuli_Chr02 | 29609575                | GG                                     | CC                 | CC               | DRR             | 101493055     | protein AAR2 homolog |                    |
| SNP_10347_A_29644841 | NC_021161.1    | Ca_Kabuli_Chr02 | 29644841                | CC                                     | TT                 | TT               | INTERGENIC      |               |                      |                    |
| SNP_10348_A_29644848 | NC_021161.1    | Ca_Kabuli_Chr02 | 29644848                | AA                                     | TT                 | TT               | INTERGENIC      |               |                      |                    |
| SNP_10349_A_29644870 | NC_021161.1    | Ca_Kabuli_Chr02 | 29644870                | CC                                     | AA                 | AA               | INTERGENIC      |               |                      |                    |
| SNP_10350_A_29644871 | NC_021161.1    | Ca_Kabuli_Chr02 | 29644871                | TT                                     | CC                 | CC               | INTERGENIC      |               |                      |                    |
| SNP_10351_A_29644872 | NC_021161.1    | Ca_Kabuli_Chr02 | 29644872                | AA                                     | TT                 | TT               | INTERGENIC      |               |                      |                    |
| SNP_10352_A_29644885 | NC_021161.1    | Ca_Kabuli_Chr02 | 29644885                | TT                                     | CC                 | AA               | INTERGENIC      |               |                      |                    |
| SNP_10353_A_29644900 | NC_021161.1    | Ca_Kabuli_Chr02 | 29644900                | AA                                     | CC                 | CC               | INTERGENIC      |               |                      |                    |
| SNP_10354_A_29647507 | NC_021161.1    | Ca_Kabuli_Chr02 | 29647507                | AA                                     | CC                 | CC               | INTERGENIC      |               |                      |                    |



| SNPs IDs             | Chromosome IDs | Chromosomes     | Physical positions (bp) | CDC Frontier genome (Reference genome) | (Pusa 1103 & HPNB) | (ILWC 46 & LPNB) | Sequence genome       | Components of | Gene accession IDs | Putative functions |
|----------------------|----------------|-----------------|-------------------------|----------------------------------------|--------------------|------------------|-----------------------|---------------|--------------------|--------------------|
| SNP_10355_A_29653901 | NC_021161.1    | Ca_Kabuli_Chr02 | 29653901                | CC                                     | AA                 | AA               | INTERGENIC            |               |                    |                    |
| SNP_10356_A_29662146 | NC_021161.1    | Ca_Kabuli_Chr02 | 29662146                | TT                                     | AA                 | AA               | INTERGENIC            |               |                    |                    |
| SNP_10357_A_29679306 | NC_021161.1    | Ca_Kabuli_Chr02 | 29679306                | TT                                     | AA                 | AA               | INTERGENIC            |               |                    |                    |
| SNP_10358_A_29734843 | NC_021161.1    | Ca_Kabuli_Chr02 | 29734843                | TT                                     | AA                 | AA               | INTERGENIC            |               |                    |                    |
| SNP_10359_A_29737528 | NC_021161.1    | Ca_Kabuli_Chr02 | 29737528                | CC                                     | GG                 | GG               | INTERGENIC            |               |                    |                    |
| SNP_10360_A_29737529 | NC_021161.1    | Ca_Kabuli_Chr02 | 29737529                | GG                                     | AA                 | AA               | INTERGENIC            |               |                    |                    |
| SNP_10361_A_29737657 | NC_021161.1    | Ca_Kabuli_Chr02 | 29737657                | CC                                     | TT                 | TT               | INTERGENIC            |               |                    |                    |
| SNP_10362_A_29737689 | NC_021161.1    | Ca_Kabuli_Chr02 | 29737689                | TT                                     | CC                 | CC               | INTERGENIC            |               |                    |                    |
| SNP_10363_A_29737749 | NC_021161.1    | Ca_Kabuli_Chr02 | 29737749                | CC                                     | TT                 | TT               | INTERGENIC            |               |                    |                    |
| SNP_10364_A_29737750 | NC_021161.1    | Ca_Kabuli_Chr02 | 29737750                | TT                                     | CC                 | CC               | INTERGENIC            |               |                    |                    |
| SNP_10365_A_29737889 | NC_021161.1    | Ca_Kabuli_Chr02 | 29737889                | CC                                     | TT                 | TT               | INTERGENIC            |               |                    |                    |
| SNP_10366_A_29738013 | NC_021161.1    | Ca_Kabuli_Chr02 | 29738013                | AA                                     | CC                 | CC               | INTERGENIC            |               |                    |                    |
| SNP_10367_A_29738028 | NC_021161.1    | Ca_Kabuli_Chr02 | 29738028                | AA                                     | GG                 | GG               | INTERGENIC            |               |                    |                    |
| SNP_10368_A_29738092 | NC_021161.1    | Ca_Kabuli_Chr02 | 29738092                | TT                                     | CC                 | CC               | INTERGENIC            |               |                    |                    |
| SNP_10369_A_29738100 | NC_021161.1    | Ca_Kabuli_Chr02 | 29738100                | CC                                     | TT                 | TT               | INTERGENIC            |               |                    |                    |
| SNP_10370_A_29738109 | NC_021161.1    | Ca_Kabuli_Chr02 | 29738109                | CC                                     | AA                 | AA               | INTERGENIC            |               |                    |                    |
| SNP_10371_A_29738141 | NC_021161.1    | Ca_Kabuli_Chr02 | 29738141                | TT                                     | CC                 | CC               | INTERGENIC            |               |                    |                    |
| SNP_10372_A_29738208 | NC_021161.1    | Ca_Kabuli_Chr02 | 29738208                | GG                                     | TT                 | TT               | DRR                   | 101508726     | Unknown function   |                    |
| SNP_10373_A_29738837 | NC_021161.1    | Ca_Kabuli_Chr02 | 29738837                | CC                                     | AA                 | AA               | DRR                   | 101508726     | Unknown function   |                    |
| SNP_10374_A_29738991 | NC_021161.1    | Ca_Kabuli_Chr02 | 29738991                | CC                                     | AA                 | AA               | DRR                   | 101508726     | Unknown function   |                    |
| SNP_10375_A_29739240 | NC_021161.1    | Ca_Kabuli_Chr02 | 29739240                | GG                                     | AA                 | AA               | NON_SYNONYMOUS_CODING | 101508726     | Unknown function   |                    |
| SNP_10376_A_29742485 | NC_021161.1    | Ca_Kabuli_Chr02 | 29742485                | AA                                     | CC                 | CC               | INTERGENIC            |               |                    |                    |

| SNPs IDs             | Chromosome IDs | Chromosomes     | Physical positions (bp) | CDC Frontier genome (Reference genome) | (Pusa 1103 & HPNB) | (ILWC 46 & LPNB) | Sequence Components of genome | Gene accession IDs | Putative functions         |
|----------------------|----------------|-----------------|-------------------------|----------------------------------------|--------------------|------------------|-------------------------------|--------------------|----------------------------|
| SNP_10377_A_29829391 | NC_021161.1    | Ca_Kabuli_Chr02 | 29829391                | GG                                     | AA                 | AA               | URR                           | 101497024          | Unknown function           |
| SNP_10378_A_29829777 | NC_021161.1    | Ca_Kabuli_Chr02 | 29829777                | TT                                     | CC                 | CC               | URR                           | 101497024          | Unknown function           |
| SNP_10380_A_29857545 | NC_021161.1    | Ca_Kabuli_Chr02 | 29857545                | CC                                     | TT                 | TT               | INTERGENIC                    |                    |                            |
| SNP_10381_A_29912209 | NC_021161.1    | Ca_Kabuli_Chr02 | 29912209                | CC                                     | GG                 | GG               | DRR                           | 101499754          | AP3-complex subunit beta-A |
| SNP_10382_A_29962717 | NC_021161.1    | Ca_Kabuli_Chr02 | 29962717                | GG                                     | AA                 | AA               | URR                           | 101502195          | protein AAR2 homolog       |
| SNP_10384_A_29962796 | NC_021161.1    | Ca_Kabuli_Chr02 | 29962796                | AA                                     | GG                 | GG               | URR                           | 101502195          | protein AAR2 homolog       |
| SNP_10385_A_29964135 | NC_021161.1    | Ca_Kabuli_Chr02 | 29964135                | CC                                     | AA                 | AA               | URR                           | 101502195          | protein AAR2 homolog       |
| SNP_10386_A_29964711 | NC_021161.1    | Ca_Kabuli_Chr02 | 29964711                | TT                                     | AA                 | AA               | INTERGENIC                    |                    |                            |
| SNP_10387_A_30065245 | NC_021161.1    | Ca_Kabuli_Chr02 | 30065245                | GG                                     | AA                 | AA               | INTERGENIC                    |                    |                            |
| SNP_10388_A_30071725 | NC_021161.1    | Ca_Kabuli_Chr02 | 30071725                | AA                                     | GG                 | GG               | INTERGENIC                    |                    |                            |
| SNP_10389_A_30075834 | NC_021161.1    | Ca_Kabuli_Chr02 | 30075834                | TT                                     | CC                 | CC               | INTERGENIC                    |                    |                            |
| SNP_10390_A_30092030 | NC_021161.1    | Ca_Kabuli_Chr02 | 30092030                | GG                                     | TT                 | TT               | INTRON                        | 101510980          | cucumis-in-like            |
| SNP_10391_A_30092077 | NC_021161.1    | Ca_Kabuli_Chr02 | 30092077                | GG                                     | AA                 | AA               | INTRON                        | 101510980          | cucumis-in-like            |
| SNP_10392_A_30092875 | NC_021161.1    | Ca_Kabuli_Chr02 | 30092875                | AA                                     | CC                 | CC               | URR                           | 101510980          | cucumis-in-like            |
| SNP_10393_A_30094917 | NC_021161.1    | Ca_Kabuli_Chr02 | 30094917                | AA                                     | TT                 | TT               | INTERGENIC                    |                    |                            |
| SNP_10394_A_30095148 | NC_021161.1    | Ca_Kabuli_Chr02 | 30095148                | TT                                     | AA                 | AA               | INTERGENIC                    |                    |                            |
| SNP_10395_A_30095150 | NC_021161.1    | Ca_Kabuli_Chr02 | 30095150                | TT                                     | CC                 | CC               | INTERGENIC                    |                    |                            |
| SNP_10396_A_30095622 | NC_021161.1    | Ca_Kabuli_Chr02 | 30095622                | AA                                     | GG                 | GG               | INTERGENIC                    |                    |                            |
| SNP_10399_A_30097122 | NC_021161.1    | Ca_Kabuli_Chr02 | 30097122                | GG                                     | AA                 | AA               | INTERGENIC                    |                    |                            |
| SNP_10400_A_30112419 | NC_021161.1    | Ca_Kabuli_Chr02 | 30112419                | GG                                     | AA                 | AA               | INTRON                        | 101511288          | cucumis-in-like            |
| SNP_10401_A_30112435 | NC_021161.1    | Ca_Kabuli_Chr02 | 30112435                | CC                                     | GG                 | GG               | INTRON                        | 101511288          | cucumis-in-like            |
| SNP_10403_A_30112621 | NC_021161.1    | Ca_Kabuli_Chr02 | 30112621                | GG                                     | AA                 | AA               | INTRON                        | 101511288          | cucumis-in-like            |

| SNPs IDs             | Chromosome IDs | Chromosomes     | Physical positions (bp) | CDC Frontier genome (Reference genome) | (Pusa 1103 & HPNB) | (ILWC 46 & LPNB) | Sequence Components of genome | Gene accession IDs | Putative functions           |
|----------------------|----------------|-----------------|-------------------------|----------------------------------------|--------------------|------------------|-------------------------------|--------------------|------------------------------|
| SNP_10404_A_30112661 | NC_021161.1    | Ca_Kabuli_Chr02 | 30112661                | TT                                     | GG                 | GG               | INTRON                        | 10151288           | cucumis-in-like              |
| SNP_10406_A_30126013 | NC_021161.1    | Ca_Kabuli_Chr02 | 30126013                | TT                                     | AA                 | AA               | INTRON                        | 10151288           | cucumis-in-like              |
| SNP_10407_A_30145319 | NC_021161.1    | Ca_Kabuli_Chr02 | 30145319                | CC                                     | TT                 | TT               | DRR                           | 101512144          | uncharacterized LOC101512144 |
| SNP_10408_A_30146046 | NC_021161.1    | Ca_Kabuli_Chr02 | 30146046                | GG                                     | AA                 | AA               | URR                           | 101511831          | UPF0396 protein-like         |
| SNP_10409_A_30146187 | NC_021161.1    | Ca_Kabuli_Chr02 | 30146187                | GG                                     | AA                 | AA               | URR                           | 101511831          | UPF0396 protein-like         |
| SNP_10410_A_30146287 | NC_021161.1    | Ca_Kabuli_Chr02 | 30146287                | CC                                     | TT                 | TT               | URR                           | 101511831          | UPF0396 protein-like         |
| SNP_10411_A_30146362 | NC_021161.1    | Ca_Kabuli_Chr02 | 30146362                | CC                                     | AA                 | AA               | URR                           | 101511831          | UPF0396 protein-like         |
| SNP_10412_A_30146363 | NC_021161.1    | Ca_Kabuli_Chr02 | 30146363                | CC                                     | AA                 | AA               | URR                           | 101511831          | UPF0396 protein-like         |
| SNP_10413_A_30146370 | NC_021161.1    | Ca_Kabuli_Chr02 | 30146370                | TT                                     | CC                 | CC               | URR                           | 101511831          | UPF0396 protein-like         |
| SNP_10414_A_30146418 | NC_021161.1    | Ca_Kabuli_Chr02 | 30146418                | CC                                     | TT                 | TT               | URR                           | 101511831          | UPF0396 protein-like         |
| SNP_10416_A_30146538 | NC_021161.1    | Ca_Kabuli_Chr02 | 30146538                | AA                                     | TT                 | TT               | URR                           | 101511831          | UPF0396 protein-like         |
| SNP_10417_A_30147134 | NC_021161.1    | Ca_Kabuli_Chr02 | 30147134                | CC                                     | TT                 | TT               | URR                           | 101511831          | UPF0396 protein-like         |
| SNP_10418_A_30147137 | NC_021161.1    | Ca_Kabuli_Chr02 | 30147137                | CC                                     | TT                 | TT               | URR                           | 101511831          | UPF0396 protein-like         |
| SNP_10420_A_30147382 | NC_021161.1    | Ca_Kabuli_Chr02 | 30147382                | GG                                     | AA                 | AA               | URR                           | 101511831          | UPF0396 protein-like         |
| SNP_10421_A_30147445 | NC_021161.1    | Ca_Kabuli_Chr02 | 30147445                | TT                                     | CC                 | CC               | URR                           | 101511831          | UPF0396 protein-like         |
| SNP_10422_A_30164761 | NC_021161.1    | Ca_Kabuli_Chr02 | 30164761                | TT                                     | CC                 | CC               | INTERGENIC                    |                    |                              |
| SNP_10423_A_30164767 | NC_021161.1    | Ca_Kabuli_Chr02 | 30164767                | CC                                     | TT                 | TT               | INTERGENIC                    |                    |                              |
| SNP_10424_A_30164942 | NC_021161.1    | Ca_Kabuli_Chr02 | 30164942                | TT                                     | AA                 | AA               | INTERGENIC                    |                    |                              |
| SNP_10425_A_30165086 | NC_021161.1    | Ca_Kabuli_Chr02 | 30165086                | TT                                     | AA                 | AA               | INTERGENIC                    |                    |                              |
| SNP_10426_A_30172866 | NC_021161.1    | Ca_Kabuli_Chr02 | 30172866                | GG                                     | CC                 | CC               | INTERGENIC                    |                    |                              |
| SNP_10427_A_30172924 | NC_021161.1    | Ca_Kabuli_Chr02 | 30172924                | TT                                     | CC                 | CC               | INTERGENIC                    |                    |                              |
| SNP_10428_A_30173691 | NC_021161.1    | Ca_Kabuli_Chr02 | 30173691                | GG                                     | AA                 | AA               | DRR                           | 101512469          | uncharacterized LOC101512469 |

| SNPs IDs             | Chromosome IDs | Chromosomes     | Physical positions (bp) | CDC Frontier genome (Reference genome) | (Pusa 1103 & HPNB) | (ILWC 46 & LPNB) | Sequence Components of genome | Gene accession IDs | Putative functions                                        |
|----------------------|----------------|-----------------|-------------------------|----------------------------------------|--------------------|------------------|-------------------------------|--------------------|-----------------------------------------------------------|
| SNP_10430_A_30174959 | NC_021161.1    | Ca_Kabuli_Chr02 | 30174959                | CC                                     | TT                 | TT               | INTRON                        | 101512469          | uncharacterized LOC101512469                              |
| SNP_10431_A_30198132 | NC_021161.1    | Ca_Kabuli_Chr02 | 30198132                | AA                                     | TT                 | TT               | INTERGENIC                    |                    |                                                           |
| SNP_10434_A_30314523 | NC_021161.1    | Ca_Kabuli_Chr02 | 30314523                | TT                                     | AA                 | AA               | INTERGENIC                    |                    |                                                           |
| SNP_10435_A_30314548 | NC_021161.1    | Ca_Kabuli_Chr02 | 30314548                | CC                                     | TT                 | TT               | INTERGENIC                    |                    |                                                           |
| SNP_10436_A_30314576 | NC_021161.1    | Ca_Kabuli_Chr02 | 30314576                | GG                                     | AA                 | AA               | INTERGENIC                    |                    |                                                           |
| SNP_10437_A_30314594 | NC_021161.1    | Ca_Kabuli_Chr02 | 30314594                | CC                                     | TT                 | TT               | INTERGENIC                    |                    |                                                           |
| SNP_10438_A_30314650 | NC_021161.1    | Ca_Kabuli_Chr02 | 30314650                | AA                                     | GG                 | GG               | INTERGENIC                    |                    |                                                           |
| SNP_10439_A_30325617 | NC_021161.1    | Ca_Kabuli_Chr02 | 30325617                | CC                                     | TT                 | TT               | URR                           | 101514641          | proline transporter 1-like                                |
| SNP_10440_A_30329361 | NC_021161.1    | Ca_Kabuli_Chr02 | 30329361                | TT                                     | CC                 | CC               | DRR                           | 101488831          | uncharacterized protein At1g04910-like                    |
| SNP_10441_A_30336694 | NC_021161.1    | Ca_Kabuli_Chr02 | 30336694                | GG                                     | AA                 | AA               | INTRON                        | 101489573          | 60S ribosomal protein L35a-1                              |
| SNP_10442_A_30336700 | NC_021161.1    | Ca_Kabuli_Chr02 | 30336700                | CC                                     | TT                 | TT               | INTRON                        | 101489573          | 60S ribosomal protein L35a-1                              |
| SNP_10443_A_30340022 | NC_021161.1    | Ca_Kabuli_Chr02 | 30340022                | CC                                     | TT                 | TT               | URR                           | 101489573          | 60S ribosomal protein L35a-1                              |
| SNP_10444_A_30340029 | NC_021161.1    | Ca_Kabuli_Chr02 | 30340029                | AA                                     | GG                 | GG               | URR                           | 101489573          | 60S ribosomal protein L35a-1                              |
| SNP_10446_A_30342831 | NC_021161.1    | Ca_Kabuli_Chr02 | 30342831                | GG                                     | AA                 | AA               | INTERGENIC                    |                    |                                                           |
| SNP_10447_A_30342840 | NC_021161.1    | Ca_Kabuli_Chr02 | 30342840                | AA                                     | TT                 | TT               | INTERGENIC                    |                    |                                                           |
| SNP_10451_A_30343152 | NC_021161.1    | Ca_Kabuli_Chr02 | 30343152                | CC                                     | TT                 | TT               | INTERGENIC                    |                    |                                                           |
| SNP_10452_A_30343233 | NC_021161.1    | Ca_Kabuli_Chr02 | 30343233                | CC                                     | TT                 | TT               | INTERGENIC                    |                    |                                                           |
| SNP_10453_A_30343246 | NC_021161.1    | Ca_Kabuli_Chr02 | 30343246                | AA                                     | GG                 | GG               | INTERGENIC                    |                    |                                                           |
| SNP_10456_A_30343883 | NC_021161.1    | Ca_Kabuli_Chr02 | 30343883                | TT                                     | AA                 | AA               | INTERGENIC                    |                    |                                                           |
| SNP_10457_A_30343888 | NC_021161.1    | Ca_Kabuli_Chr02 | 30343888                | TT                                     | AA                 | AA               | INTERGENIC                    |                    |                                                           |
| SNP_10458_A_30345114 | NC_021161.1    | Ca_Kabuli_Chr02 | 30345114                | GG                                     | TT                 | TT               | DRR                           | 101489890          | probable sugar phosphate/phosphate translocator At3g11320 |
| SNP_10460_A_30346208 | NC_021161.1    | Ca_Kabuli_Chr02 | 30346208                | GG                                     | CC                 | CC               | INTERGENIC                    |                    |                                                           |

| SNPs IDs             | Chromosome IDs | Chromosomes     | Physical positions (bp) | CDC Frontier genome (Reference genome) | (Pusa 1103 & HPNB) | (ILWC 46 & LPNB) | Sequence Components of genome | Gene accession IDs | Putative functions                                        |
|----------------------|----------------|-----------------|-------------------------|----------------------------------------|--------------------|------------------|-------------------------------|--------------------|-----------------------------------------------------------|
| SNP_10461_A_30346964 | NC_021161.1    | Ca_Kabuli_Chr02 | 30346964                | TT                                     | AA                 | AA               | INTRON                        | 101489890          | probable sugar phosphate/phosphate translocator At3g11320 |
| SNP_10462_A_30346976 | NC_021161.1    | Ca_Kabuli_Chr02 | 30346976                | CC                                     | TT                 | TT               | INTRON                        | 101489890          | probable sugar phosphate/phosphate translocator At3g11320 |
| SNP_10463_A_30346983 | NC_021161.1    | Ca_Kabuli_Chr02 | 30346983                | TT                                     | CC                 | CC               | INTRON                        | 101489890          | probable sugar phosphate/phosphate translocator At3g11320 |
| SNP_10464_A_30346987 | NC_021161.1    | Ca_Kabuli_Chr02 | 30346987                | AA                                     | TT                 | TT               | INTRON                        | 101489890          | probable sugar phosphate/phosphate translocator At3g11320 |
| SNP_10465_A_30346988 | NC_021161.1    | Ca_Kabuli_Chr02 | 30346988                | AA                                     | TT                 | TT               | INTRON                        | 101489890          | probable sugar phosphate/phosphate translocator At3g11320 |
| SNP_10466_A_30347927 | NC_021161.1    | Ca_Kabuli_Chr02 | 30347927                | CC                                     | TT                 | TT               | INTRON                        | 101489890          | probable sugar phosphate/phosphate translocator At3g11320 |
| SNP_10467_A_30347942 | NC_021161.1    | Ca_Kabuli_Chr02 | 30347942                | AA                                     | GG                 | GG               | INTRON                        | 101489890          | probable sugar phosphate/phosphate translocator At3g11320 |
| SNP_10468_A_30348176 | NC_021161.1    | Ca_Kabuli_Chr02 | 30348176                | TT                                     | CC                 | CC               | SYNONYMOUS_CODING             | 101489890          | probable sugar phosphate/phosphate translocator At3g11320 |
| SNP_10469_A_30348895 | NC_021161.1    | Ca_Kabuli_Chr02 | 30348895                | AA                                     | CC                 | CC               | DRR                           | 101497148          | Unknown function                                          |
| SNP_10470_A_30355143 | NC_021161.1    | Ca_Kabuli_Chr02 | 30355143                | AA                                     | TT                 | TT               | DRR                           | 101490227          | uncharacterized protein At2g39920-like                    |
| SNP_10471_A_30355364 | NC_021161.1    | Ca_Kabuli_Chr02 | 30355364                | GG                                     | AA                 | AA               | DRR                           | 101490227          | uncharacterized protein At2g39920-like                    |
| SNP_10472_A_30355368 | NC_021161.1    | Ca_Kabuli_Chr02 | 30355368                | TT                                     | AA                 | AA               | DRR                           | 101490227          | uncharacterized protein At2g39920-like                    |
| SNP_10473_A_30355373 | NC_021161.1    | Ca_Kabuli_Chr02 | 30355373                | AA                                     | GG                 | GG               | DRR                           | 101490227          | uncharacterized protein At2g39920-like                    |
| SNP_10474_A_30356049 | NC_021161.1    | Ca_Kabuli_Chr02 | 30356049                | TT                                     | CC                 | CC               | URR                           | 101497481          | glucan endo-1,3-beta-glucosidase 12                       |
| SNP_10475_A_30356830 | NC_021161.1    | Ca_Kabuli_Chr02 | 30356830                | GG                                     | CC                 | CC               | INTERGENIC                    |                    |                                                           |
| SNP_10476_A_30357124 | NC_021161.1    | Ca_Kabuli_Chr02 | 30357124                | CC                                     | AA                 | AA               | INTERGENIC                    |                    |                                                           |
| SNP_10477_A_30357172 | NC_021161.1    | Ca_Kabuli_Chr02 | 30357172                | CC                                     | AA                 | AA               | INTERGENIC                    |                    |                                                           |
| SNP_10478_A_30357229 | NC_021161.1    | Ca_Kabuli_Chr02 | 30357229                | GG                                     | TT                 | TT               | INTERGENIC                    |                    |                                                           |
| SNP_10479_A_30357232 | NC_021161.1    | Ca_Kabuli_Chr02 | 30357232                | GG                                     | AA                 | AA               | INTERGENIC                    |                    |                                                           |
| SNP_10480_A_30358789 | NC_021161.1    | Ca_Kabuli_Chr02 | 30358789                | CC                                     | TT                 | TT               | URR                           | 101490227          | uncharacterized protein At2g39920-like                    |
| SNP_10482_A_30363651 | NC_021161.1    | Ca_Kabuli_Chr02 | 30363651                | AA                                     | TT                 | TT               | DRR                           | 101491505          | laccase-4-like                                            |
| SNP_10483_A_30364111 | NC_021161.1    | Ca_Kabuli_Chr02 | 30364111                | AA                                     | GG                 | GG               | DRR                           | 101491505          | laccase-4-like                                            |

| SNPs IDs             | Chromosome IDs | Chromosomes     | Physical positions (bp) | CDC Frontier (Reference genome) | (Pusa 1103 & HPNB) | (ILWC 46 & LPNB) | Sequence Components of genome | Gene accession IDs | Putative functions                    |
|----------------------|----------------|-----------------|-------------------------|---------------------------------|--------------------|------------------|-------------------------------|--------------------|---------------------------------------|
| SNP_10484_A_30364520 | NC_021161.1    | Ca_Kabuli_Chr02 | 30364520                | TT                              | CC                 | CC               | DRR                           | 101491505          | laccase-4-like                        |
| SNP_10485_A_30364636 | NC_021161.1    | Ca_Kabuli_Chr02 | 30364636                | CC                              | AA                 | AA               | URR                           | 101491193          | uncharacterized LOC101491193          |
| SNP_10486_A_30364809 | NC_021161.1    | Ca_Kabuli_Chr02 | 30364809                | CC                              | GG                 | GG               | URR                           | 101491193          | uncharacterized LOC101491193          |
| SNP_10487_A_30364810 | NC_021161.1    | Ca_Kabuli_Chr02 | 30364810                | AA                              | GG                 | GG               | URR                           | 101491193          | uncharacterized LOC101491193          |
| SNP_10488_A_30364838 | NC_021161.1    | Ca_Kabuli_Chr02 | 30364838                | TT                              | CC                 | CC               | URR                           | 101491193          | uncharacterized LOC101491193          |
| SNP_10489_A_30364839 | NC_021161.1    | Ca_Kabuli_Chr02 | 30364839                | AA                              | GG                 | GG               | URR                           | 101491193          | uncharacterized LOC101491193          |
| SNP_10490_A_30364850 | NC_021161.1    | Ca_Kabuli_Chr02 | 30364850                | AA                              | GG                 | GG               | URR                           | 101491193          | uncharacterized LOC101491193          |
| SNP_10491_A_30365431 | NC_021161.1    | Ca_Kabuli_Chr02 | 30365431                | GG                              | CC                 | CC               | URR                           | 101497817          | Unknown function                      |
| SNP_10492_A_30369011 | NC_021161.1    | Ca_Kabuli_Chr02 | 30369011                | TT                              | CC                 | CC               | DRR                           | 101491816          | rRNA-processing protein fcf2-like     |
| SNP_10494_A_30369519 | NC_021161.1    | Ca_Kabuli_Chr02 | 30369519                | CC                              | TT                 | TT               | DRR                           | 101491816          | rRNA-processing protein fcf2-like     |
| SNP_10495_A_30370411 | NC_021161.1    | Ca_Kabuli_Chr02 | 30370411                | CC                              | TT                 | TT               | INTERGENIC                    |                    |                                       |
| SNP_10497_A_30373918 | NC_021161.1    | Ca_Kabuli_Chr02 | 30373918                | GG                              | CC                 | CC               | URR                           | 101491816          | rRNA-processing protein fcf2-like     |
| SNP_10500_A_30383429 | NC_021161.1    | Ca_Kabuli_Chr02 | 30383429                | GG                              | AA                 | AA               | INTERGENIC                    |                    |                                       |
| SNP_10501_A_30385849 | NC_021161.1    | Ca_Kabuli_Chr02 | 30385849                | GG                              | AA                 | AA               | INTERGENIC                    |                    |                                       |
| SNP_10502_A_30385853 | NC_021161.1    | Ca_Kabuli_Chr02 | 30385853                | GG                              | AA                 | AA               | INTERGENIC                    |                    |                                       |
| SNP_10503_A_30386067 | NC_021161.1    | Ca_Kabuli_Chr02 | 30386067                | TT                              | GG                 | GG               | INTERGENIC                    |                    |                                       |
| SNP_10504_A_30386140 | NC_021161.1    | Ca_Kabuli_Chr02 | 30386140                | CC                              | TT                 | TT               | INTERGENIC                    |                    |                                       |
| SNP_10505_A_30386145 | NC_021161.1    | Ca_Kabuli_Chr02 | 30386145                | AA                              | GG                 | GG               | INTERGENIC                    |                    |                                       |
| SNP_10506_A_30386155 | NC_021161.1    | Ca_Kabuli_Chr02 | 30386155                | AA                              | GG                 | GG               | INTERGENIC                    |                    |                                       |
| SNP_10507_A_30389433 | NC_021161.1    | Ca_Kabuli_Chr02 | 30389433                | TT                              | CC                 | CC               | SYNONYMOUS_CODING             | 101492486          | coronatine-insensitive protein 1-like |
| SNP_10508_A_30390607 | NC_021161.1    | Ca_Kabuli_Chr02 | 30390607                | GG                              | AA                 | AA               | INTRON                        | 101492486          | coronatine-insensitive protein 1-like |
| SNP_10509_A_30390893 | NC_021161.1    | Ca_Kabuli_Chr02 | 30390893                | TT                              | AA                 | AA               | INTRON                        | 101492486          | coronatine-insensitive protein 1-like |

| SNPs IDs             | Chromosome IDs | Chromosomes     | Physical positions (bp) | CDC Frontier genome (Reference genome) | (Pusa 1103 & HPNB) | (ILWC 46 & LPNB) | Sequence Components of genome | Gene accession IDs | Putative functions                    |
|----------------------|----------------|-----------------|-------------------------|----------------------------------------|--------------------|------------------|-------------------------------|--------------------|---------------------------------------|
| SNP_10511_A_30391318 | NC_021161.1    | Ca_Kabuli_Chr02 | 30391318                | GG                                     | AA                 | AA               | INTRON                        | 101492486          | coronatine-insensitive protein 1-like |
| SNP_10512_A_30393397 | NC_021161.1    | Ca_Kabuli_Chr02 | 30393397                | AA                                     | CC                 | CC               | URR                           | 101492486          | coronatine-insensitive protein 1-like |
| SNP_10513_A_30393453 | NC_021161.1    | Ca_Kabuli_Chr02 | 30393453                | AA                                     | GG                 | GG               | URR                           | 101492486          | coronatine-insensitive protein 1-like |
| SNP_10514_A_30393457 | NC_021161.1    | Ca_Kabuli_Chr02 | 30393457                | CC                                     | TT                 | TT               | URR                           | 101492486          | coronatine-insensitive protein 1-like |
| SNP_10515_A_30393461 | NC_021161.1    | Ca_Kabuli_Chr02 | 30393461                | GG                                     | TT                 | TT               | URR                           | 101492486          | coronatine-insensitive protein 1-like |
| SNP_10516_A_30393483 | NC_021161.1    | Ca_Kabuli_Chr02 | 30393483                | CC                                     | TT                 | TT               | URR                           | 101492486          | coronatine-insensitive protein 1-like |
| SNP_10517_A_30393521 | NC_021161.1    | Ca_Kabuli_Chr02 | 30393521                | CC                                     | AA                 | AA               | URR                           | 101492486          | coronatine-insensitive protein 1-like |
| SNP_10518_A_30393749 | NC_021161.1    | Ca_Kabuli_Chr02 | 30393749                | CC                                     | AA                 | AA               | URR                           | 101492486          | coronatine-insensitive protein 1-like |
| SNP_10519_A_30393788 | NC_021161.1    | Ca_Kabuli_Chr02 | 30393788                | CC                                     | TT                 | TT               | URR                           | 101492486          | coronatine-insensitive protein 1-like |
| SNP_10521_A_30394661 | NC_021161.1    | Ca_Kabuli_Chr02 | 30394661                | AA                                     | GG                 | GG               | INTERGENIC                    |                    |                                       |
| SNP_10522_A_30395048 | NC_021161.1    | Ca_Kabuli_Chr02 | 30395048                | GG                                     | TT                 | TT               | INTERGENIC                    |                    |                                       |
| SNP_10524_A_30396938 | NC_021161.1    | Ca_Kabuli_Chr02 | 30396938                | TT                                     | CC                 | CC               | INTERGENIC                    |                    |                                       |
| SNP_10525_A_30400213 | NC_021161.1    | Ca_Kabuli_Chr02 | 30400213                | CC                                     | TT                 | TT               | INTERGENIC                    |                    |                                       |
| SNP_10526_A_30400702 | NC_021161.1    | Ca_Kabuli_Chr02 | 30400702                | GG                                     | AA                 | AA               | INTERGENIC                    |                    |                                       |
| SNP_10527_A_30400717 | NC_021161.1    | Ca_Kabuli_Chr02 | 30400717                | TT                                     | CC                 | CC               | INTERGENIC                    |                    |                                       |
| SNP_10528_A_30401726 | NC_021161.1    | Ca_Kabuli_Chr02 | 30401726                | AA                                     | CC                 | CC               | INTERGENIC                    |                    |                                       |
| SNP_10529_A_30402632 | NC_021161.1    | Ca_Kabuli_Chr02 | 30402632                | GG                                     | AA                 | AA               | INTERGENIC                    |                    |                                       |
| SNP_10530_A_30402875 | NC_021161.1    | Ca_Kabuli_Chr02 | 30402875                | CC                                     | TT                 | TT               | DRR                           | 101492819          | uncharacterized LOC101492819          |
| SNP_10531_A_30403606 | NC_021161.1    | Ca_Kabuli_Chr02 | 30403606                | CC                                     | AA                 | AA               | DRR                           | 101492819          | uncharacterized LOC101492819          |
| SNP_10532_A_30403620 | NC_021161.1    | Ca_Kabuli_Chr02 | 30403620                | AA                                     | TT                 | TT               | DRR                           | 101492819          | uncharacterized LOC101492819          |
| SNP_10533_A_30403642 | NC_021161.1    | Ca_Kabuli_Chr02 | 30403642                | AA                                     | TT                 | TT               | DRR                           | 101492819          | uncharacterized LOC101492819          |
| SNP_10534_A_30404767 | NC_021161.1    | Ca_Kabuli_Chr02 | 30404767                | GG                                     | AA                 | AA               | NON_SYNONYMOUS_CODING         | 101492819          | uncharacterized LOC101492819          |

| SNPs IDs             | Chromosome IDs | Chromosomes     | Physical positions (bp) | CDC Frontier (Reference genome) | (Pusa 1103 & HPNB) | (ILWC 46 & LPNB) | Sequence Components of genome | Gene accession IDs | Putative functions                                    |
|----------------------|----------------|-----------------|-------------------------|---------------------------------|--------------------|------------------|-------------------------------|--------------------|-------------------------------------------------------|
| SNP_10535_A_30404776 | NC_021161.1    | Ca_Kabuli_Chr02 | 30404776                | GG                              | AA                 | AA               | NON_SYNONYMOUS_CODING         | 101492819          | uncharacterized LOC101492819                          |
| SNP_10536_A_30406098 | NC_021161.1    | Ca_Kabuli_Chr02 | 30406098                | CC                              | TT                 | TT               | INTRON                        | 101492819          | uncharacterized LOC101492819                          |
| SNP_10537_A_30410624 | NC_021161.1    | Ca_Kabuli_Chr02 | 30410624                | GG                              | CC                 | CC               | URR                           | 101492819          | uncharacterized LOC101492819                          |
| SNP_10538_A_30410808 | NC_021161.1    | Ca_Kabuli_Chr02 | 30410808                | TT                              | CC                 | CC               | URR                           | 101492819          | uncharacterized LOC101492819                          |
| SNP_10539_A_30418777 | NC_021161.1    | Ca_Kabuli_Chr02 | 30418777                | CC                              | TT                 | TT               | URR                           | 101493148          | probable signal peptidase complex subunit 2           |
| SNP_10541_A_30423911 | NC_021161.1    | Ca_Kabuli_Chr02 | 30423911                | GG                              | AA                 | AA               | INTRON                        | 101493478          | peroxisomal nicotinamide adenine dinucleotide carrier |
| SNP_10542_A_30426293 | NC_021161.1    | Ca_Kabuli_Chr02 | 30426293                | AA                              | CC                 | CC               | URR                           | 101493478          | peroxisomal nicotinamide adenine dinucleotide carrier |
| SNP_10543_A_30432342 | NC_021161.1    | Ca_Kabuli_Chr02 | 30432342                | AA                              | GG                 | GG               | INTERGENIC                    |                    |                                                       |
| SNP_10544_A_30432767 | NC_021161.1    | Ca_Kabuli_Chr02 | 30432767                | AA                              | GG                 | GG               | INTERGENIC                    |                    |                                                       |
| SNP_10546_A_30435214 | NC_021161.1    | Ca_Kabuli_Chr02 | 30435214                | AA                              | CC                 | CC               | INTERGENIC                    |                    |                                                       |
| SNP_10547_A_30435217 | NC_021161.1    | Ca_Kabuli_Chr02 | 30435217                | CC                              | TT                 | TT               | INTERGENIC                    |                    |                                                       |
| SNP_10548_A_30435491 | NC_021161.1    | Ca_Kabuli_Chr02 | 30435491                | AA                              | TT                 | TT               | INTERGENIC                    |                    |                                                       |
| SNP_10549_A_30444945 | NC_021161.1    | Ca_Kabuli_Chr02 | 30444945                | CC                              | TT                 | TT               | INTERGENIC                    |                    |                                                       |
| SNP_10550_A_30444952 | NC_021161.1    | Ca_Kabuli_Chr02 | 30444952                | CC                              | TT                 | TT               | INTERGENIC                    |                    |                                                       |
| SNP_10551_A_30445537 | NC_021161.1    | Ca_Kabuli_Chr02 | 30445537                | GG                              | AA                 | AA               | INTERGENIC                    |                    |                                                       |
| SNP_10552_A_30445774 | NC_021161.1    | Ca_Kabuli_Chr02 | 30445774                | CC                              | TT                 | TT               | INTERGENIC                    |                    |                                                       |
| SNP_10553_A_30445799 | NC_021161.1    | Ca_Kabuli_Chr02 | 30445799                | CC                              | TT                 | TT               | INTERGENIC                    |                    |                                                       |
| SNP_10554_A_30445815 | NC_021161.1    | Ca_Kabuli_Chr02 | 30445815                | GG                              | AA                 | AA               | INTERGENIC                    |                    |                                                       |
| SNP_10555_A_30447560 | NC_021161.1    | Ca_Kabuli_Chr02 | 30447560                | GG                              | TT                 | TT               | INTERGENIC                    |                    |                                                       |
| SNP_10558_A_30447827 | NC_021161.1    | Ca_Kabuli_Chr02 | 30447827                | TT                              | GG                 | GG               | INTERGENIC                    |                    |                                                       |
| SNP_10559_A_30447828 | NC_021161.1    | Ca_Kabuli_Chr02 | 30447828                | TT                              | AA                 | AA               | INTERGENIC                    |                    |                                                       |
| SNP_10560_A_30449144 | NC_021161.1    | Ca_Kabuli_Chr02 | 30449144                | CC                              | TT                 | TT               | INTERGENIC                    |                    |                                                       |



| SNPs IDs             | Chromosome IDs | Chromosomes     | Physical positions (bp) | CDC Frontier (Reference genome) | (Pusa 1103 & HPNB) | (ILWC 46 & LPNB) | Sequence Components of genome | Gene accession IDs | Putative functions                                       |
|----------------------|----------------|-----------------|-------------------------|---------------------------------|--------------------|------------------|-------------------------------|--------------------|----------------------------------------------------------|
| SNP_10562_A_30449269 | NC_021161.1    | Ca_Kabuli_Chr02 | 30449269                | GG                              | AA                 | AA               | INTERGENIC                    |                    |                                                          |
| SNP_10563_A_30451641 | NC_021161.1    | Ca_Kabuli_Chr02 | 30451641                | TT                              | GG                 | GG               | INTERGENIC                    |                    |                                                          |
| SNP_10564_A_30456697 | NC_021161.1    | Ca_Kabuli_Chr02 | 30456697                | AA                              | TT                 | TT               | DRR                           | 101494967          | WUSCHEL-related homeobox 5-like                          |
| SNP_10566_A_30456740 | NC_021161.1    | Ca_Kabuli_Chr02 | 30456740                | GG                              | AA                 | AA               | DRR                           | 101494967          | WUSCHEL-related homeobox 5-like                          |
| SNP_10567_A_30457263 | NC_021161.1    | Ca_Kabuli_Chr02 | 30457263                | AA                              | GG                 | GG               | DRR                           | 101494967          | WUSCHEL-related homeobox 5-like                          |
| SNP_10569_A_30457999 | NC_021161.1    | Ca_Kabuli_Chr02 | 30457999                | CC                              | TT                 | TT               | URR                           | 101494647          | 26S proteasome non-ATPase regulatory subunit 7 homolog A |
| SNP_10570_A_30458063 | NC_021161.1    | Ca_Kabuli_Chr02 | 30458063                | AA                              | CC                 | CC               | URR                           | 101494647          | 26S proteasome non-ATPase regulatory subunit 7 homolog A |
| SNP_10571_A_30458064 | NC_021161.1    | Ca_Kabuli_Chr02 | 30458064                | GG                              | TT                 | TT               | URR                           | 101494647          | 26S proteasome non-ATPase regulatory subunit 7 homolog A |
| SNP_10572_A_30458234 | NC_021161.1    | Ca_Kabuli_Chr02 | 30458234                | TT                              | CC                 | CC               | URR                           | 101494647          | 26S proteasome non-ATPase regulatory subunit 7 homolog A |
| SNP_10573_A_30458241 | NC_021161.1    | Ca_Kabuli_Chr02 | 30458241                | GG                              | AA                 | AA               | URR                           | 101494647          | 26S proteasome non-ATPase regulatory subunit 7 homolog A |
| SNP_10574_A_30459113 | NC_021161.1    | Ca_Kabuli_Chr02 | 30459113                | CC                              | GG                 | GG               | INTERGENIC                    |                    |                                                          |
| SNP_10576_A_30461799 | NC_021161.1    | Ca_Kabuli_Chr02 | 30461799                | CC                              | TT                 | TT               | INTERGENIC                    |                    |                                                          |
| SNP_10577_A_30461814 | NC_021161.1    | Ca_Kabuli_Chr02 | 30461814                | TT                              | AA                 | AA               | INTERGENIC                    |                    |                                                          |
| SNP_10578_A_30461976 | NC_021161.1    | Ca_Kabuli_Chr02 | 30461976                | AA                              | TT                 | TT               | INTERGENIC                    |                    |                                                          |
| SNP_10579_A_30461993 | NC_021161.1    | Ca_Kabuli_Chr02 | 30461993                | AA                              | CC                 | CC               | INTERGENIC                    |                    |                                                          |
| SNP_10580_A_30462219 | NC_021161.1    | Ca_Kabuli_Chr02 | 30462219                | TT                              | AA                 | AA               | INTERGENIC                    |                    |                                                          |
| SNP_10581_A_30462233 | NC_021161.1    | Ca_Kabuli_Chr02 | 30462233                | CC                              | TT                 | TT               | INTERGENIC                    |                    |                                                          |
| SNP_10582_A_30462273 | NC_021161.1    | Ca_Kabuli_Chr02 | 30462273                | TT                              | CC                 | CC               | INTERGENIC                    |                    |                                                          |
| SNP_10583_A_30462945 | NC_021161.1    | Ca_Kabuli_Chr02 | 30462945                | AA                              | GG                 | GG               | INTERGENIC                    |                    |                                                          |
| SNP_10584_A_30463494 | NC_021161.1    | Ca_Kabuli_Chr02 | 30463494                | GG                              | AA                 | AA               | INTERGENIC                    |                    |                                                          |
| SNP_10585_A_30463504 | NC_021161.1    | Ca_Kabuli_Chr02 | 30463504                | CC                              | GG                 | GG               | INTERGENIC                    |                    |                                                          |
| SNP_10586_A_30463520 | NC_021161.1    | Ca_Kabuli_Chr02 | 30463520                | AA                              | GG                 | GG               | INTERGENIC                    |                    |                                                          |

| SNPs IDs             | Chromosome IDs | Chromosomes     | Physical positions (bp) | CDC Frontier genome (Reference genome) | (Pusa 1103 & HPNB) | (ILWC 46 & LPNB) | Sequence Components of genome | Gene accession IDs | Putative functions                                        |
|----------------------|----------------|-----------------|-------------------------|----------------------------------------|--------------------|------------------|-------------------------------|--------------------|-----------------------------------------------------------|
| SNP_10587_A_30464384 | NC_021161.1    | Ca_Kabuli_Chr02 | 30464384                | AA                                     | GG                 | GG               | INTERGENIC                    |                    |                                                           |
| SNP_10588_A_30464905 | NC_021161.1    | Ca_Kabuli_Chr02 | 30464905                | CC                                     | TT                 | TT               | INTERGENIC                    |                    |                                                           |
| SNP_10589_A_30465205 | NC_021161.1    | Ca_Kabuli_Chr02 | 30465205                | TT                                     | AA                 | AA               | INTERGENIC                    |                    |                                                           |
| SNP_10590_A_30468316 | NC_021161.1    | Ca_Kabuli_Chr02 | 30468316                | AA                                     | TT                 | TT               | SYNONYMOUS_CODING             | 101495293          | eukaryotic translation initiation factor 3 subunit F-like |
| SNP_10591_A_30474405 | NC_021161.1    | Ca_Kabuli_Chr02 | 30474405                | CC                                     | TT                 | TT               | INTERGENIC                    |                    |                                                           |
| SNP_10592_A_30474436 | NC_021161.1    | Ca_Kabuli_Chr02 | 30474436                | GG                                     | TT                 | TT               | INTERGENIC                    |                    |                                                           |
| SNP_10593_A_30474454 | NC_021161.1    | Ca_Kabuli_Chr02 | 30474454                | CC                                     | TT                 | TT               | INTERGENIC                    |                    |                                                           |
| SNP_10594_A_30474459 | NC_021161.1    | Ca_Kabuli_Chr02 | 30474459                | CC                                     | AA                 | AA               | INTERGENIC                    |                    |                                                           |
| SNP_10595_A_30476111 | NC_021161.1    | Ca_Kabuli_Chr02 | 30476111                | TT                                     | CC                 | CC               | INTERGENIC                    |                    |                                                           |
| SNP_10596_A_30476117 | NC_021161.1    | Ca_Kabuli_Chr02 | 30476117                | TT                                     | GG                 | GG               | INTERGENIC                    |                    |                                                           |
| SNP_10597_A_30476324 | NC_021161.1    | Ca_Kabuli_Chr02 | 30476324                | GG                                     | AA                 | AA               | INTERGENIC                    |                    |                                                           |
| SNP_10598_A_30476375 | NC_021161.1    | Ca_Kabuli_Chr02 | 30476375                | CC                                     | AA                 | AA               | INTERGENIC                    |                    |                                                           |
| SNP_10599_A_30478472 | NC_021161.1    | Ca_Kabuli_Chr02 | 30478472                | AA                                     | GG                 | GG               | DRR                           | 101495619          | probable aquaporin PIP-type 7a                            |
| SNP_10600_A_30478610 | NC_021161.1    | Ca_Kabuli_Chr02 | 30478610                | GG                                     | AA                 | AA               | DRR                           | 101495619          | probable aquaporin PIP-type 7a                            |
| SNP_10603_A_30484808 | NC_021161.1    | Ca_Kabuli_Chr02 | 30484808                | AA                                     | CC                 | CC               | INTERGENIC                    |                    |                                                           |
| SNP_10605_A_30489863 | NC_021161.1    | Ca_Kabuli_Chr02 | 30489863                | AA                                     | GG                 | GG               | INTERGENIC                    |                    |                                                           |
| SNP_10606_A_30489869 | NC_021161.1    | Ca_Kabuli_Chr02 | 30489869                | CC                                     | TT                 | TT               | INTERGENIC                    |                    |                                                           |
| SNP_10607_A_30490049 | NC_021161.1    | Ca_Kabuli_Chr02 | 30490049                | AA                                     | GG                 | GG               | INTERGENIC                    |                    |                                                           |
| SNP_10608_A_30490297 | NC_021161.1    | Ca_Kabuli_Chr02 | 30490297                | TT                                     | AA                 | AA               | INTERGENIC                    |                    |                                                           |
| SNP_10610_A_30494139 | NC_021161.1    | Ca_Kabuli_Chr02 | 30494139                | CC                                     | TT                 | TT               | INTERGENIC                    |                    |                                                           |
| SNP_10611_A_30500037 | NC_021161.1    | Ca_Kabuli_Chr02 | 30500037                | TT                                     | CC                 | CC               | INTERGENIC                    |                    |                                                           |
| SNP_10612_A_30500318 | NC_021161.1    | Ca_Kabuli_Chr02 | 30500318                | TT                                     | AA                 | AA               | INTERGENIC                    |                    |                                                           |

| SNPs IDs             | Chromosome IDs | Chromosomes     | Physical positions (bp) | CDC Frontier genome (Reference genome) | (Pusa 1103 & HPNB) | (ILWC 46 & LPNB) | Sequence Components of genome | Gene accession IDs | Putative functions                       |
|----------------------|----------------|-----------------|-------------------------|----------------------------------------|--------------------|------------------|-------------------------------|--------------------|------------------------------------------|
| SNP_10613_A_30500387 | NC_021161.1    | Ca_Kabuli_Chr02 | 30500387                | GG                                     | AA                 | AA               | INTERGENIC                    |                    |                                          |
| SNP_10614_A_30500423 | NC_021161.1    | Ca_Kabuli_Chr02 | 30500423                | TT                                     | CC                 | CC               | INTERGENIC                    |                    |                                          |
| SNP_10615_A_30500540 | NC_021161.1    | Ca_Kabuli_Chr02 | 30500540                | TT                                     | CC                 | CC               | INTERGENIC                    |                    |                                          |
| SNP_10616_A_30504126 | NC_021161.1    | Ca_Kabuli_Chr02 | 30504126                | AA                                     | GG                 | GG               | DRR                           | 101496162          | glycosyltransferase family 64 protein C4 |
| SNP_10617_A_30504142 | NC_021161.1    | Ca_Kabuli_Chr02 | 30504142                | AA                                     | TT                 | TT               | DRR                           | 101496162          | glycosyltransferase family 64 protein C4 |
| SNP_10618_A_30504364 | NC_021161.1    | Ca_Kabuli_Chr02 | 30504364                | TT                                     | CC                 | CC               | DRR                           | 101496162          | glycosyltransferase family 64 protein C4 |
| SNP_10619_A_30505703 | NC_021161.1    | Ca_Kabuli_Chr02 | 30505703                | AA                                     | TT                 | TT               | INTERGENIC                    |                    |                                          |
| SNP_10620_A_30505708 | NC_021161.1    | Ca_Kabuli_Chr02 | 30505708                | AA                                     | GG                 | GG               | INTERGENIC                    |                    |                                          |
| SNP_10621_A_30506532 | NC_021161.1    | Ca_Kabuli_Chr02 | 30506532                | TT                                     | CC                 | CC               | INTERGENIC                    |                    |                                          |
| SNP_10622_A_30510916 | NC_021161.1    | Ca_Kabuli_Chr02 | 30510916                | AA                                     | GG                 | GG               | DRR                           | 101496492          | uncharacterized LOC101496492             |
| SNP_10623_A_30510948 | NC_021161.1    | Ca_Kabuli_Chr02 | 30510948                | CC                                     | TT                 | TT               | URR                           | 101496162          | glycosyltransferase family 64 protein C4 |
| SNP_10624_A_30510985 | NC_021161.1    | Ca_Kabuli_Chr02 | 30510985                | AA                                     | GG                 | GG               | URR                           | 101496162          | glycosyltransferase family 64 protein C4 |
| SNP_10625_A_30511036 | NC_021161.1    | Ca_Kabuli_Chr02 | 30511036                | GG                                     | AA                 | AA               | URR                           | 101496162          | glycosyltransferase family 64 protein C4 |
| SNP_10626_A_30514256 | NC_021161.1    | Ca_Kabuli_Chr02 | 30514256                | TT                                     | GG                 | GG               | URR                           | 101496492          | uncharacterized LOC101496492             |
| SNP_10628_A_30517281 | NC_021161.1    | Ca_Kabuli_Chr02 | 30517281                | AA                                     | GG                 | GG               | INTERGENIC                    |                    |                                          |
| SNP_10629_A_30517317 | NC_021161.1    | Ca_Kabuli_Chr02 | 30517317                | GG                                     | AA                 | AA               | INTERGENIC                    |                    |                                          |
| SNP_10630_A_30517863 | NC_021161.1    | Ca_Kabuli_Chr02 | 30517863                | TT                                     | CC                 | CC               | DRR                           | 101496827          | nematode resistance protein-like HSPRO2  |
| SNP_10631_A_30526059 | NC_021161.1    | Ca_Kabuli_Chr02 | 30526059                | AA                                     | GG                 | GG               | INTERGENIC                    |                    |                                          |
| SNP_10632_A_30526273 | NC_021161.1    | Ca_Kabuli_Chr02 | 30526273                | GG                                     | TT                 | TT               | INTERGENIC                    |                    |                                          |
| SNP_10633_A_30526325 | NC_021161.1    | Ca_Kabuli_Chr02 | 30526325                | AA                                     | CC                 | CC               | INTERGENIC                    |                    |                                          |
| SNP_10634_A_30526578 | NC_021161.1    | Ca_Kabuli_Chr02 | 30526578                | TT                                     | GG                 | GG               | INTERGENIC                    |                    |                                          |
| SNP_10636_A_30538869 | NC_021161.1    | Ca_Kabuli_Chr02 | 30538869                | AA                                     | TT                 | TT               | INTRON                        | 101497480          | 60S acidic ribosomal protein P0-like     |

| SNPs IDs             | Chromosome IDs | Chromosomes     | Physical positions (bp) | CDC Frontier (Reference genome) | (Pusa 1103 & HPNB) | (ILWC 46 & LPNB) | Sequence Components of genome | Gene accession IDs | Putative functions                                |
|----------------------|----------------|-----------------|-------------------------|---------------------------------|--------------------|------------------|-------------------------------|--------------------|---------------------------------------------------|
| SNP_10637_A_30539227 | NC_021161.1    | Ca_Kabuli_Chr02 | 30539227                | AA                              | CC                 | CC               | INTRON                        | 101497480          | 60S acidic ribosomal protein P0-like              |
| SNP_10638_A_30549477 | NC_021161.1    | Ca_Kabuli_Chr02 | 30549477                | AA                              | CC                 | CC               | INTERGENIC                    |                    |                                                   |
| SNP_10640_A_30553736 | NC_021161.1    | Ca_Kabuli_Chr02 | 30553736                | GG                              | AA                 | AA               | INTERGENIC                    |                    |                                                   |
| SNP_10642_A_30556045 | NC_021161.1    | Ca_Kabuli_Chr02 | 30556045                | AA                              | CC                 | CC               | INTERGENIC                    |                    |                                                   |
| SNP_10643_A_30556355 | NC_021161.1    | Ca_Kabuli_Chr02 | 30556355                | AA                              | GG                 | GG               | INTERGENIC                    |                    |                                                   |
| SNP_10645_A_30560068 | NC_021161.1    | Ca_Kabuli_Chr02 | 30560068                | AA                              | GG                 | GG               | INTERGENIC                    |                    |                                                   |
| SNP_10646_A_30560083 | NC_021161.1    | Ca_Kabuli_Chr02 | 30560083                | AA                              | GG                 | GG               | INTERGENIC                    |                    |                                                   |
| SNP_10647_A_30566013 | NC_021161.1    | Ca_Kabuli_Chr02 | 30566013                | TT                              | GG                 | GG               | DRR                           | 101497816          | auxin transporter-like protein 1                  |
| SNP_10648_A_30566742 | NC_021161.1    | Ca_Kabuli_Chr02 | 30566742                | CC                              | TT                 | TT               | URR                           | 101497816          | auxin transporter-like protein 1                  |
| SNP_10649_A_30566753 | NC_021161.1    | Ca_Kabuli_Chr02 | 30566753                | CC                              | AA                 | AA               | URR                           | 101497816          | auxin transporter-like protein 1                  |
| SNP_10650_A_30566988 | NC_021161.1    | Ca_Kabuli_Chr02 | 30566988                | TT                              | GG                 | GG               | START_GAINED                  | 101497816          | auxin transporter-like protein 1                  |
| SNP_10652_A_30571883 | NC_021161.1    | Ca_Kabuli_Chr02 | 30571883                | GG                              | AA                 | AA               | INTRON                        | 101497816          | auxin transporter-like protein 1                  |
| SNP_10653_A_30572292 | NC_021161.1    | Ca_Kabuli_Chr02 | 30572292                | CC                              | TT                 | TT               | INTERGENIC                    |                    |                                                   |
| SNP_10655_A_30574277 | NC_021161.1    | Ca_Kabuli_Chr02 | 30574277                | AA                              | CC                 | CC               | URR                           | 101497816          | auxin transporter-like protein 1                  |
| SNP_10657_A_30574820 | NC_021161.1    | Ca_Kabuli_Chr02 | 30574820                | CC                              | TT                 | TT               | DRR                           | 101498341          | uncharacterized LOC101498341                      |
| SNP_10658_A_30574844 | NC_021161.1    | Ca_Kabuli_Chr02 | 30574844                | TT                              | AA                 | AA               | DRR                           | 101498341          | uncharacterized LOC101498341                      |
| SNP_10659_A_30574991 | NC_021161.1    | Ca_Kabuli_Chr02 | 30574991                | AA                              | GG                 | GG               | DRR                           | 101498341          | uncharacterized LOC101498341                      |
| SNP_10661_A_30579172 | NC_021161.1    | Ca_Kabuli_Chr02 | 30579172                | GG                              | AA                 | AA               | URR                           | 101498341          | uncharacterized LOC101498341                      |
| SNP_10662_A_30579222 | NC_021161.1    | Ca_Kabuli_Chr02 | 30579222                | AA                              | GG                 | GG               | URR                           | 101498341          | uncharacterized LOC101498341                      |
| SNP_10663_A_30582181 | NC_021161.1    | Ca_Kabuli_Chr02 | 30582181                | CC                              | AA                 | AA               | INTERGENIC                    |                    |                                                   |
| SNP_10664_A_30582183 | NC_021161.1    | Ca_Kabuli_Chr02 | 30582183                | TT                              | CC                 | CC               | INTERGENIC                    |                    |                                                   |
| SNP_10665_A_30584070 | NC_021161.1    | Ca_Kabuli_Chr02 | 30584070                | CC                              | TT                 | TT               | INTRON                        | 101500172          | probable zinc metalloprotease EGY2, chloroplastic |

| SNPs IDs             | Chromosome IDs | Chromosomes     | Physical positions (bp) | CDC Frontier genome (Reference genome) | (Pusa 1103 & HPNB) | (ILWC 46 & LPNB) | Sequence Components of genome | Gene accession IDs | Putative functions                                |
|----------------------|----------------|-----------------|-------------------------|----------------------------------------|--------------------|------------------|-------------------------------|--------------------|---------------------------------------------------|
| SNP_10666_A_30584108 | NC_021161.1    | Ca_Kabuli_Chr02 | 30584108                | CC                                     | TT                 | TT               | INTRON                        | 101500172          | probable zinc metalloprotease EGY2, chloroplastic |
| SNP_10667_A_30584109 | NC_021161.1    | Ca_Kabuli_Chr02 | 30584109                | GG                                     | AA                 | AA               | INTRON                        | 101500172          | probable zinc metalloprotease EGY2, chloroplastic |
| SNP_10668_A_30584126 | NC_021161.1    | Ca_Kabuli_Chr02 | 30584126                | TT                                     | CC                 | CC               | INTRON                        | 101500172          | probable zinc metalloprotease EGY2, chloroplastic |
| SNP_10669_A_30584164 | NC_021161.1    | Ca_Kabuli_Chr02 | 30584164                | TT                                     | AA                 | AA               | INTRON                        | 101500172          | probable zinc metalloprotease EGY2, chloroplastic |
| SNP_10670_A_30587647 | NC_021161.1    | Ca_Kabuli_Chr02 | 30587647                | GG                                     | AA                 | AA               | INTERGENIC                    |                    |                                                   |
| SNP_10671_A_30592864 | NC_021161.1    | Ca_Kabuli_Chr02 | 30592864                | CC                                     | TT                 | TT               | INTERGENIC                    |                    |                                                   |
| SNP_10672_A_30616820 | NC_021161.1    | Ca_Kabuli_Chr02 | 30616820                | GG                                     | AA                 | AA               | INTERGENIC                    |                    |                                                   |
| SNP_10673_A_30618625 | NC_021161.1    | Ca_Kabuli_Chr02 | 30618625                | AA                                     | TT                 | TT               | URR                           | 101500812          | mucin-17-like                                     |
| SNP_10674_A_30621306 | NC_021161.1    | Ca_Kabuli_Chr02 | 30621306                | AA                                     | GG                 | GG               | INTRON                        | 101501133          | protein yippee-like                               |
| SNP_10675_A_30621313 | NC_021161.1    | Ca_Kabuli_Chr02 | 30621313                | TT                                     | AA                 | AA               | INTRON                        | 101501133          | protein yippee-like                               |
| SNP_10676_A_30621315 | NC_021161.1    | Ca_Kabuli_Chr02 | 30621315                | GG                                     | TT                 | TT               | INTRON                        | 101501133          | protein yippee-like                               |
| SNP_10677_A_30621663 | NC_021161.1    | Ca_Kabuli_Chr02 | 30621663                | GG                                     | AA                 | AA               | INTRON                        | 101501133          | protein yippee-like                               |
| SNP_10679_A_30622774 | NC_021161.1    | Ca_Kabuli_Chr02 | 30622774                | GG                                     | CC                 | CC               | INTRON                        | 101501133          | protein yippee-like                               |
| SNP_10680_A_30623390 | NC_021161.1    | Ca_Kabuli_Chr02 | 30623390                | AA                                     | TT                 | TT               | URR                           | 101501133          | protein yippee-like                               |
| SNP_10683_A_30624421 | NC_021161.1    | Ca_Kabuli_Chr02 | 30624421                | TT                                     | GG                 | GG               | URR                           | 101501133          | protein yippee-like                               |
| SNP_10685_A_30630120 | NC_021161.1    | Ca_Kabuli_Chr02 | 30630120                | CC                                     | TT                 | TT               | INTERGENIC                    |                    |                                                   |
| SNP_10686_A_30630121 | NC_021161.1    | Ca_Kabuli_Chr02 | 30630121                | TT                                     | CC                 | CC               | INTERGENIC                    |                    |                                                   |
| SNP_10687_A_30630358 | NC_021161.1    | Ca_Kabuli_Chr02 | 30630358                | AA                                     | GG                 | GG               | INTERGENIC                    |                    |                                                   |
| SNP_10688_A_30631239 | NC_021161.1    | Ca_Kabuli_Chr02 | 30631239                | TT                                     | CC                 | CC               | INTERGENIC                    |                    |                                                   |
| SNP_10689_A_30633181 | NC_021161.1    | Ca_Kabuli_Chr02 | 30633181                | GG                                     | AA                 | AA               | INTERGENIC                    |                    |                                                   |
| SNP_10690_A_30637970 | NC_021161.1    | Ca_Kabuli_Chr02 | 30637970                | AA                                     | TT                 | TT               | INTERGENIC                    |                    |                                                   |
| SNP_10691_A_30639917 | NC_021161.1    | Ca_Kabuli_Chr02 | 30639917                | CC                                     | TT                 | TT               | INTERGENIC                    |                    |                                                   |

| SNPs IDs             | Chromosome IDs | Chromosomes     | Physical positions (bp) | CDC Frontier genome (Reference genome) | (Pusa 1103 & HPNB) | (ILWC 46 & LPNB) | Sequence genome   | Components of | Gene accession IDs   | Putative functions |
|----------------------|----------------|-----------------|-------------------------|----------------------------------------|--------------------|------------------|-------------------|---------------|----------------------|--------------------|
| SNP_10692_A_30639918 | NC_021161.1    | Ca_Kabuli_Chr02 | 30639918                | TT                                     | CC                 | CC               | INTERGENIC        |               |                      |                    |
| SNP_10693_A_30641506 | NC_021161.1    | Ca_Kabuli_Chr02 | 30641506                | TT                                     | CC                 | CC               | INTERGENIC        |               |                      |                    |
| SNP_10694_A_30641510 | NC_021161.1    | Ca_Kabuli_Chr02 | 30641510                | CC                                     | TT                 | TT               | INTERGENIC        |               |                      |                    |
| SNP_10695_A_30642469 | NC_021161.1    | Ca_Kabuli_Chr02 | 30642469                | GG                                     | CC                 | CC               | INTERGENIC        |               |                      |                    |
| SNP_10697_A_30643029 | NC_021161.1    | Ca_Kabuli_Chr02 | 30643029                | TT                                     | GG                 | GG               | INTERGENIC        |               |                      |                    |
| SNP_10698_A_30645577 | NC_021161.1    | Ca_Kabuli_Chr02 | 30645577                | CC                                     | AA                 | AA               | INTERGENIC        |               |                      |                    |
| SNP_10701_A_30648566 | NC_021161.1    | Ca_Kabuli_Chr02 | 30648566                | AA                                     | CC                 | CC               | INTERGENIC        |               |                      |                    |
| SNP_10702_A_30649226 | NC_021161.1    | Ca_Kabuli_Chr02 | 30649226                | CC                                     | TT                 | TT               | INTERGENIC        |               |                      |                    |
| SNP_10703_A_30649297 | NC_021161.1    | Ca_Kabuli_Chr02 | 30649297                | AA                                     | GG                 | GG               | INTERGENIC        |               |                      |                    |
| SNP_10704_A_30649304 | NC_021161.1    | Ca_Kabuli_Chr02 | 30649304                | CC                                     | TT                 | TT               | INTERGENIC        |               |                      |                    |
| SNP_10705_A_30649305 | NC_021161.1    | Ca_Kabuli_Chr02 | 30649305                | AA                                     | CC                 | CC               | INTERGENIC        |               |                      |                    |
| SNP_10706_A_30649361 | NC_021161.1    | Ca_Kabuli_Chr02 | 30649361                | AA                                     | GG                 | GG               | INTERGENIC        |               |                      |                    |
| SNP_10707_A_30663525 | NC_021161.1    | Ca_Kabuli_Chr02 | 30663525                | TT                                     | CC                 | CC               | DRR               | 101502086     | cytochrome P450 90A1 |                    |
| SNP_10708_A_30663527 | NC_021161.1    | Ca_Kabuli_Chr02 | 30663527                | GG                                     | AA                 | AA               | DRR               | 101502086     | cytochrome P450 90A1 |                    |
| SNP_10709_A_30664977 | NC_021161.1    | Ca_Kabuli_Chr02 | 30664977                | CC                                     | TT                 | TT               | INTRON            | 101502086     | cytochrome P450 90A1 |                    |
| SNP_10710_A_30665436 | NC_021161.1    | Ca_Kabuli_Chr02 | 30665436                | CC                                     | GG                 | GG               | INTRON            | 101502086     | cytochrome P450 90A1 |                    |
| SNP_10713_A_30666811 | NC_021161.1    | Ca_Kabuli_Chr02 | 30666811                | CC                                     | GG                 | GG               | INTRON            | 101502086     | cytochrome P450 90A1 |                    |
| SNP_10714_A_30670035 | NC_021161.1    | Ca_Kabuli_Chr02 | 30670035                | AA                                     | TT                 | TT               | SYNONYMOUS_CODING | 101502086     | cytochrome P450 90A1 |                    |
| SNP_10715_A_30671930 | NC_021161.1    | Ca_Kabuli_Chr02 | 30671930                | AA                                     | GG                 | GG               | URR               | 101502086     | cytochrome P450 90A1 |                    |
| SNP_10716_A_30671931 | NC_021161.1    | Ca_Kabuli_Chr02 | 30671931                | AA                                     | CC                 | CC               | URR               | 101502086     | cytochrome P450 90A1 |                    |
| SNP_10717_A_30671956 | NC_021161.1    | Ca_Kabuli_Chr02 | 30671956                | CC                                     | TT                 | TT               | URR               | 101502086     | cytochrome P450 90A1 |                    |
| SNP_10718_A_30671976 | NC_021161.1    | Ca_Kabuli_Chr02 | 30671976                | GG                                     | AA                 | AA               | URR               | 101502086     | cytochrome P450 90A1 |                    |

| SNPs IDs             | Chromosome IDs | Chromosomes     | Physical positions (bp) | CDC Frontier genome (Reference genome) | (Pusa 1103 & HPNB) | (ILWC 46 & LPNB) | Sequence Components of genome | Gene accession IDs | Putative functions                    |
|----------------------|----------------|-----------------|-------------------------|----------------------------------------|--------------------|------------------|-------------------------------|--------------------|---------------------------------------|
| SNP_10719_A_30671988 | NC_021161.1    | Ca_Kabuli_Chr02 | 30671988                | CC                                     | TT                 | TT               | URR                           | 101502086          | cytochrome P450 90A1                  |
| SNP_10721_A_30672070 | NC_021161.1    | Ca_Kabuli_Chr02 | 30672070                | CC                                     | TT                 | TT               | URR                           | 101502086          | cytochrome P450 90A1                  |
| SNP_10722_A_30672082 | NC_021161.1    | Ca_Kabuli_Chr02 | 30672082                | AA                                     | GG                 | GG               | URR                           | 101502086          | cytochrome P450 90A1                  |
| SNP_10723_A_30672123 | NC_021161.1    | Ca_Kabuli_Chr02 | 30672123                | GG                                     | AA                 | AA               | URR                           | 101502086          | cytochrome P450 90A1                  |
| SNP_10727_A_30676488 | NC_021161.1    | Ca_Kabuli_Chr02 | 30676488                | CC                                     | TT                 | TT               | INTERGENIC                    |                    |                                       |
| SNP_10728_A_30676511 | NC_021161.1    | Ca_Kabuli_Chr02 | 30676511                | CC                                     | TT                 | TT               | INTERGENIC                    |                    |                                       |
| SNP_10729_A_30676520 | NC_021161.1    | Ca_Kabuli_Chr02 | 30676520                | TT                                     | CC                 | CC               | INTERGENIC                    |                    |                                       |
| SNP_10731_A_30676791 | NC_021161.1    | Ca_Kabuli_Chr02 | 30676791                | GG                                     | AA                 | AA               | INTERGENIC                    |                    |                                       |
| SNP_10732_A_30676793 | NC_021161.1    | Ca_Kabuli_Chr02 | 30676793                | TT                                     | GG                 | GG               | INTERGENIC                    |                    |                                       |
| SNP_10733_A_30676796 | NC_021161.1    | Ca_Kabuli_Chr02 | 30676796                | CC                                     | TT                 | TT               | INTERGENIC                    |                    |                                       |
| SNP_10734_A_30676841 | NC_021161.1    | Ca_Kabuli_Chr02 | 30676841                | TT                                     | CC                 | CC               | INTERGENIC                    |                    |                                       |
| SNP_10735_A_30678015 | NC_021161.1    | Ca_Kabuli_Chr02 | 30678015                | CC                                     | TT                 | TT               | INTERGENIC                    |                    |                                       |
| SNP_10736_A_30678035 | NC_021161.1    | Ca_Kabuli_Chr02 | 30678035                | AA                                     | GG                 | GG               | INTERGENIC                    |                    |                                       |
| SNP_10737_A_30678328 | NC_021161.1    | Ca_Kabuli_Chr02 | 30678328                | TT                                     | CC                 | CC               | INTERGENIC                    |                    |                                       |
| SNP_10738_A_30678329 | NC_021161.1    | Ca_Kabuli_Chr02 | 30678329                | AA                                     | GG                 | GG               | INTERGENIC                    |                    |                                       |
| SNP_10739_A_30679151 | NC_021161.1    | Ca_Kabuli_Chr02 | 30679151                | TT                                     | AA                 | AA               | INTERGENIC                    |                    |                                       |
| SNP_10740_A_30679654 | NC_021161.1    | Ca_Kabuli_Chr02 | 30679654                | AA                                     | CC                 | CC               | INTERGENIC                    |                    |                                       |
| SNP_10741_A_30679689 | NC_021161.1    | Ca_Kabuli_Chr02 | 30679689                | TT                                     | CC                 | CC               | INTERGENIC                    |                    |                                       |
| SNP_10742_A_30685427 | NC_021161.1    | Ca_Kabuli_Chr02 | 30685427                | AA                                     | GG                 | GG               | INTRON                        | 101502615          | cytosolic purine 5'-nucleotidase-like |
| SNP_10743_A_30689564 | NC_021161.1    | Ca_Kabuli_Chr02 | 30689564                | CC                                     | TT                 | TT               | URR                           | 101502615          | cytosolic purine 5'-nucleotidase-like |
| SNP_10744_A_30690067 | NC_021161.1    | Ca_Kabuli_Chr02 | 30690067                | CC                                     | TT                 | TT               | URR                           | 101502615          | cytosolic purine 5'-nucleotidase-like |
| SNP_10746_A_30690207 | NC_021161.1    | Ca_Kabuli_Chr02 | 30690207                | TT                                     | AA                 | AA               | URR                           | 101502615          | cytosolic purine 5'-nucleotidase-like |

| SNPs IDs             | Chromosome IDs | Chromosomes     | Physical positions (bp) | CDC Frontier (Reference genome) | (Pusa 1103 & HPNB) | (ILWC 46 & LPNB) | Sequence Components of genome | Gene accession IDs | Putative functions                      |
|----------------------|----------------|-----------------|-------------------------|---------------------------------|--------------------|------------------|-------------------------------|--------------------|-----------------------------------------|
| SNP_10749_A_30690609 | NC_021161.1    | Ca_Kabuli_Chr02 | 30690609                | CC                              | AA                 | AA               | URR                           | 101502615          | cytosolic purine 5'-nucleotidase-like   |
| SNP_10750_A_30690684 | NC_021161.1    | Ca_Kabuli_Chr02 | 30690684                | GG                              | AA                 | AA               | URR                           | 101502615          | cytosolic purine 5'-nucleotidase-like   |
| SNP_10751_A_30690826 | NC_021161.1    | Ca_Kabuli_Chr02 | 30690826                | AA                              | TT                 | TT               | URR                           | 101502615          | cytosolic purine 5'-nucleotidase-like   |
| SNP_10752_A_30690852 | NC_021161.1    | Ca_Kabuli_Chr02 | 30690852                | GG                              | TT                 | TT               | URR                           | 101502615          | cytosolic purine 5'-nucleotidase-like   |
| SNP_10753_A_30692076 | NC_021161.1    | Ca_Kabuli_Chr02 | 30692076                | AA                              | CC                 | CC               | INTERGENIC                    |                    |                                         |
| SNP_10754_A_30695598 | NC_021161.1    | Ca_Kabuli_Chr02 | 30695598                | TT                              | GG                 | GG               | DRR                           | 101503142          | FACT complex subunit SSRP1-like         |
| SNP_10756_A_30695656 | NC_021161.1    | Ca_Kabuli_Chr02 | 30695656                | GG                              | AA                 | AA               | DRR                           | 101503142          | FACT complex subunit SSRP1-like         |
| SNP_10758_A_30701514 | NC_021161.1    | Ca_Kabuli_Chr02 | 30701514                | AA                              | GG                 | GG               | INTRON                        | 101503142          | FACT complex subunit SSRP1-like         |
| SNP_10762_A_30703675 | NC_021161.1    | Ca_Kabuli_Chr02 | 30703675                | CC                              | GG                 | GG               | URR                           | 101503142          | FACT complex subunit SSRP1-like         |
| SNP_10763_A_30703705 | NC_021161.1    | Ca_Kabuli_Chr02 | 30703705                | GG                              | TT                 | TT               | URR                           | 101503142          | FACT complex subunit SSRP1-like         |
| SNP_10764_A_30703873 | NC_021161.1    | Ca_Kabuli_Chr02 | 30703873                | GG                              | TT                 | TT               | URR                           | 101503142          | FACT complex subunit SSRP1-like         |
| SNP_10765_A_30704086 | NC_021161.1    | Ca_Kabuli_Chr02 | 30704086                | CC                              | AA                 | AA               | URR                           | 101503142          | FACT complex subunit SSRP1-like         |
| SNP_10767_A_30709329 | NC_021161.1    | Ca_Kabuli_Chr02 | 30709329                | GG                              | AA                 | AA               | INTERGENIC                    |                    |                                         |
| SNP_10768_A_30710588 | NC_021161.1    | Ca_Kabuli_Chr02 | 30710588                | TT                              | CC                 | CC               | DRR                           | 101504327          | phosphoinositide phospholipase C 6-like |
| SNP_10769_A_30711821 | NC_021161.1    | Ca_Kabuli_Chr02 | 30711821                | AA                              | GG                 | GG               | URR                           | 101503581          | phosphoinositide phospholipase C 6-like |
| SNP_10770_A_30711863 | NC_021161.1    | Ca_Kabuli_Chr02 | 30711863                | AA                              | TT                 | TT               | URR                           | 101503581          | phosphoinositide phospholipase C 6-like |
| SNP_10771_A_30715994 | NC_021161.1    | Ca_Kabuli_Chr02 | 30715994                | GG                              | AA                 | AA               | INTRON                        | 101504327          | phosphoinositide phospholipase C 6-like |
| SNP_10772_A_30716237 | NC_021161.1    | Ca_Kabuli_Chr02 | 30716237                | TT                              | CC                 | CC               | SYNONYMOUS_CODING             | 101504327          | phosphoinositide phospholipase C 6-like |
| SNP_10773_A_30716266 | NC_021161.1    | Ca_Kabuli_Chr02 | 30716266                | TT                              | CC                 | CC               | NON_SYNONYMOUS_CODING         | 101504327          | phosphoinositide phospholipase C 6-like |
| SNP_10774_A_30718248 | NC_021161.1    | Ca_Kabuli_Chr02 | 30718248                | AA                              | GG                 | GG               | URR                           | 101504327          | phosphoinositide phospholipase C 6-like |
| SNP_10775_A_30718389 | NC_021161.1    | Ca_Kabuli_Chr02 | 30718389                | TT                              | CC                 | CC               | URR                           | 101504327          | phosphoinositide phospholipase C 6-like |
| SNP_10776_A_30718547 | NC_021161.1    | Ca_Kabuli_Chr02 | 30718547                | GG                              | AA                 | AA               | URR                           | 101504327          | phosphoinositide phospholipase C 6-like |



| SNPs IDs             | Chromosome IDs | Chromosomes     | Physical positions (bp) | CDC Frontier (Reference genome) | (Pusa 1103 & HPNB) | (ILWC 46 & LPNB) | Sequence Components of genome | Gene accession IDs | Putative functions                                                               |
|----------------------|----------------|-----------------|-------------------------|---------------------------------|--------------------|------------------|-------------------------------|--------------------|----------------------------------------------------------------------------------|
| SNP_10777_A_30718800 | NC_021161.1    | Ca_Kabuli_Chr02 | 30718800                | GG                              | AA                 | AA               | INTERGENIC                    |                    |                                                                                  |
| SNP_10778_A_30718806 | NC_021161.1    | Ca_Kabuli_Chr02 | 30718806                | AA                              | GG                 | GG               | INTERGENIC                    |                    |                                                                                  |
| SNP_10779_A_30718812 | NC_021161.1    | Ca_Kabuli_Chr02 | 30718812                | CC                              | TT                 | TT               | INTERGENIC                    |                    |                                                                                  |
| SNP_10780_A_30719898 | NC_021161.1    | Ca_Kabuli_Chr02 | 30719898                | TT                              | AA                 | AA               | INTERGENIC                    |                    |                                                                                  |
| SNP_10782_A_30720337 | NC_021161.1    | Ca_Kabuli_Chr02 | 30720337                | TT                              | AA                 | AA               | INTERGENIC                    |                    |                                                                                  |
| SNP_10786_A_30734898 | NC_021161.1    | Ca_Kabuli_Chr02 | 30734898                | AA                              | CC                 | CC               | INTERGENIC                    |                    |                                                                                  |
| SNP_10788_A_30737344 | NC_021161.1    | Ca_Kabuli_Chr02 | 30737344                | GG                              | AA                 | AA               | URR                           | 101504660          | phosphoinositide phospholipase C 2-like                                          |
| SNP_10789_A_30737390 | NC_021161.1    | Ca_Kabuli_Chr02 | 30737390                | GG                              | AA                 | AA               | URR                           | 101504660          | phosphoinositide phospholipase C 2-like                                          |
| SNP_10790_A_30737392 | NC_021161.1    | Ca_Kabuli_Chr02 | 30737392                | CC                              | TT                 | TT               | URR                           | 101504660          | phosphoinositide phospholipase C 2-like                                          |
| SNP_10792_A_30738247 | NC_021161.1    | Ca_Kabuli_Chr02 | 30738247                | AA                              | GG                 | GG               | URR                           | 101504660          | phosphoinositide phospholipase C 2-like                                          |
| SNP_10793_A_30756245 | NC_021161.1    | Ca_Kabuli_Chr02 | 30756245                | CC                              | TT                 | TT               | URR                           | 101490767          | zinc finger protein 830-like                                                     |
| SNP_10794_A_30768592 | NC_021161.1    | Ca_Kabuli_Chr02 | 30768592                | CC                              | GG                 | GG               | URR                           | 101490228          | tRNA threonylcarbamoyladenosine dehydratase 2-like                               |
| SNP_10795_A_30772504 | NC_021161.1    | Ca_Kabuli_Chr02 | 30772504                | CC                              | TT                 | TT               | URR                           | 101489891          | carboxy-terminal domain RNA polymerase II polypeptide A small phosphatase 1-like |
| SNP_10797_A_30774157 | NC_021161.1    | Ca_Kabuli_Chr02 | 30774157                | TT                              | CC                 | CC               | URR                           | 101489891          | carboxy-terminal domain RNA polymerase II polypeptide A small phosphatase 1-like |
| SNP_10798_A_30774159 | NC_021161.1    | Ca_Kabuli_Chr02 | 30774159                | GG                              | AA                 | AA               | URR                           | 101489891          | carboxy-terminal domain RNA polymerase II polypeptide A small phosphatase 1-like |
| SNP_10799_A_30774167 | NC_021161.1    | Ca_Kabuli_Chr02 | 30774167                | AA                              | GG                 | GG               | INTERGENIC                    |                    |                                                                                  |
| SNP_10800_A_30783867 | NC_021161.1    | Ca_Kabuli_Chr02 | 30783867                | GG                              | AA                 | AA               | INTERGENIC                    |                    |                                                                                  |
| SNP_10801_A_30785547 | NC_021161.1    | Ca_Kabuli_Chr02 | 30785547                | TT                              | CC                 | CC               | INTERGENIC                    |                    |                                                                                  |
| SNP_10802_A_30785569 | NC_021161.1    | Ca_Kabuli_Chr02 | 30785569                | GG                              | AA                 | AA               | INTERGENIC                    |                    |                                                                                  |
| SNP_10803_A_30785598 | NC_021161.1    | Ca_Kabuli_Chr02 | 30785598                | TT                              | AA                 | AA               | INTERGENIC                    |                    |                                                                                  |
| SNP_10804_A_30785615 | NC_021161.1    | Ca_Kabuli_Chr02 | 30785615                | AA                              | GG                 | GG               | INTERGENIC                    |                    |                                                                                  |
| SNP_10805_A_30785616 | NC_021161.1    | Ca_Kabuli_Chr02 | 30785616                | GG                              | AA                 | AA               | INTERGENIC                    |                    |                                                                                  |

| SNPs IDs             | Chromosome IDs | Chromosomes     | Physical positions (bp) | CDC Frontier genome (Reference genome) | (Pusa 1103 & HPNB) | (ILWC 46 & LPNB) | Sequence genome | Components of | Gene accession IDs | Putative functions |
|----------------------|----------------|-----------------|-------------------------|----------------------------------------|--------------------|------------------|-----------------|---------------|--------------------|--------------------|
| SNP_10806_A_30785622 | NC_021161.1    | Ca_Kabuli_Chr02 | 30785622                | GG                                     | CC                 | CC               | INTERGENIC      |               |                    |                    |
| SNP_10807_A_30785631 | NC_021161.1    | Ca_Kabuli_Chr02 | 30785631                | AA                                     | GG                 | GG               | INTERGENIC      |               |                    |                    |
| SNP_10808_A_30785670 | NC_021161.1    | Ca_Kabuli_Chr02 | 30785670                | AA                                     | GG                 | GG               | INTERGENIC      |               |                    |                    |
| SNP_10809_A_30785811 | NC_021161.1    | Ca_Kabuli_Chr02 | 30785811                | CC                                     | TT                 | TT               | INTERGENIC      |               |                    |                    |
| SNP_10812_A_30793781 | NC_021161.1    | Ca_Kabuli_Chr02 | 30793781                | GG                                     | TT                 | TT               | INTERGENIC      |               |                    |                    |
| SNP_10813_A_30794442 | NC_021161.1    | Ca_Kabuli_Chr02 | 30794442                | AA                                     | GG                 | GG               | INTERGENIC      |               |                    |                    |
| SNP_10815_A_30794677 | NC_021161.1    | Ca_Kabuli_Chr02 | 30794677                | AA                                     | GG                 | GG               | INTERGENIC      |               |                    |                    |
| SNP_10816_A_30794926 | NC_021161.1    | Ca_Kabuli_Chr02 | 30794926                | CC                                     | TT                 | TT               | INTERGENIC      |               |                    |                    |
| SNP_10817_A_30795247 | NC_021161.1    | Ca_Kabuli_Chr02 | 30795247                | TT                                     | CC                 | CC               | INTERGENIC      |               |                    |                    |
| SNP_10818_A_30795430 | NC_021161.1    | Ca_Kabuli_Chr02 | 30795430                | GG                                     | CC                 | CC               | INTERGENIC      |               |                    |                    |
| SNP_10820_A_30798637 | NC_021161.1    | Ca_Kabuli_Chr02 | 30798637                | AA                                     | TT                 | TT               | INTERGENIC      |               |                    |                    |
| SNP_10822_A_30807204 | NC_021161.1    | Ca_Kabuli_Chr02 | 30807204                | AA                                     | TT                 | TT               | INTERGENIC      |               |                    |                    |
| SNP_10823_A_30809153 | NC_021161.1    | Ca_Kabuli_Chr02 | 30809153                | AA                                     | TT                 | TT               | INTERGENIC      |               |                    |                    |
| SNP_10824_A_30810396 | NC_021161.1    | Ca_Kabuli_Chr02 | 30810396                | AA                                     | CC                 | CC               | INTERGENIC      |               |                    |                    |
| SNP_10825_A_30810402 | NC_021161.1    | Ca_Kabuli_Chr02 | 30810402                | CC                                     | TT                 | TT               | INTERGENIC      |               |                    |                    |
| SNP_10826_A_30810411 | NC_021161.1    | Ca_Kabuli_Chr02 | 30810411                | GG                                     | AA                 | AA               | INTERGENIC      |               |                    |                    |
| SNP_10827_A_30810416 | NC_021161.1    | Ca_Kabuli_Chr02 | 30810416                | CC                                     | TT                 | TT               | INTERGENIC      |               |                    |                    |
| SNP_10828_A_30810435 | NC_021161.1    | Ca_Kabuli_Chr02 | 30810435                | GG                                     | TT                 | TT               | INTERGENIC      |               |                    |                    |
| SNP_10829_A_30819944 | NC_021161.1    | Ca_Kabuli_Chr02 | 30819944                | TT                                     | CC                 | CC               | INTERGENIC      |               |                    |                    |
| SNP_10830_A_30819981 | NC_021161.1    | Ca_Kabuli_Chr02 | 30819981                | AA                                     | GG                 | GG               | INTERGENIC      |               |                    |                    |
| SNP_10831_A_30820057 | NC_021161.1    | Ca_Kabuli_Chr02 | 30820057                | TT                                     | GG                 | GG               | INTERGENIC      |               |                    |                    |
| SNP_10832_A_30820072 | NC_021161.1    | Ca_Kabuli_Chr02 | 30820072                | CC                                     | AA                 | AA               | INTERGENIC      |               |                    |                    |

| SNPs IDs             | Chromosome IDs | Chromosomes     | Physical positions (bp) | CDC Frontier genome (Reference genome) | (Pusa 1103 & HPNB) | (ILWC 46 & LPNB) | Sequence genome | Components of | Gene accession IDs | Putative functions |
|----------------------|----------------|-----------------|-------------------------|----------------------------------------|--------------------|------------------|-----------------|---------------|--------------------|--------------------|
| SNP_10833_A_30820101 | NC_021161.1    | Ca_Kabuli_Chr02 | 30820101                | GG                                     | AA                 | AA               | INTERGENIC      |               |                    |                    |
| SNP_10834_A_30820237 | NC_021161.1    | Ca_Kabuli_Chr02 | 30820237                | GG                                     | TT                 | TT               | INTERGENIC      |               |                    |                    |
| SNP_10835_A_30820324 | NC_021161.1    | Ca_Kabuli_Chr02 | 30820324                | AA                                     | GG                 | GG               | INTERGENIC      |               |                    |                    |
| SNP_10836_A_30820891 | NC_021161.1    | Ca_Kabuli_Chr02 | 30820891                | TT                                     | CC                 | CC               | INTERGENIC      |               |                    |                    |
| SNP_10837_A_30820898 | NC_021161.1    | Ca_Kabuli_Chr02 | 30820898                | CC                                     | TT                 | TT               | INTERGENIC      |               |                    |                    |
| SNP_10838_A_30822415 | NC_021161.1    | Ca_Kabuli_Chr02 | 30822415                | GG                                     | AA                 | AA               | INTERGENIC      |               |                    |                    |
| SNP_10839_A_30822448 | NC_021161.1    | Ca_Kabuli_Chr02 | 30822448                | AA                                     | GG                 | GG               | INTERGENIC      |               |                    |                    |
| SNP_10840_A_30822456 | NC_021161.1    | Ca_Kabuli_Chr02 | 30822456                | GG                                     | AA                 | AA               | INTERGENIC      |               |                    |                    |
| SNP_10841_A_30822774 | NC_021161.1    | Ca_Kabuli_Chr02 | 30822774                | CC                                     | AA                 | AA               | INTERGENIC      |               |                    |                    |
| SNP_10842_A_30823814 | NC_021161.1    | Ca_Kabuli_Chr02 | 30823814                | AA                                     | GG                 | GG               | INTERGENIC      |               |                    |                    |
| SNP_10843_A_30829676 | NC_021161.1    | Ca_Kabuli_Chr02 | 30829676                | GG                                     | AA                 | AA               | INTERGENIC      |               |                    |                    |
| SNP_10844_A_30831569 | NC_021161.1    | Ca_Kabuli_Chr02 | 30831569                | GG                                     | AA                 | AA               | INTERGENIC      |               |                    |                    |
| SNP_10845_A_30831594 | NC_021161.1    | Ca_Kabuli_Chr02 | 30831594                | AA                                     | CC                 | CC               | INTERGENIC      |               |                    |                    |
| SNP_10846_A_30831625 | NC_021161.1    | Ca_Kabuli_Chr02 | 30831625                | CC                                     | AA                 | AA               | INTERGENIC      |               |                    |                    |
| SNP_10847_A_30831628 | NC_021161.1    | Ca_Kabuli_Chr02 | 30831628                | GG                                     | AA                 | AA               | INTERGENIC      |               |                    |                    |
| SNP_10848_A_30831663 | NC_021161.1    | Ca_Kabuli_Chr02 | 30831663                | TT                                     | CC                 | CC               | INTERGENIC      |               |                    |                    |
| SNP_10849_A_30831665 | NC_021161.1    | Ca_Kabuli_Chr02 | 30831665                | TT                                     | GG                 | GG               | INTERGENIC      |               |                    |                    |
| SNP_10850_A_30831674 | NC_021161.1    | Ca_Kabuli_Chr02 | 30831674                | CC                                     | TT                 | TT               | INTERGENIC      |               |                    |                    |
| SNP_10851_A_30831843 | NC_021161.1    | Ca_Kabuli_Chr02 | 30831843                | CC                                     | TT                 | TT               | INTERGENIC      |               |                    |                    |
| SNP_10852_A_30834880 | NC_021161.1    | Ca_Kabuli_Chr02 | 30834880                | TT                                     | CC                 | CC               | INTERGENIC      |               |                    |                    |
| SNP_10853_A_30834945 | NC_021161.1    | Ca_Kabuli_Chr02 | 30834945                | CC                                     | TT                 | TT               | INTERGENIC      |               |                    |                    |
| SNP_10854_A_30834997 | NC_021161.1    | Ca_Kabuli_Chr02 | 30834997                | AA                                     | GG                 | GG               | INTERGENIC      |               |                    |                    |

| SNPs IDs             | Chromosome IDs | Chromosomes     | Physical positions (bp) | CDC Frontier genome (Reference genome) | (Pusa 1103 & HPNB) | (ILWC 46 & LPNB) | Sequence Components of genome | Gene accession IDs | Putative functions                           |
|----------------------|----------------|-----------------|-------------------------|----------------------------------------|--------------------|------------------|-------------------------------|--------------------|----------------------------------------------|
| SNP_10855_A_30836851 | NC_021161.1    | Ca_Kabuli_Chr02 | 30836851                | AA                                     | GG                 | GG               | INTERGENIC                    |                    |                                              |
| SNP_10856_A_30836912 | NC_021161.1    | Ca_Kabuli_Chr02 | 30836912                | AA                                     | GG                 | GG               | INTERGENIC                    |                    |                                              |
| SNP_10857_A_30837040 | NC_021161.1    | Ca_Kabuli_Chr02 | 30837040                | AA                                     | GG                 | GG               | INTERGENIC                    |                    |                                              |
| SNP_10858_A_30837083 | NC_021161.1    | Ca_Kabuli_Chr02 | 30837083                | TT                                     | AA                 | AA               | INTERGENIC                    |                    |                                              |
| SNP_10859_A_30839798 | NC_021161.1    | Ca_Kabuli_Chr02 | 30839798                | TT                                     | CC                 | CC               | INTERGENIC                    |                    |                                              |
| SNP_10860_A_30844398 | NC_021161.1    | Ca_Kabuli_Chr02 | 30844398                | TT                                     | AA                 | AA               | INTRON                        | 101489251          | protein SRG1-like                            |
| SNP_10861_A_30846073 | NC_021161.1    | Ca_Kabuli_Chr02 | 30846073                | AA                                     | GG                 | GG               | INTRON                        | 101489251          | protein SRG1-like                            |
| SNP_10863_A_30846393 | NC_021161.1    | Ca_Kabuli_Chr02 | 30846393                | AA                                     | GG                 | GG               | INTRON                        | 101489251          | protein SRG1-like                            |
| SNP_10864_A_30846412 | NC_021161.1    | Ca_Kabuli_Chr02 | 30846412                | AA                                     | GG                 | GG               | INTRON                        | 101489251          | protein SRG1-like                            |
| SNP_10866_A_30848630 | NC_021161.1    | Ca_Kabuli_Chr02 | 30848630                | GG                                     | AA                 | AA               | URR                           | 101489251          | protein SRG1-like                            |
| SNP_10869_A_30860657 | NC_021161.1    | Ca_Kabuli_Chr02 | 30860657                | TT                                     | CC                 | CC               | INTERGENIC                    |                    |                                              |
| SNP_10870_A_30860930 | NC_021161.1    | Ca_Kabuli_Chr02 | 30860930                | GG                                     | CC                 | CC               | INTERGENIC                    |                    |                                              |
| SNP_10871_A_30864892 | NC_021161.1    | Ca_Kabuli_Chr02 | 30864892                | AA                                     | CC                 | CC               | DRR                           | 101488929          | zinc finger CCH domain-containing protein 29 |
| SNP_10872_A_30870068 | NC_021161.1    | Ca_Kabuli_Chr02 | 30870068                | AA                                     | CC                 | CC               | DRR                           | 101488378          | lethal(2) giant larvae protein homolog SRO77 |
| SNP_10873_A_30870069 | NC_021161.1    | Ca_Kabuli_Chr02 | 30870069                | TT                                     | CC                 | CC               | DRR                           | 101488378          | lethal(2) giant larvae protein homolog SRO77 |
| SNP_10875_A_30873891 | NC_021161.1    | Ca_Kabuli_Chr02 | 30873891                | TT                                     | CC                 | CC               | INTRON                        | 101488378          | lethal(2) giant larvae protein homolog SRO77 |
| SNP_10876_A_30876517 | NC_021161.1    | Ca_Kabuli_Chr02 | 30876517                | TT                                     | GG                 | GG               | INTRON                        | 101488378          | lethal(2) giant larvae protein homolog SRO77 |
| SNP_10877_A_30876552 | NC_021161.1    | Ca_Kabuli_Chr02 | 30876552                | AA                                     | TT                 | TT               | INTRON                        | 101488378          | lethal(2) giant larvae protein homolog SRO77 |
| SNP_10878_A_30876608 | NC_021161.1    | Ca_Kabuli_Chr02 | 30876608                | AA                                     | GG                 | GG               | INTRON                        | 101488378          | lethal(2) giant larvae protein homolog SRO77 |
| SNP_10879_A_30882151 | NC_021161.1    | Ca_Kabuli_Chr02 | 30882151                | GG                                     | AA                 | AA               | INTRON                        | 101488378          | lethal(2) giant larvae protein homolog SRO77 |
| SNP_10880_A_30883017 | NC_021161.1    | Ca_Kabuli_Chr02 | 30883017                | AA                                     | GG                 | GG               | INTRON                        | 101488378          | lethal(2) giant larvae protein homolog SRO77 |
| SNP_10881_A_30883023 | NC_021161.1    | Ca_Kabuli_Chr02 | 30883023                | TT                                     | GG                 | GG               | INTRON                        | 101488378          | lethal(2) giant larvae protein homolog SRO77 |

| SNPs IDs             | Chromosome IDs | Chromosomes     | Physical positions (bp) | CDC Frontier genome (Reference genome) | (Pusa 1103 & HPNB) | (ILWC 46 & LPNB) | Sequence Components of genome | Gene accession IDs | Putative functions                           |
|----------------------|----------------|-----------------|-------------------------|----------------------------------------|--------------------|------------------|-------------------------------|--------------------|----------------------------------------------|
| SNP_10883_A_30886122 | NC_021161.1    | Ca_Kabuli_Chr02 | 30886122                | AA                                     | GG                 | GG               | URR                           | 101488378          | lethal(2) giant larvae protein homolog SRO77 |
| SNP_10884_A_30887172 | NC_021161.1    | Ca_Kabuli_Chr02 | 30887172                | TT                                     | CC                 | CC               | URR                           | 101488378          | lethal(2) giant larvae protein homolog SRO77 |
| SNP_10885_A_30887207 | NC_021161.1    | Ca_Kabuli_Chr02 | 30887207                | CC                                     | AA                 | AA               | URR                           | 101488378          | lethal(2) giant larvae protein homolog SRO77 |
| SNP_10886_A_30887575 | NC_021161.1    | Ca_Kabuli_Chr02 | 30887575                | CC                                     | TT                 | TT               | INTERGENIC                    |                    |                                              |
| SNP_10888_A_30887898 | NC_021161.1    | Ca_Kabuli_Chr02 | 30887898                | CC                                     | TT                 | TT               | INTERGENIC                    |                    |                                              |
| SNP_10889_A_30887911 | NC_021161.1    | Ca_Kabuli_Chr02 | 30887911                | CC                                     | TT                 | TT               | INTERGENIC                    |                    |                                              |
| SNP_10890_A_30887917 | NC_021161.1    | Ca_Kabuli_Chr02 | 30887917                | AA                                     | TT                 | TT               | INTERGENIC                    |                    |                                              |
| SNP_10891_A_30887938 | NC_021161.1    | Ca_Kabuli_Chr02 | 30887938                | AA                                     | TT                 | TT               | INTERGENIC                    |                    |                                              |
| SNP_10892_A_30889812 | NC_021161.1    | Ca_Kabuli_Chr02 | 30889812                | CC                                     | TT                 | TT               | INTERGENIC                    |                    |                                              |
| SNP_10893_A_30890035 | NC_021161.1    | Ca_Kabuli_Chr02 | 30890035                | TT                                     | CC                 | CC               | INTERGENIC                    |                    |                                              |
| SNP_10894_A_30890061 | NC_021161.1    | Ca_Kabuli_Chr02 | 30890061                | AA                                     | CC                 | CC               | INTERGENIC                    |                    |                                              |
| SNP_10895_A_30890096 | NC_021161.1    | Ca_Kabuli_Chr02 | 30890096                | CC                                     | GG                 | GG               | INTERGENIC                    |                    |                                              |
| SNP_10896_A_30890113 | NC_021161.1    | Ca_Kabuli_Chr02 | 30890113                | AA                                     | TT                 | TT               | INTERGENIC                    |                    |                                              |
| SNP_10898_A_30890587 | NC_021161.1    | Ca_Kabuli_Chr02 | 30890587                | GG                                     | AA                 | AA               | DRR                           | 101515623          | gibberellin 2-beta-dioxygenase 1             |
| SNP_10900_A_30890913 | NC_021161.1    | Ca_Kabuli_Chr02 | 30890913                | AA                                     | GG                 | GG               | DRR                           | 101515623          | gibberellin 2-beta-dioxygenase 1             |
| SNP_10902_A_30892201 | NC_021161.1    | Ca_Kabuli_Chr02 | 30892201                | TT                                     | AA                 | AA               | INTRON                        | 101515623          | gibberellin 2-beta-dioxygenase 1             |
| SNP_10903_A_30894575 | NC_021161.1    | Ca_Kabuli_Chr02 | 30894575                | TT                                     | CC                 | CC               | URR                           | 101515623          | gibberellin 2-beta-dioxygenase 1             |
| SNP_10904_A_30898026 | NC_021161.1    | Ca_Kabuli_Chr02 | 30898026                | TT                                     | AA                 | AA               | DRR                           | 101515072          | protein ESKIMO 1-like                        |
| SNP_10905_A_30898158 | NC_021161.1    | Ca_Kabuli_Chr02 | 30898158                | TT                                     | AA                 | AA               | DRR                           | 101515072          | protein ESKIMO 1-like                        |
| SNP_10907_A_30905750 | NC_021161.1    | Ca_Kabuli_Chr02 | 30905750                | TT                                     | CC                 | CC               | INTERGENIC                    |                    |                                              |
| SNP_10908_A_30906209 | NC_021161.1    | Ca_Kabuli_Chr02 | 30906209                | TT                                     | GG                 | GG               | INTERGENIC                    |                    |                                              |
| SNP_10909_A_30909983 | NC_021161.1    | Ca_Kabuli_Chr02 | 30909983                | GG                                     | CC                 | CC               | INTRON                        | 101499129          | anaphase-promoting complex subunit 1         |

| SNPs IDs             | Chromosome IDs | Chromosomes     | Physical positions (bp) | CDC Frontier (Reference genome) | (Pusa 1103 & HPNB) | (ILWC 46 & LPNB) | Sequence Components of genome | Gene accession IDs | Putative functions                   |
|----------------------|----------------|-----------------|-------------------------|---------------------------------|--------------------|------------------|-------------------------------|--------------------|--------------------------------------|
| SNP_10910_A_30912471 | NC_021161.1    | Ca_Kabuli_Chr02 | 30912471                | AA                              | TT                 | TT               | INTRON                        | 101499129          | anaphase-promoting complex subunit 1 |
| SNP_10911_A_30915461 | NC_021161.1    | Ca_Kabuli_Chr02 | 30915461                | AA                              | GG                 | GG               | INTRON                        | 101499129          | anaphase-promoting complex subunit 1 |
| SNP_10912_A_30916565 | NC_021161.1    | Ca_Kabuli_Chr02 | 30916565                | GG                              | TT                 | TT               | INTRON                        | 101499129          | anaphase-promoting complex subunit 1 |
| SNP_10913_A_30920573 | NC_021161.1    | Ca_Kabuli_Chr02 | 30920573                | GG                              | AA                 | AA               | INTRON                        | 101499129          | anaphase-promoting complex subunit 1 |
| SNP_10914_A_30927050 | NC_021161.1    | Ca_Kabuli_Chr02 | 30927050                | AA                              | CC                 | CC               | INTRON                        | 101499129          | anaphase-promoting complex subunit 1 |
| SNP_10915_A_30927063 | NC_021161.1    | Ca_Kabuli_Chr02 | 30927063                | CC                              | AA                 | AA               | INTRON                        | 101499129          | anaphase-promoting complex subunit 1 |
| SNP_10916_A_30930857 | NC_021161.1    | Ca_Kabuli_Chr02 | 30930857                | TT                              | CC                 | CC               | INTRON                        | 101499129          | anaphase-promoting complex subunit 1 |
| SNP_10917_A_30930860 | NC_021161.1    | Ca_Kabuli_Chr02 | 30930860                | CC                              | TT                 | TT               | INTRON                        | 101499129          | anaphase-promoting complex subunit 1 |
| SNP_10918_A_30933581 | NC_021161.1    | Ca_Kabuli_Chr02 | 30933581                | GG                              | TT                 | TT               | URR                           | 101499129          | anaphase-promoting complex subunit 1 |
| SNP_10919_A_30933605 | NC_021161.1    | Ca_Kabuli_Chr02 | 30933605                | GG                              | AA                 | AA               | URR                           | 101499129          | anaphase-promoting complex subunit 1 |
| SNP_10920_A_30936944 | NC_021161.1    | Ca_Kabuli_Chr02 | 30936944                | TT                              | GG                 | GG               | INTERGENIC                    |                    |                                      |
| SNP_10921_A_30938122 | NC_021161.1    | Ca_Kabuli_Chr02 | 30938122                | GG                              | AA                 | AA               | INTERGENIC                    |                    |                                      |
| SNP_10922_A_30942394 | NC_021161.1    | Ca_Kabuli_Chr02 | 30942394                | GG                              | TT                 | TT               | INTERGENIC                    |                    |                                      |
| SNP_10923_A_30942793 | NC_021161.1    | Ca_Kabuli_Chr02 | 30942793                | GG                              | CC                 | CC               | INTERGENIC                    |                    |                                      |
| SNP_10924_A_30942801 | NC_021161.1    | Ca_Kabuli_Chr02 | 30942801                | AA                              | GG                 | GG               | INTERGENIC                    |                    |                                      |
| SNP_10925_A_30943057 | NC_021161.1    | Ca_Kabuli_Chr02 | 30943057                | AA                              | TT                 | TT               | INTERGENIC                    |                    |                                      |
| SNP_10926_A_30943059 | NC_021161.1    | Ca_Kabuli_Chr02 | 30943059                | AA                              | CC                 | CC               | INTERGENIC                    |                    |                                      |
| SNP_10927_A_30943305 | NC_021161.1    | Ca_Kabuli_Chr02 | 30943305                | TT                              | GG                 | GG               | DRR                           | 101514746          | clathrin heavy chain 2               |
| SNP_10929_A_30949199 | NC_021161.1    | Ca_Kabuli_Chr02 | 30949199                | AA                              | GG                 | GG               | INTRON                        | 101514746          | clathrin heavy chain 2               |
| SNP_10930_A_30953606 | NC_021161.1    | Ca_Kabuli_Chr02 | 30953606                | TT                              | CC                 | CC               | SYNONYMOUS_CODING             | 101514746          | clathrin heavy chain 2               |
| SNP_10931_A_30954701 | NC_021161.1    | Ca_Kabuli_Chr02 | 30954701                | AA                              | GG                 | GG               | SYNONYMOUS_CODING             | 101514746          | clathrin heavy chain 2               |
| SNP_10932_A_30957589 | NC_021161.1    | Ca_Kabuli_Chr02 | 30957589                | TT                              | AA                 | AA               | URR                           | 101514746          | clathrin heavy chain 2               |

| SNPs IDs             | Chromosome IDs | Chromosomes     | Physical positions (bp) | CDC Frontier genome (Reference genome) | (Pusa 1103 & HPNB) | (ILWC 46 & LPNB) | Sequence genome | Components of | Gene accession IDs | Putative functions              |
|----------------------|----------------|-----------------|-------------------------|----------------------------------------|--------------------|------------------|-----------------|---------------|--------------------|---------------------------------|
| SNP_10933_A_30957590 | NC_021161.1    | Ca_Kabuli_Chr02 | 30957590                | TT                                     | AA                 | AA               | URR             |               | 101514746          | clathrin heavy chain 2          |
| SNP_10934_A_30957619 | NC_021161.1    | Ca_Kabuli_Chr02 | 30957619                | CC                                     | TT                 | TT               | URR             |               | 101514746          | clathrin heavy chain 2          |
| SNP_10935_A_30957846 | NC_021161.1    | Ca_Kabuli_Chr02 | 30957846                | TT                                     | CC                 | CC               | URR             |               | 101514746          | clathrin heavy chain 2          |
| SNP_10936_A_30957888 | NC_021161.1    | Ca_Kabuli_Chr02 | 30957888                | GG                                     | AA                 | AA               | URR             |               | 101514746          | clathrin heavy chain 2          |
| SNP_10937_A_30958001 | NC_021161.1    | Ca_Kabuli_Chr02 | 30958001                | AA                                     | GG                 | GG               | URR             |               | 101514746          | clathrin heavy chain 2          |
| SNP_10938_A_30958778 | NC_021161.1    | Ca_Kabuli_Chr02 | 30958778                | CC                                     | TT                 | TT               | DRR             |               | 101514420          | transcription factor MYB44-like |
| SNP_10939_A_30962699 | NC_021161.1    | Ca_Kabuli_Chr02 | 30962699                | TT                                     | CC                 | CC               | URR             |               | 101514420          | transcription factor MYB44-like |
| SNP_10940_A_30963081 | NC_021161.1    | Ca_Kabuli_Chr02 | 30963081                | TT                                     | CC                 | CC               | INTERGENIC      |               |                    |                                 |
| SNP_10941_A_30963111 | NC_021161.1    | Ca_Kabuli_Chr02 | 30963111                | AA                                     | GG                 | GG               | INTERGENIC      |               |                    |                                 |
| SNP_10943_A_30963191 | NC_021161.1    | Ca_Kabuli_Chr02 | 30963191                | GG                                     | TT                 | TT               | INTERGENIC      |               |                    |                                 |
| SNP_10944_A_30963461 | NC_021161.1    | Ca_Kabuli_Chr02 | 30963461                | TT                                     | CC                 | CC               | INTERGENIC      |               |                    |                                 |
| SNP_10945_A_30963779 | NC_021161.1    | Ca_Kabuli_Chr02 | 30963779                | TT                                     | GG                 | GG               | INTERGENIC      |               |                    |                                 |
| SNP_10946_A_30964140 | NC_021161.1    | Ca_Kabuli_Chr02 | 30964140                | CC                                     | AA                 | AA               | INTERGENIC      |               |                    |                                 |
| SNP_10947_A_30964158 | NC_021161.1    | Ca_Kabuli_Chr02 | 30964158                | GG                                     | TT                 | TT               | INTERGENIC      |               |                    |                                 |
| SNP_10948_A_30967823 | NC_021161.1    | Ca_Kabuli_Chr02 | 30967823                | AA                                     | GG                 | GG               | URR             |               | 101514211          | uncharacterized LOC101514211    |
| SNP_10949_A_30967894 | NC_021161.1    | Ca_Kabuli_Chr02 | 30967894                | TT                                     | GG                 | GG               | INTERGENIC      |               |                    |                                 |
| SNP_10950_A_30967901 | NC_021161.1    | Ca_Kabuli_Chr02 | 30967901                | TT                                     | CC                 | CC               | INTERGENIC      |               |                    |                                 |
| SNP_10951_A_30968584 | NC_021161.1    | Ca_Kabuli_Chr02 | 30968584                | CC                                     | AA                 | AA               | INTERGENIC      |               |                    |                                 |
| SNP_10952_A_30969223 | NC_021161.1    | Ca_Kabuli_Chr02 | 30969223                | CC                                     | TT                 | TT               | INTERGENIC      |               |                    |                                 |
| SNP_10953_A_30979164 | NC_021161.1    | Ca_Kabuli_Chr02 | 30979164                | TT                                     | AA                 | AA               | INTERGENIC      |               |                    |                                 |
| SNP_10954_A_30979203 | NC_021161.1    | Ca_Kabuli_Chr02 | 30979203                | CC                                     | TT                 | TT               | INTERGENIC      |               |                    |                                 |
| SNP_10955_A_30979221 | NC_021161.1    | Ca_Kabuli_Chr02 | 30979221                | GG                                     | TT                 | TT               | INTERGENIC      |               |                    |                                 |

| SNPs IDs             | Chromosome IDs | Chromosomes     | Physical positions (bp) | CDC Frontier (Reference genome) | (Pusa 1103 & HPNB) | (ILWC 46 & LPNB) | Sequence Components of genome | Gene accession IDs | Putative functions                            |
|----------------------|----------------|-----------------|-------------------------|---------------------------------|--------------------|------------------|-------------------------------|--------------------|-----------------------------------------------|
| SNP_10956_A_30979246 | NC_021161.1    | Ca_Kabuli_Chr02 | 30979246                | GG                              | AA                 | AA               | INTERGENIC                    |                    |                                               |
| SNP_10957_A_30979384 | NC_021161.1    | Ca_Kabuli_Chr02 | 30979384                | TT                              | GG                 | GG               | INTERGENIC                    |                    |                                               |
| SNP_10958_A_30982698 | NC_021161.1    | Ca_Kabuli_Chr02 | 30982698                | TT                              | GG                 | GG               | URR                           | 101513864          | RING-H2 finger protein ATL66                  |
| SNP_10959_A_30982703 | NC_021161.1    | Ca_Kabuli_Chr02 | 30982703                | AA                              | GG                 | GG               | URR                           | 101513864          | RING-H2 finger protein ATL66                  |
| SNP_10960_A_30987779 | NC_021161.1    | Ca_Kabuli_Chr02 | 30987779                | AA                              | TT                 | TT               | INTERGENIC                    |                    |                                               |
| SNP_10961_A_30988444 | NC_021161.1    | Ca_Kabuli_Chr02 | 30988444                | GG                              | AA                 | AA               | INTERGENIC                    |                    |                                               |
| SNP_10962_A_30991163 | NC_021161.1    | Ca_Kabuli_Chr02 | 30991163                | AA                              | CC                 | CC               | INTERGENIC                    |                    |                                               |
| SNP_10963_A_30991208 | NC_021161.1    | Ca_Kabuli_Chr02 | 30991208                | TT                              | CC                 | CC               | INTERGENIC                    |                    |                                               |
| SNP_10965_A_30997236 | NC_021161.1    | Ca_Kabuli_Chr02 | 30997236                | GG                              | AA                 | AA               | DRR                           | 101499450          | ethylene-responsive transcription factor ABI4 |
| SNP_10966_A_30997574 | NC_021161.1    | Ca_Kabuli_Chr02 | 30997574                | CC                              | AA                 | AA               | NON_SYNONYMOUS_CODING         | 101499450          | ethylene-responsive transcription factor ABI4 |
| SNP_10967_A_30997873 | NC_021161.1    | Ca_Kabuli_Chr02 | 30997873                | AA                              | TT                 | TT               | NON_SYNONYMOUS_CODING         | 101499450          | ethylene-responsive transcription factor ABI4 |
| SNP_10968_A_30999531 | NC_021161.1    | Ca_Kabuli_Chr02 | 30999531                | AA                              | CC                 | CC               | URR                           | 101499450          | ethylene-responsive transcription factor ABI4 |
| SNP_10969_A_31004191 | NC_021161.1    | Ca_Kabuli_Chr02 | 31004191                | GG                              | AA                 | AA               | INTERGENIC                    |                    |                                               |
| SNP_10970_A_31004236 | NC_021161.1    | Ca_Kabuli_Chr02 | 31004236                | GG                              | AA                 | AA               | INTERGENIC                    |                    |                                               |
| SNP_10971_A_31004237 | NC_021161.1    | Ca_Kabuli_Chr02 | 31004237                | CC                              | GG                 | GG               | INTERGENIC                    |                    |                                               |
| SNP_10972_A_31004884 | NC_021161.1    | Ca_Kabuli_Chr02 | 31004884                | AA                              | GG                 | GG               | DRR                           | 101513557          | LOB domain-containing protein 21              |
| SNP_10973_A_31006876 | NC_021161.1    | Ca_Kabuli_Chr02 | 31006876                | GG                              | AA                 | AA               | URR                           | 101513557          | LOB domain-containing protein 21              |
| SNP_10974_A_31007180 | NC_021161.1    | Ca_Kabuli_Chr02 | 31007180                | GG                              | CC                 | CC               | URR                           | 101513557          | LOB domain-containing protein 21              |
| SNP_10975_A_31007204 | NC_021161.1    | Ca_Kabuli_Chr02 | 31007204                | CC                              | TT                 | TT               | URR                           | 101513557          | LOB domain-containing protein 21              |
| SNP_10976_A_31007264 | NC_021161.1    | Ca_Kabuli_Chr02 | 31007264                | TT                              | CC                 | CC               | URR                           | 101513557          | LOB domain-containing protein 21              |
| SNP_10977_A_31007596 | NC_021161.1    | Ca_Kabuli_Chr02 | 31007596                | AA                              | TT                 | TT               | URR                           | 101513557          | LOB domain-containing protein 21              |
| SNP_10978_A_31009132 | NC_021161.1    | Ca_Kabuli_Chr02 | 31009132                | AA                              | GG                 | GG               | INTERGENIC                    |                    |                                               |



| SNPs IDs             | Chromosome IDs | Chromosomes     | Physical positions (bp) | CDC Frontier (Reference genome) | (Pusa 1103 & HPNB) | (ILWC 46 & LPNB) | Sequence Components of genome | Gene accession IDs | Putative functions                      |
|----------------------|----------------|-----------------|-------------------------|---------------------------------|--------------------|------------------|-------------------------------|--------------------|-----------------------------------------|
| SNP_10979_A_31009138 | NC_021161.1    | Ca_Kabuli_Chr02 | 31009138                | AA                              | TT                 | TT               | INTERGENIC                    |                    |                                         |
| SNP_10980_A_31009562 | NC_021161.1    | Ca_Kabuli_Chr02 | 31009562                | AA                              | GG                 | GG               | INTERGENIC                    |                    |                                         |
| SNP_10981_A_31009581 | NC_021161.1    | Ca_Kabuli_Chr02 | 31009581                | AA                              | TT                 | TT               | INTERGENIC                    |                    |                                         |
| SNP_10982_A_31009889 | NC_021161.1    | Ca_Kabuli_Chr02 | 31009889                | TT                              | GG                 | GG               | INTERGENIC                    |                    |                                         |
| SNP_10983_A_31009890 | NC_021161.1    | Ca_Kabuli_Chr02 | 31009890                | TT                              | GG                 | GG               | INTERGENIC                    |                    |                                         |
| SNP_10984_A_31009894 | NC_021161.1    | Ca_Kabuli_Chr02 | 31009894                | CC                              | TT                 | TT               | INTERGENIC                    |                    |                                         |
| SNP_10985_A_31009905 | NC_021161.1    | Ca_Kabuli_Chr02 | 31009905                | TT                              | AA                 | AA               | INTERGENIC                    |                    |                                         |
| SNP_10986_A_31009938 | NC_021161.1    | Ca_Kabuli_Chr02 | 31009938                | AA                              | TT                 | TT               | INTERGENIC                    |                    |                                         |
| SNP_10987_A_31009952 | NC_021161.1    | Ca_Kabuli_Chr02 | 31009952                | AA                              | GG                 | GG               | INTERGENIC                    |                    |                                         |
| SNP_10988_A_31010312 | NC_021161.1    | Ca_Kabuli_Chr02 | 31010312                | TT                              | GG                 | GG               | INTERGENIC                    |                    |                                         |
| SNP_10989_A_31010557 | NC_021161.1    | Ca_Kabuli_Chr02 | 31010557                | TT                              | CC                 | CC               | INTERGENIC                    |                    |                                         |
| SNP_10990_A_31012312 | NC_021161.1    | Ca_Kabuli_Chr02 | 31012312                | GG                              | AA                 | AA               | INTERGENIC                    |                    |                                         |
| SNP_10991_A_31012489 | NC_021161.1    | Ca_Kabuli_Chr02 | 31012489                | TT                              | CC                 | CC               | INTERGENIC                    |                    |                                         |
| SNP_10993_A_31013910 | NC_021161.1    | Ca_Kabuli_Chr02 | 31013910                | AA                              | GG                 | GG               | DRR                           | 101513231          | U-box domain-containing protein 13-like |
| SNP_10994_A_31013920 | NC_021161.1    | Ca_Kabuli_Chr02 | 31013920                | GG                              | AA                 | AA               | DRR                           | 101513231          | U-box domain-containing protein 13-like |
| SNP_10995_A_31013933 | NC_021161.1    | Ca_Kabuli_Chr02 | 31013933                | TT                              | CC                 | CC               | DRR                           | 101513231          | U-box domain-containing protein 13-like |
| SNP_10996_A_31015768 | NC_021161.1    | Ca_Kabuli_Chr02 | 31015768                | CC                              | AA                 | AA               | INTERGENIC                    |                    |                                         |
| SNP_10997_A_31016590 | NC_021161.1    | Ca_Kabuli_Chr02 | 31016590                | CC                              | TT                 | TT               | INTERGENIC                    |                    |                                         |
| SNP_10998_A_31017514 | NC_021161.1    | Ca_Kabuli_Chr02 | 31017514                | CC                              | TT                 | TT               | URR                           | 101513231          | U-box domain-containing protein 13-like |
| SNP_10999_A_31017731 | NC_021161.1    | Ca_Kabuli_Chr02 | 31017731                | GG                              | AA                 | AA               | DRR                           | 101512907          | uncharacterized LOC101512907            |
| SNP_11001_A_31017941 | NC_021161.1    | Ca_Kabuli_Chr02 | 31017941                | GG                              | AA                 | AA               | DRR                           | 101512907          | uncharacterized LOC101512907            |
| SNP_11002_A_31017944 | NC_021161.1    | Ca_Kabuli_Chr02 | 31017944                | AA                              | GG                 | GG               | DRR                           | 101512907          | uncharacterized LOC101512907            |

| SNPs IDs             | Chromosome IDs | Chromosomes     | Physical positions (bp) | CDC Frontier genome (Reference genome) | (Pusa 1103 & HPNB) | (ILWC 46 & LPNB) | Sequence Components of genome | Gene accession IDs | Putative functions                                       |
|----------------------|----------------|-----------------|-------------------------|----------------------------------------|--------------------|------------------|-------------------------------|--------------------|----------------------------------------------------------|
| SNP_11003_A_31020198 | NC_021161.1    | Ca_Kabuli_Chr02 | 31020198                | CC                                     | AA                 | AA               | INTERGENIC                    |                    |                                                          |
| SNP_11004_A_31028976 | NC_021161.1    | Ca_Kabuli_Chr02 | 31028976                | GG                                     | AA                 | AA               | DRR                           | 101512374          | probable inactive receptor-like protein kinase At3g56050 |
| SNP_11005_A_31033817 | NC_021161.1    | Ca_Kabuli_Chr02 | 31033817                | TT                                     | CC                 | CC               | INTRON                        | 101512374          | probable inactive receptor-like protein kinase At3g56050 |
| SNP_11006_A_31035179 | NC_021161.1    | Ca_Kabuli_Chr02 | 31035179                | TT                                     | CC                 | CC               | URR                           | 101512374          | probable inactive receptor-like protein kinase At3g56050 |
| SNP_11007_A_31036218 | NC_021161.1    | Ca_Kabuli_Chr02 | 31036218                | AA                                     | TT                 | TT               | INTERGENIC                    |                    |                                                          |
| SNP_11008_A_31036250 | NC_021161.1    | Ca_Kabuli_Chr02 | 31036250                | AA                                     | GG                 | GG               | INTERGENIC                    |                    |                                                          |
| SNP_11009_A_31036254 | NC_021161.1    | Ca_Kabuli_Chr02 | 31036254                | AA                                     | TT                 | TT               | INTERGENIC                    |                    |                                                          |
| SNP_11010_A_31039584 | NC_021161.1    | Ca_Kabuli_Chr02 | 31039584                | GG                                     | AA                 | AA               | INTERGENIC                    |                    |                                                          |
| SNP_11011_A_31039598 | NC_021161.1    | Ca_Kabuli_Chr02 | 31039598                | GG                                     | AA                 | AA               | INTERGENIC                    |                    |                                                          |
| SNP_11012_A_31039624 | NC_021161.1    | Ca_Kabuli_Chr02 | 31039624                | TT                                     | CC                 | CC               | INTERGENIC                    |                    |                                                          |
| SNP_11013_A_31040757 | NC_021161.1    | Ca_Kabuli_Chr02 | 31040757                | GG                                     | AA                 | AA               | INTERGENIC                    |                    |                                                          |
| SNP_11015_A_31041741 | NC_021161.1    | Ca_Kabuli_Chr02 | 31041741                | CC                                     | TT                 | TT               | INTERGENIC                    |                    |                                                          |
| SNP_11016_A_31041756 | NC_021161.1    | Ca_Kabuli_Chr02 | 31041756                | TT                                     | CC                 | CC               | INTERGENIC                    |                    |                                                          |
| SNP_11017_A_31041764 | NC_021161.1    | Ca_Kabuli_Chr02 | 31041764                | TT                                     | CC                 | CC               | INTERGENIC                    |                    |                                                          |
| SNP_11018_A_31042052 | NC_021161.1    | Ca_Kabuli_Chr02 | 31042052                | AA                                     | GG                 | GG               | INTERGENIC                    |                    |                                                          |
| SNP_11019_A_31042550 | NC_021161.1    | Ca_Kabuli_Chr02 | 31042550                | CC                                     | AA                 | AA               | INTERGENIC                    |                    |                                                          |
| SNP_11020_A_31042596 | NC_021161.1    | Ca_Kabuli_Chr02 | 31042596                | GG                                     | CC                 | CC               | INTERGENIC                    |                    |                                                          |
| SNP_11021_A_31042981 | NC_021161.1    | Ca_Kabuli_Chr02 | 31042981                | CC                                     | AA                 | AA               | INTERGENIC                    |                    |                                                          |
| SNP_11022_A_31042982 | NC_021161.1    | Ca_Kabuli_Chr02 | 31042982                | GG                                     | AA                 | AA               | INTERGENIC                    |                    |                                                          |
| SNP_11023_A_31043004 | NC_021161.1    | Ca_Kabuli_Chr02 | 31043004                | AA                                     | GG                 | GG               | INTERGENIC                    |                    |                                                          |
| SNP_11024_A_31043210 | NC_021161.1    | Ca_Kabuli_Chr02 | 31043210                | AA                                     | GG                 | GG               | INTERGENIC                    |                    |                                                          |
| SNP_11025_A_31043215 | NC_021161.1    | Ca_Kabuli_Chr02 | 31043215                | TT                                     | GG                 | GG               | INTERGENIC                    |                    |                                                          |

| SNPs IDs             | Chromosome IDs | Chromosomes     | Physical positions (bp) | CDC Frontier genome (Reference genome) | (Pusa 1103 & HPNB) | (ILWC 46 & LPNB) | Sequence Components of genome | Gene accession IDs | Putative functions                                          |
|----------------------|----------------|-----------------|-------------------------|----------------------------------------|--------------------|------------------|-------------------------------|--------------------|-------------------------------------------------------------|
| SNP_11026_A_31044684 | NC_021161.1    | Ca_Kabuli_Chr02 | 31044684                | TT                                     | CC                 | CC               | SYNONYMOUS_CODING             | 101512046          | uncharacterized protein At5g39865-like                      |
| SNP_11027_A_31047576 | NC_021161.1    | Ca_Kabuli_Chr02 | 31047576                | TT                                     | AA                 | AA               | INTERGENIC                    |                    |                                                             |
| SNP_11028_A_31047582 | NC_021161.1    | Ca_Kabuli_Chr02 | 31047582                | AA                                     | TT                 | TT               | INTERGENIC                    |                    |                                                             |
| SNP_11029_A_31047616 | NC_021161.1    | Ca_Kabuli_Chr02 | 31047616                | CC                                     | TT                 | TT               | INTERGENIC                    |                    |                                                             |
| SNP_11030_A_31047637 | NC_021161.1    | Ca_Kabuli_Chr02 | 31047637                | AA                                     | GG                 | GG               | INTERGENIC                    |                    |                                                             |
| SNP_11031_A_31050299 | NC_021161.1    | Ca_Kabuli_Chr02 | 31050299                | GG                                     | TT                 | TT               | DRR                           | 101500067          | sister chromatid cohesion 1 protein 1                       |
| SNP_11032_A_31051479 | NC_021161.1    | Ca_Kabuli_Chr02 | 31051479                | GG                                     | AA                 | AA               | INTRON                        | 101500067          | sister chromatid cohesion 1 protein 1                       |
| SNP_11034_A_31060072 | NC_021161.1    | Ca_Kabuli_Chr02 | 31060072                | GG                                     | AA                 | AA               | INTRON                        | 101500067          | sister chromatid cohesion 1 protein 1                       |
| SNP_11035_A_31061742 | NC_021161.1    | Ca_Kabuli_Chr02 | 31061742                | AA                                     | CC                 | CC               | URR                           | 101500067          | sister chromatid cohesion 1 protein 1                       |
| SNP_11036_A_31072486 | NC_021161.1    | Ca_Kabuli_Chr02 | 31072486                | CC                                     | TT                 | TT               | INTERGENIC                    |                    |                                                             |
| SNP_11037_A_31072763 | NC_021161.1    | Ca_Kabuli_Chr02 | 31072763                | CC                                     | AA                 | AA               | INTERGENIC                    |                    |                                                             |
| SNP_11038_A_31072819 | NC_021161.1    | Ca_Kabuli_Chr02 | 31072819                | GG                                     | TT                 | TT               | INTERGENIC                    |                    |                                                             |
| SNP_11039_A_31072839 | NC_021161.1    | Ca_Kabuli_Chr02 | 31072839                | TT                                     | GG                 | GG               | INTERGENIC                    |                    |                                                             |
| SNP_11040_A_31072916 | NC_021161.1    | Ca_Kabuli_Chr02 | 31072916                | CC                                     | AA                 | AA               | INTERGENIC                    |                    |                                                             |
| SNP_11041_A_31073002 | NC_021161.1    | Ca_Kabuli_Chr02 | 31073002                | TT                                     | CC                 | CC               | INTERGENIC                    |                    |                                                             |
| SNP_11042_A_31073368 | NC_021161.1    | Ca_Kabuli_Chr02 | 31073368                | AA                                     | TT                 | TT               | INTERGENIC                    |                    |                                                             |
| SNP_11043_A_31073579 | NC_021161.1    | Ca_Kabuli_Chr02 | 31073579                | TT                                     | CC                 | CC               | INTERGENIC                    |                    |                                                             |
| SNP_11044_A_31076994 | NC_021161.1    | Ca_Kabuli_Chr02 | 31076994                | GG                                     | CC                 | CC               | DRR                           | 101511092          | peptide-N4-(N-acetyl-beta-glucosaminyl)asparagine amidase A |
| SNP_11045_A_31077397 | NC_021161.1    | Ca_Kabuli_Chr02 | 31077397                | AA                                     | GG                 | GG               | DRR                           | 101511092          | peptide-N4-(N-acetyl-beta-glucosaminyl)asparagine amidase A |
| SNP_11046_A_31077398 | NC_021161.1    | Ca_Kabuli_Chr02 | 31077398                | CC                                     | TT                 | TT               | DRR                           | 101511092          | peptide-N4-(N-acetyl-beta-glucosaminyl)asparagine amidase A |
| SNP_11047_A_31077461 | NC_021161.1    | Ca_Kabuli_Chr02 | 31077461                | AA                                     | GG                 | GG               | DRR                           | 101511092          | peptide-N4-(N-acetyl-beta-glucosaminyl)asparagine amidase A |
| SNP_11048_A_31081079 | NC_021161.1    | Ca_Kabuli_Chr02 | 31081079                | AA                                     | GG                 | GG               | URR                           | 101511092          | peptide-N4-(N-acetyl-beta-glucosaminyl)asparagine amidase A |

| SNPs IDs             | Chromosome IDs | Chromosomes     | Physical positions (bp) | CDC Frontier (Reference genome) | (Pusa 1103 & HPNB) | (ILWC 46 & LPNB) | Sequence Components of genome | Gene accession IDs | Putative functions                  |
|----------------------|----------------|-----------------|-------------------------|---------------------------------|--------------------|------------------|-------------------------------|--------------------|-------------------------------------|
| SNP_11049_A_31081869 | NC_021161.1    | Ca_Kabuli_Chr02 | 31081869                | CC                              | TT                 | TT               | URR                           | 101410588          | transfer RNA lysine (anticodon CUU) |
| SNP_11050_A_31081876 | NC_021161.1    | Ca_Kabuli_Chr02 | 31081876                | TT                              | CC                 | CC               | URR                           | 101410588          | transfer RNA lysine (anticodon CUU) |
| SNP_11051_A_31081912 | NC_021161.1    | Ca_Kabuli_Chr02 | 31081912                | GG                              | AA                 | AA               | URR                           | 101410588          | transfer RNA lysine (anticodon CUU) |
| SNP_11052_A_31083069 | NC_021161.1    | Ca_Kabuli_Chr02 | 31083069                | GG                              | AA                 | AA               | INTERGENIC                    |                    |                                     |
| SNP_11053_A_31083283 | NC_021161.1    | Ca_Kabuli_Chr02 | 31083283                | TT                              | CC                 | CC               | INTERGENIC                    |                    |                                     |
| SNP_11054_A_31083308 | NC_021161.1    | Ca_Kabuli_Chr02 | 31083308                | TT                              | CC                 | CC               | INTERGENIC                    |                    |                                     |
| SNP_11055_A_31084640 | NC_021161.1    | Ca_Kabuli_Chr02 | 31084640                | TT                              | CC                 | CC               | INTERGENIC                    |                    |                                     |
| SNP_11056_A_31084674 | NC_021161.1    | Ca_Kabuli_Chr02 | 31084674                | GG                              | CC                 | CC               | INTERGENIC                    |                    |                                     |
| SNP_11057_A_31085041 | NC_021161.1    | Ca_Kabuli_Chr02 | 31085041                | CC                              | AA                 | AA               | INTERGENIC                    |                    |                                     |
| SNP_11059_A_31085106 | NC_021161.1    | Ca_Kabuli_Chr02 | 31085106                | TT                              | CC                 | CC               | INTERGENIC                    |                    |                                     |
| SNP_11060_A_31085111 | NC_021161.1    | Ca_Kabuli_Chr02 | 31085111                | CC                              | TT                 | TT               | INTERGENIC                    |                    |                                     |
| SNP_11061_A_31085114 | NC_021161.1    | Ca_Kabuli_Chr02 | 31085114                | CC                              | TT                 | TT               | INTERGENIC                    |                    |                                     |
| SNP_11062_A_31085115 | NC_021161.1    | Ca_Kabuli_Chr02 | 31085115                | CC                              | TT                 | TT               | INTERGENIC                    |                    |                                     |
| SNP_11063_A_31085377 | NC_021161.1    | Ca_Kabuli_Chr02 | 31085377                | CC                              | GG                 | GG               | INTERGENIC                    |                    |                                     |
| SNP_11064_A_31085458 | NC_021161.1    | Ca_Kabuli_Chr02 | 31085458                | AA                              | TT                 | TT               | INTERGENIC                    |                    |                                     |
| SNP_11065_A_31085461 | NC_021161.1    | Ca_Kabuli_Chr02 | 31085461                | AA                              | GG                 | GG               | INTERGENIC                    |                    |                                     |
| SNP_11066_A_31085478 | NC_021161.1    | Ca_Kabuli_Chr02 | 31085478                | CC                              | TT                 | TT               | INTERGENIC                    |                    |                                     |
| SNP_11067_A_31085682 | NC_021161.1    | Ca_Kabuli_Chr02 | 31085682                | AA                              | GG                 | GG               | INTERGENIC                    |                    |                                     |
| SNP_11068_A_31086009 | NC_021161.1    | Ca_Kabuli_Chr02 | 31086009                | AA                              | TT                 | TT               | INTERGENIC                    |                    |                                     |
| SNP_11069_A_31087443 | NC_021161.1    | Ca_Kabuli_Chr02 | 31087443                | TT                              | GG                 | GG               | DRR                           | 101510766          | 40S ribosomal protein S4-1-like     |
| SNP_11070_A_31088609 | NC_021161.1    | Ca_Kabuli_Chr02 | 31088609                | CC                              | TT                 | TT               | INTERGENIC                    |                    |                                     |
| SNP_11071_A_31088617 | NC_021161.1    | Ca_Kabuli_Chr02 | 31088617                | GG                              | AA                 | AA               | INTERGENIC                    |                    |                                     |

| SNPs IDs             | Chromosome IDs | Chromosomes     | Physical positions (bp) | CDC Frontier genome (Reference genome) | (Pusa 1103 & HPNB) | (ILWC 46 & LPNB) | Sequence Components of genome | Gene accession IDs | Putative functions                          |
|----------------------|----------------|-----------------|-------------------------|----------------------------------------|--------------------|------------------|-------------------------------|--------------------|---------------------------------------------|
| SNP_11072_A_31089663 | NC_021161.1    | Ca_Kabuli_Chr02 | 31089663                | TT                                     | CC                 | CC               | INTERGENIC                    |                    |                                             |
| SNP_11073_A_31089684 | NC_021161.1    | Ca_Kabuli_Chr02 | 31089684                | AA                                     | TT                 | TT               | INTERGENIC                    |                    |                                             |
| SNP_11074_A_31091348 | NC_021161.1    | Ca_Kabuli_Chr02 | 31091348                | GG                                     | AA                 | AA               | DRR                           | 101510209          | ferritin-4, chloroplastic                   |
| SNP_11075_A_31091350 | NC_021161.1    | Ca_Kabuli_Chr02 | 31091350                | GG                                     | AA                 | AA               | DRR                           | 101510209          | ferritin-4, chloroplastic                   |
| SNP_11076_A_31091575 | NC_021161.1    | Ca_Kabuli_Chr02 | 31091575                | GG                                     | TT                 | TT               | DRR                           | 101510209          | ferritin-4, chloroplastic                   |
| SNP_11077_A_31092679 | NC_021161.1    | Ca_Kabuli_Chr02 | 31092679                | AA                                     | TT                 | TT               | INTERGENIC                    |                    |                                             |
| SNP_11078_A_31092974 | NC_021161.1    | Ca_Kabuli_Chr02 | 31092974                | GG                                     | AA                 | AA               | INTERGENIC                    |                    |                                             |
| SNP_11079_A_31094856 | NC_021161.1    | Ca_Kabuli_Chr02 | 31094856                | TT                                     | CC                 | CC               | URR                           | 101510209          | ferritin-4, chloroplastic                   |
| SNP_11080_A_31098851 | NC_021161.1    | Ca_Kabuli_Chr02 | 31098851                | CC                                     | TT                 | TT               | INTERGENIC                    |                    |                                             |
| SNP_11081_A_31103306 | NC_021161.1    | Ca_Kabuli_Chr02 | 31103306                | CC                                     | GG                 | GG               | INTRON                        | 101509890          | putative glutamine amidotransferase YLR126C |
| SNP_11082_A_31103312 | NC_021161.1    | Ca_Kabuli_Chr02 | 31103312                | CC                                     | TT                 | TT               | INTRON                        | 101509890          | putative glutamine amidotransferase YLR126C |
| SNP_11083_A_31103320 | NC_021161.1    | Ca_Kabuli_Chr02 | 31103320                | GG                                     | AA                 | AA               | INTRON                        | 101509890          | putative glutamine amidotransferase YLR126C |
| SNP_11084_A_31104021 | NC_021161.1    | Ca_Kabuli_Chr02 | 31104021                | GG                                     | AA                 | AA               | INTRON                        | 101509890          | putative glutamine amidotransferase YLR126C |
| SNP_11085_A_31104042 | NC_021161.1    | Ca_Kabuli_Chr02 | 31104042                | GG                                     | TT                 | TT               | INTRON                        | 101509890          | putative glutamine amidotransferase YLR126C |
| SNP_11086_A_31104814 | NC_021161.1    | Ca_Kabuli_Chr02 | 31104814                | AA                                     | GG                 | GG               | URR                           | 101509890          | putative glutamine amidotransferase YLR126C |
| SNP_11087_A_31104916 | NC_021161.1    | Ca_Kabuli_Chr02 | 31104916                | GG                                     | AA                 | AA               | URR                           | 101509890          | putative glutamine amidotransferase YLR126C |
| SNP_11088_A_31104945 | NC_021161.1    | Ca_Kabuli_Chr02 | 31104945                | GG                                     | AA                 | AA               | URR                           | 101509890          | putative glutamine amidotransferase YLR126C |
| SNP_11089_A_31105204 | NC_021161.1    | Ca_Kabuli_Chr02 | 31105204                | TT                                     | GG                 | GG               | URR                           | 101509890          | putative glutamine amidotransferase YLR126C |
| SNP_11090_A_31105889 | NC_021161.1    | Ca_Kabuli_Chr02 | 31105889                | TT                                     | GG                 | GG               | URR                           | 101509890          | putative glutamine amidotransferase YLR126C |
| SNP_11092_A_31106178 | NC_021161.1    | Ca_Kabuli_Chr02 | 31106178                | AA                                     | TT                 | TT               | URR                           | 101509890          | putative glutamine amidotransferase YLR126C |
| SNP_11093_A_31106783 | NC_021161.1    | Ca_Kabuli_Chr02 | 31106783                | TT                                     | CC                 | CC               | INTERGENIC                    |                    |                                             |
| SNP_11094_A_31106793 | NC_021161.1    | Ca_Kabuli_Chr02 | 31106793                | GG                                     | AA                 | AA               | INTERGENIC                    |                    |                                             |

| SNPs IDs             | Chromosome IDs | Chromosomes     | Physical positions (bp) | CDC Frontier genome (Reference genome) | (Pusa 1103 & HPNB) | (ILWC 46 & LPNB) | Sequence genome | Components of | Gene accession IDs | Putative functions |
|----------------------|----------------|-----------------|-------------------------|----------------------------------------|--------------------|------------------|-----------------|---------------|--------------------|--------------------|
| SNP_11095_A_31106804 | NC_021161.1    | Ca_Kabuli_Chr02 | 31106804                | AA                                     | CC                 | CC               | INTERGENIC      |               |                    |                    |
| SNP_11096_A_31106931 | NC_021161.1    | Ca_Kabuli_Chr02 | 31106931                | AA                                     | GG                 | GG               | INTERGENIC      |               |                    |                    |
| SNP_11097_A_31106956 | NC_021161.1    | Ca_Kabuli_Chr02 | 31106956                | AA                                     | GG                 | GG               | INTERGENIC      |               |                    |                    |
| SNP_11098_A_31106958 | NC_021161.1    | Ca_Kabuli_Chr02 | 31106958                | CC                                     | GG                 | GG               | INTERGENIC      |               |                    |                    |
| SNP_11099_A_31106971 | NC_021161.1    | Ca_Kabuli_Chr02 | 31106971                | AA                                     | GG                 | GG               | INTERGENIC      |               |                    |                    |
| SNP_11100_A_31106988 | NC_021161.1    | Ca_Kabuli_Chr02 | 31106988                | AA                                     | GG                 | GG               | INTERGENIC      |               |                    |                    |
| SNP_11101_A_31107037 | NC_021161.1    | Ca_Kabuli_Chr02 | 31107037                | TT                                     | CC                 | CC               | INTERGENIC      |               |                    |                    |
| SNP_11102_A_31107589 | NC_021161.1    | Ca_Kabuli_Chr02 | 31107589                | CC                                     | TT                 | TT               | INTERGENIC      |               |                    |                    |
| SNP_11103_A_31107741 | NC_021161.1    | Ca_Kabuli_Chr02 | 31107741                | AA                                     | GG                 | GG               | INTERGENIC      |               |                    |                    |
| SNP_11104_A_31107783 | NC_021161.1    | Ca_Kabuli_Chr02 | 31107783                | AA                                     | TT                 | TT               | INTERGENIC      |               |                    |                    |
| SNP_11105_A_31107819 | NC_021161.1    | Ca_Kabuli_Chr02 | 31107819                | TT                                     | AA                 | AA               | INTERGENIC      |               |                    |                    |
| SNP_11106_A_31107910 | NC_021161.1    | Ca_Kabuli_Chr02 | 31107910                | CC                                     | TT                 | TT               | INTERGENIC      |               |                    |                    |
| SNP_11107_A_31107918 | NC_021161.1    | Ca_Kabuli_Chr02 | 31107918                | TT                                     | CC                 | CC               | INTERGENIC      |               |                    |                    |
| SNP_11108_A_31107933 | NC_021161.1    | Ca_Kabuli_Chr02 | 31107933                | CC                                     | GG                 | GG               | INTERGENIC      |               |                    |                    |
| SNP_11109_A_31107960 | NC_021161.1    | Ca_Kabuli_Chr02 | 31107960                | AA                                     | TT                 | TT               | INTERGENIC      |               |                    |                    |
| SNP_11110_A_31108090 | NC_021161.1    | Ca_Kabuli_Chr02 | 31108090                | TT                                     | CC                 | CC               | INTERGENIC      |               |                    |                    |
| SNP_11112_A_31108153 | NC_021161.1    | Ca_Kabuli_Chr02 | 31108153                | GG                                     | AA                 | AA               | INTERGENIC      |               |                    |                    |
| SNP_11113_A_31108184 | NC_021161.1    | Ca_Kabuli_Chr02 | 31108184                | AA                                     | CC                 | CC               | INTERGENIC      |               |                    |                    |
| SNP_11114_A_31108195 | NC_021161.1    | Ca_Kabuli_Chr02 | 31108195                | CC                                     | AA                 | AA               | INTERGENIC      |               |                    |                    |
| SNP_11115_A_31108509 | NC_021161.1    | Ca_Kabuli_Chr02 | 31108509                | CC                                     | AA                 | AA               | INTERGENIC      |               |                    |                    |
| SNP_11116_A_31108527 | NC_021161.1    | Ca_Kabuli_Chr02 | 31108527                | TT                                     | AA                 | AA               | INTERGENIC      |               |                    |                    |
| SNP_11117_A_31108537 | NC_021161.1    | Ca_Kabuli_Chr02 | 31108537                | CC                                     | GG                 | GG               | INTERGENIC      |               |                    |                    |

| SNPs IDs             | Chromosome IDs | Chromosomes     | Physical positions (bp) | CDC Frontier genome (Reference genome) | (Pusa 1103 & HPNB) | (ILWC 46 & LPNB) | Sequence Components of genome | Gene accession IDs | Putative functions                          |
|----------------------|----------------|-----------------|-------------------------|----------------------------------------|--------------------|------------------|-------------------------------|--------------------|---------------------------------------------|
| SNP_11118_A_31108578 | NC_021161.1    | Ca_Kabuli_Chr02 | 31108578                | GG                                     | AA                 | AA               | INTERGENIC                    |                    |                                             |
| SNP_11120_A_31108700 | NC_021161.1    | Ca_Kabuli_Chr02 | 31108700                | GG                                     | AA                 | AA               | INTERGENIC                    |                    |                                             |
| SNP_11121_A_31108836 | NC_021161.1    | Ca_Kabuli_Chr02 | 31108836                | AA                                     | TT                 | TT               | INTERGENIC                    |                    |                                             |
| SNP_11122_A_31109358 | NC_021161.1    | Ca_Kabuli_Chr02 | 31109358                | TT                                     | CC                 | CC               | INTERGENIC                    |                    |                                             |
| SNP_11123_A_31109435 | NC_021161.1    | Ca_Kabuli_Chr02 | 31109435                | GG                                     | AA                 | AA               | INTERGENIC                    |                    |                                             |
| SNP_11125_A_31109502 | NC_021161.1    | Ca_Kabuli_Chr02 | 31109502                | CC                                     | TT                 | TT               | INTERGENIC                    |                    |                                             |
| SNP_11126_A_31109558 | NC_021161.1    | Ca_Kabuli_Chr02 | 31109558                | AA                                     | TT                 | TT               | INTERGENIC                    |                    |                                             |
| SNP_11127_A_31109615 | NC_021161.1    | Ca_Kabuli_Chr02 | 31109615                | CC                                     | AA                 | AA               | INTERGENIC                    |                    |                                             |
| SNP_11128_A_31109760 | NC_021161.1    | Ca_Kabuli_Chr02 | 31109760                | TT                                     | GG                 | GG               | INTERGENIC                    |                    |                                             |
| SNP_11129_A_31109851 | NC_021161.1    | Ca_Kabuli_Chr02 | 31109851                | GG                                     | TT                 | TT               | INTERGENIC                    |                    |                                             |
| SNP_11130_A_31109874 | NC_021161.1    | Ca_Kabuli_Chr02 | 31109874                | TT                                     | CC                 | CC               | INTERGENIC                    |                    |                                             |
| SNP_11131_A_31109889 | NC_021161.1    | Ca_Kabuli_Chr02 | 31109889                | CC                                     | TT                 | TT               | INTERGENIC                    |                    |                                             |
| SNP_11132_A_31110060 | NC_021161.1    | Ca_Kabuli_Chr02 | 31110060                | GG                                     | TT                 | TT               | INTERGENIC                    |                    |                                             |
| SNP_11133_A_31110661 | NC_021161.1    | Ca_Kabuli_Chr02 | 31110661                | AA                                     | TT                 | TT               | DRR                           | 101509568          | putative glutamine amidotransferase YLR126C |
| SNP_11134_A_31110687 | NC_021161.1    | Ca_Kabuli_Chr02 | 31110687                | TT                                     | CC                 | CC               | DRR                           | 101509568          | putative glutamine amidotransferase YLR126C |
| SNP_11135_A_31111046 | NC_021161.1    | Ca_Kabuli_Chr02 | 31111046                | TT                                     | GG                 | GG               | DRR                           | 101509568          | putative glutamine amidotransferase YLR126C |
| SNP_11136_A_31111150 | NC_021161.1    | Ca_Kabuli_Chr02 | 31111150                | CC                                     | GG                 | GG               | DRR                           | 101509568          | putative glutamine amidotransferase YLR126C |
| SNP_11137_A_31111633 | NC_021161.1    | Ca_Kabuli_Chr02 | 31111633                | CC                                     | TT                 | TT               | INTRON                        | 101509568          | putative glutamine amidotransferase YLR126C |
| SNP_11138_A_31111655 | NC_021161.1    | Ca_Kabuli_Chr02 | 31111655                | TT                                     | GG                 | GG               | INTRON                        | 101509568          | putative glutamine amidotransferase YLR126C |
| SNP_11139_A_31111803 | NC_021161.1    | Ca_Kabuli_Chr02 | 31111803                | AA                                     | GG                 | GG               | INTRON                        | 101509568          | putative glutamine amidotransferase YLR126C |
| SNP_11140_A_31111857 | NC_021161.1    | Ca_Kabuli_Chr02 | 31111857                | CC                                     | TT                 | TT               | INTRON                        | 101509568          | putative glutamine amidotransferase YLR126C |
| SNP_11141_A_31112155 | NC_021161.1    | Ca_Kabuli_Chr02 | 31112155                | CC                                     | TT                 | TT               | INTRON                        | 101509568          | putative glutamine amidotransferase YLR126C |

| SNPs IDs             | Chromosome IDs | Chromosomes     | Physical positions (bp) | CDC Frontier (Reference genome) | (Pusa 1103 & HPNB) | (ILWC 46 & LPNB) | Sequence Components of genome | Gene accession IDs | Putative functions                          |
|----------------------|----------------|-----------------|-------------------------|---------------------------------|--------------------|------------------|-------------------------------|--------------------|---------------------------------------------|
| SNP_11142_A_31112189 | NC_021161.1    | Ca_Kabuli_Chr02 | 31112189                | GG                              | AA                 | AA               | INTRON                        | 101509568          | putative glutamine amidotransferase YLR126C |
| SNP_11143_A_31112261 | NC_021161.1    | Ca_Kabuli_Chr02 | 31112261                | AA                              | GG                 | GG               | SYNONYMOUS_CODING             | 101509568          | putative glutamine amidotransferase YLR126C |
| SNP_11144_A_31115618 | NC_021161.1    | Ca_Kabuli_Chr02 | 31115618                | CC                              | TT                 | TT               | URR                           | 101509568          | putative glutamine amidotransferase YLR126C |
| SNP_11145_A_31115654 | NC_021161.1    | Ca_Kabuli_Chr02 | 31115654                | TT                              | CC                 | CC               | URR                           | 101509568          | putative glutamine amidotransferase YLR126C |
| SNP_11146_A_31116979 | NC_021161.1    | Ca_Kabuli_Chr02 | 31116979                | AA                              | TT                 | TT               | INTERGENIC                    |                    |                                             |
| SNP_11147_A_31117002 | NC_021161.1    | Ca_Kabuli_Chr02 | 31117002                | CC                              | TT                 | TT               | INTERGENIC                    |                    |                                             |
| SNP_11148_A_31117210 | NC_021161.1    | Ca_Kabuli_Chr02 | 31117210                | AA                              | GG                 | GG               | INTERGENIC                    |                    |                                             |
| SNP_11149_A_31117243 | NC_021161.1    | Ca_Kabuli_Chr02 | 31117243                | GG                              | TT                 | TT               | INTERGENIC                    |                    |                                             |
| SNP_11151_A_31118895 | NC_021161.1    | Ca_Kabuli_Chr02 | 31118895                | CC                              | TT                 | TT               | INTERGENIC                    |                    |                                             |
| SNP_11152_A_31119144 | NC_021161.1    | Ca_Kabuli_Chr02 | 31119144                | AA                              | GG                 | GG               | INTERGENIC                    |                    |                                             |
| SNP_11153_A_31122637 | NC_021161.1    | Ca_Kabuli_Chr02 | 31122637                | CC                              | GG                 | GG               | INTERGENIC                    |                    |                                             |
| SNP_11154_A_31122919 | NC_021161.1    | Ca_Kabuli_Chr02 | 31122919                | CC                              | GG                 | GG               | INTERGENIC                    |                    |                                             |
| SNP_11155_A_31123088 | NC_021161.1    | Ca_Kabuli_Chr02 | 31123088                | AA                              | GG                 | GG               | INTERGENIC                    |                    |                                             |
| SNP_11156_A_31123102 | NC_021161.1    | Ca_Kabuli_Chr02 | 31123102                | TT                              | CC                 | CC               | INTERGENIC                    |                    |                                             |
| SNP_11157_A_31123830 | NC_021161.1    | Ca_Kabuli_Chr02 | 31123830                | GG                              | TT                 | TT               | INTERGENIC                    |                    |                                             |
| SNP_11159_A_31125355 | NC_021161.1    | Ca_Kabuli_Chr02 | 31125355                | AA                              | TT                 | TT               | INTERGENIC                    |                    |                                             |
| SNP_11160_A_31125507 | NC_021161.1    | Ca_Kabuli_Chr02 | 31125507                | CC                              | GG                 | GG               | INTERGENIC                    |                    |                                             |
| SNP_11161_A_31125826 | NC_021161.1    | Ca_Kabuli_Chr02 | 31125826                | CC                              | AA                 | AA               | INTERGENIC                    |                    |                                             |
| SNP_11162_A_31125887 | NC_021161.1    | Ca_Kabuli_Chr02 | 31125887                | TT                              | AA                 | AA               | INTERGENIC                    |                    |                                             |
| SNP_11163_A_31127463 | NC_021161.1    | Ca_Kabuli_Chr02 | 31127463                | CC                              | AA                 | AA               | INTRON                        | 101509246          | LOB domain-containing protein 12-like       |
| SNP_11164_A_31128608 | NC_021161.1    | Ca_Kabuli_Chr02 | 31128608                | TT                              | CC                 | CC               | URR                           | 101509246          | LOB domain-containing protein 12-like       |
| SNP_11166_A_31133074 | NC_021161.1    | Ca_Kabuli_Chr02 | 31133074                | GG                              | AA                 | AA               | INTERGENIC                    |                    |                                             |



| SNPs IDs             | Chromosome IDs | Chromosomes     | Physical positions (bp) | CDC Frontier genome (Reference genome) | (Pusa 1103 & HPNB) | (ILWC 46 & LPNB) | Sequence Components of genome | Gene accession IDs | Putative functions                                |
|----------------------|----------------|-----------------|-------------------------|----------------------------------------|--------------------|------------------|-------------------------------|--------------------|---------------------------------------------------|
| SNP_11168_A_31137897 | NC_021161.1    | Ca_Kabuli_Chr02 | 31137897                | CC                                     | TT                 | TT               | INTRON                        | 101508931          | protein trichome birefringence-like 33            |
| SNP_11169_A_31137943 | NC_021161.1    | Ca_Kabuli_Chr02 | 31137943                | AA                                     | GG                 | GG               | INTRON                        | 101508931          | protein trichome birefringence-like 33            |
| SNP_11170_A_31138034 | NC_021161.1    | Ca_Kabuli_Chr02 | 31138034                | GG                                     | AA                 | AA               | INTRON                        | 101508931          | protein trichome birefringence-like 33            |
| SNP_11171_A_31138097 | NC_021161.1    | Ca_Kabuli_Chr02 | 31138097                | CC                                     | TT                 | TT               | INTRON                        | 101508931          | protein trichome birefringence-like 33            |
| SNP_11172_A_31138215 | NC_021161.1    | Ca_Kabuli_Chr02 | 31138215                | TT                                     | AA                 | AA               | INTRON                        | 101508931          | protein trichome birefringence-like 33            |
| SNP_11174_A_31138448 | NC_021161.1    | Ca_Kabuli_Chr02 | 31138448                | AA                                     | CC                 | CC               | INTRON                        | 101508931          | protein trichome birefringence-like 33            |
| SNP_11175_A_31139160 | NC_021161.1    | Ca_Kabuli_Chr02 | 31139160                | CC                                     | GG                 | GG               | URR                           | 101508931          | protein trichome birefringence-like 33            |
| SNP_11176_A_31141711 | NC_021161.1    | Ca_Kabuli_Chr02 | 31141711                | TT                                     | CC                 | CC               | INTERGENIC                    |                    |                                                   |
| SNP_11177_A_31142011 | NC_021161.1    | Ca_Kabuli_Chr02 | 31142011                | TT                                     | CC                 | CC               | INTERGENIC                    |                    |                                                   |
| SNP_11178_A_31142012 | NC_021161.1    | Ca_Kabuli_Chr02 | 31142012                | AA                                     | CC                 | CC               | INTERGENIC                    |                    |                                                   |
| SNP_11180_A_31146601 | NC_021161.1    | Ca_Kabuli_Chr02 | 31146601                | CC                                     | TT                 | TT               | URR                           | 101508615          | abscisic acid receptor PYL4-like                  |
| SNP_11181_A_31146797 | NC_021161.1    | Ca_Kabuli_Chr02 | 31146797                | GG                                     | TT                 | TT               | URR                           | 101508615          | abscisic acid receptor PYL4-like                  |
| SNP_11184_A_31158705 | NC_021161.1    | Ca_Kabuli_Chr02 | 31158705                | TT                                     | AA                 | AA               | NON_SYNONYMOUS_CODING         | 101508296          | SNF2 domain-containing protein CLASSY 1-like      |
| SNP_11185_A_31159586 | NC_021161.1    | Ca_Kabuli_Chr02 | 31159586                | GG                                     | CC                 | CC               | INTRON                        | 101508296          | SNF2 domain-containing protein CLASSY 1-like      |
| SNP_11186_A_31159593 | NC_021161.1    | Ca_Kabuli_Chr02 | 31159593                | TT                                     | AA                 | AA               | INTRON                        | 101508296          | SNF2 domain-containing protein CLASSY 1-like      |
| SNP_11187_A_31159660 | NC_021161.1    | Ca_Kabuli_Chr02 | 31159660                | GG                                     | TT                 | TT               | INTRON                        | 101508296          | SNF2 domain-containing protein CLASSY 1-like      |
| SNP_11189_A_31163967 | NC_021161.1    | Ca_Kabuli_Chr02 | 31163967                | AA                                     | GG                 | GG               | INTERGENIC                    |                    |                                                   |
| SNP_11190_A_31164829 | NC_021161.1    | Ca_Kabuli_Chr02 | 31164829                | TT                                     | CC                 | CC               | INTERGENIC                    |                    |                                                   |
| SNP_11191_A_31169239 | NC_021161.1    | Ca_Kabuli_Chr02 | 31169239                | AA                                     | TT                 | TT               | URR                           | 101507986          | dehydration-responsive element-binding protein 2C |
| SNP_11192_A_31169240 | NC_021161.1    | Ca_Kabuli_Chr02 | 31169240                | CC                                     | TT                 | TT               | URR                           | 101507986          | dehydration-responsive element-binding protein 2C |
| SNP_11193_A_31169721 | NC_021161.1    | Ca_Kabuli_Chr02 | 31169721                | CC                                     | TT                 | TT               | URR                           | 101507986          | dehydration-responsive element-binding protein 2C |
| SNP_11194_A_31170042 | NC_021161.1    | Ca_Kabuli_Chr02 | 31170042                | AA                                     | CC                 | CC               | URR                           | 101507986          | dehydration-responsive element-binding protein 2C |

| SNPs IDs             | Chromosome IDs | Chromosomes     | Physical positions (bp) | CDC Frontier (Reference genome) | (Pusa 1103 & HPNB) | (ILWC 46 & LPNB) | Sequence genome | Components of | Gene accession IDs | Putative functions |
|----------------------|----------------|-----------------|-------------------------|---------------------------------|--------------------|------------------|-----------------|---------------|--------------------|--------------------|
| SNP_11195_A_31170859 | NC_021161.1    | Ca_Kabuli_Chr02 | 31170859                | AA                              | GG                 | GG               | INTERGENIC      |               |                    |                    |
| SNP_11196_A_31170861 | NC_021161.1    | Ca_Kabuli_Chr02 | 31170861                | AA                              | TT                 | TT               | INTERGENIC      |               |                    |                    |
| SNP_11197_A_31170866 | NC_021161.1    | Ca_Kabuli_Chr02 | 31170866                | TT                              | CC                 | CC               | INTERGENIC      |               |                    |                    |
| SNP_11198_A_31170867 | NC_021161.1    | Ca_Kabuli_Chr02 | 31170867                | CC                              | TT                 | TT               | INTERGENIC      |               |                    |                    |
| SNP_11199_A_31170877 | NC_021161.1    | Ca_Kabuli_Chr02 | 31170877                | AA                              | TT                 | TT               | INTERGENIC      |               |                    |                    |
| SNP_11200_A_31170888 | NC_021161.1    | Ca_Kabuli_Chr02 | 31170888                | AA                              | GG                 | GG               | INTERGENIC      |               |                    |                    |
| SNP_11202_A_31172877 | NC_021161.1    | Ca_Kabuli_Chr02 | 31172877                | AA                              | GG                 | GG               | INTERGENIC      |               |                    |                    |
| SNP_11204_A_31176248 | NC_021161.1    | Ca_Kabuli_Chr02 | 31176248                | AA                              | GG                 | GG               | INTERGENIC      |               |                    |                    |
| SNP_11205_A_31177062 | NC_021161.1    | Ca_Kabuli_Chr02 | 31177062                | TT                              | AA                 | AA               | INTERGENIC      |               |                    |                    |
| SNP_11206_A_31177095 | NC_021161.1    | Ca_Kabuli_Chr02 | 31177095                | AA                              | GG                 | GG               | INTERGENIC      |               |                    |                    |
| SNP_11208_A_31177125 | NC_021161.1    | Ca_Kabuli_Chr02 | 31177125                | AA                              | GG                 | GG               | INTERGENIC      |               |                    |                    |
| SNP_11209_A_31177766 | NC_021161.1    | Ca_Kabuli_Chr02 | 31177766                | CC                              | TT                 | TT               | INTERGENIC      |               |                    |                    |
| SNP_11210_A_31177772 | NC_021161.1    | Ca_Kabuli_Chr02 | 31177772                | GG                              | AA                 | AA               | INTERGENIC      |               |                    |                    |
| SNP_11211_A_31177920 | NC_021161.1    | Ca_Kabuli_Chr02 | 31177920                | GG                              | AA                 | AA               | INTERGENIC      |               |                    |                    |
| SNP_11213_A_31178888 | NC_021161.1    | Ca_Kabuli_Chr02 | 31178888                | GG                              | TT                 | TT               | INTERGENIC      |               |                    |                    |
| SNP_11214_A_31178889 | NC_021161.1    | Ca_Kabuli_Chr02 | 31178889                | TT                              | CC                 | CC               | INTERGENIC      |               |                    |                    |
| SNP_11215_A_31178923 | NC_021161.1    | Ca_Kabuli_Chr02 | 31178923                | TT                              | CC                 | CC               | INTERGENIC      |               |                    |                    |
| SNP_11216_A_31179092 | NC_021161.1    | Ca_Kabuli_Chr02 | 31179092                | TT                              | GG                 | GG               | INTERGENIC      |               |                    |                    |
| SNP_11217_A_31179201 | NC_021161.1    | Ca_Kabuli_Chr02 | 31179201                | AA                              | TT                 | TT               | INTERGENIC      |               |                    |                    |
| SNP_11218_A_31179293 | NC_021161.1    | Ca_Kabuli_Chr02 | 31179293                | TT                              | CC                 | CC               | INTERGENIC      |               |                    |                    |
| SNP_11219_A_31180025 | NC_021161.1    | Ca_Kabuli_Chr02 | 31180025                | TT                              | CC                 | CC               | INTERGENIC      |               |                    |                    |
| SNP_11220_A_31180259 | NC_021161.1    | Ca_Kabuli_Chr02 | 31180259                | GG                              | CC                 | CC               | INTERGENIC      |               |                    |                    |

| SNPs IDs             | Chromosome IDs | Chromosomes     | Physical positions (bp) | CDC Frontier genome (Reference genome) | (Pusa 1103 & HPNB) | (ILWC 46 & LPNB) | Sequence Components of genome | Gene accession IDs | Putative functions                                             |
|----------------------|----------------|-----------------|-------------------------|----------------------------------------|--------------------|------------------|-------------------------------|--------------------|----------------------------------------------------------------|
| SNP_11221_A_31180338 | NC_021161.1    | Ca_Kabuli_Chr02 | 31180338                | CC                                     | TT                 | TT               | INTERGENIC                    |                    |                                                                |
| SNP_11222_A_31180534 | NC_021161.1    | Ca_Kabuli_Chr02 | 31180534                | CC                                     | TT                 | TT               | INTERGENIC                    |                    |                                                                |
| SNP_11224_A_31187160 | NC_021161.1    | Ca_Kabuli_Chr02 | 31187160                | GG                                     | CC                 | CC               | INTRON                        | 101507664          | laccase-5                                                      |
| SNP_11225_A_31187429 | NC_021161.1    | Ca_Kabuli_Chr02 | 31187429                | GG                                     | TT                 | TT               | INTRON                        | 101507664          | laccase-5                                                      |
| SNP_11226_A_31188942 | NC_021161.1    | Ca_Kabuli_Chr02 | 31188942                | TT                                     | CC                 | CC               | INTRON                        | 101507664          | laccase-5                                                      |
| SNP_11227_A_31188998 | NC_021161.1    | Ca_Kabuli_Chr02 | 31188998                | GG                                     | AA                 | AA               | INTRON                        | 101507664          | laccase-5                                                      |
| SNP_11229_A_31189514 | NC_021161.1    | Ca_Kabuli_Chr02 | 31189514                | AA                                     | GG                 | GG               | INTRON                        | 101507664          | laccase-5                                                      |
| SNP_11230_A_31189837 | NC_021161.1    | Ca_Kabuli_Chr02 | 31189837                | CC                                     | GG                 | GG               | INTRON                        | 101507664          | laccase-5                                                      |
| SNP_11231_A_31189839 | NC_021161.1    | Ca_Kabuli_Chr02 | 31189839                | CC                                     | TT                 | TT               | INTRON                        | 101507664          | laccase-5                                                      |
| SNP_11232_A_31190529 | NC_021161.1    | Ca_Kabuli_Chr02 | 31190529                | GG                                     | AA                 | AA               | URR                           | 101507664          | laccase-5                                                      |
| SNP_11233_A_31190538 | NC_021161.1    | Ca_Kabuli_Chr02 | 31190538                | CC                                     | TT                 | TT               | URR                           | 101507664          | laccase-5                                                      |
| SNP_11234_A_31191744 | NC_021161.1    | Ca_Kabuli_Chr02 | 31191744                | TT                                     | CC                 | CC               | URR                           | 101507664          | laccase-5                                                      |
| SNP_11235_A_31194952 | NC_021161.1    | Ca_Kabuli_Chr02 | 31194952                | TT                                     | CC                 | CC               | INTERGENIC                    |                    |                                                                |
| SNP_11236_A_31195034 | NC_021161.1    | Ca_Kabuli_Chr02 | 31195034                | GG                                     | AA                 | AA               | INTERGENIC                    |                    |                                                                |
| SNP_11237_A_31195082 | NC_021161.1    | Ca_Kabuli_Chr02 | 31195082                | CC                                     | TT                 | TT               | INTERGENIC                    |                    |                                                                |
| SNP_11238_A_31196416 | NC_021161.1    | Ca_Kabuli_Chr02 | 31196416                | TT                                     | CC                 | CC               | INTERGENIC                    |                    |                                                                |
| SNP_11239_A_31196594 | NC_021161.1    | Ca_Kabuli_Chr02 | 31196594                | TT                                     | CC                 | CC               | INTERGENIC                    |                    |                                                                |
| SNP_11240_A_31198116 | NC_021161.1    | Ca_Kabuli_Chr02 | 31198116                | AA                                     | GG                 | GG               | DRR                           | 101507351          | sorting nexin 2A-like                                          |
| SNP_11241_A_31198154 | NC_021161.1    | Ca_Kabuli_Chr02 | 31198154                | GG                                     | CC                 | CC               | DRR                           | 101507351          | sorting nexin 2A-like                                          |
| SNP_11242_A_31200497 | NC_021161.1    | Ca_Kabuli_Chr02 | 31200497                | CC                                     | TT                 | TT               | INTERGENIC                    |                    |                                                                |
| SNP_11243_A_31203831 | NC_021161.1    | Ca_Kabuli_Chr02 | 31203831                | AA                                     | GG                 | GG               | DRR                           | 101507029          | probable leucine-rich repeat receptor-like protein kinase IMK3 |
| SNP_11244_A_31209227 | NC_021161.1    | Ca_Kabuli_Chr02 | 31209227                | AA                                     | GG                 | GG               | URR                           | 101507029          | probable leucine-rich repeat receptor-like protein kinase IMK3 |

| SNPs IDs             | Chromosome IDs | Chromosomes     | Physical positions (bp) | CDC Frontier (Reference genome) | (Pusa 1103 & HPNB) | (ILWC 46 & LPNB) | Sequence Components of genome | Gene accession IDs | Putative functions                                             |
|----------------------|----------------|-----------------|-------------------------|---------------------------------|--------------------|------------------|-------------------------------|--------------------|----------------------------------------------------------------|
| SNP_11245_A_31209312 | NC_021161.1    | Ca_Kabuli_Chr02 | 31209312                | AA                              | CC                 | CC               | URR                           | 101507029          | probable leucine-rich repeat receptor-like protein kinase IMK3 |
| SNP_11246_A_31209362 | NC_021161.1    | Ca_Kabuli_Chr02 | 31209362                | AA                              | GG                 | GG               | URR                           | 101507029          | probable leucine-rich repeat receptor-like protein kinase IMK3 |
| SNP_11247_A_31209894 | NC_021161.1    | Ca_Kabuli_Chr02 | 31209894                | GG                              | TT                 | TT               | INTERGENIC                    |                    |                                                                |
| SNP_11248_A_31214331 | NC_021161.1    | Ca_Kabuli_Chr02 | 31214331                | TT                              | CC                 | CC               | DRR                           | 101506699          | PRA1 family protein B3                                         |
| SNP_11249_A_31216249 | NC_021161.1    | Ca_Kabuli_Chr02 | 31216249                | GG                              | AA                 | AA               | URR                           | 101506699          | PRA1 family protein B3                                         |
| SNP_11250_A_31216490 | NC_021161.1    | Ca_Kabuli_Chr02 | 31216490                | AA                              | GG                 | GG               | URR                           | 101506699          | PRA1 family protein B3                                         |
| SNP_11251_A_31216524 | NC_021161.1    | Ca_Kabuli_Chr02 | 31216524                | CC                              | TT                 | TT               | URR                           | 101506699          | PRA1 family protein B3                                         |
| SNP_11252_A_31216529 | NC_021161.1    | Ca_Kabuli_Chr02 | 31216529                | CC                              | TT                 | TT               | URR                           | 101506699          | PRA1 family protein B3                                         |
| SNP_11253_A_31216556 | NC_021161.1    | Ca_Kabuli_Chr02 | 31216556                | AA                              | GG                 | GG               | URR                           | 101506699          | PRA1 family protein B3                                         |
| SNP_11254_A_31216779 | NC_021161.1    | Ca_Kabuli_Chr02 | 31216779                | GG                              | AA                 | AA               | INTERGENIC                    |                    |                                                                |
| SNP_11255_A_31216817 | NC_021161.1    | Ca_Kabuli_Chr02 | 31216817                | GG                              | AA                 | AA               | INTERGENIC                    |                    |                                                                |
| SNP_11256_A_31216892 | NC_021161.1    | Ca_Kabuli_Chr02 | 31216892                | AA                              | GG                 | GG               | INTERGENIC                    |                    |                                                                |
| SNP_11257_A_31216944 | NC_021161.1    | Ca_Kabuli_Chr02 | 31216944                | TT                              | AA                 | AA               | INTERGENIC                    |                    |                                                                |
| SNP_11258_A_31218042 | NC_021161.1    | Ca_Kabuli_Chr02 | 31218042                | TT                              | CC                 | CC               | INTERGENIC                    |                    |                                                                |
| SNP_11259_A_31225801 | NC_021161.1    | Ca_Kabuli_Chr02 | 31225801                | TT                              | GG                 | GG               | INTERGENIC                    |                    |                                                                |
| SNP_11260_A_31227437 | NC_021161.1    | Ca_Kabuli_Chr02 | 31227437                | CC                              | TT                 | TT               | INTERGENIC                    |                    |                                                                |
| SNP_11261_A_31228093 | NC_021161.1    | Ca_Kabuli_Chr02 | 31228093                | CC                              | AA                 | AA               | INTERGENIC                    |                    |                                                                |
| SNP_11262_A_31228097 | NC_021161.1    | Ca_Kabuli_Chr02 | 31228097                | AA                              | GG                 | GG               | INTERGENIC                    |                    |                                                                |
| SNP_11263_A_31229818 | NC_021161.1    | Ca_Kabuli_Chr02 | 31229818                | TT                              | CC                 | CC               | INTERGENIC                    |                    |                                                                |
| SNP_11264_A_31232468 | NC_021161.1    | Ca_Kabuli_Chr02 | 31232468                | AA                              | TT                 | TT               | DRR                           | 101506372          | uncharacterized LOC101506372                                   |
| SNP_11266_A_31232866 | NC_021161.1    | Ca_Kabuli_Chr02 | 31232866                | CC                              | GG                 | GG               | DRR                           | 101506372          | uncharacterized LOC101506372                                   |
| SNP_11267_A_31233307 | NC_021161.1    | Ca_Kabuli_Chr02 | 31233307                | AA                              | GG                 | GG               | NON_SYNONYMOUS_CODING         | 101506372          | uncharacterized LOC101506372                                   |

| SNPs IDs             | Chromosome IDs | Chromosomes     | Physical positions (bp) | CDC Frontier genome (Reference genome) | (Pusa 1103 & HPNB) | (ILWC 46 & LPNB) | Sequence Components of genome | Gene accession IDs | Putative functions           |
|----------------------|----------------|-----------------|-------------------------|----------------------------------------|--------------------|------------------|-------------------------------|--------------------|------------------------------|
| SNP_11269_A_31234261 | NC_021161.1    | Ca_Kabuli_Chr02 | 31234261                | CC                                     | TT                 | TT               | INTRON                        | 101506372          | uncharacterized LOC101506372 |
| SNP_11270_A_31234391 | NC_021161.1    | Ca_Kabuli_Chr02 | 31234391                | CC                                     | TT                 | TT               | INTRON                        | 101506372          | uncharacterized LOC101506372 |
| SNP_11271_A_31234398 | NC_021161.1    | Ca_Kabuli_Chr02 | 31234398                | TT                                     | CC                 | CC               | INTRON                        | 101506372          | uncharacterized LOC101506372 |
| SNP_11272_A_31234460 | NC_021161.1    | Ca_Kabuli_Chr02 | 31234460                | TT                                     | CC                 | CC               | INTRON                        | 101506372          | uncharacterized LOC101506372 |
| SNP_11273_A_31235978 | NC_021161.1    | Ca_Kabuli_Chr02 | 31235978                | GG                                     | AA                 | AA               | URR                           | 101506372          | uncharacterized LOC101506372 |
| SNP_11274_A_31235982 | NC_021161.1    | Ca_Kabuli_Chr02 | 31235982                | CC                                     | TT                 | TT               | URR                           | 101506372          | uncharacterized LOC101506372 |
| SNP_11275_A_31235990 | NC_021161.1    | Ca_Kabuli_Chr02 | 31235990                | AA                                     | TT                 | TT               | URR                           | 101506372          | uncharacterized LOC101506372 |
| SNP_11276_A_31235994 | NC_021161.1    | Ca_Kabuli_Chr02 | 31235994                | TT                                     | AA                 | AA               | URR                           | 101506372          | uncharacterized LOC101506372 |
| SNP_11277_A_31235995 | NC_021161.1    | Ca_Kabuli_Chr02 | 31235995                | GG                                     | TT                 | TT               | URR                           | 101506372          | uncharacterized LOC101506372 |
| SNP_11278_A_31238308 | NC_021161.1    | Ca_Kabuli_Chr02 | 31238308                | TT                                     | CC                 | CC               | INTERGENIC                    |                    |                              |
| SNP_11279_A_31238320 | NC_021161.1    | Ca_Kabuli_Chr02 | 31238320                | GG                                     | TT                 | TT               | INTERGENIC                    |                    |                              |
| SNP_11280_A_31238625 | NC_021161.1    | Ca_Kabuli_Chr02 | 31238625                | AA                                     | GG                 | GG               | INTERGENIC                    |                    |                              |
| SNP_11281_A_31238689 | NC_021161.1    | Ca_Kabuli_Chr02 | 31238689                | AA                                     | GG                 | GG               | INTERGENIC                    |                    |                              |
| SNP_11282_A_31238743 | NC_021161.1    | Ca_Kabuli_Chr02 | 31238743                | AA                                     | GG                 | GG               | INTERGENIC                    |                    |                              |
| SNP_11283_A_31239806 | NC_021161.1    | Ca_Kabuli_Chr02 | 31239806                | TT                                     | CC                 | CC               | INTERGENIC                    |                    |                              |
| SNP_11284_A_31240109 | NC_021161.1    | Ca_Kabuli_Chr02 | 31240109                | GG                                     | AA                 | AA               | INTERGENIC                    |                    |                              |
| SNP_11286_A_31242790 | NC_021161.1    | Ca_Kabuli_Chr02 | 31242790                | CC                                     | TT                 | TT               | DRR                           | 101505618          | uncharacterized LOC101505618 |
| SNP_11287_A_31242791 | NC_021161.1    | Ca_Kabuli_Chr02 | 31242791                | GG                                     | AA                 | AA               | DRR                           | 101505618          | uncharacterized LOC101505618 |
| SNP_11288_A_31244050 | NC_021161.1    | Ca_Kabuli_Chr02 | 31244050                | GG                                     | TT                 | TT               | INTERGENIC                    |                    |                              |
| SNP_11289_A_31244272 | NC_021161.1    | Ca_Kabuli_Chr02 | 31244272                | CC                                     | TT                 | TT               | INTERGENIC                    |                    |                              |
| SNP_11290_A_31244333 | NC_021161.1    | Ca_Kabuli_Chr02 | 31244333                | TT                                     | AA                 | AA               | INTERGENIC                    |                    |                              |
| SNP_11292_A_31244578 | NC_021161.1    | Ca_Kabuli_Chr02 | 31244578                | AA                                     | GG                 | GG               | INTERGENIC                    |                    |                              |

| SNPs IDs             | Chromosome IDs | Chromosomes     | Physical positions (bp) | CDC Frontier genome (Reference genome) | (Pusa 1103 & HPNB) | (ILWC 46 & LPNB) | Sequence Components of genome | Gene accession IDs | Putative functions                            |
|----------------------|----------------|-----------------|-------------------------|----------------------------------------|--------------------|------------------|-------------------------------|--------------------|-----------------------------------------------|
| SNP_11293_A_31246664 | NC_021161.1    | Ca_Kabuli_Chr02 | 31246664                | CC                                     | TT                 | TT               | DRR                           | 101505291          | arogenate dehydrogenase 1, chloroplastic-like |
| SNP_11294_A_31246881 | NC_021161.1    | Ca_Kabuli_Chr02 | 31246881                | CC                                     | TT                 | TT               | DRR                           | 101505291          | arogenate dehydrogenase 1, chloroplastic-like |
| SNP_11295_A_31251269 | NC_021161.1    | Ca_Kabuli_Chr02 | 31251269                | CC                                     | TT                 | TT               | URR                           | 101505291          | arogenate dehydrogenase 1, chloroplastic-like |
| SNP_11296_A_31255751 | NC_021161.1    | Ca_Kabuli_Chr02 | 31255751                | GG                                     | TT                 | TT               | URR                           | 101500398          | cation/H(+) antiporter 15-like                |
| SNP_11297_A_31257610 | NC_021161.1    | Ca_Kabuli_Chr02 | 31257610                | CC                                     | TT                 | TT               | INTRON                        | 101500710          | chromatin assembly factor 1 subunit A-B-like  |
| SNP_11298_A_31260834 | NC_021161.1    | Ca_Kabuli_Chr02 | 31260834                | TT                                     | CC                 | CC               | URR                           | 101500710          | chromatin assembly factor 1 subunit A-B-like  |
| SNP_11299_A_31261133 | NC_021161.1    | Ca_Kabuli_Chr02 | 31261133                | GG                                     | AA                 | AA               | URR                           | 101500710          | chromatin assembly factor 1 subunit A-B-like  |
| SNP_11300_A_31261233 | NC_021161.1    | Ca_Kabuli_Chr02 | 31261233                | AA                                     | GG                 | GG               | URR                           | 101500710          | chromatin assembly factor 1 subunit A-B-like  |
| SNP_11301_A_31261304 | NC_021161.1    | Ca_Kabuli_Chr02 | 31261304                | TT                                     | CC                 | CC               | URR                           | 101500710          | chromatin assembly factor 1 subunit A-B-like  |
| SNP_11302_A_31263194 | NC_021161.1    | Ca_Kabuli_Chr02 | 31263194                | CC                                     | GG                 | GG               | INTERGENIC                    |                    |                                               |
| SNP_11303_A_31266493 | NC_021161.1    | Ca_Kabuli_Chr02 | 31266493                | GG                                     | TT                 | TT               | INTERGENIC                    |                    |                                               |
| SNP_11304_A_31270597 | NC_021161.1    | Ca_Kabuli_Chr02 | 31270597                | GG                                     | AA                 | AA               | INTERGENIC                    |                    |                                               |
| SNP_11305_A_31275543 | NC_021161.1    | Ca_Kabuli_Chr02 | 31275543                | CC                                     | AA                 | AA               | INTERGENIC                    |                    |                                               |
| SNP_11307_A_31278374 | NC_021161.1    | Ca_Kabuli_Chr02 | 31278374                | GG                                     | AA                 | AA               | INTERGENIC                    |                    |                                               |
| SNP_11308_A_31279399 | NC_021161.1    | Ca_Kabuli_Chr02 | 31279399                | CC                                     | TT                 | TT               | INTERGENIC                    |                    |                                               |
| SNP_11309_A_31286290 | NC_021161.1    | Ca_Kabuli_Chr02 | 31286290                | AA                                     | GG                 | GG               | INTERGENIC                    |                    |                                               |
| SNP_11311_A_31287247 | NC_021161.1    | Ca_Kabuli_Chr02 | 31287247                | AA                                     | CC                 | CC               | INTERGENIC                    |                    |                                               |
| SNP_11312_A_31287314 | NC_021161.1    | Ca_Kabuli_Chr02 | 31287314                | GG                                     | AA                 | AA               | INTERGENIC                    |                    |                                               |
| SNP_11313_A_31289705 | NC_021161.1    | Ca_Kabuli_Chr02 | 31289705                | CC                                     | TT                 | TT               | INTERGENIC                    |                    |                                               |
| SNP_11314_A_31290828 | NC_021161.1    | Ca_Kabuli_Chr02 | 31290828                | AA                                     | TT                 | TT               | INTERGENIC                    |                    |                                               |
| SNP_11316_A_31295058 | NC_021161.1    | Ca_Kabuli_Chr02 | 31295058                | TT                                     | CC                 | CC               | INTERGENIC                    |                    |                                               |
| SNP_11317_A_31295270 | NC_021161.1    | Ca_Kabuli_Chr02 | 31295270                | CC                                     | TT                 | TT               | INTERGENIC                    |                    |                                               |

| SNPs IDs             | Chromosome IDs | Chromosomes     | Physical positions (bp) | CDC Frontier genome (Reference genome) | (Pusa 1103 & HPNB) | (ILWC 46 & LPNB) | Sequence Components of genome | Gene accession IDs | Putative functions                                        |
|----------------------|----------------|-----------------|-------------------------|----------------------------------------|--------------------|------------------|-------------------------------|--------------------|-----------------------------------------------------------|
| SNP_11318_A_31297774 | NC_021161.1    | Ca_Kabuli_Chr02 | 31297774                | CC                                     | GG                 | GG               | INTERGENIC                    |                    |                                                           |
| SNP_11319_A_31298325 | NC_021161.1    | Ca_Kabuli_Chr02 | 31298325                | TT                                     | AA                 | AA               | INTERGENIC                    |                    |                                                           |
| SNP_11321_A_31299723 | NC_021161.1    | Ca_Kabuli_Chr02 | 31299723                | AA                                     | GG                 | GG               | DRR                           | 101491097          | protein EARLY RESPONSIVE TO DEHYDRATION 15-like           |
| SNP_11322_A_31299976 | NC_021161.1    | Ca_Kabuli_Chr02 | 31299976                | AA                                     | GG                 | GG               | DRR                           | 101491097          | protein EARLY RESPONSIVE TO DEHYDRATION 15-like           |
| SNP_11324_A_31301167 | NC_021161.1    | Ca_Kabuli_Chr02 | 31301167                | CC                                     | TT                 | TT               | URR                           | 101491097          | protein EARLY RESPONSIVE TO DEHYDRATION 15-like           |
| SNP_11325_A_31302443 | NC_021161.1    | Ca_Kabuli_Chr02 | 31302443                | TT                                     | CC                 | CC               | URR                           | 101491097          | protein EARLY RESPONSIVE TO DEHYDRATION 15-like           |
| SNP_11326_A_31303395 | NC_021161.1    | Ca_Kabuli_Chr02 | 31303395                | AA                                     | CC                 | CC               | DRR                           | 101491731          | staphylococcal-like nuclease CAN2                         |
| SNP_11327_A_31303433 | NC_021161.1    | Ca_Kabuli_Chr02 | 31303433                | TT                                     | AA                 | AA               | DRR                           | 101491731          | staphylococcal-like nuclease CAN2                         |
| SNP_11328_A_31304693 | NC_021161.1    | Ca_Kabuli_Chr02 | 31304693                | CC                                     | TT                 | TT               | URR                           | 101491415          | copper transport protein CCH                              |
| SNP_11329_A_31304857 | NC_021161.1    | Ca_Kabuli_Chr02 | 31304857                | GG                                     | TT                 | TT               | URR                           | 101491415          | copper transport protein CCH                              |
| SNP_11330_A_31305297 | NC_021161.1    | Ca_Kabuli_Chr02 | 31305297                | CC                                     | TT                 | TT               | INTERGENIC                    |                    |                                                           |
| SNP_11331_A_31308921 | NC_021161.1    | Ca_Kabuli_Chr02 | 31308921                | AA                                     | GG                 | GG               | URR                           | 101491731          | staphylococcal-like nuclease CAN2                         |
| SNP_11332_A_31313006 | NC_021161.1    | Ca_Kabuli_Chr02 | 31313006                | AA                                     | GG                 | GG               | INTERGENIC                    |                    |                                                           |
| SNP_11333_A_31316304 | NC_021161.1    | Ca_Kabuli_Chr02 | 31316304                | GG                                     | AA                 | AA               | INTERGENIC                    |                    |                                                           |
| SNP_11334_A_31316346 | NC_021161.1    | Ca_Kabuli_Chr02 | 31316346                | AA                                     | GG                 | GG               | INTERGENIC                    |                    |                                                           |
| SNP_11335_A_31316490 | NC_021161.1    | Ca_Kabuli_Chr02 | 31316490                | GG                                     | AA                 | AA               | INTERGENIC                    |                    |                                                           |
| SNP_11336_A_31316515 | NC_021161.1    | Ca_Kabuli_Chr02 | 31316515                | CC                                     | TT                 | TT               | INTERGENIC                    |                    |                                                           |
| SNP_11337_A_31316574 | NC_021161.1    | Ca_Kabuli_Chr02 | 31316574                | TT                                     | GG                 | GG               | INTERGENIC                    |                    |                                                           |
| SNP_11338_A_31316604 | NC_021161.1    | Ca_Kabuli_Chr02 | 31316604                | TT                                     | CC                 | CC               | INTERGENIC                    |                    |                                                           |
| SNP_11339_A_31316675 | NC_021161.1    | Ca_Kabuli_Chr02 | 31316675                | AA                                     | GG                 | GG               | INTERGENIC                    |                    |                                                           |
| SNP_11341_A_31317922 | NC_021161.1    | Ca_Kabuli_Chr02 | 31317922                | CC                                     | AA                 | AA               | DRR                           | 101492393          | alpha-soluble NSF attachment protein 2-like               |
| SNP_11342_A_31323059 | NC_021161.1    | Ca_Kabuli_Chr02 | 31323059                | TT                                     | CC                 | CC               | DRR                           | 101492724          | putative sodium-coupled neutral amino acid transporter 10 |

| SNPs IDs             | Chromosome IDs | Chromosomes     | Physical positions (bp) | CDC Frontier genome (Reference genome) | (Pusa 1103 & HPNB) | (ILWC 46 & LPNB) | Sequence Components of genome | Gene accession IDs | Putative functions                                        |
|----------------------|----------------|-----------------|-------------------------|----------------------------------------|--------------------|------------------|-------------------------------|--------------------|-----------------------------------------------------------|
| SNP_11343_A_31323311 | NC_021161.1    | Ca_Kabuli_Chr02 | 31323311                | TT                                     | CC                 | CC               | DRR                           | 101492724          | putative sodium-coupled neutral amino acid transporter 10 |
| SNP_11344_A_31323317 | NC_021161.1    | Ca_Kabuli_Chr02 | 31323317                | GG                                     | AA                 | AA               | DRR                           | 101492724          | putative sodium-coupled neutral amino acid transporter 10 |
| SNP_11345_A_31325472 | NC_021161.1    | Ca_Kabuli_Chr02 | 31325472                | AA                                     | TT                 | TT               | INTRON                        | 101492724          | putative sodium-coupled neutral amino acid transporter 10 |
| SNP_11346_A_31325478 | NC_021161.1    | Ca_Kabuli_Chr02 | 31325478                | TT                                     | GG                 | GG               | INTRON                        | 101492724          | putative sodium-coupled neutral amino acid transporter 10 |
| SNP_11347_A_31325481 | NC_021161.1    | Ca_Kabuli_Chr02 | 31325481                | AA                                     | GG                 | GG               | INTRON                        | 101492724          | putative sodium-coupled neutral amino acid transporter 10 |
| SNP_11348_A_31325482 | NC_021161.1    | Ca_Kabuli_Chr02 | 31325482                | CC                                     | GG                 | GG               | INTRON                        | 101492724          | putative sodium-coupled neutral amino acid transporter 10 |
| SNP_11349_A_31325955 | NC_021161.1    | Ca_Kabuli_Chr02 | 31325955                | TT                                     | CC                 | CC               | SYNONYMOUS_CODING             | 101492724          | putative sodium-coupled neutral amino acid transporter 10 |
| SNP_11350_A_31331389 | NC_021161.1    | Ca_Kabuli_Chr02 | 31331389                | TT                                     | AA                 | AA               | INTERGENIC                    |                    |                                                           |
| SNP_11351_A_31332109 | NC_021161.1    | Ca_Kabuli_Chr02 | 31332109                | CC                                     | GG                 | GG               | INTERGENIC                    |                    |                                                           |
| SNP_11352_A_31334617 | NC_021161.1    | Ca_Kabuli_Chr02 | 31334617                | CC                                     | TT                 | TT               | INTERGENIC                    |                    |                                                           |
| SNP_11353_A_31335436 | NC_021161.1    | Ca_Kabuli_Chr02 | 31335436                | GG                                     | AA                 | AA               | INTERGENIC                    |                    |                                                           |
| SNP_11354_A_31335919 | NC_021161.1    | Ca_Kabuli_Chr02 | 31335919                | CC                                     | TT                 | TT               | INTERGENIC                    |                    |                                                           |
| SNP_11355_A_31335990 | NC_021161.1    | Ca_Kabuli_Chr02 | 31335990                | GG                                     | AA                 | AA               | INTERGENIC                    |                    |                                                           |
| SNP_11356_A_31344733 | NC_021161.1    | Ca_Kabuli_Chr02 | 31344733                | AA                                     | GG                 | GG               | INTERGENIC                    |                    |                                                           |
| SNP_11357_A_31345606 | NC_021161.1    | Ca_Kabuli_Chr02 | 31345606                | TT                                     | AA                 | AA               | INTERGENIC                    |                    |                                                           |
| SNP_11358_A_31345607 | NC_021161.1    | Ca_Kabuli_Chr02 | 31345607                | AA                                     | TT                 | TT               | INTERGENIC                    |                    |                                                           |
| SNP_11359_A_31346305 | NC_021161.1    | Ca_Kabuli_Chr02 | 31346305                | TT                                     | GG                 | GG               | DRR                           | 101493380          | uncharacterized protein At2g40430-like                    |
| SNP_11360_A_31346653 | NC_021161.1    | Ca_Kabuli_Chr02 | 31346653                | TT                                     | CC                 | CC               | DRR                           | 101493380          | uncharacterized protein At2g40430-like                    |
| SNP_11361_A_31347009 | NC_021161.1    | Ca_Kabuli_Chr02 | 31347009                | CC                                     | TT                 | TT               | DRR                           | 101493380          | uncharacterized protein At2g40430-like                    |
| SNP_11362_A_31350563 | NC_021161.1    | Ca_Kabuli_Chr02 | 31350563                | CC                                     | TT                 | TT               | INTERGENIC                    |                    |                                                           |
| SNP_11363_A_31352289 | NC_021161.1    | Ca_Kabuli_Chr02 | 31352289                | TT                                     | CC                 | CC               | URR                           | 101493380          | uncharacterized protein At2g40430-like                    |
| SNP_11364_A_31352301 | NC_021161.1    | Ca_Kabuli_Chr02 | 31352301                | GG                                     | AA                 | AA               | URR                           | 101493380          | uncharacterized protein At2g40430-like                    |



| SNPs IDs             | Chromosome IDs | Chromosomes     | Physical positions (bp) | CDC Frontier (Reference genome) | (Pusa 1103 & HPNB) | (ILWC 46 & LPNB) | Sequence Components of genome | Gene accession IDs | Putative functions                     |
|----------------------|----------------|-----------------|-------------------------|---------------------------------|--------------------|------------------|-------------------------------|--------------------|----------------------------------------|
| SNP_11365_A_31352312 | NC_021161.1    | Ca_Kabuli_Chr02 | 31352312                | AA                              | GG                 | GG               | URR                           | 101493380          | uncharacterized protein A12g40430-like |
| SNP_11367_A_31354165 | NC_021161.1    | Ca_Kabuli_Chr02 | 31354165                | TT                              | CC                 | CC               | INTERGENIC                    |                    |                                        |
| SNP_11368_A_31354290 | NC_021161.1    | Ca_Kabuli_Chr02 | 31354290                | AA                              | TT                 | TT               | INTERGENIC                    |                    |                                        |
| SNP_11369_A_31354760 | NC_021161.1    | Ca_Kabuli_Chr02 | 31354760                | TT                              | GG                 | GG               | DRR                           | 101501338          | uncharacterized LOC101501338           |
| SNP_11370_A_31354773 | NC_021161.1    | Ca_Kabuli_Chr02 | 31354773                | CC                              | TT                 | TT               | DRR                           | 101501338          | uncharacterized LOC101501338           |
| SNP_11372_A_31356773 | NC_021161.1    | Ca_Kabuli_Chr02 | 31356773                | CC                              | TT                 | TT               | START_GAINED                  | 101501338          | uncharacterized LOC101501338           |
| SNP_11373_A_31361746 | NC_021161.1    | Ca_Kabuli_Chr02 | 31361746                | GG                              | CC                 | CC               | INTERGENIC                    |                    |                                        |
| SNP_11374_A_31361866 | NC_021161.1    | Ca_Kabuli_Chr02 | 31361866                | AA                              | TT                 | TT               | INTERGENIC                    |                    |                                        |
| SNP_11375_A_31362129 | NC_021161.1    | Ca_Kabuli_Chr02 | 31362129                | TT                              | AA                 | AA               | INTERGENIC                    |                    |                                        |
| SNP_11376_A_31362163 | NC_021161.1    | Ca_Kabuli_Chr02 | 31362163                | CC                              | AA                 | AA               | INTERGENIC                    |                    |                                        |
| SNP_11377_A_31364291 | NC_021161.1    | Ca_Kabuli_Chr02 | 31364291                | AA                              | GG                 | GG               | INTERGENIC                    |                    |                                        |
| SNP_11378_A_31364810 | NC_021161.1    | Ca_Kabuli_Chr02 | 31364810                | TT                              | GG                 | GG               | INTERGENIC                    |                    |                                        |
| SNP_11379_A_31364822 | NC_021161.1    | Ca_Kabuli_Chr02 | 31364822                | CC                              | GG                 | GG               | INTERGENIC                    |                    |                                        |
| SNP_11380_A_31365150 | NC_021161.1    | Ca_Kabuli_Chr02 | 31365150                | TT                              | AA                 | AA               | INTERGENIC                    |                    |                                        |
| SNP_11381_A_31365286 | NC_021161.1    | Ca_Kabuli_Chr02 | 31365286                | GG                              | TT                 | TT               | INTERGENIC                    |                    |                                        |
| SNP_11383_A_31365635 | NC_021161.1    | Ca_Kabuli_Chr02 | 31365635                | AA                              | TT                 | TT               | INTERGENIC                    |                    |                                        |
| SNP_11386_A_31368894 | NC_021161.1    | Ca_Kabuli_Chr02 | 31368894                | TT                              | AA                 | AA               | DRR                           | 101493912          | transcription factor ICE1              |
| SNP_11387_A_31372714 | NC_021161.1    | Ca_Kabuli_Chr02 | 31372714                | AA                              | GG                 | GG               | URR                           | 101493912          | transcription factor ICE1              |
| SNP_11388_A_31372718 | NC_021161.1    | Ca_Kabuli_Chr02 | 31372718                | GG                              | TT                 | TT               | URR                           | 101493912          | transcription factor ICE1              |
| SNP_11389_A_31373054 | NC_021161.1    | Ca_Kabuli_Chr02 | 31373054                | AA                              | TT                 | TT               | URR                           | 101493912          | transcription factor ICE1              |
| SNP_11390_A_31374261 | NC_021161.1    | Ca_Kabuli_Chr02 | 31374261                | GG                              | TT                 | TT               | URR                           | 101493912          | transcription factor ICE1              |
| SNP_11391_A_31374272 | NC_021161.1    | Ca_Kabuli_Chr02 | 31374272                | AA                              | CC                 | CC               | URR                           | 101493912          | transcription factor ICE1              |

| SNPs IDs             | Chromosome IDs | Chromosomes     | Physical positions (bp) | CDC Frontier genome (Reference genome) | (Pusa 1103 & HPNB) | (ILWC 46 & LPNB) | Sequence Components of genome | Gene accession IDs | Putative functions           |
|----------------------|----------------|-----------------|-------------------------|----------------------------------------|--------------------|------------------|-------------------------------|--------------------|------------------------------|
| SNP_11392_A_31374593 | NC_021161.1    | Ca_Kabuli_Chr02 | 31374593                | CC                                     | TT                 | TT               | URR                           | 101493912          | transcription factor ICE1    |
| SNP_11393_A_31374774 | NC_021161.1    | Ca_Kabuli_Chr02 | 31374774                | TT                                     | CC                 | CC               | INTERGENIC                    |                    |                              |
| SNP_11394_A_31374793 | NC_021161.1    | Ca_Kabuli_Chr02 | 31374793                | AA                                     | GG                 | GG               | INTERGENIC                    |                    |                              |
| SNP_11395_A_31374818 | NC_021161.1    | Ca_Kabuli_Chr02 | 31374818                | GG                                     | CC                 | CC               | INTERGENIC                    |                    |                              |
| SNP_11396_A_31375367 | NC_021161.1    | Ca_Kabuli_Chr02 | 31375367                | CC                                     | TT                 | TT               | INTERGENIC                    |                    |                              |
| SNP_11397_A_31375478 | NC_021161.1    | Ca_Kabuli_Chr02 | 31375478                | GG                                     | AA                 | AA               | INTERGENIC                    |                    |                              |
| SNP_11398_A_31375513 | NC_021161.1    | Ca_Kabuli_Chr02 | 31375513                | TT                                     | CC                 | CC               | INTERGENIC                    |                    |                              |
| SNP_11399_A_31376207 | NC_021161.1    | Ca_Kabuli_Chr02 | 31376207                | GG                                     | AA                 | AA               | DRR                           | 101494235          | uncharacterized LOC101494235 |
| SNP_11400_A_31376209 | NC_021161.1    | Ca_Kabuli_Chr02 | 31376209                | GG                                     | AA                 | AA               | DRR                           | 101494235          | uncharacterized LOC101494235 |
| SNP_11401_A_31379033 | NC_021161.1    | Ca_Kabuli_Chr02 | 31379033                | AA                                     | GG                 | GG               | URR                           | 101494235          | uncharacterized LOC101494235 |
| SNP_11402_A_31381916 | NC_021161.1    | Ca_Kabuli_Chr02 | 31381916                | AA                                     | TT                 | TT               | URR                           | 101494860          | uncharacterized LOC101494860 |
| SNP_11403_A_31382278 | NC_021161.1    | Ca_Kabuli_Chr02 | 31382278                | CC                                     | TT                 | TT               | URR                           | 101494860          | uncharacterized LOC101494860 |
| SNP_11404_A_31385930 | NC_021161.1    | Ca_Kabuli_Chr02 | 31385930                | GG                                     | CC                 | CC               | DRR                           | 101494541          | peroxidase P7                |
| SNP_11405_A_31385939 | NC_021161.1    | Ca_Kabuli_Chr02 | 31385939                | AA                                     | GG                 | GG               | DRR                           | 101494541          | peroxidase P7                |
| SNP_11406_A_31386778 | NC_021161.1    | Ca_Kabuli_Chr02 | 31386778                | AA                                     | GG                 | GG               | INTERGENIC                    |                    |                              |
| SNP_11408_A_31386822 | NC_021161.1    | Ca_Kabuli_Chr02 | 31386822                | TT                                     | CC                 | CC               | INTERGENIC                    |                    |                              |
| SNP_11409_A_31387468 | NC_021161.1    | Ca_Kabuli_Chr02 | 31387468                | TT                                     | CC                 | CC               | INTERGENIC                    |                    |                              |
| SNP_11411_A_31388223 | NC_021161.1    | Ca_Kabuli_Chr02 | 31388223                | AA                                     | TT                 | TT               | URR                           | 101494541          | peroxidase P7                |
| SNP_11413_A_31388284 | NC_021161.1    | Ca_Kabuli_Chr02 | 31388284                | CC                                     | TT                 | TT               | URR                           | 101494541          | peroxidase P7                |
| SNP_11414_A_31388290 | NC_021161.1    | Ca_Kabuli_Chr02 | 31388290                | AA                                     | TT                 | TT               | URR                           | 101494541          | peroxidase P7                |
| SNP_11415_A_31388336 | NC_021161.1    | Ca_Kabuli_Chr02 | 31388336                | GG                                     | AA                 | AA               | URR                           | 101494541          | peroxidase P7                |
| SNP_11416_A_31388342 | NC_021161.1    | Ca_Kabuli_Chr02 | 31388342                | CC                                     | TT                 | TT               | URR                           | 101494541          | peroxidase P7                |

| SNPs IDs             | Chromosome IDs | Chromosomes     | Physical positions (bp) | CDC Frontier genome (Reference genome) | (Pusa 1103 & HPNB) | (ILWC 46 & LPNB) | Sequence Components of genome | Gene accession IDs | Putative functions                                                                   |
|----------------------|----------------|-----------------|-------------------------|----------------------------------------|--------------------|------------------|-------------------------------|--------------------|--------------------------------------------------------------------------------------|
| SNP_11418_A_31388375 | NC_021161.1    | Ca_Kabuli_Chr02 | 31388375                | AA                                     | GG                 | GG               | URR                           | 101494541          | peroxidase P7                                                                        |
| SNP_11419_A_31388388 | NC_021161.1    | Ca_Kabuli_Chr02 | 31388388                | AA                                     | GG                 | GG               | URR                           | 101494541          | peroxidase P7                                                                        |
| SNP_11420_A_31388417 | NC_021161.1    | Ca_Kabuli_Chr02 | 31388417                | CC                                     | TT                 | TT               | URR                           | 101494541          | peroxidase P7                                                                        |
| SNP_11421_A_31388448 | NC_021161.1    | Ca_Kabuli_Chr02 | 31388448                | GG                                     | AA                 | AA               | URR                           | 101494541          | peroxidase P7                                                                        |
| SNP_11422_A_31388452 | NC_021161.1    | Ca_Kabuli_Chr02 | 31388452                | GG                                     | AA                 | AA               | URR                           | 101494541          | peroxidase P7                                                                        |
| SNP_11423_A_31388454 | NC_021161.1    | Ca_Kabuli_Chr02 | 31388454                | AA                                     | GG                 | GG               | URR                           | 101494541          | peroxidase P7                                                                        |
| SNP_11424_A_31388461 | NC_021161.1    | Ca_Kabuli_Chr02 | 31388461                | CC                                     | AA                 | AA               | URR                           | 101494541          | peroxidase P7                                                                        |
| SNP_11425_A_31388474 | NC_021161.1    | Ca_Kabuli_Chr02 | 31388474                | GG                                     | AA                 | AA               | URR                           | 101494541          | peroxidase P7                                                                        |
| SNP_11426_A_31388477 | NC_021161.1    | Ca_Kabuli_Chr02 | 31388477                | AA                                     | GG                 | GG               | URR                           | 101494541          | peroxidase P7                                                                        |
| SNP_11427_A_31388519 | NC_021161.1    | Ca_Kabuli_Chr02 | 31388519                | GG                                     | AA                 | AA               | URR                           | 101494541          | peroxidase P7                                                                        |
| SNP_11428_A_31388545 | NC_021161.1    | Ca_Kabuli_Chr02 | 31388545                | GG                                     | CC                 | CC               | URR                           | 101494541          | peroxidase P7                                                                        |
| SNP_11429_A_31388571 | NC_021161.1    | Ca_Kabuli_Chr02 | 31388571                | CC                                     | TT                 | TT               | URR                           | 101494541          | peroxidase P7                                                                        |
| SNP_11430_A_31389028 | NC_021161.1    | Ca_Kabuli_Chr02 | 31389028                | CC                                     | TT                 | TT               | URR                           | 101494541          | peroxidase P7                                                                        |
| SNP_11431_A_31389564 | NC_021161.1    | Ca_Kabuli_Chr02 | 31389564                | GG                                     | AA                 | AA               | URR                           | 101494541          | peroxidase P7                                                                        |
| SNP_11432_A_31389742 | NC_021161.1    | Ca_Kabuli_Chr02 | 31389742                | TT                                     | CC                 | CC               | URR                           | 101494541          | peroxidase P7                                                                        |
| SNP_11433_A_31390793 | NC_021161.1    | Ca_Kabuli_Chr02 | 31390793                | AA                                     | GG                 | GG               | DRR                           | 101501658          | probable leucine-rich repeat receptor-like serine/threonine-protein kinase At3g14840 |
| SNP_11434_A_31391003 | NC_021161.1    | Ca_Kabuli_Chr02 | 31391003                | AA                                     | CC                 | CC               | INTERGENIC                    |                    |                                                                                      |
| SNP_11435_A_31406400 | NC_021161.1    | Ca_Kabuli_Chr02 | 31406400                | AA                                     | GG                 | GG               | INTERGENIC                    |                    |                                                                                      |
| SNP_11436_A_31406424 | NC_021161.1    | Ca_Kabuli_Chr02 | 31406424                | TT                                     | CC                 | CC               | INTERGENIC                    |                    |                                                                                      |
| SNP_11438_A_31407187 | NC_021161.1    | Ca_Kabuli_Chr02 | 31407187                | AA                                     | GG                 | GG               | INTERGENIC                    |                    |                                                                                      |
| SNP_11439_A_31408268 | NC_021161.1    | Ca_Kabuli_Chr02 | 31408268                | TT                                     | CC                 | CC               | INTERGENIC                    |                    |                                                                                      |
| SNP_11440_A_31410897 | NC_021161.1    | Ca_Kabuli_Chr02 | 31410897                | CC                                     | AA                 | AA               | DRR                           | 101495510          | LOB domain-containing protein 15-like                                                |

| SNPs IDs             | Chromosome IDs | Chromosomes     | Physical positions (bp) | CDC Frontier genome (Reference genome) | (Pusa 1103 & HPNB) | (ILWC 46 & LPNB) | Sequence Components of genome | Gene accession IDs | Putative functions                |
|----------------------|----------------|-----------------|-------------------------|----------------------------------------|--------------------|------------------|-------------------------------|--------------------|-----------------------------------|
| SNP_11442_A_31419674 | NC_021161.1    | Ca_Kabuli_Chr02 | 31419674                | GG                                     | AA                 | AA               | INTERGENIC                    |                    |                                   |
| SNP_11443_A_31419697 | NC_021161.1    | Ca_Kabuli_Chr02 | 31419697                | CC                                     | TT                 | TT               | INTERGENIC                    |                    |                                   |
| SNP_11444_A_31419702 | NC_021161.1    | Ca_Kabuli_Chr02 | 31419702                | TT                                     | CC                 | CC               | INTERGENIC                    |                    |                                   |
| SNP_11445_A_31419723 | NC_021161.1    | Ca_Kabuli_Chr02 | 31419723                | TT                                     | CC                 | CC               | INTERGENIC                    |                    |                                   |
| SNP_11446_A_31419744 | NC_021161.1    | Ca_Kabuli_Chr02 | 31419744                | TT                                     | GG                 | GG               | INTERGENIC                    |                    |                                   |
| SNP_11447_A_31420642 | NC_021161.1    | Ca_Kabuli_Chr02 | 31420642                | GG                                     | CC                 | CC               | DRR                           | 101495839          | Unknown function                  |
| SNP_11448_A_31420951 | NC_021161.1    | Ca_Kabuli_Chr02 | 31420951                | TT                                     | GG                 | GG               | DRR                           | 101495839          | Unknown function                  |
| SNP_11449_A_31427154 | NC_021161.1    | Ca_Kabuli_Chr02 | 31427154                | AA                                     | GG                 | GG               | INTRON                        | 101496164          | WEB family protein At2g40480-like |
| SNP_11450_A_31427187 | NC_021161.1    | Ca_Kabuli_Chr02 | 31427187                | TT                                     | CC                 | CC               | INTRON                        | 101496164          | WEB family protein At2g40480-like |
| SNP_11451_A_31427670 | NC_021161.1    | Ca_Kabuli_Chr02 | 31427670                | GG                                     | TT                 | TT               | SYNONYMOUS_CODING             | 101496164          | WEB family protein At2g40480-like |
| SNP_11452_A_31431416 | NC_021161.1    | Ca_Kabuli_Chr02 | 31431416                | AA                                     | GG                 | GG               | INTERGENIC                    |                    |                                   |
| SNP_11453_A_31438288 | NC_021161.1    | Ca_Kabuli_Chr02 | 31438288                | TT                                     | GG                 | GG               | INTRON                        | 101502301          | high mobility group B protein 7   |
| SNP_11454_A_31438291 | NC_021161.1    | Ca_Kabuli_Chr02 | 31438291                | AA                                     | GG                 | GG               | INTRON                        | 101502301          | high mobility group B protein 7   |
| SNP_11456_A_31441483 | NC_021161.1    | Ca_Kabuli_Chr02 | 31441483                | GG                                     | TT                 | TT               | INTRON                        | 101502301          | high mobility group B protein 7   |
| SNP_11457_A_31441846 | NC_021161.1    | Ca_Kabuli_Chr02 | 31441846                | GG                                     | AA                 | AA               | INTRON                        | 101502301          | high mobility group B protein 7   |
| SNP_11458_A_31442726 | NC_021161.1    | Ca_Kabuli_Chr02 | 31442726                | GG                                     | AA                 | AA               | INTRON                        | 101502301          | high mobility group B protein 7   |
| SNP_11459_A_31447453 | NC_021161.1    | Ca_Kabuli_Chr02 | 31447453                | TT                                     | CC                 | CC               | NON_SYNONYMOUS_CODING         | 101502301          | high mobility group B protein 7   |
| SNP_11460_A_31448305 | NC_021161.1    | Ca_Kabuli_Chr02 | 31448305                | TT                                     | CC                 | CC               | URR                           | 101502301          | high mobility group B protein 7   |
| SNP_11462_A_31450217 | NC_021161.1    | Ca_Kabuli_Chr02 | 31450217                | AA                                     | TT                 | TT               | INTERGENIC                    |                    |                                   |
| SNP_11463_A_31450239 | NC_021161.1    | Ca_Kabuli_Chr02 | 31450239                | TT                                     | CC                 | CC               | INTERGENIC                    |                    |                                   |
| SNP_11464_A_31450347 | NC_021161.1    | Ca_Kabuli_Chr02 | 31450347                | TT                                     | CC                 | CC               | INTERGENIC                    |                    |                                   |
| SNP_11465_A_31450508 | NC_021161.1    | Ca_Kabuli_Chr02 | 31450508                | AA                                     | GG                 | GG               | INTERGENIC                    |                    |                                   |

| SNPs IDs             | Chromosome IDs | Chromosomes     | Physical positions (bp) | CDC Frontier genome (Reference genome) | (Pusa 1103 & HPNB) | (ILWC 46 & LPNB) | Sequence genome | Components of | Gene accession IDs | Putative functions |
|----------------------|----------------|-----------------|-------------------------|----------------------------------------|--------------------|------------------|-----------------|---------------|--------------------|--------------------|
| SNP_11467_A_31450729 | NC_021161.1    | Ca_Kabuli_Chr02 | 31450729                | AA                                     | GG                 | GG               | INTERGENIC      |               |                    |                    |
| SNP_11468_A_31450829 | NC_021161.1    | Ca_Kabuli_Chr02 | 31450829                | GG                                     | AA                 | AA               | INTERGENIC      |               |                    |                    |
| SNP_11469_A_31451618 | NC_021161.1    | Ca_Kabuli_Chr02 | 31451618                | AA                                     | TT                 | TT               | INTERGENIC      |               |                    |                    |
| SNP_11470_A_31451925 | NC_021161.1    | Ca_Kabuli_Chr02 | 31451925                | TT                                     | CC                 | CC               | INTERGENIC      |               |                    |                    |
| SNP_11471_A_31451963 | NC_021161.1    | Ca_Kabuli_Chr02 | 31451963                | TT                                     | CC                 | CC               | INTERGENIC      |               |                    |                    |
| SNP_11472_A_31451973 | NC_021161.1    | Ca_Kabuli_Chr02 | 31451973                | TT                                     | CC                 | CC               | INTERGENIC      |               |                    |                    |
| SNP_11473_A_31454302 | NC_021161.1    | Ca_Kabuli_Chr02 | 31454302                | AA                                     | GG                 | GG               | INTERGENIC      |               |                    |                    |
| SNP_11474_A_31455832 | NC_021161.1    | Ca_Kabuli_Chr02 | 31455832                | GG                                     | AA                 | AA               | INTERGENIC      |               |                    |                    |
| SNP_11475_A_31456138 | NC_021161.1    | Ca_Kabuli_Chr02 | 31456138                | CC                                     | TT                 | TT               | INTERGENIC      |               |                    |                    |
| SNP_11477_A_31459304 | NC_021161.1    | Ca_Kabuli_Chr02 | 31459304                | TT                                     | CC                 | CC               | INTERGENIC      |               |                    |                    |
| SNP_11478_A_31460398 | NC_021161.1    | Ca_Kabuli_Chr02 | 31460398                | AA                                     | GG                 | GG               | INTERGENIC      |               |                    |                    |
| SNP_11479_A_31460420 | NC_021161.1    | Ca_Kabuli_Chr02 | 31460420                | CC                                     | TT                 | TT               | INTERGENIC      |               |                    |                    |
| SNP_11480_A_31468851 | NC_021161.1    | Ca_Kabuli_Chr02 | 31468851                | TT                                     | CC                 | CC               | INTERGENIC      |               |                    |                    |
| SNP_11481_A_31469969 | NC_021161.1    | Ca_Kabuli_Chr02 | 31469969                | AA                                     | GG                 | GG               | INTERGENIC      |               |                    |                    |
| SNP_11482_A_31473995 | NC_021161.1    | Ca_Kabuli_Chr02 | 31473995                | CC                                     | TT                 | TT               | INTERGENIC      |               |                    |                    |
| SNP_11483_A_31482920 | NC_021161.1    | Ca_Kabuli_Chr02 | 31482920                | CC                                     | GG                 | GG               | INTERGENIC      |               |                    |                    |
| SNP_11484_A_31482964 | NC_021161.1    | Ca_Kabuli_Chr02 | 31482964                | AA                                     | GG                 | GG               | INTERGENIC      |               |                    |                    |
| SNP_11485_A_31483239 | NC_021161.1    | Ca_Kabuli_Chr02 | 31483239                | AA                                     | TT                 | TT               | INTERGENIC      |               |                    |                    |
| SNP_11486_A_31483240 | NC_021161.1    | Ca_Kabuli_Chr02 | 31483240                | AA                                     | CC                 | CC               | INTERGENIC      |               |                    |                    |
| SNP_11487_A_31483242 | NC_021161.1    | Ca_Kabuli_Chr02 | 31483242                | AA                                     | GG                 | GG               | INTERGENIC      |               |                    |                    |
| SNP_11488_A_31485877 | NC_021161.1    | Ca_Kabuli_Chr02 | 31485877                | AA                                     | GG                 | GG               | INTERGENIC      |               |                    |                    |
| SNP_11489_A_31494822 | NC_021161.1    | Ca_Kabuli_Chr02 | 31494822                | AA                                     | TT                 | TT               | INTERGENIC      |               |                    |                    |

| SNPs IDs             | Chromosome IDs | Chromosomes     | Physical positions (bp) | CDC Frontier genome (Reference genome) | (Pusa 1103 & HPNB) | (ILWC 46 & LPNB) | Sequence genome | Components of | Gene accession IDs | Putative functions |
|----------------------|----------------|-----------------|-------------------------|----------------------------------------|--------------------|------------------|-----------------|---------------|--------------------|--------------------|
| SNP_11490_A_31498842 | NC_021161.1    | Ca_Kabuli_Chr02 | 31498842                | TT                                     | CC                 | CC               | INTERGENIC      |               |                    |                    |
| SNP_11491_A_31505495 | NC_021161.1    | Ca_Kabuli_Chr02 | 31505495                | GG                                     | AA                 | AA               | INTERGENIC      |               |                    |                    |
| SNP_11492_A_31513480 | NC_021161.1    | Ca_Kabuli_Chr02 | 31513480                | AA                                     | CC                 | CC               | INTERGENIC      |               |                    |                    |
| SNP_11493_A_31534100 | NC_021161.1    | Ca_Kabuli_Chr02 | 31534100                | CC                                     | TT                 | TT               | INTERGENIC      |               |                    |                    |
| SNP_11495_A_31534502 | NC_021161.1    | Ca_Kabuli_Chr02 | 31534502                | AA                                     | TT                 | TT               | INTERGENIC      |               |                    |                    |
| SNP_11496_A_31534623 | NC_021161.1    | Ca_Kabuli_Chr02 | 31534623                | AA                                     | TT                 | TT               | INTERGENIC      |               |                    |                    |
| SNP_11497_A_31534642 | NC_021161.1    | Ca_Kabuli_Chr02 | 31534642                | TT                                     | AA                 | AA               | INTERGENIC      |               |                    |                    |
| SNP_11498_A_31534720 | NC_021161.1    | Ca_Kabuli_Chr02 | 31534720                | TT                                     | CC                 | CC               | INTERGENIC      |               |                    |                    |
| SNP_11499_A_31534820 | NC_021161.1    | Ca_Kabuli_Chr02 | 31534820                | AA                                     | CC                 | CC               | INTERGENIC      |               |                    |                    |
| SNP_11501_A_31539910 | NC_021161.1    | Ca_Kabuli_Chr02 | 31539910                | AA                                     | TT                 | TT               | INTERGENIC      |               |                    |                    |
| SNP_11502_A_31544611 | NC_021161.1    | Ca_Kabuli_Chr02 | 31544611                | TT                                     | CC                 | CC               | INTERGENIC      |               |                    |                    |
| SNP_11503_A_31544617 | NC_021161.1    | Ca_Kabuli_Chr02 | 31544617                | CC                                     | TT                 | TT               | INTERGENIC      |               |                    |                    |
| SNP_11504_A_31544618 | NC_021161.1    | Ca_Kabuli_Chr02 | 31544618                | AA                                     | GG                 | GG               | INTERGENIC      |               |                    |                    |
| SNP_11505_A_31544635 | NC_021161.1    | Ca_Kabuli_Chr02 | 31544635                | TT                                     | CC                 | CC               | INTERGENIC      |               |                    |                    |
| SNP_11506_A_31544649 | NC_021161.1    | Ca_Kabuli_Chr02 | 31544649                | CC                                     | TT                 | TT               | INTERGENIC      |               |                    |                    |
| SNP_11507_A_31544657 | NC_021161.1    | Ca_Kabuli_Chr02 | 31544657                | TT                                     | CC                 | CC               | INTERGENIC      |               |                    |                    |
| SNP_11508_A_31545290 | NC_021161.1    | Ca_Kabuli_Chr02 | 31545290                | GG                                     | AA                 | AA               | INTERGENIC      |               |                    |                    |
| SNP_11510_A_31550427 | NC_021161.1    | Ca_Kabuli_Chr02 | 31550427                | AA                                     | TT                 | TT               | INTERGENIC      |               |                    |                    |
| SNP_11511_A_31550569 | NC_021161.1    | Ca_Kabuli_Chr02 | 31550569                | AA                                     | GG                 | GG               | INTERGENIC      |               |                    |                    |
| SNP_11512_A_31551866 | NC_021161.1    | Ca_Kabuli_Chr02 | 31551866                | GG                                     | AA                 | AA               | INTERGENIC      |               |                    |                    |
| SNP_11513_A_31552279 | NC_021161.1    | Ca_Kabuli_Chr02 | 31552279                | AA                                     | GG                 | GG               | INTERGENIC      |               |                    |                    |
| SNP_11514_A_31552828 | NC_021161.1    | Ca_Kabuli_Chr02 | 31552828                | CC                                     | TT                 | TT               | INTERGENIC      |               |                    |                    |

| SNPs IDs             | Chromosome IDs | Chromosomes     | Physical positions (bp) | CDC Frontier genome (Reference genome) | (Pusa 1103 & HPNB) | (ILWC 46 & LPNB) | Sequence Components of genome | Gene accession IDs | Putative functions                                       |
|----------------------|----------------|-----------------|-------------------------|----------------------------------------|--------------------|------------------|-------------------------------|--------------------|----------------------------------------------------------|
| SNP_11515_A_31553094 | NC_021161.1    | Ca_Kabuli_Chr02 | 31553094                | GG                                     | AA                 | AA               | INTERGENIC                    |                    |                                                          |
| SNP_11516_A_31553140 | NC_021161.1    | Ca_Kabuli_Chr02 | 31553140                | CC                                     | TT                 | TT               | INTERGENIC                    |                    |                                                          |
| SNP_11517_A_31559266 | NC_021161.1    | Ca_Kabuli_Chr02 | 31559266                | TT                                     | CC                 | CC               | INTERGENIC                    |                    |                                                          |
| SNP_11518_A_31559410 | NC_021161.1    | Ca_Kabuli_Chr02 | 31559410                | AA                                     | CC                 | CC               | INTERGENIC                    |                    |                                                          |
| SNP_11519_A_31559786 | NC_021161.1    | Ca_Kabuli_Chr02 | 31559786                | CC                                     | TT                 | TT               | INTERGENIC                    |                    |                                                          |
| SNP_11520_A_31560496 | NC_021161.1    | Ca_Kabuli_Chr02 | 31560496                | AA                                     | GG                 | GG               | INTERGENIC                    |                    |                                                          |
| SNP_11521_A_31561983 | NC_021161.1    | Ca_Kabuli_Chr02 | 31561983                | GG                                     | AA                 | AA               | INTERGENIC                    |                    |                                                          |
| SNP_11523_A_31564192 | NC_021161.1    | Ca_Kabuli_Chr02 | 31564192                | GG                                     | AA                 | AA               | INTERGENIC                    |                    |                                                          |
| SNP_11524_A_31567730 | NC_021161.1    | Ca_Kabuli_Chr02 | 31567730                | AA                                     | CC                 | CC               | INTERGENIC                    |                    |                                                          |
| SNP_11525_A_31575088 | NC_021161.1    | Ca_Kabuli_Chr02 | 31575088                | GG                                     | TT                 | TT               | INTERGENIC                    |                    |                                                          |
| SNP_11526_A_31581314 | NC_021161.1    | Ca_Kabuli_Chr02 | 31581314                | AA                                     | TT                 | TT               | DRR                           | 101503262          | indole-3-glycerol phosphate synthase, chloroplastic-like |
| SNP_11527_A_31581534 | NC_021161.1    | Ca_Kabuli_Chr02 | 31581534                | TT                                     | GG                 | GG               | DRR                           | 101503262          | indole-3-glycerol phosphate synthase, chloroplastic-like |
| SNP_11528_A_31588364 | NC_021161.1    | Ca_Kabuli_Chr02 | 31588364                | AA                                     | GG                 | GG               | URR                           | 101503262          | indole-3-glycerol phosphate synthase, chloroplastic-like |
| SNP_11529_A_31595948 | NC_021161.1    | Ca_Kabuli_Chr02 | 31595948                | AA                                     | GG                 | GG               | URR                           | 101503804          | protein transport protein Sec61 subunit gamma            |
| SNP_11530_A_31595949 | NC_021161.1    | Ca_Kabuli_Chr02 | 31595949                | CC                                     | TT                 | TT               | URR                           | 101503804          | protein transport protein Sec61 subunit gamma            |
| SNP_11531_A_31595968 | NC_021161.1    | Ca_Kabuli_Chr02 | 31595968                | TT                                     | CC                 | CC               | URR                           | 101503804          | protein transport protein Sec61 subunit gamma            |
| SNP_11532_A_31596139 | NC_021161.1    | Ca_Kabuli_Chr02 | 31596139                | AA                                     | CC                 | CC               | URR                           | 101503804          | protein transport protein Sec61 subunit gamma            |
| SNP_11533_A_31596461 | NC_021161.1    | Ca_Kabuli_Chr02 | 31596461                | GG                                     | AA                 | AA               | URR                           | 101503804          | protein transport protein Sec61 subunit gamma            |
| SNP_11534_A_31596462 | NC_021161.1    | Ca_Kabuli_Chr02 | 31596462                | AA                                     | GG                 | GG               | URR                           | 101503804          | protein transport protein Sec61 subunit gamma            |
| SNP_11535_A_31599784 | NC_021161.1    | Ca_Kabuli_Chr02 | 31599784                | AA                                     | GG                 | GG               | INTERGENIC                    |                    |                                                          |
| SNP_11536_A_31605222 | NC_021161.1    | Ca_Kabuli_Chr02 | 31605222                | GG                                     | TT                 | TT               | INTERGENIC                    |                    |                                                          |
| SNP_11537_A_31605351 | NC_021161.1    | Ca_Kabuli_Chr02 | 31605351                | GG                                     | AA                 | AA               | INTERGENIC                    |                    |                                                          |

| SNPs IDs             | Chromosome IDs | Chromosomes     | Physical positions (bp) | CDC Frontier (Reference genome) | (Pusa 1103 & HPNB) | (ILWC 46 & LPNB) | Sequence Components of genome | Gene accession IDs | Putative functions             |
|----------------------|----------------|-----------------|-------------------------|---------------------------------|--------------------|------------------|-------------------------------|--------------------|--------------------------------|
| SNP_11538_A_31605412 | NC_021161.1    | Ca_Kabuli_Chr02 | 31605412                | CC                              | TT                 | TT               | INTERGENIC                    |                    |                                |
| SNP_11539_A_31605421 | NC_021161.1    | Ca_Kabuli_Chr02 | 31605421                | AA                              | GG                 | GG               | INTERGENIC                    |                    |                                |
| SNP_11540_A_31605422 | NC_021161.1    | Ca_Kabuli_Chr02 | 31605422                | GG                              | AA                 | AA               | INTERGENIC                    |                    |                                |
| SNP_11541_A_31605426 | NC_021161.1    | Ca_Kabuli_Chr02 | 31605426                | TT                              | GG                 | GG               | INTERGENIC                    |                    |                                |
| SNP_11542_A_31605431 | NC_021161.1    | Ca_Kabuli_Chr02 | 31605431                | TT                              | CC                 | CC               | INTERGENIC                    |                    |                                |
| SNP_11543_A_31605458 | NC_021161.1    | Ca_Kabuli_Chr02 | 31605458                | TT                              | CC                 | CC               | INTERGENIC                    |                    |                                |
| SNP_11544_A_31605479 | NC_021161.1    | Ca_Kabuli_Chr02 | 31605479                | AA                              | GG                 | GG               | INTERGENIC                    |                    |                                |
| SNP_11545_A_31605499 | NC_021161.1    | Ca_Kabuli_Chr02 | 31605499                | AA                              | CC                 | CC               | INTERGENIC                    |                    |                                |
| SNP_11546_A_31605511 | NC_021161.1    | Ca_Kabuli_Chr02 | 31605511                | AA                              | GG                 | GG               | INTERGENIC                    |                    |                                |
| SNP_11547_A_31605534 | NC_021161.1    | Ca_Kabuli_Chr02 | 31605534                | CC                              | GG                 | GG               | INTERGENIC                    |                    |                                |
| SNP_11548_A_31605568 | NC_021161.1    | Ca_Kabuli_Chr02 | 31605568                | CC                              | AA                 | AA               | INTERGENIC                    |                    |                                |
| SNP_11549_A_31605659 | NC_021161.1    | Ca_Kabuli_Chr02 | 31605659                | TT                              | CC                 | CC               | INTERGENIC                    |                    |                                |
| SNP_11550_A_31615618 | NC_021161.1    | Ca_Kabuli_Chr02 | 31615618                | AA                              | GG                 | GG               | INTERGENIC                    |                    |                                |
| SNP_11551_A_31626868 | NC_021161.1    | Ca_Kabuli_Chr02 | 31626868                | CC                              | TT                 | TT               | INTERGENIC                    |                    |                                |
| SNP_11552_A_31631647 | NC_021161.1    | Ca_Kabuli_Chr02 | 31631647                | CC                              | TT                 | TT               | INTERGENIC                    |                    |                                |
| SNP_11553_A_31631852 | NC_021161.1    | Ca_Kabuli_Chr02 | 31631852                | CC                              | TT                 | TT               | INTERGENIC                    |                    |                                |
| SNP_11554_A_31633564 | NC_021161.1    | Ca_Kabuli_Chr02 | 31633564                | TT                              | AA                 | AA               | INTERGENIC                    |                    |                                |
| SNP_11555_A_31633593 | NC_021161.1    | Ca_Kabuli_Chr02 | 31633593                | AA                              | GG                 | GG               | INTERGENIC                    |                    |                                |
| SNP_11556_A_31635612 | NC_021161.1    | Ca_Kabuli_Chr02 | 31635612                | AA                              | GG                 | GG               | INTRON                        | 101490451          | glycine-rich protein DOT1-like |
| SNP_11557_A_31635630 | NC_021161.1    | Ca_Kabuli_Chr02 | 31635630                | TT                              | CC                 | CC               | INTRON                        | 101490451          | glycine-rich protein DOT1-like |
| SNP_11558_A_31636072 | NC_021161.1    | Ca_Kabuli_Chr02 | 31636072                | GG                              | TT                 | TT               | INTRON                        | 101490451          | glycine-rich protein DOT1-like |
| SNP_11559_A_31636083 | NC_021161.1    | Ca_Kabuli_Chr02 | 31636083                | CC                              | GG                 | GG               | INTRON                        | 101490451          | glycine-rich protein DOT1-like |



| SNPs IDs             | Chromosome IDs | Chromosomes     | Physical positions (bp) | CDC Frontier (Reference genome) | (Pusa 1103 & HPNB) | (ILWC 46 & LPNB) | Sequence Components of genome | Gene accession IDs | Putative functions                                            |
|----------------------|----------------|-----------------|-------------------------|---------------------------------|--------------------|------------------|-------------------------------|--------------------|---------------------------------------------------------------|
| SNP_11560_A_31636765 | NC_021161.1    | Ca_Kabuli_Chr02 | 31636765                | GG                              | AA                 | AA               | URR                           | 101490451          | glycine-rich protein DOT1-like                                |
| SNP_11561_A_31642932 | NC_021161.1    | Ca_Kabuli_Chr02 | 31642932                | GG                              | AA                 | AA               | INTRON                        | 101490769          | Unknown function                                              |
| SNP_11564_A_31672573 | NC_021161.1    | Ca_Kabuli_Chr02 | 31672573                | GG                              | AA                 | AA               | INTRON                        | 101491098          | abscisic acid and environmental stress-inducible protein-like |
| SNP_11565_A_31673833 | NC_021161.1    | Ca_Kabuli_Chr02 | 31673833                | TT                              | AA                 | AA               | INTRON                        | 101491098          | abscisic acid and environmental stress-inducible protein-like |
| SNP_11567_A_31678858 | NC_021161.1    | Ca_Kabuli_Chr02 | 31678858                | GG                              | AA                 | AA               | INTERGENIC                    |                    |                                                               |
| SNP_11568_A_31678865 | NC_021161.1    | Ca_Kabuli_Chr02 | 31678865                | AA                              | GG                 | GG               | INTERGENIC                    |                    |                                                               |
| SNP_11569_A_31683342 | NC_021161.1    | Ca_Kabuli_Chr02 | 31683342                | AA                              | GG                 | GG               | INTERGENIC                    |                    |                                                               |
| SNP_11570_A_31683376 | NC_021161.1    | Ca_Kabuli_Chr02 | 31683376                | GG                              | CC                 | CC               | INTERGENIC                    |                    |                                                               |
| SNP_11571_A_31683781 | NC_021161.1    | Ca_Kabuli_Chr02 | 31683781                | CC                              | TT                 | TT               | INTERGENIC                    |                    |                                                               |
| SNP_11572_A_31686031 | NC_021161.1    | Ca_Kabuli_Chr02 | 31686031                | AA                              | GG                 | GG               | INTERGENIC                    |                    |                                                               |
| SNP_11573_A_31688095 | NC_021161.1    | Ca_Kabuli_Chr02 | 31688095                | TT                              | CC                 | CC               | INTERGENIC                    |                    |                                                               |
| SNP_11574_A_31688100 | NC_021161.1    | Ca_Kabuli_Chr02 | 31688100                | TT                              | CC                 | CC               | INTERGENIC                    |                    |                                                               |
| SNP_11575_A_31688377 | NC_021161.1    | Ca_Kabuli_Chr02 | 31688377                | GG                              | AA                 | AA               | INTERGENIC                    |                    |                                                               |
| SNP_11576_A_31688526 | NC_021161.1    | Ca_Kabuli_Chr02 | 31688526                | CC                              | AA                 | AA               | INTERGENIC                    |                    |                                                               |
| SNP_11577_A_31693575 | NC_021161.1    | Ca_Kabuli_Chr02 | 31693575                | GG                              | AA                 | AA               | INTERGENIC                    |                    |                                                               |
| SNP_11578_A_31694657 | NC_021161.1    | Ca_Kabuli_Chr02 | 31694657                | AA                              | GG                 | GG               | INTERGENIC                    |                    |                                                               |
| SNP_11579_A_31694708 | NC_021161.1    | Ca_Kabuli_Chr02 | 31694708                | GG                              | AA                 | AA               | INTERGENIC                    |                    |                                                               |
| SNP_11581_A_31696976 | NC_021161.1    | Ca_Kabuli_Chr02 | 31696976                | AA                              | CC                 | CC               | INTERGENIC                    |                    |                                                               |
| SNP_11583_A_31698846 | NC_021161.1    | Ca_Kabuli_Chr02 | 31698846                | TT                              | CC                 | CC               | INTERGENIC                    |                    |                                                               |
| SNP_11584_A_31698902 | NC_021161.1    | Ca_Kabuli_Chr02 | 31698902                | CC                              | TT                 | TT               | INTERGENIC                    |                    |                                                               |
| SNP_11585_A_31699256 | NC_021161.1    | Ca_Kabuli_Chr02 | 31699256                | AA                              | CC                 | CC               | INTERGENIC                    |                    |                                                               |
| SNP_11586_A_31702166 | NC_021161.1    | Ca_Kabuli_Chr02 | 31702166                | AA                              | GG                 | GG               | INTERGENIC                    |                    |                                                               |

| SNPs IDs             | Chromosome IDs | Chromosomes     | Physical positions (bp) | CDC Frontier genome (Reference genome) | (Pusa 1103 & HPNB) | (ILWC 46 & LPNB) | Sequence Components of genome | Gene accession IDs | Putative functions                             |
|----------------------|----------------|-----------------|-------------------------|----------------------------------------|--------------------|------------------|-------------------------------|--------------------|------------------------------------------------|
| SNP_11587_A_31713131 | NC_021161.1    | Ca_Kabuli_Chr02 | 31713131                | TT                                     | AA                 | AA               | DRR                           | 101504439          | Unknown function                               |
| SNP_11589_A_31713692 | NC_021161.1    | Ca_Kabuli_Chr02 | 31713692                | GG                                     | AA                 | AA               | NON_SYNONYMOUS_CODING         | 101504439          | Unknown function                               |
| SNP_11590_A_31713706 | NC_021161.1    | Ca_Kabuli_Chr02 | 31713706                | CC                                     | TT                 | TT               | URR                           | 101504439          | Unknown function                               |
| SNP_11591_A_31713743 | NC_021161.1    | Ca_Kabuli_Chr02 | 31713743                | GG                                     | AA                 | AA               | URR                           | 101504439          | Unknown function                               |
| SNP_11592_A_31714007 | NC_021161.1    | Ca_Kabuli_Chr02 | 31714007                | GG                                     | AA                 | AA               | URR                           | 101504439          | Unknown function                               |
| SNP_11593_A_31720020 | NC_021161.1    | Ca_Kabuli_Chr02 | 31720020                | TT                                     | GG                 | GG               | INTERGENIC                    |                    |                                                |
| SNP_11594_A_31720039 | NC_021161.1    | Ca_Kabuli_Chr02 | 31720039                | TT                                     | CC                 | CC               | INTERGENIC                    |                    |                                                |
| SNP_11595_A_31720075 | NC_021161.1    | Ca_Kabuli_Chr02 | 31720075                | AA                                     | GG                 | GG               | INTERGENIC                    |                    |                                                |
| SNP_11596_A_31720442 | NC_021161.1    | Ca_Kabuli_Chr02 | 31720442                | TT                                     | CC                 | CC               | INTERGENIC                    |                    |                                                |
| SNP_11597_A_31725727 | NC_021161.1    | Ca_Kabuli_Chr02 | 31725727                | TT                                     | AA                 | AA               | DRR                           | 101504755          | glycine-rich cell wall structural protein-like |
| SNP_11598_A_31725748 | NC_021161.1    | Ca_Kabuli_Chr02 | 31725748                | GG                                     | CC                 | CC               | DRR                           | 101504755          | glycine-rich cell wall structural protein-like |
| SNP_11599_A_31726844 | NC_021161.1    | Ca_Kabuli_Chr02 | 31726844                | TT                                     | GG                 | GG               | INTRON                        | 101504755          | glycine-rich cell wall structural protein-like |
| SNP_11600_A_31726889 | NC_021161.1    | Ca_Kabuli_Chr02 | 31726889                | AA                                     | GG                 | GG               | INTRON                        | 101504755          | glycine-rich cell wall structural protein-like |
| SNP_11601_A_31726946 | NC_021161.1    | Ca_Kabuli_Chr02 | 31726946                | CC                                     | TT                 | TT               | INTRON                        | 101504755          | glycine-rich cell wall structural protein-like |
| SNP_11602_A_31726962 | NC_021161.1    | Ca_Kabuli_Chr02 | 31726962                | CC                                     | GG                 | GG               | INTRON                        | 101504755          | glycine-rich cell wall structural protein-like |
| SNP_11603_A_31728089 | NC_021161.1    | Ca_Kabuli_Chr02 | 31728089                | GG                                     | CC                 | CC               | URR                           | 101504755          | glycine-rich cell wall structural protein-like |
| SNP_11604_A_31728189 | NC_021161.1    | Ca_Kabuli_Chr02 | 31728189                | CC                                     | AA                 | AA               | URR                           | 101504755          | glycine-rich cell wall structural protein-like |
| SNP_11605_A_31730684 | NC_021161.1    | Ca_Kabuli_Chr02 | 31730684                | AA                                     | CC                 | CC               | INTERGENIC                    |                    |                                                |
| SNP_11606_A_31730709 | NC_021161.1    | Ca_Kabuli_Chr02 | 31730709                | GG                                     | AA                 | AA               | INTERGENIC                    |                    |                                                |
| SNP_11607_A_31730713 | NC_021161.1    | Ca_Kabuli_Chr02 | 31730713                | AA                                     | GG                 | GG               | INTERGENIC                    |                    |                                                |
| SNP_11608_A_31730722 | NC_021161.1    | Ca_Kabuli_Chr02 | 31730722                | AA                                     | CC                 | CC               | INTERGENIC                    |                    |                                                |
| SNP_11609_A_31731141 | NC_021161.1    | Ca_Kabuli_Chr02 | 31731141                | CC                                     | GG                 | GG               | INTERGENIC                    |                    |                                                |

| SNPs IDs             | Chromosome IDs | Chromosomes     | Physical positions (bp) | CDC Frontier genome (Reference genome) | (Pusa 1103 & HPNB) | (ILWC 46 & LPNB) | Sequence genome | Components of | Gene accession IDs | Putative functions |
|----------------------|----------------|-----------------|-------------------------|----------------------------------------|--------------------|------------------|-----------------|---------------|--------------------|--------------------|
| SNP_11610_A_31731156 | NC_021161.1    | Ca_Kabuli_Chr02 | 31731156                | GG                                     | TT                 | TT               | INTERGENIC      |               |                    |                    |
| SNP_11611_A_31731190 | NC_021161.1    | Ca_Kabuli_Chr02 | 31731190                | GG                                     | AA                 | AA               | INTERGENIC      |               |                    |                    |
| SNP_11612_A_31731220 | NC_021161.1    | Ca_Kabuli_Chr02 | 31731220                | GG                                     | TT                 | TT               | INTERGENIC      |               |                    |                    |
| SNP_11613_A_31731765 | NC_021161.1    | Ca_Kabuli_Chr02 | 31731765                | GG                                     | AA                 | AA               | INTERGENIC      |               |                    |                    |
| SNP_11614_A_31731772 | NC_021161.1    | Ca_Kabuli_Chr02 | 31731772                | TT                                     | CC                 | CC               | INTERGENIC      |               |                    |                    |
| SNP_11615_A_31731975 | NC_021161.1    | Ca_Kabuli_Chr02 | 31731975                | CC                                     | AA                 | AA               | INTERGENIC      |               |                    |                    |
| SNP_11616_A_31732016 | NC_021161.1    | Ca_Kabuli_Chr02 | 31732016                | CC                                     | TT                 | TT               | INTERGENIC      |               |                    |                    |
| SNP_11617_A_31732770 | NC_021161.1    | Ca_Kabuli_Chr02 | 31732770                | CC                                     | GG                 | GG               | INTERGENIC      |               |                    |                    |
| SNP_11618_A_31735265 | NC_021161.1    | Ca_Kabuli_Chr02 | 31735265                | TT                                     | CC                 | CC               | INTERGENIC      |               |                    |                    |
| SNP_11619_A_31735266 | NC_021161.1    | Ca_Kabuli_Chr02 | 31735266                | GG                                     | AA                 | AA               | INTERGENIC      |               |                    |                    |
| SNP_11620_A_31735877 | NC_021161.1    | Ca_Kabuli_Chr02 | 31735877                | CC                                     | TT                 | TT               | INTERGENIC      |               |                    |                    |
| SNP_11621_A_31736523 | NC_021161.1    | Ca_Kabuli_Chr02 | 31736523                | GG                                     | AA                 | AA               | INTERGENIC      |               |                    |                    |
| SNP_11622_A_31736844 | NC_021161.1    | Ca_Kabuli_Chr02 | 31736844                | GG                                     | TT                 | TT               | INTERGENIC      |               |                    |                    |
| SNP_11623_A_31737127 | NC_021161.1    | Ca_Kabuli_Chr02 | 31737127                | GG                                     | AA                 | AA               | INTERGENIC      |               |                    |                    |
| SNP_11624_A_31737371 | NC_021161.1    | Ca_Kabuli_Chr02 | 31737371                | AA                                     | CC                 | CC               | INTERGENIC      |               |                    |                    |
| SNP_11625_A_31738009 | NC_021161.1    | Ca_Kabuli_Chr02 | 31738009                | CC                                     | TT                 | TT               | INTERGENIC      |               |                    |                    |
| SNP_11626_A_31738015 | NC_021161.1    | Ca_Kabuli_Chr02 | 31738015                | GG                                     | AA                 | AA               | INTERGENIC      |               |                    |                    |
| SNP_11627_A_31738341 | NC_021161.1    | Ca_Kabuli_Chr02 | 31738341                | GG                                     | AA                 | AA               | INTERGENIC      |               |                    |                    |
| SNP_11628_A_31738641 | NC_021161.1    | Ca_Kabuli_Chr02 | 31738641                | TT                                     | CC                 | CC               | INTERGENIC      |               |                    |                    |
| SNP_11629_A_31739109 | NC_021161.1    | Ca_Kabuli_Chr02 | 31739109                | CC                                     | TT                 | TT               | INTERGENIC      |               |                    |                    |
| SNP_11630_A_31739141 | NC_021161.1    | Ca_Kabuli_Chr02 | 31739141                | GG                                     | AA                 | AA               | INTERGENIC      |               |                    |                    |
| SNP_11631_A_31739183 | NC_021161.1    | Ca_Kabuli_Chr02 | 31739183                | AA                                     | TT                 | TT               | INTERGENIC      |               |                    |                    |

| SNPs IDs             | Chromosome IDs | Chromosomes     | Physical positions (bp) | CDC Frontier genome (Reference genome) | (Pusa 1103 & HPNB) | (ILWC 46 & LPNB) | Sequence Components of genome | Gene accession IDs | Putative functions                                       |
|----------------------|----------------|-----------------|-------------------------|----------------------------------------|--------------------|------------------|-------------------------------|--------------------|----------------------------------------------------------|
| SNP_11632_A_31739440 | NC_021161.1    | Ca_Kabuli_Chr02 | 31739440                | TT                                     | CC                 | CC               | INTERGENIC                    |                    |                                                          |
| SNP_11633_A_31740302 | NC_021161.1    | Ca_Kabuli_Chr02 | 31740302                | CC                                     | TT                 | TT               | INTERGENIC                    |                    |                                                          |
| SNP_11634_A_31740532 | NC_021161.1    | Ca_Kabuli_Chr02 | 31740532                | TT                                     | GG                 | GG               | INTERGENIC                    |                    |                                                          |
| SNP_11636_A_31749031 | NC_021161.1    | Ca_Kabuli_Chr02 | 31749031                | GG                                     | CC                 | CC               | INTERGENIC                    |                    |                                                          |
| SNP_11637_A_31754985 | NC_021161.1    | Ca_Kabuli_Chr02 | 31754985                | AA                                     | GG                 | GG               | INTERGENIC                    |                    |                                                          |
| SNP_11638_A_31755488 | NC_021161.1    | Ca_Kabuli_Chr02 | 31755488                | TT                                     | AA                 | AA               | INTERGENIC                    |                    |                                                          |
| SNP_11639_A_31760293 | NC_021161.1    | Ca_Kabuli_Chr02 | 31760293                | AA                                     | GG                 | GG               | INTERGENIC                    |                    |                                                          |
| SNP_11640_A_31760307 | NC_021161.1    | Ca_Kabuli_Chr02 | 31760307                | TT                                     | CC                 | CC               | INTERGENIC                    |                    |                                                          |
| SNP_11641_A_31767056 | NC_021161.1    | Ca_Kabuli_Chr02 | 31767056                | CC                                     | GG                 | GG               | INTERGENIC                    |                    |                                                          |
| SNP_11642_A_31780231 | NC_021161.1    | Ca_Kabuli_Chr02 | 31780231                | TT                                     | CC                 | CC               | INTERGENIC                    |                    |                                                          |
| SNP_11643_A_31780704 | NC_021161.1    | Ca_Kabuli_Chr02 | 31780704                | CC                                     | AA                 | AA               | INTERGENIC                    |                    |                                                          |
| SNP_11644_A_31780987 | NC_021161.1    | Ca_Kabuli_Chr02 | 31780987                | AA                                     | CC                 | CC               | INTERGENIC                    |                    |                                                          |
| SNP_11645_A_31781584 | NC_021161.1    | Ca_Kabuli_Chr02 | 31781584                | TT                                     | GG                 | GG               | INTERGENIC                    |                    |                                                          |
| SNP_11646_A_31781961 | NC_021161.1    | Ca_Kabuli_Chr02 | 31781961                | CC                                     | AA                 | AA               | INTERGENIC                    |                    |                                                          |
| SNP_11647_A_31783058 | NC_021161.1    | Ca_Kabuli_Chr02 | 31783058                | AA                                     | CC                 | CC               | INTERGENIC                    |                    |                                                          |
| SNP_11648_A_31783394 | NC_021161.1    | Ca_Kabuli_Chr02 | 31783394                | CC                                     | GG                 | GG               | INTERGENIC                    |                    |                                                          |
| SNP_11649_A_31784315 | NC_021161.1    | Ca_Kabuli_Chr02 | 31784315                | TT                                     | GG                 | GG               | INTERGENIC                    |                    |                                                          |
| SNP_11650_A_31784537 | NC_021161.1    | Ca_Kabuli_Chr02 | 31784537                | AA                                     | GG                 | GG               | INTERGENIC                    |                    |                                                          |
| SNP_11651_A_31793137 | NC_021161.1    | Ca_Kabuli_Chr02 | 31793137                | AA                                     | GG                 | GG               | NON_SYNONYMOUS_CODING         | 101505079          | abscisic acid and environmental stress-inducible protein |
| SNP_11652_A_31794021 | NC_021161.1    | Ca_Kabuli_Chr02 | 31794021                | AA                                     | TT                 | TT               | INTRON                        | 101505079          | abscisic acid and environmental stress-inducible protein |
| SNP_11653_A_31794042 | NC_021161.1    | Ca_Kabuli_Chr02 | 31794042                | GG                                     | CC                 | CC               | INTRON                        | 101505079          | abscisic acid and environmental stress-inducible protein |
| SNP_11655_A_31794222 | NC_021161.1    | Ca_Kabuli_Chr02 | 31794222                | CC                                     | AA                 | AA               | NON_SYNONYMOUS_CODING         | 101505079          | abscisic acid and environmental stress-inducible protein |

| SNPs IDs             | Chromosome IDs | Chromosomes     | Physical positions (bp) | CDC Frontier (Reference genome) | (Pusa 1103 & HPNB) | (ILWC 46 & LPNB) | Sequence Components of genome | Gene accession IDs | Putative functions                                       |
|----------------------|----------------|-----------------|-------------------------|---------------------------------|--------------------|------------------|-------------------------------|--------------------|----------------------------------------------------------|
| SNP_11656_A_31794246 | NC_021161.1    | Ca_Kabuli_Chr02 | 31794246                | CC                              | TT                 | TT               | SYNONYMOUS_CODING             | 101505079          | abscisic acid and environmental stress-inducible protein |
| SNP_11657_A_31794292 | NC_021161.1    | Ca_Kabuli_Chr02 | 31794292                | GG                              | AA                 | AA               | NON_SYNONYMOUS_CODING         | 101505079          | abscisic acid and environmental stress-inducible protein |
| SNP_11659_A_31796585 | NC_021161.1    | Ca_Kabuli_Chr02 | 31796585                | TT                              | AA                 | AA               | INTERGENIC                    |                    |                                                          |
| SNP_11660_A_31798977 | NC_021161.1    | Ca_Kabuli_Chr02 | 31798977                | TT                              | GG                 | GG               | INTERGENIC                    |                    |                                                          |
| SNP_11661_A_31799242 | NC_021161.1    | Ca_Kabuli_Chr02 | 31799242                | GG                              | AA                 | AA               | INTERGENIC                    |                    |                                                          |
| SNP_11663_A_31799287 | NC_021161.1    | Ca_Kabuli_Chr02 | 31799287                | TT                              | CC                 | CC               | INTERGENIC                    |                    |                                                          |
| SNP_11664_A_31799322 | NC_021161.1    | Ca_Kabuli_Chr02 | 31799322                | TT                              | AA                 | AA               | INTERGENIC                    |                    |                                                          |
| SNP_11665_A_31805761 | NC_021161.1    | Ca_Kabuli_Chr02 | 31805761                | TT                              | CC                 | CC               | INTRON                        | 101491732          | uncharacterized LOC101491732                             |
| SNP_11666_A_31805799 | NC_021161.1    | Ca_Kabuli_Chr02 | 31805799                | CC                              | TT                 | TT               | INTRON                        | 101491732          | uncharacterized LOC101491732                             |
| SNP_11667_A_31806079 | NC_021161.1    | Ca_Kabuli_Chr02 | 31806079                | TT                              | GG                 | GG               | INTRON                        | 101491732          | uncharacterized LOC101491732                             |
| SNP_11668_A_31806455 | NC_021161.1    | Ca_Kabuli_Chr02 | 31806455                | CC                              | TT                 | TT               | INTRON                        | 101491732          | uncharacterized LOC101491732                             |
| SNP_11669_A_31811242 | NC_021161.1    | Ca_Kabuli_Chr02 | 31811242                | CC                              | TT                 | TT               | DRR                           | 101505620          | protein IQ-DOMAIN 1                                      |
| SNP_11670_A_31811276 | NC_021161.1    | Ca_Kabuli_Chr02 | 31811276                | GG                              | AA                 | AA               | DRR                           | 101505620          | protein IQ-DOMAIN 1                                      |
| SNP_11671_A_31812972 | NC_021161.1    | Ca_Kabuli_Chr02 | 31812972                | CC                              | AA                 | AA               | INTERGENIC                    |                    |                                                          |
| SNP_11672_A_31813156 | NC_021161.1    | Ca_Kabuli_Chr02 | 31813156                | GG                              | AA                 | AA               | INTERGENIC                    |                    |                                                          |
| SNP_11673_A_31814019 | NC_021161.1    | Ca_Kabuli_Chr02 | 31814019                | CC                              | AA                 | AA               | INTERGENIC                    |                    |                                                          |
| SNP_11675_A_31814491 | NC_021161.1    | Ca_Kabuli_Chr02 | 31814491                | CC                              | TT                 | TT               | INTRON                        | 101505620          | protein IQ-DOMAIN 1                                      |
| SNP_11676_A_31816090 | NC_021161.1    | Ca_Kabuli_Chr02 | 31816090                | CC                              | GG                 | GG               | INTERGENIC                    |                    |                                                          |
| SNP_11677_A_31816184 | NC_021161.1    | Ca_Kabuli_Chr02 | 31816184                | CC                              | TT                 | TT               | URR                           | 101505620          | protein IQ-DOMAIN 1                                      |
| SNP_11678_A_31816188 | NC_021161.1    | Ca_Kabuli_Chr02 | 31816188                | AA                              | GG                 | GG               | URR                           | 101505620          | protein IQ-DOMAIN 1                                      |
| SNP_11679_A_31816287 | NC_021161.1    | Ca_Kabuli_Chr02 | 31816287                | CC                              | TT                 | TT               | URR                           | 101505620          | protein IQ-DOMAIN 1                                      |
| SNP_11680_A_31819264 | NC_021161.1    | Ca_Kabuli_Chr02 | 31819264                | TT                              | AA                 | AA               | INTERGENIC                    |                    |                                                          |

| SNPs IDs             | Chromosome IDs | Chromosomes     | Physical positions (bp) | CDC Frontier (Reference genome) | (Pusa 1103 & HPNB) | (ILWC 46 & LPNB) | Sequence Components of genome | Gene accession IDs | Putative functions                              |
|----------------------|----------------|-----------------|-------------------------|---------------------------------|--------------------|------------------|-------------------------------|--------------------|-------------------------------------------------|
| SNP_11681_A_31819265 | NC_021161.1    | Ca_Kabuli_Chr02 | 31819265                | TT                              | AA                 | AA               | INTERGENIC                    |                    |                                                 |
| SNP_11682_A_31821724 | NC_021161.1    | Ca_Kabuli_Chr02 | 31821724                | GG                              | TT                 | TT               | INTERGENIC                    |                    |                                                 |
| SNP_11683_A_31821922 | NC_021161.1    | Ca_Kabuli_Chr02 | 31821922                | TT                              | CC                 | CC               | INTERGENIC                    |                    |                                                 |
| SNP_11684_A_31821979 | NC_021161.1    | Ca_Kabuli_Chr02 | 31821979                | GG                              | CC                 | CC               | INTERGENIC                    |                    |                                                 |
| SNP_11685_A_31822067 | NC_021161.1    | Ca_Kabuli_Chr02 | 31822067                | TT                              | GG                 | GG               | INTERGENIC                    |                    |                                                 |
| SNP_11686_A_31822077 | NC_021161.1    | Ca_Kabuli_Chr02 | 31822077                | TT                              | CC                 | CC               | INTERGENIC                    |                    |                                                 |
| SNP_11687_A_31822385 | NC_021161.1    | Ca_Kabuli_Chr02 | 31822385                | TT                              | CC                 | CC               | DRR                           | 101506488          | 39S ribosomal protein L41-A, mitochondrial-like |
| SNP_11688_A_31822415 | NC_021161.1    | Ca_Kabuli_Chr02 | 31822415                | TT                              | CC                 | CC               | DRR                           | 101506488          | 39S ribosomal protein L41-A, mitochondrial-like |
| SNP_11689_A_31823795 | NC_021161.1    | Ca_Kabuli_Chr02 | 31823795                | CC                              | TT                 | TT               | URR                           | 101506155          | putative BPI/LBP family protein At1g04970       |
| SNP_11690_A_31823802 | NC_021161.1    | Ca_Kabuli_Chr02 | 31823802                | GG                              | CC                 | CC               | URR                           | 101506155          | putative BPI/LBP family protein At1g04970       |
| SNP_11691_A_31825220 | NC_021161.1    | Ca_Kabuli_Chr02 | 31825220                | AA                              | GG                 | GG               | INTERGENIC                    |                    |                                                 |
| SNP_11692_A_31825352 | NC_021161.1    | Ca_Kabuli_Chr02 | 31825352                | GG                              | AA                 | AA               | INTERGENIC                    |                    |                                                 |
| SNP_11693_A_31826687 | NC_021161.1    | Ca_Kabuli_Chr02 | 31826687                | TT                              | AA                 | AA               | DRR                           | 101507030          | ribonuclease Z, chloroplastic                   |
| SNP_11694_A_31827520 | NC_021161.1    | Ca_Kabuli_Chr02 | 31827520                | TT                              | CC                 | CC               | URR                           | 101506488          | 39S ribosomal protein L41-A, mitochondrial-like |
| SNP_11696_A_31828381 | NC_021161.1    | Ca_Kabuli_Chr02 | 31828381                | GG                              | CC                 | CC               | URR                           | 101506488          | 39S ribosomal protein L41-A, mitochondrial-like |
| SNP_11698_A_31828557 | NC_021161.1    | Ca_Kabuli_Chr02 | 31828557                | AA                              | TT                 | TT               | URR                           | 101506488          | 39S ribosomal protein L41-A, mitochondrial-like |
| SNP_11699_A_31828569 | NC_021161.1    | Ca_Kabuli_Chr02 | 31828569                | TT                              | CC                 | CC               | URR                           | 101506488          | 39S ribosomal protein L41-A, mitochondrial-like |
| SNP_11700_A_31828585 | NC_021161.1    | Ca_Kabuli_Chr02 | 31828585                | TT                              | CC                 | CC               | URR                           | 101506488          | 39S ribosomal protein L41-A, mitochondrial-like |
| SNP_11701_A_31828844 | NC_021161.1    | Ca_Kabuli_Chr02 | 31828844                | AA                              | GG                 | GG               | URR                           | 101506488          | 39S ribosomal protein L41-A, mitochondrial-like |
| SNP_11702_A_31829384 | NC_021161.1    | Ca_Kabuli_Chr02 | 31829384                | TT                              | CC                 | CC               | INTRON                        | 101507030          | ribonuclease Z, chloroplastic                   |
| SNP_11703_A_31829536 | NC_021161.1    | Ca_Kabuli_Chr02 | 31829536                | GG                              | AA                 | AA               | SYNONYMOUS_CODING             | 101507030          | ribonuclease Z, chloroplastic                   |
| SNP_11704_A_31832681 | NC_021161.1    | Ca_Kabuli_Chr02 | 31832681                | TT                              | AA                 | AA               | DRR                           | 101507352          | protein-tyrosine-phosphatase IBR5               |

| SNPs IDs             | Chromosome IDs | Chromosomes     | Physical positions (bp) | CDC Frontier genome (Reference genome) | (Pusa 1103 & HPNB) | (ILWC 46 & LPNB) | Sequence Components of genome | Gene accession IDs | Putative functions                  |
|----------------------|----------------|-----------------|-------------------------|----------------------------------------|--------------------|------------------|-------------------------------|--------------------|-------------------------------------|
| SNP_11705_A_31832682 | NC_021161.1    | Ca_Kabuli_Chr02 | 31832682                | AA                                     | GG                 | GG               | DRR                           | 101507352          | protein-tyrosine-phosphatase IBR5   |
| SNP_11706_A_31832687 | NC_021161.1    | Ca_Kabuli_Chr02 | 31832687                | CC                                     | TT                 | TT               | DRR                           | 101507352          | protein-tyrosine-phosphatase IBR5   |
| SNP_11707_A_31832692 | NC_021161.1    | Ca_Kabuli_Chr02 | 31832692                | AA                                     | GG                 | GG               | DRR                           | 101507352          | protein-tyrosine-phosphatase IBR5   |
| SNP_11708_A_31832695 | NC_021161.1    | Ca_Kabuli_Chr02 | 31832695                | TT                                     | CC                 | CC               | DRR                           | 101507352          | protein-tyrosine-phosphatase IBR5   |
| SNP_11709_A_31834780 | NC_021161.1    | Ca_Kabuli_Chr02 | 31834780                | TT                                     | AA                 | AA               | INTERGENIC                    |                    |                                     |
| SNP_11710_A_31838133 | NC_021161.1    | Ca_Kabuli_Chr02 | 31838133                | CC                                     | TT                 | TT               | DRR                           | 101507352          | protein-tyrosine-phosphatase IBR5   |
| SNP_11712_A_31838941 | NC_021161.1    | Ca_Kabuli_Chr02 | 31838941                | GG                                     | AA                 | AA               | URR                           | 101507352          | protein-tyrosine-phosphatase IBR5   |
| SNP_11713_A_31846019 | NC_021161.1    | Ca_Kabuli_Chr02 | 31846019                | TT                                     | AA                 | AA               | INTERGENIC                    |                    |                                     |
| SNP_11714_A_31849143 | NC_021161.1    | Ca_Kabuli_Chr02 | 31849143                | TT                                     | CC                 | CC               | INTERGENIC                    |                    |                                     |
| SNP_11715_A_31849487 | NC_021161.1    | Ca_Kabuli_Chr02 | 31849487                | AA                                     | GG                 | GG               | INTERGENIC                    |                    |                                     |
| SNP_11716_A_31849515 | NC_021161.1    | Ca_Kabuli_Chr02 | 31849515                | CC                                     | TT                 | TT               | INTERGENIC                    |                    |                                     |
| SNP_11717_A_31849516 | NC_021161.1    | Ca_Kabuli_Chr02 | 31849516                | TT                                     | CC                 | CC               | INTERGENIC                    |                    |                                     |
| SNP_11718_A_31849600 | NC_021161.1    | Ca_Kabuli_Chr02 | 31849600                | AA                                     | TT                 | TT               | INTERGENIC                    |                    |                                     |
| SNP_11719_A_31849605 | NC_021161.1    | Ca_Kabuli_Chr02 | 31849605                | TT                                     | CC                 | CC               | INTERGENIC                    |                    |                                     |
| SNP_11720_A_31850440 | NC_021161.1    | Ca_Kabuli_Chr02 | 31850440                | CC                                     | TT                 | TT               | INTERGENIC                    |                    |                                     |
| SNP_11721_A_31850458 | NC_021161.1    | Ca_Kabuli_Chr02 | 31850458                | GG                                     | AA                 | AA               | INTERGENIC                    |                    |                                     |
| SNP_11722_A_31851045 | NC_021161.1    | Ca_Kabuli_Chr02 | 31851045                | CC                                     | TT                 | TT               | INTERGENIC                    |                    |                                     |
| SNP_11723_A_31851461 | NC_021161.1    | Ca_Kabuli_Chr02 | 31851461                | AA                                     | TT                 | TT               | INTERGENIC                    |                    |                                     |
| SNP_11724_A_31851796 | NC_021161.1    | Ca_Kabuli_Chr02 | 31851796                | GG                                     | AA                 | AA               | INTERGENIC                    |                    |                                     |
| SNP_11727_A_31853844 | NC_021161.1    | Ca_Kabuli_Chr02 | 31853844                | AA                                     | GG                 | GG               | DRR                           | 101507666          | GDSL esterase/lipase At4g26790-like |
| SNP_11728_A_31854851 | NC_021161.1    | Ca_Kabuli_Chr02 | 31854851                | AA                                     | TT                 | TT               | INTRON                        | 101507666          | GDSL esterase/lipase At4g26790-like |
| SNP_11729_A_31858935 | NC_021161.1    | Ca_Kabuli_Chr02 | 31858935                | CC                                     | TT                 | TT               | URR                           | 101507666          | GDSL esterase/lipase At4g26790-like |

| SNPs IDs             | Chromosome IDs | Chromosomes     | Physical positions (bp) | CDC Frontier (Reference genome) | (Pusa 1103 & HPNB) | (ILWC 46 & LPNB) | Sequence Components of genome | Gene accession IDs | Putative functions                          |
|----------------------|----------------|-----------------|-------------------------|---------------------------------|--------------------|------------------|-------------------------------|--------------------|---------------------------------------------|
| SNP_11730_A_31858946 | NC_021161.1    | Ca_Kabuli_Chr02 | 31858946                | GG                              | AA                 | AA               | URR                           | 101507666          | GDSL esterase/lipase At4g26790-like         |
| SNP_11731_A_31858996 | NC_021161.1    | Ca_Kabuli_Chr02 | 31858996                | CC                              | TT                 | TT               | URR                           | 101507666          | GDSL esterase/lipase At4g26790-like         |
| SNP_11732_A_31859001 | NC_021161.1    | Ca_Kabuli_Chr02 | 31859001                | AA                              | GG                 | GG               | URR                           | 101507666          | GDSL esterase/lipase At4g26790-like         |
| SNP_11733_A_31859192 | NC_021161.1    | Ca_Kabuli_Chr02 | 31859192                | TT                              | CC                 | CC               | URR                           | 101507666          | GDSL esterase/lipase At4g26790-like         |
| SNP_11734_A_31860491 | NC_021161.1    | Ca_Kabuli_Chr02 | 31860491                | CC                              | AA                 | AA               | INTERGENIC                    |                    |                                             |
| SNP_11735_A_31860514 | NC_021161.1    | Ca_Kabuli_Chr02 | 31860514                | CC                              | TT                 | TT               | INTERGENIC                    |                    |                                             |
| SNP_11736_A_31861509 | NC_021161.1    | Ca_Kabuli_Chr02 | 31861509                | AA                              | TT                 | TT               | INTERGENIC                    |                    |                                             |
| SNP_11738_A_31861788 | NC_021161.1    | Ca_Kabuli_Chr02 | 31861788                | CC                              | GG                 | GG               | INTERGENIC                    |                    |                                             |
| SNP_11739_A_31861820 | NC_021161.1    | Ca_Kabuli_Chr02 | 31861820                | CC                              | AA                 | AA               | INTERGENIC                    |                    |                                             |
| SNP_11740_A_31865680 | NC_021161.1    | Ca_Kabuli_Chr02 | 31865680                | GG                              | TT                 | TT               | INTERGENIC                    |                    |                                             |
| SNP_11741_A_31865809 | NC_021161.1    | Ca_Kabuli_Chr02 | 31865809                | TT                              | CC                 | CC               | INTERGENIC                    |                    |                                             |
| SNP_11742_A_31865865 | NC_021161.1    | Ca_Kabuli_Chr02 | 31865865                | CC                              | TT                 | TT               | INTERGENIC                    |                    |                                             |
| SNP_11743_A_31865901 | NC_021161.1    | Ca_Kabuli_Chr02 | 31865901                | CC                              | TT                 | TT               | INTERGENIC                    |                    |                                             |
| SNP_11744_A_31865918 | NC_021161.1    | Ca_Kabuli_Chr02 | 31865918                | CC                              | TT                 | TT               | INTERGENIC                    |                    |                                             |
| SNP_11745_A_31865930 | NC_021161.1    | Ca_Kabuli_Chr02 | 31865930                | AA                              | GG                 | GG               | INTERGENIC                    |                    |                                             |
| SNP_11746_A_31865933 | NC_021161.1    | Ca_Kabuli_Chr02 | 31865933                | CC                              | TT                 | TT               | INTERGENIC                    |                    |                                             |
| SNP_11747_A_31871327 | NC_021161.1    | Ca_Kabuli_Chr02 | 31871327                | GG                              | AA                 | AA               | INTERGENIC                    |                    |                                             |
| SNP_11748_A_31881396 | NC_021161.1    | Ca_Kabuli_Chr02 | 31881396                | CC                              | TT                 | TT               | INTRON                        | 101508616          | centromere/kinetochore protein zw10 homolog |
| SNP_11749_A_31881488 | NC_021161.1    | Ca_Kabuli_Chr02 | 31881488                | AA                              | GG                 | GG               | INTRON                        | 101508616          | centromere/kinetochore protein zw10 homolog |
| SNP_11750_A_31881918 | NC_021161.1    | Ca_Kabuli_Chr02 | 31881918                | GG                              | TT                 | TT               | NON_SYNONYMOUS_CODING         | 101508616          | centromere/kinetochore protein zw10 homolog |
| SNP_11751_A_31882696 | NC_021161.1    | Ca_Kabuli_Chr02 | 31882696                | GG                              | AA                 | AA               | INTRON                        | 101508616          | centromere/kinetochore protein zw10 homolog |
| SNP_11752_A_31882704 | NC_021161.1    | Ca_Kabuli_Chr02 | 31882704                | CC                              | TT                 | TT               | INTRON                        | 101508616          | centromere/kinetochore protein zw10 homolog |



| SNPs IDs             | Chromosome IDs | Chromosomes     | Physical positions (bp) | CDC Frontier (Reference genome) | (Pusa 1103 & HPNB) | (ILWC 46 & LPNB) | Sequence Components of genome | Gene accession IDs | Putative functions                          |
|----------------------|----------------|-----------------|-------------------------|---------------------------------|--------------------|------------------|-------------------------------|--------------------|---------------------------------------------|
| SNP_11753_A_31882707 | NC_021161.1    | Ca_Kabuli_Chr02 | 31882707                | GG                              | AA                 | AA               | INTRON                        | 101508616          | centromere/kinetochore protein zw10 homolog |
| SNP_11754_A_31882872 | NC_021161.1    | Ca_Kabuli_Chr02 | 31882872                | TT                              | CC                 | CC               | INTERGENIC                    |                    |                                             |
| SNP_11755_A_31882924 | NC_021161.1    | Ca_Kabuli_Chr02 | 31882924                | AA                              | CC                 | CC               | INTERGENIC                    |                    |                                             |
| SNP_11757_A_31882982 | NC_021161.1    | Ca_Kabuli_Chr02 | 31882982                | TT                              | CC                 | CC               | INTERGENIC                    |                    |                                             |
| SNP_11759_A_31883040 | NC_021161.1    | Ca_Kabuli_Chr02 | 31883040                | AA                              | CC                 | CC               | INTERGENIC                    |                    |                                             |
| SNP_11760_A_31883583 | NC_021161.1    | Ca_Kabuli_Chr02 | 31883583                | GG                              | TT                 | TT               | INTERGENIC                    |                    |                                             |
| SNP_11761_A_31891906 | NC_021161.1    | Ca_Kabuli_Chr02 | 31891906                | GG                              | AA                 | AA               | INTERGENIC                    |                    |                                             |
| SNP_11762_A_31892602 | NC_021161.1    | Ca_Kabuli_Chr02 | 31892602                | CC                              | GG                 | GG               | URR                           | 101508932          | protein disulfide isomerase-like 2-3        |
| SNP_11764_A_31893042 | NC_021161.1    | Ca_Kabuli_Chr02 | 31893042                | TT                              | AA                 | AA               | URR                           | 101508932          | protein disulfide isomerase-like 2-3        |
| SNP_11765_A_31893130 | NC_021161.1    | Ca_Kabuli_Chr02 | 31893130                | TT                              | CC                 | CC               | URR                           | 101508932          | protein disulfide isomerase-like 2-3        |
| SNP_11766_A_31893140 | NC_021161.1    | Ca_Kabuli_Chr02 | 31893140                | AA                              | GG                 | GG               | URR                           | 101508932          | protein disulfide isomerase-like 2-3        |
| SNP_11767_A_31893240 | NC_021161.1    | Ca_Kabuli_Chr02 | 31893240                | AA                              | GG                 | GG               | URR                           | 101508932          | protein disulfide isomerase-like 2-3        |
| SNP_11768_A_31893244 | NC_021161.1    | Ca_Kabuli_Chr02 | 31893244                | TT                              | CC                 | CC               | URR                           | 101508932          | protein disulfide isomerase-like 2-3        |
| SNP_11769_A_31893285 | NC_021161.1    | Ca_Kabuli_Chr02 | 31893285                | GG                              | AA                 | AA               | URR                           | 101508932          | protein disulfide isomerase-like 2-3        |
| SNP_11770_A_31893292 | NC_021161.1    | Ca_Kabuli_Chr02 | 31893292                | AA                              | TT                 | TT               | URR                           | 101508932          | protein disulfide isomerase-like 2-3        |
| SNP_11771_A_31893346 | NC_021161.1    | Ca_Kabuli_Chr02 | 31893346                | AA                              | GG                 | GG               | URR                           | 101508932          | protein disulfide isomerase-like 2-3        |
| SNP_11772_A_31895451 | NC_021161.1    | Ca_Kabuli_Chr02 | 31895451                | AA                              | GG                 | GG               | INTRON                        | 101509247          | triacylglycerol lipase 2-like               |
| SNP_11773_A_31895602 | NC_021161.1    | Ca_Kabuli_Chr02 | 31895602                | GG                              | AA                 | AA               | INTRON                        | 101509247          | triacylglycerol lipase 2-like               |
| SNP_11774_A_31896133 | NC_021161.1    | Ca_Kabuli_Chr02 | 31896133                | CC                              | AA                 | AA               | INTRON                        | 101509247          | triacylglycerol lipase 2-like               |
| SNP_11775_A_31899131 | NC_021161.1    | Ca_Kabuli_Chr02 | 31899131                | TT                              | CC                 | CC               | INTRON                        | 101509247          | triacylglycerol lipase 2-like               |
| SNP_11776_A_31899301 | NC_021161.1    | Ca_Kabuli_Chr02 | 31899301                | GG                              | TT                 | TT               | INTRON                        | 101509247          | triacylglycerol lipase 2-like               |
| SNP_11777_A_31899531 | NC_021161.1    | Ca_Kabuli_Chr02 | 31899531                | CC                              | TT                 | TT               | INTRON                        | 101509247          | triacylglycerol lipase 2-like               |

| SNPs IDs             | Chromosome IDs | Chromosomes     | Physical positions (bp) | CDC Frontier genome (Reference genome) | (Pusa 1103 & HPNB) | (ILWC 46 & LPNB) | Sequence Components of genome | Gene accession IDs | Putative functions                      |
|----------------------|----------------|-----------------|-------------------------|----------------------------------------|--------------------|------------------|-------------------------------|--------------------|-----------------------------------------|
| SNP_11778_A_31899537 | NC_021161.1    | Ca_Kabuli_Chr02 | 31899537                | GG                                     | AA                 | AA               | INTRON                        | 101509247          | triacylglycerol lipase 2-like           |
| SNP_11779_A_31901807 | NC_021161.1    | Ca_Kabuli_Chr02 | 31901807                | GG                                     | AA                 | AA               | INTRON                        | 101509247          | triacylglycerol lipase 2-like           |
| SNP_11780_A_31901808 | NC_021161.1    | Ca_Kabuli_Chr02 | 31901808                | TT                                     | CC                 | CC               | INTRON                        | 101509247          | triacylglycerol lipase 2-like           |
| SNP_11781_A_31901974 | NC_021161.1    | Ca_Kabuli_Chr02 | 31901974                | AA                                     | CC                 | CC               | INTRON                        | 101509247          | triacylglycerol lipase 2-like           |
| SNP_11782_A_31901995 | NC_021161.1    | Ca_Kabuli_Chr02 | 31901995                | TT                                     | GG                 | GG               | INTRON                        | 101509247          | triacylglycerol lipase 2-like           |
| SNP_11783_A_31903109 | NC_021161.1    | Ca_Kabuli_Chr02 | 31903109                | GG                                     | AA                 | AA               | INTERGENIC                    |                    |                                         |
| SNP_11784_A_31903142 | NC_021161.1    | Ca_Kabuli_Chr02 | 31903142                | CC                                     | TT                 | TT               | INTERGENIC                    |                    |                                         |
| SNP_11785_A_31903218 | NC_021161.1    | Ca_Kabuli_Chr02 | 31903218                | TT                                     | CC                 | CC               | INTERGENIC                    |                    |                                         |
| SNP_11786_A_31904118 | NC_021161.1    | Ca_Kabuli_Chr02 | 31904118                | TT                                     | GG                 | GG               | INTERGENIC                    |                    |                                         |
| SNP_11787_A_31904440 | NC_021161.1    | Ca_Kabuli_Chr02 | 31904440                | CC                                     | AA                 | AA               | INTERGENIC                    |                    |                                         |
| SNP_11788_A_31904452 | NC_021161.1    | Ca_Kabuli_Chr02 | 31904452                | CC                                     | TT                 | TT               | INTERGENIC                    |                    |                                         |
| SNP_11789_A_31904918 | NC_021161.1    | Ca_Kabuli_Chr02 | 31904918                | AA                                     | GG                 | GG               | INTERGENIC                    |                    |                                         |
| SNP_11790_A_31905048 | NC_021161.1    | Ca_Kabuli_Chr02 | 31905048                | CC                                     | TT                 | TT               | INTERGENIC                    |                    |                                         |
| SNP_11791_A_31905162 | NC_021161.1    | Ca_Kabuli_Chr02 | 31905162                | GG                                     | AA                 | AA               | INTERGENIC                    |                    |                                         |
| SNP_11793_A_31905475 | NC_021161.1    | Ca_Kabuli_Chr02 | 31905475                | CC                                     | AA                 | AA               | INTERGENIC                    |                    |                                         |
| SNP_11794_A_31905476 | NC_021161.1    | Ca_Kabuli_Chr02 | 31905476                | GG                                     | TT                 | TT               | INTERGENIC                    |                    |                                         |
| SNP_11795_A_31905480 | NC_021161.1    | Ca_Kabuli_Chr02 | 31905480                | AA                                     | TT                 | TT               | INTERGENIC                    |                    |                                         |
| SNP_11797_A_31905960 | NC_021161.1    | Ca_Kabuli_Chr02 | 31905960                | AA                                     | GG                 | GG               | URR                           | 101509247          | triacylglycerol lipase 2-like           |
| SNP_11798_A_31906090 | NC_021161.1    | Ca_Kabuli_Chr02 | 31906090                | AA                                     | GG                 | GG               | URR                           | 101509247          | triacylglycerol lipase 2-like           |
| SNP_11799_A_31907541 | NC_021161.1    | Ca_Kabuli_Chr02 | 31907541                | AA                                     | TT                 | TT               | URR                           | 101509247          | triacylglycerol lipase 2-like           |
| SNP_11800_A_31908377 | NC_021161.1    | Ca_Kabuli_Chr02 | 31908377                | GG                                     | AA                 | AA               | INTRON                        | 101509797          | E3 ubiquitin-protein ligase BRE1-like 2 |
| SNP_11801_A_31909395 | NC_021161.1    | Ca_Kabuli_Chr02 | 31909395                | CC                                     | TT                 | TT               | INTRON                        | 101509797          | E3 ubiquitin-protein ligase BRE1-like 2 |

| SNPs IDs             | Chromosome IDs | Chromosomes     | Physical positions (bp) | CDC Frontier genome (Reference genome) | (Pusa 1103 & HPNB) | (ILWC 46 & LPNB) | Sequence Components of genome | Gene accession IDs | Putative functions                              |
|----------------------|----------------|-----------------|-------------------------|----------------------------------------|--------------------|------------------|-------------------------------|--------------------|-------------------------------------------------|
| SNP_11802_A_31911365 | NC_021161.1    | Ca_Kabuli_Chr02 | 31911365                | GG                                     | AA                 | AA               | INTRON                        | 101509797          | E3 ubiquitin-protein ligase BRE1-like 2         |
| SNP_11803_A_31911657 | NC_021161.1    | Ca_Kabuli_Chr02 | 31911657                | AA                                     | TT                 | TT               | INTRON                        | 101509797          | E3 ubiquitin-protein ligase BRE1-like 2         |
| SNP_11805_A_31916122 | NC_021161.1    | Ca_Kabuli_Chr02 | 31916122                | GG                                     | TT                 | TT               | INTRON                        | 101509797          | E3 ubiquitin-protein ligase BRE1-like 2         |
| SNP_11806_A_31917531 | NC_021161.1    | Ca_Kabuli_Chr02 | 31917531                | CC                                     | TT                 | TT               | INTRON                        | 101509797          | E3 ubiquitin-protein ligase BRE1-like 2         |
| SNP_11807_A_31918859 | NC_021161.1    | Ca_Kabuli_Chr02 | 31918859                | AA                                     | GG                 | GG               | INTRON                        | 101509797          | E3 ubiquitin-protein ligase BRE1-like 2         |
| SNP_11808_A_31920007 | NC_021161.1    | Ca_Kabuli_Chr02 | 31920007                | TT                                     | CC                 | CC               | URR                           | 101509797          | E3 ubiquitin-protein ligase BRE1-like 2         |
| SNP_11810_A_31921045 | NC_021161.1    | Ca_Kabuli_Chr02 | 31921045                | CC                                     | GG                 | GG               | URR                           | 101509797          | E3 ubiquitin-protein ligase BRE1-like 2         |
| SNP_11811_A_31921415 | NC_021161.1    | Ca_Kabuli_Chr02 | 31921415                | AA                                     | GG                 | GG               | URR                           | 101509797          | E3 ubiquitin-protein ligase BRE1-like 2         |
| SNP_11813_A_31921905 | NC_021161.1    | Ca_Kabuli_Chr02 | 31921905                | GG                                     | AA                 | AA               | INTERGENIC                    |                    |                                                 |
| SNP_11814_A_31922960 | NC_021161.1    | Ca_Kabuli_Chr02 | 31922960                | AA                                     | GG                 | GG               | INTERGENIC                    |                    |                                                 |
| SNP_11815_A_31922977 | NC_021161.1    | Ca_Kabuli_Chr02 | 31922977                | TT                                     | GG                 | GG               | INTERGENIC                    |                    |                                                 |
| SNP_11816_A_31925042 | NC_021161.1    | Ca_Kabuli_Chr02 | 31925042                | CC                                     | AA                 | AA               | INTERGENIC                    |                    |                                                 |
| SNP_11817_A_31925258 | NC_021161.1    | Ca_Kabuli_Chr02 | 31925258                | CC                                     | GG                 | GG               | INTERGENIC                    |                    |                                                 |
| SNP_11819_A_31926511 | NC_021161.1    | Ca_Kabuli_Chr02 | 31926511                | AA                                     | CC                 | CC               | INTERGENIC                    |                    |                                                 |
| SNP_11820_A_31926520 | NC_021161.1    | Ca_Kabuli_Chr02 | 31926520                | AA                                     | GG                 | GG               | INTERGENIC                    |                    |                                                 |
| SNP_11821_A_31929882 | NC_021161.1    | Ca_Kabuli_Chr02 | 31929882                | AA                                     | GG                 | GG               | URR                           | 101510116          | ethylene-responsive transcription factor 3-like |
| SNP_11822_A_31929913 | NC_021161.1    | Ca_Kabuli_Chr02 | 31929913                | TT                                     | CC                 | CC               | URR                           | 101510116          | ethylene-responsive transcription factor 3-like |
| SNP_11823_A_31932804 | NC_021161.1    | Ca_Kabuli_Chr02 | 31932804                | AA                                     | GG                 | GG               | INTERGENIC                    |                    |                                                 |
| SNP_11824_A_31935373 | NC_021161.1    | Ca_Kabuli_Chr02 | 31935373                | TT                                     | CC                 | CC               | INTERGENIC                    |                    |                                                 |
| SNP_11825_A_31936391 | NC_021161.1    | Ca_Kabuli_Chr02 | 31936391                | TT                                     | AA                 | AA               | INTERGENIC                    |                    |                                                 |
| SNP_11826_A_31939017 | NC_021161.1    | Ca_Kabuli_Chr02 | 31939017                | GG                                     | AA                 | AA               | DRR                           | 101510439          | zinc finger CCH domain-containing protein 3     |
| SNP_11828_A_31941554 | NC_021161.1    | Ca_Kabuli_Chr02 | 31941554                | AA                                     | TT                 | TT               | INTRON                        | 101510439          | zinc finger CCH domain-containing protein 3     |

| SNPs IDs             | Chromosome IDs | Chromosomes     | Physical positions (bp) | CDC Frontier (Reference genome) | (Pusa 1103 & HPNB) | (ILWC 46 & LPNB) | Sequence Components of genome | Gene accession IDs | Putative functions                                                 |
|----------------------|----------------|-----------------|-------------------------|---------------------------------|--------------------|------------------|-------------------------------|--------------------|--------------------------------------------------------------------|
| SNP_11829_A_31944702 | NC_021161.1    | Ca_Kabuli_Chr02 | 31944702                | TT                              | CC                 | CC               | URR                           | 101510439          | zinc finger CCH domain-containing protein 3                        |
| SNP_11830_A_31945956 | NC_021161.1    | Ca_Kabuli_Chr02 | 31945956                | CC                              | TT                 | TT               | URR                           | 101510439          | zinc finger CCH domain-containing protein 3                        |
| SNP_11831_A_31945964 | NC_021161.1    | Ca_Kabuli_Chr02 | 31945964                | TT                              | GG                 | GG               | URR                           | 101510439          | zinc finger CCH domain-containing protein 3                        |
| SNP_11833_A_31947873 | NC_021161.1    | Ca_Kabuli_Chr02 | 31947873                | AA                              | GG                 | GG               | INTERGENIC                    |                    |                                                                    |
| SNP_11834_A_31947877 | NC_021161.1    | Ca_Kabuli_Chr02 | 31947877                | TT                              | CC                 | CC               | INTERGENIC                    |                    |                                                                    |
| SNP_11835_A_31948063 | NC_021161.1    | Ca_Kabuli_Chr02 | 31948063                | TT                              | CC                 | CC               | INTERGENIC                    |                    |                                                                    |
| SNP_11836_A_31953236 | NC_021161.1    | Ca_Kabuli_Chr02 | 31953236                | CC                              | TT                 | TT               | INTERGENIC                    |                    |                                                                    |
| SNP_11837_A_31955875 | NC_021161.1    | Ca_Kabuli_Chr02 | 31955875                | GG                              | TT                 | TT               | INTERGENIC                    |                    |                                                                    |
| SNP_11838_A_31956464 | NC_021161.1    | Ca_Kabuli_Chr02 | 31956464                | AA                              | GG                 | GG               | INTERGENIC                    |                    |                                                                    |
| SNP_11839_A_31956468 | NC_021161.1    | Ca_Kabuli_Chr02 | 31956468                | AA                              | GG                 | GG               | INTERGENIC                    |                    |                                                                    |
| SNP_11840_A_31958120 | NC_021161.1    | Ca_Kabuli_Chr02 | 31958120                | GG                              | AA                 | AA               | NON_SYNONYMOUS_CODING         | 101492725          | arogenate dehydratase/prephenate dehydratase 2, chloroplastic-like |
| SNP_11841_A_31958213 | NC_021161.1    | Ca_Kabuli_Chr02 | 31958213                | AA                              | GG                 | GG               | INTRON                        | 101492725          | arogenate dehydratase/prephenate dehydratase 2, chloroplastic-like |
| SNP_11842_A_31958227 | NC_021161.1    | Ca_Kabuli_Chr02 | 31958227                | TT                              | CC                 | CC               | INTRON                        | 101492725          | arogenate dehydratase/prephenate dehydratase 2, chloroplastic-like |
| SNP_11843_A_31958471 | NC_021161.1    | Ca_Kabuli_Chr02 | 31958471                | CC                              | TT                 | TT               | INTRON                        | 101492725          | arogenate dehydratase/prephenate dehydratase 2, chloroplastic-like |
| SNP_11844_A_31958525 | NC_021161.1    | Ca_Kabuli_Chr02 | 31958525                | AA                              | GG                 | GG               | INTRON                        | 101492725          | arogenate dehydratase/prephenate dehydratase 2, chloroplastic-like |
| SNP_11845_A_31960075 | NC_021161.1    | Ca_Kabuli_Chr02 | 31960075                | AA                              | GG                 | GG               | INTRON                        | 101492725          | arogenate dehydratase/prephenate dehydratase 2, chloroplastic-like |
| SNP_11846_A_31964485 | NC_021161.1    | Ca_Kabuli_Chr02 | 31964485                | TT                              | CC                 | CC               | DRR                           | 101510767          | E3 ubiquitin-protein ligase COP1                                   |
| SNP_11847_A_31981070 | NC_021161.1    | Ca_Kabuli_Chr02 | 31981070                | GG                              | AA                 | AA               | INTERGENIC                    |                    |                                                                    |
| SNP_11848_A_31981626 | NC_021161.1    | Ca_Kabuli_Chr02 | 31981626                | TT                              | CC                 | CC               | INTERGENIC                    |                    |                                                                    |
| SNP_11849_A_31992321 | NC_021161.1    | Ca_Kabuli_Chr02 | 31992321                | AA                              | GG                 | GG               | INTERGENIC                    |                    |                                                                    |
| SNP_11850_A_32002598 | NC_021161.1    | Ca_Kabuli_Chr02 | 32002598                | AA                              | GG                 | GG               | INTERGENIC                    |                    |                                                                    |
| SNP_11851_A_32003468 | NC_021161.1    | Ca_Kabuli_Chr02 | 32003468                | TT                              | CC                 | CC               | INTERGENIC                    |                    |                                                                    |

| SNPs IDs             | Chromosome IDs | Chromosomes     | Physical positions (bp) | CDC Frontier genome (Reference genome) | (Pusa 1103 & HPNB) | (ILWC 46 & LPNB) | Sequence Components of genome | Gene accession IDs | Putative functions                              |
|----------------------|----------------|-----------------|-------------------------|----------------------------------------|--------------------|------------------|-------------------------------|--------------------|-------------------------------------------------|
| SNP_11852_A_32003469 | NC_021161.1    | Ca_Kabuli_Chr02 | 32003469                | TT                                     | CC                 | CC               | INTERGENIC                    |                    |                                                 |
| SNP_11853_A_32003473 | NC_021161.1    | Ca_Kabuli_Chr02 | 32003473                | GG                                     | AA                 | AA               | INTERGENIC                    |                    |                                                 |
| SNP_11854_A_32008336 | NC_021161.1    | Ca_Kabuli_Chr02 | 32008336                | TT                                     | CC                 | CC               | INTERGENIC                    |                    |                                                 |
| SNP_11855_A_32008549 | NC_021161.1    | Ca_Kabuli_Chr02 | 32008549                | GG                                     | AA                 | AA               | INTERGENIC                    |                    |                                                 |
| SNP_11856_A_32012972 | NC_021161.1    | Ca_Kabuli_Chr02 | 32012972                | AA                                     | GG                 | GG               | DRR                           | 101511093          | probable tyrosine-protein phosphatase At1g05000 |
| SNP_11857_A_32012984 | NC_021161.1    | Ca_Kabuli_Chr02 | 32012984                | GG                                     | AA                 | AA               | DRR                           | 101511093          | probable tyrosine-protein phosphatase At1g05000 |
| SNP_11858_A_32021412 | NC_021161.1    | Ca_Kabuli_Chr02 | 32021412                | AA                                     | GG                 | GG               | INTERGENIC                    |                    |                                                 |
| SNP_11859_A_32024091 | NC_021161.1    | Ca_Kabuli_Chr02 | 32024091                | GG                                     | AA                 | AA               | INTERGENIC                    |                    |                                                 |
| SNP_11860_A_32025214 | NC_021161.1    | Ca_Kabuli_Chr02 | 32025214                | TT                                     | CC                 | CC               | INTERGENIC                    |                    |                                                 |
| SNP_11861_A_32033409 | NC_021161.1    | Ca_Kabuli_Chr02 | 32033409                | CC                                     | GG                 | GG               | DRR                           | 101511400          | uncharacterized LOC101511400                    |
| SNP_11862_A_32036581 | NC_021161.1    | Ca_Kabuli_Chr02 | 32036581                | GG                                     | AA                 | AA               | INTRON                        | 101511400          | uncharacterized LOC101511400                    |
| SNP_11863_A_32046205 | NC_021161.1    | Ca_Kabuli_Chr02 | 32046205                | CC                                     | TT                 | TT               | INTERGENIC                    |                    |                                                 |
| SNP_11864_A_32046207 | NC_021161.1    | Ca_Kabuli_Chr02 | 32046207                | CC                                     | TT                 | TT               | INTERGENIC                    |                    |                                                 |
| SNP_11865_A_32046243 | NC_021161.1    | Ca_Kabuli_Chr02 | 32046243                | GG                                     | AA                 | AA               | INTERGENIC                    |                    |                                                 |
| SNP_11866_A_32046276 | NC_021161.1    | Ca_Kabuli_Chr02 | 32046276                | TT                                     | CC                 | CC               | INTERGENIC                    |                    |                                                 |
| SNP_11867_A_32048211 | NC_021161.1    | Ca_Kabuli_Chr02 | 32048211                | TT                                     | AA                 | AA               | INTERGENIC                    |                    |                                                 |
| SNP_11868_A_32057390 | NC_021161.1    | Ca_Kabuli_Chr02 | 32057390                | TT                                     | GG                 | GG               | DRR                           | 101493058          | uncharacterized LOC101493058                    |
| SNP_11869_A_32057617 | NC_021161.1    | Ca_Kabuli_Chr02 | 32057617                | GG                                     | TT                 | TT               | DRR                           | 101493058          | uncharacterized LOC101493058                    |
| SNP_11870_A_32059890 | NC_021161.1    | Ca_Kabuli_Chr02 | 32059890                | GG                                     | AA                 | AA               | NON_SYNONYMOUS_CODING         | 101493058          | uncharacterized LOC101493058                    |
| SNP_11871_A_32059913 | NC_021161.1    | Ca_Kabuli_Chr02 | 32059913                | GG                                     | AA                 | AA               | INTRON                        | 101493058          | uncharacterized LOC101493058                    |
| SNP_11872_A_32059914 | NC_021161.1    | Ca_Kabuli_Chr02 | 32059914                | AA                                     | GG                 | GG               | INTRON                        | 101493058          | uncharacterized LOC101493058                    |
| SNP_11873_A_32065322 | NC_021161.1    | Ca_Kabuli_Chr02 | 32065322                | GG                                     | CC                 | CC               | INTERGENIC                    |                    |                                                 |

| SNPs IDs             | Chromosome IDs | Chromosomes     | Physical positions (bp) | CDC Frontier (Reference genome) | (Pusa 1103 & HPNB) | (ILWC 46 & LPNB) | Sequence Components of genome | Gene accession IDs | Putative functions                                                              |
|----------------------|----------------|-----------------|-------------------------|---------------------------------|--------------------|------------------|-------------------------------|--------------------|---------------------------------------------------------------------------------|
| SNP_11874_A_32070859 | NC_021161.1    | Ca_Kabuli_Chr02 | 32070859                | GG                              | TT                 | TT               | DRR                           | 101512471          | transmembrane protein 256 homolog                                               |
| SNP_11875_A_32074774 | NC_021161.1    | Ca_Kabuli_Chr02 | 32074774                | AA                              | GG                 | GG               | DRR                           | 101512790          | serine/threonine-protein phosphatase 6 regulatory ankyrin repeat subunit B-like |
| SNP_11876_A_32083348 | NC_021161.1    | Ca_Kabuli_Chr02 | 32083348                | AA                              | GG                 | GG               | URR                           | 101512790          | serine/threonine-protein phosphatase 6 regulatory ankyrin repeat subunit B-like |
| SNP_11877_A_32083359 | NC_021161.1    | Ca_Kabuli_Chr02 | 32083359                | AA                              | GG                 | GG               | URR                           | 101512790          | serine/threonine-protein phosphatase 6 regulatory ankyrin repeat subunit B-like |
| SNP_11878_A_32083507 | NC_021161.1    | Ca_Kabuli_Chr02 | 32083507                | CC                              | GG                 | GG               | URR                           | 101512790          | serine/threonine-protein phosphatase 6 regulatory ankyrin repeat subunit B-like |
| SNP_11880_A_32088931 | NC_021161.1    | Ca_Kabuli_Chr02 | 32088931                | CC                              | GG                 | GG               | INTERGENIC                    |                    |                                                                                 |
| SNP_11881_A_32089444 | NC_021161.1    | Ca_Kabuli_Chr02 | 32089444                | AA                              | CC                 | CC               | INTERGENIC                    |                    |                                                                                 |
| SNP_11882_A_32089515 | NC_021161.1    | Ca_Kabuli_Chr02 | 32089515                | GG                              | AA                 | AA               | INTERGENIC                    |                    |                                                                                 |
| SNP_11883_A_32099648 | NC_021161.1    | Ca_Kabuli_Chr02 | 32099648                | AA                              | TT                 | TT               | INTERGENIC                    |                    |                                                                                 |
| SNP_11884_A_32100202 | NC_021161.1    | Ca_Kabuli_Chr02 | 32100202                | GG                              | TT                 | TT               | INTERGENIC                    |                    |                                                                                 |
| SNP_11885_A_32104719 | NC_021161.1    | Ca_Kabuli_Chr02 | 32104719                | GG                              | AA                 | AA               | URR                           | 101513445          | Unknown function                                                                |
| SNP_11886_A_32113308 | NC_021161.1    | Ca_Kabuli_Chr02 | 32113308                | GG                              | AA                 | AA               | INTRON                        | 101493700          | TMV resistance protein N-like                                                   |
| SNP_11887_A_32113740 | NC_021161.1    | Ca_Kabuli_Chr02 | 32113740                | AA                              | GG                 | GG               | INTRON                        | 101493700          | TMV resistance protein N-like                                                   |
| SNP_11888_A_32114593 | NC_021161.1    | Ca_Kabuli_Chr02 | 32114593                | AA                              | CC                 | CC               | NON_SYNONYMOUS_CODING         | 101493700          | TMV resistance protein N-like                                                   |
| SNP_11889_A_32116204 | NC_021161.1    | Ca_Kabuli_Chr02 | 32116204                | AA                              | GG                 | GG               | URR                           | 101493700          | TMV resistance protein N-like                                                   |
| SNP_11890_A_32122645 | NC_021161.1    | Ca_Kabuli_Chr02 | 32122645                | GG                              | AA                 | AA               | START_GAINED                  | 101514321          | glucan endo-1,3-beta-glucosidase 12-like                                        |
| SNP_11891_A_32126993 | NC_021161.1    | Ca_Kabuli_Chr02 | 32126993                | AA                              | TT                 | TT               | INTRON                        | id38798            | Unknown function                                                                |
| SNP_11893_A_32127462 | NC_021161.1    | Ca_Kabuli_Chr02 | 32127462                | AA                              | TT                 | TT               | NON_SYNONYMOUS_CODING         | id38798            | Unknown function                                                                |
| SNP_11894_A_32128629 | NC_021161.1    | Ca_Kabuli_Chr02 | 32128629                | CC                              | AA                 | AA               | DRR                           | 101515501          | phenylalanine--tRNA ligase, chloroplast/mtochondrial                            |
| SNP_11895_A_32134514 | NC_021161.1    | Ca_Kabuli_Chr02 | 32134514                | AA                              | GG                 | GG               | INTRON                        | 101515501          | phenylalanine--tRNA ligase, chloroplast/mtochondrial                            |
| SNP_11896_A_32134773 | NC_021161.1    | Ca_Kabuli_Chr02 | 32134773                | TT                              | CC                 | CC               | INTERGENIC                    |                    |                                                                                 |
| SNP_11897_A_32134856 | NC_021161.1    | Ca_Kabuli_Chr02 | 32134856                | TT                              | CC                 | CC               | INTERGENIC                    |                    |                                                                                 |

| SNPs IDs             | Chromosome IDs | Chromosomes     | Physical positions (bp) | CDC Frontier genome (Reference genome) | (Pusa 1103 & HPNB) | (ILWC 46 & LPNB) | Sequence Components of genome | Gene accession IDs | Putative functions                                                   |
|----------------------|----------------|-----------------|-------------------------|----------------------------------------|--------------------|------------------|-------------------------------|--------------------|----------------------------------------------------------------------|
| SNP_11898_A_32139426 | NC_021161.1    | Ca_Kabuli_Chr02 | 32139426                | TT                                     | AA                 | AA               | DRR                           | 101489157          | subtilisin-like protease Glyma18g48580                               |
| SNP_11899_A_32145129 | NC_021161.1    | Ca_Kabuli_Chr02 | 32145129                | TT                                     | CC                 | CC               | INTRON                        | 101489157          | subtilisin-like protease Glyma18g48580                               |
| SNP_11900_A_32145131 | NC_021161.1    | Ca_Kabuli_Chr02 | 32145131                | CC                                     | TT                 | TT               | INTRON                        | 101489157          | subtilisin-like protease Glyma18g48580                               |
| SNP_11901_A_32145299 | NC_021161.1    | Ca_Kabuli_Chr02 | 32145299                | TT                                     | AA                 | AA               | INTRON                        | 101489157          | subtilisin-like protease Glyma18g48580                               |
| SNP_11902_A_32145392 | NC_021161.1    | Ca_Kabuli_Chr02 | 32145392                | CC                                     | AA                 | AA               | INTRON                        | 101489157          | subtilisin-like protease Glyma18g48580                               |
| SNP_11903_A_32145445 | NC_021161.1    | Ca_Kabuli_Chr02 | 32145445                | TT                                     | GG                 | GG               | INTRON                        | 101489157          | subtilisin-like protease Glyma18g48580                               |
| SNP_11905_A_32153107 | NC_021161.1    | Ca_Kabuli_Chr02 | 32153107                | AA                                     | CC                 | CC               | INTERGENIC                    |                    |                                                                      |
| SNP_11906_A_32156271 | NC_021161.1    | Ca_Kabuli_Chr02 | 32156271                | CC                                     | TT                 | TT               | INTERGENIC                    |                    |                                                                      |
| SNP_11907_A_32156290 | NC_021161.1    | Ca_Kabuli_Chr02 | 32156290                | CC                                     | GG                 | GG               | INTERGENIC                    |                    |                                                                      |
| SNP_11908_A_32156327 | NC_021161.1    | Ca_Kabuli_Chr02 | 32156327                | TT                                     | GG                 | GG               | INTERGENIC                    |                    |                                                                      |
| SNP_11909_A_32156328 | NC_021161.1    | Ca_Kabuli_Chr02 | 32156328                | TT                                     | AA                 | AA               | INTERGENIC                    |                    |                                                                      |
| SNP_11910_A_32156334 | NC_021161.1    | Ca_Kabuli_Chr02 | 32156334                | AA                                     | CC                 | CC               | INTERGENIC                    |                    |                                                                      |
| SNP_11911_A_32158698 | NC_021161.1    | Ca_Kabuli_Chr02 | 32158698                | AA                                     | TT                 | TT               | DRR                           | 101494021          | nucleobase-ascorbate transporter 1-like                              |
| SNP_11912_A_32158871 | NC_021161.1    | Ca_Kabuli_Chr02 | 32158871                | AA                                     | GG                 | GG               | DRR                           | 101494021          | nucleobase-ascorbate transporter 1-like                              |
| SNP_11913_A_32160094 | NC_021161.1    | Ca_Kabuli_Chr02 | 32160094                | CC                                     | TT                 | TT               | URR                           | 101489486          | probable LRR receptor-like serine/threonine-protein kinase At4g08850 |
| SNP_11914_A_32160413 | NC_021161.1    | Ca_Kabuli_Chr02 | 32160413                | AA                                     | GG                 | GG               | INTERGENIC                    |                    |                                                                      |
| SNP_11915_A_32160729 | NC_021161.1    | Ca_Kabuli_Chr02 | 32160729                | TT                                     | CC                 | CC               | INTERGENIC                    |                    |                                                                      |
| SNP_11916_A_32160730 | NC_021161.1    | Ca_Kabuli_Chr02 | 32160730                | AA                                     | CC                 | CC               | INTERGENIC                    |                    |                                                                      |
| SNP_11919_A_32164148 | NC_021161.1    | Ca_Kabuli_Chr02 | 32164148                | GG                                     | AA                 | AA               | INTRON                        | 101494021          | nucleobase-ascorbate transporter 1-like                              |
| SNP_11920_A_32167716 | NC_021161.1    | Ca_Kabuli_Chr02 | 32167716                | AA                                     | TT                 | TT               | INTRON                        | 101494021          | nucleobase-ascorbate transporter 1-like                              |
| SNP_11921_A_32168305 | NC_021161.1    | Ca_Kabuli_Chr02 | 32168305                | TT                                     | AA                 | AA               | URR                           | 101494021          | nucleobase-ascorbate transporter 1-like                              |
| SNP_11923_A_32178251 | NC_021161.1    | Ca_Kabuli_Chr02 | 32178251                | AA                                     | CC                 | CC               | INTERGENIC                    |                    |                                                                      |

| SNPs IDs             | Chromosome IDs | Chromosomes     | Physical positions (bp) | CDC Frontier genome (Reference genome) | (Pusa 1103 & HPNB) | (ILWC 46 & LPNB) | Sequence Components of genome | Gene accession IDs | Putative functions |
|----------------------|----------------|-----------------|-------------------------|----------------------------------------|--------------------|------------------|-------------------------------|--------------------|--------------------|
| SNP_11924_A_32179029 | NC_021161.1    | Ca_Kabuli_Chr02 | 32179029                | AA                                     | CC                 | CC               | INTERGENIC                    |                    |                    |
| SNP_11925_A_32179340 | NC_021161.1    | Ca_Kabuli_Chr02 | 32179340                | TT                                     | GG                 | GG               | INTERGENIC                    |                    |                    |
| SNP_11926_A_32180539 | NC_021161.1    | Ca_Kabuli_Chr02 | 32180539                | AA                                     | CC                 | CC               | INTERGENIC                    |                    |                    |
| SNP_11927_A_32183074 | NC_021161.1    | Ca_Kabuli_Chr02 | 32183074                | CC                                     | TT                 | TT               | INTERGENIC                    |                    |                    |
| SNP_11928_A_32183099 | NC_021161.1    | Ca_Kabuli_Chr02 | 32183099                | AA                                     | TT                 | TT               | INTERGENIC                    |                    |                    |
| SNP_11929_A_32204165 | NC_021161.1    | Ca_Kabuli_Chr02 | 32204165                | AA                                     | TT                 | TT               | INTRON                        | 101490875          | cucumisin-like     |
| SNP_11930_A_32208817 | NC_021161.1    | Ca_Kabuli_Chr02 | 32208817                | TT                                     | CC                 | CC               | INTRON                        | 101490875          | cucumisin-like     |
| SNP_11931_A_32208822 | NC_021161.1    | Ca_Kabuli_Chr02 | 32208822                | GG                                     | AA                 | AA               | INTRON                        | 101490875          | cucumisin-like     |
| SNP_11932_A_32208937 | NC_021161.1    | Ca_Kabuli_Chr02 | 32208937                | TT                                     | CC                 | CC               | INTRON                        | 101490875          | cucumisin-like     |
| SNP_11933_A_32209005 | NC_021161.1    | Ca_Kabuli_Chr02 | 32209005                | TT                                     | AA                 | AA               | INTRON                        | 101490875          | cucumisin-like     |
| SNP_11934_A_32209035 | NC_021161.1    | Ca_Kabuli_Chr02 | 32209035                | TT                                     | AA                 | AA               | INTRON                        | 101490875          | cucumisin-like     |
| SNP_11936_A_32209145 | NC_021161.1    | Ca_Kabuli_Chr02 | 32209145                | GG                                     | TT                 | TT               | NON_SYNONYMOUS_CODING         | 101490875          | cucumisin-like     |
| SNP_11937_A_32209171 | NC_021161.1    | Ca_Kabuli_Chr02 | 32209171                | AA                                     | CC                 | CC               | NON_SYNONYMOUS_CODING         | 101490875          | cucumisin-like     |
| SNP_11938_A_32209179 | NC_021161.1    | Ca_Kabuli_Chr02 | 32209179                | GG                                     | AA                 | AA               | NON_SYNONYMOUS_CODING         | 101490875          | cucumisin-like     |
| SNP_11939_A_32209201 | NC_021161.1    | Ca_Kabuli_Chr02 | 32209201                | AA                                     | TT                 | TT               | NON_SYNONYMOUS_CODING         | 101490875          | cucumisin-like     |
| SNP_11940_A_32209208 | NC_021161.1    | Ca_Kabuli_Chr02 | 32209208                | CC                                     | TT                 | TT               | NON_SYNONYMOUS_CODING         | 101490875          | cucumisin-like     |
| SNP_11941_A_32209291 | NC_021161.1    | Ca_Kabuli_Chr02 | 32209291                | GG                                     | CC                 | CC               | URR                           | 101490875          | cucumisin-like     |
| SNP_11942_A_32209319 | NC_021161.1    | Ca_Kabuli_Chr02 | 32209319                | CC                                     | AA                 | AA               | URR                           | 101490875          | cucumisin-like     |
| SNP_11944_A_32209368 | NC_021161.1    | Ca_Kabuli_Chr02 | 32209368                | TT                                     | CC                 | CC               | URR                           | 101490875          | cucumisin-like     |
| SNP_11945_A_32209427 | NC_021161.1    | Ca_Kabuli_Chr02 | 32209427                | AA                                     | CC                 | CC               | URR                           | 101490875          | cucumisin-like     |
| SNP_11946_A_32209429 | NC_021161.1    | Ca_Kabuli_Chr02 | 32209429                | AA                                     | TT                 | TT               | URR                           | 101490875          | cucumisin-like     |
| SNP_11947_A_32209435 | NC_021161.1    | Ca_Kabuli_Chr02 | 32209435                | GG                                     | AA                 | AA               | URR                           | 101490875          | cucumisin-like     |



| SNPs IDs             | Chromosome IDs | Chromosomes     | Physical positions (bp) | CDC Frontier genome (Reference genome) | (Pusa 1103 & HPNB) | (ILWC 46 & LPNB) | Sequence Components of genome | Gene accession IDs | Putative functions |
|----------------------|----------------|-----------------|-------------------------|----------------------------------------|--------------------|------------------|-------------------------------|--------------------|--------------------|
| SNP_11948_A_32209479 | NC_021161.1    | Ca_Kabuli_Chr02 | 32209479                | CC                                     | TT                 | TT               | URR                           | 101490875          | cucumisin-like     |
| SNP_11949_A_32209606 | NC_021161.1    | Ca_Kabuli_Chr02 | 32209606                | GG                                     | AA                 | AA               | URR                           | 101490875          | cucumisin-like     |
| SNP_11950_A_32209621 | NC_021161.1    | Ca_Kabuli_Chr02 | 32209621                | TT                                     | CC                 | CC               | URR                           | 101490875          | cucumisin-like     |
| SNP_11951_A_32209631 | NC_021161.1    | Ca_Kabuli_Chr02 | 32209631                | GG                                     | TT                 | TT               | URR                           | 101490875          | cucumisin-like     |
| SNP_11952_A_32209648 | NC_021161.1    | Ca_Kabuli_Chr02 | 32209648                | CC                                     | GG                 | GG               | URR                           | 101490875          | cucumisin-like     |
| SNP_11953_A_32209663 | NC_021161.1    | Ca_Kabuli_Chr02 | 32209663                | AA                                     | CC                 | CC               | URR                           | 101490875          | cucumisin-like     |
| SNP_11955_A_32209729 | NC_021161.1    | Ca_Kabuli_Chr02 | 32209729                | TT                                     | AA                 | AA               | URR                           | 101490875          | cucumisin-like     |
| SNP_11956_A_32209742 | NC_021161.1    | Ca_Kabuli_Chr02 | 32209742                | AA                                     | CC                 | CC               | URR                           | 101490875          | cucumisin-like     |
| SNP_11957_A_32209766 | NC_021161.1    | Ca_Kabuli_Chr02 | 32209766                | AA                                     | GG                 | GG               | URR                           | 101490875          | cucumisin-like     |
| SNP_11958_A_32209793 | NC_021161.1    | Ca_Kabuli_Chr02 | 32209793                | AA                                     | CC                 | CC               | URR                           | 101490875          | cucumisin-like     |
| SNP_11959_A_32209845 | NC_021161.1    | Ca_Kabuli_Chr02 | 32209845                | GG                                     | AA                 | AA               | URR                           | 101490875          | cucumisin-like     |
| SNP_11960_A_32209871 | NC_021161.1    | Ca_Kabuli_Chr02 | 32209871                | GG                                     | CC                 | CC               | URR                           | 101490875          | cucumisin-like     |
| SNP_11961_A_32209927 | NC_021161.1    | Ca_Kabuli_Chr02 | 32209927                | CC                                     | GG                 | GG               | URR                           | 101490875          | cucumisin-like     |
| SNP_11962_A_32209990 | NC_021161.1    | Ca_Kabuli_Chr02 | 32209990                | CC                                     | TT                 | TT               | URR                           | 101490875          | cucumisin-like     |
| SNP_11963_A_32210010 | NC_021161.1    | Ca_Kabuli_Chr02 | 32210010                | AA                                     | CC                 | CC               | URR                           | 101490875          | cucumisin-like     |
| SNP_11964_A_32210049 | NC_021161.1    | Ca_Kabuli_Chr02 | 32210049                | AA                                     | GG                 | GG               | URR                           | 101490875          | cucumisin-like     |
| SNP_11966_A_32210189 | NC_021161.1    | Ca_Kabuli_Chr02 | 32210189                | AA                                     | TT                 | TT               | URR                           | 101490875          | cucumisin-like     |
| SNP_11968_A_32211592 | NC_021161.1    | Ca_Kabuli_Chr02 | 32211592                | GG                                     | TT                 | TT               | INTERGENIC                    |                    |                    |
| SNP_11969_A_32211898 | NC_021161.1    | Ca_Kabuli_Chr02 | 32211898                | TT                                     | GG                 | GG               | INTERGENIC                    |                    |                    |
| SNP_11971_A_32212178 | NC_021161.1    | Ca_Kabuli_Chr02 | 32212178                | CC                                     | AA                 | AA               | INTERGENIC                    |                    |                    |
| SNP_11972_A_32212180 | NC_021161.1    | Ca_Kabuli_Chr02 | 32212180                | TT                                     | CC                 | CC               | INTERGENIC                    |                    |                    |
| SNP_11973_A_32212491 | NC_021161.1    | Ca_Kabuli_Chr02 | 32212491                | CC                                     | TT                 | TT               | INTERGENIC                    |                    |                    |

| SNPs IDs             | Chromosome IDs | Chromosomes     | Physical positions (bp) | CDC Frontier genome (Reference genome) | (Pusa 1103 & HPNB) | (ILWC 46 & LPNB) | Sequence Components of genome | Gene accession IDs | Putative functions           |
|----------------------|----------------|-----------------|-------------------------|----------------------------------------|--------------------|------------------|-------------------------------|--------------------|------------------------------|
| SNP_11974_A_32212607 | NC_021161.1    | Ca_Kabuli_Chr02 | 32212607                | TT                                     | AA                 | AA               | INTERGENIC                    |                    |                              |
| SNP_11976_A_32213346 | NC_021161.1    | Ca_Kabuli_Chr02 | 32213346                | CC                                     | TT                 | TT               | INTERGENIC                    |                    |                              |
| SNP_11977_A_32213351 | NC_021161.1    | Ca_Kabuli_Chr02 | 32213351                | CC                                     | TT                 | TT               | INTERGENIC                    |                    |                              |
| SNP_11978_A_32213382 | NC_021161.1    | Ca_Kabuli_Chr02 | 32213382                | TT                                     | AA                 | AA               | INTERGENIC                    |                    |                              |
| SNP_11979_A_32213420 | NC_021161.1    | Ca_Kabuli_Chr02 | 32213420                | GG                                     | AA                 | AA               | INTERGENIC                    |                    |                              |
| SNP_11981_A_32213807 | NC_021161.1    | Ca_Kabuli_Chr02 | 32213807                | CC                                     | TT                 | TT               | INTERGENIC                    |                    |                              |
| SNP_11982_A_32214942 | NC_021161.1    | Ca_Kabuli_Chr02 | 32214942                | TT                                     | CC                 | CC               | INTERGENIC                    |                    |                              |
| SNP_11983_A_32216465 | NC_021161.1    | Ca_Kabuli_Chr02 | 32216465                | CC                                     | TT                 | TT               | INTERGENIC                    |                    |                              |
| SNP_11984_A_32222665 | NC_021161.1    | Ca_Kabuli_Chr02 | 32222665                | GG                                     | AA                 | AA               | INTERGENIC                    |                    |                              |
| SNP_11985_A_32222927 | NC_021161.1    | Ca_Kabuli_Chr02 | 32222927                | AA                                     | GG                 | GG               | INTERGENIC                    |                    |                              |
| SNP_11986_A_32222940 | NC_021161.1    | Ca_Kabuli_Chr02 | 32222940                | CC                                     | GG                 | GG               | INTERGENIC                    |                    |                              |
| SNP_11987_A_32222942 | NC_021161.1    | Ca_Kabuli_Chr02 | 32222942                | TT                                     | CC                 | CC               | INTERGENIC                    |                    |                              |
| SNP_11988_A_32222975 | NC_021161.1    | Ca_Kabuli_Chr02 | 32222975                | CC                                     | TT                 | TT               | INTERGENIC                    |                    |                              |
| SNP_11989_A_32223049 | NC_021161.1    | Ca_Kabuli_Chr02 | 32223049                | GG                                     | AA                 | AA               | INTERGENIC                    |                    |                              |
| SNP_11990_A_32242731 | NC_021161.1    | Ca_Kabuli_Chr02 | 32242731                | CC                                     | AA                 | AA               | INTERGENIC                    |                    |                              |
| SNP_11992_A_32247753 | NC_021161.1    | Ca_Kabuli_Chr02 | 32247753                | CC                                     | TT                 | TT               | INTERGENIC                    |                    |                              |
| SNP_11993_A_32249198 | NC_021161.1    | Ca_Kabuli_Chr02 | 32249198                | GG                                     | AA                 | AA               | INTERGENIC                    |                    |                              |
| SNP_11994_A_32249964 | NC_021161.1    | Ca_Kabuli_Chr02 | 32249964                | CC                                     | TT                 | TT               | INTERGENIC                    |                    |                              |
| SNP_11995_A_32251668 | NC_021161.1    | Ca_Kabuli_Chr02 | 32251668                | TT                                     | CC                 | CC               | URR                           | 101495186          | protein NRT1/ PTR FAMILY 6.4 |
| SNP_11996_A_32252273 | NC_021161.1    | Ca_Kabuli_Chr02 | 32252273                | CC                                     | TT                 | TT               | URR                           | 101495186          | protein NRT1/ PTR FAMILY 6.4 |
| SNP_11997_A_32258988 | NC_021161.1    | Ca_Kabuli_Chr02 | 32258988                | TT                                     | AA                 | AA               | INTRON                        | 101495840          | homeobox protein SBH1-like   |
| SNP_11998_A_32259025 | NC_021161.1    | Ca_Kabuli_Chr02 | 32259025                | GG                                     | AA                 | AA               | INTRON                        | 101495840          | homeobox protein SBH1-like   |

| SNPs IDs             | Chromosome IDs | Chromosomes     | Physical positions (bp) | CDC Frontier genome (Reference genome) | (Pusa 1103 & HPNB) | (ILWC 46 & LPNB) | Sequence Components of genome | Gene accession IDs | Putative functions         |
|----------------------|----------------|-----------------|-------------------------|----------------------------------------|--------------------|------------------|-------------------------------|--------------------|----------------------------|
| SNP_11999_A_32261882 | NC_021161.1    | Ca_Kabuli_Chr02 | 32261882                | GG                                     | AA                 | AA               | URR                           | 101495840          | homeobox protein SBH1-like |
| SNP_12000_A_32264779 | NC_021161.1    | Ca_Kabuli_Chr02 | 32264779                | GG                                     | AA                 | AA               | INTERGENIC                    |                    |                            |
| SNP_12001_A_32266102 | NC_021161.1    | Ca_Kabuli_Chr02 | 32266102                | AA                                     | GG                 | GG               | INTERGENIC                    |                    |                            |
| SNP_12002_A_32266126 | NC_021161.1    | Ca_Kabuli_Chr02 | 32266126                | CC                                     | AA                 | AA               | INTERGENIC                    |                    |                            |
| SNP_12003_A_32266384 | NC_021161.1    | Ca_Kabuli_Chr02 | 32266384                | GG                                     | AA                 | AA               | INTERGENIC                    |                    |                            |
| SNP_12004_A_32266403 | NC_021161.1    | Ca_Kabuli_Chr02 | 32266403                | TT                                     | CC                 | CC               | INTERGENIC                    |                    |                            |
| SNP_12005_A_32266948 | NC_021161.1    | Ca_Kabuli_Chr02 | 32266948                | AA                                     | TT                 | TT               | INTERGENIC                    |                    |                            |
| SNP_12006_A_32267310 | NC_021161.1    | Ca_Kabuli_Chr02 | 32267310                | TT                                     | GG                 | GG               | INTERGENIC                    |                    |                            |
| SNP_12007_A_32267376 | NC_021161.1    | Ca_Kabuli_Chr02 | 32267376                | GG                                     | AA                 | AA               | INTERGENIC                    |                    |                            |
| SNP_12008_A_32267979 | NC_021161.1    | Ca_Kabuli_Chr02 | 32267979                | TT                                     | CC                 | CC               | INTERGENIC                    |                    |                            |
| SNP_12009_A_32269251 | NC_021161.1    | Ca_Kabuli_Chr02 | 32269251                | GG                                     | AA                 | AA               | INTERGENIC                    |                    |                            |
| SNP_12010_A_32269975 | NC_021161.1    | Ca_Kabuli_Chr02 | 32269975                | CC                                     | TT                 | TT               | INTERGENIC                    |                    |                            |
| SNP_12011_A_32271647 | NC_021161.1    | Ca_Kabuli_Chr02 | 32271647                | AA                                     | CC                 | CC               | INTERGENIC                    |                    |                            |
| SNP_12012_A_32272368 | NC_021161.1    | Ca_Kabuli_Chr02 | 32272368                | AA                                     | GG                 | GG               | INTERGENIC                    |                    |                            |
| SNP_12013_A_32272435 | NC_021161.1    | Ca_Kabuli_Chr02 | 32272435                | AA                                     | GG                 | GG               | INTERGENIC                    |                    |                            |
| SNP_12014_A_32274708 | NC_021161.1    | Ca_Kabuli_Chr02 | 32274708                | CC                                     | TT                 | TT               | INTERGENIC                    |                    |                            |
| SNP_12016_A_32290479 | NC_021161.1    | Ca_Kabuli_Chr02 | 32290479                | CC                                     | TT                 | TT               | URR                           | 101496494          | protein FAM91A1-like       |
| SNP_12017_A_32290611 | NC_021161.1    | Ca_Kabuli_Chr02 | 32290611                | CC                                     | TT                 | TT               | URR                           | 101496494          | protein FAM91A1-like       |
| SNP_12018_A_32290650 | NC_021161.1    | Ca_Kabuli_Chr02 | 32290650                | AA                                     | GG                 | GG               | URR                           | 101496494          | protein FAM91A1-like       |
| SNP_12019_A_32290652 | NC_021161.1    | Ca_Kabuli_Chr02 | 32290652                | GG                                     | AA                 | AA               | URR                           | 101496494          | protein FAM91A1-like       |
| SNP_12020_A_32291315 | NC_021161.1    | Ca_Kabuli_Chr02 | 32291315                | TT                                     | CC                 | CC               | INTERGENIC                    |                    |                            |
| SNP_12021_A_32291332 | NC_021161.1    | Ca_Kabuli_Chr02 | 32291332                | CC                                     | TT                 | TT               | INTERGENIC                    |                    |                            |

| SNPs IDs             | Chromosome IDs | Chromosomes     | Physical positions (bp) | CDC Frontier genome (Reference genome) | (Pusa 1103 & HPNB) | (ILWC 46 & LPNB) | Sequence Components of genome | Gene accession IDs | Putative functions                                                               |
|----------------------|----------------|-----------------|-------------------------|----------------------------------------|--------------------|------------------|-------------------------------|--------------------|----------------------------------------------------------------------------------|
| SNP_12022_A_32291565 | NC_021161.1    | Ca_Kabuli_Chr02 | 32291565                | AA                                     | GG                 | GG               | INTERGENIC                    |                    |                                                                                  |
| SNP_12023_A_32291633 | NC_021161.1    | Ca_Kabuli_Chr02 | 32291633                | CC                                     | TT                 | TT               | INTERGENIC                    |                    |                                                                                  |
| SNP_12024_A_32292210 | NC_021161.1    | Ca_Kabuli_Chr02 | 32292210                | AA                                     | GG                 | GG               | INTERGENIC                    |                    |                                                                                  |
| SNP_12026_A_32296544 | NC_021161.1    | Ca_Kabuli_Chr02 | 32296544                | TT                                     | CC                 | CC               | INTRON                        | 101496828          | leucine-rich repeat receptor-like tyrosine-protein kinase PXC3                   |
| SNP_12027_A_32327223 | NC_021161.1    | Ca_Kabuli_Chr02 | 32327223                | AA                                     | GG                 | GG               | INTRON                        | 101497149          | putative phosphatidylglycerol/phosphatidylinositol transfer protein DDB_G0282179 |
| SNP_12028_A_32329175 | NC_021161.1    | Ca_Kabuli_Chr02 | 32329175                | AA                                     | CC                 | CC               | URR                           | 101497149          | putative phosphatidylglycerol/phosphatidylinositol transfer protein DDB_G0282179 |
| SNP_12029_A_32330853 | NC_021161.1    | Ca_Kabuli_Chr02 | 32330853                | AA                                     | GG                 | GG               | INTERGENIC                    |                    |                                                                                  |
| SNP_12031_A_32334151 | NC_021161.1    | Ca_Kabuli_Chr02 | 32334151                | CC                                     | AA                 | AA               | DRR                           | 101497482          | probable LRR receptor-like serine/threonine-protein kinase At4g36180             |
| SNP_12032_A_32334152 | NC_021161.1    | Ca_Kabuli_Chr02 | 32334152                | GG                                     | AA                 | AA               | DRR                           | 101497482          | probable LRR receptor-like serine/threonine-protein kinase At4g36180             |
| SNP_12033_A_32339308 | NC_021161.1    | Ca_Kabuli_Chr02 | 32339308                | TT                                     | GG                 | GG               | URR                           | 101497482          | probable LRR receptor-like serine/threonine-protein kinase At4g36180             |
| SNP_12034_A_32339336 | NC_021161.1    | Ca_Kabuli_Chr02 | 32339336                | AA                                     | GG                 | GG               | URR                           | 101497482          | probable LRR receptor-like serine/threonine-protein kinase At4g36180             |
| SNP_12035_A_32339337 | NC_021161.1    | Ca_Kabuli_Chr02 | 32339337                | TT                                     | CC                 | CC               | URR                           | 101497482          | probable LRR receptor-like serine/threonine-protein kinase At4g36180             |
| SNP_12036_A_32339640 | NC_021161.1    | Ca_Kabuli_Chr02 | 32339640                | TT                                     | AA                 | AA               | URR                           | 101497482          | probable LRR receptor-like serine/threonine-protein kinase At4g36180             |
| SNP_12037_A_32339644 | NC_021161.1    | Ca_Kabuli_Chr02 | 32339644                | CC                                     | TT                 | TT               | URR                           | 101497482          | probable LRR receptor-like serine/threonine-protein kinase At4g36180             |
| SNP_12038_A_32339645 | NC_021161.1    | Ca_Kabuli_Chr02 | 32339645                | CC                                     | GG                 | GG               | URR                           | 101497482          | probable LRR receptor-like serine/threonine-protein kinase At4g36180             |
| SNP_12039_A_32339712 | NC_021161.1    | Ca_Kabuli_Chr02 | 32339712                | CC                                     | TT                 | TT               | URR                           | 101497482          | probable LRR receptor-like serine/threonine-protein kinase At4g36180             |
| SNP_12040_A_32339824 | NC_021161.1    | Ca_Kabuli_Chr02 | 32339824                | TT                                     | CC                 | CC               | URR                           | 101497482          | probable LRR receptor-like serine/threonine-protein kinase At4g36180             |
| SNP_12041_A_32339911 | NC_021161.1    | Ca_Kabuli_Chr02 | 32339911                | CC                                     | TT                 | TT               | URR                           | 101497482          | probable LRR receptor-like serine/threonine-protein kinase At4g36180             |
| SNP_12042_A_32339964 | NC_021161.1    | Ca_Kabuli_Chr02 | 32339964                | TT                                     | CC                 | CC               | URR                           | 101497482          | probable LRR receptor-like serine/threonine-protein kinase At4g36180             |
| SNP_12043_A_32340050 | NC_021161.1    | Ca_Kabuli_Chr02 | 32340050                | GG                                     | AA                 | AA               | URR                           | 101497482          | probable LRR receptor-like serine/threonine-protein kinase At4g36180             |
| SNP_12044_A_32340108 | NC_021161.1    | Ca_Kabuli_Chr02 | 32340108                | TT                                     | CC                 | CC               | URR                           | 101497482          | probable LRR receptor-like serine/threonine-protein kinase At4g36180             |
| SNP_12047_A_32347231 | NC_021161.1    | Ca_Kabuli_Chr02 | 32347231                | GG                                     | TT                 | TT               | INTRON                        | 101498012          | uncharacterized LOC101498012                                                     |

| SNPs IDs             | Chromosome IDs | Chromosomes     | Physical positions (bp) | CDC Frontier genome (Reference genome) | (Pusa 1103 & HPNB) | (ILWC 46 & LPNB) | Sequence Components of genome | Gene accession IDs | Putative functions           |
|----------------------|----------------|-----------------|-------------------------|----------------------------------------|--------------------|------------------|-------------------------------|--------------------|------------------------------|
| SNP_12048_A_32347232 | NC_021161.1    | Ca_Kabuli_Chr02 | 32347232                | CC                                     | TT                 | TT               | INTRON                        | 101498012          | uncharacterized LOC101498012 |
| SNP_12049_A_32351741 | NC_021161.1    | Ca_Kabuli_Chr02 | 32351741                | AA                                     | GG                 | GG               | INTERGENIC                    |                    |                              |
| SNP_12050_A_32351821 | NC_021161.1    | Ca_Kabuli_Chr02 | 32351821                | TT                                     | CC                 | CC               | INTERGENIC                    |                    |                              |
| SNP_12052_A_32353330 | NC_021161.1    | Ca_Kabuli_Chr02 | 32353330                | GG                                     | AA                 | AA               | DRR                           | 101491506          | receptor-like protein 12     |
| SNP_12053_A_32353341 | NC_021161.1    | Ca_Kabuli_Chr02 | 32353341                | GG                                     | TT                 | TT               | DRR                           | 101491506          | receptor-like protein 12     |
| SNP_12054_A_32353400 | NC_021161.1    | Ca_Kabuli_Chr02 | 32353400                | CC                                     | TT                 | TT               | DRR                           | 101491506          | receptor-like protein 12     |
| SNP_12057_A_32357822 | NC_021161.1    | Ca_Kabuli_Chr02 | 32357822                | TT                                     | CC                 | CC               | INTERGENIC                    |                    |                              |
| SNP_12058_A_32357887 | NC_021161.1    | Ca_Kabuli_Chr02 | 32357887                | TT                                     | GG                 | GG               | INTERGENIC                    |                    |                              |
| SNP_12059_A_32357931 | NC_021161.1    | Ca_Kabuli_Chr02 | 32357931                | CC                                     | TT                 | TT               | INTERGENIC                    |                    |                              |
| SNP_12060_A_32358220 | NC_021161.1    | Ca_Kabuli_Chr02 | 32358220                | AA                                     | TT                 | TT               | INTRON                        | 101491506          | receptor-like protein 12     |
| SNP_12061_A_32358250 | NC_021161.1    | Ca_Kabuli_Chr02 | 32358250                | GG                                     | AA                 | AA               | INTRON                        | 101491506          | receptor-like protein 12     |
| SNP_12063_A_32360108 | NC_021161.1    | Ca_Kabuli_Chr02 | 32360108                | AA                                     | GG                 | GG               | URR                           | 101491506          | receptor-like protein 12     |
| SNP_12064_A_32360166 | NC_021161.1    | Ca_Kabuli_Chr02 | 32360166                | AA                                     | TT                 | TT               | URR                           | 101491506          | receptor-like protein 12     |
| SNP_12065_A_32362420 | NC_021161.1    | Ca_Kabuli_Chr02 | 32362420                | TT                                     | GG                 | GG               | INTERGENIC                    |                    |                              |
| SNP_12066_A_32362464 | NC_021161.1    | Ca_Kabuli_Chr02 | 32362464                | AA                                     | GG                 | GG               | INTERGENIC                    |                    |                              |
| SNP_12068_A_32365533 | NC_021161.1    | Ca_Kabuli_Chr02 | 32365533                | TT                                     | AA                 | AA               | INTERGENIC                    |                    |                              |
| SNP_12069_A_32366277 | NC_021161.1    | Ca_Kabuli_Chr02 | 32366277                | GG                                     | CC                 | CC               | INTERGENIC                    |                    |                              |
| SNP_12070_A_32368521 | NC_021161.1    | Ca_Kabuli_Chr02 | 32368521                | GG                                     | AA                 | AA               | INTERGENIC                    |                    |                              |
| SNP_12071_A_32369529 | NC_021161.1    | Ca_Kabuli_Chr02 | 32369529                | CC                                     | TT                 | TT               | INTERGENIC                    |                    |                              |
| SNP_12073_A_32369855 | NC_021161.1    | Ca_Kabuli_Chr02 | 32369855                | CC                                     | TT                 | TT               | INTERGENIC                    |                    |                              |
| SNP_12074_A_32369867 | NC_021161.1    | Ca_Kabuli_Chr02 | 32369867                | AA                                     | CC                 | CC               | INTERGENIC                    |                    |                              |
| SNP_12075_A_32370005 | NC_021161.1    | Ca_Kabuli_Chr02 | 32370005                | AA                                     | TT                 | TT               | INTERGENIC                    |                    |                              |

| SNPs IDs             | Chromosome IDs | Chromosomes     | Physical positions (bp) | CDC Frontier genome (Reference genome) | (Pusa 1103 & HPNB) | (ILWC 46 & LPNB) | Sequence Components of genome | Gene accession IDs | Putative functions                   |
|----------------------|----------------|-----------------|-------------------------|----------------------------------------|--------------------|------------------|-------------------------------|--------------------|--------------------------------------|
| SNP_12076_A_32370088 | NC_021161.1    | Ca_Kabuli_Chr02 | 32370088                | AA                                     | CC                 | CC               | INTERGENIC                    |                    |                                      |
| SNP_12077_A_32370345 | NC_021161.1    | Ca_Kabuli_Chr02 | 32370345                | AA                                     | TT                 | TT               | INTERGENIC                    |                    |                                      |
| SNP_12078_A_32371653 | NC_021161.1    | Ca_Kabuli_Chr02 | 32371653                | TT                                     | AA                 | AA               | INTERGENIC                    |                    |                                      |
| SNP_12079_A_32371920 | NC_021161.1    | Ca_Kabuli_Chr02 | 32371920                | CC                                     | AA                 | AA               | INTERGENIC                    |                    |                                      |
| SNP_12080_A_32372441 | NC_021161.1    | Ca_Kabuli_Chr02 | 32372441                | AA                                     | TT                 | TT               | INTERGENIC                    |                    |                                      |
| SNP_12081_A_32372442 | NC_021161.1    | Ca_Kabuli_Chr02 | 32372442                | CC                                     | TT                 | TT               | INTERGENIC                    |                    |                                      |
| SNP_12082_A_32372443 | NC_021161.1    | Ca_Kabuli_Chr02 | 32372443                | CC                                     | TT                 | TT               | INTERGENIC                    |                    |                                      |
| SNP_12083_A_32372489 | NC_021161.1    | Ca_Kabuli_Chr02 | 32372489                | TT                                     | AA                 | AA               | INTERGENIC                    |                    |                                      |
| SNP_12084_A_32372947 | NC_021161.1    | Ca_Kabuli_Chr02 | 32372947                | AA                                     | GG                 | GG               | INTERGENIC                    |                    |                                      |
| SNP_12085_A_32372956 | NC_021161.1    | Ca_Kabuli_Chr02 | 32372956                | CC                                     | TT                 | TT               | INTERGENIC                    |                    |                                      |
| SNP_12086_A_32373321 | NC_021161.1    | Ca_Kabuli_Chr02 | 32373321                | CC                                     | TT                 | TT               | INTERGENIC                    |                    |                                      |
| SNP_12087_A_32375458 | NC_021161.1    | Ca_Kabuli_Chr02 | 32375458                | GG                                     | AA                 | AA               | SYNONYMOUS_CODING             | 101491819          | exosome complex component RRP40-like |
| SNP_12088_A_32376874 | NC_021161.1    | Ca_Kabuli_Chr02 | 32376874                | CC                                     | TT                 | TT               | INTRON                        | 101491819          | exosome complex component RRP40-like |
| SNP_12090_A_32379088 | NC_021161.1    | Ca_Kabuli_Chr02 | 32379088                | CC                                     | GG                 | GG               | URR                           | 101491819          | exosome complex component RRP40-like |
| SNP_12091_A_32379091 | NC_021161.1    | Ca_Kabuli_Chr02 | 32379091                | GG                                     | AA                 | AA               | URR                           | 101491819          | exosome complex component RRP40-like |
| SNP_12092_A_32379123 | NC_021161.1    | Ca_Kabuli_Chr02 | 32379123                | GG                                     | AA                 | AA               | URR                           | 101491819          | exosome complex component RRP40-like |
| SNP_12093_A_32379536 | NC_021161.1    | Ca_Kabuli_Chr02 | 32379536                | GG                                     | AA                 | AA               | URR                           | 101491819          | exosome complex component RRP40-like |
| SNP_12094_A_32379555 | NC_021161.1    | Ca_Kabuli_Chr02 | 32379555                | GG                                     | AA                 | AA               | URR                           | 101491819          | exosome complex component RRP40-like |
| SNP_12097_A_32380409 | NC_021161.1    | Ca_Kabuli_Chr02 | 32380409                | TT                                     | CC                 | CC               | URR                           | 101491819          | exosome complex component RRP40-like |
| SNP_12098_A_32389153 | NC_021161.1    | Ca_Kabuli_Chr02 | 32389153                | AA                                     | GG                 | GG               | INTRON                        | 101498343          | uncharacterized LOC101498343         |
| SNP_12099_A_32389199 | NC_021161.1    | Ca_Kabuli_Chr02 | 32389199                | CC                                     | TT                 | TT               | INTRON                        | 101498343          | uncharacterized LOC101498343         |
| SNP_12100_A_32392558 | NC_021161.1    | Ca_Kabuli_Chr02 | 32392558                | AA                                     | TT                 | TT               | INTERGENIC                    |                    |                                      |

| SNPs IDs             | Chromosome IDs | Chromosomes     | Physical positions (bp) | CDC Frontier genome (Reference genome) | (Pusa 1103 & HPNB) | (ILWC 46 & LPNB) | Sequence genome | Components of | Gene accession IDs | Putative functions |
|----------------------|----------------|-----------------|-------------------------|----------------------------------------|--------------------|------------------|-----------------|---------------|--------------------|--------------------|
| SNP_12101_A_32392640 | NC_021161.1    | Ca_Kabuli_Chr02 | 32392640                | GG                                     | CC                 | CC               | INTERGENIC      |               |                    |                    |
| SNP_12102_A_32392684 | NC_021161.1    | Ca_Kabuli_Chr02 | 32392684                | AA                                     | TT                 | TT               | INTERGENIC      |               |                    |                    |
| SNP_12103_A_32392693 | NC_021161.1    | Ca_Kabuli_Chr02 | 32392693                | TT                                     | GG                 | GG               | INTERGENIC      |               |                    |                    |
| SNP_12104_A_32392696 | NC_021161.1    | Ca_Kabuli_Chr02 | 32392696                | GG                                     | CC                 | CC               | INTERGENIC      |               |                    |                    |
| SNP_12105_A_32392749 | NC_021161.1    | Ca_Kabuli_Chr02 | 32392749                | CC                                     | TT                 | TT               | INTERGENIC      |               |                    |                    |
| SNP_12106_A_32392801 | NC_021161.1    | Ca_Kabuli_Chr02 | 32392801                | TT                                     | CC                 | CC               | INTERGENIC      |               |                    |                    |
| SNP_12107_A_32392809 | NC_021161.1    | Ca_Kabuli_Chr02 | 32392809                | AA                                     | TT                 | TT               | INTERGENIC      |               |                    |                    |
| SNP_12108_A_32392830 | NC_021161.1    | Ca_Kabuli_Chr02 | 32392830                | GG                                     | AA                 | AA               | INTERGENIC      |               |                    |                    |
| SNP_12109_A_32392846 | NC_021161.1    | Ca_Kabuli_Chr02 | 32392846                | TT                                     | CC                 | CC               | INTERGENIC      |               |                    |                    |
| SNP_12110_A_32392893 | NC_021161.1    | Ca_Kabuli_Chr02 | 32392893                | CC                                     | AA                 | AA               | INTERGENIC      |               |                    |                    |
| SNP_12111_A_32392943 | NC_021161.1    | Ca_Kabuli_Chr02 | 32392943                | AA                                     | GG                 | GG               | INTERGENIC      |               |                    |                    |
| SNP_12112_A_32392948 | NC_021161.1    | Ca_Kabuli_Chr02 | 32392948                | TT                                     | GG                 | GG               | INTERGENIC      |               |                    |                    |
| SNP_12113_A_32393014 | NC_021161.1    | Ca_Kabuli_Chr02 | 32393014                | CC                                     | TT                 | TT               | INTERGENIC      |               |                    |                    |
| SNP_12114_A_32393015 | NC_021161.1    | Ca_Kabuli_Chr02 | 32393015                | GG                                     | TT                 | TT               | INTERGENIC      |               |                    |                    |
| SNP_12115_A_32393035 | NC_021161.1    | Ca_Kabuli_Chr02 | 32393035                | GG                                     | AA                 | AA               | INTERGENIC      |               |                    |                    |
| SNP_12117_A_32393075 | NC_021161.1    | Ca_Kabuli_Chr02 | 32393075                | CC                                     | TT                 | TT               | INTERGENIC      |               |                    |                    |
| SNP_12119_A_32393124 | NC_021161.1    | Ca_Kabuli_Chr02 | 32393124                | AA                                     | GG                 | GG               | INTERGENIC      |               |                    |                    |
| SNP_12120_A_32393135 | NC_021161.1    | Ca_Kabuli_Chr02 | 32393135                | AA                                     | CC                 | CC               | INTERGENIC      |               |                    |                    |
| SNP_12122_A_32393364 | NC_021161.1    | Ca_Kabuli_Chr02 | 32393364                | GG                                     | TT                 | TT               | INTERGENIC      |               |                    |                    |
| SNP_12123_A_32393429 | NC_021161.1    | Ca_Kabuli_Chr02 | 32393429                | GG                                     | AA                 | AA               | INTERGENIC      |               |                    |                    |
| SNP_12125_A_32393490 | NC_021161.1    | Ca_Kabuli_Chr02 | 32393490                | TT                                     | CC                 | CC               | INTERGENIC      |               |                    |                    |
| SNP_12126_A_32393509 | NC_021161.1    | Ca_Kabuli_Chr02 | 32393509                | GG                                     | AA                 | AA               | INTERGENIC      |               |                    |                    |

| SNPs IDs             | Chromosome IDs | Chromosomes     | Physical positions (bp) | CDC Frontier genome (Reference genome) | (Pusa 1103 & HPNB) | (ILWC 46 & LPNB) | Sequence Components of genome | Gene accession IDs | Putative functions                     |
|----------------------|----------------|-----------------|-------------------------|----------------------------------------|--------------------|------------------|-------------------------------|--------------------|----------------------------------------|
| SNP_12127_A_32393535 | NC_021161.1    | Ca_Kabuli_Chr02 | 32393535                | TT                                     | AA                 | AA               | INTERGENIC                    |                    |                                        |
| SNP_12128_A_32393539 | NC_021161.1    | Ca_Kabuli_Chr02 | 32393539                | AA                                     | GG                 | GG               | INTERGENIC                    |                    |                                        |
| SNP_12129_A_32393574 | NC_021161.1    | Ca_Kabuli_Chr02 | 32393574                | GG                                     | TT                 | TT               | INTERGENIC                    |                    |                                        |
| SNP_12130_A_32393596 | NC_021161.1    | Ca_Kabuli_Chr02 | 32393596                | GG                                     | AA                 | AA               | INTERGENIC                    |                    |                                        |
| SNP_12133_A_32393670 | NC_021161.1    | Ca_Kabuli_Chr02 | 32393670                | CC                                     | TT                 | TT               | INTERGENIC                    |                    |                                        |
| SNP_12134_A_32396574 | NC_021161.1    | Ca_Kabuli_Chr02 | 32396574                | TT                                     | CC                 | CC               | DRR                           | 101498685          | Unknown function                       |
| SNP_12137_A_32404256 | NC_021161.1    | Ca_Kabuli_Chr02 | 32404256                | AA                                     | TT                 | TT               | INTERGENIC                    |                    |                                        |
| SNP_12138_A_32404266 | NC_021161.1    | Ca_Kabuli_Chr02 | 32404266                | GG                                     | AA                 | AA               | INTERGENIC                    |                    |                                        |
| SNP_12140_A_32406465 | NC_021161.1    | Ca_Kabuli_Chr02 | 32406465                | AA                                     | TT                 | TT               | DRR                           | 101499009          | chitin elicitor receptor kinase 1-like |
| SNP_12141_A_32406487 | NC_021161.1    | Ca_Kabuli_Chr02 | 32406487                | CC                                     | TT                 | TT               | DRR                           | 101499009          | chitin elicitor receptor kinase 1-like |
| SNP_12142_A_32406681 | NC_021161.1    | Ca_Kabuli_Chr02 | 32406681                | AA                                     | CC                 | CC               | DRR                           | 101499009          | chitin elicitor receptor kinase 1-like |
| SNP_12143_A_32406696 | NC_021161.1    | Ca_Kabuli_Chr02 | 32406696                | TT                                     | CC                 | CC               | DRR                           | 101499009          | chitin elicitor receptor kinase 1-like |
| SNP_12144_A_32406706 | NC_021161.1    | Ca_Kabuli_Chr02 | 32406706                | TT                                     | CC                 | CC               | DRR                           | 101499009          | chitin elicitor receptor kinase 1-like |
| SNP_12145_A_32406712 | NC_021161.1    | Ca_Kabuli_Chr02 | 32406712                | TT                                     | AA                 | AA               | DRR                           | 101499009          | chitin elicitor receptor kinase 1-like |
| SNP_12146_A_32406713 | NC_021161.1    | Ca_Kabuli_Chr02 | 32406713                | AA                                     | GG                 | GG               | DRR                           | 101499009          | chitin elicitor receptor kinase 1-like |
| SNP_12147_A_32409967 | NC_021161.1    | Ca_Kabuli_Chr02 | 32409967                | CC                                     | AA                 | AA               | INTRON                        | 101499009          | chitin elicitor receptor kinase 1-like |
| SNP_12148_A_32411198 | NC_021161.1    | Ca_Kabuli_Chr02 | 32411198                | CC                                     | GG                 | GG               | NON_SYNONYMOUS_CODING         | 101499009          | chitin elicitor receptor kinase 1-like |
| SNP_12149_A_32414671 | NC_021161.1    | Ca_Kabuli_Chr02 | 32414671                | CC                                     | AA                 | AA               | DRR                           | 101499326          | chitin elicitor receptor kinase 1-like |
| SNP_12150_A_32415809 | NC_021161.1    | Ca_Kabuli_Chr02 | 32415809                | CC                                     | TT                 | TT               | INTERGENIC                    |                    |                                        |
| SNP_12151_A_32415818 | NC_021161.1    | Ca_Kabuli_Chr02 | 32415818                | TT                                     | CC                 | CC               | INTERGENIC                    |                    |                                        |
| SNP_12152_A_32416298 | NC_021161.1    | Ca_Kabuli_Chr02 | 32416298                | TT                                     | CC                 | CC               | INTERGENIC                    |                    |                                        |
| SNP_12153_A_32416997 | NC_021161.1    | Ca_Kabuli_Chr02 | 32416997                | AA                                     | GG                 | GG               | INTRON                        | 101499326          | chitin elicitor receptor kinase 1-like |



| SNPs IDs             | Chromosome IDs | Chromosomes     | Physical positions (bp) | CDC Frontier genome (Reference genome) | (Pusa 1103 & HPNB) | (ILWC 46 & LPNB) | Sequence Components of genome | Gene accession IDs | Putative functions                                       |
|----------------------|----------------|-----------------|-------------------------|----------------------------------------|--------------------|------------------|-------------------------------|--------------------|----------------------------------------------------------|
| SNP_12155_A_32417466 | NC_021161.1    | Ca_Kabuli_Chr02 | 32417466                | GG                                     | AA                 | AA               | INTRON                        | 101499326          | chitin elicitor receptor kinase 1-like                   |
| SNP_12156_A_32419750 | NC_021161.1    | Ca_Kabuli_Chr02 | 32419750                | GG                                     | AA                 | AA               | URR                           | 101499326          | chitin elicitor receptor kinase 1-like                   |
| SNP_12157_A_32420680 | NC_021161.1    | Ca_Kabuli_Chr02 | 32420680                | AA                                     | CC                 | CC               | URR                           | 101499326          | chitin elicitor receptor kinase 1-like                   |
| SNP_12158_A_32422076 | NC_021161.1    | Ca_Kabuli_Chr02 | 32422076                | AA                                     | TT                 | TT               | DRR                           | 101492489          | serine/threonine-protein phosphatase 7 long form homolog |
| SNP_12159_A_32422326 | NC_021161.1    | Ca_Kabuli_Chr02 | 32422326                | GG                                     | AA                 | AA               | DRR                           | 101492489          | serine/threonine-protein phosphatase 7 long form homolog |
| SNP_12160_A_32422327 | NC_021161.1    | Ca_Kabuli_Chr02 | 32422327                | CC                                     | TT                 | TT               | DRR                           | 101492489          | serine/threonine-protein phosphatase 7 long form homolog |
| SNP_12161_A_32422343 | NC_021161.1    | Ca_Kabuli_Chr02 | 32422343                | GG                                     | AA                 | AA               | DRR                           | 101492489          | serine/threonine-protein phosphatase 7 long form homolog |
| SNP_12162_A_32422374 | NC_021161.1    | Ca_Kabuli_Chr02 | 32422374                | TT                                     | AA                 | AA               | DRR                           | 101492489          | serine/threonine-protein phosphatase 7 long form homolog |
| SNP_12163_A_32423004 | NC_021161.1    | Ca_Kabuli_Chr02 | 32423004                | CC                                     | TT                 | TT               | URR                           | 101492147          | UPF0481 protein At3g47200-like                           |
| SNP_12165_A_32430207 | NC_021161.1    | Ca_Kabuli_Chr02 | 32430207                | TT                                     | CC                 | CC               | INTERGENIC                    |                    |                                                          |
| SNP_12166_A_32430211 | NC_021161.1    | Ca_Kabuli_Chr02 | 32430211                | TT                                     | CC                 | CC               | INTERGENIC                    |                    |                                                          |
| SNP_12168_A_32430261 | NC_021161.1    | Ca_Kabuli_Chr02 | 32430261                | TT                                     | CC                 | CC               | DRR                           | 101492821          | uncharacterized LOC101492821                             |
| SNP_12169_A_32430280 | NC_021161.1    | Ca_Kabuli_Chr02 | 32430280                | TT                                     | GG                 | GG               | DRR                           | 101492821          | uncharacterized LOC101492821                             |
| SNP_12170_A_32430407 | NC_021161.1    | Ca_Kabuli_Chr02 | 32430407                | AA                                     | CC                 | CC               | DRR                           | 101492821          | uncharacterized LOC101492821                             |
| SNP_12172_A_32430539 | NC_021161.1    | Ca_Kabuli_Chr02 | 32430539                | TT                                     | CC                 | CC               | DRR                           | 101492821          | uncharacterized LOC101492821                             |
| SNP_12173_A_32430590 | NC_021161.1    | Ca_Kabuli_Chr02 | 32430590                | TT                                     | CC                 | CC               | DRR                           | 101492821          | uncharacterized LOC101492821                             |
| SNP_12174_A_32432084 | NC_021161.1    | Ca_Kabuli_Chr02 | 32432084                | CC                                     | TT                 | TT               | INTERGENIC                    |                    |                                                          |
| SNP_12175_A_32432394 | NC_021161.1    | Ca_Kabuli_Chr02 | 32432394                | CC                                     | TT                 | TT               | INTERGENIC                    |                    |                                                          |
| SNP_12176_A_32432423 | NC_021161.1    | Ca_Kabuli_Chr02 | 32432423                | TT                                     | CC                 | CC               | INTERGENIC                    |                    |                                                          |
| SNP_12177_A_32436625 | NC_021161.1    | Ca_Kabuli_Chr02 | 32436625                | TT                                     | AA                 | AA               | URR                           | 101492821          | uncharacterized LOC101492821                             |
| SNP_12178_A_32436684 | NC_021161.1    | Ca_Kabuli_Chr02 | 32436684                | AA                                     | TT                 | TT               | URR                           | 101492821          | uncharacterized LOC101492821                             |
| SNP_12179_A_32436918 | NC_021161.1    | Ca_Kabuli_Chr02 | 32436918                | GG                                     | AA                 | AA               | URR                           | 101492821          | uncharacterized LOC101492821                             |

| SNPs IDs             | Chromosome IDs | Chromosomes     | Physical positions (bp) | CDC Frontier (Reference genome) | (Pusa 1103 & HPNB) | (ILWC 46 & LPNB) | Sequence Components of genome | Gene accession IDs | Putative functions           |
|----------------------|----------------|-----------------|-------------------------|---------------------------------|--------------------|------------------|-------------------------------|--------------------|------------------------------|
| SNP_12180_A_32436922 | NC_021161.1    | Ca_Kabuli_Chr02 | 32436922                | TT                              | CC                 | CC               | URR                           | 101492821          | uncharacterized LOC101492821 |
| SNP_12181_A_32436953 | NC_021161.1    | Ca_Kabuli_Chr02 | 32436953                | AA                              | GG                 | GG               | URR                           | 101492821          | uncharacterized LOC101492821 |
| SNP_12182_A_32436976 | NC_021161.1    | Ca_Kabuli_Chr02 | 32436976                | TT                              | GG                 | GG               | URR                           | 101492821          | uncharacterized LOC101492821 |
| SNP_12183_A_32452902 | NC_021161.1    | Ca_Kabuli_Chr02 | 32452902                | CC                              | TT                 | TT               | INTRON                        | 101493150          | receptor-like protein 12     |
| SNP_12184_A_32453136 | NC_021161.1    | Ca_Kabuli_Chr02 | 32453136                | TT                              | GG                 | GG               | INTRON                        | 101493150          | receptor-like protein 12     |
| SNP_12185_A_32475317 | NC_021161.1    | Ca_Kabuli_Chr02 | 32475317                | AA                              | GG                 | GG               | SYNONYMOUS_CODING             | 101493150          | receptor-like protein 12     |
| SNP_12186_A_32475327 | NC_021161.1    | Ca_Kabuli_Chr02 | 32475327                | CC                              | TT                 | TT               | NON_SYNONYMOUS_CODING         | 101493150          | receptor-like protein 12     |
| SNP_12187_A_32476909 | NC_021161.1    | Ca_Kabuli_Chr02 | 32476909                | GG                              | CC                 | CC               | URR                           | 101493150          | receptor-like protein 12     |
| SNP_12189_A_32478583 | NC_021161.1    | Ca_Kabuli_Chr02 | 32478583                | GG                              | AA                 | AA               | INTERGENIC                    |                    |                              |
| SNP_12190_A_32479255 | NC_021161.1    | Ca_Kabuli_Chr02 | 32479255                | CC                              | TT                 | TT               | INTERGENIC                    |                    |                              |
| SNP_12191_A_32479266 | NC_021161.1    | Ca_Kabuli_Chr02 | 32479266                | AA                              | GG                 | GG               | INTERGENIC                    |                    |                              |
| SNP_12192_A_32479272 | NC_021161.1    | Ca_Kabuli_Chr02 | 32479272                | TT                              | AA                 | AA               | INTERGENIC                    |                    |                              |
| SNP_12193_A_32480615 | NC_021161.1    | Ca_Kabuli_Chr02 | 32480615                | GG                              | AA                 | AA               | DRR                           | 101499643          | CSC1-like protein At3g21620  |
| SNP_12195_A_32480830 | NC_021161.1    | Ca_Kabuli_Chr02 | 32480830                | CC                              | TT                 | TT               | DRR                           | 101499643          | CSC1-like protein At3g21620  |
| SNP_12196_A_32480985 | NC_021161.1    | Ca_Kabuli_Chr02 | 32480985                | AA                              | TT                 | TT               | DRR                           | 101499643          | CSC1-like protein At3g21620  |
| SNP_12198_A_32481004 | NC_021161.1    | Ca_Kabuli_Chr02 | 32481004                | TT                              | CC                 | CC               | DRR                           | 101499643          | CSC1-like protein At3g21620  |
| SNP_12200_A_32493025 | NC_021161.1    | Ca_Kabuli_Chr02 | 32493025                | GG                              | AA                 | AA               | INTERGENIC                    |                    |                              |
| SNP_12201_A_32526117 | NC_021161.1    | Ca_Kabuli_Chr02 | 32526117                | CC                              | TT                 | TT               | INTERGENIC                    |                    |                              |
| SNP_12202_A_32540967 | NC_021161.1    | Ca_Kabuli_Chr02 | 32540967                | CC                              | AA                 | AA               | INTERGENIC                    |                    |                              |
| SNP_12203_A_32599948 | NC_021161.1    | Ca_Kabuli_Chr02 | 32599948                | CC                              | GG                 | GG               | INTERGENIC                    |                    |                              |
| SNP_12204_A_32599949 | NC_021161.1    | Ca_Kabuli_Chr02 | 32599949                | CC                              | GG                 | GG               | INTERGENIC                    |                    |                              |
| SNP_12205_A_32642456 | NC_021161.1    | Ca_Kabuli_Chr02 | 32642456                | AA                              | TT                 | TT               | URR                           | 101503908          | uncharacterized LOC101503908 |

| SNPs IDs             | Chromosome IDs | Chromosomes     | Physical positions (bp) | CDC Frontier genome (Reference genome) | (Pusa 1103 & HPNB) | (ILWC 46 & LPNB) | Sequence Components of genome | Gene accession IDs | Putative functions                         |
|----------------------|----------------|-----------------|-------------------------|----------------------------------------|--------------------|------------------|-------------------------------|--------------------|--------------------------------------------|
| SNP_12207_A_32643409 | NC_021161.1    | Ca_Kabuli_Chr02 | 32643409                | TT                                     | CC                 | CC               | URR                           | 101504441          | 22.7 kDa class IV heat shock protein       |
| SNP_12208_A_32644190 | NC_021161.1    | Ca_Kabuli_Chr02 | 32644190                | TT                                     | CC                 | CC               | URR                           | 101504441          | 22.7 kDa class IV heat shock protein       |
| SNP_12209_A_32644375 | NC_021161.1    | Ca_Kabuli_Chr02 | 32644375                | AA                                     | GG                 | GG               | URR                           | 101504441          | 22.7 kDa class IV heat shock protein       |
| SNP_12210_A_32644380 | NC_021161.1    | Ca_Kabuli_Chr02 | 32644380                | AA                                     | CC                 | CC               | URR                           | 101504441          | 22.7 kDa class IV heat shock protein       |
| SNP_12211_A_32644402 | NC_021161.1    | Ca_Kabuli_Chr02 | 32644402                | AA                                     | TT                 | TT               | URR                           | 101504441          | 22.7 kDa class IV heat shock protein       |
| SNP_12212_A_32644438 | NC_021161.1    | Ca_Kabuli_Chr02 | 32644438                | GG                                     | TT                 | TT               | URR                           | 101504441          | 22.7 kDa class IV heat shock protein       |
| SNP_12213_A_32644552 | NC_021161.1    | Ca_Kabuli_Chr02 | 32644552                | CC                                     | GG                 | GG               | URR                           | 101504441          | 22.7 kDa class IV heat shock protein       |
| SNP_12214_A_32644806 | NC_021161.1    | Ca_Kabuli_Chr02 | 32644806                | TT                                     | GG                 | GG               | URR                           | 101504441          | 22.7 kDa class IV heat shock protein       |
| SNP_12215_A_32644818 | NC_021161.1    | Ca_Kabuli_Chr02 | 32644818                | GG                                     | AA                 | AA               | URR                           | 101504441          | 22.7 kDa class IV heat shock protein       |
| SNP_12216_A_32645928 | NC_021161.1    | Ca_Kabuli_Chr02 | 32645928                | GG                                     | AA                 | AA               | INTERGENIC                    |                    |                                            |
| SNP_12217_A_32645929 | NC_021161.1    | Ca_Kabuli_Chr02 | 32645929                | CC                                     | TT                 | TT               | INTERGENIC                    |                    |                                            |
| SNP_12218_A_32645940 | NC_021161.1    | Ca_Kabuli_Chr02 | 32645940                | GG                                     | AA                 | AA               | INTERGENIC                    |                    |                                            |
| SNP_12219_A_32646090 | NC_021161.1    | Ca_Kabuli_Chr02 | 32646090                | CC                                     | TT                 | TT               | INTERGENIC                    |                    |                                            |
| SNP_12220_A_32648324 | NC_021161.1    | Ca_Kabuli_Chr02 | 32648324                | CC                                     | TT                 | TT               | DRR                           | 101504756          | inactive protein RESTRICTED TEV MOVEMENT 2 |
| SNP_12223_A_32726922 | NC_021161.1    | Ca_Kabuli_Chr02 | 32726922                | CC                                     | TT                 | TT               | INTERGENIC                    |                    |                                            |
| SNP_12224_A_32752549 | NC_021161.1    | Ca_Kabuli_Chr02 | 32752549                | AA                                     | TT                 | TT               | DRR                           | 101508101          | very-long-chain enoyl-CoA reductase-like   |
| SNP_12225_A_32774922 | NC_021161.1    | Ca_Kabuli_Chr02 | 32774922                | CC                                     | TT                 | TT               | URR                           | 101509248          | uncharacterized LOC101509248               |
| SNP_12226_A_32805557 | NC_021161.1    | Ca_Kabuli_Chr02 | 32805557                | TT                                     | CC                 | CC               | INTERGENIC                    |                    |                                            |
| SNP_12227_A_32819380 | NC_021161.1    | Ca_Kabuli_Chr02 | 32819380                | AA                                     | CC                 | CC               | INTERGENIC                    |                    |                                            |
| SNP_12229_A_32915039 | NC_021161.1    | Ca_Kabuli_Chr02 | 32915039                | GG                                     | AA                 | AA               | INTERGENIC                    |                    |                                            |
| SNP_12230_A_32915145 | NC_021161.1    | Ca_Kabuli_Chr02 | 32915145                | AA                                     | TT                 | TT               | INTERGENIC                    |                    |                                            |
| SNP_12231_A_33115816 | NC_021161.1    | Ca_Kabuli_Chr02 | 33115816                | AA                                     | GG                 | GG               | DRR                           | 101495399          | cysteine proteinase inhibitor-like         |

| SNPs IDs             | Chromosome IDs | Chromosomes     | Physical positions (bp) | CDC Frontier genome (Reference genome) | (Pusa 1103 & HPNB) | (ILWC 46 & LPNB) | Sequence Components of genome | Gene accession IDs | Putative functions                           |
|----------------------|----------------|-----------------|-------------------------|----------------------------------------|--------------------|------------------|-------------------------------|--------------------|----------------------------------------------|
| SNP_12232_A_33116207 | NC_021161.1    | Ca_Kabuli_Chr02 | 33116207                | GG                                     | AA                 | AA               | INTERGENIC                    |                    |                                              |
| SNP_12233_A_33151940 | NC_021161.1    | Ca_Kabuli_Chr02 | 33151940                | TT                                     | GG                 | GG               | URR                           | 101497025          | G2/mitotic-specific cyclin S13-7             |
| SNP_12234_A_33151950 | NC_021161.1    | Ca_Kabuli_Chr02 | 33151950                | GG                                     | TT                 | TT               | URR                           | 101497025          | G2/mitotic-specific cyclin S13-7             |
| SNP_12235_A_33152001 | NC_021161.1    | Ca_Kabuli_Chr02 | 33152001                | CC                                     | AA                 | AA               | URR                           | 101497025          | G2/mitotic-specific cyclin S13-7             |
| SNP_12236_A_33152077 | NC_021161.1    | Ca_Kabuli_Chr02 | 33152077                | GG                                     | TT                 | TT               | URR                           | 101497025          | G2/mitotic-specific cyclin S13-7             |
| SNP_12237_A_33152162 | NC_021161.1    | Ca_Kabuli_Chr02 | 33152162                | AA                                     | GG                 | GG               | URR                           | 101497025          | G2/mitotic-specific cyclin S13-7             |
| SNP_12238_A_33152231 | NC_021161.1    | Ca_Kabuli_Chr02 | 33152231                | AA                                     | TT                 | TT               | URR                           | 101497025          | G2/mitotic-specific cyclin S13-7             |
| SNP_12239_A_33166132 | NC_021161.1    | Ca_Kabuli_Chr02 | 33166132                | TT                                     | CC                 | CC               | DRR                           | 101496386          | probable CCR4-associated factor 1 homolog 11 |
| SNP_12240_A_33166160 | NC_021161.1    | Ca_Kabuli_Chr02 | 33166160                | TT                                     | CC                 | CC               | DRR                           | 101496386          | probable CCR4-associated factor 1 homolog 11 |
| SNP_12241_A_33166192 | NC_021161.1    | Ca_Kabuli_Chr02 | 33166192                | GG                                     | AA                 | AA               | DRR                           | 101496386          | probable CCR4-associated factor 1 homolog 11 |
| SNP_12242_A_33166240 | NC_021161.1    | Ca_Kabuli_Chr02 | 33166240                | AA                                     | GG                 | GG               | SYNONYMOUS_CODING             | 101496386          | probable CCR4-associated factor 1 homolog 11 |
| SNP_12243_A_33166434 | NC_021161.1    | Ca_Kabuli_Chr02 | 33166434                | TT                                     | CC                 | CC               | NON_SYNONYMOUS_CODING         | 101496386          | probable CCR4-associated factor 1 homolog 11 |
| SNP_12244_A_33166485 | NC_021161.1    | Ca_Kabuli_Chr02 | 33166485                | GG                                     | TT                 | TT               | NON_SYNONYMOUS_CODING         | 101496386          | probable CCR4-associated factor 1 homolog 11 |
| SNP_12245_A_33166525 | NC_021161.1    | Ca_Kabuli_Chr02 | 33166525                | GG                                     | AA                 | AA               | SYNONYMOUS_CODING             | 101496386          | probable CCR4-associated factor 1 homolog 11 |
| SNP_12246_A_33166535 | NC_021161.1    | Ca_Kabuli_Chr02 | 33166535                | CC                                     | GG                 | GG               | NON_SYNONYMOUS_CODING         | 101496386          | probable CCR4-associated factor 1 homolog 11 |
| SNP_12247_A_33166561 | NC_021161.1    | Ca_Kabuli_Chr02 | 33166561                | CC                                     | TT                 | TT               | SYNONYMOUS_CODING             | 101496386          | probable CCR4-associated factor 1 homolog 11 |
| SNP_12248_A_33166563 | NC_021161.1    | Ca_Kabuli_Chr02 | 33166563                | AA                                     | CC                 | CC               | NON_SYNONYMOUS_CODING         | 101496386          | probable CCR4-associated factor 1 homolog 11 |
| SNP_12249_A_33166570 | NC_021161.1    | Ca_Kabuli_Chr02 | 33166570                | GG                                     | AA                 | AA               | SYNONYMOUS_CODING             | 101496386          | probable CCR4-associated factor 1 homolog 11 |
| SNP_12250_A_33166582 | NC_021161.1    | Ca_Kabuli_Chr02 | 33166582                | CC                                     | AA                 | AA               | SYNONYMOUS_CODING             | 101496386          | probable CCR4-associated factor 1 homolog 11 |
| SNP_12251_A_33166704 | NC_021161.1    | Ca_Kabuli_Chr02 | 33166704                | CC                                     | TT                 | TT               | NON_SYNONYMOUS_CODING         | 101496386          | probable CCR4-associated factor 1 homolog 11 |
| SNP_12252_A_33167008 | NC_021161.1    | Ca_Kabuli_Chr02 | 33167008                | AA                                     | GG                 | GG               | URR                           | 101496386          | probable CCR4-associated factor 1 homolog 11 |
| SNP_12253_A_33167107 | NC_021161.1    | Ca_Kabuli_Chr02 | 33167107                | AA                                     | CC                 | CC               | URR                           | 101496386          | probable CCR4-associated factor 1 homolog 11 |

| SNPs IDs             | Chromosome IDs | Chromosomes     | Physical positions (bp) | CDC Frontier (Reference genome) | (Pusa 1103 & HPNB) | (ILWC 46 & LPNB) | Sequence Components of genome | Gene accession IDs | Putative functions                           |
|----------------------|----------------|-----------------|-------------------------|---------------------------------|--------------------|------------------|-------------------------------|--------------------|----------------------------------------------|
| SNP_12254_A_33167116 | NC_021161.1    | Ca_Kabuli_Chr02 | 33167116                | AA                              | GG                 | GG               | URR                           | 101496386          | probable CCR4-associated factor 1 homolog 11 |
| SNP_12255_A_33218507 | NC_021161.1    | Ca_Kabuli_Chr02 | 33218507                | AA                              | GG                 | GG               | INTERGENIC                    |                    |                                              |
| SNP_12256_A_33243537 | NC_021161.1    | Ca_Kabuli_Chr02 | 33243537                | TT                              | CC                 | CC               | DRR                           | 101499224          | uncharacterized LOC101499224                 |
| SNP_12258_A_33269338 | NC_021161.1    | Ca_Kabuli_Chr02 | 33269338                | GG                              | TT                 | TT               | URR                           | 101496717          | uncharacterized LOC101496717                 |
| SNP_12259_A_33269410 | NC_021161.1    | Ca_Kabuli_Chr02 | 33269410                | AA                              | GG                 | GG               | URR                           | 101496717          | uncharacterized LOC101496717                 |
| SNP_12260_A_33269694 | NC_021161.1    | Ca_Kabuli_Chr02 | 33269694                | CC                              | TT                 | TT               | URR                           | 101496717          | uncharacterized LOC101496717                 |
| SNP_12262_A_33320209 | NC_021161.1    | Ca_Kabuli_Chr02 | 33320209                | TT                              | CC                 | CC               | INTERGENIC                    |                    |                                              |
| SNP_12263_A_33320212 | NC_021161.1    | Ca_Kabuli_Chr02 | 33320212                | AA                              | CC                 | CC               | INTERGENIC                    |                    |                                              |
| SNP_12264_A_33345383 | NC_021161.1    | Ca_Kabuli_Chr02 | 33345383                | AA                              | GG                 | GG               | INTERGENIC                    |                    |                                              |
| SNP_12265_A_33345575 | NC_021161.1    | Ca_Kabuli_Chr02 | 33345575                | AA                              | GG                 | GG               | INTERGENIC                    |                    |                                              |
| SNP_12266_A_33345581 | NC_021161.1    | Ca_Kabuli_Chr02 | 33345581                | GG                              | AA                 | AA               | INTERGENIC                    |                    |                                              |
| SNP_12268_A_33345682 | NC_021161.1    | Ca_Kabuli_Chr02 | 33345682                | CC                              | TT                 | TT               | INTERGENIC                    |                    |                                              |
| SNP_12269_A_33345764 | NC_021161.1    | Ca_Kabuli_Chr02 | 33345764                | GG                              | AA                 | AA               | INTERGENIC                    |                    |                                              |
| SNP_12270_A_33345775 | NC_021161.1    | Ca_Kabuli_Chr02 | 33345775                | GG                              | TT                 | TT               | INTERGENIC                    |                    |                                              |
| SNP_12271_A_33346395 | NC_021161.1    | Ca_Kabuli_Chr02 | 33346395                | AA                              | TT                 | TT               | INTERGENIC                    |                    |                                              |
| SNP_12272_A_33346444 | NC_021161.1    | Ca_Kabuli_Chr02 | 33346444                | AA                              | GG                 | GG               | INTERGENIC                    |                    |                                              |
| SNP_12273_A_33346452 | NC_021161.1    | Ca_Kabuli_Chr02 | 33346452                | GG                              | AA                 | AA               | INTERGENIC                    |                    |                                              |
| SNP_12275_A_33346816 | NC_021161.1    | Ca_Kabuli_Chr02 | 33346816                | GG                              | TT                 | TT               | INTERGENIC                    |                    |                                              |
| SNP_12276_A_33346860 | NC_021161.1    | Ca_Kabuli_Chr02 | 33346860                | AA                              | CC                 | CC               | INTERGENIC                    |                    |                                              |
| SNP_12277_A_33346903 | NC_021161.1    | Ca_Kabuli_Chr02 | 33346903                | AA                              | GG                 | GG               | INTERGENIC                    |                    |                                              |
| SNP_12278_A_33346949 | NC_021161.1    | Ca_Kabuli_Chr02 | 33346949                | GG                              | AA                 | AA               | INTERGENIC                    |                    |                                              |
| SNP_12279_A_33347171 | NC_021161.1    | Ca_Kabuli_Chr02 | 33347171                | CC                              | TT                 | TT               | INTERGENIC                    |                    |                                              |

| SNPs IDs             | Chromosome IDs | Chromosomes     | Physical positions (bp) | CDC Frontier (Reference genome) | (Pusa 1103 & HPNB) | (ILWC 46 & LPNB) | Sequence Components of genome | Gene accession IDs | Putative functions                            |
|----------------------|----------------|-----------------|-------------------------|---------------------------------|--------------------|------------------|-------------------------------|--------------------|-----------------------------------------------|
| SNP_12280_A_33397468 | NC_021161.1    | Ca_Kabuli_Chr02 | 33397468                | AA                              | TT                 | TT               | DRR                           | 101504229          | putative disease resistance protein At3g14460 |
| SNP_12282_A_33398527 | NC_021161.1    | Ca_Kabuli_Chr02 | 33398527                | GG                              | TT                 | TT               | DRR                           | 101504229          | putative disease resistance protein At3g14460 |
| SNP_12283_A_33398549 | NC_021161.1    | Ca_Kabuli_Chr02 | 33398549                | CC                              | TT                 | TT               | DRR                           | 101504229          | putative disease resistance protein At3g14460 |
| SNP_12284_A_33398550 | NC_021161.1    | Ca_Kabuli_Chr02 | 33398550                | AA                              | GG                 | GG               | DRR                           | 101504229          | putative disease resistance protein At3g14460 |
| SNP_12285_A_33398561 | NC_021161.1    | Ca_Kabuli_Chr02 | 33398561                | CC                              | TT                 | TT               | DRR                           | 101504229          | putative disease resistance protein At3g14460 |
| SNP_12286_A_33401553 | NC_021161.1    | Ca_Kabuli_Chr02 | 33401553                | GG                              | AA                 | AA               | NON_SYNONYMOUS_CODING         | 101504229          | putative disease resistance protein At3g14460 |
| SNP_12287_A_33404571 | NC_021161.1    | Ca_Kabuli_Chr02 | 33404571                | CC                              | TT                 | TT               | URR                           | 101504229          | putative disease resistance protein At3g14460 |
| SNP_12289_A_33405265 | NC_021161.1    | Ca_Kabuli_Chr02 | 33405265                | GG                              | AA                 | AA               | INTERGENIC                    |                    |                                               |
| SNP_12290_A_33405469 | NC_021161.1    | Ca_Kabuli_Chr02 | 33405469                | AA                              | GG                 | GG               | INTERGENIC                    |                    |                                               |
| SNP_12291_A_33418452 | NC_021161.1    | Ca_Kabuli_Chr02 | 33418452                | GG                              | AA                 | AA               | INTERGENIC                    |                    |                                               |
| SNP_12292_A_33424021 | NC_021161.1    | Ca_Kabuli_Chr02 | 33424021                | CC                              | AA                 | AA               | INTERGENIC                    |                    |                                               |
| SNP_12293_A_33462805 | NC_021161.1    | Ca_Kabuli_Chr02 | 33462805                | AA                              | GG                 | GG               | INTERGENIC                    |                    |                                               |
| SNP_12294_A_33462911 | NC_021161.1    | Ca_Kabuli_Chr02 | 33462911                | GG                              | TT                 | TT               | INTERGENIC                    |                    |                                               |
| SNP_12295_A_33463060 | NC_021161.1    | Ca_Kabuli_Chr02 | 33463060                | CC                              | GG                 | GG               | INTERGENIC                    |                    |                                               |
| SNP_12296_A_33465922 | NC_021161.1    | Ca_Kabuli_Chr02 | 33465922                | TT                              | GG                 | GG               | INTERGENIC                    |                    |                                               |
| SNP_12297_A_33483361 | NC_021161.1    | Ca_Kabuli_Chr02 | 33483361                | AA                              | GG                 | GG               | INTERGENIC                    |                    |                                               |
| SNP_12298_A_33483364 | NC_021161.1    | Ca_Kabuli_Chr02 | 33483364                | AA                              | CC                 | CC               | INTERGENIC                    |                    |                                               |
| SNP_12299_A_33542104 | NC_021161.1    | Ca_Kabuli_Chr02 | 33542104                | AA                              | GG                 | GG               | INTERGENIC                    |                    |                                               |
| SNP_12300_A_33585775 | NC_021161.1    | Ca_Kabuli_Chr02 | 33585775                | TT                              | GG                 | GG               | INTERGENIC                    |                    |                                               |
| SNP_12301_A_33585801 | NC_021161.1    | Ca_Kabuli_Chr02 | 33585801                | AA                              | TT                 | TT               | INTERGENIC                    |                    |                                               |
| SNP_12304_A_33761577 | NC_021161.1    | Ca_Kabuli_Chr02 | 33761577                | GG                              | AA                 | AA               | DRR                           | 101512267          | N-acetyl-D-glucosamine kinase                 |
| SNP_12306_A_33955534 | NC_021161.1    | Ca_Kabuli_Chr02 | 33955534                | TT                              | CC                 | CC               | INTERGENIC                    |                    |                                               |

| SNPs IDs             | Chromosome IDs | Chromosomes     | Physical positions (bp) | CDC Frontier genome (Reference genome) | (Pusa 1103 & HPNB) | (ILWC 46 & LPNB) | Sequence Components of genome | Gene accession IDs | Putative functions                                |
|----------------------|----------------|-----------------|-------------------------|----------------------------------------|--------------------|------------------|-------------------------------|--------------------|---------------------------------------------------|
| SNP_12308_A_33959804 | NC_021161.1    | Ca_Kabuli_Chr02 | 33959804                | TT                                     | CC                 | CC               | INTERGENIC                    |                    |                                                   |
| SNP_12309_A_33959859 | NC_021161.1    | Ca_Kabuli_Chr02 | 33959859                | CC                                     | TT                 | TT               | INTERGENIC                    |                    |                                                   |
| SNP_12310_A_33961729 | NC_021161.1    | Ca_Kabuli_Chr02 | 33961729                | GG                                     | AA                 | AA               | DRR                           | 101499328          | zinc finger CCH domain-containing protein 41-like |
| SNP_12311_A_33984158 | NC_021161.1    | Ca_Kabuli_Chr02 | 33984158                | GG                                     | TT                 | TT               | INTRON                        | 101499644          | Unknown function                                  |
| SNP_12312_A_33984200 | NC_021161.1    | Ca_Kabuli_Chr02 | 33984200                | TT                                     | AA                 | AA               | INTRON                        | 101499644          | Unknown function                                  |
| SNP_12313_A_33984237 | NC_021161.1    | Ca_Kabuli_Chr02 | 33984237                | CC                                     | TT                 | TT               | INTRON                        | 101499644          | Unknown function                                  |
| SNP_12314_A_33984260 | NC_021161.1    | Ca_Kabuli_Chr02 | 33984260                | AA                                     | GG                 | GG               | INTRON                        | 101499644          | Unknown function                                  |
| SNP_12316_A_33984388 | NC_021161.1    | Ca_Kabuli_Chr02 | 33984388                | GG                                     | CC                 | CC               | INTRON                        | 101499644          | Unknown function                                  |
| SNP_12317_A_33984402 | NC_021161.1    | Ca_Kabuli_Chr02 | 33984402                | GG                                     | AA                 | AA               | INTRON                        | 101499644          | Unknown function                                  |
| SNP_12318_A_33984409 | NC_021161.1    | Ca_Kabuli_Chr02 | 33984409                | AA                                     | TT                 | TT               | INTRON                        | 101499644          | Unknown function                                  |
| SNP_12319_A_33984416 | NC_021161.1    | Ca_Kabuli_Chr02 | 33984416                | CC                                     | TT                 | TT               | INTRON                        | 101499644          | Unknown function                                  |
| SNP_12320_A_33984453 | NC_021161.1    | Ca_Kabuli_Chr02 | 33984453                | TT                                     | CC                 | CC               | INTRON                        | 101499644          | Unknown function                                  |
| SNP_12321_A_33984502 | NC_021161.1    | Ca_Kabuli_Chr02 | 33984502                | GG                                     | AA                 | AA               | INTRON                        | 101499644          | Unknown function                                  |
| SNP_12322_A_33984568 | NC_021161.1    | Ca_Kabuli_Chr02 | 33984568                | TT                                     | GG                 | GG               | INTRON                        | 101499644          | Unknown function                                  |
| SNP_12323_A_33984576 | NC_021161.1    | Ca_Kabuli_Chr02 | 33984576                | TT                                     | GG                 | GG               | INTRON                        | 101499644          | Unknown function                                  |
| SNP_12324_A_33984580 | NC_021161.1    | Ca_Kabuli_Chr02 | 33984580                | AA                                     | TT                 | TT               | INTRON                        | 101499644          | Unknown function                                  |
| SNP_12325_A_33984585 | NC_021161.1    | Ca_Kabuli_Chr02 | 33984585                | TT                                     | GG                 | GG               | INTRON                        | 101499644          | Unknown function                                  |
| SNP_12326_A_33984598 | NC_021161.1    | Ca_Kabuli_Chr02 | 33984598                | AA                                     | CC                 | CC               | INTRON                        | 101499644          | Unknown function                                  |
| SNP_12327_A_33984614 | NC_021161.1    | Ca_Kabuli_Chr02 | 33984614                | AA                                     | TT                 | TT               | INTRON                        | 101499644          | Unknown function                                  |
| SNP_12328_A_33984681 | NC_021161.1    | Ca_Kabuli_Chr02 | 33984681                | AA                                     | TT                 | TT               | INTRON                        | 101499644          | Unknown function                                  |
| SNP_12329_A_33985356 | NC_021161.1    | Ca_Kabuli_Chr02 | 33985356                | GG                                     | AA                 | AA               | INTRON                        | 101499644          | Unknown function                                  |
| SNP_12330_A_33985612 | NC_021161.1    | Ca_Kabuli_Chr02 | 33985612                | GG                                     | AA                 | AA               | INTRON                        | 101499644          | Unknown function                                  |

| SNPs IDs             | Chromosome IDs | Chromosomes     | Physical positions (bp) | CDC Frontier (Reference genome) | (Pusa 1103 & HPNB) | (ILWC 46 & LPNB) | Sequence Components of genome | Gene accession IDs | Putative functions |
|----------------------|----------------|-----------------|-------------------------|---------------------------------|--------------------|------------------|-------------------------------|--------------------|--------------------|
| SNP_12331_A_33986315 | NC_021161.1    | Ca_Kabuli_Chr02 | 33986315                | TT                              | GG                 | GG               | INTRON                        | 101499644          | Unknown function   |
| SNP_12332_A_33986317 | NC_021161.1    | Ca_Kabuli_Chr02 | 33986317                | TT                              | CC                 | CC               | INTRON                        | 101499644          | Unknown function   |
| SNP_12333_A_33986335 | NC_021161.1    | Ca_Kabuli_Chr02 | 33986335                | TT                              | CC                 | CC               | INTRON                        | 101499644          | Unknown function   |
| SNP_12334_A_33986566 | NC_021161.1    | Ca_Kabuli_Chr02 | 33986566                | AA                              | GG                 | GG               | NON_SYNONYMOUS_CODING         | 101499644          | Unknown function   |
| SNP_12336_A_33986629 | NC_021161.1    | Ca_Kabuli_Chr02 | 33986629                | AA                              | TT                 | TT               | NON_SYNONYMOUS_CODING         | 101499644          | Unknown function   |
| SNP_12337_A_33986683 | NC_021161.1    | Ca_Kabuli_Chr02 | 33986683                | CC                              | TT                 | TT               | NON_SYNONYMOUS_CODING         | 101499644          | Unknown function   |
| SNP_12338_A_33986688 | NC_021161.1    | Ca_Kabuli_Chr02 | 33986688                | TT                              | AA                 | CC               | NON_SYNONYMOUS_CODING         | 101499644          | Unknown function   |
| SNP_12339_A_33986714 | NC_021161.1    | Ca_Kabuli_Chr02 | 33986714                | AA                              | TT                 | TT               | NON_SYNONYMOUS_CODING         | 101499644          | Unknown function   |
| SNP_12340_A_33986740 | NC_021161.1    | Ca_Kabuli_Chr02 | 33986740                | CC                              | TT                 | TT               | NON_SYNONYMOUS_CODING         | 101499644          | Unknown function   |
| SNP_12341_A_33986819 | NC_021161.1    | Ca_Kabuli_Chr02 | 33986819                | AA                              | TT                 | TT               | URR                           | 101499644          | Unknown function   |
| SNP_12342_A_33986828 | NC_021161.1    | Ca_Kabuli_Chr02 | 33986828                | AA                              | GG                 | GG               | URR                           | 101499644          | Unknown function   |
| SNP_12343_A_33986838 | NC_021161.1    | Ca_Kabuli_Chr02 | 33986838                | GG                              | AA                 | AA               | URR                           | 101499644          | Unknown function   |
| SNP_12344_A_33986845 | NC_021161.1    | Ca_Kabuli_Chr02 | 33986845                | TT                              | GG                 | GG               | URR                           | 101499644          | Unknown function   |
| SNP_12345_A_33986923 | NC_021161.1    | Ca_Kabuli_Chr02 | 33986923                | AA                              | TT                 | TT               | URR                           | 101499644          | Unknown function   |
| SNP_12346_A_34022954 | NC_021161.1    | Ca_Kabuli_Chr02 | 34022954                | GG                              | AA                 | AA               | INTERGENIC                    |                    |                    |
| SNP_12347_A_34025175 | NC_021161.1    | Ca_Kabuli_Chr02 | 34025175                | AA                              | TT                 | TT               | URR                           | 101493152          | Unknown function   |
| SNP_12348_A_34025270 | NC_021161.1    | Ca_Kabuli_Chr02 | 34025270                | TT                              | CC                 | CC               | URR                           | 101493152          | Unknown function   |
| SNP_12349_A_34025286 | NC_021161.1    | Ca_Kabuli_Chr02 | 34025286                | TT                              | CC                 | CC               | URR                           | 101493152          | Unknown function   |
| SNP_12350_A_34025330 | NC_021161.1    | Ca_Kabuli_Chr02 | 34025330                | AA                              | TT                 | TT               | URR                           | 101493152          | Unknown function   |
| SNP_12351_A_34025637 | NC_021161.1    | Ca_Kabuli_Chr02 | 34025637                | TT                              | CC                 | CC               | URR                           | 101493152          | Unknown function   |
| SNP_12352_A_34028460 | NC_021161.1    | Ca_Kabuli_Chr02 | 34028460                | AA                              | CC                 | CC               | INTERGENIC                    |                    |                    |
| SNP_12353_A_34028465 | NC_021161.1    | Ca_Kabuli_Chr02 | 34028465                | AA                              | TT                 | TT               | INTERGENIC                    |                    |                    |



| SNPs IDs             | Chromosome IDs | Chromosomes     | Physical positions (bp) | CDC Frontier genome (Reference genome) | (Pusa 1103 & HPNB) | (ILWC 46 & LPNB) | Sequence Components of genome | Gene accession IDs | Putative functions                  |
|----------------------|----------------|-----------------|-------------------------|----------------------------------------|--------------------|------------------|-------------------------------|--------------------|-------------------------------------|
| SNP_12354_A_34028525 | NC_021161.1    | Ca_Kabuli_Chr02 | 34028525                | AA                                     | TT                 | TT               | INTERGENIC                    |                    |                                     |
| SNP_12355_A_34028549 | NC_021161.1    | Ca_Kabuli_Chr02 | 34028549                | CC                                     | AA                 | AA               | INTERGENIC                    |                    |                                     |
| SNP_12356_A_34028572 | NC_021161.1    | Ca_Kabuli_Chr02 | 34028572                | AA                                     | TT                 | TT               | INTERGENIC                    |                    |                                     |
| SNP_12357_A_34028751 | NC_021161.1    | Ca_Kabuli_Chr02 | 34028751                | TT                                     | CC                 | CC               | INTERGENIC                    |                    |                                     |
| SNP_12359_A_34054646 | NC_021161.1    | Ca_Kabuli_Chr02 | 34054646                | GG                                     | AA                 | AA               | INTERGENIC                    |                    |                                     |
| SNP_12360_A_34054932 | NC_021161.1    | Ca_Kabuli_Chr02 | 34054932                | AA                                     | TT                 | TT               | INTERGENIC                    |                    |                                     |
| SNP_12361_A_34061593 | NC_021161.1    | Ca_Kabuli_Chr02 | 34061593                | CC                                     | AA                 | AA               | INTERGENIC                    |                    |                                     |
| SNP_12362_A_34065051 | NC_021161.1    | Ca_Kabuli_Chr02 | 34065051                | CC                                     | GG                 | GG               | INTERGENIC                    |                    |                                     |
| SNP_12363_A_34076126 | NC_021161.1    | Ca_Kabuli_Chr02 | 34076126                | AA                                     | CC                 | CC               | INTERGENIC                    |                    |                                     |
| SNP_12364_A_34081564 | NC_021161.1    | Ca_Kabuli_Chr02 | 34081564                | GG                                     | AA                 | AA               | DRR                           | 101494747          | Unknown function                    |
| SNP_12365_A_34086029 | NC_021161.1    | Ca_Kabuli_Chr02 | 34086029                | CC                                     | TT                 | TT               | INTERGENIC                    |                    |                                     |
| SNP_12366_A_34086035 | NC_021161.1    | Ca_Kabuli_Chr02 | 34086035                | CC                                     | GG                 | GG               | INTERGENIC                    |                    |                                     |
| SNP_12367_A_34086050 | NC_021161.1    | Ca_Kabuli_Chr02 | 34086050                | GG                                     | AA                 | AA               | INTERGENIC                    |                    |                                     |
| SNP_12368_A_34086056 | NC_021161.1    | Ca_Kabuli_Chr02 | 34086056                | TT                                     | CC                 | CC               | INTERGENIC                    |                    |                                     |
| SNP_12369_A_34086179 | NC_021161.1    | Ca_Kabuli_Chr02 | 34086179                | CC                                     | GG                 | AA               | INTERGENIC                    |                    |                                     |
| SNP_12370_A_34086188 | NC_021161.1    | Ca_Kabuli_Chr02 | 34086188                | GG                                     | AA                 | AA               | INTERGENIC                    |                    |                                     |
| SNP_12371_A_34086198 | NC_021161.1    | Ca_Kabuli_Chr02 | 34086198                | TT                                     | CC                 | CC               | INTERGENIC                    |                    |                                     |
| SNP_12372_A_34086534 | NC_021161.1    | Ca_Kabuli_Chr02 | 34086534                | TT                                     | CC                 | CC               | INTERGENIC                    |                    |                                     |
| SNP_12373_A_34086616 | NC_021161.1    | Ca_Kabuli_Chr02 | 34086616                | CC                                     | GG                 | GG               | INTERGENIC                    |                    |                                     |
| SNP_12374_A_34087085 | NC_021161.1    | Ca_Kabuli_Chr02 | 34087085                | TT                                     | CC                 | CC               | INTERGENIC                    |                    |                                     |
| SNP_12375_A_34090102 | NC_021161.1    | Ca_Kabuli_Chr02 | 34090102                | CC                                     | TT                 | TT               | INTERGENIC                    |                    |                                     |
| SNP_12376_A_34164814 | NC_021161.1    | Ca_Kabuli_Chr02 | 34164814                | GG                                     | AA                 | AA               | URR                           | 101503806          | 4-hydroxyphenylpyruvate dioxygenase |

| SNPs IDs             | Chromosome IDs | Chromosomes     | Physical positions (bp) | CDC Frontier genome (Reference genome) | (Pusa 1103 & HPNB) | (ILWC 46 & LPNB) | Sequence genome   | Components of | Gene accession IDs | Putative functions                                                   |
|----------------------|----------------|-----------------|-------------------------|----------------------------------------|--------------------|------------------|-------------------|---------------|--------------------|----------------------------------------------------------------------|
| SNP_12377_A_34295084 | NC_021161.1    | Ca_Kabuli_Chr02 | 34295084                | GG                                     | AA                 | AA               | INTERGENIC        |               |                    |                                                                      |
| SNP_12378_A_34353800 | NC_021161.1    | Ca_Kabuli_Chr02 | 34353800                | CC                                     | TT                 | TT               | INTERGENIC        |               |                    |                                                                      |
| SNP_12380_A_34354082 | NC_021161.1    | Ca_Kabuli_Chr02 | 34354082                | TT                                     | CC                 | CC               | INTERGENIC        |               |                    |                                                                      |
| SNP_12381_A_34354372 | NC_021161.1    | Ca_Kabuli_Chr02 | 34354372                | GG                                     | TT                 | TT               | INTERGENIC        |               |                    |                                                                      |
| SNP_12382_A_34354616 | NC_021161.1    | Ca_Kabuli_Chr02 | 34354616                | GG                                     | AA                 | AA               | INTERGENIC        |               |                    |                                                                      |
| SNP_12383_A_34354632 | NC_021161.1    | Ca_Kabuli_Chr02 | 34354632                | AA                                     | TT                 | TT               | INTERGENIC        |               |                    |                                                                      |
| SNP_12384_A_34355149 | NC_021161.1    | Ca_Kabuli_Chr02 | 34355149                | GG                                     | CC                 | CC               | URR               |               | 101497026          | Unknown function                                                     |
| SNP_12387_A_34355499 | NC_021161.1    | Ca_Kabuli_Chr02 | 34355499                | TT                                     | AA                 | AA               | URR               |               | 101497026          | Unknown function                                                     |
| SNP_12388_A_34355549 | NC_021161.1    | Ca_Kabuli_Chr02 | 34355549                | AA                                     | TT                 | TT               | URR               |               | 101497026          | Unknown function                                                     |
| SNP_12389_A_34355603 | NC_021161.1    | Ca_Kabuli_Chr02 | 34355603                | AA                                     | GG                 | GG               | URR               |               | 101497026          | Unknown function                                                     |
| SNP_12390_A_34355804 | NC_021161.1    | Ca_Kabuli_Chr02 | 34355804                | AA                                     | GG                 | GG               | URR               |               | 101497026          | Unknown function                                                     |
| SNP_12391_A_34355956 | NC_021161.1    | Ca_Kabuli_Chr02 | 34355956                | CC                                     | TT                 | TT               | URR               |               | 101497026          | Unknown function                                                     |
| SNP_12392_A_34357798 | NC_021161.1    | Ca_Kabuli_Chr02 | 34357798                | TT                                     | GG                 | GG               | DRR               |               | 101497356          | probable xyloglucan endotransglucosylase/hydrolase protein 16        |
| SNP_12393_A_34357881 | NC_021161.1    | Ca_Kabuli_Chr02 | 34357881                | AA                                     | TT                 | TT               | SYNONYMOUS_CODING |               | 101497356          | probable xyloglucan endotransglucosylase/hydrolase protein 16        |
| SNP_12394_A_34449469 | NC_021161.1    | Ca_Kabuli_Chr02 | 34449469                | GG                                     | AA                 | AA               | URR               |               | 101515297          | probable LRR receptor-like serine/threonine-protein kinase At1g07650 |
| SNP_12397_A_34515994 | NC_021161.1    | Ca_Kabuli_Chr02 | 34515994                | TT                                     | GG                 | GG               | INTERGENIC        |               |                    |                                                                      |
| SNP_12398_A_34566633 | NC_021161.1    | Ca_Kabuli_Chr02 | 34566633                | TT                                     | CC                 | CC               | URR               |               | 101500294          | glucose-6-phosphate/phosphate translocator 1, chloroplastic          |
| SNP_12399_A_34566908 | NC_021161.1    | Ca_Kabuli_Chr02 | 34566908                | CC                                     | TT                 | TT               | URR               |               | 101500294          | glucose-6-phosphate/phosphate translocator 1, chloroplastic          |
| SNP_12400_A_34567061 | NC_021161.1    | Ca_Kabuli_Chr02 | 34567061                | AA                                     | TT                 | TT               | URR               |               | 101500294          | glucose-6-phosphate/phosphate translocator 1, chloroplastic          |
| SNP_12402_A_34669279 | NC_021161.1    | Ca_Kabuli_Chr02 | 34669279                | CC                                     | TT                 | TT               | INTERGENIC        |               |                    |                                                                      |
| SNP_12403_A_34683522 | NC_021161.1    | Ca_Kabuli_Chr02 | 34683522                | TT                                     | AA                 | AA               | INTERGENIC        |               |                    |                                                                      |
| SNP_12404_A_34683539 | NC_021161.1    | Ca_Kabuli_Chr02 | 34683539                | CC                                     | TT                 | TT               | INTERGENIC        |               |                    |                                                                      |

| SNPs IDs             | Chromosome IDs | Chromosomes     | Physical positions (bp) | CDC Frontier genome (Reference genome) | (Pusa 1103 & HPNB) | (ILWC 46 & LPNB) | Sequence genome | Components of | Gene accession IDs | Putative functions |
|----------------------|----------------|-----------------|-------------------------|----------------------------------------|--------------------|------------------|-----------------|---------------|--------------------|--------------------|
| SNP_12405_A_34683739 | NC_021161.1    | Ca_Kabuli_Chr02 | 34683739                | AA                                     | CC                 | CC               | INTERGENIC      |               |                    |                    |
| SNP_12407_A_34683876 | NC_021161.1    | Ca_Kabuli_Chr02 | 34683876                | AA                                     | GG                 | GG               | INTERGENIC      |               |                    |                    |
| SNP_12408_A_34683889 | NC_021161.1    | Ca_Kabuli_Chr02 | 34683889                | AA                                     | TT                 | TT               | INTERGENIC      |               |                    |                    |
| SNP_12409_A_34683928 | NC_021161.1    | Ca_Kabuli_Chr02 | 34683928                | TT                                     | AA                 | AA               | INTERGENIC      |               |                    |                    |
| SNP_12410_A_34683949 | NC_021161.1    | Ca_Kabuli_Chr02 | 34683949                | CC                                     | AA                 | AA               | INTERGENIC      |               |                    |                    |
| SNP_12411_A_34684026 | NC_021161.1    | Ca_Kabuli_Chr02 | 34684026                | TT                                     | CC                 | CC               | INTERGENIC      |               |                    |                    |
| SNP_12412_A_34684048 | NC_021161.1    | Ca_Kabuli_Chr02 | 34684048                | CC                                     | TT                 | TT               | INTERGENIC      |               |                    |                    |
| SNP_12413_A_34684138 | NC_021161.1    | Ca_Kabuli_Chr02 | 34684138                | GG                                     | AA                 | AA               | INTERGENIC      |               |                    |                    |
| SNP_12414_A_34684183 | NC_021161.1    | Ca_Kabuli_Chr02 | 34684183                | AA                                     | GG                 | GG               | INTERGENIC      |               |                    |                    |
| SNP_12415_A_34684216 | NC_021161.1    | Ca_Kabuli_Chr02 | 34684216                | AA                                     | GG                 | GG               | INTERGENIC      |               |                    |                    |
| SNP_12416_A_34684222 | NC_021161.1    | Ca_Kabuli_Chr02 | 34684222                | GG                                     | AA                 | AA               | INTERGENIC      |               |                    |                    |
| SNP_12417_A_34684251 | NC_021161.1    | Ca_Kabuli_Chr02 | 34684251                | GG                                     | TT                 | TT               | INTERGENIC      |               |                    |                    |
| SNP_12418_A_34684271 | NC_021161.1    | Ca_Kabuli_Chr02 | 34684271                | AA                                     | TT                 | TT               | INTERGENIC      |               |                    |                    |
| SNP_12419_A_34684276 | NC_021161.1    | Ca_Kabuli_Chr02 | 34684276                | AA                                     | GG                 | GG               | INTERGENIC      |               |                    |                    |
| SNP_12420_A_34684296 | NC_021161.1    | Ca_Kabuli_Chr02 | 34684296                | AA                                     | GG                 | GG               | INTERGENIC      |               |                    |                    |
| SNP_12421_A_34684298 | NC_021161.1    | Ca_Kabuli_Chr02 | 34684298                | CC                                     | AA                 | AA               | INTERGENIC      |               |                    |                    |
| SNP_12422_A_34684314 | NC_021161.1    | Ca_Kabuli_Chr02 | 34684314                | GG                                     | CC                 | CC               | INTERGENIC      |               |                    |                    |
| SNP_12423_A_34684322 | NC_021161.1    | Ca_Kabuli_Chr02 | 34684322                | GG                                     | CC                 | CC               | INTERGENIC      |               |                    |                    |
| SNP_12424_A_34684323 | NC_021161.1    | Ca_Kabuli_Chr02 | 34684323                | GG                                     | AA                 | AA               | INTERGENIC      |               |                    |                    |
| SNP_12425_A_34684327 | NC_021161.1    | Ca_Kabuli_Chr02 | 34684327                | AA                                     | GG                 | GG               | INTERGENIC      |               |                    |                    |
| SNP_12426_A_34684342 | NC_021161.1    | Ca_Kabuli_Chr02 | 34684342                | TT                                     | GG                 | GG               | INTERGENIC      |               |                    |                    |
| SNP_12427_A_34684346 | NC_021161.1    | Ca_Kabuli_Chr02 | 34684346                | GG                                     | AA                 | AA               | INTERGENIC      |               |                    |                    |

| SNPs IDs             | Chromosome IDs | Chromosomes     | Physical positions (bp) | CDC Frontier genome (Reference genome) | (Pusa 1103 & HPNB) | (ILWC 46 & LPNB) | Sequence genome | Components of | Gene accession IDs              | Putative functions |
|----------------------|----------------|-----------------|-------------------------|----------------------------------------|--------------------|------------------|-----------------|---------------|---------------------------------|--------------------|
| SNP_12428_A_34684354 | NC_021161.1    | Ca_Kabuli_Chr02 | 34684354                | TT                                     | CC                 | CC               | INTERGENIC      |               |                                 |                    |
| SNP_12430_A_34684403 | NC_021161.1    | Ca_Kabuli_Chr02 | 34684403                | GG                                     | AA                 | AA               | INTERGENIC      |               |                                 |                    |
| SNP_12431_A_34684448 | NC_021161.1    | Ca_Kabuli_Chr02 | 34684448                | CC                                     | TT                 | TT               | INTERGENIC      |               |                                 |                    |
| SNP_12432_A_34684509 | NC_021161.1    | Ca_Kabuli_Chr02 | 34684509                | TT                                     | GG                 | GG               | INTERGENIC      |               |                                 |                    |
| SNP_12433_A_34684646 | NC_021161.1    | Ca_Kabuli_Chr02 | 34684646                | GG                                     | AA                 | AA               | INTERGENIC      |               |                                 |                    |
| SNP_12434_A_34684732 | NC_021161.1    | Ca_Kabuli_Chr02 | 34684732                | AA                                     | GG                 | GG               | INTERGENIC      |               |                                 |                    |
| SNP_12435_A_34684742 | NC_021161.1    | Ca_Kabuli_Chr02 | 34684742                | GG                                     | AA                 | AA               | INTERGENIC      |               |                                 |                    |
| SNP_12436_A_34684754 | NC_021161.1    | Ca_Kabuli_Chr02 | 34684754                | GG                                     | TT                 | TT               | INTERGENIC      |               |                                 |                    |
| SNP_12437_A_34684833 | NC_021161.1    | Ca_Kabuli_Chr02 | 34684833                | GG                                     | AA                 | AA               | INTERGENIC      |               |                                 |                    |
| SNP_12439_A_34685009 | NC_021161.1    | Ca_Kabuli_Chr02 | 34685009                | CC                                     | AA                 | AA               | INTERGENIC      |               |                                 |                    |
| SNP_12440_A_34685048 | NC_021161.1    | Ca_Kabuli_Chr02 | 34685048                | CC                                     | TT                 | TT               | INTERGENIC      |               |                                 |                    |
| SNP_12441_A_34685085 | NC_021161.1    | Ca_Kabuli_Chr02 | 34685085                | CC                                     | TT                 | TT               | INTERGENIC      |               |                                 |                    |
| SNP_12442_A_34685101 | NC_021161.1    | Ca_Kabuli_Chr02 | 34685101                | CC                                     | TT                 | TT               | INTERGENIC      |               |                                 |                    |
| SNP_12443_A_34685116 | NC_021161.1    | Ca_Kabuli_Chr02 | 34685116                | TT                                     | GG                 | GG               | INTERGENIC      |               |                                 |                    |
| SNP_12444_A_34685148 | NC_021161.1    | Ca_Kabuli_Chr02 | 34685148                | GG                                     | TT                 | TT               | INTERGENIC      |               |                                 |                    |
| SNP_12445_A_34685180 | NC_021161.1    | Ca_Kabuli_Chr02 | 34685180                | CC                                     | TT                 | TT               | INTERGENIC      |               |                                 |                    |
| SNP_12447_A_34685339 | NC_021161.1    | Ca_Kabuli_Chr02 | 34685339                | TT                                     | GG                 | GG               | INTERGENIC      |               |                                 |                    |
| SNP_12448_A_34685691 | NC_021161.1    | Ca_Kabuli_Chr02 | 34685691                | TT                                     | AA                 | AA               | INTERGENIC      |               |                                 |                    |
| SNP_12449_A_34685913 | NC_021161.1    | Ca_Kabuli_Chr02 | 34685913                | AA                                     | CC                 | CC               | INTERGENIC      |               |                                 |                    |
| SNP_12451_A_34768734 | NC_021161.1    | Ca_Kabuli_Chr02 | 34768734                | TT                                     | GG                 | GG               | DRR             | 101504982     | NEP1-interacting protein 1-like |                    |
| SNP_12452_A_34768736 | NC_021161.1    | Ca_Kabuli_Chr02 | 34768736                | TT                                     | AA                 | AA               | DRR             | 101504982     | NEP1-interacting protein 1-like |                    |
| SNP_12453_A_34807547 | NC_021161.1    | Ca_Kabuli_Chr02 | 34807547                | GG                                     | AA                 | AA               | INTERGENIC      |               |                                 |                    |

| SNPs IDs             | Chromosome IDs | Chromosomes     | Physical positions (bp) | CDC Frontier genome (Reference genome) | (Pusa 1103 & HPNB) | (ILWC 46 & LPNB) | Sequence Components of genome | Gene accession IDs | Putative functions           |
|----------------------|----------------|-----------------|-------------------------|----------------------------------------|--------------------|------------------|-------------------------------|--------------------|------------------------------|
| SNP_12454_A_34807638 | NC_021161.1    | Ca_Kabuli_Chr02 | 34807638                | GG                                     | CC                 | CC               | INTERGENIC                    |                    |                              |
| SNP_12455_A_34809592 | NC_021161.1    | Ca_Kabuli_Chr02 | 34809592                | GG                                     | AA                 | AA               | INTERGENIC                    |                    |                              |
| SNP_12456_A_34830579 | NC_021161.1    | Ca_Kabuli_Chr02 | 34830579                | TT                                     | GG                 | GG               | NON_SYNONYMOUS_CODING         | id40820            | Unknown function             |
| SNP_12457_A_34830714 | NC_021161.1    | Ca_Kabuli_Chr02 | 34830714                | CC                                     | TT                 | TT               | SYNONYMOUS_CODING             | id40820            | Unknown function             |
| SNP_12458_A_34830733 | NC_021161.1    | Ca_Kabuli_Chr02 | 34830733                | CC                                     | GG                 | GG               | NON_SYNONYMOUS_CODING         | id40820            | Unknown function             |
| SNP_12459_A_34830827 | NC_021161.1    | Ca_Kabuli_Chr02 | 34830827                | CC                                     | TT                 | TT               | NON_SYNONYMOUS_CODING         | id40820            | Unknown function             |
| SNP_12460_A_34830967 | NC_021161.1    | Ca_Kabuli_Chr02 | 34830967                | GG                                     | AA                 | AA               | NON_SYNONYMOUS_CODING         | id40820            | Unknown function             |
| SNP_12461_A_34918131 | NC_021161.1    | Ca_Kabuli_Chr02 | 34918131                | TT                                     | CC                 | CC               | URR                           | 101496055          | uncharacterized LOC101496055 |
| SNP_12462_A_34979636 | NC_021161.1    | Ca_Kabuli_Chr02 | 34979636                | TT                                     | AA                 | AA               | DRR                           | 101498015          | uncharacterized LOC101498015 |
| SNP_12464_A_34997328 | NC_021161.1    | Ca_Kabuli_Chr02 | 34997328                | AA                                     | GG                 | GG               | INTERGENIC                    |                    |                              |
| SNP_12465_A_35168735 | NC_021161.1    | Ca_Kabuli_Chr02 | 35168735                | AA                                     | CC                 | CC               | INTERGENIC                    |                    |                              |
| SNP_12466_A_35168737 | NC_021161.1    | Ca_Kabuli_Chr02 | 35168737                | AA                                     | CC                 | CC               | INTERGENIC                    |                    |                              |
| SNP_12467_A_35258326 | NC_021161.1    | Ca_Kabuli_Chr02 | 35258326                | CC                                     | TT                 | TT               | INTRON                        | 101499646          | Unknown function             |
| SNP_12468_A_35258337 | NC_021161.1    | Ca_Kabuli_Chr02 | 35258337                | TT                                     | AA                 | AA               | INTRON                        | 101499646          | Unknown function             |
| SNP_12469_A_35258397 | NC_021161.1    | Ca_Kabuli_Chr02 | 35258397                | TT                                     | CC                 | CC               | INTRON                        | 101499646          | Unknown function             |
| SNP_12471_A_35258711 | NC_021161.1    | Ca_Kabuli_Chr02 | 35258711                | TT                                     | CC                 | CC               | INTRON                        | 101499646          | Unknown function             |
| SNP_12472_A_35258756 | NC_021161.1    | Ca_Kabuli_Chr02 | 35258756                | CC                                     | TT                 | TT               | INTRON                        | 101499646          | Unknown function             |
| SNP_12473_A_35258881 | NC_021161.1    | Ca_Kabuli_Chr02 | 35258881                | TT                                     | CC                 | CC               | INTRON                        | 101499646          | Unknown function             |
| SNP_12474_A_35287787 | NC_021161.1    | Ca_Kabuli_Chr02 | 35287787                | CC                                     | TT                 | TT               | INTERGENIC                    |                    |                              |
| SNP_12475_A_35287791 | NC_021161.1    | Ca_Kabuli_Chr02 | 35287791                | TT                                     | GG                 | GG               | INTERGENIC                    |                    |                              |
| SNP_12476_A_35287799 | NC_021161.1    | Ca_Kabuli_Chr02 | 35287799                | AA                                     | GG                 | GG               | INTERGENIC                    |                    |                              |
| SNP_12477_A_35287962 | NC_021161.1    | Ca_Kabuli_Chr02 | 35287962                | GG                                     | CC                 | CC               | INTERGENIC                    |                    |                              |

| SNPs IDs             | Chromosome IDs | Chromosomes     | Physical positions (bp) | CDC Frontier genome (Reference genome) | (Pusa 1103 & HPNB) | (ILWC 46 & LPNB) | Sequence genome | Components of | Gene accession IDs | Putative functions |
|----------------------|----------------|-----------------|-------------------------|----------------------------------------|--------------------|------------------|-----------------|---------------|--------------------|--------------------|
| SNP_12478_A_35288028 | NC_021161.1    | Ca_Kabuli_Chr02 | 35288028                | TT                                     | AA                 | AA               | INTERGENIC      |               |                    |                    |
| SNP_12479_A_35288039 | NC_021161.1    | Ca_Kabuli_Chr02 | 35288039                | AA                                     | GG                 | GG               | INTERGENIC      |               |                    |                    |
| SNP_12480_A_35288097 | NC_021161.1    | Ca_Kabuli_Chr02 | 35288097                | TT                                     | CC                 | CC               | INTERGENIC      |               |                    |                    |
| SNP_12482_A_35288190 | NC_021161.1    | Ca_Kabuli_Chr02 | 35288190                | AA                                     | GG                 | GG               | INTERGENIC      |               |                    |                    |
| SNP_12483_A_35288203 | NC_021161.1    | Ca_Kabuli_Chr02 | 35288203                | AA                                     | GG                 | GG               | INTERGENIC      |               |                    |                    |
| SNP_12484_A_35288205 | NC_021161.1    | Ca_Kabuli_Chr02 | 35288205                | GG                                     | TT                 | TT               | INTERGENIC      |               |                    |                    |
| SNP_12485_A_35288260 | NC_021161.1    | Ca_Kabuli_Chr02 | 35288260                | AA                                     | GG                 | GG               | INTERGENIC      |               |                    |                    |
| SNP_12486_A_35288350 | NC_021161.1    | Ca_Kabuli_Chr02 | 35288350                | TT                                     | CC                 | CC               | INTERGENIC      |               |                    |                    |
| SNP_12487_A_35288351 | NC_021161.1    | Ca_Kabuli_Chr02 | 35288351                | TT                                     | CC                 | CC               | INTERGENIC      |               |                    |                    |
| SNP_12488_A_35288379 | NC_021161.1    | Ca_Kabuli_Chr02 | 35288379                | AA                                     | CC                 | CC               | INTERGENIC      |               |                    |                    |
| SNP_12489_A_35288412 | NC_021161.1    | Ca_Kabuli_Chr02 | 35288412                | GG                                     | TT                 | TT               | INTERGENIC      |               |                    |                    |
| SNP_12491_A_35288529 | NC_021161.1    | Ca_Kabuli_Chr02 | 35288529                | AA                                     | TT                 | TT               | INTERGENIC      |               |                    |                    |
| SNP_12492_A_35288530 | NC_021161.1    | Ca_Kabuli_Chr02 | 35288530                | CC                                     | TT                 | TT               | INTERGENIC      |               |                    |                    |
| SNP_12493_A_35288540 | NC_021161.1    | Ca_Kabuli_Chr02 | 35288540                | TT                                     | AA                 | AA               | INTERGENIC      |               |                    |                    |
| SNP_12494_A_35288578 | NC_021161.1    | Ca_Kabuli_Chr02 | 35288578                | GG                                     | TT                 | TT               | INTERGENIC      |               |                    |                    |
| SNP_12495_A_35288581 | NC_021161.1    | Ca_Kabuli_Chr02 | 35288581                | GG                                     | AA                 | AA               | INTERGENIC      |               |                    |                    |
| SNP_12496_A_35288859 | NC_021161.1    | Ca_Kabuli_Chr02 | 35288859                | TT                                     | GG                 | GG               | INTERGENIC      |               |                    |                    |
| SNP_12497_A_35288863 | NC_021161.1    | Ca_Kabuli_Chr02 | 35288863                | GG                                     | TT                 | TT               | INTERGENIC      |               |                    |                    |
| SNP_12498_A_35288966 | NC_021161.1    | Ca_Kabuli_Chr02 | 35288966                | TT                                     | CC                 | CC               | INTERGENIC      |               |                    |                    |
| SNP_12499_A_35288967 | NC_021161.1    | Ca_Kabuli_Chr02 | 35288967                | TT                                     | AA                 | AA               | INTERGENIC      |               |                    |                    |
| SNP_12500_A_35289047 | NC_021161.1    | Ca_Kabuli_Chr02 | 35289047                | TT                                     | CC                 | CC               | INTERGENIC      |               |                    |                    |
| SNP_12501_A_35289099 | NC_021161.1    | Ca_Kabuli_Chr02 | 35289099                | TT                                     | GG                 | GG               | INTERGENIC      |               |                    |                    |

| SNPs IDs             | Chromosome IDs | Chromosomes     | Physical positions (bp) | CDC Frontier genome (Reference genome) | (Pusa 1103 & HPNB) | (ILWC 46 & LPNB) | Sequence Components of genome | Gene accession IDs | Putative functions |
|----------------------|----------------|-----------------|-------------------------|----------------------------------------|--------------------|------------------|-------------------------------|--------------------|--------------------|
| SNP_12502_A_35289103 | NC_021161.1    | Ca_Kabuli_Chr02 | 35289103                | GG                                     | CC                 | CC               | INTERGENIC                    |                    |                    |
| SNP_12503_A_35289282 | NC_021161.1    | Ca_Kabuli_Chr02 | 35289282                | AA                                     | CC                 | CC               | INTERGENIC                    |                    |                    |
| SNP_12504_A_35289300 | NC_021161.1    | Ca_Kabuli_Chr02 | 35289300                | AA                                     | CC                 | CC               | INTERGENIC                    |                    |                    |
| SNP_12505_A_35289367 | NC_021161.1    | Ca_Kabuli_Chr02 | 35289367                | GG                                     | TT                 | TT               | INTERGENIC                    |                    |                    |
| SNP_12506_A_35289371 | NC_021161.1    | Ca_Kabuli_Chr02 | 35289371                | AA                                     | TT                 | TT               | INTERGENIC                    |                    |                    |
| SNP_12508_A_35289427 | NC_021161.1    | Ca_Kabuli_Chr02 | 35289427                | AA                                     | GG                 | GG               | DRR                           | 101503145          | Unknown function   |
| SNP_12509_A_35289459 | NC_021161.1    | Ca_Kabuli_Chr02 | 35289459                | AA                                     | TT                 | TT               | DRR                           | 101503145          | Unknown function   |
| SNP_12510_A_35291940 | NC_021161.1    | Ca_Kabuli_Chr02 | 35291940                | AA                                     | GG                 | GG               | INTRON                        | 101503145          | Unknown function   |
| SNP_12512_A_35297860 | NC_021161.1    | Ca_Kabuli_Chr02 | 35297860                | CC                                     | AA                 | AA               | INTRON                        | 101503145          | Unknown function   |
| SNP_12513_A_35298528 | NC_021161.1    | Ca_Kabuli_Chr02 | 35298528                | GG                                     | AA                 | AA               | SYNONYMOUS_CODING             | 101503145          | Unknown function   |
| SNP_12514_A_35298553 | NC_021161.1    | Ca_Kabuli_Chr02 | 35298553                | CC                                     | GG                 | GG               | NON_SYNONYMOUS_CODING         | 101503145          | Unknown function   |
| SNP_12515_A_35298581 | NC_021161.1    | Ca_Kabuli_Chr02 | 35298581                | CC                                     | TT                 | TT               | INTRON                        | 101503145          | Unknown function   |
| SNP_12516_A_35298784 | NC_021161.1    | Ca_Kabuli_Chr02 | 35298784                | TT                                     | AA                 | AA               | INTRON                        | 101503145          | Unknown function   |
| SNP_12517_A_35298857 | NC_021161.1    | Ca_Kabuli_Chr02 | 35298857                | GG                                     | AA                 | AA               | INTRON                        | 101503145          | Unknown function   |
| SNP_12519_A_35299116 | NC_021161.1    | Ca_Kabuli_Chr02 | 35299116                | GG                                     | AA                 | AA               | INTRON                        | 101503145          | Unknown function   |
| SNP_12520_A_35299117 | NC_021161.1    | Ca_Kabuli_Chr02 | 35299117                | AA                                     | CC                 | CC               | INTRON                        | 101503145          | Unknown function   |
| SNP_12521_A_35299129 | NC_021161.1    | Ca_Kabuli_Chr02 | 35299129                | GG                                     | AA                 | AA               | INTRON                        | 101503145          | Unknown function   |
| SNP_12522_A_35299161 | NC_021161.1    | Ca_Kabuli_Chr02 | 35299161                | CC                                     | GG                 | GG               | INTRON                        | 101503145          | Unknown function   |
| SNP_12523_A_35299163 | NC_021161.1    | Ca_Kabuli_Chr02 | 35299163                | AA                                     | GG                 | GG               | INTRON                        | 101503145          | Unknown function   |
| SNP_12524_A_35300860 | NC_021161.1    | Ca_Kabuli_Chr02 | 35300860                | TT                                     | CC                 | CC               | URR                           | 101503145          | Unknown function   |
| SNP_12525_A_35302916 | NC_021161.1    | Ca_Kabuli_Chr02 | 35302916                | GG                                     | AA                 | AA               | INTERGENIC                    |                    |                    |
| SNP_12526_A_35302992 | NC_021161.1    | Ca_Kabuli_Chr02 | 35302992                | GG                                     | AA                 | AA               | INTERGENIC                    |                    |                    |

| SNPs IDs             | Chromosome IDs | Chromosomes     | Physical positions (bp) | CDC Frontier genome (Reference genome) | (Pusa 1103 & HPNB) | (ILWC 46 & LPNB) | Sequence genome | Components of | Gene accession IDs | Putative functions |
|----------------------|----------------|-----------------|-------------------------|----------------------------------------|--------------------|------------------|-----------------|---------------|--------------------|--------------------|
| SNP_12527_A_35303184 | NC_021161.1    | Ca_Kabuli_Chr02 | 35303184                | GG                                     | AA                 | AA               | INTERGENIC      |               |                    |                    |
| SNP_12528_A_35303217 | NC_021161.1    | Ca_Kabuli_Chr02 | 35303217                | CC                                     | TT                 | TT               | INTERGENIC      |               |                    |                    |
| SNP_12529_A_35303231 | NC_021161.1    | Ca_Kabuli_Chr02 | 35303231                | CC                                     | TT                 | TT               | INTERGENIC      |               |                    |                    |
| SNP_12530_A_35303281 | NC_021161.1    | Ca_Kabuli_Chr02 | 35303281                | TT                                     | AA                 | AA               | INTERGENIC      |               |                    |                    |
| SNP_12531_A_35303295 | NC_021161.1    | Ca_Kabuli_Chr02 | 35303295                | GG                                     | AA                 | AA               | INTERGENIC      |               |                    |                    |
| SNP_12532_A_35303397 | NC_021161.1    | Ca_Kabuli_Chr02 | 35303397                | GG                                     | AA                 | AA               | INTERGENIC      |               |                    |                    |
| SNP_12534_A_35303511 | NC_021161.1    | Ca_Kabuli_Chr02 | 35303511                | GG                                     | AA                 | AA               | INTERGENIC      |               |                    |                    |
| SNP_12535_A_35303589 | NC_021161.1    | Ca_Kabuli_Chr02 | 35303589                | AA                                     | GG                 | GG               | INTERGENIC      |               |                    |                    |
| SNP_12536_A_35303595 | NC_021161.1    | Ca_Kabuli_Chr02 | 35303595                | TT                                     | GG                 | GG               | INTERGENIC      |               |                    |                    |
| SNP_12537_A_35303614 | NC_021161.1    | Ca_Kabuli_Chr02 | 35303614                | TT                                     | CC                 | CC               | INTERGENIC      |               |                    |                    |
| SNP_12538_A_35303671 | NC_021161.1    | Ca_Kabuli_Chr02 | 35303671                | CC                                     | AA                 | AA               | INTERGENIC      |               |                    |                    |
| SNP_12539_A_35303711 | NC_021161.1    | Ca_Kabuli_Chr02 | 35303711                | GG                                     | AA                 | AA               | INTERGENIC      |               |                    |                    |
| SNP_12540_A_35303778 | NC_021161.1    | Ca_Kabuli_Chr02 | 35303778                | AA                                     | GG                 | GG               | INTERGENIC      |               |                    |                    |
| SNP_12541_A_35303932 | NC_021161.1    | Ca_Kabuli_Chr02 | 35303932                | TT                                     | CC                 | CC               | INTERGENIC      |               |                    |                    |
| SNP_12542_A_35303957 | NC_021161.1    | Ca_Kabuli_Chr02 | 35303957                | TT                                     | CC                 | CC               | INTERGENIC      |               |                    |                    |
| SNP_12543_A_35303978 | NC_021161.1    | Ca_Kabuli_Chr02 | 35303978                | TT                                     | GG                 | GG               | INTERGENIC      |               |                    |                    |
| SNP_12544_A_35304015 | NC_021161.1    | Ca_Kabuli_Chr02 | 35304015                | GG                                     | CC                 | CC               | INTERGENIC      |               |                    |                    |
| SNP_12545_A_35304021 | NC_021161.1    | Ca_Kabuli_Chr02 | 35304021                | TT                                     | CC                 | CC               | INTERGENIC      |               |                    |                    |
| SNP_12546_A_35304053 | NC_021161.1    | Ca_Kabuli_Chr02 | 35304053                | GG                                     | TT                 | TT               | INTERGENIC      |               |                    |                    |
| SNP_12547_A_35304070 | NC_021161.1    | Ca_Kabuli_Chr02 | 35304070                | TT                                     | CC                 | CC               | INTERGENIC      |               |                    |                    |
| SNP_12548_A_35304105 | NC_021161.1    | Ca_Kabuli_Chr02 | 35304105                | TT                                     | CC                 | CC               | INTERGENIC      |               |                    |                    |
| SNP_12549_A_35304132 | NC_021161.1    | Ca_Kabuli_Chr02 | 35304132                | CC                                     | TT                 | TT               | INTERGENIC      |               |                    |                    |



| SNPs IDs             | Chromosome IDs | Chromosomes     | Physical positions (bp) | CDC Frontier genome (Reference genome) | (Pusa 1103 & HPNB) | (ILWC 46 & LPNB) | Sequence genome | Components of | Gene accession IDs | Putative functions                                             |
|----------------------|----------------|-----------------|-------------------------|----------------------------------------|--------------------|------------------|-----------------|---------------|--------------------|----------------------------------------------------------------|
| SNP_12550_A_35304207 | NC_021161.1    | Ca_Kabuli_Chr02 | 35304207                | GG                                     | AA                 | AA               | INTERGENIC      |               |                    |                                                                |
| SNP_12551_A_35304311 | NC_021161.1    | Ca_Kabuli_Chr02 | 35304311                | GG                                     | AA                 | AA               | INTERGENIC      |               |                    |                                                                |
| SNP_12552_A_35304603 | NC_021161.1    | Ca_Kabuli_Chr02 | 35304603                | CC                                     | TT                 | TT               | INTERGENIC      |               |                    |                                                                |
| SNP_12554_A_35304719 | NC_021161.1    | Ca_Kabuli_Chr02 | 35304719                | TT                                     | CC                 | CC               | INTERGENIC      |               |                    |                                                                |
| SNP_12555_A_35304722 | NC_021161.1    | Ca_Kabuli_Chr02 | 35304722                | TT                                     | CC                 | CC               | INTERGENIC      |               |                    |                                                                |
| SNP_12556_A_35304764 | NC_021161.1    | Ca_Kabuli_Chr02 | 35304764                | TT                                     | CC                 | CC               | INTERGENIC      |               |                    |                                                                |
| SNP_12557_A_35304962 | NC_021161.1    | Ca_Kabuli_Chr02 | 35304962                | GG                                     | TT                 | TT               | INTERGENIC      |               |                    |                                                                |
| SNP_12558_A_35305015 | NC_021161.1    | Ca_Kabuli_Chr02 | 35305015                | GG                                     | AA                 | AA               | INTERGENIC      |               |                    |                                                                |
| SNP_12559_A_35305138 | NC_021161.1    | Ca_Kabuli_Chr02 | 35305138                | AA                                     | GG                 | GG               | INTERGENIC      |               |                    |                                                                |
| SNP_12560_A_35305210 | NC_021161.1    | Ca_Kabuli_Chr02 | 35305210                | GG                                     | AA                 | AA               | INTERGENIC      |               |                    |                                                                |
| SNP_12561_A_35305399 | NC_021161.1    | Ca_Kabuli_Chr02 | 35305399                | CC                                     | TT                 | TT               | INTERGENIC      |               |                    |                                                                |
| SNP_12562_A_35305429 | NC_021161.1    | Ca_Kabuli_Chr02 | 35305429                | AA                                     | GG                 | GG               | INTERGENIC      |               |                    |                                                                |
| SNP_12563_A_35305584 | NC_021161.1    | Ca_Kabuli_Chr02 | 35305584                | AA                                     | GG                 | GG               | INTERGENIC      |               |                    |                                                                |
| SNP_12564_A_35306353 | NC_021161.1    | Ca_Kabuli_Chr02 | 35306353                | GG                                     | AA                 | AA               | INTERGENIC      |               |                    |                                                                |
| SNP_12565_A_35306374 | NC_021161.1    | Ca_Kabuli_Chr02 | 35306374                | TT                                     | CC                 | CC               | INTERGENIC      |               |                    |                                                                |
| SNP_12566_A_35313126 | NC_021161.1    | Ca_Kabuli_Chr02 | 35313126                | GG                                     | TT                 | TT               | INTERGENIC      |               |                    |                                                                |
| SNP_12567_A_35313198 | NC_021161.1    | Ca_Kabuli_Chr02 | 35313198                | TT                                     | GG                 | GG               | INTERGENIC      |               |                    |                                                                |
| SNP_12568_A_35313225 | NC_021161.1    | Ca_Kabuli_Chr02 | 35313225                | TT                                     | GG                 | GG               | INTERGENIC      |               |                    |                                                                |
| SNP_12569_A_35313337 | NC_021161.1    | Ca_Kabuli_Chr02 | 35313337                | TT                                     | AA                 | AA               | INTERGENIC      |               |                    |                                                                |
| SNP_12571_A_35457956 | NC_021161.1    | Ca_Kabuli_Chr02 | 35457956                | AA                                     | CC                 | CC               | INTERGENIC      |               |                    |                                                                |
| SNP_12572_A_35483289 | NC_021161.1    | Ca_Kabuli_Chr02 | 35483289                | TT                                     | CC                 | CC               | URR             | 101504128     |                    | meiotic recombination protein SPO11-1                          |
| SNP_12573_A_35580628 | NC_021161.1    | Ca_Kabuli_Chr02 | 35580628                | AA                                     | TT                 | TT               | URR             | 101514214     |                    | nicotinamide/nicotinic acid mononucleotide adenylyltransferase |

| SNPs IDs             | Chromosome IDs | Chromosomes     | Physical positions (bp) | CDC Frontier (Reference genome) | (Pusa 1103 & HPNB) | (ILWC 46 & LPNB) | Sequence Components of genome | Gene accession IDs | Putative functions                                             |
|----------------------|----------------|-----------------|-------------------------|---------------------------------|--------------------|------------------|-------------------------------|--------------------|----------------------------------------------------------------|
| SNP_12574_A_35580685 | NC_021161.1    | Ca_Kabuli_Chr02 | 35580685                | CC                              | GG                 | GG               | URR                           | 101514214          | nicotinamide/nicotinic acid mononucleotide adenylyltransferase |
| SNP_12575_A_35580704 | NC_021161.1    | Ca_Kabuli_Chr02 | 35580704                | CC                              | AA                 | AA               | URR                           | 101514214          | nicotinamide/nicotinic acid mononucleotide adenylyltransferase |
| SNP_12576_A_35580924 | NC_021161.1    | Ca_Kabuli_Chr02 | 35580924                | GG                              | AA                 | AA               | URR                           | 101514214          | nicotinamide/nicotinic acid mononucleotide adenylyltransferase |
| SNP_12577_A_35582139 | NC_021161.1    | Ca_Kabuli_Chr02 | 35582139                | TT                              | CC                 | CC               | INTERGENIC                    |                    |                                                                |
| SNP_12578_A_35582151 | NC_021161.1    | Ca_Kabuli_Chr02 | 35582151                | TT                              | GG                 | GG               | INTERGENIC                    |                    |                                                                |
| SNP_12579_A_35634400 | NC_021161.1    | Ca_Kabuli_Chr02 | 35634400                | TT                              | GG                 | GG               | INTERGENIC                    |                    |                                                                |
| SNP_12580_A_35658957 | NC_021161.1    | Ca_Kabuli_Chr02 | 35658957                | GG                              | AA                 | AA               | INTERGENIC                    |                    |                                                                |
| SNP_12581_A_35711922 | NC_021161.1    | Ca_Kabuli_Chr02 | 35711922                | TT                              | CC                 | CC               | URR                           | 101491102          | tubulin-folding cofactor A                                     |
| SNP_12582_A_35848990 | NC_021161.1    | Ca_Kabuli_Chr02 | 35848990                | AA                              | GG                 | GG               | INTERGENIC                    |                    |                                                                |
| SNP_12583_A_35878088 | NC_021161.1    | Ca_Kabuli_Chr02 | 35878088                | GG                              | AA                 | AA               | INTRON                        | 101506060          | aspartic proteinase-like protein 2                             |
| SNP_12584_A_35878257 | NC_021161.1    | Ca_Kabuli_Chr02 | 35878257                | TT                              | CC                 | CC               | NON_SYNONYMOUS_CODING         | 101506060          | aspartic proteinase-like protein 2                             |
| SNP_12585_A_35878302 | NC_021161.1    | Ca_Kabuli_Chr02 | 35878302                | CC                              | TT                 | TT               | INTRON                        | 101506060          | aspartic proteinase-like protein 2                             |
| SNP_12586_A_35878342 | NC_021161.1    | Ca_Kabuli_Chr02 | 35878342                | TT                              | GG                 | GG               | INTRON                        | 101506060          | aspartic proteinase-like protein 2                             |
| SNP_12587_A_35878427 | NC_021161.1    | Ca_Kabuli_Chr02 | 35878427                | CC                              | TT                 | TT               | SYNONYMOUS_CODING             | 101506060          | aspartic proteinase-like protein 2                             |
| SNP_12588_A_35878458 | NC_021161.1    | Ca_Kabuli_Chr02 | 35878458                | TT                              | AA                 | AA               | NON_SYNONYMOUS_CODING         | 101506060          | aspartic proteinase-like protein 2                             |
| SNP_12589_A_35878527 | NC_021161.1    | Ca_Kabuli_Chr02 | 35878527                | TT                              | AA                 | AA               | NON_SYNONYMOUS_CODING         | 101506060          | aspartic proteinase-like protein 2                             |
| SNP_12590_A_35878767 | NC_021161.1    | Ca_Kabuli_Chr02 | 35878767                | CC                              | GG                 | GG               | URR                           | 101506060          | aspartic proteinase-like protein 2                             |
| SNP_12591_A_35901119 | NC_021161.1    | Ca_Kabuli_Chr02 | 35901119                | TT                              | CC                 | CC               | URR                           | 101499331          | neutral ceramidase-like                                        |
| SNP_12592_A_35901124 | NC_021161.1    | Ca_Kabuli_Chr02 | 35901124                | TT                              | AA                 | AA               | URR                           | 101499331          | neutral ceramidase-like                                        |
| SNP_12593_A_35901139 | NC_021161.1    | Ca_Kabuli_Chr02 | 35901139                | AA                              | CC                 | CC               | URR                           | 101499331          | neutral ceramidase-like                                        |
| SNP_12594_A_35925516 | NC_021161.1    | Ca_Kabuli_Chr02 | 35925516                | TT                              | CC                 | CC               | INTRON                        | 101506374          | transcriptional regulator STERILE APETALA                      |
| SNP_12595_A_35944781 | NC_021161.1    | Ca_Kabuli_Chr02 | 35944781                | CC                              | TT                 | TT               | SYNONYMOUS_CODING             | 101506703          | phytochromobilin:ferredoxin oxidoreductase, chloroplastic      |

| SNPs IDs             | Chromosome IDs | Chromosomes     | Physical positions (bp) | CDC Frontier (Reference genome) | (Pusa 1103 & HPNB) | (ILWC 46 & LPNB) | Sequence Components of genome | Gene accession IDs | Putative functions                                        |
|----------------------|----------------|-----------------|-------------------------|---------------------------------|--------------------|------------------|-------------------------------|--------------------|-----------------------------------------------------------|
| SNP_12596_A_35944799 | NC_021161.1    | Ca_Kabuli_Chr02 | 35944799                | GG                              | AA                 | AA               | SYNONYMOUS_CODING             | 101506703          | phytochromobilin:ferredoxin oxidoreductase, chloroplastic |
| SNP_12597_A_35944816 | NC_021161.1    | Ca_Kabuli_Chr02 | 35944816                | AA                              | CC                 | CC               | NON_SYNONYMOUS_CODING         | 101506703          | phytochromobilin:ferredoxin oxidoreductase, chloroplastic |
| SNP_12598_A_35944831 | NC_021161.1    | Ca_Kabuli_Chr02 | 35944831                | CC                              | TT                 | TT               | NON_SYNONYMOUS_CODING         | 101506703          | phytochromobilin:ferredoxin oxidoreductase, chloroplastic |
| SNP_12599_A_35944834 | NC_021161.1    | Ca_Kabuli_Chr02 | 35944834                | CC                              | TT                 | TT               | NON_SYNONYMOUS_CODING         | 101506703          | phytochromobilin:ferredoxin oxidoreductase, chloroplastic |
| SNP_12600_A_35944855 | NC_021161.1    | Ca_Kabuli_Chr02 | 35944855                | CC                              | TT                 | TT               | NON_SYNONYMOUS_CODING         | 101506703          | phytochromobilin:ferredoxin oxidoreductase, chloroplastic |
| SNP_12601_A_35944897 | NC_021161.1    | Ca_Kabuli_Chr02 | 35944897                | TT                              | AA                 | AA               | INTERGENIC                    |                    |                                                           |
| SNP_12602_A_35944958 | NC_021161.1    | Ca_Kabuli_Chr02 | 35944958                | TT                              | CC                 | CC               | INTERGENIC                    |                    |                                                           |
| SNP_12604_A_35945012 | NC_021161.1    | Ca_Kabuli_Chr02 | 35945012                | AA                              | GG                 | GG               | INTERGENIC                    |                    |                                                           |
| SNP_12605_A_35945028 | NC_021161.1    | Ca_Kabuli_Chr02 | 35945028                | TT                              | AA                 | AA               | INTERGENIC                    |                    |                                                           |
| SNP_12606_A_35945051 | NC_021161.1    | Ca_Kabuli_Chr02 | 35945051                | CC                              | AA                 | AA               | INTERGENIC                    |                    |                                                           |
| SNP_12607_A_35945091 | NC_021161.1    | Ca_Kabuli_Chr02 | 35945091                | CC                              | AA                 | AA               | INTERGENIC                    |                    |                                                           |
| SNP_12608_A_35945161 | NC_021161.1    | Ca_Kabuli_Chr02 | 35945161                | AA                              | TT                 | TT               | INTERGENIC                    |                    |                                                           |
| SNP_12609_A_35945220 | NC_021161.1    | Ca_Kabuli_Chr02 | 35945220                | AA                              | CC                 | CC               | INTERGENIC                    |                    |                                                           |
| SNP_12610_A_35945284 | NC_021161.1    | Ca_Kabuli_Chr02 | 35945284                | AA                              | GG                 | GG               | INTERGENIC                    |                    |                                                           |
| SNP_12611_A_35945287 | NC_021161.1    | Ca_Kabuli_Chr02 | 35945287                | AA                              | GG                 | GG               | INTERGENIC                    |                    |                                                           |
| SNP_12612_A_35963501 | NC_021161.1    | Ca_Kabuli_Chr02 | 35963501                | TT                              | CC                 | CC               | INTERGENIC                    |                    |                                                           |
| SNP_12613_A_35983927 | NC_021161.1    | Ca_Kabuli_Chr02 | 35983927                | AA                              | CC                 | CC               | INTERGENIC                    |                    |                                                           |
| SNP_12616_A_36194474 | NC_021161.1    | Ca_Kabuli_Chr02 | 36194474                | AA                              | GG                 | GG               | INTERGENIC                    |                    |                                                           |
| SNP_12618_A_36235576 | NC_021161.1    | Ca_Kabuli_Chr02 | 36235576                | TT                              | AA                 | AA               | DRR                           | 101489159          | uncharacterized LOC101489159                              |
| SNP_12619_A_36321382 | NC_021161.1    | Ca_Kabuli_Chr02 | 36321382                | AA                              | TT                 | TT               | INTRON                        | 101492728          | uncharacterized LOC101492728                              |
| SNP_12620_A_36555130 | NC_021161.1    | Ca_Kabuli_Chr02 | 36555130                | GG                              | AA                 | AA               | INTRON                        | 101501873          | protein FAR1-RELATED SEQUENCE 9                           |
| SNP_12621_A_36624181 | NC_021161.1    | Ca_Kabuli_Chr02 | 36624181                | GG                              | TT                 | TT               | INTERGENIC                    |                    |                                                           |

| SNPs IDs             | Chromosome IDs | Chromosomes     | Physical positions (bp) | CDC Frontier (Reference genome) | (Pusa 1103 & HPNB) | (ILWC 46 & LPNB) | Sequence Components of genome | Gene accession IDs | Putative functions                      |
|----------------------|----------------|-----------------|-------------------------|---------------------------------|--------------------|------------------|-------------------------------|--------------------|-----------------------------------------|
| SNP_12622_A_36624256 | NC_021161.1    | Ca_Kabuli_Chr02 | 36624256                | TT                              | CC                 | CC               | INTERGENIC                    |                    |                                         |
| SNP_12623_A_36624276 | NC_021161.1    | Ca_Kabuli_Chr02 | 36624276                | AA                              | GG                 | GG               | INTERGENIC                    |                    |                                         |
| SNP_12624_A_36624397 | NC_021161.1    | Ca_Kabuli_Chr02 | 36624397                | AA                              | GG                 | GG               | INTERGENIC                    |                    |                                         |
| SNP_12625_A_36624408 | NC_021161.1    | Ca_Kabuli_Chr02 | 36624408                | TT                              | GG                 | GG               | INTERGENIC                    |                    |                                         |
| SNP_12626_A_36624497 | NC_021161.1    | Ca_Kabuli_Chr02 | 36624497                | TT                              | CC                 | CC               | INTERGENIC                    |                    |                                         |
| SNP_12627_A_36624552 | NC_021161.1    | Ca_Kabuli_Chr02 | 36624552                | TT                              | CC                 | CC               | INTERGENIC                    |                    |                                         |
| SNP_12628_A_4730     | NC_021162.1    | Ca_Kabuli_Chr03 | 4730                    | TT                              | AA                 | AA               | INTERGENIC                    |                    |                                         |
| SNP_12629_A_40641    | NC_021162.1    | Ca_Kabuli_Chr03 | 40641                   | GG                              | AA                 | AA               | URR                           | 101510012          | uncharacterized LOC101510012            |
| SNP_12631_A_71753    | NC_021162.1    | Ca_Kabuli_Chr03 | 71753                   | TT                              | GG                 | GG               | DRR                           | 101511294          | uncharacterized LOC101511294            |
| SNP_12632_A_87442    | NC_021162.1    | Ca_Kabuli_Chr03 | 87442                   | CC                              | GG                 | AA               | INTERGENIC                    |                    |                                         |
| SNP_12633_A_87856    | NC_021162.1    | Ca_Kabuli_Chr03 | 87856                   | GG                              | AA                 | AA               | INTERGENIC                    |                    |                                         |
| SNP_12635_A_109292   | NC_021162.1    | Ca_Kabuli_Chr03 | 109292                  | TT                              | GG                 | GG               | INTRON                        | 101511936          | bidirectional sugar transporter N3-like |
| SNP_12636_A_123913   | NC_021162.1    | Ca_Kabuli_Chr03 | 123913                  | TT                              | CC                 | CC               | INTERGENIC                    |                    |                                         |
| SNP_12637_A_124514   | NC_021162.1    | Ca_Kabuli_Chr03 | 124514                  | GG                              | TT                 | TT               | INTERGENIC                    |                    |                                         |
| SNP_12639_A_160944   | NC_021162.1    | Ca_Kabuli_Chr03 | 160944                  | AA                              | GG                 | GG               | INTERGENIC                    |                    |                                         |
| SNP_12640_A_178971   | NC_021162.1    | Ca_Kabuli_Chr03 | 178971                  | TT                              | GG                 | GG               | INTERGENIC                    |                    |                                         |
| SNP_12641_A_183983   | NC_021162.1    | Ca_Kabuli_Chr03 | 183983                  | TT                              | AA                 | AA               | INTERGENIC                    |                    |                                         |
| SNP_12642_A_183985   | NC_021162.1    | Ca_Kabuli_Chr03 | 183985                  | TT                              | CC                 | CC               | INTERGENIC                    |                    |                                         |
| SNP_12643_A_189842   | NC_021162.1    | Ca_Kabuli_Chr03 | 189842                  | AA                              | CC                 | CC               | INTERGENIC                    |                    |                                         |
| SNP_12644_A_189869   | NC_021162.1    | Ca_Kabuli_Chr03 | 189869                  | CC                              | TT                 | TT               | INTERGENIC                    |                    |                                         |
| SNP_12645_A_189870   | NC_021162.1    | Ca_Kabuli_Chr03 | 189870                  | TT                              | CC                 | CC               | INTERGENIC                    |                    |                                         |
| SNP_12646_A_189902   | NC_021162.1    | Ca_Kabuli_Chr03 | 189902                  | CC                              | AA                 | AA               | INTERGENIC                    |                    |                                         |

| SNPs IDs           | Chromosome IDs | Chromosomes     | Physical positions (bp) | CDC Frontier genome (Reference genome) | (Pusa 1103 & HPNB) | (ILWC 46 & LPNB) | Sequence Components of genome | Gene accession IDs | Putative functions              |
|--------------------|----------------|-----------------|-------------------------|----------------------------------------|--------------------|------------------|-------------------------------|--------------------|---------------------------------|
| SNP_12647_A_189916 | NC_021162.1    | Ca_Kabuli_Chr03 | 189916                  | AA                                     | GG                 | GG               | INTERGENIC                    |                    |                                 |
| SNP_12648_A_193234 | NC_021162.1    | Ca_Kabuli_Chr03 | 193234                  | AA                                     | GG                 | GG               | INTERGENIC                    |                    |                                 |
| SNP_12650_A_251369 | NC_021162.1    | Ca_Kabuli_Chr03 | 251369                  | AA                                     | GG                 | GG               | INTERGENIC                    |                    |                                 |
| SNP_12651_A_277453 | NC_021162.1    | Ca_Kabuli_Chr03 | 277453                  | TT                                     | GG                 | GG               | INTERGENIC                    |                    |                                 |
| SNP_12652_A_277720 | NC_021162.1    | Ca_Kabuli_Chr03 | 277720                  | AA                                     | GG                 | GG               | INTERGENIC                    |                    |                                 |
| SNP_12653_A_282969 | NC_021162.1    | Ca_Kabuli_Chr03 | 282969                  | TT                                     | CC                 | CC               | INTERGENIC                    |                    |                                 |
| SNP_12654_A_335984 | NC_021162.1    | Ca_Kabuli_Chr03 | 335984                  | AA                                     | GG                 | GG               | INTERGENIC                    |                    |                                 |
| SNP_12655_A_335987 | NC_021162.1    | Ca_Kabuli_Chr03 | 335987                  | CC                                     | TT                 | TT               | INTERGENIC                    |                    |                                 |
| SNP_12656_A_335993 | NC_021162.1    | Ca_Kabuli_Chr03 | 335993                  | GG                                     | TT                 | AA               | INTERGENIC                    |                    |                                 |
| SNP_12657_A_339173 | NC_021162.1    | Ca_Kabuli_Chr03 | 339173                  | CC                                     | TT                 | TT               | INTERGENIC                    |                    |                                 |
| SNP_12658_A_358390 | NC_021162.1    | Ca_Kabuli_Chr03 | 358390                  | AA                                     | CC                 | CC               | INTERGENIC                    |                    |                                 |
| SNP_12659_A_365192 | NC_021162.1    | Ca_Kabuli_Chr03 | 365192                  | TT                                     | AA                 | AA               | NON_SYNONYMOUS_CODING         | 101489581          | vacuolar-processing enzyme-like |
| SNP_12660_A_365305 | NC_021162.1    | Ca_Kabuli_Chr03 | 365305                  | CC                                     | TT                 | TT               | INTRON                        | 101489581          | vacuolar-processing enzyme-like |
| SNP_12661_A_365418 | NC_021162.1    | Ca_Kabuli_Chr03 | 365418                  | AA                                     | TT                 | TT               | INTRON                        | 101489581          | vacuolar-processing enzyme-like |
| SNP_12662_A_371696 | NC_021162.1    | Ca_Kabuli_Chr03 | 371696                  | AA                                     | GG                 | GG               | INTERGENIC                    |                    |                                 |
| SNP_12663_A_376342 | NC_021162.1    | Ca_Kabuli_Chr03 | 376342                  | GG                                     | TT                 | TT               | INTERGENIC                    |                    |                                 |
| SNP_12664_A_376712 | NC_021162.1    | Ca_Kabuli_Chr03 | 376712                  | TT                                     | CC                 | CC               | INTERGENIC                    |                    |                                 |
| SNP_12665_A_380777 | NC_021162.1    | Ca_Kabuli_Chr03 | 380777                  | AA                                     | GG                 | GG               | INTERGENIC                    |                    |                                 |
| SNP_12667_A_390649 | NC_021162.1    | Ca_Kabuli_Chr03 | 390649                  | AA                                     | GG                 | GG               | INTERGENIC                    |                    |                                 |
| SNP_12668_A_395820 | NC_021162.1    | Ca_Kabuli_Chr03 | 395820                  | GG                                     | AA                 | AA               | INTERGENIC                    |                    |                                 |
| SNP_12669_A_415305 | NC_021162.1    | Ca_Kabuli_Chr03 | 415305                  | GG                                     | AA                 | AA               | INTRON                        | 101490235          | vacuolar-processing enzyme-like |
| SNP_12670_A_415434 | NC_021162.1    | Ca_Kabuli_Chr03 | 415434                  | CC                                     | TT                 | TT               | INTRON                        | 101490235          | vacuolar-processing enzyme-like |

| SNPs IDs           | Chromosome IDs | Chromosomes     | Physical positions (bp) | CDC Frontier (Reference genome) | (Pusa 1103 & HPNB) | (ILWC 46 & LPNB) | Sequence Components of genome | Gene accession IDs | Putative functions                        |
|--------------------|----------------|-----------------|-------------------------|---------------------------------|--------------------|------------------|-------------------------------|--------------------|-------------------------------------------|
| SNP_12671_A_415494 | NC_021162.1    | Ca_Kabuli_Chr03 | 415494                  | TT                              | GG                 | GG               | INTRON                        | 101490235          | vacuolar-processing enzyme-like           |
| SNP_12672_A_426792 | NC_021162.1    | Ca_Kabuli_Chr03 | 426792                  | GG                              | AA                 | AA               | DRR                           | 101490878          | uncharacterized LOC101490878              |
| SNP_12673_A_427697 | NC_021162.1    | Ca_Kabuli_Chr03 | 427697                  | CC                              | TT                 | TT               | NON_SYNONYMOUS_CODING         | 101490878          | uncharacterized LOC101490878              |
| SNP_12674_A_450062 | NC_021162.1    | Ca_Kabuli_Chr03 | 450062                  | GG                              | AA                 | AA               | INTERGENIC                    |                    |                                           |
| SNP_12675_A_450073 | NC_021162.1    | Ca_Kabuli_Chr03 | 450073                  | GG                              | TT                 | TT               | INTERGENIC                    |                    |                                           |
| SNP_12677_A_451700 | NC_021162.1    | Ca_Kabuli_Chr03 | 451700                  | GG                              | AA                 | AA               | DRR                           | 101491197          | F-box/kelch-repeat protein At3g23880-like |
| SNP_12678_A_451980 | NC_021162.1    | Ca_Kabuli_Chr03 | 451980                  | CC                              | AA                 | AA               | DRR                           | 101491197          | F-box/kelch-repeat protein At3g23880-like |
| SNP_12679_A_452090 | NC_021162.1    | Ca_Kabuli_Chr03 | 452090                  | TT                              | AA                 | AA               | DRR                           | 101491197          | F-box/kelch-repeat protein At3g23880-like |
| SNP_12680_A_452114 | NC_021162.1    | Ca_Kabuli_Chr03 | 452114                  | CC                              | TT                 | TT               | DRR                           | 101491197          | F-box/kelch-repeat protein At3g23880-like |
| SNP_12681_A_454268 | NC_021162.1    | Ca_Kabuli_Chr03 | 454268                  | AA                              | GG                 | GG               | SYNONYMOUS_CODING             | 101491197          | F-box/kelch-repeat protein At3g23880-like |
| SNP_12682_A_454271 | NC_021162.1    | Ca_Kabuli_Chr03 | 454271                  | GG                              | AA                 | AA               | SYNONYMOUS_CODING             | 101491197          | F-box/kelch-repeat protein At3g23880-like |
| SNP_12685_A_454727 | NC_021162.1    | Ca_Kabuli_Chr03 | 454727                  | CC                              | TT                 | TT               | URR                           | 101491197          | F-box/kelch-repeat protein At3g23880-like |
| SNP_12686_A_454738 | NC_021162.1    | Ca_Kabuli_Chr03 | 454738                  | TT                              | CC                 | CC               | URR                           | 101491197          | F-box/kelch-repeat protein At3g23880-like |
| SNP_12687_A_454851 | NC_021162.1    | Ca_Kabuli_Chr03 | 454851                  | GG                              | AA                 | AA               | URR                           | 101491197          | F-box/kelch-repeat protein At3g23880-like |
| SNP_12688_A_454862 | NC_021162.1    | Ca_Kabuli_Chr03 | 454862                  | AA                              | GG                 | GG               | URR                           | 101491197          | F-box/kelch-repeat protein At3g23880-like |
| SNP_12691_A_580550 | NC_021162.1    | Ca_Kabuli_Chr03 | 580550                  | GG                              | CC                 | CC               | INTERGENIC                    |                    |                                           |
| SNP_12693_A_635196 | NC_021162.1    | Ca_Kabuli_Chr03 | 635196                  | AA                              | GG                 | GG               | INTERGENIC                    |                    |                                           |
| SNP_12694_A_635197 | NC_021162.1    | Ca_Kabuli_Chr03 | 635197                  | AA                              | TT                 | TT               | INTERGENIC                    |                    |                                           |
| SNP_12695_A_646923 | NC_021162.1    | Ca_Kabuli_Chr03 | 646923                  | AA                              | GG                 | GG               | INTERGENIC                    |                    |                                           |
| SNP_12696_A_647432 | NC_021162.1    | Ca_Kabuli_Chr03 | 647432                  | CC                              | TT                 | TT               | INTERGENIC                    |                    |                                           |
| SNP_12697_A_647437 | NC_021162.1    | Ca_Kabuli_Chr03 | 647437                  | GG                              | AA                 | AA               | INTERGENIC                    |                    |                                           |
| SNP_12698_A_647492 | NC_021162.1    | Ca_Kabuli_Chr03 | 647492                  | CC                              | AA                 | AA               | INTERGENIC                    |                    |                                           |

| SNPs IDs           | Chromosome IDs | Chromosomes     | Physical positions (bp) | CDC Frontier (Reference genome) | (Pusa 1103 & HPNB) | (ILWC 46 & LPNB) | Sequence Components of genome | Gene accession IDs | Putative functions           |
|--------------------|----------------|-----------------|-------------------------|---------------------------------|--------------------|------------------|-------------------------------|--------------------|------------------------------|
| SNP_12699_A_671284 | NC_021162.1    | Ca_Kabuli_Chr03 | 671284                  | TT                              | CC                 | CC               | SYNONYMOUS_CODING             | 101498348          | uncharacterized LOC101498348 |
| SNP_12700_A_671321 | NC_021162.1    | Ca_Kabuli_Chr03 | 671321                  | GG                              | AA                 | AA               | NON_SYNONYMOUS_CODING         | 101498348          | uncharacterized LOC101498348 |
| SNP_12701_A_671376 | NC_021162.1    | Ca_Kabuli_Chr03 | 671376                  | TT                              | CC                 | CC               | INTRON                        | 101498348          | uncharacterized LOC101498348 |
| SNP_12702_A_671392 | NC_021162.1    | Ca_Kabuli_Chr03 | 671392                  | TT                              | GG                 | GG               | INTRON                        | 101498348          | uncharacterized LOC101498348 |
| SNP_12703_A_671399 | NC_021162.1    | Ca_Kabuli_Chr03 | 671399                  | GG                              | CC                 | CC               | INTRON                        | 101498348          | uncharacterized LOC101498348 |
| SNP_12704_A_671412 | NC_021162.1    | Ca_Kabuli_Chr03 | 671412                  | TT                              | AA                 | AA               | INTRON                        | 101498348          | uncharacterized LOC101498348 |
| SNP_12705_A_671451 | NC_021162.1    | Ca_Kabuli_Chr03 | 671451                  | AA                              | GG                 | GG               | INTRON                        | 101498348          | uncharacterized LOC101498348 |
| SNP_12706_A_671549 | NC_021162.1    | Ca_Kabuli_Chr03 | 671549                  | TT                              | CC                 | CC               | NON_SYNONYMOUS_CODING         | 101498348          | uncharacterized LOC101498348 |
| SNP_12707_A_671633 | NC_021162.1    | Ca_Kabuli_Chr03 | 671633                  | TT                              | CC                 | CC               | NON_SYNONYMOUS_CODING         | 101498348          | uncharacterized LOC101498348 |
| SNP_12708_A_675629 | NC_021162.1    | Ca_Kabuli_Chr03 | 675629                  | TT                              | CC                 | CC               | URR                           | 101498348          | uncharacterized LOC101498348 |
| SNP_12710_A_745505 | NC_021162.1    | Ca_Kabuli_Chr03 | 745505                  | CC                              | GG                 | GG               | INTERGENIC                    |                    |                              |
| SNP_12711_A_753641 | NC_021162.1    | Ca_Kabuli_Chr03 | 753641                  | CC                              | TT                 | TT               | INTERGENIC                    |                    |                              |
| SNP_12712_A_761747 | NC_021162.1    | Ca_Kabuli_Chr03 | 761747                  | AA                              | GG                 | GG               | INTERGENIC                    |                    |                              |
| SNP_12715_A_873251 | NC_021162.1    | Ca_Kabuli_Chr03 | 873251                  | AA                              | TT                 | TT               | INTERGENIC                    |                    |                              |
| SNP_12716_A_897520 | NC_021162.1    | Ca_Kabuli_Chr03 | 897520                  | GG                              | AA                 | AA               | INTERGENIC                    |                    |                              |
| SNP_12717_A_898747 | NC_021162.1    | Ca_Kabuli_Chr03 | 898747                  | GG                              | CC                 | CC               | INTERGENIC                    |                    |                              |
| SNP_12718_A_917627 | NC_021162.1    | Ca_Kabuli_Chr03 | 917627                  | TT                              | CC                 | CC               | INTERGENIC                    |                    |                              |
| SNP_12719_A_922553 | NC_021162.1    | Ca_Kabuli_Chr03 | 922553                  | AA                              | GG                 | GG               | INTERGENIC                    |                    |                              |
| SNP_12720_A_922557 | NC_021162.1    | Ca_Kabuli_Chr03 | 922557                  | AA                              | TT                 | TT               | INTERGENIC                    |                    |                              |
| SNP_12721_A_922645 | NC_021162.1    | Ca_Kabuli_Chr03 | 922645                  | TT                              | CC                 | CC               | INTERGENIC                    |                    |                              |
| SNP_12722_A_924803 | NC_021162.1    | Ca_Kabuli_Chr03 | 924803                  | AA                              | GG                 | GG               | INTERGENIC                    |                    |                              |
| SNP_12723_A_924839 | NC_021162.1    | Ca_Kabuli_Chr03 | 924839                  | AA                              | GG                 | GG               | INTERGENIC                    |                    |                              |

| SNPs IDs            | Chromosome IDs | Chromosomes     | Physical positions (bp) | CDC Frontier (Reference genome) | (Pusa 1103 & HPNB) | (ILWC 46 & LPNB) | Sequence Components of genome | Gene accession IDs | Putative functions           |
|---------------------|----------------|-----------------|-------------------------|---------------------------------|--------------------|------------------|-------------------------------|--------------------|------------------------------|
| SNP_12724_A_924929  | NC_021162.1    | Ca_Kabuli_Chr03 | 924929                  | AA                              | TT                 | TT               | INTERGENIC                    |                    |                              |
| SNP_12725_A_925169  | NC_021162.1    | Ca_Kabuli_Chr03 | 925169                  | CC                              | TT                 | TT               | INTERGENIC                    |                    |                              |
| SNP_12726_A_925181  | NC_021162.1    | Ca_Kabuli_Chr03 | 925181                  | GG                              | TT                 | TT               | DRR                           | 101501558          | uncharacterized LOC101501558 |
| SNP_12727_A_925596  | NC_021162.1    | Ca_Kabuli_Chr03 | 925596                  | AA                              | GG                 | GG               | DRR                           | 101501558          | uncharacterized LOC101501558 |
| SNP_12728_A_925645  | NC_021162.1    | Ca_Kabuli_Chr03 | 925645                  | AA                              | GG                 | GG               | DRR                           | 101501558          | uncharacterized LOC101501558 |
| SNP_12729_A_938951  | NC_021162.1    | Ca_Kabuli_Chr03 | 938951                  | AA                              | GG                 | GG               | INTERGENIC                    |                    |                              |
| SNP_12731_A_939100  | NC_021162.1    | Ca_Kabuli_Chr03 | 939100                  | AA                              | GG                 | GG               | INTERGENIC                    |                    |                              |
| SNP_12732_A_939166  | NC_021162.1    | Ca_Kabuli_Chr03 | 939166                  | GG                              | TT                 | TT               | INTERGENIC                    |                    |                              |
| SNP_12733_A_939396  | NC_021162.1    | Ca_Kabuli_Chr03 | 939396                  | GG                              | AA                 | AA               | INTERGENIC                    |                    |                              |
| SNP_12735_A_959118  | NC_021162.1    | Ca_Kabuli_Chr03 | 959118                  | TT                              | GG                 | GG               | INTERGENIC                    |                    |                              |
| SNP_12736_A_959400  | NC_021162.1    | Ca_Kabuli_Chr03 | 959400                  | TT                              | CC                 | CC               | INTERGENIC                    |                    |                              |
| SNP_12737_A_962517  | NC_021162.1    | Ca_Kabuli_Chr03 | 962517                  | GG                              | AA                 | AA               | INTERGENIC                    |                    |                              |
| SNP_12738_A_962645  | NC_021162.1    | Ca_Kabuli_Chr03 | 962645                  | TT                              | AA                 | AA               | INTERGENIC                    |                    |                              |
| SNP_12739_A_962951  | NC_021162.1    | Ca_Kabuli_Chr03 | 962951                  | GG                              | AA                 | AA               | INTERGENIC                    |                    |                              |
| SNP_12740_A_964568  | NC_021162.1    | Ca_Kabuli_Chr03 | 964568                  | CC                              | TT                 | TT               | INTERGENIC                    |                    |                              |
| SNP_12741_A_968322  | NC_021162.1    | Ca_Kabuli_Chr03 | 968322                  | GG                              | TT                 | TT               | INTERGENIC                    |                    |                              |
| SNP_12742_A_993659  | NC_021162.1    | Ca_Kabuli_Chr03 | 993659                  | TT                              | CC                 | CC               | INTERGENIC                    |                    |                              |
| SNP_12743_A_1000952 | NC_021162.1    | Ca_Kabuli_Chr03 | 1000952                 | TT                              | GG                 | GG               | INTERGENIC                    |                    |                              |
| SNP_12744_A_1005009 | NC_021162.1    | Ca_Kabuli_Chr03 | 1005009                 | GG                              | AA                 | AA               | INTERGENIC                    |                    |                              |
| SNP_12745_A_1005340 | NC_021162.1    | Ca_Kabuli_Chr03 | 1005340                 | CC                              | AA                 | AA               | INTERGENIC                    |                    |                              |
| SNP_12746_A_1005376 | NC_021162.1    | Ca_Kabuli_Chr03 | 1005376                 | AA                              | GG                 | GG               | INTERGENIC                    |                    |                              |
| SNP_12747_A_1005431 | NC_021162.1    | Ca_Kabuli_Chr03 | 1005431                 | AA                              | GG                 | GG               | INTERGENIC                    |                    |                              |



| SNPs IDs            | Chromosome IDs | Chromosomes     | Physical positions (bp) | CDC Frontier genome (Reference genome) | (Pusa 1103 & HPNB) | (ILWC 46 & LPNB) | Sequence genome | Components of | Gene accession IDs | Putative functions |
|---------------------|----------------|-----------------|-------------------------|----------------------------------------|--------------------|------------------|-----------------|---------------|--------------------|--------------------|
| SNP_12748_A_1038194 | NC_021162.1    | Ca_Kabuli_Chr03 | 1038194                 | AA                                     | GG                 | GG               | INTERGENIC      |               |                    |                    |
| SNP_12749_A_1062591 | NC_021162.1    | Ca_Kabuli_Chr03 | 1062591                 | GG                                     | AA                 | AA               | INTERGENIC      |               |                    |                    |
| SNP_12750_A_1063130 | NC_021162.1    | Ca_Kabuli_Chr03 | 1063130                 | AA                                     | CC                 | CC               | INTERGENIC      |               |                    |                    |
| SNP_12751_A_1063148 | NC_021162.1    | Ca_Kabuli_Chr03 | 1063148                 | TT                                     | CC                 | CC               | INTERGENIC      |               |                    |                    |
| SNP_12752_A_1074556 | NC_021162.1    | Ca_Kabuli_Chr03 | 1074556                 | AA                                     | GG                 | GG               | INTERGENIC      |               |                    |                    |
| SNP_12753_A_1111448 | NC_021162.1    | Ca_Kabuli_Chr03 | 1111448                 | AA                                     | GG                 | GG               | INTERGENIC      |               |                    |                    |
| SNP_12754_A_1119339 | NC_021162.1    | Ca_Kabuli_Chr03 | 1119339                 | TT                                     | CC                 | CC               | INTERGENIC      |               |                    |                    |
| SNP_12755_A_1119346 | NC_021162.1    | Ca_Kabuli_Chr03 | 1119346                 | AA                                     | TT                 | TT               | INTERGENIC      |               |                    |                    |
| SNP_12758_A_1175415 | NC_021162.1    | Ca_Kabuli_Chr03 | 1175415                 | TT                                     | GG                 | GG               | INTERGENIC      |               |                    |                    |
| SNP_12759_A_1175443 | NC_021162.1    | Ca_Kabuli_Chr03 | 1175443                 | AA                                     | CC                 | CC               | INTERGENIC      |               |                    |                    |
| SNP_12760_A_1175453 | NC_021162.1    | Ca_Kabuli_Chr03 | 1175453                 | TT                                     | GG                 | GG               | INTERGENIC      |               |                    |                    |
| SNP_12761_A_1175485 | NC_021162.1    | Ca_Kabuli_Chr03 | 1175485                 | TT                                     | CC                 | CC               | INTERGENIC      |               |                    |                    |
| SNP_12762_A_1175486 | NC_021162.1    | Ca_Kabuli_Chr03 | 1175486                 | AA                                     | TT                 | TT               | INTERGENIC      |               |                    |                    |
| SNP_12763_A_1175538 | NC_021162.1    | Ca_Kabuli_Chr03 | 1175538                 | AA                                     | CC                 | CC               | INTERGENIC      |               |                    |                    |
| SNP_12764_A_1175761 | NC_021162.1    | Ca_Kabuli_Chr03 | 1175761                 | AA                                     | GG                 | GG               | INTERGENIC      |               |                    |                    |
| SNP_12765_A_1175791 | NC_021162.1    | Ca_Kabuli_Chr03 | 1175791                 | AA                                     | TT                 | TT               | INTERGENIC      |               |                    |                    |
| SNP_12766_A_1175911 | NC_021162.1    | Ca_Kabuli_Chr03 | 1175911                 | AA                                     | GG                 | GG               | INTERGENIC      |               |                    |                    |
| SNP_12767_A_1185573 | NC_021162.1    | Ca_Kabuli_Chr03 | 1185573                 | CC                                     | TT                 | TT               | INTERGENIC      |               |                    |                    |
| SNP_12768_A_1185584 | NC_021162.1    | Ca_Kabuli_Chr03 | 1185584                 | TT                                     | CC                 | CC               | INTERGENIC      |               |                    |                    |
| SNP_12769_A_1185787 | NC_021162.1    | Ca_Kabuli_Chr03 | 1185787                 | TT                                     | AA                 | AA               | INTERGENIC      |               |                    |                    |
| SNP_12770_A_1185903 | NC_021162.1    | Ca_Kabuli_Chr03 | 1185903                 | GG                                     | TT                 | TT               | INTERGENIC      |               |                    |                    |
| SNP_12771_A_1185904 | NC_021162.1    | Ca_Kabuli_Chr03 | 1185904                 | GG                                     | AA                 | AA               | INTERGENIC      |               |                    |                    |

| SNPs IDs            | Chromosome IDs | Chromosomes     | Physical positions (bp) | CDC Frontier genome (Reference genome) | (Pusa 1103 & HPNB) | (ILWC 46 & LPNB) | Sequence Components of genome | Gene accession IDs | Putative functions |
|---------------------|----------------|-----------------|-------------------------|----------------------------------------|--------------------|------------------|-------------------------------|--------------------|--------------------|
| SNP_12772_A_1185933 | NC_021162.1    | Ca_Kabuli_Chr03 | 1185933                 | TT                                     | CC                 | CC               | INTERGENIC                    |                    |                    |
| SNP_12773_A_1188676 | NC_021162.1    | Ca_Kabuli_Chr03 | 1188676                 | TT                                     | AA                 | AA               | INTERGENIC                    |                    |                    |
| SNP_12774_A_1188728 | NC_021162.1    | Ca_Kabuli_Chr03 | 1188728                 | GG                                     | AA                 | AA               | INTERGENIC                    |                    |                    |
| SNP_12775_A_1189479 | NC_021162.1    | Ca_Kabuli_Chr03 | 1189479                 | AA                                     | CC                 | CC               | INTERGENIC                    |                    |                    |
| SNP_12776_A_1241886 | NC_021162.1    | Ca_Kabuli_Chr03 | 1241886                 | TT                                     | CC                 | CC               | INTRON                        | 101509477          | Unknown function   |
| SNP_12777_A_1244917 | NC_021162.1    | Ca_Kabuli_Chr03 | 1244917                 | AA                                     | TT                 | TT               | INTRON                        | 101509477          | Unknown function   |
| SNP_12778_A_1273643 | NC_021162.1    | Ca_Kabuli_Chr03 | 1273643                 | CC                                     | GG                 | GG               | INTERGENIC                    |                    |                    |
| SNP_12781_A_1391556 | NC_021162.1    | Ca_Kabuli_Chr03 | 1391556                 | AA                                     | CC                 | CC               | INTERGENIC                    |                    |                    |
| SNP_12782_A_1393855 | NC_021162.1    | Ca_Kabuli_Chr03 | 1393855                 | CC                                     | TT                 | TT               | INTERGENIC                    |                    |                    |
| SNP_12783_A_1395094 | NC_021162.1    | Ca_Kabuli_Chr03 | 1395094                 | TT                                     | AA                 | AA               | INTERGENIC                    |                    |                    |
| SNP_12784_A_1395105 | NC_021162.1    | Ca_Kabuli_Chr03 | 1395105                 | TT                                     | GG                 | GG               | INTERGENIC                    |                    |                    |
| SNP_12785_A_1395109 | NC_021162.1    | Ca_Kabuli_Chr03 | 1395109                 | AA                                     | GG                 | GG               | INTERGENIC                    |                    |                    |
| SNP_12786_A_1395110 | NC_021162.1    | Ca_Kabuli_Chr03 | 1395110                 | TT                                     | AA                 | AA               | INTERGENIC                    |                    |                    |
| SNP_12787_A_1395121 | NC_021162.1    | Ca_Kabuli_Chr03 | 1395121                 | AA                                     | GG                 | GG               | INTERGENIC                    |                    |                    |
| SNP_12788_A_1395135 | NC_021162.1    | Ca_Kabuli_Chr03 | 1395135                 | CC                                     | TT                 | TT               | INTERGENIC                    |                    |                    |
| SNP_12789_A_1395392 | NC_021162.1    | Ca_Kabuli_Chr03 | 1395392                 | CC                                     | AA                 | AA               | INTERGENIC                    |                    |                    |
| SNP_12790_A_1395397 | NC_021162.1    | Ca_Kabuli_Chr03 | 1395397                 | TT                                     | AA                 | AA               | INTERGENIC                    |                    |                    |
| SNP_12791_A_1395398 | NC_021162.1    | Ca_Kabuli_Chr03 | 1395398                 | AA                                     | CC                 | CC               | INTERGENIC                    |                    |                    |
| SNP_12792_A_1395399 | NC_021162.1    | Ca_Kabuli_Chr03 | 1395399                 | TT                                     | AA                 | AA               | INTERGENIC                    |                    |                    |
| SNP_12793_A_1395400 | NC_021162.1    | Ca_Kabuli_Chr03 | 1395400                 | GG                                     | TT                 | TT               | INTERGENIC                    |                    |                    |
| SNP_12795_A_1395482 | NC_021162.1    | Ca_Kabuli_Chr03 | 1395482                 | CC                                     | TT                 | TT               | INTERGENIC                    |                    |                    |
| SNP_12796_A_1395580 | NC_021162.1    | Ca_Kabuli_Chr03 | 1395580                 | GG                                     | TT                 | TT               | INTERGENIC                    |                    |                    |

| SNPs IDs            | Chromosome IDs | Chromosomes     | Physical positions (bp) | CDC Frontier genome (Reference genome) | (Pusa 1103 & HPNB) | (ILWC 46 & LPNB) | Sequence genome | Components of | Gene accession IDs | Putative functions |
|---------------------|----------------|-----------------|-------------------------|----------------------------------------|--------------------|------------------|-----------------|---------------|--------------------|--------------------|
| SNP_12797_A_1395591 | NC_021162.1    | Ca_Kabuli_Chr03 | 1395591                 | CC                                     | GG                 | GG               | INTERGENIC      |               |                    |                    |
| SNP_12798_A_1395826 | NC_021162.1    | Ca_Kabuli_Chr03 | 1395826                 | TT                                     | GG                 | GG               | INTERGENIC      |               |                    |                    |
| SNP_12799_A_1396167 | NC_021162.1    | Ca_Kabuli_Chr03 | 1396167                 | TT                                     | GG                 | GG               | INTERGENIC      |               |                    |                    |
| SNP_12800_A_1396182 | NC_021162.1    | Ca_Kabuli_Chr03 | 1396182                 | AA                                     | GG                 | GG               | INTERGENIC      |               |                    |                    |
| SNP_12801_A_1396512 | NC_021162.1    | Ca_Kabuli_Chr03 | 1396512                 | GG                                     | AA                 | AA               | INTERGENIC      |               |                    |                    |
| SNP_12802_A_1396580 | NC_021162.1    | Ca_Kabuli_Chr03 | 1396580                 | CC                                     | TT                 | TT               | INTERGENIC      |               |                    |                    |
| SNP_12803_A_1397159 | NC_021162.1    | Ca_Kabuli_Chr03 | 1397159                 | AA                                     | GG                 | GG               | INTERGENIC      |               |                    |                    |
| SNP_12805_A_1403996 | NC_021162.1    | Ca_Kabuli_Chr03 | 1403996                 | AA                                     | GG                 | GG               | INTERGENIC      |               |                    |                    |
| SNP_12806_A_1404012 | NC_021162.1    | Ca_Kabuli_Chr03 | 1404012                 | AA                                     | GG                 | GG               | INTERGENIC      |               |                    |                    |
| SNP_12807_A_1404027 | NC_021162.1    | Ca_Kabuli_Chr03 | 1404027                 | CC                                     | TT                 | TT               | INTERGENIC      |               |                    |                    |
| SNP_12808_A_1404033 | NC_021162.1    | Ca_Kabuli_Chr03 | 1404033                 | GG                                     | AA                 | AA               | INTERGENIC      |               |                    |                    |
| SNP_12809_A_1450685 | NC_021162.1    | Ca_Kabuli_Chr03 | 1450685                 | GG                                     | TT                 | TT               | INTERGENIC      |               |                    |                    |
| SNP_12810_A_1450898 | NC_021162.1    | Ca_Kabuli_Chr03 | 1450898                 | CC                                     | TT                 | TT               | INTERGENIC      |               |                    |                    |
| SNP_12811_A_1450984 | NC_021162.1    | Ca_Kabuli_Chr03 | 1450984                 | AA                                     | GG                 | GG               | INTERGENIC      |               |                    |                    |
| SNP_12812_A_1452268 | NC_021162.1    | Ca_Kabuli_Chr03 | 1452268                 | TT                                     | AA                 | AA               | INTERGENIC      |               |                    |                    |
| SNP_12813_A_1452269 | NC_021162.1    | Ca_Kabuli_Chr03 | 1452269                 | CC                                     | AA                 | AA               | INTERGENIC      |               |                    |                    |
| SNP_12814_A_1454878 | NC_021162.1    | Ca_Kabuli_Chr03 | 1454878                 | AA                                     | GG                 | GG               | INTERGENIC      |               |                    |                    |
| SNP_12815_A_1458366 | NC_021162.1    | Ca_Kabuli_Chr03 | 1458366                 | GG                                     | AA                 | AA               | INTERGENIC      |               |                    |                    |
| SNP_12816_A_1461935 | NC_021162.1    | Ca_Kabuli_Chr03 | 1461935                 | GG                                     | AA                 | AA               | INTERGENIC      |               |                    |                    |
| SNP_12817_A_1468205 | NC_021162.1    | Ca_Kabuli_Chr03 | 1468205                 | GG                                     | CC                 | CC               | INTERGENIC      |               |                    |                    |
| SNP_12818_A_1476372 | NC_021162.1    | Ca_Kabuli_Chr03 | 1476372                 | AA                                     | GG                 | GG               | INTERGENIC      |               |                    |                    |
| SNP_12819_A_1477916 | NC_021162.1    | Ca_Kabuli_Chr03 | 1477916                 | AA                                     | TT                 | TT               | INTERGENIC      |               |                    |                    |

| SNPs IDs            | Chromosome IDs | Chromosomes     | Physical positions (bp) | CDC Frontier genome (Reference genome) | (Pusa 1103 & HPNB) | (ILWC 46 & LPNB) | Sequence Components of genome | Gene accession IDs | Putative functions           |
|---------------------|----------------|-----------------|-------------------------|----------------------------------------|--------------------|------------------|-------------------------------|--------------------|------------------------------|
| SNP_12820_A_1489932 | NC_021162.1    | Ca_Kabuli_Chr03 | 1489932                 | AA                                     | TT                 | TT               | URR                           | 101503356          | myb-related protein 305-like |
| SNP_12821_A_1492921 | NC_021162.1    | Ca_Kabuli_Chr03 | 1492921                 | CC                                     | TT                 | TT               | INTERGENIC                    |                    |                              |
| SNP_12822_A_1511250 | NC_021162.1    | Ca_Kabuli_Chr03 | 1511250                 | AA                                     | GG                 | GG               | INTERGENIC                    |                    |                              |
| SNP_12823_A_1511279 | NC_021162.1    | Ca_Kabuli_Chr03 | 1511279                 | TT                                     | CC                 | CC               | INTERGENIC                    |                    |                              |
| SNP_12824_A_1511782 | NC_021162.1    | Ca_Kabuli_Chr03 | 1511782                 | CC                                     | AA                 | AA               | INTERGENIC                    |                    |                              |
| SNP_12825_A_1532706 | NC_021162.1    | Ca_Kabuli_Chr03 | 1532706                 | TT                                     | CC                 | CC               | INTERGENIC                    |                    |                              |
| SNP_12826_A_1532808 | NC_021162.1    | Ca_Kabuli_Chr03 | 1532808                 | AA                                     | CC                 | CC               | INTERGENIC                    |                    |                              |
| SNP_12827_A_1532809 | NC_021162.1    | Ca_Kabuli_Chr03 | 1532809                 | GG                                     | AA                 | AA               | INTERGENIC                    |                    |                              |
| SNP_12828_A_1532866 | NC_021162.1    | Ca_Kabuli_Chr03 | 1532866                 | AA                                     | CC                 | CC               | INTERGENIC                    |                    |                              |
| SNP_12829_A_1533019 | NC_021162.1    | Ca_Kabuli_Chr03 | 1533019                 | GG                                     | AA                 | AA               | INTERGENIC                    |                    |                              |
| SNP_12830_A_1533039 | NC_021162.1    | Ca_Kabuli_Chr03 | 1533039                 | AA                                     | GG                 | GG               | INTERGENIC                    |                    |                              |
| SNP_12831_A_1533044 | NC_021162.1    | Ca_Kabuli_Chr03 | 1533044                 | AA                                     | GG                 | GG               | INTERGENIC                    |                    |                              |
| SNP_12832_A_1533063 | NC_021162.1    | Ca_Kabuli_Chr03 | 1533063                 | TT                                     | GG                 | GG               | INTERGENIC                    |                    |                              |
| SNP_12833_A_1533228 | NC_021162.1    | Ca_Kabuli_Chr03 | 1533228                 | AA                                     | CC                 | CC               | INTERGENIC                    |                    |                              |
| SNP_12834_A_1533230 | NC_021162.1    | Ca_Kabuli_Chr03 | 1533230                 | TT                                     | AA                 | AA               | INTERGENIC                    |                    |                              |
| SNP_12835_A_1533266 | NC_021162.1    | Ca_Kabuli_Chr03 | 1533266                 | GG                                     | CC                 | CC               | INTERGENIC                    |                    |                              |
| SNP_12836_A_1533319 | NC_021162.1    | Ca_Kabuli_Chr03 | 1533319                 | AA                                     | GG                 | GG               | INTERGENIC                    |                    |                              |
| SNP_12837_A_1533341 | NC_021162.1    | Ca_Kabuli_Chr03 | 1533341                 | CC                                     | TT                 | TT               | INTERGENIC                    |                    |                              |
| SNP_12839_A_1533408 | NC_021162.1    | Ca_Kabuli_Chr03 | 1533408                 | CC                                     | AA                 | AA               | INTERGENIC                    |                    |                              |
| SNP_12840_A_1533410 | NC_021162.1    | Ca_Kabuli_Chr03 | 1533410                 | GG                                     | AA                 | AA               | INTERGENIC                    |                    |                              |
| SNP_12841_A_1533560 | NC_021162.1    | Ca_Kabuli_Chr03 | 1533560                 | TT                                     | CC                 | CC               | INTERGENIC                    |                    |                              |
| SNP_12842_A_1533706 | NC_021162.1    | Ca_Kabuli_Chr03 | 1533706                 | CC                                     | GG                 | GG               | INTERGENIC                    |                    |                              |

| SNPs IDs            | Chromosome IDs | Chromosomes     | Physical positions (bp) | CDC Frontier genome (Reference genome) | (Pusa 1103 & HPNB) | (ILWC 46 & LPNB) | Sequence Components of genome | Gene accession IDs | Putative functions           |
|---------------------|----------------|-----------------|-------------------------|----------------------------------------|--------------------|------------------|-------------------------------|--------------------|------------------------------|
| SNP_12843_A_1533711 | NC_021162.1    | Ca_Kabuli_Chr03 | 1533711                 | TT                                     | CC                 | CC               | INTERGENIC                    |                    |                              |
| SNP_12844_A_1533885 | NC_021162.1    | Ca_Kabuli_Chr03 | 1533885                 | TT                                     | CC                 | CC               | INTERGENIC                    |                    |                              |
| SNP_12846_A_1534140 | NC_021162.1    | Ca_Kabuli_Chr03 | 1534140                 | AA                                     | GG                 | GG               | INTERGENIC                    |                    |                              |
| SNP_12847_A_1534278 | NC_021162.1    | Ca_Kabuli_Chr03 | 1534278                 | AA                                     | CC                 | CC               | INTERGENIC                    |                    |                              |
| SNP_12848_A_1534371 | NC_021162.1    | Ca_Kabuli_Chr03 | 1534371                 | TT                                     | AA                 | AA               | INTERGENIC                    |                    |                              |
| SNP_12849_A_1534419 | NC_021162.1    | Ca_Kabuli_Chr03 | 1534419                 | CC                                     | TT                 | TT               | INTERGENIC                    |                    |                              |
| SNP_12850_A_1534459 | NC_021162.1    | Ca_Kabuli_Chr03 | 1534459                 | TT                                     | AA                 | AA               | INTERGENIC                    |                    |                              |
| SNP_12851_A_1534509 | NC_021162.1    | Ca_Kabuli_Chr03 | 1534509                 | GG                                     | AA                 | AA               | INTERGENIC                    |                    |                              |
| SNP_12852_A_1534631 | NC_021162.1    | Ca_Kabuli_Chr03 | 1534631                 | AA                                     | CC                 | CC               | INTERGENIC                    |                    |                              |
| SNP_12853_A_1534763 | NC_021162.1    | Ca_Kabuli_Chr03 | 1534763                 | CC                                     | TT                 | TT               | INTERGENIC                    |                    |                              |
| SNP_12854_A_1534806 | NC_021162.1    | Ca_Kabuli_Chr03 | 1534806                 | GG                                     | AA                 | AA               | INTERGENIC                    |                    |                              |
| SNP_12855_A_1546100 | NC_021162.1    | Ca_Kabuli_Chr03 | 1546100                 | TT                                     | CC                 | CC               | STOP_LOST                     | 101510769          | uncharacterized LOC101510769 |
| SNP_12856_A_1547263 | NC_021162.1    | Ca_Kabuli_Chr03 | 1547263                 | CC                                     | TT                 | TT               | INTRON                        | 101510769          | uncharacterized LOC101510769 |
| SNP_12857_A_1566101 | NC_021162.1    | Ca_Kabuli_Chr03 | 1566101                 | TT                                     | CC                 | CC               | INTERGENIC                    |                    |                              |
| SNP_12859_A_1650689 | NC_021162.1    | Ca_Kabuli_Chr03 | 1650689                 | AA                                     | GG                 | GG               | INTERGENIC                    |                    |                              |
| SNP_12860_A_1657145 | NC_021162.1    | Ca_Kabuli_Chr03 | 1657145                 | GG                                     | AA                 | AA               | INTERGENIC                    |                    |                              |
| SNP_12861_A_1718188 | NC_021162.1    | Ca_Kabuli_Chr03 | 1718188                 | TT                                     | CC                 | CC               | INTERGENIC                    |                    |                              |
| SNP_12862_A_1796233 | NC_021162.1    | Ca_Kabuli_Chr03 | 1796233                 | CC                                     | TT                 | TT               | INTERGENIC                    |                    |                              |
| SNP_12863_A_1796238 | NC_021162.1    | Ca_Kabuli_Chr03 | 1796238                 | TT                                     | CC                 | CC               | INTERGENIC                    |                    |                              |
| SNP_12864_A_1796242 | NC_021162.1    | Ca_Kabuli_Chr03 | 1796242                 | CC                                     | TT                 | TT               | INTERGENIC                    |                    |                              |
| SNP_12865_A_1796251 | NC_021162.1    | Ca_Kabuli_Chr03 | 1796251                 | AA                                     | GG                 | GG               | INTERGENIC                    |                    |                              |
| SNP_12866_A_1796272 | NC_021162.1    | Ca_Kabuli_Chr03 | 1796272                 | CC                                     | TT                 | TT               | INTERGENIC                    |                    |                              |

| SNPs IDs            | Chromosome IDs | Chromosomes     | Physical positions (bp) | CDC Frontier genome (Reference genome) | (Pusa 1103 & HPNB) | (ILWC 46 & LPNB) | Sequence Components of genome | Gene accession IDs | Putative functions |
|---------------------|----------------|-----------------|-------------------------|----------------------------------------|--------------------|------------------|-------------------------------|--------------------|--------------------|
| SNP_12867_A_1796370 | NC_021162.1    | Ca_Kabuli_Chr03 | 1796370                 | AA                                     | CC                 | CC               | INTERGENIC                    |                    |                    |
| SNP_12868_A_1796373 | NC_021162.1    | Ca_Kabuli_Chr03 | 1796373                 | GG                                     | AA                 | AA               | INTERGENIC                    |                    |                    |
| SNP_12869_A_1796380 | NC_021162.1    | Ca_Kabuli_Chr03 | 1796380                 | CC                                     | TT                 | TT               | INTERGENIC                    |                    |                    |
| SNP_12870_A_1796425 | NC_021162.1    | Ca_Kabuli_Chr03 | 1796425                 | CC                                     | TT                 | TT               | INTERGENIC                    |                    |                    |
| SNP_12872_A_1796699 | NC_021162.1    | Ca_Kabuli_Chr03 | 1796699                 | TT                                     | CC                 | CC               | INTERGENIC                    |                    |                    |
| SNP_12873_A_1796717 | NC_021162.1    | Ca_Kabuli_Chr03 | 1796717                 | AA                                     | GG                 | GG               | INTERGENIC                    |                    |                    |
| SNP_12874_A_1828968 | NC_021162.1    | Ca_Kabuli_Chr03 | 1828968                 | AA                                     | GG                 | GG               | INTERGENIC                    |                    |                    |
| SNP_12875_A_1869905 | NC_021162.1    | Ca_Kabuli_Chr03 | 1869905                 | TT                                     | AA                 | AA               | INTERGENIC                    |                    |                    |
| SNP_12876_A_1872261 | NC_021162.1    | Ca_Kabuli_Chr03 | 1872261                 | AA                                     | GG                 | GG               | INTERGENIC                    |                    |                    |
| SNP_12877_A_1924160 | NC_021162.1    | Ca_Kabuli_Chr03 | 1924160                 | AA                                     | GG                 | GG               | INTERGENIC                    |                    |                    |
| SNP_12878_A_1966084 | NC_021162.1    | Ca_Kabuli_Chr03 | 1966084                 | CC                                     | AA                 | AA               | INTERGENIC                    |                    |                    |
| SNP_12879_A_1994208 | NC_021162.1    | Ca_Kabuli_Chr03 | 1994208                 | AA                                     | GG                 | GG               | INTERGENIC                    |                    |                    |
| SNP_12881_A_2065853 | NC_021162.1    | Ca_Kabuli_Chr03 | 2065853                 | TT                                     | AA                 | AA               | INTERGENIC                    |                    |                    |
| SNP_12882_A_2122350 | NC_021162.1    | Ca_Kabuli_Chr03 | 2122350                 | CC                                     | TT                 | TT               | INTERGENIC                    |                    |                    |
| SNP_12884_A_2182313 | NC_021162.1    | Ca_Kabuli_Chr03 | 2182313                 | AA                                     | GG                 | GG               | INTERGENIC                    |                    |                    |
| SNP_12885_A_2194503 | NC_021162.1    | Ca_Kabuli_Chr03 | 2194503                 | GG                                     | AA                 | AA               | INTERGENIC                    |                    |                    |
| SNP_12886_A_2194692 | NC_021162.1    | Ca_Kabuli_Chr03 | 2194692                 | GG                                     | TT                 | TT               | INTERGENIC                    |                    |                    |
| SNP_12887_A_2194715 | NC_021162.1    | Ca_Kabuli_Chr03 | 2194715                 | TT                                     | AA                 | AA               | INTERGENIC                    |                    |                    |
| SNP_12889_A_2194738 | NC_021162.1    | Ca_Kabuli_Chr03 | 2194738                 | TT                                     | CC                 | CC               | INTERGENIC                    |                    |                    |
| SNP_12890_A_2206622 | NC_021162.1    | Ca_Kabuli_Chr03 | 2206622                 | GG                                     | AA                 | AA               | INTRON                        | 101513993          | Unknown function   |
| SNP_12891_A_2210460 | NC_021162.1    | Ca_Kabuli_Chr03 | 2210460                 | TT                                     | CC                 | CC               | URR                           | 101513993          | Unknown function   |
| SNP_12892_A_2260030 | NC_021162.1    | Ca_Kabuli_Chr03 | 2260030                 | AA                                     | GG                 | GG               | INTERGENIC                    |                    |                    |

| SNPs IDs            | Chromosome IDs | Chromosomes     | Physical positions (bp) | CDC Frontier (Reference genome) | (Pusa 1103 & HPNB) | (ILWC 46 & LPNB) | Sequence genome | Components of | Gene accession IDs | Putative functions |
|---------------------|----------------|-----------------|-------------------------|---------------------------------|--------------------|------------------|-----------------|---------------|--------------------|--------------------|
| SNP_12893_A_2260444 | NC_021162.1    | Ca_Kabuli_Chr03 | 2260444                 | GG                              | AA                 | AA               | INTERGENIC      |               |                    |                    |
| SNP_12895_A_2308010 | NC_021162.1    | Ca_Kabuli_Chr03 | 2308010                 | TT                              | GG                 | GG               | INTERGENIC      |               |                    |                    |
| SNP_12897_A_2341411 | NC_021162.1    | Ca_Kabuli_Chr03 | 2341411                 | GG                              | AA                 | AA               | INTERGENIC      |               |                    |                    |
| SNP_12898_A_2365556 | NC_021162.1    | Ca_Kabuli_Chr03 | 2365556                 | CC                              | AA                 | AA               | INTERGENIC      |               |                    |                    |
| SNP_12899_A_2382525 | NC_021162.1    | Ca_Kabuli_Chr03 | 2382525                 | CC                              | AA                 | AA               | INTERGENIC      |               |                    |                    |
| SNP_12900_A_2382590 | NC_021162.1    | Ca_Kabuli_Chr03 | 2382590                 | AA                              | CC                 | CC               | INTERGENIC      |               |                    |                    |
| SNP_12901_A_2382636 | NC_021162.1    | Ca_Kabuli_Chr03 | 2382636                 | TT                              | AA                 | AA               | INTERGENIC      |               |                    |                    |
| SNP_12902_A_2384745 | NC_021162.1    | Ca_Kabuli_Chr03 | 2384745                 | TT                              | GG                 | GG               | INTERGENIC      |               |                    |                    |
| SNP_12903_A_2387855 | NC_021162.1    | Ca_Kabuli_Chr03 | 2387855                 | AA                              | GG                 | GG               | INTERGENIC      |               |                    |                    |
| SNP_12904_A_2414956 | NC_021162.1    | Ca_Kabuli_Chr03 | 2414956                 | AA                              | GG                 | GG               | INTERGENIC      |               |                    |                    |
| SNP_12907_A_2442094 | NC_021162.1    | Ca_Kabuli_Chr03 | 2442094                 | CC                              | AA                 | AA               | INTERGENIC      |               |                    |                    |
| SNP_12908_A_2496733 | NC_021162.1    | Ca_Kabuli_Chr03 | 2496733                 | GG                              | AA                 | AA               | INTERGENIC      |               |                    |                    |
| SNP_12909_A_2571335 | NC_021162.1    | Ca_Kabuli_Chr03 | 2571335                 | AA                              | GG                 | GG               | INTERGENIC      |               |                    |                    |
| SNP_12910_A_2571487 | NC_021162.1    | Ca_Kabuli_Chr03 | 2571487                 | AA                              | TT                 | TT               | INTERGENIC      |               |                    |                    |
| SNP_12911_A_2571517 | NC_021162.1    | Ca_Kabuli_Chr03 | 2571517                 | AA                              | CC                 | CC               | INTERGENIC      |               |                    |                    |
| SNP_12912_A_2571572 | NC_021162.1    | Ca_Kabuli_Chr03 | 2571572                 | CC                              | GG                 | GG               | INTERGENIC      |               |                    |                    |
| SNP_12913_A_2573694 | NC_021162.1    | Ca_Kabuli_Chr03 | 2573694                 | AA                              | CC                 | CC               | INTERGENIC      |               |                    |                    |
| SNP_12914_A_2573705 | NC_021162.1    | Ca_Kabuli_Chr03 | 2573705                 | GG                              | AA                 | AA               | INTERGENIC      |               |                    |                    |
| SNP_12915_A_2573707 | NC_021162.1    | Ca_Kabuli_Chr03 | 2573707                 | GG                              | AA                 | AA               | INTERGENIC      |               |                    |                    |
| SNP_12916_A_2573753 | NC_021162.1    | Ca_Kabuli_Chr03 | 2573753                 | CC                              | GG                 | GG               | INTERGENIC      |               |                    |                    |
| SNP_12917_A_2573763 | NC_021162.1    | Ca_Kabuli_Chr03 | 2573763                 | TT                              | GG                 | GG               | INTERGENIC      |               |                    |                    |
| SNP_12918_A_2631120 | NC_021162.1    | Ca_Kabuli_Chr03 | 2631120                 | TT                              | CC                 | CC               | INTERGENIC      |               |                    |                    |

| SNPs IDs            | Chromosome IDs | Chromosomes     | Physical positions (bp) | CDC Frontier (Reference genome) | (Pusa 1103 & HPNB) | (ILWC 46 & LPNB) | Sequence genome | Components of | Gene accession IDs | Putative functions |
|---------------------|----------------|-----------------|-------------------------|---------------------------------|--------------------|------------------|-----------------|---------------|--------------------|--------------------|
| SNP_12919_A_2631149 | NC_021162.1    | Ca_Kabuli_Chr03 | 2631149                 | TT                              | CC                 | CC               | INTERGENIC      |               |                    |                    |
| SNP_12920_A_2631150 | NC_021162.1    | Ca_Kabuli_Chr03 | 2631150                 | AA                              | GG                 | GG               | INTERGENIC      |               |                    |                    |
| SNP_12921_A_2631164 | NC_021162.1    | Ca_Kabuli_Chr03 | 2631164                 | GG                              | AA                 | AA               | INTERGENIC      |               |                    |                    |
| SNP_12922_A_2631188 | NC_021162.1    | Ca_Kabuli_Chr03 | 2631188                 | GG                              | AA                 | AA               | INTERGENIC      |               |                    |                    |
| SNP_12923_A_2631205 | NC_021162.1    | Ca_Kabuli_Chr03 | 2631205                 | AA                              | GG                 | GG               | INTERGENIC      |               |                    |                    |
| SNP_12924_A_2631222 | NC_021162.1    | Ca_Kabuli_Chr03 | 2631222                 | GG                              | AA                 | AA               | INTERGENIC      |               |                    |                    |
| SNP_12925_A_2631237 | NC_021162.1    | Ca_Kabuli_Chr03 | 2631237                 | GG                              | TT                 | TT               | INTERGENIC      |               |                    |                    |
| SNP_12926_A_2631241 | NC_021162.1    | Ca_Kabuli_Chr03 | 2631241                 | CC                              | GG                 | GG               | INTERGENIC      |               |                    |                    |
| SNP_12927_A_2631250 | NC_021162.1    | Ca_Kabuli_Chr03 | 2631250                 | CC                              | TT                 | TT               | INTERGENIC      |               |                    |                    |
| SNP_12928_A_2631466 | NC_021162.1    | Ca_Kabuli_Chr03 | 2631466                 | TT                              | CC                 | CC               | INTERGENIC      |               |                    |                    |
| SNP_12929_A_2631553 | NC_021162.1    | Ca_Kabuli_Chr03 | 2631553                 | GG                              | AA                 | AA               | INTERGENIC      |               |                    |                    |
| SNP_12930_A_2631569 | NC_021162.1    | Ca_Kabuli_Chr03 | 2631569                 | AA                              | GG                 | GG               | INTERGENIC      |               |                    |                    |
| SNP_12931_A_2631582 | NC_021162.1    | Ca_Kabuli_Chr03 | 2631582                 | TT                              | GG                 | GG               | INTERGENIC      |               |                    |                    |
| SNP_12932_A_2631589 | NC_021162.1    | Ca_Kabuli_Chr03 | 2631589                 | GG                              | AA                 | AA               | INTERGENIC      |               |                    |                    |
| SNP_12933_A_2631593 | NC_021162.1    | Ca_Kabuli_Chr03 | 2631593                 | TT                              | CC                 | CC               | INTERGENIC      |               |                    |                    |
| SNP_12934_A_2686345 | NC_021162.1    | Ca_Kabuli_Chr03 | 2686345                 | GG                              | AA                 | AA               | INTERGENIC      |               |                    |                    |
| SNP_12935_A_2692072 | NC_021162.1    | Ca_Kabuli_Chr03 | 2692072                 | TT                              | AA                 | AA               | INTERGENIC      |               |                    |                    |
| SNP_12936_A_2712514 | NC_021162.1    | Ca_Kabuli_Chr03 | 2712514                 | TT                              | AA                 | AA               | INTERGENIC      |               |                    |                    |
| SNP_12937_A_2712516 | NC_021162.1    | Ca_Kabuli_Chr03 | 2712516                 | TT                              | CC                 | CC               | INTERGENIC      |               |                    |                    |
| SNP_12938_A_2717674 | NC_021162.1    | Ca_Kabuli_Chr03 | 2717674                 | GG                              | AA                 | AA               | INTERGENIC      |               |                    |                    |
| SNP_12939_A_2717687 | NC_021162.1    | Ca_Kabuli_Chr03 | 2717687                 | AA                              | GG                 | GG               | INTERGENIC      |               |                    |                    |
| SNP_12940_A_2736617 | NC_021162.1    | Ca_Kabuli_Chr03 | 2736617                 | AA                              | GG                 | GG               | INTERGENIC      |               |                    |                    |



| SNPs IDs            | Chromosome IDs | Chromosomes     | Physical positions (bp) | CDC Frontier genome (Reference genome) | (Pusa 1103 & HPNB) | (ILWC 46 & LPNB) | Sequence Components of genome | Gene accession IDs | Putative functions |
|---------------------|----------------|-----------------|-------------------------|----------------------------------------|--------------------|------------------|-------------------------------|--------------------|--------------------|
| SNP_12941_A_2762578 | NC_021162.1    | Ca_Kabuli_Chr03 | 2762578                 | CC                                     | AA                 | AA               | INTERGENIC                    |                    |                    |
| SNP_12942_A_2764763 | NC_021162.1    | Ca_Kabuli_Chr03 | 2764763                 | CC                                     | TT                 | TT               | INTERGENIC                    |                    |                    |
| SNP_12943_A_2767481 | NC_021162.1    | Ca_Kabuli_Chr03 | 2767481                 | TT                                     | GG                 | GG               | INTERGENIC                    |                    |                    |
| SNP_12944_A_2767493 | NC_021162.1    | Ca_Kabuli_Chr03 | 2767493                 | GG                                     | AA                 | AA               | INTERGENIC                    |                    |                    |
| SNP_12945_A_2767542 | NC_021162.1    | Ca_Kabuli_Chr03 | 2767542                 | GG                                     | TT                 | TT               | INTERGENIC                    |                    |                    |
| SNP_12946_A_2767548 | NC_021162.1    | Ca_Kabuli_Chr03 | 2767548                 | AA                                     | GG                 | GG               | INTERGENIC                    |                    |                    |
| SNP_12947_A_2767612 | NC_021162.1    | Ca_Kabuli_Chr03 | 2767612                 | TT                                     | CC                 | CC               | INTERGENIC                    |                    |                    |
| SNP_12948_A_2767747 | NC_021162.1    | Ca_Kabuli_Chr03 | 2767747                 | CC                                     | TT                 | TT               | INTERGENIC                    |                    |                    |
| SNP_12949_A_2767775 | NC_021162.1    | Ca_Kabuli_Chr03 | 2767775                 | AA                                     | GG                 | GG               | INTERGENIC                    |                    |                    |
| SNP_12950_A_2816925 | NC_021162.1    | Ca_Kabuli_Chr03 | 2816925                 | CC                                     | AA                 | AA               | INTRON                        | 101496608          | Unknown function   |
| SNP_12951_A_2855217 | NC_021162.1    | Ca_Kabuli_Chr03 | 2855217                 | GG                                     | AA                 | AA               | INTERGENIC                    |                    |                    |
| SNP_12952_A_2855225 | NC_021162.1    | Ca_Kabuli_Chr03 | 2855225                 | CC                                     | TT                 | TT               | INTERGENIC                    |                    |                    |
| SNP_12953_A_2855246 | NC_021162.1    | Ca_Kabuli_Chr03 | 2855246                 | GG                                     | CC                 | CC               | INTERGENIC                    |                    |                    |
| SNP_12954_A_2855322 | NC_021162.1    | Ca_Kabuli_Chr03 | 2855322                 | TT                                     | CC                 | CC               | INTERGENIC                    |                    |                    |
| SNP_12955_A_2855344 | NC_021162.1    | Ca_Kabuli_Chr03 | 2855344                 | AA                                     | GG                 | GG               | INTERGENIC                    |                    |                    |
| SNP_12956_A_2855360 | NC_021162.1    | Ca_Kabuli_Chr03 | 2855360                 | CC                                     | TT                 | TT               | INTERGENIC                    |                    |                    |
| SNP_12957_A_2855441 | NC_021162.1    | Ca_Kabuli_Chr03 | 2855441                 | AA                                     | GG                 | GG               | INTERGENIC                    |                    |                    |
| SNP_12958_A_2855486 | NC_021162.1    | Ca_Kabuli_Chr03 | 2855486                 | TT                                     | GG                 | GG               | INTERGENIC                    |                    |                    |
| SNP_12959_A_2855488 | NC_021162.1    | Ca_Kabuli_Chr03 | 2855488                 | AA                                     | GG                 | GG               | INTERGENIC                    |                    |                    |
| SNP_12960_A_2855512 | NC_021162.1    | Ca_Kabuli_Chr03 | 2855512                 | AA                                     | TT                 | TT               | INTERGENIC                    |                    |                    |
| SNP_12961_A_2855532 | NC_021162.1    | Ca_Kabuli_Chr03 | 2855532                 | AA                                     | GG                 | GG               | INTERGENIC                    |                    |                    |
| SNP_12962_A_2855540 | NC_021162.1    | Ca_Kabuli_Chr03 | 2855540                 | AA                                     | TT                 | TT               | INTERGENIC                    |                    |                    |

| SNPs IDs            | Chromosome IDs | Chromosomes     | Physical positions (bp) | CDC Frontier genome (Reference genome) | (Pusa 1103 & HPNB) | (ILWC 46 & LPNB) | Sequence genome | Components of | Gene accession IDs | Putative functions |
|---------------------|----------------|-----------------|-------------------------|----------------------------------------|--------------------|------------------|-----------------|---------------|--------------------|--------------------|
| SNP_12963_A_2855560 | NC_021162.1    | Ca_Kabuli_Chr03 | 2855550                 | TT                                     | CC                 | CC               | INTERGENIC      |               |                    |                    |
| SNP_12964_A_2855608 | NC_021162.1    | Ca_Kabuli_Chr03 | 2855608                 | CC                                     | TT                 | TT               | INTERGENIC      |               |                    |                    |
| SNP_12965_A_2855611 | NC_021162.1    | Ca_Kabuli_Chr03 | 2855611                 | CC                                     | TT                 | TT               | INTERGENIC      |               |                    |                    |
| SNP_12966_A_2855612 | NC_021162.1    | Ca_Kabuli_Chr03 | 2855612                 | CC                                     | AA                 | AA               | INTERGENIC      |               |                    |                    |
| SNP_12967_A_2855676 | NC_021162.1    | Ca_Kabuli_Chr03 | 2855676                 | GG                                     | TT                 | TT               | INTERGENIC      |               |                    |                    |
| SNP_12968_A_2855741 | NC_021162.1    | Ca_Kabuli_Chr03 | 2855741                 | CC                                     | GG                 | GG               | INTERGENIC      |               |                    |                    |
| SNP_12969_A_2855776 | NC_021162.1    | Ca_Kabuli_Chr03 | 2855776                 | AA                                     | GG                 | GG               | INTERGENIC      |               |                    |                    |
| SNP_12970_A_2855803 | NC_021162.1    | Ca_Kabuli_Chr03 | 2855803                 | AA                                     | CC                 | CC               | INTERGENIC      |               |                    |                    |
| SNP_12971_A_2855812 | NC_021162.1    | Ca_Kabuli_Chr03 | 2855812                 | TT                                     | CC                 | CC               | INTERGENIC      |               |                    |                    |
| SNP_12972_A_2855848 | NC_021162.1    | Ca_Kabuli_Chr03 | 2855848                 | CC                                     | AA                 | AA               | INTERGENIC      |               |                    |                    |
| SNP_12973_A_2855858 | NC_021162.1    | Ca_Kabuli_Chr03 | 2855858                 | GG                                     | TT                 | TT               | INTERGENIC      |               |                    |                    |
| SNP_12974_A_2855949 | NC_021162.1    | Ca_Kabuli_Chr03 | 2855949                 | GG                                     | AA                 | AA               | INTERGENIC      |               |                    |                    |
| SNP_12975_A_2855965 | NC_021162.1    | Ca_Kabuli_Chr03 | 2855965                 | CC                                     | GG                 | GG               | INTERGENIC      |               |                    |                    |
| SNP_12977_A_2856020 | NC_021162.1    | Ca_Kabuli_Chr03 | 2856020                 | CC                                     | GG                 | GG               | INTERGENIC      |               |                    |                    |
| SNP_12978_A_2856038 | NC_021162.1    | Ca_Kabuli_Chr03 | 2856038                 | TT                                     | CC                 | CC               | INTERGENIC      |               |                    |                    |
| SNP_12979_A_2856050 | NC_021162.1    | Ca_Kabuli_Chr03 | 2856050                 | AA                                     | GG                 | GG               | INTERGENIC      |               |                    |                    |
| SNP_12980_A_2856064 | NC_021162.1    | Ca_Kabuli_Chr03 | 2856064                 | GG                                     | TT                 | TT               | INTERGENIC      |               |                    |                    |
| SNP_12981_A_2856181 | NC_021162.1    | Ca_Kabuli_Chr03 | 2856181                 | CC                                     | TT                 | TT               | INTERGENIC      |               |                    |                    |
| SNP_12982_A_2856194 | NC_021162.1    | Ca_Kabuli_Chr03 | 2856194                 | CC                                     | TT                 | TT               | INTERGENIC      |               |                    |                    |
| SNP_12983_A_2856233 | NC_021162.1    | Ca_Kabuli_Chr03 | 2856233                 | CC                                     | TT                 | TT               | INTERGENIC      |               |                    |                    |
| SNP_12984_A_2856311 | NC_021162.1    | Ca_Kabuli_Chr03 | 2856311                 | CC                                     | GG                 | GG               | INTERGENIC      |               |                    |                    |
| SNP_12985_A_2856321 | NC_021162.1    | Ca_Kabuli_Chr03 | 2856321                 | AA                                     | CC                 | CC               | INTERGENIC      |               |                    |                    |

| SNPs IDs            | Chromosome IDs | Chromosomes     | Physical positions (bp) | CDC Frontier genome (Reference genome) | (Pusa 1103 & HPNB) | (ILWC 46 & LPNB) | Sequence Components of genome | Gene accession IDs | Putative functions                            |
|---------------------|----------------|-----------------|-------------------------|----------------------------------------|--------------------|------------------|-------------------------------|--------------------|-----------------------------------------------|
| SNP_12986_A_2856361 | NC_021162.1    | Ca_Kabuli_Chr03 | 2856361                 | CC                                     | TT                 | TT               | INTERGENIC                    |                    |                                               |
| SNP_12987_A_2856380 | NC_021162.1    | Ca_Kabuli_Chr03 | 2856380                 | AA                                     | GG                 | GG               | INTERGENIC                    |                    |                                               |
| SNP_12988_A_2856390 | NC_021162.1    | Ca_Kabuli_Chr03 | 2856390                 | TT                                     | CC                 | CC               | INTERGENIC                    |                    |                                               |
| SNP_12989_A_2856406 | NC_021162.1    | Ca_Kabuli_Chr03 | 2856406                 | GG                                     | AA                 | AA               | INTERGENIC                    |                    |                                               |
| SNP_12990_A_2856436 | NC_021162.1    | Ca_Kabuli_Chr03 | 2856436                 | AA                                     | CC                 | CC               | INTERGENIC                    |                    |                                               |
| SNP_12991_A_2856468 | NC_021162.1    | Ca_Kabuli_Chr03 | 2856468                 | AA                                     | GG                 | GG               | INTERGENIC                    |                    |                                               |
| SNP_12992_A_2856497 | NC_021162.1    | Ca_Kabuli_Chr03 | 2856497                 | GG                                     | TT                 | TT               | INTERGENIC                    |                    |                                               |
| SNP_12993_A_2858357 | NC_021162.1    | Ca_Kabuli_Chr03 | 2858357                 | AA                                     | CC                 | CC               | INTERGENIC                    |                    |                                               |
| SNP_12994_A_2858389 | NC_021162.1    | Ca_Kabuli_Chr03 | 2858389                 | GG                                     | AA                 | AA               | INTERGENIC                    |                    |                                               |
| SNP_12995_A_2878279 | NC_021162.1    | Ca_Kabuli_Chr03 | 2878279                 | TT                                     | AA                 | AA               | INTERGENIC                    |                    |                                               |
| SNP_12996_A_2885132 | NC_021162.1    | Ca_Kabuli_Chr03 | 2885132                 | AA                                     | GG                 | GG               | INTERGENIC                    |                    |                                               |
| SNP_12997_A_2903010 | NC_021162.1    | Ca_Kabuli_Chr03 | 2903010                 | GG                                     | AA                 | AA               | URR                           | 101492274          | proline dehydrogenase 2, mitochondrial-like   |
| SNP_12999_A_2931788 | NC_021162.1    | Ca_Kabuli_Chr03 | 2931788                 | TT                                     | AA                 | AA               | INTRON                        | 101493155          | cell division cycle protein 27 homolog B-like |
| SNP_13000_A_2931792 | NC_021162.1    | Ca_Kabuli_Chr03 | 2931792                 | TT                                     | GG                 | GG               | INTRON                        | 101493155          | cell division cycle protein 27 homolog B-like |
| SNP_13001_A_2932033 | NC_021162.1    | Ca_Kabuli_Chr03 | 2932033                 | CC                                     | AA                 | AA               | INTRON                        | 101493155          | cell division cycle protein 27 homolog B-like |
| SNP_13002_A_2954902 | NC_021162.1    | Ca_Kabuli_Chr03 | 2954902                 | TT                                     | CC                 | CC               | INTERGENIC                    |                    |                                               |
| SNP_13003_A_2954910 | NC_021162.1    | Ca_Kabuli_Chr03 | 2954910                 | GG                                     | AA                 | AA               | INTERGENIC                    |                    |                                               |
| SNP_13005_A_2989574 | NC_021162.1    | Ca_Kabuli_Chr03 | 2989574                 | AA                                     | GG                 | GG               | INTERGENIC                    |                    |                                               |
| SNP_13008_A_3063834 | NC_021162.1    | Ca_Kabuli_Chr03 | 3063834                 | TT                                     | CC                 | CC               | INTERGENIC                    |                    |                                               |
| SNP_13009_A_3117702 | NC_021162.1    | Ca_Kabuli_Chr03 | 3117702                 | AA                                     | TT                 | TT               | INTERGENIC                    |                    |                                               |
| SNP_13010_A_3120554 | NC_021162.1    | Ca_Kabuli_Chr03 | 3120554                 | CC                                     | GG                 | GG               | INTERGENIC                    |                    |                                               |
| SNP_13011_A_3120570 | NC_021162.1    | Ca_Kabuli_Chr03 | 3120570                 | AA                                     | GG                 | GG               | INTERGENIC                    |                    |                                               |

| SNPs IDs            | Chromosome IDs | Chromosomes     | Physical positions (bp) | CDC Frontier genome (Reference genome) | (Pusa 1103 & HPNB) | (ILWC 46 & LPNB) | Sequence genome       | Components of | Gene accession IDs                                 | Putative functions |
|---------------------|----------------|-----------------|-------------------------|----------------------------------------|--------------------|------------------|-----------------------|---------------|----------------------------------------------------|--------------------|
| SNP_13012_A_3128996 | NC_021162.1    | Ca_Kabuli_Chr03 | 3128996                 | AA                                     | GG                 | GG               | INTERGENIC            |               |                                                    |                    |
| SNP_13013_A_3129049 | NC_021162.1    | Ca_Kabuli_Chr03 | 3129049                 | TT                                     | GG                 | GG               | INTERGENIC            |               |                                                    |                    |
| SNP_13014_A_3129547 | NC_021162.1    | Ca_Kabuli_Chr03 | 3129547                 | CC                                     | TT                 | TT               | INTERGENIC            |               |                                                    |                    |
| SNP_13015_A_3149542 | NC_021162.1    | Ca_Kabuli_Chr03 | 3149542                 | GG                                     | AA                 | AA               | INTERGENIC            |               |                                                    |                    |
| SNP_13016_A_3151408 | NC_021162.1    | Ca_Kabuli_Chr03 | 3151408                 | CC                                     | TT                 | TT               | INTERGENIC            |               |                                                    |                    |
| SNP_13017_A_3155738 | NC_021162.1    | Ca_Kabuli_Chr03 | 3155738                 | CC                                     | AA                 | AA               | INTERGENIC            |               |                                                    |                    |
| SNP_13018_A_3155747 | NC_021162.1    | Ca_Kabuli_Chr03 | 3155747                 | GG                                     | AA                 | AA               | INTERGENIC            |               |                                                    |                    |
| SNP_13019_A_3170826 | NC_021162.1    | Ca_Kabuli_Chr03 | 3170826                 | TT                                     | GG                 | GG               | INTERGENIC            |               |                                                    |                    |
| SNP_13020_A_3170887 | NC_021162.1    | Ca_Kabuli_Chr03 | 3170887                 | CC                                     | TT                 | TT               | INTERGENIC            |               |                                                    |                    |
| SNP_13021_A_3170936 | NC_021162.1    | Ca_Kabuli_Chr03 | 3170936                 | GG                                     | AA                 | AA               | INTERGENIC            |               |                                                    |                    |
| SNP_13023_A_3216272 | NC_021162.1    | Ca_Kabuli_Chr03 | 3216272                 | AA                                     | GG                 | GG               | INTERGENIC            |               |                                                    |                    |
| SNP_13024_A_3235163 | NC_021162.1    | Ca_Kabuli_Chr03 | 3235163                 | GG                                     | CC                 | CC               | DRR                   | 101500496     | ATPase family AAA domain-containing protein 2-like |                    |
| SNP_13026_A_3235442 | NC_021162.1    | Ca_Kabuli_Chr03 | 3235442                 | AA                                     | GG                 | GG               | DRR                   | 101500496     | ATPase family AAA domain-containing protein 2-like |                    |
| SNP_13028_A_3235491 | NC_021162.1    | Ca_Kabuli_Chr03 | 3235491                 | CC                                     | TT                 | TT               | DRR                   | 101500496     | ATPase family AAA domain-containing protein 2-like |                    |
| SNP_13029_A_3235536 | NC_021162.1    | Ca_Kabuli_Chr03 | 3235536                 | AA                                     | GG                 | GG               | DRR                   | 101500496     | ATPase family AAA domain-containing protein 2-like |                    |
| SNP_13031_A_3235751 | NC_021162.1    | Ca_Kabuli_Chr03 | 3235751                 | TT                                     | CC                 | CC               | DRR                   | 101500496     | ATPase family AAA domain-containing protein 2-like |                    |
| SNP_13032_A_3235789 | NC_021162.1    | Ca_Kabuli_Chr03 | 3235789                 | CC                                     | AA                 | AA               | DRR                   | 101500496     | ATPase family AAA domain-containing protein 2-like |                    |
| SNP_13033_A_3235799 | NC_021162.1    | Ca_Kabuli_Chr03 | 3235799                 | CC                                     | AA                 | AA               | DRR                   | 101500496     | ATPase family AAA domain-containing protein 2-like |                    |
| SNP_13034_A_3235814 | NC_021162.1    | Ca_Kabuli_Chr03 | 3235814                 | GG                                     | CC                 | CC               | DRR                   | 101500496     | ATPase family AAA domain-containing protein 2-like |                    |
| SNP_13035_A_3235887 | NC_021162.1    | Ca_Kabuli_Chr03 | 3235887                 | GG                                     | TT                 | TT               | NON_SYNONYMOUS_CODING | 101500496     | ATPase family AAA domain-containing protein 2-like |                    |
| SNP_13036_A_3267134 | NC_021162.1    | Ca_Kabuli_Chr03 | 3267134                 | TT                                     | GG                 | GG               | INTERGENIC            |               |                                                    |                    |
| SNP_13037_A_3272989 | NC_021162.1    | Ca_Kabuli_Chr03 | 3272989                 | AA                                     | CC                 | CC               | DRR                   | 101497583     | uncharacterized protein At3g28850                  |                    |

| SNPs IDs            | Chromosome IDs | Chromosomes     | Physical positions (bp) | CDC Frontier (Reference genome) | (Pusa 1103 & HPNB) | (ILWC 46 & LPNB) | Sequence genome | Components of | Gene accession IDs | Putative functions |
|---------------------|----------------|-----------------|-------------------------|---------------------------------|--------------------|------------------|-----------------|---------------|--------------------|--------------------|
| SNP_13039_A_3289512 | NC_021162.1    | Ca_Kabuli_Chr03 | 3289512                 | AA                              | TT                 | TT               | INTERGENIC      |               |                    |                    |
| SNP_13040_A_3289570 | NC_021162.1    | Ca_Kabuli_Chr03 | 3289570                 | GG                              | AA                 | AA               | INTERGENIC      |               |                    |                    |
| SNP_13041_A_3289590 | NC_021162.1    | Ca_Kabuli_Chr03 | 3289590                 | TT                              | GG                 | GG               | INTERGENIC      |               |                    |                    |
| SNP_13042_A_3289860 | NC_021162.1    | Ca_Kabuli_Chr03 | 3289860                 | AA                              | GG                 | GG               | INTERGENIC      |               |                    |                    |
| SNP_13043_A_3289890 | NC_021162.1    | Ca_Kabuli_Chr03 | 3289890                 | TT                              | CC                 | CC               | INTERGENIC      |               |                    |                    |
| SNP_13044_A_3289913 | NC_021162.1    | Ca_Kabuli_Chr03 | 3289913                 | AA                              | TT                 | TT               | INTERGENIC      |               |                    |                    |
| SNP_13045_A_3289952 | NC_021162.1    | Ca_Kabuli_Chr03 | 3289952                 | TT                              | CC                 | CC               | INTERGENIC      |               |                    |                    |
| SNP_13046_A_3291641 | NC_021162.1    | Ca_Kabuli_Chr03 | 3291641                 | AA                              | GG                 | GG               | INTERGENIC      |               |                    |                    |
| SNP_13047_A_3291656 | NC_021162.1    | Ca_Kabuli_Chr03 | 3291656                 | GG                              | TT                 | TT               | INTERGENIC      |               |                    |                    |
| SNP_13048_A_3291688 | NC_021162.1    | Ca_Kabuli_Chr03 | 3291688                 | GG                              | AA                 | AA               | INTERGENIC      |               |                    |                    |
| SNP_13049_A_3291697 | NC_021162.1    | Ca_Kabuli_Chr03 | 3291697                 | AA                              | GG                 | GG               | INTERGENIC      |               |                    |                    |
| SNP_13050_A_3291742 | NC_021162.1    | Ca_Kabuli_Chr03 | 3291742                 | GG                              | AA                 | AA               | INTERGENIC      |               |                    |                    |
| SNP_13051_A_3291746 | NC_021162.1    | Ca_Kabuli_Chr03 | 3291746                 | CC                              | TT                 | TT               | INTERGENIC      |               |                    |                    |
| SNP_13052_A_3291751 | NC_021162.1    | Ca_Kabuli_Chr03 | 3291751                 | AA                              | TT                 | TT               | INTERGENIC      |               |                    |                    |
| SNP_13053_A_3291800 | NC_021162.1    | Ca_Kabuli_Chr03 | 3291800                 | AA                              | GG                 | GG               | INTERGENIC      |               |                    |                    |
| SNP_13054_A_3291802 | NC_021162.1    | Ca_Kabuli_Chr03 | 3291802                 | AA                              | GG                 | GG               | INTERGENIC      |               |                    |                    |
| SNP_13055_A_3291907 | NC_021162.1    | Ca_Kabuli_Chr03 | 3291907                 | CC                              | AA                 | AA               | INTERGENIC      |               |                    |                    |
| SNP_13056_A_3306471 | NC_021162.1    | Ca_Kabuli_Chr03 | 3306471                 | AA                              | GG                 | GG               | INTERGENIC      |               |                    |                    |
| SNP_13057_A_3306586 | NC_021162.1    | Ca_Kabuli_Chr03 | 3306586                 | TT                              | CC                 | CC               | INTERGENIC      |               |                    |                    |
| SNP_13058_A_3339551 | NC_021162.1    | Ca_Kabuli_Chr03 | 3339551                 | GG                              | AA                 | AA               | INTERGENIC      |               |                    |                    |
| SNP_13059_A_3339625 | NC_021162.1    | Ca_Kabuli_Chr03 | 3339625                 | GG                              | AA                 | AA               | INTERGENIC      |               |                    |                    |
| SNP_13060_A_3356806 | NC_021162.1    | Ca_Kabuli_Chr03 | 3356806                 | CC                              | TT                 | TT               | INTERGENIC      |               |                    |                    |

| SNPs IDs            | Chromosome IDs | Chromosomes     | Physical positions (bp) | CDC Frontier genome (Reference genome) | (Pusa 1103 & HPNB) | (ILWC 46 & LPNB) | Sequence Components of genome | Gene accession IDs | Putative functions                     |
|---------------------|----------------|-----------------|-------------------------|----------------------------------------|--------------------|------------------|-------------------------------|--------------------|----------------------------------------|
| SNP_13061_A_3356810 | NC_021162.1    | Ca_Kabuli_Chr03 | 3356810                 | GG                                     | AA                 | AA               | INTERGENIC                    |                    |                                        |
| SNP_13062_A_3377498 | NC_021162.1    | Ca_Kabuli_Chr03 | 3377498                 | CC                                     | TT                 | TT               | INTERGENIC                    |                    |                                        |
| SNP_13063_A_3385175 | NC_021162.1    | Ca_Kabuli_Chr03 | 3385175                 | TT                                     | GG                 | GG               | INTERGENIC                    |                    |                                        |
| SNP_13064_A_3392065 | NC_021162.1    | Ca_Kabuli_Chr03 | 3392065                 | AA                                     | TT                 | TT               | INTERGENIC                    |                    |                                        |
| SNP_13067_A_3462028 | NC_021162.1    | Ca_Kabuli_Chr03 | 3462028                 | AA                                     | GG                 | GG               | INTERGENIC                    |                    |                                        |
| SNP_13068_A_3498572 | NC_021162.1    | Ca_Kabuli_Chr03 | 3498572                 | AA                                     | GG                 | GG               | INTERGENIC                    |                    |                                        |
| SNP_13069_A_3500408 | NC_021162.1    | Ca_Kabuli_Chr03 | 3500408                 | GG                                     | AA                 | AA               | INTERGENIC                    |                    |                                        |
| SNP_13070_A_3500414 | NC_021162.1    | Ca_Kabuli_Chr03 | 3500414                 | AA                                     | CC                 | CC               | INTERGENIC                    |                    |                                        |
| SNP_13071_A_3503311 | NC_021162.1    | Ca_Kabuli_Chr03 | 3503311                 | GG                                     | AA                 | AA               | DRR                           | 101501768          | 60S acidic ribosomal protein P1-3-like |
| SNP_13072_A_3503313 | NC_021162.1    | Ca_Kabuli_Chr03 | 3503313                 | AA                                     | TT                 | TT               | DRR                           | 101501768          | 60S acidic ribosomal protein P1-3-like |
| SNP_13073_A_3503317 | NC_021162.1    | Ca_Kabuli_Chr03 | 3503317                 | GG                                     | CC                 | CC               | DRR                           | 101501768          | 60S acidic ribosomal protein P1-3-like |
| SNP_13074_A_3503322 | NC_021162.1    | Ca_Kabuli_Chr03 | 3503322                 | GG                                     | AA                 | AA               | DRR                           | 101501768          | 60S acidic ribosomal protein P1-3-like |
| SNP_13075_A_3503812 | NC_021162.1    | Ca_Kabuli_Chr03 | 3503812                 | AA                                     | TT                 | TT               | DRR                           | 101501768          | 60S acidic ribosomal protein P1-3-like |
| SNP_13076_A_3517501 | NC_021162.1    | Ca_Kabuli_Chr03 | 3517501                 | GG                                     | AA                 | AA               | INTERGENIC                    |                    |                                        |
| SNP_13078_A_3517871 | NC_021162.1    | Ca_Kabuli_Chr03 | 3517871                 | TT                                     | GG                 | GG               | INTERGENIC                    |                    |                                        |
| SNP_13079_A_3517913 | NC_021162.1    | Ca_Kabuli_Chr03 | 3517913                 | GG                                     | AA                 | AA               | INTERGENIC                    |                    |                                        |
| SNP_13080_A_3531706 | NC_021162.1    | Ca_Kabuli_Chr03 | 3531706                 | GG                                     | AA                 | AA               | INTERGENIC                    |                    |                                        |
| SNP_13081_A_3531756 | NC_021162.1    | Ca_Kabuli_Chr03 | 3531756                 | AA                                     | TT                 | TT               | INTERGENIC                    |                    |                                        |
| SNP_13082_A_3533590 | NC_021162.1    | Ca_Kabuli_Chr03 | 3533590                 | GG                                     | CC                 | CC               | URR                           | 101502621          | uncharacterized LOC101502621           |
| SNP_13083_A_3535079 | NC_021162.1    | Ca_Kabuli_Chr03 | 3535079                 | CC                                     | TT                 | TT               | DRR                           | 101508938          | 60S acidic ribosomal protein P1-3-like |
| SNP_13084_A_3535409 | NC_021162.1    | Ca_Kabuli_Chr03 | 3535409                 | TT                                     | CC                 | CC               | DRR                           | 101508938          | 60S acidic ribosomal protein P1-3-like |
| SNP_13085_A_3535646 | NC_021162.1    | Ca_Kabuli_Chr03 | 3535646                 | GG                                     | CC                 | CC               | INTERGENIC                    |                    |                                        |

| SNPs IDs            | Chromosome IDs | Chromosomes     | Physical positions (bp) | CDC Frontier (Reference genome) | (Pusa 1103 & HPNB) | (ILWC 46 & LPNB) | Sequence Components of genome | Gene accession IDs | Putative functions                     |
|---------------------|----------------|-----------------|-------------------------|---------------------------------|--------------------|------------------|-------------------------------|--------------------|----------------------------------------|
| SNP_13086_A_3535678 | NC_021162.1    | Ca_Kabuli_Chr03 | 3535678                 | CC                              | TT                 | TT               | INTERGENIC                    |                    |                                        |
| SNP_13087_A_3537002 | NC_021162.1    | Ca_Kabuli_Chr03 | 3537002                 | AA                              | CC                 | CC               | INTERGENIC                    |                    |                                        |
| SNP_13088_A_3537075 | NC_021162.1    | Ca_Kabuli_Chr03 | 3537075                 | AA                              | GG                 | GG               | INTERGENIC                    |                    |                                        |
| SNP_13089_A_3537147 | NC_021162.1    | Ca_Kabuli_Chr03 | 3537147                 | GG                              | CC                 | CC               | INTERGENIC                    |                    |                                        |
| SNP_13090_A_3537176 | NC_021162.1    | Ca_Kabuli_Chr03 | 3537176                 | AA                              | GG                 | GG               | INTERGENIC                    |                    |                                        |
| SNP_13091_A_3537311 | NC_021162.1    | Ca_Kabuli_Chr03 | 3537311                 | TT                              | CC                 | CC               | INTRON                        | 101508938          | 60S acidic ribosomal protein P1-3-like |
| SNP_13092_A_3537312 | NC_021162.1    | Ca_Kabuli_Chr03 | 3537312                 | CC                              | AA                 | AA               | INTRON                        | 101508938          | 60S acidic ribosomal protein P1-3-like |
| SNP_13093_A_3537360 | NC_021162.1    | Ca_Kabuli_Chr03 | 3537360                 | AA                              | GG                 | GG               | INTRON                        | 101508938          | 60S acidic ribosomal protein P1-3-like |
| SNP_13094_A_3537405 | NC_021162.1    | Ca_Kabuli_Chr03 | 3537405                 | CC                              | TT                 | TT               | INTRON                        | 101508938          | 60S acidic ribosomal protein P1-3-like |
| SNP_13095_A_3537584 | NC_021162.1    | Ca_Kabuli_Chr03 | 3537584                 | TT                              | CC                 | CC               | INTRON                        | 101508938          | 60S acidic ribosomal protein P1-3-like |
| SNP_13096_A_3537585 | NC_021162.1    | Ca_Kabuli_Chr03 | 3537585                 | TT                              | CC                 | CC               | INTRON                        | 101508938          | 60S acidic ribosomal protein P1-3-like |
| SNP_13098_A_3542315 | NC_021162.1    | Ca_Kabuli_Chr03 | 3542315                 | TT                              | GG                 | GG               | INTRON                        | 101508938          | 60S acidic ribosomal protein P1-3-like |
| SNP_13099_A_3580684 | NC_021162.1    | Ca_Kabuli_Chr03 | 3580684                 | TT                              | CC                 | CC               | INTERGENIC                    |                    |                                        |
| SNP_13100_A_3583168 | NC_021162.1    | Ca_Kabuli_Chr03 | 3583168                 | CC                              | AA                 | AA               | INTERGENIC                    |                    |                                        |
| SNP_13101_A_3587340 | NC_021162.1    | Ca_Kabuli_Chr03 | 3587340                 | CC                              | TT                 | TT               | INTERGENIC                    |                    |                                        |
| SNP_13102_A_3608245 | NC_021162.1    | Ca_Kabuli_Chr03 | 3608245                 | AA                              | TT                 | TT               | INTERGENIC                    |                    |                                        |
| SNP_13103_A_3629354 | NC_021162.1    | Ca_Kabuli_Chr03 | 3629354                 | CC                              | TT                 | TT               | INTERGENIC                    |                    |                                        |
| SNP_13105_A_3646793 | NC_021162.1    | Ca_Kabuli_Chr03 | 3646793                 | AA                              | GG                 | GG               | INTERGENIC                    |                    |                                        |
| SNP_13106_A_3646795 | NC_021162.1    | Ca_Kabuli_Chr03 | 3646795                 | TT                              | CC                 | CC               | INTERGENIC                    |                    |                                        |
| SNP_13107_A_3688411 | NC_021162.1    | Ca_Kabuli_Chr03 | 3688411                 | CC                              | AA                 | AA               | INTERGENIC                    |                    |                                        |
| SNP_13108_A_3691795 | NC_021162.1    | Ca_Kabuli_Chr03 | 3691795                 | AA                              | GG                 | GG               | INTERGENIC                    |                    |                                        |
| SNP_13109_A_3708772 | NC_021162.1    | Ca_Kabuli_Chr03 | 3708772                 | TT                              | GG                 | GG               | INTRON                        | 101504331          | uncharacterized LOC101504331           |

| SNPs IDs            | Chromosome IDs | Chromosomes     | Physical positions (bp) | CDC Frontier genome (Reference genome) | (Pusa 1103 & HPNB) | (ILWC 46 & LPNB) | Sequence genome | Components of | Gene accession IDs                                           | Putative functions |
|---------------------|----------------|-----------------|-------------------------|----------------------------------------|--------------------|------------------|-----------------|---------------|--------------------------------------------------------------|--------------------|
| SNP_13110_A_3731127 | NC_021162.1    | Ca_Kabuli_Chr03 | 3731127                 | AA                                     | CC                 | CC               | INTERGENIC      |               |                                                              |                    |
| SNP_13111_A_3731404 | NC_021162.1    | Ca_Kabuli_Chr03 | 3731404                 | AA                                     | CC                 | CC               | INTERGENIC      |               |                                                              |                    |
| SNP_13112_A_3731445 | NC_021162.1    | Ca_Kabuli_Chr03 | 3731445                 | TT                                     | AA                 | AA               | INTERGENIC      |               |                                                              |                    |
| SNP_13113_A_3731452 | NC_021162.1    | Ca_Kabuli_Chr03 | 3731452                 | AA                                     | GG                 | GG               | INTERGENIC      |               |                                                              |                    |
| SNP_13114_A_3731466 | NC_021162.1    | Ca_Kabuli_Chr03 | 3731466                 | TT                                     | AA                 | AA               | INTERGENIC      |               |                                                              |                    |
| SNP_13115_A_3731482 | NC_021162.1    | Ca_Kabuli_Chr03 | 3731482                 | CC                                     | GG                 | GG               | INTERGENIC      |               |                                                              |                    |
| SNP_13116_A_3734857 | NC_021162.1    | Ca_Kabuli_Chr03 | 3734857                 | TT                                     | CC                 | CC               | INTERGENIC      |               |                                                              |                    |
| SNP_13117_A_3734918 | NC_021162.1    | Ca_Kabuli_Chr03 | 3734918                 | TT                                     | CC                 | CC               | INTERGENIC      |               |                                                              |                    |
| SNP_13118_A_3734973 | NC_021162.1    | Ca_Kabuli_Chr03 | 3734973                 | AA                                     | CC                 | CC               | INTERGENIC      |               |                                                              |                    |
| SNP_13119_A_3746153 | NC_021162.1    | Ca_Kabuli_Chr03 | 3746153                 | TT                                     | CC                 | CC               | URR             | 101504881     | multiple organellar RNA editing factor 6, mitochondrial-like |                    |
| SNP_13120_A_3754491 | NC_021162.1    | Ca_Kabuli_Chr03 | 3754491                 | GG                                     | AA                 | AA               | INTERGENIC      |               |                                                              |                    |
| SNP_13121_A_3787239 | NC_021162.1    | Ca_Kabuli_Chr03 | 3787239                 | AA                                     | TT                 | TT               | INTERGENIC      |               |                                                              |                    |
| SNP_13122_A_3787362 | NC_021162.1    | Ca_Kabuli_Chr03 | 3787362                 | CC                                     | AA                 | AA               | INTERGENIC      |               |                                                              |                    |
| SNP_13123_A_3789202 | NC_021162.1    | Ca_Kabuli_Chr03 | 3789202                 | TT                                     | CC                 | CC               | INTERGENIC      |               |                                                              |                    |
| SNP_13124_A_3797029 | NC_021162.1    | Ca_Kabuli_Chr03 | 3797029                 | GG                                     | AA                 | AA               | INTERGENIC      |               |                                                              |                    |
| SNP_13125_A_3804458 | NC_021162.1    | Ca_Kabuli_Chr03 | 3804458                 | TT                                     | CC                 | CC               | INTERGENIC      |               |                                                              |                    |
| SNP_13126_A_3804516 | NC_021162.1    | Ca_Kabuli_Chr03 | 3804516                 | CC                                     | TT                 | TT               | INTERGENIC      |               |                                                              |                    |
| SNP_13127_A_3804555 | NC_021162.1    | Ca_Kabuli_Chr03 | 3804555                 | AA                                     | GG                 | GG               | INTERGENIC      |               |                                                              |                    |
| SNP_13128_A_3804627 | NC_021162.1    | Ca_Kabuli_Chr03 | 3804627                 | GG                                     | AA                 | AA               | INTERGENIC      |               |                                                              |                    |
| SNP_13130_A_3818085 | NC_021162.1    | Ca_Kabuli_Chr03 | 3818085                 | AA                                     | GG                 | GG               | INTERGENIC      |               |                                                              |                    |
| SNP_13131_A_3818120 | NC_021162.1    | Ca_Kabuli_Chr03 | 3818120                 | AA                                     | GG                 | GG               | INTERGENIC      |               |                                                              |                    |
| SNP_13132_A_3818135 | NC_021162.1    | Ca_Kabuli_Chr03 | 3818135                 | CC                                     | GG                 | GG               | INTERGENIC      |               |                                                              |                    |



| SNPs IDs            | Chromosome IDs | Chromosomes     | Physical positions (bp) | CDC Frontier (Reference genome) | (Pusa 1103 & HPNB) | (ILWC 46 & LPNB) | Sequence genome | Components of | Gene accession IDs                                       | Putative functions |
|---------------------|----------------|-----------------|-------------------------|---------------------------------|--------------------|------------------|-----------------|---------------|----------------------------------------------------------|--------------------|
| SNP_13133_A_3820417 | NC_021162.1    | Ca_Kabuli_Chr03 | 3820417                 | AA                              | CC                 | CC               | INTERGENIC      |               |                                                          |                    |
| SNP_13134_A_3842231 | NC_021162.1    | Ca_Kabuli_Chr03 | 3842231                 | GG                              | TT                 | TT               | INTERGENIC      |               |                                                          |                    |
| SNP_13136_A_3866325 | NC_021162.1    | Ca_Kabuli_Chr03 | 3866325                 | TT                              | CC                 | CC               | INTERGENIC      |               |                                                          |                    |
| SNP_13137_A_3866326 | NC_021162.1    | Ca_Kabuli_Chr03 | 3866326                 | AA                              | GG                 | GG               | INTERGENIC      |               |                                                          |                    |
| SNP_13140_A_3884249 | NC_021162.1    | Ca_Kabuli_Chr03 | 3884249                 | TT                              | GG                 | GG               | INTERGENIC      |               |                                                          |                    |
| SNP_13141_A_3953749 | NC_021162.1    | Ca_Kabuli_Chr03 | 3953749                 | GG                              | CC                 | CC               | INTRON          | 101507993     | 1-aminocyclopropane-1-carboxylate oxidase homolog 1-like |                    |
| SNP_13143_A_3962965 | NC_021162.1    | Ca_Kabuli_Chr03 | 3962965                 | GG                              | AA                 | AA               | INTERGENIC      |               |                                                          |                    |
| SNP_13144_A_3963025 | NC_021162.1    | Ca_Kabuli_Chr03 | 3963025                 | AA                              | TT                 | TT               | INTERGENIC      |               |                                                          |                    |
| SNP_13145_A_3963159 | NC_021162.1    | Ca_Kabuli_Chr03 | 3963159                 | TT                              | CC                 | CC               | INTERGENIC      |               |                                                          |                    |
| SNP_13146_A_3963178 | NC_021162.1    | Ca_Kabuli_Chr03 | 3963178                 | GG                              | AA                 | AA               | INTERGENIC      |               |                                                          |                    |
| SNP_13147_A_3963192 | NC_021162.1    | Ca_Kabuli_Chr03 | 3963192                 | CC                              | TT                 | TT               | INTERGENIC      |               |                                                          |                    |
| SNP_13148_A_3963202 | NC_021162.1    | Ca_Kabuli_Chr03 | 3963202                 | AA                              | GG                 | GG               | INTERGENIC      |               |                                                          |                    |
| SNP_13149_A_3963208 | NC_021162.1    | Ca_Kabuli_Chr03 | 3963208                 | AA                              | TT                 | TT               | INTERGENIC      |               |                                                          |                    |
| SNP_13150_A_3963213 | NC_021162.1    | Ca_Kabuli_Chr03 | 3963213                 | GG                              | AA                 | AA               | INTERGENIC      |               |                                                          |                    |
| SNP_13151_A_3963246 | NC_021162.1    | Ca_Kabuli_Chr03 | 3963246                 | CC                              | TT                 | TT               | INTERGENIC      |               |                                                          |                    |
| SNP_13152_A_3963347 | NC_021162.1    | Ca_Kabuli_Chr03 | 3963347                 | AA                              | GG                 | GG               | INTERGENIC      |               |                                                          |                    |
| SNP_13153_A_3963610 | NC_021162.1    | Ca_Kabuli_Chr03 | 3963610                 | AA                              | GG                 | GG               | INTERGENIC      |               |                                                          |                    |
| SNP_13154_A_3963613 | NC_021162.1    | Ca_Kabuli_Chr03 | 3963613                 | GG                              | AA                 | AA               | INTERGENIC      |               |                                                          |                    |
| SNP_13155_A_3963624 | NC_021162.1    | Ca_Kabuli_Chr03 | 3963624                 | AA                              | GG                 | GG               | INTERGENIC      |               |                                                          |                    |
| SNP_13156_A_3974802 | NC_021162.1    | Ca_Kabuli_Chr03 | 3974802                 | CC                              | AA                 | AA               | INTERGENIC      |               |                                                          |                    |
| SNP_13157_A_3977987 | NC_021162.1    | Ca_Kabuli_Chr03 | 3977987                 | AA                              | GG                 | GG               | INTERGENIC      |               |                                                          |                    |
| SNP_13158_A_3978022 | NC_021162.1    | Ca_Kabuli_Chr03 | 3978022                 | GG                              | TT                 | TT               | INTERGENIC      |               |                                                          |                    |

| SNPs IDs            | Chromosome IDs | Chromosomes     | Physical positions (bp) | CDC Frontier genome (Reference genome) | (Pusa 1103 & HPNB) | (ILWC 46 & LPNB) | Sequence genome | Components of | Gene accession IDs | Putative functions |
|---------------------|----------------|-----------------|-------------------------|----------------------------------------|--------------------|------------------|-----------------|---------------|--------------------|--------------------|
| SNP_13159_A_3998057 | NC_021162.1    | Ca_Kabuli_Chr03 | 3998057                 | CC                                     | TT                 | TT               | INTERGENIC      |               |                    |                    |
| SNP_13160_A_3999282 | NC_021162.1    | Ca_Kabuli_Chr03 | 3999282                 | CC                                     | TT                 | TT               | INTERGENIC      |               |                    |                    |
| SNP_13161_A_4006385 | NC_021162.1    | Ca_Kabuli_Chr03 | 4006385                 | TT                                     | CC                 | CC               | INTERGENIC      |               |                    |                    |
| SNP_13162_A_4006386 | NC_021162.1    | Ca_Kabuli_Chr03 | 4006386                 | TT                                     | GG                 | GG               | INTERGENIC      |               |                    |                    |
| SNP_13163_A_4017759 | NC_021162.1    | Ca_Kabuli_Chr03 | 4017759                 | TT                                     | CC                 | CC               | INTERGENIC      |               |                    |                    |
| SNP_13164_A_4035964 | NC_021162.1    | Ca_Kabuli_Chr03 | 4035964                 | AA                                     | GG                 | GG               | INTERGENIC      |               |                    |                    |
| SNP_13165_A_4036016 | NC_021162.1    | Ca_Kabuli_Chr03 | 4036016                 | CC                                     | AA                 | AA               | INTERGENIC      |               |                    |                    |
| SNP_13166_A_4036026 | NC_021162.1    | Ca_Kabuli_Chr03 | 4036026                 | AA                                     | GG                 | GG               | INTERGENIC      |               |                    |                    |
| SNP_13167_A_4036369 | NC_021162.1    | Ca_Kabuli_Chr03 | 4036369                 | CC                                     | AA                 | AA               | INTERGENIC      |               |                    |                    |
| SNP_13168_A_4040916 | NC_021162.1    | Ca_Kabuli_Chr03 | 4040916                 | AA                                     | TT                 | TT               | INTERGENIC      |               |                    |                    |
| SNP_13169_A_4041806 | NC_021162.1    | Ca_Kabuli_Chr03 | 4041806                 | TT                                     | CC                 | CC               | INTERGENIC      |               |                    |                    |
| SNP_13171_A_4056392 | NC_021162.1    | Ca_Kabuli_Chr03 | 4056392                 | GG                                     | AA                 | AA               | INTERGENIC      |               |                    |                    |
| SNP_13172_A_4056452 | NC_021162.1    | Ca_Kabuli_Chr03 | 4056452                 | CC                                     | AA                 | AA               | INTERGENIC      |               |                    |                    |
| SNP_13173_A_4056533 | NC_021162.1    | Ca_Kabuli_Chr03 | 4056533                 | AA                                     | GG                 | GG               | INTERGENIC      |               |                    |                    |
| SNP_13174_A_4073256 | NC_021162.1    | Ca_Kabuli_Chr03 | 4073256                 | TT                                     | GG                 | GG               | INTERGENIC      |               |                    |                    |
| SNP_13175_A_4073322 | NC_021162.1    | Ca_Kabuli_Chr03 | 4073322                 | TT                                     | GG                 | GG               | INTERGENIC      |               |                    |                    |
| SNP_13176_A_4073324 | NC_021162.1    | Ca_Kabuli_Chr03 | 4073324                 | GG                                     | AA                 | AA               | INTERGENIC      |               |                    |                    |
| SNP_13178_A_4076513 | NC_021162.1    | Ca_Kabuli_Chr03 | 4076513                 | TT                                     | AA                 | AA               | INTERGENIC      |               |                    |                    |
| SNP_13179_A_4076534 | NC_021162.1    | Ca_Kabuli_Chr03 | 4076534                 | AA                                     | TT                 | TT               | INTERGENIC      |               |                    |                    |
| SNP_13180_A_4076541 | NC_021162.1    | Ca_Kabuli_Chr03 | 4076541                 | AA                                     | TT                 | TT               | INTERGENIC      |               |                    |                    |
| SNP_13182_A_4098871 | NC_021162.1    | Ca_Kabuli_Chr03 | 4098871                 | GG                                     | TT                 | TT               | INTERGENIC      |               |                    |                    |
| SNP_13183_A_4098876 | NC_021162.1    | Ca_Kabuli_Chr03 | 4098876                 | GG                                     | AA                 | AA               | INTERGENIC      |               |                    |                    |

| SNPs IDs            | Chromosome IDs | Chromosomes     | Physical positions (bp) | CDC Frontier (Reference genome) | (Pusa 1103 & HPNB) | (ILWC 46 & LPNB) | Sequence Components of genome | Gene accession IDs | Putative functions           |
|---------------------|----------------|-----------------|-------------------------|---------------------------------|--------------------|------------------|-------------------------------|--------------------|------------------------------|
| SNP_13184_A_4098910 | NC_021162.1    | Ca_Kabuli_Chr03 | 4098910                 | TT                              | AA                 | AA               | INTERGENIC                    |                    |                              |
| SNP_13185_A_4116877 | NC_021162.1    | Ca_Kabuli_Chr03 | 4116877                 | CC                              | TT                 | TT               | INTERGENIC                    |                    |                              |
| SNP_13186_A_4116914 | NC_021162.1    | Ca_Kabuli_Chr03 | 4116914                 | GG                              | TT                 | TT               | INTERGENIC                    |                    |                              |
| SNP_13187_A_4155186 | NC_021162.1    | Ca_Kabuli_Chr03 | 4155186                 | GG                              | CC                 | CC               | INTERGENIC                    |                    |                              |
| SNP_13188_A_4172137 | NC_021162.1    | Ca_Kabuli_Chr03 | 4172137                 | TT                              | CC                 | CC               | INTERGENIC                    |                    |                              |
| SNP_13189_A_4172681 | NC_021162.1    | Ca_Kabuli_Chr03 | 4172681                 | AA                              | CC                 | CC               | INTERGENIC                    |                    |                              |
| SNP_13190_A_4232128 | NC_021162.1    | Ca_Kabuli_Chr03 | 4232128                 | AA                              | TT                 | TT               | INTERGENIC                    |                    |                              |
| SNP_13191_A_4232588 | NC_021162.1    | Ca_Kabuli_Chr03 | 4232588                 | GG                              | TT                 | TT               | INTERGENIC                    |                    |                              |
| SNP_13192_A_4232899 | NC_021162.1    | Ca_Kabuli_Chr03 | 4232899                 | CC                              | GG                 | GG               | INTERGENIC                    |                    |                              |
| SNP_13193_A_4257265 | NC_021162.1    | Ca_Kabuli_Chr03 | 4257265                 | AA                              | TT                 | TT               | INTRON                        | 101515186          | cytochrome P450 71A1-like    |
| SNP_13194_A_4264274 | NC_021162.1    | Ca_Kabuli_Chr03 | 4264274                 | AA                              | CC                 | CC               | INTERGENIC                    |                    |                              |
| SNP_13195_A_4271012 | NC_021162.1    | Ca_Kabuli_Chr03 | 4271012                 | CC                              | AA                 | AA               | INTERGENIC                    |                    |                              |
| SNP_13196_A_4292337 | NC_021162.1    | Ca_Kabuli_Chr03 | 4292337                 | TT                              | CC                 | CC               | INTERGENIC                    |                    |                              |
| SNP_13197_A_4307807 | NC_021162.1    | Ca_Kabuli_Chr03 | 4307807                 | CC                              | GG                 | GG               | INTERGENIC                    |                    |                              |
| SNP_13198_A_4307844 | NC_021162.1    | Ca_Kabuli_Chr03 | 4307844                 | AA                              | GG                 | GG               | INTERGENIC                    |                    |                              |
| SNP_13199_A_4307880 | NC_021162.1    | Ca_Kabuli_Chr03 | 4307880                 | TT                              | CC                 | CC               | INTERGENIC                    |                    |                              |
| SNP_13200_A_4307939 | NC_021162.1    | Ca_Kabuli_Chr03 | 4307939                 | TT                              | CC                 | CC               | INTERGENIC                    |                    |                              |
| SNP_13201_A_4376783 | NC_021162.1    | Ca_Kabuli_Chr03 | 4376783                 | AA                              | TT                 | TT               | INTERGENIC                    |                    |                              |
| SNP_13202_A_4381971 | NC_021162.1    | Ca_Kabuli_Chr03 | 4381971                 | TT                              | CC                 | CC               | DRR                           | 101491198          | uncharacterized LOC101491198 |
| SNP_13203_A_4381973 | NC_021162.1    | Ca_Kabuli_Chr03 | 4381973                 | AA                              | GG                 | GG               | DRR                           | 101491198          | uncharacterized LOC101491198 |
| SNP_13204_A_4381974 | NC_021162.1    | Ca_Kabuli_Chr03 | 4381974                 | CC                              | TT                 | TT               | DRR                           | 101491198          | uncharacterized LOC101491198 |
| SNP_13205_A_4385009 | NC_021162.1    | Ca_Kabuli_Chr03 | 4385009                 | TT                              | CC                 | CC               | INTERGENIC                    |                    |                              |

| SNPs IDs            | Chromosome IDs | Chromosomes     | Physical positions (bp) | CDC Frontier genome (Reference genome) | (Pusa 1103 & HPNB) | (ILWC 46 & LPNB) | Sequence genome | Components of | Gene accession IDs | Putative functions |
|---------------------|----------------|-----------------|-------------------------|----------------------------------------|--------------------|------------------|-----------------|---------------|--------------------|--------------------|
| SNP_13206_A_4506753 | NC_021162.1    | Ca_Kabuli_Chr03 | 4506753                 | TT                                     | CC                 | CC               | INTERGENIC      |               |                    |                    |
| SNP_13207_A_4506755 | NC_021162.1    | Ca_Kabuli_Chr03 | 4506755                 | AA                                     | CC                 | CC               | INTERGENIC      |               |                    |                    |
| SNP_13208_A_4506761 | NC_021162.1    | Ca_Kabuli_Chr03 | 4506761                 | AA                                     | GG                 | GG               | INTERGENIC      |               |                    |                    |
| SNP_13209_A_4536671 | NC_021162.1    | Ca_Kabuli_Chr03 | 4536671                 | CC                                     | TT                 | TT               | INTERGENIC      |               |                    |                    |
| SNP_13210_A_4536776 | NC_021162.1    | Ca_Kabuli_Chr03 | 4536776                 | AA                                     | CC                 | CC               | INTERGENIC      |               |                    |                    |
| SNP_13211_A_4566303 | NC_021162.1    | Ca_Kabuli_Chr03 | 4566303                 | CC                                     | GG                 | GG               | INTERGENIC      |               |                    |                    |
| SNP_13212_A_4611065 | NC_021162.1    | Ca_Kabuli_Chr03 | 4611065                 | AA                                     | CC                 | CC               | INTERGENIC      |               |                    |                    |
| SNP_13213_A_4611069 | NC_021162.1    | Ca_Kabuli_Chr03 | 4611069                 | TT                                     | CC                 | CC               | INTERGENIC      |               |                    |                    |
| SNP_13214_A_4611190 | NC_021162.1    | Ca_Kabuli_Chr03 | 4611190                 | TT                                     | GG                 | GG               | INTERGENIC      |               |                    |                    |
| SNP_13215_A_4611494 | NC_021162.1    | Ca_Kabuli_Chr03 | 4611494                 | AA                                     | GG                 | GG               | INTERGENIC      |               |                    |                    |
| SNP_13216_A_4611571 | NC_021162.1    | Ca_Kabuli_Chr03 | 4611571                 | TT                                     | AA                 | AA               | INTERGENIC      |               |                    |                    |
| SNP_13217_A_4611605 | NC_021162.1    | Ca_Kabuli_Chr03 | 4611605                 | CC                                     | TT                 | TT               | INTERGENIC      |               |                    |                    |
| SNP_13218_A_4619343 | NC_021162.1    | Ca_Kabuli_Chr03 | 4619343                 | CC                                     | TT                 | TT               | INTERGENIC      |               |                    |                    |
| SNP_13219_A_4619492 | NC_021162.1    | Ca_Kabuli_Chr03 | 4619492                 | TT                                     | CC                 | CC               | INTERGENIC      |               |                    |                    |
| SNP_13220_A_4619695 | NC_021162.1    | Ca_Kabuli_Chr03 | 4619695                 | TT                                     | CC                 | CC               | INTERGENIC      |               |                    |                    |
| SNP_13222_A_4688117 | NC_021162.1    | Ca_Kabuli_Chr03 | 4688117                 | GG                                     | AA                 | AA               | INTERGENIC      |               |                    |                    |
| SNP_13223_A_4688256 | NC_021162.1    | Ca_Kabuli_Chr03 | 4688256                 | CC                                     | TT                 | TT               | INTERGENIC      |               |                    |                    |
| SNP_13224_A_4688258 | NC_021162.1    | Ca_Kabuli_Chr03 | 4688258                 | AA                                     | GG                 | GG               | INTERGENIC      |               |                    |                    |
| SNP_13225_A_4688269 | NC_021162.1    | Ca_Kabuli_Chr03 | 4688269                 | CC                                     | TT                 | TT               | INTERGENIC      |               |                    |                    |
| SNP_13226_A_4688327 | NC_021162.1    | Ca_Kabuli_Chr03 | 4688327                 | TT                                     | GG                 | GG               | INTERGENIC      |               |                    |                    |
| SNP_13227_A_4688383 | NC_021162.1    | Ca_Kabuli_Chr03 | 4688383                 | TT                                     | CC                 | CC               | INTERGENIC      |               |                    |                    |
| SNP_13228_A_4688500 | NC_021162.1    | Ca_Kabuli_Chr03 | 4688500                 | GG                                     | AA                 | AA               | INTERGENIC      |               |                    |                    |

| SNPs IDs            | Chromosome IDs | Chromosomes     | Physical positions (bp) | CDC Frontier genome (Reference genome) | (Pusa 1103 & HPNB) | (ILWC 46 & LPNB) | Sequence genome | Components of | Gene accession IDs | Putative functions |
|---------------------|----------------|-----------------|-------------------------|----------------------------------------|--------------------|------------------|-----------------|---------------|--------------------|--------------------|
| SNP_13229_A_4688770 | NC_021162.1    | Ca_Kabuli_Chr03 | 4688770                 | TT                                     | AA                 | AA               | INTERGENIC      |               |                    |                    |
| SNP_13230_A_4688799 | NC_021162.1    | Ca_Kabuli_Chr03 | 4688799                 | AA                                     | TT                 | TT               | INTERGENIC      |               |                    |                    |
| SNP_13231_A_4688866 | NC_021162.1    | Ca_Kabuli_Chr03 | 4688866                 | AA                                     | TT                 | TT               | INTERGENIC      |               |                    |                    |
| SNP_13232_A_4688867 | NC_021162.1    | Ca_Kabuli_Chr03 | 4688867                 | TT                                     | AA                 | AA               | INTERGENIC      |               |                    |                    |
| SNP_13233_A_4688868 | NC_021162.1    | Ca_Kabuli_Chr03 | 4688868                 | TT                                     | AA                 | AA               | INTERGENIC      |               |                    |                    |
| SNP_13234_A_4688885 | NC_021162.1    | Ca_Kabuli_Chr03 | 4688885                 | AA                                     | GG                 | GG               | INTERGENIC      |               |                    |                    |
| SNP_13235_A_4688901 | NC_021162.1    | Ca_Kabuli_Chr03 | 4688901                 | AA                                     | CC                 | CC               | INTERGENIC      |               |                    |                    |
| SNP_13236_A_4689021 | NC_021162.1    | Ca_Kabuli_Chr03 | 4689021                 | CC                                     | TT                 | TT               | INTERGENIC      |               |                    |                    |
| SNP_13237_A_4689029 | NC_021162.1    | Ca_Kabuli_Chr03 | 4689029                 | GG                                     | AA                 | AA               | INTERGENIC      |               |                    |                    |
| SNP_13238_A_4689053 | NC_021162.1    | Ca_Kabuli_Chr03 | 4689053                 | GG                                     | CC                 | CC               | INTERGENIC      |               |                    |                    |
| SNP_13239_A_4689098 | NC_021162.1    | Ca_Kabuli_Chr03 | 4689098                 | GG                                     | AA                 | AA               | INTERGENIC      |               |                    |                    |
| SNP_13241_A_4689310 | NC_021162.1    | Ca_Kabuli_Chr03 | 4689310                 | TT                                     | CC                 | CC               | INTERGENIC      |               |                    |                    |
| SNP_13242_A_4720312 | NC_021162.1    | Ca_Kabuli_Chr03 | 4720312                 | GG                                     | AA                 | AA               | INTERGENIC      |               |                    |                    |
| SNP_13243_A_4720317 | NC_021162.1    | Ca_Kabuli_Chr03 | 4720317                 | TT                                     | GG                 | GG               | INTERGENIC      |               |                    |                    |
| SNP_13244_A_4720319 | NC_021162.1    | Ca_Kabuli_Chr03 | 4720319                 | AA                                     | CC                 | CC               | INTERGENIC      |               |                    |                    |
| SNP_13245_A_4720392 | NC_021162.1    | Ca_Kabuli_Chr03 | 4720392                 | TT                                     | CC                 | CC               | INTERGENIC      |               |                    |                    |
| SNP_13246_A_4720557 | NC_021162.1    | Ca_Kabuli_Chr03 | 4720557                 | CC                                     | AA                 | AA               | INTERGENIC      |               |                    |                    |
| SNP_13247_A_4737432 | NC_021162.1    | Ca_Kabuli_Chr03 | 4737432                 | AA                                     | TT                 | TT               | INTERGENIC      |               |                    |                    |
| SNP_13248_A_4783877 | NC_021162.1    | Ca_Kabuli_Chr03 | 4783877                 | CC                                     | TT                 | TT               | INTERGENIC      |               |                    |                    |
| SNP_13249_A_4787573 | NC_021162.1    | Ca_Kabuli_Chr03 | 4787573                 | AA                                     | GG                 | GG               | INTERGENIC      |               |                    |                    |
| SNP_13250_A_4787576 | NC_021162.1    | Ca_Kabuli_Chr03 | 4787576                 | AA                                     | GG                 | GG               | INTERGENIC      |               |                    |                    |
| SNP_13251_A_4787661 | NC_021162.1    | Ca_Kabuli_Chr03 | 4787661                 | GG                                     | AA                 | AA               | INTERGENIC      |               |                    |                    |

| SNPs IDs            | Chromosome IDs | Chromosomes     | Physical positions (bp) | CDC Frontier genome (Reference genome) | (Pusa 1103 & HPNB) | (ILWC 46 & LPNB) | Sequence Components of genome | Gene accession IDs | Putative functions                                                              |
|---------------------|----------------|-----------------|-------------------------|----------------------------------------|--------------------|------------------|-------------------------------|--------------------|---------------------------------------------------------------------------------|
| SNP_13252_A_4789424 | NC_021162.1    | Ca_Kabuli_Chr03 | 4789424                 | AA                                     | TT                 | TT               | DRR                           | 101501142          | Unknown function                                                                |
| SNP_13253_A_4789569 | NC_021162.1    | Ca_Kabuli_Chr03 | 4789569                 | AA                                     | CC                 | CC               | DRR                           | 101501142          | Unknown function                                                                |
| SNP_13254_A_4792964 | NC_021162.1    | Ca_Kabuli_Chr03 | 4792964                 | TT                                     | CC                 | CC               | URR                           | 101501142          | Unknown function                                                                |
| SNP_13255_A_4845876 | NC_021162.1    | Ca_Kabuli_Chr03 | 4845876                 | GG                                     | AA                 | AA               | INTERGENIC                    |                    |                                                                                 |
| SNP_13256_A_4863917 | NC_021162.1    | Ca_Kabuli_Chr03 | 4863917                 | GG                                     | TT                 | TT               | URR                           | 101497584          | probable mitochondrial saccharopine dehydrogenase-like oxidoreductase At5g39410 |
| SNP_13257_A_4946277 | NC_021162.1    | Ca_Kabuli_Chr03 | 4946277                 | TT                                     | CC                 | CC               | INTERGENIC                    |                    |                                                                                 |
| SNP_13258_A_4952174 | NC_021162.1    | Ca_Kabuli_Chr03 | 4952174                 | AA                                     | CC                 | CC               | INTERGENIC                    |                    |                                                                                 |
| SNP_13259_A_4952236 | NC_021162.1    | Ca_Kabuli_Chr03 | 4952236                 | GG                                     | AA                 | AA               | INTERGENIC                    |                    |                                                                                 |
| SNP_13260_A_4954598 | NC_021162.1    | Ca_Kabuli_Chr03 | 4954598                 | AA                                     | GG                 | GG               | INTERGENIC                    |                    |                                                                                 |
| SNP_13261_A_4954698 | NC_021162.1    | Ca_Kabuli_Chr03 | 4954698                 | CC                                     | TT                 | TT               | INTERGENIC                    |                    |                                                                                 |
| SNP_13262_A_4955404 | NC_021162.1    | Ca_Kabuli_Chr03 | 4955404                 | CC                                     | TT                 | TT               | INTERGENIC                    |                    |                                                                                 |
| SNP_13263_A_4957784 | NC_021162.1    | Ca_Kabuli_Chr03 | 4957784                 | GG                                     | TT                 | TT               | INTERGENIC                    |                    |                                                                                 |
| SNP_13264_A_4958809 | NC_021162.1    | Ca_Kabuli_Chr03 | 4958809                 | GG                                     | AA                 | AA               | INTERGENIC                    |                    |                                                                                 |
| SNP_13265_A_4958824 | NC_021162.1    | Ca_Kabuli_Chr03 | 4958824                 | AA                                     | GG                 | GG               | INTERGENIC                    |                    |                                                                                 |
| SNP_13266_A_4958853 | NC_021162.1    | Ca_Kabuli_Chr03 | 4958853                 | TT                                     | CC                 | CC               | INTERGENIC                    |                    |                                                                                 |
| SNP_13267_A_4962805 | NC_021162.1    | Ca_Kabuli_Chr03 | 4962805                 | CC                                     | AA                 | AA               | DRR                           | 101502719          | GDSL esterase/lipase At5g45910-like                                             |
| SNP_13268_A_4962915 | NC_021162.1    | Ca_Kabuli_Chr03 | 4962915                 | TT                                     | GG                 | GG               | DRR                           | 101502719          | GDSL esterase/lipase At5g45910-like                                             |
| SNP_13269_A_4962971 | NC_021162.1    | Ca_Kabuli_Chr03 | 4962971                 | AA                                     | GG                 | GG               | DRR                           | 101502719          | GDSL esterase/lipase At5g45910-like                                             |
| SNP_13270_A_4962973 | NC_021162.1    | Ca_Kabuli_Chr03 | 4962973                 | AA                                     | GG                 | GG               | DRR                           | 101502719          | GDSL esterase/lipase At5g45910-like                                             |
| SNP_13271_A_4963182 | NC_021162.1    | Ca_Kabuli_Chr03 | 4963182                 | CC                                     | TT                 | TT               | DRR                           | 101502719          | GDSL esterase/lipase At5g45910-like                                             |
| SNP_13272_A_4963276 | NC_021162.1    | Ca_Kabuli_Chr03 | 4963276                 | TT                                     | GG                 | GG               | DRR                           | 101502719          | GDSL esterase/lipase At5g45910-like                                             |
| SNP_13273_A_4964707 | NC_021162.1    | Ca_Kabuli_Chr03 | 4964707                 | TT                                     | CC                 | CC               | URR                           | 101502719          | GDSL esterase/lipase At5g45910-like                                             |

| SNPs IDs            | Chromosome IDs | Chromosomes     | Physical positions (bp) | CDC Frontier genome (Reference genome) | (Pusa 1103 & HPNB) | (ILWC 46 & LPNB) | Sequence Components of genome | Gene accession IDs | Putative functions                  |
|---------------------|----------------|-----------------|-------------------------|----------------------------------------|--------------------|------------------|-------------------------------|--------------------|-------------------------------------|
| SNP_13274_A_4964990 | NC_021162.1    | Ca_Kabuli_Chr03 | 4964990                 | CC                                     | TT                 | TT               | URR                           | 101502719          | GDSL esterase/lipase At5g45910-like |
| SNP_13275_A_4964991 | NC_021162.1    | Ca_Kabuli_Chr03 | 4964991                 | CC                                     | TT                 | TT               | URR                           | 101502719          | GDSL esterase/lipase At5g45910-like |
| SNP_13276_A_4965048 | NC_021162.1    | Ca_Kabuli_Chr03 | 4965048                 | GG                                     | AA                 | AA               | URR                           | 101502719          | GDSL esterase/lipase At5g45910-like |
| SNP_13277_A_4965187 | NC_021162.1    | Ca_Kabuli_Chr03 | 4965187                 | AA                                     | CC                 | CC               | URR                           | 101502719          | GDSL esterase/lipase At5g45910-like |
| SNP_13278_A_4965188 | NC_021162.1    | Ca_Kabuli_Chr03 | 4965188                 | CC                                     | AA                 | AA               | URR                           | 101502719          | GDSL esterase/lipase At5g45910-like |
| SNP_13279_A_4965286 | NC_021162.1    | Ca_Kabuli_Chr03 | 4965286                 | AA                                     | TT                 | TT               | URR                           | 101502719          | GDSL esterase/lipase At5g45910-like |
| SNP_13281_A_4965561 | NC_021162.1    | Ca_Kabuli_Chr03 | 4965561                 | AA                                     | TT                 | TT               | DRR                           | 101499229          | GDSL esterase/lipase At5g45910-like |
| SNP_13283_A_4965643 | NC_021162.1    | Ca_Kabuli_Chr03 | 4965643                 | AA                                     | TT                 | TT               | DRR                           | 101499229          | GDSL esterase/lipase At5g45910-like |
| SNP_13284_A_4965646 | NC_021162.1    | Ca_Kabuli_Chr03 | 4965646                 | AA                                     | TT                 | TT               | DRR                           | 101499229          | GDSL esterase/lipase At5g45910-like |
| SNP_13285_A_4965648 | NC_021162.1    | Ca_Kabuli_Chr03 | 4965648                 | AA                                     | CC                 | CC               | DRR                           | 101499229          | GDSL esterase/lipase At5g45910-like |
| SNP_13286_A_4965669 | NC_021162.1    | Ca_Kabuli_Chr03 | 4965669                 | AA                                     | GG                 | GG               | DRR                           | 101499229          | GDSL esterase/lipase At5g45910-like |
| SNP_13287_A_4965678 | NC_021162.1    | Ca_Kabuli_Chr03 | 4965678                 | TT                                     | AA                 | AA               | DRR                           | 101499229          | GDSL esterase/lipase At5g45910-like |
| SNP_13288_A_4965689 | NC_021162.1    | Ca_Kabuli_Chr03 | 4965689                 | TT                                     | CC                 | CC               | DRR                           | 101499229          | GDSL esterase/lipase At5g45910-like |
| SNP_13289_A_4965750 | NC_021162.1    | Ca_Kabuli_Chr03 | 4965750                 | AA                                     | GG                 | GG               | DRR                           | 101499229          | GDSL esterase/lipase At5g45910-like |
| SNP_13290_A_4965771 | NC_021162.1    | Ca_Kabuli_Chr03 | 4965771                 | CC                                     | AA                 | AA               | DRR                           | 101499229          | GDSL esterase/lipase At5g45910-like |
| SNP_13291_A_4965813 | NC_021162.1    | Ca_Kabuli_Chr03 | 4965813                 | TT                                     | AA                 | AA               | DRR                           | 101499229          | GDSL esterase/lipase At5g45910-like |
| SNP_13292_A_4965982 | NC_021162.1    | Ca_Kabuli_Chr03 | 4965982                 | CC                                     | TT                 | TT               | DRR                           | 101499229          | GDSL esterase/lipase At5g45910-like |
| SNP_13294_A_4966188 | NC_021162.1    | Ca_Kabuli_Chr03 | 4966188                 | CC                                     | TT                 | TT               | DRR                           | 101499229          | GDSL esterase/lipase At5g45910-like |
| SNP_13295_A_4966809 | NC_021162.1    | Ca_Kabuli_Chr03 | 4966809                 | AA                                     | CC                 | CC               | INTRON                        | 101499229          | GDSL esterase/lipase At5g45910-like |
| SNP_13296_A_4966928 | NC_021162.1    | Ca_Kabuli_Chr03 | 4966928                 | TT                                     | CC                 | CC               | SYNONYMOUS_CODING             | 101499229          | GDSL esterase/lipase At5g45910-like |
| SNP_13299_A_4975317 | NC_021162.1    | Ca_Kabuli_Chr03 | 4975317                 | TT                                     | CC                 | CC               | SYNONYMOUS_CODING             | 101499229          | GDSL esterase/lipase At5g45910-like |
| SNP_13300_A_5141777 | NC_021162.1    | Ca_Kabuli_Chr03 | 5141777                 | GG                                     | AA                 | AA               | INTERGENIC                    |                    |                                     |

| SNPs IDs            | Chromosome IDs | Chromosomes     | Physical positions (bp) | CDC Frontier genome (Reference genome) | (Pusa 1103 & HPNB) | (ILWC 46 & LPNB) | Sequence genome | Components of | Gene accession IDs | Putative functions |
|---------------------|----------------|-----------------|-------------------------|----------------------------------------|--------------------|------------------|-----------------|---------------|--------------------|--------------------|
| SNP_13301_A_5141778 | NC_021162.1    | Ca_Kabuli_Chr03 | 5141778                 | TT                                     | CC                 | CC               | INTERGENIC      |               |                    |                    |
| SNP_13303_A_5229745 | NC_021162.1    | Ca_Kabuli_Chr03 | 5229745                 | GG                                     | AA                 | AA               | INTERGENIC      |               |                    |                    |
| SNP_13305_A_5270108 | NC_021162.1    | Ca_Kabuli_Chr03 | 5270108                 | AA                                     | GG                 | GG               | INTERGENIC      |               |                    |                    |
| SNP_13306_A_5270131 | NC_021162.1    | Ca_Kabuli_Chr03 | 5270131                 | TT                                     | CC                 | CC               | INTERGENIC      |               |                    |                    |
| SNP_13307_A_5270241 | NC_021162.1    | Ca_Kabuli_Chr03 | 5270241                 | TT                                     | GG                 | GG               | INTERGENIC      |               |                    |                    |
| SNP_13308_A_5270290 | NC_021162.1    | Ca_Kabuli_Chr03 | 5270290                 | AA                                     | GG                 | GG               | INTERGENIC      |               |                    |                    |
| SNP_13309_A_5270298 | NC_021162.1    | Ca_Kabuli_Chr03 | 5270298                 | AA                                     | TT                 | TT               | INTERGENIC      |               |                    |                    |
| SNP_13310_A_5270306 | NC_021162.1    | Ca_Kabuli_Chr03 | 5270306                 | AA                                     | TT                 | GG               | INTERGENIC      |               |                    |                    |
| SNP_13311_A_5270398 | NC_021162.1    | Ca_Kabuli_Chr03 | 5270398                 | TT                                     | AA                 | AA               | INTERGENIC      |               |                    |                    |
| SNP_13312_A_5270439 | NC_021162.1    | Ca_Kabuli_Chr03 | 5270439                 | CC                                     | TT                 | TT               | INTERGENIC      |               |                    |                    |
| SNP_13314_A_5270648 | NC_021162.1    | Ca_Kabuli_Chr03 | 5270648                 | CC                                     | GG                 | GG               | INTERGENIC      |               |                    |                    |
| SNP_13315_A_5273919 | NC_021162.1    | Ca_Kabuli_Chr03 | 5273919                 | CC                                     | TT                 | TT               | INTERGENIC      |               |                    |                    |
| SNP_13316_A_5274027 | NC_021162.1    | Ca_Kabuli_Chr03 | 5274027                 | GG                                     | AA                 | AA               | INTERGENIC      |               |                    |                    |
| SNP_13317_A_5274147 | NC_021162.1    | Ca_Kabuli_Chr03 | 5274147                 | TT                                     | CC                 | CC               | INTERGENIC      |               |                    |                    |
| SNP_13318_A_5274156 | NC_021162.1    | Ca_Kabuli_Chr03 | 5274156                 | AA                                     | GG                 | GG               | INTERGENIC      |               |                    |                    |
| SNP_13319_A_5274178 | NC_021162.1    | Ca_Kabuli_Chr03 | 5274178                 | TT                                     | CC                 | CC               | INTERGENIC      |               |                    |                    |
| SNP_13320_A_5274192 | NC_021162.1    | Ca_Kabuli_Chr03 | 5274192                 | AA                                     | GG                 | GG               | INTERGENIC      |               |                    |                    |
| SNP_13321_A_5274198 | NC_021162.1    | Ca_Kabuli_Chr03 | 5274198                 | AA                                     | GG                 | GG               | INTERGENIC      |               |                    |                    |
| SNP_13322_A_5274204 | NC_021162.1    | Ca_Kabuli_Chr03 | 5274204                 | TT                                     | CC                 | CC               | INTERGENIC      |               |                    |                    |
| SNP_13323_A_5274210 | NC_021162.1    | Ca_Kabuli_Chr03 | 5274210                 | TT                                     | AA                 | AA               | INTERGENIC      |               |                    |                    |
| SNP_13324_A_5274216 | NC_021162.1    | Ca_Kabuli_Chr03 | 5274216                 | AA                                     | CC                 | CC               | INTERGENIC      |               |                    |                    |
| SNP_13325_A_5274231 | NC_021162.1    | Ca_Kabuli_Chr03 | 5274231                 | TT                                     | AA                 | AA               | INTERGENIC      |               |                    |                    |



| SNPs IDs            | Chromosome IDs | Chromosomes     | Physical positions (bp) | CDC Frontier genome (Reference genome) | (Pusa 1103 & HPNB) | (ILWC 46 & LPNB) | Sequence genome | Components of | Gene accession IDs | Putative functions |
|---------------------|----------------|-----------------|-------------------------|----------------------------------------|--------------------|------------------|-----------------|---------------|--------------------|--------------------|
| SNP_13326_A_5274249 | NC_021162.1    | Ca_Kabuli_Chr03 | 5274249                 | AA                                     | GG                 | GG               | INTERGENIC      |               |                    |                    |
| SNP_13327_A_5274255 | NC_021162.1    | Ca_Kabuli_Chr03 | 5274255                 | CC                                     | AA                 | AA               | INTERGENIC      |               |                    |                    |
| SNP_13328_A_5274261 | NC_021162.1    | Ca_Kabuli_Chr03 | 5274261                 | CC                                     | TT                 | TT               | INTERGENIC      |               |                    |                    |
| SNP_13329_A_5274291 | NC_021162.1    | Ca_Kabuli_Chr03 | 5274291                 | TT                                     | GG                 | GG               | INTERGENIC      |               |                    |                    |
| SNP_13330_A_5274303 | NC_021162.1    | Ca_Kabuli_Chr03 | 5274303                 | TT                                     | AA                 | AA               | INTERGENIC      |               |                    |                    |
| SNP_13331_A_5274318 | NC_021162.1    | Ca_Kabuli_Chr03 | 5274318                 | TT                                     | AA                 | AA               | INTERGENIC      |               |                    |                    |
| SNP_13332_A_5274330 | NC_021162.1    | Ca_Kabuli_Chr03 | 5274330                 | TT                                     | CC                 | CC               | INTERGENIC      |               |                    |                    |
| SNP_13333_A_5274342 | NC_021162.1    | Ca_Kabuli_Chr03 | 5274342                 | GG                                     | AA                 | AA               | INTERGENIC      |               |                    |                    |
| SNP_13334_A_5274366 | NC_021162.1    | Ca_Kabuli_Chr03 | 5274366                 | AA                                     | GG                 | GG               | INTERGENIC      |               |                    |                    |
| SNP_13335_A_5274396 | NC_021162.1    | Ca_Kabuli_Chr03 | 5274396                 | GG                                     | AA                 | AA               | INTERGENIC      |               |                    |                    |
| SNP_13336_A_5274404 | NC_021162.1    | Ca_Kabuli_Chr03 | 5274404                 | AA                                     | CC                 | CC               | INTERGENIC      |               |                    |                    |
| SNP_13337_A_5274411 | NC_021162.1    | Ca_Kabuli_Chr03 | 5274411                 | TT                                     | CC                 | CC               | INTERGENIC      |               |                    |                    |
| SNP_13338_A_5274428 | NC_021162.1    | Ca_Kabuli_Chr03 | 5274428                 | TT                                     | CC                 | CC               | INTERGENIC      |               |                    |                    |
| SNP_13339_A_5276575 | NC_021162.1    | Ca_Kabuli_Chr03 | 5276575                 | GG                                     | AA                 | AA               | INTERGENIC      |               |                    |                    |
| SNP_13340_A_5276590 | NC_021162.1    | Ca_Kabuli_Chr03 | 5276590                 | TT                                     | CC                 | CC               | INTERGENIC      |               |                    |                    |
| SNP_13341_A_5276645 | NC_021162.1    | Ca_Kabuli_Chr03 | 5276645                 | AA                                     | GG                 | GG               | INTERGENIC      |               |                    |                    |
| SNP_13342_A_5276647 | NC_021162.1    | Ca_Kabuli_Chr03 | 5276647                 | TT                                     | CC                 | CC               | INTERGENIC      |               |                    |                    |
| SNP_13343_A_5276656 | NC_021162.1    | Ca_Kabuli_Chr03 | 5276656                 | CC                                     | TT                 | TT               | INTERGENIC      |               |                    |                    |
| SNP_13344_A_5276665 | NC_021162.1    | Ca_Kabuli_Chr03 | 5276665                 | TT                                     | GG                 | GG               | INTERGENIC      |               |                    |                    |
| SNP_13345_A_5276672 | NC_021162.1    | Ca_Kabuli_Chr03 | 5276672                 | TT                                     | CC                 | CC               | INTERGENIC      |               |                    |                    |
| SNP_13346_A_5276686 | NC_021162.1    | Ca_Kabuli_Chr03 | 5276686                 | AA                                     | GG                 | GG               | INTERGENIC      |               |                    |                    |
| SNP_13347_A_5281632 | NC_021162.1    | Ca_Kabuli_Chr03 | 5281632                 | CC                                     | AA                 | AA               | INTERGENIC      |               |                    |                    |

| SNPs IDs            | Chromosome IDs | Chromosomes     | Physical positions (bp) | CDC Frontier genome (Reference genome) | (Pusa 1103 & HPNB) | (ILWC 46 & LPNB) | Sequence genome | Components of | Gene accession IDs | Putative functions |
|---------------------|----------------|-----------------|-------------------------|----------------------------------------|--------------------|------------------|-----------------|---------------|--------------------|--------------------|
| SNP_13348_A_5281706 | NC_021162.1    | Ca_Kabuli_Chr03 | 5281706                 | TT                                     | AA                 | AA               | INTERGENIC      |               |                    |                    |
| SNP_13349_A_5282066 | NC_021162.1    | Ca_Kabuli_Chr03 | 5282066                 | GG                                     | AA                 | AA               | INTERGENIC      |               |                    |                    |
| SNP_13350_A_5282132 | NC_021162.1    | Ca_Kabuli_Chr03 | 5282132                 | GG                                     | AA                 | AA               | INTERGENIC      |               |                    |                    |
| SNP_13351_A_5282429 | NC_021162.1    | Ca_Kabuli_Chr03 | 5282429                 | AA                                     | GG                 | GG               | INTERGENIC      |               |                    |                    |
| SNP_13352_A_5285791 | NC_021162.1    | Ca_Kabuli_Chr03 | 5285791                 | TT                                     | CC                 | CC               | INTERGENIC      |               |                    |                    |
| SNP_13353_A_5285793 | NC_021162.1    | Ca_Kabuli_Chr03 | 5285793                 | TT                                     | CC                 | CC               | INTERGENIC      |               |                    |                    |
| SNP_13354_A_5285804 | NC_021162.1    | Ca_Kabuli_Chr03 | 5285804                 | GG                                     | CC                 | CC               | INTERGENIC      |               |                    |                    |
| SNP_13355_A_5285820 | NC_021162.1    | Ca_Kabuli_Chr03 | 5285820                 | GG                                     | CC                 | CC               | INTERGENIC      |               |                    |                    |
| SNP_13356_A_5285854 | NC_021162.1    | Ca_Kabuli_Chr03 | 5285854                 | AA                                     | GG                 | GG               | INTERGENIC      |               |                    |                    |
| SNP_13357_A_5285873 | NC_021162.1    | Ca_Kabuli_Chr03 | 5285873                 | TT                                     | AA                 | AA               | INTERGENIC      |               |                    |                    |
| SNP_13358_A_5285931 | NC_021162.1    | Ca_Kabuli_Chr03 | 5285931                 | AA                                     | TT                 | TT               | INTERGENIC      |               |                    |                    |
| SNP_13359_A_5285933 | NC_021162.1    | Ca_Kabuli_Chr03 | 5285933                 | CC                                     | AA                 | AA               | INTERGENIC      |               |                    |                    |
| SNP_13360_A_5286136 | NC_021162.1    | Ca_Kabuli_Chr03 | 5286136                 | AA                                     | GG                 | GG               | INTERGENIC      |               |                    |                    |
| SNP_13362_A_5287440 | NC_021162.1    | Ca_Kabuli_Chr03 | 5287440                 | GG                                     | AA                 | AA               | INTERGENIC      |               |                    |                    |
| SNP_13363_A_5287450 | NC_021162.1    | Ca_Kabuli_Chr03 | 5287450                 | CC                                     | TT                 | TT               | INTERGENIC      |               |                    |                    |
| SNP_13364_A_5287564 | NC_021162.1    | Ca_Kabuli_Chr03 | 5287564                 | GG                                     | AA                 | AA               | INTERGENIC      |               |                    |                    |
| SNP_13365_A_5287574 | NC_021162.1    | Ca_Kabuli_Chr03 | 5287574                 | TT                                     | AA                 | AA               | INTERGENIC      |               |                    |                    |
| SNP_13366_A_5287688 | NC_021162.1    | Ca_Kabuli_Chr03 | 5287688                 | CC                                     | TT                 | TT               | INTERGENIC      |               |                    |                    |
| SNP_13367_A_5287691 | NC_021162.1    | Ca_Kabuli_Chr03 | 5287691                 | AA                                     | GG                 | GG               | INTERGENIC      |               |                    |                    |
| SNP_13368_A_5287699 | NC_021162.1    | Ca_Kabuli_Chr03 | 5287699                 | CC                                     | TT                 | TT               | INTERGENIC      |               |                    |                    |
| SNP_13369_A_5287769 | NC_021162.1    | Ca_Kabuli_Chr03 | 5287769                 | AA                                     | TT                 | TT               | INTERGENIC      |               |                    |                    |
| SNP_13371_A_5288445 | NC_021162.1    | Ca_Kabuli_Chr03 | 5288445                 | GG                                     | AA                 | AA               | INTERGENIC      |               |                    |                    |

| SNPs IDs            | Chromosome IDs | Chromosomes     | Physical positions (bp) | CDC Frontier genome (Reference genome) | (Pusa 1103 & HPNB) | (ILWC 46 & LPNB) | Sequence genome | Components of | Gene accession IDs           | Putative functions |
|---------------------|----------------|-----------------|-------------------------|----------------------------------------|--------------------|------------------|-----------------|---------------|------------------------------|--------------------|
| SNP_13372_A_5288448 | NC_021162.1    | Ca_Kabuli_Chr03 | 5288448                 | AA                                     | CC                 | CC               | INTERGENIC      |               |                              |                    |
| SNP_13373_A_5288453 | NC_021162.1    | Ca_Kabuli_Chr03 | 5288453                 | AA                                     | TT                 | TT               | INTERGENIC      |               |                              |                    |
| SNP_13374_A_5288461 | NC_021162.1    | Ca_Kabuli_Chr03 | 5288461                 | CC                                     | GG                 | GG               | INTERGENIC      |               |                              |                    |
| SNP_13375_A_5288462 | NC_021162.1    | Ca_Kabuli_Chr03 | 5288462                 | CC                                     | AA                 | AA               | INTERGENIC      |               |                              |                    |
| SNP_13376_A_5288474 | NC_021162.1    | Ca_Kabuli_Chr03 | 5288474                 | AA                                     | GG                 | GG               | INTERGENIC      |               |                              |                    |
| SNP_13377_A_5292269 | NC_021162.1    | Ca_Kabuli_Chr03 | 5292269                 | AA                                     | GG                 | GG               | INTERGENIC      |               |                              |                    |
| SNP_13378_A_5292280 | NC_021162.1    | Ca_Kabuli_Chr03 | 5292280                 | GG                                     | AA                 | AA               | INTERGENIC      |               |                              |                    |
| SNP_13379_A_5304963 | NC_021162.1    | Ca_Kabuli_Chr03 | 5304963                 | GG                                     | AA                 | AA               | INTERGENIC      |               |                              |                    |
| SNP_13380_A_5340461 | NC_021162.1    | Ca_Kabuli_Chr03 | 5340461                 | AA                                     | GG                 | GG               | INTERGENIC      |               |                              |                    |
| SNP_13381_A_5340504 | NC_021162.1    | Ca_Kabuli_Chr03 | 5340504                 | AA                                     | GG                 | GG               | INTERGENIC      |               |                              |                    |
| SNP_13382_A_5340847 | NC_021162.1    | Ca_Kabuli_Chr03 | 5340847                 | TT                                     | CC                 | CC               | INTERGENIC      |               |                              |                    |
| SNP_13383_A_5340876 | NC_021162.1    | Ca_Kabuli_Chr03 | 5340876                 | AA                                     | GG                 | GG               | INTERGENIC      |               |                              |                    |
| SNP_13384_A_5344680 | NC_021162.1    | Ca_Kabuli_Chr03 | 5344680                 | GG                                     | AA                 | AA               | INTERGENIC      |               |                              |                    |
| SNP_13386_A_5460078 | NC_021162.1    | Ca_Kabuli_Chr03 | 5460078                 | GG                                     | AA                 | AA               | INTERGENIC      |               |                              |                    |
| SNP_13387_A_5494578 | NC_021162.1    | Ca_Kabuli_Chr03 | 5494578                 | AA                                     | CC                 | CC               | INTERGENIC      |               |                              |                    |
| SNP_13388_A_5502027 | NC_021162.1    | Ca_Kabuli_Chr03 | 5502027                 | AA                                     | CC                 | CC               | DRR             | 101510873     | uncharacterized LOC101510873 |                    |
| SNP_13390_A_5507725 | NC_021162.1    | Ca_Kabuli_Chr03 | 5507725                 | GG                                     | AA                 | AA               | INTERGENIC      |               |                              |                    |
| SNP_13392_A_5507946 | NC_021162.1    | Ca_Kabuli_Chr03 | 5507946                 | AA                                     | CC                 | CC               | INTERGENIC      |               |                              |                    |
| SNP_13393_A_5508035 | NC_021162.1    | Ca_Kabuli_Chr03 | 5508035                 | GG                                     | TT                 | TT               | INTERGENIC      |               |                              |                    |
| SNP_13394_A_5509903 | NC_021162.1    | Ca_Kabuli_Chr03 | 5509903                 | GG                                     | AA                 | AA               | INTERGENIC      |               |                              |                    |
| SNP_13395_A_5509907 | NC_021162.1    | Ca_Kabuli_Chr03 | 5509907                 | AA                                     | GG                 | GG               | INTERGENIC      |               |                              |                    |
| SNP_13396_A_5509909 | NC_021162.1    | Ca_Kabuli_Chr03 | 5509909                 | GG                                     | TT                 | TT               | INTERGENIC      |               |                              |                    |

| SNPs IDs            | Chromosome IDs | Chromosomes     | Physical positions (bp) | CDC Frontier genome (Reference genome) | (Pusa 1103 & HPNB) | (ILWC 46 & LPNB) | Sequence Components of genome | Gene accession IDs | Putative functions                         |
|---------------------|----------------|-----------------|-------------------------|----------------------------------------|--------------------|------------------|-------------------------------|--------------------|--------------------------------------------|
| SNP_13397_A_5509936 | NC_021162.1    | Ca_Kabuli_Chr03 | 5509936                 | AA                                     | GG                 | GG               | INTERGENIC                    |                    |                                            |
| SNP_13398_A_5510172 | NC_021162.1    | Ca_Kabuli_Chr03 | 5510172                 | TT                                     | GG                 | GG               | INTERGENIC                    |                    |                                            |
| SNP_13399_A_5510189 | NC_021162.1    | Ca_Kabuli_Chr03 | 5510189                 | GG                                     | AA                 | AA               | INTERGENIC                    |                    |                                            |
| SNP_13400_A_5510205 | NC_021162.1    | Ca_Kabuli_Chr03 | 5510205                 | GG                                     | TT                 | TT               | INTERGENIC                    |                    |                                            |
| SNP_13401_A_5510238 | NC_021162.1    | Ca_Kabuli_Chr03 | 5510238                 | TT                                     | CC                 | CC               | INTERGENIC                    |                    |                                            |
| SNP_13404_A_5516814 | NC_021162.1    | Ca_Kabuli_Chr03 | 5516814                 | TT                                     | AA                 | AA               | INTERGENIC                    |                    |                                            |
| SNP_13406_A_5622296 | NC_021162.1    | Ca_Kabuli_Chr03 | 5622296                 | AA                                     | CC                 | CC               | DRR                           | 101489374          | cysteine proteinase inhibitor 5-like       |
| SNP_13407_A_5637283 | NC_021162.1    | Ca_Kabuli_Chr03 | 5637283                 | CC                                     | TT                 | TT               | SYNONYMOUS_CODING             | 101511839          | non-specific lipid-transfer protein A-like |
| SNP_13408_A_5637345 | NC_021162.1    | Ca_Kabuli_Chr03 | 5637345                 | AA                                     | GG                 | GG               | NON_SYNONYMOUS_CODING         | 101511839          | non-specific lipid-transfer protein A-like |
| SNP_13409_A_5637634 | NC_021162.1    | Ca_Kabuli_Chr03 | 5637634                 | CC                                     | GG                 | GG               | URR                           | 101511839          | non-specific lipid-transfer protein A-like |
| SNP_13410_A_5637675 | NC_021162.1    | Ca_Kabuli_Chr03 | 5637675                 | AA                                     | TT                 | TT               | URR                           | 101511839          | non-specific lipid-transfer protein A-like |
| SNP_13411_A_5637769 | NC_021162.1    | Ca_Kabuli_Chr03 | 5637769                 | CC                                     | AA                 | AA               | URR                           | 101511839          | non-specific lipid-transfer protein A-like |
| SNP_13412_A_5647513 | NC_021162.1    | Ca_Kabuli_Chr03 | 5647513                 | GG                                     | AA                 | AA               | NON_SYNONYMOUS_CODING         | 101512151          | non-specific lipid-transfer protein A-like |
| SNP_13413_A_5687388 | NC_021162.1    | Ca_Kabuli_Chr03 | 5687388                 | CC                                     | TT                 | TT               | INTERGENIC                    |                    |                                            |
| SNP_13414_A_5689031 | NC_021162.1    | Ca_Kabuli_Chr03 | 5689031                 | TT                                     | CC                 | CC               | INTERGENIC                    |                    |                                            |
| SNP_13415_A_5689050 | NC_021162.1    | Ca_Kabuli_Chr03 | 5689050                 | CC                                     | TT                 | TT               | INTERGENIC                    |                    |                                            |
| SNP_13417_A_5689357 | NC_021162.1    | Ca_Kabuli_Chr03 | 5689357                 | TT                                     | CC                 | CC               | INTERGENIC                    |                    |                                            |
| SNP_13418_A_5689359 | NC_021162.1    | Ca_Kabuli_Chr03 | 5689359                 | AA                                     | GG                 | GG               | INTERGENIC                    |                    |                                            |
| SNP_13419_A_5692240 | NC_021162.1    | Ca_Kabuli_Chr03 | 5692240                 | TT                                     | AA                 | AA               | INTERGENIC                    |                    |                                            |
| SNP_13420_A_5692263 | NC_021162.1    | Ca_Kabuli_Chr03 | 5692263                 | TT                                     | CC                 | CC               | INTERGENIC                    |                    |                                            |
| SNP_13421_A_5692267 | NC_021162.1    | Ca_Kabuli_Chr03 | 5692267                 | TT                                     | CC                 | CC               | INTERGENIC                    |                    |                                            |
| SNP_13422_A_5692283 | NC_021162.1    | Ca_Kabuli_Chr03 | 5692283                 | GG                                     | AA                 | AA               | INTERGENIC                    |                    |                                            |

| SNPs IDs            | Chromosome IDs | Chromosomes     | Physical positions (bp) | CDC Frontier (Reference genome) | (Pusa 1103 & HPNB) | (ILWC 46 & LPNB) | Sequence Components of genome | Gene accession IDs | Putative functions                                |
|---------------------|----------------|-----------------|-------------------------|---------------------------------|--------------------|------------------|-------------------------------|--------------------|---------------------------------------------------|
| SNP_13423_A_5692466 | NC_021162.1    | Ca_Kabuli_Chr03 | 5692466                 | TT                              | CC                 | CC               | INTERGENIC                    |                    |                                                   |
| SNP_13424_A_5692468 | NC_021162.1    | Ca_Kabuli_Chr03 | 5692468                 | GG                              | AA                 | AA               | INTERGENIC                    |                    |                                                   |
| SNP_13425_A_5716270 | NC_021162.1    | Ca_Kabuli_Chr03 | 5716270                 | AA                              | GG                 | GG               | INTERGENIC                    |                    |                                                   |
| SNP_13426_A_5716306 | NC_021162.1    | Ca_Kabuli_Chr03 | 5716306                 | AA                              | TT                 | TT               | INTERGENIC                    |                    |                                                   |
| SNP_13427_A_5716315 | NC_021162.1    | Ca_Kabuli_Chr03 | 5716315                 | AA                              | CC                 | CC               | INTERGENIC                    |                    |                                                   |
| SNP_13428_A_5717960 | NC_021162.1    | Ca_Kabuli_Chr03 | 5717960                 | TT                              | CC                 | CC               | INTERGENIC                    |                    |                                                   |
| SNP_13429_A_5717996 | NC_021162.1    | Ca_Kabuli_Chr03 | 5717996                 | TT                              | AA                 | AA               | INTERGENIC                    |                    |                                                   |
| SNP_13430_A_5718300 | NC_021162.1    | Ca_Kabuli_Chr03 | 5718300                 | AA                              | CC                 | CC               | INTERGENIC                    |                    |                                                   |
| SNP_13431_A_5730063 | NC_021162.1    | Ca_Kabuli_Chr03 | 5730063                 | CC                              | TT                 | TT               | INTRON                        | 101513562          | truncated transcription factor CAULIFLOWER A-like |
| SNP_13432_A_5805133 | NC_021162.1    | Ca_Kabuli_Chr03 | 5805133                 | AA                              | TT                 | TT               | INTERGENIC                    |                    |                                                   |
| SNP_13433_A_5805214 | NC_021162.1    | Ca_Kabuli_Chr03 | 5805214                 | CC                              | TT                 | TT               | INTERGENIC                    |                    |                                                   |
| SNP_13434_A_5838813 | NC_021162.1    | Ca_Kabuli_Chr03 | 5838813                 | AA                              | CC                 | CC               | INTRON                        | 101490680          | Unknown function                                  |
| SNP_13435_A_5840829 | NC_021162.1    | Ca_Kabuli_Chr03 | 5840829                 | AA                              | GG                 | GG               | INTRON                        | 101490680          | Unknown function                                  |
| SNP_13436_A_5840841 | NC_021162.1    | Ca_Kabuli_Chr03 | 5840841                 | AA                              | GG                 | GG               | INTRON                        | 101490680          | Unknown function                                  |
| SNP_13437_A_5840858 | NC_021162.1    | Ca_Kabuli_Chr03 | 5840858                 | TT                              | GG                 | GG               | INTRON                        | 101490680          | Unknown function                                  |
| SNP_13438_A_5840860 | NC_021162.1    | Ca_Kabuli_Chr03 | 5840860                 | AA                              | GG                 | GG               | INTRON                        | 101490680          | Unknown function                                  |
| SNP_13439_A_5840888 | NC_021162.1    | Ca_Kabuli_Chr03 | 5840888                 | GG                              | TT                 | TT               | INTRON                        | 101490680          | Unknown function                                  |
| SNP_13440_A_5840904 | NC_021162.1    | Ca_Kabuli_Chr03 | 5840904                 | CC                              | TT                 | TT               | INTRON                        | 101490680          | Unknown function                                  |
| SNP_13441_A_5840927 | NC_021162.1    | Ca_Kabuli_Chr03 | 5840927                 | AA                              | GG                 | GG               | INTRON                        | 101490680          | Unknown function                                  |
| SNP_13442_A_5841031 | NC_021162.1    | Ca_Kabuli_Chr03 | 5841031                 | AA                              | GG                 | GG               | INTRON                        | 101490680          | Unknown function                                  |
| SNP_13443_A_5841413 | NC_021162.1    | Ca_Kabuli_Chr03 | 5841413                 | AA                              | GG                 | GG               | INTRON                        | 101490680          | Unknown function                                  |
| SNP_13444_A_5900893 | NC_021162.1    | Ca_Kabuli_Chr03 | 5900893                 | GG                              | AA                 | AA               | INTERGENIC                    |                    |                                                   |

| SNPs IDs            | Chromosome IDs | Chromosomes     | Physical positions (bp) | CDC Frontier genome (Reference genome) | (Pusa 1103 & HPNB) | (ILWC 46 & LPNB) | Sequence genome | Components of | Gene accession IDs | Putative functions |
|---------------------|----------------|-----------------|-------------------------|----------------------------------------|--------------------|------------------|-----------------|---------------|--------------------|--------------------|
| SNP_13445_A_5900897 | NC_021162.1    | Ca_Kabuli_Chr03 | 5900897                 | CC                                     | TT                 | TT               | INTERGENIC      |               |                    |                    |
| SNP_13446_A_5900902 | NC_021162.1    | Ca_Kabuli_Chr03 | 5900902                 | GG                                     | AA                 | AA               | INTERGENIC      |               |                    |                    |
| SNP_13447_A_5910255 | NC_021162.1    | Ca_Kabuli_Chr03 | 5910255                 | AA                                     | GG                 | GG               | INTERGENIC      |               |                    |                    |
| SNP_13449_A_5922757 | NC_021162.1    | Ca_Kabuli_Chr03 | 5922757                 | AA                                     | GG                 | GG               | INTERGENIC      |               |                    |                    |
| SNP_13450_A_5923068 | NC_021162.1    | Ca_Kabuli_Chr03 | 5923068                 | AA                                     | GG                 | GG               | INTERGENIC      |               |                    |                    |
| SNP_13451_A_5936213 | NC_021162.1    | Ca_Kabuli_Chr03 | 5936213                 | TT                                     | CC                 | CC               | INTERGENIC      |               |                    |                    |
| SNP_13452_A_5936579 | NC_021162.1    | Ca_Kabuli_Chr03 | 5936579                 | CC                                     | TT                 | TT               | INTERGENIC      |               |                    |                    |
| SNP_13453_A_5936608 | NC_021162.1    | Ca_Kabuli_Chr03 | 5936608                 | TT                                     | AA                 | AA               | INTERGENIC      |               |                    |                    |
| SNP_13454_A_5936665 | NC_021162.1    | Ca_Kabuli_Chr03 | 5936665                 | CC                                     | TT                 | TT               | INTERGENIC      |               |                    |                    |
| SNP_13455_A_5936666 | NC_021162.1    | Ca_Kabuli_Chr03 | 5936666                 | AA                                     | GG                 | GG               | INTERGENIC      |               |                    |                    |
| SNP_13456_A_5936668 | NC_021162.1    | Ca_Kabuli_Chr03 | 5936668                 | GG                                     | AA                 | AA               | INTERGENIC      |               |                    |                    |
| SNP_13457_A_5943814 | NC_021162.1    | Ca_Kabuli_Chr03 | 5943814                 | GG                                     | CC                 | CC               | INTERGENIC      |               |                    |                    |
| SNP_13458_A_5959132 | NC_021162.1    | Ca_Kabuli_Chr03 | 5959132                 | TT                                     | CC                 | CC               | INTERGENIC      |               |                    |                    |
| SNP_13459_A_5959211 | NC_021162.1    | Ca_Kabuli_Chr03 | 5959211                 | TT                                     | CC                 | CC               | INTERGENIC      |               |                    |                    |
| SNP_13460_A_5959222 | NC_021162.1    | Ca_Kabuli_Chr03 | 5959222                 | AA                                     | TT                 | TT               | INTERGENIC      |               |                    |                    |
| SNP_13461_A_5967019 | NC_021162.1    | Ca_Kabuli_Chr03 | 5967019                 | GG                                     | CC                 | CC               | INTERGENIC      |               |                    |                    |
| SNP_13462_A_5970699 | NC_021162.1    | Ca_Kabuli_Chr03 | 5970699                 | AA                                     | TT                 | TT               | INTERGENIC      |               |                    |                    |
| SNP_13463_A_5993515 | NC_021162.1    | Ca_Kabuli_Chr03 | 5993515                 | TT                                     | CC                 | CC               | INTERGENIC      |               |                    |                    |
| SNP_13464_A_5994269 | NC_021162.1    | Ca_Kabuli_Chr03 | 5994269                 | AA                                     | CC                 | CC               | INTERGENIC      |               |                    |                    |
| SNP_13465_A_5994298 | NC_021162.1    | Ca_Kabuli_Chr03 | 5994298                 | TT                                     | AA                 | GG               | INTERGENIC      |               |                    |                    |
| SNP_13466_A_6004267 | NC_021162.1    | Ca_Kabuli_Chr03 | 6004267                 | AA                                     | TT                 | TT               | INTERGENIC      |               |                    |                    |
| SNP_13467_A_6004312 | NC_021162.1    | Ca_Kabuli_Chr03 | 6004312                 | AA                                     | GG                 | GG               | INTERGENIC      |               |                    |                    |

| SNPs IDs            | Chromosome IDs | Chromosomes     | Physical positions (bp) | CDC Frontier genome (Reference genome) | (Pusa 1103 & HPNB) | (ILWC 46 & LPNB) | Sequence genome | Components of | Gene accession IDs | Putative functions |
|---------------------|----------------|-----------------|-------------------------|----------------------------------------|--------------------|------------------|-----------------|---------------|--------------------|--------------------|
| SNP_13468_A_6004732 | NC_021162.1    | Ca_Kabuli_Chr03 | 6004732                 | AA                                     | GG                 | GG               | INTERGENIC      |               |                    |                    |
| SNP_13469_A_6004797 | NC_021162.1    | Ca_Kabuli_Chr03 | 6004797                 | AA                                     | GG                 | GG               | INTERGENIC      |               |                    |                    |
| SNP_13470_A_6030829 | NC_021162.1    | Ca_Kabuli_Chr03 | 6030829                 | TT                                     | CC                 | CC               | INTERGENIC      |               |                    |                    |
| SNP_13471_A_6030871 | NC_021162.1    | Ca_Kabuli_Chr03 | 6030871                 | TT                                     | GG                 | GG               | INTERGENIC      |               |                    |                    |
| SNP_13472_A_6031035 | NC_021162.1    | Ca_Kabuli_Chr03 | 6031035                 | GG                                     | AA                 | AA               | INTERGENIC      |               |                    |                    |
| SNP_13473_A_6031082 | NC_021162.1    | Ca_Kabuli_Chr03 | 6031082                 | TT                                     | CC                 | CC               | INTERGENIC      |               |                    |                    |
| SNP_13474_A_6031215 | NC_021162.1    | Ca_Kabuli_Chr03 | 6031215                 | TT                                     | CC                 | CC               | INTERGENIC      |               |                    |                    |
| SNP_13475_A_6031225 | NC_021162.1    | Ca_Kabuli_Chr03 | 6031225                 | AA                                     | CC                 | CC               | INTERGENIC      |               |                    |                    |
| SNP_13476_A_6031238 | NC_021162.1    | Ca_Kabuli_Chr03 | 6031238                 | GG                                     | AA                 | AA               | INTERGENIC      |               |                    |                    |
| SNP_13477_A_6031433 | NC_021162.1    | Ca_Kabuli_Chr03 | 6031433                 | GG                                     | AA                 | AA               | INTERGENIC      |               |                    |                    |
| SNP_13478_A_6031451 | NC_021162.1    | Ca_Kabuli_Chr03 | 6031451                 | TT                                     | CC                 | CC               | INTERGENIC      |               |                    |                    |
| SNP_13479_A_6031463 | NC_021162.1    | Ca_Kabuli_Chr03 | 6031463                 | GG                                     | AA                 | AA               | INTERGENIC      |               |                    |                    |
| SNP_13480_A_6031466 | NC_021162.1    | Ca_Kabuli_Chr03 | 6031466                 | CC                                     | TT                 | TT               | INTERGENIC      |               |                    |                    |
| SNP_13481_A_6031496 | NC_021162.1    | Ca_Kabuli_Chr03 | 6031496                 | AA                                     | TT                 | TT               | INTERGENIC      |               |                    |                    |
| SNP_13482_A_6037644 | NC_021162.1    | Ca_Kabuli_Chr03 | 6037644                 | TT                                     | CC                 | CC               | INTERGENIC      |               |                    |                    |
| SNP_13483_A_6037759 | NC_021162.1    | Ca_Kabuli_Chr03 | 6037759                 | TT                                     | CC                 | CC               | INTERGENIC      |               |                    |                    |
| SNP_13484_A_6037762 | NC_021162.1    | Ca_Kabuli_Chr03 | 6037762                 | CC                                     | TT                 | TT               | INTERGENIC      |               |                    |                    |
| SNP_13485_A_6037800 | NC_021162.1    | Ca_Kabuli_Chr03 | 6037800                 | CC                                     | AA                 | AA               | INTERGENIC      |               |                    |                    |
| SNP_13486_A_6056636 | NC_021162.1    | Ca_Kabuli_Chr03 | 6056636                 | GG                                     | TT                 | TT               | INTERGENIC      |               |                    |                    |
| SNP_13487_A_6104435 | NC_021162.1    | Ca_Kabuli_Chr03 | 6104435                 | CC                                     | GG                 | GG               | INTERGENIC      |               |                    |                    |
| SNP_13488_A_6104594 | NC_021162.1    | Ca_Kabuli_Chr03 | 6104594                 | TT                                     | GG                 | GG               | INTERGENIC      |               |                    |                    |
| SNP_13489_A_6104777 | NC_021162.1    | Ca_Kabuli_Chr03 | 6104777                 | CC                                     | GG                 | GG               | INTERGENIC      |               |                    |                    |

| SNPs IDs            | Chromosome IDs | Chromosomes     | Physical positions (bp) | CDC Frontier (Reference genome) | (Pusa 1103 & HPNB) | (ILWC 46 & LPNB) | Sequence genome | Components of | Gene accession IDs | Putative functions |
|---------------------|----------------|-----------------|-------------------------|---------------------------------|--------------------|------------------|-----------------|---------------|--------------------|--------------------|
| SNP_13490_A_6117690 | NC_021162.1    | Ca_Kabuli_Chr03 | 6117690                 | TT                              | GG                 | GG               | INTERGENIC      |               |                    |                    |
| SNP_13491_A_6157667 | NC_021162.1    | Ca_Kabuli_Chr03 | 6157667                 | TT                              | GG                 | GG               | INTERGENIC      |               |                    |                    |
| SNP_13492_A_6234452 | NC_021162.1    | Ca_Kabuli_Chr03 | 6234452                 | TT                              | CC                 | CC               | INTERGENIC      |               |                    |                    |
| SNP_13493_A_6234453 | NC_021162.1    | Ca_Kabuli_Chr03 | 6234453                 | TT                              | CC                 | CC               | INTERGENIC      |               |                    |                    |
| SNP_13494_A_6243880 | NC_021162.1    | Ca_Kabuli_Chr03 | 6243880                 | AA                              | GG                 | GG               | INTERGENIC      |               |                    |                    |
| SNP_13495_A_6243889 | NC_021162.1    | Ca_Kabuli_Chr03 | 6243889                 | CC                              | TT                 | TT               | INTERGENIC      |               |                    |                    |
| SNP_13498_A_6297129 | NC_021162.1    | Ca_Kabuli_Chr03 | 6297129                 | GG                              | AA                 | AA               | INTERGENIC      |               |                    |                    |
| SNP_13500_A_6328620 | NC_021162.1    | Ca_Kabuli_Chr03 | 6328620                 | GG                              | TT                 | TT               | INTERGENIC      |               |                    |                    |
| SNP_13501_A_6328696 | NC_021162.1    | Ca_Kabuli_Chr03 | 6328696                 | CC                              | TT                 | TT               | INTERGENIC      |               |                    |                    |
| SNP_13502_A_6331120 | NC_021162.1    | Ca_Kabuli_Chr03 | 6331120                 | AA                              | GG                 | GG               | INTERGENIC      |               |                    |                    |
| SNP_13503_A_6333759 | NC_021162.1    | Ca_Kabuli_Chr03 | 6333759                 | AA                              | TT                 | TT               | INTERGENIC      |               |                    |                    |
| SNP_13504_A_6333827 | NC_021162.1    | Ca_Kabuli_Chr03 | 6333827                 | AA                              | GG                 | GG               | INTERGENIC      |               |                    |                    |
| SNP_13505_A_6362632 | NC_021162.1    | Ca_Kabuli_Chr03 | 6362632                 | GG                              | AA                 | AA               | INTERGENIC      |               |                    |                    |
| SNP_13506_A_6371793 | NC_021162.1    | Ca_Kabuli_Chr03 | 6371793                 | CC                              | TT                 | TT               | INTERGENIC      |               |                    |                    |
| SNP_13507_A_6371941 | NC_021162.1    | Ca_Kabuli_Chr03 | 6371941                 | CC                              | TT                 | TT               | INTERGENIC      |               |                    |                    |
| SNP_13508_A_6371988 | NC_021162.1    | Ca_Kabuli_Chr03 | 6371988                 | GG                              | AA                 | AA               | INTERGENIC      |               |                    |                    |
| SNP_13509_A_6372002 | NC_021162.1    | Ca_Kabuli_Chr03 | 6372002                 | TT                              | AA                 | AA               | INTERGENIC      |               |                    |                    |
| SNP_13510_A_6372004 | NC_021162.1    | Ca_Kabuli_Chr03 | 6372004                 | AA                              | GG                 | GG               | INTERGENIC      |               |                    |                    |
| SNP_13512_A_6372228 | NC_021162.1    | Ca_Kabuli_Chr03 | 6372228                 | AA                              | TT                 | TT               | INTERGENIC      |               |                    |                    |
| SNP_13513_A_6372262 | NC_021162.1    | Ca_Kabuli_Chr03 | 6372262                 | AA                              | CC                 | CC               | INTERGENIC      |               |                    |                    |
| SNP_13514_A_6372264 | NC_021162.1    | Ca_Kabuli_Chr03 | 6372264                 | AA                              | TT                 | TT               | INTERGENIC      |               |                    |                    |
| SNP_13517_A_6373630 | NC_021162.1    | Ca_Kabuli_Chr03 | 6373630                 | AA                              | GG                 | GG               | INTERGENIC      |               |                    |                    |



| SNPs IDs            | Chromosome IDs | Chromosomes     | Physical positions (bp) | CDC Frontier genome (Reference genome) | (Pusa 1103 & HPNB) | (ILWC 46 & LPNB) | Sequence genome | Components of | Gene accession IDs | Putative functions |
|---------------------|----------------|-----------------|-------------------------|----------------------------------------|--------------------|------------------|-----------------|---------------|--------------------|--------------------|
| SNP_13518_A_6386864 | NC_021162.1    | Ca_Kabuli_Chr03 | 6386864                 | TT                                     | CC                 | CC               | INTERGENIC      |               |                    |                    |
| SNP_13519_A_6386896 | NC_021162.1    | Ca_Kabuli_Chr03 | 6386896                 | CC                                     | TT                 | TT               | INTERGENIC      |               |                    |                    |
| SNP_13520_A_6386928 | NC_021162.1    | Ca_Kabuli_Chr03 | 6386928                 | TT                                     | CC                 | CC               | INTERGENIC      |               |                    |                    |
| SNP_13522_A_6386943 | NC_021162.1    | Ca_Kabuli_Chr03 | 6386943                 | GG                                     | AA                 | AA               | INTERGENIC      |               |                    |                    |
| SNP_13523_A_6426786 | NC_021162.1    | Ca_Kabuli_Chr03 | 6426786                 | CC                                     | TT                 | TT               | INTERGENIC      |               |                    |                    |
| SNP_13524_A_6428253 | NC_021162.1    | Ca_Kabuli_Chr03 | 6428253                 | TT                                     | AA                 | AA               | INTERGENIC      |               |                    |                    |
| SNP_13525_A_6430648 | NC_021162.1    | Ca_Kabuli_Chr03 | 6430648                 | TT                                     | CC                 | CC               | INTERGENIC      |               |                    |                    |
| SNP_13526_A_6430649 | NC_021162.1    | Ca_Kabuli_Chr03 | 6430649                 | AA                                     | GG                 | GG               | INTERGENIC      |               |                    |                    |
| SNP_13527_A_6448669 | NC_021162.1    | Ca_Kabuli_Chr03 | 6448669                 | TT                                     | CC                 | CC               | INTERGENIC      |               |                    |                    |
| SNP_13528_A_6474373 | NC_021162.1    | Ca_Kabuli_Chr03 | 6474373                 | AA                                     | TT                 | TT               | INTERGENIC      |               |                    |                    |
| SNP_13529_A_6474374 | NC_021162.1    | Ca_Kabuli_Chr03 | 6474374                 | AA                                     | TT                 | TT               | INTERGENIC      |               |                    |                    |
| SNP_13530_A_6519841 | NC_021162.1    | Ca_Kabuli_Chr03 | 6519841                 | AA                                     | GG                 | GG               | INTERGENIC      |               |                    |                    |
| SNP_13531_A_6520284 | NC_021162.1    | Ca_Kabuli_Chr03 | 6520284                 | AA                                     | GG                 | GG               | INTERGENIC      |               |                    |                    |
| SNP_13532_A_6520291 | NC_021162.1    | Ca_Kabuli_Chr03 | 6520291                 | CC                                     | TT                 | TT               | INTERGENIC      |               |                    |                    |
| SNP_13533_A_6527298 | NC_021162.1    | Ca_Kabuli_Chr03 | 6527298                 | TT                                     | GG                 | GG               | INTERGENIC      |               |                    |                    |
| SNP_13534_A_6527301 | NC_021162.1    | Ca_Kabuli_Chr03 | 6527301                 | GG                                     | AA                 | AA               | INTERGENIC      |               |                    |                    |
| SNP_13535_A_6527322 | NC_021162.1    | Ca_Kabuli_Chr03 | 6527322                 | TT                                     | CC                 | CC               | INTERGENIC      |               |                    |                    |
| SNP_13536_A_6566874 | NC_021162.1    | Ca_Kabuli_Chr03 | 6566874                 | CC                                     | TT                 | TT               | INTERGENIC      |               |                    |                    |
| SNP_13537_A_6569728 | NC_021162.1    | Ca_Kabuli_Chr03 | 6569728                 | CC                                     | TT                 | TT               | INTERGENIC      |               |                    |                    |
| SNP_13538_A_6581942 | NC_021162.1    | Ca_Kabuli_Chr03 | 6581942                 | GG                                     | AA                 | AA               | INTERGENIC      |               |                    |                    |
| SNP_13539_A_6582270 | NC_021162.1    | Ca_Kabuli_Chr03 | 6582270                 | TT                                     | CC                 | CC               | INTERGENIC      |               |                    |                    |
| SNP_13540_A_6583701 | NC_021162.1    | Ca_Kabuli_Chr03 | 6583701                 | CC                                     | GG                 | GG               | INTERGENIC      |               |                    |                    |

| SNPs IDs            | Chromosome IDs | Chromosomes     | Physical positions (bp) | CDC Frontier (Reference genome) | (Pusa 1103 & HPNB) | (ILWC 46 & LPNB) | Sequence genome | Components of | Gene accession IDs | Putative functions |
|---------------------|----------------|-----------------|-------------------------|---------------------------------|--------------------|------------------|-----------------|---------------|--------------------|--------------------|
| SNP_13542_A_6587860 | NC_021162.1    | Ca_Kabuli_Chr03 | 6587860                 | AA                              | GG                 | GG               | INTERGENIC      |               |                    |                    |
| SNP_13543_A_6588348 | NC_021162.1    | Ca_Kabuli_Chr03 | 6588348                 | TT                              | AA                 | AA               | INTERGENIC      |               |                    |                    |
| SNP_13544_A_6588638 | NC_021162.1    | Ca_Kabuli_Chr03 | 6588638                 | CC                              | TT                 | TT               | INTERGENIC      |               |                    |                    |
| SNP_13545_A_6588778 | NC_021162.1    | Ca_Kabuli_Chr03 | 6588778                 | TT                              | GG                 | GG               | INTERGENIC      |               |                    |                    |
| SNP_13546_A_6588920 | NC_021162.1    | Ca_Kabuli_Chr03 | 6588920                 | GG                              | AA                 | AA               | INTERGENIC      |               |                    |                    |
| SNP_13547_A_6589283 | NC_021162.1    | Ca_Kabuli_Chr03 | 6589283                 | CC                              | AA                 | AA               | INTERGENIC      |               |                    |                    |
| SNP_13548_A_6590181 | NC_021162.1    | Ca_Kabuli_Chr03 | 6590181                 | CC                              | TT                 | TT               | INTERGENIC      |               |                    |                    |
| SNP_13549_A_6590380 | NC_021162.1    | Ca_Kabuli_Chr03 | 6590380                 | GG                              | AA                 | AA               | INTERGENIC      |               |                    |                    |
| SNP_13550_A_6590452 | NC_021162.1    | Ca_Kabuli_Chr03 | 6590452                 | CC                              | AA                 | AA               | INTERGENIC      |               |                    |                    |
| SNP_13551_A_6591729 | NC_021162.1    | Ca_Kabuli_Chr03 | 6591729                 | TT                              | GG                 | GG               | INTERGENIC      |               |                    |                    |
| SNP_13552_A_6592074 | NC_021162.1    | Ca_Kabuli_Chr03 | 6592074                 | CC                              | TT                 | TT               | INTERGENIC      |               |                    |                    |
| SNP_13553_A_6599039 | NC_021162.1    | Ca_Kabuli_Chr03 | 6599039                 | TT                              | CC                 | CC               | INTERGENIC      |               |                    |                    |
| SNP_13554_A_6599058 | NC_021162.1    | Ca_Kabuli_Chr03 | 6599058                 | AA                              | CC                 | CC               | INTERGENIC      |               |                    |                    |
| SNP_13555_A_6599070 | NC_021162.1    | Ca_Kabuli_Chr03 | 6599070                 | TT                              | CC                 | CC               | INTERGENIC      |               |                    |                    |
| SNP_13556_A_6599081 | NC_021162.1    | Ca_Kabuli_Chr03 | 6599081                 | CC                              | TT                 | TT               | INTERGENIC      |               |                    |                    |
| SNP_13557_A_6599095 | NC_021162.1    | Ca_Kabuli_Chr03 | 6599095                 | GG                              | CC                 | CC               | INTERGENIC      |               |                    |                    |
| SNP_13558_A_6599098 | NC_021162.1    | Ca_Kabuli_Chr03 | 6599098                 | TT                              | AA                 | AA               | INTERGENIC      |               |                    |                    |
| SNP_13559_A_6599124 | NC_021162.1    | Ca_Kabuli_Chr03 | 6599124                 | TT                              | AA                 | AA               | INTERGENIC      |               |                    |                    |
| SNP_13560_A_6599143 | NC_021162.1    | Ca_Kabuli_Chr03 | 6599143                 | TT                              | CC                 | CC               | INTERGENIC      |               |                    |                    |
| SNP_13561_A_6599149 | NC_021162.1    | Ca_Kabuli_Chr03 | 6599149                 | TT                              | CC                 | CC               | INTERGENIC      |               |                    |                    |
| SNP_13562_A_6599174 | NC_021162.1    | Ca_Kabuli_Chr03 | 6599174                 | AA                              | TT                 | TT               | INTERGENIC      |               |                    |                    |
| SNP_13563_A_6599175 | NC_021162.1    | Ca_Kabuli_Chr03 | 6599175                 | TT                              | AA                 | AA               | INTERGENIC      |               |                    |                    |

| SNPs IDs            | Chromosome IDs | Chromosomes     | Physical positions (bp) | CDC Frontier (Reference genome) | (Pusa 1103 & HPNB) | (ILWC 46 & LPNB) | Sequence Components of genome | Gene accession IDs | Putative functions                                  |
|---------------------|----------------|-----------------|-------------------------|---------------------------------|--------------------|------------------|-------------------------------|--------------------|-----------------------------------------------------|
| SNP_13564_A_6599208 | NC_021162.1    | Ca_Kabuli_Chr03 | 6599208                 | AA                              | GG                 | GG               | INTERGENIC                    |                    |                                                     |
| SNP_13565_A_6599217 | NC_021162.1    | Ca_Kabuli_Chr03 | 6599217                 | TT                              | AA                 | AA               | INTERGENIC                    |                    |                                                     |
| SNP_13566_A_6599258 | NC_021162.1    | Ca_Kabuli_Chr03 | 6599258                 | CC                              | AA                 | AA               | INTERGENIC                    |                    |                                                     |
| SNP_13567_A_6599482 | NC_021162.1    | Ca_Kabuli_Chr03 | 6599482                 | GG                              | AA                 | AA               | INTERGENIC                    |                    |                                                     |
| SNP_13568_A_6599878 | NC_021162.1    | Ca_Kabuli_Chr03 | 6599878                 | CC                              | GG                 | GG               | INTERGENIC                    |                    |                                                     |
| SNP_13569_A_6600101 | NC_021162.1    | Ca_Kabuli_Chr03 | 6600101                 | AA                              | GG                 | GG               | INTERGENIC                    |                    |                                                     |
| SNP_13570_A_6600484 | NC_021162.1    | Ca_Kabuli_Chr03 | 6600484                 | AA                              | GG                 | GG               | INTERGENIC                    |                    |                                                     |
| SNP_13571_A_6600839 | NC_021162.1    | Ca_Kabuli_Chr03 | 6600839                 | CC                              | AA                 | AA               | INTERGENIC                    |                    |                                                     |
| SNP_13572_A_6601618 | NC_021162.1    | Ca_Kabuli_Chr03 | 6601618                 | CC                              | TT                 | TT               | INTERGENIC                    |                    |                                                     |
| SNP_13573_A_6608861 | NC_021162.1    | Ca_Kabuli_Chr03 | 6608861                 | TT                              | AA                 | AA               | INTERGENIC                    |                    |                                                     |
| SNP_13574_A_6626764 | NC_021162.1    | Ca_Kabuli_Chr03 | 6626764                 | AA                              | CC                 | CC               | DRR                           | 101496170          | pyruvate kinase, cytosolic isozyme-like             |
| SNP_13575_A_6628150 | NC_021162.1    | Ca_Kabuli_Chr03 | 6628150                 | AA                              | TT                 | TT               | INTRON                        | 101496170          | pyruvate kinase, cytosolic isozyme-like             |
| SNP_13576_A_6647487 | NC_021162.1    | Ca_Kabuli_Chr03 | 6647487                 | TT                              | CC                 | CC               | INTERGENIC                    |                    |                                                     |
| SNP_13577_A_6649696 | NC_021162.1    | Ca_Kabuli_Chr03 | 6649696                 | GG                              | AA                 | AA               | INTERGENIC                    |                    |                                                     |
| SNP_13579_A_6668661 | NC_021162.1    | Ca_Kabuli_Chr03 | 6668661                 | AA                              | GG                 | GG               | INTERGENIC                    |                    |                                                     |
| SNP_13581_A_6675431 | NC_021162.1    | Ca_Kabuli_Chr03 | 6675431                 | AA                              | GG                 | GG               | INTRON                        | 101496723          | pre-mRNA-processing ATP-dependent RNA helicase prp5 |
| SNP_13582_A_6675470 | NC_021162.1    | Ca_Kabuli_Chr03 | 6675470                 | GG                              | TT                 | TT               | INTRON                        | 101496723          | pre-mRNA-processing ATP-dependent RNA helicase prp5 |
| SNP_13583_A_6675544 | NC_021162.1    | Ca_Kabuli_Chr03 | 6675544                 | TT                              | CC                 | CC               | INTRON                        | 101496723          | pre-mRNA-processing ATP-dependent RNA helicase prp5 |
| SNP_13584_A_6675562 | NC_021162.1    | Ca_Kabuli_Chr03 | 6675562                 | AA                              | GG                 | GG               | INTRON                        | 101496723          | pre-mRNA-processing ATP-dependent RNA helicase prp5 |
| SNP_13585_A_6675633 | NC_021162.1    | Ca_Kabuli_Chr03 | 6675633                 | TT                              | GG                 | GG               | INTRON                        | 101496723          | pre-mRNA-processing ATP-dependent RNA helicase prp5 |
| SNP_13587_A_6675959 | NC_021162.1    | Ca_Kabuli_Chr03 | 6675959                 | GG                              | TT                 | TT               | INTRON                        | 101496723          | pre-mRNA-processing ATP-dependent RNA helicase prp5 |
| SNP_13588_A_6675964 | NC_021162.1    | Ca_Kabuli_Chr03 | 6675964                 | GG                              | AA                 | AA               | INTRON                        | 101496723          | pre-mRNA-processing ATP-dependent RNA helicase prp5 |

| SNPs IDs            | Chromosome IDs | Chromosomes     | Physical positions (bp) | CDC Frontier genome (Reference genome) | (Pusa 1103 & HPNB) | (ILWC 46 & LPNB) | Sequence Components of genome | Gene accession IDs | Putative functions                                          |
|---------------------|----------------|-----------------|-------------------------|----------------------------------------|--------------------|------------------|-------------------------------|--------------------|-------------------------------------------------------------|
| SNP_13590_A_6675977 | NC_021162.1    | Ca_Kabuli_Chr03 | 6675977                 | CC                                     | TT                 | TT               | INTRON                        | 101496723          | pre-mRNA-processing ATP-dependent RNA helicase prp5         |
| SNP_13591_A_6698037 | NC_021162.1    | Ca_Kabuli_Chr03 | 6698037                 | AA                                     | GG                 | GG               | INTERGENIC                    |                    |                                                             |
| SNP_13592_A_6724711 | NC_021162.1    | Ca_Kabuli_Chr03 | 6724711                 | TT                                     | CC                 | CC               | INTERGENIC                    |                    |                                                             |
| SNP_13593_A_6724712 | NC_021162.1    | Ca_Kabuli_Chr03 | 6724712                 | TT                                     | CC                 | CC               | INTERGENIC                    |                    |                                                             |
| SNP_13594_A_6734840 | NC_021162.1    | Ca_Kabuli_Chr03 | 6734840                 | GG                                     | AA                 | AA               | INTERGENIC                    |                    |                                                             |
| SNP_13595_A_6734844 | NC_021162.1    | Ca_Kabuli_Chr03 | 6734844                 | CC                                     | TT                 | TT               | INTERGENIC                    |                    |                                                             |
| SNP_13596_A_6735548 | NC_021162.1    | Ca_Kabuli_Chr03 | 6735548                 | CC                                     | AA                 | AA               | INTERGENIC                    |                    |                                                             |
| SNP_13597_A_6739882 | NC_021162.1    | Ca_Kabuli_Chr03 | 6739882                 | AA                                     | GG                 | GG               | INTERGENIC                    |                    |                                                             |
| SNP_13598_A_6740213 | NC_021162.1    | Ca_Kabuli_Chr03 | 6740213                 | AA                                     | GG                 | GG               | INTERGENIC                    |                    |                                                             |
| SNP_13599_A_6749184 | NC_021162.1    | Ca_Kabuli_Chr03 | 6749184                 | CC                                     | AA                 | AA               | INTRON                        | 101497363          | glycerol-3-phosphate dehydrogenase SDP6, mitochondrial-like |
| SNP_13600_A_6772524 | NC_021162.1    | Ca_Kabuli_Chr03 | 6772524                 | TT                                     | CC                 | CC               | URR                           | 101511194          | pentatricopeptide repeat-containing protein At3g29230-like  |
| SNP_13601_A_6772552 | NC_021162.1    | Ca_Kabuli_Chr03 | 6772552                 | CC                                     | TT                 | TT               | URR                           | 101511194          | pentatricopeptide repeat-containing protein At3g29230-like  |
| SNP_13602_A_6772738 | NC_021162.1    | Ca_Kabuli_Chr03 | 6772738                 | AA                                     | GG                 | GG               | URR                           | 101511194          | pentatricopeptide repeat-containing protein At3g29230-like  |
| SNP_13603_A_6772746 | NC_021162.1    | Ca_Kabuli_Chr03 | 6772746                 | AA                                     | GG                 | GG               | URR                           | 101511194          | pentatricopeptide repeat-containing protein At3g29230-like  |
| SNP_13604_A_6772870 | NC_021162.1    | Ca_Kabuli_Chr03 | 6772870                 | TT                                     | CC                 | CC               | URR                           | 101511194          | pentatricopeptide repeat-containing protein At3g29230-like  |
| SNP_13606_A_6773044 | NC_021162.1    | Ca_Kabuli_Chr03 | 6773044                 | CC                                     | AA                 | AA               | URR                           | 101511194          | pentatricopeptide repeat-containing protein At3g29230-like  |
| SNP_13607_A_6773169 | NC_021162.1    | Ca_Kabuli_Chr03 | 6773169                 | GG                                     | AA                 | AA               | URR                           | 101511194          | pentatricopeptide repeat-containing protein At3g29230-like  |
| SNP_13608_A_6773171 | NC_021162.1    | Ca_Kabuli_Chr03 | 6773171                 | AA                                     | GG                 | GG               | URR                           | 101511194          | pentatricopeptide repeat-containing protein At3g29230-like  |
| SNP_13609_A_6773439 | NC_021162.1    | Ca_Kabuli_Chr03 | 6773439                 | TT                                     | CC                 | CC               | URR                           | 101511194          | pentatricopeptide repeat-containing protein At3g29230-like  |
| SNP_13610_A_6773443 | NC_021162.1    | Ca_Kabuli_Chr03 | 6773443                 | TT                                     | CC                 | CC               | URR                           | 101511194          | pentatricopeptide repeat-containing protein At3g29230-like  |
| SNP_13611_A_6773447 | NC_021162.1    | Ca_Kabuli_Chr03 | 6773447                 | GG                                     | AA                 | AA               | URR                           | 101511194          | pentatricopeptide repeat-containing protein At3g29230-like  |
| SNP_13612_A_6773481 | NC_021162.1    | Ca_Kabuli_Chr03 | 6773481                 | TT                                     | CC                 | CC               | URR                           | 101511194          | pentatricopeptide repeat-containing protein At3g29230-like  |

| SNPs IDs            | Chromosome IDs | Chromosomes     | Physical positions (bp) | CDC Frontier genome (Reference genome) | (Pusa 1103 & HPNB) | (ILWC 46 & LPNB) | Sequence Components of genome | Gene accession IDs | Putative functions                                         |
|---------------------|----------------|-----------------|-------------------------|----------------------------------------|--------------------|------------------|-------------------------------|--------------------|------------------------------------------------------------|
| SNP_13613_A_6774057 | NC_021162.1    | Ca_Kabuli_Chr03 | 6774057                 | CC                                     | TT                 | TT               | INTERGENIC                    |                    |                                                            |
| SNP_13615_A_6774146 | NC_021162.1    | Ca_Kabuli_Chr03 | 6774146                 | GG                                     | AA                 | AA               | INTERGENIC                    |                    |                                                            |
| SNP_13616_A_6774235 | NC_021162.1    | Ca_Kabuli_Chr03 | 6774235                 | CC                                     | AA                 | AA               | INTERGENIC                    |                    |                                                            |
| SNP_13617_A_6777878 | NC_021162.1    | Ca_Kabuli_Chr03 | 6777878                 | CC                                     | TT                 | TT               | URR                           | 101498692          | uncharacterized LOC101498692                               |
| SNP_13618_A_6780284 | NC_021162.1    | Ca_Kabuli_Chr03 | 6780284                 | AA                                     | GG                 | GG               | INTERGENIC                    |                    |                                                            |
| SNP_13619_A_6780560 | NC_021162.1    | Ca_Kabuli_Chr03 | 6780560                 | GG                                     | AA                 | AA               | INTERGENIC                    |                    |                                                            |
| SNP_13620_A_6780692 | NC_021162.1    | Ca_Kabuli_Chr03 | 6780692                 | TT                                     | AA                 | AA               | INTERGENIC                    |                    |                                                            |
| SNP_13621_A_6780770 | NC_021162.1    | Ca_Kabuli_Chr03 | 6780770                 | TT                                     | CC                 | CC               | INTERGENIC                    |                    |                                                            |
| SNP_13622_A_6780894 | NC_021162.1    | Ca_Kabuli_Chr03 | 6780894                 | GG                                     | AA                 | AA               | INTERGENIC                    |                    |                                                            |
| SNP_13623_A_6781030 | NC_021162.1    | Ca_Kabuli_Chr03 | 6781030                 | TT                                     | AA                 | AA               | INTERGENIC                    |                    |                                                            |
| SNP_13624_A_6781062 | NC_021162.1    | Ca_Kabuli_Chr03 | 6781062                 | TT                                     | GG                 | GG               | INTERGENIC                    |                    |                                                            |
| SNP_13625_A_6781245 | NC_021162.1    | Ca_Kabuli_Chr03 | 6781245                 | AA                                     | CC                 | CC               | INTERGENIC                    |                    |                                                            |
| SNP_13627_A_6790084 | NC_021162.1    | Ca_Kabuli_Chr03 | 6790084                 | GG                                     | AA                 | AA               | DRR                           | 101512152          | pentatricopeptide repeat-containing protein At3g29230-like |
| SNP_13628_A_6790188 | NC_021162.1    | Ca_Kabuli_Chr03 | 6790188                 | CC                                     | TT                 | TT               | DRR                           | 101512152          | pentatricopeptide repeat-containing protein At3g29230-like |
| SNP_13629_A_6790218 | NC_021162.1    | Ca_Kabuli_Chr03 | 6790218                 | TT                                     | AA                 | AA               | DRR                           | 101512152          | pentatricopeptide repeat-containing protein At3g29230-like |
| SNP_13630_A_6790293 | NC_021162.1    | Ca_Kabuli_Chr03 | 6790293                 | GG                                     | AA                 | AA               | DRR                           | 101512152          | pentatricopeptide repeat-containing protein At3g29230-like |
| SNP_13631_A_6790446 | NC_021162.1    | Ca_Kabuli_Chr03 | 6790446                 | CC                                     | TT                 | TT               | DRR                           | 101512152          | pentatricopeptide repeat-containing protein At3g29230-like |
| SNP_13632_A_6811715 | NC_021162.1    | Ca_Kabuli_Chr03 | 6811715                 | CC                                     | GG                 | GG               | DRR                           | 101499337          | 60S ribosomal protein L15-1                                |
| SNP_13633_A_6821740 | NC_021162.1    | Ca_Kabuli_Chr03 | 6821740                 | TT                                     | AA                 | AA               | INTERGENIC                    |                    |                                                            |
| SNP_13634_A_6821764 | NC_021162.1    | Ca_Kabuli_Chr03 | 6821764                 | GG                                     | CC                 | CC               | INTERGENIC                    |                    |                                                            |
| SNP_13635_A_6821934 | NC_021162.1    | Ca_Kabuli_Chr03 | 6821934                 | TT                                     | CC                 | CC               | INTERGENIC                    |                    |                                                            |
| SNP_13637_A_6822158 | NC_021162.1    | Ca_Kabuli_Chr03 | 6822158                 | AA                                     | GG                 | GG               | INTERGENIC                    |                    |                                                            |

| SNPs IDs            | Chromosome IDs | Chromosomes     | Physical positions (bp) | CDC Frontier genome (Reference genome) | (Pusa 1103 & HPNB) | (ILWC 46 & LPNB) | Sequence Components of genome | Gene accession IDs | Putative functions           |
|---------------------|----------------|-----------------|-------------------------|----------------------------------------|--------------------|------------------|-------------------------------|--------------------|------------------------------|
| SNP_13638_A_6822180 | NC_021162.1    | Ca_Kabuli_Chr03 | 6822180                 | AA                                     | CC                 | CC               | INTERGENIC                    |                    |                              |
| SNP_13639_A_6822181 | NC_021162.1    | Ca_Kabuli_Chr03 | 6822181                 | TT                                     | CC                 | CC               | INTERGENIC                    |                    |                              |
| SNP_13640_A_6823640 | NC_021162.1    | Ca_Kabuli_Chr03 | 6823640                 | TT                                     | CC                 | CC               | DRR                           | 101499848          | uncharacterized LOC101499848 |
| SNP_13641_A_6826099 | NC_021162.1    | Ca_Kabuli_Chr03 | 6826099                 | TT                                     | CC                 | CC               | INTRON                        | id44115            | Unknown function             |
| SNP_13642_A_6826221 | NC_021162.1    | Ca_Kabuli_Chr03 | 6826221                 | TT                                     | CC                 | CC               | INTRON                        | id44115            | Unknown function             |
| SNP_13643_A_6826292 | NC_021162.1    | Ca_Kabuli_Chr03 | 6826292                 | GG                                     | AA                 | AA               | INTRON                        | id44115            | Unknown function             |
| SNP_13644_A_6826297 | NC_021162.1    | Ca_Kabuli_Chr03 | 6826297                 | TT                                     | CC                 | CC               | INTRON                        | id44115            | Unknown function             |
| SNP_13645_A_6838416 | NC_021162.1    | Ca_Kabuli_Chr03 | 6838416                 | AA                                     | TT                 | TT               | INTERGENIC                    |                    |                              |
| SNP_13646_A_6838581 | NC_021162.1    | Ca_Kabuli_Chr03 | 6838581                 | CC                                     | AA                 | AA               | INTERGENIC                    |                    |                              |
| SNP_13648_A_6838838 | NC_021162.1    | Ca_Kabuli_Chr03 | 6838838                 | GG                                     | AA                 | AA               | INTERGENIC                    |                    |                              |
| SNP_13649_A_6859424 | NC_021162.1    | Ca_Kabuli_Chr03 | 6859424                 | CC                                     | TT                 | TT               | INTERGENIC                    |                    |                              |
| SNP_13650_A_6859432 | NC_021162.1    | Ca_Kabuli_Chr03 | 6859432                 | CC                                     | AA                 | AA               | INTERGENIC                    |                    |                              |
| SNP_13651_A_6859470 | NC_021162.1    | Ca_Kabuli_Chr03 | 6859470                 | CC                                     | AA                 | AA               | INTERGENIC                    |                    |                              |
| SNP_13652_A_6859498 | NC_021162.1    | Ca_Kabuli_Chr03 | 6859498                 | TT                                     | CC                 | CC               | INTERGENIC                    |                    |                              |
| SNP_13653_A_6859561 | NC_021162.1    | Ca_Kabuli_Chr03 | 6859561                 | GG                                     | AA                 | AA               | INTERGENIC                    |                    |                              |
| SNP_13654_A_6859668 | NC_021162.1    | Ca_Kabuli_Chr03 | 6859668                 | GG                                     | AA                 | AA               | INTERGENIC                    |                    |                              |
| SNP_13655_A_6859702 | NC_021162.1    | Ca_Kabuli_Chr03 | 6859702                 | CC                                     | TT                 | TT               | INTERGENIC                    |                    |                              |
| SNP_13656_A_6859716 | NC_021162.1    | Ca_Kabuli_Chr03 | 6859716                 | GG                                     | AA                 | AA               | INTERGENIC                    |                    |                              |
| SNP_13657_A_6859862 | NC_021162.1    | Ca_Kabuli_Chr03 | 6859862                 | AA                                     | TT                 | TT               | INTERGENIC                    |                    |                              |
| SNP_13658_A_6859889 | NC_021162.1    | Ca_Kabuli_Chr03 | 6859889                 | GG                                     | AA                 | AA               | INTERGENIC                    |                    |                              |
| SNP_13659_A_6859890 | NC_021162.1    | Ca_Kabuli_Chr03 | 6859890                 | TT                                     | CC                 | CC               | INTERGENIC                    |                    |                              |
| SNP_13660_A_6867917 | NC_021162.1    | Ca_Kabuli_Chr03 | 6867917                 | TT                                     | AA                 | AA               | INTERGENIC                    |                    |                              |

| SNPs IDs            | Chromosome IDs | Chromosomes     | Physical positions (bp) | CDC Frontier genome (Reference genome) | (Pusa 1103 & HPNB) | (ILWC 46 & LPNB) | Sequence Components of genome | Gene accession IDs | Putative functions                                       |
|---------------------|----------------|-----------------|-------------------------|----------------------------------------|--------------------|------------------|-------------------------------|--------------------|----------------------------------------------------------|
| SNP_13661_A_6873949 | NC_021162.1    | Ca_Kabuli_Chr03 | 6873949                 | TT                                     | CC                 | CC               | INTERGENIC                    |                    |                                                          |
| SNP_13662_A_6873999 | NC_021162.1    | Ca_Kabuli_Chr03 | 6873999                 | TT                                     | CC                 | CC               | INTERGENIC                    |                    |                                                          |
| SNP_13663_A_6906571 | NC_021162.1    | Ca_Kabuli_Chr03 | 6906571                 | TT                                     | CC                 | CC               | URR                           | 101501026          | pentatricopeptide repeat-containing protein At4g01570    |
| SNP_13664_A_6947337 | NC_021162.1    | Ca_Kabuli_Chr03 | 6947337                 | AA                                     | GG                 | GG               | INTERGENIC                    |                    |                                                          |
| SNP_13665_A_6951719 | NC_021162.1    | Ca_Kabuli_Chr03 | 6951719                 | GG                                     | AA                 | AA               | INTERGENIC                    |                    |                                                          |
| SNP_13666_A_7045344 | NC_021162.1    | Ca_Kabuli_Chr03 | 7045344                 | CC                                     | TT                 | TT               | DRR                           | 101502518          | uncharacterized LOC101502518                             |
| SNP_13667_A_7065569 | NC_021162.1    | Ca_Kabuli_Chr03 | 7065569                 | AA                                     | CC                 | CC               | INTERGENIC                    |                    |                                                          |
| SNP_13668_A_7065580 | NC_021162.1    | Ca_Kabuli_Chr03 | 7065580                 | AA                                     | GG                 | GG               | INTERGENIC                    |                    |                                                          |
| SNP_13669_A_7065625 | NC_021162.1    | Ca_Kabuli_Chr03 | 7065625                 | CC                                     | TT                 | TT               | INTERGENIC                    |                    |                                                          |
| SNP_13670_A_7066548 | NC_021162.1    | Ca_Kabuli_Chr03 | 7066548                 | AA                                     | GG                 | GG               | INTERGENIC                    |                    |                                                          |
| SNP_13672_A_7093134 | NC_021162.1    | Ca_Kabuli_Chr03 | 7093134                 | GG                                     | AA                 | AA               | INTRON                        | 101513760          | Unknown function                                         |
| SNP_13673_A_7103295 | NC_021162.1    | Ca_Kabuli_Chr03 | 7103295                 | CC                                     | GG                 | GG               | INTERGENIC                    |                    |                                                          |
| SNP_13674_A_7119654 | NC_021162.1    | Ca_Kabuli_Chr03 | 7119654                 | CC                                     | AA                 | AA               | URR                           | 101503267          | uncharacterized protein At1g04910                        |
| SNP_13675_A_7120457 | NC_021162.1    | Ca_Kabuli_Chr03 | 7120457                 | GG                                     | CC                 | CC               | INTERGENIC                    |                    |                                                          |
| SNP_13676_A_7120476 | NC_021162.1    | Ca_Kabuli_Chr03 | 7120476                 | CC                                     | GG                 | GG               | INTERGENIC                    |                    |                                                          |
| SNP_13677_A_7162939 | NC_021162.1    | Ca_Kabuli_Chr03 | 7162939                 | TT                                     | GG                 | GG               | INTERGENIC                    |                    |                                                          |
| SNP_13678_A_7166759 | NC_021162.1    | Ca_Kabuli_Chr03 | 7166759                 | TT                                     | AA                 | AA               | INTERGENIC                    |                    |                                                          |
| SNP_13679_A_7241756 | NC_021162.1    | Ca_Kabuli_Chr03 | 7241756                 | TT                                     | AA                 | AA               | DRR                           | 101503810          | phosphatidylinositol 4-kinase gamma 7-like               |
| SNP_13680_A_7255457 | NC_021162.1    | Ca_Kabuli_Chr03 | 7255457                 | GG                                     | AA                 | AA               | INTERGENIC                    |                    |                                                          |
| SNP_13682_A_7405549 | NC_021162.1    | Ca_Kabuli_Chr03 | 7405549                 | AA                                     | GG                 | GG               | DRR                           | 101505957          | DNA-directed RNA polymerase 2, chloroplast/mitochondrial |
| SNP_13683_A_7425620 | NC_021162.1    | Ca_Kabuli_Chr03 | 7425620                 | CC                                     | AA                 | AA               | INTERGENIC                    |                    |                                                          |
| SNP_13685_A_7470707 | NC_021162.1    | Ca_Kabuli_Chr03 | 7470707                 | CC                                     | GG                 | GG               | INTERGENIC                    |                    |                                                          |

| SNPs IDs            | Chromosome IDs | Chromosomes     | Physical positions (bp) | CDC Frontier genome (Reference genome) | (Pusa 1103 & HPNB) | (ILWC 46 & LPNB) | Sequence genome | Components of | Gene accession IDs | Putative functions |
|---------------------|----------------|-----------------|-------------------------|----------------------------------------|--------------------|------------------|-----------------|---------------|--------------------|--------------------|
| SNP_13686_A_7470742 | NC_021162.1    | Ca_Kabuli_Chr03 | 7470742                 | GG                                     | AA                 | AA               | INTERGENIC      |               |                    |                    |
| SNP_13687_A_7570957 | NC_021162.1    | Ca_Kabuli_Chr03 | 7570957                 | TT                                     | AA                 | AA               | INTERGENIC      |               |                    |                    |
| SNP_13688_A_7570958 | NC_021162.1    | Ca_Kabuli_Chr03 | 7570958                 | TT                                     | GG                 | GG               | INTERGENIC      |               |                    |                    |
| SNP_13689_A_7575906 | NC_021162.1    | Ca_Kabuli_Chr03 | 7575906                 | AA                                     | TT                 | TT               | INTERGENIC      |               |                    |                    |
| SNP_13691_A_7627283 | NC_021162.1    | Ca_Kabuli_Chr03 | 7627283                 | GG                                     | CC                 | CC               | INTERGENIC      |               |                    |                    |
| SNP_13692_A_7681861 | NC_021162.1    | Ca_Kabuli_Chr03 | 7681861                 | AA                                     | GG                 | GG               | INTERGENIC      |               |                    |                    |
| SNP_13693_A_7681873 | NC_021162.1    | Ca_Kabuli_Chr03 | 7681873                 | TT                                     | CC                 | CC               | INTERGENIC      |               |                    |                    |
| SNP_13694_A_7681877 | NC_021162.1    | Ca_Kabuli_Chr03 | 7681877                 | AA                                     | TT                 | TT               | INTERGENIC      |               |                    |                    |
| SNP_13696_A_7681919 | NC_021162.1    | Ca_Kabuli_Chr03 | 7681919                 | TT                                     | CC                 | CC               | INTERGENIC      |               |                    |                    |
| SNP_13697_A_7730530 | NC_021162.1    | Ca_Kabuli_Chr03 | 7730530                 | GG                                     | AA                 | AA               | INTERGENIC      |               |                    |                    |
| SNP_13699_A_7804323 | NC_021162.1    | Ca_Kabuli_Chr03 | 7804323                 | TT                                     | GG                 | GG               | INTERGENIC      |               |                    |                    |
| SNP_13700_A_7804423 | NC_021162.1    | Ca_Kabuli_Chr03 | 7804423                 | TT                                     | GG                 | GG               | INTERGENIC      |               |                    |                    |
| SNP_13701_A_7804559 | NC_021162.1    | Ca_Kabuli_Chr03 | 7804559                 | TT                                     | GG                 | GG               | INTERGENIC      |               |                    |                    |
| SNP_13702_A_7804607 | NC_021162.1    | Ca_Kabuli_Chr03 | 7804607                 | AA                                     | GG                 | GG               | INTERGENIC      |               |                    |                    |
| SNP_13703_A_7830611 | NC_021162.1    | Ca_Kabuli_Chr03 | 7830611                 | CC                                     | TT                 | TT               | INTERGENIC      |               |                    |                    |
| SNP_13704_A_7868321 | NC_021162.1    | Ca_Kabuli_Chr03 | 7868321                 | AA                                     | GG                 | GG               | INTERGENIC      |               |                    |                    |
| SNP_13707_A_7959420 | NC_021162.1    | Ca_Kabuli_Chr03 | 7959420                 | AA                                     | CC                 | CC               | INTERGENIC      |               |                    |                    |
| SNP_13708_A_7959450 | NC_021162.1    | Ca_Kabuli_Chr03 | 7959450                 | TT                                     | CC                 | CC               | INTERGENIC      |               |                    |                    |
| SNP_13709_A_7959601 | NC_021162.1    | Ca_Kabuli_Chr03 | 7959601                 | AA                                     | CC                 | CC               | INTERGENIC      |               |                    |                    |
| SNP_13710_A_7959718 | NC_021162.1    | Ca_Kabuli_Chr03 | 7959718                 | AA                                     | TT                 | TT               | INTERGENIC      |               |                    |                    |
| SNP_13711_A_7959744 | NC_021162.1    | Ca_Kabuli_Chr03 | 7959744                 | AA                                     | GG                 | GG               | INTERGENIC      |               |                    |                    |
| SNP_13713_A_7959882 | NC_021162.1    | Ca_Kabuli_Chr03 | 7959882                 | CC                                     | TT                 | TT               | INTERGENIC      |               |                    |                    |



| SNPs IDs            | Chromosome IDs | Chromosomes     | Physical positions (bp) | CDC Frontier genome (Reference genome) | (Pusa 1103 & HPNB) | (ILWC 46 & LPNB) | Sequence genome | Components of | Gene accession IDs | Putative functions |
|---------------------|----------------|-----------------|-------------------------|----------------------------------------|--------------------|------------------|-----------------|---------------|--------------------|--------------------|
| SNP_13714_A_7959948 | NC_021162.1    | Ca_Kabuli_Chr03 | 7959948                 | CC                                     | TT                 | TT               | INTERGENIC      |               |                    |                    |
| SNP_13715_A_7963472 | NC_021162.1    | Ca_Kabuli_Chr03 | 7963472                 | AA                                     | GG                 | GG               | INTERGENIC      |               |                    |                    |
| SNP_13716_A_7963568 | NC_021162.1    | Ca_Kabuli_Chr03 | 7963568                 | TT                                     | CC                 | CC               | INTERGENIC      |               |                    |                    |
| SNP_13717_A_7963783 | NC_021162.1    | Ca_Kabuli_Chr03 | 7963783                 | TT                                     | CC                 | CC               | INTERGENIC      |               |                    |                    |
| SNP_13718_A_7972876 | NC_021162.1    | Ca_Kabuli_Chr03 | 7972876                 | GG                                     | AA                 | AA               | INTERGENIC      |               |                    |                    |
| SNP_13719_A_8058436 | NC_021162.1    | Ca_Kabuli_Chr03 | 8058436                 | AA                                     | TT                 | TT               | INTERGENIC      |               |                    |                    |
| SNP_13720_A_8059620 | NC_021162.1    | Ca_Kabuli_Chr03 | 8059620                 | CC                                     | AA                 | AA               | INTERGENIC      |               |                    |                    |
| SNP_13722_A_8062018 | NC_021162.1    | Ca_Kabuli_Chr03 | 8062018                 | AA                                     | GG                 | GG               | INTERGENIC      |               |                    |                    |
| SNP_13723_A_8062043 | NC_021162.1    | Ca_Kabuli_Chr03 | 8062043                 | TT                                     | CC                 | CC               | INTERGENIC      |               |                    |                    |
| SNP_13724_A_8062078 | NC_021162.1    | Ca_Kabuli_Chr03 | 8062078                 | CC                                     | TT                 | TT               | INTERGENIC      |               |                    |                    |
| SNP_13725_A_8062094 | NC_021162.1    | Ca_Kabuli_Chr03 | 8062094                 | AA                                     | CC                 | CC               | INTERGENIC      |               |                    |                    |
| SNP_13726_A_8062098 | NC_021162.1    | Ca_Kabuli_Chr03 | 8062098                 | TT                                     | CC                 | CC               | INTERGENIC      |               |                    |                    |
| SNP_13727_A_8062124 | NC_021162.1    | Ca_Kabuli_Chr03 | 8062124                 | AA                                     | CC                 | CC               | INTERGENIC      |               |                    |                    |
| SNP_13728_A_8062197 | NC_021162.1    | Ca_Kabuli_Chr03 | 8062197                 | AA                                     | CC                 | CC               | INTERGENIC      |               |                    |                    |
| SNP_13729_A_8062348 | NC_021162.1    | Ca_Kabuli_Chr03 | 8062348                 | GG                                     | AA                 | AA               | INTERGENIC      |               |                    |                    |
| SNP_13730_A_8062386 | NC_021162.1    | Ca_Kabuli_Chr03 | 8062386                 | CC                                     | TT                 | TT               | INTERGENIC      |               |                    |                    |
| SNP_13731_A_8062389 | NC_021162.1    | Ca_Kabuli_Chr03 | 8062389                 | CC                                     | AA                 | AA               | INTERGENIC      |               |                    |                    |
| SNP_13732_A_8062451 | NC_021162.1    | Ca_Kabuli_Chr03 | 8062451                 | AA                                     | CC                 | CC               | INTERGENIC      |               |                    |                    |
| SNP_13733_A_8062510 | NC_021162.1    | Ca_Kabuli_Chr03 | 8062510                 | TT                                     | CC                 | CC               | INTERGENIC      |               |                    |                    |
| SNP_13734_A_8064480 | NC_021162.1    | Ca_Kabuli_Chr03 | 8064480                 | AA                                     | GG                 | GG               | INTERGENIC      |               |                    |                    |
| SNP_13735_A_8088131 | NC_021162.1    | Ca_Kabuli_Chr03 | 8088131                 | GG                                     | CC                 | CC               | INTERGENIC      |               |                    |                    |
| SNP_13736_A_8088149 | NC_021162.1    | Ca_Kabuli_Chr03 | 8088149                 | CC                                     | AA                 | AA               | INTERGENIC      |               |                    |                    |

| SNPs IDs            | Chromosome IDs | Chromosomes     | Physical positions (bp) | CDC Frontier genome (Reference genome) | (Pusa 1103 & HPNB) | (ILWC 46 & LPNB) | Sequence genome | Components of | Gene accession IDs | Putative functions |
|---------------------|----------------|-----------------|-------------------------|----------------------------------------|--------------------|------------------|-----------------|---------------|--------------------|--------------------|
| SNP_13737_A_8088257 | NC_021162.1    | Ca_Kabuli_Chr03 | 8088257                 | AA                                     | CC                 | CC               | INTERGENIC      |               |                    |                    |
| SNP_13738_A_8088319 | NC_021162.1    | Ca_Kabuli_Chr03 | 8088319                 | TT                                     | CC                 | CC               | INTERGENIC      |               |                    |                    |
| SNP_13739_A_8088345 | NC_021162.1    | Ca_Kabuli_Chr03 | 8088345                 | GG                                     | AA                 | AA               | INTERGENIC      |               |                    |                    |
| SNP_13740_A_8088358 | NC_021162.1    | Ca_Kabuli_Chr03 | 8088358                 | TT                                     | CC                 | CC               | INTERGENIC      |               |                    |                    |
| SNP_13741_A_8088387 | NC_021162.1    | Ca_Kabuli_Chr03 | 8088387                 | TT                                     | CC                 | CC               | INTERGENIC      |               |                    |                    |
| SNP_13742_A_8088394 | NC_021162.1    | Ca_Kabuli_Chr03 | 8088394                 | TT                                     | CC                 | CC               | INTERGENIC      |               |                    |                    |
| SNP_13743_A_8088419 | NC_021162.1    | Ca_Kabuli_Chr03 | 8088419                 | AA                                     | CC                 | CC               | INTERGENIC      |               |                    |                    |
| SNP_13744_A_8088433 | NC_021162.1    | Ca_Kabuli_Chr03 | 8088433                 | CC                                     | AA                 | AA               | INTERGENIC      |               |                    |                    |
| SNP_13745_A_8088447 | NC_021162.1    | Ca_Kabuli_Chr03 | 8088447                 | GG                                     | AA                 | AA               | INTERGENIC      |               |                    |                    |
| SNP_13746_A_8088452 | NC_021162.1    | Ca_Kabuli_Chr03 | 8088452                 | GG                                     | AA                 | AA               | INTERGENIC      |               |                    |                    |
| SNP_13747_A_8088534 | NC_021162.1    | Ca_Kabuli_Chr03 | 8088534                 | AA                                     | CC                 | CC               | INTERGENIC      |               |                    |                    |
| SNP_13748_A_8088586 | NC_021162.1    | Ca_Kabuli_Chr03 | 8088586                 | TT                                     | CC                 | CC               | INTERGENIC      |               |                    |                    |
| SNP_13749_A_8089354 | NC_021162.1    | Ca_Kabuli_Chr03 | 8089354                 | AA                                     | GG                 | GG               | INTERGENIC      |               |                    |                    |
| SNP_13750_A_8132239 | NC_021162.1    | Ca_Kabuli_Chr03 | 8132239                 | TT                                     | CC                 | CC               | INTERGENIC      |               |                    |                    |
| SNP_13751_A_8157702 | NC_021162.1    | Ca_Kabuli_Chr03 | 8157702                 | TT                                     | CC                 | CC               | INTERGENIC      |               |                    |                    |
| SNP_13752_A_8178690 | NC_021162.1    | Ca_Kabuli_Chr03 | 8178690                 | AA                                     | CC                 | CC               | INTERGENIC      |               |                    |                    |
| SNP_13753_A_8200581 | NC_021162.1    | Ca_Kabuli_Chr03 | 8200581                 | GG                                     | TT                 | TT               | INTERGENIC      |               |                    |                    |
| SNP_13754_A_8218350 | NC_021162.1    | Ca_Kabuli_Chr03 | 8218350                 | AA                                     | TT                 | TT               | INTERGENIC      |               |                    |                    |
| SNP_13755_A_8218663 | NC_021162.1    | Ca_Kabuli_Chr03 | 8218663                 | CC                                     | TT                 | TT               | INTERGENIC      |               |                    |                    |
| SNP_13756_A_8222541 | NC_021162.1    | Ca_Kabuli_Chr03 | 8222541                 | TT                                     | GG                 | GG               | INTERGENIC      |               |                    |                    |
| SNP_13757_A_8234620 | NC_021162.1    | Ca_Kabuli_Chr03 | 8234620                 | AA                                     | TT                 | TT               | INTERGENIC      |               |                    |                    |
| SNP_13758_A_8234632 | NC_021162.1    | Ca_Kabuli_Chr03 | 8234632                 | GG                                     | AA                 | AA               | INTERGENIC      |               |                    |                    |

| SNPs IDs            | Chromosome IDs | Chromosomes     | Physical positions (bp) | CDC Frontier genome (Reference genome) | (Pusa 1103 & HPNB) | (ILWC 46 & LPNB) | Sequence genome | Components of | Gene accession IDs | Putative functions |
|---------------------|----------------|-----------------|-------------------------|----------------------------------------|--------------------|------------------|-----------------|---------------|--------------------|--------------------|
| SNP_13759_A_8234697 | NC_021162.1    | Ca_Kabuli_Chr03 | 8234697                 | CC                                     | TT                 | TT               | INTERGENIC      |               |                    |                    |
| SNP_13760_A_8234899 | NC_021162.1    | Ca_Kabuli_Chr03 | 8234899                 | AA                                     | GG                 | GG               | INTERGENIC      |               |                    |                    |
| SNP_13761_A_8234900 | NC_021162.1    | Ca_Kabuli_Chr03 | 8234900                 | GG                                     | TT                 | TT               | INTERGENIC      |               |                    |                    |
| SNP_13762_A_8234984 | NC_021162.1    | Ca_Kabuli_Chr03 | 8234984                 | CC                                     | TT                 | TT               | INTERGENIC      |               |                    |                    |
| SNP_13763_A_8241319 | NC_021162.1    | Ca_Kabuli_Chr03 | 8241319                 | GG                                     | CC                 | CC               | INTERGENIC      |               |                    |                    |
| SNP_13764_A_8241427 | NC_021162.1    | Ca_Kabuli_Chr03 | 8241427                 | GG                                     | AA                 | AA               | INTERGENIC      |               |                    |                    |
| SNP_13765_A_8241880 | NC_021162.1    | Ca_Kabuli_Chr03 | 8241880                 | AA                                     | GG                 | GG               | INTERGENIC      |               |                    |                    |
| SNP_13766_A_8244320 | NC_021162.1    | Ca_Kabuli_Chr03 | 8244320                 | TT                                     | CC                 | CC               | INTERGENIC      |               |                    |                    |
| SNP_13768_A_8245668 | NC_021162.1    | Ca_Kabuli_Chr03 | 8245668                 | AA                                     | GG                 | GG               | INTERGENIC      |               |                    |                    |
| SNP_13769_A_8245671 | NC_021162.1    | Ca_Kabuli_Chr03 | 8245671                 | AA                                     | CC                 | CC               | INTERGENIC      |               |                    |                    |
| SNP_13770_A_8245781 | NC_021162.1    | Ca_Kabuli_Chr03 | 8245781                 | AA                                     | GG                 | GG               | INTERGENIC      |               |                    |                    |
| SNP_13771_A_8277711 | NC_021162.1    | Ca_Kabuli_Chr03 | 8277711                 | CC                                     | TT                 | TT               | INTERGENIC      |               |                    |                    |
| SNP_13772_A_8304850 | NC_021162.1    | Ca_Kabuli_Chr03 | 8304850                 | TT                                     | CC                 | CC               | INTERGENIC      |               |                    |                    |
| SNP_13773_A_8306740 | NC_021162.1    | Ca_Kabuli_Chr03 | 8306740                 | TT                                     | CC                 | CC               | INTERGENIC      |               |                    |                    |
| SNP_13774_A_8306785 | NC_021162.1    | Ca_Kabuli_Chr03 | 8306785                 | GG                                     | AA                 | AA               | INTERGENIC      |               |                    |                    |
| SNP_13775_A_8325330 | NC_021162.1    | Ca_Kabuli_Chr03 | 8325330                 | GG                                     | TT                 | TT               | INTERGENIC      |               |                    |                    |
| SNP_13777_A_8325511 | NC_021162.1    | Ca_Kabuli_Chr03 | 8325511                 | AA                                     | GG                 | GG               | INTERGENIC      |               |                    |                    |
| SNP_13778_A_8337514 | NC_021162.1    | Ca_Kabuli_Chr03 | 8337514                 | GG                                     | AA                 | AA               | INTERGENIC      |               |                    |                    |
| SNP_13779_A_8359463 | NC_021162.1    | Ca_Kabuli_Chr03 | 8359463                 | CC                                     | AA                 | AA               | INTERGENIC      |               |                    |                    |
| SNP_13780_A_8360453 | NC_021162.1    | Ca_Kabuli_Chr03 | 8360453                 | AA                                     | GG                 | GG               | INTERGENIC      |               |                    |                    |
| SNP_13781_A_8360473 | NC_021162.1    | Ca_Kabuli_Chr03 | 8360473                 | AA                                     | GG                 | GG               | INTERGENIC      |               |                    |                    |
| SNP_13782_A_8374894 | NC_021162.1    | Ca_Kabuli_Chr03 | 8374894                 | GG                                     | AA                 | AA               | INTERGENIC      |               |                    |                    |

| SNPs IDs            | Chromosome IDs | Chromosomes     | Physical positions (bp) | CDC Frontier (Reference genome) | (Pusa 1103 & HPNB) | (ILWC 46 & LPNB) | Sequence Components of genome | Gene accession IDs | Putative functions              |
|---------------------|----------------|-----------------|-------------------------|---------------------------------|--------------------|------------------|-------------------------------|--------------------|---------------------------------|
| SNP_13783_A_8383998 | NC_021162.1    | Ca_Kabuli_Chr03 | 8383998                 | GG                              | AA                 | AA               | INTERGENIC                    |                    |                                 |
| SNP_13785_A_8393133 | NC_021162.1    | Ca_Kabuli_Chr03 | 8393133                 | AA                              | CC                 | CC               | INTERGENIC                    |                    |                                 |
| SNP_13787_A_8413489 | NC_021162.1    | Ca_Kabuli_Chr03 | 8413489                 | TT                              | AA                 | AA               | INTERGENIC                    |                    |                                 |
| SNP_13788_A_8436767 | NC_021162.1    | Ca_Kabuli_Chr03 | 8436767                 | TT                              | CC                 | CC               | INTRON                        | 101495626          | uncharacterized LOC101495626    |
| SNP_13789_A_8437126 | NC_021162.1    | Ca_Kabuli_Chr03 | 8437126                 | TT                              | GG                 | GG               | INTRON                        | 101495626          | uncharacterized LOC101495626    |
| SNP_13790_A_8470189 | NC_021162.1    | Ca_Kabuli_Chr03 | 8470189                 | CC                              | TT                 | TT               | INTERGENIC                    |                    |                                 |
| SNP_13791_A_8501119 | NC_021162.1    | Ca_Kabuli_Chr03 | 8501119                 | CC                              | GG                 | GG               | INTERGENIC                    |                    |                                 |
| SNP_13792_A_8501451 | NC_021162.1    | Ca_Kabuli_Chr03 | 8501451                 | AA                              | GG                 | GG               | INTERGENIC                    |                    |                                 |
| SNP_13793_A_8501466 | NC_021162.1    | Ca_Kabuli_Chr03 | 8501466                 | AA                              | GG                 | GG               | INTERGENIC                    |                    |                                 |
| SNP_13794_A_8501496 | NC_021162.1    | Ca_Kabuli_Chr03 | 8501496                 | TT                              | CC                 | CC               | INTERGENIC                    |                    |                                 |
| SNP_13795_A_8501500 | NC_021162.1    | Ca_Kabuli_Chr03 | 8501500                 | GG                              | CC                 | CC               | INTERGENIC                    |                    |                                 |
| SNP_13796_A_8501504 | NC_021162.1    | Ca_Kabuli_Chr03 | 8501504                 | CC                              | AA                 | AA               | INTERGENIC                    |                    |                                 |
| SNP_13797_A_8501515 | NC_021162.1    | Ca_Kabuli_Chr03 | 8501515                 | CC                              | GG                 | GG               | INTERGENIC                    |                    |                                 |
| SNP_13798_A_8501854 | NC_021162.1    | Ca_Kabuli_Chr03 | 8501854                 | GG                              | AA                 | AA               | INTERGENIC                    |                    |                                 |
| SNP_13799_A_8501873 | NC_021162.1    | Ca_Kabuli_Chr03 | 8501873                 | AA                              | CC                 | CC               | INTERGENIC                    |                    |                                 |
| SNP_13800_A_8501874 | NC_021162.1    | Ca_Kabuli_Chr03 | 8501874                 | GG                              | TT                 | TT               | INTERGENIC                    |                    |                                 |
| SNP_13801_A_8501875 | NC_021162.1    | Ca_Kabuli_Chr03 | 8501875                 | AA                              | TT                 | TT               | INTERGENIC                    |                    |                                 |
| SNP_13802_A_8501876 | NC_021162.1    | Ca_Kabuli_Chr03 | 8501876                 | GG                              | AA                 | AA               | INTERGENIC                    |                    |                                 |
| SNP_13803_A_8501878 | NC_021162.1    | Ca_Kabuli_Chr03 | 8501878                 | GG                              | CC                 | CC               | INTERGENIC                    |                    |                                 |
| SNP_13804_A_8501879 | NC_021162.1    | Ca_Kabuli_Chr03 | 8501879                 | GG                              | AA                 | AA               | INTERGENIC                    |                    |                                 |
| SNP_13806_A_8527233 | NC_021162.1    | Ca_Kabuli_Chr03 | 8527233                 | GG                              | AA                 | AA               | URR                           | 101496833          | vacuolar-processing enzyme-like |
| SNP_13807_A_8527266 | NC_021162.1    | Ca_Kabuli_Chr03 | 8527266                 | AA                              | GG                 | GG               | URR                           | 101496833          | vacuolar-processing enzyme-like |

| SNPs IDs            | Chromosome IDs | Chromosomes     | Physical positions (bp) | CDC Frontier genome (Reference genome) | (Pusa 1103 & HPNB) | (ILWC 46 & LPNB) | Sequence Components of genome | Gene accession IDs | Putative functions              |
|---------------------|----------------|-----------------|-------------------------|----------------------------------------|--------------------|------------------|-------------------------------|--------------------|---------------------------------|
| SNP_13808_A_8527618 | NC_021162.1    | Ca_Kabuli_Chr03 | 8527618                 | GG                                     | AA                 | AA               | INTERGENIC                    |                    |                                 |
| SNP_13809_A_8527761 | NC_021162.1    | Ca_Kabuli_Chr03 | 8527761                 | TT                                     | CC                 | CC               | INTERGENIC                    |                    |                                 |
| SNP_13810_A_8535045 | NC_021162.1    | Ca_Kabuli_Chr03 | 8535045                 | CC                                     | TT                 | TT               | NON_SYNONYMOUS_CODING         | id44425            | Unknown function                |
| SNP_13811_A_8535179 | NC_021162.1    | Ca_Kabuli_Chr03 | 8535179                 | CC                                     | TT                 | TT               | NON_SYNONYMOUS_CODING         | id44425            | Unknown function                |
| SNP_13812_A_8535228 | NC_021162.1    | Ca_Kabuli_Chr03 | 8535228                 | GG                                     | TT                 | TT               | NON_SYNONYMOUS_CODING         | id44425            | Unknown function                |
| SNP_13813_A_8535241 | NC_021162.1    | Ca_Kabuli_Chr03 | 8535241                 | AA                                     | CC                 | CC               | NON_SYNONYMOUS_CODING         | id44425            | Unknown function                |
| SNP_13814_A_8535291 | NC_021162.1    | Ca_Kabuli_Chr03 | 8535291                 | TT                                     | CC                 | CC               | NON_SYNONYMOUS_CODING         | id44425            | Unknown function                |
| SNP_13815_A_8535364 | NC_021162.1    | Ca_Kabuli_Chr03 | 8535364                 | TT                                     | CC                 | CC               | INTRON                        | id44425            | Unknown function                |
| SNP_13816_A_8535369 | NC_021162.1    | Ca_Kabuli_Chr03 | 8535369                 | TT                                     | CC                 | CC               | INTRON                        | id44425            | Unknown function                |
| SNP_13817_A_8535487 | NC_021162.1    | Ca_Kabuli_Chr03 | 8535487                 | GG                                     | TT                 | TT               | NON_SYNONYMOUS_CODING         | id44425            | Unknown function                |
| SNP_13818_A_8535510 | NC_021162.1    | Ca_Kabuli_Chr03 | 8535510                 | GG                                     | CC                 | CC               | INTRON                        | id44425            | Unknown function                |
| SNP_13819_A_8535523 | NC_021162.1    | Ca_Kabuli_Chr03 | 8535523                 | AA                                     | GG                 | GG               | INTRON                        | id44425            | Unknown function                |
| SNP_13820_A_8535749 | NC_021162.1    | Ca_Kabuli_Chr03 | 8535749                 | AA                                     | CC                 | CC               | INTRON                        | id44425            | Unknown function                |
| SNP_13821_A_8535779 | NC_021162.1    | Ca_Kabuli_Chr03 | 8535779                 | CC                                     | TT                 | TT               | NON_SYNONYMOUS_CODING         | id44425            | Unknown function                |
| SNP_13822_A_8535920 | NC_021162.1    | Ca_Kabuli_Chr03 | 8535920                 | TT                                     | CC                 | CC               | INTRON                        | id44425            | Unknown function                |
| SNP_13823_A_8535940 | NC_021162.1    | Ca_Kabuli_Chr03 | 8535940                 | AA                                     | CC                 | CC               | INTRON                        | id44425            | Unknown function                |
| SNP_13824_A_8536213 | NC_021162.1    | Ca_Kabuli_Chr03 | 8536213                 | TT                                     | CC                 | CC               | NON_SYNONYMOUS_CODING         | id44425            | Unknown function                |
| SNP_13825_A_8536275 | NC_021162.1    | Ca_Kabuli_Chr03 | 8536275                 | CC                                     | TT                 | TT               | INTRON                        | id44425            | Unknown function                |
| SNP_13826_A_8536295 | NC_021162.1    | Ca_Kabuli_Chr03 | 8536295                 | AA                                     | TT                 | TT               | INTRON                        | id44425            | Unknown function                |
| SNP_13827_A_8536568 | NC_021162.1    | Ca_Kabuli_Chr03 | 8536568                 | TT                                     | CC                 | CC               | INTRON                        | id44425            | Unknown function                |
| SNP_13828_A_8546011 | NC_021162.1    | Ca_Kabuli_Chr03 | 8546011                 | TT                                     | CC                 | CC               | DRR                           | 101497152          | vacuolar-processing enzyme-like |
| SNP_13829_A_8546013 | NC_021162.1    | Ca_Kabuli_Chr03 | 8546013                 | TT                                     | CC                 | CC               | DRR                           | 101497152          | vacuolar-processing enzyme-like |

| SNPs IDs            | Chromosome IDs | Chromosomes     | Physical positions (bp) | CDC Frontier genome (Reference genome) | (Pusa 1103 & HPNB) | (ILWC 46 & LPNB) | Sequence Components of genome | Gene accession IDs | Putative functions                               |
|---------------------|----------------|-----------------|-------------------------|----------------------------------------|--------------------|------------------|-------------------------------|--------------------|--------------------------------------------------|
| SNP_13830_A_8550793 | NC_021162.1    | Ca_Kabuli_Chr03 | 8550793                 | GG                                     | AA                 | AA               | URR                           | 101497152          | vacuolar-processing enzyme-like                  |
| SNP_13831_A_8552217 | NC_021162.1    | Ca_Kabuli_Chr03 | 8552217                 | AA                                     | GG                 | GG               | URR                           | 101497152          | vacuolar-processing enzyme-like                  |
| SNP_13832_A_8582600 | NC_021162.1    | Ca_Kabuli_Chr03 | 8582600                 | CC                                     | TT                 | TT               | INTERGENIC                    |                    |                                                  |
| SNP_13833_A_8609778 | NC_021162.1    | Ca_Kabuli_Chr03 | 8609778                 | GG                                     | CC                 | CC               | INTERGENIC                    |                    |                                                  |
| SNP_13834_A_8622958 | NC_021162.1    | Ca_Kabuli_Chr03 | 8622958                 | AA                                     | GG                 | GG               | INTERGENIC                    |                    |                                                  |
| SNP_13835_A_8624718 | NC_021162.1    | Ca_Kabuli_Chr03 | 8624718                 | CC                                     | TT                 | TT               | INTERGENIC                    |                    |                                                  |
| SNP_13836_A_8624748 | NC_021162.1    | Ca_Kabuli_Chr03 | 8624748                 | TT                                     | GG                 | GG               | INTERGENIC                    |                    |                                                  |
| SNP_13837_A_8651674 | NC_021162.1    | Ca_Kabuli_Chr03 | 8651674                 | AA                                     | GG                 | GG               | INTERGENIC                    |                    |                                                  |
| SNP_13838_A_8651691 | NC_021162.1    | Ca_Kabuli_Chr03 | 8651691                 | TT                                     | GG                 | GG               | INTERGENIC                    |                    |                                                  |
| SNP_13839_A_8651707 | NC_021162.1    | Ca_Kabuli_Chr03 | 8651707                 | CC                                     | TT                 | TT               | INTERGENIC                    |                    |                                                  |
| SNP_13840_A_8651731 | NC_021162.1    | Ca_Kabuli_Chr03 | 8651731                 | TT                                     | CC                 | CC               | INTERGENIC                    |                    |                                                  |
| SNP_13841_A_8687229 | NC_021162.1    | Ca_Kabuli_Chr03 | 8687229                 | AA                                     | TT                 | TT               | DRR                           | 101498815          | uncharacterized protein At2g39795, mitochondrial |
| SNP_13842_A_8723355 | NC_021162.1    | Ca_Kabuli_Chr03 | 8723355                 | CC                                     | TT                 | TT               | INTERGENIC                    |                    |                                                  |
| SNP_13843_A_8727540 | NC_021162.1    | Ca_Kabuli_Chr03 | 8727540                 | AA                                     | GG                 | GG               | INTERGENIC                    |                    |                                                  |
| SNP_13844_A_8737612 | NC_021162.1    | Ca_Kabuli_Chr03 | 8737612                 | AA                                     | CC                 | CC               | INTRON                        | 101500403          | uncharacterized LOC101500403                     |
| SNP_13846_A_8756629 | NC_021162.1    | Ca_Kabuli_Chr03 | 8756629                 | GG                                     | AA                 | AA               | INTERGENIC                    |                    |                                                  |
| SNP_13847_A_8756665 | NC_021162.1    | Ca_Kabuli_Chr03 | 8756665                 | GG                                     | AA                 | AA               | INTERGENIC                    |                    |                                                  |
| SNP_13848_A_8758481 | NC_021162.1    | Ca_Kabuli_Chr03 | 8758481                 | AA                                     | GG                 | GG               | INTERGENIC                    |                    |                                                  |
| SNP_13849_A_8776093 | NC_021162.1    | Ca_Kabuli_Chr03 | 8776093                 | AA                                     | TT                 | TT               | INTERGENIC                    |                    |                                                  |
| SNP_13850_A_8781540 | NC_021162.1    | Ca_Kabuli_Chr03 | 8781540                 | CC                                     | GG                 | GG               | DRR                           | 101501027          | uncharacterized LOC101501027                     |
| SNP_13851_A_8781548 | NC_021162.1    | Ca_Kabuli_Chr03 | 8781548                 | TT                                     | GG                 | GG               | DRR                           | 101501027          | uncharacterized LOC101501027                     |
| SNP_13852_A_8795909 | NC_021162.1    | Ca_Kabuli_Chr03 | 8795909                 | GG                                     | AA                 | AA               | INTERGENIC                    |                    |                                                  |

| SNPs IDs            | Chromosome IDs | Chromosomes     | Physical positions (bp) | CDC Frontier genome (Reference genome) | (Pusa 1103 & HPNB) | (ILWC 46 & LPNB) | Sequence genome | Components of | Gene accession IDs | Putative functions |
|---------------------|----------------|-----------------|-------------------------|----------------------------------------|--------------------|------------------|-----------------|---------------|--------------------|--------------------|
| SNP_13853_A_8800934 | NC_021162.1    | Ca_Kabuli_Chr03 | 8800934                 | TT                                     | AA                 | AA               | INTERGENIC      |               |                    |                    |
| SNP_13854_A_8800937 | NC_021162.1    | Ca_Kabuli_Chr03 | 8800937                 | TT                                     | GG                 | GG               | INTERGENIC      |               |                    |                    |
| SNP_13855_A_8805232 | NC_021162.1    | Ca_Kabuli_Chr03 | 8805232                 | GG                                     | CC                 | CC               | INTERGENIC      |               |                    |                    |
| SNP_13856_A_8823707 | NC_021162.1    | Ca_Kabuli_Chr03 | 8823707                 | AA                                     | CC                 | CC               | INTERGENIC      |               |                    |                    |
| SNP_13857_A_8836868 | NC_021162.1    | Ca_Kabuli_Chr03 | 8836868                 | TT                                     | CC                 | CC               | INTERGENIC      |               |                    |                    |
| SNP_13858_A_8861013 | NC_021162.1    | Ca_Kabuli_Chr03 | 8861013                 | CC                                     | TT                 | TT               | INTERGENIC      |               |                    |                    |
| SNP_13859_A_8932359 | NC_021162.1    | Ca_Kabuli_Chr03 | 8932359                 | CC                                     | GG                 | GG               | INTERGENIC      |               |                    |                    |
| SNP_13860_A_8932363 | NC_021162.1    | Ca_Kabuli_Chr03 | 8932363                 | TT                                     | CC                 | CC               | INTERGENIC      |               |                    |                    |
| SNP_13861_A_8932537 | NC_021162.1    | Ca_Kabuli_Chr03 | 8932537                 | AA                                     | TT                 | TT               | INTERGENIC      |               |                    |                    |
| SNP_13862_A_8932561 | NC_021162.1    | Ca_Kabuli_Chr03 | 8932561                 | TT                                     | CC                 | CC               | INTERGENIC      |               |                    |                    |
| SNP_13863_A_8932783 | NC_021162.1    | Ca_Kabuli_Chr03 | 8932783                 | GG                                     | AA                 | AA               | INTERGENIC      |               |                    |                    |
| SNP_13864_A_8932912 | NC_021162.1    | Ca_Kabuli_Chr03 | 8932912                 | AA                                     | CC                 | CC               | INTERGENIC      |               |                    |                    |
| SNP_13865_A_8933638 | NC_021162.1    | Ca_Kabuli_Chr03 | 8933638                 | GG                                     | AA                 | AA               | INTERGENIC      |               |                    |                    |
| SNP_13866_A_8941732 | NC_021162.1    | Ca_Kabuli_Chr03 | 8941732                 | AA                                     | GG                 | GG               | INTERGENIC      |               |                    |                    |
| SNP_13867_A_8941857 | NC_021162.1    | Ca_Kabuli_Chr03 | 8941857                 | AA                                     | TT                 | TT               | INTERGENIC      |               |                    |                    |
| SNP_13868_A_8941858 | NC_021162.1    | Ca_Kabuli_Chr03 | 8941858                 | TT                                     | AA                 | AA               | INTERGENIC      |               |                    |                    |
| SNP_13870_A_8992525 | NC_021162.1    | Ca_Kabuli_Chr03 | 8992525                 | AA                                     | GG                 | GG               | INTERGENIC      |               |                    |                    |
| SNP_13871_A_8992527 | NC_021162.1    | Ca_Kabuli_Chr03 | 8992527                 | AA                                     | GG                 | GG               | INTERGENIC      |               |                    |                    |
| SNP_13872_A_9012017 | NC_021162.1    | Ca_Kabuli_Chr03 | 9012017                 | AA                                     | TT                 | TT               | INTERGENIC      |               |                    |                    |
| SNP_13873_A_9041758 | NC_021162.1    | Ca_Kabuli_Chr03 | 9041758                 | GG                                     | AA                 | AA               | INTERGENIC      |               |                    |                    |
| SNP_13874_A_9042199 | NC_021162.1    | Ca_Kabuli_Chr03 | 9042199                 | TT                                     | AA                 | AA               | INTERGENIC      |               |                    |                    |
| SNP_13875_A_9060398 | NC_021162.1    | Ca_Kabuli_Chr03 | 9060398                 | TT                                     | CC                 | CC               | INTERGENIC      |               |                    |                    |

| SNPs IDs            | Chromosome IDs | Chromosomes     | Physical positions (bp) | CDC Frontier genome (Reference genome) | (Pusa 1103 & HPNB) | (ILWC 46 & LPNB) | Sequence genome | Components of | Gene accession IDs | Putative functions |
|---------------------|----------------|-----------------|-------------------------|----------------------------------------|--------------------|------------------|-----------------|---------------|--------------------|--------------------|
| SNP_13876_A_9060444 | NC_021162.1    | Ca_Kabuli_Chr03 | 9060444                 | TT                                     | AA                 | CC               | INTERGENIC      |               |                    |                    |
| SNP_13877_A_9060445 | NC_021162.1    | Ca_Kabuli_Chr03 | 9060445                 | AA                                     | GG                 | GG               | INTERGENIC      |               |                    |                    |
| SNP_13878_A_9060506 | NC_021162.1    | Ca_Kabuli_Chr03 | 9060506                 | AA                                     | TT                 | TT               | INTERGENIC      |               |                    |                    |
| SNP_13879_A_9060589 | NC_021162.1    | Ca_Kabuli_Chr03 | 9060589                 | TT                                     | CC                 | CC               | INTERGENIC      |               |                    |                    |
| SNP_13880_A_9060688 | NC_021162.1    | Ca_Kabuli_Chr03 | 9060688                 | CC                                     | TT                 | TT               | INTERGENIC      |               |                    |                    |
| SNP_13881_A_9060817 | NC_021162.1    | Ca_Kabuli_Chr03 | 9060817                 | GG                                     | AA                 | AA               | INTERGENIC      |               |                    |                    |
| SNP_13882_A_9060829 | NC_021162.1    | Ca_Kabuli_Chr03 | 9060829                 | CC                                     | TT                 | TT               | INTERGENIC      |               |                    |                    |
| SNP_13883_A_9060937 | NC_021162.1    | Ca_Kabuli_Chr03 | 9060937                 | GG                                     | AA                 | AA               | INTERGENIC      |               |                    |                    |
| SNP_13884_A_9063884 | NC_021162.1    | Ca_Kabuli_Chr03 | 9063884                 | AA                                     | GG                 | GG               | INTERGENIC      |               |                    |                    |
| SNP_13885_A_9063902 | NC_021162.1    | Ca_Kabuli_Chr03 | 9063902                 | CC                                     | TT                 | TT               | INTERGENIC      |               |                    |                    |
| SNP_13887_A_9063938 | NC_021162.1    | Ca_Kabuli_Chr03 | 9063938                 | AA                                     | GG                 | GG               | INTERGENIC      |               |                    |                    |
| SNP_13888_A_9063941 | NC_021162.1    | Ca_Kabuli_Chr03 | 9063941                 | TT                                     | GG                 | GG               | INTERGENIC      |               |                    |                    |
| SNP_13889_A_9063944 | NC_021162.1    | Ca_Kabuli_Chr03 | 9063944                 | AA                                     | GG                 | GG               | INTERGENIC      |               |                    |                    |
| SNP_13890_A_9063962 | NC_021162.1    | Ca_Kabuli_Chr03 | 9063962                 | AA                                     | GG                 | GG               | INTERGENIC      |               |                    |                    |
| SNP_13891_A_9063965 | NC_021162.1    | Ca_Kabuli_Chr03 | 9063965                 | GG                                     | AA                 | AA               | INTERGENIC      |               |                    |                    |
| SNP_13892_A_9063974 | NC_021162.1    | Ca_Kabuli_Chr03 | 9063974                 | AA                                     | GG                 | GG               | INTERGENIC      |               |                    |                    |
| SNP_13894_A_9063994 | NC_021162.1    | Ca_Kabuli_Chr03 | 9063994                 | GG                                     | TT                 | TT               | INTERGENIC      |               |                    |                    |
| SNP_13895_A_9064024 | NC_021162.1    | Ca_Kabuli_Chr03 | 9064024                 | AA                                     | GG                 | GG               | INTERGENIC      |               |                    |                    |
| SNP_13896_A_9064026 | NC_021162.1    | Ca_Kabuli_Chr03 | 9064026                 | AA                                     | GG                 | GG               | INTERGENIC      |               |                    |                    |
| SNP_13897_A_9064027 | NC_021162.1    | Ca_Kabuli_Chr03 | 9064027                 | TT                                     | CC                 | CC               | INTERGENIC      |               |                    |                    |
| SNP_13898_A_9064103 | NC_021162.1    | Ca_Kabuli_Chr03 | 9064103                 | TT                                     | CC                 | CC               | INTERGENIC      |               |                    |                    |
| SNP_13899_A_9067061 | NC_021162.1    | Ca_Kabuli_Chr03 | 9067061                 | CC                                     | TT                 | TT               | INTERGENIC      |               |                    |                    |



| SNPs IDs            | Chromosome IDs | Chromosomes     | Physical positions (bp) | CDC Frontier genome (Reference genome) | (Pusa 1103 & HPNB) | (ILWC 46 & LPNB) | Sequence genome       | Components of | Gene accession IDs | Putative functions |
|---------------------|----------------|-----------------|-------------------------|----------------------------------------|--------------------|------------------|-----------------------|---------------|--------------------|--------------------|
| SNP_13900_A_9067342 | NC_021162.1    | Ca_Kabuli_Chr03 | 9067342                 | GG                                     | CC                 | CC               | INTERGENIC            |               |                    |                    |
| SNP_13901_A_9067373 | NC_021162.1    | Ca_Kabuli_Chr03 | 9067373                 | AA                                     | GG                 | GG               | INTERGENIC            |               |                    |                    |
| SNP_13902_A_9067400 | NC_021162.1    | Ca_Kabuli_Chr03 | 9067400                 | AA                                     | GG                 | GG               | INTERGENIC            |               |                    |                    |
| SNP_13903_A_9067425 | NC_021162.1    | Ca_Kabuli_Chr03 | 9067425                 | AA                                     | GG                 | GG               | INTERGENIC            |               |                    |                    |
| SNP_13904_A_9067479 | NC_021162.1    | Ca_Kabuli_Chr03 | 9067479                 | GG                                     | AA                 | AA               | INTERGENIC            |               |                    |                    |
| SNP_13906_A_9068216 | NC_021162.1    | Ca_Kabuli_Chr03 | 9068216                 | AA                                     | GG                 | GG               | INTERGENIC            |               |                    |                    |
| SNP_13907_A_9069190 | NC_021162.1    | Ca_Kabuli_Chr03 | 9069190                 | GG                                     | AA                 | AA               | INTERGENIC            |               |                    |                    |
| SNP_13908_A_9080718 | NC_021162.1    | Ca_Kabuli_Chr03 | 9080718                 | CC                                     | TT                 | TT               | INTERGENIC            |               |                    |                    |
| SNP_13909_A_9080719 | NC_021162.1    | Ca_Kabuli_Chr03 | 9080719                 | AA                                     | GG                 | GG               | INTERGENIC            |               |                    |                    |
| SNP_13910_A_9144617 | NC_021162.1    | Ca_Kabuli_Chr03 | 9144617                 | AA                                     | GG                 | GG               | NON_SYNONYMOUS_CODING | id44551       |                    | Unknown function   |
| SNP_13911_A_9145288 | NC_021162.1    | Ca_Kabuli_Chr03 | 9145288                 | CC                                     | TT                 | TT               | URR                   | 101504018     |                    | Unknown function   |
| SNP_13914_A_9289289 | NC_021162.1    | Ca_Kabuli_Chr03 | 9289289                 | TT                                     | AA                 | AA               | INTERGENIC            |               |                    |                    |
| SNP_13915_A_9366999 | NC_021162.1    | Ca_Kabuli_Chr03 | 9366999                 | AA                                     | CC                 | CC               | INTERGENIC            |               |                    |                    |
| SNP_13916_A_9374597 | NC_021162.1    | Ca_Kabuli_Chr03 | 9374597                 | AA                                     | GG                 | GG               | INTERGENIC            |               |                    |                    |
| SNP_13917_A_9400875 | NC_021162.1    | Ca_Kabuli_Chr03 | 9400875                 | AA                                     | TT                 | TT               | INTERGENIC            |               |                    |                    |
| SNP_13918_A_9429751 | NC_021162.1    | Ca_Kabuli_Chr03 | 9429751                 | AA                                     | GG                 | GG               | INTERGENIC            |               |                    |                    |
| SNP_13919_A_9429779 | NC_021162.1    | Ca_Kabuli_Chr03 | 9429779                 | TT                                     | CC                 | CC               | INTERGENIC            |               |                    |                    |
| SNP_13920_A_9520829 | NC_021162.1    | Ca_Kabuli_Chr03 | 9520829                 | TT                                     | GG                 | GG               | INTERGENIC            |               |                    |                    |
| SNP_13921_A_9541205 | NC_021162.1    | Ca_Kabuli_Chr03 | 9541205                 | GG                                     | AA                 | AA               | INTERGENIC            |               |                    |                    |
| SNP_13922_A_9542398 | NC_021162.1    | Ca_Kabuli_Chr03 | 9542398                 | GG                                     | AA                 | AA               | INTERGENIC            |               |                    |                    |
| SNP_13923_A_9544618 | NC_021162.1    | Ca_Kabuli_Chr03 | 9544618                 | TT                                     | AA                 | AA               | INTERGENIC            |               |                    |                    |
| SNP_13924_A_9544623 | NC_021162.1    | Ca_Kabuli_Chr03 | 9544623                 | CC                                     | TT                 | TT               | INTERGENIC            |               |                    |                    |

| SNPs IDs            | Chromosome IDs | Chromosomes     | Physical positions (bp) | CDC Frontier genome (Reference genome) | (Pusa 1103 & HPNB) | (ILWC 46 & LPNB) | Sequence Components of genome | Gene accession IDs | Putative functions           |
|---------------------|----------------|-----------------|-------------------------|----------------------------------------|--------------------|------------------|-------------------------------|--------------------|------------------------------|
| SNP_13925_A_9544630 | NC_021162.1    | Ca_Kabuli_Chr03 | 9544630                 | GG                                     | AA                 | AA               | INTERGENIC                    |                    |                              |
| SNP_13926_A_9577875 | NC_021162.1    | Ca_Kabuli_Chr03 | 9577875                 | AA                                     | GG                 | GG               | URR                           | 101513994          | uncharacterized LOC101513994 |
| SNP_13927_A_9577902 | NC_021162.1    | Ca_Kabuli_Chr03 | 9577902                 | CC                                     | GG                 | GG               | URR                           | 101513994          | uncharacterized LOC101513994 |
| SNP_13929_A_9577987 | NC_021162.1    | Ca_Kabuli_Chr03 | 9577987                 | AA                                     | GG                 | GG               | URR                           | 101513994          | uncharacterized LOC101513994 |
| SNP_13930_A_9578032 | NC_021162.1    | Ca_Kabuli_Chr03 | 9578032                 | TT                                     | CC                 | CC               | URR                           | 101513994          | uncharacterized LOC101513994 |
| SNP_13931_A_9578048 | NC_021162.1    | Ca_Kabuli_Chr03 | 9578048                 | GG                                     | TT                 | TT               | URR                           | 101513994          | uncharacterized LOC101513994 |
| SNP_13932_A_9578264 | NC_021162.1    | Ca_Kabuli_Chr03 | 9578264                 | TT                                     | CC                 | CC               | URR                           | 101513994          | uncharacterized LOC101513994 |
| SNP_13933_A_9578341 | NC_021162.1    | Ca_Kabuli_Chr03 | 9578341                 | TT                                     | GG                 | GG               | URR                           | 101513994          | uncharacterized LOC101513994 |
| SNP_13934_A_9578346 | NC_021162.1    | Ca_Kabuli_Chr03 | 9578346                 | TT                                     | CC                 | CC               | URR                           | 101513994          | uncharacterized LOC101513994 |
| SNP_13935_A_9578388 | NC_021162.1    | Ca_Kabuli_Chr03 | 9578388                 | TT                                     | GG                 | GG               | URR                           | 101513994          | uncharacterized LOC101513994 |
| SNP_13936_A_9578412 | NC_021162.1    | Ca_Kabuli_Chr03 | 9578412                 | TT                                     | GG                 | GG               | URR                           | 101513994          | uncharacterized LOC101513994 |
| SNP_13938_A_9584678 | NC_021162.1    | Ca_Kabuli_Chr03 | 9584678                 | CC                                     | AA                 | AA               | URR                           | 101513340          | Unknown function             |
| SNP_13939_A_9621789 | NC_021162.1    | Ca_Kabuli_Chr03 | 9621789                 | GG                                     | AA                 | AA               | INTERGENIC                    |                    |                              |
| SNP_13940_A_9649822 | NC_021162.1    | Ca_Kabuli_Chr03 | 9649822                 | GG                                     | TT                 | TT               | INTERGENIC                    |                    |                              |
| SNP_13941_A_9649887 | NC_021162.1    | Ca_Kabuli_Chr03 | 9649887                 | GG                                     | AA                 | AA               | INTERGENIC                    |                    |                              |
| SNP_13942_A_9649917 | NC_021162.1    | Ca_Kabuli_Chr03 | 9649917                 | AA                                     | CC                 | CC               | INTERGENIC                    |                    |                              |
| SNP_13943_A_9650310 | NC_021162.1    | Ca_Kabuli_Chr03 | 9650310                 | GG                                     | TT                 | TT               | INTERGENIC                    |                    |                              |
| SNP_13944_A_9650499 | NC_021162.1    | Ca_Kabuli_Chr03 | 9650499                 | AA                                     | CC                 | CC               | INTERGENIC                    |                    |                              |
| SNP_13945_A_9650559 | NC_021162.1    | Ca_Kabuli_Chr03 | 9650559                 | GG                                     | AA                 | AA               | INTERGENIC                    |                    |                              |
| SNP_13946_A_9650583 | NC_021162.1    | Ca_Kabuli_Chr03 | 9650583                 | TT                                     | CC                 | CC               | INTERGENIC                    |                    |                              |
| SNP_13947_A_9650654 | NC_021162.1    | Ca_Kabuli_Chr03 | 9650654                 | CC                                     | TT                 | TT               | INTERGENIC                    |                    |                              |
| SNP_13948_A_9785182 | NC_021162.1    | Ca_Kabuli_Chr03 | 9785182                 | AA                                     | TT                 | TT               | INTERGENIC                    |                    |                              |

| SNPs IDs             | Chromosome IDs | Chromosomes     | Physical positions (bp) | CDC Frontier (Reference genome) | (Pusa 1103 & HPNB) | (ILWC 46 & LPNB) | Sequence Components of genome | Gene accession IDs | Putative functions                 |
|----------------------|----------------|-----------------|-------------------------|---------------------------------|--------------------|------------------|-------------------------------|--------------------|------------------------------------|
| SNP_13949_A_9795373  | NC_021162.1    | Ca_Kabuli_Chr03 | 9795373                 | TT                              | GG                 | GG               | INTRON                        | 101490559          | importin beta-like SAD2            |
| SNP_13950_A_9816487  | NC_021162.1    | Ca_Kabuli_Chr03 | 9816487                 | AA                              | TT                 | TT               | INTERGENIC                    |                    |                                    |
| SNP_13951_A_9820265  | NC_021162.1    | Ca_Kabuli_Chr03 | 9820265                 | TT                              | GG                 | GG               | INTERGENIC                    |                    |                                    |
| SNP_13952_A_9820285  | NC_021162.1    | Ca_Kabuli_Chr03 | 9820285                 | TT                              | CC                 | CC               | INTERGENIC                    |                    |                                    |
| SNP_13953_A_9849186  | NC_021162.1    | Ca_Kabuli_Chr03 | 9849186                 | TT                              | AA                 | AA               | INTERGENIC                    |                    |                                    |
| SNP_13954_A_9870764  | NC_021162.1    | Ca_Kabuli_Chr03 | 9870764                 | TT                              | CC                 | CC               | INTERGENIC                    |                    |                                    |
| SNP_13955_A_9883097  | NC_021162.1    | Ca_Kabuli_Chr03 | 9883097                 | GG                              | CC                 | CC               | INTERGENIC                    |                    |                                    |
| SNP_13956_A_9940409  | NC_021162.1    | Ca_Kabuli_Chr03 | 9940409                 | TT                              | CC                 | CC               | INTRON                        | 101501253          | auxin-induced protein PCNT115-like |
| SNP_13957_A_9967749  | NC_021162.1    | Ca_Kabuli_Chr03 | 9967749                 | TT                              | CC                 | CC               | INTRON                        | 101501253          | auxin-induced protein PCNT115-like |
| SNP_13958_A_9967750  | NC_021162.1    | Ca_Kabuli_Chr03 | 9967750                 | AA                              | TT                 | TT               | INTRON                        | 101501253          | auxin-induced protein PCNT115-like |
| SNP_13959_A_9981830  | NC_021162.1    | Ca_Kabuli_Chr03 | 9981830                 | GG                              | TT                 | TT               | INTRON                        | 101501253          | auxin-induced protein PCNT115-like |
| SNP_13961_A_10026538 | NC_021162.1    | Ca_Kabuli_Chr03 | 10026538                | TT                              | AA                 | AA               | INTERGENIC                    |                    |                                    |
| SNP_13962_A_10026674 | NC_021162.1    | Ca_Kabuli_Chr03 | 10026674                | CC                              | TT                 | TT               | INTERGENIC                    |                    |                                    |
| SNP_13963_A_10026736 | NC_021162.1    | Ca_Kabuli_Chr03 | 10026736                | GG                              | AA                 | AA               | INTERGENIC                    |                    |                                    |
| SNP_13964_A_10051995 | NC_021162.1    | Ca_Kabuli_Chr03 | 10051995                | TT                              | AA                 | AA               | INTERGENIC                    |                    |                                    |
| SNP_13965_A_10079811 | NC_021162.1    | Ca_Kabuli_Chr03 | 10079811                | TT                              | GG                 | GG               | INTERGENIC                    |                    |                                    |
| SNP_13966_A_10079833 | NC_021162.1    | Ca_Kabuli_Chr03 | 10079833                | TT                              | CC                 | CC               | INTERGENIC                    |                    |                                    |
| SNP_13967_A_10080350 | NC_021162.1    | Ca_Kabuli_Chr03 | 10080350                | AA                              | TT                 | TT               | INTERGENIC                    |                    |                                    |
| SNP_13968_A_10094580 | NC_021162.1    | Ca_Kabuli_Chr03 | 10094580                | GG                              | TT                 | TT               | URR                           | 101501876          | Unknown function                   |
| SNP_13969_A_10094592 | NC_021162.1    | Ca_Kabuli_Chr03 | 10094592                | TT                              | CC                 | CC               | URR                           | 101501876          | Unknown function                   |
| SNP_13971_A_10094657 | NC_021162.1    | Ca_Kabuli_Chr03 | 10094657                | AA                              | GG                 | GG               | URR                           | 101501876          | Unknown function                   |
| SNP_13972_A_10159074 | NC_021162.1    | Ca_Kabuli_Chr03 | 10159074                | AA                              | GG                 | GG               | INTERGENIC                    |                    |                                    |

| SNPs IDs             | Chromosome IDs | Chromosomes     | Physical positions (bp) | CDC Frontier genome (Reference genome) | (Pusa 1103 & HPNB) | (ILWC 46 & LPNB) | Sequence Components of genome | Gene accession IDs | Putative functions |
|----------------------|----------------|-----------------|-------------------------|----------------------------------------|--------------------|------------------|-------------------------------|--------------------|--------------------|
| SNP_13974_A_10159548 | NC_021162.1    | Ca_Kabuli_Chr03 | 10159548                | TT                                     | CC                 | CC               | INTERGENIC                    |                    |                    |
| SNP_13975_A_10169165 | NC_021162.1    | Ca_Kabuli_Chr03 | 10169165                | GG                                     | AA                 | AA               | INTERGENIC                    |                    |                    |
| SNP_13976_A_10169196 | NC_021162.1    | Ca_Kabuli_Chr03 | 10169196                | GG                                     | AA                 | AA               | INTERGENIC                    |                    |                    |
| SNP_13977_A_10169224 | NC_021162.1    | Ca_Kabuli_Chr03 | 10169224                | AA                                     | GG                 | GG               | INTERGENIC                    |                    |                    |
| SNP_13978_A_10169335 | NC_021162.1    | Ca_Kabuli_Chr03 | 10169335                | TT                                     | CC                 | CC               | INTERGENIC                    |                    |                    |
| SNP_13979_A_10169512 | NC_021162.1    | Ca_Kabuli_Chr03 | 10169512                | AA                                     | GG                 | GG               | INTERGENIC                    |                    |                    |
| SNP_13980_A_10169685 | NC_021162.1    | Ca_Kabuli_Chr03 | 10169685                | GG                                     | CC                 | CC               | INTERGENIC                    |                    |                    |
| SNP_13981_A_10184259 | NC_021162.1    | Ca_Kabuli_Chr03 | 10184259                | AA                                     | GG                 | GG               | INTERGENIC                    |                    |                    |
| SNP_13982_A_10184548 | NC_021162.1    | Ca_Kabuli_Chr03 | 10184548                | AA                                     | CC                 | CC               | INTERGENIC                    |                    |                    |
| SNP_13983_A_10189322 | NC_021162.1    | Ca_Kabuli_Chr03 | 10189322                | GG                                     | AA                 | AA               | INTERGENIC                    |                    |                    |
| SNP_13984_A_10193992 | NC_021162.1    | Ca_Kabuli_Chr03 | 10193992                | TT                                     | GG                 | GG               | INTERGENIC                    |                    |                    |
| SNP_13985_A_10254917 | NC_021162.1    | Ca_Kabuli_Chr03 | 10254917                | TT                                     | CC                 | CC               | DRR                           | 101502520          | Unknown function   |
| SNP_13986_A_10255230 | NC_021162.1    | Ca_Kabuli_Chr03 | 10255230                | AA                                     | GG                 | GG               | DRR                           | 101502520          | Unknown function   |
| SNP_13987_A_10255319 | NC_021162.1    | Ca_Kabuli_Chr03 | 10255319                | AA                                     | GG                 | GG               | DRR                           | 101502520          | Unknown function   |
| SNP_13988_A_10276087 | NC_021162.1    | Ca_Kabuli_Chr03 | 10276087                | TT                                     | CC                 | CC               | INTERGENIC                    |                    |                    |
| SNP_13989_A_10294440 | NC_021162.1    | Ca_Kabuli_Chr03 | 10294440                | CC                                     | TT                 | TT               | INTERGENIC                    |                    |                    |
| SNP_13991_A_10342271 | NC_021162.1    | Ca_Kabuli_Chr03 | 10342271                | AA                                     | GG                 | GG               | INTERGENIC                    |                    |                    |
| SNP_13992_A_10342292 | NC_021162.1    | Ca_Kabuli_Chr03 | 10342292                | GG                                     | AA                 | AA               | INTERGENIC                    |                    |                    |
| SNP_13993_A_10342294 | NC_021162.1    | Ca_Kabuli_Chr03 | 10342294                | CC                                     | TT                 | TT               | INTERGENIC                    |                    |                    |
| SNP_13994_A_10342694 | NC_021162.1    | Ca_Kabuli_Chr03 | 10342694                | AA                                     | CC                 | CC               | INTERGENIC                    |                    |                    |
| SNP_13996_A_10359095 | NC_021162.1    | Ca_Kabuli_Chr03 | 10359095                | CC                                     | TT                 | TT               | INTERGENIC                    |                    |                    |
| SNP_13997_A_10388046 | NC_021162.1    | Ca_Kabuli_Chr03 | 10388046                | CC                                     | TT                 | TT               | URR                           | 101503149          | Unknown function   |

| SNPs IDs             | Chromosome IDs | Chromosomes     | Physical positions (bp) | CDC Frontier genome (Reference genome) | (Pusa 1103 & HPNB) | (ILWC 46 & LPNB) | Sequence Components of genome | Gene accession IDs | Putative functions |
|----------------------|----------------|-----------------|-------------------------|----------------------------------------|--------------------|------------------|-------------------------------|--------------------|--------------------|
| SNP_13999_A_10407092 | NC_021162.1    | Ca_Kabuli_Chr03 | 10407092                | TT                                     | CC                 | CC               | INTERGENIC                    |                    |                    |
| SNP_14000_A_10505142 | NC_021162.1    | Ca_Kabuli_Chr03 | 10505142                | AA                                     | CC                 | CC               | INTERGENIC                    |                    |                    |
| SNP_14001_A_10505172 | NC_021162.1    | Ca_Kabuli_Chr03 | 10505172                | CC                                     | AA                 | AA               | INTERGENIC                    |                    |                    |
| SNP_14002_A_10505263 | NC_021162.1    | Ca_Kabuli_Chr03 | 10505263                | AA                                     | CC                 | CC               | INTERGENIC                    |                    |                    |
| SNP_14003_A_10594902 | NC_021162.1    | Ca_Kabuli_Chr03 | 10594902                | CC                                     | TT                 | TT               | INTERGENIC                    |                    |                    |
| SNP_14004_A_10603132 | NC_021162.1    | Ca_Kabuli_Chr03 | 10603132                | AA                                     | GG                 | GG               | INTERGENIC                    |                    |                    |
| SNP_14005_A_10663701 | NC_021162.1    | Ca_Kabuli_Chr03 | 10663701                | TT                                     | AA                 | AA               | INTERGENIC                    |                    |                    |
| SNP_14006_A_10670280 | NC_021162.1    | Ca_Kabuli_Chr03 | 10670280                | TT                                     | CC                 | CC               | DRR                           | 101506375          | Unknown function   |
| SNP_14007_A_10670635 | NC_021162.1    | Ca_Kabuli_Chr03 | 10670635                | AA                                     | GG                 | GG               | SYNONYMOUS_CODING             | 101506375          | Unknown function   |
| SNP_14010_A_10851683 | NC_021162.1    | Ca_Kabuli_Chr03 | 10851683                | GG                                     | AA                 | AA               | INTERGENIC                    |                    |                    |
| SNP_14011_A_10851707 | NC_021162.1    | Ca_Kabuli_Chr03 | 10851707                | AA                                     | GG                 | GG               | INTERGENIC                    |                    |                    |
| SNP_14012_A_10851878 | NC_021162.1    | Ca_Kabuli_Chr03 | 10851878                | TT                                     | CC                 | CC               | INTERGENIC                    |                    |                    |
| SNP_14013_A_10851895 | NC_021162.1    | Ca_Kabuli_Chr03 | 10851895                | AA                                     | GG                 | GG               | INTERGENIC                    |                    |                    |
| SNP_14014_A_10852009 | NC_021162.1    | Ca_Kabuli_Chr03 | 10852009                | AA                                     | GG                 | GG               | INTERGENIC                    |                    |                    |
| SNP_14015_A_10852024 | NC_021162.1    | Ca_Kabuli_Chr03 | 10852024                | AA                                     | GG                 | GG               | INTERGENIC                    |                    |                    |
| SNP_14017_A_10892832 | NC_021162.1    | Ca_Kabuli_Chr03 | 10892832                | GG                                     | AA                 | AA               | INTERGENIC                    |                    |                    |
| SNP_14018_A_10919080 | NC_021162.1    | Ca_Kabuli_Chr03 | 10919080                | GG                                     | AA                 | AA               | DRR                           | 101515508          | mucin-5AC-like     |
| SNP_14019_A_10922915 | NC_021162.1    | Ca_Kabuli_Chr03 | 10922915                | TT                                     | GG                 | GG               | URR                           | 101515508          | mucin-5AC-like     |
| SNP_14020_A_10923019 | NC_021162.1    | Ca_Kabuli_Chr03 | 10923019                | TT                                     | AA                 | AA               | URR                           | 101515508          | mucin-5AC-like     |
| SNP_14021_A_10923031 | NC_021162.1    | Ca_Kabuli_Chr03 | 10923031                | AA                                     | GG                 | GG               | URR                           | 101515508          | mucin-5AC-like     |
| SNP_14022_A_10923148 | NC_021162.1    | Ca_Kabuli_Chr03 | 10923148                | AA                                     | GG                 | GG               | URR                           | 101515508          | mucin-5AC-like     |
| SNP_14024_A_10923178 | NC_021162.1    | Ca_Kabuli_Chr03 | 10923178                | AA                                     | GG                 | GG               | URR                           | 101515508          | mucin-5AC-like     |

| SNPs IDs             | Chromosome IDs | Chromosomes     | Physical positions (bp) | CDC Frontier genome (Reference genome) | (Pusa 1103 & HPNB) | (ILWC 46 & LPNB) | Sequence Components of genome | Gene accession IDs | Putative functions |
|----------------------|----------------|-----------------|-------------------------|----------------------------------------|--------------------|------------------|-------------------------------|--------------------|--------------------|
| SNP_14025_A_10923181 | NC_021162.1    | Ca_Kabuli_Chr03 | 10923181                | GG                                     | AA                 | AA               | URR                           | 101515508          | mucin-5AC-like     |
| SNP_14028_A_10923298 | NC_021162.1    | Ca_Kabuli_Chr03 | 10923298                | GG                                     | AA                 | AA               | URR                           | 101515508          | mucin-5AC-like     |
| SNP_14029_A_10923400 | NC_021162.1    | Ca_Kabuli_Chr03 | 10923400                | AA                                     | TT                 | TT               | URR                           | 101515508          | mucin-5AC-like     |
| SNP_14030_A_10923435 | NC_021162.1    | Ca_Kabuli_Chr03 | 10923435                | CC                                     | AA                 | AA               | URR                           | 101515508          | mucin-5AC-like     |
| SNP_14031_A_10923472 | NC_021162.1    | Ca_Kabuli_Chr03 | 10923472                | TT                                     | CC                 | CC               | URR                           | 101515508          | mucin-5AC-like     |
| SNP_14032_A_10923478 | NC_021162.1    | Ca_Kabuli_Chr03 | 10923478                | AA                                     | GG                 | GG               | URR                           | 101515508          | mucin-5AC-like     |
| SNP_14033_A_10949211 | NC_021162.1    | Ca_Kabuli_Chr03 | 10949211                | TT                                     | CC                 | CC               | INTERGENIC                    |                    |                    |
| SNP_14034_A_10954227 | NC_021162.1    | Ca_Kabuli_Chr03 | 10954227                | TT                                     | CC                 | CC               | INTERGENIC                    |                    |                    |
| SNP_14035_A_10954463 | NC_021162.1    | Ca_Kabuli_Chr03 | 10954463                | GG                                     | TT                 | TT               | INTERGENIC                    |                    |                    |
| SNP_14036_A_10954524 | NC_021162.1    | Ca_Kabuli_Chr03 | 10954524                | CC                                     | TT                 | TT               | INTERGENIC                    |                    |                    |
| SNP_14037_A_10994298 | NC_021162.1    | Ca_Kabuli_Chr03 | 10994298                | GG                                     | AA                 | AA               | INTERGENIC                    |                    |                    |
| SNP_14038_A_10995811 | NC_021162.1    | Ca_Kabuli_Chr03 | 10995811                | CC                                     | TT                 | TT               | INTERGENIC                    |                    |                    |
| SNP_14039_A_10995829 | NC_021162.1    | Ca_Kabuli_Chr03 | 10995829                | CC                                     | GG                 | GG               | INTERGENIC                    |                    |                    |
| SNP_14040_A_10995838 | NC_021162.1    | Ca_Kabuli_Chr03 | 10995838                | GG                                     | AA                 | AA               | INTERGENIC                    |                    |                    |
| SNP_14041_A_10995841 | NC_021162.1    | Ca_Kabuli_Chr03 | 10995841                | CC                                     | TT                 | TT               | INTERGENIC                    |                    |                    |
| SNP_14042_A_11011487 | NC_021162.1    | Ca_Kabuli_Chr03 | 11011487                | GG                                     | AA                 | AA               | INTERGENIC                    |                    |                    |
| SNP_14043_A_11011499 | NC_021162.1    | Ca_Kabuli_Chr03 | 11011499                | AA                                     | GG                 | GG               | INTERGENIC                    |                    |                    |
| SNP_14045_A_11142866 | NC_021162.1    | Ca_Kabuli_Chr03 | 11142866                | AA                                     | CC                 | CC               | INTERGENIC                    |                    |                    |
| SNP_14046_A_11142872 | NC_021162.1    | Ca_Kabuli_Chr03 | 11142872                | TT                                     | CC                 | CC               | INTERGENIC                    |                    |                    |
| SNP_14047_A_11142945 | NC_021162.1    | Ca_Kabuli_Chr03 | 11142945                | TT                                     | CC                 | CC               | INTERGENIC                    |                    |                    |
| SNP_14048_A_11146549 | NC_021162.1    | Ca_Kabuli_Chr03 | 11146549                | AA                                     | GG                 | GG               | INTERGENIC                    |                    |                    |
| SNP_14049_A_11162419 | NC_021162.1    | Ca_Kabuli_Chr03 | 11162419                | CC                                     | TT                 | TT               | INTERGENIC                    |                    |                    |

| SNPs IDs             | Chromosome IDs | Chromosomes     | Physical positions (bp) | CDC Frontier (Reference genome) | (Pusa 1103 & HPNB) | (ILWC 46 & LPNB) | Sequence Components of genome | Gene accession IDs | Putative functions                        |
|----------------------|----------------|-----------------|-------------------------|---------------------------------|--------------------|------------------|-------------------------------|--------------------|-------------------------------------------|
| SNP_14050_A_11177241 | NC_021162.1    | Ca_Kabuli_Chr03 | 11177241                | TT                              | CC                 | CC               | URR                           | 101489261          | F-box/kelch-repeat protein At3g23880-like |
| SNP_14052_A_11231891 | NC_021162.1    | Ca_Kabuli_Chr03 | 11231891                | AA                              | GG                 | GG               | INTERGENIC                    |                    |                                           |
| SNP_14053_A_11238766 | NC_021162.1    | Ca_Kabuli_Chr03 | 11238766                | TT                              | AA                 | AA               | INTERGENIC                    |                    |                                           |
| SNP_14054_A_11252272 | NC_021162.1    | Ca_Kabuli_Chr03 | 11252272                | AA                              | GG                 | GG               | INTERGENIC                    |                    |                                           |
| SNP_14055_A_11252282 | NC_021162.1    | Ca_Kabuli_Chr03 | 11252282                | AA                              | GG                 | GG               | INTERGENIC                    |                    |                                           |
| SNP_14056_A_11252582 | NC_021162.1    | Ca_Kabuli_Chr03 | 11252582                | GG                              | TT                 | TT               | INTERGENIC                    |                    |                                           |
| SNP_14057_A_11252627 | NC_021162.1    | Ca_Kabuli_Chr03 | 11252627                | AA                              | TT                 | TT               | INTERGENIC                    |                    |                                           |
| SNP_14058_A_11262847 | NC_021162.1    | Ca_Kabuli_Chr03 | 11262847                | GG                              | AA                 | AA               | INTERGENIC                    |                    |                                           |
| SNP_14060_A_11282153 | NC_021162.1    | Ca_Kabuli_Chr03 | 11282153                | GG                              | TT                 | TT               | INTERGENIC                    |                    |                                           |
| SNP_14061_A_11282367 | NC_021162.1    | Ca_Kabuli_Chr03 | 11282367                | CC                              | TT                 | TT               | INTERGENIC                    |                    |                                           |
| SNP_14062_A_11282433 | NC_021162.1    | Ca_Kabuli_Chr03 | 11282433                | AA                              | GG                 | GG               | INTERGENIC                    |                    |                                           |
| SNP_14063_A_11326762 | NC_021162.1    | Ca_Kabuli_Chr03 | 11326762                | TT                              | CC                 | CC               | INTERGENIC                    |                    |                                           |
| SNP_14064_A_11326798 | NC_021162.1    | Ca_Kabuli_Chr03 | 11326798                | AA                              | GG                 | GG               | INTERGENIC                    |                    |                                           |
| SNP_14065_A_11326815 | NC_021162.1    | Ca_Kabuli_Chr03 | 11326815                | TT                              | CC                 | CC               | INTERGENIC                    |                    |                                           |
| SNP_14066_A_11326818 | NC_021162.1    | Ca_Kabuli_Chr03 | 11326818                | GG                              | AA                 | AA               | INTERGENIC                    |                    |                                           |
| SNP_14068_A_11402472 | NC_021162.1    | Ca_Kabuli_Chr03 | 11402472                | AA                              | GG                 | GG               | INTERGENIC                    |                    |                                           |
| SNP_14069_A_11402539 | NC_021162.1    | Ca_Kabuli_Chr03 | 11402539                | TT                              | CC                 | CC               | INTERGENIC                    |                    |                                           |
| SNP_14070_A_11402823 | NC_021162.1    | Ca_Kabuli_Chr03 | 11402823                | TT                              | CC                 | CC               | INTERGENIC                    |                    |                                           |
| SNP_14071_A_11402894 | NC_021162.1    | Ca_Kabuli_Chr03 | 11402894                | TT                              | AA                 | AA               | INTERGENIC                    |                    |                                           |
| SNP_14072_A_11447632 | NC_021162.1    | Ca_Kabuli_Chr03 | 11447632                | TT                              | CC                 | CC               | INTERGENIC                    |                    |                                           |
| SNP_14073_A_11457567 | NC_021162.1    | Ca_Kabuli_Chr03 | 11457567                | CC                              | TT                 | TT               | INTRON                        | 101492158          | uncharacterized LOC101492158              |
| SNP_14074_A_11465059 | NC_021162.1    | Ca_Kabuli_Chr03 | 11465059                | AA                              | GG                 | GG               | INTRON                        | 101492158          | uncharacterized LOC101492158              |

| SNPs IDs             | Chromosome IDs | Chromosomes     | Physical positions (bp) | CDC Frontier genome (Reference genome) | (Pusa 1103 & HPNB) | (ILWC 46 & LPNB) | Sequence genome | Components of | Gene accession IDs | Putative functions |
|----------------------|----------------|-----------------|-------------------------|----------------------------------------|--------------------|------------------|-----------------|---------------|--------------------|--------------------|
| SNP_14076_A_11497986 | NC_021162.1    | Ca_Kabuli_Chr03 | 11497986                | CC                                     | TT                 | TT               | INTERGENIC      |               |                    |                    |
| SNP_14077_A_11498215 | NC_021162.1    | Ca_Kabuli_Chr03 | 11498215                | TT                                     | GG                 | GG               | INTERGENIC      |               |                    |                    |
| SNP_14078_A_11498275 | NC_021162.1    | Ca_Kabuli_Chr03 | 11498275                | TT                                     | CC                 | CC               | INTERGENIC      |               |                    |                    |
| SNP_14079_A_11498292 | NC_021162.1    | Ca_Kabuli_Chr03 | 11498292                | TT                                     | CC                 | CC               | INTERGENIC      |               |                    |                    |
| SNP_14080_A_11498307 | NC_021162.1    | Ca_Kabuli_Chr03 | 11498307                | TT                                     | CC                 | CC               | INTERGENIC      |               |                    |                    |
| SNP_14081_A_11498315 | NC_021162.1    | Ca_Kabuli_Chr03 | 11498315                | GG                                     | AA                 | AA               | INTERGENIC      |               |                    |                    |
| SNP_14082_A_11498329 | NC_021162.1    | Ca_Kabuli_Chr03 | 11498329                | CC                                     | TT                 | TT               | INTERGENIC      |               |                    |                    |
| SNP_14083_A_11498477 | NC_021162.1    | Ca_Kabuli_Chr03 | 11498477                | TT                                     | CC                 | CC               | INTERGENIC      |               |                    |                    |
| SNP_14084_A_11498554 | NC_021162.1    | Ca_Kabuli_Chr03 | 11498554                | TT                                     | AA                 | AA               | INTERGENIC      |               |                    |                    |
| SNP_14085_A_11519778 | NC_021162.1    | Ca_Kabuli_Chr03 | 11519778                | GG                                     | AA                 | AA               | INTERGENIC      |               |                    |                    |
| SNP_14086_A_11519783 | NC_021162.1    | Ca_Kabuli_Chr03 | 11519783                | AA                                     | TT                 | TT               | INTERGENIC      |               |                    |                    |
| SNP_14087_A_11519785 | NC_021162.1    | Ca_Kabuli_Chr03 | 11519785                | TT                                     | CC                 | CC               | INTERGENIC      |               |                    |                    |
| SNP_14089_A_11520310 | NC_021162.1    | Ca_Kabuli_Chr03 | 11520310                | TT                                     | CC                 | CC               | INTERGENIC      |               |                    |                    |
| SNP_14090_A_11527391 | NC_021162.1    | Ca_Kabuli_Chr03 | 11527391                | AA                                     | GG                 | GG               | INTERGENIC      |               |                    |                    |
| SNP_14091_A_11527460 | NC_021162.1    | Ca_Kabuli_Chr03 | 11527460                | GG                                     | AA                 | AA               | INTERGENIC      |               |                    |                    |
| SNP_14092_A_11527466 | NC_021162.1    | Ca_Kabuli_Chr03 | 11527466                | TT                                     | CC                 | CC               | INTERGENIC      |               |                    |                    |
| SNP_14093_A_11527509 | NC_021162.1    | Ca_Kabuli_Chr03 | 11527509                | AA                                     | TT                 | TT               | INTERGENIC      |               |                    |                    |
| SNP_14094_A_11527511 | NC_021162.1    | Ca_Kabuli_Chr03 | 11527511                | AA                                     | GG                 | GG               | INTERGENIC      |               |                    |                    |
| SNP_14095_A_11527576 | NC_021162.1    | Ca_Kabuli_Chr03 | 11527576                | AA                                     | GG                 | GG               | INTERGENIC      |               |                    |                    |
| SNP_14096_A_11527832 | NC_021162.1    | Ca_Kabuli_Chr03 | 11527832                | AA                                     | GG                 | GG               | INTERGENIC      |               |                    |                    |
| SNP_14097_A_11527905 | NC_021162.1    | Ca_Kabuli_Chr03 | 11527905                | AA                                     | GG                 | GG               | INTERGENIC      |               |                    |                    |
| SNP_14098_A_11527927 | NC_021162.1    | Ca_Kabuli_Chr03 | 11527927                | AA                                     | GG                 | GG               | INTERGENIC      |               |                    |                    |



| SNPs IDs             | Chromosome IDs | Chromosomes     | Physical positions (bp) | CDC Frontier genome (Reference genome) | (Pusa 1103 & HPNB) | (ILWC 46 & LPNB) | Sequence Components of genome | Gene accession IDs | Putative functions           |
|----------------------|----------------|-----------------|-------------------------|----------------------------------------|--------------------|------------------|-------------------------------|--------------------|------------------------------|
| SNP_14099_A_11528043 | NC_021162.1    | Ca_Kabuli_Chr03 | 11528043                | AA                                     | GG                 | GG               | INTERGENIC                    |                    |                              |
| SNP_14100_A_11532092 | NC_021162.1    | Ca_Kabuli_Chr03 | 11532092                | GG                                     | TT                 | TT               | INTERGENIC                    |                    |                              |
| SNP_14101_A_11536190 | NC_021162.1    | Ca_Kabuli_Chr03 | 11536190                | CC                                     | TT                 | TT               | INTERGENIC                    |                    |                              |
| SNP_14103_A_11592330 | NC_021162.1    | Ca_Kabuli_Chr03 | 11592330                | TT                                     | CC                 | CC               | INTERGENIC                    |                    |                              |
| SNP_14105_A_11608346 | NC_021162.1    | Ca_Kabuli_Chr03 | 11608346                | GG                                     | AA                 | AA               | INTERGENIC                    |                    |                              |
| SNP_14106_A_11608356 | NC_021162.1    | Ca_Kabuli_Chr03 | 11608356                | CC                                     | TT                 | TT               | INTERGENIC                    |                    |                              |
| SNP_14107_A_11608396 | NC_021162.1    | Ca_Kabuli_Chr03 | 11608396                | AA                                     | GG                 | GG               | INTERGENIC                    |                    |                              |
| SNP_14108_A_11626479 | NC_021162.1    | Ca_Kabuli_Chr03 | 11626479                | GG                                     | AA                 | AA               | INTRON                        | 101512052          | uncharacterized LOC101512052 |
| SNP_14109_A_11714815 | NC_021162.1    | Ca_Kabuli_Chr03 | 11714815                | CC                                     | TT                 | TT               | INTERGENIC                    |                    |                              |
| SNP_14110_A_11732469 | NC_021162.1    | Ca_Kabuli_Chr03 | 11732469                | AA                                     | GG                 | GG               | INTERGENIC                    |                    |                              |
| SNP_14111_A_11760835 | NC_021162.1    | Ca_Kabuli_Chr03 | 11760835                | CC                                     | TT                 | TT               | INTERGENIC                    |                    |                              |
| SNP_14113_A_11765448 | NC_021162.1    | Ca_Kabuli_Chr03 | 11765448                | AA                                     | CC                 | TT               | INTERGENIC                    |                    |                              |
| SNP_14114_A_11765515 | NC_021162.1    | Ca_Kabuli_Chr03 | 11765515                | CC                                     | TT                 | TT               | INTERGENIC                    |                    |                              |
| SNP_14115_A_11765522 | NC_021162.1    | Ca_Kabuli_Chr03 | 11765522                | TT                                     | CC                 | CC               | INTERGENIC                    |                    |                              |
| SNP_14116_A_11774111 | NC_021162.1    | Ca_Kabuli_Chr03 | 11774111                | AA                                     | TT                 | TT               | INTERGENIC                    |                    |                              |
| SNP_14117_A_11774179 | NC_021162.1    | Ca_Kabuli_Chr03 | 11774179                | AA                                     | TT                 | TT               | INTERGENIC                    |                    |                              |
| SNP_14118_A_11774194 | NC_021162.1    | Ca_Kabuli_Chr03 | 11774194                | AA                                     | CC                 | CC               | INTERGENIC                    |                    |                              |
| SNP_14119_A_11774207 | NC_021162.1    | Ca_Kabuli_Chr03 | 11774207                | TT                                     | GG                 | GG               | INTERGENIC                    |                    |                              |
| SNP_14120_A_11774222 | NC_021162.1    | Ca_Kabuli_Chr03 | 11774222                | TT                                     | AA                 | AA               | INTERGENIC                    |                    |                              |
| SNP_14121_A_11774230 | NC_021162.1    | Ca_Kabuli_Chr03 | 11774230                | CC                                     | AA                 | AA               | INTERGENIC                    |                    |                              |
| SNP_14122_A_11774261 | NC_021162.1    | Ca_Kabuli_Chr03 | 11774261                | GG                                     | AA                 | AA               | INTERGENIC                    |                    |                              |
| SNP_14123_A_11774312 | NC_021162.1    | Ca_Kabuli_Chr03 | 11774312                | AA                                     | GG                 | GG               | INTERGENIC                    |                    |                              |

| SNPs IDs             | Chromosome IDs | Chromosomes     | Physical positions (bp) | CDC Frontier genome (Reference genome) | (Pusa 1103 & HPNB) | (ILWC 46 & LPNB) | Sequence Components of genome | Gene accession IDs | Putative functions                     |
|----------------------|----------------|-----------------|-------------------------|----------------------------------------|--------------------|------------------|-------------------------------|--------------------|----------------------------------------|
| SNP_14124_A_11774315 | NC_021162.1    | Ca_Kabuli_Chr03 | 11774315                | TT                                     | CC                 | CC               | INTERGENIC                    |                    |                                        |
| SNP_14125_A_11778567 | NC_021162.1    | Ca_Kabuli_Chr03 | 11778567                | CC                                     | TT                 | TT               | INTERGENIC                    |                    |                                        |
| SNP_14126_A_11784968 | NC_021162.1    | Ca_Kabuli_Chr03 | 11784968                | AA                                     | GG                 | GG               | INTERGENIC                    |                    |                                        |
| SNP_14127_A_11805351 | NC_021162.1    | Ca_Kabuli_Chr03 | 11805351                | AA                                     | TT                 | TT               | INTRON                        | 101514217          | uncharacterized LOC101514217           |
| SNP_14128_A_11830671 | NC_021162.1    | Ca_Kabuli_Chr03 | 11830671                | TT                                     | AA                 | AA               | INTERGENIC                    |                    |                                        |
| SNP_14130_A_11906884 | NC_021162.1    | Ca_Kabuli_Chr03 | 11906884                | GG                                     | CC                 | CC               | URR                           | 101493486          | E3 ubiquitin-protein ligase SDIR1-like |
| SNP_14131_A_11906908 | NC_021162.1    | Ca_Kabuli_Chr03 | 11906908                | GG                                     | AA                 | AA               | URR                           | 101493486          | E3 ubiquitin-protein ligase SDIR1-like |
| SNP_14132_A_11906920 | NC_021162.1    | Ca_Kabuli_Chr03 | 11906920                | CC                                     | TT                 | TT               | URR                           | 101493486          | E3 ubiquitin-protein ligase SDIR1-like |
| SNP_14133_A_11906921 | NC_021162.1    | Ca_Kabuli_Chr03 | 11906921                | TT                                     | CC                 | CC               | URR                           | 101493486          | E3 ubiquitin-protein ligase SDIR1-like |
| SNP_14134_A_11906924 | NC_021162.1    | Ca_Kabuli_Chr03 | 11906924                | GG                                     | AA                 | AA               | URR                           | 101493486          | E3 ubiquitin-protein ligase SDIR1-like |
| SNP_14136_A_11930408 | NC_021162.1    | Ca_Kabuli_Chr03 | 11930408                | GG                                     | AA                 | AA               | INTERGENIC                    |                    |                                        |
| SNP_14137_A_11930841 | NC_021162.1    | Ca_Kabuli_Chr03 | 11930841                | CC                                     | AA                 | AA               | DRR                           | 101497696          | protein FAR1-RELATED SEQUENCE 5-like   |
| SNP_14138_A_11930873 | NC_021162.1    | Ca_Kabuli_Chr03 | 11930873                | TT                                     | CC                 | CC               | DRR                           | 101497696          | protein FAR1-RELATED SEQUENCE 5-like   |
| SNP_14139_A_11950220 | NC_021162.1    | Ca_Kabuli_Chr03 | 11950220                | TT                                     | CC                 | CC               | INTERGENIC                    |                    |                                        |
| SNP_14140_A_11950231 | NC_021162.1    | Ca_Kabuli_Chr03 | 11950231                | CC                                     | AA                 | AA               | INTERGENIC                    |                    |                                        |
| SNP_14141_A_11950316 | NC_021162.1    | Ca_Kabuli_Chr03 | 11950316                | GG                                     | AA                 | AA               | INTERGENIC                    |                    |                                        |
| SNP_14142_A_11960418 | NC_021162.1    | Ca_Kabuli_Chr03 | 11960418                | AA                                     | GG                 | GG               | INTERGENIC                    |                    |                                        |
| SNP_14143_A_11960419 | NC_021162.1    | Ca_Kabuli_Chr03 | 11960419                | TT                                     | CC                 | CC               | INTERGENIC                    |                    |                                        |
| SNP_14144_A_11960421 | NC_021162.1    | Ca_Kabuli_Chr03 | 11960421                | CC                                     | AA                 | AA               | INTERGENIC                    |                    |                                        |
| SNP_14145_A_11981616 | NC_021162.1    | Ca_Kabuli_Chr03 | 11981616                | TT                                     | CC                 | CC               | INTERGENIC                    |                    |                                        |
| SNP_14146_A_12008370 | NC_021162.1    | Ca_Kabuli_Chr03 | 12008370                | AA                                     | GG                 | GG               | INTERGENIC                    |                    |                                        |
| SNP_14147_A_12032365 | NC_021162.1    | Ca_Kabuli_Chr03 | 12032365                | GG                                     | AA                 | AA               | INTERGENIC                    |                    |                                        |

| SNPs IDs             | Chromosome IDs | Chromosomes     | Physical positions (bp) | CDC Frontier genome (Reference genome) | (Pusa 1103 & HPNB) | (ILWC 46 & LPNB) | Sequence Components of genome | Gene accession IDs | Putative functions                                         |
|----------------------|----------------|-----------------|-------------------------|----------------------------------------|--------------------|------------------|-------------------------------|--------------------|------------------------------------------------------------|
| SNP_14148_A_12032397 | NC_021162.1    | Ca_Kabuli_Chr03 | 12032397                | AA                                     | CC                 | CC               | INTERGENIC                    |                    |                                                            |
| SNP_14149_A_12032401 | NC_021162.1    | Ca_Kabuli_Chr03 | 12032401                | TT                                     | CC                 | CC               | INTERGENIC                    |                    |                                                            |
| SNP_14150_A_12032407 | NC_021162.1    | Ca_Kabuli_Chr03 | 12032407                | AA                                     | TT                 | TT               | INTERGENIC                    |                    |                                                            |
| SNP_14151_A_12032462 | NC_021162.1    | Ca_Kabuli_Chr03 | 12032462                | AA                                     | GG                 | GG               | INTERGENIC                    |                    |                                                            |
| SNP_14152_A_12034202 | NC_021162.1    | Ca_Kabuli_Chr03 | 12034202                | CC                                     | AA                 | AA               | INTERGENIC                    |                    |                                                            |
| SNP_14153_A_12061982 | NC_021162.1    | Ca_Kabuli_Chr03 | 12061982                | AA                                     | GG                 | GG               | INTRON                        | 101494130          | uncharacterized LOC101494130                               |
| SNP_14154_A_12080826 | NC_021162.1    | Ca_Kabuli_Chr03 | 12080826                | AA                                     | CC                 | CC               | INTERGENIC                    |                    |                                                            |
| SNP_14155_A_12111545 | NC_021162.1    | Ca_Kabuli_Chr03 | 12111545                | CC                                     | TT                 | TT               | INTERGENIC                    |                    |                                                            |
| SNP_14156_A_12111753 | NC_021162.1    | Ca_Kabuli_Chr03 | 12111753                | AA                                     | TT                 | TT               | INTERGENIC                    |                    |                                                            |
| SNP_14157_A_12111758 | NC_021162.1    | Ca_Kabuli_Chr03 | 12111758                | TT                                     | AA                 | AA               | INTERGENIC                    |                    |                                                            |
| SNP_14158_A_12111759 | NC_021162.1    | Ca_Kabuli_Chr03 | 12111759                | TT                                     | CC                 | CC               | INTERGENIC                    |                    |                                                            |
| SNP_14159_A_12111760 | NC_021162.1    | Ca_Kabuli_Chr03 | 12111760                | TT                                     | AA                 | AA               | INTERGENIC                    |                    |                                                            |
| SNP_14160_A_12111879 | NC_021162.1    | Ca_Kabuli_Chr03 | 12111879                | CC                                     | TT                 | TT               | INTERGENIC                    |                    |                                                            |
| SNP_14161_A_12117441 | NC_021162.1    | Ca_Kabuli_Chr03 | 12117441                | AA                                     | CC                 | CC               | INTRON                        | 101499021          | pentatricopeptide repeat-containing protein At1g63330-like |
| SNP_14163_A_12163829 | NC_021162.1    | Ca_Kabuli_Chr03 | 12163829                | CC                                     | AA                 | AA               | INTERGENIC                    |                    |                                                            |
| SNP_14164_A_12163866 | NC_021162.1    | Ca_Kabuli_Chr03 | 12163866                | GG                                     | AA                 | AA               | INTERGENIC                    |                    |                                                            |
| SNP_14165_A_12208945 | NC_021162.1    | Ca_Kabuli_Chr03 | 12208945                | AA                                     | GG                 | GG               | INTERGENIC                    |                    |                                                            |
| SNP_14166_A_12345927 | NC_021162.1    | Ca_Kabuli_Chr03 | 12345927                | CC                                     | TT                 | TT               | INTERGENIC                    |                    |                                                            |
| SNP_14167_A_12345942 | NC_021162.1    | Ca_Kabuli_Chr03 | 12345942                | GG                                     | AA                 | AA               | INTERGENIC                    |                    |                                                            |
| SNP_14168_A_12348432 | NC_021162.1    | Ca_Kabuli_Chr03 | 12348432                | AA                                     | TT                 | TT               | INTERGENIC                    |                    |                                                            |
| SNP_14169_A_12387051 | NC_021162.1    | Ca_Kabuli_Chr03 | 12387051                | AA                                     | CC                 | CC               | INTERGENIC                    |                    |                                                            |
| SNP_14170_A_12387488 | NC_021162.1    | Ca_Kabuli_Chr03 | 12387488                | TT                                     | CC                 | CC               | INTERGENIC                    |                    |                                                            |

| SNPs IDs             | Chromosome IDs | Chromosomes     | Physical positions (bp) | CDC Frontier genome (Reference genome) | (Pusa 1103 & HPNB) | (ILWC 46 & LPNB) | Sequence Components of genome | Gene accession IDs | Putative functions                                       |
|----------------------|----------------|-----------------|-------------------------|----------------------------------------|--------------------|------------------|-------------------------------|--------------------|----------------------------------------------------------|
| SNP_14171_A_12387519 | NC_021162.1    | Ca_Kabuli_Chr03 | 12387519                | GG                                     | AA                 | AA               | INTERGENIC                    |                    |                                                          |
| SNP_14172_A_12387588 | NC_021162.1    | Ca_Kabuli_Chr03 | 12387588                | AA                                     | GG                 | GG               | INTERGENIC                    |                    |                                                          |
| SNP_14173_A_12387619 | NC_021162.1    | Ca_Kabuli_Chr03 | 12387619                | GG                                     | TT                 | TT               | INTERGENIC                    |                    |                                                          |
| SNP_14174_A_12387668 | NC_021162.1    | Ca_Kabuli_Chr03 | 12387668                | TT                                     | CC                 | CC               | INTERGENIC                    |                    |                                                          |
| SNP_14175_A_12387698 | NC_021162.1    | Ca_Kabuli_Chr03 | 12387698                | TT                                     | CC                 | CC               | INTERGENIC                    |                    |                                                          |
| SNP_14176_A_12423437 | NC_021162.1    | Ca_Kabuli_Chr03 | 12423437                | CC                                     | GG                 | GG               | URR                           | 101506268          | serine/threonine-protein phosphatase 7 long form homolog |
| SNP_14177_A_12423454 | NC_021162.1    | Ca_Kabuli_Chr03 | 12423454                | GG                                     | TT                 | TT               | URR                           | 101506268          | serine/threonine-protein phosphatase 7 long form homolog |
| SNP_14178_A_12423576 | NC_021162.1    | Ca_Kabuli_Chr03 | 12423576                | CC                                     | TT                 | TT               | URR                           | 101506268          | serine/threonine-protein phosphatase 7 long form homolog |
| SNP_14179_A_12423839 | NC_021162.1    | Ca_Kabuli_Chr03 | 12423839                | CC                                     | TT                 | TT               | URR                           | 101506268          | serine/threonine-protein phosphatase 7 long form homolog |
| SNP_14180_A_12432324 | NC_021162.1    | Ca_Kabuli_Chr03 | 12432324                | TT                                     | AA                 | AA               | INTERGENIC                    |                    |                                                          |
| SNP_14181_A_12432325 | NC_021162.1    | Ca_Kabuli_Chr03 | 12432325                | AA                                     | CC                 | CC               | INTERGENIC                    |                    |                                                          |
| SNP_14182_A_12432493 | NC_021162.1    | Ca_Kabuli_Chr03 | 12432493                | TT                                     | CC                 | CC               | INTERGENIC                    |                    |                                                          |
| SNP_14183_A_12432818 | NC_021162.1    | Ca_Kabuli_Chr03 | 12432818                | CC                                     | GG                 | GG               | INTERGENIC                    |                    |                                                          |
| SNP_14184_A_12432832 | NC_021162.1    | Ca_Kabuli_Chr03 | 12432832                | TT                                     | CC                 | CC               | INTERGENIC                    |                    |                                                          |
| SNP_14185_A_12438400 | NC_021162.1    | Ca_Kabuli_Chr03 | 12438400                | TT                                     | CC                 | CC               | INTERGENIC                    |                    |                                                          |
| SNP_14186_A_12451958 | NC_021162.1    | Ca_Kabuli_Chr03 | 12451958                | AA                                     | GG                 | GG               | INTERGENIC                    |                    |                                                          |
| SNP_14187_A_12529502 | NC_021162.1    | Ca_Kabuli_Chr03 | 12529502                | AA                                     | GG                 | GG               | INTERGENIC                    |                    |                                                          |
| SNP_14188_A_12560207 | NC_021162.1    | Ca_Kabuli_Chr03 | 12560207                | CC                                     | TT                 | TT               | INTERGENIC                    |                    |                                                          |
| SNP_14189_A_12565550 | NC_021162.1    | Ca_Kabuli_Chr03 | 12565550                | CC                                     | TT                 | TT               | INTERGENIC                    |                    |                                                          |
| SNP_14190_A_12581437 | NC_021162.1    | Ca_Kabuli_Chr03 | 12581437                | TT                                     | CC                 | CC               | INTERGENIC                    |                    |                                                          |
| SNP_14191_A_12581643 | NC_021162.1    | Ca_Kabuli_Chr03 | 12581643                | AA                                     | GG                 | GG               | INTERGENIC                    |                    |                                                          |
| SNP_14192_A_12581704 | NC_021162.1    | Ca_Kabuli_Chr03 | 12581704                | CC                                     | TT                 | TT               | INTERGENIC                    |                    |                                                          |

| SNPs IDs             | Chromosome IDs | Chromosomes     | Physical positions (bp) | CDC Frontier genome (Reference genome) | (Pusa 1103 & HPNB) | (ILWC 46 & LPNB) | Sequence genome | Components of | Gene accession IDs | Putative functions |
|----------------------|----------------|-----------------|-------------------------|----------------------------------------|--------------------|------------------|-----------------|---------------|--------------------|--------------------|
| SNP_14193_A_12581961 | NC_021162.1    | Ca_Kabuli_Chr03 | 12581961                | CC                                     | TT                 | TT               | INTERGENIC      |               |                    |                    |
| SNP_14194_A_12582006 | NC_021162.1    | Ca_Kabuli_Chr03 | 12582006                | AA                                     | TT                 | TT               | INTERGENIC      |               |                    |                    |
| SNP_14195_A_12582123 | NC_021162.1    | Ca_Kabuli_Chr03 | 12582123                | GG                                     | AA                 | AA               | INTERGENIC      |               |                    |                    |
| SNP_14196_A_12582140 | NC_021162.1    | Ca_Kabuli_Chr03 | 12582140                | GG                                     | AA                 | AA               | INTERGENIC      |               |                    |                    |
| SNP_14197_A_12593264 | NC_021162.1    | Ca_Kabuli_Chr03 | 12593264                | CC                                     | TT                 | TT               | INTERGENIC      |               |                    |                    |
| SNP_14198_A_12660292 | NC_021162.1    | Ca_Kabuli_Chr03 | 12660292                | TT                                     | AA                 | AA               | INTERGENIC      |               |                    |                    |
| SNP_14199_A_12684039 | NC_021162.1    | Ca_Kabuli_Chr03 | 12684039                | TT                                     | CC                 | CC               | INTERGENIC      |               |                    |                    |
| SNP_14201_A_12699596 | NC_021162.1    | Ca_Kabuli_Chr03 | 12699596                | AA                                     | CC                 | CC               | INTERGENIC      |               |                    |                    |
| SNP_14202_A_12699629 | NC_021162.1    | Ca_Kabuli_Chr03 | 12699629                | CC                                     | TT                 | TT               | INTERGENIC      |               |                    |                    |
| SNP_14203_A_12699638 | NC_021162.1    | Ca_Kabuli_Chr03 | 12699638                | GG                                     | AA                 | AA               | INTERGENIC      |               |                    |                    |
| SNP_14204_A_12699656 | NC_021162.1    | Ca_Kabuli_Chr03 | 12699656                | AA                                     | CC                 | CC               | INTERGENIC      |               |                    |                    |
| SNP_14206_A_12717364 | NC_021162.1    | Ca_Kabuli_Chr03 | 12717364                | CC                                     | AA                 | AA               | INTERGENIC      |               |                    |                    |
| SNP_14207_A_12739819 | NC_021162.1    | Ca_Kabuli_Chr03 | 12739819                | CC                                     | TT                 | TT               | INTERGENIC      |               |                    |                    |
| SNP_14208_A_12739850 | NC_021162.1    | Ca_Kabuli_Chr03 | 12739850                | GG                                     | CC                 | CC               | INTERGENIC      |               |                    |                    |
| SNP_14209_A_12739882 | NC_021162.1    | Ca_Kabuli_Chr03 | 12739882                | AA                                     | GG                 | GG               | INTERGENIC      |               |                    |                    |
| SNP_14210_A_12740154 | NC_021162.1    | Ca_Kabuli_Chr03 | 12740154                | AA                                     | GG                 | GG               | INTERGENIC      |               |                    |                    |
| SNP_14211_A_12740161 | NC_021162.1    | Ca_Kabuli_Chr03 | 12740161                | TT                                     | CC                 | CC               | INTERGENIC      |               |                    |                    |
| SNP_14213_A_12747046 | NC_021162.1    | Ca_Kabuli_Chr03 | 12747046                | CC                                     | TT                 | TT               | INTERGENIC      |               |                    |                    |
| SNP_14214_A_12779120 | NC_021162.1    | Ca_Kabuli_Chr03 | 12779120                | AA                                     | GG                 | GG               | INTERGENIC      |               |                    |                    |
| SNP_14215_A_12779140 | NC_021162.1    | Ca_Kabuli_Chr03 | 12779140                | TT                                     | CC                 | CC               | INTERGENIC      |               |                    |                    |
| SNP_14216_A_12779176 | NC_021162.1    | Ca_Kabuli_Chr03 | 12779176                | TT                                     | CC                 | CC               | INTERGENIC      |               |                    |                    |
| SNP_14217_A_12779512 | NC_021162.1    | Ca_Kabuli_Chr03 | 12779512                | GG                                     | TT                 | TT               | INTERGENIC      |               |                    |                    |

| SNPs IDs             | Chromosome IDs | Chromosomes     | Physical positions (bp) | CDC Frontier (Reference genome) | (Pusa 1103 & HPNB) | (ILWC 46 & LPNB) | Sequence genome | Components of | Gene accession IDs    | Putative functions |
|----------------------|----------------|-----------------|-------------------------|---------------------------------|--------------------|------------------|-----------------|---------------|-----------------------|--------------------|
| SNP_14218_A_12793719 | NC_021162.1    | Ca_Kabuli_Chr03 | 12793719                | TT                              | AA                 | AA               | INTERGENIC      |               |                       |                    |
| SNP_14219_A_12809049 | NC_021162.1    | Ca_Kabuli_Chr03 | 12809049                | AA                              | CC                 | CC               | INTERGENIC      |               |                       |                    |
| SNP_14220_A_12809058 | NC_021162.1    | Ca_Kabuli_Chr03 | 12809058                | TT                              | GG                 | GG               | INTERGENIC      |               |                       |                    |
| SNP_14221_A_12809104 | NC_021162.1    | Ca_Kabuli_Chr03 | 12809104                | AA                              | GG                 | GG               | INTERGENIC      |               |                       |                    |
| SNP_14222_A_12809371 | NC_021162.1    | Ca_Kabuli_Chr03 | 12809371                | GG                              | AA                 | AA               | INTERGENIC      |               |                       |                    |
| SNP_14223_A_12809372 | NC_021162.1    | Ca_Kabuli_Chr03 | 12809372                | TT                              | CC                 | CC               | INTERGENIC      |               |                       |                    |
| SNP_14224_A_12829739 | NC_021162.1    | Ca_Kabuli_Chr03 | 12829739                | CC                              | TT                 | TT               | INTERGENIC      |               |                       |                    |
| SNP_14226_A_12947328 | NC_021162.1    | Ca_Kabuli_Chr03 | 12947328                | GG                              | AA                 | AA               | URR             | 101504021     | CASP-like protein 4D1 |                    |
| SNP_14227_A_12969802 | NC_021162.1    | Ca_Kabuli_Chr03 | 12969802                | TT                              | AA                 | AA               | INTERGENIC      |               |                       |                    |
| SNP_14229_A_12993808 | NC_021162.1    | Ca_Kabuli_Chr03 | 12993808                | AA                              | TT                 | TT               | INTERGENIC      |               |                       |                    |
| SNP_14230_A_12993826 | NC_021162.1    | Ca_Kabuli_Chr03 | 12993826                | CC                              | TT                 | TT               | INTERGENIC      |               |                       |                    |
| SNP_14231_A_12993827 | NC_021162.1    | Ca_Kabuli_Chr03 | 12993827                | AA                              | GG                 | GG               | INTERGENIC      |               |                       |                    |
| SNP_14232_A_12993841 | NC_021162.1    | Ca_Kabuli_Chr03 | 12993841                | TT                              | GG                 | GG               | INTERGENIC      |               |                       |                    |
| SNP_14233_A_12993846 | NC_021162.1    | Ca_Kabuli_Chr03 | 12993846                | GG                              | AA                 | AA               | INTERGENIC      |               |                       |                    |
| SNP_14234_A_12993915 | NC_021162.1    | Ca_Kabuli_Chr03 | 12993915                | AA                              | GG                 | GG               | INTERGENIC      |               |                       |                    |
| SNP_14236_A_12994188 | NC_021162.1    | Ca_Kabuli_Chr03 | 12994188                | TT                              | CC                 | CC               | INTERGENIC      |               |                       |                    |
| SNP_14237_A_12994253 | NC_021162.1    | Ca_Kabuli_Chr03 | 12994253                | TT                              | CC                 | CC               | INTERGENIC      |               |                       |                    |
| SNP_14238_A_12994269 | NC_021162.1    | Ca_Kabuli_Chr03 | 12994269                | AA                              | CC                 | CC               | INTERGENIC      |               |                       |                    |
| SNP_14239_A_12994305 | NC_021162.1    | Ca_Kabuli_Chr03 | 12994305                | TT                              | CC                 | CC               | INTERGENIC      |               |                       |                    |
| SNP_14240_A_12994318 | NC_021162.1    | Ca_Kabuli_Chr03 | 12994318                | AA                              | GG                 | GG               | INTERGENIC      |               |                       |                    |
| SNP_14241_A_12994324 | NC_021162.1    | Ca_Kabuli_Chr03 | 12994324                | TT                              | GG                 | GG               | INTERGENIC      |               |                       |                    |
| SNP_14242_A_13020823 | NC_021162.1    | Ca_Kabuli_Chr03 | 13020823                | CC                              | AA                 | AA               | INTERGENIC      |               |                       |                    |

| SNPs IDs             | Chromosome IDs | Chromosomes     | Physical positions (bp) | CDC Frontier genome (Reference genome) | (Pusa 1103 & HPNB) | (ILWC 46 & LPNB) | Sequence genome | Components of | Gene accession IDs | Putative functions |
|----------------------|----------------|-----------------|-------------------------|----------------------------------------|--------------------|------------------|-----------------|---------------|--------------------|--------------------|
| SNP_14244_A_13036372 | NC_021162.1    | Ca_Kabuli_Chr03 | 13036372                | AA                                     | CC                 | CC               | INTERGENIC      |               |                    |                    |
| SNP_14245_A_13040449 | NC_021162.1    | Ca_Kabuli_Chr03 | 13040449                | CC                                     | TT                 | TT               | INTERGENIC      |               |                    |                    |
| SNP_14246_A_13040983 | NC_021162.1    | Ca_Kabuli_Chr03 | 13040983                | TT                                     | CC                 | CC               | INTERGENIC      |               |                    |                    |
| SNP_14247_A_13041005 | NC_021162.1    | Ca_Kabuli_Chr03 | 13041005                | GG                                     | AA                 | AA               | INTERGENIC      |               |                    |                    |
| SNP_14248_A_13041039 | NC_021162.1    | Ca_Kabuli_Chr03 | 13041039                | AA                                     | GG                 | GG               | INTERGENIC      |               |                    |                    |
| SNP_14249_A_13041042 | NC_021162.1    | Ca_Kabuli_Chr03 | 13041042                | TT                                     | CC                 | CC               | INTERGENIC      |               |                    |                    |
| SNP_14250_A_13041075 | NC_021162.1    | Ca_Kabuli_Chr03 | 13041075                | CC                                     | AA                 | AA               | INTERGENIC      |               |                    |                    |
| SNP_14251_A_13041122 | NC_021162.1    | Ca_Kabuli_Chr03 | 13041122                | GG                                     | AA                 | AA               | INTERGENIC      |               |                    |                    |
| SNP_14252_A_13041422 | NC_021162.1    | Ca_Kabuli_Chr03 | 13041422                | CC                                     | TT                 | TT               | INTERGENIC      |               |                    |                    |
| SNP_14253_A_13041468 | NC_021162.1    | Ca_Kabuli_Chr03 | 13041468                | CC                                     | TT                 | TT               | INTERGENIC      |               |                    |                    |
| SNP_14254_A_13041533 | NC_021162.1    | Ca_Kabuli_Chr03 | 13041533                | AA                                     | GG                 | GG               | INTERGENIC      |               |                    |                    |
| SNP_14255_A_13041578 | NC_021162.1    | Ca_Kabuli_Chr03 | 13041578                | AA                                     | GG                 | GG               | INTERGENIC      |               |                    |                    |
| SNP_14256_A_13041598 | NC_021162.1    | Ca_Kabuli_Chr03 | 13041598                | AA                                     | GG                 | GG               | INTERGENIC      |               |                    |                    |
| SNP_14257_A_13042121 | NC_021162.1    | Ca_Kabuli_Chr03 | 13042121                | AA                                     | TT                 | TT               | INTERGENIC      |               |                    |                    |
| SNP_14258_A_13042123 | NC_021162.1    | Ca_Kabuli_Chr03 | 13042123                | GG                                     | AA                 | AA               | INTERGENIC      |               |                    |                    |
| SNP_14259_A_13050707 | NC_021162.1    | Ca_Kabuli_Chr03 | 13050707                | TT                                     | CC                 | CC               | INTERGENIC      |               |                    |                    |
| SNP_14260_A_13050719 | NC_021162.1    | Ca_Kabuli_Chr03 | 13050719                | AA                                     | GG                 | GG               | INTERGENIC      |               |                    |                    |
| SNP_14261_A_13068635 | NC_021162.1    | Ca_Kabuli_Chr03 | 13068635                | AA                                     | GG                 | GG               | INTERGENIC      |               |                    |                    |
| SNP_14262_A_13079593 | NC_021162.1    | Ca_Kabuli_Chr03 | 13079593                | AA                                     | GG                 | GG               | INTERGENIC      |               |                    |                    |
| SNP_14263_A_13096562 | NC_021162.1    | Ca_Kabuli_Chr03 | 13096562                | TT                                     | CC                 | CC               | INTERGENIC      |               |                    |                    |
| SNP_14264_A_13096566 | NC_021162.1    | Ca_Kabuli_Chr03 | 13096566                | AA                                     | CC                 | CC               | INTERGENIC      |               |                    |                    |
| SNP_14265_A_13096590 | NC_021162.1    | Ca_Kabuli_Chr03 | 13096590                | AA                                     | CC                 | CC               | INTERGENIC      |               |                    |                    |

| SNPs IDs             | Chromosome IDs | Chromosomes     | Physical positions (bp) | CDC Frontier genome (Reference genome) | (Pusa 1103 & HPNB) | (ILWC 46 & LPNB) | Sequence genome | Components of | Gene accession IDs | Putative functions |
|----------------------|----------------|-----------------|-------------------------|----------------------------------------|--------------------|------------------|-----------------|---------------|--------------------|--------------------|
| SNP_14266_A_13096629 | NC_021162.1    | Ca_Kabuli_Chr03 | 13096629                | TT                                     | GG                 | GG               | INTERGENIC      |               |                    |                    |
| SNP_14267_A_13096654 | NC_021162.1    | Ca_Kabuli_Chr03 | 13096654                | TT                                     | CC                 | CC               | INTERGENIC      |               |                    |                    |
| SNP_14268_A_13096771 | NC_021162.1    | Ca_Kabuli_Chr03 | 13096771                | AA                                     | GG                 | GG               | INTERGENIC      |               |                    |                    |
| SNP_14269_A_13096799 | NC_021162.1    | Ca_Kabuli_Chr03 | 13096799                | TT                                     | GG                 | GG               | INTERGENIC      |               |                    |                    |
| SNP_14270_A_13096813 | NC_021162.1    | Ca_Kabuli_Chr03 | 13096813                | GG                                     | AA                 | AA               | INTERGENIC      |               |                    |                    |
| SNP_14271_A_13096814 | NC_021162.1    | Ca_Kabuli_Chr03 | 13096814                | GG                                     | TT                 | TT               | INTERGENIC      |               |                    |                    |
| SNP_14272_A_13096869 | NC_021162.1    | Ca_Kabuli_Chr03 | 13096869                | TT                                     | CC                 | CC               | INTERGENIC      |               |                    |                    |
| SNP_14274_A_13097110 | NC_021162.1    | Ca_Kabuli_Chr03 | 13097110                | CC                                     | TT                 | TT               | INTERGENIC      |               |                    |                    |
| SNP_14275_A_13097189 | NC_021162.1    | Ca_Kabuli_Chr03 | 13097189                | AA                                     | GG                 | GG               | INTERGENIC      |               |                    |                    |
| SNP_14276_A_13146137 | NC_021162.1    | Ca_Kabuli_Chr03 | 13146137                | GG                                     | CC                 | CC               | INTERGENIC      |               |                    |                    |
| SNP_14277_A_13180035 | NC_021162.1    | Ca_Kabuli_Chr03 | 13180035                | CC                                     | TT                 | TT               | INTERGENIC      |               |                    |                    |
| SNP_14278_A_13180039 | NC_021162.1    | Ca_Kabuli_Chr03 | 13180039                | TT                                     | GG                 | GG               | INTERGENIC      |               |                    |                    |
| SNP_14279_A_13180052 | NC_021162.1    | Ca_Kabuli_Chr03 | 13180052                | TT                                     | CC                 | CC               | INTERGENIC      |               |                    |                    |
| SNP_14280_A_13185138 | NC_021162.1    | Ca_Kabuli_Chr03 | 13185138                | GG                                     | TT                 | TT               | INTERGENIC      |               |                    |                    |
| SNP_14281_A_13185163 | NC_021162.1    | Ca_Kabuli_Chr03 | 13185163                | GG                                     | CC                 | CC               | INTERGENIC      |               |                    |                    |
| SNP_14282_A_13185164 | NC_021162.1    | Ca_Kabuli_Chr03 | 13185164                | AA                                     | CC                 | CC               | INTERGENIC      |               |                    |                    |
| SNP_14283_A_13185210 | NC_021162.1    | Ca_Kabuli_Chr03 | 13185210                | GG                                     | AA                 | AA               | INTERGENIC      |               |                    |                    |
| SNP_14284_A_13185297 | NC_021162.1    | Ca_Kabuli_Chr03 | 13185297                | CC                                     | AA                 | AA               | INTERGENIC      |               |                    |                    |
| SNP_14285_A_13185329 | NC_021162.1    | Ca_Kabuli_Chr03 | 13185329                | GG                                     | AA                 | AA               | INTERGENIC      |               |                    |                    |
| SNP_14286_A_13185350 | NC_021162.1    | Ca_Kabuli_Chr03 | 13185350                | GG                                     | AA                 | AA               | INTERGENIC      |               |                    |                    |
| SNP_14287_A_13185385 | NC_021162.1    | Ca_Kabuli_Chr03 | 13185385                | GG                                     | TT                 | TT               | INTERGENIC      |               |                    |                    |
| SNP_14288_A_13185408 | NC_021162.1    | Ca_Kabuli_Chr03 | 13185408                | CC                                     | TT                 | TT               | INTERGENIC      |               |                    |                    |



| SNPs IDs             | Chromosome IDs | Chromosomes     | Physical positions (bp) | CDC Frontier genome (Reference genome) | (Pusa 1103 & HPNB) | (ILWC 46 & LPNB) | Sequence Components of genome | Gene accession IDs | Putative functions                |
|----------------------|----------------|-----------------|-------------------------|----------------------------------------|--------------------|------------------|-------------------------------|--------------------|-----------------------------------|
| SNP_14289_A_13185472 | NC_021162.1    | Ca_Kabuli_Chr03 | 13185472                | AA                                     | CC                 | CC               | INTERGENIC                    |                    |                                   |
| SNP_14290_A_13185558 | NC_021162.1    | Ca_Kabuli_Chr03 | 13185558                | GG                                     | CC                 | CC               | INTERGENIC                    |                    |                                   |
| SNP_14291_A_13185559 | NC_021162.1    | Ca_Kabuli_Chr03 | 13185559                | GG                                     | AA                 | AA               | INTERGENIC                    |                    |                                   |
| SNP_14292_A_13185579 | NC_021162.1    | Ca_Kabuli_Chr03 | 13185579                | TT                                     | CC                 | CC               | INTERGENIC                    |                    |                                   |
| SNP_14293_A_13185767 | NC_021162.1    | Ca_Kabuli_Chr03 | 13185767                | CC                                     | GG                 | GG               | INTERGENIC                    |                    |                                   |
| SNP_14295_A_13238621 | NC_021162.1    | Ca_Kabuli_Chr03 | 13238621                | AA                                     | CC                 | CC               | INTERGENIC                    |                    |                                   |
| SNP_14296_A_13243753 | NC_021162.1    | Ca_Kabuli_Chr03 | 13243753                | GG                                     | AA                 | AA               | URR                           | 101513236          | Unknown function                  |
| SNP_14297_A_13243754 | NC_021162.1    | Ca_Kabuli_Chr03 | 13243754                | GG                                     | CC                 | CC               | URR                           | 101513236          | Unknown function                  |
| SNP_14298_A_13247963 | NC_021162.1    | Ca_Kabuli_Chr03 | 13247963                | CC                                     | TT                 | TT               | INTERGENIC                    |                    |                                   |
| SNP_14299_A_13285211 | NC_021162.1    | Ca_Kabuli_Chr03 | 13285211                | AA                                     | GG                 | GG               | INTRON                        | 101513874          | heat shock 70 kDa protein 18-like |
| SNP_14301_A_13285217 | NC_021162.1    | Ca_Kabuli_Chr03 | 13285217                | AA                                     | GG                 | GG               | INTRON                        | 101513874          | heat shock 70 kDa protein 18-like |
| SNP_14303_A_13319737 | NC_021162.1    | Ca_Kabuli_Chr03 | 13319737                | GG                                     | AA                 | AA               | INTERGENIC                    |                    |                                   |
| SNP_14304_A_13363334 | NC_021162.1    | Ca_Kabuli_Chr03 | 13363334                | AA                                     | GG                 | GG               | SYNONYMOUS_CODING             | id45492            | Unknown function                  |
| SNP_14305_A_13364307 | NC_021162.1    | Ca_Kabuli_Chr03 | 13364307                | GG                                     | AA                 | AA               | INTRON                        | id45492            | Unknown function                  |
| SNP_14306_A_13364387 | NC_021162.1    | Ca_Kabuli_Chr03 | 13364387                | GG                                     | AA                 | AA               | INTRON                        | id45492            | Unknown function                  |
| SNP_14307_A_13364426 | NC_021162.1    | Ca_Kabuli_Chr03 | 13364426                | GG                                     | AA                 | AA               | URR                           | 101509695          | uncharacterized LOC101509695      |
| SNP_14308_A_13364428 | NC_021162.1    | Ca_Kabuli_Chr03 | 13364428                | AA                                     | GG                 | GG               | URR                           | 101509695          | uncharacterized LOC101509695      |
| SNP_14309_A_13364493 | NC_021162.1    | Ca_Kabuli_Chr03 | 13364493                | CC                                     | TT                 | TT               | URR                           | 101509695          | uncharacterized LOC101509695      |
| SNP_14310_A_13364515 | NC_021162.1    | Ca_Kabuli_Chr03 | 13364515                | AA                                     | CC                 | CC               | URR                           | 101509695          | uncharacterized LOC101509695      |
| SNP_14311_A_13364596 | NC_021162.1    | Ca_Kabuli_Chr03 | 13364596                | CC                                     | AA                 | AA               | URR                           | 101509695          | uncharacterized LOC101509695      |
| SNP_14312_A_13364823 | NC_021162.1    | Ca_Kabuli_Chr03 | 13364823                | GG                                     | CC                 | CC               | URR                           | 101509695          | uncharacterized LOC101509695      |
| SNP_14313_A_13450423 | NC_021162.1    | Ca_Kabuli_Chr03 | 13450423                | CC                                     | TT                 | TT               | INTERGENIC                    |                    |                                   |

| SNPs IDs             | Chromosome IDs | Chromosomes     | Physical positions (bp) | CDC Frontier genome (Reference genome) | (Pusa 1103 & HPNB) | (ILWC 46 & LPNB) | Sequence genome | Components of | Gene accession IDs | Putative functions |
|----------------------|----------------|-----------------|-------------------------|----------------------------------------|--------------------|------------------|-----------------|---------------|--------------------|--------------------|
| SNP_14314_A_13450435 | NC_021162.1    | Ca_Kabuli_Chr03 | 13450435                | GG                                     | AA                 | AA               | INTERGENIC      |               |                    |                    |
| SNP_14315_A_13450999 | NC_021162.1    | Ca_Kabuli_Chr03 | 13450999                | AA                                     | CC                 | CC               | INTERGENIC      |               |                    |                    |
| SNP_14316_A_13451009 | NC_021162.1    | Ca_Kabuli_Chr03 | 13451009                | GG                                     | TT                 | TT               | INTERGENIC      |               |                    |                    |
| SNP_14317_A_13451073 | NC_021162.1    | Ca_Kabuli_Chr03 | 13451073                | AA                                     | TT                 | TT               | INTERGENIC      |               |                    |                    |
| SNP_14318_A_13451074 | NC_021162.1    | Ca_Kabuli_Chr03 | 13451074                | AA                                     | CC                 | CC               | INTERGENIC      |               |                    |                    |
| SNP_14319_A_13451076 | NC_021162.1    | Ca_Kabuli_Chr03 | 13451076                | AA                                     | GG                 | GG               | INTERGENIC      |               |                    |                    |
| SNP_14320_A_13451077 | NC_021162.1    | Ca_Kabuli_Chr03 | 13451077                | TT                                     | CC                 | CC               | INTERGENIC      |               |                    |                    |
| SNP_14321_A_13451093 | NC_021162.1    | Ca_Kabuli_Chr03 | 13451093                | TT                                     | CC                 | CC               | INTERGENIC      |               |                    |                    |
| SNP_14322_A_13451106 | NC_021162.1    | Ca_Kabuli_Chr03 | 13451106                | AA                                     | TT                 | TT               | INTERGENIC      |               |                    |                    |
| SNP_14323_A_13479523 | NC_021162.1    | Ca_Kabuli_Chr03 | 13479523                | CC                                     | TT                 | TT               | INTERGENIC      |               |                    |                    |
| SNP_14324_A_13480016 | NC_021162.1    | Ca_Kabuli_Chr03 | 13480016                | TT                                     | CC                 | CC               | INTERGENIC      |               |                    |                    |
| SNP_14325_A_13487957 | NC_021162.1    | Ca_Kabuli_Chr03 | 13487957                | AA                                     | GG                 | GG               | INTERGENIC      |               |                    |                    |
| SNP_14326_A_13488023 | NC_021162.1    | Ca_Kabuli_Chr03 | 13488023                | GG                                     | AA                 | AA               | INTERGENIC      |               |                    |                    |
| SNP_14327_A_13488375 | NC_021162.1    | Ca_Kabuli_Chr03 | 13488375                | AA                                     | GG                 | GG               | INTERGENIC      |               |                    |                    |
| SNP_14328_A_13488414 | NC_021162.1    | Ca_Kabuli_Chr03 | 13488414                | AA                                     | GG                 | GG               | INTERGENIC      |               |                    |                    |
| SNP_14329_A_13488476 | NC_021162.1    | Ca_Kabuli_Chr03 | 13488476                | TT                                     | CC                 | CC               | INTERGENIC      |               |                    |                    |
| SNP_14330_A_13488517 | NC_021162.1    | Ca_Kabuli_Chr03 | 13488517                | AA                                     | TT                 | TT               | INTERGENIC      |               |                    |                    |
| SNP_14331_A_13488518 | NC_021162.1    | Ca_Kabuli_Chr03 | 13488518                | TT                                     | AA                 | AA               | INTERGENIC      |               |                    |                    |
| SNP_14333_A_13554624 | NC_021162.1    | Ca_Kabuli_Chr03 | 13554624                | TT                                     | CC                 | CC               | INTERGENIC      |               |                    |                    |
| SNP_14334_A_13556723 | NC_021162.1    | Ca_Kabuli_Chr03 | 13556723                | TT                                     | AA                 | AA               | INTERGENIC      |               |                    |                    |
| SNP_14335_A_13556906 | NC_021162.1    | Ca_Kabuli_Chr03 | 13556906                | TT                                     | CC                 | CC               | INTERGENIC      |               |                    |                    |
| SNP_14336_A_13591721 | NC_021162.1    | Ca_Kabuli_Chr03 | 13591721                | GG                                     | AA                 | AA               | INTERGENIC      |               |                    |                    |

| SNPs IDs             | Chromosome IDs | Chromosomes     | Physical positions (bp) | CDC Frontier genome (Reference genome) | (Pusa 1103 & HPNB) | (ILWC 46 & LPNB) | Sequence genome | Components of | Gene accession IDs | Putative functions |
|----------------------|----------------|-----------------|-------------------------|----------------------------------------|--------------------|------------------|-----------------|---------------|--------------------|--------------------|
| SNP_14337_A_13597050 | NC_021162.1    | Ca_Kabuli_Chr03 | 13597050                | AA                                     | GG                 | GG               | INTERGENIC      |               |                    |                    |
| SNP_14339_A_13787486 | NC_021162.1    | Ca_Kabuli_Chr03 | 13787486                | GG                                     | AA                 | AA               | INTERGENIC      |               |                    |                    |
| SNP_14340_A_13788757 | NC_021162.1    | Ca_Kabuli_Chr03 | 13788757                | GG                                     | AA                 | AA               | INTERGENIC      |               |                    |                    |
| SNP_14343_A_13830425 | NC_021162.1    | Ca_Kabuli_Chr03 | 13830425                | CC                                     | GG                 | GG               | INTERGENIC      |               |                    |                    |
| SNP_14345_A_13849981 | NC_021162.1    | Ca_Kabuli_Chr03 | 13849981                | AA                                     | GG                 | GG               | INTERGENIC      |               |                    |                    |
| SNP_14346_A_13852265 | NC_021162.1    | Ca_Kabuli_Chr03 | 13852265                | GG                                     | AA                 | AA               | INTERGENIC      |               |                    |                    |
| SNP_14347_A_13868409 | NC_021162.1    | Ca_Kabuli_Chr03 | 13868409                | GG                                     | AA                 | AA               | INTERGENIC      |               |                    |                    |
| SNP_14348_A_13868412 | NC_021162.1    | Ca_Kabuli_Chr03 | 13868412                | CC                                     | TT                 | TT               | INTERGENIC      |               |                    |                    |
| SNP_14349_A_13868478 | NC_021162.1    | Ca_Kabuli_Chr03 | 13868478                | AA                                     | GG                 | GG               | INTERGENIC      |               |                    |                    |
| SNP_14350_A_13868536 | NC_021162.1    | Ca_Kabuli_Chr03 | 13868536                | AA                                     | GG                 | GG               | INTERGENIC      |               |                    |                    |
| SNP_14351_A_13868720 | NC_021162.1    | Ca_Kabuli_Chr03 | 13868720                | GG                                     | AA                 | AA               | INTERGENIC      |               |                    |                    |
| SNP_14352_A_13868750 | NC_021162.1    | Ca_Kabuli_Chr03 | 13868750                | AA                                     | GG                 | GG               | INTERGENIC      |               |                    |                    |
| SNP_14353_A_13868801 | NC_021162.1    | Ca_Kabuli_Chr03 | 13868801                | AA                                     | CC                 | CC               | INTERGENIC      |               |                    |                    |
| SNP_14354_A_13868803 | NC_021162.1    | Ca_Kabuli_Chr03 | 13868803                | TT                                     | GG                 | GG               | INTERGENIC      |               |                    |                    |
| SNP_14355_A_13868811 | NC_021162.1    | Ca_Kabuli_Chr03 | 13868811                | TT                                     | CC                 | CC               | INTERGENIC      |               |                    |                    |
| SNP_14356_A_13868818 | NC_021162.1    | Ca_Kabuli_Chr03 | 13868818                | TT                                     | GG                 | GG               | INTERGENIC      |               |                    |                    |
| SNP_14357_A_13868880 | NC_021162.1    | Ca_Kabuli_Chr03 | 13868880                | TT                                     | CC                 | CC               | INTERGENIC      |               |                    |                    |
| SNP_14358_A_13868851 | NC_021162.1    | Ca_Kabuli_Chr03 | 13868851                | AA                                     | GG                 | GG               | INTERGENIC      |               |                    |                    |
| SNP_14359_A_13917997 | NC_021162.1    | Ca_Kabuli_Chr03 | 13917997                | GG                                     | TT                 | TT               | INTERGENIC      |               |                    |                    |
| SNP_14360_A_13935059 | NC_021162.1    | Ca_Kabuli_Chr03 | 13935059                | AA                                     | TT                 | TT               | INTERGENIC      |               |                    |                    |
| SNP_14361_A_13935464 | NC_021162.1    | Ca_Kabuli_Chr03 | 13935464                | TT                                     | CC                 | CC               | INTERGENIC      |               |                    |                    |
| SNP_14362_A_13935971 | NC_021162.1    | Ca_Kabuli_Chr03 | 13935971                | CC                                     | AA                 | AA               | INTERGENIC      |               |                    |                    |

| SNPs IDs             | Chromosome IDs | Chromosomes     | Physical positions (bp) | CDC Frontier genome (Reference genome) | (Pusa 1103 & HPNB) | (ILWC 46 & LPNB) | Sequence Components of genome | Gene accession IDs | Putative functions                 |
|----------------------|----------------|-----------------|-------------------------|----------------------------------------|--------------------|------------------|-------------------------------|--------------------|------------------------------------|
| SNP_14363_A_13935983 | NC_021162.1    | Ca_Kabuli_Chr03 | 13935983                | CC                                     | TT                 | TT               | INTERGENIC                    |                    |                                    |
| SNP_14364_A_13950687 | NC_021162.1    | Ca_Kabuli_Chr03 | 13950687                | TT                                     | GG                 | GG               | INTERGENIC                    |                    |                                    |
| SNP_14365_A_13950688 | NC_021162.1    | Ca_Kabuli_Chr03 | 13950688                | GG                                     | TT                 | TT               | INTERGENIC                    |                    |                                    |
| SNP_14366_A_13955807 | NC_021162.1    | Ca_Kabuli_Chr03 | 13955807                | TT                                     | CC                 | CC               | INTERGENIC                    |                    |                                    |
| SNP_14367_A_13957669 | NC_021162.1    | Ca_Kabuli_Chr03 | 13957669                | AA                                     | CC                 | CC               | INTERGENIC                    |                    |                                    |
| SNP_14368_A_14015483 | NC_021162.1    | Ca_Kabuli_Chr03 | 14015483                | CC                                     | TT                 | TT               | INTERGENIC                    |                    |                                    |
| SNP_14369_A_14163687 | NC_021162.1    | Ca_Kabuli_Chr03 | 14163687                | AA                                     | CC                 | CC               | INTRON                        | 101497585          | protein TAPETUM DETERMINANT 1-like |
| SNP_14370_A_14181088 | NC_021162.1    | Ca_Kabuli_Chr03 | 14181088                | AA                                     | GG                 | GG               | URR                           | 101494656          | uncharacterized LOC101494656       |
| SNP_14371_A_14227205 | NC_021162.1    | Ca_Kabuli_Chr03 | 14227205                | CC                                     | AA                 | AA               | DRR                           | 101495627          | Unknown function                   |
| SNP_14372_A_14227841 | NC_021162.1    | Ca_Kabuli_Chr03 | 14227841                | GG                                     | AA                 | AA               | DRR                           | 101498572          | Unknown function                   |
| SNP_14373_A_14227848 | NC_021162.1    | Ca_Kabuli_Chr03 | 14227848                | AA                                     | GG                 | GG               | DRR                           | 101498572          | Unknown function                   |
| SNP_14374_A_14227854 | NC_021162.1    | Ca_Kabuli_Chr03 | 14227854                | AA                                     | CC                 | CC               | DRR                           | 101498572          | Unknown function                   |
| SNP_14375_A_14242806 | NC_021162.1    | Ca_Kabuli_Chr03 | 14242806                | CC                                     | TT                 | TT               | INTERGENIC                    |                    |                                    |
| SNP_14376_A_14243770 | NC_021162.1    | Ca_Kabuli_Chr03 | 14243770                | CC                                     | TT                 | TT               | INTERGENIC                    |                    |                                    |
| SNP_14377_A_14243772 | NC_021162.1    | Ca_Kabuli_Chr03 | 14243772                | AA                                     | GG                 | GG               | INTERGENIC                    |                    |                                    |
| SNP_14378_A_14245519 | NC_021162.1    | Ca_Kabuli_Chr03 | 14245519                | AA                                     | CC                 | CC               | INTERGENIC                    |                    |                                    |
| SNP_14379_A_14245528 | NC_021162.1    | Ca_Kabuli_Chr03 | 14245528                | TT                                     | AA                 | AA               | INTERGENIC                    |                    |                                    |
| SNP_14380_A_14245585 | NC_021162.1    | Ca_Kabuli_Chr03 | 14245585                | AA                                     | GG                 | GG               | INTERGENIC                    |                    |                                    |
| SNP_14382_A_14245801 | NC_021162.1    | Ca_Kabuli_Chr03 | 14245801                | AA                                     | GG                 | GG               | INTERGENIC                    |                    |                                    |
| SNP_14383_A_14245810 | NC_021162.1    | Ca_Kabuli_Chr03 | 14245810                | CC                                     | TT                 | TT               | INTERGENIC                    |                    |                                    |
| SNP_14384_A_14245813 | NC_021162.1    | Ca_Kabuli_Chr03 | 14245813                | TT                                     | AA                 | AA               | INTERGENIC                    |                    |                                    |
| SNP_14385_A_14247092 | NC_021162.1    | Ca_Kabuli_Chr03 | 14247092                | TT                                     | CC                 | CC               | INTERGENIC                    |                    |                                    |

| SNPs IDs             | Chromosome IDs | Chromosomes     | Physical positions (bp) | CDC Frontier genome (Reference genome) | (Pusa 1103 & HPNB) | (ILWC 46 & LPNB) | Sequence genome | Components of | Gene accession IDs | Putative functions |
|----------------------|----------------|-----------------|-------------------------|----------------------------------------|--------------------|------------------|-----------------|---------------|--------------------|--------------------|
| SNP_14386_A_14247194 | NC_021162.1    | Ca_Kabuli_Chr03 | 14247194                | AA                                     | GG                 | GG               | INTERGENIC      |               |                    |                    |
| SNP_14387_A_14247231 | NC_021162.1    | Ca_Kabuli_Chr03 | 14247231                | TT                                     | CC                 | CC               | INTERGENIC      |               |                    |                    |
| SNP_14388_A_14247491 | NC_021162.1    | Ca_Kabuli_Chr03 | 14247491                | GG                                     | AA                 | AA               | INTERGENIC      |               |                    |                    |
| SNP_14389_A_14247724 | NC_021162.1    | Ca_Kabuli_Chr03 | 14247724                | CC                                     | TT                 | TT               | INTERGENIC      |               |                    |                    |
| SNP_14390_A_14247789 | NC_021162.1    | Ca_Kabuli_Chr03 | 14247789                | GG                                     | TT                 | TT               | INTERGENIC      |               |                    |                    |
| SNP_14391_A_14247834 | NC_021162.1    | Ca_Kabuli_Chr03 | 14247834                | AA                                     | TT                 | TT               | INTERGENIC      |               |                    |                    |
| SNP_14392_A_14247853 | NC_021162.1    | Ca_Kabuli_Chr03 | 14247853                | GG                                     | AA                 | AA               | INTERGENIC      |               |                    |                    |
| SNP_14393_A_14247953 | NC_021162.1    | Ca_Kabuli_Chr03 | 14247953                | CC                                     | TT                 | TT               | INTERGENIC      |               |                    |                    |
| SNP_14394_A_14248011 | NC_021162.1    | Ca_Kabuli_Chr03 | 14248011                | GG                                     | TT                 | TT               | INTERGENIC      |               |                    |                    |
| SNP_14395_A_14248014 | NC_021162.1    | Ca_Kabuli_Chr03 | 14248014                | AA                                     | CC                 | CC               | INTERGENIC      |               |                    |                    |
| SNP_14396_A_14248095 | NC_021162.1    | Ca_Kabuli_Chr03 | 14248095                | TT                                     | GG                 | GG               | INTERGENIC      |               |                    |                    |
| SNP_14397_A_14248098 | NC_021162.1    | Ca_Kabuli_Chr03 | 14248098                | TT                                     | AA                 | AA               | INTERGENIC      |               |                    |                    |
| SNP_14398_A_14248157 | NC_021162.1    | Ca_Kabuli_Chr03 | 14248157                | AA                                     | GG                 | GG               | INTERGENIC      |               |                    |                    |
| SNP_14399_A_14248309 | NC_021162.1    | Ca_Kabuli_Chr03 | 14248309                | TT                                     | CC                 | CC               | INTERGENIC      |               |                    |                    |
| SNP_14400_A_14248339 | NC_021162.1    | Ca_Kabuli_Chr03 | 14248339                | TT                                     | CC                 | CC               | INTERGENIC      |               |                    |                    |
| SNP_14401_A_14248404 | NC_021162.1    | Ca_Kabuli_Chr03 | 14248404                | TT                                     | AA                 | AA               | INTERGENIC      |               |                    |                    |
| SNP_14402_A_14248410 | NC_021162.1    | Ca_Kabuli_Chr03 | 14248410                | TT                                     | CC                 | CC               | INTERGENIC      |               |                    |                    |
| SNP_14403_A_14248576 | NC_021162.1    | Ca_Kabuli_Chr03 | 14248576                | TT                                     | CC                 | CC               | INTERGENIC      |               |                    |                    |
| SNP_14404_A_14248799 | NC_021162.1    | Ca_Kabuli_Chr03 | 14248799                | GG                                     | AA                 | AA               | INTERGENIC      |               |                    |                    |
| SNP_14405_A_14248827 | NC_021162.1    | Ca_Kabuli_Chr03 | 14248827                | AA                                     | GG                 | GG               | INTERGENIC      |               |                    |                    |
| SNP_14406_A_14248933 | NC_021162.1    | Ca_Kabuli_Chr03 | 14248933                | GG                                     | AA                 | AA               | INTERGENIC      |               |                    |                    |
| SNP_14407_A_14249125 | NC_021162.1    | Ca_Kabuli_Chr03 | 14249125                | TT                                     | CC                 | CC               | INTERGENIC      |               |                    |                    |

| SNPs IDs             | Chromosome IDs | Chromosomes     | Physical positions (bp) | CDC Frontier genome (Reference genome) | (Pusa 1103 & HPNB) | (ILWC 46 & LPNB) | Sequence Components of genome | Gene accession IDs | Putative functions           |
|----------------------|----------------|-----------------|-------------------------|----------------------------------------|--------------------|------------------|-------------------------------|--------------------|------------------------------|
| SNP_14408_A_14249133 | NC_021162.1    | Ca_Kabuli_Chr03 | 14249133                | AA                                     | GG                 | GG               | INTERGENIC                    |                    |                              |
| SNP_14409_A_14249147 | NC_021162.1    | Ca_Kabuli_Chr03 | 14249147                | AA                                     | GG                 | GG               | INTERGENIC                    |                    |                              |
| SNP_14410_A_14249148 | NC_021162.1    | Ca_Kabuli_Chr03 | 14249148                | AA                                     | TT                 | TT               | INTERGENIC                    |                    |                              |
| SNP_14411_A_14249156 | NC_021162.1    | Ca_Kabuli_Chr03 | 14249156                | CC                                     | TT                 | TT               | INTERGENIC                    |                    |                              |
| SNP_14412_A_14249242 | NC_021162.1    | Ca_Kabuli_Chr03 | 14249242                | TT                                     | AA                 | AA               | INTERGENIC                    |                    |                              |
| SNP_14413_A_14249248 | NC_021162.1    | Ca_Kabuli_Chr03 | 14249248                | AA                                     | GG                 | GG               | INTERGENIC                    |                    |                              |
| SNP_14414_A_14249439 | NC_021162.1    | Ca_Kabuli_Chr03 | 14249439                | CC                                     | TT                 | TT               | INTERGENIC                    |                    |                              |
| SNP_14415_A_14249493 | NC_021162.1    | Ca_Kabuli_Chr03 | 14249493                | AA                                     | GG                 | GG               | INTERGENIC                    |                    |                              |
| SNP_14416_A_14249508 | NC_021162.1    | Ca_Kabuli_Chr03 | 14249508                | GG                                     | CC                 | CC               | INTERGENIC                    |                    |                              |
| SNP_14417_A_14430962 | NC_021162.1    | Ca_Kabuli_Chr03 | 14430962                | CC                                     | TT                 | TT               | NON_SYNONYMOUS_CODING         | 101504131          | uncharacterized LOC101504131 |
| SNP_14418_A_14430984 | NC_021162.1    | Ca_Kabuli_Chr03 | 14430984                | GG                                     | TT                 | TT               | NON_SYNONYMOUS_CODING         | 101504131          | uncharacterized LOC101504131 |
| SNP_14419_A_14430995 | NC_021162.1    | Ca_Kabuli_Chr03 | 14430995                | GG                                     | TT                 | TT               | NON_SYNONYMOUS_CODING         | 101504131          | uncharacterized LOC101504131 |
| SNP_14420_A_14488182 | NC_021162.1    | Ca_Kabuli_Chr03 | 14488182                | AA                                     | CC                 | CC               | INTERGENIC                    |                    |                              |
| SNP_14421_A_14488184 | NC_021162.1    | Ca_Kabuli_Chr03 | 14488184                | TT                                     | CC                 | CC               | INTERGENIC                    |                    |                              |
| SNP_14422_A_14488192 | NC_021162.1    | Ca_Kabuli_Chr03 | 14488192                | TT                                     | CC                 | CC               | INTERGENIC                    |                    |                              |
| SNP_14423_A_14495027 | NC_021162.1    | Ca_Kabuli_Chr03 | 14495027                | TT                                     | CC                 | CC               | INTERGENIC                    |                    |                              |
| SNP_14424_A_14495029 | NC_021162.1    | Ca_Kabuli_Chr03 | 14495029                | TT                                     | GG                 | GG               | INTERGENIC                    |                    |                              |
| SNP_14425_A_14495131 | NC_021162.1    | Ca_Kabuli_Chr03 | 14495131                | AA                                     | GG                 | GG               | INTERGENIC                    |                    |                              |
| SNP_14426_A_14495154 | NC_021162.1    | Ca_Kabuli_Chr03 | 14495154                | CC                                     | TT                 | TT               | INTERGENIC                    |                    |                              |
| SNP_14427_A_14495170 | NC_021162.1    | Ca_Kabuli_Chr03 | 14495170                | AA                                     | CC                 | CC               | INTERGENIC                    |                    |                              |
| SNP_14428_A_14495185 | NC_021162.1    | Ca_Kabuli_Chr03 | 14495185                | TT                                     | CC                 | CC               | INTERGENIC                    |                    |                              |
| SNP_14429_A_14495205 | NC_021162.1    | Ca_Kabuli_Chr03 | 14495205                | GG                                     | AA                 | AA               | INTERGENIC                    |                    |                              |

| SNPs IDs             | Chromosome IDs | Chromosomes     | Physical positions (bp) | CDC Frontier genome (Reference genome) | (Pusa 1103 & HPNB) | (ILWC 46 & LPNB) | Sequence Components of genome | Gene accession IDs | Putative functions                      |
|----------------------|----------------|-----------------|-------------------------|----------------------------------------|--------------------|------------------|-------------------------------|--------------------|-----------------------------------------|
| SNP_14430_A_14495264 | NC_021162.1    | Ca_Kabuli_Chr03 | 14495264                | TT                                     | CC                 | CC               | INTERGENIC                    |                    |                                         |
| SNP_14431_A_14495412 | NC_021162.1    | Ca_Kabuli_Chr03 | 14495412                | CC                                     | AA                 | AA               | INTERGENIC                    |                    |                                         |
| SNP_14432_A_14495459 | NC_021162.1    | Ca_Kabuli_Chr03 | 14495459                | TT                                     | CC                 | CC               | INTERGENIC                    |                    |                                         |
| SNP_14433_A_14495501 | NC_021162.1    | Ca_Kabuli_Chr03 | 14495501                | TT                                     | CC                 | CC               | INTERGENIC                    |                    |                                         |
| SNP_14434_A_14503487 | NC_021162.1    | Ca_Kabuli_Chr03 | 14503487                | AA                                     | GG                 | GG               | INTERGENIC                    |                    |                                         |
| SNP_14435_A_14543486 | NC_021162.1    | Ca_Kabuli_Chr03 | 14543486                | AA                                     | CC                 | CC               | INTERGENIC                    |                    |                                         |
| SNP_14436_A_14543487 | NC_021162.1    | Ca_Kabuli_Chr03 | 14543487                | TT                                     | GG                 | GG               | INTERGENIC                    |                    |                                         |
| SNP_14437_A_14575029 | NC_021162.1    | Ca_Kabuli_Chr03 | 14575029                | TT                                     | CC                 | CC               | INTERGENIC                    |                    |                                         |
| SNP_14438_A_14575390 | NC_021162.1    | Ca_Kabuli_Chr03 | 14575390                | AA                                     | GG                 | GG               | INTERGENIC                    |                    |                                         |
| SNP_14439_A_14575419 | NC_021162.1    | Ca_Kabuli_Chr03 | 14575419                | AA                                     | GG                 | GG               | INTERGENIC                    |                    |                                         |
| SNP_14440_A_14577295 | NC_021162.1    | Ca_Kabuli_Chr03 | 14577295                | TT                                     | CC                 | CC               | INTERGENIC                    |                    |                                         |
| SNP_14442_A_14653365 | NC_021162.1    | Ca_Kabuli_Chr03 | 14653365                | AA                                     | GG                 | GG               | INTRON                        | 101500404          | E3 ubiquitin-protein ligase BRE1-like 1 |
| SNP_14443_A_14679933 | NC_021162.1    | Ca_Kabuli_Chr03 | 14679933                | GG                                     | TT                 | TT               | INTERGENIC                    |                    |                                         |
| SNP_14444_A_14696998 | NC_021162.1    | Ca_Kabuli_Chr03 | 14696998                | AA                                     | GG                 | GG               | DRR                           | 101500921          | uncharacterized LOC101500921            |
| SNP_14445_A_14703843 | NC_021162.1    | Ca_Kabuli_Chr03 | 14703843                | TT                                     | CC                 | CC               | INTERGENIC                    |                    |                                         |
| SNP_14446_A_14706603 | NC_021162.1    | Ca_Kabuli_Chr03 | 14706603                | AA                                     | CC                 | CC               | INTERGENIC                    |                    |                                         |
| SNP_14447_A_14780176 | NC_021162.1    | Ca_Kabuli_Chr03 | 14780176                | CC                                     | TT                 | TT               | INTERGENIC                    |                    |                                         |
| SNP_14448_A_14780247 | NC_021162.1    | Ca_Kabuli_Chr03 | 14780247                | AA                                     | GG                 | GG               | INTERGENIC                    |                    |                                         |
| SNP_14449_A_14780282 | NC_021162.1    | Ca_Kabuli_Chr03 | 14780282                | AA                                     | GG                 | GG               | INTERGENIC                    |                    |                                         |
| SNP_14450_A_14790349 | NC_021162.1    | Ca_Kabuli_Chr03 | 14790349                | CC                                     | AA                 | AA               | INTERGENIC                    |                    |                                         |
| SNP_14451_A_14795717 | NC_021162.1    | Ca_Kabuli_Chr03 | 14795717                | GG                                     | AA                 | AA               | INTERGENIC                    |                    |                                         |
| SNP_14452_A_14795996 | NC_021162.1    | Ca_Kabuli_Chr03 | 14795996                | AA                                     | TT                 | TT               | INTERGENIC                    |                    |                                         |

| SNPs IDs             | Chromosome IDs | Chromosomes     | Physical positions (bp) | CDC Frontier genome (Reference genome) | (Pusa 1103 & HPNB) | (ILWC 46 & LPNB) | Sequence Components of genome | Gene accession IDs | Putative functions               |
|----------------------|----------------|-----------------|-------------------------|----------------------------------------|--------------------|------------------|-------------------------------|--------------------|----------------------------------|
| SNP_14453_A_14796042 | NC_021162.1    | Ca_Kabuli_Chr03 | 14796042                | GG                                     | TT                 | TT               | INTERGENIC                    |                    |                                  |
| SNP_14454_A_14797148 | NC_021162.1    | Ca_Kabuli_Chr03 | 14797148                | AA                                     | GG                 | GG               | INTERGENIC                    |                    |                                  |
| SNP_14456_A_14801632 | NC_021162.1    | Ca_Kabuli_Chr03 | 14801632                | TT                                     | CC                 | CC               | INTERGENIC                    |                    |                                  |
| SNP_14457_A_14805350 | NC_021162.1    | Ca_Kabuli_Chr03 | 14805350                | CC                                     | TT                 | TT               | INTERGENIC                    |                    |                                  |
| SNP_14458_A_14814676 | NC_021162.1    | Ca_Kabuli_Chr03 | 14814676                | CC                                     | TT                 | TT               | URR                           | 101502098          | hydroquinone glucosyltransferase |
| SNP_14459_A_14815740 | NC_021162.1    | Ca_Kabuli_Chr03 | 14815740                | TT                                     | CC                 | CC               | URR                           | 101502098          | hydroquinone glucosyltransferase |
| SNP_14460_A_14815947 | NC_021162.1    | Ca_Kabuli_Chr03 | 14815947                | GG                                     | AA                 | AA               | URR                           | 101502098          | hydroquinone glucosyltransferase |
| SNP_14461_A_14816120 | NC_021162.1    | Ca_Kabuli_Chr03 | 14816120                | AA                                     | TT                 | TT               | URR                           | 101502098          | hydroquinone glucosyltransferase |
| SNP_14462_A_14816180 | NC_021162.1    | Ca_Kabuli_Chr03 | 14816180                | TT                                     | CC                 | CC               | URR                           | 101502098          | hydroquinone glucosyltransferase |
| SNP_14463_A_14816185 | NC_021162.1    | Ca_Kabuli_Chr03 | 14816185                | AA                                     | GG                 | GG               | URR                           | 101502098          | hydroquinone glucosyltransferase |
| SNP_14464_A_14816216 | NC_021162.1    | Ca_Kabuli_Chr03 | 14816216                | GG                                     | AA                 | AA               | URR                           | 101502098          | hydroquinone glucosyltransferase |
| SNP_14465_A_14820102 | NC_021162.1    | Ca_Kabuli_Chr03 | 14820102                | GG                                     | TT                 | TT               | INTERGENIC                    |                    |                                  |
| SNP_14466_A_14820116 | NC_021162.1    | Ca_Kabuli_Chr03 | 14820116                | TT                                     | CC                 | CC               | INTERGENIC                    |                    |                                  |
| SNP_14467_A_14835338 | NC_021162.1    | Ca_Kabuli_Chr03 | 14835338                | AA                                     | CC                 | CC               | INTERGENIC                    |                    |                                  |
| SNP_14468_A_14835685 | NC_021162.1    | Ca_Kabuli_Chr03 | 14835685                | TT                                     | AA                 | AA               | INTERGENIC                    |                    |                                  |
| SNP_14469_A_14836903 | NC_021162.1    | Ca_Kabuli_Chr03 | 14836903                | CC                                     | GG                 | GG               | INTERGENIC                    |                    |                                  |
| SNP_14471_A_14843257 | NC_021162.1    | Ca_Kabuli_Chr03 | 14843257                | AA                                     | GG                 | GG               | INTERGENIC                    |                    |                                  |
| SNP_14472_A_14845795 | NC_021162.1    | Ca_Kabuli_Chr03 | 14845795                | TT                                     | AA                 | AA               | INTERGENIC                    |                    |                                  |
| SNP_14473_A_14848635 | NC_021162.1    | Ca_Kabuli_Chr03 | 14848635                | CC                                     | TT                 | TT               | INTERGENIC                    |                    |                                  |
| SNP_14474_A_14848666 | NC_021162.1    | Ca_Kabuli_Chr03 | 14848666                | CC                                     | GG                 | GG               | INTERGENIC                    |                    |                                  |
| SNP_14475_A_14848673 | NC_021162.1    | Ca_Kabuli_Chr03 | 14848673                | GG                                     | TT                 | TT               | INTERGENIC                    |                    |                                  |
| SNP_14476_A_14848682 | NC_021162.1    | Ca_Kabuli_Chr03 | 14848682                | CC                                     | GG                 | GG               | INTERGENIC                    |                    |                                  |



| SNPs IDs             | Chromosome IDs | Chromosomes     | Physical positions (bp) | CDC Frontier genome (Reference genome) | (Pusa 1103 & HPNB) | (ILWC 46 & LPNB) | Sequence genome | Components of | Gene accession IDs | Putative functions |
|----------------------|----------------|-----------------|-------------------------|----------------------------------------|--------------------|------------------|-----------------|---------------|--------------------|--------------------|
| SNP_14477_A_14853611 | NC_021162.1    | Ca_Kabuli_Chr03 | 14853611                | AA                                     | TT                 | TT               | INTERGENIC      |               |                    |                    |
| SNP_14478_A_14853947 | NC_021162.1    | Ca_Kabuli_Chr03 | 14853947                | TT                                     | GG                 | GG               | INTERGENIC      |               |                    |                    |
| SNP_14479_A_14854067 | NC_021162.1    | Ca_Kabuli_Chr03 | 14854067                | AA                                     | GG                 | GG               | INTERGENIC      |               |                    |                    |
| SNP_14480_A_14854204 | NC_021162.1    | Ca_Kabuli_Chr03 | 14854204                | CC                                     | GG                 | GG               | INTERGENIC      |               |                    |                    |
| SNP_14481_A_14858487 | NC_021162.1    | Ca_Kabuli_Chr03 | 14858487                | AA                                     | TT                 | TT               | INTERGENIC      |               |                    |                    |
| SNP_14482_A_14858491 | NC_021162.1    | Ca_Kabuli_Chr03 | 14858491                | TT                                     | GG                 | GG               | INTERGENIC      |               |                    |                    |
| SNP_14483_A_14858495 | NC_021162.1    | Ca_Kabuli_Chr03 | 14858495                | AA                                     | GG                 | GG               | INTERGENIC      |               |                    |                    |
| SNP_14484_A_14858499 | NC_021162.1    | Ca_Kabuli_Chr03 | 14858499                | AA                                     | GG                 | GG               | INTERGENIC      |               |                    |                    |
| SNP_14485_A_14859923 | NC_021162.1    | Ca_Kabuli_Chr03 | 14859923                | AA                                     | GG                 | GG               | INTERGENIC      |               |                    |                    |
| SNP_14486_A_14860007 | NC_021162.1    | Ca_Kabuli_Chr03 | 14860007                | CC                                     | TT                 | TT               | INTERGENIC      |               |                    |                    |
| SNP_14487_A_14862985 | NC_021162.1    | Ca_Kabuli_Chr03 | 14862985                | GG                                     | TT                 | TT               | INTERGENIC      |               |                    |                    |
| SNP_14488_A_14862988 | NC_021162.1    | Ca_Kabuli_Chr03 | 14862988                | AA                                     | TT                 | TT               | INTERGENIC      |               |                    |                    |
| SNP_14489_A_14867226 | NC_021162.1    | Ca_Kabuli_Chr03 | 14867226                | AA                                     | CC                 | CC               | INTERGENIC      |               |                    |                    |
| SNP_14490_A_14867508 | NC_021162.1    | Ca_Kabuli_Chr03 | 14867508                | TT                                     | GG                 | GG               | INTERGENIC      |               |                    |                    |
| SNP_14491_A_14867608 | NC_021162.1    | Ca_Kabuli_Chr03 | 14867608                | CC                                     | GG                 | GG               | INTERGENIC      |               |                    |                    |
| SNP_14492_A_14867621 | NC_021162.1    | Ca_Kabuli_Chr03 | 14867621                | AA                                     | GG                 | GG               | INTERGENIC      |               |                    |                    |
| SNP_14493_A_14867716 | NC_021162.1    | Ca_Kabuli_Chr03 | 14867716                | GG                                     | AA                 | AA               | INTERGENIC      |               |                    |                    |
| SNP_14494_A_14867718 | NC_021162.1    | Ca_Kabuli_Chr03 | 14867718                | AA                                     | GG                 | GG               | INTERGENIC      |               |                    |                    |
| SNP_14495_A_14867748 | NC_021162.1    | Ca_Kabuli_Chr03 | 14867748                | TT                                     | GG                 | GG               | INTERGENIC      |               |                    |                    |
| SNP_14496_A_14867789 | NC_021162.1    | Ca_Kabuli_Chr03 | 14867789                | AA                                     | GG                 | GG               | INTERGENIC      |               |                    |                    |
| SNP_14497_A_14868671 | NC_021162.1    | Ca_Kabuli_Chr03 | 14868671                | TT                                     | CC                 | CC               | INTERGENIC      |               |                    |                    |
| SNP_14498_A_14868767 | NC_021162.1    | Ca_Kabuli_Chr03 | 14868767                | CC                                     | AA                 | AA               | INTERGENIC      |               |                    |                    |

| SNPs IDs             | Chromosome IDs | Chromosomes     | Physical positions (bp) | CDC Frontier genome (Reference genome) | (Pusa 1103 & HPNB) | (ILWC 46 & LPNB) | Sequence genome | Components of | Gene accession IDs | Putative functions |
|----------------------|----------------|-----------------|-------------------------|----------------------------------------|--------------------|------------------|-----------------|---------------|--------------------|--------------------|
| SNP_14499_A_14868840 | NC_021162.1    | Ca_Kabuli_Chr03 | 14868840                | AA                                     | GG                 | GG               | INTERGENIC      |               |                    |                    |
| SNP_14500_A_14868871 | NC_021162.1    | Ca_Kabuli_Chr03 | 14868871                | AA                                     | GG                 | GG               | INTERGENIC      |               |                    |                    |
| SNP_14501_A_14868975 | NC_021162.1    | Ca_Kabuli_Chr03 | 14868975                | AA                                     | TT                 | TT               | INTERGENIC      |               |                    |                    |
| SNP_14502_A_14868980 | NC_021162.1    | Ca_Kabuli_Chr03 | 14868980                | TT                                     | CC                 | CC               | INTERGENIC      |               |                    |                    |
| SNP_14504_A_14878396 | NC_021162.1    | Ca_Kabuli_Chr03 | 14878396                | AA                                     | TT                 | TT               | INTERGENIC      |               |                    |                    |
| SNP_14505_A_14878402 | NC_021162.1    | Ca_Kabuli_Chr03 | 14878402                | GG                                     | AA                 | AA               | INTERGENIC      |               |                    |                    |
| SNP_14506_A_14878598 | NC_021162.1    | Ca_Kabuli_Chr03 | 14878598                | CC                                     | TT                 | TT               | INTERGENIC      |               |                    |                    |
| SNP_14507_A_14879312 | NC_021162.1    | Ca_Kabuli_Chr03 | 14879312                | AA                                     | TT                 | TT               | INTERGENIC      |               |                    |                    |
| SNP_14508_A_14879389 | NC_021162.1    | Ca_Kabuli_Chr03 | 14879389                | CC                                     | AA                 | AA               | INTERGENIC      |               |                    |                    |
| SNP_14509_A_14879992 | NC_021162.1    | Ca_Kabuli_Chr03 | 14879992                | CC                                     | TT                 | TT               | INTERGENIC      |               |                    |                    |
| SNP_14510_A_14879993 | NC_021162.1    | Ca_Kabuli_Chr03 | 14879993                | CC                                     | AA                 | AA               | INTERGENIC      |               |                    |                    |
| SNP_14512_A_14880876 | NC_021162.1    | Ca_Kabuli_Chr03 | 14880876                | TT                                     | GG                 | GG               | INTERGENIC      |               |                    |                    |
| SNP_14513_A_14880889 | NC_021162.1    | Ca_Kabuli_Chr03 | 14880889                | CC                                     | GG                 | GG               | INTERGENIC      |               |                    |                    |
| SNP_14514_A_14880891 | NC_021162.1    | Ca_Kabuli_Chr03 | 14880891                | GG                                     | AA                 | AA               | INTERGENIC      |               |                    |                    |
| SNP_14515_A_14880943 | NC_021162.1    | Ca_Kabuli_Chr03 | 14880943                | TT                                     | CC                 | CC               | INTERGENIC      |               |                    |                    |
| SNP_14516_A_14880955 | NC_021162.1    | Ca_Kabuli_Chr03 | 14880955                | CC                                     | AA                 | AA               | INTERGENIC      |               |                    |                    |
| SNP_14517_A_14880978 | NC_021162.1    | Ca_Kabuli_Chr03 | 14880978                | AA                                     | GG                 | GG               | INTERGENIC      |               |                    |                    |
| SNP_14518_A_14881069 | NC_021162.1    | Ca_Kabuli_Chr03 | 14881069                | GG                                     | AA                 | AA               | INTERGENIC      |               |                    |                    |
| SNP_14519_A_14881143 | NC_021162.1    | Ca_Kabuli_Chr03 | 14881143                | GG                                     | AA                 | AA               | INTERGENIC      |               |                    |                    |
| SNP_14520_A_14881183 | NC_021162.1    | Ca_Kabuli_Chr03 | 14881183                | AA                                     | TT                 | TT               | INTERGENIC      |               |                    |                    |
| SNP_14521_A_14881189 | NC_021162.1    | Ca_Kabuli_Chr03 | 14881189                | TT                                     | CC                 | CC               | INTERGENIC      |               |                    |                    |
| SNP_14522_A_14881311 | NC_021162.1    | Ca_Kabuli_Chr03 | 14881311                | CC                                     | TT                 | TT               | INTERGENIC      |               |                    |                    |

| SNPs IDs             | Chromosome IDs | Chromosomes     | Physical positions (bp) | CDC Frontier (Reference genome) | (Pusa 1103 & HPNB) | (ILWC 46 & LPNB) | Sequence genome | Components of | Gene accession IDs | Putative functions |
|----------------------|----------------|-----------------|-------------------------|---------------------------------|--------------------|------------------|-----------------|---------------|--------------------|--------------------|
| SNP_14523_A_14881381 | NC_021162.1    | Ca_Kabuli_Chr03 | 14881381                | GG                              | AA                 | AA               | INTERGENIC      |               |                    |                    |
| SNP_14524_A_14881397 | NC_021162.1    | Ca_Kabuli_Chr03 | 14881397                | TT                              | GG                 | GG               | INTERGENIC      |               |                    |                    |
| SNP_14525_A_14881406 | NC_021162.1    | Ca_Kabuli_Chr03 | 14881406                | TT                              | AA                 | AA               | INTERGENIC      |               |                    |                    |
| SNP_14526_A_14881412 | NC_021162.1    | Ca_Kabuli_Chr03 | 14881412                | AA                              | GG                 | GG               | INTERGENIC      |               |                    |                    |
| SNP_14527_A_14881434 | NC_021162.1    | Ca_Kabuli_Chr03 | 14881434                | CC                              | TT                 | TT               | INTERGENIC      |               |                    |                    |
| SNP_14528_A_14881483 | NC_021162.1    | Ca_Kabuli_Chr03 | 14881483                | GG                              | TT                 | TT               | INTERGENIC      |               |                    |                    |
| SNP_14529_A_14889048 | NC_021162.1    | Ca_Kabuli_Chr03 | 14889048                | AA                              | TT                 | TT               | INTERGENIC      |               |                    |                    |
| SNP_14530_A_14889195 | NC_021162.1    | Ca_Kabuli_Chr03 | 14889195                | GG                              | CC                 | CC               | INTERGENIC      |               |                    |                    |
| SNP_14531_A_14889223 | NC_021162.1    | Ca_Kabuli_Chr03 | 14889223                | AA                              | CC                 | CC               | INTERGENIC      |               |                    |                    |
| SNP_14532_A_14889240 | NC_021162.1    | Ca_Kabuli_Chr03 | 14889240                | AA                              | GG                 | GG               | INTERGENIC      |               |                    |                    |
| SNP_14533_A_14889334 | NC_021162.1    | Ca_Kabuli_Chr03 | 14889334                | TT                              | CC                 | CC               | INTERGENIC      |               |                    |                    |
| SNP_14534_A_14889463 | NC_021162.1    | Ca_Kabuli_Chr03 | 14889463                | TT                              | AA                 | AA               | INTERGENIC      |               |                    |                    |
| SNP_14535_A_14889568 | NC_021162.1    | Ca_Kabuli_Chr03 | 14889568                | AA                              | TT                 | TT               | INTERGENIC      |               |                    |                    |
| SNP_14536_A_14889664 | NC_021162.1    | Ca_Kabuli_Chr03 | 14889664                | CC                              | TT                 | TT               | INTERGENIC      |               |                    |                    |
| SNP_14537_A_14889745 | NC_021162.1    | Ca_Kabuli_Chr03 | 14889745                | CC                              | TT                 | TT               | INTERGENIC      |               |                    |                    |
| SNP_14538_A_14889805 | NC_021162.1    | Ca_Kabuli_Chr03 | 14889805                | TT                              | CC                 | CC               | INTERGENIC      |               |                    |                    |
| SNP_14539_A_14890062 | NC_021162.1    | Ca_Kabuli_Chr03 | 14890062                | AA                              | TT                 | TT               | INTERGENIC      |               |                    |                    |
| SNP_14540_A_14890932 | NC_021162.1    | Ca_Kabuli_Chr03 | 14890932                | AA                              | GG                 | GG               | INTERGENIC      |               |                    |                    |
| SNP_14541_A_14890933 | NC_021162.1    | Ca_Kabuli_Chr03 | 14890933                | TT                              | CC                 | CC               | INTERGENIC      |               |                    |                    |
| SNP_14542_A_14891174 | NC_021162.1    | Ca_Kabuli_Chr03 | 14891174                | GG                              | CC                 | CC               | INTERGENIC      |               |                    |                    |
| SNP_14543_A_14891213 | NC_021162.1    | Ca_Kabuli_Chr03 | 14891213                | CC                              | AA                 | AA               | INTERGENIC      |               |                    |                    |
| SNP_14544_A_14892951 | NC_021162.1    | Ca_Kabuli_Chr03 | 14892951                | CC                              | TT                 | TT               | INTERGENIC      |               |                    |                    |

| SNPs IDs             | Chromosome IDs | Chromosomes     | Physical positions (bp) | CDC Frontier genome (Reference genome) | (Pusa 1103 & HPNB) | (ILWC 46 & LPNB) | Sequence genome | Components of | Gene accession IDs | Putative functions                    |
|----------------------|----------------|-----------------|-------------------------|----------------------------------------|--------------------|------------------|-----------------|---------------|--------------------|---------------------------------------|
| SNP_14545_A_14893246 | NC_021162.1    | Ca_Kabuli_Chr03 | 14893246                | CC                                     | TT                 | TT               | INTERGENIC      |               |                    |                                       |
| SNP_14546_A_14893290 | NC_021162.1    | Ca_Kabuli_Chr03 | 14893290                | GG                                     | CC                 | CC               | INTERGENIC      |               |                    |                                       |
| SNP_14547_A_14893385 | NC_021162.1    | Ca_Kabuli_Chr03 | 14893385                | CC                                     | AA                 | AA               | INTERGENIC      |               |                    |                                       |
| SNP_14548_A_14893438 | NC_021162.1    | Ca_Kabuli_Chr03 | 14893438                | TT                                     | CC                 | CC               | INTERGENIC      |               |                    |                                       |
| SNP_14549_A_14893486 | NC_021162.1    | Ca_Kabuli_Chr03 | 14893486                | CC                                     | GG                 | GG               | INTERGENIC      |               |                    |                                       |
| SNP_14550_A_14893498 | NC_021162.1    | Ca_Kabuli_Chr03 | 14893498                | AA                                     | TT                 | TT               | INTERGENIC      |               |                    |                                       |
| SNP_14551_A_14893537 | NC_021162.1    | Ca_Kabuli_Chr03 | 14893537                | AA                                     | CC                 | CC               | INTERGENIC      |               |                    |                                       |
| SNP_14552_A_14894352 | NC_021162.1    | Ca_Kabuli_Chr03 | 14894352                | AA                                     | GG                 | GG               | INTERGENIC      |               |                    |                                       |
| SNP_14554_A_14904456 | NC_021162.1    | Ca_Kabuli_Chr03 | 14904456                | TT                                     | CC                 | CC               | INTERGENIC      |               |                    |                                       |
| SNP_14555_A_14905191 | NC_021162.1    | Ca_Kabuli_Chr03 | 14905191                | TT                                     | GG                 | GG               | INTERGENIC      |               |                    |                                       |
| SNP_14556_A_14905954 | NC_021162.1    | Ca_Kabuli_Chr03 | 14905954                | AA                                     | TT                 | TT               | INTERGENIC      |               |                    |                                       |
| SNP_14557_A_14905963 | NC_021162.1    | Ca_Kabuli_Chr03 | 14905963                | TT                                     | GG                 | GG               | INTERGENIC      |               |                    |                                       |
| SNP_14558_A_14908015 | NC_021162.1    | Ca_Kabuli_Chr03 | 14908015                | AA                                     | TT                 | TT               | INTERGENIC      |               |                    |                                       |
| SNP_14560_A_14935253 | NC_021162.1    | Ca_Kabuli_Chr03 | 14935253                | GG                                     | TT                 | TT               | INTERGENIC      |               |                    |                                       |
| SNP_14561_A_14935255 | NC_021162.1    | Ca_Kabuli_Chr03 | 14935255                | AA                                     | GG                 | GG               | INTERGENIC      |               |                    |                                       |
| SNP_14562_A_14945054 | NC_021162.1    | Ca_Kabuli_Chr03 | 14945054                | AA                                     | TT                 | TT               | INTERGENIC      |               |                    |                                       |
| SNP_14564_A_14952189 | NC_021162.1    | Ca_Kabuli_Chr03 | 14952189                | TT                                     | GG                 | GG               | INTERGENIC      |               |                    |                                       |
| SNP_14565_A_14952213 | NC_021162.1    | Ca_Kabuli_Chr03 | 14952213                | CC                                     | GG                 | GG               | INTERGENIC      |               |                    |                                       |
| SNP_14566_A_14958702 | NC_021162.1    | Ca_Kabuli_Chr03 | 14958702                | TT                                     | CC                 | CC               | INTERGENIC      |               |                    |                                       |
| SNP_14567_A_14963933 | NC_021162.1    | Ca_Kabuli_Chr03 | 14963933                | AA                                     | GG                 | GG               | INTERGENIC      |               |                    |                                       |
| SNP_14568_A_15013555 | NC_021162.1    | Ca_Kabuli_Chr03 | 15013555                | AA                                     | GG                 | GG               | URR             |               | 101502940          | hydroquinone glucosyltransferase-like |
| SNP_14569_A_15013557 | NC_021162.1    | Ca_Kabuli_Chr03 | 15013557                | TT                                     | CC                 | CC               | URR             |               | 101502940          | hydroquinone glucosyltransferase-like |

| SNPs IDs             | Chromosome IDs | Chromosomes     | Physical positions (bp) | CDC Frontier genome (Reference genome) | (Pusa 1103 & HPNB) | (ILWC 46 & LPNB) | Sequence genome       | Components of | Gene accession IDs | Putative functions           |
|----------------------|----------------|-----------------|-------------------------|----------------------------------------|--------------------|------------------|-----------------------|---------------|--------------------|------------------------------|
| SNP_14570_A_15034415 | NC_021162.1    | Ca_Kabuli_Chr03 | 15034415                | GG                                     | TT                 | TT               | INTERGENIC            |               |                    |                              |
| SNP_14571_A_15038336 | NC_021162.1    | Ca_Kabuli_Chr03 | 15038336                | TT                                     | CC                 | CC               | INTERGENIC            |               |                    |                              |
| SNP_14572_A_15038518 | NC_021162.1    | Ca_Kabuli_Chr03 | 15038518                | CC                                     | TT                 | TT               | INTERGENIC            |               |                    |                              |
| SNP_14573_A_15038531 | NC_021162.1    | Ca_Kabuli_Chr03 | 15038531                | TT                                     | CC                 | CC               | INTERGENIC            |               |                    |                              |
| SNP_14574_A_15038792 | NC_021162.1    | Ca_Kabuli_Chr03 | 15038792                | AA                                     | CC                 | CC               | INTERGENIC            |               |                    |                              |
| SNP_14575_A_15038981 | NC_021162.1    | Ca_Kabuli_Chr03 | 15038981                | GG                                     | AA                 | AA               | INTERGENIC            |               |                    |                              |
| SNP_14576_A_15038989 | NC_021162.1    | Ca_Kabuli_Chr03 | 15038989                | TT                                     | CC                 | CC               | INTERGENIC            |               |                    |                              |
| SNP_14578_A_15039766 | NC_021162.1    | Ca_Kabuli_Chr03 | 15039766                | AA                                     | CC                 | CC               | INTERGENIC            |               |                    |                              |
| SNP_14579_A_15039772 | NC_021162.1    | Ca_Kabuli_Chr03 | 15039772                | TT                                     | AA                 | AA               | INTERGENIC            |               |                    |                              |
| SNP_14581_A_15047555 | NC_021162.1    | Ca_Kabuli_Chr03 | 15047555                | AA                                     | TT                 | TT               | INTERGENIC            |               |                    |                              |
| SNP_14582_A_15047616 | NC_021162.1    | Ca_Kabuli_Chr03 | 15047616                | CC                                     | TT                 | TT               | INTERGENIC            |               |                    |                              |
| SNP_14583_A_15047652 | NC_021162.1    | Ca_Kabuli_Chr03 | 15047652                | TT                                     | CC                 | CC               | INTERGENIC            |               |                    |                              |
| SNP_14584_A_15047667 | NC_021162.1    | Ca_Kabuli_Chr03 | 15047667                | TT                                     | GG                 | GG               | INTERGENIC            |               |                    |                              |
| SNP_14585_A_15052207 | NC_021162.1    | Ca_Kabuli_Chr03 | 15052207                | AA                                     | CC                 | CC               | NON_SYNONYMOUS_CODING | 101506708     |                    | uncharacterized LOC101506708 |
| SNP_14586_A_15052254 | NC_021162.1    | Ca_Kabuli_Chr03 | 15052254                | GG                                     | TT                 | TT               | NON_SYNONYMOUS_CODING | 101506708     |                    | uncharacterized LOC101506708 |
| SNP_14587_A_15052898 | NC_021162.1    | Ca_Kabuli_Chr03 | 15052898                | CC                                     | GG                 | GG               | URR                   | 101506708     |                    | uncharacterized LOC101506708 |
| SNP_14588_A_15053080 | NC_021162.1    | Ca_Kabuli_Chr03 | 15053080                | GG                                     | AA                 | AA               | URR                   | 101506708     |                    | uncharacterized LOC101506708 |
| SNP_14590_A_15158798 | NC_021162.1    | Ca_Kabuli_Chr03 | 15158798                | AA                                     | CC                 | CC               | INTERGENIC            |               |                    |                              |
| SNP_14591_A_15173136 | NC_021162.1    | Ca_Kabuli_Chr03 | 15173136                | GG                                     | CC                 | CC               | INTERGENIC            |               |                    |                              |
| SNP_14592_A_15196240 | NC_021162.1    | Ca_Kabuli_Chr03 | 15196240                | TT                                     | CC                 | CC               | INTERGENIC            |               |                    |                              |
| SNP_14593_A_15212417 | NC_021162.1    | Ca_Kabuli_Chr03 | 15212417                | CC                                     | AA                 | AA               | INTERGENIC            |               |                    |                              |
| SNP_14594_A_15212540 | NC_021162.1    | Ca_Kabuli_Chr03 | 15212540                | GG                                     | AA                 | AA               | INTERGENIC            |               |                    |                              |

| SNPs IDs             | Chromosome IDs | Chromosomes     | Physical positions (bp) | CDC Frontier genome (Reference genome) | (Pusa 1103 & HPNB) | (ILWC 46 & LPNB) | Sequence Components of genome | Gene accession IDs | Putative functions                                            |
|----------------------|----------------|-----------------|-------------------------|----------------------------------------|--------------------|------------------|-------------------------------|--------------------|---------------------------------------------------------------|
| SNP_14595_A_15216309 | NC_021162.1    | Ca_Kabuli_Chr03 | 15216309                | AA                                     | GG                 | GG               | INTERGENIC                    |                    |                                                               |
| SNP_14596_A_15231840 | NC_021162.1    | Ca_Kabuli_Chr03 | 15231840                | GG                                     | AA                 | AA               | INTERGENIC                    |                    |                                                               |
| SNP_14597_A_15232252 | NC_021162.1    | Ca_Kabuli_Chr03 | 15232252                | AA                                     | GG                 | GG               | INTERGENIC                    |                    |                                                               |
| SNP_14599_A_15265887 | NC_021162.1    | Ca_Kabuli_Chr03 | 15265887                | CC                                     | GG                 | GG               | SYNONYMOUS_CODING             | 101510221          | cytochrome b561 and DOMON domain-containing protein At3g25290 |
| SNP_14600_A_15271826 | NC_021162.1    | Ca_Kabuli_Chr03 | 15271826                | AA                                     | GG                 | GG               | INTERGENIC                    |                    |                                                               |
| SNP_14601_A_15271833 | NC_021162.1    | Ca_Kabuli_Chr03 | 15271833                | TT                                     | CC                 | CC               | INTERGENIC                    |                    |                                                               |
| SNP_14602_A_15271861 | NC_021162.1    | Ca_Kabuli_Chr03 | 15271861                | GG                                     | AA                 | AA               | INTERGENIC                    |                    |                                                               |
| SNP_14603_A_15271867 | NC_021162.1    | Ca_Kabuli_Chr03 | 15271867                | GG                                     | AA                 | AA               | INTERGENIC                    |                    |                                                               |
| SNP_14604_A_15272204 | NC_021162.1    | Ca_Kabuli_Chr03 | 15272204                | AA                                     | GG                 | GG               | INTERGENIC                    |                    |                                                               |
| SNP_14605_A_15309631 | NC_021162.1    | Ca_Kabuli_Chr03 | 15309631                | TT                                     | CC                 | CC               | INTERGENIC                    |                    |                                                               |
| SNP_14606_A_15309941 | NC_021162.1    | Ca_Kabuli_Chr03 | 15309941                | AA                                     | GG                 | GG               | INTERGENIC                    |                    |                                                               |
| SNP_14607_A_15314199 | NC_021162.1    | Ca_Kabuli_Chr03 | 15314199                | GG                                     | AA                 | AA               | INTERGENIC                    |                    |                                                               |
| SNP_14608_A_15314229 | NC_021162.1    | Ca_Kabuli_Chr03 | 15314229                | GG                                     | AA                 | AA               | INTERGENIC                    |                    |                                                               |
| SNP_14609_A_15314488 | NC_021162.1    | Ca_Kabuli_Chr03 | 15314488                | TT                                     | CC                 | CC               | INTERGENIC                    |                    |                                                               |
| SNP_14615_A_15582179 | NC_021162.1    | Ca_Kabuli_Chr03 | 15582179                | AA                                     | CC                 | CC               | INTERGENIC                    |                    |                                                               |
| SNP_14616_A_15582184 | NC_021162.1    | Ca_Kabuli_Chr03 | 15582184                | CC                                     | GG                 | GG               | INTERGENIC                    |                    |                                                               |
| SNP_14617_A_15583874 | NC_021162.1    | Ca_Kabuli_Chr03 | 15583874                | TT                                     | CC                 | CC               | INTERGENIC                    |                    |                                                               |
| SNP_14618_A_15584182 | NC_021162.1    | Ca_Kabuli_Chr03 | 15584182                | CC                                     | AA                 | AA               | INTERGENIC                    |                    |                                                               |
| SNP_14619_A_15588665 | NC_021162.1    | Ca_Kabuli_Chr03 | 15588665                | GG                                     | AA                 | AA               | INTERGENIC                    |                    |                                                               |
| SNP_14620_A_15588669 | NC_021162.1    | Ca_Kabuli_Chr03 | 15588669                | CC                                     | TT                 | TT               | INTERGENIC                    |                    |                                                               |
| SNP_14621_A_15588672 | NC_021162.1    | Ca_Kabuli_Chr03 | 15588672                | CC                                     | TT                 | TT               | INTERGENIC                    |                    |                                                               |
| SNP_14622_A_15588682 | NC_021162.1    | Ca_Kabuli_Chr03 | 15588682                | AA                                     | GG                 | GG               | INTERGENIC                    |                    |                                                               |

| SNPs IDs             | Chromosome IDs | Chromosomes     | Physical positions (bp) | CDC Frontier genome (Reference genome) | (Pusa 1103 & HPNB) | (ILWC 46 & LPNB) | Sequence genome | Components of | Gene accession IDs | Putative functions |
|----------------------|----------------|-----------------|-------------------------|----------------------------------------|--------------------|------------------|-----------------|---------------|--------------------|--------------------|
| SNP_14623_A_15588738 | NC_021162.1    | Ca_Kabuli_Chr03 | 15588738                | AA                                     | CC                 | CC               | INTERGENIC      |               |                    |                    |
| SNP_14624_A_15589054 | NC_021162.1    | Ca_Kabuli_Chr03 | 15589054                | GG                                     | TT                 | TT               | INTERGENIC      |               |                    |                    |
| SNP_14625_A_15589397 | NC_021162.1    | Ca_Kabuli_Chr03 | 15589397                | TT                                     | CC                 | CC               | INTERGENIC      |               |                    |                    |
| SNP_14626_A_15596676 | NC_021162.1    | Ca_Kabuli_Chr03 | 15596676                | TT                                     | CC                 | CC               | INTERGENIC      |               |                    |                    |
| SNP_14627_A_15633868 | NC_021162.1    | Ca_Kabuli_Chr03 | 15633868                | GG                                     | AA                 | AA               | INTERGENIC      |               |                    |                    |
| SNP_14628_A_15649640 | NC_021162.1    | Ca_Kabuli_Chr03 | 15649640                | CC                                     | TT                 | TT               | INTERGENIC      |               |                    |                    |
| SNP_14630_A_15652871 | NC_021162.1    | Ca_Kabuli_Chr03 | 15652871                | TT                                     | CC                 | CC               | INTERGENIC      |               |                    |                    |
| SNP_14631_A_15657720 | NC_021162.1    | Ca_Kabuli_Chr03 | 15657720                | GG                                     | AA                 | AA               | INTERGENIC      |               |                    |                    |
| SNP_14632_A_15657745 | NC_021162.1    | Ca_Kabuli_Chr03 | 15657745                | AA                                     | GG                 | GG               | INTERGENIC      |               |                    |                    |
| SNP_14633_A_15657755 | NC_021162.1    | Ca_Kabuli_Chr03 | 15657755                | TT                                     | CC                 | CC               | INTERGENIC      |               |                    |                    |
| SNP_14634_A_15657768 | NC_021162.1    | Ca_Kabuli_Chr03 | 15657768                | AA                                     | GG                 | GG               | INTERGENIC      |               |                    |                    |
| SNP_14635_A_15657779 | NC_021162.1    | Ca_Kabuli_Chr03 | 15657779                | AA                                     | GG                 | GG               | INTERGENIC      |               |                    |                    |
| SNP_14636_A_15657886 | NC_021162.1    | Ca_Kabuli_Chr03 | 15657886                | GG                                     | AA                 | AA               | INTERGENIC      |               |                    |                    |
| SNP_14637_A_15657907 | NC_021162.1    | Ca_Kabuli_Chr03 | 15657907                | CC                                     | GG                 | GG               | INTERGENIC      |               |                    |                    |
| SNP_14638_A_15657913 | NC_021162.1    | Ca_Kabuli_Chr03 | 15657913                | TT                                     | CC                 | CC               | INTERGENIC      |               |                    |                    |
| SNP_14639_A_15657931 | NC_021162.1    | Ca_Kabuli_Chr03 | 15657931                | AA                                     | GG                 | GG               | INTERGENIC      |               |                    |                    |
| SNP_14640_A_15657942 | NC_021162.1    | Ca_Kabuli_Chr03 | 15657942                | CC                                     | TT                 | TT               | INTERGENIC      |               |                    |                    |
| SNP_14641_A_15657944 | NC_021162.1    | Ca_Kabuli_Chr03 | 15657944                | AA                                     | CC                 | CC               | INTERGENIC      |               |                    |                    |
| SNP_14642_A_15657955 | NC_021162.1    | Ca_Kabuli_Chr03 | 15657955                | TT                                     | CC                 | CC               | INTERGENIC      |               |                    |                    |
| SNP_14643_A_15657968 | NC_021162.1    | Ca_Kabuli_Chr03 | 15657968                | CC                                     | AA                 | AA               | INTERGENIC      |               |                    |                    |
| SNP_14644_A_15657972 | NC_021162.1    | Ca_Kabuli_Chr03 | 15657972                | AA                                     | CC                 | CC               | INTERGENIC      |               |                    |                    |
| SNP_14645_A_15657977 | NC_021162.1    | Ca_Kabuli_Chr03 | 15657977                | TT                                     | CC                 | CC               | INTERGENIC      |               |                    |                    |

| SNPs IDs             | Chromosome IDs | Chromosomes     | Physical positions (bp) | CDC Frontier genome (Reference genome) | (Pusa 1103 & HPNB) | (ILWC 46 & LPNB) | Sequence genome | Components of | Gene accession IDs | Putative functions |
|----------------------|----------------|-----------------|-------------------------|----------------------------------------|--------------------|------------------|-----------------|---------------|--------------------|--------------------|
| SNP_14646_A_15658021 | NC_021162.1    | Ca_Kabuli_Chr03 | 15658021                | TT                                     | CC                 | CC               | INTERGENIC      |               |                    |                    |
| SNP_14647_A_15658361 | NC_021162.1    | Ca_Kabuli_Chr03 | 15658361                | AA                                     | TT                 | TT               | INTERGENIC      |               |                    |                    |
| SNP_14648_A_15658537 | NC_021162.1    | Ca_Kabuli_Chr03 | 15658537                | TT                                     | CC                 | CC               | INTERGENIC      |               |                    |                    |
| SNP_14649_A_15658598 | NC_021162.1    | Ca_Kabuli_Chr03 | 15658598                | GG                                     | TT                 | TT               | INTERGENIC      |               |                    |                    |
| SNP_14650_A_15658686 | NC_021162.1    | Ca_Kabuli_Chr03 | 15658686                | TT                                     | GG                 | GG               | INTERGENIC      |               |                    |                    |
| SNP_14651_A_15658714 | NC_021162.1    | Ca_Kabuli_Chr03 | 15658714                | TT                                     | GG                 | GG               | INTERGENIC      |               |                    |                    |
| SNP_14652_A_15658736 | NC_021162.1    | Ca_Kabuli_Chr03 | 15658736                | TT                                     | CC                 | CC               | INTERGENIC      |               |                    |                    |
| SNP_14653_A_15658803 | NC_021162.1    | Ca_Kabuli_Chr03 | 15658803                | AA                                     | CC                 | CC               | INTERGENIC      |               |                    |                    |
| SNP_14654_A_15658805 | NC_021162.1    | Ca_Kabuli_Chr03 | 15658805                | GG                                     | CC                 | CC               | INTERGENIC      |               |                    |                    |
| SNP_14655_A_15658815 | NC_021162.1    | Ca_Kabuli_Chr03 | 15658815                | TT                                     | CC                 | CC               | INTERGENIC      |               |                    |                    |
| SNP_14656_A_15658819 | NC_021162.1    | Ca_Kabuli_Chr03 | 15658819                | GG                                     | AA                 | AA               | INTERGENIC      |               |                    |                    |
| SNP_14657_A_15658867 | NC_021162.1    | Ca_Kabuli_Chr03 | 15658867                | TT                                     | CC                 | CC               | INTERGENIC      |               |                    |                    |
| SNP_14658_A_15658923 | NC_021162.1    | Ca_Kabuli_Chr03 | 15658923                | AA                                     | GG                 | GG               | INTERGENIC      |               |                    |                    |
| SNP_14659_A_15658928 | NC_021162.1    | Ca_Kabuli_Chr03 | 15658928                | TT                                     | CC                 | CC               | INTERGENIC      |               |                    |                    |
| SNP_14660_A_15658971 | NC_021162.1    | Ca_Kabuli_Chr03 | 15658971                | TT                                     | CC                 | CC               | INTERGENIC      |               |                    |                    |
| SNP_14661_A_15658984 | NC_021162.1    | Ca_Kabuli_Chr03 | 15658984                | TT                                     | CC                 | CC               | INTERGENIC      |               |                    |                    |
| SNP_14662_A_15659061 | NC_021162.1    | Ca_Kabuli_Chr03 | 15659061                | AA                                     | CC                 | CC               | INTERGENIC      |               |                    |                    |
| SNP_14663_A_15659075 | NC_021162.1    | Ca_Kabuli_Chr03 | 15659075                | AA                                     | CC                 | CC               | INTERGENIC      |               |                    |                    |
| SNP_14664_A_15659081 | NC_021162.1    | Ca_Kabuli_Chr03 | 15659081                | CC                                     | TT                 | TT               | INTERGENIC      |               |                    |                    |
| SNP_14665_A_15659125 | NC_021162.1    | Ca_Kabuli_Chr03 | 15659125                | TT                                     | CC                 | CC               | INTERGENIC      |               |                    |                    |
| SNP_14666_A_15659138 | NC_021162.1    | Ca_Kabuli_Chr03 | 15659138                | GG                                     | TT                 | TT               | INTERGENIC      |               |                    |                    |
| SNP_14667_A_15659140 | NC_021162.1    | Ca_Kabuli_Chr03 | 15659140                | AA                                     | GG                 | GG               | INTERGENIC      |               |                    |                    |



| SNPs IDs             | Chromosome IDs | Chromosomes     | Physical positions (bp) | CDC Frontier genome (Reference genome) | (Pusa 1103 & HPNB) | (ILWC 46 & LPNB) | Sequence genome | Components of | Gene accession IDs | Putative functions |
|----------------------|----------------|-----------------|-------------------------|----------------------------------------|--------------------|------------------|-----------------|---------------|--------------------|--------------------|
| SNP_14668_A_15659151 | NC_021162.1    | Ca_Kabuli_Chr03 | 15659151                | CC                                     | AA                 | AA               | INTERGENIC      |               |                    |                    |
| SNP_14669_A_15659162 | NC_021162.1    | Ca_Kabuli_Chr03 | 15659162                | TT                                     | CC                 | CC               | INTERGENIC      |               |                    |                    |
| SNP_14670_A_15659213 | NC_021162.1    | Ca_Kabuli_Chr03 | 15659213                | AA                                     | CC                 | CC               | INTERGENIC      |               |                    |                    |
| SNP_14671_A_15659257 | NC_021162.1    | Ca_Kabuli_Chr03 | 15659257                | CC                                     | TT                 | TT               | INTERGENIC      |               |                    |                    |
| SNP_14672_A_15659263 | NC_021162.1    | Ca_Kabuli_Chr03 | 15659263                | TT                                     | CC                 | CC               | INTERGENIC      |               |                    |                    |
| SNP_14673_A_15659306 | NC_021162.1    | Ca_Kabuli_Chr03 | 15659306                | TT                                     | GG                 | GG               | INTERGENIC      |               |                    |                    |
| SNP_14674_A_15659311 | NC_021162.1    | Ca_Kabuli_Chr03 | 15659311                | TT                                     | CC                 | CC               | INTERGENIC      |               |                    |                    |
| SNP_14675_A_15659319 | NC_021162.1    | Ca_Kabuli_Chr03 | 15659319                | GG                                     | TT                 | TT               | INTERGENIC      |               |                    |                    |
| SNP_14676_A_15659334 | NC_021162.1    | Ca_Kabuli_Chr03 | 15659334                | CC                                     | AA                 | AA               | INTERGENIC      |               |                    |                    |
| SNP_14677_A_15659354 | NC_021162.1    | Ca_Kabuli_Chr03 | 15659354                | AA                                     | GG                 | GG               | INTERGENIC      |               |                    |                    |
| SNP_14678_A_15659363 | NC_021162.1    | Ca_Kabuli_Chr03 | 15659363                | AA                                     | CC                 | CC               | INTERGENIC      |               |                    |                    |
| SNP_14679_A_15659387 | NC_021162.1    | Ca_Kabuli_Chr03 | 15659387                | GG                                     | AA                 | AA               | INTERGENIC      |               |                    |                    |
| SNP_14680_A_15659400 | NC_021162.1    | Ca_Kabuli_Chr03 | 15659400                | TT                                     | CC                 | CC               | INTERGENIC      |               |                    |                    |
| SNP_14681_A_15659420 | NC_021162.1    | Ca_Kabuli_Chr03 | 15659420                | TT                                     | CC                 | CC               | INTERGENIC      |               |                    |                    |
| SNP_14682_A_15659459 | NC_021162.1    | Ca_Kabuli_Chr03 | 15659459                | AA                                     | TT                 | TT               | INTERGENIC      |               |                    |                    |
| SNP_14683_A_15659474 | NC_021162.1    | Ca_Kabuli_Chr03 | 15659474                | AA                                     | GG                 | GG               | INTERGENIC      |               |                    |                    |
| SNP_14684_A_15659508 | NC_021162.1    | Ca_Kabuli_Chr03 | 15659508                | TT                                     | AA                 | AA               | INTERGENIC      |               |                    |                    |
| SNP_14685_A_15659513 | NC_021162.1    | Ca_Kabuli_Chr03 | 15659513                | AA                                     | GG                 | GG               | INTERGENIC      |               |                    |                    |
| SNP_14686_A_15659556 | NC_021162.1    | Ca_Kabuli_Chr03 | 15659556                | AA                                     | CC                 | CC               | INTERGENIC      |               |                    |                    |
| SNP_14687_A_15659582 | NC_021162.1    | Ca_Kabuli_Chr03 | 15659582                | GG                                     | TT                 | TT               | INTERGENIC      |               |                    |                    |
| SNP_14688_A_15659590 | NC_021162.1    | Ca_Kabuli_Chr03 | 15659590                | TT                                     | AA                 | AA               | INTERGENIC      |               |                    |                    |
| SNP_14689_A_15659597 | NC_021162.1    | Ca_Kabuli_Chr03 | 15659597                | AA                                     | TT                 | TT               | INTERGENIC      |               |                    |                    |

| SNPs IDs             | Chromosome IDs | Chromosomes     | Physical positions (bp) | CDC Frontier genome (Reference genome) | (Pusa 1103 & HPNB) | (ILWC 46 & LPNB) | Sequence genome | Components of | Gene accession IDs | Putative functions |
|----------------------|----------------|-----------------|-------------------------|----------------------------------------|--------------------|------------------|-----------------|---------------|--------------------|--------------------|
| SNP_14690_A_15659616 | NC_021162.1    | Ca_Kabuli_Chr03 | 15659616                | AA                                     | CC                 | CC               | INTERGENIC      |               |                    |                    |
| SNP_14691_A_15659651 | NC_021162.1    | Ca_Kabuli_Chr03 | 15659651                | AA                                     | GG                 | GG               | INTERGENIC      |               |                    |                    |
| SNP_14692_A_15659653 | NC_021162.1    | Ca_Kabuli_Chr03 | 15659653                | AA                                     | GG                 | GG               | INTERGENIC      |               |                    |                    |
| SNP_14693_A_15659667 | NC_021162.1    | Ca_Kabuli_Chr03 | 15659667                | TT                                     | CC                 | CC               | INTERGENIC      |               |                    |                    |
| SNP_14694_A_15659694 | NC_021162.1    | Ca_Kabuli_Chr03 | 15659694                | TT                                     | CC                 | CC               | INTERGENIC      |               |                    |                    |
| SNP_14695_A_15659712 | NC_021162.1    | Ca_Kabuli_Chr03 | 15659712                | TT                                     | CC                 | CC               | INTERGENIC      |               |                    |                    |
| SNP_14696_A_15659749 | NC_021162.1    | Ca_Kabuli_Chr03 | 15659749                | GG                                     | CC                 | CC               | INTERGENIC      |               |                    |                    |
| SNP_14697_A_15659774 | NC_021162.1    | Ca_Kabuli_Chr03 | 15659774                | AA                                     | CC                 | CC               | INTERGENIC      |               |                    |                    |
| SNP_14698_A_15659806 | NC_021162.1    | Ca_Kabuli_Chr03 | 15659806                | AA                                     | GG                 | GG               | INTERGENIC      |               |                    |                    |
| SNP_14699_A_15659811 | NC_021162.1    | Ca_Kabuli_Chr03 | 15659811                | TT                                     | CC                 | CC               | INTERGENIC      |               |                    |                    |
| SNP_14700_A_15659867 | NC_021162.1    | Ca_Kabuli_Chr03 | 15659867                | AA                                     | GG                 | GG               | INTERGENIC      |               |                    |                    |
| SNP_14701_A_15659957 | NC_021162.1    | Ca_Kabuli_Chr03 | 15659957                | TT                                     | CC                 | CC               | INTERGENIC      |               |                    |                    |
| SNP_14702_A_15659997 | NC_021162.1    | Ca_Kabuli_Chr03 | 15659997                | AA                                     | GG                 | GG               | INTERGENIC      |               |                    |                    |
| SNP_14703_A_15660047 | NC_021162.1    | Ca_Kabuli_Chr03 | 15660047                | TT                                     | CC                 | CC               | INTERGENIC      |               |                    |                    |
| SNP_14704_A_15660063 | NC_021162.1    | Ca_Kabuli_Chr03 | 15660063                | TT                                     | CC                 | CC               | INTERGENIC      |               |                    |                    |
| SNP_14705_A_15660076 | NC_021162.1    | Ca_Kabuli_Chr03 | 15660076                | AA                                     | GG                 | GG               | INTERGENIC      |               |                    |                    |
| SNP_14706_A_15660096 | NC_021162.1    | Ca_Kabuli_Chr03 | 15660096                | AA                                     | GG                 | GG               | INTERGENIC      |               |                    |                    |
| SNP_14707_A_15660116 | NC_021162.1    | Ca_Kabuli_Chr03 | 15660116                | TT                                     | CC                 | CC               | INTERGENIC      |               |                    |                    |
| SNP_14708_A_15660128 | NC_021162.1    | Ca_Kabuli_Chr03 | 15660128                | AA                                     | GG                 | GG               | INTERGENIC      |               |                    |                    |
| SNP_14709_A_15660163 | NC_021162.1    | Ca_Kabuli_Chr03 | 15660163                | GG                                     | AA                 | AA               | INTERGENIC      |               |                    |                    |
| SNP_14710_A_15660341 | NC_021162.1    | Ca_Kabuli_Chr03 | 15660341                | TT                                     | CC                 | CC               | INTERGENIC      |               |                    |                    |
| SNP_14711_A_15660348 | NC_021162.1    | Ca_Kabuli_Chr03 | 15660348                | AA                                     | GG                 | GG               | INTERGENIC      |               |                    |                    |

| SNPs IDs             | Chromosome IDs | Chromosomes     | Physical positions (bp) | CDC Frontier genome (Reference genome) | (Pusa 1103 & HPNB) | (ILWC 46 & LPNB) | Sequence Components of genome | Gene accession IDs | Putative functions                      |
|----------------------|----------------|-----------------|-------------------------|----------------------------------------|--------------------|------------------|-------------------------------|--------------------|-----------------------------------------|
| SNP_14712_A_15660352 | NC_021162.1    | Ca_Kabuli_Chr03 | 15660352                | AA                                     | GG                 | GG               | INTERGENIC                    |                    |                                         |
| SNP_14713_A_15660358 | NC_021162.1    | Ca_Kabuli_Chr03 | 15660358                | AA                                     | GG                 | GG               | INTERGENIC                    |                    |                                         |
| SNP_14714_A_15660389 | NC_021162.1    | Ca_Kabuli_Chr03 | 15660389                | AA                                     | CC                 | CC               | INTERGENIC                    |                    |                                         |
| SNP_14715_A_15660414 | NC_021162.1    | Ca_Kabuli_Chr03 | 15660414                | TT                                     | CC                 | CC               | INTERGENIC                    |                    |                                         |
| SNP_14716_A_15660438 | NC_021162.1    | Ca_Kabuli_Chr03 | 15660438                | CC                                     | GG                 | GG               | INTERGENIC                    |                    |                                         |
| SNP_14718_A_15660636 | NC_021162.1    | Ca_Kabuli_Chr03 | 15660636                | AA                                     | GG                 | GG               | INTERGENIC                    |                    |                                         |
| SNP_14719_A_15660684 | NC_021162.1    | Ca_Kabuli_Chr03 | 15660684                | AA                                     | GG                 | GG               | INTERGENIC                    |                    |                                         |
| SNP_14720_A_15721232 | NC_021162.1    | Ca_Kabuli_Chr03 | 15721232                | AA                                     | GG                 | GG               | URR                           | 101515302          | gibberellin 2-beta-dioxygenase 8-like   |
| SNP_14721_A_15806617 | NC_021162.1    | Ca_Kabuli_Chr03 | 15806617                | CC                                     | GG                 | GG               | INTERGENIC                    |                    |                                         |
| SNP_14722_A_15810106 | NC_021162.1    | Ca_Kabuli_Chr03 | 15810106                | AA                                     | GG                 | GG               | INTERGENIC                    |                    |                                         |
| SNP_14723_A_15820877 | NC_021162.1    | Ca_Kabuli_Chr03 | 15820877                | GG                                     | TT                 | TT               | INTERGENIC                    |                    |                                         |
| SNP_14724_A_15820898 | NC_021162.1    | Ca_Kabuli_Chr03 | 15820898                | TT                                     | GG                 | GG               | INTERGENIC                    |                    |                                         |
| SNP_14726_A_15884777 | NC_021162.1    | Ca_Kabuli_Chr03 | 15884777                | AA                                     | GG                 | GG               | INTRON                        | 101489586          | protein FAR1-RELATED SEQUENCE 12        |
| SNP_14727_A_15884782 | NC_021162.1    | Ca_Kabuli_Chr03 | 15884782                | TT                                     | CC                 | CC               | INTRON                        | 101489586          | protein FAR1-RELATED SEQUENCE 12        |
| SNP_14728_A_15940776 | NC_021162.1    | Ca_Kabuli_Chr03 | 15940776                | TT                                     | CC                 | CC               | URR                           | 101491106          | poly(A)-specific ribonuclease PARN-like |
| SNP_14729_A_15978309 | NC_021162.1    | Ca_Kabuli_Chr03 | 15978309                | TT                                     | CC                 | CC               | INTRON                        | 101491636          | metacaspase-1                           |
| SNP_14730_A_15988949 | NC_021162.1    | Ca_Kabuli_Chr03 | 15988949                | GG                                     | AA                 | AA               | INTERGENIC                    |                    |                                         |
| SNP_14731_A_16046766 | NC_021162.1    | Ca_Kabuli_Chr03 | 16046766                | CC                                     | TT                 | TT               | URR                           | 101498354          | zinc finger MYM-type protein 1-like     |
| SNP_14732_A_16087690 | NC_021162.1    | Ca_Kabuli_Chr03 | 16087690                | CC                                     | TT                 | TT               | INTERGENIC                    |                    |                                         |
| SNP_14733_A_16087743 | NC_021162.1    | Ca_Kabuli_Chr03 | 16087743                | GG                                     | AA                 | AA               | INTERGENIC                    |                    |                                         |
| SNP_14734_A_16088210 | NC_021162.1    | Ca_Kabuli_Chr03 | 16088210                | TT                                     | CC                 | CC               | INTERGENIC                    |                    |                                         |
| SNP_14735_A_16094341 | NC_021162.1    | Ca_Kabuli_Chr03 | 16094341                | GG                                     | AA                 | AA               | INTERGENIC                    |                    |                                         |

| SNPs IDs             | Chromosome IDs | Chromosomes     | Physical positions (bp) | CDC Frontier (Reference genome) | (Pusa 1103 & HPNB) | (ILWC 46 & LPNB) | Sequence genome | Components of | Gene accession IDs | Putative functions |
|----------------------|----------------|-----------------|-------------------------|---------------------------------|--------------------|------------------|-----------------|---------------|--------------------|--------------------|
| SNP_14736_A_16106719 | NC_021162.1    | Ca_Kabuli_Chr03 | 16106719                | TT                              | CC                 | CC               | INTERGENIC      |               |                    |                    |
| SNP_14737_A_16106734 | NC_021162.1    | Ca_Kabuli_Chr03 | 16106734                | TT                              | AA                 | AA               | INTERGENIC      |               |                    |                    |
| SNP_14738_A_16106945 | NC_021162.1    | Ca_Kabuli_Chr03 | 16106945                | AA                              | GG                 | GG               | INTERGENIC      |               |                    |                    |
| SNP_14739_A_16106983 | NC_021162.1    | Ca_Kabuli_Chr03 | 16106983                | TT                              | CC                 | CC               | INTERGENIC      |               |                    |                    |
| SNP_14740_A_16107228 | NC_021162.1    | Ca_Kabuli_Chr03 | 16107228                | AA                              | GG                 | GG               | INTERGENIC      |               |                    |                    |
| SNP_14741_A_16107263 | NC_021162.1    | Ca_Kabuli_Chr03 | 16107263                | AA                              | GG                 | GG               | INTERGENIC      |               |                    |                    |
| SNP_14742_A_16107292 | NC_021162.1    | Ca_Kabuli_Chr03 | 16107292                | AA                              | GG                 | GG               | INTERGENIC      |               |                    |                    |
| SNP_14743_A_16107345 | NC_021162.1    | Ca_Kabuli_Chr03 | 16107345                | CC                              | TT                 | TT               | INTERGENIC      |               |                    |                    |
| SNP_14744_A_16115088 | NC_021162.1    | Ca_Kabuli_Chr03 | 16115088                | AA                              | GG                 | GG               | INTERGENIC      |               |                    |                    |
| SNP_14745_A_16115201 | NC_021162.1    | Ca_Kabuli_Chr03 | 16115201                | GG                              | AA                 | AA               | INTERGENIC      |               |                    |                    |
| SNP_14746_A_16115209 | NC_021162.1    | Ca_Kabuli_Chr03 | 16115209                | CC                              | AA                 | AA               | INTERGENIC      |               |                    |                    |
| SNP_14747_A_16116723 | NC_021162.1    | Ca_Kabuli_Chr03 | 16116723                | TT                              | AA                 | AA               | INTERGENIC      |               |                    |                    |
| SNP_14748_A_16117260 | NC_021162.1    | Ca_Kabuli_Chr03 | 16117260                | AA                              | GG                 | GG               | INTERGENIC      |               |                    |                    |
| SNP_14749_A_16117458 | NC_021162.1    | Ca_Kabuli_Chr03 | 16117458                | CC                              | TT                 | TT               | INTERGENIC      |               |                    |                    |
| SNP_14750_A_16117549 | NC_021162.1    | Ca_Kabuli_Chr03 | 16117549                | GG                              | AA                 | AA               | INTERGENIC      |               |                    |                    |
| SNP_14751_A_16117587 | NC_021162.1    | Ca_Kabuli_Chr03 | 16117587                | CC                              | AA                 | AA               | INTERGENIC      |               |                    |                    |
| SNP_14752_A_16117952 | NC_021162.1    | Ca_Kabuli_Chr03 | 16117952                | AA                              | TT                 | TT               | INTERGENIC      |               |                    |                    |
| SNP_14753_A_16125786 | NC_021162.1    | Ca_Kabuli_Chr03 | 16125786                | TT                              | AA                 | AA               | INTERGENIC      |               |                    |                    |
| SNP_14755_A_16133223 | NC_021162.1    | Ca_Kabuli_Chr03 | 16133223                | TT                              | CC                 | CC               | INTERGENIC      |               |                    |                    |
| SNP_14757_A_16133445 | NC_021162.1    | Ca_Kabuli_Chr03 | 16133445                | CC                              | GG                 | GG               | INTERGENIC      |               |                    |                    |
| SNP_14761_A_16155154 | NC_021162.1    | Ca_Kabuli_Chr03 | 16155154                | GG                              | AA                 | AA               | INTERGENIC      |               |                    |                    |
| SNP_14762_A_16160472 | NC_021162.1    | Ca_Kabuli_Chr03 | 16160472                | TT                              | CC                 | CC               | INTERGENIC      |               |                    |                    |

| SNPs IDs             | Chromosome IDs | Chromosomes     | Physical positions (bp) | CDC Frontier genome (Reference genome) | (Pusa 1103 & HPNB) | (ILWC 46 & LPNB) | Sequence genome | Components of | Gene accession IDs | Putative functions |
|----------------------|----------------|-----------------|-------------------------|----------------------------------------|--------------------|------------------|-----------------|---------------|--------------------|--------------------|
| SNP_14763_A_16160921 | NC_021162.1    | Ca_Kabuli_Chr03 | 16160921                | AA                                     | GG                 | GG               | INTERGENIC      |               |                    |                    |
| SNP_14764_A_16160922 | NC_021162.1    | Ca_Kabuli_Chr03 | 16160922                | TT                                     | CC                 | CC               | INTERGENIC      |               |                    |                    |
| SNP_14765_A_16160936 | NC_021162.1    | Ca_Kabuli_Chr03 | 16160936                | TT                                     | AA                 | AA               | INTERGENIC      |               |                    |                    |
| SNP_14766_A_16160958 | NC_021162.1    | Ca_Kabuli_Chr03 | 16160958                | TT                                     | GG                 | GG               | INTERGENIC      |               |                    |                    |
| SNP_14767_A_16161146 | NC_021162.1    | Ca_Kabuli_Chr03 | 16161146                | AA                                     | GG                 | GG               | INTERGENIC      |               |                    |                    |
| SNP_14768_A_16164160 | NC_021162.1    | Ca_Kabuli_Chr03 | 16164160                | GG                                     | AA                 | AA               | INTERGENIC      |               |                    |                    |
| SNP_14769_A_16164177 | NC_021162.1    | Ca_Kabuli_Chr03 | 16164177                | CC                                     | TT                 | TT               | INTERGENIC      |               |                    |                    |
| SNP_14770_A_16164198 | NC_021162.1    | Ca_Kabuli_Chr03 | 16164198                | AA                                     | GG                 | GG               | INTERGENIC      |               |                    |                    |
| SNP_14771_A_16166613 | NC_021162.1    | Ca_Kabuli_Chr03 | 16166613                | AA                                     | GG                 | GG               | INTERGENIC      |               |                    |                    |
| SNP_14772_A_16166640 | NC_021162.1    | Ca_Kabuli_Chr03 | 16166640                | TT                                     | CC                 | CC               | INTERGENIC      |               |                    |                    |
| SNP_14774_A_16166862 | NC_021162.1    | Ca_Kabuli_Chr03 | 16166862                | AA                                     | TT                 | TT               | INTERGENIC      |               |                    |                    |
| SNP_14775_A_16166938 | NC_021162.1    | Ca_Kabuli_Chr03 | 16166938                | GG                                     | AA                 | AA               | INTERGENIC      |               |                    |                    |
| SNP_14776_A_16167055 | NC_021162.1    | Ca_Kabuli_Chr03 | 16167055                | TT                                     | CC                 | CC               | INTERGENIC      |               |                    |                    |
| SNP_14777_A_16167092 | NC_021162.1    | Ca_Kabuli_Chr03 | 16167092                | AA                                     | GG                 | GG               | INTERGENIC      |               |                    |                    |
| SNP_14778_A_16167100 | NC_021162.1    | Ca_Kabuli_Chr03 | 16167100                | GG                                     | TT                 | TT               | INTERGENIC      |               |                    |                    |
| SNP_14779_A_16167116 | NC_021162.1    | Ca_Kabuli_Chr03 | 16167116                | CC                                     | TT                 | TT               | INTERGENIC      |               |                    |                    |
| SNP_14780_A_16167247 | NC_021162.1    | Ca_Kabuli_Chr03 | 16167247                | AA                                     | GG                 | GG               | INTERGENIC      |               |                    |                    |
| SNP_14782_A_16168969 | NC_021162.1    | Ca_Kabuli_Chr03 | 16168969                | GG                                     | AA                 | AA               | INTERGENIC      |               |                    |                    |
| SNP_14783_A_16168982 | NC_021162.1    | Ca_Kabuli_Chr03 | 16168982                | CC                                     | TT                 | TT               | INTERGENIC      |               |                    |                    |
| SNP_14784_A_16169143 | NC_021162.1    | Ca_Kabuli_Chr03 | 16169143                | AA                                     | GG                 | GG               | INTERGENIC      |               |                    |                    |
| SNP_14785_A_16169169 | NC_021162.1    | Ca_Kabuli_Chr03 | 16169169                | AA                                     | GG                 | GG               | INTERGENIC      |               |                    |                    |
| SNP_14786_A_16169209 | NC_021162.1    | Ca_Kabuli_Chr03 | 16169209                | CC                                     | TT                 | TT               | INTERGENIC      |               |                    |                    |

| SNPs IDs             | Chromosome IDs | Chromosomes     | Physical positions (bp) | CDC Frontier genome (Reference genome) | (Pusa 1103 & HPNB) | (ILWC 46 & LPNB) | Sequence genome | Components of | Gene accession IDs | Putative functions |
|----------------------|----------------|-----------------|-------------------------|----------------------------------------|--------------------|------------------|-----------------|---------------|--------------------|--------------------|
| SNP_14787_A_16169245 | NC_021162.1    | Ca_Kabuli_Chr03 | 16169245                | GG                                     | AA                 | AA               | INTERGENIC      |               |                    |                    |
| SNP_14788_A_16170975 | NC_021162.1    | Ca_Kabuli_Chr03 | 16170975                | CC                                     | TT                 | TT               | INTERGENIC      |               |                    |                    |
| SNP_14789_A_16170997 | NC_021162.1    | Ca_Kabuli_Chr03 | 16170997                | TT                                     | CC                 | CC               | INTERGENIC      |               |                    |                    |
| SNP_14790_A_16170998 | NC_021162.1    | Ca_Kabuli_Chr03 | 16170998                | CC                                     | AA                 | AA               | INTERGENIC      |               |                    |                    |
| SNP_14791_A_16171007 | NC_021162.1    | Ca_Kabuli_Chr03 | 16171007                | GG                                     | AA                 | AA               | INTERGENIC      |               |                    |                    |
| SNP_14792_A_16171028 | NC_021162.1    | Ca_Kabuli_Chr03 | 16171028                | CC                                     | TT                 | TT               | INTERGENIC      |               |                    |                    |
| SNP_14793_A_16171051 | NC_021162.1    | Ca_Kabuli_Chr03 | 16171051                | TT                                     | CC                 | CC               | INTERGENIC      |               |                    |                    |
| SNP_14795_A_16171366 | NC_021162.1    | Ca_Kabuli_Chr03 | 16171366                | CC                                     | TT                 | TT               | INTERGENIC      |               |                    |                    |
| SNP_14796_A_16171409 | NC_021162.1    | Ca_Kabuli_Chr03 | 16171409                | TT                                     | GG                 | GG               | INTERGENIC      |               |                    |                    |
| SNP_14797_A_16171625 | NC_021162.1    | Ca_Kabuli_Chr03 | 16171625                | AA                                     | TT                 | TT               | INTERGENIC      |               |                    |                    |
| SNP_14798_A_16171811 | NC_021162.1    | Ca_Kabuli_Chr03 | 16171811                | TT                                     | CC                 | CC               | INTERGENIC      |               |                    |                    |
| SNP_14799_A_16181553 | NC_021162.1    | Ca_Kabuli_Chr03 | 16181553                | GG                                     | TT                 | TT               | INTERGENIC      |               |                    |                    |
| SNP_14800_A_16181559 | NC_021162.1    | Ca_Kabuli_Chr03 | 16181559                | GG                                     | TT                 | TT               | INTERGENIC      |               |                    |                    |
| SNP_14801_A_16181971 | NC_021162.1    | Ca_Kabuli_Chr03 | 16181971                | CC                                     | TT                 | TT               | INTERGENIC      |               |                    |                    |
| SNP_14802_A_16182007 | NC_021162.1    | Ca_Kabuli_Chr03 | 16182007                | CC                                     | TT                 | TT               | INTERGENIC      |               |                    |                    |
| SNP_14803_A_16182646 | NC_021162.1    | Ca_Kabuli_Chr03 | 16182646                | TT                                     | CC                 | CC               | INTERGENIC      |               |                    |                    |
| SNP_14804_A_16182674 | NC_021162.1    | Ca_Kabuli_Chr03 | 16182674                | GG                                     | AA                 | AA               | INTERGENIC      |               |                    |                    |
| SNP_14806_A_16182938 | NC_021162.1    | Ca_Kabuli_Chr03 | 16182938                | GG                                     | AA                 | AA               | INTERGENIC      |               |                    |                    |
| SNP_14807_A_16183118 | NC_021162.1    | Ca_Kabuli_Chr03 | 16183118                | CC                                     | TT                 | TT               | INTERGENIC      |               |                    |                    |
| SNP_14808_A_16183187 | NC_021162.1    | Ca_Kabuli_Chr03 | 16183187                | CC                                     | TT                 | TT               | INTERGENIC      |               |                    |                    |
| SNP_14809_A_16183207 | NC_021162.1    | Ca_Kabuli_Chr03 | 16183207                | GG                                     | AA                 | AA               | INTERGENIC      |               |                    |                    |
| SNP_14810_A_16183241 | NC_021162.1    | Ca_Kabuli_Chr03 | 16183241                | CC                                     | GG                 | GG               | INTERGENIC      |               |                    |                    |

| SNPs IDs             | Chromosome IDs | Chromosomes     | Physical positions (bp) | CDC Frontier genome (Reference genome) | (Pusa 1103 & HPNB) | (ILWC 46 & LPNB) | Sequence Components of genome | Gene accession IDs | Putative functions |
|----------------------|----------------|-----------------|-------------------------|----------------------------------------|--------------------|------------------|-------------------------------|--------------------|--------------------|
| SNP_14811_A_16183257 | NC_021162.1    | Ca_Kabuli_Chr03 | 16183257                | TT                                     | CC                 | CC               | INTERGENIC                    |                    |                    |
| SNP_14812_A_16183452 | NC_021162.1    | Ca_Kabuli_Chr03 | 16183452                | TT                                     | AA                 | AA               | INTERGENIC                    |                    |                    |
| SNP_14813_A_16190276 | NC_021162.1    | Ca_Kabuli_Chr03 | 16190276                | GG                                     | TT                 | TT               | INTERGENIC                    |                    |                    |
| SNP_14814_A_16190500 | NC_021162.1    | Ca_Kabuli_Chr03 | 16190500                | TT                                     | CC                 | CC               | INTERGENIC                    |                    |                    |
| SNP_14815_A_16190693 | NC_021162.1    | Ca_Kabuli_Chr03 | 16190693                | AA                                     | GG                 | GG               | INTERGENIC                    |                    |                    |
| SNP_14816_A_16190727 | NC_021162.1    | Ca_Kabuli_Chr03 | 16190727                | CC                                     | TT                 | TT               | INTERGENIC                    |                    |                    |
| SNP_14817_A_16190766 | NC_021162.1    | Ca_Kabuli_Chr03 | 16190766                | TT                                     | AA                 | AA               | INTERGENIC                    |                    |                    |
| SNP_14819_A_16190976 | NC_021162.1    | Ca_Kabuli_Chr03 | 16190976                | AA                                     | GG                 | GG               | INTERGENIC                    |                    |                    |
| SNP_14820_A_16195021 | NC_021162.1    | Ca_Kabuli_Chr03 | 16195021                | CC                                     | TT                 | TT               | DRR                           | 101498696          | Unknown function   |
| SNP_14821_A_16195099 | NC_021162.1    | Ca_Kabuli_Chr03 | 16195099                | GG                                     | AA                 | AA               | DRR                           | 101498696          | Unknown function   |
| SNP_14823_A_16195223 | NC_021162.1    | Ca_Kabuli_Chr03 | 16195223                | AA                                     | GG                 | GG               | DRR                           | 101498696          | Unknown function   |
| SNP_14826_A_16195752 | NC_021162.1    | Ca_Kabuli_Chr03 | 16195752                | AA                                     | TT                 | TT               | DRR                           | 101498696          | Unknown function   |
| SNP_14827_A_16195770 | NC_021162.1    | Ca_Kabuli_Chr03 | 16195770                | CC                                     | TT                 | TT               | DRR                           | 101498696          | Unknown function   |
| SNP_14828_A_16195781 | NC_021162.1    | Ca_Kabuli_Chr03 | 16195781                | GG                                     | CC                 | CC               | DRR                           | 101498696          | Unknown function   |
| SNP_14829_A_16195806 | NC_021162.1    | Ca_Kabuli_Chr03 | 16195806                | AA                                     | TT                 | TT               | DRR                           | 101498696          | Unknown function   |
| SNP_14830_A_16195811 | NC_021162.1    | Ca_Kabuli_Chr03 | 16195811                | CC                                     | AA                 | AA               | DRR                           | 101498696          | Unknown function   |
| SNP_14831_A_16195828 | NC_021162.1    | Ca_Kabuli_Chr03 | 16195828                | CC                                     | GG                 | GG               | DRR                           | 101498696          | Unknown function   |
| SNP_14832_A_16195883 | NC_021162.1    | Ca_Kabuli_Chr03 | 16195883                | GG                                     | AA                 | AA               | URR                           | 101498696          | Unknown function   |
| SNP_14833_A_16195914 | NC_021162.1    | Ca_Kabuli_Chr03 | 16195914                | AA                                     | GG                 | GG               | URR                           | 101498696          | Unknown function   |
| SNP_14834_A_16196052 | NC_021162.1    | Ca_Kabuli_Chr03 | 16196052                | TT                                     | CC                 | CC               | INTRON                        | 101498696          | Unknown function   |
| SNP_14835_A_16196098 | NC_021162.1    | Ca_Kabuli_Chr03 | 16196098                | CC                                     | TT                 | TT               | INTRON                        | 101498696          | Unknown function   |
| SNP_14836_A_16196649 | NC_021162.1    | Ca_Kabuli_Chr03 | 16196649                | TT                                     | AA                 | AA               | INTRON                        | 101498696          | Unknown function   |

| SNPs IDs             | Chromosome IDs | Chromosomes     | Physical positions (bp) | CDC Frontier genome (Reference genome) | (Pusa 1103 & HPNB) | (ILWC 46 & LPNB) | Sequence Components of genome | Gene accession IDs | Putative functions |
|----------------------|----------------|-----------------|-------------------------|----------------------------------------|--------------------|------------------|-------------------------------|--------------------|--------------------|
| SNP_14837_A_16196718 | NC_021162.1    | Ca_Kabuli_Chr03 | 16196718                | AA                                     | TT                 | TT               | INTRON                        | 101498696          | Unknown function   |
| SNP_14838_A_16196841 | NC_021162.1    | Ca_Kabuli_Chr03 | 16196841                | TT                                     | AA                 | AA               | INTRON                        | 101498696          | Unknown function   |
| SNP_14839_A_16196885 | NC_021162.1    | Ca_Kabuli_Chr03 | 16196885                | TT                                     | AA                 | AA               | INTRON                        | 101498696          | Unknown function   |
| SNP_14840_A_16197226 | NC_021162.1    | Ca_Kabuli_Chr03 | 16197226                | AA                                     | CC                 | CC               | NON_SYNONYMOUS_CODING         | 101498696          | Unknown function   |
| SNP_14842_A_16197370 | NC_021162.1    | Ca_Kabuli_Chr03 | 16197370                | AA                                     | GG                 | GG               | DRR                           | 101498696          | Unknown function   |
| SNP_14843_A_16197539 | NC_021162.1    | Ca_Kabuli_Chr03 | 16197539                | GG                                     | TT                 | TT               | URR                           | 101498696          | Unknown function   |
| SNP_14844_A_16197582 | NC_021162.1    | Ca_Kabuli_Chr03 | 16197582                | CC                                     | AA                 | AA               | URR                           | 101498696          | Unknown function   |
| SNP_14845_A_16197638 | NC_021162.1    | Ca_Kabuli_Chr03 | 16197638                | AA                                     | GG                 | GG               | URR                           | 101498696          | Unknown function   |
| SNP_14846_A_16197653 | NC_021162.1    | Ca_Kabuli_Chr03 | 16197653                | CC                                     | TT                 | TT               | URR                           | 101498696          | Unknown function   |
| SNP_14847_A_16197689 | NC_021162.1    | Ca_Kabuli_Chr03 | 16197689                | AA                                     | GG                 | GG               | URR                           | 101498696          | Unknown function   |
| SNP_14848_A_16197703 | NC_021162.1    | Ca_Kabuli_Chr03 | 16197703                | GG                                     | AA                 | AA               | URR                           | 101498696          | Unknown function   |
| SNP_14849_A_16197713 | NC_021162.1    | Ca_Kabuli_Chr03 | 16197713                | TT                                     | CC                 | CC               | URR                           | 101498696          | Unknown function   |
| SNP_14850_A_16197731 | NC_021162.1    | Ca_Kabuli_Chr03 | 16197731                | GG                                     | AA                 | AA               | URR                           | 101498696          | Unknown function   |
| SNP_14851_A_16197733 | NC_021162.1    | Ca_Kabuli_Chr03 | 16197733                | CC                                     | TT                 | TT               | URR                           | 101498696          | Unknown function   |
| SNP_14852_A_16197749 | NC_021162.1    | Ca_Kabuli_Chr03 | 16197749                | TT                                     | CC                 | CC               | URR                           | 101498696          | Unknown function   |
| SNP_14853_A_16211946 | NC_021162.1    | Ca_Kabuli_Chr03 | 16211946                | TT                                     | CC                 | CC               | INTERGENIC                    |                    |                    |
| SNP_14854_A_16211999 | NC_021162.1    | Ca_Kabuli_Chr03 | 16211999                | TT                                     | AA                 | AA               | INTERGENIC                    |                    |                    |
| SNP_14855_A_16212077 | NC_021162.1    | Ca_Kabuli_Chr03 | 16212077                | AA                                     | GG                 | GG               | INTERGENIC                    |                    |                    |
| SNP_14856_A_16212123 | NC_021162.1    | Ca_Kabuli_Chr03 | 16212123                | CC                                     | AA                 | AA               | INTERGENIC                    |                    |                    |
| SNP_14857_A_16212168 | NC_021162.1    | Ca_Kabuli_Chr03 | 16212168                | AA                                     | GG                 | GG               | INTERGENIC                    |                    |                    |
| SNP_14858_A_16212198 | NC_021162.1    | Ca_Kabuli_Chr03 | 16212198                | GG                                     | TT                 | TT               | INTERGENIC                    |                    |                    |
| SNP_14859_A_16212226 | NC_021162.1    | Ca_Kabuli_Chr03 | 16212226                | GG                                     | AA                 | AA               | INTERGENIC                    |                    |                    |



| SNPs IDs             | Chromosome IDs | Chromosomes     | Physical positions (bp) | CDC Frontier genome (Reference genome) | (Pusa 1103 & HPNB) | (ILWC 46 & LPNB) | Sequence genome | Components of | Gene accession IDs | Putative functions |
|----------------------|----------------|-----------------|-------------------------|----------------------------------------|--------------------|------------------|-----------------|---------------|--------------------|--------------------|
| SNP_14860_A_16212290 | NC_021162.1    | Ca_Kabuli_Chr03 | 16212290                | AA                                     | TT                 | TT               | INTERGENIC      |               |                    |                    |
| SNP_14861_A_16212362 | NC_021162.1    | Ca_Kabuli_Chr03 | 16212362                | AA                                     | GG                 | GG               | INTERGENIC      |               |                    |                    |
| SNP_14863_A_16212401 | NC_021162.1    | Ca_Kabuli_Chr03 | 16212401                | TT                                     | CC                 | CC               | INTERGENIC      |               |                    |                    |
| SNP_14864_A_16212438 | NC_021162.1    | Ca_Kabuli_Chr03 | 16212438                | TT                                     | CC                 | CC               | INTERGENIC      |               |                    |                    |
| SNP_14865_A_16212485 | NC_021162.1    | Ca_Kabuli_Chr03 | 16212485                | CC                                     | GG                 | GG               | INTERGENIC      |               |                    |                    |
| SNP_14866_A_16212488 | NC_021162.1    | Ca_Kabuli_Chr03 | 16212488                | TT                                     | CC                 | CC               | INTERGENIC      |               |                    |                    |
| SNP_14867_A_16236381 | NC_021162.1    | Ca_Kabuli_Chr03 | 16236381                | AA                                     | TT                 | TT               | INTERGENIC      |               |                    |                    |
| SNP_14868_A_16236392 | NC_021162.1    | Ca_Kabuli_Chr03 | 16236392                | CC                                     | TT                 | TT               | INTERGENIC      |               |                    |                    |
| SNP_14869_A_16236480 | NC_021162.1    | Ca_Kabuli_Chr03 | 16236480                | AA                                     | GG                 | GG               | INTERGENIC      |               |                    |                    |
| SNP_14870_A_16237507 | NC_021162.1    | Ca_Kabuli_Chr03 | 16237507                | AA                                     | GG                 | GG               | INTERGENIC      |               |                    |                    |
| SNP_14871_A_16237518 | NC_021162.1    | Ca_Kabuli_Chr03 | 16237518                | TT                                     | AA                 | AA               | INTERGENIC      |               |                    |                    |
| SNP_14872_A_16237530 | NC_021162.1    | Ca_Kabuli_Chr03 | 16237530                | TT                                     | CC                 | CC               | INTERGENIC      |               |                    |                    |
| SNP_14873_A_16240320 | NC_021162.1    | Ca_Kabuli_Chr03 | 16240320                | TT                                     | AA                 | AA               | INTERGENIC      |               |                    |                    |
| SNP_14874_A_16244871 | NC_021162.1    | Ca_Kabuli_Chr03 | 16244871                | CC                                     | TT                 | TT               | INTERGENIC      |               |                    |                    |
| SNP_14875_A_16245336 | NC_021162.1    | Ca_Kabuli_Chr03 | 16245336                | GG                                     | CC                 | CC               | INTERGENIC      |               |                    |                    |
| SNP_14876_A_16245342 | NC_021162.1    | Ca_Kabuli_Chr03 | 16245342                | AA                                     | GG                 | GG               | INTERGENIC      |               |                    |                    |
| SNP_14877_A_16264128 | NC_021162.1    | Ca_Kabuli_Chr03 | 16264128                | GG                                     | CC                 | CC               | INTERGENIC      |               |                    |                    |
| SNP_14878_A_16283986 | NC_021162.1    | Ca_Kabuli_Chr03 | 16283986                | GG                                     | AA                 | AA               | INTERGENIC      |               |                    |                    |
| SNP_14879_A_16284046 | NC_021162.1    | Ca_Kabuli_Chr03 | 16284046                | TT                                     | CC                 | CC               | INTERGENIC      |               |                    |                    |
| SNP_14880_A_16309753 | NC_021162.1    | Ca_Kabuli_Chr03 | 16309753                | AA                                     | TT                 | TT               | INTERGENIC      |               |                    |                    |
| SNP_14881_A_16331630 | NC_021162.1    | Ca_Kabuli_Chr03 | 16331630                | AA                                     | CC                 | CC               | INTERGENIC      |               |                    |                    |
| SNP_14882_A_16331807 | NC_021162.1    | Ca_Kabuli_Chr03 | 16331807                | AA                                     | GG                 | GG               | INTERGENIC      |               |                    |                    |

| SNPs IDs             | Chromosome IDs | Chromosomes     | Physical positions (bp) | CDC Frontier (Reference genome) | (Pusa 1103 & HPNB) | (ILWC 46 & LPNB) | Sequence Components of genome | Gene accession IDs | Putative functions                  |
|----------------------|----------------|-----------------|-------------------------|---------------------------------|--------------------|------------------|-------------------------------|--------------------|-------------------------------------|
| SNP_14883_A_16331822 | NC_021162.1    | Ca_Kabuli_Chr03 | 16331822                | AA                              | CC                 | CC               | INTERGENIC                    |                    |                                     |
| SNP_14884_A_16331838 | NC_021162.1    | Ca_Kabuli_Chr03 | 16331838                | TT                              | AA                 | AA               | INTERGENIC                    |                    |                                     |
| SNP_14885_A_16331935 | NC_021162.1    | Ca_Kabuli_Chr03 | 16331935                | GG                              | AA                 | AA               | INTERGENIC                    |                    |                                     |
| SNP_14888_A_16413569 | NC_021162.1    | Ca_Kabuli_Chr03 | 16413569                | TT                              | CC                 | CC               | URR                           | 101410587          | transfer RNA lysine (anticodon UUU) |
| SNP_14889_A_16413573 | NC_021162.1    | Ca_Kabuli_Chr03 | 16413573                | TT                              | CC                 | CC               | URR                           | 101410587          | transfer RNA lysine (anticodon UUU) |
| SNP_14890_A_16413587 | NC_021162.1    | Ca_Kabuli_Chr03 | 16413587                | GG                              | AA                 | AA               | URR                           | 101410587          | transfer RNA lysine (anticodon UUU) |
| SNP_14891_A_16413639 | NC_021162.1    | Ca_Kabuli_Chr03 | 16413639                | AA                              | GG                 | GG               | URR                           | 101410587          | transfer RNA lysine (anticodon UUU) |
| SNP_14892_A_16413642 | NC_021162.1    | Ca_Kabuli_Chr03 | 16413642                | GG                              | AA                 | AA               | URR                           | 101410587          | transfer RNA lysine (anticodon UUU) |
| SNP_14893_A_16413648 | NC_021162.1    | Ca_Kabuli_Chr03 | 16413648                | GG                              | AA                 | AA               | URR                           | 101410587          | transfer RNA lysine (anticodon UUU) |
| SNP_14894_A_16413662 | NC_021162.1    | Ca_Kabuli_Chr03 | 16413662                | CC                              | TT                 | TT               | URR                           | 101410587          | transfer RNA lysine (anticodon UUU) |
| SNP_14895_A_16413954 | NC_021162.1    | Ca_Kabuli_Chr03 | 16413954                | TT                              | CC                 | CC               | URR                           | 101410587          | transfer RNA lysine (anticodon UUU) |
| SNP_14896_A_16414054 | NC_021162.1    | Ca_Kabuli_Chr03 | 16414054                | AA                              | CC                 | CC               | URR                           | 101410587          | transfer RNA lysine (anticodon UUU) |
| SNP_14897_A_16414066 | NC_021162.1    | Ca_Kabuli_Chr03 | 16414066                | GG                              | AA                 | AA               | URR                           | 101410587          | transfer RNA lysine (anticodon UUU) |
| SNP_14898_A_16414104 | NC_021162.1    | Ca_Kabuli_Chr03 | 16414104                | GG                              | AA                 | AA               | URR                           | 101410587          | transfer RNA lysine (anticodon UUU) |
| SNP_14900_A_16441419 | NC_021162.1    | Ca_Kabuli_Chr03 | 16441419                | TT                              | AA                 | AA               | INTERGENIC                    |                    |                                     |
| SNP_14901_A_16441444 | NC_021162.1    | Ca_Kabuli_Chr03 | 16441444                | TT                              | CC                 | CC               | INTERGENIC                    |                    |                                     |
| SNP_14902_A_16441500 | NC_021162.1    | Ca_Kabuli_Chr03 | 16441500                | TT                              | CC                 | CC               | INTERGENIC                    |                    |                                     |
| SNP_14903_A_16441514 | NC_021162.1    | Ca_Kabuli_Chr03 | 16441514                | CC                              | AA                 | AA               | INTERGENIC                    |                    |                                     |
| SNP_14904_A_16441516 | NC_021162.1    | Ca_Kabuli_Chr03 | 16441516                | AA                              | TT                 | TT               | INTERGENIC                    |                    |                                     |
| SNP_14905_A_16441517 | NC_021162.1    | Ca_Kabuli_Chr03 | 16441517                | AA                              | GG                 | GG               | INTERGENIC                    |                    |                                     |
| SNP_14906_A_16441550 | NC_021162.1    | Ca_Kabuli_Chr03 | 16441550                | GG                              | AA                 | AA               | INTERGENIC                    |                    |                                     |
| SNP_14907_A_16441687 | NC_021162.1    | Ca_Kabuli_Chr03 | 16441687                | TT                              | GG                 | GG               | INTERGENIC                    |                    |                                     |

| SNPs IDs             | Chromosome IDs | Chromosomes     | Physical positions (bp) | CDC Frontier genome (Reference genome) | (Pusa 1103 & HPNB) | (ILWC 46 & LPNB) | Sequence Components of genome | Gene accession IDs | Putative functions                                       |
|----------------------|----------------|-----------------|-------------------------|----------------------------------------|--------------------|------------------|-------------------------------|--------------------|----------------------------------------------------------|
| SNP_14908_A_16454570 | NC_021162.1    | Ca_Kabuli_Chr03 | 16454570                | CC                                     | TT                 | TT               | INTERGENIC                    |                    |                                                          |
| SNP_14909_A_16466973 | NC_021162.1    | Ca_Kabuli_Chr03 | 16466973                | GG                                     | AA                 | AA               | INTERGENIC                    |                    |                                                          |
| SNP_14910_A_16467050 | NC_021162.1    | Ca_Kabuli_Chr03 | 16467050                | TT                                     | CC                 | CC               | INTERGENIC                    |                    |                                                          |
| SNP_14911_A_16471580 | NC_021162.1    | Ca_Kabuli_Chr03 | 16471580                | CC                                     | TT                 | TT               | INTERGENIC                    |                    |                                                          |
| SNP_14912_A_16471630 | NC_021162.1    | Ca_Kabuli_Chr03 | 16471630                | TT                                     | GG                 | GG               | INTERGENIC                    |                    |                                                          |
| SNP_14913_A_16471637 | NC_021162.1    | Ca_Kabuli_Chr03 | 16471637                | AA                                     | TT                 | TT               | INTERGENIC                    |                    |                                                          |
| SNP_14914_A_16471686 | NC_021162.1    | Ca_Kabuli_Chr03 | 16471686                | AA                                     | GG                 | GG               | INTERGENIC                    |                    |                                                          |
| SNP_14915_A_16471687 | NC_021162.1    | Ca_Kabuli_Chr03 | 16471687                | AA                                     | GG                 | GG               | INTERGENIC                    |                    |                                                          |
| SNP_14916_A_16471943 | NC_021162.1    | Ca_Kabuli_Chr03 | 16471943                | TT                                     | GG                 | GG               | INTERGENIC                    |                    |                                                          |
| SNP_14917_A_16504050 | NC_021162.1    | Ca_Kabuli_Chr03 | 16504050                | CC                                     | TT                 | TT               | URR                           | 101511842          | Unknown function                                         |
| SNP_14918_A_16504960 | NC_021162.1    | Ca_Kabuli_Chr03 | 16504960                | TT                                     | AA                 | AA               | URR                           | 101511842          | Unknown function                                         |
| SNP_14920_A_16530781 | NC_021162.1    | Ca_Kabuli_Chr03 | 16530781                | AA                                     | TT                 | TT               | DRR                           | 101501345          | 40S ribosomal protein S6-like                            |
| SNP_14922_A_16633818 | NC_021162.1    | Ca_Kabuli_Chr03 | 16633818                | TT                                     | CC                 | CC               | INTERGENIC                    |                    |                                                          |
| SNP_14923_A_16652183 | NC_021162.1    | Ca_Kabuli_Chr03 | 16652183                | AA                                     | TT                 | TT               | URR                           | 101502828          | U-box domain-containing protein 9-like                   |
| SNP_14924_A_16652187 | NC_021162.1    | Ca_Kabuli_Chr03 | 16652187                | AA                                     | GG                 | GG               | URR                           | 101502828          | U-box domain-containing protein 9-like                   |
| SNP_14925_A_16668226 | NC_021162.1    | Ca_Kabuli_Chr03 | 16668226                | GG                                     | AA                 | AA               | INTERGENIC                    |                    |                                                          |
| SNP_14926_A_16747356 | NC_021162.1    | Ca_Kabuli_Chr03 | 16747356                | TT                                     | CC                 | CC               | INTERGENIC                    |                    |                                                          |
| SNP_14927_A_16747361 | NC_021162.1    | Ca_Kabuli_Chr03 | 16747361                | TT                                     | CC                 | CC               | INTERGENIC                    |                    |                                                          |
| SNP_14928_A_16747373 | NC_021162.1    | Ca_Kabuli_Chr03 | 16747373                | AA                                     | GG                 | GG               | INTERGENIC                    |                    |                                                          |
| SNP_14929_A_16747391 | NC_021162.1    | Ca_Kabuli_Chr03 | 16747391                | TT                                     | CC                 | CC               | INTERGENIC                    |                    |                                                          |
| SNP_14930_A_16747396 | NC_021162.1    | Ca_Kabuli_Chr03 | 16747396                | TT                                     | CC                 | CC               | INTERGENIC                    |                    |                                                          |
| SNP_14931_A_16763108 | NC_021162.1    | Ca_Kabuli_Chr03 | 16763108                | CC                                     | TT                 | TT               | INTRON                        | 101503701          | probable mitochondrial-processing peptidase subunit beta |

| SNPs IDs             | Chromosome IDs | Chromosomes     | Physical positions (bp) | CDC Frontier genome (Reference genome) | (Pusa 1103 & HPNB) | (ILWC 46 & LPNB) | Sequence Components of genome | Gene accession IDs | Putative functions                           |
|----------------------|----------------|-----------------|-------------------------|----------------------------------------|--------------------|------------------|-------------------------------|--------------------|----------------------------------------------|
| SNP_14932_A_16772686 | NC_021162.1    | Ca_Kabuli_Chr03 | 16772686                | CC                                     | TT                 | TT               | INTERGENIC                    |                    |                                              |
| SNP_14934_A_16784985 | NC_021162.1    | Ca_Kabuli_Chr03 | 16784985                | CC                                     | AA                 | AA               | INTERGENIC                    |                    |                                              |
| SNP_14936_A_16820942 | NC_021162.1    | Ca_Kabuli_Chr03 | 16820942                | TT                                     | CC                 | CC               | INTERGENIC                    |                    |                                              |
| SNP_14937_A_16879573 | NC_021162.1    | Ca_Kabuli_Chr03 | 16879573                | TT                                     | CC                 | CC               | INTERGENIC                    |                    |                                              |
| SNP_14939_A_16891349 | NC_021162.1    | Ca_Kabuli_Chr03 | 16891349                | GG                                     | AA                 | AA               | DRR                           | 101504338          | 40S ribosomal protein S8-like                |
| SNP_14940_A_16900404 | NC_021162.1    | Ca_Kabuli_Chr03 | 16900404                | CC                                     | TT                 | TT               | INTERGENIC                    |                    |                                              |
| SNP_14941_A_16937639 | NC_021162.1    | Ca_Kabuli_Chr03 | 16937639                | TT                                     | AA                 | AA               | DRR                           | 101505841          | probable glucan endo-1,3-beta-glucosidase A6 |
| SNP_14943_A_17015839 | NC_021162.1    | Ca_Kabuli_Chr03 | 17015839                | AA                                     | CC                 | CC               | INTERGENIC                    |                    |                                              |
| SNP_14944_A_17030909 | NC_021162.1    | Ca_Kabuli_Chr03 | 17030909                | AA                                     | TT                 | TT               | INTERGENIC                    |                    |                                              |
| SNP_14945_A_17030915 | NC_021162.1    | Ca_Kabuli_Chr03 | 17030915                | TT                                     | AA                 | AA               | INTERGENIC                    |                    |                                              |
| SNP_14946_A_17031033 | NC_021162.1    | Ca_Kabuli_Chr03 | 17031033                | CC                                     | TT                 | TT               | INTERGENIC                    |                    |                                              |
| SNP_14947_A_17031342 | NC_021162.1    | Ca_Kabuli_Chr03 | 17031342                | AA                                     | GG                 | GG               | INTERGENIC                    |                    |                                              |
| SNP_14948_A_17031413 | NC_021162.1    | Ca_Kabuli_Chr03 | 17031413                | TT                                     | GG                 | GG               | INTERGENIC                    |                    |                                              |
| SNP_14949_A_17031515 | NC_021162.1    | Ca_Kabuli_Chr03 | 17031515                | AA                                     | TT                 | TT               | INTERGENIC                    |                    |                                              |
| SNP_14950_A_17031539 | NC_021162.1    | Ca_Kabuli_Chr03 | 17031539                | TT                                     | GG                 | GG               | INTERGENIC                    |                    |                                              |
| SNP_14951_A_17031886 | NC_021162.1    | Ca_Kabuli_Chr03 | 17031886                | AA                                     | CC                 | CC               | INTERGENIC                    |                    |                                              |
| SNP_14953_A_17034515 | NC_021162.1    | Ca_Kabuli_Chr03 | 17034515                | AA                                     | GG                 | GG               | INTERGENIC                    |                    |                                              |
| SNP_14954_A_17035050 | NC_021162.1    | Ca_Kabuli_Chr03 | 17035050                | AA                                     | GG                 | GG               | INTERGENIC                    |                    |                                              |
| SNP_14955_A_17038966 | NC_021162.1    | Ca_Kabuli_Chr03 | 17038966                | TT                                     | GG                 | GG               | INTERGENIC                    |                    |                                              |
| SNP_14956_A_17039093 | NC_021162.1    | Ca_Kabuli_Chr03 | 17039093                | AA                                     | GG                 | GG               | INTERGENIC                    |                    |                                              |
| SNP_14957_A_17039154 | NC_021162.1    | Ca_Kabuli_Chr03 | 17039154                | TT                                     | AA                 | AA               | INTERGENIC                    |                    |                                              |
| SNP_14958_A_17039230 | NC_021162.1    | Ca_Kabuli_Chr03 | 17039230                | TT                                     | CC                 | CC               | INTERGENIC                    |                    |                                              |

| SNPs IDs             | Chromosome IDs | Chromosomes     | Physical positions (bp) | CDC Frontier (Reference genome) | (Pusa 1103 & HPNB) | (ILWC 46 & LPNB) | Sequence genome | Components of | Gene accession IDs | Putative functions |
|----------------------|----------------|-----------------|-------------------------|---------------------------------|--------------------|------------------|-----------------|---------------|--------------------|--------------------|
| SNP_14960_A_17039333 | NC_021162.1    | Ca_Kabuli_Chr03 | 17039333                | AA                              | GG                 | GG               | INTERGENIC      |               |                    |                    |
| SNP_14961_A_17039363 | NC_021162.1    | Ca_Kabuli_Chr03 | 17039363                | AA                              | CC                 | CC               | INTERGENIC      |               |                    |                    |
| SNP_14962_A_17039364 | NC_021162.1    | Ca_Kabuli_Chr03 | 17039364                | CC                              | TT                 | TT               | INTERGENIC      |               |                    |                    |
| SNP_14963_A_17039450 | NC_021162.1    | Ca_Kabuli_Chr03 | 17039450                | TT                              | AA                 | AA               | INTERGENIC      |               |                    |                    |
| SNP_14964_A_17039463 | NC_021162.1    | Ca_Kabuli_Chr03 | 17039463                | AA                              | TT                 | TT               | INTERGENIC      |               |                    |                    |
| SNP_14966_A_17135281 | NC_021162.1    | Ca_Kabuli_Chr03 | 17135281                | GG                              | AA                 | AA               | INTERGENIC      |               |                    |                    |
| SNP_14967_A_17138524 | NC_021162.1    | Ca_Kabuli_Chr03 | 17138524                | CC                              | GG                 | GG               | INTERGENIC      |               |                    |                    |
| SNP_14968_A_17169294 | NC_021162.1    | Ca_Kabuli_Chr03 | 17169294                | GG                              | CC                 | CC               | INTERGENIC      |               |                    |                    |
| SNP_14971_A_17219949 | NC_021162.1    | Ca_Kabuli_Chr03 | 17219949                | CC                              | TT                 | TT               | INTERGENIC      |               |                    |                    |
| SNP_14972_A_17239658 | NC_021162.1    | Ca_Kabuli_Chr03 | 17239658                | CC                              | AA                 | AA               | INTERGENIC      |               |                    |                    |
| SNP_14973_A_17249904 | NC_021162.1    | Ca_Kabuli_Chr03 | 17249904                | AA                              | GG                 | GG               | INTERGENIC      |               |                    |                    |
| SNP_14974_A_17292310 | NC_021162.1    | Ca_Kabuli_Chr03 | 17292310                | TT                              | CC                 | CC               | INTERGENIC      |               |                    |                    |
| SNP_14975_A_17292313 | NC_021162.1    | Ca_Kabuli_Chr03 | 17292313                | TT                              | GG                 | GG               | INTERGENIC      |               |                    |                    |
| SNP_14976_A_17311848 | NC_021162.1    | Ca_Kabuli_Chr03 | 17311848                | TT                              | AA                 | AA               | INTERGENIC      |               |                    |                    |
| SNP_14977_A_17353994 | NC_021162.1    | Ca_Kabuli_Chr03 | 17353994                | TT                              | AA                 | AA               | URR             | 101495194     | laccase-17-like    |                    |
| SNP_14978_A_17374301 | NC_021162.1    | Ca_Kabuli_Chr03 | 17374301                | TT                              | AA                 | AA               | INTERGENIC      |               |                    |                    |
| SNP_14979_A_17389778 | NC_021162.1    | Ca_Kabuli_Chr03 | 17389778                | AA                              | CC                 | CC               | INTERGENIC      |               |                    |                    |
| SNP_14981_A_17411303 | NC_021162.1    | Ca_Kabuli_Chr03 | 17411303                | GG                              | AA                 | AA               | INTERGENIC      |               |                    |                    |
| SNP_14982_A_17491556 | NC_021162.1    | Ca_Kabuli_Chr03 | 17491556                | GG                              | AA                 | AA               | INTERGENIC      |               |                    |                    |
| SNP_14984_A_17491909 | NC_021162.1    | Ca_Kabuli_Chr03 | 17491909                | AA                              | TT                 | TT               | INTERGENIC      |               |                    |                    |
| SNP_14985_A_17491910 | NC_021162.1    | Ca_Kabuli_Chr03 | 17491910                | AA                              | TT                 | TT               | INTERGENIC      |               |                    |                    |
| SNP_14986_A_17491911 | NC_021162.1    | Ca_Kabuli_Chr03 | 17491911                | AA                              | TT                 | TT               | INTERGENIC      |               |                    |                    |

| SNPs IDs             | Chromosome IDs | Chromosomes     | Physical positions (bp) | CDC Frontier genome (Reference genome) | (Pusa 1103 & HPNB) | (ILWC 46 & LPNB) | Sequence Components of genome | Gene accession IDs | Putative functions                                       |
|----------------------|----------------|-----------------|-------------------------|----------------------------------------|--------------------|------------------|-------------------------------|--------------------|----------------------------------------------------------|
| SNP_14987_A_17491912 | NC_021162.1    | Ca_Kabuli_Chr03 | 17491912                | AA                                     | TT                 | TT               | INTERGENIC                    |                    |                                                          |
| SNP_14988_A_17491928 | NC_021162.1    | Ca_Kabuli_Chr03 | 17491928                | AA                                     | GG                 | GG               | INTERGENIC                    |                    |                                                          |
| SNP_14989_A_17492106 | NC_021162.1    | Ca_Kabuli_Chr03 | 17492106                | TT                                     | CC                 | CC               | INTERGENIC                    |                    |                                                          |
| SNP_14990_A_17492210 | NC_021162.1    | Ca_Kabuli_Chr03 | 17492210                | TT                                     | AA                 | AA               | INTERGENIC                    |                    |                                                          |
| SNP_14991_A_17492211 | NC_021162.1    | Ca_Kabuli_Chr03 | 17492211                | CC                                     | TT                 | TT               | INTERGENIC                    |                    |                                                          |
| SNP_14992_A_17499157 | NC_021162.1    | Ca_Kabuli_Chr03 | 17499157                | TT                                     | GG                 | GG               | INTERGENIC                    |                    |                                                          |
| SNP_14993_A_17506140 | NC_021162.1    | Ca_Kabuli_Chr03 | 17506140                | TT                                     | CC                 | CC               | INTERGENIC                    |                    |                                                          |
| SNP_14994_A_17506523 | NC_021162.1    | Ca_Kabuli_Chr03 | 17506523                | CC                                     | TT                 | TT               | INTERGENIC                    |                    |                                                          |
| SNP_14995_A_17506610 | NC_021162.1    | Ca_Kabuli_Chr03 | 17506610                | AA                                     | GG                 | GG               | INTERGENIC                    |                    |                                                          |
| SNP_14996_A_17508913 | NC_021162.1    | Ca_Kabuli_Chr03 | 17508913                | CC                                     | AA                 | AA               | INTERGENIC                    |                    |                                                          |
| SNP_14997_A_17536193 | NC_021162.1    | Ca_Kabuli_Chr03 | 17536193                | AA                                     | GG                 | GG               | INTERGENIC                    |                    |                                                          |
| SNP_14998_A_17571259 | NC_021162.1    | Ca_Kabuli_Chr03 | 17571259                | CC                                     | TT                 | TT               | URR                           | 101498238          | glycine-rich protein DOT1                                |
| SNP_14999_A_17571290 | NC_021162.1    | Ca_Kabuli_Chr03 | 17571290                | AA                                     | CC                 | CC               | URR                           | 101498238          | glycine-rich protein DOT1                                |
| SNP_15000_A_17571291 | NC_021162.1    | Ca_Kabuli_Chr03 | 17571291                | AA                                     | CC                 | CC               | URR                           | 101498238          | glycine-rich protein DOT1                                |
| SNP_15002_A_17580757 | NC_021162.1    | Ca_Kabuli_Chr03 | 17580757                | GG                                     | AA                 | AA               | URR                           | 101501667          | serine/threonine-protein phosphatase 7 long form homolog |
| SNP_15003_A_17601044 | NC_021162.1    | Ca_Kabuli_Chr03 | 17601044                | TT                                     | CC                 | CC               | INTERGENIC                    |                    |                                                          |
| SNP_15004_A_17601352 | NC_021162.1    | Ca_Kabuli_Chr03 | 17601352                | GG                                     | AA                 | AA               | INTERGENIC                    |                    |                                                          |
| SNP_15005_A_17601370 | NC_021162.1    | Ca_Kabuli_Chr03 | 17601370                | TT                                     | CC                 | CC               | INTERGENIC                    |                    |                                                          |
| SNP_15006_A_17601444 | NC_021162.1    | Ca_Kabuli_Chr03 | 17601444                | AA                                     | GG                 | GG               | INTERGENIC                    |                    |                                                          |
| SNP_15008_A_17679172 | NC_021162.1    | Ca_Kabuli_Chr03 | 17679172                | AA                                     | GG                 | GG               | INTERGENIC                    |                    |                                                          |
| SNP_15009_A_17679196 | NC_021162.1    | Ca_Kabuli_Chr03 | 17679196                | CC                                     | AA                 | AA               | INTERGENIC                    |                    |                                                          |
| SNP_15010_A_17693298 | NC_021162.1    | Ca_Kabuli_Chr03 | 17693298                | TT                                     | AA                 | AA               | INTERGENIC                    |                    |                                                          |

| SNPs IDs             | Chromosome IDs | Chromosomes     | Physical positions (bp) | CDC Frontier genome (Reference genome) | (Pusa 1103 & HPNB) | (ILWC 46 & LPNB) | Sequence genome | Components of | Gene accession IDs | Putative functions |
|----------------------|----------------|-----------------|-------------------------|----------------------------------------|--------------------|------------------|-----------------|---------------|--------------------|--------------------|
| SNP_15011_A_17752903 | NC_021162.1    | Ca_Kabuli_Chr03 | 17752903                | TT                                     | CC                 | CC               | INTERGENIC      |               |                    |                    |
| SNP_15012_A_17756027 | NC_021162.1    | Ca_Kabuli_Chr03 | 17756027                | TT                                     | CC                 | CC               | INTERGENIC      |               |                    |                    |
| SNP_15013_A_17756132 | NC_021162.1    | Ca_Kabuli_Chr03 | 17756132                | GG                                     | AA                 | AA               | INTERGENIC      |               |                    |                    |
| SNP_15014_A_17756149 | NC_021162.1    | Ca_Kabuli_Chr03 | 17756149                | GG                                     | AA                 | AA               | INTERGENIC      |               |                    |                    |
| SNP_15015_A_17756166 | NC_021162.1    | Ca_Kabuli_Chr03 | 17756166                | AA                                     | GG                 | GG               | INTERGENIC      |               |                    |                    |
| SNP_15016_A_17756182 | NC_021162.1    | Ca_Kabuli_Chr03 | 17756182                | AA                                     | TT                 | TT               | INTERGENIC      |               |                    |                    |
| SNP_15017_A_17756186 | NC_021162.1    | Ca_Kabuli_Chr03 | 17756186                | TT                                     | CC                 | CC               | INTERGENIC      |               |                    |                    |
| SNP_15018_A_17756200 | NC_021162.1    | Ca_Kabuli_Chr03 | 17756200                | CC                                     | TT                 | TT               | INTERGENIC      |               |                    |                    |
| SNP_15019_A_17756242 | NC_021162.1    | Ca_Kabuli_Chr03 | 17756242                | TT                                     | CC                 | CC               | INTERGENIC      |               |                    |                    |
| SNP_15020_A_17756254 | NC_021162.1    | Ca_Kabuli_Chr03 | 17756254                | CC                                     | TT                 | TT               | INTERGENIC      |               |                    |                    |
| SNP_15021_A_17756258 | NC_021162.1    | Ca_Kabuli_Chr03 | 17756258                | AA                                     | GG                 | GG               | INTERGENIC      |               |                    |                    |
| SNP_15022_A_17756262 | NC_021162.1    | Ca_Kabuli_Chr03 | 17756262                | CC                                     | TT                 | TT               | INTERGENIC      |               |                    |                    |
| SNP_15023_A_17756292 | NC_021162.1    | Ca_Kabuli_Chr03 | 17756292                | TT                                     | CC                 | CC               | INTERGENIC      |               |                    |                    |
| SNP_15024_A_17756301 | NC_021162.1    | Ca_Kabuli_Chr03 | 17756301                | TT                                     | CC                 | CC               | INTERGENIC      |               |                    |                    |
| SNP_15025_A_17756312 | NC_021162.1    | Ca_Kabuli_Chr03 | 17756312                | CC                                     | TT                 | TT               | INTERGENIC      |               |                    |                    |
| SNP_15026_A_17756346 | NC_021162.1    | Ca_Kabuli_Chr03 | 17756346                | CC                                     | TT                 | TT               | INTERGENIC      |               |                    |                    |
| SNP_15027_A_17756423 | NC_021162.1    | Ca_Kabuli_Chr03 | 17756423                | CC                                     | TT                 | TT               | INTERGENIC      |               |                    |                    |
| SNP_15028_A_17756440 | NC_021162.1    | Ca_Kabuli_Chr03 | 17756440                | AA                                     | GG                 | GG               | INTERGENIC      |               |                    |                    |
| SNP_15029_A_17756470 | NC_021162.1    | Ca_Kabuli_Chr03 | 17756470                | CC                                     | TT                 | TT               | INTERGENIC      |               |                    |                    |
| SNP_15030_A_17756514 | NC_021162.1    | Ca_Kabuli_Chr03 | 17756514                | AA                                     | GG                 | GG               | INTERGENIC      |               |                    |                    |
| SNP_15031_A_17756522 | NC_021162.1    | Ca_Kabuli_Chr03 | 17756522                | GG                                     | TT                 | TT               | INTERGENIC      |               |                    |                    |
| SNP_15032_A_17756574 | NC_021162.1    | Ca_Kabuli_Chr03 | 17756574                | AA                                     | GG                 | GG               | INTERGENIC      |               |                    |                    |

| SNPs IDs             | Chromosome IDs | Chromosomes     | Physical positions (bp) | CDC Frontier genome (Reference genome) | (Pusa 1103 & HPNB) | (ILWC 46 & LPNB) | Sequence Components of genome | Gene accession IDs | Putative functions                                        |
|----------------------|----------------|-----------------|-------------------------|----------------------------------------|--------------------|------------------|-------------------------------|--------------------|-----------------------------------------------------------|
| SNP_15033_A_17756717 | NC_021162.1    | Ca_Kabuli_Chr03 | 17756717                | TT                                     | CC                 | CC               | INTERGENIC                    |                    |                                                           |
| SNP_15034_A_17757593 | NC_021162.1    | Ca_Kabuli_Chr03 | 17757593                | GG                                     | AA                 | AA               | INTERGENIC                    |                    |                                                           |
| SNP_15035_A_17805415 | NC_021162.1    | Ca_Kabuli_Chr03 | 17805415                | AA                                     | GG                 | GG               | INTRON                        | 101504992          | metallothionein-like protein 2                            |
| SNP_15036_A_17805470 | NC_021162.1    | Ca_Kabuli_Chr03 | 17805470                | GG                                     | AA                 | AA               | INTRON                        | 101504992          | metallothionein-like protein 2                            |
| SNP_15038_A_17849148 | NC_021162.1    | Ca_Kabuli_Chr03 | 17849148                | GG                                     | AA                 | AA               | INTRON                        | 101511621          | probable sugar phosphate/phosphate translocator At5g25400 |
| SNP_15039_A_17849153 | NC_021162.1    | Ca_Kabuli_Chr03 | 17849153                | AA                                     | GG                 | GG               | INTRON                        | 101511621          | probable sugar phosphate/phosphate translocator At5g25400 |
| SNP_15040_A_17874816 | NC_021162.1    | Ca_Kabuli_Chr03 | 17874816                | GG                                     | TT                 | TT               | INTERGENIC                    |                    |                                                           |
| SNP_15042_A_17940689 | NC_021162.1    | Ca_Kabuli_Chr03 | 17940689                | TT                                     | GG                 | GG               | URR                           | 101507474          | transcription factor AS1                                  |
| SNP_15044_A_17941602 | NC_021162.1    | Ca_Kabuli_Chr03 | 17941602                | CC                                     | TT                 | TT               | INTERGENIC                    |                    |                                                           |
| SNP_15045_A_17997417 | NC_021162.1    | Ca_Kabuli_Chr03 | 17997417                | CC                                     | TT                 | TT               | INTERGENIC                    |                    |                                                           |
| SNP_15047_A_18019162 | NC_021162.1    | Ca_Kabuli_Chr03 | 18019162                | CC                                     | TT                 | TT               | INTERGENIC                    |                    |                                                           |
| SNP_15048_A_18019223 | NC_021162.1    | Ca_Kabuli_Chr03 | 18019223                | TT                                     | CC                 | CC               | INTERGENIC                    |                    |                                                           |
| SNP_15049_A_18019436 | NC_021162.1    | Ca_Kabuli_Chr03 | 18019436                | GG                                     | AA                 | AA               | INTERGENIC                    |                    |                                                           |
| SNP_15050_A_18019829 | NC_021162.1    | Ca_Kabuli_Chr03 | 18019829                | TT                                     | CC                 | CC               | INTERGENIC                    |                    |                                                           |
| SNP_15051_A_18038443 | NC_021162.1    | Ca_Kabuli_Chr03 | 18038443                | CC                                     | AA                 | AA               | URR                           | 101509053          | inactive rhomboid protein 1-like                          |
| SNP_15052_A_18048501 | NC_021162.1    | Ca_Kabuli_Chr03 | 18048501                | AA                                     | TT                 | TT               | URR                           | 101509376          | oxysterol-binding protein-related protein 3A-like         |
| SNP_15053_A_18048504 | NC_021162.1    | Ca_Kabuli_Chr03 | 18048504                | AA                                     | TT                 | TT               | URR                           | 101509376          | oxysterol-binding protein-related protein 3A-like         |
| SNP_15054_A_18062393 | NC_021162.1    | Ca_Kabuli_Chr03 | 18062393                | GG                                     | AA                 | AA               | INTERGENIC                    |                    |                                                           |
| SNP_15055_A_18062402 | NC_021162.1    | Ca_Kabuli_Chr03 | 18062402                | GG                                     | CC                 | CC               | INTERGENIC                    |                    |                                                           |
| SNP_15056_A_18062926 | NC_021162.1    | Ca_Kabuli_Chr03 | 18062926                | TT                                     | CC                 | CC               | INTERGENIC                    |                    |                                                           |
| SNP_15057_A_18091869 | NC_021162.1    | Ca_Kabuli_Chr03 | 18091869                | CC                                     | TT                 | TT               | INTERGENIC                    |                    |                                                           |
| SNP_15058_A_18092632 | NC_021162.1    | Ca_Kabuli_Chr03 | 18092632                | AA                                     | GG                 | GG               | INTERGENIC                    |                    |                                                           |



| SNPs IDs             | Chromosome IDs | Chromosomes     | Physical positions (bp) | CDC Frontier genome (Reference genome) | (Pusa 1103 & HPNB) | (ILWC 46 & LPNB) | Sequence genome | Components of | Gene accession IDs           | Putative functions |
|----------------------|----------------|-----------------|-------------------------|----------------------------------------|--------------------|------------------|-----------------|---------------|------------------------------|--------------------|
| SNP_15059_A_18093339 | NC_021162.1    | Ca_Kabuli_Chr03 | 18093339                | CC                                     | GG                 | GG               | INTERGENIC      |               |                              |                    |
| SNP_15060_A_18128918 | NC_021162.1    | Ca_Kabuli_Chr03 | 18128918                | AA                                     | GG                 | GG               | INTERGENIC      |               |                              |                    |
| SNP_15061_A_18133205 | NC_021162.1    | Ca_Kabuli_Chr03 | 18133205                | GG                                     | AA                 | AA               | INTERGENIC      |               |                              |                    |
| SNP_15062_A_18133220 | NC_021162.1    | Ca_Kabuli_Chr03 | 18133220                | GG                                     | AA                 | AA               | INTERGENIC      |               |                              |                    |
| SNP_15063_A_18133243 | NC_021162.1    | Ca_Kabuli_Chr03 | 18133243                | GG                                     | AA                 | AA               | INTERGENIC      |               |                              |                    |
| SNP_15064_A_18133287 | NC_021162.1    | Ca_Kabuli_Chr03 | 18133287                | GG                                     | AA                 | AA               | INTERGENIC      |               |                              |                    |
| SNP_15065_A_18170535 | NC_021162.1    | Ca_Kabuli_Chr03 | 18170535                | CC                                     | AA                 | AA               | INTERGENIC      |               |                              |                    |
| SNP_15066_A_18170547 | NC_021162.1    | Ca_Kabuli_Chr03 | 18170547                | AA                                     | GG                 | GG               | INTERGENIC      |               |                              |                    |
| SNP_15067_A_18170749 | NC_021162.1    | Ca_Kabuli_Chr03 | 18170749                | GG                                     | CC                 | CC               | INTERGENIC      |               |                              |                    |
| SNP_15068_A_18170756 | NC_021162.1    | Ca_Kabuli_Chr03 | 18170756                | GG                                     | CC                 | CC               | INTERGENIC      |               |                              |                    |
| SNP_15069_A_18170780 | NC_021162.1    | Ca_Kabuli_Chr03 | 18170780                | AA                                     | GG                 | GG               | INTERGENIC      |               |                              |                    |
| SNP_15070_A_18170826 | NC_021162.1    | Ca_Kabuli_Chr03 | 18170826                | CC                                     | TT                 | TT               | INTERGENIC      |               |                              |                    |
| SNP_15071_A_18170832 | NC_021162.1    | Ca_Kabuli_Chr03 | 18170832                | AA                                     | GG                 | GG               | INTERGENIC      |               |                              |                    |
| SNP_15072_A_18170907 | NC_021162.1    | Ca_Kabuli_Chr03 | 18170907                | CC                                     | AA                 | AA               | INTERGENIC      |               |                              |                    |
| SNP_15073_A_18173571 | NC_021162.1    | Ca_Kabuli_Chr03 | 18173571                | AA                                     | CC                 | CC               | DRR             | 101512605     | uncharacterized LOC101512605 |                    |
| SNP_15074_A_18179312 | NC_021162.1    | Ca_Kabuli_Chr03 | 18179312                | CC                                     | AA                 | AA               | URR             | 101512912     | uncharacterized LOC101512912 |                    |
| SNP_15075_A_18189875 | NC_021162.1    | Ca_Kabuli_Chr03 | 18189875                | AA                                     | CC                 | CC               | INTERGENIC      |               |                              |                    |
| SNP_15076_A_18190097 | NC_021162.1    | Ca_Kabuli_Chr03 | 18190097                | CC                                     | TT                 | TT               | INTERGENIC      |               |                              |                    |
| SNP_15077_A_18190102 | NC_021162.1    | Ca_Kabuli_Chr03 | 18190102                | AA                                     | TT                 | TT               | INTERGENIC      |               |                              |                    |
| SNP_15078_A_18190147 | NC_021162.1    | Ca_Kabuli_Chr03 | 18190147                | CC                                     | TT                 | TT               | INTERGENIC      |               |                              |                    |
| SNP_15079_A_18190169 | NC_021162.1    | Ca_Kabuli_Chr03 | 18190169                | TT                                     | CC                 | CC               | INTERGENIC      |               |                              |                    |
| SNP_15080_A_18190286 | NC_021162.1    | Ca_Kabuli_Chr03 | 18190286                | GG                                     | AA                 | AA               | INTERGENIC      |               |                              |                    |

| SNPs IDs             | Chromosome IDs | Chromosomes     | Physical positions (bp) | CDC Frontier genome (Reference genome) | (Pusa 1103 & HPNB) | (ILWC 46 & LPNB) | Sequence genome | Components of | Gene accession IDs | Putative functions |
|----------------------|----------------|-----------------|-------------------------|----------------------------------------|--------------------|------------------|-----------------|---------------|--------------------|--------------------|
| SNP_15081_A_18190333 | NC_021162.1    | Ca_Kabuli_Chr03 | 18190333                | TT                                     | GG                 | GG               | INTERGENIC      |               |                    |                    |
| SNP_15082_A_18190624 | NC_021162.1    | Ca_Kabuli_Chr03 | 18190624                | TT                                     | AA                 | AA               | INTERGENIC      |               |                    |                    |
| SNP_15083_A_18190635 | NC_021162.1    | Ca_Kabuli_Chr03 | 18190635                | AA                                     | CC                 | CC               | INTERGENIC      |               |                    |                    |
| SNP_15085_A_18191058 | NC_021162.1    | Ca_Kabuli_Chr03 | 18191058                | AA                                     | GG                 | GG               | INTERGENIC      |               |                    |                    |
| SNP_15086_A_18191090 | NC_021162.1    | Ca_Kabuli_Chr03 | 18191090                | AA                                     | TT                 | TT               | INTERGENIC      |               |                    |                    |
| SNP_15087_A_18191095 | NC_021162.1    | Ca_Kabuli_Chr03 | 18191095                | TT                                     | AA                 | AA               | INTERGENIC      |               |                    |                    |
| SNP_15088_A_18191101 | NC_021162.1    | Ca_Kabuli_Chr03 | 18191101                | CC                                     | TT                 | TT               | INTERGENIC      |               |                    |                    |
| SNP_15089_A_18191128 | NC_021162.1    | Ca_Kabuli_Chr03 | 18191128                | CC                                     | TT                 | TT               | INTERGENIC      |               |                    |                    |
| SNP_15090_A_18191136 | NC_021162.1    | Ca_Kabuli_Chr03 | 18191136                | CC                                     | TT                 | TT               | INTERGENIC      |               |                    |                    |
| SNP_15091_A_18191409 | NC_021162.1    | Ca_Kabuli_Chr03 | 18191409                | AA                                     | GG                 | GG               | INTERGENIC      |               |                    |                    |
| SNP_15092_A_18191433 | NC_021162.1    | Ca_Kabuli_Chr03 | 18191433                | AA                                     | GG                 | GG               | INTERGENIC      |               |                    |                    |
| SNP_15093_A_18192514 | NC_021162.1    | Ca_Kabuli_Chr03 | 18192514                | TT                                     | CC                 | CC               | INTERGENIC      |               |                    |                    |
| SNP_15094_A_18196771 | NC_021162.1    | Ca_Kabuli_Chr03 | 18196771                | TT                                     | GG                 | GG               | INTERGENIC      |               |                    |                    |
| SNP_15095_A_18197026 | NC_021162.1    | Ca_Kabuli_Chr03 | 18197026                | CC                                     | TT                 | TT               | INTERGENIC      |               |                    |                    |
| SNP_15097_A_18253227 | NC_021162.1    | Ca_Kabuli_Chr03 | 18253227                | AA                                     | GG                 | GG               | INTERGENIC      |               |                    |                    |
| SNP_15098_A_18253280 | NC_021162.1    | Ca_Kabuli_Chr03 | 18253280                | CC                                     | TT                 | TT               | INTERGENIC      |               |                    |                    |
| SNP_15099_A_18253490 | NC_021162.1    | Ca_Kabuli_Chr03 | 18253490                | GG                                     | AA                 | AA               | INTERGENIC      |               |                    |                    |
| SNP_15101_A_18272752 | NC_021162.1    | Ca_Kabuli_Chr03 | 18272752                | CC                                     | TT                 | TT               | INTERGENIC      |               |                    |                    |
| SNP_15102_A_18272767 | NC_021162.1    | Ca_Kabuli_Chr03 | 18272767                | TT                                     | CC                 | CC               | INTERGENIC      |               |                    |                    |
| SNP_15103_A_18303044 | NC_021162.1    | Ca_Kabuli_Chr03 | 18303044                | TT                                     | CC                 | CC               | INTERGENIC      |               |                    |                    |
| SNP_15104_A_18303115 | NC_021162.1    | Ca_Kabuli_Chr03 | 18303115                | AA                                     | GG                 | GG               | INTERGENIC      |               |                    |                    |
| SNP_15105_A_18303404 | NC_021162.1    | Ca_Kabuli_Chr03 | 18303404                | AA                                     | TT                 | TT               | INTERGENIC      |               |                    |                    |

| SNPs IDs             | Chromosome IDs | Chromosomes     | Physical positions (bp) | CDC Frontier genome (Reference genome) | (Pusa 1103 & HPNB) | (ILWC 46 & LPNB) | Sequence Components of genome | Gene accession IDs | Putative functions                                       |
|----------------------|----------------|-----------------|-------------------------|----------------------------------------|--------------------|------------------|-------------------------------|--------------------|----------------------------------------------------------|
| SNP_15106_A_18303447 | NC_021162.1    | Ca_Kabuli_Chr03 | 18303447                | TT                                     | CC                 | CC               | INTERGENIC                    |                    |                                                          |
| SNP_15108_A_18359624 | NC_021162.1    | Ca_Kabuli_Chr03 | 18359624                | CC                                     | AA                 | AA               | INTERGENIC                    |                    |                                                          |
| SNP_15109_A_18434851 | NC_021162.1    | Ca_Kabuli_Chr03 | 18434851                | AA                                     | GG                 | GG               | INTERGENIC                    |                    |                                                          |
| SNP_15110_A_18435129 | NC_021162.1    | Ca_Kabuli_Chr03 | 18435129                | GG                                     | AA                 | AA               | INTERGENIC                    |                    |                                                          |
| SNP_15111_A_18435140 | NC_021162.1    | Ca_Kabuli_Chr03 | 18435140                | AA                                     | GG                 | GG               | INTERGENIC                    |                    |                                                          |
| SNP_15112_A_18435196 | NC_021162.1    | Ca_Kabuli_Chr03 | 18435196                | TT                                     | GG                 | GG               | INTERGENIC                    |                    |                                                          |
| SNP_15113_A_18491181 | NC_021162.1    | Ca_Kabuli_Chr03 | 18491181                | TT                                     | GG                 | GG               | INTERGENIC                    |                    |                                                          |
| SNP_15114_A_18564617 | NC_021162.1    | Ca_Kabuli_Chr03 | 18564617                | TT                                     | CC                 | CC               | INTERGENIC                    |                    |                                                          |
| SNP_15115_A_18574549 | NC_021162.1    | Ca_Kabuli_Chr03 | 18574549                | GG                                     | AA                 | AA               | INTRON                        | 101493065          | uncharacterized LOC101493065                             |
| SNP_15116_A_18627331 | NC_021162.1    | Ca_Kabuli_Chr03 | 18627331                | TT                                     | AA                 | AA               | INTERGENIC                    |                    |                                                          |
| SNP_15118_A_18670279 | NC_021162.1    | Ca_Kabuli_Chr03 | 18670279                | CC                                     | TT                 | TT               | INTERGENIC                    |                    |                                                          |
| SNP_15119_A_18670290 | NC_021162.1    | Ca_Kabuli_Chr03 | 18670290                | CC                                     | TT                 | TT               | INTERGENIC                    |                    |                                                          |
| SNP_15120_A_18670519 | NC_021162.1    | Ca_Kabuli_Chr03 | 18670519                | TT                                     | GG                 | GG               | INTERGENIC                    |                    |                                                          |
| SNP_15121_A_18670749 | NC_021162.1    | Ca_Kabuli_Chr03 | 18670749                | TT                                     | GG                 | GG               | INTERGENIC                    |                    |                                                          |
| SNP_15123_A_18713853 | NC_021162.1    | Ca_Kabuli_Chr03 | 18713853                | GG                                     | AA                 | AA               | URR                           | 101496933          | ATP-dependent DNA helicase PIF1-like                     |
| SNP_15124_A_18755322 | NC_021162.1    | Ca_Kabuli_Chr03 | 18755322                | AA                                     | TT                 | TT               | INTERGENIC                    |                    |                                                          |
| SNP_15125_A_18755323 | NC_021162.1    | Ca_Kabuli_Chr03 | 18755323                | TT                                     | GG                 | GG               | INTERGENIC                    |                    |                                                          |
| SNP_15126_A_18774162 | NC_021162.1    | Ca_Kabuli_Chr03 | 18774162                | TT                                     | AA                 | AA               | INTERGENIC                    |                    |                                                          |
| SNP_15127_A_18777587 | NC_021162.1    | Ca_Kabuli_Chr03 | 18777587                | AA                                     | CC                 | CC               | NON_SYNONYMOUS_CODING         | 101497261          | Unknown function                                         |
| SNP_15128_A_18892078 | NC_021162.1    | Ca_Kabuli_Chr03 | 18892078                | CC                                     | TT                 | TT               | URR                           | 101488945          | serine/threonine-protein phosphatase 7 long form homolog |
| SNP_15129_A_18935051 | NC_021162.1    | Ca_Kabuli_Chr03 | 18935051                | AA                                     | CC                 | CC               | INTERGENIC                    |                    |                                                          |
| SNP_15130_A_18935074 | NC_021162.1    | Ca_Kabuli_Chr03 | 18935074                | TT                                     | AA                 | AA               | INTERGENIC                    |                    |                                                          |

| SNPs IDs             | Chromosome IDs | Chromosomes     | Physical positions (bp) | CDC Frontier genome (Reference genome) | (Pusa 1103 & HPNB) | (ILWC 46 & LPNB) | Sequence Components of genome | Gene accession IDs | Putative functions                |
|----------------------|----------------|-----------------|-------------------------|----------------------------------------|--------------------|------------------|-------------------------------|--------------------|-----------------------------------|
| SNP_15131_A_18935090 | NC_021162.1    | Ca_Kabuli_Chr03 | 18935090                | AA                                     | GG                 | GG               | INTERGENIC                    |                    |                                   |
| SNP_15132_A_18935277 | NC_021162.1    | Ca_Kabuli_Chr03 | 18935277                | AA                                     | GG                 | GG               | INTERGENIC                    |                    |                                   |
| SNP_15133_A_18935321 | NC_021162.1    | Ca_Kabuli_Chr03 | 18935321                | TT                                     | CC                 | CC               | INTERGENIC                    |                    |                                   |
| SNP_15134_A_18941761 | NC_021162.1    | Ca_Kabuli_Chr03 | 18941761                | AA                                     | GG                 | GG               | INTERGENIC                    |                    |                                   |
| SNP_15136_A_18943247 | NC_021162.1    | Ca_Kabuli_Chr03 | 18943247                | AA                                     | TT                 | TT               | INTERGENIC                    |                    |                                   |
| SNP_15137_A_18971268 | NC_021162.1    | Ca_Kabuli_Chr03 | 18971268                | GG                                     | AA                 | AA               | INTERGENIC                    |                    |                                   |
| SNP_15138_A_19007108 | NC_021162.1    | Ca_Kabuli_Chr03 | 19007108                | TT                                     | GG                 | GG               | INTERGENIC                    |                    |                                   |
| SNP_15139_A_19008740 | NC_021162.1    | Ca_Kabuli_Chr03 | 19008740                | TT                                     | AA                 | AA               | INTERGENIC                    |                    |                                   |
| SNP_15140_A_19008742 | NC_021162.1    | Ca_Kabuli_Chr03 | 19008742                | AA                                     | TT                 | TT               | INTERGENIC                    |                    |                                   |
| SNP_15141_A_19008772 | NC_021162.1    | Ca_Kabuli_Chr03 | 19008772                | CC                                     | TT                 | TT               | INTERGENIC                    |                    |                                   |
| SNP_15142_A_19008774 | NC_021162.1    | Ca_Kabuli_Chr03 | 19008774                | CC                                     | AA                 | AA               | INTERGENIC                    |                    |                                   |
| SNP_15143_A_19008775 | NC_021162.1    | Ca_Kabuli_Chr03 | 19008775                | AA                                     | CC                 | CC               | INTERGENIC                    |                    |                                   |
| SNP_15144_A_19036568 | NC_021162.1    | Ca_Kabuli_Chr03 | 19036568                | AA                                     | GG                 | GG               | INTERGENIC                    |                    |                                   |
| SNP_15145_A_19036579 | NC_021162.1    | Ca_Kabuli_Chr03 | 19036579                | GG                                     | TT                 | TT               | INTERGENIC                    |                    |                                   |
| SNP_15146_A_19054998 | NC_021162.1    | Ca_Kabuli_Chr03 | 19054998                | AA                                     | GG                 | GG               | URR                           | 101503592          | protein NRT1/ PTR FAMILY 8.1-like |
| SNP_15149_A_19089346 | NC_021162.1    | Ca_Kabuli_Chr03 | 19089346                | TT                                     | CC                 | CC               | NON_SYNONYMOUS_CODING         | 101490564          | uncharacterized LOC101490564      |
| SNP_15150_A_19089417 | NC_021162.1    | Ca_Kabuli_Chr03 | 19089417                | TT                                     | CC                 | CC               | NON_SYNONYMOUS_CODING         | 101490564          | uncharacterized LOC101490564      |
| SNP_15151_A_19089456 | NC_021162.1    | Ca_Kabuli_Chr03 | 19089456                | TT                                     | GG                 | GG               | NON_SYNONYMOUS_CODING         | 101490564          | uncharacterized LOC101490564      |
| SNP_15152_A_19089483 | NC_021162.1    | Ca_Kabuli_Chr03 | 19089483                | AA                                     | GG                 | GG               | NON_SYNONYMOUS_CODING         | 101490564          | uncharacterized LOC101490564      |
| SNP_15153_A_19089515 | NC_021162.1    | Ca_Kabuli_Chr03 | 19089515                | GG                                     | AA                 | AA               | NON_SYNONYMOUS_CODING         | 101490564          | uncharacterized LOC101490564      |
| SNP_15154_A_19089740 | NC_021162.1    | Ca_Kabuli_Chr03 | 19089740                | CC                                     | AA                 | AA               | INTRON                        | 101490564          | uncharacterized LOC101490564      |
| SNP_15156_A_19148778 | NC_021162.1    | Ca_Kabuli_Chr03 | 19148778                | GG                                     | AA                 | AA               | INTERGENIC                    |                    |                                   |

| SNPs IDs             | Chromosome IDs | Chromosomes     | Physical positions (bp) | CDC Frontier genome (Reference genome) | (Pusa 1103 & HPNB) | (ILWC 46 & LPNB) | Sequence Components of genome | Gene accession IDs | Putative functions                              |
|----------------------|----------------|-----------------|-------------------------|----------------------------------------|--------------------|------------------|-------------------------------|--------------------|-------------------------------------------------|
| SNP_15158_A_19164903 | NC_021162.1    | Ca_Kabuli_Chr03 | 19164903                | AA                                     | GG                 | GG               | INTERGENIC                    |                    |                                                 |
| SNP_15159_A_19176023 | NC_021162.1    | Ca_Kabuli_Chr03 | 19176023                | TT                                     | CC                 | CC               | INTRON                        | 101505408          | glycerol-3-phosphate 2-O-acyltransferase 6-like |
| SNP_15160_A_19176024 | NC_021162.1    | Ca_Kabuli_Chr03 | 19176024                | AA                                     | CC                 | CC               | INTRON                        | 101505408          | glycerol-3-phosphate 2-O-acyltransferase 6-like |
| SNP_15161_A_19189185 | NC_021162.1    | Ca_Kabuli_Chr03 | 19189185                | AA                                     | GG                 | GG               | INTERGENIC                    |                    |                                                 |
| SNP_15162_A_19196511 | NC_021162.1    | Ca_Kabuli_Chr03 | 19196511                | AA                                     | TT                 | TT               | INTERGENIC                    |                    |                                                 |
| SNP_15163_A_19196834 | NC_021162.1    | Ca_Kabuli_Chr03 | 19196834                | AA                                     | CC                 | CC               | INTERGENIC                    |                    |                                                 |
| SNP_15164_A_19196883 | NC_021162.1    | Ca_Kabuli_Chr03 | 19196883                | TT                                     | CC                 | CC               | INTERGENIC                    |                    |                                                 |
| SNP_15165_A_19198407 | NC_021162.1    | Ca_Kabuli_Chr03 | 19198407                | CC                                     | GG                 | GG               | INTERGENIC                    |                    |                                                 |
| SNP_15166_A_19198551 | NC_021162.1    | Ca_Kabuli_Chr03 | 19198551                | GG                                     | AA                 | AA               | INTERGENIC                    |                    |                                                 |
| SNP_15167_A_19198639 | NC_021162.1    | Ca_Kabuli_Chr03 | 19198639                | TT                                     | GG                 | GG               | INTERGENIC                    |                    |                                                 |
| SNP_15168_A_19198654 | NC_021162.1    | Ca_Kabuli_Chr03 | 19198654                | TT                                     | CC                 | CC               | INTERGENIC                    |                    |                                                 |
| SNP_15169_A_19198771 | NC_021162.1    | Ca_Kabuli_Chr03 | 19198771                | TT                                     | CC                 | CC               | INTERGENIC                    |                    |                                                 |
| SNP_15170_A_19198864 | NC_021162.1    | Ca_Kabuli_Chr03 | 19198864                | TT                                     | CC                 | CC               | INTERGENIC                    |                    |                                                 |
| SNP_15171_A_19198953 | NC_021162.1    | Ca_Kabuli_Chr03 | 19198953                | TT                                     | CC                 | CC               | INTERGENIC                    |                    |                                                 |
| SNP_15172_A_19198990 | NC_021162.1    | Ca_Kabuli_Chr03 | 19198990                | TT                                     | GG                 | GG               | INTERGENIC                    |                    |                                                 |
| SNP_15173_A_19199019 | NC_021162.1    | Ca_Kabuli_Chr03 | 19199019                | AA                                     | CC                 | CC               | INTERGENIC                    |                    |                                                 |
| SNP_15174_A_19206096 | NC_021162.1    | Ca_Kabuli_Chr03 | 19206096                | AA                                     | TT                 | TT               | INTERGENIC                    |                    |                                                 |
| SNP_15175_A_19230723 | NC_021162.1    | Ca_Kabuli_Chr03 | 19230723                | AA                                     | GG                 | GG               | INTERGENIC                    |                    |                                                 |
| SNP_15176_A_19314754 | NC_021162.1    | Ca_Kabuli_Chr03 | 19314754                | GG                                     | CC                 | CC               | INTERGENIC                    |                    |                                                 |
| SNP_15177_A_19356444 | NC_021162.1    | Ca_Kabuli_Chr03 | 19356444                | AA                                     | GG                 | GG               | URR                           | 101507884          | putative serine/threonine-protein kinase        |
| SNP_15178_A_19356488 | NC_021162.1    | Ca_Kabuli_Chr03 | 19356488                | AA                                     | GG                 | GG               | URR                           | 101507884          | putative serine/threonine-protein kinase        |
| SNP_15179_A_19357461 | NC_021162.1    | Ca_Kabuli_Chr03 | 19357461                | AA                                     | CC                 | CC               | URR                           | 101508421          | uncharacterized LOC101508421                    |

| SNPs IDs             | Chromosome IDs | Chromosomes     | Physical positions (bp) | CDC Frontier (Reference genome) | (Pusa 1103 & HPNB) | (ILWC 46 & LPNB) | Sequence Components of genome | Gene accession IDs | Putative functions                  |
|----------------------|----------------|-----------------|-------------------------|---------------------------------|--------------------|------------------|-------------------------------|--------------------|-------------------------------------|
| SNP_15180_A_19357487 | NC_021162.1    | Ca_Kabuli_Chr03 | 19357487                | CC                              | AA                 | AA               | URR                           | 101508421          | uncharacterized LOC101508421        |
| SNP_15181_A_19357545 | NC_021162.1    | Ca_Kabuli_Chr03 | 19357545                | AA                              | TT                 | TT               | URR                           | 101508421          | uncharacterized LOC101508421        |
| SNP_15182_A_19357549 | NC_021162.1    | Ca_Kabuli_Chr03 | 19357549                | TT                              | CC                 | CC               | URR                           | 101508421          | uncharacterized LOC101508421        |
| SNP_15183_A_19357721 | NC_021162.1    | Ca_Kabuli_Chr03 | 19357721                | CC                              | AA                 | AA               | URR                           | 101508421          | uncharacterized LOC101508421        |
| SNP_15184_A_19357783 | NC_021162.1    | Ca_Kabuli_Chr03 | 19357783                | TT                              | AA                 | AA               | URR                           | 101508421          | uncharacterized LOC101508421        |
| SNP_15185_A_19357788 | NC_021162.1    | Ca_Kabuli_Chr03 | 19357788                | CC                              | TT                 | TT               | URR                           | 101508421          | uncharacterized LOC101508421        |
| SNP_15186_A_19357930 | NC_021162.1    | Ca_Kabuli_Chr03 | 19357930                | CC                              | TT                 | TT               | URR                           | 101508421          | uncharacterized LOC101508421        |
| SNP_15187_A_19357972 | NC_021162.1    | Ca_Kabuli_Chr03 | 19357972                | TT                              | CC                 | CC               | URR                           | 101508421          | uncharacterized LOC101508421        |
| SNP_15188_A_19358021 | NC_021162.1    | Ca_Kabuli_Chr03 | 19358021                | CC                              | TT                 | TT               | URR                           | 101508421          | uncharacterized LOC101508421        |
| SNP_15189_A_19358108 | NC_021162.1    | Ca_Kabuli_Chr03 | 19358108                | AA                              | GG                 | GG               | URR                           | 101508421          | uncharacterized LOC101508421        |
| SNP_15190_A_19358186 | NC_021162.1    | Ca_Kabuli_Chr03 | 19358186                | AA                              | GG                 | GG               | URR                           | 101508421          | uncharacterized LOC101508421        |
| SNP_15191_A_19358343 | NC_021162.1    | Ca_Kabuli_Chr03 | 19358343                | CC                              | TT                 | TT               | URR                           | 101508421          | uncharacterized LOC101508421        |
| SNP_15192_A_19358347 | NC_021162.1    | Ca_Kabuli_Chr03 | 19358347                | TT                              | CC                 | CC               | URR                           | 101508421          | uncharacterized LOC101508421        |
| SNP_15193_A_19358410 | NC_021162.1    | Ca_Kabuli_Chr03 | 19358410                | GG                              | CC                 | CC               | URR                           | 101508421          | uncharacterized LOC101508421        |
| SNP_15194_A_19358422 | NC_021162.1    | Ca_Kabuli_Chr03 | 19358422                | AA                              | CC                 | CC               | URR                           | 101508421          | uncharacterized LOC101508421        |
| SNP_15196_A_19358678 | NC_021162.1    | Ca_Kabuli_Chr03 | 19358678                | GG                              | AA                 | AA               | URR                           | 101508421          | uncharacterized LOC101508421        |
| SNP_15197_A_19358710 | NC_021162.1    | Ca_Kabuli_Chr03 | 19358710                | CC                              | TT                 | TT               | URR                           | 101508421          | uncharacterized LOC101508421        |
| SNP_15198_A_19358718 | NC_021162.1    | Ca_Kabuli_Chr03 | 19358718                | GG                              | AA                 | AA               | URR                           | 101508421          | uncharacterized LOC101508421        |
| SNP_15199_A_19358734 | NC_021162.1    | Ca_Kabuli_Chr03 | 19358734                | CC                              | TT                 | TT               | URR                           | 101508421          | uncharacterized LOC101508421        |
| SNP_15200_A_19358745 | NC_021162.1    | Ca_Kabuli_Chr03 | 19358745                | CC                              | TT                 | TT               | URR                           | 101508421          | uncharacterized LOC101508421        |
| SNP_15201_A_19358834 | NC_021162.1    | Ca_Kabuli_Chr03 | 19358834                | CC                              | AA                 | AA               | URR                           | 101508421          | uncharacterized LOC101508421        |
| SNP_15202_A_19358877 | NC_021162.1    | Ca_Kabuli_Chr03 | 19358877                | CC                              | GG                 | GG               | DRR                           | 101491208          | zinc finger MYM-type protein 1-like |

| SNPs IDs             | Chromosome IDs | Chromosomes     | Physical positions (bp) | CDC Frontier genome (Reference genome) | (Pusa 1103 & HPNB) | (ILWC 46 & LPNB) | Sequence genome | Components of | Gene accession IDs | Putative functions                  |
|----------------------|----------------|-----------------|-------------------------|----------------------------------------|--------------------|------------------|-----------------|---------------|--------------------|-------------------------------------|
| SNP_15203_A_19358880 | NC_021162.1    | Ca_Kabuli_Chr03 | 19358880                | TT                                     | CC                 | CC               | DRR             |               | 101491208          | zinc finger MYM-type protein 1-like |
| SNP_15204_A_19358954 | NC_021162.1    | Ca_Kabuli_Chr03 | 19358954                | AA                                     | TT                 | TT               | DRR             |               | 101491208          | zinc finger MYM-type protein 1-like |
| SNP_15205_A_19358967 | NC_021162.1    | Ca_Kabuli_Chr03 | 19358967                | GG                                     | AA                 | AA               | DRR             |               | 101491208          | zinc finger MYM-type protein 1-like |
| SNP_15206_A_19358993 | NC_021162.1    | Ca_Kabuli_Chr03 | 19358993                | AA                                     | GG                 | GG               | DRR             |               | 101491208          | zinc finger MYM-type protein 1-like |
| SNP_15208_A_19359053 | NC_021162.1    | Ca_Kabuli_Chr03 | 19359053                | GG                                     | AA                 | AA               | DRR             |               | 101491208          | zinc finger MYM-type protein 1-like |
| SNP_15209_A_19359059 | NC_021162.1    | Ca_Kabuli_Chr03 | 19359059                | TT                                     | GG                 | GG               | DRR             |               | 101491208          | zinc finger MYM-type protein 1-like |
| SNP_15210_A_19359111 | NC_021162.1    | Ca_Kabuli_Chr03 | 19359111                | CC                                     | TT                 | TT               | DRR             |               | 101491208          | zinc finger MYM-type protein 1-like |
| SNP_15211_A_19359147 | NC_021162.1    | Ca_Kabuli_Chr03 | 19359147                | GG                                     | CC                 | CC               | DRR             |               | 101491208          | zinc finger MYM-type protein 1-like |
| SNP_15212_A_19359151 | NC_021162.1    | Ca_Kabuli_Chr03 | 19359151                | GG                                     | CC                 | CC               | DRR             |               | 101491208          | zinc finger MYM-type protein 1-like |
| SNP_15213_A_19359153 | NC_021162.1    | Ca_Kabuli_Chr03 | 19359153                | GG                                     | TT                 | TT               | DRR             |               | 101491208          | zinc finger MYM-type protein 1-like |
| SNP_15214_A_19359188 | NC_021162.1    | Ca_Kabuli_Chr03 | 19359188                | CC                                     | TT                 | TT               | DRR             |               | 101491208          | zinc finger MYM-type protein 1-like |
| SNP_15215_A_19359189 | NC_021162.1    | Ca_Kabuli_Chr03 | 19359189                | TT                                     | GG                 | GG               | DRR             |               | 101491208          | zinc finger MYM-type protein 1-like |
| SNP_15216_A_19359254 | NC_021162.1    | Ca_Kabuli_Chr03 | 19359254                | AA                                     | GG                 | GG               | DRR             |               | 101491208          | zinc finger MYM-type protein 1-like |
| SNP_15217_A_19359309 | NC_021162.1    | Ca_Kabuli_Chr03 | 19359309                | AA                                     | TT                 | TT               | DRR             |               | 101491208          | zinc finger MYM-type protein 1-like |
| SNP_15218_A_19359310 | NC_021162.1    | Ca_Kabuli_Chr03 | 19359310                | GG                                     | CC                 | CC               | DRR             |               | 101491208          | zinc finger MYM-type protein 1-like |
| SNP_15220_A_19359455 | NC_021162.1    | Ca_Kabuli_Chr03 | 19359455                | AA                                     | TT                 | TT               | DRR             |               | 101491208          | zinc finger MYM-type protein 1-like |
| SNP_15221_A_19359494 | NC_021162.1    | Ca_Kabuli_Chr03 | 19359494                | CC                                     | TT                 | TT               | DRR             |               | 101491208          | zinc finger MYM-type protein 1-like |
| SNP_15222_A_19359510 | NC_021162.1    | Ca_Kabuli_Chr03 | 19359510                | AA                                     | GG                 | GG               | DRR             |               | 101491208          | zinc finger MYM-type protein 1-like |
| SNP_15223_A_19359522 | NC_021162.1    | Ca_Kabuli_Chr03 | 19359522                | CC                                     | TT                 | TT               | DRR             |               | 101491208          | zinc finger MYM-type protein 1-like |
| SNP_15224_A_19359528 | NC_021162.1    | Ca_Kabuli_Chr03 | 19359528                | TT                                     | CC                 | CC               | DRR             |               | 101491208          | zinc finger MYM-type protein 1-like |
| SNP_15225_A_19359544 | NC_021162.1    | Ca_Kabuli_Chr03 | 19359544                | TT                                     | CC                 | CC               | DRR             |               | 101491208          | zinc finger MYM-type protein 1-like |
| SNP_15226_A_19359576 | NC_021162.1    | Ca_Kabuli_Chr03 | 19359576                | TT                                     | GG                 | GG               | DRR             |               | 101491208          | zinc finger MYM-type protein 1-like |

| SNPs IDs             | Chromosome IDs | Chromosomes     | Physical positions (bp) | CDC Frontier (Reference genome) | (Pusa 1103 & HPNB) | (ILWC 46 & LPNB) | Sequence Components of genome | Gene accession IDs | Putative functions                  |
|----------------------|----------------|-----------------|-------------------------|---------------------------------|--------------------|------------------|-------------------------------|--------------------|-------------------------------------|
| SNP_15227_A_19359580 | NC_021162.1    | Ca_Kabuli_Chr03 | 19359580                | CC                              | TT                 | TT               | DRR                           | 101491208          | zinc finger MYM-type protein 1-like |
| SNP_15228_A_19359641 | NC_021162.1    | Ca_Kabuli_Chr03 | 19359641                | GG                              | AA                 | AA               | DRR                           | 101491208          | zinc finger MYM-type protein 1-like |
| SNP_15229_A_19359749 | NC_021162.1    | Ca_Kabuli_Chr03 | 19359749                | TT                              | CC                 | CC               | DRR                           | 101491208          | zinc finger MYM-type protein 1-like |
| SNP_15230_A_19359992 | NC_021162.1    | Ca_Kabuli_Chr03 | 19359992                | CC                              | TT                 | TT               | INTERGENIC                    |                    |                                     |
| SNP_15231_A_19360046 | NC_021162.1    | Ca_Kabuli_Chr03 | 19360046                | AA                              | GG                 | GG               | INTERGENIC                    |                    |                                     |
| SNP_15232_A_19360153 | NC_021162.1    | Ca_Kabuli_Chr03 | 19360153                | GG                              | TT                 | TT               | INTERGENIC                    |                    |                                     |
| SNP_15233_A_19360198 | NC_021162.1    | Ca_Kabuli_Chr03 | 19360198                | AA                              | CC                 | CC               | INTERGENIC                    |                    |                                     |
| SNP_15234_A_19361040 | NC_021162.1    | Ca_Kabuli_Chr03 | 19361040                | GG                              | TT                 | TT               | INTERGENIC                    |                    |                                     |
| SNP_15235_A_19361361 | NC_021162.1    | Ca_Kabuli_Chr03 | 19361361                | GG                              | AA                 | AA               | INTERGENIC                    |                    |                                     |
| SNP_15236_A_19361640 | NC_021162.1    | Ca_Kabuli_Chr03 | 19361640                | AA                              | GG                 | GG               | INTERGENIC                    |                    |                                     |
| SNP_15237_A_19361653 | NC_021162.1    | Ca_Kabuli_Chr03 | 19361653                | AA                              | GG                 | GG               | INTERGENIC                    |                    |                                     |
| SNP_15238_A_19361968 | NC_021162.1    | Ca_Kabuli_Chr03 | 19361968                | TT                              | AA                 | AA               | INTERGENIC                    |                    |                                     |
| SNP_15239_A_19362033 | NC_021162.1    | Ca_Kabuli_Chr03 | 19362033                | TT                              | AA                 | AA               | INTERGENIC                    |                    |                                     |
| SNP_15240_A_19362034 | NC_021162.1    | Ca_Kabuli_Chr03 | 19362034                | GG                              | AA                 | AA               | INTERGENIC                    |                    |                                     |
| SNP_15241_A_19362035 | NC_021162.1    | Ca_Kabuli_Chr03 | 19362035                | CC                              | AA                 | AA               | INTERGENIC                    |                    |                                     |
| SNP_15242_A_19362043 | NC_021162.1    | Ca_Kabuli_Chr03 | 19362043                | AA                              | TT                 | TT               | INTERGENIC                    |                    |                                     |
| SNP_15243_A_19362069 | NC_021162.1    | Ca_Kabuli_Chr03 | 19362069                | TT                              | CC                 | CC               | INTERGENIC                    |                    |                                     |
| SNP_15244_A_19366628 | NC_021162.1    | Ca_Kabuli_Chr03 | 19366628                | TT                              | CC                 | CC               | INTERGENIC                    |                    |                                     |
| SNP_15245_A_19367244 | NC_021162.1    | Ca_Kabuli_Chr03 | 19367244                | CC                              | TT                 | TT               | URR                           | 101508736          | uncharacterized LOC101508736        |
| SNP_15246_A_19367265 | NC_021162.1    | Ca_Kabuli_Chr03 | 19367265                | GG                              | AA                 | AA               | URR                           | 101508736          | uncharacterized LOC101508736        |
| SNP_15247_A_19367432 | NC_021162.1    | Ca_Kabuli_Chr03 | 19367432                | GG                              | AA                 | AA               | URR                           | 101508736          | uncharacterized LOC101508736        |
| SNP_15248_A_19367540 | NC_021162.1    | Ca_Kabuli_Chr03 | 19367540                | AA                              | TT                 | TT               | URR                           | 101508736          | uncharacterized LOC101508736        |



| SNPs IDs             | Chromosome IDs | Chromosomes     | Physical positions (bp) | CDC Frontier genome (Reference genome) | (Pusa 1103 & HPNB) | (ILWC 46 & LPNB) | Sequence Components of genome | Gene accession IDs | Putative functions           |
|----------------------|----------------|-----------------|-------------------------|----------------------------------------|--------------------|------------------|-------------------------------|--------------------|------------------------------|
| SNP_15249_A_19367596 | NC_021162.1    | Ca_Kabuli_Chr03 | 19367596                | AA                                     | TT                 | TT               | URR                           | 101508736          | uncharacterized LOC101508736 |
| SNP_15250_A_19367688 | NC_021162.1    | Ca_Kabuli_Chr03 | 19367688                | AA                                     | TT                 | TT               | URR                           | 101508736          | uncharacterized LOC101508736 |
| SNP_15251_A_19367756 | NC_021162.1    | Ca_Kabuli_Chr03 | 19367756                | TT                                     | CC                 | CC               | URR                           | 101508736          | uncharacterized LOC101508736 |
| SNP_15252_A_19367815 | NC_021162.1    | Ca_Kabuli_Chr03 | 19367815                | CC                                     | AA                 | AA               | URR                           | 101508736          | uncharacterized LOC101508736 |
| SNP_15253_A_19367941 | NC_021162.1    | Ca_Kabuli_Chr03 | 19367941                | CC                                     | TT                 | TT               | URR                           | 101508736          | uncharacterized LOC101508736 |
| SNP_15254_A_19368046 | NC_021162.1    | Ca_Kabuli_Chr03 | 19368046                | AA                                     | CC                 | CC               | URR                           | 101508736          | uncharacterized LOC101508736 |
| SNP_15255_A_19368421 | NC_021162.1    | Ca_Kabuli_Chr03 | 19368421                | AA                                     | GG                 | GG               | URR                           | 101508736          | uncharacterized LOC101508736 |
| SNP_15257_A_19368460 | NC_021162.1    | Ca_Kabuli_Chr03 | 19368460                | CC                                     | AA                 | AA               | URR                           | 101508736          | uncharacterized LOC101508736 |
| SNP_15258_A_19368514 | NC_021162.1    | Ca_Kabuli_Chr03 | 19368514                | AA                                     | TT                 | TT               | URR                           | 101508736          | uncharacterized LOC101508736 |
| SNP_15259_A_19368543 | NC_021162.1    | Ca_Kabuli_Chr03 | 19368543                | TT                                     | AA                 | AA               | URR                           | 101508736          | uncharacterized LOC101508736 |
| SNP_15261_A_19368598 | NC_021162.1    | Ca_Kabuli_Chr03 | 19368598                | AA                                     | GG                 | GG               | URR                           | 101508736          | uncharacterized LOC101508736 |
| SNP_15262_A_19368881 | NC_021162.1    | Ca_Kabuli_Chr03 | 19368881                | TT                                     | AA                 | AA               | INTERGENIC                    |                    |                              |
| SNP_15264_A_19369150 | NC_021162.1    | Ca_Kabuli_Chr03 | 19369150                | TT                                     | GG                 | GG               | INTERGENIC                    |                    |                              |
| SNP_15265_A_19369196 | NC_021162.1    | Ca_Kabuli_Chr03 | 19369196                | GG                                     | AA                 | AA               | INTERGENIC                    |                    |                              |
| SNP_15266_A_19369257 | NC_021162.1    | Ca_Kabuli_Chr03 | 19369257                | GG                                     | CC                 | CC               | INTERGENIC                    |                    |                              |
| SNP_15267_A_19369312 | NC_021162.1    | Ca_Kabuli_Chr03 | 19369312                | AA                                     | TT                 | TT               | INTERGENIC                    |                    |                              |
| SNP_15268_A_19369587 | NC_021162.1    | Ca_Kabuli_Chr03 | 19369587                | CC                                     | TT                 | TT               | INTERGENIC                    |                    |                              |
| SNP_15269_A_19369590 | NC_021162.1    | Ca_Kabuli_Chr03 | 19369590                | AA                                     | CC                 | CC               | INTERGENIC                    |                    |                              |
| SNP_15270_A_19369627 | NC_021162.1    | Ca_Kabuli_Chr03 | 19369627                | AA                                     | GG                 | GG               | INTERGENIC                    |                    |                              |
| SNP_15271_A_19370429 | NC_021162.1    | Ca_Kabuli_Chr03 | 19370429                | AA                                     | CC                 | CC               | INTERGENIC                    |                    |                              |
| SNP_15272_A_19370503 | NC_021162.1    | Ca_Kabuli_Chr03 | 19370503                | TT                                     | AA                 | AA               | INTERGENIC                    |                    |                              |
| SNP_15273_A_19370827 | NC_021162.1    | Ca_Kabuli_Chr03 | 19370827                | GG                                     | AA                 | AA               | INTERGENIC                    |                    |                              |

| SNPs IDs             | Chromosome IDs | Chromosomes     | Physical positions (bp) | CDC Frontier genome (Reference genome) | (Pusa 1103 & HPNB) | (ILWC 46 & LPNB) | Sequence genome | Components of | Gene accession IDs | Putative functions |
|----------------------|----------------|-----------------|-------------------------|----------------------------------------|--------------------|------------------|-----------------|---------------|--------------------|--------------------|
| SNP_15274_A_19370857 | NC_021162.1    | Ca_Kabuli_Chr03 | 19370857                | GG                                     | TT                 | TT               | INTERGENIC      |               |                    |                    |
| SNP_15276_A_19372850 | NC_021162.1    | Ca_Kabuli_Chr03 | 19372850                | GG                                     | AA                 | AA               | INTERGENIC      |               |                    |                    |
| SNP_15277_A_19372913 | NC_021162.1    | Ca_Kabuli_Chr03 | 19372913                | GG                                     | AA                 | AA               | INTERGENIC      |               |                    |                    |
| SNP_15278_A_19373237 | NC_021162.1    | Ca_Kabuli_Chr03 | 19373237                | AA                                     | TT                 | TT               | INTERGENIC      |               |                    |                    |
| SNP_15279_A_19373371 | NC_021162.1    | Ca_Kabuli_Chr03 | 19373371                | TT                                     | AA                 | AA               | INTERGENIC      |               |                    |                    |
| SNP_15280_A_19373419 | NC_021162.1    | Ca_Kabuli_Chr03 | 19373419                | TT                                     | CC                 | CC               | INTERGENIC      |               |                    |                    |
| SNP_15281_A_19373446 | NC_021162.1    | Ca_Kabuli_Chr03 | 19373446                | CC                                     | GG                 | GG               | INTERGENIC      |               |                    |                    |
| SNP_15282_A_19373558 | NC_021162.1    | Ca_Kabuli_Chr03 | 19373558                | GG                                     | AA                 | AA               | INTERGENIC      |               |                    |                    |
| SNP_15283_A_19373579 | NC_021162.1    | Ca_Kabuli_Chr03 | 19373579                | CC                                     | TT                 | TT               | INTERGENIC      |               |                    |                    |
| SNP_15284_A_19373625 | NC_021162.1    | Ca_Kabuli_Chr03 | 19373625                | CC                                     | AA                 | AA               | INTERGENIC      |               |                    |                    |
| SNP_15285_A_19373629 | NC_021162.1    | Ca_Kabuli_Chr03 | 19373629                | TT                                     | CC                 | CC               | INTERGENIC      |               |                    |                    |
| SNP_15287_A_19373968 | NC_021162.1    | Ca_Kabuli_Chr03 | 19373968                | AA                                     | GG                 | GG               | INTERGENIC      |               |                    |                    |
| SNP_15288_A_19374000 | NC_021162.1    | Ca_Kabuli_Chr03 | 19374000                | AA                                     | TT                 | TT               | INTERGENIC      |               |                    |                    |
| SNP_15289_A_19374012 | NC_021162.1    | Ca_Kabuli_Chr03 | 19374012                | TT                                     | CC                 | CC               | INTERGENIC      |               |                    |                    |
| SNP_15290_A_19374013 | NC_021162.1    | Ca_Kabuli_Chr03 | 19374013                | TT                                     | CC                 | CC               | INTERGENIC      |               |                    |                    |
| SNP_15291_A_19374024 | NC_021162.1    | Ca_Kabuli_Chr03 | 19374024                | GG                                     | TT                 | TT               | INTERGENIC      |               |                    |                    |
| SNP_15292_A_19374038 | NC_021162.1    | Ca_Kabuli_Chr03 | 19374038                | AA                                     | CC                 | CC               | INTERGENIC      |               |                    |                    |
| SNP_15293_A_19374046 | NC_021162.1    | Ca_Kabuli_Chr03 | 19374046                | AA                                     | TT                 | TT               | INTERGENIC      |               |                    |                    |
| SNP_15294_A_19374051 | NC_021162.1    | Ca_Kabuli_Chr03 | 19374051                | CC                                     | TT                 | TT               | INTERGENIC      |               |                    |                    |
| SNP_15295_A_19374066 | NC_021162.1    | Ca_Kabuli_Chr03 | 19374066                | GG                                     | AA                 | AA               | INTERGENIC      |               |                    |                    |
| SNP_15296_A_19374102 | NC_021162.1    | Ca_Kabuli_Chr03 | 19374102                | TT                                     | AA                 | AA               | INTERGENIC      |               |                    |                    |
| SNP_15297_A_19374150 | NC_021162.1    | Ca_Kabuli_Chr03 | 19374150                | TT                                     | CC                 | CC               | INTERGENIC      |               |                    |                    |

| SNPs IDs             | Chromosome IDs | Chromosomes     | Physical positions (bp) | CDC Frontier genome (Reference genome) | (Pusa 1103 & HPNB) | (ILWC 46 & LPNB) | Sequence genome | Components of | Gene accession IDs | Putative functions |
|----------------------|----------------|-----------------|-------------------------|----------------------------------------|--------------------|------------------|-----------------|---------------|--------------------|--------------------|
| SNP_15298_A_19374352 | NC_021162.1    | Ca_Kabuli_Chr03 | 19374352                | GG                                     | TT                 | TT               | INTERGENIC      |               |                    |                    |
| SNP_15299_A_19374538 | NC_021162.1    | Ca_Kabuli_Chr03 | 19374538                | CC                                     | AA                 | AA               | INTERGENIC      |               |                    |                    |
| SNP_15300_A_19374558 | NC_021162.1    | Ca_Kabuli_Chr03 | 19374558                | CC                                     | TT                 | TT               | INTERGENIC      |               |                    |                    |
| SNP_15301_A_19374606 | NC_021162.1    | Ca_Kabuli_Chr03 | 19374606                | CC                                     | TT                 | TT               | INTERGENIC      |               |                    |                    |
| SNP_15302_A_19374611 | NC_021162.1    | Ca_Kabuli_Chr03 | 19374611                | TT                                     | GG                 | GG               | INTERGENIC      |               |                    |                    |
| SNP_15303_A_19374638 | NC_021162.1    | Ca_Kabuli_Chr03 | 19374638                | TT                                     | GG                 | GG               | INTERGENIC      |               |                    |                    |
| SNP_15304_A_19374732 | NC_021162.1    | Ca_Kabuli_Chr03 | 19374732                | CC                                     | GG                 | GG               | INTERGENIC      |               |                    |                    |
| SNP_15305_A_19375012 | NC_021162.1    | Ca_Kabuli_Chr03 | 19375012                | TT                                     | AA                 | AA               | INTERGENIC      |               |                    |                    |
| SNP_15307_A_19375191 | NC_021162.1    | Ca_Kabuli_Chr03 | 19375191                | AA                                     | CC                 | CC               | INTERGENIC      |               |                    |                    |
| SNP_15308_A_19375219 | NC_021162.1    | Ca_Kabuli_Chr03 | 19375219                | TT                                     | AA                 | AA               | INTERGENIC      |               |                    |                    |
| SNP_15309_A_19375236 | NC_021162.1    | Ca_Kabuli_Chr03 | 19375236                | GG                                     | AA                 | AA               | INTERGENIC      |               |                    |                    |
| SNP_15310_A_19375495 | NC_021162.1    | Ca_Kabuli_Chr03 | 19375495                | TT                                     | CC                 | CC               | INTERGENIC      |               |                    |                    |
| SNP_15311_A_19375505 | NC_021162.1    | Ca_Kabuli_Chr03 | 19375505                | TT                                     | GG                 | GG               | INTERGENIC      |               |                    |                    |
| SNP_15312_A_19375539 | NC_021162.1    | Ca_Kabuli_Chr03 | 19375539                | AA                                     | GG                 | GG               | INTERGENIC      |               |                    |                    |
| SNP_15314_A_19376104 | NC_021162.1    | Ca_Kabuli_Chr03 | 19376104                | CC                                     | AA                 | AA               | INTERGENIC      |               |                    |                    |
| SNP_15315_A_19376166 | NC_021162.1    | Ca_Kabuli_Chr03 | 19376166                | TT                                     | GG                 | GG               | INTERGENIC      |               |                    |                    |
| SNP_15316_A_19376201 | NC_021162.1    | Ca_Kabuli_Chr03 | 19376201                | CC                                     | TT                 | TT               | INTERGENIC      |               |                    |                    |
| SNP_15317_A_19376255 | NC_021162.1    | Ca_Kabuli_Chr03 | 19376255                | CC                                     | TT                 | TT               | INTERGENIC      |               |                    |                    |
| SNP_15318_A_19376296 | NC_021162.1    | Ca_Kabuli_Chr03 | 19376296                | GG                                     | AA                 | AA               | INTERGENIC      |               |                    |                    |
| SNP_15319_A_19376356 | NC_021162.1    | Ca_Kabuli_Chr03 | 19376356                | CC                                     | TT                 | TT               | INTERGENIC      |               |                    |                    |
| SNP_15320_A_19376562 | NC_021162.1    | Ca_Kabuli_Chr03 | 19376562                | AA                                     | GG                 | GG               | INTERGENIC      |               |                    |                    |
| SNP_15321_A_19376579 | NC_021162.1    | Ca_Kabuli_Chr03 | 19376579                | AA                                     | GG                 | GG               | INTERGENIC      |               |                    |                    |

| SNPs IDs             | Chromosome IDs | Chromosomes     | Physical positions (bp) | CDC Frontier genome (Reference genome) | (Pusa 1103 & HPNB) | (ILWC 46 & LPNB) | Sequence genome | Components of | Gene accession IDs | Putative functions |
|----------------------|----------------|-----------------|-------------------------|----------------------------------------|--------------------|------------------|-----------------|---------------|--------------------|--------------------|
| SNP_15322_A_19376603 | NC_021162.1    | Ca_Kabuli_Chr03 | 19376603                | TT                                     | AA                 | AA               | INTERGENIC      |               |                    |                    |
| SNP_15323_A_19379659 | NC_021162.1    | Ca_Kabuli_Chr03 | 19379659                | GG                                     | TT                 | TT               | INTERGENIC      |               |                    |                    |
| SNP_15324_A_19380292 | NC_021162.1    | Ca_Kabuli_Chr03 | 19380292                | CC                                     | TT                 | TT               | INTERGENIC      |               |                    |                    |
| SNP_15325_A_19380371 | NC_021162.1    | Ca_Kabuli_Chr03 | 19380371                | CC                                     | TT                 | TT               | INTERGENIC      |               |                    |                    |
| SNP_15326_A_19380434 | NC_021162.1    | Ca_Kabuli_Chr03 | 19380434                | TT                                     | GG                 | GG               | INTERGENIC      |               |                    |                    |
| SNP_15327_A_19380490 | NC_021162.1    | Ca_Kabuli_Chr03 | 19380490                | GG                                     | AA                 | AA               | INTERGENIC      |               |                    |                    |
| SNP_15328_A_19380514 | NC_021162.1    | Ca_Kabuli_Chr03 | 19380514                | CC                                     | TT                 | TT               | INTERGENIC      |               |                    |                    |
| SNP_15329_A_19380519 | NC_021162.1    | Ca_Kabuli_Chr03 | 19380519                | TT                                     | CC                 | CC               | INTERGENIC      |               |                    |                    |
| SNP_15330_A_19380582 | NC_021162.1    | Ca_Kabuli_Chr03 | 19380582                | TT                                     | CC                 | CC               | INTERGENIC      |               |                    |                    |
| SNP_15331_A_19380625 | NC_021162.1    | Ca_Kabuli_Chr03 | 19380625                | GG                                     | AA                 | AA               | INTERGENIC      |               |                    |                    |
| SNP_15332_A_19380659 | NC_021162.1    | Ca_Kabuli_Chr03 | 19380659                | TT                                     | CC                 | CC               | INTERGENIC      |               |                    |                    |
| SNP_15333_A_19380721 | NC_021162.1    | Ca_Kabuli_Chr03 | 19380721                | TT                                     | CC                 | CC               | INTERGENIC      |               |                    |                    |
| SNP_15334_A_19380769 | NC_021162.1    | Ca_Kabuli_Chr03 | 19380769                | TT                                     | CC                 | CC               | INTERGENIC      |               |                    |                    |
| SNP_15335_A_19380799 | NC_021162.1    | Ca_Kabuli_Chr03 | 19380799                | TT                                     | CC                 | CC               | INTERGENIC      |               |                    |                    |
| SNP_15336_A_19380962 | NC_021162.1    | Ca_Kabuli_Chr03 | 19380962                | GG                                     | TT                 | TT               | INTERGENIC      |               |                    |                    |
| SNP_15337_A_19380966 | NC_021162.1    | Ca_Kabuli_Chr03 | 19380966                | TT                                     | CC                 | CC               | INTERGENIC      |               |                    |                    |
| SNP_15338_A_19381107 | NC_021162.1    | Ca_Kabuli_Chr03 | 19381107                | GG                                     | AA                 | AA               | INTERGENIC      |               |                    |                    |
| SNP_15339_A_19381139 | NC_021162.1    | Ca_Kabuli_Chr03 | 19381139                | GG                                     | AA                 | AA               | INTERGENIC      |               |                    |                    |
| SNP_15340_A_19381306 | NC_021162.1    | Ca_Kabuli_Chr03 | 19381306                | CC                                     | TT                 | TT               | INTERGENIC      |               |                    |                    |
| SNP_15341_A_19381356 | NC_021162.1    | Ca_Kabuli_Chr03 | 19381356                | AA                                     | GG                 | GG               | INTERGENIC      |               |                    |                    |
| SNP_15342_A_19381365 | NC_021162.1    | Ca_Kabuli_Chr03 | 19381365                | TT                                     | CC                 | CC               | INTERGENIC      |               |                    |                    |
| SNP_15343_A_19381428 | NC_021162.1    | Ca_Kabuli_Chr03 | 19381428                | CC                                     | TT                 | TT               | INTERGENIC      |               |                    |                    |

| SNPs IDs             | Chromosome IDs | Chromosomes     | Physical positions (bp) | CDC Frontier genome (Reference genome) | (Pusa 1103 & HPNB) | (ILWC 46 & LPNB) | Sequence genome | Components of | Gene accession IDs | Putative functions |
|----------------------|----------------|-----------------|-------------------------|----------------------------------------|--------------------|------------------|-----------------|---------------|--------------------|--------------------|
| SNP_15344_A_19381453 | NC_021162.1    | Ca_Kabuli_Chr03 | 19381453                | TT                                     | GG                 | GG               | INTERGENIC      |               |                    |                    |
| SNP_15345_A_19381591 | NC_021162.1    | Ca_Kabuli_Chr03 | 19381591                | AA                                     | CC                 | CC               | INTERGENIC      |               |                    |                    |
| SNP_15346_A_19381592 | NC_021162.1    | Ca_Kabuli_Chr03 | 19381592                | TT                                     | AA                 | AA               | INTERGENIC      |               |                    |                    |
| SNP_15347_A_19381719 | NC_021162.1    | Ca_Kabuli_Chr03 | 19381719                | TT                                     | GG                 | GG               | INTERGENIC      |               |                    |                    |
| SNP_15348_A_19381727 | NC_021162.1    | Ca_Kabuli_Chr03 | 19381727                | AA                                     | GG                 | GG               | INTERGENIC      |               |                    |                    |
| SNP_15349_A_19381739 | NC_021162.1    | Ca_Kabuli_Chr03 | 19381739                | TT                                     | CC                 | CC               | INTERGENIC      |               |                    |                    |
| SNP_15350_A_19381787 | NC_021162.1    | Ca_Kabuli_Chr03 | 19381787                | GG                                     | AA                 | AA               | INTERGENIC      |               |                    |                    |
| SNP_15351_A_19381804 | NC_021162.1    | Ca_Kabuli_Chr03 | 19381804                | TT                                     | CC                 | CC               | INTERGENIC      |               |                    |                    |
| SNP_15352_A_19381839 | NC_021162.1    | Ca_Kabuli_Chr03 | 19381839                | CC                                     | AA                 | AA               | INTERGENIC      |               |                    |                    |
| SNP_15353_A_19381894 | NC_021162.1    | Ca_Kabuli_Chr03 | 19381894                | AA                                     | CC                 | CC               | INTERGENIC      |               |                    |                    |
| SNP_15354_A_19381919 | NC_021162.1    | Ca_Kabuli_Chr03 | 19381919                | CC                                     | TT                 | TT               | INTERGENIC      |               |                    |                    |
| SNP_15355_A_19381999 | NC_021162.1    | Ca_Kabuli_Chr03 | 19381999                | TT                                     | CC                 | CC               | INTERGENIC      |               |                    |                    |
| SNP_15356_A_19382001 | NC_021162.1    | Ca_Kabuli_Chr03 | 19382001                | AA                                     | GG                 | GG               | INTERGENIC      |               |                    |                    |
| SNP_15357_A_19382008 | NC_021162.1    | Ca_Kabuli_Chr03 | 19382008                | CC                                     | AA                 | AA               | INTERGENIC      |               |                    |                    |
| SNP_15358_A_19382076 | NC_021162.1    | Ca_Kabuli_Chr03 | 19382076                | TT                                     | CC                 | CC               | INTERGENIC      |               |                    |                    |
| SNP_15359_A_19382126 | NC_021162.1    | Ca_Kabuli_Chr03 | 19382126                | GG                                     | CC                 | CC               | INTERGENIC      |               |                    |                    |
| SNP_15360_A_19382193 | NC_021162.1    | Ca_Kabuli_Chr03 | 19382193                | TT                                     | CC                 | CC               | INTERGENIC      |               |                    |                    |
| SNP_15361_A_19382254 | NC_021162.1    | Ca_Kabuli_Chr03 | 19382254                | GG                                     | AA                 | AA               | INTERGENIC      |               |                    |                    |
| SNP_15362_A_19382269 | NC_021162.1    | Ca_Kabuli_Chr03 | 19382269                | GG                                     | AA                 | AA               | INTERGENIC      |               |                    |                    |
| SNP_15363_A_19382324 | NC_021162.1    | Ca_Kabuli_Chr03 | 19382324                | GG                                     | AA                 | AA               | INTERGENIC      |               |                    |                    |
| SNP_15364_A_19382328 | NC_021162.1    | Ca_Kabuli_Chr03 | 19382328                | AA                                     | GG                 | GG               | INTERGENIC      |               |                    |                    |
| SNP_15365_A_19382329 | NC_021162.1    | Ca_Kabuli_Chr03 | 19382329                | CC                                     | TT                 | TT               | INTERGENIC      |               |                    |                    |

| SNPs IDs             | Chromosome IDs | Chromosomes     | Physical positions (bp) | CDC Frontier genome (Reference genome) | (Pusa 1103 & HPNB) | (ILWC 46 & LPNB) | Sequence genome | Components of | Gene accession IDs | Putative functions |
|----------------------|----------------|-----------------|-------------------------|----------------------------------------|--------------------|------------------|-----------------|---------------|--------------------|--------------------|
| SNP_15366_A_19382458 | NC_021162.1    | Ca_Kabuli_Chr03 | 19382458                | TT                                     | GG                 | GG               | INTERGENIC      |               |                    |                    |
| SNP_15367_A_19382480 | NC_021162.1    | Ca_Kabuli_Chr03 | 19382480                | TT                                     | GG                 | GG               | INTERGENIC      |               |                    |                    |
| SNP_15368_A_19382500 | NC_021162.1    | Ca_Kabuli_Chr03 | 19382500                | TT                                     | GG                 | GG               | INTERGENIC      |               |                    |                    |
| SNP_15369_A_19382512 | NC_021162.1    | Ca_Kabuli_Chr03 | 19382512                | CC                                     | TT                 | TT               | INTERGENIC      |               |                    |                    |
| SNP_15370_A_19382558 | NC_021162.1    | Ca_Kabuli_Chr03 | 19382558                | GG                                     | CC                 | CC               | INTERGENIC      |               |                    |                    |
| SNP_15371_A_19382559 | NC_021162.1    | Ca_Kabuli_Chr03 | 19382559                | GG                                     | TT                 | TT               | INTERGENIC      |               |                    |                    |
| SNP_15372_A_19382563 | NC_021162.1    | Ca_Kabuli_Chr03 | 19382563                | GG                                     | AA                 | AA               | INTERGENIC      |               |                    |                    |
| SNP_15373_A_19382751 | NC_021162.1    | Ca_Kabuli_Chr03 | 19382751                | CC                                     | TT                 | TT               | INTERGENIC      |               |                    |                    |
| SNP_15374_A_19382759 | NC_021162.1    | Ca_Kabuli_Chr03 | 19382759                | TT                                     | AA                 | AA               | INTERGENIC      |               |                    |                    |
| SNP_15375_A_19382808 | NC_021162.1    | Ca_Kabuli_Chr03 | 19382808                | GG                                     | TT                 | TT               | INTERGENIC      |               |                    |                    |
| SNP_15376_A_19383352 | NC_021162.1    | Ca_Kabuli_Chr03 | 19383352                | AA                                     | TT                 | TT               | INTERGENIC      |               |                    |                    |
| SNP_15377_A_19383542 | NC_021162.1    | Ca_Kabuli_Chr03 | 19383542                | AA                                     | GG                 | GG               | INTERGENIC      |               |                    |                    |
| SNP_15378_A_19383555 | NC_021162.1    | Ca_Kabuli_Chr03 | 19383555                | CC                                     | TT                 | TT               | INTERGENIC      |               |                    |                    |
| SNP_15379_A_19383593 | NC_021162.1    | Ca_Kabuli_Chr03 | 19383593                | GG                                     | AA                 | AA               | INTERGENIC      |               |                    |                    |
| SNP_15380_A_19383698 | NC_021162.1    | Ca_Kabuli_Chr03 | 19383698                | AA                                     | CC                 | CC               | INTERGENIC      |               |                    |                    |
| SNP_15381_A_19383714 | NC_021162.1    | Ca_Kabuli_Chr03 | 19383714                | GG                                     | AA                 | AA               | INTERGENIC      |               |                    |                    |
| SNP_15382_A_19383772 | NC_021162.1    | Ca_Kabuli_Chr03 | 19383772                | CC                                     | TT                 | TT               | INTERGENIC      |               |                    |                    |
| SNP_15384_A_19384022 | NC_021162.1    | Ca_Kabuli_Chr03 | 19384022                | GG                                     | AA                 | AA               | INTERGENIC      |               |                    |                    |
| SNP_15385_A_19384055 | NC_021162.1    | Ca_Kabuli_Chr03 | 19384055                | AA                                     | GG                 | GG               | INTERGENIC      |               |                    |                    |
| SNP_15386_A_19384089 | NC_021162.1    | Ca_Kabuli_Chr03 | 19384089                | AA                                     | GG                 | GG               | INTERGENIC      |               |                    |                    |
| SNP_15387_A_19384093 | NC_021162.1    | Ca_Kabuli_Chr03 | 19384093                | CC                                     | TT                 | TT               | INTERGENIC      |               |                    |                    |
| SNP_15388_A_19384108 | NC_021162.1    | Ca_Kabuli_Chr03 | 19384108                | AA                                     | CC                 | CC               | INTERGENIC      |               |                    |                    |

| SNPs IDs             | Chromosome IDs | Chromosomes     | Physical positions (bp) | CDC Frontier genome (Reference genome) | (Pusa 1103 & HPNB) | (ILWC 46 & LPNB) | Sequence genome | Components of | Gene accession IDs | Putative functions |
|----------------------|----------------|-----------------|-------------------------|----------------------------------------|--------------------|------------------|-----------------|---------------|--------------------|--------------------|
| SNP_15389_A_19384125 | NC_021162.1    | Ca_Kabuli_Chr03 | 19384125                | GG                                     | AA                 | AA               | INTERGENIC      |               |                    |                    |
| SNP_15390_A_19384126 | NC_021162.1    | Ca_Kabuli_Chr03 | 19384126                | GG                                     | AA                 | AA               | INTERGENIC      |               |                    |                    |
| SNP_15391_A_19384915 | NC_021162.1    | Ca_Kabuli_Chr03 | 19384915                | AA                                     | GG                 | GG               | INTERGENIC      |               |                    |                    |
| SNP_15392_A_19385144 | NC_021162.1    | Ca_Kabuli_Chr03 | 19385144                | CC                                     | AA                 | AA               | INTERGENIC      |               |                    |                    |
| SNP_15393_A_19385147 | NC_021162.1    | Ca_Kabuli_Chr03 | 19385147                | CC                                     | TT                 | TT               | INTERGENIC      |               |                    |                    |
| SNP_15394_A_19385179 | NC_021162.1    | Ca_Kabuli_Chr03 | 19385179                | AA                                     | GG                 | GG               | INTERGENIC      |               |                    |                    |
| SNP_15395_A_19385271 | NC_021162.1    | Ca_Kabuli_Chr03 | 19385271                | TT                                     | CC                 | CC               | INTERGENIC      |               |                    |                    |
| SNP_15396_A_19385318 | NC_021162.1    | Ca_Kabuli_Chr03 | 19385318                | AA                                     | GG                 | GG               | INTERGENIC      |               |                    |                    |
| SNP_15397_A_19385371 | NC_021162.1    | Ca_Kabuli_Chr03 | 19385371                | GG                                     | AA                 | AA               | INTERGENIC      |               |                    |                    |
| SNP_15398_A_19385519 | NC_021162.1    | Ca_Kabuli_Chr03 | 19385519                | TT                                     | CC                 | CC               | INTERGENIC      |               |                    |                    |
| SNP_15399_A_19385526 | NC_021162.1    | Ca_Kabuli_Chr03 | 19385526                | CC                                     | TT                 | TT               | INTERGENIC      |               |                    |                    |
| SNP_15400_A_19385609 | NC_021162.1    | Ca_Kabuli_Chr03 | 19385609                | TT                                     | CC                 | CC               | INTERGENIC      |               |                    |                    |
| SNP_15401_A_19385618 | NC_021162.1    | Ca_Kabuli_Chr03 | 19385618                | TT                                     | AA                 | AA               | INTERGENIC      |               |                    |                    |
| SNP_15402_A_19385645 | NC_021162.1    | Ca_Kabuli_Chr03 | 19385645                | AA                                     | GG                 | GG               | INTERGENIC      |               |                    |                    |
| SNP_15403_A_19385650 | NC_021162.1    | Ca_Kabuli_Chr03 | 19385650                | AA                                     | GG                 | GG               | INTERGENIC      |               |                    |                    |
| SNP_15404_A_19385655 | NC_021162.1    | Ca_Kabuli_Chr03 | 19385655                | CC                                     | TT                 | TT               | INTERGENIC      |               |                    |                    |
| SNP_15405_A_19385753 | NC_021162.1    | Ca_Kabuli_Chr03 | 19385753                | TT                                     | CC                 | CC               | INTERGENIC      |               |                    |                    |
| SNP_15406_A_19385808 | NC_021162.1    | Ca_Kabuli_Chr03 | 19385808                | GG                                     | CC                 | CC               | INTERGENIC      |               |                    |                    |
| SNP_15407_A_19385936 | NC_021162.1    | Ca_Kabuli_Chr03 | 19385936                | AA                                     | GG                 | GG               | INTERGENIC      |               |                    |                    |
| SNP_15408_A_19385937 | NC_021162.1    | Ca_Kabuli_Chr03 | 19385937                | AA                                     | GG                 | GG               | INTERGENIC      |               |                    |                    |
| SNP_15409_A_19385972 | NC_021162.1    | Ca_Kabuli_Chr03 | 19385972                | GG                                     | AA                 | AA               | INTERGENIC      |               |                    |                    |
| SNP_15410_A_19385976 | NC_021162.1    | Ca_Kabuli_Chr03 | 19385976                | GG                                     | AA                 | AA               | INTERGENIC      |               |                    |                    |

| SNPs IDs             | Chromosome IDs | Chromosomes     | Physical positions (bp) | CDC Frontier (Reference genome) | (Pusa 1103 & HPNB) | (ILWC 46 & LPNB) | Sequence Components of genome | Gene accession IDs | Putative functions                 |
|----------------------|----------------|-----------------|-------------------------|---------------------------------|--------------------|------------------|-------------------------------|--------------------|------------------------------------|
| SNP_15411_A_19385982 | NC_021162.1    | Ca_Kabuli_Chr03 | 19385982                | AA                              | GG                 | GG               | INTERGENIC                    |                    |                                    |
| SNP_15412_A_19386061 | NC_021162.1    | Ca_Kabuli_Chr03 | 19386061                | AA                              | GG                 | GG               | INTERGENIC                    |                    |                                    |
| SNP_15413_A_19386096 | NC_021162.1    | Ca_Kabuli_Chr03 | 19386096                | GG                              | AA                 | AA               | INTERGENIC                    |                    |                                    |
| SNP_15414_A_19386105 | NC_021162.1    | Ca_Kabuli_Chr03 | 19386105                | GG                              | CC                 | CC               | INTERGENIC                    |                    |                                    |
| SNP_15415_A_19389449 | NC_021162.1    | Ca_Kabuli_Chr03 | 19389449                | TT                              | CC                 | CC               | DRR                           | 101508942          | mucin-17-like                      |
| SNP_15417_A_19402911 | NC_021162.1    | Ca_Kabuli_Chr03 | 19402911                | GG                              | TT                 | TT               | INTERGENIC                    |                    |                                    |
| SNP_15418_A_19452892 | NC_021162.1    | Ca_Kabuli_Chr03 | 19452892                | TT                              | CC                 | CC               | URR                           | 101510878          | protein root UVB sensitive 5       |
| SNP_15419_A_19452910 | NC_021162.1    | Ca_Kabuli_Chr03 | 19452910                | CC                              | AA                 | AA               | URR                           | 101510878          | protein root UVB sensitive 5       |
| SNP_15420_A_19452913 | NC_021162.1    | Ca_Kabuli_Chr03 | 19452913                | GG                              | TT                 | TT               | URR                           | 101510878          | protein root UVB sensitive 5       |
| SNP_15421_A_19452969 | NC_021162.1    | Ca_Kabuli_Chr03 | 19452969                | AA                              | GG                 | GG               | URR                           | 101510878          | protein root UVB sensitive 5       |
| SNP_15422_A_19452970 | NC_021162.1    | Ca_Kabuli_Chr03 | 19452970                | CC                              | TT                 | TT               | URR                           | 101510878          | protein root UVB sensitive 5       |
| SNP_15423_A_19452981 | NC_021162.1    | Ca_Kabuli_Chr03 | 19452981                | AA                              | CC                 | CC               | URR                           | 101510878          | protein root UVB sensitive 5       |
| SNP_15424_A_19452985 | NC_021162.1    | Ca_Kabuli_Chr03 | 19452985                | GG                              | TT                 | TT               | URR                           | 101510878          | protein root UVB sensitive 5       |
| SNP_15425_A_19486748 | NC_021162.1    | Ca_Kabuli_Chr03 | 19486748                | TT                              | CC                 | CC               | INTERGENIC                    |                    |                                    |
| SNP_15426_A_19492691 | NC_021162.1    | Ca_Kabuli_Chr03 | 19492691                | TT                              | AA                 | AA               | URR                           | 101512695          | vacuolar cation/proton exchanger 3 |
| SNP_15427_A_19492692 | NC_021162.1    | Ca_Kabuli_Chr03 | 19492692                | TT                              | AA                 | AA               | URR                           | 101512695          | vacuolar cation/proton exchanger 3 |
| SNP_15428_A_19494405 | NC_021162.1    | Ca_Kabuli_Chr03 | 19494405                | AA                              | CC                 | CC               | INTERGENIC                    |                    |                                    |
| SNP_15429_A_19533100 | NC_021162.1    | Ca_Kabuli_Chr03 | 19533100                | GG                              | AA                 | AA               | INTERGENIC                    |                    |                                    |
| SNP_15432_A_19608773 | NC_021162.1    | Ca_Kabuli_Chr03 | 19608773                | AA                              | CC                 | CC               | INTERGENIC                    |                    |                                    |
| SNP_15433_A_19634111 | NC_021162.1    | Ca_Kabuli_Chr03 | 19634111                | AA                              | CC                 | CC               | INTERGENIC                    |                    |                                    |
| SNP_15434_A_19634128 | NC_021162.1    | Ca_Kabuli_Chr03 | 19634128                | AA                              | TT                 | TT               | INTERGENIC                    |                    |                                    |
| SNP_15435_A_19634370 | NC_021162.1    | Ca_Kabuli_Chr03 | 19634370                | CC                              | TT                 | TT               | INTERGENIC                    |                    |                                    |



| SNPs IDs             | Chromosome IDs | Chromosomes     | Physical positions (bp) | CDC Frontier (Reference genome) | (Pusa 1103 & HPNB) | (ILWC 46 & LPNB) | Sequence genome | Components of | Gene accession IDs | Putative functions |
|----------------------|----------------|-----------------|-------------------------|---------------------------------|--------------------|------------------|-----------------|---------------|--------------------|--------------------|
| SNP_15437_A_19639561 | NC_021162.1    | Ca_Kabuli_Chr03 | 19639561                | TT                              | CC                 | CC               | INTERGENIC      |               |                    |                    |
| SNP_15438_A_19639939 | NC_021162.1    | Ca_Kabuli_Chr03 | 19639939                | GG                              | AA                 | AA               | INTERGENIC      |               |                    |                    |
| SNP_15439_A_19639973 | NC_021162.1    | Ca_Kabuli_Chr03 | 19639973                | TT                              | AA                 | AA               | INTERGENIC      |               |                    |                    |
| SNP_15440_A_19639989 | NC_021162.1    | Ca_Kabuli_Chr03 | 19639989                | TT                              | GG                 | GG               | INTERGENIC      |               |                    |                    |
| SNP_15441_A_19639992 | NC_021162.1    | Ca_Kabuli_Chr03 | 19639992                | AA                              | TT                 | TT               | INTERGENIC      |               |                    |                    |
| SNP_15442_A_19643050 | NC_021162.1    | Ca_Kabuli_Chr03 | 19643050                | GG                              | CC                 | CC               | INTERGENIC      |               |                    |                    |
| SNP_15443_A_19643082 | NC_021162.1    | Ca_Kabuli_Chr03 | 19643082                | GG                              | AA                 | AA               | INTERGENIC      |               |                    |                    |
| SNP_15444_A_19646572 | NC_021162.1    | Ca_Kabuli_Chr03 | 19646572                | AA                              | GG                 | GG               | INTERGENIC      |               |                    |                    |
| SNP_15445_A_19646916 | NC_021162.1    | Ca_Kabuli_Chr03 | 19646916                | CC                              | TT                 | TT               | INTERGENIC      |               |                    |                    |
| SNP_15446_A_19686998 | NC_021162.1    | Ca_Kabuli_Chr03 | 19686998                | CC                              | AA                 | AA               | INTERGENIC      |               |                    |                    |
| SNP_15447_A_19687341 | NC_021162.1    | Ca_Kabuli_Chr03 | 19687341                | AA                              | GG                 | GG               | INTERGENIC      |               |                    |                    |
| SNP_15448_A_19688555 | NC_021162.1    | Ca_Kabuli_Chr03 | 19688555                | GG                              | AA                 | AA               | INTERGENIC      |               |                    |                    |
| SNP_15449_A_19688719 | NC_021162.1    | Ca_Kabuli_Chr03 | 19688719                | GG                              | AA                 | AA               | INTERGENIC      |               |                    |                    |
| SNP_15450_A_19688748 | NC_021162.1    | Ca_Kabuli_Chr03 | 19688748                | GG                              | AA                 | AA               | INTERGENIC      |               |                    |                    |
| SNP_15451_A_19702417 | NC_021162.1    | Ca_Kabuli_Chr03 | 19702417                | GG                              | TT                 | TT               | INTERGENIC      |               |                    |                    |
| SNP_15452_A_19709580 | NC_021162.1    | Ca_Kabuli_Chr03 | 19709580                | AA                              | TT                 | TT               | INTERGENIC      |               |                    |                    |
| SNP_15453_A_19735115 | NC_021162.1    | Ca_Kabuli_Chr03 | 19735115                | CC                              | AA                 | AA               | INTERGENIC      |               |                    |                    |
| SNP_15454_A_19742599 | NC_021162.1    | Ca_Kabuli_Chr03 | 19742599                | TT                              | AA                 | AA               | INTERGENIC      |               |                    |                    |
| SNP_15455_A_19835964 | NC_021162.1    | Ca_Kabuli_Chr03 | 19835964                | TT                              | CC                 | CC               | INTERGENIC      |               |                    |                    |
| SNP_15456_A_19835966 | NC_021162.1    | Ca_Kabuli_Chr03 | 19835966                | GG                              | TT                 | TT               | INTERGENIC      |               |                    |                    |
| SNP_15457_A_19897251 | NC_021162.1    | Ca_Kabuli_Chr03 | 19897251                | TT                              | GG                 | GG               | INTERGENIC      |               |                    |                    |
| SNP_15458_A_19897252 | NC_021162.1    | Ca_Kabuli_Chr03 | 19897252                | CC                              | GG                 | GG               | INTERGENIC      |               |                    |                    |

| SNPs IDs             | Chromosome IDs | Chromosomes     | Physical positions (bp) | CDC Frontier genome (Reference genome) | (Pusa 1103 & HPNB) | (ILWC 46 & LPNB) | Sequence Components of genome | Gene accession IDs | Putative functions           |
|----------------------|----------------|-----------------|-------------------------|----------------------------------------|--------------------|------------------|-------------------------------|--------------------|------------------------------|
| SNP_15459_A_19897277 | NC_021162.1    | Ca_Kabuli_Chr03 | 19897277                | CC                                     | AA                 | AA               | INTERGENIC                    |                    |                              |
| SNP_15460_A_19897524 | NC_021162.1    | Ca_Kabuli_Chr03 | 19897524                | GG                                     | AA                 | AA               | INTERGENIC                    |                    |                              |
| SNP_15461_A_19960101 | NC_021162.1    | Ca_Kabuli_Chr03 | 19960101                | AA                                     | GG                 | GG               | URR                           | 101488385          | uncharacterized LOC101488385 |
| SNP_15462_A_19960175 | NC_021162.1    | Ca_Kabuli_Chr03 | 19960175                | GG                                     | AA                 | AA               | URR                           | 101488385          | uncharacterized LOC101488385 |
| SNP_15463_A_19960239 | NC_021162.1    | Ca_Kabuli_Chr03 | 19960239                | AA                                     | CC                 | CC               | URR                           | 101488385          | uncharacterized LOC101488385 |
| SNP_15464_A_19961010 | NC_021162.1    | Ca_Kabuli_Chr03 | 19961010                | CC                                     | TT                 | TT               | URR                           | 101488385          | uncharacterized LOC101488385 |
| SNP_15465_A_19961016 | NC_021162.1    | Ca_Kabuli_Chr03 | 19961016                | AA                                     | CC                 | CC               | URR                           | 101488385          | uncharacterized LOC101488385 |
| SNP_15466_A_19964171 | NC_021162.1    | Ca_Kabuli_Chr03 | 19964171                | GG                                     | TT                 | TT               | INTERGENIC                    |                    |                              |
| SNP_15467_A_19965123 | NC_021162.1    | Ca_Kabuli_Chr03 | 19965123                | AA                                     | GG                 | GG               | INTERGENIC                    |                    |                              |
| SNP_15468_A_19965226 | NC_021162.1    | Ca_Kabuli_Chr03 | 19965226                | AA                                     | GG                 | GG               | INTERGENIC                    |                    |                              |
| SNP_15469_A_19967565 | NC_021162.1    | Ca_Kabuli_Chr03 | 19967565                | AA                                     | GG                 | GG               | INTERGENIC                    |                    |                              |
| SNP_15470_A_19967773 | NC_021162.1    | Ca_Kabuli_Chr03 | 19967773                | AA                                     | GG                 | GG               | INTERGENIC                    |                    |                              |
| SNP_15471_A_19967843 | NC_021162.1    | Ca_Kabuli_Chr03 | 19967843                | TT                                     | CC                 | CC               | INTERGENIC                    |                    |                              |
| SNP_15472_A_19967948 | NC_021162.1    | Ca_Kabuli_Chr03 | 19967948                | GG                                     | TT                 | TT               | INTERGENIC                    |                    |                              |
| SNP_15473_A_19967963 | NC_021162.1    | Ca_Kabuli_Chr03 | 19967963                | TT                                     | CC                 | CC               | INTERGENIC                    |                    |                              |
| SNP_15474_A_19968170 | NC_021162.1    | Ca_Kabuli_Chr03 | 19968170                | CC                                     | TT                 | TT               | INTERGENIC                    |                    |                              |
| SNP_15475_A_19968197 | NC_021162.1    | Ca_Kabuli_Chr03 | 19968197                | AA                                     | GG                 | GG               | INTERGENIC                    |                    |                              |
| SNP_15478_A_19970387 | NC_021162.1    | Ca_Kabuli_Chr03 | 19970387                | CC                                     | GG                 | GG               | INTERGENIC                    |                    |                              |
| SNP_15479_A_19994000 | NC_021162.1    | Ca_Kabuli_Chr03 | 19994000                | AA                                     | TT                 | TT               | INTERGENIC                    |                    |                              |
| SNP_15480_A_19994048 | NC_021162.1    | Ca_Kabuli_Chr03 | 19994048                | GG                                     | CC                 | CC               | INTERGENIC                    |                    |                              |
| SNP_15481_A_19994126 | NC_021162.1    | Ca_Kabuli_Chr03 | 19994126                | AA                                     | GG                 | GG               | INTERGENIC                    |                    |                              |
| SNP_15482_A_19994168 | NC_021162.1    | Ca_Kabuli_Chr03 | 19994168                | CC                                     | AA                 | AA               | INTERGENIC                    |                    |                              |

| SNPs IDs             | Chromosome IDs | Chromosomes     | Physical positions (bp) | CDC Frontier (Reference genome) | (Pusa 1103 & HPNB) | (ILWC 46 & LPNB) | Sequence Components of genome | Gene accession IDs | Putative functions                                       |
|----------------------|----------------|-----------------|-------------------------|---------------------------------|--------------------|------------------|-------------------------------|--------------------|----------------------------------------------------------|
| SNP_15483_A_19994170 | NC_021162.1    | Ca_Kabuli_Chr03 | 19994170                | AA                              | GG                 | GG               | INTERGENIC                    |                    |                                                          |
| SNP_15484_A_19994352 | NC_021162.1    | Ca_Kabuli_Chr03 | 19994352                | AA                              | GG                 | GG               | INTERGENIC                    |                    |                                                          |
| SNP_15485_A_19997872 | NC_021162.1    | Ca_Kabuli_Chr03 | 19997872                | GG                              | AA                 | AA               | NON_SYNONYMOUS_CODING         | 101488710          | serine/threonine-protein phosphatase 7 long form homolog |
| SNP_15486_A_20000257 | NC_021162.1    | Ca_Kabuli_Chr03 | 20000257                | TT                              | AA                 | AA               | DRR                           | 101489046          | uncharacterized LOC101489046                             |
| SNP_15489_A_20011676 | NC_021162.1    | Ca_Kabuli_Chr03 | 20011676                | GG                              | TT                 | TT               | INTERGENIC                    |                    |                                                          |
| SNP_15490_A_20011718 | NC_021162.1    | Ca_Kabuli_Chr03 | 20011718                | GG                              | AA                 | AA               | INTERGENIC                    |                    |                                                          |
| SNP_15491_A_20011742 | NC_021162.1    | Ca_Kabuli_Chr03 | 20011742                | CC                              | TT                 | TT               | INTERGENIC                    |                    |                                                          |
| SNP_15492_A_20011933 | NC_021162.1    | Ca_Kabuli_Chr03 | 20011933                | CC                              | TT                 | TT               | URR                           | 101499759          | uncharacterized LOC101499759                             |
| SNP_15493_A_20012040 | NC_021162.1    | Ca_Kabuli_Chr03 | 20012040                | CC                              | TT                 | TT               | URR                           | 101499759          | uncharacterized LOC101499759                             |
| SNP_15494_A_20012067 | NC_021162.1    | Ca_Kabuli_Chr03 | 20012067                | CC                              | TT                 | TT               | URR                           | 101499759          | uncharacterized LOC101499759                             |
| SNP_15495_A_20012171 | NC_021162.1    | Ca_Kabuli_Chr03 | 20012171                | GG                              | AA                 | AA               | URR                           | 101499759          | uncharacterized LOC101499759                             |
| SNP_15496_A_20012191 | NC_021162.1    | Ca_Kabuli_Chr03 | 20012191                | TT                              | CC                 | CC               | URR                           | 101499759          | uncharacterized LOC101499759                             |
| SNP_15497_A_20012193 | NC_021162.1    | Ca_Kabuli_Chr03 | 20012193                | GG                              | AA                 | AA               | URR                           | 101499759          | uncharacterized LOC101499759                             |
| SNP_15498_A_20075274 | NC_021162.1    | Ca_Kabuli_Chr03 | 20075274                | AA                              | GG                 | GG               | INTERGENIC                    |                    |                                                          |
| SNP_15499_A_20075277 | NC_021162.1    | Ca_Kabuli_Chr03 | 20075277                | AA                              | GG                 | GG               | INTERGENIC                    |                    |                                                          |
| SNP_15500_A_20081473 | NC_021162.1    | Ca_Kabuli_Chr03 | 20081473                | GG                              | AA                 | AA               | DRR                           | 101501983          | uncharacterized LOC101501983                             |
| SNP_15501_A_20162167 | NC_021162.1    | Ca_Kabuli_Chr03 | 20162167                | TT                              | AA                 | AA               | URR                           | 101489701          | Unknown function                                         |
| SNP_15502_A_20193082 | NC_021162.1    | Ca_Kabuli_Chr03 | 20193082                | TT                              | CC                 | CC               | INTERGENIC                    |                    |                                                          |
| SNP_15503_A_20222130 | NC_021162.1    | Ca_Kabuli_Chr03 | 20222130                | GG                              | TT                 | TT               | INTERGENIC                    |                    |                                                          |
| SNP_15504_A_20232380 | NC_021162.1    | Ca_Kabuli_Chr03 | 20232380                | TT                              | AA                 | AA               | INTERGENIC                    |                    |                                                          |
| SNP_15505_A_20256109 | NC_021162.1    | Ca_Kabuli_Chr03 | 20256109                | AA                              | CC                 | CC               | INTERGENIC                    |                    |                                                          |
| SNP_15506_A_20258270 | NC_021162.1    | Ca_Kabuli_Chr03 | 20258270                | TT                              | CC                 | CC               | INTERGENIC                    |                    |                                                          |

| SNPs IDs             | Chromosome IDs | Chromosomes     | Physical positions (bp) | CDC Frontier (Reference genome) | (Pusa 1103 & HPNB) | (ILWC 46 & LPNB) | Sequence genome | Components of | Gene accession IDs | Putative functions |
|----------------------|----------------|-----------------|-------------------------|---------------------------------|--------------------|------------------|-----------------|---------------|--------------------|--------------------|
| SNP_15507_A_20258298 | NC_021162.1    | Ca_Kabuli_Chr03 | 20258298                | CC                              | TT                 | TT               | INTERGENIC      |               |                    |                    |
| SNP_15508_A_20258317 | NC_021162.1    | Ca_Kabuli_Chr03 | 20258317                | AA                              | GG                 | GG               | INTERGENIC      |               |                    |                    |
| SNP_15509_A_20258551 | NC_021162.1    | Ca_Kabuli_Chr03 | 20258551                | TT                              | GG                 | GG               | INTERGENIC      |               |                    |                    |
| SNP_15510_A_20258573 | NC_021162.1    | Ca_Kabuli_Chr03 | 20258573                | AA                              | CC                 | CC               | INTERGENIC      |               |                    |                    |
| SNP_15511_A_20323846 | NC_021162.1    | Ca_Kabuli_Chr03 | 20323846                | GG                              | AA                 | AA               | INTERGENIC      |               |                    |                    |
| SNP_15512_A_20323960 | NC_021162.1    | Ca_Kabuli_Chr03 | 20323960                | TT                              | AA                 | AA               | INTERGENIC      |               |                    |                    |
| SNP_15513_A_20324152 | NC_021162.1    | Ca_Kabuli_Chr03 | 20324152                | CC                              | AA                 | AA               | INTERGENIC      |               |                    |                    |
| SNP_15514_A_20324219 | NC_021162.1    | Ca_Kabuli_Chr03 | 20324219                | AA                              | CC                 | CC               | INTERGENIC      |               |                    |                    |
| SNP_15515_A_20324232 | NC_021162.1    | Ca_Kabuli_Chr03 | 20324232                | TT                              | CC                 | CC               | INTERGENIC      |               |                    |                    |
| SNP_15516_A_20324254 | NC_021162.1    | Ca_Kabuli_Chr03 | 20324254                | AA                              | GG                 | GG               | INTERGENIC      |               |                    |                    |
| SNP_15517_A_20324276 | NC_021162.1    | Ca_Kabuli_Chr03 | 20324276                | AA                              | CC                 | CC               | INTERGENIC      |               |                    |                    |
| SNP_15520_A_20339414 | NC_021162.1    | Ca_Kabuli_Chr03 | 20339414                | AA                              | GG                 | GG               | INTERGENIC      |               |                    |                    |
| SNP_15521_A_20424957 | NC_021162.1    | Ca_Kabuli_Chr03 | 20424957                | GG                              | AA                 | AA               | INTERGENIC      |               |                    |                    |
| SNP_15522_A_20429394 | NC_021162.1    | Ca_Kabuli_Chr03 | 20429394                | GG                              | AA                 | AA               | INTERGENIC      |               |                    |                    |
| SNP_15523_A_20436687 | NC_021162.1    | Ca_Kabuli_Chr03 | 20436687                | CC                              | TT                 | TT               | INTERGENIC      |               |                    |                    |
| SNP_15524_A_20436728 | NC_021162.1    | Ca_Kabuli_Chr03 | 20436728                | TT                              | CC                 | CC               | INTERGENIC      |               |                    |                    |
| SNP_15525_A_20438634 | NC_021162.1    | Ca_Kabuli_Chr03 | 20438634                | TT                              | CC                 | CC               | INTERGENIC      |               |                    |                    |
| SNP_15526_A_20439004 | NC_021162.1    | Ca_Kabuli_Chr03 | 20439004                | GG                              | TT                 | TT               | INTERGENIC      |               |                    |                    |
| SNP_15527_A_20439013 | NC_021162.1    | Ca_Kabuli_Chr03 | 20439013                | AA                              | TT                 | TT               | INTERGENIC      |               |                    |                    |
| SNP_15528_A_20439091 | NC_021162.1    | Ca_Kabuli_Chr03 | 20439091                | AA                              | CC                 | CC               | INTERGENIC      |               |                    |                    |
| SNP_15529_A_20439271 | NC_021162.1    | Ca_Kabuli_Chr03 | 20439271                | TT                              | AA                 | AA               | INTERGENIC      |               |                    |                    |
| SNP_15530_A_20445028 | NC_021162.1    | Ca_Kabuli_Chr03 | 20445028                | GG                              | AA                 | AA               | INTERGENIC      |               |                    |                    |

| SNPs IDs             | Chromosome IDs | Chromosomes     | Physical positions (bp) | CDC Frontier (Reference genome) | (Pusa 1103 & HPNB) | (ILWC 46 & LPNB) | Sequence genome | Components of | Gene accession IDs | Putative functions |
|----------------------|----------------|-----------------|-------------------------|---------------------------------|--------------------|------------------|-----------------|---------------|--------------------|--------------------|
| SNP_15534_A_20616410 | NC_021162.1    | Ca_Kabuli_Chr03 | 20616410                | CC                              | TT                 | TT               | INTERGENIC      |               |                    |                    |
| SNP_15536_A_20621232 | NC_021162.1    | Ca_Kabuli_Chr03 | 20621232                | TT                              | AA                 | AA               | INTERGENIC      |               |                    |                    |
| SNP_15537_A_20621269 | NC_021162.1    | Ca_Kabuli_Chr03 | 20621269                | GG                              | CC                 | CC               | INTERGENIC      |               |                    |                    |
| SNP_15538_A_20698903 | NC_021162.1    | Ca_Kabuli_Chr03 | 20698903                | GG                              | AA                 | AA               | INTERGENIC      |               |                    |                    |
| SNP_15539_A_20698911 | NC_021162.1    | Ca_Kabuli_Chr03 | 20698911                | AA                              | GG                 | GG               | INTERGENIC      |               |                    |                    |
| SNP_15540_A_20728620 | NC_021162.1    | Ca_Kabuli_Chr03 | 20728620                | AA                              | GG                 | GG               | INTERGENIC      |               |                    |                    |
| SNP_15541_A_20728629 | NC_021162.1    | Ca_Kabuli_Chr03 | 20728629                | GG                              | AA                 | AA               | INTERGENIC      |               |                    |                    |
| SNP_15542_A_20729129 | NC_021162.1    | Ca_Kabuli_Chr03 | 20729129                | GG                              | CC                 | CC               | INTERGENIC      |               |                    |                    |
| SNP_15543_A_20730663 | NC_021162.1    | Ca_Kabuli_Chr03 | 20730663                | CC                              | TT                 | TT               | INTERGENIC      |               |                    |                    |
| SNP_15544_A_20730724 | NC_021162.1    | Ca_Kabuli_Chr03 | 20730724                | TT                              | GG                 | GG               | INTERGENIC      |               |                    |                    |
| SNP_15545_A_20730734 | NC_021162.1    | Ca_Kabuli_Chr03 | 20730734                | CC                              | TT                 | TT               | INTERGENIC      |               |                    |                    |
| SNP_15546_A_20731027 | NC_021162.1    | Ca_Kabuli_Chr03 | 20731027                | CC                              | TT                 | TT               | INTERGENIC      |               |                    |                    |
| SNP_15547_A_20738510 | NC_021162.1    | Ca_Kabuli_Chr03 | 20738510                | AA                              | CC                 | CC               | INTERGENIC      |               |                    |                    |
| SNP_15548_A_20738578 | NC_021162.1    | Ca_Kabuli_Chr03 | 20738578                | TT                              | CC                 | CC               | INTERGENIC      |               |                    |                    |
| SNP_15549_A_20738789 | NC_021162.1    | Ca_Kabuli_Chr03 | 20738789                | CC                              | TT                 | TT               | INTERGENIC      |               |                    |                    |
| SNP_15550_A_20738820 | NC_021162.1    | Ca_Kabuli_Chr03 | 20738820                | CC                              | TT                 | TT               | INTERGENIC      |               |                    |                    |
| SNP_15551_A_20744087 | NC_021162.1    | Ca_Kabuli_Chr03 | 20744087                | CC                              | TT                 | TT               | INTERGENIC      |               |                    |                    |
| SNP_15552_A_20744226 | NC_021162.1    | Ca_Kabuli_Chr03 | 20744226                | AA                              | GG                 | GG               | INTERGENIC      |               |                    |                    |
| SNP_15553_A_20744433 | NC_021162.1    | Ca_Kabuli_Chr03 | 20744433                | AA                              | GG                 | GG               | INTERGENIC      |               |                    |                    |
| SNP_15554_A_20744515 | NC_021162.1    | Ca_Kabuli_Chr03 | 20744515                | AA                              | TT                 | TT               | INTERGENIC      |               |                    |                    |
| SNP_15555_A_20744525 | NC_021162.1    | Ca_Kabuli_Chr03 | 20744525                | GG                              | AA                 | AA               | INTERGENIC      |               |                    |                    |
| SNP_15556_A_20744550 | NC_021162.1    | Ca_Kabuli_Chr03 | 20744550                | GG                              | CC                 | CC               | INTERGENIC      |               |                    |                    |

| SNPs IDs             | Chromosome IDs | Chromosomes     | Physical positions (bp) | CDC Frontier (Reference genome) | (Pusa 1103 & HPNB) | (ILWC 46 & LPNB) | Sequence Components of genome | Gene accession IDs | Putative functions                |
|----------------------|----------------|-----------------|-------------------------|---------------------------------|--------------------|------------------|-------------------------------|--------------------|-----------------------------------|
| SNP_15557_A_20744564 | NC_021162.1    | Ca_Kabuli_Chr03 | 20744564                | CC                              | TT                 | TT               | INTERGENIC                    |                    |                                   |
| SNP_15559_A_20773721 | NC_021162.1    | Ca_Kabuli_Chr03 | 20773721                | AA                              | GG                 | GG               | DRR                           | 101492951          | protein LURP-one-related 15-like  |
| SNP_15560_A_20847880 | NC_021162.1    | Ca_Kabuli_Chr03 | 20847880                | TT                              | GG                 | GG               | INTERGENIC                    |                    |                                   |
| SNP_15561_A_20896548 | NC_021162.1    | Ca_Kabuli_Chr03 | 20896548                | AA                              | CC                 | CC               | INTERGENIC                    |                    |                                   |
| SNP_15562_A_20896581 | NC_021162.1    | Ca_Kabuli_Chr03 | 20896581                | GG                              | AA                 | AA               | INTERGENIC                    |                    |                                   |
| SNP_15563_A_20896604 | NC_021162.1    | Ca_Kabuli_Chr03 | 20896604                | AA                              | TT                 | TT               | INTERGENIC                    |                    |                                   |
| SNP_15564_A_20896610 | NC_021162.1    | Ca_Kabuli_Chr03 | 20896610                | TT                              | AA                 | AA               | INTERGENIC                    |                    |                                   |
| SNP_15565_A_20899410 | NC_021162.1    | Ca_Kabuli_Chr03 | 20899410                | AA                              | GG                 | GG               | INTERGENIC                    |                    |                                   |
| SNP_15566_A_20899436 | NC_021162.1    | Ca_Kabuli_Chr03 | 20899436                | TT                              | CC                 | CC               | INTERGENIC                    |                    |                                   |
| SNP_15567_A_20913600 | NC_021162.1    | Ca_Kabuli_Chr03 | 20913600                | CC                              | TT                 | TT               | INTERGENIC                    |                    |                                   |
| SNP_15568_A_20913615 | NC_021162.1    | Ca_Kabuli_Chr03 | 20913615                | CC                              | TT                 | TT               | INTERGENIC                    |                    |                                   |
| SNP_15569_A_20933493 | NC_021162.1    | Ca_Kabuli_Chr03 | 20933493                | TT                              | AA                 | AA               | URR                           | 101495195          | uncharacterized LOC101495195      |
| SNP_15570_A_20933563 | NC_021162.1    | Ca_Kabuli_Chr03 | 20933563                | AA                              | GG                 | GG               | URR                           | 101495195          | uncharacterized LOC101495195      |
| SNP_15571_A_20933634 | NC_021162.1    | Ca_Kabuli_Chr03 | 20933634                | AA                              | GG                 | GG               | URR                           | 101495195          | uncharacterized LOC101495195      |
| SNP_15572_A_20940618 | NC_021162.1    | Ca_Kabuli_Chr03 | 20940618                | CC                              | GG                 | GG               | INTERGENIC                    |                    |                                   |
| SNP_15573_A_20951796 | NC_021162.1    | Ca_Kabuli_Chr03 | 20951796                | AA                              | TT                 | TT               | INTRON                        | 101489590          | transcription factor SCREAM2-like |
| SNP_15574_A_20970480 | NC_021162.1    | Ca_Kabuli_Chr03 | 20970480                | CC                              | GG                 | GG               | INTERGENIC                    |                    |                                   |
| SNP_15575_A_20970483 | NC_021162.1    | Ca_Kabuli_Chr03 | 20970483                | AA                              | TT                 | TT               | INTERGENIC                    |                    |                                   |
| SNP_15577_A_21012448 | NC_021162.1    | Ca_Kabuli_Chr03 | 21012448                | AA                              | CC                 | CC               | INTERGENIC                    |                    |                                   |
| SNP_15578_A_21012514 | NC_021162.1    | Ca_Kabuli_Chr03 | 21012514                | CC                              | TT                 | TT               | INTERGENIC                    |                    |                                   |
| SNP_15579_A_21012925 | NC_021162.1    | Ca_Kabuli_Chr03 | 21012925                | GG                              | AA                 | AA               | INTERGENIC                    |                    |                                   |
| SNP_15580_A_21060357 | NC_021162.1    | Ca_Kabuli_Chr03 | 21060357                | AA                              | CC                 | CC               | INTERGENIC                    |                    |                                   |

| SNPs IDs             | Chromosome IDs | Chromosomes     | Physical positions (bp) | CDC Frontier genome (Reference genome) | (Pusa 1103 & HPNB) | (ILWC 46 & LPNB) | Sequence Components of genome | Gene accession IDs | Putative functions                         |
|----------------------|----------------|-----------------|-------------------------|----------------------------------------|--------------------|------------------|-------------------------------|--------------------|--------------------------------------------|
| SNP_15581_A_21060358 | NC_021162.1    | Ca_Kabuli_Chr03 | 21060358                | CC                                     | AA                 | AA               | INTERGENIC                    |                    |                                            |
| SNP_15582_A_21066960 | NC_021162.1    | Ca_Kabuli_Chr03 | 21066960                | CC                                     | TT                 | TT               | NON_SYNONYMOUS_CODING         | id48218            | Unknown function                           |
| SNP_15583_A_21066962 | NC_021162.1    | Ca_Kabuli_Chr03 | 21066962                | AA                                     | GG                 | GG               | NON_SYNONYMOUS_CODING         | id48218            | Unknown function                           |
| SNP_15584_A_21068831 | NC_021162.1    | Ca_Kabuli_Chr03 | 21068831                | AA                                     | GG                 | GG               | INTRON                        | 101492734          | lysine-tRNA ligase-like                    |
| SNP_15585_A_21068834 | NC_021162.1    | Ca_Kabuli_Chr03 | 21068834                | AA                                     | GG                 | GG               | INTRON                        | 101492734          | lysine-tRNA ligase-like                    |
| SNP_15586_A_21068846 | NC_021162.1    | Ca_Kabuli_Chr03 | 21068846                | GG                                     | CC                 | CC               | INTRON                        | 101492734          | lysine-tRNA ligase-like                    |
| SNP_15587_A_21069019 | NC_021162.1    | Ca_Kabuli_Chr03 | 21069019                | TT                                     | AA                 | AA               | INTRON                        | 101492734          | lysine-tRNA ligase-like                    |
| SNP_15588_A_21069041 | NC_021162.1    | Ca_Kabuli_Chr03 | 21069041                | TT                                     | CC                 | CC               | INTRON                        | 101492734          | lysine-tRNA ligase-like                    |
| SNP_15590_A_21182746 | NC_021162.1    | Ca_Kabuli_Chr03 | 21182746                | CC                                     | TT                 | TT               | DRR                           | 101495519          | serine/threonine-protein kinase HT1        |
| SNP_15591_A_21186380 | NC_021162.1    | Ca_Kabuli_Chr03 | 21186380                | AA                                     | TT                 | TT               | INTRON                        | 101495519          | serine/threonine-protein kinase HT1        |
| SNP_15592_A_21186394 | NC_021162.1    | Ca_Kabuli_Chr03 | 21186394                | GG                                     | AA                 | AA               | INTRON                        | 101495519          | serine/threonine-protein kinase HT1        |
| SNP_15593_A_21186782 | NC_021162.1    | Ca_Kabuli_Chr03 | 21186782                | TT                                     | GG                 | GG               | DRR                           | 101494754          | non-specific lipid-transfer protein 1-like |
| SNP_15594_A_21186822 | NC_021162.1    | Ca_Kabuli_Chr03 | 21186822                | TT                                     | AA                 | AA               | DRR                           | 101494754          | non-specific lipid-transfer protein 1-like |
| SNP_15595_A_21186823 | NC_021162.1    | Ca_Kabuli_Chr03 | 21186823                | TT                                     | CC                 | CC               | DRR                           | 101494754          | non-specific lipid-transfer protein 1-like |
| SNP_15596_A_21211688 | NC_021162.1    | Ca_Kabuli_Chr03 | 21211688                | TT                                     | CC                 | CC               | INTERGENIC                    |                    |                                            |
| SNP_15597_A_21243912 | NC_021162.1    | Ca_Kabuli_Chr03 | 21243912                | TT                                     | CC                 | CC               | DRR                           | 101496395          | uncharacterized LOC101496395               |
| SNP_15599_A_21303410 | NC_021162.1    | Ca_Kabuli_Chr03 | 21303410                | GG                                     | AA                 | AA               | URR                           | 101496504          | uncharacterized LOC101496504               |
| SNP_15602_A_21321452 | NC_021162.1    | Ca_Kabuli_Chr03 | 21321452                | TT                                     | CC                 | CC               | INTERGENIC                    |                    |                                            |
| SNP_15603_A_21321455 | NC_021162.1    | Ca_Kabuli_Chr03 | 21321455                | TT                                     | CC                 | CC               | INTERGENIC                    |                    |                                            |
| SNP_15604_A_21321491 | NC_021162.1    | Ca_Kabuli_Chr03 | 21321491                | AA                                     | GG                 | GG               | INTERGENIC                    |                    |                                            |
| SNP_15605_A_21321712 | NC_021162.1    | Ca_Kabuli_Chr03 | 21321712                | CC                                     | TT                 | TT               | INTERGENIC                    |                    |                                            |
| SNP_15606_A_21331803 | NC_021162.1    | Ca_Kabuli_Chr03 | 21331803                | AA                                     | GG                 | GG               | INTERGENIC                    |                    |                                            |

| SNPs IDs             | Chromosome IDs | Chromosomes     | Physical positions (bp) | CDC Frontier genome (Reference genome) | (Pusa 1103 & HPNB) | (ILWC 46 & LPNB) | Sequence genome | Components of | Gene accession IDs | Putative functions |
|----------------------|----------------|-----------------|-------------------------|----------------------------------------|--------------------|------------------|-----------------|---------------|--------------------|--------------------|
| SNP_15607_A_21331835 | NC_021162.1    | Ca_Kabuli_Chr03 | 21331835                | AA                                     | CC                 | CC               | INTERGENIC      |               |                    |                    |
| SNP_15608_A_21331850 | NC_021162.1    | Ca_Kabuli_Chr03 | 21331850                | AA                                     | CC                 | CC               | INTERGENIC      |               |                    |                    |
| SNP_15609_A_21331872 | NC_021162.1    | Ca_Kabuli_Chr03 | 21331872                | AA                                     | TT                 | TT               | INTERGENIC      |               |                    |                    |
| SNP_15610_A_21356265 | NC_021162.1    | Ca_Kabuli_Chr03 | 21356265                | GG                                     | AA                 | AA               | INTERGENIC      |               |                    |                    |
| SNP_15611_A_21356341 | NC_021162.1    | Ca_Kabuli_Chr03 | 21356341                | AA                                     | GG                 | GG               | INTERGENIC      |               |                    |                    |
| SNP_15612_A_21397297 | NC_021162.1    | Ca_Kabuli_Chr03 | 21397297                | GG                                     | TT                 | TT               | INTERGENIC      |               |                    |                    |
| SNP_15613_A_21397433 | NC_021162.1    | Ca_Kabuli_Chr03 | 21397433                | TT                                     | CC                 | CC               | INTERGENIC      |               |                    |                    |
| SNP_15614_A_21397512 | NC_021162.1    | Ca_Kabuli_Chr03 | 21397512                | GG                                     | AA                 | AA               | INTERGENIC      |               |                    |                    |
| SNP_15615_A_21397529 | NC_021162.1    | Ca_Kabuli_Chr03 | 21397529                | AA                                     | GG                 | GG               | INTERGENIC      |               |                    |                    |
| SNP_15616_A_21397587 | NC_021162.1    | Ca_Kabuli_Chr03 | 21397587                | CC                                     | TT                 | TT               | INTERGENIC      |               |                    |                    |
| SNP_15617_A_21397602 | NC_021162.1    | Ca_Kabuli_Chr03 | 21397602                | TT                                     | GG                 | GG               | INTERGENIC      |               |                    |                    |
| SNP_15618_A_21397691 | NC_021162.1    | Ca_Kabuli_Chr03 | 21397691                | GG                                     | TT                 | TT               | INTERGENIC      |               |                    |                    |
| SNP_15619_A_21414090 | NC_021162.1    | Ca_Kabuli_Chr03 | 21414090                | GG                                     | CC                 | CC               | INTERGENIC      |               |                    |                    |
| SNP_15620_A_21414164 | NC_021162.1    | Ca_Kabuli_Chr03 | 21414164                | TT                                     | CC                 | CC               | INTERGENIC      |               |                    |                    |
| SNP_15621_A_21414225 | NC_021162.1    | Ca_Kabuli_Chr03 | 21414225                | GG                                     | CC                 | CC               | INTERGENIC      |               |                    |                    |
| SNP_15622_A_21422190 | NC_021162.1    | Ca_Kabuli_Chr03 | 21422190                | TT                                     | CC                 | CC               | INTERGENIC      |               |                    |                    |
| SNP_15624_A_21583417 | NC_021162.1    | Ca_Kabuli_Chr03 | 21583417                | CC                                     | AA                 | AA               | INTERGENIC      |               |                    |                    |
| SNP_15625_A_21583495 | NC_021162.1    | Ca_Kabuli_Chr03 | 21583495                | CC                                     | TT                 | TT               | INTERGENIC      |               |                    |                    |
| SNP_15626_A_21583604 | NC_021162.1    | Ca_Kabuli_Chr03 | 21583604                | AA                                     | TT                 | TT               | INTERGENIC      |               |                    |                    |
| SNP_15627_A_21583609 | NC_021162.1    | Ca_Kabuli_Chr03 | 21583609                | TT                                     | AA                 | AA               | INTERGENIC      |               |                    |                    |
| SNP_15628_A_21583610 | NC_021162.1    | Ca_Kabuli_Chr03 | 21583610                | GG                                     | AA                 | AA               | INTERGENIC      |               |                    |                    |
| SNP_15629_A_21583629 | NC_021162.1    | Ca_Kabuli_Chr03 | 21583629                | AA                                     | TT                 | TT               | INTERGENIC      |               |                    |                    |



| SNPs IDs             | Chromosome IDs | Chromosomes     | Physical positions (bp) | CDC Frontier genome (Reference genome) | (Pusa 1103 & HPNB) | (ILWC 46 & LPNB) | Sequence Components of genome | Gene accession IDs | Putative functions           |
|----------------------|----------------|-----------------|-------------------------|----------------------------------------|--------------------|------------------|-------------------------------|--------------------|------------------------------|
| SNP_15631_A_21620251 | NC_021162.1    | Ca_Kabuli_Chr03 | 21620251                | AA                                     | GG                 | GG               | INTERGENIC                    |                    |                              |
| SNP_15632_A_21635312 | NC_021162.1    | Ca_Kabuli_Chr03 | 21635312                | AA                                     | TT                 | TT               | INTERGENIC                    |                    |                              |
| SNP_15633_A_21635387 | NC_021162.1    | Ca_Kabuli_Chr03 | 21635387                | CC                                     | AA                 | AA               | INTERGENIC                    |                    |                              |
| SNP_15634_A_21635388 | NC_021162.1    | Ca_Kabuli_Chr03 | 21635388                | AA                                     | TT                 | TT               | INTERGENIC                    |                    |                              |
| SNP_15635_A_21635390 | NC_021162.1    | Ca_Kabuli_Chr03 | 21635390                | AA                                     | GG                 | GG               | INTERGENIC                    |                    |                              |
| SNP_15636_A_21635417 | NC_021162.1    | Ca_Kabuli_Chr03 | 21635417                | GG                                     | TT                 | TT               | INTERGENIC                    |                    |                              |
| SNP_15637_A_21635466 | NC_021162.1    | Ca_Kabuli_Chr03 | 21635466                | AA                                     | GG                 | GG               | INTERGENIC                    |                    |                              |
| SNP_15639_A_21635661 | NC_021162.1    | Ca_Kabuli_Chr03 | 21635661                | GG                                     | TT                 | TT               | INTERGENIC                    |                    |                              |
| SNP_15640_A_21635673 | NC_021162.1    | Ca_Kabuli_Chr03 | 21635673                | AA                                     | TT                 | TT               | INTERGENIC                    |                    |                              |
| SNP_15641_A_21635675 | NC_021162.1    | Ca_Kabuli_Chr03 | 21635675                | GG                                     | AA                 | AA               | INTERGENIC                    |                    |                              |
| SNP_15642_A_21635688 | NC_021162.1    | Ca_Kabuli_Chr03 | 21635688                | AA                                     | GG                 | GG               | INTERGENIC                    |                    |                              |
| SNP_15643_A_21635766 | NC_021162.1    | Ca_Kabuli_Chr03 | 21635766                | TT                                     | CC                 | CC               | INTERGENIC                    |                    |                              |
| SNP_15644_A_21635859 | NC_021162.1    | Ca_Kabuli_Chr03 | 21635859                | GG                                     | TT                 | TT               | INTERGENIC                    |                    |                              |
| SNP_15645_A_21640816 | NC_021162.1    | Ca_Kabuli_Chr03 | 21640816                | TT                                     | CC                 | CC               | INTRON                        | 101510020          | uncharacterized LOC101510020 |
| SNP_15646_A_21699777 | NC_021162.1    | Ca_Kabuli_Chr03 | 21699777                | GG                                     | AA                 | AA               | INTRON                        | 101512486          | uncharacterized LOC101512486 |
| SNP_15647_A_21881295 | NC_021162.1    | Ca_Kabuli_Chr03 | 21881295                | AA                                     | GG                 | GG               | INTERGENIC                    |                    |                              |
| SNP_15648_A_21883771 | NC_021162.1    | Ca_Kabuli_Chr03 | 21883771                | TT                                     | AA                 | AA               | INTERGENIC                    |                    |                              |
| SNP_15649_A_21883789 | NC_021162.1    | Ca_Kabuli_Chr03 | 21883789                | GG                                     | AA                 | AA               | INTERGENIC                    |                    |                              |
| SNP_15650_A_21884622 | NC_021162.1    | Ca_Kabuli_Chr03 | 21884622                | GG                                     | AA                 | AA               | INTERGENIC                    |                    |                              |
| SNP_15651_A_21885730 | NC_021162.1    | Ca_Kabuli_Chr03 | 21885730                | GG                                     | AA                 | AA               | DRR                           | 101507476          | Unknown function             |
| SNP_15652_A_21885772 | NC_021162.1    | Ca_Kabuli_Chr03 | 21885772                | AA                                     | CC                 | CC               | DRR                           | 101507476          | Unknown function             |
| SNP_15653_A_21885775 | NC_021162.1    | Ca_Kabuli_Chr03 | 21885775                | AA                                     | GG                 | GG               | DRR                           | 101507476          | Unknown function             |

| SNPs IDs             | Chromosome IDs | Chromosomes     | Physical positions (bp) | CDC Frontier genome (Reference genome) | (Pusa 1103 & HPNB) | (ILWC 46 & LPNB) | Sequence Components of genome | Gene accession IDs | Putative functions |
|----------------------|----------------|-----------------|-------------------------|----------------------------------------|--------------------|------------------|-------------------------------|--------------------|--------------------|
| SNP_15654_A_21886198 | NC_021162.1    | Ca_Kabuli_Chr03 | 21886198                | GG                                     | AA                 | AA               | DRR                           | 101507476          | Unknown function   |
| SNP_15655_A_21887525 | NC_021162.1    | Ca_Kabuli_Chr03 | 21887525                | TT                                     | GG                 | GG               | NON_SYNONYMOUS_CODING         | 101507476          | Unknown function   |
| SNP_15656_A_21887705 | NC_021162.1    | Ca_Kabuli_Chr03 | 21887705                | GG                                     | AA                 | AA               | NON_SYNONYMOUS_CODING         | 101507476          | Unknown function   |
| SNP_15657_A_21890831 | NC_021162.1    | Ca_Kabuli_Chr03 | 21890831                | TT                                     | CC                 | CC               | NON_SYNONYMOUS_CODING         | 101507476          | Unknown function   |
| SNP_15658_A_21891241 | NC_021162.1    | Ca_Kabuli_Chr03 | 21891241                | TT                                     | GG                 | GG               | INTRON                        | 101507476          | Unknown function   |
| SNP_15659_A_21891764 | NC_021162.1    | Ca_Kabuli_Chr03 | 21891764                | GG                                     | AA                 | AA               | INTRON                        | 101507476          | Unknown function   |
| SNP_15660_A_21891798 | NC_021162.1    | Ca_Kabuli_Chr03 | 21891798                | GG                                     | TT                 | TT               | INTRON                        | 101507476          | Unknown function   |
| SNP_15661_A_21891850 | NC_021162.1    | Ca_Kabuli_Chr03 | 21891850                | GG                                     | AA                 | AA               | INTRON                        | 101507476          | Unknown function   |
| SNP_15662_A_21892123 | NC_021162.1    | Ca_Kabuli_Chr03 | 21892123                | AA                                     | TT                 | TT               | NON_SYNONYMOUS_CODING         | 101507476          | Unknown function   |
| SNP_15663_A_21892130 | NC_021162.1    | Ca_Kabuli_Chr03 | 21892130                | TT                                     | CC                 | CC               | NON_SYNONYMOUS_CODING         | 101507476          | Unknown function   |
| SNP_15664_A_21892171 | NC_021162.1    | Ca_Kabuli_Chr03 | 21892171                | CC                                     | TT                 | TT               | NON_SYNONYMOUS_CODING         | 101507476          | Unknown function   |
| SNP_15665_A_21893042 | NC_021162.1    | Ca_Kabuli_Chr03 | 21893042                | AA                                     | GG                 | GG               | URR                           | 101507476          | Unknown function   |
| SNP_15666_A_21893100 | NC_021162.1    | Ca_Kabuli_Chr03 | 21893100                | GG                                     | TT                 | TT               | URR                           | 101507476          | Unknown function   |
| SNP_15667_A_21895322 | NC_021162.1    | Ca_Kabuli_Chr03 | 21895322                | GG                                     | AA                 | AA               | INTERGENIC                    |                    |                    |
| SNP_15668_A_21895446 | NC_021162.1    | Ca_Kabuli_Chr03 | 21895446                | GG                                     | AA                 | AA               | INTERGENIC                    |                    |                    |
| SNP_15669_A_21895702 | NC_021162.1    | Ca_Kabuli_Chr03 | 21895702                | CC                                     | TT                 | TT               | INTERGENIC                    |                    |                    |
| SNP_15671_A_21899661 | NC_021162.1    | Ca_Kabuli_Chr03 | 21899661                | GG                                     | AA                 | AA               | INTERGENIC                    |                    |                    |
| SNP_15672_A_21900017 | NC_021162.1    | Ca_Kabuli_Chr03 | 21900017                | CC                                     | AA                 | AA               | INTERGENIC                    |                    |                    |
| SNP_15673_A_21903492 | NC_021162.1    | Ca_Kabuli_Chr03 | 21903492                | GG                                     | AA                 | AA               | INTERGENIC                    |                    |                    |
| SNP_15674_A_21904319 | NC_021162.1    | Ca_Kabuli_Chr03 | 21904319                | AA                                     | GG                 | GG               | INTERGENIC                    |                    |                    |
| SNP_15675_A_21904374 | NC_021162.1    | Ca_Kabuli_Chr03 | 21904374                | AA                                     | CC                 | CC               | INTERGENIC                    |                    |                    |
| SNP_15676_A_21922688 | NC_021162.1    | Ca_Kabuli_Chr03 | 21922688                | TT                                     | CC                 | CC               | INTERGENIC                    |                    |                    |

| SNPs IDs             | Chromosome IDs | Chromosomes     | Physical positions (bp) | CDC Frontier (Reference genome) | (Pusa 1103 & HPNB) | (ILWC 46 & LPNB) | Sequence Components of genome | Gene accession IDs | Putative functions                                 |
|----------------------|----------------|-----------------|-------------------------|---------------------------------|--------------------|------------------|-------------------------------|--------------------|----------------------------------------------------|
| SNP_15677_A_21923172 | NC_021162.1    | Ca_Kabuli_Chr03 | 21923172                | AA                              | TT                 | TT               | INTERGENIC                    |                    |                                                    |
| SNP_15678_A_21936479 | NC_021162.1    | Ca_Kabuli_Chr03 | 21936479                | GG                              | AA                 | AA               | INTRON                        | 101507785          | uncharacterized LOC101507785                       |
| SNP_15679_A_21938152 | NC_021162.1    | Ca_Kabuli_Chr03 | 21938152                | GG                              | AA                 | AA               | INTRON                        | 101507785          | uncharacterized LOC101507785                       |
| SNP_15680_A_21954185 | NC_021162.1    | Ca_Kabuli_Chr03 | 21954185                | CC                              | AA                 | AA               | URR                           | 101500079          | AT-hook motif nuclear-localized protein 7-like     |
| SNP_15681_A_21955470 | NC_021162.1    | Ca_Kabuli_Chr03 | 21955470                | TT                              | AA                 | AA               | INTERGENIC                    |                    |                                                    |
| SNP_15683_A_22022151 | NC_021162.1    | Ca_Kabuli_Chr03 | 22022151                | CC                              | TT                 | TT               | DRR                           | 101502203          | armadillo repeat-containing kinesin-like protein 2 |
| SNP_15685_A_22070451 | NC_021162.1    | Ca_Kabuli_Chr03 | 22070451                | TT                              | GG                 | GG               | URR                           | 101503154          | myosin-11                                          |
| SNP_15686_A_22070475 | NC_021162.1    | Ca_Kabuli_Chr03 | 22070475                | AA                              | TT                 | TT               | URR                           | 101503154          | myosin-11                                          |
| SNP_15687_A_22125334 | NC_021162.1    | Ca_Kabuli_Chr03 | 22125334                | AA                              | GG                 | GG               | INTERGENIC                    |                    |                                                    |
| SNP_15688_A_22125361 | NC_021162.1    | Ca_Kabuli_Chr03 | 22125361                | TT                              | CC                 | CC               | INTERGENIC                    |                    |                                                    |
| SNP_15689_A_22125375 | NC_021162.1    | Ca_Kabuli_Chr03 | 22125375                | AA                              | TT                 | TT               | INTERGENIC                    |                    |                                                    |
| SNP_15690_A_22125735 | NC_021162.1    | Ca_Kabuli_Chr03 | 22125735                | CC                              | AA                 | AA               | INTERGENIC                    |                    |                                                    |
| SNP_15691_A_22125782 | NC_021162.1    | Ca_Kabuli_Chr03 | 22125782                | TT                              | CC                 | CC               | INTERGENIC                    |                    |                                                    |
| SNP_15692_A_22130171 | NC_021162.1    | Ca_Kabuli_Chr03 | 22130171                | GG                              | AA                 | AA               | INTERGENIC                    |                    |                                                    |
| SNP_15693_A_22130178 | NC_021162.1    | Ca_Kabuli_Chr03 | 22130178                | AA                              | GG                 | GG               | INTERGENIC                    |                    |                                                    |
| SNP_15694_A_22130250 | NC_021162.1    | Ca_Kabuli_Chr03 | 22130250                | AA                              | GG                 | GG               | INTERGENIC                    |                    |                                                    |
| SNP_15695_A_22130333 | NC_021162.1    | Ca_Kabuli_Chr03 | 22130333                | AA                              | GG                 | GG               | INTERGENIC                    |                    |                                                    |
| SNP_15696_A_22130334 | NC_021162.1    | Ca_Kabuli_Chr03 | 22130334                | AA                              | GG                 | GG               | INTERGENIC                    |                    |                                                    |
| SNP_15697_A_22130343 | NC_021162.1    | Ca_Kabuli_Chr03 | 22130343                | GG                              | TT                 | TT               | INTERGENIC                    |                    |                                                    |
| SNP_15698_A_22130356 | NC_021162.1    | Ca_Kabuli_Chr03 | 22130356                | AA                              | TT                 | TT               | INTERGENIC                    |                    |                                                    |
| SNP_15699_A_22130466 | NC_021162.1    | Ca_Kabuli_Chr03 | 22130466                | GG                              | AA                 | AA               | INTERGENIC                    |                    |                                                    |
| SNP_15700_A_22130508 | NC_021162.1    | Ca_Kabuli_Chr03 | 22130508                | CC                              | TT                 | TT               | INTERGENIC                    |                    |                                                    |

| SNPs IDs             | Chromosome IDs | Chromosomes     | Physical positions (bp) | CDC Frontier (Reference genome) | (Pusa 1103 & HPNB) | (ILWC 46 & LPNB) | Sequence Components of genome | Gene accession IDs | Putative functions                           |
|----------------------|----------------|-----------------|-------------------------|---------------------------------|--------------------|------------------|-------------------------------|--------------------|----------------------------------------------|
| SNP_15701_A_22130661 | NC_021162.1    | Ca_Kabuli_Chr03 | 22130661                | GG                              | AA                 | AA               | INTERGENIC                    |                    |                                              |
| SNP_15702_A_22130682 | NC_021162.1    | Ca_Kabuli_Chr03 | 22130682                | CC                              | AA                 | AA               | INTERGENIC                    |                    |                                              |
| SNP_15703_A_22130697 | NC_021162.1    | Ca_Kabuli_Chr03 | 22130697                | AA                              | GG                 | GG               | INTERGENIC                    |                    |                                              |
| SNP_15704_A_22130712 | NC_021162.1    | Ca_Kabuli_Chr03 | 22130712                | AA                              | GG                 | GG               | INTERGENIC                    |                    |                                              |
| SNP_15705_A_22130751 | NC_021162.1    | Ca_Kabuli_Chr03 | 22130751                | AA                              | GG                 | GG               | INTERGENIC                    |                    |                                              |
| SNP_15706_A_22324020 | NC_021162.1    | Ca_Kabuli_Chr03 | 22324020                | AA                              | TT                 | TT               | URR                           | 101511101          | CRS2-associated factor 1, mitochondrial      |
| SNP_15707_A_22343847 | NC_021162.1    | Ca_Kabuli_Chr03 | 22343847                | AA                              | CC                 | CC               | DRR                           | 101511740          | subtilisin-like protease SBT1.1              |
| SNP_15708_A_22347449 | NC_021162.1    | Ca_Kabuli_Chr03 | 22347449                | AA                              | CC                 | CC               | URR                           | 101511740          | subtilisin-like protease SBT1.1              |
| SNP_15709_A_22361462 | NC_021162.1    | Ca_Kabuli_Chr03 | 22361462                | TT                              | AA                 | AA               | DRR                           | 101410551          | transfer RNA leucine (anticodon AAG)         |
| SNP_15711_A_22425997 | NC_021162.1    | Ca_Kabuli_Chr03 | 22425997                | CC                              | TT                 | TT               | INTERGENIC                    |                    |                                              |
| SNP_15712_A_22445359 | NC_021162.1    | Ca_Kabuli_Chr03 | 22445359                | GG                              | AA                 | AA               | INTERGENIC                    |                    |                                              |
| SNP_15713_A_22478295 | NC_021162.1    | Ca_Kabuli_Chr03 | 22478295                | TT                              | CC                 | CC               | INTERGENIC                    |                    |                                              |
| SNP_15714_A_22478296 | NC_021162.1    | Ca_Kabuli_Chr03 | 22478296                | AA                              | GG                 | GG               | INTERGENIC                    |                    |                                              |
| SNP_15715_A_22482848 | NC_021162.1    | Ca_Kabuli_Chr03 | 22482848                | GG                              | AA                 | AA               | INTERGENIC                    |                    |                                              |
| SNP_15716_A_22538918 | NC_021162.1    | Ca_Kabuli_Chr03 | 22538918                | CC                              | TT                 | TT               | NON_SYNONYMOUS_CODING         | 101489048          | uncharacterized LOC101489048                 |
| SNP_15717_A_22554212 | NC_021162.1    | Ca_Kabuli_Chr03 | 22554212                | TT                              | AA                 | AA               | INTERGENIC                    |                    |                                              |
| SNP_15718_A_22600257 | NC_021162.1    | Ca_Kabuli_Chr03 | 22600257                | TT                              | CC                 | CC               | INTERGENIC                    |                    |                                              |
| SNP_15719_A_22621186 | NC_021162.1    | Ca_Kabuli_Chr03 | 22621186                | AA                              | GG                 | GG               | DRR                           | 101491317          | SPX and EXS domain-containing protein 1-like |
| SNP_15720_A_22621733 | NC_021162.1    | Ca_Kabuli_Chr03 | 22621733                | GG                              | AA                 | AA               | DRR                           | 101491317          | SPX and EXS domain-containing protein 1-like |
| SNP_15722_A_22732591 | NC_021162.1    | Ca_Kabuli_Chr03 | 22732591                | CC                              | TT                 | TT               | DRR                           | 101510344          | uncharacterized LOC101510344                 |
| SNP_15723_A_22743150 | NC_021162.1    | Ca_Kabuli_Chr03 | 22743150                | GG                              | AA                 | AA               | INTERGENIC                    |                    |                                              |
| SNP_15724_A_22816757 | NC_021162.1    | Ca_Kabuli_Chr03 | 22816757                | TT                              | CC                 | CC               | INTRON                        | 101510995          | serine/threonine-protein kinase RIO1-like    |

| SNPs IDs             | Chromosome IDs | Chromosomes     | Physical positions (bp) | CDC Frontier genome (Reference genome) | (Pusa 1103 & HPNB) | (ILWC 46 & LPNB) | Sequence Components of genome | Gene accession IDs | Putative functions                     |
|----------------------|----------------|-----------------|-------------------------|----------------------------------------|--------------------|------------------|-------------------------------|--------------------|----------------------------------------|
| SNP_15725_A_22836776 | NC_021162.1    | Ca_Kabuli_Chr03 | 22836776                | AA                                     | TT                 | TT               | URR                           | 101497700          | uncharacterized protein At3g61260-like |
| SNP_15726_A_22836777 | NC_021162.1    | Ca_Kabuli_Chr03 | 22836777                | TT                                     | AA                 | AA               | URR                           | 101497700          | uncharacterized protein At3g61260-like |
| SNP_15728_A_22935147 | NC_021162.1    | Ca_Kabuli_Chr03 | 22935147                | TT                                     | GG                 | GG               | INTRON                        | 101511627          | Unknown function                       |
| SNP_15729_A_22935154 | NC_021162.1    | Ca_Kabuli_Chr03 | 22935154                | GG                                     | AA                 | AA               | INTRON                        | 101511627          | Unknown function                       |
| SNP_15731_A_22944106 | NC_021162.1    | Ca_Kabuli_Chr03 | 22944106                | TT                                     | AA                 | AA               | DRR                           | 101511951          | Unknown function                       |
| SNP_15732_A_22961719 | NC_021162.1    | Ca_Kabuli_Chr03 | 22961719                | CC                                     | TT                 | TT               | INTERGENIC                    |                    |                                        |
| SNP_15733_A_22963619 | NC_021162.1    | Ca_Kabuli_Chr03 | 22963619                | GG                                     | TT                 | TT               | INTERGENIC                    |                    |                                        |
| SNP_15734_A_22964420 | NC_021162.1    | Ca_Kabuli_Chr03 | 22964420                | AA                                     | TT                 | TT               | DRR                           | 101502424          | uncharacterized LOC101502424           |
| SNP_15735_A_22978506 | NC_021162.1    | Ca_Kabuli_Chr03 | 22978506                | TT                                     | CC                 | CC               | INTRON                        | 101502727          | acyl-coenzyme A thioesterase 8-like    |
| SNP_15736_A_22996910 | NC_021162.1    | Ca_Kabuli_Chr03 | 22996910                | GG                                     | AA                 | AA               | URR                           | 101503037          | beta-amylase 7                         |
| SNP_15737_A_22999646 | NC_021162.1    | Ca_Kabuli_Chr03 | 22999646                | TT                                     | AA                 | AA               | INTERGENIC                    |                    |                                        |
| SNP_15738_A_23001795 | NC_021162.1    | Ca_Kabuli_Chr03 | 23001795                | GG                                     | TT                 | TT               | INTERGENIC                    |                    |                                        |
| SNP_15739_A_23012928 | NC_021162.1    | Ca_Kabuli_Chr03 | 23012928                | TT                                     | GG                 | GG               | INTERGENIC                    |                    |                                        |
| SNP_15740_A_23013246 | NC_021162.1    | Ca_Kabuli_Chr03 | 23013246                | AA                                     | TT                 | TT               | INTERGENIC                    |                    |                                        |
| SNP_15741_A_23013920 | NC_021162.1    | Ca_Kabuli_Chr03 | 23013920                | GG                                     | AA                 | AA               | INTERGENIC                    |                    |                                        |
| SNP_15742_A_23014149 | NC_021162.1    | Ca_Kabuli_Chr03 | 23014149                | TT                                     | GG                 | GG               | DRR                           | 101503367          | gibberellin 3-beta-dioxygenase 4-like  |
| SNP_15743_A_23014151 | NC_021162.1    | Ca_Kabuli_Chr03 | 23014151                | TT                                     | CC                 | CC               | DRR                           | 101503367          | gibberellin 3-beta-dioxygenase 4-like  |
| SNP_15744_A_23014152 | NC_021162.1    | Ca_Kabuli_Chr03 | 23014152                | GG                                     | AA                 | AA               | DRR                           | 101503367          | gibberellin 3-beta-dioxygenase 4-like  |
| SNP_15745_A_23014178 | NC_021162.1    | Ca_Kabuli_Chr03 | 23014178                | TT                                     | AA                 | AA               | DRR                           | 101503367          | gibberellin 3-beta-dioxygenase 4-like  |
| SNP_15746_A_23014183 | NC_021162.1    | Ca_Kabuli_Chr03 | 23014183                | GG                                     | CC                 | CC               | DRR                           | 101503367          | gibberellin 3-beta-dioxygenase 4-like  |
| SNP_15748_A_23016959 | NC_021162.1    | Ca_Kabuli_Chr03 | 23016959                | CC                                     | TT                 | TT               | URR                           | 101503367          | gibberellin 3-beta-dioxygenase 4-like  |
| SNP_15749_A_23018703 | NC_021162.1    | Ca_Kabuli_Chr03 | 23018703                | CC                                     | AA                 | AA               | INTERGENIC                    |                    |                                        |

| SNPs IDs             | Chromosome IDs | Chromosomes     | Physical positions (bp) | CDC Frontier genome (Reference genome) | (Pusa 1103 & HPNB) | (ILWC 46 & LPNB) | Sequence Components of genome | Gene accession IDs | Putative functions                                                        |
|----------------------|----------------|-----------------|-------------------------|----------------------------------------|--------------------|------------------|-------------------------------|--------------------|---------------------------------------------------------------------------|
| SNP_15750_A_23019096 | NC_021162.1    | Ca_Kabuli_Chr03 | 23019096                | CC                                     | TT                 | TT               | INTERGENIC                    |                    |                                                                           |
| SNP_15751_A_23019162 | NC_021162.1    | Ca_Kabuli_Chr03 | 23019162                | AA                                     | TT                 | TT               | INTERGENIC                    |                    |                                                                           |
| SNP_15754_A_23130460 | NC_021162.1    | Ca_Kabuli_Chr03 | 23130460                | AA                                     | GG                 | GG               | URR                           | 101507257          | U-box domain-containing protein 33                                        |
| SNP_15755_A_23132419 | NC_021162.1    | Ca_Kabuli_Chr03 | 23132419                | GG                                     | AA                 | AA               | INTERGENIC                    |                    |                                                                           |
| SNP_15757_A_23255460 | NC_021162.1    | Ca_Kabuli_Chr03 | 23255460                | CC                                     | TT                 | TT               | DRR                           | 101512608          | bifunctional L-3-cyanoalanine synthase/cysteine synthase 1, mitochondrial |
| SNP_15758_A_23297021 | NC_021162.1    | Ca_Kabuli_Chr03 | 23297021                | GG                                     | AA                 | AA               | INTERGENIC                    |                    |                                                                           |
| SNP_15759_A_23297124 | NC_021162.1    | Ca_Kabuli_Chr03 | 23297124                | AA                                     | GG                 | GG               | INTERGENIC                    |                    |                                                                           |
| SNP_15760_A_23305981 | NC_021162.1    | Ca_Kabuli_Chr03 | 23305981                | GG                                     | TT                 | TT               | URR                           | 101513242          | AT-rich interactive domain-containing protein 2-like                      |
| SNP_15762_A_23325576 | NC_021162.1    | Ca_Kabuli_Chr03 | 23325576                | AA                                     | GG                 | GG               | DRR                           | 101513768          | protein TRANSPARENT TESTA 12                                              |
| SNP_15764_A_23424409 | NC_021162.1    | Ca_Kabuli_Chr03 | 23424409                | TT                                     | GG                 | GG               | INTERGENIC                    |                    |                                                                           |
| SNP_15765_A_23432755 | NC_021162.1    | Ca_Kabuli_Chr03 | 23432755                | TT                                     | CC                 | CC               | INTERGENIC                    |                    |                                                                           |
| SNP_15766_A_23432930 | NC_021162.1    | Ca_Kabuli_Chr03 | 23432930                | AA                                     | GG                 | GG               | INTERGENIC                    |                    |                                                                           |
| SNP_15768_A_23536876 | NC_021162.1    | Ca_Kabuli_Chr03 | 23536876                | TT                                     | CC                 | CC               | INTRON                        | 101493607          | F-box/kelch-repeat protein At3g23880-like                                 |
| SNP_15771_A_23606300 | NC_021162.1    | Ca_Kabuli_Chr03 | 23606300                | AA                                     | GG                 | GG               | INTERGENIC                    |                    |                                                                           |
| SNP_15772_A_23736062 | NC_021162.1    | Ca_Kabuli_Chr03 | 23736062                | AA                                     | GG                 | GG               | URR                           | 101500411          | uncharacterized LOC101500411                                              |
| SNP_15773_A_23738807 | NC_021162.1    | Ca_Kabuli_Chr03 | 23738807                | CC                                     | TT                 | TT               | URR                           | 101514868          | serine/threonine-protein phosphatase 7 long form homolog                  |
| SNP_15774_A_23738808 | NC_021162.1    | Ca_Kabuli_Chr03 | 23738808                | AA                                     | TT                 | TT               | URR                           | 101514868          | serine/threonine-protein phosphatase 7 long form homolog                  |
| SNP_15775_A_23738820 | NC_021162.1    | Ca_Kabuli_Chr03 | 23738820                | AA                                     | TT                 | TT               | URR                           | 101514868          | serine/threonine-protein phosphatase 7 long form homolog                  |
| SNP_15776_A_23738821 | NC_021162.1    | Ca_Kabuli_Chr03 | 23738821                | GG                                     | CC                 | CC               | URR                           | 101514868          | serine/threonine-protein phosphatase 7 long form homolog                  |
| SNP_15777_A_23738829 | NC_021162.1    | Ca_Kabuli_Chr03 | 23738829                | TT                                     | CC                 | CC               | URR                           | 101514868          | serine/threonine-protein phosphatase 7 long form homolog                  |
| SNP_15778_A_23751881 | NC_021162.1    | Ca_Kabuli_Chr03 | 23751881                | AA                                     | GG                 | GG               | INTRON                        | 101500721          | sterol 3-beta-glucosyltransferase UGT80A2-like                            |
| SNP_15779_A_23758881 | NC_021162.1    | Ca_Kabuli_Chr03 | 23758881                | CC                                     | TT                 | TT               | URR                           | 101500721          | sterol 3-beta-glucosyltransferase UGT80A2-like                            |

| SNPs IDs             | Chromosome IDs | Chromosomes     | Physical positions (bp) | CDC Frontier genome (Reference genome) | (Pusa 1103 & HPNB) | (ILWC 46 & LPNB) | Sequence Components of genome | Gene accession IDs | Putative functions                              |
|----------------------|----------------|-----------------|-------------------------|----------------------------------------|--------------------|------------------|-------------------------------|--------------------|-------------------------------------------------|
| SNP_15780_A_23763347 | NC_021162.1    | Ca_Kabuli_Chr03 | 23763347                | AA                                     | GG                 | GG               | DRR                           | 101501150          | protein LUTEIN DEFICIENT 5, chloroplastic       |
| SNP_15781_A_23763353 | NC_021162.1    | Ca_Kabuli_Chr03 | 23763353                | GG                                     | TT                 | TT               | DRR                           | 101501150          | protein LUTEIN DEFICIENT 5, chloroplastic       |
| SNP_15782_A_23795665 | NC_021162.1    | Ca_Kabuli_Chr03 | 23795665                | AA                                     | CC                 | CC               | INTRON                        | 101502312          | ALBINO3-like protein 2, chloroplastic           |
| SNP_15783_A_23795667 | NC_021162.1    | Ca_Kabuli_Chr03 | 23795667                | CC                                     | TT                 | TT               | INTRON                        | 101502312          | ALBINO3-like protein 2, chloroplastic           |
| SNP_15784_A_23795690 | NC_021162.1    | Ca_Kabuli_Chr03 | 23795690                | AA                                     | TT                 | TT               | INTRON                        | 101502312          | ALBINO3-like protein 2, chloroplastic           |
| SNP_15786_A_23843426 | NC_021162.1    | Ca_Kabuli_Chr03 | 23843426                | TT                                     | CC                 | CC               | INTERGENIC                    |                    |                                                 |
| SNP_15787_A_23843430 | NC_021162.1    | Ca_Kabuli_Chr03 | 23843430                | TT                                     | GG                 | GG               | INTERGENIC                    |                    |                                                 |
| SNP_15788_A_23855473 | NC_021162.1    | Ca_Kabuli_Chr03 | 23855473                | AA                                     | TT                 | TT               | URR                           | 101515194          | vicilin-like                                    |
| SNP_15789_A_23855476 | NC_021162.1    | Ca_Kabuli_Chr03 | 23855476                | AA                                     | TT                 | TT               | URR                           | 101515194          | vicilin-like                                    |
| SNP_15790_A_23857333 | NC_021162.1    | Ca_Kabuli_Chr03 | 23857333                | GG                                     | TT                 | TT               | INTERGENIC                    |                    |                                                 |
| SNP_15791_A_23945963 | NC_021162.1    | Ca_Kabuli_Chr03 | 23945963                | AA                                     | GG                 | GG               | URR                           | 101507887          | probable tyrosine-protein phosphatase At1g05000 |
| SNP_15792_A_23946006 | NC_021162.1    | Ca_Kabuli_Chr03 | 23946006                | AA                                     | GG                 | GG               | URR                           | 101507887          | probable tyrosine-protein phosphatase At1g05000 |
| SNP_15793_A_23946041 | NC_021162.1    | Ca_Kabuli_Chr03 | 23946041                | TT                                     | AA                 | AA               | URR                           | 101507887          | probable tyrosine-protein phosphatase At1g05000 |
| SNP_15794_A_23948711 | NC_021162.1    | Ca_Kabuli_Chr03 | 23948711                | AA                                     | CC                 | CC               | INTERGENIC                    |                    |                                                 |
| SNP_15795_A_23948970 | NC_021162.1    | Ca_Kabuli_Chr03 | 23948970                | AA                                     | CC                 | CC               | INTERGENIC                    |                    |                                                 |
| SNP_15796_A_23948977 | NC_021162.1    | Ca_Kabuli_Chr03 | 23948977                | TT                                     | GG                 | GG               | INTERGENIC                    |                    |                                                 |
| SNP_15797_A_23949003 | NC_021162.1    | Ca_Kabuli_Chr03 | 23949003                | TT                                     | CC                 | CC               | INTERGENIC                    |                    |                                                 |
| SNP_15798_A_23949010 | NC_021162.1    | Ca_Kabuli_Chr03 | 23949010                | GG                                     | AA                 | AA               | INTERGENIC                    |                    |                                                 |
| SNP_15799_A_23949012 | NC_021162.1    | Ca_Kabuli_Chr03 | 23949012                | TT                                     | CC                 | CC               | INTERGENIC                    |                    |                                                 |
| SNP_15800_A_23949191 | NC_021162.1    | Ca_Kabuli_Chr03 | 23949191                | AA                                     | GG                 | GG               | INTERGENIC                    |                    |                                                 |
| SNP_15801_A_23949364 | NC_021162.1    | Ca_Kabuli_Chr03 | 23949364                | AA                                     | GG                 | GG               | INTERGENIC                    |                    |                                                 |
| SNP_15802_A_23949501 | NC_021162.1    | Ca_Kabuli_Chr03 | 23949501                | TT                                     | CC                 | CC               | INTERGENIC                    |                    |                                                 |

| SNPs IDs             | Chromosome IDs | Chromosomes     | Physical positions (bp) | CDC Frontier (Reference genome) | (Pusa 1103 & HPNB) | (ILWC 46 & LPNB) | Sequence Components of genome | Gene accession IDs | Putative functions                     |
|----------------------|----------------|-----------------|-------------------------|---------------------------------|--------------------|------------------|-------------------------------|--------------------|----------------------------------------|
| SNP_15803_A_23949503 | NC_021162.1    | Ca_Kabuli_Chr03 | 23949503                | TT                              | CC                 | CC               | INTERGENIC                    |                    |                                        |
| SNP_15804_A_23949510 | NC_021162.1    | Ca_Kabuli_Chr03 | 23949510                | TT                              | CC                 | CC               | INTERGENIC                    |                    |                                        |
| SNP_15805_A_23949537 | NC_021162.1    | Ca_Kabuli_Chr03 | 23949537                | TT                              | CC                 | CC               | INTERGENIC                    |                    |                                        |
| SNP_15806_A_23949543 | NC_021162.1    | Ca_Kabuli_Chr03 | 23949543                | AA                              | CC                 | CC               | INTERGENIC                    |                    |                                        |
| SNP_15807_A_23949558 | NC_021162.1    | Ca_Kabuli_Chr03 | 23949558                | AA                              | GG                 | GG               | INTERGENIC                    |                    |                                        |
| SNP_15808_A_23949589 | NC_021162.1    | Ca_Kabuli_Chr03 | 23949589                | GG                              | AA                 | AA               | INTERGENIC                    |                    |                                        |
| SNP_15809_A_23992612 | NC_021162.1    | Ca_Kabuli_Chr03 | 23992612                | AA                              | GG                 | GG               | INTERGENIC                    |                    |                                        |
| SNP_15810_A_24010837 | NC_021162.1    | Ca_Kabuli_Chr03 | 24010837                | TT                              | AA                 | AA               | INTERGENIC                    |                    |                                        |
| SNP_15811_A_24032461 | NC_021162.1    | Ca_Kabuli_Chr03 | 24032461                | CC                              | TT                 | TT               | INTERGENIC                    |                    |                                        |
| SNP_15813_A_24112679 | NC_021162.1    | Ca_Kabuli_Chr03 | 24112679                | TT                              | CC                 | CC               | DRR                           | 101513997          | ER membrane protein complex subunit 10 |
| SNP_15814_A_24112686 | NC_021162.1    | Ca_Kabuli_Chr03 | 24112686                | TT                              | AA                 | AA               | DRR                           | 101513997          | ER membrane protein complex subunit 10 |
| SNP_15816_A_24160408 | NC_021162.1    | Ca_Kabuli_Chr03 | 24160408                | AA                              | GG                 | GG               | INTRON                        | 101488841          | phospholipase A(1) LCAT3               |
| SNP_15817_A_24174652 | NC_021162.1    | Ca_Kabuli_Chr03 | 24174652                | TT                              | CC                 | CC               | INTERGENIC                    |                    |                                        |
| SNP_15818_A_24174698 | NC_021162.1    | Ca_Kabuli_Chr03 | 24174698                | TT                              | GG                 | GG               | INTERGENIC                    |                    |                                        |
| SNP_15819_A_24174727 | NC_021162.1    | Ca_Kabuli_Chr03 | 24174727                | AA                              | GG                 | GG               | INTERGENIC                    |                    |                                        |
| SNP_15820_A_24174758 | NC_021162.1    | Ca_Kabuli_Chr03 | 24174758                | AA                              | TT                 | TT               | INTERGENIC                    |                    |                                        |
| SNP_15821_A_24174765 | NC_021162.1    | Ca_Kabuli_Chr03 | 24174765                | TT                              | CC                 | CC               | INTERGENIC                    |                    |                                        |
| SNP_15822_A_24174893 | NC_021162.1    | Ca_Kabuli_Chr03 | 24174893                | TT                              | CC                 | CC               | INTERGENIC                    |                    |                                        |
| SNP_15823_A_24175300 | NC_021162.1    | Ca_Kabuli_Chr03 | 24175300                | GG                              | AA                 | AA               | INTERGENIC                    |                    |                                        |
| SNP_15824_A_24177255 | NC_021162.1    | Ca_Kabuli_Chr03 | 24177255                | CC                              | TT                 | TT               | INTERGENIC                    |                    |                                        |
| SNP_15825_A_24177505 | NC_021162.1    | Ca_Kabuli_Chr03 | 24177505                | TT                              | GG                 | GG               | INTERGENIC                    |                    |                                        |
| SNP_15826_A_24187072 | NC_021162.1    | Ca_Kabuli_Chr03 | 24187072                | AA                              | GG                 | GG               | INTERGENIC                    |                    |                                        |



| SNPs IDs             | Chromosome IDs | Chromosomes     | Physical positions (bp) | CDC Frontier genome (Reference genome) | (Pusa 1103 & HPNB) | (ILWC 46 & LPNB) | Sequence genome | Components of | Gene accession IDs | Putative functions |
|----------------------|----------------|-----------------|-------------------------|----------------------------------------|--------------------|------------------|-----------------|---------------|--------------------|--------------------|
| SNP_15827_A_24187382 | NC_021162.1    | Ca_Kabuli_Chr03 | 24187382                | GG                                     | AA                 | AA               | INTERGENIC      |               |                    |                    |
| SNP_15828_A_24187421 | NC_021162.1    | Ca_Kabuli_Chr03 | 24187421                | GG                                     | AA                 | AA               | INTERGENIC      |               |                    |                    |
| SNP_15829_A_24187437 | NC_021162.1    | Ca_Kabuli_Chr03 | 24187437                | TT                                     | CC                 | CC               | INTERGENIC      |               |                    |                    |
| SNP_15830_A_24187451 | NC_021162.1    | Ca_Kabuli_Chr03 | 24187451                | AA                                     | TT                 | TT               | INTERGENIC      |               |                    |                    |
| SNP_15831_A_24187452 | NC_021162.1    | Ca_Kabuli_Chr03 | 24187452                | AA                                     | GG                 | GG               | INTERGENIC      |               |                    |                    |
| SNP_15832_A_24187453 | NC_021162.1    | Ca_Kabuli_Chr03 | 24187453                | AA                                     | TT                 | TT               | INTERGENIC      |               |                    |                    |
| SNP_15833_A_24187457 | NC_021162.1    | Ca_Kabuli_Chr03 | 24187457                | CC                                     | AA                 | GG               | INTERGENIC      |               |                    |                    |
| SNP_15834_A_24187505 | NC_021162.1    | Ca_Kabuli_Chr03 | 24187505                | TT                                     | AA                 | AA               | INTERGENIC      |               |                    |                    |
| SNP_15835_A_24187508 | NC_021162.1    | Ca_Kabuli_Chr03 | 24187508                | CC                                     | AA                 | AA               | INTERGENIC      |               |                    |                    |
| SNP_15836_A_24187519 | NC_021162.1    | Ca_Kabuli_Chr03 | 24187519                | GG                                     | AA                 | AA               | INTERGENIC      |               |                    |                    |
| SNP_15837_A_24187520 | NC_021162.1    | Ca_Kabuli_Chr03 | 24187520                | AA                                     | GG                 | GG               | INTERGENIC      |               |                    |                    |
| SNP_15838_A_24187535 | NC_021162.1    | Ca_Kabuli_Chr03 | 24187535                | GG                                     | AA                 | AA               | INTERGENIC      |               |                    |                    |
| SNP_15840_A_24187558 | NC_021162.1    | Ca_Kabuli_Chr03 | 24187558                | AA                                     | CC                 | CC               | INTERGENIC      |               |                    |                    |
| SNP_15841_A_24187568 | NC_021162.1    | Ca_Kabuli_Chr03 | 24187568                | GG                                     | AA                 | AA               | INTERGENIC      |               |                    |                    |
| SNP_15842_A_24187571 | NC_021162.1    | Ca_Kabuli_Chr03 | 24187571                | GG                                     | TT                 | TT               | INTERGENIC      |               |                    |                    |
| SNP_15843_A_24187577 | NC_021162.1    | Ca_Kabuli_Chr03 | 24187577                | TT                                     | AA                 | AA               | INTERGENIC      |               |                    |                    |
| SNP_15844_A_24187595 | NC_021162.1    | Ca_Kabuli_Chr03 | 24187595                | AA                                     | GG                 | GG               | INTERGENIC      |               |                    |                    |
| SNP_15845_A_24187734 | NC_021162.1    | Ca_Kabuli_Chr03 | 24187734                | TT                                     | AA                 | AA               | INTERGENIC      |               |                    |                    |
| SNP_15846_A_24187746 | NC_021162.1    | Ca_Kabuli_Chr03 | 24187746                | AA                                     | CC                 | CC               | INTERGENIC      |               |                    |                    |
| SNP_15847_A_24187774 | NC_021162.1    | Ca_Kabuli_Chr03 | 24187774                | AA                                     | TT                 | TT               | INTERGENIC      |               |                    |                    |
| SNP_15848_A_24187819 | NC_021162.1    | Ca_Kabuli_Chr03 | 24187819                | TT                                     | GG                 | GG               | INTERGENIC      |               |                    |                    |
| SNP_15849_A_24187823 | NC_021162.1    | Ca_Kabuli_Chr03 | 24187823                | AA                                     | GG                 | GG               | INTERGENIC      |               |                    |                    |

| SNPs IDs             | Chromosome IDs | Chromosomes     | Physical positions (bp) | CDC Frontier genome (Reference genome) | (Pusa 1103 & HPNB) | (ILWC 46 & LPNB) | Sequence Components of genome | Gene accession IDs | Putative functions                   |
|----------------------|----------------|-----------------|-------------------------|----------------------------------------|--------------------|------------------|-------------------------------|--------------------|--------------------------------------|
| SNP_15850_A_24187850 | NC_021162.1    | Ca_Kabuli_Chr03 | 24187850                | AA                                     | GG                 | GG               | INTERGENIC                    |                    |                                      |
| SNP_15851_A_24187853 | NC_021162.1    | Ca_Kabuli_Chr03 | 24187853                | CC                                     | TT                 | TT               | INTERGENIC                    |                    |                                      |
| SNP_15852_A_24187863 | NC_021162.1    | Ca_Kabuli_Chr03 | 24187863                | CC                                     | TT                 | TT               | INTERGENIC                    |                    |                                      |
| SNP_15853_A_24187914 | NC_021162.1    | Ca_Kabuli_Chr03 | 24187914                | AA                                     | TT                 | TT               | INTERGENIC                    |                    |                                      |
| SNP_15854_A_24187915 | NC_021162.1    | Ca_Kabuli_Chr03 | 24187915                | AA                                     | CC                 | CC               | INTERGENIC                    |                    |                                      |
| SNP_15855_A_24187955 | NC_021162.1    | Ca_Kabuli_Chr03 | 24187955                | TT                                     | CC                 | CC               | INTERGENIC                    |                    |                                      |
| SNP_15856_A_24187970 | NC_021162.1    | Ca_Kabuli_Chr03 | 24187970                | AA                                     | GG                 | GG               | INTERGENIC                    |                    |                                      |
| SNP_15857_A_24187988 | NC_021162.1    | Ca_Kabuli_Chr03 | 24187988                | TT                                     | CC                 | CC               | INTERGENIC                    |                    |                                      |
| SNP_15858_A_24187995 | NC_021162.1    | Ca_Kabuli_Chr03 | 24187995                | GG                                     | AA                 | AA               | INTERGENIC                    |                    |                                      |
| SNP_15859_A_24188025 | NC_021162.1    | Ca_Kabuli_Chr03 | 24188025                | CC                                     | TT                 | TT               | INTERGENIC                    |                    |                                      |
| SNP_15861_A_24270461 | NC_021162.1    | Ca_Kabuli_Chr03 | 24270461                | TT                                     | AA                 | AA               | URR                           | 101493167          | uncharacterized LOC101493167         |
| SNP_15862_A_24270612 | NC_021162.1    | Ca_Kabuli_Chr03 | 24270612                | CC                                     | TT                 | TT               | URR                           | 101493167          | uncharacterized LOC101493167         |
| SNP_15863_A_24272955 | NC_021162.1    | Ca_Kabuli_Chr03 | 24272955                | CC                                     | AA                 | AA               | INTERGENIC                    |                    |                                      |
| SNP_15865_A_24273004 | NC_021162.1    | Ca_Kabuli_Chr03 | 24273004                | TT                                     | CC                 | CC               | INTERGENIC                    |                    |                                      |
| SNP_15866_A_24277694 | NC_021162.1    | Ca_Kabuli_Chr03 | 24277694                | CC                                     | TT                 | TT               | INTERGENIC                    |                    |                                      |
| SNP_15867_A_24295655 | NC_021162.1    | Ca_Kabuli_Chr03 | 24295655                | AA                                     | GG                 | GG               | INTERGENIC                    |                    |                                      |
| SNP_15868_A_24320298 | NC_021162.1    | Ca_Kabuli_Chr03 | 24320298                | GG                                     | AA                 | AA               | SYNONYMOUS_CODING             | 101490891          | ATP-dependent DNA helicase PIF1-like |
| SNP_15869_A_24342458 | NC_021162.1    | Ca_Kabuli_Chr03 | 24342458                | AA                                     | GG                 | GG               | DRR                           | 101496290          | cytochrome c-2                       |
| SNP_15870_A_24409247 | NC_021162.1    | Ca_Kabuli_Chr03 | 24409247                | GG                                     | AA                 | AA               | INTERGENIC                    |                    |                                      |
| SNP_15871_A_24422419 | NC_021162.1    | Ca_Kabuli_Chr03 | 24422419                | TT                                     | CC                 | CC               | INTERGENIC                    |                    |                                      |
| SNP_15872_A_24483713 | NC_021162.1    | Ca_Kabuli_Chr03 | 24483713                | TT                                     | AA                 | AA               | URR                           | 101500304          | uncharacterized protein C106.07c     |
| SNP_15873_A_24508734 | NC_021162.1    | Ca_Kabuli_Chr03 | 24508734                | TT                                     | CC                 | CC               | URR                           | 101501458          | uncharacterized LOC101501458         |

| SNPs IDs             | Chromosome IDs | Chromosomes     | Physical positions (bp) | CDC Frontier genome (Reference genome) | (Pusa 1103 & HPNB) | (ILWC 46 & LPNB) | Sequence Components of genome | Gene accession IDs | Putative functions                            |
|----------------------|----------------|-----------------|-------------------------|----------------------------------------|--------------------|------------------|-------------------------------|--------------------|-----------------------------------------------|
| SNP_15874_A_24534422 | NC_021162.1    | Ca_Kabuli_Chr03 | 24534422                | GG                                     | AA                 | AA               | URR                           | 101502836          | cysteine protease ATG4                        |
| SNP_15875_A_24584281 | NC_021162.1    | Ca_Kabuli_Chr03 | 24584281                | CC                                     | TT                 | TT               | URR                           | 101493491          | putative glucan endo-1,3-beta-glucosidase GVI |
| SNP_15876_A_24594534 | NC_021162.1    | Ca_Kabuli_Chr03 | 24594534                | CC                                     | TT                 | TT               | INTERGENIC                    |                    |                                               |
| SNP_15877_A_24594786 | NC_021162.1    | Ca_Kabuli_Chr03 | 24594786                | CC                                     | AA                 | AA               | INTERGENIC                    |                    |                                               |
| SNP_15878_A_24613182 | NC_021162.1    | Ca_Kabuli_Chr03 | 24613182                | AA                                     | GG                 | GG               | URR                           | 101494445          | glucan endo-1,3-beta-glucosidase-like         |
| SNP_15879_A_24613524 | NC_021162.1    | Ca_Kabuli_Chr03 | 24613524                | TT                                     | CC                 | CC               | URR                           | 101494445          | glucan endo-1,3-beta-glucosidase-like         |
| SNP_15880_A_24613566 | NC_021162.1    | Ca_Kabuli_Chr03 | 24613566                | AA                                     | GG                 | GG               | URR                           | 101494445          | glucan endo-1,3-beta-glucosidase-like         |
| SNP_15881_A_24649653 | NC_021162.1    | Ca_Kabuli_Chr03 | 24649653                | GG                                     | AA                 | AA               | INTERGENIC                    |                    |                                               |
| SNP_15882_A_24649729 | NC_021162.1    | Ca_Kabuli_Chr03 | 24649729                | GG                                     | TT                 | TT               | INTERGENIC                    |                    |                                               |
| SNP_15883_A_24653411 | NC_021162.1    | Ca_Kabuli_Chr03 | 24653411                | AA                                     | GG                 | GG               | INTERGENIC                    |                    |                                               |
| SNP_15885_A_24790092 | NC_021162.1    | Ca_Kabuli_Chr03 | 24790092                | CC                                     | TT                 | TT               | INTERGENIC                    |                    |                                               |
| SNP_15886_A_24791035 | NC_021162.1    | Ca_Kabuli_Chr03 | 24791035                | GG                                     | CC                 | CC               | INTERGENIC                    |                    |                                               |
| SNP_15887_A_24796069 | NC_021162.1    | Ca_Kabuli_Chr03 | 24796069                | CC                                     | AA                 | AA               | INTRON                        | 101496071          | Unknown function                              |
| SNP_15888_A_24796317 | NC_021162.1    | Ca_Kabuli_Chr03 | 24796317                | AA                                     | GG                 | GG               | INTRON                        | 101496071          | Unknown function                              |
| SNP_15889_A_24796328 | NC_021162.1    | Ca_Kabuli_Chr03 | 24796328                | AA                                     | TT                 | TT               | INTRON                        | 101496071          | Unknown function                              |
| SNP_15890_A_24796347 | NC_021162.1    | Ca_Kabuli_Chr03 | 24796347                | AA                                     | CC                 | CC               | INTRON                        | 101496071          | Unknown function                              |
| SNP_15891_A_24796349 | NC_021162.1    | Ca_Kabuli_Chr03 | 24796349                | TT                                     | CC                 | CC               | INTRON                        | 101496071          | Unknown function                              |
| SNP_15892_A_24796400 | NC_021162.1    | Ca_Kabuli_Chr03 | 24796400                | TT                                     | CC                 | CC               | INTRON                        | 101496071          | Unknown function                              |
| SNP_15893_A_24796488 | NC_021162.1    | Ca_Kabuli_Chr03 | 24796488                | CC                                     | AA                 | AA               | INTRON                        | 101496071          | Unknown function                              |
| SNP_15894_A_24796528 | NC_021162.1    | Ca_Kabuli_Chr03 | 24796528                | CC                                     | TT                 | TT               | INTRON                        | 101496071          | Unknown function                              |
| SNP_15895_A_24796535 | NC_021162.1    | Ca_Kabuli_Chr03 | 24796535                | AA                                     | TT                 | TT               | INTRON                        | 101496071          | Unknown function                              |
| SNP_15896_A_24796575 | NC_021162.1    | Ca_Kabuli_Chr03 | 24796575                | CC                                     | TT                 | TT               | INTRON                        | 101496071          | Unknown function                              |

| SNPs IDs             | Chromosome IDs | Chromosomes     | Physical positions (bp) | CDC Frontier genome (Reference genome) | (Pusa 1103 & HPNB) | (ILWC 46 & LPNB) | Sequence Components of genome | Gene accession IDs | Putative functions                                                             |
|----------------------|----------------|-----------------|-------------------------|----------------------------------------|--------------------|------------------|-------------------------------|--------------------|--------------------------------------------------------------------------------|
| SNP_15897_A_24796582 | NC_021162.1    | Ca_Kabuli_Chr03 | 24796582                | CC                                     | AA                 | AA               | INTRON                        | 101496071          | Unknown function                                                               |
| SNP_15898_A_24796615 | NC_021162.1    | Ca_Kabuli_Chr03 | 24796615                | AA                                     | CC                 | CC               | INTRON                        | 101496071          | Unknown function                                                               |
| SNP_15899_A_24796712 | NC_021162.1    | Ca_Kabuli_Chr03 | 24796712                | AA                                     | TT                 | TT               | INTRON                        | 101496071          | Unknown function                                                               |
| SNP_15900_A_24796715 | NC_021162.1    | Ca_Kabuli_Chr03 | 24796715                | CC                                     | TT                 | TT               | INTRON                        | 101496071          | Unknown function                                                               |
| SNP_15901_A_24813967 | NC_021162.1    | Ca_Kabuli_Chr03 | 24813967                | CC                                     | AA                 | AA               | INTERGENIC                    |                    |                                                                                |
| SNP_15902_A_24973104 | NC_021162.1    | Ca_Kabuli_Chr03 | 24973104                | CC                                     | TT                 | TT               | INTERGENIC                    |                    |                                                                                |
| SNP_15904_A_25012067 | NC_021162.1    | Ca_Kabuli_Chr03 | 25012067                | AA                                     | TT                 | TT               | INTERGENIC                    |                    |                                                                                |
| SNP_15905_A_25040615 | NC_021162.1    | Ca_Kabuli_Chr03 | 25040615                | AA                                     | GG                 | GG               | DRR                           | 101514983          | chloroplastic group IIB intron splicing facilitator CRS2-B, chloroplastic-like |
| SNP_15906_A_25040663 | NC_021162.1    | Ca_Kabuli_Chr03 | 25040663                | GG                                     | AA                 | AA               | DRR                           | 101514983          | chloroplastic group IIB intron splicing facilitator CRS2-B, chloroplastic-like |
| SNP_15907_A_25040673 | NC_021162.1    | Ca_Kabuli_Chr03 | 25040673                | GG                                     | TT                 | TT               | DRR                           | 101514983          | chloroplastic group IIB intron splicing facilitator CRS2-B, chloroplastic-like |
| SNP_15908_A_25040718 | NC_021162.1    | Ca_Kabuli_Chr03 | 25040718                | TT                                     | CC                 | CC               | DRR                           | 101514983          | chloroplastic group IIB intron splicing facilitator CRS2-B, chloroplastic-like |
| SNP_15909_A_25040730 | NC_021162.1    | Ca_Kabuli_Chr03 | 25040730                | AA                                     | GG                 | GG               | DRR                           | 101514983          | chloroplastic group IIB intron splicing facilitator CRS2-B, chloroplastic-like |
| SNP_15910_A_25040745 | NC_021162.1    | Ca_Kabuli_Chr03 | 25040745                | AA                                     | GG                 | GG               | DRR                           | 101514983          | chloroplastic group IIB intron splicing facilitator CRS2-B, chloroplastic-like |
| SNP_15911_A_25040798 | NC_021162.1    | Ca_Kabuli_Chr03 | 25040798                | AA                                     | GG                 | GG               | DRR                           | 101514983          | chloroplastic group IIB intron splicing facilitator CRS2-B, chloroplastic-like |
| SNP_15912_A_25040800 | NC_021162.1    | Ca_Kabuli_Chr03 | 25040800                | AA                                     | GG                 | GG               | DRR                           | 101514983          | chloroplastic group IIB intron splicing facilitator CRS2-B, chloroplastic-like |
| SNP_15913_A_25040827 | NC_021162.1    | Ca_Kabuli_Chr03 | 25040827                | AA                                     | GG                 | GG               | DRR                           | 101514983          | chloroplastic group IIB intron splicing facilitator CRS2-B, chloroplastic-like |
| SNP_15914_A_25040835 | NC_021162.1    | Ca_Kabuli_Chr03 | 25040835                | AA                                     | TT                 | TT               | DRR                           | 101514983          | chloroplastic group IIB intron splicing facilitator CRS2-B, chloroplastic-like |
| SNP_15915_A_25040838 | NC_021162.1    | Ca_Kabuli_Chr03 | 25040838                | TT                                     | CC                 | CC               | DRR                           | 101514983          | chloroplastic group IIB intron splicing facilitator CRS2-B, chloroplastic-like |
| SNP_15916_A_25040844 | NC_021162.1    | Ca_Kabuli_Chr03 | 25040844                | TT                                     | CC                 | CC               | DRR                           | 101514983          | chloroplastic group IIB intron splicing facilitator CRS2-B, chloroplastic-like |
| SNP_15917_A_25154718 | NC_021162.1    | Ca_Kabuli_Chr03 | 25154718                | GG                                     | TT                 | TT               | INTERGENIC                    |                    |                                                                                |
| SNP_15918_A_25185782 | NC_021162.1    | Ca_Kabuli_Chr03 | 25185782                | CC                                     | TT                 | TT               | INTERGENIC                    |                    |                                                                                |
| SNP_15919_A_25289371 | NC_021162.1    | Ca_Kabuli_Chr03 | 25289371                | CC                                     | TT                 | TT               | INTERGENIC                    |                    |                                                                                |

| SNPs IDs             | Chromosome IDs | Chromosomes     | Physical positions (bp) | CDC Frontier genome (Reference genome) | (Pusa 1103 & HPNB) | (ILWC 46 & LPNB) | Sequence Components of genome | Gene accession IDs | Putative functions                                    |
|----------------------|----------------|-----------------|-------------------------|----------------------------------------|--------------------|------------------|-------------------------------|--------------------|-------------------------------------------------------|
| SNP_15920_A_25317478 | NC_021162.1    | Ca_Kabuli_Chr03 | 25317478                | AA                                     | TT                 | TT               | INTERGENIC                    |                    |                                                       |
| SNP_15921_A_25317479 | NC_021162.1    | Ca_Kabuli_Chr03 | 25317479                | AA                                     | TT                 | TT               | INTERGENIC                    |                    |                                                       |
| SNP_15922_A_25360984 | NC_021162.1    | Ca_Kabuli_Chr03 | 25360984                | CC                                     | TT                 | TT               | DRR                           | 101499765          | acyltransferase-like protein At3g26840, chloroplastic |
| SNP_15923_A_25391076 | NC_021162.1    | Ca_Kabuli_Chr03 | 25391076                | GG                                     | AA                 | AA               | INTERGENIC                    |                    |                                                       |
| SNP_15924_A_25405529 | NC_021162.1    | Ca_Kabuli_Chr03 | 25405529                | TT                                     | AA                 | AA               | INTERGENIC                    |                    |                                                       |
| SNP_15925_A_25546017 | NC_021162.1    | Ca_Kabuli_Chr03 | 25546017                | AA                                     | TT                 | TT               | INTERGENIC                    |                    |                                                       |
| SNP_15927_A_25625867 | NC_021162.1    | Ca_Kabuli_Chr03 | 25625867                | AA                                     | GG                 | GG               | DRR                           | 101508741          | uncharacterized LOC101508741                          |
| SNP_15928_A_25625873 | NC_021162.1    | Ca_Kabuli_Chr03 | 25625873                | AA                                     | GG                 | GG               | DRR                           | 101508741          | uncharacterized LOC101508741                          |
| SNP_15930_A_25765370 | NC_021162.1    | Ca_Kabuli_Chr03 | 25765370                | TT                                     | AA                 | AA               | DRR                           | 101509380          | CLAVATA3/ESR (CLE)-related protein 4A-2-like          |
| SNP_15931_A_25811254 | NC_021162.1    | Ca_Kabuli_Chr03 | 25811254                | CC                                     | TT                 | TT               | INTERGENIC                    |                    |                                                       |
| SNP_15932_A_25813360 | NC_021162.1    | Ca_Kabuli_Chr03 | 25813360                | AA                                     | TT                 | TT               | INTERGENIC                    |                    |                                                       |
| SNP_15933_A_25813369 | NC_021162.1    | Ca_Kabuli_Chr03 | 25813369                | TT                                     | AA                 | AA               | INTERGENIC                    |                    |                                                       |
| SNP_15934_A_25827863 | NC_021162.1    | Ca_Kabuli_Chr03 | 25827863                | GG                                     | TT                 | TT               | INTERGENIC                    |                    |                                                       |
| SNP_15935_A_25869863 | NC_021162.1    | Ca_Kabuli_Chr03 | 25869863                | CC                                     | GG                 | GG               | DRR                           | 101510677          | uncharacterized LOC101510677                          |
| SNP_15936_A_25872806 | NC_021162.1    | Ca_Kabuli_Chr03 | 25872806                | AA                                     | CC                 | CC               | URR                           | 101510677          | uncharacterized LOC101510677                          |
| SNP_15937_A_25872828 | NC_021162.1    | Ca_Kabuli_Chr03 | 25872828                | AA                                     | GG                 | GG               | URR                           | 101510677          | uncharacterized LOC101510677                          |
| SNP_15938_A_25872829 | NC_021162.1    | Ca_Kabuli_Chr03 | 25872829                | GG                                     | AA                 | AA               | URR                           | 101510677          | uncharacterized LOC101510677                          |
| SNP_15939_A_25872988 | NC_021162.1    | Ca_Kabuli_Chr03 | 25872988                | GG                                     | AA                 | AA               | URR                           | 101510677          | uncharacterized LOC101510677                          |
| SNP_15940_A_25885789 | NC_021162.1    | Ca_Kabuli_Chr03 | 25885789                | TT                                     | CC                 | CC               | INTERGENIC                    |                    |                                                       |
| SNP_15941_A_25885798 | NC_021162.1    | Ca_Kabuli_Chr03 | 25885798                | AA                                     | GG                 | GG               | INTERGENIC                    |                    |                                                       |
| SNP_15942_A_25886077 | NC_021162.1    | Ca_Kabuli_Chr03 | 25886077                | AA                                     | TT                 | TT               | INTERGENIC                    |                    |                                                       |
| SNP_15943_A_25886087 | NC_021162.1    | Ca_Kabuli_Chr03 | 25886087                | TT                                     | AA                 | AA               | INTERGENIC                    |                    |                                                       |

| SNPs IDs             | Chromosome IDs | Chromosomes     | Physical positions (bp) | CDC Frontier genome (Reference genome) | (Pusa 1103 & HPNB) | (ILWC 46 & LPNB) | Sequence genome | Components of | Gene accession IDs | Putative functions |
|----------------------|----------------|-----------------|-------------------------|----------------------------------------|--------------------|------------------|-----------------|---------------|--------------------|--------------------|
| SNP_15944_A_25886088 | NC_021162.1    | Ca_Kabuli_Chr03 | 25886088                | AA                                     | TT                 | TT               | INTERGENIC      |               |                    |                    |
| SNP_15945_A_25886103 | NC_021162.1    | Ca_Kabuli_Chr03 | 25886103                | AA                                     | GG                 | GG               | INTERGENIC      |               |                    |                    |
| SNP_15946_A_25886132 | NC_021162.1    | Ca_Kabuli_Chr03 | 25886132                | CC                                     | TT                 | TT               | INTERGENIC      |               |                    |                    |
| SNP_15947_A_25886163 | NC_021162.1    | Ca_Kabuli_Chr03 | 25886163                | AA                                     | TT                 | TT               | INTERGENIC      |               |                    |                    |
| SNP_15948_A_25886164 | NC_021162.1    | Ca_Kabuli_Chr03 | 25886164                | TT                                     | AA                 | AA               | INTERGENIC      |               |                    |                    |
| SNP_15949_A_25886183 | NC_021162.1    | Ca_Kabuli_Chr03 | 25886183                | CC                                     | GG                 | GG               | INTERGENIC      |               |                    |                    |
| SNP_15950_A_25886194 | NC_021162.1    | Ca_Kabuli_Chr03 | 25886194                | AA                                     | GG                 | GG               | INTERGENIC      |               |                    |                    |
| SNP_15951_A_25886220 | NC_021162.1    | Ca_Kabuli_Chr03 | 25886220                | CC                                     | AA                 | AA               | INTERGENIC      |               |                    |                    |
| SNP_15952_A_25886242 | NC_021162.1    | Ca_Kabuli_Chr03 | 25886242                | GG                                     | AA                 | AA               | INTERGENIC      |               |                    |                    |
| SNP_15953_A_25886382 | NC_021162.1    | Ca_Kabuli_Chr03 | 25886382                | GG                                     | AA                 | AA               | INTERGENIC      |               |                    |                    |
| SNP_15954_A_25888027 | NC_021162.1    | Ca_Kabuli_Chr03 | 25888027                | GG                                     | AA                 | AA               | INTERGENIC      |               |                    |                    |
| SNP_15956_A_25888108 | NC_021162.1    | Ca_Kabuli_Chr03 | 25888108                | CC                                     | GG                 | GG               | INTERGENIC      |               |                    |                    |
| SNP_15957_A_25888172 | NC_021162.1    | Ca_Kabuli_Chr03 | 25888172                | TT                                     | AA                 | AA               | INTERGENIC      |               |                    |                    |
| SNP_15958_A_25888215 | NC_021162.1    | Ca_Kabuli_Chr03 | 25888215                | CC                                     | TT                 | TT               | INTERGENIC      |               |                    |                    |
| SNP_15959_A_25888226 | NC_021162.1    | Ca_Kabuli_Chr03 | 25888226                | TT                                     | CC                 | CC               | INTERGENIC      |               |                    |                    |
| SNP_15960_A_25888497 | NC_021162.1    | Ca_Kabuli_Chr03 | 25888497                | GG                                     | AA                 | AA               | INTERGENIC      |               |                    |                    |
| SNP_15961_A_25888499 | NC_021162.1    | Ca_Kabuli_Chr03 | 25888499                | AA                                     | CC                 | CC               | INTERGENIC      |               |                    |                    |
| SNP_15962_A_25888504 | NC_021162.1    | Ca_Kabuli_Chr03 | 25888504                | AA                                     | GG                 | GG               | INTERGENIC      |               |                    |                    |
| SNP_15963_A_25888512 | NC_021162.1    | Ca_Kabuli_Chr03 | 25888512                | TT                                     | CC                 | CC               | INTERGENIC      |               |                    |                    |
| SNP_15964_A_25888573 | NC_021162.1    | Ca_Kabuli_Chr03 | 25888573                | AA                                     | GG                 | GG               | INTERGENIC      |               |                    |                    |
| SNP_15965_A_25888585 | NC_021162.1    | Ca_Kabuli_Chr03 | 25888585                | AA                                     | GG                 | GG               | INTERGENIC      |               |                    |                    |
| SNP_15966_A_25888659 | NC_021162.1    | Ca_Kabuli_Chr03 | 25888659                | TT                                     | AA                 | AA               | INTERGENIC      |               |                    |                    |

| SNPs IDs             | Chromosome IDs | Chromosomes     | Physical positions (bp) | CDC Frontier genome (Reference genome) | (Pusa 1103 & HPNB) | (ILWC 46 & LPNB) | Sequence genome | Components of | Gene accession IDs | Putative functions |
|----------------------|----------------|-----------------|-------------------------|----------------------------------------|--------------------|------------------|-----------------|---------------|--------------------|--------------------|
| SNP_15967_A_25888665 | NC_021162.1    | Ca_Kabuli_Chr03 | 25888665                | AA                                     | TT                 | TT               | INTERGENIC      |               |                    |                    |
| SNP_15968_A_25888698 | NC_021162.1    | Ca_Kabuli_Chr03 | 25888698                | AA                                     | TT                 | TT               | INTERGENIC      |               |                    |                    |
| SNP_15969_A_25888753 | NC_021162.1    | Ca_Kabuli_Chr03 | 25888753                | TT                                     | GG                 | GG               | INTERGENIC      |               |                    |                    |
| SNP_15971_A_25888961 | NC_021162.1    | Ca_Kabuli_Chr03 | 25888961                | TT                                     | CC                 | CC               | INTERGENIC      |               |                    |                    |
| SNP_15972_A_25888970 | NC_021162.1    | Ca_Kabuli_Chr03 | 25888970                | AA                                     | TT                 | TT               | INTERGENIC      |               |                    |                    |
| SNP_15973_A_25888971 | NC_021162.1    | Ca_Kabuli_Chr03 | 25888971                | CC                                     | AA                 | AA               | INTERGENIC      |               |                    |                    |
| SNP_15974_A_25888986 | NC_021162.1    | Ca_Kabuli_Chr03 | 25888986                | GG                                     | AA                 | AA               | INTERGENIC      |               |                    |                    |
| SNP_15975_A_25889032 | NC_021162.1    | Ca_Kabuli_Chr03 | 25889032                | CC                                     | TT                 | TT               | INTERGENIC      |               |                    |                    |
| SNP_15976_A_25889053 | NC_021162.1    | Ca_Kabuli_Chr03 | 25889053                | TT                                     | CC                 | CC               | INTERGENIC      |               |                    |                    |
| SNP_15977_A_25889085 | NC_021162.1    | Ca_Kabuli_Chr03 | 25889085                | AA                                     | GG                 | GG               | INTERGENIC      |               |                    |                    |
| SNP_15979_A_25889157 | NC_021162.1    | Ca_Kabuli_Chr03 | 25889157                | CC                                     | TT                 | TT               | INTERGENIC      |               |                    |                    |
| SNP_15980_A_25889158 | NC_021162.1    | Ca_Kabuli_Chr03 | 25889158                | AA                                     | TT                 | TT               | INTERGENIC      |               |                    |                    |
| SNP_15981_A_25889389 | NC_021162.1    | Ca_Kabuli_Chr03 | 25889389                | CC                                     | TT                 | TT               | INTERGENIC      |               |                    |                    |
| SNP_15982_A_25889405 | NC_021162.1    | Ca_Kabuli_Chr03 | 25889405                | CC                                     | AA                 | AA               | INTERGENIC      |               |                    |                    |
| SNP_15983_A_25889416 | NC_021162.1    | Ca_Kabuli_Chr03 | 25889416                | TT                                     | GG                 | GG               | INTERGENIC      |               |                    |                    |
| SNP_15984_A_25889604 | NC_021162.1    | Ca_Kabuli_Chr03 | 25889604                | AA                                     | TT                 | TT               | INTERGENIC      |               |                    |                    |
| SNP_15985_A_25889605 | NC_021162.1    | Ca_Kabuli_Chr03 | 25889605                | TT                                     | AA                 | AA               | INTERGENIC      |               |                    |                    |
| SNP_15987_A_25889650 | NC_021162.1    | Ca_Kabuli_Chr03 | 25889650                | GG                                     | AA                 | AA               | INTERGENIC      |               |                    |                    |
| SNP_15988_A_25890509 | NC_021162.1    | Ca_Kabuli_Chr03 | 25890509                | TT                                     | CC                 | CC               | INTERGENIC      |               |                    |                    |
| SNP_15989_A_25890789 | NC_021162.1    | Ca_Kabuli_Chr03 | 25890789                | AA                                     | TT                 | TT               | INTERGENIC      |               |                    |                    |
| SNP_15990_A_25891218 | NC_021162.1    | Ca_Kabuli_Chr03 | 25891218                | AA                                     | TT                 | TT               | INTERGENIC      |               |                    |                    |
| SNP_15991_A_25891463 | NC_021162.1    | Ca_Kabuli_Chr03 | 25891463                | AA                                     | CC                 | CC               | INTERGENIC      |               |                    |                    |

| SNPs IDs             | Chromosome IDs | Chromosomes     | Physical positions (bp) | CDC Frontier genome (Reference genome) | (Pusa 1103 & HPNB) | (ILWC 46 & LPNB) | Sequence Components of genome | Gene accession IDs | Putative functions           |
|----------------------|----------------|-----------------|-------------------------|----------------------------------------|--------------------|------------------|-------------------------------|--------------------|------------------------------|
| SNP_15992_A_25891464 | NC_021162.1    | Ca_Kabuli_Chr03 | 25891464                | TT                                     | GG                 | GG               | INTERGENIC                    |                    |                              |
| SNP_15993_A_25891471 | NC_021162.1    | Ca_Kabuli_Chr03 | 25891471                | TT                                     | AA                 | AA               | INTERGENIC                    |                    |                              |
| SNP_15995_A_25892027 | NC_021162.1    | Ca_Kabuli_Chr03 | 25892027                | TT                                     | CC                 | CC               | INTERGENIC                    |                    |                              |
| SNP_15996_A_25971833 | NC_021162.1    | Ca_Kabuli_Chr03 | 25971833                | AA                                     | GG                 | GG               | URR                           | 101513019          | uncharacterized LOC101513019 |
| SNP_15997_A_25971852 | NC_021162.1    | Ca_Kabuli_Chr03 | 25971852                | TT                                     | CC                 | CC               | URR                           | 101513019          | uncharacterized LOC101513019 |
| SNP_15998_A_25971861 | NC_021162.1    | Ca_Kabuli_Chr03 | 25971861                | AA                                     | GG                 | GG               | URR                           | 101513019          | uncharacterized LOC101513019 |
| SNP_15999_A_25971878 | NC_021162.1    | Ca_Kabuli_Chr03 | 25971878                | TT                                     | AA                 | AA               | URR                           | 101513019          | uncharacterized LOC101513019 |
| SNP_16000_A_25972042 | NC_021162.1    | Ca_Kabuli_Chr03 | 25972042                | TT                                     | CC                 | CC               | URR                           | 101513019          | uncharacterized LOC101513019 |
| SNP_16001_A_25972178 | NC_021162.1    | Ca_Kabuli_Chr03 | 25972178                | AA                                     | GG                 | GG               | URR                           | 101513019          | uncharacterized LOC101513019 |
| SNP_16002_A_25972211 | NC_021162.1    | Ca_Kabuli_Chr03 | 25972211                | TT                                     | CC                 | CC               | URR                           | 101513019          | uncharacterized LOC101513019 |
| SNP_16003_A_25972250 | NC_021162.1    | Ca_Kabuli_Chr03 | 25972250                | TT                                     | GG                 | GG               | URR                           | 101513019          | uncharacterized LOC101513019 |
| SNP_16004_A_25972368 | NC_021162.1    | Ca_Kabuli_Chr03 | 25972368                | AA                                     | GG                 | GG               | URR                           | 101513019          | uncharacterized LOC101513019 |
| SNP_16005_A_25972426 | NC_021162.1    | Ca_Kabuli_Chr03 | 25972426                | AA                                     | GG                 | GG               | URR                           | 101513019          | uncharacterized LOC101513019 |
| SNP_16006_A_25972441 | NC_021162.1    | Ca_Kabuli_Chr03 | 25972441                | AA                                     | GG                 | GG               | URR                           | 101513019          | uncharacterized LOC101513019 |
| SNP_16008_A_25972449 | NC_021162.1    | Ca_Kabuli_Chr03 | 25972449                | TT                                     | CC                 | CC               | URR                           | 101513019          | uncharacterized LOC101513019 |
| SNP_16011_A_26004985 | NC_021162.1    | Ca_Kabuli_Chr03 | 26004985                | TT                                     | GG                 | GG               | INTERGENIC                    |                    |                              |
| SNP_16012_A_26014355 | NC_021162.1    | Ca_Kabuli_Chr03 | 26014355                | GG                                     | AA                 | AA               | INTERGENIC                    |                    |                              |
| SNP_16014_A_26042030 | NC_021162.1    | Ca_Kabuli_Chr03 | 26042030                | CC                                     | TT                 | TT               | INTRON                        | 101505971          | uncharacterized LOC101505971 |
| SNP_16015_A_26042424 | NC_021162.1    | Ca_Kabuli_Chr03 | 26042424                | TT                                     | CC                 | CC               | INTRON                        | 101505971          | uncharacterized LOC101505971 |
| SNP_16016_A_26042447 | NC_021162.1    | Ca_Kabuli_Chr03 | 26042447                | TT                                     | AA                 | AA               | INTRON                        | 101505971          | uncharacterized LOC101505971 |
| SNP_16017_A_26042477 | NC_021162.1    | Ca_Kabuli_Chr03 | 26042477                | TT                                     | CC                 | CC               | INTRON                        | 101505971          | uncharacterized LOC101505971 |
| SNP_16018_A_26042549 | NC_021162.1    | Ca_Kabuli_Chr03 | 26042549                | AA                                     | CC                 | CC               | INTRON                        | 101505971          | uncharacterized LOC101505971 |



| SNPs IDs             | Chromosome IDs | Chromosomes     | Physical positions (bp) | CDC Frontier genome (Reference genome) | (Pusa 1103 & HPNB) | (ILWC 46 & LPNB) | Sequence Components of genome | Gene accession IDs | Putative functions                            |
|----------------------|----------------|-----------------|-------------------------|----------------------------------------|--------------------|------------------|-------------------------------|--------------------|-----------------------------------------------|
| SNP_16019_A_26070575 | NC_021162.1    | Ca_Kabuli_Chr03 | 26070575                | AA                                     | GG                 | GG               | INTERGENIC                    |                    |                                               |
| SNP_16020_A_26070813 | NC_021162.1    | Ca_Kabuli_Chr03 | 26070813                | AA                                     | TT                 | TT               | INTERGENIC                    |                    |                                               |
| SNP_16022_A_26071315 | NC_021162.1    | Ca_Kabuli_Chr03 | 26071315                | GG                                     | AA                 | AA               | INTERGENIC                    |                    |                                               |
| SNP_16023_A_26071332 | NC_021162.1    | Ca_Kabuli_Chr03 | 26071332                | TT                                     | AA                 | AA               | INTERGENIC                    |                    |                                               |
| SNP_16024_A_26071524 | NC_021162.1    | Ca_Kabuli_Chr03 | 26071524                | GG                                     | CC                 | CC               | INTERGENIC                    |                    |                                               |
| SNP_16025_A_26071763 | NC_021162.1    | Ca_Kabuli_Chr03 | 26071763                | GG                                     | CC                 | CC               | INTERGENIC                    |                    |                                               |
| SNP_16027_A_26071929 | NC_021162.1    | Ca_Kabuli_Chr03 | 26071929                | AA                                     | CC                 | CC               | INTERGENIC                    |                    |                                               |
| SNP_16028_A_26071936 | NC_021162.1    | Ca_Kabuli_Chr03 | 26071936                | GG                                     | AA                 | AA               | INTERGENIC                    |                    |                                               |
| SNP_16029_A_26074399 | NC_021162.1    | Ca_Kabuli_Chr03 | 26074399                | AA                                     | TT                 | TT               | INTRON                        | 101506600          | 3,7-dimethylxanthine N-methyltransferase-like |
| SNP_16030_A_26074424 | NC_021162.1    | Ca_Kabuli_Chr03 | 26074424                | CC                                     | TT                 | TT               | INTRON                        | 101506600          | 3,7-dimethylxanthine N-methyltransferase-like |
| SNP_16031_A_26074450 | NC_021162.1    | Ca_Kabuli_Chr03 | 26074450                | TT                                     | GG                 | GG               | INTRON                        | 101506600          | 3,7-dimethylxanthine N-methyltransferase-like |
| SNP_16032_A_26095480 | NC_021162.1    | Ca_Kabuli_Chr03 | 26095480                | CC                                     | AA                 | AA               | INTRON                        | 101506600          | 3,7-dimethylxanthine N-methyltransferase-like |
| SNP_16033_A_26101426 | NC_021162.1    | Ca_Kabuli_Chr03 | 26101426                | AA                                     | GG                 | GG               | URR                           | 101506600          | 3,7-dimethylxanthine N-methyltransferase-like |
| SNP_16034_A_26101750 | NC_021162.1    | Ca_Kabuli_Chr03 | 26101750                | AA                                     | TT                 | TT               | URR                           | 101506600          | 3,7-dimethylxanthine N-methyltransferase-like |
| SNP_16035_A_26108236 | NC_021162.1    | Ca_Kabuli_Chr03 | 26108236                | TT                                     | CC                 | CC               | INTRON                        | 101515408          | 7-methylxanthosine synthase 1-like            |
| SNP_16037_A_26114159 | NC_021162.1    | Ca_Kabuli_Chr03 | 26114159                | CC                                     | AA                 | AA               | INTRON                        | 101515408          | 7-methylxanthosine synthase 1-like            |
| SNP_16038_A_26114176 | NC_021162.1    | Ca_Kabuli_Chr03 | 26114176                | AA                                     | TT                 | TT               | INTRON                        | 101515408          | 7-methylxanthosine synthase 1-like            |
| SNP_16040_A_26114539 | NC_021162.1    | Ca_Kabuli_Chr03 | 26114539                | CC                                     | GG                 | GG               | INTRON                        | 101515408          | 7-methylxanthosine synthase 1-like            |
| SNP_16041_A_26114734 | NC_021162.1    | Ca_Kabuli_Chr03 | 26114734                | TT                                     | CC                 | CC               | INTERGENIC                    |                    |                                               |
| SNP_16042_A_26114742 | NC_021162.1    | Ca_Kabuli_Chr03 | 26114742                | CC                                     | TT                 | TT               | INTERGENIC                    |                    |                                               |
| SNP_16043_A_26114743 | NC_021162.1    | Ca_Kabuli_Chr03 | 26114743                | GG                                     | AA                 | AA               | INTERGENIC                    |                    |                                               |
| SNP_16044_A_26114858 | NC_021162.1    | Ca_Kabuli_Chr03 | 26114858                | CC                                     | TT                 | TT               | INTERGENIC                    |                    |                                               |

| SNPs IDs             | Chromosome IDs | Chromosomes     | Physical positions (bp) | CDC Frontier genome (Reference genome) | (Pusa 1103 & HPNB) | (ILWC 46 & LPNB) | Sequence genome | Components of | Gene accession IDs                 | Putative functions |
|----------------------|----------------|-----------------|-------------------------|----------------------------------------|--------------------|------------------|-----------------|---------------|------------------------------------|--------------------|
| SNP_16045_A_26114967 | NC_021162.1    | Ca_Kabuli_Chr03 | 26114967                | CC                                     | TT                 | TT               | INTERGENIC      |               |                                    |                    |
| SNP_16046_A_26114972 | NC_021162.1    | Ca_Kabuli_Chr03 | 26114972                | AA                                     | TT                 | TT               | INTERGENIC      |               |                                    |                    |
| SNP_16048_A_26115036 | NC_021162.1    | Ca_Kabuli_Chr03 | 26115036                | AA                                     | GG                 | GG               | INTERGENIC      |               |                                    |                    |
| SNP_16049_A_26115051 | NC_021162.1    | Ca_Kabuli_Chr03 | 26115051                | GG                                     | CC                 | CC               | INTERGENIC      |               |                                    |                    |
| SNP_16050_A_26115162 | NC_021162.1    | Ca_Kabuli_Chr03 | 26115162                | AA                                     | TT                 | TT               | INTERGENIC      |               |                                    |                    |
| SNP_16051_A_26115199 | NC_021162.1    | Ca_Kabuli_Chr03 | 26115199                | TT                                     | AA                 | AA               | INTERGENIC      |               |                                    |                    |
| SNP_16052_A_26115202 | NC_021162.1    | Ca_Kabuli_Chr03 | 26115202                | CC                                     | GG                 | GG               | INTERGENIC      |               |                                    |                    |
| SNP_16053_A_26115226 | NC_021162.1    | Ca_Kabuli_Chr03 | 26115226                | AA                                     | TT                 | TT               | INTERGENIC      |               |                                    |                    |
| SNP_16054_A_26115322 | NC_021162.1    | Ca_Kabuli_Chr03 | 26115322                | TT                                     | AA                 | AA               | INTERGENIC      |               |                                    |                    |
| SNP_16055_A_26115384 | NC_021162.1    | Ca_Kabuli_Chr03 | 26115384                | AA                                     | TT                 | TT               | INTERGENIC      |               |                                    |                    |
| SNP_16056_A_26115435 | NC_021162.1    | Ca_Kabuli_Chr03 | 26115435                | TT                                     | GG                 | GG               | INTERGENIC      |               |                                    |                    |
| SNP_16057_A_26115491 | NC_021162.1    | Ca_Kabuli_Chr03 | 26115491                | AA                                     | GG                 | GG               | INTERGENIC      |               |                                    |                    |
| SNP_16058_A_26115543 | NC_021162.1    | Ca_Kabuli_Chr03 | 26115543                | GG                                     | AA                 | AA               | INTERGENIC      |               |                                    |                    |
| SNP_16059_A_26115748 | NC_021162.1    | Ca_Kabuli_Chr03 | 26115748                | AA                                     | TT                 | TT               | INTERGENIC      |               |                                    |                    |
| SNP_16060_A_26115856 | NC_021162.1    | Ca_Kabuli_Chr03 | 26115856                | GG                                     | CC                 | CC               | INTERGENIC      |               |                                    |                    |
| SNP_16061_A_26115864 | NC_021162.1    | Ca_Kabuli_Chr03 | 26115864                | GG                                     | AA                 | AA               | INTERGENIC      |               |                                    |                    |
| SNP_16062_A_26115961 | NC_021162.1    | Ca_Kabuli_Chr03 | 26115961                | AA                                     | GG                 | GG               | INTERGENIC      |               |                                    |                    |
| SNP_16063_A_26116717 | NC_021162.1    | Ca_Kabuli_Chr03 | 26116717                | CC                                     | AA                 | AA               | URR             | 101515408     | 7-methylxanthosine synthase 1-like |                    |
| SNP_16064_A_26179972 | NC_021162.1    | Ca_Kabuli_Chr03 | 26179972                | TT                                     | CC                 | CC               | INTERGENIC      |               |                                    |                    |
| SNP_16067_A_26433067 | NC_021162.1    | Ca_Kabuli_Chr03 | 26433067                | GG                                     | AA                 | AA               | INTERGENIC      |               |                                    |                    |
| SNP_16068_A_26439635 | NC_021162.1    | Ca_Kabuli_Chr03 | 26439635                | CC                                     | TT                 | TT               | INTRON          | 101508200     | protein FLOWERING LOCUS T-like     |                    |
| SNP_16069_A_26439643 | NC_021162.1    | Ca_Kabuli_Chr03 | 26439643                | CC                                     | TT                 | TT               | INTRON          | 101508200     | protein FLOWERING LOCUS T-like     |                    |

| SNPs IDs             | Chromosome IDs | Chromosomes     | Physical positions (bp) | CDC Frontier (Reference genome) | (Pusa 1103 & HPNB) | (ILWC 46 & LPNB) | Sequence Components of genome | Gene accession IDs | Putative functions                                       |
|----------------------|----------------|-----------------|-------------------------|---------------------------------|--------------------|------------------|-------------------------------|--------------------|----------------------------------------------------------|
| SNP_16070_A_26478729 | NC_021162.1    | Ca_Kabuli_Chr03 | 26478729                | GG                              | TT                 | TT               | INTRON                        | 101499461          | nucleoside-triphosphatase-like                           |
| SNP_16071_A_26483938 | NC_021162.1    | Ca_Kabuli_Chr03 | 26483938                | AA                              | GG                 | GG               | INTERGENIC                    |                    |                                                          |
| SNP_16072_A_26484165 | NC_021162.1    | Ca_Kabuli_Chr03 | 26484165                | CC                              | TT                 | TT               | INTERGENIC                    |                    |                                                          |
| SNP_16073_A_26484343 | NC_021162.1    | Ca_Kabuli_Chr03 | 26484343                | AA                              | GG                 | GG               | INTERGENIC                    |                    |                                                          |
| SNP_16074_A_26495558 | NC_021162.1    | Ca_Kabuli_Chr03 | 26495558                | GG                              | AA                 | AA               | INTERGENIC                    |                    |                                                          |
| SNP_16075_A_26495591 | NC_021162.1    | Ca_Kabuli_Chr03 | 26495591                | AA                              | GG                 | GG               | INTERGENIC                    |                    |                                                          |
| SNP_16076_A_26495683 | NC_021162.1    | Ca_Kabuli_Chr03 | 26495683                | TT                              | CC                 | CC               | INTERGENIC                    |                    |                                                          |
| SNP_16077_A_26495685 | NC_021162.1    | Ca_Kabuli_Chr03 | 26495685                | TT                              | CC                 | CC               | INTERGENIC                    |                    |                                                          |
| SNP_16078_A_26495689 | NC_021162.1    | Ca_Kabuli_Chr03 | 26495689                | AA                              | TT                 | TT               | INTERGENIC                    |                    |                                                          |
| SNP_16079_A_26495714 | NC_021162.1    | Ca_Kabuli_Chr03 | 26495714                | TT                              | AA                 | AA               | INTERGENIC                    |                    |                                                          |
| SNP_16081_A_26495815 | NC_021162.1    | Ca_Kabuli_Chr03 | 26495815                | GG                              | AA                 | AA               | INTERGENIC                    |                    |                                                          |
| SNP_16082_A_26495956 | NC_021162.1    | Ca_Kabuli_Chr03 | 26495956                | CC                              | TT                 | TT               | INTERGENIC                    |                    |                                                          |
| SNP_16083_A_26496003 | NC_021162.1    | Ca_Kabuli_Chr03 | 26496003                | AA                              | CC                 | CC               | INTERGENIC                    |                    |                                                          |
| SNP_16084_A_26496135 | NC_021162.1    | Ca_Kabuli_Chr03 | 26496135                | AA                              | GG                 | GG               | INTERGENIC                    |                    |                                                          |
| SNP_16085_A_26496154 | NC_021162.1    | Ca_Kabuli_Chr03 | 26496154                | AA                              | GG                 | GG               | INTERGENIC                    |                    |                                                          |
| SNP_16086_A_26496191 | NC_021162.1    | Ca_Kabuli_Chr03 | 26496191                | TT                              | GG                 | GG               | INTERGENIC                    |                    |                                                          |
| SNP_16087_A_26510984 | NC_021162.1    | Ca_Kabuli_Chr03 | 26510984                | TT                              | CC                 | CC               | INTERGENIC                    |                    |                                                          |
| SNP_16088_A_26584974 | NC_021162.1    | Ca_Kabuli_Chr03 | 26584974                | CC                              | TT                 | TT               | DRR                           | 101503370          | glucan endo-1,3-beta-glucosidase 8-like                  |
| SNP_16089_A_26652455 | NC_021162.1    | Ca_Kabuli_Chr03 | 26652455                | CC                              | TT                 | TT               | DRR                           | 101508837          | E3 ubiquitin-protein ligase SINA-like 4                  |
| SNP_16090_A_26652965 | NC_021162.1    | Ca_Kabuli_Chr03 | 26652965                | AA                              | GG                 | GG               | DRR                           | 101508837          | E3 ubiquitin-protein ligase SINA-like 4                  |
| SNP_16091_A_26707690 | NC_021162.1    | Ca_Kabuli_Chr03 | 26707690                | TT                              | CC                 | CC               | NON_SYNONYMOUS_CODING         | 101509159          | serine/threonine-protein phosphatase 7 long form homolog |
| SNP_16092_A_26708024 | NC_021162.1    | Ca_Kabuli_Chr03 | 26708024                | TT                              | AA                 | AA               | URR                           | 101509159          | serine/threonine-protein phosphatase 7 long form homolog |

| SNPs IDs             | Chromosome IDs | Chromosomes     | Physical positions (bp) | CDC Frontier genome (Reference genome) | (Pusa 1103 & HPNB) | (ILWC 46 & LPNB) | Sequence Components of genome | Gene accession IDs | Putative functions                                                  |
|----------------------|----------------|-----------------|-------------------------|----------------------------------------|--------------------|------------------|-------------------------------|--------------------|---------------------------------------------------------------------|
| SNP_16094_A_26792931 | NC_021162.1    | Ca_Kabuli_Chr03 | 26792931                | AA                                     | GG                 | GG               | DRR                           | 101512386          | Unknown function                                                    |
| SNP_16095_A_26794373 | NC_021162.1    | Ca_Kabuli_Chr03 | 26794373                | AA                                     | TT                 | TT               | URR                           | 101512386          | Unknown function                                                    |
| SNP_16097_A_26875885 | NC_021162.1    | Ca_Kabuli_Chr03 | 26875885                | CC                                     | GG                 | GG               | INTERGENIC                    |                    |                                                                     |
| SNP_16098_A_26897312 | NC_021162.1    | Ca_Kabuli_Chr03 | 26897312                | CC                                     | TT                 | TT               | URR                           | 101510448          | mavicyanin-like                                                     |
| SNP_16099_A_26897934 | NC_021162.1    | Ca_Kabuli_Chr03 | 26897934                | GG                                     | AA                 | AA               | URR                           | 101510448          | mavicyanin-like                                                     |
| SNP_16101_A_26967658 | NC_021162.1    | Ca_Kabuli_Chr03 | 26967658                | CC                                     | TT                 | TT               | DRR                           | 101492954          | exosome component 10-like                                           |
| SNP_16103_A_27039857 | NC_021162.1    | Ca_Kabuli_Chr03 | 27039857                | AA                                     | TT                 | TT               | INTERGENIC                    |                    |                                                                     |
| SNP_16104_A_27055450 | NC_021162.1    | Ca_Kabuli_Chr03 | 27055450                | GG                                     | AA                 | AA               | DRR                           | 101496400          | cationic amino acid transporter 4, vacuolar                         |
| SNP_16105_A_27097607 | NC_021162.1    | Ca_Kabuli_Chr03 | 27097607                | AA                                     | GG                 | GG               | INTRON                        | 101497377          | probable polyribonucleotide nucleotidyltransferase 1, chloroplastic |
| SNP_16106_A_27111082 | NC_021162.1    | Ca_Kabuli_Chr03 | 27111082                | CC                                     | TT                 | TT               | URR                           | 101498031          | cation/calcium exchanger 1                                          |
| SNP_16107_A_27174816 | NC_021162.1    | Ca_Kabuli_Chr03 | 27174816                | AA                                     | GG                 | GG               | INTERGENIC                    |                    |                                                                     |
| SNP_16108_A_27228445 | NC_021162.1    | Ca_Kabuli_Chr03 | 27228445                | GG                                     | TT                 | TT               | INTERGENIC                    |                    |                                                                     |
| SNP_16109_A_27238032 | NC_021162.1    | Ca_Kabuli_Chr03 | 27238032                | TT                                     | GG                 | GG               | INTERGENIC                    |                    |                                                                     |
| SNP_16110_A_27238879 | NC_021162.1    | Ca_Kabuli_Chr03 | 27238879                | AA                                     | GG                 | GG               | URR                           | 101514337          | inorganic phosphate transporter 1-4-like                            |
| SNP_16111_A_27240695 | NC_021162.1    | Ca_Kabuli_Chr03 | 27240695                | GG                                     | AA                 | AA               | URR                           | 101514337          | inorganic phosphate transporter 1-4-like                            |
| SNP_16112_A_27240708 | NC_021162.1    | Ca_Kabuli_Chr03 | 27240708                | TT                                     | CC                 | CC               | URR                           | 101514337          | inorganic phosphate transporter 1-4-like                            |
| SNP_16113_A_27240762 | NC_021162.1    | Ca_Kabuli_Chr03 | 27240762                | CC                                     | GG                 | GG               | INTERGENIC                    |                    |                                                                     |
| SNP_16114_A_27240763 | NC_021162.1    | Ca_Kabuli_Chr03 | 27240763                | AA                                     | CC                 | CC               | INTERGENIC                    |                    |                                                                     |
| SNP_16115_A_27244284 | NC_021162.1    | Ca_Kabuli_Chr03 | 27244284                | AA                                     | TT                 | TT               | INTERGENIC                    |                    |                                                                     |
| SNP_16116_A_27245484 | NC_021162.1    | Ca_Kabuli_Chr03 | 27245484                | GG                                     | AA                 | AA               | INTERGENIC                    |                    |                                                                     |
| SNP_16117_A_27282648 | NC_021162.1    | Ca_Kabuli_Chr03 | 27282648                | GG                                     | AA                 | AA               | INTERGENIC                    |                    |                                                                     |
| SNP_16118_A_27356423 | NC_021162.1    | Ca_Kabuli_Chr03 | 27356423                | GG                                     | AA                 | AA               | INTERGENIC                    |                    |                                                                     |

| SNPs IDs             | Chromosome IDs | Chromosomes     | Physical positions (bp) | CDC Frontier genome (Reference genome) | (Pusa 1103 & HPNB) | (ILWC 46 & LPNB) | Sequence Components of genome | Gene accession IDs | Putative functions                                                  |
|----------------------|----------------|-----------------|-------------------------|----------------------------------------|--------------------|------------------|-------------------------------|--------------------|---------------------------------------------------------------------|
| SNP_16120_A_27397784 | NC_021162.1    | Ca_Kabuli_Chr03 | 27397784                | GG                                     | TT                 | TT               | URR                           | 101508113          | GDSL esterase/lipase At3g26430-like                                 |
| SNP_16121_A_27415667 | NC_021162.1    | Ca_Kabuli_Chr03 | 27415667                | TT                                     | AA                 | AA               | URR                           | 101508742          | grpE protein homolog, mitochondrial                                 |
| SNP_16122_A_27420388 | NC_021162.1    | Ca_Kabuli_Chr03 | 27420388                | CC                                     | AA                 | AA               | SYNONYMOUS_CODING             | 101509490          | protein TRANSPARENT TESTA 12-like                                   |
| SNP_16123_A_27452348 | NC_021162.1    | Ca_Kabuli_Chr03 | 27452348                | CC                                     | AA                 | AA               | INTRON                        | 101511952          | UPF0400 protein C337.03-like                                        |
| SNP_16124_A_27553488 | NC_021162.1    | Ca_Kabuli_Chr03 | 27553488                | CC                                     | GG                 | GG               | INTERGENIC                    |                    |                                                                     |
| SNP_16125_A_27582610 | NC_021162.1    | Ca_Kabuli_Chr03 | 27582610                | CC                                     | GG                 | GG               | INTRON                        | 101488715          | alpha-L-arabinofuranosidase 1-like                                  |
| SNP_16126_A_27582866 | NC_021162.1    | Ca_Kabuli_Chr03 | 27582866                | CC                                     | TT                 | TT               | SYNONYMOUS_CODING             | 101488715          | alpha-L-arabinofuranosidase 1-like                                  |
| SNP_16127_A_27582869 | NC_021162.1    | Ca_Kabuli_Chr03 | 27582869                | TT                                     | CC                 | CC               | STOP_LOST                     | 101488715          | alpha-L-arabinofuranosidase 1-like                                  |
| SNP_16128_A_27629059 | NC_021162.1    | Ca_Kabuli_Chr03 | 27629059                | CC                                     | TT                 | TT               | DRR                           | 101490139          | protein PHR1-LIKE 1-like                                            |
| SNP_16130_A_27658533 | NC_021162.1    | Ca_Kabuli_Chr03 | 27658533                | TT                                     | AA                 | AA               | INTERGENIC                    |                    |                                                                     |
| SNP_16131_A_27736094 | NC_021162.1    | Ca_Kabuli_Chr03 | 27736094                | AA                                     | GG                 | GG               | DRR                           | 101495955          | histone-lysine N-methyltransferase, H3 lysine-9 specific SUVH1-like |
| SNP_16132_A_27736098 | NC_021162.1    | Ca_Kabuli_Chr03 | 27736098                | AA                                     | GG                 | GG               | DRR                           | 101495955          | histone-lysine N-methyltransferase, H3 lysine-9 specific SUVH1-like |
| SNP_16133_A_27736128 | NC_021162.1    | Ca_Kabuli_Chr03 | 27736128                | TT                                     | AA                 | AA               | DRR                           | 101495955          | histone-lysine N-methyltransferase, H3 lysine-9 specific SUVH1-like |
| SNP_16135_A_27854270 | NC_021162.1    | Ca_Kabuli_Chr03 | 27854270                | AA                                     | GG                 | GG               | INTRON                        | 101498915          | uncharacterized LOC101498915                                        |
| SNP_16136_A_27854283 | NC_021162.1    | Ca_Kabuli_Chr03 | 27854283                | CC                                     | TT                 | TT               | INTRON                        | 101498915          | uncharacterized LOC101498915                                        |
| SNP_16137_A_27854306 | NC_021162.1    | Ca_Kabuli_Chr03 | 27854306                | GG                                     | AA                 | AA               | INTRON                        | 101498915          | uncharacterized LOC101498915                                        |
| SNP_16138_A_27854352 | NC_021162.1    | Ca_Kabuli_Chr03 | 27854352                | TT                                     | CC                 | CC               | INTRON                        | 101498915          | uncharacterized LOC101498915                                        |
| SNP_16139_A_27854355 | NC_021162.1    | Ca_Kabuli_Chr03 | 27854355                | GG                                     | AA                 | AA               | INTRON                        | 101498915          | uncharacterized LOC101498915                                        |
| SNP_16140_A_27854427 | NC_021162.1    | Ca_Kabuli_Chr03 | 27854427                | TT                                     | AA                 | AA               | INTRON                        | 101498915          | uncharacterized LOC101498915                                        |
| SNP_16141_A_27854555 | NC_021162.1    | Ca_Kabuli_Chr03 | 27854555                | GG                                     | AA                 | AA               | INTRON                        | 101498915          | uncharacterized LOC101498915                                        |
| SNP_16142_A_27854694 | NC_021162.1    | Ca_Kabuli_Chr03 | 27854694                | AA                                     | GG                 | GG               | INTRON                        | 101498915          | uncharacterized LOC101498915                                        |
| SNP_16143_A_27854695 | NC_021162.1    | Ca_Kabuli_Chr03 | 27854695                | AA                                     | GG                 | GG               | INTRON                        | 101498915          | uncharacterized LOC101498915                                        |

| SNPs IDs             | Chromosome IDs | Chromosomes     | Physical positions (bp) | CDC Frontier genome (Reference genome) | (Pusa 1103 & HPNB) | (ILWC 46 & LPNB) | Sequence Components of genome | Gene accession IDs | Putative functions                |
|----------------------|----------------|-----------------|-------------------------|----------------------------------------|--------------------|------------------|-------------------------------|--------------------|-----------------------------------|
| SNP_16144_A_27854731 | NC_021162.1    | Ca_Kabuli_Chr03 | 27854731                | AA                                     | GG                 | GG               | INTRON                        | 101498915          | uncharacterized LOC101498915      |
| SNP_16145_A_27854735 | NC_021162.1    | Ca_Kabuli_Chr03 | 27854735                | AA                                     | GG                 | GG               | INTRON                        | 101498915          | uncharacterized LOC101498915      |
| SNP_16146_A_27854744 | NC_021162.1    | Ca_Kabuli_Chr03 | 27854744                | GG                                     | TT                 | TT               | INTRON                        | 101498915          | uncharacterized LOC101498915      |
| SNP_16148_A_27854816 | NC_021162.1    | Ca_Kabuli_Chr03 | 27854816                | GG                                     | TT                 | TT               | INTRON                        | 101498915          | uncharacterized LOC101498915      |
| SNP_16149_A_27855139 | NC_021162.1    | Ca_Kabuli_Chr03 | 27855139                | AA                                     | CC                 | CC               | INTRON                        | 101498915          | uncharacterized LOC101498915      |
| SNP_16150_A_27856730 | NC_021162.1    | Ca_Kabuli_Chr03 | 27856730                | GG                                     | AA                 | AA               | INTRON                        | 101498915          | uncharacterized LOC101498915      |
| SNP_16153_A_27866897 | NC_021162.1    | Ca_Kabuli_Chr03 | 27866897                | AA                                     | CC                 | CC               | INTERGENIC                    |                    |                                   |
| SNP_16154_A_27866904 | NC_021162.1    | Ca_Kabuli_Chr03 | 27866904                | TT                                     | CC                 | CC               | INTERGENIC                    |                    |                                   |
| SNP_16155_A_27866950 | NC_021162.1    | Ca_Kabuli_Chr03 | 27866950                | AA                                     | GG                 | GG               | INTERGENIC                    |                    |                                   |
| SNP_16156_A_27867189 | NC_021162.1    | Ca_Kabuli_Chr03 | 27867189                | GG                                     | AA                 | AA               | INTERGENIC                    |                    |                                   |
| SNP_16157_A_27867193 | NC_021162.1    | Ca_Kabuli_Chr03 | 27867193                | AA                                     | TT                 | TT               | INTERGENIC                    |                    |                                   |
| SNP_16158_A_27869912 | NC_021162.1    | Ca_Kabuli_Chr03 | 27869912                | GG                                     | AA                 | AA               | INTERGENIC                    |                    |                                   |
| SNP_16159_A_27870132 | NC_021162.1    | Ca_Kabuli_Chr03 | 27870132                | TT                                     | CC                 | CC               | INTERGENIC                    |                    |                                   |
| SNP_16160_A_27884114 | NC_021162.1    | Ca_Kabuli_Chr03 | 27884114                | AA                                     | CC                 | CC               | DOWNSTREAM                    | SUPT6H             | Unknown function                  |
| SNP_16161_A_27943942 | NC_021162.1    | Ca_Kabuli_Chr03 | 27943942                | TT                                     | AA                 | AA               | INTERGENIC                    |                    |                                   |
| SNP_16162_A_27950343 | NC_021162.1    | Ca_Kabuli_Chr03 | 27950343                | CC                                     | TT                 | TT               | INTERGENIC                    |                    |                                   |
| SNP_16163_A_27970929 | NC_021162.1    | Ca_Kabuli_Chr03 | 27970929                | CC                                     | GG                 | GG               | URR                           | 101491009          | Unknown function                  |
| SNP_16164_A_28052822 | NC_021162.1    | Ca_Kabuli_Chr03 | 28052822                | CC                                     | GG                 | GG               | URR                           | 101504345          | protein NRT1/ PTR FAMILY 3.1-like |
| SNP_16165_A_28074907 | NC_021162.1    | Ca_Kabuli_Chr03 | 28074907                | TT                                     | AA                 | AA               | INTERGENIC                    |                    |                                   |
| SNP_16166_A_28075103 | NC_021162.1    | Ca_Kabuli_Chr03 | 28075103                | CC                                     | TT                 | TT               | INTERGENIC                    |                    |                                   |
| SNP_16167_A_28109606 | NC_021162.1    | Ca_Kabuli_Chr03 | 28109606                | TT                                     | CC                 | CC               | INTERGENIC                    |                    |                                   |
| SNP_16168_A_28109758 | NC_021162.1    | Ca_Kabuli_Chr03 | 28109758                | AA                                     | GG                 | GG               | INTERGENIC                    |                    |                                   |

| SNPs IDs             | Chromosome IDs | Chromosomes     | Physical positions (bp) | CDC Frontier (Reference genome) | (Pusa 1103 & HPNB) | (ILWC 46 & LPNB) | Sequence genome | Components of | Gene accession IDs | Putative functions |
|----------------------|----------------|-----------------|-------------------------|---------------------------------|--------------------|------------------|-----------------|---------------|--------------------|--------------------|
| SNP_16170_A_28114045 | NC_021162.1    | Ca_Kabuli_Chr03 | 28114045                | AA                              | TT                 | TT               | INTERGENIC      |               |                    |                    |
| SNP_16171_A_28150628 | NC_021162.1    | Ca_Kabuli_Chr03 | 28150628                | AA                              | CC                 | CC               | INTERGENIC      |               |                    |                    |
| SNP_16172_A_28188262 | NC_021162.1    | Ca_Kabuli_Chr03 | 28188262                | CC                              | TT                 | TT               | INTERGENIC      |               |                    |                    |
| SNP_16174_A_28188337 | NC_021162.1    | Ca_Kabuli_Chr03 | 28188337                | GG                              | TT                 | TT               | INTERGENIC      |               |                    |                    |
| SNP_16175_A_28188406 | NC_021162.1    | Ca_Kabuli_Chr03 | 28188406                | AA                              | TT                 | TT               | INTERGENIC      |               |                    |                    |
| SNP_16176_A_28188412 | NC_021162.1    | Ca_Kabuli_Chr03 | 28188412                | GG                              | AA                 | AA               | INTERGENIC      |               |                    |                    |
| SNP_16178_A_28188447 | NC_021162.1    | Ca_Kabuli_Chr03 | 28188447                | TT                              | AA                 | AA               | INTERGENIC      |               |                    |                    |
| SNP_16179_A_28188497 | NC_021162.1    | Ca_Kabuli_Chr03 | 28188497                | AA                              | GG                 | GG               | INTERGENIC      |               |                    |                    |
| SNP_16181_A_28193234 | NC_021162.1    | Ca_Kabuli_Chr03 | 28193234                | GG                              | AA                 | AA               | INTERGENIC      |               |                    |                    |
| SNP_16182_A_28193238 | NC_021162.1    | Ca_Kabuli_Chr03 | 28193238                | GG                              | AA                 | AA               | INTERGENIC      |               |                    |                    |
| SNP_16183_A_28193301 | NC_021162.1    | Ca_Kabuli_Chr03 | 28193301                | CC                              | TT                 | TT               | INTERGENIC      |               |                    |                    |
| SNP_16184_A_28198303 | NC_021162.1    | Ca_Kabuli_Chr03 | 28198303                | TT                              | AA                 | AA               | INTERGENIC      |               |                    |                    |
| SNP_16185_A_28198304 | NC_021162.1    | Ca_Kabuli_Chr03 | 28198304                | CC                              | TT                 | TT               | INTERGENIC      |               |                    |                    |
| SNP_16186_A_28198336 | NC_021162.1    | Ca_Kabuli_Chr03 | 28198336                | TT                              | CC                 | CC               | INTERGENIC      |               |                    |                    |
| SNP_16187_A_28198384 | NC_021162.1    | Ca_Kabuli_Chr03 | 28198384                | CC                              | TT                 | TT               | INTERGENIC      |               |                    |                    |
| SNP_16188_A_28198392 | NC_021162.1    | Ca_Kabuli_Chr03 | 28198392                | AA                              | GG                 | GG               | INTERGENIC      |               |                    |                    |
| SNP_16189_A_28221570 | NC_021162.1    | Ca_Kabuli_Chr03 | 28221570                | CC                              | AA                 | AA               | INTERGENIC      |               |                    |                    |
| SNP_16190_A_28221571 | NC_021162.1    | Ca_Kabuli_Chr03 | 28221571                | GG                              | TT                 | TT               | INTERGENIC      |               |                    |                    |
| SNP_16191_A_28283677 | NC_021162.1    | Ca_Kabuli_Chr03 | 28283677                | AA                              | GG                 | GG               | INTERGENIC      |               |                    |                    |
| SNP_16194_A_28317187 | NC_021162.1    | Ca_Kabuli_Chr03 | 28317187                | TT                              | AA                 | AA               | INTERGENIC      |               |                    |                    |
| SNP_16195_A_28356476 | NC_021162.1    | Ca_Kabuli_Chr03 | 28356476                | TT                              | CC                 | CC               | INTERGENIC      |               |                    |                    |
| SNP_16196_A_28362634 | NC_021162.1    | Ca_Kabuli_Chr03 | 28362634                | TT                              | CC                 | CC               | INTERGENIC      |               |                    |                    |

| SNPs IDs             | Chromosome IDs | Chromosomes     | Physical positions (bp) | CDC Frontier (Reference genome) | (Pusa 1103 & HPNB) | (ILWC 46 & LPNB) | Sequence Components of genome | Gene accession IDs | Putative functions                                     |
|----------------------|----------------|-----------------|-------------------------|---------------------------------|--------------------|------------------|-------------------------------|--------------------|--------------------------------------------------------|
| SNP_16197_A_28407926 | NC_021162.1    | Ca_Kabuli_Chr03 | 28407926                | TT                              | AA                 | AA               | DRR                           | 101497827          | pentatricopeptide repeat-containing protein At4g33990  |
| SNP_16198_A_28421658 | NC_021162.1    | Ca_Kabuli_Chr03 | 28421658                | GG                              | AA                 | AA               | INTRON                        | 101498705          | 10 kDa chaperonin-like                                 |
| SNP_16201_A_28655485 | NC_021162.1    | Ca_Kabuli_Chr03 | 28655485                | CC                              | TT                 | TT               | INTERGENIC                    |                    |                                                        |
| SNP_16202_A_28672643 | NC_021162.1    | Ca_Kabuli_Chr03 | 28672643                | TT                              | CC                 | CC               | INTRON                        | 101506279          | ferredoxin-dependent glutamate synthase, chloroplastic |
| SNP_16205_A_28797835 | NC_021162.1    | Ca_Kabuli_Chr03 | 28797835                | GG                              | CC                 | CC               | INTERGENIC                    |                    |                                                        |
| SNP_16206_A_28799215 | NC_021162.1    | Ca_Kabuli_Chr03 | 28799215                | AA                              | CC                 | CC               | INTERGENIC                    |                    |                                                        |
| SNP_16207_A_28799300 | NC_021162.1    | Ca_Kabuli_Chr03 | 28799300                | GG                              | AA                 | AA               | INTERGENIC                    |                    |                                                        |
| SNP_16208_A_28799332 | NC_021162.1    | Ca_Kabuli_Chr03 | 28799332                | AA                              | TT                 | TT               | INTERGENIC                    |                    |                                                        |
| SNP_16209_A_28799366 | NC_021162.1    | Ca_Kabuli_Chr03 | 28799366                | CC                              | TT                 | TT               | INTERGENIC                    |                    |                                                        |
| SNP_16210_A_28799374 | NC_021162.1    | Ca_Kabuli_Chr03 | 28799374                | TT                              | AA                 | AA               | INTERGENIC                    |                    |                                                        |
| SNP_16211_A_28799381 | NC_021162.1    | Ca_Kabuli_Chr03 | 28799381                | TT                              | AA                 | AA               | INTERGENIC                    |                    |                                                        |
| SNP_16213_A_28799482 | NC_021162.1    | Ca_Kabuli_Chr03 | 28799482                | AA                              | GG                 | GG               | INTERGENIC                    |                    |                                                        |
| SNP_16214_A_28799558 | NC_021162.1    | Ca_Kabuli_Chr03 | 28799558                | AA                              | CC                 | CC               | DRR                           | 101489710          | early nodulin-55-1-like                                |
| SNP_16216_A_28799600 | NC_021162.1    | Ca_Kabuli_Chr03 | 28799600                | GG                              | AA                 | AA               | DRR                           | 101489710          | early nodulin-55-1-like                                |
| SNP_16217_A_28799626 | NC_021162.1    | Ca_Kabuli_Chr03 | 28799626                | GG                              | AA                 | AA               | DRR                           | 101489710          | early nodulin-55-1-like                                |
| SNP_16218_A_28799633 | NC_021162.1    | Ca_Kabuli_Chr03 | 28799633                | TT                              | CC                 | CC               | DRR                           | 101489710          | early nodulin-55-1-like                                |
| SNP_16219_A_28799779 | NC_021162.1    | Ca_Kabuli_Chr03 | 28799779                | TT                              | CC                 | CC               | DRR                           | 101489710          | early nodulin-55-1-like                                |
| SNP_16220_A_28799803 | NC_021162.1    | Ca_Kabuli_Chr03 | 28799803                | CC                              | AA                 | AA               | DRR                           | 101489710          | early nodulin-55-1-like                                |
| SNP_16221_A_28799805 | NC_021162.1    | Ca_Kabuli_Chr03 | 28799805                | GG                              | TT                 | TT               | DRR                           | 101489710          | early nodulin-55-1-like                                |
| SNP_16222_A_28799843 | NC_021162.1    | Ca_Kabuli_Chr03 | 28799843                | AA                              | GG                 | GG               | DRR                           | 101489710          | early nodulin-55-1-like                                |
| SNP_16223_A_28799850 | NC_021162.1    | Ca_Kabuli_Chr03 | 28799850                | TT                              | AA                 | AA               | DRR                           | 101489710          | early nodulin-55-1-like                                |
| SNP_16224_A_28799879 | NC_021162.1    | Ca_Kabuli_Chr03 | 28799879                | GG                              | AA                 | AA               | DRR                           | 101489710          | early nodulin-55-1-like                                |



| SNPs IDs             | Chromosome IDs | Chromosomes     | Physical positions (bp) | CDC Frontier genome (Reference genome) | (Pusa 1103 & HPNB) | (ILWC 46 & LPNB) | Sequence Components of genome | Gene accession IDs | Putative functions                                               |
|----------------------|----------------|-----------------|-------------------------|----------------------------------------|--------------------|------------------|-------------------------------|--------------------|------------------------------------------------------------------|
| SNP_16225_A_28799880 | NC_021162.1    | Ca_Kabuli_Chr03 | 28799880                | TT                                     | GG                 | GG               | DRR                           | 101489710          | early nodulin-55-1-like                                          |
| SNP_16226_A_28799930 | NC_021162.1    | Ca_Kabuli_Chr03 | 28799930                | GG                                     | AA                 | AA               | DRR                           | 101489710          | early nodulin-55-1-like                                          |
| SNP_16228_A_28870353 | NC_021162.1    | Ca_Kabuli_Chr03 | 28870353                | GG                                     | AA                 | AA               | URR                           | 101512920          | haloacid dehalogenase-like hydrolase domain-containing protein 3 |
| SNP_16229_A_28902233 | NC_021162.1    | Ca_Kabuli_Chr03 | 28902233                | AA                                     | TT                 | TT               | INTERGENIC                    |                    |                                                                  |
| SNP_16230_A_28923981 | NC_021162.1    | Ca_Kabuli_Chr03 | 28923981                | AA                                     | CC                 | CC               | DRR                           | 101513886          | triacylglycerol lipase SDP1                                      |
| SNP_16233_A_28994270 | NC_021162.1    | Ca_Kabuli_Chr03 | 28994270                | TT                                     | AA                 | AA               | URR                           | 101488950          | uncharacterized LOC101488950                                     |
| SNP_16234_A_28994737 | NC_021162.1    | Ca_Kabuli_Chr03 | 28994737                | CC                                     | AA                 | AA               | INTRON                        | 101489274          | uncharacterized LOC101489274                                     |
| SNP_16235_A_28994904 | NC_021162.1    | Ca_Kabuli_Chr03 | 28994904                | TT                                     | GG                 | GG               | INTRON                        | 101489274          | uncharacterized LOC101489274                                     |
| SNP_16236_A_28994916 | NC_021162.1    | Ca_Kabuli_Chr03 | 28994916                | AA                                     | GG                 | GG               | INTRON                        | 101489274          | uncharacterized LOC101489274                                     |
| SNP_16237_A_28994917 | NC_021162.1    | Ca_Kabuli_Chr03 | 28994917                | TT                                     | CC                 | CC               | INTRON                        | 101489274          | uncharacterized LOC101489274                                     |
| SNP_16239_A_28994994 | NC_021162.1    | Ca_Kabuli_Chr03 | 28994994                | CC                                     | TT                 | TT               | INTRON                        | 101489274          | uncharacterized LOC101489274                                     |
| SNP_16240_A_28994995 | NC_021162.1    | Ca_Kabuli_Chr03 | 28994995                | AA                                     | CC                 | CC               | INTRON                        | 101489274          | uncharacterized LOC101489274                                     |
| SNP_16241_A_28995029 | NC_021162.1    | Ca_Kabuli_Chr03 | 28995029                | GG                                     | TT                 | TT               | INTRON                        | 101489274          | uncharacterized LOC101489274                                     |
| SNP_16242_A_28995047 | NC_021162.1    | Ca_Kabuli_Chr03 | 28995047                | CC                                     | TT                 | TT               | INTRON                        | 101489274          | uncharacterized LOC101489274                                     |
| SNP_16243_A_28995098 | NC_021162.1    | Ca_Kabuli_Chr03 | 28995098                | AA                                     | GG                 | GG               | INTRON                        | 101489274          | uncharacterized LOC101489274                                     |
| SNP_16244_A_28995112 | NC_021162.1    | Ca_Kabuli_Chr03 | 28995112                | CC                                     | AA                 | AA               | INTRON                        | 101489274          | uncharacterized LOC101489274                                     |
| SNP_16246_A_28995158 | NC_021162.1    | Ca_Kabuli_Chr03 | 28995158                | TT                                     | CC                 | CC               | INTRON                        | 101489274          | uncharacterized LOC101489274                                     |
| SNP_16247_A_28995293 | NC_021162.1    | Ca_Kabuli_Chr03 | 28995293                | GG                                     | CC                 | CC               | NON_SYNONYMOUS_CODING         | 101489274          | uncharacterized LOC101489274                                     |
| SNP_16248_A_28995357 | NC_021162.1    | Ca_Kabuli_Chr03 | 28995357                | AA                                     | GG                 | GG               | INTRON                        | 101489274          | uncharacterized LOC101489274                                     |
| SNP_16249_A_28995359 | NC_021162.1    | Ca_Kabuli_Chr03 | 28995359                | GG                                     | AA                 | AA               | INTRON                        | 101489274          | uncharacterized LOC101489274                                     |
| SNP_16250_A_28995379 | NC_021162.1    | Ca_Kabuli_Chr03 | 28995379                | AA                                     | GG                 | GG               | INTRON                        | 101489274          | uncharacterized LOC101489274                                     |
| SNP_16251_A_28995407 | NC_021162.1    | Ca_Kabuli_Chr03 | 28995407                | AA                                     | GG                 | GG               | INTRON                        | 101489274          | uncharacterized LOC101489274                                     |

| SNPs IDs             | Chromosome IDs | Chromosomes     | Physical positions (bp) | CDC Frontier (Reference genome) | (Pusa 1103 & HPNB) | (ILWC 46 & LPNB) | Sequence Components of genome | Gene accession IDs | Putative functions           |
|----------------------|----------------|-----------------|-------------------------|---------------------------------|--------------------|------------------|-------------------------------|--------------------|------------------------------|
| SNP_16252_A_28995492 | NC_021162.1    | Ca_Kabuli_Chr03 | 28995492                | AA                              | GG                 | GG               | INTRON                        | 101489274          | uncharacterized LOC101489274 |
| SNP_16253_A_28995566 | NC_021162.1    | Ca_Kabuli_Chr03 | 28995566                | TT                              | AA                 | AA               | INTRON                        | 101489274          | uncharacterized LOC101489274 |
| SNP_16254_A_28995571 | NC_021162.1    | Ca_Kabuli_Chr03 | 28995571                | CC                              | TT                 | TT               | INTRON                        | 101489274          | uncharacterized LOC101489274 |
| SNP_16255_A_28995576 | NC_021162.1    | Ca_Kabuli_Chr03 | 28995576                | TT                              | GG                 | GG               | INTRON                        | 101489274          | uncharacterized LOC101489274 |
| SNP_16256_A_28995586 | NC_021162.1    | Ca_Kabuli_Chr03 | 28995586                | GG                              | AA                 | AA               | INTRON                        | 101489274          | uncharacterized LOC101489274 |
| SNP_16257_A_28996624 | NC_021162.1    | Ca_Kabuli_Chr03 | 28996624                | GG                              | TT                 | TT               | INTRON                        | 101489274          | uncharacterized LOC101489274 |
| SNP_16258_A_28996928 | NC_021162.1    | Ca_Kabuli_Chr03 | 28996928                | AA                              | GG                 | GG               | NON_SYNONYMOUS_CODING         | 101489274          | uncharacterized LOC101489274 |
| SNP_16259_A_28996931 | NC_021162.1    | Ca_Kabuli_Chr03 | 28996931                | AA                              | GG                 | GG               | NON_SYNONYMOUS_CODING         | 101489274          | uncharacterized LOC101489274 |
| SNP_16260_A_28996935 | NC_021162.1    | Ca_Kabuli_Chr03 | 28996935                | AA                              | GG                 | GG               | SYNONYMOUS_CODING             | 101489274          | uncharacterized LOC101489274 |
| SNP_16261_A_28996971 | NC_021162.1    | Ca_Kabuli_Chr03 | 28996971                | TT                              | AA                 | AA               | NON_SYNONYMOUS_CODING         | 101489274          | uncharacterized LOC101489274 |
| SNP_16262_A_28996977 | NC_021162.1    | Ca_Kabuli_Chr03 | 28996977                | TT                              | CC                 | CC               | SYNONYMOUS_CODING             | 101489274          | uncharacterized LOC101489274 |
| SNP_16263_A_28997022 | NC_021162.1    | Ca_Kabuli_Chr03 | 28997022                | CC                              | TT                 | TT               | SYNONYMOUS_CODING             | 101489274          | uncharacterized LOC101489274 |
| SNP_16264_A_28997027 | NC_021162.1    | Ca_Kabuli_Chr03 | 28997027                | AA                              | CC                 | CC               | NON_SYNONYMOUS_CODING         | 101489274          | uncharacterized LOC101489274 |
| SNP_16265_A_28997140 | NC_021162.1    | Ca_Kabuli_Chr03 | 28997140                | TT                              | CC                 | CC               | NON_SYNONYMOUS_CODING         | 101489274          | uncharacterized LOC101489274 |
| SNP_16266_A_28997179 | NC_021162.1    | Ca_Kabuli_Chr03 | 28997179                | GG                              | AA                 | AA               | NON_SYNONYMOUS_CODING         | 101489274          | uncharacterized LOC101489274 |
| SNP_16267_A_28997337 | NC_021162.1    | Ca_Kabuli_Chr03 | 28997337                | CC                              | TT                 | TT               | NON_SYNONYMOUS_CODING         | 101489274          | uncharacterized LOC101489274 |
| SNP_16268_A_28997338 | NC_021162.1    | Ca_Kabuli_Chr03 | 28997338                | AA                              | GG                 | GG               | NON_SYNONYMOUS_CODING         | 101489274          | uncharacterized LOC101489274 |
| SNP_16269_A_28997389 | NC_021162.1    | Ca_Kabuli_Chr03 | 28997389                | AA                              | CC                 | CC               | NON_SYNONYMOUS_CODING         | 101489274          | uncharacterized LOC101489274 |
| SNP_16270_A_28997427 | NC_021162.1    | Ca_Kabuli_Chr03 | 28997427                | CC                              | TT                 | TT               | STOP_GAINED                   | 101489274          | uncharacterized LOC101489274 |
| SNP_16271_A_28999544 | NC_021162.1    | Ca_Kabuli_Chr03 | 28999544                | TT                              | AA                 | AA               | NON_SYNONYMOUS_CODING         | 101489274          | uncharacterized LOC101489274 |
| SNP_16272_A_28999585 | NC_021162.1    | Ca_Kabuli_Chr03 | 28999585                | GG                              | AA                 | AA               | NON_SYNONYMOUS_CODING         | 101489274          | uncharacterized LOC101489274 |
| SNP_16273_A_28999587 | NC_021162.1    | Ca_Kabuli_Chr03 | 28999587                | CC                              | GG                 | GG               | SYNONYMOUS_CODING             | 101489274          | uncharacterized LOC101489274 |

| SNPs IDs             | Chromosome IDs | Chromosomes     | Physical positions (bp) | CDC Frontier (Reference genome) | (Pusa 1103 & HPNB) | (ILWC 46 & LPNB) | Sequence Components of genome | Gene accession IDs | Putative functions           |
|----------------------|----------------|-----------------|-------------------------|---------------------------------|--------------------|------------------|-------------------------------|--------------------|------------------------------|
| SNP_16274_A_28999620 | NC_021162.1    | Ca_Kabuli_Chr03 | 28999620                | AA                              | GG                 | GG               | INTRON                        | 101489274          | uncharacterized LOC101489274 |
| SNP_16276_A_28999780 | NC_021162.1    | Ca_Kabuli_Chr03 | 28999780                | AA                              | CC                 | CC               | INTRON                        | 101489274          | uncharacterized LOC101489274 |
| SNP_16277_A_28999785 | NC_021162.1    | Ca_Kabuli_Chr03 | 28999785                | CC                              | GG                 | GG               | INTRON                        | 101489274          | uncharacterized LOC101489274 |
| SNP_16278_A_28999798 | NC_021162.1    | Ca_Kabuli_Chr03 | 28999798                | CC                              | TT                 | TT               | INTRON                        | 101489274          | uncharacterized LOC101489274 |
| SNP_16279_A_28999814 | NC_021162.1    | Ca_Kabuli_Chr03 | 28999814                | AA                              | TT                 | TT               | INTRON                        | 101489274          | uncharacterized LOC101489274 |
| SNP_16280_A_28999900 | NC_021162.1    | Ca_Kabuli_Chr03 | 28999900                | CC                              | TT                 | TT               | INTRON                        | 101489274          | uncharacterized LOC101489274 |
| SNP_16281_A_28999916 | NC_021162.1    | Ca_Kabuli_Chr03 | 28999916                | TT                              | AA                 | AA               | INTRON                        | 101489274          | uncharacterized LOC101489274 |
| SNP_16282_A_28999921 | NC_021162.1    | Ca_Kabuli_Chr03 | 28999921                | AA                              | TT                 | TT               | INTRON                        | 101489274          | uncharacterized LOC101489274 |
| SNP_16283_A_29000035 | NC_021162.1    | Ca_Kabuli_Chr03 | 29000035                | TT                              | GG                 | GG               | INTRON                        | 101489274          | uncharacterized LOC101489274 |
| SNP_16284_A_29000040 | NC_021162.1    | Ca_Kabuli_Chr03 | 29000040                | CC                              | GG                 | GG               | INTRON                        | 101489274          | uncharacterized LOC101489274 |
| SNP_16285_A_29000093 | NC_021162.1    | Ca_Kabuli_Chr03 | 29000093                | AA                              | GG                 | GG               | INTRON                        | 101489274          | uncharacterized LOC101489274 |
| SNP_16286_A_29000161 | NC_021162.1    | Ca_Kabuli_Chr03 | 29000161                | TT                              | GG                 | GG               | INTRON                        | 101489274          | uncharacterized LOC101489274 |
| SNP_16287_A_29000240 | NC_021162.1    | Ca_Kabuli_Chr03 | 29000240                | GG                              | AA                 | AA               | INTRON                        | 101489274          | uncharacterized LOC101489274 |
| SNP_16288_A_29000268 | NC_021162.1    | Ca_Kabuli_Chr03 | 29000268                | GG                              | AA                 | AA               | INTRON                        | 101489274          | uncharacterized LOC101489274 |
| SNP_16289_A_29000627 | NC_021162.1    | Ca_Kabuli_Chr03 | 29000627                | GG                              | CC                 | CC               | INTRON                        | 101489274          | uncharacterized LOC101489274 |
| SNP_16290_A_29000720 | NC_021162.1    | Ca_Kabuli_Chr03 | 29000720                | GG                              | CC                 | CC               | INTRON                        | 101489274          | uncharacterized LOC101489274 |
| SNP_16291_A_29000723 | NC_021162.1    | Ca_Kabuli_Chr03 | 29000723                | TT                              | AA                 | AA               | INTRON                        | 101489274          | uncharacterized LOC101489274 |
| SNP_16292_A_29000745 | NC_021162.1    | Ca_Kabuli_Chr03 | 29000745                | GG                              | AA                 | AA               | INTRON                        | 101489274          | uncharacterized LOC101489274 |
| SNP_16293_A_29000758 | NC_021162.1    | Ca_Kabuli_Chr03 | 29000758                | GG                              | TT                 | TT               | INTRON                        | 101489274          | uncharacterized LOC101489274 |
| SNP_16294_A_29000770 | NC_021162.1    | Ca_Kabuli_Chr03 | 29000770                | AA                              | GG                 | GG               | INTRON                        | 101489274          | uncharacterized LOC101489274 |
| SNP_16295_A_29000810 | NC_021162.1    | Ca_Kabuli_Chr03 | 29000810                | CC                              | TT                 | TT               | INTRON                        | 101489274          | uncharacterized LOC101489274 |
| SNP_16297_A_29000965 | NC_021162.1    | Ca_Kabuli_Chr03 | 29000965                | GG                              | TT                 | TT               | NON_SYNONYMOUS_CODING         | 101489274          | uncharacterized LOC101489274 |

| SNPs IDs             | Chromosome IDs | Chromosomes     | Physical positions (bp) | CDC Frontier (Reference genome) | (Pusa 1103 & HPNB) | (ILWC 46 & LPNB) | Sequence Components of genome | Gene accession IDs | Putative functions                          |
|----------------------|----------------|-----------------|-------------------------|---------------------------------|--------------------|------------------|-------------------------------|--------------------|---------------------------------------------|
| SNP_16298_A_29000970 | NC_021162.1    | Ca_Kabuli_Chr03 | 29000970                | AA                              | TT                 | TT               | NON_SYNONYMOUS_CODING         | 101489274          | uncharacterized LOC101489274                |
| SNP_16299_A_29000975 | NC_021162.1    | Ca_Kabuli_Chr03 | 29000975                | AA                              | CC                 | CC               | NON_SYNONYMOUS_CODING         | 101489274          | uncharacterized LOC101489274                |
| SNP_16300_A_29000981 | NC_021162.1    | Ca_Kabuli_Chr03 | 29000981                | CC                              | TT                 | TT               | SYNONYMOUS_CODING             | 101489274          | uncharacterized LOC101489274                |
| SNP_16301_A_29001038 | NC_021162.1    | Ca_Kabuli_Chr03 | 29001038                | TT                              | CC                 | CC               | INTERGENIC                    |                    |                                             |
| SNP_16302_A_29001043 | NC_021162.1    | Ca_Kabuli_Chr03 | 29001043                | AA                              | GG                 | GG               | INTERGENIC                    |                    |                                             |
| SNP_16303_A_29001068 | NC_021162.1    | Ca_Kabuli_Chr03 | 29001068                | GG                              | AA                 | AA               | INTERGENIC                    |                    |                                             |
| SNP_16304_A_29001074 | NC_021162.1    | Ca_Kabuli_Chr03 | 29001074                | TT                              | CC                 | CC               | INTERGENIC                    |                    |                                             |
| SNP_16305_A_29042319 | NC_021162.1    | Ca_Kabuli_Chr03 | 29042319                | AA                              | GG                 | GG               | DRR                           | 101490369          | F-box/FBD/LRR-repeat protein At1g78750-like |
| SNP_16307_A_29105109 | NC_021162.1    | Ca_Kabuli_Chr03 | 29105109                | AA                              | GG                 | GG               | DRR                           | 101494252          | uncharacterized LOC101494252                |
| SNP_16308_A_29116167 | NC_021162.1    | Ca_Kabuli_Chr03 | 29116167                | GG                              | TT                 | TT               | URR                           | 101494252          | uncharacterized LOC101494252                |
| SNP_16309_A_29132058 | NC_021162.1    | Ca_Kabuli_Chr03 | 29132058                | TT                              | CC                 | CC               | DRR                           | 101491011          | Unknown function                            |
| SNP_16310_A_29213244 | NC_021162.1    | Ca_Kabuli_Chr03 | 29213244                | AA                              | GG                 | GG               | URR                           | 101499346          | putative disease resistance protein RGA3    |
| SNP_16312_A_29248691 | NC_021162.1    | Ca_Kabuli_Chr03 | 29248691                | CC                              | GG                 | GG               | INTERGENIC                    |                    |                                             |
| SNP_16313_A_29249434 | NC_021162.1    | Ca_Kabuli_Chr03 | 29249434                | CC                              | TT                 | TT               | INTERGENIC                    |                    |                                             |
| SNP_16314_A_29249503 | NC_021162.1    | Ca_Kabuli_Chr03 | 29249503                | AA                              | GG                 | GG               | INTERGENIC                    |                    |                                             |
| SNP_16315_A_29249508 | NC_021162.1    | Ca_Kabuli_Chr03 | 29249508                | TT                              | GG                 | GG               | INTERGENIC                    |                    |                                             |
| SNP_16316_A_29249514 | NC_021162.1    | Ca_Kabuli_Chr03 | 29249514                | CC                              | TT                 | TT               | INTERGENIC                    |                    |                                             |
| SNP_16317_A_29249535 | NC_021162.1    | Ca_Kabuli_Chr03 | 29249535                | GG                              | AA                 | AA               | INTERGENIC                    |                    |                                             |
| SNP_16318_A_29249553 | NC_021162.1    | Ca_Kabuli_Chr03 | 29249553                | AA                              | GG                 | GG               | INTERGENIC                    |                    |                                             |
| SNP_16319_A_29249614 | NC_021162.1    | Ca_Kabuli_Chr03 | 29249614                | AA                              | GG                 | GG               | INTERGENIC                    |                    |                                             |
| SNP_16320_A_29249942 | NC_021162.1    | Ca_Kabuli_Chr03 | 29249942                | TT                              | CC                 | CC               | INTERGENIC                    |                    |                                             |
| SNP_16321_A_29250000 | NC_021162.1    | Ca_Kabuli_Chr03 | 29250000                | AA                              | CC                 | CC               | INTERGENIC                    |                    |                                             |

| SNPs IDs             | Chromosome IDs | Chromosomes     | Physical positions (bp) | CDC Frontier genome (Reference genome) | (Pusa 1103 & HPNB) | (ILWC 46 & LPNB) | Sequence Components of genome | Gene accession IDs | Putative functions                                                        |
|----------------------|----------------|-----------------|-------------------------|----------------------------------------|--------------------|------------------|-------------------------------|--------------------|---------------------------------------------------------------------------|
| SNP_16322_A_29250029 | NC_021162.1    | Ca_Kabuli_Chr03 | 29250029                | GG                                     | AA                 | AA               | INTERGENIC                    |                    |                                                                           |
| SNP_16323_A_29250115 | NC_021162.1    | Ca_Kabuli_Chr03 | 29250115                | GG                                     | CC                 | CC               | INTERGENIC                    |                    |                                                                           |
| SNP_16324_A_29297776 | NC_021162.1    | Ca_Kabuli_Chr03 | 29297776                | TT                                     | AA                 | AA               | URR                           | 101502626          | ABC transporter A family member 1                                         |
| SNP_16325_A_29318929 | NC_021162.1    | Ca_Kabuli_Chr03 | 29318929                | GG                                     | AA                 | AA               | INTERGENIC                    |                    |                                                                           |
| SNP_16326_A_29328596 | NC_021162.1    | Ca_Kabuli_Chr03 | 29328596                | CC                                     | TT                 | TT               | INTERGENIC                    |                    |                                                                           |
| SNP_16329_A_29494700 | NC_021162.1    | Ca_Kabuli_Chr03 | 29494700                | GG                                     | AA                 | AA               | INTERGENIC                    |                    |                                                                           |
| SNP_16330_A_29503386 | NC_021162.1    | Ca_Kabuli_Chr03 | 29503386                | GG                                     | AA                 | AA               | URR                           | 101513461          | probable galactinol--sucrose galactosyltransferase 2                      |
| SNP_16333_A_29570466 | NC_021162.1    | Ca_Kabuli_Chr03 | 29570466                | AA                                     | GG                 | GG               | INTERGENIC                    |                    |                                                                           |
| SNP_16335_A_29627886 | NC_021162.1    | Ca_Kabuli_Chr03 | 29627886                | AA                                     | GG                 | GG               | INTRON                        | 101490572          | 1-acyl-sn-glycerol-3-phosphate acyltransferase 2                          |
| SNP_16336_A_29718103 | NC_021162.1    | Ca_Kabuli_Chr03 | 29718103                | CC                                     | TT                 | TT               | DRR                           | 101492627          | pentatricopeptide repeat-containing protein At1g05750, chloroplastic-like |
| SNP_16339_A_29762301 | NC_021162.1    | Ca_Kabuli_Chr03 | 29762301                | TT                                     | CC                 | CC               | URR                           | 101496074          | protein cornichon homolog 1                                               |
| SNP_16343_A_29780273 | NC_021162.1    | Ca_Kabuli_Chr03 | 29780273                | TT                                     | AA                 | AA               | DRR                           | 101497593          | Unknown function                                                          |
| SNP_16344_A_29827587 | NC_021162.1    | Ca_Kabuli_Chr03 | 29827587                | CC                                     | AA                 | AA               | INTERGENIC                    |                    |                                                                           |
| SNP_16345_A_29834598 | NC_021162.1    | Ca_Kabuli_Chr03 | 29834598                | TT                                     | GG                 | GG               | DRR                           | 101499557          | polygalacturonase inhibitor                                               |
| SNP_16346_A_29877241 | NC_021162.1    | Ca_Kabuli_Chr03 | 29877241                | TT                                     | AA                 | AA               | URR                           | 101501033          | TBCC domain-containing protein 1-like                                     |
| SNP_16347_A_29882403 | NC_021162.1    | Ca_Kabuli_Chr03 | 29882403                | TT                                     | AA                 | AA               | INTERGENIC                    |                    |                                                                           |
| SNP_16348_A_29900611 | NC_021162.1    | Ca_Kabuli_Chr03 | 29900611                | AA                                     | GG                 | GG               | URR                           | 101502532          | squamosa promoter-binding-like protein 9                                  |
| SNP_16349_A_29952160 | NC_021162.1    | Ca_Kabuli_Chr03 | 29952160                | CC                                     | TT                 | TT               | INTERGENIC                    |                    |                                                                           |
| SNP_16351_A_29984644 | NC_021162.1    | Ca_Kabuli_Chr03 | 29984644                | TT                                     | AA                 | AA               | URR                           | 101506718          | 18 kDa seed maturation protein-like                                       |
| SNP_16352_A_29984646 | NC_021162.1    | Ca_Kabuli_Chr03 | 29984646                | AA                                     | GG                 | GG               | URR                           | 101506718          | 18 kDa seed maturation protein-like                                       |
| SNP_16353_A_30029610 | NC_021162.1    | Ca_Kabuli_Chr03 | 30029610                | AA                                     | CC                 | CC               | INTRON                        | 101510027          | nudix hydrolase 23, chloroplastic                                         |
| SNP_16354_A_30031090 | NC_021162.1    | Ca_Kabuli_Chr03 | 30031090                | CC                                     | TT                 | TT               | URR                           | 101510027          | nudix hydrolase 23, chloroplastic                                         |

| SNPs IDs             | Chromosome IDs | Chromosomes     | Physical positions (bp) | CDC Frontier genome (Reference genome) | (Pusa 1103 & HPNB) | (ILWC 46 & LPNB) | Sequence Components of genome | Gene accession IDs | Putative functions                              |
|----------------------|----------------|-----------------|-------------------------|----------------------------------------|--------------------|------------------|-------------------------------|--------------------|-------------------------------------------------|
| SNP_16356_A_30078591 | NC_021162.1    | Ca_Kabuli_Chr03 | 30078591                | GG                                     | AA                 | AA               | INTERGENIC                    |                    |                                                 |
| SNP_16358_A_30134414 | NC_021162.1    | Ca_Kabuli_Chr03 | 30134414                | TT                                     | CC                 | CC               | DRR                           | 101514338          | E3 ubiquitin-protein ligase SINAT2              |
| SNP_16359_A_30136201 | NC_021162.1    | Ca_Kabuli_Chr03 | 30136201                | AA                                     | GG                 | GG               | INTRON                        | 101514338          | E3 ubiquitin-protein ligase SINAT2              |
| SNP_16360_A_30151830 | NC_021162.1    | Ca_Kabuli_Chr03 | 30151830                | AA                                     | GG                 | GG               | INTERGENIC                    |                    |                                                 |
| SNP_16361_A_30188163 | NC_021162.1    | Ca_Kabuli_Chr03 | 30188163                | TT                                     | AA                 | AA               | INTERGENIC                    |                    |                                                 |
| SNP_16362_A_30211595 | NC_021162.1    | Ca_Kabuli_Chr03 | 30211595                | AA                                     | GG                 | GG               | INTRON                        | 101490028          | kinesin-related protein 4                       |
| SNP_16363_A_30251537 | NC_021162.1    | Ca_Kabuli_Chr03 | 30251537                | GG                                     | TT                 | TT               | INTERGENIC                    |                    |                                                 |
| SNP_16364_A_30325257 | NC_021162.1    | Ca_Kabuli_Chr03 | 30325257                | AA                                     | TT                 | TT               | INTERGENIC                    |                    |                                                 |
| SNP_16365_A_30325258 | NC_021162.1    | Ca_Kabuli_Chr03 | 30325258                | AA                                     | TT                 | TT               | INTERGENIC                    |                    |                                                 |
| SNP_16366_A_30334462 | NC_021162.1    | Ca_Kabuli_Chr03 | 30334462                | CC                                     | TT                 | TT               | INTERGENIC                    |                    |                                                 |
| SNP_16368_A_30370287 | NC_021162.1    | Ca_Kabuli_Chr03 | 30370287                | CC                                     | TT                 | TT               | URR                           | 101498367          | short-chain type dehydrogenase/reductase-like   |
| SNP_16369_A_30396895 | NC_021162.1    | Ca_Kabuli_Chr03 | 30396895                | TT                                     | CC                 | CC               | INTERGENIC                    |                    |                                                 |
| SNP_16371_A_30461610 | NC_021162.1    | Ca_Kabuli_Chr03 | 30461610                | GG                                     | AA                 | AA               | INTERGENIC                    |                    |                                                 |
| SNP_16372_A_30491396 | NC_021162.1    | Ca_Kabuli_Chr03 | 30491396                | GG                                     | AA                 | AA               | INTERGENIC                    |                    |                                                 |
| SNP_16373_A_30497900 | NC_021162.1    | Ca_Kabuli_Chr03 | 30497900                | AA                                     | TT                 | TT               | URR                           | 101495525          | aluminum-activated malate transporter 2-like    |
| SNP_16374_A_30557094 | NC_021162.1    | Ca_Kabuli_Chr03 | 30557094                | TT                                     | CC                 | CC               | INTRON                        | 101504457          | uncharacterized LOC101504457                    |
| SNP_16375_A_30582493 | NC_021162.1    | Ca_Kabuli_Chr03 | 30582493                | GG                                     | AA                 | AA               | INTERGENIC                    |                    |                                                 |
| SNP_16376_A_30602207 | NC_021162.1    | Ca_Kabuli_Chr03 | 30602207                | AA                                     | TT                 | TT               | INTERGENIC                    |                    |                                                 |
| SNP_16377_A_30602216 | NC_021162.1    | Ca_Kabuli_Chr03 | 30602216                | GG                                     | AA                 | AA               | INTERGENIC                    |                    |                                                 |
| SNP_16378_A_30602272 | NC_021162.1    | Ca_Kabuli_Chr03 | 30602272                | GG                                     | TT                 | TT               | INTERGENIC                    |                    |                                                 |
| SNP_16380_A_30637349 | NC_021162.1    | Ca_Kabuli_Chr03 | 30637349                | AA                                     | GG                 | GG               | DRR                           | 101496179          | ent-copalyl diphosphate synthase, chloroplastic |
| SNP_16381_A_30667396 | NC_021162.1    | Ca_Kabuli_Chr03 | 30667396                | CC                                     | TT                 | TT               | INTRON                        | 101507482          | F-box protein At4g02760-like                    |

| SNPs IDs             | Chromosome IDs | Chromosomes     | Physical positions (bp) | CDC Frontier genome (Reference genome) | (Pusa 1103 & HPNB) | (ILWC 46 & LPNB) | Sequence genome | Components of | Gene accession IDs | Putative functions                        |
|----------------------|----------------|-----------------|-------------------------|----------------------------------------|--------------------|------------------|-----------------|---------------|--------------------|-------------------------------------------|
| SNP_16382_A_30746910 | NC_021162.1    | Ca_Kabuli_Chr03 | 30746910                | AA                                     | GG                 | GG               | INTERGENIC      |               |                    |                                           |
| SNP_16383_A_30820127 | NC_021162.1    | Ca_Kabuli_Chr03 | 30820127                | TT                                     | CC                 | CC               | INTERGENIC      |               |                    |                                           |
| SNP_16384_A_30820134 | NC_021162.1    | Ca_Kabuli_Chr03 | 30820134                | GG                                     | AA                 | AA               | INTERGENIC      |               |                    |                                           |
| SNP_16385_A_30820142 | NC_021162.1    | Ca_Kabuli_Chr03 | 30820142                | AA                                     | GG                 | GG               | INTERGENIC      |               |                    |                                           |
| SNP_16386_A_30820175 | NC_021162.1    | Ca_Kabuli_Chr03 | 30820175                | TT                                     | GG                 | GG               | INTERGENIC      |               |                    |                                           |
| SNP_16387_A_30820176 | NC_021162.1    | Ca_Kabuli_Chr03 | 30820176                | TT                                     | CC                 | CC               | INTERGENIC      |               |                    |                                           |
| SNP_16388_A_30820186 | NC_021162.1    | Ca_Kabuli_Chr03 | 30820186                | GG                                     | AA                 | AA               | INTERGENIC      |               |                    |                                           |
| SNP_16389_A_30820208 | NC_021162.1    | Ca_Kabuli_Chr03 | 30820208                | AA                                     | GG                 | GG               | INTERGENIC      |               |                    |                                           |
| SNP_16391_A_30841746 | NC_021162.1    | Ca_Kabuli_Chr03 | 30841746                | GG                                     | AA                 | AA               | URR             | 101497712     |                    | BI1-like protein                          |
| SNP_16392_A_30846290 | NC_021162.1    | Ca_Kabuli_Chr03 | 30846290                | TT                                     | GG                 | GG               | INTERGENIC      |               |                    |                                           |
| SNP_16393_A_30846301 | NC_021162.1    | Ca_Kabuli_Chr03 | 30846301                | GG                                     | AA                 | AA               | INTERGENIC      |               |                    |                                           |
| SNP_16394_A_30846404 | NC_021162.1    | Ca_Kabuli_Chr03 | 30846404                | AA                                     | GG                 | GG               | INTERGENIC      |               |                    |                                           |
| SNP_16395_A_30846773 | NC_021162.1    | Ca_Kabuli_Chr03 | 30846773                | AA                                     | GG                 | GG               | INTERGENIC      |               |                    |                                           |
| SNP_16396_A_30846791 | NC_021162.1    | Ca_Kabuli_Chr03 | 30846791                | TT                                     | CC                 | CC               | INTERGENIC      |               |                    |                                           |
| SNP_16397_A_30846815 | NC_021162.1    | Ca_Kabuli_Chr03 | 30846815                | AA                                     | TT                 | TT               | INTERGENIC      |               |                    |                                           |
| SNP_16398_A_30846854 | NC_021162.1    | Ca_Kabuli_Chr03 | 30846854                | AA                                     | GG                 | GG               | INTERGENIC      |               |                    |                                           |
| SNP_16399_A_30902750 | NC_021162.1    | Ca_Kabuli_Chr03 | 30902750                | TT                                     | AA                 | AA               | URR             | 101499767     |                    | peptidyl-prolyl cis-trans isomerase CYP63 |
| SNP_16400_A_30930418 | NC_021162.1    | Ca_Kabuli_Chr03 | 30930418                | GG                                     | AA                 | AA               | INTERGENIC      |               |                    |                                           |
| SNP_16401_A_30930423 | NC_021162.1    | Ca_Kabuli_Chr03 | 30930423                | GG                                     | CC                 | CC               | INTERGENIC      |               |                    |                                           |
| SNP_16403_A_30930645 | NC_021162.1    | Ca_Kabuli_Chr03 | 30930645                | TT                                     | CC                 | CC               | INTERGENIC      |               |                    |                                           |
| SNP_16404_A_30953574 | NC_021162.1    | Ca_Kabuli_Chr03 | 30953574                | TT                                     | GG                 | GG               | INTERGENIC      |               |                    |                                           |
| SNP_16405_A_30977478 | NC_021162.1    | Ca_Kabuli_Chr03 | 30977478                | TT                                     | CC                 | CC               | INTERGENIC      |               |                    |                                           |

| SNPs IDs             | Chromosome IDs | Chromosomes     | Physical positions (bp) | CDC Frontier (Reference genome) | (Pusa 1103 & HPNB) | (ILWC 46 & LPNB) | Sequence Components of genome | Gene accession IDs | Putative functions                  |
|----------------------|----------------|-----------------|-------------------------|---------------------------------|--------------------|------------------|-------------------------------|--------------------|-------------------------------------|
| SNP_16406_A_30977484 | NC_021162.1    | Ca_Kabuli_Chr03 | 30977484                | AA                              | TT                 | TT               | INTERGENIC                    |                    |                                     |
| SNP_16407_A_31008722 | NC_021162.1    | Ca_Kabuli_Chr03 | 31008722                | AA                              | CC                 | CC               | INTERGENIC                    |                    |                                     |
| SNP_16409_A_31222105 | NC_021162.1    | Ca_Kabuli_Chr03 | 31222105                | TT                              | CC                 | CC               | URR                           | 101515314          | F-box protein At2g26160-like        |
| SNP_16410_A_31222108 | NC_021162.1    | Ca_Kabuli_Chr03 | 31222108                | AA                              | GG                 | GG               | URR                           | 101515314          | F-box protein At2g26160-like        |
| SNP_16411_A_31232521 | NC_021162.1    | Ca_Kabuli_Chr03 | 31232521                | GG                              | AA                 | AA               | INTERGENIC                    |                    |                                     |
| SNP_16412_A_31258013 | NC_021162.1    | Ca_Kabuli_Chr03 | 31258013                | TT                              | CC                 | CC               | INTERGENIC                    |                    |                                     |
| SNP_16413_A_31262532 | NC_021162.1    | Ca_Kabuli_Chr03 | 31262532                | CC                              | TT                 | TT               | INTERGENIC                    |                    |                                     |
| SNP_16414_A_31262533 | NC_021162.1    | Ca_Kabuli_Chr03 | 31262533                | AA                              | TT                 | TT               | INTERGENIC                    |                    |                                     |
| SNP_16415_A_31267348 | NC_021162.1    | Ca_Kabuli_Chr03 | 31267348                | TT                              | AA                 | AA               | INTERGENIC                    |                    |                                     |
| SNP_16416_A_31270189 | NC_021162.1    | Ca_Kabuli_Chr03 | 31270189                | TT                              | CC                 | CC               | URR                           | 101513579          | Unknown function                    |
| SNP_16417_A_31270524 | NC_021162.1    | Ca_Kabuli_Chr03 | 31270524                | AA                              | GG                 | GG               | URR                           | 101513579          | Unknown function                    |
| SNP_16418_A_31287085 | NC_021162.1    | Ca_Kabuli_Chr03 | 31287085                | GG                              | AA                 | AA               | INTERGENIC                    |                    |                                     |
| SNP_16419_A_31287129 | NC_021162.1    | Ca_Kabuli_Chr03 | 31287129                | CC                              | GG                 | GG               | INTERGENIC                    |                    |                                     |
| SNP_16420_A_31287130 | NC_021162.1    | Ca_Kabuli_Chr03 | 31287130                | CC                              | AA                 | AA               | INTERGENIC                    |                    |                                     |
| SNP_16421_A_31289046 | NC_021162.1    | Ca_Kabuli_Chr03 | 31289046                | GG                              | AA                 | AA               | NON_SYNONYMOUS_CODING         | 101514235          | inorganic phosphate transporter 1-4 |
| SNP_16423_A_31293451 | NC_021162.1    | Ca_Kabuli_Chr03 | 31293451                | GG                              | TT                 | TT               | INTERGENIC                    |                    |                                     |
| SNP_16425_A_31293463 | NC_021162.1    | Ca_Kabuli_Chr03 | 31293463                | AA                              | GG                 | GG               | INTERGENIC                    |                    |                                     |
| SNP_16426_A_31294818 | NC_021162.1    | Ca_Kabuli_Chr03 | 31294818                | AA                              | GG                 | GG               | DRR                           | 101514876          | myb-related protein Myb4            |
| SNP_16427_A_31295071 | NC_021162.1    | Ca_Kabuli_Chr03 | 31295071                | GG                              | AA                 | AA               | DRR                           | 101514876          | myb-related protein Myb4            |
| SNP_16428_A_31295110 | NC_021162.1    | Ca_Kabuli_Chr03 | 31295110                | AA                              | CC                 | CC               | DRR                           | 101514876          | myb-related protein Myb4            |
| SNP_16429_A_31295138 | NC_021162.1    | Ca_Kabuli_Chr03 | 31295138                | AA                              | GG                 | GG               | DRR                           | 101514876          | myb-related protein Myb4            |
| SNP_16430_A_31295583 | NC_021162.1    | Ca_Kabuli_Chr03 | 31295583                | GG                              | TT                 | TT               | INTRON                        | 101514876          | myb-related protein Myb4            |



| SNPs IDs             | Chromosome IDs | Chromosomes     | Physical positions (bp) | CDC Frontier genome (Reference genome) | (Pusa 1103 & HPNB) | (ILWC 46 & LPNB) | Sequence Components of genome | Gene accession IDs | Putative functions                 |
|----------------------|----------------|-----------------|-------------------------|----------------------------------------|--------------------|------------------|-------------------------------|--------------------|------------------------------------|
| SNP_16432_A_31296272 | NC_021162.1    | Ca_Kabuli_Chr03 | 31296272                | AA                                     | GG                 | GG               | INTRON                        | 101514876          | myb-related protein Myb4           |
| SNP_16433_A_31296494 | NC_021162.1    | Ca_Kabuli_Chr03 | 31296494                | TT                                     | AA                 | AA               | DRR                           | 101488719          | Unknown function                   |
| SNP_16434_A_31296677 | NC_021162.1    | Ca_Kabuli_Chr03 | 31296677                | AA                                     | GG                 | GG               | DRR                           | 101488719          | Unknown function                   |
| SNP_16435_A_31296787 | NC_021162.1    | Ca_Kabuli_Chr03 | 31296787                | TT                                     | CC                 | CC               | DRR                           | 101488719          | Unknown function                   |
| SNP_16437_A_31296838 | NC_021162.1    | Ca_Kabuli_Chr03 | 31296838                | TT                                     | CC                 | CC               | DRR                           | 101488719          | Unknown function                   |
| SNP_16438_A_31296993 | NC_021162.1    | Ca_Kabuli_Chr03 | 31296993                | AA                                     | GG                 | GG               | DRR                           | 101488719          | Unknown function                   |
| SNP_16439_A_31298117 | NC_021162.1    | Ca_Kabuli_Chr03 | 31298117                | GG                                     | TT                 | TT               | DRR                           | 101515202          | pre-mRNA-splicing factor SLU7-like |
| SNP_16442_A_31298655 | NC_021162.1    | Ca_Kabuli_Chr03 | 31298655                | TT                                     | CC                 | CC               | DRR                           | 101515202          | pre-mRNA-splicing factor SLU7-like |
| SNP_16443_A_31302712 | NC_021162.1    | Ca_Kabuli_Chr03 | 31302712                | CC                                     | TT                 | TT               | INTERGENIC                    |                    |                                    |
| SNP_16444_A_31314015 | NC_021162.1    | Ca_Kabuli_Chr03 | 31314015                | AA                                     | CC                 | CC               | INTERGENIC                    |                    |                                    |
| SNP_16446_A_31322721 | NC_021162.1    | Ca_Kabuli_Chr03 | 31322721                | TT                                     | AA                 | AA               | INTRON                        | 101488604          | target of Myb protein 1            |
| SNP_16447_A_31323608 | NC_021162.1    | Ca_Kabuli_Chr03 | 31323608                | TT                                     | CC                 | CC               | INTRON                        | 101488604          | target of Myb protein 1            |
| SNP_16449_A_31327556 | NC_021162.1    | Ca_Kabuli_Chr03 | 31327556                | GG                                     | AA                 | AA               | INTERGENIC                    |                    |                                    |
| SNP_16451_A_31328422 | NC_021162.1    | Ca_Kabuli_Chr03 | 31328422                | TT                                     | CC                 | CC               | DRR                           | 101489600          | U-box domain-containing protein 3  |
| SNP_16452_A_31328805 | NC_021162.1    | Ca_Kabuli_Chr03 | 31328805                | GG                                     | AA                 | AA               | DRR                           | 101489600          | U-box domain-containing protein 3  |
| SNP_16453_A_31333432 | NC_021162.1    | Ca_Kabuli_Chr03 | 31333432                | CC                                     | AA                 | AA               | INTRON                        | 101489600          | U-box domain-containing protein 3  |
| SNP_16454_A_31333917 | NC_021162.1    | Ca_Kabuli_Chr03 | 31333917                | CC                                     | TT                 | TT               | DRR                           | 101489600          | U-box domain-containing protein 3  |
| SNP_16455_A_31334118 | NC_021162.1    | Ca_Kabuli_Chr03 | 31334118                | CC                                     | GG                 | GG               | URR                           | 101489600          | U-box domain-containing protein 3  |
| SNP_16456_A_31336040 | NC_021162.1    | Ca_Kabuli_Chr03 | 31336040                | CC                                     | TT                 | TT               | INTERGENIC                    |                    |                                    |
| SNP_16457_A_31336567 | NC_021162.1    | Ca_Kabuli_Chr03 | 31336567                | GG                                     | AA                 | AA               | INTERGENIC                    |                    |                                    |
| SNP_16459_A_31336827 | NC_021162.1    | Ca_Kabuli_Chr03 | 31336827                | CC                                     | TT                 | TT               | INTERGENIC                    |                    |                                    |
| SNP_16460_A_31336940 | NC_021162.1    | Ca_Kabuli_Chr03 | 31336940                | AA                                     | TT                 | TT               | INTERGENIC                    |                    |                                    |

| SNPs IDs             | Chromosome IDs | Chromosomes     | Physical positions (bp) | CDC Frontier (Reference genome) | (Pusa 1103 & HPNB) | (ILWC 46 & LPNB) | Sequence Components of genome | Gene accession IDs | Putative functions                              |
|----------------------|----------------|-----------------|-------------------------|---------------------------------|--------------------|------------------|-------------------------------|--------------------|-------------------------------------------------|
| SNP_16461_A_31337533 | NC_021162.1    | Ca_Kabuli_Chr03 | 31337533                | TT                              | GG                 | GG               | INTERGENIC                    |                    |                                                 |
| SNP_16462_A_31337540 | NC_021162.1    | Ca_Kabuli_Chr03 | 31337540                | AA                              | TT                 | TT               | INTERGENIC                    |                    |                                                 |
| SNP_16463_A_31339155 | NC_021162.1    | Ca_Kabuli_Chr03 | 31339155                | AA                              | GG                 | GG               | INTERGENIC                    |                    |                                                 |
| SNP_16465_A_31339569 | NC_021162.1    | Ca_Kabuli_Chr03 | 31339569                | CC                              | TT                 | TT               | INTERGENIC                    |                    |                                                 |
| SNP_16466_A_31339739 | NC_021162.1    | Ca_Kabuli_Chr03 | 31339739                | AA                              | TT                 | TT               | DRR                           | 101490141          | protein LIGHT-DEPENDENT SHORT HYPOCOTYLS 4-like |
| SNP_16467_A_31339777 | NC_021162.1    | Ca_Kabuli_Chr03 | 31339777                | AA                              | GG                 | GG               | DRR                           | 101490141          | protein LIGHT-DEPENDENT SHORT HYPOCOTYLS 4-like |
| SNP_16468_A_31339788 | NC_021162.1    | Ca_Kabuli_Chr03 | 31339788                | GG                              | TT                 | TT               | DRR                           | 101490141          | protein LIGHT-DEPENDENT SHORT HYPOCOTYLS 4-like |
| SNP_16469_A_31340090 | NC_021162.1    | Ca_Kabuli_Chr03 | 31340090                | AA                              | GG                 | GG               | DRR                           | 101490141          | protein LIGHT-DEPENDENT SHORT HYPOCOTYLS 4-like |
| SNP_16470_A_31343065 | NC_021162.1    | Ca_Kabuli_Chr03 | 31343065                | GG                              | AA                 | AA               | URR                           | 101490141          | protein LIGHT-DEPENDENT SHORT HYPOCOTYLS 4-like |
| SNP_16472_A_31343891 | NC_021162.1    | Ca_Kabuli_Chr03 | 31343891                | GG                              | AA                 | AA               | URR                           | 101490141          | protein LIGHT-DEPENDENT SHORT HYPOCOTYLS 4-like |
| SNP_16473_A_31343898 | NC_021162.1    | Ca_Kabuli_Chr03 | 31343898                | GG                              | AA                 | AA               | URR                           | 101490141          | protein LIGHT-DEPENDENT SHORT HYPOCOTYLS 4-like |
| SNP_16474_A_31343902 | NC_021162.1    | Ca_Kabuli_Chr03 | 31343902                | GG                              | AA                 | AA               | URR                           | 101490141          | protein LIGHT-DEPENDENT SHORT HYPOCOTYLS 4-like |
| SNP_16475_A_31347748 | NC_021162.1    | Ca_Kabuli_Chr03 | 31347748                | AA                              | GG                 | GG               | INTERGENIC                    |                    |                                                 |
| SNP_16476_A_31347752 | NC_021162.1    | Ca_Kabuli_Chr03 | 31347752                | GG                              | CC                 | CC               | INTERGENIC                    |                    |                                                 |
| SNP_16477_A_31347759 | NC_021162.1    | Ca_Kabuli_Chr03 | 31347759                | AA                              | CC                 | CC               | INTERGENIC                    |                    |                                                 |
| SNP_16478_A_31347911 | NC_021162.1    | Ca_Kabuli_Chr03 | 31347911                | AA                              | TT                 | TT               | INTERGENIC                    |                    |                                                 |
| SNP_16479_A_31348829 | NC_021162.1    | Ca_Kabuli_Chr03 | 31348829                | TT                              | CC                 | CC               | INTERGENIC                    |                    |                                                 |
| SNP_16480_A_31353210 | NC_021162.1    | Ca_Kabuli_Chr03 | 31353210                | GG                              | AA                 | AA               | DRR                           | 101490463          | probable arabinose 5-phosphate isomerase        |
| SNP_16482_A_31353259 | NC_021162.1    | Ca_Kabuli_Chr03 | 31353259                | AA                              | GG                 | GG               | DRR                           | 101490463          | probable arabinose 5-phosphate isomerase        |
| SNP_16483_A_31353265 | NC_021162.1    | Ca_Kabuli_Chr03 | 31353265                | AA                              | GG                 | GG               | DRR                           | 101490463          | probable arabinose 5-phosphate isomerase        |
| SNP_16484_A_31353694 | NC_021162.1    | Ca_Kabuli_Chr03 | 31353694                | CC                              | TT                 | TT               | DRR                           | 101490463          | probable arabinose 5-phosphate isomerase        |
| SNP_16485_A_31353709 | NC_021162.1    | Ca_Kabuli_Chr03 | 31353709                | TT                              | GG                 | GG               | DRR                           | 101490463          | probable arabinose 5-phosphate isomerase        |

| SNPs IDs             | Chromosome IDs | Chromosomes     | Physical positions (bp) | CDC Frontier (Reference genome) | (Pusa 1103 & HPNB) | (ILWC 46 & LPNB) | Sequence Components of genome | Gene accession IDs | Putative functions                         |
|----------------------|----------------|-----------------|-------------------------|---------------------------------|--------------------|------------------|-------------------------------|--------------------|--------------------------------------------|
| SNP_16486_A_31355460 | NC_021162.1    | Ca_Kabuli_Chr03 | 31355460                | TT                              | CC                 | CC               | INTERGENIC                    |                    |                                            |
| SNP_16487_A_31355693 | NC_021162.1    | Ca_Kabuli_Chr03 | 31355693                | TT                              | GG                 | GG               | INTERGENIC                    |                    |                                            |
| SNP_16488_A_31358137 | NC_021162.1    | Ca_Kabuli_Chr03 | 31358137                | GG                              | TT                 | TT               | URR                           | 101490463          | probable arabinose 5-phosphate isomerase   |
| SNP_16489_A_31358425 | NC_021162.1    | Ca_Kabuli_Chr03 | 31358425                | GG                              | CC                 | CC               | URR                           | 101490463          | probable arabinose 5-phosphate isomerase   |
| SNP_16490_A_31363577 | NC_021162.1    | Ca_Kabuli_Chr03 | 31363577                | TT                              | CC                 | CC               | URR                           | 101490786          | putative lysine-specific demethylase JMJ16 |
| SNP_16491_A_31363915 | NC_021162.1    | Ca_Kabuli_Chr03 | 31363915                | CC                              | TT                 | TT               | URR                           | 101490786          | putative lysine-specific demethylase JMJ16 |
| SNP_16492_A_31363919 | NC_021162.1    | Ca_Kabuli_Chr03 | 31363919                | GG                              | AA                 | AA               | URR                           | 101490786          | putative lysine-specific demethylase JMJ16 |
| SNP_16495_A_31368814 | NC_021162.1    | Ca_Kabuli_Chr03 | 31368814                | CC                              | TT                 | TT               | DRR                           | 101491532          | NAC domain-containing protein 21/22        |
| SNP_16496_A_31370964 | NC_021162.1    | Ca_Kabuli_Chr03 | 31370964                | AA                              | GG                 | GG               | INTRON                        | 101491532          | NAC domain-containing protein 21/22        |
| SNP_16497_A_31370965 | NC_021162.1    | Ca_Kabuli_Chr03 | 31370965                | CC                              | AA                 | AA               | INTRON                        | 101491532          | NAC domain-containing protein 21/22        |
| SNP_16498_A_31371009 | NC_021162.1    | Ca_Kabuli_Chr03 | 31371009                | CC                              | TT                 | TT               | INTRON                        | 101491532          | NAC domain-containing protein 21/22        |
| SNP_16499_A_31371021 | NC_021162.1    | Ca_Kabuli_Chr03 | 31371021                | CC                              | TT                 | TT               | INTRON                        | 101491532          | NAC domain-containing protein 21/22        |
| SNP_16500_A_31371051 | NC_021162.1    | Ca_Kabuli_Chr03 | 31371051                | AA                              | CC                 | CC               | INTRON                        | 101491532          | NAC domain-containing protein 21/22        |
| SNP_16501_A_31371067 | NC_021162.1    | Ca_Kabuli_Chr03 | 31371067                | TT                              | GG                 | GG               | INTRON                        | 101491532          | NAC domain-containing protein 21/22        |
| SNP_16503_A_31371541 | NC_021162.1    | Ca_Kabuli_Chr03 | 31371541                | CC                              | TT                 | TT               | INTRON                        | 101491532          | NAC domain-containing protein 21/22        |
| SNP_16504_A_31371558 | NC_021162.1    | Ca_Kabuli_Chr03 | 31371558                | TT                              | CC                 | CC               | INTRON                        | 101491532          | NAC domain-containing protein 21/22        |
| SNP_16505_A_31374999 | NC_021162.1    | Ca_Kabuli_Chr03 | 31374999                | CC                              | TT                 | TT               | INTRON                        | 101491532          | NAC domain-containing protein 21/22        |
| SNP_16506_A_31375813 | NC_021162.1    | Ca_Kabuli_Chr03 | 31375813                | AA                              | TT                 | TT               | INTRON                        | 101491532          | NAC domain-containing protein 21/22        |
| SNP_16507_A_31376026 | NC_021162.1    | Ca_Kabuli_Chr03 | 31376026                | AA                              | TT                 | TT               | NON_SYNONYMOUS_CODING         | 101491532          | NAC domain-containing protein 21/22        |
| SNP_16508_A_31376587 | NC_021162.1    | Ca_Kabuli_Chr03 | 31376587                | GG                              | TT                 | TT               | URR                           | 101491532          | NAC domain-containing protein 21/22        |
| SNP_16509_A_31376705 | NC_021162.1    | Ca_Kabuli_Chr03 | 31376705                | GG                              | CC                 | CC               | URR                           | 101491532          | NAC domain-containing protein 21/22        |
| SNP_16510_A_31377101 | NC_021162.1    | Ca_Kabuli_Chr03 | 31377101                | AA                              | CC                 | CC               | URR                           | 101491532          | NAC domain-containing protein 21/22        |

| SNPs IDs             | Chromosome IDs | Chromosomes     | Physical positions (bp) | CDC Frontier genome (Reference genome) | (Pusa 1103 & HPNB) | (ILWC 46 & LPNB) | Sequence Components of genome | Gene accession IDs | Putative functions                                                            |
|----------------------|----------------|-----------------|-------------------------|----------------------------------------|--------------------|------------------|-------------------------------|--------------------|-------------------------------------------------------------------------------|
| SNP_16511_A_31378760 | NC_021162.1    | Ca_Kabuli_Chr03 | 31378760                | CC                                     | TT                 | TT               | INTERGENIC                    |                    |                                                                               |
| SNP_16512_A_31380333 | NC_021162.1    | Ca_Kabuli_Chr03 | 31380333                | CC                                     | GG                 | GG               | INTERGENIC                    |                    |                                                                               |
| SNP_16513_A_31381445 | NC_021162.1    | Ca_Kabuli_Chr03 | 31381445                | TT                                     | AA                 | AA               | INTERGENIC                    |                    |                                                                               |
| SNP_16515_A_31381767 | NC_021162.1    | Ca_Kabuli_Chr03 | 31381767                | TT                                     | CC                 | CC               | INTERGENIC                    |                    |                                                                               |
| SNP_16516_A_31381787 | NC_021162.1    | Ca_Kabuli_Chr03 | 31381787                | AA                                     | GG                 | GG               | INTERGENIC                    |                    |                                                                               |
| SNP_16517_A_31381806 | NC_021162.1    | Ca_Kabuli_Chr03 | 31381806                | AA                                     | CC                 | CC               | INTERGENIC                    |                    |                                                                               |
| SNP_16519_A_31381820 | NC_021162.1    | Ca_Kabuli_Chr03 | 31381820                | TT                                     | CC                 | CC               | INTERGENIC                    |                    |                                                                               |
| SNP_16520_A_31381938 | NC_021162.1    | Ca_Kabuli_Chr03 | 31381938                | TT                                     | CC                 | CC               | INTERGENIC                    |                    |                                                                               |
| SNP_16521_A_31386986 | NC_021162.1    | Ca_Kabuli_Chr03 | 31386986                | TT                                     | CC                 | CC               | INTERGENIC                    |                    |                                                                               |
| SNP_16522_A_31387042 | NC_021162.1    | Ca_Kabuli_Chr03 | 31387042                | GG                                     | AA                 | AA               | INTERGENIC                    |                    |                                                                               |
| SNP_16523_A_31387568 | NC_021162.1    | Ca_Kabuli_Chr03 | 31387568                | CC                                     | TT                 | TT               | INTERGENIC                    |                    |                                                                               |
| SNP_16525_A_31393344 | NC_021162.1    | Ca_Kabuli_Chr03 | 31393344                | CC                                     | TT                 | TT               | INTERGENIC                    |                    |                                                                               |
| SNP_16526_A_31394023 | NC_021162.1    | Ca_Kabuli_Chr03 | 31394023                | GG                                     | AA                 | AA               | INTERGENIC                    |                    |                                                                               |
| SNP_16527_A_31394044 | NC_021162.1    | Ca_Kabuli_Chr03 | 31394044                | TT                                     | CC                 | CC               | INTERGENIC                    |                    |                                                                               |
| SNP_16528_A_31394047 | NC_021162.1    | Ca_Kabuli_Chr03 | 31394047                | TT                                     | GG                 | GG               | INTERGENIC                    |                    |                                                                               |
| SNP_16529_A_31394362 | NC_021162.1    | Ca_Kabuli_Chr03 | 31394362                | CC                                     | GG                 | GG               | INTERGENIC                    |                    |                                                                               |
| SNP_16530_A_31395817 | NC_021162.1    | Ca_Kabuli_Chr03 | 31395817                | GG                                     | TT                 | TT               | INTERGENIC                    |                    |                                                                               |
| SNP_16531_A_31396057 | NC_021162.1    | Ca_Kabuli_Chr03 | 31396057                | AA                                     | GG                 | GG               | INTERGENIC                    |                    |                                                                               |
| SNP_16532_A_31396116 | NC_021162.1    | Ca_Kabuli_Chr03 | 31396116                | AA                                     | GG                 | GG               | INTERGENIC                    |                    |                                                                               |
| SNP_16533_A_31399710 | NC_021162.1    | Ca_Kabuli_Chr03 | 31399710                | CC                                     | AA                 | AA               | INTERGENIC                    |                    |                                                                               |
| SNP_16536_A_31414195 | NC_021162.1    | Ca_Kabuli_Chr03 | 31414195                | TT                                     | GG                 | GG               | URR                           | 101491839          | dolichyl-diphosphooligosaccharide--protein glycosyltransferase subunit 2-like |
| SNP_16537_A_31414213 | NC_021162.1    | Ca_Kabuli_Chr03 | 31414213                | AA                                     | CC                 | CC               | INTRON                        | 101492406          | H/ACA ribonucleoprotein complex subunit 3-like protein                        |

| SNPs IDs             | Chromosome IDs | Chromosomes     | Physical positions (bp) | CDC Frontier (Reference genome) | (Pusa 1103 & HPNB) | (ILWC 46 & LPNB) | Sequence Components of genome | Gene accession IDs | Putative functions                                           |
|----------------------|----------------|-----------------|-------------------------|---------------------------------|--------------------|------------------|-------------------------------|--------------------|--------------------------------------------------------------|
| SNP_16538_A_31414536 | NC_021162.1    | Ca_Kabuli_Chr03 | 31414536                | TT                              | AA                 | AA               | INTRON                        | 101492406          | H/AcA ribonucleoprotein complex subunit 3-like protein       |
| SNP_16539_A_31417551 | NC_021162.1    | Ca_Kabuli_Chr03 | 31417551                | AA                              | GG                 | GG               | DRR                           | 101492739          | serine/threonine-protein kinase tricorner                    |
| SNP_16540_A_31419948 | NC_021162.1    | Ca_Kabuli_Chr03 | 31419948                | CC                              | TT                 | TT               | SYNONYMOUS_CODING             | 101492739          | serine/threonine-protein kinase tricorner                    |
| SNP_16542_A_31434642 | NC_021162.1    | Ca_Kabuli_Chr03 | 31434642                | TT                              | CC                 | CC               | URR                           | 101493293          | casein kinase I-like                                         |
| SNP_16543_A_31434664 | NC_021162.1    | Ca_Kabuli_Chr03 | 31434664                | CC                              | TT                 | TT               | URR                           | 101493293          | casein kinase I-like                                         |
| SNP_16544_A_31434743 | NC_021162.1    | Ca_Kabuli_Chr03 | 31434743                | AA                              | GG                 | GG               | URR                           | 101493293          | casein kinase I-like                                         |
| SNP_16545_A_31434748 | NC_021162.1    | Ca_Kabuli_Chr03 | 31434748                | TT                              | CC                 | CC               | URR                           | 101493293          | casein kinase I-like                                         |
| SNP_16546_A_31435013 | NC_021162.1    | Ca_Kabuli_Chr03 | 31435013                | TT                              | CC                 | CC               | URR                           | 101493293          | casein kinase I-like                                         |
| SNP_16547_A_31435024 | NC_021162.1    | Ca_Kabuli_Chr03 | 31435024                | AA                              | TT                 | TT               | URR                           | 101493293          | casein kinase I-like                                         |
| SNP_16548_A_31435896 | NC_021162.1    | Ca_Kabuli_Chr03 | 31435896                | AA                              | CC                 | CC               | DRR                           | 101493614          | vacuolar protein sorting-associated protein 2 homolog 3-like |
| SNP_16549_A_31439934 | NC_021162.1    | Ca_Kabuli_Chr03 | 31439934                | AA                              | CC                 | CC               | INTERGENIC                    |                    |                                                              |
| SNP_16551_A_31443631 | NC_021162.1    | Ca_Kabuli_Chr03 | 31443631                | CC                              | TT                 | TT               | INTERGENIC                    |                    |                                                              |
| SNP_16553_A_31446565 | NC_021162.1    | Ca_Kabuli_Chr03 | 31446565                | AA                              | TT                 | TT               | INTRON                        | 101494257          | glycolipid transfer protein 1-like                           |
| SNP_16554_A_31446605 | NC_021162.1    | Ca_Kabuli_Chr03 | 31446605                | GG                              | CC                 | CC               | INTRON                        | 101494257          | glycolipid transfer protein 1-like                           |
| SNP_16555_A_31447484 | NC_021162.1    | Ca_Kabuli_Chr03 | 31447484                | TT                              | CC                 | CC               | INTRON                        | 101494257          | glycolipid transfer protein 1-like                           |
| SNP_16556_A_31449151 | NC_021162.1    | Ca_Kabuli_Chr03 | 31449151                | AA                              | GG                 | GG               | URR                           | 101494257          | glycolipid transfer protein 1-like                           |
| SNP_16557_A_31454280 | NC_021162.1    | Ca_Kabuli_Chr03 | 31454280                | TT                              | CC                 | CC               | INTRON                        | 101494765          | glutathione gamma-glutamylcysteinyltransferase 1             |
| SNP_16558_A_31454283 | NC_021162.1    | Ca_Kabuli_Chr03 | 31454283                | AA                              | GG                 | GG               | INTRON                        | 101494765          | glutathione gamma-glutamylcysteinyltransferase 1             |
| SNP_16559_A_31454284 | NC_021162.1    | Ca_Kabuli_Chr03 | 31454284                | TT                              | GG                 | GG               | INTRON                        | 101494765          | glutathione gamma-glutamylcysteinyltransferase 1             |
| SNP_16560_A_31458311 | NC_021162.1    | Ca_Kabuli_Chr03 | 31458311                | TT                              | CC                 | CC               | INTERGENIC                    |                    |                                                              |
| SNP_16561_A_31458838 | NC_021162.1    | Ca_Kabuli_Chr03 | 31458838                | AA                              | GG                 | GG               | URR                           | 101494765          | glutathione gamma-glutamylcysteinyltransferase 1             |
| SNP_16562_A_31459368 | NC_021162.1    | Ca_Kabuli_Chr03 | 31459368                | CC                              | TT                 | TT               | DRR                           | 101495095          | glutathione gamma-glutamylcysteinyltransferase 3-like        |

| SNPs IDs             | Chromosome IDs | Chromosomes     | Physical positions (bp) | CDC Frontier genome (Reference genome) | (Pusa 1103 & HPNB) | (ILWC 46 & LPNB) | Sequence Components of genome | Gene accession IDs | Putative functions                                    |
|----------------------|----------------|-----------------|-------------------------|----------------------------------------|--------------------|------------------|-------------------------------|--------------------|-------------------------------------------------------|
| SNP_16563_A_31459384 | NC_021162.1    | Ca_Kabuli_Chr03 | 31459384                | GG                                     | AA                 | AA               | DRR                           | 101495095          | glutathione gamma-glutamylcysteinyltransferase 3-like |
| SNP_16564_A_31459428 | NC_021162.1    | Ca_Kabuli_Chr03 | 31459428                | GG                                     | AA                 | AA               | DRR                           | 101495095          | glutathione gamma-glutamylcysteinyltransferase 3-like |
| SNP_16565_A_31459907 | NC_021162.1    | Ca_Kabuli_Chr03 | 31459907                | TT                                     | CC                 | CC               | DRR                           | 101495095          | glutathione gamma-glutamylcysteinyltransferase 3-like |
| SNP_16566_A_31461015 | NC_021162.1    | Ca_Kabuli_Chr03 | 31461015                | AA                                     | GG                 | GG               | INTERGENIC                    |                    |                                                       |
| SNP_16567_A_31465740 | NC_021162.1    | Ca_Kabuli_Chr03 | 31465740                | CC                                     | TT                 | TT               | INTRON                        | 101495095          | glutathione gamma-glutamylcysteinyltransferase 3-like |
| SNP_16568_A_31466823 | NC_021162.1    | Ca_Kabuli_Chr03 | 31466823                | CC                                     | TT                 | TT               | INTRON                        | 101495095          | glutathione gamma-glutamylcysteinyltransferase 3-like |
| SNP_16570_A_31471729 | NC_021162.1    | Ca_Kabuli_Chr03 | 31471729                | GG                                     | AA                 | AA               | INTERGENIC                    |                    |                                                       |
| SNP_16571_A_31473282 | NC_021162.1    | Ca_Kabuli_Chr03 | 31473282                | AA                                     | GG                 | GG               | INTERGENIC                    |                    |                                                       |
| SNP_16572_A_31473504 | NC_021162.1    | Ca_Kabuli_Chr03 | 31473504                | GG                                     | AA                 | AA               | INTERGENIC                    |                    |                                                       |
| SNP_16573_A_31475350 | NC_021162.1    | Ca_Kabuli_Chr03 | 31475350                | AA                                     | CC                 | CC               | INTERGENIC                    |                    |                                                       |
| SNP_16574_A_31475353 | NC_021162.1    | Ca_Kabuli_Chr03 | 31475353                | TT                                     | CC                 | CC               | INTERGENIC                    |                    |                                                       |
| SNP_16575_A_31475354 | NC_021162.1    | Ca_Kabuli_Chr03 | 31475354                | AA                                     | GG                 | GG               | INTERGENIC                    |                    |                                                       |
| SNP_16576_A_31475704 | NC_021162.1    | Ca_Kabuli_Chr03 | 31475704                | CC                                     | TT                 | TT               | INTERGENIC                    |                    |                                                       |
| SNP_16577_A_31475707 | NC_021162.1    | Ca_Kabuli_Chr03 | 31475707                | TT                                     | CC                 | CC               | INTERGENIC                    |                    |                                                       |
| SNP_16578_A_31475844 | NC_021162.1    | Ca_Kabuli_Chr03 | 31475844                | GG                                     | AA                 | AA               | INTERGENIC                    |                    |                                                       |
| SNP_16579_A_31476037 | NC_021162.1    | Ca_Kabuli_Chr03 | 31476037                | TT                                     | CC                 | CC               | DRR                           | 101495423          | long-chain-alcohol oxidase FAO2                       |
| SNP_16581_A_31476317 | NC_021162.1    | Ca_Kabuli_Chr03 | 31476317                | AA                                     | GG                 | GG               | DRR                           | 101495423          | long-chain-alcohol oxidase FAO2                       |
| SNP_16583_A_31480284 | NC_021162.1    | Ca_Kabuli_Chr03 | 31480284                | AA                                     | TT                 | TT               | INTERGENIC                    |                    |                                                       |
| SNP_16585_A_31480845 | NC_021162.1    | Ca_Kabuli_Chr03 | 31480845                | CC                                     | TT                 | TT               | URR                           | 101495423          | long-chain-alcohol oxidase FAO2                       |
| SNP_16586_A_31480867 | NC_021162.1    | Ca_Kabuli_Chr03 | 31480867                | GG                                     | AA                 | AA               | URR                           | 101495423          | long-chain-alcohol oxidase FAO2                       |
| SNP_16587_A_31480876 | NC_021162.1    | Ca_Kabuli_Chr03 | 31480876                | GG                                     | AA                 | AA               | URR                           | 101495423          | long-chain-alcohol oxidase FAO2                       |
| SNP_16588_A_31482029 | NC_021162.1    | Ca_Kabuli_Chr03 | 31482029                | TT                                     | CC                 | CC               | URR                           | 101495423          | long-chain-alcohol oxidase FAO2                       |

| SNPs IDs             | Chromosome IDs | Chromosomes     | Physical positions (bp) | CDC Frontier (Reference genome) | (Pusa 1103 & HPNB) | (ILWC 46 & LPNB) | Sequence Components of genome | Gene accession IDs | Putative functions                     |
|----------------------|----------------|-----------------|-------------------------|---------------------------------|--------------------|------------------|-------------------------------|--------------------|----------------------------------------|
| SNP_16589_A_31484959 | NC_021162.1    | Ca_Kabuli_Chr03 | 31484959                | AA                              | GG                 | GG               | INTERGENIC                    |                    |                                        |
| SNP_16590_A_31485005 | NC_021162.1    | Ca_Kabuli_Chr03 | 31485005                | CC                              | TT                 | TT               | INTERGENIC                    |                    |                                        |
| SNP_16591_A_31493381 | NC_021162.1    | Ca_Kabuli_Chr03 | 31493381                | CC                              | GG                 | GG               | INTERGENIC                    |                    |                                        |
| SNP_16592_A_31494935 | NC_021162.1    | Ca_Kabuli_Chr03 | 31494935                | CC                              | TT                 | TT               | DRR                           | 101497164          | rho GDP-dissociation inhibitor 1-like  |
| SNP_16594_A_31495281 | NC_021162.1    | Ca_Kabuli_Chr03 | 31495281                | TT                              | GG                 | GG               | DRR                           | 101497164          | rho GDP-dissociation inhibitor 1-like  |
| SNP_16595_A_31495288 | NC_021162.1    | Ca_Kabuli_Chr03 | 31495288                | TT                              | GG                 | GG               | DRR                           | 101497164          | rho GDP-dissociation inhibitor 1-like  |
| SNP_16596_A_31496335 | NC_021162.1    | Ca_Kabuli_Chr03 | 31496335                | TT                              | GG                 | GG               | INTERGENIC                    |                    |                                        |
| SNP_16597_A_31497841 | NC_021162.1    | Ca_Kabuli_Chr03 | 31497841                | AA                              | GG                 | GG               | INTERGENIC                    |                    |                                        |
| SNP_16598_A_31498017 | NC_021162.1    | Ca_Kabuli_Chr03 | 31498017                | TT                              | AA                 | AA               | INTERGENIC                    |                    |                                        |
| SNP_16600_A_31501432 | NC_021162.1    | Ca_Kabuli_Chr03 | 31501432                | GG                              | AA                 | AA               | URR                           | 101489387          | Unknown function                       |
| SNP_16601_A_31504083 | NC_021162.1    | Ca_Kabuli_Chr03 | 31504083                | AA                              | GG                 | GG               | INTRON                        | 101497495          | phospholipid--sterol O-acyltransferase |
| SNP_16602_A_31504162 | NC_021162.1    | Ca_Kabuli_Chr03 | 31504162                | TT                              | AA                 | AA               | INTRON                        | 101497495          | phospholipid--sterol O-acyltransferase |
| SNP_16603_A_31506258 | NC_021162.1    | Ca_Kabuli_Chr03 | 31506258                | AA                              | GG                 | GG               | INTRON                        | 101497495          | phospholipid--sterol O-acyltransferase |
| SNP_16604_A_31506830 | NC_021162.1    | Ca_Kabuli_Chr03 | 31506830                | AA                              | CC                 | CC               | INTRON                        | 101497495          | phospholipid--sterol O-acyltransferase |
| SNP_16605_A_31511940 | NC_021162.1    | Ca_Kabuli_Chr03 | 31511940                | TT                              | GG                 | GG               | URR                           | 101497495          | phospholipid--sterol O-acyltransferase |
| SNP_16606_A_31512136 | NC_021162.1    | Ca_Kabuli_Chr03 | 31512136                | CC                              | TT                 | TT               | URR                           | 101497495          | phospholipid--sterol O-acyltransferase |
| SNP_16607_A_31512137 | NC_021162.1    | Ca_Kabuli_Chr03 | 31512137                | GG                              | AA                 | AA               | URR                           | 101497495          | phospholipid--sterol O-acyltransferase |
| SNP_16608_A_31512161 | NC_021162.1    | Ca_Kabuli_Chr03 | 31512161                | CC                              | TT                 | TT               | URR                           | 101497495          | phospholipid--sterol O-acyltransferase |
| SNP_16609_A_31513347 | NC_021162.1    | Ca_Kabuli_Chr03 | 31513347                | TT                              | CC                 | CC               | URR                           | 101497495          | phospholipid--sterol O-acyltransferase |
| SNP_16611_A_31514332 | NC_021162.1    | Ca_Kabuli_Chr03 | 31514332                | TT                              | CC                 | CC               | DRR                           | 101489712          | protein NRT1/ PTR FAMILY 5.2-like      |
| SNP_16612_A_31516662 | NC_021162.1    | Ca_Kabuli_Chr03 | 31516662                | GG                              | TT                 | TT               | SYNONYMOUS_CODING             | 101489712          | protein NRT1/ PTR FAMILY 5.2-like      |
| SNP_16613_A_31517136 | NC_021162.1    | Ca_Kabuli_Chr03 | 31517136                | GG                              | AA                 | AA               | INTRON                        | 101489712          | protein NRT1/ PTR FAMILY 5.2-like      |

| SNPs IDs             | Chromosome IDs | Chromosomes     | Physical positions (bp) | CDC Frontier (Reference genome) | (Pusa 1103 & HPNB) | (ILWC 46 & LPNB) | Sequence Components of genome | Gene accession IDs | Putative functions                     |
|----------------------|----------------|-----------------|-------------------------|---------------------------------|--------------------|------------------|-------------------------------|--------------------|----------------------------------------|
| SNP_16615_A_31519880 | NC_021162.1    | Ca_Kabuli_Chr03 | 31519880                | CC                              | TT                 | TT               | URR                           | 101489712          | protein NRT1/ PTR FAMILY 5.2-like      |
| SNP_16616_A_31520190 | NC_021162.1    | Ca_Kabuli_Chr03 | 31520190                | TT                              | CC                 | CC               | URR                           | 101489712          | protein NRT1/ PTR FAMILY 5.2-like      |
| SNP_16617_A_31520198 | NC_021162.1    | Ca_Kabuli_Chr03 | 31520198                | GG                              | AA                 | AA               | URR                           | 101489712          | protein NRT1/ PTR FAMILY 5.2-like      |
| SNP_16618_A_31527846 | NC_021162.1    | Ca_Kabuli_Chr03 | 31527846                | AA                              | GG                 | GG               | DRR                           | 101498036          | protein NRT1/ PTR FAMILY 5.2-like      |
| SNP_16619_A_31530410 | NC_021162.1    | Ca_Kabuli_Chr03 | 31530410                | TT                              | AA                 | AA               | INTRON                        | 101498036          | protein NRT1/ PTR FAMILY 5.2-like      |
| SNP_16621_A_31531382 | NC_021162.1    | Ca_Kabuli_Chr03 | 31531382                | GG                              | AA                 | AA               | INTRON                        | 101498036          | protein NRT1/ PTR FAMILY 5.2-like      |
| SNP_16622_A_31538607 | NC_021162.1    | Ca_Kabuli_Chr03 | 31538607                | GG                              | AA                 | AA               | INTERGENIC                    |                    |                                        |
| SNP_16624_A_31543787 | NC_021162.1    | Ca_Kabuli_Chr03 | 31543787                | CC                              | TT                 | TT               | URR                           | 101498370          | BRCA1-associated RING domain protein 1 |
| SNP_16625_A_31544194 | NC_021162.1    | Ca_Kabuli_Chr03 | 31544194                | GG                              | AA                 | AA               | URR                           | 101498370          | BRCA1-associated RING domain protein 1 |
| SNP_16626_A_31544206 | NC_021162.1    | Ca_Kabuli_Chr03 | 31544206                | AA                              | CC                 | CC               | URR                           | 101498370          | BRCA1-associated RING domain protein 1 |
| SNP_16627_A_31560700 | NC_021162.1    | Ca_Kabuli_Chr03 | 31560700                | TT                              | AA                 | AA               | INTERGENIC                    |                    |                                        |
| SNP_16628_A_31560701 | NC_021162.1    | Ca_Kabuli_Chr03 | 31560701                | TT                              | CC                 | CC               | INTERGENIC                    |                    |                                        |
| SNP_16630_A_31560710 | NC_021162.1    | Ca_Kabuli_Chr03 | 31560710                | AA                              | GG                 | GG               | INTERGENIC                    |                    |                                        |
| SNP_16632_A_31563174 | NC_021162.1    | Ca_Kabuli_Chr03 | 31563174                | TT                              | CC                 | CC               | INTERGENIC                    |                    |                                        |
| SNP_16633_A_31563195 | NC_021162.1    | Ca_Kabuli_Chr03 | 31563195                | AA                              | TT                 | TT               | INTERGENIC                    |                    |                                        |
| SNP_16634_A_31563199 | NC_021162.1    | Ca_Kabuli_Chr03 | 31563199                | CC                              | TT                 | TT               | INTERGENIC                    |                    |                                        |
| SNP_16635_A_31563214 | NC_021162.1    | Ca_Kabuli_Chr03 | 31563214                | GG                              | AA                 | AA               | INTERGENIC                    |                    |                                        |
| SNP_16636_A_31563272 | NC_021162.1    | Ca_Kabuli_Chr03 | 31563272                | CC                              | TT                 | TT               | INTERGENIC                    |                    |                                        |
| SNP_16637_A_31563282 | NC_021162.1    | Ca_Kabuli_Chr03 | 31563282                | GG                              | AA                 | AA               | INTERGENIC                    |                    |                                        |
| SNP_16638_A_31563553 | NC_021162.1    | Ca_Kabuli_Chr03 | 31563553                | GG                              | AA                 | AA               | INTERGENIC                    |                    |                                        |
| SNP_16639_A_31563575 | NC_021162.1    | Ca_Kabuli_Chr03 | 31563575                | GG                              | AA                 | AA               | INTERGENIC                    |                    |                                        |
| SNP_16640_A_31563576 | NC_021162.1    | Ca_Kabuli_Chr03 | 31563576                | GG                              | AA                 | AA               | INTERGENIC                    |                    |                                        |



| SNPs IDs             | Chromosome IDs | Chromosomes     | Physical positions (bp) | CDC Frontier genome (Reference genome) | (Pusa 1103 & HPNB) | (ILWC 46 & LPNB) | Sequence Components of genome | Gene accession IDs | Putative functions                      |
|----------------------|----------------|-----------------|-------------------------|----------------------------------------|--------------------|------------------|-------------------------------|--------------------|-----------------------------------------|
| SNP_16641_A_31563584 | NC_021162.1    | Ca_Kabuli_Chr03 | 31563584                | TT                                     | CC                 | CC               | INTERGENIC                    |                    |                                         |
| SNP_16642_A_31565174 | NC_021162.1    | Ca_Kabuli_Chr03 | 31565174                | TT                                     | CC                 | CC               | DRR                           | 101410558          | transfer RNA methionine (anticodon CAU) |
| SNP_16643_A_31565210 | NC_021162.1    | Ca_Kabuli_Chr03 | 31565210                | AA                                     | TT                 | TT               | DRR                           | 101410558          | transfer RNA methionine (anticodon CAU) |
| SNP_16644_A_31565398 | NC_021162.1    | Ca_Kabuli_Chr03 | 31565398                | TT                                     | GG                 | GG               | DRR                           | 101499035          | protein PHR1-LIKE 1-like                |
| SNP_16645_A_31565399 | NC_021162.1    | Ca_Kabuli_Chr03 | 31565399                | GG                                     | AA                 | AA               | DRR                           | 101499035          | protein PHR1-LIKE 1-like                |
| SNP_16646_A_31565411 | NC_021162.1    | Ca_Kabuli_Chr03 | 31565411                | TT                                     | GG                 | GG               | DRR                           | 101499035          | protein PHR1-LIKE 1-like                |
| SNP_16647_A_31565543 | NC_021162.1    | Ca_Kabuli_Chr03 | 31565543                | AA                                     | GG                 | GG               | DRR                           | 101499035          | protein PHR1-LIKE 1-like                |
| SNP_16648_A_31565657 | NC_021162.1    | Ca_Kabuli_Chr03 | 31565657                | CC                                     | TT                 | TT               | DRR                           | 101499035          | protein PHR1-LIKE 1-like                |
| SNP_16649_A_31565674 | NC_021162.1    | Ca_Kabuli_Chr03 | 31565674                | GG                                     | CC                 | CC               | DRR                           | 101499035          | protein PHR1-LIKE 1-like                |
| SNP_16650_A_31565676 | NC_021162.1    | Ca_Kabuli_Chr03 | 31565676                | AA                                     | GG                 | GG               | DRR                           | 101499035          | protein PHR1-LIKE 1-like                |
| SNP_16651_A_31565696 | NC_021162.1    | Ca_Kabuli_Chr03 | 31565696                | CC                                     | AA                 | AA               | DRR                           | 101499035          | protein PHR1-LIKE 1-like                |
| SNP_16652_A_31565990 | NC_021162.1    | Ca_Kabuli_Chr03 | 31565990                | TT                                     | CC                 | CC               | DRR                           | 101499035          | protein PHR1-LIKE 1-like                |
| SNP_16653_A_31566048 | NC_021162.1    | Ca_Kabuli_Chr03 | 31566048                | TT                                     | AA                 | AA               | DRR                           | 101499035          | protein PHR1-LIKE 1-like                |
| SNP_16654_A_31566094 | NC_021162.1    | Ca_Kabuli_Chr03 | 31566094                | GG                                     | AA                 | AA               | DRR                           | 101499035          | protein PHR1-LIKE 1-like                |
| SNP_16656_A_31567070 | NC_021162.1    | Ca_Kabuli_Chr03 | 31567070                | TT                                     | CC                 | CC               | URR                           | 101410558          | transfer RNA methionine (anticodon CAU) |
| SNP_16657_A_31570892 | NC_021162.1    | Ca_Kabuli_Chr03 | 31570892                | TT                                     | CC                 | CC               | INTRON                        | 101499035          | protein PHR1-LIKE 1-like                |
| SNP_16658_A_31572298 | NC_021162.1    | Ca_Kabuli_Chr03 | 31572298                | TT                                     | AA                 | AA               | URR                           | 101499035          | protein PHR1-LIKE 1-like                |
| SNP_16659_A_31575128 | NC_021162.1    | Ca_Kabuli_Chr03 | 31575128                | CC                                     | AA                 | AA               | URR                           | 101499035          | protein PHR1-LIKE 1-like                |
| SNP_16660_A_31578205 | NC_021162.1    | Ca_Kabuli_Chr03 | 31578205                | GG                                     | AA                 | AA               | INTERGENIC                    |                    |                                         |
| SNP_16661_A_31578217 | NC_021162.1    | Ca_Kabuli_Chr03 | 31578217                | AA                                     | CC                 | CC               | INTERGENIC                    |                    |                                         |
| SNP_16662_A_31578521 | NC_021162.1    | Ca_Kabuli_Chr03 | 31578521                | TT                                     | GG                 | GG               | INTERGENIC                    |                    |                                         |
| SNP_16663_A_31578677 | NC_021162.1    | Ca_Kabuli_Chr03 | 31578677                | CC                                     | AA                 | AA               | INTERGENIC                    |                    |                                         |

| SNPs IDs             | Chromosome IDs | Chromosomes     | Physical positions (bp) | CDC Frontier genome (Reference genome) | (Pusa 1103 & HPNB) | (ILWC 46 & LPNB) | Sequence Components of genome | Gene accession IDs | Putative functions                                       |
|----------------------|----------------|-----------------|-------------------------|----------------------------------------|--------------------|------------------|-------------------------------|--------------------|----------------------------------------------------------|
| SNP_16664_A_31578689 | NC_021162.1    | Ca_Kabuli_Chr03 | 31578689                | AA                                     | CC                 | CC               | INTERGENIC                    |                    |                                                          |
| SNP_16665_A_31578708 | NC_021162.1    | Ca_Kabuli_Chr03 | 31578708                | TT                                     | AA                 | AA               | INTERGENIC                    |                    |                                                          |
| SNP_16666_A_31585993 | NC_021162.1    | Ca_Kabuli_Chr03 | 31585993                | GG                                     | AA                 | AA               | DRR                           | 101500192          | histone-lysine N-methyltransferase SUV2-like             |
| SNP_16667_A_31591180 | NC_021162.1    | Ca_Kabuli_Chr03 | 31591180                | TT                                     | CC                 | CC               | INTRON                        | 101500192          | histone-lysine N-methyltransferase SUV2-like             |
| SNP_16668_A_31594709 | NC_021162.1    | Ca_Kabuli_Chr03 | 31594709                | TT                                     | AA                 | AA               | URR                           | 101500192          | histone-lysine N-methyltransferase SUV2-like             |
| SNP_16669_A_31594711 | NC_021162.1    | Ca_Kabuli_Chr03 | 31594711                | TT                                     | GG                 | GG               | URR                           | 101500192          | histone-lysine N-methyltransferase SUV2-like             |
| SNP_16670_A_31594863 | NC_021162.1    | Ca_Kabuli_Chr03 | 31594863                | GG                                     | AA                 | AA               | URR                           | 101500192          | histone-lysine N-methyltransferase SUV2-like             |
| SNP_16671_A_31594902 | NC_021162.1    | Ca_Kabuli_Chr03 | 31594902                | CC                                     | TT                 | TT               | URR                           | 101500192          | histone-lysine N-methyltransferase SUV2-like             |
| SNP_16672_A_31595157 | NC_021162.1    | Ca_Kabuli_Chr03 | 31595157                | AA                                     | GG                 | GG               | URR                           | 101500192          | histone-lysine N-methyltransferase SUV2-like             |
| SNP_16676_A_31602668 | NC_021162.1    | Ca_Kabuli_Chr03 | 31602668                | CC                                     | TT                 | TT               | URR                           | 101490371          | serine/threonine-protein phosphatase 7 long form homolog |
| SNP_16677_A_31602732 | NC_021162.1    | Ca_Kabuli_Chr03 | 31602732                | AA                                     | GG                 | GG               | URR                           | 101490371          | serine/threonine-protein phosphatase 7 long form homolog |
| SNP_16678_A_31602736 | NC_021162.1    | Ca_Kabuli_Chr03 | 31602736                | GG                                     | AA                 | AA               | URR                           | 101490371          | serine/threonine-protein phosphatase 7 long form homolog |
| SNP_16679_A_31602903 | NC_021162.1    | Ca_Kabuli_Chr03 | 31602903                | TT                                     | GG                 | GG               | URR                           | 101490694          | Unknown function                                         |
| SNP_16681_A_31602945 | NC_021162.1    | Ca_Kabuli_Chr03 | 31602945                | AA                                     | CC                 | CC               | URR                           | 101490694          | Unknown function                                         |
| SNP_16682_A_31607150 | NC_021162.1    | Ca_Kabuli_Chr03 | 31607150                | GG                                     | CC                 | CC               | INTRON                        | 101500934          | cysteine-rich repeat secretory protein 56-like           |
| SNP_16684_A_31607988 | NC_021162.1    | Ca_Kabuli_Chr03 | 31607988                | TT                                     | CC                 | CC               | URR                           | 101500934          | cysteine-rich repeat secretory protein 56-like           |
| SNP_16685_A_31607994 | NC_021162.1    | Ca_Kabuli_Chr03 | 31607994                | GG                                     | CC                 | CC               | URR                           | 101500934          | cysteine-rich repeat secretory protein 56-like           |
| SNP_16686_A_31607995 | NC_021162.1    | Ca_Kabuli_Chr03 | 31607995                | GG                                     | TT                 | TT               | URR                           | 101500934          | cysteine-rich repeat secretory protein 56-like           |
| SNP_16687_A_31609499 | NC_021162.1    | Ca_Kabuli_Chr03 | 31609499                | CC                                     | TT                 | TT               | URR                           | 101500934          | cysteine-rich repeat secretory protein 56-like           |
| SNP_16689_A_31610710 | NC_021162.1    | Ca_Kabuli_Chr03 | 31610710                | CC                                     | TT                 | TT               | INTERGENIC                    |                    |                                                          |
| SNP_16690_A_31610828 | NC_021162.1    | Ca_Kabuli_Chr03 | 31610828                | CC                                     | TT                 | TT               | INTERGENIC                    |                    |                                                          |
| SNP_16691_A_31610852 | NC_021162.1    | Ca_Kabuli_Chr03 | 31610852                | TT                                     | CC                 | CC               | INTERGENIC                    |                    |                                                          |

| SNPs IDs             | Chromosome IDs | Chromosomes     | Physical positions (bp) | CDC Frontier (Reference genome) | (Pusa 1103 & HPNB) | (ILWC 46 & LPNB) | Sequence Components of genome | Gene accession IDs | Putative functions            |
|----------------------|----------------|-----------------|-------------------------|---------------------------------|--------------------|------------------|-------------------------------|--------------------|-------------------------------|
| SNP_16692_A_31610908 | NC_021162.1    | Ca_Kabuli_Chr03 | 31610908                | GG                              | AA                 | AA               | INTERGENIC                    |                    |                               |
| SNP_16693_A_31610914 | NC_021162.1    | Ca_Kabuli_Chr03 | 31610914                | GG                              | TT                 | TT               | INTERGENIC                    |                    |                               |
| SNP_16694_A_31610916 | NC_021162.1    | Ca_Kabuli_Chr03 | 31610916                | AA                              | TT                 | TT               | INTERGENIC                    |                    |                               |
| SNP_16696_A_31611162 | NC_021162.1    | Ca_Kabuli_Chr03 | 31611162                | GG                              | TT                 | TT               | INTERGENIC                    |                    |                               |
| SNP_16697_A_31614115 | NC_021162.1    | Ca_Kabuli_Chr03 | 31614115                | GG                              | AA                 | AA               | INTERGENIC                    |                    |                               |
| SNP_16698_A_31614129 | NC_021162.1    | Ca_Kabuli_Chr03 | 31614129                | GG                              | CC                 | CC               | INTERGENIC                    |                    |                               |
| SNP_16699_A_31614133 | NC_021162.1    | Ca_Kabuli_Chr03 | 31614133                | CC                              | TT                 | TT               | INTERGENIC                    |                    |                               |
| SNP_16700_A_31614164 | NC_021162.1    | Ca_Kabuli_Chr03 | 31614164                | CC                              | TT                 | TT               | INTERGENIC                    |                    |                               |
| SNP_16701_A_31614165 | NC_021162.1    | Ca_Kabuli_Chr03 | 31614165                | TT                              | AA                 | AA               | INTERGENIC                    |                    |                               |
| SNP_16702_A_31614196 | NC_021162.1    | Ca_Kabuli_Chr03 | 31614196                | GG                              | AA                 | AA               | INTERGENIC                    |                    |                               |
| SNP_16703_A_31614199 | NC_021162.1    | Ca_Kabuli_Chr03 | 31614199                | GG                              | TT                 | TT               | INTERGENIC                    |                    |                               |
| SNP_16704_A_31614253 | NC_021162.1    | Ca_Kabuli_Chr03 | 31614253                | GG                              | TT                 | TT               | INTERGENIC                    |                    |                               |
| SNP_16705_A_31614257 | NC_021162.1    | Ca_Kabuli_Chr03 | 31614257                | GG                              | AA                 | AA               | INTERGENIC                    |                    |                               |
| SNP_16706_A_31614478 | NC_021162.1    | Ca_Kabuli_Chr03 | 31614478                | CC                              | TT                 | TT               | INTERGENIC                    |                    |                               |
| SNP_16707_A_31619923 | NC_021162.1    | Ca_Kabuli_Chr03 | 31619923                | CC                              | TT                 | TT               | SYNONYMOUS_CODING             | 101501466          | pre-mRNA-processing factor 39 |
| SNP_16708_A_31623810 | NC_021162.1    | Ca_Kabuli_Chr03 | 31623810                | AA                              | GG                 | GG               | INTRON                        | 101501466          | pre-mRNA-processing factor 39 |
| SNP_16709_A_31625307 | NC_021162.1    | Ca_Kabuli_Chr03 | 31625307                | TT                              | GG                 | GG               | INTRON                        | 101501466          | pre-mRNA-processing factor 39 |
| SNP_16710_A_31627871 | NC_021162.1    | Ca_Kabuli_Chr03 | 31627871                | TT                              | CC                 | CC               | DRR                           | 101501784          | putative G3BP-like protein    |
| SNP_16711_A_31628593 | NC_021162.1    | Ca_Kabuli_Chr03 | 31628593                | CC                              | TT                 | TT               | URR                           | 101501466          | pre-mRNA-processing factor 39 |
| SNP_16712_A_31629099 | NC_021162.1    | Ca_Kabuli_Chr03 | 31629099                | GG                              | AA                 | AA               | INTERGENIC                    |                    |                               |
| SNP_16714_A_31633990 | NC_021162.1    | Ca_Kabuli_Chr03 | 31633990                | AA                              | CC                 | CC               | INTERGENIC                    |                    |                               |
| SNP_16715_A_31634511 | NC_021162.1    | Ca_Kabuli_Chr03 | 31634511                | TT                              | AA                 | AA               | URR                           | 101501784          | putative G3BP-like protein    |

| SNPs IDs             | Chromosome IDs | Chromosomes     | Physical positions (bp) | CDC Frontier genome (Reference genome) | (Pusa 1103 & HPNB) | (ILWC 46 & LPNB) | Sequence Components of genome | Gene accession IDs | Putative functions                                       |
|----------------------|----------------|-----------------|-------------------------|----------------------------------------|--------------------|------------------|-------------------------------|--------------------|----------------------------------------------------------|
| SNP_16716_A_31637621 | NC_021162.1    | Ca_Kabuli_Chr03 | 31637621                | GG                                     | TT                 | TT               | DRR                           | 101491012          | leucine-rich repeat receptor-like protein kinase PXL2    |
| SNP_16717_A_31646439 | NC_021162.1    | Ca_Kabuli_Chr03 | 31646439                | GG                                     | AA                 | AA               | DRR                           | 101502842          | uncharacterized LOC101502842                             |
| SNP_16718_A_31646454 | NC_021162.1    | Ca_Kabuli_Chr03 | 31646454                | AA                                     | GG                 | GG               | DRR                           | 101502842          | uncharacterized LOC101502842                             |
| SNP_16719_A_31651602 | NC_021162.1    | Ca_Kabuli_Chr03 | 31651602                | CC                                     | TT                 | TT               | URR                           | 101502842          | uncharacterized LOC101502842                             |
| SNP_16720_A_31656226 | NC_021162.1    | Ca_Kabuli_Chr03 | 31656226                | CC                                     | TT                 | TT               | INTERGENIC                    |                    |                                                          |
| SNP_16726_A_31940335 | NC_021162.1    | Ca_Kabuli_Chr03 | 31940335                | AA                                     | GG                 | GG               | INTERGENIC                    |                    |                                                          |
| SNP_16727_A_31940438 | NC_021162.1    | Ca_Kabuli_Chr03 | 31940438                | CC                                     | GG                 | GG               | INTERGENIC                    |                    |                                                          |
| SNP_16728_A_31940508 | NC_021162.1    | Ca_Kabuli_Chr03 | 31940508                | CC                                     | TT                 | TT               | INTERGENIC                    |                    |                                                          |
| SNP_16729_A_31940682 | NC_021162.1    | Ca_Kabuli_Chr03 | 31940682                | GG                                     | AA                 | AA               | INTERGENIC                    |                    |                                                          |
| SNP_16730_A_31960732 | NC_021162.1    | Ca_Kabuli_Chr03 | 31960732                | AA                                     | GG                 | GG               | URR                           | 101511526          | CLIP-associated protein-like                             |
| SNP_16731_A_31987983 | NC_021162.1    | Ca_Kabuli_Chr03 | 31987983                | CC                                     | TT                 | TT               | URR                           | 101514002          | 26S proteasome regulatory subunit 4 homolog A            |
| SNP_16732_A_31988330 | NC_021162.1    | Ca_Kabuli_Chr03 | 31988330                | GG                                     | AA                 | AA               | URR                           | 101514002          | 26S proteasome regulatory subunit 4 homolog A            |
| SNP_16733_A_32334899 | NC_021162.1    | Ca_Kabuli_Chr03 | 32334899                | TT                                     | CC                 | CC               | NON_SYNONYMOUS_CODING         | 101502214          | serine/threonine-protein phosphatase 7 long form homolog |
| SNP_16734_A_32334940 | NC_021162.1    | Ca_Kabuli_Chr03 | 32334940                | AA                                     | CC                 | CC               | NON_SYNONYMOUS_CODING         | 101502214          | serine/threonine-protein phosphatase 7 long form homolog |
| SNP_16735_A_32334949 | NC_021162.1    | Ca_Kabuli_Chr03 | 32334949                | TT                                     | CC                 | CC               | NON_SYNONYMOUS_CODING         | 101502214          | serine/threonine-protein phosphatase 7 long form homolog |
| SNP_16736_A_32336077 | NC_021162.1    | Ca_Kabuli_Chr03 | 32336077                | TT                                     | CC                 | CC               | URR                           | 101502214          | serine/threonine-protein phosphatase 7 long form homolog |
| SNP_16737_A_32336301 | NC_021162.1    | Ca_Kabuli_Chr03 | 32336301                | AA                                     | CC                 | CC               | URR                           | 101502214          | serine/threonine-protein phosphatase 7 long form homolog |
| SNP_16739_A_32378897 | NC_021162.1    | Ca_Kabuli_Chr03 | 32378897                | GG                                     | AA                 | AA               | INTRON                        | 101503165          | uncharacterized LOC101503165                             |
| SNP_16741_A_32413071 | NC_021162.1    | Ca_Kabuli_Chr03 | 32413071                | CC                                     | GG                 | GG               | INTERGENIC                    |                    |                                                          |
| SNP_16742_A_32414372 | NC_021162.1    | Ca_Kabuli_Chr03 | 32414372                | TT                                     | CC                 | CC               | INTERGENIC                    |                    |                                                          |
| SNP_16743_A_32414401 | NC_021162.1    | Ca_Kabuli_Chr03 | 32414401                | TT                                     | CC                 | CC               | INTERGENIC                    |                    |                                                          |
| SNP_16744_A_32414411 | NC_021162.1    | Ca_Kabuli_Chr03 | 32414411                | CC                                     | TT                 | TT               | INTERGENIC                    |                    |                                                          |

| SNPs IDs             | Chromosome IDs | Chromosomes     | Physical positions (bp) | CDC Frontier genome (Reference genome) | (Pusa 1103 & HPNB) | (ILWC 46 & LPNB) | Sequence Components of genome | Gene accession IDs | Putative functions                                                   |
|----------------------|----------------|-----------------|-------------------------|----------------------------------------|--------------------|------------------|-------------------------------|--------------------|----------------------------------------------------------------------|
| SNP_16745_A_32414708 | NC_021162.1    | Ca_Kabuli_Chr03 | 32414708                | TT                                     | CC                 | CC               | INTERGENIC                    |                    |                                                                      |
| SNP_16746_A_32414834 | NC_021162.1    | Ca_Kabuli_Chr03 | 32414834                | TT                                     | CC                 | CC               | INTERGENIC                    |                    |                                                                      |
| SNP_16747_A_32414897 | NC_021162.1    | Ca_Kabuli_Chr03 | 32414897                | AA                                     | GG                 | GG               | INTERGENIC                    |                    |                                                                      |
| SNP_16748_A_32414898 | NC_021162.1    | Ca_Kabuli_Chr03 | 32414898                | GG                                     | AA                 | AA               | INTERGENIC                    |                    |                                                                      |
| SNP_16749_A_32457747 | NC_021162.1    | Ca_Kabuli_Chr03 | 32457747                | GG                                     | AA                 | AA               | INTRON                        | id57470            | Unknown function                                                     |
| SNP_16750_A_32457924 | NC_021162.1    | Ca_Kabuli_Chr03 | 32457924                | CC                                     | AA                 | AA               | SPLICE_SITE_REGION            | id57470            | Unknown function                                                     |
| SNP_16751_A_32458016 | NC_021162.1    | Ca_Kabuli_Chr03 | 32458016                | CC                                     | AA                 | AA               | NON_SYNONYMOUS_CODING         | id57470            | Unknown function                                                     |
| SNP_16752_A_32458192 | NC_021162.1    | Ca_Kabuli_Chr03 | 32458192                | CC                                     | AA                 | AA               | INTRON                        | id57470            | Unknown function                                                     |
| SNP_16753_A_32458230 | NC_021162.1    | Ca_Kabuli_Chr03 | 32458230                | CC                                     | TT                 | TT               | INTRON                        | id57470            | Unknown function                                                     |
| SNP_16754_A_32482929 | NC_021162.1    | Ca_Kabuli_Chr03 | 32482929                | TT                                     | CC                 | CC               | URR                           | 101498149          | elongation factor 1-delta 2-like                                     |
| SNP_16755_A_32514916 | NC_021162.1    | Ca_Kabuli_Chr03 | 32514916                | GG                                     | CC                 | CC               | INTERGENIC                    |                    |                                                                      |
| SNP_16756_A_32515605 | NC_021162.1    | Ca_Kabuli_Chr03 | 32515605                | GG                                     | AA                 | AA               | INTERGENIC                    |                    |                                                                      |
| SNP_16758_A_32589733 | NC_021162.1    | Ca_Kabuli_Chr03 | 32589733                | AA                                     | TT                 | TT               | URR                           | 101410598          | transfer RNA arginine (anticodon UCG)                                |
| SNP_16759_A_32589963 | NC_021162.1    | Ca_Kabuli_Chr03 | 32589963                | CC                                     | TT                 | TT               | URR                           | 101410598          | transfer RNA arginine (anticodon UCG)                                |
| SNP_16760_A_32590005 | NC_021162.1    | Ca_Kabuli_Chr03 | 32590005                | GG                                     | AA                 | AA               | URR                           | 101410598          | transfer RNA arginine (anticodon UCG)                                |
| SNP_16761_A_32590021 | NC_021162.1    | Ca_Kabuli_Chr03 | 32590021                | TT                                     | CC                 | CC               | URR                           | 101410598          | transfer RNA arginine (anticodon UCG)                                |
| SNP_16762_A_32590085 | NC_021162.1    | Ca_Kabuli_Chr03 | 32590085                | CC                                     | TT                 | TT               | URR                           | 101410598          | transfer RNA arginine (anticodon UCG)                                |
| SNP_16764_A_32627171 | NC_021162.1    | Ca_Kabuli_Chr03 | 32627171                | GG                                     | AA                 | AA               | URR                           | 101503482          | uncharacterized LOC101503482                                         |
| SNP_16766_A_32696216 | NC_021162.1    | Ca_Kabuli_Chr03 | 32696216                | TT                                     | CC                 | CC               | URR                           | 101506829          | probable protein phosphatase 2C 38                                   |
| SNP_16767_A_32720754 | NC_021162.1    | Ca_Kabuli_Chr03 | 32720754                | AA                                     | GG                 | GG               | DRR                           | 101505754          | uncharacterized LOC101505754                                         |
| SNP_16768_A_32752150 | NC_021162.1    | Ca_Kabuli_Chr03 | 32752150                | GG                                     | AA                 | AA               | URR                           | 101510782          | pentatricopeptide repeat-containing protein At5g02830, chloroplastic |
| SNP_16769_A_32784592 | NC_021162.1    | Ca_Kabuli_Chr03 | 32784592                | GG                                     | AA                 | AA               | SYNONYMOUS_CODING             | 101511746          | probable LRR receptor-like serine/threonine-protein kinase At1g67720 |

| SNPs IDs             | Chromosome IDs | Chromosomes     | Physical positions (bp) | CDC Frontier genome (Reference genome) | (Pusa 1103 & HPNB) | (ILWC 46 & LPNB) | Sequence Components of genome | Gene accession IDs | Putative functions                               |
|----------------------|----------------|-----------------|-------------------------|----------------------------------------|--------------------|------------------|-------------------------------|--------------------|--------------------------------------------------|
| SNP_16770_A_32790149 | NC_021162.1    | Ca_Kabuli_Chr03 | 32790149                | GG                                     | TT                 | TT               | DRR                           | 101512494          | nuclear transcription factor Y subunit B-10      |
| SNP_16771_A_32835392 | NC_021162.1    | Ca_Kabuli_Chr03 | 32835392                | GG                                     | CC                 | CC               | INTERGENIC                    |                    |                                                  |
| SNP_16772_A_32948677 | NC_021162.1    | Ca_Kabuli_Chr03 | 32948677                | CC                                     | AA                 | AA               | DRR                           | 101491841          | dnaJ protein P58IPK homolog                      |
| SNP_16773_A_32982680 | NC_021162.1    | Ca_Kabuli_Chr03 | 32982680                | CC                                     | TT                 | TT               | URR                           | 101493717          | probable E3 ubiquitin-protein ligase LOG2        |
| SNP_16774_A_32993002 | NC_021162.1    | Ca_Kabuli_Chr03 | 32993002                | AA                                     | TT                 | TT               | URR                           | 101494566          | aquaporin PIP2-5-like                            |
| SNP_16775_A_33039585 | NC_021162.1    | Ca_Kabuli_Chr03 | 33039585                | GG                                     | AA                 | AA               | INTERGENIC                    |                    |                                                  |
| SNP_16776_A_33083363 | NC_021162.1    | Ca_Kabuli_Chr03 | 33083363                | GG                                     | AA                 | AA               | INTRON                        | 101506720          | chromodomain-helicase-DNA-binding protein 3-like |
| SNP_16778_A_33121835 | NC_021162.1    | Ca_Kabuli_Chr03 | 33121835                | TT                                     | GG                 | GG               | INTERGENIC                    |                    |                                                  |
| SNP_16780_A_33228442 | NC_021162.1    | Ca_Kabuli_Chr03 | 33228442                | GG                                     | AA                 | AA               | DRR                           | 101501354          | histidine--tRNA ligase, cytoplasmic              |
| SNP_16782_A_33252803 | NC_021162.1    | Ca_Kabuli_Chr03 | 33252803                | AA                                     | TT                 | TT               | INTERGENIC                    |                    |                                                  |
| SNP_16783_A_33323445 | NC_021162.1    | Ca_Kabuli_Chr03 | 33323445                | CC                                     | GG                 | GG               | DRR                           | 101508637          | CASP-like protein 2D1                            |
| SNP_16784_A_33333343 | NC_021162.1    | Ca_Kabuli_Chr03 | 33333343                | AA                                     | CC                 | CC               | INTERGENIC                    |                    |                                                  |
| SNP_16785_A_33335631 | NC_021162.1    | Ca_Kabuli_Chr03 | 33335631                | GG                                     | AA                 | AA               | INTERGENIC                    |                    |                                                  |
| SNP_16787_A_33358443 | NC_021162.1    | Ca_Kabuli_Chr03 | 33358443                | AA                                     | GG                 | GG               | DRR                           | 101512619          | Unknown function                                 |
| SNP_16788_A_33381138 | NC_021162.1    | Ca_Kabuli_Chr03 | 33381138                | AA                                     | GG                 | GG               | INTERGENIC                    |                    |                                                  |
| SNP_16790_A_33393522 | NC_021162.1    | Ca_Kabuli_Chr03 | 33393522                | GG                                     | TT                 | TT               | INTERGENIC                    |                    |                                                  |
| SNP_16791_A_33419582 | NC_021162.1    | Ca_Kabuli_Chr03 | 33419582                | CC                                     | TT                 | TT               | INTERGENIC                    |                    |                                                  |
| SNP_16792_A_33435087 | NC_021162.1    | Ca_Kabuli_Chr03 | 33435087                | GG                                     | CC                 | CC               | INTERGENIC                    |                    |                                                  |
| SNP_16794_A_33531508 | NC_021162.1    | Ca_Kabuli_Chr03 | 33531508                | CC                                     | TT                 | TT               | INTRON                        | 101510452          | protein SHOOT GRAVITROPISM 6-like                |
| SNP_16795_A_33540265 | NC_021162.1    | Ca_Kabuli_Chr03 | 33540265                | AA                                     | GG                 | GG               | INTERGENIC                    |                    |                                                  |
| SNP_16797_A_33568225 | NC_021162.1    | Ca_Kabuli_Chr03 | 33568225                | TT                                     | CC                 | CC               | URR                           | 101511309          | UDP-glycosyltransferase 73C2-like                |
| SNP_16798_A_33568229 | NC_021162.1    | Ca_Kabuli_Chr03 | 33568229                | TT                                     | CC                 | CC               | URR                           | 101511309          | UDP-glycosyltransferase 73C2-like                |

| SNPs IDs             | Chromosome IDs | Chromosomes     | Physical positions (bp) | CDC Frontier genome (Reference genome) | (Pusa 1103 & HPNB) | (ILWC 46 & LPNB) | Sequence Components of genome | Gene accession IDs | Putative functions           |
|----------------------|----------------|-----------------|-------------------------|----------------------------------------|--------------------|------------------|-------------------------------|--------------------|------------------------------|
| SNP_16799_A_33599246 | NC_021162.1    | Ca_Kabuli_Chr03 | 33599246                | CC                                     | TT                 | TT               | INTERGENIC                    |                    |                              |
| SNP_16800_A_33624738 | NC_021162.1    | Ca_Kabuli_Chr03 | 33624738                | CC                                     | TT                 | TT               | INTRON                        | 101515204          | uncharacterized LOC101515204 |
| SNP_16801_A_33626018 | NC_021162.1    | Ca_Kabuli_Chr03 | 33626018                | TT                                     | AA                 | AA               | INTRON                        | 101515204          | uncharacterized LOC101515204 |
| SNP_16802_A_33629825 | NC_021162.1    | Ca_Kabuli_Chr03 | 33629825                | GG                                     | TT                 | TT               | INTERGENIC                    |                    |                              |
| SNP_16803_A_33629844 | NC_021162.1    | Ca_Kabuli_Chr03 | 33629844                | TT                                     | CC                 | CC               | INTERGENIC                    |                    |                              |
| SNP_16804_A_33629856 | NC_021162.1    | Ca_Kabuli_Chr03 | 33629856                | CC                                     | TT                 | TT               | INTERGENIC                    |                    |                              |
| SNP_16805_A_33629971 | NC_021162.1    | Ca_Kabuli_Chr03 | 33629971                | GG                                     | AA                 | AA               | INTERGENIC                    |                    |                              |
| SNP_16806_A_33630022 | NC_021162.1    | Ca_Kabuli_Chr03 | 33630022                | GG                                     | AA                 | AA               | INTERGENIC                    |                    |                              |
| SNP_16807_A_33639994 | NC_021162.1    | Ca_Kabuli_Chr03 | 33639994                | GG                                     | AA                 | AA               | INTERGENIC                    |                    |                              |
| SNP_16808_A_33645952 | NC_021162.1    | Ca_Kabuli_Chr03 | 33645952                | AA                                     | TT                 | TT               | INTERGENIC                    |                    |                              |
| SNP_16809_A_33652209 | NC_021162.1    | Ca_Kabuli_Chr03 | 33652209                | TT                                     | CC                 | CC               | INTERGENIC                    |                    |                              |
| SNP_16810_A_33662368 | NC_021162.1    | Ca_Kabuli_Chr03 | 33662368                | CC                                     | TT                 | TT               | INTERGENIC                    |                    |                              |
| SNP_16811_A_33662374 | NC_021162.1    | Ca_Kabuli_Chr03 | 33662374                | TT                                     | GG                 | GG               | INTERGENIC                    |                    |                              |
| SNP_16812_A_33683491 | NC_021162.1    | Ca_Kabuli_Chr03 | 33683491                | AA                                     | CC                 | CC               | INTERGENIC                    |                    |                              |
| SNP_16813_A_33712529 | NC_021162.1    | Ca_Kabuli_Chr03 | 33712529                | CC                                     | GG                 | GG               | DRR                           | 101515525          | uncharacterized LOC101515525 |
| SNP_16816_A_33777738 | NC_021162.1    | Ca_Kabuli_Chr03 | 33777738                | CC                                     | AA                 | AA               | INTERGENIC                    |                    |                              |
| SNP_16817_A_33778522 | NC_021162.1    | Ca_Kabuli_Chr03 | 33778522                | GG                                     | AA                 | AA               | INTERGENIC                    |                    |                              |
| SNP_16818_A_33779104 | NC_021162.1    | Ca_Kabuli_Chr03 | 33779104                | TT                                     | AA                 | AA               | INTERGENIC                    |                    |                              |
| SNP_16819_A_33791762 | NC_021162.1    | Ca_Kabuli_Chr03 | 33791762                | AA                                     | GG                 | GG               | DRR                           | 101497833          | Unknown function             |
| SNP_16820_A_33792119 | NC_021162.1    | Ca_Kabuli_Chr03 | 33792119                | TT                                     | AA                 | AA               | INTERGENIC                    |                    |                              |
| SNP_16821_A_33792129 | NC_021162.1    | Ca_Kabuli_Chr03 | 33792129                | AA                                     | CC                 | CC               | INTERGENIC                    |                    |                              |
| SNP_16822_A_33792176 | NC_021162.1    | Ca_Kabuli_Chr03 | 33792176                | AA                                     | GG                 | GG               | INTERGENIC                    |                    |                              |

| SNPs IDs             | Chromosome IDs | Chromosomes     | Physical positions (bp) | CDC Frontier genome (Reference genome) | (Pusa 1103 & HPNB) | (ILWC 46 & LPNB) | Sequence Components of genome | Gene accession IDs | Putative functions                                             |
|----------------------|----------------|-----------------|-------------------------|----------------------------------------|--------------------|------------------|-------------------------------|--------------------|----------------------------------------------------------------|
| SNP_16823_A_33792181 | NC_021162.1    | Ca_Kabuli_Chr03 | 33792181                | GG                                     | TT                 | TT               | INTERGENIC                    |                    |                                                                |
| SNP_16824_A_33794702 | NC_021162.1    | Ca_Kabuli_Chr03 | 33794702                | AA                                     | GG                 | GG               | DRR                           | 101498151          | uncharacterized LOC101498151                                   |
| SNP_16825_A_33794836 | NC_021162.1    | Ca_Kabuli_Chr03 | 33794836                | AA                                     | CC                 | CC               | DRR                           | 101498151          | uncharacterized LOC101498151                                   |
| SNP_16826_A_33795129 | NC_021162.1    | Ca_Kabuli_Chr03 | 33795129                | AA                                     | CC                 | CC               | DRR                           | 101498151          | uncharacterized LOC101498151                                   |
| SNP_16827_A_33795138 | NC_021162.1    | Ca_Kabuli_Chr03 | 33795138                | GG                                     | AA                 | AA               | DRR                           | 101498151          | uncharacterized LOC101498151                                   |
| SNP_16828_A_33795248 | NC_021162.1    | Ca_Kabuli_Chr03 | 33795248                | AA                                     | GG                 | GG               | DRR                           | 101498151          | uncharacterized LOC101498151                                   |
| SNP_16829_A_33813187 | NC_021162.1    | Ca_Kabuli_Chr03 | 33813187                | CC                                     | TT                 | TT               | INTERGENIC                    |                    |                                                                |
| SNP_16830_A_33827947 | NC_021162.1    | Ca_Kabuli_Chr03 | 33827947                | AA                                     | CC                 | CC               | INTERGENIC                    |                    |                                                                |
| SNP_16832_A_33848360 | NC_021162.1    | Ca_Kabuli_Chr03 | 33848360                | GG                                     | AA                 | AA               | INTERGENIC                    |                    |                                                                |
| SNP_16833_A_33848879 | NC_021162.1    | Ca_Kabuli_Chr03 | 33848879                | CC                                     | TT                 | TT               | INTERGENIC                    |                    |                                                                |
| SNP_16834_A_33859229 | NC_021162.1    | Ca_Kabuli_Chr03 | 33859229                | TT                                     | AA                 | AA               | INTERGENIC                    |                    |                                                                |
| SNP_16836_A_33883300 | NC_021162.1    | Ca_Kabuli_Chr03 | 33883300                | TT                                     | CC                 | CC               | INTERGENIC                    |                    |                                                                |
| SNP_16837_A_33909689 | NC_021162.1    | Ca_Kabuli_Chr03 | 33909689                | GG                                     | AA                 | AA               | INTRON                        | 101493718          | putative pentatricopeptide repeat-containing protein At3g11460 |
| SNP_16838_A_33914071 | NC_021162.1    | Ca_Kabuli_Chr03 | 33914071                | TT                                     | GG                 | GG               | URR                           | 101493718          | putative pentatricopeptide repeat-containing protein At3g11460 |
| SNP_16841_A_33990236 | NC_021162.1    | Ca_Kabuli_Chr03 | 33990236                | AA                                     | CC                 | CC               | INTERGENIC                    |                    |                                                                |
| SNP_16842_A_34022739 | NC_021162.1    | Ca_Kabuli_Chr03 | 34022739                | CC                                     | AA                 | AA               | INTERGENIC                    |                    |                                                                |
| SNP_16843_A_34032814 | NC_021162.1    | Ca_Kabuli_Chr03 | 34032814                | CC                                     | TT                 | TT               | INTERGENIC                    |                    |                                                                |
| SNP_16846_A_34032942 | NC_021162.1    | Ca_Kabuli_Chr03 | 34032942                | GG                                     | CC                 | CC               | INTERGENIC                    |                    |                                                                |
| SNP_16847_A_34033774 | NC_021162.1    | Ca_Kabuli_Chr03 | 34033774                | AA                                     | GG                 | GG               | INTERGENIC                    |                    |                                                                |
| SNP_16848_A_34065648 | NC_021162.1    | Ca_Kabuli_Chr03 | 34065648                | CC                                     | TT                 | TT               | INTERGENIC                    |                    |                                                                |
| SNP_16849_A_34065668 | NC_021162.1    | Ca_Kabuli_Chr03 | 34065668                | AA                                     | GG                 | GG               | INTERGENIC                    |                    |                                                                |
| SNP_16850_A_34065679 | NC_021162.1    | Ca_Kabuli_Chr03 | 34065679                | AA                                     | GG                 | GG               | INTERGENIC                    |                    |                                                                |



| SNPs IDs             | Chromosome IDs | Chromosomes     | Physical positions (bp) | CDC Frontier genome (Reference genome) | (Pusa 1103 & HPNB) | (ILWC 46 & LPNB) | Sequence Components of genome | Gene accession IDs | Putative functions                       |
|----------------------|----------------|-----------------|-------------------------|----------------------------------------|--------------------|------------------|-------------------------------|--------------------|------------------------------------------|
| SNP_16851_A_34065712 | NC_021162.1    | Ca_Kabuli_Chr03 | 34065712                | TT                                     | CC                 | CC               | INTERGENIC                    |                    |                                          |
| SNP_16852_A_34069902 | NC_021162.1    | Ca_Kabuli_Chr03 | 34069902                | GG                                     | CC                 | CC               | INTERGENIC                    |                    |                                          |
| SNP_16853_A_34087253 | NC_021162.1    | Ca_Kabuli_Chr03 | 34087253                | TT                                     | CC                 | CC               | INTERGENIC                    |                    |                                          |
| SNP_16854_A_34087294 | NC_021162.1    | Ca_Kabuli_Chr03 | 34087294                | GG                                     | AA                 | AA               | INTERGENIC                    |                    |                                          |
| SNP_16855_A_34109568 | NC_021162.1    | Ca_Kabuli_Chr03 | 34109568                | CC                                     | AA                 | AA               | INTERGENIC                    |                    |                                          |
| SNP_16856_A_34109570 | NC_021162.1    | Ca_Kabuli_Chr03 | 34109570                | TT                                     | AA                 | AA               | INTERGENIC                    |                    |                                          |
| SNP_16857_A_34128505 | NC_021162.1    | Ca_Kabuli_Chr03 | 34128505                | TT                                     | CC                 | CC               | INTERGENIC                    |                    |                                          |
| SNP_16858_A_34142796 | NC_021162.1    | Ca_Kabuli_Chr03 | 34142796                | CC                                     | TT                 | TT               | INTERGENIC                    |                    |                                          |
| SNP_16860_A_34151392 | NC_021162.1    | Ca_Kabuli_Chr03 | 34151392                | CC                                     | AA                 | AA               | INTERGENIC                    |                    |                                          |
| SNP_16862_A_34161182 | NC_021162.1    | Ca_Kabuli_Chr03 | 34161182                | GG                                     | CC                 | CC               | INTERGENIC                    |                    |                                          |
| SNP_16863_A_34169411 | NC_021162.1    | Ca_Kabuli_Chr03 | 34169411                | GG                                     | AA                 | AA               | INTERGENIC                    |                    |                                          |
| SNP_16864_A_34193885 | NC_021162.1    | Ca_Kabuli_Chr03 | 34193885                | TT                                     | AA                 | AA               | INTRON                        | 101500726          | Unknown function                         |
| SNP_16865_A_34217927 | NC_021162.1    | Ca_Kabuli_Chr03 | 34217927                | GG                                     | AA                 | AA               | URR                           | 101501036          | Unknown function                         |
| SNP_16867_A_34302947 | NC_021162.1    | Ca_Kabuli_Chr03 | 34302947                | TT                                     | AA                 | AA               | INTERGENIC                    |                    |                                          |
| SNP_16868_A_34340892 | NC_021162.1    | Ca_Kabuli_Chr03 | 34340892                | AA                                     | CC                 | CC               | URR                           | 101505514          | ACT domain-containing protein ACR10-like |
| SNP_16869_A_34352788 | NC_021162.1    | Ca_Kabuli_Chr03 | 34352788                | GG                                     | CC                 | CC               | INTRON                        | id58692            | Unknown function                         |
| SNP_16870_A_34365026 | NC_021162.1    | Ca_Kabuli_Chr03 | 34365026                | TT                                     | AA                 | AA               | INTERGENIC                    |                    |                                          |
| SNP_16871_A_34365163 | NC_021162.1    | Ca_Kabuli_Chr03 | 34365163                | GG                                     | AA                 | AA               | INTERGENIC                    |                    |                                          |
| SNP_16872_A_34365203 | NC_021162.1    | Ca_Kabuli_Chr03 | 34365203                | GG                                     | TT                 | TT               | INTERGENIC                    |                    |                                          |
| SNP_16874_A_34365265 | NC_021162.1    | Ca_Kabuli_Chr03 | 34365265                | TT                                     | GG                 | GG               | INTERGENIC                    |                    |                                          |
| SNP_16875_A_34367367 | NC_021162.1    | Ca_Kabuli_Chr03 | 34367367                | AA                                     | TT                 | TT               | INTERGENIC                    |                    |                                          |
| SNP_16877_A_34460855 | NC_021162.1    | Ca_Kabuli_Chr03 | 34460855                | CC                                     | TT                 | TT               | INTERGENIC                    |                    |                                          |

| SNPs IDs             | Chromosome IDs | Chromosomes     | Physical positions (bp) | CDC Frontier genome (Reference genome) | (Pusa 1103 & HPNB) | (ILWC 46 & LPNB) | Sequence Components of genome | Gene accession IDs | Putative functions                |
|----------------------|----------------|-----------------|-------------------------|----------------------------------------|--------------------|------------------|-------------------------------|--------------------|-----------------------------------|
| SNP_16878_A_34464327 | NC_021162.1    | Ca_Kabuli_Chr03 | 34464327                | CC                                     | TT                 | TT               | INTERGENIC                    |                    |                                   |
| SNP_16880_A_34491162 | NC_021162.1    | Ca_Kabuli_Chr03 | 34491162                | GG                                     | AA                 | AA               | URR                           | 101510356          | Unknown function                  |
| SNP_16882_A_34495996 | NC_021162.1    | Ca_Kabuli_Chr03 | 34495996                | TT                                     | AA                 | AA               | DRR                           | 101509269          | WD repeat-containing protein 3    |
| SNP_16885_A_34521538 | NC_021162.1    | Ca_Kabuli_Chr03 | 34521538                | GG                                     | AA                 | AA               | INTERGENIC                    |                    |                                   |
| SNP_16886_A_34521539 | NC_021162.1    | Ca_Kabuli_Chr03 | 34521539                | AA                                     | GG                 | GG               | INTERGENIC                    |                    |                                   |
| SNP_16887_A_34523789 | NC_021162.1    | Ca_Kabuli_Chr03 | 34523789                | GG                                     | AA                 | AA               | INTERGENIC                    |                    |                                   |
| SNP_16888_A_34525218 | NC_021162.1    | Ca_Kabuli_Chr03 | 34525218                | CC                                     | TT                 | TT               | INTRON                        | 101509812          | protein SHOOT GRAVITROPISM 6-like |
| SNP_16889_A_34527469 | NC_021162.1    | Ca_Kabuli_Chr03 | 34527469                | TT                                     | CC                 | CC               | INTRON                        | 101509812          | protein SHOOT GRAVITROPISM 6-like |
| SNP_16890_A_34527474 | NC_021162.1    | Ca_Kabuli_Chr03 | 34527474                | TT                                     | CC                 | CC               | INTRON                        | 101509812          | protein SHOOT GRAVITROPISM 6-like |
| SNP_16891_A_34531329 | NC_021162.1    | Ca_Kabuli_Chr03 | 34531329                | AA                                     | GG                 | GG               | INTRON                        | 101509812          | protein SHOOT GRAVITROPISM 6-like |
| SNP_16892_A_34531557 | NC_021162.1    | Ca_Kabuli_Chr03 | 34531557                | GG                                     | AA                 | AA               | INTRON                        | 101509812          | protein SHOOT GRAVITROPISM 6-like |
| SNP_16893_A_34531583 | NC_021162.1    | Ca_Kabuli_Chr03 | 34531583                | TT                                     | CC                 | CC               | INTRON                        | 101509812          | protein SHOOT GRAVITROPISM 6-like |
| SNP_16894_A_34531598 | NC_021162.1    | Ca_Kabuli_Chr03 | 34531598                | CC                                     | TT                 | TT               | INTRON                        | 101509812          | protein SHOOT GRAVITROPISM 6-like |
| SNP_16895_A_34531807 | NC_021162.1    | Ca_Kabuli_Chr03 | 34531807                | GG                                     | TT                 | TT               | INTRON                        | 101509812          | protein SHOOT GRAVITROPISM 6-like |
| SNP_16896_A_34533752 | NC_021162.1    | Ca_Kabuli_Chr03 | 34533752                | CC                                     | GG                 | GG               | INTRON                        | 101509812          | protein SHOOT GRAVITROPISM 6-like |
| SNP_16897_A_34535964 | NC_021162.1    | Ca_Kabuli_Chr03 | 34535964                | TT                                     | AA                 | AA               | INTRON                        | 101509812          | protein SHOOT GRAVITROPISM 6-like |
| SNP_16898_A_34538170 | NC_021162.1    | Ca_Kabuli_Chr03 | 34538170                | TT                                     | CC                 | CC               | INTRON                        | 101509812          | protein SHOOT GRAVITROPISM 6-like |
| SNP_16899_A_34538175 | NC_021162.1    | Ca_Kabuli_Chr03 | 34538175                | AA                                     | TT                 | TT               | INTRON                        | 101509812          | protein SHOOT GRAVITROPISM 6-like |
| SNP_16901_A_34538864 | NC_021162.1    | Ca_Kabuli_Chr03 | 34538864                | CC                                     | TT                 | TT               | INTRON                        | 101509812          | protein SHOOT GRAVITROPISM 6-like |
| SNP_16902_A_34538865 | NC_021162.1    | Ca_Kabuli_Chr03 | 34538865                | AA                                     | CC                 | CC               | INTRON                        | 101509812          | protein SHOOT GRAVITROPISM 6-like |
| SNP_16903_A_34538891 | NC_021162.1    | Ca_Kabuli_Chr03 | 34538891                | CC                                     | TT                 | TT               | INTRON                        | 101509812          | protein SHOOT GRAVITROPISM 6-like |
| SNP_16904_A_34540061 | NC_021162.1    | Ca_Kabuli_Chr03 | 34540061                | GG                                     | AA                 | AA               | INTRON                        | 101509812          | protein SHOOT GRAVITROPISM 6-like |

| SNPs IDs             | Chromosome IDs | Chromosomes     | Physical positions (bp) | CDC Frontier (Reference genome) | (Pusa 1103 & HPNB) | (ILWC 46 & LPNB) | Sequence Components of genome | Gene accession IDs | Putative functions                |
|----------------------|----------------|-----------------|-------------------------|---------------------------------|--------------------|------------------|-------------------------------|--------------------|-----------------------------------|
| SNP_16905_A_34540092 | NC_021162.1    | Ca_Kabuli_Chr03 | 34540092                | AA                              | CC                 | CC               | INTRON                        | 101509812          | protein SHOOT GRAVITROPISM 6-like |
| SNP_16906_A_34540126 | NC_021162.1    | Ca_Kabuli_Chr03 | 34540126                | AA                              | GG                 | GG               | INTRON                        | 101509812          | protein SHOOT GRAVITROPISM 6-like |
| SNP_16907_A_34540214 | NC_021162.1    | Ca_Kabuli_Chr03 | 34540214                | CC                              | TT                 | TT               | INTRON                        | 101509812          | protein SHOOT GRAVITROPISM 6-like |
| SNP_16908_A_34540293 | NC_021162.1    | Ca_Kabuli_Chr03 | 34540293                | TT                              | CC                 | CC               | INTRON                        | 101509812          | protein SHOOT GRAVITROPISM 6-like |
| SNP_16909_A_34540471 | NC_021162.1    | Ca_Kabuli_Chr03 | 34540471                | AA                              | CC                 | CC               | INTRON                        | 101509812          | protein SHOOT GRAVITROPISM 6-like |
| SNP_16910_A_34540505 | NC_021162.1    | Ca_Kabuli_Chr03 | 34540505                | GG                              | TT                 | TT               | INTRON                        | 101509812          | protein SHOOT GRAVITROPISM 6-like |
| SNP_16911_A_34540782 | NC_021162.1    | Ca_Kabuli_Chr03 | 34540782                | AA                              | GG                 | GG               | INTRON                        | 101509812          | protein SHOOT GRAVITROPISM 6-like |
| SNP_16912_A_34540983 | NC_021162.1    | Ca_Kabuli_Chr03 | 34540983                | AA                              | TT                 | TT               | INTRON                        | 101509812          | protein SHOOT GRAVITROPISM 6-like |
| SNP_16913_A_34541197 | NC_021162.1    | Ca_Kabuli_Chr03 | 34541197                | AA                              | CC                 | CC               | INTRON                        | 101509812          | protein SHOOT GRAVITROPISM 6-like |
| SNP_16914_A_34541715 | NC_021162.1    | Ca_Kabuli_Chr03 | 34541715                | AA                              | GG                 | GG               | INTRON                        | 101509812          | protein SHOOT GRAVITROPISM 6-like |
| SNP_16915_A_34543649 | NC_021162.1    | Ca_Kabuli_Chr03 | 34543649                | GG                              | TT                 | TT               | INTRON                        | 101509812          | protein SHOOT GRAVITROPISM 6-like |
| SNP_16916_A_34543650 | NC_021162.1    | Ca_Kabuli_Chr03 | 34543650                | TT                              | AA                 | AA               | INTRON                        | 101509812          | protein SHOOT GRAVITROPISM 6-like |
| SNP_16917_A_34543987 | NC_021162.1    | Ca_Kabuli_Chr03 | 34543987                | AA                              | GG                 | GG               | INTRON                        | 101509812          | protein SHOOT GRAVITROPISM 6-like |
| SNP_16918_A_34544086 | NC_021162.1    | Ca_Kabuli_Chr03 | 34544086                | TT                              | AA                 | AA               | INTRON                        | 101509812          | protein SHOOT GRAVITROPISM 6-like |
| SNP_16919_A_34549532 | NC_021162.1    | Ca_Kabuli_Chr03 | 34549532                | AA                              | GG                 | GG               | INTRON                        | 101509812          | protein SHOOT GRAVITROPISM 6-like |
| SNP_16920_A_34550679 | NC_021162.1    | Ca_Kabuli_Chr03 | 34550679                | TT                              | GG                 | GG               | INTRON                        | 101509812          | protein SHOOT GRAVITROPISM 6-like |
| SNP_16921_A_34550686 | NC_021162.1    | Ca_Kabuli_Chr03 | 34550686                | AA                              | GG                 | GG               | INTRON                        | 101509812          | protein SHOOT GRAVITROPISM 6-like |
| SNP_16922_A_34550945 | NC_021162.1    | Ca_Kabuli_Chr03 | 34550945                | TT                              | AA                 | AA               | INTRON                        | 101509812          | protein SHOOT GRAVITROPISM 6-like |
| SNP_16923_A_34550971 | NC_021162.1    | Ca_Kabuli_Chr03 | 34550971                | CC                              | TT                 | TT               | INTRON                        | 101509812          | protein SHOOT GRAVITROPISM 6-like |
| SNP_16924_A_34551027 | NC_021162.1    | Ca_Kabuli_Chr03 | 34551027                | GG                              | AA                 | AA               | INTRON                        | 101509812          | protein SHOOT GRAVITROPISM 6-like |
| SNP_16925_A_34551054 | NC_021162.1    | Ca_Kabuli_Chr03 | 34551054                | AA                              | TT                 | TT               | INTRON                        | 101509812          | protein SHOOT GRAVITROPISM 6-like |
| SNP_16926_A_34551580 | NC_021162.1    | Ca_Kabuli_Chr03 | 34551580                | AA                              | CC                 | CC               | INTRON                        | 101509812          | protein SHOOT GRAVITROPISM 6-like |

| SNPs IDs             | Chromosome IDs | Chromosomes     | Physical positions (bp) | CDC Frontier genome (Reference genome) | (Pusa 1103 & HPNB) | (ILWC 46 & LPNB) | Sequence Components of genome | Gene accession IDs | Putative functions                |
|----------------------|----------------|-----------------|-------------------------|----------------------------------------|--------------------|------------------|-------------------------------|--------------------|-----------------------------------|
| SNP_16927_A_34552502 | NC_021162.1    | Ca_Kabuli_Chr03 | 34552502                | GG                                     | AA                 | AA               | INTRON                        | 101509812          | protein SHOOT GRAVITROPISM 6-like |
| SNP_16928_A_34553361 | NC_021162.1    | Ca_Kabuli_Chr03 | 34553361                | CC                                     | TT                 | TT               | INTRON                        | 101509812          | protein SHOOT GRAVITROPISM 6-like |
| SNP_16929_A_34555885 | NC_021162.1    | Ca_Kabuli_Chr03 | 34555885                | CC                                     | TT                 | TT               | INTRON                        | 101509812          | protein SHOOT GRAVITROPISM 6-like |
| SNP_16930_A_34555927 | NC_021162.1    | Ca_Kabuli_Chr03 | 34555927                | CC                                     | TT                 | TT               | INTRON                        | 101509812          | protein SHOOT GRAVITROPISM 6-like |
| SNP_16931_A_34558021 | NC_021162.1    | Ca_Kabuli_Chr03 | 34558021                | GG                                     | AA                 | AA               | URR                           | 101509812          | protein SHOOT GRAVITROPISM 6-like |
| SNP_16932_A_34560204 | NC_021162.1    | Ca_Kabuli_Chr03 | 34560204                | TT                                     | CC                 | CC               | INTERGENIC                    |                    |                                   |
| SNP_16933_A_34560216 | NC_021162.1    | Ca_Kabuli_Chr03 | 34560216                | TT                                     | CC                 | CC               | INTERGENIC                    |                    |                                   |
| SNP_16934_A_34560365 | NC_021162.1    | Ca_Kabuli_Chr03 | 34560365                | CC                                     | TT                 | TT               | INTERGENIC                    |                    |                                   |
| SNP_16935_A_34560379 | NC_021162.1    | Ca_Kabuli_Chr03 | 34560379                | CC                                     | TT                 | TT               | INTERGENIC                    |                    |                                   |
| SNP_16936_A_34560387 | NC_021162.1    | Ca_Kabuli_Chr03 | 34560387                | GG                                     | AA                 | AA               | INTERGENIC                    |                    |                                   |
| SNP_16937_A_34560638 | NC_021162.1    | Ca_Kabuli_Chr03 | 34560638                | AA                                     | GG                 | GG               | INTERGENIC                    |                    |                                   |
| SNP_16938_A_34562531 | NC_021162.1    | Ca_Kabuli_Chr03 | 34562531                | GG                                     | AA                 | AA               | SYNONYMOUS_CODING             | 101510567          | UDP-glycosyltransferase 73C2-like |
| SNP_16939_A_34562927 | NC_021162.1    | Ca_Kabuli_Chr03 | 34562927                | CC                                     | GG                 | GG               | INTRON                        | 101510567          | UDP-glycosyltransferase 73C2-like |
| SNP_16940_A_34565925 | NC_021162.1    | Ca_Kabuli_Chr03 | 34565925                | AA                                     | TT                 | TT               | URR                           | 101510567          | UDP-glycosyltransferase 73C2-like |
| SNP_16942_A_34565993 | NC_021162.1    | Ca_Kabuli_Chr03 | 34565993                | GG                                     | AA                 | AA               | URR                           | 101510567          | UDP-glycosyltransferase 73C2-like |
| SNP_16943_A_34566234 | NC_021162.1    | Ca_Kabuli_Chr03 | 34566234                | AA                                     | GG                 | GG               | URR                           | 101510567          | UDP-glycosyltransferase 73C2-like |
| SNP_16944_A_34566483 | NC_021162.1    | Ca_Kabuli_Chr03 | 34566483                | TT                                     | AA                 | AA               | INTERGENIC                    |                    |                                   |
| SNP_16946_A_34568595 | NC_021162.1    | Ca_Kabuli_Chr03 | 34568595                | GG                                     | AA                 | AA               | DRR                           | 101510891          | UDP-glycosyltransferase 73C1      |
| SNP_16947_A_34568825 | NC_021162.1    | Ca_Kabuli_Chr03 | 34568825                | AA                                     | GG                 | GG               | DRR                           | 101510891          | UDP-glycosyltransferase 73C1      |
| SNP_16948_A_34570976 | NC_021162.1    | Ca_Kabuli_Chr03 | 34570976                | GG                                     | AA                 | AA               | URR                           | 101510891          | UDP-glycosyltransferase 73C1      |
| SNP_16949_A_34570998 | NC_021162.1    | Ca_Kabuli_Chr03 | 34570998                | AA                                     | TT                 | TT               | URR                           | 101510891          | UDP-glycosyltransferase 73C1      |
| SNP_16950_A_34572372 | NC_021162.1    | Ca_Kabuli_Chr03 | 34572372                | AA                                     | CC                 | CC               | URR                           | 101510891          | UDP-glycosyltransferase 73C1      |

| SNPs IDs             | Chromosome IDs | Chromosomes     | Physical positions (bp) | CDC Frontier (Reference genome) | (Pusa 1103 & HPNB) | (ILWC 46 & LPNB) | Sequence Components of genome | Gene accession IDs | Putative functions                       |
|----------------------|----------------|-----------------|-------------------------|---------------------------------|--------------------|------------------|-------------------------------|--------------------|------------------------------------------|
| SNP_16951_A_34573973 | NC_021162.1    | Ca_Kabuli_Chr03 | 34573973                | TT                              | CC                 | CC               | INTERGENIC                    |                    |                                          |
| SNP_16952_A_34574010 | NC_021162.1    | Ca_Kabuli_Chr03 | 34574010                | CC                              | TT                 | TT               | INTERGENIC                    |                    |                                          |
| SNP_16953_A_34574069 | NC_021162.1    | Ca_Kabuli_Chr03 | 34574069                | CC                              | TT                 | TT               | INTERGENIC                    |                    |                                          |
| SNP_16954_A_34574157 | NC_021162.1    | Ca_Kabuli_Chr03 | 34574157                | AA                              | GG                 | GG               | INTERGENIC                    |                    |                                          |
| SNP_16957_A_34601661 | NC_021162.1    | Ca_Kabuli_Chr03 | 34601661                | CC                              | AA                 | AA               | NON_SYNONYMOUS_CODING         | 101512705          | uncharacterized LOC101512705             |
| SNP_16958_A_34601755 | NC_021162.1    | Ca_Kabuli_Chr03 | 34601755                | TT                              | GG                 | GG               | INTRON                        | 101512705          | uncharacterized LOC101512705             |
| SNP_16959_A_34601798 | NC_021162.1    | Ca_Kabuli_Chr03 | 34601798                | TT                              | GG                 | GG               | INTRON                        | 101512705          | uncharacterized LOC101512705             |
| SNP_16960_A_34604798 | NC_021162.1    | Ca_Kabuli_Chr03 | 34604798                | AA                              | GG                 | GG               | URR                           | 101512705          | uncharacterized LOC101512705             |
| SNP_16961_A_34605060 | NC_021162.1    | Ca_Kabuli_Chr03 | 34605060                | AA                              | GG                 | GG               | URR                           | 101512705          | uncharacterized LOC101512705             |
| SNP_16963_A_34607945 | NC_021162.1    | Ca_Kabuli_Chr03 | 34607945                | GG                              | AA                 | AA               | INTERGENIC                    |                    |                                          |
| SNP_16964_A_34608032 | NC_021162.1    | Ca_Kabuli_Chr03 | 34608032                | TT                              | AA                 | AA               | INTERGENIC                    |                    |                                          |
| SNP_16965_A_34608170 | NC_021162.1    | Ca_Kabuli_Chr03 | 34608170                | AA                              | GG                 | GG               | INTERGENIC                    |                    |                                          |
| SNP_16968_A_34621382 | NC_021162.1    | Ca_Kabuli_Chr03 | 34621382                | TT                              | CC                 | CC               | INTERGENIC                    |                    |                                          |
| SNP_16969_A_34623570 | NC_021162.1    | Ca_Kabuli_Chr03 | 34623570                | TT                              | CC                 | CC               | INTERGENIC                    |                    |                                          |
| SNP_16970_A_34623573 | NC_021162.1    | Ca_Kabuli_Chr03 | 34623573                | AA                              | CC                 | CC               | INTERGENIC                    |                    |                                          |
| SNP_16971_A_34623898 | NC_021162.1    | Ca_Kabuli_Chr03 | 34623898                | TT                              | AA                 | AA               | INTERGENIC                    |                    |                                          |
| SNP_16973_A_34626369 | NC_021162.1    | Ca_Kabuli_Chr03 | 34626369                | AA                              | TT                 | TT               | DRR                           | 101513252          | uncharacterized permease C29B12.14c-like |
| SNP_16975_A_34628335 | NC_021162.1    | Ca_Kabuli_Chr03 | 34628335                | TT                              | CC                 | CC               | INTRON                        | 101513252          | uncharacterized permease C29B12.14c-like |
| SNP_16976_A_34629523 | NC_021162.1    | Ca_Kabuli_Chr03 | 34629523                | GG                              | AA                 | AA               | URR                           | 101513252          | uncharacterized permease C29B12.14c-like |
| SNP_16977_A_34629831 | NC_021162.1    | Ca_Kabuli_Chr03 | 34629831                | CC                              | GG                 | GG               | URR                           | 101513252          | uncharacterized permease C29B12.14c-like |
| SNP_16978_A_34630025 | NC_021162.1    | Ca_Kabuli_Chr03 | 34630025                | AA                              | GG                 | GG               | URR                           | 101513252          | uncharacterized permease C29B12.14c-like |
| SNP_16979_A_34631414 | NC_021162.1    | Ca_Kabuli_Chr03 | 34631414                | CC                              | TT                 | TT               | URR                           | 101513252          | uncharacterized permease C29B12.14c-like |

| SNPs IDs             | Chromosome IDs | Chromosomes     | Physical positions (bp) | CDC Frontier (Reference genome) | (Pusa 1103 & HPNB) | (ILWC 46 & LPNB) | Sequence Components of genome | Gene accession IDs | Putative functions                                       |
|----------------------|----------------|-----------------|-------------------------|---------------------------------|--------------------|------------------|-------------------------------|--------------------|----------------------------------------------------------|
| SNP_16980_A_34632826 | NC_021162.1    | Ca_Kabuli_Chr03 | 34632826                | CC                              | TT                 | TT               | INTERGENIC                    |                    |                                                          |
| SNP_16981_A_34633052 | NC_021162.1    | Ca_Kabuli_Chr03 | 34633052                | AA                              | GG                 | GG               | INTERGENIC                    |                    |                                                          |
| SNP_16982_A_34633661 | NC_021162.1    | Ca_Kabuli_Chr03 | 34633661                | TT                              | GG                 | GG               | DRR                           | 101513580          | uncharacterized protein At3g50808-like                   |
| SNP_16983_A_34634120 | NC_021162.1    | Ca_Kabuli_Chr03 | 34634120                | AA                              | GG                 | GG               | DRR                           | 101513580          | uncharacterized protein At3g50808-like                   |
| SNP_16984_A_34637890 | NC_021162.1    | Ca_Kabuli_Chr03 | 34637890                | TT                              | AA                 | AA               | URR                           | 101513580          | uncharacterized protein At3g50808-like                   |
| SNP_16985_A_34638726 | NC_021162.1    | Ca_Kabuli_Chr03 | 34638726                | AA                              | CC                 | CC               | DRR                           | 101513895          | vacuolar protein-sorting-associated protein 37 homolog 1 |
| SNP_16986_A_34638855 | NC_021162.1    | Ca_Kabuli_Chr03 | 34638855                | TT                              | AA                 | AA               | DRR                           | 101513895          | vacuolar protein-sorting-associated protein 37 homolog 1 |
| SNP_16987_A_34638885 | NC_021162.1    | Ca_Kabuli_Chr03 | 34638885                | TT                              | CC                 | CC               | DRR                           | 101513895          | vacuolar protein-sorting-associated protein 37 homolog 1 |
| SNP_16988_A_34638892 | NC_021162.1    | Ca_Kabuli_Chr03 | 34638892                | CC                              | AA                 | AA               | DRR                           | 101513895          | vacuolar protein-sorting-associated protein 37 homolog 1 |
| SNP_16989_A_34638897 | NC_021162.1    | Ca_Kabuli_Chr03 | 34638897                | GG                              | AA                 | AA               | DRR                           | 101513895          | vacuolar protein-sorting-associated protein 37 homolog 1 |
| SNP_16990_A_34640395 | NC_021162.1    | Ca_Kabuli_Chr03 | 34640395                | CC                              | TT                 | TT               | INTERGENIC                    |                    |                                                          |
| SNP_16991_A_34642236 | NC_021162.1    | Ca_Kabuli_Chr03 | 34642236                | GG                              | AA                 | AA               | INTERGENIC                    |                    |                                                          |
| SNP_16992_A_34642335 | NC_021162.1    | Ca_Kabuli_Chr03 | 34642335                | CC                              | GG                 | GG               | INTERGENIC                    |                    |                                                          |
| SNP_16993_A_34644741 | NC_021162.1    | Ca_Kabuli_Chr03 | 34644741                | AA                              | GG                 | GG               | URR                           | 101513895          | vacuolar protein-sorting-associated protein 37 homolog 1 |
| SNP_16994_A_34645361 | NC_021162.1    | Ca_Kabuli_Chr03 | 34645361                | GG                              | AA                 | AA               | INTERGENIC                    |                    |                                                          |
| SNP_16995_A_34645368 | NC_021162.1    | Ca_Kabuli_Chr03 | 34645368                | AA                              | CC                 | CC               | INTERGENIC                    |                    |                                                          |
| SNP_16996_A_34645390 | NC_021162.1    | Ca_Kabuli_Chr03 | 34645390                | GG                              | CC                 | CC               | INTERGENIC                    |                    |                                                          |
| SNP_16997_A_34646085 | NC_021162.1    | Ca_Kabuli_Chr03 | 34646085                | CC                              | AA                 | AA               | DRR                           | 101514762          | protein PELOTA 1-like                                    |
| SNP_16998_A_34648525 | NC_021162.1    | Ca_Kabuli_Chr03 | 34648525                | TT                              | CC                 | CC               | DRR                           | 101515086          | aspartic proteinase-like protein 2                       |
| SNP_16999_A_34648534 | NC_021162.1    | Ca_Kabuli_Chr03 | 34648534                | CC                              | TT                 | TT               | DRR                           | 101515086          | aspartic proteinase-like protein 2                       |
| SNP_17000_A_34648573 | NC_021162.1    | Ca_Kabuli_Chr03 | 34648573                | TT                              | GG                 | GG               | DRR                           | 101515086          | aspartic proteinase-like protein 2                       |
| SNP_17001_A_34651812 | NC_021162.1    | Ca_Kabuli_Chr03 | 34651812                | AA                              | CC                 | CC               | INTERGENIC                    |                    |                                                          |

| SNPs IDs             | Chromosome IDs | Chromosomes     | Physical positions (bp) | CDC Frontier genome (Reference genome) | (Pusa 1103 & HPNB) | (ILWC 46 & LPNB) | Sequence Components of genome | Gene accession IDs | Putative functions                      |
|----------------------|----------------|-----------------|-------------------------|----------------------------------------|--------------------|------------------|-------------------------------|--------------------|-----------------------------------------|
| SNP_17002_A_34659150 | NC_021162.1    | Ca_Kabuli_Chr03 | 34659150                | CC                                     | TT                 | TT               | INTERGENIC                    |                    |                                         |
| SNP_17003_A_34659151 | NC_021162.1    | Ca_Kabuli_Chr03 | 34659151                | GG                                     | TT                 | TT               | INTERGENIC                    |                    |                                         |
| SNP_17005_A_34662239 | NC_021162.1    | Ca_Kabuli_Chr03 | 34662239                | TT                                     | CC                 | CC               | INTRON                        | 101515641          | polyadenylate-binding protein 7         |
| SNP_17007_A_34666599 | NC_021162.1    | Ca_Kabuli_Chr03 | 34666599                | GG                                     | TT                 | TT               | INTERGENIC                    |                    |                                         |
| SNP_17008_A_34666626 | NC_021162.1    | Ca_Kabuli_Chr03 | 34666626                | AA                                     | CC                 | CC               | INTERGENIC                    |                    |                                         |
| SNP_17009_A_34666756 | NC_021162.1    | Ca_Kabuli_Chr03 | 34666756                | TT                                     | CC                 | CC               | INTERGENIC                    |                    |                                         |
| SNP_17010_A_34669756 | NC_021162.1    | Ca_Kabuli_Chr03 | 34669756                | TT                                     | CC                 | CC               | INTRON                        | 101488395          | cactin                                  |
| SNP_17011_A_34673392 | NC_021162.1    | Ca_Kabuli_Chr03 | 34673392                | GG                                     | CC                 | CC               | URR                           | 101488395          | cactin                                  |
| SNP_17012_A_34673417 | NC_021162.1    | Ca_Kabuli_Chr03 | 34673417                | TT                                     | CC                 | CC               | URR                           | 101488395          | cactin                                  |
| SNP_17013_A_34673430 | NC_021162.1    | Ca_Kabuli_Chr03 | 34673430                | AA                                     | GG                 | GG               | URR                           | 101488395          | cactin                                  |
| SNP_17014_A_34673755 | NC_021162.1    | Ca_Kabuli_Chr03 | 34673755                | AA                                     | GG                 | GG               | URR                           | 101488395          | cactin                                  |
| SNP_17015_A_34674842 | NC_021162.1    | Ca_Kabuli_Chr03 | 34674842                | AA                                     | GG                 | GG               | URR                           | 101488395          | cactin                                  |
| SNP_17016_A_34674843 | NC_021162.1    | Ca_Kabuli_Chr03 | 34674843                | AA                                     | GG                 | GG               | URR                           | 101488395          | cactin                                  |
| SNP_17018_A_34679537 | NC_021162.1    | Ca_Kabuli_Chr03 | 34679537                | GG                                     | TT                 | TT               | INTERGENIC                    |                    |                                         |
| SNP_17019_A_34679657 | NC_021162.1    | Ca_Kabuli_Chr03 | 34679657                | AA                                     | GG                 | GG               | INTERGENIC                    |                    |                                         |
| SNP_17020_A_34680537 | NC_021162.1    | Ca_Kabuli_Chr03 | 34680537                | GG                                     | AA                 | AA               | INTERGENIC                    |                    |                                         |
| SNP_17022_A_34681331 | NC_021162.1    | Ca_Kabuli_Chr03 | 34681331                | GG                                     | AA                 | AA               | URR                           | 101488722          | wall-associated receptor kinase-like 20 |
| SNP_17024_A_34681704 | NC_021162.1    | Ca_Kabuli_Chr03 | 34681704                | TT                                     | AA                 | AA               | DRR                           | 101489923          | probable carboxylesterase 18            |
| SNP_17025_A_34682070 | NC_021162.1    | Ca_Kabuli_Chr03 | 34682070                | AA                                     | GG                 | GG               | DRR                           | 101489923          | probable carboxylesterase 18            |
| SNP_17026_A_34682335 | NC_021162.1    | Ca_Kabuli_Chr03 | 34682335                | CC                                     | GG                 | GG               | DRR                           | 101489923          | probable carboxylesterase 18            |
| SNP_17027_A_34684326 | NC_021162.1    | Ca_Kabuli_Chr03 | 34684326                | TT                                     | AA                 | AA               | URR                           | 101489923          | probable carboxylesterase 18            |
| SNP_17028_A_34685379 | NC_021162.1    | Ca_Kabuli_Chr03 | 34685379                | GG                                     | CC                 | CC               | URR                           | 101489923          | probable carboxylesterase 18            |

| SNPs IDs             | Chromosome IDs | Chromosomes     | Physical positions (bp) | CDC Frontier genome (Reference genome) | (Pusa 1103 & HPNB) | (ILWC 46 & LPNB) | Sequence Components of genome | Gene accession IDs | Putative functions                     |
|----------------------|----------------|-----------------|-------------------------|----------------------------------------|--------------------|------------------|-------------------------------|--------------------|----------------------------------------|
| SNP_17029_A_34685431 | NC_021162.1    | Ca_Kabuli_Chr03 | 34685431                | AA                                     | CC                 | CC               | URR                           | 101489923          | probable carboxylesterase 18           |
| SNP_17030_A_34685433 | NC_021162.1    | Ca_Kabuli_Chr03 | 34685433                | AA                                     | GG                 | GG               | URR                           | 101489923          | probable carboxylesterase 18           |
| SNP_17032_A_34686398 | NC_021162.1    | Ca_Kabuli_Chr03 | 34686398                | AA                                     | TT                 | TT               | INTERGENIC                    |                    |                                        |
| SNP_17033_A_34686416 | NC_021162.1    | Ca_Kabuli_Chr03 | 34686416                | TT                                     | CC                 | CC               | INTERGENIC                    |                    |                                        |
| SNP_17034_A_34686616 | NC_021162.1    | Ca_Kabuli_Chr03 | 34686616                | TT                                     | GG                 | GG               | INTERGENIC                    |                    |                                        |
| SNP_17035_A_34686821 | NC_021162.1    | Ca_Kabuli_Chr03 | 34686821                | GG                                     | AA                 | AA               | INTERGENIC                    |                    |                                        |
| SNP_17036_A_34688029 | NC_021162.1    | Ca_Kabuli_Chr03 | 34688029                | TT                                     | CC                 | CC               | DRR                           | 101490256          | uncharacterized LOC101490256           |
| SNP_17037_A_34689147 | NC_021162.1    | Ca_Kabuli_Chr03 | 34689147                | AA                                     | GG                 | GG               | INTERGENIC                    |                    |                                        |
| SNP_17038_A_34692510 | NC_021162.1    | Ca_Kabuli_Chr03 | 34692510                | CC                                     | AA                 | AA               | DRR                           | 101490788          | E3 ubiquitin-protein ligase UPL7       |
| SNP_17039_A_34692876 | NC_021162.1    | Ca_Kabuli_Chr03 | 34692876                | TT                                     | CC                 | CC               | URR                           | 101490256          | uncharacterized LOC101490256           |
| SNP_17040_A_34694025 | NC_021162.1    | Ca_Kabuli_Chr03 | 34694025                | AA                                     | GG                 | GG               | URR                           | 101490256          | uncharacterized LOC101490256           |
| SNP_17041_A_34699967 | NC_021162.1    | Ca_Kabuli_Chr03 | 34699967                | AA                                     | GG                 | GG               | NON_SYNONYMOUS_CODING         | 101490788          | E3 ubiquitin-protein ligase UPL7       |
| SNP_17042_A_34701614 | NC_021162.1    | Ca_Kabuli_Chr03 | 34701614                | CC                                     | TT                 | TT               | INTRON                        | 101490788          | E3 ubiquitin-protein ligase UPL7       |
| SNP_17043_A_34714500 | NC_021162.1    | Ca_Kabuli_Chr03 | 34714500                | AA                                     | TT                 | TT               | INTERGENIC                    |                    |                                        |
| SNP_17044_A_34716545 | NC_021162.1    | Ca_Kabuli_Chr03 | 34716545                | TT                                     | CC                 | CC               | DRR                           | 101491844          | probable glycosyltransferase At5g03795 |
| SNP_17045_A_34716679 | NC_021162.1    | Ca_Kabuli_Chr03 | 34716679                | AA                                     | CC                 | CC               | DRR                           | 101491844          | probable glycosyltransferase At5g03795 |
| SNP_17046_A_34716710 | NC_021162.1    | Ca_Kabuli_Chr03 | 34716710                | TT                                     | AA                 | AA               | DRR                           | 101491844          | probable glycosyltransferase At5g03795 |
| SNP_17047_A_34716765 | NC_021162.1    | Ca_Kabuli_Chr03 | 34716765                | TT                                     | AA                 | AA               | DRR                           | 101491844          | probable glycosyltransferase At5g03795 |
| SNP_17048_A_34716767 | NC_021162.1    | Ca_Kabuli_Chr03 | 34716767                | TT                                     | AA                 | AA               | DRR                           | 101491844          | probable glycosyltransferase At5g03795 |
| SNP_17049_A_34716949 | NC_021162.1    | Ca_Kabuli_Chr03 | 34716949                | CC                                     | AA                 | AA               | DRR                           | 101491844          | probable glycosyltransferase At5g03795 |
| SNP_17051_A_34718392 | NC_021162.1    | Ca_Kabuli_Chr03 | 34718392                | AA                                     | GG                 | GG               | INTRON                        | 101491844          | probable glycosyltransferase At5g03795 |
| SNP_17052_A_34719174 | NC_021162.1    | Ca_Kabuli_Chr03 | 34719174                | GG                                     | TT                 | TT               | INTRON                        | 101491844          | probable glycosyltransferase At5g03795 |



| SNPs IDs             | Chromosome IDs | Chromosomes     | Physical positions (bp) | CDC Frontier genome (Reference genome) | (Pusa 1103 & HPNB) | (ILWC 46 & LPNB) | Sequence Components of genome | Gene accession IDs | Putative functions                               |
|----------------------|----------------|-----------------|-------------------------|----------------------------------------|--------------------|------------------|-------------------------------|--------------------|--------------------------------------------------|
| SNP_17053_A_34721612 | NC_021162.1    | Ca_Kabuli_Chr03 | 34721612                | TT                                     | CC                 | CC               | DRR                           | 101492177          | embryonic protein DC-8                           |
| SNP_17055_A_34727293 | NC_021162.1    | Ca_Kabuli_Chr03 | 34727293                | TT                                     | GG                 | GG               | DRR                           | 101492516          | uncharacterized LOC101492516                     |
| SNP_17057_A_34732064 | NC_021162.1    | Ca_Kabuli_Chr03 | 34732064                | CC                                     | AA                 | AA               | URR                           | 101492516          | uncharacterized LOC101492516                     |
| SNP_17058_A_34732065 | NC_021162.1    | Ca_Kabuli_Chr03 | 34732065                | AA                                     | CC                 | CC               | URR                           | 101492516          | uncharacterized LOC101492516                     |
| SNP_17059_A_34732149 | NC_021162.1    | Ca_Kabuli_Chr03 | 34732149                | AA                                     | CC                 | CC               | URR                           | 101492516          | uncharacterized LOC101492516                     |
| SNP_17061_A_34733029 | NC_021162.1    | Ca_Kabuli_Chr03 | 34733029                | CC                                     | GG                 | GG               | URR                           | 101492516          | uncharacterized LOC101492516                     |
| SNP_17062_A_34735254 | NC_021162.1    | Ca_Kabuli_Chr03 | 34735254                | AA                                     | GG                 | GG               | DRR                           | 101492846          | ribosomal protein L24                            |
| SNP_17063_A_34735858 | NC_021162.1    | Ca_Kabuli_Chr03 | 34735858                | TT                                     | GG                 | GG               | INTERGENIC                    |                    |                                                  |
| SNP_17064_A_34735964 | NC_021162.1    | Ca_Kabuli_Chr03 | 34735964                | TT                                     | GG                 | GG               | INTERGENIC                    |                    |                                                  |
| SNP_17066_A_34739020 | NC_021162.1    | Ca_Kabuli_Chr03 | 34739020                | TT                                     | CC                 | CC               | URR                           | 101492846          | ribosomal protein L24                            |
| SNP_17067_A_34739037 | NC_021162.1    | Ca_Kabuli_Chr03 | 34739037                | CC                                     | TT                 | TT               | URR                           | 101492846          | ribosomal protein L24                            |
| SNP_17068_A_34739057 | NC_021162.1    | Ca_Kabuli_Chr03 | 34739057                | AA                                     | GG                 | GG               | URR                           | 101492846          | ribosomal protein L24                            |
| SNP_17069_A_34739222 | NC_021162.1    | Ca_Kabuli_Chr03 | 34739222                | GG                                     | AA                 | AA               | URR                           | 101492846          | ribosomal protein L24                            |
| SNP_17072_A_34739873 | NC_021162.1    | Ca_Kabuli_Chr03 | 34739873                | GG                                     | TT                 | TT               | INTERGENIC                    |                    |                                                  |
| SNP_17073_A_34743821 | NC_021162.1    | Ca_Kabuli_Chr03 | 34743821                | AA                                     | TT                 | TT               | INTRON                        | 101493178          | putative homeobox-leucine zipper protein ATHB-51 |
| SNP_17074_A_34745429 | NC_021162.1    | Ca_Kabuli_Chr03 | 34745429                | AA                                     | GG                 | GG               | URR                           | 101493178          | putative homeobox-leucine zipper protein ATHB-51 |
| SNP_17076_A_34748496 | NC_021162.1    | Ca_Kabuli_Chr03 | 34748496                | TT                                     | AA                 | AA               | INTERGENIC                    |                    |                                                  |
| SNP_17077_A_34748499 | NC_021162.1    | Ca_Kabuli_Chr03 | 34748499                | TT                                     | AA                 | AA               | INTERGENIC                    |                    |                                                  |
| SNP_17078_A_34748627 | NC_021162.1    | Ca_Kabuli_Chr03 | 34748627                | TT                                     | AA                 | AA               | INTERGENIC                    |                    |                                                  |
| SNP_17079_A_34749185 | NC_021162.1    | Ca_Kabuli_Chr03 | 34749185                | CC                                     | TT                 | TT               | INTERGENIC                    |                    |                                                  |
| SNP_17082_A_34751853 | NC_021162.1    | Ca_Kabuli_Chr03 | 34751853                | CC                                     | TT                 | TT               | INTERGENIC                    |                    |                                                  |
| SNP_17084_A_34754516 | NC_021162.1    | Ca_Kabuli_Chr03 | 34754516                | CC                                     | GG                 | GG               | INTERGENIC                    |                    |                                                  |

| SNPs IDs             | Chromosome IDs | Chromosomes     | Physical positions (bp) | CDC Frontier (Reference genome) | (Pusa 1103 & HPNB) | (ILWC 46 & LPNB) | Sequence Components of genome | Gene accession IDs | Putative functions                        |
|----------------------|----------------|-----------------|-------------------------|---------------------------------|--------------------|------------------|-------------------------------|--------------------|-------------------------------------------|
| SNP_17085_A_34755052 | NC_021162.1    | Ca_Kabuli_Chr03 | 34755052                | GG                              | AA                 | AA               | INTERGENIC                    |                    |                                           |
| SNP_17086_A_34755070 | NC_021162.1    | Ca_Kabuli_Chr03 | 34755070                | TT                              | AA                 | AA               | INTERGENIC                    |                    |                                           |
| SNP_17088_A_34760443 | NC_021162.1    | Ca_Kabuli_Chr03 | 34760443                | CC                              | TT                 | TT               | URR                           | 101493499          | F-box protein PP2-A15                     |
| SNP_17089_A_34760469 | NC_021162.1    | Ca_Kabuli_Chr03 | 34760469                | GG                              | TT                 | TT               | URR                           | 101493499          | F-box protein PP2-A15                     |
| SNP_17090_A_34760477 | NC_021162.1    | Ca_Kabuli_Chr03 | 34760477                | CC                              | TT                 | TT               | URR                           | 101493499          | F-box protein PP2-A15                     |
| SNP_17091_A_34760483 | NC_021162.1    | Ca_Kabuli_Chr03 | 34760483                | AA                              | GG                 | GG               | URR                           | 101493499          | F-box protein PP2-A15                     |
| SNP_17092_A_34760499 | NC_021162.1    | Ca_Kabuli_Chr03 | 34760499                | TT                              | CC                 | CC               | URR                           | 101493499          | F-box protein PP2-A15                     |
| SNP_17093_A_34760731 | NC_021162.1    | Ca_Kabuli_Chr03 | 34760731                | TT                              | AA                 | AA               | URR                           | 101493499          | F-box protein PP2-A15                     |
| SNP_17094_A_34761459 | NC_021162.1    | Ca_Kabuli_Chr03 | 34761459                | AA                              | GG                 | GG               | URR                           | 101493499          | F-box protein PP2-A15                     |
| SNP_17095_A_34761486 | NC_021162.1    | Ca_Kabuli_Chr03 | 34761486                | TT                              | CC                 | CC               | URR                           | 101493499          | F-box protein PP2-A15                     |
| SNP_17096_A_34761516 | NC_021162.1    | Ca_Kabuli_Chr03 | 34761516                | GG                              | AA                 | AA               | URR                           | 101493499          | F-box protein PP2-A15                     |
| SNP_17098_A_34763273 | NC_021162.1    | Ca_Kabuli_Chr03 | 34763273                | GG                              | TT                 | TT               | INTERGENIC                    |                    |                                           |
| SNP_17099_A_34763292 | NC_021162.1    | Ca_Kabuli_Chr03 | 34763292                | CC                              | TT                 | TT               | INTERGENIC                    |                    |                                           |
| SNP_17100_A_34763482 | NC_021162.1    | Ca_Kabuli_Chr03 | 34763482                | TT                              | CC                 | CC               | INTERGENIC                    |                    |                                           |
| SNP_17101_A_34763497 | NC_021162.1    | Ca_Kabuli_Chr03 | 34763497                | CC                              | TT                 | TT               | INTERGENIC                    |                    |                                           |
| SNP_17102_A_34763525 | NC_021162.1    | Ca_Kabuli_Chr03 | 34763525                | GG                              | AA                 | AA               | INTERGENIC                    |                    |                                           |
| SNP_17103_A_34763566 | NC_021162.1    | Ca_Kabuli_Chr03 | 34763566                | TT                              | CC                 | CC               | INTERGENIC                    |                    |                                           |
| SNP_17104_A_34765256 | NC_021162.1    | Ca_Kabuli_Chr03 | 34765256                | AA                              | TT                 | TT               | DRR                           | 101494258          | uncharacterized protein DDB_G0290301-like |
| SNP_17105_A_34765822 | NC_021162.1    | Ca_Kabuli_Chr03 | 34765822                | TT                              | CC                 | CC               | INTERGENIC                    |                    |                                           |
| SNP_17106_A_34785452 | NC_021162.1    | Ca_Kabuli_Chr03 | 34785452                | CC                              | AA                 | AA               | INTERGENIC                    |                    |                                           |
| SNP_17107_A_34785530 | NC_021162.1    | Ca_Kabuli_Chr03 | 34785530                | AA                              | TT                 | TT               | INTERGENIC                    |                    |                                           |
| SNP_17108_A_34786127 | NC_021162.1    | Ca_Kabuli_Chr03 | 34786127                | GG                              | AA                 | AA               | INTERGENIC                    |                    |                                           |

| SNPs IDs             | Chromosome IDs | Chromosomes     | Physical positions (bp) | CDC Frontier genome (Reference genome) | (Pusa 1103 & HPNB) | (ILWC 46 & LPNB) | Sequence genome | Components of | Gene accession IDs                  | Putative functions |
|----------------------|----------------|-----------------|-------------------------|----------------------------------------|--------------------|------------------|-----------------|---------------|-------------------------------------|--------------------|
| SNP_17109_A_34786174 | NC_021162.1    | Ca_Kabuli_Chr03 | 34786174                | TT                                     | CC                 | CC               | INTERGENIC      |               |                                     |                    |
| SNP_17110_A_34786175 | NC_021162.1    | Ca_Kabuli_Chr03 | 34786175                | GG                                     | CC                 | CC               | INTERGENIC      |               |                                     |                    |
| SNP_17111_A_34786338 | NC_021162.1    | Ca_Kabuli_Chr03 | 34786338                | TT                                     | AA                 | AA               | INTERGENIC      |               |                                     |                    |
| SNP_17112_A_34786376 | NC_021162.1    | Ca_Kabuli_Chr03 | 34786376                | GG                                     | AA                 | AA               | INTERGENIC      |               |                                     |                    |
| SNP_17113_A_34786753 | NC_021162.1    | Ca_Kabuli_Chr03 | 34786753                | GG                                     | CC                 | CC               | INTERGENIC      |               |                                     |                    |
| SNP_17114_A_34786827 | NC_021162.1    | Ca_Kabuli_Chr03 | 34786827                | AA                                     | GG                 | GG               | INTERGENIC      |               |                                     |                    |
| SNP_17115_A_34786897 | NC_021162.1    | Ca_Kabuli_Chr03 | 34786897                | TT                                     | GG                 | GG               | INTERGENIC      |               |                                     |                    |
| SNP_17116_A_34788656 | NC_021162.1    | Ca_Kabuli_Chr03 | 34788656                | TT                                     | CC                 | CC               | INTERGENIC      |               |                                     |                    |
| SNP_17117_A_34789587 | NC_021162.1    | Ca_Kabuli_Chr03 | 34789587                | TT                                     | CC                 | CC               | INTERGENIC      |               |                                     |                    |
| SNP_17118_A_34789664 | NC_021162.1    | Ca_Kabuli_Chr03 | 34789664                | GG                                     | TT                 | TT               | INTERGENIC      |               |                                     |                    |
| SNP_17119_A_34789702 | NC_021162.1    | Ca_Kabuli_Chr03 | 34789702                | CC                                     | TT                 | TT               | INTERGENIC      |               |                                     |                    |
| SNP_17121_A_34797011 | NC_021162.1    | Ca_Kabuli_Chr03 | 34797011                | AA                                     | GG                 | GG               | INTERGENIC      |               |                                     |                    |
| SNP_17123_A_34797230 | NC_021162.1    | Ca_Kabuli_Chr03 | 34797230                | TT                                     | GG                 | GG               | INTERGENIC      |               |                                     |                    |
| SNP_17124_A_34797254 | NC_021162.1    | Ca_Kabuli_Chr03 | 34797254                | TT                                     | CC                 | CC               | DRR             | 101410559     | transfer RNA valine (anticodon AAC) |                    |
| SNP_17125_A_34797294 | NC_021162.1    | Ca_Kabuli_Chr03 | 34797294                | TT                                     | CC                 | CC               | DRR             | 101410559     | transfer RNA valine (anticodon AAC) |                    |
| SNP_17126_A_34797309 | NC_021162.1    | Ca_Kabuli_Chr03 | 34797309                | TT                                     | CC                 | CC               | DRR             | 101410559     | transfer RNA valine (anticodon AAC) |                    |
| SNP_17127_A_34797606 | NC_021162.1    | Ca_Kabuli_Chr03 | 34797606                | TT                                     | GG                 | GG               | DRR             | 101410559     | transfer RNA valine (anticodon AAC) |                    |
| SNP_17129_A_34797812 | NC_021162.1    | Ca_Kabuli_Chr03 | 34797812                | CC                                     | AA                 | AA               | DRR             | 101410559     | transfer RNA valine (anticodon AAC) |                    |
| SNP_17130_A_34797850 | NC_021162.1    | Ca_Kabuli_Chr03 | 34797850                | TT                                     | CC                 | CC               | DRR             | 101410559     | transfer RNA valine (anticodon AAC) |                    |
| SNP_17132_A_34798209 | NC_021162.1    | Ca_Kabuli_Chr03 | 34798209                | AA                                     | CC                 | CC               | DRR             | 101410559     | transfer RNA valine (anticodon AAC) |                    |
| SNP_17133_A_34798349 | NC_021162.1    | Ca_Kabuli_Chr03 | 34798349                | TT                                     | GG                 | GG               | URR             | 101410559     | transfer RNA valine (anticodon AAC) |                    |
| SNP_17134_A_34798350 | NC_021162.1    | Ca_Kabuli_Chr03 | 34798350                | CC                                     | AA                 | AA               | URR             | 101410559     | transfer RNA valine (anticodon AAC) |                    |

| SNPs IDs             | Chromosome IDs | Chromosomes     | Physical positions (bp) | CDC Frontier genome (Reference genome) | (Pusa 1103 & HPNB) | (ILWC 46 & LPNB) | Sequence Components of genome | Gene accession IDs | Putative functions                                                   |
|----------------------|----------------|-----------------|-------------------------|----------------------------------------|--------------------|------------------|-------------------------------|--------------------|----------------------------------------------------------------------|
| SNP_17135_A_34801263 | NC_021162.1    | Ca_Kabuli_Chr03 | 34801263                | CC                                     | GG                 | GG               | SYNONYMOUS_CODING             | 101495208          | uncharacterized LOC101495208                                         |
| SNP_17136_A_34803050 | NC_021162.1    | Ca_Kabuli_Chr03 | 34803050                | CC                                     | TT                 | TT               | URR                           | 101495208          | uncharacterized LOC101495208                                         |
| SNP_17137_A_34809061 | NC_021162.1    | Ca_Kabuli_Chr03 | 34809061                | AA                                     | TT                 | TT               | INTERGENIC                    |                    |                                                                      |
| SNP_17138_A_34809576 | NC_021162.1    | Ca_Kabuli_Chr03 | 34809576                | TT                                     | GG                 | GG               | INTERGENIC                    |                    |                                                                      |
| SNP_17139_A_34809732 | NC_021162.1    | Ca_Kabuli_Chr03 | 34809732                | AA                                     | TT                 | TT               | INTERGENIC                    |                    |                                                                      |
| SNP_17140_A_34809733 | NC_021162.1    | Ca_Kabuli_Chr03 | 34809733                | AA                                     | TT                 | TT               | INTERGENIC                    |                    |                                                                      |
| SNP_17141_A_34809736 | NC_021162.1    | Ca_Kabuli_Chr03 | 34809736                | GG                                     | AA                 | AA               | INTERGENIC                    |                    |                                                                      |
| SNP_17142_A_34809747 | NC_021162.1    | Ca_Kabuli_Chr03 | 34809747                | CC                                     | TT                 | TT               | INTERGENIC                    |                    |                                                                      |
| SNP_17143_A_34809892 | NC_021162.1    | Ca_Kabuli_Chr03 | 34809892                | CC                                     | AA                 | AA               | INTERGENIC                    |                    |                                                                      |
| SNP_17144_A_34809897 | NC_021162.1    | Ca_Kabuli_Chr03 | 34809897                | TT                                     | AA                 | AA               | INTERGENIC                    |                    |                                                                      |
| SNP_17145_A_34809902 | NC_021162.1    | Ca_Kabuli_Chr03 | 34809902                | AA                                     | GG                 | GG               | INTERGENIC                    |                    |                                                                      |
| SNP_17146_A_34815172 | NC_021162.1    | Ca_Kabuli_Chr03 | 34815172                | GG                                     | TT                 | TT               | URR                           | 101496080          | glucomannan 4-beta-mannosyltransferase 9-like                        |
| SNP_17148_A_34819168 | NC_021162.1    | Ca_Kabuli_Chr03 | 34819168                | TT                                     | CC                 | CC               | INTRON                        | 101496080          | glucomannan 4-beta-mannosyltransferase 9-like                        |
| SNP_17149_A_34819174 | NC_021162.1    | Ca_Kabuli_Chr03 | 34819174                | AA                                     | CC                 | CC               | INTRON                        | 101496080          | glucomannan 4-beta-mannosyltransferase 9-like                        |
| SNP_17150_A_34827383 | NC_021162.1    | Ca_Kabuli_Chr03 | 34827383                | GG                                     | AA                 | AA               | URR                           | 101496740          | pentatricopeptide repeat-containing protein At5g12100, mitochondrial |
| SNP_17151_A_34827430 | NC_021162.1    | Ca_Kabuli_Chr03 | 34827430                | CC                                     | TT                 | TT               | URR                           | 101496740          | pentatricopeptide repeat-containing protein At5g12100, mitochondrial |
| SNP_17152_A_34827653 | NC_021162.1    | Ca_Kabuli_Chr03 | 34827653                | AA                                     | GG                 | GG               | URR                           | 101496740          | pentatricopeptide repeat-containing protein At5g12100, mitochondrial |
| SNP_17153_A_34827656 | NC_021162.1    | Ca_Kabuli_Chr03 | 34827656                | CC                                     | TT                 | TT               | URR                           | 101496740          | pentatricopeptide repeat-containing protein At5g12100, mitochondrial |
| SNP_17154_A_34827660 | NC_021162.1    | Ca_Kabuli_Chr03 | 34827660                | CC                                     | TT                 | TT               | URR                           | 101496740          | pentatricopeptide repeat-containing protein At5g12100, mitochondrial |
| SNP_17155_A_34827702 | NC_021162.1    | Ca_Kabuli_Chr03 | 34827702                | TT                                     | CC                 | CC               | URR                           | 101496740          | pentatricopeptide repeat-containing protein At5g12100, mitochondrial |
| SNP_17156_A_34827964 | NC_021162.1    | Ca_Kabuli_Chr03 | 34827964                | CC                                     | AA                 | AA               | URR                           | 101496740          | pentatricopeptide repeat-containing protein At5g12100, mitochondrial |
| SNP_17157_A_34827989 | NC_021162.1    | Ca_Kabuli_Chr03 | 34827989                | TT                                     | CC                 | CC               | URR                           | 101496740          | pentatricopeptide repeat-containing protein At5g12100, mitochondrial |

| SNPs IDs             | Chromosome IDs | Chromosomes     | Physical positions (bp) | CDC Frontier (Reference genome) | (Pusa 1103 & HPNB) | (ILWC 46 & LPNB) | Sequence Components of genome | Gene accession IDs | Putative functions                        |
|----------------------|----------------|-----------------|-------------------------|---------------------------------|--------------------|------------------|-------------------------------|--------------------|-------------------------------------------|
| SNP_17158_A_34834777 | NC_021162.1    | Ca_Kabuli_Chr03 | 34834777                | GG                              | AA                 | AA               | INTERGENIC                    |                    |                                           |
| SNP_17159_A_34834985 | NC_021162.1    | Ca_Kabuli_Chr03 | 34834985                | AA                              | GG                 | GG               | INTERGENIC                    |                    |                                           |
| SNP_17161_A_34836978 | NC_021162.1    | Ca_Kabuli_Chr03 | 34836978                | CC                              | GG                 | GG               | INTRON                        | 101497047          | enolase-like                              |
| SNP_17162_A_34839817 | NC_021162.1    | Ca_Kabuli_Chr03 | 34839817                | TT                              | CC                 | CC               | INTRON                        | 101497047          | enolase-like                              |
| SNP_17164_A_34845268 | NC_021162.1    | Ca_Kabuli_Chr03 | 34845268                | CC                              | TT                 | TT               | INTERGENIC                    |                    |                                           |
| SNP_17166_A_34847320 | NC_021162.1    | Ca_Kabuli_Chr03 | 34847320                | TT                              | GG                 | GG               | INTERGENIC                    |                    |                                           |
| SNP_17167_A_34847701 | NC_021162.1    | Ca_Kabuli_Chr03 | 34847701                | GG                              | AA                 | AA               | INTERGENIC                    |                    |                                           |
| SNP_17168_A_34847717 | NC_021162.1    | Ca_Kabuli_Chr03 | 34847717                | TT                              | GG                 | GG               | INTERGENIC                    |                    |                                           |
| SNP_17169_A_34849532 | NC_021162.1    | Ca_Kabuli_Chr03 | 34849532                | AA                              | TT                 | TT               | INTERGENIC                    |                    |                                           |
| SNP_17170_A_34849558 | NC_021162.1    | Ca_Kabuli_Chr03 | 34849558                | CC                              | TT                 | TT               | INTERGENIC                    |                    |                                           |
| SNP_17171_A_34850925 | NC_021162.1    | Ca_Kabuli_Chr03 | 34850925                | CC                              | AA                 | AA               | DRR                           | 101497715          | histone deacetylase HDT1                  |
| SNP_17172_A_34851404 | NC_021162.1    | Ca_Kabuli_Chr03 | 34851404                | CC                              | AA                 | AA               | URR                           | 101497382          | splicing factor U2af small subunit B-like |
| SNP_17173_A_34851435 | NC_021162.1    | Ca_Kabuli_Chr03 | 34851435                | CC                              | GG                 | GG               | URR                           | 101497382          | splicing factor U2af small subunit B-like |
| SNP_17174_A_34851809 | NC_021162.1    | Ca_Kabuli_Chr03 | 34851809                | TT                              | CC                 | CC               | INTERGENIC                    |                    |                                           |
| SNP_17175_A_34851843 | NC_021162.1    | Ca_Kabuli_Chr03 | 34851843                | GG                              | AA                 | AA               | INTERGENIC                    |                    |                                           |
| SNP_17177_A_34852030 | NC_021162.1    | Ca_Kabuli_Chr03 | 34852030                | GG                              | AA                 | AA               | INTERGENIC                    |                    |                                           |
| SNP_17179_A_34852070 | NC_021162.1    | Ca_Kabuli_Chr03 | 34852070                | TT                              | GG                 | GG               | INTERGENIC                    |                    |                                           |
| SNP_17180_A_34852450 | NC_021162.1    | Ca_Kabuli_Chr03 | 34852450                | GG                              | TT                 | TT               | INTERGENIC                    |                    |                                           |
| SNP_17181_A_34857152 | NC_021162.1    | Ca_Kabuli_Chr03 | 34857152                | AA                              | GG                 | GG               | URR                           | 101497715          | histone deacetylase HDT1                  |
| SNP_17182_A_34857170 | NC_021162.1    | Ca_Kabuli_Chr03 | 34857170                | CC                              | GG                 | GG               | URR                           | 101497715          | histone deacetylase HDT1                  |
| SNP_17183_A_34857171 | NC_021162.1    | Ca_Kabuli_Chr03 | 34857171                | AA                              | GG                 | GG               | URR                           | 101497715          | histone deacetylase HDT1                  |
| SNP_17184_A_34857452 | NC_021162.1    | Ca_Kabuli_Chr03 | 34857452                | TT                              | CC                 | CC               | URR                           | 101497715          | histone deacetylase HDT1                  |

| SNPs IDs             | Chromosome IDs | Chromosomes     | Physical positions (bp) | CDC Frontier (Reference genome) | (Pusa 1103 & HPNB) | (ILWC 46 & LPNB) | Sequence Components of genome | Gene accession IDs | Putative functions                                 |
|----------------------|----------------|-----------------|-------------------------|---------------------------------|--------------------|------------------|-------------------------------|--------------------|----------------------------------------------------|
| SNP_17185_A_34857582 | NC_021162.1    | Ca_Kabuli_Chr03 | 34857582                | AA                              | GG                 | GG               | URR                           | 101497715          | histone deacetylase HDT1                           |
| SNP_17186_A_34857674 | NC_021162.1    | Ca_Kabuli_Chr03 | 34857674                | TT                              | GG                 | GG               | URR                           | 101497715          | histone deacetylase HDT1                           |
| SNP_17187_A_34857857 | NC_021162.1    | Ca_Kabuli_Chr03 | 34857857                | AA                              | GG                 | GG               | URR                           | 101497715          | histone deacetylase HDT1                           |
| SNP_17188_A_34858324 | NC_021162.1    | Ca_Kabuli_Chr03 | 34858324                | GG                              | CC                 | CC               | URR                           | 101497715          | histone deacetylase HDT1                           |
| SNP_17189_A_34859336 | NC_021162.1    | Ca_Kabuli_Chr03 | 34859336                | GG                              | AA                 | AA               | DRR                           | 101498250          | polyadenylation and cleavage factor homolog 4-like |
| SNP_17190_A_34859657 | NC_021162.1    | Ca_Kabuli_Chr03 | 34859657                | CC                              | TT                 | TT               | DRR                           | 101498250          | polyadenylation and cleavage factor homolog 4-like |
| SNP_17191_A_34861525 | NC_021162.1    | Ca_Kabuli_Chr03 | 34861525                | TT                              | GG                 | GG               | INTRON                        | 101498250          | polyadenylation and cleavage factor homolog 4-like |
| SNP_17193_A_34866642 | NC_021162.1    | Ca_Kabuli_Chr03 | 34866642                | AA                              | GG                 | GG               | URR                           | 101498250          | polyadenylation and cleavage factor homolog 4-like |
| SNP_17194_A_34867042 | NC_021162.1    | Ca_Kabuli_Chr03 | 34867042                | CC                              | TT                 | TT               | URR                           | 101498250          | polyadenylation and cleavage factor homolog 4-like |
| SNP_17195_A_34867119 | NC_021162.1    | Ca_Kabuli_Chr03 | 34867119                | AA                              | GG                 | GG               | URR                           | 101498250          | polyadenylation and cleavage factor homolog 4-like |
| SNP_17196_A_34869880 | NC_021162.1    | Ca_Kabuli_Chr03 | 34869880                | AA                              | CC                 | CC               | INTERGENIC                    |                    |                                                    |
| SNP_17197_A_34869917 | NC_021162.1    | Ca_Kabuli_Chr03 | 34869917                | TT                              | GG                 | GG               | INTERGENIC                    |                    |                                                    |
| SNP_17198_A_34871941 | NC_021162.1    | Ca_Kabuli_Chr03 | 34871941                | AA                              | GG                 | GG               | INTERGENIC                    |                    |                                                    |
| SNP_17199_A_34871998 | NC_021162.1    | Ca_Kabuli_Chr03 | 34871998                | CC                              | TT                 | TT               | INTERGENIC                    |                    |                                                    |
| SNP_17200_A_34871999 | NC_021162.1    | Ca_Kabuli_Chr03 | 34871999                | CC                              | GG                 | GG               | INTERGENIC                    |                    |                                                    |
| SNP_17201_A_34872001 | NC_021162.1    | Ca_Kabuli_Chr03 | 34872001                | TT                              | CC                 | CC               | INTERGENIC                    |                    |                                                    |
| SNP_17202_A_34872225 | NC_021162.1    | Ca_Kabuli_Chr03 | 34872225                | GG                              | TT                 | TT               | INTERGENIC                    |                    |                                                    |
| SNP_17204_A_34873488 | NC_021162.1    | Ca_Kabuli_Chr03 | 34873488                | CC                              | TT                 | TT               | INTERGENIC                    |                    |                                                    |
| SNP_17205_A_34873489 | NC_021162.1    | Ca_Kabuli_Chr03 | 34873489                | AA                              | TT                 | TT               | INTERGENIC                    |                    |                                                    |
| SNP_17207_A_34874518 | NC_021162.1    | Ca_Kabuli_Chr03 | 34874518                | AA                              | GG                 | GG               | DRR                           | 101498584          | PAN domain-containing protein At5g03700            |
| SNP_17208_A_34879673 | NC_021162.1    | Ca_Kabuli_Chr03 | 34879673                | TT                              | CC                 | CC               | INTERGENIC                    |                    |                                                    |
| SNP_17209_A_34879854 | NC_021162.1    | Ca_Kabuli_Chr03 | 34879854                | GG                              | AA                 | AA               | INTERGENIC                    |                    |                                                    |

| SNPs IDs             | Chromosome IDs | Chromosomes     | Physical positions (bp) | CDC Frontier genome (Reference genome) | (Pusa 1103 & HPNB) | (ILWC 46 & LPNB) | Sequence Components of genome | Gene accession IDs | Putative functions                                       |
|----------------------|----------------|-----------------|-------------------------|----------------------------------------|--------------------|------------------|-------------------------------|--------------------|----------------------------------------------------------|
| SNP_17210_A_34879895 | NC_021162.1    | Ca_Kabuli_Chr03 | 34879895                | AA                                     | GG                 | GG               | INTERGENIC                    |                    |                                                          |
| SNP_17211_A_34881689 | NC_021162.1    | Ca_Kabuli_Chr03 | 34881689                | CC                                     | AA                 | AA               | DRR                           | 101498919          | uncharacterized LOC101498919                             |
| SNP_17212_A_34883008 | NC_021162.1    | Ca_Kabuli_Chr03 | 34883008                | GG                                     | TT                 | TT               | SYNONYMOUS_CODING             | 101498919          | uncharacterized LOC101498919                             |
| SNP_17213_A_34885139 | NC_021162.1    | Ca_Kabuli_Chr03 | 34885139                | TT                                     | CC                 | CC               | URR                           | 101498919          | uncharacterized LOC101498919                             |
| SNP_17214_A_34886876 | NC_021162.1    | Ca_Kabuli_Chr03 | 34886876                | GG                                     | TT                 | TT               | DRR                           | 101499242          | fructose-bisphosphate aldolase, cytoplasmic isozyme-like |
| SNP_17215_A_34886898 | NC_021162.1    | Ca_Kabuli_Chr03 | 34886898                | AA                                     | CC                 | CC               | DRR                           | 101499242          | fructose-bisphosphate aldolase, cytoplasmic isozyme-like |
| SNP_17216_A_34886950 | NC_021162.1    | Ca_Kabuli_Chr03 | 34886950                | AA                                     | GG                 | GG               | DRR                           | 101499242          | fructose-bisphosphate aldolase, cytoplasmic isozyme-like |
| SNP_17217_A_34887362 | NC_021162.1    | Ca_Kabuli_Chr03 | 34887362                | AA                                     | TT                 | TT               | INTERGENIC                    |                    |                                                          |
| SNP_17219_A_34887552 | NC_021162.1    | Ca_Kabuli_Chr03 | 34887552                | GG                                     | AA                 | AA               | INTERGENIC                    |                    |                                                          |
| SNP_17220_A_34887561 | NC_021162.1    | Ca_Kabuli_Chr03 | 34887561                | AA                                     | GG                 | GG               | INTERGENIC                    |                    |                                                          |
| SNP_17221_A_34887857 | NC_021162.1    | Ca_Kabuli_Chr03 | 34887857                | TT                                     | AA                 | AA               | INTERGENIC                    |                    |                                                          |
| SNP_17222_A_34890235 | NC_021162.1    | Ca_Kabuli_Chr03 | 34890235                | CC                                     | AA                 | AA               | URR                           | 101499242          | fructose-bisphosphate aldolase, cytoplasmic isozyme-like |
| SNP_17223_A_34890243 | NC_021162.1    | Ca_Kabuli_Chr03 | 34890243                | TT                                     | CC                 | CC               | URR                           | 101499242          | fructose-bisphosphate aldolase, cytoplasmic isozyme-like |
| SNP_17224_A_34890490 | NC_021162.1    | Ca_Kabuli_Chr03 | 34890490                | GG                                     | AA                 | AA               | URR                           | 101499242          | fructose-bisphosphate aldolase, cytoplasmic isozyme-like |
| SNP_17225_A_34896806 | NC_021162.1    | Ca_Kabuli_Chr03 | 34896806                | TT                                     | CC                 | CC               | URR                           | 101499561          | trihelix transcription factor PTL                        |
| SNP_17226_A_34896819 | NC_021162.1    | Ca_Kabuli_Chr03 | 34896819                | AA                                     | TT                 | TT               | URR                           | 101499561          | trihelix transcription factor PTL                        |
| SNP_17229_A_34909593 | NC_021162.1    | Ca_Kabuli_Chr03 | 34909593                | GG                                     | AA                 | AA               | INTERGENIC                    |                    |                                                          |
| SNP_17230_A_34909594 | NC_021162.1    | Ca_Kabuli_Chr03 | 34909594                | AA                                     | GG                 | GG               | INTERGENIC                    |                    |                                                          |
| SNP_17231_A_34910912 | NC_021162.1    | Ca_Kabuli_Chr03 | 34910912                | TT                                     | AA                 | AA               | DRR                           | 101512292          | ethylene-responsive transcription factor ERF024          |
| SNP_17233_A_34912106 | NC_021162.1    | Ca_Kabuli_Chr03 | 34912106                | AA                                     | TT                 | TT               | URR                           | 101512292          | ethylene-responsive transcription factor ERF024          |
| SNP_17234_A_34912108 | NC_021162.1    | Ca_Kabuli_Chr03 | 34912108                | TT                                     | GG                 | GG               | URR                           | 101512292          | ethylene-responsive transcription factor ERF024          |
| SNP_17235_A_34912377 | NC_021162.1    | Ca_Kabuli_Chr03 | 34912377                | AA                                     | GG                 | GG               | URR                           | 101512292          | ethylene-responsive transcription factor ERF024          |

| SNPs IDs             | Chromosome IDs | Chromosomes     | Physical positions (bp) | CDC Frontier genome (Reference genome) | (Pusa 1103 & HPNB) | (ILWC 46 & LPNB) | Sequence Components of genome | Gene accession IDs | Putative functions                              |
|----------------------|----------------|-----------------|-------------------------|----------------------------------------|--------------------|------------------|-------------------------------|--------------------|-------------------------------------------------|
| SNP_17236_A_34913508 | NC_021162.1    | Ca_Kabuli_Chr03 | 34913508                | AA                                     | GG                 | GG               | URR                           | 101512292          | ethylene-responsive transcription factor ERF024 |
| SNP_17240_A_34914648 | NC_021162.1    | Ca_Kabuli_Chr03 | 34914648                | GG                                     | AA                 | AA               | INTERGENIC                    |                    |                                                 |
| SNP_17241_A_34914900 | NC_021162.1    | Ca_Kabuli_Chr03 | 34914900                | CC                                     | TT                 | TT               | INTERGENIC                    |                    |                                                 |
| SNP_17242_A_34914905 | NC_021162.1    | Ca_Kabuli_Chr03 | 34914905                | GG                                     | TT                 | TT               | INTERGENIC                    |                    |                                                 |
| SNP_17243_A_34914951 | NC_021162.1    | Ca_Kabuli_Chr03 | 34914951                | TT                                     | CC                 | CC               | INTERGENIC                    |                    |                                                 |
| SNP_17244_A_34914957 | NC_021162.1    | Ca_Kabuli_Chr03 | 34914957                | TT                                     | CC                 | CC               | INTERGENIC                    |                    |                                                 |
| SNP_17245_A_34915314 | NC_021162.1    | Ca_Kabuli_Chr03 | 34915314                | TT                                     | AA                 | AA               | INTERGENIC                    |                    |                                                 |
| SNP_17246_A_34915335 | NC_021162.1    | Ca_Kabuli_Chr03 | 34915335                | AA                                     | TT                 | TT               | INTERGENIC                    |                    |                                                 |
| SNP_17247_A_34915585 | NC_021162.1    | Ca_Kabuli_Chr03 | 34915585                | CC                                     | TT                 | TT               | INTERGENIC                    |                    |                                                 |
| SNP_17249_A_34916126 | NC_021162.1    | Ca_Kabuli_Chr03 | 34916126                | CC                                     | TT                 | TT               | INTERGENIC                    |                    |                                                 |
| SNP_17250_A_34921846 | NC_021162.1    | Ca_Kabuli_Chr03 | 34921846                | TT                                     | CC                 | CC               | INTRON                        | 101499859          | uncharacterized LOC101499859                    |
| SNP_17251_A_34921926 | NC_021162.1    | Ca_Kabuli_Chr03 | 34921926                | GG                                     | TT                 | TT               | INTRON                        | 101499859          | uncharacterized LOC101499859                    |
| SNP_17252_A_34923642 | NC_021162.1    | Ca_Kabuli_Chr03 | 34923642                | GG                                     | AA                 | AA               | URR                           | 101499859          | uncharacterized LOC101499859                    |
| SNP_17253_A_34923688 | NC_021162.1    | Ca_Kabuli_Chr03 | 34923688                | AA                                     | GG                 | GG               | URR                           | 101499859          | uncharacterized LOC101499859                    |
| SNP_17254_A_34924000 | NC_021162.1    | Ca_Kabuli_Chr03 | 34924000                | CC                                     | TT                 | TT               | URR                           | 101499859          | uncharacterized LOC101499859                    |
| SNP_17255_A_34927339 | NC_021162.1    | Ca_Kabuli_Chr03 | 34927339                | GG                                     | TT                 | TT               | INTERGENIC                    |                    |                                                 |
| SNP_17256_A_34927527 | NC_021162.1    | Ca_Kabuli_Chr03 | 34927527                | CC                                     | TT                 | TT               | INTERGENIC                    |                    |                                                 |
| SNP_17257_A_34927895 | NC_021162.1    | Ca_Kabuli_Chr03 | 34927895                | AA                                     | CC                 | CC               | INTERGENIC                    |                    |                                                 |
| SNP_17258_A_34927945 | NC_021162.1    | Ca_Kabuli_Chr03 | 34927945                | TT                                     | AA                 | AA               | INTERGENIC                    |                    |                                                 |
| SNP_17259_A_34928847 | NC_021162.1    | Ca_Kabuli_Chr03 | 34928847                | TT                                     | GG                 | GG               | INTERGENIC                    |                    |                                                 |
| SNP_17260_A_34929855 | NC_021162.1    | Ca_Kabuli_Chr03 | 34929855                | AA                                     | TT                 | TT               | INTERGENIC                    |                    |                                                 |
| SNP_17261_A_34929858 | NC_021162.1    | Ca_Kabuli_Chr03 | 34929858                | AA                                     | TT                 | TT               | INTERGENIC                    |                    |                                                 |



| SNPs IDs             | Chromosome IDs | Chromosomes     | Physical positions (bp) | CDC Frontier genome (Reference genome) | (Pusa 1103 & HPNB) | (ILWC 46 & LPNB) | Sequence genome | Components of | Gene accession IDs | Putative functions                                |
|----------------------|----------------|-----------------|-------------------------|----------------------------------------|--------------------|------------------|-----------------|---------------|--------------------|---------------------------------------------------|
| SNP_17263_A_34932973 | NC_021162.1    | Ca_Kabuli_Chr03 | 34932973                | AA                                     | GG                 | GG               | INTERGENIC      |               |                    |                                                   |
| SNP_17264_A_34933665 | NC_021162.1    | Ca_Kabuli_Chr03 | 34933665                | GG                                     | TT                 | TT               | INTERGENIC      |               |                    |                                                   |
| SNP_17265_A_34934610 | NC_021162.1    | Ca_Kabuli_Chr03 | 34934610                | TT                                     | CC                 | CC               | INTERGENIC      |               |                    |                                                   |
| SNP_17266_A_34934643 | NC_021162.1    | Ca_Kabuli_Chr03 | 34934643                | AA                                     | GG                 | GG               | INTERGENIC      |               |                    |                                                   |
| SNP_17267_A_34941988 | NC_021162.1    | Ca_Kabuli_Chr03 | 34941988                | TT                                     | CC                 | CC               | INTERGENIC      |               |                    |                                                   |
| SNP_17268_A_34942218 | NC_021162.1    | Ca_Kabuli_Chr03 | 34942218                | GG                                     | AA                 | AA               | INTERGENIC      |               |                    |                                                   |
| SNP_17269_A_34942219 | NC_021162.1    | Ca_Kabuli_Chr03 | 34942219                | AA                                     | TT                 | TT               | INTERGENIC      |               |                    |                                                   |
| SNP_17270_A_34942246 | NC_021162.1    | Ca_Kabuli_Chr03 | 34942246                | TT                                     | CC                 | CC               | INTERGENIC      |               |                    |                                                   |
| SNP_17271_A_34943101 | NC_021162.1    | Ca_Kabuli_Chr03 | 34943101                | TT                                     | AA                 | AA               | INTERGENIC      |               |                    |                                                   |
| SNP_17273_A_34943701 | NC_021162.1    | Ca_Kabuli_Chr03 | 34943701                | CC                                     | TT                 | TT               | INTERGENIC      |               |                    |                                                   |
| SNP_17274_A_34943709 | NC_021162.1    | Ca_Kabuli_Chr03 | 34943709                | GG                                     | AA                 | AA               | INTERGENIC      |               |                    |                                                   |
| SNP_17275_A_34943721 | NC_021162.1    | Ca_Kabuli_Chr03 | 34943721                | CC                                     | TT                 | TT               | INTERGENIC      |               |                    |                                                   |
| SNP_17277_A_34943906 | NC_021162.1    | Ca_Kabuli_Chr03 | 34943906                | CC                                     | TT                 | TT               | INTERGENIC      |               |                    |                                                   |
| SNP_17278_A_34947648 | NC_021162.1    | Ca_Kabuli_Chr03 | 34947648                | TT                                     | AA                 | AA               | URR             |               | 101500193          | ankyrin repeat domain-containing protein 30A-like |
| SNP_17279_A_34947649 | NC_021162.1    | Ca_Kabuli_Chr03 | 34947649                | TT                                     | AA                 | AA               | URR             |               | 101500193          | ankyrin repeat domain-containing protein 30A-like |
| SNP_17280_A_34947672 | NC_021162.1    | Ca_Kabuli_Chr03 | 34947672                | AA                                     | TT                 | TT               | URR             |               | 101500193          | ankyrin repeat domain-containing protein 30A-like |
| SNP_17281_A_34948634 | NC_021162.1    | Ca_Kabuli_Chr03 | 34948634                | TT                                     | AA                 | AA               | URR             |               | 101500193          | ankyrin repeat domain-containing protein 30A-like |
| SNP_17282_A_34948663 | NC_021162.1    | Ca_Kabuli_Chr03 | 34948663                | TT                                     | CC                 | CC               | URR             |               | 101500193          | ankyrin repeat domain-containing protein 30A-like |
| SNP_17283_A_34949225 | NC_021162.1    | Ca_Kabuli_Chr03 | 34949225                | TT                                     | CC                 | CC               | URR             |               | 101500193          | ankyrin repeat domain-containing protein 30A-like |
| SNP_17284_A_34951040 | NC_021162.1    | Ca_Kabuli_Chr03 | 34951040                | CC                                     | TT                 | TT               | INTERGENIC      |               |                    |                                                   |
| SNP_17285_A_34953651 | NC_021162.1    | Ca_Kabuli_Chr03 | 34953651                | CC                                     | TT                 | TT               | INTERGENIC      |               |                    |                                                   |
| SNP_17286_A_34953873 | NC_021162.1    | Ca_Kabuli_Chr03 | 34953873                | TT                                     | AA                 | AA               | INTERGENIC      |               |                    |                                                   |

| SNPs IDs             | Chromosome IDs | Chromosomes     | Physical positions (bp) | CDC Frontier genome (Reference genome) | (Pusa 1103 & HPNB) | (ILWC 46 & LPNB) | Sequence genome | Components of | Gene accession IDs | Putative functions                                              |
|----------------------|----------------|-----------------|-------------------------|----------------------------------------|--------------------|------------------|-----------------|---------------|--------------------|-----------------------------------------------------------------|
| SNP_17289_A_34954978 | NC_021162.1    | Ca_Kabuli_Chr03 | 34954978                | AA                                     | GG                 | GG               | INTERGENIC      |               |                    |                                                                 |
| SNP_17291_A_34962596 | NC_021162.1    | Ca_Kabuli_Chr03 | 34962596                | AA                                     | GG                 | GG               | INTERGENIC      |               |                    |                                                                 |
| SNP_17292_A_34962619 | NC_021162.1    | Ca_Kabuli_Chr03 | 34962619                | TT                                     | CC                 | CC               | INTERGENIC      |               |                    |                                                                 |
| SNP_17293_A_34963096 | NC_021162.1    | Ca_Kabuli_Chr03 | 34963096                | TT                                     | AA                 | AA               | INTERGENIC      |               |                    |                                                                 |
| SNP_17296_A_34964297 | NC_021162.1    | Ca_Kabuli_Chr03 | 34964297                | GG                                     | AA                 | AA               | INTERGENIC      |               |                    |                                                                 |
| SNP_17297_A_34965985 | NC_021162.1    | Ca_Kabuli_Chr03 | 34965985                | AA                                     | GG                 | GG               | INTERGENIC      |               |                    |                                                                 |
| SNP_17298_A_34966908 | NC_021162.1    | Ca_Kabuli_Chr03 | 34966908                | CC                                     | AA                 | AA               | INTERGENIC      |               |                    |                                                                 |
| SNP_17299_A_34967085 | NC_021162.1    | Ca_Kabuli_Chr03 | 34967085                | GG                                     | CC                 | CC               | INTERGENIC      |               |                    |                                                                 |
| SNP_17300_A_34967587 | NC_021162.1    | Ca_Kabuli_Chr03 | 34967587                | GG                                     | AA                 | AA               | INTERGENIC      |               |                    |                                                                 |
| SNP_17301_A_34967633 | NC_021162.1    | Ca_Kabuli_Chr03 | 34967633                | AA                                     | GG                 | GG               | INTERGENIC      |               |                    |                                                                 |
| SNP_17302_A_34967646 | NC_021162.1    | Ca_Kabuli_Chr03 | 34967646                | CC                                     | TT                 | TT               | INTERGENIC      |               |                    |                                                                 |
| SNP_17304_A_34967907 | NC_021162.1    | Ca_Kabuli_Chr03 | 34967907                | GG                                     | TT                 | TT               | INTERGENIC      |               |                    |                                                                 |
| SNP_17306_A_34971464 | NC_021162.1    | Ca_Kabuli_Chr03 | 34971464                | TT                                     | CC                 | CC               | INTERGENIC      |               |                    |                                                                 |
| SNP_17307_A_34972452 | NC_021162.1    | Ca_Kabuli_Chr03 | 34972452                | TT                                     | AA                 | AA               | INTERGENIC      |               |                    |                                                                 |
| SNP_17308_A_34972460 | NC_021162.1    | Ca_Kabuli_Chr03 | 34972460                | CC                                     | AA                 | AA               | INTERGENIC      |               |                    |                                                                 |
| SNP_17310_A_34976181 | NC_021162.1    | Ca_Kabuli_Chr03 | 34976181                | AA                                     | TT                 | TT               | INTERGENIC      |               |                    |                                                                 |
| SNP_17311_A_34982751 | NC_021162.1    | Ca_Kabuli_Chr03 | 34982751                | GG                                     | AA                 | AA               | INTRON          |               | 101501037          | 1,4-alpha-glucan-branching chloroplastic/amyloplastic enzyme 1, |
| SNP_17312_A_34987219 | NC_021162.1    | Ca_Kabuli_Chr03 | 34987219                | TT                                     | AA                 | AA               | INTRON          |               | 101501037          | 1,4-alpha-glucan-branching chloroplastic/amyloplastic enzyme 1, |
| SNP_17313_A_34995502 | NC_021162.1    | Ca_Kabuli_Chr03 | 34995502                | AA                                     | GG                 | GG               | INTRON          |               | 101501037          | 1,4-alpha-glucan-branching chloroplastic/amyloplastic enzyme 1, |
| SNP_17314_A_34995688 | NC_021162.1    | Ca_Kabuli_Chr03 | 34995688                | TT                                     | CC                 | CC               | INTRON          |               | 101501037          | 1,4-alpha-glucan-branching chloroplastic/amyloplastic enzyme 1, |
| SNP_17315_A_35009340 | NC_021162.1    | Ca_Kabuli_Chr03 | 35009340                | TT                                     | CC                 | CC               | INTRON          |               | 101512624          | ABC transporter G family member 39-like                         |
| SNP_17316_A_35015397 | NC_021162.1    | Ca_Kabuli_Chr03 | 35015397                | TT                                     | CC                 | CC               | INTRON          |               | 101512624          | ABC transporter G family member 39-like                         |

| SNPs IDs             | Chromosome IDs | Chromosomes     | Physical positions (bp) | CDC Frontier genome (Reference genome) | (Pusa 1103 & HPNB) | (ILWC 46 & LPNB) | Sequence Components of genome | Gene accession IDs | Putative functions                      |
|----------------------|----------------|-----------------|-------------------------|----------------------------------------|--------------------|------------------|-------------------------------|--------------------|-----------------------------------------|
| SNP_17318_A_35020789 | NC_021162.1    | Ca_Kabuli_Chr03 | 35020789                | CC                                     | TT                 | TT               | DRR                           | 101501889          | ABC transporter G family member 39-like |
| SNP_17319_A_35020829 | NC_021162.1    | Ca_Kabuli_Chr03 | 35020829                | TT                                     | CC                 | CC               | DRR                           | 101501889          | ABC transporter G family member 39-like |
| SNP_17320_A_35026571 | NC_021162.1    | Ca_Kabuli_Chr03 | 35026571                | TT                                     | AA                 | AA               | SYNONYMOUS_CODING             | 101501889          | ABC transporter G family member 39-like |
| SNP_17322_A_35030717 | NC_021162.1    | Ca_Kabuli_Chr03 | 35030717                | AA                                     | GG                 | GG               | URR                           | 101501889          | ABC transporter G family member 39-like |
| SNP_17323_A_35030799 | NC_021162.1    | Ca_Kabuli_Chr03 | 35030799                | AA                                     | TT                 | TT               | URR                           | 101501889          | ABC transporter G family member 39-like |
| SNP_17324_A_35030901 | NC_021162.1    | Ca_Kabuli_Chr03 | 35030901                | TT                                     | CC                 | CC               | URR                           | 101501889          | ABC transporter G family member 39-like |
| SNP_17326_A_35032099 | NC_021162.1    | Ca_Kabuli_Chr03 | 35032099                | CC                                     | TT                 | TT               | URR                           | 101501889          | ABC transporter G family member 39-like |
| SNP_17328_A_35033251 | NC_021162.1    | Ca_Kabuli_Chr03 | 35033251                | CC                                     | TT                 | TT               | INTERGENIC                    |                    |                                         |
| SNP_17329_A_35033407 | NC_021162.1    | Ca_Kabuli_Chr03 | 35033407                | CC                                     | TT                 | TT               | INTERGENIC                    |                    |                                         |
| SNP_17330_A_35034566 | NC_021162.1    | Ca_Kabuli_Chr03 | 35034566                | CC                                     | TT                 | TT               | INTERGENIC                    |                    |                                         |
| SNP_17332_A_35038161 | NC_021162.1    | Ca_Kabuli_Chr03 | 35038161                | TT                                     | CC                 | CC               | INTRON                        | 101501578          | BTB/POZ domain-containing protein FBL11 |
| SNP_17333_A_35039219 | NC_021162.1    | Ca_Kabuli_Chr03 | 35039219                | AA                                     | GG                 | GG               | SYNONYMOUS_CODING             | 101501578          | BTB/POZ domain-containing protein FBL11 |
| SNP_17334_A_35039252 | NC_021162.1    | Ca_Kabuli_Chr03 | 35039252                | TT                                     | CC                 | CC               | NON_SYNONYMOUS_CODING         | 101501578          | BTB/POZ domain-containing protein FBL11 |
| SNP_17337_A_35046701 | NC_021162.1    | Ca_Kabuli_Chr03 | 35046701                | CC                                     | TT                 | TT               | URR                           | 101501578          | BTB/POZ domain-containing protein FBL11 |
| SNP_17338_A_35046888 | NC_021162.1    | Ca_Kabuli_Chr03 | 35046888                | CC                                     | TT                 | TT               | URR                           | 101501578          | BTB/POZ domain-containing protein FBL11 |
| SNP_17339_A_35049103 | NC_021162.1    | Ca_Kabuli_Chr03 | 35049103                | GG                                     | AA                 | AA               | INTERGENIC                    |                    |                                         |
| SNP_17340_A_35049374 | NC_021162.1    | Ca_Kabuli_Chr03 | 35049374                | AA                                     | TT                 | TT               | INTERGENIC                    |                    |                                         |
| SNP_17341_A_35049402 | NC_021162.1    | Ca_Kabuli_Chr03 | 35049402                | CC                                     | TT                 | TT               | INTERGENIC                    |                    |                                         |
| SNP_17342_A_35049835 | NC_021162.1    | Ca_Kabuli_Chr03 | 35049835                | TT                                     | GG                 | GG               | INTERGENIC                    |                    |                                         |
| SNP_17343_A_35054232 | NC_021162.1    | Ca_Kabuli_Chr03 | 35054232                | CC                                     | TT                 | TT               | INTRON                        | 101512931          | ABC transporter G family member 39-like |
| SNP_17344_A_35054340 | NC_021162.1    | Ca_Kabuli_Chr03 | 35054340                | CC                                     | GG                 | GG               | INTRON                        | 101512931          | ABC transporter G family member 39-like |
| SNP_17345_A_35054370 | NC_021162.1    | Ca_Kabuli_Chr03 | 35054370                | TT                                     | CC                 | CC               | INTRON                        | 101512931          | ABC transporter G family member 39-like |

| SNPs IDs             | Chromosome IDs | Chromosomes     | Physical positions (bp) | CDC Frontier (Reference genome) | (Pusa 1103 & HPNB) | (ILWC 46 & LPNB) | Sequence Components of genome | Gene accession IDs | Putative functions                        |
|----------------------|----------------|-----------------|-------------------------|---------------------------------|--------------------|------------------|-------------------------------|--------------------|-------------------------------------------|
| SNP_17346_A_35054583 | NC_021162.1    | Ca_Kabuli_Chr03 | 35054583                | CC                              | TT                 | TT               | INTRON                        | 101512931          | ABC transporter G family member 39-like   |
| SNP_17347_A_35054584 | NC_021162.1    | Ca_Kabuli_Chr03 | 35054584                | TT                              | CC                 | CC               | INTRON                        | 101512931          | ABC transporter G family member 39-like   |
| SNP_17348_A_35055580 | NC_021162.1    | Ca_Kabuli_Chr03 | 35055580                | AA                              | GG                 | GG               | INTRON                        | 101512931          | ABC transporter G family member 39-like   |
| SNP_17349_A_35055587 | NC_021162.1    | Ca_Kabuli_Chr03 | 35055587                | GG                              | CC                 | CC               | INTRON                        | 101512931          | ABC transporter G family member 39-like   |
| SNP_17350_A_35055855 | NC_021162.1    | Ca_Kabuli_Chr03 | 35055855                | AA                              | GG                 | GG               | NON_SYNONYMOUS_CODING         | 101512931          | ABC transporter G family member 39-like   |
| SNP_17352_A_35069930 | NC_021162.1    | Ca_Kabuli_Chr03 | 35069930                | CC                              | TT                 | TT               | DRR                           | 101502217          | serine/threonine-protein kinase KIPK-like |
| SNP_17353_A_35069948 | NC_021162.1    | Ca_Kabuli_Chr03 | 35069948                | CC                              | TT                 | TT               | DRR                           | 101502217          | serine/threonine-protein kinase KIPK-like |
| SNP_17354_A_35070050 | NC_021162.1    | Ca_Kabuli_Chr03 | 35070050                | TT                              | CC                 | CC               | DRR                           | 101502217          | serine/threonine-protein kinase KIPK-like |
| SNP_17355_A_35070521 | NC_021162.1    | Ca_Kabuli_Chr03 | 35070521                | GG                              | CC                 | CC               | DRR                           | 101502217          | serine/threonine-protein kinase KIPK-like |
| SNP_17357_A_35080442 | NC_021162.1    | Ca_Kabuli_Chr03 | 35080442                | TT                              | GG                 | GG               | INTERGENIC                    |                    |                                           |
| SNP_17358_A_35080488 | NC_021162.1    | Ca_Kabuli_Chr03 | 35080488                | GG                              | AA                 | AA               | INTERGENIC                    |                    |                                           |
| SNP_17359_A_35086663 | NC_021162.1    | Ca_Kabuli_Chr03 | 35086663                | GG                              | AA                 | AA               | INTERGENIC                    |                    |                                           |
| SNP_17361_A_35086725 | NC_021162.1    | Ca_Kabuli_Chr03 | 35086725                | CC                              | GG                 | GG               | INTERGENIC                    |                    |                                           |
| SNP_17363_A_35087082 | NC_021162.1    | Ca_Kabuli_Chr03 | 35087082                | GG                              | AA                 | AA               | INTERGENIC                    |                    |                                           |
| SNP_17364_A_35087800 | NC_021162.1    | Ca_Kabuli_Chr03 | 35087800                | TT                              | CC                 | CC               | URR                           | 101502848          | subtilisin-like protease SBT4.14          |
| SNP_17365_A_35087807 | NC_021162.1    | Ca_Kabuli_Chr03 | 35087807                | TT                              | AA                 | AA               | URR                           | 101502848          | subtilisin-like protease SBT4.14          |
| SNP_17366_A_35088941 | NC_021162.1    | Ca_Kabuli_Chr03 | 35088941                | CC                              | TT                 | TT               | URR                           | 101502848          | subtilisin-like protease SBT4.14          |
| SNP_17367_A_35090365 | NC_021162.1    | Ca_Kabuli_Chr03 | 35090365                | AA                              | GG                 | GG               | INTERGENIC                    |                    |                                           |
| SNP_17368_A_35090875 | NC_021162.1    | Ca_Kabuli_Chr03 | 35090875                | TT                              | CC                 | CC               | INTERGENIC                    |                    |                                           |
| SNP_17369_A_35093851 | NC_021162.1    | Ca_Kabuli_Chr03 | 35093851                | AA                              | GG                 | GG               | URR                           | 101513587          | GDSL esterase/lipase At5g03610-like       |
| SNP_17370_A_35094678 | NC_021162.1    | Ca_Kabuli_Chr03 | 35094678                | TT                              | CC                 | CC               | URR                           | 101513587          | GDSL esterase/lipase At5g03610-like       |
| SNP_17371_A_35095221 | NC_021162.1    | Ca_Kabuli_Chr03 | 35095221                | TT                              | CC                 | CC               | INTERGENIC                    |                    |                                           |

| SNPs IDs             | Chromosome IDs | Chromosomes     | Physical positions (bp) | CDC Frontier (Reference genome) | (Pusa 1103 & HPNB) | (ILWC 46 & LPNB) | Sequence Components of genome | Gene accession IDs | Putative functions                                                         |
|----------------------|----------------|-----------------|-------------------------|---------------------------------|--------------------|------------------|-------------------------------|--------------------|----------------------------------------------------------------------------|
| SNP_17372_A_35099621 | NC_021162.1    | Ca_Kabuli_Chr03 | 35099621                | CC                              | GG                 | GG               | INTERGENIC                    |                    |                                                                            |
| SNP_17373_A_35100574 | NC_021162.1    | Ca_Kabuli_Chr03 | 35100574                | TT                              | AA                 | AA               | URR                           | 101503167          | uridine nucleosidase 1                                                     |
| SNP_17375_A_35100921 | NC_021162.1    | Ca_Kabuli_Chr03 | 35100921                | GG                              | AA                 | AA               | URR                           | 101503167          | uridine nucleosidase 1                                                     |
| SNP_17377_A_35101675 | NC_021162.1    | Ca_Kabuli_Chr03 | 35101675                | AA                              | GG                 | GG               | URR                           | 101503167          | uridine nucleosidase 1                                                     |
| SNP_17378_A_35101748 | NC_021162.1    | Ca_Kabuli_Chr03 | 35101748                | AA                              | GG                 | GG               | URR                           | 101503167          | uridine nucleosidase 1                                                     |
| SNP_17379_A_35101760 | NC_021162.1    | Ca_Kabuli_Chr03 | 35101760                | GG                              | AA                 | AA               | URR                           | 101503167          | uridine nucleosidase 1                                                     |
| SNP_17380_A_35101803 | NC_021162.1    | Ca_Kabuli_Chr03 | 35101803                | CC                              | TT                 | TT               | URR                           | 101503167          | uridine nucleosidase 1                                                     |
| SNP_17381_A_35101849 | NC_021162.1    | Ca_Kabuli_Chr03 | 35101849                | AA                              | GG                 | GG               | URR                           | 101503167          | uridine nucleosidase 1                                                     |
| SNP_17382_A_35101854 | NC_021162.1    | Ca_Kabuli_Chr03 | 35101854                | GG                              | AA                 | AA               | URR                           | 101503167          | uridine nucleosidase 1                                                     |
| SNP_17383_A_35101887 | NC_021162.1    | Ca_Kabuli_Chr03 | 35101887                | AA                              | GG                 | GG               | URR                           | 101503167          | uridine nucleosidase 1                                                     |
| SNP_17384_A_35101897 | NC_021162.1    | Ca_Kabuli_Chr03 | 35101897                | CC                              | TT                 | TT               | URR                           | 101503167          | uridine nucleosidase 1                                                     |
| SNP_17385_A_35101898 | NC_021162.1    | Ca_Kabuli_Chr03 | 35101898                | AA                              | GG                 | GG               | URR                           | 101503167          | uridine nucleosidase 1                                                     |
| SNP_17386_A_35102008 | NC_021162.1    | Ca_Kabuli_Chr03 | 35102008                | AA                              | GG                 | GG               | INTERGENIC                    |                    |                                                                            |
| SNP_17387_A_35102017 | NC_021162.1    | Ca_Kabuli_Chr03 | 35102017                | GG                              | CC                 | CC               | INTERGENIC                    |                    |                                                                            |
| SNP_17388_A_35102037 | NC_021162.1    | Ca_Kabuli_Chr03 | 35102037                | TT                              | CC                 | CC               | INTERGENIC                    |                    |                                                                            |
| SNP_17389_A_35102375 | NC_021162.1    | Ca_Kabuli_Chr03 | 35102375                | TT                              | CC                 | CC               | INTERGENIC                    |                    |                                                                            |
| SNP_17390_A_35104006 | NC_021162.1    | Ca_Kabuli_Chr03 | 35104006                | TT                              | CC                 | CC               | DRR                           | 101503822          | solute carrier family 35 member F2-like                                    |
| SNP_17392_A_35107035 | NC_021162.1    | Ca_Kabuli_Chr03 | 35107035                | AA                              | TT                 | TT               | INTRON                        | 101503822          | solute carrier family 35 member F2-like                                    |
| SNP_17393_A_35109274 | NC_021162.1    | Ca_Kabuli_Chr03 | 35109274                | GG                              | AA                 | AA               | INTRON                        | 101503822          | solute carrier family 35 member F2-like                                    |
| SNP_17394_A_35113789 | NC_021162.1    | Ca_Kabuli_Chr03 | 35113789                | TT                              | AA                 | AA               | URR                           | 101503486          | zinc finger A20 and AN1 domain-containing stress-associated protein 4-like |
| SNP_17396_A_35117321 | NC_021162.1    | Ca_Kabuli_Chr03 | 35117321                | CC                              | TT                 | TT               | INTERGENIC                    |                    |                                                                            |
| SNP_17397_A_35117615 | NC_021162.1    | Ca_Kabuli_Chr03 | 35117615                | CC                              | TT                 | TT               | INTERGENIC                    |                    |                                                                            |

| SNPs IDs             | Chromosome IDs | Chromosomes     | Physical positions (bp) | CDC Frontier genome (Reference genome) | (Pusa 1103 & HPNB) | (ILWC 46 & LPNB) | Sequence Components of genome | Gene accession IDs | Putative functions                  |
|----------------------|----------------|-----------------|-------------------------|----------------------------------------|--------------------|------------------|-------------------------------|--------------------|-------------------------------------|
| SNP_17398_A_35117683 | NC_021162.1    | Ca_Kabuli_Chr03 | 35117683                | AA                                     | GG                 | GG               | INTERGENIC                    |                    |                                     |
| SNP_17400_A_35119222 | NC_021162.1    | Ca_Kabuli_Chr03 | 35119222                | CC                                     | TT                 | TT               | INTERGENIC                    |                    |                                     |
| SNP_17401_A_35119516 | NC_021162.1    | Ca_Kabuli_Chr03 | 35119516                | AA                                     | TT                 | TT               | INTERGENIC                    |                    |                                     |
| SNP_17402_A_35119521 | NC_021162.1    | Ca_Kabuli_Chr03 | 35119521                | AA                                     | TT                 | TT               | INTERGENIC                    |                    |                                     |
| SNP_17403_A_35119553 | NC_021162.1    | Ca_Kabuli_Chr03 | 35119553                | TT                                     | CC                 | CC               | INTERGENIC                    |                    |                                     |
| SNP_17404_A_35125509 | NC_021162.1    | Ca_Kabuli_Chr03 | 35125509                | AA                                     | CC                 | CC               | INTRON                        | 101505098          | uncharacterized LOC101505098        |
| SNP_17405_A_35126134 | NC_021162.1    | Ca_Kabuli_Chr03 | 35126134                | GG                                     | CC                 | CC               | INTRON                        | 101505098          | uncharacterized LOC101505098        |
| SNP_17406_A_35126183 | NC_021162.1    | Ca_Kabuli_Chr03 | 35126183                | AA                                     | GG                 | GG               | SYNONYMOUS_CODING             | 101505098          | uncharacterized LOC101505098        |
| SNP_17407_A_35127891 | NC_021162.1    | Ca_Kabuli_Chr03 | 35127891                | CC                                     | TT                 | TT               | URR                           | 101505098          | uncharacterized LOC101505098        |
| SNP_17408_A_35131572 | NC_021162.1    | Ca_Kabuli_Chr03 | 35131572                | TT                                     | CC                 | CC               | INTERGENIC                    |                    |                                     |
| SNP_17409_A_35131588 | NC_021162.1    | Ca_Kabuli_Chr03 | 35131588                | TT                                     | CC                 | CC               | INTERGENIC                    |                    |                                     |
| SNP_17410_A_35131613 | NC_021162.1    | Ca_Kabuli_Chr03 | 35131613                | AA                                     | TT                 | TT               | INTERGENIC                    |                    |                                     |
| SNP_17411_A_35135657 | NC_021162.1    | Ca_Kabuli_Chr03 | 35135657                | TT                                     | CC                 | CC               | INTERGENIC                    |                    |                                     |
| SNP_17412_A_35136396 | NC_021162.1    | Ca_Kabuli_Chr03 | 35136396                | AA                                     | GG                 | GG               | INTERGENIC                    |                    |                                     |
| SNP_17414_A_35137450 | NC_021162.1    | Ca_Kabuli_Chr03 | 35137450                | TT                                     | CC                 | CC               | DRR                           | 101514241          | probable purple acid phosphatase 20 |
| SNP_17416_A_35139354 | NC_021162.1    | Ca_Kabuli_Chr03 | 35139354                | AA                                     | GG                 | GG               | INTRON                        | 101514241          | probable purple acid phosphatase 20 |
| SNP_17418_A_35143356 | NC_021162.1    | Ca_Kabuli_Chr03 | 35143356                | GG                                     | AA                 | AA               | URR                           | 101514241          | probable purple acid phosphatase 20 |
| SNP_17419_A_35143671 | NC_021162.1    | Ca_Kabuli_Chr03 | 35143671                | CC                                     | TT                 | TT               | URR                           | 101514241          | probable purple acid phosphatase 20 |
| SNP_17420_A_35144053 | NC_021162.1    | Ca_Kabuli_Chr03 | 35144053                | GG                                     | TT                 | TT               | URR                           | 101514241          | probable purple acid phosphatase 20 |
| SNP_17421_A_35144207 | NC_021162.1    | Ca_Kabuli_Chr03 | 35144207                | GG                                     | AA                 | AA               | URR                           | 101514241          | probable purple acid phosphatase 20 |
| SNP_17422_A_35146798 | NC_021162.1    | Ca_Kabuli_Chr03 | 35146798                | TT                                     | AA                 | AA               | INTERGENIC                    |                    |                                     |
| SNP_17423_A_35147012 | NC_021162.1    | Ca_Kabuli_Chr03 | 35147012                | GG                                     | CC                 | CC               | INTERGENIC                    |                    |                                     |

| SNPs IDs             | Chromosome IDs | Chromosomes     | Physical positions (bp) | CDC Frontier (Reference genome) | (Pusa 1103 & HPNB) | (ILWC 46 & LPNB) | Sequence Components of genome | Gene accession IDs | Putative functions           |
|----------------------|----------------|-----------------|-------------------------|---------------------------------|--------------------|------------------|-------------------------------|--------------------|------------------------------|
| SNP_17424_A_35147052 | NC_021162.1    | Ca_Kabuli_Chr03 | 35147052                | TT                              | AA                 | AA               | INTERGENIC                    |                    |                              |
| SNP_17426_A_35149563 | NC_021162.1    | Ca_Kabuli_Chr03 | 35149563                | GG                              | AA                 | AA               | INTERGENIC                    |                    |                              |
| SNP_17427_A_35149595 | NC_021162.1    | Ca_Kabuli_Chr03 | 35149595                | TT                              | CC                 | CC               | INTERGENIC                    |                    |                              |
| SNP_17428_A_35149764 | NC_021162.1    | Ca_Kabuli_Chr03 | 35149764                | AA                              | GG                 | GG               | INTERGENIC                    |                    |                              |
| SNP_17429_A_35150060 | NC_021162.1    | Ca_Kabuli_Chr03 | 35150060                | GG                              | AA                 | AA               | INTERGENIC                    |                    |                              |
| SNP_17430_A_35151330 | NC_021162.1    | Ca_Kabuli_Chr03 | 35151330                | CC                              | TT                 | TT               | INTERGENIC                    |                    |                              |
| SNP_17431_A_35151339 | NC_021162.1    | Ca_Kabuli_Chr03 | 35151339                | GG                              | AA                 | AA               | INTERGENIC                    |                    |                              |
| SNP_17432_A_35151364 | NC_021162.1    | Ca_Kabuli_Chr03 | 35151364                | CC                              | GG                 | GG               | INTERGENIC                    |                    |                              |
| SNP_17433_A_35151379 | NC_021162.1    | Ca_Kabuli_Chr03 | 35151379                | GG                              | AA                 | AA               | INTERGENIC                    |                    |                              |
| SNP_17434_A_35151388 | NC_021162.1    | Ca_Kabuli_Chr03 | 35151388                | AA                              | GG                 | GG               | INTERGENIC                    |                    |                              |
| SNP_17435_A_35152153 | NC_021162.1    | Ca_Kabuli_Chr03 | 35152153                | TT                              | CC                 | CC               | INTERGENIC                    |                    |                              |
| SNP_17436_A_35158309 | NC_021162.1    | Ca_Kabuli_Chr03 | 35158309                | TT                              | AA                 | AA               | URR                           | 101505420          | uncharacterized LOC101505420 |
| SNP_17437_A_35158323 | NC_021162.1    | Ca_Kabuli_Chr03 | 35158323                | AA                              | GG                 | GG               | URR                           | 101505420          | uncharacterized LOC101505420 |
| SNP_17438_A_35158343 | NC_021162.1    | Ca_Kabuli_Chr03 | 35158343                | GG                              | AA                 | AA               | URR                           | 101505420          | uncharacterized LOC101505420 |
| SNP_17439_A_35158383 | NC_021162.1    | Ca_Kabuli_Chr03 | 35158383                | CC                              | TT                 | TT               | URR                           | 101505420          | uncharacterized LOC101505420 |
| SNP_17440_A_35158390 | NC_021162.1    | Ca_Kabuli_Chr03 | 35158390                | AA                              | CC                 | CC               | URR                           | 101505420          | uncharacterized LOC101505420 |
| SNP_17441_A_35158656 | NC_021162.1    | Ca_Kabuli_Chr03 | 35158656                | TT                              | CC                 | CC               | INTERGENIC                    |                    |                              |
| SNP_17442_A_35164608 | NC_021162.1    | Ca_Kabuli_Chr03 | 35164608                | AA                              | GG                 | GG               | URR                           | 101505755          | protein YIPF5 homolog        |
| SNP_17443_A_35164616 | NC_021162.1    | Ca_Kabuli_Chr03 | 35164616                | AA                              | GG                 | GG               | URR                           | 101505755          | protein YIPF5 homolog        |
| SNP_17444_A_35166611 | NC_021162.1    | Ca_Kabuli_Chr03 | 35166611                | TT                              | CC                 | CC               | INTERGENIC                    |                    |                              |
| SNP_17446_A_35173327 | NC_021162.1    | Ca_Kabuli_Chr03 | 35173327                | AA                              | GG                 | GG               | DRR                           | 101506075          | protein CENTRORADIALIS-like  |
| SNP_17447_A_35173813 | NC_021162.1    | Ca_Kabuli_Chr03 | 35173813                | AA                              | GG                 | GG               | DRR                           | 101506075          | protein CENTRORADIALIS-like  |

| SNPs IDs             | Chromosome IDs | Chromosomes     | Physical positions (bp) | CDC Frontier (Reference genome) | (Pusa 1103 & HPNB) | (ILWC 46 & LPNB) | Sequence Components of genome | Gene accession IDs | Putative functions                                                    |
|----------------------|----------------|-----------------|-------------------------|---------------------------------|--------------------|------------------|-------------------------------|--------------------|-----------------------------------------------------------------------|
| SNP_17448_A_35173827 | NC_021162.1    | Ca_Kabuli_Chr03 | 35173827                | GG                              | CC                 | CC               | DRR                           | 101506075          | protein CENTRORADIALIS-like                                           |
| SNP_17449_A_35175117 | NC_021162.1    | Ca_Kabuli_Chr03 | 35175117                | TT                              | GG                 | GG               | URR                           | 101506075          | protein CENTRORADIALIS-like                                           |
| SNP_17450_A_35178761 | NC_021162.1    | Ca_Kabuli_Chr03 | 35178761                | CC                              | TT                 | TT               | INTERGENIC                    |                    |                                                                       |
| SNP_17452_A_35187188 | NC_021162.1    | Ca_Kabuli_Chr03 | 35187188                | CC                              | TT                 | TT               | DRR                           | 101507167          | F-box/LRR-repeat protein At1g67190-like                               |
| SNP_17453_A_35190531 | NC_021162.1    | Ca_Kabuli_Chr03 | 35190531                | CC                              | GG                 | GG               | URR                           | 101507167          | F-box/LRR-repeat protein At1g67190-like                               |
| SNP_17454_A_35190912 | NC_021162.1    | Ca_Kabuli_Chr03 | 35190912                | GG                              | TT                 | TT               | URR                           | 101507167          | F-box/LRR-repeat protein At1g67190-like                               |
| SNP_17455_A_35199619 | NC_021162.1    | Ca_Kabuli_Chr03 | 35199619                | TT                              | GG                 | GG               | URR                           | 101507484          | cell division protein FtsZ homolog 2-1, chloroplastic-like            |
| SNP_17456_A_35204651 | NC_021162.1    | Ca_Kabuli_Chr03 | 35204651                | CC                              | GG                 | GG               | DRR                           | 101508117          | uncharacterized LOC101508117                                          |
| SNP_17457_A_35204674 | NC_021162.1    | Ca_Kabuli_Chr03 | 35204674                | GG                              | CC                 | CC               | DRR                           | 101508117          | uncharacterized LOC101508117                                          |
| SNP_17459_A_35204687 | NC_021162.1    | Ca_Kabuli_Chr03 | 35204687                | TT                              | GG                 | GG               | DRR                           | 101508117          | uncharacterized LOC101508117                                          |
| SNP_17460_A_35213049 | NC_021162.1    | Ca_Kabuli_Chr03 | 35213049                | TT                              | GG                 | GG               | URR                           | 101507796          | probable cytosolic iron-sulfur protein assembly protein CIAO1 homolog |
| SNP_17462_A_35213116 | NC_021162.1    | Ca_Kabuli_Chr03 | 35213116                | AA                              | GG                 | GG               | URR                           | 101507796          | probable cytosolic iron-sulfur protein assembly protein CIAO1 homolog |
| SNP_17463_A_35213717 | NC_021162.1    | Ca_Kabuli_Chr03 | 35213717                | TT                              | AA                 | AA               | URR                           | 101507796          | probable cytosolic iron-sulfur protein assembly protein CIAO1 homolog |
| SNP_17464_A_35213948 | NC_021162.1    | Ca_Kabuli_Chr03 | 35213948                | AA                              | GG                 | GG               | DRR                           | 101508529          | cytochrome b-c1 complex subunit 9                                     |
| SNP_17465_A_35214130 | NC_021162.1    | Ca_Kabuli_Chr03 | 35214130                | GG                              | AA                 | AA               | DRR                           | 101508529          | cytochrome b-c1 complex subunit 9                                     |
| SNP_17466_A_35214237 | NC_021162.1    | Ca_Kabuli_Chr03 | 35214237                | CC                              | TT                 | TT               | DRR                           | 101508529          | cytochrome b-c1 complex subunit 9                                     |
| SNP_17467_A_35214255 | NC_021162.1    | Ca_Kabuli_Chr03 | 35214255                | TT                              | GG                 | GG               | DRR                           | 101508529          | cytochrome b-c1 complex subunit 9                                     |
| SNP_17468_A_35214405 | NC_021162.1    | Ca_Kabuli_Chr03 | 35214405                | TT                              | AA                 | AA               | DRR                           | 101508529          | cytochrome b-c1 complex subunit 9                                     |
| SNP_17469_A_35214525 | NC_021162.1    | Ca_Kabuli_Chr03 | 35214525                | TT                              | AA                 | AA               | DRR                           | 101508529          | cytochrome b-c1 complex subunit 9                                     |
| SNP_17470_A_35215139 | NC_021162.1    | Ca_Kabuli_Chr03 | 35215139                | TT                              | CC                 | CC               | SYNONYMOUS_CODING             | 101508529          | cytochrome b-c1 complex subunit 9                                     |
| SNP_17472_A_35219964 | NC_021162.1    | Ca_Kabuli_Chr03 | 35219964                | TT                              | CC                 | CC               | INTERGENIC                    |                    |                                                                       |
| SNP_17473_A_35219965 | NC_021162.1    | Ca_Kabuli_Chr03 | 35219965                | CC                              | TT                 | TT               | INTERGENIC                    |                    |                                                                       |



| SNPs IDs             | Chromosome IDs | Chromosomes     | Physical positions (bp) | CDC Frontier genome (Reference genome) | (Pusa 1103 & HPNB) | (ILWC 46 & LPNB) | Sequence Components of genome | Gene accession IDs | Putative functions                                 |
|----------------------|----------------|-----------------|-------------------------|----------------------------------------|--------------------|------------------|-------------------------------|--------------------|----------------------------------------------------|
| SNP_17474_A_35220255 | NC_021162.1    | Ca_Kabuli_Chr03 | 35220255                | AA                                     | GG                 | GG               | INTERGENIC                    |                    |                                                    |
| SNP_17475_A_35225825 | NC_021162.1    | Ca_Kabuli_Chr03 | 35225825                | GG                                     | TT                 | TT               | INTRON                        | 101508842          | lysophospholipid acyltransferase LPEAT1-like       |
| SNP_17476_A_35226585 | NC_021162.1    | Ca_Kabuli_Chr03 | 35226585                | TT                                     | CC                 | CC               | INTERGENIC                    |                    |                                                    |
| SNP_17477_A_35228105 | NC_021162.1    | Ca_Kabuli_Chr03 | 35228105                | TT                                     | AA                 | AA               | INTERGENIC                    |                    |                                                    |
| SNP_17478_A_35229219 | NC_021162.1    | Ca_Kabuli_Chr03 | 35229219                | AA                                     | TT                 | TT               | URR                           | 101508842          | lysophospholipid acyltransferase LPEAT1-like       |
| SNP_17480_A_35233191 | NC_021162.1    | Ca_Kabuli_Chr03 | 35233191                | AA                                     | CC                 | CC               | INTERGENIC                    |                    |                                                    |
| SNP_17481_A_35233366 | NC_021162.1    | Ca_Kabuli_Chr03 | 35233366                | GG                                     | AA                 | AA               | DRR                           | 101510234          | glucosamine 6-phosphate N-acetyltransferase        |
| SNP_17482_A_35233458 | NC_021162.1    | Ca_Kabuli_Chr03 | 35233458                | GG                                     | AA                 | AA               | DRR                           | 101510234          | glucosamine 6-phosphate N-acetyltransferase        |
| SNP_17483_A_35233832 | NC_021162.1    | Ca_Kabuli_Chr03 | 35233832                | GG                                     | AA                 | AA               | DRR                           | 101510234          | glucosamine 6-phosphate N-acetyltransferase        |
| SNP_17484_A_35236437 | NC_021162.1    | Ca_Kabuli_Chr03 | 35236437                | TT                                     | CC                 | CC               | URR                           | 101510234          | glucosamine 6-phosphate N-acetyltransferase        |
| SNP_17485_A_35236617 | NC_021162.1    | Ca_Kabuli_Chr03 | 35236617                | CC                                     | GG                 | GG               | URR                           | 101510234          | glucosamine 6-phosphate N-acetyltransferase        |
| SNP_17486_A_35241514 | NC_021162.1    | Ca_Kabuli_Chr03 | 35241514                | TT                                     | CC                 | CC               | INTERGENIC                    |                    |                                                    |
| SNP_17487_A_35241974 | NC_021162.1    | Ca_Kabuli_Chr03 | 35241974                | CC                                     | TT                 | TT               | INTERGENIC                    |                    |                                                    |
| SNP_17489_A_35243616 | NC_021162.1    | Ca_Kabuli_Chr03 | 35243616                | AA                                     | GG                 | GG               | INTERGENIC                    |                    |                                                    |
| SNP_17490_A_35245192 | NC_021162.1    | Ca_Kabuli_Chr03 | 35245192                | AA                                     | TT                 | TT               | URR                           | 101511634          | heme-binding-like protein At3g10130, chloroplastic |
| SNP_17491_A_35245957 | NC_021162.1    | Ca_Kabuli_Chr03 | 35245957                | AA                                     | GG                 | GG               | DRR                           | 101511310          | uncharacterized LOC101511310                       |
| SNP_17492_A_35246018 | NC_021162.1    | Ca_Kabuli_Chr03 | 35246018                | TT                                     | AA                 | AA               | DRR                           | 101511310          | uncharacterized LOC101511310                       |
| SNP_17493_A_35247339 | NC_021162.1    | Ca_Kabuli_Chr03 | 35247339                | GG                                     | CC                 | CC               | URR                           | 101511310          | uncharacterized LOC101511310                       |
| SNP_17496_A_35248369 | NC_021162.1    | Ca_Kabuli_Chr03 | 35248369                | CC                                     | TT                 | TT               | URR                           | 101511310          | uncharacterized LOC101511310                       |
| SNP_17497_A_35248370 | NC_021162.1    | Ca_Kabuli_Chr03 | 35248370                | TT                                     | GG                 | GG               | URR                           | 101511310          | uncharacterized LOC101511310                       |
| SNP_17498_A_35249547 | NC_021162.1    | Ca_Kabuli_Chr03 | 35249547                | AA                                     | GG                 | GG               | INTERGENIC                    |                    |                                                    |
| SNP_17499_A_35249556 | NC_021162.1    | Ca_Kabuli_Chr03 | 35249556                | TT                                     | CC                 | CC               | INTERGENIC                    |                    |                                                    |

| SNPs IDs             | Chromosome IDs | Chromosomes     | Physical positions (bp) | CDC Frontier genome (Reference genome) | (Pusa 1103 & HPNB) | (ILWC 46 & LPNB) | Sequence Components of genome | Gene accession IDs | Putative functions                     |
|----------------------|----------------|-----------------|-------------------------|----------------------------------------|--------------------|------------------|-------------------------------|--------------------|----------------------------------------|
| SNP_17500_A_35249633 | NC_021162.1    | Ca_Kabuli_Chr03 | 35249633                | CC                                     | TT                 | TT               | INTERGENIC                    |                    |                                        |
| SNP_17501_A_35249865 | NC_021162.1    | Ca_Kabuli_Chr03 | 35249865                | GG                                     | AA                 | AA               | INTERGENIC                    |                    |                                        |
| SNP_17502_A_35250228 | NC_021162.1    | Ca_Kabuli_Chr03 | 35250228                | AA                                     | TT                 | TT               | INTERGENIC                    |                    |                                        |
| SNP_17503_A_35250233 | NC_021162.1    | Ca_Kabuli_Chr03 | 35250233                | GG                                     | AA                 | AA               | INTERGENIC                    |                    |                                        |
| SNP_17504_A_35252786 | NC_021162.1    | Ca_Kabuli_Chr03 | 35252786                | TT                                     | CC                 | CC               | INTERGENIC                    |                    |                                        |
| SNP_17505_A_35255056 | NC_021162.1    | Ca_Kabuli_Chr03 | 35255056                | AA                                     | TT                 | TT               | INTERGENIC                    |                    |                                        |
| SNP_17506_A_35256914 | NC_021162.1    | Ca_Kabuli_Chr03 | 35256914                | TT                                     | CC                 | CC               | INTERGENIC                    |                    |                                        |
| SNP_17507_A_35257239 | NC_021162.1    | Ca_Kabuli_Chr03 | 35257239                | GG                                     | AA                 | AA               | INTERGENIC                    |                    |                                        |
| SNP_17508_A_35260770 | NC_021162.1    | Ca_Kabuli_Chr03 | 35260770                | AA                                     | CC                 | CC               | URR                           | 101512167          | uncharacterized protein At5g39865      |
| SNP_17510_A_35261425 | NC_021162.1    | Ca_Kabuli_Chr03 | 35261425                | TT                                     | CC                 | CC               | URR                           | 101512167          | uncharacterized protein At5g39865      |
| SNP_17511_A_35261783 | NC_021162.1    | Ca_Kabuli_Chr03 | 35261783                | CC                                     | TT                 | TT               | URR                           | 101512167          | uncharacterized protein At5g39865      |
| SNP_17513_A_35261854 | NC_021162.1    | Ca_Kabuli_Chr03 | 35261854                | TT                                     | GG                 | GG               | URR                           | 101512167          | uncharacterized protein At5g39865      |
| SNP_17514_A_35265162 | NC_021162.1    | Ca_Kabuli_Chr03 | 35265162                | TT                                     | CC                 | CC               | INTERGENIC                    |                    |                                        |
| SNP_17515_A_35265181 | NC_021162.1    | Ca_Kabuli_Chr03 | 35265181                | AA                                     | CC                 | CC               | INTERGENIC                    |                    |                                        |
| SNP_17517_A_35266486 | NC_021162.1    | Ca_Kabuli_Chr03 | 35266486                | CC                                     | TT                 | TT               | INTERGENIC                    |                    |                                        |
| SNP_17518_A_35267165 | NC_021162.1    | Ca_Kabuli_Chr03 | 35267165                | CC                                     | TT                 | TT               | INTERGENIC                    |                    |                                        |
| SNP_17519_A_35267279 | NC_021162.1    | Ca_Kabuli_Chr03 | 35267279                | AA                                     | GG                 | GG               | INTERGENIC                    |                    |                                        |
| SNP_17520_A_35267523 | NC_021162.1    | Ca_Kabuli_Chr03 | 35267523                | AA                                     | GG                 | GG               | INTERGENIC                    |                    |                                        |
| SNP_17522_A_35286227 | NC_021162.1    | Ca_Kabuli_Chr03 | 35286227                | CC                                     | TT                 | TT               | INTERGENIC                    |                    |                                        |
| SNP_17523_A_35286242 | NC_021162.1    | Ca_Kabuli_Chr03 | 35286242                | CC                                     | TT                 | TT               | INTERGENIC                    |                    |                                        |
| SNP_17524_A_35286250 | NC_021162.1    | Ca_Kabuli_Chr03 | 35286250                | AA                                     | GG                 | GG               | INTERGENIC                    |                    |                                        |
| SNP_17525_A_35286474 | NC_021162.1    | Ca_Kabuli_Chr03 | 35286474                | AA                                     | TT                 | TT               | DRR                           | 101513581          | replication protein A 14 kDa subunit B |

| SNPs IDs             | Chromosome IDs | Chromosomes     | Physical positions (bp) | CDC Frontier (Reference genome) | (Pusa 1103 & HPNB) | (ILWC 46 & LPNB) | Sequence Components of genome | Gene accession IDs | Putative functions                                        |
|----------------------|----------------|-----------------|-------------------------|---------------------------------|--------------------|------------------|-------------------------------|--------------------|-----------------------------------------------------------|
| SNP_17526_A_35289150 | NC_021162.1    | Ca_Kabuli_Chr03 | 35289150                | CC                              | TT                 | TT               | DRR                           | 101515087          | signal recognition particle 54 kDa protein, chloroplastic |
| SNP_17527_A_35290669 | NC_021162.1    | Ca_Kabuli_Chr03 | 35290669                | GG                              | TT                 | TT               | URR                           | 101513581          | replication protein A 14 kDa subunit B                    |
| SNP_17528_A_35290986 | NC_021162.1    | Ca_Kabuli_Chr03 | 35290986                | GG                              | AA                 | AA               | INTRON                        | 101515087          | signal recognition particle 54 kDa protein, chloroplastic |
| SNP_17530_A_35294594 | NC_021162.1    | Ca_Kabuli_Chr03 | 35294594                | AA                              | CC                 | CC               | INTERGENIC                    |                    |                                                           |
| SNP_17531_A_35294687 | NC_021162.1    | Ca_Kabuli_Chr03 | 35294687                | TT                              | CC                 | CC               | INTERGENIC                    |                    |                                                           |
| SNP_17532_A_35298939 | NC_021162.1    | Ca_Kabuli_Chr03 | 35298939                | GG                              | AA                 | AA               | INTRON                        | 101515411          | rho GTPase-activating protein 5                           |
| SNP_17535_A_35301374 | NC_021162.1    | Ca_Kabuli_Chr03 | 35301374                | TT                              | CC                 | CC               | URR                           | 101515411          | rho GTPase-activating protein 5                           |
| SNP_17536_A_35301377 | NC_021162.1    | Ca_Kabuli_Chr03 | 35301377                | GG                              | CC                 | CC               | URR                           | 101515411          | rho GTPase-activating protein 5                           |
| SNP_17537_A_35301379 | NC_021162.1    | Ca_Kabuli_Chr03 | 35301379                | GG                              | AA                 | AA               | URR                           | 101515411          | rho GTPase-activating protein 5                           |
| SNP_17538_A_35301980 | NC_021162.1    | Ca_Kabuli_Chr03 | 35301980                | CC                              | AA                 | AA               | URR                           | 101515411          | rho GTPase-activating protein 5                           |
| SNP_17541_A_35303471 | NC_021162.1    | Ca_Kabuli_Chr03 | 35303471                | CC                              | AA                 | AA               | INTERGENIC                    |                    |                                                           |
| SNP_17542_A_35303608 | NC_021162.1    | Ca_Kabuli_Chr03 | 35303608                | GG                              | CC                 | CC               | INTERGENIC                    |                    |                                                           |
| SNP_17543_A_35304414 | NC_021162.1    | Ca_Kabuli_Chr03 | 35304414                | AA                              | TT                 | TT               | INTERGENIC                    |                    |                                                           |
| SNP_17544_A_35304561 | NC_021162.1    | Ca_Kabuli_Chr03 | 35304561                | TT                              | CC                 | CC               | INTERGENIC                    |                    |                                                           |
| SNP_17545_A_35304596 | NC_021162.1    | Ca_Kabuli_Chr03 | 35304596                | CC                              | TT                 | TT               | INTERGENIC                    |                    |                                                           |
| SNP_17546_A_35305100 | NC_021162.1    | Ca_Kabuli_Chr03 | 35305100                | GG                              | AA                 | AA               | INTERGENIC                    |                    |                                                           |
| SNP_17547_A_35306378 | NC_021162.1    | Ca_Kabuli_Chr03 | 35306378                | CC                              | GG                 | GG               | DRR                           | 101515746          | probable small nuclear ribonucleoprotein G                |
| SNP_17548_A_35306661 | NC_021162.1    | Ca_Kabuli_Chr03 | 35306661                | TT                              | CC                 | CC               | DRR                           | 101515746          | probable small nuclear ribonucleoprotein G                |
| SNP_17549_A_35306663 | NC_021162.1    | Ca_Kabuli_Chr03 | 35306663                | AA                              | GG                 | GG               | DRR                           | 101515746          | probable small nuclear ribonucleoprotein G                |
| SNP_17551_A_35307551 | NC_021162.1    | Ca_Kabuli_Chr03 | 35307551                | TT                              | CC                 | CC               | INTRON                        | 101515746          | probable small nuclear ribonucleoprotein G                |
| SNP_17552_A_35307553 | NC_021162.1    | Ca_Kabuli_Chr03 | 35307553                | AA                              | GG                 | GG               | INTRON                        | 101515746          | probable small nuclear ribonucleoprotein G                |
| SNP_17554_A_35310935 | NC_021162.1    | Ca_Kabuli_Chr03 | 35310935                | AA                              | TT                 | TT               | INTERGENIC                    |                    |                                                           |

| SNPs IDs             | Chromosome IDs | Chromosomes     | Physical positions (bp) | CDC Frontier genome (Reference genome) | (Pusa 1103 & HPNB) | (ILWC 46 & LPNB) | Sequence Components of genome | Gene accession IDs | Putative functions                        |
|----------------------|----------------|-----------------|-------------------------|----------------------------------------|--------------------|------------------|-------------------------------|--------------------|-------------------------------------------|
| SNP_17555_A_35312564 | NC_021162.1    | Ca_Kabuli_Chr03 | 35312564                | GG                                     | AA                 | AA               | INTERGENIC                    |                    |                                           |
| SNP_17556_A_35312835 | NC_021162.1    | Ca_Kabuli_Chr03 | 35312835                | GG                                     | CC                 | CC               | INTERGENIC                    |                    |                                           |
| SNP_17557_A_35312857 | NC_021162.1    | Ca_Kabuli_Chr03 | 35312857                | GG                                     | AA                 | AA               | INTERGENIC                    |                    |                                           |
| SNP_17558_A_35312861 | NC_021162.1    | Ca_Kabuli_Chr03 | 35312861                | CC                                     | TT                 | TT               | INTERGENIC                    |                    |                                           |
| SNP_17559_A_35314275 | NC_021162.1    | Ca_Kabuli_Chr03 | 35314275                | TT                                     | CC                 | CC               | URR                           | 101488509          | indole-3-acetic acid-induced protein ARG7 |
| SNP_17560_A_35314277 | NC_021162.1    | Ca_Kabuli_Chr03 | 35314277                | CC                                     | AA                 | AA               | URR                           | 101488509          | indole-3-acetic acid-induced protein ARG7 |
| SNP_17561_A_35314288 | NC_021162.1    | Ca_Kabuli_Chr03 | 35314288                | AA                                     | GG                 | GG               | URR                           | 101488509          | indole-3-acetic acid-induced protein ARG7 |
| SNP_17562_A_35316765 | NC_021162.1    | Ca_Kabuli_Chr03 | 35316765                | TT                                     | CC                 | CC               | INTERGENIC                    |                    |                                           |
| SNP_17563_A_35316833 | NC_021162.1    | Ca_Kabuli_Chr03 | 35316833                | TT                                     | CC                 | CC               | INTERGENIC                    |                    |                                           |
| SNP_17564_A_35316869 | NC_021162.1    | Ca_Kabuli_Chr03 | 35316869                | AA                                     | GG                 | GG               | INTERGENIC                    |                    |                                           |
| SNP_17565_A_35316909 | NC_021162.1    | Ca_Kabuli_Chr03 | 35316909                | TT                                     | CC                 | CC               | INTERGENIC                    |                    |                                           |
| SNP_17566_A_35316950 | NC_021162.1    | Ca_Kabuli_Chr03 | 35316950                | CC                                     | AA                 | AA               | INTERGENIC                    |                    |                                           |
| SNP_17567_A_35316960 | NC_021162.1    | Ca_Kabuli_Chr03 | 35316960                | GG                                     | AA                 | AA               | INTERGENIC                    |                    |                                           |
| SNP_17568_A_35317043 | NC_021162.1    | Ca_Kabuli_Chr03 | 35317043                | GG                                     | CC                 | CC               | INTERGENIC                    |                    |                                           |
| SNP_17569_A_35317050 | NC_021162.1    | Ca_Kabuli_Chr03 | 35317050                | GG                                     | AA                 | AA               | INTERGENIC                    |                    |                                           |
| SNP_17570_A_35317104 | NC_021162.1    | Ca_Kabuli_Chr03 | 35317104                | TT                                     | CC                 | CC               | INTERGENIC                    |                    |                                           |
| SNP_17571_A_35317296 | NC_021162.1    | Ca_Kabuli_Chr03 | 35317296                | GG                                     | TT                 | TT               | INTERGENIC                    |                    |                                           |
| SNP_17573_A_35320392 | NC_021162.1    | Ca_Kabuli_Chr03 | 35320392                | AA                                     | GG                 | GG               | URR                           | 101488848          | uncharacterized LOC101488848              |
| SNP_17574_A_35320402 | NC_021162.1    | Ca_Kabuli_Chr03 | 35320402                | AA                                     | GG                 | GG               | URR                           | 101488848          | uncharacterized LOC101488848              |
| SNP_17575_A_35320403 | NC_021162.1    | Ca_Kabuli_Chr03 | 35320403                | TT                                     | CC                 | CC               | URR                           | 101488848          | uncharacterized LOC101488848              |
| SNP_17576_A_35323226 | NC_021162.1    | Ca_Kabuli_Chr03 | 35323226                | TT                                     | GG                 | GG               | INTERGENIC                    |                    |                                           |
| SNP_17577_A_35323249 | NC_021162.1    | Ca_Kabuli_Chr03 | 35323249                | TT                                     | CC                 | CC               | INTERGENIC                    |                    |                                           |

| SNPs IDs             | Chromosome IDs | Chromosomes     | Physical positions (bp) | CDC Frontier genome (Reference genome) | (Pusa 1103 & HPNB) | (ILWC 46 & LPNB) | Sequence Components of genome | Gene accession IDs | Putative functions                                  |
|----------------------|----------------|-----------------|-------------------------|----------------------------------------|--------------------|------------------|-------------------------------|--------------------|-----------------------------------------------------|
| SNP_17578_A_35323275 | NC_021162.1    | Ca_Kabuli_Chr03 | 35323275                | CC                                     | TT                 | TT               | INTERGENIC                    |                    |                                                     |
| SNP_17579_A_35323281 | NC_021162.1    | Ca_Kabuli_Chr03 | 35323281                | GG                                     | AA                 | AA               | INTERGENIC                    |                    |                                                     |
| SNP_17580_A_35323562 | NC_021162.1    | Ca_Kabuli_Chr03 | 35323562                | GG                                     | AA                 | AA               | INTERGENIC                    |                    |                                                     |
| SNP_17581_A_35324320 | NC_021162.1    | Ca_Kabuli_Chr03 | 35324320                | GG                                     | AA                 | AA               | INTERGENIC                    |                    |                                                     |
| SNP_17583_A_35329961 | NC_021162.1    | Ca_Kabuli_Chr03 | 35329961                | CC                                     | TT                 | TT               | INTRON                        | 101489170          | 125 kDa kinesin-related protein                     |
| SNP_17584_A_35330012 | NC_021162.1    | Ca_Kabuli_Chr03 | 35330012                | GG                                     | AA                 | AA               | NON_SYNONYMOUS_CODING         | 101489170          | 125 kDa kinesin-related protein                     |
| SNP_17585_A_35333800 | NC_021162.1    | Ca_Kabuli_Chr03 | 35333800                | CC                                     | TT                 | TT               | DRR                           | 101489501          | beta-fructofuranosidase, insoluble isoenzyme 1-like |
| SNP_17586_A_35334908 | NC_021162.1    | Ca_Kabuli_Chr03 | 35334908                | AA                                     | GG                 | GG               | URR                           | 101489170          | 125 kDa kinesin-related protein                     |
| SNP_17587_A_35334917 | NC_021162.1    | Ca_Kabuli_Chr03 | 35334917                | AA                                     | TT                 | TT               | URR                           | 101489170          | 125 kDa kinesin-related protein                     |
| SNP_17588_A_35336784 | NC_021162.1    | Ca_Kabuli_Chr03 | 35336784                | TT                                     | CC                 | CC               | INTERGENIC                    |                    |                                                     |
| SNP_17589_A_35336793 | NC_021162.1    | Ca_Kabuli_Chr03 | 35336793                | TT                                     | CC                 | CC               | INTERGENIC                    |                    |                                                     |
| SNP_17590_A_35336796 | NC_021162.1    | Ca_Kabuli_Chr03 | 35336796                | TT                                     | AA                 | AA               | INTERGENIC                    |                    |                                                     |
| SNP_17592_A_35337016 | NC_021162.1    | Ca_Kabuli_Chr03 | 35337016                | TT                                     | AA                 | AA               | INTERGENIC                    |                    |                                                     |
| SNP_17593_A_35339549 | NC_021162.1    | Ca_Kabuli_Chr03 | 35339549                | TT                                     | AA                 | AA               | INTRON                        | 101489501          | beta-fructofuranosidase, insoluble isoenzyme 1-like |
| SNP_17594_A_35340979 | NC_021162.1    | Ca_Kabuli_Chr03 | 35340979                | AA                                     | GG                 | GG               | URR                           | 101489501          | beta-fructofuranosidase, insoluble isoenzyme 1-like |
| SNP_17595_A_35343151 | NC_021162.1    | Ca_Kabuli_Chr03 | 35343151                | CC                                     | TT                 | TT               | INTERGENIC                    |                    |                                                     |
| SNP_17596_A_35349650 | NC_021162.1    | Ca_Kabuli_Chr03 | 35349650                | AA                                     | TT                 | TT               | DRR                           | 101490142          | ubiquitin-60S ribosomal protein L40                 |
| SNP_17597_A_35350337 | NC_021162.1    | Ca_Kabuli_Chr03 | 35350337                | AA                                     | TT                 | TT               | INTERGENIC                    |                    |                                                     |
| SNP_17598_A_35350342 | NC_021162.1    | Ca_Kabuli_Chr03 | 35350342                | CC                                     | AA                 | AA               | INTERGENIC                    |                    |                                                     |
| SNP_17599_A_35350354 | NC_021162.1    | Ca_Kabuli_Chr03 | 35350354                | AA                                     | CC                 | CC               | INTERGENIC                    |                    |                                                     |
| SNP_17600_A_35350356 | NC_021162.1    | Ca_Kabuli_Chr03 | 35350356                | GG                                     | CC                 | CC               | INTERGENIC                    |                    |                                                     |
| SNP_17601_A_35350388 | NC_021162.1    | Ca_Kabuli_Chr03 | 35350388                | AA                                     | CC                 | CC               | INTERGENIC                    |                    |                                                     |

| SNPs IDs             | Chromosome IDs | Chromosomes     | Physical positions (bp) | CDC Frontier genome (Reference genome) | (Pusa 1103 & HPNB) | (ILWC 46 & LPNB) | Sequence Components of genome | Gene accession IDs | Putative functions                                |
|----------------------|----------------|-----------------|-------------------------|----------------------------------------|--------------------|------------------|-------------------------------|--------------------|---------------------------------------------------|
| SNP_17602_A_35350400 | NC_021162.1    | Ca_Kabuli_Chr03 | 35350400                | AA                                     | TT                 | TT               | INTERGENIC                    |                    |                                                   |
| SNP_17603_A_35350403 | NC_021162.1    | Ca_Kabuli_Chr03 | 35350403                | CC                                     | AA                 | AA               | INTERGENIC                    |                    |                                                   |
| SNP_17604_A_35350462 | NC_021162.1    | Ca_Kabuli_Chr03 | 35350462                | TT                                     | CC                 | CC               | INTERGENIC                    |                    |                                                   |
| SNP_17605_A_35350755 | NC_021162.1    | Ca_Kabuli_Chr03 | 35350755                | CC                                     | AA                 | AA               | INTERGENIC                    |                    |                                                   |
| SNP_17606_A_35351036 | NC_021162.1    | Ca_Kabuli_Chr03 | 35351036                | AA                                     | GG                 | GG               | INTERGENIC                    |                    |                                                   |
| SNP_17607_A_35351044 | NC_021162.1    | Ca_Kabuli_Chr03 | 35351044                | CC                                     | AA                 | AA               | INTERGENIC                    |                    |                                                   |
| SNP_17608_A_35351060 | NC_021162.1    | Ca_Kabuli_Chr03 | 35351060                | CC                                     | TT                 | TT               | INTERGENIC                    |                    |                                                   |
| SNP_17609_A_35351064 | NC_021162.1    | Ca_Kabuli_Chr03 | 35351064                | CC                                     | GG                 | GG               | INTERGENIC                    |                    |                                                   |
| SNP_17610_A_35357975 | NC_021162.1    | Ca_Kabuli_Chr03 | 35357975                | CC                                     | TT                 | TT               | URR                           | 101490465          | alpha/beta hydrolase domain-containing protein 11 |
| SNP_17611_A_35358393 | NC_021162.1    | Ca_Kabuli_Chr03 | 35358393                | CC                                     | TT                 | TT               | URR                           | 101490465          | alpha/beta hydrolase domain-containing protein 11 |
| SNP_17612_A_35358581 | NC_021162.1    | Ca_Kabuli_Chr03 | 35358581                | AA                                     | TT                 | TT               | URR                           | 101490465          | alpha/beta hydrolase domain-containing protein 11 |
| SNP_17613_A_35358582 | NC_021162.1    | Ca_Kabuli_Chr03 | 35358582                | TT                                     | AA                 | AA               | URR                           | 101490465          | alpha/beta hydrolase domain-containing protein 11 |
| SNP_17614_A_35358585 | NC_021162.1    | Ca_Kabuli_Chr03 | 35358585                | AA                                     | TT                 | TT               | URR                           | 101490465          | alpha/beta hydrolase domain-containing protein 11 |
| SNP_17616_A_35361456 | NC_021162.1    | Ca_Kabuli_Chr03 | 35361456                | GG                                     | TT                 | TT               | INTERGENIC                    |                    |                                                   |
| SNP_17618_A_35362339 | NC_021162.1    | Ca_Kabuli_Chr03 | 35362339                | AA                                     | GG                 | GG               | INTERGENIC                    |                    |                                                   |
| SNP_17619_A_35362970 | NC_021162.1    | Ca_Kabuli_Chr03 | 35362970                | CC                                     | AA                 | AA               | DRR                           | 101490790          | uncharacterized LOC101490790                      |
| SNP_17620_A_35363242 | NC_021162.1    | Ca_Kabuli_Chr03 | 35363242                | TT                                     | CC                 | CC               | DRR                           | 101490790          | uncharacterized LOC101490790                      |
| SNP_17621_A_35363302 | NC_021162.1    | Ca_Kabuli_Chr03 | 35363302                | AA                                     | GG                 | GG               | DRR                           | 101490790          | uncharacterized LOC101490790                      |
| SNP_17622_A_35363308 | NC_021162.1    | Ca_Kabuli_Chr03 | 35363308                | TT                                     | CC                 | CC               | DRR                           | 101490790          | uncharacterized LOC101490790                      |
| SNP_17623_A_35363309 | NC_021162.1    | Ca_Kabuli_Chr03 | 35363309                | TT                                     | CC                 | CC               | DRR                           | 101490790          | uncharacterized LOC101490790                      |
| SNP_17624_A_35363327 | NC_021162.1    | Ca_Kabuli_Chr03 | 35363327                | CC                                     | TT                 | TT               | DRR                           | 101490790          | uncharacterized LOC101490790                      |
| SNP_17625_A_35363346 | NC_021162.1    | Ca_Kabuli_Chr03 | 35363346                | CC                                     | TT                 | TT               | DRR                           | 101490790          | uncharacterized LOC101490790                      |

| SNPs IDs             | Chromosome IDs | Chromosomes     | Physical positions (bp) | CDC Frontier genome (Reference genome) | (Pusa 1103 & HPNB) | (ILWC 46 & LPNB) | Sequence genome | Components of | Gene accession IDs | Putative functions                                     |
|----------------------|----------------|-----------------|-------------------------|----------------------------------------|--------------------|------------------|-----------------|---------------|--------------------|--------------------------------------------------------|
| SNP_17627_A_35367107 | NC_021162.1    | Ca_Kabuli_Chr03 | 35367107                | TT                                     | AA                 | AA               | INTERGENIC      |               |                    |                                                        |
| SNP_17628_A_35367139 | NC_021162.1    | Ca_Kabuli_Chr03 | 35367139                | TT                                     | CC                 | CC               | INTERGENIC      |               |                    |                                                        |
| SNP_17629_A_35367153 | NC_021162.1    | Ca_Kabuli_Chr03 | 35367153                | GG                                     | AA                 | AA               | INTERGENIC      |               |                    |                                                        |
| SNP_17630_A_35367154 | NC_021162.1    | Ca_Kabuli_Chr03 | 35367154                | CC                                     | TT                 | TT               | INTERGENIC      |               |                    |                                                        |
| SNP_17631_A_35367604 | NC_021162.1    | Ca_Kabuli_Chr03 | 35367604                | TT                                     | CC                 | CC               | INTERGENIC      |               |                    |                                                        |
| SNP_17632_A_35367613 | NC_021162.1    | Ca_Kabuli_Chr03 | 35367613                | CC                                     | TT                 | TT               | INTERGENIC      |               |                    |                                                        |
| SNP_17633_A_35367996 | NC_021162.1    | Ca_Kabuli_Chr03 | 35367996                | AA                                     | GG                 | GG               | INTERGENIC      |               |                    |                                                        |
| SNP_17634_A_35368016 | NC_021162.1    | Ca_Kabuli_Chr03 | 35368016                | GG                                     | TT                 | TT               | INTERGENIC      |               |                    |                                                        |
| SNP_17635_A_35368338 | NC_021162.1    | Ca_Kabuli_Chr03 | 35368338                | AA                                     | GG                 | GG               | INTERGENIC      |               |                    |                                                        |
| SNP_17637_A_35368793 | NC_021162.1    | Ca_Kabuli_Chr03 | 35368793                | TT                                     | GG                 | GG               | INTERGENIC      |               |                    |                                                        |
| SNP_17638_A_35368994 | NC_021162.1    | Ca_Kabuli_Chr03 | 35368994                | GG                                     | AA                 | AA               | INTERGENIC      |               |                    |                                                        |
| SNP_17640_A_35370998 | NC_021162.1    | Ca_Kabuli_Chr03 | 35370998                | TT                                     | CC                 | CC               | INTERGENIC      |               |                    |                                                        |
| SNP_17641_A_35374917 | NC_021162.1    | Ca_Kabuli_Chr03 | 35374917                | TT                                     | AA                 | AA               | URR             |               | 101491116          | NAC domain-containing protein 90-like                  |
| SNP_17642_A_35375042 | NC_021162.1    | Ca_Kabuli_Chr03 | 35375042                | AA                                     | GG                 | GG               | URR             |               | 101491116          | NAC domain-containing protein 90-like                  |
| SNP_17643_A_35375051 | NC_021162.1    | Ca_Kabuli_Chr03 | 35375051                | GG                                     | AA                 | AA               | URR             |               | 101491116          | NAC domain-containing protein 90-like                  |
| SNP_17644_A_35375052 | NC_021162.1    | Ca_Kabuli_Chr03 | 35375052                | AA                                     | CC                 | CC               | URR             |               | 101491116          | NAC domain-containing protein 90-like                  |
| SNP_17645_A_35375352 | NC_021162.1    | Ca_Kabuli_Chr03 | 35375352                | GG                                     | AA                 | AA               | URR             |               | 101491116          | NAC domain-containing protein 90-like                  |
| SNP_17646_A_35375354 | NC_021162.1    | Ca_Kabuli_Chr03 | 35375354                | GG                                     | AA                 | AA               | URR             |               | 101491116          | NAC domain-containing protein 90-like                  |
| SNP_17647_A_35379903 | NC_021162.1    | Ca_Kabuli_Chr03 | 35379903                | CC                                     | GG                 | GG               | INTERGENIC      |               |                    |                                                        |
| SNP_17648_A_35379937 | NC_021162.1    | Ca_Kabuli_Chr03 | 35379937                | TT                                     | AA                 | AA               | INTERGENIC      |               |                    |                                                        |
| SNP_17649_A_35382189 | NC_021162.1    | Ca_Kabuli_Chr03 | 35382189                | GG                                     | AA                 | AA               | DRR             |               | 101491430          | vacuolar protein sorting-associated protein 55 homolog |
| SNP_17650_A_35382524 | NC_021162.1    | Ca_Kabuli_Chr03 | 35382524                | AA                                     | CC                 | CC               | DRR             |               | 101491430          | vacuolar protein sorting-associated protein 55 homolog |

| SNPs IDs             | Chromosome IDs | Chromosomes     | Physical positions (bp) | CDC Frontier genome (Reference genome) | (Pusa 1103 & HPNB) | (ILWC 46 & LPNB) | Sequence Components of genome | Gene accession IDs | Putative functions                          |
|----------------------|----------------|-----------------|-------------------------|----------------------------------------|--------------------|------------------|-------------------------------|--------------------|---------------------------------------------|
| SNP_17651_A_35389679 | NC_021162.1    | Ca_Kabuli_Chr03 | 35389679                | GG                                     | AA                 | AA               | INTRON                        | 101492291          | peptidyl-prolyl cis-trans isomerase CYP18-2 |
| SNP_17652_A_35390302 | NC_021162.1    | Ca_Kabuli_Chr03 | 35390302                | GG                                     | AA                 | AA               | DRR                           | 101491958          | mitochondrial fission protein ELM1          |
| SNP_17653_A_35390550 | NC_021162.1    | Ca_Kabuli_Chr03 | 35390550                | CC                                     | TT                 | TT               | DRR                           | 101491958          | mitochondrial fission protein ELM1          |
| SNP_17655_A_35391902 | NC_021162.1    | Ca_Kabuli_Chr03 | 35391902                | CC                                     | AA                 | AA               | URR                           | 101492291          | peptidyl-prolyl cis-trans isomerase CYP18-2 |
| SNP_17657_A_35393574 | NC_021162.1    | Ca_Kabuli_Chr03 | 35393574                | CC                                     | GG                 | GG               | INTRON                        | 101491958          | mitochondrial fission protein ELM1          |
| SNP_17658_A_35393575 | NC_021162.1    | Ca_Kabuli_Chr03 | 35393575                | GG                                     | TT                 | TT               | INTRON                        | 101491958          | mitochondrial fission protein ELM1          |
| SNP_17660_A_35395961 | NC_021162.1    | Ca_Kabuli_Chr03 | 35395961                | GG                                     | AA                 | AA               | DRR                           | 101492629          | mRNA-decapping enzyme-like protein          |
| SNP_17661_A_35395969 | NC_021162.1    | Ca_Kabuli_Chr03 | 35395969                | CC                                     | AA                 | AA               | DRR                           | 101492629          | mRNA-decapping enzyme-like protein          |
| SNP_17662_A_35395973 | NC_021162.1    | Ca_Kabuli_Chr03 | 35395973                | AA                                     | TT                 | TT               | DRR                           | 101492629          | mRNA-decapping enzyme-like protein          |
| SNP_17664_A_35396060 | NC_021162.1    | Ca_Kabuli_Chr03 | 35396060                | TT                                     | CC                 | CC               | DRR                           | 101492629          | mRNA-decapping enzyme-like protein          |
| SNP_17665_A_35396649 | NC_021162.1    | Ca_Kabuli_Chr03 | 35396649                | TT                                     | CC                 | CC               | URR                           | 101491958          | mitochondrial fission protein ELM1          |
| SNP_17667_A_35398736 | NC_021162.1    | Ca_Kabuli_Chr03 | 35398736                | GG                                     | AA                 | AA               | INTERGENIC                    |                    |                                             |
| SNP_17668_A_35399422 | NC_021162.1    | Ca_Kabuli_Chr03 | 35399422                | AA                                     | CC                 | CC               | INTERGENIC                    |                    |                                             |
| SNP_17670_A_35409681 | NC_021162.1    | Ca_Kabuli_Chr03 | 35409681                | GG                                     | AA                 | AA               | URR                           | 101514556          | probable F-box protein At1g60180            |
| SNP_17671_A_35409731 | NC_021162.1    | Ca_Kabuli_Chr03 | 35409731                | TT                                     | AA                 | AA               | URR                           | 101514556          | probable F-box protein At1g60180            |
| SNP_17672_A_35409752 | NC_021162.1    | Ca_Kabuli_Chr03 | 35409752                | GG                                     | AA                 | AA               | URR                           | 101514556          | probable F-box protein At1g60180            |
| SNP_17673_A_35409764 | NC_021162.1    | Ca_Kabuli_Chr03 | 35409764                | TT                                     | CC                 | CC               | URR                           | 101514556          | probable F-box protein At1g60180            |
| SNP_17674_A_35409826 | NC_021162.1    | Ca_Kabuli_Chr03 | 35409826                | TT                                     | GG                 | GG               | URR                           | 101514556          | probable F-box protein At1g60180            |
| SNP_17675_A_35414923 | NC_021162.1    | Ca_Kabuli_Chr03 | 35414923                | CC                                     | TT                 | TT               | SYNONYMOUS_CODING             | 101493500          | uncharacterized LOC101493500                |
| SNP_17676_A_35421345 | NC_021162.1    | Ca_Kabuli_Chr03 | 35421345                | GG                                     | AA                 | AA               | INTRON                        | 101493500          | uncharacterized LOC101493500                |
| SNP_17677_A_35423600 | NC_021162.1    | Ca_Kabuli_Chr03 | 35423600                | GG                                     | TT                 | TT               | DRR                           | 101494041          | uncharacterized LOC101494041                |
| SNP_17678_A_35423605 | NC_021162.1    | Ca_Kabuli_Chr03 | 35423605                | GG                                     | AA                 | AA               | DRR                           | 101494041          | uncharacterized LOC101494041                |



| SNPs IDs             | Chromosome IDs | Chromosomes     | Physical positions (bp) | CDC Frontier genome (Reference genome) | (Pusa 1103 & HPNB) | (ILWC 46 & LPNB) | Sequence Components of genome | Gene accession IDs | Putative functions                          |
|----------------------|----------------|-----------------|-------------------------|----------------------------------------|--------------------|------------------|-------------------------------|--------------------|---------------------------------------------|
| SNP_17679_A_35425433 | NC_021162.1    | Ca_Kabuli_Chr03 | 35425433                | CC                                     | TT                 | TT               | INTERGENIC                    |                    |                                             |
| SNP_17680_A_35426481 | NC_021162.1    | Ca_Kabuli_Chr03 | 35426481                | TT                                     | CC                 | CC               | INTERGENIC                    |                    |                                             |
| SNP_17681_A_35426514 | NC_021162.1    | Ca_Kabuli_Chr03 | 35426514                | GG                                     | TT                 | TT               | INTERGENIC                    |                    |                                             |
| SNP_17683_A_35436696 | NC_021162.1    | Ca_Kabuli_Chr03 | 35436696                | TT                                     | AA                 | AA               | URR                           | 101494766          | B3 domain-containing protein At2g36080-like |
| SNP_17684_A_35438797 | NC_021162.1    | Ca_Kabuli_Chr03 | 35438797                | GG                                     | AA                 | AA               | INTERGENIC                    |                    |                                             |
| SNP_17685_A_35438806 | NC_021162.1    | Ca_Kabuli_Chr03 | 35438806                | GG                                     | TT                 | TT               | INTERGENIC                    |                    |                                             |
| SNP_17687_A_35440262 | NC_021162.1    | Ca_Kabuli_Chr03 | 35440262                | TT                                     | AA                 | AA               | INTERGENIC                    |                    |                                             |
| SNP_17688_A_35441289 | NC_021162.1    | Ca_Kabuli_Chr03 | 35441289                | TT                                     | CC                 | CC               | INTERGENIC                    |                    |                                             |
| SNP_17689_A_35441368 | NC_021162.1    | Ca_Kabuli_Chr03 | 35441368                | CC                                     | TT                 | TT               | INTERGENIC                    |                    |                                             |
| SNP_17690_A_35443470 | NC_021162.1    | Ca_Kabuli_Chr03 | 35443470                | AA                                     | GG                 | GG               | INTERGENIC                    |                    |                                             |
| SNP_17691_A_35444737 | NC_021162.1    | Ca_Kabuli_Chr03 | 35444737                | CC                                     | TT                 | TT               | INTERGENIC                    |                    |                                             |
| SNP_17692_A_35445699 | NC_021162.1    | Ca_Kabuli_Chr03 | 35445699                | TT                                     | GG                 | GG               | INTERGENIC                    |                    |                                             |
| SNP_17693_A_35446104 | NC_021162.1    | Ca_Kabuli_Chr03 | 35446104                | TT                                     | CC                 | CC               | INTERGENIC                    |                    |                                             |
| SNP_17694_A_35446107 | NC_021162.1    | Ca_Kabuli_Chr03 | 35446107                | TT                                     | GG                 | GG               | INTERGENIC                    |                    |                                             |
| SNP_17695_A_35446588 | NC_021162.1    | Ca_Kabuli_Chr03 | 35446588                | CC                                     | TT                 | TT               | DRR                           | 101495097          | lysosomal Pro-X carboxypeptidase-like       |
| SNP_17696_A_35446606 | NC_021162.1    | Ca_Kabuli_Chr03 | 35446606                | GG                                     | AA                 | AA               | DRR                           | 101495097          | lysosomal Pro-X carboxypeptidase-like       |
| SNP_17697_A_35451549 | NC_021162.1    | Ca_Kabuli_Chr03 | 35451549                | TT                                     | GG                 | GG               | URR                           | 101495097          | lysosomal Pro-X carboxypeptidase-like       |
| SNP_17698_A_35452390 | NC_021162.1    | Ca_Kabuli_Chr03 | 35452390                | CC                                     | TT                 | TT               | URR                           | 101495097          | lysosomal Pro-X carboxypeptidase-like       |
| SNP_17699_A_35452418 | NC_021162.1    | Ca_Kabuli_Chr03 | 35452418                | CC                                     | TT                 | TT               | URR                           | 101495097          | lysosomal Pro-X carboxypeptidase-like       |
| SNP_17700_A_35454290 | NC_021162.1    | Ca_Kabuli_Chr03 | 35454290                | TT                                     | CC                 | CC               | INTERGENIC                    |                    |                                             |
| SNP_17701_A_35456486 | NC_021162.1    | Ca_Kabuli_Chr03 | 35456486                | CC                                     | AA                 | AA               | INTERGENIC                    |                    |                                             |
| SNP_17702_A_35456768 | NC_021162.1    | Ca_Kabuli_Chr03 | 35456768                | TT                                     | AA                 | AA               | INTERGENIC                    |                    |                                             |

| SNPs IDs             | Chromosome IDs | Chromosomes     | Physical positions (bp) | CDC Frontier genome (Reference genome) | (Pusa 1103 & HPNB) | (ILWC 46 & LPNB) | Sequence Components of genome | Gene accession IDs | Putative functions                                             |
|----------------------|----------------|-----------------|-------------------------|----------------------------------------|--------------------|------------------|-------------------------------|--------------------|----------------------------------------------------------------|
| SNP_17703_A_35456804 | NC_021162.1    | Ca_Kabuli_Chr03 | 35456804                | AA                                     | GG                 | GG               | INTERGENIC                    |                    |                                                                |
| SNP_17704_A_35456812 | NC_021162.1    | Ca_Kabuli_Chr03 | 35456812                | GG                                     | AA                 | AA               | INTERGENIC                    |                    |                                                                |
| SNP_17705_A_35456827 | NC_021162.1    | Ca_Kabuli_Chr03 | 35456827                | GG                                     | AA                 | AA               | INTERGENIC                    |                    |                                                                |
| SNP_17706_A_35457805 | NC_021162.1    | Ca_Kabuli_Chr03 | 35457805                | CC                                     | TT                 | TT               | INTERGENIC                    |                    |                                                                |
| SNP_17707_A_35458910 | NC_021162.1    | Ca_Kabuli_Chr03 | 35458910                | TT                                     | CC                 | CC               | INTERGENIC                    |                    |                                                                |
| SNP_17708_A_35458923 | NC_021162.1    | Ca_Kabuli_Chr03 | 35458923                | CC                                     | AA                 | AA               | INTERGENIC                    |                    |                                                                |
| SNP_17709_A_35459347 | NC_021162.1    | Ca_Kabuli_Chr03 | 35459347                | TT                                     | CC                 | CC               | INTERGENIC                    |                    |                                                                |
| SNP_17710_A_35460875 | NC_021162.1    | Ca_Kabuli_Chr03 | 35460875                | GG                                     | TT                 | TT               | INTRON                        | 101495425          | uncharacterized LOC101495425                                   |
| SNP_17711_A_35465789 | NC_021162.1    | Ca_Kabuli_Chr03 | 35465789                | AA                                     | GG                 | GG               | INTERGENIC                    |                    |                                                                |
| SNP_17712_A_35466310 | NC_021162.1    | Ca_Kabuli_Chr03 | 35466310                | GG                                     | TT                 | TT               | INTERGENIC                    |                    |                                                                |
| SNP_17714_A_35469769 | NC_021162.1    | Ca_Kabuli_Chr03 | 35469769                | TT                                     | CC                 | CC               | INTRON                        | 101495760          | putative pentatricopeptide repeat-containing protein At5g37570 |
| SNP_17715_A_35480208 | NC_021162.1    | Ca_Kabuli_Chr03 | 35480208                | TT                                     | CC                 | CC               | URR                           | 101496081          | secoisolaricresinol dehydrogenase-like                         |
| SNP_17716_A_35480215 | NC_021162.1    | Ca_Kabuli_Chr03 | 35480215                | TT                                     | GG                 | GG               | URR                           | 101496081          | secoisolaricresinol dehydrogenase-like                         |
| SNP_17717_A_35480216 | NC_021162.1    | Ca_Kabuli_Chr03 | 35480216                | CC                                     | TT                 | TT               | URR                           | 101496081          | secoisolaricresinol dehydrogenase-like                         |
| SNP_17718_A_35483779 | NC_021162.1    | Ca_Kabuli_Chr03 | 35483779                | AA                                     | GG                 | GG               | INTERGENIC                    |                    |                                                                |
| SNP_17719_A_35484116 | NC_021162.1    | Ca_Kabuli_Chr03 | 35484116                | AA                                     | GG                 | GG               | INTERGENIC                    |                    |                                                                |
| SNP_17720_A_35484658 | NC_021162.1    | Ca_Kabuli_Chr03 | 35484658                | CC                                     | AA                 | AA               | INTERGENIC                    |                    |                                                                |
| SNP_17721_A_35484826 | NC_021162.1    | Ca_Kabuli_Chr03 | 35484826                | GG                                     | AA                 | AA               | INTERGENIC                    |                    |                                                                |
| SNP_17723_A_35488377 | NC_021162.1    | Ca_Kabuli_Chr03 | 35488377                | TT                                     | AA                 | AA               | INTRON                        | 101496741          | TLD domain-containing protein 1                                |
| SNP_17724_A_35489912 | NC_021162.1    | Ca_Kabuli_Chr03 | 35489912                | GG                                     | AA                 | AA               | INTRON                        | 101496741          | TLD domain-containing protein 1                                |
| SNP_17725_A_35490399 | NC_021162.1    | Ca_Kabuli_Chr03 | 35490399                | CC                                     | GG                 | GG               | INTRON                        | 101496741          | TLD domain-containing protein 1                                |
| SNP_17726_A_35492244 | NC_021162.1    | Ca_Kabuli_Chr03 | 35492244                | CC                                     | AA                 | AA               | INTRON                        | 101496741          | TLD domain-containing protein 1                                |

| SNPs IDs             | Chromosome IDs | Chromosomes     | Physical positions (bp) | CDC Frontier (Reference genome) | (Pusa 1103 & HPNB) | (ILWC 46 & LPNB) | Sequence Components of genome | Gene accession IDs | Putative functions              |
|----------------------|----------------|-----------------|-------------------------|---------------------------------|--------------------|------------------|-------------------------------|--------------------|---------------------------------|
| SNP_17727_A_35492306 | NC_021162.1    | Ca_Kabuli_Chr03 | 35492306                | AA                              | TT                 | TT               | INTRON                        | 101496741          | TLD domain-containing protein 1 |
| SNP_17728_A_35493733 | NC_021162.1    | Ca_Kabuli_Chr03 | 35493733                | AA                              | GG                 | GG               | URR                           | 101496741          | TLD domain-containing protein 1 |
| SNP_17729_A_35495746 | NC_021162.1    | Ca_Kabuli_Chr03 | 35495746                | TT                              | CC                 | CC               | INTERGENIC                    |                    |                                 |
| SNP_17730_A_35495813 | NC_021162.1    | Ca_Kabuli_Chr03 | 35495813                | AA                              | CC                 | CC               | INTERGENIC                    |                    |                                 |
| SNP_17731_A_35495816 | NC_021162.1    | Ca_Kabuli_Chr03 | 35495816                | TT                              | CC                 | CC               | INTERGENIC                    |                    |                                 |
| SNP_17732_A_35498803 | NC_021162.1    | Ca_Kabuli_Chr03 | 35498803                | CC                              | TT                 | TT               | INTERGENIC                    |                    |                                 |
| SNP_17733_A_35498948 | NC_021162.1    | Ca_Kabuli_Chr03 | 35498948                | TT                              | AA                 | AA               | INTERGENIC                    |                    |                                 |
| SNP_17734_A_35499272 | NC_021162.1    | Ca_Kabuli_Chr03 | 35499272                | AA                              | TT                 | TT               | INTERGENIC                    |                    |                                 |
| SNP_17735_A_35499281 | NC_021162.1    | Ca_Kabuli_Chr03 | 35499281                | CC                              | GG                 | GG               | INTERGENIC                    |                    |                                 |
| SNP_17736_A_35500150 | NC_021162.1    | Ca_Kabuli_Chr03 | 35500150                | GG                              | CC                 | CC               | INTERGENIC                    |                    |                                 |
| SNP_17737_A_35502457 | NC_021162.1    | Ca_Kabuli_Chr03 | 35502457                | TT                              | CC                 | CC               | INTERGENIC                    |                    |                                 |
| SNP_17738_A_35502549 | NC_021162.1    | Ca_Kabuli_Chr03 | 35502549                | GG                              | AA                 | AA               | INTERGENIC                    |                    |                                 |
| SNP_17739_A_35505837 | NC_021162.1    | Ca_Kabuli_Chr03 | 35505837                | CC                              | AA                 | AA               | INTERGENIC                    |                    |                                 |
| SNP_17741_A_35505862 | NC_021162.1    | Ca_Kabuli_Chr03 | 35505862                | AA                              | GG                 | GG               | INTERGENIC                    |                    |                                 |
| SNP_17742_A_35513860 | NC_021162.1    | Ca_Kabuli_Chr03 | 35513860                | CC                              | TT                 | TT               | INTERGENIC                    |                    |                                 |
| SNP_17743_A_35526402 | NC_021162.1    | Ca_Kabuli_Chr03 | 35526402                | GG                              | AA                 | AA               | INTERGENIC                    |                    |                                 |
| SNP_17745_A_35529241 | NC_021162.1    | Ca_Kabuli_Chr03 | 35529241                | TT                              | AA                 | AA               | DRR                           | 101497716          | transcription repressor OFP15   |
| SNP_17746_A_35529275 | NC_021162.1    | Ca_Kabuli_Chr03 | 35529275                | TT                              | CC                 | CC               | DRR                           | 101497716          | transcription repressor OFP15   |
| SNP_17747_A_35529363 | NC_021162.1    | Ca_Kabuli_Chr03 | 35529363                | TT                              | AA                 | AA               | DRR                           | 101497716          | transcription repressor OFP15   |
| SNP_17748_A_35531312 | NC_021162.1    | Ca_Kabuli_Chr03 | 35531312                | AA                              | GG                 | GG               | URR                           | 101497716          | transcription repressor OFP15   |
| SNP_17749_A_35532597 | NC_021162.1    | Ca_Kabuli_Chr03 | 35532597                | CC                              | TT                 | TT               | INTERGENIC                    |                    |                                 |
| SNP_17751_A_35532791 | NC_021162.1    | Ca_Kabuli_Chr03 | 35532791                | AA                              | GG                 | GG               | INTERGENIC                    |                    |                                 |

| SNPs IDs             | Chromosome IDs | Chromosomes     | Physical positions (bp) | CDC Frontier genome (Reference genome) | (Pusa 1103 & HPNB) | (ILWC 46 & LPNB) | Sequence Components of genome | Gene accession IDs | Putative functions                      |
|----------------------|----------------|-----------------|-------------------------|----------------------------------------|--------------------|------------------|-------------------------------|--------------------|-----------------------------------------|
| SNP_17752_A_35535618 | NC_021162.1    | Ca_Kabuli_Chr03 | 35535618                | TT                                     | CC                 | CC               | INTERGENIC                    |                    |                                         |
| SNP_17753_A_35535622 | NC_021162.1    | Ca_Kabuli_Chr03 | 35535622                | GG                                     | AA                 | AA               | INTERGENIC                    |                    |                                         |
| SNP_17754_A_35536345 | NC_021162.1    | Ca_Kabuli_Chr03 | 35536345                | TT                                     | CC                 | CC               | INTERGENIC                    |                    |                                         |
| SNP_17755_A_35545757 | NC_021162.1    | Ca_Kabuli_Chr03 | 35545757                | CC                                     | AA                 | AA               | DRR                           | 101498373          | UPF0554 protein                         |
| SNP_17756_A_35550680 | NC_021162.1    | Ca_Kabuli_Chr03 | 35550680                | GG                                     | AA                 | AA               | INTRON                        | 101498373          | UPF0554 protein                         |
| SNP_17757_A_35551431 | NC_021162.1    | Ca_Kabuli_Chr03 | 35551431                | CC                                     | TT                 | TT               | INTRON                        | 101498373          | UPF0554 protein                         |
| SNP_17758_A_35554239 | NC_021162.1    | Ca_Kabuli_Chr03 | 35554239                | CC                                     | TT                 | TT               | URR                           | 101498373          | UPF0554 protein                         |
| SNP_17759_A_35554526 | NC_021162.1    | Ca_Kabuli_Chr03 | 35554526                | GG                                     | CC                 | CC               | URR                           | 101498373          | UPF0554 protein                         |
| SNP_17760_A_35554529 | NC_021162.1    | Ca_Kabuli_Chr03 | 35554529                | CC                                     | GG                 | GG               | URR                           | 101498373          | UPF0554 protein                         |
| SNP_17762_A_35562346 | NC_021162.1    | Ca_Kabuli_Chr03 | 35562346                | TT                                     | AA                 | AA               | URR                           | 101499038          | HVA22-like protein j                    |
| SNP_17763_A_35562365 | NC_021162.1    | Ca_Kabuli_Chr03 | 35562365                | GG                                     | TT                 | TT               | URR                           | 101499038          | HVA22-like protein j                    |
| SNP_17764_A_35562535 | NC_021162.1    | Ca_Kabuli_Chr03 | 35562535                | GG                                     | AA                 | AA               | DRR                           | 101499562          | 2-Cys peroxiredoxin BAS1, chloroplastic |
| SNP_17765_A_35562570 | NC_021162.1    | Ca_Kabuli_Chr03 | 35562570                | TT                                     | CC                 | CC               | DRR                           | 101499562          | 2-Cys peroxiredoxin BAS1, chloroplastic |
| SNP_17766_A_35562713 | NC_021162.1    | Ca_Kabuli_Chr03 | 35562713                | GG                                     | TT                 | TT               | DRR                           | 101499562          | 2-Cys peroxiredoxin BAS1, chloroplastic |
| SNP_17768_A_35564239 | NC_021162.1    | Ca_Kabuli_Chr03 | 35564239                | GG                                     | TT                 | TT               | INTERGENIC                    |                    |                                         |
| SNP_17770_A_35569917 | NC_021162.1    | Ca_Kabuli_Chr03 | 35569917                | AA                                     | GG                 | GG               | URR                           | 101500088          | uncharacterized LOC101500088            |
| SNP_17771_A_35570325 | NC_021162.1    | Ca_Kabuli_Chr03 | 35570325                | AA                                     | GG                 | GG               | URR                           | 101500088          | uncharacterized LOC101500088            |
| SNP_17772_A_35570358 | NC_021162.1    | Ca_Kabuli_Chr03 | 35570358                | TT                                     | CC                 | CC               | URR                           | 101500088          | uncharacterized LOC101500088            |
| SNP_17773_A_35570370 | NC_021162.1    | Ca_Kabuli_Chr03 | 35570370                | GG                                     | AA                 | AA               | URR                           | 101500088          | uncharacterized LOC101500088            |
| SNP_17774_A_35570374 | NC_021162.1    | Ca_Kabuli_Chr03 | 35570374                | GG                                     | AA                 | AA               | URR                           | 101500088          | uncharacterized LOC101500088            |
| SNP_17775_A_35570379 | NC_021162.1    | Ca_Kabuli_Chr03 | 35570379                | GG                                     | AA                 | AA               | URR                           | 101500088          | uncharacterized LOC101500088            |
| SNP_17776_A_35570383 | NC_021162.1    | Ca_Kabuli_Chr03 | 35570383                | GG                                     | AA                 | AA               | URR                           | 101500088          | uncharacterized LOC101500088            |

| SNPs IDs             | Chromosome IDs | Chromosomes     | Physical positions (bp) | CDC Frontier genome (Reference genome) | (Pusa 1103 & HPNB) | (ILWC 46 & LPNB) | Sequence Components of genome | Gene accession IDs | Putative functions                |
|----------------------|----------------|-----------------|-------------------------|----------------------------------------|--------------------|------------------|-------------------------------|--------------------|-----------------------------------|
| SNP_17777_A_35570384 | NC_021162.1    | Ca_Kabuli_Chr03 | 35570384                | GG                                     | AA                 | AA               | URR                           | 101500088          | uncharacterized LOC101500088      |
| SNP_17778_A_35570405 | NC_021162.1    | Ca_Kabuli_Chr03 | 35570405                | AA                                     | CC                 | CC               | URR                           | 101500088          | uncharacterized LOC101500088      |
| SNP_17779_A_35570456 | NC_021162.1    | Ca_Kabuli_Chr03 | 35570456                | AA                                     | GG                 | GG               | URR                           | 101500088          | uncharacterized LOC101500088      |
| SNP_17780_A_35572248 | NC_021162.1    | Ca_Kabuli_Chr03 | 35572248                | TT                                     | CC                 | CC               | INTERGENIC                    |                    |                                   |
| SNP_17781_A_35573295 | NC_021162.1    | Ca_Kabuli_Chr03 | 35573295                | GG                                     | CC                 | CC               | INTERGENIC                    |                    |                                   |
| SNP_17782_A_35574782 | NC_021162.1    | Ca_Kabuli_Chr03 | 35574782                | TT                                     | GG                 | GG               | INTERGENIC                    |                    |                                   |
| SNP_17784_A_35575059 | NC_021162.1    | Ca_Kabuli_Chr03 | 35575059                | CC                                     | TT                 | TT               | DRR                           | 101500418          | aspartic proteinase nepenthesin-1 |
| SNP_17785_A_35579755 | NC_021162.1    | Ca_Kabuli_Chr03 | 35579755                | AA                                     | CC                 | CC               | URR                           | 101500418          | aspartic proteinase nepenthesin-1 |
| SNP_17786_A_35580420 | NC_021162.1    | Ca_Kabuli_Chr03 | 35580420                | GG                                     | AA                 | AA               | INTERGENIC                    |                    |                                   |
| SNP_17787_A_35580473 | NC_021162.1    | Ca_Kabuli_Chr03 | 35580473                | GG                                     | CC                 | CC               | INTERGENIC                    |                    |                                   |
| SNP_17788_A_35580485 | NC_021162.1    | Ca_Kabuli_Chr03 | 35580485                | TT                                     | CC                 | CC               | INTERGENIC                    |                    |                                   |
| SNP_17789_A_35580779 | NC_021162.1    | Ca_Kabuli_Chr03 | 35580779                | CC                                     | TT                 | TT               | INTERGENIC                    |                    |                                   |
| SNP_17790_A_35582202 | NC_021162.1    | Ca_Kabuli_Chr03 | 35582202                | AA                                     | GG                 | GG               | INTERGENIC                    |                    |                                   |
| SNP_17791_A_35583088 | NC_021162.1    | Ca_Kabuli_Chr03 | 35583088                | GG                                     | AA                 | AA               | INTERGENIC                    |                    |                                   |
| SNP_17792_A_35583520 | NC_021162.1    | Ca_Kabuli_Chr03 | 35583520                | GG                                     | AA                 | AA               | INTERGENIC                    |                    |                                   |
| SNP_17793_A_35584239 | NC_021162.1    | Ca_Kabuli_Chr03 | 35584239                | AA                                     | TT                 | TT               | INTERGENIC                    |                    |                                   |
| SNP_17794_A_35584257 | NC_021162.1    | Ca_Kabuli_Chr03 | 35584257                | TT                                     | CC                 | CC               | INTERGENIC                    |                    |                                   |
| SNP_17795_A_35591220 | NC_021162.1    | Ca_Kabuli_Chr03 | 35591220                | CC                                     | TT                 | TT               | INTERGENIC                    |                    |                                   |
| SNP_17797_A_35591247 | NC_021162.1    | Ca_Kabuli_Chr03 | 35591247                | CC                                     | TT                 | TT               | INTERGENIC                    |                    |                                   |
| SNP_17798_A_35591268 | NC_021162.1    | Ca_Kabuli_Chr03 | 35591268                | GG                                     | AA                 | AA               | INTERGENIC                    |                    |                                   |
| SNP_17799_A_35591326 | NC_021162.1    | Ca_Kabuli_Chr03 | 35591326                | TT                                     | CC                 | CC               | INTERGENIC                    |                    |                                   |
| SNP_17800_A_35591329 | NC_021162.1    | Ca_Kabuli_Chr03 | 35591329                | CC                                     | TT                 | TT               | INTERGENIC                    |                    |                                   |

| SNPs IDs             | Chromosome IDs | Chromosomes     | Physical positions (bp) | CDC Frontier genome (Reference genome) | (Pusa 1103 & HPNB) | (ILWC 46 & LPNB) | Sequence Components of genome | Gene accession IDs | Putative functions           |
|----------------------|----------------|-----------------|-------------------------|----------------------------------------|--------------------|------------------|-------------------------------|--------------------|------------------------------|
| SNP_17801_A_35591544 | NC_021162.1    | Ca_Kabuli_Chr03 | 35591544                | TT                                     | AA                 | AA               | INTERGENIC                    |                    |                              |
| SNP_17802_A_35591546 | NC_021162.1    | Ca_Kabuli_Chr03 | 35591546                | TT                                     | CC                 | CC               | INTERGENIC                    |                    |                              |
| SNP_17803_A_35593324 | NC_021162.1    | Ca_Kabuli_Chr03 | 35593324                | TT                                     | CC                 | CC               | INTERGENIC                    |                    |                              |
| SNP_17804_A_35593645 | NC_021162.1    | Ca_Kabuli_Chr03 | 35593645                | AA                                     | GG                 | GG               | INTERGENIC                    |                    |                              |
| SNP_17806_A_35600432 | NC_021162.1    | Ca_Kabuli_Chr03 | 35600432                | TT                                     | GG                 | GG               | DRR                           | 101514882          | protein YLS9-like            |
| SNP_17807_A_35600437 | NC_021162.1    | Ca_Kabuli_Chr03 | 35600437                | CC                                     | TT                 | TT               | DRR                           | 101514882          | protein YLS9-like            |
| SNP_17809_A_35600622 | NC_021162.1    | Ca_Kabuli_Chr03 | 35600622                | TT                                     | GG                 | GG               | DRR                           | 101514882          | protein YLS9-like            |
| SNP_17810_A_35600624 | NC_021162.1    | Ca_Kabuli_Chr03 | 35600624                | CC                                     | GG                 | GG               | DRR                           | 101514882          | protein YLS9-like            |
| SNP_17811_A_35600625 | NC_021162.1    | Ca_Kabuli_Chr03 | 35600625                | GG                                     | TT                 | TT               | DRR                           | 101514882          | protein YLS9-like            |
| SNP_17812_A_35600652 | NC_021162.1    | Ca_Kabuli_Chr03 | 35600652                | AA                                     | GG                 | GG               | DRR                           | 101514882          | protein YLS9-like            |
| SNP_17813_A_35600657 | NC_021162.1    | Ca_Kabuli_Chr03 | 35600657                | AA                                     | CC                 | CC               | DRR                           | 101514882          | protein YLS9-like            |
| SNP_17814_A_35600658 | NC_021162.1    | Ca_Kabuli_Chr03 | 35600658                | TT                                     | AA                 | AA               | DRR                           | 101514882          | protein YLS9-like            |
| SNP_17815_A_35602023 | NC_021162.1    | Ca_Kabuli_Chr03 | 35602023                | CC                                     | GG                 | GG               | URR                           | 101514882          | protein YLS9-like            |
| SNP_17816_A_35602029 | NC_021162.1    | Ca_Kabuli_Chr03 | 35602029                | TT                                     | CC                 | CC               | URR                           | 101514882          | protein YLS9-like            |
| SNP_17818_A_35602302 | NC_021162.1    | Ca_Kabuli_Chr03 | 35602302                | AA                                     | TT                 | TT               | URR                           | 101514882          | protein YLS9-like            |
| SNP_17819_A_35602326 | NC_021162.1    | Ca_Kabuli_Chr03 | 35602326                | CC                                     | TT                 | TT               | URR                           | 101514882          | protein YLS9-like            |
| SNP_17820_A_35604310 | NC_021162.1    | Ca_Kabuli_Chr03 | 35604310                | AA                                     | GG                 | GG               | INTERGENIC                    |                    |                              |
| SNP_17821_A_35605366 | NC_021162.1    | Ca_Kabuli_Chr03 | 35605366                | AA                                     | CC                 | CC               | DRR                           | 101501355          | protein YLS9-like            |
| SNP_17822_A_35608050 | NC_021162.1    | Ca_Kabuli_Chr03 | 35608050                | TT                                     | AA                 | AA               | URR                           | 101501355          | protein YLS9-like            |
| SNP_17823_A_35608071 | NC_021162.1    | Ca_Kabuli_Chr03 | 35608071                | GG                                     | AA                 | AA               | URR                           | 101501355          | protein YLS9-like            |
| SNP_17825_A_35615558 | NC_021162.1    | Ca_Kabuli_Chr03 | 35615558                | AA                                     | GG                 | GG               | INTERGENIC                    |                    |                              |
| SNP_17826_A_35617892 | NC_021162.1    | Ca_Kabuli_Chr03 | 35617892                | TT                                     | CC                 | CC               | URR                           | 101515208          | uncharacterized LOC101515208 |

| SNPs IDs             | Chromosome IDs | Chromosomes     | Physical positions (bp) | CDC Frontier (Reference genome) | (Pusa 1103 & HPNB) | (ILWC 46 & LPNB) | Sequence Components of genome | Gene accession IDs | Putative functions                   |
|----------------------|----------------|-----------------|-------------------------|---------------------------------|--------------------|------------------|-------------------------------|--------------------|--------------------------------------|
| SNP_17829_A_35624890 | NC_021162.1    | Ca_Kabuli_Chr03 | 35624890                | AA                              | GG                 | GG               | URR                           | 101501676          | uncharacterized LOC101501676         |
| SNP_17831_A_35626716 | NC_021162.1    | Ca_Kabuli_Chr03 | 35626716                | GG                              | AA                 | AA               | INTERGENIC                    |                    |                                      |
| SNP_17832_A_35626810 | NC_021162.1    | Ca_Kabuli_Chr03 | 35626810                | CC                              | AA                 | AA               | INTERGENIC                    |                    |                                      |
| SNP_17833_A_35627385 | NC_021162.1    | Ca_Kabuli_Chr03 | 35627385                | TT                              | CC                 | CC               | INTERGENIC                    |                    |                                      |
| SNP_17834_A_35628407 | NC_021162.1    | Ca_Kabuli_Chr03 | 35628407                | AA                              | GG                 | GG               | INTERGENIC                    |                    |                                      |
| SNP_17835_A_35628443 | NC_021162.1    | Ca_Kabuli_Chr03 | 35628443                | AA                              | GG                 | GG               | INTERGENIC                    |                    |                                      |
| SNP_17836_A_35631086 | NC_021162.1    | Ca_Kabuli_Chr03 | 35631086                | TT                              | CC                 | CC               | INTERGENIC                    |                    |                                      |
| SNP_17837_A_35631833 | NC_021162.1    | Ca_Kabuli_Chr03 | 35631833                | AA                              | TT                 | TT               | INTERGENIC                    |                    |                                      |
| SNP_17838_A_35631909 | NC_021162.1    | Ca_Kabuli_Chr03 | 35631909                | CC                              | AA                 | AA               | INTERGENIC                    |                    |                                      |
| SNP_17839_A_35632173 | NC_021162.1    | Ca_Kabuli_Chr03 | 35632173                | AA                              | TT                 | TT               | INTERGENIC                    |                    |                                      |
| SNP_17840_A_35632348 | NC_021162.1    | Ca_Kabuli_Chr03 | 35632348                | GG                              | AA                 | AA               | INTERGENIC                    |                    |                                      |
| SNP_17841_A_35632441 | NC_021162.1    | Ca_Kabuli_Chr03 | 35632441                | AA                              | GG                 | GG               | INTERGENIC                    |                    |                                      |
| SNP_17842_A_35633751 | NC_021162.1    | Ca_Kabuli_Chr03 | 35633751                | TT                              | AA                 | AA               | INTERGENIC                    |                    |                                      |
| SNP_17843_A_35633759 | NC_021162.1    | Ca_Kabuli_Chr03 | 35633759                | TT                              | CC                 | CC               | INTERGENIC                    |                    |                                      |
| SNP_17844_A_35635333 | NC_021162.1    | Ca_Kabuli_Chr03 | 35635333                | AA                              | GG                 | GG               | INTERGENIC                    |                    |                                      |
| SNP_17846_A_35638328 | NC_021162.1    | Ca_Kabuli_Chr03 | 35638328                | TT                              | CC                 | CC               | INTRON                        | 101501991          | testis-expressed sequence 10 protein |
| SNP_17847_A_35638381 | NC_021162.1    | Ca_Kabuli_Chr03 | 35638381                | CC                              | TT                 | TT               | INTRON                        | 101501991          | testis-expressed sequence 10 protein |
| SNP_17848_A_35639903 | NC_021162.1    | Ca_Kabuli_Chr03 | 35639903                | GG                              | CC                 | CC               | INTRON                        | 101501991          | testis-expressed sequence 10 protein |
| SNP_17849_A_35640273 | NC_021162.1    | Ca_Kabuli_Chr03 | 35640273                | AA                              | CC                 | CC               | INTRON                        | 101501991          | testis-expressed sequence 10 protein |
| SNP_17850_A_35640274 | NC_021162.1    | Ca_Kabuli_Chr03 | 35640274                | CC                              | AA                 | AA               | INTRON                        | 101501991          | testis-expressed sequence 10 protein |
| SNP_17851_A_35642241 | NC_021162.1    | Ca_Kabuli_Chr03 | 35642241                | AA                              | GG                 | GG               | INTRON                        | 101501991          | testis-expressed sequence 10 protein |
| SNP_17852_A_35642255 | NC_021162.1    | Ca_Kabuli_Chr03 | 35642255                | GG                              | CC                 | CC               | INTRON                        | 101501991          | testis-expressed sequence 10 protein |

| SNPs IDs             | Chromosome IDs | Chromosomes     | Physical positions (bp) | CDC Frontier (Reference genome) | (Pusa 1103 & HPNB) | (ILWC 46 & LPNB) | Sequence Components of genome | Gene accession IDs | Putative functions                    |
|----------------------|----------------|-----------------|-------------------------|---------------------------------|--------------------|------------------|-------------------------------|--------------------|---------------------------------------|
| SNP_17853_A_35642373 | NC_021162.1    | Ca_Kabuli_Chr03 | 35642373                | TT                              | CC                 | CC               | INTRON                        | 101501991          | testis-expressed sequence 10 protein  |
| SNP_17854_A_35643107 | NC_021162.1    | Ca_Kabuli_Chr03 | 35643107                | CC                              | TT                 | TT               | INTRON                        | 101501991          | testis-expressed sequence 10 protein  |
| SNP_17855_A_35643493 | NC_021162.1    | Ca_Kabuli_Chr03 | 35643493                | GG                              | AA                 | AA               | INTRON                        | 101501991          | testis-expressed sequence 10 protein  |
| SNP_17856_A_35643513 | NC_021162.1    | Ca_Kabuli_Chr03 | 35643513                | CC                              | AA                 | AA               | INTRON                        | 101501991          | testis-expressed sequence 10 protein  |
| SNP_17857_A_35643692 | NC_021162.1    | Ca_Kabuli_Chr03 | 35643692                | GG                              | AA                 | AA               | INTRON                        | 101501991          | testis-expressed sequence 10 protein  |
| SNP_17859_A_35647138 | NC_021162.1    | Ca_Kabuli_Chr03 | 35647138                | AA                              | GG                 | GG               | INTRON                        | 101501991          | testis-expressed sequence 10 protein  |
| SNP_17860_A_35650241 | NC_021162.1    | Ca_Kabuli_Chr03 | 35650241                | TT                              | CC                 | CC               | DRR                           | 101515531          | uncharacterized LOC101515531          |
| SNP_17861_A_35650256 | NC_021162.1    | Ca_Kabuli_Chr03 | 35650256                | TT                              | CC                 | CC               | DRR                           | 101515531          | uncharacterized LOC101515531          |
| SNP_17862_A_35650258 | NC_021162.1    | Ca_Kabuli_Chr03 | 35650258                | TT                              | GG                 | GG               | DRR                           | 101515531          | uncharacterized LOC101515531          |
| SNP_17863_A_35650261 | NC_021162.1    | Ca_Kabuli_Chr03 | 35650261                | AA                              | CC                 | CC               | DRR                           | 101515531          | uncharacterized LOC101515531          |
| SNP_17864_A_35651357 | NC_021162.1    | Ca_Kabuli_Chr03 | 35651357                | GG                              | TT                 | TT               | INTRON                        | 101515531          | uncharacterized LOC101515531          |
| SNP_17865_A_35651365 | NC_021162.1    | Ca_Kabuli_Chr03 | 35651365                | AA                              | GG                 | GG               | INTRON                        | 101515531          | uncharacterized LOC101515531          |
| SNP_17866_A_35652667 | NC_021162.1    | Ca_Kabuli_Chr03 | 35652667                | GG                              | AA                 | AA               | INTERGENIC                    |                    |                                       |
| SNP_17868_A_35652860 | NC_021162.1    | Ca_Kabuli_Chr03 | 35652860                | GG                              | TT                 | TT               | INTERGENIC                    |                    |                                       |
| SNP_17869_A_35656356 | NC_021162.1    | Ca_Kabuli_Chr03 | 35656356                | AA                              | GG                 | GG               | URR                           | 101515531          | uncharacterized LOC101515531          |
| SNP_17870_A_35660919 | NC_021162.1    | Ca_Kabuli_Chr03 | 35660919                | CC                              | AA                 | AA               | SYNONYMOUS_CODING             | 101502630          | probable receptor protein kinase TMK1 |
| SNP_17871_A_35661120 | NC_021162.1    | Ca_Kabuli_Chr03 | 35661120                | AA                              | GG                 | GG               | SYNONYMOUS_CODING             | 101502630          | probable receptor protein kinase TMK1 |
| SNP_17872_A_35664355 | NC_021162.1    | Ca_Kabuli_Chr03 | 35664355                | GG                              | AA                 | AA               | INTERGENIC                    |                    |                                       |
| SNP_17873_A_35665280 | NC_021162.1    | Ca_Kabuli_Chr03 | 35665280                | CC                              | TT                 | TT               | INTERGENIC                    |                    |                                       |
| SNP_17874_A_35666576 | NC_021162.1    | Ca_Kabuli_Chr03 | 35666576                | AA                              | TT                 | TT               | INTERGENIC                    |                    |                                       |
| SNP_17875_A_35666599 | NC_021162.1    | Ca_Kabuli_Chr03 | 35666599                | GG                              | AA                 | AA               | INTERGENIC                    |                    |                                       |
| SNP_17876_A_35669147 | NC_021162.1    | Ca_Kabuli_Chr03 | 35669147                | CC                              | TT                 | TT               | INTERGENIC                    |                    |                                       |



| SNPs IDs             | Chromosome IDs | Chromosomes     | Physical positions (bp) | CDC Frontier genome (Reference genome) | (Pusa 1103 & HPNB) | (ILWC 46 & LPNB) | Sequence Components of genome | Gene accession IDs | Putative functions                                   |
|----------------------|----------------|-----------------|-------------------------|----------------------------------------|--------------------|------------------|-------------------------------|--------------------|------------------------------------------------------|
| SNP_17877_A_35669200 | NC_021162.1    | Ca_Kabuli_Chr03 | 35669200                | TT                                     | CC                 | CC               | INTERGENIC                    |                    |                                                      |
| SNP_17878_A_35669394 | NC_021162.1    | Ca_Kabuli_Chr03 | 35669394                | AA                                     | GG                 | GG               | INTERGENIC                    |                    |                                                      |
| SNP_17879_A_35669433 | NC_021162.1    | Ca_Kabuli_Chr03 | 35669433                | GG                                     | AA                 | AA               | INTERGENIC                    |                    |                                                      |
| SNP_17880_A_35670799 | NC_021162.1    | Ca_Kabuli_Chr03 | 35670799                | GG                                     | AA                 | AA               | DRR                           | 101502949          | digalactosyldiacylglycerol synthase 1, chloroplastic |
| SNP_17881_A_35674025 | NC_021162.1    | Ca_Kabuli_Chr03 | 35674025                | TT                                     | GG                 | GG               | INTRON                        | 101502949          | digalactosyldiacylglycerol synthase 1, chloroplastic |
| SNP_17882_A_35674373 | NC_021162.1    | Ca_Kabuli_Chr03 | 35674373                | GG                                     | AA                 | AA               | INTRON                        | 101502949          | digalactosyldiacylglycerol synthase 1, chloroplastic |
| SNP_17883_A_35674746 | NC_021162.1    | Ca_Kabuli_Chr03 | 35674746                | TT                                     | AA                 | AA               | INTRON                        | 101502949          | digalactosyldiacylglycerol synthase 1, chloroplastic |
| SNP_17884_A_35674777 | NC_021162.1    | Ca_Kabuli_Chr03 | 35674777                | AA                                     | CC                 | CC               | INTRON                        | 101502949          | digalactosyldiacylglycerol synthase 1, chloroplastic |
| SNP_17886_A_35678788 | NC_021162.1    | Ca_Kabuli_Chr03 | 35678788                | GG                                     | AA                 | AA               | URR                           | 101502949          | digalactosyldiacylglycerol synthase 1, chloroplastic |
| SNP_17888_A_35679699 | NC_021162.1    | Ca_Kabuli_Chr03 | 35679699                | CC                                     | AA                 | AA               | DRR                           | 101488282          | aluminum-activated malate transporter 8              |
| SNP_17889_A_35679709 | NC_021162.1    | Ca_Kabuli_Chr03 | 35679709                | CC                                     | TT                 | TT               | DRR                           | 101488282          | aluminum-activated malate transporter 8              |
| SNP_17890_A_35679782 | NC_021162.1    | Ca_Kabuli_Chr03 | 35679782                | GG                                     | TT                 | TT               | DRR                           | 101488282          | aluminum-activated malate transporter 8              |
| SNP_17891_A_35680086 | NC_021162.1    | Ca_Kabuli_Chr03 | 35680086                | AA                                     | GG                 | GG               | DRR                           | 101488282          | aluminum-activated malate transporter 8              |
| SNP_17892_A_35680726 | NC_021162.1    | Ca_Kabuli_Chr03 | 35680726                | GG                                     | AA                 | AA               | INTERGENIC                    |                    |                                                      |
| SNP_17893_A_35684506 | NC_021162.1    | Ca_Kabuli_Chr03 | 35684506                | GG                                     | AA                 | AA               | URR                           | 101488282          | aluminum-activated malate transporter 8              |
| SNP_17894_A_35685090 | NC_021162.1    | Ca_Kabuli_Chr03 | 35685090                | TT                                     | AA                 | AA               | URR                           | 101488282          | aluminum-activated malate transporter 8              |
| SNP_17895_A_35685813 | NC_021162.1    | Ca_Kabuli_Chr03 | 35685813                | TT                                     | CC                 | CC               | URR                           | 101488282          | aluminum-activated malate transporter 8              |
| SNP_17896_A_35685826 | NC_021162.1    | Ca_Kabuli_Chr03 | 35685826                | AA                                     | GG                 | GG               | URR                           | 101488282          | aluminum-activated malate transporter 8              |
| SNP_17897_A_35692908 | NC_021162.1    | Ca_Kabuli_Chr03 | 35692908                | TT                                     | AA                 | AA               | INTERGENIC                    |                    |                                                      |
| SNP_17898_A_35692954 | NC_021162.1    | Ca_Kabuli_Chr03 | 35692954                | GG                                     | TT                 | TT               | INTERGENIC                    |                    |                                                      |
| SNP_17899_A_35695066 | NC_021162.1    | Ca_Kabuli_Chr03 | 35695066                | GG                                     | AA                 | AA               | INTERGENIC                    |                    |                                                      |
| SNP_17900_A_35695428 | NC_021162.1    | Ca_Kabuli_Chr03 | 35695428                | GG                                     | AA                 | AA               | INTERGENIC                    |                    |                                                      |

| SNPs IDs             | Chromosome IDs | Chromosomes     | Physical positions (bp) | CDC Frontier genome (Reference genome) | (Pusa 1103 & HPNB) | (ILWC 46 & LPNB) | Sequence genome | Components of | Gene accession IDs | Putative functions |
|----------------------|----------------|-----------------|-------------------------|----------------------------------------|--------------------|------------------|-----------------|---------------|--------------------|--------------------|
| SNP_17901_A_35696447 | NC_021162.1    | Ca_Kabuli_Chr03 | 35696447                | CC                                     | TT                 | TT               | INTERGENIC      |               |                    |                    |
| SNP_17904_A_35699173 | NC_021162.1    | Ca_Kabuli_Chr03 | 35699173                | CC                                     | TT                 | TT               | INTERGENIC      |               |                    |                    |
| SNP_17906_A_35702944 | NC_021162.1    | Ca_Kabuli_Chr03 | 35702944                | CC                                     | AA                 | AA               | INTERGENIC      |               |                    |                    |
| SNP_17907_A_35703033 | NC_021162.1    | Ca_Kabuli_Chr03 | 35703033                | CC                                     | TT                 | TT               | INTERGENIC      |               |                    |                    |
| SNP_17908_A_35703034 | NC_021162.1    | Ca_Kabuli_Chr03 | 35703034                | CC                                     | TT                 | TT               | INTERGENIC      |               |                    |                    |
| SNP_17909_A_35703129 | NC_021162.1    | Ca_Kabuli_Chr03 | 35703129                | AA                                     | GG                 | GG               | INTERGENIC      |               |                    |                    |
| SNP_17910_A_35703266 | NC_021162.1    | Ca_Kabuli_Chr03 | 35703266                | TT                                     | CC                 | CC               | INTERGENIC      |               |                    |                    |
| SNP_17911_A_35703283 | NC_021162.1    | Ca_Kabuli_Chr03 | 35703283                | CC                                     | TT                 | TT               | INTERGENIC      |               |                    |                    |
| SNP_17912_A_35703290 | NC_021162.1    | Ca_Kabuli_Chr03 | 35703290                | TT                                     | CC                 | CC               | INTERGENIC      |               |                    |                    |
| SNP_17913_A_35703306 | NC_021162.1    | Ca_Kabuli_Chr03 | 35703306                | AA                                     | GG                 | GG               | INTERGENIC      |               |                    |                    |
| SNP_17915_A_35703741 | NC_021162.1    | Ca_Kabuli_Chr03 | 35703741                | TT                                     | GG                 | GG               | INTERGENIC      |               |                    |                    |
| SNP_17916_A_35703956 | NC_021162.1    | Ca_Kabuli_Chr03 | 35703956                | CC                                     | AA                 | AA               | INTERGENIC      |               |                    |                    |
| SNP_17919_A_35707263 | NC_021162.1    | Ca_Kabuli_Chr03 | 35707263                | TT                                     | CC                 | CC               | INTERGENIC      |               |                    |                    |
| SNP_17920_A_35707341 | NC_021162.1    | Ca_Kabuli_Chr03 | 35707341                | CC                                     | GG                 | GG               | INTERGENIC      |               |                    |                    |
| SNP_17921_A_35707366 | NC_021162.1    | Ca_Kabuli_Chr03 | 35707366                | CC                                     | GG                 | GG               | INTERGENIC      |               |                    |                    |
| SNP_17922_A_35707828 | NC_021162.1    | Ca_Kabuli_Chr03 | 35707828                | CC                                     | TT                 | TT               | INTERGENIC      |               |                    |                    |
| SNP_17923_A_35707900 | NC_021162.1    | Ca_Kabuli_Chr03 | 35707900                | AA                                     | TT                 | TT               | INTERGENIC      |               |                    |                    |
| SNP_17924_A_35708239 | NC_021162.1    | Ca_Kabuli_Chr03 | 35708239                | AA                                     | GG                 | GG               | INTERGENIC      |               |                    |                    |
| SNP_17925_A_35708264 | NC_021162.1    | Ca_Kabuli_Chr03 | 35708264                | AA                                     | TT                 | TT               | INTERGENIC      |               |                    |                    |
| SNP_17926_A_35709709 | NC_021162.1    | Ca_Kabuli_Chr03 | 35709709                | AA                                     | TT                 | TT               | INTERGENIC      |               |                    |                    |
| SNP_17927_A_35711286 | NC_021162.1    | Ca_Kabuli_Chr03 | 35711286                | TT                                     | GG                 | GG               | INTERGENIC      |               |                    |                    |
| SNP_17928_A_35711297 | NC_021162.1    | Ca_Kabuli_Chr03 | 35711297                | AA                                     | TT                 | TT               | INTERGENIC      |               |                    |                    |

| SNPs IDs             | Chromosome IDs | Chromosomes     | Physical positions (bp) | CDC Frontier genome (Reference genome) | (Pusa 1103 & HPNB) | (ILWC 46 & LPNB) | Sequence Components of genome | Gene accession IDs | Putative functions                          |
|----------------------|----------------|-----------------|-------------------------|----------------------------------------|--------------------|------------------|-------------------------------|--------------------|---------------------------------------------|
| SNP_17929_A_35711319 | NC_021162.1    | Ca_Kabuli_Chr03 | 35711319                | CC                                     | TT                 | TT               | INTERGENIC                    |                    |                                             |
| SNP_17930_A_35711634 | NC_021162.1    | Ca_Kabuli_Chr03 | 35711634                | GG                                     | AA                 | AA               | INTERGENIC                    |                    |                                             |
| SNP_17931_A_35711670 | NC_021162.1    | Ca_Kabuli_Chr03 | 35711670                | TT                                     | GG                 | GG               | INTERGENIC                    |                    |                                             |
| SNP_17932_A_35716785 | NC_021162.1    | Ca_Kabuli_Chr03 | 35716785                | CC                                     | AA                 | AA               | INTRON                        | 101503601          | BEL1-like homeodomain protein 1             |
| SNP_17933_A_35716797 | NC_021162.1    | Ca_Kabuli_Chr03 | 35716797                | TT                                     | GG                 | GG               | INTRON                        | 101503601          | BEL1-like homeodomain protein 1             |
| SNP_17934_A_35718902 | NC_021162.1    | Ca_Kabuli_Chr03 | 35718902                | TT                                     | CC                 | CC               | INTERGENIC                    |                    |                                             |
| SNP_17935_A_35719501 | NC_021162.1    | Ca_Kabuli_Chr03 | 35719501                | TT                                     | AA                 | AA               | INTERGENIC                    |                    |                                             |
| SNP_17936_A_35719586 | NC_021162.1    | Ca_Kabuli_Chr03 | 35719586                | TT                                     | AA                 | AA               | INTERGENIC                    |                    |                                             |
| SNP_17937_A_35719606 | NC_021162.1    | Ca_Kabuli_Chr03 | 35719606                | CC                                     | TT                 | TT               | INTERGENIC                    |                    |                                             |
| SNP_17938_A_35722717 | NC_021162.1    | Ca_Kabuli_Chr03 | 35722717                | TT                                     | AA                 | AA               | URR                           | 101503601          | BEL1-like homeodomain protein 1             |
| SNP_17939_A_35725242 | NC_021162.1    | Ca_Kabuli_Chr03 | 35725242                | TT                                     | AA                 | AA               | URR                           | 101503925          | BTB/POZ domain-containing protein At3g05675 |
| SNP_17940_A_35725271 | NC_021162.1    | Ca_Kabuli_Chr03 | 35725271                | CC                                     | TT                 | TT               | URR                           | 101503925          | BTB/POZ domain-containing protein At3g05675 |
| SNP_17941_A_35725277 | NC_021162.1    | Ca_Kabuli_Chr03 | 35725277                | TT                                     | GG                 | GG               | URR                           | 101503925          | BTB/POZ domain-containing protein At3g05675 |
| SNP_17942_A_35725416 | NC_021162.1    | Ca_Kabuli_Chr03 | 35725416                | TT                                     | CC                 | CC               | URR                           | 101503925          | BTB/POZ domain-containing protein At3g05675 |
| SNP_17943_A_35725422 | NC_021162.1    | Ca_Kabuli_Chr03 | 35725422                | GG                                     | AA                 | AA               | URR                           | 101503925          | BTB/POZ domain-containing protein At3g05675 |
| SNP_17944_A_35725423 | NC_021162.1    | Ca_Kabuli_Chr03 | 35725423                | TT                                     | CC                 | CC               | URR                           | 101503925          | BTB/POZ domain-containing protein At3g05675 |
| SNP_17945_A_35725431 | NC_021162.1    | Ca_Kabuli_Chr03 | 35725431                | AA                                     | GG                 | GG               | URR                           | 101503925          | BTB/POZ domain-containing protein At3g05675 |
| SNP_17946_A_35725461 | NC_021162.1    | Ca_Kabuli_Chr03 | 35725461                | AA                                     | GG                 | GG               | URR                           | 101503925          | BTB/POZ domain-containing protein At3g05675 |
| SNP_17947_A_35725481 | NC_021162.1    | Ca_Kabuli_Chr03 | 35725481                | GG                                     | AA                 | AA               | URR                           | 101503925          | BTB/POZ domain-containing protein At3g05675 |
| SNP_17948_A_35725485 | NC_021162.1    | Ca_Kabuli_Chr03 | 35725485                | GG                                     | AA                 | AA               | URR                           | 101503925          | BTB/POZ domain-containing protein At3g05675 |
| SNP_17949_A_35725498 | NC_021162.1    | Ca_Kabuli_Chr03 | 35725498                | CC                                     | GG                 | GG               | URR                           | 101503925          | BTB/POZ domain-containing protein At3g05675 |
| SNP_17950_A_35725602 | NC_021162.1    | Ca_Kabuli_Chr03 | 35725602                | CC                                     | TT                 | TT               | URR                           | 101503925          | BTB/POZ domain-containing protein At3g05675 |

| SNPs IDs             | Chromosome IDs | Chromosomes     | Physical positions (bp) | CDC Frontier (Reference genome) | (Pusa 1103 & HPNB) | (ILWC 46 & LPNB) | Sequence Components of genome | Gene accession IDs | Putative functions                          |
|----------------------|----------------|-----------------|-------------------------|---------------------------------|--------------------|------------------|-------------------------------|--------------------|---------------------------------------------|
| SNP_17951_A_35725698 | NC_021162.1    | Ca_Kabuli_Chr03 | 35725698                | AA                              | GG                 | GG               | URR                           | 101503925          | BTB/POZ domain-containing protein At3g05675 |
| SNP_17953_A_35725845 | NC_021162.1    | Ca_Kabuli_Chr03 | 35725845                | AA                              | TT                 | TT               | URR                           | 101503925          | BTB/POZ domain-containing protein At3g05675 |
| SNP_17954_A_35725895 | NC_021162.1    | Ca_Kabuli_Chr03 | 35725895                | GG                              | TT                 | TT               | URR                           | 101503925          | BTB/POZ domain-containing protein At3g05675 |
| SNP_17956_A_35725921 | NC_021162.1    | Ca_Kabuli_Chr03 | 35725921                | GG                              | CC                 | CC               | URR                           | 101503925          | BTB/POZ domain-containing protein At3g05675 |
| SNP_17957_A_35725952 | NC_021162.1    | Ca_Kabuli_Chr03 | 35725952                | GG                              | AA                 | AA               | URR                           | 101503925          | BTB/POZ domain-containing protein At3g05675 |
| SNP_17958_A_35726092 | NC_021162.1    | Ca_Kabuli_Chr03 | 35726092                | TT                              | CC                 | CC               | URR                           | 101503925          | BTB/POZ domain-containing protein At3g05675 |
| SNP_17959_A_35726095 | NC_021162.1    | Ca_Kabuli_Chr03 | 35726095                | TT                              | CC                 | CC               | URR                           | 101503925          | BTB/POZ domain-containing protein At3g05675 |
| SNP_17960_A_35726358 | NC_021162.1    | Ca_Kabuli_Chr03 | 35726358                | GG                              | AA                 | AA               | URR                           | 101503925          | BTB/POZ domain-containing protein At3g05675 |
| SNP_17961_A_35726377 | NC_021162.1    | Ca_Kabuli_Chr03 | 35726377                | AA                              | TT                 | TT               | URR                           | 101503925          | BTB/POZ domain-containing protein At3g05675 |
| SNP_17963_A_35726557 | NC_021162.1    | Ca_Kabuli_Chr03 | 35726557                | GG                              | AA                 | AA               | URR                           | 101503925          | BTB/POZ domain-containing protein At3g05675 |
| SNP_17964_A_35726636 | NC_021162.1    | Ca_Kabuli_Chr03 | 35726636                | TT                              | CC                 | CC               | INTERGENIC                    |                    |                                             |
| SNP_17965_A_35726822 | NC_021162.1    | Ca_Kabuli_Chr03 | 35726822                | TT                              | CC                 | CC               | INTERGENIC                    |                    |                                             |
| SNP_17966_A_35727048 | NC_021162.1    | Ca_Kabuli_Chr03 | 35727048                | CC                              | TT                 | TT               | INTERGENIC                    |                    |                                             |
| SNP_17967_A_35727072 | NC_021162.1    | Ca_Kabuli_Chr03 | 35727072                | CC                              | TT                 | TT               | INTERGENIC                    |                    |                                             |
| SNP_17968_A_35727087 | NC_021162.1    | Ca_Kabuli_Chr03 | 35727087                | AA                              | GG                 | GG               | INTERGENIC                    |                    |                                             |
| SNP_17969_A_35727301 | NC_021162.1    | Ca_Kabuli_Chr03 | 35727301                | AA                              | GG                 | GG               | INTERGENIC                    |                    |                                             |
| SNP_17970_A_35727346 | NC_021162.1    | Ca_Kabuli_Chr03 | 35727346                | CC                              | GG                 | GG               | INTERGENIC                    |                    |                                             |
| SNP_17971_A_35727950 | NC_021162.1    | Ca_Kabuli_Chr03 | 35727950                | CC                              | TT                 | TT               | INTERGENIC                    |                    |                                             |
| SNP_17972_A_35728304 | NC_021162.1    | Ca_Kabuli_Chr03 | 35728304                | TT                              | CC                 | CC               | INTERGENIC                    |                    |                                             |
| SNP_17973_A_35728312 | NC_021162.1    | Ca_Kabuli_Chr03 | 35728312                | GG                              | AA                 | AA               | INTERGENIC                    |                    |                                             |
| SNP_17974_A_35728326 | NC_021162.1    | Ca_Kabuli_Chr03 | 35728326                | GG                              | AA                 | AA               | INTERGENIC                    |                    |                                             |
| SNP_17975_A_35728360 | NC_021162.1    | Ca_Kabuli_Chr03 | 35728360                | GG                              | AA                 | AA               | INTERGENIC                    |                    |                                             |

| SNPs IDs             | Chromosome IDs | Chromosomes     | Physical positions (bp) | CDC Frontier genome (Reference genome) | (Pusa 1103 & HPNB) | (ILWC 46 & LPNB) | Sequence genome | Components of | Gene accession IDs                | Putative functions |
|----------------------|----------------|-----------------|-------------------------|----------------------------------------|--------------------|------------------|-----------------|---------------|-----------------------------------|--------------------|
| SNP_17976_A_35728530 | NC_021162.1    | Ca_Kabuli_Chr03 | 35728530                | GG                                     | AA                 | AA               | INTERGENIC      |               |                                   |                    |
| SNP_17977_A_35728544 | NC_021162.1    | Ca_Kabuli_Chr03 | 35728544                | GG                                     | AA                 | AA               | INTERGENIC      |               |                                   |                    |
| SNP_17978_A_35728614 | NC_021162.1    | Ca_Kabuli_Chr03 | 35728614                | AA                                     | GG                 | GG               | INTERGENIC      |               |                                   |                    |
| SNP_17979_A_35728847 | NC_021162.1    | Ca_Kabuli_Chr03 | 35728847                | AA                                     | CC                 | CC               | INTERGENIC      |               |                                   |                    |
| SNP_17980_A_35729048 | NC_021162.1    | Ca_Kabuli_Chr03 | 35729048                | AA                                     | GG                 | GG               | INTERGENIC      |               |                                   |                    |
| SNP_17981_A_35729810 | NC_021162.1    | Ca_Kabuli_Chr03 | 35729810                | TT                                     | CC                 | CC               | INTERGENIC      |               |                                   |                    |
| SNP_17983_A_35730691 | NC_021162.1    | Ca_Kabuli_Chr03 | 35730691                | TT                                     | AA                 | AA               | INTERGENIC      |               |                                   |                    |
| SNP_17984_A_35731256 | NC_021162.1    | Ca_Kabuli_Chr03 | 35731256                | CC                                     | GG                 | GG               | INTERGENIC      |               |                                   |                    |
| SNP_17985_A_35733292 | NC_021162.1    | Ca_Kabuli_Chr03 | 35733292                | CC                                     | TT                 | TT               | INTERGENIC      |               |                                   |                    |
| SNP_17986_A_35733299 | NC_021162.1    | Ca_Kabuli_Chr03 | 35733299                | AA                                     | TT                 | TT               | INTERGENIC      |               |                                   |                    |
| SNP_17988_A_35733646 | NC_021162.1    | Ca_Kabuli_Chr03 | 35733646                | AA                                     | TT                 | TT               | INTERGENIC      |               |                                   |                    |
| SNP_17989_A_35733787 | NC_021162.1    | Ca_Kabuli_Chr03 | 35733787                | GG                                     | AA                 | AA               | INTERGENIC      |               |                                   |                    |
| SNP_17990_A_35733796 | NC_021162.1    | Ca_Kabuli_Chr03 | 35733796                | GG                                     | AA                 | AA               | INTERGENIC      |               |                                   |                    |
| SNP_17991_A_35733854 | NC_021162.1    | Ca_Kabuli_Chr03 | 35733854                | TT                                     | CC                 | CC               | INTERGENIC      |               |                                   |                    |
| SNP_17992_A_35734994 | NC_021162.1    | Ca_Kabuli_Chr03 | 35734994                | CC                                     | TT                 | TT               | INTERGENIC      |               |                                   |                    |
| SNP_17993_A_35735032 | NC_021162.1    | Ca_Kabuli_Chr03 | 35735032                | CC                                     | TT                 | TT               | INTERGENIC      |               |                                   |                    |
| SNP_17994_A_35735050 | NC_021162.1    | Ca_Kabuli_Chr03 | 35735050                | AA                                     | CC                 | CC               | INTERGENIC      |               |                                   |                    |
| SNP_17995_A_35735060 | NC_021162.1    | Ca_Kabuli_Chr03 | 35735060                | AA                                     | GG                 | GG               | INTERGENIC      |               |                                   |                    |
| SNP_17996_A_35735075 | NC_021162.1    | Ca_Kabuli_Chr03 | 35735075                | TT                                     | AA                 | AA               | INTERGENIC      |               |                                   |                    |
| SNP_17997_A_35736248 | NC_021162.1    | Ca_Kabuli_Chr03 | 35736248                | GG                                     | CC                 | CC               | INTERGENIC      |               |                                   |                    |
| SNP_17998_A_35736557 | NC_021162.1    | Ca_Kabuli_Chr03 | 35736557                | GG                                     | TT                 | TT               | INTERGENIC      |               |                                   |                    |
| SNP_17999_A_35739917 | NC_021162.1    | Ca_Kabuli_Chr03 | 35739917                | CC                                     | GG                 | GG               | DRR             | 101504462     | E3 ubiquitin-protein ligase PUB22 |                    |

| SNPs IDs             | Chromosome IDs | Chromosomes     | Physical positions (bp) | CDC Frontier genome (Reference genome) | (Pusa 1103 & HPNB) | (ILWC 46 & LPNB) | Sequence Components of genome | Gene accession IDs | Putative functions                               |
|----------------------|----------------|-----------------|-------------------------|----------------------------------------|--------------------|------------------|-------------------------------|--------------------|--------------------------------------------------|
| SNP_18000_A_35740106 | NC_021162.1    | Ca_Kabuli_Chr03 | 35740106                | AA                                     | GG                 | GG               | URR                           | 101504462          | E3 ubiquitin-protein ligase PUB22                |
| SNP_18001_A_35742462 | NC_021162.1    | Ca_Kabuli_Chr03 | 35742462                | GG                                     | AA                 | AA               | INTERGENIC                    |                    |                                                  |
| SNP_18002_A_35742756 | NC_021162.1    | Ca_Kabuli_Chr03 | 35742756                | AA                                     | GG                 | GG               | INTERGENIC                    |                    |                                                  |
| SNP_18003_A_35742758 | NC_021162.1    | Ca_Kabuli_Chr03 | 35742758                | TT                                     | AA                 | AA               | INTERGENIC                    |                    |                                                  |
| SNP_18004_A_35743235 | NC_021162.1    | Ca_Kabuli_Chr03 | 35743235                | CC                                     | TT                 | TT               | INTERGENIC                    |                    |                                                  |
| SNP_18005_A_35744150 | NC_021162.1    | Ca_Kabuli_Chr03 | 35744150                | GG                                     | TT                 | TT               | INTERGENIC                    |                    |                                                  |
| SNP_18006_A_35744285 | NC_021162.1    | Ca_Kabuli_Chr03 | 35744285                | GG                                     | AA                 | AA               | INTERGENIC                    |                    |                                                  |
| SNP_18007_A_35744346 | NC_021162.1    | Ca_Kabuli_Chr03 | 35744346                | TT                                     | CC                 | CC               | INTERGENIC                    |                    |                                                  |
| SNP_18008_A_35744354 | NC_021162.1    | Ca_Kabuli_Chr03 | 35744354                | GG                                     | CC                 | CC               | INTERGENIC                    |                    |                                                  |
| SNP_18009_A_35745593 | NC_021162.1    | Ca_Kabuli_Chr03 | 35745593                | CC                                     | AA                 | AA               | INTERGENIC                    |                    |                                                  |
| SNP_18010_A_35758196 | NC_021162.1    | Ca_Kabuli_Chr03 | 35758196                | GG                                     | CC                 | CC               | INTRON                        | 101504782          | trafficking protein particle complex subunit 8   |
| SNP_18012_A_35767634 | NC_021162.1    | Ca_Kabuli_Chr03 | 35767634                | AA                                     | GG                 | GG               | URR                           | 101504782          | trafficking protein particle complex subunit 8   |
| SNP_18013_A_35767852 | NC_021162.1    | Ca_Kabuli_Chr03 | 35767852                | AA                                     | GG                 | GG               | URR                           | 101504782          | trafficking protein particle complex subunit 8   |
| SNP_18014_A_35767854 | NC_021162.1    | Ca_Kabuli_Chr03 | 35767854                | AA                                     | GG                 | GG               | URR                           | 101504782          | trafficking protein particle complex subunit 8   |
| SNP_18015_A_35768040 | NC_021162.1    | Ca_Kabuli_Chr03 | 35768040                | TT                                     | CC                 | CC               | DRR                           | 101505099          | syntaxin-121-like                                |
| SNP_18016_A_35768566 | NC_021162.1    | Ca_Kabuli_Chr03 | 35768566                | AA                                     | CC                 | CC               | DRR                           | 101505099          | syntaxin-121-like                                |
| SNP_18018_A_35768801 | NC_021162.1    | Ca_Kabuli_Chr03 | 35768801                | CC                                     | TT                 | TT               | DRR                           | 101505099          | syntaxin-121-like                                |
| SNP_18021_A_35772767 | NC_021162.1    | Ca_Kabuli_Chr03 | 35772767                | CC                                     | GG                 | GG               | DRR                           | 101505421          | putative deoxyribonuclease TATDN1                |
| SNP_18022_A_35773029 | NC_021162.1    | Ca_Kabuli_Chr03 | 35773029                | AA                                     | GG                 | GG               | DRR                           | 101505421          | putative deoxyribonuclease TATDN1                |
| SNP_18023_A_35773030 | NC_021162.1    | Ca_Kabuli_Chr03 | 35773030                | TT                                     | CC                 | CC               | DRR                           | 101505421          | putative deoxyribonuclease TATDN1                |
| SNP_18025_A_35779408 | NC_021162.1    | Ca_Kabuli_Chr03 | 35779408                | AA                                     | GG                 | GG               | INTERGENIC                    |                    |                                                  |
| SNP_18027_A_35779997 | NC_021162.1    | Ca_Kabuli_Chr03 | 35779997                | CC                                     | TT                 | TT               | DRR                           | 101506076          | nuclear transcription factor Y subunit A-10-like |

| SNPs IDs             | Chromosome IDs | Chromosomes     | Physical positions (bp) | CDC Frontier (Reference genome) | (Pusa 1103 & HPNB) | (ILWC 46 & LPNB) | Sequence Components of genome | Gene accession IDs | Putative functions                               |
|----------------------|----------------|-----------------|-------------------------|---------------------------------|--------------------|------------------|-------------------------------|--------------------|--------------------------------------------------|
| SNP_18028_A_35783245 | NC_021162.1    | Ca_Kabuli_Chr03 | 35783245                | AA                              | CC                 | CC               | INTRON                        | 101506076          | nuclear transcription factor Y subunit A-10-like |
| SNP_18031_A_35784669 | NC_021162.1    | Ca_Kabuli_Chr03 | 35784669                | AA                              | GG                 | GG               | INTRON                        | 101506076          | nuclear transcription factor Y subunit A-10-like |
| SNP_18033_A_35786891 | NC_021162.1    | Ca_Kabuli_Chr03 | 35786891                | AA                              | TT                 | TT               | URR                           | 101506076          | nuclear transcription factor Y subunit A-10-like |
| SNP_18035_A_35789323 | NC_021162.1    | Ca_Kabuli_Chr03 | 35789323                | TT                              | CC                 | CC               | INTERGENIC                    |                    |                                                  |
| SNP_18036_A_35790393 | NC_021162.1    | Ca_Kabuli_Chr03 | 35790393                | CC                              | AA                 | AA               | INTERGENIC                    |                    |                                                  |
| SNP_18037_A_35790420 | NC_021162.1    | Ca_Kabuli_Chr03 | 35790420                | AA                              | GG                 | GG               | INTERGENIC                    |                    |                                                  |
| SNP_18038_A_35794095 | NC_021162.1    | Ca_Kabuli_Chr03 | 35794095                | AA                              | TT                 | TT               | INTERGENIC                    |                    |                                                  |
| SNP_18039_A_35795289 | NC_021162.1    | Ca_Kabuli_Chr03 | 35795289                | GG                              | AA                 | AA               | INTERGENIC                    |                    |                                                  |
| SNP_18041_A_35799636 | NC_021162.1    | Ca_Kabuli_Chr03 | 35799636                | CC                              | TT                 | TT               | INTERGENIC                    |                    |                                                  |
| SNP_18043_A_35800354 | NC_021162.1    | Ca_Kabuli_Chr03 | 35800354                | GG                              | AA                 | AA               | INTERGENIC                    |                    |                                                  |
| SNP_18044_A_35801000 | NC_021162.1    | Ca_Kabuli_Chr03 | 35801000                | TT                              | CC                 | CC               | DRR                           | 101506391          | uncharacterized protein At5g39865-like           |
| SNP_18045_A_35801398 | NC_021162.1    | Ca_Kabuli_Chr03 | 35801398                | AA                              | GG                 | GG               | DRR                           | 101506391          | uncharacterized protein At5g39865-like           |
| SNP_18046_A_35801401 | NC_021162.1    | Ca_Kabuli_Chr03 | 35801401                | AA                              | GG                 | GG               | DRR                           | 101506391          | uncharacterized protein At5g39865-like           |
| SNP_18048_A_35801780 | NC_021162.1    | Ca_Kabuli_Chr03 | 35801780                | CC                              | TT                 | TT               | URR                           | 101506391          | uncharacterized protein At5g39865-like           |
| SNP_18049_A_35803112 | NC_021162.1    | Ca_Kabuli_Chr03 | 35803112                | TT                              | GG                 | GG               | URR                           | 101506391          | uncharacterized protein At5g39865-like           |
| SNP_18050_A_35804115 | NC_021162.1    | Ca_Kabuli_Chr03 | 35804115                | AA                              | GG                 | GG               | URR                           | 101506391          | uncharacterized protein At5g39865-like           |
| SNP_18051_A_35807265 | NC_021162.1    | Ca_Kabuli_Chr03 | 35807265                | TT                              | CC                 | CC               | INTERGENIC                    |                    |                                                  |
| SNP_18054_A_35811462 | NC_021162.1    | Ca_Kabuli_Chr03 | 35811462                | CC                              | TT                 | TT               | URR                           | 101506722          | uncharacterized LOC101506722                     |
| SNP_18056_A_35811476 | NC_021162.1    | Ca_Kabuli_Chr03 | 35811476                | AA                              | GG                 | GG               | URR                           | 101506722          | uncharacterized LOC101506722                     |
| SNP_18057_A_35811492 | NC_021162.1    | Ca_Kabuli_Chr03 | 35811492                | CC                              | TT                 | TT               | URR                           | 101506722          | uncharacterized LOC101506722                     |
| SNP_18058_A_35812541 | NC_021162.1    | Ca_Kabuli_Chr03 | 35812541                | GG                              | TT                 | TT               | URR                           | 101506722          | uncharacterized LOC101506722                     |
| SNP_18059_A_35812872 | NC_021162.1    | Ca_Kabuli_Chr03 | 35812872                | CC                              | AA                 | AA               | INTERGENIC                    |                    |                                                  |

| SNPs IDs             | Chromosome IDs | Chromosomes     | Physical positions (bp) | CDC Frontier genome (Reference genome) | (Pusa 1103 & HPNB) | (ILWC 46 & LPNB) | Sequence Components of genome | Gene accession IDs | Putative functions                           |
|----------------------|----------------|-----------------|-------------------------|----------------------------------------|--------------------|------------------|-------------------------------|--------------------|----------------------------------------------|
| SNP_18060_A_35815620 | NC_021162.1    | Ca_Kabuli_Chr03 | 35815620                | TT                                     | AA                 | AA               | INTERGENIC                    |                    |                                              |
| SNP_18061_A_35817363 | NC_021162.1    | Ca_Kabuli_Chr03 | 35817363                | GG                                     | AA                 | AA               | DRR                           | 101507058          | ubiquitin carboxyl-terminal hydrolase 8-like |
| SNP_18062_A_35817623 | NC_021162.1    | Ca_Kabuli_Chr03 | 35817623                | GG                                     | TT                 | TT               | DRR                           | 101507058          | ubiquitin carboxyl-terminal hydrolase 8-like |
| SNP_18063_A_35817624 | NC_021162.1    | Ca_Kabuli_Chr03 | 35817624                | GG                                     | AA                 | AA               | DRR                           | 101507058          | ubiquitin carboxyl-terminal hydrolase 8-like |
| SNP_18064_A_35817658 | NC_021162.1    | Ca_Kabuli_Chr03 | 35817658                | GG                                     | TT                 | TT               | DRR                           | 101507058          | ubiquitin carboxyl-terminal hydrolase 8-like |
| SNP_18065_A_35817704 | NC_021162.1    | Ca_Kabuli_Chr03 | 35817704                | GG                                     | AA                 | AA               | DRR                           | 101507058          | ubiquitin carboxyl-terminal hydrolase 8-like |
| SNP_18066_A_35817818 | NC_021162.1    | Ca_Kabuli_Chr03 | 35817818                | AA                                     | GG                 | GG               | DRR                           | 101507058          | ubiquitin carboxyl-terminal hydrolase 8-like |
| SNP_18067_A_35822107 | NC_021162.1    | Ca_Kabuli_Chr03 | 35822107                | TT                                     | AA                 | AA               | INTRON                        | 101507058          | ubiquitin carboxyl-terminal hydrolase 8-like |
| SNP_18068_A_35823916 | NC_021162.1    | Ca_Kabuli_Chr03 | 35823916                | GG                                     | AA                 | AA               | INTRON                        | 101507058          | ubiquitin carboxyl-terminal hydrolase 8-like |
| SNP_18069_A_35824440 | NC_021162.1    | Ca_Kabuli_Chr03 | 35824440                | AA                                     | GG                 | GG               | INTRON                        | 101507058          | ubiquitin carboxyl-terminal hydrolase 8-like |
| SNP_18070_A_35828993 | NC_021162.1    | Ca_Kabuli_Chr03 | 35828993                | CC                                     | TT                 | TT               | INTERGENIC                    |                    |                                              |
| SNP_18071_A_35832185 | NC_021162.1    | Ca_Kabuli_Chr03 | 35832185                | TT                                     | AA                 | AA               | INTRON                        | 101507374          | uncharacterized LOC101507374                 |
| SNP_18073_A_35833520 | NC_021162.1    | Ca_Kabuli_Chr03 | 35833520                | AA                                     | GG                 | GG               | URR                           | 101507895          | dihydroneopterin aldolase 2-like             |
| SNP_18074_A_35836339 | NC_021162.1    | Ca_Kabuli_Chr03 | 35836339                | GG                                     | AA                 | AA               | INTERGENIC                    |                    |                                              |
| SNP_18075_A_35836954 | NC_021162.1    | Ca_Kabuli_Chr03 | 35836954                | AA                                     | GG                 | GG               | INTERGENIC                    |                    |                                              |
| SNP_18076_A_35837466 | NC_021162.1    | Ca_Kabuli_Chr03 | 35837466                | GG                                     | AA                 | AA               | INTRON                        | 101507374          | uncharacterized LOC101507374                 |
| SNP_18077_A_35839332 | NC_021162.1    | Ca_Kabuli_Chr03 | 35839332                | TT                                     | AA                 | AA               | URR                           | 101507374          | uncharacterized LOC101507374                 |
| SNP_18078_A_35839702 | NC_021162.1    | Ca_Kabuli_Chr03 | 35839702                | AA                                     | GG                 | GG               | DRR                           | 101508435          | uncharacterized LOC101508435                 |
| SNP_18079_A_35841677 | NC_021162.1    | Ca_Kabuli_Chr03 | 35841677                | AA                                     | TT                 | TT               | INTERGENIC                    |                    |                                              |
| SNP_18080_A_35841707 | NC_021162.1    | Ca_Kabuli_Chr03 | 35841707                | CC                                     | TT                 | TT               | INTERGENIC                    |                    |                                              |
| SNP_18081_A_35842559 | NC_021162.1    | Ca_Kabuli_Chr03 | 35842559                | GG                                     | TT                 | TT               | INTERGENIC                    |                    |                                              |
| SNP_18082_A_35844819 | NC_021162.1    | Ca_Kabuli_Chr03 | 35844819                | AA                                     | GG                 | GG               | INTRON                        | 101508435          | uncharacterized LOC101508435                 |



| SNPs IDs             | Chromosome IDs | Chromosomes     | Physical positions (bp) | CDC Frontier (Reference genome) | (Pusa 1103 & HPNB) | (ILWC 46 & LPNB) | Sequence Components of genome | Gene accession IDs | Putative functions                        |
|----------------------|----------------|-----------------|-------------------------|---------------------------------|--------------------|------------------|-------------------------------|--------------------|-------------------------------------------|
| SNP_18083_A_35846182 | NC_021162.1    | Ca_Kabuli_Chr03 | 35846182                | GG                              | TT                 | TT               | INTRON                        | 101508435          | uncharacterized LOC101508435              |
| SNP_18084_A_35847625 | NC_021162.1    | Ca_Kabuli_Chr03 | 35847625                | AA                              | GG                 | GG               | URR                           | 101508435          | uncharacterized LOC101508435              |
| SNP_18085_A_35848340 | NC_021162.1    | Ca_Kabuli_Chr03 | 35848340                | TT                              | GG                 | GG               | URR                           | 101508435          | uncharacterized LOC101508435              |
| SNP_18086_A_35848643 | NC_021162.1    | Ca_Kabuli_Chr03 | 35848643                | AA                              | GG                 | GG               | URR                           | 101508435          | uncharacterized LOC101508435              |
| SNP_18087_A_35850568 | NC_021162.1    | Ca_Kabuli_Chr03 | 35850568                | GG                              | TT                 | TT               | INTERGENIC                    |                    |                                           |
| SNP_18088_A_35850854 | NC_021162.1    | Ca_Kabuli_Chr03 | 35850854                | TT                              | CC                 | CC               | INTERGENIC                    |                    |                                           |
| SNP_18093_A_35860334 | NC_021162.1    | Ca_Kabuli_Chr03 | 35860334                | GG                              | AA                 | AA               | URR                           | 101488611          | calcium-dependent protein kinase 2        |
| SNP_18094_A_35862103 | NC_021162.1    | Ca_Kabuli_Chr03 | 35862103                | CC                              | TT                 | TT               | INTERGENIC                    |                    |                                           |
| SNP_18096_A_35869928 | NC_021162.1    | Ca_Kabuli_Chr03 | 35869928                | TT                              | AA                 | AA               | DRR                           | 101509588          | fasciclin-like arabinogalactan protein 16 |
| SNP_18097_A_35873079 | NC_021162.1    | Ca_Kabuli_Chr03 | 35873079                | CC                              | GG                 | GG               | URR                           | 101509588          | fasciclin-like arabinogalactan protein 16 |
| SNP_18098_A_35873086 | NC_021162.1    | Ca_Kabuli_Chr03 | 35873086                | CC                              | TT                 | TT               | URR                           | 101509588          | fasciclin-like arabinogalactan protein 16 |
| SNP_18100_A_35878035 | NC_021162.1    | Ca_Kabuli_Chr03 | 35878035                | GG                              | CC                 | CC               | INTRON                        | 101510235          | E3 ubiquitin-protein ligase RHF2A-like    |
| SNP_18101_A_35879164 | NC_021162.1    | Ca_Kabuli_Chr03 | 35879164                | GG                              | TT                 | TT               | URR                           | 101510235          | E3 ubiquitin-protein ligase RHF2A-like    |
| SNP_18102_A_35879734 | NC_021162.1    | Ca_Kabuli_Chr03 | 35879734                | CC                              | TT                 | TT               | URR                           | 101510235          | E3 ubiquitin-protein ligase RHF2A-like    |
| SNP_18103_A_35880776 | NC_021162.1    | Ca_Kabuli_Chr03 | 35880776                | CC                              | AA                 | AA               | INTRON                        | 101510569          | Unknown function                          |
| SNP_18104_A_35883408 | NC_021162.1    | Ca_Kabuli_Chr03 | 35883408                | GG                              | TT                 | TT               | URR                           | 101510569          | Unknown function                          |
| SNP_18105_A_35883639 | NC_021162.1    | Ca_Kabuli_Chr03 | 35883639                | GG                              | TT                 | TT               | URR                           | 101510569          | Unknown function                          |
| SNP_18106_A_35883649 | NC_021162.1    | Ca_Kabuli_Chr03 | 35883649                | TT                              | CC                 | CC               | URR                           | 101510569          | Unknown function                          |
| SNP_18107_A_35885255 | NC_021162.1    | Ca_Kabuli_Chr03 | 35885255                | AA                              | TT                 | TT               | INTERGENIC                    |                    |                                           |
| SNP_18108_A_35885466 | NC_021162.1    | Ca_Kabuli_Chr03 | 35885466                | AA                              | CC                 | CC               | INTERGENIC                    |                    |                                           |
| SNP_18111_A_35894240 | NC_021162.1    | Ca_Kabuli_Chr03 | 35894240                | CC                              | TT                 | TT               | INTERGENIC                    |                    |                                           |
| SNP_18113_A_35894791 | NC_021162.1    | Ca_Kabuli_Chr03 | 35894791                | CC                              | TT                 | TT               | DRR                           | 101511111          | uncharacterized LOC101511111              |

| SNPs IDs             | Chromosome IDs | Chromosomes     | Physical positions (bp) | CDC Frontier genome (Reference genome) | (Pusa 1103 & HPNB) | (ILWC 46 & LPNB) | Sequence Components of genome | Gene accession IDs | Putative functions                 |
|----------------------|----------------|-----------------|-------------------------|----------------------------------------|--------------------|------------------|-------------------------------|--------------------|------------------------------------|
| SNP_18114_A_35894793 | NC_021162.1    | Ca_Kabuli_Chr03 | 35894793                | GG                                     | AA                 | AA               | DRR                           | 101511111          | uncharacterized LOC101511111       |
| SNP_18116_A_35895372 | NC_021162.1    | Ca_Kabuli_Chr03 | 35895372                | AA                                     | GG                 | GG               | INTERGENIC                    |                    |                                    |
| SNP_18117_A_35895415 | NC_021162.1    | Ca_Kabuli_Chr03 | 35895415                | TT                                     | CC                 | CC               | INTERGENIC                    |                    |                                    |
| SNP_18118_A_35898581 | NC_021162.1    | Ca_Kabuli_Chr03 | 35898581                | CC                                     | TT                 | TT               | INTERGENIC                    |                    |                                    |
| SNP_18119_A_35898591 | NC_021162.1    | Ca_Kabuli_Chr03 | 35898591                | AA                                     | GG                 | GG               | INTERGENIC                    |                    |                                    |
| SNP_18120_A_35898948 | NC_021162.1    | Ca_Kabuli_Chr03 | 35898948                | TT                                     | CC                 | CC               | INTERGENIC                    |                    |                                    |
| SNP_18121_A_35898980 | NC_021162.1    | Ca_Kabuli_Chr03 | 35898980                | GG                                     | AA                 | AA               | INTERGENIC                    |                    |                                    |
| SNP_18122_A_35902635 | NC_021162.1    | Ca_Kabuli_Chr03 | 35902635                | GG                                     | AA                 | AA               | INTRON                        | 101511748          | ABC transporter G family member 22 |
| SNP_18123_A_35902641 | NC_021162.1    | Ca_Kabuli_Chr03 | 35902641                | GG                                     | AA                 | AA               | INTRON                        | 101511748          | ABC transporter G family member 22 |
| SNP_18124_A_35902656 | NC_021162.1    | Ca_Kabuli_Chr03 | 35902656                | CC                                     | TT                 | TT               | INTRON                        | 101511748          | ABC transporter G family member 22 |
| SNP_18125_A_35902660 | NC_021162.1    | Ca_Kabuli_Chr03 | 35902660                | GG                                     | AA                 | AA               | INTRON                        | 101511748          | ABC transporter G family member 22 |
| SNP_18126_A_35903585 | NC_021162.1    | Ca_Kabuli_Chr03 | 35903585                | GG                                     | CC                 | CC               | INTRON                        | 101511748          | ABC transporter G family member 22 |
| SNP_18127_A_35903593 | NC_021162.1    | Ca_Kabuli_Chr03 | 35903593                | TT                                     | CC                 | CC               | INTRON                        | 101511748          | ABC transporter G family member 22 |
| SNP_18128_A_35903596 | NC_021162.1    | Ca_Kabuli_Chr03 | 35903596                | TT                                     | CC                 | CC               | INTRON                        | 101511748          | ABC transporter G family member 22 |
| SNP_18129_A_35903625 | NC_021162.1    | Ca_Kabuli_Chr03 | 35903625                | CC                                     | AA                 | AA               | INTRON                        | 101511748          | ABC transporter G family member 22 |
| SNP_18130_A_35906593 | NC_021162.1    | Ca_Kabuli_Chr03 | 35906593                | TT                                     | AA                 | AA               | INTRON                        | 101511748          | ABC transporter G family member 22 |
| SNP_18131_A_35906713 | NC_021162.1    | Ca_Kabuli_Chr03 | 35906713                | AA                                     | TT                 | TT               | INTRON                        | 101511748          | ABC transporter G family member 22 |
| SNP_18132_A_35910847 | NC_021162.1    | Ca_Kabuli_Chr03 | 35910847                | GG                                     | AA                 | AA               | INTRON                        | 101511748          | ABC transporter G family member 22 |
| SNP_18133_A_35911128 | NC_021162.1    | Ca_Kabuli_Chr03 | 35911128                | GG                                     | CC                 | CC               | URR                           | 101511748          | ABC transporter G family member 22 |
| SNP_18135_A_35911684 | NC_021162.1    | Ca_Kabuli_Chr03 | 35911684                | TT                                     | CC                 | CC               | URR                           | 101511748          | ABC transporter G family member 22 |
| SNP_18136_A_35911760 | NC_021162.1    | Ca_Kabuli_Chr03 | 35911760                | TT                                     | CC                 | CC               | URR                           | 101511748          | ABC transporter G family member 22 |
| SNP_18137_A_35911768 | NC_021162.1    | Ca_Kabuli_Chr03 | 35911768                | TT                                     | AA                 | AA               | URR                           | 101511748          | ABC transporter G family member 22 |

| SNPs IDs             | Chromosome IDs | Chromosomes     | Physical positions (bp) | CDC Frontier (Reference genome) | (Pusa 1103 & HPNB) | (ILWC 46 & LPNB) | Sequence Components of genome | Gene accession IDs | Putative functions                                    |
|----------------------|----------------|-----------------|-------------------------|---------------------------------|--------------------|------------------|-------------------------------|--------------------|-------------------------------------------------------|
| SNP_18138_A_35911796 | NC_021162.1    | Ca_Kabuli_Chr03 | 35911796                | TT                              | CC                 | CC               | URR                           | 101511748          | ABC transporter G family member 22                    |
| SNP_18139_A_35915220 | NC_021162.1    | Ca_Kabuli_Chr03 | 35915220                | GG                              | AA                 | AA               | INTERGENIC                    |                    |                                                       |
| SNP_18140_A_35915255 | NC_021162.1    | Ca_Kabuli_Chr03 | 35915255                | GG                              | TT                 | TT               | INTERGENIC                    |                    |                                                       |
| SNP_18142_A_35918645 | NC_021162.1    | Ca_Kabuli_Chr03 | 35918645                | TT                              | CC                 | CC               | DRR                           | 101513139          | protein downstream neighbor of Son                    |
| SNP_18143_A_35921998 | NC_021162.1    | Ca_Kabuli_Chr03 | 35921998                | TT                              | CC                 | CC               | INTRON                        | 101513139          | protein downstream neighbor of Son                    |
| SNP_18144_A_35923206 | NC_021162.1    | Ca_Kabuli_Chr03 | 35923206                | AA                              | GG                 | GG               | INTRON                        | 101513139          | protein downstream neighbor of Son                    |
| SNP_18145_A_35924227 | NC_021162.1    | Ca_Kabuli_Chr03 | 35924227                | TT                              | AA                 | AA               | INTRON                        | 101513139          | protein downstream neighbor of Son                    |
| SNP_18146_A_35925039 | NC_021162.1    | Ca_Kabuli_Chr03 | 35925039                | TT                              | CC                 | CC               | INTERGENIC                    |                    |                                                       |
| SNP_18147_A_35928060 | NC_021162.1    | Ca_Kabuli_Chr03 | 35928060                | AA                              | GG                 | GG               | URR                           | 101513139          | protein downstream neighbor of Son                    |
| SNP_18148_A_35928393 | NC_021162.1    | Ca_Kabuli_Chr03 | 35928393                | AA                              | TT                 | TT               | URR                           | 101513139          | protein downstream neighbor of Son                    |
| SNP_18149_A_35928524 | NC_021162.1    | Ca_Kabuli_Chr03 | 35928524                | AA                              | GG                 | GG               | URR                           | 101513139          | protein downstream neighbor of Son                    |
| SNP_18150_A_35928566 | NC_021162.1    | Ca_Kabuli_Chr03 | 35928566                | TT                              | CC                 | CC               | URR                           | 101513139          | protein downstream neighbor of Son                    |
| SNP_18151_A_35928590 | NC_021162.1    | Ca_Kabuli_Chr03 | 35928590                | TT                              | CC                 | CC               | URR                           | 101513139          | protein downstream neighbor of Son                    |
| SNP_18153_A_35929084 | NC_021162.1    | Ca_Kabuli_Chr03 | 35929084                | CC                              | TT                 | TT               | DRR                           | 101513466          | pentatricopeptide repeat-containing protein At5g06540 |
| SNP_18154_A_35932462 | NC_021162.1    | Ca_Kabuli_Chr03 | 35932462                | CC                              | AA                 | AA               | DRR                           | 101513774          | F-box protein At5g06550                               |
| SNP_18155_A_35935793 | NC_021162.1    | Ca_Kabuli_Chr03 | 35935793                | AA                              | CC                 | CC               | DRR                           | 101514115          | myosin-binding protein 7-like                         |
| SNP_18156_A_35936784 | NC_021162.1    | Ca_Kabuli_Chr03 | 35936784                | AA                              | GG                 | GG               | URR                           | 101513774          | F-box protein At5g06550                               |
| SNP_18157_A_35936797 | NC_021162.1    | Ca_Kabuli_Chr03 | 35936797                | AA                              | TT                 | TT               | URR                           | 101513774          | F-box protein At5g06550                               |
| SNP_18158_A_35941626 | NC_021162.1    | Ca_Kabuli_Chr03 | 35941626                | CC                              | TT                 | TT               | INTERGENIC                    |                    |                                                       |
| SNP_18159_A_35942301 | NC_021162.1    | Ca_Kabuli_Chr03 | 35942301                | CC                              | AA                 | AA               | INTERGENIC                    |                    |                                                       |
| SNP_18160_A_35942305 | NC_021162.1    | Ca_Kabuli_Chr03 | 35942305                | CC                              | TT                 | TT               | INTERGENIC                    |                    |                                                       |
| SNP_18161_A_35942348 | NC_021162.1    | Ca_Kabuli_Chr03 | 35942348                | CC                              | TT                 | TT               | INTERGENIC                    |                    |                                                       |

| SNPs IDs             | Chromosome IDs | Chromosomes     | Physical positions (bp) | CDC Frontier genome (Reference genome) | (Pusa 1103 & HPNB) | (ILWC 46 & LPNB) | Sequence Components of genome | Gene accession IDs | Putative functions                                  |
|----------------------|----------------|-----------------|-------------------------|----------------------------------------|--------------------|------------------|-------------------------------|--------------------|-----------------------------------------------------|
| SNP_18162_A_35946667 | NC_021162.1    | Ca_Kabuli_Chr03 | 35946667                | AA                                     | GG                 | GG               | INTRON                        | 101514440          | 60S ribosomal protein L35a-1-like                   |
| SNP_18163_A_35947846 | NC_021162.1    | Ca_Kabuli_Chr03 | 35947846                | AA                                     | TT                 | TT               | DRR                           | 101514440          | 60S ribosomal protein L35a-1-like                   |
| SNP_18165_A_35948139 | NC_021162.1    | Ca_Kabuli_Chr03 | 35948139                | AA                                     | TT                 | TT               | URR                           | 101514440          | 60S ribosomal protein L35a-1-like                   |
| SNP_18166_A_35951326 | NC_021162.1    | Ca_Kabuli_Chr03 | 35951326                | TT                                     | AA                 | AA               | INTERGENIC                    |                    |                                                     |
| SNP_18167_A_35954073 | NC_021162.1    | Ca_Kabuli_Chr03 | 35954073                | TT                                     | CC                 | CC               | INTERGENIC                    |                    |                                                     |
| SNP_18168_A_35954141 | NC_021162.1    | Ca_Kabuli_Chr03 | 35954141                | GG                                     | CC                 | CC               | INTERGENIC                    |                    |                                                     |
| SNP_18169_A_35954187 | NC_021162.1    | Ca_Kabuli_Chr03 | 35954187                | CC                                     | TT                 | TT               | INTERGENIC                    |                    |                                                     |
| SNP_18170_A_35954352 | NC_021162.1    | Ca_Kabuli_Chr03 | 35954352                | TT                                     | CC                 | CC               | INTERGENIC                    |                    |                                                     |
| SNP_18171_A_35959640 | NC_021162.1    | Ca_Kabuli_Chr03 | 35959640                | TT                                     | CC                 | CC               | INTRON                        | 101514764          | probable carboxylesterase 15                        |
| SNP_18172_A_35959668 | NC_021162.1    | Ca_Kabuli_Chr03 | 35959668                | TT                                     | AA                 | AA               | INTRON                        | 101514764          | probable carboxylesterase 15                        |
| SNP_18173_A_35960018 | NC_021162.1    | Ca_Kabuli_Chr03 | 35960018                | AA                                     | TT                 | TT               | INTRON                        | 101514764          | probable carboxylesterase 15                        |
| SNP_18176_A_35963558 | NC_021162.1    | Ca_Kabuli_Chr03 | 35963558                | TT                                     | GG                 | GG               | URR                           | 101514764          | probable carboxylesterase 15                        |
| SNP_18177_A_35965502 | NC_021162.1    | Ca_Kabuli_Chr03 | 35965502                | AA                                     | GG                 | GG               | INTERGENIC                    |                    |                                                     |
| SNP_18178_A_35965794 | NC_021162.1    | Ca_Kabuli_Chr03 | 35965794                | AA                                     | GG                 | GG               | INTERGENIC                    |                    |                                                     |
| SNP_18179_A_35965831 | NC_021162.1    | Ca_Kabuli_Chr03 | 35965831                | AA                                     | CC                 | CC               | INTERGENIC                    |                    |                                                     |
| SNP_18180_A_35966139 | NC_021162.1    | Ca_Kabuli_Chr03 | 35966139                | CC                                     | TT                 | TT               | INTERGENIC                    |                    |                                                     |
| SNP_18181_A_35968176 | NC_021162.1    | Ca_Kabuli_Chr03 | 35968176                | AA                                     | TT                 | TT               | DRR                           | 101515089          | D-lactate dehydrogenase [cytochrome], mitochondrial |
| SNP_18182_A_35968932 | NC_021162.1    | Ca_Kabuli_Chr03 | 35968932                | AA                                     | GG                 | GG               | DRR                           | 101515089          | D-lactate dehydrogenase [cytochrome], mitochondrial |
| SNP_18186_A_35977041 | NC_021162.1    | Ca_Kabuli_Chr03 | 35977041                | CC                                     | TT                 | TT               | INTRON                        | 101515089          | D-lactate dehydrogenase [cytochrome], mitochondrial |
| SNP_18188_A_35982741 | NC_021162.1    | Ca_Kabuli_Chr03 | 35982741                | AA                                     | CC                 | CC               | DRR                           | 101489285          | probable E3 ubiquitin-protein ligase BAH1-like      |
| SNP_18189_A_35982754 | NC_021162.1    | Ca_Kabuli_Chr03 | 35982754                | CC                                     | TT                 | TT               | DRR                           | 101489285          | probable E3 ubiquitin-protein ligase BAH1-like      |
| SNP_18190_A_35982772 | NC_021162.1    | Ca_Kabuli_Chr03 | 35982772                | TT                                     | CC                 | CC               | DRR                           | 101489285          | probable E3 ubiquitin-protein ligase BAH1-like      |

| SNPs IDs             | Chromosome IDs | Chromosomes     | Physical positions (bp) | CDC Frontier (Reference genome) | (Pusa 1103 & HPNB) | (ILWC 46 & LPNB) | Sequence Components of genome | Gene accession IDs | Putative functions                             |
|----------------------|----------------|-----------------|-------------------------|---------------------------------|--------------------|------------------|-------------------------------|--------------------|------------------------------------------------|
| SNP_18191_A_35983006 | NC_021162.1    | Ca_Kabuli_Chr03 | 35983006                | TT                              | CC                 | CC               | INTRON                        | 101489285          | probable E3 ubiquitin-protein ligase BAH1-like |
| SNP_18192_A_35987871 | NC_021162.1    | Ca_Kabuli_Chr03 | 35987871                | GG                              | CC                 | CC               | URR                           | 101489285          | probable E3 ubiquitin-protein ligase BAH1-like |
| SNP_18193_A_35988044 | NC_021162.1    | Ca_Kabuli_Chr03 | 35988044                | AA                              | TT                 | TT               | URR                           | 101489285          | probable E3 ubiquitin-protein ligase BAH1-like |
| SNP_18194_A_35988060 | NC_021162.1    | Ca_Kabuli_Chr03 | 35988060                | TT                              | GG                 | GG               | URR                           | 101489285          | probable E3 ubiquitin-protein ligase BAH1-like |
| SNP_18195_A_35988085 | NC_021162.1    | Ca_Kabuli_Chr03 | 35988085                | AA                              | GG                 | GG               | URR                           | 101489285          | probable E3 ubiquitin-protein ligase BAH1-like |
| SNP_18197_A_35991024 | NC_021162.1    | Ca_Kabuli_Chr03 | 35991024                | AA                              | GG                 | GG               | SYNONYMOUS_CODING             | 101515747          | uncharacterized LOC101515747                   |
| SNP_18198_A_35992486 | NC_021162.1    | Ca_Kabuli_Chr03 | 35992486                | AA                              | GG                 | GG               | URR                           | 101515747          | uncharacterized LOC101515747                   |
| SNP_18199_A_35993606 | NC_021162.1    | Ca_Kabuli_Chr03 | 35993606                | TT                              | CC                 | CC               | URR                           | 101515747          | uncharacterized LOC101515747                   |
| SNP_18200_A_35993630 | NC_021162.1    | Ca_Kabuli_Chr03 | 35993630                | CC                              | AA                 | AA               | URR                           | 101515747          | uncharacterized LOC101515747                   |
| SNP_18201_A_35993631 | NC_021162.1    | Ca_Kabuli_Chr03 | 35993631                | AA                              | GG                 | GG               | URR                           | 101515747          | uncharacterized LOC101515747                   |
| SNP_18202_A_35993741 | NC_021162.1    | Ca_Kabuli_Chr03 | 35993741                | GG                              | AA                 | AA               | INTERGENIC                    |                    |                                                |
| SNP_18203_A_35994108 | NC_021162.1    | Ca_Kabuli_Chr03 | 35994108                | AA                              | GG                 | GG               | DRR                           | 101488510          | proton-coupled amino acid transporter 3        |
| SNP_18204_A_35994154 | NC_021162.1    | Ca_Kabuli_Chr03 | 35994154                | AA                              | GG                 | GG               | DRR                           | 101488510          | proton-coupled amino acid transporter 3        |
| SNP_18206_A_35995895 | NC_021162.1    | Ca_Kabuli_Chr03 | 35995895                | CC                              | GG                 | GG               | INTERGENIC                    |                    |                                                |
| SNP_18207_A_35998725 | NC_021162.1    | Ca_Kabuli_Chr03 | 35998725                | CC                              | TT                 | TT               | URR                           | 101488510          | proton-coupled amino acid transporter 3        |
| SNP_18208_A_35999930 | NC_021162.1    | Ca_Kabuli_Chr03 | 35999930                | TT                              | CC                 | CC               | DRR                           | 101489280          | probable glutamate carboxypeptidase 2          |
| SNP_18209_A_36000012 | NC_021162.1    | Ca_Kabuli_Chr03 | 36000012                | AA                              | TT                 | TT               | DRR                           | 101489280          | probable glutamate carboxypeptidase 2          |
| SNP_18210_A_36000018 | NC_021162.1    | Ca_Kabuli_Chr03 | 36000018                | CC                              | TT                 | TT               | DRR                           | 101489280          | probable glutamate carboxypeptidase 2          |
| SNP_18211_A_36000214 | NC_021162.1    | Ca_Kabuli_Chr03 | 36000214                | GG                              | AA                 | AA               | DRR                           | 101489280          | probable glutamate carboxypeptidase 2          |
| SNP_18212_A_36003029 | NC_021162.1    | Ca_Kabuli_Chr03 | 36003029                | GG                              | TT                 | TT               | INTERGENIC                    |                    |                                                |
| SNP_18213_A_36003060 | NC_021162.1    | Ca_Kabuli_Chr03 | 36003060                | GG                              | AA                 | AA               | INTERGENIC                    |                    |                                                |
| SNP_18214_A_36006161 | NC_021162.1    | Ca_Kabuli_Chr03 | 36006161                | GG                              | CC                 | CC               | INTERGENIC                    |                    |                                                |

| SNPs IDs             | Chromosome IDs | Chromosomes     | Physical positions (bp) | CDC Frontier genome (Reference genome) | (Pusa 1103 & HPNB) | (ILWC 46 & LPNB) | Sequence Components of genome | Gene accession IDs | Putative functions                                                   |
|----------------------|----------------|-----------------|-------------------------|----------------------------------------|--------------------|------------------|-------------------------------|--------------------|----------------------------------------------------------------------|
| SNP_18215_A_36006240 | NC_021162.1    | Ca_Kabuli_Chr03 | 36006240                | TT                                     | AA                 | AA               | INTERGENIC                    |                    |                                                                      |
| SNP_18216_A_36013761 | NC_021162.1    | Ca_Kabuli_Chr03 | 36013761                | AA                                     | GG                 | GG               | DRR                           | 101489602          | MATH domain and coiled-coil domain-containing protein At3g58370-like |
| SNP_18217_A_36015430 | NC_021162.1    | Ca_Kabuli_Chr03 | 36015430                | CC                                     | TT                 | TT               | INTERGENIC                    |                    |                                                                      |
| SNP_18218_A_36015795 | NC_021162.1    | Ca_Kabuli_Chr03 | 36015795                | GG                                     | AA                 | AA               | INTERGENIC                    |                    |                                                                      |
| SNP_18219_A_36016090 | NC_021162.1    | Ca_Kabuli_Chr03 | 36016090                | GG                                     | CC                 | CC               | INTERGENIC                    |                    |                                                                      |
| SNP_18221_A_36016493 | NC_021162.1    | Ca_Kabuli_Chr03 | 36016493                | TT                                     | AA                 | AA               | INTERGENIC                    |                    |                                                                      |
| SNP_18222_A_36016497 | NC_021162.1    | Ca_Kabuli_Chr03 | 36016497                | TT                                     | AA                 | AA               | INTERGENIC                    |                    |                                                                      |
| SNP_18223_A_36018234 | NC_021162.1    | Ca_Kabuli_Chr03 | 36018234                | TT                                     | GG                 | GG               | URR                           | 101489602          | MATH domain and coiled-coil domain-containing protein At3g58370-like |
| SNP_18225_A_36019556 | NC_021162.1    | Ca_Kabuli_Chr03 | 36019556                | AA                                     | TT                 | TT               | URR                           | 101490263          | Unknown function                                                     |
| SNP_18226_A_36019564 | NC_021162.1    | Ca_Kabuli_Chr03 | 36019564                | TT                                     | GG                 | GG               | URR                           | 101490263          | Unknown function                                                     |
| SNP_18227_A_36019591 | NC_021162.1    | Ca_Kabuli_Chr03 | 36019591                | AA                                     | CC                 | CC               | URR                           | 101490263          | Unknown function                                                     |
| SNP_18230_A_36021278 | NC_021162.1    | Ca_Kabuli_Chr03 | 36021278                | AA                                     | TT                 | TT               | INTERGENIC                    |                    |                                                                      |
| SNP_18231_A_36025714 | NC_021162.1    | Ca_Kabuli_Chr03 | 36025714                | AA                                     | TT                 | TT               | URR                           | 101490581          | MATH domain and coiled-coil domain-containing protein At3g58360-like |
| SNP_18232_A_36025733 | NC_021162.1    | Ca_Kabuli_Chr03 | 36025733                | CC                                     | TT                 | TT               | URR                           | 101490581          | MATH domain and coiled-coil domain-containing protein At3g58360-like |
| SNP_18233_A_36025964 | NC_021162.1    | Ca_Kabuli_Chr03 | 36025964                | TT                                     | CC                 | CC               | URR                           | 101490581          | MATH domain and coiled-coil domain-containing protein At3g58360-like |
| SNP_18234_A_36027916 | NC_021162.1    | Ca_Kabuli_Chr03 | 36027916                | TT                                     | AA                 | AA               | INTERGENIC                    |                    |                                                                      |
| SNP_18235_A_36031003 | NC_021162.1    | Ca_Kabuli_Chr03 | 36031003                | GG                                     | TT                 | TT               | INTERGENIC                    |                    |                                                                      |
| SNP_18236_A_36031004 | NC_021162.1    | Ca_Kabuli_Chr03 | 36031004                | GG                                     | TT                 | TT               | INTERGENIC                    |                    |                                                                      |
| SNP_18237_A_36031397 | NC_021162.1    | Ca_Kabuli_Chr03 | 36031397                | CC                                     | AA                 | AA               | INTERGENIC                    |                    |                                                                      |
| SNP_18238_A_36031559 | NC_021162.1    | Ca_Kabuli_Chr03 | 36031559                | AA                                     | GG                 | GG               | INTERGENIC                    |                    |                                                                      |
| SNP_18239_A_36032472 | NC_021162.1    | Ca_Kabuli_Chr03 | 36032472                | GG                                     | AA                 | AA               | INTERGENIC                    |                    |                                                                      |
| SNP_18240_A_36032483 | NC_021162.1    | Ca_Kabuli_Chr03 | 36032483                | TT                                     | AA                 | AA               | INTERGENIC                    |                    |                                                                      |

| SNPs IDs             | Chromosome IDs | Chromosomes     | Physical positions (bp) | CDC Frontier genome (Reference genome) | (Pusa 1103 & HPNB) | (ILWC 46 & LPNB) | Sequence Components of genome | Gene accession IDs | Putative functions                                |
|----------------------|----------------|-----------------|-------------------------|----------------------------------------|--------------------|------------------|-------------------------------|--------------------|---------------------------------------------------|
| SNP_18242_A_36032817 | NC_021162.1    | Ca_Kabuli_Chr03 | 36032817                | AA                                     | GG                 | GG               | INTERGENIC                    |                    |                                                   |
| SNP_18243_A_36035630 | NC_021162.1    | Ca_Kabuli_Chr03 | 36035630                | AA                                     | GG                 | GG               | INTRON                        | 101489924          | uncharacterized protein At3g58460                 |
| SNP_18244_A_36036243 | NC_021162.1    | Ca_Kabuli_Chr03 | 36036243                | GG                                     | AA                 | AA               | INTRON                        | 101489924          | uncharacterized protein At3g58460                 |
| SNP_18247_A_36041210 | NC_021162.1    | Ca_Kabuli_Chr03 | 36041210                | TT                                     | CC                 | CC               | URR                           | 101489924          | uncharacterized protein At3g58460                 |
| SNP_18248_A_36041235 | NC_021162.1    | Ca_Kabuli_Chr03 | 36041235                | TT                                     | AA                 | AA               | URR                           | 101489924          | uncharacterized protein At3g58460                 |
| SNP_18249_A_36041263 | NC_021162.1    | Ca_Kabuli_Chr03 | 36041263                | CC                                     | TT                 | TT               | URR                           | 101489924          | uncharacterized protein At3g58460                 |
| SNP_18250_A_36041395 | NC_021162.1    | Ca_Kabuli_Chr03 | 36041395                | AA                                     | TT                 | TT               | URR                           | 101489924          | uncharacterized protein At3g58460                 |
| SNP_18251_A_36041396 | NC_021162.1    | Ca_Kabuli_Chr03 | 36041396                | AA                                     | GG                 | GG               | URR                           | 101489924          | uncharacterized protein At3g58460                 |
| SNP_18252_A_36042923 | NC_021162.1    | Ca_Kabuli_Chr03 | 36042923                | GG                                     | AA                 | AA               | URR                           | 101489924          | uncharacterized protein At3g58460                 |
| SNP_18253_A_36042938 | NC_021162.1    | Ca_Kabuli_Chr03 | 36042938                | AA                                     | GG                 | GG               | URR                           | 101489924          | uncharacterized protein At3g58460                 |
| SNP_18254_A_36043125 | NC_021162.1    | Ca_Kabuli_Chr03 | 36043125                | GG                                     | AA                 | AA               | INTERGENIC                    |                    |                                                   |
| SNP_18256_A_36043225 | NC_021162.1    | Ca_Kabuli_Chr03 | 36043225                | CC                                     | TT                 | TT               | INTERGENIC                    |                    |                                                   |
| SNP_18257_A_36043231 | NC_021162.1    | Ca_Kabuli_Chr03 | 36043231                | TT                                     | AA                 | AA               | INTERGENIC                    |                    |                                                   |
| SNP_18258_A_36043243 | NC_021162.1    | Ca_Kabuli_Chr03 | 36043243                | GG                                     | TT                 | TT               | INTERGENIC                    |                    |                                                   |
| SNP_18259_A_36043244 | NC_021162.1    | Ca_Kabuli_Chr03 | 36043244                | GG                                     | AA                 | AA               | INTERGENIC                    |                    |                                                   |
| SNP_18260_A_36043528 | NC_021162.1    | Ca_Kabuli_Chr03 | 36043528                | GG                                     | TT                 | TT               | INTERGENIC                    |                    |                                                   |
| SNP_18261_A_36043569 | NC_021162.1    | Ca_Kabuli_Chr03 | 36043569                | TT                                     | GG                 | GG               | INTERGENIC                    |                    |                                                   |
| SNP_18262_A_36043690 | NC_021162.1    | Ca_Kabuli_Chr03 | 36043690                | CC                                     | TT                 | TT               | INTERGENIC                    |                    |                                                   |
| SNP_18263_A_36043938 | NC_021162.1    | Ca_Kabuli_Chr03 | 36043938                | TT                                     | CC                 | CC               | INTERGENIC                    |                    |                                                   |
| SNP_18264_A_36043981 | NC_021162.1    | Ca_Kabuli_Chr03 | 36043981                | AA                                     | TT                 | TT               | INTERGENIC                    |                    |                                                   |
| SNP_18265_A_36044031 | NC_021162.1    | Ca_Kabuli_Chr03 | 36044031                | AA                                     | GG                 | GG               | INTERGENIC                    |                    |                                                   |
| SNP_18266_A_36045639 | NC_021162.1    | Ca_Kabuli_Chr03 | 36045639                | CC                                     | GG                 | GG               | DRR                           | 101490257          | calcium homeostasis endoplasmic reticulum protein |

| SNPs IDs             | Chromosome IDs | Chromosomes     | Physical positions (bp) | CDC Frontier (Reference genome) | (Pusa 1103 & HPNB) | (ILWC 46 & LPNB) | Sequence Components of genome | Gene accession IDs | Putative functions                                   |
|----------------------|----------------|-----------------|-------------------------|---------------------------------|--------------------|------------------|-------------------------------|--------------------|------------------------------------------------------|
| SNP_18268_A_36046495 | NC_021162.1    | Ca_Kabuli_Chr03 | 36046495                | AA                              | TT                 | TT               | INTRON                        | 101490257          | calcium homeostasis endoplasmic reticulum protein    |
| SNP_18269_A_36051425 | NC_021162.1    | Ca_Kabuli_Chr03 | 36051425                | TT                              | CC                 | CC               | URR                           | 101490257          | calcium homeostasis endoplasmic reticulum protein    |
| SNP_18270_A_36051828 | NC_021162.1    | Ca_Kabuli_Chr03 | 36051828                | CC                              | TT                 | TT               | URR                           | 101490257          | calcium homeostasis endoplasmic reticulum protein    |
| SNP_18271_A_36053008 | NC_021162.1    | Ca_Kabuli_Chr03 | 36053008                | AA                              | TT                 | TT               | INTERGENIC                    |                    |                                                      |
| SNP_18272_A_36053009 | NC_021162.1    | Ca_Kabuli_Chr03 | 36053009                | GG                              | AA                 | AA               | INTERGENIC                    |                    |                                                      |
| SNP_18273_A_36053229 | NC_021162.1    | Ca_Kabuli_Chr03 | 36053229                | GG                              | CC                 | CC               | INTERGENIC                    |                    |                                                      |
| SNP_18274_A_36056221 | NC_021162.1    | Ca_Kabuli_Chr03 | 36056221                | TT                              | CC                 | CC               | DRR                           | 101490576          | pre-mRNA-splicing factor prp12                       |
| SNP_18275_A_36061541 | NC_021162.1    | Ca_Kabuli_Chr03 | 36061541                | GG                              | TT                 | TT               | INTRON                        | 101490576          | pre-mRNA-splicing factor prp12                       |
| SNP_18276_A_36067893 | NC_021162.1    | Ca_Kabuli_Chr03 | 36067893                | GG                              | AA                 | AA               | INTERGENIC                    |                    |                                                      |
| SNP_18277_A_36074420 | NC_021162.1    | Ca_Kabuli_Chr03 | 36074420                | TT                              | CC                 | CC               | INTERGENIC                    |                    |                                                      |
| SNP_18279_A_36076102 | NC_021162.1    | Ca_Kabuli_Chr03 | 36076102                | TT                              | CC                 | CC               | URR                           | 101491327          | hemK methyltransferase family member 1               |
| SNP_18280_A_36076207 | NC_021162.1    | Ca_Kabuli_Chr03 | 36076207                | AA                              | GG                 | GG               | URR                           | 101491327          | hemK methyltransferase family member 1               |
| SNP_18281_A_36081375 | NC_021162.1    | Ca_Kabuli_Chr03 | 36081375                | CC                              | TT                 | TT               | INTERGENIC                    |                    |                                                      |
| SNP_18284_A_36090068 | NC_021162.1    | Ca_Kabuli_Chr03 | 36090068                | CC                              | TT                 | TT               | URR                           | 101491960          | lipid phosphate phosphatase delta                    |
| SNP_18285_A_36091903 | NC_021162.1    | Ca_Kabuli_Chr03 | 36091903                | GG                              | AA                 | AA               | INTERGENIC                    |                    |                                                      |
| SNP_18286_A_36096458 | NC_021162.1    | Ca_Kabuli_Chr03 | 36096458                | TT                              | GG                 | GG               | INTERGENIC                    |                    |                                                      |
| SNP_18287_A_36096615 | NC_021162.1    | Ca_Kabuli_Chr03 | 36096615                | TT                              | CC                 | CC               | INTERGENIC                    |                    |                                                      |
| SNP_18288_A_36096639 | NC_021162.1    | Ca_Kabuli_Chr03 | 36096639                | CC                              | TT                 | TT               | INTERGENIC                    |                    |                                                      |
| SNP_18289_A_36096719 | NC_021162.1    | Ca_Kabuli_Chr03 | 36096719                | GG                              | CC                 | CC               | INTERGENIC                    |                    |                                                      |
| SNP_18290_A_36097382 | NC_021162.1    | Ca_Kabuli_Chr03 | 36097382                | TT                              | AA                 | AA               | INTERGENIC                    |                    |                                                      |
| SNP_18291_A_36097642 | NC_021162.1    | Ca_Kabuli_Chr03 | 36097642                | AA                              | CC                 | CC               | INTERGENIC                    |                    |                                                      |
| SNP_18292_A_36098645 | NC_021162.1    | Ca_Kabuli_Chr03 | 36098645                | GG                              | AA                 | AA               | DRR                           | 101492293          | carbon catabolite repressor protein 4 homolog 2-like |



| SNPs IDs             | Chromosome IDs | Chromosomes     | Physical positions (bp) | CDC Frontier genome (Reference genome) | (Pusa 1103 & HPNB) | (ILWC 46 & LPNB) | Sequence Components of genome | Gene accession IDs | Putative functions                                   |
|----------------------|----------------|-----------------|-------------------------|----------------------------------------|--------------------|------------------|-------------------------------|--------------------|------------------------------------------------------|
| SNP_18293_A_36098854 | NC_021162.1    | Ca_Kabuli_Chr03 | 36098854                | CC                                     | AA                 | AA               | DRR                           | 101492293          | carbon catabolite repressor protein 4 homolog 2-like |
| SNP_18294_A_36099089 | NC_021162.1    | Ca_Kabuli_Chr03 | 36099089                | CC                                     | GG                 | GG               | DRR                           | 101492293          | carbon catabolite repressor protein 4 homolog 2-like |
| SNP_18296_A_36108615 | NC_021162.1    | Ca_Kabuli_Chr03 | 36108615                | AA                                     | CC                 | CC               | INTERGENIC                    |                    |                                                      |
| SNP_18297_A_36108956 | NC_021162.1    | Ca_Kabuli_Chr03 | 36108956                | AA                                     | CC                 | CC               | INTERGENIC                    |                    |                                                      |
| SNP_18300_A_36109414 | NC_021162.1    | Ca_Kabuli_Chr03 | 36109414                | TT                                     | CC                 | CC               | DRR                           | 101492631          | 60S ribosomal protein L21-1-like                     |
| SNP_18301_A_36110937 | NC_021162.1    | Ca_Kabuli_Chr03 | 36110937                | AA                                     | CC                 | CC               | INTERGENIC                    |                    |                                                      |
| SNP_18302_A_36111061 | NC_021162.1    | Ca_Kabuli_Chr03 | 36111061                | TT                                     | CC                 | CC               | INTERGENIC                    |                    |                                                      |
| SNP_18303_A_36112306 | NC_021162.1    | Ca_Kabuli_Chr03 | 36112306                | CC                                     | TT                 | TT               | URR                           | 101492631          | 60S ribosomal protein L21-1-like                     |
| SNP_18304_A_36114135 | NC_021162.1    | Ca_Kabuli_Chr03 | 36114135                | CC                                     | TT                 | TT               | DRR                           | 101493297          | sister-chromatid cohesion protein 3                  |
| SNP_18305_A_36114530 | NC_021162.1    | Ca_Kabuli_Chr03 | 36114530                | CC                                     | AA                 | AA               | DRR                           | 101493297          | sister-chromatid cohesion protein 3                  |
| SNP_18306_A_36114956 | NC_021162.1    | Ca_Kabuli_Chr03 | 36114956                | AA                                     | GG                 | GG               | DRR                           | 101493297          | sister-chromatid cohesion protein 3                  |
| SNP_18307_A_36116181 | NC_021162.1    | Ca_Kabuli_Chr03 | 36116181                | GG                                     | AA                 | AA               | URR                           | 101492961          | Unknown function                                     |
| SNP_18308_A_36119592 | NC_021162.1    | Ca_Kabuli_Chr03 | 36119592                | TT                                     | CC                 | CC               | NON_SYNONYMOUS_CODING         | 101493297          | sister-chromatid cohesion protein 3                  |
| SNP_18309_A_36119602 | NC_021162.1    | Ca_Kabuli_Chr03 | 36119602                | CC                                     | AA                 | AA               | NON_SYNONYMOUS_CODING         | 101493297          | sister-chromatid cohesion protein 3                  |
| SNP_18311_A_36120523 | NC_021162.1    | Ca_Kabuli_Chr03 | 36120523                | GG                                     | AA                 | AA               | INTRON                        | 101493297          | sister-chromatid cohesion protein 3                  |
| SNP_18313_A_36120860 | NC_021162.1    | Ca_Kabuli_Chr03 | 36120860                | TT                                     | AA                 | AA               | INTRON                        | 101493297          | sister-chromatid cohesion protein 3                  |
| SNP_18314_A_36124338 | NC_021162.1    | Ca_Kabuli_Chr03 | 36124338                | CC                                     | TT                 | TT               | INTRON                        | 101493297          | sister-chromatid cohesion protein 3                  |
| SNP_18315_A_36126832 | NC_021162.1    | Ca_Kabuli_Chr03 | 36126832                | TT                                     | AA                 | AA               | INTERGENIC                    |                    |                                                      |
| SNP_18316_A_36129592 | NC_021162.1    | Ca_Kabuli_Chr03 | 36129592                | TT                                     | AA                 | AA               | DRR                           | 101493618          | NPL4-like protein 1                                  |
| SNP_18317_A_36129641 | NC_021162.1    | Ca_Kabuli_Chr03 | 36129641                | TT                                     | CC                 | CC               | DRR                           | 101493618          | NPL4-like protein 1                                  |
| SNP_18319_A_36129711 | NC_021162.1    | Ca_Kabuli_Chr03 | 36129711                | TT                                     | CC                 | CC               | DRR                           | 101493618          | NPL4-like protein 1                                  |
| SNP_18320_A_36129760 | NC_021162.1    | Ca_Kabuli_Chr03 | 36129760                | CC                                     | TT                 | TT               | DRR                           | 101493618          | NPL4-like protein 1                                  |

| SNPs IDs             | Chromosome IDs | Chromosomes     | Physical positions (bp) | CDC Frontier genome (Reference genome) | (Pusa 1103 & HPNB) | (ILWC 46 & LPNB) | Sequence Components of genome | Gene accession IDs | Putative functions                   |
|----------------------|----------------|-----------------|-------------------------|----------------------------------------|--------------------|------------------|-------------------------------|--------------------|--------------------------------------|
| SNP_18321_A_36129763 | NC_021162.1    | Ca_Kabuli_Chr03 | 36129763                | TT                                     | AA                 | AA               | DRR                           | 101493618          | NPL4-like protein 1                  |
| SNP_18323_A_36129838 | NC_021162.1    | Ca_Kabuli_Chr03 | 36129838                | AA                                     | TT                 | TT               | DRR                           | 101493618          | NPL4-like protein 1                  |
| SNP_18324_A_36133091 | NC_021162.1    | Ca_Kabuli_Chr03 | 36133091                | TT                                     | CC                 | CC               | INTERGENIC                    |                    |                                      |
| SNP_18325_A_36135383 | NC_021162.1    | Ca_Kabuli_Chr03 | 36135383                | CC                                     | AA                 | AA               | DRR                           | 101493935          | peroxidase 3-like                    |
| SNP_18326_A_36135407 | NC_021162.1    | Ca_Kabuli_Chr03 | 36135407                | TT                                     | GG                 | GG               | DRR                           | 101493935          | peroxidase 3-like                    |
| SNP_18327_A_36135433 | NC_021162.1    | Ca_Kabuli_Chr03 | 36135433                | AA                                     | TT                 | TT               | DRR                           | 101493935          | peroxidase 3-like                    |
| SNP_18330_A_36136597 | NC_021162.1    | Ca_Kabuli_Chr03 | 36136597                | CC                                     | GG                 | GG               | URR                           | 101493618          | NPL4-like protein 1                  |
| SNP_18332_A_36138366 | NC_021162.1    | Ca_Kabuli_Chr03 | 36138366                | CC                                     | AA                 | AA               | URR                           | 101493935          | peroxidase 3-like                    |
| SNP_18333_A_36138544 | NC_021162.1    | Ca_Kabuli_Chr03 | 36138544                | TT                                     | GG                 | GG               | URR                           | 101493935          | peroxidase 3-like                    |
| SNP_18334_A_36138753 | NC_021162.1    | Ca_Kabuli_Chr03 | 36138753                | TT                                     | CC                 | CC               | URR                           | 101493935          | peroxidase 3-like                    |
| SNP_18335_A_36138769 | NC_021162.1    | Ca_Kabuli_Chr03 | 36138769                | GG                                     | AA                 | AA               | URR                           | 101493935          | peroxidase 3-like                    |
| SNP_18336_A_36139543 | NC_021162.1    | Ca_Kabuli_Chr03 | 36139543                | AA                                     | GG                 | GG               | URR                           | 101493935          | peroxidase 3-like                    |
| SNP_18337_A_36139552 | NC_021162.1    | Ca_Kabuli_Chr03 | 36139552                | TT                                     | AA                 | AA               | URR                           | 101493935          | peroxidase 3-like                    |
| SNP_18338_A_36139557 | NC_021162.1    | Ca_Kabuli_Chr03 | 36139557                | CC                                     | TT                 | TT               | URR                           | 101493935          | peroxidase 3-like                    |
| SNP_18339_A_36140401 | NC_021162.1    | Ca_Kabuli_Chr03 | 36140401                | AA                                     | TT                 | TT               | INTERGENIC                    |                    |                                      |
| SNP_18340_A_36141172 | NC_021162.1    | Ca_Kabuli_Chr03 | 36141172                | GG                                     | AA                 | AA               | INTERGENIC                    |                    |                                      |
| SNP_18341_A_36144601 | NC_021162.1    | Ca_Kabuli_Chr03 | 36144601                | GG                                     | AA                 | AA               | INTERGENIC                    |                    |                                      |
| SNP_18342_A_36144852 | NC_021162.1    | Ca_Kabuli_Chr03 | 36144852                | AA                                     | CC                 | CC               | INTERGENIC                    |                    |                                      |
| SNP_18343_A_36144918 | NC_021162.1    | Ca_Kabuli_Chr03 | 36144918                | TT                                     | CC                 | CC               | INTERGENIC                    |                    |                                      |
| SNP_18344_A_36147595 | NC_021162.1    | Ca_Kabuli_Chr03 | 36147595                | CC                                     | TT                 | TT               | URR                           | 101494259          | rho GTPase-activating protein 2-like |
| SNP_18345_A_36147605 | NC_021162.1    | Ca_Kabuli_Chr03 | 36147605                | TT                                     | CC                 | CC               | URR                           | 101494259          | rho GTPase-activating protein 2-like |
| SNP_18346_A_36147999 | NC_021162.1    | Ca_Kabuli_Chr03 | 36147999                | AA                                     | TT                 | TT               | URR                           | 101494570          | uncharacterized LOC101494570         |

| SNPs IDs             | Chromosome IDs | Chromosomes     | Physical positions (bp) | CDC Frontier genome (Reference genome) | (Pusa 1103 & HPNB) | (ILWC 46 & LPNB) | Sequence Components of genome | Gene accession IDs | Putative functions                               |
|----------------------|----------------|-----------------|-------------------------|----------------------------------------|--------------------|------------------|-------------------------------|--------------------|--------------------------------------------------|
| SNP_18347_A_36148402 | NC_021162.1    | Ca_Kabuli_Chr03 | 36148402                | CC                                     | TT                 | TT               | URR                           | 101494570          | uncharacterized LOC101494570                     |
| SNP_18349_A_36153178 | NC_021162.1    | Ca_Kabuli_Chr03 | 36153178                | CC                                     | TT                 | TT               | INTERGENIC                    |                    |                                                  |
| SNP_18350_A_36153916 | NC_021162.1    | Ca_Kabuli_Chr03 | 36153916                | AA                                     | TT                 | TT               | DRR                           | 101494886          | RNA-binding protein BRN1                         |
| SNP_18351_A_36154520 | NC_021162.1    | Ca_Kabuli_Chr03 | 36154520                | AA                                     | CC                 | CC               | INTRON                        | 101494886          | RNA-binding protein BRN1                         |
| SNP_18352_A_36162343 | NC_021162.1    | Ca_Kabuli_Chr03 | 36162343                | TT                                     | CC                 | CC               | INTERGENIC                    |                    |                                                  |
| SNP_18353_A_36162346 | NC_021162.1    | Ca_Kabuli_Chr03 | 36162346                | TT                                     | CC                 | CC               | INTERGENIC                    |                    |                                                  |
| SNP_18354_A_36162396 | NC_021162.1    | Ca_Kabuli_Chr03 | 36162396                | TT                                     | CC                 | CC               | INTERGENIC                    |                    |                                                  |
| SNP_18355_A_36162402 | NC_021162.1    | Ca_Kabuli_Chr03 | 36162402                | TT                                     | GG                 | GG               | INTERGENIC                    |                    |                                                  |
| SNP_18356_A_36162463 | NC_021162.1    | Ca_Kabuli_Chr03 | 36162463                | CC                                     | TT                 | TT               | INTERGENIC                    |                    |                                                  |
| SNP_18357_A_36163532 | NC_021162.1    | Ca_Kabuli_Chr03 | 36163532                | CC                                     | TT                 | TT               | DRR                           | 101495426          | U1 small nuclear ribonucleoprotein C             |
| SNP_18358_A_36163564 | NC_021162.1    | Ca_Kabuli_Chr03 | 36163564                | TT                                     | CC                 | CC               | DRR                           | 101495426          | U1 small nuclear ribonucleoprotein C             |
| SNP_18359_A_36166016 | NC_021162.1    | Ca_Kabuli_Chr03 | 36166016                | TT                                     | CC                 | CC               | INTERGENIC                    |                    |                                                  |
| SNP_18361_A_36170918 | NC_021162.1    | Ca_Kabuli_Chr03 | 36170918                | TT                                     | GG                 | GG               | INTERGENIC                    |                    |                                                  |
| SNP_18362_A_36173706 | NC_021162.1    | Ca_Kabuli_Chr03 | 36173706                | AA                                     | GG                 | GG               | URR                           | 101495959          | uncharacterized LOC101495959                     |
| SNP_18363_A_36175964 | NC_021162.1    | Ca_Kabuli_Chr03 | 36175964                | AA                                     | GG                 | GG               | DRR                           | 101496624          | uncharacterized LOC101496624                     |
| SNP_18364_A_36175968 | NC_021162.1    | Ca_Kabuli_Chr03 | 36175968                | CC                                     | GG                 | GG               | DRR                           | 101496624          | uncharacterized LOC101496624                     |
| SNP_18365_A_36178723 | NC_021162.1    | Ca_Kabuli_Chr03 | 36178723                | AA                                     | TT                 | TT               | URR                           | 101496624          | uncharacterized LOC101496624                     |
| SNP_18367_A_36178773 | NC_021162.1    | Ca_Kabuli_Chr03 | 36178773                | AA                                     | TT                 | TT               | URR                           | 101496624          | uncharacterized LOC101496624                     |
| SNP_18368_A_36178984 | NC_021162.1    | Ca_Kabuli_Chr03 | 36178984                | AA                                     | TT                 | TT               | DRR                           | 101496943          | probable indole-3-pyruvate monooxygenase YUCCA10 |
| SNP_18369_A_36179041 | NC_021162.1    | Ca_Kabuli_Chr03 | 36179041                | AA                                     | GG                 | GG               | DRR                           | 101496943          | probable indole-3-pyruvate monooxygenase YUCCA10 |
| SNP_18370_A_36179101 | NC_021162.1    | Ca_Kabuli_Chr03 | 36179101                | TT                                     | CC                 | CC               | DRR                           | 101496943          | probable indole-3-pyruvate monooxygenase YUCCA10 |
| SNP_18371_A_36179105 | NC_021162.1    | Ca_Kabuli_Chr03 | 36179105                | AA                                     | GG                 | GG               | DRR                           | 101496943          | probable indole-3-pyruvate monooxygenase YUCCA10 |

| SNPs IDs             | Chromosome IDs | Chromosomes     | Physical positions (bp) | CDC Frontier genome (Reference genome) | (Pusa 1103 & HPNB) | (ILWC 46 & LPNB) | Sequence Components of genome | Gene accession IDs | Putative functions                               |
|----------------------|----------------|-----------------|-------------------------|----------------------------------------|--------------------|------------------|-------------------------------|--------------------|--------------------------------------------------|
| SNP_18372_A_36179114 | NC_021162.1    | Ca_Kabuli_Chr03 | 36179114                | AA                                     | GG                 | GG               | DRR                           | 101496943          | probable indole-3-pyruvate monooxygenase YUCCA10 |
| SNP_18373_A_36179119 | NC_021162.1    | Ca_Kabuli_Chr03 | 36179119                | GG                                     | AA                 | AA               | DRR                           | 101496943          | probable indole-3-pyruvate monooxygenase YUCCA10 |
| SNP_18374_A_36179125 | NC_021162.1    | Ca_Kabuli_Chr03 | 36179125                | GG                                     | AA                 | AA               | DRR                           | 101496943          | probable indole-3-pyruvate monooxygenase YUCCA10 |
| SNP_18375_A_36179869 | NC_021162.1    | Ca_Kabuli_Chr03 | 36179869                | AA                                     | GG                 | GG               | URR                           | 101496624          | uncharacterized LOC101496624                     |
| SNP_18376_A_36179885 | NC_021162.1    | Ca_Kabuli_Chr03 | 36179885                | AA                                     | GG                 | GG               | URR                           | 101496624          | uncharacterized LOC101496624                     |
| SNP_18377_A_36180131 | NC_021162.1    | Ca_Kabuli_Chr03 | 36180131                | AA                                     | GG                 | GG               | URR                           | 101496624          | uncharacterized LOC101496624                     |
| SNP_18378_A_36180349 | NC_021162.1    | Ca_Kabuli_Chr03 | 36180349                | GG                                     | AA                 | AA               | URR                           | 101496624          | uncharacterized LOC101496624                     |
| SNP_18379_A_36182790 | NC_021162.1    | Ca_Kabuli_Chr03 | 36182790                | GG                                     | AA                 | AA               | INTERGENIC                    |                    |                                                  |
| SNP_18380_A_36182800 | NC_021162.1    | Ca_Kabuli_Chr03 | 36182800                | GG                                     | AA                 | AA               | INTERGENIC                    |                    |                                                  |
| SNP_18381_A_36185599 | NC_021162.1    | Ca_Kabuli_Chr03 | 36185599                | TT                                     | CC                 | CC               | INTERGENIC                    |                    |                                                  |
| SNP_18382_A_36185668 | NC_021162.1    | Ca_Kabuli_Chr03 | 36185668                | TT                                     | CC                 | CC               | INTERGENIC                    |                    |                                                  |
| SNP_18383_A_36185702 | NC_021162.1    | Ca_Kabuli_Chr03 | 36185702                | TT                                     | AA                 | AA               | INTERGENIC                    |                    |                                                  |
| SNP_18384_A_36186606 | NC_021162.1    | Ca_Kabuli_Chr03 | 36186606                | TT                                     | CC                 | CC               | INTERGENIC                    |                    |                                                  |
| SNP_18385_A_36186906 | NC_021162.1    | Ca_Kabuli_Chr03 | 36186906                | AA                                     | GG                 | GG               | INTERGENIC                    |                    |                                                  |
| SNP_18386_A_36192600 | NC_021162.1    | Ca_Kabuli_Chr03 | 36192600                | AA                                     | TT                 | TT               | INTERGENIC                    |                    |                                                  |
| SNP_18387_A_36192697 | NC_021162.1    | Ca_Kabuli_Chr03 | 36192697                | GG                                     | AA                 | AA               | INTERGENIC                    |                    |                                                  |
| SNP_18388_A_36192932 | NC_021162.1    | Ca_Kabuli_Chr03 | 36192932                | TT                                     | CC                 | CC               | INTERGENIC                    |                    |                                                  |
| SNP_18389_A_36193313 | NC_021162.1    | Ca_Kabuli_Chr03 | 36193313                | AA                                     | GG                 | GG               | INTERGENIC                    |                    |                                                  |
| SNP_18390_A_36193668 | NC_021162.1    | Ca_Kabuli_Chr03 | 36193668                | CC                                     | GG                 | GG               | INTERGENIC                    |                    |                                                  |
| SNP_18391_A_36195450 | NC_021162.1    | Ca_Kabuli_Chr03 | 36195450                | TT                                     | AA                 | AA               | DRR                           | 101497598          | protein NETWORKED 3A-like                        |
| SNP_18393_A_36195509 | NC_021162.1    | Ca_Kabuli_Chr03 | 36195509                | TT                                     | CC                 | CC               | DRR                           | 101497598          | protein NETWORKED 3A-like                        |
| SNP_18394_A_36198675 | NC_021162.1    | Ca_Kabuli_Chr03 | 36198675                | AA                                     | GG                 | GG               | INTERGENIC                    |                    |                                                  |

| SNPs IDs             | Chromosome IDs | Chromosomes     | Physical positions (bp) | CDC Frontier genome (Reference genome) | (Pusa 1103 & HPNB) | (ILWC 46 & LPNB) | Sequence Components of genome | Gene accession IDs | Putative functions                              |
|----------------------|----------------|-----------------|-------------------------|----------------------------------------|--------------------|------------------|-------------------------------|--------------------|-------------------------------------------------|
| SNP_18397_A_36207628 | NC_021162.1    | Ca_Kabuli_Chr03 | 36207628                | AA                                     | GG                 | GG               | INTRON                        | 101498479          | DNA ligase 1                                    |
| SNP_18399_A_36207805 | NC_021162.1    | Ca_Kabuli_Chr03 | 36207805                | GG                                     | AA                 | AA               | INTRON                        | 101498479          | DNA ligase 1                                    |
| SNP_18401_A_36211500 | NC_021162.1    | Ca_Kabuli_Chr03 | 36211500                | CC                                     | TT                 | TT               | DRR                           | 101498827          | CASP-like protein 1E1                           |
| SNP_18402_A_36211533 | NC_021162.1    | Ca_Kabuli_Chr03 | 36211533                | GG                                     | CC                 | CC               | DRR                           | 101498827          | CASP-like protein 1E1                           |
| SNP_18403_A_36211536 | NC_021162.1    | Ca_Kabuli_Chr03 | 36211536                | CC                                     | AA                 | AA               | DRR                           | 101498827          | CASP-like protein 1E1                           |
| SNP_18404_A_36211546 | NC_021162.1    | Ca_Kabuli_Chr03 | 36211546                | CC                                     | TT                 | TT               | DRR                           | 101498827          | CASP-like protein 1E1                           |
| SNP_18406_A_36213848 | NC_021162.1    | Ca_Kabuli_Chr03 | 36213848                | GG                                     | AA                 | AA               | URR                           | 101498827          | CASP-like protein 1E1                           |
| SNP_18407_A_36214839 | NC_021162.1    | Ca_Kabuli_Chr03 | 36214839                | TT                                     | AA                 | AA               | URR                           | 101498827          | CASP-like protein 1E1                           |
| SNP_18408_A_36214926 | NC_021162.1    | Ca_Kabuli_Chr03 | 36214926                | GG                                     | AA                 | AA               | URR                           | 101498827          | CASP-like protein 1E1                           |
| SNP_18409_A_36215221 | NC_021162.1    | Ca_Kabuli_Chr03 | 36215221                | TT                                     | CC                 | CC               | DRR                           | 101499146          | zinc finger protein CONSTANS-LIKE 13            |
| SNP_18410_A_36215249 | NC_021162.1    | Ca_Kabuli_Chr03 | 36215249                | GG                                     | AA                 | AA               | DRR                           | 101499146          | zinc finger protein CONSTANS-LIKE 13            |
| SNP_18411_A_36215664 | NC_021162.1    | Ca_Kabuli_Chr03 | 36215664                | GG                                     | CC                 | CC               | DRR                           | 101499146          | zinc finger protein CONSTANS-LIKE 13            |
| SNP_18412_A_36217378 | NC_021162.1    | Ca_Kabuli_Chr03 | 36217378                | CC                                     | TT                 | TT               | INTERGENIC                    |                    |                                                 |
| SNP_18413_A_36218034 | NC_021162.1    | Ca_Kabuli_Chr03 | 36218034                | TT                                     | CC                 | CC               | INTERGENIC                    |                    |                                                 |
| SNP_18416_A_36219067 | NC_021162.1    | Ca_Kabuli_Chr03 | 36219067                | GG                                     | AA                 | AA               | INTERGENIC                    |                    |                                                 |
| SNP_18417_A_36219318 | NC_021162.1    | Ca_Kabuli_Chr03 | 36219318                | TT                                     | CC                 | CC               | INTERGENIC                    |                    |                                                 |
| SNP_18419_A_36219354 | NC_021162.1    | Ca_Kabuli_Chr03 | 36219354                | AA                                     | GG                 | GG               | INTERGENIC                    |                    |                                                 |
| SNP_18421_A_36220512 | NC_021162.1    | Ca_Kabuli_Chr03 | 36220512                | CC                                     | TT                 | TT               | URR                           | 101499146          | zinc finger protein CONSTANS-LIKE 13            |
| SNP_18422_A_36220514 | NC_021162.1    | Ca_Kabuli_Chr03 | 36220514                | TT                                     | GG                 | GG               | URR                           | 101499146          | zinc finger protein CONSTANS-LIKE 13            |
| SNP_18423_A_36220762 | NC_021162.1    | Ca_Kabuli_Chr03 | 36220762                | AA                                     | CC                 | CC               | DRR                           | 101500194          | membrane-anchored ubiquitin-fold protein 3-like |
| SNP_18424_A_36225920 | NC_021162.1    | Ca_Kabuli_Chr03 | 36225920                | AA                                     | GG                 | GG               | URR                           | 101500194          | membrane-anchored ubiquitin-fold protein 3-like |
| SNP_18428_A_36228531 | NC_021162.1    | Ca_Kabuli_Chr03 | 36228531                | TT                                     | GG                 | GG               | INTRON                        | 101499860          | 40S ribosomal protein S15-4                     |

| SNPs IDs             | Chromosome IDs | Chromosomes     | Physical positions (bp) | CDC Frontier (Reference genome) | (Pusa 1103 & HPNB) | (ILWC 46 & LPNB) | Sequence Components of genome | Gene accession IDs | Putative functions               |
|----------------------|----------------|-----------------|-------------------------|---------------------------------|--------------------|------------------|-------------------------------|--------------------|----------------------------------|
| SNP_18429_A_36228555 | NC_021162.1    | Ca_Kabuli_Chr03 | 36228555                | CC                              | TT                 | TT               | INTRON                        | 101499860          | 40S ribosomal protein S15-4      |
| SNP_18430_A_36228903 | NC_021162.1    | Ca_Kabuli_Chr03 | 36228903                | AA                              | TT                 | TT               | INTRON                        | 101499860          | 40S ribosomal protein S15-4      |
| SNP_18431_A_36228957 | NC_021162.1    | Ca_Kabuli_Chr03 | 36228957                | GG                              | CC                 | CC               | INTRON                        | 101499860          | 40S ribosomal protein S15-4      |
| SNP_18432_A_36228966 | NC_021162.1    | Ca_Kabuli_Chr03 | 36228966                | TT                              | AA                 | AA               | INTERGENIC                    |                    |                                  |
| SNP_18433_A_36228988 | NC_021162.1    | Ca_Kabuli_Chr03 | 36228988                | AA                              | CC                 | CC               | INTERGENIC                    |                    |                                  |
| SNP_18434_A_36229014 | NC_021162.1    | Ca_Kabuli_Chr03 | 36229014                | TT                              | CC                 | CC               | INTERGENIC                    |                    |                                  |
| SNP_18435_A_36229017 | NC_021162.1    | Ca_Kabuli_Chr03 | 36229017                | AA                              | TT                 | TT               | INTERGENIC                    |                    |                                  |
| SNP_18436_A_36229031 | NC_021162.1    | Ca_Kabuli_Chr03 | 36229031                | GG                              | AA                 | AA               | INTERGENIC                    |                    |                                  |
| SNP_18437_A_36229060 | NC_021162.1    | Ca_Kabuli_Chr03 | 36229060                | GG                              | TT                 | TT               | INTERGENIC                    |                    |                                  |
| SNP_18438_A_36230761 | NC_021162.1    | Ca_Kabuli_Chr03 | 36230761                | TT                              | AA                 | AA               | URR                           | 101499860          | 40S ribosomal protein S15-4      |
| SNP_18440_A_36230996 | NC_021162.1    | Ca_Kabuli_Chr03 | 36230996                | GG                              | AA                 | AA               | URR                           | 101499860          | 40S ribosomal protein S15-4      |
| SNP_18442_A_36233790 | NC_021162.1    | Ca_Kabuli_Chr03 | 36233790                | CC                              | GG                 | GG               | DRR                           | 101500507          | monothiol glutaredoxin-S11       |
| SNP_18443_A_36233892 | NC_021162.1    | Ca_Kabuli_Chr03 | 36233892                | AA                              | GG                 | GG               | DRR                           | 101500507          | monothiol glutaredoxin-S11       |
| SNP_18444_A_36239929 | NC_021162.1    | Ca_Kabuli_Chr03 | 36239929                | TT                              | AA                 | AA               | INTERGENIC                    |                    |                                  |
| SNP_18445_A_36239936 | NC_021162.1    | Ca_Kabuli_Chr03 | 36239936                | TT                              | AA                 | AA               | INTERGENIC                    |                    |                                  |
| SNP_18446_A_36240112 | NC_021162.1    | Ca_Kabuli_Chr03 | 36240112                | AA                              | GG                 | GG               | INTERGENIC                    |                    |                                  |
| SNP_18447_A_36240124 | NC_021162.1    | Ca_Kabuli_Chr03 | 36240124                | CC                              | GG                 | GG               | INTERGENIC                    |                    |                                  |
| SNP_18448_A_36240160 | NC_021162.1    | Ca_Kabuli_Chr03 | 36240160                | TT                              | AA                 | AA               | INTERGENIC                    |                    |                                  |
| SNP_18450_A_36241663 | NC_021162.1    | Ca_Kabuli_Chr03 | 36241663                | GG                              | TT                 | TT               | DRR                           | 101501158          | OTU domain-containing protein 6B |
| SNP_18451_A_36241940 | NC_021162.1    | Ca_Kabuli_Chr03 | 36241940                | AA                              | GG                 | GG               | DRR                           | 101501158          | OTU domain-containing protein 6B |
| SNP_18452_A_36241967 | NC_021162.1    | Ca_Kabuli_Chr03 | 36241967                | TT                              | CC                 | CC               | DRR                           | 101501158          | OTU domain-containing protein 6B |
| SNP_18453_A_36243149 | NC_021162.1    | Ca_Kabuli_Chr03 | 36243149                | AA                              | CC                 | CC               | NON_SYNONYMOUS_CODING         | 101501158          | OTU domain-containing protein 6B |

| SNPs IDs             | Chromosome IDs | Chromosomes     | Physical positions (bp) | CDC Frontier genome (Reference genome) | (Pusa 1103 & HPNB) | (ILWC 46 & LPNB) | Sequence Components of genome | Gene accession IDs | Putative functions                               |
|----------------------|----------------|-----------------|-------------------------|----------------------------------------|--------------------|------------------|-------------------------------|--------------------|--------------------------------------------------|
| SNP_18454_A_36246546 | NC_021162.1    | Ca_Kabuli_Chr03 | 36246546                | AA                                     | TT                 | TT               | URR                           | 101501158          | OTU domain-containing protein 6B                 |
| SNP_18455_A_36249359 | NC_021162.1    | Ca_Kabuli_Chr03 | 36249359                | AA                                     | TT                 | TT               | URR                           | 101501469          | monothiol glutaredoxin-S6                        |
| SNP_18458_A_36250883 | NC_021162.1    | Ca_Kabuli_Chr03 | 36250883                | AA                                     | GG                 | GG               | URR                           | 101501469          | monothiol glutaredoxin-S6                        |
| SNP_18459_A_36263255 | NC_021162.1    | Ca_Kabuli_Chr03 | 36263255                | GG                                     | AA                 | AA               | URR                           | 101502431          | BTB/POZ domain-containing protein At1g03010-like |
| SNP_18460_A_36267752 | NC_021162.1    | Ca_Kabuli_Chr03 | 36267752                | TT                                     | GG                 | GG               | INTRON                        | 101503168          | peptide chain release factor APG3, chloroplastic |
| SNP_18461_A_36267756 | NC_021162.1    | Ca_Kabuli_Chr03 | 36267756                | TT                                     | CC                 | CC               | INTRON                        | 101503168          | peptide chain release factor APG3, chloroplastic |
| SNP_18462_A_36267769 | NC_021162.1    | Ca_Kabuli_Chr03 | 36267769                | TT                                     | CC                 | CC               | INTRON                        | 101503168          | peptide chain release factor APG3, chloroplastic |
| SNP_18463_A_36267782 | NC_021162.1    | Ca_Kabuli_Chr03 | 36267782                | CC                                     | TT                 | TT               | INTRON                        | 101503168          | peptide chain release factor APG3, chloroplastic |
| SNP_18464_A_36269103 | NC_021162.1    | Ca_Kabuli_Chr03 | 36269103                | CC                                     | AA                 | AA               | INTRON                        | 101503168          | peptide chain release factor APG3, chloroplastic |
| SNP_18465_A_36269552 | NC_021162.1    | Ca_Kabuli_Chr03 | 36269552                | TT                                     | CC                 | CC               | INTRON                        | 101503168          | peptide chain release factor APG3, chloroplastic |
| SNP_18466_A_36270023 | NC_021162.1    | Ca_Kabuli_Chr03 | 36270023                | GG                                     | CC                 | CC               | INTRON                        | 101503168          | peptide chain release factor APG3, chloroplastic |
| SNP_18467_A_36271109 | NC_021162.1    | Ca_Kabuli_Chr03 | 36271109                | TT                                     | AA                 | AA               | INTRON                        | 101503168          | peptide chain release factor APG3, chloroplastic |
| SNP_18468_A_36273837 | NC_021162.1    | Ca_Kabuli_Chr03 | 36273837                | GG                                     | AA                 | AA               | UPSTREAM                      | SPATA20            | Unknown function                                 |
| SNP_18470_A_36274541 | NC_021162.1    | Ca_Kabuli_Chr03 | 36274541                | CC                                     | TT                 | TT               | DRR                           | 101503487          | spermatogenesis-associated protein 20            |
| SNP_18471_A_36279680 | NC_021162.1    | Ca_Kabuli_Chr03 | 36279680                | CC                                     | AA                 | AA               | INTRON                        | SPATA20            | Unknown function                                 |
| SNP_18472_A_36279909 | NC_021162.1    | Ca_Kabuli_Chr03 | 36279909                | CC                                     | TT                 | TT               | INTRON                        | SPATA20            | Unknown function                                 |
| SNP_18474_A_36286578 | NC_021162.1    | Ca_Kabuli_Chr03 | 36286578                | GG                                     | TT                 | TT               | DOWNSTREAM                    | SPATA20            | Unknown function                                 |
| SNP_18476_A_36286650 | NC_021162.1    | Ca_Kabuli_Chr03 | 36286650                | AA                                     | GG                 | GG               | DOWNSTREAM                    | SPATA20            | Unknown function                                 |
| SNP_18477_A_36286933 | NC_021162.1    | Ca_Kabuli_Chr03 | 36286933                | CC                                     | TT                 | TT               | DOWNSTREAM                    | SPATA20            | Unknown function                                 |
| SNP_18478_A_36289930 | NC_021162.1    | Ca_Kabuli_Chr03 | 36289930                | GG                                     | CC                 | CC               | INTERGENIC                    |                    |                                                  |
| SNP_18479_A_36290211 | NC_021162.1    | Ca_Kabuli_Chr03 | 36290211                | CC                                     | TT                 | TT               | INTERGENIC                    |                    |                                                  |
| SNP_18480_A_36290215 | NC_021162.1    | Ca_Kabuli_Chr03 | 36290215                | GG                                     | AA                 | AA               | INTERGENIC                    |                    |                                                  |

| SNPs IDs             | Chromosome IDs | Chromosomes     | Physical positions (bp) | CDC Frontier (Reference genome) | (Pusa 1103 & HPNB) | (ILWC 46 & LPNB) | Sequence Components of genome | Gene accession IDs | Putative functions               |
|----------------------|----------------|-----------------|-------------------------|---------------------------------|--------------------|------------------|-------------------------------|--------------------|----------------------------------|
| SNP_18481_A_36290238 | NC_021162.1    | Ca_Kabuli_Chr03 | 36290238                | CC                              | TT                 | TT               | INTERGENIC                    |                    |                                  |
| SNP_18482_A_36290261 | NC_021162.1    | Ca_Kabuli_Chr03 | 36290261                | TT                              | AA                 | AA               | INTERGENIC                    |                    |                                  |
| SNP_18483_A_36290924 | NC_021162.1    | Ca_Kabuli_Chr03 | 36290924                | TT                              | GG                 | GG               | DRR                           | 101503823          | uncharacterized LOC101503823     |
| SNP_18484_A_36293625 | NC_021162.1    | Ca_Kabuli_Chr03 | 36293625                | CC                              | TT                 | TT               | SYNONYMOUS_CODING             | 101503823          | uncharacterized LOC101503823     |
| SNP_18485_A_36293637 | NC_021162.1    | Ca_Kabuli_Chr03 | 36293637                | CC                              | TT                 | TT               | SYNONYMOUS_CODING             | 101503823          | uncharacterized LOC101503823     |
| SNP_18486_A_36295261 | NC_021162.1    | Ca_Kabuli_Chr03 | 36295261                | TT                              | CC                 | CC               | INTRON                        | 101503823          | uncharacterized LOC101503823     |
| SNP_18488_A_36300066 | NC_021162.1    | Ca_Kabuli_Chr03 | 36300066                | TT                              | CC                 | CC               | INTERGENIC                    |                    |                                  |
| SNP_18489_A_36300094 | NC_021162.1    | Ca_Kabuli_Chr03 | 36300094                | GG                              | AA                 | AA               | INTERGENIC                    |                    |                                  |
| SNP_18490_A_36301651 | NC_021162.1    | Ca_Kabuli_Chr03 | 36301651                | GG                              | TT                 | TT               | INTERGENIC                    |                    |                                  |
| SNP_18491_A_36301861 | NC_021162.1    | Ca_Kabuli_Chr03 | 36301861                | TT                              | CC                 | CC               | INTERGENIC                    |                    |                                  |
| SNP_18492_A_36304148 | NC_021162.1    | Ca_Kabuli_Chr03 | 36304148                | TT                              | CC                 | CC               | INTERGENIC                    |                    |                                  |
| SNP_18493_A_36307966 | NC_021162.1    | Ca_Kabuli_Chr03 | 36307966                | AA                              | GG                 | GG               | DRR                           | 101504783          | 40S ribosomal protein S26-1-like |
| SNP_18495_A_36308695 | NC_021162.1    | Ca_Kabuli_Chr03 | 36308695                | TT                              | AA                 | AA               | DRR                           | 101504783          | 40S ribosomal protein S26-1-like |
| SNP_18496_A_36308700 | NC_021162.1    | Ca_Kabuli_Chr03 | 36308700                | TT                              | CC                 | CC               | DRR                           | 101504783          | 40S ribosomal protein S26-1-like |
| SNP_18497_A_36308702 | NC_021162.1    | Ca_Kabuli_Chr03 | 36308702                | CC                              | TT                 | TT               | DRR                           | 101504783          | 40S ribosomal protein S26-1-like |
| SNP_18499_A_36320329 | NC_021162.1    | Ca_Kabuli_Chr03 | 36320329                | CC                              | TT                 | TT               | INTRON                        | 101505100          | cullin-1                         |
| SNP_18500_A_36320333 | NC_021162.1    | Ca_Kabuli_Chr03 | 36320333                | GG                              | AA                 | AA               | INTRON                        | 101505100          | cullin-1                         |
| SNP_18501_A_36320548 | NC_021162.1    | Ca_Kabuli_Chr03 | 36320548                | CC                              | TT                 | TT               | INTRON                        | 101505100          | cullin-1                         |
| SNP_18503_A_36320623 | NC_021162.1    | Ca_Kabuli_Chr03 | 36320623                | CC                              | AA                 | AA               | INTRON                        | 101505100          | cullin-1                         |
| SNP_18504_A_36320650 | NC_021162.1    | Ca_Kabuli_Chr03 | 36320650                | AA                              | TT                 | TT               | INTRON                        | 101505100          | cullin-1                         |
| SNP_18505_A_36320657 | NC_021162.1    | Ca_Kabuli_Chr03 | 36320657                | TT                              | AA                 | AA               | INTRON                        | 101505100          | cullin-1                         |
| SNP_18506_A_36321089 | NC_021162.1    | Ca_Kabuli_Chr03 | 36321089                | GG                              | TT                 | TT               | INTRON                        | 101505100          | cullin-1                         |



| SNPs IDs             | Chromosome IDs | Chromosomes     | Physical positions (bp) | CDC Frontier genome (Reference genome) | (Pusa 1103 & HPNB) | (ILWC 46 & LPNB) | Sequence Components of genome | Gene accession IDs | Putative functions                  |
|----------------------|----------------|-----------------|-------------------------|----------------------------------------|--------------------|------------------|-------------------------------|--------------------|-------------------------------------|
| SNP_18507_A_36321121 | NC_021162.1    | Ca_Kabuli_Chr03 | 36321121                | AA                                     | GG                 | GG               | INTRON                        | 101505100          | cullin-1                            |
| SNP_18508_A_36321380 | NC_021162.1    | Ca_Kabuli_Chr03 | 36321380                | AA                                     | TT                 | TT               | INTRON                        | 101505100          | cullin-1                            |
| SNP_18509_A_36321471 | NC_021162.1    | Ca_Kabuli_Chr03 | 36321471                | TT                                     | CC                 | CC               | INTRON                        | 101505100          | cullin-1                            |
| SNP_18510_A_36321864 | NC_021162.1    | Ca_Kabuli_Chr03 | 36321864                | GG                                     | AA                 | AA               | INTRON                        | 101505100          | cullin-1                            |
| SNP_18511_A_36322482 | NC_021162.1    | Ca_Kabuli_Chr03 | 36322482                | CC                                     | TT                 | TT               | INTRON                        | 101505100          | cullin-1                            |
| SNP_18512_A_36323847 | NC_021162.1    | Ca_Kabuli_Chr03 | 36323847                | AA                                     | GG                 | GG               | URR                           | 101505100          | cullin-1                            |
| SNP_18513_A_36327159 | NC_021162.1    | Ca_Kabuli_Chr03 | 36327159                | TT                                     | CC                 | CC               | INTERGENIC                    |                    |                                     |
| SNP_18514_A_36327499 | NC_021162.1    | Ca_Kabuli_Chr03 | 36327499                | TT                                     | AA                 | AA               | INTERGENIC                    |                    |                                     |
| SNP_18516_A_36331205 | NC_021162.1    | Ca_Kabuli_Chr03 | 36331205                | GG                                     | CC                 | CC               | INTRON                        | 101505423          | homeobox protein LUMINIDEPENDENS    |
| SNP_18517_A_36334365 | NC_021162.1    | Ca_Kabuli_Chr03 | 36334365                | GG                                     | AA                 | AA               | INTRON                        | 101505423          | homeobox protein LUMINIDEPENDENS    |
| SNP_18518_A_36334607 | NC_021162.1    | Ca_Kabuli_Chr03 | 36334607                | TT                                     | AA                 | AA               | INTRON                        | 101505423          | homeobox protein LUMINIDEPENDENS    |
| SNP_18519_A_36339400 | NC_021162.1    | Ca_Kabuli_Chr03 | 36339400                | GG                                     | AA                 | AA               | URR                           | 101505423          | homeobox protein LUMINIDEPENDENS    |
| SNP_18520_A_36342684 | NC_021162.1    | Ca_Kabuli_Chr03 | 36342684                | GG                                     | CC                 | CC               | INTERGENIC                    |                    |                                     |
| SNP_18521_A_36342686 | NC_021162.1    | Ca_Kabuli_Chr03 | 36342686                | GG                                     | CC                 | CC               | INTERGENIC                    |                    |                                     |
| SNP_18522_A_36342828 | NC_021162.1    | Ca_Kabuli_Chr03 | 36342828                | TT                                     | AA                 | AA               | INTERGENIC                    |                    |                                     |
| SNP_18523_A_36342985 | NC_021162.1    | Ca_Kabuli_Chr03 | 36342985                | AA                                     | GG                 | GG               | INTERGENIC                    |                    |                                     |
| SNP_18524_A_36343880 | NC_021162.1    | Ca_Kabuli_Chr03 | 36343880                | CC                                     | TT                 | TT               | DRR                           | 101505978          | protein indeterminate-domain 2-like |
| SNP_18525_A_36343888 | NC_021162.1    | Ca_Kabuli_Chr03 | 36343888                | GG                                     | AA                 | AA               | DRR                           | 101505978          | protein indeterminate-domain 2-like |
| SNP_18526_A_36349603 | NC_021162.1    | Ca_Kabuli_Chr03 | 36349603                | AA                                     | GG                 | GG               | INTERGENIC                    |                    |                                     |
| SNP_18527_A_36350705 | NC_021162.1    | Ca_Kabuli_Chr03 | 36350705                | TT                                     | CC                 | CC               | INTERGENIC                    |                    |                                     |
| SNP_18528_A_36351801 | NC_021162.1    | Ca_Kabuli_Chr03 | 36351801                | GG                                     | AA                 | AA               | INTERGENIC                    |                    |                                     |
| SNP_18529_A_36351802 | NC_021162.1    | Ca_Kabuli_Chr03 | 36351802                | AA                                     | GG                 | GG               | INTERGENIC                    |                    |                                     |

| SNPs IDs             | Chromosome IDs | Chromosomes     | Physical positions (bp) | CDC Frontier genome (Reference genome) | (Pusa 1103 & HPNB) | (ILWC 46 & LPNB) | Sequence Components of genome | Gene accession IDs | Putative functions           |
|----------------------|----------------|-----------------|-------------------------|----------------------------------------|--------------------|------------------|-------------------------------|--------------------|------------------------------|
| SNP_18530_A_36351850 | NC_021162.1    | Ca_Kabuli_Chr03 | 36351850                | AA                                     | GG                 | GG               | INTERGENIC                    |                    |                              |
| SNP_18532_A_36353624 | NC_021162.1    | Ca_Kabuli_Chr03 | 36353624                | GG                                     | AA                 | AA               | INTERGENIC                    |                    |                              |
| SNP_18533_A_36354039 | NC_021162.1    | Ca_Kabuli_Chr03 | 36354039                | CC                                     | TT                 | TT               | INTERGENIC                    |                    |                              |
| SNP_18534_A_36354395 | NC_021162.1    | Ca_Kabuli_Chr03 | 36354395                | CC                                     | AA                 | AA               | INTERGENIC                    |                    |                              |
| SNP_18535_A_36354872 | NC_021162.1    | Ca_Kabuli_Chr03 | 36354872                | GG                                     | AA                 | AA               | INTERGENIC                    |                    |                              |
| SNP_18536_A_36355552 | NC_021162.1    | Ca_Kabuli_Chr03 | 36355552                | TT                                     | CC                 | CC               | INTERGENIC                    |                    |                              |
| SNP_18537_A_36355607 | NC_021162.1    | Ca_Kabuli_Chr03 | 36355607                | AA                                     | GG                 | GG               | INTERGENIC                    |                    |                              |
| SNP_18538_A_36356528 | NC_021162.1    | Ca_Kabuli_Chr03 | 36356528                | AA                                     | GG                 | GG               | DRR                           | 101506286          | uncharacterized LOC101506286 |
| SNP_18540_A_36363564 | NC_021162.1    | Ca_Kabuli_Chr03 | 36363564                | TT                                     | CC                 | CC               | URR                           | 101506286          | uncharacterized LOC101506286 |
| SNP_18541_A_36363711 | NC_021162.1    | Ca_Kabuli_Chr03 | 36363711                | GG                                     | AA                 | AA               | URR                           | 101506286          | uncharacterized LOC101506286 |
| SNP_18543_A_36371963 | NC_021162.1    | Ca_Kabuli_Chr03 | 36371963                | CC                                     | TT                 | TT               | INTERGENIC                    |                    |                              |
| SNP_18544_A_36372479 | NC_021162.1    | Ca_Kabuli_Chr03 | 36372479                | AA                                     | TT                 | TT               | INTERGENIC                    |                    |                              |
| SNP_18545_A_36372506 | NC_021162.1    | Ca_Kabuli_Chr03 | 36372506                | TT                                     | GG                 | GG               | INTERGENIC                    |                    |                              |
| SNP_18546_A_36372783 | NC_021162.1    | Ca_Kabuli_Chr03 | 36372783                | AA                                     | TT                 | TT               | INTERGENIC                    |                    |                              |
| SNP_18547_A_36375782 | NC_021162.1    | Ca_Kabuli_Chr03 | 36375782                | AA                                     | CC                 | CC               | DRR                           | 101506941          | wee1-like protein kinase     |
| SNP_18548_A_36375788 | NC_021162.1    | Ca_Kabuli_Chr03 | 36375788                | CC                                     | TT                 | TT               | DRR                           | 101506941          | wee1-like protein kinase     |
| SNP_18549_A_36378358 | NC_021162.1    | Ca_Kabuli_Chr03 | 36378358                | GG                                     | AA                 | AA               | INTERGENIC                    |                    |                              |
| SNP_18550_A_36381331 | NC_021162.1    | Ca_Kabuli_Chr03 | 36381331                | CC                                     | AA                 | AA               | DRR                           | 101507267          | uncharacterized LOC101507267 |
| SNP_18551_A_36381395 | NC_021162.1    | Ca_Kabuli_Chr03 | 36381395                | TT                                     | GG                 | GG               | DRR                           | 101507267          | uncharacterized LOC101507267 |
| SNP_18553_A_36382336 | NC_021162.1    | Ca_Kabuli_Chr03 | 36382336                | GG                                     | AA                 | AA               | URR                           | 101506941          | wee1-like protein kinase     |
| SNP_18554_A_36382339 | NC_021162.1    | Ca_Kabuli_Chr03 | 36382339                | CC                                     | TT                 | TT               | URR                           | 101506941          | wee1-like protein kinase     |
| SNP_18555_A_36382375 | NC_021162.1    | Ca_Kabuli_Chr03 | 36382375                | GG                                     | CC                 | CC               | URR                           | 101506941          | wee1-like protein kinase     |

| SNPs IDs             | Chromosome IDs | Chromosomes     | Physical positions (bp) | CDC Frontier genome (Reference genome) | (Pusa 1103 & HPNB) | (ILWC 46 & LPNB) | Sequence Components of genome | Gene accession IDs | Putative functions                                         |
|----------------------|----------------|-----------------|-------------------------|----------------------------------------|--------------------|------------------|-------------------------------|--------------------|------------------------------------------------------------|
| SNP_18556_A_36382455 | NC_021162.1    | Ca_Kabuli_Chr03 | 36382455                | TT                                     | CC                 | CC               | URR                           | 101506941          | wee1-like protein kinase                                   |
| SNP_18557_A_36382459 | NC_021162.1    | Ca_Kabuli_Chr03 | 36382459                | CC                                     | AA                 | AA               | URR                           | 101506941          | wee1-like protein kinase                                   |
| SNP_18558_A_36383151 | NC_021162.1    | Ca_Kabuli_Chr03 | 36383151                | CC                                     | TT                 | TT               | INTRON                        | 101507267          | uncharacterized LOC101507267                               |
| SNP_18559_A_36383153 | NC_021162.1    | Ca_Kabuli_Chr03 | 36383153                | GG                                     | AA                 | AA               | INTRON                        | 101507267          | uncharacterized LOC101507267                               |
| SNP_18560_A_36383164 | NC_021162.1    | Ca_Kabuli_Chr03 | 36383164                | GG                                     | AA                 | AA               | INTRON                        | 101507267          | uncharacterized LOC101507267                               |
| SNP_18561_A_36383210 | NC_021162.1    | Ca_Kabuli_Chr03 | 36383210                | AA                                     | TT                 | TT               | INTRON                        | 101507267          | uncharacterized LOC101507267                               |
| SNP_18562_A_36384909 | NC_021162.1    | Ca_Kabuli_Chr03 | 36384909                | GG                                     | AA                 | AA               | NON_SYNONYMOUS_CODING         | 101507267          | uncharacterized LOC101507267                               |
| SNP_18563_A_36389212 | NC_021162.1    | Ca_Kabuli_Chr03 | 36389212                | GG                                     | TT                 | TT               | DRR                           | 101507580          | pentatricopeptide repeat-containing protein At5g56310-like |
| SNP_18564_A_36392074 | NC_021162.1    | Ca_Kabuli_Chr03 | 36392074                | GG                                     | TT                 | TT               | DRR                           | 101410607          | transfer RNA glycine (anticodon CCC)                       |
| SNP_18565_A_36393349 | NC_021162.1    | Ca_Kabuli_Chr03 | 36393349                | TT                                     | CC                 | CC               | URR                           | 101507580          | pentatricopeptide repeat-containing protein At5g56310-like |
| SNP_18568_A_36397387 | NC_021162.1    | Ca_Kabuli_Chr03 | 36397387                | GG                                     | AA                 | AA               | INTERGENIC                    |                    |                                                            |
| SNP_18569_A_36397447 | NC_021162.1    | Ca_Kabuli_Chr03 | 36397447                | GG                                     | AA                 | AA               | INTERGENIC                    |                    |                                                            |
| SNP_18570_A_36397463 | NC_021162.1    | Ca_Kabuli_Chr03 | 36397463                | GG                                     | TT                 | TT               | INTERGENIC                    |                    |                                                            |
| SNP_18572_A_36399221 | NC_021162.1    | Ca_Kabuli_Chr03 | 36399221                | AA                                     | GG                 | GG               | URR                           | 101508205          | cyclin-dependent kinase 12-like                            |
| SNP_18573_A_36399415 | NC_021162.1    | Ca_Kabuli_Chr03 | 36399415                | TT                                     | CC                 | CC               | URR                           | 101508205          | cyclin-dependent kinase 12-like                            |
| SNP_18574_A_36399459 | NC_021162.1    | Ca_Kabuli_Chr03 | 36399459                | AA                                     | GG                 | GG               | DRR                           | 101508530          | bifunctional protein FoI2                                  |
| SNP_18576_A_36399532 | NC_021162.1    | Ca_Kabuli_Chr03 | 36399532                | GG                                     | AA                 | AA               | DRR                           | 101508530          | bifunctional protein FoI2                                  |
| SNP_18577_A_36404908 | NC_021162.1    | Ca_Kabuli_Chr03 | 36404908                | GG                                     | AA                 | AA               | INTERGENIC                    |                    |                                                            |
| SNP_18578_A_36404974 | NC_021162.1    | Ca_Kabuli_Chr03 | 36404974                | CC                                     | TT                 | TT               | INTERGENIC                    |                    |                                                            |
| SNP_18579_A_36409162 | NC_021162.1    | Ca_Kabuli_Chr03 | 36409162                | GG                                     | AA                 | AA               | DRR                           | 101509166          | rapid alkalization factor                                  |
| SNP_18580_A_36409969 | NC_021162.1    | Ca_Kabuli_Chr03 | 36409969                | GG                                     | AA                 | AA               | DRR                           | 101509496          | heat shock factor-binding protein 1-like                   |
| SNP_18583_A_36410699 | NC_021162.1    | Ca_Kabuli_Chr03 | 36410699                | AA                                     | GG                 | GG               | DRR                           | 101509496          | heat shock factor-binding protein 1-like                   |

| SNPs IDs             | Chromosome IDs | Chromosomes     | Physical positions (bp) | CDC Frontier genome (Reference genome) | (Pusa 1103 & HPNB) | (ILWC 46 & LPNB) | Sequence Components of genome | Gene accession IDs | Putative functions                                              |
|----------------------|----------------|-----------------|-------------------------|----------------------------------------|--------------------|------------------|-------------------------------|--------------------|-----------------------------------------------------------------|
| SNP_18584_A_36410824 | NC_021162.1    | Ca_Kabuli_Chr03 | 36410824                | CC                                     | TT                 | TT               | URR                           | 101509166          | rapid alkalization factor                                       |
| SNP_18585_A_36413064 | NC_021162.1    | Ca_Kabuli_Chr03 | 36413064                | GG                                     | AA                 | AA               | URR                           | 101509496          | heat shock factor-binding protein 1-like                        |
| SNP_18586_A_36416697 | NC_021162.1    | Ca_Kabuli_Chr03 | 36416697                | TT                                     | GG                 | GG               | INTRON                        | 101509815          | dol-P-Man:Man(5)GlcNAc(2)-PP-Dol mannosyltransferase alpha-1,3- |
| SNP_18587_A_36418442 | NC_021162.1    | Ca_Kabuli_Chr03 | 36418442                | CC                                     | TT                 | TT               | INTRON                        | 101509815          | dol-P-Man:Man(5)GlcNAc(2)-PP-Dol mannosyltransferase alpha-1,3- |
| SNP_18589_A_36420257 | NC_021162.1    | Ca_Kabuli_Chr03 | 36420257                | GG                                     | AA                 | AA               | DRR                           | 101491220          | uncharacterized LOC101491220                                    |
| SNP_18591_A_36420670 | NC_021162.1    | Ca_Kabuli_Chr03 | 36420670                | GG                                     | AA                 | AA               | DRR                           | 101491220          | uncharacterized LOC101491220                                    |
| SNP_18592_A_36420709 | NC_021162.1    | Ca_Kabuli_Chr03 | 36420709                | CC                                     | TT                 | TT               | DRR                           | 101491220          | uncharacterized LOC101491220                                    |
| SNP_18594_A_36421301 | NC_021162.1    | Ca_Kabuli_Chr03 | 36421301                | AA                                     | TT                 | TT               | URR                           | 101509815          | dol-P-Man:Man(5)GlcNAc(2)-PP-Dol mannosyltransferase alpha-1,3- |
| SNP_18595_A_36421315 | NC_021162.1    | Ca_Kabuli_Chr03 | 36421315                | GG                                     | AA                 | AA               | URR                           | 101509815          | dol-P-Man:Man(5)GlcNAc(2)-PP-Dol mannosyltransferase alpha-1,3- |
| SNP_18596_A_36421681 | NC_021162.1    | Ca_Kabuli_Chr03 | 36421681                | AA                                     | TT                 | TT               | DRR                           | 101510570          | translocator protein homolog                                    |
| SNP_18597_A_36424448 | NC_021162.1    | Ca_Kabuli_Chr03 | 36424448                | GG                                     | CC                 | CC               | DRR                           | 101510893          | xyloglucan 6-xylosyltransferase 2                               |
| SNP_18598_A_36433588 | NC_021162.1    | Ca_Kabuli_Chr03 | 36433588                | TT                                     | CC                 | CC               | INTERGENIC                    |                    |                                                                 |
| SNP_18600_A_36436825 | NC_021162.1    | Ca_Kabuli_Chr03 | 36436825                | AA                                     | GG                 | GG               | INTERGENIC                    |                    |                                                                 |
| SNP_18601_A_36442104 | NC_021162.1    | Ca_Kabuli_Chr03 | 36442104                | CC                                     | AA                 | AA               | INTERGENIC                    |                    |                                                                 |
| SNP_18604_A_36449110 | NC_021162.1    | Ca_Kabuli_Chr03 | 36449110                | CC                                     | AA                 | AA               | INTERGENIC                    |                    |                                                                 |
| SNP_18605_A_36452293 | NC_021162.1    | Ca_Kabuli_Chr03 | 36452293                | CC                                     | TT                 | TT               | INTRON                        | 101512497          | probable E3 ubiquitin-protein ligase BAH1-like 1                |
| SNP_18606_A_36452417 | NC_021162.1    | Ca_Kabuli_Chr03 | 36452417                | GG                                     | AA                 | AA               | INTRON                        | 101512497          | probable E3 ubiquitin-protein ligase BAH1-like 1                |
| SNP_18607_A_36452423 | NC_021162.1    | Ca_Kabuli_Chr03 | 36452423                | CC                                     | GG                 | GG               | INTRON                        | 101512497          | probable E3 ubiquitin-protein ligase BAH1-like 1                |
| SNP_18608_A_36452427 | NC_021162.1    | Ca_Kabuli_Chr03 | 36452427                | CC                                     | TT                 | TT               | INTRON                        | 101512497          | probable E3 ubiquitin-protein ligase BAH1-like 1                |
| SNP_18610_A_36455599 | NC_021162.1    | Ca_Kabuli_Chr03 | 36455599                | CC                                     | AA                 | AA               | URR                           | 101512497          | probable E3 ubiquitin-protein ligase BAH1-like 1                |
| SNP_18612_A_36455820 | NC_021162.1    | Ca_Kabuli_Chr03 | 36455820                | CC                                     | TT                 | TT               | INTERGENIC                    |                    |                                                                 |
| SNP_18613_A_36456747 | NC_021162.1    | Ca_Kabuli_Chr03 | 36456747                | TT                                     | GG                 | GG               | INTERGENIC                    |                    |                                                                 |

| SNPs IDs             | Chromosome IDs | Chromosomes     | Physical positions (bp) | CDC Frontier genome (Reference genome) | (Pusa 1103 & HPNB) | (ILWC 46 & LPNB) | Sequence Components of genome | Gene accession IDs | Putative functions                        |
|----------------------|----------------|-----------------|-------------------------|----------------------------------------|--------------------|------------------|-------------------------------|--------------------|-------------------------------------------|
| SNP_18614_A_36457350 | NC_021162.1    | Ca_Kabuli_Chr03 | 36457350                | AA                                     | GG                 | GG               | INTERGENIC                    |                    |                                           |
| SNP_18617_A_36458368 | NC_021162.1    | Ca_Kabuli_Chr03 | 36458368                | TT                                     | GG                 | GG               | INTERGENIC                    |                    |                                           |
| SNP_18618_A_36458371 | NC_021162.1    | Ca_Kabuli_Chr03 | 36458371                | AA                                     | GG                 | GG               | INTERGENIC                    |                    |                                           |
| SNP_18619_A_36460299 | NC_021162.1    | Ca_Kabuli_Chr03 | 36460299                | TT                                     | CC                 | CC               | INTERGENIC                    |                    |                                           |
| SNP_18620_A_36463062 | NC_021162.1    | Ca_Kabuli_Chr03 | 36463062                | CC                                     | TT                 | TT               | URR                           | 101512811          | universal stress protein A-like protein   |
| SNP_18621_A_36463293 | NC_021162.1    | Ca_Kabuli_Chr03 | 36463293                | TT                                     | CC                 | CC               | DRR                           | 101513141          | phytochrome A-associated F-box protein    |
| SNP_18622_A_36466031 | NC_021162.1    | Ca_Kabuli_Chr03 | 36466031                | TT                                     | CC                 | CC               | URR                           | 101513141          | phytochrome A-associated F-box protein    |
| SNP_18623_A_36467514 | NC_021162.1    | Ca_Kabuli_Chr03 | 36467514                | GG                                     | AA                 | AA               | INTERGENIC                    |                    |                                           |
| SNP_18624_A_36467774 | NC_021162.1    | Ca_Kabuli_Chr03 | 36467774                | AA                                     | GG                 | GG               | INTERGENIC                    |                    |                                           |
| SNP_18625_A_36468124 | NC_021162.1    | Ca_Kabuli_Chr03 | 36468124                | AA                                     | GG                 | GG               | INTERGENIC                    |                    |                                           |
| SNP_18626_A_36468268 | NC_021162.1    | Ca_Kabuli_Chr03 | 36468268                | CC                                     | TT                 | TT               | INTERGENIC                    |                    |                                           |
| SNP_18627_A_36475872 | NC_021162.1    | Ca_Kabuli_Chr03 | 36475872                | TT                                     | CC                 | CC               | INTRON                        | 101491540          | serine/arginine-rich-splicing factor SR34 |
| SNP_18628_A_36476413 | NC_021162.1    | Ca_Kabuli_Chr03 | 36476413                | TT                                     | GG                 | GG               | INTRON                        | 101491540          | serine/arginine-rich-splicing factor SR34 |
| SNP_18629_A_36477769 | NC_021162.1    | Ca_Kabuli_Chr03 | 36477769                | GG                                     | CC                 | CC               | INTRON                        | 101491540          | serine/arginine-rich-splicing factor SR34 |
| SNP_18630_A_36480123 | NC_021162.1    | Ca_Kabuli_Chr03 | 36480123                | GG                                     | CC                 | CC               | INTRON                        | 101491540          | serine/arginine-rich-splicing factor SR34 |
| SNP_18631_A_36480968 | NC_021162.1    | Ca_Kabuli_Chr03 | 36480968                | TT                                     | CC                 | CC               | INTRON                        | 101491540          | serine/arginine-rich-splicing factor SR34 |
| SNP_18632_A_36481261 | NC_021162.1    | Ca_Kabuli_Chr03 | 36481261                | GG                                     | AA                 | AA               | INTRON                        | 101491540          | serine/arginine-rich-splicing factor SR34 |
| SNP_18633_A_36481984 | NC_021162.1    | Ca_Kabuli_Chr03 | 36481984                | GG                                     | TT                 | TT               | INTRON                        | 101491540          | serine/arginine-rich-splicing factor SR34 |
| SNP_18634_A_36485999 | NC_021162.1    | Ca_Kabuli_Chr03 | 36485999                | AA                                     | TT                 | TT               | INTERGENIC                    |                    |                                           |
| SNP_18635_A_36488972 | NC_021162.1    | Ca_Kabuli_Chr03 | 36488972                | CC                                     | TT                 | TT               | DRR                           | 101514116          | caffeoylshikimate esterase-like           |
| SNP_18636_A_36489094 | NC_021162.1    | Ca_Kabuli_Chr03 | 36489094                | GG                                     | AA                 | AA               | DRR                           | 101514116          | caffeoylshikimate esterase-like           |
| SNP_18637_A_36489389 | NC_021162.1    | Ca_Kabuli_Chr03 | 36489389                | GG                                     | TT                 | TT               | DRR                           | 101514116          | caffeoylshikimate esterase-like           |

| SNPs IDs             | Chromosome IDs | Chromosomes     | Physical positions (bp) | CDC Frontier genome (Reference genome) | (Pusa 1103 & HPNB) | (ILWC 46 & LPNB) | Sequence Components of genome | Gene accession IDs | Putative functions                   |
|----------------------|----------------|-----------------|-------------------------|----------------------------------------|--------------------|------------------|-------------------------------|--------------------|--------------------------------------|
| SNP_18638_A_36489395 | NC_021162.1    | Ca_Kabuli_Chr03 | 36489395                | AA                                     | CC                 | CC               | DRR                           | 101514116          | caffeoylshikimate esterase-like      |
| SNP_18639_A_36489556 | NC_021162.1    | Ca_Kabuli_Chr03 | 36489556                | AA                                     | GG                 | GG               | DRR                           | 101514116          | caffeoylshikimate esterase-like      |
| SNP_18640_A_36489564 | NC_021162.1    | Ca_Kabuli_Chr03 | 36489564                | AA                                     | TT                 | TT               | DRR                           | 101514116          | caffeoylshikimate esterase-like      |
| SNP_18642_A_36490689 | NC_021162.1    | Ca_Kabuli_Chr03 | 36490689                | CC                                     | TT                 | TT               | URR                           | 101513776          | 21 kDa protein-like                  |
| SNP_18643_A_36496018 | NC_021162.1    | Ca_Kabuli_Chr03 | 36496018                | TT                                     | CC                 | CC               | URR                           | 101514116          | caffeoylshikimate esterase-like      |
| SNP_18644_A_36496029 | NC_021162.1    | Ca_Kabuli_Chr03 | 36496029                | TT                                     | CC                 | CC               | URR                           | 101514116          | caffeoylshikimate esterase-like      |
| SNP_18645_A_36496083 | NC_021162.1    | Ca_Kabuli_Chr03 | 36496083                | TT                                     | CC                 | CC               | URR                           | 101514116          | caffeoylshikimate esterase-like      |
| SNP_18646_A_36496084 | NC_021162.1    | Ca_Kabuli_Chr03 | 36496084                | GG                                     | CC                 | CC               | URR                           | 101514116          | caffeoylshikimate esterase-like      |
| SNP_18647_A_36497369 | NC_021162.1    | Ca_Kabuli_Chr03 | 36497369                | AA                                     | CC                 | CC               | INTERGENIC                    |                    |                                      |
| SNP_18648_A_36499325 | NC_021162.1    | Ca_Kabuli_Chr03 | 36499325                | AA                                     | TT                 | TT               | INTERGENIC                    |                    |                                      |
| SNP_18649_A_36499335 | NC_021162.1    | Ca_Kabuli_Chr03 | 36499335                | CC                                     | TT                 | TT               | INTERGENIC                    |                    |                                      |
| SNP_18650_A_36499900 | NC_021162.1    | Ca_Kabuli_Chr03 | 36499900                | CC                                     | TT                 | TT               | INTERGENIC                    |                    |                                      |
| SNP_18651_A_36503556 | NC_021162.1    | Ca_Kabuli_Chr03 | 36503556                | TT                                     | CC                 | CC               | INTRON                        | 101491846          | uncharacterized protein C57A7.06     |
| SNP_18652_A_36505429 | NC_021162.1    | Ca_Kabuli_Chr03 | 36505429                | TT                                     | CC                 | CC               | INTRON                        | 101491846          | uncharacterized protein C57A7.06     |
| SNP_18653_A_36505437 | NC_021162.1    | Ca_Kabuli_Chr03 | 36505437                | TT                                     | AA                 | AA               | INTRON                        | 101491846          | uncharacterized protein C57A7.06     |
| SNP_18654_A_36505837 | NC_021162.1    | Ca_Kabuli_Chr03 | 36505837                | TT                                     | AA                 | AA               | INTRON                        | 101491846          | uncharacterized protein C57A7.06     |
| SNP_18655_A_36507575 | NC_021162.1    | Ca_Kabuli_Chr03 | 36507575                | AA                                     | GG                 | GG               | URR                           | 101491846          | uncharacterized protein C57A7.06     |
| SNP_18656_A_36509560 | NC_021162.1    | Ca_Kabuli_Chr03 | 36509560                | GG                                     | AA                 | AA               | INTERGENIC                    |                    |                                      |
| SNP_18657_A_36515063 | NC_021162.1    | Ca_Kabuli_Chr03 | 36515063                | TT                                     | CC                 | CC               | INTRON                        | 101514663          | U1 small nuclear ribonucleoprotein A |
| SNP_18658_A_36515655 | NC_021162.1    | Ca_Kabuli_Chr03 | 36515655                | TT                                     | CC                 | CC               | INTRON                        | 101514663          | U1 small nuclear ribonucleoprotein A |
| SNP_18659_A_36516576 | NC_021162.1    | Ca_Kabuli_Chr03 | 36516576                | CC                                     | AA                 | AA               | URR                           | 101514663          | U1 small nuclear ribonucleoprotein A |
| SNP_18660_A_36516611 | NC_021162.1    | Ca_Kabuli_Chr03 | 36516611                | GG                                     | AA                 | AA               | URR                           | 101514663          | U1 small nuclear ribonucleoprotein A |

| SNPs IDs             | Chromosome IDs | Chromosomes     | Physical positions (bp) | CDC Frontier (Reference genome) | (Pusa 1103 & HPNB) | (ILWC 46 & LPNB) | Sequence Components of genome | Gene accession IDs | Putative functions                             |
|----------------------|----------------|-----------------|-------------------------|---------------------------------|--------------------|------------------|-------------------------------|--------------------|------------------------------------------------|
| SNP_18661_A_36517162 | NC_021162.1    | Ca_Kabuli_Chr03 | 36517162                | CC                              | AA                 | AA               | URR                           | 101514663          | U1 small nuclear ribonucleoprotein A           |
| SNP_18662_A_36524758 | NC_021162.1    | Ca_Kabuli_Chr03 | 36524758                | AA                              | GG                 | GG               | INTERGENIC                    |                    |                                                |
| SNP_18663_A_36525145 | NC_021162.1    | Ca_Kabuli_Chr03 | 36525145                | TT                              | AA                 | AA               | URR                           | 101514990          | indole-3-acetic acid-induced protein ARG2-like |
| SNP_18664_A_36525391 | NC_021162.1    | Ca_Kabuli_Chr03 | 36525391                | TT                              | AA                 | AA               | URR                           | 101514990          | indole-3-acetic acid-induced protein ARG2-like |
| SNP_18666_A_36526350 | NC_021162.1    | Ca_Kabuli_Chr03 | 36526350                | CC                              | TT                 | TT               | DRR                           | 101515317          | uncharacterized protein At5g01610-like         |
| SNP_18667_A_36526362 | NC_021162.1    | Ca_Kabuli_Chr03 | 36526362                | AA                              | TT                 | TT               | DRR                           | 101515317          | uncharacterized protein At5g01610-like         |
| SNP_18668_A_36526428 | NC_021162.1    | Ca_Kabuli_Chr03 | 36526428                | CC                              | TT                 | TT               | DRR                           | 101515317          | uncharacterized protein At5g01610-like         |
| SNP_18669_A_36527112 | NC_021162.1    | Ca_Kabuli_Chr03 | 36527112                | CC                              | TT                 | TT               | DRR                           | 101515317          | uncharacterized protein At5g01610-like         |
| SNP_18670_A_36527338 | NC_021162.1    | Ca_Kabuli_Chr03 | 36527338                | TT                              | CC                 | CC               | INTERGENIC                    |                    |                                                |
| SNP_18672_A_36529837 | NC_021162.1    | Ca_Kabuli_Chr03 | 36529837                | AA                              | GG                 | GG               | DRR                           | 101515642          | exocyst complex component SEC15B               |
| SNP_18673_A_36529877 | NC_021162.1    | Ca_Kabuli_Chr03 | 36529877                | AA                              | TT                 | TT               | DRR                           | 101515642          | exocyst complex component SEC15B               |
| SNP_18674_A_36530024 | NC_021162.1    | Ca_Kabuli_Chr03 | 36530024                | TT                              | CC                 | CC               | DRR                           | 101515642          | exocyst complex component SEC15B               |
| SNP_18675_A_36530149 | NC_021162.1    | Ca_Kabuli_Chr03 | 36530149                | CC                              | TT                 | TT               | DRR                           | 101515642          | exocyst complex component SEC15B               |
| SNP_18677_A_36531849 | NC_021162.1    | Ca_Kabuli_Chr03 | 36531849                | GG                              | TT                 | TT               | SYNONYMOUS_CODING             | 101515642          | exocyst complex component SEC15B               |
| SNP_18678_A_36533790 | NC_021162.1    | Ca_Kabuli_Chr03 | 36533790                | AA                              | TT                 | TT               | URR                           | 101515642          | exocyst complex component SEC15B               |
| SNP_18679_A_36533796 | NC_021162.1    | Ca_Kabuli_Chr03 | 36533796                | GG                              | AA                 | AA               | URR                           | 101515642          | exocyst complex component SEC15B               |
| SNP_18680_A_36543238 | NC_021162.1    | Ca_Kabuli_Chr03 | 36543238                | CC                              | TT                 | TT               | INTRON                        | 101488396          | 60S ribosomal protein L18                      |
| SNP_18681_A_36543270 | NC_021162.1    | Ca_Kabuli_Chr03 | 36543270                | TT                              | GG                 | GG               | INTRON                        | 101488396          | 60S ribosomal protein L18                      |
| SNP_18682_A_36543556 | NC_021162.1    | Ca_Kabuli_Chr03 | 36543556                | TT                              | CC                 | CC               | INTERGENIC                    |                    |                                                |
| SNP_18683_A_36553274 | NC_021162.1    | Ca_Kabuli_Chr03 | 36553274                | AA                              | GG                 | GG               | URR                           | 101488724          | bifunctional epoxide hydrolase 2               |
| SNP_18684_A_36561497 | NC_021162.1    | Ca_Kabuli_Chr03 | 36561497                | TT                              | CC                 | CC               | INTERGENIC                    |                    |                                                |
| SNP_18685_A_36565284 | NC_021162.1    | Ca_Kabuli_Chr03 | 36565284                | CC                              | TT                 | TT               | DRR                           | 101489391          | uncharacterized LOC101489391                   |

| SNPs IDs             | Chromosome IDs | Chromosomes     | Physical positions (bp) | CDC Frontier genome (Reference genome) | (Pusa 1103 & HPNB) | (ILWC 46 & LPNB) | Sequence Components of genome | Gene accession IDs | Putative functions                                  |
|----------------------|----------------|-----------------|-------------------------|----------------------------------------|--------------------|------------------|-------------------------------|--------------------|-----------------------------------------------------|
| SNP_18686_A_36565325 | NC_021162.1    | Ca_Kabuli_Chr03 | 36565325                | GG                                     | AA                 | AA               | DRR                           | 101489391          | uncharacterized LOC101489391                        |
| SNP_18687_A_36565340 | NC_021162.1    | Ca_Kabuli_Chr03 | 36565340                | CC                                     | AA                 | AA               | DRR                           | 101489391          | uncharacterized LOC101489391                        |
| SNP_18688_A_36565484 | NC_021162.1    | Ca_Kabuli_Chr03 | 36565484                | AA                                     | GG                 | GG               | DRR                           | 101489391          | uncharacterized LOC101489391                        |
| SNP_18689_A_36574188 | NC_021162.1    | Ca_Kabuli_Chr03 | 36574188                | AA                                     | TT                 | TT               | NON_SYNONYMOUS_CODING         | 101490034          | probable pectinesterase/pectinesterase inhibitor 41 |
| SNP_18690_A_36582453 | NC_021162.1    | Ca_Kabuli_Chr03 | 36582453                | AA                                     | GG                 | GG               | DRR                           | 101490578          | pectinesterase                                      |
| SNP_18691_A_36582526 | NC_021162.1    | Ca_Kabuli_Chr03 | 36582526                | GG                                     | TT                 | TT               | DRR                           | 101490578          | pectinesterase                                      |
| SNP_18692_A_36582540 | NC_021162.1    | Ca_Kabuli_Chr03 | 36582540                | CC                                     | TT                 | TT               | DRR                           | 101490578          | pectinesterase                                      |
| SNP_18695_A_36582635 | NC_021162.1    | Ca_Kabuli_Chr03 | 36582635                | GG                                     | TT                 | TT               | DRR                           | 101490578          | pectinesterase                                      |
| SNP_18696_A_36583588 | NC_021162.1    | Ca_Kabuli_Chr03 | 36583588                | GG                                     | AA                 | AA               | NON_SYNONYMOUS_CODING         | 101490578          | pectinesterase                                      |
| SNP_18697_A_36588896 | NC_021162.1    | Ca_Kabuli_Chr03 | 36588896                | CC                                     | GG                 | GG               | INTERGENIC                    |                    |                                                     |
| SNP_18698_A_36588976 | NC_021162.1    | Ca_Kabuli_Chr03 | 36588976                | AA                                     | GG                 | GG               | INTERGENIC                    |                    |                                                     |
| SNP_18699_A_36595731 | NC_021162.1    | Ca_Kabuli_Chr03 | 36595731                | CC                                     | GG                 | GG               | URR                           | 101490898          | sucrose synthase 2                                  |
| SNP_18700_A_36595804 | NC_021162.1    | Ca_Kabuli_Chr03 | 36595804                | AA                                     | TT                 | TT               | URR                           | 101490898          | sucrose synthase 2                                  |
| SNP_18701_A_36595835 | NC_021162.1    | Ca_Kabuli_Chr03 | 36595835                | TT                                     | CC                 | CC               | URR                           | 101490898          | sucrose synthase 2                                  |
| SNP_18702_A_36596053 | NC_021162.1    | Ca_Kabuli_Chr03 | 36596053                | TT                                     | CC                 | CC               | URR                           | 101490898          | sucrose synthase 2                                  |
| SNP_18703_A_36596056 | NC_021162.1    | Ca_Kabuli_Chr03 | 36596056                | TT                                     | CC                 | CC               | URR                           | 101490898          | sucrose synthase 2                                  |
| SNP_18704_A_36596079 | NC_021162.1    | Ca_Kabuli_Chr03 | 36596079                | CC                                     | TT                 | TT               | URR                           | 101490898          | sucrose synthase 2                                  |
| SNP_18706_A_36597646 | NC_021162.1    | Ca_Kabuli_Chr03 | 36597646                | AA                                     | CC                 | CC               | INTERGENIC                    |                    |                                                     |
| SNP_18707_A_36597947 | NC_021162.1    | Ca_Kabuli_Chr03 | 36597947                | TT                                     | CC                 | CC               | INTERGENIC                    |                    |                                                     |
| SNP_18709_A_36598332 | NC_021162.1    | Ca_Kabuli_Chr03 | 36598332                | AA                                     | TT                 | TT               | INTERGENIC                    |                    |                                                     |
| SNP_18710_A_36607351 | NC_021162.1    | Ca_Kabuli_Chr03 | 36607351                | TT                                     | CC                 | CC               | INTERGENIC                    |                    |                                                     |
| SNP_18713_A_36614066 | NC_021162.1    | Ca_Kabuli_Chr03 | 36614066                | CC                                     | TT                 | TT               | INTERGENIC                    |                    |                                                     |



| SNPs IDs             | Chromosome IDs | Chromosomes     | Physical positions (bp) | CDC Frontier genome (Reference genome) | (Pusa 1103 & HPNB) | (ILWC 46 & LPNB) | Sequence genome | Components of | Gene accession IDs                                                | Putative functions |
|----------------------|----------------|-----------------|-------------------------|----------------------------------------|--------------------|------------------|-----------------|---------------|-------------------------------------------------------------------|--------------------|
| SNP_18714_A_36614085 | NC_021162.1    | Ca_Kabuli_Chr03 | 36614085                | CC                                     | TT                 | TT               | INTERGENIC      |               |                                                                   |                    |
| SNP_18715_A_36614117 | NC_021162.1    | Ca_Kabuli_Chr03 | 36614117                | TT                                     | GG                 | GG               | INTERGENIC      |               |                                                                   |                    |
| SNP_18717_A_36616855 | NC_021162.1    | Ca_Kabuli_Chr03 | 36616855                | TT                                     | CC                 | CC               | INTERGENIC      |               |                                                                   |                    |
| SNP_18718_A_36624185 | NC_021162.1    | Ca_Kabuli_Chr03 | 36624185                | GG                                     | AA                 | AA               | URR             | 101492847     | ethylene response sensor 1                                        |                    |
| SNP_18719_A_36624186 | NC_021162.1    | Ca_Kabuli_Chr03 | 36624186                | GG                                     | TT                 | TT               | URR             | 101492847     | ethylene response sensor 1                                        |                    |
| SNP_18722_A_36624667 | NC_021162.1    | Ca_Kabuli_Chr03 | 36624667                | TT                                     | AA                 | AA               | URR             | 101492847     | ethylene response sensor 1                                        |                    |
| SNP_18723_A_36624687 | NC_021162.1    | Ca_Kabuli_Chr03 | 36624687                | AA                                     | GG                 | GG               | URR             | 101492847     | ethylene response sensor 1                                        |                    |
| SNP_18725_A_36625095 | NC_021162.1    | Ca_Kabuli_Chr03 | 36625095                | CC                                     | TT                 | TT               | URR             | 101492847     | ethylene response sensor 1                                        |                    |
| SNP_18726_A_36625113 | NC_021162.1    | Ca_Kabuli_Chr03 | 36625113                | AA                                     | GG                 | GG               | URR             | 101492847     | ethylene response sensor 1                                        |                    |
| SNP_18728_A_36626182 | NC_021162.1    | Ca_Kabuli_Chr03 | 36626182                | TT                                     | CC                 | CC               | INTERGENIC      |               |                                                                   |                    |
| SNP_18729_A_36626220 | NC_021162.1    | Ca_Kabuli_Chr03 | 36626220                | GG                                     | AA                 | AA               | INTERGENIC      |               |                                                                   |                    |
| SNP_18730_A_36631328 | NC_021162.1    | Ca_Kabuli_Chr03 | 36631328                | CC                                     | AA                 | AA               | INTRON          | 101492520     | nicotinamide adenine dinucleotide transporter 1, chloroplast-like |                    |
| SNP_18731_A_36632819 | NC_021162.1    | Ca_Kabuli_Chr03 | 36632819                | AA                                     | CC                 | CC               | INTRON          | 101492520     | nicotinamide adenine dinucleotide transporter 1, chloroplast-like |                    |
| SNP_18732_A_36632968 | NC_021162.1    | Ca_Kabuli_Chr03 | 36632968                | TT                                     | CC                 | CC               | INTRON          | 101492520     | nicotinamide adenine dinucleotide transporter 1, chloroplast-like |                    |
| SNP_18733_A_36633190 | NC_021162.1    | Ca_Kabuli_Chr03 | 36633190                | AA                                     | GG                 | GG               | INTRON          | 101492520     | nicotinamide adenine dinucleotide transporter 1, chloroplast-like |                    |
| SNP_18734_A_36636648 | NC_021162.1    | Ca_Kabuli_Chr03 | 36636648                | GG                                     | AA                 | AA               | INTERGENIC      |               |                                                                   |                    |
| SNP_18735_A_36636698 | NC_021162.1    | Ca_Kabuli_Chr03 | 36636698                | CC                                     | TT                 | TT               | INTERGENIC      |               |                                                                   |                    |
| SNP_18738_A_36638179 | NC_021162.1    | Ca_Kabuli_Chr03 | 36638179                | GG                                     | TT                 | TT               | INTERGENIC      |               |                                                                   |                    |
| SNP_18740_A_36638413 | NC_021162.1    | Ca_Kabuli_Chr03 | 36638413                | TT                                     | CC                 | CC               | INTERGENIC      |               |                                                                   |                    |
| SNP_18741_A_36638424 | NC_021162.1    | Ca_Kabuli_Chr03 | 36638424                | TT                                     | CC                 | CC               | INTERGENIC      |               |                                                                   |                    |
| SNP_18742_A_36638450 | NC_021162.1    | Ca_Kabuli_Chr03 | 36638450                | TT                                     | AA                 | AA               | INTERGENIC      |               |                                                                   |                    |
| SNP_18743_A_36638562 | NC_021162.1    | Ca_Kabuli_Chr03 | 36638562                | AA                                     | GG                 | GG               | INTERGENIC      |               |                                                                   |                    |

| SNPs IDs             | Chromosome IDs | Chromosomes     | Physical positions (bp) | CDC Frontier genome (Reference genome) | (Pusa 1103 & HPNB) | (ILWC 46 & LPNB) | Sequence Components of genome | Gene accession IDs | Putative functions                        |
|----------------------|----------------|-----------------|-------------------------|----------------------------------------|--------------------|------------------|-------------------------------|--------------------|-------------------------------------------|
| SNP_18744_A_36638834 | NC_021162.1    | Ca_Kabuli_Chr03 | 36638834                | AA                                     | CC                 | CC               | INTERGENIC                    |                    |                                           |
| SNP_18745_A_36638869 | NC_021162.1    | Ca_Kabuli_Chr03 | 36638869                | CC                                     | AA                 | AA               | INTERGENIC                    |                    |                                           |
| SNP_18746_A_36638912 | NC_021162.1    | Ca_Kabuli_Chr03 | 36638912                | AA                                     | TT                 | TT               | INTERGENIC                    |                    |                                           |
| SNP_18747_A_36639464 | NC_021162.1    | Ca_Kabuli_Chr03 | 36639464                | GG                                     | AA                 | AA               | INTERGENIC                    |                    |                                           |
| SNP_18748_A_36640594 | NC_021162.1    | Ca_Kabuli_Chr03 | 36640594                | CC                                     | TT                 | TT               | INTERGENIC                    |                    |                                           |
| SNP_18749_A_36640598 | NC_021162.1    | Ca_Kabuli_Chr03 | 36640598                | TT                                     | CC                 | CC               | INTERGENIC                    |                    |                                           |
| SNP_18750_A_36641347 | NC_021162.1    | Ca_Kabuli_Chr03 | 36641347                | CC                                     | AA                 | AA               | DRR                           | 101493396          | syntxin-43                                |
| SNP_18751_A_36641419 | NC_021162.1    | Ca_Kabuli_Chr03 | 36641419                | GG                                     | AA                 | AA               | DRR                           | 101493396          | syntxin-43                                |
| SNP_18752_A_36645717 | NC_021162.1    | Ca_Kabuli_Chr03 | 36645717                | CC                                     | GG                 | GG               | INTRON                        | 101493396          | syntxin-43                                |
| SNP_18754_A_36652857 | NC_021162.1    | Ca_Kabuli_Chr03 | 36652857                | TT                                     | AA                 | AA               | URR                           | 101493720          | cellulose synthase-like protein D5        |
| SNP_18755_A_36653569 | NC_021162.1    | Ca_Kabuli_Chr03 | 36653569                | TT                                     | CC                 | CC               | URR                           | 101493720          | cellulose synthase-like protein D5        |
| SNP_18756_A_36654180 | NC_021162.1    | Ca_Kabuli_Chr03 | 36654180                | TT                                     | CC                 | CC               | INTERGENIC                    |                    |                                           |
| SNP_18757_A_36655860 | NC_021162.1    | Ca_Kabuli_Chr03 | 36655860                | AA                                     | CC                 | CC               | INTERGENIC                    |                    |                                           |
| SNP_18758_A_36655874 | NC_021162.1    | Ca_Kabuli_Chr03 | 36655874                | AA                                     | GG                 | GG               | INTERGENIC                    |                    |                                           |
| SNP_18759_A_36670448 | NC_021162.1    | Ca_Kabuli_Chr03 | 36670448                | TT                                     | GG                 | GG               | URR                           | 101494260          | probable galacturonosyltransferase-like 7 |
| SNP_18760_A_36670452 | NC_021162.1    | Ca_Kabuli_Chr03 | 36670452                | CC                                     | TT                 | TT               | URR                           | 101494260          | probable galacturonosyltransferase-like 7 |
| SNP_18761_A_36670727 | NC_021162.1    | Ca_Kabuli_Chr03 | 36670727                | GG                                     | TT                 | TT               | INTERGENIC                    |                    |                                           |
| SNP_18762_A_36670746 | NC_021162.1    | Ca_Kabuli_Chr03 | 36670746                | GG                                     | AA                 | AA               | INTERGENIC                    |                    |                                           |
| SNP_18763_A_36670747 | NC_021162.1    | Ca_Kabuli_Chr03 | 36670747                | GG                                     | AA                 | AA               | INTERGENIC                    |                    |                                           |
| SNP_18764_A_36674430 | NC_021162.1    | Ca_Kabuli_Chr03 | 36674430                | TT                                     | GG                 | GG               | INTERGENIC                    |                    |                                           |
| SNP_18765_A_36674466 | NC_021162.1    | Ca_Kabuli_Chr03 | 36674466                | CC                                     | AA                 | AA               | INTERGENIC                    |                    |                                           |
| SNP_18766_A_36675600 | NC_021162.1    | Ca_Kabuli_Chr03 | 36675600                | AA                                     | TT                 | TT               | INTERGENIC                    |                    |                                           |

| SNPs IDs             | Chromosome IDs | Chromosomes     | Physical positions (bp) | CDC Frontier genome (Reference genome) | (Pusa 1103 & HPNB) | (ILWC 46 & LPNB) | Sequence Components of genome | Gene accession IDs | Putative functions                                             |
|----------------------|----------------|-----------------|-------------------------|----------------------------------------|--------------------|------------------|-------------------------------|--------------------|----------------------------------------------------------------|
| SNP_18767_A_36675792 | NC_021162.1    | Ca_Kabuli_Chr03 | 36675792                | CC                                     | TT                 | TT               | INTERGENIC                    |                    |                                                                |
| SNP_18768_A_36676513 | NC_021162.1    | Ca_Kabuli_Chr03 | 36676513                | CC                                     | TT                 | TT               | INTERGENIC                    |                    |                                                                |
| SNP_18769_A_36676663 | NC_021162.1    | Ca_Kabuli_Chr03 | 36676663                | CC                                     | AA                 | AA               | INTERGENIC                    |                    |                                                                |
| SNP_18771_A_36684818 | NC_021162.1    | Ca_Kabuli_Chr03 | 36684818                | TT                                     | CC                 | CC               | DRR                           | 101495308          | zinc finger CCH domain-containing protein 1                    |
| SNP_18772_A_36685662 | NC_021162.1    | Ca_Kabuli_Chr03 | 36685662                | AA                                     | TT                 | TT               | URR                           | 101493182          | glyceraldehyde-3-phosphate dehydrogenase, testis-specific-like |
| SNP_18773_A_36688554 | NC_021162.1    | Ca_Kabuli_Chr03 | 36688554                | AA                                     | GG                 | GG               | DRR                           | 101496184          | uncharacterized LOC101496184                                   |
| SNP_18775_A_36692007 | NC_021162.1    | Ca_Kabuli_Chr03 | 36692007                | TT                                     | AA                 | AA               | DRR                           | 101496512          | uncharacterized LOC101496512                                   |
| SNP_18776_A_36692961 | NC_021162.1    | Ca_Kabuli_Chr03 | 36692961                | TT                                     | CC                 | CC               | DRR                           | 101496512          | uncharacterized LOC101496512                                   |
| SNP_18777_A_36694288 | NC_021162.1    | Ca_Kabuli_Chr03 | 36694288                | CC                                     | AA                 | AA               | DRR                           | 101496845          | transcription factor MYB12-like                                |
| SNP_18778_A_36694771 | NC_021162.1    | Ca_Kabuli_Chr03 | 36694771                | AA                                     | GG                 | GG               | URR                           | 101496512          | uncharacterized LOC101496512                                   |
| SNP_18779_A_36696159 | NC_021162.1    | Ca_Kabuli_Chr03 | 36696159                | AA                                     | GG                 | GG               | INTERGENIC                    |                    |                                                                |
| SNP_18780_A_36697144 | NC_021162.1    | Ca_Kabuli_Chr03 | 36697144                | AA                                     | GG                 | GG               | INTRON                        | 101496845          | transcription factor MYB12-like                                |
| SNP_18783_A_36705590 | NC_021162.1    | Ca_Kabuli_Chr03 | 36705590                | GG                                     | AA                 | AA               | INTERGENIC                    |                    |                                                                |
| SNP_18785_A_36707090 | NC_021162.1    | Ca_Kabuli_Chr03 | 36707090                | TT                                     | AA                 | AA               | INTERGENIC                    |                    |                                                                |
| SNP_18786_A_36707117 | NC_021162.1    | Ca_Kabuli_Chr03 | 36707117                | AA                                     | TT                 | TT               | INTERGENIC                    |                    |                                                                |
| SNP_18787_A_36707169 | NC_021162.1    | Ca_Kabuli_Chr03 | 36707169                | CC                                     | TT                 | TT               | INTERGENIC                    |                    |                                                                |
| SNP_18788_A_36707178 | NC_021162.1    | Ca_Kabuli_Chr03 | 36707178                | AA                                     | GG                 | GG               | INTERGENIC                    |                    |                                                                |
| SNP_18789_A_36707195 | NC_021162.1    | Ca_Kabuli_Chr03 | 36707195                | AA                                     | GG                 | GG               | INTERGENIC                    |                    |                                                                |
| SNP_18791_A_36707549 | NC_021162.1    | Ca_Kabuli_Chr03 | 36707549                | GG                                     | AA                 | AA               | INTERGENIC                    |                    |                                                                |
| SNP_18793_A_36708517 | NC_021162.1    | Ca_Kabuli_Chr03 | 36708517                | TT                                     | CC                 | CC               | INTERGENIC                    |                    |                                                                |
| SNP_18794_A_36709469 | NC_021162.1    | Ca_Kabuli_Chr03 | 36709469                | CC                                     | TT                 | TT               | INTERGENIC                    |                    |                                                                |
| SNP_18795_A_36715903 | NC_021162.1    | Ca_Kabuli_Chr03 | 36715903                | TT                                     | CC                 | CC               | URR                           | 101497170          | dnaJ protein ERDJ3B                                            |

| SNPs IDs             | Chromosome IDs | Chromosomes     | Physical positions (bp) | CDC Frontier (Reference genome) | (Pusa 1103 & HPNB) | (ILWC 46 & LPNB) | Sequence Components of genome | Gene accession IDs | Putative functions           |
|----------------------|----------------|-----------------|-------------------------|---------------------------------|--------------------|------------------|-------------------------------|--------------------|------------------------------|
| SNP_18796_A_36716425 | NC_021162.1    | Ca_Kabuli_Chr03 | 36716425                | TT                              | GG                 | GG               | URR                           | 101497170          | dnaJ protein ERDJ3B          |
| SNP_18798_A_36719359 | NC_021162.1    | Ca_Kabuli_Chr03 | 36719359                | AA                              | GG                 | GG               | DRR                           | 101493817          | uncharacterized LOC101493817 |
| SNP_18799_A_36719374 | NC_021162.1    | Ca_Kabuli_Chr03 | 36719374                | GG                              | AA                 | AA               | DRR                           | 101493817          | uncharacterized LOC101493817 |
| SNP_18800_A_36719389 | NC_021162.1    | Ca_Kabuli_Chr03 | 36719389                | AA                              | TT                 | TT               | DRR                           | 101493817          | uncharacterized LOC101493817 |
| SNP_18801_A_36721996 | NC_021162.1    | Ca_Kabuli_Chr03 | 36721996                | GG                              | AA                 | AA               | SYNONYMOUS_CODING             | 101493817          | uncharacterized LOC101493817 |
| SNP_18802_A_36724218 | NC_021162.1    | Ca_Kabuli_Chr03 | 36724218                | GG                              | CC                 | CC               | URR                           | 101493817          | uncharacterized LOC101493817 |
| SNP_18803_A_36725110 | NC_021162.1    | Ca_Kabuli_Chr03 | 36725110                | TT                              | CC                 | CC               | INTERGENIC                    |                    |                              |
| SNP_18804_A_36725393 | NC_021162.1    | Ca_Kabuli_Chr03 | 36725393                | CC                              | TT                 | TT               | INTERGENIC                    |                    |                              |
| SNP_18805_A_36726705 | NC_021162.1    | Ca_Kabuli_Chr03 | 36726705                | CC                              | TT                 | TT               | INTERGENIC                    |                    |                              |
| SNP_18806_A_36728108 | NC_021162.1    | Ca_Kabuli_Chr03 | 36728108                | TT                              | AA                 | AA               | INTERGENIC                    |                    |                              |
| SNP_18807_A_36728346 | NC_021162.1    | Ca_Kabuli_Chr03 | 36728346                | CC                              | GG                 | GG               | INTERGENIC                    |                    |                              |
| SNP_18808_A_36728634 | NC_021162.1    | Ca_Kabuli_Chr03 | 36728634                | AA                              | GG                 | GG               | INTERGENIC                    |                    |                              |
| SNP_18809_A_36728676 | NC_021162.1    | Ca_Kabuli_Chr03 | 36728676                | AA                              | GG                 | GG               | INTERGENIC                    |                    |                              |
| SNP_18810_A_36728742 | NC_021162.1    | Ca_Kabuli_Chr03 | 36728742                | CC                              | GG                 | GG               | INTERGENIC                    |                    |                              |
| SNP_18811_A_36728750 | NC_021162.1    | Ca_Kabuli_Chr03 | 36728750                | TT                              | CC                 | CC               | INTERGENIC                    |                    |                              |
| SNP_18812_A_36729712 | NC_021162.1    | Ca_Kabuli_Chr03 | 36729712                | AA                              | GG                 | GG               | INTERGENIC                    |                    |                              |
| SNP_18813_A_36730092 | NC_021162.1    | Ca_Kabuli_Chr03 | 36730092                | GG                              | AA                 | AA               | INTERGENIC                    |                    |                              |
| SNP_18814_A_36735624 | NC_021162.1    | Ca_Kabuli_Chr03 | 36735624                | CC                              | TT                 | TT               | URR                           | 101497500          | uncharacterized LOC101497500 |
| SNP_18815_A_36735708 | NC_021162.1    | Ca_Kabuli_Chr03 | 36735708                | AA                              | CC                 | CC               | URR                           | 101497500          | uncharacterized LOC101497500 |
| SNP_18819_A_36736062 | NC_021162.1    | Ca_Kabuli_Chr03 | 36736062                | TT                              | GG                 | GG               | URR                           | 101497500          | uncharacterized LOC101497500 |
| SNP_18820_A_36736138 | NC_021162.1    | Ca_Kabuli_Chr03 | 36736138                | TT                              | CC                 | CC               | URR                           | 101497500          | uncharacterized LOC101497500 |
| SNP_18821_A_36736139 | NC_021162.1    | Ca_Kabuli_Chr03 | 36736139                | TT                              | CC                 | CC               | URR                           | 101497500          | uncharacterized LOC101497500 |

| SNPs IDs             | Chromosome IDs | Chromosomes     | Physical positions (bp) | CDC Frontier genome (Reference genome) | (Pusa 1103 & HPNB) | (ILWC 46 & LPNB) | Sequence Components of genome | Gene accession IDs | Putative functions           |
|----------------------|----------------|-----------------|-------------------------|----------------------------------------|--------------------|------------------|-------------------------------|--------------------|------------------------------|
| SNP_18822_A_36736296 | NC_021162.1    | Ca_Kabuli_Chr03 | 36736296                | GG                                     | TT                 | TT               | URR                           | 101497500          | uncharacterized LOC101497500 |
| SNP_18823_A_36737154 | NC_021162.1    | Ca_Kabuli_Chr03 | 36737154                | CC                                     | AA                 | AA               | URR                           | 101497500          | uncharacterized LOC101497500 |
| SNP_18824_A_36738017 | NC_021162.1    | Ca_Kabuli_Chr03 | 36738017                | CC                                     | AA                 | AA               | INTERGENIC                    |                    |                              |
| SNP_18825_A_36738049 | NC_021162.1    | Ca_Kabuli_Chr03 | 36738049                | CC                                     | TT                 | TT               | INTERGENIC                    |                    |                              |
| SNP_18826_A_36738145 | NC_021162.1    | Ca_Kabuli_Chr03 | 36738145                | GG                                     | AA                 | AA               | INTERGENIC                    |                    |                              |
| SNP_18827_A_36745281 | NC_021162.1    | Ca_Kabuli_Chr03 | 36745281                | TT                                     | AA                 | AA               | INTERGENIC                    |                    |                              |
| SNP_18828_A_36745307 | NC_021162.1    | Ca_Kabuli_Chr03 | 36745307                | AA                                     | TT                 | TT               | INTERGENIC                    |                    |                              |
| SNP_18829_A_36745412 | NC_021162.1    | Ca_Kabuli_Chr03 | 36745412                | CC                                     | TT                 | TT               | INTERGENIC                    |                    |                              |
| SNP_18830_A_36745542 | NC_021162.1    | Ca_Kabuli_Chr03 | 36745542                | AA                                     | GG                 | GG               | INTERGENIC                    |                    |                              |
| SNP_18831_A_36746318 | NC_021162.1    | Ca_Kabuli_Chr03 | 36746318                | TT                                     | CC                 | CC               | INTERGENIC                    |                    |                              |
| SNP_18832_A_36746674 | NC_021162.1    | Ca_Kabuli_Chr03 | 36746674                | TT                                     | AA                 | AA               | INTERGENIC                    |                    |                              |
| SNP_18833_A_36746679 | NC_021162.1    | Ca_Kabuli_Chr03 | 36746679                | GG                                     | TT                 | TT               | INTERGENIC                    |                    |                              |
| SNP_18834_A_36747048 | NC_021162.1    | Ca_Kabuli_Chr03 | 36747048                | CC                                     | TT                 | TT               | INTERGENIC                    |                    |                              |
| SNP_18835_A_36747636 | NC_021162.1    | Ca_Kabuli_Chr03 | 36747636                | TT                                     | AA                 | AA               | DRR                           | 101497836          | probable beta-D-xylosidase 2 |
| SNP_18836_A_36747695 | NC_021162.1    | Ca_Kabuli_Chr03 | 36747695                | AA                                     | GG                 | GG               | DRR                           | 101497836          | probable beta-D-xylosidase 2 |
| SNP_18837_A_36747711 | NC_021162.1    | Ca_Kabuli_Chr03 | 36747711                | GG                                     | AA                 | AA               | DRR                           | 101497836          | probable beta-D-xylosidase 2 |
| SNP_18838_A_36749419 | NC_021162.1    | Ca_Kabuli_Chr03 | 36749419                | CC                                     | GG                 | GG               | INTRON                        | 101497836          | probable beta-D-xylosidase 2 |
| SNP_18839_A_36749471 | NC_021162.1    | Ca_Kabuli_Chr03 | 36749471                | CC                                     | AA                 | AA               | INTRON                        | 101497836          | probable beta-D-xylosidase 2 |
| SNP_18840_A_36749982 | NC_021162.1    | Ca_Kabuli_Chr03 | 36749982                | TT                                     | CC                 | CC               | SYNONYMOUS_CODING             | 101497836          | probable beta-D-xylosidase 2 |
| SNP_18841_A_36750004 | NC_021162.1    | Ca_Kabuli_Chr03 | 36750004                | GG                                     | AA                 | AA               | NON_SYNONYMOUS_CODING         | 101497836          | probable beta-D-xylosidase 2 |
| SNP_18842_A_36751506 | NC_021162.1    | Ca_Kabuli_Chr03 | 36751506                | CC                                     | TT                 | TT               | INTRON                        | 101497836          | probable beta-D-xylosidase 2 |
| SNP_18845_A_36753325 | NC_021162.1    | Ca_Kabuli_Chr03 | 36753325                | TT                                     | GG                 | GG               | INTRON                        | 101497836          | probable beta-D-xylosidase 2 |

| SNPs IDs             | Chromosome IDs | Chromosomes     | Physical positions (bp) | CDC Frontier genome (Reference genome) | (Pusa 1103 & HPNB) | (ILWC 46 & LPNB) | Sequence Components of genome | Gene accession IDs | Putative functions                              |
|----------------------|----------------|-----------------|-------------------------|----------------------------------------|--------------------|------------------|-------------------------------|--------------------|-------------------------------------------------|
| SNP_18846_A_36753567 | NC_021162.1    | Ca_Kabuli_Chr03 | 36753567                | TT                                     | GG                 | GG               | INTRON                        | 101497836          | probable beta-D-xylosidase 2                    |
| SNP_18847_A_36756330 | NC_021162.1    | Ca_Kabuli_Chr03 | 36756330                | CC                                     | TT                 | TT               | URR                           | 101497836          | probable beta-D-xylosidase 2                    |
| SNP_18848_A_36756375 | NC_021162.1    | Ca_Kabuli_Chr03 | 36756375                | CC                                     | GG                 | GG               | URR                           | 101497836          | probable beta-D-xylosidase 2                    |
| SNP_18849_A_36756390 | NC_021162.1    | Ca_Kabuli_Chr03 | 36756390                | CC                                     | GG                 | GG               | URR                           | 101497836          | probable beta-D-xylosidase 2                    |
| SNP_18851_A_36756829 | NC_021162.1    | Ca_Kabuli_Chr03 | 36756829                | CC                                     | TT                 | TT               | INTERGENIC                    |                    |                                                 |
| SNP_18852_A_36759831 | NC_021162.1    | Ca_Kabuli_Chr03 | 36759831                | GG                                     | AA                 | AA               | INTERGENIC                    |                    |                                                 |
| SNP_18853_A_36761662 | NC_021162.1    | Ca_Kabuli_Chr03 | 36761662                | TT                                     | GG                 | GG               | DRR                           | 101498153          | uncharacterized LOC101498153                    |
| SNP_18854_A_36761926 | NC_021162.1    | Ca_Kabuli_Chr03 | 36761926                | TT                                     | CC                 | CC               | DRR                           | 101498153          | uncharacterized LOC101498153                    |
| SNP_18855_A_36762810 | NC_021162.1    | Ca_Kabuli_Chr03 | 36762810                | GG                                     | CC                 | CC               | INTERGENIC                    |                    |                                                 |
| SNP_18856_A_36763224 | NC_021162.1    | Ca_Kabuli_Chr03 | 36763224                | TT                                     | CC                 | CC               | URR                           | 101498153          | uncharacterized LOC101498153                    |
| SNP_18857_A_36766647 | NC_021162.1    | Ca_Kabuli_Chr03 | 36766647                | CC                                     | TT                 | TT               | DRR                           | 101499148          | uncharacterized LOC101499148                    |
| SNP_18858_A_36766657 | NC_021162.1    | Ca_Kabuli_Chr03 | 36766657                | GG                                     | AA                 | AA               | DRR                           | 101499148          | uncharacterized LOC101499148                    |
| SNP_18859_A_36803293 | NC_021162.1    | Ca_Kabuli_Chr03 | 36803293                | CC                                     | AA                 | AA               | INTERGENIC                    |                    |                                                 |
| SNP_18860_A_36841811 | NC_021162.1    | Ca_Kabuli_Chr03 | 36841811                | CC                                     | TT                 | TT               | DRR                           | 101494454          | DELLA protein RGL2-like                         |
| SNP_18861_A_36872943 | NC_021162.1    | Ca_Kabuli_Chr03 | 36872943                | TT                                     | GG                 | GG               | INTRON                        | 101502950          | proline-rich receptor-like protein kinase PERK3 |
| SNP_18862_A_36921691 | NC_021162.1    | Ca_Kabuli_Chr03 | 36921691                | AA                                     | TT                 | TT               | INTERGENIC                    |                    |                                                 |
| SNP_18864_A_36983995 | NC_021162.1    | Ca_Kabuli_Chr03 | 36983995                | TT                                     | CC                 | CC               | INTERGENIC                    |                    |                                                 |
| SNP_18865_A_36983999 | NC_021162.1    | Ca_Kabuli_Chr03 | 36983999                | AA                                     | CC                 | CC               | INTERGENIC                    |                    |                                                 |
| SNP_18866_A_36984003 | NC_021162.1    | Ca_Kabuli_Chr03 | 36984003                | TT                                     | AA                 | AA               | INTERGENIC                    |                    |                                                 |
| SNP_18867_A_37014682 | NC_021162.1    | Ca_Kabuli_Chr03 | 37014682                | AA                                     | GG                 | GG               | INTERGENIC                    |                    |                                                 |
| SNP_18869_A_37018802 | NC_021162.1    | Ca_Kabuli_Chr03 | 37018802                | AA                                     | TT                 | TT               | DRR                           | 101509386          | probable boron transporter 2                    |
| SNP_18870_A_37026533 | NC_021162.1    | Ca_Kabuli_Chr03 | 37026533                | CC                                     | TT                 | TT               | INTERGENIC                    |                    |                                                 |

| SNPs IDs             | Chromosome IDs | Chromosomes     | Physical positions (bp) | CDC Frontier genome (Reference genome) | (Pusa 1103 & HPNB) | (ILWC 46 & LPNB) | Sequence genome | Components of | Gene accession IDs | Putative functions                                                        |
|----------------------|----------------|-----------------|-------------------------|----------------------------------------|--------------------|------------------|-----------------|---------------|--------------------|---------------------------------------------------------------------------|
| SNP_18871_A_37026538 | NC_021162.1    | Ca_Kabuli_Chr03 | 37026538                | TT                                     | AA                 | AA               | INTERGENIC      |               |                    |                                                                           |
| SNP_18874_A_37061708 | NC_021162.1    | Ca_Kabuli_Chr03 | 37061708                | TT                                     | CC                 | CC               | URR             | 101510572     |                    | short-chain dehydrogenase reductase 3b-like                               |
| SNP_18875_A_37133206 | NC_021162.1    | Ca_Kabuli_Chr03 | 37133206                | AA                                     | GG                 | GG               | URR             | 101513583     |                    | uncharacterized LOC101513583                                              |
| SNP_18876_A_37149694 | NC_021162.1    | Ca_Kabuli_Chr03 | 37149694                | TT                                     | CC                 | CC               | URR             | 101514554     |                    | two-pore potassium channel 5                                              |
| SNP_18879_A_37296888 | NC_021162.1    | Ca_Kabuli_Chr03 | 37296888                | AA                                     | GG                 | GG               | INTRON          | 101495766     |                    | cathepsin B-like                                                          |
| SNP_18880_A_37296893 | NC_021162.1    | Ca_Kabuli_Chr03 | 37296893                | AA                                     | CC                 | CC               | INTRON          | 101495766     |                    | cathepsin B-like                                                          |
| SNP_18881_A_37375392 | NC_021162.1    | Ca_Kabuli_Chr03 | 37375392                | CC                                     | TT                 | TT               | URR             | 101496945     |                    | protein NRT1/ PTR FAMILY 4.5-like                                         |
| SNP_18882_A_37381957 | NC_021162.1    | Ca_Kabuli_Chr03 | 37381957                | TT                                     | CC                 | CC               | URR             | 101497275     |                    | pectin acetyltransferase 12-like                                          |
| SNP_18883_A_37409331 | NC_021162.1    | Ca_Kabuli_Chr03 | 37409331                | CC                                     | TT                 | TT               | URR             | 101498154     |                    | pentatricopeptide repeat-containing protein At3g49170, chloroplastic-like |
| SNP_18885_A_37484401 | NC_021162.1    | Ca_Kabuli_Chr03 | 37484401                | GG                                     | AA                 | AA               | URR             | 101501993     |                    | putative serine/threonine-protein kinase haspin homolog                   |
| SNP_18886_A_37502257 | NC_021162.1    | Ca_Kabuli_Chr03 | 37502257                | CC                                     | TT                 | TT               | INTRON          | 101502633     |                    | protein transport protein Sec24-like At3g07100                            |
| SNP_18888_A_37704613 | NC_021162.1    | Ca_Kabuli_Chr03 | 37704613                | AA                                     | GG                 | GG               | INTERGENIC      |               |                    |                                                                           |
| SNP_18889_A_37718901 | NC_021162.1    | Ca_Kabuli_Chr03 | 37718901                | TT                                     | CC                 | CC               | INTERGENIC      |               |                    |                                                                           |
| SNP_18890_A_37718909 | NC_021162.1    | Ca_Kabuli_Chr03 | 37718909                | TT                                     | AA                 | AA               | INTERGENIC      |               |                    |                                                                           |
| SNP_18891_A_37719635 | NC_021162.1    | Ca_Kabuli_Chr03 | 37719635                | TT                                     | AA                 | AA               | INTERGENIC      |               |                    |                                                                           |
| SNP_18892_A_37719653 | NC_021162.1    | Ca_Kabuli_Chr03 | 37719653                | TT                                     | CC                 | CC               | INTERGENIC      |               |                    |                                                                           |
| SNP_18893_A_37719695 | NC_021162.1    | Ca_Kabuli_Chr03 | 37719695                | AA                                     | GG                 | GG               | INTERGENIC      |               |                    |                                                                           |
| SNP_18894_A_37730582 | NC_021162.1    | Ca_Kabuli_Chr03 | 37730582                | TT                                     | CC                 | CC               | INTRON          | 101498718     |                    | NHL repeat-containing protein 2-like                                      |
| SNP_18895_A_37732805 | NC_021162.1    | Ca_Kabuli_Chr03 | 37732805                | AA                                     | CC                 | CC               | INTRON          | 101498718     |                    | NHL repeat-containing protein 2-like                                      |
| SNP_18896_A_37743751 | NC_021162.1    | Ca_Kabuli_Chr03 | 37743751                | CC                                     | GG                 | GG               | URR             | 101499041     |                    | Unknown function                                                          |
| SNP_18897_A_37743754 | NC_021162.1    | Ca_Kabuli_Chr03 | 37743754                | GG                                     | AA                 | AA               | URR             | 101499041     |                    | Unknown function                                                          |
| SNP_18898_A_37757563 | NC_021162.1    | Ca_Kabuli_Chr03 | 37757563                | TT                                     | AA                 | AA               | DRR             | 101511961     |                    | importin subunit alpha-like                                               |

| SNPs IDs             | Chromosome IDs | Chromosomes     | Physical positions (bp) | CDC Frontier genome (Reference genome) | (Pusa 1103 & HPNB) | (ILWC 46 & LPNB) | Sequence Components of genome | Gene accession IDs | Putative functions                               |
|----------------------|----------------|-----------------|-------------------------|----------------------------------------|--------------------|------------------|-------------------------------|--------------------|--------------------------------------------------|
| SNP_18899_A_37757566 | NC_021162.1    | Ca_Kabuli_Chr03 | 37757566                | TT                                     | GG                 | GG               | DRR                           | 101511961          | importin subunit alpha-like                      |
| SNP_18900_A_37764173 | NC_021162.1    | Ca_Kabuli_Chr03 | 37764173                | TT                                     | GG                 | GG               | URR                           | 101511961          | importin subunit alpha-like                      |
| SNP_18901_A_37764353 | NC_021162.1    | Ca_Kabuli_Chr03 | 37764353                | TT                                     | CC                 | CC               | URR                           | 101511961          | importin subunit alpha-like                      |
| SNP_18902_A_37764502 | NC_021162.1    | Ca_Kabuli_Chr03 | 37764502                | TT                                     | CC                 | CC               | URR                           | 101511961          | importin subunit alpha-like                      |
| SNP_18903_A_37764569 | NC_021162.1    | Ca_Kabuli_Chr03 | 37764569                | TT                                     | CC                 | CC               | URR                           | 101511961          | importin subunit alpha-like                      |
| SNP_18904_A_37764572 | NC_021162.1    | Ca_Kabuli_Chr03 | 37764572                | GG                                     | AA                 | AA               | URR                           | 101511961          | importin subunit alpha-like                      |
| SNP_18905_A_37764631 | NC_021162.1    | Ca_Kabuli_Chr03 | 37764631                | TT                                     | CC                 | CC               | URR                           | 101511961          | importin subunit alpha-like                      |
| SNP_18906_A_37765265 | NC_021162.1    | Ca_Kabuli_Chr03 | 37765265                | AA                                     | GG                 | GG               | URR                           | 101511961          | importin subunit alpha-like                      |
| SNP_18907_A_37765269 | NC_021162.1    | Ca_Kabuli_Chr03 | 37765269                | TT                                     | CC                 | CC               | URR                           | 101511961          | importin subunit alpha-like                      |
| SNP_18908_A_37765415 | NC_021162.1    | Ca_Kabuli_Chr03 | 37765415                | AA                                     | CC                 | CC               | URR                           | 101511961          | importin subunit alpha-like                      |
| SNP_18909_A_37769383 | NC_021162.1    | Ca_Kabuli_Chr03 | 37769383                | TT                                     | GG                 | GG               | URR                           | 101512290          | GATA transcription factor 16-like                |
| SNP_18910_A_37808182 | NC_021162.1    | Ca_Kabuli_Chr03 | 37808182                | CC                                     | TT                 | TT               | INTERGENIC                    |                    |                                                  |
| SNP_18911_A_37808185 | NC_021162.1    | Ca_Kabuli_Chr03 | 37808185                | GG                                     | AA                 | AA               | INTERGENIC                    |                    |                                                  |
| SNP_18912_A_37808191 | NC_021162.1    | Ca_Kabuli_Chr03 | 37808191                | GG                                     | TT                 | TT               | INTERGENIC                    |                    |                                                  |
| SNP_18913_A_37812257 | NC_021162.1    | Ca_Kabuli_Chr03 | 37812257                | GG                                     | CC                 | CC               | START_GAINED                  | 101514664          | kinesin-4                                        |
| SNP_18914_A_37813057 | NC_021162.1    | Ca_Kabuli_Chr03 | 37813057                | CC                                     | AA                 | AA               | INTRON                        | 101514664          | kinesin-4                                        |
| SNP_18915_A_37846029 | NC_021162.1    | Ca_Kabuli_Chr03 | 37846029                | AA                                     | TT                 | TT               | INTERGENIC                    |                    |                                                  |
| SNP_18916_A_37846035 | NC_021162.1    | Ca_Kabuli_Chr03 | 37846035                | TT                                     | AA                 | AA               | INTERGENIC                    |                    |                                                  |
| SNP_18917_A_37880733 | NC_021162.1    | Ca_Kabuli_Chr03 | 37880733                | AA                                     | GG                 | GG               | INTERGENIC                    |                    |                                                  |
| SNP_18918_A_37898795 | NC_021162.1    | Ca_Kabuli_Chr03 | 37898795                | AA                                     | GG                 | GG               | URR                           | 101491119          | F-box protein PP2-B15-like                       |
| SNP_18920_A_38092175 | NC_021162.1    | Ca_Kabuli_Chr03 | 38092175                | TT                                     | AA                 | AA               | INTRON                        | 101499771          | respiratory burst oxidase homolog protein B-like |
| SNP_18922_A_38136871 | NC_021162.1    | Ca_Kabuli_Chr03 | 38136871                | GG                                     | TT                 | TT               | URR                           | 101501579          | uncharacterized LOC101501579                     |



| SNPs IDs             | Chromosome IDs | Chromosomes     | Physical positions (bp) | CDC Frontier genome (Reference genome) | (Pusa 1103 & HPNB) | (ILWC 46 & LPNB) | Sequence Components of genome | Gene accession IDs | Putative functions                    |
|----------------------|----------------|-----------------|-------------------------|----------------------------------------|--------------------|------------------|-------------------------------|--------------------|---------------------------------------|
| SNP_18923_A_38137190 | NC_021162.1    | Ca_Kabuli_Chr03 | 38137190                | AA                                     | GG                 | GG               | URR                           | 101501579          | uncharacterized LOC101501579          |
| SNP_18925_A_38140951 | NC_021162.1    | Ca_Kabuli_Chr03 | 38140951                | AA                                     | TT                 | TT               | INTERGENIC                    |                    |                                       |
| SNP_18927_A_38141326 | NC_021162.1    | Ca_Kabuli_Chr03 | 38141326                | AA                                     | TT                 | TT               | INTERGENIC                    |                    |                                       |
| SNP_18928_A_38141327 | NC_021162.1    | Ca_Kabuli_Chr03 | 38141327                | AA                                     | TT                 | TT               | INTERGENIC                    |                    |                                       |
| SNP_18930_A_38142275 | NC_021162.1    | Ca_Kabuli_Chr03 | 38142275                | TT                                     | CC                 | CC               | DRR                           | 101501891          | sucrose nonfermenting 4-like protein  |
| SNP_18931_A_38142657 | NC_021162.1    | Ca_Kabuli_Chr03 | 38142657                | GG                                     | AA                 | AA               | DRR                           | 101501891          | sucrose nonfermenting 4-like protein  |
| SNP_18932_A_38142739 | NC_021162.1    | Ca_Kabuli_Chr03 | 38142739                | AA                                     | CC                 | CC               | DRR                           | 101501891          | sucrose nonfermenting 4-like protein  |
| SNP_18933_A_38142742 | NC_021162.1    | Ca_Kabuli_Chr03 | 38142742                | GG                                     | AA                 | AA               | DRR                           | 101501891          | sucrose nonfermenting 4-like protein  |
| SNP_18934_A_38142746 | NC_021162.1    | Ca_Kabuli_Chr03 | 38142746                | AA                                     | CC                 | CC               | DRR                           | 101501891          | sucrose nonfermenting 4-like protein  |
| SNP_18935_A_38142829 | NC_021162.1    | Ca_Kabuli_Chr03 | 38142829                | CC                                     | TT                 | TT               | DRR                           | 101501891          | sucrose nonfermenting 4-like protein  |
| SNP_18938_A_38157557 | NC_021162.1    | Ca_Kabuli_Chr03 | 38157557                | GG                                     | AA                 | AA               | INTRON                        | 101503172          | DNA polymerase zeta catalytic subunit |
| SNP_18939_A_38162859 | NC_021162.1    | Ca_Kabuli_Chr03 | 38162859                | CC                                     | TT                 | TT               | NON_SYNONYMOUS_CODING         | 101503172          | DNA polymerase zeta catalytic subunit |
| SNP_18940_A_38163026 | NC_021162.1    | Ca_Kabuli_Chr03 | 38163026                | CC                                     | AA                 | AA               | SYNONYMOUS_CODING             | 101503172          | DNA polymerase zeta catalytic subunit |
| SNP_18942_A_38167528 | NC_021162.1    | Ca_Kabuli_Chr03 | 38167528                | GG                                     | CC                 | CC               | NON_SYNONYMOUS_CODING         | 101503172          | DNA polymerase zeta catalytic subunit |
| SNP_18943_A_38167837 | NC_021162.1    | Ca_Kabuli_Chr03 | 38167837                | AA                                     | GG                 | GG               | NON_SYNONYMOUS_CODING         | 101503172          | DNA polymerase zeta catalytic subunit |
| SNP_18944_A_38169101 | NC_021162.1    | Ca_Kabuli_Chr03 | 38169101                | GG                                     | AA                 | AA               | INTRON                        | 101503172          | DNA polymerase zeta catalytic subunit |
| SNP_18945_A_38169102 | NC_021162.1    | Ca_Kabuli_Chr03 | 38169102                | GG                                     | TT                 | TT               | INTRON                        | 101503172          | DNA polymerase zeta catalytic subunit |
| SNP_18946_A_38170174 | NC_021162.1    | Ca_Kabuli_Chr03 | 38170174                | TT                                     | CC                 | CC               | INTERGENIC                    |                    |                                       |
| SNP_18948_A_38170279 | NC_021162.1    | Ca_Kabuli_Chr03 | 38170279                | CC                                     | TT                 | TT               | INTERGENIC                    |                    |                                       |
| SNP_18949_A_38170634 | NC_021162.1    | Ca_Kabuli_Chr03 | 38170634                | GG                                     | AA                 | AA               | INTERGENIC                    |                    |                                       |
| SNP_18950_A_38170639 | NC_021162.1    | Ca_Kabuli_Chr03 | 38170639                | AA                                     | GG                 | GG               | INTERGENIC                    |                    |                                       |
| SNP_18951_A_38170656 | NC_021162.1    | Ca_Kabuli_Chr03 | 38170656                | TT                                     | CC                 | CC               | INTERGENIC                    |                    |                                       |

| SNPs IDs             | Chromosome IDs | Chromosomes     | Physical positions (bp) | CDC Frontier genome (Reference genome) | (Pusa 1103 & HPNB) | (ILWC 46 & LPNB) | Sequence Components of genome | Gene accession IDs | Putative functions                    |
|----------------------|----------------|-----------------|-------------------------|----------------------------------------|--------------------|------------------|-------------------------------|--------------------|---------------------------------------|
| SNP_18952_A_38173163 | NC_021162.1    | Ca_Kabuli_Chr03 | 38173163                | AA                                     | GG                 | GG               | INTERGENIC                    |                    |                                       |
| SNP_18954_A_38174656 | NC_021162.1    | Ca_Kabuli_Chr03 | 38174656                | AA                                     | GG                 | GG               | URR                           | 101503172          | DNA polymerase zeta catalytic subunit |
| SNP_18955_A_38174760 | NC_021162.1    | Ca_Kabuli_Chr03 | 38174760                | TT                                     | CC                 | CC               | URR                           | 101503172          | DNA polymerase zeta catalytic subunit |
| SNP_18956_A_38176160 | NC_021162.1    | Ca_Kabuli_Chr03 | 38176160                | CC                                     | TT                 | TT               | INTRON                        | 101502735          | probable linoleate 9S-lipoxygenase 5  |
| SNP_18957_A_38177157 | NC_021162.1    | Ca_Kabuli_Chr03 | 38177157                | CC                                     | TT                 | TT               | INTRON                        | 101502735          | probable linoleate 9S-lipoxygenase 5  |
| SNP_18958_A_38177170 | NC_021162.1    | Ca_Kabuli_Chr03 | 38177170                | CC                                     | GG                 | GG               | INTRON                        | 101502735          | probable linoleate 9S-lipoxygenase 5  |
| SNP_18959_A_38177171 | NC_021162.1    | Ca_Kabuli_Chr03 | 38177171                | TT                                     | GG                 | GG               | INTRON                        | 101502735          | probable linoleate 9S-lipoxygenase 5  |
| SNP_18960_A_38177181 | NC_021162.1    | Ca_Kabuli_Chr03 | 38177181                | CC                                     | TT                 | TT               | INTRON                        | 101502735          | probable linoleate 9S-lipoxygenase 5  |
| SNP_18961_A_38177185 | NC_021162.1    | Ca_Kabuli_Chr03 | 38177185                | AA                                     | CC                 | CC               | INTRON                        | 101502735          | probable linoleate 9S-lipoxygenase 5  |
| SNP_18962_A_38177187 | NC_021162.1    | Ca_Kabuli_Chr03 | 38177187                | GG                                     | CC                 | CC               | INTRON                        | 101502735          | probable linoleate 9S-lipoxygenase 5  |
| SNP_18963_A_38177222 | NC_021162.1    | Ca_Kabuli_Chr03 | 38177222                | TT                                     | CC                 | CC               | INTRON                        | 101502735          | probable linoleate 9S-lipoxygenase 5  |
| SNP_18964_A_38177611 | NC_021162.1    | Ca_Kabuli_Chr03 | 38177611                | GG                                     | TT                 | TT               | INTRON                        | 101502735          | probable linoleate 9S-lipoxygenase 5  |
| SNP_18965_A_38177996 | NC_021162.1    | Ca_Kabuli_Chr03 | 38177996                | AA                                     | TT                 | TT               | INTRON                        | 101502735          | probable linoleate 9S-lipoxygenase 5  |
| SNP_18966_A_38178304 | NC_021162.1    | Ca_Kabuli_Chr03 | 38178304                | GG                                     | TT                 | TT               | INTRON                        | 101502735          | probable linoleate 9S-lipoxygenase 5  |
| SNP_18967_A_38178313 | NC_021162.1    | Ca_Kabuli_Chr03 | 38178313                | TT                                     | AA                 | AA               | INTRON                        | 101502735          | probable linoleate 9S-lipoxygenase 5  |
| SNP_18968_A_38179700 | NC_021162.1    | Ca_Kabuli_Chr03 | 38179700                | TT                                     | CC                 | CC               | NON_SYNONYMOUS_CODING         | 101502735          | probable linoleate 9S-lipoxygenase 5  |
| SNP_18969_A_38180619 | NC_021162.1    | Ca_Kabuli_Chr03 | 38180619                | GG                                     | AA                 | AA               | URR                           | 101502735          | probable linoleate 9S-lipoxygenase 5  |
| SNP_18970_A_38181789 | NC_021162.1    | Ca_Kabuli_Chr03 | 38181789                | TT                                     | CC                 | CC               | URR                           | 101502735          | probable linoleate 9S-lipoxygenase 5  |
| SNP_18971_A_38183877 | NC_021162.1    | Ca_Kabuli_Chr03 | 38183877                | GG                                     | AA                 | AA               | INTERGENIC                    |                    |                                       |
| SNP_18972_A_38184255 | NC_021162.1    | Ca_Kabuli_Chr03 | 38184255                | GG                                     | AA                 | AA               | INTERGENIC                    |                    |                                       |
| SNP_18973_A_38184292 | NC_021162.1    | Ca_Kabuli_Chr03 | 38184292                | GG                                     | AA                 | AA               | INTERGENIC                    |                    |                                       |
| SNP_18974_A_38186009 | NC_021162.1    | Ca_Kabuli_Chr03 | 38186009                | TT                                     | CC                 | CC               | DRR                           | 101503047          | protein AUXIN RESPONSE 4              |

| SNPs IDs             | Chromosome IDs | Chromosomes     | Physical positions (bp) | CDC Frontier genome (Reference genome) | (Pusa 1103 & HPNB) | (ILWC 46 & LPNB) | Sequence Components of genome | Gene accession IDs | Putative functions                                    |
|----------------------|----------------|-----------------|-------------------------|----------------------------------------|--------------------|------------------|-------------------------------|--------------------|-------------------------------------------------------|
| SNP_18975_A_38186689 | NC_021162.1    | Ca_Kabuli_Chr03 | 38186689                | GG                                     | CC                 | CC               | INTRON                        | 101503047          | protein AUXIN RESPONSE 4                              |
| SNP_18976_A_38194497 | NC_021162.1    | Ca_Kabuli_Chr03 | 38194497                | AA                                     | GG                 | GG               | URR                           | 101503492          | uncharacterized LOC101503492                          |
| SNP_18977_A_38201164 | NC_021162.1    | Ca_Kabuli_Chr03 | 38201164                | GG                                     | AA                 | AA               | NON_SYNONYMOUS_CODING         | 101503378          | probable Xaa-Pro aminopeptidase P                     |
| SNP_18978_A_38201238 | NC_021162.1    | Ca_Kabuli_Chr03 | 38201238                | GG                                     | AA                 | AA               | NON_SYNONYMOUS_CODING         | 101503378          | probable Xaa-Pro aminopeptidase P                     |
| SNP_18979_A_38201768 | NC_021162.1    | Ca_Kabuli_Chr03 | 38201768                | TT                                     | CC                 | CC               | INTRON                        | 101503378          | probable Xaa-Pro aminopeptidase P                     |
| SNP_18980_A_38202789 | NC_021162.1    | Ca_Kabuli_Chr03 | 38202789                | TT                                     | GG                 | GG               | SPLICE_SITE_REGION            | 101503378          | probable Xaa-Pro aminopeptidase P                     |
| SNP_18981_A_38204806 | NC_021162.1    | Ca_Kabuli_Chr03 | 38204806                | CC                                     | TT                 | TT               | INTRON                        | 101503378          | probable Xaa-Pro aminopeptidase P                     |
| SNP_18982_A_38204878 | NC_021162.1    | Ca_Kabuli_Chr03 | 38204878                | GG                                     | CC                 | CC               | INTRON                        | 101503378          | probable Xaa-Pro aminopeptidase P                     |
| SNP_18983_A_38205525 | NC_021162.1    | Ca_Kabuli_Chr03 | 38205525                | GG                                     | AA                 | AA               | INTRON                        | 101503378          | probable Xaa-Pro aminopeptidase P                     |
| SNP_18985_A_38205913 | NC_021162.1    | Ca_Kabuli_Chr03 | 38205913                | CC                                     | TT                 | TT               | INTERGENIC                    |                    |                                                       |
| SNP_18986_A_38206346 | NC_021162.1    | Ca_Kabuli_Chr03 | 38206346                | GG                                     | CC                 | CC               | URR                           | 101503378          | probable Xaa-Pro aminopeptidase P                     |
| SNP_18990_A_38215904 | NC_021162.1    | Ca_Kabuli_Chr03 | 38215904                | GG                                     | TT                 | TT               | DRR                           | 101504043          | microtubule-binding protein TANGLED-like              |
| SNP_18993_A_38221405 | NC_021162.1    | Ca_Kabuli_Chr03 | 38221405                | CC                                     | AA                 | AA               | INTRON                        | 101504897          | kinesin-like protein KIFC3                            |
| SNP_18994_A_38224700 | NC_021162.1    | Ca_Kabuli_Chr03 | 38224700                | AA                                     | GG                 | GG               | INTERGENIC                    |                    |                                                       |
| SNP_18995_A_38226680 | NC_021162.1    | Ca_Kabuli_Chr03 | 38226680                | CC                                     | TT                 | TT               | DRR                           | 101504354          | uncharacterized LOC101504354                          |
| SNP_18996_A_38226688 | NC_021162.1    | Ca_Kabuli_Chr03 | 38226688                | CC                                     | TT                 | TT               | DRR                           | 101504354          | uncharacterized LOC101504354                          |
| SNP_18997_A_38226732 | NC_021162.1    | Ca_Kabuli_Chr03 | 38226732                | AA                                     | GG                 | GG               | DRR                           | 101504354          | uncharacterized LOC101504354                          |
| SNP_18998_A_38227031 | NC_021162.1    | Ca_Kabuli_Chr03 | 38227031                | GG                                     | AA                 | AA               | URR                           | 101504897          | kinesin-like protein KIFC3                            |
| SNP_18999_A_38227405 | NC_021162.1    | Ca_Kabuli_Chr03 | 38227405                | TT                                     | CC                 | CC               | URR                           | 101504897          | kinesin-like protein KIFC3                            |
| SNP_19000_A_38228118 | NC_021162.1    | Ca_Kabuli_Chr03 | 38228118                | TT                                     | GG                 | GG               | INTERGENIC                    |                    |                                                       |
| SNP_19001_A_38228247 | NC_021162.1    | Ca_Kabuli_Chr03 | 38228247                | GG                                     | TT                 | TT               | INTERGENIC                    |                    |                                                       |
| SNP_19003_A_38229037 | NC_021162.1    | Ca_Kabuli_Chr03 | 38229037                | AA                                     | GG                 | GG               | DRR                           | 101505201          | pentatricopeptide repeat-containing protein At3g05340 |

| SNPs IDs             | Chromosome IDs | Chromosomes     | Physical positions (bp) | CDC Frontier genome (Reference genome) | (Pusa 1103 & HPNB) | (ILWC 46 & LPNB) | Sequence genome | Components of | Gene accession IDs | Putative functions                                    |
|----------------------|----------------|-----------------|-------------------------|----------------------------------------|--------------------|------------------|-----------------|---------------|--------------------|-------------------------------------------------------|
| SNP_19004_A_38231177 | NC_021162.1    | Ca_Kabuli_Chr03 | 38231177                | CC                                     | TT                 | TT               | URR             |               | 101504354          | uncharacterized LOC101504354                          |
| SNP_19005_A_38232488 | NC_021162.1    | Ca_Kabuli_Chr03 | 38232488                | GG                                     | AA                 | AA               | URR             |               | 101505201          | pentatricopeptide repeat-containing protein At3g05340 |
| SNP_19006_A_38232793 | NC_021162.1    | Ca_Kabuli_Chr03 | 38232793                | CC                                     | GG                 | GG               | URR             |               | 101505201          | pentatricopeptide repeat-containing protein At3g05340 |
| SNP_19007_A_38233291 | NC_021162.1    | Ca_Kabuli_Chr03 | 38233291                | CC                                     | TT                 | TT               | DRR             |               | 101505520          | mannosylglycoprotein endo-beta-mannosidase-like       |
| SNP_19008_A_38233672 | NC_021162.1    | Ca_Kabuli_Chr03 | 38233672                | CC                                     | TT                 | TT               | DRR             |               | 101505520          | mannosylglycoprotein endo-beta-mannosidase-like       |
| SNP_19009_A_38233868 | NC_021162.1    | Ca_Kabuli_Chr03 | 38233868                | TT                                     | GG                 | GG               | DRR             |               | 101505520          | mannosylglycoprotein endo-beta-mannosidase-like       |
| SNP_19010_A_38239068 | NC_021162.1    | Ca_Kabuli_Chr03 | 38239068                | AA                                     | GG                 | GG               | INTERGENIC      |               |                    |                                                       |
| SNP_19011_A_38239132 | NC_021162.1    | Ca_Kabuli_Chr03 | 38239132                | CC                                     | TT                 | TT               | INTERGENIC      |               |                    |                                                       |
| SNP_19012_A_38239838 | NC_021162.1    | Ca_Kabuli_Chr03 | 38239838                | GG                                     | CC                 | CC               | INTERGENIC      |               |                    |                                                       |
| SNP_19013_A_38239878 | NC_021162.1    | Ca_Kabuli_Chr03 | 38239878                | TT                                     | CC                 | CC               | INTERGENIC      |               |                    |                                                       |
| SNP_19014_A_38240352 | NC_021162.1    | Ca_Kabuli_Chr03 | 38240352                | AA                                     | CC                 | CC               | INTERGENIC      |               |                    |                                                       |
| SNP_19016_A_38240364 | NC_021162.1    | Ca_Kabuli_Chr03 | 38240364                | TT                                     | CC                 | CC               | INTERGENIC      |               |                    |                                                       |
| SNP_19017_A_38240659 | NC_021162.1    | Ca_Kabuli_Chr03 | 38240659                | TT                                     | AA                 | AA               | URR             |               | 101505520          | mannosylglycoprotein endo-beta-mannosidase-like       |
| SNP_19018_A_38240675 | NC_021162.1    | Ca_Kabuli_Chr03 | 38240675                | AA                                     | TT                 | TT               | URR             |               | 101505520          | mannosylglycoprotein endo-beta-mannosidase-like       |
| SNP_19021_A_38241374 | NC_021162.1    | Ca_Kabuli_Chr03 | 38241374                | GG                                     | AA                 | AA               | URR             |               | 101505520          | mannosylglycoprotein endo-beta-mannosidase-like       |
| SNP_19022_A_38353156 | NC_021162.1    | Ca_Kabuli_Chr03 | 38353156                | TT                                     | CC                 | CC               | INTERGENIC      |               |                    |                                                       |
| SNP_19023_A_38353157 | NC_021162.1    | Ca_Kabuli_Chr03 | 38353157                | TT                                     | GG                 | GG               | INTERGENIC      |               |                    |                                                       |
| SNP_19024_A_38594721 | NC_021162.1    | Ca_Kabuli_Chr03 | 38594721                | CC                                     | TT                 | TT               | URR             |               | 101494044          | proteasome subunit beta type-4-like                   |
| SNP_19025_A_38622868 | NC_021162.1    | Ca_Kabuli_Chr03 | 38622868                | TT                                     | GG                 | GG               | URR             |               | 101495311          | 40S ribosomal protein S24-1                           |
| SNP_19026_A_38622880 | NC_021162.1    | Ca_Kabuli_Chr03 | 38622880                | AA                                     | CC                 | CC               | URR             |               | 101495311          | 40S ribosomal protein S24-1                           |
| SNP_19028_A_38690610 | NC_021162.1    | Ca_Kabuli_Chr03 | 38690610                | GG                                     | AA                 | AA               | INTERGENIC      |               |                    |                                                       |
| SNP_19029_A_38690638 | NC_021162.1    | Ca_Kabuli_Chr03 | 38690638                | GG                                     | AA                 | AA               | INTERGENIC      |               |                    |                                                       |

| SNPs IDs             | Chromosome IDs | Chromosomes     | Physical positions (bp) | CDC Frontier (Reference genome) | (Pusa 1103 & HPNB) | (ILWC 46 & LPNB) | Sequence Components of genome | Gene accession IDs | Putative functions                          |
|----------------------|----------------|-----------------|-------------------------|---------------------------------|--------------------|------------------|-------------------------------|--------------------|---------------------------------------------|
| SNP_19030_A_38690747 | NC_021162.1    | Ca_Kabuli_Chr03 | 38690747                | AA                              | TT                 | TT               | INTERGENIC                    |                    |                                             |
| SNP_19031_A_38691177 | NC_021162.1    | Ca_Kabuli_Chr03 | 38691177                | AA                              | GG                 | GG               | DRR                           | 101498253          | uncharacterized LOC101498253                |
| SNP_19032_A_38708828 | NC_021162.1    | Ca_Kabuli_Chr03 | 38708828                | GG                              | AA                 | AA               | INTERGENIC                    |                    |                                             |
| SNP_19033_A_38738084 | NC_021162.1    | Ca_Kabuli_Chr03 | 38738084                | AA                              | GG                 | GG               | DRR                           | 101501040          | uncharacterized LOC101501040                |
| SNP_19035_A_38869849 | NC_021162.1    | Ca_Kabuli_Chr03 | 38869849                | TT                              | AA                 | AA               | INTERGENIC                    |                    |                                             |
| SNP_19036_A_38870483 | NC_021162.1    | Ca_Kabuli_Chr03 | 38870483                | AA                              | TT                 | TT               | INTERGENIC                    |                    |                                             |
| SNP_19038_A_38900791 | NC_021162.1    | Ca_Kabuli_Chr03 | 38900791                | AA                              | GG                 | GG               | INTERGENIC                    |                    |                                             |
| SNP_19039_A_38900814 | NC_021162.1    | Ca_Kabuli_Chr03 | 38900814                | AA                              | GG                 | GG               | INTERGENIC                    |                    |                                             |
| SNP_19040_A_38900826 | NC_021162.1    | Ca_Kabuli_Chr03 | 38900826                | CC                              | TT                 | TT               | INTERGENIC                    |                    |                                             |
| SNP_19041_A_38901082 | NC_021162.1    | Ca_Kabuli_Chr03 | 38901082                | TT                              | CC                 | CC               | INTERGENIC                    |                    |                                             |
| SNP_19042_A_38902396 | NC_021162.1    | Ca_Kabuli_Chr03 | 38902396                | AA                              | TT                 | TT               | INTERGENIC                    |                    |                                             |
| SNP_19043_A_38902606 | NC_021162.1    | Ca_Kabuli_Chr03 | 38902606                | AA                              | GG                 | GG               | INTERGENIC                    |                    |                                             |
| SNP_19044_A_38902671 | NC_021162.1    | Ca_Kabuli_Chr03 | 38902671                | TT                              | GG                 | GG               | INTERGENIC                    |                    |                                             |
| SNP_19045_A_38955778 | NC_021162.1    | Ca_Kabuli_Chr03 | 38955778                | GG                              | AA                 | AA               | URR                           | 101511209          | protein PHR1-LIKE 1-like                    |
| SNP_19046_A_38958286 | NC_021162.1    | Ca_Kabuli_Chr03 | 38958286                | GG                              | AA                 | AA               | INTERGENIC                    |                    |                                             |
| SNP_19047_A_38958295 | NC_021162.1    | Ca_Kabuli_Chr03 | 38958295                | AA                              | GG                 | GG               | INTERGENIC                    |                    |                                             |
| SNP_19048_A_38958319 | NC_021162.1    | Ca_Kabuli_Chr03 | 38958319                | CC                              | AA                 | AA               | INTERGENIC                    |                    |                                             |
| SNP_19049_A_39156216 | NC_021162.1    | Ca_Kabuli_Chr03 | 39156216                | GG                              | CC                 | CC               | INTERGENIC                    |                    |                                             |
| SNP_19050_A_39179185 | NC_021162.1    | Ca_Kabuli_Chr03 | 39179185                | TT                              | CC                 | CC               | DRR                           | 101492179          | GDSL esterase/lipase At5g33370              |
| SNP_19051_A_39179199 | NC_021162.1    | Ca_Kabuli_Chr03 | 39179199                | CC                              | TT                 | TT               | DRR                           | 101492179          | GDSL esterase/lipase At5g33370              |
| SNP_19052_A_39251583 | NC_021162.1    | Ca_Kabuli_Chr03 | 39251583                | TT                              | CC                 | CC               | SYNONYMOUS_CODING             | 101495764          | uncharacterized LOC101495764                |
| SNP_19053_A_39293058 | NC_021162.1    | Ca_Kabuli_Chr03 | 39293058                | TT                              | AA                 | AA               | URR                           | 101497932          | BTB/POZ domain-containing protein POB1-like |

| SNPs IDs             | Chromosome IDs | Chromosomes     | Physical positions (bp) | CDC Frontier (Reference genome) | (Pusa 1103 & HPNB) | (ILWC 46 & LPNB) | Sequence Components of genome | Gene accession IDs | Putative functions                       |
|----------------------|----------------|-----------------|-------------------------|---------------------------------|--------------------|------------------|-------------------------------|--------------------|------------------------------------------|
| SNP_19054_A_39326079 | NC_021162.1    | Ca_Kabuli_Chr03 | 39326079                | TT                              | AA                 | AA               | URR                           | 101499665          | putative glucose-6-phosphate 1-epimerase |
| SNP_19055_A_39396669 | NC_021162.1    | Ca_Kabuli_Chr03 | 39396669                | AA                              | CC                 | CC               | DRR                           | 101505854          | protein ROOT PRIMORDIUM DEFECTIVE 1      |
| SNP_19056_A_39419265 | NC_021162.1    | Ca_Kabuli_Chr03 | 39419265                | CC                              | AA                 | AA               | INTERGENIC                    |                    |                                          |
| SNP_19057_A_39419727 | NC_021162.1    | Ca_Kabuli_Chr03 | 39419727                | CC                              | TT                 | TT               | INTERGENIC                    |                    |                                          |
| SNP_19059_A_39539026 | NC_021162.1    | Ca_Kabuli_Chr03 | 39539026                | CC                              | TT                 | TT               | INTERGENIC                    |                    |                                          |
| SNP_19061_A_39611014 | NC_021162.1    | Ca_Kabuli_Chr03 | 39611014                | AA                              | TT                 | TT               | INTERGENIC                    |                    |                                          |
| SNP_19062_A_39611027 | NC_021162.1    | Ca_Kabuli_Chr03 | 39611027                | TT                              | CC                 | CC               | INTERGENIC                    |                    |                                          |
| SNP_19064_A_39611094 | NC_021162.1    | Ca_Kabuli_Chr03 | 39611094                | AA                              | CC                 | CC               | INTERGENIC                    |                    |                                          |
| SNP_19065_A_39611320 | NC_021162.1    | Ca_Kabuli_Chr03 | 39611320                | AA                              | GG                 | GG               | INTRON                        | 101490580          | uncharacterized LOC101490580             |
| SNP_19066_A_39611410 | NC_021162.1    | Ca_Kabuli_Chr03 | 39611410                | TT                              | CC                 | CC               | SYNONYMOUS_CODING             | 101490580          | uncharacterized LOC101490580             |
| SNP_19067_A_39611444 | NC_021162.1    | Ca_Kabuli_Chr03 | 39611444                | GG                              | AA                 | AA               | NON_SYNONYMOUS_CODING         | 101490580          | uncharacterized LOC101490580             |
| SNP_19068_A_39611446 | NC_021162.1    | Ca_Kabuli_Chr03 | 39611446                | AA                              | TT                 | TT               | NON_SYNONYMOUS_CODING         | 101490580          | uncharacterized LOC101490580             |
| SNP_19069_A_39611461 | NC_021162.1    | Ca_Kabuli_Chr03 | 39611461                | GG                              | AA                 | AA               | SPLICE_SITE_REGION            | 101490580          | uncharacterized LOC101490580             |
| SNP_19070_A_39611468 | NC_021162.1    | Ca_Kabuli_Chr03 | 39611468                | CC                              | TT                 | TT               | INTRON                        | 101490580          | uncharacterized LOC101490580             |
| SNP_19071_A_39611490 | NC_021162.1    | Ca_Kabuli_Chr03 | 39611490                | CC                              | TT                 | TT               | INTRON                        | 101490580          | uncharacterized LOC101490580             |
| SNP_19072_A_39628916 | NC_021162.1    | Ca_Kabuli_Chr03 | 39628916                | AA                              | GG                 | GG               | URR                           | 101491962          | cytochrome b5 isoform E-like             |
| SNP_19074_A_39683421 | NC_021162.1    | Ca_Kabuli_Chr03 | 39683421                | CC                              | GG                 | GG               | URR                           | 101494571          | 3-ketoacyl-CoA synthase 1-like           |
| SNP_19075_A_39713805 | NC_021162.1    | Ca_Kabuli_Chr03 | 39713805                | GG                              | AA                 | AA               | INTERGENIC                    |                    |                                          |
| SNP_19077_A_39864815 | NC_021162.1    | Ca_Kabuli_Chr03 | 39864815                | GG                              | CC                 | CC               | INTERGENIC                    |                    |                                          |
| SNP_19078_A_39865286 | NC_021162.1    | Ca_Kabuli_Chr03 | 39865286                | AA                              | TT                 | TT               | INTERGENIC                    |                    |                                          |
| SNP_19079_A_39865460 | NC_021162.1    | Ca_Kabuli_Chr03 | 39865460                | AA                              | CC                 | CC               | INTERGENIC                    |                    |                                          |
| SNP_19080_A_39865465 | NC_021162.1    | Ca_Kabuli_Chr03 | 39865465                | AA                              | TT                 | TT               | INTERGENIC                    |                    |                                          |

| SNPs IDs             | Chromosome IDs | Chromosomes     | Physical positions (bp) | CDC Frontier (Reference genome) | (Pusa 1103 & HPNB) | (ILWC 46 & LPNB) | Sequence Components of genome | Gene accession IDs | Putative functions                               |
|----------------------|----------------|-----------------|-------------------------|---------------------------------|--------------------|------------------|-------------------------------|--------------------|--------------------------------------------------|
| SNP_19081_A_39866503 | NC_021162.1    | Ca_Kabuli_Chr03 | 39866503                | GG                              | AA                 | AA               | INTERGENIC                    |                    |                                                  |
| SNP_19083_A_39906999 | NC_021162.1    | Ca_Kabuli_Chr03 | 39906999                | TT                              | AA                 | AA               | INTERGENIC                    |                    |                                                  |
| SNP_19084_A_39929979 | NC_021162.1    | Ca_Kabuli_Chr03 | 39929979                | CC                              | AA                 | AA               | INTRON                        | 101506079          | ankyrin repeat-containing protein At5g02620-like |
| SNP_19085_A_39932592 | NC_021162.1    | Ca_Kabuli_Chr03 | 39932592                | GG                              | AA                 | AA               | INTRON                        | 101506079          | ankyrin repeat-containing protein At5g02620-like |
| SNP_19086_A_39934096 | NC_021162.1    | Ca_Kabuli_Chr03 | 39934096                | CC                              | TT                 | TT               | INTRON                        | 101506079          | ankyrin repeat-containing protein At5g02620-like |
| SNP_19087_A_39978056 | NC_021162.1    | Ca_Kabuli_Chr03 | 39978056                | TT                              | CC                 | CC               | INTERGENIC                    |                    |                                                  |
| SNP_19088_A_39978389 | NC_021162.1    | Ca_Kabuli_Chr03 | 39978389                | AA                              | GG                 | GG               | INTERGENIC                    |                    |                                                  |
| SNP_19089_A_39978422 | NC_021162.1    | Ca_Kabuli_Chr03 | 39978422                | AA                              | GG                 | GG               | INTERGENIC                    |                    |                                                  |
| SNP_19090_A_39978427 | NC_021162.1    | Ca_Kabuli_Chr03 | 39978427                | AA                              | GG                 | GG               | INTERGENIC                    |                    |                                                  |
| SNP_19091_A_39979079 | NC_021162.1    | Ca_Kabuli_Chr03 | 39979079                | TT                              | GG                 | GG               | INTERGENIC                    |                    |                                                  |
| SNP_19092_A_39979104 | NC_021162.1    | Ca_Kabuli_Chr03 | 39979104                | TT                              | CC                 | CC               | INTERGENIC                    |                    |                                                  |
| SNP_19093_A_39979119 | NC_021162.1    | Ca_Kabuli_Chr03 | 39979119                | AA                              | GG                 | GG               | INTERGENIC                    |                    |                                                  |
| SNP_19094_A_39979173 | NC_021162.1    | Ca_Kabuli_Chr03 | 39979173                | GG                              | CC                 | CC               | INTERGENIC                    |                    |                                                  |
| SNP_19095_A_39979504 | NC_021162.1    | Ca_Kabuli_Chr03 | 39979504                | TT                              | AA                 | AA               | INTERGENIC                    |                    |                                                  |
| SNP_19096_A_39981442 | NC_021162.1    | Ca_Kabuli_Chr03 | 39981442                | AA                              | TT                 | TT               | INTERGENIC                    |                    |                                                  |
| SNP_19097_A_39981443 | NC_021162.1    | Ca_Kabuli_Chr03 | 39981443                | TT                              | GG                 | GG               | INTERGENIC                    |                    |                                                  |
| SNP_19098_A_39988165 | NC_021162.1    | Ca_Kabuli_Chr03 | 39988165                | GG                              | CC                 | CC               | INTERGENIC                    |                    |                                                  |
| SNP_19099_A_39988204 | NC_021162.1    | Ca_Kabuli_Chr03 | 39988204                | AA                              | CC                 | CC               | INTERGENIC                    |                    |                                                  |
| SNP_19100_A_39988413 | NC_021162.1    | Ca_Kabuli_Chr03 | 39988413                | GG                              | AA                 | AA               | INTERGENIC                    |                    |                                                  |
| SNP_19101_A_39988431 | NC_021162.1    | Ca_Kabuli_Chr03 | 39988431                | CC                              | TT                 | TT               | INTERGENIC                    |                    |                                                  |
| SNP_19103_A_13991    | NC_021163.1    | Ca_Kabuli_Chr04 | 13991                   | TT                              | CC                 | CC               | INTERGENIC                    |                    |                                                  |
| SNP_19104_A_17977    | NC_021163.1    | Ca_Kabuli_Chr04 | 17977                   | TT                              | GG                 | GG               | DRR                           | 101490377          | probable transcription factor PosF21             |

| SNPs IDs           | Chromosome IDs | Chromosomes     | Physical positions (bp) | CDC Frontier (Reference genome) | (Pusa 1103 & HPNB) | (ILWC 46 & LPNB) | Sequence Components of genome | Gene accession IDs | Putative functions                   |
|--------------------|----------------|-----------------|-------------------------|---------------------------------|--------------------|------------------|-------------------------------|--------------------|--------------------------------------|
| SNP_19105_A_17983  | NC_021163.1    | Ca_Kabuli_Chr04 | 17983                   | TT                              | CC                 | CC               | DRR                           | 101490377          | probable transcription factor PosF21 |
| SNP_19106_A_43120  | NC_021163.1    | Ca_Kabuli_Chr04 | 43120                   | AA                              | TT                 | TT               | URR                           | 101491016          | uncharacterized LOC101491016         |
| SNP_19107_A_79769  | NC_021163.1    | Ca_Kabuli_Chr04 | 79769                   | GG                              | AA                 | AA               | INTERGENIC                    |                    |                                      |
| SNP_19108_A_80152  | NC_021163.1    | Ca_Kabuli_Chr04 | 80152                   | CC                              | AA                 | AA               | INTERGENIC                    |                    |                                      |
| SNP_19109_A_80169  | NC_021163.1    | Ca_Kabuli_Chr04 | 80169                   | TT                              | CC                 | CC               | INTERGENIC                    |                    |                                      |
| SNP_19110_A_80212  | NC_021163.1    | Ca_Kabuli_Chr04 | 80212                   | CC                              | TT                 | TT               | INTERGENIC                    |                    |                                      |
| SNP_19111_A_80250  | NC_021163.1    | Ca_Kabuli_Chr04 | 80250                   | AA                              | GG                 | GG               | INTERGENIC                    |                    |                                      |
| SNP_19112_A_80289  | NC_021163.1    | Ca_Kabuli_Chr04 | 80289                   | AA                              | GG                 | GG               | INTERGENIC                    |                    |                                      |
| SNP_19113_A_85556  | NC_021163.1    | Ca_Kabuli_Chr04 | 85556                   | TT                              | GG                 | GG               | INTERGENIC                    |                    |                                      |
| SNP_19114_A_85592  | NC_021163.1    | Ca_Kabuli_Chr04 | 85592                   | GG                              | CC                 | CC               | INTERGENIC                    |                    |                                      |
| SNP_19115_A_85721  | NC_021163.1    | Ca_Kabuli_Chr04 | 85721                   | CC                              | TT                 | TT               | INTERGENIC                    |                    |                                      |
| SNP_19116_A_85761  | NC_021163.1    | Ca_Kabuli_Chr04 | 85761                   | AA                              | TT                 | TT               | INTERGENIC                    |                    |                                      |
| SNP_19117_A_86019  | NC_021163.1    | Ca_Kabuli_Chr04 | 86019                   | TT                              | GG                 | GG               | INTERGENIC                    |                    |                                      |
| SNP_19118_A_113187 | NC_021163.1    | Ca_Kabuli_Chr04 | 113187                  | TT                              | CC                 | CC               | INTERGENIC                    |                    |                                      |
| SNP_19119_A_113197 | NC_021163.1    | Ca_Kabuli_Chr04 | 113197                  | TT                              | AA                 | AA               | INTERGENIC                    |                    |                                      |
| SNP_19120_A_130718 | NC_021163.1    | Ca_Kabuli_Chr04 | 130718                  | TT                              | GG                 | GG               | INTERGENIC                    |                    |                                      |
| SNP_19121_A_130759 | NC_021163.1    | Ca_Kabuli_Chr04 | 130759                  | AA                              | GG                 | GG               | INTERGENIC                    |                    |                                      |
| SNP_19122_A_130789 | NC_021163.1    | Ca_Kabuli_Chr04 | 130789                  | TT                              | CC                 | CC               | INTERGENIC                    |                    |                                      |
| SNP_19123_A_130827 | NC_021163.1    | Ca_Kabuli_Chr04 | 130827                  | AA                              | GG                 | GG               | INTERGENIC                    |                    |                                      |
| SNP_19124_A_130850 | NC_021163.1    | Ca_Kabuli_Chr04 | 130850                  | TT                              | CC                 | CC               | INTERGENIC                    |                    |                                      |
| SNP_19125_A_130974 | NC_021163.1    | Ca_Kabuli_Chr04 | 130974                  | AA                              | GG                 | GG               | INTERGENIC                    |                    |                                      |
| SNP_19126_A_131016 | NC_021163.1    | Ca_Kabuli_Chr04 | 131016                  | AA                              | GG                 | GG               | INTERGENIC                    |                    |                                      |



| SNPs IDs           | Chromosome IDs | Chromosomes     | Physical positions (bp) | CDC Frontier genome (Reference genome) | (Pusa 1103 & HPNB) | (ILWC 46 & LPNB) | Sequence Components of genome | Gene accession IDs | Putative functions                                                        |
|--------------------|----------------|-----------------|-------------------------|----------------------------------------|--------------------|------------------|-------------------------------|--------------------|---------------------------------------------------------------------------|
| SNP_19127_A_131032 | NC_021163.1    | Ca_Kabuli_Chr04 | 131032                  | CC                                     | TT                 | TT               | INTERGENIC                    |                    |                                                                           |
| SNP_19128_A_131049 | NC_021163.1    | Ca_Kabuli_Chr04 | 131049                  | TT                                     | CC                 | CC               | INTERGENIC                    |                    |                                                                           |
| SNP_19130_A_131091 | NC_021163.1    | Ca_Kabuli_Chr04 | 131091                  | GG                                     | AA                 | AA               | INTERGENIC                    |                    |                                                                           |
| SNP_19131_A_131093 | NC_021163.1    | Ca_Kabuli_Chr04 | 131093                  | CC                                     | AA                 | AA               | INTERGENIC                    |                    |                                                                           |
| SNP_19132_A_209064 | NC_021163.1    | Ca_Kabuli_Chr04 | 209064                  | GG                                     | AA                 | AA               | INTERGENIC                    |                    |                                                                           |
| SNP_19133_A_274365 | NC_021163.1    | Ca_Kabuli_Chr04 | 274365                  | AA                                     | TT                 | TT               | INTERGENIC                    |                    |                                                                           |
| SNP_19134_A_274366 | NC_021163.1    | Ca_Kabuli_Chr04 | 274366                  | TT                                     | AA                 | AA               | INTERGENIC                    |                    |                                                                           |
| SNP_19135_A_274479 | NC_021163.1    | Ca_Kabuli_Chr04 | 274479                  | CC                                     | AA                 | AA               | INTERGENIC                    |                    |                                                                           |
| SNP_19137_A_357234 | NC_021163.1    | Ca_Kabuli_Chr04 | 357234                  | CC                                     | TT                 | TT               | INTRON                        | 101499046          | pentatricopeptide repeat-containing protein At3g02650, mitochondrial-like |
| SNP_19138_A_357397 | NC_021163.1    | Ca_Kabuli_Chr04 | 357397                  | TT                                     | AA                 | AA               | INTRON                        | 101499046          | pentatricopeptide repeat-containing protein At3g02650, mitochondrial-like |
| SNP_19139_A_357527 | NC_021163.1    | Ca_Kabuli_Chr04 | 357527                  | CC                                     | TT                 | TT               | INTRON                        | 101499046          | pentatricopeptide repeat-containing protein At3g02650, mitochondrial-like |
| SNP_19140_A_357529 | NC_021163.1    | Ca_Kabuli_Chr04 | 357529                  | CC                                     | TT                 | TT               | INTRON                        | 101499046          | pentatricopeptide repeat-containing protein At3g02650, mitochondrial-like |
| SNP_19141_A_357562 | NC_021163.1    | Ca_Kabuli_Chr04 | 357562                  | TT                                     | CC                 | CC               | INTRON                        | 101499046          | pentatricopeptide repeat-containing protein At3g02650, mitochondrial-like |
| SNP_19142_A_357582 | NC_021163.1    | Ca_Kabuli_Chr04 | 357582                  | TT                                     | GG                 | GG               | INTRON                        | 101499046          | pentatricopeptide repeat-containing protein At3g02650, mitochondrial-like |
| SNP_19143_A_357637 | NC_021163.1    | Ca_Kabuli_Chr04 | 357637                  | AA                                     | CC                 | CC               | INTRON                        | 101499046          | pentatricopeptide repeat-containing protein At3g02650, mitochondrial-like |
| SNP_19144_A_357650 | NC_021163.1    | Ca_Kabuli_Chr04 | 357650                  | GG                                     | AA                 | AA               | INTRON                        | 101499046          | pentatricopeptide repeat-containing protein At3g02650, mitochondrial-like |
| SNP_19145_A_417882 | NC_021163.1    | Ca_Kabuli_Chr04 | 417882                  | AA                                     | GG                 | GG               | URR                           | 101499977          | Unknown function                                                          |
| SNP_19146_A_417895 | NC_021163.1    | Ca_Kabuli_Chr04 | 417895                  | CC                                     | TT                 | TT               | URR                           | 101499977          | Unknown function                                                          |
| SNP_19147_A_417904 | NC_021163.1    | Ca_Kabuli_Chr04 | 417904                  | GG                                     | AA                 | AA               | URR                           | 101499977          | Unknown function                                                          |
| SNP_19148_A_418186 | NC_021163.1    | Ca_Kabuli_Chr04 | 418186                  | AA                                     | GG                 | GG               | URR                           | 101499977          | Unknown function                                                          |
| SNP_19149_A_418250 | NC_021163.1    | Ca_Kabuli_Chr04 | 418250                  | AA                                     | CC                 | CC               | URR                           | 101499977          | Unknown function                                                          |
| SNP_19150_A_421894 | NC_021163.1    | Ca_Kabuli_Chr04 | 421894                  | GG                                     | AA                 | AA               | INTERGENIC                    |                    |                                                                           |

| SNPs IDs            | Chromosome IDs | Chromosomes     | Physical positions (bp) | CDC Frontier genome (Reference genome) | (Pusa 1103 & HPNB) | (ILWC 46 & LPNB) | Sequence Components of genome | Gene accession IDs | Putative functions                                       |
|---------------------|----------------|-----------------|-------------------------|----------------------------------------|--------------------|------------------|-------------------------------|--------------------|----------------------------------------------------------|
| SNP_19151_A_471800  | NC_021163.1    | Ca_Kabuli_Chr04 | 471800                  | CC                                     | TT                 | TT               | URR                           | 101502541          | probable histone H2B.3-like                              |
| SNP_19152_A_674431  | NC_021163.1    | Ca_Kabuli_Chr04 | 674431                  | GG                                     | AA                 | AA               | URR                           | 101508535          | monothiol glutaredoxin-S10                               |
| SNP_19153_A_714229  | NC_021163.1    | Ca_Kabuli_Chr04 | 714229                  | AA                                     | TT                 | TT               | INTRON                        | 101509172          | myosin-6-like                                            |
| SNP_19154_A_823929  | NC_021163.1    | Ca_Kabuli_Chr04 | 823929                  | CC                                     | AA                 | AA               | INTRON                        | 101514243          | ABC transporter C family member 5                        |
| SNP_19155_A_823931  | NC_021163.1    | Ca_Kabuli_Chr04 | 823931                  | TT                                     | CC                 | CC               | INTRON                        | 101514243          | ABC transporter C family member 5                        |
| SNP_19156_A_823946  | NC_021163.1    | Ca_Kabuli_Chr04 | 823946                  | AA                                     | GG                 | GG               | INTRON                        | 101514243          | ABC transporter C family member 5                        |
| SNP_19157_A_823967  | NC_021163.1    | Ca_Kabuli_Chr04 | 823967                  | AA                                     | CC                 | CC               | INTRON                        | 101514243          | ABC transporter C family member 5                        |
| SNP_19158_A_823970  | NC_021163.1    | Ca_Kabuli_Chr04 | 823970                  | TT                                     | CC                 | CC               | INTRON                        | 101514243          | ABC transporter C family member 5                        |
| SNP_19159_A_958445  | NC_021163.1    | Ca_Kabuli_Chr04 | 958445                  | AA                                     | GG                 | GG               | INTERGENIC                    |                    |                                                          |
| SNP_19161_A_982276  | NC_021163.1    | Ca_Kabuli_Chr04 | 982276                  | AA                                     | GG                 | GG               | NON_SYNONYMOUS_CODING         | 101503176          | CRIB domain-containing protein RIC7-like                 |
| SNP_19162_A_1023040 | NC_021163.1    | Ca_Kabuli_Chr04 | 1023040                 | TT                                     | AA                 | AA               | INTERGENIC                    |                    |                                                          |
| SNP_19163_A_1055878 | NC_021163.1    | Ca_Kabuli_Chr04 | 1055878                 | CC                                     | GG                 | GG               | URR                           | 101496185          | uncharacterized protein At1g03900                        |
| SNP_19164_A_1089346 | NC_021163.1    | Ca_Kabuli_Chr04 | 1089346                 | TT                                     | CC                 | CC               | INTERGENIC                    |                    |                                                          |
| SNP_19166_A_1227317 | NC_021163.1    | Ca_Kabuli_Chr04 | 1227317                 | GG                                     | AA                 | AA               | DRR                           | 101502737          | ethylene-responsive transcription factor ERF098-like     |
| SNP_19167_A_1233809 | NC_021163.1    | Ca_Kabuli_Chr04 | 1233809                 | GG                                     | TT                 | TT               | INTERGENIC                    |                    |                                                          |
| SNP_19168_A_1273383 | NC_021163.1    | Ca_Kabuli_Chr04 | 1273383                 | AA                                     | GG                 | GG               | URR                           | 101504046          | autophagy-related protein 9                              |
| SNP_19170_A_1309137 | NC_021163.1    | Ca_Kabuli_Chr04 | 1309137                 | CC                                     | TT                 | TT               | URR                           | 101505204          | 1-aminocyclopropane-1-carboxylate oxidase homolog 1-like |
| SNP_19172_A_1332059 | NC_021163.1    | Ca_Kabuli_Chr04 | 1332059                 | TT                                     | CC                 | CC               | INTERGENIC                    |                    |                                                          |
| SNP_19173_A_1337990 | NC_021163.1    | Ca_Kabuli_Chr04 | 1337990                 | CC                                     | GG                 | GG               | URR                           | 101505857          | LOB domain-containing protein 29                         |
| SNP_19175_A_1408998 | NC_021163.1    | Ca_Kabuli_Chr04 | 1408998                 | CC                                     | TT                 | TT               | INTERGENIC                    |                    |                                                          |
| SNP_19176_A_1416664 | NC_021163.1    | Ca_Kabuli_Chr04 | 1416664                 | GG                                     | AA                 | AA               | DRR                           | 101508331          | cytochrome P450 94A2-like                                |
| SNP_19177_A_1474086 | NC_021163.1    | Ca_Kabuli_Chr04 | 1474086                 | AA                                     | CC                 | CC               | DRR                           | 101510135          | histone H1                                               |

| SNPs IDs            | Chromosome IDs | Chromosomes     | Physical positions (bp) | CDC Frontier genome (Reference genome) | (Pusa 1103 & HPNB) | (ILWC 46 & LPNB) | Sequence Components of genome | Gene accession IDs | Putative functions                                 |
|---------------------|----------------|-----------------|-------------------------|----------------------------------------|--------------------|------------------|-------------------------------|--------------------|----------------------------------------------------|
| SNP_19178_A_1521075 | NC_021163.1    | Ca_Kabuli_Chr04 | 1521075                 | AA                                     | GG                 | GG               | URR                           | 101512174          | signal recognition particle 9 kDa protein          |
| SNP_19179_A_1536859 | NC_021163.1    | Ca_Kabuli_Chr04 | 1536859                 | TT                                     | CC                 | CC               | INTERGENIC                    |                    |                                                    |
| SNP_19180_A_1556316 | NC_021163.1    | Ca_Kabuli_Chr04 | 1556316                 | GG                                     | AA                 | AA               | INTRON                        | 101513032          | probable galacturonosyltransferase 6               |
| SNP_19181_A_1596982 | NC_021163.1    | Ca_Kabuli_Chr04 | 1596982                 | GG                                     | AA                 | AA               | INTERGENIC                    |                    |                                                    |
| SNP_19182_A_1597120 | NC_021163.1    | Ca_Kabuli_Chr04 | 1597120                 | TT                                     | CC                 | CC               | INTERGENIC                    |                    |                                                    |
| SNP_19183_A_1605325 | NC_021163.1    | Ca_Kabuli_Chr04 | 1605325                 | AA                                     | CC                 | CC               | INTERGENIC                    |                    |                                                    |
| SNP_19185_A_1676975 | NC_021163.1    | Ca_Kabuli_Chr04 | 1676975                 | CC                                     | TT                 | TT               | INTRON                        | 101490148          | guanine nucleotide-binding protein subunit gamma 2 |
| SNP_19186_A_1676981 | NC_021163.1    | Ca_Kabuli_Chr04 | 1676981                 | TT                                     | CC                 | CC               | INTRON                        | 101490148          | guanine nucleotide-binding protein subunit gamma 2 |
| SNP_19187_A_1677022 | NC_021163.1    | Ca_Kabuli_Chr04 | 1677022                 | GG                                     | AA                 | AA               | INTRON                        | 101490148          | guanine nucleotide-binding protein subunit gamma 2 |
| SNP_19188_A_1677032 | NC_021163.1    | Ca_Kabuli_Chr04 | 1677032                 | GG                                     | TT                 | TT               | INTRON                        | 101490148          | guanine nucleotide-binding protein subunit gamma 2 |
| SNP_19189_A_1677042 | NC_021163.1    | Ca_Kabuli_Chr04 | 1677042                 | AA                                     | CC                 | CC               | INTRON                        | 101490148          | guanine nucleotide-binding protein subunit gamma 2 |
| SNP_19190_A_1677101 | NC_021163.1    | Ca_Kabuli_Chr04 | 1677101                 | TT                                     | AA                 | AA               | INTRON                        | 101490148          | guanine nucleotide-binding protein subunit gamma 2 |
| SNP_19191_A_1677197 | NC_021163.1    | Ca_Kabuli_Chr04 | 1677197                 | GG                                     | AA                 | AA               | INTRON                        | 101490148          | guanine nucleotide-binding protein subunit gamma 2 |
| SNP_19192_A_1677209 | NC_021163.1    | Ca_Kabuli_Chr04 | 1677209                 | TT                                     | AA                 | AA               | INTRON                        | 101490148          | guanine nucleotide-binding protein subunit gamma 2 |
| SNP_19193_A_1677215 | NC_021163.1    | Ca_Kabuli_Chr04 | 1677215                 | GG                                     | CC                 | CC               | INTRON                        | 101490148          | guanine nucleotide-binding protein subunit gamma 2 |
| SNP_19194_A_1677219 | NC_021163.1    | Ca_Kabuli_Chr04 | 1677219                 | TT                                     | GG                 | GG               | INTRON                        | 101490148          | guanine nucleotide-binding protein subunit gamma 2 |
| SNP_19195_A_1677233 | NC_021163.1    | Ca_Kabuli_Chr04 | 1677233                 | TT                                     | CC                 | CC               | INTRON                        | 101490148          | guanine nucleotide-binding protein subunit gamma 2 |
| SNP_19196_A_1677241 | NC_021163.1    | Ca_Kabuli_Chr04 | 1677241                 | TT                                     | CC                 | CC               | INTRON                        | 101490148          | guanine nucleotide-binding protein subunit gamma 2 |
| SNP_19197_A_1677242 | NC_021163.1    | Ca_Kabuli_Chr04 | 1677242                 | GG                                     | AA                 | AA               | INTRON                        | 101490148          | guanine nucleotide-binding protein subunit gamma 2 |
| SNP_19199_A_1677466 | NC_021163.1    | Ca_Kabuli_Chr04 | 1677466                 | CC                                     | TT                 | TT               | INTRON                        | 101490148          | guanine nucleotide-binding protein subunit gamma 2 |
| SNP_19200_A_1707575 | NC_021163.1    | Ca_Kabuli_Chr04 | 1707575                 | TT                                     | AA                 | AA               | SYNONYMOUS_CODING             | 101492182          | BEACH domain-containing protein lvsA               |
| SNP_19201_A_1762477 | NC_021163.1    | Ca_Kabuli_Chr04 | 1762477                 | CC                                     | AA                 | AA               | URR                           | 101493300          | protein indeterminate-domain 7                     |

| SNPs IDs            | Chromosome IDs | Chromosomes     | Physical positions (bp) | CDC Frontier (Reference genome) | (Pusa 1103 & HPNB) | (ILWC 46 & LPNB) | Sequence Components of genome | Gene accession IDs | Putative functions                         |
|---------------------|----------------|-----------------|-------------------------|---------------------------------|--------------------|------------------|-------------------------------|--------------------|--------------------------------------------|
| SNP_19202_A_1763741 | NC_021163.1    | Ca_Kabuli_Chr04 | 1763741                 | AA                              | TT                 | TT               | URR                           | 101493300          | protein indeterminate-domain 7             |
| SNP_19203_A_1765656 | NC_021163.1    | Ca_Kabuli_Chr04 | 1765656                 | CC                              | TT                 | TT               | INTERGENIC                    |                    |                                            |
| SNP_19204_A_1766023 | NC_021163.1    | Ca_Kabuli_Chr04 | 1766023                 | GG                              | AA                 | AA               | INTERGENIC                    |                    |                                            |
| SNP_19205_A_1767743 | NC_021163.1    | Ca_Kabuli_Chr04 | 1767743                 | AA                              | GG                 | GG               | INTERGENIC                    |                    |                                            |
| SNP_19208_A_1779838 | NC_021163.1    | Ca_Kabuli_Chr04 | 1779838                 | CC                              | TT                 | TT               | URR                           | 101493622          | heat stress transcription factor A-6b-like |
| SNP_19209_A_1780202 | NC_021163.1    | Ca_Kabuli_Chr04 | 1780202                 | GG                              | TT                 | TT               | DRR                           | 101494572          | uncharacterized LOC101494572               |
| SNP_19210_A_1781745 | NC_021163.1    | Ca_Kabuli_Chr04 | 1781745                 | GG                              | AA                 | AA               | SYNONYMOUS_CODING             | 101494572          | uncharacterized LOC101494572               |
| SNP_19211_A_1781806 | NC_021163.1    | Ca_Kabuli_Chr04 | 1781806                 | CC                              | AA                 | AA               | NON_SYNONYMOUS_CODING         | 101494572          | uncharacterized LOC101494572               |
| SNP_19213_A_1786768 | NC_021163.1    | Ca_Kabuli_Chr04 | 1786768                 | TT                              | GG                 | GG               | INTRON                        | 101494572          | uncharacterized LOC101494572               |
| SNP_19214_A_1788433 | NC_021163.1    | Ca_Kabuli_Chr04 | 1788433                 | GG                              | AA                 | AA               | INTRON                        | 101494572          | uncharacterized LOC101494572               |
| SNP_19215_A_1789390 | NC_021163.1    | Ca_Kabuli_Chr04 | 1789390                 | TT                              | CC                 | CC               | INTRON                        | 101494572          | uncharacterized LOC101494572               |
| SNP_19216_A_1789434 | NC_021163.1    | Ca_Kabuli_Chr04 | 1789434                 | CC                              | AA                 | AA               | INTRON                        | 101494572          | uncharacterized LOC101494572               |
| SNP_19217_A_1789590 | NC_021163.1    | Ca_Kabuli_Chr04 | 1789590                 | TT                              | GG                 | GG               | INTRON                        | 101494572          | uncharacterized LOC101494572               |
| SNP_19218_A_1789648 | NC_021163.1    | Ca_Kabuli_Chr04 | 1789648                 | TT                              | GG                 | GG               | INTRON                        | 101494572          | uncharacterized LOC101494572               |
| SNP_19219_A_1791871 | NC_021163.1    | Ca_Kabuli_Chr04 | 1791871                 | AA                              | GG                 | GG               | INTRON                        | 101494572          | uncharacterized LOC101494572               |
| SNP_19221_A_1791990 | NC_021163.1    | Ca_Kabuli_Chr04 | 1791990                 | AA                              | GG                 | GG               | INTRON                        | 101494572          | uncharacterized LOC101494572               |
| SNP_19222_A_1792114 | NC_021163.1    | Ca_Kabuli_Chr04 | 1792114                 | GG                              | AA                 | AA               | INTRON                        | 101494572          | uncharacterized LOC101494572               |
| SNP_19223_A_1795380 | NC_021163.1    | Ca_Kabuli_Chr04 | 1795380                 | GG                              | AA                 | AA               | INTRON                        | 101494572          | uncharacterized LOC101494572               |
| SNP_19224_A_1800269 | NC_021163.1    | Ca_Kabuli_Chr04 | 1800269                 | AA                              | GG                 | GG               | INTRON                        | 101494572          | uncharacterized LOC101494572               |
| SNP_19225_A_1806726 | NC_021163.1    | Ca_Kabuli_Chr04 | 1806726                 | AA                              | GG                 | GG               | INTRON                        | 101494572          | uncharacterized LOC101494572               |
| SNP_19227_A_1812891 | NC_021163.1    | Ca_Kabuli_Chr04 | 1812891                 | AA                              | GG                 | GG               | DRR                           | 101494888          | ETO1-like protein 1                        |
| SNP_19228_A_1813211 | NC_021163.1    | Ca_Kabuli_Chr04 | 1813211                 | TT                              | AA                 | AA               | DRR                           | 101494888          | ETO1-like protein 1                        |

| SNPs IDs            | Chromosome IDs | Chromosomes     | Physical positions (bp) | CDC Frontier genome (Reference genome) | (Pusa 1103 & HPNB) | (ILWC 46 & LPNB) | Sequence genome | Components of | Gene accession IDs  | Putative functions |
|---------------------|----------------|-----------------|-------------------------|----------------------------------------|--------------------|------------------|-----------------|---------------|---------------------|--------------------|
| SNP_19229_A_1813759 | NC_021163.1    | Ca_Kabuli_Chr04 | 1813759                 | AA                                     | TT                 | TT               | INTERGENIC      |               |                     |                    |
| SNP_19230_A_1818840 | NC_021163.1    | Ca_Kabuli_Chr04 | 1818840                 | AA                                     | CC                 | CC               | URR             | 101494888     | ETO1-like protein 1 |                    |
| SNP_19231_A_1821752 | NC_021163.1    | Ca_Kabuli_Chr04 | 1821752                 | CC                                     | TT                 | TT               | INTERGENIC      |               |                     |                    |
| SNP_19232_A_1821753 | NC_021163.1    | Ca_Kabuli_Chr04 | 1821753                 | AA                                     | CC                 | CC               | INTERGENIC      |               |                     |                    |
| SNP_19233_A_1822245 | NC_021163.1    | Ca_Kabuli_Chr04 | 1822245                 | GG                                     | AA                 | AA               | INTERGENIC      |               |                     |                    |
| SNP_19234_A_1822247 | NC_021163.1    | Ca_Kabuli_Chr04 | 1822247                 | GG                                     | AA                 | AA               | INTERGENIC      |               |                     |                    |
| SNP_19235_A_1822261 | NC_021163.1    | Ca_Kabuli_Chr04 | 1822261                 | TT                                     | CC                 | CC               | INTERGENIC      |               |                     |                    |
| SNP_19236_A_1823903 | NC_021163.1    | Ca_Kabuli_Chr04 | 1823903                 | TT                                     | CC                 | CC               | INTERGENIC      |               |                     |                    |
| SNP_19237_A_1823954 | NC_021163.1    | Ca_Kabuli_Chr04 | 1823954                 | AA                                     | CC                 | CC               | INTERGENIC      |               |                     |                    |
| SNP_19238_A_1824304 | NC_021163.1    | Ca_Kabuli_Chr04 | 1824304                 | GG                                     | AA                 | AA               | INTERGENIC      |               |                     |                    |
| SNP_19239_A_1824309 | NC_021163.1    | Ca_Kabuli_Chr04 | 1824309                 | GG                                     | AA                 | AA               | INTERGENIC      |               |                     |                    |
| SNP_19240_A_1824650 | NC_021163.1    | Ca_Kabuli_Chr04 | 1824650                 | CC                                     | TT                 | TT               | INTERGENIC      |               |                     |                    |
| SNP_19241_A_1824739 | NC_021163.1    | Ca_Kabuli_Chr04 | 1824739                 | CC                                     | TT                 | TT               | INTERGENIC      |               |                     |                    |
| SNP_19242_A_1825483 | NC_021163.1    | Ca_Kabuli_Chr04 | 1825483                 | AA                                     | GG                 | GG               | INTERGENIC      |               |                     |                    |
| SNP_19243_A_1826663 | NC_021163.1    | Ca_Kabuli_Chr04 | 1826663                 | CC                                     | AA                 | AA               | INTERGENIC      |               |                     |                    |
| SNP_19244_A_1826678 | NC_021163.1    | Ca_Kabuli_Chr04 | 1826678                 | AA                                     | GG                 | GG               | INTERGENIC      |               |                     |                    |
| SNP_19245_A_1827639 | NC_021163.1    | Ca_Kabuli_Chr04 | 1827639                 | GG                                     | AA                 | AA               | DRR             | 101495859     | BI1-like protein    |                    |
| SNP_19246_A_1827673 | NC_021163.1    | Ca_Kabuli_Chr04 | 1827673                 | GG                                     | TT                 | TT               | DRR             | 101495859     | BI1-like protein    |                    |
| SNP_19247_A_1830715 | NC_021163.1    | Ca_Kabuli_Chr04 | 1830715                 | CC                                     | TT                 | TT               | URR             | 101495859     | BI1-like protein    |                    |
| SNP_19248_A_1830863 | NC_021163.1    | Ca_Kabuli_Chr04 | 1830863                 | GG                                     | TT                 | TT               | URR             | 101495859     | BI1-like protein    |                    |
| SNP_19250_A_1833143 | NC_021163.1    | Ca_Kabuli_Chr04 | 1833143                 | AA                                     | TT                 | TT               | INTERGENIC      |               |                     |                    |
| SNP_19251_A_1834292 | NC_021163.1    | Ca_Kabuli_Chr04 | 1834292                 | GG                                     | AA                 | AA               | INTERGENIC      |               |                     |                    |

| SNPs IDs            | Chromosome IDs | Chromosomes     | Physical positions (bp) | CDC Frontier (Reference genome) | (Pusa 1103 & HPNB) | (ILWC 46 & LPNB) | Sequence Components of genome | Gene accession IDs | Putative functions                   |
|---------------------|----------------|-----------------|-------------------------|---------------------------------|--------------------|------------------|-------------------------------|--------------------|--------------------------------------|
| SNP_19253_A_1840074 | NC_021163.1    | Ca_Kabuli_Chr04 | 1840074                 | TT                              | CC                 | CC               | INTERGENIC                    |                    |                                      |
| SNP_19254_A_1844407 | NC_021163.1    | Ca_Kabuli_Chr04 | 1844407                 | GG                              | AA                 | AA               | URR                           | 101496515          | uncharacterized LOC101496515         |
| SNP_19255_A_1847451 | NC_021163.1    | Ca_Kabuli_Chr04 | 1847451                 | GG                              | CC                 | CC               | INTRON                        | 101496848          | serine/threonine-protein kinase Nek4 |
| SNP_19256_A_1847749 | NC_021163.1    | Ca_Kabuli_Chr04 | 1847749                 | TT                              | GG                 | GG               | INTRON                        | 101496848          | serine/threonine-protein kinase Nek4 |
| SNP_19258_A_1849634 | NC_021163.1    | Ca_Kabuli_Chr04 | 1849634                 | AA                              | GG                 | GG               | URR                           | 101496848          | serine/threonine-protein kinase Nek4 |
| SNP_19260_A_1858388 | NC_021163.1    | Ca_Kabuli_Chr04 | 1858388                 | AA                              | CC                 | CC               | INTERGENIC                    |                    |                                      |
| SNP_19261_A_1858441 | NC_021163.1    | Ca_Kabuli_Chr04 | 1858441                 | TT                              | GG                 | GG               | INTERGENIC                    |                    |                                      |
| SNP_19263_A_1859517 | NC_021163.1    | Ca_Kabuli_Chr04 | 1859517                 | CC                              | TT                 | TT               | INTERGENIC                    |                    |                                      |
| SNP_19264_A_1859832 | NC_021163.1    | Ca_Kabuli_Chr04 | 1859832                 | TT                              | CC                 | CC               | INTERGENIC                    |                    |                                      |
| SNP_19265_A_1859844 | NC_021163.1    | Ca_Kabuli_Chr04 | 1859844                 | TT                              | CC                 | CC               | INTERGENIC                    |                    |                                      |
| SNP_19266_A_1859887 | NC_021163.1    | Ca_Kabuli_Chr04 | 1859887                 | CC                              | TT                 | TT               | INTERGENIC                    |                    |                                      |
| SNP_19267_A_1861758 | NC_021163.1    | Ca_Kabuli_Chr04 | 1861758                 | CC                              | TT                 | TT               | INTERGENIC                    |                    |                                      |
| SNP_19268_A_1866558 | NC_021163.1    | Ca_Kabuli_Chr04 | 1866558                 | GG                              | AA                 | AA               | INTERGENIC                    |                    |                                      |
| SNP_19269_A_1867618 | NC_021163.1    | Ca_Kabuli_Chr04 | 1867618                 | AA                              | GG                 | GG               | INTERGENIC                    |                    |                                      |
| SNP_19270_A_1870666 | NC_021163.1    | Ca_Kabuli_Chr04 | 1870666                 | CC                              | GG                 | GG               | INTERGENIC                    |                    |                                      |
| SNP_19271_A_1871064 | NC_021163.1    | Ca_Kabuli_Chr04 | 1871064                 | TT                              | CC                 | CC               | INTERGENIC                    |                    |                                      |
| SNP_19272_A_1874813 | NC_021163.1    | Ca_Kabuli_Chr04 | 1874813                 | CC                              | TT                 | TT               | INTRON                        | 101497505          | protein NETWORKED 1D                 |
| SNP_19273_A_1874826 | NC_021163.1    | Ca_Kabuli_Chr04 | 1874826                 | AA                              | TT                 | TT               | INTRON                        | 101497505          | protein NETWORKED 1D                 |
| SNP_19274_A_1882550 | NC_021163.1    | Ca_Kabuli_Chr04 | 1882550                 | CC                              | TT                 | TT               | INTERGENIC                    |                    |                                      |
| SNP_19275_A_1903951 | NC_021163.1    | Ca_Kabuli_Chr04 | 1903951                 | AA                              | GG                 | GG               | INTERGENIC                    |                    |                                      |
| SNP_19276_A_1904694 | NC_021163.1    | Ca_Kabuli_Chr04 | 1904694                 | AA                              | GG                 | GG               | INTERGENIC                    |                    |                                      |
| SNP_19279_A_2023425 | NC_021163.1    | Ca_Kabuli_Chr04 | 2023425                 | TT                              | CC                 | CC               | SYNONYMOUS_CODING             | 101502954          | NF-kappa-B-activating protein        |

| SNPs IDs            | Chromosome IDs | Chromosomes     | Physical positions (bp) | CDC Frontier genome (Reference genome) | (Pusa 1103 & HPNB) | (ILWC 46 & LPNB) | Sequence Components of genome | Gene accession IDs | Putative functions            |
|---------------------|----------------|-----------------|-------------------------|----------------------------------------|--------------------|------------------|-------------------------------|--------------------|-------------------------------|
| SNP_19280_A_2023429 | NC_021163.1    | Ca_Kabuli_Chr04 | 2023429                 | GG                                     | AA                 | AA               | NON_SYNONYMOUS_CODING         | 101502954          | NF-kappa-B-activating protein |
| SNP_19281_A_2024095 | NC_021163.1    | Ca_Kabuli_Chr04 | 2024095                 | GG                                     | AA                 | AA               | NON_SYNONYMOUS_CODING         | 101502954          | NF-kappa-B-activating protein |
| SNP_19282_A_2024108 | NC_021163.1    | Ca_Kabuli_Chr04 | 2024108                 | AA                                     | GG                 | GG               | NON_SYNONYMOUS_CODING         | 101502954          | NF-kappa-B-activating protein |
| SNP_19283_A_2024112 | NC_021163.1    | Ca_Kabuli_Chr04 | 2024112                 | GG                                     | AA                 | AA               | SYNONYMOUS_CODING             | 101502954          | NF-kappa-B-activating protein |
| SNP_19284_A_2024132 | NC_021163.1    | Ca_Kabuli_Chr04 | 2024132                 | GG                                     | CC                 | CC               | NON_SYNONYMOUS_CODING         | 101502954          | NF-kappa-B-activating protein |
| SNP_19285_A_2024142 | NC_021163.1    | Ca_Kabuli_Chr04 | 2024142                 | GG                                     | CC                 | CC               | SYNONYMOUS_CODING             | 101502954          | NF-kappa-B-activating protein |
| SNP_19286_A_2024144 | NC_021163.1    | Ca_Kabuli_Chr04 | 2024144                 | CC                                     | AA                 | AA               | NON_SYNONYMOUS_CODING         | 101502954          | NF-kappa-B-activating protein |
| SNP_19288_A_2032225 | NC_021163.1    | Ca_Kabuli_Chr04 | 2032225                 | CC                                     | TT                 | TT               | SYNONYMOUS_CODING             | 101503280          | crooked neck-like protein 1   |
| SNP_19289_A_2032243 | NC_021163.1    | Ca_Kabuli_Chr04 | 2032243                 | TT                                     | CC                 | CC               | SYNONYMOUS_CODING             | 101503280          | crooked neck-like protein 1   |
| SNP_19290_A_2032329 | NC_021163.1    | Ca_Kabuli_Chr04 | 2032329                 | CC                                     | TT                 | TT               | NON_SYNONYMOUS_CODING         | 101503280          | crooked neck-like protein 1   |
| SNP_19291_A_2032374 | NC_021163.1    | Ca_Kabuli_Chr04 | 2032374                 | GG                                     | AA                 | AA               | NON_SYNONYMOUS_CODING         | 101503280          | crooked neck-like protein 1   |
| SNP_19292_A_2032396 | NC_021163.1    | Ca_Kabuli_Chr04 | 2032396                 | GG                                     | CC                 | CC               | NON_SYNONYMOUS_CODING         | 101503280          | crooked neck-like protein 1   |
| SNP_19293_A_2032416 | NC_021163.1    | Ca_Kabuli_Chr04 | 2032416                 | CC                                     | GG                 | GG               | NON_SYNONYMOUS_CODING         | 101503280          | crooked neck-like protein 1   |
| SNP_19294_A_2032449 | NC_021163.1    | Ca_Kabuli_Chr04 | 2032449                 | AA                                     | GG                 | GG               | NON_SYNONYMOUS_CODING         | 101503280          | crooked neck-like protein 1   |
| SNP_19295_A_2032480 | NC_021163.1    | Ca_Kabuli_Chr04 | 2032480                 | TT                                     | CC                 | CC               | INTRON                        | 101503280          | crooked neck-like protein 1   |
| SNP_19296_A_2032481 | NC_021163.1    | Ca_Kabuli_Chr04 | 2032481                 | GG                                     | TT                 | TT               | INTRON                        | 101503280          | crooked neck-like protein 1   |
| SNP_19297_A_2032510 | NC_021163.1    | Ca_Kabuli_Chr04 | 2032510                 | AA                                     | TT                 | TT               | INTRON                        | 101503280          | crooked neck-like protein 1   |
| SNP_19298_A_2032529 | NC_021163.1    | Ca_Kabuli_Chr04 | 2032529                 | GG                                     | AA                 | AA               | INTRON                        | 101503280          | crooked neck-like protein 1   |
| SNP_19300_A_2032567 | NC_021163.1    | Ca_Kabuli_Chr04 | 2032567                 | TT                                     | CC                 | CC               | SYNONYMOUS_CODING             | 101503280          | crooked neck-like protein 1   |
| SNP_19301_A_2032582 | NC_021163.1    | Ca_Kabuli_Chr04 | 2032582                 | CC                                     | TT                 | TT               | SYNONYMOUS_CODING             | 101503280          | crooked neck-like protein 1   |
| SNP_19302_A_2032636 | NC_021163.1    | Ca_Kabuli_Chr04 | 2032636                 | AA                                     | GG                 | GG               | INTRON                        | 101503280          | crooked neck-like protein 1   |
| SNP_19303_A_2032638 | NC_021163.1    | Ca_Kabuli_Chr04 | 2032638                 | TT                                     | AA                 | AA               | INTRON                        | 101503280          | crooked neck-like protein 1   |

| SNPs IDs            | Chromosome IDs | Chromosomes     | Physical positions (bp) | CDC Frontier genome (Reference genome) | (Pusa 1103 & HPNB) | (ILWC 46 & LPNB) | Sequence Components of genome | Gene accession IDs | Putative functions          |
|---------------------|----------------|-----------------|-------------------------|----------------------------------------|--------------------|------------------|-------------------------------|--------------------|-----------------------------|
| SNP_19304_A_2032773 | NC_021163.1    | Ca_Kabuli_Chr04 | 2032773                 | AA                                     | TT                 | TT               | INTRON                        | 101503280          | crooked neck-like protein 1 |
| SNP_19305_A_2032846 | NC_021163.1    | Ca_Kabuli_Chr04 | 2032846                 | AA                                     | GG                 | GG               | INTRON                        | 101503280          | crooked neck-like protein 1 |
| SNP_19306_A_2032858 | NC_021163.1    | Ca_Kabuli_Chr04 | 2032858                 | AA                                     | GG                 | GG               | INTRON                        | 101503280          | crooked neck-like protein 1 |
| SNP_19307_A_2032866 | NC_021163.1    | Ca_Kabuli_Chr04 | 2032866                 | GG                                     | CC                 | CC               | INTRON                        | 101503280          | crooked neck-like protein 1 |
| SNP_19308_A_2032904 | NC_021163.1    | Ca_Kabuli_Chr04 | 2032904                 | GG                                     | AA                 | AA               | INTRON                        | 101503280          | crooked neck-like protein 1 |
| SNP_19309_A_2034107 | NC_021163.1    | Ca_Kabuli_Chr04 | 2034107                 | GG                                     | TT                 | TT               | INTRON                        | 101503280          | crooked neck-like protein 1 |
| SNP_19310_A_2034132 | NC_021163.1    | Ca_Kabuli_Chr04 | 2034132                 | GG                                     | AA                 | AA               | INTRON                        | 101503280          | crooked neck-like protein 1 |
| SNP_19311_A_2034149 | NC_021163.1    | Ca_Kabuli_Chr04 | 2034149                 | TT                                     | CC                 | CC               | INTRON                        | 101503280          | crooked neck-like protein 1 |
| SNP_19312_A_2034152 | NC_021163.1    | Ca_Kabuli_Chr04 | 2034152                 | TT                                     | CC                 | CC               | INTRON                        | 101503280          | crooked neck-like protein 1 |
| SNP_19313_A_2034169 | NC_021163.1    | Ca_Kabuli_Chr04 | 2034169                 | TT                                     | CC                 | CC               | INTRON                        | 101503280          | crooked neck-like protein 1 |
| SNP_19314_A_2034182 | NC_021163.1    | Ca_Kabuli_Chr04 | 2034182                 | CC                                     | AA                 | AA               | INTRON                        | 101503280          | crooked neck-like protein 1 |
| SNP_19315_A_2034186 | NC_021163.1    | Ca_Kabuli_Chr04 | 2034186                 | CC                                     | GG                 | GG               | INTRON                        | 101503280          | crooked neck-like protein 1 |
| SNP_19316_A_2034266 | NC_021163.1    | Ca_Kabuli_Chr04 | 2034266                 | CC                                     | TT                 | TT               | SYNONYMOUS_CODING             | 101503280          | crooked neck-like protein 1 |
| SNP_19317_A_2034304 | NC_021163.1    | Ca_Kabuli_Chr04 | 2034304                 | GG                                     | AA                 | AA               | NON_SYNONYMOUS_CODING         | 101503280          | crooked neck-like protein 1 |
| SNP_19318_A_2034340 | NC_021163.1    | Ca_Kabuli_Chr04 | 2034340                 | AA                                     | CC                 | CC               | NON_SYNONYMOUS_CODING         | 101503280          | crooked neck-like protein 1 |
| SNP_19319_A_2034385 | NC_021163.1    | Ca_Kabuli_Chr04 | 2034385                 | CC                                     | AA                 | AA               | INTRON                        | 101503280          | crooked neck-like protein 1 |
| SNP_19320_A_2034396 | NC_021163.1    | Ca_Kabuli_Chr04 | 2034396                 | GG                                     | AA                 | AA               | INTRON                        | 101503280          | crooked neck-like protein 1 |
| SNP_19321_A_2034398 | NC_021163.1    | Ca_Kabuli_Chr04 | 2034398                 | TT                                     | CC                 | CC               | INTRON                        | 101503280          | crooked neck-like protein 1 |
| SNP_19323_A_2034505 | NC_021163.1    | Ca_Kabuli_Chr04 | 2034505                 | GG                                     | AA                 | AA               | SYNONYMOUS_CODING             | 101503280          | crooked neck-like protein 1 |
| SNP_19324_A_2034547 | NC_021163.1    | Ca_Kabuli_Chr04 | 2034547                 | GG                                     | AA                 | AA               | SYNONYMOUS_CODING             | 101503280          | crooked neck-like protein 1 |
| SNP_19325_A_2034556 | NC_021163.1    | Ca_Kabuli_Chr04 | 2034556                 | GG                                     | AA                 | AA               | SYNONYMOUS_CODING             | 101503280          | crooked neck-like protein 1 |
| SNP_19326_A_2034717 | NC_021163.1    | Ca_Kabuli_Chr04 | 2034717                 | GG                                     | CC                 | CC               | INTRON                        | 101503280          | crooked neck-like protein 1 |



| SNPs IDs            | Chromosome IDs | Chromosomes     | Physical positions (bp) | CDC Frontier genome (Reference genome) | (Pusa 1103 & HPNB) | (ILWC 46 & LPNB) | Sequence Components of genome | Gene accession IDs | Putative functions          |
|---------------------|----------------|-----------------|-------------------------|----------------------------------------|--------------------|------------------|-------------------------------|--------------------|-----------------------------|
| SNP_19327_A_2034721 | NC_021163.1    | Ca_Kabuli_Chr04 | 2034721                 | GG                                     | AA                 | AA               | INTRON                        | 101503280          | crooked neck-like protein 1 |
| SNP_19328_A_2034756 | NC_021163.1    | Ca_Kabuli_Chr04 | 2034756                 | AA                                     | GG                 | GG               | INTRON                        | 101503280          | crooked neck-like protein 1 |
| SNP_19329_A_2034757 | NC_021163.1    | Ca_Kabuli_Chr04 | 2034757                 | AA                                     | CC                 | CC               | INTRON                        | 101503280          | crooked neck-like protein 1 |
| SNP_19330_A_2034768 | NC_021163.1    | Ca_Kabuli_Chr04 | 2034768                 | GG                                     | AA                 | AA               | INTRON                        | 101503280          | crooked neck-like protein 1 |
| SNP_19331_A_2034835 | NC_021163.1    | Ca_Kabuli_Chr04 | 2034835                 | GG                                     | CC                 | CC               | INTRON                        | 101503280          | crooked neck-like protein 1 |
| SNP_19332_A_2034850 | NC_021163.1    | Ca_Kabuli_Chr04 | 2034850                 | TT                                     | CC                 | CC               | INTRON                        | 101503280          | crooked neck-like protein 1 |
| SNP_19333_A_2034894 | NC_021163.1    | Ca_Kabuli_Chr04 | 2034894                 | TT                                     | CC                 | CC               | INTRON                        | 101503280          | crooked neck-like protein 1 |
| SNP_19334_A_2034900 | NC_021163.1    | Ca_Kabuli_Chr04 | 2034900                 | AA                                     | TT                 | TT               | INTRON                        | 101503280          | crooked neck-like protein 1 |
| SNP_19335_A_2034952 | NC_021163.1    | Ca_Kabuli_Chr04 | 2034952                 | AA                                     | GG                 | GG               | INTRON                        | 101503280          | crooked neck-like protein 1 |
| SNP_19336_A_2034974 | NC_021163.1    | Ca_Kabuli_Chr04 | 2034974                 | GG                                     | TT                 | TT               | INTRON                        | 101503280          | crooked neck-like protein 1 |
| SNP_19337_A_2035015 | NC_021163.1    | Ca_Kabuli_Chr04 | 2035015                 | GG                                     | TT                 | TT               | NON_SYNONYMOUS_CODING         | 101503280          | crooked neck-like protein 1 |
| SNP_19338_A_2035016 | NC_021163.1    | Ca_Kabuli_Chr04 | 2035016                 | TT                                     | AA                 | AA               | NON_SYNONYMOUS_CODING         | 101503280          | crooked neck-like protein 1 |
| SNP_19339_A_2035035 | NC_021163.1    | Ca_Kabuli_Chr04 | 2035035                 | GG                                     | CC                 | CC               | NON_SYNONYMOUS_CODING         | 101503280          | crooked neck-like protein 1 |
| SNP_19340_A_2035047 | NC_021163.1    | Ca_Kabuli_Chr04 | 2035047                 | AA                                     | TT                 | TT               | NON_SYNONYMOUS_CODING         | 101503280          | crooked neck-like protein 1 |
| SNP_19341_A_2035090 | NC_021163.1    | Ca_Kabuli_Chr04 | 2035090                 | TT                                     | CC                 | CC               | SYNONYMOUS_CODING             | 101503280          | crooked neck-like protein 1 |
| SNP_19342_A_2035166 | NC_021163.1    | Ca_Kabuli_Chr04 | 2035166                 | AA                                     | GG                 | GG               | NON_SYNONYMOUS_CODING         | 101503280          | crooked neck-like protein 1 |
| SNP_19343_A_2035174 | NC_021163.1    | Ca_Kabuli_Chr04 | 2035174                 | CC                                     | TT                 | TT               | SYNONYMOUS_CODING             | 101503280          | crooked neck-like protein 1 |
| SNP_19344_A_2035187 | NC_021163.1    | Ca_Kabuli_Chr04 | 2035187                 | TT                                     | CC                 | CC               | INTRON                        | 101503280          | crooked neck-like protein 1 |
| SNP_19345_A_2035188 | NC_021163.1    | Ca_Kabuli_Chr04 | 2035188                 | GG                                     | AA                 | AA               | INTRON                        | 101503280          | crooked neck-like protein 1 |
| SNP_19346_A_2035191 | NC_021163.1    | Ca_Kabuli_Chr04 | 2035191                 | AA                                     | CC                 | CC               | INTRON                        | 101503280          | crooked neck-like protein 1 |
| SNP_19347_A_2035192 | NC_021163.1    | Ca_Kabuli_Chr04 | 2035192                 | CC                                     | AA                 | AA               | INTRON                        | 101503280          | crooked neck-like protein 1 |
| SNP_19349_A_2035329 | NC_021163.1    | Ca_Kabuli_Chr04 | 2035329                 | AA                                     | CC                 | CC               | SYNONYMOUS_CODING             | 101503280          | crooked neck-like protein 1 |

| SNPs IDs            | Chromosome IDs | Chromosomes     | Physical positions (bp) | CDC Frontier (Reference genome) | (Pusa 1103 & HPNB) | (ILWC 46 & LPNB) | Sequence Components of genome | Gene accession IDs | Putative functions          |
|---------------------|----------------|-----------------|-------------------------|---------------------------------|--------------------|------------------|-------------------------------|--------------------|-----------------------------|
| SNP_19350_A_2035330 | NC_021163.1    | Ca_Kabuli_Chr04 | 2035330                 | GG                              | CC                 | CC               | NON_SYNONYMOUS_CODING         | 101503280          | crooked neck-like protein 1 |
| SNP_19351_A_2035400 | NC_021163.1    | Ca_Kabuli_Chr04 | 2035400                 | AA                              | GG                 | GG               | SYNONYMOUS_CODING             | 101503280          | crooked neck-like protein 1 |
| SNP_19352_A_2035405 | NC_021163.1    | Ca_Kabuli_Chr04 | 2035405                 | GG                              | AA                 | AA               | NON_SYNONYMOUS_CODING         | 101503280          | crooked neck-like protein 1 |
| SNP_19353_A_2035415 | NC_021163.1    | Ca_Kabuli_Chr04 | 2035415                 | CC                              | TT                 | TT               | SYNONYMOUS_CODING             | 101503280          | crooked neck-like protein 1 |
| SNP_19354_A_2035525 | NC_021163.1    | Ca_Kabuli_Chr04 | 2035525                 | AA                              | GG                 | GG               | INTRON                        | 101503280          | crooked neck-like protein 1 |
| SNP_19355_A_2035526 | NC_021163.1    | Ca_Kabuli_Chr04 | 2035526                 | GG                              | AA                 | AA               | INTRON                        | 101503280          | crooked neck-like protein 1 |
| SNP_19356_A_2035530 | NC_021163.1    | Ca_Kabuli_Chr04 | 2035530                 | CC                              | TT                 | TT               | INTRON                        | 101503280          | crooked neck-like protein 1 |
| SNP_19357_A_2035543 | NC_021163.1    | Ca_Kabuli_Chr04 | 2035543                 | GG                              | TT                 | TT               | INTRON                        | 101503280          | crooked neck-like protein 1 |
| SNP_19358_A_2035561 | NC_021163.1    | Ca_Kabuli_Chr04 | 2035561                 | TT                              | GG                 | GG               | INTRON                        | 101503280          | crooked neck-like protein 1 |
| SNP_19359_A_2035678 | NC_021163.1    | Ca_Kabuli_Chr04 | 2035678                 | TT                              | CC                 | CC               | INTRON                        | 101503280          | crooked neck-like protein 1 |
| SNP_19360_A_2035692 | NC_021163.1    | Ca_Kabuli_Chr04 | 2035692                 | AA                              | CC                 | CC               | INTRON                        | 101503280          | crooked neck-like protein 1 |
| SNP_19362_A_2035720 | NC_021163.1    | Ca_Kabuli_Chr04 | 2035720                 | TT                              | CC                 | CC               | SYNONYMOUS_CODING             | 101503280          | crooked neck-like protein 1 |
| SNP_19363_A_2035757 | NC_021163.1    | Ca_Kabuli_Chr04 | 2035757                 | CC                              | TT                 | TT               | NON_SYNONYMOUS_CODING         | 101503280          | crooked neck-like protein 1 |
| SNP_19365_A_2035841 | NC_021163.1    | Ca_Kabuli_Chr04 | 2035841                 | TT                              | CC                 | CC               | DRR                           | 101503280          | crooked neck-like protein 1 |
| SNP_19366_A_2035894 | NC_021163.1    | Ca_Kabuli_Chr04 | 2035894                 | AA                              | CC                 | CC               | DRR                           | 101503280          | crooked neck-like protein 1 |
| SNP_19367_A_2035921 | NC_021163.1    | Ca_Kabuli_Chr04 | 2035921                 | AA                              | TT                 | TT               | DRR                           | 101503280          | crooked neck-like protein 1 |
| SNP_19368_A_2035923 | NC_021163.1    | Ca_Kabuli_Chr04 | 2035923                 | GG                              | AA                 | AA               | DRR                           | 101503280          | crooked neck-like protein 1 |
| SNP_19369_A_2035930 | NC_021163.1    | Ca_Kabuli_Chr04 | 2035930                 | AA                              | TT                 | TT               | DRR                           | 101503280          | crooked neck-like protein 1 |
| SNP_19370_A_2035955 | NC_021163.1    | Ca_Kabuli_Chr04 | 2035955                 | CC                              | AA                 | AA               | DRR                           | 101503280          | crooked neck-like protein 1 |
| SNP_19371_A_2036101 | NC_021163.1    | Ca_Kabuli_Chr04 | 2036101                 | TT                              | AA                 | AA               | URR                           | 101503280          | crooked neck-like protein 1 |
| SNP_19372_A_2036112 | NC_021163.1    | Ca_Kabuli_Chr04 | 2036112                 | AA                              | CC                 | CC               | URR                           | 101503280          | crooked neck-like protein 1 |
| SNP_19373_A_2036118 | NC_021163.1    | Ca_Kabuli_Chr04 | 2036118                 | TT                              | AA                 | AA               | URR                           | 101503280          | crooked neck-like protein 1 |

| SNPs IDs            | Chromosome IDs | Chromosomes     | Physical positions (bp) | CDC Frontier (Reference genome) | (Pusa 1103 & HPNB) | (ILWC 46 & LPNB) | Sequence Components of genome | Gene accession IDs | Putative functions                                               |
|---------------------|----------------|-----------------|-------------------------|---------------------------------|--------------------|------------------|-------------------------------|--------------------|------------------------------------------------------------------|
| SNP_19374_A_2080262 | NC_021163.1    | Ca_Kabuli_Chr04 | 2080262                 | GG                              | TT                 | TT               | INTERGENIC                    |                    |                                                                  |
| SNP_19375_A_2097121 | NC_021163.1    | Ca_Kabuli_Chr04 | 2097121                 | AA                              | GG                 | GG               | INTERGENIC                    |                    |                                                                  |
| SNP_19376_A_2110908 | NC_021163.1    | Ca_Kabuli_Chr04 | 2110908                 | CC                              | TT                 | TT               | DRR                           | 101505528          | chloroplast stem-loop binding protein of 41 kDa a, chloroplastic |
| SNP_19377_A_2122788 | NC_021163.1    | Ca_Kabuli_Chr04 | 2122788                 | TT                              | CC                 | CC               | URR                           | 101505859          | uncharacterized LOC101505859                                     |
| SNP_19379_A_2185341 | NC_021163.1    | Ca_Kabuli_Chr04 | 2185341                 | CC                              | TT                 | TT               | INTERGENIC                    |                    |                                                                  |
| SNP_19380_A_2211561 | NC_021163.1    | Ca_Kabuli_Chr04 | 2211561                 | TT                              | CC                 | CC               | DRR                           | 101507064          | transcription factor bHLH83                                      |
| SNP_19382_A_2469045 | NC_021163.1    | Ca_Kabuli_Chr04 | 2469045                 | AA                              | TT                 | TT               | URR                           | 101490701          | cyclin-dependent kinase inhibitor 4-like                         |
| SNP_19383_A_2472815 | NC_021163.1    | Ca_Kabuli_Chr04 | 2472815                 | GG                              | AA                 | AA               | INTERGENIC                    |                    |                                                                  |
| SNP_19384_A_2556907 | NC_021163.1    | Ca_Kabuli_Chr04 | 2556907                 | CC                              | AA                 | AA               | URR                           | 101494361          | 3-isopropylmalate dehydratase large subunit-like                 |
| SNP_19385_A_2556914 | NC_021163.1    | Ca_Kabuli_Chr04 | 2556914                 | TT                              | CC                 | CC               | URR                           | 101494361          | 3-isopropylmalate dehydratase large subunit-like                 |
| SNP_19386_A_2556922 | NC_021163.1    | Ca_Kabuli_Chr04 | 2556922                 | CC                              | TT                 | TT               | URR                           | 101494361          | 3-isopropylmalate dehydratase large subunit-like                 |
| SNP_19387_A_2556928 | NC_021163.1    | Ca_Kabuli_Chr04 | 2556928                 | AA                              | TT                 | TT               | URR                           | 101494361          | 3-isopropylmalate dehydratase large subunit-like                 |
| SNP_19388_A_2556982 | NC_021163.1    | Ca_Kabuli_Chr04 | 2556982                 | GG                              | AA                 | AA               | URR                           | 101494361          | 3-isopropylmalate dehydratase large subunit-like                 |
| SNP_19389_A_2568526 | NC_021163.1    | Ca_Kabuli_Chr04 | 2568526                 | AA                              | GG                 | GG               | URR                           | 101495212          | uncharacterized LOC101495212                                     |
| SNP_19391_A_2612361 | NC_021163.1    | Ca_Kabuli_Chr04 | 2612361                 | CC                              | TT                 | TT               | URR                           | 101509594          | uncharacterized protein At5g64816                                |
| SNP_19392_A_2687996 | NC_021163.1    | Ca_Kabuli_Chr04 | 2687996                 | TT                              | AA                 | AA               | DRR                           | 101502327          | AT-hook motif nuclear-localized protein 20-like                  |
| SNP_19393_A_2688002 | NC_021163.1    | Ca_Kabuli_Chr04 | 2688002                 | CC                              | TT                 | TT               | DRR                           | 101502327          | AT-hook motif nuclear-localized protein 20-like                  |
| SNP_19394_A_2688270 | NC_021163.1    | Ca_Kabuli_Chr04 | 2688270                 | AA                              | GG                 | GG               | DRR                           | 101502327          | AT-hook motif nuclear-localized protein 20-like                  |
| SNP_19397_A_2743187 | NC_021163.1    | Ca_Kabuli_Chr04 | 2743187                 | AA                              | TT                 | TT               | INTERGENIC                    |                    |                                                                  |
| SNP_19400_A_2854458 | NC_021163.1    | Ca_Kabuli_Chr04 | 2854458                 | CC                              | TT                 | TT               | INTERGENIC                    |                    |                                                                  |
| SNP_19401_A_2883725 | NC_021163.1    | Ca_Kabuli_Chr04 | 2883725                 | CC                              | AA                 | AA               | DRR                           | 101490150          | probable inorganic phosphate transporter 1-3                     |
| SNP_19402_A_2883731 | NC_021163.1    | Ca_Kabuli_Chr04 | 2883731                 | CC                              | TT                 | TT               | DRR                           | 101490150          | probable inorganic phosphate transporter 1-3                     |

| SNPs IDs            | Chromosome IDs | Chromosomes     | Physical positions (bp) | CDC Frontier (Reference genome) | (Pusa 1103 & HPNB) | (ILWC 46 & LPNB) | Sequence Components of genome | Gene accession IDs | Putative functions                           |
|---------------------|----------------|-----------------|-------------------------|---------------------------------|--------------------|------------------|-------------------------------|--------------------|----------------------------------------------|
| SNP_19403_A_2884267 | NC_021163.1    | Ca_Kabuli_Chr04 | 2884267                 | AA                              | GG                 | GG               | DRR                           | 101490150          | probable inorganic phosphate transporter 1-3 |
| SNP_19405_A_2894167 | NC_021163.1    | Ca_Kabuli_Chr04 | 2894167                 | CC                              | TT                 | TT               | URR                           | 101490799          | inorganic phosphate transporter 1-4-like     |
| SNP_19406_A_2894168 | NC_021163.1    | Ca_Kabuli_Chr04 | 2894168                 | TT                              | CC                 | CC               | URR                           | 101490799          | inorganic phosphate transporter 1-4-like     |
| SNP_19407_A_2894655 | NC_021163.1    | Ca_Kabuli_Chr04 | 2894655                 | AA                              | GG                 | GG               | URR                           | 101490799          | inorganic phosphate transporter 1-4-like     |
| SNP_19410_A_2909555 | NC_021163.1    | Ca_Kabuli_Chr04 | 2909555                 | TT                              | GG                 | GG               | URR                           | 101491439          | DNA-directed RNA polymerase V subunit 7      |
| SNP_19411_A_2916073 | NC_021163.1    | Ca_Kabuli_Chr04 | 2916073                 | GG                              | AA                 | AA               | INTERGENIC                    |                    |                                              |
| SNP_19412_A_2916138 | NC_021163.1    | Ca_Kabuli_Chr04 | 2916138                 | AA                              | GG                 | GG               | INTERGENIC                    |                    |                                              |
| SNP_19413_A_2916537 | NC_021163.1    | Ca_Kabuli_Chr04 | 2916537                 | CC                              | TT                 | TT               | INTERGENIC                    |                    |                                              |
| SNP_19414_A_2920096 | NC_021163.1    | Ca_Kabuli_Chr04 | 2920096                 | TT                              | CC                 | CC               | DRR                           | 101492853          | protein SIEVE ELEMENT OCCLUSION B-like       |
| SNP_19416_A_2973659 | NC_021163.1    | Ca_Kabuli_Chr04 | 2973659                 | AA                              | GG                 | GG               | INTERGENIC                    |                    |                                              |
| SNP_19417_A_2988554 | NC_021163.1    | Ca_Kabuli_Chr04 | 2988554                 | AA                              | TT                 | TT               | INTERGENIC                    |                    |                                              |
| SNP_19418_A_2999510 | NC_021163.1    | Ca_Kabuli_Chr04 | 2999510                 | CC                              | TT                 | TT               | DRR                           | 101497175          | ureidoglycolate hydrolase                    |
| SNP_19422_A_3159935 | NC_021163.1    | Ca_Kabuli_Chr04 | 3159935                 | AA                              | TT                 | TT               | URR                           | 101502739          | probable 60S ribosomal protein L14           |
| SNP_19423_A_3239502 | NC_021163.1    | Ca_Kabuli_Chr04 | 3239502                 | TT                              | AA                 | AA               | DRR                           | 101505861          | serine/threonine-protein kinase tricorner    |
| SNP_19424_A_3239505 | NC_021163.1    | Ca_Kabuli_Chr04 | 3239505                 | TT                              | AA                 | AA               | DRR                           | 101505861          | serine/threonine-protein kinase tricorner    |
| SNP_19425_A_3266921 | NC_021163.1    | Ca_Kabuli_Chr04 | 3266921                 | AA                              | GG                 | GG               | URR                           | 101506840          | protein LIGHT-DEPENDENT SHORT HYPOCOTYLS 3   |
| SNP_19426_A_3355854 | NC_021163.1    | Ca_Kabuli_Chr04 | 3355854                 | AA                              | GG                 | GG               | INTRON                        | 101510457          | magnesium transporter MRS2-2-like            |
| SNP_19427_A_3355865 | NC_021163.1    | Ca_Kabuli_Chr04 | 3355865                 | GG                              | CC                 | CC               | INTRON                        | 101510457          | magnesium transporter MRS2-2-like            |
| SNP_19428_A_3355909 | NC_021163.1    | Ca_Kabuli_Chr04 | 3355909                 | GG                              | CC                 | CC               | INTRON                        | 101510457          | magnesium transporter MRS2-2-like            |
| SNP_19429_A_3355921 | NC_021163.1    | Ca_Kabuli_Chr04 | 3355921                 | AA                              | CC                 | CC               | INTRON                        | 101510457          | magnesium transporter MRS2-2-like            |
| SNP_19430_A_3392394 | NC_021163.1    | Ca_Kabuli_Chr04 | 3392394                 | TT                              | AA                 | AA               | URR                           | 101512178          | auxin-induced protein 22B-like               |
| SNP_19431_A_3556246 | NC_021163.1    | Ca_Kabuli_Chr04 | 3556246                 | TT                              | CC                 | CC               | INTERGENIC                    |                    |                                              |

| SNPs IDs            | Chromosome IDs | Chromosomes     | Physical positions (bp) | CDC Frontier genome (Reference genome) | (Pusa 1103 & HPNB) | (ILWC 46 & LPNB) | Sequence Components of genome | Gene accession IDs | Putative functions           |
|---------------------|----------------|-----------------|-------------------------|----------------------------------------|--------------------|------------------|-------------------------------|--------------------|------------------------------|
| SNP_19432_A_3581161 | NC_021163.1    | Ca_Kabuli_Chr04 | 3581161                 | CC                                     | GG                 | GG               | INTERGENIC                    |                    |                              |
| SNP_19433_A_3791344 | NC_021163.1    | Ca_Kabuli_Chr04 | 3791344                 | TT                                     | CC                 | CC               | INTRON                        | 101501044          | uncharacterized LOC101501044 |
| SNP_19434_A_3791346 | NC_021163.1    | Ca_Kabuli_Chr04 | 3791346                 | TT                                     | CC                 | CC               | INTRON                        | 101501044          | uncharacterized LOC101501044 |
| SNP_19436_A_3833261 | NC_021163.1    | Ca_Kabuli_Chr04 | 3833261                 | AA                                     | TT                 | TT               | INTERGENIC                    |                    |                              |
| SNP_19437_A_3833279 | NC_021163.1    | Ca_Kabuli_Chr04 | 3833279                 | CC                                     | TT                 | TT               | INTERGENIC                    |                    |                              |
| SNP_19438_A_3833365 | NC_021163.1    | Ca_Kabuli_Chr04 | 3833365                 | TT                                     | CC                 | CC               | INTERGENIC                    |                    |                              |
| SNP_19439_A_3833637 | NC_021163.1    | Ca_Kabuli_Chr04 | 3833637                 | AA                                     | GG                 | GG               | INTERGENIC                    |                    |                              |
| SNP_19440_A_3833774 | NC_021163.1    | Ca_Kabuli_Chr04 | 3833774                 | GG                                     | AA                 | AA               | INTERGENIC                    |                    |                              |
| SNP_19441_A_3833809 | NC_021163.1    | Ca_Kabuli_Chr04 | 3833809                 | CC                                     | TT                 | TT               | INTERGENIC                    |                    |                              |
| SNP_19442_A_3840394 | NC_021163.1    | Ca_Kabuli_Chr04 | 3840394                 | TT                                     | GG                 | GG               | INTERGENIC                    |                    |                              |
| SNP_19443_A_3847522 | NC_021163.1    | Ca_Kabuli_Chr04 | 3847522                 | GG                                     | AA                 | AA               | INTERGENIC                    |                    |                              |
| SNP_19444_A_3868479 | NC_021163.1    | Ca_Kabuli_Chr04 | 3868479                 | GG                                     | AA                 | AA               | INTRON                        | 101508215          | uncharacterized LOC101508215 |
| SNP_19445_A_3869621 | NC_021163.1    | Ca_Kabuli_Chr04 | 3869621                 | AA                                     | CC                 | CC               | INTRON                        | 101508215          | uncharacterized LOC101508215 |
| SNP_19446_A_3869698 | NC_021163.1    | Ca_Kabuli_Chr04 | 3869698                 | GG                                     | TT                 | TT               | INTRON                        | 101508215          | uncharacterized LOC101508215 |
| SNP_19447_A_3869993 | NC_021163.1    | Ca_Kabuli_Chr04 | 3869993                 | AA                                     | TT                 | TT               | INTRON                        | 101508215          | uncharacterized LOC101508215 |
| SNP_19448_A_3872059 | NC_021163.1    | Ca_Kabuli_Chr04 | 3872059                 | TT                                     | GG                 | GG               | INTRON                        | 101508215          | uncharacterized LOC101508215 |
| SNP_19449_A_3872267 | NC_021163.1    | Ca_Kabuli_Chr04 | 3872267                 | TT                                     | AA                 | AA               | INTRON                        | 101508215          | uncharacterized LOC101508215 |
| SNP_19450_A_3872325 | NC_021163.1    | Ca_Kabuli_Chr04 | 3872325                 | TT                                     | CC                 | CC               | INTRON                        | 101508215          | uncharacterized LOC101508215 |
| SNP_19451_A_3872366 | NC_021163.1    | Ca_Kabuli_Chr04 | 3872366                 | AA                                     | GG                 | GG               | INTRON                        | 101508215          | uncharacterized LOC101508215 |
| SNP_19452_A_3872378 | NC_021163.1    | Ca_Kabuli_Chr04 | 3872378                 | GG                                     | AA                 | AA               | INTRON                        | 101508215          | uncharacterized LOC101508215 |
| SNP_19453_A_3872555 | NC_021163.1    | Ca_Kabuli_Chr04 | 3872555                 | TT                                     | CC                 | CC               | INTRON                        | 101508215          | uncharacterized LOC101508215 |
| SNP_19454_A_3872571 | NC_021163.1    | Ca_Kabuli_Chr04 | 3872571                 | TT                                     | AA                 | AA               | INTRON                        | 101508215          | uncharacterized LOC101508215 |

| SNPs IDs            | Chromosome IDs | Chromosomes     | Physical positions (bp) | CDC Frontier (Reference genome) | (Pusa 1103 & HPNB) | (ILWC 46 & LPNB) | Sequence Components of genome | Gene accession IDs | Putative functions                  |
|---------------------|----------------|-----------------|-------------------------|---------------------------------|--------------------|------------------|-------------------------------|--------------------|-------------------------------------|
| SNP_19455_A_3872654 | NC_021163.1    | Ca_Kabuli_Chr04 | 3872654                 | TT                              | CC                 | CC               | INTRON                        | 101508215          | uncharacterized LOC101508215        |
| SNP_19457_A_3989016 | NC_021163.1    | Ca_Kabuli_Chr04 | 3989016                 | GG                              | AA                 | AA               | URR                           | 101513035          | alpha-galactosidase-like            |
| SNP_19459_A_4030271 | NC_021163.1    | Ca_Kabuli_Chr04 | 4030271                 | CC                              | GG                 | GG               | URR                           | 101489067          | dof zinc finger protein DOF2.5-like |
| SNP_19460_A_4030384 | NC_021163.1    | Ca_Kabuli_Chr04 | 4030384                 | GG                              | AA                 | AA               | URR                           | 101489067          | dof zinc finger protein DOF2.5-like |
| SNP_19461_A_4030654 | NC_021163.1    | Ca_Kabuli_Chr04 | 4030654                 | AA                              | CC                 | CC               | URR                           | 101489067          | dof zinc finger protein DOF2.5-like |
| SNP_19462_A_4030660 | NC_021163.1    | Ca_Kabuli_Chr04 | 4030660                 | TT                              | AA                 | AA               | URR                           | 101489067          | dof zinc finger protein DOF2.5-like |
| SNP_19463_A_4030810 | NC_021163.1    | Ca_Kabuli_Chr04 | 4030810                 | GG                              | AA                 | AA               | URR                           | 101489067          | dof zinc finger protein DOF2.5-like |
| SNP_19465_A_4030890 | NC_021163.1    | Ca_Kabuli_Chr04 | 4030890                 | AA                              | GG                 | GG               | URR                           | 101489067          | dof zinc finger protein DOF2.5-like |
| SNP_19466_A_4030910 | NC_021163.1    | Ca_Kabuli_Chr04 | 4030910                 | CC                              | TT                 | TT               | URR                           | 101489067          | dof zinc finger protein DOF2.5-like |
| SNP_19467_A_4030921 | NC_021163.1    | Ca_Kabuli_Chr04 | 4030921                 | CC                              | TT                 | TT               | URR                           | 101489067          | dof zinc finger protein DOF2.5-like |
| SNP_19469_A_4031973 | NC_021163.1    | Ca_Kabuli_Chr04 | 4031973                 | TT                              | CC                 | CC               | INTERGENIC                    |                    |                                     |
| SNP_19470_A_4032183 | NC_021163.1    | Ca_Kabuli_Chr04 | 4032183                 | GG                              | AA                 | AA               | INTERGENIC                    |                    |                                     |
| SNP_19471_A_4032195 | NC_021163.1    | Ca_Kabuli_Chr04 | 4032195                 | CC                              | GG                 | GG               | INTERGENIC                    |                    |                                     |
| SNP_19472_A_4032200 | NC_021163.1    | Ca_Kabuli_Chr04 | 4032200                 | AA                              | GG                 | GG               | INTERGENIC                    |                    |                                     |
| SNP_19473_A_4036773 | NC_021163.1    | Ca_Kabuli_Chr04 | 4036773                 | GG                              | AA                 | AA               | INTERGENIC                    |                    |                                     |
| SNP_19474_A_4037718 | NC_021163.1    | Ca_Kabuli_Chr04 | 4037718                 | TT                              | CC                 | CC               | INTERGENIC                    |                    |                                     |
| SNP_19475_A_4038970 | NC_021163.1    | Ca_Kabuli_Chr04 | 4038970                 | AA                              | CC                 | CC               | INTERGENIC                    |                    |                                     |
| SNP_19477_A_4044712 | NC_021163.1    | Ca_Kabuli_Chr04 | 4044712                 | TT                              | CC                 | CC               | INTERGENIC                    |                    |                                     |
| SNP_19478_A_4044841 | NC_021163.1    | Ca_Kabuli_Chr04 | 4044841                 | TT                              | AA                 | AA               | INTERGENIC                    |                    |                                     |
| SNP_19479_A_4044876 | NC_021163.1    | Ca_Kabuli_Chr04 | 4044876                 | TT                              | GG                 | GG               | INTERGENIC                    |                    |                                     |
| SNP_19481_A_4044999 | NC_021163.1    | Ca_Kabuli_Chr04 | 4044999                 | AA                              | CC                 | CC               | INTERGENIC                    |                    |                                     |
| SNP_19483_A_4046449 | NC_021163.1    | Ca_Kabuli_Chr04 | 4046449                 | CC                              | TT                 | TT               | DRR                           | 101509177          | transcription factor bHLH157        |

| SNPs IDs            | Chromosome IDs | Chromosomes     | Physical positions (bp) | CDC Frontier (Reference genome) | (Pusa 1103 & HPNB) | (ILWC 46 & LPNB) | Sequence Components of genome | Gene accession IDs | Putative functions           |
|---------------------|----------------|-----------------|-------------------------|---------------------------------|--------------------|------------------|-------------------------------|--------------------|------------------------------|
| SNP_19484_A_4046513 | NC_021163.1    | Ca_Kabuli_Chr04 | 4046513                 | CC                              | GG                 | GG               | DRR                           | 101509177          | transcription factor bHLH157 |
| SNP_19485_A_4047974 | NC_021163.1    | Ca_Kabuli_Chr04 | 4047974                 | CC                              | TT                 | TT               | INTRON                        | 101509177          | transcription factor bHLH157 |
| SNP_19486_A_4054108 | NC_021163.1    | Ca_Kabuli_Chr04 | 4054108                 | CC                              | TT                 | TT               | INTERGENIC                    |                    |                              |
| SNP_19487_A_4054113 | NC_021163.1    | Ca_Kabuli_Chr04 | 4054113                 | CC                              | TT                 | TT               | INTERGENIC                    |                    |                              |
| SNP_19488_A_4055658 | NC_021163.1    | Ca_Kabuli_Chr04 | 4055658                 | AA                              | GG                 | GG               | INTERGENIC                    |                    |                              |
| SNP_19489_A_4056522 | NC_021163.1    | Ca_Kabuli_Chr04 | 4056522                 | CC                              | TT                 | TT               | INTERGENIC                    |                    |                              |
| SNP_19490_A_4056932 | NC_021163.1    | Ca_Kabuli_Chr04 | 4056932                 | AA                              | GG                 | GG               | INTERGENIC                    |                    |                              |
| SNP_19491_A_4057004 | NC_021163.1    | Ca_Kabuli_Chr04 | 4057004                 | CC                              | TT                 | TT               | INTERGENIC                    |                    |                              |
| SNP_19492_A_4063076 | NC_021163.1    | Ca_Kabuli_Chr04 | 4063076                 | TT                              | CC                 | CC               | INTERGENIC                    |                    |                              |
| SNP_19493_A_4063876 | NC_021163.1    | Ca_Kabuli_Chr04 | 4063876                 | AA                              | CC                 | CC               | INTERGENIC                    |                    |                              |
| SNP_19494_A_4067043 | NC_021163.1    | Ca_Kabuli_Chr04 | 4067043                 | AA                              | GG                 | GG               | INTERGENIC                    |                    |                              |
| SNP_19495_A_4067100 | NC_021163.1    | Ca_Kabuli_Chr04 | 4067100                 | GG                              | AA                 | AA               | INTERGENIC                    |                    |                              |
| SNP_19496_A_4067382 | NC_021163.1    | Ca_Kabuli_Chr04 | 4067382                 | CC                              | TT                 | TT               | INTERGENIC                    |                    |                              |
| SNP_19497_A_4079929 | NC_021163.1    | Ca_Kabuli_Chr04 | 4079929                 | TT                              | CC                 | CC               | INTERGENIC                    |                    |                              |
| SNP_19498_A_4080067 | NC_021163.1    | Ca_Kabuli_Chr04 | 4080067                 | GG                              | TT                 | TT               | INTERGENIC                    |                    |                              |
| SNP_19499_A_4080108 | NC_021163.1    | Ca_Kabuli_Chr04 | 4080108                 | AA                              | GG                 | GG               | INTERGENIC                    |                    |                              |
| SNP_19500_A_4080120 | NC_021163.1    | Ca_Kabuli_Chr04 | 4080120                 | TT                              | GG                 | GG               | INTERGENIC                    |                    |                              |
| SNP_19501_A_4080510 | NC_021163.1    | Ca_Kabuli_Chr04 | 4080510                 | AA                              | CC                 | CC               | INTERGENIC                    |                    |                              |
| SNP_19502_A_4080750 | NC_021163.1    | Ca_Kabuli_Chr04 | 4080750                 | TT                              | CC                 | CC               | INTERGENIC                    |                    |                              |
| SNP_19503_A_4083891 | NC_021163.1    | Ca_Kabuli_Chr04 | 4083891                 | AA                              | TT                 | TT               | INTERGENIC                    |                    |                              |
| SNP_19504_A_4085234 | NC_021163.1    | Ca_Kabuli_Chr04 | 4085234                 | CC                              | TT                 | TT               | INTERGENIC                    |                    |                              |
| SNP_19505_A_4085502 | NC_021163.1    | Ca_Kabuli_Chr04 | 4085502                 | TT                              | CC                 | CC               | INTERGENIC                    |                    |                              |

| SNPs IDs            | Chromosome IDs | Chromosomes     | Physical positions (bp) | CDC Frontier (Reference genome) | (Pusa 1103 & HPNB) | (ILWC 46 & LPNB) | Sequence Components of genome | Gene accession IDs | Putative functions                            |
|---------------------|----------------|-----------------|-------------------------|---------------------------------|--------------------|------------------|-------------------------------|--------------------|-----------------------------------------------|
| SNP_19506_A_4085530 | NC_021163.1    | Ca_Kabuli_Chr04 | 4085530                 | GG                              | AA                 | AA               | INTERGENIC                    |                    |                                               |
| SNP_19507_A_4085535 | NC_021163.1    | Ca_Kabuli_Chr04 | 4085535                 | CC                              | TT                 | TT               | INTERGENIC                    |                    |                                               |
| SNP_19508_A_4085538 | NC_021163.1    | Ca_Kabuli_Chr04 | 4085538                 | CC                              | AA                 | AA               | INTERGENIC                    |                    |                                               |
| SNP_19509_A_4086328 | NC_021163.1    | Ca_Kabuli_Chr04 | 4086328                 | AA                              | CC                 | CC               | INTERGENIC                    |                    |                                               |
| SNP_19511_A_4090381 | NC_021163.1    | Ca_Kabuli_Chr04 | 4090381                 | GG                              | TT                 | TT               | URR                           | 101490040          | aluminum-activated malate transporter 10-like |
| SNP_19512_A_4090383 | NC_021163.1    | Ca_Kabuli_Chr04 | 4090383                 | AA                              | GG                 | GG               | URR                           | 101490040          | aluminum-activated malate transporter 10-like |
| SNP_19513_A_4090666 | NC_021163.1    | Ca_Kabuli_Chr04 | 4090666                 | CC                              | TT                 | TT               | URR                           | 101490040          | aluminum-activated malate transporter 10-like |
| SNP_19514_A_4096801 | NC_021163.1    | Ca_Kabuli_Chr04 | 4096801                 | GG                              | TT                 | TT               | INTERGENIC                    |                    |                                               |
| SNP_19515_A_4096929 | NC_021163.1    | Ca_Kabuli_Chr04 | 4096929                 | CC                              | GG                 | GG               | INTERGENIC                    |                    |                                               |
| SNP_19516_A_4096956 | NC_021163.1    | Ca_Kabuli_Chr04 | 4096956                 | AA                              | CC                 | CC               | INTERGENIC                    |                    |                                               |
| SNP_19517_A_4097295 | NC_021163.1    | Ca_Kabuli_Chr04 | 4097295                 | CC                              | TT                 | TT               | INTERGENIC                    |                    |                                               |
| SNP_19518_A_4097472 | NC_021163.1    | Ca_Kabuli_Chr04 | 4097472                 | CC                              | TT                 | TT               | INTERGENIC                    |                    |                                               |
| SNP_19519_A_4097935 | NC_021163.1    | Ca_Kabuli_Chr04 | 4097935                 | CC                              | TT                 | TT               | INTERGENIC                    |                    |                                               |
| SNP_19520_A_4099842 | NC_021163.1    | Ca_Kabuli_Chr04 | 4099842                 | TT                              | AA                 | AA               | URR                           | 101490379          | plant UBX domain-containing protein 10        |
| SNP_19521_A_4101408 | NC_021163.1    | Ca_Kabuli_Chr04 | 4101408                 | CC                              | AA                 | AA               | INTERGENIC                    |                    |                                               |
| SNP_19522_A_4101413 | NC_021163.1    | Ca_Kabuli_Chr04 | 4101413                 | GG                              | TT                 | TT               | INTERGENIC                    |                    |                                               |
| SNP_19523_A_4102757 | NC_021163.1    | Ca_Kabuli_Chr04 | 4102757                 | AA                              | GG                 | GG               | DRR                           | 101490702          | mavicyanin                                    |
| SNP_19524_A_4102786 | NC_021163.1    | Ca_Kabuli_Chr04 | 4102786                 | GG                              | AA                 | AA               | DRR                           | 101490702          | mavicyanin                                    |
| SNP_19525_A_4104922 | NC_021163.1    | Ca_Kabuli_Chr04 | 4104922                 | AA                              | GG                 | GG               | DRR                           | 101491021          | serine/threonine-protein kinase BLUS1         |
| SNP_19527_A_4112352 | NC_021163.1    | Ca_Kabuli_Chr04 | 4112352                 | CC                              | TT                 | TT               | INTRON                        | 101491021          | serine/threonine-protein kinase BLUS1         |
| SNP_19528_A_4112551 | NC_021163.1    | Ca_Kabuli_Chr04 | 4112551                 | AA                              | CC                 | CC               | INTRON                        | 101491021          | serine/threonine-protein kinase BLUS1         |
| SNP_19530_A_4116806 | NC_021163.1    | Ca_Kabuli_Chr04 | 4116806                 | GG                              | TT                 | TT               | URR                           | 101491021          | serine/threonine-protein kinase BLUS1         |



| SNPs IDs            | Chromosome IDs | Chromosomes     | Physical positions (bp) | CDC Frontier genome (Reference genome) | (Pusa 1103 & HPNB) | (ILWC 46 & LPNB) | Sequence genome | Components of | Gene accession IDs           | Putative functions |
|---------------------|----------------|-----------------|-------------------------|----------------------------------------|--------------------|------------------|-----------------|---------------|------------------------------|--------------------|
| SNP_19531_A_4117366 | NC_021163.1    | Ca_Kabuli_Chr04 | 4117366                 | CC                                     | TT                 | TT               | INTERGENIC      |               |                              |                    |
| SNP_19532_A_4117408 | NC_021163.1    | Ca_Kabuli_Chr04 | 4117408                 | TT                                     | CC                 | CC               | INTERGENIC      |               |                              |                    |
| SNP_19533_A_4117413 | NC_021163.1    | Ca_Kabuli_Chr04 | 4117413                 | AA                                     | TT                 | TT               | INTERGENIC      |               |                              |                    |
| SNP_19535_A_4123698 | NC_021163.1    | Ca_Kabuli_Chr04 | 4123698                 | CC                                     | AA                 | AA               | INTERGENIC      |               |                              |                    |
| SNP_19536_A_4123704 | NC_021163.1    | Ca_Kabuli_Chr04 | 4123704                 | GG                                     | TT                 | TT               | INTERGENIC      |               |                              |                    |
| SNP_19537_A_4123735 | NC_021163.1    | Ca_Kabuli_Chr04 | 4123735                 | GG                                     | CC                 | CC               | INTERGENIC      |               |                              |                    |
| SNP_19538_A_4125210 | NC_021163.1    | Ca_Kabuli_Chr04 | 4125210                 | CC                                     | AA                 | AA               | INTERGENIC      |               |                              |                    |
| SNP_19539_A_4127016 | NC_021163.1    | Ca_Kabuli_Chr04 | 4127016                 | CC                                     | TT                 | TT               | INTERGENIC      |               |                              |                    |
| SNP_19540_A_4127030 | NC_021163.1    | Ca_Kabuli_Chr04 | 4127030                 | CC                                     | TT                 | TT               | INTERGENIC      |               |                              |                    |
| SNP_19541_A_4127032 | NC_021163.1    | Ca_Kabuli_Chr04 | 4127032                 | CC                                     | TT                 | TT               | INTERGENIC      |               |                              |                    |
| SNP_19542_A_4127600 | NC_021163.1    | Ca_Kabuli_Chr04 | 4127600                 | CC                                     | AA                 | AA               | INTERGENIC      |               |                              |                    |
| SNP_19543_A_4127601 | NC_021163.1    | Ca_Kabuli_Chr04 | 4127601                 | GG                                     | TT                 | TT               | INTERGENIC      |               |                              |                    |
| SNP_19544_A_4127603 | NC_021163.1    | Ca_Kabuli_Chr04 | 4127603                 | CC                                     | TT                 | TT               | INTERGENIC      |               |                              |                    |
| SNP_19545_A_4127883 | NC_021163.1    | Ca_Kabuli_Chr04 | 4127883                 | CC                                     | TT                 | TT               | INTERGENIC      |               |                              |                    |
| SNP_19546_A_4160257 | NC_021163.1    | Ca_Kabuli_Chr04 | 4160257                 | AA                                     | GG                 | GG               | INTERGENIC      |               |                              |                    |
| SNP_19547_A_4191068 | NC_021163.1    | Ca_Kabuli_Chr04 | 4191068                 | CC                                     | AA                 | AA               | INTERGENIC      |               |                              |                    |
| SNP_19548_A_4195558 | NC_021163.1    | Ca_Kabuli_Chr04 | 4195558                 | GG                                     | AA                 | AA               | INTRON          | 101492854     | uncharacterized LOC101492854 |                    |
| SNP_19549_A_4196372 | NC_021163.1    | Ca_Kabuli_Chr04 | 4196372                 | GG                                     | CC                 | CC               | INTRON          | 101492854     | uncharacterized LOC101492854 |                    |
| SNP_19551_A_4261320 | NC_021163.1    | Ca_Kabuli_Chr04 | 4261320                 | GG                                     | AA                 | AA               | INTERGENIC      |               |                              |                    |
| SNP_19553_A_4354198 | NC_021163.1    | Ca_Kabuli_Chr04 | 4354198                 | CC                                     | TT                 | TT               | INTERGENIC      |               |                              |                    |
| SNP_19554_A_4383138 | NC_021163.1    | Ca_Kabuli_Chr04 | 4383138                 | AA                                     | GG                 | GG               | INTERGENIC      |               |                              |                    |
| SNP_19555_A_4383826 | NC_021163.1    | Ca_Kabuli_Chr04 | 4383826                 | CC                                     | AA                 | AA               | INTERGENIC      |               |                              |                    |

| SNPs IDs            | Chromosome IDs | Chromosomes     | Physical positions (bp) | CDC Frontier genome (Reference genome) | (Pusa 1103 & HPNB) | (ILWC 46 & LPNB) | Sequence Components of genome | Gene accession IDs | Putative functions                                                            |
|---------------------|----------------|-----------------|-------------------------|----------------------------------------|--------------------|------------------|-------------------------------|--------------------|-------------------------------------------------------------------------------|
| SNP_19556_A_4432420 | NC_021163.1    | Ca_Kabuli_Chr04 | 4432420                 | AA                                     | TT                 | TT               | URR                           | 101503833          | putative F-box protein PP2-B12                                                |
| SNP_19557_A_4432421 | NC_021163.1    | Ca_Kabuli_Chr04 | 4432421                 | AA                                     | GG                 | GG               | URR                           | 101503833          | putative F-box protein PP2-B12                                                |
| SNP_19558_A_4437498 | NC_021163.1    | Ca_Kabuli_Chr04 | 4437498                 | GG                                     | AA                 | AA               | NON_SYNONYMOUS_CODING         | 101504148          | putative F-box protein PP2-B12                                                |
| SNP_19559_A_4447139 | NC_021163.1    | Ca_Kabuli_Chr04 | 4447139                 | TT                                     | CC                 | CC               | URR                           | 101504470          | putative F-box protein PP2-B12                                                |
| SNP_19560_A_4448073 | NC_021163.1    | Ca_Kabuli_Chr04 | 4448073                 | AA                                     | TT                 | TT               | URR                           | 101504470          | putative F-box protein PP2-B12                                                |
| SNP_19561_A_4460853 | NC_021163.1    | Ca_Kabuli_Chr04 | 4460853                 | AA                                     | GG                 | GG               | NON_SYNONYMOUS_CODING         | 101505429          | U11/U12 small nuclear ribonucleoprotein 48 kDa protein                        |
| SNP_19562_A_4463840 | NC_021163.1    | Ca_Kabuli_Chr04 | 4463840                 | GG                                     | AA                 | AA               | URR                           | 101505429          | U11/U12 small nuclear ribonucleoprotein 48 kDa protein                        |
| SNP_19563_A_4466126 | NC_021163.1    | Ca_Kabuli_Chr04 | 4466126                 | TT                                     | CC                 | CC               | INTERGENIC                    |                    |                                                                               |
| SNP_19564_A_4466150 | NC_021163.1    | Ca_Kabuli_Chr04 | 4466150                 | AA                                     | GG                 | GG               | DRR                           | 101506182          | probable UDP-N-acetylglucosamine--peptide N-acetylglucosaminyltransferase SEC |
| SNP_19565_A_4466178 | NC_021163.1    | Ca_Kabuli_Chr04 | 4466178                 | TT                                     | CC                 | CC               | DRR                           | 101506182          | probable UDP-N-acetylglucosamine--peptide N-acetylglucosaminyltransferase SEC |
| SNP_19566_A_4466197 | NC_021163.1    | Ca_Kabuli_Chr04 | 4466197                 | AA                                     | TT                 | TT               | DRR                           | 101506182          | probable UDP-N-acetylglucosamine--peptide N-acetylglucosaminyltransferase SEC |
| SNP_19567_A_4466212 | NC_021163.1    | Ca_Kabuli_Chr04 | 4466212                 | TT                                     | CC                 | CC               | DRR                           | 101506182          | probable UDP-N-acetylglucosamine--peptide N-acetylglucosaminyltransferase SEC |
| SNP_19568_A_4468861 | NC_021163.1    | Ca_Kabuli_Chr04 | 4468861                 | CC                                     | AA                 | AA               | INTRON                        | 101506182          | probable UDP-N-acetylglucosamine--peptide N-acetylglucosaminyltransferase SEC |
| SNP_19570_A_4471782 | NC_021163.1    | Ca_Kabuli_Chr04 | 4471782                 | TT                                     | AA                 | AA               | INTRON                        | 101506182          | probable UDP-N-acetylglucosamine--peptide N-acetylglucosaminyltransferase SEC |
| SNP_19572_A_4479621 | NC_021163.1    | Ca_Kabuli_Chr04 | 4479621                 | AA                                     | GG                 | GG               | URR                           | 101506182          | probable UDP-N-acetylglucosamine--peptide N-acetylglucosaminyltransferase SEC |
| SNP_19574_A_4480373 | NC_021163.1    | Ca_Kabuli_Chr04 | 4480373                 | TT                                     | CC                 | CC               | URR                           | 101506182          | probable UDP-N-acetylglucosamine--peptide N-acetylglucosaminyltransferase SEC |
| SNP_19576_A_4480394 | NC_021163.1    | Ca_Kabuli_Chr04 | 4480394                 | GG                                     | TT                 | TT               | URR                           | 101506182          | probable UDP-N-acetylglucosamine--peptide N-acetylglucosaminyltransferase SEC |
| SNP_19577_A_4480593 | NC_021163.1    | Ca_Kabuli_Chr04 | 4480593                 | GG                                     | TT                 | TT               | INTERGENIC                    |                    |                                                                               |
| SNP_19580_A_4481290 | NC_021163.1    | Ca_Kabuli_Chr04 | 4481290                 | GG                                     | CC                 | CC               | DRR                           | 101507066          | uncharacterized LOC101507066                                                  |
| SNP_19583_A_4484356 | NC_021163.1    | Ca_Kabuli_Chr04 | 4484356                 | GG                                     | AA                 | AA               | SYNONYMOUS_CODING             | 101507066          | uncharacterized LOC101507066                                                  |
| SNP_19584_A_4484557 | NC_021163.1    | Ca_Kabuli_Chr04 | 4484557                 | GG                                     | AA                 | AA               | SYNONYMOUS_CODING             | 101507066          | uncharacterized LOC101507066                                                  |
| SNP_19585_A_4485886 | NC_021163.1    | Ca_Kabuli_Chr04 | 4485886                 | TT                                     | GG                 | GG               | NON_SYNONYMOUS_CODING         | 101507066          | uncharacterized LOC101507066                                                  |

| SNPs IDs            | Chromosome IDs | Chromosomes     | Physical positions (bp) | CDC Frontier (Reference genome) | (Pusa 1103 & HPNB) | (ILWC 46 & LPNB) | Sequence Components of genome | Gene accession IDs | Putative functions                  |
|---------------------|----------------|-----------------|-------------------------|---------------------------------|--------------------|------------------|-------------------------------|--------------------|-------------------------------------|
| SNP_19586_A_4485912 | NC_021163.1    | Ca_Kabuli_Chr04 | 4485912                 | CC                              | TT                 | TT               | NON_SYNONYMOUS_CODING         | 101507066          | uncharacterized LOC101507066        |
| SNP_19587_A_4487184 | NC_021163.1    | Ca_Kabuli_Chr04 | 4487184                 | GG                              | AA                 | AA               | INTRON                        | 101507066          | uncharacterized LOC101507066        |
| SNP_19588_A_4487218 | NC_021163.1    | Ca_Kabuli_Chr04 | 4487218                 | GG                              | AA                 | AA               | INTRON                        | 101507066          | uncharacterized LOC101507066        |
| SNP_19589_A_4487228 | NC_021163.1    | Ca_Kabuli_Chr04 | 4487228                 | CC                              | AA                 | AA               | INTRON                        | 101507066          | uncharacterized LOC101507066        |
| SNP_19591_A_4488203 | NC_021163.1    | Ca_Kabuli_Chr04 | 4488203                 | AA                              | TT                 | TT               | INTERGENIC                    |                    |                                     |
| SNP_19593_A_4498190 | NC_021163.1    | Ca_Kabuli_Chr04 | 4498190                 | CC                              | TT                 | TT               | INTERGENIC                    |                    |                                     |
| SNP_19594_A_4498199 | NC_021163.1    | Ca_Kabuli_Chr04 | 4498199                 | GG                              | AA                 | AA               | INTERGENIC                    |                    |                                     |
| SNP_19595_A_4499764 | NC_021163.1    | Ca_Kabuli_Chr04 | 4499764                 | AA                              | CC                 | CC               | INTERGENIC                    |                    |                                     |
| SNP_19596_A_4499771 | NC_021163.1    | Ca_Kabuli_Chr04 | 4499771                 | CC                              | GG                 | GG               | INTERGENIC                    |                    |                                     |
| SNP_19598_A_4502469 | NC_021163.1    | Ca_Kabuli_Chr04 | 4502469                 | CC                              | TT                 | TT               | INTRON                        | 101507386          | GDSL esterase/lipase At5g33370-like |
| SNP_19599_A_4502478 | NC_021163.1    | Ca_Kabuli_Chr04 | 4502478                 | AA                              | GG                 | GG               | INTRON                        | 101507386          | GDSL esterase/lipase At5g33370-like |
| SNP_19600_A_4502516 | NC_021163.1    | Ca_Kabuli_Chr04 | 4502516                 | TT                              | GG                 | GG               | INTRON                        | 101507386          | GDSL esterase/lipase At5g33370-like |
| SNP_19601_A_4503481 | NC_021163.1    | Ca_Kabuli_Chr04 | 4503481                 | TT                              | CC                 | CC               | INTRON                        | 101507386          | GDSL esterase/lipase At5g33370-like |
| SNP_19602_A_4503482 | NC_021163.1    | Ca_Kabuli_Chr04 | 4503482                 | TT                              | CC                 | CC               | INTRON                        | 101507386          | GDSL esterase/lipase At5g33370-like |
| SNP_19603_A_4503543 | NC_021163.1    | Ca_Kabuli_Chr04 | 4503543                 | AA                              | GG                 | GG               | INTRON                        | 101507386          | GDSL esterase/lipase At5g33370-like |
| SNP_19604_A_4503592 | NC_021163.1    | Ca_Kabuli_Chr04 | 4503592                 | CC                              | AA                 | AA               | INTRON                        | 101507386          | GDSL esterase/lipase At5g33370-like |
| SNP_19606_A_4504405 | NC_021163.1    | Ca_Kabuli_Chr04 | 4504405                 | GG                              | AA                 | AA               | SYNONYMOUS_CODING             | 101507386          | GDSL esterase/lipase At5g33370-like |
| SNP_19607_A_4504813 | NC_021163.1    | Ca_Kabuli_Chr04 | 4504813                 | GG                              | AA                 | AA               | SYNONYMOUS_CODING             | 101507386          | GDSL esterase/lipase At5g33370-like |
| SNP_19608_A_4505919 | NC_021163.1    | Ca_Kabuli_Chr04 | 4505919                 | TT                              | AA                 | AA               | URR                           | 101507386          | GDSL esterase/lipase At5g33370-like |
| SNP_19609_A_4506551 | NC_021163.1    | Ca_Kabuli_Chr04 | 4506551                 | AA                              | TT                 | TT               | URR                           | 101507386          | GDSL esterase/lipase At5g33370-like |
| SNP_19610_A_4506552 | NC_021163.1    | Ca_Kabuli_Chr04 | 4506552                 | TT                              | AA                 | AA               | URR                           | 101507386          | GDSL esterase/lipase At5g33370-like |
| SNP_19612_A_4508481 | NC_021163.1    | Ca_Kabuli_Chr04 | 4508481                 | AA                              | GG                 | GG               | INTERGENIC                    |                    |                                     |

| SNPs IDs            | Chromosome IDs | Chromosomes     | Physical positions (bp) | CDC Frontier genome (Reference genome) | (Pusa 1103 & HPNB) | (ILWC 46 & LPNB) | Sequence Components of genome | Gene accession IDs | Putative functions           |
|---------------------|----------------|-----------------|-------------------------|----------------------------------------|--------------------|------------------|-------------------------------|--------------------|------------------------------|
| SNP_19613_A_4509193 | NC_021163.1    | Ca_Kabuli_Chr04 | 4509193                 | CC                                     | TT                 | TT               | INTERGENIC                    |                    |                              |
| SNP_19615_A_4513673 | NC_021163.1    | Ca_Kabuli_Chr04 | 4513673                 | AA                                     | GG                 | GG               | INTERGENIC                    |                    |                              |
| SNP_19616_A_4517209 | NC_021163.1    | Ca_Kabuli_Chr04 | 4517209                 | GG                                     | CC                 | CC               | INTERGENIC                    |                    |                              |
| SNP_19618_A_4521166 | NC_021163.1    | Ca_Kabuli_Chr04 | 4521166                 | TT                                     | CC                 | CC               | INTERGENIC                    |                    |                              |
| SNP_19619_A_4521252 | NC_021163.1    | Ca_Kabuli_Chr04 | 4521252                 | CC                                     | TT                 | TT               | INTERGENIC                    |                    |                              |
| SNP_19620_A_4521255 | NC_021163.1    | Ca_Kabuli_Chr04 | 4521255                 | AA                                     | CC                 | CC               | INTERGENIC                    |                    |                              |
| SNP_19621_A_4521494 | NC_021163.1    | Ca_Kabuli_Chr04 | 4521494                 | AA                                     | TT                 | TT               | INTERGENIC                    |                    |                              |
| SNP_19622_A_4521527 | NC_021163.1    | Ca_Kabuli_Chr04 | 4521527                 | CC                                     | TT                 | TT               | INTERGENIC                    |                    |                              |
| SNP_19623_A_4522300 | NC_021163.1    | Ca_Kabuli_Chr04 | 4522300                 | TT                                     | CC                 | CC               | INTERGENIC                    |                    |                              |
| SNP_19624_A_4522587 | NC_021163.1    | Ca_Kabuli_Chr04 | 4522587                 | AA                                     | GG                 | GG               | INTERGENIC                    |                    |                              |
| SNP_19625_A_4522591 | NC_021163.1    | Ca_Kabuli_Chr04 | 4522591                 | GG                                     | AA                 | AA               | INTERGENIC                    |                    |                              |
| SNP_19626_A_4523321 | NC_021163.1    | Ca_Kabuli_Chr04 | 4523321                 | GG                                     | AA                 | AA               | INTERGENIC                    |                    |                              |
| SNP_19628_A_4532346 | NC_021163.1    | Ca_Kabuli_Chr04 | 4532346                 | CC                                     | GG                 | GG               | URR                           | 101507695          | uncharacterized LOC101507695 |
| SNP_19629_A_4532580 | NC_021163.1    | Ca_Kabuli_Chr04 | 4532580                 | AA                                     | TT                 | TT               | URR                           | 101507695          | uncharacterized LOC101507695 |
| SNP_19630_A_4532865 | NC_021163.1    | Ca_Kabuli_Chr04 | 4532865                 | TT                                     | AA                 | AA               | URR                           | 101507695          | uncharacterized LOC101507695 |
| SNP_19631_A_4533020 | NC_021163.1    | Ca_Kabuli_Chr04 | 4533020                 | TT                                     | AA                 | AA               | URR                           | 101507695          | uncharacterized LOC101507695 |
| SNP_19632_A_4533051 | NC_021163.1    | Ca_Kabuli_Chr04 | 4533051                 | CC                                     | TT                 | TT               | URR                           | 101507695          | uncharacterized LOC101507695 |
| SNP_19633_A_4534779 | NC_021163.1    | Ca_Kabuli_Chr04 | 4534779                 | TT                                     | CC                 | CC               | DRR                           | 101510142          | uncharacterized LOC101510142 |
| SNP_19634_A_4536728 | NC_021163.1    | Ca_Kabuli_Chr04 | 4536728                 | TT                                     | CC                 | CC               | INTRON                        | 101510142          | uncharacterized LOC101510142 |
| SNP_19635_A_4536750 | NC_021163.1    | Ca_Kabuli_Chr04 | 4536750                 | AA                                     | GG                 | GG               | INTRON                        | 101510142          | uncharacterized LOC101510142 |
| SNP_19637_A_4537667 | NC_021163.1    | Ca_Kabuli_Chr04 | 4537667                 | GG                                     | AA                 | AA               | INTRON                        | 101510142          | uncharacterized LOC101510142 |
| SNP_19638_A_4539141 | NC_021163.1    | Ca_Kabuli_Chr04 | 4539141                 | TT                                     | CC                 | CC               | INTRON                        | 101510142          | uncharacterized LOC101510142 |

| SNPs IDs            | Chromosome IDs | Chromosomes     | Physical positions (bp) | CDC Frontier genome (Reference genome) | (Pusa 1103 & HPNB) | (ILWC 46 & LPNB) | Sequence Components of genome | Gene accession IDs | Putative functions                               |
|---------------------|----------------|-----------------|-------------------------|----------------------------------------|--------------------|------------------|-------------------------------|--------------------|--------------------------------------------------|
| SNP_19639_A_4539434 | NC_021163.1    | Ca_Kabuli_Chr04 | 4539434                 | AA                                     | GG                 | GG               | INTRON                        | 101510142          | uncharacterized LOC101510142                     |
| SNP_19640_A_4539465 | NC_021163.1    | Ca_Kabuli_Chr04 | 4539465                 | TT                                     | CC                 | CC               | INTRON                        | 101510142          | uncharacterized LOC101510142                     |
| SNP_19641_A_4539472 | NC_021163.1    | Ca_Kabuli_Chr04 | 4539472                 | CC                                     | TT                 | TT               | INTRON                        | 101510142          | uncharacterized LOC101510142                     |
| SNP_19642_A_4539491 | NC_021163.1    | Ca_Kabuli_Chr04 | 4539491                 | GG                                     | CC                 | CC               | INTRON                        | 101510142          | uncharacterized LOC101510142                     |
| SNP_19643_A_4539663 | NC_021163.1    | Ca_Kabuli_Chr04 | 4539663                 | GG                                     | AA                 | AA               | INTRON                        | 101510142          | uncharacterized LOC101510142                     |
| SNP_19644_A_4539685 | NC_021163.1    | Ca_Kabuli_Chr04 | 4539685                 | AA                                     | GG                 | GG               | INTRON                        | 101510142          | uncharacterized LOC101510142                     |
| SNP_19646_A_4540184 | NC_021163.1    | Ca_Kabuli_Chr04 | 4540184                 | TT                                     | CC                 | CC               | INTRON                        | 101510142          | uncharacterized LOC101510142                     |
| SNP_19647_A_4540476 | NC_021163.1    | Ca_Kabuli_Chr04 | 4540476                 | GG                                     | AA                 | AA               | INTRON                        | 101510142          | uncharacterized LOC101510142                     |
| SNP_19648_A_4542871 | NC_021163.1    | Ca_Kabuli_Chr04 | 4542871                 | AA                                     | GG                 | GG               | INTRON                        | 101510142          | uncharacterized LOC101510142                     |
| SNP_19649_A_4543886 | NC_021163.1    | Ca_Kabuli_Chr04 | 4543886                 | CC                                     | TT                 | TT               | INTRON                        | 101510142          | uncharacterized LOC101510142                     |
| SNP_19650_A_4548714 | NC_021163.1    | Ca_Kabuli_Chr04 | 4548714                 | TT                                     | CC                 | CC               | INTRON                        | 101510142          | uncharacterized LOC101510142                     |
| SNP_19651_A_4557693 | NC_021163.1    | Ca_Kabuli_Chr04 | 4557693                 | TT                                     | CC                 | CC               | INTRON                        | 101508024          | vacuolar protein sorting-associated protein 52 A |
| SNP_19652_A_4563325 | NC_021163.1    | Ca_Kabuli_Chr04 | 4563325                 | TT                                     | GG                 | GG               | INTRON                        | 101508024          | vacuolar protein sorting-associated protein 52 A |
| SNP_19653_A_4563591 | NC_021163.1    | Ca_Kabuli_Chr04 | 4563591                 | AA                                     | CC                 | CC               | INTRON                        | 101508024          | vacuolar protein sorting-associated protein 52 A |
| SNP_19654_A_4568021 | NC_021163.1    | Ca_Kabuli_Chr04 | 4568021                 | GG                                     | TT                 | TT               | URR                           | 101508024          | vacuolar protein sorting-associated protein 52 A |
| SNP_19655_A_4568023 | NC_021163.1    | Ca_Kabuli_Chr04 | 4568023                 | TT                                     | GG                 | GG               | URR                           | 101508024          | vacuolar protein sorting-associated protein 52 A |
| SNP_19657_A_4568431 | NC_021163.1    | Ca_Kabuli_Chr04 | 4568431                 | CC                                     | GG                 | GG               | URR                           | 101508024          | vacuolar protein sorting-associated protein 52 A |
| SNP_19658_A_4574806 | NC_021163.1    | Ca_Kabuli_Chr04 | 4574806                 | TT                                     | CC                 | CC               | INTERGENIC                    |                    |                                                  |
| SNP_19659_A_4574808 | NC_021163.1    | Ca_Kabuli_Chr04 | 4574808                 | CC                                     | TT                 | TT               | INTERGENIC                    |                    |                                                  |
| SNP_19660_A_4574947 | NC_021163.1    | Ca_Kabuli_Chr04 | 4574947                 | CC                                     | GG                 | GG               | URR                           | 101508336          | AT-hook motif nuclear-localized protein 14       |
| SNP_19663_A_4577843 | NC_021163.1    | Ca_Kabuli_Chr04 | 4577843                 | CC                                     | TT                 | TT               | INTERGENIC                    |                    |                                                  |
| SNP_19664_A_4580107 | NC_021163.1    | Ca_Kabuli_Chr04 | 4580107                 | TT                                     | GG                 | GG               | INTRON                        | 101508648          | protein EIN4                                     |

| SNPs IDs            | Chromosome IDs | Chromosomes     | Physical positions (bp) | CDC Frontier (Reference genome) | (Pusa 1103 & HPNB) | (ILWC 46 & LPNB) | Sequence Components of genome | Gene accession IDs | Putative functions                                    |
|---------------------|----------------|-----------------|-------------------------|---------------------------------|--------------------|------------------|-------------------------------|--------------------|-------------------------------------------------------|
| SNP_19665_A_4580372 | NC_021163.1    | Ca_Kabuli_Chr04 | 4580372                 | GG                              | TT                 | TT               | INTRON                        | 101508648          | protein EIN4                                          |
| SNP_19666_A_4582668 | NC_021163.1    | Ca_Kabuli_Chr04 | 4582668                 | AA                              | TT                 | TT               | DRR                           | 101508966          | methyltransferase-like protein 6                      |
| SNP_19667_A_4585388 | NC_021163.1    | Ca_Kabuli_Chr04 | 4585388                 | CC                              | TT                 | TT               | INTERGENIC                    |                    |                                                       |
| SNP_19668_A_4585416 | NC_021163.1    | Ca_Kabuli_Chr04 | 4585416                 | TT                              | CC                 | CC               | INTERGENIC                    |                    |                                                       |
| SNP_19669_A_4586320 | NC_021163.1    | Ca_Kabuli_Chr04 | 4586320                 | GG                              | TT                 | TT               | INTERGENIC                    |                    |                                                       |
| SNP_19670_A_4586563 | NC_021163.1    | Ca_Kabuli_Chr04 | 4586563                 | CC                              | TT                 | TT               | URR                           | 101508966          | methyltransferase-like protein 6                      |
| SNP_19671_A_4587900 | NC_021163.1    | Ca_Kabuli_Chr04 | 4587900                 | TT                              | GG                 | GG               | URR                           | 101508966          | methyltransferase-like protein 6                      |
| SNP_19673_A_4589582 | NC_021163.1    | Ca_Kabuli_Chr04 | 4589582                 | TT                              | AA                 | AA               | INTERGENIC                    |                    |                                                       |
| SNP_19675_A_4590130 | NC_021163.1    | Ca_Kabuli_Chr04 | 4590130                 | TT                              | CC                 | CC               | INTERGENIC                    |                    |                                                       |
| SNP_19676_A_4590974 | NC_021163.1    | Ca_Kabuli_Chr04 | 4590974                 | GG                              | AA                 | AA               | INTERGENIC                    |                    |                                                       |
| SNP_19677_A_4683722 | NC_021163.1    | Ca_Kabuli_Chr04 | 4683722                 | CC                              | AA                 | AA               | URR                           | 101512180          | pentatricopeptide repeat-containing protein At1g08610 |
| SNP_19679_A_4817380 | NC_021163.1    | Ca_Kabuli_Chr04 | 4817380                 | CC                              | TT                 | TT               | INTRON                        | 101489933          | uncharacterized LOC101489933                          |
| SNP_19680_A_4817399 | NC_021163.1    | Ca_Kabuli_Chr04 | 4817399                 | TT                              | AA                 | AA               | INTRON                        | 101489933          | uncharacterized LOC101489933                          |
| SNP_19681_A_4824020 | NC_021163.1    | Ca_Kabuli_Chr04 | 4824020                 | GG                              | TT                 | TT               | INTERGENIC                    |                    |                                                       |
| SNP_19682_A_4825783 | NC_021163.1    | Ca_Kabuli_Chr04 | 4825783                 | AA                              | CC                 | CC               | DRR                           | 101490267          | leucine-rich repeat receptor-like protein kinase PXL1 |
| SNP_19684_A_4826027 | NC_021163.1    | Ca_Kabuli_Chr04 | 4826027                 | GG                              | CC                 | CC               | URR                           | 101489933          | uncharacterized LOC101489933                          |
| SNP_19685_A_4826620 | NC_021163.1    | Ca_Kabuli_Chr04 | 4826620                 | CC                              | TT                 | TT               | URR                           | 101489933          | uncharacterized LOC101489933                          |
| SNP_19686_A_4826638 | NC_021163.1    | Ca_Kabuli_Chr04 | 4826638                 | TT                              | CC                 | CC               | URR                           | 101489933          | uncharacterized LOC101489933                          |
| SNP_19687_A_4830575 | NC_021163.1    | Ca_Kabuli_Chr04 | 4830575                 | GG                              | CC                 | CC               | URR                           | 101490267          | leucine-rich repeat receptor-like protein kinase PXL1 |
| SNP_19688_A_4839572 | NC_021163.1    | Ca_Kabuli_Chr04 | 4839572                 | TT                              | AA                 | AA               | INTERGENIC                    |                    |                                                       |
| SNP_19689_A_4839575 | NC_021163.1    | Ca_Kabuli_Chr04 | 4839575                 | TT                              | AA                 | AA               | INTERGENIC                    |                    |                                                       |
| SNP_19690_A_4839576 | NC_021163.1    | Ca_Kabuli_Chr04 | 4839576                 | AA                              | TT                 | TT               | INTERGENIC                    |                    |                                                       |

| SNPs IDs            | Chromosome IDs | Chromosomes     | Physical positions (bp) | CDC Frontier genome (Reference genome) | (Pusa 1103 & HPNB) | (ILWC 46 & LPNB) | Sequence Components of genome | Gene accession IDs | Putative functions                                        |
|---------------------|----------------|-----------------|-------------------------|----------------------------------------|--------------------|------------------|-------------------------------|--------------------|-----------------------------------------------------------|
| SNP_19691_A_4839797 | NC_021163.1    | Ca_Kabuli_Chr04 | 4839797                 | GG                                     | TT                 | TT               | INTERGENIC                    |                    |                                                           |
| SNP_19692_A_4839799 | NC_021163.1    | Ca_Kabuli_Chr04 | 4839799                 | GG                                     | CC                 | CC               | INTERGENIC                    |                    |                                                           |
| SNP_19694_A_4841373 | NC_021163.1    | Ca_Kabuli_Chr04 | 4841373                 | TT                                     | AA                 | AA               | DRR                           | 101490585          | inositol phosphoryceramide glucuronosyltransferase 1-like |
| SNP_19696_A_4848727 | NC_021163.1    | Ca_Kabuli_Chr04 | 4848727                 | TT                                     | GG                 | GG               | URR                           | 101490585          | inositol phosphoryceramide glucuronosyltransferase 1-like |
| SNP_19697_A_4849901 | NC_021163.1    | Ca_Kabuli_Chr04 | 4849901                 | GG                                     | CC                 | CC               | INTERGENIC                    |                    |                                                           |
| SNP_19698_A_4852668 | NC_021163.1    | Ca_Kabuli_Chr04 | 4852668                 | AA                                     | TT                 | TT               | INTERGENIC                    |                    |                                                           |
| SNP_19699_A_4852797 | NC_021163.1    | Ca_Kabuli_Chr04 | 4852797                 | GG                                     | TT                 | TT               | INTERGENIC                    |                    |                                                           |
| SNP_19700_A_4856478 | NC_021163.1    | Ca_Kabuli_Chr04 | 4856478                 | GG                                     | AA                 | AA               | INTRON                        | 101490905          | probable aminopyrimidine aminohydrolase, mitochondrial    |
| SNP_19701_A_4867531 | NC_021163.1    | Ca_Kabuli_Chr04 | 4867531                 | CC                                     | AA                 | AA               | DRR                           | 101491851          | myosin-9-like                                             |
| SNP_19702_A_4867891 | NC_021163.1    | Ca_Kabuli_Chr04 | 4867891                 | TT                                     | AA                 | AA               | DRR                           | 101491851          | myosin-9-like                                             |
| SNP_19703_A_4867939 | NC_021163.1    | Ca_Kabuli_Chr04 | 4867939                 | AA                                     | GG                 | GG               | DRR                           | 101491851          | myosin-9-like                                             |
| SNP_19704_A_4869996 | NC_021163.1    | Ca_Kabuli_Chr04 | 4869996                 | TT                                     | AA                 | AA               | INTRON                        | 101491851          | myosin-9-like                                             |
| SNP_19705_A_4875290 | NC_021163.1    | Ca_Kabuli_Chr04 | 4875290                 | GG                                     | AA                 | AA               | URR                           | 101491851          | myosin-9-like                                             |
| SNP_19707_A_4883817 | NC_021163.1    | Ca_Kabuli_Chr04 | 4883817                 | AA                                     | GG                 | GG               | INTRON                        | 101491333          | myosin-11-like                                            |
| SNP_19708_A_4886440 | NC_021163.1    | Ca_Kabuli_Chr04 | 4886440                 | CC                                     | TT                 | TT               | INTRON                        | 101491333          | myosin-11-like                                            |
| SNP_19709_A_4886667 | NC_021163.1    | Ca_Kabuli_Chr04 | 4886667                 | CC                                     | AA                 | AA               | INTRON                        | 101491333          | myosin-11-like                                            |
| SNP_19710_A_4886962 | NC_021163.1    | Ca_Kabuli_Chr04 | 4886962                 | GG                                     | AA                 | AA               | INTRON                        | 101491333          | myosin-11-like                                            |
| SNP_19711_A_4888825 | NC_021163.1    | Ca_Kabuli_Chr04 | 4888825                 | AA                                     | GG                 | GG               | INTRON                        | 101491333          | myosin-11-like                                            |
| SNP_19712_A_4890422 | NC_021163.1    | Ca_Kabuli_Chr04 | 4890422                 | CC                                     | TT                 | TT               | INTRON                        | 101491333          | myosin-11-like                                            |
| SNP_19713_A_4890680 | NC_021163.1    | Ca_Kabuli_Chr04 | 4890680                 | CC                                     | AA                 | AA               | INTERGENIC                    |                    |                                                           |
| SNP_19715_A_4893230 | NC_021163.1    | Ca_Kabuli_Chr04 | 4893230                 | CC                                     | GG                 | GG               | INTERGENIC                    |                    |                                                           |
| SNP_19717_A_4913945 | NC_021163.1    | Ca_Kabuli_Chr04 | 4913945                 | GG                                     | AA                 | AA               | INTRON                        | 101492527          | phosphoribosylaminoimidazole carboxylase, chloroplastic   |

| SNPs IDs            | Chromosome IDs | Chromosomes     | Physical positions (bp) | CDC Frontier genome (Reference genome) | (Pusa 1103 & HPNB) | (ILWC 46 & LPNB) | Sequence Components of genome | Gene accession IDs | Putative functions                       |
|---------------------|----------------|-----------------|-------------------------|----------------------------------------|--------------------|------------------|-------------------------------|--------------------|------------------------------------------|
| SNP_19718_A_4924266 | NC_021163.1    | Ca_Kabuli_Chr04 | 4924266                 | TT                                     | CC                 | CC               | INTERGENIC                    |                    |                                          |
| SNP_19719_A_4946730 | NC_021163.1    | Ca_Kabuli_Chr04 | 4946730                 | GG                                     | CC                 | CC               | INTERGENIC                    |                    |                                          |
| SNP_19721_A_4982003 | NC_021163.1    | Ca_Kabuli_Chr04 | 4982003                 | GG                                     | AA                 | AA               | DRR                           | 101499251          | pathogenesis-related protein PR-4        |
| SNP_19722_A_5027332 | NC_021163.1    | Ca_Kabuli_Chr04 | 5027332                 | AA                                     | GG                 | GG               | INTRON                        | 101499251          | pathogenesis-related protein PR-4        |
| SNP_19723_A_5047941 | NC_021163.1    | Ca_Kabuli_Chr04 | 5047941                 | AA                                     | GG                 | GG               | URR                           | 101497179          | PITH domain-containing protein A13g04780 |
| SNP_19724_A_5069914 | NC_021163.1    | Ca_Kabuli_Chr04 | 5069914                 | TT                                     | AA                 | AA               | INTRON                        | 101499251          | pathogenesis-related protein PR-4        |
| SNP_19725_A_5069915 | NC_021163.1    | Ca_Kabuli_Chr04 | 5069915                 | TT                                     | CC                 | CC               | INTRON                        | 101499251          | pathogenesis-related protein PR-4        |
| SNP_19727_A_5148557 | NC_021163.1    | Ca_Kabuli_Chr04 | 5148557                 | GG                                     | TT                 | TT               | INTERGENIC                    |                    |                                          |
| SNP_19728_A_5190592 | NC_021163.1    | Ca_Kabuli_Chr04 | 5190592                 | TT                                     | CC                 | CC               | URR                           | 101491335          | cysteine synthase-like                   |
| SNP_19729_A_5218158 | NC_021163.1    | Ca_Kabuli_Chr04 | 5218158                 | GG                                     | AA                 | AA               | INTRON                        | 101491023          | protein MON2 homolog                     |
| SNP_19730_A_5245775 | NC_021163.1    | Ca_Kabuli_Chr04 | 5245775                 | TT                                     | AA                 | AA               | INTRON                        | 101499251          | pathogenesis-related protein PR-4        |
| SNP_19731_A_5283826 | NC_021163.1    | Ca_Kabuli_Chr04 | 5283826                 | GG                                     | AA                 | AA               | URR                           | 101488963          | WD repeat-containing protein 48-like     |
| SNP_19732_A_5287080 | NC_021163.1    | Ca_Kabuli_Chr04 | 5287080                 | CC                                     | AA                 | AA               | URR                           | 101512713          | uncharacterized LOC101512713             |
| SNP_19734_A_5334305 | NC_021163.1    | Ca_Kabuli_Chr04 | 5334305                 | CC                                     | TT                 | TT               | INTRON                        | 101499251          | pathogenesis-related protein PR-4        |
| SNP_19735_A_5358456 | NC_021163.1    | Ca_Kabuli_Chr04 | 5358456                 | CC                                     | TT                 | TT               | INTRON                        | 101499251          | pathogenesis-related protein PR-4        |
| SNP_19736_A_5358818 | NC_021163.1    | Ca_Kabuli_Chr04 | 5358818                 | GG                                     | AA                 | AA               | INTRON                        | 101499251          | pathogenesis-related protein PR-4        |
| SNP_19737_A_5369836 | NC_021163.1    | Ca_Kabuli_Chr04 | 5369836                 | GG                                     | AA                 | AA               | INTRON                        | 101499251          | pathogenesis-related protein PR-4        |
| SNP_19738_A_5373682 | NC_021163.1    | Ca_Kabuli_Chr04 | 5373682                 | GG                                     | AA                 | AA               | URR                           | 101514248          | vesicle-associated protein 2-2           |
| SNP_19739_A_5412435 | NC_021163.1    | Ca_Kabuli_Chr04 | 5412435                 | CC                                     | TT                 | TT               | URR                           | 101512181          | autophagy-related protein 18h            |
| SNP_19740_A_5483399 | NC_021163.1    | Ca_Kabuli_Chr04 | 5483399                 | CC                                     | AA                 | AA               | INTRON                        | 101499251          | pathogenesis-related protein PR-4        |
| SNP_19741_A_5483473 | NC_021163.1    | Ca_Kabuli_Chr04 | 5483473                 | CC                                     | TT                 | TT               | INTRON                        | 101499251          | pathogenesis-related protein PR-4        |
| SNP_19742_A_5483534 | NC_021163.1    | Ca_Kabuli_Chr04 | 5483534                 | TT                                     | AA                 | AA               | INTRON                        | 101499251          | pathogenesis-related protein PR-4        |



| SNPs IDs            | Chromosome IDs | Chromosomes     | Physical positions (bp) | CDC Frontier genome (Reference genome) | (Pusa 1103 & HPNB) | (ILWC 46 & LPNB) | Sequence Components of genome | Gene accession IDs | Putative functions                       |
|---------------------|----------------|-----------------|-------------------------|----------------------------------------|--------------------|------------------|-------------------------------|--------------------|------------------------------------------|
| SNP_19743_A_5483700 | NC_021163.1    | Ca_Kabuli_Chr04 | 5483700                 | TT                                     | CC                 | CC               | INTRON                        | 101499251          | pathogenesis-related protein PR-4        |
| SNP_19744_A_5483811 | NC_021163.1    | Ca_Kabuli_Chr04 | 5483811                 | AA                                     | GG                 | GG               | INTRON                        | 101499251          | pathogenesis-related protein PR-4        |
| SNP_19745_A_5485013 | NC_021163.1    | Ca_Kabuli_Chr04 | 5485013                 | AA                                     | GG                 | GG               | INTRON                        | 101499251          | pathogenesis-related protein PR-4        |
| SNP_19746_A_5496094 | NC_021163.1    | Ca_Kabuli_Chr04 | 5496094                 | AA                                     | TT                 | TT               | URR                           | 101508537          | transcription factor bHLH94              |
| SNP_19747_A_5496095 | NC_021163.1    | Ca_Kabuli_Chr04 | 5496095                 | TT                                     | GG                 | GG               | URR                           | 101508537          | transcription factor bHLH94              |
| SNP_19748_A_5501376 | NC_021163.1    | Ca_Kabuli_Chr04 | 5501376                 | AA                                     | GG                 | GG               | INTRON                        | 101499251          | pathogenesis-related protein PR-4        |
| SNP_19749_A_5518961 | NC_021163.1    | Ca_Kabuli_Chr04 | 5518961                 | GG                                     | AA                 | AA               | INTRON                        | 101499251          | pathogenesis-related protein PR-4        |
| SNP_19750_A_5525199 | NC_021163.1    | Ca_Kabuli_Chr04 | 5525199                 | TT                                     | AA                 | AA               | INTRON                        | 101499251          | pathogenesis-related protein PR-4        |
| SNP_19752_A_5562821 | NC_021163.1    | Ca_Kabuli_Chr04 | 5562821                 | GG                                     | TT                 | TT               | URR                           | 101507584          | uncharacterized protein DDB_G0283357     |
| SNP_19753_A_5564922 | NC_021163.1    | Ca_Kabuli_Chr04 | 5564922                 | AA                                     | GG                 | GG               | INTERGENIC                    |                    |                                          |
| SNP_19757_A_5760634 | NC_021163.1    | Ca_Kabuli_Chr04 | 5760634                 | CC                                     | TT                 | TT               | URR                           | 101499567          | DEAD-box ATP-dependent RNA helicase 16   |
| SNP_19758_A_5824645 | NC_021163.1    | Ca_Kabuli_Chr04 | 5824645                 | AA                                     | GG                 | GG               | URR                           | 101497283          | protein RALF-like 33                     |
| SNP_19759_A_5870221 | NC_021163.1    | Ca_Kabuli_Chr04 | 5870221                 | AA                                     | GG                 | GG               | INTRON                        | 101499251          | pathogenesis-related protein PR-4        |
| SNP_19760_A_5951563 | NC_021163.1    | Ca_Kabuli_Chr04 | 5951563                 | TT                                     | CC                 | CC               | URR                           | 101491656          | glycine-rich domain-containing protein 2 |
| SNP_19762_A_6005328 | NC_021163.1    | Ca_Kabuli_Chr04 | 6005328                 | TT                                     | CC                 | CC               | URR                           | 101490269          | topless-related protein 3-like           |
| SNP_19763_A_6050270 | NC_021163.1    | Ca_Kabuli_Chr04 | 6050270                 | TT                                     | CC                 | CC               | URR                           | 101515420          | syntaxin-43                              |
| SNP_19764_A_6050328 | NC_021163.1    | Ca_Kabuli_Chr04 | 6050328                 | GG                                     | TT                 | TT               | URR                           | 101515420          | syntaxin-43                              |
| SNP_19765_A_6050642 | NC_021163.1    | Ca_Kabuli_Chr04 | 6050642                 | CC                                     | TT                 | TT               | DRR                           | 101410571          | transfer RNA threonine (anticodon AGU)   |
| SNP_19766_A_6050682 | NC_021163.1    | Ca_Kabuli_Chr04 | 6050682                 | GG                                     | AA                 | AA               | DRR                           | 101410571          | transfer RNA threonine (anticodon AGU)   |
| SNP_19767_A_6129167 | NC_021163.1    | Ca_Kabuli_Chr04 | 6129167                 | TT                                     | AA                 | AA               | INTERGENIC                    |                    |                                          |
| SNP_19769_A_6168361 | NC_021163.1    | Ca_Kabuli_Chr04 | 6168361                 | GG                                     | CC                 | CC               | INTERGENIC                    |                    |                                          |
| SNP_19771_A_6209346 | NC_021163.1    | Ca_Kabuli_Chr04 | 6209346                 | TT                                     | GG                 | GG               | INTERGENIC                    |                    |                                          |

| SNPs IDs            | Chromosome IDs | Chromosomes     | Physical positions (bp) | CDC Frontier genome (Reference genome) | (Pusa 1103 & HPNB) | (ILWC 46 & LPNB) | Sequence Components of genome | Gene accession IDs | Putative functions                                         |
|---------------------|----------------|-----------------|-------------------------|----------------------------------------|--------------------|------------------|-------------------------------|--------------------|------------------------------------------------------------|
| SNP_19772_A_6225541 | NC_021163.1    | Ca_Kabuli_Chr04 | 6225541                 | TT                                     | CC                 | CC               | URR                           | 101506949          | uncharacterized LOC101506949                               |
| SNP_19774_A_6344610 | NC_021163.1    | Ca_Kabuli_Chr04 | 6344610                 | TT                                     | AA                 | AA               | INTERGENIC                    |                    |                                                            |
| SNP_19776_A_6397747 | NC_021163.1    | Ca_Kabuli_Chr04 | 6397747                 | GG                                     | TT                 | TT               | DRR                           | 101498590          | pentatricopeptide repeat-containing protein At1g63330-like |
| SNP_19777_A_6418115 | NC_021163.1    | Ca_Kabuli_Chr04 | 6418115                 | CC                                     | TT                 | TT               | INTERGENIC                    |                    |                                                            |
| SNP_19778_A_6423526 | NC_021163.1    | Ca_Kabuli_Chr04 | 6423526                 | AA                                     | GG                 | GG               | INTERGENIC                    |                    |                                                            |
| SNP_19779_A_6443393 | NC_021163.1    | Ca_Kabuli_Chr04 | 6443393                 | AA                                     | GG                 | GG               | INTERGENIC                    |                    |                                                            |
| SNP_19780_A_6462613 | NC_021163.1    | Ca_Kabuli_Chr04 | 6462613                 | GG                                     | AA                 | AA               | INTRON                        | 101500643          | aspartic proteinase-like                                   |
| SNP_19781_A_6477607 | NC_021163.1    | Ca_Kabuli_Chr04 | 6477607                 | CC                                     | TT                 | TT               | URR                           | 101501275          | Unknown function                                           |
| SNP_19783_A_6587375 | NC_021163.1    | Ca_Kabuli_Chr04 | 6587375                 | GG                                     | TT                 | TT               | INTERGENIC                    |                    |                                                            |
| SNP_19784_A_6588114 | NC_021163.1    | Ca_Kabuli_Chr04 | 6588114                 | CC                                     | TT                 | TT               | INTERGENIC                    |                    |                                                            |
| SNP_19785_A_6600863 | NC_021163.1    | Ca_Kabuli_Chr04 | 6600863                 | TT                                     | CC                 | CC               | INTERGENIC                    |                    |                                                            |
| SNP_19786_A_6706277 | NC_021163.1    | Ca_Kabuli_Chr04 | 6706277                 | AA                                     | GG                 | GG               | INTERGENIC                    |                    |                                                            |
| SNP_19787_A_6733553 | NC_021163.1    | Ca_Kabuli_Chr04 | 6733553                 | GG                                     | AA                 | AA               | INTERGENIC                    |                    |                                                            |
| SNP_19788_A_6797350 | NC_021163.1    | Ca_Kabuli_Chr04 | 6797350                 | TT                                     | AA                 | AA               | URR                           | 101514124          | cytochrome P450 734A1-like                                 |
| SNP_19789_A_6840068 | NC_021163.1    | Ca_Kabuli_Chr04 | 6840068                 | TT                                     | AA                 | AA               | DRR                           | 101489071          | L-cysteine desulfhydrase                                   |
| SNP_19790_A_6864116 | NC_021163.1    | Ca_Kabuli_Chr04 | 6864116                 | CC                                     | TT                 | TT               | INTERGENIC                    |                    |                                                            |
| SNP_19792_A_6881123 | NC_021163.1    | Ca_Kabuli_Chr04 | 6881123                 | TT                                     | CC                 | CC               | URR                           | 101490703          | protein RADIALIS-like 3                                    |
| SNP_19793_A_6895016 | NC_021163.1    | Ca_Kabuli_Chr04 | 6895016                 | TT                                     | GG                 | GG               | INTRON                        | 101491854          | pto-interacting protein 1-like                             |
| SNP_19794_A_6901597 | NC_021163.1    | Ca_Kabuli_Chr04 | 6901597                 | TT                                     | CC                 | CC               | INTERGENIC                    |                    |                                                            |
| SNP_19796_A_6907263 | NC_021163.1    | Ca_Kabuli_Chr04 | 6907263                 | AA                                     | TT                 | TT               | INTERGENIC                    |                    |                                                            |
| SNP_19797_A_6907267 | NC_021163.1    | Ca_Kabuli_Chr04 | 6907267                 | CC                                     | TT                 | TT               | INTERGENIC                    |                    |                                                            |
| SNP_19798_A_6907299 | NC_021163.1    | Ca_Kabuli_Chr04 | 6907299                 | AA                                     | GG                 | GG               | INTERGENIC                    |                    |                                                            |

| SNPs IDs            | Chromosome IDs | Chromosomes     | Physical positions (bp) | CDC Frontier (Reference genome) | (Pusa 1103 & HPNB) | (ILWC 46 & LPNB) | Sequence Components of genome | Gene accession IDs | Putative functions                                                   |
|---------------------|----------------|-----------------|-------------------------|---------------------------------|--------------------|------------------|-------------------------------|--------------------|----------------------------------------------------------------------|
| SNP_19799_A_6945203 | NC_021163.1    | Ca_Kabuli_Chr04 | 6945203                 | CC                              | TT                 | TT               | URR                           | 101494456          | probable protein phosphatase 2C 49                                   |
| SNP_19801_A_7010492 | NC_021163.1    | Ca_Kabuli_Chr04 | 7010492                 | AA                              | TT                 | TT               | DRR                           | 101496748          | probable pectinesterase 53                                           |
| SNP_19802_A_7074415 | NC_021163.1    | Ca_Kabuli_Chr04 | 7074415                 | CC                              | TT                 | TT               | INTERGENIC                    |                    |                                                                      |
| SNP_19803_A_7074430 | NC_021163.1    | Ca_Kabuli_Chr04 | 7074430                 | GG                              | AA                 | AA               | INTERGENIC                    |                    |                                                                      |
| SNP_19805_A_7096615 | NC_021163.1    | Ca_Kabuli_Chr04 | 7096615                 | GG                              | AA                 | AA               | DRR                           | 101498727          | uncharacterized LOC101498727                                         |
| SNP_19806_A_7108099 | NC_021163.1    | Ca_Kabuli_Chr04 | 7108099                 | TT                              | GG                 | GG               | DRR                           | 101493625          | Unknown function                                                     |
| SNP_19807_A_7108103 | NC_021163.1    | Ca_Kabuli_Chr04 | 7108103                 | TT                              | AA                 | AA               | DRR                           | 101493625          | Unknown function                                                     |
| SNP_19808_A_7117272 | NC_021163.1    | Ca_Kabuli_Chr04 | 7117272                 | GG                              | CC                 | CC               | INTERGENIC                    |                    |                                                                      |
| SNP_19810_A_7160533 | NC_021163.1    | Ca_Kabuli_Chr04 | 7160533                 | TT                              | CC                 | CC               | DRR                           | 101501477          | ATP-dependent Clp protease proteolytic subunit 5, chloroplastic-like |
| SNP_19811_A_7254247 | NC_021163.1    | Ca_Kabuli_Chr04 | 7254247                 | CC                              | GG                 | GG               | INTERGENIC                    |                    |                                                                      |
| SNP_19812_A_7272521 | NC_021163.1    | Ca_Kabuli_Chr04 | 7272521                 | TT                              | CC                 | CC               | INTERGENIC                    |                    |                                                                      |
| SNP_19813_A_7287153 | NC_021163.1    | Ca_Kabuli_Chr04 | 7287153                 | GG                              | AA                 | AA               | INTERGENIC                    |                    |                                                                      |
| SNP_19814_A_7292955 | NC_021163.1    | Ca_Kabuli_Chr04 | 7292955                 | GG                              | AA                 | AA               | INTERGENIC                    |                    |                                                                      |
| SNP_19815_A_7359137 | NC_021163.1    | Ca_Kabuli_Chr04 | 7359137                 | GG                              | AA                 | AA               | INTERGENIC                    |                    |                                                                      |
| SNP_19816_A_7359150 | NC_021163.1    | Ca_Kabuli_Chr04 | 7359150                 | AA                              | GG                 | GG               | INTERGENIC                    |                    |                                                                      |
| SNP_19817_A_7359173 | NC_021163.1    | Ca_Kabuli_Chr04 | 7359173                 | AA                              | TT                 | TT               | INTERGENIC                    |                    |                                                                      |
| SNP_19818_A_7359228 | NC_021163.1    | Ca_Kabuli_Chr04 | 7359228                 | AA                              | GG                 | GG               | INTERGENIC                    |                    |                                                                      |
| SNP_19822_A_7480193 | NC_021163.1    | Ca_Kabuli_Chr04 | 7480193                 | AA                              | GG                 | GG               | INTERGENIC                    |                    |                                                                      |
| SNP_19823_A_7492679 | NC_021163.1    | Ca_Kabuli_Chr04 | 7492679                 | GG                              | AA                 | AA               | DRR                           | 101511868          | nicotinamide adenine dinucleotide transporter 1, chloroplastic       |
| SNP_19824_A_7514217 | NC_021163.1    | Ca_Kabuli_Chr04 | 7514217                 | CC                              | GG                 | GG               | INTERGENIC                    |                    |                                                                      |
| SNP_19825_A_7579920 | NC_021163.1    | Ca_Kabuli_Chr04 | 7579920                 | GG                              | AA                 | AA               | URR                           | 101495536          | extensin-2-like                                                      |
| SNP_19827_A_7638134 | NC_021163.1    | Ca_Kabuli_Chr04 | 7638134                 | CC                              | TT                 | TT               | STOP_GAINED                   | 101496194          | Unknown function                                                     |

| SNPs IDs            | Chromosome IDs | Chromosomes     | Physical positions (bp) | CDC Frontier (Reference genome) | (Pusa 1103 & HPNB) | (ILWC 46 & LPNB) | Sequence Components of genome | Gene accession IDs | Putative functions              |
|---------------------|----------------|-----------------|-------------------------|---------------------------------|--------------------|------------------|-------------------------------|--------------------|---------------------------------|
| SNP_19828_A_7638462 | NC_021163.1    | Ca_Kabuli_Chr04 | 7638462                 | GG                              | AA                 | AA               | URR                           | 101496194          | Unknown function                |
| SNP_19829_A_7676995 | NC_021163.1    | Ca_Kabuli_Chr04 | 7676995                 | AA                              | CC                 | CC               | INTERGENIC                    |                    |                                 |
| SNP_19830_A_7697608 | NC_021163.1    | Ca_Kabuli_Chr04 | 7697608                 | AA                              | CC                 | CC               | DRR                           | 101515652          | uncharacterized LOC101515652    |
| SNP_19832_A_7713065 | NC_021163.1    | Ca_Kabuli_Chr04 | 7713065                 | GG                              | AA                 | AA               | INTERGENIC                    |                    |                                 |
| SNP_19833_A_7927555 | NC_021163.1    | Ca_Kabuli_Chr04 | 7927555                 | TT                              | AA                 | AA               | INTERGENIC                    |                    |                                 |
| SNP_19834_A_7978333 | NC_021163.1    | Ca_Kabuli_Chr04 | 7978333                 | CC                              | TT                 | TT               | INTERGENIC                    |                    |                                 |
| SNP_19835_A_7997655 | NC_021163.1    | Ca_Kabuli_Chr04 | 7997655                 | GG                              | AA                 | AA               | DRR                           | 101502860          | monothiol glutaredoxin-S1-like  |
| SNP_19836_A_8020359 | NC_021163.1    | Ca_Kabuli_Chr04 | 8020359                 | AA                              | CC                 | CC               | INTERGENIC                    |                    |                                 |
| SNP_19838_A_8109633 | NC_021163.1    | Ca_Kabuli_Chr04 | 8109633                 | GG                              | AA                 | AA               | INTERGENIC                    |                    |                                 |
| SNP_19840_A_8167249 | NC_021163.1    | Ca_Kabuli_Chr04 | 8167249                 | CC                              | TT                 | TT               | URR                           | 101501795          | gibberellin receptor GID1B-like |
| SNP_19841_A_8167279 | NC_021163.1    | Ca_Kabuli_Chr04 | 8167279                 | TT                              | GG                 | GG               | URR                           | 101501795          | gibberellin receptor GID1B-like |
| SNP_19842_A_8167365 | NC_021163.1    | Ca_Kabuli_Chr04 | 8167365                 | TT                              | CC                 | CC               | URR                           | 101501795          | gibberellin receptor GID1B-like |
| SNP_19843_A_8169328 | NC_021163.1    | Ca_Kabuli_Chr04 | 8169328                 | AA                              | TT                 | TT               | INTERGENIC                    |                    |                                 |
| SNP_19844_A_8169329 | NC_021163.1    | Ca_Kabuli_Chr04 | 8169329                 | CC                              | AA                 | AA               | INTERGENIC                    |                    |                                 |
| SNP_19845_A_8169375 | NC_021163.1    | Ca_Kabuli_Chr04 | 8169375                 | TT                              | CC                 | CC               | INTERGENIC                    |                    |                                 |
| SNP_19846_A_8169421 | NC_021163.1    | Ca_Kabuli_Chr04 | 8169421                 | AA                              | GG                 | GG               | INTERGENIC                    |                    |                                 |
| SNP_19848_A_8169443 | NC_021163.1    | Ca_Kabuli_Chr04 | 8169443                 | AA                              | TT                 | TT               | INTERGENIC                    |                    |                                 |
| SNP_19849_A_8169607 | NC_021163.1    | Ca_Kabuli_Chr04 | 8169607                 | CC                              | TT                 | TT               | INTERGENIC                    |                    |                                 |
| SNP_19851_A_8169646 | NC_021163.1    | Ca_Kabuli_Chr04 | 8169646                 | GG                              | TT                 | TT               | INTERGENIC                    |                    |                                 |
| SNP_19852_A_8169659 | NC_021163.1    | Ca_Kabuli_Chr04 | 8169659                 | TT                              | CC                 | CC               | INTERGENIC                    |                    |                                 |
| SNP_19853_A_8169683 | NC_021163.1    | Ca_Kabuli_Chr04 | 8169683                 | AA                              | GG                 | GG               | INTERGENIC                    |                    |                                 |
| SNP_19854_A_8169693 | NC_021163.1    | Ca_Kabuli_Chr04 | 8169693                 | TT                              | CC                 | CC               | INTERGENIC                    |                    |                                 |

| SNPs IDs            | Chromosome IDs | Chromosomes     | Physical positions (bp) | CDC Frontier genome (Reference genome) | (Pusa 1103 & HPNB) | (ILWC 46 & LPNB) | Sequence Components of genome | Gene accession IDs | Putative functions                                           |
|---------------------|----------------|-----------------|-------------------------|----------------------------------------|--------------------|------------------|-------------------------------|--------------------|--------------------------------------------------------------|
| SNP_19855_A_8170000 | NC_021163.1    | Ca_Kabuli_Chr04 | 8170000                 | GG                                     | TT                 | TT               | INTERGENIC                    |                    |                                                              |
| SNP_19856_A_8170451 | NC_021163.1    | Ca_Kabuli_Chr04 | 8170451                 | AA                                     | CC                 | CC               | INTERGENIC                    |                    |                                                              |
| SNP_19857_A_8170794 | NC_021163.1    | Ca_Kabuli_Chr04 | 8170794                 | CC                                     | TT                 | TT               | INTERGENIC                    |                    |                                                              |
| SNP_19858_A_8170799 | NC_021163.1    | Ca_Kabuli_Chr04 | 8170799                 | TT                                     | AA                 | AA               | INTERGENIC                    |                    |                                                              |
| SNP_19859_A_8176091 | NC_021163.1    | Ca_Kabuli_Chr04 | 8176091                 | GG                                     | CC                 | CC               | INTERGENIC                    |                    |                                                              |
| SNP_19860_A_8176092 | NC_021163.1    | Ca_Kabuli_Chr04 | 8176092                 | GG                                     | CC                 | CC               | INTERGENIC                    |                    |                                                              |
| SNP_19861_A_8176308 | NC_021163.1    | Ca_Kabuli_Chr04 | 8176308                 | TT                                     | CC                 | CC               | INTERGENIC                    |                    |                                                              |
| SNP_19862_A_8182707 | NC_021163.1    | Ca_Kabuli_Chr04 | 8182707                 | CC                                     | TT                 | TT               | URR                           | 101502440          | LRR receptor-like serine/threonine-protein kinase ERL1       |
| SNP_19863_A_8184895 | NC_021163.1    | Ca_Kabuli_Chr04 | 8184895                 | TT                                     | CC                 | CC               | INTERGENIC                    |                    |                                                              |
| SNP_19864_A_8185613 | NC_021163.1    | Ca_Kabuli_Chr04 | 8185613                 | AA                                     | GG                 | GG               | DRR                           | 101502743          | histidine-containing phosphotransfer protein 1-like          |
| SNP_19866_A_8187392 | NC_021163.1    | Ca_Kabuli_Chr04 | 8187392                 | CC                                     | GG                 | GG               | INTRON                        | 101502743          | histidine-containing phosphotransfer protein 1-like          |
| SNP_19869_A_8199623 | NC_021163.1    | Ca_Kabuli_Chr04 | 8199623                 | GG                                     | CC                 | CC               | URR                           | 101503055          | autophagy-related protein 18g-like                           |
| SNP_19870_A_8201008 | NC_021163.1    | Ca_Kabuli_Chr04 | 8201008                 | TT                                     | CC                 | CC               | URR                           | 101503055          | autophagy-related protein 18g-like                           |
| SNP_19871_A_8201010 | NC_021163.1    | Ca_Kabuli_Chr04 | 8201010                 | GG                                     | AA                 | AA               | URR                           | 101503055          | autophagy-related protein 18g-like                           |
| SNP_19872_A_8202775 | NC_021163.1    | Ca_Kabuli_Chr04 | 8202775                 | AA                                     | CC                 | CC               | DRR                           | 101503610          | receptor-like cytosolic serine/threonine-protein kinase RBK2 |
| SNP_19873_A_8202782 | NC_021163.1    | Ca_Kabuli_Chr04 | 8202782                 | AA                                     | TT                 | TT               | DRR                           | 101503610          | receptor-like cytosolic serine/threonine-protein kinase RBK2 |
| SNP_19874_A_8203077 | NC_021163.1    | Ca_Kabuli_Chr04 | 8203077                 | AA                                     | GG                 | GG               | DRR                           | 101503610          | receptor-like cytosolic serine/threonine-protein kinase RBK2 |
| SNP_19875_A_8205046 | NC_021163.1    | Ca_Kabuli_Chr04 | 8205046                 | TT                                     | AA                 | AA               | SYNONYMOUS_CODING             | 101503610          | receptor-like cytosolic serine/threonine-protein kinase RBK2 |
| SNP_19877_A_8207169 | NC_021163.1    | Ca_Kabuli_Chr04 | 8207169                 | TT                                     | AA                 | AA               | URR                           | 101503610          | receptor-like cytosolic serine/threonine-protein kinase RBK2 |
| SNP_19878_A_8207691 | NC_021163.1    | Ca_Kabuli_Chr04 | 8207691                 | GG                                     | AA                 | AA               | URR                           | 101503610          | receptor-like cytosolic serine/threonine-protein kinase RBK2 |
| SNP_19879_A_8207767 | NC_021163.1    | Ca_Kabuli_Chr04 | 8207767                 | GG                                     | AA                 | AA               | URR                           | 101503610          | receptor-like cytosolic serine/threonine-protein kinase RBK2 |
| SNP_19881_A_8209315 | NC_021163.1    | Ca_Kabuli_Chr04 | 8209315                 | AA                                     | TT                 | TT               | INTERGENIC                    |                    |                                                              |

| SNPs IDs            | Chromosome IDs | Chromosomes     | Physical positions (bp) | CDC Frontier genome (Reference genome) | (Pusa 1103 & HPNB) | (ILWC 46 & LPNB) | Sequence Components of genome | Gene accession IDs | Putative functions                                              |
|---------------------|----------------|-----------------|-------------------------|----------------------------------------|--------------------|------------------|-------------------------------|--------------------|-----------------------------------------------------------------|
| SNP_19883_A_8210443 | NC_021163.1    | Ca_Kabuli_Chr04 | 8210443                 | TT                                     | GG                 | GG               | INTERGENIC                    |                    |                                                                 |
| SNP_19884_A_8214727 | NC_021163.1    | Ca_Kabuli_Chr04 | 8214727                 | AA                                     | GG                 | GG               | INTERGENIC                    |                    |                                                                 |
| SNP_19885_A_8215162 | NC_021163.1    | Ca_Kabuli_Chr04 | 8215162                 | CC                                     | TT                 | TT               | INTERGENIC                    |                    |                                                                 |
| SNP_19886_A_8215898 | NC_021163.1    | Ca_Kabuli_Chr04 | 8215898                 | CC                                     | TT                 | TT               | INTERGENIC                    |                    |                                                                 |
| SNP_19887_A_8216330 | NC_021163.1    | Ca_Kabuli_Chr04 | 8216330                 | GG                                     | AA                 | AA               | INTERGENIC                    |                    |                                                                 |
| SNP_19890_A_8217067 | NC_021163.1    | Ca_Kabuli_Chr04 | 8217067                 | GG                                     | AA                 | AA               | DRR                           | 101503935          | probable LRR receptor-like serine/threonine-protein kinase RKF3 |
| SNP_19891_A_8217130 | NC_021163.1    | Ca_Kabuli_Chr04 | 8217130                 | CC                                     | TT                 | TT               | DRR                           | 101503935          | probable LRR receptor-like serine/threonine-protein kinase RKF3 |
| SNP_19892_A_8220339 | NC_021163.1    | Ca_Kabuli_Chr04 | 8220339                 | AA                                     | GG                 | GG               | URR                           | 101503935          | probable LRR receptor-like serine/threonine-protein kinase RKF3 |
| SNP_19893_A_8220517 | NC_021163.1    | Ca_Kabuli_Chr04 | 8220517                 | AA                                     | GG                 | GG               | URR                           | 101503935          | probable LRR receptor-like serine/threonine-protein kinase RKF3 |
| SNP_19894_A_8220527 | NC_021163.1    | Ca_Kabuli_Chr04 | 8220527                 | AA                                     | GG                 | GG               | URR                           | 101503935          | probable LRR receptor-like serine/threonine-protein kinase RKF3 |
| SNP_19895_A_8220543 | NC_021163.1    | Ca_Kabuli_Chr04 | 8220543                 | GG                                     | CC                 | CC               | URR                           | 101503935          | probable LRR receptor-like serine/threonine-protein kinase RKF3 |
| SNP_19896_A_8220552 | NC_021163.1    | Ca_Kabuli_Chr04 | 8220552                 | TT                                     | AA                 | AA               | URR                           | 101503935          | probable LRR receptor-like serine/threonine-protein kinase RKF3 |
| SNP_19897_A_8220719 | NC_021163.1    | Ca_Kabuli_Chr04 | 8220719                 | GG                                     | AA                 | AA               | URR                           | 101503935          | probable LRR receptor-like serine/threonine-protein kinase RKF3 |
| SNP_19898_A_8220927 | NC_021163.1    | Ca_Kabuli_Chr04 | 8220927                 | AA                                     | GG                 | GG               | URR                           | 101503935          | probable LRR receptor-like serine/threonine-protein kinase RKF3 |
| SNP_19900_A_8222710 | NC_021163.1    | Ca_Kabuli_Chr04 | 8222710                 | TT                                     | AA                 | AA               | INTERGENIC                    |                    |                                                                 |
| SNP_19901_A_8222718 | NC_021163.1    | Ca_Kabuli_Chr04 | 8222718                 | CC                                     | TT                 | TT               | INTERGENIC                    |                    |                                                                 |
| SNP_19903_A_8226051 | NC_021163.1    | Ca_Kabuli_Chr04 | 8226051                 | CC                                     | GG                 | GG               | URR                           | 101504254          | uncharacterized LOC101504254                                    |
| SNP_19904_A_8226265 | NC_021163.1    | Ca_Kabuli_Chr04 | 8226265                 | CC                                     | TT                 | TT               | URR                           | 101504254          | uncharacterized LOC101504254                                    |
| SNP_19906_A_8226743 | NC_021163.1    | Ca_Kabuli_Chr04 | 8226743                 | CC                                     | AA                 | AA               | URR                           | 101504254          | uncharacterized LOC101504254                                    |
| SNP_19907_A_8226833 | NC_021163.1    | Ca_Kabuli_Chr04 | 8226833                 | CC                                     | TT                 | TT               | URR                           | 101504254          | uncharacterized LOC101504254                                    |
| SNP_19908_A_8226871 | NC_021163.1    | Ca_Kabuli_Chr04 | 8226871                 | CC                                     | TT                 | TT               | URR                           | 101504254          | uncharacterized LOC101504254                                    |
| SNP_19909_A_8230551 | NC_021163.1    | Ca_Kabuli_Chr04 | 8230551                 | TT                                     | CC                 | CC               | INTERGENIC                    |                    |                                                                 |

| SNPs IDs            | Chromosome IDs | Chromosomes     | Physical positions (bp) | CDC Frontier genome (Reference genome) | (Pusa 1103 & HPNB) | (ILWC 46 & LPNB) | Sequence genome   | Components of | Gene accession IDs                              | Putative functions |
|---------------------|----------------|-----------------|-------------------------|----------------------------------------|--------------------|------------------|-------------------|---------------|-------------------------------------------------|--------------------|
| SNP_19910_A_8230760 | NC_021163.1    | Ca_Kabuli_Chr04 | 8230760                 | TT                                     | CC                 | CC               | INTERGENIC        |               |                                                 |                    |
| SNP_19911_A_8230907 | NC_021163.1    | Ca_Kabuli_Chr04 | 8230907                 | TT                                     | AA                 | AA               | INTERGENIC        |               |                                                 |                    |
| SNP_19912_A_8230922 | NC_021163.1    | Ca_Kabuli_Chr04 | 8230922                 | TT                                     | CC                 | CC               | INTERGENIC        |               |                                                 |                    |
| SNP_19913_A_8230947 | NC_021163.1    | Ca_Kabuli_Chr04 | 8230947                 | AA                                     | GG                 | GG               | INTERGENIC        |               |                                                 |                    |
| SNP_19914_A_8230948 | NC_021163.1    | Ca_Kabuli_Chr04 | 8230948                 | GG                                     | AA                 | AA               | INTERGENIC        |               |                                                 |                    |
| SNP_19915_A_8230957 | NC_021163.1    | Ca_Kabuli_Chr04 | 8230957                 | CC                                     | GG                 | GG               | INTERGENIC        |               |                                                 |                    |
| SNP_19916_A_8230962 | NC_021163.1    | Ca_Kabuli_Chr04 | 8230962                 | TT                                     | CC                 | CC               | INTERGENIC        |               |                                                 |                    |
| SNP_19917_A_8231134 | NC_021163.1    | Ca_Kabuli_Chr04 | 8231134                 | GG                                     | AA                 | AA               | INTERGENIC        |               |                                                 |                    |
| SNP_19918_A_8232297 | NC_021163.1    | Ca_Kabuli_Chr04 | 8232297                 | GG                                     | AA                 | AA               | INTERGENIC        |               |                                                 |                    |
| SNP_19919_A_8232338 | NC_021163.1    | Ca_Kabuli_Chr04 | 8232338                 | GG                                     | AA                 | AA               | INTERGENIC        |               |                                                 |                    |
| SNP_19920_A_8238090 | NC_021163.1    | Ca_Kabuli_Chr04 | 8238090                 | TT                                     | AA                 | AA               | INTRON            | 101504588     | putative E3 ubiquitin-protein ligase RF4        |                    |
| SNP_19921_A_8238145 | NC_021163.1    | Ca_Kabuli_Chr04 | 8238145                 | AA                                     | TT                 | TT               | INTRON            | 101504588     | putative E3 ubiquitin-protein ligase RF4        |                    |
| SNP_19922_A_8240408 | NC_021163.1    | Ca_Kabuli_Chr04 | 8240408                 | AA                                     | GG                 | GG               | INTERGENIC        |               |                                                 |                    |
| SNP_19923_A_8253171 | NC_021163.1    | Ca_Kabuli_Chr04 | 8253171                 | AA                                     | GG                 | GG               | SYNONYMOUS_CODING | 101505211     | piezo-type mechanosensitive ion channel homolog |                    |
| SNP_19924_A_8256356 | NC_021163.1    | Ca_Kabuli_Chr04 | 8256356                 | GG                                     | TT                 | TT               | INTRON            | 101505211     | piezo-type mechanosensitive ion channel homolog |                    |
| SNP_19925_A_8256679 | NC_021163.1    | Ca_Kabuli_Chr04 | 8256679                 | CC                                     | AA                 | AA               | INTRON            | 101505211     | piezo-type mechanosensitive ion channel homolog |                    |
| SNP_19926_A_8257982 | NC_021163.1    | Ca_Kabuli_Chr04 | 8257982                 | CC                                     | TT                 | TT               | INTRON            | 101505211     | piezo-type mechanosensitive ion channel homolog |                    |
| SNP_19927_A_8264040 | NC_021163.1    | Ca_Kabuli_Chr04 | 8264040                 | AA                                     | GG                 | GG               | INTRON            | 101505211     | piezo-type mechanosensitive ion channel homolog |                    |
| SNP_19928_A_8268217 | NC_021163.1    | Ca_Kabuli_Chr04 | 8268217                 | AA                                     | GG                 | GG               | INTRON            | 101505211     | piezo-type mechanosensitive ion channel homolog |                    |
| SNP_19929_A_8275233 | NC_021163.1    | Ca_Kabuli_Chr04 | 8275233                 | AA                                     | TT                 | TT               | INTRON            | 101505211     | piezo-type mechanosensitive ion channel homolog |                    |
| SNP_19930_A_8280902 | NC_021163.1    | Ca_Kabuli_Chr04 | 8280902                 | CC                                     | AA                 | AA               | URR               | 101505211     | piezo-type mechanosensitive ion channel homolog |                    |
| SNP_19931_A_8280904 | NC_021163.1    | Ca_Kabuli_Chr04 | 8280904                 | TT                                     | CC                 | CC               | URR               | 101505211     | piezo-type mechanosensitive ion channel homolog |                    |

| SNPs IDs            | Chromosome IDs | Chromosomes     | Physical positions (bp) | CDC Frontier genome (Reference genome) | (Pusa 1103 & HPNB) | (ILWC 46 & LPNB) | Sequence Components of genome | Gene accession IDs | Putative functions                              |
|---------------------|----------------|-----------------|-------------------------|----------------------------------------|--------------------|------------------|-------------------------------|--------------------|-------------------------------------------------|
| SNP_19932_A_8280931 | NC_021163.1    | Ca_Kabuli_Chr04 | 8280931                 | GG                                     | AA                 | AA               | URR                           | 101505211          | piezo-type mechanosensitive ion channel homolog |
| SNP_19933_A_8280942 | NC_021163.1    | Ca_Kabuli_Chr04 | 8280942                 | CC                                     | TT                 | TT               | URR                           | 101505211          | piezo-type mechanosensitive ion channel homolog |
| SNP_19934_A_8281061 | NC_021163.1    | Ca_Kabuli_Chr04 | 8281061                 | CC                                     | AA                 | AA               | URR                           | 101505211          | piezo-type mechanosensitive ion channel homolog |
| SNP_19935_A_8281311 | NC_021163.1    | Ca_Kabuli_Chr04 | 8281311                 | GG                                     | AA                 | AA               | URR                           | 101505211          | piezo-type mechanosensitive ion channel homolog |
| SNP_19937_A_8281340 | NC_021163.1    | Ca_Kabuli_Chr04 | 8281340                 | TT                                     | CC                 | CC               | URR                           | 101505211          | piezo-type mechanosensitive ion channel homolog |
| SNP_19938_A_8283190 | NC_021163.1    | Ca_Kabuli_Chr04 | 8283190                 | AA                                     | GG                 | GG               | DRR                           | 101505765          | auxin-binding protein T85                       |
| SNP_19939_A_8292362 | NC_021163.1    | Ca_Kabuli_Chr04 | 8292362                 | TT                                     | GG                 | GG               | URR                           | 101506082          | probable galacturonosyltransferase-like 4       |
| SNP_19940_A_8292398 | NC_021163.1    | Ca_Kabuli_Chr04 | 8292398                 | CC                                     | TT                 | TT               | URR                           | 101506082          | probable galacturonosyltransferase-like 4       |
| SNP_19941_A_8292406 | NC_021163.1    | Ca_Kabuli_Chr04 | 8292406                 | AA                                     | GG                 | GG               | URR                           | 101506082          | probable galacturonosyltransferase-like 4       |
| SNP_19942_A_8292426 | NC_021163.1    | Ca_Kabuli_Chr04 | 8292426                 | CC                                     | TT                 | TT               | URR                           | 101506082          | probable galacturonosyltransferase-like 4       |
| SNP_19943_A_8292675 | NC_021163.1    | Ca_Kabuli_Chr04 | 8292675                 | GG                                     | AA                 | AA               | URR                           | 101506082          | probable galacturonosyltransferase-like 4       |
| SNP_19944_A_8292716 | NC_021163.1    | Ca_Kabuli_Chr04 | 8292716                 | GG                                     | AA                 | AA               | URR                           | 101506082          | probable galacturonosyltransferase-like 4       |
| SNP_19946_A_8293502 | NC_021163.1    | Ca_Kabuli_Chr04 | 8293502                 | AA                                     | TT                 | TT               | URR                           | 101506082          | probable galacturonosyltransferase-like 4       |
| SNP_19947_A_8293516 | NC_021163.1    | Ca_Kabuli_Chr04 | 8293516                 | TT                                     | CC                 | CC               | URR                           | 101506082          | probable galacturonosyltransferase-like 4       |
| SNP_19948_A_8293521 | NC_021163.1    | Ca_Kabuli_Chr04 | 8293521                 | CC                                     | TT                 | TT               | URR                           | 101506082          | probable galacturonosyltransferase-like 4       |
| SNP_19949_A_8293584 | NC_021163.1    | Ca_Kabuli_Chr04 | 8293584                 | TT                                     | CC                 | CC               | URR                           | 101506082          | probable galacturonosyltransferase-like 4       |
| SNP_19950_A_8293589 | NC_021163.1    | Ca_Kabuli_Chr04 | 8293589                 | TT                                     | AA                 | AA               | URR                           | 101506082          | probable galacturonosyltransferase-like 4       |
| SNP_19952_A_8296019 | NC_021163.1    | Ca_Kabuli_Chr04 | 8296019                 | GG                                     | AA                 | AA               | INTERGENIC                    |                    |                                                 |
| SNP_19955_A_8308913 | NC_021163.1    | Ca_Kabuli_Chr04 | 8308913                 | GG                                     | AA                 | AA               | URR                           | 101493086          | uncharacterized LOC101493086                    |
| SNP_19956_A_8309060 | NC_021163.1    | Ca_Kabuli_Chr04 | 8309060                 | AA                                     | TT                 | TT               | URR                           | 101493086          | uncharacterized LOC101493086                    |
| SNP_19958_A_8310881 | NC_021163.1    | Ca_Kabuli_Chr04 | 8310881                 | AA                                     | GG                 | GG               | INTERGENIC                    |                    |                                                 |
| SNP_19960_A_8312474 | NC_021163.1    | Ca_Kabuli_Chr04 | 8312474                 | GG                                     | AA                 | AA               | INTERGENIC                    |                    |                                                 |



| SNPs IDs            | Chromosome IDs | Chromosomes     | Physical positions (bp) | CDC Frontier genome (Reference genome) | (Pusa 1103 & HPNB) | (ILWC 46 & LPNB) | Sequence Components of genome | Gene accession IDs | Putative functions                                 |
|---------------------|----------------|-----------------|-------------------------|----------------------------------------|--------------------|------------------|-------------------------------|--------------------|----------------------------------------------------|
| SNP_19961_A_8312482 | NC_021163.1    | Ca_Kabuli_Chr04 | 8312482                 | CC                                     | AA                 | AA               | INTERGENIC                    |                    |                                                    |
| SNP_19962_A_8312496 | NC_021163.1    | Ca_Kabuli_Chr04 | 8312496                 | AA                                     | GG                 | GG               | INTERGENIC                    |                    |                                                    |
| SNP_19963_A_8312508 | NC_021163.1    | Ca_Kabuli_Chr04 | 8312508                 | CC                                     | TT                 | TT               | INTERGENIC                    |                    |                                                    |
| SNP_19964_A_8312528 | NC_021163.1    | Ca_Kabuli_Chr04 | 8312528                 | AA                                     | CC                 | CC               | INTERGENIC                    |                    |                                                    |
| SNP_19965_A_8313997 | NC_021163.1    | Ca_Kabuli_Chr04 | 8313997                 | AA                                     | GG                 | GG               | INTERGENIC                    |                    |                                                    |
| SNP_19966_A_8315864 | NC_021163.1    | Ca_Kabuli_Chr04 | 8315864                 | CC                                     | TT                 | TT               | INTERGENIC                    |                    |                                                    |
| SNP_19970_A_8316745 | NC_021163.1    | Ca_Kabuli_Chr04 | 8316745                 | AA                                     | GG                 | GG               | INTERGENIC                    |                    |                                                    |
| SNP_19971_A_8319437 | NC_021163.1    | Ca_Kabuli_Chr04 | 8319437                 | TT                                     | AA                 | AA               | INTERGENIC                    |                    |                                                    |
| SNP_19972_A_8319467 | NC_021163.1    | Ca_Kabuli_Chr04 | 8319467                 | CC                                     | TT                 | TT               | INTERGENIC                    |                    |                                                    |
| SNP_19973_A_8319743 | NC_021163.1    | Ca_Kabuli_Chr04 | 8319743                 | TT                                     | GG                 | GG               | INTERGENIC                    |                    |                                                    |
| SNP_19974_A_8320650 | NC_021163.1    | Ca_Kabuli_Chr04 | 8320650                 | AA                                     | TT                 | TT               | INTERGENIC                    |                    |                                                    |
| SNP_19975_A_8320784 | NC_021163.1    | Ca_Kabuli_Chr04 | 8320784                 | AA                                     | GG                 | GG               | INTERGENIC                    |                    |                                                    |
| SNP_19976_A_8321550 | NC_021163.1    | Ca_Kabuli_Chr04 | 8321550                 | AA                                     | CC                 | CC               | INTERGENIC                    |                    |                                                    |
| SNP_19977_A_8321561 | NC_021163.1    | Ca_Kabuli_Chr04 | 8321561                 | CC                                     | TT                 | TT               | INTERGENIC                    |                    |                                                    |
| SNP_19979_A_8332120 | NC_021163.1    | Ca_Kabuli_Chr04 | 8332120                 | GG                                     | CC                 | CC               | INTERGENIC                    |                    |                                                    |
| SNP_19980_A_8333148 | NC_021163.1    | Ca_Kabuli_Chr04 | 8333148                 | GG                                     | AA                 | AA               | URR                           | 10150702           | uncharacterized LOC10150702                        |
| SNP_19981_A_8333240 | NC_021163.1    | Ca_Kabuli_Chr04 | 8333240                 | AA                                     | TT                 | TT               | URR                           | 10150702           | uncharacterized LOC10150702                        |
| SNP_19982_A_8333387 | NC_021163.1    | Ca_Kabuli_Chr04 | 8333387                 | GG                                     | AA                 | AA               | URR                           | 10150702           | uncharacterized LOC10150702                        |
| SNP_19984_A_8333489 | NC_021163.1    | Ca_Kabuli_Chr04 | 8333489                 | CC                                     | AA                 | AA               | URR                           | 10150702           | uncharacterized LOC10150702                        |
| SNP_19985_A_8334692 | NC_021163.1    | Ca_Kabuli_Chr04 | 8334692                 | CC                                     | TT                 | TT               | DRR                           | 101507390          | mitochondrial ubiquitin ligase activator of NFKB 1 |
| SNP_19986_A_8340242 | NC_021163.1    | Ca_Kabuli_Chr04 | 8340242                 | AA                                     | GG                 | GG               | DRR                           | 101493412          | uncharacterized LOC101493412                       |
| SNP_19988_A_8343019 | NC_021163.1    | Ca_Kabuli_Chr04 | 8343019                 | TT                                     | CC                 | CC               | INTERGENIC                    |                    |                                                    |

| SNPs IDs            | Chromosome IDs | Chromosomes     | Physical positions (bp) | CDC Frontier (Reference genome) | (Pusa 1103 & HPNB) | (ILWC 46 & LPNB) | Sequence Components of genome | Gene accession IDs | Putative functions                 |
|---------------------|----------------|-----------------|-------------------------|---------------------------------|--------------------|------------------|-------------------------------|--------------------|------------------------------------|
| SNP_19989_A_8343100 | NC_021163.1    | Ca_Kabuli_Chr04 | 8343100                 | AA                              | CC                 | CC               | INTERGENIC                    |                    |                                    |
| SNP_19990_A_8343102 | NC_021163.1    | Ca_Kabuli_Chr04 | 8343102                 | AA                              | TT                 | TT               | INTERGENIC                    |                    |                                    |
| SNP_19991_A_8345982 | NC_021163.1    | Ca_Kabuli_Chr04 | 8345982                 | CC                              | TT                 | TT               | DRR                           | 101507698          | uncharacterized LOC101507698       |
| SNP_19992_A_8349125 | NC_021163.1    | Ca_Kabuli_Chr04 | 8349125                 | AA                              | GG                 | GG               | INTERGENIC                    |                    |                                    |
| SNP_19993_A_8350573 | NC_021163.1    | Ca_Kabuli_Chr04 | 8350573                 | GG                              | TT                 | TT               | URR                           | 101507698          | uncharacterized LOC101507698       |
| SNP_19994_A_8350993 | NC_021163.1    | Ca_Kabuli_Chr04 | 8350993                 | CC                              | TT                 | TT               | URR                           | 101507698          | uncharacterized LOC101507698       |
| SNP_19995_A_8351064 | NC_021163.1    | Ca_Kabuli_Chr04 | 8351064                 | TT                              | CC                 | CC               | URR                           | 101507698          | uncharacterized LOC101507698       |
| SNP_19996_A_8351094 | NC_021163.1    | Ca_Kabuli_Chr04 | 8351094                 | CC                              | TT                 | TT               | URR                           | 101507698          | uncharacterized LOC101507698       |
| SNP_19997_A_8352067 | NC_021163.1    | Ca_Kabuli_Chr04 | 8352067                 | TT                              | GG                 | GG               | URR                           | 101507698          | uncharacterized LOC101507698       |
| SNP_19998_A_8354058 | NC_021163.1    | Ca_Kabuli_Chr04 | 8354058                 | AA                              | GG                 | GG               | INTRON                        | 101508027          | uncharacterized LOC101508027       |
| SNP_19999_A_8354314 | NC_021163.1    | Ca_Kabuli_Chr04 | 8354314                 | GG                              | TT                 | TT               | INTRON                        | 101508027          | uncharacterized LOC101508027       |
| SNP_20000_A_8354854 | NC_021163.1    | Ca_Kabuli_Chr04 | 8354854                 | TT                              | CC                 | CC               | INTRON                        | 101508027          | uncharacterized LOC101508027       |
| SNP_20001_A_8360438 | NC_021163.1    | Ca_Kabuli_Chr04 | 8360438                 | GG                              | CC                 | CC               | NON_SYNONYMOUS_CODING         | 101508027          | uncharacterized LOC101508027       |
| SNP_20002_A_8361616 | NC_021163.1    | Ca_Kabuli_Chr04 | 8361616                 | CC                              | TT                 | TT               | INTERGENIC                    |                    |                                    |
| SNP_20003_A_8370216 | NC_021163.1    | Ca_Kabuli_Chr04 | 8370216                 | CC                              | AA                 | AA               | DRR                           | 101508652          | probable glutathione S-transferase |
| SNP_20005_A_8372930 | NC_021163.1    | Ca_Kabuli_Chr04 | 8372930                 | GG                              | CC                 | CC               | URR                           | 101508652          | probable glutathione S-transferase |
| SNP_20006_A_8373139 | NC_021163.1    | Ca_Kabuli_Chr04 | 8373139                 | GG                              | TT                 | TT               | URR                           | 101508652          | probable glutathione S-transferase |
| SNP_20007_A_8373155 | NC_021163.1    | Ca_Kabuli_Chr04 | 8373155                 | AA                              | GG                 | GG               | URR                           | 101508652          | probable glutathione S-transferase |
| SNP_20008_A_8373162 | NC_021163.1    | Ca_Kabuli_Chr04 | 8373162                 | AA                              | GG                 | GG               | URR                           | 101508652          | probable glutathione S-transferase |
| SNP_20010_A_8373255 | NC_021163.1    | Ca_Kabuli_Chr04 | 8373255                 | AA                              | GG                 | GG               | URR                           | 101508652          | probable glutathione S-transferase |
| SNP_20011_A_8373259 | NC_021163.1    | Ca_Kabuli_Chr04 | 8373259                 | TT                              | CC                 | CC               | URR                           | 101508652          | probable glutathione S-transferase |
| SNP_20012_A_8373269 | NC_021163.1    | Ca_Kabuli_Chr04 | 8373269                 | TT                              | CC                 | CC               | URR                           | 101508652          | probable glutathione S-transferase |

| SNPs IDs            | Chromosome IDs | Chromosomes     | Physical positions (bp) | CDC Frontier genome | (Reference genome) | (Pusa 1103 & HPNB) | (ILWC 46 & LPNB) | Sequence Components of genome | Gene accession IDs | Putative functions                                            |
|---------------------|----------------|-----------------|-------------------------|---------------------|--------------------|--------------------|------------------|-------------------------------|--------------------|---------------------------------------------------------------|
| SNP_20013_A_8373288 | NC_021163.1    | Ca_Kabuli_Chr04 | 8373288                 | GG                  |                    | AA                 | AA               | URR                           | 101508652          | probable glutathione S-transferase                            |
| SNP_20014_A_8373346 | NC_021163.1    | Ca_Kabuli_Chr04 | 8373346                 | AA                  |                    | TT                 | TT               | URR                           | 101508652          | probable glutathione S-transferase                            |
| SNP_20016_A_8375490 | NC_021163.1    | Ca_Kabuli_Chr04 | 8375490                 | TT                  |                    | CC                 | CC               | INTERGENIC                    |                    |                                                               |
| SNP_20017_A_8375498 | NC_021163.1    | Ca_Kabuli_Chr04 | 8375498                 | AA                  |                    | TT                 | TT               | INTERGENIC                    |                    |                                                               |
| SNP_20018_A_8375845 | NC_021163.1    | Ca_Kabuli_Chr04 | 8375845                 | AA                  |                    | GG                 | GG               | INTERGENIC                    |                    |                                                               |
| SNP_20021_A_8377438 | NC_021163.1    | Ca_Kabuli_Chr04 | 8377438                 | GG                  |                    | AA                 | AA               | URR                           | 101508970          | Unknown function                                              |
| SNP_20022_A_8377560 | NC_021163.1    | Ca_Kabuli_Chr04 | 8377560                 | TT                  |                    | CC                 | CC               | DRR                           | 101509283          | probable RNA polymerase II transcription factor B subunit 1-1 |
| SNP_20024_A_8377654 | NC_021163.1    | Ca_Kabuli_Chr04 | 8377654                 | CC                  |                    | TT                 | TT               | DRR                           | 101509283          | probable RNA polymerase II transcription factor B subunit 1-1 |
| SNP_20026_A_8377718 | NC_021163.1    | Ca_Kabuli_Chr04 | 8377718                 | AA                  |                    | CC                 | CC               | DRR                           | 101509283          | probable RNA polymerase II transcription factor B subunit 1-1 |
| SNP_20027_A_8379089 | NC_021163.1    | Ca_Kabuli_Chr04 | 8379089                 | AA                  |                    | GG                 | GG               | INTRON                        | 101509283          | probable RNA polymerase II transcription factor B subunit 1-1 |
| SNP_20029_A_8383147 | NC_021163.1    | Ca_Kabuli_Chr04 | 8383147                 | AA                  |                    | GG                 | GG               | INTRON                        | 101509283          | probable RNA polymerase II transcription factor B subunit 1-1 |
| SNP_20030_A_8383149 | NC_021163.1    | Ca_Kabuli_Chr04 | 8383149                 | GG                  |                    | AA                 | AA               | INTRON                        | 101509283          | probable RNA polymerase II transcription factor B subunit 1-1 |
| SNP_20031_A_8384595 | NC_021163.1    | Ca_Kabuli_Chr04 | 8384595                 | AA                  |                    | GG                 | GG               | INTRON                        | 101509283          | probable RNA polymerase II transcription factor B subunit 1-1 |
| SNP_20032_A_8384649 | NC_021163.1    | Ca_Kabuli_Chr04 | 8384649                 | GG                  |                    | AA                 | AA               | INTRON                        | 101509283          | probable RNA polymerase II transcription factor B subunit 1-1 |
| SNP_20034_A_8389543 | NC_021163.1    | Ca_Kabuli_Chr04 | 8389543                 | AA                  |                    | GG                 | GG               | INTRON                        | 101509283          | probable RNA polymerase II transcription factor B subunit 1-1 |
| SNP_20035_A_8391077 | NC_021163.1    | Ca_Kabuli_Chr04 | 8391077                 | AA                  |                    | TT                 | TT               | URR                           | 101509283          | probable RNA polymerase II transcription factor B subunit 1-1 |
| SNP_20036_A_8391079 | NC_021163.1    | Ca_Kabuli_Chr04 | 8391079                 | GG                  |                    | CC                 | CC               | URR                           | 101509283          | probable RNA polymerase II transcription factor B subunit 1-1 |
| SNP_20037_A_8391081 | NC_021163.1    | Ca_Kabuli_Chr04 | 8391081                 | GG                  |                    | AA                 | AA               | URR                           | 101509283          | probable RNA polymerase II transcription factor B subunit 1-1 |
| SNP_20038_A_8391095 | NC_021163.1    | Ca_Kabuli_Chr04 | 8391095                 | TT                  |                    | AA                 | AA               | URR                           | 101509283          | probable RNA polymerase II transcription factor B subunit 1-1 |
| SNP_20039_A_8391097 | NC_021163.1    | Ca_Kabuli_Chr04 | 8391097                 | AA                  |                    | GG                 | GG               | URR                           | 101509283          | probable RNA polymerase II transcription factor B subunit 1-1 |
| SNP_20040_A_8395216 | NC_021163.1    | Ca_Kabuli_Chr04 | 8395216                 | GG                  |                    | TT                 | TT               | INTERGENIC                    |                    |                                                               |
| SNP_20041_A_8395737 | NC_021163.1    | Ca_Kabuli_Chr04 | 8395737                 | GG                  |                    | AA                 | AA               | DRR                           | 101510250          | chaperonin CPN60-2, mitochondrial-like                        |

| SNPs IDs            | Chromosome IDs | Chromosomes     | Physical positions (bp) | CDC Frontier genome (Reference genome) | (Pusa 1103 & HPNB) | (ILWC 46 & LPNB) | Sequence Components of genome | Gene accession IDs | Putative functions                                         |
|---------------------|----------------|-----------------|-------------------------|----------------------------------------|--------------------|------------------|-------------------------------|--------------------|------------------------------------------------------------|
| SNP_20043_A_8396997 | NC_021163.1    | Ca_Kabuli_Chr04 | 8396997                 | GG                                     | AA                 | AA               | URR                           | 101509597          | pentatricopeptide repeat-containing protein At3g23020-like |
| SNP_20044_A_8399356 | NC_021163.1    | Ca_Kabuli_Chr04 | 8399356                 | AA                                     | GG                 | GG               | INTERGENIC                    |                    |                                                            |
| SNP_20045_A_8399391 | NC_021163.1    | Ca_Kabuli_Chr04 | 8399391                 | AA                                     | TT                 | TT               | INTERGENIC                    |                    |                                                            |
| SNP_20046_A_8399394 | NC_021163.1    | Ca_Kabuli_Chr04 | 8399394                 | AA                                     | CC                 | CC               | INTERGENIC                    |                    |                                                            |
| SNP_20047_A_8400105 | NC_021163.1    | Ca_Kabuli_Chr04 | 8400105                 | GG                                     | AA                 | AA               | INTERGENIC                    |                    |                                                            |
| SNP_20049_A_8401867 | NC_021163.1    | Ca_Kabuli_Chr04 | 8401867                 | CC                                     | TT                 | TT               | URR                           | 101510250          | chaperonin CPN60-2, mitochondrial-like                     |
| SNP_20050_A_8402782 | NC_021163.1    | Ca_Kabuli_Chr04 | 8402782                 | AA                                     | CC                 | CC               | URR                           | 101510250          | chaperonin CPN60-2, mitochondrial-like                     |
| SNP_20051_A_8408107 | NC_021163.1    | Ca_Kabuli_Chr04 | 8408107                 | GG                                     | AA                 | AA               | INTRON                        | 101509928          | Unknown function                                           |
| SNP_20052_A_8408118 | NC_021163.1    | Ca_Kabuli_Chr04 | 8408118                 | GG                                     | AA                 | AA               | INTRON                        | 101509928          | Unknown function                                           |
| SNP_20053_A_8409841 | NC_021163.1    | Ca_Kabuli_Chr04 | 8409841                 | GG                                     | AA                 | AA               | URR                           | 101509928          | Unknown function                                           |
| SNP_20054_A_8409846 | NC_021163.1    | Ca_Kabuli_Chr04 | 8409846                 | TT                                     | CC                 | CC               | URR                           | 101509928          | Unknown function                                           |
| SNP_20055_A_8409905 | NC_021163.1    | Ca_Kabuli_Chr04 | 8409905                 | GG                                     | TT                 | TT               | URR                           | 101509928          | Unknown function                                           |
| SNP_20056_A_8410147 | NC_021163.1    | Ca_Kabuli_Chr04 | 8410147                 | TT                                     | GG                 | GG               | URR                           | 101509928          | Unknown function                                           |
| SNP_20057_A_8411493 | NC_021163.1    | Ca_Kabuli_Chr04 | 8411493                 | GG                                     | AA                 | AA               | INTERGENIC                    |                    |                                                            |
| SNP_20058_A_8411501 | NC_021163.1    | Ca_Kabuli_Chr04 | 8411501                 | TT                                     | GG                 | GG               | INTERGENIC                    |                    |                                                            |
| SNP_20059_A_8411528 | NC_021163.1    | Ca_Kabuli_Chr04 | 8411528                 | CC                                     | TT                 | TT               | INTERGENIC                    |                    |                                                            |
| SNP_20060_A_8411537 | NC_021163.1    | Ca_Kabuli_Chr04 | 8411537                 | GG                                     | AA                 | AA               | INTERGENIC                    |                    |                                                            |
| SNP_20061_A_8413734 | NC_021163.1    | Ca_Kabuli_Chr04 | 8413734                 | CC                                     | AA                 | AA               | INTERGENIC                    |                    |                                                            |
| SNP_20062_A_8413750 | NC_021163.1    | Ca_Kabuli_Chr04 | 8413750                 | GG                                     | AA                 | AA               | INTERGENIC                    |                    |                                                            |
| SNP_20064_A_8413770 | NC_021163.1    | Ca_Kabuli_Chr04 | 8413770                 | CC                                     | TT                 | TT               | INTERGENIC                    |                    |                                                            |
| SNP_20065_A_8414031 | NC_021163.1    | Ca_Kabuli_Chr04 | 8414031                 | AA                                     | GG                 | GG               | INTERGENIC                    |                    |                                                            |
| SNP_20066_A_8414039 | NC_021163.1    | Ca_Kabuli_Chr04 | 8414039                 | TT                                     | CC                 | CC               | INTERGENIC                    |                    |                                                            |

| SNPs IDs            | Chromosome IDs | Chromosomes     | Physical positions (bp) | CDC Frontier (Reference genome) | (Pusa 1103 & HPNB) | (ILWC 46 & LPNB) | Sequence Components of genome | Gene accession IDs | Putative functions                              |
|---------------------|----------------|-----------------|-------------------------|---------------------------------|--------------------|------------------|-------------------------------|--------------------|-------------------------------------------------|
| SNP_20067_A_8414070 | NC_021163.1    | Ca_Kabuli_Chr04 | 8414070                 | CC                              | TT                 | TT               | INTERGENIC                    |                    |                                                 |
| SNP_20068_A_8414085 | NC_021163.1    | Ca_Kabuli_Chr04 | 8414085                 | TT                              | CC                 | CC               | INTERGENIC                    |                    |                                                 |
| SNP_20069_A_8414157 | NC_021163.1    | Ca_Kabuli_Chr04 | 8414157                 | TT                              | CC                 | CC               | INTERGENIC                    |                    |                                                 |
| SNP_20070_A_8414160 | NC_021163.1    | Ca_Kabuli_Chr04 | 8414160                 | GG                              | AA                 | AA               | INTERGENIC                    |                    |                                                 |
| SNP_20071_A_8414704 | NC_021163.1    | Ca_Kabuli_Chr04 | 8414704                 | GG                              | TT                 | TT               | INTERGENIC                    |                    |                                                 |
| SNP_20072_A_8414712 | NC_021163.1    | Ca_Kabuli_Chr04 | 8414712                 | AA                              | GG                 | GG               | INTERGENIC                    |                    |                                                 |
| SNP_20073_A_8414719 | NC_021163.1    | Ca_Kabuli_Chr04 | 8414719                 | TT                              | AA                 | AA               | INTERGENIC                    |                    |                                                 |
| SNP_20074_A_8414721 | NC_021163.1    | Ca_Kabuli_Chr04 | 8414721                 | TT                              | AA                 | AA               | INTERGENIC                    |                    |                                                 |
| SNP_20075_A_8414727 | NC_021163.1    | Ca_Kabuli_Chr04 | 8414727                 | TT                              | CC                 | CC               | INTERGENIC                    |                    |                                                 |
| SNP_20076_A_8415883 | NC_021163.1    | Ca_Kabuli_Chr04 | 8415883                 | AA                              | GG                 | GG               | DRR                           | 101510582          | ethylene-responsive transcription factor ERF062 |
| SNP_20077_A_8415884 | NC_021163.1    | Ca_Kabuli_Chr04 | 8415884                 | TT                              | CC                 | CC               | DRR                           | 101510582          | ethylene-responsive transcription factor ERF062 |
| SNP_20078_A_8415888 | NC_021163.1    | Ca_Kabuli_Chr04 | 8415888                 | CC                              | AA                 | AA               | DRR                           | 101510582          | ethylene-responsive transcription factor ERF062 |
| SNP_20079_A_8415898 | NC_021163.1    | Ca_Kabuli_Chr04 | 8415898                 | AA                              | GG                 | GG               | DRR                           | 101510582          | ethylene-responsive transcription factor ERF062 |
| SNP_20080_A_8415911 | NC_021163.1    | Ca_Kabuli_Chr04 | 8415911                 | AA                              | CC                 | CC               | DRR                           | 101510582          | ethylene-responsive transcription factor ERF062 |
| SNP_20081_A_8417652 | NC_021163.1    | Ca_Kabuli_Chr04 | 8417652                 | CC                              | TT                 | TT               | DRR                           | 101510909          | stellacyanin                                    |
| SNP_20082_A_8417674 | NC_021163.1    | Ca_Kabuli_Chr04 | 8417674                 | AA                              | TT                 | TT               | DRR                           | 101510909          | stellacyanin                                    |
| SNP_20084_A_8418852 | NC_021163.1    | Ca_Kabuli_Chr04 | 8418852                 | AA                              | GG                 | GG               | URR                           | 101510582          | ethylene-responsive transcription factor ERF062 |
| SNP_20085_A_8419063 | NC_021163.1    | Ca_Kabuli_Chr04 | 8419063                 | AA                              | GG                 | GG               | URR                           | 101510582          | ethylene-responsive transcription factor ERF062 |
| SNP_20086_A_8419064 | NC_021163.1    | Ca_Kabuli_Chr04 | 8419064                 | AA                              | GG                 | GG               | URR                           | 101510582          | ethylene-responsive transcription factor ERF062 |
| SNP_20087_A_8421511 | NC_021163.1    | Ca_Kabuli_Chr04 | 8421511                 | GG                              | TT                 | TT               | URR                           | 101511222          | uncharacterized LOC101511222                    |
| SNP_20089_A_8422206 | NC_021163.1    | Ca_Kabuli_Chr04 | 8422206                 | GG                              | AA                 | AA               | URR                           | 101511222          | uncharacterized LOC101511222                    |
| SNP_20090_A_8422418 | NC_021163.1    | Ca_Kabuli_Chr04 | 8422418                 | AA                              | GG                 | GG               | URR                           | 101511222          | uncharacterized LOC101511222                    |

| SNPs IDs            | Chromosome IDs | Chromosomes     | Physical positions (bp) | CDC Frontier genome (Reference genome) | (Pusa 1103 & HPNB) | (ILWC 46 & LPNB) | Sequence Components of genome | Gene accession IDs | Putative functions                             |
|---------------------|----------------|-----------------|-------------------------|----------------------------------------|--------------------|------------------|-------------------------------|--------------------|------------------------------------------------|
| SNP_20091_A_8422438 | NC_021163.1    | Ca_Kabuli_Chr04 | 8422438                 | GG                                     | AA                 | AA               | URR                           | 101511222          | uncharacterized LOC101511222                   |
| SNP_20092_A_8423823 | NC_021163.1    | Ca_Kabuli_Chr04 | 8423823                 | CC                                     | TT                 | TT               | INTERGENIC                    |                    |                                                |
| SNP_20093_A_8424811 | NC_021163.1    | Ca_Kabuli_Chr04 | 8424811                 | TT                                     | CC                 | CC               | INTERGENIC                    |                    |                                                |
| SNP_20094_A_8424850 | NC_021163.1    | Ca_Kabuli_Chr04 | 8424850                 | TT                                     | CC                 | CC               | INTERGENIC                    |                    |                                                |
| SNP_20095_A_8424851 | NC_021163.1    | Ca_Kabuli_Chr04 | 8424851                 | TT                                     | CC                 | CC               | INTERGENIC                    |                    |                                                |
| SNP_20096_A_8424879 | NC_021163.1    | Ca_Kabuli_Chr04 | 8424879                 | GG                                     | AA                 | AA               | INTERGENIC                    |                    |                                                |
| SNP_20097_A_8424881 | NC_021163.1    | Ca_Kabuli_Chr04 | 8424881                 | CC                                     | TT                 | TT               | INTERGENIC                    |                    |                                                |
| SNP_20098_A_8424999 | NC_021163.1    | Ca_Kabuli_Chr04 | 8424999                 | TT                                     | CC                 | CC               | INTERGENIC                    |                    |                                                |
| SNP_20099_A_8425301 | NC_021163.1    | Ca_Kabuli_Chr04 | 8425301                 | CC                                     | TT                 | TT               | INTERGENIC                    |                    |                                                |
| SNP_20100_A_8425321 | NC_021163.1    | Ca_Kabuli_Chr04 | 8425321                 | GG                                     | AA                 | AA               | INTERGENIC                    |                    |                                                |
| SNP_20101_A_8425322 | NC_021163.1    | Ca_Kabuli_Chr04 | 8425322                 | AA                                     | TT                 | TT               | INTERGENIC                    |                    |                                                |
| SNP_20102_A_8429318 | NC_021163.1    | Ca_Kabuli_Chr04 | 8429318                 | GG                                     | AA                 | AA               | INTRON                        | 101511538          | polycomb group protein EMBRYONIC FLOWER 2-like |
| SNP_20103_A_8432481 | NC_021163.1    | Ca_Kabuli_Chr04 | 8432481                 | TT                                     | CC                 | CC               | INTRON                        | 101511538          | polycomb group protein EMBRYONIC FLOWER 2-like |
| SNP_20104_A_8440161 | NC_021163.1    | Ca_Kabuli_Chr04 | 8440161                 | TT                                     | AA                 | AA               | INTRON                        | 101511538          | polycomb group protein EMBRYONIC FLOWER 2-like |
| SNP_20106_A_8442257 | NC_021163.1    | Ca_Kabuli_Chr04 | 8442257                 | TT                                     | AA                 | AA               | INTRON                        | 101511538          | polycomb group protein EMBRYONIC FLOWER 2-like |
| SNP_20107_A_8442598 | NC_021163.1    | Ca_Kabuli_Chr04 | 8442598                 | GG                                     | AA                 | AA               | SYNONYMOUS_CODING             | 101511538          | polycomb group protein EMBRYONIC FLOWER 2-like |
| SNP_20108_A_8445827 | NC_021163.1    | Ca_Kabuli_Chr04 | 8445827                 | TT                                     | CC                 | CC               | INTRON                        | 101511538          | polycomb group protein EMBRYONIC FLOWER 2-like |
| SNP_20109_A_8446102 | NC_021163.1    | Ca_Kabuli_Chr04 | 8446102                 | TT                                     | CC                 | CC               | INTERGENIC                    |                    |                                                |
| SNP_20110_A_8448593 | NC_021163.1    | Ca_Kabuli_Chr04 | 8448593                 | AA                                     | GG                 | GG               | URR                           | 101511538          | polycomb group protein EMBRYONIC FLOWER 2-like |
| SNP_20111_A_8448601 | NC_021163.1    | Ca_Kabuli_Chr04 | 8448601                 | TT                                     | AA                 | AA               | URR                           | 101511538          | polycomb group protein EMBRYONIC FLOWER 2-like |
| SNP_20112_A_8454042 | NC_021163.1    | Ca_Kabuli_Chr04 | 8454042                 | GG                                     | AA                 | AA               | INTERGENIC                    |                    |                                                |
| SNP_20113_A_8454163 | NC_021163.1    | Ca_Kabuli_Chr04 | 8454163                 | CC                                     | TT                 | TT               | INTERGENIC                    |                    |                                                |

| SNPs IDs            | Chromosome IDs | Chromosomes     | Physical positions (bp) | CDC Frontier (Reference genome) | (Pusa 1103 & HPNB) | (ILWC 46 & LPNB) | Sequence genome       | Components of | Gene accession IDs | Putative functions                                  |
|---------------------|----------------|-----------------|-------------------------|---------------------------------|--------------------|------------------|-----------------------|---------------|--------------------|-----------------------------------------------------|
| SNP_20114_A_8454184 | NC_021163.1    | Ca_Kabuli_Chr04 | 8454184                 | CC                              | GG                 | GG               | INTERGENIC            |               |                    |                                                     |
| SNP_20115_A_8454198 | NC_021163.1    | Ca_Kabuli_Chr04 | 8454198                 | TT                              | CC                 | CC               | INTERGENIC            |               |                    |                                                     |
| SNP_20116_A_8454218 | NC_021163.1    | Ca_Kabuli_Chr04 | 8454218                 | AA                              | GG                 | GG               | INTERGENIC            |               |                    |                                                     |
| SNP_20117_A_8454243 | NC_021163.1    | Ca_Kabuli_Chr04 | 8454243                 | GG                              | AA                 | AA               | INTERGENIC            |               |                    |                                                     |
| SNP_20118_A_8458075 | NC_021163.1    | Ca_Kabuli_Chr04 | 8458075                 | AA                              | TT                 | TT               | INTERGENIC            |               |                    |                                                     |
| SNP_20119_A_8458717 | NC_021163.1    | Ca_Kabuli_Chr04 | 8458717                 | CC                              | TT                 | TT               | INTERGENIC            |               |                    |                                                     |
| SNP_20120_A_8459387 | NC_021163.1    | Ca_Kabuli_Chr04 | 8459387                 | CC                              | TT                 | TT               | INTERGENIC            |               |                    |                                                     |
| SNP_20121_A_8460149 | NC_021163.1    | Ca_Kabuli_Chr04 | 8460149                 | AA                              | TT                 | TT               | INTERGENIC            |               |                    |                                                     |
| SNP_20122_A_8460659 | NC_021163.1    | Ca_Kabuli_Chr04 | 8460659                 | CC                              | TT                 | TT               | INTERGENIC            |               |                    |                                                     |
| SNP_20123_A_8460669 | NC_021163.1    | Ca_Kabuli_Chr04 | 8460669                 | GG                              | TT                 | TT               | INTERGENIC            |               |                    |                                                     |
| SNP_20124_A_8460676 | NC_021163.1    | Ca_Kabuli_Chr04 | 8460676                 | CC                              | TT                 | TT               | INTERGENIC            |               |                    |                                                     |
| SNP_20125_A_8463548 | NC_021163.1    | Ca_Kabuli_Chr04 | 8463548                 | AA                              | GG                 | GG               | NON_SYNONYMOUS_CODING |               | 101512184          | anthocyanidin 3-O-glucosyltransferase               |
| SNP_20126_A_8463724 | NC_021163.1    | Ca_Kabuli_Chr04 | 8463724                 | GG                              | AA                 | AA               | DRR                   |               | 101512184          | anthocyanidin 3-O-glucosyltransferase               |
| SNP_20128_A_8467303 | NC_021163.1    | Ca_Kabuli_Chr04 | 8467303                 | GG                              | AA                 | AA               | INTERGENIC            |               |                    |                                                     |
| SNP_20129_A_8467633 | NC_021163.1    | Ca_Kabuli_Chr04 | 8467633                 | TT                              | AA                 | AA               | INTERGENIC            |               |                    |                                                     |
| SNP_20130_A_8468354 | NC_021163.1    | Ca_Kabuli_Chr04 | 8468354                 | TT                              | CC                 | CC               | INTERGENIC            |               |                    |                                                     |
| SNP_20131_A_8468381 | NC_021163.1    | Ca_Kabuli_Chr04 | 8468381                 | CC                              | TT                 | TT               | INTERGENIC            |               |                    |                                                     |
| SNP_20132_A_8468413 | NC_021163.1    | Ca_Kabuli_Chr04 | 8468413                 | AA                              | GG                 | GG               | INTERGENIC            |               |                    |                                                     |
| SNP_20133_A_8471174 | NC_021163.1    | Ca_Kabuli_Chr04 | 8471174                 | AA                              | GG                 | GG               | INTERGENIC            |               |                    |                                                     |
| SNP_20135_A_8471543 | NC_021163.1    | Ca_Kabuli_Chr04 | 8471543                 | CC                              | TT                 | TT               | DRR                   |               | 101512819          | ATP-dependent 6-phosphofructokinase 4, chloroplasic |
| SNP_20136_A_8474050 | NC_021163.1    | Ca_Kabuli_Chr04 | 8474050                 | AA                              | TT                 | TT               | INTRON                |               | 101512819          | ATP-dependent 6-phosphofructokinase 4, chloroplasic |
| SNP_20137_A_8475123 | NC_021163.1    | Ca_Kabuli_Chr04 | 8475123                 | TT                              | CC                 | CC               | INTRON                |               | 101512819          | ATP-dependent 6-phosphofructokinase 4, chloroplasic |

| SNPs IDs            | Chromosome IDs | Chromosomes     | Physical positions (bp) | CDC Frontier genome (Reference genome) | (Pusa 1103 & HPNB) | (ILWC 46 & LPNB) | Sequence Components of genome | Gene accession IDs | Putative functions                                   |
|---------------------|----------------|-----------------|-------------------------|----------------------------------------|--------------------|------------------|-------------------------------|--------------------|------------------------------------------------------|
| SNP_20139_A_8475168 | NC_021163.1    | Ca_Kabuli_Chr04 | 8475168                 | GG                                     | CC                 | CC               | INTRON                        | 101512819          | ATP-dependent 6-phosphofructokinase 4, chloroplastic |
| SNP_20140_A_8478191 | NC_021163.1    | Ca_Kabuli_Chr04 | 8478191                 | GG                                     | AA                 | AA               | INTERGENIC                    |                    |                                                      |
| SNP_20141_A_8478230 | NC_021163.1    | Ca_Kabuli_Chr04 | 8478230                 | AA                                     | CC                 | CC               | INTERGENIC                    |                    |                                                      |
| SNP_20143_A_8479518 | NC_021163.1    | Ca_Kabuli_Chr04 | 8479518                 | TT                                     | CC                 | CC               | INTERGENIC                    |                    |                                                      |
| SNP_20144_A_8480713 | NC_021163.1    | Ca_Kabuli_Chr04 | 8480713                 | CC                                     | AA                 | AA               | INTERGENIC                    |                    |                                                      |
| SNP_20145_A_8480714 | NC_021163.1    | Ca_Kabuli_Chr04 | 8480714                 | TT                                     | CC                 | CC               | INTERGENIC                    |                    |                                                      |
| SNP_20146_A_8480716 | NC_021163.1    | Ca_Kabuli_Chr04 | 8480716                 | TT                                     | AA                 | AA               | INTERGENIC                    |                    |                                                      |
| SNP_20147_A_8481759 | NC_021163.1    | Ca_Kabuli_Chr04 | 8481759                 | CC                                     | TT                 | TT               | URR                           | 101512819          | ATP-dependent 6-phosphofructokinase 4, chloroplastic |
| SNP_20148_A_8481957 | NC_021163.1    | Ca_Kabuli_Chr04 | 8481957                 | GG                                     | AA                 | AA               | URR                           | 101512819          | ATP-dependent 6-phosphofructokinase 4, chloroplastic |
| SNP_20149_A_8482331 | NC_021163.1    | Ca_Kabuli_Chr04 | 8482331                 | GG                                     | AA                 | AA               | DRR                           | 101513364          | WD repeat-containing protein WRAP73                  |
| SNP_20150_A_8482379 | NC_021163.1    | Ca_Kabuli_Chr04 | 8482379                 | AA                                     | GG                 | GG               | DRR                           | 101513364          | WD repeat-containing protein WRAP73                  |
| SNP_20151_A_8482560 | NC_021163.1    | Ca_Kabuli_Chr04 | 8482560                 | GG                                     | CC                 | CC               | DRR                           | 101513364          | WD repeat-containing protein WRAP73                  |
| SNP_20152_A_8482782 | NC_021163.1    | Ca_Kabuli_Chr04 | 8482782                 | GG                                     | AA                 | AA               | DRR                           | 101513364          | WD repeat-containing protein WRAP73                  |
| SNP_20153_A_8483053 | NC_021163.1    | Ca_Kabuli_Chr04 | 8483053                 | GG                                     | AA                 | AA               | DRR                           | 101513364          | WD repeat-containing protein WRAP73                  |
| SNP_20154_A_8483063 | NC_021163.1    | Ca_Kabuli_Chr04 | 8483063                 | CC                                     | AA                 | AA               | DRR                           | 101513364          | WD repeat-containing protein WRAP73                  |
| SNP_20155_A_8489407 | NC_021163.1    | Ca_Kabuli_Chr04 | 8489407                 | TT                                     | AA                 | AA               | URR                           | 101513364          | WD repeat-containing protein WRAP73                  |
| SNP_20156_A_8489417 | NC_021163.1    | Ca_Kabuli_Chr04 | 8489417                 | GG                                     | TT                 | TT               | URR                           | 101513364          | WD repeat-containing protein WRAP73                  |
| SNP_20158_A_8494149 | NC_021163.1    | Ca_Kabuli_Chr04 | 8494149                 | AA                                     | TT                 | TT               | INTRON                        | 101513682          | putative E3 ubiquitin-protein ligase LIN             |
| SNP_20160_A_8499663 | NC_021163.1    | Ca_Kabuli_Chr04 | 8499663                 | TT                                     | CC                 | CC               | INTERGENIC                    |                    |                                                      |
| SNP_20161_A_8499968 | NC_021163.1    | Ca_Kabuli_Chr04 | 8499968                 | GG                                     | CC                 | CC               | INTERGENIC                    |                    |                                                      |
| SNP_20162_A_8500902 | NC_021163.1    | Ca_Kabuli_Chr04 | 8500902                 | CC                                     | AA                 | AA               | DRR                           | 101514252          | mitochondrial uncoupling protein 3                   |
| SNP_20164_A_8502411 | NC_021163.1    | Ca_Kabuli_Chr04 | 8502411                 | CC                                     | TT                 | TT               | URR                           | 101513682          | putative E3 ubiquitin-protein ligase LIN             |



| SNPs IDs            | Chromosome IDs | Chromosomes     | Physical positions (bp) | CDC Frontier (Reference genome) | (Pusa 1103 & HPNB) | (ILWC 46 & LPNB) | Sequence Components of genome | Gene accession IDs | Putative functions                       |
|---------------------|----------------|-----------------|-------------------------|---------------------------------|--------------------|------------------|-------------------------------|--------------------|------------------------------------------|
| SNP_20165_A_8502419 | NC_021163.1    | Ca_Kabuli_Chr04 | 8502419                 | TT                              | CC                 | CC               | URR                           | 101513682          | putative E3 ubiquitin-protein ligase LIN |
| SNP_20166_A_8502857 | NC_021163.1    | Ca_Kabuli_Chr04 | 8502857                 | TT                              | CC                 | CC               | INTERGENIC                    |                    |                                          |
| SNP_20167_A_8502888 | NC_021163.1    | Ca_Kabuli_Chr04 | 8502888                 | CC                              | TT                 | TT               | INTERGENIC                    |                    |                                          |
| SNP_20168_A_8503209 | NC_021163.1    | Ca_Kabuli_Chr04 | 8503209                 | AA                              | TT                 | TT               | INTERGENIC                    |                    |                                          |
| SNP_20169_A_8505107 | NC_021163.1    | Ca_Kabuli_Chr04 | 8505107                 | AA                              | CC                 | CC               | DRR                           | 101514568          | nuclear pore complex protein NUP1        |
| SNP_20170_A_8508878 | NC_021163.1    | Ca_Kabuli_Chr04 | 8508878                 | AA                              | GG                 | GG               | INTRON                        | 101514568          | nuclear pore complex protein NUP1        |
| SNP_20171_A_8508935 | NC_021163.1    | Ca_Kabuli_Chr04 | 8508935                 | TT                              | AA                 | AA               | INTRON                        | 101514568          | nuclear pore complex protein NUP1        |
| SNP_20173_A_8512666 | NC_021163.1    | Ca_Kabuli_Chr04 | 8512666                 | AA                              | GG                 | GG               | INTERGENIC                    |                    |                                          |
| SNP_20175_A_8514969 | NC_021163.1    | Ca_Kabuli_Chr04 | 8514969                 | GG                              | TT                 | TT               | URR                           | 101514568          | nuclear pore complex protein NUP1        |
| SNP_20176_A_8515197 | NC_021163.1    | Ca_Kabuli_Chr04 | 8515197                 | TT                              | CC                 | CC               | URR                           | 101514568          | nuclear pore complex protein NUP1        |
| SNP_20177_A_8515304 | NC_021163.1    | Ca_Kabuli_Chr04 | 8515304                 | CC                              | TT                 | TT               | URR                           | 101514568          | nuclear pore complex protein NUP1        |
| SNP_20178_A_8515309 | NC_021163.1    | Ca_Kabuli_Chr04 | 8515309                 | TT                              | CC                 | CC               | URR                           | 101514568          | nuclear pore complex protein NUP1        |
| SNP_20179_A_8515830 | NC_021163.1    | Ca_Kabuli_Chr04 | 8515830                 | GG                              | TT                 | TT               | URR                           | 101514568          | nuclear pore complex protein NUP1        |
| SNP_20180_A_8515832 | NC_021163.1    | Ca_Kabuli_Chr04 | 8515832                 | AA                              | GG                 | GG               | URR                           | 101514568          | nuclear pore complex protein NUP1        |
| SNP_20181_A_8517092 | NC_021163.1    | Ca_Kabuli_Chr04 | 8517092                 | CC                              | GG                 | GG               | DRR                           | 101514891          | uncharacterized LOC101514891             |
| SNP_20183_A_8522144 | NC_021163.1    | Ca_Kabuli_Chr04 | 8522144                 | TT                              | CC                 | CC               | INTERGENIC                    |                    |                                          |
| SNP_20185_A_8522247 | NC_021163.1    | Ca_Kabuli_Chr04 | 8522247                 | AA                              | GG                 | GG               | INTERGENIC                    |                    |                                          |
| SNP_20186_A_8522268 | NC_021163.1    | Ca_Kabuli_Chr04 | 8522268                 | CC                              | TT                 | TT               | INTERGENIC                    |                    |                                          |
| SNP_20188_A_8548515 | NC_021163.1    | Ca_Kabuli_Chr04 | 8548515                 | TT                              | AA                 | AA               | URR                           | 101494368          | Unknown function                         |
| SNP_20189_A_8568323 | NC_021163.1    | Ca_Kabuli_Chr04 | 8568323                 | TT                              | AA                 | AA               | DRR                           | 101491969          | nudix hydrolase 26, chloroplastic        |
| SNP_20191_A_8612753 | NC_021163.1    | Ca_Kabuli_Chr04 | 8612753                 | TT                              | AA                 | AA               | INTERGENIC                    |                    |                                          |
| SNP_20192_A_8612768 | NC_021163.1    | Ca_Kabuli_Chr04 | 8612768                 | AA                              | TT                 | TT               | INTERGENIC                    |                    |                                          |

| SNPs IDs            | Chromosome IDs | Chromosomes     | Physical positions (bp) | CDC Frontier genome (Reference genome) | (Pusa 1103 & HPNB) | (ILWC 46 & LPNB) | Sequence Components of genome | Gene accession IDs | Putative functions           |
|---------------------|----------------|-----------------|-------------------------|----------------------------------------|--------------------|------------------|-------------------------------|--------------------|------------------------------|
| SNP_20193_A_8613496 | NC_021163.1    | Ca_Kabuli_Chr04 | 8613496                 | TT                                     | CC                 | CC               | INTERGENIC                    |                    |                              |
| SNP_20195_A_8613793 | NC_021163.1    | Ca_Kabuli_Chr04 | 8613793                 | CC                                     | TT                 | TT               | INTERGENIC                    |                    |                              |
| SNP_20196_A_8614053 | NC_021163.1    | Ca_Kabuli_Chr04 | 8614053                 | TT                                     | AA                 | AA               | INTERGENIC                    |                    |                              |
| SNP_20198_A_8622180 | NC_021163.1    | Ca_Kabuli_Chr04 | 8622180                 | CC                                     | TT                 | TT               | URR                           | 101493943          | uncharacterized LOC101493943 |
| SNP_20199_A_8622936 | NC_021163.1    | Ca_Kabuli_Chr04 | 8622936                 | TT                                     | CC                 | CC               | URR                           | 101493943          | uncharacterized LOC101493943 |
| SNP_20200_A_8624061 | NC_021163.1    | Ca_Kabuli_Chr04 | 8624061                 | AA                                     | GG                 | GG               | INTERGENIC                    |                    |                              |
| SNP_20201_A_8624091 | NC_021163.1    | Ca_Kabuli_Chr04 | 8624091                 | AA                                     | GG                 | GG               | INTERGENIC                    |                    |                              |
| SNP_20202_A_8625673 | NC_021163.1    | Ca_Kabuli_Chr04 | 8625673                 | AA                                     | GG                 | GG               | DRR                           | 101494270          | shugoshin-1                  |
| SNP_20203_A_8625683 | NC_021163.1    | Ca_Kabuli_Chr04 | 8625683                 | TT                                     | CC                 | CC               | DRR                           | 101494270          | shugoshin-1                  |
| SNP_20204_A_8625699 | NC_021163.1    | Ca_Kabuli_Chr04 | 8625699                 | CC                                     | TT                 | TT               | DRR                           | 101494270          | shugoshin-1                  |
| SNP_20205_A_8625705 | NC_021163.1    | Ca_Kabuli_Chr04 | 8625705                 | CC                                     | TT                 | TT               | DRR                           | 101494270          | shugoshin-1                  |
| SNP_20206_A_8625717 | NC_021163.1    | Ca_Kabuli_Chr04 | 8625717                 | TT                                     | AA                 | AA               | DRR                           | 101494270          | shugoshin-1                  |
| SNP_20207_A_8625724 | NC_021163.1    | Ca_Kabuli_Chr04 | 8625724                 | GG                                     | AA                 | AA               | DRR                           | 101494270          | shugoshin-1                  |
| SNP_20208_A_8625725 | NC_021163.1    | Ca_Kabuli_Chr04 | 8625725                 | TT                                     | CC                 | CC               | DRR                           | 101494270          | shugoshin-1                  |
| SNP_20209_A_8625746 | NC_021163.1    | Ca_Kabuli_Chr04 | 8625746                 | CC                                     | TT                 | TT               | DRR                           | 101494270          | shugoshin-1                  |
| SNP_20210_A_8625755 | NC_021163.1    | Ca_Kabuli_Chr04 | 8625755                 | GG                                     | AA                 | AA               | DRR                           | 101494270          | shugoshin-1                  |
| SNP_20211_A_8626074 | NC_021163.1    | Ca_Kabuli_Chr04 | 8626074                 | AA                                     | GG                 | GG               | DRR                           | 101494270          | shugoshin-1                  |
| SNP_20212_A_8626079 | NC_021163.1    | Ca_Kabuli_Chr04 | 8626079                 | AA                                     | GG                 | GG               | DRR                           | 101494270          | shugoshin-1                  |
| SNP_20213_A_8626080 | NC_021163.1    | Ca_Kabuli_Chr04 | 8626080                 | GG                                     | TT                 | TT               | DRR                           | 101494270          | shugoshin-1                  |
| SNP_20214_A_8626090 | NC_021163.1    | Ca_Kabuli_Chr04 | 8626090                 | AA                                     | TT                 | TT               | DRR                           | 101494270          | shugoshin-1                  |
| SNP_20215_A_8630799 | NC_021163.1    | Ca_Kabuli_Chr04 | 8630799                 | CC                                     | TT                 | TT               | URR                           | 101494270          | shugoshin-1                  |
| SNP_20216_A_8633605 | NC_021163.1    | Ca_Kabuli_Chr04 | 8633605                 | TT                                     | AA                 | AA               | INTERGENIC                    |                    |                              |

| SNPs IDs            | Chromosome IDs | Chromosomes     | Physical positions (bp) | CDC Frontier (Reference genome) | (Pusa 1103 & HPNB) | (ILWC 46 & LPNB) | Sequence Components of genome | Gene accession IDs | Putative functions                               |
|---------------------|----------------|-----------------|-------------------------|---------------------------------|--------------------|------------------|-------------------------------|--------------------|--------------------------------------------------|
| SNP_20217_A_8633611 | NC_021163.1    | Ca_Kabuli_Chr04 | 8633611                 | TT                              | CC                 | CC               | INTERGENIC                    |                    |                                                  |
| SNP_20218_A_8633688 | NC_021163.1    | Ca_Kabuli_Chr04 | 8633688                 | GG                              | AA                 | AA               | INTERGENIC                    |                    |                                                  |
| SNP_20219_A_8635646 | NC_021163.1    | Ca_Kabuli_Chr04 | 8635646                 | TT                              | AA                 | AA               | INTERGENIC                    |                    |                                                  |
| SNP_20220_A_8639647 | NC_021163.1    | Ca_Kabuli_Chr04 | 8639647                 | TT                              | CC                 | CC               | DRR                           | 101494578          | uncharacterized LOC101494578                     |
| SNP_20221_A_8643533 | NC_021163.1    | Ca_Kabuli_Chr04 | 8643533                 | TT                              | GG                 | GG               | INTERGENIC                    |                    |                                                  |
| SNP_20222_A_8643895 | NC_021163.1    | Ca_Kabuli_Chr04 | 8643895                 | AA                              | GG                 | GG               | INTERGENIC                    |                    |                                                  |
| SNP_20223_A_8643896 | NC_021163.1    | Ca_Kabuli_Chr04 | 8643896                 | AA                              | GG                 | GG               | INTERGENIC                    |                    |                                                  |
| SNP_20224_A_8648091 | NC_021163.1    | Ca_Kabuli_Chr04 | 8648091                 | TT                              | GG                 | GG               | INTRON                        | 101494893          | myb family transcription factor APL-like         |
| SNP_20225_A_8648140 | NC_021163.1    | Ca_Kabuli_Chr04 | 8648140                 | GG                              | CC                 | CC               | INTRON                        | 101494893          | myb family transcription factor APL-like         |
| SNP_20226_A_8660115 | NC_021163.1    | Ca_Kabuli_Chr04 | 8660115                 | TT                              | AA                 | AA               | SYNONYMOUS_CODING             | 101495647          | putative disease resistance RPP13-like protein 2 |
| SNP_20227_A_8661708 | NC_021163.1    | Ca_Kabuli_Chr04 | 8661708                 | CC                              | TT                 | TT               | INTERGENIC                    |                    |                                                  |
| SNP_20228_A_8661795 | NC_021163.1    | Ca_Kabuli_Chr04 | 8661795                 | AA                              | TT                 | TT               | INTERGENIC                    |                    |                                                  |
| SNP_20229_A_8662718 | NC_021163.1    | Ca_Kabuli_Chr04 | 8662718                 | CC                              | GG                 | GG               | URR                           | 101495647          | putative disease resistance RPP13-like protein 2 |
| SNP_20230_A_8666356 | NC_021163.1    | Ca_Kabuli_Chr04 | 8666356                 | CC                              | TT                 | TT               | DRR                           | 101496750          | putative disease resistance RPP13-like protein 2 |
| SNP_20231_A_8666365 | NC_021163.1    | Ca_Kabuli_Chr04 | 8666365                 | CC                              | GG                 | GG               | DRR                           | 101496750          | putative disease resistance RPP13-like protein 2 |
| SNP_20232_A_8666554 | NC_021163.1    | Ca_Kabuli_Chr04 | 8666554                 | CC                              | AA                 | AA               | DRR                           | 101496750          | putative disease resistance RPP13-like protein 2 |
| SNP_20233_A_8666656 | NC_021163.1    | Ca_Kabuli_Chr04 | 8666656                 | CC                              | GG                 | GG               | URR                           | 101496195          | uncharacterized LOC101496195                     |
| SNP_20234_A_8666710 | NC_021163.1    | Ca_Kabuli_Chr04 | 8666710                 | AA                              | GG                 | GG               | URR                           | 101496195          | uncharacterized LOC101496195                     |
| SNP_20235_A_8666722 | NC_021163.1    | Ca_Kabuli_Chr04 | 8666722                 | GG                              | AA                 | AA               | URR                           | 101496195          | uncharacterized LOC101496195                     |
| SNP_20236_A_8668387 | NC_021163.1    | Ca_Kabuli_Chr04 | 8668387                 | GG                              | AA                 | AA               | URR                           | 101496195          | uncharacterized LOC101496195                     |
| SNP_20237_A_8668393 | NC_021163.1    | Ca_Kabuli_Chr04 | 8668393                 | AA                              | GG                 | GG               | URR                           | 101496195          | uncharacterized LOC101496195                     |
| SNP_20238_A_8668440 | NC_021163.1    | Ca_Kabuli_Chr04 | 8668440                 | AA                              | CC                 | CC               | URR                           | 101496195          | uncharacterized LOC101496195                     |

| SNPs IDs            | Chromosome IDs | Chromosomes     | Physical positions (bp) | CDC Frontier (Reference genome) | (Pusa 1103 & HPNB) | (ILWC 46 & LPNB) | Sequence Components of genome | Gene accession IDs | Putative functions                               |
|---------------------|----------------|-----------------|-------------------------|---------------------------------|--------------------|------------------|-------------------------------|--------------------|--------------------------------------------------|
| SNP_20239_A_8668460 | NC_021163.1    | Ca_Kabuli_Chr04 | 8668460                 | GG                              | AA                 | AA               | URR                           | 101496195          | uncharacterized LOC101496195                     |
| SNP_20240_A_8677398 | NC_021163.1    | Ca_Kabuli_Chr04 | 8677398                 | CC                              | AA                 | AA               | URR                           | 101495324          | uncharacterized LOC101495324                     |
| SNP_20241_A_8677470 | NC_021163.1    | Ca_Kabuli_Chr04 | 8677470                 | TT                              | AA                 | AA               | URR                           | 101495324          | uncharacterized LOC101495324                     |
| SNP_20242_A_8677513 | NC_021163.1    | Ca_Kabuli_Chr04 | 8677513                 | GG                              | AA                 | AA               | URR                           | 101495324          | uncharacterized LOC101495324                     |
| SNP_20243_A_8683826 | NC_021163.1    | Ca_Kabuli_Chr04 | 8683826                 | TT                              | CC                 | CC               | NON_SYNONYMOUS_CODING         | 101497058          | putative disease resistance RPP13-like protein 2 |
| SNP_20244_A_8685068 | NC_021163.1    | Ca_Kabuli_Chr04 | 8685068                 | GG                              | CC                 | CC               | NON_SYNONYMOUS_CODING         | 101497058          | putative disease resistance RPP13-like protein 2 |
| SNP_20245_A_8686517 | NC_021163.1    | Ca_Kabuli_Chr04 | 8686517                 | TT                              | CC                 | CC               | INTERGENIC                    |                    |                                                  |
| SNP_20246_A_8687848 | NC_021163.1    | Ca_Kabuli_Chr04 | 8687848                 | CC                              | AA                 | AA               | URR                           | 101497058          | putative disease resistance RPP13-like protein 2 |
| SNP_20247_A_8688539 | NC_021163.1    | Ca_Kabuli_Chr04 | 8688539                 | GG                              | AA                 | AA               | URR                           | 101497058          | putative disease resistance RPP13-like protein 2 |
| SNP_20248_A_8688544 | NC_021163.1    | Ca_Kabuli_Chr04 | 8688544                 | AA                              | GG                 | GG               | URR                           | 101497058          | putative disease resistance RPP13-like protein 2 |
| SNP_20249_A_8688552 | NC_021163.1    | Ca_Kabuli_Chr04 | 8688552                 | CC                              | GG                 | GG               | URR                           | 101497058          | putative disease resistance RPP13-like protein 2 |
| SNP_20250_A_8688562 | NC_021163.1    | Ca_Kabuli_Chr04 | 8688562                 | CC                              | AA                 | AA               | URR                           | 101497058          | putative disease resistance RPP13-like protein 2 |
| SNP_20252_A_8689189 | NC_021163.1    | Ca_Kabuli_Chr04 | 8689189                 | TT                              | CC                 | CC               | INTERGENIC                    |                    |                                                  |
| SNP_20253_A_8689200 | NC_021163.1    | Ca_Kabuli_Chr04 | 8689200                 | GG                              | TT                 | TT               | INTERGENIC                    |                    |                                                  |
| SNP_20254_A_8689227 | NC_021163.1    | Ca_Kabuli_Chr04 | 8689227                 | GG                              | TT                 | TT               | INTERGENIC                    |                    |                                                  |
| SNP_20255_A_8689355 | NC_021163.1    | Ca_Kabuli_Chr04 | 8689355                 | CC                              | GG                 | GG               | INTERGENIC                    |                    |                                                  |
| SNP_20256_A_8689359 | NC_021163.1    | Ca_Kabuli_Chr04 | 8689359                 | TT                              | GG                 | GG               | INTERGENIC                    |                    |                                                  |
| SNP_20257_A_8689365 | NC_021163.1    | Ca_Kabuli_Chr04 | 8689365                 | TT                              | CC                 | CC               | INTERGENIC                    |                    |                                                  |
| SNP_20258_A_8689376 | NC_021163.1    | Ca_Kabuli_Chr04 | 8689376                 | CC                              | TT                 | TT               | INTERGENIC                    |                    |                                                  |
| SNP_20259_A_8690027 | NC_021163.1    | Ca_Kabuli_Chr04 | 8690027                 | AA                              | TT                 | TT               | DRR                           | 101497394          | pullulanase 1, chloroplastic                     |
| SNP_20260_A_8690253 | NC_021163.1    | Ca_Kabuli_Chr04 | 8690253                 | AA                              | TT                 | TT               | DRR                           | 101497394          | pullulanase 1, chloroplastic                     |
| SNP_20261_A_8690313 | NC_021163.1    | Ca_Kabuli_Chr04 | 8690313                 | AA                              | GG                 | GG               | DRR                           | 101497394          | pullulanase 1, chloroplastic                     |

| SNPs IDs            | Chromosome IDs | Chromosomes     | Physical positions (bp) | CDC Frontier (Reference genome) | (Pusa 1103 & HPNB) | (ILWC 46 & LPNB) | Sequence Components of genome | Gene accession IDs | Putative functions                      |
|---------------------|----------------|-----------------|-------------------------|---------------------------------|--------------------|------------------|-------------------------------|--------------------|-----------------------------------------|
| SNP_20262_A_8690435 | NC_021163.1    | Ca_Kabuli_Chr04 | 8690435                 | AA                              | CC                 | CC               | DRR                           | 101497394          | pullulanase 1, chloroplastic            |
| SNP_20263_A_8690491 | NC_021163.1    | Ca_Kabuli_Chr04 | 8690491                 | AA                              | GG                 | GG               | DRR                           | 101497394          | pullulanase 1, chloroplastic            |
| SNP_20264_A_8697938 | NC_021163.1    | Ca_Kabuli_Chr04 | 8697938                 | AA                              | GG                 | GG               | INTRON                        | 101497394          | pullulanase 1, chloroplastic            |
| SNP_20266_A_8704226 | NC_021163.1    | Ca_Kabuli_Chr04 | 8704226                 | AA                              | CC                 | CC               | URR                           | 101497848          | 60S ribosomal protein L6, mitochondrial |
| SNP_20268_A_8704943 | NC_021163.1    | Ca_Kabuli_Chr04 | 8704943                 | GG                              | CC                 | CC               | URR                           | 101497848          | 60S ribosomal protein L6, mitochondrial |
| SNP_20269_A_8705007 | NC_021163.1    | Ca_Kabuli_Chr04 | 8705007                 | TT                              | CC                 | CC               | URR                           | 101497848          | 60S ribosomal protein L6, mitochondrial |
| SNP_20271_A_8708245 | NC_021163.1    | Ca_Kabuli_Chr04 | 8708245                 | GG                              | AA                 | AA               | INTERGENIC                    |                    |                                         |
| SNP_20272_A_8708353 | NC_021163.1    | Ca_Kabuli_Chr04 | 8708353                 | TT                              | CC                 | CC               | INTERGENIC                    |                    |                                         |
| SNP_20273_A_8708507 | NC_021163.1    | Ca_Kabuli_Chr04 | 8708507                 | TT                              | CC                 | CC               | INTERGENIC                    |                    |                                         |
| SNP_20274_A_8709642 | NC_021163.1    | Ca_Kabuli_Chr04 | 8709642                 | GG                              | AA                 | AA               | INTERGENIC                    |                    |                                         |
| SNP_20275_A_8709643 | NC_021163.1    | Ca_Kabuli_Chr04 | 8709643                 | AA                              | GG                 | GG               | INTERGENIC                    |                    |                                         |
| SNP_20278_A_8711391 | NC_021163.1    | Ca_Kabuli_Chr04 | 8711391                 | GG                              | TT                 | TT               | DRR                           | 101495649          | zinc finger protein ZAT5                |
| SNP_20279_A_8711434 | NC_021163.1    | Ca_Kabuli_Chr04 | 8711434                 | TT                              | CC                 | CC               | DRR                           | 101495649          | zinc finger protein ZAT5                |
| SNP_20280_A_8713259 | NC_021163.1    | Ca_Kabuli_Chr04 | 8713259                 | AA                              | TT                 | TT               | URR                           | 101495649          | zinc finger protein ZAT5                |
| SNP_20281_A_8714360 | NC_021163.1    | Ca_Kabuli_Chr04 | 8714360                 | AA                              | GG                 | GG               | URR                           | 101495649          | zinc finger protein ZAT5                |
| SNP_20282_A_8714378 | NC_021163.1    | Ca_Kabuli_Chr04 | 8714378                 | TT                              | CC                 | CC               | URR                           | 101495649          | zinc finger protein ZAT5                |
| SNP_20283_A_8715351 | NC_021163.1    | Ca_Kabuli_Chr04 | 8715351                 | AA                              | CC                 | CC               | INTERGENIC                    |                    |                                         |
| SNP_20284_A_8719050 | NC_021163.1    | Ca_Kabuli_Chr04 | 8719050                 | CC                              | TT                 | TT               | INTRON                        | 101498163          | monocopper oxidase-like protein SKU5    |
| SNP_20285_A_8720049 | NC_021163.1    | Ca_Kabuli_Chr04 | 8720049                 | CC                              | AA                 | AA               | SYNONYMOUS_CODING             | 101498163          | monocopper oxidase-like protein SKU5    |
| SNP_20287_A_8723882 | NC_021163.1    | Ca_Kabuli_Chr04 | 8723882                 | AA                              | CC                 | CC               | INTERGENIC                    |                    |                                         |
| SNP_20288_A_8723964 | NC_021163.1    | Ca_Kabuli_Chr04 | 8723964                 | TT                              | CC                 | CC               | INTERGENIC                    |                    |                                         |
| SNP_20289_A_8725987 | NC_021163.1    | Ca_Kabuli_Chr04 | 8725987                 | AA                              | GG                 | GG               | INTERGENIC                    |                    |                                         |

| SNPs IDs            | Chromosome IDs | Chromosomes     | Physical positions (bp) | CDC Frontier genome (Reference genome) | (Pusa 1103 & HPNB) | (ILWC 46 & LPNB) | Sequence Components of genome | Gene accession IDs | Putative functions                  |
|---------------------|----------------|-----------------|-------------------------|----------------------------------------|--------------------|------------------|-------------------------------|--------------------|-------------------------------------|
| SNP_20290_A_8726006 | NC_021163.1    | Ca_Kabuli_Chr04 | 8726006                 | GG                                     | AA                 | AA               | INTERGENIC                    |                    |                                     |
| SNP_20291_A_8726023 | NC_021163.1    | Ca_Kabuli_Chr04 | 8726023                 | GG                                     | AA                 | AA               | INTERGENIC                    |                    |                                     |
| SNP_20292_A_8726314 | NC_021163.1    | Ca_Kabuli_Chr04 | 8726314                 | GG                                     | AA                 | AA               | INTERGENIC                    |                    |                                     |
| SNP_20293_A_8726319 | NC_021163.1    | Ca_Kabuli_Chr04 | 8726319                 | CC                                     | TT                 | TT               | INTERGENIC                    |                    |                                     |
| SNP_20294_A_8726342 | NC_021163.1    | Ca_Kabuli_Chr04 | 8726342                 | CC                                     | TT                 | TT               | INTERGENIC                    |                    |                                     |
| SNP_20295_A_8729476 | NC_021163.1    | Ca_Kabuli_Chr04 | 8729476                 | GG                                     | TT                 | TT               | INTERGENIC                    |                    |                                     |
| SNP_20296_A_8730431 | NC_021163.1    | Ca_Kabuli_Chr04 | 8730431                 | TT                                     | CC                 | CC               | INTERGENIC                    |                    |                                     |
| SNP_20298_A_8730650 | NC_021163.1    | Ca_Kabuli_Chr04 | 8730650                 | CC                                     | TT                 | TT               | INTERGENIC                    |                    |                                     |
| SNP_20301_A_8734140 | NC_021163.1    | Ca_Kabuli_Chr04 | 8734140                 | CC                                     | TT                 | TT               | URR                           | 101495972          | agamous-like MADS-box protein AGL80 |
| SNP_20302_A_8734156 | NC_021163.1    | Ca_Kabuli_Chr04 | 8734156                 | AA                                     | TT                 | TT               | URR                           | 101495972          | agamous-like MADS-box protein AGL80 |
| SNP_20303_A_8734425 | NC_021163.1    | Ca_Kabuli_Chr04 | 8734425                 | CC                                     | TT                 | TT               | DRR                           | 101498490          | ras-related protein RABC2a-like     |
| SNP_20304_A_8736143 | NC_021163.1    | Ca_Kabuli_Chr04 | 8736143                 | CC                                     | TT                 | TT               | INTERGENIC                    |                    |                                     |
| SNP_20305_A_8737257 | NC_021163.1    | Ca_Kabuli_Chr04 | 8737257                 | TT                                     | CC                 | CC               | INTERGENIC                    |                    |                                     |
| SNP_20306_A_8737317 | NC_021163.1    | Ca_Kabuli_Chr04 | 8737317                 | GG                                     | AA                 | AA               | INTERGENIC                    |                    |                                     |
| SNP_20307_A_8737682 | NC_021163.1    | Ca_Kabuli_Chr04 | 8737682                 | CC                                     | TT                 | TT               | INTERGENIC                    |                    |                                     |
| SNP_20308_A_8737804 | NC_021163.1    | Ca_Kabuli_Chr04 | 8737804                 | TT                                     | CC                 | CC               | INTERGENIC                    |                    |                                     |
| SNP_20309_A_8744345 | NC_021163.1    | Ca_Kabuli_Chr04 | 8744345                 | GG                                     | AA                 | AA               | INTERGENIC                    |                    |                                     |
| SNP_20310_A_8744400 | NC_021163.1    | Ca_Kabuli_Chr04 | 8744400                 | CC                                     | TT                 | TT               | INTERGENIC                    |                    |                                     |
| SNP_20311_A_8746063 | NC_021163.1    | Ca_Kabuli_Chr04 | 8746063                 | AA                                     | GG                 | GG               | INTERGENIC                    |                    |                                     |
| SNP_20312_A_8746519 | NC_021163.1    | Ca_Kabuli_Chr04 | 8746519                 | AA                                     | GG                 | GG               | INTERGENIC                    |                    |                                     |
| SNP_20313_A_8746671 | NC_021163.1    | Ca_Kabuli_Chr04 | 8746671                 | CC                                     | TT                 | TT               | INTERGENIC                    |                    |                                     |
| SNP_20314_A_8747017 | NC_021163.1    | Ca_Kabuli_Chr04 | 8747017                 | CC                                     | TT                 | TT               | INTERGENIC                    |                    |                                     |

| SNPs IDs            | Chromosome IDs | Chromosomes     | Physical positions (bp) | CDC Frontier (Reference genome) | (Pusa 1103 & HPNB) | (ILWC 46 & LPNB) | Sequence Components of genome | Gene accession IDs | Putative functions               |
|---------------------|----------------|-----------------|-------------------------|---------------------------------|--------------------|------------------|-------------------------------|--------------------|----------------------------------|
| SNP_20315_A_8747021 | NC_021163.1    | Ca_Kabuli_Chr04 | 8747021                 | GG                              | AA                 | AA               | INTERGENIC                    |                    |                                  |
| SNP_20316_A_8747126 | NC_021163.1    | Ca_Kabuli_Chr04 | 8747126                 | CC                              | TT                 | TT               | INTERGENIC                    |                    |                                  |
| SNP_20317_A_8748103 | NC_021163.1    | Ca_Kabuli_Chr04 | 8748103                 | AA                              | CC                 | CC               | INTERGENIC                    |                    |                                  |
| SNP_20319_A_8749717 | NC_021163.1    | Ca_Kabuli_Chr04 | 8749717                 | GG                              | AA                 | AA               | INTERGENIC                    |                    |                                  |
| SNP_20320_A_8750627 | NC_021163.1    | Ca_Kabuli_Chr04 | 8750627                 | AA                              | GG                 | GG               | DRR                           | 101498838          | NAC domain-containing protein 7  |
| SNP_20321_A_8750631 | NC_021163.1    | Ca_Kabuli_Chr04 | 8750631                 | TT                              | CC                 | CC               | DRR                           | 101498838          | NAC domain-containing protein 7  |
| SNP_20323_A_8753611 | NC_021163.1    | Ca_Kabuli_Chr04 | 8753611                 | CC                              | TT                 | TT               | INTRON                        | 101498838          | NAC domain-containing protein 7  |
| SNP_20325_A_8758522 | NC_021163.1    | Ca_Kabuli_Chr04 | 8758522                 | CC                              | TT                 | TT               | INTERGENIC                    |                    |                                  |
| SNP_20326_A_8758573 | NC_021163.1    | Ca_Kabuli_Chr04 | 8758573                 | GG                              | AA                 | AA               | INTERGENIC                    |                    |                                  |
| SNP_20327_A_8758630 | NC_021163.1    | Ca_Kabuli_Chr04 | 8758630                 | AA                              | GG                 | GG               | INTERGENIC                    |                    |                                  |
| SNP_20328_A_8759297 | NC_021163.1    | Ca_Kabuli_Chr04 | 8759297                 | TT                              | CC                 | CC               | INTERGENIC                    |                    |                                  |
| SNP_20329_A_8759312 | NC_021163.1    | Ca_Kabuli_Chr04 | 8759312                 | TT                              | CC                 | CC               | INTERGENIC                    |                    |                                  |
| SNP_20330_A_8759514 | NC_021163.1    | Ca_Kabuli_Chr04 | 8759514                 | AA                              | GG                 | GG               | INTERGENIC                    |                    |                                  |
| SNP_20331_A_8761972 | NC_021163.1    | Ca_Kabuli_Chr04 | 8761972                 | AA                              | GG                 | GG               | INTERGENIC                    |                    |                                  |
| SNP_20332_A_8767295 | NC_021163.1    | Ca_Kabuli_Chr04 | 8767295                 | GG                              | AA                 | AA               | INTERGENIC                    |                    |                                  |
| SNP_20333_A_8767490 | NC_021163.1    | Ca_Kabuli_Chr04 | 8767490                 | TT                              | GG                 | GG               | INTERGENIC                    |                    |                                  |
| SNP_20334_A_8767509 | NC_021163.1    | Ca_Kabuli_Chr04 | 8767509                 | GG                              | AA                 | AA               | INTERGENIC                    |                    |                                  |
| SNP_20335_A_8767539 | NC_021163.1    | Ca_Kabuli_Chr04 | 8767539                 | TT                              | AA                 | AA               | INTERGENIC                    |                    |                                  |
| SNP_20336_A_8767559 | NC_021163.1    | Ca_Kabuli_Chr04 | 8767559                 | GG                              | AA                 | AA               | INTERGENIC                    |                    |                                  |
| SNP_20337_A_8769849 | NC_021163.1    | Ca_Kabuli_Chr04 | 8769849                 | AA                              | GG                 | GG               | START_GAINED                  | 101499363          | NAC domain-containing protein 53 |
| SNP_20338_A_8769862 | NC_021163.1    | Ca_Kabuli_Chr04 | 8769862                 | CC                              | TT                 | TT               | URR                           | 101499363          | NAC domain-containing protein 53 |
| SNP_20339_A_8769881 | NC_021163.1    | Ca_Kabuli_Chr04 | 8769881                 | AA                              | TT                 | TT               | URR                           | 101499363          | NAC domain-containing protein 53 |

| SNPs IDs            | Chromosome IDs | Chromosomes     | Physical positions (bp) | CDC Frontier genome (Reference genome) | (Pusa 1103 & HPNB) | (ILWC 46 & LPNB) | Sequence Components of genome | Gene accession IDs | Putative functions                                   |
|---------------------|----------------|-----------------|-------------------------|----------------------------------------|--------------------|------------------|-------------------------------|--------------------|------------------------------------------------------|
| SNP_20340_A_8773892 | NC_021163.1    | Ca_Kabuli_Chr04 | 8773892                 | AA                                     | GG                 | GG               | URR                           | 101499363          | NAC domain-containing protein 53                     |
| SNP_20341_A_8774189 | NC_021163.1    | Ca_Kabuli_Chr04 | 8774189                 | GG                                     | AA                 | AA               | URR                           | 101499363          | NAC domain-containing protein 53                     |
| SNP_20342_A_8774196 | NC_021163.1    | Ca_Kabuli_Chr04 | 8774196                 | AA                                     | TT                 | TT               | URR                           | 101499363          | NAC domain-containing protein 53                     |
| SNP_20343_A_8774248 | NC_021163.1    | Ca_Kabuli_Chr04 | 8774248                 | TT                                     | CC                 | CC               | URR                           | 101499363          | NAC domain-containing protein 53                     |
| SNP_20344_A_8774249 | NC_021163.1    | Ca_Kabuli_Chr04 | 8774249                 | CC                                     | TT                 | TT               | URR                           | 101499363          | NAC domain-containing protein 53                     |
| SNP_20345_A_8774316 | NC_021163.1    | Ca_Kabuli_Chr04 | 8774316                 | GG                                     | AA                 | AA               | URR                           | 101499363          | NAC domain-containing protein 53                     |
| SNP_20346_A_8774437 | NC_021163.1    | Ca_Kabuli_Chr04 | 8774437                 | GG                                     | AA                 | AA               | URR                           | 101499363          | NAC domain-containing protein 53                     |
| SNP_20347_A_8774891 | NC_021163.1    | Ca_Kabuli_Chr04 | 8774891                 | CC                                     | AA                 | AA               | DRR                           | 101499870          | malate dehydrogenase [NADP], chloroplastic           |
| SNP_20348_A_8775158 | NC_021163.1    | Ca_Kabuli_Chr04 | 8775158                 | GG                                     | CC                 | CC               | DRR                           | 101499870          | malate dehydrogenase [NADP], chloroplastic           |
| SNP_20349_A_8782231 | NC_021163.1    | Ca_Kabuli_Chr04 | 8782231                 | GG                                     | CC                 | CC               | INTERGENIC                    |                    |                                                      |
| SNP_20350_A_8783209 | NC_021163.1    | Ca_Kabuli_Chr04 | 8783209                 | GG                                     | AA                 | AA               | INTERGENIC                    |                    |                                                      |
| SNP_20351_A_8784188 | NC_021163.1    | Ca_Kabuli_Chr04 | 8784188                 | AA                                     | CC                 | CC               | INTERGENIC                    |                    |                                                      |
| SNP_20352_A_8792426 | NC_021163.1    | Ca_Kabuli_Chr04 | 8792426                 | TT                                     | CC                 | CC               | DRR                           | 101501276          | peroxidase 41-like                                   |
| SNP_20353_A_8800393 | NC_021163.1    | Ca_Kabuli_Chr04 | 8800393                 | TT                                     | CC                 | CC               | DRR                           | 101496309          | putative glycine-rich cell wall structural protein 1 |
| SNP_20354_A_8800413 | NC_021163.1    | Ca_Kabuli_Chr04 | 8800413                 | CC                                     | TT                 | TT               | DRR                           | 101496309          | putative glycine-rich cell wall structural protein 1 |
| SNP_20355_A_8800441 | NC_021163.1    | Ca_Kabuli_Chr04 | 8800441                 | AA                                     | GG                 | GG               | DRR                           | 101496309          | putative glycine-rich cell wall structural protein 1 |
| SNP_20356_A_8800484 | NC_021163.1    | Ca_Kabuli_Chr04 | 8800484                 | TT                                     | AA                 | AA               | DRR                           | 101496309          | putative glycine-rich cell wall structural protein 1 |
| SNP_20357_A_8803083 | NC_021163.1    | Ca_Kabuli_Chr04 | 8803083                 | GG                                     | AA                 | AA               | DRR                           | 101501591          | RNA-binding protein Nova-2                           |
| SNP_20358_A_8812548 | NC_021163.1    | Ca_Kabuli_Chr04 | 8812548                 | AA                                     | CC                 | CC               | INTERGENIC                    |                    |                                                      |
| SNP_20359_A_8816808 | NC_021163.1    | Ca_Kabuli_Chr04 | 8816808                 | AA                                     | GG                 | GG               | INTRON                        | 101496639          | uncharacterized LOC101496639                         |
| SNP_20360_A_8817318 | NC_021163.1    | Ca_Kabuli_Chr04 | 8817318                 | TT                                     | CC                 | CC               | INTRON                        | 101496639          | uncharacterized LOC101496639                         |
| SNP_20361_A_8817327 | NC_021163.1    | Ca_Kabuli_Chr04 | 8817327                 | CC                                     | GG                 | GG               | INTRON                        | 101496639          | uncharacterized LOC101496639                         |



| SNPs IDs            | Chromosome IDs | Chromosomes     | Physical positions (bp) | CDC Frontier (Reference genome) | (Pusa 1103 & HPNB) | (ILWC 46 & LPNB) | Sequence Components of genome | Gene accession IDs | Putative functions           |
|---------------------|----------------|-----------------|-------------------------|---------------------------------|--------------------|------------------|-------------------------------|--------------------|------------------------------|
| SNP_20362_A_8817607 | NC_021163.1    | Ca_Kabuli_Chr04 | 8817607                 | AA                              | GG                 | GG               | INTRON                        | 101496639          | uncharacterized LOC101496639 |
| SNP_20363_A_8818268 | NC_021163.1    | Ca_Kabuli_Chr04 | 8818268                 | TT                              | CC                 | CC               | INTRON                        | 101496639          | uncharacterized LOC101496639 |
| SNP_20364_A_8826812 | NC_021163.1    | Ca_Kabuli_Chr04 | 8826812                 | AA                              | CC                 | CC               | URR                           | 101502121          | histone H2B.3-like           |
| SNP_20365_A_8827954 | NC_021163.1    | Ca_Kabuli_Chr04 | 8827954                 | CC                              | AA                 | AA               | URR                           | 101502121          | histone H2B.3-like           |
| SNP_20366_A_8829018 | NC_021163.1    | Ca_Kabuli_Chr04 | 8829018                 | CC                              | GG                 | GG               | INTERGENIC                    |                    |                              |
| SNP_20367_A_8829255 | NC_021163.1    | Ca_Kabuli_Chr04 | 8829255                 | AA                              | GG                 | GG               | INTERGENIC                    |                    |                              |
| SNP_20368_A_8829280 | NC_021163.1    | Ca_Kabuli_Chr04 | 8829280                 | TT                              | CC                 | CC               | INTERGENIC                    |                    |                              |
| SNP_20369_A_8829585 | NC_021163.1    | Ca_Kabuli_Chr04 | 8829585                 | TT                              | CC                 | CC               | INTERGENIC                    |                    |                              |
| SNP_20370_A_8831763 | NC_021163.1    | Ca_Kabuli_Chr04 | 8831763                 | CC                              | TT                 | TT               | INTERGENIC                    |                    |                              |
| SNP_20371_A_8831811 | NC_021163.1    | Ca_Kabuli_Chr04 | 8831811                 | CC                              | AA                 | AA               | INTERGENIC                    |                    |                              |
| SNP_20372_A_8831829 | NC_021163.1    | Ca_Kabuli_Chr04 | 8831829                 | CC                              | TT                 | TT               | INTERGENIC                    |                    |                              |
| SNP_20373_A_8834014 | NC_021163.1    | Ca_Kabuli_Chr04 | 8834014                 | CC                              | TT                 | TT               | INTERGENIC                    |                    |                              |
| SNP_20374_A_8834268 | NC_021163.1    | Ca_Kabuli_Chr04 | 8834268                 | TT                              | CC                 | CC               | INTERGENIC                    |                    |                              |
| SNP_20375_A_8834273 | NC_021163.1    | Ca_Kabuli_Chr04 | 8834273                 | CC                              | TT                 | TT               | INTERGENIC                    |                    |                              |
| SNP_20376_A_8834283 | NC_021163.1    | Ca_Kabuli_Chr04 | 8834283                 | GG                              | AA                 | AA               | INTERGENIC                    |                    |                              |
| SNP_20377_A_8834290 | NC_021163.1    | Ca_Kabuli_Chr04 | 8834290                 | TT                              | CC                 | CC               | INTERGENIC                    |                    |                              |
| SNP_20378_A_8834322 | NC_021163.1    | Ca_Kabuli_Chr04 | 8834322                 | TT                              | CC                 | CC               | INTERGENIC                    |                    |                              |
| SNP_20379_A_8834346 | NC_021163.1    | Ca_Kabuli_Chr04 | 8834346                 | GG                              | TT                 | TT               | INTERGENIC                    |                    |                              |
| SNP_20381_A_8836445 | NC_021163.1    | Ca_Kabuli_Chr04 | 8836445                 | CC                              | TT                 | TT               | INTERGENIC                    |                    |                              |
| SNP_20382_A_8836484 | NC_021163.1    | Ca_Kabuli_Chr04 | 8836484                 | CC                              | TT                 | TT               | INTERGENIC                    |                    |                              |
| SNP_20383_A_8836491 | NC_021163.1    | Ca_Kabuli_Chr04 | 8836491                 | GG                              | AA                 | AA               | INTERGENIC                    |                    |                              |
| SNP_20384_A_8836523 | NC_021163.1    | Ca_Kabuli_Chr04 | 8836523                 | AA                              | CC                 | CC               | INTERGENIC                    |                    |                              |

| SNPs IDs            | Chromosome IDs | Chromosomes     | Physical positions (bp) | CDC Frontier (Reference genome) | (Pusa 1103 & HPNB) | (ILWC 46 & LPNB) | Sequence Components of genome | Gene accession IDs | Putative functions                                      |
|---------------------|----------------|-----------------|-------------------------|---------------------------------|--------------------|------------------|-------------------------------|--------------------|---------------------------------------------------------|
| SNP_20385_A_8836577 | NC_021163.1    | Ca_Kabuli_Chr04 | 8836577                 | TT                              | GG                 | GG               | INTERGENIC                    |                    |                                                         |
| SNP_20387_A_8839710 | NC_021163.1    | Ca_Kabuli_Chr04 | 8839710                 | GG                              | AA                 | AA               | INTERGENIC                    |                    |                                                         |
| SNP_20388_A_8840722 | NC_021163.1    | Ca_Kabuli_Chr04 | 8840722                 | AA                              | GG                 | GG               | INTERGENIC                    |                    |                                                         |
| SNP_20389_A_8841149 | NC_021163.1    | Ca_Kabuli_Chr04 | 8841149                 | TT                              | GG                 | GG               | INTERGENIC                    |                    |                                                         |
| SNP_20390_A_8841236 | NC_021163.1    | Ca_Kabuli_Chr04 | 8841236                 | TT                              | CC                 | CC               | INTERGENIC                    |                    |                                                         |
| SNP_20391_A_8842832 | NC_021163.1    | Ca_Kabuli_Chr04 | 8842832                 | AA                              | GG                 | GG               | INTERGENIC                    |                    |                                                         |
| SNP_20392_A_8850998 | NC_021163.1    | Ca_Kabuli_Chr04 | 8850998                 | TT                              | CC                 | CC               | DRR                           | 101497287          | desmoplakin-like                                        |
| SNP_20394_A_8858728 | NC_021163.1    | Ca_Kabuli_Chr04 | 8858728                 | AA                              | TT                 | TT               | INTERGENIC                    |                    |                                                         |
| SNP_20395_A_8859791 | NC_021163.1    | Ca_Kabuli_Chr04 | 8859791                 | AA                              | GG                 | GG               | URR                           | 101502441          | leghemoglobin-like                                      |
| SNP_20396_A_8860796 | NC_021163.1    | Ca_Kabuli_Chr04 | 8860796                 | GG                              | AA                 | AA               | URR                           | 101502441          | leghemoglobin-like                                      |
| SNP_20397_A_8861076 | NC_021163.1    | Ca_Kabuli_Chr04 | 8861076                 | CC                              | TT                 | TT               | URR                           | 101502441          | leghemoglobin-like                                      |
| SNP_20398_A_8861206 | NC_021163.1    | Ca_Kabuli_Chr04 | 8861206                 | GG                              | AA                 | AA               | URR                           | 101502441          | leghemoglobin-like                                      |
| SNP_20400_A_8865682 | NC_021163.1    | Ca_Kabuli_Chr04 | 8865682                 | CC                              | AA                 | AA               | URR                           | 101502744          | leghemoglobin-like                                      |
| SNP_20401_A_8866759 | NC_021163.1    | Ca_Kabuli_Chr04 | 8866759                 | TT                              | GG                 | GG               | INTRON                        | 101503056          | probable tRNA N6-adenosine threonylcarbamoyltransferase |
| SNP_20403_A_8871613 | NC_021163.1    | Ca_Kabuli_Chr04 | 8871613                 | AA                              | GG                 | GG               | INTERGENIC                    |                    |                                                         |
| SNP_20404_A_8871887 | NC_021163.1    | Ca_Kabuli_Chr04 | 8871887                 | GG                              | CC                 | CC               | DRR                           | 101503611          | coatamer subunit alpha-1-like                           |
| SNP_20405_A_8872632 | NC_021163.1    | Ca_Kabuli_Chr04 | 8872632                 | GG                              | CC                 | CC               | DRR                           | 101503611          | coatamer subunit alpha-1-like                           |
| SNP_20406_A_8878000 | NC_021163.1    | Ca_Kabuli_Chr04 | 8878000                 | AA                              | GG                 | GG               | URR                           | 101503611          | coatamer subunit alpha-1-like                           |
| SNP_20407_A_8878086 | NC_021163.1    | Ca_Kabuli_Chr04 | 8878086                 | GG                              | TT                 | TT               | URR                           | 101503611          | coatamer subunit alpha-1-like                           |
| SNP_20408_A_8879106 | NC_021163.1    | Ca_Kabuli_Chr04 | 8879106                 | CC                              | GG                 | GG               | URR                           | 101503611          | coatamer subunit alpha-1-like                           |
| SNP_20409_A_8879110 | NC_021163.1    | Ca_Kabuli_Chr04 | 8879110                 | TT                              | GG                 | GG               | URR                           | 101503611          | coatamer subunit alpha-1-like                           |
| SNP_20410_A_8879115 | NC_021163.1    | Ca_Kabuli_Chr04 | 8879115                 | AA                              | TT                 | TT               | URR                           | 101503611          | coatamer subunit alpha-1-like                           |

| SNPs IDs            | Chromosome IDs | Chromosomes     | Physical positions (bp) | CDC Frontier genome (Reference genome) | (Pusa 1103 & HPNB) | (ILWC 46 & LPNB) | Sequence Components of genome | Gene accession IDs | Putative functions                             |
|---------------------|----------------|-----------------|-------------------------|----------------------------------------|--------------------|------------------|-------------------------------|--------------------|------------------------------------------------|
| SNP_20411_A_8879130 | NC_021163.1    | Ca_Kabuli_Chr04 | 8879130                 | TT                                     | AA                 | AA               | URR                           | 101503611          | coatomer subunit alpha-1-like                  |
| SNP_20412_A_8880538 | NC_021163.1    | Ca_Kabuli_Chr04 | 8880538                 | CC                                     | TT                 | TT               | INTERGENIC                    |                    |                                                |
| SNP_20413_A_8886928 | NC_021163.1    | Ca_Kabuli_Chr04 | 8886928                 | AA                                     | GG                 | GG               | INTERGENIC                    |                    |                                                |
| SNP_20414_A_8889750 | NC_021163.1    | Ca_Kabuli_Chr04 | 8889750                 | TT                                     | CC                 | CC               | INTERGENIC                    |                    |                                                |
| SNP_20415_A_8889813 | NC_021163.1    | Ca_Kabuli_Chr04 | 8889813                 | GG                                     | AA                 | AA               | INTERGENIC                    |                    |                                                |
| SNP_20416_A_8890799 | NC_021163.1    | Ca_Kabuli_Chr04 | 8890799                 | AA                                     | GG                 | GG               | INTERGENIC                    |                    |                                                |
| SNP_20418_A_8894031 | NC_021163.1    | Ca_Kabuli_Chr04 | 8894031                 | TT                                     | CC                 | CC               | URR                           | 101503936          | cyclin-dependent protein kinase inhibitor SMR2 |
| SNP_20420_A_8896451 | NC_021163.1    | Ca_Kabuli_Chr04 | 8896451                 | GG                                     | TT                 | TT               | INTERGENIC                    |                    |                                                |
| SNP_20421_A_8896589 | NC_021163.1    | Ca_Kabuli_Chr04 | 8896589                 | GG                                     | CC                 | CC               | INTERGENIC                    |                    |                                                |
| SNP_20422_A_8897848 | NC_021163.1    | Ca_Kabuli_Chr04 | 8897848                 | TT                                     | GG                 | GG               | INTERGENIC                    |                    |                                                |
| SNP_20423_A_8900478 | NC_021163.1    | Ca_Kabuli_Chr04 | 8900478                 | TT                                     | AA                 | AA               | INTERGENIC                    |                    |                                                |
| SNP_20424_A_8900837 | NC_021163.1    | Ca_Kabuli_Chr04 | 8900837                 | CC                                     | GG                 | GG               | INTERGENIC                    |                    |                                                |
| SNP_20425_A_8901784 | NC_021163.1    | Ca_Kabuli_Chr04 | 8901784                 | CC                                     | AA                 | AA               | INTERGENIC                    |                    |                                                |
| SNP_20426_A_8901796 | NC_021163.1    | Ca_Kabuli_Chr04 | 8901796                 | TT                                     | AA                 | AA               | INTERGENIC                    |                    |                                                |
| SNP_20427_A_8903368 | NC_021163.1    | Ca_Kabuli_Chr04 | 8903368                 | GG                                     | AA                 | AA               | INTERGENIC                    |                    |                                                |
| SNP_20428_A_8903412 | NC_021163.1    | Ca_Kabuli_Chr04 | 8903412                 | TT                                     | CC                 | CC               | INTERGENIC                    |                    |                                                |
| SNP_20429_A_8903430 | NC_021163.1    | Ca_Kabuli_Chr04 | 8903430                 | TT                                     | AA                 | AA               | INTERGENIC                    |                    |                                                |
| SNP_20430_A_8903517 | NC_021163.1    | Ca_Kabuli_Chr04 | 8903517                 | AA                                     | TT                 | TT               | INTERGENIC                    |                    |                                                |
| SNP_20431_A_8903733 | NC_021163.1    | Ca_Kabuli_Chr04 | 8903733                 | GG                                     | AA                 | AA               | INTERGENIC                    |                    |                                                |
| SNP_20432_A_8903759 | NC_021163.1    | Ca_Kabuli_Chr04 | 8903759                 | TT                                     | CC                 | CC               | INTERGENIC                    |                    |                                                |
| SNP_20434_A_8903817 | NC_021163.1    | Ca_Kabuli_Chr04 | 8903817                 | CC                                     | AA                 | AA               | INTERGENIC                    |                    |                                                |
| SNP_20436_A_9026307 | NC_021163.1    | Ca_Kabuli_Chr04 | 9026307                 | AA                                     | GG                 | GG               | INTERGENIC                    |                    |                                                |

| SNPs IDs            | Chromosome IDs | Chromosomes     | Physical positions (bp) | CDC Frontier (Reference genome) | (Pusa 1103 & HPNB) | (ILWC 46 & LPNB) | Sequence Components of genome | Gene accession IDs | Putative functions                                                        |
|---------------------|----------------|-----------------|-------------------------|---------------------------------|--------------------|------------------|-------------------------------|--------------------|---------------------------------------------------------------------------|
| SNP_20438_A_9041805 | NC_021163.1    | Ca_Kabuli_Chr04 | 9041805                 | CC                              | GG                 | GG               | INTRON                        | 101508340          | geraniol 8-hydroxylase-like                                               |
| SNP_20439_A_9060627 | NC_021163.1    | Ca_Kabuli_Chr04 | 9060627                 | AA                              | CC                 | CC               | DRR                           | 101508654          | pentatricopeptide repeat-containing protein mitochondrial-like At3g22470, |
| SNP_20440_A_9060674 | NC_021163.1    | Ca_Kabuli_Chr04 | 9060674                 | TT                              | CC                 | CC               | DRR                           | 101508654          | pentatricopeptide repeat-containing protein mitochondrial-like At3g22470, |
| SNP_20441_A_9066176 | NC_021163.1    | Ca_Kabuli_Chr04 | 9066176                 | TT                              | AA                 | AA               | URR                           | 101508654          | pentatricopeptide repeat-containing protein mitochondrial-like At3g22470, |
| SNP_20442_A_9066214 | NC_021163.1    | Ca_Kabuli_Chr04 | 9066214                 | GG                              | TT                 | TT               | URR                           | 101508654          | pentatricopeptide repeat-containing protein mitochondrial-like At3g22470, |
| SNP_20443_A_9066255 | NC_021163.1    | Ca_Kabuli_Chr04 | 9066255                 | CC                              | TT                 | TT               | URR                           | 101508654          | pentatricopeptide repeat-containing protein mitochondrial-like At3g22470, |
| SNP_20445_A_9066488 | NC_021163.1    | Ca_Kabuli_Chr04 | 9066488                 | TT                              | CC                 | CC               | URR                           | 101508654          | pentatricopeptide repeat-containing protein mitochondrial-like At3g22470, |
| SNP_20446_A_9066622 | NC_021163.1    | Ca_Kabuli_Chr04 | 9066622                 | GG                              | AA                 | AA               | URR                           | 101508654          | pentatricopeptide repeat-containing protein mitochondrial-like At3g22470, |
| SNP_20448_A_9083510 | NC_021163.1    | Ca_Kabuli_Chr04 | 9083510                 | AA                              | GG                 | GG               | INTERGENIC                    |                    |                                                                           |
| SNP_20449_A_9083720 | NC_021163.1    | Ca_Kabuli_Chr04 | 9083720                 | CC                              | TT                 | TT               | INTERGENIC                    |                    |                                                                           |
| SNP_20450_A_9126907 | NC_021163.1    | Ca_Kabuli_Chr04 | 9126907                 | TT                              | AA                 | AA               | DRR                           | 101498931          | uncharacterized LOC101498931                                              |
| SNP_20451_A_9147377 | NC_021163.1    | Ca_Kabuli_Chr04 | 9147377                 | TT                              | CC                 | CC               | URR                           | 101510792          | uncharacterized LOC101510792                                              |
| SNP_20452_A_9147380 | NC_021163.1    | Ca_Kabuli_Chr04 | 9147380                 | AA                              | GG                 | GG               | URR                           | 101510792          | uncharacterized LOC101510792                                              |
| SNP_20453_A_9172944 | NC_021163.1    | Ca_Kabuli_Chr04 | 9172944                 | CC                              | TT                 | TT               | INTERGENIC                    |                    |                                                                           |
| SNP_20454_A_9179144 | NC_021163.1    | Ca_Kabuli_Chr04 | 9179144                 | GG                              | TT                 | TT               | URR                           | 101499255          | Unknown function                                                          |
| SNP_20455_A_9214048 | NC_021163.1    | Ca_Kabuli_Chr04 | 9214048                 | CC                              | TT                 | TT               | INTERGENIC                    |                    |                                                                           |
| SNP_20456_A_9233342 | NC_021163.1    | Ca_Kabuli_Chr04 | 9233342                 | TT                              | AA                 | AA               | INTERGENIC                    |                    |                                                                           |
| SNP_20457_A_9233352 | NC_021163.1    | Ca_Kabuli_Chr04 | 9233352                 | TT                              | AA                 | AA               | INTERGENIC                    |                    |                                                                           |
| SNP_20458_A_9233438 | NC_021163.1    | Ca_Kabuli_Chr04 | 9233438                 | AA                              | GG                 | GG               | INTERGENIC                    |                    |                                                                           |
| SNP_20459_A_9233485 | NC_021163.1    | Ca_Kabuli_Chr04 | 9233485                 | GG                              | AA                 | AA               | INTERGENIC                    |                    |                                                                           |
| SNP_20460_A_9233490 | NC_021163.1    | Ca_Kabuli_Chr04 | 9233490                 | TT                              | GG                 | GG               | INTERGENIC                    |                    |                                                                           |
| SNP_20461_A_9312774 | NC_021163.1    | Ca_Kabuli_Chr04 | 9312774                 | GG                              | TT                 | TT               | URR                           | 101515424          | host cell factor                                                          |

| SNPs IDs            | Chromosome IDs | Chromosomes     | Physical positions (bp) | CDC Frontier genome (Reference genome) | (Pusa 1103 & HPNB) | (ILWC 46 & LPNB) | Sequence Components of genome | Gene accession IDs | Putative functions                     |
|---------------------|----------------|-----------------|-------------------------|----------------------------------------|--------------------|------------------|-------------------------------|--------------------|----------------------------------------|
| SNP_20462_A_9348429 | NC_021163.1    | Ca_Kabuli_Chr04 | 9348429                 | AA                                     | CC                 | CC               | INTERGENIC                    |                    |                                        |
| SNP_20464_A_9372469 | NC_021163.1    | Ca_Kabuli_Chr04 | 9372469                 | GG                                     | AA                 | AA               | INTERGENIC                    |                    |                                        |
| SNP_20465_A_9387809 | NC_021163.1    | Ca_Kabuli_Chr04 | 9387809                 | GG                                     | AA                 | AA               | INTERGENIC                    |                    |                                        |
| SNP_20466_A_9387971 | NC_021163.1    | Ca_Kabuli_Chr04 | 9387971                 | TT                                     | CC                 | CC               | INTERGENIC                    |                    |                                        |
| SNP_20467_A_9387977 | NC_021163.1    | Ca_Kabuli_Chr04 | 9387977                 | AA                                     | CC                 | CC               | INTERGENIC                    |                    |                                        |
| SNP_20469_A_9388180 | NC_021163.1    | Ca_Kabuli_Chr04 | 9388180                 | TT                                     | AA                 | AA               | INTERGENIC                    |                    |                                        |
| SNP_20470_A_9388185 | NC_021163.1    | Ca_Kabuli_Chr04 | 9388185                 | AA                                     | GG                 | GG               | INTERGENIC                    |                    |                                        |
| SNP_20471_A_9388271 | NC_021163.1    | Ca_Kabuli_Chr04 | 9388271                 | GG                                     | TT                 | TT               | INTERGENIC                    |                    |                                        |
| SNP_20472_A_9388273 | NC_021163.1    | Ca_Kabuli_Chr04 | 9388273                 | TT                                     | CC                 | CC               | INTERGENIC                    |                    |                                        |
| SNP_20474_A_9501420 | NC_021163.1    | Ca_Kabuli_Chr04 | 9501420                 | AA                                     | TT                 | TT               | URR                           | 101492638          | receptor-like protein kinase At3g21340 |
| SNP_20475_A_9516219 | NC_021163.1    | Ca_Kabuli_Chr04 | 9516219                 | TT                                     | AA                 | AA               | URR                           | 101492970          | uncharacterized LOC101492970           |
| SNP_20476_A_9516222 | NC_021163.1    | Ca_Kabuli_Chr04 | 9516222                 | AA                                     | GG                 | GG               | URR                           | 101492970          | uncharacterized LOC101492970           |
| SNP_20477_A_9547678 | NC_021163.1    | Ca_Kabuli_Chr04 | 9547678                 | CC                                     | TT                 | TT               | INTERGENIC                    |                    |                                        |
| SNP_20479_A_9555442 | NC_021163.1    | Ca_Kabuli_Chr04 | 9555442                 | CC                                     | TT                 | TT               | INTERGENIC                    |                    |                                        |
| SNP_20481_A_9599355 | NC_021163.1    | Ca_Kabuli_Chr04 | 9599355                 | GG                                     | AA                 | AA               | INTERGENIC                    |                    |                                        |
| SNP_20482_A_9627880 | NC_021163.1    | Ca_Kabuli_Chr04 | 9627880                 | AA                                     | CC                 | CC               | INTERGENIC                    |                    |                                        |
| SNP_20483_A_9627963 | NC_021163.1    | Ca_Kabuli_Chr04 | 9627963                 | CC                                     | TT                 | TT               | INTERGENIC                    |                    |                                        |
| SNP_20484_A_9628009 | NC_021163.1    | Ca_Kabuli_Chr04 | 9628009                 | CC                                     | AA                 | AA               | INTERGENIC                    |                    |                                        |
| SNP_20485_A_9628012 | NC_021163.1    | Ca_Kabuli_Chr04 | 9628012                 | GG                                     | CC                 | CC               | INTERGENIC                    |                    |                                        |
| SNP_20486_A_9628027 | NC_021163.1    | Ca_Kabuli_Chr04 | 9628027                 | GG                                     | AA                 | AA               | INTERGENIC                    |                    |                                        |
| SNP_20487_A_9628068 | NC_021163.1    | Ca_Kabuli_Chr04 | 9628068                 | AA                                     | GG                 | GG               | INTERGENIC                    |                    |                                        |
| SNP_20488_A_9628094 | NC_021163.1    | Ca_Kabuli_Chr04 | 9628094                 | CC                                     | TT                 | TT               | INTERGENIC                    |                    |                                        |

| SNPs IDs            | Chromosome IDs | Chromosomes     | Physical positions (bp) | CDC Frontier genome (Reference genome) | (Pusa 1103 & HPNB) | (ILWC 46 & LPNB) | Sequence genome | Components of | Gene accession IDs | Putative functions |
|---------------------|----------------|-----------------|-------------------------|----------------------------------------|--------------------|------------------|-----------------|---------------|--------------------|--------------------|
| SNP_20489_A_9628213 | NC_021163.1    | Ca_Kabuli_Chr04 | 9628213                 | AA                                     | TT                 | TT               | INTERGENIC      |               |                    |                    |
| SNP_20490_A_9628234 | NC_021163.1    | Ca_Kabuli_Chr04 | 9628234                 | GG                                     | AA                 | AA               | INTERGENIC      |               |                    |                    |
| SNP_20491_A_9628241 | NC_021163.1    | Ca_Kabuli_Chr04 | 9628241                 | AA                                     | GG                 | GG               | INTERGENIC      |               |                    |                    |
| SNP_20492_A_9628456 | NC_021163.1    | Ca_Kabuli_Chr04 | 9628456                 | AA                                     | GG                 | GG               | INTERGENIC      |               |                    |                    |
| SNP_20493_A_9628486 | NC_021163.1    | Ca_Kabuli_Chr04 | 9628486                 | AA                                     | GG                 | GG               | INTERGENIC      |               |                    |                    |
| SNP_20494_A_9628622 | NC_021163.1    | Ca_Kabuli_Chr04 | 9628622                 | GG                                     | AA                 | AA               | INTERGENIC      |               |                    |                    |
| SNP_20495_A_9628659 | NC_021163.1    | Ca_Kabuli_Chr04 | 9628659                 | AA                                     | GG                 | GG               | INTERGENIC      |               |                    |                    |
| SNP_20496_A_9628664 | NC_021163.1    | Ca_Kabuli_Chr04 | 9628664                 | TT                                     | CC                 | CC               | INTERGENIC      |               |                    |                    |
| SNP_20497_A_9628675 | NC_021163.1    | Ca_Kabuli_Chr04 | 9628675                 | TT                                     | CC                 | CC               | INTERGENIC      |               |                    |                    |
| SNP_20498_A_9628818 | NC_021163.1    | Ca_Kabuli_Chr04 | 9628818                 | CC                                     | TT                 | TT               | INTERGENIC      |               |                    |                    |
| SNP_20499_A_9628831 | NC_021163.1    | Ca_Kabuli_Chr04 | 9628831                 | AA                                     | TT                 | TT               | INTERGENIC      |               |                    |                    |
| SNP_20500_A_9628871 | NC_021163.1    | Ca_Kabuli_Chr04 | 9628871                 | TT                                     | GG                 | GG               | INTERGENIC      |               |                    |                    |
| SNP_20501_A_9628972 | NC_021163.1    | Ca_Kabuli_Chr04 | 9628972                 | CC                                     | AA                 | AA               | INTERGENIC      |               |                    |                    |
| SNP_20502_A_9629128 | NC_021163.1    | Ca_Kabuli_Chr04 | 9629128                 | GG                                     | AA                 | AA               | INTERGENIC      |               |                    |                    |
| SNP_20503_A_9629129 | NC_021163.1    | Ca_Kabuli_Chr04 | 9629129                 | AA                                     | GG                 | GG               | INTERGENIC      |               |                    |                    |
| SNP_20504_A_9629167 | NC_021163.1    | Ca_Kabuli_Chr04 | 9629167                 | TT                                     | GG                 | GG               | INTERGENIC      |               |                    |                    |
| SNP_20505_A_9629168 | NC_021163.1    | Ca_Kabuli_Chr04 | 9629168                 | GG                                     | TT                 | TT               | INTERGENIC      |               |                    |                    |
| SNP_20506_A_9629173 | NC_021163.1    | Ca_Kabuli_Chr04 | 9629173                 | GG                                     | AA                 | AA               | INTERGENIC      |               |                    |                    |
| SNP_20507_A_9629181 | NC_021163.1    | Ca_Kabuli_Chr04 | 9629181                 | GG                                     | TT                 | TT               | INTERGENIC      |               |                    |                    |
| SNP_20508_A_9629417 | NC_021163.1    | Ca_Kabuli_Chr04 | 9629417                 | TT                                     | GG                 | GG               | INTERGENIC      |               |                    |                    |
| SNP_20509_A_9629477 | NC_021163.1    | Ca_Kabuli_Chr04 | 9629477                 | CC                                     | TT                 | TT               | INTERGENIC      |               |                    |                    |
| SNP_20510_A_9629502 | NC_021163.1    | Ca_Kabuli_Chr04 | 9629502                 | AA                                     | GG                 | GG               | INTERGENIC      |               |                    |                    |

| SNPs IDs            | Chromosome IDs | Chromosomes     | Physical positions (bp) | CDC Frontier genome (Reference genome) | (Pusa 1103 & HPNB) | (ILWC 46 & LPNB) | Sequence genome | Components of | Gene accession IDs | Putative functions |
|---------------------|----------------|-----------------|-------------------------|----------------------------------------|--------------------|------------------|-----------------|---------------|--------------------|--------------------|
| SNP_20511_A_9629549 | NC_021163.1    | Ca_Kabuli_Chr04 | 9629549                 | CC                                     | TT                 | TT               | INTERGENIC      |               |                    |                    |
| SNP_20512_A_9629683 | NC_021163.1    | Ca_Kabuli_Chr04 | 9629683                 | CC                                     | AA                 | AA               | INTERGENIC      |               |                    |                    |
| SNP_20513_A_9629691 | NC_021163.1    | Ca_Kabuli_Chr04 | 9629691                 | TT                                     | CC                 | CC               | INTERGENIC      |               |                    |                    |
| SNP_20514_A_9629749 | NC_021163.1    | Ca_Kabuli_Chr04 | 9629749                 | AA                                     | GG                 | GG               | INTERGENIC      |               |                    |                    |
| SNP_20515_A_9629819 | NC_021163.1    | Ca_Kabuli_Chr04 | 9629819                 | CC                                     | TT                 | TT               | INTERGENIC      |               |                    |                    |
| SNP_20516_A_9629825 | NC_021163.1    | Ca_Kabuli_Chr04 | 9629825                 | CC                                     | GG                 | GG               | INTERGENIC      |               |                    |                    |
| SNP_20517_A_9629841 | NC_021163.1    | Ca_Kabuli_Chr04 | 9629841                 | TT                                     | CC                 | CC               | INTERGENIC      |               |                    |                    |
| SNP_20518_A_9629855 | NC_021163.1    | Ca_Kabuli_Chr04 | 9629855                 | AA                                     | TT                 | TT               | INTERGENIC      |               |                    |                    |
| SNP_20519_A_9629887 | NC_021163.1    | Ca_Kabuli_Chr04 | 9629887                 | GG                                     | TT                 | TT               | INTERGENIC      |               |                    |                    |
| SNP_20520_A_9629924 | NC_021163.1    | Ca_Kabuli_Chr04 | 9629924                 | AA                                     | GG                 | GG               | INTERGENIC      |               |                    |                    |
| SNP_20521_A_9629940 | NC_021163.1    | Ca_Kabuli_Chr04 | 9629940                 | CC                                     | TT                 | TT               | INTERGENIC      |               |                    |                    |
| SNP_20522_A_9629971 | NC_021163.1    | Ca_Kabuli_Chr04 | 9629971                 | GG                                     | AA                 | AA               | INTERGENIC      |               |                    |                    |
| SNP_20523_A_9629978 | NC_021163.1    | Ca_Kabuli_Chr04 | 9629978                 | TT                                     | GG                 | GG               | INTERGENIC      |               |                    |                    |
| SNP_20524_A_9629995 | NC_021163.1    | Ca_Kabuli_Chr04 | 9629995                 | AA                                     | CC                 | CC               | INTERGENIC      |               |                    |                    |
| SNP_20525_A_9630050 | NC_021163.1    | Ca_Kabuli_Chr04 | 9630050                 | AA                                     | TT                 | TT               | INTERGENIC      |               |                    |                    |
| SNP_20526_A_9630065 | NC_021163.1    | Ca_Kabuli_Chr04 | 9630065                 | CC                                     | TT                 | TT               | INTERGENIC      |               |                    |                    |
| SNP_20527_A_9630119 | NC_021163.1    | Ca_Kabuli_Chr04 | 9630119                 | AA                                     | GG                 | GG               | INTERGENIC      |               |                    |                    |
| SNP_20528_A_9630161 | NC_021163.1    | Ca_Kabuli_Chr04 | 9630161                 | GG                                     | AA                 | AA               | INTERGENIC      |               |                    |                    |
| SNP_20529_A_9630193 | NC_021163.1    | Ca_Kabuli_Chr04 | 9630193                 | CC                                     | GG                 | GG               | INTERGENIC      |               |                    |                    |
| SNP_20530_A_9630210 | NC_021163.1    | Ca_Kabuli_Chr04 | 9630210                 | GG                                     | TT                 | TT               | INTERGENIC      |               |                    |                    |
| SNP_20531_A_9630214 | NC_021163.1    | Ca_Kabuli_Chr04 | 9630214                 | AA                                     | GG                 | GG               | INTERGENIC      |               |                    |                    |
| SNP_20532_A_9630268 | NC_021163.1    | Ca_Kabuli_Chr04 | 9630268                 | CC                                     | AA                 | AA               | INTERGENIC      |               |                    |                    |

| SNPs IDs            | Chromosome IDs | Chromosomes     | Physical positions (bp) | CDC Frontier genome (Reference genome) | (Pusa 1103 & HPNB) | (ILWC 46 & LPNB) | Sequence genome | Components of | Gene accession IDs | Putative functions |
|---------------------|----------------|-----------------|-------------------------|----------------------------------------|--------------------|------------------|-----------------|---------------|--------------------|--------------------|
| SNP_20533_A_9630282 | NC_021163.1    | Ca_Kabuli_Chr04 | 9630282                 | TT                                     | CC                 | CC               | INTERGENIC      |               |                    |                    |
| SNP_20535_A_9630356 | NC_021163.1    | Ca_Kabuli_Chr04 | 9630356                 | GG                                     | TT                 | TT               | INTERGENIC      |               |                    |                    |
| SNP_20536_A_9630406 | NC_021163.1    | Ca_Kabuli_Chr04 | 9630406                 | TT                                     | AA                 | AA               | INTERGENIC      |               |                    |                    |
| SNP_20537_A_9630414 | NC_021163.1    | Ca_Kabuli_Chr04 | 9630414                 | CC                                     | GG                 | GG               | INTERGENIC      |               |                    |                    |
| SNP_20538_A_9630415 | NC_021163.1    | Ca_Kabuli_Chr04 | 9630415                 | AA                                     | TT                 | TT               | INTERGENIC      |               |                    |                    |
| SNP_20539_A_9630425 | NC_021163.1    | Ca_Kabuli_Chr04 | 9630425                 | AA                                     | GG                 | GG               | INTERGENIC      |               |                    |                    |
| SNP_20540_A_9630466 | NC_021163.1    | Ca_Kabuli_Chr04 | 9630466                 | GG                                     | TT                 | TT               | INTERGENIC      |               |                    |                    |
| SNP_20541_A_9630526 | NC_021163.1    | Ca_Kabuli_Chr04 | 9630526                 | AA                                     | GG                 | GG               | INTERGENIC      |               |                    |                    |
| SNP_20542_A_9630530 | NC_021163.1    | Ca_Kabuli_Chr04 | 9630530                 | GG                                     | TT                 | TT               | INTERGENIC      |               |                    |                    |
| SNP_20543_A_9630563 | NC_021163.1    | Ca_Kabuli_Chr04 | 9630563                 | CC                                     | TT                 | TT               | INTERGENIC      |               |                    |                    |
| SNP_20544_A_9630587 | NC_021163.1    | Ca_Kabuli_Chr04 | 9630587                 | TT                                     | GG                 | GG               | INTERGENIC      |               |                    |                    |
| SNP_20545_A_9630598 | NC_021163.1    | Ca_Kabuli_Chr04 | 9630598                 | GG                                     | AA                 | AA               | INTERGENIC      |               |                    |                    |
| SNP_20546_A_9630602 | NC_021163.1    | Ca_Kabuli_Chr04 | 9630602                 | AA                                     | GG                 | GG               | INTERGENIC      |               |                    |                    |
| SNP_20547_A_9630604 | NC_021163.1    | Ca_Kabuli_Chr04 | 9630604                 | TT                                     | GG                 | GG               | INTERGENIC      |               |                    |                    |
| SNP_20548_A_9630739 | NC_021163.1    | Ca_Kabuli_Chr04 | 9630739                 | TT                                     | CC                 | CC               | INTERGENIC      |               |                    |                    |
| SNP_20549_A_9630780 | NC_021163.1    | Ca_Kabuli_Chr04 | 9630780                 | GG                                     | TT                 | TT               | INTERGENIC      |               |                    |                    |
| SNP_20550_A_9630902 | NC_021163.1    | Ca_Kabuli_Chr04 | 9630902                 | AA                                     | TT                 | TT               | INTERGENIC      |               |                    |                    |
| SNP_20552_A_9632840 | NC_021163.1    | Ca_Kabuli_Chr04 | 9632840                 | TT                                     | AA                 | AA               | INTERGENIC      |               |                    |                    |
| SNP_20553_A_9632849 | NC_021163.1    | Ca_Kabuli_Chr04 | 9632849                 | AA                                     | GG                 | GG               | INTERGENIC      |               |                    |                    |
| SNP_20554_A_9632892 | NC_021163.1    | Ca_Kabuli_Chr04 | 9632892                 | AA                                     | CC                 | CC               | INTERGENIC      |               |                    |                    |
| SNP_20555_A_9632908 | NC_021163.1    | Ca_Kabuli_Chr04 | 9632908                 | TT                                     | AA                 | AA               | INTERGENIC      |               |                    |                    |
| SNP_20556_A_9632955 | NC_021163.1    | Ca_Kabuli_Chr04 | 9632955                 | TT                                     | AA                 | AA               | INTERGENIC      |               |                    |                    |



| SNPs IDs             | Chromosome IDs | Chromosomes     | Physical positions (bp) | CDC Frontier genome (Reference genome) | (Pusa 1103 & HPNB) | (ILWC 46 & LPNB) | Sequence Components of genome | Gene accession IDs | Putative functions                        |
|----------------------|----------------|-----------------|-------------------------|----------------------------------------|--------------------|------------------|-------------------------------|--------------------|-------------------------------------------|
| SNP_20557_A_9632986  | NC_021163.1    | Ca_Kabuli_Chr04 | 9632986                 | AA                                     | GG                 | GG               | INTERGENIC                    |                    |                                           |
| SNP_20558_A_9632990  | NC_021163.1    | Ca_Kabuli_Chr04 | 9632990                 | GG                                     | TT                 | TT               | INTERGENIC                    |                    |                                           |
| SNP_20559_A_9633006  | NC_021163.1    | Ca_Kabuli_Chr04 | 9633006                 | CC                                     | GG                 | GG               | INTERGENIC                    |                    |                                           |
| SNP_20560_A_9633046  | NC_021163.1    | Ca_Kabuli_Chr04 | 9633046                 | GG                                     | AA                 | AA               | INTERGENIC                    |                    |                                           |
| SNP_20561_A_9633055  | NC_021163.1    | Ca_Kabuli_Chr04 | 9633055                 | AA                                     | GG                 | GG               | INTERGENIC                    |                    |                                           |
| SNP_20562_A_9634136  | NC_021163.1    | Ca_Kabuli_Chr04 | 9634136                 | TT                                     | GG                 | GG               | INTERGENIC                    |                    |                                           |
| SNP_20563_A_9634138  | NC_021163.1    | Ca_Kabuli_Chr04 | 9634138                 | TT                                     | GG                 | GG               | INTERGENIC                    |                    |                                           |
| SNP_20564_A_9634142  | NC_021163.1    | Ca_Kabuli_Chr04 | 9634142                 | GG                                     | AA                 | AA               | INTERGENIC                    |                    |                                           |
| SNP_20565_A_9638493  | NC_021163.1    | Ca_Kabuli_Chr04 | 9638493                 | TT                                     | AA                 | AA               | INTERGENIC                    |                    |                                           |
| SNP_20567_A_9658306  | NC_021163.1    | Ca_Kabuli_Chr04 | 9658306                 | TT                                     | AA                 | AA               | DRR                           | 101496524          | Unknown function                          |
| SNP_20569_A_9685877  | NC_021163.1    | Ca_Kabuli_Chr04 | 9685877                 | AA                                     | TT                 | TT               | INTERGENIC                    |                    |                                           |
| SNP_20570_A_9726237  | NC_021163.1    | Ca_Kabuli_Chr04 | 9726237                 | AA                                     | CC                 | CC               | INTERGENIC                    |                    |                                           |
| SNP_20571_A_9726356  | NC_021163.1    | Ca_Kabuli_Chr04 | 9726356                 | CC                                     | TT                 | TT               | INTERGENIC                    |                    |                                           |
| SNP_20572_A_9726364  | NC_021163.1    | Ca_Kabuli_Chr04 | 9726364                 | AA                                     | GG                 | GG               | INTERGENIC                    |                    |                                           |
| SNP_20573_A_9726390  | NC_021163.1    | Ca_Kabuli_Chr04 | 9726390                 | TT                                     | CC                 | CC               | INTERGENIC                    |                    |                                           |
| SNP_20574_A_9726430  | NC_021163.1    | Ca_Kabuli_Chr04 | 9726430                 | AA                                     | TT                 | TT               | INTERGENIC                    |                    |                                           |
| SNP_20575_A_9726681  | NC_021163.1    | Ca_Kabuli_Chr04 | 9726681                 | CC                                     | TT                 | TT               | INTERGENIC                    |                    |                                           |
| SNP_20576_A_9726719  | NC_021163.1    | Ca_Kabuli_Chr04 | 9726719                 | AA                                     | GG                 | GG               | INTERGENIC                    |                    |                                           |
| SNP_20577_A_9727214  | NC_021163.1    | Ca_Kabuli_Chr04 | 9727214                 | TT                                     | CC                 | CC               | INTERGENIC                    |                    |                                           |
| SNP_20578_A_9727350  | NC_021163.1    | Ca_Kabuli_Chr04 | 9727350                 | AA                                     | GG                 | GG               | INTERGENIC                    |                    |                                           |
| SNP_20584_A_9933697  | NC_021163.1    | Ca_Kabuli_Chr04 | 9933697                 | AA                                     | CC                 | CC               | INTERGENIC                    |                    |                                           |
| SNP_20585_A_10031364 | NC_021163.1    | Ca_Kabuli_Chr04 | 10031364                | GG                                     | TT                 | TT               | URR                           | 101509509          | probable lysine-specific demethylase ELF6 |

| SNPs IDs             | Chromosome IDs | Chromosomes     | Physical positions (bp) | CDC Frontier genome (Reference genome) | (Pusa 1103 & HPNB) | (ILWC 46 & LPNB) | Sequence Components of genome | Gene accession IDs | Putative functions                    |
|----------------------|----------------|-----------------|-------------------------|----------------------------------------|--------------------|------------------|-------------------------------|--------------------|---------------------------------------|
| SNP_20588_A_10158348 | NC_021163.1    | Ca_Kabuli_Chr04 | 10158348                | CC                                     | TT                 | TT               | INTERGENIC                    |                    |                                       |
| SNP_20590_A_10183619 | NC_021163.1    | Ca_Kabuli_Chr04 | 10183619                | TT                                     | CC                 | CC               | URR                           | 101514569          | Unknown function                      |
| SNP_20592_A_10240534 | NC_021163.1    | Ca_Kabuli_Chr04 | 10240534                | GG                                     | AA                 | AA               | INTERGENIC                    |                    |                                       |
| SNP_20593_A_10253310 | NC_021163.1    | Ca_Kabuli_Chr04 | 10253310                | TT                                     | GG                 | GG               | INTERGENIC                    |                    |                                       |
| SNP_20594_A_10253324 | NC_021163.1    | Ca_Kabuli_Chr04 | 10253324                | CC                                     | GG                 | GG               | INTERGENIC                    |                    |                                       |
| SNP_20595_A_10253370 | NC_021163.1    | Ca_Kabuli_Chr04 | 10253370                | CC                                     | AA                 | AA               | INTERGENIC                    |                    |                                       |
| SNP_20596_A_10260422 | NC_021163.1    | Ca_Kabuli_Chr04 | 10260422                | AA                                     | CC                 | CC               | INTERGENIC                    |                    |                                       |
| SNP_20597_A_10278667 | NC_021163.1    | Ca_Kabuli_Chr04 | 10278667                | CC                                     | TT                 | TT               | INTERGENIC                    |                    |                                       |
| SNP_20598_A_10319935 | NC_021163.1    | Ca_Kabuli_Chr04 | 10319935                | AA                                     | GG                 | GG               | INTERGENIC                    |                    |                                       |
| SNP_20599_A_10374933 | NC_021163.1    | Ca_Kabuli_Chr04 | 10374933                | TT                                     | CC                 | CC               | INTERGENIC                    |                    |                                       |
| SNP_20601_A_10571898 | NC_021163.1    | Ca_Kabuli_Chr04 | 10571898                | GG                                     | AA                 | AA               | INTERGENIC                    |                    |                                       |
| SNP_20604_A_10757629 | NC_021163.1    | Ca_Kabuli_Chr04 | 10757629                | AA                                     | CC                 | CC               | URR                           | 101491857          | transcription factor UPBEAT1-like     |
| SNP_20605_A_10820773 | NC_021163.1    | Ca_Kabuli_Chr04 | 10820773                | TT                                     | AA                 | AA               | INTERGENIC                    |                    |                                       |
| SNP_20606_A_10923769 | NC_021163.1    | Ca_Kabuli_Chr04 | 10923769                | CC                                     | TT                 | TT               | INTRON                        | 101491029          | protein GAMETE EXPRESSED 2            |
| SNP_20608_A_10946958 | NC_021163.1    | Ca_Kabuli_Chr04 | 10946958                | AA                                     | GG                 | GG               | INTERGENIC                    |                    |                                       |
| SNP_20609_A_11003035 | NC_021163.1    | Ca_Kabuli_Chr04 | 11003035                | TT                                     | GG                 | GG               | DRR                           | 101492308          | uncharacterized LOC101492308          |
| SNP_20610_A_11003102 | NC_021163.1    | Ca_Kabuli_Chr04 | 11003102                | TT                                     | CC                 | CC               | DRR                           | 101492308          | uncharacterized LOC101492308          |
| SNP_20611_A_11003256 | NC_021163.1    | Ca_Kabuli_Chr04 | 11003256                | AA                                     | GG                 | GG               | DRR                           | 101492308          | uncharacterized LOC101492308          |
| SNP_20612_A_11003479 | NC_021163.1    | Ca_Kabuli_Chr04 | 11003479                | TT                                     | CC                 | CC               | NON_SYNONYMOUS_CODING         | 101492308          | uncharacterized LOC101492308          |
| SNP_20613_A_11003672 | NC_021163.1    | Ca_Kabuli_Chr04 | 11003672                | AA                                     | GG                 | GG               | NON_SYNONYMOUS_CODING         | 101492308          | uncharacterized LOC101492308          |
| SNP_20614_A_11056889 | NC_021163.1    | Ca_Kabuli_Chr04 | 11056889                | TT                                     | AA                 | AA               | URR                           | 101502228          | NAC domain-containing protein 16-like |
| SNP_20615_A_11057194 | NC_021163.1    | Ca_Kabuli_Chr04 | 11057194                | AA                                     | GG                 | GG               | INTERGENIC                    |                    |                                       |

| SNPs IDs             | Chromosome IDs | Chromosomes     | Physical positions (bp) | CDC Frontier genome (Reference genome) | (Pusa 1103 & HPNB) | (ILWC 46 & LPNB) | Sequence Components of genome | Gene accession IDs | Putative functions                                           |
|----------------------|----------------|-----------------|-------------------------|----------------------------------------|--------------------|------------------|-------------------------------|--------------------|--------------------------------------------------------------|
| SNP_20617_A_11210181 | NC_021163.1    | Ca_Kabuli_Chr04 | 11210181                | GG                                     | TT                 | TT               | INTRON                        | 101508543          | type I inositol 1,4,5-trisphosphate 5-phosphatase 1-like     |
| SNP_20618_A_11210659 | NC_021163.1    | Ca_Kabuli_Chr04 | 11210659                | AA                                     | GG                 | GG               | INTRON                        | 101508543          | type I inositol 1,4,5-trisphosphate 5-phosphatase 1-like     |
| SNP_20619_A_11212351 | NC_021163.1    | Ca_Kabuli_Chr04 | 11212351                | TT                                     | CC                 | CC               | NON_SYNONYMOUS_CODING         | 101508543          | type I inositol 1,4,5-trisphosphate 5-phosphatase 1-like     |
| SNP_20620_A_11213785 | NC_021163.1    | Ca_Kabuli_Chr04 | 11213785                | GG                                     | CC                 | CC               | INTRON                        | 101508543          | type I inositol 1,4,5-trisphosphate 5-phosphatase 1-like     |
| SNP_20621_A_11216179 | NC_021163.1    | Ca_Kabuli_Chr04 | 11216179                | CC                                     | AA                 | AA               | URR                           | 101508543          | type I inositol 1,4,5-trisphosphate 5-phosphatase 1-like     |
| SNP_20622_A_11219986 | NC_021163.1    | Ca_Kabuli_Chr04 | 11219986                | CC                                     | AA                 | AA               | INTERGENIC                    |                    |                                                              |
| SNP_20624_A_11221205 | NC_021163.1    | Ca_Kabuli_Chr04 | 11221205                | AA                                     | CC                 | CC               | INTERGENIC                    |                    |                                                              |
| SNP_20625_A_11221572 | NC_021163.1    | Ca_Kabuli_Chr04 | 11221572                | TT                                     | CC                 | CC               | INTERGENIC                    |                    |                                                              |
| SNP_20626_A_11221588 | NC_021163.1    | Ca_Kabuli_Chr04 | 11221588                | GG                                     | TT                 | TT               | INTERGENIC                    |                    |                                                              |
| SNP_20627_A_11238763 | NC_021163.1    | Ca_Kabuli_Chr04 | 11238763                | TT                                     | CC                 | CC               | DRR                           | 101509931          | ATP synthase mitochondrial F1 complex assembly factor 1-like |
| SNP_20628_A_11243684 | NC_021163.1    | Ca_Kabuli_Chr04 | 11243684                | TT                                     | CC                 | CC               | URR                           | 101509931          | ATP synthase mitochondrial F1 complex assembly factor 1-like |
| SNP_20629_A_11251447 | NC_021163.1    | Ca_Kabuli_Chr04 | 11251447                | TT                                     | CC                 | CC               | DRR                           | 101510794          | carboxypeptidase D                                           |
| SNP_20630_A_11255005 | NC_021163.1    | Ca_Kabuli_Chr04 | 11255005                | TT                                     | CC                 | CC               | INTRON                        | 101510794          | carboxypeptidase D                                           |
| SNP_20631_A_11257269 | NC_021163.1    | Ca_Kabuli_Chr04 | 11257269                | CC                                     | AA                 | AA               | INTRON                        | 101510794          | carboxypeptidase D                                           |
| SNP_20632_A_11257398 | NC_021163.1    | Ca_Kabuli_Chr04 | 11257398                | GG                                     | AA                 | AA               | INTRON                        | 101510794          | carboxypeptidase D                                           |
| SNP_20633_A_11258186 | NC_021163.1    | Ca_Kabuli_Chr04 | 11258186                | CC                                     | TT                 | TT               | INTRON                        | 101510794          | carboxypeptidase D                                           |
| SNP_20634_A_11259144 | NC_021163.1    | Ca_Kabuli_Chr04 | 11259144                | CC                                     | GG                 | GG               | URR                           | 101510794          | carboxypeptidase D                                           |
| SNP_20635_A_11261289 | NC_021163.1    | Ca_Kabuli_Chr04 | 11261289                | AA                                     | GG                 | GG               | INTERGENIC                    |                    |                                                              |
| SNP_20636_A_11264353 | NC_021163.1    | Ca_Kabuli_Chr04 | 11264353                | AA                                     | GG                 | GG               | INTERGENIC                    |                    |                                                              |
| SNP_20637_A_11269875 | NC_021163.1    | Ca_Kabuli_Chr04 | 11269875                | CC                                     | TT                 | TT               | INTERGENIC                    |                    |                                                              |
| SNP_20638_A_11271099 | NC_021163.1    | Ca_Kabuli_Chr04 | 11271099                | TT                                     | AA                 | AA               | URR                           | 101511540          | protein GIGANTEA                                             |
| SNP_20639_A_11281006 | NC_021163.1    | Ca_Kabuli_Chr04 | 11281006                | AA                                     | GG                 | GG               | URR                           | 101511540          | protein GIGANTEA                                             |

| SNPs IDs             | Chromosome IDs | Chromosomes     | Physical positions (bp) | CDC Frontier genome (Reference genome) | (Pusa 1103 & HPNB) | (ILWC 46 & LPNB) | Sequence Components of genome | Gene accession IDs | Putative functions                                 |
|----------------------|----------------|-----------------|-------------------------|----------------------------------------|--------------------|------------------|-------------------------------|--------------------|----------------------------------------------------|
| SNP_20640_A_11281298 | NC_021163.1    | Ca_Kabuli_Chr04 | 11281298                | AA                                     | GG                 | GG               | URR                           | 101511540          | protein GIGANTEA                                   |
| SNP_20641_A_11281459 | NC_021163.1    | Ca_Kabuli_Chr04 | 11281459                | CC                                     | AA                 | AA               | URR                           | 101511540          | protein GIGANTEA                                   |
| SNP_20642_A_11281484 | NC_021163.1    | Ca_Kabuli_Chr04 | 11281484                | AA                                     | TT                 | TT               | URR                           | 101511540          | protein GIGANTEA                                   |
| SNP_20643_A_11283108 | NC_021163.1    | Ca_Kabuli_Chr04 | 11283108                | TT                                     | CC                 | CC               | DRR                           | 101512073          | 40S ribosomal protein S18-like                     |
| SNP_20644_A_11285366 | NC_021163.1    | Ca_Kabuli_Chr04 | 11285366                | GG                                     | AA                 | AA               | INTERGENIC                    |                    |                                                    |
| SNP_20646_A_11287770 | NC_021163.1    | Ca_Kabuli_Chr04 | 11287770                | AA                                     | TT                 | TT               | URR                           | 101512073          | 40S ribosomal protein S18-like                     |
| SNP_20647_A_11298474 | NC_021163.1    | Ca_Kabuli_Chr04 | 11298474                | TT                                     | CC                 | CC               | INTERGENIC                    |                    |                                                    |
| SNP_20648_A_11300390 | NC_021163.1    | Ca_Kabuli_Chr04 | 11300390                | TT                                     | AA                 | AA               | DRR                           | 101512715          | uncharacterized LOC101512715                       |
| SNP_20649_A_11300673 | NC_021163.1    | Ca_Kabuli_Chr04 | 11300673                | TT                                     | GG                 | GG               | DRR                           | 101512715          | uncharacterized LOC101512715                       |
| SNP_20650_A_11303414 | NC_021163.1    | Ca_Kabuli_Chr04 | 11303414                | CC                                     | TT                 | TT               | INTRON                        | id76129            | Unknown function                                   |
| SNP_20651_A_11314477 | NC_021163.1    | Ca_Kabuli_Chr04 | 11314477                | GG                                     | AA                 | AA               | DRR                           | 101513366          | Unknown function                                   |
| SNP_20652_A_11314975 | NC_021163.1    | Ca_Kabuli_Chr04 | 11314975                | CC                                     | TT                 | TT               | DRR                           | 101513366          | Unknown function                                   |
| SNP_20653_A_11315820 | NC_021163.1    | Ca_Kabuli_Chr04 | 11315820                | CC                                     | TT                 | TT               | URR                           | 101513918          | probable serine/threonine-protein kinase At1g54610 |
| SNP_20654_A_11315826 | NC_021163.1    | Ca_Kabuli_Chr04 | 11315826                | TT                                     | AA                 | AA               | URR                           | 101513918          | probable serine/threonine-protein kinase At1g54610 |
| SNP_20655_A_11315827 | NC_021163.1    | Ca_Kabuli_Chr04 | 11315827                | TT                                     | AA                 | AA               | URR                           | 101513918          | probable serine/threonine-protein kinase At1g54610 |
| SNP_20656_A_11315830 | NC_021163.1    | Ca_Kabuli_Chr04 | 11315830                | TT                                     | CC                 | CC               | URR                           | 101513918          | probable serine/threonine-protein kinase At1g54610 |
| SNP_20657_A_11315842 | NC_021163.1    | Ca_Kabuli_Chr04 | 11315842                | AA                                     | GG                 | GG               | URR                           | 101513918          | probable serine/threonine-protein kinase At1g54610 |
| SNP_20658_A_11318361 | NC_021163.1    | Ca_Kabuli_Chr04 | 11318361                | TT                                     | CC                 | CC               | URR                           | 101513366          | Unknown function                                   |
| SNP_20659_A_11318371 | NC_021163.1    | Ca_Kabuli_Chr04 | 11318371                | AA                                     | GG                 | GG               | URR                           | 101513366          | Unknown function                                   |
| SNP_20660_A_11318395 | NC_021163.1    | Ca_Kabuli_Chr04 | 11318395                | CC                                     | TT                 | TT               | URR                           | 101513366          | Unknown function                                   |
| SNP_20661_A_11322292 | NC_021163.1    | Ca_Kabuli_Chr04 | 11322292                | AA                                     | GG                 | GG               | INTERGENIC                    |                    |                                                    |
| SNP_20662_A_11324851 | NC_021163.1    | Ca_Kabuli_Chr04 | 11324851                | CC                                     | TT                 | TT               | DRR                           | 101514256          | peroxidase 12                                      |

| SNPs IDs             | Chromosome IDs | Chromosomes     | Physical positions (bp) | CDC Frontier genome (Reference genome) | (Pusa 1103 & HPNB) | (ILWC 46 & LPNB) | Sequence Components of genome | Gene accession IDs | Putative functions                                   |
|----------------------|----------------|-----------------|-------------------------|----------------------------------------|--------------------|------------------|-------------------------------|--------------------|------------------------------------------------------|
| SNP_20663_A_11324853 | NC_021163.1    | Ca_Kabuli_Chr04 | 11324853                | CC                                     | TT                 | TT               | DRR                           | 101514256          | peroxidase 12                                        |
| SNP_20664_A_11337980 | NC_021163.1    | Ca_Kabuli_Chr04 | 11337980                | TT                                     | AA                 | AA               | URR                           | 101514893          | histone-lysine N-methyltransferase ASHH1             |
| SNP_20665_A_11338519 | NC_021163.1    | Ca_Kabuli_Chr04 | 11338519                | TT                                     | CC                 | CC               | URR                           | 101514893          | histone-lysine N-methyltransferase ASHH1             |
| SNP_20666_A_11340371 | NC_021163.1    | Ca_Kabuli_Chr04 | 11340371                | TT                                     | CC                 | CC               | INTERGENIC                    |                    |                                                      |
| SNP_20668_A_11348966 | NC_021163.1    | Ca_Kabuli_Chr04 | 11348966                | TT                                     | CC                 | CC               | DRR                           | 101515541          | uncharacterized LOC101515541                         |
| SNP_20669_A_11352089 | NC_021163.1    | Ca_Kabuli_Chr04 | 11352089                | AA                                     | GG                 | GG               | URR                           | 101494272          | uncharacterized LOC101494272                         |
| SNP_20670_A_11352103 | NC_021163.1    | Ca_Kabuli_Chr04 | 11352103                | TT                                     | CC                 | CC               | URR                           | 101494272          | uncharacterized LOC101494272                         |
| SNP_20671_A_11352356 | NC_021163.1    | Ca_Kabuli_Chr04 | 11352356                | AA                                     | CC                 | CC               | URR                           | 101494272          | uncharacterized LOC101494272                         |
| SNP_20672_A_11354519 | NC_021163.1    | Ca_Kabuli_Chr04 | 11354519                | TT                                     | GG                 | GG               | INTERGENIC                    |                    |                                                      |
| SNP_20673_A_11362045 | NC_021163.1    | Ca_Kabuli_Chr04 | 11362045                | GG                                     | TT                 | TT               | DRR                           | 101488294          | ethylene-responsive transcription factor ERF110-like |
| SNP_20674_A_11363351 | NC_021163.1    | Ca_Kabuli_Chr04 | 11363351                | TT                                     | CC                 | CC               | INTRON                        | 101488294          | ethylene-responsive transcription factor ERF110-like |
| SNP_20675_A_11364937 | NC_021163.1    | Ca_Kabuli_Chr04 | 11364937                | AA                                     | CC                 | CC               | URR                           | 101488294          | ethylene-responsive transcription factor ERF110-like |
| SNP_20676_A_11365190 | NC_021163.1    | Ca_Kabuli_Chr04 | 11365190                | TT                                     | CC                 | CC               | URR                           | 101488294          | ethylene-responsive transcription factor ERF110-like |
| SNP_20677_A_11366454 | NC_021163.1    | Ca_Kabuli_Chr04 | 11366454                | TT                                     | CC                 | CC               | URR                           | 101488294          | ethylene-responsive transcription factor ERF110-like |
| SNP_20678_A_11373504 | NC_021163.1    | Ca_Kabuli_Chr04 | 11373504                | AA                                     | GG                 | GG               | INTERGENIC                    |                    |                                                      |
| SNP_20679_A_11373535 | NC_021163.1    | Ca_Kabuli_Chr04 | 11373535                | CC                                     | TT                 | TT               | INTERGENIC                    |                    |                                                      |
| SNP_20680_A_11374612 | NC_021163.1    | Ca_Kabuli_Chr04 | 11374612                | CC                                     | AA                 | AA               | INTERGENIC                    |                    |                                                      |
| SNP_20681_A_11375681 | NC_021163.1    | Ca_Kabuli_Chr04 | 11375681                | GG                                     | AA                 | AA               | INTERGENIC                    |                    |                                                      |
| SNP_20682_A_11380668 | NC_021163.1    | Ca_Kabuli_Chr04 | 11380668                | AA                                     | GG                 | GG               | INTERGENIC                    |                    |                                                      |
| SNP_20683_A_11380852 | NC_021163.1    | Ca_Kabuli_Chr04 | 11380852                | TT                                     | AA                 | AA               | INTERGENIC                    |                    |                                                      |
| SNP_20684_A_11387145 | NC_021163.1    | Ca_Kabuli_Chr04 | 11387145                | GG                                     | TT                 | TT               | INTRON                        | 101489407          | polypyrimidine tract-binding protein homolog 3       |
| SNP_20685_A_11399375 | NC_021163.1    | Ca_Kabuli_Chr04 | 11399375                | AA                                     | GG                 | GG               | URR                           | 101490160          | 60S ribosomal protein L3-1                           |

| SNPs IDs             | Chromosome IDs | Chromosomes     | Physical positions (bp) | CDC Frontier genome (Reference genome) | (Pusa 1103 & HPNB) | (ILWC 46 & LPNB) | Sequence Components of genome | Gene accession IDs | Putative functions                        |
|----------------------|----------------|-----------------|-------------------------|----------------------------------------|--------------------|------------------|-------------------------------|--------------------|-------------------------------------------|
| SNP_20686_A_11399382 | NC_021163.1    | Ca_Kabuli_Chr04 | 11399382                | TT                                     | GG                 | GG               | URR                           | 101490160          | 60S ribosomal protein L3-1                |
| SNP_20687_A_11399400 | NC_021163.1    | Ca_Kabuli_Chr04 | 11399400                | TT                                     | AA                 | AA               | URR                           | 101490160          | 60S ribosomal protein L3-1                |
| SNP_20688_A_11400483 | NC_021163.1    | Ca_Kabuli_Chr04 | 11400483                | AA                                     | GG                 | GG               | URR                           | 101490160          | 60S ribosomal protein L3-1                |
| SNP_20689_A_11415776 | NC_021163.1    | Ca_Kabuli_Chr04 | 11415776                | CC                                     | AA                 | AA               | URR                           | 101490808          | G-box-binding factor 4-like               |
| SNP_20690_A_11416024 | NC_021163.1    | Ca_Kabuli_Chr04 | 11416024                | CC                                     | TT                 | TT               | URR                           | 101490808          | G-box-binding factor 4-like               |
| SNP_20691_A_11416180 | NC_021163.1    | Ca_Kabuli_Chr04 | 11416180                | GG                                     | AA                 | AA               | URR                           | 101490808          | G-box-binding factor 4-like               |
| SNP_20692_A_11417715 | NC_021163.1    | Ca_Kabuli_Chr04 | 11417715                | CC                                     | AA                 | AA               | DRR                           | 101491663          | sterol 3-beta-glucosyltransferase UGT80B1 |
| SNP_20693_A_11426577 | NC_021163.1    | Ca_Kabuli_Chr04 | 11426577                | GG                                     | CC                 | CC               | URR                           | 101491663          | sterol 3-beta-glucosyltransferase UGT80B1 |
| SNP_20695_A_11435999 | NC_021163.1    | Ca_Kabuli_Chr04 | 11435999                | AA                                     | GG                 | GG               | DRR                           | 101492753          | thioredoxin Y1, chloroplastic-like        |
| SNP_20696_A_11438717 | NC_021163.1    | Ca_Kabuli_Chr04 | 11438717                | TT                                     | CC                 | CC               | INTERGENIC                    |                    |                                           |
| SNP_20697_A_11440998 | NC_021163.1    | Ca_Kabuli_Chr04 | 11440998                | GG                                     | AA                 | AA               | URR                           | 101492753          | thioredoxin Y1, chloroplastic-like        |
| SNP_20698_A_11442061 | NC_021163.1    | Ca_Kabuli_Chr04 | 11442061                | TT                                     | CC                 | CC               | INTERGENIC                    |                    |                                           |
| SNP_20699_A_11443240 | NC_021163.1    | Ca_Kabuli_Chr04 | 11443240                | CC                                     | TT                 | TT               | URR                           | 101493087          | 40S ribosomal protein S18-like            |
| SNP_20700_A_11443306 | NC_021163.1    | Ca_Kabuli_Chr04 | 11443306                | GG                                     | AA                 | AA               | URR                           | 101493087          | 40S ribosomal protein S18-like            |
| SNP_20701_A_11443390 | NC_021163.1    | Ca_Kabuli_Chr04 | 11443390                | AA                                     | TT                 | TT               | URR                           | 101493087          | 40S ribosomal protein S18-like            |
| SNP_20702_A_11443400 | NC_021163.1    | Ca_Kabuli_Chr04 | 11443400                | CC                                     | GG                 | GG               | URR                           | 101493087          | 40S ribosomal protein S18-like            |
| SNP_20703_A_11443803 | NC_021163.1    | Ca_Kabuli_Chr04 | 11443803                | GG                                     | CC                 | CC               | URR                           | 101493087          | 40S ribosomal protein S18-like            |
| SNP_20704_A_11451925 | NC_021163.1    | Ca_Kabuli_Chr04 | 11451925                | TT                                     | GG                 | GG               | INTERGENIC                    |                    |                                           |
| SNP_20705_A_11461022 | NC_021163.1    | Ca_Kabuli_Chr04 | 11461022                | TT                                     | CC                 | CC               | INTERGENIC                    |                    |                                           |
| SNP_20706_A_11466952 | NC_021163.1    | Ca_Kabuli_Chr04 | 11466952                | TT                                     | CC                 | CC               | URR                           | 101494271          | uncharacterized LOC101494271              |
| SNP_20707_A_11467577 | NC_021163.1    | Ca_Kabuli_Chr04 | 11467577                | TT                                     | CC                 | CC               | URR                           | 101494271          | uncharacterized LOC101494271              |
| SNP_20708_A_11467608 | NC_021163.1    | Ca_Kabuli_Chr04 | 11467608                | GG                                     | AA                 | AA               | URR                           | 101494271          | uncharacterized LOC101494271              |

| SNPs IDs             | Chromosome IDs | Chromosomes     | Physical positions (bp) | CDC Frontier (Reference genome) | (Pusa 1103 & HPNB) | (ILWC 46 & LPNB) | Sequence Components of genome | Gene accession IDs | Putative functions           |
|----------------------|----------------|-----------------|-------------------------|---------------------------------|--------------------|------------------|-------------------------------|--------------------|------------------------------|
| SNP_20709_A_11468750 | NC_021163.1    | Ca_Kabuli_Chr04 | 11468750                | CC                              | TT                 | TT               | INTERGENIC                    |                    |                              |
| SNP_20710_A_11468822 | NC_021163.1    | Ca_Kabuli_Chr04 | 11468822                | TT                              | CC                 | CC               | INTERGENIC                    |                    |                              |
| SNP_20711_A_11470142 | NC_021163.1    | Ca_Kabuli_Chr04 | 11470142                | GG                              | AA                 | AA               | INTERGENIC                    |                    |                              |
| SNP_20712_A_11470166 | NC_021163.1    | Ca_Kabuli_Chr04 | 11470166                | AA                              | GG                 | GG               | INTERGENIC                    |                    |                              |
| SNP_20713_A_11470486 | NC_021163.1    | Ca_Kabuli_Chr04 | 11470486                | GG                              | AA                 | AA               | INTERGENIC                    |                    |                              |
| SNP_20714_A_11471766 | NC_021163.1    | Ca_Kabuli_Chr04 | 11471766                | GG                              | AA                 | AA               | INTERGENIC                    |                    |                              |
| SNP_20715_A_11477517 | NC_021163.1    | Ca_Kabuli_Chr04 | 11477517                | GG                              | TT                 | TT               | URR                           | 101494579          | uncharacterized LOC101494579 |
| SNP_20716_A_11489077 | NC_021163.1    | Ca_Kabuli_Chr04 | 11489077                | TT                              | AA                 | AA               | DRR                           | 101494779          | tubby-like F-box protein 8   |
| SNP_20717_A_11492588 | NC_021163.1    | Ca_Kabuli_Chr04 | 11492588                | TT                              | GG                 | GG               | INTRON                        | 101494779          | tubby-like F-box protein 8   |
| SNP_20719_A_11515166 | NC_021163.1    | Ca_Kabuli_Chr04 | 11515166                | CC                              | TT                 | TT               | INTERGENIC                    |                    |                              |
| SNP_20720_A_11515516 | NC_021163.1    | Ca_Kabuli_Chr04 | 11515516                | AA                              | GG                 | GG               | INTERGENIC                    |                    |                              |
| SNP_20721_A_11515774 | NC_021163.1    | Ca_Kabuli_Chr04 | 11515774                | GG                              | TT                 | TT               | INTERGENIC                    |                    |                              |
| SNP_20722_A_11520604 | NC_021163.1    | Ca_Kabuli_Chr04 | 11520604                | GG                              | TT                 | TT               | INTERGENIC                    |                    |                              |
| SNP_20723_A_11524339 | NC_021163.1    | Ca_Kabuli_Chr04 | 11524339                | TT                              | CC                 | CC               | INTERGENIC                    |                    |                              |
| SNP_20724_A_11524381 | NC_021163.1    | Ca_Kabuli_Chr04 | 11524381                | CC                              | TT                 | TT               | INTERGENIC                    |                    |                              |
| SNP_20725_A_11533176 | NC_021163.1    | Ca_Kabuli_Chr04 | 11533176                | AA                              | GG                 | GG               | INTERGENIC                    |                    |                              |
| SNP_20726_A_11533598 | NC_021163.1    | Ca_Kabuli_Chr04 | 11533598                | TT                              | CC                 | CC               | INTERGENIC                    |                    |                              |
| SNP_20727_A_11539296 | NC_021163.1    | Ca_Kabuli_Chr04 | 11539296                | CC                              | TT                 | TT               | INTERGENIC                    |                    |                              |
| SNP_20728_A_11542112 | NC_021163.1    | Ca_Kabuli_Chr04 | 11542112                | AA                              | GG                 | GG               | INTERGENIC                    |                    |                              |
| SNP_20729_A_11543928 | NC_021163.1    | Ca_Kabuli_Chr04 | 11543928                | AA                              | TT                 | TT               | INTERGENIC                    |                    |                              |
| SNP_20730_A_11543930 | NC_021163.1    | Ca_Kabuli_Chr04 | 11543930                | TT                              | GG                 | GG               | INTERGENIC                    |                    |                              |
| SNP_20731_A_11544023 | NC_021163.1    | Ca_Kabuli_Chr04 | 11544023                | AA                              | CC                 | CC               | INTERGENIC                    |                    |                              |

| SNPs IDs             | Chromosome IDs | Chromosomes     | Physical positions (bp) | CDC Frontier (Reference genome) | (Pusa 1103 & HPNB) | (ILWC 46 & LPNB) | Sequence Components of genome | Gene accession IDs | Putative functions                                           |
|----------------------|----------------|-----------------|-------------------------|---------------------------------|--------------------|------------------|-------------------------------|--------------------|--------------------------------------------------------------|
| SNP_20732_A_11548696 | NC_021163.1    | Ca_Kabuli_Chr04 | 11548696                | GG                              | AA                 | AA               | INTERGENIC                    |                    |                                                              |
| SNP_20735_A_11569528 | NC_021163.1    | Ca_Kabuli_Chr04 | 11569528                | CC                              | AA                 | AA               | INTERGENIC                    |                    |                                                              |
| SNP_20736_A_11672415 | NC_021163.1    | Ca_Kabuli_Chr04 | 11672415                | TT                              | AA                 | AA               | INTERGENIC                    |                    |                                                              |
| SNP_20737_A_11681843 | NC_021163.1    | Ca_Kabuli_Chr04 | 11681843                | GG                              | AA                 | AA               | INTERGENIC                    |                    |                                                              |
| SNP_20738_A_11722537 | NC_021163.1    | Ca_Kabuli_Chr04 | 11722537                | AA                              | TT                 | TT               | DRR                           | 101500209          | extensin-3-like                                              |
| SNP_20739_A_11740752 | NC_021163.1    | Ca_Kabuli_Chr04 | 11740752                | TT                              | AA                 | AA               | INTERGENIC                    |                    |                                                              |
| SNP_20740_A_11788317 | NC_021163.1    | Ca_Kabuli_Chr04 | 11788317                | CC                              | GG                 | GG               | INTERGENIC                    |                    |                                                              |
| SNP_20741_A_11793561 | NC_021163.1    | Ca_Kabuli_Chr04 | 11793561                | CC                              | TT                 | TT               | INTERGENIC                    |                    |                                                              |
| SNP_20742_A_11793596 | NC_021163.1    | Ca_Kabuli_Chr04 | 11793596                | TT                              | CC                 | CC               | INTERGENIC                    |                    |                                                              |
| SNP_20743_A_11793658 | NC_021163.1    | Ca_Kabuli_Chr04 | 11793658                | AA                              | GG                 | GG               | INTERGENIC                    |                    |                                                              |
| SNP_20744_A_11799645 | NC_021163.1    | Ca_Kabuli_Chr04 | 11799645                | TT                              | AA                 | AA               | INTERGENIC                    |                    |                                                              |
| SNP_20745_A_11843914 | NC_021163.1    | Ca_Kabuli_Chr04 | 11843914                | TT                              | CC                 | CC               | URR                           | 101502549          | ABC transporter C family member 10-like                      |
| SNP_20746_A_11847494 | NC_021163.1    | Ca_Kabuli_Chr04 | 11847494                | CC                              | TT                 | TT               | SYNONYMOUS_CODING             | id76492            | Unknown function                                             |
| SNP_20748_A_11874718 | NC_021163.1    | Ca_Kabuli_Chr04 | 11874718                | CC                              | GG                 | GG               | INTRON                        | 101504155          | protein timeless homolog                                     |
| SNP_20749_A_11926380 | NC_021163.1    | Ca_Kabuli_Chr04 | 11926380                | TT                              | AA                 | AA               | INTRON                        | 101506297          | uncharacterized AAA domain-containing protein C16E9.10c-like |
| SNP_20751_A_12145745 | NC_021163.1    | Ca_Kabuli_Chr04 | 12145745                | GG                              | AA                 | AA               | INTERGENIC                    |                    |                                                              |
| SNP_20752_A_12178876 | NC_021163.1    | Ca_Kabuli_Chr04 | 12178876                | TT                              | AA                 | AA               | INTERGENIC                    |                    |                                                              |
| SNP_20753_A_12193677 | NC_021163.1    | Ca_Kabuli_Chr04 | 12193677                | TT                              | AA                 | AA               | INTERGENIC                    |                    |                                                              |
| SNP_20754_A_12207456 | NC_021163.1    | Ca_Kabuli_Chr04 | 12207456                | AA                              | TT                 | TT               | INTERGENIC                    |                    |                                                              |
| SNP_20755_A_12225931 | NC_021163.1    | Ca_Kabuli_Chr04 | 12225931                | AA                              | GG                 | GG               | URR                           | 101515104          | UPF0496 protein At3g49070                                    |
| SNP_20756_A_12227560 | NC_021163.1    | Ca_Kabuli_Chr04 | 12227560                | GG                              | AA                 | AA               | DRR                           | 101488296          | methyltransferase-like protein 1                             |
| SNP_20759_A_12338994 | NC_021163.1    | Ca_Kabuli_Chr04 | 12338994                | AA                              | TT                 | TT               | INTERGENIC                    |                    |                                                              |



| SNPs IDs             | Chromosome IDs | Chromosomes     | Physical positions (bp) | CDC Frontier genome (Reference genome) | (Pusa 1103 & HPNB) | (ILWC 46 & LPNB) | Sequence Components of genome | Gene accession IDs | Putative functions            |
|----------------------|----------------|-----------------|-------------------------|----------------------------------------|--------------------|------------------|-------------------------------|--------------------|-------------------------------|
| SNP_20760_A_12339004 | NC_021163.1    | Ca_Kabuli_Chr04 | 12339004                | GG                                     | AA                 | AA               | INTERGENIC                    |                    |                               |
| SNP_20761_A_12339006 | NC_021163.1    | Ca_Kabuli_Chr04 | 12339006                | CC                                     | TT                 | TT               | INTERGENIC                    |                    |                               |
| SNP_20762_A_12339165 | NC_021163.1    | Ca_Kabuli_Chr04 | 12339165                | CC                                     | TT                 | TT               | INTERGENIC                    |                    |                               |
| SNP_20763_A_12339175 | NC_021163.1    | Ca_Kabuli_Chr04 | 12339175                | AA                                     | GG                 | GG               | INTERGENIC                    |                    |                               |
| SNP_20764_A_12339185 | NC_021163.1    | Ca_Kabuli_Chr04 | 12339185                | GG                                     | AA                 | AA               | INTERGENIC                    |                    |                               |
| SNP_20765_A_12343848 | NC_021163.1    | Ca_Kabuli_Chr04 | 12343848                | TT                                     | GG                 | GG               | NON_SYNONYMOUS_CODING         | 101500100          | Unknown function              |
| SNP_20766_A_12363384 | NC_021163.1    | Ca_Kabuli_Chr04 | 12363384                | TT                                     | GG                 | GG               | INTERGENIC                    |                    |                               |
| SNP_20767_A_12391095 | NC_021163.1    | Ca_Kabuli_Chr04 | 12391095                | GG                                     | TT                 | TT               | INTERGENIC                    |                    |                               |
| SNP_20768_A_12392581 | NC_021163.1    | Ca_Kabuli_Chr04 | 12392581                | GG                                     | AA                 | AA               | INTERGENIC                    |                    |                               |
| SNP_20769_A_12463938 | NC_021163.1    | Ca_Kabuli_Chr04 | 12463938                | GG                                     | TT                 | TT               | INTERGENIC                    |                    |                               |
| SNP_20770_A_12473297 | NC_021163.1    | Ca_Kabuli_Chr04 | 12473297                | AA                                     | CC                 | CC               | URR                           | 101496311          | actin-depolymerizing factor 7 |
| SNP_20771_A_12480139 | NC_021163.1    | Ca_Kabuli_Chr04 | 12480139                | AA                                     | TT                 | TT               | INTERGENIC                    |                    |                               |
| SNP_20772_A_12480152 | NC_021163.1    | Ca_Kabuli_Chr04 | 12480152                | CC                                     | TT                 | TT               | INTERGENIC                    |                    |                               |
| SNP_20773_A_12480177 | NC_021163.1    | Ca_Kabuli_Chr04 | 12480177                | CC                                     | TT                 | TT               | INTERGENIC                    |                    |                               |
| SNP_20774_A_12485094 | NC_021163.1    | Ca_Kabuli_Chr04 | 12485094                | GG                                     | TT                 | TT               | INTERGENIC                    |                    |                               |
| SNP_20775_A_12485123 | NC_021163.1    | Ca_Kabuli_Chr04 | 12485123                | TT                                     | AA                 | AA               | INTERGENIC                    |                    |                               |
| SNP_20776_A_12485523 | NC_021163.1    | Ca_Kabuli_Chr04 | 12485523                | TT                                     | GG                 | GG               | INTERGENIC                    |                    |                               |
| SNP_20777_A_12485577 | NC_021163.1    | Ca_Kabuli_Chr04 | 12485577                | CC                                     | AA                 | AA               | INTERGENIC                    |                    |                               |
| SNP_20778_A_12485612 | NC_021163.1    | Ca_Kabuli_Chr04 | 12485612                | TT                                     | AA                 | AA               | INTERGENIC                    |                    |                               |
| SNP_20779_A_12485615 | NC_021163.1    | Ca_Kabuli_Chr04 | 12485615                | TT                                     | CC                 | CC               | INTERGENIC                    |                    |                               |
| SNP_20780_A_12485628 | NC_021163.1    | Ca_Kabuli_Chr04 | 12485628                | CC                                     | AA                 | AA               | INTERGENIC                    |                    |                               |
| SNP_20781_A_12487482 | NC_021163.1    | Ca_Kabuli_Chr04 | 12487482                | CC                                     | GG                 | GG               | DRR                           | 101498730          | uncharacterized LOC101498730  |

| SNPs IDs             | Chromosome IDs | Chromosomes     | Physical positions (bp) | CDC Frontier genome (Reference genome) | (Pusa 1103 & HPNB) | (ILWC 46 & LPNB) | Sequence Components of genome | Gene accession IDs | Putative functions                       |
|----------------------|----------------|-----------------|-------------------------|----------------------------------------|--------------------|------------------|-------------------------------|--------------------|------------------------------------------|
| SNP_20783_A_12492569 | NC_021163.1    | Ca_Kabuli_Chr04 | 12492569                | GG                                     | AA                 | AA               | INTERGENIC                    |                    |                                          |
| SNP_20784_A_12497635 | NC_021163.1    | Ca_Kabuli_Chr04 | 12497635                | TT                                     | GG                 | GG               | INTERGENIC                    |                    |                                          |
| SNP_20785_A_12503632 | NC_021163.1    | Ca_Kabuli_Chr04 | 12503632                | GG                                     | AA                 | AA               | INTRON                        | 101499984          | paramyosin                               |
| SNP_20788_A_12505377 | NC_021163.1    | Ca_Kabuli_Chr04 | 12505377                | TT                                     | GG                 | GG               | URR                           | 101499984          | paramyosin                               |
| SNP_20789_A_12505386 | NC_021163.1    | Ca_Kabuli_Chr04 | 12505386                | AA                                     | GG                 | GG               | URR                           | 101499984          | paramyosin                               |
| SNP_20791_A_12505991 | NC_021163.1    | Ca_Kabuli_Chr04 | 12505991                | AA                                     | CC                 | CC               | URR                           | 101499984          | paramyosin                               |
| SNP_20793_A_12510116 | NC_021163.1    | Ca_Kabuli_Chr04 | 12510116                | AA                                     | GG                 | GG               | INTERGENIC                    |                    |                                          |
| SNP_20795_A_12519108 | NC_021163.1    | Ca_Kabuli_Chr04 | 12519108                | CC                                     | TT                 | TT               | INTERGENIC                    |                    |                                          |
| SNP_20796_A_12520018 | NC_021163.1    | Ca_Kabuli_Chr04 | 12520018                | TT                                     | AA                 | AA               | DRR                           | 101500328          | transmembrane ascorbate ferrireductase 1 |
| SNP_20797_A_12520282 | NC_021163.1    | Ca_Kabuli_Chr04 | 12520282                | TT                                     | AA                 | AA               | DRR                           | 101500328          | transmembrane ascorbate ferrireductase 1 |
| SNP_20798_A_12523173 | NC_021163.1    | Ca_Kabuli_Chr04 | 12523173                | TT                                     | AA                 | AA               | INTRON                        | 101500328          | transmembrane ascorbate ferrireductase 1 |
| SNP_20799_A_12523236 | NC_021163.1    | Ca_Kabuli_Chr04 | 12523236                | CC                                     | TT                 | TT               | INTRON                        | 101500328          | transmembrane ascorbate ferrireductase 1 |
| SNP_20800_A_12523238 | NC_021163.1    | Ca_Kabuli_Chr04 | 12523238                | CC                                     | TT                 | TT               | INTRON                        | 101500328          | transmembrane ascorbate ferrireductase 1 |
| SNP_20801_A_12523242 | NC_021163.1    | Ca_Kabuli_Chr04 | 12523242                | GG                                     | TT                 | TT               | INTRON                        | 101500328          | transmembrane ascorbate ferrireductase 1 |
| SNP_20802_A_12523321 | NC_021163.1    | Ca_Kabuli_Chr04 | 12523321                | TT                                     | CC                 | CC               | INTRON                        | 101500328          | transmembrane ascorbate ferrireductase 1 |
| SNP_20803_A_12524770 | NC_021163.1    | Ca_Kabuli_Chr04 | 12524770                | CC                                     | TT                 | TT               | INTRON                        | 101500328          | transmembrane ascorbate ferrireductase 1 |
| SNP_20804_A_12524798 | NC_021163.1    | Ca_Kabuli_Chr04 | 12524798                | GG                                     | AA                 | AA               | INTRON                        | 101500328          | transmembrane ascorbate ferrireductase 1 |
| SNP_20806_A_12527282 | NC_021163.1    | Ca_Kabuli_Chr04 | 12527282                | CC                                     | TT                 | TT               | URR                           | 101500328          | transmembrane ascorbate ferrireductase 1 |
| SNP_20807_A_12527661 | NC_021163.1    | Ca_Kabuli_Chr04 | 12527661                | TT                                     | CC                 | CC               | URR                           | 101500328          | transmembrane ascorbate ferrireductase 1 |
| SNP_20808_A_12528154 | NC_021163.1    | Ca_Kabuli_Chr04 | 12528154                | GG                                     | AA                 | AA               | URR                           | 101500328          | transmembrane ascorbate ferrireductase 1 |
| SNP_20809_A_12528208 | NC_021163.1    | Ca_Kabuli_Chr04 | 12528208                | AA                                     | GG                 | GG               | URR                           | 101500328          | transmembrane ascorbate ferrireductase 1 |
| SNP_20811_A_12529359 | NC_021163.1    | Ca_Kabuli_Chr04 | 12529359                | AA                                     | TT                 | TT               | INTERGENIC                    |                    |                                          |

| SNPs IDs             | Chromosome IDs | Chromosomes     | Physical positions (bp) | CDC Frontier genome (Reference genome) | (Pusa 1103 & HPNB) | (ILWC 46 & LPNB) | Sequence Components of genome | Gene accession IDs | Putative functions                           |
|----------------------|----------------|-----------------|-------------------------|----------------------------------------|--------------------|------------------|-------------------------------|--------------------|----------------------------------------------|
| SNP_20812_A_12529371 | NC_021163.1    | Ca_Kabuli_Chr04 | 12529371                | TT                                     | CC                 | CC               | INTERGENIC                    |                    |                                              |
| SNP_20813_A_12529642 | NC_021163.1    | Ca_Kabuli_Chr04 | 12529642                | AA                                     | TT                 | TT               | DRR                           | 101501168          | remorin-like                                 |
| SNP_20817_A_12530287 | NC_021163.1    | Ca_Kabuli_Chr04 | 12530287                | TT                                     | CC                 | CC               | DRR                           | 101501168          | remorin-like                                 |
| SNP_20819_A_12537583 | NC_021163.1    | Ca_Kabuli_Chr04 | 12537583                | TT                                     | CC                 | CC               | URR                           | 101500843          | myb-related protein Myb4-like                |
| SNP_20820_A_12542048 | NC_021163.1    | Ca_Kabuli_Chr04 | 12542048                | GG                                     | AA                 | AA               | INTERGENIC                    |                    |                                              |
| SNP_20821_A_12542320 | NC_021163.1    | Ca_Kabuli_Chr04 | 12542320                | CC                                     | AA                 | AA               | INTERGENIC                    |                    |                                              |
| SNP_20823_A_12551202 | NC_021163.1    | Ca_Kabuli_Chr04 | 12551202                | GG                                     | AA                 | AA               | INTERGENIC                    |                    |                                              |
| SNP_20824_A_12551551 | NC_021163.1    | Ca_Kabuli_Chr04 | 12551551                | CC                                     | TT                 | TT               | INTERGENIC                    |                    |                                              |
| SNP_20825_A_12551554 | NC_021163.1    | Ca_Kabuli_Chr04 | 12551554                | GG                                     | TT                 | TT               | INTERGENIC                    |                    |                                              |
| SNP_20826_A_12553951 | NC_021163.1    | Ca_Kabuli_Chr04 | 12553951                | GG                                     | AA                 | AA               | URR                           | 101501365          | transcription factor LAF1-like               |
| SNP_20828_A_12558680 | NC_021163.1    | Ca_Kabuli_Chr04 | 12558680                | TT                                     | CC                 | CC               | INTRON                        | 101501485          | pre-mRNA cleavage factor Im 25 kDa subunit 2 |
| SNP_20829_A_12558798 | NC_021163.1    | Ca_Kabuli_Chr04 | 12558798                | TT                                     | GG                 | GG               | INTRON                        | 101501485          | pre-mRNA cleavage factor Im 25 kDa subunit 2 |
| SNP_20830_A_12558938 | NC_021163.1    | Ca_Kabuli_Chr04 | 12558938                | TT                                     | AA                 | AA               | INTRON                        | 101501485          | pre-mRNA cleavage factor Im 25 kDa subunit 2 |
| SNP_20831_A_12559070 | NC_021163.1    | Ca_Kabuli_Chr04 | 12559070                | GG                                     | AA                 | AA               | INTRON                        | 101501485          | pre-mRNA cleavage factor Im 25 kDa subunit 2 |
| SNP_20832_A_12562134 | NC_021163.1    | Ca_Kabuli_Chr04 | 12562134                | TT                                     | CC                 | CC               | URR                           | 101501485          | pre-mRNA cleavage factor Im 25 kDa subunit 2 |
| SNP_20833_A_12562178 | NC_021163.1    | Ca_Kabuli_Chr04 | 12562178                | TT                                     | AA                 | AA               | URR                           | 101501485          | pre-mRNA cleavage factor Im 25 kDa subunit 2 |
| SNP_20834_A_12562182 | NC_021163.1    | Ca_Kabuli_Chr04 | 12562182                | GG                                     | TT                 | TT               | URR                           | 101501485          | pre-mRNA cleavage factor Im 25 kDa subunit 2 |
| SNP_20835_A_12562183 | NC_021163.1    | Ca_Kabuli_Chr04 | 12562183                | AA                                     | TT                 | TT               | URR                           | 101501485          | pre-mRNA cleavage factor Im 25 kDa subunit 2 |
| SNP_20836_A_12563188 | NC_021163.1    | Ca_Kabuli_Chr04 | 12563188                | GG                                     | TT                 | TT               | INTERGENIC                    |                    |                                              |
| SNP_20837_A_12563196 | NC_021163.1    | Ca_Kabuli_Chr04 | 12563196                | GG                                     | AA                 | AA               | INTERGENIC                    |                    |                                              |
| SNP_20838_A_12565947 | NC_021163.1    | Ca_Kabuli_Chr04 | 12565947                | CC                                     | GG                 | GG               | INTERGENIC                    |                    |                                              |
| SNP_20839_A_12566192 | NC_021163.1    | Ca_Kabuli_Chr04 | 12566192                | TT                                     | CC                 | CC               | INTERGENIC                    |                    |                                              |

| SNPs IDs             | Chromosome IDs | Chromosomes     | Physical positions (bp) | CDC Frontier (Reference genome) | (Pusa 1103 & HPNB) | (ILWC 46 & LPNB) | Sequence Components of genome | Gene accession IDs | Putative functions               |
|----------------------|----------------|-----------------|-------------------------|---------------------------------|--------------------|------------------|-------------------------------|--------------------|----------------------------------|
| SNP_20840_A_12566195 | NC_021163.1    | Ca_Kabuli_Chr04 | 12566195                | AA                              | GG                 | GG               | INTERGENIC                    |                    |                                  |
| SNP_20841_A_12566196 | NC_021163.1    | Ca_Kabuli_Chr04 | 12566196                | TT                              | CC                 | CC               | INTERGENIC                    |                    |                                  |
| SNP_20842_A_12566413 | NC_021163.1    | Ca_Kabuli_Chr04 | 12566413                | CC                              | TT                 | TT               | INTERGENIC                    |                    |                                  |
| SNP_20843_A_12566596 | NC_021163.1    | Ca_Kabuli_Chr04 | 12566596                | AA                              | GG                 | GG               | INTERGENIC                    |                    |                                  |
| SNP_20845_A_12566685 | NC_021163.1    | Ca_Kabuli_Chr04 | 12566685                | AA                              | TT                 | TT               | INTERGENIC                    |                    |                                  |
| SNP_20846_A_12567018 | NC_021163.1    | Ca_Kabuli_Chr04 | 12567018                | GG                              | AA                 | AA               | DRR                           | 101501799          | homoserine kinase                |
| SNP_20847_A_12567470 | NC_021163.1    | Ca_Kabuli_Chr04 | 12567470                | CC                              | TT                 | TT               | DRR                           | 101501799          | homoserine kinase                |
| SNP_20848_A_12567909 | NC_021163.1    | Ca_Kabuli_Chr04 | 12567909                | GG                              | AA                 | AA               | DRR                           | 101501799          | homoserine kinase                |
| SNP_20849_A_12567915 | NC_021163.1    | Ca_Kabuli_Chr04 | 12567915                | CC                              | TT                 | TT               | DRR                           | 101501799          | homoserine kinase                |
| SNP_20852_A_12571151 | NC_021163.1    | Ca_Kabuli_Chr04 | 12571151                | CC                              | TT                 | TT               | URR                           | 101501799          | homoserine kinase                |
| SNP_20853_A_12571154 | NC_021163.1    | Ca_Kabuli_Chr04 | 12571154                | AA                              | GG                 | GG               | URR                           | 101501799          | homoserine kinase                |
| SNP_20854_A_12571366 | NC_021163.1    | Ca_Kabuli_Chr04 | 12571366                | GG                              | AA                 | AA               | URR                           | 101501799          | homoserine kinase                |
| SNP_20855_A_12571866 | NC_021163.1    | Ca_Kabuli_Chr04 | 12571866                | TT                              | AA                 | AA               | URR                           | 101501799          | homoserine kinase                |
| SNP_20856_A_12572114 | NC_021163.1    | Ca_Kabuli_Chr04 | 12572114                | AA                              | GG                 | GG               | URR                           | 101501799          | homoserine kinase                |
| SNP_20857_A_12572117 | NC_021163.1    | Ca_Kabuli_Chr04 | 12572117                | AA                              | TT                 | TT               | URR                           | 101501799          | homoserine kinase                |
| SNP_20859_A_12573172 | NC_021163.1    | Ca_Kabuli_Chr04 | 12573172                | CC                              | TT                 | TT               | DRR                           | 101502126          | DNA mismatch repair protein MSH3 |
| SNP_20860_A_12573804 | NC_021163.1    | Ca_Kabuli_Chr04 | 12573804                | AA                              | TT                 | TT               | DRR                           | 101502126          | DNA mismatch repair protein MSH3 |
| SNP_20861_A_12575278 | NC_021163.1    | Ca_Kabuli_Chr04 | 12575278                | GG                              | AA                 | AA               | INTERGENIC                    |                    |                                  |
| SNP_20862_A_12576696 | NC_021163.1    | Ca_Kabuli_Chr04 | 12576696                | AA                              | CC                 | CC               | INTRON                        | 101502126          | DNA mismatch repair protein MSH3 |
| SNP_20863_A_12576712 | NC_021163.1    | Ca_Kabuli_Chr04 | 12576712                | AA                              | TT                 | TT               | INTRON                        | 101502126          | DNA mismatch repair protein MSH3 |
| SNP_20864_A_12577800 | NC_021163.1    | Ca_Kabuli_Chr04 | 12577800                | TT                              | AA                 | AA               | INTRON                        | 101502126          | DNA mismatch repair protein MSH3 |
| SNP_20866_A_12578089 | NC_021163.1    | Ca_Kabuli_Chr04 | 12578089                | TT                              | AA                 | AA               | INTRON                        | 101502126          | DNA mismatch repair protein MSH3 |

| SNPs IDs             | Chromosome IDs | Chromosomes     | Physical positions (bp) | CDC Frontier genome (Reference genome) | (Pusa 1103 & HPNB) | (ILWC 46 & LPNB) | Sequence Components of genome | Gene accession IDs | Putative functions                      |
|----------------------|----------------|-----------------|-------------------------|----------------------------------------|--------------------|------------------|-------------------------------|--------------------|-----------------------------------------|
| SNP_20868_A_12578369 | NC_021163.1    | Ca_Kabuli_Chr04 | 12578369                | AA                                     | CC                 | CC               | INTRON                        | 101502126          | DNA mismatch repair protein MSH3        |
| SNP_20869_A_12578378 | NC_021163.1    | Ca_Kabuli_Chr04 | 12578378                | AA                                     | TT                 | TT               | INTRON                        | 101502126          | DNA mismatch repair protein MSH3        |
| SNP_20871_A_12581082 | NC_021163.1    | Ca_Kabuli_Chr04 | 12581082                | AA                                     | CC                 | CC               | INTRON                        | 101502126          | DNA mismatch repair protein MSH3        |
| SNP_20872_A_12583186 | NC_021163.1    | Ca_Kabuli_Chr04 | 12583186                | GG                                     | TT                 | TT               | INTRON                        | 101502126          | DNA mismatch repair protein MSH3        |
| SNP_20873_A_12587857 | NC_021163.1    | Ca_Kabuli_Chr04 | 12587857                | TT                                     | AA                 | AA               | DRR                           | 101502550          | F-box/LRR-repeat protein At3g48880      |
| SNP_20876_A_12589511 | NC_021163.1    | Ca_Kabuli_Chr04 | 12589511                | TT                                     | GG                 | GG               | SYNONYMOUS_CODING             | 101502550          | F-box/LRR-repeat protein At3g48880      |
| SNP_20877_A_12591240 | NC_021163.1    | Ca_Kabuli_Chr04 | 12591240                | AA                                     | GG                 | GG               | INTERGENIC                    |                    |                                         |
| SNP_20878_A_12592222 | NC_021163.1    | Ca_Kabuli_Chr04 | 12592222                | CC                                     | TT                 | TT               | URR                           | 101502550          | F-box/LRR-repeat protein At3g48880      |
| SNP_20880_A_12592493 | NC_021163.1    | Ca_Kabuli_Chr04 | 12592493                | GG                                     | AA                 | AA               | URR                           | 101502550          | F-box/LRR-repeat protein At3g48880      |
| SNP_20881_A_12593112 | NC_021163.1    | Ca_Kabuli_Chr04 | 12593112                | TT                                     | CC                 | CC               | URR                           | 101502550          | F-box/LRR-repeat protein At3g48880      |
| SNP_20884_A_12593349 | NC_021163.1    | Ca_Kabuli_Chr04 | 12593349                | AA                                     | TT                 | TT               | DRR                           | 101502864          | membrane steroid-binding protein 1-like |
| SNP_20885_A_12593359 | NC_021163.1    | Ca_Kabuli_Chr04 | 12593359                | AA                                     | GG                 | GG               | DRR                           | 101502864          | membrane steroid-binding protein 1-like |
| SNP_20887_A_12597123 | NC_021163.1    | Ca_Kabuli_Chr04 | 12597123                | GG                                     | AA                 | AA               | URR                           | 101502864          | membrane steroid-binding protein 1-like |
| SNP_20888_A_12597748 | NC_021163.1    | Ca_Kabuli_Chr04 | 12597748                | AA                                     | GG                 | GG               | URR                           | 101502864          | membrane steroid-binding protein 1-like |
| SNP_20889_A_12599278 | NC_021163.1    | Ca_Kabuli_Chr04 | 12599278                | CC                                     | TT                 | TT               | URR                           | 101503187          | Unknown function                        |
| SNP_20890_A_12601984 | NC_021163.1    | Ca_Kabuli_Chr04 | 12601984                | AA                                     | TT                 | TT               | INTERGENIC                    |                    |                                         |
| SNP_20891_A_12602216 | NC_021163.1    | Ca_Kabuli_Chr04 | 12602216                | AA                                     | GG                 | GG               | INTERGENIC                    |                    |                                         |
| SNP_20892_A_12602224 | NC_021163.1    | Ca_Kabuli_Chr04 | 12602224                | GG                                     | CC                 | CC               | INTERGENIC                    |                    |                                         |
| SNP_20893_A_12602360 | NC_021163.1    | Ca_Kabuli_Chr04 | 12602360                | TT                                     | AA                 | AA               | INTERGENIC                    |                    |                                         |
| SNP_20894_A_12603876 | NC_021163.1    | Ca_Kabuli_Chr04 | 12603876                | CC                                     | AA                 | AA               | INTERGENIC                    |                    |                                         |
| SNP_20896_A_12605619 | NC_021163.1    | Ca_Kabuli_Chr04 | 12605619                | CC                                     | TT                 | TT               | INTERGENIC                    |                    |                                         |
| SNP_20897_A_12606076 | NC_021163.1    | Ca_Kabuli_Chr04 | 12606076                | CC                                     | TT                 | TT               | INTERGENIC                    |                    |                                         |

| SNPs IDs             | Chromosome IDs | Chromosomes     | Physical positions (bp) | CDC Frontier genome (Reference genome) | (Pusa 1103 & HPNB) | (ILWC 46 & LPNB) | Sequence genome | Components of | Gene accession IDs                                      | Putative functions |
|----------------------|----------------|-----------------|-------------------------|----------------------------------------|--------------------|------------------|-----------------|---------------|---------------------------------------------------------|--------------------|
| SNP_20898_A_12606708 | NC_021163.1    | Ca_Kabuli_Chr04 | 12606708                | CC                                     | TT                 | TT               | INTERGENIC      |               |                                                         |                    |
| SNP_20899_A_12609301 | NC_021163.1    | Ca_Kabuli_Chr04 | 12609301                | CC                                     | TT                 | TT               | INTERGENIC      |               |                                                         |                    |
| SNP_20900_A_12609320 | NC_021163.1    | Ca_Kabuli_Chr04 | 12609320                | TT                                     | CC                 | CC               | INTERGENIC      |               |                                                         |                    |
| SNP_20901_A_12627418 | NC_021163.1    | Ca_Kabuli_Chr04 | 12627418                | CC                                     | TT                 | TT               | INTERGENIC      |               |                                                         |                    |
| SNP_20902_A_12627568 | NC_021163.1    | Ca_Kabuli_Chr04 | 12627568                | AA                                     | GG                 | GG               | INTERGENIC      |               |                                                         |                    |
| SNP_20903_A_12628062 | NC_021163.1    | Ca_Kabuli_Chr04 | 12628062                | GG                                     | TT                 | TT               | INTERGENIC      |               |                                                         |                    |
| SNP_20906_A_12676389 | NC_021163.1    | Ca_Kabuli_Chr04 | 12676389                | AA                                     | GG                 | GG               | INTERGENIC      |               |                                                         |                    |
| SNP_20907_A_12676398 | NC_021163.1    | Ca_Kabuli_Chr04 | 12676398                | GG                                     | AA                 | AA               | INTERGENIC      |               |                                                         |                    |
| SNP_20908_A_12676452 | NC_021163.1    | Ca_Kabuli_Chr04 | 12676452                | GG                                     | AA                 | AA               | INTERGENIC      |               |                                                         |                    |
| SNP_20909_A_12676486 | NC_021163.1    | Ca_Kabuli_Chr04 | 12676486                | TT                                     | CC                 | CC               | INTERGENIC      |               |                                                         |                    |
| SNP_20910_A_12676499 | NC_021163.1    | Ca_Kabuli_Chr04 | 12676499                | GG                                     | AA                 | AA               | INTERGENIC      |               |                                                         |                    |
| SNP_20911_A_12676665 | NC_021163.1    | Ca_Kabuli_Chr04 | 12676665                | AA                                     | GG                 | GG               | INTERGENIC      |               |                                                         |                    |
| SNP_20912_A_12676713 | NC_021163.1    | Ca_Kabuli_Chr04 | 12676713                | AA                                     | GG                 | GG               | INTERGENIC      |               |                                                         |                    |
| SNP_20913_A_12676757 | NC_021163.1    | Ca_Kabuli_Chr04 | 12676757                | GG                                     | AA                 | AA               | INTERGENIC      |               |                                                         |                    |
| SNP_20916_A_12769779 | NC_021163.1    | Ca_Kabuli_Chr04 | 12769779                | AA                                     | TT                 | TT               | INTERGENIC      |               |                                                         |                    |
| SNP_20917_A_12832645 | NC_021163.1    | Ca_Kabuli_Chr04 | 12832645                | TT                                     | CC                 | CC               | DRR             | 101510796     | traB domain-containing protein                          |                    |
| SNP_20921_A_13053298 | NC_021163.1    | Ca_Kabuli_Chr04 | 13053298                | AA                                     | TT                 | TT               | URR             | 101492755     | receptor-like serine/threonine-protein kinase At4g25390 |                    |
| SNP_20923_A_13082266 | NC_021163.1    | Ca_Kabuli_Chr04 | 13082266                | AA                                     | TT                 | TT               | DRR             | 101503613     | 3-ketoacyl-CoA synthase 5-like                          |                    |
| SNP_20924_A_13082268 | NC_021163.1    | Ca_Kabuli_Chr04 | 13082268                | AA                                     | TT                 | TT               | DRR             | 101503613     | 3-ketoacyl-CoA synthase 5-like                          |                    |
| SNP_20925_A_13095646 | NC_021163.1    | Ca_Kabuli_Chr04 | 13095646                | AA                                     | GG                 | GG               | INTERGENIC      |               |                                                         |                    |
| SNP_20926_A_13126290 | NC_021163.1    | Ca_Kabuli_Chr04 | 13126290                | TT                                     | AA                 | AA               | DRR             | 101495440     | xyloglucan galactosyltransferase KATAMAR11 homolog      |                    |
| SNP_20928_A_13157712 | NC_021163.1    | Ca_Kabuli_Chr04 | 13157712                | CC                                     | TT                 | TT               | INTERGENIC      |               |                                                         |                    |

| SNPs IDs             | Chromosome IDs | Chromosomes     | Physical positions (bp) | CDC Frontier (Reference genome) | (Pusa 1103 & HPNB) | (ILWC 46 & LPNB) | Sequence Components of genome | Gene accession IDs | Putative functions                                     |
|----------------------|----------------|-----------------|-------------------------|---------------------------------|--------------------|------------------|-------------------------------|--------------------|--------------------------------------------------------|
| SNP_20929_A_13158302 | NC_021163.1    | Ca_Kabuli_Chr04 | 13158302                | GG                              | AA                 | AA               | INTERGENIC                    |                    |                                                        |
| SNP_20930_A_13257901 | NC_021163.1    | Ca_Kabuli_Chr04 | 13257901                | CC                              | TT                 | TT               | DRR                           | 101500330          | probable inactive serine/threonine-protein kinase lvsG |
| SNP_20932_A_13347053 | NC_021163.1    | Ca_Kabuli_Chr04 | 13347053                | TT                              | GG                 | GG               | INTERGENIC                    |                    |                                                        |
| SNP_20933_A_13386048 | NC_021163.1    | Ca_Kabuli_Chr04 | 13386048                | AA                              | GG                 | GG               | INTERGENIC                    |                    |                                                        |
| SNP_20934_A_13404461 | NC_021163.1    | Ca_Kabuli_Chr04 | 13404461                | TT                              | AA                 | AA               | INTERGENIC                    |                    |                                                        |
| SNP_20935_A_13418361 | NC_021163.1    | Ca_Kabuli_Chr04 | 13418361                | TT                              | CC                 | CC               | INTERGENIC                    |                    |                                                        |
| SNP_20937_A_13461044 | NC_021163.1    | Ca_Kabuli_Chr04 | 13461044                | CC                              | GG                 | GG               | DRR                           | 101508222          | serine/threonine-protein kinase HT1-like               |
| SNP_20938_A_13481269 | NC_021163.1    | Ca_Kabuli_Chr04 | 13481269                | TT                              | AA                 | AA               | INTERGENIC                    |                    |                                                        |
| SNP_20940_A_13521963 | NC_021163.1    | Ca_Kabuli_Chr04 | 13521963                | TT                              | AA                 | AA               | INTERGENIC                    |                    |                                                        |
| SNP_20941_A_13555705 | NC_021163.1    | Ca_Kabuli_Chr04 | 13555705                | CC                              | TT                 | TT               | URR                           | 101510695          | vicilin-like                                           |
| SNP_20942_A_13579471 | NC_021163.1    | Ca_Kabuli_Chr04 | 13579471                | CC                              | TT                 | TT               | INTERGENIC                    |                    |                                                        |
| SNP_20943_A_13579487 | NC_021163.1    | Ca_Kabuli_Chr04 | 13579487                | CC                              | TT                 | TT               | INTERGENIC                    |                    |                                                        |
| SNP_20944_A_13580142 | NC_021163.1    | Ca_Kabuli_Chr04 | 13580142                | GG                              | TT                 | TT               | INTERGENIC                    |                    |                                                        |
| SNP_20945_A_13582452 | NC_021163.1    | Ca_Kabuli_Chr04 | 13582452                | GG                              | TT                 | TT               | DRR                           | 101512717          | uncharacterized LOC101512717                           |
| SNP_20946_A_13602212 | NC_021163.1    | Ca_Kabuli_Chr04 | 13602212                | CC                              | TT                 | TT               | INTERGENIC                    |                    |                                                        |
| SNP_20948_A_13604467 | NC_021163.1    | Ca_Kabuli_Chr04 | 13604467                | CC                              | TT                 | TT               | INTERGENIC                    |                    |                                                        |
| SNP_20949_A_13604473 | NC_021163.1    | Ca_Kabuli_Chr04 | 13604473                | GG                              | CC                 | CC               | INTERGENIC                    |                    |                                                        |
| SNP_20950_A_13612229 | NC_021163.1    | Ca_Kabuli_Chr04 | 13612229                | AA                              | CC                 | CC               | INTERGENIC                    |                    |                                                        |
| SNP_20951_A_13614057 | NC_021163.1    | Ca_Kabuli_Chr04 | 13614057                | CC                              | TT                 | TT               | INTERGENIC                    |                    |                                                        |
| SNP_20952_A_13615634 | NC_021163.1    | Ca_Kabuli_Chr04 | 13615634                | GG                              | TT                 | TT               | DRR                           | 101514017          | uncharacterized LOC101514017                           |
| SNP_20953_A_13617174 | NC_021163.1    | Ca_Kabuli_Chr04 | 13617174                | TT                              | AA                 | AA               | INTERGENIC                    |                    |                                                        |
| SNP_20955_A_13617542 | NC_021163.1    | Ca_Kabuli_Chr04 | 13617542                | GG                              | AA                 | AA               | URR                           | 101514017          | uncharacterized LOC101514017                           |

| SNPs IDs             | Chromosome IDs | Chromosomes     | Physical positions (bp) | CDC Frontier (Reference genome) | (Pusa 1103 & HPNB) | (ILWC 46 & LPNB) | Sequence Components of genome | Gene accession IDs | Putative functions                                    |
|----------------------|----------------|-----------------|-------------------------|---------------------------------|--------------------|------------------|-------------------------------|--------------------|-------------------------------------------------------|
| SNP_20956_A_13622279 | NC_021163.1    | Ca_Kabuli_Chr04 | 13622279                | AA                              | TT                 | TT               | INTRON                        | 101514350          | uncharacterized LOC101514350                          |
| SNP_20957_A_13623701 | NC_021163.1    | Ca_Kabuli_Chr04 | 13623701                | TT                              | GG                 | GG               | URR                           | 101514350          | uncharacterized LOC101514350                          |
| SNP_20958_A_13626220 | NC_021163.1    | Ca_Kabuli_Chr04 | 13626220                | CC                              | TT                 | TT               | INTERGENIC                    |                    |                                                       |
| SNP_20959_A_13628738 | NC_021163.1    | Ca_Kabuli_Chr04 | 13628738                | TT                              | CC                 | CC               | INTERGENIC                    |                    |                                                       |
| SNP_20960_A_13631050 | NC_021163.1    | Ca_Kabuli_Chr04 | 13631050                | AA                              | CC                 | CC               | INTERGENIC                    |                    |                                                       |
| SNP_20961_A_13633113 | NC_021163.1    | Ca_Kabuli_Chr04 | 13633113                | TT                              | GG                 | GG               | INTERGENIC                    |                    |                                                       |
| SNP_20962_A_13638764 | NC_021163.1    | Ca_Kabuli_Chr04 | 13638764                | AA                              | CC                 | CC               | INTERGENIC                    |                    |                                                       |
| SNP_20963_A_13638791 | NC_021163.1    | Ca_Kabuli_Chr04 | 13638791                | GG                              | AA                 | AA               | INTERGENIC                    |                    |                                                       |
| SNP_20964_A_13638820 | NC_021163.1    | Ca_Kabuli_Chr04 | 13638820                | TT                              | AA                 | AA               | INTERGENIC                    |                    |                                                       |
| SNP_20965_A_13639084 | NC_021163.1    | Ca_Kabuli_Chr04 | 13639084                | GG                              | AA                 | AA               | INTERGENIC                    |                    |                                                       |
| SNP_20967_A_13647850 | NC_021163.1    | Ca_Kabuli_Chr04 | 13647850                | CC                              | AA                 | AA               | URR                           | 101515330          | late embryogenesis abundant protein D-34-like         |
| SNP_20968_A_13647856 | NC_021163.1    | Ca_Kabuli_Chr04 | 13647856                | AA                              | TT                 | TT               | URR                           | 101515330          | late embryogenesis abundant protein D-34-like         |
| SNP_20969_A_13649077 | NC_021163.1    | Ca_Kabuli_Chr04 | 13649077                | GG                              | TT                 | TT               | INTERGENIC                    |                    |                                                       |
| SNP_20970_A_13654656 | NC_021163.1    | Ca_Kabuli_Chr04 | 13654656                | TT                              | CC                 | CC               | URR                           | 101515654          | transcription repressor OFP11                         |
| SNP_20971_A_13655442 | NC_021163.1    | Ca_Kabuli_Chr04 | 13655442                | CC                              | TT                 | TT               | INTERGENIC                    |                    |                                                       |
| SNP_20972_A_13656777 | NC_021163.1    | Ca_Kabuli_Chr04 | 13656777                | AA                              | GG                 | GG               | INTERGENIC                    |                    |                                                       |
| SNP_20973_A_13657238 | NC_021163.1    | Ca_Kabuli_Chr04 | 13657238                | TT                              | CC                 | CC               | INTERGENIC                    |                    |                                                       |
| SNP_20975_A_13658544 | NC_021163.1    | Ca_Kabuli_Chr04 | 13658544                | TT                              | AA                 | AA               | DRR                           | 101488409          | pentatricopeptide repeat-containing protein At4g14850 |
| SNP_20976_A_13662104 | NC_021163.1    | Ca_Kabuli_Chr04 | 13662104                | AA                              | GG                 | GG               | URR                           | 101488409          | pentatricopeptide repeat-containing protein At4g14850 |
| SNP_20977_A_13663092 | NC_021163.1    | Ca_Kabuli_Chr04 | 13663092                | TT                              | CC                 | CC               | URR                           | 101488409          | pentatricopeptide repeat-containing protein At4g14850 |
| SNP_20979_A_13666458 | NC_021163.1    | Ca_Kabuli_Chr04 | 13666458                | AA                              | TT                 | TT               | INTERGENIC                    |                    |                                                       |
| SNP_20980_A_13666464 | NC_021163.1    | Ca_Kabuli_Chr04 | 13666464                | AA                              | TT                 | TT               | INTERGENIC                    |                    |                                                       |



| SNPs IDs             | Chromosome IDs | Chromosomes     | Physical positions (bp) | CDC Frontier genome (Reference genome) | (Pusa 1103 & HPNB) | (ILWC 46 & LPNB) | Sequence Components of genome | Gene accession IDs | Putative functions           |
|----------------------|----------------|-----------------|-------------------------|----------------------------------------|--------------------|------------------|-------------------------------|--------------------|------------------------------|
| SNP_20981_A_13666705 | NC_021163.1    | Ca_Kabuli_Chr04 | 13666705                | CC                                     | TT                 | TT               | INTERGENIC                    |                    |                              |
| SNP_20982_A_13675501 | NC_021163.1    | Ca_Kabuli_Chr04 | 13675501                | TT                                     | CC                 | CC               | URR                           | 101488740          | geraniol 8-hydroxylase-like  |
| SNP_20983_A_13675506 | NC_021163.1    | Ca_Kabuli_Chr04 | 13675506                | CC                                     | TT                 | TT               | URR                           | 101488740          | geraniol 8-hydroxylase-like  |
| SNP_20984_A_13675746 | NC_021163.1    | Ca_Kabuli_Chr04 | 13675746                | AA                                     | GG                 | GG               | URR                           | 101488740          | geraniol 8-hydroxylase-like  |
| SNP_20985_A_13677885 | NC_021163.1    | Ca_Kabuli_Chr04 | 13677885                | AA                                     | GG                 | GG               | DRR                           | 101489076          | cysteine synthase-like       |
| SNP_20986_A_13677920 | NC_021163.1    | Ca_Kabuli_Chr04 | 13677920                | GG                                     | AA                 | AA               | DRR                           | 101489076          | cysteine synthase-like       |
| SNP_20987_A_13682276 | NC_021163.1    | Ca_Kabuli_Chr04 | 13682276                | CC                                     | TT                 | TT               | URR                           | 101489076          | cysteine synthase-like       |
| SNP_20988_A_13682491 | NC_021163.1    | Ca_Kabuli_Chr04 | 13682491                | AA                                     | GG                 | GG               | URR                           | 101489076          | cysteine synthase-like       |
| SNP_20989_A_13682517 | NC_021163.1    | Ca_Kabuli_Chr04 | 13682517                | GG                                     | AA                 | AA               | URR                           | 101489076          | cysteine synthase-like       |
| SNP_20990_A_13690423 | NC_021163.1    | Ca_Kabuli_Chr04 | 13690423                | AA                                     | GG                 | GG               | URR                           | 101489410          | FRIGIDA-like protein 4a      |
| SNP_20991_A_13691018 | NC_021163.1    | Ca_Kabuli_Chr04 | 13691018                | CC                                     | TT                 | TT               | INTERGENIC                    |                    |                              |
| SNP_20992_A_13691180 | NC_021163.1    | Ca_Kabuli_Chr04 | 13691180                | CC                                     | GG                 | GG               | INTERGENIC                    |                    |                              |
| SNP_20993_A_13691182 | NC_021163.1    | Ca_Kabuli_Chr04 | 13691182                | TT                                     | GG                 | GG               | INTERGENIC                    |                    |                              |
| SNP_20995_A_13691843 | NC_021163.1    | Ca_Kabuli_Chr04 | 13691843                | TT                                     | CC                 | CC               | INTERGENIC                    |                    |                              |
| SNP_20996_A_13691844 | NC_021163.1    | Ca_Kabuli_Chr04 | 13691844                | CC                                     | AA                 | AA               | INTERGENIC                    |                    |                              |
| SNP_20998_A_13696047 | NC_021163.1    | Ca_Kabuli_Chr04 | 13696047                | CC                                     | TT                 | TT               | INTRON                        | 101489729          | uncharacterized LOC101489729 |
| SNP_20999_A_13696360 | NC_021163.1    | Ca_Kabuli_Chr04 | 13696360                | GG                                     | AA                 | AA               | INTRON                        | 101489729          | uncharacterized LOC101489729 |
| SNP_21000_A_13698500 | NC_021163.1    | Ca_Kabuli_Chr04 | 13698500                | TT                                     | CC                 | CC               | INTRON                        | 101489729          | uncharacterized LOC101489729 |
| SNP_21001_A_13698702 | NC_021163.1    | Ca_Kabuli_Chr04 | 13698702                | GG                                     | AA                 | AA               | INTRON                        | 101489729          | uncharacterized LOC101489729 |
| SNP_21002_A_13703269 | NC_021163.1    | Ca_Kabuli_Chr04 | 13703269                | GG                                     | AA                 | AA               | INTRON                        | 101489729          | uncharacterized LOC101489729 |
| SNP_21003_A_13706011 | NC_021163.1    | Ca_Kabuli_Chr04 | 13706011                | AA                                     | TT                 | TT               | URR                           | 101489729          | uncharacterized LOC101489729 |
| SNP_21004_A_13706092 | NC_021163.1    | Ca_Kabuli_Chr04 | 13706092                | GG                                     | AA                 | AA               | URR                           | 101489729          | uncharacterized LOC101489729 |

| SNPs IDs             | Chromosome IDs | Chromosomes     | Physical positions (bp) | CDC Frontier genome (Reference genome) | (Pusa 1103 & HPNB) | (ILWC 46 & LPNB) | Sequence Components of genome | Gene accession IDs | Putative functions                                    |
|----------------------|----------------|-----------------|-------------------------|----------------------------------------|--------------------|------------------|-------------------------------|--------------------|-------------------------------------------------------|
| SNP_21005_A_13706102 | NC_021163.1    | Ca_Kabuli_Chr04 | 13706102                | TT                                     | CC                 | CC               | URR                           | 101489729          | uncharacterized LOC101489729                          |
| SNP_21006_A_13706130 | NC_021163.1    | Ca_Kabuli_Chr04 | 13706130                | AA                                     | GG                 | GG               | URR                           | 101489729          | uncharacterized LOC101489729                          |
| SNP_21007_A_13713550 | NC_021163.1    | Ca_Kabuli_Chr04 | 13713550                | GG                                     | CC                 | CC               | URR                           | 101506847          | thiamine thiazole synthase 2, chloroplastic-like      |
| SNP_21008_A_13729867 | NC_021163.1    | Ca_Kabuli_Chr04 | 13729867                | AA                                     | GG                 | GG               | URR                           | 101490910          | increased DNA methylation 1                           |
| SNP_21009_A_13729933 | NC_021163.1    | Ca_Kabuli_Chr04 | 13729933                | GG                                     | AA                 | AA               | URR                           | 101490910          | increased DNA methylation 1                           |
| SNP_21011_A_13739854 | NC_021163.1    | Ca_Kabuli_Chr04 | 13739854                | GG                                     | CC                 | CC               | DRR                           | 101492081          | pentatricopeptide repeat-containing protein At2g22070 |
| SNP_21013_A_13751090 | NC_021163.1    | Ca_Kabuli_Chr04 | 13751090                | CC                                     | TT                 | TT               | URR                           | 101492423          | probable serine/threonine-protein kinase WNK9         |
| SNP_21014_A_13751107 | NC_021163.1    | Ca_Kabuli_Chr04 | 13751107                | AA                                     | GG                 | GG               | URR                           | 101492423          | probable serine/threonine-protein kinase WNK9         |
| SNP_21015_A_13753564 | NC_021163.1    | Ca_Kabuli_Chr04 | 13753564                | CC                                     | TT                 | TT               | INTERGENIC                    |                    |                                                       |
| SNP_21016_A_13753777 | NC_021163.1    | Ca_Kabuli_Chr04 | 13753777                | CC                                     | GG                 | GG               | INTERGENIC                    |                    |                                                       |
| SNP_21017_A_13753801 | NC_021163.1    | Ca_Kabuli_Chr04 | 13753801                | TT                                     | CC                 | CC               | INTERGENIC                    |                    |                                                       |
| SNP_21019_A_13760852 | NC_021163.1    | Ca_Kabuli_Chr04 | 13760852                | TT                                     | AA                 | AA               | NON_SYNONYMOUS_CODING         | 101493195          | uncharacterized LOC101493195                          |
| SNP_21020_A_13764314 | NC_021163.1    | Ca_Kabuli_Chr04 | 13764314                | AA                                     | GG                 | GG               | DRR                           | 101493738          | uncharacterized LOC101493738                          |
| SNP_21021_A_13764476 | NC_021163.1    | Ca_Kabuli_Chr04 | 13764476                | AA                                     | TT                 | TT               | DRR                           | 101493738          | uncharacterized LOC101493738                          |
| SNP_21022_A_13765334 | NC_021163.1    | Ca_Kabuli_Chr04 | 13765334                | GG                                     | TT                 | TT               | INTERGENIC                    |                    |                                                       |
| SNP_21023_A_13766508 | NC_021163.1    | Ca_Kabuli_Chr04 | 13766508                | CC                                     | GG                 | GG               | INTERGENIC                    |                    |                                                       |
| SNP_21024_A_13770748 | NC_021163.1    | Ca_Kabuli_Chr04 | 13770748                | CC                                     | TT                 | TT               | URR                           | 101494058          | Unknown function                                      |
| SNP_21025_A_13774979 | NC_021163.1    | Ca_Kabuli_Chr04 | 13774979                | AA                                     | TT                 | TT               | INTERGENIC                    |                    |                                                       |
| SNP_21026_A_13775087 | NC_021163.1    | Ca_Kabuli_Chr04 | 13775087                | TT                                     | GG                 | GG               | INTERGENIC                    |                    |                                                       |
| SNP_21027_A_13776039 | NC_021163.1    | Ca_Kabuli_Chr04 | 13776039                | TT                                     | AA                 | AA               | INTERGENIC                    |                    |                                                       |
| SNP_21028_A_13776541 | NC_021163.1    | Ca_Kabuli_Chr04 | 13776541                | AA                                     | CC                 | CC               | INTERGENIC                    |                    |                                                       |
| SNP_21030_A_13777058 | NC_021163.1    | Ca_Kabuli_Chr04 | 13777058                | CC                                     | TT                 | TT               | INTERGENIC                    |                    |                                                       |

| SNPs IDs             | Chromosome IDs | Chromosomes     | Physical positions (bp) | CDC Frontier genome (Reference genome) | (Pusa 1103 & HPNB) | (ILWC 46 & LPNB) | Sequence Components of genome | Gene accession IDs | Putative functions                         |
|----------------------|----------------|-----------------|-------------------------|----------------------------------------|--------------------|------------------|-------------------------------|--------------------|--------------------------------------------|
| SNP_21031_A_13777828 | NC_021163.1    | Ca_Kabuli_Chr04 | 13777828                | TT                                     | AA                 | AA               | INTERGENIC                    |                    |                                            |
| SNP_21032_A_13779392 | NC_021163.1    | Ca_Kabuli_Chr04 | 13779392                | AA                                     | TT                 | TT               | INTRON                        | 101494372          | uncharacterized LOC101494372               |
| SNP_21033_A_13785371 | NC_021163.1    | Ca_Kabuli_Chr04 | 13785371                | TT                                     | CC                 | CC               | DRR                           | 101494680          | primary amine oxidase                      |
| SNP_21034_A_13792800 | NC_021163.1    | Ca_Kabuli_Chr04 | 13792800                | TT                                     | CC                 | CC               | INTERGENIC                    |                    |                                            |
| SNP_21035_A_13796125 | NC_021163.1    | Ca_Kabuli_Chr04 | 13796125                | GG                                     | AA                 | AA               | INTERGENIC                    |                    |                                            |
| SNP_21036_A_13803376 | NC_021163.1    | Ca_Kabuli_Chr04 | 13803376                | CC                                     | GG                 | GG               | INTERGENIC                    |                    |                                            |
| SNP_21037_A_13806496 | NC_021163.1    | Ca_Kabuli_Chr04 | 13806496                | GG                                     | AA                 | AA               | INTRON                        | 101495975          | linoleate 9S-lipoxygenase 5, chloroplastic |
| SNP_21038_A_13807579 | NC_021163.1    | Ca_Kabuli_Chr04 | 13807579                | AA                                     | GG                 | GG               | URR                           | 101495975          | linoleate 9S-lipoxygenase 5, chloroplastic |
| SNP_21039_A_13807588 | NC_021163.1    | Ca_Kabuli_Chr04 | 13807588                | GG                                     | AA                 | AA               | URR                           | 101495975          | linoleate 9S-lipoxygenase 5, chloroplastic |
| SNP_21040_A_13809386 | NC_021163.1    | Ca_Kabuli_Chr04 | 13809386                | CC                                     | AA                 | AA               | INTERGENIC                    |                    |                                            |
| SNP_21041_A_13810601 | NC_021163.1    | Ca_Kabuli_Chr04 | 13810601                | AA                                     | TT                 | TT               | INTERGENIC                    |                    |                                            |
| SNP_21042_A_13810632 | NC_021163.1    | Ca_Kabuli_Chr04 | 13810632                | CC                                     | TT                 | TT               | INTERGENIC                    |                    |                                            |
| SNP_21043_A_13812739 | NC_021163.1    | Ca_Kabuli_Chr04 | 13812739                | CC                                     | TT                 | TT               | INTERGENIC                    |                    |                                            |
| SNP_21044_A_13814204 | NC_021163.1    | Ca_Kabuli_Chr04 | 13814204                | CC                                     | AA                 | AA               | INTERGENIC                    |                    |                                            |
| SNP_21045_A_13814224 | NC_021163.1    | Ca_Kabuli_Chr04 | 13814224                | AA                                     | GG                 | GG               | INTERGENIC                    |                    |                                            |
| SNP_21046_A_13816563 | NC_021163.1    | Ca_Kabuli_Chr04 | 13816563                | AA                                     | GG                 | GG               | DRR                           | 101495652          | vacuole membrane protein KMS1-like         |
| SNP_21047_A_13816588 | NC_021163.1    | Ca_Kabuli_Chr04 | 13816588                | AA                                     | CC                 | CC               | DRR                           | 101495652          | vacuole membrane protein KMS1-like         |
| SNP_21048_A_13824231 | NC_021163.1    | Ca_Kabuli_Chr04 | 13824231                | CC                                     | TT                 | TT               | URR                           | 101495652          | vacuole membrane protein KMS1-like         |
| SNP_21049_A_13826044 | NC_021163.1    | Ca_Kabuli_Chr04 | 13826044                | GG                                     | AA                 | AA               | INTERGENIC                    |                    |                                            |
| SNP_21050_A_13826727 | NC_021163.1    | Ca_Kabuli_Chr04 | 13826727                | CC                                     | TT                 | TT               | INTERGENIC                    |                    |                                            |
| SNP_21051_A_13826752 | NC_021163.1    | Ca_Kabuli_Chr04 | 13826752                | GG                                     | TT                 | TT               | INTERGENIC                    |                    |                                            |
| SNP_21052_A_13832613 | NC_021163.1    | Ca_Kabuli_Chr04 | 13832613                | TT                                     | CC                 | CC               | INTERGENIC                    |                    |                                            |

| SNPs IDs             | Chromosome IDs | Chromosomes     | Physical positions (bp) | CDC Frontier genome (Reference genome) | (Pusa 1103 & HPNB) | (ILWC 46 & LPNB) | Sequence Components of genome | Gene accession IDs | Putative functions                     |
|----------------------|----------------|-----------------|-------------------------|----------------------------------------|--------------------|------------------|-------------------------------|--------------------|----------------------------------------|
| SNP_21053_A_13836146 | NC_021163.1    | Ca_Kabuli_Chr04 | 13836146                | GG                                     | TT                 | TT               | DRR                           | 101496754          | protein TIME FOR COFFEE                |
| SNP_21054_A_13846093 | NC_021163.1    | Ca_Kabuli_Chr04 | 13846093                | AA                                     | GG                 | GG               | INTERGENIC                    |                    |                                        |
| SNP_21055_A_13846929 | NC_021163.1    | Ca_Kabuli_Chr04 | 13846929                | AA                                     | CC                 | CC               | INTERGENIC                    |                    |                                        |
| SNP_21056_A_13848069 | NC_021163.1    | Ca_Kabuli_Chr04 | 13848069                | AA                                     | GG                 | GG               | INTERGENIC                    |                    |                                        |
| SNP_21057_A_13848509 | NC_021163.1    | Ca_Kabuli_Chr04 | 13848509                | CC                                     | TT                 | TT               | INTERGENIC                    |                    |                                        |
| SNP_21058_A_13848544 | NC_021163.1    | Ca_Kabuli_Chr04 | 13848544                | TT                                     | GG                 | GG               | INTERGENIC                    |                    |                                        |
| SNP_21059_A_13851248 | NC_021163.1    | Ca_Kabuli_Chr04 | 13851248                | AA                                     | TT                 | TT               | INTERGENIC                    |                    |                                        |
| SNP_21060_A_13853196 | NC_021163.1    | Ca_Kabuli_Chr04 | 13853196                | GG                                     | AA                 | AA               | INTERGENIC                    |                    |                                        |
| SNP_21061_A_13858097 | NC_021163.1    | Ca_Kabuli_Chr04 | 13858097                | AA                                     | TT                 | TT               | DRR                           | 101497730          | sugar transport protein 13-like        |
| SNP_21062_A_13864849 | NC_021163.1    | Ca_Kabuli_Chr04 | 13864849                | GG                                     | AA                 | AA               | INTERGENIC                    |                    |                                        |
| SNP_21063_A_13866985 | NC_021163.1    | Ca_Kabuli_Chr04 | 13866985                | AA                                     | TT                 | TT               | INTRON                        | 101498934          | sugar transport protein 13-like        |
| SNP_21066_A_13908943 | NC_021163.1    | Ca_Kabuli_Chr04 | 13908943                | AA                                     | GG                 | GG               | INTERGENIC                    |                    |                                        |
| SNP_21067_A_13908979 | NC_021163.1    | Ca_Kabuli_Chr04 | 13908979                | GG                                     | TT                 | TT               | INTERGENIC                    |                    |                                        |
| SNP_21068_A_13909246 | NC_021163.1    | Ca_Kabuli_Chr04 | 13909246                | CC                                     | TT                 | TT               | INTERGENIC                    |                    |                                        |
| SNP_21070_A_13911299 | NC_021163.1    | Ca_Kabuli_Chr04 | 13911299                | TT                                     | CC                 | CC               | INTERGENIC                    |                    |                                        |
| SNP_21071_A_13917600 | NC_021163.1    | Ca_Kabuli_Chr04 | 13917600                | TT                                     | GG                 | GG               | INTERGENIC                    |                    |                                        |
| SNP_21072_A_13962641 | NC_021163.1    | Ca_Kabuli_Chr04 | 13962641                | TT                                     | GG                 | GG               | URR                           | 101502005          | 2-hydroxyisoflavanone dehydratase-like |
| SNP_21073_A_13962644 | NC_021163.1    | Ca_Kabuli_Chr04 | 13962644                | AA                                     | GG                 | GG               | URR                           | 101502005          | 2-hydroxyisoflavanone dehydratase-like |
| SNP_21075_A_14158353 | NC_021163.1    | Ca_Kabuli_Chr04 | 14158353                | AA                                     | GG                 | GG               | INTERGENIC                    |                    |                                        |
| SNP_21076_A_14158660 | NC_021163.1    | Ca_Kabuli_Chr04 | 14158660                | GG                                     | AA                 | AA               | INTERGENIC                    |                    |                                        |
| SNP_21078_A_14205049 | NC_021163.1    | Ca_Kabuli_Chr04 | 14205049                | TT                                     | AA                 | AA               | INTERGENIC                    |                    |                                        |
| SNP_21079_A_14205054 | NC_021163.1    | Ca_Kabuli_Chr04 | 14205054                | AA                                     | CC                 | CC               | INTERGENIC                    |                    |                                        |

| SNPs IDs             | Chromosome IDs | Chromosomes     | Physical positions (bp) | CDC Frontier genome (Reference genome) | (Pusa 1103 & HPNB) | (ILWC 46 & LPNB) | Sequence genome | Components of | Gene accession IDs | Putative functions |
|----------------------|----------------|-----------------|-------------------------|----------------------------------------|--------------------|------------------|-----------------|---------------|--------------------|--------------------|
| SNP_21080_A_14205427 | NC_021163.1    | Ca_Kabuli_Chr04 | 14205427                | AA                                     | CC                 | CC               | INTERGENIC      |               |                    |                    |
| SNP_21081_A_14205449 | NC_021163.1    | Ca_Kabuli_Chr04 | 14205449                | GG                                     | AA                 | AA               | INTERGENIC      |               |                    |                    |
| SNP_21082_A_14260354 | NC_021163.1    | Ca_Kabuli_Chr04 | 14260354                | TT                                     | CC                 | CC               | INTERGENIC      |               |                    |                    |
| SNP_21083_A_14271489 | NC_021163.1    | Ca_Kabuli_Chr04 | 14271489                | TT                                     | AA                 | AA               | INTERGENIC      |               |                    |                    |
| SNP_21084_A_14271531 | NC_021163.1    | Ca_Kabuli_Chr04 | 14271531                | TT                                     | CC                 | CC               | INTERGENIC      |               |                    |                    |
| SNP_21085_A_14271579 | NC_021163.1    | Ca_Kabuli_Chr04 | 14271579                | TT                                     | CC                 | CC               | INTERGENIC      |               |                    |                    |
| SNP_21086_A_14271954 | NC_021163.1    | Ca_Kabuli_Chr04 | 14271954                | TT                                     | CC                 | CC               | INTERGENIC      |               |                    |                    |
| SNP_21087_A_14271960 | NC_021163.1    | Ca_Kabuli_Chr04 | 14271960                | AA                                     | CC                 | CC               | INTERGENIC      |               |                    |                    |
| SNP_21088_A_14271967 | NC_021163.1    | Ca_Kabuli_Chr04 | 14271967                | CC                                     | AA                 | AA               | INTERGENIC      |               |                    |                    |
| SNP_21090_A_14329783 | NC_021163.1    | Ca_Kabuli_Chr04 | 14329783                | GG                                     | AA                 | AA               | INTERGENIC      |               |                    |                    |
| SNP_21091_A_14329853 | NC_021163.1    | Ca_Kabuli_Chr04 | 14329853                | AA                                     | GG                 | GG               | INTERGENIC      |               |                    |                    |
| SNP_21092_A_14329858 | NC_021163.1    | Ca_Kabuli_Chr04 | 14329858                | CC                                     | GG                 | GG               | INTERGENIC      |               |                    |                    |
| SNP_21093_A_14329863 | NC_021163.1    | Ca_Kabuli_Chr04 | 14329863                | TT                                     | CC                 | CC               | INTERGENIC      |               |                    |                    |
| SNP_21094_A_14329884 | NC_021163.1    | Ca_Kabuli_Chr04 | 14329884                | AA                                     | GG                 | GG               | INTERGENIC      |               |                    |                    |
| SNP_21095_A_14329941 | NC_021163.1    | Ca_Kabuli_Chr04 | 14329941                | TT                                     | CC                 | CC               | INTERGENIC      |               |                    |                    |
| SNP_21096_A_14330178 | NC_021163.1    | Ca_Kabuli_Chr04 | 14330178                | TT                                     | CC                 | CC               | INTERGENIC      |               |                    |                    |
| SNP_21097_A_14330332 | NC_021163.1    | Ca_Kabuli_Chr04 | 14330332                | AA                                     | GG                 | GG               | INTERGENIC      |               |                    |                    |
| SNP_21098_A_14330355 | NC_021163.1    | Ca_Kabuli_Chr04 | 14330355                | AA                                     | TT                 | TT               | INTERGENIC      |               |                    |                    |
| SNP_21099_A_14330757 | NC_021163.1    | Ca_Kabuli_Chr04 | 14330757                | GG                                     | TT                 | TT               | INTERGENIC      |               |                    |                    |
| SNP_21100_A_14383445 | NC_021163.1    | Ca_Kabuli_Chr04 | 14383445                | AA                                     | GG                 | GG               | INTERGENIC      |               |                    |                    |
| SNP_21101_A_14383483 | NC_021163.1    | Ca_Kabuli_Chr04 | 14383483                | AA                                     | CC                 | CC               | INTERGENIC      |               |                    |                    |
| SNP_21102_A_14392425 | NC_021163.1    | Ca_Kabuli_Chr04 | 14392425                | GG                                     | AA                 | AA               | INTERGENIC      |               |                    |                    |

| SNPs IDs             | Chromosome IDs | Chromosomes     | Physical positions (bp) | CDC Frontier genome (Reference genome) | (Pusa 1103 & HPNB) | (ILWC 46 & LPNB) | Sequence Components of genome | Gene accession IDs | Putative functions         |
|----------------------|----------------|-----------------|-------------------------|----------------------------------------|--------------------|------------------|-------------------------------|--------------------|----------------------------|
| SNP_21103_A_14392645 | NC_021163.1    | Ca_Kabuli_Chr04 | 14392645                | AA                                     | TT                 | TT               | INTERGENIC                    |                    |                            |
| SNP_21104_A_14392669 | NC_021163.1    | Ca_Kabuli_Chr04 | 14392669                | AA                                     | GG                 | GG               | INTERGENIC                    |                    |                            |
| SNP_21105_A_14392703 | NC_021163.1    | Ca_Kabuli_Chr04 | 14392703                | AA                                     | GG                 | GG               | INTERGENIC                    |                    |                            |
| SNP_21106_A_14392721 | NC_021163.1    | Ca_Kabuli_Chr04 | 14392721                | TT                                     | GG                 | GG               | INTERGENIC                    |                    |                            |
| SNP_21108_A_14397378 | NC_021163.1    | Ca_Kabuli_Chr04 | 14397378                | TT                                     | CC                 | CC               | INTERGENIC                    |                    |                            |
| SNP_21109_A_14397507 | NC_021163.1    | Ca_Kabuli_Chr04 | 14397507                | AA                                     | CC                 | CC               | INTERGENIC                    |                    |                            |
| SNP_21110_A_14397570 | NC_021163.1    | Ca_Kabuli_Chr04 | 14397570                | GG                                     | AA                 | AA               | INTERGENIC                    |                    |                            |
| SNP_21111_A_14397591 | NC_021163.1    | Ca_Kabuli_Chr04 | 14397591                | CC                                     | TT                 | TT               | INTERGENIC                    |                    |                            |
| SNP_21112_A_14399173 | NC_021163.1    | Ca_Kabuli_Chr04 | 14399173                | TT                                     | CC                 | CC               | INTERGENIC                    |                    |                            |
| SNP_21113_A_14399444 | NC_021163.1    | Ca_Kabuli_Chr04 | 14399444                | TT                                     | GG                 | GG               | INTERGENIC                    |                    |                            |
| SNP_21114_A_14405509 | NC_021163.1    | Ca_Kabuli_Chr04 | 14405509                | CC                                     | TT                 | TT               | DRR                           | 101498167          | amino acid permease 6-like |
| SNP_21115_A_14405514 | NC_021163.1    | Ca_Kabuli_Chr04 | 14405514                | TT                                     | GG                 | GG               | DRR                           | 101498167          | amino acid permease 6-like |
| SNP_21116_A_14405577 | NC_021163.1    | Ca_Kabuli_Chr04 | 14405577                | AA                                     | GG                 | GG               | DRR                           | 101498167          | amino acid permease 6-like |
| SNP_21117_A_14405593 | NC_021163.1    | Ca_Kabuli_Chr04 | 14405593                | GG                                     | TT                 | TT               | DRR                           | 101498167          | amino acid permease 6-like |
| SNP_21118_A_14405603 | NC_021163.1    | Ca_Kabuli_Chr04 | 14405603                | AA                                     | TT                 | TT               | DRR                           | 101498167          | amino acid permease 6-like |
| SNP_21119_A_14405699 | NC_021163.1    | Ca_Kabuli_Chr04 | 14405699                | GG                                     | TT                 | TT               | DRR                           | 101498167          | amino acid permease 6-like |
| SNP_21120_A_14405707 | NC_021163.1    | Ca_Kabuli_Chr04 | 14405707                | CC                                     | TT                 | TT               | DRR                           | 101498167          | amino acid permease 6-like |
| SNP_21121_A_14405722 | NC_021163.1    | Ca_Kabuli_Chr04 | 14405722                | GG                                     | AA                 | AA               | DRR                           | 101498167          | amino acid permease 6-like |
| SNP_21123_A_14405819 | NC_021163.1    | Ca_Kabuli_Chr04 | 14405819                | AA                                     | GG                 | GG               | DRR                           | 101498167          | amino acid permease 6-like |
| SNP_21124_A_14405826 | NC_021163.1    | Ca_Kabuli_Chr04 | 14405826                | CC                                     | TT                 | TT               | DRR                           | 101498167          | amino acid permease 6-like |
| SNP_21125_A_14405834 | NC_021163.1    | Ca_Kabuli_Chr04 | 14405834                | TT                                     | CC                 | CC               | DRR                           | 101498167          | amino acid permease 6-like |
| SNP_21126_A_14405862 | NC_021163.1    | Ca_Kabuli_Chr04 | 14405862                | GG                                     | AA                 | AA               | DRR                           | 101498167          | amino acid permease 6-like |

| SNPs IDs             | Chromosome IDs | Chromosomes     | Physical positions (bp) | CDC Frontier genome (Reference genome) | (Pusa 1103 & HPNB) | (ILWC 46 & LPNB) | Sequence Components of genome | Gene accession IDs | Putative functions         |
|----------------------|----------------|-----------------|-------------------------|----------------------------------------|--------------------|------------------|-------------------------------|--------------------|----------------------------|
| SNP_21127_A_14405865 | NC_021163.1    | Ca_Kabuli_Chr04 | 14405865                | GG                                     | CC                 | CC               | DRR                           | 101498167          | amino acid permease 6-like |
| SNP_21128_A_14406021 | NC_021163.1    | Ca_Kabuli_Chr04 | 14406021                | AA                                     | TT                 | TT               | DRR                           | 101498167          | amino acid permease 6-like |
| SNP_21130_A_14406059 | NC_021163.1    | Ca_Kabuli_Chr04 | 14406059                | TT                                     | AA                 | AA               | DRR                           | 101498167          | amino acid permease 6-like |
| SNP_21131_A_14406071 | NC_021163.1    | Ca_Kabuli_Chr04 | 14406071                | TT                                     | CC                 | CC               | DRR                           | 101498167          | amino acid permease 6-like |
| SNP_21132_A_14406085 | NC_021163.1    | Ca_Kabuli_Chr04 | 14406085                | AA                                     | TT                 | TT               | DRR                           | 101498167          | amino acid permease 6-like |
| SNP_21133_A_14406101 | NC_021163.1    | Ca_Kabuli_Chr04 | 14406101                | TT                                     | CC                 | CC               | DRR                           | 101498167          | amino acid permease 6-like |
| SNP_21134_A_14406116 | NC_021163.1    | Ca_Kabuli_Chr04 | 14406116                | TT                                     | CC                 | CC               | DRR                           | 101498167          | amino acid permease 6-like |
| SNP_21136_A_14406143 | NC_021163.1    | Ca_Kabuli_Chr04 | 14406143                | TT                                     | GG                 | GG               | DRR                           | 101498167          | amino acid permease 6-like |
| SNP_21137_A_14406166 | NC_021163.1    | Ca_Kabuli_Chr04 | 14406166                | GG                                     | AA                 | AA               | DRR                           | 101498167          | amino acid permease 6-like |
| SNP_21138_A_14406185 | NC_021163.1    | Ca_Kabuli_Chr04 | 14406185                | GG                                     | AA                 | AA               | DRR                           | 101498167          | amino acid permease 6-like |
| SNP_21139_A_14406220 | NC_021163.1    | Ca_Kabuli_Chr04 | 14406220                | AA                                     | TT                 | TT               | NON_SYNONYMOUS_CODING         | 101498167          | amino acid permease 6-like |
| SNP_21140_A_14406221 | NC_021163.1    | Ca_Kabuli_Chr04 | 14406221                | GG                                     | AA                 | AA               | NON_SYNONYMOUS_CODING         | 101498167          | amino acid permease 6-like |
| SNP_21141_A_14406243 | NC_021163.1    | Ca_Kabuli_Chr04 | 14406243                | GG                                     | AA                 | AA               | SYNONYMOUS_CODING             | 101498167          | amino acid permease 6-like |
| SNP_21142_A_14406276 | NC_021163.1    | Ca_Kabuli_Chr04 | 14406276                | TT                                     | AA                 | AA               | SYNONYMOUS_CODING             | 101498167          | amino acid permease 6-like |
| SNP_21143_A_14406277 | NC_021163.1    | Ca_Kabuli_Chr04 | 14406277                | CC                                     | GG                 | GG               | NON_SYNONYMOUS_CODING         | 101498167          | amino acid permease 6-like |
| SNP_21144_A_14406348 | NC_021163.1    | Ca_Kabuli_Chr04 | 14406348                | TT                                     | GG                 | GG               | SYNONYMOUS_CODING             | 101498167          | amino acid permease 6-like |
| SNP_21145_A_14406395 | NC_021163.1    | Ca_Kabuli_Chr04 | 14406395                | TT                                     | AA                 | AA               | NON_SYNONYMOUS_CODING         | 101498167          | amino acid permease 6-like |
| SNP_21146_A_14406422 | NC_021163.1    | Ca_Kabuli_Chr04 | 14406422                | AA                                     | CC                 | CC               | NON_SYNONYMOUS_CODING         | 101498167          | amino acid permease 6-like |
| SNP_21147_A_14406528 | NC_021163.1    | Ca_Kabuli_Chr04 | 14406528                | CC                                     | TT                 | TT               | SYNONYMOUS_CODING             | 101498167          | amino acid permease 6-like |
| SNP_21149_A_14421622 | NC_021163.1    | Ca_Kabuli_Chr04 | 14421622                | AA                                     | TT                 | TT               | INTERGENIC                    |                    |                            |
| SNP_21150_A_14421887 | NC_021163.1    | Ca_Kabuli_Chr04 | 14421887                | AA                                     | GG                 | GG               | INTERGENIC                    |                    |                            |
| SNP_21151_A_14422154 | NC_021163.1    | Ca_Kabuli_Chr04 | 14422154                | AA                                     | TT                 | TT               | INTERGENIC                    |                    |                            |

| SNPs IDs             | Chromosome IDs | Chromosomes     | Physical positions (bp) | CDC Frontier genome (Reference genome) | (Pusa 1103 & HPNB) | (ILWC 46 & LPNB) | Sequence Components of genome | Gene accession IDs | Putative functions                |
|----------------------|----------------|-----------------|-------------------------|----------------------------------------|--------------------|------------------|-------------------------------|--------------------|-----------------------------------|
| SNP_21152_A_14422166 | NC_021163.1    | Ca_Kabuli_Chr04 | 14422166                | TT                                     | CC                 | CC               | INTERGENIC                    |                    |                                   |
| SNP_21153_A_14422183 | NC_021163.1    | Ca_Kabuli_Chr04 | 14422183                | CC                                     | GG                 | GG               | INTERGENIC                    |                    |                                   |
| SNP_21154_A_14422218 | NC_021163.1    | Ca_Kabuli_Chr04 | 14422218                | CC                                     | TT                 | TT               | INTERGENIC                    |                    |                                   |
| SNP_21155_A_14423894 | NC_021163.1    | Ca_Kabuli_Chr04 | 14423894                | TT                                     | GG                 | GG               | INTERGENIC                    |                    |                                   |
| SNP_21156_A_14491093 | NC_021163.1    | Ca_Kabuli_Chr04 | 14491093                | AA                                     | CC                 | CC               | INTERGENIC                    |                    |                                   |
| SNP_21157_A_14491627 | NC_021163.1    | Ca_Kabuli_Chr04 | 14491627                | CC                                     | TT                 | TT               | INTERGENIC                    |                    |                                   |
| SNP_21158_A_14556421 | NC_021163.1    | Ca_Kabuli_Chr04 | 14556421                | TT                                     | GG                 | GG               | INTERGENIC                    |                    |                                   |
| SNP_21159_A_14556477 | NC_021163.1    | Ca_Kabuli_Chr04 | 14556477                | TT                                     | CC                 | CC               | INTERGENIC                    |                    |                                   |
| SNP_21160_A_14556489 | NC_021163.1    | Ca_Kabuli_Chr04 | 14556489                | AA                                     | GG                 | GG               | INTERGENIC                    |                    |                                   |
| SNP_21161_A_14558233 | NC_021163.1    | Ca_Kabuli_Chr04 | 14558233                | GG                                     | AA                 | AA               | DRR                           | 101490385          | pre-mRNA-splicing factor 38B-like |
| SNP_21163_A_14794020 | NC_021163.1    | Ca_Kabuli_Chr04 | 14794020                | TT                                     | CC                 | CC               | INTERGENIC                    |                    |                                   |
| SNP_21164_A_14794101 | NC_021163.1    | Ca_Kabuli_Chr04 | 14794101                | AA                                     | GG                 | GG               | INTERGENIC                    |                    |                                   |
| SNP_21165_A_14794117 | NC_021163.1    | Ca_Kabuli_Chr04 | 14794117                | AA                                     | GG                 | GG               | INTERGENIC                    |                    |                                   |
| SNP_21166_A_14839359 | NC_021163.1    | Ca_Kabuli_Chr04 | 14839359                | AA                                     | GG                 | GG               | SYNONYMOUS_CODING             | 101504366          | alpha-L-fucosidase 2              |
| SNP_21167_A_14846175 | NC_021163.1    | Ca_Kabuli_Chr04 | 14846175                | TT                                     | CC                 | CC               | URR                           | 101504366          | alpha-L-fucosidase 2              |
| SNP_21168_A_14867416 | NC_021163.1    | Ca_Kabuli_Chr04 | 14867416                | TT                                     | CC                 | CC               | INTERGENIC                    |                    |                                   |
| SNP_21169_A_14911719 | NC_021163.1    | Ca_Kabuli_Chr04 | 14911719                | TT                                     | AA                 | AA               | URR                           | 101508446          | limonoid UDP-glucosyltransferase  |
| SNP_21170_A_14911774 | NC_021163.1    | Ca_Kabuli_Chr04 | 14911774                | CC                                     | AA                 | AA               | URR                           | 101508446          | limonoid UDP-glucosyltransferase  |
| SNP_21171_A_14911845 | NC_021163.1    | Ca_Kabuli_Chr04 | 14911845                | AA                                     | CC                 | CC               | URR                           | 101508446          | limonoid UDP-glucosyltransferase  |
| SNP_21172_A_14932690 | NC_021163.1    | Ca_Kabuli_Chr04 | 14932690                | AA                                     | GG                 | GG               | INTERGENIC                    |                    |                                   |
| SNP_21173_A_14932838 | NC_021163.1    | Ca_Kabuli_Chr04 | 14932838                | CC                                     | AA                 | AA               | INTERGENIC                    |                    |                                   |
| SNP_21175_A_14933063 | NC_021163.1    | Ca_Kabuli_Chr04 | 14933063                | AA                                     | GG                 | GG               | INTERGENIC                    |                    |                                   |



| SNPs IDs             | Chromosome IDs | Chromosomes     | Physical positions (bp) | CDC Frontier genome (Reference genome) | (Pusa 1103 & HPNB) | (ILWC 46 & LPNB) | Sequence genome | Components of | Gene accession IDs                                  | Putative functions |
|----------------------|----------------|-----------------|-------------------------|----------------------------------------|--------------------|------------------|-----------------|---------------|-----------------------------------------------------|--------------------|
| SNP_21176_A_14939010 | NC_021163.1    | Ca_Kabuli_Chr04 | 14939010                | AA                                     | TT                 | TT               | INTERGENIC      |               |                                                     |                    |
| SNP_21177_A_14939011 | NC_021163.1    | Ca_Kabuli_Chr04 | 14939011                | AA                                     | TT                 | TT               | INTERGENIC      |               |                                                     |                    |
| SNP_21179_A_14999768 | NC_021163.1    | Ca_Kabuli_Chr04 | 14999768                | CC                                     | TT                 | TT               | INTERGENIC      |               |                                                     |                    |
| SNP_21180_A_14999899 | NC_021163.1    | Ca_Kabuli_Chr04 | 14999899                | TT                                     | CC                 | CC               | INTERGENIC      |               |                                                     |                    |
| SNP_21181_A_15000059 | NC_021163.1    | Ca_Kabuli_Chr04 | 15000059                | AA                                     | TT                 | TT               | INTERGENIC      |               |                                                     |                    |
| SNP_21182_A_15000240 | NC_021163.1    | Ca_Kabuli_Chr04 | 15000240                | AA                                     | GG                 | GG               | INTERGENIC      |               |                                                     |                    |
| SNP_21183_A_15004610 | NC_021163.1    | Ca_Kabuli_Chr04 | 15004610                | TT                                     | CC                 | CC               | INTERGENIC      |               |                                                     |                    |
| SNP_21184_A_15004759 | NC_021163.1    | Ca_Kabuli_Chr04 | 15004759                | TT                                     | GG                 | GG               | INTERGENIC      |               |                                                     |                    |
| SNP_21185_A_15004797 | NC_021163.1    | Ca_Kabuli_Chr04 | 15004797                | TT                                     | CC                 | CC               | INTERGENIC      |               |                                                     |                    |
| SNP_21186_A_15004920 | NC_021163.1    | Ca_Kabuli_Chr04 | 15004920                | AA                                     | GG                 | GG               | INTERGENIC      |               |                                                     |                    |
| SNP_21187_A_15005007 | NC_021163.1    | Ca_Kabuli_Chr04 | 15005007                | CC                                     | AA                 | AA               | INTERGENIC      |               |                                                     |                    |
| SNP_21188_A_15005027 | NC_021163.1    | Ca_Kabuli_Chr04 | 15005027                | TT                                     | CC                 | CC               | INTERGENIC      |               |                                                     |                    |
| SNP_21190_A_15013576 | NC_021163.1    | Ca_Kabuli_Chr04 | 15013576                | TT                                     | CC                 | CC               | DRR             | 101513477     | D-3-phosphoglycerate dehydrogenase 1, chloroplastic |                    |
| SNP_21191_A_15018038 | NC_021163.1    | Ca_Kabuli_Chr04 | 15018038                | TT                                     | GG                 | GG               | INTRON          | 101513477     | D-3-phosphoglycerate dehydrogenase 1, chloroplastic |                    |
| SNP_21193_A_15048106 | NC_021163.1    | Ca_Kabuli_Chr04 | 15048106                | TT                                     | AA                 | AA               | INTERGENIC      |               |                                                     |                    |
| SNP_21194_A_15048121 | NC_021163.1    | Ca_Kabuli_Chr04 | 15048121                | AA                                     | CC                 | CC               | INTERGENIC      |               |                                                     |                    |
| SNP_21195_A_15048137 | NC_021163.1    | Ca_Kabuli_Chr04 | 15048137                | AA                                     | TT                 | TT               | INTERGENIC      |               |                                                     |                    |
| SNP_21196_A_15048142 | NC_021163.1    | Ca_Kabuli_Chr04 | 15048142                | AA                                     | CC                 | CC               | INTERGENIC      |               |                                                     |                    |
| SNP_21198_A_15048218 | NC_021163.1    | Ca_Kabuli_Chr04 | 15048218                | TT                                     | AA                 | AA               | INTERGENIC      |               |                                                     |                    |
| SNP_21199_A_15056944 | NC_021163.1    | Ca_Kabuli_Chr04 | 15056944                | GG                                     | AA                 | AA               | INTERGENIC      |               |                                                     |                    |
| SNP_21200_A_15080966 | NC_021163.1    | Ca_Kabuli_Chr04 | 15080966                | GG                                     | CC                 | CC               | INTERGENIC      |               |                                                     |                    |
| SNP_21201_A_15081007 | NC_021163.1    | Ca_Kabuli_Chr04 | 15081007                | CC                                     | TT                 | TT               | INTERGENIC      |               |                                                     |                    |

| SNPs IDs             | Chromosome IDs | Chromosomes     | Physical positions (bp) | CDC Frontier genome (Reference genome) | (Pusa 1103 & HPNB) | (ILWC 46 & LPNB) | Sequence Components of genome | Gene accession IDs | Putative functions   |
|----------------------|----------------|-----------------|-------------------------|----------------------------------------|--------------------|------------------|-------------------------------|--------------------|----------------------|
| SNP_21202_A_15081062 | NC_021163.1    | Ca_Kabuli_Chr04 | 15081062                | TT                                     | AA                 | AA               | INTERGENIC                    |                    |                      |
| SNP_21203_A_15081144 | NC_021163.1    | Ca_Kabuli_Chr04 | 15081144                | GG                                     | TT                 | TT               | INTERGENIC                    |                    |                      |
| SNP_21204_A_15095608 | NC_021163.1    | Ca_Kabuli_Chr04 | 15095608                | AA                                     | TT                 | TT               | DRR                           | 101488300          | cyclin-D3-1          |
| SNP_21205_A_15118226 | NC_021163.1    | Ca_Kabuli_Chr04 | 15118226                | TT                                     | CC                 | CC               | INTERGENIC                    |                    |                      |
| SNP_21206_A_15118778 | NC_021163.1    | Ca_Kabuli_Chr04 | 15118778                | AA                                     | TT                 | TT               | INTERGENIC                    |                    |                      |
| SNP_21207_A_15119207 | NC_021163.1    | Ca_Kabuli_Chr04 | 15119207                | TT                                     | GG                 | GG               | INTERGENIC                    |                    |                      |
| SNP_21208_A_15153847 | NC_021163.1    | Ca_Kabuli_Chr04 | 15153847                | CC                                     | TT                 | TT               | INTERGENIC                    |                    |                      |
| SNP_21209_A_15170782 | NC_021163.1    | Ca_Kabuli_Chr04 | 15170782                | AA                                     | GG                 | GG               | INTERGENIC                    |                    |                      |
| SNP_21210_A_15170850 | NC_021163.1    | Ca_Kabuli_Chr04 | 15170850                | CC                                     | TT                 | TT               | INTERGENIC                    |                    |                      |
| SNP_21211_A_15181183 | NC_021163.1    | Ca_Kabuli_Chr04 | 15181183                | AA                                     | GG                 | GG               | URR                           | 101492311          | xylosyltransferase 1 |
| SNP_21212_A_15208564 | NC_021163.1    | Ca_Kabuli_Chr04 | 15208564                | AA                                     | GG                 | GG               | INTERGENIC                    |                    |                      |
| SNP_21213_A_15208578 | NC_021163.1    | Ca_Kabuli_Chr04 | 15208578                | AA                                     | TT                 | TT               | INTERGENIC                    |                    |                      |
| SNP_21214_A_15208600 | NC_021163.1    | Ca_Kabuli_Chr04 | 15208600                | CC                                     | GG                 | GG               | INTERGENIC                    |                    |                      |
| SNP_21215_A_15212771 | NC_021163.1    | Ca_Kabuli_Chr04 | 15212771                | CC                                     | AA                 | AA               | INTERGENIC                    |                    |                      |
| SNP_21218_A_15225364 | NC_021163.1    | Ca_Kabuli_Chr04 | 15225364                | AA                                     | GG                 | GG               | INTERGENIC                    |                    |                      |
| SNP_21219_A_15227885 | NC_021163.1    | Ca_Kabuli_Chr04 | 15227885                | TT                                     | GG                 | GG               | INTERGENIC                    |                    |                      |
| SNP_21220_A_15241807 | NC_021163.1    | Ca_Kabuli_Chr04 | 15241807                | CC                                     | GG                 | GG               | INTERGENIC                    |                    |                      |
| SNP_21221_A_15252476 | NC_021163.1    | Ca_Kabuli_Chr04 | 15252476                | GG                                     | AA                 | AA               | INTERGENIC                    |                    |                      |
| SNP_21223_A_15256000 | NC_021163.1    | Ca_Kabuli_Chr04 | 15256000                | GG                                     | AA                 | AA               | INTERGENIC                    |                    |                      |
| SNP_21224_A_15265863 | NC_021163.1    | Ca_Kabuli_Chr04 | 15265863                | CC                                     | TT                 | TT               | INTERGENIC                    |                    |                      |
| SNP_21226_A_15292097 | NC_021163.1    | Ca_Kabuli_Chr04 | 15292097                | AA                                     | GG                 | GG               | INTERGENIC                    |                    |                      |
| SNP_21227_A_15330046 | NC_021163.1    | Ca_Kabuli_Chr04 | 15330046                | GG                                     | TT                 | TT               | INTERGENIC                    |                    |                      |

| SNPs IDs             | Chromosome IDs | Chromosomes     | Physical positions (bp) | CDC Frontier genome (Reference genome) | (Pusa 1103 & HPNB) | (ILWC 46 & LPNB) | Sequence genome | Components of | Gene accession IDs                            | Putative functions |
|----------------------|----------------|-----------------|-------------------------|----------------------------------------|--------------------|------------------|-----------------|---------------|-----------------------------------------------|--------------------|
| SNP_21228_A_15333258 | NC_021163.1    | Ca_Kabuli_Chr04 | 15333258                | TT                                     | CC                 | CC               | INTERGENIC      |               |                                               |                    |
| SNP_21229_A_15333300 | NC_021163.1    | Ca_Kabuli_Chr04 | 15333300                | AA                                     | GG                 | GG               | INTERGENIC      |               |                                               |                    |
| SNP_21230_A_15333325 | NC_021163.1    | Ca_Kabuli_Chr04 | 15333325                | CC                                     | TT                 | TT               | INTERGENIC      |               |                                               |                    |
| SNP_21231_A_15333354 | NC_021163.1    | Ca_Kabuli_Chr04 | 15333354                | GG                                     | AA                 | AA               | INTERGENIC      |               |                                               |                    |
| SNP_21232_A_15333356 | NC_021163.1    | Ca_Kabuli_Chr04 | 15333356                | TT                                     | CC                 | CC               | INTERGENIC      |               |                                               |                    |
| SNP_21233_A_15333426 | NC_021163.1    | Ca_Kabuli_Chr04 | 15333426                | TT                                     | GG                 | GG               | INTERGENIC      |               |                                               |                    |
| SNP_21236_A_15484695 | NC_021163.1    | Ca_Kabuli_Chr04 | 15484695                | GG                                     | CC                 | CC               | INTERGENIC      |               |                                               |                    |
| SNP_21237_A_15494879 | NC_021163.1    | Ca_Kabuli_Chr04 | 15494879                | CC                                     | TT                 | TT               | URR             | 101504592     | E3 ubiquitin-protein ligase RHA2A             |                    |
| SNP_21238_A_15495179 | NC_021163.1    | Ca_Kabuli_Chr04 | 15495179                | AA                                     | GG                 | GG               | URR             | 101504592     | E3 ubiquitin-protein ligase RHA2A             |                    |
| SNP_21239_A_15573144 | NC_021163.1    | Ca_Kabuli_Chr04 | 15573144                | TT                                     | AA                 | AA               | INTERGENIC      |               |                                               |                    |
| SNP_21240_A_15595799 | NC_021163.1    | Ca_Kabuli_Chr04 | 15595799                | AA                                     | CC                 | CC               | INTERGENIC      |               |                                               |                    |
| SNP_21241_A_15632684 | NC_021163.1    | Ca_Kabuli_Chr04 | 15632684                | TT                                     | GG                 | GG               | INTERGENIC      |               |                                               |                    |
| SNP_21242_A_15632697 | NC_021163.1    | Ca_Kabuli_Chr04 | 15632697                | TT                                     | CC                 | CC               | INTERGENIC      |               |                                               |                    |
| SNP_21244_A_15690834 | NC_021163.1    | Ca_Kabuli_Chr04 | 15690834                | TT                                     | CC                 | CC               | INTERGENIC      |               |                                               |                    |
| SNP_21245_A_15698212 | NC_021163.1    | Ca_Kabuli_Chr04 | 15698212                | GG                                     | TT                 | TT               | URR             | 101509934     | putative uncharacterized protein DDB_G0291608 |                    |
| SNP_21246_A_15742506 | NC_021163.1    | Ca_Kabuli_Chr04 | 15742506                | CC                                     | AA                 | AA               | INTERGENIC      |               |                                               |                    |
| SNP_21247_A_15768782 | NC_021163.1    | Ca_Kabuli_Chr04 | 15768782                | AA                                     | GG                 | GG               | INTERGENIC      |               |                                               |                    |
| SNP_21248_A_15788493 | NC_021163.1    | Ca_Kabuli_Chr04 | 15788493                | GG                                     | AA                 | AA               | INTERGENIC      |               |                                               |                    |
| SNP_21249_A_15788495 | NC_021163.1    | Ca_Kabuli_Chr04 | 15788495                | GG                                     | CC                 | CC               | INTERGENIC      |               |                                               |                    |
| SNP_21250_A_15788519 | NC_021163.1    | Ca_Kabuli_Chr04 | 15788519                | TT                                     | CC                 | CC               | INTERGENIC      |               |                                               |                    |
| SNP_21251_A_15788718 | NC_021163.1    | Ca_Kabuli_Chr04 | 15788718                | GG                                     | TT                 | TT               | INTERGENIC      |               |                                               |                    |
| SNP_21252_A_15788721 | NC_021163.1    | Ca_Kabuli_Chr04 | 15788721                | TT                                     | CC                 | CC               | INTERGENIC      |               |                                               |                    |

| SNPs IDs             | Chromosome IDs | Chromosomes     | Physical positions (bp) | CDC Frontier genome (Reference genome) | (Pusa 1103 & HPNB) | (ILWC 46 & LPNB) | Sequence Components of genome | Gene accession IDs | Putative functions                                 |
|----------------------|----------------|-----------------|-------------------------|----------------------------------------|--------------------|------------------|-------------------------------|--------------------|----------------------------------------------------|
| SNP_21253_A_15797728 | NC_021163.1    | Ca_Kabuli_Chr04 | 15797728                | TT                                     | GG                 | GG               | URR                           | 101514681          | uncharacterized LOC101514681                       |
| SNP_21254_A_15817059 | NC_021163.1    | Ca_Kabuli_Chr04 | 15817059                | TT                                     | CC                 | CC               | INTERGENIC                    |                    |                                                    |
| SNP_21255_A_15879275 | NC_021163.1    | Ca_Kabuli_Chr04 | 15879275                | TT                                     | CC                 | CC               | URR                           | 101489079          | probable serine/threonine-protein kinase At1g18390 |
| SNP_21256_A_15881411 | NC_021163.1    | Ca_Kabuli_Chr04 | 15881411                | CC                                     | TT                 | TT               | URR                           | 101489412          | uncharacterized LOC101489412                       |
| SNP_21257_A_15882577 | NC_021163.1    | Ca_Kabuli_Chr04 | 15882577                | CC                                     | TT                 | TT               | URR                           | 101489412          | uncharacterized LOC101489412                       |
| SNP_21258_A_15882603 | NC_021163.1    | Ca_Kabuli_Chr04 | 15882603                | AA                                     | TT                 | TT               | URR                           | 101489412          | uncharacterized LOC101489412                       |
| SNP_21259_A_15882647 | NC_021163.1    | Ca_Kabuli_Chr04 | 15882647                | TT                                     | CC                 | CC               | URR                           | 101489412          | uncharacterized LOC101489412                       |
| SNP_21260_A_15884141 | NC_021163.1    | Ca_Kabuli_Chr04 | 15884141                | AA                                     | GG                 | GG               | INTERGENIC                    |                    |                                                    |
| SNP_21261_A_15885448 | NC_021163.1    | Ca_Kabuli_Chr04 | 15885448                | AA                                     | GG                 | GG               | INTERGENIC                    |                    |                                                    |
| SNP_21262_A_15885474 | NC_021163.1    | Ca_Kabuli_Chr04 | 15885474                | AA                                     | GG                 | GG               | INTERGENIC                    |                    |                                                    |
| SNP_21263_A_15891755 | NC_021163.1    | Ca_Kabuli_Chr04 | 15891755                | CC                                     | TT                 | TT               | INTERGENIC                    |                    |                                                    |
| SNP_21264_A_15891929 | NC_021163.1    | Ca_Kabuli_Chr04 | 15891929                | GG                                     | AA                 | AA               | INTERGENIC                    |                    |                                                    |
| SNP_21267_A_15897808 | NC_021163.1    | Ca_Kabuli_Chr04 | 15897808                | CC                                     | AA                 | AA               | INTERGENIC                    |                    |                                                    |
| SNP_21268_A_15897821 | NC_021163.1    | Ca_Kabuli_Chr04 | 15897821                | TT                                     | CC                 | CC               | INTERGENIC                    |                    |                                                    |
| SNP_21269_A_15897860 | NC_021163.1    | Ca_Kabuli_Chr04 | 15897860                | GG                                     | CC                 | CC               | INTERGENIC                    |                    |                                                    |
| SNP_21271_A_15898298 | NC_021163.1    | Ca_Kabuli_Chr04 | 15898298                | TT                                     | AA                 | AA               | INTERGENIC                    |                    |                                                    |
| SNP_21272_A_15899215 | NC_021163.1    | Ca_Kabuli_Chr04 | 15899215                | CC                                     | TT                 | TT               | DRR                           | 101489732          | probable protein phosphatase 2C 15                 |
| SNP_21273_A_15903249 | NC_021163.1    | Ca_Kabuli_Chr04 | 15903249                | CC                                     | TT                 | TT               | SYNONYMOUS_CODING             | 101489732          | probable protein phosphatase 2C 15                 |
| SNP_21274_A_15907128 | NC_021163.1    | Ca_Kabuli_Chr04 | 15907128                | TT                                     | CC                 | CC               | URR                           | 101490487          | probable receptor-like protein kinase At1g67000    |
| SNP_21275_A_15907742 | NC_021163.1    | Ca_Kabuli_Chr04 | 15907742                | AA                                     | TT                 | TT               | URR                           | 101490487          | probable receptor-like protein kinase At1g67000    |
| SNP_21276_A_15908715 | NC_021163.1    | Ca_Kabuli_Chr04 | 15908715                | CC                                     | AA                 | AA               | DRR                           | 101505872          | probable receptor-like protein kinase At1g67000    |
| SNP_21277_A_15908767 | NC_021163.1    | Ca_Kabuli_Chr04 | 15908767                | AA                                     | TT                 | TT               | DRR                           | 101505872          | probable receptor-like protein kinase At1g67000    |

| SNPs IDs             | Chromosome IDs | Chromosomes     | Physical positions (bp) | CDC Frontier (Reference genome) | (Pusa 1103 & HPNB) | (ILWC 46 & LPNB) | Sequence Components of genome | Gene accession IDs | Putative functions                              |
|----------------------|----------------|-----------------|-------------------------|---------------------------------|--------------------|------------------|-------------------------------|--------------------|-------------------------------------------------|
| SNP_21278_A_15911641 | NC_021163.1    | Ca_Kabuli_Chr04 | 15911641                | TT                              | AA                 | AA               | INTERGENIC                    |                    |                                                 |
| SNP_21279_A_15911895 | NC_021163.1    | Ca_Kabuli_Chr04 | 15911895                | CC                              | AA                 | AA               | NON_SYNONYMOUS_CODING         | 101505872          | probable receptor-like protein kinase At1g67000 |
| SNP_21280_A_15914644 | NC_021163.1    | Ca_Kabuli_Chr04 | 15914644                | CC                              | TT                 | TT               | URR                           | 101505872          | probable receptor-like protein kinase At1g67000 |
| SNP_21281_A_15916802 | NC_021163.1    | Ca_Kabuli_Chr04 | 15916802                | GG                              | AA                 | AA               | INTERGENIC                    |                    |                                                 |
| SNP_21282_A_15917102 | NC_021163.1    | Ca_Kabuli_Chr04 | 15917102                | GG                              | CC                 | CC               | INTERGENIC                    |                    |                                                 |
| SNP_21283_A_15919986 | NC_021163.1    | Ca_Kabuli_Chr04 | 15919986                | CC                              | TT                 | TT               | INTERGENIC                    |                    |                                                 |
| SNP_21284_A_15921270 | NC_021163.1    | Ca_Kabuli_Chr04 | 15921270                | GG                              | AA                 | AA               | DRR                           | 101490811          | uncharacterized LOC101490811                    |
| SNP_21285_A_15923944 | NC_021163.1    | Ca_Kabuli_Chr04 | 15923944                | CC                              | GG                 | GG               | URR                           | 101490811          | uncharacterized LOC101490811                    |
| SNP_21288_A_15932740 | NC_021163.1    | Ca_Kabuli_Chr04 | 15932740                | GG                              | AA                 | AA               | INTRON                        | 101491135          | uncharacterized LOC101491135                    |
| SNP_21289_A_15932744 | NC_021163.1    | Ca_Kabuli_Chr04 | 15932744                | CC                              | TT                 | TT               | INTRON                        | 101491135          | uncharacterized LOC101491135                    |
| SNP_21290_A_15935131 | NC_021163.1    | Ca_Kabuli_Chr04 | 15935131                | GG                              | AA                 | AA               | URR                           | 101491135          | uncharacterized LOC101491135                    |
| SNP_21291_A_15935398 | NC_021163.1    | Ca_Kabuli_Chr04 | 15935398                | CC                              | TT                 | TT               | URR                           | 101491135          | uncharacterized LOC101491135                    |
| SNP_21292_A_15935863 | NC_021163.1    | Ca_Kabuli_Chr04 | 15935863                | CC                              | GG                 | GG               | URR                           | 101491135          | uncharacterized LOC101491135                    |
| SNP_21293_A_15936134 | NC_021163.1    | Ca_Kabuli_Chr04 | 15936134                | CC                              | TT                 | TT               | URR                           | 101491135          | uncharacterized LOC101491135                    |
| SNP_21294_A_15936145 | NC_021163.1    | Ca_Kabuli_Chr04 | 15936145                | AA                              | GG                 | GG               | URR                           | 101491135          | uncharacterized LOC101491135                    |
| SNP_21295_A_15938274 | NC_021163.1    | Ca_Kabuli_Chr04 | 15938274                | AA                              | GG                 | GG               | INTERGENIC                    |                    |                                                 |
| SNP_21296_A_15938371 | NC_021163.1    | Ca_Kabuli_Chr04 | 15938371                | CC                              | GG                 | GG               | INTERGENIC                    |                    |                                                 |
| SNP_21297_A_15938971 | NC_021163.1    | Ca_Kabuli_Chr04 | 15938971                | AA                              | TT                 | TT               | DRR                           | 101491667          | chaperone protein dnaJ 15                       |
| SNP_21298_A_15938973 | NC_021163.1    | Ca_Kabuli_Chr04 | 15938973                | AA                              | TT                 | TT               | DRR                           | 101491667          | chaperone protein dnaJ 15                       |
| SNP_21300_A_15939130 | NC_021163.1    | Ca_Kabuli_Chr04 | 15939130                | CC                              | AA                 | AA               | DRR                           | 101491667          | chaperone protein dnaJ 15                       |
| SNP_21301_A_15942084 | NC_021163.1    | Ca_Kabuli_Chr04 | 15942084                | AA                              | GG                 | GG               | SYNONYMOUS_CODING             | 101491667          | chaperone protein dnaJ 15                       |
| SNP_21303_A_15949506 | NC_021163.1    | Ca_Kabuli_Chr04 | 15949506                | CC                              | AA                 | AA               | INTERGENIC                    |                    |                                                 |

| SNPs IDs             | Chromosome IDs | Chromosomes     | Physical positions (bp) | CDC Frontier genome (Reference genome) | (Pusa 1103 & HPNB) | (ILWC 46 & LPNB) | Sequence genome | Components of | Gene accession IDs | Putative functions                |
|----------------------|----------------|-----------------|-------------------------|----------------------------------------|--------------------|------------------|-----------------|---------------|--------------------|-----------------------------------|
| SNP_21304_A_15950473 | NC_021163.1    | Ca_Kabuli_Chr04 | 15950473                | TT                                     | CC                 | CC               | INTERGENIC      |               |                    |                                   |
| SNP_21305_A_15950476 | NC_021163.1    | Ca_Kabuli_Chr04 | 15950476                | CC                                     | GG                 | GG               | INTERGENIC      |               |                    |                                   |
| SNP_21307_A_15950817 | NC_021163.1    | Ca_Kabuli_Chr04 | 15950817                | CC                                     | TT                 | TT               | INTERGENIC      |               |                    |                                   |
| SNP_21308_A_15954328 | NC_021163.1    | Ca_Kabuli_Chr04 | 15954328                | CC                                     | TT                 | TT               | INTERGENIC      |               |                    |                                   |
| SNP_21309_A_15954336 | NC_021163.1    | Ca_Kabuli_Chr04 | 15954336                | GG                                     | AA                 | AA               | INTERGENIC      |               |                    |                                   |
| SNP_21310_A_15959936 | NC_021163.1    | Ca_Kabuli_Chr04 | 15959936                | CC                                     | TT                 | TT               | INTERGENIC      |               |                    |                                   |
| SNP_21311_A_15962521 | NC_021163.1    | Ca_Kabuli_Chr04 | 15962521                | CC                                     | TT                 | TT               | INTERGENIC      |               |                    |                                   |
| SNP_21312_A_15962552 | NC_021163.1    | Ca_Kabuli_Chr04 | 15962552                | AA                                     | GG                 | GG               | INTERGENIC      |               |                    |                                   |
| SNP_21314_A_15964401 | NC_021163.1    | Ca_Kabuli_Chr04 | 15964401                | GG                                     | AA                 | AA               | INTERGENIC      |               |                    |                                   |
| SNP_21315_A_15966468 | NC_021163.1    | Ca_Kabuli_Chr04 | 15966468                | GG                                     | AA                 | AA               | INTERGENIC      |               |                    |                                   |
| SNP_21316_A_15966513 | NC_021163.1    | Ca_Kabuli_Chr04 | 15966513                | TT                                     | AA                 | AA               | INTERGENIC      |               |                    |                                   |
| SNP_21317_A_15966550 | NC_021163.1    | Ca_Kabuli_Chr04 | 15966550                | GG                                     | AA                 | AA               | INTERGENIC      |               |                    |                                   |
| SNP_21318_A_15966571 | NC_021163.1    | Ca_Kabuli_Chr04 | 15966571                | TT                                     | AA                 | AA               | INTERGENIC      |               |                    |                                   |
| SNP_21320_A_15972105 | NC_021163.1    | Ca_Kabuli_Chr04 | 15972105                | GG                                     | CC                 | CC               | INTRON          | 101492312     |                    | cysteine-tRNA ligase, cytoplasmic |
| SNP_21321_A_15974840 | NC_021163.1    | Ca_Kabuli_Chr04 | 15974840                | CC                                     | AA                 | AA               | URR             | 101492312     |                    | cysteine-tRNA ligase, cytoplasmic |
| SNP_21323_A_15984353 | NC_021163.1    | Ca_Kabuli_Chr04 | 15984353                | AA                                     | TT                 | TT               | INTERGENIC      |               |                    |                                   |
| SNP_21324_A_15985167 | NC_021163.1    | Ca_Kabuli_Chr04 | 15985167                | TT                                     | CC                 | CC               | INTERGENIC      |               |                    |                                   |
| SNP_21325_A_15996519 | NC_021163.1    | Ca_Kabuli_Chr04 | 15996519                | TT                                     | CC                 | CC               | INTERGENIC      |               |                    |                                   |
| SNP_21326_A_15996977 | NC_021163.1    | Ca_Kabuli_Chr04 | 15996977                | GG                                     | TT                 | TT               | INTERGENIC      |               |                    |                                   |
| SNP_21327_A_15997317 | NC_021163.1    | Ca_Kabuli_Chr04 | 15997317                | GG                                     | TT                 | TT               | INTERGENIC      |               |                    |                                   |
| SNP_21328_A_16000624 | NC_021163.1    | Ca_Kabuli_Chr04 | 16000624                | TT                                     | CC                 | CC               | INTERGENIC      |               |                    |                                   |
| SNP_21330_A_16000645 | NC_021163.1    | Ca_Kabuli_Chr04 | 16000645                | TT                                     | CC                 | CC               | INTERGENIC      |               |                    |                                   |

| SNPs IDs             | Chromosome IDs | Chromosomes     | Physical positions (bp) | CDC Frontier genome (Reference genome) | (Pusa 1103 & HPNB) | (ILWC 46 & LPNB) | Sequence Components of genome | Gene accession IDs | Putative functions           |
|----------------------|----------------|-----------------|-------------------------|----------------------------------------|--------------------|------------------|-------------------------------|--------------------|------------------------------|
| SNP_21331_A_16024871 | NC_021163.1    | Ca_Kabuli_Chr04 | 16024871                | CC                                     | AA                 | AA               | INTERGENIC                    |                    |                              |
| SNP_21332_A_16025144 | NC_021163.1    | Ca_Kabuli_Chr04 | 16025144                | TT                                     | CC                 | CC               | DRR                           | 101493197          | BI1-like protein             |
| SNP_21333_A_16025404 | NC_021163.1    | Ca_Kabuli_Chr04 | 16025404                | GG                                     | AA                 | AA               | DRR                           | 101493197          | BI1-like protein             |
| SNP_21334_A_16025436 | NC_021163.1    | Ca_Kabuli_Chr04 | 16025436                | CC                                     | TT                 | TT               | DRR                           | 101493197          | BI1-like protein             |
| SNP_21335_A_16025469 | NC_021163.1    | Ca_Kabuli_Chr04 | 16025469                | TT                                     | CC                 | CC               | DRR                           | 101493197          | BI1-like protein             |
| SNP_21336_A_16025477 | NC_021163.1    | Ca_Kabuli_Chr04 | 16025477                | AA                                     | GG                 | GG               | DRR                           | 101493197          | BI1-like protein             |
| SNP_21337_A_16025878 | NC_021163.1    | Ca_Kabuli_Chr04 | 16025878                | GG                                     | CC                 | CC               | DRR                           | 101493197          | BI1-like protein             |
| SNP_21338_A_16025879 | NC_021163.1    | Ca_Kabuli_Chr04 | 16025879                | CC                                     | TT                 | TT               | DRR                           | 101493197          | BI1-like protein             |
| SNP_21339_A_16025882 | NC_021163.1    | Ca_Kabuli_Chr04 | 16025882                | CC                                     | AA                 | AA               | DRR                           | 101493197          | BI1-like protein             |
| SNP_21340_A_16026131 | NC_021163.1    | Ca_Kabuli_Chr04 | 16026131                | AA                                     | GG                 | GG               | DRR                           | 101493197          | BI1-like protein             |
| SNP_21341_A_16026157 | NC_021163.1    | Ca_Kabuli_Chr04 | 16026157                | CC                                     | TT                 | TT               | DRR                           | 101493197          | BI1-like protein             |
| SNP_21343_A_16027959 | NC_021163.1    | Ca_Kabuli_Chr04 | 16027959                | GG                                     | AA                 | AA               | URR                           | 101493197          | BI1-like protein             |
| SNP_21344_A_16028165 | NC_021163.1    | Ca_Kabuli_Chr04 | 16028165                | CC                                     | TT                 | TT               | URR                           | 101493197          | BI1-like protein             |
| SNP_21345_A_16028227 | NC_021163.1    | Ca_Kabuli_Chr04 | 16028227                | AA                                     | GG                 | GG               | URR                           | 101493197          | BI1-like protein             |
| SNP_21347_A_16030701 | NC_021163.1    | Ca_Kabuli_Chr04 | 16030701                | CC                                     | TT                 | TT               | INTERGENIC                    |                    |                              |
| SNP_21348_A_16030738 | NC_021163.1    | Ca_Kabuli_Chr04 | 16030738                | TT                                     | AA                 | AA               | INTERGENIC                    |                    |                              |
| SNP_21349_A_16030861 | NC_021163.1    | Ca_Kabuli_Chr04 | 16030861                | GG                                     | AA                 | AA               | INTERGENIC                    |                    |                              |
| SNP_21350_A_16030878 | NC_021163.1    | Ca_Kabuli_Chr04 | 16030878                | AA                                     | GG                 | GG               | INTERGENIC                    |                    |                              |
| SNP_21351_A_16031556 | NC_021163.1    | Ca_Kabuli_Chr04 | 16031556                | TT                                     | CC                 | CC               | DRR                           | 101506517          | uncharacterized LOC101506517 |
| SNP_21352_A_16031557 | NC_021163.1    | Ca_Kabuli_Chr04 | 16031557                | CC                                     | GG                 | GG               | DRR                           | 101506517          | uncharacterized LOC101506517 |
| SNP_21353_A_16031562 | NC_021163.1    | Ca_Kabuli_Chr04 | 16031562                | CC                                     | AA                 | AA               | DRR                           | 101506517          | uncharacterized LOC101506517 |
| SNP_21354_A_16031593 | NC_021163.1    | Ca_Kabuli_Chr04 | 16031593                | TT                                     | GG                 | GG               | DRR                           | 101506517          | uncharacterized LOC101506517 |

| SNPs IDs             | Chromosome IDs | Chromosomes     | Physical positions (bp) | CDC Frontier genome (Reference genome) | (Pusa 1103 & HPNB) | (ILWC 46 & LPNB) | Sequence Components of genome | Gene accession IDs | Putative functions              |
|----------------------|----------------|-----------------|-------------------------|----------------------------------------|--------------------|------------------|-------------------------------|--------------------|---------------------------------|
| SNP_21355_A_16032788 | NC_021163.1    | Ca_Kabuli_Chr04 | 16032788                | AA                                     | GG                 | GG               | URR                           | 101506517          | uncharacterized LOC101506517    |
| SNP_21356_A_16042155 | NC_021163.1    | Ca_Kabuli_Chr04 | 16042155                | GG                                     | AA                 | AA               | INTERGENIC                    |                    |                                 |
| SNP_21357_A_16044240 | NC_021163.1    | Ca_Kabuli_Chr04 | 16044240                | GG                                     | AA                 | AA               | DRR                           | 101493829          | glutamine-tRNA ligase           |
| SNP_21358_A_16045510 | NC_021163.1    | Ca_Kabuli_Chr04 | 16045510                | GG                                     | AA                 | AA               | INTRON                        | 101493829          | glutamine-tRNA ligase           |
| SNP_21359_A_16045526 | NC_021163.1    | Ca_Kabuli_Chr04 | 16045526                | CC                                     | GG                 | GG               | INTRON                        | 101493829          | glutamine-tRNA ligase           |
| SNP_21360_A_16046081 | NC_021163.1    | Ca_Kabuli_Chr04 | 16046081                | GG                                     | AA                 | AA               | INTRON                        | 101493829          | glutamine-tRNA ligase           |
| SNP_21362_A_16053803 | NC_021163.1    | Ca_Kabuli_Chr04 | 16053803                | TT                                     | CC                 | CC               | SPLICE_SITE_REGION            | 101493829          | glutamine-tRNA ligase           |
| SNP_21363_A_16054666 | NC_021163.1    | Ca_Kabuli_Chr04 | 16054666                | CC                                     | GG                 | GG               | URR                           | 101493829          | glutamine-tRNA ligase           |
| SNP_21364_A_16056205 | NC_021163.1    | Ca_Kabuli_Chr04 | 16056205                | CC                                     | TT                 | TT               | INTERGENIC                    |                    |                                 |
| SNP_21365_A_16056687 | NC_021163.1    | Ca_Kabuli_Chr04 | 16056687                | CC                                     | TT                 | TT               | INTERGENIC                    |                    |                                 |
| SNP_21366_A_16058824 | NC_021163.1    | Ca_Kabuli_Chr04 | 16058824                | AA                                     | GG                 | GG               | INTERGENIC                    |                    |                                 |
| SNP_21367_A_16058827 | NC_021163.1    | Ca_Kabuli_Chr04 | 16058827                | CC                                     | GG                 | GG               | INTERGENIC                    |                    |                                 |
| SNP_21368_A_16060358 | NC_021163.1    | Ca_Kabuli_Chr04 | 16060358                | AA                                     | TT                 | TT               | INTERGENIC                    |                    |                                 |
| SNP_21369_A_16064570 | NC_021163.1    | Ca_Kabuli_Chr04 | 16064570                | TT                                     | AA                 | AA               | URR                           | 101494157          | transcription factor MYB24-like |
| SNP_21372_A_16067407 | NC_021163.1    | Ca_Kabuli_Chr04 | 16067407                | TT                                     | AA                 | AA               | INTERGENIC                    |                    |                                 |
| SNP_21373_A_16067422 | NC_021163.1    | Ca_Kabuli_Chr04 | 16067422                | AA                                     | GG                 | GG               | INTERGENIC                    |                    |                                 |
| SNP_21374_A_16067484 | NC_021163.1    | Ca_Kabuli_Chr04 | 16067484                | GG                                     | AA                 | AA               | INTERGENIC                    |                    |                                 |
| SNP_21375_A_16072597 | NC_021163.1    | Ca_Kabuli_Chr04 | 16072597                | AA                                     | TT                 | TT               | DRR                           | 101494464          | uncharacterized LOC101494464    |
| SNP_21376_A_16074580 | NC_021163.1    | Ca_Kabuli_Chr04 | 16074580                | AA                                     | CC                 | CC               | INTERGENIC                    |                    |                                 |
| SNP_21377_A_16079762 | NC_021163.1    | Ca_Kabuli_Chr04 | 16079762                | AA                                     | CC                 | CC               | URR                           | 101495224          | endonuclease 2                  |
| SNP_21379_A_16084056 | NC_021163.1    | Ca_Kabuli_Chr04 | 16084056                | TT                                     | CC                 | CC               | INTERGENIC                    |                    |                                 |
| SNP_21380_A_16088500 | NC_021163.1    | Ca_Kabuli_Chr04 | 16088500                | AA                                     | GG                 | GG               | INTERGENIC                    |                    |                                 |



| SNPs IDs             | Chromosome IDs | Chromosomes     | Physical positions (bp) | CDC Frontier (Reference genome) | (Pusa 1103 & HPNB) | (ILWC 46 & LPNB) | Sequence Components of genome | Gene accession IDs | Putative functions                           |
|----------------------|----------------|-----------------|-------------------------|---------------------------------|--------------------|------------------|-------------------------------|--------------------|----------------------------------------------|
| SNP_21381_A_16088814 | NC_021163.1    | Ca_Kabuli_Chr04 | 16088814                | AA                              | CC                 | CC               | INTERGENIC                    |                    |                                              |
| SNP_21382_A_16089633 | NC_021163.1    | Ca_Kabuli_Chr04 | 16089633                | CC                              | TT                 | TT               | INTERGENIC                    |                    |                                              |
| SNP_21383_A_16089712 | NC_021163.1    | Ca_Kabuli_Chr04 | 16089712                | GG                              | TT                 | TT               | INTERGENIC                    |                    |                                              |
| SNP_21384_A_16090010 | NC_021163.1    | Ca_Kabuli_Chr04 | 16090010                | CC                              | AA                 | AA               | INTERGENIC                    |                    |                                              |
| SNP_21387_A_16095961 | NC_021163.1    | Ca_Kabuli_Chr04 | 16095961                | GG                              | TT                 | TT               | DRR                           | 101495542          | uncharacterized LOC101495542                 |
| SNP_21388_A_16095989 | NC_021163.1    | Ca_Kabuli_Chr04 | 16095989                | CC                              | TT                 | TT               | DRR                           | 101495542          | uncharacterized LOC101495542                 |
| SNP_21389_A_16098897 | NC_021163.1    | Ca_Kabuli_Chr04 | 16098897                | GG                              | AA                 | AA               | URR                           | 101495542          | uncharacterized LOC101495542                 |
| SNP_21390_A_16098933 | NC_021163.1    | Ca_Kabuli_Chr04 | 16098933                | CC                              | TT                 | TT               | URR                           | 101495542          | uncharacterized LOC101495542                 |
| SNP_21391_A_16098986 | NC_021163.1    | Ca_Kabuli_Chr04 | 16098986                | CC                              | TT                 | TT               | URR                           | 101495542          | uncharacterized LOC101495542                 |
| SNP_21392_A_16098989 | NC_021163.1    | Ca_Kabuli_Chr04 | 16098989                | AA                              | GG                 | GG               | URR                           | 101495542          | uncharacterized LOC101495542                 |
| SNP_21393_A_16098993 | NC_021163.1    | Ca_Kabuli_Chr04 | 16098993                | CC                              | TT                 | TT               | URR                           | 101495542          | uncharacterized LOC101495542                 |
| SNP_21394_A_16098996 | NC_021163.1    | Ca_Kabuli_Chr04 | 16098996                | TT                              | AA                 | AA               | URR                           | 101495542          | uncharacterized LOC101495542                 |
| SNP_21395_A_16099398 | NC_021163.1    | Ca_Kabuli_Chr04 | 16099398                | TT                              | AA                 | AA               | URR                           | 101495542          | uncharacterized LOC101495542                 |
| SNP_21396_A_16099450 | NC_021163.1    | Ca_Kabuli_Chr04 | 16099450                | TT                              | AA                 | AA               | URR                           | 101495542          | uncharacterized LOC101495542                 |
| SNP_21397_A_16100038 | NC_021163.1    | Ca_Kabuli_Chr04 | 16100038                | GG                              | AA                 | AA               | INTERGENIC                    |                    |                                              |
| SNP_21398_A_16100067 | NC_021163.1    | Ca_Kabuli_Chr04 | 16100067                | AA                              | CC                 | CC               | INTERGENIC                    |                    |                                              |
| SNP_21399_A_16100071 | NC_021163.1    | Ca_Kabuli_Chr04 | 16100071                | TT                              | AA                 | AA               | INTERGENIC                    |                    |                                              |
| SNP_21400_A_16100319 | NC_021163.1    | Ca_Kabuli_Chr04 | 16100319                | CC                              | AA                 | AA               | INTERGENIC                    |                    |                                              |
| SNP_21401_A_16101725 | NC_021163.1    | Ca_Kabuli_Chr04 | 16101725                | TT                              | CC                 | CC               | INTERGENIC                    |                    |                                              |
| SNP_21402_A_16101780 | NC_021163.1    | Ca_Kabuli_Chr04 | 16101780                | AA                              | TT                 | TT               | INTERGENIC                    |                    |                                              |
| SNP_21403_A_16103361 | NC_021163.1    | Ca_Kabuli_Chr04 | 16103361                | CC                              | AA                 | AA               | DRR                           | 101495872          | VQ motif-containing protein 8, chloroplastic |
| SNP_21405_A_16120815 | NC_021163.1    | Ca_Kabuli_Chr04 | 16120815                | AA                              | CC                 | CC               | INTERGENIC                    |                    |                                              |

| SNPs IDs             | Chromosome IDs | Chromosomes     | Physical positions (bp) | CDC Frontier genome (Reference genome) | (Pusa 1103 & HPNB) | (ILWC 46 & LPNB) | Sequence Components of genome | Gene accession IDs | Putative functions              |
|----------------------|----------------|-----------------|-------------------------|----------------------------------------|--------------------|------------------|-------------------------------|--------------------|---------------------------------|
| SNP_21406_A_16121119 | NC_021163.1    | Ca_Kabuli_Chr04 | 16121119                | TT                                     | CC                 | CC               | INTERGENIC                    |                    |                                 |
| SNP_21407_A_16131259 | NC_021163.1    | Ca_Kabuli_Chr04 | 16131259                | CC                                     | TT                 | TT               | INTERGENIC                    |                    |                                 |
| SNP_21409_A_16158002 | NC_021163.1    | Ca_Kabuli_Chr04 | 16158002                | GG                                     | AA                 | AA               | INTERGENIC                    |                    |                                 |
| SNP_21410_A_16160780 | NC_021163.1    | Ca_Kabuli_Chr04 | 16160780                | GG                                     | AA                 | AA               | INTERGENIC                    |                    |                                 |
| SNP_21411_A_16164843 | NC_021163.1    | Ca_Kabuli_Chr04 | 16164843                | TT                                     | CC                 | CC               | INTERGENIC                    |                    |                                 |
| SNP_21412_A_16186679 | NC_021163.1    | Ca_Kabuli_Chr04 | 16186679                | TT                                     | CC                 | CC               | URR                           | 101497733          | IST1 homolog                    |
| SNP_21413_A_16186691 | NC_021163.1    | Ca_Kabuli_Chr04 | 16186691                | TT                                     | AA                 | AA               | URR                           | 101497733          | IST1 homolog                    |
| SNP_21414_A_16186693 | NC_021163.1    | Ca_Kabuli_Chr04 | 16186693                | AA                                     | GG                 | GG               | URR                           | 101497733          | IST1 homolog                    |
| SNP_21418_A_16352323 | NC_021163.1    | Ca_Kabuli_Chr04 | 16352323                | CC                                     | TT                 | TT               | INTERGENIC                    |                    |                                 |
| SNP_21419_A_16371213 | NC_021163.1    | Ca_Kabuli_Chr04 | 16371213                | AA                                     | TT                 | TT               | INTERGENIC                    |                    |                                 |
| SNP_21420_A_16404619 | NC_021163.1    | Ca_Kabuli_Chr04 | 16404619                | CC                                     | TT                 | TT               | INTERGENIC                    |                    |                                 |
| SNP_21421_A_16449543 | NC_021163.1    | Ca_Kabuli_Chr04 | 16449543                | GG                                     | AA                 | AA               | URR                           | 101501685          | ubiquitin receptor RAD23c-like  |
| SNP_21422_A_16526809 | NC_021163.1    | Ca_Kabuli_Chr04 | 16526809                | TT                                     | CC                 | CC               | URR                           | 101504911          | probable carboxylesterase 17    |
| SNP_21423_A_16576161 | NC_021163.1    | Ca_Kabuli_Chr04 | 16576161                | GG                                     | TT                 | TT               | INTERGENIC                    |                    |                                 |
| SNP_21424_A_16576400 | NC_021163.1    | Ca_Kabuli_Chr04 | 16576400                | AA                                     | GG                 | GG               | INTERGENIC                    |                    |                                 |
| SNP_21425_A_16576410 | NC_021163.1    | Ca_Kabuli_Chr04 | 16576410                | GG                                     | AA                 | AA               | INTERGENIC                    |                    |                                 |
| SNP_21426_A_16576418 | NC_021163.1    | Ca_Kabuli_Chr04 | 16576418                | TT                                     | AA                 | AA               | INTERGENIC                    |                    |                                 |
| SNP_21427_A_16576419 | NC_021163.1    | Ca_Kabuli_Chr04 | 16576419                | TT                                     | CC                 | CC               | INTERGENIC                    |                    |                                 |
| SNP_21428_A_16576426 | NC_021163.1    | Ca_Kabuli_Chr04 | 16576426                | CC                                     | AA                 | AA               | INTERGENIC                    |                    |                                 |
| SNP_21429_A_16576470 | NC_021163.1    | Ca_Kabuli_Chr04 | 16576470                | GG                                     | AA                 | AA               | INTERGENIC                    |                    |                                 |
| SNP_21430_A_16584739 | NC_021163.1    | Ca_Kabuli_Chr04 | 16584739                | CC                                     | GG                 | GG               | URR                           | 101508129          | 40S ribosomal protein S3-2-like |
| SNP_21431_A_16593865 | NC_021163.1    | Ca_Kabuli_Chr04 | 16593865                | CC                                     | TT                 | TT               | DRR                           | 101508657          | uncharacterized LOC101508657    |

| SNPs IDs             | Chromosome IDs | Chromosomes     | Physical positions (bp) | CDC Frontier genome (Reference genome) | (Pusa 1103 & HPNB) | (ILWC 46 & LPNB) | Sequence Components of genome | Gene accession IDs | Putative functions                                    |
|----------------------|----------------|-----------------|-------------------------|----------------------------------------|--------------------|------------------|-------------------------------|--------------------|-------------------------------------------------------|
| SNP_21432_A_16594182 | NC_021163.1    | Ca_Kabuli_Chr04 | 16594182                | CC                                     | TT                 | TT               | DRR                           | 101508657          | uncharacterized LOC101508657                          |
| SNP_21433_A_16605926 | NC_021163.1    | Ca_Kabuli_Chr04 | 16605926                | CC                                     | AA                 | AA               | INTERGENIC                    |                    |                                                       |
| SNP_21434_A_16742257 | NC_021163.1    | Ca_Kabuli_Chr04 | 16742257                | AA                                     | GG                 | GG               | INTERGENIC                    |                    |                                                       |
| SNP_21436_A_16826107 | NC_021163.1    | Ca_Kabuli_Chr04 | 16826107                | CC                                     | TT                 | TT               | URR                           | 101490047          | uncharacterized LOC101490047                          |
| SNP_21439_A_16879410 | NC_021163.1    | Ca_Kabuli_Chr04 | 16879410                | AA                                     | GG                 | GG               | URR                           | 101491556          | uncharacterized LOC101491556                          |
| SNP_21440_A_16879738 | NC_021163.1    | Ca_Kabuli_Chr04 | 16879738                | CC                                     | TT                 | TT               | INTERGENIC                    |                    |                                                       |
| SNP_21441_A_16879754 | NC_021163.1    | Ca_Kabuli_Chr04 | 16879754                | AA                                     | GG                 | GG               | INTERGENIC                    |                    |                                                       |
| SNP_21442_A_16883439 | NC_021163.1    | Ca_Kabuli_Chr04 | 16883439                | CC                                     | TT                 | TT               | DRR                           | 101492536          | germin-like protein subfamily 3 member 2              |
| SNP_21443_A_16911923 | NC_021163.1    | Ca_Kabuli_Chr04 | 16911923                | TT                                     | GG                 | GG               | NON_SYNONYMOUS_CODING         | 101492866          | pentatricopeptide repeat-containing protein At2g35130 |
| SNP_21444_A_16913891 | NC_021163.1    | Ca_Kabuli_Chr04 | 16913891                | CC                                     | TT                 | TT               | URR                           | 101492866          | pentatricopeptide repeat-containing protein At2g35130 |
| SNP_21447_A_16936912 | NC_021163.1    | Ca_Kabuli_Chr04 | 16936912                | TT                                     | CC                 | CC               | INTERGENIC                    |                    |                                                       |
| SNP_21448_A_16936947 | NC_021163.1    | Ca_Kabuli_Chr04 | 16936947                | TT                                     | CC                 | CC               | INTERGENIC                    |                    |                                                       |
| SNP_21449_A_16942123 | NC_021163.1    | Ca_Kabuli_Chr04 | 16942123                | AA                                     | CC                 | CC               | INTERGENIC                    |                    |                                                       |
| SNP_21450_A_16943134 | NC_021163.1    | Ca_Kabuli_Chr04 | 16943134                | TT                                     | CC                 | CC               | INTERGENIC                    |                    |                                                       |
| SNP_21452_A_16943240 | NC_021163.1    | Ca_Kabuli_Chr04 | 16943240                | GG                                     | AA                 | AA               | INTERGENIC                    |                    |                                                       |
| SNP_21454_A_16957491 | NC_021163.1    | Ca_Kabuli_Chr04 | 16957491                | AA                                     | GG                 | GG               | INTERGENIC                    |                    |                                                       |
| SNP_21455_A_16961142 | NC_021163.1    | Ca_Kabuli_Chr04 | 16961142                | TT                                     | CC                 | CC               | DRR                           | 101510699          | histone-lysine N-methyltransferase 2D-like            |
| SNP_21456_A_16981920 | NC_021163.1    | Ca_Kabuli_Chr04 | 16981920                | AA                                     | CC                 | CC               | DRR                           | 101494897          | protein transport protein Sec24-like At4g32640        |
| SNP_21458_A_16984427 | NC_021163.1    | Ca_Kabuli_Chr04 | 16984427                | TT                                     | AA                 | AA               | INTRON                        | 101494897          | protein transport protein Sec24-like At4g32640        |
| SNP_21459_A_16984435 | NC_021163.1    | Ca_Kabuli_Chr04 | 16984435                | AA                                     | TT                 | TT               | INTRON                        | 101494897          | protein transport protein Sec24-like At4g32640        |
| SNP_21460_A_16989686 | NC_021163.1    | Ca_Kabuli_Chr04 | 16989686                | TT                                     | CC                 | CC               | INTRON                        | 101494897          | protein transport protein Sec24-like At4g32640        |
| SNP_21461_A_16993406 | NC_021163.1    | Ca_Kabuli_Chr04 | 16993406                | AA                                     | CC                 | CC               | SYNONYMOUS_CODING             | 101494897          | protein transport protein Sec24-like At4g32640        |

| SNPs IDs             | Chromosome IDs | Chromosomes     | Physical positions (bp) | CDC Frontier (Reference genome) | (Pusa 1103 & HPNB) | (ILWC 46 & LPNB) | Sequence Components of genome | Gene accession IDs | Putative functions                             |
|----------------------|----------------|-----------------|-------------------------|---------------------------------|--------------------|------------------|-------------------------------|--------------------|------------------------------------------------|
| SNP_21462_A_16998113 | NC_021163.1    | Ca_Kabuli_Chr04 | 16998113                | TT                              | CC                 | CC               | DRR                           | 101495543          | uncharacterized LOC101495543                   |
| SNP_21463_A_16999529 | NC_021163.1    | Ca_Kabuli_Chr04 | 16999529                | CC                              | AA                 | AA               | URR                           | 101494897          | protein transport protein Sec24-like At4g32640 |
| SNP_21464_A_17003080 | NC_021163.1    | Ca_Kabuli_Chr04 | 17003080                | GG                              | AA                 | AA               | URR                           | 101495543          | uncharacterized LOC101495543                   |
| SNP_21465_A_17003084 | NC_021163.1    | Ca_Kabuli_Chr04 | 17003084                | GG                              | TT                 | TT               | URR                           | 101495543          | uncharacterized LOC101495543                   |
| SNP_21466_A_17003599 | NC_021163.1    | Ca_Kabuli_Chr04 | 17003599                | GG                              | AA                 | AA               | INTRON                        | 101495225          | mitochondrial pyruvate carrier 1               |
| SNP_21467_A_17003939 | NC_021163.1    | Ca_Kabuli_Chr04 | 17003939                | TT                              | CC                 | CC               | INTRON                        | 101495225          | mitochondrial pyruvate carrier 1               |
| SNP_21468_A_17003942 | NC_021163.1    | Ca_Kabuli_Chr04 | 17003942                | GG                              | AA                 | AA               | INTRON                        | 101495225          | mitochondrial pyruvate carrier 1               |
| SNP_21469_A_17003953 | NC_021163.1    | Ca_Kabuli_Chr04 | 17003953                | GG                              | AA                 | AA               | INTRON                        | 101495225          | mitochondrial pyruvate carrier 1               |
| SNP_21470_A_17003961 | NC_021163.1    | Ca_Kabuli_Chr04 | 17003961                | TT                              | GG                 | GG               | INTRON                        | 101495225          | mitochondrial pyruvate carrier 1               |
| SNP_21471_A_17011438 | NC_021163.1    | Ca_Kabuli_Chr04 | 17011438                | GG                              | TT                 | TT               | INTERGENIC                    |                    |                                                |
| SNP_21472_A_17011490 | NC_021163.1    | Ca_Kabuli_Chr04 | 17011490                | AA                              | CC                 | CC               | INTERGENIC                    |                    |                                                |
| SNP_21473_A_17013283 | NC_021163.1    | Ca_Kabuli_Chr04 | 17013283                | CC                              | TT                 | TT               | INTERGENIC                    |                    |                                                |
| SNP_21474_A_17013308 | NC_021163.1    | Ca_Kabuli_Chr04 | 17013308                | CC                              | AA                 | AA               | INTERGENIC                    |                    |                                                |
| SNP_21475_A_17013332 | NC_021163.1    | Ca_Kabuli_Chr04 | 17013332                | CC                              | AA                 | AA               | INTERGENIC                    |                    |                                                |
| SNP_21477_A_17023346 | NC_021163.1    | Ca_Kabuli_Chr04 | 17023346                | CC                              | AA                 | AA               | INTERGENIC                    |                    |                                                |
| SNP_21478_A_17025588 | NC_021163.1    | Ca_Kabuli_Chr04 | 17025588                | TT                              | CC                 | CC               | INTERGENIC                    |                    |                                                |
| SNP_21481_A_17045240 | NC_021163.1    | Ca_Kabuli_Chr04 | 17045240                | AA                              | GG                 | GG               | INTERGENIC                    |                    |                                                |
| SNP_21482_A_17045889 | NC_021163.1    | Ca_Kabuli_Chr04 | 17045889                | CC                              | GG                 | GG               | INTERGENIC                    |                    |                                                |
| SNP_21483_A_17045970 | NC_021163.1    | Ca_Kabuli_Chr04 | 17045970                | TT                              | CC                 | CC               | INTERGENIC                    |                    |                                                |
| SNP_21484_A_17047133 | NC_021163.1    | Ca_Kabuli_Chr04 | 17047133                | AA                              | CC                 | CC               | INTERGENIC                    |                    |                                                |
| SNP_21487_A_17057617 | NC_021163.1    | Ca_Kabuli_Chr04 | 17057617                | GG                              | AA                 | AA               | INTERGENIC                    |                    |                                                |
| SNP_21488_A_17063625 | NC_021163.1    | Ca_Kabuli_Chr04 | 17063625                | GG                              | AA                 | AA               | URR                           | 101497735          | uncharacterized LOC101497735                   |

| SNPs IDs             | Chromosome IDs | Chromosomes     | Physical positions (bp) | CDC Frontier genome (Reference genome) | (Pusa 1103 & HPNB) | (ILWC 46 & LPNB) | Sequence Components of genome | Gene accession IDs | Putative functions                       |
|----------------------|----------------|-----------------|-------------------------|----------------------------------------|--------------------|------------------|-------------------------------|--------------------|------------------------------------------|
| SNP_21489_A_17063788 | NC_021163.1    | Ca_Kabuli_Chr04 | 17063788                | CC                                     | TT                 | TT               | URR                           | 101497735          | uncharacterized LOC101497735             |
| SNP_21491_A_17063849 | NC_021163.1    | Ca_Kabuli_Chr04 | 17063849                | TT                                     | AA                 | AA               | URR                           | 101497735          | uncharacterized LOC101497735             |
| SNP_21492_A_17063855 | NC_021163.1    | Ca_Kabuli_Chr04 | 17063855                | CC                                     | TT                 | TT               | URR                           | 101497735          | uncharacterized LOC101497735             |
| SNP_21493_A_17064735 | NC_021163.1    | Ca_Kabuli_Chr04 | 17064735                | AA                                     | GG                 | GG               | INTERGENIC                    |                    |                                          |
| SNP_21494_A_17071708 | NC_021163.1    | Ca_Kabuli_Chr04 | 17071708                | TT                                     | AA                 | AA               | INTERGENIC                    |                    |                                          |
| SNP_21496_A_17072501 | NC_021163.1    | Ca_Kabuli_Chr04 | 17072501                | TT                                     | CC                 | CC               | INTERGENIC                    |                    |                                          |
| SNP_21497_A_17073989 | NC_021163.1    | Ca_Kabuli_Chr04 | 17073989                | AA                                     | GG                 | GG               | INTRON                        | 101498268          | transcription factor ABORTED MICROSPORES |
| SNP_21498_A_17081211 | NC_021163.1    | Ca_Kabuli_Chr04 | 17081211                | TT                                     | CC                 | CC               | URR                           | 101498605          | Unknown function                         |
| SNP_21499_A_17081510 | NC_021163.1    | Ca_Kabuli_Chr04 | 17081510                | AA                                     | GG                 | GG               | URR                           | 101498605          | Unknown function                         |
| SNP_21500_A_17081524 | NC_021163.1    | Ca_Kabuli_Chr04 | 17081524                | GG                                     | AA                 | AA               | URR                           | 101498605          | Unknown function                         |
| SNP_21501_A_17081536 | NC_021163.1    | Ca_Kabuli_Chr04 | 17081536                | AA                                     | GG                 | GG               | URR                           | 101498605          | Unknown function                         |
| SNP_21502_A_17081546 | NC_021163.1    | Ca_Kabuli_Chr04 | 17081546                | CC                                     | TT                 | TT               | URR                           | 101498605          | Unknown function                         |
| SNP_21503_A_17081588 | NC_021163.1    | Ca_Kabuli_Chr04 | 17081588                | GG                                     | AA                 | AA               | URR                           | 101498605          | Unknown function                         |
| SNP_21504_A_17081628 | NC_021163.1    | Ca_Kabuli_Chr04 | 17081628                | AA                                     | GG                 | GG               | URR                           | 101498605          | Unknown function                         |
| SNP_21505_A_17081639 | NC_021163.1    | Ca_Kabuli_Chr04 | 17081639                | AA                                     | GG                 | GG               | URR                           | 101498605          | Unknown function                         |
| SNP_21506_A_17081694 | NC_021163.1    | Ca_Kabuli_Chr04 | 17081694                | TT                                     | GG                 | GG               | URR                           | 101498605          | Unknown function                         |
| SNP_21509_A_17081945 | NC_021163.1    | Ca_Kabuli_Chr04 | 17081945                | AA                                     | TT                 | TT               | URR                           | 101498605          | Unknown function                         |
| SNP_21510_A_17081985 | NC_021163.1    | Ca_Kabuli_Chr04 | 17081985                | AA                                     | TT                 | TT               | URR                           | 101498605          | Unknown function                         |
| SNP_21511_A_17082019 | NC_021163.1    | Ca_Kabuli_Chr04 | 17082019                | AA                                     | TT                 | TT               | URR                           | 101498605          | Unknown function                         |
| SNP_21512_A_17082185 | NC_021163.1    | Ca_Kabuli_Chr04 | 17082185                | GG                                     | AA                 | AA               | INTERGENIC                    |                    |                                          |
| SNP_21513_A_17082216 | NC_021163.1    | Ca_Kabuli_Chr04 | 17082216                | TT                                     | CC                 | CC               | INTERGENIC                    |                    |                                          |
| SNP_21515_A_17087031 | NC_021163.1    | Ca_Kabuli_Chr04 | 17087031                | GG                                     | AA                 | AA               | DRR                           | 101498937          | uncharacterized LOC101498937             |

| SNPs IDs             | Chromosome IDs | Chromosomes     | Physical positions (bp) | CDC Frontier genome (Reference genome) | (Pusa 1103 & HPNB) | (ILWC 46 & LPNB) | Sequence Components of genome | Gene accession IDs | Putative functions                          |
|----------------------|----------------|-----------------|-------------------------|----------------------------------------|--------------------|------------------|-------------------------------|--------------------|---------------------------------------------|
| SNP_21516_A_17087866 | NC_021163.1    | Ca_Kabuli_Chr04 | 17087866                | AA                                     | GG                 | GG               | INTRON                        | id80882            | Unknown function                            |
| SNP_21517_A_17089421 | NC_021163.1    | Ca_Kabuli_Chr04 | 17089421                | CC                                     | TT                 | TT               | INTRON                        | id80882            | Unknown function                            |
| SNP_21518_A_17089961 | NC_021163.1    | Ca_Kabuli_Chr04 | 17089961                | AA                                     | TT                 | TT               | INTRON                        | id80882            | Unknown function                            |
| SNP_21520_A_17094772 | NC_021163.1    | Ca_Kabuli_Chr04 | 17094772                | GG                                     | CC                 | CC               | INTERGENIC                    |                    |                                             |
| SNP_21521_A_17096081 | NC_021163.1    | Ca_Kabuli_Chr04 | 17096081                | TT                                     | CC                 | CC               | INTERGENIC                    |                    |                                             |
| SNP_21522_A_17096125 | NC_021163.1    | Ca_Kabuli_Chr04 | 17096125                | GG                                     | AA                 | AA               | INTERGENIC                    |                    |                                             |
| SNP_21523_A_17096298 | NC_021163.1    | Ca_Kabuli_Chr04 | 17096298                | GG                                     | AA                 | AA               | INTERGENIC                    |                    |                                             |
| SNP_21524_A_17096299 | NC_021163.1    | Ca_Kabuli_Chr04 | 17096299                | TT                                     | CC                 | CC               | INTERGENIC                    |                    |                                             |
| SNP_21527_A_17101264 | NC_021163.1    | Ca_Kabuli_Chr04 | 17101264                | CC                                     | TT                 | TT               | INTERGENIC                    |                    |                                             |
| SNP_21529_A_17101475 | NC_021163.1    | Ca_Kabuli_Chr04 | 17101475                | CC                                     | TT                 | TT               | INTERGENIC                    |                    |                                             |
| SNP_21530_A_17101572 | NC_021163.1    | Ca_Kabuli_Chr04 | 17101572                | GG                                     | AA                 | AA               | INTERGENIC                    |                    |                                             |
| SNP_21532_A_17101728 | NC_021163.1    | Ca_Kabuli_Chr04 | 17101728                | TT                                     | CC                 | CC               | INTERGENIC                    |                    |                                             |
| SNP_21533_A_17104879 | NC_021163.1    | Ca_Kabuli_Chr04 | 17104879                | CC                                     | GG                 | GG               | URR                           | 101499161          | mavicyanin-like                             |
| SNP_21534_A_17105765 | NC_021163.1    | Ca_Kabuli_Chr04 | 17105765                | GG                                     | AA                 | AA               | URR                           | 101499161          | mavicyanin-like                             |
| SNP_21535_A_17115296 | NC_021163.1    | Ca_Kabuli_Chr04 | 17115296                | AA                                     | GG                 | GG               | URR                           | 101499482          | probable ubiquitin-conjugating enzyme E2 23 |
| SNP_21536_A_17115324 | NC_021163.1    | Ca_Kabuli_Chr04 | 17115324                | TT                                     | AA                 | AA               | URR                           | 101499482          | probable ubiquitin-conjugating enzyme E2 23 |
| SNP_21537_A_17115333 | NC_021163.1    | Ca_Kabuli_Chr04 | 17115333                | AA                                     | CC                 | CC               | URR                           | 101499482          | probable ubiquitin-conjugating enzyme E2 23 |
| SNP_21538_A_17115336 | NC_021163.1    | Ca_Kabuli_Chr04 | 17115336                | AA                                     | TT                 | TT               | URR                           | 101499482          | probable ubiquitin-conjugating enzyme E2 23 |
| SNP_21539_A_17115337 | NC_021163.1    | Ca_Kabuli_Chr04 | 17115337                | GG                                     | TT                 | TT               | URR                           | 101499482          | probable ubiquitin-conjugating enzyme E2 23 |
| SNP_21540_A_17133563 | NC_021163.1    | Ca_Kabuli_Chr04 | 17133563                | AA                                     | GG                 | GG               | INTRON                        | 101500527          | zeaxanthin epoxidase, chloroplastic-like    |
| SNP_21541_A_17133570 | NC_021163.1    | Ca_Kabuli_Chr04 | 17133570                | AA                                     | GG                 | GG               | INTRON                        | 101500527          | zeaxanthin epoxidase, chloroplastic-like    |
| SNP_21542_A_17134135 | NC_021163.1    | Ca_Kabuli_Chr04 | 17134135                | TT                                     | AA                 | AA               | INTRON                        | 101500527          | zeaxanthin epoxidase, chloroplastic-like    |

| SNPs IDs             | Chromosome IDs | Chromosomes     | Physical positions (bp) | CDC Frontier genome (Reference genome) | (Pusa 1103 & HPNB) | (ILWC 46 & LPNB) | Sequence Components of genome | Gene accession IDs | Putative functions                       |
|----------------------|----------------|-----------------|-------------------------|----------------------------------------|--------------------|------------------|-------------------------------|--------------------|------------------------------------------|
| SNP_21543_A_17134444 | NC_021163.1    | Ca_Kabuli_Chr04 | 17134444                | AA                                     | GG                 | GG               | INTRON                        | 101500527          | zeaxanthin epoxidase, chloroplastic-like |
| SNP_21544_A_17134450 | NC_021163.1    | Ca_Kabuli_Chr04 | 17134450                | AA                                     | CC                 | CC               | INTRON                        | 101500527          | zeaxanthin epoxidase, chloroplastic-like |
| SNP_21545_A_17136492 | NC_021163.1    | Ca_Kabuli_Chr04 | 17136492                | AA                                     | TT                 | TT               | URR                           | 101500527          | zeaxanthin epoxidase, chloroplastic-like |
| SNP_21546_A_17136495 | NC_021163.1    | Ca_Kabuli_Chr04 | 17136495                | AA                                     | TT                 | TT               | URR                           | 101500527          | zeaxanthin epoxidase, chloroplastic-like |
| SNP_21547_A_17136498 | NC_021163.1    | Ca_Kabuli_Chr04 | 17136498                | TT                                     | CC                 | CC               | URR                           | 101500527          | zeaxanthin epoxidase, chloroplastic-like |
| SNP_21549_A_17143087 | NC_021163.1    | Ca_Kabuli_Chr04 | 17143087                | TT                                     | CC                 | CC               | INTERGENIC                    |                    |                                          |
| SNP_21550_A_17143737 | NC_021163.1    | Ca_Kabuli_Chr04 | 17143737                | GG                                     | TT                 | TT               | INTERGENIC                    |                    |                                          |
| SNP_21551_A_17143739 | NC_021163.1    | Ca_Kabuli_Chr04 | 17143739                | AA                                     | GG                 | GG               | INTERGENIC                    |                    |                                          |
| SNP_21552_A_17143775 | NC_021163.1    | Ca_Kabuli_Chr04 | 17143775                | CC                                     | TT                 | TT               | INTERGENIC                    |                    |                                          |
| SNP_21553_A_17146890 | NC_021163.1    | Ca_Kabuli_Chr04 | 17146890                | AA                                     | TT                 | TT               | DRR                           | 101501488          | RNA-binding protein 39                   |
| SNP_21554_A_17146923 | NC_021163.1    | Ca_Kabuli_Chr04 | 17146923                | TT                                     | AA                 | AA               | DRR                           | 101501488          | RNA-binding protein 39                   |
| SNP_21555_A_17146924 | NC_021163.1    | Ca_Kabuli_Chr04 | 17146924                | TT                                     | AA                 | AA               | DRR                           | 101501488          | RNA-binding protein 39                   |
| SNP_21556_A_17146933 | NC_021163.1    | Ca_Kabuli_Chr04 | 17146933                | AA                                     | TT                 | TT               | DRR                           | 101501488          | RNA-binding protein 39                   |
| SNP_21557_A_17146935 | NC_021163.1    | Ca_Kabuli_Chr04 | 17146935                | GG                                     | AA                 | AA               | DRR                           | 101501488          | RNA-binding protein 39                   |
| SNP_21558_A_17147875 | NC_021163.1    | Ca_Kabuli_Chr04 | 17147875                | TT                                     | CC                 | CC               | URR                           | 101500845          | zeaxanthin epoxidase, chloroplastic-like |
| SNP_21559_A_17147926 | NC_021163.1    | Ca_Kabuli_Chr04 | 17147926                | CC                                     | TT                 | TT               | URR                           | 101500845          | zeaxanthin epoxidase, chloroplastic-like |
| SNP_21560_A_17148434 | NC_021163.1    | Ca_Kabuli_Chr04 | 17148434                | AA                                     | GG                 | GG               | INTRON                        | 101501488          | RNA-binding protein 39                   |
| SNP_21561_A_17148894 | NC_021163.1    | Ca_Kabuli_Chr04 | 17148894                | GG                                     | CC                 | CC               | INTRON                        | 101501488          | RNA-binding protein 39                   |
| SNP_21562_A_17148895 | NC_021163.1    | Ca_Kabuli_Chr04 | 17148895                | GG                                     | AA                 | AA               | INTRON                        | 101501488          | RNA-binding protein 39                   |
| SNP_21563_A_17149577 | NC_021163.1    | Ca_Kabuli_Chr04 | 17149577                | GG                                     | AA                 | AA               | INTERGENIC                    |                    |                                          |
| SNP_21564_A_17149953 | NC_021163.1    | Ca_Kabuli_Chr04 | 17149953                | GG                                     | TT                 | TT               | INTERGENIC                    |                    |                                          |
| SNP_21565_A_17149959 | NC_021163.1    | Ca_Kabuli_Chr04 | 17149959                | GG                                     | CC                 | CC               | INTERGENIC                    |                    |                                          |

| SNPs IDs             | Chromosome IDs | Chromosomes     | Physical positions (bp) | CDC Frontier (Reference genome) | (Pusa 1103 & HPNB) | (ILWC 46 & LPNB) | Sequence Components of genome | Gene accession IDs | Putative functions           |
|----------------------|----------------|-----------------|-------------------------|---------------------------------|--------------------|------------------|-------------------------------|--------------------|------------------------------|
| SNP_21566_A_17150293 | NC_021163.1    | Ca_Kabuli_Chr04 | 17150293                | TT                              | GG                 | GG               | INTERGENIC                    |                    |                              |
| SNP_21567_A_17151571 | NC_021163.1    | Ca_Kabuli_Chr04 | 17151571                | CC                              | TT                 | TT               | INTERGENIC                    |                    |                              |
| SNP_21568_A_17151693 | NC_021163.1    | Ca_Kabuli_Chr04 | 17151693                | AA                              | TT                 | TT               | INTERGENIC                    |                    |                              |
| SNP_21569_A_17156597 | NC_021163.1    | Ca_Kabuli_Chr04 | 17156597                | GG                              | CC                 | CC               | URR                           | 101501171          | Unknown function             |
| SNP_21570_A_17157748 | NC_021163.1    | Ca_Kabuli_Chr04 | 17157748                | GG                              | CC                 | CC               | URR                           | 101501488          | RNA-binding protein 39       |
| SNP_21572_A_17157814 | NC_021163.1    | Ca_Kabuli_Chr04 | 17157814                | CC                              | TT                 | TT               | URR                           | 101501488          | RNA-binding protein 39       |
| SNP_21573_A_17158098 | NC_021163.1    | Ca_Kabuli_Chr04 | 17158098                | TT                              | CC                 | CC               | URR                           | 101501488          | RNA-binding protein 39       |
| SNP_21574_A_17158645 | NC_021163.1    | Ca_Kabuli_Chr04 | 17158645                | AA                              | GG                 | GG               | DRR                           | 101501802          | uncharacterized LOC101501802 |
| SNP_21575_A_17158887 | NC_021163.1    | Ca_Kabuli_Chr04 | 17158887                | GG                              | CC                 | CC               | DRR                           | 101501802          | uncharacterized LOC101501802 |
| SNP_21576_A_17159103 | NC_021163.1    | Ca_Kabuli_Chr04 | 17159103                | CC                              | TT                 | TT               | DRR                           | 101501802          | uncharacterized LOC101501802 |
| SNP_21577_A_17161491 | NC_021163.1    | Ca_Kabuli_Chr04 | 17161491                | AA                              | GG                 | GG               | INTRON                        | 101501802          | uncharacterized LOC101501802 |
| SNP_21578_A_17161685 | NC_021163.1    | Ca_Kabuli_Chr04 | 17161685                | TT                              | AA                 | AA               | INTRON                        | 101501802          | uncharacterized LOC101501802 |
| SNP_21579_A_17166265 | NC_021163.1    | Ca_Kabuli_Chr04 | 17166265                | CC                              | AA                 | AA               | URR                           | 101501802          | uncharacterized LOC101501802 |
| SNP_21580_A_17166319 | NC_021163.1    | Ca_Kabuli_Chr04 | 17166319                | CC                              | TT                 | TT               | URR                           | 101501802          | uncharacterized LOC101501802 |
| SNP_21581_A_17166333 | NC_021163.1    | Ca_Kabuli_Chr04 | 17166333                | CC                              | AA                 | AA               | URR                           | 101501802          | uncharacterized LOC101501802 |
| SNP_21582_A_17167265 | NC_021163.1    | Ca_Kabuli_Chr04 | 17167265                | GG                              | CC                 | CC               | INTERGENIC                    |                    |                              |
| SNP_21584_A_17167362 | NC_021163.1    | Ca_Kabuli_Chr04 | 17167362                | CC                              | AA                 | AA               | INTERGENIC                    |                    |                              |
| SNP_21585_A_17167464 | NC_021163.1    | Ca_Kabuli_Chr04 | 17167464                | CC                              | TT                 | TT               | INTERGENIC                    |                    |                              |
| SNP_21586_A_17167505 | NC_021163.1    | Ca_Kabuli_Chr04 | 17167505                | AA                              | GG                 | GG               | INTERGENIC                    |                    |                              |
| SNP_21587_A_17169291 | NC_021163.1    | Ca_Kabuli_Chr04 | 17169291                | TT                              | CC                 | CC               | INTERGENIC                    |                    |                              |
| SNP_21588_A_17169306 | NC_021163.1    | Ca_Kabuli_Chr04 | 17169306                | GG                              | AA                 | AA               | INTERGENIC                    |                    |                              |
| SNP_21589_A_17169342 | NC_021163.1    | Ca_Kabuli_Chr04 | 17169342                | CC                              | TT                 | TT               | INTERGENIC                    |                    |                              |



| SNPs IDs             | Chromosome IDs | Chromosomes     | Physical positions (bp) | CDC Frontier (Reference genome) | (Pusa 1103 & HPNB) | (ILWC 46 & LPNB) | Sequence Components of genome | Gene accession IDs | Putative functions                 |
|----------------------|----------------|-----------------|-------------------------|---------------------------------|--------------------|------------------|-------------------------------|--------------------|------------------------------------|
| SNP_21590_A_17169361 | NC_021163.1    | Ca_Kabuli_Chr04 | 17169361                | TT                              | CC                 | CC               | INTERGENIC                    |                    |                                    |
| SNP_21591_A_17169376 | NC_021163.1    | Ca_Kabuli_Chr04 | 17169376                | TT                              | CC                 | CC               | INTERGENIC                    |                    |                                    |
| SNP_21592_A_17169378 | NC_021163.1    | Ca_Kabuli_Chr04 | 17169378                | CC                              | TT                 | TT               | INTERGENIC                    |                    |                                    |
| SNP_21593_A_17169556 | NC_021163.1    | Ca_Kabuli_Chr04 | 17169556                | TT                              | CC                 | CC               | INTERGENIC                    |                    |                                    |
| SNP_21594_A_17169613 | NC_021163.1    | Ca_Kabuli_Chr04 | 17169613                | TT                              | CC                 | CC               | INTERGENIC                    |                    |                                    |
| SNP_21595_A_17169629 | NC_021163.1    | Ca_Kabuli_Chr04 | 17169629                | AA                              | GG                 | GG               | INTERGENIC                    |                    |                                    |
| SNP_21596_A_17171946 | NC_021163.1    | Ca_Kabuli_Chr04 | 17171946                | AA                              | CC                 | CC               | INTERGENIC                    |                    |                                    |
| SNP_21597_A_17171950 | NC_021163.1    | Ca_Kabuli_Chr04 | 17171950                | CC                              | TT                 | TT               | INTERGENIC                    |                    |                                    |
| SNP_21598_A_17171975 | NC_021163.1    | Ca_Kabuli_Chr04 | 17171975                | CC                              | TT                 | TT               | INTERGENIC                    |                    |                                    |
| SNP_21599_A_17185504 | NC_021163.1    | Ca_Kabuli_Chr04 | 17185504                | AA                              | TT                 | TT               | INTERGENIC                    |                    |                                    |
| SNP_21600_A_17185775 | NC_021163.1    | Ca_Kabuli_Chr04 | 17185775                | TT                              | AA                 | AA               | INTERGENIC                    |                    |                                    |
| SNP_21601_A_17186721 | NC_021163.1    | Ca_Kabuli_Chr04 | 17186721                | GG                              | AA                 | AA               | INTERGENIC                    |                    |                                    |
| SNP_21602_A_17186742 | NC_021163.1    | Ca_Kabuli_Chr04 | 17186742                | AA                              | GG                 | GG               | INTERGENIC                    |                    |                                    |
| SNP_21603_A_17187340 | NC_021163.1    | Ca_Kabuli_Chr04 | 17187340                | TT                              | CC                 | CC               | INTERGENIC                    |                    |                                    |
| SNP_21604_A_17187560 | NC_021163.1    | Ca_Kabuli_Chr04 | 17187560                | GG                              | CC                 | CC               | INTERGENIC                    |                    |                                    |
| SNP_21605_A_17188232 | NC_021163.1    | Ca_Kabuli_Chr04 | 17188232                | TT                              | CC                 | CC               | INTERGENIC                    |                    |                                    |
| SNP_21606_A_17188448 | NC_021163.1    | Ca_Kabuli_Chr04 | 17188448                | TT                              | AA                 | AA               | INTERGENIC                    |                    |                                    |
| SNP_21607_A_17188457 | NC_021163.1    | Ca_Kabuli_Chr04 | 17188457                | AA                              | TT                 | TT               | INTERGENIC                    |                    |                                    |
| SNP_21609_A_17193804 | NC_021163.1    | Ca_Kabuli_Chr04 | 17193804                | GG                              | TT                 | TT               | URR                           | 101502646          | probable protein phosphatase 2C 79 |
| SNP_21610_A_17194311 | NC_021163.1    | Ca_Kabuli_Chr04 | 17194311                | AA                              | TT                 | TT               | URR                           | 101502646          | probable protein phosphatase 2C 79 |
| SNP_21611_A_17195038 | NC_021163.1    | Ca_Kabuli_Chr04 | 17195038                | TT                              | CC                 | CC               | URR                           | 101502646          | probable protein phosphatase 2C 79 |
| SNP_21612_A_17195039 | NC_021163.1    | Ca_Kabuli_Chr04 | 17195039                | AA                              | GG                 | GG               | URR                           | 101502646          | probable protein phosphatase 2C 79 |

| SNPs IDs             | Chromosome IDs | Chromosomes     | Physical positions (bp) | CDC Frontier (Reference genome) | (Pusa 1103 & HPNB) | (ILWC 46 & LPNB) | Sequence Components of genome | Gene accession IDs | Putative functions                                    |
|----------------------|----------------|-----------------|-------------------------|---------------------------------|--------------------|------------------|-------------------------------|--------------------|-------------------------------------------------------|
| SNP_21613_A_17195321 | NC_021163.1    | Ca_Kabuli_Chr04 | 17195321                | AA                              | GG                 | GG               | INTERGENIC                    |                    |                                                       |
| SNP_21614_A_17195331 | NC_021163.1    | Ca_Kabuli_Chr04 | 17195331                | CC                              | TT                 | TT               | INTERGENIC                    |                    |                                                       |
| SNP_21616_A_17199300 | NC_021163.1    | Ca_Kabuli_Chr04 | 17199300                | AA                              | GG                 | GG               | INTERGENIC                    |                    |                                                       |
| SNP_21617_A_17201153 | NC_021163.1    | Ca_Kabuli_Chr04 | 17201153                | AA                              | TT                 | TT               | URR                           | 101502337          | uncharacterized LOC101502337                          |
| SNP_21618_A_17201158 | NC_021163.1    | Ca_Kabuli_Chr04 | 17201158                | AA                              | TT                 | TT               | URR                           | 101502337          | uncharacterized LOC101502337                          |
| SNP_21619_A_17201166 | NC_021163.1    | Ca_Kabuli_Chr04 | 17201166                | AA                              | GG                 | GG               | URR                           | 101502337          | uncharacterized LOC101502337                          |
| SNP_21620_A_17201283 | NC_021163.1    | Ca_Kabuli_Chr04 | 17201283                | TT                              | AA                 | AA               | URR                           | 101502337          | uncharacterized LOC101502337                          |
| SNP_21621_A_17201336 | NC_021163.1    | Ca_Kabuli_Chr04 | 17201336                | GG                              | CC                 | CC               | DRR                           | 101503512          | protein CHAPERONE-LIKE PROTEIN OF POR1, chloroplastic |
| SNP_21622_A_17201343 | NC_021163.1    | Ca_Kabuli_Chr04 | 17201343                | CC                              | TT                 | TT               | DRR                           | 101503512          | protein CHAPERONE-LIKE PROTEIN OF POR1, chloroplastic |
| SNP_21626_A_17206453 | NC_021163.1    | Ca_Kabuli_Chr04 | 17206453                | TT                              | CC                 | CC               | DRR                           | 101502961          | V-type proton ATPase subunit B 2                      |
| SNP_21627_A_17206463 | NC_021163.1    | Ca_Kabuli_Chr04 | 17206463                | CC                              | TT                 | TT               | DRR                           | 101502961          | V-type proton ATPase subunit B 2                      |
| SNP_21628_A_17206614 | NC_021163.1    | Ca_Kabuli_Chr04 | 17206614                | CC                              | GG                 | GG               | DRR                           | 101502961          | V-type proton ATPase subunit B 2                      |
| SNP_21629_A_17206637 | NC_021163.1    | Ca_Kabuli_Chr04 | 17206637                | AA                              | TT                 | TT               | DRR                           | 101502961          | V-type proton ATPase subunit B 2                      |
| SNP_21630_A_17206641 | NC_021163.1    | Ca_Kabuli_Chr04 | 17206641                | AA                              | TT                 | TT               | DRR                           | 101502961          | V-type proton ATPase subunit B 2                      |
| SNP_21633_A_17208628 | NC_021163.1    | Ca_Kabuli_Chr04 | 17208628                | GG                              | AA                 | AA               | INTRON                        | 101502961          | V-type proton ATPase subunit B 2                      |
| SNP_21634_A_17209657 | NC_021163.1    | Ca_Kabuli_Chr04 | 17209657                | GG                              | AA                 | AA               | INTRON                        | 101502961          | V-type proton ATPase subunit B 2                      |
| SNP_21635_A_17209665 | NC_021163.1    | Ca_Kabuli_Chr04 | 17209665                | TT                              | CC                 | CC               | INTRON                        | 101502961          | V-type proton ATPase subunit B 2                      |
| SNP_21636_A_17209690 | NC_021163.1    | Ca_Kabuli_Chr04 | 17209690                | AA                              | GG                 | GG               | INTRON                        | 101502961          | V-type proton ATPase subunit B 2                      |
| SNP_21639_A_17211789 | NC_021163.1    | Ca_Kabuli_Chr04 | 17211789                | GG                              | AA                 | AA               | INTRON                        | 101502961          | V-type proton ATPase subunit B 2                      |
| SNP_21640_A_17212149 | NC_021163.1    | Ca_Kabuli_Chr04 | 17212149                | GG                              | CC                 | CC               | INTRON                        | 101502961          | V-type proton ATPase subunit B 2                      |
| SNP_21641_A_17212159 | NC_021163.1    | Ca_Kabuli_Chr04 | 17212159                | TT                              | CC                 | CC               | INTRON                        | 101502961          | V-type proton ATPase subunit B 2                      |
| SNP_21642_A_17219687 | NC_021163.1    | Ca_Kabuli_Chr04 | 17219687                | GG                              | AA                 | AA               | INTERGENIC                    |                    |                                                       |

| SNPs IDs             | Chromosome IDs | Chromosomes     | Physical positions (bp) | CDC Frontier genome (Reference genome) | (Pusa 1103 & HPNB) | (ILWC 46 & LPNB) | Sequence Components of genome | Gene accession IDs | Putative functions                                                                     |
|----------------------|----------------|-----------------|-------------------------|----------------------------------------|--------------------|------------------|-------------------------------|--------------------|----------------------------------------------------------------------------------------|
| SNP_21643_A_17219705 | NC_021163.1    | Ca_Kabuli_Chr04 | 17219705                | AA                                     | GG                 | GG               | INTERGENIC                    |                    |                                                                                        |
| SNP_21644_A_17219746 | NC_021163.1    | Ca_Kabuli_Chr04 | 17219746                | AA                                     | GG                 | GG               | INTERGENIC                    |                    |                                                                                        |
| SNP_21645_A_17226678 | NC_021163.1    | Ca_Kabuli_Chr04 | 17226678                | TT                                     | CC                 | CC               | INTERGENIC                    |                    |                                                                                        |
| SNP_21646_A_17226722 | NC_021163.1    | Ca_Kabuli_Chr04 | 17226722                | CC                                     | TT                 | TT               | INTERGENIC                    |                    |                                                                                        |
| SNP_21647_A_17227010 | NC_021163.1    | Ca_Kabuli_Chr04 | 17227010                | CC                                     | TT                 | TT               | INTERGENIC                    |                    |                                                                                        |
| SNP_21648_A_17229165 | NC_021163.1    | Ca_Kabuli_Chr04 | 17229165                | GG                                     | CC                 | CC               | INTRON                        | 101504261          | transportin-1                                                                          |
| SNP_21649_A_17230036 | NC_021163.1    | Ca_Kabuli_Chr04 | 17230036                | AA                                     | GG                 | GG               | INTRON                        | 101504261          | transportin-1                                                                          |
| SNP_21650_A_17231523 | NC_021163.1    | Ca_Kabuli_Chr04 | 17231523                | CC                                     | GG                 | GG               | INTRON                        | 101504261          | transportin-1                                                                          |
| SNP_21651_A_17231539 | NC_021163.1    | Ca_Kabuli_Chr04 | 17231539                | AA                                     | GG                 | GG               | INTRON                        | 101504261          | transportin-1                                                                          |
| SNP_21652_A_17231785 | NC_021163.1    | Ca_Kabuli_Chr04 | 17231785                | GG                                     | TT                 | TT               | INTRON                        | 101504261          | transportin-1                                                                          |
| SNP_21653_A_17234821 | NC_021163.1    | Ca_Kabuli_Chr04 | 17234821                | GG                                     | AA                 | AA               | INTERGENIC                    |                    |                                                                                        |
| SNP_21654_A_17239360 | NC_021163.1    | Ca_Kabuli_Chr04 | 17239360                | GG                                     | AA                 | AA               | URR                           | 101504261          | transportin-1                                                                          |
| SNP_21655_A_17239364 | NC_021163.1    | Ca_Kabuli_Chr04 | 17239364                | TT                                     | CC                 | CC               | URR                           | 101504261          | transportin-1                                                                          |
| SNP_21656_A_17239391 | NC_021163.1    | Ca_Kabuli_Chr04 | 17239391                | CC                                     | AA                 | AA               | URR                           | 101504261          | transportin-1                                                                          |
| SNP_21657_A_17239421 | NC_021163.1    | Ca_Kabuli_Chr04 | 17239421                | GG                                     | AA                 | AA               | URR                           | 101504261          | transportin-1                                                                          |
| SNP_21658_A_17242104 | NC_021163.1    | Ca_Kabuli_Chr04 | 17242104                | TT                                     | AA                 | AA               | URR                           | 101504593          | serine/threonine protein phosphatase 2A 57 kDa regulatory subunit B' beta isoform-like |
| SNP_21660_A_17242518 | NC_021163.1    | Ca_Kabuli_Chr04 | 17242518                | TT                                     | AA                 | AA               | URR                           | 101504593          | serine/threonine protein phosphatase 2A 57 kDa regulatory subunit B' beta isoform-like |
| SNP_21661_A_17243784 | NC_021163.1    | Ca_Kabuli_Chr04 | 17243784                | GG                                     | AA                 | AA               | INTERGENIC                    |                    |                                                                                        |
| SNP_21662_A_17243785 | NC_021163.1    | Ca_Kabuli_Chr04 | 17243785                | TT                                     | GG                 | GG               | INTERGENIC                    |                    |                                                                                        |
| SNP_21663_A_17243792 | NC_021163.1    | Ca_Kabuli_Chr04 | 17243792                | GG                                     | AA                 | AA               | INTERGENIC                    |                    |                                                                                        |
| SNP_21664_A_17244392 | NC_021163.1    | Ca_Kabuli_Chr04 | 17244392                | TT                                     | AA                 | AA               | INTERGENIC                    |                    |                                                                                        |
| SNP_21665_A_17244912 | NC_021163.1    | Ca_Kabuli_Chr04 | 17244912                | CC                                     | TT                 | TT               | INTERGENIC                    |                    |                                                                                        |

| SNPs IDs             | Chromosome IDs | Chromosomes     | Physical positions (bp) | CDC Frontier genome (Reference genome) | (Pusa 1103 & HPNB) | (ILWC 46 & LPNB) | Sequence Components of genome | Gene accession IDs | Putative functions                             |
|----------------------|----------------|-----------------|-------------------------|----------------------------------------|--------------------|------------------|-------------------------------|--------------------|------------------------------------------------|
| SNP_21666_A_17245236 | NC_021163.1    | Ca_Kabuli_Chr04 | 17245236                | AA                                     | TT                 | TT               | INTERGENIC                    |                    |                                                |
| SNP_21670_A_17248388 | NC_021163.1    | Ca_Kabuli_Chr04 | 17248388                | AA                                     | CC                 | CC               | INTERGENIC                    |                    |                                                |
| SNP_21671_A_17248389 | NC_021163.1    | Ca_Kabuli_Chr04 | 17248389                | CC                                     | TT                 | TT               | INTERGENIC                    |                    |                                                |
| SNP_21672_A_17248410 | NC_021163.1    | Ca_Kabuli_Chr04 | 17248410                | AA                                     | GG                 | GG               | INTERGENIC                    |                    |                                                |
| SNP_21673_A_17248457 | NC_021163.1    | Ca_Kabuli_Chr04 | 17248457                | AA                                     | GG                 | GG               | INTERGENIC                    |                    |                                                |
| SNP_21674_A_17248773 | NC_021163.1    | Ca_Kabuli_Chr04 | 17248773                | AA                                     | GG                 | GG               | INTERGENIC                    |                    |                                                |
| SNP_21675_A_17250376 | NC_021163.1    | Ca_Kabuli_Chr04 | 17250376                | AA                                     | TT                 | TT               | INTERGENIC                    |                    |                                                |
| SNP_21677_A_17251527 | NC_021163.1    | Ca_Kabuli_Chr04 | 17251527                | AA                                     | CC                 | CC               | INTERGENIC                    |                    |                                                |
| SNP_21678_A_17251774 | NC_021163.1    | Ca_Kabuli_Chr04 | 17251774                | GG                                     | AA                 | AA               | INTERGENIC                    |                    |                                                |
| SNP_21680_A_17253847 | NC_021163.1    | Ca_Kabuli_Chr04 | 17253847                | GG                                     | TT                 | TT               | INTERGENIC                    |                    |                                                |
| SNP_21681_A_17253876 | NC_021163.1    | Ca_Kabuli_Chr04 | 17253876                | TT                                     | CC                 | CC               | INTERGENIC                    |                    |                                                |
| SNP_21682_A_17253888 | NC_021163.1    | Ca_Kabuli_Chr04 | 17253888                | CC                                     | TT                 | TT               | INTERGENIC                    |                    |                                                |
| SNP_21683_A_17253928 | NC_021163.1    | Ca_Kabuli_Chr04 | 17253928                | AA                                     | CC                 | CC               | INTERGENIC                    |                    |                                                |
| SNP_21685_A_17253963 | NC_021163.1    | Ca_Kabuli_Chr04 | 17253963                | GG                                     | AA                 | AA               | INTERGENIC                    |                    |                                                |
| SNP_21688_A_17257295 | NC_021163.1    | Ca_Kabuli_Chr04 | 17257295                | TT                                     | CC                 | CC               | INTERGENIC                    |                    |                                                |
| SNP_21689_A_17257307 | NC_021163.1    | Ca_Kabuli_Chr04 | 17257307                | AA                                     | GG                 | GG               | INTERGENIC                    |                    |                                                |
| SNP_21691_A_17260294 | NC_021163.1    | Ca_Kabuli_Chr04 | 17260294                | GG                                     | AA                 | AA               | DRR                           | 101505114          | hippocampus abundant transcript-like protein 1 |
| SNP_21692_A_17260299 | NC_021163.1    | Ca_Kabuli_Chr04 | 17260299                | TT                                     | AA                 | AA               | DRR                           | 101505114          | hippocampus abundant transcript-like protein 1 |
| SNP_21693_A_17263704 | NC_021163.1    | Ca_Kabuli_Chr04 | 17263704                | CC                                     | TT                 | TT               | INTERGENIC                    |                    |                                                |
| SNP_21694_A_17263955 | NC_021163.1    | Ca_Kabuli_Chr04 | 17263955                | GG                                     | AA                 | AA               | INTERGENIC                    |                    |                                                |
| SNP_21695_A_17263961 | NC_021163.1    | Ca_Kabuli_Chr04 | 17263961                | AA                                     | GG                 | GG               | INTERGENIC                    |                    |                                                |
| SNP_21696_A_17263976 | NC_021163.1    | Ca_Kabuli_Chr04 | 17263976                | GG                                     | AA                 | AA               | INTERGENIC                    |                    |                                                |

| SNPs IDs             | Chromosome IDs | Chromosomes     | Physical positions (bp) | CDC Frontier genome (Reference genome) | (Pusa 1103 & HPNB) | (ILWC 46 & LPNB) | Sequence Components of genome | Gene accession IDs | Putative functions                 |
|----------------------|----------------|-----------------|-------------------------|----------------------------------------|--------------------|------------------|-------------------------------|--------------------|------------------------------------|
| SNP_21697_A_17263977 | NC_021163.1    | Ca_Kabuli_Chr04 | 17263977                | CC                                     | GG                 | GG               | INTERGENIC                    |                    |                                    |
| SNP_21698_A_17263989 | NC_021163.1    | Ca_Kabuli_Chr04 | 17263989                | TT                                     | GG                 | GG               | INTERGENIC                    |                    |                                    |
| SNP_21699_A_17264132 | NC_021163.1    | Ca_Kabuli_Chr04 | 17264132                | TT                                     | AA                 | AA               | INTERGENIC                    |                    |                                    |
| SNP_21700_A_17264172 | NC_021163.1    | Ca_Kabuli_Chr04 | 17264172                | AA                                     | CC                 | CC               | INTERGENIC                    |                    |                                    |
| SNP_21701_A_17264592 | NC_021163.1    | Ca_Kabuli_Chr04 | 17264592                | AA                                     | GG                 | GG               | INTERGENIC                    |                    |                                    |
| SNP_21702_A_17266576 | NC_021163.1    | Ca_Kabuli_Chr04 | 17266576                | AA                                     | GG                 | GG               | INTERGENIC                    |                    |                                    |
| SNP_21703_A_17271106 | NC_021163.1    | Ca_Kabuli_Chr04 | 17271106                | GG                                     | AA                 | AA               | INTERGENIC                    |                    |                                    |
| SNP_21704_A_17275977 | NC_021163.1    | Ca_Kabuli_Chr04 | 17275977                | GG                                     | AA                 | AA               | INTERGENIC                    |                    |                                    |
| SNP_21705_A_17276666 | NC_021163.1    | Ca_Kabuli_Chr04 | 17276666                | AA                                     | GG                 | GG               | INTERGENIC                    |                    |                                    |
| SNP_21706_A_17280268 | NC_021163.1    | Ca_Kabuli_Chr04 | 17280268                | CC                                     | TT                 | TT               | URR                           | 101505774          | DDB1- and CUL4-associated factor 8 |
| SNP_21707_A_17284787 | NC_021163.1    | Ca_Kabuli_Chr04 | 17284787                | GG                                     | AA                 | AA               | DRR                           | 101512303          | uncharacterized LOC101512303       |
| SNP_21708_A_17284803 | NC_021163.1    | Ca_Kabuli_Chr04 | 17284803                | CC                                     | TT                 | TT               | DRR                           | 101512303          | uncharacterized LOC101512303       |
| SNP_21709_A_17284845 | NC_021163.1    | Ca_Kabuli_Chr04 | 17284845                | CC                                     | TT                 | TT               | DRR                           | 101512303          | uncharacterized LOC101512303       |
| SNP_21711_A_17285076 | NC_021163.1    | Ca_Kabuli_Chr04 | 17285076                | GG                                     | TT                 | TT               | DRR                           | 101512303          | uncharacterized LOC101512303       |
| SNP_21714_A_17288914 | NC_021163.1    | Ca_Kabuli_Chr04 | 17288914                | GG                                     | AA                 | AA               | INTRON                        | 101512303          | uncharacterized LOC101512303       |
| SNP_21715_A_17288932 | NC_021163.1    | Ca_Kabuli_Chr04 | 17288932                | GG                                     | AA                 | AA               | INTRON                        | 101512303          | uncharacterized LOC101512303       |
| SNP_21716_A_17289312 | NC_021163.1    | Ca_Kabuli_Chr04 | 17289312                | GG                                     | AA                 | AA               | INTERGENIC                    |                    |                                    |
| SNP_21717_A_17289320 | NC_021163.1    | Ca_Kabuli_Chr04 | 17289320                | AA                                     | CC                 | CC               | INTERGENIC                    |                    |                                    |
| SNP_21718_A_17289327 | NC_021163.1    | Ca_Kabuli_Chr04 | 17289327                | AA                                     | GG                 | GG               | INTERGENIC                    |                    |                                    |
| SNP_21720_A_17291149 | NC_021163.1    | Ca_Kabuli_Chr04 | 17291149                | TT                                     | CC                 | CC               | URR                           | 101512303          | uncharacterized LOC101512303       |
| SNP_21721_A_17293633 | NC_021163.1    | Ca_Kabuli_Chr04 | 17293633                | AA                                     | GG                 | GG               | DRR                           | 101506961          | uncharacterized LOC101506961       |
| SNP_21722_A_17294997 | NC_021163.1    | Ca_Kabuli_Chr04 | 17294997                | TT                                     | AA                 | AA               | INTERGENIC                    |                    |                                    |

| SNPs IDs             | Chromosome IDs | Chromosomes     | Physical positions (bp) | CDC Frontier genome (Reference genome) | (Pusa 1103 & HPNB) | (ILWC 46 & LPNB) | Sequence Components of genome | Gene accession IDs | Putative functions                          |
|----------------------|----------------|-----------------|-------------------------|----------------------------------------|--------------------|------------------|-------------------------------|--------------------|---------------------------------------------|
| SNP_21723_A_17296992 | NC_021163.1    | Ca_Kabuli_Chr04 | 17296992                | TT                                     | AA                 | AA               | INTERGENIC                    |                    |                                             |
| SNP_21725_A_17312104 | NC_021163.1    | Ca_Kabuli_Chr04 | 17312104                | TT                                     | CC                 | CC               | INTERGENIC                    |                    |                                             |
| SNP_21726_A_17312414 | NC_021163.1    | Ca_Kabuli_Chr04 | 17312414                | TT                                     | CC                 | CC               | INTERGENIC                    |                    |                                             |
| SNP_21728_A_17314178 | NC_021163.1    | Ca_Kabuli_Chr04 | 17314178                | GG                                     | AA                 | AA               | URR                           | 101507285          | serine/threonine-protein kinase ATR         |
| SNP_21731_A_17315396 | NC_021163.1    | Ca_Kabuli_Chr04 | 17315396                | CC                                     | TT                 | TT               | DRR                           | 101508226          | mechanosensitive ion channel protein 6-like |
| SNP_21732_A_17315413 | NC_021163.1    | Ca_Kabuli_Chr04 | 17315413                | AA                                     | GG                 | GG               | DRR                           | 101508226          | mechanosensitive ion channel protein 6-like |
| SNP_21734_A_17318145 | NC_021163.1    | Ca_Kabuli_Chr04 | 17318145                | TT                                     | GG                 | GG               | INTRON                        | 101508226          | mechanosensitive ion channel protein 6-like |
| SNP_21735_A_17318759 | NC_021163.1    | Ca_Kabuli_Chr04 | 17318759                | AA                                     | GG                 | GG               | INTRON                        | 101508226          | mechanosensitive ion channel protein 6-like |
| SNP_21736_A_17322164 | NC_021163.1    | Ca_Kabuli_Chr04 | 17322164                | TT                                     | CC                 | CC               | URR                           | 101508226          | mechanosensitive ion channel protein 6-like |
| SNP_21737_A_17322404 | NC_021163.1    | Ca_Kabuli_Chr04 | 17322404                | AA                                     | GG                 | GG               | URR                           | 101508226          | mechanosensitive ion channel protein 6-like |
| SNP_21738_A_17322493 | NC_021163.1    | Ca_Kabuli_Chr04 | 17322493                | CC                                     | AA                 | AA               | URR                           | 101508226          | mechanosensitive ion channel protein 6-like |
| SNP_21739_A_17322528 | NC_021163.1    | Ca_Kabuli_Chr04 | 17322528                | GG                                     | TT                 | TT               | URR                           | 101508226          | mechanosensitive ion channel protein 6-like |
| SNP_21740_A_17322553 | NC_021163.1    | Ca_Kabuli_Chr04 | 17322553                | GG                                     | AA                 | AA               | URR                           | 101508226          | mechanosensitive ion channel protein 6-like |
| SNP_21741_A_17322798 | NC_021163.1    | Ca_Kabuli_Chr04 | 17322798                | AA                                     | GG                 | GG               | URR                           | 101508226          | mechanosensitive ion channel protein 6-like |
| SNP_21743_A_17328524 | NC_021163.1    | Ca_Kabuli_Chr04 | 17328524                | TT                                     | AA                 | AA               | INTERGENIC                    |                    |                                             |
| SNP_21744_A_17329047 | NC_021163.1    | Ca_Kabuli_Chr04 | 17329047                | AA                                     | GG                 | GG               | INTERGENIC                    |                    |                                             |
| SNP_21746_A_17329576 | NC_021163.1    | Ca_Kabuli_Chr04 | 17329576                | TT                                     | CC                 | CC               | INTERGENIC                    |                    |                                             |
| SNP_21747_A_17331959 | NC_021163.1    | Ca_Kabuli_Chr04 | 17331959                | CC                                     | TT                 | TT               | INTERGENIC                    |                    |                                             |
| SNP_21748_A_17335181 | NC_021163.1    | Ca_Kabuli_Chr04 | 17335181                | TT                                     | AA                 | AA               | INTERGENIC                    |                    |                                             |
| SNP_21749_A_17335358 | NC_021163.1    | Ca_Kabuli_Chr04 | 17335358                | CC                                     | TT                 | TT               | INTERGENIC                    |                    |                                             |
| SNP_21750_A_17339200 | NC_021163.1    | Ca_Kabuli_Chr04 | 17339200                | GG                                     | AA                 | AA               | INTERGENIC                    |                    |                                             |
| SNP_21751_A_17340574 | NC_021163.1    | Ca_Kabuli_Chr04 | 17340574                | TT                                     | GG                 | GG               | INTERGENIC                    |                    |                                             |

| SNPs IDs             | Chromosome IDs | Chromosomes     | Physical positions (bp) | CDC Frontier (Reference genome) | (Pusa 1103 & HPNB) | (ILWC 46 & LPNB) | Sequence Components of genome | Gene accession IDs | Putative functions                                           |
|----------------------|----------------|-----------------|-------------------------|---------------------------------|--------------------|------------------|-------------------------------|--------------------|--------------------------------------------------------------|
| SNP_21752_A_17344166 | NC_021163.1    | Ca_Kabuli_Chr04 | 17344166                | CC                              | AA                 | AA               | INTRON                        | 101508977          | mediator of RNA polymerase II transcription subunit 36a-like |
| SNP_21753_A_17344172 | NC_021163.1    | Ca_Kabuli_Chr04 | 17344172                | AA                              | GG                 | GG               | INTRON                        | 101508977          | mediator of RNA polymerase II transcription subunit 36a-like |
| SNP_21754_A_17344239 | NC_021163.1    | Ca_Kabuli_Chr04 | 17344239                | GG                              | AA                 | AA               | INTRON                        | 101508977          | mediator of RNA polymerase II transcription subunit 36a-like |
| SNP_21755_A_17344449 | NC_021163.1    | Ca_Kabuli_Chr04 | 17344449                | CC                              | TT                 | TT               | INTRON                        | 101508977          | mediator of RNA polymerase II transcription subunit 36a-like |
| SNP_21756_A_17344522 | NC_021163.1    | Ca_Kabuli_Chr04 | 17344522                | TT                              | CC                 | CC               | INTRON                        | 101508977          | mediator of RNA polymerase II transcription subunit 36a-like |
| SNP_21757_A_17349267 | NC_021163.1    | Ca_Kabuli_Chr04 | 17349267                | GG                              | TT                 | TT               | INTERGENIC                    |                    |                                                              |
| SNP_21758_A_17354444 | NC_021163.1    | Ca_Kabuli_Chr04 | 17354444                | AA                              | TT                 | TT               | INTERGENIC                    |                    |                                                              |
| SNP_21759_A_17354495 | NC_021163.1    | Ca_Kabuli_Chr04 | 17354495                | TT                              | CC                 | CC               | INTERGENIC                    |                    |                                                              |
| SNP_21761_A_17355117 | NC_021163.1    | Ca_Kabuli_Chr04 | 17355117                | CC                              | TT                 | TT               | INTERGENIC                    |                    |                                                              |
| SNP_21762_A_17355406 | NC_021163.1    | Ca_Kabuli_Chr04 | 17355406                | CC                              | AA                 | AA               | INTERGENIC                    |                    |                                                              |
| SNP_21763_A_17356607 | NC_021163.1    | Ca_Kabuli_Chr04 | 17356607                | GG                              | AA                 | AA               | INTERGENIC                    |                    |                                                              |
| SNP_21764_A_17358921 | NC_021163.1    | Ca_Kabuli_Chr04 | 17358921                | TT                              | AA                 | AA               | INTRON                        | 101509291          | serine/threonine-protein kinase HT1                          |
| SNP_21765_A_17358922 | NC_021163.1    | Ca_Kabuli_Chr04 | 17358922                | TT                              | AA                 | AA               | INTRON                        | 101509291          | serine/threonine-protein kinase HT1                          |
| SNP_21766_A_17360064 | NC_021163.1    | Ca_Kabuli_Chr04 | 17360064                | GG                              | AA                 | AA               | INTRON                        | 101509291          | serine/threonine-protein kinase HT1                          |
| SNP_21768_A_17363099 | NC_021163.1    | Ca_Kabuli_Chr04 | 17363099                | AA                              | TT                 | TT               | INTRON                        | 101509291          | serine/threonine-protein kinase HT1                          |
| SNP_21771_A_17367952 | NC_021163.1    | Ca_Kabuli_Chr04 | 17367952                | TT                              | CC                 | CC               | URR                           | 101509291          | serine/threonine-protein kinase HT1                          |
| SNP_21772_A_17372655 | NC_021163.1    | Ca_Kabuli_Chr04 | 17372655                | TT                              | CC                 | CC               | INTERGENIC                    |                    |                                                              |
| SNP_21774_A_17376800 | NC_021163.1    | Ca_Kabuli_Chr04 | 17376800                | TT                              | CC                 | CC               | DRR                           | 101509834          | F-box/LRR-repeat protein 10                                  |
| SNP_21775_A_17383425 | NC_021163.1    | Ca_Kabuli_Chr04 | 17383425                | TT                              | GG                 | GG               | INTERGENIC                    |                    |                                                              |
| SNP_21776_A_17383426 | NC_021163.1    | Ca_Kabuli_Chr04 | 17383426                | GG                              | CC                 | CC               | INTERGENIC                    |                    |                                                              |
| SNP_21777_A_17383473 | NC_021163.1    | Ca_Kabuli_Chr04 | 17383473                | CC                              | TT                 | TT               | INTERGENIC                    |                    |                                                              |
| SNP_21778_A_17383477 | NC_021163.1    | Ca_Kabuli_Chr04 | 17383477                | TT                              | CC                 | CC               | INTERGENIC                    |                    |                                                              |

| SNPs IDs             | Chromosome IDs | Chromosomes     | Physical positions (bp) | CDC Frontier genome (Reference genome) | (Pusa 1103 & HPNB) | (ILWC 46 & LPNB) | Sequence Components of genome | Gene accession IDs | Putative functions                     |
|----------------------|----------------|-----------------|-------------------------|----------------------------------------|--------------------|------------------|-------------------------------|--------------------|----------------------------------------|
| SNP_21779_A_17384974 | NC_021163.1    | Ca_Kabuli_Chr04 | 17384974                | GG                                     | TT                 | TT               | INTERGENIC                    |                    |                                        |
| SNP_21781_A_17398168 | NC_021163.1    | Ca_Kabuli_Chr04 | 17398168                | CC                                     | GG                 | GG               | URR                           | 101510147          | lysine-specific demethylase JMJ25-like |
| SNP_21782_A_17398645 | NC_021163.1    | Ca_Kabuli_Chr04 | 17398645                | AA                                     | GG                 | GG               | URR                           | 101510147          | lysine-specific demethylase JMJ25-like |
| SNP_21783_A_17402316 | NC_021163.1    | Ca_Kabuli_Chr04 | 17402316                | CC                                     | TT                 | TT               | INTERGENIC                    |                    |                                        |
| SNP_21784_A_17402424 | NC_021163.1    | Ca_Kabuli_Chr04 | 17402424                | CC                                     | TT                 | TT               | INTERGENIC                    |                    |                                        |
| SNP_21785_A_17403021 | NC_021163.1    | Ca_Kabuli_Chr04 | 17403021                | AA                                     | GG                 | GG               | INTERGENIC                    |                    |                                        |
| SNP_21786_A_17403032 | NC_021163.1    | Ca_Kabuli_Chr04 | 17403032                | CC                                     | AA                 | AA               | INTERGENIC                    |                    |                                        |
| SNP_21787_A_17403038 | NC_021163.1    | Ca_Kabuli_Chr04 | 17403038                | AA                                     | GG                 | GG               | INTERGENIC                    |                    |                                        |
| SNP_21788_A_17403329 | NC_021163.1    | Ca_Kabuli_Chr04 | 17403329                | GG                                     | AA                 | AA               | INTERGENIC                    |                    |                                        |
| SNP_21789_A_17403335 | NC_021163.1    | Ca_Kabuli_Chr04 | 17403335                | CC                                     | TT                 | TT               | INTERGENIC                    |                    |                                        |
| SNP_21790_A_17405094 | NC_021163.1    | Ca_Kabuli_Chr04 | 17405094                | GG                                     | TT                 | TT               | INTERGENIC                    |                    |                                        |
| SNP_21791_A_17405254 | NC_021163.1    | Ca_Kabuli_Chr04 | 17405254                | GG                                     | AA                 | AA               | INTERGENIC                    |                    |                                        |
| SNP_21792_A_17406893 | NC_021163.1    | Ca_Kabuli_Chr04 | 17406893                | CC                                     | AA                 | AA               | INTERGENIC                    |                    |                                        |
| SNP_21793_A_17407407 | NC_021163.1    | Ca_Kabuli_Chr04 | 17407407                | TT                                     | CC                 | CC               | INTERGENIC                    |                    |                                        |
| SNP_21794_A_17407479 | NC_021163.1    | Ca_Kabuli_Chr04 | 17407479                | GG                                     | TT                 | TT               | INTERGENIC                    |                    |                                        |
| SNP_21795_A_17408503 | NC_021163.1    | Ca_Kabuli_Chr04 | 17408503                | AA                                     | TT                 | TT               | INTERGENIC                    |                    |                                        |
| SNP_21796_A_17409094 | NC_021163.1    | Ca_Kabuli_Chr04 | 17409094                | CC                                     | AA                 | AA               | INTERGENIC                    |                    |                                        |
| SNP_21797_A_17420091 | NC_021163.1    | Ca_Kabuli_Chr04 | 17420091                | AA                                     | GG                 | GG               | INTERGENIC                    |                    |                                        |
| SNP_21799_A_17420486 | NC_021163.1    | Ca_Kabuli_Chr04 | 17420486                | AA                                     | GG                 | GG               | INTERGENIC                    |                    |                                        |
| SNP_21800_A_17420764 | NC_021163.1    | Ca_Kabuli_Chr04 | 17420764                | AA                                     | GG                 | GG               | INTERGENIC                    |                    |                                        |
| SNP_21801_A_17420788 | NC_021163.1    | Ca_Kabuli_Chr04 | 17420788                | TT                                     | AA                 | AA               | INTERGENIC                    |                    |                                        |
| SNP_21802_A_17420794 | NC_021163.1    | Ca_Kabuli_Chr04 | 17420794                | AA                                     | TT                 | TT               | INTERGENIC                    |                    |                                        |



| SNPs IDs             | Chromosome IDs | Chromosomes     | Physical positions (bp) | CDC Frontier genome (Reference genome) | (Pusa 1103 & HPNB) | (ILWC 46 & LPNB) | Sequence Components of genome | Gene accession IDs | Putative functions                     |
|----------------------|----------------|-----------------|-------------------------|----------------------------------------|--------------------|------------------|-------------------------------|--------------------|----------------------------------------|
| SNP_21803_A_17421011 | NC_021163.1    | Ca_Kabuli_Chr04 | 17421011                | GG                                     | TT                 | TT               | INTERGENIC                    |                    |                                        |
| SNP_21804_A_17421031 | NC_021163.1    | Ca_Kabuli_Chr04 | 17421031                | CC                                     | TT                 | TT               | INTERGENIC                    |                    |                                        |
| SNP_21805_A_17421111 | NC_021163.1    | Ca_Kabuli_Chr04 | 17421111                | CC                                     | AA                 | AA               | INTERGENIC                    |                    |                                        |
| SNP_21806_A_17421197 | NC_021163.1    | Ca_Kabuli_Chr04 | 17421197                | CC                                     | TT                 | TT               | INTERGENIC                    |                    |                                        |
| SNP_21807_A_17421214 | NC_021163.1    | Ca_Kabuli_Chr04 | 17421214                | GG                                     | AA                 | AA               | INTERGENIC                    |                    |                                        |
| SNP_21809_A_17422173 | NC_021163.1    | Ca_Kabuli_Chr04 | 17422173                | AA                                     | GG                 | GG               | INTERGENIC                    |                    |                                        |
| SNP_21810_A_17422178 | NC_021163.1    | Ca_Kabuli_Chr04 | 17422178                | CC                                     | TT                 | TT               | INTERGENIC                    |                    |                                        |
| SNP_21813_A_17423379 | NC_021163.1    | Ca_Kabuli_Chr04 | 17423379                | AA                                     | CC                 | CC               | INTERGENIC                    |                    |                                        |
| SNP_21814_A_17423390 | NC_021163.1    | Ca_Kabuli_Chr04 | 17423390                | CC                                     | TT                 | TT               | INTERGENIC                    |                    |                                        |
| SNP_21815_A_17423397 | NC_021163.1    | Ca_Kabuli_Chr04 | 17423397                | GG                                     | AA                 | AA               | INTERGENIC                    |                    |                                        |
| SNP_21816_A_17423420 | NC_021163.1    | Ca_Kabuli_Chr04 | 17423420                | TT                                     | CC                 | CC               | INTERGENIC                    |                    |                                        |
| SNP_21817_A_17423426 | NC_021163.1    | Ca_Kabuli_Chr04 | 17423426                | TT                                     | CC                 | CC               | INTERGENIC                    |                    |                                        |
| SNP_21818_A_17423450 | NC_021163.1    | Ca_Kabuli_Chr04 | 17423450                | TT                                     | CC                 | CC               | INTERGENIC                    |                    |                                        |
| SNP_21819_A_17423585 | NC_021163.1    | Ca_Kabuli_Chr04 | 17423585                | TT                                     | CC                 | CC               | INTERGENIC                    |                    |                                        |
| SNP_21820_A_17423647 | NC_021163.1    | Ca_Kabuli_Chr04 | 17423647                | TT                                     | CC                 | CC               | INTERGENIC                    |                    |                                        |
| SNP_21821_A_17423648 | NC_021163.1    | Ca_Kabuli_Chr04 | 17423648                | AA                                     | GG                 | GG               | INTERGENIC                    |                    |                                        |
| SNP_21822_A_17424966 | NC_021163.1    | Ca_Kabuli_Chr04 | 17424966                | GG                                     | AA                 | AA               | INTERGENIC                    |                    |                                        |
| SNP_21823_A_17425659 | NC_021163.1    | Ca_Kabuli_Chr04 | 17425659                | CC                                     | TT                 | TT               | DRR                           | 101510800          | lysine-specific demethylase JMJ25-like |
| SNP_21824_A_17425660 | NC_021163.1    | Ca_Kabuli_Chr04 | 17425660                | GG                                     | AA                 | AA               | DRR                           | 101510800          | lysine-specific demethylase JMJ25-like |
| SNP_21825_A_17425665 | NC_021163.1    | Ca_Kabuli_Chr04 | 17425665                | TT                                     | CC                 | CC               | DRR                           | 101510800          | lysine-specific demethylase JMJ25-like |
| SNP_21826_A_17425688 | NC_021163.1    | Ca_Kabuli_Chr04 | 17425688                | AA                                     | CC                 | CC               | DRR                           | 101510800          | lysine-specific demethylase JMJ25-like |
| SNP_21827_A_17425696 | NC_021163.1    | Ca_Kabuli_Chr04 | 17425696                | CC                                     | TT                 | TT               | DRR                           | 101510800          | lysine-specific demethylase JMJ25-like |

| SNPs IDs             | Chromosome IDs | Chromosomes     | Physical positions (bp) | CDC Frontier (Reference genome) | (Pusa 1103 & HPNB) | (ILWC 46 & LPNB) | Sequence genome | Components of | Gene accession IDs | Putative functions                     |
|----------------------|----------------|-----------------|-------------------------|---------------------------------|--------------------|------------------|-----------------|---------------|--------------------|----------------------------------------|
| SNP_21828_A_17425697 | NC_021163.1    | Ca_Kabuli_Chr04 | 17425697                | TT                              | CC                 | CC               | DRR             |               | 101510800          | lysine-specific demethylase JMJ25-like |
| SNP_21829_A_17425729 | NC_021163.1    | Ca_Kabuli_Chr04 | 17425729                | TT                              | AA                 | AA               | DRR             |               | 101510800          | lysine-specific demethylase JMJ25-like |
| SNP_21830_A_17425730 | NC_021163.1    | Ca_Kabuli_Chr04 | 17425730                | CC                              | GG                 | GG               | DRR             |               | 101510800          | lysine-specific demethylase JMJ25-like |
| SNP_21831_A_17426204 | NC_021163.1    | Ca_Kabuli_Chr04 | 17426204                | CC                              | TT                 | TT               | DRR             |               | 101510800          | lysine-specific demethylase JMJ25-like |
| SNP_21832_A_17428440 | NC_021163.1    | Ca_Kabuli_Chr04 | 17428440                | CC                              | TT                 | TT               | INTRON          |               | 101510800          | lysine-specific demethylase JMJ25-like |
| SNP_21833_A_17430554 | NC_021163.1    | Ca_Kabuli_Chr04 | 17430554                | AA                              | CC                 | CC               | INTRON          |               | 101510800          | lysine-specific demethylase JMJ25-like |
| SNP_21834_A_17431553 | NC_021163.1    | Ca_Kabuli_Chr04 | 17431553                | AA                              | GG                 | GG               | INTRON          |               | 101510800          | lysine-specific demethylase JMJ25-like |
| SNP_21836_A_17431595 | NC_021163.1    | Ca_Kabuli_Chr04 | 17431595                | GG                              | AA                 | AA               | INTRON          |               | 101510800          | lysine-specific demethylase JMJ25-like |
| SNP_21837_A_17432850 | NC_021163.1    | Ca_Kabuli_Chr04 | 17432850                | TT                              | AA                 | AA               | INTRON          |               | 101510800          | lysine-specific demethylase JMJ25-like |
| SNP_21839_A_17434326 | NC_021163.1    | Ca_Kabuli_Chr04 | 17434326                | GG                              | TT                 | TT               | INTERGENIC      |               |                    |                                        |
| SNP_21840_A_17436201 | NC_021163.1    | Ca_Kabuli_Chr04 | 17436201                | TT                              | GG                 | GG               | INTERGENIC      |               |                    |                                        |
| SNP_21841_A_17436279 | NC_021163.1    | Ca_Kabuli_Chr04 | 17436279                | TT                              | GG                 | GG               | INTERGENIC      |               |                    |                                        |
| SNP_21842_A_17436281 | NC_021163.1    | Ca_Kabuli_Chr04 | 17436281                | GG                              | TT                 | TT               | INTERGENIC      |               |                    |                                        |
| SNP_21843_A_17436288 | NC_021163.1    | Ca_Kabuli_Chr04 | 17436288                | AA                              | GG                 | GG               | INTERGENIC      |               |                    |                                        |
| SNP_21845_A_17436359 | NC_021163.1    | Ca_Kabuli_Chr04 | 17436359                | AA                              | GG                 | GG               | URR             |               | 101510469          | uncharacterized LOC101510469           |
| SNP_21846_A_17436363 | NC_021163.1    | Ca_Kabuli_Chr04 | 17436363                | CC                              | TT                 | TT               | URR             |               | 101510469          | uncharacterized LOC101510469           |
| SNP_21847_A_17439191 | NC_021163.1    | Ca_Kabuli_Chr04 | 17439191                | TT                              | CC                 | CC               | INTERGENIC      |               |                    |                                        |
| SNP_21848_A_17439465 | NC_021163.1    | Ca_Kabuli_Chr04 | 17439465                | GG                              | CC                 | CC               | INTERGENIC      |               |                    |                                        |
| SNP_21849_A_17439553 | NC_021163.1    | Ca_Kabuli_Chr04 | 17439553                | AA                              | GG                 | GG               | INTERGENIC      |               |                    |                                        |
| SNP_21850_A_17439571 | NC_021163.1    | Ca_Kabuli_Chr04 | 17439571                | TT                              | GG                 | GG               | INTERGENIC      |               |                    |                                        |
| SNP_21851_A_17439574 | NC_021163.1    | Ca_Kabuli_Chr04 | 17439574                | AA                              | TT                 | TT               | INTERGENIC      |               |                    |                                        |
| SNP_21852_A_17439685 | NC_021163.1    | Ca_Kabuli_Chr04 | 17439685                | AA                              | GG                 | GG               | INTERGENIC      |               |                    |                                        |

| SNPs IDs             | Chromosome IDs | Chromosomes     | Physical positions (bp) | CDC Frontier genome (Reference genome) | (Pusa 1103 & HPNB) | (ILWC 46 & LPNB) | Sequence Components of genome | Gene accession IDs | Putative functions                      |
|----------------------|----------------|-----------------|-------------------------|----------------------------------------|--------------------|------------------|-------------------------------|--------------------|-----------------------------------------|
| SNP_21853_A_17439938 | NC_021163.1    | Ca_Kabuli_Chr04 | 17439938                | TT                                     | CC                 | CC               | INTERGENIC                    |                    |                                         |
| SNP_21855_A_17440096 | NC_021163.1    | Ca_Kabuli_Chr04 | 17440096                | AA                                     | TT                 | TT               | INTERGENIC                    |                    |                                         |
| SNP_21856_A_17441026 | NC_021163.1    | Ca_Kabuli_Chr04 | 17441026                | TT                                     | GG                 | GG               | INTERGENIC                    |                    |                                         |
| SNP_21857_A_17445937 | NC_021163.1    | Ca_Kabuli_Chr04 | 17445937                | GG                                     | AA                 | AA               | INTERGENIC                    |                    |                                         |
| SNP_21859_A_17453185 | NC_021163.1    | Ca_Kabuli_Chr04 | 17453185                | AA                                     | CC                 | CC               | DRR                           | 101512402          | WAT1-related protein At3g30340-like     |
| SNP_21860_A_17458120 | NC_021163.1    | Ca_Kabuli_Chr04 | 17458120                | GG                                     | AA                 | AA               | URR                           | 101512402          | WAT1-related protein At3g30340-like     |
| SNP_21861_A_17459659 | NC_021163.1    | Ca_Kabuli_Chr04 | 17459659                | CC                                     | TT                 | TT               | INTERGENIC                    |                    |                                         |
| SNP_21862_A_17461610 | NC_021163.1    | Ca_Kabuli_Chr04 | 17461610                | AA                                     | TT                 | TT               | INTERGENIC                    |                    |                                         |
| SNP_21863_A_17461634 | NC_021163.1    | Ca_Kabuli_Chr04 | 17461634                | AA                                     | TT                 | TT               | INTERGENIC                    |                    |                                         |
| SNP_21864_A_17461709 | NC_021163.1    | Ca_Kabuli_Chr04 | 17461709                | TT                                     | CC                 | CC               | INTERGENIC                    |                    |                                         |
| SNP_21865_A_17461733 | NC_021163.1    | Ca_Kabuli_Chr04 | 17461733                | CC                                     | TT                 | TT               | INTERGENIC                    |                    |                                         |
| SNP_21866_A_17461745 | NC_021163.1    | Ca_Kabuli_Chr04 | 17461745                | GG                                     | AA                 | AA               | INTERGENIC                    |                    |                                         |
| SNP_21867_A_17467875 | NC_021163.1    | Ca_Kabuli_Chr04 | 17467875                | TT                                     | GG                 | GG               | INTERGENIC                    |                    |                                         |
| SNP_21868_A_17468882 | NC_021163.1    | Ca_Kabuli_Chr04 | 17468882                | GG                                     | AA                 | AA               | INTERGENIC                    |                    |                                         |
| SNP_21869_A_17469526 | NC_021163.1    | Ca_Kabuli_Chr04 | 17469526                | AA                                     | TT                 | TT               | URR                           | 101512719          | E3 ubiquitin ligase BIG BROTHER-related |
| SNP_21870_A_17470588 | NC_021163.1    | Ca_Kabuli_Chr04 | 17470588                | GG                                     | TT                 | TT               | URR                           | 101512719          | E3 ubiquitin ligase BIG BROTHER-related |
| SNP_21871_A_17470838 | NC_021163.1    | Ca_Kabuli_Chr04 | 17470838                | GG                                     | AA                 | AA               | URR                           | 101512719          | E3 ubiquitin ligase BIG BROTHER-related |
| SNP_21873_A_17471104 | NC_021163.1    | Ca_Kabuli_Chr04 | 17471104                | TT                                     | CC                 | CC               | INTERGENIC                    |                    |                                         |
| SNP_21874_A_17471452 | NC_021163.1    | Ca_Kabuli_Chr04 | 17471452                | GG                                     | AA                 | AA               | DRR                           | 101513599          | SNW/SKI-interacting protein-like        |
| SNP_21875_A_17474930 | NC_021163.1    | Ca_Kabuli_Chr04 | 17474930                | GG                                     | AA                 | AA               | URR                           | 101513599          | SNW/SKI-interacting protein-like        |
| SNP_21876_A_17475106 | NC_021163.1    | Ca_Kabuli_Chr04 | 17475106                | TT                                     | AA                 | AA               | URR                           | 101513599          | SNW/SKI-interacting protein-like        |
| SNP_21878_A_17476269 | NC_021163.1    | Ca_Kabuli_Chr04 | 17476269                | AA                                     | TT                 | TT               | URR                           | 101513599          | SNW/SKI-interacting protein-like        |

| SNPs IDs             | Chromosome IDs | Chromosomes     | Physical positions (bp) | CDC Frontier genome (Reference genome) | (Pusa 1103 & HPNB) | (ILWC 46 & LPNB) | Sequence Components of genome | Gene accession IDs | Putative functions                                                           |
|----------------------|----------------|-----------------|-------------------------|----------------------------------------|--------------------|------------------|-------------------------------|--------------------|------------------------------------------------------------------------------|
| SNP_21879_A_17483838 | NC_021163.1    | Ca_Kabuli_Chr04 | 17483838                | TT                                     | CC                 | CC               | INTRON                        | 101513271          | dolichyl-diphosphooligosaccharide--protein glycosyltransferase subunit STT3A |
| SNP_21881_A_17485430 | NC_021163.1    | Ca_Kabuli_Chr04 | 17485430                | GG                                     | AA                 | AA               | INTERGENIC                    |                    |                                                                              |
| SNP_21882_A_17486908 | NC_021163.1    | Ca_Kabuli_Chr04 | 17486908                | GG                                     | AA                 | AA               | INTERGENIC                    |                    |                                                                              |
| SNP_21883_A_17489054 | NC_021163.1    | Ca_Kabuli_Chr04 | 17489054                | GG                                     | AA                 | AA               | DRR                           | 101514261          | uncharacterized LOC101514261                                                 |
| SNP_21884_A_17491203 | NC_021163.1    | Ca_Kabuli_Chr04 | 17491203                | GG                                     | AA                 | AA               | INTERGENIC                    |                    |                                                                              |
| SNP_21885_A_17491462 | NC_021163.1    | Ca_Kabuli_Chr04 | 17491462                | AA                                     | TT                 | TT               | INTERGENIC                    |                    |                                                                              |
| SNP_21886_A_17492435 | NC_021163.1    | Ca_Kabuli_Chr04 | 17492435                | CC                                     | TT                 | TT               | DRR                           | 101513923          | Unknown function                                                             |
| SNP_21887_A_17493610 | NC_021163.1    | Ca_Kabuli_Chr04 | 17493610                | AA                                     | GG                 | GG               | INTRON                        | 101513923          | Unknown function                                                             |
| SNP_21888_A_17495500 | NC_021163.1    | Ca_Kabuli_Chr04 | 17495500                | GG                                     | AA                 | AA               | URR                           | 101513923          | Unknown function                                                             |
| SNP_21889_A_17498303 | NC_021163.1    | Ca_Kabuli_Chr04 | 17498303                | AA                                     | CC                 | CC               | NON_SYNONYMOUS_CODING         | 101514261          | uncharacterized LOC101514261                                                 |
| SNP_21890_A_17498461 | NC_021163.1    | Ca_Kabuli_Chr04 | 17498461                | AA                                     | GG                 | GG               | SYNONYMOUS_CODING             | 101514261          | uncharacterized LOC101514261                                                 |
| SNP_21891_A_17515043 | NC_021163.1    | Ca_Kabuli_Chr04 | 17515043                | GG                                     | AA                 | AA               | NON_SYNONYMOUS_CODING         | 101513924          | Unknown function                                                             |
| SNP_21892_A_17515057 | NC_021163.1    | Ca_Kabuli_Chr04 | 17515057                | AA                                     | CC                 | CC               | STOP_GAINED                   | 101513924          | Unknown function                                                             |
| SNP_21893_A_17527159 | NC_021163.1    | Ca_Kabuli_Chr04 | 17527159                | CC                                     | TT                 | TT               | INTRON                        | 101514900          | pentatricopeptide repeat-containing protein At3g59040                        |
| SNP_21894_A_17528094 | NC_021163.1    | Ca_Kabuli_Chr04 | 17528094                | AA                                     | CC                 | CC               | INTRON                        | 101514900          | pentatricopeptide repeat-containing protein At3g59040                        |
| SNP_21896_A_17533015 | NC_021163.1    | Ca_Kabuli_Chr04 | 17533015                | CC                                     | GG                 | GG               | DRR                           | 101515225          | uncharacterized LOC101515225                                                 |
| SNP_21897_A_17533355 | NC_021163.1    | Ca_Kabuli_Chr04 | 17533355                | TT                                     | AA                 | AA               | INTRON                        | 101515225          | uncharacterized LOC101515225                                                 |
| SNP_21898_A_17533375 | NC_021163.1    | Ca_Kabuli_Chr04 | 17533375                | AA                                     | GG                 | GG               | INTRON                        | 101515225          | uncharacterized LOC101515225                                                 |
| SNP_21901_A_17533549 | NC_021163.1    | Ca_Kabuli_Chr04 | 17533549                | TT                                     | CC                 | CC               | INTERGENIC                    |                    |                                                                              |
| SNP_21902_A_17533622 | NC_021163.1    | Ca_Kabuli_Chr04 | 17533622                | CC                                     | AA                 | AA               | INTERGENIC                    |                    |                                                                              |
| SNP_21903_A_17534807 | NC_021163.1    | Ca_Kabuli_Chr04 | 17534807                | TT                                     | CC                 | CC               | URR                           | 101515225          | uncharacterized LOC101515225                                                 |
| SNP_21904_A_17534847 | NC_021163.1    | Ca_Kabuli_Chr04 | 17534847                | CC                                     | TT                 | TT               | URR                           | 101515225          | uncharacterized LOC101515225                                                 |

| SNPs IDs             | Chromosome IDs | Chromosomes     | Physical positions (bp) | CDC Frontier (Reference genome) | (Pusa 1103 & HPNB) | (ILWC 46 & LPNB) | Sequence Components of genome | Gene accession IDs | Putative functions                                            |
|----------------------|----------------|-----------------|-------------------------|---------------------------------|--------------------|------------------|-------------------------------|--------------------|---------------------------------------------------------------|
| SNP_21905_A_17534888 | NC_021163.1    | Ca_Kabuli_Chr04 | 17534888                | AA                              | TT                 | TT               | URR                           | 101515225          | uncharacterized LOC101515225                                  |
| SNP_21906_A_17534921 | NC_021163.1    | Ca_Kabuli_Chr04 | 17534921                | AA                              | GG                 | GG               | URR                           | 101515225          | uncharacterized LOC101515225                                  |
| SNP_21909_A_17535080 | NC_021163.1    | Ca_Kabuli_Chr04 | 17535080                | CC                              | TT                 | TT               | URR                           | 101515225          | uncharacterized LOC101515225                                  |
| SNP_21910_A_17535082 | NC_021163.1    | Ca_Kabuli_Chr04 | 17535082                | CC                              | TT                 | TT               | URR                           | 101515225          | uncharacterized LOC101515225                                  |
| SNP_21911_A_17535133 | NC_021163.1    | Ca_Kabuli_Chr04 | 17535133                | AA                              | GG                 | GG               | DRR                           | 101515548          | mitochondrial phosphate carrier protein 1, mitochondrial-like |
| SNP_21913_A_17535191 | NC_021163.1    | Ca_Kabuli_Chr04 | 17535191                | CC                              | TT                 | TT               | DRR                           | 101515548          | mitochondrial phosphate carrier protein 1, mitochondrial-like |
| SNP_21914_A_17537854 | NC_021163.1    | Ca_Kabuli_Chr04 | 17537854                | AA                              | GG                 | GG               | DRR                           | 101514577          | serine/threonine-protein phosphatase 7 long form homolog      |
| SNP_21915_A_17537902 | NC_021163.1    | Ca_Kabuli_Chr04 | 17537902                | AA                              | GG                 | GG               | DRR                           | 101514577          | serine/threonine-protein phosphatase 7 long form homolog      |
| SNP_21918_A_17553513 | NC_021163.1    | Ca_Kabuli_Chr04 | 17553513                | TT                              | AA                 | AA               | INTERGENIC                    |                    |                                                               |
| SNP_21919_A_17553863 | NC_021163.1    | Ca_Kabuli_Chr04 | 17553863                | AA                              | CC                 | CC               | INTERGENIC                    |                    |                                                               |
| SNP_21920_A_17554452 | NC_021163.1    | Ca_Kabuli_Chr04 | 17554452                | CC                              | AA                 | AA               | INTERGENIC                    |                    |                                                               |
| SNP_21921_A_17560893 | NC_021163.1    | Ca_Kabuli_Chr04 | 17560893                | AA                              | CC                 | CC               | INTERGENIC                    |                    |                                                               |
| SNP_21922_A_17561114 | NC_021163.1    | Ca_Kabuli_Chr04 | 17561114                | CC                              | TT                 | TT               | INTERGENIC                    |                    |                                                               |
| SNP_21923_A_17566886 | NC_021163.1    | Ca_Kabuli_Chr04 | 17566886                | GG                              | AA                 | AA               | INTERGENIC                    |                    |                                                               |
| SNP_21924_A_17567079 | NC_021163.1    | Ca_Kabuli_Chr04 | 17567079                | TT                              | CC                 | CC               | INTERGENIC                    |                    |                                                               |
| SNP_21926_A_17568170 | NC_021163.1    | Ca_Kabuli_Chr04 | 17568170                | TT                              | GG                 | GG               | INTERGENIC                    |                    |                                                               |
| SNP_21927_A_17568228 | NC_021163.1    | Ca_Kabuli_Chr04 | 17568228                | TT                              | AA                 | AA               | INTERGENIC                    |                    |                                                               |
| SNP_21929_A_17580989 | NC_021163.1    | Ca_Kabuli_Chr04 | 17580989                | TT                              | CC                 | CC               | URR                           | 101515226          | Unknown function                                              |
| SNP_21930_A_17581562 | NC_021163.1    | Ca_Kabuli_Chr04 | 17581562                | GG                              | AA                 | AA               | URR                           | 101515226          | Unknown function                                              |
| SNP_21931_A_17581611 | NC_021163.1    | Ca_Kabuli_Chr04 | 17581611                | AA                              | TT                 | TT               | URR                           | 101515226          | Unknown function                                              |
| SNP_21932_A_17581676 | NC_021163.1    | Ca_Kabuli_Chr04 | 17581676                | CC                              | GG                 | GG               | URR                           | 101515226          | Unknown function                                              |
| SNP_21933_A_17583640 | NC_021163.1    | Ca_Kabuli_Chr04 | 17583640                | AA                              | GG                 | GG               | INTERGENIC                    |                    |                                                               |

| SNPs IDs             | Chromosome IDs | Chromosomes     | Physical positions (bp) | CDC Frontier genome (Reference genome) | (Pusa 1103 & HPNB) | (ILWC 46 & LPNB) | Sequence genome | Components of | Gene accession IDs | Putative functions |
|----------------------|----------------|-----------------|-------------------------|----------------------------------------|--------------------|------------------|-----------------|---------------|--------------------|--------------------|
| SNP_21934_A_17587309 | NC_021163.1    | Ca_Kabuli_Chr04 | 17587309                | AA                                     | CC                 | CC               | INTERGENIC      |               |                    |                    |
| SNP_21935_A_17595546 | NC_021163.1    | Ca_Kabuli_Chr04 | 17595546                | CC                                     | AA                 | AA               | INTERGENIC      |               |                    |                    |
| SNP_21936_A_17595864 | NC_021163.1    | Ca_Kabuli_Chr04 | 17595864                | TT                                     | AA                 | AA               | INTERGENIC      |               |                    |                    |
| SNP_21937_A_17596054 | NC_021163.1    | Ca_Kabuli_Chr04 | 17596054                | GG                                     | TT                 | TT               | INTERGENIC      |               |                    |                    |
| SNP_21938_A_17596360 | NC_021163.1    | Ca_Kabuli_Chr04 | 17596360                | AA                                     | GG                 | GG               | INTERGENIC      |               |                    |                    |
| SNP_21939_A_17597982 | NC_021163.1    | Ca_Kabuli_Chr04 | 17597982                | TT                                     | GG                 | GG               | INTERGENIC      |               |                    |                    |
| SNP_21940_A_17598712 | NC_021163.1    | Ca_Kabuli_Chr04 | 17598712                | AA                                     | GG                 | GG               | INTERGENIC      |               |                    |                    |
| SNP_21941_A_17598790 | NC_021163.1    | Ca_Kabuli_Chr04 | 17598790                | TT                                     | GG                 | GG               | INTERGENIC      |               |                    |                    |
| SNP_21942_A_17599326 | NC_021163.1    | Ca_Kabuli_Chr04 | 17599326                | AA                                     | GG                 | GG               | INTERGENIC      |               |                    |                    |
| SNP_21943_A_17600176 | NC_021163.1    | Ca_Kabuli_Chr04 | 17600176                | GG                                     | AA                 | AA               | INTERGENIC      |               |                    |                    |
| SNP_21944_A_17600292 | NC_021163.1    | Ca_Kabuli_Chr04 | 17600292                | CC                                     | GG                 | GG               | INTERGENIC      |               |                    |                    |
| SNP_21945_A_17600298 | NC_021163.1    | Ca_Kabuli_Chr04 | 17600298                | TT                                     | GG                 | GG               | INTERGENIC      |               |                    |                    |
| SNP_21946_A_17600324 | NC_021163.1    | Ca_Kabuli_Chr04 | 17600324                | TT                                     | CC                 | CC               | INTERGENIC      |               |                    |                    |
| SNP_21947_A_17600388 | NC_021163.1    | Ca_Kabuli_Chr04 | 17600388                | TT                                     | GG                 | GG               | INTERGENIC      |               |                    |                    |
| SNP_21948_A_17600467 | NC_021163.1    | Ca_Kabuli_Chr04 | 17600467                | AA                                     | GG                 | GG               | INTERGENIC      |               |                    |                    |
| SNP_21949_A_17600562 | NC_021163.1    | Ca_Kabuli_Chr04 | 17600562                | TT                                     | GG                 | GG               | INTERGENIC      |               |                    |                    |
| SNP_21950_A_17600618 | NC_021163.1    | Ca_Kabuli_Chr04 | 17600618                | CC                                     | TT                 | TT               | INTERGENIC      |               |                    |                    |
| SNP_21951_A_17600744 | NC_021163.1    | Ca_Kabuli_Chr04 | 17600744                | GG                                     | AA                 | AA               | INTERGENIC      |               |                    |                    |
| SNP_21952_A_17600774 | NC_021163.1    | Ca_Kabuli_Chr04 | 17600774                | GG                                     | CC                 | CC               | INTERGENIC      |               |                    |                    |
| SNP_21955_A_17601012 | NC_021163.1    | Ca_Kabuli_Chr04 | 17601012                | TT                                     | CC                 | CC               | INTERGENIC      |               |                    |                    |
| SNP_21956_A_17601081 | NC_021163.1    | Ca_Kabuli_Chr04 | 17601081                | TT                                     | AA                 | AA               | INTERGENIC      |               |                    |                    |
| SNP_21958_A_17601539 | NC_021163.1    | Ca_Kabuli_Chr04 | 17601539                | CC                                     | TT                 | TT               | INTERGENIC      |               |                    |                    |

| SNPs IDs             | Chromosome IDs | Chromosomes     | Physical positions (bp) | CDC Frontier genome (Reference genome) | (Pusa 1103 & HPNB) | (ILWC 46 & LPNB) | Sequence Components of genome | Gene accession IDs | Putative functions                                        |
|----------------------|----------------|-----------------|-------------------------|----------------------------------------|--------------------|------------------|-------------------------------|--------------------|-----------------------------------------------------------|
| SNP_21959_A_17601603 | NC_021163.1    | Ca_Kabuli_Chr04 | 17601603                | GG                                     | AA                 | AA               | DRR                           | 101488304          | E2F-associated phosphoprotein                             |
| SNP_21960_A_17601607 | NC_021163.1    | Ca_Kabuli_Chr04 | 17601607                | CC                                     | AA                 | AA               | DRR                           | 101488304          | E2F-associated phosphoprotein                             |
| SNP_21961_A_17601646 | NC_021163.1    | Ca_Kabuli_Chr04 | 17601646                | TT                                     | AA                 | AA               | DRR                           | 101488304          | E2F-associated phosphoprotein                             |
| SNP_21962_A_17601762 | NC_021163.1    | Ca_Kabuli_Chr04 | 17601762                | GG                                     | AA                 | AA               | DRR                           | 101488304          | E2F-associated phosphoprotein                             |
| SNP_21963_A_17601763 | NC_021163.1    | Ca_Kabuli_Chr04 | 17601763                | AA                                     | GG                 | GG               | DRR                           | 101488304          | E2F-associated phosphoprotein                             |
| SNP_21964_A_17601777 | NC_021163.1    | Ca_Kabuli_Chr04 | 17601777                | CC                                     | AA                 | AA               | DRR                           | 101488304          | E2F-associated phosphoprotein                             |
| SNP_21965_A_17601786 | NC_021163.1    | Ca_Kabuli_Chr04 | 17601786                | GG                                     | AA                 | AA               | DRR                           | 101488304          | E2F-associated phosphoprotein                             |
| SNP_21966_A_17601792 | NC_021163.1    | Ca_Kabuli_Chr04 | 17601792                | AA                                     | GG                 | GG               | DRR                           | 101488304          | E2F-associated phosphoprotein                             |
| SNP_21967_A_17601794 | NC_021163.1    | Ca_Kabuli_Chr04 | 17601794                | AA                                     | GG                 | GG               | DRR                           | 101488304          | E2F-associated phosphoprotein                             |
| SNP_21968_A_17601830 | NC_021163.1    | Ca_Kabuli_Chr04 | 17601830                | GG                                     | AA                 | AA               | DRR                           | 101488304          | E2F-associated phosphoprotein                             |
| SNP_21969_A_17601835 | NC_021163.1    | Ca_Kabuli_Chr04 | 17601835                | GG                                     | AA                 | AA               | DRR                           | 101488304          | E2F-associated phosphoprotein                             |
| SNP_21970_A_17601933 | NC_021163.1    | Ca_Kabuli_Chr04 | 17601933                | TT                                     | GG                 | GG               | DRR                           | 101488304          | E2F-associated phosphoprotein                             |
| SNP_21971_A_17602199 | NC_021163.1    | Ca_Kabuli_Chr04 | 17602199                | GG                                     | AA                 | AA               | DRR                           | 101488304          | E2F-associated phosphoprotein                             |
| SNP_21972_A_17602202 | NC_021163.1    | Ca_Kabuli_Chr04 | 17602202                | GG                                     | AA                 | AA               | DRR                           | 101488304          | E2F-associated phosphoprotein                             |
| SNP_21973_A_17602346 | NC_021163.1    | Ca_Kabuli_Chr04 | 17602346                | CC                                     | TT                 | TT               | DRR                           | 101488304          | E2F-associated phosphoprotein                             |
| SNP_21974_A_17602932 | NC_021163.1    | Ca_Kabuli_Chr04 | 17602932                | TT                                     | CC                 | CC               | INTRON                        | 101488304          | E2F-associated phosphoprotein                             |
| SNP_21975_A_17607636 | NC_021163.1    | Ca_Kabuli_Chr04 | 17607636                | AA                                     | GG                 | GG               | URR                           | 101488304          | E2F-associated phosphoprotein                             |
| SNP_21976_A_17607643 | NC_021163.1    | Ca_Kabuli_Chr04 | 17607643                | GG                                     | CC                 | CC               | URR                           | 101488304          | E2F-associated phosphoprotein                             |
| SNP_21977_A_17607644 | NC_021163.1    | Ca_Kabuli_Chr04 | 17607644                | CC                                     | TT                 | TT               | URR                           | 101488304          | E2F-associated phosphoprotein                             |
| SNP_21978_A_17608924 | NC_021163.1    | Ca_Kabuli_Chr04 | 17608924                | GG                                     | AA                 | AA               | INTERGENIC                    |                    |                                                           |
| SNP_21979_A_17610767 | NC_021163.1    | Ca_Kabuli_Chr04 | 17610767                | TT                                     | CC                 | CC               | DRR                           | 101489414          | anthranilate synthase alpha subunit 2, chloroplastic-like |
| SNP_21980_A_17610768 | NC_021163.1    | Ca_Kabuli_Chr04 | 17610768                | GG                                     | AA                 | AA               | DRR                           | 101489414          | anthranilate synthase alpha subunit 2, chloroplastic-like |

| SNPs IDs             | Chromosome IDs | Chromosomes     | Physical positions (bp) | CDC Frontier genome | (Reference genome) | (Pusa 1103 & HPNB) | (ILWC 46 & LPNB) | Sequence Components of genome | Gene accession IDs | Putative functions                                        |
|----------------------|----------------|-----------------|-------------------------|---------------------|--------------------|--------------------|------------------|-------------------------------|--------------------|-----------------------------------------------------------|
| SNP_21981_A_17616082 | NC_021163.1    | Ca_Kabuli_Chr04 | 17616082                | CC                  |                    | AA                 | AA               | INTRON                        | 101489414          | anthranilate synthase alpha subunit 2, chloroplastic-like |
| SNP_21982_A_17616084 | NC_021163.1    | Ca_Kabuli_Chr04 | 17616084                | CC                  |                    | TT                 | TT               | INTRON                        | 101489414          | anthranilate synthase alpha subunit 2, chloroplastic-like |
| SNP_21983_A_17617701 | NC_021163.1    | Ca_Kabuli_Chr04 | 17617701                | CC                  |                    | TT                 | TT               | URR                           | 101489414          | anthranilate synthase alpha subunit 2, chloroplastic-like |
| SNP_21985_A_17618212 | NC_021163.1    | Ca_Kabuli_Chr04 | 17618212                | TT                  |                    | AA                 | AA               | URR                           | 101489414          | anthranilate synthase alpha subunit 2, chloroplastic-like |
| SNP_21986_A_17619062 | NC_021163.1    | Ca_Kabuli_Chr04 | 17619062                | TT                  |                    | AA                 | AA               | DRR                           | 101489733          | dihydroorotate dehydrogenase (quinone), mitochondrial     |
| SNP_21987_A_17619115 | NC_021163.1    | Ca_Kabuli_Chr04 | 17619115                | TT                  |                    | CC                 | CC               | DRR                           | 101489733          | dihydroorotate dehydrogenase (quinone), mitochondrial     |
| SNP_21988_A_17619120 | NC_021163.1    | Ca_Kabuli_Chr04 | 17619120                | AA                  |                    | GG                 | GG               | DRR                           | 101489733          | dihydroorotate dehydrogenase (quinone), mitochondrial     |
| SNP_21989_A_17623490 | NC_021163.1    | Ca_Kabuli_Chr04 | 17623490                | GG                  |                    | AA                 | AA               | INTRON                        | 101489733          | dihydroorotate dehydrogenase (quinone), mitochondrial     |
| SNP_21990_A_17626374 | NC_021163.1    | Ca_Kabuli_Chr04 | 17626374                | CC                  |                    | TT                 | TT               | URR                           | 101489733          | dihydroorotate dehydrogenase (quinone), mitochondrial     |
| SNP_21991_A_17627789 | NC_021163.1    | Ca_Kabuli_Chr04 | 17627789                | AA                  |                    | TT                 | TT               | INTERGENIC                    |                    |                                                           |
| SNP_21992_A_17627910 | NC_021163.1    | Ca_Kabuli_Chr04 | 17627910                | TT                  |                    | AA                 | AA               | INTERGENIC                    |                    |                                                           |
| SNP_21993_A_17628072 | NC_021163.1    | Ca_Kabuli_Chr04 | 17628072                | GG                  |                    | AA                 | AA               | INTERGENIC                    |                    |                                                           |
| SNP_21994_A_17628074 | NC_021163.1    | Ca_Kabuli_Chr04 | 17628074                | CC                  |                    | GG                 | GG               | INTERGENIC                    |                    |                                                           |
| SNP_21995_A_17629117 | NC_021163.1    | Ca_Kabuli_Chr04 | 17629117                | GG                  |                    | TT                 | TT               | DRR                           | 101490049          | myosin-1                                                  |
| SNP_21997_A_17631084 | NC_021163.1    | Ca_Kabuli_Chr04 | 17631084                | TT                  |                    | GG                 | GG               | INTRON                        | 101490049          | myosin-1                                                  |
| SNP_21998_A_17631123 | NC_021163.1    | Ca_Kabuli_Chr04 | 17631123                | CC                  |                    | GG                 | GG               | INTRON                        | 101490049          | myosin-1                                                  |
| SNP_21999_A_17633666 | NC_021163.1    | Ca_Kabuli_Chr04 | 17633666                | TT                  |                    | CC                 | CC               | INTRON                        | 101490049          | myosin-1                                                  |
| SNP_22000_A_17633923 | NC_021163.1    | Ca_Kabuli_Chr04 | 17633923                | TT                  |                    | AA                 | AA               | INTRON                        | 101490049          | myosin-1                                                  |
| SNP_22001_A_17635156 | NC_021163.1    | Ca_Kabuli_Chr04 | 17635156                | TT                  |                    | CC                 | CC               | SYNONYMOUS_CODING             | 101490049          | myosin-1                                                  |
| SNP_22002_A_17635960 | NC_021163.1    | Ca_Kabuli_Chr04 | 17635960                | GG                  |                    | AA                 | AA               | INTRON                        | 101490049          | myosin-1                                                  |
| SNP_22004_A_17636811 | NC_021163.1    | Ca_Kabuli_Chr04 | 17636811                | AA                  |                    | GG                 | GG               | INTRON                        | 101490049          | myosin-1                                                  |
| SNP_22005_A_17636882 | NC_021163.1    | Ca_Kabuli_Chr04 | 17636882                | TT                  |                    | CC                 | CC               | INTRON                        | 101490049          | myosin-1                                                  |



| SNPs IDs             | Chromosome IDs | Chromosomes     | Physical positions (bp) | CDC Frontier (Reference genome) | (Pusa 1103 & HPNB) | (ILWC 46 & LPNB) | Sequence Components of genome | Gene accession IDs | Putative functions                                                          |
|----------------------|----------------|-----------------|-------------------------|---------------------------------|--------------------|------------------|-------------------------------|--------------------|-----------------------------------------------------------------------------|
| SNP_22006_A_17637196 | NC_021163.1    | Ca_Kabuli_Chr04 | 17637196                | CC                              | TT                 | TT               | INTRON                        | 101490049          | myosin-1                                                                    |
| SNP_22009_A_17639677 | NC_021163.1    | Ca_Kabuli_Chr04 | 17639677                | GG                              | AA                 | AA               | SYNONYMOUS_CODING             | 101490049          | myosin-1                                                                    |
| SNP_22011_A_17640707 | NC_021163.1    | Ca_Kabuli_Chr04 | 17640707                | GG                              | AA                 | AA               | DRR                           | 101490592          | FAD synthetase 1, chloroplastic-like                                        |
| SNP_22012_A_17640760 | NC_021163.1    | Ca_Kabuli_Chr04 | 17640760                | CC                              | TT                 | TT               | DRR                           | 101490592          | FAD synthetase 1, chloroplastic-like                                        |
| SNP_22013_A_17645218 | NC_021163.1    | Ca_Kabuli_Chr04 | 17645218                | AA                              | TT                 | TT               | URR                           | 101490592          | FAD synthetase 1, chloroplastic-like                                        |
| SNP_22014_A_17645500 | NC_021163.1    | Ca_Kabuli_Chr04 | 17645500                | GG                              | TT                 | TT               | DRR                           | 101490917          | cyclic pyranopterin monophosphate synthase accessory protein, mitochondrial |
| SNP_22016_A_17649888 | NC_021163.1    | Ca_Kabuli_Chr04 | 17649888                | TT                              | CC                 | CC               | DRR                           | 101491234          | transmembrane protein 53                                                    |
| SNP_22017_A_17650144 | NC_021163.1    | Ca_Kabuli_Chr04 | 17650144                | CC                              | AA                 | AA               | DRR                           | 101491234          | transmembrane protein 53                                                    |
| SNP_22019_A_17656809 | NC_021163.1    | Ca_Kabuli_Chr04 | 17656809                | GG                              | AA                 | AA               | INTERGENIC                    |                    |                                                                             |
| SNP_22020_A_17656876 | NC_021163.1    | Ca_Kabuli_Chr04 | 17656876                | TT                              | GG                 | GG               | INTERGENIC                    |                    |                                                                             |
| SNP_22021_A_17656877 | NC_021163.1    | Ca_Kabuli_Chr04 | 17656877                | GG                              | AA                 | AA               | INTERGENIC                    |                    |                                                                             |
| SNP_22022_A_17666954 | NC_021163.1    | Ca_Kabuli_Chr04 | 17666954                | GG                              | TT                 | TT               | DRR                           | 101492201          | putative GEM-like protein 8                                                 |
| SNP_22023_A_17666963 | NC_021163.1    | Ca_Kabuli_Chr04 | 17666963                | AA                              | TT                 | TT               | DRR                           | 101492201          | putative GEM-like protein 8                                                 |
| SNP_22024_A_17668000 | NC_021163.1    | Ca_Kabuli_Chr04 | 17668000                | TT                              | GG                 | GG               | INTERGENIC                    |                    |                                                                             |
| SNP_22025_A_17670524 | NC_021163.1    | Ca_Kabuli_Chr04 | 17670524                | GG                              | AA                 | AA               | URR                           | 101492201          | putative GEM-like protein 8                                                 |
| SNP_22026_A_17670973 | NC_021163.1    | Ca_Kabuli_Chr04 | 17670973                | TT                              | CC                 | CC               | INTERGENIC                    |                    |                                                                             |
| SNP_22027_A_17671028 | NC_021163.1    | Ca_Kabuli_Chr04 | 17671028                | CC                              | GG                 | GG               | INTERGENIC                    |                    |                                                                             |
| SNP_22028_A_17671327 | NC_021163.1    | Ca_Kabuli_Chr04 | 17671327                | CC                              | TT                 | TT               | INTERGENIC                    |                    |                                                                             |
| SNP_22029_A_17671328 | NC_021163.1    | Ca_Kabuli_Chr04 | 17671328                | AA                              | GG                 | GG               | INTERGENIC                    |                    |                                                                             |
| SNP_22030_A_17672531 | NC_021163.1    | Ca_Kabuli_Chr04 | 17672531                | GG                              | CC                 | CC               | INTERGENIC                    |                    |                                                                             |
| SNP_22031_A_17672787 | NC_021163.1    | Ca_Kabuli_Chr04 | 17672787                | AA                              | CC                 | CC               | DRR                           | 101492537          | GEM-like protein 4                                                          |
| SNP_22032_A_17674638 | NC_021163.1    | Ca_Kabuli_Chr04 | 17674638                | GG                              | AA                 | AA               | INTRON                        | 101492537          | GEM-like protein 4                                                          |

| SNPs IDs             | Chromosome IDs | Chromosomes     | Physical positions (bp) | CDC Frontier genome (Reference genome) | (Pusa 1103 & HPNB) | (ILWC 46 & LPNB) | Sequence genome | Components of | Gene accession IDs | Putative functions                              |
|----------------------|----------------|-----------------|-------------------------|----------------------------------------|--------------------|------------------|-----------------|---------------|--------------------|-------------------------------------------------|
| SNP_22033_A_17675684 | NC_021163.1    | Ca_Kabuli_Chr04 | 17675684                | GG                                     | AA                 | AA               | URR             |               | 101492537          | GEM-like protein 4                              |
| SNP_22034_A_17681651 | NC_021163.1    | Ca_Kabuli_Chr04 | 17681651                | GG                                     | AA                 | AA               | URR             |               | 101492867          | putative GEM-like protein 8                     |
| SNP_22035_A_17682245 | NC_021163.1    | Ca_Kabuli_Chr04 | 17682245                | AA                                     | GG                 | GG               | DRR             |               | 101493199          | putative GEM-like protein 8                     |
| SNP_22036_A_17684767 | NC_021163.1    | Ca_Kabuli_Chr04 | 17684767                | GG                                     | AA                 | AA               | URR             |               | 101493199          | putative GEM-like protein 8                     |
| SNP_22038_A_17699746 | NC_021163.1    | Ca_Kabuli_Chr04 | 17699746                | TT                                     | AA                 | AA               | INTERGENIC      |               |                    |                                                 |
| SNP_22039_A_17703495 | NC_021163.1    | Ca_Kabuli_Chr04 | 17703495                | AA                                     | GG                 | GG               | INTERGENIC      |               |                    |                                                 |
| SNP_22042_A_17715557 | NC_021163.1    | Ca_Kabuli_Chr04 | 17715557                | CC                                     | TT                 | TT               | INTERGENIC      |               |                    |                                                 |
| SNP_22044_A_17715691 | NC_021163.1    | Ca_Kabuli_Chr04 | 17715691                | AA                                     | TT                 | TT               | INTERGENIC      |               |                    |                                                 |
| SNP_22045_A_17715700 | NC_021163.1    | Ca_Kabuli_Chr04 | 17715700                | TT                                     | CC                 | CC               | INTERGENIC      |               |                    |                                                 |
| SNP_22046_A_17715709 | NC_021163.1    | Ca_Kabuli_Chr04 | 17715709                | AA                                     | TT                 | TT               | INTERGENIC      |               |                    |                                                 |
| SNP_22047_A_17715939 | NC_021163.1    | Ca_Kabuli_Chr04 | 17715939                | AA                                     | GG                 | GG               | INTERGENIC      |               |                    |                                                 |
| SNP_22049_A_17717058 | NC_021163.1    | Ca_Kabuli_Chr04 | 17717058                | AA                                     | CC                 | CC               | INTERGENIC      |               |                    |                                                 |
| SNP_22050_A_17717062 | NC_021163.1    | Ca_Kabuli_Chr04 | 17717062                | TT                                     | CC                 | CC               | INTERGENIC      |               |                    |                                                 |
| SNP_22051_A_17717486 | NC_021163.1    | Ca_Kabuli_Chr04 | 17717486                | CC                                     | AA                 | AA               | DRR             |               | 101494784          | protein ASPARTIC PROTEASE IN GUARD CELL 2-like  |
| SNP_22052_A_17720327 | NC_021163.1    | Ca_Kabuli_Chr04 | 17720327                | CC                                     | AA                 | AA               | URR             |               | 101494784          | protein ASPARTIC PROTEASE IN GUARD CELL 2-like  |
| SNP_22053_A_17720348 | NC_021163.1    | Ca_Kabuli_Chr04 | 17720348                | AA                                     | GG                 | GG               | URR             |               | 101494784          | protein ASPARTIC PROTEASE IN GUARD CELL 2-like  |
| SNP_22055_A_17720401 | NC_021163.1    | Ca_Kabuli_Chr04 | 17720401                | TT                                     | CC                 | CC               | URR             |               | 101494784          | protein ASPARTIC PROTEASE IN GUARD CELL 2-like  |
| SNP_22056_A_17720730 | NC_021163.1    | Ca_Kabuli_Chr04 | 17720730                | AA                                     | CC                 | CC               | DRR             |               | 101495115          | uncharacterized ATP-dependent helicase C23E6.02 |
| SNP_22057_A_17723467 | NC_021163.1    | Ca_Kabuli_Chr04 | 17723467                | AA                                     | GG                 | GG               | INTERGENIC      |               |                    |                                                 |
| SNP_22058_A_17724562 | NC_021163.1    | Ca_Kabuli_Chr04 | 17724562                | GG                                     | TT                 | TT               | INTERGENIC      |               |                    |                                                 |
| SNP_22059_A_17724583 | NC_021163.1    | Ca_Kabuli_Chr04 | 17724583                | GG                                     | TT                 | TT               | INTERGENIC      |               |                    |                                                 |
| SNP_22060_A_17725692 | NC_021163.1    | Ca_Kabuli_Chr04 | 17725692                | TT                                     | CC                 | CC               | INTRON          |               | 101495115          | uncharacterized ATP-dependent helicase C23E6.02 |

| SNPs IDs             | Chromosome IDs | Chromosomes     | Physical positions (bp) | CDC Frontier (Reference genome) | (Pusa 1103 & HPNB) | (ILWC 46 & LPNB) | Sequence Components of genome | Gene accession IDs | Putative functions                              |
|----------------------|----------------|-----------------|-------------------------|---------------------------------|--------------------|------------------|-------------------------------|--------------------|-------------------------------------------------|
| SNP_22061_A_17726295 | NC_021163.1    | Ca_Kabuli_Chr04 | 17726295                | TT                              | CC                 | CC               | INTRON                        | 101495115          | uncharacterized ATP-dependent helicase C23E6.02 |
| SNP_22062_A_17728820 | NC_021163.1    | Ca_Kabuli_Chr04 | 17728820                | AA                              | GG                 | GG               | INTRON                        | 101495115          | uncharacterized ATP-dependent helicase C23E6.02 |
| SNP_22063_A_17728826 | NC_021163.1    | Ca_Kabuli_Chr04 | 17728826                | AA                              | TT                 | TT               | INTRON                        | 101495115          | uncharacterized ATP-dependent helicase C23E6.02 |
| SNP_22064_A_17728845 | NC_021163.1    | Ca_Kabuli_Chr04 | 17728845                | CC                              | AA                 | AA               | INTRON                        | 101495115          | uncharacterized ATP-dependent helicase C23E6.02 |
| SNP_22065_A_17728962 | NC_021163.1    | Ca_Kabuli_Chr04 | 17728962                | GG                              | CC                 | CC               | INTRON                        | 101495115          | uncharacterized ATP-dependent helicase C23E6.02 |
| SNP_22066_A_17735206 | NC_021163.1    | Ca_Kabuli_Chr04 | 17735206                | CC                              | TT                 | TT               | INTERGENIC                    |                    |                                                 |
| SNP_22068_A_17735538 | NC_021163.1    | Ca_Kabuli_Chr04 | 17735538                | CC                              | TT                 | TT               | INTERGENIC                    |                    |                                                 |
| SNP_22069_A_17735569 | NC_021163.1    | Ca_Kabuli_Chr04 | 17735569                | AA                              | TT                 | TT               | INTERGENIC                    |                    |                                                 |
| SNP_22071_A_17735617 | NC_021163.1    | Ca_Kabuli_Chr04 | 17735617                | TT                              | AA                 | AA               | INTERGENIC                    |                    |                                                 |
| SNP_22072_A_17735618 | NC_021163.1    | Ca_Kabuli_Chr04 | 17735618                | TT                              | AA                 | AA               | INTERGENIC                    |                    |                                                 |
| SNP_22073_A_17735627 | NC_021163.1    | Ca_Kabuli_Chr04 | 17735627                | TT                              | GG                 | GG               | INTERGENIC                    |                    |                                                 |
| SNP_22074_A_17735639 | NC_021163.1    | Ca_Kabuli_Chr04 | 17735639                | GG                              | TT                 | TT               | INTERGENIC                    |                    |                                                 |
| SNP_22075_A_17735692 | NC_021163.1    | Ca_Kabuli_Chr04 | 17735692                | CC                              | AA                 | AA               | INTERGENIC                    |                    |                                                 |
| SNP_22076_A_17735737 | NC_021163.1    | Ca_Kabuli_Chr04 | 17735737                | TT                              | AA                 | AA               | INTERGENIC                    |                    |                                                 |
| SNP_22077_A_17739265 | NC_021163.1    | Ca_Kabuli_Chr04 | 17739265                | TT                              | CC                 | CC               | INTERGENIC                    |                    |                                                 |
| SNP_22078_A_17739984 | NC_021163.1    | Ca_Kabuli_Chr04 | 17739984                | GG                              | AA                 | AA               | INTERGENIC                    |                    |                                                 |
| SNP_22080_A_17740637 | NC_021163.1    | Ca_Kabuli_Chr04 | 17740637                | AA                              | CC                 | CC               | INTERGENIC                    |                    |                                                 |
| SNP_22081_A_17740658 | NC_021163.1    | Ca_Kabuli_Chr04 | 17740658                | GG                              | TT                 | TT               | INTERGENIC                    |                    |                                                 |
| SNP_22082_A_17740849 | NC_021163.1    | Ca_Kabuli_Chr04 | 17740849                | GG                              | AA                 | AA               | INTERGENIC                    |                    |                                                 |
| SNP_22083_A_17740872 | NC_021163.1    | Ca_Kabuli_Chr04 | 17740872                | AA                              | GG                 | GG               | INTERGENIC                    |                    |                                                 |
| SNP_22084_A_17740931 | NC_021163.1    | Ca_Kabuli_Chr04 | 17740931                | GG                              | AA                 | AA               | INTERGENIC                    |                    |                                                 |
| SNP_22085_A_17740947 | NC_021163.1    | Ca_Kabuli_Chr04 | 17740947                | AA                              | TT                 | TT               | INTERGENIC                    |                    |                                                 |

| SNPs IDs             | Chromosome IDs | Chromosomes     | Physical positions (bp) | CDC Frontier genome | (Reference genome) | (Pusa 1103 & HPNB) | (ILWC 46 & LPNB) | Sequence genome | Components of | Gene accession IDs | Putative functions                                     |
|----------------------|----------------|-----------------|-------------------------|---------------------|--------------------|--------------------|------------------|-----------------|---------------|--------------------|--------------------------------------------------------|
| SNP_22086_A_17740966 | NC_021163.1    | Ca_Kabuli_Chr04 | 17740966                | GG                  |                    | AA                 | AA               | INTERGENIC      |               |                    |                                                        |
| SNP_22087_A_17740983 | NC_021163.1    | Ca_Kabuli_Chr04 | 17740983                | CC                  |                    | TT                 | TT               | INTERGENIC      |               |                    |                                                        |
| SNP_22088_A_17741010 | NC_021163.1    | Ca_Kabuli_Chr04 | 17741010                | CC                  |                    | TT                 | TT               | INTERGENIC      |               |                    |                                                        |
| SNP_22089_A_17741299 | NC_021163.1    | Ca_Kabuli_Chr04 | 17741299                | GG                  |                    | AA                 | AA               | INTERGENIC      |               |                    |                                                        |
| SNP_22090_A_17742322 | NC_021163.1    | Ca_Kabuli_Chr04 | 17742322                | TT                  |                    | GG                 | GG               | INTERGENIC      |               |                    |                                                        |
| SNP_22091_A_17742328 | NC_021163.1    | Ca_Kabuli_Chr04 | 17742328                | AA                  |                    | GG                 | GG               | INTERGENIC      |               |                    |                                                        |
| SNP_22092_A_17743996 | NC_021163.1    | Ca_Kabuli_Chr04 | 17743996                | GG                  |                    | AA                 | AA               | INTERGENIC      |               |                    |                                                        |
| SNP_22093_A_17749856 | NC_021163.1    | Ca_Kabuli_Chr04 | 17749856                | TT                  |                    | CC                 | CC               | DRR             |               | 101495980          | LRR receptor-like serine/threonine-protein kinase GSO1 |
| SNP_22094_A_17753419 | NC_021163.1    | Ca_Kabuli_Chr04 | 17753419                | AA                  |                    | CC                 | CC               | URR             |               | 101495980          | LRR receptor-like serine/threonine-protein kinase GSO1 |
| SNP_22095_A_17754479 | NC_021163.1    | Ca_Kabuli_Chr04 | 17754479                | GG                  |                    | AA                 | AA               | INTERGENIC      |               |                    |                                                        |
| SNP_22096_A_17755658 | NC_021163.1    | Ca_Kabuli_Chr04 | 17755658                | GG                  |                    | AA                 | AA               | INTERGENIC      |               |                    |                                                        |
| SNP_22099_A_17759830 | NC_021163.1    | Ca_Kabuli_Chr04 | 17759830                | AA                  |                    | TT                 | TT               | INTRON          |               | 101496531          | prolyl endopeptidase-like                              |
| SNP_22100_A_17763666 | NC_021163.1    | Ca_Kabuli_Chr04 | 17763666                | AA                  |                    | GG                 | GG               | INTERGENIC      |               |                    |                                                        |
| SNP_22104_A_17775765 | NC_021163.1    | Ca_Kabuli_Chr04 | 17775765                | CC                  |                    | GG                 | GG               | URR             |               | 101497292          | PIN2/TERF1-interacting telomerase inhibitor 1-like     |
| SNP_22105_A_17775767 | NC_021163.1    | Ca_Kabuli_Chr04 | 17775767                | TT                  |                    | CC                 | CC               | URR             |               | 101497292          | PIN2/TERF1-interacting telomerase inhibitor 1-like     |
| SNP_22106_A_17775791 | NC_021163.1    | Ca_Kabuli_Chr04 | 17775791                | AA                  |                    | CC                 | CC               | URR             |               | 101497292          | PIN2/TERF1-interacting telomerase inhibitor 1-like     |
| SNP_22108_A_17775920 | NC_021163.1    | Ca_Kabuli_Chr04 | 17775920                | CC                  |                    | TT                 | TT               | URR             |               | 101497292          | PIN2/TERF1-interacting telomerase inhibitor 1-like     |
| SNP_22110_A_17777689 | NC_021163.1    | Ca_Kabuli_Chr04 | 17777689                | AA                  |                    | GG                 | GG               | INTERGENIC      |               |                    |                                                        |
| SNP_22111_A_17779388 | NC_021163.1    | Ca_Kabuli_Chr04 | 17779388                | TT                  |                    | CC                 | CC               | INTERGENIC      |               |                    |                                                        |
| SNP_22112_A_17787029 | NC_021163.1    | Ca_Kabuli_Chr04 | 17787029                | AA                  |                    | CC                 | CC               | URR             |               | 101497853          | uncharacterized LOC101497853                           |
| SNP_22113_A_17787053 | NC_021163.1    | Ca_Kabuli_Chr04 | 17787053                | AA                  |                    | TT                 | TT               | URR             |               | 101497853          | uncharacterized LOC101497853                           |
| SNP_22114_A_17787116 | NC_021163.1    | Ca_Kabuli_Chr04 | 17787116                | GG                  |                    | AA                 | AA               | URR             |               | 101497853          | uncharacterized LOC101497853                           |

| SNPs IDs             | Chromosome IDs | Chromosomes     | Physical positions (bp) | CDC Frontier genome (Reference genome) | (Pusa 1103 & HPNB) | (ILWC 46 & LPNB) | Sequence genome | Components of | Gene accession IDs                    | Putative functions |
|----------------------|----------------|-----------------|-------------------------|----------------------------------------|--------------------|------------------|-----------------|---------------|---------------------------------------|--------------------|
| SNP_22115_A_17788376 | NC_021163.1    | Ca_Kabuli_Chr04 | 17788376                | AA                                     | GG                 | GG               | INTERGENIC      |               |                                       |                    |
| SNP_22116_A_17792817 | NC_021163.1    | Ca_Kabuli_Chr04 | 17792817                | CC                                     | TT                 | TT               | INTERGENIC      |               |                                       |                    |
| SNP_22117_A_17793813 | NC_021163.1    | Ca_Kabuli_Chr04 | 17793813                | AA                                     | GG                 | GG               | INTERGENIC      |               |                                       |                    |
| SNP_22119_A_17825605 | NC_021163.1    | Ca_Kabuli_Chr04 | 17825605                | CC                                     | TT                 | TT               | INTERGENIC      |               |                                       |                    |
| SNP_22120_A_17825607 | NC_021163.1    | Ca_Kabuli_Chr04 | 17825607                | CC                                     | TT                 | TT               | INTERGENIC      |               |                                       |                    |
| SNP_22121_A_17825619 | NC_021163.1    | Ca_Kabuli_Chr04 | 17825619                | CC                                     | TT                 | TT               | INTERGENIC      |               |                                       |                    |
| SNP_22122_A_17825626 | NC_021163.1    | Ca_Kabuli_Chr04 | 17825626                | CC                                     | TT                 | TT               | INTERGENIC      |               |                                       |                    |
| SNP_22123_A_17825650 | NC_021163.1    | Ca_Kabuli_Chr04 | 17825650                | CC                                     | TT                 | TT               | INTERGENIC      |               |                                       |                    |
| SNP_22124_A_17825685 | NC_021163.1    | Ca_Kabuli_Chr04 | 17825685                | GG                                     | AA                 | AA               | INTERGENIC      |               |                                       |                    |
| SNP_22125_A_17825707 | NC_021163.1    | Ca_Kabuli_Chr04 | 17825707                | CC                                     | AA                 | AA               | INTERGENIC      |               |                                       |                    |
| SNP_22126_A_17825804 | NC_021163.1    | Ca_Kabuli_Chr04 | 17825804                | CC                                     | TT                 | TT               | INTERGENIC      |               |                                       |                    |
| SNP_22127_A_17825828 | NC_021163.1    | Ca_Kabuli_Chr04 | 17825828                | GG                                     | TT                 | TT               | INTERGENIC      |               |                                       |                    |
| SNP_22128_A_17825874 | NC_021163.1    | Ca_Kabuli_Chr04 | 17825874                | TT                                     | AA                 | AA               | INTERGENIC      |               |                                       |                    |
| SNP_22129_A_17826082 | NC_021163.1    | Ca_Kabuli_Chr04 | 17826082                | TT                                     | CC                 | CC               | INTERGENIC      |               |                                       |                    |
| SNP_22130_A_17826110 | NC_021163.1    | Ca_Kabuli_Chr04 | 17826110                | TT                                     | CC                 | CC               | INTERGENIC      |               |                                       |                    |
| SNP_22132_A_17828957 | NC_021163.1    | Ca_Kabuli_Chr04 | 17828957                | AA                                     | GG                 | GG               | INTERGENIC      |               |                                       |                    |
| SNP_22134_A_17830519 | NC_021163.1    | Ca_Kabuli_Chr04 | 17830519                | AA                                     | CC                 | CC               | INTERGENIC      |               |                                       |                    |
| SNP_22135_A_17831396 | NC_021163.1    | Ca_Kabuli_Chr04 | 17831396                | TT                                     | GG                 | GG               | INTERGENIC      |               |                                       |                    |
| SNP_22136_A_17838321 | NC_021163.1    | Ca_Kabuli_Chr04 | 17838321                | CC                                     | TT                 | TT               | DRR             | 101490387     | CASP-like protein 4C2                 |                    |
| SNP_22137_A_17842815 | NC_021163.1    | Ca_Kabuli_Chr04 | 17842815                | CC                                     | AA                 | AA               | INTERGENIC      |               |                                       |                    |
| SNP_22138_A_17844364 | NC_021163.1    | Ca_Kabuli_Chr04 | 17844364                | TT                                     | AA                 | AA               | URR             | 101410597     | transfer RNA arginine (anticodon CCG) |                    |
| SNP_22139_A_17844396 | NC_021163.1    | Ca_Kabuli_Chr04 | 17844396                | AA                                     | CC                 | CC               | URR             | 101410597     | transfer RNA arginine (anticodon CCG) |                    |

| SNPs IDs             | Chromosome IDs | Chromosomes     | Physical positions (bp) | CDC Frontier genome (Reference genome) | (Pusa 1103 & HPNB) | (ILWC 46 & LPNB) | Sequence Components of genome | Gene accession IDs | Putative functions                               |
|----------------------|----------------|-----------------|-------------------------|----------------------------------------|--------------------|------------------|-------------------------------|--------------------|--------------------------------------------------|
| SNP_22140_A_17846440 | NC_021163.1    | Ca_Kabuli_Chr04 | 17846440                | AA                                     | CC                 | CC               | INTRON                        | 101490711          | probable methionine-tRNA ligase, mitochondrial   |
| SNP_22142_A_17856646 | NC_021163.1    | Ca_Kabuli_Chr04 | 17856646                | AA                                     | TT                 | TT               | INTERGENIC                    |                    |                                                  |
| SNP_22143_A_17856937 | NC_021163.1    | Ca_Kabuli_Chr04 | 17856937                | GG                                     | TT                 | TT               | INTERGENIC                    |                    |                                                  |
| SNP_22144_A_17861709 | NC_021163.1    | Ca_Kabuli_Chr04 | 17861709                | TT                                     | AA                 | AA               | URR                           | 101410594          | transfer RNA cysteine (anticodon GCA)            |
| SNP_22146_A_17862526 | NC_021163.1    | Ca_Kabuli_Chr04 | 17862526                | GG                                     | AA                 | AA               | INTERGENIC                    |                    |                                                  |
| SNP_22147_A_17862757 | NC_021163.1    | Ca_Kabuli_Chr04 | 17862757                | AA                                     | TT                 | TT               | INTERGENIC                    |                    |                                                  |
| SNP_22148_A_17862762 | NC_021163.1    | Ca_Kabuli_Chr04 | 17862762                | AA                                     | CC                 | CC               | INTERGENIC                    |                    |                                                  |
| SNP_22150_A_17862799 | NC_021163.1    | Ca_Kabuli_Chr04 | 17862799                | AA                                     | CC                 | CC               | INTERGENIC                    |                    |                                                  |
| SNP_22151_A_17863115 | NC_021163.1    | Ca_Kabuli_Chr04 | 17863115                | AA                                     | GG                 | GG               | INTERGENIC                    |                    |                                                  |
| SNP_22153_A_17865633 | NC_021163.1    | Ca_Kabuli_Chr04 | 17865633                | GG                                     | AA                 | AA               | DRR                           | 101491866          | ras-related protein RABE1c-like                  |
| SNP_22154_A_17865661 | NC_021163.1    | Ca_Kabuli_Chr04 | 17865661                | CC                                     | TT                 | TT               | DRR                           | 101491866          | ras-related protein RABE1c-like                  |
| SNP_22155_A_17865669 | NC_021163.1    | Ca_Kabuli_Chr04 | 17865669                | TT                                     | CC                 | CC               | DRR                           | 101491866          | ras-related protein RABE1c-like                  |
| SNP_22156_A_17866010 | NC_021163.1    | Ca_Kabuli_Chr04 | 17866010                | CC                                     | TT                 | TT               | DRR                           | 101491866          | ras-related protein RABE1c-like                  |
| SNP_22157_A_17871763 | NC_021163.1    | Ca_Kabuli_Chr04 | 17871763                | CC                                     | TT                 | TT               | URR                           | 101491866          | ras-related protein RABE1c-like                  |
| SNP_22158_A_17921523 | NC_021163.1    | Ca_Kabuli_Chr04 | 17921523                | TT                                     | CC                 | CC               | URR                           | 101495002          | ABC transporter B family member 20               |
| SNP_22160_A_17975390 | NC_021163.1    | Ca_Kabuli_Chr04 | 17975390                | CC                                     | TT                 | TT               | INTERGENIC                    |                    |                                                  |
| SNP_22161_A_18027089 | NC_021163.1    | Ca_Kabuli_Chr04 | 18027089                | AA                                     | TT                 | TT               | INTERGENIC                    |                    |                                                  |
| SNP_22162_A_18033669 | NC_021163.1    | Ca_Kabuli_Chr04 | 18033669                | TT                                     | CC                 | CC               | INTERGENIC                    |                    |                                                  |
| SNP_22163_A_18033859 | NC_021163.1    | Ca_Kabuli_Chr04 | 18033859                | TT                                     | CC                 | CC               | INTERGENIC                    |                    |                                                  |
| SNP_22165_A_18090774 | NC_021163.1    | Ca_Kabuli_Chr04 | 18090774                | TT                                     | CC                 | CC               | URR                           | 101500218          | GRIP and coiled-coil domain-containing protein 2 |
| SNP_22166_A_18094505 | NC_021163.1    | Ca_Kabuli_Chr04 | 18094505                | GG                                     | AA                 | AA               | INTERGENIC                    |                    |                                                  |
| SNP_22167_A_18106541 | NC_021163.1    | Ca_Kabuli_Chr04 | 18106541                | CC                                     | AA                 | AA               | INTERGENIC                    |                    |                                                  |

| SNPs IDs             | Chromosome IDs | Chromosomes     | Physical positions (bp) | CDC Frontier genome (Reference genome) | (Pusa 1103 & HPNB) | (ILWC 46 & LPNB) | Sequence genome | Components of | Gene accession IDs | Putative functions                                                       |
|----------------------|----------------|-----------------|-------------------------|----------------------------------------|--------------------|------------------|-----------------|---------------|--------------------|--------------------------------------------------------------------------|
| SNP_22169_A_18138248 | NC_021163.1    | Ca_Kabuli_Chr04 | 18138248                | CC                                     | AA                 | AA               | INTERGENIC      |               |                    |                                                                          |
| SNP_22170_A_18147181 | NC_021163.1    | Ca_Kabuli_Chr04 | 18147181                | GG                                     | TT                 | TT               | INTERGENIC      |               |                    |                                                                          |
| SNP_22171_A_18147190 | NC_021163.1    | Ca_Kabuli_Chr04 | 18147190                | TT                                     | GG                 | GG               | INTERGENIC      |               |                    |                                                                          |
| SNP_22172_A_18183859 | NC_021163.1    | Ca_Kabuli_Chr04 | 18183859                | TT                                     | CC                 | CC               | INTERGENIC      |               |                    |                                                                          |
| SNP_22174_A_18249673 | NC_021163.1    | Ca_Kabuli_Chr04 | 18249673                | CC                                     | AA                 | AA               | URR             |               | 101503944          | fructose-bisphosphate aldolase-lysine N-methyltransferase, chloroplastic |
| SNP_22175_A_18260097 | NC_021163.1    | Ca_Kabuli_Chr04 | 18260097                | AA                                     | TT                 | TT               | INTERGENIC      |               |                    |                                                                          |
| SNP_22176_A_18262308 | NC_021163.1    | Ca_Kabuli_Chr04 | 18262308                | TT                                     | AA                 | AA               | INTERGENIC      |               |                    |                                                                          |
| SNP_22177_A_18263858 | NC_021163.1    | Ca_Kabuli_Chr04 | 18263858                | TT                                     | CC                 | CC               | INTERGENIC      |               |                    |                                                                          |
| SNP_22178_A_18264121 | NC_021163.1    | Ca_Kabuli_Chr04 | 18264121                | AA                                     | GG                 | GG               | INTERGENIC      |               |                    |                                                                          |
| SNP_22179_A_18264423 | NC_021163.1    | Ca_Kabuli_Chr04 | 18264423                | TT                                     | AA                 | AA               | INTERGENIC      |               |                    |                                                                          |
| SNP_22180_A_18264713 | NC_021163.1    | Ca_Kabuli_Chr04 | 18264713                | TT                                     | AA                 | AA               | INTERGENIC      |               |                    |                                                                          |
| SNP_22181_A_18295473 | NC_021163.1    | Ca_Kabuli_Chr04 | 18295473                | CC                                     | TT                 | TT               | INTERGENIC      |               |                    |                                                                          |
| SNP_22182_A_18295648 | NC_021163.1    | Ca_Kabuli_Chr04 | 18295648                | AA                                     | CC                 | CC               | INTERGENIC      |               |                    |                                                                          |
| SNP_22183_A_18296469 | NC_021163.1    | Ca_Kabuli_Chr04 | 18296469                | TT                                     | CC                 | CC               | INTERGENIC      |               |                    |                                                                          |
| SNP_22184_A_18310729 | NC_021163.1    | Ca_Kabuli_Chr04 | 18310729                | TT                                     | AA                 | AA               | INTERGENIC      |               |                    |                                                                          |
| SNP_22185_A_18310732 | NC_021163.1    | Ca_Kabuli_Chr04 | 18310732                | TT                                     | CC                 | CC               | INTERGENIC      |               |                    |                                                                          |
| SNP_22186_A_18342783 | NC_021163.1    | Ca_Kabuli_Chr04 | 18342783                | AA                                     | TT                 | TT               | INTRON          |               | 101491868          | Unknown function                                                         |
| SNP_22187_A_18369514 | NC_021163.1    | Ca_Kabuli_Chr04 | 18369514                | CC                                     | AA                 | AA               | INTERGENIC      |               |                    |                                                                          |
| SNP_22188_A_18369522 | NC_021163.1    | Ca_Kabuli_Chr04 | 18369522                | AA                                     | TT                 | TT               | INTERGENIC      |               |                    |                                                                          |
| SNP_22189_A_18379245 | NC_021163.1    | Ca_Kabuli_Chr04 | 18379245                | AA                                     | GG                 | GG               | INTERGENIC      |               |                    |                                                                          |
| SNP_22190_A_18379966 | NC_021163.1    | Ca_Kabuli_Chr04 | 18379966                | GG                                     | TT                 | TT               | INTERGENIC      |               |                    |                                                                          |
| SNP_22191_A_18388451 | NC_021163.1    | Ca_Kabuli_Chr04 | 18388451                | TT                                     | CC                 | CC               | INTERGENIC      |               |                    |                                                                          |

| SNPs IDs             | Chromosome IDs | Chromosomes     | Physical positions (bp) | CDC Frontier genome (Reference genome) | (Pusa 1103 & HPNB) | (ILWC 46 & LPNB) | Sequence Components of genome | Gene accession IDs | Putative functions           |
|----------------------|----------------|-----------------|-------------------------|----------------------------------------|--------------------|------------------|-------------------------------|--------------------|------------------------------|
| SNP_22193_A_18430129 | NC_021163.1    | Ca_Kabuli_Chr04 | 18430129                | AA                                     | GG                 | GG               | INTRON                        | 101492204          | protein CLP1 homolog         |
| SNP_22194_A_18445751 | NC_021163.1    | Ca_Kabuli_Chr04 | 18445751                | GG                                     | AA                 | AA               | INTERGENIC                    |                    |                              |
| SNP_22195_A_18445824 | NC_021163.1    | Ca_Kabuli_Chr04 | 18445824                | AA                                     | CC                 | CC               | INTERGENIC                    |                    |                              |
| SNP_22197_A_18458064 | NC_021163.1    | Ca_Kabuli_Chr04 | 18458064                | CC                                     | TT                 | TT               | INTERGENIC                    |                    |                              |
| SNP_22198_A_18515433 | NC_021163.1    | Ca_Kabuli_Chr04 | 18515433                | TT                                     | AA                 | AA               | INTERGENIC                    |                    |                              |
| SNP_22201_A_18676428 | NC_021163.1    | Ca_Kabuli_Chr04 | 18676428                | TT                                     | GG                 | GG               | INTERGENIC                    |                    |                              |
| SNP_22202_A_18676647 | NC_021163.1    | Ca_Kabuli_Chr04 | 18676647                | AA                                     | TT                 | TT               | INTERGENIC                    |                    |                              |
| SNP_22203_A_18676838 | NC_021163.1    | Ca_Kabuli_Chr04 | 18676838                | TT                                     | CC                 | CC               | INTERGENIC                    |                    |                              |
| SNP_22204_A_18677131 | NC_021163.1    | Ca_Kabuli_Chr04 | 18677131                | TT                                     | CC                 | CC               | INTERGENIC                    |                    |                              |
| SNP_22205_A_18677169 | NC_021163.1    | Ca_Kabuli_Chr04 | 18677169                | TT                                     | CC                 | CC               | INTERGENIC                    |                    |                              |
| SNP_22206_A_18703967 | NC_021163.1    | Ca_Kabuli_Chr04 | 18703967                | TT                                     | CC                 | CC               | INTERGENIC                    |                    |                              |
| SNP_22207_A_18704126 | NC_021163.1    | Ca_Kabuli_Chr04 | 18704126                | GG                                     | AA                 | AA               | INTERGENIC                    |                    |                              |
| SNP_22208_A_18770103 | NC_021163.1    | Ca_Kabuli_Chr04 | 18770103                | TT                                     | GG                 | GG               | INTRON                        | 101492868          | callose synthase 9           |
| SNP_22210_A_18801999 | NC_021163.1    | Ca_Kabuli_Chr04 | 18801999                | GG                                     | TT                 | TT               | INTRON                        | 101493200          | uncharacterized LOC101493200 |
| SNP_22211_A_18807358 | NC_021163.1    | Ca_Kabuli_Chr04 | 18807358                | CC                                     | AA                 | AA               | DRR                           | 101493516          | Unknown function             |
| SNP_22212_A_18807387 | NC_021163.1    | Ca_Kabuli_Chr04 | 18807387                | GG                                     | AA                 | AA               | URR                           | 101493200          | uncharacterized LOC101493200 |
| SNP_22213_A_18816200 | NC_021163.1    | Ca_Kabuli_Chr04 | 18816200                | GG                                     | AA                 | AA               | INTERGENIC                    |                    |                              |
| SNP_22214_A_18821166 | NC_021163.1    | Ca_Kabuli_Chr04 | 18821166                | AA                                     | TT                 | TT               | INTERGENIC                    |                    |                              |
| SNP_22216_A_18833807 | NC_021163.1    | Ca_Kabuli_Chr04 | 18833807                | TT                                     | CC                 | CC               | INTERGENIC                    |                    |                              |
| SNP_22217_A_18834163 | NC_021163.1    | Ca_Kabuli_Chr04 | 18834163                | TT                                     | AA                 | AA               | INTERGENIC                    |                    |                              |
| SNP_22218_A_18834165 | NC_021163.1    | Ca_Kabuli_Chr04 | 18834165                | CC                                     | TT                 | TT               | INTERGENIC                    |                    |                              |
| SNP_22219_A_18841073 | NC_021163.1    | Ca_Kabuli_Chr04 | 18841073                | CC                                     | AA                 | AA               | INTERGENIC                    |                    |                              |



| SNPs IDs             | Chromosome IDs | Chromosomes     | Physical positions (bp) | CDC Frontier genome (Reference genome) | (Pusa 1103 & HPNB) | (ILWC 46 & LPNB) | Sequence genome | Components of | Gene accession IDs     | Putative functions |
|----------------------|----------------|-----------------|-------------------------|----------------------------------------|--------------------|------------------|-----------------|---------------|------------------------|--------------------|
| SNP_22220_A_18841074 | NC_021163.1    | Ca_Kabuli_Chr04 | 18841074                | TT                                     | CC                 | CC               | INTERGENIC      |               |                        |                    |
| SNP_22222_A_18978477 | NC_021163.1    | Ca_Kabuli_Chr04 | 18978477                | CC                                     | TT                 | TT               | INTERGENIC      |               |                        |                    |
| SNP_22224_A_19008678 | NC_021163.1    | Ca_Kabuli_Chr04 | 19008678                | AA                                     | TT                 | TT               | INTERGENIC      |               |                        |                    |
| SNP_22225_A_19008682 | NC_021163.1    | Ca_Kabuli_Chr04 | 19008682                | AA                                     | GG                 | GG               | INTERGENIC      |               |                        |                    |
| SNP_22227_A_19046014 | NC_021163.1    | Ca_Kabuli_Chr04 | 19046014                | AA                                     | TT                 | TT               | INTERGENIC      |               |                        |                    |
| SNP_22229_A_19046122 | NC_021163.1    | Ca_Kabuli_Chr04 | 19046122                | AA                                     | CC                 | CC               | INTERGENIC      |               |                        |                    |
| SNP_22230_A_19046132 | NC_021163.1    | Ca_Kabuli_Chr04 | 19046132                | AA                                     | CC                 | CC               | INTERGENIC      |               |                        |                    |
| SNP_22231_A_19046288 | NC_021163.1    | Ca_Kabuli_Chr04 | 19046288                | TT                                     | GG                 | GG               | INTERGENIC      |               |                        |                    |
| SNP_22233_A_19076169 | NC_021163.1    | Ca_Kabuli_Chr04 | 19076169                | GG                                     | AA                 | AA               | INTRON          | 101502651     | prolyl 4-hydroxylase 1 |                    |
| SNP_22234_A_19082324 | NC_021163.1    | Ca_Kabuli_Chr04 | 19082324                | GG                                     | AA                 | AA               | INTERGENIC      |               |                        |                    |
| SNP_22235_A_19103892 | NC_021163.1    | Ca_Kabuli_Chr04 | 19103892                | GG                                     | CC                 | CC               | INTERGENIC      |               |                        |                    |
| SNP_22238_A_19288941 | NC_021163.1    | Ca_Kabuli_Chr04 | 19288941                | GG                                     | AA                 | AA               | INTERGENIC      |               |                        |                    |
| SNP_22240_A_19341573 | NC_021163.1    | Ca_Kabuli_Chr04 | 19341573                | TT                                     | AA                 | AA               | INTERGENIC      |               |                        |                    |
| SNP_22241_A_19371445 | NC_021163.1    | Ca_Kabuli_Chr04 | 19371445                | AA                                     | TT                 | TT               | INTERGENIC      |               |                        |                    |
| SNP_22242_A_19397407 | NC_021163.1    | Ca_Kabuli_Chr04 | 19397407                | CC                                     | TT                 | TT               | INTERGENIC      |               |                        |                    |
| SNP_22243_A_19400448 | NC_021163.1    | Ca_Kabuli_Chr04 | 19400448                | TT                                     | CC                 | CC               | INTERGENIC      |               |                        |                    |
| SNP_22244_A_19400519 | NC_021163.1    | Ca_Kabuli_Chr04 | 19400519                | CC                                     | TT                 | TT               | INTERGENIC      |               |                        |                    |
| SNP_22245_A_19400565 | NC_021163.1    | Ca_Kabuli_Chr04 | 19400565                | TT                                     | CC                 | CC               | INTERGENIC      |               |                        |                    |
| SNP_22246_A_19402520 | NC_021163.1    | Ca_Kabuli_Chr04 | 19402520                | AA                                     | GG                 | GG               | INTERGENIC      |               |                        |                    |
| SNP_22247_A_19427637 | NC_021163.1    | Ca_Kabuli_Chr04 | 19427637                | TT                                     | CC                 | CC               | INTERGENIC      |               |                        |                    |
| SNP_22249_A_19445892 | NC_021163.1    | Ca_Kabuli_Chr04 | 19445892                | AA                                     | GG                 | GG               | INTERGENIC      |               |                        |                    |
| SNP_22250_A_19446108 | NC_021163.1    | Ca_Kabuli_Chr04 | 19446108                | AA                                     | GG                 | GG               | INTERGENIC      |               |                        |                    |

| SNPs IDs             | Chromosome IDs | Chromosomes     | Physical positions (bp) | CDC Frontier genome (Reference genome) | (Pusa 1103 & HPNB) | (ILWC 46 & LPNB) | Sequence Components of genome | Gene accession IDs | Putative functions                          |
|----------------------|----------------|-----------------|-------------------------|----------------------------------------|--------------------|------------------|-------------------------------|--------------------|---------------------------------------------|
| SNP_22251_A_19446272 | NC_021163.1    | Ca_Kabuli_Chr04 | 19446272                | AA                                     | GG                 | GG               | INTERGENIC                    |                    |                                             |
| SNP_22252_A_19446307 | NC_021163.1    | Ca_Kabuli_Chr04 | 19446307                | TT                                     | CC                 | CC               | INTERGENIC                    |                    |                                             |
| SNP_22253_A_19473885 | NC_021163.1    | Ca_Kabuli_Chr04 | 19473885                | TT                                     | CC                 | CC               | URR                           | 101511327          | glutathione S-transferase L3-like           |
| SNP_22254_A_19517367 | NC_021163.1    | Ca_Kabuli_Chr04 | 19517367                | TT                                     | GG                 | GG               | INTRON                        | 101512945          | two-component response regulator-like APRR3 |
| SNP_22255_A_19517423 | NC_021163.1    | Ca_Kabuli_Chr04 | 19517423                | TT                                     | CC                 | CC               | INTRON                        | 101512945          | two-component response regulator-like APRR3 |
| SNP_22256_A_19517709 | NC_021163.1    | Ca_Kabuli_Chr04 | 19517709                | GG                                     | AA                 | AA               | INTRON                        | 101512945          | two-component response regulator-like APRR3 |
| SNP_22257_A_19568483 | NC_021163.1    | Ca_Kabuli_Chr04 | 19568483                | AA                                     | CC                 | CC               | INTERGENIC                    |                    |                                             |
| SNP_22258_A_19571586 | NC_021163.1    | Ca_Kabuli_Chr04 | 19571586                | AA                                     | GG                 | GG               | INTERGENIC                    |                    |                                             |
| SNP_22259_A_19572092 | NC_021163.1    | Ca_Kabuli_Chr04 | 19572092                | GG                                     | TT                 | TT               | INTERGENIC                    |                    |                                             |
| SNP_22260_A_19572097 | NC_021163.1    | Ca_Kabuli_Chr04 | 19572097                | TT                                     | AA                 | AA               | INTERGENIC                    |                    |                                             |
| SNP_22261_A_19621038 | NC_021163.1    | Ca_Kabuli_Chr04 | 19621038                | CC                                     | TT                 | TT               | INTERGENIC                    |                    |                                             |
| SNP_22263_A_19649039 | NC_021163.1    | Ca_Kabuli_Chr04 | 19649039                | GG                                     | AA                 | AA               | INTERGENIC                    |                    |                                             |
| SNP_22266_A_19783925 | NC_021163.1    | Ca_Kabuli_Chr04 | 19783925                | AA                                     | GG                 | GG               | NON_SYNONYMOUS_CODING         | 101497737          | aspartic proteinase-like protein 2          |
| SNP_22267_A_19784143 | NC_021163.1    | Ca_Kabuli_Chr04 | 19784143                | GG                                     | TT                 | TT               | INTRON                        | 101497737          | aspartic proteinase-like protein 2          |
| SNP_22268_A_19784198 | NC_021163.1    | Ca_Kabuli_Chr04 | 19784198                | GG                                     | AA                 | AA               | INTRON                        | 101497737          | aspartic proteinase-like protein 2          |
| SNP_22269_A_19856643 | NC_021163.1    | Ca_Kabuli_Chr04 | 19856643                | AA                                     | GG                 | GG               | INTERGENIC                    |                    |                                             |
| SNP_22270_A_19878638 | NC_021163.1    | Ca_Kabuli_Chr04 | 19878638                | CC                                     | TT                 | TT               | INTERGENIC                    |                    |                                             |
| SNP_22271_A_19884273 | NC_021163.1    | Ca_Kabuli_Chr04 | 19884273                | TT                                     | GG                 | GG               | INTERGENIC                    |                    |                                             |
| SNP_22272_A_19939073 | NC_021163.1    | Ca_Kabuli_Chr04 | 19939073                | GG                                     | AA                 | AA               | URR                           | 101501491          | putative serine/threonine-protein kinase    |
| SNP_22273_A_19968923 | NC_021163.1    | Ca_Kabuli_Chr04 | 19968923                | CC                                     | TT                 | TT               | INTERGENIC                    |                    |                                             |
| SNP_22274_A_20005682 | NC_021163.1    | Ca_Kabuli_Chr04 | 20005682                | AA                                     | TT                 | TT               | INTRON                        | 101502652          | V-type proton ATPase subunit G1-like        |
| SNP_22275_A_20016336 | NC_021163.1    | Ca_Kabuli_Chr04 | 20016336                | CC                                     | TT                 | TT               | INTERGENIC                    |                    |                                             |

| SNPs IDs             | Chromosome IDs | Chromosomes     | Physical positions (bp) | CDC Frontier (Reference genome) | (Pusa 1103 & HPNB) | (ILWC 46 & LPNB) | Sequence Components of genome | Gene accession IDs | Putative functions                                                |
|----------------------|----------------|-----------------|-------------------------|---------------------------------|--------------------|------------------|-------------------------------|--------------------|-------------------------------------------------------------------|
| SNP_22276_A_20068535 | NC_021163.1    | Ca_Kabuli_Chr04 | 20068535                | CC                              | AA                 | AA               | INTERGENIC                    |                    |                                                                   |
| SNP_22277_A_20072491 | NC_021163.1    | Ca_Kabuli_Chr04 | 20072491                | GG                              | AA                 | AA               | INTERGENIC                    |                    |                                                                   |
| SNP_22278_A_20097143 | NC_021163.1    | Ca_Kabuli_Chr04 | 20097143                | AA                              | GG                 | GG               | INTERGENIC                    |                    |                                                                   |
| SNP_22279_A_20097455 | NC_021163.1    | Ca_Kabuli_Chr04 | 20097455                | AA                              | GG                 | GG               | INTERGENIC                    |                    |                                                                   |
| SNP_22280_A_20150005 | NC_021163.1    | Ca_Kabuli_Chr04 | 20150005                | AA                              | CC                 | CC               | INTERGENIC                    |                    |                                                                   |
| SNP_22281_A_20163463 | NC_021163.1    | Ca_Kabuli_Chr04 | 20163463                | AA                              | GG                 | GG               | URR                           | 101505875          | BTB/POZ domain-containing protein At5g03250-like                  |
| SNP_22282_A_20164679 | NC_021163.1    | Ca_Kabuli_Chr04 | 20164679                | TT                              | AA                 | AA               | DRR                           | 101491237          | uncharacterized protein At4g04775-like                            |
| SNP_22283_A_20211093 | NC_021163.1    | Ca_Kabuli_Chr04 | 20211093                | TT                              | GG                 | GG               | INTERGENIC                    |                    |                                                                   |
| SNP_22284_A_20212198 | NC_021163.1    | Ca_Kabuli_Chr04 | 20212198                | GG                              | AA                 | AA               | INTERGENIC                    |                    |                                                                   |
| SNP_22285_A_20226263 | NC_021163.1    | Ca_Kabuli_Chr04 | 20226263                | CC                              | TT                 | TT               | INTERGENIC                    |                    |                                                                   |
| SNP_22286_A_20266495 | NC_021163.1    | Ca_Kabuli_Chr04 | 20266495                | AA                              | GG                 | GG               | INTERGENIC                    |                    |                                                                   |
| SNP_22287_A_20266508 | NC_021163.1    | Ca_Kabuli_Chr04 | 20266508                | AA                              | CC                 | CC               | INTERGENIC                    |                    |                                                                   |
| SNP_22288_A_20266651 | NC_021163.1    | Ca_Kabuli_Chr04 | 20266651                | GG                              | AA                 | AA               | INTERGENIC                    |                    |                                                                   |
| SNP_22289_A_20266670 | NC_021163.1    | Ca_Kabuli_Chr04 | 20266670                | TT                              | CC                 | CC               | INTERGENIC                    |                    |                                                                   |
| SNP_22290_A_20266684 | NC_021163.1    | Ca_Kabuli_Chr04 | 20266684                | CC                              | AA                 | AA               | INTERGENIC                    |                    |                                                                   |
| SNP_22291_A_20280946 | NC_021163.1    | Ca_Kabuli_Chr04 | 20280946                | AA                              | CC                 | CC               | INTERGENIC                    |                    |                                                                   |
| SNP_22292_A_20342636 | NC_021163.1    | Ca_Kabuli_Chr04 | 20342636                | TT                              | CC                 | CC               | URR                           | 101507911          | isocitrate dehydrogenase [NAD] catalytic subunit 5, mitochondrial |
| SNP_22293_A_20419846 | NC_021163.1    | Ca_Kabuli_Chr04 | 20419846                | TT                              | AA                 | AA               | INTERGENIC                    |                    |                                                                   |
| SNP_22295_A_20478241 | NC_021163.1    | Ca_Kabuli_Chr04 | 20478241                | GG                              | AA                 | AA               | URR                           | 101511429          | cell division cycle protein 48 homolog                            |
| SNP_22296_A_20532147 | NC_021163.1    | Ca_Kabuli_Chr04 | 20532147                | GG                              | AA                 | AA               | INTERGENIC                    |                    |                                                                   |
| SNP_22298_A_20540455 | NC_021163.1    | Ca_Kabuli_Chr04 | 20540455                | TT                              | CC                 | CC               | INTERGENIC                    |                    |                                                                   |
| SNP_22299_A_20573203 | NC_021163.1    | Ca_Kabuli_Chr04 | 20573203                | CC                              | TT                 | TT               | INTERGENIC                    |                    |                                                                   |

| SNPs IDs             | Chromosome IDs | Chromosomes     | Physical positions (bp) | CDC Frontier genome (Reference genome) | (Pusa 1103 & HPNB) | (ILWC 46 & LPNB) | Sequence Components of genome | Gene accession IDs | Putative functions                  |
|----------------------|----------------|-----------------|-------------------------|----------------------------------------|--------------------|------------------|-------------------------------|--------------------|-------------------------------------|
| SNP_22300_A_20594476 | NC_021163.1    | Ca_Kabuli_Chr04 | 20594476                | AA                                     | TT                 | TT               | INTERGENIC                    |                    |                                     |
| SNP_22301_A_20615665 | NC_021163.1    | Ca_Kabuli_Chr04 | 20615665                | AA                                     | GG                 | GG               | URR                           | 101493201          | uncharacterized LOC101493201        |
| SNP_22302_A_20621552 | NC_021163.1    | Ca_Kabuli_Chr04 | 20621552                | CC                                     | TT                 | TT               | URR                           | 101513050          | nucleolar protein 58                |
| SNP_22303_A_20641399 | NC_021163.1    | Ca_Kabuli_Chr04 | 20641399                | AA                                     | GG                 | GG               | DRR                           | 101493517          | uncharacterized LOC101493517        |
| SNP_22305_A_20650666 | NC_021163.1    | Ca_Kabuli_Chr04 | 20650666                | TT                                     | AA                 | AA               | DRR                           | 101513691          | nuclear pore complex protein NUP160 |
| SNP_22306_A_20656083 | NC_021163.1    | Ca_Kabuli_Chr04 | 20656083                | GG                                     | CC                 | CC               | INTRON                        | 101513691          | nuclear pore complex protein NUP160 |
| SNP_22310_A_20738472 | NC_021163.1    | Ca_Kabuli_Chr04 | 20738472                | AA                                     | GG                 | GG               | INTERGENIC                    |                    |                                     |
| SNP_22311_A_20738499 | NC_021163.1    | Ca_Kabuli_Chr04 | 20738499                | AA                                     | GG                 | GG               | INTERGENIC                    |                    |                                     |
| SNP_22312_A_20738517 | NC_021163.1    | Ca_Kabuli_Chr04 | 20738517                | TT                                     | GG                 | GG               | INTERGENIC                    |                    |                                     |
| SNP_22313_A_20738526 | NC_021163.1    | Ca_Kabuli_Chr04 | 20738526                | GG                                     | AA                 | AA               | INTERGENIC                    |                    |                                     |
| SNP_22314_A_20766145 | NC_021163.1    | Ca_Kabuli_Chr04 | 20766145                | GG                                     | AA                 | AA               | URR                           | 101515009          | protein RRP45A-like                 |
| SNP_22316_A_20817654 | NC_021163.1    | Ca_Kabuli_Chr04 | 20817654                | GG                                     | TT                 | TT               | INTERGENIC                    |                    |                                     |
| SNP_22317_A_20819755 | NC_021163.1    | Ca_Kabuli_Chr04 | 20819755                | TT                                     | CC                 | CC               | INTERGENIC                    |                    |                                     |
| SNP_22318_A_20819763 | NC_021163.1    | Ca_Kabuli_Chr04 | 20819763                | AA                                     | GG                 | GG               | INTERGENIC                    |                    |                                     |
| SNP_22319_A_20819768 | NC_021163.1    | Ca_Kabuli_Chr04 | 20819768                | TT                                     | AA                 | AA               | INTERGENIC                    |                    |                                     |
| SNP_22320_A_20819770 | NC_021163.1    | Ca_Kabuli_Chr04 | 20819770                | CC                                     | GG                 | GG               | INTERGENIC                    |                    |                                     |
| SNP_22321_A_20819771 | NC_021163.1    | Ca_Kabuli_Chr04 | 20819771                | AA                                     | CC                 | CC               | INTERGENIC                    |                    |                                     |
| SNP_22322_A_20819803 | NC_021163.1    | Ca_Kabuli_Chr04 | 20819803                | AA                                     | CC                 | CC               | INTERGENIC                    |                    |                                     |
| SNP_22323_A_20819806 | NC_021163.1    | Ca_Kabuli_Chr04 | 20819806                | CC                                     | TT                 | TT               | INTERGENIC                    |                    |                                     |
| SNP_22324_A_20820629 | NC_021163.1    | Ca_Kabuli_Chr04 | 20820629                | TT                                     | CC                 | CC               | INTERGENIC                    |                    |                                     |
| SNP_22325_A_20830228 | NC_021163.1    | Ca_Kabuli_Chr04 | 20830228                | GG                                     | TT                 | TT               | INTERGENIC                    |                    |                                     |
| SNP_22326_A_20830263 | NC_021163.1    | Ca_Kabuli_Chr04 | 20830263                | TT                                     | CC                 | CC               | INTERGENIC                    |                    |                                     |

| SNPs IDs             | Chromosome IDs | Chromosomes     | Physical positions (bp) | CDC Frontier genome (Reference genome) | (Pusa 1103 & HPNB) | (ILWC 46 & LPNB) | Sequence genome | Components of | Gene accession IDs                 | Putative functions |
|----------------------|----------------|-----------------|-------------------------|----------------------------------------|--------------------|------------------|-----------------|---------------|------------------------------------|--------------------|
| SNP_22327_A_20830458 | NC_021163.1    | Ca_Kabuli_Chr04 | 20830458                | TT                                     | CC                 | CC               | INTERGENIC      |               |                                    |                    |
| SNP_22328_A_20830523 | NC_021163.1    | Ca_Kabuli_Chr04 | 20830523                | GG                                     | AA                 | AA               | INTERGENIC      |               |                                    |                    |
| SNP_22329_A_20845655 | NC_021163.1    | Ca_Kabuli_Chr04 | 20845655                | AA                                     | GG                 | GG               | INTERGENIC      |               |                                    |                    |
| SNP_22331_A_20928529 | NC_021163.1    | Ca_Kabuli_Chr04 | 20928529                | GG                                     | TT                 | TT               | INTERGENIC      |               |                                    |                    |
| SNP_22332_A_20997961 | NC_021163.1    | Ca_Kabuli_Chr04 | 20997961                | CC                                     | GG                 | GG               | INTERGENIC      |               |                                    |                    |
| SNP_22333_A_20997965 | NC_021163.1    | Ca_Kabuli_Chr04 | 20997965                | TT                                     | GG                 | GG               | INTERGENIC      |               |                                    |                    |
| SNP_22335_A_20998790 | NC_021163.1    | Ca_Kabuli_Chr04 | 20998790                | CC                                     | TT                 | TT               | INTERGENIC      |               |                                    |                    |
| SNP_22336_A_21008514 | NC_021163.1    | Ca_Kabuli_Chr04 | 21008514                | TT                                     | GG                 | GG               | INTERGENIC      |               |                                    |                    |
| SNP_22337_A_21008552 | NC_021163.1    | Ca_Kabuli_Chr04 | 21008552                | CC                                     | AA                 | AA               | INTERGENIC      |               |                                    |                    |
| SNP_22338_A_21008556 | NC_021163.1    | Ca_Kabuli_Chr04 | 21008556                | CC                                     | AA                 | AA               | INTERGENIC      |               |                                    |                    |
| SNP_22339_A_21015255 | NC_021163.1    | Ca_Kabuli_Chr04 | 21015255                | CC                                     | TT                 | TT               | INTERGENIC      |               |                                    |                    |
| SNP_22342_A_21063560 | NC_021163.1    | Ca_Kabuli_Chr04 | 21063560                | AA                                     | CC                 | CC               | INTERGENIC      |               |                                    |                    |
| SNP_22343_A_21067645 | NC_021163.1    | Ca_Kabuli_Chr04 | 21067645                | TT                                     | CC                 | CC               | INTERGENIC      |               |                                    |                    |
| SNP_22344_A_21071866 | NC_021163.1    | Ca_Kabuli_Chr04 | 21071866                | CC                                     | GG                 | GG               | DRR             | 101495983     | uncharacterized LOC101495983       |                    |
| SNP_22346_A_21076465 | NC_021163.1    | Ca_Kabuli_Chr04 | 21076465                | CC                                     | TT                 | TT               | DRR             | 101502556     | aspartic proteinase-like protein 2 |                    |
| SNP_22347_A_21076710 | NC_021163.1    | Ca_Kabuli_Chr04 | 21076710                | CC                                     | TT                 | TT               | DRR             | 101502556     | aspartic proteinase-like protein 2 |                    |
| SNP_22348_A_21105903 | NC_021163.1    | Ca_Kabuli_Chr04 | 21105903                | GG                                     | AA                 | AA               | INTRON          | 101502869     | aspartic proteinase-like protein 2 |                    |
| SNP_22349_A_21125560 | NC_021163.1    | Ca_Kabuli_Chr04 | 21125560                | GG                                     | AA                 | AA               | INTRON          | 101502869     | aspartic proteinase-like protein 2 |                    |
| SNP_22351_A_21185442 | NC_021163.1    | Ca_Kabuli_Chr04 | 21185442                | CC                                     | TT                 | TT               | INTRON          | 101502869     | aspartic proteinase-like protein 2 |                    |
| SNP_22352_A_21213431 | NC_021163.1    | Ca_Kabuli_Chr04 | 21213431                | TT                                     | CC                 | CC               | URR             | 101502869     | aspartic proteinase-like protein 2 |                    |
| SNP_22354_A_21229628 | NC_021163.1    | Ca_Kabuli_Chr04 | 21229628                | CC                                     | AA                 | AA               | INTERGENIC      |               |                                    |                    |
| SNP_22355_A_21229669 | NC_021163.1    | Ca_Kabuli_Chr04 | 21229669                | AA                                     | TT                 | TT               | INTERGENIC      |               |                                    |                    |

| SNPs IDs             | Chromosome IDs | Chromosomes     | Physical positions (bp) | CDC Frontier genome (Reference genome) | (Pusa 1103 & HPNB) | (ILWC 46 & LPNB) | Sequence Components of genome | Gene accession IDs | Putative functions                                   |
|----------------------|----------------|-----------------|-------------------------|----------------------------------------|--------------------|------------------|-------------------------------|--------------------|------------------------------------------------------|
| SNP_22356_A_21229753 | NC_021163.1    | Ca_Kabuli_Chr04 | 21229753                | GG                                     | CC                 | CC               | INTERGENIC                    |                    |                                                      |
| SNP_22357_A_21229780 | NC_021163.1    | Ca_Kabuli_Chr04 | 21229780                | AA                                     | GG                 | GG               | INTERGENIC                    |                    |                                                      |
| SNP_22358_A_21229861 | NC_021163.1    | Ca_Kabuli_Chr04 | 21229861                | AA                                     | CC                 | CC               | INTERGENIC                    |                    |                                                      |
| SNP_22359_A_21229884 | NC_021163.1    | Ca_Kabuli_Chr04 | 21229884                | TT                                     | CC                 | CC               | INTERGENIC                    |                    |                                                      |
| SNP_22360_A_21229968 | NC_021163.1    | Ca_Kabuli_Chr04 | 21229968                | GG                                     | TT                 | TT               | INTERGENIC                    |                    |                                                      |
| SNP_22361_A_21231328 | NC_021163.1    | Ca_Kabuli_Chr04 | 21231328                | AA                                     | GG                 | GG               | INTERGENIC                    |                    |                                                      |
| SNP_22362_A_21231441 | NC_021163.1    | Ca_Kabuli_Chr04 | 21231441                | GG                                     | CC                 | CC               | INTERGENIC                    |                    |                                                      |
| SNP_22363_A_21231506 | NC_021163.1    | Ca_Kabuli_Chr04 | 21231506                | TT                                     | CC                 | CC               | INTERGENIC                    |                    |                                                      |
| SNP_22364_A_21234316 | NC_021163.1    | Ca_Kabuli_Chr04 | 21234316                | AA                                     | GG                 | GG               | INTERGENIC                    |                    |                                                      |
| SNP_22365_A_21234651 | NC_021163.1    | Ca_Kabuli_Chr04 | 21234651                | CC                                     | AA                 | AA               | INTERGENIC                    |                    |                                                      |
| SNP_22366_A_21234709 | NC_021163.1    | Ca_Kabuli_Chr04 | 21234709                | TT                                     | GG                 | GG               | INTERGENIC                    |                    |                                                      |
| SNP_22367_A_21239758 | NC_021163.1    | Ca_Kabuli_Chr04 | 21239758                | AA                                     | GG                 | GG               | INTRON                        | 101503196          | probable 2-oxoglutarate/Fe(II)-dependent dioxygenase |
| SNP_22368_A_21239895 | NC_021163.1    | Ca_Kabuli_Chr04 | 21239895                | CC                                     | TT                 | TT               | INTRON                        | 101503196          | probable 2-oxoglutarate/Fe(II)-dependent dioxygenase |
| SNP_22369_A_21240167 | NC_021163.1    | Ca_Kabuli_Chr04 | 21240167                | AA                                     | TT                 | TT               | INTRON                        | 101503196          | probable 2-oxoglutarate/Fe(II)-dependent dioxygenase |
| SNP_22370_A_21240207 | NC_021163.1    | Ca_Kabuli_Chr04 | 21240207                | TT                                     | AA                 | AA               | INTRON                        | 101503196          | probable 2-oxoglutarate/Fe(II)-dependent dioxygenase |
| SNP_22371_A_21243734 | NC_021163.1    | Ca_Kabuli_Chr04 | 21243734                | GG                                     | AA                 | AA               | NON_SYNONYMOUS_CODING         | 101503196          | probable 2-oxoglutarate/Fe(II)-dependent dioxygenase |
| SNP_22372_A_21314477 | NC_021163.1    | Ca_Kabuli_Chr04 | 21314477                | CC                                     | TT                 | TT               | INTERGENIC                    |                    |                                                      |
| SNP_22373_A_21318138 | NC_021163.1    | Ca_Kabuli_Chr04 | 21318138                | CC                                     | AA                 | AA               | INTERGENIC                    |                    |                                                      |
| SNP_22374_A_21331108 | NC_021163.1    | Ca_Kabuli_Chr04 | 21331108                | TT                                     | AA                 | AA               | INTERGENIC                    |                    |                                                      |
| SNP_22375_A_21331112 | NC_021163.1    | Ca_Kabuli_Chr04 | 21331112                | TT                                     | CC                 | CC               | INTERGENIC                    |                    |                                                      |
| SNP_22376_A_21331119 | NC_021163.1    | Ca_Kabuli_Chr04 | 21331119                | TT                                     | CC                 | CC               | INTERGENIC                    |                    |                                                      |
| SNP_22377_A_21331164 | NC_021163.1    | Ca_Kabuli_Chr04 | 21331164                | AA                                     | CC                 | CC               | INTERGENIC                    |                    |                                                      |

| SNPs IDs             | Chromosome IDs | Chromosomes     | Physical positions (bp) | CDC Frontier genome (Reference genome) | (Pusa 1103 & HPNB) | (ILWC 46 & LPNB) | Sequence Components of genome | Gene accession IDs | Putative functions           |
|----------------------|----------------|-----------------|-------------------------|----------------------------------------|--------------------|------------------|-------------------------------|--------------------|------------------------------|
| SNP_22378_A_21331505 | NC_021163.1    | Ca_Kabuli_Chr04 | 21331505                | AA                                     | GG                 | GG               | INTERGENIC                    |                    |                              |
| SNP_22379_A_21331512 | NC_021163.1    | Ca_Kabuli_Chr04 | 21331512                | TT                                     | AA                 | AA               | INTERGENIC                    |                    |                              |
| SNP_22380_A_21331552 | NC_021163.1    | Ca_Kabuli_Chr04 | 21331552                | TT                                     | CC                 | CC               | INTERGENIC                    |                    |                              |
| SNP_22381_A_21346316 | NC_021163.1    | Ca_Kabuli_Chr04 | 21346316                | AA                                     | TT                 | TT               | INTERGENIC                    |                    |                              |
| SNP_22382_A_21347515 | NC_021163.1    | Ca_Kabuli_Chr04 | 21347515                | TT                                     | AA                 | AA               | INTERGENIC                    |                    |                              |
| SNP_22383_A_21347667 | NC_021163.1    | Ca_Kabuli_Chr04 | 21347667                | TT                                     | GG                 | GG               | INTERGENIC                    |                    |                              |
| SNP_22384_A_21347760 | NC_021163.1    | Ca_Kabuli_Chr04 | 21347760                | TT                                     | AA                 | AA               | INTERGENIC                    |                    |                              |
| SNP_22385_A_21347905 | NC_021163.1    | Ca_Kabuli_Chr04 | 21347905                | CC                                     | AA                 | AA               | INTERGENIC                    |                    |                              |
| SNP_22386_A_21357886 | NC_021163.1    | Ca_Kabuli_Chr04 | 21357886                | TT                                     | CC                 | CC               | INTERGENIC                    |                    |                              |
| SNP_22389_A_21426623 | NC_021163.1    | Ca_Kabuli_Chr04 | 21426623                | GG                                     | CC                 | CC               | INTERGENIC                    |                    |                              |
| SNP_22390_A_21426725 | NC_021163.1    | Ca_Kabuli_Chr04 | 21426725                | AA                                     | GG                 | GG               | INTERGENIC                    |                    |                              |
| SNP_22391_A_21463462 | NC_021163.1    | Ca_Kabuli_Chr04 | 21463462                | TT                                     | CC                 | CC               | INTERGENIC                    |                    |                              |
| SNP_22392_A_21511754 | NC_021163.1    | Ca_Kabuli_Chr04 | 21511754                | AA                                     | GG                 | GG               | INTRON                        | 101505441          | uncharacterized LOC101505441 |
| SNP_22393_A_21511779 | NC_021163.1    | Ca_Kabuli_Chr04 | 21511779                | TT                                     | GG                 | GG               | INTRON                        | 101505441          | uncharacterized LOC101505441 |
| SNP_22395_A_21514660 | NC_021163.1    | Ca_Kabuli_Chr04 | 21514660                | TT                                     | AA                 | AA               | INTRON                        | 101505441          | uncharacterized LOC101505441 |
| SNP_22396_A_21529154 | NC_021163.1    | Ca_Kabuli_Chr04 | 21529154                | CC                                     | TT                 | TT               | INTRON                        | 101505441          | uncharacterized LOC101505441 |
| SNP_22398_A_21529200 | NC_021163.1    | Ca_Kabuli_Chr04 | 21529200                | GG                                     | AA                 | AA               | INTRON                        | 101505441          | uncharacterized LOC101505441 |
| SNP_22400_A_21571039 | NC_021163.1    | Ca_Kabuli_Chr04 | 21571039                | CC                                     | TT                 | TT               | INTERGENIC                    |                    |                              |
| SNP_22401_A_21571185 | NC_021163.1    | Ca_Kabuli_Chr04 | 21571185                | AA                                     | GG                 | GG               | INTERGENIC                    |                    |                              |
| SNP_22402_A_21583540 | NC_021163.1    | Ca_Kabuli_Chr04 | 21583540                | GG                                     | AA                 | AA               | INTERGENIC                    |                    |                              |
| SNP_22403_A_21599133 | NC_021163.1    | Ca_Kabuli_Chr04 | 21599133                | GG                                     | AA                 | AA               | INTERGENIC                    |                    |                              |
| SNP_22405_A_21601868 | NC_021163.1    | Ca_Kabuli_Chr04 | 21601868                | TT                                     | CC                 | CC               | INTERGENIC                    |                    |                              |

| SNPs IDs             | Chromosome IDs | Chromosomes     | Physical positions (bp) | CDC Frontier genome (Reference genome) | (Pusa 1103 & HPNB) | (ILWC 46 & LPNB) | Sequence genome | Components of | Gene accession IDs | Putative functions |
|----------------------|----------------|-----------------|-------------------------|----------------------------------------|--------------------|------------------|-----------------|---------------|--------------------|--------------------|
| SNP_22406_A_21601908 | NC_021163.1    | Ca_Kabuli_Chr04 | 21601908                | TT                                     | AA                 | AA               | INTERGENIC      |               |                    |                    |
| SNP_22407_A_21601968 | NC_021163.1    | Ca_Kabuli_Chr04 | 21601968                | AA                                     | CC                 | CC               | INTERGENIC      |               |                    |                    |
| SNP_22408_A_21601974 | NC_021163.1    | Ca_Kabuli_Chr04 | 21601974                | TT                                     | AA                 | AA               | INTERGENIC      |               |                    |                    |
| SNP_22409_A_21607236 | NC_021163.1    | Ca_Kabuli_Chr04 | 21607236                | AA                                     | CC                 | CC               | INTERGENIC      |               |                    |                    |
| SNP_22410_A_21607300 | NC_021163.1    | Ca_Kabuli_Chr04 | 21607300                | TT                                     | CC                 | CC               | INTERGENIC      |               |                    |                    |
| SNP_22411_A_21607615 | NC_021163.1    | Ca_Kabuli_Chr04 | 21607615                | AA                                     | GG                 | GG               | INTERGENIC      |               |                    |                    |
| SNP_22412_A_21607747 | NC_021163.1    | Ca_Kabuli_Chr04 | 21607747                | TT                                     | CC                 | CC               | INTERGENIC      |               |                    |                    |
| SNP_22413_A_21607768 | NC_021163.1    | Ca_Kabuli_Chr04 | 21607768                | TT                                     | GG                 | GG               | INTERGENIC      |               |                    |                    |
| SNP_22414_A_21607903 | NC_021163.1    | Ca_Kabuli_Chr04 | 21607903                | GG                                     | AA                 | AA               | INTERGENIC      |               |                    |                    |
| SNP_22415_A_21609261 | NC_021163.1    | Ca_Kabuli_Chr04 | 21609261                | TT                                     | AA                 | AA               | INTERGENIC      |               |                    |                    |
| SNP_22416_A_21622088 | NC_021163.1    | Ca_Kabuli_Chr04 | 21622088                | AA                                     | GG                 | GG               | INTERGENIC      |               |                    |                    |
| SNP_22417_A_21622089 | NC_021163.1    | Ca_Kabuli_Chr04 | 21622089                | GG                                     | AA                 | AA               | INTERGENIC      |               |                    |                    |
| SNP_22418_A_21622187 | NC_021163.1    | Ca_Kabuli_Chr04 | 21622187                | TT                                     | CC                 | CC               | INTERGENIC      |               |                    |                    |
| SNP_22419_A_21622353 | NC_021163.1    | Ca_Kabuli_Chr04 | 21622353                | GG                                     | TT                 | TT               | INTERGENIC      |               |                    |                    |
| SNP_22420_A_21622641 | NC_021163.1    | Ca_Kabuli_Chr04 | 21622641                | AA                                     | GG                 | GG               | INTERGENIC      |               |                    |                    |
| SNP_22421_A_21623016 | NC_021163.1    | Ca_Kabuli_Chr04 | 21623016                | AA                                     | GG                 | GG               | INTERGENIC      |               |                    |                    |
| SNP_22423_A_21684093 | NC_021163.1    | Ca_Kabuli_Chr04 | 21684093                | TT                                     | AA                 | AA               | INTERGENIC      |               |                    |                    |
| SNP_22424_A_21684736 | NC_021163.1    | Ca_Kabuli_Chr04 | 21684736                | CC                                     | TT                 | TT               | INTERGENIC      |               |                    |                    |
| SNP_22425_A_21691029 | NC_021163.1    | Ca_Kabuli_Chr04 | 21691029                | GG                                     | AA                 | AA               | INTERGENIC      |               |                    |                    |
| SNP_22426_A_21691060 | NC_021163.1    | Ca_Kabuli_Chr04 | 21691060                | CC                                     | TT                 | TT               | INTERGENIC      |               |                    |                    |
| SNP_22427_A_21691100 | NC_021163.1    | Ca_Kabuli_Chr04 | 21691100                | AA                                     | GG                 | GG               | INTERGENIC      |               |                    |                    |
| SNP_22428_A_21693559 | NC_021163.1    | Ca_Kabuli_Chr04 | 21693559                | TT                                     | GG                 | GG               | INTERGENIC      |               |                    |                    |



| SNPs IDs             | Chromosome IDs | Chromosomes     | Physical positions (bp) | CDC Frontier genome (Reference genome) | (Pusa 1103 & HPNB) | (ILWC 46 & LPNB) | Sequence genome | Components of | Gene accession IDs                | Putative functions |
|----------------------|----------------|-----------------|-------------------------|----------------------------------------|--------------------|------------------|-----------------|---------------|-----------------------------------|--------------------|
| SNP_22429_A_21694217 | NC_021163.1    | Ca_Kabuli_Chr04 | 21694217                | CC                                     | AA                 | AA               | INTERGENIC      |               |                                   |                    |
| SNP_22430_A_21731646 | NC_021163.1    | Ca_Kabuli_Chr04 | 21731646                | TT                                     | CC                 | CC               | INTERGENIC      |               |                                   |                    |
| SNP_22431_A_21731806 | NC_021163.1    | Ca_Kabuli_Chr04 | 21731806                | AA                                     | TT                 | TT               | INTERGENIC      |               |                                   |                    |
| SNP_22432_A_21731852 | NC_021163.1    | Ca_Kabuli_Chr04 | 21731852                | GG                                     | AA                 | AA               | INTERGENIC      |               |                                   |                    |
| SNP_22433_A_21731859 | NC_021163.1    | Ca_Kabuli_Chr04 | 21731859                | AA                                     | TT                 | TT               | INTERGENIC      |               |                                   |                    |
| SNP_22434_A_21744752 | NC_021163.1    | Ca_Kabuli_Chr04 | 21744752                | CC                                     | TT                 | TT               | INTERGENIC      |               |                                   |                    |
| SNP_22435_A_21778566 | NC_021163.1    | Ca_Kabuli_Chr04 | 21778566                | TT                                     | CC                 | CC               | URR             | 101500956     | UDP-glycosyltransferase 73C3-like |                    |
| SNP_22436_A_21790801 | NC_021163.1    | Ca_Kabuli_Chr04 | 21790801                | TT                                     | CC                 | CC               | INTERGENIC      |               |                                   |                    |
| SNP_22437_A_21804593 | NC_021163.1    | Ca_Kabuli_Chr04 | 21804593                | GG                                     | AA                 | AA               | INTERGENIC      |               |                                   |                    |
| SNP_22438_A_21804619 | NC_021163.1    | Ca_Kabuli_Chr04 | 21804619                | GG                                     | AA                 | AA               | INTERGENIC      |               |                                   |                    |
| SNP_22439_A_21804742 | NC_021163.1    | Ca_Kabuli_Chr04 | 21804742                | AA                                     | GG                 | GG               | INTERGENIC      |               |                                   |                    |
| SNP_22441_A_21804788 | NC_021163.1    | Ca_Kabuli_Chr04 | 21804788                | TT                                     | GG                 | GG               | INTERGENIC      |               |                                   |                    |
| SNP_22442_A_21804812 | NC_021163.1    | Ca_Kabuli_Chr04 | 21804812                | AA                                     | GG                 | GG               | INTERGENIC      |               |                                   |                    |
| SNP_22443_A_21804822 | NC_021163.1    | Ca_Kabuli_Chr04 | 21804822                | GG                                     | AA                 | AA               | INTERGENIC      |               |                                   |                    |
| SNP_22444_A_21839323 | NC_021163.1    | Ca_Kabuli_Chr04 | 21839323                | GG                                     | AA                 | AA               | INTERGENIC      |               |                                   |                    |
| SNP_22445_A_21849320 | NC_021163.1    | Ca_Kabuli_Chr04 | 21849320                | TT                                     | CC                 | CC               | INTERGENIC      |               |                                   |                    |
| SNP_22446_A_21849528 | NC_021163.1    | Ca_Kabuli_Chr04 | 21849528                | GG                                     | AA                 | AA               | INTERGENIC      |               |                                   |                    |
| SNP_22447_A_21849656 | NC_021163.1    | Ca_Kabuli_Chr04 | 21849656                | AA                                     | GG                 | GG               | INTERGENIC      |               |                                   |                    |
| SNP_22448_A_21887828 | NC_021163.1    | Ca_Kabuli_Chr04 | 21887828                | GG                                     | TT                 | TT               | INTERGENIC      |               |                                   |                    |
| SNP_22450_A_21928816 | NC_021163.1    | Ca_Kabuli_Chr04 | 21928816                | GG                                     | AA                 | AA               | INTERGENIC      |               |                                   |                    |
| SNP_22451_A_21929650 | NC_021163.1    | Ca_Kabuli_Chr04 | 21929650                | AA                                     | GG                 | GG               | INTERGENIC      |               |                                   |                    |
| SNP_22452_A_21930063 | NC_021163.1    | Ca_Kabuli_Chr04 | 21930063                | CC                                     | AA                 | AA               | INTERGENIC      |               |                                   |                    |

| SNPs IDs             | Chromosome IDs | Chromosomes     | Physical positions (bp) | CDC Frontier genome (Reference genome) | (Pusa 1103 & HPNB) | (ILWC 46 & LPNB) | Sequence genome | Components of | Gene accession IDs                   | Putative functions |
|----------------------|----------------|-----------------|-------------------------|----------------------------------------|--------------------|------------------|-----------------|---------------|--------------------------------------|--------------------|
| SNP_22453_A_21936452 | NC_021163.1    | Ca_Kabuli_Chr04 | 21936452                | AA                                     | GG                 | GG               | INTERGENIC      |               |                                      |                    |
| SNP_22454_A_21936764 | NC_021163.1    | Ca_Kabuli_Chr04 | 21936764                | GG                                     | TT                 | TT               | INTERGENIC      |               |                                      |                    |
| SNP_22455_A_21936784 | NC_021163.1    | Ca_Kabuli_Chr04 | 21936784                | CC                                     | TT                 | TT               | INTERGENIC      |               |                                      |                    |
| SNP_22456_A_21936785 | NC_021163.1    | Ca_Kabuli_Chr04 | 21936785                | CC                                     | TT                 | TT               | INTERGENIC      |               |                                      |                    |
| SNP_22457_A_21936801 | NC_021163.1    | Ca_Kabuli_Chr04 | 21936801                | AA                                     | TT                 | TT               | INTERGENIC      |               |                                      |                    |
| SNP_22458_A_21946535 | NC_021163.1    | Ca_Kabuli_Chr04 | 21946535                | TT                                     | GG                 | GG               | DRR             | 101510919     | auxin-induced protein 6B-like        |                    |
| SNP_22459_A_22027194 | NC_021163.1    | Ca_Kabuli_Chr04 | 22027194                | AA                                     | GG                 | GG               | INTERGENIC      |               |                                      |                    |
| SNP_22460_A_22052628 | NC_021163.1    | Ca_Kabuli_Chr04 | 22052628                | TT                                     | AA                 | AA               | INTERGENIC      |               |                                      |                    |
| SNP_22461_A_22052881 | NC_021163.1    | Ca_Kabuli_Chr04 | 22052881                | GG                                     | AA                 | AA               | INTERGENIC      |               |                                      |                    |
| SNP_22462_A_22089471 | NC_021163.1    | Ca_Kabuli_Chr04 | 22089471                | AA                                     | GG                 | GG               | URR             | 101491238     | protein ROS1-like                    |                    |
| SNP_22463_A_22092886 | NC_021163.1    | Ca_Kabuli_Chr04 | 22092886                | GG                                     | AA                 | AA               | INTERGENIC      |               |                                      |                    |
| SNP_22465_A_22113745 | NC_021163.1    | Ca_Kabuli_Chr04 | 22113745                | CC                                     | TT                 | TT               | INTERGENIC      |               |                                      |                    |
| SNP_22466_A_22115061 | NC_021163.1    | Ca_Kabuli_Chr04 | 22115061                | AA                                     | GG                 | GG               | INTERGENIC      |               |                                      |                    |
| SNP_22467_A_22127622 | NC_021163.1    | Ca_Kabuli_Chr04 | 22127622                | TT                                     | CC                 | CC               | DRR             | 101491564     | ribosome production factor 2 homolog |                    |
| SNP_22468_A_22127884 | NC_021163.1    | Ca_Kabuli_Chr04 | 22127884                | GG                                     | CC                 | CC               | URR             | 101513159     | heat stress transcription factor A-3 |                    |
| SNP_22469_A_22134669 | NC_021163.1    | Ca_Kabuli_Chr04 | 22134669                | AA                                     | TT                 | TT               | URR             | 101491564     | ribosome production factor 2 homolog |                    |
| SNP_22470_A_22134969 | NC_021163.1    | Ca_Kabuli_Chr04 | 22134969                | GG                                     | CC                 | CC               | URR             | 101491564     | ribosome production factor 2 homolog |                    |
| SNP_22472_A_22135052 | NC_021163.1    | Ca_Kabuli_Chr04 | 22135052                | TT                                     | CC                 | CC               | INTERGENIC      |               |                                      |                    |
| SNP_22473_A_22135108 | NC_021163.1    | Ca_Kabuli_Chr04 | 22135108                | AA                                     | TT                 | TT               | INTERGENIC      |               |                                      |                    |
| SNP_22474_A_22135118 | NC_021163.1    | Ca_Kabuli_Chr04 | 22135118                | CC                                     | AA                 | AA               | INTERGENIC      |               |                                      |                    |
| SNP_22475_A_22135439 | NC_021163.1    | Ca_Kabuli_Chr04 | 22135439                | AA                                     | GG                 | GG               | DRR             | 101513482     | ribosome production factor 2 homolog |                    |
| SNP_22476_A_22135485 | NC_021163.1    | Ca_Kabuli_Chr04 | 22135485                | GG                                     | CC                 | CC               | DRR             | 101513482     | ribosome production factor 2 homolog |                    |

| SNPs IDs             | Chromosome IDs | Chromosomes     | Physical positions (bp) | CDC Frontier genome (Reference genome) | (Pusa 1103 & HPNB) | (ILWC 46 & LPNB) | Sequence Components of genome | Gene accession IDs | Putative functions                   |
|----------------------|----------------|-----------------|-------------------------|----------------------------------------|--------------------|------------------|-------------------------------|--------------------|--------------------------------------|
| SNP_22477_A_22135519 | NC_021163.1    | Ca_Kabuli_Chr04 | 22135519                | GG                                     | AA                 | AA               | DRR                           | 101513482          | ribosome production factor 2 homolog |
| SNP_22478_A_22135523 | NC_021163.1    | Ca_Kabuli_Chr04 | 22135523                | AA                                     | TT                 | TT               | DRR                           | 101513482          | ribosome production factor 2 homolog |
| SNP_22479_A_22135542 | NC_021163.1    | Ca_Kabuli_Chr04 | 22135542                | AA                                     | CC                 | CC               | DRR                           | 101513482          | ribosome production factor 2 homolog |
| SNP_22480_A_22135622 | NC_021163.1    | Ca_Kabuli_Chr04 | 22135622                | TT                                     | AA                 | AA               | DRR                           | 101513482          | ribosome production factor 2 homolog |
| SNP_22481_A_22135690 | NC_021163.1    | Ca_Kabuli_Chr04 | 22135690                | AA                                     | GG                 | GG               | DRR                           | 101513482          | ribosome production factor 2 homolog |
| SNP_22482_A_22135714 | NC_021163.1    | Ca_Kabuli_Chr04 | 22135714                | GG                                     | AA                 | AA               | DRR                           | 101513482          | ribosome production factor 2 homolog |
| SNP_22483_A_22135718 | NC_021163.1    | Ca_Kabuli_Chr04 | 22135718                | GG                                     | TT                 | TT               | DRR                           | 101513482          | ribosome production factor 2 homolog |
| SNP_22484_A_22135724 | NC_021163.1    | Ca_Kabuli_Chr04 | 22135724                | CC                                     | AA                 | AA               | DRR                           | 101513482          | ribosome production factor 2 homolog |
| SNP_22485_A_22135765 | NC_021163.1    | Ca_Kabuli_Chr04 | 22135765                | CC                                     | AA                 | AA               | DRR                           | 101513482          | ribosome production factor 2 homolog |
| SNP_22486_A_22135774 | NC_021163.1    | Ca_Kabuli_Chr04 | 22135774                | GG                                     | AA                 | AA               | DRR                           | 101513482          | ribosome production factor 2 homolog |
| SNP_22487_A_22135787 | NC_021163.1    | Ca_Kabuli_Chr04 | 22135787                | GG                                     | AA                 | AA               | DRR                           | 101513482          | ribosome production factor 2 homolog |
| SNP_22488_A_22135788 | NC_021163.1    | Ca_Kabuli_Chr04 | 22135788                | TT                                     | CC                 | CC               | DRR                           | 101513482          | ribosome production factor 2 homolog |
| SNP_22489_A_22135818 | NC_021163.1    | Ca_Kabuli_Chr04 | 22135818                | CC                                     | TT                 | TT               | DRR                           | 101513482          | ribosome production factor 2 homolog |
| SNP_22490_A_22135886 | NC_021163.1    | Ca_Kabuli_Chr04 | 22135886                | AA                                     | CC                 | CC               | DRR                           | 101513482          | ribosome production factor 2 homolog |
| SNP_22491_A_22135901 | NC_021163.1    | Ca_Kabuli_Chr04 | 22135901                | TT                                     | CC                 | CC               | DRR                           | 101513482          | ribosome production factor 2 homolog |
| SNP_22492_A_22135922 | NC_021163.1    | Ca_Kabuli_Chr04 | 22135922                | CC                                     | AA                 | AA               | DRR                           | 101513482          | ribosome production factor 2 homolog |
| SNP_22493_A_22135932 | NC_021163.1    | Ca_Kabuli_Chr04 | 22135932                | GG                                     | CC                 | CC               | DRR                           | 101513482          | ribosome production factor 2 homolog |
| SNP_22494_A_22135973 | NC_021163.1    | Ca_Kabuli_Chr04 | 22135973                | AA                                     | TT                 | TT               | DRR                           | 101513482          | ribosome production factor 2 homolog |
| SNP_22495_A_22135999 | NC_021163.1    | Ca_Kabuli_Chr04 | 22135999                | AA                                     | GG                 | GG               | DRR                           | 101513482          | ribosome production factor 2 homolog |
| SNP_22496_A_22136020 | NC_021163.1    | Ca_Kabuli_Chr04 | 22136020                | GG                                     | AA                 | AA               | DRR                           | 101513482          | ribosome production factor 2 homolog |
| SNP_22497_A_22136088 | NC_021163.1    | Ca_Kabuli_Chr04 | 22136088                | GG                                     | TT                 | TT               | DRR                           | 101513482          | ribosome production factor 2 homolog |
| SNP_22498_A_22136125 | NC_021163.1    | Ca_Kabuli_Chr04 | 22136125                | TT                                     | AA                 | AA               | DRR                           | 101513482          | ribosome production factor 2 homolog |

| SNPs IDs             | Chromosome IDs | Chromosomes     | Physical positions (bp) | CDC Frontier genome (Reference genome) | (Pusa 1103 & HPNB) | (ILWC 46 & LPNB) | Sequence Components of genome | Gene accession IDs | Putative functions                   |
|----------------------|----------------|-----------------|-------------------------|----------------------------------------|--------------------|------------------|-------------------------------|--------------------|--------------------------------------|
| SNP_22499_A_22136128 | NC_021163.1    | Ca_Kabuli_Chr04 | 22136128                | GG                                     | AA                 | AA               | DRR                           | 101513482          | ribosome production factor 2 homolog |
| SNP_22500_A_22136129 | NC_021163.1    | Ca_Kabuli_Chr04 | 22136129                | AA                                     | TT                 | TT               | DRR                           | 101513482          | ribosome production factor 2 homolog |
| SNP_22501_A_22136174 | NC_021163.1    | Ca_Kabuli_Chr04 | 22136174                | AA                                     | TT                 | TT               | NON_SYNONYMOUS_CODING         | 101513482          | ribosome production factor 2 homolog |
| SNP_22502_A_22136215 | NC_021163.1    | Ca_Kabuli_Chr04 | 22136215                | GG                                     | AA                 | AA               | NON_SYNONYMOUS_CODING         | 101513482          | ribosome production factor 2 homolog |
| SNP_22503_A_22136281 | NC_021163.1    | Ca_Kabuli_Chr04 | 22136281                | AA                                     | GG                 | GG               | INTRON                        | 101513482          | ribosome production factor 2 homolog |
| SNP_22504_A_22136283 | NC_021163.1    | Ca_Kabuli_Chr04 | 22136283                | TT                                     | CC                 | CC               | INTRON                        | 101513482          | ribosome production factor 2 homolog |
| SNP_22505_A_22136289 | NC_021163.1    | Ca_Kabuli_Chr04 | 22136289                | AA                                     | CC                 | CC               | INTRON                        | 101513482          | ribosome production factor 2 homolog |
| SNP_22506_A_22137399 | NC_021163.1    | Ca_Kabuli_Chr04 | 22137399                | AA                                     | GG                 | GG               | INTRON                        | 101513482          | ribosome production factor 2 homolog |
| SNP_22507_A_22191794 | NC_021163.1    | Ca_Kabuli_Chr04 | 22191794                | CC                                     | TT                 | TT               | INTERGENIC                    |                    |                                      |
| SNP_22508_A_22265399 | NC_021163.1    | Ca_Kabuli_Chr04 | 22265399                | CC                                     | AA                 | AA               | INTERGENIC                    |                    |                                      |
| SNP_22509_A_22304336 | NC_021163.1    | Ca_Kabuli_Chr04 | 22304336                | AA                                     | CC                 | CC               | INTERGENIC                    |                    |                                      |
| SNP_22511_A_22314038 | NC_021163.1    | Ca_Kabuli_Chr04 | 22314038                | CC                                     | GG                 | GG               | INTERGENIC                    |                    |                                      |
| SNP_22514_A_22381766 | NC_021163.1    | Ca_Kabuli_Chr04 | 22381766                | GG                                     | AA                 | AA               | INTERGENIC                    |                    |                                      |
| SNP_22515_A_22412124 | NC_021163.1    | Ca_Kabuli_Chr04 | 22412124                | AA                                     | GG                 | GG               | INTERGENIC                    |                    |                                      |
| SNP_22516_A_22412185 | NC_021163.1    | Ca_Kabuli_Chr04 | 22412185                | GG                                     | AA                 | AA               | INTERGENIC                    |                    |                                      |
| SNP_22517_A_22412201 | NC_021163.1    | Ca_Kabuli_Chr04 | 22412201                | TT                                     | CC                 | CC               | INTERGENIC                    |                    |                                      |
| SNP_22518_A_22412216 | NC_021163.1    | Ca_Kabuli_Chr04 | 22412216                | AA                                     | GG                 | GG               | INTERGENIC                    |                    |                                      |
| SNP_22519_A_22412220 | NC_021163.1    | Ca_Kabuli_Chr04 | 22412220                | TT                                     | CC                 | CC               | INTERGENIC                    |                    |                                      |
| SNP_22521_A_22444144 | NC_021163.1    | Ca_Kabuli_Chr04 | 22444144                | AA                                     | TT                 | TT               | INTERGENIC                    |                    |                                      |
| SNP_22522_A_22458609 | NC_021163.1    | Ca_Kabuli_Chr04 | 22458609                | CC                                     | AA                 | AA               | INTERGENIC                    |                    |                                      |
| SNP_22523_A_22483854 | NC_021163.1    | Ca_Kabuli_Chr04 | 22483854                | AA                                     | GG                 | GG               | INTERGENIC                    |                    |                                      |
| SNP_22524_A_22483941 | NC_021163.1    | Ca_Kabuli_Chr04 | 22483941                | TT                                     | CC                 | CC               | INTERGENIC                    |                    |                                      |

| SNPs IDs             | Chromosome IDs | Chromosomes     | Physical positions (bp) | CDC Frontier genome (Reference genome) | (Pusa 1103 & HPNB) | (ILWC 46 & LPNB) | Sequence genome | Components of | Gene accession IDs | Putative functions |
|----------------------|----------------|-----------------|-------------------------|----------------------------------------|--------------------|------------------|-----------------|---------------|--------------------|--------------------|
| SNP_22527_A_22521172 | NC_021163.1    | Ca_Kabuli_Chr04 | 22521172                | GG                                     | TT                 | TT               | INTERGENIC      |               |                    |                    |
| SNP_22528_A_22527458 | NC_021163.1    | Ca_Kabuli_Chr04 | 22527458                | TT                                     | GG                 | GG               | INTERGENIC      |               |                    |                    |
| SNP_22530_A_22562649 | NC_021163.1    | Ca_Kabuli_Chr04 | 22562649                | CC                                     | AA                 | AA               | INTERGENIC      |               |                    |                    |
| SNP_22531_A_22570038 | NC_021163.1    | Ca_Kabuli_Chr04 | 22570038                | GG                                     | AA                 | AA               | INTERGENIC      |               |                    |                    |
| SNP_22532_A_22570045 | NC_021163.1    | Ca_Kabuli_Chr04 | 22570045                | AA                                     | TT                 | TT               | INTERGENIC      |               |                    |                    |
| SNP_22533_A_22570384 | NC_021163.1    | Ca_Kabuli_Chr04 | 22570384                | TT                                     | CC                 | CC               | INTERGENIC      |               |                    |                    |
| SNP_22534_A_22570443 | NC_021163.1    | Ca_Kabuli_Chr04 | 22570443                | TT                                     | CC                 | CC               | INTERGENIC      |               |                    |                    |
| SNP_22535_A_22570496 | NC_021163.1    | Ca_Kabuli_Chr04 | 22570496                | AA                                     | GG                 | GG               | INTERGENIC      |               |                    |                    |
| SNP_22536_A_22570981 | NC_021163.1    | Ca_Kabuli_Chr04 | 22570981                | AA                                     | CC                 | CC               | INTERGENIC      |               |                    |                    |
| SNP_22537_A_22570989 | NC_021163.1    | Ca_Kabuli_Chr04 | 22570989                | AA                                     | GG                 | GG               | INTERGENIC      |               |                    |                    |
| SNP_22538_A_22601338 | NC_021163.1    | Ca_Kabuli_Chr04 | 22601338                | TT                                     | AA                 | AA               | INTERGENIC      |               |                    |                    |
| SNP_22539_A_22601429 | NC_021163.1    | Ca_Kabuli_Chr04 | 22601429                | AA                                     | CC                 | CC               | INTERGENIC      |               |                    |                    |
| SNP_22540_A_22601500 | NC_021163.1    | Ca_Kabuli_Chr04 | 22601500                | AA                                     | TT                 | TT               | INTERGENIC      |               |                    |                    |
| SNP_22541_A_22601595 | NC_021163.1    | Ca_Kabuli_Chr04 | 22601595                | AA                                     | GG                 | GG               | INTERGENIC      |               |                    |                    |
| SNP_22542_A_22601657 | NC_021163.1    | Ca_Kabuli_Chr04 | 22601657                | TT                                     | GG                 | GG               | INTERGENIC      |               |                    |                    |
| SNP_22544_A_22618011 | NC_021163.1    | Ca_Kabuli_Chr04 | 22618011                | TT                                     | GG                 | GG               | INTERGENIC      |               |                    |                    |
| SNP_22545_A_22618309 | NC_021163.1    | Ca_Kabuli_Chr04 | 22618309                | TT                                     | CC                 | CC               | INTERGENIC      |               |                    |                    |
| SNP_22546_A_22622199 | NC_021163.1    | Ca_Kabuli_Chr04 | 22622199                | GG                                     | AA                 | AA               | INTERGENIC      |               |                    |                    |
| SNP_22548_A_22657292 | NC_021163.1    | Ca_Kabuli_Chr04 | 22657292                | GG                                     | AA                 | AA               | INTERGENIC      |               |                    |                    |
| SNP_22549_A_22657526 | NC_021163.1    | Ca_Kabuli_Chr04 | 22657526                | AA                                     | GG                 | GG               | INTERGENIC      |               |                    |                    |
| SNP_22550_A_22658927 | NC_021163.1    | Ca_Kabuli_Chr04 | 22658927                | CC                                     | TT                 | TT               | INTERGENIC      |               |                    |                    |
| SNP_22551_A_22661020 | NC_021163.1    | Ca_Kabuli_Chr04 | 22661020                | AA                                     | GG                 | GG               | INTERGENIC      |               |                    |                    |

| SNPs IDs             | Chromosome IDs | Chromosomes     | Physical positions (bp) | CDC Frontier genome (Reference genome) | (Pusa 1103 & HPNB) | (ILWC 46 & LPNB) | Sequence genome | Components of | Gene accession IDs | Putative functions |
|----------------------|----------------|-----------------|-------------------------|----------------------------------------|--------------------|------------------|-----------------|---------------|--------------------|--------------------|
| SNP_22552_A_22661060 | NC_021163.1    | Ca_Kabuli_Chr04 | 22661060                | GG                                     | TT                 | TT               | INTERGENIC      |               |                    |                    |
| SNP_22553_A_22662557 | NC_021163.1    | Ca_Kabuli_Chr04 | 22662557                | AA                                     | CC                 | CC               | INTERGENIC      |               |                    |                    |
| SNP_22554_A_22663993 | NC_021163.1    | Ca_Kabuli_Chr04 | 22663993                | TT                                     | GG                 | GG               | INTERGENIC      |               |                    |                    |
| SNP_22555_A_22664477 | NC_021163.1    | Ca_Kabuli_Chr04 | 22664477                | AA                                     | TT                 | TT               | INTERGENIC      |               |                    |                    |
| SNP_22556_A_22664748 | NC_021163.1    | Ca_Kabuli_Chr04 | 22664748                | CC                                     | AA                 | AA               | INTERGENIC      |               |                    |                    |
| SNP_22557_A_22664759 | NC_021163.1    | Ca_Kabuli_Chr04 | 22664759                | GG                                     | AA                 | AA               | INTERGENIC      |               |                    |                    |
| SNP_22558_A_22664777 | NC_021163.1    | Ca_Kabuli_Chr04 | 22664777                | AA                                     | GG                 | GG               | INTERGENIC      |               |                    |                    |
| SNP_22559_A_22664798 | NC_021163.1    | Ca_Kabuli_Chr04 | 22664798                | TT                                     | CC                 | CC               | INTERGENIC      |               |                    |                    |
| SNP_22560_A_22664808 | NC_021163.1    | Ca_Kabuli_Chr04 | 22664808                | AA                                     | CC                 | CC               | INTERGENIC      |               |                    |                    |
| SNP_22561_A_22664810 | NC_021163.1    | Ca_Kabuli_Chr04 | 22664810                | TT                                     | AA                 | AA               | INTERGENIC      |               |                    |                    |
| SNP_22563_A_22664892 | NC_021163.1    | Ca_Kabuli_Chr04 | 22664892                | CC                                     | AA                 | AA               | INTERGENIC      |               |                    |                    |
| SNP_22565_A_22664933 | NC_021163.1    | Ca_Kabuli_Chr04 | 22664933                | TT                                     | CC                 | CC               | INTERGENIC      |               |                    |                    |
| SNP_22566_A_22667794 | NC_021163.1    | Ca_Kabuli_Chr04 | 22667794                | TT                                     | GG                 | GG               | INTERGENIC      |               |                    |                    |
| SNP_22567_A_22667797 | NC_021163.1    | Ca_Kabuli_Chr04 | 22667797                | AA                                     | GG                 | GG               | INTERGENIC      |               |                    |                    |
| SNP_22568_A_22668226 | NC_021163.1    | Ca_Kabuli_Chr04 | 22668226                | TT                                     | CC                 | CC               | INTERGENIC      |               |                    |                    |
| SNP_22569_A_22668592 | NC_021163.1    | Ca_Kabuli_Chr04 | 22668592                | CC                                     | TT                 | TT               | INTERGENIC      |               |                    |                    |
| SNP_22572_A_22675756 | NC_021163.1    | Ca_Kabuli_Chr04 | 22675756                | TT                                     | AA                 | AA               | INTERGENIC      |               |                    |                    |
| SNP_22573_A_22676018 | NC_021163.1    | Ca_Kabuli_Chr04 | 22676018                | TT                                     | AA                 | AA               | INTERGENIC      |               |                    |                    |
| SNP_22574_A_22677264 | NC_021163.1    | Ca_Kabuli_Chr04 | 22677264                | CC                                     | TT                 | TT               | INTERGENIC      |               |                    |                    |
| SNP_22575_A_22677283 | NC_021163.1    | Ca_Kabuli_Chr04 | 22677283                | AA                                     | GG                 | GG               | INTERGENIC      |               |                    |                    |
| SNP_22576_A_22677298 | NC_021163.1    | Ca_Kabuli_Chr04 | 22677298                | TT                                     | GG                 | GG               | INTERGENIC      |               |                    |                    |
| SNP_22577_A_22677355 | NC_021163.1    | Ca_Kabuli_Chr04 | 22677355                | CC                                     | GG                 | GG               | INTERGENIC      |               |                    |                    |

| SNPs IDs             | Chromosome IDs | Chromosomes     | Physical positions (bp) | CDC Frontier (Reference genome) | (Pusa 1103 & HPNB) | (ILWC 46 & LPNB) | Sequence genome | Components of | Gene accession IDs | Putative functions |
|----------------------|----------------|-----------------|-------------------------|---------------------------------|--------------------|------------------|-----------------|---------------|--------------------|--------------------|
| SNP_22578_A_22677365 | NC_021163.1    | Ca_Kabuli_Chr04 | 22677365                | TT                              | CC                 | CC               | INTERGENIC      |               |                    |                    |
| SNP_22579_A_22677518 | NC_021163.1    | Ca_Kabuli_Chr04 | 22677518                | CC                              | TT                 | TT               | INTERGENIC      |               |                    |                    |
| SNP_22580_A_22677802 | NC_021163.1    | Ca_Kabuli_Chr04 | 22677802                | CC                              | TT                 | TT               | INTERGENIC      |               |                    |                    |
| SNP_22581_A_22678683 | NC_021163.1    | Ca_Kabuli_Chr04 | 22678683                | TT                              | GG                 | GG               | INTERGENIC      |               |                    |                    |
| SNP_22582_A_22678687 | NC_021163.1    | Ca_Kabuli_Chr04 | 22678687                | AA                              | CC                 | CC               | INTERGENIC      |               |                    |                    |
| SNP_22583_A_22678716 | NC_021163.1    | Ca_Kabuli_Chr04 | 22678716                | AA                              | GG                 | GG               | INTERGENIC      |               |                    |                    |
| SNP_22584_A_22680509 | NC_021163.1    | Ca_Kabuli_Chr04 | 22680509                | AA                              | GG                 | GG               | INTERGENIC      |               |                    |                    |
| SNP_22585_A_22680689 | NC_021163.1    | Ca_Kabuli_Chr04 | 22680689                | AA                              | GG                 | GG               | INTERGENIC      |               |                    |                    |
| SNP_22586_A_22681076 | NC_021163.1    | Ca_Kabuli_Chr04 | 22681076                | TT                              | CC                 | CC               | INTERGENIC      |               |                    |                    |
| SNP_22587_A_22681090 | NC_021163.1    | Ca_Kabuli_Chr04 | 22681090                | AA                              | GG                 | GG               | INTERGENIC      |               |                    |                    |
| SNP_22588_A_22686019 | NC_021163.1    | Ca_Kabuli_Chr04 | 22686019                | CC                              | TT                 | TT               | INTERGENIC      |               |                    |                    |
| SNP_22589_A_22695278 | NC_021163.1    | Ca_Kabuli_Chr04 | 22695278                | TT                              | CC                 | CC               | INTERGENIC      |               |                    |                    |
| SNP_22590_A_22697377 | NC_021163.1    | Ca_Kabuli_Chr04 | 22697377                | CC                              | AA                 | AA               | INTERGENIC      |               |                    |                    |
| SNP_22591_A_22700627 | NC_021163.1    | Ca_Kabuli_Chr04 | 22700627                | AA                              | GG                 | GG               | INTERGENIC      |               |                    |                    |
| SNP_22592_A_22700669 | NC_021163.1    | Ca_Kabuli_Chr04 | 22700669                | TT                              | GG                 | GG               | INTERGENIC      |               |                    |                    |
| SNP_22593_A_22700678 | NC_021163.1    | Ca_Kabuli_Chr04 | 22700678                | AA                              | GG                 | GG               | INTERGENIC      |               |                    |                    |
| SNP_22594_A_22700686 | NC_021163.1    | Ca_Kabuli_Chr04 | 22700686                | TT                              | AA                 | AA               | INTERGENIC      |               |                    |                    |
| SNP_22595_A_22700692 | NC_021163.1    | Ca_Kabuli_Chr04 | 22700692                | TT                              | AA                 | AA               | INTERGENIC      |               |                    |                    |
| SNP_22597_A_22703200 | NC_021163.1    | Ca_Kabuli_Chr04 | 22703200                | CC                              | TT                 | TT               | INTERGENIC      |               |                    |                    |
| SNP_22598_A_22703225 | NC_021163.1    | Ca_Kabuli_Chr04 | 22703225                | CC                              | TT                 | TT               | INTERGENIC      |               |                    |                    |
| SNP_22599_A_22703496 | NC_021163.1    | Ca_Kabuli_Chr04 | 22703496                | CC                              | TT                 | TT               | INTERGENIC      |               |                    |                    |
| SNP_22600_A_22703796 | NC_021163.1    | Ca_Kabuli_Chr04 | 22703796                | AA                              | CC                 | CC               | INTERGENIC      |               |                    |                    |

| SNPs IDs             | Chromosome IDs | Chromosomes     | Physical positions (bp) | CDC Frontier genome | (Reference genome) | (Pusa 1103 & HPNB) | (ILWC 46 & LPNB) | Sequence Components of genome | Gene accession IDs | Putative functions                  |
|----------------------|----------------|-----------------|-------------------------|---------------------|--------------------|--------------------|------------------|-------------------------------|--------------------|-------------------------------------|
| SNP_22601_A_22703797 | NC_021163.1    | Ca_Kabuli_Chr04 | 22703797                | TT                  |                    | CC                 | CC               | INTERGENIC                    |                    |                                     |
| SNP_22602_A_22704061 | NC_021163.1    | Ca_Kabuli_Chr04 | 22704061                | AA                  |                    | TT                 | TT               | INTERGENIC                    |                    |                                     |
| SNP_22603_A_22705236 | NC_021163.1    | Ca_Kabuli_Chr04 | 22705236                | GG                  |                    | TT                 | TT               | INTERGENIC                    |                    |                                     |
| SNP_22604_A_22719087 | NC_021163.1    | Ca_Kabuli_Chr04 | 22719087                | GG                  |                    | AA                 | AA               | INTERGENIC                    |                    |                                     |
| SNP_22606_A_22720210 | NC_021163.1    | Ca_Kabuli_Chr04 | 22720210                | AA                  |                    | GG                 | GG               | DRR                           | 101493834          | myosin-binding protein 7-like       |
| SNP_22607_A_22723774 | NC_021163.1    | Ca_Kabuli_Chr04 | 22723774                | AA                  |                    | TT                 | TT               | INTRON                        | 101493834          | myosin-binding protein 7-like       |
| SNP_22609_A_22724028 | NC_021163.1    | Ca_Kabuli_Chr04 | 22724028                | GG                  |                    | CC                 | CC               | INTRON                        | 101493834          | myosin-binding protein 7-like       |
| SNP_22610_A_22724089 | NC_021163.1    | Ca_Kabuli_Chr04 | 22724089                | AA                  |                    | TT                 | TT               | INTRON                        | 101493834          | myosin-binding protein 7-like       |
| SNP_22611_A_22727787 | NC_021163.1    | Ca_Kabuli_Chr04 | 22727787                | AA                  |                    | GG                 | GG               | INTERGENIC                    |                    |                                     |
| SNP_22612_A_22727821 | NC_021163.1    | Ca_Kabuli_Chr04 | 22727821                | GG                  |                    | TT                 | TT               | INTERGENIC                    |                    |                                     |
| SNP_22614_A_22730920 | NC_021163.1    | Ca_Kabuli_Chr04 | 22730920                | AA                  |                    | GG                 | GG               | INTRON                        | 101494161          | calcium-dependent protein kinase 20 |
| SNP_22615_A_22731313 | NC_021163.1    | Ca_Kabuli_Chr04 | 22731313                | CC                  |                    | TT                 | TT               | INTRON                        | 101494161          | calcium-dependent protein kinase 20 |
| SNP_22616_A_22734367 | NC_021163.1    | Ca_Kabuli_Chr04 | 22734367                | GG                  |                    | AA                 | AA               | DRR                           | 101494161          | calcium-dependent protein kinase 20 |
| SNP_22618_A_22736536 | NC_021163.1    | Ca_Kabuli_Chr04 | 22736536                | CC                  |                    | TT                 | TT               | URR                           | 101494161          | calcium-dependent protein kinase 20 |
| SNP_22619_A_22736581 | NC_021163.1    | Ca_Kabuli_Chr04 | 22736581                | CC                  |                    | TT                 | TT               | URR                           | 101494161          | calcium-dependent protein kinase 20 |
| SNP_22621_A_22746166 | NC_021163.1    | Ca_Kabuli_Chr04 | 22746166                | AA                  |                    | GG                 | GG               | INTERGENIC                    |                    |                                     |
| SNP_22622_A_22746180 | NC_021163.1    | Ca_Kabuli_Chr04 | 22746180                | GG                  |                    | CC                 | CC               | INTERGENIC                    |                    |                                     |
| SNP_22623_A_22747463 | NC_021163.1    | Ca_Kabuli_Chr04 | 22747463                | CC                  |                    | TT                 | TT               | INTERGENIC                    |                    |                                     |
| SNP_22624_A_22748826 | NC_021163.1    | Ca_Kabuli_Chr04 | 22748826                | CC                  |                    | TT                 | TT               | INTERGENIC                    |                    |                                     |
| SNP_22627_A_22750324 | NC_021163.1    | Ca_Kabuli_Chr04 | 22750324                | AA                  |                    | TT                 | TT               | INTERGENIC                    |                    |                                     |
| SNP_22628_A_22754483 | NC_021163.1    | Ca_Kabuli_Chr04 | 22754483                | AA                  |                    | GG                 | GG               | INTERGENIC                    |                    |                                     |
| SNP_22629_A_22755119 | NC_021163.1    | Ca_Kabuli_Chr04 | 22755119                | GG                  |                    | TT                 | TT               | INTERGENIC                    |                    |                                     |



| SNPs IDs             | Chromosome IDs | Chromosomes     | Physical positions (bp) | CDC Frontier genome (Reference genome) | (Pusa 1103 & HPNB) | (ILWC 46 & LPNB) | Sequence genome | Components of | Gene accession IDs | Putative functions |
|----------------------|----------------|-----------------|-------------------------|----------------------------------------|--------------------|------------------|-----------------|---------------|--------------------|--------------------|
| SNP_22631_A_22755259 | NC_021163.1    | Ca_Kabuli_Chr04 | 22755259                | TT                                     | CC                 | CC               | INTERGENIC      |               |                    |                    |
| SNP_22632_A_22755547 | NC_021163.1    | Ca_Kabuli_Chr04 | 22755547                | GG                                     | AA                 | AA               | INTERGENIC      |               |                    |                    |
| SNP_22633_A_22759596 | NC_021163.1    | Ca_Kabuli_Chr04 | 22759596                | GG                                     | CC                 | CC               | INTERGENIC      |               |                    |                    |
| SNP_22634_A_22759822 | NC_021163.1    | Ca_Kabuli_Chr04 | 22759822                | AA                                     | GG                 | GG               | INTERGENIC      |               |                    |                    |
| SNP_22635_A_22759843 | NC_021163.1    | Ca_Kabuli_Chr04 | 22759843                | GG                                     | AA                 | AA               | INTERGENIC      |               |                    |                    |
| SNP_22636_A_22764450 | NC_021163.1    | Ca_Kabuli_Chr04 | 22764450                | CC                                     | TT                 | TT               | INTERGENIC      |               |                    |                    |
| SNP_22637_A_22764814 | NC_021163.1    | Ca_Kabuli_Chr04 | 22764814                | GG                                     | AA                 | AA               | INTERGENIC      |               |                    |                    |
| SNP_22638_A_22764850 | NC_021163.1    | Ca_Kabuli_Chr04 | 22764850                | AA                                     | GG                 | GG               | INTERGENIC      |               |                    |                    |
| SNP_22639_A_22765100 | NC_021163.1    | Ca_Kabuli_Chr04 | 22765100                | AA                                     | GG                 | GG               | INTERGENIC      |               |                    |                    |
| SNP_22640_A_22765452 | NC_021163.1    | Ca_Kabuli_Chr04 | 22765452                | TT                                     | CC                 | CC               | INTERGENIC      |               |                    |                    |
| SNP_22643_A_22766516 | NC_021163.1    | Ca_Kabuli_Chr04 | 22766516                | AA                                     | GG                 | GG               | INTERGENIC      |               |                    |                    |
| SNP_22644_A_22766520 | NC_021163.1    | Ca_Kabuli_Chr04 | 22766520                | AA                                     | TT                 | TT               | INTERGENIC      |               |                    |                    |
| SNP_22645_A_22766521 | NC_021163.1    | Ca_Kabuli_Chr04 | 22766521                | AA                                     | TT                 | TT               | INTERGENIC      |               |                    |                    |
| SNP_22646_A_22766556 | NC_021163.1    | Ca_Kabuli_Chr04 | 22766556                | CC                                     | AA                 | AA               | INTERGENIC      |               |                    |                    |
| SNP_22648_A_22766884 | NC_021163.1    | Ca_Kabuli_Chr04 | 22766884                | AA                                     | GG                 | GG               | INTERGENIC      |               |                    |                    |
| SNP_22649_A_22766889 | NC_021163.1    | Ca_Kabuli_Chr04 | 22766889                | AA                                     | GG                 | GG               | INTERGENIC      |               |                    |                    |
| SNP_22651_A_22767399 | NC_021163.1    | Ca_Kabuli_Chr04 | 22767399                | CC                                     | TT                 | TT               | INTERGENIC      |               |                    |                    |
| SNP_22652_A_22767402 | NC_021163.1    | Ca_Kabuli_Chr04 | 22767402                | AA                                     | GG                 | GG               | INTERGENIC      |               |                    |                    |
| SNP_22653_A_22767701 | NC_021163.1    | Ca_Kabuli_Chr04 | 22767701                | GG                                     | AA                 | AA               | INTERGENIC      |               |                    |                    |
| SNP_22654_A_22767904 | NC_021163.1    | Ca_Kabuli_Chr04 | 22767904                | CC                                     | TT                 | TT               | INTERGENIC      |               |                    |                    |
| SNP_22655_A_22767934 | NC_021163.1    | Ca_Kabuli_Chr04 | 22767934                | AA                                     | TT                 | TT               | INTERGENIC      |               |                    |                    |
| SNP_22656_A_22775092 | NC_021163.1    | Ca_Kabuli_Chr04 | 22775092                | AA                                     | TT                 | TT               | INTERGENIC      |               |                    |                    |

| SNPs IDs             | Chromosome IDs | Chromosomes     | Physical positions (bp) | CDC Frontier genome (Reference genome) | (Pusa 1103 & HPNB) | (ILWC 46 & LPNB) | Sequence Components of genome | Gene accession IDs | Putative functions                      |
|----------------------|----------------|-----------------|-------------------------|----------------------------------------|--------------------|------------------|-------------------------------|--------------------|-----------------------------------------|
| SNP_22657_A_22780875 | NC_021163.1    | Ca_Kabuli_Chr04 | 22780875                | AA                                     | GG                 | GG               | INTERGENIC                    |                    |                                         |
| SNP_22658_A_22783222 | NC_021163.1    | Ca_Kabuli_Chr04 | 22783222                | CC                                     | TT                 | TT               | INTERGENIC                    |                    |                                         |
| SNP_22659_A_22783471 | NC_021163.1    | Ca_Kabuli_Chr04 | 22783471                | CC                                     | AA                 | AA               | INTERGENIC                    |                    |                                         |
| SNP_22660_A_22783476 | NC_021163.1    | Ca_Kabuli_Chr04 | 22783476                | TT                                     | CC                 | CC               | INTERGENIC                    |                    |                                         |
| SNP_22661_A_22785835 | NC_021163.1    | Ca_Kabuli_Chr04 | 22785835                | AA                                     | TT                 | TT               | INTERGENIC                    |                    |                                         |
| SNP_22662_A_22785861 | NC_021163.1    | Ca_Kabuli_Chr04 | 22785861                | GG                                     | CC                 | CC               | INTERGENIC                    |                    |                                         |
| SNP_22663_A_22788862 | NC_021163.1    | Ca_Kabuli_Chr04 | 22788862                | TT                                     | CC                 | CC               | INTERGENIC                    |                    |                                         |
| SNP_22664_A_22788872 | NC_021163.1    | Ca_Kabuli_Chr04 | 22788872                | CC                                     | TT                 | TT               | INTERGENIC                    |                    |                                         |
| SNP_22665_A_22789374 | NC_021163.1    | Ca_Kabuli_Chr04 | 22789374                | TT                                     | CC                 | CC               | INTERGENIC                    |                    |                                         |
| SNP_22668_A_22794488 | NC_021163.1    | Ca_Kabuli_Chr04 | 22794488                | AA                                     | TT                 | TT               | INTRON                        | 101494791          | ABC transporter G family member 22-like |
| SNP_22669_A_22795854 | NC_021163.1    | Ca_Kabuli_Chr04 | 22795854                | CC                                     | TT                 | TT               | INTRON                        | 101494791          | ABC transporter G family member 22-like |
| SNP_22671_A_22799961 | NC_021163.1    | Ca_Kabuli_Chr04 | 22799961                | AA                                     | TT                 | TT               | INTRON                        | 101494791          | ABC transporter G family member 22-like |
| SNP_22672_A_22799986 | NC_021163.1    | Ca_Kabuli_Chr04 | 22799986                | CC                                     | TT                 | TT               | INTRON                        | 101494791          | ABC transporter G family member 22-like |
| SNP_22673_A_22800020 | NC_021163.1    | Ca_Kabuli_Chr04 | 22800020                | GG                                     | AA                 | AA               | INTRON                        | 101494791          | ABC transporter G family member 22-like |
| SNP_22674_A_22800381 | NC_021163.1    | Ca_Kabuli_Chr04 | 22800381                | GG                                     | AA                 | AA               | INTRON                        | 101494791          | ABC transporter G family member 22-like |
| SNP_22675_A_22803721 | NC_021163.1    | Ca_Kabuli_Chr04 | 22803721                | GG                                     | AA                 | AA               | INTRON                        | 101494791          | ABC transporter G family member 22-like |
| SNP_22676_A_22807358 | NC_021163.1    | Ca_Kabuli_Chr04 | 22807358                | CC                                     | TT                 | TT               | INTERGENIC                    |                    |                                         |
| SNP_22677_A_22808692 | NC_021163.1    | Ca_Kabuli_Chr04 | 22808692                | AA                                     | TT                 | TT               | DRR                           | 101494469          | polycopene isomerase, chloroplastic     |
| SNP_22678_A_22808881 | NC_021163.1    | Ca_Kabuli_Chr04 | 22808881                | TT                                     | CC                 | CC               | DRR                           | 101494469          | polycopene isomerase, chloroplastic     |
| SNP_22679_A_22816876 | NC_021163.1    | Ca_Kabuli_Chr04 | 22816876                | TT                                     | CC                 | CC               | URR                           | 101494469          | polycopene isomerase, chloroplastic     |
| SNP_22680_A_22816892 | NC_021163.1    | Ca_Kabuli_Chr04 | 22816892                | TT                                     | CC                 | CC               | URR                           | 101494469          | polycopene isomerase, chloroplastic     |
| SNP_22681_A_22816901 | NC_021163.1    | Ca_Kabuli_Chr04 | 22816901                | CC                                     | TT                 | TT               | URR                           | 101494469          | polycopene isomerase, chloroplastic     |

| SNPs IDs             | Chromosome IDs | Chromosomes     | Physical positions (bp) | CDC Frontier (Reference genome) | (Pusa 1103 & HPNB) | (ILWC 46 & LPNB) | Sequence Components of genome | Gene accession IDs | Putative functions                   |
|----------------------|----------------|-----------------|-------------------------|---------------------------------|--------------------|------------------|-------------------------------|--------------------|--------------------------------------|
| SNP_22682_A_22816915 | NC_021163.1    | Ca_Kabuli_Chr04 | 22816915                | CC                              | AA                 | AA               | URR                           | 101494469          | prolycopene isomerase, chloroplastic |
| SNP_22683_A_22816946 | NC_021163.1    | Ca_Kabuli_Chr04 | 22816946                | AA                              | GG                 | GG               | URR                           | 101494469          | prolycopene isomerase, chloroplastic |
| SNP_22684_A_22818218 | NC_021163.1    | Ca_Kabuli_Chr04 | 22818218                | TT                              | CC                 | CC               | INTERGENIC                    |                    |                                      |
| SNP_22685_A_22818540 | NC_021163.1    | Ca_Kabuli_Chr04 | 22818540                | AA                              | CC                 | CC               | INTERGENIC                    |                    |                                      |
| SNP_22686_A_22818856 | NC_021163.1    | Ca_Kabuli_Chr04 | 22818856                | AA                              | GG                 | GG               | INTERGENIC                    |                    |                                      |
| SNP_22687_A_22818857 | NC_021163.1    | Ca_Kabuli_Chr04 | 22818857                | TT                              | CC                 | CC               | INTERGENIC                    |                    |                                      |
| SNP_22688_A_22818868 | NC_021163.1    | Ca_Kabuli_Chr04 | 22818868                | CC                              | AA                 | AA               | INTERGENIC                    |                    |                                      |
| SNP_22689_A_22818995 | NC_021163.1    | Ca_Kabuli_Chr04 | 22818995                | AA                              | GG                 | GG               | INTERGENIC                    |                    |                                      |
| SNP_22690_A_22819012 | NC_021163.1    | Ca_Kabuli_Chr04 | 22819012                | CC                              | GG                 | GG               | INTERGENIC                    |                    |                                      |
| SNP_22691_A_22819020 | NC_021163.1    | Ca_Kabuli_Chr04 | 22819020                | GG                              | AA                 | AA               | INTERGENIC                    |                    |                                      |
| SNP_22692_A_22819046 | NC_021163.1    | Ca_Kabuli_Chr04 | 22819046                | CC                              | AA                 | AA               | INTERGENIC                    |                    |                                      |
| SNP_22693_A_22819095 | NC_021163.1    | Ca_Kabuli_Chr04 | 22819095                | AA                              | TT                 | TT               | INTERGENIC                    |                    |                                      |
| SNP_22694_A_22819252 | NC_021163.1    | Ca_Kabuli_Chr04 | 22819252                | TT                              | CC                 | CC               | INTERGENIC                    |                    |                                      |
| SNP_22695_A_22819258 | NC_021163.1    | Ca_Kabuli_Chr04 | 22819258                | CC                              | AA                 | AA               | INTERGENIC                    |                    |                                      |
| SNP_22696_A_22819269 | NC_021163.1    | Ca_Kabuli_Chr04 | 22819269                | AA                              | GG                 | GG               | INTERGENIC                    |                    |                                      |
| SNP_22697_A_22819322 | NC_021163.1    | Ca_Kabuli_Chr04 | 22819322                | CC                              | TT                 | TT               | INTERGENIC                    |                    |                                      |
| SNP_22698_A_22820479 | NC_021163.1    | Ca_Kabuli_Chr04 | 22820479                | TT                              | CC                 | CC               | INTERGENIC                    |                    |                                      |
| SNP_22699_A_22820632 | NC_021163.1    | Ca_Kabuli_Chr04 | 22820632                | GG                              | TT                 | TT               | INTERGENIC                    |                    |                                      |
| SNP_22700_A_22821454 | NC_021163.1    | Ca_Kabuli_Chr04 | 22821454                | AA                              | GG                 | GG               | INTERGENIC                    |                    |                                      |
| SNP_22702_A_22824661 | NC_021163.1    | Ca_Kabuli_Chr04 | 22824661                | AA                              | GG                 | GG               | INTERGENIC                    |                    |                                      |
| SNP_22703_A_22824892 | NC_021163.1    | Ca_Kabuli_Chr04 | 22824892                | GG                              | TT                 | TT               | DRR                           | 101495120          | sucrose-phosphatase 1-like           |
| SNP_22704_A_22824924 | NC_021163.1    | Ca_Kabuli_Chr04 | 22824924                | TT                              | CC                 | CC               | DRR                           | 101495120          | sucrose-phosphatase 1-like           |

| SNPs IDs             | Chromosome IDs | Chromosomes     | Physical positions (bp) | CDC Frontier (Reference genome) | (Pusa 1103 & HPNB) | (ILWC 46 & LPNB) | Sequence Components of genome | Gene accession IDs | Putative functions                                                  |
|----------------------|----------------|-----------------|-------------------------|---------------------------------|--------------------|------------------|-------------------------------|--------------------|---------------------------------------------------------------------|
| SNP_22705_A_22825010 | NC_021163.1    | Ca_Kabuli_Chr04 | 22825010                | CC                              | AA                 | AA               | DRR                           | 101495120          | sucrose-phosphatase 1-like                                          |
| SNP_22706_A_22825027 | NC_021163.1    | Ca_Kabuli_Chr04 | 22825027                | GG                              | AA                 | AA               | DRR                           | 101495120          | sucrose-phosphatase 1-like                                          |
| SNP_22708_A_22825104 | NC_021163.1    | Ca_Kabuli_Chr04 | 22825104                | TT                              | CC                 | CC               | DRR                           | 101495120          | sucrose-phosphatase 1-like                                          |
| SNP_22709_A_22825111 | NC_021163.1    | Ca_Kabuli_Chr04 | 22825111                | AA                              | GG                 | GG               | DRR                           | 101495120          | sucrose-phosphatase 1-like                                          |
| SNP_22710_A_22832972 | NC_021163.1    | Ca_Kabuli_Chr04 | 22832972                | AA                              | GG                 | GG               | URR                           | 101410594          | transfer RNA cysteine (anticodon GCA)                               |
| SNP_22711_A_22833560 | NC_021163.1    | Ca_Kabuli_Chr04 | 22833560                | GG                              | AA                 | AA               | URR                           | 101410594          | transfer RNA cysteine (anticodon GCA)                               |
| SNP_22712_A_22836522 | NC_021163.1    | Ca_Kabuli_Chr04 | 22836522                | CC                              | AA                 | AA               | DRR                           | 101515335          | Unknown function                                                    |
| SNP_22715_A_22838016 | NC_021163.1    | Ca_Kabuli_Chr04 | 22838016                | AA                              | GG                 | GG               | URR                           | 101515335          | Unknown function                                                    |
| SNP_22716_A_22838122 | NC_021163.1    | Ca_Kabuli_Chr04 | 22838122                | GG                              | AA                 | AA               | URR                           | 101515335          | Unknown function                                                    |
| SNP_22717_A_22848597 | NC_021163.1    | Ca_Kabuli_Chr04 | 22848597                | TT                              | CC                 | CC               | INTERGENIC                    |                    |                                                                     |
| SNP_22719_A_22853938 | NC_021163.1    | Ca_Kabuli_Chr04 | 22853938                | CC                              | TT                 | TT               | INTERGENIC                    |                    |                                                                     |
| SNP_22720_A_22862791 | NC_021163.1    | Ca_Kabuli_Chr04 | 22862791                | CC                              | TT                 | TT               | DRR                           | 101496099          | eukaryotic translation initiation factor 5B-like                    |
| SNP_22721_A_22863376 | NC_021163.1    | Ca_Kabuli_Chr04 | 22863376                | GG                              | TT                 | TT               | DRR                           | 101496099          | eukaryotic translation initiation factor 5B-like                    |
| SNP_22722_A_22864182 | NC_021163.1    | Ca_Kabuli_Chr04 | 22864182                | GG                              | AA                 | AA               | URR                           | 101495777          | putative RNA polymerase II subunit B1 CTD phosphatase RPAP2 homolog |
| SNP_22725_A_22870534 | NC_021163.1    | Ca_Kabuli_Chr04 | 22870534                | TT                              | AA                 | AA               | INTERGENIC                    |                    |                                                                     |
| SNP_22726_A_22870624 | NC_021163.1    | Ca_Kabuli_Chr04 | 22870624                | AA                              | CC                 | CC               | INTERGENIC                    |                    |                                                                     |
| SNP_22727_A_22870642 | NC_021163.1    | Ca_Kabuli_Chr04 | 22870642                | CC                              | TT                 | TT               | INTERGENIC                    |                    |                                                                     |
| SNP_22728_A_22870655 | NC_021163.1    | Ca_Kabuli_Chr04 | 22870655                | GG                              | AA                 | AA               | INTERGENIC                    |                    |                                                                     |
| SNP_22729_A_22879225 | NC_021163.1    | Ca_Kabuli_Chr04 | 22879225                | CC                              | AA                 | AA               | INTERGENIC                    |                    |                                                                     |
| SNP_22730_A_22880412 | NC_021163.1    | Ca_Kabuli_Chr04 | 22880412                | AA                              | TT                 | TT               | INTERGENIC                    |                    |                                                                     |
| SNP_22731_A_22882884 | NC_021163.1    | Ca_Kabuli_Chr04 | 22882884                | TT                              | CC                 | CC               | INTERGENIC                    |                    |                                                                     |
| SNP_22732_A_22883317 | NC_021163.1    | Ca_Kabuli_Chr04 | 22883317                | GG                              | AA                 | AA               | INTERGENIC                    |                    |                                                                     |

| SNPs IDs             | Chromosome IDs | Chromosomes     | Physical positions (bp) | CDC Frontier (Reference genome) | (Pusa 1103 & HPNB) | (ILWC 46 & LPNB) | Sequence Components of genome | Gene accession IDs | Putative functions                                                            |
|----------------------|----------------|-----------------|-------------------------|---------------------------------|--------------------|------------------|-------------------------------|--------------------|-------------------------------------------------------------------------------|
| SNP_22733_A_22883493 | NC_021163.1    | Ca_Kabuli_Chr04 | 22883493                | GG                              | AA                 | AA               | INTERGENIC                    |                    |                                                                               |
| SNP_22735_A_22884748 | NC_021163.1    | Ca_Kabuli_Chr04 | 22884748                | GG                              | CC                 | CC               | INTERGENIC                    |                    |                                                                               |
| SNP_22736_A_22889612 | NC_021163.1    | Ca_Kabuli_Chr04 | 22889612                | CC                              | AA                 | AA               | INTERGENIC                    |                    |                                                                               |
| SNP_22738_A_22890028 | NC_021163.1    | Ca_Kabuli_Chr04 | 22890028                | AA                              | TT                 | TT               | INTERGENIC                    |                    |                                                                               |
| SNP_22739_A_22890062 | NC_021163.1    | Ca_Kabuli_Chr04 | 22890062                | AA                              | GG                 | GG               | INTERGENIC                    |                    |                                                                               |
| SNP_22740_A_22890355 | NC_021163.1    | Ca_Kabuli_Chr04 | 22890355                | TT                              | CC                 | CC               | INTERGENIC                    |                    |                                                                               |
| SNP_22741_A_22894592 | NC_021163.1    | Ca_Kabuli_Chr04 | 22894592                | TT                              | GG                 | GG               | INTERGENIC                    |                    |                                                                               |
| SNP_22742_A_22896684 | NC_021163.1    | Ca_Kabuli_Chr04 | 22896684                | AA                              | TT                 | TT               | INTERGENIC                    |                    |                                                                               |
| SNP_22743_A_22896859 | NC_021163.1    | Ca_Kabuli_Chr04 | 22896859                | TT                              | GG                 | GG               | INTERGENIC                    |                    |                                                                               |
| SNP_22747_A_22900812 | NC_021163.1    | Ca_Kabuli_Chr04 | 22900812                | AA                              | GG                 | GG               | INTRON                        | 101496428          | calcium-dependent protein kinase 1-like                                       |
| SNP_22748_A_22900814 | NC_021163.1    | Ca_Kabuli_Chr04 | 22900814                | TT                              | AA                 | AA               | INTRON                        | 101496428          | calcium-dependent protein kinase 1-like                                       |
| SNP_22749_A_22900853 | NC_021163.1    | Ca_Kabuli_Chr04 | 22900853                | TT                              | GG                 | GG               | INTRON                        | 101496428          | calcium-dependent protein kinase 1-like                                       |
| SNP_22750_A_22900878 | NC_021163.1    | Ca_Kabuli_Chr04 | 22900878                | GG                              | AA                 | AA               | INTRON                        | 101496428          | calcium-dependent protein kinase 1-like                                       |
| SNP_22751_A_22901184 | NC_021163.1    | Ca_Kabuli_Chr04 | 22901184                | CC                              | TT                 | TT               | INTERGENIC                    |                    |                                                                               |
| SNP_22753_A_22901978 | NC_021163.1    | Ca_Kabuli_Chr04 | 22901978                | CC                              | AA                 | AA               | INTERGENIC                    |                    |                                                                               |
| SNP_22754_A_22901997 | NC_021163.1    | Ca_Kabuli_Chr04 | 22901997                | AA                              | GG                 | GG               | INTERGENIC                    |                    |                                                                               |
| SNP_22755_A_22902346 | NC_021163.1    | Ca_Kabuli_Chr04 | 22902346                | TT                              | AA                 | AA               | INTERGENIC                    |                    |                                                                               |
| SNP_22756_A_22902373 | NC_021163.1    | Ca_Kabuli_Chr04 | 22902373                | CC                              | GG                 | GG               | INTERGENIC                    |                    |                                                                               |
| SNP_22757_A_22902420 | NC_021163.1    | Ca_Kabuli_Chr04 | 22902420                | GG                              | AA                 | AA               | INTERGENIC                    |                    |                                                                               |
| SNP_22758_A_22906083 | NC_021163.1    | Ca_Kabuli_Chr04 | 22906083                | AA                              | GG                 | GG               | DRR                           | 101515661          | putative pentatricopeptide repeat-containing protein At5g06400, mitochondrial |
| SNP_22759_A_22906088 | NC_021163.1    | Ca_Kabuli_Chr04 | 22906088                | AA                              | GG                 | GG               | DRR                           | 101515661          | putative pentatricopeptide repeat-containing protein At5g06400, mitochondrial |
| SNP_22761_A_22914142 | NC_021163.1    | Ca_Kabuli_Chr04 | 22914142                | CC                              | TT                 | TT               | URR                           | 101496759          | D-tyrosyl-tRNA(Tyr) deacylase                                                 |

| SNPs IDs             | Chromosome IDs | Chromosomes     | Physical positions (bp) | CDC Frontier genome (Reference genome) | (Pusa 1103 & HPNB) | (ILWC 46 & LPNB) | Sequence genome | Components of | Gene accession IDs | Putative functions                                           |
|----------------------|----------------|-----------------|-------------------------|----------------------------------------|--------------------|------------------|-----------------|---------------|--------------------|--------------------------------------------------------------|
| SNP_22762_A_22914149 | NC_021163.1    | Ca_Kabuli_Chr04 | 22914149                | TT                                     | GG                 | GG               | URR             |               | 101496759          | D-tyrosyl-tRNA(Tyr) deacylase                                |
| SNP_22763_A_22914293 | NC_021163.1    | Ca_Kabuli_Chr04 | 22914293                | CC                                     | TT                 | TT               | URR             |               | 101496759          | D-tyrosyl-tRNA(Tyr) deacylase                                |
| SNP_22765_A_22914628 | NC_021163.1    | Ca_Kabuli_Chr04 | 22914628                | GG                                     | TT                 | TT               | URR             |               | 101496759          | D-tyrosyl-tRNA(Tyr) deacylase                                |
| SNP_22766_A_22914633 | NC_021163.1    | Ca_Kabuli_Chr04 | 22914633                | AA                                     | GG                 | GG               | URR             |               | 101496759          | D-tyrosyl-tRNA(Tyr) deacylase                                |
| SNP_22767_A_22920834 | NC_021163.1    | Ca_Kabuli_Chr04 | 22920834                | TT                                     | CC                 | CC               | INTERGENIC      |               |                    |                                                              |
| SNP_22769_A_22923928 | NC_021163.1    | Ca_Kabuli_Chr04 | 22923928                | TT                                     | CC                 | CC               | INTERGENIC      |               |                    |                                                              |
| SNP_22770_A_22924436 | NC_021163.1    | Ca_Kabuli_Chr04 | 22924436                | TT                                     | CC                 | CC               | INTERGENIC      |               |                    |                                                              |
| SNP_22771_A_22924697 | NC_021163.1    | Ca_Kabuli_Chr04 | 22924697                | TT                                     | CC                 | CC               | INTERGENIC      |               |                    |                                                              |
| SNP_22772_A_22925428 | NC_021163.1    | Ca_Kabuli_Chr04 | 22925428                | CC                                     | TT                 | TT               | INTERGENIC      |               |                    |                                                              |
| SNP_22773_A_22925518 | NC_021163.1    | Ca_Kabuli_Chr04 | 22925518                | TT                                     | CC                 | CC               | INTERGENIC      |               |                    |                                                              |
| SNP_22774_A_22925539 | NC_021163.1    | Ca_Kabuli_Chr04 | 22925539                | CC                                     | TT                 | TT               | INTERGENIC      |               |                    |                                                              |
| SNP_22777_A_22934498 | NC_021163.1    | Ca_Kabuli_Chr04 | 22934498                | TT                                     | CC                 | CC               | URR             |               | 101497069          | iron-sulfur cluster co-chaperone protein HscB, mitochondrial |
| SNP_22778_A_22934501 | NC_021163.1    | Ca_Kabuli_Chr04 | 22934501                | AA                                     | GG                 | GG               | URR             |               | 101497069          | iron-sulfur cluster co-chaperone protein HscB, mitochondrial |
| SNP_22779_A_22934538 | NC_021163.1    | Ca_Kabuli_Chr04 | 22934538                | TT                                     | AA                 | AA               | URR             |               | 101497069          | iron-sulfur cluster co-chaperone protein HscB, mitochondrial |
| SNP_22780_A_22934788 | NC_021163.1    | Ca_Kabuli_Chr04 | 22934788                | CC                                     | TT                 | TT               | URR             |               | 101497069          | iron-sulfur cluster co-chaperone protein HscB, mitochondrial |
| SNP_22781_A_22934827 | NC_021163.1    | Ca_Kabuli_Chr04 | 22934827                | AA                                     | CC                 | CC               | URR             |               | 101497069          | iron-sulfur cluster co-chaperone protein HscB, mitochondrial |
| SNP_22782_A_22935317 | NC_021163.1    | Ca_Kabuli_Chr04 | 22935317                | AA                                     | GG                 | GG               | URR             |               | 101497069          | iron-sulfur cluster co-chaperone protein HscB, mitochondrial |
| SNP_22783_A_22935332 | NC_021163.1    | Ca_Kabuli_Chr04 | 22935332                | CC                                     | TT                 | TT               | URR             |               | 101497069          | iron-sulfur cluster co-chaperone protein HscB, mitochondrial |
| SNP_22784_A_22938738 | NC_021163.1    | Ca_Kabuli_Chr04 | 22938738                | GG                                     | AA                 | AA               | INTERGENIC      |               |                    |                                                              |
| SNP_22785_A_22940144 | NC_021163.1    | Ca_Kabuli_Chr04 | 22940144                | CC                                     | TT                 | TT               | INTERGENIC      |               |                    |                                                              |
| SNP_22786_A_22943447 | NC_021163.1    | Ca_Kabuli_Chr04 | 22943447                | CC                                     | TT                 | TT               | INTERGENIC      |               |                    |                                                              |
| SNP_22787_A_22943465 | NC_021163.1    | Ca_Kabuli_Chr04 | 22943465                | TT                                     | GG                 | GG               | INTERGENIC      |               |                    |                                                              |

| SNPs IDs             | Chromosome IDs | Chromosomes     | Physical positions (bp) | CDC Frontier genome (Reference genome) | (Pusa 1103 & HPNB) | (ILWC 46 & LPNB) | Sequence Components of genome | Gene accession IDs | Putative functions           |
|----------------------|----------------|-----------------|-------------------------|----------------------------------------|--------------------|------------------|-------------------------------|--------------------|------------------------------|
| SNP_22788_A_22943494 | NC_021163.1    | Ca_Kabuli_Chr04 | 22943494                | GG                                     | AA                 | AA               | INTERGENIC                    |                    |                              |
| SNP_22789_A_22945261 | NC_021163.1    | Ca_Kabuli_Chr04 | 22945261                | TT                                     | CC                 | CC               | INTERGENIC                    |                    |                              |
| SNP_22790_A_22946758 | NC_021163.1    | Ca_Kabuli_Chr04 | 22946758                | TT                                     | CC                 | CC               | DRR                           | 101497525          | uncharacterized LOC101497525 |
| SNP_22791_A_22946761 | NC_021163.1    | Ca_Kabuli_Chr04 | 22946761                | TT                                     | AA                 | AA               | DRR                           | 101497525          | uncharacterized LOC101497525 |
| SNP_22792_A_22947094 | NC_021163.1    | Ca_Kabuli_Chr04 | 22947094                | AA                                     | GG                 | GG               | DRR                           | 101497525          | uncharacterized LOC101497525 |
| SNP_22793_A_22954122 | NC_021163.1    | Ca_Kabuli_Chr04 | 22954122                | AA                                     | GG                 | GG               | INTRON                        | 101497525          | uncharacterized LOC101497525 |
| SNP_22794_A_22957628 | NC_021163.1    | Ca_Kabuli_Chr04 | 22957628                | TT                                     | CC                 | CC               | INTERGENIC                    |                    |                              |
| SNP_22795_A_22964105 | NC_021163.1    | Ca_Kabuli_Chr04 | 22964105                | GG                                     | AA                 | AA               | INTERGENIC                    |                    |                              |
| SNP_22796_A_22966568 | NC_021163.1    | Ca_Kabuli_Chr04 | 22966568                | TT                                     | CC                 | CC               | INTERGENIC                    |                    |                              |
| SNP_22797_A_22967140 | NC_021163.1    | Ca_Kabuli_Chr04 | 22967140                | CC                                     | AA                 | AA               | DRR                           | 101498269          | uncharacterized LOC101498269 |
| SNP_22798_A_22971608 | NC_021163.1    | Ca_Kabuli_Chr04 | 22971608                | TT                                     | AA                 | AA               | NON_SYNONYMOUS_CODING         | 101498269          | uncharacterized LOC101498269 |
| SNP_22799_A_22973176 | NC_021163.1    | Ca_Kabuli_Chr04 | 22973176                | AA                                     | TT                 | TT               | URR                           | 101498269          | uncharacterized LOC101498269 |
| SNP_22800_A_22973186 | NC_021163.1    | Ca_Kabuli_Chr04 | 22973186                | GG                                     | TT                 | TT               | URR                           | 101498269          | uncharacterized LOC101498269 |
| SNP_22801_A_22973201 | NC_021163.1    | Ca_Kabuli_Chr04 | 22973201                | AA                                     | GG                 | GG               | URR                           | 101498269          | uncharacterized LOC101498269 |
| SNP_22803_A_22974062 | NC_021163.1    | Ca_Kabuli_Chr04 | 22974062                | CC                                     | AA                 | AA               | URR                           | 101498269          | uncharacterized LOC101498269 |
| SNP_22804_A_22974082 | NC_021163.1    | Ca_Kabuli_Chr04 | 22974082                | TT                                     | GG                 | GG               | URR                           | 101498269          | uncharacterized LOC101498269 |
| SNP_22805_A_22974130 | NC_021163.1    | Ca_Kabuli_Chr04 | 22974130                | CC                                     | TT                 | TT               | URR                           | 101498269          | uncharacterized LOC101498269 |
| SNP_22807_A_22974382 | NC_021163.1    | Ca_Kabuli_Chr04 | 22974382                | CC                                     | TT                 | TT               | URR                           | 101498269          | uncharacterized LOC101498269 |
| SNP_22808_A_22976529 | NC_021163.1    | Ca_Kabuli_Chr04 | 22976529                | GG                                     | AA                 | AA               | INTERGENIC                    |                    |                              |
| SNP_22809_A_22981194 | NC_021163.1    | Ca_Kabuli_Chr04 | 22981194                | TT                                     | CC                 | CC               | INTERGENIC                    |                    |                              |
| SNP_22811_A_22981229 | NC_021163.1    | Ca_Kabuli_Chr04 | 22981229                | AA                                     | GG                 | GG               | INTERGENIC                    |                    |                              |
| SNP_22812_A_22981308 | NC_021163.1    | Ca_Kabuli_Chr04 | 22981308                | CC                                     | TT                 | TT               | INTERGENIC                    |                    |                              |

| SNPs IDs             | Chromosome IDs | Chromosomes     | Physical positions (bp) | CDC Frontier genome (Reference genome) | (Pusa 1103 & HPNB) | (ILWC 46 & LPNB) | Sequence genome | Components of | Gene accession IDs | Putative functions |
|----------------------|----------------|-----------------|-------------------------|----------------------------------------|--------------------|------------------|-----------------|---------------|--------------------|--------------------|
| SNP_22813_A_22981332 | NC_021163.1    | Ca_Kabuli_Chr04 | 22981332                | GG                                     | AA                 | AA               | INTERGENIC      |               |                    |                    |
| SNP_22815_A_22981451 | NC_021163.1    | Ca_Kabuli_Chr04 | 22981451                | TT                                     | AA                 | AA               | INTERGENIC      |               |                    |                    |
| SNP_22816_A_22981469 | NC_021163.1    | Ca_Kabuli_Chr04 | 22981469                | GG                                     | AA                 | AA               | INTERGENIC      |               |                    |                    |
| SNP_22817_A_22981489 | NC_021163.1    | Ca_Kabuli_Chr04 | 22981489                | AA                                     | CC                 | CC               | INTERGENIC      |               |                    |                    |
| SNP_22818_A_22981495 | NC_021163.1    | Ca_Kabuli_Chr04 | 22981495                | CC                                     | TT                 | TT               | INTERGENIC      |               |                    |                    |
| SNP_22820_A_22984839 | NC_021163.1    | Ca_Kabuli_Chr04 | 22984839                | AA                                     | GG                 | GG               | INTERGENIC      |               |                    |                    |
| SNP_22821_A_22985735 | NC_021163.1    | Ca_Kabuli_Chr04 | 22985735                | AA                                     | TT                 | TT               | INTERGENIC      |               |                    |                    |
| SNP_22822_A_23002004 | NC_021163.1    | Ca_Kabuli_Chr04 | 23002004                | CC                                     | TT                 | TT               | INTERGENIC      |               |                    |                    |
| SNP_22823_A_23002015 | NC_021163.1    | Ca_Kabuli_Chr04 | 23002015                | TT                                     | AA                 | AA               | INTERGENIC      |               |                    |                    |
| SNP_22824_A_23002017 | NC_021163.1    | Ca_Kabuli_Chr04 | 23002017                | AA                                     | GG                 | GG               | INTERGENIC      |               |                    |                    |
| SNP_22825_A_23002147 | NC_021163.1    | Ca_Kabuli_Chr04 | 23002147                | GG                                     | AA                 | AA               | INTERGENIC      |               |                    |                    |
| SNP_22826_A_23002180 | NC_021163.1    | Ca_Kabuli_Chr04 | 23002180                | TT                                     | CC                 | CC               | INTERGENIC      |               |                    |                    |
| SNP_22827_A_23002188 | NC_021163.1    | Ca_Kabuli_Chr04 | 23002188                | AA                                     | GG                 | GG               | INTERGENIC      |               |                    |                    |
| SNP_22828_A_23002223 | NC_021163.1    | Ca_Kabuli_Chr04 | 23002223                | TT                                     | CC                 | CC               | INTERGENIC      |               |                    |                    |
| SNP_22829_A_23002238 | NC_021163.1    | Ca_Kabuli_Chr04 | 23002238                | TT                                     | CC                 | CC               | INTERGENIC      |               |                    |                    |
| SNP_22830_A_23002248 | NC_021163.1    | Ca_Kabuli_Chr04 | 23002248                | TT                                     | CC                 | CC               | INTERGENIC      |               |                    |                    |
| SNP_22831_A_23002255 | NC_021163.1    | Ca_Kabuli_Chr04 | 23002255                | AA                                     | GG                 | GG               | INTERGENIC      |               |                    |                    |
| SNP_22832_A_23002392 | NC_021163.1    | Ca_Kabuli_Chr04 | 23002392                | TT                                     | CC                 | CC               | INTERGENIC      |               |                    |                    |
| SNP_22833_A_23002428 | NC_021163.1    | Ca_Kabuli_Chr04 | 23002428                | CC                                     | GG                 | GG               | INTERGENIC      |               |                    |                    |
| SNP_22834_A_23002465 | NC_021163.1    | Ca_Kabuli_Chr04 | 23002465                | GG                                     | AA                 | AA               | INTERGENIC      |               |                    |                    |
| SNP_22835_A_23002472 | NC_021163.1    | Ca_Kabuli_Chr04 | 23002472                | TT                                     | CC                 | CC               | INTERGENIC      |               |                    |                    |
| SNP_22836_A_23002478 | NC_021163.1    | Ca_Kabuli_Chr04 | 23002478                | TT                                     | AA                 | AA               | INTERGENIC      |               |                    |                    |



| SNPs IDs             | Chromosome IDs | Chromosomes     | Physical positions (bp) | CDC Frontier (Reference genome) | (Pusa 1103 & HPNB) | (ILWC 46 & LPNB) | Sequence genome | Components of | Gene accession IDs | Putative functions |
|----------------------|----------------|-----------------|-------------------------|---------------------------------|--------------------|------------------|-----------------|---------------|--------------------|--------------------|
| SNP_22837_A_23002527 | NC_021163.1    | Ca_Kabuli_Chr04 | 23002527                | CC                              | TT                 | TT               | INTERGENIC      |               |                    |                    |
| SNP_22840_A_23002791 | NC_021163.1    | Ca_Kabuli_Chr04 | 23002791                | TT                              | AA                 | AA               | INTERGENIC      |               |                    |                    |
| SNP_22841_A_23002880 | NC_021163.1    | Ca_Kabuli_Chr04 | 23002880                | CC                              | TT                 | TT               | INTERGENIC      |               |                    |                    |
| SNP_22842_A_23002934 | NC_021163.1    | Ca_Kabuli_Chr04 | 23002934                | AA                              | GG                 | GG               | INTERGENIC      |               |                    |                    |
| SNP_22843_A_23012731 | NC_021163.1    | Ca_Kabuli_Chr04 | 23012731                | TT                              | GG                 | GG               | INTERGENIC      |               |                    |                    |
| SNP_22844_A_23012889 | NC_021163.1    | Ca_Kabuli_Chr04 | 23012889                | GG                              | AA                 | AA               | INTERGENIC      |               |                    |                    |
| SNP_22845_A_23018231 | NC_021163.1    | Ca_Kabuli_Chr04 | 23018231                | CC                              | TT                 | TT               | INTERGENIC      |               |                    |                    |
| SNP_22846_A_23018280 | NC_021163.1    | Ca_Kabuli_Chr04 | 23018280                | TT                              | AA                 | AA               | INTERGENIC      |               |                    |                    |
| SNP_22848_A_23019150 | NC_021163.1    | Ca_Kabuli_Chr04 | 23019150                | CC                              | AA                 | AA               | INTERGENIC      |               |                    |                    |
| SNP_22849_A_23019259 | NC_021163.1    | Ca_Kabuli_Chr04 | 23019259                | GG                              | AA                 | AA               | INTERGENIC      |               |                    |                    |
| SNP_22850_A_23020132 | NC_021163.1    | Ca_Kabuli_Chr04 | 23020132                | CC                              | TT                 | TT               | INTERGENIC      |               |                    |                    |
| SNP_22851_A_23020170 | NC_021163.1    | Ca_Kabuli_Chr04 | 23020170                | GG                              | AA                 | AA               | INTERGENIC      |               |                    |                    |
| SNP_22852_A_23020172 | NC_021163.1    | Ca_Kabuli_Chr04 | 23020172                | TT                              | CC                 | CC               | INTERGENIC      |               |                    |                    |
| SNP_22853_A_23020179 | NC_021163.1    | Ca_Kabuli_Chr04 | 23020179                | GG                              | AA                 | AA               | INTERGENIC      |               |                    |                    |
| SNP_22855_A_23020274 | NC_021163.1    | Ca_Kabuli_Chr04 | 23020274                | CC                              | TT                 | TT               | INTERGENIC      |               |                    |                    |
| SNP_22857_A_23027457 | NC_021163.1    | Ca_Kabuli_Chr04 | 23027457                | CC                              | TT                 | TT               | INTERGENIC      |               |                    |                    |
| SNP_22858_A_23027472 | NC_021163.1    | Ca_Kabuli_Chr04 | 23027472                | AA                              | TT                 | TT               | INTERGENIC      |               |                    |                    |
| SNP_22859_A_23027501 | NC_021163.1    | Ca_Kabuli_Chr04 | 23027501                | AA                              | GG                 | GG               | INTERGENIC      |               |                    |                    |
| SNP_22860_A_23027509 | NC_021163.1    | Ca_Kabuli_Chr04 | 23027509                | CC                              | TT                 | TT               | INTERGENIC      |               |                    |                    |
| SNP_22861_A_23027519 | NC_021163.1    | Ca_Kabuli_Chr04 | 23027519                | GG                              | TT                 | TT               | INTERGENIC      |               |                    |                    |
| SNP_22862_A_23027544 | NC_021163.1    | Ca_Kabuli_Chr04 | 23027544                | AA                              | GG                 | GG               | INTERGENIC      |               |                    |                    |
| SNP_22863_A_23027545 | NC_021163.1    | Ca_Kabuli_Chr04 | 23027545                | GG                              | AA                 | AA               | INTERGENIC      |               |                    |                    |

| SNPs IDs             | Chromosome IDs | Chromosomes     | Physical positions (bp) | CDC Frontier genome (Reference genome) | (Pusa 1103 & HPNB) | (ILWC 46 & LPNB) | Sequence genome | Components of | Gene accession IDs | Putative functions |
|----------------------|----------------|-----------------|-------------------------|----------------------------------------|--------------------|------------------|-----------------|---------------|--------------------|--------------------|
| SNP_22864_A_23027827 | NC_021163.1    | Ca_Kabuli_Chr04 | 23027827                | CC                                     | AA                 | AA               | INTERGENIC      |               |                    |                    |
| SNP_22865_A_23032211 | NC_021163.1    | Ca_Kabuli_Chr04 | 23032211                | GG                                     | AA                 | AA               | INTERGENIC      |               |                    |                    |
| SNP_22866_A_23032315 | NC_021163.1    | Ca_Kabuli_Chr04 | 23032315                | CC                                     | TT                 | TT               | INTERGENIC      |               |                    |                    |
| SNP_22867_A_23032318 | NC_021163.1    | Ca_Kabuli_Chr04 | 23032318                | TT                                     | GG                 | GG               | INTERGENIC      |               |                    |                    |
| SNP_22868_A_23033294 | NC_021163.1    | Ca_Kabuli_Chr04 | 23033294                | TT                                     | CC                 | CC               | INTERGENIC      |               |                    |                    |
| SNP_22869_A_23034261 | NC_021163.1    | Ca_Kabuli_Chr04 | 23034261                | AA                                     | TT                 | TT               | INTERGENIC      |               |                    |                    |
| SNP_22870_A_23034357 | NC_021163.1    | Ca_Kabuli_Chr04 | 23034357                | TT                                     | GG                 | GG               | INTERGENIC      |               |                    |                    |
| SNP_22871_A_23034372 | NC_021163.1    | Ca_Kabuli_Chr04 | 23034372                | TT                                     | CC                 | CC               | INTERGENIC      |               |                    |                    |
| SNP_22872_A_23034639 | NC_021163.1    | Ca_Kabuli_Chr04 | 23034639                | TT                                     | GG                 | GG               | INTERGENIC      |               |                    |                    |
| SNP_22873_A_23036790 | NC_021163.1    | Ca_Kabuli_Chr04 | 23036790                | CC                                     | TT                 | TT               | INTERGENIC      |               |                    |                    |
| SNP_22874_A_23036811 | NC_021163.1    | Ca_Kabuli_Chr04 | 23036811                | GG                                     | AA                 | AA               | INTERGENIC      |               |                    |                    |
| SNP_22875_A_23036963 | NC_021163.1    | Ca_Kabuli_Chr04 | 23036963                | TT                                     | GG                 | GG               | INTERGENIC      |               |                    |                    |
| SNP_22876_A_23037662 | NC_021163.1    | Ca_Kabuli_Chr04 | 23037662                | GG                                     | TT                 | TT               | INTERGENIC      |               |                    |                    |
| SNP_22877_A_23037720 | NC_021163.1    | Ca_Kabuli_Chr04 | 23037720                | GG                                     | TT                 | TT               | INTERGENIC      |               |                    |                    |
| SNP_22878_A_23039036 | NC_021163.1    | Ca_Kabuli_Chr04 | 23039036                | CC                                     | TT                 | TT               | INTERGENIC      |               |                    |                    |
| SNP_22879_A_23039037 | NC_021163.1    | Ca_Kabuli_Chr04 | 23039037                | GG                                     | AA                 | AA               | INTERGENIC      |               |                    |                    |
| SNP_22880_A_23039052 | NC_021163.1    | Ca_Kabuli_Chr04 | 23039052                | CC                                     | GG                 | GG               | INTERGENIC      |               |                    |                    |
| SNP_22881_A_23039914 | NC_021163.1    | Ca_Kabuli_Chr04 | 23039914                | GG                                     | TT                 | TT               | INTERGENIC      |               |                    |                    |
| SNP_22882_A_23040200 | NC_021163.1    | Ca_Kabuli_Chr04 | 23040200                | GG                                     | TT                 | TT               | INTERGENIC      |               |                    |                    |
| SNP_22883_A_23040402 | NC_021163.1    | Ca_Kabuli_Chr04 | 23040402                | TT                                     | CC                 | CC               | INTERGENIC      |               |                    |                    |
| SNP_22884_A_23040756 | NC_021163.1    | Ca_Kabuli_Chr04 | 23040756                | GG                                     | AA                 | AA               | INTERGENIC      |               |                    |                    |
| SNP_22885_A_23040776 | NC_021163.1    | Ca_Kabuli_Chr04 | 23040776                | CC                                     | TT                 | TT               | INTERGENIC      |               |                    |                    |

| SNPs IDs             | Chromosome IDs | Chromosomes     | Physical positions (bp) | CDC Frontier genome (Reference genome) | (Pusa 1103 & HPNB) | (ILWC 46 & LPNB) | Sequence Components of genome | Gene accession IDs | Putative functions                                                               |
|----------------------|----------------|-----------------|-------------------------|----------------------------------------|--------------------|------------------|-------------------------------|--------------------|----------------------------------------------------------------------------------|
| SNP_22886_A_23042079 | NC_021163.1    | Ca_Kabuli_Chr04 | 23042079                | AA                                     | CC                 | CC               | INTERGENIC                    |                    |                                                                                  |
| SNP_22887_A_23048981 | NC_021163.1    | Ca_Kabuli_Chr04 | 23048981                | CC                                     | TT                 | TT               | INTERGENIC                    |                    |                                                                                  |
| SNP_22888_A_23048998 | NC_021163.1    | Ca_Kabuli_Chr04 | 23048998                | AA                                     | GG                 | GG               | INTERGENIC                    |                    |                                                                                  |
| SNP_22889_A_23050576 | NC_021163.1    | Ca_Kabuli_Chr04 | 23050576                | TT                                     | CC                 | CC               | DRR                           | 101499059          | uncharacterized LOC101499059                                                     |
| SNP_22890_A_23050659 | NC_021163.1    | Ca_Kabuli_Chr04 | 23050659                | GG                                     | TT                 | TT               | DRR                           | 101499059          | uncharacterized LOC101499059                                                     |
| SNP_22891_A_23050687 | NC_021163.1    | Ca_Kabuli_Chr04 | 23050687                | AA                                     | TT                 | TT               | DRR                           | 101499059          | uncharacterized LOC101499059                                                     |
| SNP_22892_A_23050857 | NC_021163.1    | Ca_Kabuli_Chr04 | 23050857                | AA                                     | TT                 | TT               | DRR                           | 101499059          | uncharacterized LOC101499059                                                     |
| SNP_22893_A_23055274 | NC_021163.1    | Ca_Kabuli_Chr04 | 23055274                | TT                                     | CC                 | CC               | URR                           | 101499059          | uncharacterized LOC101499059                                                     |
| SNP_22894_A_23055310 | NC_021163.1    | Ca_Kabuli_Chr04 | 23055310                | CC                                     | TT                 | TT               | URR                           | 101499059          | uncharacterized LOC101499059                                                     |
| SNP_22897_A_23058465 | NC_021163.1    | Ca_Kabuli_Chr04 | 23058465                | GG                                     | AA                 | AA               | INTERGENIC                    |                    |                                                                                  |
| SNP_22898_A_23058467 | NC_021163.1    | Ca_Kabuli_Chr04 | 23058467                | CC                                     | TT                 | TT               | INTERGENIC                    |                    |                                                                                  |
| SNP_22899_A_23058484 | NC_021163.1    | Ca_Kabuli_Chr04 | 23058484                | GG                                     | AA                 | AA               | INTERGENIC                    |                    |                                                                                  |
| SNP_22900_A_23060360 | NC_021163.1    | Ca_Kabuli_Chr04 | 23060360                | AA                                     | CC                 | CC               | INTERGENIC                    |                    |                                                                                  |
| SNP_22901_A_23060363 | NC_021163.1    | Ca_Kabuli_Chr04 | 23060363                | TT                                     | GG                 | GG               | INTERGENIC                    |                    |                                                                                  |
| SNP_22903_A_23067083 | NC_021163.1    | Ca_Kabuli_Chr04 | 23067083                | AA                                     | GG                 | GG               | INTRON                        | 101499372          | putative phosphatidylglycerol/phosphatidylinositol transfer protein DDB_G0282179 |
| SNP_22904_A_23067319 | NC_021163.1    | Ca_Kabuli_Chr04 | 23067319                | CC                                     | TT                 | TT               | INTRON                        | 101499372          | putative phosphatidylglycerol/phosphatidylinositol transfer protein DDB_G0282179 |
| SNP_22907_A_23077417 | NC_021163.1    | Ca_Kabuli_Chr04 | 23077417                | CC                                     | GG                 | GG               | URR                           | 101499680          | RING-H2 finger protein ATL70-like                                                |
| SNP_22908_A_23077538 | NC_021163.1    | Ca_Kabuli_Chr04 | 23077538                | AA                                     | GG                 | GG               | URR                           | 101499680          | RING-H2 finger protein ATL70-like                                                |
| SNP_22909_A_23077541 | NC_021163.1    | Ca_Kabuli_Chr04 | 23077541                | TT                                     | CC                 | CC               | URR                           | 101499680          | RING-H2 finger protein ATL70-like                                                |
| SNP_22911_A_23077692 | NC_021163.1    | Ca_Kabuli_Chr04 | 23077692                | TT                                     | AA                 | AA               | URR                           | 101499680          | RING-H2 finger protein ATL70-like                                                |
| SNP_22912_A_23077768 | NC_021163.1    | Ca_Kabuli_Chr04 | 23077768                | TT                                     | CC                 | CC               | URR                           | 101499680          | RING-H2 finger protein ATL70-like                                                |
| SNP_22913_A_23077886 | NC_021163.1    | Ca_Kabuli_Chr04 | 23077886                | GG                                     | AA                 | AA               | URR                           | 101499680          | RING-H2 finger protein ATL70-like                                                |

| SNPs IDs             | Chromosome IDs | Chromosomes     | Physical positions (bp) | CDC Frontier genome (Reference genome) | (Pusa 1103 & HPNB) | (ILWC 46 & LPNB) | Sequence Components of genome | Gene accession IDs | Putative functions                |
|----------------------|----------------|-----------------|-------------------------|----------------------------------------|--------------------|------------------|-------------------------------|--------------------|-----------------------------------|
| SNP_22914_A_23077897 | NC_021163.1    | Ca_Kabuli_Chr04 | 23077897                | TT                                     | CC                 | CC               | URR                           | 101499680          | RING-H2 finger protein ATL70-like |
| SNP_22915_A_23077919 | NC_021163.1    | Ca_Kabuli_Chr04 | 23077919                | GG                                     | AA                 | AA               | URR                           | 101499680          | RING-H2 finger protein ATL70-like |
| SNP_22917_A_23079115 | NC_021163.1    | Ca_Kabuli_Chr04 | 23079115                | AA                                     | GG                 | GG               | URR                           | 101499680          | RING-H2 finger protein ATL70-like |
| SNP_22918_A_23079127 | NC_021163.1    | Ca_Kabuli_Chr04 | 23079127                | GG                                     | CC                 | CC               | URR                           | 101499680          | RING-H2 finger protein ATL70-like |
| SNP_22919_A_23079204 | NC_021163.1    | Ca_Kabuli_Chr04 | 23079204                | AA                                     | GG                 | GG               | INTERGENIC                    |                    |                                   |
| SNP_22921_A_23098875 | NC_021163.1    | Ca_Kabuli_Chr04 | 23098875                | GG                                     | AA                 | AA               | INTERGENIC                    |                    |                                   |
| SNP_22922_A_23105108 | NC_021163.1    | Ca_Kabuli_Chr04 | 23105108                | CC                                     | TT                 | TT               | INTRON                        | 101499989          | uncharacterized LOC101499989      |
| SNP_22923_A_23109069 | NC_021163.1    | Ca_Kabuli_Chr04 | 23109069                | TT                                     | CC                 | CC               | URR                           | 101499989          | uncharacterized LOC101499989      |
| SNP_22924_A_23112217 | NC_021163.1    | Ca_Kabuli_Chr04 | 23112217                | CC                                     | TT                 | TT               | INTERGENIC                    |                    |                                   |
| SNP_22925_A_23112233 | NC_021163.1    | Ca_Kabuli_Chr04 | 23112233                | TT                                     | CC                 | CC               | INTERGENIC                    |                    |                                   |
| SNP_22926_A_23117300 | NC_021163.1    | Ca_Kabuli_Chr04 | 23117300                | TT                                     | GG                 | GG               | INTERGENIC                    |                    |                                   |
| SNP_22927_A_23117836 | NC_021163.1    | Ca_Kabuli_Chr04 | 23117836                | AA                                     | CC                 | CC               | INTERGENIC                    |                    |                                   |
| SNP_22928_A_23120614 | NC_021163.1    | Ca_Kabuli_Chr04 | 23120614                | TT                                     | GG                 | GG               | INTERGENIC                    |                    |                                   |
| SNP_22929_A_23130064 | NC_021163.1    | Ca_Kabuli_Chr04 | 23130064                | AA                                     | GG                 | GG               | INTERGENIC                    |                    |                                   |
| SNP_22930_A_23130082 | NC_021163.1    | Ca_Kabuli_Chr04 | 23130082                | AA                                     | GG                 | GG               | INTERGENIC                    |                    |                                   |
| SNP_22933_A_23135516 | NC_021163.1    | Ca_Kabuli_Chr04 | 23135516                | GG                                     | AA                 | AA               | INTERGENIC                    |                    |                                   |
| SNP_22934_A_23135566 | NC_021163.1    | Ca_Kabuli_Chr04 | 23135566                | TT                                     | AA                 | AA               | INTERGENIC                    |                    |                                   |
| SNP_22935_A_23135827 | NC_021163.1    | Ca_Kabuli_Chr04 | 23135827                | GG                                     | AA                 | AA               | INTERGENIC                    |                    |                                   |
| SNP_22936_A_23136810 | NC_021163.1    | Ca_Kabuli_Chr04 | 23136810                | AA                                     | GG                 | GG               | INTERGENIC                    |                    |                                   |
| SNP_22937_A_23137177 | NC_021163.1    | Ca_Kabuli_Chr04 | 23137177                | CC                                     | TT                 | TT               | INTERGENIC                    |                    |                                   |
| SNP_22938_A_23153853 | NC_021163.1    | Ca_Kabuli_Chr04 | 23153853                | TT                                     | CC                 | CC               | DRR                           | 101488749          | Unknown function                  |
| SNP_22939_A_23158926 | NC_021163.1    | Ca_Kabuli_Chr04 | 23158926                | AA                                     | GG                 | GG               | DRR                           | 101501176          | syntxin-121-like                  |

| SNPs IDs             | Chromosome IDs | Chromosomes     | Physical positions (bp) | CDC Frontier genome (Reference genome) | (Pusa 1103 & HPNB) | (ILWC 46 & LPNB) | Sequence Components of genome | Gene accession IDs | Putative functions                        |
|----------------------|----------------|-----------------|-------------------------|----------------------------------------|--------------------|------------------|-------------------------------|--------------------|-------------------------------------------|
| SNP_22940_A_23188558 | NC_021163.1    | Ca_Kabuli_Chr04 | 23188558                | AA                                     | CC                 | CC               | INTERGENIC                    |                    |                                           |
| SNP_22942_A_23227269 | NC_021163.1    | Ca_Kabuli_Chr04 | 23227269                | AA                                     | TT                 | TT               | INTERGENIC                    |                    |                                           |
| SNP_22943_A_23251609 | NC_021163.1    | Ca_Kabuli_Chr04 | 23251609                | AA                                     | GG                 | GG               | INTRON                        | 101489736          | cell differentiation protein RCD1 homolog |
| SNP_22944_A_23277116 | NC_021163.1    | Ca_Kabuli_Chr04 | 23277116                | CC                                     | TT                 | TT               | INTRON                        | 101490388          | Unknown function                          |
| SNP_22945_A_23310215 | NC_021163.1    | Ca_Kabuli_Chr04 | 23310215                | AA                                     | GG                 | GG               | INTRON                        | 101502344          | UPF0505 protein C16orf62 homolog          |
| SNP_22946_A_23350691 | NC_021163.1    | Ca_Kabuli_Chr04 | 23350691                | AA                                     | TT                 | TT               | INTERGENIC                    |                    |                                           |
| SNP_22947_A_23350692 | NC_021163.1    | Ca_Kabuli_Chr04 | 23350692                | AA                                     | CC                 | CC               | INTERGENIC                    |                    |                                           |
| SNP_22948_A_23361358 | NC_021163.1    | Ca_Kabuli_Chr04 | 23361358                | TT                                     | CC                 | CC               | INTERGENIC                    |                    |                                           |
| SNP_22949_A_23361800 | NC_021163.1    | Ca_Kabuli_Chr04 | 23361800                | CC                                     | TT                 | TT               | INTERGENIC                    |                    |                                           |
| SNP_22950_A_23398776 | NC_021163.1    | Ca_Kabuli_Chr04 | 23398776                | CC                                     | TT                 | TT               | INTERGENIC                    |                    |                                           |
| SNP_22951_A_23398778 | NC_021163.1    | Ca_Kabuli_Chr04 | 23398778                | GG                                     | AA                 | AA               | INTERGENIC                    |                    |                                           |
| SNP_22952_A_23421482 | NC_021163.1    | Ca_Kabuli_Chr04 | 23421482                | TT                                     | CC                 | CC               | INTERGENIC                    |                    |                                           |
| SNP_22953_A_23421483 | NC_021163.1    | Ca_Kabuli_Chr04 | 23421483                | AA                                     | CC                 | CC               | INTERGENIC                    |                    |                                           |
| SNP_22954_A_23421659 | NC_021163.1    | Ca_Kabuli_Chr04 | 23421659                | AA                                     | GG                 | GG               | INTERGENIC                    |                    |                                           |
| SNP_22955_A_23421683 | NC_021163.1    | Ca_Kabuli_Chr04 | 23421683                | TT                                     | CC                 | CC               | INTERGENIC                    |                    |                                           |
| SNP_22956_A_23421711 | NC_021163.1    | Ca_Kabuli_Chr04 | 23421711                | CC                                     | AA                 | AA               | INTERGENIC                    |                    |                                           |
| SNP_22957_A_23421798 | NC_021163.1    | Ca_Kabuli_Chr04 | 23421798                | AA                                     | GG                 | GG               | INTERGENIC                    |                    |                                           |
| SNP_22958_A_23421800 | NC_021163.1    | Ca_Kabuli_Chr04 | 23421800                | AA                                     | GG                 | GG               | INTERGENIC                    |                    |                                           |
| SNP_22959_A_23421865 | NC_021163.1    | Ca_Kabuli_Chr04 | 23421865                | TT                                     | CC                 | CC               | INTERGENIC                    |                    |                                           |
| SNP_22960_A_23456341 | NC_021163.1    | Ca_Kabuli_Chr04 | 23456341                | CC                                     | TT                 | TT               | INTRON                        | 101491979          | dof zinc finger protein DOF3.5-like       |
| SNP_22961_A_23508620 | NC_021163.1    | Ca_Kabuli_Chr04 | 23508620                | TT                                     | CC                 | CC               | INTERGENIC                    |                    |                                           |
| SNP_22962_A_23508740 | NC_021163.1    | Ca_Kabuli_Chr04 | 23508740                | TT                                     | CC                 | CC               | INTERGENIC                    |                    |                                           |

| SNPs IDs             | Chromosome IDs | Chromosomes     | Physical positions (bp) | CDC Frontier genome (Reference genome) | (Pusa 1103 & HPNB) | (ILWC 46 & LPNB) | Sequence genome       | Components of | Gene accession IDs | Putative functions |
|----------------------|----------------|-----------------|-------------------------|----------------------------------------|--------------------|------------------|-----------------------|---------------|--------------------|--------------------|
| SNP_22963_A_23508757 | NC_021163.1    | Ca_Kabuli_Chr04 | 23508757                | CC                                     | TT                 | TT               | INTERGENIC            |               |                    |                    |
| SNP_22964_A_23518648 | NC_021163.1    | Ca_Kabuli_Chr04 | 23518648                | GG                                     | AA                 | AA               | INTERGENIC            |               |                    |                    |
| SNP_22966_A_23587135 | NC_021163.1    | Ca_Kabuli_Chr04 | 23587135                | AA                                     | GG                 | GG               | INTERGENIC            |               |                    |                    |
| SNP_22967_A_23587138 | NC_021163.1    | Ca_Kabuli_Chr04 | 23587138                | GG                                     | AA                 | AA               | INTERGENIC            |               |                    |                    |
| SNP_22968_A_23587183 | NC_021163.1    | Ca_Kabuli_Chr04 | 23587183                | GG                                     | CC                 | CC               | INTERGENIC            |               |                    |                    |
| SNP_22969_A_23590151 | NC_021163.1    | Ca_Kabuli_Chr04 | 23590151                | CC                                     | AA                 | AA               | INTERGENIC            |               |                    |                    |
| SNP_22970_A_23632486 | NC_021163.1    | Ca_Kabuli_Chr04 | 23632486                | TT                                     | CC                 | CC               | INTERGENIC            |               |                    |                    |
| SNP_22971_A_23634253 | NC_021163.1    | Ca_Kabuli_Chr04 | 23634253                | CC                                     | GG                 | GG               | NON_SYNONYMOUS_CODING | id84431       |                    | Unknown function   |
| SNP_22972_A_23643987 | NC_021163.1    | Ca_Kabuli_Chr04 | 23643987                | CC                                     | TT                 | TT               | INTERGENIC            |               |                    |                    |
| SNP_22973_A_23647020 | NC_021163.1    | Ca_Kabuli_Chr04 | 23647020                | GG                                     | CC                 | CC               | INTERGENIC            |               |                    |                    |
| SNP_22974_A_23664000 | NC_021163.1    | Ca_Kabuli_Chr04 | 23664000                | TT                                     | CC                 | CC               | INTERGENIC            |               |                    |                    |
| SNP_22975_A_23694294 | NC_021163.1    | Ca_Kabuli_Chr04 | 23694294                | GG                                     | TT                 | TT               | INTERGENIC            |               |                    |                    |
| SNP_22976_A_23694305 | NC_021163.1    | Ca_Kabuli_Chr04 | 23694305                | AA                                     | CC                 | CC               | INTERGENIC            |               |                    |                    |
| SNP_22977_A_23694309 | NC_021163.1    | Ca_Kabuli_Chr04 | 23694309                | TT                                     | CC                 | CC               | INTERGENIC            |               |                    |                    |
| SNP_22978_A_23694316 | NC_021163.1    | Ca_Kabuli_Chr04 | 23694316                | TT                                     | CC                 | CC               | INTERGENIC            |               |                    |                    |
| SNP_22979_A_23694330 | NC_021163.1    | Ca_Kabuli_Chr04 | 23694330                | AA                                     | CC                 | CC               | INTERGENIC            |               |                    |                    |
| SNP_22980_A_23694347 | NC_021163.1    | Ca_Kabuli_Chr04 | 23694347                | TT                                     | GG                 | GG               | INTERGENIC            |               |                    |                    |
| SNP_22981_A_23694349 | NC_021163.1    | Ca_Kabuli_Chr04 | 23694349                | AA                                     | GG                 | GG               | INTERGENIC            |               |                    |                    |
| SNP_22982_A_23699517 | NC_021163.1    | Ca_Kabuli_Chr04 | 23699517                | TT                                     | GG                 | GG               | INTERGENIC            |               |                    |                    |
| SNP_22983_A_23699523 | NC_021163.1    | Ca_Kabuli_Chr04 | 23699523                | TT                                     | GG                 | GG               | INTERGENIC            |               |                    |                    |
| SNP_22984_A_23699525 | NC_021163.1    | Ca_Kabuli_Chr04 | 23699525                | AA                                     | TT                 | TT               | INTERGENIC            |               |                    |                    |
| SNP_22985_A_23699532 | NC_021163.1    | Ca_Kabuli_Chr04 | 23699532                | GG                                     | AA                 | AA               | INTERGENIC            |               |                    |                    |

| SNPs IDs             | Chromosome IDs | Chromosomes     | Physical positions (bp) | CDC Frontier genome (Reference genome) | (Pusa 1103 & HPNB) | (ILWC 46 & LPNB) | Sequence genome | Components of | Gene accession IDs | Putative functions |
|----------------------|----------------|-----------------|-------------------------|----------------------------------------|--------------------|------------------|-----------------|---------------|--------------------|--------------------|
| SNP_22986_A_23699540 | NC_021163.1    | Ca_Kabuli_Chr04 | 23699540                | CC                                     | GG                 | GG               | INTERGENIC      |               |                    |                    |
| SNP_22987_A_23699628 | NC_021163.1    | Ca_Kabuli_Chr04 | 23699628                | GG                                     | CC                 | CC               | INTERGENIC      |               |                    |                    |
| SNP_22988_A_23699629 | NC_021163.1    | Ca_Kabuli_Chr04 | 23699629                | TT                                     | CC                 | CC               | INTERGENIC      |               |                    |                    |
| SNP_22989_A_23699658 | NC_021163.1    | Ca_Kabuli_Chr04 | 23699658                | AA                                     | GG                 | GG               | INTERGENIC      |               |                    |                    |
| SNP_22990_A_23699807 | NC_021163.1    | Ca_Kabuli_Chr04 | 23699807                | CC                                     | TT                 | TT               | INTERGENIC      |               |                    |                    |
| SNP_22991_A_23699964 | NC_021163.1    | Ca_Kabuli_Chr04 | 23699964                | AA                                     | TT                 | TT               | INTERGENIC      |               |                    |                    |
| SNP_22992_A_23719800 | NC_021163.1    | Ca_Kabuli_Chr04 | 23719800                | AA                                     | GG                 | GG               | INTERGENIC      |               |                    |                    |
| SNP_22993_A_23719813 | NC_021163.1    | Ca_Kabuli_Chr04 | 23719813                | AA                                     | TT                 | TT               | INTERGENIC      |               |                    |                    |
| SNP_22994_A_23719815 | NC_021163.1    | Ca_Kabuli_Chr04 | 23719815                | TT                                     | AA                 | AA               | INTERGENIC      |               |                    |                    |
| SNP_22995_A_23720147 | NC_021163.1    | Ca_Kabuli_Chr04 | 23720147                | CC                                     | TT                 | TT               | INTERGENIC      |               |                    |                    |
| SNP_22996_A_23720227 | NC_021163.1    | Ca_Kabuli_Chr04 | 23720227                | AA                                     | GG                 | GG               | INTERGENIC      |               |                    |                    |
| SNP_22997_A_23720338 | NC_021163.1    | Ca_Kabuli_Chr04 | 23720338                | AA                                     | GG                 | GG               | INTERGENIC      |               |                    |                    |
| SNP_22998_A_23720360 | NC_021163.1    | Ca_Kabuli_Chr04 | 23720360                | TT                                     | CC                 | CC               | INTERGENIC      |               |                    |                    |
| SNP_22999_A_23720873 | NC_021163.1    | Ca_Kabuli_Chr04 | 23720873                | AA                                     | GG                 | GG               | INTERGENIC      |               |                    |                    |
| SNP_23000_A_23721102 | NC_021163.1    | Ca_Kabuli_Chr04 | 23721102                | GG                                     | CC                 | CC               | INTERGENIC      |               |                    |                    |
| SNP_23002_A_23757424 | NC_021163.1    | Ca_Kabuli_Chr04 | 23757424                | TT                                     | AA                 | AA               | INTERGENIC      |               |                    |                    |
| SNP_23003_A_23827811 | NC_021163.1    | Ca_Kabuli_Chr04 | 23827811                | GG                                     | AA                 | AA               | INTERGENIC      |               |                    |                    |
| SNP_23004_A_23827904 | NC_021163.1    | Ca_Kabuli_Chr04 | 23827904                | CC                                     | TT                 | TT               | INTERGENIC      |               |                    |                    |
| SNP_23005_A_23827913 | NC_021163.1    | Ca_Kabuli_Chr04 | 23827913                | TT                                     | GG                 | GG               | INTERGENIC      |               |                    |                    |
| SNP_23006_A_23828033 | NC_021163.1    | Ca_Kabuli_Chr04 | 23828033                | AA                                     | TT                 | TT               | INTERGENIC      |               |                    |                    |
| SNP_23007_A_23828135 | NC_021163.1    | Ca_Kabuli_Chr04 | 23828135                | GG                                     | AA                 | AA               | INTERGENIC      |               |                    |                    |
| SNP_23008_A_23828187 | NC_021163.1    | Ca_Kabuli_Chr04 | 23828187                | AA                                     | TT                 | TT               | INTERGENIC      |               |                    |                    |

| SNPs IDs             | Chromosome IDs | Chromosomes     | Physical positions (bp) | CDC Frontier genome (Reference genome) | (Pusa 1103 & HPNB) | (ILWC 46 & LPNB) | Sequence Components of genome | Gene accession IDs | Putative functions            |
|----------------------|----------------|-----------------|-------------------------|----------------------------------------|--------------------|------------------|-------------------------------|--------------------|-------------------------------|
| SNP_23009_A_23828307 | NC_021163.1    | Ca_Kabuli_Chr04 | 23828307                | CC                                     | TT                 | TT               | INTERGENIC                    |                    |                               |
| SNP_23010_A_23844546 | NC_021163.1    | Ca_Kabuli_Chr04 | 23844546                | GG                                     | AA                 | AA               | INTERGENIC                    |                    |                               |
| SNP_23011_A_23918850 | NC_021163.1    | Ca_Kabuli_Chr04 | 23918850                | TT                                     | GG                 | GG               | INTRON                        | 101508663          | uncharacterized LOC101508663  |
| SNP_23013_A_23969480 | NC_021163.1    | Ca_Kabuli_Chr04 | 23969480                | CC                                     | TT                 | TT               | INTERGENIC                    |                    |                               |
| SNP_23014_A_23984815 | NC_021163.1    | Ca_Kabuli_Chr04 | 23984815                | CC                                     | AA                 | AA               | INTERGENIC                    |                    |                               |
| SNP_23015_A_23991267 | NC_021163.1    | Ca_Kabuli_Chr04 | 23991267                | GG                                     | AA                 | AA               | INTERGENIC                    |                    |                               |
| SNP_23016_A_24001310 | NC_021163.1    | Ca_Kabuli_Chr04 | 24001310                | AA                                     | GG                 | GG               | INTERGENIC                    |                    |                               |
| SNP_23017_A_24043941 | NC_021163.1    | Ca_Kabuli_Chr04 | 24043941                | CC                                     | TT                 | TT               | INTERGENIC                    |                    |                               |
| SNP_23018_A_24057180 | NC_021163.1    | Ca_Kabuli_Chr04 | 24057180                | TT                                     | CC                 | CC               | URR                           | 101510920          | histidine--tRNA ligase        |
| SNP_23019_A_24063613 | NC_021163.1    | Ca_Kabuli_Chr04 | 24063613                | GG                                     | AA                 | AA               | INTERGENIC                    |                    |                               |
| SNP_23020_A_24063617 | NC_021163.1    | Ca_Kabuli_Chr04 | 24063617                | TT                                     | CC                 | CC               | INTERGENIC                    |                    |                               |
| SNP_23021_A_24096072 | NC_021163.1    | Ca_Kabuli_Chr04 | 24096072                | AA                                     | GG                 | GG               | INTERGENIC                    |                    |                               |
| SNP_23023_A_24110470 | NC_021163.1    | Ca_Kabuli_Chr04 | 24110470                | TT                                     | AA                 | AA               | INTERGENIC                    |                    |                               |
| SNP_23024_A_24112693 | NC_021163.1    | Ca_Kabuli_Chr04 | 24112693                | GG                                     | TT                 | TT               | STOP_GAINED                   | 101495546          | transcription repressor OFP15 |
| SNP_23025_A_24113024 | NC_021163.1    | Ca_Kabuli_Chr04 | 24113024                | TT                                     | GG                 | GG               | NON_SYNONYMOUS_CODING         | 101495546          | transcription repressor OFP15 |
| SNP_23028_A_24143322 | NC_021163.1    | Ca_Kabuli_Chr04 | 24143322                | GG                                     | AA                 | AA               | INTERGENIC                    |                    |                               |
| SNP_23029_A_24189968 | NC_021163.1    | Ca_Kabuli_Chr04 | 24189968                | AA                                     | TT                 | TT               | INTERGENIC                    |                    |                               |
| SNP_23030_A_24189975 | NC_021163.1    | Ca_Kabuli_Chr04 | 24189975                | GG                                     | TT                 | TT               | INTERGENIC                    |                    |                               |
| SNP_23031_A_24219555 | NC_021163.1    | Ca_Kabuli_Chr04 | 24219555                | AA                                     | GG                 | GG               | INTERGENIC                    |                    |                               |
| SNP_23033_A_24286631 | NC_021163.1    | Ca_Kabuli_Chr04 | 24286631                | GG                                     | AA                 | AA               | INTERGENIC                    |                    |                               |
| SNP_23034_A_24311759 | NC_021163.1    | Ca_Kabuli_Chr04 | 24311759                | AA                                     | TT                 | TT               | INTERGENIC                    |                    |                               |
| SNP_23035_A_24326929 | NC_021163.1    | Ca_Kabuli_Chr04 | 24326929                | AA                                     | GG                 | GG               | INTERGENIC                    |                    |                               |



| SNPs IDs             | Chromosome IDs | Chromosomes     | Physical positions (bp) | CDC Frontier (Reference genome) | (Pusa 1103 & HPNB) | (ILWC 46 & LPNB) | Sequence genome | Components of | Gene accession IDs | Putative functions |
|----------------------|----------------|-----------------|-------------------------|---------------------------------|--------------------|------------------|-----------------|---------------|--------------------|--------------------|
| SNP_23036_A_24341200 | NC_021163.1    | Ca_Kabuli_Chr04 | 24341200                | AA                              | CC                 | CC               | INTERGENIC      |               |                    |                    |
| SNP_23037_A_24350107 | NC_021163.1    | Ca_Kabuli_Chr04 | 24350107                | TT                              | CC                 | CC               | INTERGENIC      |               |                    |                    |
| SNP_23038_A_24350109 | NC_021163.1    | Ca_Kabuli_Chr04 | 24350109                | TT                              | AA                 | AA               | INTERGENIC      |               |                    |                    |
| SNP_23039_A_24350136 | NC_021163.1    | Ca_Kabuli_Chr04 | 24350136                | TT                              | CC                 | CC               | INTERGENIC      |               |                    |                    |
| SNP_23040_A_24350159 | NC_021163.1    | Ca_Kabuli_Chr04 | 24350159                | TT                              | GG                 | GG               | INTERGENIC      |               |                    |                    |
| SNP_23041_A_24350213 | NC_021163.1    | Ca_Kabuli_Chr04 | 24350213                | TT                              | CC                 | CC               | INTERGENIC      |               |                    |                    |
| SNP_23042_A_24350372 | NC_021163.1    | Ca_Kabuli_Chr04 | 24350372                | CC                              | TT                 | TT               | INTERGENIC      |               |                    |                    |
| SNP_23043_A_24350424 | NC_021163.1    | Ca_Kabuli_Chr04 | 24350424                | AA                              | GG                 | GG               | INTERGENIC      |               |                    |                    |
| SNP_23044_A_24356954 | NC_021163.1    | Ca_Kabuli_Chr04 | 24356954                | TT                              | GG                 | GG               | INTERGENIC      |               |                    |                    |
| SNP_23045_A_24357057 | NC_021163.1    | Ca_Kabuli_Chr04 | 24357057                | TT                              | GG                 | GG               | INTERGENIC      |               |                    |                    |
| SNP_23046_A_24357070 | NC_021163.1    | Ca_Kabuli_Chr04 | 24357070                | TT                              | GG                 | GG               | INTERGENIC      |               |                    |                    |
| SNP_23049_A_24378320 | NC_021163.1    | Ca_Kabuli_Chr04 | 24378320                | TT                              | GG                 | GG               | INTERGENIC      |               |                    |                    |
| SNP_23050_A_24379880 | NC_021163.1    | Ca_Kabuli_Chr04 | 24379880                | GG                              | AA                 | AA               | INTERGENIC      |               |                    |                    |
| SNP_23051_A_24398858 | NC_021163.1    | Ca_Kabuli_Chr04 | 24398858                | TT                              | CC                 | CC               | INTERGENIC      |               |                    |                    |
| SNP_23052_A_24426602 | NC_021163.1    | Ca_Kabuli_Chr04 | 24426602                | CC                              | TT                 | TT               | INTERGENIC      |               |                    |                    |
| SNP_23054_A_24427653 | NC_021163.1    | Ca_Kabuli_Chr04 | 24427653                | TT                              | GG                 | GG               | INTERGENIC      |               |                    |                    |
| SNP_23055_A_24436836 | NC_021163.1    | Ca_Kabuli_Chr04 | 24436836                | CC                              | AA                 | AA               | INTERGENIC      |               |                    |                    |
| SNP_23056_A_24437885 | NC_021163.1    | Ca_Kabuli_Chr04 | 24437885                | CC                              | TT                 | TT               | INTERGENIC      |               |                    |                    |
| SNP_23057_A_24438182 | NC_021163.1    | Ca_Kabuli_Chr04 | 24438182                | AA                              | CC                 | CC               | INTERGENIC      |               |                    |                    |
| SNP_23058_A_24438228 | NC_021163.1    | Ca_Kabuli_Chr04 | 24438228                | TT                              | CC                 | CC               | INTERGENIC      |               |                    |                    |
| SNP_23059_A_24438244 | NC_021163.1    | Ca_Kabuli_Chr04 | 24438244                | CC                              | TT                 | TT               | INTERGENIC      |               |                    |                    |
| SNP_23060_A_24442898 | NC_021163.1    | Ca_Kabuli_Chr04 | 24442898                | TT                              | CC                 | CC               | INTERGENIC      |               |                    |                    |

| SNPs IDs             | Chromosome IDs | Chromosomes     | Physical positions (bp) | CDC Frontier genome (Reference genome) | (Pusa 1103 & HPNB) | (ILWC 46 & LPNB) | Sequence genome | Components of | Gene accession IDs | Putative functions |
|----------------------|----------------|-----------------|-------------------------|----------------------------------------|--------------------|------------------|-----------------|---------------|--------------------|--------------------|
| SNP_23061_A_24442902 | NC_021163.1    | Ca_Kabuli_Chr04 | 24442902                | GG                                     | CC                 | CC               | INTERGENIC      |               |                    |                    |
| SNP_23062_A_24442904 | NC_021163.1    | Ca_Kabuli_Chr04 | 24442904                | GG                                     | AA                 | AA               | INTERGENIC      |               |                    |                    |
| SNP_23063_A_24442906 | NC_021163.1    | Ca_Kabuli_Chr04 | 24442906                | GG                                     | AA                 | AA               | INTERGENIC      |               |                    |                    |
| SNP_23064_A_24442907 | NC_021163.1    | Ca_Kabuli_Chr04 | 24442907                | TT                                     | CC                 | CC               | INTERGENIC      |               |                    |                    |
| SNP_23065_A_24442909 | NC_021163.1    | Ca_Kabuli_Chr04 | 24442909                | TT                                     | CC                 | CC               | INTERGENIC      |               |                    |                    |
| SNP_23067_A_24453336 | NC_021163.1    | Ca_Kabuli_Chr04 | 24453336                | GG                                     | AA                 | AA               | INTERGENIC      |               |                    |                    |
| SNP_23068_A_24453377 | NC_021163.1    | Ca_Kabuli_Chr04 | 24453377                | TT                                     | GG                 | GG               | INTERGENIC      |               |                    |                    |
| SNP_23069_A_24453397 | NC_021163.1    | Ca_Kabuli_Chr04 | 24453397                | AA                                     | CC                 | CC               | INTERGENIC      |               |                    |                    |
| SNP_23070_A_24453419 | NC_021163.1    | Ca_Kabuli_Chr04 | 24453419                | AA                                     | TT                 | TT               | INTERGENIC      |               |                    |                    |
| SNP_23071_A_24453421 | NC_021163.1    | Ca_Kabuli_Chr04 | 24453421                | AA                                     | CC                 | CC               | INTERGENIC      |               |                    |                    |
| SNP_23072_A_24453422 | NC_021163.1    | Ca_Kabuli_Chr04 | 24453422                | AA                                     | GG                 | GG               | INTERGENIC      |               |                    |                    |
| SNP_23073_A_24453433 | NC_021163.1    | Ca_Kabuli_Chr04 | 24453433                | AA                                     | TT                 | TT               | INTERGENIC      |               |                    |                    |
| SNP_23074_A_24453739 | NC_021163.1    | Ca_Kabuli_Chr04 | 24453739                | TT                                     | AA                 | AA               | INTERGENIC      |               |                    |                    |
| SNP_23075_A_24453750 | NC_021163.1    | Ca_Kabuli_Chr04 | 24453750                | AA                                     | GG                 | GG               | INTERGENIC      |               |                    |                    |
| SNP_23076_A_24453752 | NC_021163.1    | Ca_Kabuli_Chr04 | 24453752                | AA                                     | TT                 | TT               | INTERGENIC      |               |                    |                    |
| SNP_23078_A_24456669 | NC_021163.1    | Ca_Kabuli_Chr04 | 24456669                | TT                                     | CC                 | CC               | INTERGENIC      |               |                    |                    |
| SNP_23079_A_24456938 | NC_021163.1    | Ca_Kabuli_Chr04 | 24456938                | AA                                     | GG                 | GG               | INTERGENIC      |               |                    |                    |
| SNP_23080_A_24478812 | NC_021163.1    | Ca_Kabuli_Chr04 | 24478812                | AA                                     | GG                 | GG               | INTERGENIC      |               |                    |                    |
| SNP_23081_A_24478837 | NC_021163.1    | Ca_Kabuli_Chr04 | 24478837                | TT                                     | CC                 | CC               | INTERGENIC      |               |                    |                    |
| SNP_23082_A_24478841 | NC_021163.1    | Ca_Kabuli_Chr04 | 24478841                | AA                                     | CC                 | CC               | INTERGENIC      |               |                    |                    |
| SNP_23085_A_24479137 | NC_021163.1    | Ca_Kabuli_Chr04 | 24479137                | CC                                     | TT                 | TT               | INTERGENIC      |               |                    |                    |
| SNP_23086_A_24479172 | NC_021163.1    | Ca_Kabuli_Chr04 | 24479172                | CC                                     | TT                 | TT               | INTERGENIC      |               |                    |                    |

| SNPs IDs             | Chromosome IDs | Chromosomes     | Physical positions (bp) | CDC Frontier genome (Reference genome) | (Pusa 1103 & HPNB) | (ILWC 46 & LPNB) | Sequence genome | Components of | Gene accession IDs                                         | Putative functions |
|----------------------|----------------|-----------------|-------------------------|----------------------------------------|--------------------|------------------|-----------------|---------------|------------------------------------------------------------|--------------------|
| SNP_23087_A_24479186 | NC_021163.1    | Ca_Kabuli_Chr04 | 24479186                | AA                                     | TT                 | TT               | INTERGENIC      |               |                                                            |                    |
| SNP_23088_A_24479187 | NC_021163.1    | Ca_Kabuli_Chr04 | 24479187                | AA                                     | TT                 | TT               | INTERGENIC      |               |                                                            |                    |
| SNP_23089_A_24479189 | NC_021163.1    | Ca_Kabuli_Chr04 | 24479189                | TT                                     | AA                 | AA               | INTERGENIC      |               |                                                            |                    |
| SNP_23090_A_24479205 | NC_021163.1    | Ca_Kabuli_Chr04 | 24479205                | GG                                     | AA                 | AA               | INTERGENIC      |               |                                                            |                    |
| SNP_23091_A_24479225 | NC_021163.1    | Ca_Kabuli_Chr04 | 24479225                | CC                                     | AA                 | AA               | INTERGENIC      |               |                                                            |                    |
| SNP_23092_A_24483368 | NC_021163.1    | Ca_Kabuli_Chr04 | 24483368                | GG                                     | TT                 | TT               | INTERGENIC      |               |                                                            |                    |
| SNP_23093_A_24484637 | NC_021163.1    | Ca_Kabuli_Chr04 | 24484637                | GG                                     | AA                 | AA               | INTERGENIC      |               |                                                            |                    |
| SNP_23094_A_24494560 | NC_021163.1    | Ca_Kabuli_Chr04 | 24494560                | GG                                     | AA                 | AA               | INTERGENIC      |               |                                                            |                    |
| SNP_23096_A_24512995 | NC_021163.1    | Ca_Kabuli_Chr04 | 24512995                | AA                                     | TT                 | TT               | DRR             | 101497738     | pentatricopeptide repeat-containing protein At2g44880-like |                    |
| SNP_23097_A_24519101 | NC_021163.1    | Ca_Kabuli_Chr04 | 24519101                | CC                                     | TT                 | TT               | INTERGENIC      |               |                                                            |                    |
| SNP_23098_A_24538326 | NC_021163.1    | Ca_Kabuli_Chr04 | 24538326                | TT                                     | AA                 | AA               | INTERGENIC      |               |                                                            |                    |
| SNP_23099_A_24547807 | NC_021163.1    | Ca_Kabuli_Chr04 | 24547807                | CC                                     | GG                 | GG               | INTERGENIC      |               |                                                            |                    |
| SNP_23101_A_24556522 | NC_021163.1    | Ca_Kabuli_Chr04 | 24556522                | CC                                     | AA                 | AA               | INTERGENIC      |               |                                                            |                    |
| SNP_23102_A_24556523 | NC_021163.1    | Ca_Kabuli_Chr04 | 24556523                | CC                                     | AA                 | AA               | INTERGENIC      |               |                                                            |                    |
| SNP_23103_A_24556535 | NC_021163.1    | Ca_Kabuli_Chr04 | 24556535                | CC                                     | TT                 | TT               | INTERGENIC      |               |                                                            |                    |
| SNP_23104_A_24560053 | NC_021163.1    | Ca_Kabuli_Chr04 | 24560053                | GG                                     | TT                 | TT               | INTERGENIC      |               |                                                            |                    |
| SNP_23105_A_24568261 | NC_021163.1    | Ca_Kabuli_Chr04 | 24568261                | GG                                     | TT                 | TT               | INTERGENIC      |               |                                                            |                    |
| SNP_23106_A_24572946 | NC_021163.1    | Ca_Kabuli_Chr04 | 24572946                | AA                                     | CC                 | CC               | INTERGENIC      |               |                                                            |                    |
| SNP_23107_A_24581967 | NC_021163.1    | Ca_Kabuli_Chr04 | 24581967                | CC                                     | AA                 | AA               | INTERGENIC      |               |                                                            |                    |
| SNP_23108_A_24628721 | NC_021163.1    | Ca_Kabuli_Chr04 | 24628721                | TT                                     | GG                 | GG               | INTERGENIC      |               |                                                            |                    |
| SNP_23109_A_24628729 | NC_021163.1    | Ca_Kabuli_Chr04 | 24628729                | AA                                     | TT                 | TT               | INTERGENIC      |               |                                                            |                    |
| SNP_23110_A_24657087 | NC_021163.1    | Ca_Kabuli_Chr04 | 24657087                | CC                                     | TT                 | TT               | INTERGENIC      |               |                                                            |                    |

| SNPs IDs             | Chromosome IDs | Chromosomes     | Physical positions (bp) | CDC Frontier (Reference genome) | (Pusa 1103 & HPNB) | (ILWC 46 & LPNB) | Sequence Components of genome | Gene accession IDs | Putative functions                        |
|----------------------|----------------|-----------------|-------------------------|---------------------------------|--------------------|------------------|-------------------------------|--------------------|-------------------------------------------|
| SNP_23111_A_2466997  | NC_021163.1    | Ca_Kabuli_Chr04 | 2466997                 | CC                              | AA                 | AA               | INTERGENIC                    |                    |                                           |
| SNP_23113_A_24679360 | NC_021163.1    | Ca_Kabuli_Chr04 | 24679360                | AA                              | GG                 | GG               | INTERGENIC                    |                    |                                           |
| SNP_23114_A_24692658 | NC_021163.1    | Ca_Kabuli_Chr04 | 24692658                | CC                              | GG                 | GG               | INTERGENIC                    |                    |                                           |
| SNP_23115_A_24694984 | NC_021163.1    | Ca_Kabuli_Chr04 | 24694984                | TT                              | CC                 | CC               | INTERGENIC                    |                    |                                           |
| SNP_23116_A_24698498 | NC_021163.1    | Ca_Kabuli_Chr04 | 24698498                | CC                              | GG                 | GG               | INTERGENIC                    |                    |                                           |
| SNP_23117_A_24703000 | NC_021163.1    | Ca_Kabuli_Chr04 | 24703000                | CC                              | TT                 | TT               | INTERGENIC                    |                    |                                           |
| SNP_23118_A_24704170 | NC_021163.1    | Ca_Kabuli_Chr04 | 24704170                | CC                              | AA                 | AA               | INTERGENIC                    |                    |                                           |
| SNP_23119_A_24715325 | NC_021163.1    | Ca_Kabuli_Chr04 | 24715325                | AA                              | GG                 | GG               | INTRON                        | 101504369          | serine/threonine-protein kinase CTR1-like |
| SNP_23120_A_24722520 | NC_021163.1    | Ca_Kabuli_Chr04 | 24722520                | TT                              | CC                 | CC               | INTRON                        | 101504369          | serine/threonine-protein kinase CTR1-like |
| SNP_23121_A_24736139 | NC_021163.1    | Ca_Kabuli_Chr04 | 24736139                | GG                              | CC                 | CC               | INTRON                        | 101504369          | serine/threonine-protein kinase CTR1-like |
| SNP_23122_A_24740712 | NC_021163.1    | Ca_Kabuli_Chr04 | 24740712                | GG                              | AA                 | AA               | INTERGENIC                    |                    |                                           |
| SNP_23123_A_24760058 | NC_021163.1    | Ca_Kabuli_Chr04 | 24760058                | AA                              | GG                 | GG               | INTERGENIC                    |                    |                                           |
| SNP_23124_A_24760113 | NC_021163.1    | Ca_Kabuli_Chr04 | 24760113                | AA                              | TT                 | TT               | INTERGENIC                    |                    |                                           |
| SNP_23125_A_24760391 | NC_021163.1    | Ca_Kabuli_Chr04 | 24760391                | TT                              | GG                 | GG               | INTERGENIC                    |                    |                                           |
| SNP_23126_A_24760394 | NC_021163.1    | Ca_Kabuli_Chr04 | 24760394                | TT                              | CC                 | CC               | INTERGENIC                    |                    |                                           |
| SNP_23127_A_24760416 | NC_021163.1    | Ca_Kabuli_Chr04 | 24760416                | TT                              | CC                 | CC               | INTERGENIC                    |                    |                                           |
| SNP_23128_A_24760417 | NC_021163.1    | Ca_Kabuli_Chr04 | 24760417                | GG                              | AA                 | AA               | INTERGENIC                    |                    |                                           |
| SNP_23129_A_24760491 | NC_021163.1    | Ca_Kabuli_Chr04 | 24760491                | GG                              | AA                 | AA               | INTERGENIC                    |                    |                                           |
| SNP_23130_A_24760505 | NC_021163.1    | Ca_Kabuli_Chr04 | 24760505                | AA                              | CC                 | CC               | INTERGENIC                    |                    |                                           |
| SNP_23131_A_24777146 | NC_021163.1    | Ca_Kabuli_Chr04 | 24777146                | TT                              | CC                 | CC               | INTRON                        | 101500533          | uncharacterized LOC101500533              |
| SNP_23132_A_24777456 | NC_021163.1    | Ca_Kabuli_Chr04 | 24777456                | CC                              | AA                 | AA               | INTRON                        | 101500533          | uncharacterized LOC101500533              |
| SNP_23133_A_24777458 | NC_021163.1    | Ca_Kabuli_Chr04 | 24777458                | AA                              | GG                 | GG               | INTRON                        | 101500533          | uncharacterized LOC101500533              |

| SNPs IDs             | Chromosome IDs | Chromosomes     | Physical positions (bp) | CDC Frontier genome (Reference genome) | (Pusa 1103 & HPNB) | (ILWC 46 & LPNB) | Sequence Components of genome | Gene accession IDs | Putative functions           |
|----------------------|----------------|-----------------|-------------------------|----------------------------------------|--------------------|------------------|-------------------------------|--------------------|------------------------------|
| SNP_23134_A_24777507 | NC_021163.1    | Ca_Kabuli_Chr04 | 24777507                | TT                                     | AA                 | AA               | INTRON                        | 101500533          | uncharacterized LOC101500533 |
| SNP_23135_A_24777519 | NC_021163.1    | Ca_Kabuli_Chr04 | 24777519                | TT                                     | CC                 | CC               | INTRON                        | 101500533          | uncharacterized LOC101500533 |
| SNP_23136_A_24777521 | NC_021163.1    | Ca_Kabuli_Chr04 | 24777521                | GG                                     | TT                 | TT               | INTRON                        | 101500533          | uncharacterized LOC101500533 |
| SNP_23137_A_24785015 | NC_021163.1    | Ca_Kabuli_Chr04 | 24785015                | TT                                     | CC                 | CC               | URR                           | 101500533          | uncharacterized LOC101500533 |
| SNP_23138_A_24786866 | NC_021163.1    | Ca_Kabuli_Chr04 | 24786866                | TT                                     | CC                 | CC               | DRR                           | 101505020          | uncharacterized LOC101505020 |
| SNP_23139_A_24786867 | NC_021163.1    | Ca_Kabuli_Chr04 | 24786867                | GG                                     | AA                 | AA               | DRR                           | 101505020          | uncharacterized LOC101505020 |
| SNP_23140_A_24786905 | NC_021163.1    | Ca_Kabuli_Chr04 | 24786905                | TT                                     | CC                 | CC               | DRR                           | 101505020          | uncharacterized LOC101505020 |
| SNP_23141_A_24786925 | NC_021163.1    | Ca_Kabuli_Chr04 | 24786925                | TT                                     | CC                 | CC               | DRR                           | 101505020          | uncharacterized LOC101505020 |
| SNP_23142_A_24793216 | NC_021163.1    | Ca_Kabuli_Chr04 | 24793216                | CC                                     | TT                 | TT               | INTERGENIC                    |                    |                              |
| SNP_23143_A_24797183 | NC_021163.1    | Ca_Kabuli_Chr04 | 24797183                | AA                                     | CC                 | CC               | INTERGENIC                    |                    |                              |
| SNP_23144_A_24797930 | NC_021163.1    | Ca_Kabuli_Chr04 | 24797930                | TT                                     | CC                 | CC               | INTERGENIC                    |                    |                              |
| SNP_23145_A_24800422 | NC_021163.1    | Ca_Kabuli_Chr04 | 24800422                | CC                                     | TT                 | TT               | INTERGENIC                    |                    |                              |
| SNP_23146_A_24801369 | NC_021163.1    | Ca_Kabuli_Chr04 | 24801369                | GG                                     | CC                 | CC               | INTERGENIC                    |                    |                              |
| SNP_23147_A_24809140 | NC_021163.1    | Ca_Kabuli_Chr04 | 24809140                | AA                                     | GG                 | GG               | INTERGENIC                    |                    |                              |
| SNP_23148_A_24828207 | NC_021163.1    | Ca_Kabuli_Chr04 | 24828207                | TT                                     | CC                 | CC               | INTERGENIC                    |                    |                              |
| SNP_23150_A_24837114 | NC_021163.1    | Ca_Kabuli_Chr04 | 24837114                | AA                                     | GG                 | GG               | INTERGENIC                    |                    |                              |
| SNP_23151_A_24840434 | NC_021163.1    | Ca_Kabuli_Chr04 | 24840434                | GG                                     | TT                 | TT               | INTERGENIC                    |                    |                              |
| SNP_23152_A_24870691 | NC_021163.1    | Ca_Kabuli_Chr04 | 24870691                | GG                                     | AA                 | AA               | INTERGENIC                    |                    |                              |
| SNP_23153_A_24876598 | NC_021163.1    | Ca_Kabuli_Chr04 | 24876598                | GG                                     | AA                 | AA               | INTERGENIC                    |                    |                              |
| SNP_23154_A_24877472 | NC_021163.1    | Ca_Kabuli_Chr04 | 24877472                | CC                                     | AA                 | AA               | INTERGENIC                    |                    |                              |
| SNP_23155_A_24877619 | NC_021163.1    | Ca_Kabuli_Chr04 | 24877619                | TT                                     | CC                 | CC               | INTERGENIC                    |                    |                              |
| SNP_23156_A_24891060 | NC_021163.1    | Ca_Kabuli_Chr04 | 24891060                | CC                                     | TT                 | TT               | INTERGENIC                    |                    |                              |

| SNPs IDs             | Chromosome IDs | Chromosomes     | Physical positions (bp) | CDC Frontier genome (Reference genome) | (Pusa 1103 & HPNB) | (ILWC 46 & LPNB) | Sequence genome | Components of | Gene accession IDs | Putative functions |
|----------------------|----------------|-----------------|-------------------------|----------------------------------------|--------------------|------------------|-----------------|---------------|--------------------|--------------------|
| SNP_23159_A_24914825 | NC_021163.1    | Ca_Kabuli_Chr04 | 24914825                | TT                                     | GG                 | GG               | INTERGENIC      |               |                    |                    |
| SNP_23160_A_24929516 | NC_021163.1    | Ca_Kabuli_Chr04 | 24929516                | TT                                     | CC                 | CC               | INTERGENIC      |               |                    |                    |
| SNP_23161_A_24939253 | NC_021163.1    | Ca_Kabuli_Chr04 | 24939253                | GG                                     | AA                 | AA               | INTERGENIC      |               |                    |                    |
| SNP_23163_A_24948799 | NC_021163.1    | Ca_Kabuli_Chr04 | 24948799                | TT                                     | AA                 | AA               | INTERGENIC      |               |                    |                    |
| SNP_23164_A_24956503 | NC_021163.1    | Ca_Kabuli_Chr04 | 24956503                | GG                                     | AA                 | AA               | INTERGENIC      |               |                    |                    |
| SNP_23165_A_24956633 | NC_021163.1    | Ca_Kabuli_Chr04 | 24956633                | AA                                     | GG                 | GG               | INTERGENIC      |               |                    |                    |
| SNP_23166_A_24958608 | NC_021163.1    | Ca_Kabuli_Chr04 | 24958608                | GG                                     | TT                 | TT               | INTERGENIC      |               |                    |                    |
| SNP_23167_A_24961855 | NC_021163.1    | Ca_Kabuli_Chr04 | 24961855                | AA                                     | GG                 | GG               | INTERGENIC      |               |                    |                    |
| SNP_23168_A_24965366 | NC_021163.1    | Ca_Kabuli_Chr04 | 24965366                | AA                                     | CC                 | CC               | INTERGENIC      |               |                    |                    |
| SNP_23169_A_24996662 | NC_021163.1    | Ca_Kabuli_Chr04 | 24996662                | GG                                     | AA                 | AA               | INTERGENIC      |               |                    |                    |
| SNP_23170_A_24996716 | NC_021163.1    | Ca_Kabuli_Chr04 | 24996716                | AA                                     | GG                 | GG               | INTERGENIC      |               |                    |                    |
| SNP_23171_A_24996722 | NC_021163.1    | Ca_Kabuli_Chr04 | 24996722                | TT                                     | CC                 | CC               | INTERGENIC      |               |                    |                    |
| SNP_23172_A_24996749 | NC_021163.1    | Ca_Kabuli_Chr04 | 24996749                | GG                                     | AA                 | AA               | INTERGENIC      |               |                    |                    |
| SNP_23173_A_24996955 | NC_021163.1    | Ca_Kabuli_Chr04 | 24996955                | TT                                     | CC                 | CC               | INTERGENIC      |               |                    |                    |
| SNP_23174_A_25011236 | NC_021163.1    | Ca_Kabuli_Chr04 | 25011236                | AA                                     | GG                 | GG               | INTERGENIC      |               |                    |                    |
| SNP_23175_A_25011251 | NC_021163.1    | Ca_Kabuli_Chr04 | 25011251                | AA                                     | TT                 | TT               | INTERGENIC      |               |                    |                    |
| SNP_23176_A_25011311 | NC_021163.1    | Ca_Kabuli_Chr04 | 25011311                | GG                                     | AA                 | AA               | INTERGENIC      |               |                    |                    |
| SNP_23177_A_25011320 | NC_021163.1    | Ca_Kabuli_Chr04 | 25011320                | AA                                     | TT                 | TT               | INTERGENIC      |               |                    |                    |
| SNP_23178_A_25011326 | NC_021163.1    | Ca_Kabuli_Chr04 | 25011326                | AA                                     | GG                 | GG               | INTERGENIC      |               |                    |                    |
| SNP_23179_A_25011356 | NC_021163.1    | Ca_Kabuli_Chr04 | 25011356                | GG                                     | AA                 | AA               | INTERGENIC      |               |                    |                    |
| SNP_23180_A_25011365 | NC_021163.1    | Ca_Kabuli_Chr04 | 25011365                | GG                                     | AA                 | AA               | INTERGENIC      |               |                    |                    |
| SNP_23181_A_25011576 | NC_021163.1    | Ca_Kabuli_Chr04 | 25011576                | AA                                     | GG                 | GG               | INTERGENIC      |               |                    |                    |

| SNPs IDs             | Chromosome IDs | Chromosomes     | Physical positions (bp) | CDC Frontier genome (Reference genome) | (Pusa 1103 & HPNB) | (ILWC 46 & LPNB) | Sequence Components of genome | Gene accession IDs | Putative functions           |
|----------------------|----------------|-----------------|-------------------------|----------------------------------------|--------------------|------------------|-------------------------------|--------------------|------------------------------|
| SNP_23182_A_25024256 | NC_021163.1    | Ca_Kabuli_Chr04 | 25024256                | GG                                     | TT                 | TT               | INTERGENIC                    |                    |                              |
| SNP_23183_A_25024608 | NC_021163.1    | Ca_Kabuli_Chr04 | 25024608                | CC                                     | AA                 | AA               | INTERGENIC                    |                    |                              |
| SNP_23184_A_25024830 | NC_021163.1    | Ca_Kabuli_Chr04 | 25024830                | AA                                     | CC                 | CC               | INTERGENIC                    |                    |                              |
| SNP_23185_A_25024947 | NC_021163.1    | Ca_Kabuli_Chr04 | 25024947                | GG                                     | AA                 | AA               | INTERGENIC                    |                    |                              |
| SNP_23186_A_25025206 | NC_021163.1    | Ca_Kabuli_Chr04 | 25025206                | CC                                     | TT                 | TT               | INTERGENIC                    |                    |                              |
| SNP_23187_A_25026727 | NC_021163.1    | Ca_Kabuli_Chr04 | 25026727                | AA                                     | CC                 | CC               | DRR                           | 101488417          | uncharacterized LOC101488417 |
| SNP_23188_A_25026737 | NC_021163.1    | Ca_Kabuli_Chr04 | 25026737                | AA                                     | GG                 | GG               | DRR                           | 101488417          | uncharacterized LOC101488417 |
| SNP_23189_A_25026746 | NC_021163.1    | Ca_Kabuli_Chr04 | 25026746                | AA                                     | GG                 | GG               | DRR                           | 101488417          | uncharacterized LOC101488417 |
| SNP_23190_A_25026755 | NC_021163.1    | Ca_Kabuli_Chr04 | 25026755                | TT                                     | GG                 | GG               | DRR                           | 101488417          | uncharacterized LOC101488417 |
| SNP_23191_A_25026761 | NC_021163.1    | Ca_Kabuli_Chr04 | 25026761                | TT                                     | CC                 | CC               | DRR                           | 101488417          | uncharacterized LOC101488417 |
| SNP_23192_A_25026799 | NC_021163.1    | Ca_Kabuli_Chr04 | 25026799                | AA                                     | GG                 | GG               | DRR                           | 101488417          | uncharacterized LOC101488417 |
| SNP_23193_A_25027020 | NC_021163.1    | Ca_Kabuli_Chr04 | 25027020                | AA                                     | GG                 | GG               | NON_SYNONYMOUS_CODING         | 101488417          | uncharacterized LOC101488417 |
| SNP_23194_A_25027030 | NC_021163.1    | Ca_Kabuli_Chr04 | 25027030                | TT                                     | CC                 | CC               | NON_SYNONYMOUS_CODING         | 101488417          | uncharacterized LOC101488417 |
| SNP_23195_A_25027637 | NC_021163.1    | Ca_Kabuli_Chr04 | 25027637                | AA                                     | GG                 | GG               | SYNONYMOUS_CODING             | 101488417          | uncharacterized LOC101488417 |
| SNP_23196_A_25027648 | NC_021163.1    | Ca_Kabuli_Chr04 | 25027648                | CC                                     | TT                 | TT               | NON_SYNONYMOUS_CODING         | 101488417          | uncharacterized LOC101488417 |
| SNP_23197_A_25027877 | NC_021163.1    | Ca_Kabuli_Chr04 | 25027877                | AA                                     | GG                 | GG               | INTRON                        | 101488417          | uncharacterized LOC101488417 |
| SNP_23198_A_25041255 | NC_021163.1    | Ca_Kabuli_Chr04 | 25041255                | AA                                     | GG                 | GG               | INTERGENIC                    |                    |                              |
| SNP_23199_A_25041745 | NC_021163.1    | Ca_Kabuli_Chr04 | 25041745                | GG                                     | AA                 | AA               | INTERGENIC                    |                    |                              |
| SNP_23200_A_25046461 | NC_021163.1    | Ca_Kabuli_Chr04 | 25046461                | TT                                     | GG                 | GG               | INTERGENIC                    |                    |                              |
| SNP_23201_A_25046963 | NC_021163.1    | Ca_Kabuli_Chr04 | 25046963                | AA                                     | GG                 | GG               | INTERGENIC                    |                    |                              |
| SNP_23202_A_25047032 | NC_021163.1    | Ca_Kabuli_Chr04 | 25047032                | AA                                     | GG                 | GG               | INTERGENIC                    |                    |                              |
| SNP_23203_A_25047033 | NC_021163.1    | Ca_Kabuli_Chr04 | 25047033                | TT                                     | GG                 | GG               | INTERGENIC                    |                    |                              |

| SNPs IDs             | Chromosome IDs | Chromosomes     | Physical positions (bp) | CDC Frontier genome (Reference genome) | (Pusa 1103 & HPNB) | (ILWC 46 & LPNB) | Sequence genome | Components of | Gene accession IDs | Putative functions |
|----------------------|----------------|-----------------|-------------------------|----------------------------------------|--------------------|------------------|-----------------|---------------|--------------------|--------------------|
| SNP_23204_A_25047046 | NC_021163.1    | Ca_Kabuli_Chr04 | 25047046                | TT                                     | GG                 | GG               | INTERGENIC      |               |                    |                    |
| SNP_23205_A_25047110 | NC_021163.1    | Ca_Kabuli_Chr04 | 25047110                | GG                                     | AA                 | AA               | INTERGENIC      |               |                    |                    |
| SNP_23206_A_25047171 | NC_021163.1    | Ca_Kabuli_Chr04 | 25047171                | GG                                     | CC                 | CC               | INTERGENIC      |               |                    |                    |
| SNP_23207_A_25047379 | NC_021163.1    | Ca_Kabuli_Chr04 | 25047379                | CC                                     | TT                 | TT               | INTERGENIC      |               |                    |                    |
| SNP_23208_A_25047557 | NC_021163.1    | Ca_Kabuli_Chr04 | 25047557                | CC                                     | TT                 | TT               | INTERGENIC      |               |                    |                    |
| SNP_23209_A_25047837 | NC_021163.1    | Ca_Kabuli_Chr04 | 25047837                | CC                                     | AA                 | AA               | INTERGENIC      |               |                    |                    |
| SNP_23210_A_25048526 | NC_021163.1    | Ca_Kabuli_Chr04 | 25048526                | CC                                     | TT                 | TT               | INTERGENIC      |               |                    |                    |
| SNP_23211_A_25048582 | NC_021163.1    | Ca_Kabuli_Chr04 | 25048582                | AA                                     | TT                 | TT               | INTERGENIC      |               |                    |                    |
| SNP_23212_A_25051487 | NC_021163.1    | Ca_Kabuli_Chr04 | 25051487                | TT                                     | CC                 | CC               | INTERGENIC      |               |                    |                    |
| SNP_23213_A_25052542 | NC_021163.1    | Ca_Kabuli_Chr04 | 25052542                | GG                                     | AA                 | AA               | INTERGENIC      |               |                    |                    |
| SNP_23214_A_25053677 | NC_021163.1    | Ca_Kabuli_Chr04 | 25053677                | TT                                     | GG                 | GG               | INTERGENIC      |               |                    |                    |
| SNP_23215_A_25053796 | NC_021163.1    | Ca_Kabuli_Chr04 | 25053796                | CC                                     | TT                 | TT               | INTERGENIC      |               |                    |                    |
| SNP_23216_A_25054020 | NC_021163.1    | Ca_Kabuli_Chr04 | 25054020                | AA                                     | CC                 | CC               | INTERGENIC      |               |                    |                    |
| SNP_23217_A_25055171 | NC_021163.1    | Ca_Kabuli_Chr04 | 25055171                | AA                                     | CC                 | CC               | INTERGENIC      |               |                    |                    |
| SNP_23218_A_25055211 | NC_021163.1    | Ca_Kabuli_Chr04 | 25055211                | CC                                     | TT                 | TT               | INTERGENIC      |               |                    |                    |
| SNP_23220_A_25059399 | NC_021163.1    | Ca_Kabuli_Chr04 | 25059399                | GG                                     | AA                 | AA               | INTERGENIC      |               |                    |                    |
| SNP_23221_A_25059432 | NC_021163.1    | Ca_Kabuli_Chr04 | 25059432                | AA                                     | GG                 | GG               | INTERGENIC      |               |                    |                    |
| SNP_23222_A_25059482 | NC_021163.1    | Ca_Kabuli_Chr04 | 25059482                | AA                                     | GG                 | GG               | INTERGENIC      |               |                    |                    |
| SNP_23223_A_25060676 | NC_021163.1    | Ca_Kabuli_Chr04 | 25060676                | TT                                     | CC                 | CC               | INTERGENIC      |               |                    |                    |
| SNP_23224_A_25064164 | NC_021163.1    | Ca_Kabuli_Chr04 | 25064164                | AA                                     | GG                 | GG               | INTERGENIC      |               |                    |                    |
| SNP_23225_A_25064235 | NC_021163.1    | Ca_Kabuli_Chr04 | 25064235                | GG                                     | AA                 | AA               | INTERGENIC      |               |                    |                    |
| SNP_23226_A_25067188 | NC_021163.1    | Ca_Kabuli_Chr04 | 25067188                | TT                                     | CC                 | CC               | INTERGENIC      |               |                    |                    |



| SNPs IDs             | Chromosome IDs | Chromosomes     | Physical positions (bp) | CDC Frontier genome (Reference genome) | (Pusa 1103 & HPNB) | (ILWC 46 & LPNB) | Sequence genome | Components of | Gene accession IDs | Putative functions |
|----------------------|----------------|-----------------|-------------------------|----------------------------------------|--------------------|------------------|-----------------|---------------|--------------------|--------------------|
| SNP_23227_A_25067267 | NC_021163.1    | Ca_Kabuli_Chr04 | 25067267                | TT                                     | CC                 | CC               | INTERGENIC      |               |                    |                    |
| SNP_23228_A_25067269 | NC_021163.1    | Ca_Kabuli_Chr04 | 25067269                | TT                                     | CC                 | CC               | INTERGENIC      |               |                    |                    |
| SNP_23229_A_25067421 | NC_021163.1    | Ca_Kabuli_Chr04 | 25067421                | GG                                     | AA                 | AA               | INTERGENIC      |               |                    |                    |
| SNP_23230_A_25067592 | NC_021163.1    | Ca_Kabuli_Chr04 | 25067592                | TT                                     | GG                 | GG               | INTERGENIC      |               |                    |                    |
| SNP_23231_A_25069256 | NC_021163.1    | Ca_Kabuli_Chr04 | 25069256                | CC                                     | GG                 | GG               | INTERGENIC      |               |                    |                    |
| SNP_23232_A_25070433 | NC_021163.1    | Ca_Kabuli_Chr04 | 25070433                | CC                                     | AA                 | AA               | INTERGENIC      |               |                    |                    |
| SNP_23235_A_25071009 | NC_021163.1    | Ca_Kabuli_Chr04 | 25071009                | CC                                     | TT                 | TT               | INTERGENIC      |               |                    |                    |
| SNP_23236_A_25071036 | NC_021163.1    | Ca_Kabuli_Chr04 | 25071036                | TT                                     | GG                 | GG               | INTERGENIC      |               |                    |                    |
| SNP_23237_A_25071094 | NC_021163.1    | Ca_Kabuli_Chr04 | 25071094                | CC                                     | TT                 | TT               | INTERGENIC      |               |                    |                    |
| SNP_23238_A_25071164 | NC_021163.1    | Ca_Kabuli_Chr04 | 25071164                | GG                                     | TT                 | TT               | INTERGENIC      |               |                    |                    |
| SNP_23240_A_25071346 | NC_021163.1    | Ca_Kabuli_Chr04 | 25071346                | CC                                     | GG                 | GG               | INTERGENIC      |               |                    |                    |
| SNP_23241_A_25071476 | NC_021163.1    | Ca_Kabuli_Chr04 | 25071476                | GG                                     | CC                 | CC               | INTERGENIC      |               |                    |                    |
| SNP_23242_A_25071599 | NC_021163.1    | Ca_Kabuli_Chr04 | 25071599                | GG                                     | AA                 | AA               | INTERGENIC      |               |                    |                    |
| SNP_23243_A_25074132 | NC_021163.1    | Ca_Kabuli_Chr04 | 25074132                | TT                                     | CC                 | CC               | INTERGENIC      |               |                    |                    |
| SNP_23245_A_25074508 | NC_021163.1    | Ca_Kabuli_Chr04 | 25074508                | TT                                     | CC                 | CC               | INTERGENIC      |               |                    |                    |
| SNP_23246_A_25074574 | NC_021163.1    | Ca_Kabuli_Chr04 | 25074574                | CC                                     | TT                 | TT               | INTERGENIC      |               |                    |                    |
| SNP_23247_A_25074654 | NC_021163.1    | Ca_Kabuli_Chr04 | 25074654                | AA                                     | CC                 | CC               | INTERGENIC      |               |                    |                    |
| SNP_23248_A_25084598 | NC_021163.1    | Ca_Kabuli_Chr04 | 25084598                | TT                                     | CC                 | CC               | INTERGENIC      |               |                    |                    |
| SNP_23249_A_25084644 | NC_021163.1    | Ca_Kabuli_Chr04 | 25084644                | TT                                     | CC                 | CC               | INTERGENIC      |               |                    |                    |
| SNP_23250_A_25089264 | NC_021163.1    | Ca_Kabuli_Chr04 | 25089264                | TT                                     | CC                 | CC               | INTERGENIC      |               |                    |                    |
| SNP_23251_A_25089354 | NC_021163.1    | Ca_Kabuli_Chr04 | 25089354                | AA                                     | TT                 | TT               | INTERGENIC      |               |                    |                    |
| SNP_23252_A_25089362 | NC_021163.1    | Ca_Kabuli_Chr04 | 25089362                | CC                                     | AA                 | AA               | INTERGENIC      |               |                    |                    |

| SNPs IDs             | Chromosome IDs | Chromosomes     | Physical positions (bp) | CDC Frontier genome (Reference genome) | (Pusa 1103 & HPNB) | (ILWC 46 & LPNB) | Sequence genome | Components of | Gene accession IDs                              | Putative functions |
|----------------------|----------------|-----------------|-------------------------|----------------------------------------|--------------------|------------------|-----------------|---------------|-------------------------------------------------|--------------------|
| SNP_23253_A_25089375 | NC_021163.1    | Ca_Kabuli_Chr04 | 25089375                | AA                                     | GG                 | GG               | INTERGENIC      |               |                                                 |                    |
| SNP_23255_A_25104513 | NC_021163.1    | Ca_Kabuli_Chr04 | 25104513                | AA                                     | GG                 | GG               | INTERGENIC      |               |                                                 |                    |
| SNP_23256_A_25105960 | NC_021163.1    | Ca_Kabuli_Chr04 | 25105960                | GG                                     | AA                 | AA               | INTERGENIC      |               |                                                 |                    |
| SNP_23257_A_25106154 | NC_021163.1    | Ca_Kabuli_Chr04 | 25106154                | TT                                     | CC                 | CC               | INTERGENIC      |               |                                                 |                    |
| SNP_23258_A_25106164 | NC_021163.1    | Ca_Kabuli_Chr04 | 25106164                | TT                                     | CC                 | CC               | INTERGENIC      |               |                                                 |                    |
| SNP_23259_A_25111752 | NC_021163.1    | Ca_Kabuli_Chr04 | 25111752                | TT                                     | GG                 | GG               | INTERGENIC      |               |                                                 |                    |
| SNP_23260_A_25116829 | NC_021163.1    | Ca_Kabuli_Chr04 | 25116829                | CC                                     | TT                 | TT               | INTERGENIC      |               |                                                 |                    |
| SNP_23261_A_25117235 | NC_021163.1    | Ca_Kabuli_Chr04 | 25117235                | TT                                     | CC                 | CC               | INTERGENIC      |               |                                                 |                    |
| SNP_23262_A_25124840 | NC_021163.1    | Ca_Kabuli_Chr04 | 25124840                | TT                                     | CC                 | CC               | URR             | 101489084     | Unknown function                                |                    |
| SNP_23263_A_25125353 | NC_021163.1    | Ca_Kabuli_Chr04 | 25125353                | CC                                     | GG                 | GG               | INTERGENIC      |               |                                                 |                    |
| SNP_23264_A_25130369 | NC_021163.1    | Ca_Kabuli_Chr04 | 25130369                | TT                                     | CC                 | CC               | INTERGENIC      |               |                                                 |                    |
| SNP_23265_A_25133600 | NC_021163.1    | Ca_Kabuli_Chr04 | 25133600                | CC                                     | GG                 | GG               | INTERGENIC      |               |                                                 |                    |
| SNP_23266_A_25133605 | NC_021163.1    | Ca_Kabuli_Chr04 | 25133605                | CC                                     | AA                 | AA               | INTERGENIC      |               |                                                 |                    |
| SNP_23267_A_25133606 | NC_021163.1    | Ca_Kabuli_Chr04 | 25133606                | TT                                     | AA                 | AA               | INTERGENIC      |               |                                                 |                    |
| SNP_23268_A_25134034 | NC_021163.1    | Ca_Kabuli_Chr04 | 25134034                | GG                                     | AA                 | AA               | INTERGENIC      |               |                                                 |                    |
| SNP_23269_A_25136143 | NC_021163.1    | Ca_Kabuli_Chr04 | 25136143                | GG                                     | AA                 | AA               | INTERGENIC      |               |                                                 |                    |
| SNP_23270_A_25136608 | NC_021163.1    | Ca_Kabuli_Chr04 | 25136608                | TT                                     | AA                 | AA               | INTERGENIC      |               |                                                 |                    |
| SNP_23271_A_25141481 | NC_021163.1    | Ca_Kabuli_Chr04 | 25141481                | TT                                     | CC                 | CC               | INTERGENIC      |               |                                                 |                    |
| SNP_23272_A_25144874 | NC_021163.1    | Ca_Kabuli_Chr04 | 25144874                | TT                                     | CC                 | CC               | INTERGENIC      |               |                                                 |                    |
| SNP_23273_A_25148070 | NC_021163.1    | Ca_Kabuli_Chr04 | 25148070                | CC                                     | AA                 | AA               | INTERGENIC      |               |                                                 |                    |
| SNP_23274_A_25154833 | NC_021163.1    | Ca_Kabuli_Chr04 | 25154833                | TT                                     | AA                 | AA               | URR             | 101507290     | probable indole-3-pyruvate monooxygenase YUCCA3 |                    |
| SNP_23275_A_25161374 | NC_021163.1    | Ca_Kabuli_Chr04 | 25161374                | GG                                     | AA                 | AA               | INTERGENIC      |               |                                                 |                    |

| SNPs IDs             | Chromosome IDs | Chromosomes     | Physical positions (bp) | CDC Frontier genome (Reference genome) | (Pusa 1103 & HPNB) | (ILWC 46 & LPNB) | Sequence Components of genome | Gene accession IDs | Putative functions                                     |
|----------------------|----------------|-----------------|-------------------------|----------------------------------------|--------------------|------------------|-------------------------------|--------------------|--------------------------------------------------------|
| SNP_23276_A_25163007 | NC_021163.1    | Ca_Kabuli_Chr04 | 25163007                | GG                                     | AA                 | AA               | INTERGENIC                    |                    |                                                        |
| SNP_23277_A_25163357 | NC_021163.1    | Ca_Kabuli_Chr04 | 25163357                | AA                                     | GG                 | GG               | INTERGENIC                    |                    |                                                        |
| SNP_23278_A_25164979 | NC_021163.1    | Ca_Kabuli_Chr04 | 25164979                | CC                                     | TT                 | TT               | INTERGENIC                    |                    |                                                        |
| SNP_23279_A_25166376 | NC_021163.1    | Ca_Kabuli_Chr04 | 25166376                | GG                                     | AA                 | AA               | INTERGENIC                    |                    |                                                        |
| SNP_23280_A_25168094 | NC_021163.1    | Ca_Kabuli_Chr04 | 25168094                | TT                                     | GG                 | GG               | INTERGENIC                    |                    |                                                        |
| SNP_23282_A_25177855 | NC_021163.1    | Ca_Kabuli_Chr04 | 25177855                | TT                                     | CC                 | CC               | INTERGENIC                    |                    |                                                        |
| SNP_23283_A_25177872 | NC_021163.1    | Ca_Kabuli_Chr04 | 25177872                | AA                                     | GG                 | GG               | INTERGENIC                    |                    |                                                        |
| SNP_23284_A_25179026 | NC_021163.1    | Ca_Kabuli_Chr04 | 25179026                | GG                                     | AA                 | AA               | INTERGENIC                    |                    |                                                        |
| SNP_23285_A_25185247 | NC_021163.1    | Ca_Kabuli_Chr04 | 25185247                | CC                                     | TT                 | TT               | INTRON                        | 101507596          | 7-hydroxymethyl chlorophyll a reductase, chloroplastic |
| SNP_23286_A_25185322 | NC_021163.1    | Ca_Kabuli_Chr04 | 25185322                | TT                                     | CC                 | CC               | INTRON                        | 101507596          | 7-hydroxymethyl chlorophyll a reductase, chloroplastic |
| SNP_23288_A_25190129 | NC_021163.1    | Ca_Kabuli_Chr04 | 25190129                | AA                                     | GG                 | GG               | INTERGENIC                    |                    |                                                        |
| SNP_23289_A_25193204 | NC_021163.1    | Ca_Kabuli_Chr04 | 25193204                | CC                                     | TT                 | TT               | INTERGENIC                    |                    |                                                        |
| SNP_23290_A_25200782 | NC_021163.1    | Ca_Kabuli_Chr04 | 25200782                | TT                                     | CC                 | CC               | INTERGENIC                    |                    |                                                        |
| SNP_23291_A_25200978 | NC_021163.1    | Ca_Kabuli_Chr04 | 25200978                | GG                                     | TT                 | TT               | INTERGENIC                    |                    |                                                        |
| SNP_23292_A_25201469 | NC_021163.1    | Ca_Kabuli_Chr04 | 25201469                | AA                                     | TT                 | TT               | INTERGENIC                    |                    |                                                        |
| SNP_23293_A_25202318 | NC_021163.1    | Ca_Kabuli_Chr04 | 25202318                | GG                                     | TT                 | TT               | INTERGENIC                    |                    |                                                        |
| SNP_23294_A_25202618 | NC_021163.1    | Ca_Kabuli_Chr04 | 25202618                | CC                                     | TT                 | TT               | INTERGENIC                    |                    |                                                        |
| SNP_23295_A_25204153 | NC_021163.1    | Ca_Kabuli_Chr04 | 25204153                | AA                                     | GG                 | GG               | INTERGENIC                    |                    |                                                        |
| SNP_23297_A_25213585 | NC_021163.1    | Ca_Kabuli_Chr04 | 25213585                | AA                                     | GG                 | GG               | DRR                           | 101489417          | Unknown function                                       |
| SNP_23299_A_25213878 | NC_021163.1    | Ca_Kabuli_Chr04 | 25213878                | GG                                     | TT                 | TT               | DRR                           | 101489417          | Unknown function                                       |
| SNP_23300_A_25214226 | NC_021163.1    | Ca_Kabuli_Chr04 | 25214226                | TT                                     | AA                 | AA               | URR                           | 101489417          | Unknown function                                       |
| SNP_23301_A_25215121 | NC_021163.1    | Ca_Kabuli_Chr04 | 25215121                | AA                                     | GG                 | GG               | URR                           | 101489417          | Unknown function                                       |

| SNPs IDs             | Chromosome IDs | Chromosomes     | Physical positions (bp) | CDC Frontier genome (Reference genome) | (Pusa 1103 & HPNB) | (ILWC 46 & LPNB) | Sequence Components of genome | Gene accession IDs | Putative functions                                              |
|----------------------|----------------|-----------------|-------------------------|----------------------------------------|--------------------|------------------|-------------------------------|--------------------|-----------------------------------------------------------------|
| SNP_23302_A_25220099 | NC_021163.1    | Ca_Kabuli_Chr04 | 25220099                | AA                                     | GG                 | GG               | DRR                           | 101490052          | uncharacterized LOC101490052                                    |
| SNP_23303_A_25220135 | NC_021163.1    | Ca_Kabuli_Chr04 | 25220135                | CC                                     | AA                 | AA               | DRR                           | 101490052          | uncharacterized LOC101490052                                    |
| SNP_23304_A_25222392 | NC_021163.1    | Ca_Kabuli_Chr04 | 25222392                | TT                                     | CC                 | CC               | INTERGENIC                    |                    |                                                                 |
| SNP_23305_A_25225692 | NC_021163.1    | Ca_Kabuli_Chr04 | 25225692                | TT                                     | AA                 | AA               | INTRON                        | 101490052          | uncharacterized LOC101490052                                    |
| SNP_23306_A_25226129 | NC_021163.1    | Ca_Kabuli_Chr04 | 25226129                | CC                                     | AA                 | AA               | INTRON                        | 101490052          | uncharacterized LOC101490052                                    |
| SNP_23307_A_25227714 | NC_021163.1    | Ca_Kabuli_Chr04 | 25227714                | TT                                     | GG                 | GG               | INTRON                        | 101490052          | uncharacterized LOC101490052                                    |
| SNP_23309_A_25237270 | NC_021163.1    | Ca_Kabuli_Chr04 | 25237270                | AA                                     | CC                 | CC               | INTERGENIC                    |                    |                                                                 |
| SNP_23310_A_25237913 | NC_021163.1    | Ca_Kabuli_Chr04 | 25237913                | CC                                     | AA                 | AA               | INTERGENIC                    |                    |                                                                 |
| SNP_23311_A_25237945 | NC_021163.1    | Ca_Kabuli_Chr04 | 25237945                | AA                                     | CC                 | CC               | INTERGENIC                    |                    |                                                                 |
| SNP_23312_A_25237949 | NC_021163.1    | Ca_Kabuli_Chr04 | 25237949                | CC                                     | TT                 | TT               | INTERGENIC                    |                    |                                                                 |
| SNP_23313_A_25241814 | NC_021163.1    | Ca_Kabuli_Chr04 | 25241814                | TT                                     | CC                 | CC               | INTERGENIC                    |                    |                                                                 |
| SNP_23314_A_25241833 | NC_021163.1    | Ca_Kabuli_Chr04 | 25241833                | GG                                     | CC                 | CC               | INTERGENIC                    |                    |                                                                 |
| SNP_23315_A_25241840 | NC_021163.1    | Ca_Kabuli_Chr04 | 25241840                | TT                                     | CC                 | CC               | INTERGENIC                    |                    |                                                                 |
| SNP_23316_A_25250135 | NC_021163.1    | Ca_Kabuli_Chr04 | 25250135                | TT                                     | CC                 | CC               | INTERGENIC                    |                    |                                                                 |
| SNP_23318_A_25253448 | NC_021163.1    | Ca_Kabuli_Chr04 | 25253448                | GG                                     | CC                 | CC               | URR                           | 101508132          | ATP-dependent zinc metalloprotease FTSH 4, mitochondrial-like   |
| SNP_23319_A_25253466 | NC_021163.1    | Ca_Kabuli_Chr04 | 25253466                | AA                                     | CC                 | CC               | URR                           | 101508132          | ATP-dependent zinc metalloprotease FTSH 4, mitochondrial-like   |
| SNP_23320_A_25255286 | NC_021163.1    | Ca_Kabuli_Chr04 | 25255286                | TT                                     | CC                 | CC               | URR                           | 101508452          | NADH dehydrogenase [ubiquinone] 1 alpha subcomplex subunit 13-B |
| SNP_23321_A_25258225 | NC_021163.1    | Ca_Kabuli_Chr04 | 25258225                | AA                                     | GG                 | GG               | INTERGENIC                    |                    |                                                                 |
| SNP_23322_A_25258648 | NC_021163.1    | Ca_Kabuli_Chr04 | 25258648                | GG                                     | AA                 | AA               | INTERGENIC                    |                    |                                                                 |
| SNP_23323_A_25258654 | NC_021163.1    | Ca_Kabuli_Chr04 | 25258654                | CC                                     | TT                 | TT               | INTERGENIC                    |                    |                                                                 |
| SNP_23324_A_25258924 | NC_021163.1    | Ca_Kabuli_Chr04 | 25258924                | CC                                     | TT                 | TT               | INTERGENIC                    |                    |                                                                 |
| SNP_23326_A_25260061 | NC_021163.1    | Ca_Kabuli_Chr04 | 25260061                | GG                                     | TT                 | TT               | INTERGENIC                    |                    |                                                                 |

| SNPs IDs             | Chromosome IDs | Chromosomes     | Physical positions (bp) | CDC Frontier genome (Reference genome) | (Pusa 1103 & HPNB) | (ILWC 46 & LPNB) | Sequence Components of genome | Gene accession IDs | Putative functions      |
|----------------------|----------------|-----------------|-------------------------|----------------------------------------|--------------------|------------------|-------------------------------|--------------------|-------------------------|
| SNP_23327_A_25260618 | NC_021163.1    | Ca_Kabuli_Chr04 | 25260618                | CC                                     | AA                 | AA               | INTERGENIC                    |                    |                         |
| SNP_23328_A_25279104 | NC_021163.1    | Ca_Kabuli_Chr04 | 25279104                | CC                                     | TT                 | TT               | INTERGENIC                    |                    |                         |
| SNP_23329_A_25279120 | NC_021163.1    | Ca_Kabuli_Chr04 | 25279120                | AA                                     | GG                 | GG               | INTERGENIC                    |                    |                         |
| SNP_23330_A_25279124 | NC_021163.1    | Ca_Kabuli_Chr04 | 25279124                | AA                                     | GG                 | GG               | INTERGENIC                    |                    |                         |
| SNP_23331_A_25279184 | NC_021163.1    | Ca_Kabuli_Chr04 | 25279184                | CC                                     | TT                 | TT               | INTERGENIC                    |                    |                         |
| SNP_23332_A_25279839 | NC_021163.1    | Ca_Kabuli_Chr04 | 25279839                | GG                                     | CC                 | CC               | INTERGENIC                    |                    |                         |
| SNP_23333_A_25279883 | NC_021163.1    | Ca_Kabuli_Chr04 | 25279883                | CC                                     | TT                 | TT               | INTERGENIC                    |                    |                         |
| SNP_23334_A_25279886 | NC_021163.1    | Ca_Kabuli_Chr04 | 25279886                | CC                                     | TT                 | TT               | INTERGENIC                    |                    |                         |
| SNP_23335_A_25285023 | NC_021163.1    | Ca_Kabuli_Chr04 | 25285023                | AA                                     | GG                 | GG               | INTRON                        | 101508756          | PHD finger protein ING1 |
| SNP_23336_A_25285317 | NC_021163.1    | Ca_Kabuli_Chr04 | 25285317                | GG                                     | AA                 | AA               | SYNONYMOUS_CODING             | 101508756          | PHD finger protein ING1 |
| SNP_23337_A_25285688 | NC_021163.1    | Ca_Kabuli_Chr04 | 25285688                | GG                                     | TT                 | TT               | INTRON                        | 101508756          | PHD finger protein ING1 |
| SNP_23338_A_25290127 | NC_021163.1    | Ca_Kabuli_Chr04 | 25290127                | TT                                     | CC                 | CC               | INTERGENIC                    |                    |                         |
| SNP_23339_A_25290128 | NC_021163.1    | Ca_Kabuli_Chr04 | 25290128                | CC                                     | TT                 | TT               | INTERGENIC                    |                    |                         |
| SNP_23340_A_25290174 | NC_021163.1    | Ca_Kabuli_Chr04 | 25290174                | AA                                     | GG                 | GG               | INTERGENIC                    |                    |                         |
| SNP_23341_A_25290192 | NC_021163.1    | Ca_Kabuli_Chr04 | 25290192                | GG                                     | AA                 | AA               | INTERGENIC                    |                    |                         |
| SNP_23343_A_25290353 | NC_021163.1    | Ca_Kabuli_Chr04 | 25290353                | CC                                     | AA                 | AA               | INTERGENIC                    |                    |                         |
| SNP_23345_A_25290408 | NC_021163.1    | Ca_Kabuli_Chr04 | 25290408                | AA                                     | GG                 | GG               | INTERGENIC                    |                    |                         |
| SNP_23346_A_25290496 | NC_021163.1    | Ca_Kabuli_Chr04 | 25290496                | AA                                     | GG                 | GG               | INTERGENIC                    |                    |                         |
| SNP_23347_A_25290636 | NC_021163.1    | Ca_Kabuli_Chr04 | 25290636                | TT                                     | CC                 | CC               | INTERGENIC                    |                    |                         |
| SNP_23348_A_25290688 | NC_021163.1    | Ca_Kabuli_Chr04 | 25290688                | CC                                     | TT                 | TT               | INTERGENIC                    |                    |                         |
| SNP_23349_A_25290689 | NC_021163.1    | Ca_Kabuli_Chr04 | 25290689                | AA                                     | GG                 | GG               | INTERGENIC                    |                    |                         |
| SNP_23350_A_25290763 | NC_021163.1    | Ca_Kabuli_Chr04 | 25290763                | CC                                     | TT                 | TT               | INTERGENIC                    |                    |                         |

| SNPs IDs             | Chromosome IDs | Chromosomes     | Physical positions (bp) | CDC Frontier genome (Reference genome) | (Pusa 1103 & HPNB) | (ILWC 46 & LPNB) | Sequence genome | Components of | Gene accession IDs | Putative functions |
|----------------------|----------------|-----------------|-------------------------|----------------------------------------|--------------------|------------------|-----------------|---------------|--------------------|--------------------|
| SNP_23351_A_25290772 | NC_021163.1    | Ca_Kabuli_Chr04 | 25290772                | CC                                     | TT                 | TT               | INTERGENIC      |               |                    |                    |
| SNP_23352_A_25290826 | NC_021163.1    | Ca_Kabuli_Chr04 | 25290826                | AA                                     | CC                 | CC               | INTERGENIC      |               |                    |                    |
| SNP_23353_A_25290872 | NC_021163.1    | Ca_Kabuli_Chr04 | 25290872                | AA                                     | GG                 | GG               | INTERGENIC      |               |                    |                    |
| SNP_23355_A_25292725 | NC_021163.1    | Ca_Kabuli_Chr04 | 25292725                | TT                                     | AA                 | AA               | INTERGENIC      |               |                    |                    |
| SNP_23356_A_25293034 | NC_021163.1    | Ca_Kabuli_Chr04 | 25293034                | TT                                     | GG                 | GG               | INTERGENIC      |               |                    |                    |
| SNP_23357_A_25293082 | NC_021163.1    | Ca_Kabuli_Chr04 | 25293082                | TT                                     | CC                 | CC               | INTERGENIC      |               |                    |                    |
| SNP_23358_A_25293084 | NC_021163.1    | Ca_Kabuli_Chr04 | 25293084                | AA                                     | GG                 | GG               | INTERGENIC      |               |                    |                    |
| SNP_23359_A_25293086 | NC_021163.1    | Ca_Kabuli_Chr04 | 25293086                | AA                                     | GG                 | GG               | INTERGENIC      |               |                    |                    |
| SNP_23360_A_25296896 | NC_021163.1    | Ca_Kabuli_Chr04 | 25296896                | CC                                     | TT                 | TT               | INTERGENIC      |               |                    |                    |
| SNP_23361_A_25296903 | NC_021163.1    | Ca_Kabuli_Chr04 | 25296903                | AA                                     | TT                 | TT               | INTERGENIC      |               |                    |                    |
| SNP_23362_A_25296946 | NC_021163.1    | Ca_Kabuli_Chr04 | 25296946                | GG                                     | AA                 | AA               | INTERGENIC      |               |                    |                    |
| SNP_23363_A_25299990 | NC_021163.1    | Ca_Kabuli_Chr04 | 25299990                | CC                                     | TT                 | TT               | INTERGENIC      |               |                    |                    |
| SNP_23364_A_25303354 | NC_021163.1    | Ca_Kabuli_Chr04 | 25303354                | CC                                     | TT                 | TT               | INTERGENIC      |               |                    |                    |
| SNP_23365_A_25303561 | NC_021163.1    | Ca_Kabuli_Chr04 | 25303561                | TT                                     | GG                 | GG               | INTERGENIC      |               |                    |                    |
| SNP_23366_A_25319533 | NC_021163.1    | Ca_Kabuli_Chr04 | 25319533                | TT                                     | GG                 | GG               | INTERGENIC      |               |                    |                    |
| SNP_23367_A_25326903 | NC_021163.1    | Ca_Kabuli_Chr04 | 25326903                | AA                                     | GG                 | GG               | INTERGENIC      |               |                    |                    |
| SNP_23368_A_25326998 | NC_021163.1    | Ca_Kabuli_Chr04 | 25326998                | AA                                     | GG                 | GG               | INTERGENIC      |               |                    |                    |
| SNP_23369_A_25327040 | NC_021163.1    | Ca_Kabuli_Chr04 | 25327040                | AA                                     | CC                 | CC               | INTERGENIC      |               |                    |                    |
| SNP_23370_A_25327095 | NC_021163.1    | Ca_Kabuli_Chr04 | 25327095                | TT                                     | CC                 | CC               | INTERGENIC      |               |                    |                    |
| SNP_23371_A_25327101 | NC_021163.1    | Ca_Kabuli_Chr04 | 25327101                | CC                                     | TT                 | TT               | INTERGENIC      |               |                    |                    |
| SNP_23372_A_25327104 | NC_021163.1    | Ca_Kabuli_Chr04 | 25327104                | CC                                     | TT                 | TT               | INTERGENIC      |               |                    |                    |
| SNP_23373_A_25327119 | NC_021163.1    | Ca_Kabuli_Chr04 | 25327119                | AA                                     | GG                 | GG               | INTERGENIC      |               |                    |                    |

| SNPs IDs             | Chromosome IDs | Chromosomes     | Physical positions (bp) | CDC Frontier genome (Reference genome) | (Pusa 1103 & HPNB) | (ILWC 46 & LPNB) | Sequence Components of genome | Gene accession IDs | Putative functions                   |
|----------------------|----------------|-----------------|-------------------------|----------------------------------------|--------------------|------------------|-------------------------------|--------------------|--------------------------------------|
| SNP_23374_A_25327131 | NC_021163.1    | Ca_Kabuli_Chr04 | 25327131                | TT                                     | CC                 | CC               | INTERGENIC                    |                    |                                      |
| SNP_23375_A_25327171 | NC_021163.1    | Ca_Kabuli_Chr04 | 25327171                | TT                                     | CC                 | CC               | INTERGENIC                    |                    |                                      |
| SNP_23376_A_25327187 | NC_021163.1    | Ca_Kabuli_Chr04 | 25327187                | GG                                     | TT                 | TT               | INTERGENIC                    |                    |                                      |
| SNP_23377_A_25327260 | NC_021163.1    | Ca_Kabuli_Chr04 | 25327260                | GG                                     | AA                 | AA               | INTERGENIC                    |                    |                                      |
| SNP_23378_A_25327311 | NC_021163.1    | Ca_Kabuli_Chr04 | 25327311                | TT                                     | GG                 | GG               | INTERGENIC                    |                    |                                      |
| SNP_23379_A_25327420 | NC_021163.1    | Ca_Kabuli_Chr04 | 25327420                | TT                                     | GG                 | GG               | INTERGENIC                    |                    |                                      |
| SNP_23380_A_25327458 | NC_021163.1    | Ca_Kabuli_Chr04 | 25327458                | CC                                     | TT                 | TT               | INTERGENIC                    |                    |                                      |
| SNP_23381_A_25327460 | NC_021163.1    | Ca_Kabuli_Chr04 | 25327460                | TT                                     | GG                 | GG               | INTERGENIC                    |                    |                                      |
| SNP_23382_A_25327468 | NC_021163.1    | Ca_Kabuli_Chr04 | 25327468                | TT                                     | CC                 | CC               | INTERGENIC                    |                    |                                      |
| SNP_23383_A_25340966 | NC_021163.1    | Ca_Kabuli_Chr04 | 25340966                | AA                                     | CC                 | CC               | INTERGENIC                    |                    |                                      |
| SNP_23384_A_25348388 | NC_021163.1    | Ca_Kabuli_Chr04 | 25348388                | AA                                     | TT                 | TT               | INTERGENIC                    |                    |                                      |
| SNP_23385_A_25352391 | NC_021163.1    | Ca_Kabuli_Chr04 | 25352391                | GG                                     | AA                 | AA               | URR                           | 101410550          | transfer RNA leucine (anticodon CAA) |
| SNP_23386_A_25352408 | NC_021163.1    | Ca_Kabuli_Chr04 | 25352408                | TT                                     | CC                 | CC               | URR                           | 101410550          | transfer RNA leucine (anticodon CAA) |
| SNP_23387_A_25352414 | NC_021163.1    | Ca_Kabuli_Chr04 | 25352414                | GG                                     | CC                 | CC               | URR                           | 101410550          | transfer RNA leucine (anticodon CAA) |
| SNP_23388_A_25352447 | NC_021163.1    | Ca_Kabuli_Chr04 | 25352447                | TT                                     | AA                 | AA               | URR                           | 101410550          | transfer RNA leucine (anticodon CAA) |
| SNP_23391_A_25352701 | NC_021163.1    | Ca_Kabuli_Chr04 | 25352701                | CC                                     | AA                 | AA               | URR                           | 101410550          | transfer RNA leucine (anticodon CAA) |
| SNP_23392_A_25352705 | NC_021163.1    | Ca_Kabuli_Chr04 | 25352705                | TT                                     | CC                 | CC               | URR                           | 101410550          | transfer RNA leucine (anticodon CAA) |
| SNP_23393_A_25352709 | NC_021163.1    | Ca_Kabuli_Chr04 | 25352709                | CC                                     | TT                 | TT               | URR                           | 101410550          | transfer RNA leucine (anticodon CAA) |
| SNP_23394_A_25352734 | NC_021163.1    | Ca_Kabuli_Chr04 | 25352734                | CC                                     | TT                 | TT               | URR                           | 101410550          | transfer RNA leucine (anticodon CAA) |
| SNP_23395_A_25352772 | NC_021163.1    | Ca_Kabuli_Chr04 | 25352772                | GG                                     | AA                 | AA               | URR                           | 101410550          | transfer RNA leucine (anticodon CAA) |
| SNP_23396_A_25352787 | NC_021163.1    | Ca_Kabuli_Chr04 | 25352787                | GG                                     | AA                 | AA               | URR                           | 101410550          | transfer RNA leucine (anticodon CAA) |
| SNP_23397_A_25352798 | NC_021163.1    | Ca_Kabuli_Chr04 | 25352798                | GG                                     | AA                 | AA               | URR                           | 101410550          | transfer RNA leucine (anticodon CAA) |

| SNPs IDs             | Chromosome IDs | Chromosomes     | Physical positions (bp) | CDC Frontier genome (Reference genome) | (Pusa 1103 & HPNB) | (ILWC 46 & LPNB) | Sequence Components of genome | Gene accession IDs | Putative functions                   |
|----------------------|----------------|-----------------|-------------------------|----------------------------------------|--------------------|------------------|-------------------------------|--------------------|--------------------------------------|
| SNP_23398_A_25353023 | NC_021163.1    | Ca_Kabuli_Chr04 | 25353023                | GG                                     | AA                 | AA               | URR                           | 101410550          | transfer RNA leucine (anticodon CAA) |
| SNP_23399_A_25353035 | NC_021163.1    | Ca_Kabuli_Chr04 | 25353035                | GG                                     | AA                 | AA               | URR                           | 101410550          | transfer RNA leucine (anticodon CAA) |
| SNP_23400_A_25353051 | NC_021163.1    | Ca_Kabuli_Chr04 | 25353051                | CC                                     | AA                 | AA               | URR                           | 101410550          | transfer RNA leucine (anticodon CAA) |
| SNP_23401_A_25353060 | NC_021163.1    | Ca_Kabuli_Chr04 | 25353060                | GG                                     | TT                 | TT               | URR                           | 101410550          | transfer RNA leucine (anticodon CAA) |
| SNP_23402_A_25353061 | NC_021163.1    | Ca_Kabuli_Chr04 | 25353061                | TT                                     | AA                 | AA               | URR                           | 101410550          | transfer RNA leucine (anticodon CAA) |
| SNP_23405_A_25353219 | NC_021163.1    | Ca_Kabuli_Chr04 | 25353219                | CC                                     | TT                 | TT               | URR                           | 101410550          | transfer RNA leucine (anticodon CAA) |
| SNP_23406_A_25353230 | NC_021163.1    | Ca_Kabuli_Chr04 | 25353230                | GG                                     | TT                 | TT               | URR                           | 101410550          | transfer RNA leucine (anticodon CAA) |
| SNP_23407_A_25353240 | NC_021163.1    | Ca_Kabuli_Chr04 | 25353240                | TT                                     | GG                 | GG               | URR                           | 101410550          | transfer RNA leucine (anticodon CAA) |
| SNP_23408_A_25353282 | NC_021163.1    | Ca_Kabuli_Chr04 | 25353282                | CC                                     | AA                 | AA               | URR                           | 101410550          | transfer RNA leucine (anticodon CAA) |
| SNP_23409_A_25353292 | NC_021163.1    | Ca_Kabuli_Chr04 | 25353292                | GG                                     | AA                 | AA               | URR                           | 101410550          | transfer RNA leucine (anticodon CAA) |
| SNP_23410_A_25353302 | NC_021163.1    | Ca_Kabuli_Chr04 | 25353302                | AA                                     | GG                 | GG               | URR                           | 101410550          | transfer RNA leucine (anticodon CAA) |
| SNP_23411_A_25353314 | NC_021163.1    | Ca_Kabuli_Chr04 | 25353314                | AA                                     | TT                 | TT               | URR                           | 101410550          | transfer RNA leucine (anticodon CAA) |
| SNP_23412_A_25353340 | NC_021163.1    | Ca_Kabuli_Chr04 | 25353340                | GG                                     | TT                 | TT               | URR                           | 101410550          | transfer RNA leucine (anticodon CAA) |
| SNP_23413_A_25353351 | NC_021163.1    | Ca_Kabuli_Chr04 | 25353351                | TT                                     | AA                 | AA               | URR                           | 101410550          | transfer RNA leucine (anticodon CAA) |
| SNP_23414_A_25353360 | NC_021163.1    | Ca_Kabuli_Chr04 | 25353360                | GG                                     | TT                 | TT               | URR                           | 101410550          | transfer RNA leucine (anticodon CAA) |
| SNP_23415_A_25353428 | NC_021163.1    | Ca_Kabuli_Chr04 | 25353428                | CC                                     | GG                 | GG               | INTRON                        | 101490714          | 40S ribosomal protein S8-like        |
| SNP_23416_A_25353473 | NC_021163.1    | Ca_Kabuli_Chr04 | 25353473                | AA                                     | TT                 | TT               | INTRON                        | 101490714          | 40S ribosomal protein S8-like        |
| SNP_23417_A_25358011 | NC_021163.1    | Ca_Kabuli_Chr04 | 25358011                | GG                                     | AA                 | AA               | INTERGENIC                    |                    |                                      |
| SNP_23419_A_25358164 | NC_021163.1    | Ca_Kabuli_Chr04 | 25358164                | GG                                     | AA                 | AA               | INTERGENIC                    |                    |                                      |
| SNP_23420_A_25358284 | NC_021163.1    | Ca_Kabuli_Chr04 | 25358284                | AA                                     | TT                 | TT               | INTERGENIC                    |                    |                                      |
| SNP_23421_A_25358376 | NC_021163.1    | Ca_Kabuli_Chr04 | 25358376                | CC                                     | TT                 | TT               | INTERGENIC                    |                    |                                      |
| SNP_23422_A_25358447 | NC_021163.1    | Ca_Kabuli_Chr04 | 25358447                | TT                                     | CC                 | CC               | INTERGENIC                    |                    |                                      |



| SNPs IDs             | Chromosome IDs | Chromosomes     | Physical positions (bp) | CDC Frontier genome (Reference genome) | (Pusa 1103 & HPNB) | (ILWC 46 & LPNB) | Sequence genome | Components of | Gene accession IDs | Putative functions |
|----------------------|----------------|-----------------|-------------------------|----------------------------------------|--------------------|------------------|-----------------|---------------|--------------------|--------------------|
| SNP_23423_A_25358456 | NC_021163.1    | Ca_Kabuli_Chr04 | 25358456                | GG                                     | TT                 | TT               | INTERGENIC      |               |                    |                    |
| SNP_23424_A_25358477 | NC_021163.1    | Ca_Kabuli_Chr04 | 25358477                | GG                                     | TT                 | TT               | INTERGENIC      |               |                    |                    |
| SNP_23425_A_25358493 | NC_021163.1    | Ca_Kabuli_Chr04 | 25358493                | TT                                     | CC                 | CC               | INTERGENIC      |               |                    |                    |
| SNP_23426_A_25358501 | NC_021163.1    | Ca_Kabuli_Chr04 | 25358501                | GG                                     | AA                 | AA               | INTERGENIC      |               |                    |                    |
| SNP_23427_A_25358503 | NC_021163.1    | Ca_Kabuli_Chr04 | 25358503                | CC                                     | TT                 | TT               | INTERGENIC      |               |                    |                    |
| SNP_23428_A_25359079 | NC_021163.1    | Ca_Kabuli_Chr04 | 25359079                | CC                                     | AA                 | AA               | INTERGENIC      |               |                    |                    |
| SNP_23429_A_25359100 | NC_021163.1    | Ca_Kabuli_Chr04 | 25359100                | TT                                     | CC                 | CC               | INTERGENIC      |               |                    |                    |
| SNP_23430_A_25359225 | NC_021163.1    | Ca_Kabuli_Chr04 | 25359225                | AA                                     | CC                 | CC               | INTERGENIC      |               |                    |                    |
| SNP_23431_A_25359252 | NC_021163.1    | Ca_Kabuli_Chr04 | 25359252                | CC                                     | GG                 | GG               | INTERGENIC      |               |                    |                    |
| SNP_23432_A_25360800 | NC_021163.1    | Ca_Kabuli_Chr04 | 25360800                | CC                                     | AA                 | AA               | INTERGENIC      |               |                    |                    |
| SNP_23434_A_25366329 | NC_021163.1    | Ca_Kabuli_Chr04 | 25366329                | GG                                     | AA                 | AA               | INTERGENIC      |               |                    |                    |
| SNP_23435_A_25366368 | NC_021163.1    | Ca_Kabuli_Chr04 | 25366368                | TT                                     | GG                 | GG               | INTERGENIC      |               |                    |                    |
| SNP_23436_A_25366699 | NC_021163.1    | Ca_Kabuli_Chr04 | 25366699                | GG                                     | AA                 | AA               | INTERGENIC      |               |                    |                    |
| SNP_23437_A_25366762 | NC_021163.1    | Ca_Kabuli_Chr04 | 25366762                | AA                                     | CC                 | CC               | INTERGENIC      |               |                    |                    |
| SNP_23438_A_25366813 | NC_021163.1    | Ca_Kabuli_Chr04 | 25366813                | CC                                     | AA                 | AA               | INTERGENIC      |               |                    |                    |
| SNP_23439_A_25366867 | NC_021163.1    | Ca_Kabuli_Chr04 | 25366867                | CC                                     | TT                 | TT               | INTERGENIC      |               |                    |                    |
| SNP_23440_A_25366892 | NC_021163.1    | Ca_Kabuli_Chr04 | 25366892                | CC                                     | TT                 | TT               | INTERGENIC      |               |                    |                    |
| SNP_23441_A_25366908 | NC_021163.1    | Ca_Kabuli_Chr04 | 25366908                | AA                                     | GG                 | GG               | INTERGENIC      |               |                    |                    |
| SNP_23442_A_25366958 | NC_021163.1    | Ca_Kabuli_Chr04 | 25366958                | CC                                     | GG                 | GG               | INTERGENIC      |               |                    |                    |
| SNP_23443_A_25367008 | NC_021163.1    | Ca_Kabuli_Chr04 | 25367008                | CC                                     | TT                 | TT               | INTERGENIC      |               |                    |                    |
| SNP_23444_A_25367152 | NC_021163.1    | Ca_Kabuli_Chr04 | 25367152                | GG                                     | AA                 | AA               | INTERGENIC      |               |                    |                    |
| SNP_23445_A_25367175 | NC_021163.1    | Ca_Kabuli_Chr04 | 25367175                | CC                                     | TT                 | TT               | INTERGENIC      |               |                    |                    |

| SNPs IDs             | Chromosome IDs | Chromosomes     | Physical positions (bp) | CDC Frontier genome (Reference genome) | (Pusa 1103 & HPNB) | (ILWC 46 & LPNB) | Sequence Components of genome | Gene accession IDs | Putative functions                   |
|----------------------|----------------|-----------------|-------------------------|----------------------------------------|--------------------|------------------|-------------------------------|--------------------|--------------------------------------|
| SNP_23447_A_25368889 | NC_021163.1    | Ca_Kabuli_Chr04 | 25368889                | TT                                     | AA                 | AA               | INTERGENIC                    |                    |                                      |
| SNP_23448_A_25368921 | NC_021163.1    | Ca_Kabuli_Chr04 | 25368921                | TT                                     | AA                 | AA               | INTERGENIC                    |                    |                                      |
| SNP_23449_A_25370958 | NC_021163.1    | Ca_Kabuli_Chr04 | 25370958                | TT                                     | CC                 | CC               | DRR                           | 101410550          | transfer RNA leucine (anticodon CAA) |
| SNP_23450_A_25372026 | NC_021163.1    | Ca_Kabuli_Chr04 | 25372026                | AA                                     | TT                 | TT               | URR                           | 101410550          | transfer RNA leucine (anticodon CAA) |
| SNP_23451_A_25374959 | NC_021163.1    | Ca_Kabuli_Chr04 | 25374959                | TT                                     | CC                 | CC               | INTERGENIC                    |                    |                                      |
| SNP_23452_A_25375245 | NC_021163.1    | Ca_Kabuli_Chr04 | 25375245                | AA                                     | CC                 | CC               | INTERGENIC                    |                    |                                      |
| SNP_23453_A_25375357 | NC_021163.1    | Ca_Kabuli_Chr04 | 25375357                | GG                                     | AA                 | AA               | INTERGENIC                    |                    |                                      |
| SNP_23454_A_25375449 | NC_021163.1    | Ca_Kabuli_Chr04 | 25375449                | TT                                     | AA                 | AA               | INTERGENIC                    |                    |                                      |
| SNP_23455_A_25375500 | NC_021163.1    | Ca_Kabuli_Chr04 | 25375500                | TT                                     | CC                 | CC               | INTERGENIC                    |                    |                                      |
| SNP_23456_A_25375517 | NC_021163.1    | Ca_Kabuli_Chr04 | 25375517                | TT                                     | AA                 | AA               | INTERGENIC                    |                    |                                      |
| SNP_23457_A_25375526 | NC_021163.1    | Ca_Kabuli_Chr04 | 25375526                | TT                                     | AA                 | AA               | INTERGENIC                    |                    |                                      |
| SNP_23458_A_25375608 | NC_021163.1    | Ca_Kabuli_Chr04 | 25375608                | GG                                     | AA                 | AA               | INTERGENIC                    |                    |                                      |
| SNP_23459_A_25375693 | NC_021163.1    | Ca_Kabuli_Chr04 | 25375693                | GG                                     | AA                 | AA               | INTERGENIC                    |                    |                                      |
| SNP_23461_A_25375724 | NC_021163.1    | Ca_Kabuli_Chr04 | 25375724                | CC                                     | TT                 | TT               | INTERGENIC                    |                    |                                      |
| SNP_23462_A_25375895 | NC_021163.1    | Ca_Kabuli_Chr04 | 25375895                | GG                                     | AA                 | AA               | INTERGENIC                    |                    |                                      |
| SNP_23463_A_25375933 | NC_021163.1    | Ca_Kabuli_Chr04 | 25375933                | GG                                     | AA                 | AA               | INTERGENIC                    |                    |                                      |
| SNP_23464_A_25376115 | NC_021163.1    | Ca_Kabuli_Chr04 | 25376115                | CC                                     | AA                 | AA               | INTERGENIC                    |                    |                                      |
| SNP_23465_A_25376331 | NC_021163.1    | Ca_Kabuli_Chr04 | 25376331                | GG                                     | TT                 | TT               | INTERGENIC                    |                    |                                      |
| SNP_23467_A_25378194 | NC_021163.1    | Ca_Kabuli_Chr04 | 25378194                | GG                                     | TT                 | TT               | INTERGENIC                    |                    |                                      |
| SNP_23468_A_25389227 | NC_021163.1    | Ca_Kabuli_Chr04 | 25389227                | AA                                     | TT                 | TT               | INTERGENIC                    |                    |                                      |
| SNP_23469_A_25389307 | NC_021163.1    | Ca_Kabuli_Chr04 | 25389307                | CC                                     | TT                 | TT               | INTERGENIC                    |                    |                                      |
| SNP_23470_A_25389453 | NC_021163.1    | Ca_Kabuli_Chr04 | 25389453                | AA                                     | GG                 | GG               | INTERGENIC                    |                    |                                      |

| SNPs IDs             | Chromosome IDs | Chromosomes     | Physical positions (bp) | CDC Frontier genome (Reference genome) | (Pusa 1103 & HPNB) | (ILWC 46 & LPNB) | Sequence genome | Components of | Gene accession IDs                           | Putative functions |
|----------------------|----------------|-----------------|-------------------------|----------------------------------------|--------------------|------------------|-----------------|---------------|----------------------------------------------|--------------------|
| SNP_23471_A_25389457 | NC_021163.1    | Ca_Kabuli_Chr04 | 25389457                | TT                                     | CC                 | CC               | INTERGENIC      |               |                                              |                    |
| SNP_23472_A_25389458 | NC_021163.1    | Ca_Kabuli_Chr04 | 25389458                | CC                                     | TT                 | TT               | INTERGENIC      |               |                                              |                    |
| SNP_23473_A_25391577 | NC_021163.1    | Ca_Kabuli_Chr04 | 25391577                | GG                                     | TT                 | TT               | INTERGENIC      |               |                                              |                    |
| SNP_23474_A_25391614 | NC_021163.1    | Ca_Kabuli_Chr04 | 25391614                | AA                                     | GG                 | GG               | INTERGENIC      |               |                                              |                    |
| SNP_23475_A_25391728 | NC_021163.1    | Ca_Kabuli_Chr04 | 25391728                | CC                                     | TT                 | TT               | INTERGENIC      |               |                                              |                    |
| SNP_23476_A_25391763 | NC_021163.1    | Ca_Kabuli_Chr04 | 25391763                | AA                                     | GG                 | GG               | INTERGENIC      |               |                                              |                    |
| SNP_23477_A_25394574 | NC_021163.1    | Ca_Kabuli_Chr04 | 25394574                | GG                                     | AA                 | AA               | INTERGENIC      |               |                                              |                    |
| SNP_23478_A_25394583 | NC_021163.1    | Ca_Kabuli_Chr04 | 25394583                | CC                                     | AA                 | AA               | INTERGENIC      |               |                                              |                    |
| SNP_23479_A_25409825 | NC_021163.1    | Ca_Kabuli_Chr04 | 25409825                | GG                                     | CC                 | CC               | INTERGENIC      |               |                                              |                    |
| SNP_23480_A_25409861 | NC_021163.1    | Ca_Kabuli_Chr04 | 25409861                | CC                                     | TT                 | TT               | INTERGENIC      |               |                                              |                    |
| SNP_23481_A_25434325 | NC_021163.1    | Ca_Kabuli_Chr04 | 25434325                | TT                                     | GG                 | GG               | URR             | 101491349     | probable ubiquitin-like-specific protease 2B |                    |
| SNP_23482_A_25434356 | NC_021163.1    | Ca_Kabuli_Chr04 | 25434356                | CC                                     | TT                 | TT               | URR             | 101491349     | probable ubiquitin-like-specific protease 2B |                    |
| SNP_23483_A_25434418 | NC_021163.1    | Ca_Kabuli_Chr04 | 25434418                | TT                                     | CC                 | CC               | URR             | 101491349     | probable ubiquitin-like-specific protease 2B |                    |
| SNP_23484_A_25434590 | NC_021163.1    | Ca_Kabuli_Chr04 | 25434590                | GG                                     | CC                 | CC               | URR             | 101491349     | probable ubiquitin-like-specific protease 2B |                    |
| SNP_23485_A_25434726 | NC_021163.1    | Ca_Kabuli_Chr04 | 25434726                | CC                                     | TT                 | TT               | URR             | 101491349     | probable ubiquitin-like-specific protease 2B |                    |
| SNP_23486_A_25439165 | NC_021163.1    | Ca_Kabuli_Chr04 | 25439165                | GG                                     | AA                 | AA               | INTERGENIC      |               |                                              |                    |
| SNP_23487_A_25439166 | NC_021163.1    | Ca_Kabuli_Chr04 | 25439166                | TT                                     | AA                 | AA               | INTERGENIC      |               |                                              |                    |
| SNP_23488_A_25440451 | NC_021163.1    | Ca_Kabuli_Chr04 | 25440451                | GG                                     | AA                 | AA               | INTERGENIC      |               |                                              |                    |
| SNP_23489_A_25440636 | NC_021163.1    | Ca_Kabuli_Chr04 | 25440636                | AA                                     | GG                 | GG               | INTERGENIC      |               |                                              |                    |
| SNP_23490_A_25440737 | NC_021163.1    | Ca_Kabuli_Chr04 | 25440737                | TT                                     | CC                 | CC               | INTERGENIC      |               |                                              |                    |
| SNP_23491_A_25440812 | NC_021163.1    | Ca_Kabuli_Chr04 | 25440812                | AA                                     | TT                 | TT               | INTERGENIC      |               |                                              |                    |
| SNP_23492_A_25440845 | NC_021163.1    | Ca_Kabuli_Chr04 | 25440845                | GG                                     | AA                 | AA               | INTERGENIC      |               |                                              |                    |

| SNPs IDs             | Chromosome IDs | Chromosomes     | Physical positions (bp) | CDC Frontier (Reference genome) | (Pusa 1103 & HPNB) | (ILWC 46 & LPNB) | Sequence genome | Components of | Gene accession IDs | Putative functions |
|----------------------|----------------|-----------------|-------------------------|---------------------------------|--------------------|------------------|-----------------|---------------|--------------------|--------------------|
| SNP_23493_A_25440915 | NC_021163.1    | Ca_Kabuli_Chr04 | 25440915                | TT                              | AA                 | AA               | INTERGENIC      |               |                    |                    |
| SNP_23494_A_25441076 | NC_021163.1    | Ca_Kabuli_Chr04 | 25441076                | AA                              | GG                 | GG               | INTERGENIC      |               |                    |                    |
| SNP_23495_A_25441930 | NC_021163.1    | Ca_Kabuli_Chr04 | 25441930                | AA                              | CC                 | CC               | INTERGENIC      |               |                    |                    |
| SNP_23496_A_25448713 | NC_021163.1    | Ca_Kabuli_Chr04 | 25448713                | TT                              | AA                 | AA               | INTERGENIC      |               |                    |                    |
| SNP_23497_A_25448721 | NC_021163.1    | Ca_Kabuli_Chr04 | 25448721                | AA                              | GG                 | GG               | INTERGENIC      |               |                    |                    |
| SNP_23498_A_25456275 | NC_021163.1    | Ca_Kabuli_Chr04 | 25456275                | TT                              | CC                 | CC               | INTERGENIC      |               |                    |                    |
| SNP_23499_A_25456534 | NC_021163.1    | Ca_Kabuli_Chr04 | 25456534                | GG                              | TT                 | TT               | INTERGENIC      |               |                    |                    |
| SNP_23500_A_25456597 | NC_021163.1    | Ca_Kabuli_Chr04 | 25456597                | CC                              | AA                 | AA               | INTERGENIC      |               |                    |                    |
| SNP_23501_A_25456869 | NC_021163.1    | Ca_Kabuli_Chr04 | 25456869                | GG                              | AA                 | AA               | INTERGENIC      |               |                    |                    |
| SNP_23502_A_25456942 | NC_021163.1    | Ca_Kabuli_Chr04 | 25456942                | CC                              | GG                 | GG               | INTERGENIC      |               |                    |                    |
| SNP_23504_A_25461498 | NC_021163.1    | Ca_Kabuli_Chr04 | 25461498                | TT                              | AA                 | AA               | INTERGENIC      |               |                    |                    |
| SNP_23505_A_25463676 | NC_021163.1    | Ca_Kabuli_Chr04 | 25463676                | TT                              | CC                 | CC               | INTERGENIC      |               |                    |                    |
| SNP_23506_A_25463687 | NC_021163.1    | Ca_Kabuli_Chr04 | 25463687                | TT                              | AA                 | AA               | INTERGENIC      |               |                    |                    |
| SNP_23507_A_25463688 | NC_021163.1    | Ca_Kabuli_Chr04 | 25463688                | GG                              | AA                 | AA               | INTERGENIC      |               |                    |                    |
| SNP_23508_A_25463689 | NC_021163.1    | Ca_Kabuli_Chr04 | 25463689                | GG                              | CC                 | CC               | INTERGENIC      |               |                    |                    |
| SNP_23509_A_25463735 | NC_021163.1    | Ca_Kabuli_Chr04 | 25463735                | TT                              | CC                 | CC               | INTERGENIC      |               |                    |                    |
| SNP_23510_A_25463741 | NC_021163.1    | Ca_Kabuli_Chr04 | 25463741                | GG                              | TT                 | TT               | INTERGENIC      |               |                    |                    |
| SNP_23514_A_25474392 | NC_021163.1    | Ca_Kabuli_Chr04 | 25474392                | GG                              | TT                 | TT               | INTERGENIC      |               |                    |                    |
| SNP_23516_A_25479893 | NC_021163.1    | Ca_Kabuli_Chr04 | 25479893                | AA                              | GG                 | GG               | INTERGENIC      |               |                    |                    |
| SNP_23517_A_25486840 | NC_021163.1    | Ca_Kabuli_Chr04 | 25486840                | AA                              | CC                 | CC               | INTERGENIC      |               |                    |                    |
| SNP_23518_A_25491495 | NC_021163.1    | Ca_Kabuli_Chr04 | 25491495                | CC                              | GG                 | GG               | INTERGENIC      |               |                    |                    |
| SNP_23519_A_25492372 | NC_021163.1    | Ca_Kabuli_Chr04 | 25492372                | AA                              | CC                 | CC               | INTERGENIC      |               |                    |                    |

| SNPs IDs             | Chromosome IDs | Chromosomes     | Physical positions (bp) | CDC Frontier genome (Reference genome) | (Pusa 1103 & HPNB) | (ILWC 46 & LPNB) | Sequence Components of genome | Gene accession IDs | Putative functions                    |
|----------------------|----------------|-----------------|-------------------------|----------------------------------------|--------------------|------------------|-------------------------------|--------------------|---------------------------------------|
| SNP_23520_A_25494229 | NC_021163.1    | Ca_Kabuli_Chr04 | 25494229                | TT                                     | CC                 | CC               | INTERGENIC                    |                    |                                       |
| SNP_23522_A_25495813 | NC_021163.1    | Ca_Kabuli_Chr04 | 25495813                | AA                                     | GG                 | GG               | INTERGENIC                    |                    |                                       |
| SNP_23523_A_25497678 | NC_021163.1    | Ca_Kabuli_Chr04 | 25497678                | TT                                     | GG                 | GG               | INTERGENIC                    |                    |                                       |
| SNP_23524_A_25499257 | NC_021163.1    | Ca_Kabuli_Chr04 | 25499257                | TT                                     | CC                 | CC               | INTERGENIC                    |                    |                                       |
| SNP_23526_A_25504264 | NC_021163.1    | Ca_Kabuli_Chr04 | 25504264                | AA                                     | GG                 | GG               | INTERGENIC                    |                    |                                       |
| SNP_23527_A_25505905 | NC_021163.1    | Ca_Kabuli_Chr04 | 25505905                | GG                                     | AA                 | AA               | INTERGENIC                    |                    |                                       |
| SNP_23529_A_25512246 | NC_021163.1    | Ca_Kabuli_Chr04 | 25512246                | TT                                     | GG                 | GG               | INTRON                        | 101492978          | probable serine incorporator          |
| SNP_23530_A_25513053 | NC_021163.1    | Ca_Kabuli_Chr04 | 25513053                | GG                                     | CC                 | CC               | INTRON                        | 101492978          | probable serine incorporator          |
| SNP_23531_A_25513059 | NC_021163.1    | Ca_Kabuli_Chr04 | 25513059                | GG                                     | CC                 | CC               | INTRON                        | 101492978          | probable serine incorporator          |
| SNP_23532_A_25515314 | NC_021163.1    | Ca_Kabuli_Chr04 | 25515314                | GG                                     | AA                 | AA               | INTRON                        | 101492978          | probable serine incorporator          |
| SNP_23533_A_25515338 | NC_021163.1    | Ca_Kabuli_Chr04 | 25515338                | GG                                     | TT                 | TT               | INTRON                        | 101492978          | probable serine incorporator          |
| SNP_23536_A_25538011 | NC_021163.1    | Ca_Kabuli_Chr04 | 25538011                | TT                                     | CC                 | CC               | URR                           | 101493635          | F-box protein At2g26160-like          |
| SNP_23537_A_25543726 | NC_021163.1    | Ca_Kabuli_Chr04 | 25543726                | GG                                     | AA                 | AA               | INTERGENIC                    |                    |                                       |
| SNP_23538_A_25543890 | NC_021163.1    | Ca_Kabuli_Chr04 | 25543890                | TT                                     | CC                 | CC               | INTERGENIC                    |                    |                                       |
| SNP_23539_A_25557575 | NC_021163.1    | Ca_Kabuli_Chr04 | 25557575                | TT                                     | GG                 | GG               | INTERGENIC                    |                    |                                       |
| SNP_23540_A_25566858 | NC_021163.1    | Ca_Kabuli_Chr04 | 25566858                | GG                                     | TT                 | TT               | INTERGENIC                    |                    |                                       |
| SNP_23542_A_25579592 | NC_021163.1    | Ca_Kabuli_Chr04 | 25579592                | GG                                     | TT                 | TT               | INTERGENIC                    |                    |                                       |
| SNP_23543_A_25581394 | NC_021163.1    | Ca_Kabuli_Chr04 | 25581394                | AA                                     | GG                 | GG               | INTERGENIC                    |                    |                                       |
| SNP_23544_A_25587774 | NC_021163.1    | Ca_Kabuli_Chr04 | 25587774                | CC                                     | TT                 | TT               | DRR                           | 101493950          | LOB domain-containing protein 12-like |
| SNP_23547_A_25596134 | NC_021163.1    | Ca_Kabuli_Chr04 | 25596134                | CC                                     | TT                 | TT               | INTERGENIC                    |                    |                                       |
| SNP_23548_A_25604828 | NC_021163.1    | Ca_Kabuli_Chr04 | 25604828                | CC                                     | AA                 | AA               | INTERGENIC                    |                    |                                       |
| SNP_23549_A_25607350 | NC_021163.1    | Ca_Kabuli_Chr04 | 25607350                | TT                                     | CC                 | CC               | INTERGENIC                    |                    |                                       |

| SNPs IDs             | Chromosome IDs | Chromosomes     | Physical positions (bp) | CDC Frontier genome (Reference genome) | (Pusa 1103 & HPNB) | (ILWC 46 & LPNB) | Sequence genome | Components of | Gene accession IDs   | Putative functions |
|----------------------|----------------|-----------------|-------------------------|----------------------------------------|--------------------|------------------|-----------------|---------------|----------------------|--------------------|
| SNP_23550_A_25615463 | NC_021163.1    | Ca_Kabuli_Chr04 | 25615463                | TT                                     | CC                 | CC               | INTERGENIC      |               |                      |                    |
| SNP_23552_A_25629695 | NC_021163.1    | Ca_Kabuli_Chr04 | 25629695                | TT                                     | CC                 | CC               | INTERGENIC      |               |                      |                    |
| SNP_23553_A_25633028 | NC_021163.1    | Ca_Kabuli_Chr04 | 25633028                | TT                                     | CC                 | CC               | INTERGENIC      |               |                      |                    |
| SNP_23554_A_25634030 | NC_021163.1    | Ca_Kabuli_Chr04 | 25634030                | GG                                     | AA                 | AA               | INTERGENIC      |               |                      |                    |
| SNP_23555_A_25637810 | NC_021163.1    | Ca_Kabuli_Chr04 | 25637810                | GG                                     | AA                 | AA               | INTERGENIC      |               |                      |                    |
| SNP_23556_A_25642034 | NC_021163.1    | Ca_Kabuli_Chr04 | 25642034                | GG                                     | TT                 | TT               | INTERGENIC      |               |                      |                    |
| SNP_23557_A_25642565 | NC_021163.1    | Ca_Kabuli_Chr04 | 25642565                | AA                                     | TT                 | TT               | INTERGENIC      |               |                      |                    |
| SNP_23558_A_25646169 | NC_021163.1    | Ca_Kabuli_Chr04 | 25646169                | GG                                     | TT                 | TT               | INTERGENIC      |               |                      |                    |
| SNP_23559_A_25647602 | NC_021163.1    | Ca_Kabuli_Chr04 | 25647602                | AA                                     | GG                 | GG               | INTERGENIC      |               |                      |                    |
| SNP_23560_A_25647714 | NC_021163.1    | Ca_Kabuli_Chr04 | 25647714                | AA                                     | TT                 | TT               | INTERGENIC      |               |                      |                    |
| SNP_23561_A_25649605 | NC_021163.1    | Ca_Kabuli_Chr04 | 25649605                | TT                                     | GG                 | GG               | DRR             | 101510372     | xylosyltransferase 2 |                    |
| SNP_23563_A_25659486 | NC_021163.1    | Ca_Kabuli_Chr04 | 25659486                | AA                                     | TT                 | TT               | INTERGENIC      |               |                      |                    |
| SNP_23564_A_25659647 | NC_021163.1    | Ca_Kabuli_Chr04 | 25659647                | GG                                     | AA                 | AA               | INTERGENIC      |               |                      |                    |
| SNP_23565_A_25673585 | NC_021163.1    | Ca_Kabuli_Chr04 | 25673585                | CC                                     | TT                 | TT               | INTERGENIC      |               |                      |                    |
| SNP_23566_A_25675046 | NC_021163.1    | Ca_Kabuli_Chr04 | 25675046                | GG                                     | AA                 | AA               | INTERGENIC      |               |                      |                    |
| SNP_23567_A_25675898 | NC_021163.1    | Ca_Kabuli_Chr04 | 25675898                | CC                                     | AA                 | AA               | INTERGENIC      |               |                      |                    |
| SNP_23568_A_25679872 | NC_021163.1    | Ca_Kabuli_Chr04 | 25679872                | AA                                     | GG                 | GG               | INTERGENIC      |               |                      |                    |
| SNP_23569_A_25681696 | NC_021163.1    | Ca_Kabuli_Chr04 | 25681696                | TT                                     | CC                 | CC               | INTERGENIC      |               |                      |                    |
| SNP_23570_A_25683594 | NC_021163.1    | Ca_Kabuli_Chr04 | 25683594                | TT                                     | GG                 | GG               | INTERGENIC      |               |                      |                    |
| SNP_23571_A_25683634 | NC_021163.1    | Ca_Kabuli_Chr04 | 25683634                | AA                                     | GG                 | GG               | INTERGENIC      |               |                      |                    |
| SNP_23572_A_25684064 | NC_021163.1    | Ca_Kabuli_Chr04 | 25684064                | TT                                     | CC                 | CC               | INTERGENIC      |               |                      |                    |
| SNP_23573_A_25685113 | NC_021163.1    | Ca_Kabuli_Chr04 | 25685113                | GG                                     | AA                 | AA               | INTERGENIC      |               |                      |                    |

| SNPs IDs             | Chromosome IDs | Chromosomes     | Physical positions (bp) | CDC Frontier genome (Reference genome) | (Pusa 1103 & HPNB) | (ILWC 46 & LPNB) | Sequence genome | Components of | Gene accession IDs | Putative functions |
|----------------------|----------------|-----------------|-------------------------|----------------------------------------|--------------------|------------------|-----------------|---------------|--------------------|--------------------|
| SNP_23574_A_25685975 | NC_021163.1    | Ca_Kabuli_Chr04 | 25685975                | GG                                     | AA                 | AA               | INTERGENIC      |               |                    |                    |
| SNP_23575_A_25685988 | NC_021163.1    | Ca_Kabuli_Chr04 | 25685988                | TT                                     | GG                 | GG               | INTERGENIC      |               |                    |                    |
| SNP_23576_A_25686198 | NC_021163.1    | Ca_Kabuli_Chr04 | 25686198                | GG                                     | AA                 | AA               | INTERGENIC      |               |                    |                    |
| SNP_23577_A_25686396 | NC_021163.1    | Ca_Kabuli_Chr04 | 25686396                | TT                                     | CC                 | CC               | INTERGENIC      |               |                    |                    |
| SNP_23578_A_25693684 | NC_021163.1    | Ca_Kabuli_Chr04 | 25693684                | AA                                     | CC                 | CC               | INTERGENIC      |               |                    |                    |
| SNP_23579_A_25695917 | NC_021163.1    | Ca_Kabuli_Chr04 | 25695917                | TT                                     | AA                 | AA               | INTERGENIC      |               |                    |                    |
| SNP_23580_A_25695974 | NC_021163.1    | Ca_Kabuli_Chr04 | 25695974                | CC                                     | TT                 | TT               | INTERGENIC      |               |                    |                    |
| SNP_23581_A_25699169 | NC_021163.1    | Ca_Kabuli_Chr04 | 25699169                | AA                                     | GG                 | GG               | INTERGENIC      |               |                    |                    |
| SNP_23582_A_25699256 | NC_021163.1    | Ca_Kabuli_Chr04 | 25699256                | GG                                     | CC                 | CC               | INTERGENIC      |               |                    |                    |
| SNP_23583_A_25699943 | NC_021163.1    | Ca_Kabuli_Chr04 | 25699943                | GG                                     | AA                 | AA               | INTERGENIC      |               |                    |                    |
| SNP_23584_A_25699960 | NC_021163.1    | Ca_Kabuli_Chr04 | 25699960                | GG                                     | AA                 | AA               | INTERGENIC      |               |                    |                    |
| SNP_23585_A_25703453 | NC_021163.1    | Ca_Kabuli_Chr04 | 25703453                | GG                                     | AA                 | AA               | INTERGENIC      |               |                    |                    |
| SNP_23586_A_25710225 | NC_021163.1    | Ca_Kabuli_Chr04 | 25710225                | AA                                     | TT                 | TT               | INTERGENIC      |               |                    |                    |
| SNP_23587_A_25717228 | NC_021163.1    | Ca_Kabuli_Chr04 | 25717228                | TT                                     | GG                 | GG               | INTERGENIC      |               |                    |                    |
| SNP_23588_A_25717378 | NC_021163.1    | Ca_Kabuli_Chr04 | 25717378                | TT                                     | AA                 | AA               | INTERGENIC      |               |                    |                    |
| SNP_23589_A_25720921 | NC_021163.1    | Ca_Kabuli_Chr04 | 25720921                | AA                                     | GG                 | GG               | INTERGENIC      |               |                    |                    |
| SNP_23590_A_25723399 | NC_021163.1    | Ca_Kabuli_Chr04 | 25723399                | TT                                     | CC                 | CC               | INTERGENIC      |               |                    |                    |
| SNP_23591_A_25723475 | NC_021163.1    | Ca_Kabuli_Chr04 | 25723475                | CC                                     | TT                 | TT               | INTERGENIC      |               |                    |                    |
| SNP_23592_A_25723830 | NC_021163.1    | Ca_Kabuli_Chr04 | 25723830                | CC                                     | TT                 | TT               | INTERGENIC      |               |                    |                    |
| SNP_23593_A_25731102 | NC_021163.1    | Ca_Kabuli_Chr04 | 25731102                | CC                                     | TT                 | TT               | INTERGENIC      |               |                    |                    |
| SNP_23594_A_25731400 | NC_021163.1    | Ca_Kabuli_Chr04 | 25731400                | GG                                     | CC                 | CC               | INTERGENIC      |               |                    |                    |
| SNP_23595_A_25741517 | NC_021163.1    | Ca_Kabuli_Chr04 | 25741517                | AA                                     | GG                 | GG               | INTERGENIC      |               |                    |                    |

| SNPs IDs             | Chromosome IDs | Chromosomes     | Physical positions (bp) | CDC Frontier genome (Reference genome) | (Pusa 1103 & HPNB) | (ILWC 46 & LPNB) | Sequence genome | Components of | Gene accession IDs | Putative functions                |
|----------------------|----------------|-----------------|-------------------------|----------------------------------------|--------------------|------------------|-----------------|---------------|--------------------|-----------------------------------|
| SNP_23596_A_25744472 | NC_021163.1    | Ca_Kabuli_Chr04 | 25744472                | TT                                     | AA                 | AA               | INTERGENIC      |               |                    |                                   |
| SNP_23597_A_25754687 | NC_021163.1    | Ca_Kabuli_Chr04 | 25754687                | CC                                     | AA                 | AA               | DRR             | 101511329     |                    | lachrymatory-factor synthase-like |
| SNP_23599_A_25760195 | NC_021163.1    | Ca_Kabuli_Chr04 | 25760195                | GG                                     | AA                 | AA               | INTERGENIC      |               |                    |                                   |
| SNP_23600_A_25760566 | NC_021163.1    | Ca_Kabuli_Chr04 | 25760566                | CC                                     | TT                 | TT               | INTERGENIC      |               |                    |                                   |
| SNP_23601_A_25760572 | NC_021163.1    | Ca_Kabuli_Chr04 | 25760572                | TT                                     | CC                 | CC               | INTERGENIC      |               |                    |                                   |
| SNP_23602_A_25763196 | NC_021163.1    | Ca_Kabuli_Chr04 | 25763196                | GG                                     | TT                 | TT               | INTERGENIC      |               |                    |                                   |
| SNP_23604_A_25768465 | NC_021163.1    | Ca_Kabuli_Chr04 | 25768465                | AA                                     | GG                 | GG               | INTERGENIC      |               |                    |                                   |
| SNP_23605_A_25768466 | NC_021163.1    | Ca_Kabuli_Chr04 | 25768466                | AA                                     | GG                 | GG               | INTERGENIC      |               |                    |                                   |
| SNP_23606_A_25768479 | NC_021163.1    | Ca_Kabuli_Chr04 | 25768479                | GG                                     | TT                 | TT               | INTERGENIC      |               |                    |                                   |
| SNP_23607_A_25768481 | NC_021163.1    | Ca_Kabuli_Chr04 | 25768481                | AA                                     | GG                 | GG               | INTERGENIC      |               |                    |                                   |
| SNP_23608_A_25772681 | NC_021163.1    | Ca_Kabuli_Chr04 | 25772681                | AA                                     | GG                 | GG               | INTERGENIC      |               |                    |                                   |
| SNP_23609_A_25775971 | NC_021163.1    | Ca_Kabuli_Chr04 | 25775971                | TT                                     | CC                 | CC               | INTERGENIC      |               |                    |                                   |
| SNP_23611_A_25776622 | NC_021163.1    | Ca_Kabuli_Chr04 | 25776622                | CC                                     | TT                 | TT               | INTERGENIC      |               |                    |                                   |
| SNP_23613_A_25784140 | NC_021163.1    | Ca_Kabuli_Chr04 | 25784140                | CC                                     | TT                 | TT               | INTERGENIC      |               |                    |                                   |
| SNP_23614_A_25790132 | NC_021163.1    | Ca_Kabuli_Chr04 | 25790132                | CC                                     | TT                 | TT               | INTRON          | 101494587     |                    | Unknown function                  |
| SNP_23616_A_25790550 | NC_021163.1    | Ca_Kabuli_Chr04 | 25790550                | TT                                     | CC                 | CC               | INTRON          | 101494587     |                    | Unknown function                  |
| SNP_23617_A_25790566 | NC_021163.1    | Ca_Kabuli_Chr04 | 25790566                | GG                                     | AA                 | AA               | INTRON          | 101494587     |                    | Unknown function                  |
| SNP_23618_A_25790654 | NC_021163.1    | Ca_Kabuli_Chr04 | 25790654                | CC                                     | TT                 | TT               | INTRON          | 101494587     |                    | Unknown function                  |
| SNP_23619_A_25790779 | NC_021163.1    | Ca_Kabuli_Chr04 | 25790779                | CC                                     | TT                 | TT               | INTRON          | 101494587     |                    | Unknown function                  |
| SNP_23620_A_25793178 | NC_021163.1    | Ca_Kabuli_Chr04 | 25793178                | CC                                     | AA                 | AA               | URR             | 101494587     |                    | Unknown function                  |
| SNP_23621_A_25793854 | NC_021163.1    | Ca_Kabuli_Chr04 | 25793854                | CC                                     | TT                 | TT               | URR             | 101494587     |                    | Unknown function                  |
| SNP_23622_A_25803666 | NC_021163.1    | Ca_Kabuli_Chr04 | 25803666                | TT                                     | AA                 | AA               | INTERGENIC      |               |                    |                                   |



| SNPs IDs             | Chromosome IDs | Chromosomes     | Physical positions (bp) | CDC Frontier (Reference genome) | (Pusa 1103 & HPNB) | (ILWC 46 & LPNB) | Sequence Components of genome | Gene accession IDs | Putative functions                                                             |
|----------------------|----------------|-----------------|-------------------------|---------------------------------|--------------------|------------------|-------------------------------|--------------------|--------------------------------------------------------------------------------|
| SNP_23623_A_25803723 | NC_021163.1    | Ca_Kabuli_Chr04 | 25803723                | GG                              | AA                 | AA               | INTERGENIC                    |                    |                                                                                |
| SNP_23624_A_25807511 | NC_021163.1    | Ca_Kabuli_Chr04 | 25807511                | AA                              | GG                 | GG               | SYNONYMOUS_CODING             | 101511976          | uncharacterized aarF domain-containing protein kinase At1g71810, chloroplastic |
| SNP_23626_A_25814068 | NC_021163.1    | Ca_Kabuli_Chr04 | 25814068                | CC                              | GG                 | GG               | INTRON                        | 101511976          | uncharacterized aarF domain-containing protein kinase At1g71810, chloroplastic |
| SNP_23627_A_25815454 | NC_021163.1    | Ca_Kabuli_Chr04 | 25815454                | TT                              | CC                 | CC               | INTRON                        | 101511976          | uncharacterized aarF domain-containing protein kinase At1g71810, chloroplastic |
| SNP_23628_A_25817195 | NC_021163.1    | Ca_Kabuli_Chr04 | 25817195                | TT                              | CC                 | CC               | INTRON                        | 101511976          | uncharacterized aarF domain-containing protein kinase At1g71810, chloroplastic |
| SNP_23629_A_25818324 | NC_021163.1    | Ca_Kabuli_Chr04 | 25818324                | AA                              | TT                 | TT               | INTRON                        | 101511976          | uncharacterized aarF domain-containing protein kinase At1g71810, chloroplastic |
| SNP_23632_A_25824859 | NC_021163.1    | Ca_Kabuli_Chr04 | 25824859                | TT                              | CC                 | CC               | INTERGENIC                    |                    |                                                                                |
| SNP_23633_A_25829358 | NC_021163.1    | Ca_Kabuli_Chr04 | 25829358                | AA                              | TT                 | TT               | INTERGENIC                    |                    |                                                                                |
| SNP_23634_A_25833696 | NC_021163.1    | Ca_Kabuli_Chr04 | 25833696                | GG                              | AA                 | AA               | INTERGENIC                    |                    |                                                                                |
| SNP_23636_A_25847303 | NC_021163.1    | Ca_Kabuli_Chr04 | 25847303                | CC                              | TT                 | TT               | INTERGENIC                    |                    |                                                                                |
| SNP_23637_A_25847655 | NC_021163.1    | Ca_Kabuli_Chr04 | 25847655                | CC                              | AA                 | AA               | INTERGENIC                    |                    |                                                                                |
| SNP_23639_A_25847740 | NC_021163.1    | Ca_Kabuli_Chr04 | 25847740                | GG                              | TT                 | TT               | INTERGENIC                    |                    |                                                                                |
| SNP_23640_A_25857538 | NC_021163.1    | Ca_Kabuli_Chr04 | 25857538                | TT                              | GG                 | GG               | DRR                           | 101495228          | putative B3 domain-containing protein At1g78640                                |
| SNP_23641_A_25860451 | NC_021163.1    | Ca_Kabuli_Chr04 | 25860451                | CC                              | TT                 | TT               | URR                           | 101495228          | putative B3 domain-containing protein At1g78640                                |
| SNP_23642_A_25866443 | NC_021163.1    | Ca_Kabuli_Chr04 | 25866443                | GG                              | CC                 | CC               | INTERGENIC                    |                    |                                                                                |
| SNP_23643_A_25867541 | NC_021163.1    | Ca_Kabuli_Chr04 | 25867541                | CC                              | TT                 | TT               | INTERGENIC                    |                    |                                                                                |
| SNP_23644_A_25867568 | NC_021163.1    | Ca_Kabuli_Chr04 | 25867568                | AA                              | GG                 | GG               | INTERGENIC                    |                    |                                                                                |
| SNP_23645_A_25878849 | NC_021163.1    | Ca_Kabuli_Chr04 | 25878849                | GG                              | AA                 | AA               | INTERGENIC                    |                    |                                                                                |
| SNP_23646_A_25882677 | NC_021163.1    | Ca_Kabuli_Chr04 | 25882677                | GG                              | TT                 | TT               | INTERGENIC                    |                    |                                                                                |
| SNP_23647_A_25884462 | NC_021163.1    | Ca_Kabuli_Chr04 | 25884462                | GG                              | CC                 | CC               | INTERGENIC                    |                    |                                                                                |
| SNP_23649_A_25884871 | NC_021163.1    | Ca_Kabuli_Chr04 | 25884871                | GG                              | AA                 | AA               | INTERGENIC                    |                    |                                                                                |
| SNP_23650_A_25885290 | NC_021163.1    | Ca_Kabuli_Chr04 | 25885290                | GG                              | CC                 | CC               | INTERGENIC                    |                    |                                                                                |

| SNPs IDs             | Chromosome IDs | Chromosomes     | Physical positions (bp) | CDC Frontier (Reference genome) | (Pusa 1103 & HPNB) | (ILWC 46 & LPNB) | Sequence genome | Components of | Gene accession IDs | Putative functions |
|----------------------|----------------|-----------------|-------------------------|---------------------------------|--------------------|------------------|-----------------|---------------|--------------------|--------------------|
| SNP_23651_A_25885315 | NC_021163.1    | Ca_Kabuli_Chr04 | 25885315                | AA                              | GG                 | GG               | INTERGENIC      |               |                    |                    |
| SNP_23652_A_25886998 | NC_021163.1    | Ca_Kabuli_Chr04 | 25886998                | CC                              | TT                 | TT               | INTERGENIC      |               |                    |                    |
| SNP_23653_A_25887548 | NC_021163.1    | Ca_Kabuli_Chr04 | 25887548                | TT                              | AA                 | AA               | INTERGENIC      |               |                    |                    |
| SNP_23654_A_25887712 | NC_021163.1    | Ca_Kabuli_Chr04 | 25887712                | GG                              | AA                 | AA               | INTERGENIC      |               |                    |                    |
| SNP_23655_A_25889441 | NC_021163.1    | Ca_Kabuli_Chr04 | 25889441                | GG                              | AA                 | AA               | INTERGENIC      |               |                    |                    |
| SNP_23656_A_25889475 | NC_021163.1    | Ca_Kabuli_Chr04 | 25889475                | TT                              | CC                 | CC               | INTERGENIC      |               |                    |                    |
| SNP_23657_A_25890920 | NC_021163.1    | Ca_Kabuli_Chr04 | 25890920                | AA                              | CC                 | CC               | INTERGENIC      |               |                    |                    |
| SNP_23658_A_25890969 | NC_021163.1    | Ca_Kabuli_Chr04 | 25890969                | TT                              | GG                 | GG               | INTERGENIC      |               |                    |                    |
| SNP_23659_A_25892200 | NC_021163.1    | Ca_Kabuli_Chr04 | 25892200                | TT                              | AA                 | AA               | INTERGENIC      |               |                    |                    |
| SNP_23660_A_25892771 | NC_021163.1    | Ca_Kabuli_Chr04 | 25892771                | AA                              | CC                 | CC               | INTERGENIC      |               |                    |                    |
| SNP_23661_A_25897842 | NC_021163.1    | Ca_Kabuli_Chr04 | 25897842                | TT                              | CC                 | CC               | INTERGENIC      |               |                    |                    |
| SNP_23662_A_25902925 | NC_021163.1    | Ca_Kabuli_Chr04 | 25902925                | GG                              | AA                 | AA               | INTERGENIC      |               |                    |                    |
| SNP_23663_A_25903091 | NC_021163.1    | Ca_Kabuli_Chr04 | 25903091                | GG                              | CC                 | CC               | INTERGENIC      |               |                    |                    |
| SNP_23664_A_25903105 | NC_021163.1    | Ca_Kabuli_Chr04 | 25903105                | AA                              | CC                 | CC               | INTERGENIC      |               |                    |                    |
| SNP_23665_A_25909521 | NC_021163.1    | Ca_Kabuli_Chr04 | 25909521                | GG                              | TT                 | TT               | INTERGENIC      |               |                    |                    |
| SNP_23666_A_25910328 | NC_021163.1    | Ca_Kabuli_Chr04 | 25910328                | TT                              | AA                 | AA               | INTERGENIC      |               |                    |                    |
| SNP_23667_A_25910329 | NC_021163.1    | Ca_Kabuli_Chr04 | 25910329                | TT                              | CC                 | CC               | INTERGENIC      |               |                    |                    |
| SNP_23668_A_25910696 | NC_021163.1    | Ca_Kabuli_Chr04 | 25910696                | TT                              | CC                 | CC               | INTERGENIC      |               |                    |                    |
| SNP_23669_A_25911214 | NC_021163.1    | Ca_Kabuli_Chr04 | 25911214                | TT                              | CC                 | CC               | INTERGENIC      |               |                    |                    |
| SNP_23670_A_25911444 | NC_021163.1    | Ca_Kabuli_Chr04 | 25911444                | CC                              | AA                 | AA               | INTERGENIC      |               |                    |                    |
| SNP_23671_A_25912835 | NC_021163.1    | Ca_Kabuli_Chr04 | 25912835                | CC                              | TT                 | TT               | INTERGENIC      |               |                    |                    |
| SNP_23672_A_25912899 | NC_021163.1    | Ca_Kabuli_Chr04 | 25912899                | GG                              | AA                 | AA               | INTERGENIC      |               |                    |                    |

| SNPs IDs             | Chromosome IDs | Chromosomes     | Physical positions (bp) | CDC Frontier (Reference genome) | (Pusa 1103 & HPNB) | (ILWC 46 & LPNB) | Sequence Components of genome | Gene accession IDs | Putative functions                     |
|----------------------|----------------|-----------------|-------------------------|---------------------------------|--------------------|------------------|-------------------------------|--------------------|----------------------------------------|
| SNP_23673_A_25913604 | NC_021163.1    | Ca_Kabuli_Chr04 | 25913604                | CC                              | TT                 | TT               | INTERGENIC                    |                    |                                        |
| SNP_23674_A_25913645 | NC_021163.1    | Ca_Kabuli_Chr04 | 25913645                | TT                              | GG                 | GG               | INTERGENIC                    |                    |                                        |
| SNP_23675_A_25916766 | NC_021163.1    | Ca_Kabuli_Chr04 | 25916766                | TT                              | AA                 | AA               | INTERGENIC                    |                    |                                        |
| SNP_23677_A_25916845 | NC_021163.1    | Ca_Kabuli_Chr04 | 25916845                | GG                              | AA                 | AA               | INTERGENIC                    |                    |                                        |
| SNP_23678_A_25916920 | NC_021163.1    | Ca_Kabuli_Chr04 | 25916920                | AA                              | CC                 | CC               | INTERGENIC                    |                    |                                        |
| SNP_23679_A_25916984 | NC_021163.1    | Ca_Kabuli_Chr04 | 25916984                | CC                              | AA                 | AA               | INTERGENIC                    |                    |                                        |
| SNP_23680_A_25917031 | NC_021163.1    | Ca_Kabuli_Chr04 | 25917031                | CC                              | TT                 | TT               | INTERGENIC                    |                    |                                        |
| SNP_23681_A_25917105 | NC_021163.1    | Ca_Kabuli_Chr04 | 25917105                | CC                              | TT                 | TT               | INTERGENIC                    |                    |                                        |
| SNP_23682_A_25923959 | NC_021163.1    | Ca_Kabuli_Chr04 | 25923959                | GG                              | TT                 | TT               | URR                           | 101514461          | 3-ketoacyl-CoA thiolase 2, peroxisomal |
| SNP_23683_A_25923977 | NC_021163.1    | Ca_Kabuli_Chr04 | 25923977                | GG                              | AA                 | AA               | URR                           | 101514461          | 3-ketoacyl-CoA thiolase 2, peroxisomal |
| SNP_23685_A_25926006 | NC_021163.1    | Ca_Kabuli_Chr04 | 25926006                | AA                              | GG                 | GG               | INTERGENIC                    |                    |                                        |
| SNP_23686_A_25926799 | NC_021163.1    | Ca_Kabuli_Chr04 | 25926799                | GG                              | AA                 | AA               | INTERGENIC                    |                    |                                        |
| SNP_23687_A_25934778 | NC_021163.1    | Ca_Kabuli_Chr04 | 25934778                | AA                              | GG                 | GG               | INTERGENIC                    |                    |                                        |
| SNP_23688_A_25934940 | NC_021163.1    | Ca_Kabuli_Chr04 | 25934940                | GG                              | TT                 | TT               | INTERGENIC                    |                    |                                        |
| SNP_23689_A_25937309 | NC_021163.1    | Ca_Kabuli_Chr04 | 25937309                | GG                              | AA                 | AA               | INTERGENIC                    |                    |                                        |
| SNP_23691_A_25937554 | NC_021163.1    | Ca_Kabuli_Chr04 | 25937554                | GG                              | AA                 | AA               | INTERGENIC                    |                    |                                        |
| SNP_23692_A_25939551 | NC_021163.1    | Ca_Kabuli_Chr04 | 25939551                | TT                              | CC                 | CC               | INTERGENIC                    |                    |                                        |
| SNP_23693_A_25940156 | NC_021163.1    | Ca_Kabuli_Chr04 | 25940156                | AA                              | GG                 | GG               | INTERGENIC                    |                    |                                        |
| SNP_23694_A_25940187 | NC_021163.1    | Ca_Kabuli_Chr04 | 25940187                | GG                              | TT                 | TT               | INTERGENIC                    |                    |                                        |
| SNP_23696_A_25940234 | NC_021163.1    | Ca_Kabuli_Chr04 | 25940234                | AA                              | GG                 | GG               | INTERGENIC                    |                    |                                        |
| SNP_23697_A_25940402 | NC_021163.1    | Ca_Kabuli_Chr04 | 25940402                | TT                              | CC                 | CC               | INTERGENIC                    |                    |                                        |
| SNP_23698_A_25942364 | NC_021163.1    | Ca_Kabuli_Chr04 | 25942364                | TT                              | AA                 | AA               | INTERGENIC                    |                    |                                        |

| SNPs IDs             | Chromosome IDs | Chromosomes     | Physical positions (bp) | CDC Frontier genome (Reference genome) | (Pusa 1103 & HPNB) | (ILWC 46 & LPNB) | Sequence Components of genome | Gene accession IDs | Putative functions                              |
|----------------------|----------------|-----------------|-------------------------|----------------------------------------|--------------------|------------------|-------------------------------|--------------------|-------------------------------------------------|
| SNP_23700_A_25943464 | NC_021163.1    | Ca_Kabuli_Chr04 | 25943464                | GG                                     | CC                 | CC               | INTERGENIC                    |                    |                                                 |
| SNP_23701_A_25945430 | NC_021163.1    | Ca_Kabuli_Chr04 | 25945430                | GG                                     | AA                 | AA               | INTERGENIC                    |                    |                                                 |
| SNP_23702_A_25948671 | NC_021163.1    | Ca_Kabuli_Chr04 | 25948671                | TT                                     | GG                 | GG               | INTERGENIC                    |                    |                                                 |
| SNP_23703_A_25948746 | NC_021163.1    | Ca_Kabuli_Chr04 | 25948746                | GG                                     | AA                 | AA               | INTERGENIC                    |                    |                                                 |
| SNP_23704_A_25949189 | NC_021163.1    | Ca_Kabuli_Chr04 | 25949189                | GG                                     | TT                 | TT               | DRR                           | 101514785          | uncharacterized LOC101514785                    |
| SNP_23705_A_25949209 | NC_021163.1    | Ca_Kabuli_Chr04 | 25949209                | CC                                     | TT                 | TT               | DRR                           | 101514785          | uncharacterized LOC101514785                    |
| SNP_23706_A_25949616 | NC_021163.1    | Ca_Kabuli_Chr04 | 25949616                | GG                                     | AA                 | AA               | DRR                           | 101514785          | uncharacterized LOC101514785                    |
| SNP_23707_A_25949802 | NC_021163.1    | Ca_Kabuli_Chr04 | 25949802                | CC                                     | TT                 | TT               | DRR                           | 101514785          | uncharacterized LOC101514785                    |
| SNP_23708_A_25949838 | NC_021163.1    | Ca_Kabuli_Chr04 | 25949838                | TT                                     | AA                 | AA               | DRR                           | 101514785          | uncharacterized LOC101514785                    |
| SNP_23709_A_25950191 | NC_021163.1    | Ca_Kabuli_Chr04 | 25950191                | CC                                     | AA                 | AA               | SYNONYMOUS_CODING             | id85088            | Unknown function                                |
| SNP_23710_A_25950624 | NC_021163.1    | Ca_Kabuli_Chr04 | 25950624                | CC                                     | TT                 | TT               | INTRON                        | id85088            | Unknown function                                |
| SNP_23711_A_25954225 | NC_021163.1    | Ca_Kabuli_Chr04 | 25954225                | GG                                     | AA                 | AA               | INTERGENIC                    |                    |                                                 |
| SNP_23714_A_25956691 | NC_021163.1    | Ca_Kabuli_Chr04 | 25956691                | GG                                     | TT                 | TT               | URR                           | 101514785          | uncharacterized LOC101514785                    |
| SNP_23715_A_25957471 | NC_021163.1    | Ca_Kabuli_Chr04 | 25957471                | AA                                     | TT                 | TT               | URR                           | 101496535          | Unknown function                                |
| SNP_23716_A_25957595 | NC_021163.1    | Ca_Kabuli_Chr04 | 25957595                | TT                                     | AA                 | AA               | URR                           | 101496535          | Unknown function                                |
| SNP_23717_A_25957853 | NC_021163.1    | Ca_Kabuli_Chr04 | 25957853                | CC                                     | AA                 | AA               | URR                           | 101496535          | Unknown function                                |
| SNP_23718_A_25957943 | NC_021163.1    | Ca_Kabuli_Chr04 | 25957943                | GG                                     | AA                 | AA               | URR                           | 101496535          | Unknown function                                |
| SNP_23719_A_25962491 | NC_021163.1    | Ca_Kabuli_Chr04 | 25962491                | AA                                     | TT                 | TT               | URR                           | 101497196          | putative B3 domain-containing protein At1g78640 |
| SNP_23720_A_25962559 | NC_021163.1    | Ca_Kabuli_Chr04 | 25962559                | CC                                     | GG                 | GG               | URR                           | 101497196          | putative B3 domain-containing protein At1g78640 |
| SNP_23721_A_25962651 | NC_021163.1    | Ca_Kabuli_Chr04 | 25962651                | CC                                     | TT                 | TT               | URR                           | 101497196          | putative B3 domain-containing protein At1g78640 |
| SNP_23722_A_25962759 | NC_021163.1    | Ca_Kabuli_Chr04 | 25962759                | TT                                     | GG                 | GG               | URR                           | 101497196          | putative B3 domain-containing protein At1g78640 |
| SNP_23723_A_25962799 | NC_021163.1    | Ca_Kabuli_Chr04 | 25962799                | TT                                     | AA                 | AA               | URR                           | 101497196          | putative B3 domain-containing protein At1g78640 |

| SNPs IDs             | Chromosome IDs | Chromosomes     | Physical positions (bp) | CDC Frontier genome (Reference genome) | (Pusa 1103 & HPNB) | (ILWC 46 & LPNB) | Sequence Components of genome | Gene accession IDs | Putative functions                              |
|----------------------|----------------|-----------------|-------------------------|----------------------------------------|--------------------|------------------|-------------------------------|--------------------|-------------------------------------------------|
| SNP_23726_A_25963017 | NC_021163.1    | Ca_Kabuli_Chr04 | 25963017                | AA                                     | TT                 | TT               | URR                           | 101497196          | putative B3 domain-containing protein At1g78640 |
| SNP_23728_A_25963259 | NC_021163.1    | Ca_Kabuli_Chr04 | 25963259                | GG                                     | AA                 | AA               | URR                           | 101497196          | putative B3 domain-containing protein At1g78640 |
| SNP_23730_A_25963301 | NC_021163.1    | Ca_Kabuli_Chr04 | 25963301                | TT                                     | CC                 | CC               | URR                           | 101497196          | putative B3 domain-containing protein At1g78640 |
| SNP_23732_A_25963410 | NC_021163.1    | Ca_Kabuli_Chr04 | 25963410                | CC                                     | TT                 | TT               | URR                           | 101497196          | putative B3 domain-containing protein At1g78640 |
| SNP_23734_A_25963486 | NC_021163.1    | Ca_Kabuli_Chr04 | 25963486                | AA                                     | CC                 | CC               | URR                           | 101497196          | putative B3 domain-containing protein At1g78640 |
| SNP_23735_A_25963487 | NC_021163.1    | Ca_Kabuli_Chr04 | 25963487                | GG                                     | AA                 | AA               | URR                           | 101497196          | putative B3 domain-containing protein At1g78640 |
| SNP_23736_A_25963505 | NC_021163.1    | Ca_Kabuli_Chr04 | 25963505                | AA                                     | CC                 | CC               | URR                           | 101497196          | putative B3 domain-containing protein At1g78640 |
| SNP_23737_A_25963509 | NC_021163.1    | Ca_Kabuli_Chr04 | 25963509                | GG                                     | TT                 | TT               | URR                           | 101497196          | putative B3 domain-containing protein At1g78640 |
| SNP_23738_A_25963540 | NC_021163.1    | Ca_Kabuli_Chr04 | 25963540                | TT                                     | CC                 | CC               | URR                           | 101497196          | putative B3 domain-containing protein At1g78640 |
| SNP_23739_A_25963542 | NC_021163.1    | Ca_Kabuli_Chr04 | 25963542                | GG                                     | AA                 | AA               | URR                           | 101497196          | putative B3 domain-containing protein At1g78640 |
| SNP_23740_A_25963574 | NC_021163.1    | Ca_Kabuli_Chr04 | 25963574                | CC                                     | TT                 | TT               | URR                           | 101497196          | putative B3 domain-containing protein At1g78640 |
| SNP_23741_A_25963588 | NC_021163.1    | Ca_Kabuli_Chr04 | 25963588                | CC                                     | TT                 | TT               | URR                           | 101497196          | putative B3 domain-containing protein At1g78640 |
| SNP_23742_A_25964269 | NC_021163.1    | Ca_Kabuli_Chr04 | 25964269                | CC                                     | AA                 | AA               | INTERGENIC                    |                    |                                                 |
| SNP_23743_A_25964286 | NC_021163.1    | Ca_Kabuli_Chr04 | 25964286                | TT                                     | CC                 | CC               | INTERGENIC                    |                    |                                                 |
| SNP_23744_A_25964296 | NC_021163.1    | Ca_Kabuli_Chr04 | 25964296                | CC                                     | TT                 | TT               | INTERGENIC                    |                    |                                                 |
| SNP_23745_A_25964368 | NC_021163.1    | Ca_Kabuli_Chr04 | 25964368                | GG                                     | AA                 | AA               | INTERGENIC                    |                    |                                                 |
| SNP_23746_A_25964478 | NC_021163.1    | Ca_Kabuli_Chr04 | 25964478                | AA                                     | GG                 | GG               | INTERGENIC                    |                    |                                                 |
| SNP_23747_A_25964543 | NC_021163.1    | Ca_Kabuli_Chr04 | 25964543                | AA                                     | GG                 | GG               | INTERGENIC                    |                    |                                                 |
| SNP_23748_A_25964692 | NC_021163.1    | Ca_Kabuli_Chr04 | 25964692                | AA                                     | CC                 | CC               | INTERGENIC                    |                    |                                                 |
| SNP_23749_A_25964701 | NC_021163.1    | Ca_Kabuli_Chr04 | 25964701                | CC                                     | TT                 | TT               | INTERGENIC                    |                    |                                                 |
| SNP_23750_A_25964738 | NC_021163.1    | Ca_Kabuli_Chr04 | 25964738                | AA                                     | GG                 | GG               | INTERGENIC                    |                    |                                                 |
| SNP_23751_A_25964847 | NC_021163.1    | Ca_Kabuli_Chr04 | 25964847                | GG                                     | TT                 | TT               | INTERGENIC                    |                    |                                                 |

| SNPs IDs             | Chromosome IDs | Chromosomes     | Physical positions (bp) | CDC Frontier genome (Reference genome) | (Pusa 1103 & HPNB) | (ILWC 46 & LPNB) | Sequence genome | Components of | Gene accession IDs | Putative functions |
|----------------------|----------------|-----------------|-------------------------|----------------------------------------|--------------------|------------------|-----------------|---------------|--------------------|--------------------|
| SNP_23752_A_25964855 | NC_021163.1    | Ca_Kabuli_Chr04 | 25964855                | AA                                     | CC                 | CC               | INTERGENIC      |               |                    |                    |
| SNP_23753_A_25965130 | NC_021163.1    | Ca_Kabuli_Chr04 | 25965130                | AA                                     | GG                 | GG               | INTERGENIC      |               |                    |                    |
| SNP_23754_A_25965188 | NC_021163.1    | Ca_Kabuli_Chr04 | 25965188                | TT                                     | GG                 | GG               | INTERGENIC      |               |                    |                    |
| SNP_23755_A_25965211 | NC_021163.1    | Ca_Kabuli_Chr04 | 25965211                | CC                                     | TT                 | TT               | INTERGENIC      |               |                    |                    |
| SNP_23756_A_25965337 | NC_021163.1    | Ca_Kabuli_Chr04 | 25965337                | AA                                     | CC                 | CC               | INTERGENIC      |               |                    |                    |
| SNP_23758_A_25965466 | NC_021163.1    | Ca_Kabuli_Chr04 | 25965466                | CC                                     | AA                 | AA               | INTERGENIC      |               |                    |                    |
| SNP_23759_A_25965544 | NC_021163.1    | Ca_Kabuli_Chr04 | 25965544                | GG                                     | CC                 | CC               | INTERGENIC      |               |                    |                    |
| SNP_23760_A_25965801 | NC_021163.1    | Ca_Kabuli_Chr04 | 25965801                | GG                                     | TT                 | TT               | INTERGENIC      |               |                    |                    |
| SNP_23761_A_25965820 | NC_021163.1    | Ca_Kabuli_Chr04 | 25965820                | GG                                     | AA                 | AA               | INTERGENIC      |               |                    |                    |
| SNP_23762_A_25965854 | NC_021163.1    | Ca_Kabuli_Chr04 | 25965854                | AA                                     | CC                 | CC               | INTERGENIC      |               |                    |                    |
| SNP_23763_A_25965883 | NC_021163.1    | Ca_Kabuli_Chr04 | 25965883                | GG                                     | AA                 | AA               | INTERGENIC      |               |                    |                    |
| SNP_23764_A_25966064 | NC_021163.1    | Ca_Kabuli_Chr04 | 25966064                | CC                                     | GG                 | GG               | INTERGENIC      |               |                    |                    |
| SNP_23766_A_25966076 | NC_021163.1    | Ca_Kabuli_Chr04 | 25966076                | GG                                     | AA                 | AA               | INTERGENIC      |               |                    |                    |
| SNP_23767_A_25966085 | NC_021163.1    | Ca_Kabuli_Chr04 | 25966085                | TT                                     | AA                 | AA               | INTERGENIC      |               |                    |                    |
| SNP_23768_A_25966093 | NC_021163.1    | Ca_Kabuli_Chr04 | 25966093                | TT                                     | GG                 | GG               | INTERGENIC      |               |                    |                    |
| SNP_23769_A_25966111 | NC_021163.1    | Ca_Kabuli_Chr04 | 25966111                | TT                                     | GG                 | GG               | INTERGENIC      |               |                    |                    |
| SNP_23770_A_25966283 | NC_021163.1    | Ca_Kabuli_Chr04 | 25966283                | TT                                     | GG                 | GG               | INTERGENIC      |               |                    |                    |
| SNP_23771_A_25966307 | NC_021163.1    | Ca_Kabuli_Chr04 | 25966307                | GG                                     | AA                 | AA               | INTERGENIC      |               |                    |                    |
| SNP_23772_A_25966309 | NC_021163.1    | Ca_Kabuli_Chr04 | 25966309                | AA                                     | GG                 | GG               | INTERGENIC      |               |                    |                    |
| SNP_23773_A_25966318 | NC_021163.1    | Ca_Kabuli_Chr04 | 25966318                | CC                                     | TT                 | TT               | INTERGENIC      |               |                    |                    |
| SNP_23774_A_25966360 | NC_021163.1    | Ca_Kabuli_Chr04 | 25966360                | CC                                     | TT                 | TT               | INTERGENIC      |               |                    |                    |
| SNP_23775_A_25966366 | NC_021163.1    | Ca_Kabuli_Chr04 | 25966366                | CC                                     | TT                 | TT               | INTERGENIC      |               |                    |                    |

| SNPs IDs             | Chromosome IDs | Chromosomes     | Physical positions (bp) | CDC Frontier genome (Reference genome) | (Pusa 1103 & HPNB) | (ILWC 46 & LPNB) | Sequence genome | Components of | Gene accession IDs | Putative functions |
|----------------------|----------------|-----------------|-------------------------|----------------------------------------|--------------------|------------------|-----------------|---------------|--------------------|--------------------|
| SNP_23776_A_25966379 | NC_021163.1    | Ca_Kabuli_Chr04 | 25966379                | GG                                     | AA                 | AA               | INTERGENIC      |               |                    |                    |
| SNP_23777_A_25966399 | NC_021163.1    | Ca_Kabuli_Chr04 | 25966399                | CC                                     | AA                 | AA               | INTERGENIC      |               |                    |                    |
| SNP_23778_A_25966407 | NC_021163.1    | Ca_Kabuli_Chr04 | 25966407                | AA                                     | GG                 | GG               | INTERGENIC      |               |                    |                    |
| SNP_23779_A_25966420 | NC_021163.1    | Ca_Kabuli_Chr04 | 25966420                | GG                                     | AA                 | AA               | INTERGENIC      |               |                    |                    |
| SNP_23780_A_25966445 | NC_021163.1    | Ca_Kabuli_Chr04 | 25966445                | TT                                     | AA                 | AA               | INTERGENIC      |               |                    |                    |
| SNP_23781_A_25966458 | NC_021163.1    | Ca_Kabuli_Chr04 | 25966458                | TT                                     | AA                 | AA               | INTERGENIC      |               |                    |                    |
| SNP_23782_A_25966544 | NC_021163.1    | Ca_Kabuli_Chr04 | 25966544                | CC                                     | GG                 | GG               | INTERGENIC      |               |                    |                    |
| SNP_23783_A_25966548 | NC_021163.1    | Ca_Kabuli_Chr04 | 25966548                | AA                                     | GG                 | GG               | INTERGENIC      |               |                    |                    |
| SNP_23784_A_25966590 | NC_021163.1    | Ca_Kabuli_Chr04 | 25966590                | CC                                     | TT                 | TT               | INTERGENIC      |               |                    |                    |
| SNP_23785_A_25966709 | NC_021163.1    | Ca_Kabuli_Chr04 | 25966709                | AA                                     | GG                 | GG               | INTERGENIC      |               |                    |                    |
| SNP_23786_A_25966726 | NC_021163.1    | Ca_Kabuli_Chr04 | 25966726                | AA                                     | GG                 | GG               | INTERGENIC      |               |                    |                    |
| SNP_23787_A_25966738 | NC_021163.1    | Ca_Kabuli_Chr04 | 25966738                | TT                                     | GG                 | GG               | INTERGENIC      |               |                    |                    |
| SNP_23788_A_25966741 | NC_021163.1    | Ca_Kabuli_Chr04 | 25966741                | CC                                     | AA                 | AA               | INTERGENIC      |               |                    |                    |
| SNP_23789_A_25966756 | NC_021163.1    | Ca_Kabuli_Chr04 | 25966756                | AA                                     | TT                 | TT               | INTERGENIC      |               |                    |                    |
| SNP_23790_A_25966782 | NC_021163.1    | Ca_Kabuli_Chr04 | 25966782                | CC                                     | AA                 | AA               | INTERGENIC      |               |                    |                    |
| SNP_23791_A_25966860 | NC_021163.1    | Ca_Kabuli_Chr04 | 25966860                | AA                                     | TT                 | TT               | INTERGENIC      |               |                    |                    |
| SNP_23792_A_25966887 | NC_021163.1    | Ca_Kabuli_Chr04 | 25966887                | AA                                     | TT                 | TT               | INTERGENIC      |               |                    |                    |
| SNP_23793_A_25966909 | NC_021163.1    | Ca_Kabuli_Chr04 | 25966909                | AA                                     | GG                 | GG               | INTERGENIC      |               |                    |                    |
| SNP_23794_A_25966927 | NC_021163.1    | Ca_Kabuli_Chr04 | 25966927                | AA                                     | GG                 | GG               | INTERGENIC      |               |                    |                    |
| SNP_23795_A_25966935 | NC_021163.1    | Ca_Kabuli_Chr04 | 25966935                | CC                                     | TT                 | TT               | INTERGENIC      |               |                    |                    |
| SNP_23796_A_25966953 | NC_021163.1    | Ca_Kabuli_Chr04 | 25966953                | GG                                     | TT                 | TT               | INTERGENIC      |               |                    |                    |
| SNP_23797_A_25966999 | NC_021163.1    | Ca_Kabuli_Chr04 | 25966999                | CC                                     | AA                 | AA               | INTERGENIC      |               |                    |                    |

| SNPs IDs             | Chromosome IDs | Chromosomes     | Physical positions (bp) | CDC Frontier genome (Reference genome) | (Pusa 1103 & HPNB) | (ILWC 46 & LPNB) | Sequence genome | Components of | Gene accession IDs | Putative functions |
|----------------------|----------------|-----------------|-------------------------|----------------------------------------|--------------------|------------------|-----------------|---------------|--------------------|--------------------|
| SNP_23798_A_25967073 | NC_021163.1    | Ca_Kabuli_Chr04 | 25967073                | GG                                     | TT                 | TT               | INTERGENIC      |               |                    |                    |
| SNP_23799_A_25967125 | NC_021163.1    | Ca_Kabuli_Chr04 | 25967125                | GG                                     | AA                 | AA               | INTERGENIC      |               |                    |                    |
| SNP_23800_A_25967142 | NC_021163.1    | Ca_Kabuli_Chr04 | 25967142                | AA                                     | CC                 | CC               | INTERGENIC      |               |                    |                    |
| SNP_23802_A_25967344 | NC_021163.1    | Ca_Kabuli_Chr04 | 25967344                | GG                                     | AA                 | AA               | INTERGENIC      |               |                    |                    |
| SNP_23803_A_25967711 | NC_021163.1    | Ca_Kabuli_Chr04 | 25967711                | TT                                     | GG                 | GG               | INTERGENIC      |               |                    |                    |
| SNP_23804_A_25967788 | NC_021163.1    | Ca_Kabuli_Chr04 | 25967788                | AA                                     | GG                 | GG               | INTERGENIC      |               |                    |                    |
| SNP_23805_A_25967795 | NC_021163.1    | Ca_Kabuli_Chr04 | 25967795                | AA                                     | CC                 | CC               | INTERGENIC      |               |                    |                    |
| SNP_23806_A_25967968 | NC_021163.1    | Ca_Kabuli_Chr04 | 25967968                | CC                                     | TT                 | TT               | INTERGENIC      |               |                    |                    |
| SNP_23808_A_25968001 | NC_021163.1    | Ca_Kabuli_Chr04 | 25968001                | CC                                     | GG                 | GG               | INTERGENIC      |               |                    |                    |
| SNP_23809_A_25968019 | NC_021163.1    | Ca_Kabuli_Chr04 | 25968019                | CC                                     | AA                 | AA               | INTERGENIC      |               |                    |                    |
| SNP_23810_A_25968020 | NC_021163.1    | Ca_Kabuli_Chr04 | 25968020                | AA                                     | TT                 | TT               | INTERGENIC      |               |                    |                    |
| SNP_23811_A_25968028 | NC_021163.1    | Ca_Kabuli_Chr04 | 25968028                | CC                                     | TT                 | TT               | INTERGENIC      |               |                    |                    |
| SNP_23812_A_25968065 | NC_021163.1    | Ca_Kabuli_Chr04 | 25968065                | TT                                     | GG                 | GG               | INTERGENIC      |               |                    |                    |
| SNP_23813_A_25968240 | NC_021163.1    | Ca_Kabuli_Chr04 | 25968240                | TT                                     | CC                 | CC               | INTERGENIC      |               |                    |                    |
| SNP_23814_A_25968297 | NC_021163.1    | Ca_Kabuli_Chr04 | 25968297                | TT                                     | AA                 | AA               | INTERGENIC      |               |                    |                    |
| SNP_23815_A_25968319 | NC_021163.1    | Ca_Kabuli_Chr04 | 25968319                | CC                                     | AA                 | AA               | INTERGENIC      |               |                    |                    |
| SNP_23816_A_25968364 | NC_021163.1    | Ca_Kabuli_Chr04 | 25968364                | AA                                     | CC                 | CC               | INTERGENIC      |               |                    |                    |
| SNP_23817_A_25968422 | NC_021163.1    | Ca_Kabuli_Chr04 | 25968422                | CC                                     | AA                 | AA               | INTERGENIC      |               |                    |                    |
| SNP_23818_A_25968462 | NC_021163.1    | Ca_Kabuli_Chr04 | 25968462                | TT                                     | CC                 | CC               | INTERGENIC      |               |                    |                    |
| SNP_23819_A_25968501 | NC_021163.1    | Ca_Kabuli_Chr04 | 25968501                | TT                                     | GG                 | GG               | INTERGENIC      |               |                    |                    |
| SNP_23820_A_25968743 | NC_021163.1    | Ca_Kabuli_Chr04 | 25968743                | TT                                     | AA                 | AA               | INTERGENIC      |               |                    |                    |
| SNP_23821_A_25968765 | NC_021163.1    | Ca_Kabuli_Chr04 | 25968765                | TT                                     | CC                 | CC               | INTERGENIC      |               |                    |                    |



| SNPs IDs             | Chromosome IDs | Chromosomes     | Physical positions (bp) | CDC Frontier genome (Reference genome) | (Pusa 1103 & HPNB) | (ILWC 46 & LPNB) | Sequence genome | Components of | Gene accession IDs | Putative functions |
|----------------------|----------------|-----------------|-------------------------|----------------------------------------|--------------------|------------------|-----------------|---------------|--------------------|--------------------|
| SNP_23823_A_25968852 | NC_021163.1    | Ca_Kabuli_Chr04 | 25968852                | TT                                     | CC                 | CC               | INTERGENIC      |               |                    |                    |
| SNP_23824_A_25968923 | NC_021163.1    | Ca_Kabuli_Chr04 | 25968923                | TT                                     | CC                 | CC               | INTERGENIC      |               |                    |                    |
| SNP_23825_A_25968976 | NC_021163.1    | Ca_Kabuli_Chr04 | 25968976                | CC                                     | TT                 | TT               | INTERGENIC      |               |                    |                    |
| SNP_23826_A_25969138 | NC_021163.1    | Ca_Kabuli_Chr04 | 25969138                | TT                                     | CC                 | CC               | INTERGENIC      |               |                    |                    |
| SNP_23827_A_25969257 | NC_021163.1    | Ca_Kabuli_Chr04 | 25969257                | AA                                     | GG                 | GG               | INTERGENIC      |               |                    |                    |
| SNP_23828_A_25969297 | NC_021163.1    | Ca_Kabuli_Chr04 | 25969297                | GG                                     | AA                 | AA               | INTERGENIC      |               |                    |                    |
| SNP_23829_A_25969321 | NC_021163.1    | Ca_Kabuli_Chr04 | 25969321                | AA                                     | GG                 | GG               | INTERGENIC      |               |                    |                    |
| SNP_23830_A_25969489 | NC_021163.1    | Ca_Kabuli_Chr04 | 25969489                | CC                                     | AA                 | AA               | INTERGENIC      |               |                    |                    |
| SNP_23832_A_25969551 | NC_021163.1    | Ca_Kabuli_Chr04 | 25969551                | GG                                     | AA                 | AA               | INTERGENIC      |               |                    |                    |
| SNP_23833_A_25969578 | NC_021163.1    | Ca_Kabuli_Chr04 | 25969578                | CC                                     | TT                 | TT               | INTERGENIC      |               |                    |                    |
| SNP_23834_A_25969613 | NC_021163.1    | Ca_Kabuli_Chr04 | 25969613                | CC                                     | TT                 | TT               | INTERGENIC      |               |                    |                    |
| SNP_23835_A_25969625 | NC_021163.1    | Ca_Kabuli_Chr04 | 25969625                | CC                                     | TT                 | TT               | INTERGENIC      |               |                    |                    |
| SNP_23836_A_25969630 | NC_021163.1    | Ca_Kabuli_Chr04 | 25969630                | GG                                     | AA                 | AA               | INTERGENIC      |               |                    |                    |
| SNP_23837_A_25969715 | NC_021163.1    | Ca_Kabuli_Chr04 | 25969715                | GG                                     | AA                 | AA               | INTERGENIC      |               |                    |                    |
| SNP_23838_A_25969738 | NC_021163.1    | Ca_Kabuli_Chr04 | 25969738                | AA                                     | GG                 | GG               | INTERGENIC      |               |                    |                    |
| SNP_23839_A_25969792 | NC_021163.1    | Ca_Kabuli_Chr04 | 25969792                | AA                                     | GG                 | GG               | INTERGENIC      |               |                    |                    |
| SNP_23840_A_25969813 | NC_021163.1    | Ca_Kabuli_Chr04 | 25969813                | AA                                     | GG                 | GG               | INTERGENIC      |               |                    |                    |
| SNP_23841_A_25969849 | NC_021163.1    | Ca_Kabuli_Chr04 | 25969849                | TT                                     | CC                 | CC               | INTERGENIC      |               |                    |                    |
| SNP_23842_A_25969872 | NC_021163.1    | Ca_Kabuli_Chr04 | 25969872                | AA                                     | GG                 | GG               | INTERGENIC      |               |                    |                    |
| SNP_23843_A_25969892 | NC_021163.1    | Ca_Kabuli_Chr04 | 25969892                | AA                                     | GG                 | GG               | INTERGENIC      |               |                    |                    |
| SNP_23844_A_25970135 | NC_021163.1    | Ca_Kabuli_Chr04 | 25970135                | AA                                     | GG                 | GG               | INTERGENIC      |               |                    |                    |
| SNP_23846_A_25970181 | NC_021163.1    | Ca_Kabuli_Chr04 | 25970181                | CC                                     | TT                 | TT               | INTERGENIC      |               |                    |                    |

| SNPs IDs             | Chromosome IDs | Chromosomes     | Physical positions (bp) | CDC Frontier genome (Reference genome) | (Pusa 1103 & HPNB) | (ILWC 46 & LPNB) | Sequence genome | Components of | Gene accession IDs | Putative functions |
|----------------------|----------------|-----------------|-------------------------|----------------------------------------|--------------------|------------------|-----------------|---------------|--------------------|--------------------|
| SNP_23847_A_25970244 | NC_021163.1    | Ca_Kabuli_Chr04 | 25970244                | AA                                     | TT                 | TT               | INTERGENIC      |               |                    |                    |
| SNP_23848_A_25970296 | NC_021163.1    | Ca_Kabuli_Chr04 | 25970296                | CC                                     | TT                 | TT               | INTERGENIC      |               |                    |                    |
| SNP_23849_A_25970386 | NC_021163.1    | Ca_Kabuli_Chr04 | 25970386                | GG                                     | AA                 | AA               | INTERGENIC      |               |                    |                    |
| SNP_23850_A_25970396 | NC_021163.1    | Ca_Kabuli_Chr04 | 25970396                | CC                                     | TT                 | TT               | INTERGENIC      |               |                    |                    |
| SNP_23851_A_25970399 | NC_021163.1    | Ca_Kabuli_Chr04 | 25970399                | GG                                     | AA                 | AA               | INTERGENIC      |               |                    |                    |
| SNP_23852_A_25970426 | NC_021163.1    | Ca_Kabuli_Chr04 | 25970426                | CC                                     | AA                 | AA               | INTERGENIC      |               |                    |                    |
| SNP_23853_A_25970467 | NC_021163.1    | Ca_Kabuli_Chr04 | 25970467                | AA                                     | CC                 | CC               | INTERGENIC      |               |                    |                    |
| SNP_23854_A_25970527 | NC_021163.1    | Ca_Kabuli_Chr04 | 25970527                | CC                                     | AA                 | AA               | INTERGENIC      |               |                    |                    |
| SNP_23855_A_25970562 | NC_021163.1    | Ca_Kabuli_Chr04 | 25970562                | TT                                     | GG                 | GG               | INTERGENIC      |               |                    |                    |
| SNP_23856_A_25970563 | NC_021163.1    | Ca_Kabuli_Chr04 | 25970563                | CC                                     | AA                 | AA               | INTERGENIC      |               |                    |                    |
| SNP_23857_A_25970583 | NC_021163.1    | Ca_Kabuli_Chr04 | 25970583                | TT                                     | AA                 | AA               | INTERGENIC      |               |                    |                    |
| SNP_23858_A_25970599 | NC_021163.1    | Ca_Kabuli_Chr04 | 25970599                | GG                                     | TT                 | TT               | INTERGENIC      |               |                    |                    |
| SNP_23859_A_25970609 | NC_021163.1    | Ca_Kabuli_Chr04 | 25970609                | AA                                     | CC                 | CC               | INTERGENIC      |               |                    |                    |
| SNP_23860_A_25970671 | NC_021163.1    | Ca_Kabuli_Chr04 | 25970671                | GG                                     | AA                 | AA               | INTERGENIC      |               |                    |                    |
| SNP_23861_A_25970730 | NC_021163.1    | Ca_Kabuli_Chr04 | 25970730                | TT                                     | GG                 | GG               | INTERGENIC      |               |                    |                    |
| SNP_23862_A_25970749 | NC_021163.1    | Ca_Kabuli_Chr04 | 25970749                | GG                                     | AA                 | AA               | INTERGENIC      |               |                    |                    |
| SNP_23863_A_25970762 | NC_021163.1    | Ca_Kabuli_Chr04 | 25970762                | GG                                     | AA                 | AA               | INTERGENIC      |               |                    |                    |
| SNP_23864_A_25970766 | NC_021163.1    | Ca_Kabuli_Chr04 | 25970766                | AA                                     | GG                 | GG               | INTERGENIC      |               |                    |                    |
| SNP_23865_A_25970795 | NC_021163.1    | Ca_Kabuli_Chr04 | 25970795                | CC                                     | AA                 | AA               | INTERGENIC      |               |                    |                    |
| SNP_23866_A_25970855 | NC_021163.1    | Ca_Kabuli_Chr04 | 25970855                | GG                                     | AA                 | AA               | INTERGENIC      |               |                    |                    |
| SNP_23867_A_25970866 | NC_021163.1    | Ca_Kabuli_Chr04 | 25970866                | AA                                     | CC                 | CC               | INTERGENIC      |               |                    |                    |
| SNP_23868_A_25970867 | NC_021163.1    | Ca_Kabuli_Chr04 | 25970867                | CC                                     | TT                 | TT               | INTERGENIC      |               |                    |                    |

| SNPs IDs             | Chromosome IDs | Chromosomes     | Physical positions (bp) | CDC Frontier genome (Reference genome) | (Pusa 1103 & HPNB) | (ILWC 46 & LPNB) | Sequence genome | Components of | Gene accession IDs | Putative functions |
|----------------------|----------------|-----------------|-------------------------|----------------------------------------|--------------------|------------------|-----------------|---------------|--------------------|--------------------|
| SNP_23869_A_25970880 | NC_021163.1    | Ca_Kabuli_Chr04 | 25970880                | GG                                     | AA                 | AA               | INTERGENIC      |               |                    |                    |
| SNP_23870_A_25970912 | NC_021163.1    | Ca_Kabuli_Chr04 | 25970912                | TT                                     | GG                 | GG               | INTERGENIC      |               |                    |                    |
| SNP_23871_A_25971024 | NC_021163.1    | Ca_Kabuli_Chr04 | 25971024                | GG                                     | TT                 | TT               | INTERGENIC      |               |                    |                    |
| SNP_23872_A_25971030 | NC_021163.1    | Ca_Kabuli_Chr04 | 25971030                | CC                                     | TT                 | TT               | INTERGENIC      |               |                    |                    |
| SNP_23873_A_25971077 | NC_021163.1    | Ca_Kabuli_Chr04 | 25971077                | TT                                     | CC                 | CC               | INTERGENIC      |               |                    |                    |
| SNP_23874_A_25971140 | NC_021163.1    | Ca_Kabuli_Chr04 | 25971140                | TT                                     | CC                 | CC               | INTERGENIC      |               |                    |                    |
| SNP_23875_A_25971158 | NC_021163.1    | Ca_Kabuli_Chr04 | 25971158                | GG                                     | AA                 | AA               | INTERGENIC      |               |                    |                    |
| SNP_23876_A_25971221 | NC_021163.1    | Ca_Kabuli_Chr04 | 25971221                | TT                                     | CC                 | CC               | INTERGENIC      |               |                    |                    |
| SNP_23877_A_25971402 | NC_021163.1    | Ca_Kabuli_Chr04 | 25971402                | TT                                     | GG                 | GG               | INTERGENIC      |               |                    |                    |
| SNP_23878_A_25971626 | NC_021163.1    | Ca_Kabuli_Chr04 | 25971626                | CC                                     | TT                 | TT               | INTERGENIC      |               |                    |                    |
| SNP_23879_A_25971651 | NC_021163.1    | Ca_Kabuli_Chr04 | 25971651                | TT                                     | CC                 | CC               | INTERGENIC      |               |                    |                    |
| SNP_23881_A_25971711 | NC_021163.1    | Ca_Kabuli_Chr04 | 25971711                | TT                                     | GG                 | GG               | INTERGENIC      |               |                    |                    |
| SNP_23883_A_25971859 | NC_021163.1    | Ca_Kabuli_Chr04 | 25971859                | TT                                     | GG                 | GG               | INTERGENIC      |               |                    |                    |
| SNP_23884_A_25971914 | NC_021163.1    | Ca_Kabuli_Chr04 | 25971914                | GG                                     | AA                 | AA               | INTERGENIC      |               |                    |                    |
| SNP_23885_A_25972029 | NC_021163.1    | Ca_Kabuli_Chr04 | 25972029                | GG                                     | AA                 | AA               | INTERGENIC      |               |                    |                    |
| SNP_23886_A_25972099 | NC_021163.1    | Ca_Kabuli_Chr04 | 25972099                | TT                                     | AA                 | AA               | INTERGENIC      |               |                    |                    |
| SNP_23887_A_25972155 | NC_021163.1    | Ca_Kabuli_Chr04 | 25972155                | TT                                     | CC                 | CC               | INTERGENIC      |               |                    |                    |
| SNP_23888_A_25972173 | NC_021163.1    | Ca_Kabuli_Chr04 | 25972173                | CC                                     | AA                 | AA               | INTERGENIC      |               |                    |                    |
| SNP_23889_A_25972204 | NC_021163.1    | Ca_Kabuli_Chr04 | 25972204                | CC                                     | AA                 | AA               | INTERGENIC      |               |                    |                    |
| SNP_23890_A_25972211 | NC_021163.1    | Ca_Kabuli_Chr04 | 25972211                | GG                                     | TT                 | TT               | INTERGENIC      |               |                    |                    |
| SNP_23891_A_25972223 | NC_021163.1    | Ca_Kabuli_Chr04 | 25972223                | AA                                     | CC                 | CC               | INTERGENIC      |               |                    |                    |
| SNP_23892_A_25972505 | NC_021163.1    | Ca_Kabuli_Chr04 | 25972505                | CC                                     | AA                 | AA               | INTERGENIC      |               |                    |                    |

| SNPs IDs             | Chromosome IDs | Chromosomes     | Physical positions (bp) | CDC Frontier genome (Reference genome) | (Pusa 1103 & HPNB) | (ILWC 46 & LPNB) | Sequence genome | Components of | Gene accession IDs | Putative functions |
|----------------------|----------------|-----------------|-------------------------|----------------------------------------|--------------------|------------------|-----------------|---------------|--------------------|--------------------|
| SNP_23893_A_25972524 | NC_021163.1    | Ca_Kabuli_Chr04 | 25972524                | AA                                     | GG                 | GG               | INTERGENIC      |               |                    |                    |
| SNP_23894_A_25972577 | NC_021163.1    | Ca_Kabuli_Chr04 | 25972577                | GG                                     | AA                 | AA               | INTERGENIC      |               |                    |                    |
| SNP_23895_A_25972586 | NC_021163.1    | Ca_Kabuli_Chr04 | 25972586                | TT                                     | CC                 | CC               | INTERGENIC      |               |                    |                    |
| SNP_23896_A_25972667 | NC_021163.1    | Ca_Kabuli_Chr04 | 25972667                | GG                                     | AA                 | AA               | INTERGENIC      |               |                    |                    |
| SNP_23897_A_25972668 | NC_021163.1    | Ca_Kabuli_Chr04 | 25972668                | GG                                     | AA                 | AA               | INTERGENIC      |               |                    |                    |
| SNP_23898_A_25972702 | NC_021163.1    | Ca_Kabuli_Chr04 | 25972702                | AA                                     | GG                 | GG               | INTERGENIC      |               |                    |                    |
| SNP_23899_A_25972745 | NC_021163.1    | Ca_Kabuli_Chr04 | 25972745                | AA                                     | GG                 | GG               | INTERGENIC      |               |                    |                    |
| SNP_23900_A_25972832 | NC_021163.1    | Ca_Kabuli_Chr04 | 25972832                | TT                                     | CC                 | CC               | INTERGENIC      |               |                    |                    |
| SNP_23901_A_25972858 | NC_021163.1    | Ca_Kabuli_Chr04 | 25972858                | TT                                     | CC                 | CC               | INTERGENIC      |               |                    |                    |
| SNP_23902_A_25973013 | NC_021163.1    | Ca_Kabuli_Chr04 | 25973013                | AA                                     | TT                 | TT               | INTERGENIC      |               |                    |                    |
| SNP_23903_A_25973164 | NC_021163.1    | Ca_Kabuli_Chr04 | 25973164                | GG                                     | AA                 | AA               | INTERGENIC      |               |                    |                    |
| SNP_23904_A_25973303 | NC_021163.1    | Ca_Kabuli_Chr04 | 25973303                | TT                                     | CC                 | CC               | INTERGENIC      |               |                    |                    |
| SNP_23905_A_25973395 | NC_021163.1    | Ca_Kabuli_Chr04 | 25973395                | CC                                     | TT                 | TT               | INTERGENIC      |               |                    |                    |
| SNP_23907_A_25973522 | NC_021163.1    | Ca_Kabuli_Chr04 | 25973522                | AA                                     | TT                 | TT               | INTERGENIC      |               |                    |                    |
| SNP_23908_A_25973671 | NC_021163.1    | Ca_Kabuli_Chr04 | 25973671                | CC                                     | TT                 | TT               | INTERGENIC      |               |                    |                    |
| SNP_23909_A_25973737 | NC_021163.1    | Ca_Kabuli_Chr04 | 25973737                | TT                                     | GG                 | GG               | INTERGENIC      |               |                    |                    |
| SNP_23910_A_25973756 | NC_021163.1    | Ca_Kabuli_Chr04 | 25973756                | AA                                     | GG                 | GG               | INTERGENIC      |               |                    |                    |
| SNP_23911_A_25973793 | NC_021163.1    | Ca_Kabuli_Chr04 | 25973793                | TT                                     | CC                 | CC               | INTERGENIC      |               |                    |                    |
| SNP_23912_A_25973795 | NC_021163.1    | Ca_Kabuli_Chr04 | 25973795                | GG                                     | TT                 | TT               | INTERGENIC      |               |                    |                    |
| SNP_23913_A_25973933 | NC_021163.1    | Ca_Kabuli_Chr04 | 25973933                | TT                                     | CC                 | CC               | INTERGENIC      |               |                    |                    |
| SNP_23914_A_25973940 | NC_021163.1    | Ca_Kabuli_Chr04 | 25973940                | GG                                     | AA                 | AA               | INTERGENIC      |               |                    |                    |
| SNP_23915_A_25973942 | NC_021163.1    | Ca_Kabuli_Chr04 | 25973942                | CC                                     | TT                 | TT               | INTERGENIC      |               |                    |                    |

| SNPs IDs             | Chromosome IDs | Chromosomes     | Physical positions (bp) | CDC Frontier genome (Reference genome) | (Pusa 1103 & HPNB) | (ILWC 46 & LPNB) | Sequence Components of genome | Gene accession IDs | Putative functions |
|----------------------|----------------|-----------------|-------------------------|----------------------------------------|--------------------|------------------|-------------------------------|--------------------|--------------------|
| SNP_23916_A_25974065 | NC_021163.1    | Ca_Kabuli_Chr04 | 25974065                | GG                                     | TT                 | TT               | DRR                           | 101497527          | Unknown function   |
| SNP_23917_A_25974075 | NC_021163.1    | Ca_Kabuli_Chr04 | 25974075                | GG                                     | TT                 | TT               | DRR                           | 101497527          | Unknown function   |
| SNP_23918_A_25974320 | NC_021163.1    | Ca_Kabuli_Chr04 | 25974320                | GG                                     | AA                 | AA               | DRR                           | 101497527          | Unknown function   |
| SNP_23919_A_25974533 | NC_021163.1    | Ca_Kabuli_Chr04 | 25974533                | AA                                     | GG                 | GG               | DRR                           | 101497527          | Unknown function   |
| SNP_23920_A_25974540 | NC_021163.1    | Ca_Kabuli_Chr04 | 25974540                | AA                                     | GG                 | GG               | DRR                           | 101497527          | Unknown function   |
| SNP_23921_A_25974649 | NC_021163.1    | Ca_Kabuli_Chr04 | 25974649                | TT                                     | CC                 | CC               | DRR                           | 101497527          | Unknown function   |
| SNP_23922_A_25974728 | NC_021163.1    | Ca_Kabuli_Chr04 | 25974728                | CC                                     | TT                 | TT               | DRR                           | 101497527          | Unknown function   |
| SNP_23923_A_25974771 | NC_021163.1    | Ca_Kabuli_Chr04 | 25974771                | GG                                     | AA                 | AA               | DRR                           | 101497527          | Unknown function   |
| SNP_23924_A_25974777 | NC_021163.1    | Ca_Kabuli_Chr04 | 25974777                | TT                                     | CC                 | CC               | DRR                           | 101497527          | Unknown function   |
| SNP_23925_A_25974803 | NC_021163.1    | Ca_Kabuli_Chr04 | 25974803                | AA                                     | GG                 | GG               | DRR                           | 101497527          | Unknown function   |
| SNP_23927_A_25974873 | NC_021163.1    | Ca_Kabuli_Chr04 | 25974873                | CC                                     | TT                 | TT               | DRR                           | 101497527          | Unknown function   |
| SNP_23928_A_25974888 | NC_021163.1    | Ca_Kabuli_Chr04 | 25974888                | GG                                     | AA                 | AA               | DRR                           | 101497527          | Unknown function   |
| SNP_23929_A_25974945 | NC_021163.1    | Ca_Kabuli_Chr04 | 25974945                | CC                                     | GG                 | GG               | DRR                           | 101497527          | Unknown function   |
| SNP_23930_A_25974960 | NC_021163.1    | Ca_Kabuli_Chr04 | 25974960                | GG                                     | TT                 | TT               | DRR                           | 101497527          | Unknown function   |
| SNP_23931_A_25975083 | NC_021163.1    | Ca_Kabuli_Chr04 | 25975083                | AA                                     | GG                 | GG               | SYNONYMOUS_CODING             | 101497527          | Unknown function   |
| SNP_23932_A_25975092 | NC_021163.1    | Ca_Kabuli_Chr04 | 25975092                | TT                                     | CC                 | CC               | SYNONYMOUS_CODING             | 101497527          | Unknown function   |
| SNP_23934_A_25975190 | NC_021163.1    | Ca_Kabuli_Chr04 | 25975190                | GG                                     | AA                 | AA               | NON_SYNONYMOUS_CODING         | 101497527          | Unknown function   |
| SNP_23935_A_25975245 | NC_021163.1    | Ca_Kabuli_Chr04 | 25975245                | CC                                     | TT                 | TT               | SYNONYMOUS_CODING             | 101497527          | Unknown function   |
| SNP_23936_A_25975280 | NC_021163.1    | Ca_Kabuli_Chr04 | 25975280                | CC                                     | TT                 | TT               | NON_SYNONYMOUS_CODING         | 101497527          | Unknown function   |
| SNP_23937_A_25975282 | NC_021163.1    | Ca_Kabuli_Chr04 | 25975282                | GG                                     | AA                 | AA               | NON_SYNONYMOUS_CODING         | 101497527          | Unknown function   |
| SNP_23938_A_25975305 | NC_021163.1    | Ca_Kabuli_Chr04 | 25975305                | AA                                     | GG                 | GG               | SYNONYMOUS_CODING             | 101497527          | Unknown function   |
| SNP_23939_A_25975319 | NC_021163.1    | Ca_Kabuli_Chr04 | 25975319                | CC                                     | TT                 | TT               | NON_SYNONYMOUS_CODING         | 101497527          | Unknown function   |

| SNPs IDs             | Chromosome IDs | Chromosomes     | Physical positions (bp) | CDC Frontier genome (Reference genome) | (Pusa 1103 & HPNB) | (ILWC 46 & LPNB) | Sequence Components of genome | Gene accession IDs | Putative functions |
|----------------------|----------------|-----------------|-------------------------|----------------------------------------|--------------------|------------------|-------------------------------|--------------------|--------------------|
| SNP_23940_A_25975391 | NC_021163.1    | Ca_Kabuli_Chr04 | 25975391                | AA                                     | CC                 | CC               | NON_SYNONYMOUS_CODING         | 101497527          | Unknown function   |
| SNP_23941_A_25975479 | NC_021163.1    | Ca_Kabuli_Chr04 | 25975479                | AA                                     | GG                 | GG               | SYNONYMOUS_CODING             | 101497527          | Unknown function   |
| SNP_23942_A_25975550 | NC_021163.1    | Ca_Kabuli_Chr04 | 25975550                | GG                                     | TT                 | TT               | URR                           | 101497527          | Unknown function   |
| SNP_23943_A_25975582 | NC_021163.1    | Ca_Kabuli_Chr04 | 25975582                | CC                                     | TT                 | TT               | URR                           | 101497527          | Unknown function   |
| SNP_23944_A_25975601 | NC_021163.1    | Ca_Kabuli_Chr04 | 25975601                | TT                                     | CC                 | CC               | URR                           | 101497527          | Unknown function   |
| SNP_23945_A_25975611 | NC_021163.1    | Ca_Kabuli_Chr04 | 25975611                | GG                                     | CC                 | CC               | URR                           | 101497527          | Unknown function   |
| SNP_23946_A_25975653 | NC_021163.1    | Ca_Kabuli_Chr04 | 25975653                | GG                                     | AA                 | AA               | URR                           | 101497527          | Unknown function   |
| SNP_23947_A_25975661 | NC_021163.1    | Ca_Kabuli_Chr04 | 25975661                | AA                                     | GG                 | GG               | URR                           | 101497527          | Unknown function   |
| SNP_23948_A_25976561 | NC_021163.1    | Ca_Kabuli_Chr04 | 25976561                | CC                                     | AA                 | AA               | URR                           | 101497527          | Unknown function   |
| SNP_23949_A_25976666 | NC_021163.1    | Ca_Kabuli_Chr04 | 25976666                | CC                                     | AA                 | AA               | URR                           | 101497527          | Unknown function   |
| SNP_23950_A_25976704 | NC_021163.1    | Ca_Kabuli_Chr04 | 25976704                | CC                                     | TT                 | TT               | URR                           | 101497527          | Unknown function   |
| SNP_23951_A_25976744 | NC_021163.1    | Ca_Kabuli_Chr04 | 25976744                | AA                                     | GG                 | GG               | URR                           | 101497527          | Unknown function   |
| SNP_23952_A_25976755 | NC_021163.1    | Ca_Kabuli_Chr04 | 25976755                | TT                                     | AA                 | AA               | URR                           | 101497527          | Unknown function   |
| SNP_23953_A_25976767 | NC_021163.1    | Ca_Kabuli_Chr04 | 25976767                | GG                                     | AA                 | AA               | URR                           | 101497527          | Unknown function   |
| SNP_23954_A_25976769 | NC_021163.1    | Ca_Kabuli_Chr04 | 25976769                | GG                                     | TT                 | TT               | URR                           | 101497527          | Unknown function   |
| SNP_23955_A_25976885 | NC_021163.1    | Ca_Kabuli_Chr04 | 25976885                | CC                                     | TT                 | TT               | URR                           | 101497527          | Unknown function   |
| SNP_23956_A_25976980 | NC_021163.1    | Ca_Kabuli_Chr04 | 25976980                | TT                                     | CC                 | CC               | URR                           | 101497527          | Unknown function   |
| SNP_23957_A_25977012 | NC_021163.1    | Ca_Kabuli_Chr04 | 25977012                | AA                                     | GG                 | GG               | URR                           | 101497527          | Unknown function   |
| SNP_23958_A_25977122 | NC_021163.1    | Ca_Kabuli_Chr04 | 25977122                | TT                                     | AA                 | AA               | URR                           | 101497527          | Unknown function   |
| SNP_23959_A_25977137 | NC_021163.1    | Ca_Kabuli_Chr04 | 25977137                | GG                                     | AA                 | AA               | URR                           | 101497527          | Unknown function   |
| SNP_23960_A_25977322 | NC_021163.1    | Ca_Kabuli_Chr04 | 25977322                | TT                                     | GG                 | GG               | URR                           | 101497527          | Unknown function   |
| SNP_23961_A_25977345 | NC_021163.1    | Ca_Kabuli_Chr04 | 25977345                | TT                                     | CC                 | CC               | URR                           | 101497527          | Unknown function   |

| SNPs IDs             | Chromosome IDs | Chromosomes     | Physical positions (bp) | CDC Frontier genome (Reference genome) | (Pusa 1103 & HPNB) | (ILWC 46 & LPNB) | Sequence Components of genome | Gene accession IDs | Putative functions |
|----------------------|----------------|-----------------|-------------------------|----------------------------------------|--------------------|------------------|-------------------------------|--------------------|--------------------|
| SNP_23962_A_25977508 | NC_021163.1    | Ca_Kabuli_Chr04 | 25977508                | TT                                     | CC                 | CC               | URR                           | 101497527          | Unknown function   |
| SNP_23963_A_25977545 | NC_021163.1    | Ca_Kabuli_Chr04 | 25977545                | GG                                     | TT                 | TT               | INTERGENIC                    |                    |                    |
| SNP_23964_A_25977758 | NC_021163.1    | Ca_Kabuli_Chr04 | 25977758                | TT                                     | GG                 | GG               | INTERGENIC                    |                    |                    |
| SNP_23965_A_25977915 | NC_021163.1    | Ca_Kabuli_Chr04 | 25977915                | GG                                     | CC                 | CC               | INTERGENIC                    |                    |                    |
| SNP_23967_A_25978520 | NC_021163.1    | Ca_Kabuli_Chr04 | 25978520                | TT                                     | CC                 | CC               | INTERGENIC                    |                    |                    |
| SNP_23968_A_25978751 | NC_021163.1    | Ca_Kabuli_Chr04 | 25978751                | TT                                     | CC                 | CC               | INTERGENIC                    |                    |                    |
| SNP_23969_A_25979377 | NC_021163.1    | Ca_Kabuli_Chr04 | 25979377                | GG                                     | CC                 | CC               | INTERGENIC                    |                    |                    |
| SNP_23970_A_25979657 | NC_021163.1    | Ca_Kabuli_Chr04 | 25979657                | AA                                     | GG                 | GG               | INTERGENIC                    |                    |                    |
| SNP_23972_A_25980776 | NC_021163.1    | Ca_Kabuli_Chr04 | 25980776                | AA                                     | TT                 | TT               | INTERGENIC                    |                    |                    |
| SNP_23973_A_25980826 | NC_021163.1    | Ca_Kabuli_Chr04 | 25980826                | AA                                     | GG                 | GG               | INTERGENIC                    |                    |                    |
| SNP_23974_A_25980870 | NC_021163.1    | Ca_Kabuli_Chr04 | 25980870                | TT                                     | CC                 | CC               | INTERGENIC                    |                    |                    |
| SNP_23975_A_25980904 | NC_021163.1    | Ca_Kabuli_Chr04 | 25980904                | AA                                     | CC                 | CC               | INTERGENIC                    |                    |                    |
| SNP_23976_A_25980995 | NC_021163.1    | Ca_Kabuli_Chr04 | 25980995                | GG                                     | AA                 | AA               | INTERGENIC                    |                    |                    |
| SNP_23977_A_25981042 | NC_021163.1    | Ca_Kabuli_Chr04 | 25981042                | GG                                     | TT                 | TT               | INTERGENIC                    |                    |                    |
| SNP_23978_A_25981293 | NC_021163.1    | Ca_Kabuli_Chr04 | 25981293                | AA                                     | TT                 | TT               | INTERGENIC                    |                    |                    |
| SNP_23980_A_25981530 | NC_021163.1    | Ca_Kabuli_Chr04 | 25981530                | CC                                     | TT                 | TT               | INTERGENIC                    |                    |                    |
| SNP_23981_A_25981533 | NC_021163.1    | Ca_Kabuli_Chr04 | 25981533                | GG                                     | AA                 | AA               | INTERGENIC                    |                    |                    |
| SNP_23982_A_25981534 | NC_021163.1    | Ca_Kabuli_Chr04 | 25981534                | GG                                     | AA                 | AA               | INTERGENIC                    |                    |                    |
| SNP_23983_A_25981541 | NC_021163.1    | Ca_Kabuli_Chr04 | 25981541                | AA                                     | CC                 | CC               | INTERGENIC                    |                    |                    |
| SNP_23984_A_25981653 | NC_021163.1    | Ca_Kabuli_Chr04 | 25981653                | AA                                     | CC                 | CC               | INTERGENIC                    |                    |                    |
| SNP_23985_A_25981679 | NC_021163.1    | Ca_Kabuli_Chr04 | 25981679                | GG                                     | AA                 | AA               | INTERGENIC                    |                    |                    |
| SNP_23986_A_25981715 | NC_021163.1    | Ca_Kabuli_Chr04 | 25981715                | CC                                     | TT                 | TT               | INTERGENIC                    |                    |                    |

| SNPs IDs             | Chromosome IDs | Chromosomes     | Physical positions (bp) | CDC Frontier genome (Reference genome) | (Pusa 1103 & HPNB) | (ILWC 46 & LPNB) | Sequence genome | Components of | Gene accession IDs | Putative functions |
|----------------------|----------------|-----------------|-------------------------|----------------------------------------|--------------------|------------------|-----------------|---------------|--------------------|--------------------|
| SNP_23987_A_25981738 | NC_021163.1    | Ca_Kabuli_Chr04 | 25981738                | AA                                     | GG                 | GG               | INTERGENIC      |               |                    |                    |
| SNP_23988_A_25981781 | NC_021163.1    | Ca_Kabuli_Chr04 | 25981781                | TT                                     | CC                 | CC               | INTERGENIC      |               |                    |                    |
| SNP_23989_A_25981891 | NC_021163.1    | Ca_Kabuli_Chr04 | 25981891                | GG                                     | AA                 | AA               | INTERGENIC      |               |                    |                    |
| SNP_23990_A_25981973 | NC_021163.1    | Ca_Kabuli_Chr04 | 25981973                | AA                                     | GG                 | GG               | INTERGENIC      |               |                    |                    |
| SNP_23991_A_25981974 | NC_021163.1    | Ca_Kabuli_Chr04 | 25981974                | TT                                     | CC                 | CC               | INTERGENIC      |               |                    |                    |
| SNP_23992_A_25982065 | NC_021163.1    | Ca_Kabuli_Chr04 | 25982065                | GG                                     | AA                 | AA               | INTERGENIC      |               |                    |                    |
| SNP_23993_A_25982085 | NC_021163.1    | Ca_Kabuli_Chr04 | 25982085                | CC                                     | GG                 | GG               | INTERGENIC      |               |                    |                    |
| SNP_23994_A_25982121 | NC_021163.1    | Ca_Kabuli_Chr04 | 25982121                | AA                                     | TT                 | TT               | INTERGENIC      |               |                    |                    |
| SNP_23995_A_25982137 | NC_021163.1    | Ca_Kabuli_Chr04 | 25982137                | TT                                     | CC                 | CC               | INTERGENIC      |               |                    |                    |
| SNP_23996_A_25982149 | NC_021163.1    | Ca_Kabuli_Chr04 | 25982149                | CC                                     | TT                 | TT               | INTERGENIC      |               |                    |                    |
| SNP_23997_A_25982188 | NC_021163.1    | Ca_Kabuli_Chr04 | 25982188                | CC                                     | TT                 | TT               | INTERGENIC      |               |                    |                    |
| SNP_23998_A_25982226 | NC_021163.1    | Ca_Kabuli_Chr04 | 25982226                | CC                                     | AA                 | AA               | INTERGENIC      |               |                    |                    |
| SNP_23999_A_25982275 | NC_021163.1    | Ca_Kabuli_Chr04 | 25982275                | GG                                     | AA                 | AA               | INTERGENIC      |               |                    |                    |
| SNP_24000_A_25982330 | NC_021163.1    | Ca_Kabuli_Chr04 | 25982330                | AA                                     | GG                 | GG               | INTERGENIC      |               |                    |                    |
| SNP_24001_A_25982560 | NC_021163.1    | Ca_Kabuli_Chr04 | 25982560                | TT                                     | AA                 | AA               | INTERGENIC      |               |                    |                    |
| SNP_24002_A_25982573 | NC_021163.1    | Ca_Kabuli_Chr04 | 25982573                | CC                                     | TT                 | TT               | INTERGENIC      |               |                    |                    |
| SNP_24003_A_25982587 | NC_021163.1    | Ca_Kabuli_Chr04 | 25982587                | GG                                     | TT                 | TT               | INTERGENIC      |               |                    |                    |
| SNP_24004_A_25982670 | NC_021163.1    | Ca_Kabuli_Chr04 | 25982670                | AA                                     | GG                 | GG               | INTERGENIC      |               |                    |                    |
| SNP_24005_A_25982678 | NC_021163.1    | Ca_Kabuli_Chr04 | 25982678                | CC                                     | AA                 | AA               | INTERGENIC      |               |                    |                    |
| SNP_24006_A_25982679 | NC_021163.1    | Ca_Kabuli_Chr04 | 25982679                | AA                                     | TT                 | TT               | INTERGENIC      |               |                    |                    |
| SNP_24007_A_25982697 | NC_021163.1    | Ca_Kabuli_Chr04 | 25982697                | AA                                     | GG                 | GG               | INTERGENIC      |               |                    |                    |
| SNP_24009_A_25982763 | NC_021163.1    | Ca_Kabuli_Chr04 | 25982763                | TT                                     | CC                 | CC               | INTERGENIC      |               |                    |                    |



| SNPs IDs             | Chromosome IDs | Chromosomes     | Physical positions (bp) | CDC Frontier genome (Reference genome) | (Pusa 1103 & HPNB) | (ILWC 46 & LPNB) | Sequence genome | Components of | Gene accession IDs | Putative functions |
|----------------------|----------------|-----------------|-------------------------|----------------------------------------|--------------------|------------------|-----------------|---------------|--------------------|--------------------|
| SNP_24010_A_25982767 | NC_021163.1    | Ca_Kabuli_Chr04 | 25982767                | TT                                     | AA                 | AA               | INTERGENIC      |               |                    |                    |
| SNP_24011_A_25982774 | NC_021163.1    | Ca_Kabuli_Chr04 | 25982774                | AA                                     | TT                 | TT               | INTERGENIC      |               |                    |                    |
| SNP_24012_A_25982797 | NC_021163.1    | Ca_Kabuli_Chr04 | 25982797                | CC                                     | GG                 | GG               | INTERGENIC      |               |                    |                    |
| SNP_24013_A_25982943 | NC_021163.1    | Ca_Kabuli_Chr04 | 25982943                | AA                                     | CC                 | CC               | INTERGENIC      |               |                    |                    |
| SNP_24014_A_25982960 | NC_021163.1    | Ca_Kabuli_Chr04 | 25982960                | CC                                     | TT                 | TT               | INTERGENIC      |               |                    |                    |
| SNP_24015_A_25982968 | NC_021163.1    | Ca_Kabuli_Chr04 | 25982968                | AA                                     | GG                 | GG               | INTERGENIC      |               |                    |                    |
| SNP_24016_A_25983036 | NC_021163.1    | Ca_Kabuli_Chr04 | 25983036                | GG                                     | AA                 | AA               | INTERGENIC      |               |                    |                    |
| SNP_24017_A_25983040 | NC_021163.1    | Ca_Kabuli_Chr04 | 25983040                | AA                                     | GG                 | GG               | INTERGENIC      |               |                    |                    |
| SNP_24018_A_25983045 | NC_021163.1    | Ca_Kabuli_Chr04 | 25983045                | AA                                     | CC                 | CC               | INTERGENIC      |               |                    |                    |
| SNP_24019_A_25983110 | NC_021163.1    | Ca_Kabuli_Chr04 | 25983110                | TT                                     | AA                 | AA               | INTERGENIC      |               |                    |                    |
| SNP_24020_A_25983139 | NC_021163.1    | Ca_Kabuli_Chr04 | 25983139                | CC                                     | TT                 | TT               | INTERGENIC      |               |                    |                    |
| SNP_24021_A_25983206 | NC_021163.1    | Ca_Kabuli_Chr04 | 25983206                | AA                                     | TT                 | TT               | INTERGENIC      |               |                    |                    |
| SNP_24022_A_25983311 | NC_021163.1    | Ca_Kabuli_Chr04 | 25983311                | AA                                     | GG                 | GG               | INTERGENIC      |               |                    |                    |
| SNP_24023_A_25983366 | NC_021163.1    | Ca_Kabuli_Chr04 | 25983366                | TT                                     | CC                 | CC               | INTERGENIC      |               |                    |                    |
| SNP_24024_A_25983525 | NC_021163.1    | Ca_Kabuli_Chr04 | 25983525                | TT                                     | GG                 | GG               | INTERGENIC      |               |                    |                    |
| SNP_24025_A_25983541 | NC_021163.1    | Ca_Kabuli_Chr04 | 25983541                | TT                                     | GG                 | GG               | INTERGENIC      |               |                    |                    |
| SNP_24026_A_25983567 | NC_021163.1    | Ca_Kabuli_Chr04 | 25983567                | TT                                     | GG                 | GG               | INTERGENIC      |               |                    |                    |
| SNP_24027_A_25983581 | NC_021163.1    | Ca_Kabuli_Chr04 | 25983581                | TT                                     | GG                 | GG               | INTERGENIC      |               |                    |                    |
| SNP_24028_A_25983691 | NC_021163.1    | Ca_Kabuli_Chr04 | 25983691                | AA                                     | GG                 | GG               | INTERGENIC      |               |                    |                    |
| SNP_24029_A_25983776 | NC_021163.1    | Ca_Kabuli_Chr04 | 25983776                | TT                                     | GG                 | GG               | INTERGENIC      |               |                    |                    |
| SNP_24030_A_25983787 | NC_021163.1    | Ca_Kabuli_Chr04 | 25983787                | TT                                     | AA                 | AA               | INTERGENIC      |               |                    |                    |
| SNP_24031_A_25983788 | NC_021163.1    | Ca_Kabuli_Chr04 | 25983788                | TT                                     | AA                 | AA               | INTERGENIC      |               |                    |                    |

| SNPs IDs             | Chromosome IDs | Chromosomes     | Physical positions (bp) | CDC Frontier genome (Reference genome) | (Pusa 1103 & HPNB) | (ILWC 46 & LPNB) | Sequence genome | Components of | Gene accession IDs | Putative functions |
|----------------------|----------------|-----------------|-------------------------|----------------------------------------|--------------------|------------------|-----------------|---------------|--------------------|--------------------|
| SNP_24033_A_25983825 | NC_021163.1    | Ca_Kabuli_Chr04 | 25983825                | CC                                     | AA                 | AA               | INTERGENIC      |               |                    |                    |
| SNP_24034_A_25983886 | NC_021163.1    | Ca_Kabuli_Chr04 | 25983886                | AA                                     | CC                 | CC               | INTERGENIC      |               |                    |                    |
| SNP_24035_A_25983911 | NC_021163.1    | Ca_Kabuli_Chr04 | 25983911                | GG                                     | AA                 | AA               | INTERGENIC      |               |                    |                    |
| SNP_24036_A_25983972 | NC_021163.1    | Ca_Kabuli_Chr04 | 25983972                | CC                                     | TT                 | TT               | INTERGENIC      |               |                    |                    |
| SNP_24037_A_25983975 | NC_021163.1    | Ca_Kabuli_Chr04 | 25983975                | CC                                     | GG                 | GG               | INTERGENIC      |               |                    |                    |
| SNP_24038_A_25983978 | NC_021163.1    | Ca_Kabuli_Chr04 | 25983978                | GG                                     | TT                 | TT               | INTERGENIC      |               |                    |                    |
| SNP_24039_A_25983994 | NC_021163.1    | Ca_Kabuli_Chr04 | 25983994                | CC                                     | AA                 | AA               | INTERGENIC      |               |                    |                    |
| SNP_24040_A_25984010 | NC_021163.1    | Ca_Kabuli_Chr04 | 25984010                | AA                                     | TT                 | TT               | INTERGENIC      |               |                    |                    |
| SNP_24041_A_25984012 | NC_021163.1    | Ca_Kabuli_Chr04 | 25984012                | GG                                     | AA                 | AA               | INTERGENIC      |               |                    |                    |
| SNP_24042_A_25984015 | NC_021163.1    | Ca_Kabuli_Chr04 | 25984015                | CC                                     | AA                 | AA               | INTERGENIC      |               |                    |                    |
| SNP_24043_A_25984043 | NC_021163.1    | Ca_Kabuli_Chr04 | 25984043                | TT                                     | CC                 | CC               | INTERGENIC      |               |                    |                    |
| SNP_24045_A_25984180 | NC_021163.1    | Ca_Kabuli_Chr04 | 25984180                | TT                                     | AA                 | AA               | INTERGENIC      |               |                    |                    |
| SNP_24046_A_25984211 | NC_021163.1    | Ca_Kabuli_Chr04 | 25984211                | TT                                     | CC                 | CC               | INTERGENIC      |               |                    |                    |
| SNP_24047_A_25984285 | NC_021163.1    | Ca_Kabuli_Chr04 | 25984285                | TT                                     | AA                 | AA               | INTERGENIC      |               |                    |                    |
| SNP_24048_A_25984330 | NC_021163.1    | Ca_Kabuli_Chr04 | 25984330                | GG                                     | AA                 | AA               | INTERGENIC      |               |                    |                    |
| SNP_24049_A_25984368 | NC_021163.1    | Ca_Kabuli_Chr04 | 25984368                | GG                                     | AA                 | AA               | INTERGENIC      |               |                    |                    |
| SNP_24050_A_25984403 | NC_021163.1    | Ca_Kabuli_Chr04 | 25984403                | CC                                     | TT                 | TT               | INTERGENIC      |               |                    |                    |
| SNP_24051_A_25984421 | NC_021163.1    | Ca_Kabuli_Chr04 | 25984421                | AA                                     | TT                 | TT               | INTERGENIC      |               |                    |                    |
| SNP_24053_A_25984569 | NC_021163.1    | Ca_Kabuli_Chr04 | 25984569                | TT                                     | CC                 | CC               | INTERGENIC      |               |                    |                    |
| SNP_24054_A_25984623 | NC_021163.1    | Ca_Kabuli_Chr04 | 25984623                | AA                                     | GG                 | GG               | INTERGENIC      |               |                    |                    |
| SNP_24055_A_25984647 | NC_021163.1    | Ca_Kabuli_Chr04 | 25984647                | AA                                     | GG                 | GG               | INTERGENIC      |               |                    |                    |
| SNP_24056_A_25984679 | NC_021163.1    | Ca_Kabuli_Chr04 | 25984679                | TT                                     | GG                 | GG               | INTERGENIC      |               |                    |                    |

| SNPs IDs             | Chromosome IDs | Chromosomes     | Physical positions (bp) | CDC Frontier genome (Reference genome) | (Pusa 1103 & HPNB) | (ILWC 46 & LPNB) | Sequence genome | Components of | Gene accession IDs | Putative functions |
|----------------------|----------------|-----------------|-------------------------|----------------------------------------|--------------------|------------------|-----------------|---------------|--------------------|--------------------|
| SNP_24057_A_25984680 | NC_021163.1    | Ca_Kabuli_Chr04 | 25984680                | CC                                     | TT                 | TT               | INTERGENIC      |               |                    |                    |
| SNP_24058_A_25984785 | NC_021163.1    | Ca_Kabuli_Chr04 | 25984785                | AA                                     | CC                 | CC               | INTERGENIC      |               |                    |                    |
| SNP_24059_A_25984799 | NC_021163.1    | Ca_Kabuli_Chr04 | 25984799                | GG                                     | AA                 | AA               | INTERGENIC      |               |                    |                    |
| SNP_24060_A_25984857 | NC_021163.1    | Ca_Kabuli_Chr04 | 25984857                | GG                                     | AA                 | AA               | INTERGENIC      |               |                    |                    |
| SNP_24061_A_25984933 | NC_021163.1    | Ca_Kabuli_Chr04 | 25984933                | CC                                     | GG                 | GG               | INTERGENIC      |               |                    |                    |
| SNP_24062_A_25984965 | NC_021163.1    | Ca_Kabuli_Chr04 | 25984965                | CC                                     | TT                 | TT               | INTERGENIC      |               |                    |                    |
| SNP_24063_A_25984985 | NC_021163.1    | Ca_Kabuli_Chr04 | 25984985                | TT                                     | CC                 | CC               | INTERGENIC      |               |                    |                    |
| SNP_24064_A_25985017 | NC_021163.1    | Ca_Kabuli_Chr04 | 25985017                | GG                                     | AA                 | AA               | INTERGENIC      |               |                    |                    |
| SNP_24065_A_25985095 | NC_021163.1    | Ca_Kabuli_Chr04 | 25985095                | CC                                     | TT                 | TT               | INTERGENIC      |               |                    |                    |
| SNP_24066_A_25985099 | NC_021163.1    | Ca_Kabuli_Chr04 | 25985099                | TT                                     | GG                 | GG               | INTERGENIC      |               |                    |                    |
| SNP_24067_A_25985120 | NC_021163.1    | Ca_Kabuli_Chr04 | 25985120                | CC                                     | AA                 | AA               | INTERGENIC      |               |                    |                    |
| SNP_24068_A_25985217 | NC_021163.1    | Ca_Kabuli_Chr04 | 25985217                | GG                                     | AA                 | AA               | INTERGENIC      |               |                    |                    |
| SNP_24069_A_25985231 | NC_021163.1    | Ca_Kabuli_Chr04 | 25985231                | TT                                     | CC                 | CC               | INTERGENIC      |               |                    |                    |
| SNP_24070_A_25985243 | NC_021163.1    | Ca_Kabuli_Chr04 | 25985243                | TT                                     | CC                 | CC               | INTERGENIC      |               |                    |                    |
| SNP_24071_A_25985801 | NC_021163.1    | Ca_Kabuli_Chr04 | 25985801                | TT                                     | CC                 | CC               | INTERGENIC      |               |                    |                    |
| SNP_24072_A_25985951 | NC_021163.1    | Ca_Kabuli_Chr04 | 25985951                | CC                                     | TT                 | TT               | INTERGENIC      |               |                    |                    |
| SNP_24073_A_25985982 | NC_021163.1    | Ca_Kabuli_Chr04 | 25985982                | GG                                     | AA                 | AA               | INTERGENIC      |               |                    |                    |
| SNP_24074_A_25986031 | NC_021163.1    | Ca_Kabuli_Chr04 | 25986031                | TT                                     | CC                 | CC               | INTERGENIC      |               |                    |                    |
| SNP_24075_A_25986063 | NC_021163.1    | Ca_Kabuli_Chr04 | 25986063                | AA                                     | CC                 | CC               | INTERGENIC      |               |                    |                    |
| SNP_24076_A_25986093 | NC_021163.1    | Ca_Kabuli_Chr04 | 25986093                | TT                                     | AA                 | AA               | INTERGENIC      |               |                    |                    |
| SNP_24077_A_25986124 | NC_021163.1    | Ca_Kabuli_Chr04 | 25986124                | CC                                     | AA                 | AA               | INTERGENIC      |               |                    |                    |
| SNP_24078_A_25986382 | NC_021163.1    | Ca_Kabuli_Chr04 | 25986382                | CC                                     | TT                 | TT               | INTERGENIC      |               |                    |                    |

| SNPs IDs             | Chromosome IDs | Chromosomes     | Physical positions (bp) | CDC Frontier genome (Reference genome) | (Pusa 1103 & HPNB) | (ILWC 46 & LPNB) | Sequence genome | Components of | Gene accession IDs | Putative functions |
|----------------------|----------------|-----------------|-------------------------|----------------------------------------|--------------------|------------------|-----------------|---------------|--------------------|--------------------|
| SNP_24079_A_25986900 | NC_021163.1    | Ca_Kabuli_Chr04 | 25986900                | TT                                     | GG                 | GG               | INTERGENIC      |               |                    |                    |
| SNP_24080_A_25986904 | NC_021163.1    | Ca_Kabuli_Chr04 | 25986904                | GG                                     | CC                 | CC               | INTERGENIC      |               |                    |                    |
| SNP_24081_A_25986972 | NC_021163.1    | Ca_Kabuli_Chr04 | 25986972                | CC                                     | TT                 | TT               | INTERGENIC      |               |                    |                    |
| SNP_24082_A_25987071 | NC_021163.1    | Ca_Kabuli_Chr04 | 25987071                | CC                                     | TT                 | TT               | INTERGENIC      |               |                    |                    |
| SNP_24083_A_25987110 | NC_021163.1    | Ca_Kabuli_Chr04 | 25987110                | CC                                     | AA                 | AA               | INTERGENIC      |               |                    |                    |
| SNP_24084_A_25987121 | NC_021163.1    | Ca_Kabuli_Chr04 | 25987121                | GG                                     | AA                 | AA               | INTERGENIC      |               |                    |                    |
| SNP_24085_A_25987129 | NC_021163.1    | Ca_Kabuli_Chr04 | 25987129                | AA                                     | GG                 | GG               | INTERGENIC      |               |                    |                    |
| SNP_24086_A_25987151 | NC_021163.1    | Ca_Kabuli_Chr04 | 25987151                | TT                                     | CC                 | CC               | INTERGENIC      |               |                    |                    |
| SNP_24087_A_25987159 | NC_021163.1    | Ca_Kabuli_Chr04 | 25987159                | AA                                     | TT                 | TT               | INTERGENIC      |               |                    |                    |
| SNP_24088_A_25987187 | NC_021163.1    | Ca_Kabuli_Chr04 | 25987187                | TT                                     | AA                 | AA               | INTERGENIC      |               |                    |                    |
| SNP_24090_A_25987336 | NC_021163.1    | Ca_Kabuli_Chr04 | 25987336                | CC                                     | TT                 | TT               | INTERGENIC      |               |                    |                    |
| SNP_24091_A_25987341 | NC_021163.1    | Ca_Kabuli_Chr04 | 25987341                | GG                                     | AA                 | AA               | INTERGENIC      |               |                    |                    |
| SNP_24092_A_25987513 | NC_021163.1    | Ca_Kabuli_Chr04 | 25987513                | TT                                     | GG                 | GG               | INTERGENIC      |               |                    |                    |
| SNP_24093_A_25987529 | NC_021163.1    | Ca_Kabuli_Chr04 | 25987529                | GG                                     | AA                 | AA               | INTERGENIC      |               |                    |                    |
| SNP_24094_A_25987571 | NC_021163.1    | Ca_Kabuli_Chr04 | 25987571                | GG                                     | AA                 | AA               | INTERGENIC      |               |                    |                    |
| SNP_24095_A_25987575 | NC_021163.1    | Ca_Kabuli_Chr04 | 25987575                | AA                                     | GG                 | GG               | INTERGENIC      |               |                    |                    |
| SNP_24097_A_25987634 | NC_021163.1    | Ca_Kabuli_Chr04 | 25987634                | TT                                     | CC                 | CC               | INTERGENIC      |               |                    |                    |
| SNP_24098_A_25987706 | NC_021163.1    | Ca_Kabuli_Chr04 | 25987706                | AA                                     | CC                 | CC               | INTERGENIC      |               |                    |                    |
| SNP_24099_A_25987773 | NC_021163.1    | Ca_Kabuli_Chr04 | 25987773                | GG                                     | TT                 | TT               | INTERGENIC      |               |                    |                    |
| SNP_24100_A_25987914 | NC_021163.1    | Ca_Kabuli_Chr04 | 25987914                | CC                                     | TT                 | TT               | INTERGENIC      |               |                    |                    |
| SNP_24101_A_25987961 | NC_021163.1    | Ca_Kabuli_Chr04 | 25987961                | TT                                     | CC                 | CC               | INTERGENIC      |               |                    |                    |
| SNP_24102_A_25988031 | NC_021163.1    | Ca_Kabuli_Chr04 | 25988031                | GG                                     | CC                 | CC               | INTERGENIC      |               |                    |                    |

| SNPs IDs             | Chromosome IDs | Chromosomes     | Physical positions (bp) | CDC Frontier genome (Reference genome) | (Pusa 1103 & HPNB) | (ILWC 46 & LPNB) | Sequence genome | Components of | Gene accession IDs | Putative functions |
|----------------------|----------------|-----------------|-------------------------|----------------------------------------|--------------------|------------------|-----------------|---------------|--------------------|--------------------|
| SNP_24103_A_25988033 | NC_021163.1    | Ca_Kabuli_Chr04 | 25988033                | TT                                     | AA                 | AA               | INTERGENIC      |               |                    |                    |
| SNP_24104_A_25988554 | NC_021163.1    | Ca_Kabuli_Chr04 | 25988554                | CC                                     | GG                 | GG               | INTERGENIC      |               |                    |                    |
| SNP_24105_A_25988615 | NC_021163.1    | Ca_Kabuli_Chr04 | 25988615                | TT                                     | CC                 | CC               | INTERGENIC      |               |                    |                    |
| SNP_24106_A_25988858 | NC_021163.1    | Ca_Kabuli_Chr04 | 25988858                | GG                                     | AA                 | AA               | INTERGENIC      |               |                    |                    |
| SNP_24107_A_25988872 | NC_021163.1    | Ca_Kabuli_Chr04 | 25988872                | TT                                     | GG                 | GG               | INTERGENIC      |               |                    |                    |
| SNP_24108_A_25988901 | NC_021163.1    | Ca_Kabuli_Chr04 | 25988901                | CC                                     | GG                 | GG               | INTERGENIC      |               |                    |                    |
| SNP_24109_A_25988944 | NC_021163.1    | Ca_Kabuli_Chr04 | 25988944                | TT                                     | GG                 | GG               | INTERGENIC      |               |                    |                    |
| SNP_24111_A_25989057 | NC_021163.1    | Ca_Kabuli_Chr04 | 25989057                | CC                                     | TT                 | TT               | INTERGENIC      |               |                    |                    |
| SNP_24112_A_25989121 | NC_021163.1    | Ca_Kabuli_Chr04 | 25989121                | TT                                     | CC                 | CC               | INTERGENIC      |               |                    |                    |
| SNP_24113_A_25989226 | NC_021163.1    | Ca_Kabuli_Chr04 | 25989226                | CC                                     | TT                 | TT               | INTERGENIC      |               |                    |                    |
| SNP_24114_A_25989271 | NC_021163.1    | Ca_Kabuli_Chr04 | 25989271                | CC                                     | TT                 | TT               | INTERGENIC      |               |                    |                    |
| SNP_24117_A_25989354 | NC_021163.1    | Ca_Kabuli_Chr04 | 25989354                | GG                                     | TT                 | TT               | INTERGENIC      |               |                    |                    |
| SNP_24118_A_25989461 | NC_021163.1    | Ca_Kabuli_Chr04 | 25989461                | TT                                     | CC                 | CC               | INTERGENIC      |               |                    |                    |
| SNP_24119_A_25989518 | NC_021163.1    | Ca_Kabuli_Chr04 | 25989518                | AA                                     | CC                 | CC               | INTERGENIC      |               |                    |                    |
| SNP_24120_A_25989602 | NC_021163.1    | Ca_Kabuli_Chr04 | 25989602                | CC                                     | TT                 | TT               | INTERGENIC      |               |                    |                    |
| SNP_24121_A_25989657 | NC_021163.1    | Ca_Kabuli_Chr04 | 25989657                | AA                                     | GG                 | GG               | INTERGENIC      |               |                    |                    |
| SNP_24122_A_25989665 | NC_021163.1    | Ca_Kabuli_Chr04 | 25989665                | TT                                     | AA                 | AA               | INTERGENIC      |               |                    |                    |
| SNP_24123_A_25989731 | NC_021163.1    | Ca_Kabuli_Chr04 | 25989731                | TT                                     | GG                 | GG               | INTERGENIC      |               |                    |                    |
| SNP_24124_A_25989797 | NC_021163.1    | Ca_Kabuli_Chr04 | 25989797                | AA                                     | CC                 | CC               | INTERGENIC      |               |                    |                    |
| SNP_24125_A_25989814 | NC_021163.1    | Ca_Kabuli_Chr04 | 25989814                | TT                                     | CC                 | CC               | INTERGENIC      |               |                    |                    |
| SNP_24126_A_25989998 | NC_021163.1    | Ca_Kabuli_Chr04 | 25989998                | GG                                     | AA                 | AA               | INTERGENIC      |               |                    |                    |
| SNP_24127_A_25990052 | NC_021163.1    | Ca_Kabuli_Chr04 | 25990052                | CC                                     | AA                 | AA               | INTERGENIC      |               |                    |                    |

| SNPs IDs             | Chromosome IDs | Chromosomes     | Physical positions (bp) | CDC Frontier genome (Reference genome) | (Pusa 1103 & HPNB) | (ILWC 46 & LPNB) | Sequence genome | Components of | Gene accession IDs | Putative functions |
|----------------------|----------------|-----------------|-------------------------|----------------------------------------|--------------------|------------------|-----------------|---------------|--------------------|--------------------|
| SNP_24128_A_25990055 | NC_021163.1    | Ca_Kabuli_Chr04 | 25990055                | TT                                     | CC                 | CC               | INTERGENIC      |               |                    |                    |
| SNP_24129_A_25990107 | NC_021163.1    | Ca_Kabuli_Chr04 | 25990107                | AA                                     | GG                 | GG               | INTERGENIC      |               |                    |                    |
| SNP_24130_A_25990110 | NC_021163.1    | Ca_Kabuli_Chr04 | 25990110                | AA                                     | TT                 | TT               | INTERGENIC      |               |                    |                    |
| SNP_24131_A_25990140 | NC_021163.1    | Ca_Kabuli_Chr04 | 25990140                | AA                                     | GG                 | GG               | INTERGENIC      |               |                    |                    |
| SNP_24132_A_25990218 | NC_021163.1    | Ca_Kabuli_Chr04 | 25990218                | TT                                     | AA                 | AA               | INTERGENIC      |               |                    |                    |
| SNP_24133_A_25990259 | NC_021163.1    | Ca_Kabuli_Chr04 | 25990259                | AA                                     | GG                 | GG               | INTERGENIC      |               |                    |                    |
| SNP_24134_A_25990277 | NC_021163.1    | Ca_Kabuli_Chr04 | 25990277                | TT                                     | GG                 | GG               | INTERGENIC      |               |                    |                    |
| SNP_24135_A_25990343 | NC_021163.1    | Ca_Kabuli_Chr04 | 25990343                | CC                                     | TT                 | TT               | INTERGENIC      |               |                    |                    |
| SNP_24136_A_25990353 | NC_021163.1    | Ca_Kabuli_Chr04 | 25990353                | TT                                     | CC                 | CC               | INTERGENIC      |               |                    |                    |
| SNP_24137_A_25990401 | NC_021163.1    | Ca_Kabuli_Chr04 | 25990401                | AA                                     | TT                 | TT               | INTERGENIC      |               |                    |                    |
| SNP_24138_A_25990450 | NC_021163.1    | Ca_Kabuli_Chr04 | 25990450                | GG                                     | AA                 | AA               | INTERGENIC      |               |                    |                    |
| SNP_24139_A_25990556 | NC_021163.1    | Ca_Kabuli_Chr04 | 25990556                | CC                                     | TT                 | TT               | INTERGENIC      |               |                    |                    |
| SNP_24140_A_25990592 | NC_021163.1    | Ca_Kabuli_Chr04 | 25990592                | AA                                     | GG                 | GG               | INTERGENIC      |               |                    |                    |
| SNP_24141_A_25990720 | NC_021163.1    | Ca_Kabuli_Chr04 | 25990720                | AA                                     | GG                 | GG               | INTERGENIC      |               |                    |                    |
| SNP_24142_A_25990816 | NC_021163.1    | Ca_Kabuli_Chr04 | 25990816                | CC                                     | GG                 | GG               | INTERGENIC      |               |                    |                    |
| SNP_24143_A_25990827 | NC_021163.1    | Ca_Kabuli_Chr04 | 25990827                | GG                                     | CC                 | CC               | INTERGENIC      |               |                    |                    |
| SNP_24144_A_25990857 | NC_021163.1    | Ca_Kabuli_Chr04 | 25990857                | TT                                     | CC                 | CC               | INTERGENIC      |               |                    |                    |
| SNP_24146_A_25990929 | NC_021163.1    | Ca_Kabuli_Chr04 | 25990929                | CC                                     | TT                 | TT               | INTERGENIC      |               |                    |                    |
| SNP_24147_A_25990939 | NC_021163.1    | Ca_Kabuli_Chr04 | 25990939                | CC                                     | TT                 | TT               | INTERGENIC      |               |                    |                    |
| SNP_24148_A_25991026 | NC_021163.1    | Ca_Kabuli_Chr04 | 25991026                | AA                                     | GG                 | GG               | INTERGENIC      |               |                    |                    |
| SNP_24149_A_25991056 | NC_021163.1    | Ca_Kabuli_Chr04 | 25991056                | GG                                     | TT                 | TT               | INTERGENIC      |               |                    |                    |
| SNP_24150_A_25991368 | NC_021163.1    | Ca_Kabuli_Chr04 | 25991368                | AA                                     | GG                 | GG               | INTERGENIC      |               |                    |                    |

| SNPs IDs             | Chromosome IDs | Chromosomes     | Physical positions (bp) | CDC Frontier genome (Reference genome) | (Pusa 1103 & HPNB) | (ILWC 46 & LPNB) | Sequence genome | Components of | Gene accession IDs | Putative functions |
|----------------------|----------------|-----------------|-------------------------|----------------------------------------|--------------------|------------------|-----------------|---------------|--------------------|--------------------|
| SNP_24151_A_25992593 | NC_021163.1    | Ca_Kabuli_Chr04 | 25992593                | AA                                     | GG                 | GG               | INTERGENIC      |               |                    |                    |
| SNP_24152_A_25993284 | NC_021163.1    | Ca_Kabuli_Chr04 | 25993284                | CC                                     | TT                 | TT               | INTERGENIC      |               |                    |                    |
| SNP_24153_A_25993293 | NC_021163.1    | Ca_Kabuli_Chr04 | 25993293                | GG                                     | AA                 | AA               | INTERGENIC      |               |                    |                    |
| SNP_24154_A_25994152 | NC_021163.1    | Ca_Kabuli_Chr04 | 25994152                | GG                                     | TT                 | TT               | INTERGENIC      |               |                    |                    |
| SNP_24155_A_25994157 | NC_021163.1    | Ca_Kabuli_Chr04 | 25994157                | GG                                     | AA                 | AA               | INTERGENIC      |               |                    |                    |
| SNP_24156_A_25994177 | NC_021163.1    | Ca_Kabuli_Chr04 | 25994177                | GG                                     | AA                 | AA               | INTERGENIC      |               |                    |                    |
| SNP_24157_A_25994294 | NC_021163.1    | Ca_Kabuli_Chr04 | 25994294                | GG                                     | AA                 | AA               | INTERGENIC      |               |                    |                    |
| SNP_24158_A_25994341 | NC_021163.1    | Ca_Kabuli_Chr04 | 25994341                | GG                                     | AA                 | AA               | INTERGENIC      |               |                    |                    |
| SNP_24160_A_25994468 | NC_021163.1    | Ca_Kabuli_Chr04 | 25994468                | GG                                     | CC                 | CC               | INTERGENIC      |               |                    |                    |
| SNP_24161_A_25994645 | NC_021163.1    | Ca_Kabuli_Chr04 | 25994645                | TT                                     | CC                 | CC               | INTERGENIC      |               |                    |                    |
| SNP_24162_A_25994652 | NC_021163.1    | Ca_Kabuli_Chr04 | 25994652                | CC                                     | TT                 | TT               | INTERGENIC      |               |                    |                    |
| SNP_24163_A_25994686 | NC_021163.1    | Ca_Kabuli_Chr04 | 25994686                | TT                                     | CC                 | CC               | INTERGENIC      |               |                    |                    |
| SNP_24165_A_25994789 | NC_021163.1    | Ca_Kabuli_Chr04 | 25994789                | AA                                     | GG                 | GG               | INTERGENIC      |               |                    |                    |
| SNP_24166_A_25994977 | NC_021163.1    | Ca_Kabuli_Chr04 | 25994977                | GG                                     | CC                 | CC               | INTERGENIC      |               |                    |                    |
| SNP_24167_A_25995054 | NC_021163.1    | Ca_Kabuli_Chr04 | 25995054                | TT                                     | AA                 | AA               | INTERGENIC      |               |                    |                    |
| SNP_24169_A_25995103 | NC_021163.1    | Ca_Kabuli_Chr04 | 25995103                | CC                                     | TT                 | TT               | INTERGENIC      |               |                    |                    |
| SNP_24170_A_25995147 | NC_021163.1    | Ca_Kabuli_Chr04 | 25995147                | CC                                     | AA                 | AA               | INTERGENIC      |               |                    |                    |
| SNP_24171_A_25995170 | NC_021163.1    | Ca_Kabuli_Chr04 | 25995170                | GG                                     | AA                 | AA               | INTERGENIC      |               |                    |                    |
| SNP_24172_A_25995223 | NC_021163.1    | Ca_Kabuli_Chr04 | 25995223                | TT                                     | AA                 | AA               | INTERGENIC      |               |                    |                    |
| SNP_24173_A_25995346 | NC_021163.1    | Ca_Kabuli_Chr04 | 25995346                | CC                                     | AA                 | AA               | INTERGENIC      |               |                    |                    |
| SNP_24174_A_25995350 | NC_021163.1    | Ca_Kabuli_Chr04 | 25995350                | AA                                     | GG                 | GG               | INTERGENIC      |               |                    |                    |
| SNP_24175_A_25995354 | NC_021163.1    | Ca_Kabuli_Chr04 | 25995354                | CC                                     | TT                 | TT               | INTERGENIC      |               |                    |                    |

| SNPs IDs             | Chromosome IDs | Chromosomes     | Physical positions (bp) | CDC Frontier genome (Reference genome) | (Pusa 1103 & HPNB) | (ILWC 46 & LPNB) | Sequence Components of genome | Gene accession IDs | Putative functions                              |
|----------------------|----------------|-----------------|-------------------------|----------------------------------------|--------------------|------------------|-------------------------------|--------------------|-------------------------------------------------|
| SNP_24176_A_25995406 | NC_021163.1    | Ca_Kabuli_Chr04 | 25995406                | TT                                     | CC                 | CC               | INTERGENIC                    |                    |                                                 |
| SNP_24177_A_25995425 | NC_021163.1    | Ca_Kabuli_Chr04 | 25995425                | GG                                     | TT                 | TT               | INTERGENIC                    |                    |                                                 |
| SNP_24178_A_25995499 | NC_021163.1    | Ca_Kabuli_Chr04 | 25995499                | AA                                     | GG                 | GG               | INTERGENIC                    |                    |                                                 |
| SNP_24179_A_25995536 | NC_021163.1    | Ca_Kabuli_Chr04 | 25995536                | CC                                     | TT                 | TT               | INTERGENIC                    |                    |                                                 |
| SNP_24180_A_25995563 | NC_021163.1    | Ca_Kabuli_Chr04 | 25995563                | TT                                     | CC                 | CC               | INTERGENIC                    |                    |                                                 |
| SNP_24181_A_25995694 | NC_021163.1    | Ca_Kabuli_Chr04 | 25995694                | TT                                     | GG                 | GG               | DRR                           | 101497859          | putative B3 domain-containing protein At1g78640 |
| SNP_24182_A_25995698 | NC_021163.1    | Ca_Kabuli_Chr04 | 25995698                | GG                                     | AA                 | AA               | DRR                           | 101497859          | putative B3 domain-containing protein At1g78640 |
| SNP_24183_A_25995728 | NC_021163.1    | Ca_Kabuli_Chr04 | 25995728                | AA                                     | GG                 | GG               | DRR                           | 101497859          | putative B3 domain-containing protein At1g78640 |
| SNP_24184_A_25995781 | NC_021163.1    | Ca_Kabuli_Chr04 | 25995781                | CC                                     | TT                 | TT               | DRR                           | 101497859          | putative B3 domain-containing protein At1g78640 |
| SNP_24186_A_25995881 | NC_021163.1    | Ca_Kabuli_Chr04 | 25995881                | TT                                     | CC                 | CC               | DRR                           | 101497859          | putative B3 domain-containing protein At1g78640 |
| SNP_24187_A_25995895 | NC_021163.1    | Ca_Kabuli_Chr04 | 25995895                | AA                                     | CC                 | CC               | DRR                           | 101497859          | putative B3 domain-containing protein At1g78640 |
| SNP_24188_A_25995908 | NC_021163.1    | Ca_Kabuli_Chr04 | 25995908                | AA                                     | GG                 | GG               | DRR                           | 101497859          | putative B3 domain-containing protein At1g78640 |
| SNP_24189_A_25995926 | NC_021163.1    | Ca_Kabuli_Chr04 | 25995926                | CC                                     | AA                 | AA               | DRR                           | 101497859          | putative B3 domain-containing protein At1g78640 |
| SNP_24191_A_25995997 | NC_021163.1    | Ca_Kabuli_Chr04 | 25995997                | AA                                     | TT                 | TT               | DRR                           | 101497859          | putative B3 domain-containing protein At1g78640 |
| SNP_24192_A_25996071 | NC_021163.1    | Ca_Kabuli_Chr04 | 25996071                | CC                                     | GG                 | GG               | DRR                           | 101497859          | putative B3 domain-containing protein At1g78640 |
| SNP_24194_A_25996292 | NC_021163.1    | Ca_Kabuli_Chr04 | 25996292                | AA                                     | GG                 | GG               | DRR                           | 101497859          | putative B3 domain-containing protein At1g78640 |
| SNP_24196_A_26000053 | NC_021163.1    | Ca_Kabuli_Chr04 | 26000053                | AA                                     | TT                 | TT               | INTERGENIC                    |                    |                                                 |
| SNP_24197_A_26001294 | NC_021163.1    | Ca_Kabuli_Chr04 | 26001294                | TT                                     | GG                 | GG               | INTERGENIC                    |                    |                                                 |
| SNP_24198_A_26001571 | NC_021163.1    | Ca_Kabuli_Chr04 | 26001571                | CC                                     | TT                 | TT               | INTERGENIC                    |                    |                                                 |
| SNP_24199_A_26001783 | NC_021163.1    | Ca_Kabuli_Chr04 | 26001783                | TT                                     | GG                 | GG               | INTERGENIC                    |                    |                                                 |
| SNP_24202_A_26017550 | NC_021163.1    | Ca_Kabuli_Chr04 | 26017550                | CC                                     | TT                 | TT               | INTERGENIC                    |                    |                                                 |
| SNP_24203_A_26017985 | NC_021163.1    | Ca_Kabuli_Chr04 | 26017985                | TT                                     | CC                 | CC               | INTERGENIC                    |                    |                                                 |



| SNPs IDs             | Chromosome IDs | Chromosomes     | Physical positions (bp) | CDC Frontier genome (Reference genome) | (Pusa 1103 & HPNB) | (ILWC 46 & LPNB) | Sequence genome | Components of | Gene accession IDs | Putative functions |
|----------------------|----------------|-----------------|-------------------------|----------------------------------------|--------------------|------------------|-----------------|---------------|--------------------|--------------------|
| SNP_24204_A_26019082 | NC_021163.1    | Ca_Kabuli_Chr04 | 26019082                | AA                                     | GG                 | GG               | INTERGENIC      |               |                    |                    |
| SNP_24205_A_26020022 | NC_021163.1    | Ca_Kabuli_Chr04 | 26020022                | CC                                     | TT                 | TT               | INTERGENIC      |               |                    |                    |
| SNP_24206_A_26023493 | NC_021163.1    | Ca_Kabuli_Chr04 | 26023493                | AA                                     | TT                 | TT               | INTERGENIC      |               |                    |                    |
| SNP_24207_A_26023515 | NC_021163.1    | Ca_Kabuli_Chr04 | 26023515                | TT                                     | GG                 | GG               | INTERGENIC      |               |                    |                    |
| SNP_24208_A_26029372 | NC_021163.1    | Ca_Kabuli_Chr04 | 26029372                | TT                                     | CC                 | CC               | INTERGENIC      |               |                    |                    |
| SNP_24209_A_26030553 | NC_021163.1    | Ca_Kabuli_Chr04 | 26030553                | GG                                     | AA                 | AA               | INTERGENIC      |               |                    |                    |
| SNP_24210_A_26030578 | NC_021163.1    | Ca_Kabuli_Chr04 | 26030578                | AA                                     | CC                 | CC               | INTERGENIC      |               |                    |                    |
| SNP_24211_A_26030895 | NC_021163.1    | Ca_Kabuli_Chr04 | 26030895                | CC                                     | AA                 | AA               | INTERGENIC      |               |                    |                    |
| SNP_24212_A_26030896 | NC_021163.1    | Ca_Kabuli_Chr04 | 26030896                | AA                                     | CC                 | CC               | INTERGENIC      |               |                    |                    |
| SNP_24213_A_26030970 | NC_021163.1    | Ca_Kabuli_Chr04 | 26030970                | TT                                     | CC                 | CC               | INTERGENIC      |               |                    |                    |
| SNP_24214_A_26030974 | NC_021163.1    | Ca_Kabuli_Chr04 | 26030974                | TT                                     | AA                 | AA               | INTERGENIC      |               |                    |                    |
| SNP_24215_A_26055037 | NC_021163.1    | Ca_Kabuli_Chr04 | 26055037                | AA                                     | GG                 | GG               | INTERGENIC      |               |                    |                    |
| SNP_24216_A_26056019 | NC_021163.1    | Ca_Kabuli_Chr04 | 26056019                | GG                                     | AA                 | AA               | INTERGENIC      |               |                    |                    |
| SNP_24219_A_26067565 | NC_021163.1    | Ca_Kabuli_Chr04 | 26067565                | TT                                     | AA                 | AA               | INTERGENIC      |               |                    |                    |
| SNP_24220_A_26072129 | NC_021163.1    | Ca_Kabuli_Chr04 | 26072129                | AA                                     | CC                 | CC               | INTERGENIC      |               |                    |                    |
| SNP_24221_A_26076223 | NC_021163.1    | Ca_Kabuli_Chr04 | 26076223                | TT                                     | CC                 | CC               | INTERGENIC      |               |                    |                    |
| SNP_24222_A_26082279 | NC_021163.1    | Ca_Kabuli_Chr04 | 26082279                | GG                                     | AA                 | AA               | URR             | 101498173     | Unknown function   |                    |
| SNP_24223_A_26089526 | NC_021163.1    | Ca_Kabuli_Chr04 | 26089526                | AA                                     | TT                 | TT               | INTERGENIC      |               |                    |                    |
| SNP_24224_A_26089529 | NC_021163.1    | Ca_Kabuli_Chr04 | 26089529                | GG                                     | AA                 | AA               | INTERGENIC      |               |                    |                    |
| SNP_24225_A_26090483 | NC_021163.1    | Ca_Kabuli_Chr04 | 26090483                | AA                                     | GG                 | GG               | INTERGENIC      |               |                    |                    |
| SNP_24226_A_26091371 | NC_021163.1    | Ca_Kabuli_Chr04 | 26091371                | CC                                     | AA                 | AA               | INTERGENIC      |               |                    |                    |
| SNP_24227_A_26099276 | NC_021163.1    | Ca_Kabuli_Chr04 | 26099276                | CC                                     | GG                 | GG               | INTERGENIC      |               |                    |                    |

| SNPs IDs             | Chromosome IDs | Chromosomes     | Physical positions (bp) | CDC Frontier genome (Reference genome) | (Pusa 1103 & HPNB) | (ILWC 46 & LPNB) | Sequence genome | Components of | Gene accession IDs       | Putative functions |
|----------------------|----------------|-----------------|-------------------------|----------------------------------------|--------------------|------------------|-----------------|---------------|--------------------------|--------------------|
| SNP_24228_A_26100751 | NC_021163.1    | Ca_Kabuli_Chr04 | 26100751                | AA                                     | GG                 | GG               | INTERGENIC      |               |                          |                    |
| SNP_24229_A_26103788 | NC_021163.1    | Ca_Kabuli_Chr04 | 26103788                | CC                                     | TT                 | TT               | INTERGENIC      |               |                          |                    |
| SNP_24230_A_26108817 | NC_021163.1    | Ca_Kabuli_Chr04 | 26108817                | TT                                     | GG                 | GG               | INTERGENIC      |               |                          |                    |
| SNP_24231_A_26109221 | NC_021163.1    | Ca_Kabuli_Chr04 | 26109221                | CC                                     | TT                 | TT               | INTERGENIC      |               |                          |                    |
| SNP_24232_A_26110270 | NC_021163.1    | Ca_Kabuli_Chr04 | 26110270                | TT                                     | CC                 | CC               | INTERGENIC      |               |                          |                    |
| SNP_24234_A_26116751 | NC_021163.1    | Ca_Kabuli_Chr04 | 26116751                | CC                                     | TT                 | TT               | INTERGENIC      |               |                          |                    |
| SNP_24235_A_26116756 | NC_021163.1    | Ca_Kabuli_Chr04 | 26116756                | GG                                     | CC                 | CC               | INTERGENIC      |               |                          |                    |
| SNP_24236_A_26117103 | NC_021163.1    | Ca_Kabuli_Chr04 | 26117103                | GG                                     | AA                 | AA               | INTERGENIC      |               |                          |                    |
| SNP_24238_A_26128269 | NC_021163.1    | Ca_Kabuli_Chr04 | 26128269                | CC                                     | TT                 | TT               | INTERGENIC      |               |                          |                    |
| SNP_24239_A_26129240 | NC_021163.1    | Ca_Kabuli_Chr04 | 26129240                | GG                                     | AA                 | AA               | INTERGENIC      |               |                          |                    |
| SNP_24240_A_26144568 | NC_021163.1    | Ca_Kabuli_Chr04 | 26144568                | AA                                     | GG                 | GG               | INTERGENIC      |               |                          |                    |
| SNP_24241_A_26152926 | NC_021163.1    | Ca_Kabuli_Chr04 | 26152926                | CC                                     | TT                 | TT               | INTERGENIC      |               |                          |                    |
| SNP_24242_A_26153015 | NC_021163.1    | Ca_Kabuli_Chr04 | 26153015                | CC                                     | TT                 | TT               | INTERGENIC      |               |                          |                    |
| SNP_24243_A_26154987 | NC_021163.1    | Ca_Kabuli_Chr04 | 26154987                | TT                                     | CC                 | CC               | INTERGENIC      |               |                          |                    |
| SNP_24244_A_26155899 | NC_021163.1    | Ca_Kabuli_Chr04 | 26155899                | AA                                     | GG                 | GG               | INTERGENIC      |               |                          |                    |
| SNP_24245_A_26161206 | NC_021163.1    | Ca_Kabuli_Chr04 | 26161206                | GG                                     | AA                 | AA               | INTERGENIC      |               |                          |                    |
| SNP_24246_A_26166194 | NC_021163.1    | Ca_Kabuli_Chr04 | 26166194                | GG                                     | AA                 | AA               | DRR             | 101515337     | probable pectate lyase 1 |                    |
| SNP_24247_A_26168504 | NC_021163.1    | Ca_Kabuli_Chr04 | 26168504                | AA                                     | GG                 | GG               | INTRON          | 101515337     | probable pectate lyase 1 |                    |
| SNP_24248_A_26169224 | NC_021163.1    | Ca_Kabuli_Chr04 | 26169224                | GG                                     | CC                 | CC               | INTRON          | 101515337     | probable pectate lyase 1 |                    |
| SNP_24249_A_26174176 | NC_021163.1    | Ca_Kabuli_Chr04 | 26174176                | AA                                     | GG                 | GG               | URR             | 101515337     | probable pectate lyase 1 |                    |
| SNP_24250_A_26174393 | NC_021163.1    | Ca_Kabuli_Chr04 | 26174393                | GG                                     | TT                 | TT               | URR             | 101515337     | probable pectate lyase 1 |                    |
| SNP_24251_A_26175625 | NC_021163.1    | Ca_Kabuli_Chr04 | 26175625                | GG                                     | TT                 | TT               | INTERGENIC      |               |                          |                    |

| SNPs IDs             | Chromosome IDs | Chromosomes     | Physical positions (bp) | CDC Frontier (Reference genome) | (Pusa 1103 & HPNB) | (ILWC 46 & LPNB) | Sequence Components of genome | Gene accession IDs | Putative functions                   |
|----------------------|----------------|-----------------|-------------------------|---------------------------------|--------------------|------------------|-------------------------------|--------------------|--------------------------------------|
| SNP_24253_A_26178746 | NC_021163.1    | Ca_Kabuli_Chr04 | 26178746                | GG                              | AA                 | AA               | INTERGENIC                    |                    |                                      |
| SNP_24254_A_26179569 | NC_021163.1    | Ca_Kabuli_Chr04 | 26179569                | AA                              | GG                 | GG               | INTERGENIC                    |                    |                                      |
| SNP_24255_A_26185087 | NC_021163.1    | Ca_Kabuli_Chr04 | 26185087                | AA                              | GG                 | GG               | INTERGENIC                    |                    |                                      |
| SNP_24256_A_26186895 | NC_021163.1    | Ca_Kabuli_Chr04 | 26186895                | AA                              | CC                 | CC               | INTERGENIC                    |                    |                                      |
| SNP_24257_A_26188185 | NC_021163.1    | Ca_Kabuli_Chr04 | 26188185                | AA                              | GG                 | GG               | INTERGENIC                    |                    |                                      |
| SNP_24258_A_26189629 | NC_021163.1    | Ca_Kabuli_Chr04 | 26189629                | TT                              | CC                 | CC               | INTERGENIC                    |                    |                                      |
| SNP_24259_A_26191345 | NC_021163.1    | Ca_Kabuli_Chr04 | 26191345                | CC                              | AA                 | AA               | INTERGENIC                    |                    |                                      |
| SNP_24260_A_26191350 | NC_021163.1    | Ca_Kabuli_Chr04 | 26191350                | AA                              | CC                 | CC               | INTERGENIC                    |                    |                                      |
| SNP_24261_A_26195852 | NC_021163.1    | Ca_Kabuli_Chr04 | 26195852                | AA                              | CC                 | CC               | INTERGENIC                    |                    |                                      |
| SNP_24262_A_26197668 | NC_021163.1    | Ca_Kabuli_Chr04 | 26197668                | AA                              | TT                 | TT               | INTERGENIC                    |                    |                                      |
| SNP_24263_A_26198486 | NC_021163.1    | Ca_Kabuli_Chr04 | 26198486                | CC                              | AA                 | AA               | INTERGENIC                    |                    |                                      |
| SNP_24264_A_26198489 | NC_021163.1    | Ca_Kabuli_Chr04 | 26198489                | AA                              | GG                 | GG               | INTERGENIC                    |                    |                                      |
| SNP_24265_A_26198986 | NC_021163.1    | Ca_Kabuli_Chr04 | 26198986                | AA                              | CC                 | CC               | INTERGENIC                    |                    |                                      |
| SNP_24266_A_26201483 | NC_021163.1    | Ca_Kabuli_Chr04 | 26201483                | GG                              | TT                 | TT               | INTERGENIC                    |                    |                                      |
| SNP_24268_A_26207056 | NC_021163.1    | Ca_Kabuli_Chr04 | 26207056                | GG                              | AA                 | AA               | INTERGENIC                    |                    |                                      |
| SNP_24269_A_26207433 | NC_021163.1    | Ca_Kabuli_Chr04 | 26207433                | AA                              | CC                 | CC               | INTERGENIC                    |                    |                                      |
| SNP_24270_A_26207573 | NC_021163.1    | Ca_Kabuli_Chr04 | 26207573                | TT                              | CC                 | CC               | INTERGENIC                    |                    |                                      |
| SNP_24271_A_26207802 | NC_021163.1    | Ca_Kabuli_Chr04 | 26207802                | CC                              | GG                 | GG               | INTERGENIC                    |                    |                                      |
| SNP_24272_A_26219102 | NC_021163.1    | Ca_Kabuli_Chr04 | 26219102                | AA                              | TT                 | TT               | INTRON                        | 101515663          | inosine triphosphate pyrophosphatase |
| SNP_24273_A_26235011 | NC_021163.1    | Ca_Kabuli_Chr04 | 26235011                | CC                              | TT                 | TT               | URR                           | 101515663          | inosine triphosphate pyrophosphatase |
| SNP_24274_A_26236527 | NC_021163.1    | Ca_Kabuli_Chr04 | 26236527                | TT                              | CC                 | CC               | INTERGENIC                    |                    |                                      |
| SNP_24276_A_26239324 | NC_021163.1    | Ca_Kabuli_Chr04 | 26239324                | AA                              | CC                 | CC               | INTERGENIC                    |                    |                                      |

| SNPs IDs             | Chromosome IDs | Chromosomes     | Physical positions (bp) | CDC Frontier (Reference genome) | (Pusa 1103 & HPNB) | (ILWC 46 & LPNB) | Sequence genome | Components of | Gene accession IDs | Putative functions |
|----------------------|----------------|-----------------|-------------------------|---------------------------------|--------------------|------------------|-----------------|---------------|--------------------|--------------------|
| SNP_24277_A_26243097 | NC_021163.1    | Ca_Kabuli_Chr04 | 26243097                | GG                              | CC                 | CC               | INTERGENIC      |               |                    |                    |
| SNP_24278_A_26244281 | NC_021163.1    | Ca_Kabuli_Chr04 | 26244281                | AA                              | GG                 | GG               | INTERGENIC      |               |                    |                    |
| SNP_24279_A_26245393 | NC_021163.1    | Ca_Kabuli_Chr04 | 26245393                | TT                              | CC                 | CC               | INTERGENIC      |               |                    |                    |
| SNP_24280_A_26248981 | NC_021163.1    | Ca_Kabuli_Chr04 | 26248981                | TT                              | CC                 | CC               | INTERGENIC      |               |                    |                    |
| SNP_24283_A_26252036 | NC_021163.1    | Ca_Kabuli_Chr04 | 26252036                | AA                              | CC                 | CC               | INTERGENIC      |               |                    |                    |
| SNP_24284_A_26262745 | NC_021163.1    | Ca_Kabuli_Chr04 | 26262745                | AA                              | GG                 | GG               | INTERGENIC      |               |                    |                    |
| SNP_24285_A_26262780 | NC_021163.1    | Ca_Kabuli_Chr04 | 26262780                | GG                              | TT                 | TT               | INTERGENIC      |               |                    |                    |
| SNP_24286_A_26263313 | NC_021163.1    | Ca_Kabuli_Chr04 | 26263313                | AA                              | GG                 | GG               | INTERGENIC      |               |                    |                    |
| SNP_24287_A_26263444 | NC_021163.1    | Ca_Kabuli_Chr04 | 26263444                | TT                              | CC                 | CC               | INTERGENIC      |               |                    |                    |
| SNP_24288_A_26263447 | NC_021163.1    | Ca_Kabuli_Chr04 | 26263447                | TT                              | CC                 | CC               | INTERGENIC      |               |                    |                    |
| SNP_24289_A_26263528 | NC_021163.1    | Ca_Kabuli_Chr04 | 26263528                | TT                              | CC                 | CC               | INTERGENIC      |               |                    |                    |
| SNP_24290_A_26263560 | NC_021163.1    | Ca_Kabuli_Chr04 | 26263560                | AA                              | GG                 | GG               | INTERGENIC      |               |                    |                    |
| SNP_24291_A_26263910 | NC_021163.1    | Ca_Kabuli_Chr04 | 26263910                | GG                              | AA                 | AA               | INTERGENIC      |               |                    |                    |
| SNP_24292_A_26263986 | NC_021163.1    | Ca_Kabuli_Chr04 | 26263986                | CC                              | TT                 | TT               | INTERGENIC      |               |                    |                    |
| SNP_24293_A_26264183 | NC_021163.1    | Ca_Kabuli_Chr04 | 26264183                | GG                              | AA                 | AA               | INTERGENIC      |               |                    |                    |
| SNP_24296_A_26295399 | NC_021163.1    | Ca_Kabuli_Chr04 | 26295399                | TT                              | CC                 | CC               | INTERGENIC      |               |                    |                    |
| SNP_24297_A_26295404 | NC_021163.1    | Ca_Kabuli_Chr04 | 26295404                | CC                              | AA                 | AA               | INTERGENIC      |               |                    |                    |
| SNP_24298_A_26300291 | NC_021163.1    | Ca_Kabuli_Chr04 | 26300291                | GG                              | AA                 | AA               | INTERGENIC      |               |                    |                    |
| SNP_24299_A_26300608 | NC_021163.1    | Ca_Kabuli_Chr04 | 26300608                | GG                              | AA                 | AA               | INTERGENIC      |               |                    |                    |
| SNP_24300_A_26306713 | NC_021163.1    | Ca_Kabuli_Chr04 | 26306713                | AA                              | CC                 | CC               | INTERGENIC      |               |                    |                    |
| SNP_24301_A_26307236 | NC_021163.1    | Ca_Kabuli_Chr04 | 26307236                | CC                              | TT                 | TT               | INTERGENIC      |               |                    |                    |
| SNP_24302_A_26307468 | NC_021163.1    | Ca_Kabuli_Chr04 | 26307468                | AA                              | GG                 | GG               | INTERGENIC      |               |                    |                    |

| SNPs IDs             | Chromosome IDs | Chromosomes     | Physical positions (bp) | CDC Frontier genome (Reference genome) | (Pusa 1103 & HPNB) | (ILWC 46 & LPNB) | Sequence Components of genome | Gene accession IDs | Putative functions                      |
|----------------------|----------------|-----------------|-------------------------|----------------------------------------|--------------------|------------------|-------------------------------|--------------------|-----------------------------------------|
| SNP_24303_A_26307508 | NC_021163.1    | Ca_Kabuli_Chr04 | 26307508                | CC                                     | TT                 | TT               | INTERGENIC                    |                    |                                         |
| SNP_24305_A_26309695 | NC_021163.1    | Ca_Kabuli_Chr04 | 26309695                | GG                                     | AA                 | AA               | INTERGENIC                    |                    |                                         |
| SNP_24306_A_26309992 | NC_021163.1    | Ca_Kabuli_Chr04 | 26309992                | GG                                     | TT                 | TT               | INTERGENIC                    |                    |                                         |
| SNP_24308_A_26343072 | NC_021163.1    | Ca_Kabuli_Chr04 | 26343072                | AA                                     | TT                 | TT               | INTRON                        | 101500434          | late embryogenesis abundant protein D-7 |
| SNP_24309_A_26344180 | NC_021163.1    | Ca_Kabuli_Chr04 | 26344180                | GG                                     | AA                 | AA               | DRR                           | 101502015          | uncharacterized LOC101502015            |
| SNP_24310_A_26351243 | NC_021163.1    | Ca_Kabuli_Chr04 | 26351243                | AA                                     | GG                 | GG               | INTRON                        | 101502015          | uncharacterized LOC101502015            |
| SNP_24311_A_26352795 | NC_021163.1    | Ca_Kabuli_Chr04 | 26352795                | TT                                     | CC                 | CC               | INTRON                        | 101502015          | uncharacterized LOC101502015            |
| SNP_24312_A_26357126 | NC_021163.1    | Ca_Kabuli_Chr04 | 26357126                | AA                                     | TT                 | TT               | INTERGENIC                    |                    |                                         |
| SNP_24313_A_26363529 | NC_021163.1    | Ca_Kabuli_Chr04 | 26363529                | TT                                     | GG                 | GG               | URR                           | 101410594          | transfer RNA cysteine (anticodon GCA)   |
| SNP_24315_A_26365936 | NC_021163.1    | Ca_Kabuli_Chr04 | 26365936                | AA                                     | CC                 | CC               | UPSTREAM                      | Gene_ma13097       | Unknown function                        |
| SNP_24316_A_26369504 | NC_021163.1    | Ca_Kabuli_Chr04 | 26369504                | TT                                     | CC                 | CC               | INTERGENIC                    |                    |                                         |
| SNP_24318_A_26380167 | NC_021163.1    | Ca_Kabuli_Chr04 | 26380167                | TT                                     | CC                 | CC               | INTERGENIC                    |                    |                                         |
| SNP_24319_A_26382032 | NC_021163.1    | Ca_Kabuli_Chr04 | 26382032                | GG                                     | AA                 | AA               | INTERGENIC                    |                    |                                         |
| SNP_24321_A_26394392 | NC_021163.1    | Ca_Kabuli_Chr04 | 26394392                | GG                                     | TT                 | TT               | INTERGENIC                    |                    |                                         |
| SNP_24322_A_26394593 | NC_021163.1    | Ca_Kabuli_Chr04 | 26394593                | GG                                     | AA                 | AA               | INTERGENIC                    |                    |                                         |
| SNP_24323_A_26394651 | NC_021163.1    | Ca_Kabuli_Chr04 | 26394651                | GG                                     | TT                 | TT               | INTERGENIC                    |                    |                                         |
| SNP_24325_A_26399327 | NC_021163.1    | Ca_Kabuli_Chr04 | 26399327                | CC                                     | TT                 | TT               | INTERGENIC                    |                    |                                         |
| SNP_24326_A_26399559 | NC_021163.1    | Ca_Kabuli_Chr04 | 26399559                | TT                                     | CC                 | CC               | INTERGENIC                    |                    |                                         |
| SNP_24327_A_26403324 | NC_021163.1    | Ca_Kabuli_Chr04 | 26403324                | CC                                     | AA                 | AA               | INTERGENIC                    |                    |                                         |
| SNP_24328_A_26404680 | NC_021163.1    | Ca_Kabuli_Chr04 | 26404680                | CC                                     | TT                 | TT               | INTERGENIC                    |                    |                                         |
| SNP_24329_A_26404809 | NC_021163.1    | Ca_Kabuli_Chr04 | 26404809                | AA                                     | GG                 | GG               | INTERGENIC                    |                    |                                         |
| SNP_24330_A_26406188 | NC_021163.1    | Ca_Kabuli_Chr04 | 26406188                | GG                                     | TT                 | TT               | INTERGENIC                    |                    |                                         |

| SNPs IDs             | Chromosome IDs | Chromosomes     | Physical positions (bp) | CDC Frontier genome (Reference genome) | (Pusa 1103 & HPNB) | (ILWC 46 & LPNB) | Sequence Components of genome | Gene accession IDs | Putative functions                    |
|----------------------|----------------|-----------------|-------------------------|----------------------------------------|--------------------|------------------|-------------------------------|--------------------|---------------------------------------|
| SNP_24331_A_26409325 | NC_021163.1    | Ca_Kabuli_Chr04 | 26409325                | GG                                     | AA                 | AA               | INTERGENIC                    |                    |                                       |
| SNP_24332_A_26409507 | NC_021163.1    | Ca_Kabuli_Chr04 | 26409507                | AA                                     | TT                 | TT               | INTERGENIC                    |                    |                                       |
| SNP_24333_A_26410990 | NC_021163.1    | Ca_Kabuli_Chr04 | 26410990                | TT                                     | CC                 | CC               | DRR                           | 101410594          | transfer RNA cysteine (anticodon GCA) |
| SNP_24334_A_26411090 | NC_021163.1    | Ca_Kabuli_Chr04 | 26411090                | AA                                     | TT                 | TT               | DRR                           | 101410594          | transfer RNA cysteine (anticodon GCA) |
| SNP_24335_A_26411091 | NC_021163.1    | Ca_Kabuli_Chr04 | 26411091                | GG                                     | AA                 | AA               | DRR                           | 101410594          | transfer RNA cysteine (anticodon GCA) |
| SNP_24336_A_26411141 | NC_021163.1    | Ca_Kabuli_Chr04 | 26411141                | AA                                     | TT                 | TT               | DRR                           | 101410594          | transfer RNA cysteine (anticodon GCA) |
| SNP_24337_A_26411203 | NC_021163.1    | Ca_Kabuli_Chr04 | 26411203                | TT                                     | CC                 | CC               | DRR                           | 101410594          | transfer RNA cysteine (anticodon GCA) |
| SNP_24338_A_26411481 | NC_021163.1    | Ca_Kabuli_Chr04 | 26411481                | TT                                     | AA                 | AA               | DRR                           | 101410594          | transfer RNA cysteine (anticodon GCA) |
| SNP_24339_A_26415971 | NC_021163.1    | Ca_Kabuli_Chr04 | 26415971                | GG                                     | AA                 | AA               | URR                           | 101500748          | thioredoxin-like protein YLS8         |
| SNP_24340_A_26457150 | NC_021163.1    | Ca_Kabuli_Chr04 | 26457150                | GG                                     | TT                 | TT               | INTERGENIC                    |                    |                                       |
| SNP_24341_A_26460774 | NC_021163.1    | Ca_Kabuli_Chr04 | 26460774                | GG                                     | AA                 | AA               | INTERGENIC                    |                    |                                       |
| SNP_24342_A_26460791 | NC_021163.1    | Ca_Kabuli_Chr04 | 26460791                | GG                                     | AA                 | AA               | INTERGENIC                    |                    |                                       |
| SNP_24343_A_26464689 | NC_021163.1    | Ca_Kabuli_Chr04 | 26464689                | TT                                     | CC                 | CC               | INTERGENIC                    |                    |                                       |
| SNP_24344_A_26468021 | NC_021163.1    | Ca_Kabuli_Chr04 | 26468021                | AA                                     | CC                 | CC               | INTERGENIC                    |                    |                                       |
| SNP_24345_A_26469196 | NC_021163.1    | Ca_Kabuli_Chr04 | 26469196                | TT                                     | CC                 | CC               | INTERGENIC                    |                    |                                       |
| SNP_24346_A_26472418 | NC_021163.1    | Ca_Kabuli_Chr04 | 26472418                | CC                                     | TT                 | TT               | INTERGENIC                    |                    |                                       |
| SNP_24347_A_26472540 | NC_021163.1    | Ca_Kabuli_Chr04 | 26472540                | CC                                     | TT                 | TT               | INTERGENIC                    |                    |                                       |
| SNP_24348_A_26473644 | NC_021163.1    | Ca_Kabuli_Chr04 | 26473644                | CC                                     | TT                 | TT               | INTERGENIC                    |                    |                                       |
| SNP_24349_A_26483830 | NC_021163.1    | Ca_Kabuli_Chr04 | 26483830                | AA                                     | TT                 | TT               | INTRON                        | 101504914          | aspartic proteinase-like protein 2    |
| SNP_24350_A_26487857 | NC_021163.1    | Ca_Kabuli_Chr04 | 26487857                | GG                                     | AA                 | AA               | URR                           | 101504914          | aspartic proteinase-like protein 2    |
| SNP_24351_A_26489973 | NC_021163.1    | Ca_Kabuli_Chr04 | 26489973                | AA                                     | TT                 | TT               | INTERGENIC                    |                    |                                       |
| SNP_24352_A_26491033 | NC_021163.1    | Ca_Kabuli_Chr04 | 26491033                | TT                                     | CC                 | CC               | INTERGENIC                    |                    |                                       |

| SNPs IDs             | Chromosome IDs | Chromosomes     | Physical positions (bp) | CDC Frontier genome (Reference genome) | (Pusa 1103 & HPNB) | (ILWC 46 & LPNB) | Sequence Components of genome | Gene accession IDs | Putative functions                                    |
|----------------------|----------------|-----------------|-------------------------|----------------------------------------|--------------------|------------------|-------------------------------|--------------------|-------------------------------------------------------|
| SNP_24353_A_26492869 | NC_021163.1    | Ca_Kabuli_Chr04 | 26492869                | CC                                     | TT                 | TT               | INTERGENIC                    |                    |                                                       |
| SNP_24354_A_26494434 | NC_021163.1    | Ca_Kabuli_Chr04 | 26494434                | CC                                     | AA                 | AA               | INTERGENIC                    |                    |                                                       |
| SNP_24355_A_26494502 | NC_021163.1    | Ca_Kabuli_Chr04 | 26494502                | GG                                     | AA                 | AA               | INTERGENIC                    |                    |                                                       |
| SNP_24357_A_26496559 | NC_021163.1    | Ca_Kabuli_Chr04 | 26496559                | GG                                     | TT                 | TT               | INTERGENIC                    |                    |                                                       |
| SNP_24358_A_26500268 | NC_021163.1    | Ca_Kabuli_Chr04 | 26500268                | AA                                     | CC                 | CC               | INTERGENIC                    |                    |                                                       |
| SNP_24359_A_26502245 | NC_021163.1    | Ca_Kabuli_Chr04 | 26502245                | AA                                     | TT                 | TT               | INTERGENIC                    |                    |                                                       |
| SNP_24360_A_26502573 | NC_021163.1    | Ca_Kabuli_Chr04 | 26502573                | CC                                     | TT                 | TT               | INTERGENIC                    |                    |                                                       |
| SNP_24361_A_26509372 | NC_021163.1    | Ca_Kabuli_Chr04 | 26509372                | TT                                     | CC                 | CC               | INTERGENIC                    |                    |                                                       |
| SNP_24362_A_26509658 | NC_021163.1    | Ca_Kabuli_Chr04 | 26509658                | CC                                     | TT                 | TT               | INTERGENIC                    |                    |                                                       |
| SNP_24363_A_26510725 | NC_021163.1    | Ca_Kabuli_Chr04 | 26510725                | GG                                     | CC                 | CC               | INTERGENIC                    |                    |                                                       |
| SNP_24364_A_26517317 | NC_021163.1    | Ca_Kabuli_Chr04 | 26517317                | AA                                     | GG                 | GG               | SYNONYMOUS_CODING             | 101503621          | pentatricopeptide repeat-containing protein At2g32630 |
| SNP_24365_A_26526641 | NC_021163.1    | Ca_Kabuli_Chr04 | 26526641                | AA                                     | GG                 | GG               | INTERGENIC                    |                    |                                                       |
| SNP_24367_A_26530375 | NC_021163.1    | Ca_Kabuli_Chr04 | 26530375                | CC                                     | TT                 | TT               | INTRON                        | 101503948          | putative G3BP-like protein                            |
| SNP_24368_A_26532430 | NC_021163.1    | Ca_Kabuli_Chr04 | 26532430                | CC                                     | AA                 | AA               | INTRON                        | 101503948          | putative G3BP-like protein                            |
| SNP_24369_A_26545855 | NC_021163.1    | Ca_Kabuli_Chr04 | 26545855                | GG                                     | AA                 | AA               | URR                           | 101505544          | uncharacterized LOC101505544                          |
| SNP_24370_A_26556298 | NC_021163.1    | Ca_Kabuli_Chr04 | 26556298                | TT                                     | CC                 | CC               | INTERGENIC                    |                    |                                                       |
| SNP_24371_A_26556502 | NC_021163.1    | Ca_Kabuli_Chr04 | 26556502                | AA                                     | CC                 | CC               | INTERGENIC                    |                    |                                                       |
| SNP_24372_A_26556665 | NC_021163.1    | Ca_Kabuli_Chr04 | 26556665                | TT                                     | CC                 | CC               | INTERGENIC                    |                    |                                                       |
| SNP_24373_A_26591861 | NC_021163.1    | Ca_Kabuli_Chr04 | 26591861                | TT                                     | CC                 | CC               | INTERGENIC                    |                    |                                                       |
| SNP_24374_A_26592209 | NC_021163.1    | Ca_Kabuli_Chr04 | 26592209                | TT                                     | CC                 | CC               | INTERGENIC                    |                    |                                                       |
| SNP_24375_A_26597703 | NC_021163.1    | Ca_Kabuli_Chr04 | 26597703                | AA                                     | GG                 | GG               | INTERGENIC                    |                    |                                                       |
| SNP_24376_A_26604951 | NC_021163.1    | Ca_Kabuli_Chr04 | 26604951                | AA                                     | CC                 | CC               | INTERGENIC                    |                    |                                                       |

| SNPs IDs             | Chromosome IDs | Chromosomes     | Physical positions (bp) | CDC Frontier genome (Reference genome) | (Pusa 1103 & HPNB) | (ILWC 46 & LPNB) | Sequence genome | Components of | Gene accession IDs                               | Putative functions |
|----------------------|----------------|-----------------|-------------------------|----------------------------------------|--------------------|------------------|-----------------|---------------|--------------------------------------------------|--------------------|
| SNP_24377_A_26608249 | NC_021163.1    | Ca_Kabuli_Chr04 | 26608249                | TT                                     | CC                 | CC               | INTERGENIC      |               |                                                  |                    |
| SNP_24378_A_26608275 | NC_021163.1    | Ca_Kabuli_Chr04 | 26608275                | TT                                     | CC                 | CC               | INTERGENIC      |               |                                                  |                    |
| SNP_24379_A_26608421 | NC_021163.1    | Ca_Kabuli_Chr04 | 26608421                | AA                                     | GG                 | GG               | INTERGENIC      |               |                                                  |                    |
| SNP_24380_A_26608501 | NC_021163.1    | Ca_Kabuli_Chr04 | 26608501                | AA                                     | CC                 | CC               | INTERGENIC      |               |                                                  |                    |
| SNP_24381_A_26608595 | NC_021163.1    | Ca_Kabuli_Chr04 | 26608595                | CC                                     | AA                 | AA               | DRR             | 101504264     | 3-isopropylmalate dehydratase large subunit-like |                    |
| SNP_24382_A_26608936 | NC_021163.1    | Ca_Kabuli_Chr04 | 26608936                | GG                                     | AA                 | AA               | DRR             | 101504264     | 3-isopropylmalate dehydratase large subunit-like |                    |
| SNP_24383_A_26608958 | NC_021163.1    | Ca_Kabuli_Chr04 | 26608958                | CC                                     | GG                 | GG               | DRR             | 101504264     | 3-isopropylmalate dehydratase large subunit-like |                    |
| SNP_24384_A_26609027 | NC_021163.1    | Ca_Kabuli_Chr04 | 26609027                | TT                                     | CC                 | CC               | DRR             | 101504264     | 3-isopropylmalate dehydratase large subunit-like |                    |
| SNP_24385_A_26620417 | NC_021163.1    | Ca_Kabuli_Chr04 | 26620417                | AA                                     | GG                 | GG               | URR             | 101504264     | 3-isopropylmalate dehydratase large subunit-like |                    |
| SNP_24387_A_26621999 | NC_021163.1    | Ca_Kabuli_Chr04 | 26621999                | CC                                     | TT                 | TT               | URR             | 101504264     | 3-isopropylmalate dehydratase large subunit-like |                    |
| SNP_24389_A_26625423 | NC_021163.1    | Ca_Kabuli_Chr04 | 26625423                | AA                                     | GG                 | GG               | INTERGENIC      |               |                                                  |                    |
| SNP_24390_A_26626777 | NC_021163.1    | Ca_Kabuli_Chr04 | 26626777                | CC                                     | GG                 | GG               | INTERGENIC      |               |                                                  |                    |
| SNP_24391_A_26635066 | NC_021163.1    | Ca_Kabuli_Chr04 | 26635066                | TT                                     | CC                 | CC               | INTRON          | 101504596     | DNA mismatch repair protein MSH1, mitochondrial  |                    |
| SNP_24392_A_26648237 | NC_021163.1    | Ca_Kabuli_Chr04 | 26648237                | TT                                     | GG                 | GG               | INTRON          | 101504596     | DNA mismatch repair protein MSH1, mitochondrial  |                    |
| SNP_24394_A_26653928 | NC_021163.1    | Ca_Kabuli_Chr04 | 26653928                | CC                                     | TT                 | TT               | INTERGENIC      |               |                                                  |                    |
| SNP_24395_A_26654756 | NC_021163.1    | Ca_Kabuli_Chr04 | 26654756                | CC                                     | TT                 | TT               | INTERGENIC      |               |                                                  |                    |
| SNP_24396_A_26657010 | NC_021163.1    | Ca_Kabuli_Chr04 | 26657010                | AA                                     | GG                 | GG               | INTERGENIC      |               |                                                  |                    |
| SNP_24397_A_26659042 | NC_021163.1    | Ca_Kabuli_Chr04 | 26659042                | GG                                     | AA                 | AA               | INTERGENIC      |               |                                                  |                    |
| SNP_24398_A_26659776 | NC_021163.1    | Ca_Kabuli_Chr04 | 26659776                | CC                                     | TT                 | TT               | INTERGENIC      |               |                                                  |                    |
| SNP_24399_A_26660409 | NC_021163.1    | Ca_Kabuli_Chr04 | 26660409                | TT                                     | AA                 | AA               | INTERGENIC      |               |                                                  |                    |
| SNP_24401_A_26663049 | NC_021163.1    | Ca_Kabuli_Chr04 | 26663049                | GG                                     | AA                 | AA               | INTERGENIC      |               |                                                  |                    |
| SNP_24402_A_26663678 | NC_021163.1    | Ca_Kabuli_Chr04 | 26663678                | TT                                     | CC                 | CC               | INTERGENIC      |               |                                                  |                    |



| SNPs IDs             | Chromosome IDs | Chromosomes     | Physical positions (bp) | CDC Frontier genome (Reference genome) | (Pusa 1103 & HPNB) | (ILWC 46 & LPNB) | Sequence genome       | Components of | Gene accession IDs              | Putative functions |
|----------------------|----------------|-----------------|-------------------------|----------------------------------------|--------------------|------------------|-----------------------|---------------|---------------------------------|--------------------|
| SNP_24404_A_26670340 | NC_021163.1    | Ca_Kabuli_Chr04 | 26670340                | CC                                     | GG                 | GG               | INTERGENIC            |               |                                 |                    |
| SNP_24406_A_26673840 | NC_021163.1    | Ca_Kabuli_Chr04 | 26673840                | GG                                     | TT                 | TT               | INTERGENIC            |               |                                 |                    |
| SNP_24407_A_26684060 | NC_021163.1    | Ca_Kabuli_Chr04 | 26684060                | GG                                     | AA                 | AA               | INTERGENIC            |               |                                 |                    |
| SNP_24408_A_26728704 | NC_021163.1    | Ca_Kabuli_Chr04 | 26728704                | GG                                     | TT                 | TT               | INTERGENIC            |               |                                 |                    |
| SNP_24409_A_26730192 | NC_021163.1    | Ca_Kabuli_Chr04 | 26730192                | GG                                     | AA                 | AA               | INTERGENIC            |               |                                 |                    |
| SNP_24410_A_26745152 | NC_021163.1    | Ca_Kabuli_Chr04 | 26745152                | GG                                     | AA                 | AA               | INTERGENIC            |               |                                 |                    |
| SNP_24411_A_26745458 | NC_021163.1    | Ca_Kabuli_Chr04 | 26745458                | CC                                     | GG                 | GG               | INTERGENIC            |               |                                 |                    |
| SNP_24412_A_26745459 | NC_021163.1    | Ca_Kabuli_Chr04 | 26745459                | AA                                     | TT                 | TT               | INTERGENIC            |               |                                 |                    |
| SNP_24413_A_26746575 | NC_021163.1    | Ca_Kabuli_Chr04 | 26746575                | TT                                     | CC                 | CC               | INTERGENIC            |               |                                 |                    |
| SNP_24415_A_26750909 | NC_021163.1    | Ca_Kabuli_Chr04 | 26750909                | GG                                     | AA                 | AA               | INTERGENIC            |               |                                 |                    |
| SNP_24418_A_26753125 | NC_021163.1    | Ca_Kabuli_Chr04 | 26753125                | TT                                     | AA                 | AA               | INTERGENIC            |               |                                 |                    |
| SNP_24419_A_26753146 | NC_021163.1    | Ca_Kabuli_Chr04 | 26753146                | GG                                     | AA                 | AA               | INTERGENIC            |               |                                 |                    |
| SNP_24420_A_26761872 | NC_021163.1    | Ca_Kabuli_Chr04 | 26761872                | AA                                     | GG                 | GG               | INTERGENIC            |               |                                 |                    |
| SNP_24422_A_26763506 | NC_021163.1    | Ca_Kabuli_Chr04 | 26763506                | TT                                     | AA                 | AA               | DRR                   | 101507078     | transcription factor MYB24-like |                    |
| SNP_24423_A_26765251 | NC_021163.1    | Ca_Kabuli_Chr04 | 26765251                | AA                                     | CC                 | CC               | NON_SYNONYMOUS_CODING | 101507078     | transcription factor MYB24-like |                    |
| SNP_24425_A_26766108 | NC_021163.1    | Ca_Kabuli_Chr04 | 26766108                | AA                                     | GG                 | GG               | URR                   | 101507078     | transcription factor MYB24-like |                    |
| SNP_24426_A_26777097 | NC_021163.1    | Ca_Kabuli_Chr04 | 26777097                | TT                                     | CC                 | CC               | INTERGENIC            |               |                                 |                    |
| SNP_24427_A_26777507 | NC_021163.1    | Ca_Kabuli_Chr04 | 26777507                | CC                                     | AA                 | AA               | INTERGENIC            |               |                                 |                    |
| SNP_24428_A_26781599 | NC_021163.1    | Ca_Kabuli_Chr04 | 26781599                | CC                                     | TT                 | TT               | INTERGENIC            |               |                                 |                    |
| SNP_24429_A_26785725 | NC_021163.1    | Ca_Kabuli_Chr04 | 26785725                | TT                                     | AA                 | AA               | INTERGENIC            |               |                                 |                    |
| SNP_24431_A_26790234 | NC_021163.1    | Ca_Kabuli_Chr04 | 26790234                | TT                                     | AA                 | AA               | INTERGENIC            |               |                                 |                    |
| SNP_24432_A_26794110 | NC_021163.1    | Ca_Kabuli_Chr04 | 26794110                | AA                                     | CC                 | CC               | INTERGENIC            |               |                                 |                    |

| SNPs IDs             | Chromosome IDs | Chromosomes     | Physical positions (bp) | CDC Frontier genome (Reference genome) | (Pusa 1103 & HPNB) | (ILWC 46 & LPNB) | Sequence Components of genome | Gene accession IDs | Putative functions                   |
|----------------------|----------------|-----------------|-------------------------|----------------------------------------|--------------------|------------------|-------------------------------|--------------------|--------------------------------------|
| SNP_24433_A_26794395 | NC_021163.1    | Ca_Kabuli_Chr04 | 26794395                | GG                                     | AA                 | AA               | INTERGENIC                    |                    |                                      |
| SNP_24434_A_26805605 | NC_021163.1    | Ca_Kabuli_Chr04 | 26805605                | GG                                     | AA                 | AA               | INTERGENIC                    |                    |                                      |
| SNP_24435_A_26805821 | NC_021163.1    | Ca_Kabuli_Chr04 | 26805821                | AA                                     | GG                 | GG               | INTERGENIC                    |                    |                                      |
| SNP_24436_A_26807953 | NC_021163.1    | Ca_Kabuli_Chr04 | 26807953                | TT                                     | GG                 | GG               | DRR                           | 101510921          | uncharacterized LOC101510921         |
| SNP_24437_A_26808107 | NC_021163.1    | Ca_Kabuli_Chr04 | 26808107                | TT                                     | CC                 | CC               | DRR                           | 101510921          | uncharacterized LOC101510921         |
| SNP_24438_A_26808224 | NC_021163.1    | Ca_Kabuli_Chr04 | 26808224                | CC                                     | TT                 | TT               | DRR                           | 101510921          | uncharacterized LOC101510921         |
| SNP_24439_A_26808230 | NC_021163.1    | Ca_Kabuli_Chr04 | 26808230                | CC                                     | AA                 | AA               | DRR                           | 101510921          | uncharacterized LOC101510921         |
| SNP_24440_A_26810599 | NC_021163.1    | Ca_Kabuli_Chr04 | 26810599                | GG                                     | TT                 | TT               | INTRON                        | 101510921          | uncharacterized LOC101510921         |
| SNP_24441_A_26810674 | NC_021163.1    | Ca_Kabuli_Chr04 | 26810674                | AA                                     | CC                 | CC               | INTRON                        | 101510921          | uncharacterized LOC101510921         |
| SNP_24442_A_26810680 | NC_021163.1    | Ca_Kabuli_Chr04 | 26810680                | CC                                     | TT                 | TT               | INTRON                        | 101510921          | uncharacterized LOC101510921         |
| SNP_24443_A_26810737 | NC_021163.1    | Ca_Kabuli_Chr04 | 26810737                | CC                                     | TT                 | TT               | INTRON                        | 101510921          | uncharacterized LOC101510921         |
| SNP_24444_A_26810749 | NC_021163.1    | Ca_Kabuli_Chr04 | 26810749                | GG                                     | AA                 | AA               | INTRON                        | 101510921          | uncharacterized LOC101510921         |
| SNP_24445_A_26810862 | NC_021163.1    | Ca_Kabuli_Chr04 | 26810862                | CC                                     | TT                 | TT               | INTRON                        | 101510921          | uncharacterized LOC101510921         |
| SNP_24447_A_26815871 | NC_021163.1    | Ca_Kabuli_Chr04 | 26815871                | AA                                     | TT                 | TT               | INTERGENIC                    |                    |                                      |
| SNP_24448_A_26816346 | NC_021163.1    | Ca_Kabuli_Chr04 | 26816346                | GG                                     | TT                 | TT               | INTERGENIC                    |                    |                                      |
| SNP_24449_A_26818366 | NC_021163.1    | Ca_Kabuli_Chr04 | 26818366                | CC                                     | TT                 | TT               | INTERGENIC                    |                    |                                      |
| SNP_24450_A_26821666 | NC_021163.1    | Ca_Kabuli_Chr04 | 26821666                | AA                                     | TT                 | TT               | DRR                           | 101511233          | Unknown function                     |
| SNP_24451_A_26821667 | NC_021163.1    | Ca_Kabuli_Chr04 | 26821667                | CC                                     | AA                 | AA               | DRR                           | 101511233          | Unknown function                     |
| SNP_24452_A_26827993 | NC_021163.1    | Ca_Kabuli_Chr04 | 26827993                | TT                                     | AA                 | AA               | INTERGENIC                    |                    |                                      |
| SNP_24453_A_26828921 | NC_021163.1    | Ca_Kabuli_Chr04 | 26828921                | GG                                     | AA                 | AA               | INTERGENIC                    |                    |                                      |
| SNP_24454_A_26828931 | NC_021163.1    | Ca_Kabuli_Chr04 | 26828931                | GG                                     | CC                 | CC               | INTERGENIC                    |                    |                                      |
| SNP_24455_A_26832621 | NC_021163.1    | Ca_Kabuli_Chr04 | 26832621                | GG                                     | AA                 | AA               | DRR                           | 101507400          | ammonium transporter 1 member 1-like |

| SNPs IDs             | Chromosome IDs | Chromosomes     | Physical positions (bp) | CDC Frontier genome (Reference genome) | (Pusa 1103 & HPNB) | (ILWC 46 & LPNB) | Sequence Components of genome | Gene accession IDs | Putative functions                   |
|----------------------|----------------|-----------------|-------------------------|----------------------------------------|--------------------|------------------|-------------------------------|--------------------|--------------------------------------|
| SNP_24456_A_26832906 | NC_021163.1    | Ca_Kabuli_Chr04 | 26832906                | AA                                     | TT                 | TT               | DRR                           | 101507400          | ammonium transporter 1 member 1-like |
| SNP_24457_A_26838861 | NC_021163.1    | Ca_Kabuli_Chr04 | 26838861                | CC                                     | TT                 | TT               | INTERGENIC                    |                    |                                      |
| SNP_24458_A_26840451 | NC_021163.1    | Ca_Kabuli_Chr04 | 26840451                | AA                                     | CC                 | CC               | NON_SYNONYMOUS_CODING         | 101511556          | uncharacterized LOC101511556         |
| SNP_24459_A_26840850 | NC_021163.1    | Ca_Kabuli_Chr04 | 26840850                | TT                                     | CC                 | CC               | INTRON                        | 101511556          | uncharacterized LOC101511556         |
| SNP_24461_A_26846997 | NC_021163.1    | Ca_Kabuli_Chr04 | 26846997                | CC                                     | AA                 | AA               | INTRON                        | 101511556          | uncharacterized LOC101511556         |
| SNP_24462_A_26847013 | NC_021163.1    | Ca_Kabuli_Chr04 | 26847013                | GG                                     | AA                 | AA               | INTRON                        | 101511556          | uncharacterized LOC101511556         |
| SNP_24464_A_26847339 | NC_021163.1    | Ca_Kabuli_Chr04 | 26847339                | AA                                     | CC                 | CC               | INTRON                        | 101511556          | uncharacterized LOC101511556         |
| SNP_24465_A_26847401 | NC_021163.1    | Ca_Kabuli_Chr04 | 26847401                | TT                                     | CC                 | CC               | INTRON                        | 101511556          | uncharacterized LOC101511556         |
| SNP_24466_A_26847454 | NC_021163.1    | Ca_Kabuli_Chr04 | 26847454                | AA                                     | GG                 | GG               | INTRON                        | 101511556          | uncharacterized LOC101511556         |
| SNP_24467_A_26847461 | NC_021163.1    | Ca_Kabuli_Chr04 | 26847461                | GG                                     | TT                 | TT               | INTRON                        | 101511556          | uncharacterized LOC101511556         |
| SNP_24468_A_26847470 | NC_021163.1    | Ca_Kabuli_Chr04 | 26847470                | TT                                     | CC                 | CC               | INTRON                        | 101511556          | uncharacterized LOC101511556         |
| SNP_24470_A_26850227 | NC_021163.1    | Ca_Kabuli_Chr04 | 26850227                | TT                                     | CC                 | CC               | INTRON                        | 101511556          | uncharacterized LOC101511556         |
| SNP_24471_A_26857868 | NC_021163.1    | Ca_Kabuli_Chr04 | 26857868                | CC                                     | TT                 | TT               | SYNONYMOUS_CODING             | 101511883          | Unknown function                     |
| SNP_24472_A_26858372 | NC_021163.1    | Ca_Kabuli_Chr04 | 26858372                | AA                                     | GG                 | GG               | SYNONYMOUS_CODING             | 101511883          | Unknown function                     |
| SNP_24473_A_26863089 | NC_021163.1    | Ca_Kabuli_Chr04 | 26863089                | TT                                     | CC                 | CC               | INTRON                        | 101511883          | Unknown function                     |
| SNP_24474_A_26866009 | NC_021163.1    | Ca_Kabuli_Chr04 | 26866009                | AA                                     | TT                 | TT               | URR                           | 101511883          | Unknown function                     |
| SNP_24475_A_26866303 | NC_021163.1    | Ca_Kabuli_Chr04 | 26866303                | AA                                     | GG                 | GG               | URR                           | 101511883          | Unknown function                     |
| SNP_24476_A_26866304 | NC_021163.1    | Ca_Kabuli_Chr04 | 26866304                | GG                                     | AA                 | AA               | URR                           | 101511883          | Unknown function                     |
| SNP_24477_A_26867036 | NC_021163.1    | Ca_Kabuli_Chr04 | 26867036                | TT                                     | CC                 | CC               | INTERGENIC                    |                    |                                      |
| SNP_24479_A_26895552 | NC_021163.1    | Ca_Kabuli_Chr04 | 26895552                | AA                                     | TT                 | TT               | INTERGENIC                    |                    |                                      |
| SNP_24480_A_26895708 | NC_021163.1    | Ca_Kabuli_Chr04 | 26895708                | CC                                     | AA                 | AA               | INTERGENIC                    |                    |                                      |
| SNP_24482_A_26902778 | NC_021163.1    | Ca_Kabuli_Chr04 | 26902778                | TT                                     | GG                 | GG               | INTERGENIC                    |                    |                                      |

| SNPs IDs             | Chromosome IDs | Chromosomes     | Physical positions (bp) | CDC Frontier (Reference genome) | (Pusa 1103 & HPNB) | (ILWC 46 & LPNB) | Sequence Components of genome | Gene accession IDs | Putative functions                      |
|----------------------|----------------|-----------------|-------------------------|---------------------------------|--------------------|------------------|-------------------------------|--------------------|-----------------------------------------|
| SNP_24483_A_26902794 | NC_021163.1    | Ca_Kabuli_Chr04 | 26902794                | TT                              | CC                 | CC               | INTERGENIC                    |                    |                                         |
| SNP_24484_A_26902814 | NC_021163.1    | Ca_Kabuli_Chr04 | 26902814                | AA                              | CC                 | CC               | INTERGENIC                    |                    |                                         |
| SNP_24485_A_26903017 | NC_021163.1    | Ca_Kabuli_Chr04 | 26903017                | AA                              | GG                 | GG               | INTERGENIC                    |                    |                                         |
| SNP_24486_A_26903072 | NC_021163.1    | Ca_Kabuli_Chr04 | 26903072                | TT                              | CC                 | CC               | INTERGENIC                    |                    |                                         |
| SNP_24487_A_26903245 | NC_021163.1    | Ca_Kabuli_Chr04 | 26903245                | AA                              | GG                 | GG               | INTERGENIC                    |                    |                                         |
| SNP_24489_A_26904549 | NC_021163.1    | Ca_Kabuli_Chr04 | 26904549                | GG                              | AA                 | AA               | INTERGENIC                    |                    |                                         |
| SNP_24491_A_26916177 | NC_021163.1    | Ca_Kabuli_Chr04 | 26916177                | TT                              | CC                 | CC               | INTRON                        | 101508666          | 28 kDa ribonucleoprotein, chloroplastic |
| SNP_24492_A_26916471 | NC_021163.1    | Ca_Kabuli_Chr04 | 26916471                | TT                              | CC                 | CC               | INTRON                        | 101508666          | 28 kDa ribonucleoprotein, chloroplastic |
| SNP_24493_A_26936463 | NC_021163.1    | Ca_Kabuli_Chr04 | 26936463                | TT                              | CC                 | CC               | INTERGENIC                    |                    |                                         |
| SNP_24494_A_26936524 | NC_021163.1    | Ca_Kabuli_Chr04 | 26936524                | CC                              | TT                 | TT               | INTERGENIC                    |                    |                                         |
| SNP_24495_A_26936771 | NC_021163.1    | Ca_Kabuli_Chr04 | 26936771                | GG                              | AA                 | AA               | INTERGENIC                    |                    |                                         |
| SNP_24496_A_26936787 | NC_021163.1    | Ca_Kabuli_Chr04 | 26936787                | TT                              | GG                 | GG               | INTERGENIC                    |                    |                                         |
| SNP_24497_A_26936921 | NC_021163.1    | Ca_Kabuli_Chr04 | 26936921                | AA                              | GG                 | GG               | INTERGENIC                    |                    |                                         |
| SNP_24498_A_26936939 | NC_021163.1    | Ca_Kabuli_Chr04 | 26936939                | AA                              | GG                 | GG               | INTERGENIC                    |                    |                                         |
| SNP_24499_A_26936951 | NC_021163.1    | Ca_Kabuli_Chr04 | 26936951                | AA                              | GG                 | GG               | INTERGENIC                    |                    |                                         |
| SNP_24500_A_26936954 | NC_021163.1    | Ca_Kabuli_Chr04 | 26936954                | TT                              | AA                 | AA               | INTERGENIC                    |                    |                                         |
| SNP_24501_A_26936964 | NC_021163.1    | Ca_Kabuli_Chr04 | 26936964                | TT                              | AA                 | AA               | INTERGENIC                    |                    |                                         |
| SNP_24502_A_26937009 | NC_021163.1    | Ca_Kabuli_Chr04 | 26937009                | GG                              | AA                 | AA               | INTERGENIC                    |                    |                                         |
| SNP_24503_A_26937019 | NC_021163.1    | Ca_Kabuli_Chr04 | 26937019                | TT                              | AA                 | AA               | INTERGENIC                    |                    |                                         |
| SNP_24504_A_26937041 | NC_021163.1    | Ca_Kabuli_Chr04 | 26937041                | AA                              | CC                 | CC               | INTERGENIC                    |                    |                                         |
| SNP_24505_A_26937045 | NC_021163.1    | Ca_Kabuli_Chr04 | 26937045                | CC                              | TT                 | TT               | INTERGENIC                    |                    |                                         |
| SNP_24506_A_26937046 | NC_021163.1    | Ca_Kabuli_Chr04 | 26937046                | TT                              | CC                 | CC               | INTERGENIC                    |                    |                                         |

| SNPs IDs             | Chromosome IDs | Chromosomes     | Physical positions (bp) | CDC Frontier genome (Reference genome) | (Pusa 1103 & HPNB) | (ILWC 46 & LPNB) | Sequence genome | Components of | Gene accession IDs                                           | Putative functions |
|----------------------|----------------|-----------------|-------------------------|----------------------------------------|--------------------|------------------|-----------------|---------------|--------------------------------------------------------------|--------------------|
| SNP_24507_A_26937054 | NC_021163.1    | Ca_Kabuli_Chr04 | 26937054                | GG                                     | AA                 | AA               | INTERGENIC      |               |                                                              |                    |
| SNP_24508_A_26937056 | NC_021163.1    | Ca_Kabuli_Chr04 | 26937056                | GG                                     | AA                 | AA               | INTERGENIC      |               |                                                              |                    |
| SNP_24509_A_26937074 | NC_021163.1    | Ca_Kabuli_Chr04 | 26937074                | CC                                     | TT                 | TT               | INTERGENIC      |               |                                                              |                    |
| SNP_24510_A_26937078 | NC_021163.1    | Ca_Kabuli_Chr04 | 26937078                | AA                                     | GG                 | GG               | INTERGENIC      |               |                                                              |                    |
| SNP_24511_A_26937133 | NC_021163.1    | Ca_Kabuli_Chr04 | 26937133                | GG                                     | TT                 | TT               | INTERGENIC      |               |                                                              |                    |
| SNP_24512_A_26937145 | NC_021163.1    | Ca_Kabuli_Chr04 | 26937145                | AA                                     | GG                 | GG               | INTERGENIC      |               |                                                              |                    |
| SNP_24513_A_26937146 | NC_021163.1    | Ca_Kabuli_Chr04 | 26937146                | CC                                     | TT                 | TT               | INTERGENIC      |               |                                                              |                    |
| SNP_24514_A_26937151 | NC_021163.1    | Ca_Kabuli_Chr04 | 26937151                | TT                                     | CC                 | CC               | INTERGENIC      |               |                                                              |                    |
| SNP_24515_A_26937209 | NC_021163.1    | Ca_Kabuli_Chr04 | 26937209                | TT                                     | GG                 | GG               | INTERGENIC      |               |                                                              |                    |
| SNP_24516_A_26947593 | NC_021163.1    | Ca_Kabuli_Chr04 | 26947593                | GG                                     | TT                 | TT               | INTERGENIC      |               |                                                              |                    |
| SNP_24517_A_26947601 | NC_021163.1    | Ca_Kabuli_Chr04 | 26947601                | TT                                     | AA                 | AA               | INTERGENIC      |               |                                                              |                    |
| SNP_24518_A_26947662 | NC_021163.1    | Ca_Kabuli_Chr04 | 26947662                | AA                                     | GG                 | GG               | INTERGENIC      |               |                                                              |                    |
| SNP_24519_A_26947663 | NC_021163.1    | Ca_Kabuli_Chr04 | 26947663                | AA                                     | GG                 | GG               | INTERGENIC      |               |                                                              |                    |
| SNP_24520_A_26947666 | NC_021163.1    | Ca_Kabuli_Chr04 | 26947666                | AA                                     | TT                 | TT               | INTERGENIC      |               |                                                              |                    |
| SNP_24521_A_26952429 | NC_021163.1    | Ca_Kabuli_Chr04 | 26952429                | GG                                     | AA                 | AA               | URR             | 101508984     | uncharacterized TPR repeat-containing protein At1g05150-like |                    |
| SNP_24522_A_26961729 | NC_021163.1    | Ca_Kabuli_Chr04 | 26961729                | AA                                     | GG                 | GG               | INTERGENIC      |               |                                                              |                    |
| SNP_24523_A_26966282 | NC_021163.1    | Ca_Kabuli_Chr04 | 26966282                | TT                                     | CC                 | CC               | INTERGENIC      |               |                                                              |                    |
| SNP_24524_A_26967633 | NC_021163.1    | Ca_Kabuli_Chr04 | 26967633                | GG                                     | TT                 | TT               | DRR             | 101509298     | 60S ribosomal protein L4-like                                |                    |
| SNP_24525_A_26970286 | NC_021163.1    | Ca_Kabuli_Chr04 | 26970286                | TT                                     | AA                 | AA               | URR             | 101509298     | 60S ribosomal protein L4-like                                |                    |
| SNP_24526_A_26970670 | NC_021163.1    | Ca_Kabuli_Chr04 | 26970670                | CC                                     | AA                 | AA               | URR             | 101509298     | 60S ribosomal protein L4-like                                |                    |
| SNP_24527_A_26976535 | NC_021163.1    | Ca_Kabuli_Chr04 | 26976535                | GG                                     | AA                 | AA               | INTERGENIC      |               |                                                              |                    |
| SNP_24528_A_26979070 | NC_021163.1    | Ca_Kabuli_Chr04 | 26979070                | CC                                     | GG                 | GG               | INTERGENIC      |               |                                                              |                    |

| SNPs IDs             | Chromosome IDs | Chromosomes     | Physical positions (bp) | CDC Frontier genome (Reference genome) | (Pusa 1103 & HPNB) | (ILWC 46 & LPNB) | Sequence Components of genome | Gene accession IDs | Putative functions         |
|----------------------|----------------|-----------------|-------------------------|----------------------------------------|--------------------|------------------|-------------------------------|--------------------|----------------------------|
| SNP_24529_A_26991164 | NC_021163.1    | Ca_Kabuli_Chr04 | 26991164                | TT                                     | CC                 | CC               | URR                           | 101509611          | 40S ribosomal protein S3-3 |
| SNP_24531_A_27005105 | NC_021163.1    | Ca_Kabuli_Chr04 | 27005105                | GG                                     | AA                 | AA               | INTERGENIC                    |                    |                            |
| SNP_24532_A_27007607 | NC_021163.1    | Ca_Kabuli_Chr04 | 27007607                | TT                                     | AA                 | AA               | INTERGENIC                    |                    |                            |
| SNP_24533_A_27016029 | NC_021163.1    | Ca_Kabuli_Chr04 | 27016029                | TT                                     | CC                 | CC               | INTERGENIC                    |                    |                            |
| SNP_24534_A_27016058 | NC_021163.1    | Ca_Kabuli_Chr04 | 27016058                | GG                                     | AA                 | AA               | INTERGENIC                    |                    |                            |
| SNP_24535_A_27016170 | NC_021163.1    | Ca_Kabuli_Chr04 | 27016170                | CC                                     | TT                 | TT               | INTERGENIC                    |                    |                            |
| SNP_24536_A_27016304 | NC_021163.1    | Ca_Kabuli_Chr04 | 27016304                | GG                                     | AA                 | AA               | INTERGENIC                    |                    |                            |
| SNP_24537_A_27016707 | NC_021163.1    | Ca_Kabuli_Chr04 | 27016707                | AA                                     | CC                 | CC               | INTERGENIC                    |                    |                            |
| SNP_24538_A_27017121 | NC_021163.1    | Ca_Kabuli_Chr04 | 27017121                | AA                                     | GG                 | GG               | INTERGENIC                    |                    |                            |
| SNP_24540_A_27017429 | NC_021163.1    | Ca_Kabuli_Chr04 | 27017429                | CC                                     | AA                 | AA               | INTERGENIC                    |                    |                            |
| SNP_24541_A_27017698 | NC_021163.1    | Ca_Kabuli_Chr04 | 27017698                | CC                                     | TT                 | TT               | INTERGENIC                    |                    |                            |
| SNP_24542_A_27018012 | NC_021163.1    | Ca_Kabuli_Chr04 | 27018012                | CC                                     | TT                 | TT               | INTERGENIC                    |                    |                            |
| SNP_24543_A_27018594 | NC_021163.1    | Ca_Kabuli_Chr04 | 27018594                | TT                                     | CC                 | CC               | INTERGENIC                    |                    |                            |
| SNP_24544_A_27018689 | NC_021163.1    | Ca_Kabuli_Chr04 | 27018689                | AA                                     | TT                 | TT               | INTERGENIC                    |                    |                            |
| SNP_24545_A_27019383 | NC_021163.1    | Ca_Kabuli_Chr04 | 27019383                | CC                                     | TT                 | TT               | INTERGENIC                    |                    |                            |
| SNP_24546_A_27019750 | NC_021163.1    | Ca_Kabuli_Chr04 | 27019750                | CC                                     | AA                 | AA               | INTERGENIC                    |                    |                            |
| SNP_24547_A_27019754 | NC_021163.1    | Ca_Kabuli_Chr04 | 27019754                | CC                                     | AA                 | AA               | INTERGENIC                    |                    |                            |
| SNP_24548_A_27020032 | NC_021163.1    | Ca_Kabuli_Chr04 | 27020032                | TT                                     | GG                 | GG               | INTERGENIC                    |                    |                            |
| SNP_24549_A_27020035 | NC_021163.1    | Ca_Kabuli_Chr04 | 27020035                | AA                                     | GG                 | GG               | INTERGENIC                    |                    |                            |
| SNP_24550_A_27021007 | NC_021163.1    | Ca_Kabuli_Chr04 | 27021007                | AA                                     | GG                 | GG               | INTERGENIC                    |                    |                            |
| SNP_24551_A_27021282 | NC_021163.1    | Ca_Kabuli_Chr04 | 27021282                | CC                                     | TT                 | TT               | INTERGENIC                    |                    |                            |
| SNP_24552_A_27021482 | NC_021163.1    | Ca_Kabuli_Chr04 | 27021482                | GG                                     | AA                 | AA               | INTERGENIC                    |                    |                            |

| SNPs IDs             | Chromosome IDs | Chromosomes     | Physical positions (bp) | CDC Frontier (Reference genome) | (Pusa 1103 & HPNB) | (ILWC 46 & LPNB) | Sequence Components of genome | Gene accession IDs | Putative functions                  |
|----------------------|----------------|-----------------|-------------------------|---------------------------------|--------------------|------------------|-------------------------------|--------------------|-------------------------------------|
| SNP_24553_A_27021491 | NC_021163.1    | Ca_Kabuli_Chr04 | 27021491                | GG                              | AA                 | AA               | INTERGENIC                    |                    |                                     |
| SNP_24554_A_27022074 | NC_021163.1    | Ca_Kabuli_Chr04 | 27022074                | CC                              | GG                 | GG               | INTERGENIC                    |                    |                                     |
| SNP_24555_A_27026471 | NC_021163.1    | Ca_Kabuli_Chr04 | 27026471                | GG                              | TT                 | TT               | INTERGENIC                    |                    |                                     |
| SNP_24556_A_27027025 | NC_021163.1    | Ca_Kabuli_Chr04 | 27027025                | CC                              | TT                 | TT               | INTERGENIC                    |                    |                                     |
| SNP_24557_A_27027033 | NC_021163.1    | Ca_Kabuli_Chr04 | 27027033                | AA                              | GG                 | GG               | INTERGENIC                    |                    |                                     |
| SNP_24558_A_27037378 | NC_021163.1    | Ca_Kabuli_Chr04 | 27037378                | CC                              | TT                 | TT               | INTERGENIC                    |                    |                                     |
| SNP_24559_A_27038141 | NC_021163.1    | Ca_Kabuli_Chr04 | 27038141                | CC                              | GG                 | GG               | INTERGENIC                    |                    |                                     |
| SNP_24560_A_27041050 | NC_021163.1    | Ca_Kabuli_Chr04 | 27041050                | GG                              | TT                 | TT               | INTERGENIC                    |                    |                                     |
| SNP_24561_A_27057073 | NC_021163.1    | Ca_Kabuli_Chr04 | 27057073                | AA                              | CC                 | CC               | INTRON                        | 101509941          | oxidation resistance protein 1-like |
| SNP_24562_A_27061101 | NC_021163.1    | Ca_Kabuli_Chr04 | 27061101                | AA                              | GG                 | GG               | INTERGENIC                    |                    |                                     |
| SNP_24563_A_27065069 | NC_021163.1    | Ca_Kabuli_Chr04 | 27065069                | AA                              | CC                 | CC               | INTERGENIC                    |                    |                                     |
| SNP_24564_A_27065430 | NC_021163.1    | Ca_Kabuli_Chr04 | 27065430                | TT                              | AA                 | AA               | INTERGENIC                    |                    |                                     |
| SNP_24565_A_27068425 | NC_021163.1    | Ca_Kabuli_Chr04 | 27068425                | TT                              | CC                 | CC               | INTERGENIC                    |                    |                                     |
| SNP_24566_A_27069048 | NC_021163.1    | Ca_Kabuli_Chr04 | 27069048                | TT                              | AA                 | AA               | INTERGENIC                    |                    |                                     |
| SNP_24567_A_27070454 | NC_021163.1    | Ca_Kabuli_Chr04 | 27070454                | AA                              | GG                 | GG               | INTERGENIC                    |                    |                                     |
| SNP_24568_A_27070513 | NC_021163.1    | Ca_Kabuli_Chr04 | 27070513                | CC                              | TT                 | TT               | INTERGENIC                    |                    |                                     |
| SNP_24569_A_27070881 | NC_021163.1    | Ca_Kabuli_Chr04 | 27070881                | GG                              | CC                 | CC               | INTERGENIC                    |                    |                                     |
| SNP_24570_A_27071270 | NC_021163.1    | Ca_Kabuli_Chr04 | 27071270                | TT                              | AA                 | AA               | INTERGENIC                    |                    |                                     |
| SNP_24571_A_27072105 | NC_021163.1    | Ca_Kabuli_Chr04 | 27072105                | CC                              | TT                 | TT               | INTERGENIC                    |                    |                                     |
| SNP_24573_A_27077656 | NC_021163.1    | Ca_Kabuli_Chr04 | 27077656                | TT                              | CC                 | CC               | INTERGENIC                    |                    |                                     |
| SNP_24575_A_27081760 | NC_021163.1    | Ca_Kabuli_Chr04 | 27081760                | CC                              | TT                 | TT               | INTERGENIC                    |                    |                                     |
| SNP_24576_A_27082011 | NC_021163.1    | Ca_Kabuli_Chr04 | 27082011                | CC                              | TT                 | TT               | INTERGENIC                    |                    |                                     |

| SNPs IDs             | Chromosome IDs | Chromosomes     | Physical positions (bp) | CDC Frontier genome (Reference genome) | (Pusa 1103 & HPNB) | (ILWC 46 & LPNB) | Sequence genome | Components of | Gene accession IDs | Putative functions                      |
|----------------------|----------------|-----------------|-------------------------|----------------------------------------|--------------------|------------------|-----------------|---------------|--------------------|-----------------------------------------|
| SNP_24577_A_27082279 | NC_021163.1    | Ca_Kabuli_Chr04 | 27082279                | AA                                     | GG                 | GG               | INTERGENIC      |               |                    |                                         |
| SNP_24578_A_27082376 | NC_021163.1    | Ca_Kabuli_Chr04 | 27082376                | AA                                     | GG                 | GG               | INTERGENIC      |               |                    |                                         |
| SNP_24580_A_27082859 | NC_021163.1    | Ca_Kabuli_Chr04 | 27082859                | GG                                     | AA                 | AA               | INTERGENIC      |               |                    |                                         |
| SNP_24582_A_27106685 | NC_021163.1    | Ca_Kabuli_Chr04 | 27106685                | GG                                     | AA                 | AA               | INTERGENIC      |               |                    |                                         |
| SNP_24583_A_27106914 | NC_021163.1    | Ca_Kabuli_Chr04 | 27106914                | AA                                     | GG                 | GG               | INTERGENIC      |               |                    |                                         |
| SNP_24584_A_27122720 | NC_021163.1    | Ca_Kabuli_Chr04 | 27122720                | CC                                     | TT                 | TT               | INTERGENIC      |               |                    |                                         |
| SNP_24585_A_27124747 | NC_021163.1    | Ca_Kabuli_Chr04 | 27124747                | AA                                     | GG                 | GG               | URR             | 101510265     |                    | pre-mRNA-processing factor 19 homolog 2 |
| SNP_24586_A_27136212 | NC_021163.1    | Ca_Kabuli_Chr04 | 27136212                | CC                                     | TT                 | TT               | INTERGENIC      |               |                    |                                         |
| SNP_24587_A_27137808 | NC_021163.1    | Ca_Kabuli_Chr04 | 27137808                | GG                                     | AA                 | AA               | INTERGENIC      |               |                    |                                         |
| SNP_24588_A_27137811 | NC_021163.1    | Ca_Kabuli_Chr04 | 27137811                | CC                                     | GG                 | GG               | INTERGENIC      |               |                    |                                         |
| SNP_24589_A_27140021 | NC_021163.1    | Ca_Kabuli_Chr04 | 27140021                | TT                                     | CC                 | CC               | INTERGENIC      |               |                    |                                         |
| SNP_24590_A_27141872 | NC_021163.1    | Ca_Kabuli_Chr04 | 27141872                | GG                                     | TT                 | TT               | INTERGENIC      |               |                    |                                         |
| SNP_24591_A_27143276 | NC_021163.1    | Ca_Kabuli_Chr04 | 27143276                | GG                                     | AA                 | AA               | INTERGENIC      |               |                    |                                         |
| SNP_24592_A_27143282 | NC_021163.1    | Ca_Kabuli_Chr04 | 27143282                | GG                                     | AA                 | AA               | INTERGENIC      |               |                    |                                         |
| SNP_24593_A_27143311 | NC_021163.1    | Ca_Kabuli_Chr04 | 27143311                | AA                                     | GG                 | GG               | INTERGENIC      |               |                    |                                         |
| SNP_24594_A_27147012 | NC_021163.1    | Ca_Kabuli_Chr04 | 27147012                | AA                                     | CC                 | CC               | INTERGENIC      |               |                    |                                         |
| SNP_24596_A_27153064 | NC_021163.1    | Ca_Kabuli_Chr04 | 27153064                | CC                                     | TT                 | TT               | INTERGENIC      |               |                    |                                         |
| SNP_24598_A_27170284 | NC_021163.1    | Ca_Kabuli_Chr04 | 27170284                | GG                                     | TT                 | TT               | INTERGENIC      |               |                    |                                         |
| SNP_24599_A_27170715 | NC_021163.1    | Ca_Kabuli_Chr04 | 27170715                | CC                                     | AA                 | AA               | INTERGENIC      |               |                    |                                         |
| SNP_24600_A_27172845 | NC_021163.1    | Ca_Kabuli_Chr04 | 27172845                | TT                                     | CC                 | CC               | INTERGENIC      |               |                    |                                         |
| SNP_24601_A_27173145 | NC_021163.1    | Ca_Kabuli_Chr04 | 27173145                | GG                                     | TT                 | TT               | INTERGENIC      |               |                    |                                         |
| SNP_24602_A_27173185 | NC_021163.1    | Ca_Kabuli_Chr04 | 27173185                | TT                                     | CC                 | CC               | INTERGENIC      |               |                    |                                         |



| SNPs IDs             | Chromosome IDs | Chromosomes     | Physical positions (bp) | CDC Frontier genome (Reference genome) | (Pusa 1103 & HPNB) | (ILWC 46 & LPNB) | Sequence Components of genome | Gene accession IDs | Putative functions           |
|----------------------|----------------|-----------------|-------------------------|----------------------------------------|--------------------|------------------|-------------------------------|--------------------|------------------------------|
| SNP_24603_A_27173278 | NC_021163.1    | Ca_Kabuli_Chr04 | 27173278                | AA                                     | GG                 | GG               | INTERGENIC                    |                    |                              |
| SNP_24604_A_27180836 | NC_021163.1    | Ca_Kabuli_Chr04 | 27180836                | CC                                     | AA                 | AA               | INTERGENIC                    |                    |                              |
| SNP_24605_A_27182656 | NC_021163.1    | Ca_Kabuli_Chr04 | 27182656                | GG                                     | AA                 | AA               | INTERGENIC                    |                    |                              |
| SNP_24607_A_27185920 | NC_021163.1    | Ca_Kabuli_Chr04 | 27185920                | CC                                     | TT                 | TT               | INTERGENIC                    |                    |                              |
| SNP_24608_A_27185974 | NC_021163.1    | Ca_Kabuli_Chr04 | 27185974                | GG                                     | CC                 | CC               | INTERGENIC                    |                    |                              |
| SNP_24609_A_27197886 | NC_021163.1    | Ca_Kabuli_Chr04 | 27197886                | TT                                     | CC                 | CC               | URR                           | 101512836          | homeobox protein 5           |
| SNP_24610_A_27198961 | NC_021163.1    | Ca_Kabuli_Chr04 | 27198961                | AA                                     | GG                 | GG               | URR                           | 101512836          | homeobox protein 5           |
| SNP_24611_A_27199028 | NC_021163.1    | Ca_Kabuli_Chr04 | 27199028                | CC                                     | AA                 | AA               | URR                           | 101512836          | homeobox protein 5           |
| SNP_24612_A_27199039 | NC_021163.1    | Ca_Kabuli_Chr04 | 27199039                | AA                                     | GG                 | GG               | URR                           | 101512836          | homeobox protein 5           |
| SNP_24613_A_27199543 | NC_021163.1    | Ca_Kabuli_Chr04 | 27199543                | AA                                     | GG                 | GG               | DRR                           | 101513163          | uncharacterized LOC101513163 |
| SNP_24614_A_27201081 | NC_021163.1    | Ca_Kabuli_Chr04 | 27201081                | GG                                     | AA                 | AA               | DRR                           | 101513485          | Unknown function             |
| SNP_24615_A_27205095 | NC_021163.1    | Ca_Kabuli_Chr04 | 27205095                | TT                                     | CC                 | CC               | URR                           | 101513485          | Unknown function             |
| SNP_24616_A_27206557 | NC_021163.1    | Ca_Kabuli_Chr04 | 27206557                | CC                                     | TT                 | TT               | INTERGENIC                    |                    |                              |
| SNP_24617_A_27207205 | NC_021163.1    | Ca_Kabuli_Chr04 | 27207205                | CC                                     | AA                 | AA               | INTERGENIC                    |                    |                              |
| SNP_24618_A_27207893 | NC_021163.1    | Ca_Kabuli_Chr04 | 27207893                | CC                                     | AA                 | AA               | INTERGENIC                    |                    |                              |
| SNP_24619_A_27208335 | NC_021163.1    | Ca_Kabuli_Chr04 | 27208335                | AA                                     | GG                 | GG               | INTERGENIC                    |                    |                              |
| SNP_24620_A_27208358 | NC_021163.1    | Ca_Kabuli_Chr04 | 27208358                | AA                                     | GG                 | GG               | INTERGENIC                    |                    |                              |
| SNP_24621_A_27208359 | NC_021163.1    | Ca_Kabuli_Chr04 | 27208359                | CC                                     | AA                 | AA               | INTERGENIC                    |                    |                              |
| SNP_24622_A_27210217 | NC_021163.1    | Ca_Kabuli_Chr04 | 27210217                | CC                                     | GG                 | GG               | INTERGENIC                    |                    |                              |
| SNP_24623_A_27210395 | NC_021163.1    | Ca_Kabuli_Chr04 | 27210395                | AA                                     | TT                 | TT               | INTERGENIC                    |                    |                              |
| SNP_24624_A_27212829 | NC_021163.1    | Ca_Kabuli_Chr04 | 27212829                | TT                                     | AA                 | AA               | INTERGENIC                    |                    |                              |
| SNP_24625_A_27213197 | NC_021163.1    | Ca_Kabuli_Chr04 | 27213197                | GG                                     | AA                 | AA               | INTERGENIC                    |                    |                              |

| SNPs IDs             | Chromosome IDs | Chromosomes     | Physical positions (bp) | CDC Frontier genome (Reference genome) | (Pusa 1103 & HPNB) | (ILWC 46 & LPNB) | Sequence Components of genome | Gene accession IDs | Putative functions              |
|----------------------|----------------|-----------------|-------------------------|----------------------------------------|--------------------|------------------|-------------------------------|--------------------|---------------------------------|
| SNP_24626_A_27213247 | NC_021163.1    | Ca_Kabuli_Chr04 | 27213247                | AA                                     | GG                 | GG               | INTERGENIC                    |                    |                                 |
| SNP_24627_A_27213588 | NC_021163.1    | Ca_Kabuli_Chr04 | 27213588                | AA                                     | CC                 | CC               | INTERGENIC                    |                    |                                 |
| SNP_24628_A_27215519 | NC_021163.1    | Ca_Kabuli_Chr04 | 27215519                | TT                                     | CC                 | CC               | INTERGENIC                    |                    |                                 |
| SNP_24631_A_27240725 | NC_021163.1    | Ca_Kabuli_Chr04 | 27240725                | CC                                     | TT                 | TT               | INTERGENIC                    |                    |                                 |
| SNP_24633_A_27246990 | NC_021163.1    | Ca_Kabuli_Chr04 | 27246990                | AA                                     | GG                 | GG               | SYNONYMOUS_CODING             | 101510593          | uncharacterized LOC101510593    |
| SNP_24634_A_27249261 | NC_021163.1    | Ca_Kabuli_Chr04 | 27249261                | GG                                     | AA                 | AA               | URR                           | 101510593          | uncharacterized LOC101510593    |
| SNP_24635_A_27251554 | NC_021163.1    | Ca_Kabuli_Chr04 | 27251554                | CC                                     | TT                 | TT               | INTERGENIC                    |                    |                                 |
| SNP_24636_A_27253545 | NC_021163.1    | Ca_Kabuli_Chr04 | 27253545                | TT                                     | GG                 | GG               | INTERGENIC                    |                    |                                 |
| SNP_24637_A_27253546 | NC_021163.1    | Ca_Kabuli_Chr04 | 27253546                | CC                                     | AA                 | AA               | INTERGENIC                    |                    |                                 |
| SNP_24638_A_27257036 | NC_021163.1    | Ca_Kabuli_Chr04 | 27257036                | TT                                     | CC                 | CC               | NON_SYNONYMOUS_CODING         | 101513790          | sugar transport protein 10-like |
| SNP_24639_A_27257137 | NC_021163.1    | Ca_Kabuli_Chr04 | 27257137                | CC                                     | GG                 | GG               | NON_SYNONYMOUS_CODING         | 101513790          | sugar transport protein 10-like |
| SNP_24640_A_27257230 | NC_021163.1    | Ca_Kabuli_Chr04 | 27257230                | AA                                     | GG                 | GG               | URR                           | 101513790          | sugar transport protein 10-like |
| SNP_24641_A_27258567 | NC_021163.1    | Ca_Kabuli_Chr04 | 27258567                | AA                                     | TT                 | TT               | URR                           | 101513790          | sugar transport protein 10-like |
| SNP_24643_A_27260725 | NC_021163.1    | Ca_Kabuli_Chr04 | 27260725                | GG                                     | CC                 | CC               | INTERGENIC                    |                    |                                 |
| SNP_24644_A_27261833 | NC_021163.1    | Ca_Kabuli_Chr04 | 27261833                | CC                                     | AA                 | AA               | INTERGENIC                    |                    |                                 |
| SNP_24645_A_27266248 | NC_021163.1    | Ca_Kabuli_Chr04 | 27266248                | TT                                     | CC                 | CC               | INTRON                        | 101514135          | sugar transport protein 10-like |
| SNP_24646_A_27266317 | NC_021163.1    | Ca_Kabuli_Chr04 | 27266317                | CC                                     | AA                 | AA               | INTRON                        | 101514135          | sugar transport protein 10-like |
| SNP_24647_A_27266370 | NC_021163.1    | Ca_Kabuli_Chr04 | 27266370                | GG                                     | AA                 | AA               | INTRON                        | 101514135          | sugar transport protein 10-like |
| SNP_24648_A_27266481 | NC_021163.1    | Ca_Kabuli_Chr04 | 27266481                | GG                                     | AA                 | AA               | INTRON                        | 101514135          | sugar transport protein 10-like |
| SNP_24649_A_27266505 | NC_021163.1    | Ca_Kabuli_Chr04 | 27266505                | CC                                     | GG                 | GG               | INTRON                        | 101514135          | sugar transport protein 10-like |
| SNP_24650_A_27266567 | NC_021163.1    | Ca_Kabuli_Chr04 | 27266567                | AA                                     | GG                 | GG               | INTRON                        | 101514135          | sugar transport protein 10-like |
| SNP_24651_A_27266594 | NC_021163.1    | Ca_Kabuli_Chr04 | 27266594                | AA                                     | TT                 | TT               | INTRON                        | 101514135          | sugar transport protein 10-like |

| SNPs IDs             | Chromosome IDs | Chromosomes     | Physical positions (bp) | CDC Frontier genome (Reference genome) | (Pusa 1103 & HPNB) | (ILWC 46 & LPNB) | Sequence genome       | Components of | Gene accession IDs | Putative functions              |
|----------------------|----------------|-----------------|-------------------------|----------------------------------------|--------------------|------------------|-----------------------|---------------|--------------------|---------------------------------|
| SNP_24652_A_27266635 | NC_021163.1    | Ca_Kabuli_Chr04 | 27266635                | CC                                     | TT                 | TT               | INTRON                |               | 101514135          | sugar transport protein 10-like |
| SNP_24653_A_27266644 | NC_021163.1    | Ca_Kabuli_Chr04 | 27266644                | CC                                     | AA                 | AA               | INTRON                |               | 101514135          | sugar transport protein 10-like |
| SNP_24654_A_27266658 | NC_021163.1    | Ca_Kabuli_Chr04 | 27266658                | TT                                     | CC                 | CC               | INTRON                |               | 101514135          | sugar transport protein 10-like |
| SNP_24655_A_27266660 | NC_021163.1    | Ca_Kabuli_Chr04 | 27266660                | AA                                     | TT                 | TT               | INTRON                |               | 101514135          | sugar transport protein 10-like |
| SNP_24656_A_27266748 | NC_021163.1    | Ca_Kabuli_Chr04 | 27266748                | TT                                     | AA                 | AA               | INTRON                |               | 101514135          | sugar transport protein 10-like |
| SNP_24657_A_27266780 | NC_021163.1    | Ca_Kabuli_Chr04 | 27266780                | GG                                     | TT                 | TT               | INTRON                |               | 101514135          | sugar transport protein 10-like |
| SNP_24658_A_27266849 | NC_021163.1    | Ca_Kabuli_Chr04 | 27266849                | AA                                     | CC                 | CC               | INTRON                |               | 101514135          | sugar transport protein 10-like |
| SNP_24659_A_27266887 | NC_021163.1    | Ca_Kabuli_Chr04 | 27266887                | AA                                     | TT                 | TT               | INTRON                |               | 101514135          | sugar transport protein 10-like |
| SNP_24660_A_27266933 | NC_021163.1    | Ca_Kabuli_Chr04 | 27266933                | TT                                     | GG                 | GG               | INTRON                |               | 101514135          | sugar transport protein 10-like |
| SNP_24661_A_27266957 | NC_021163.1    | Ca_Kabuli_Chr04 | 27266957                | CC                                     | TT                 | TT               | INTRON                |               | 101514135          | sugar transport protein 10-like |
| SNP_24662_A_27266973 | NC_021163.1    | Ca_Kabuli_Chr04 | 27266973                | AA                                     | GG                 | GG               | INTRON                |               | 101514135          | sugar transport protein 10-like |
| SNP_24663_A_27267083 | NC_021163.1    | Ca_Kabuli_Chr04 | 27267083                | AA                                     | GG                 | GG               | INTRON                |               | 101514135          | sugar transport protein 10-like |
| SNP_24665_A_27267220 | NC_021163.1    | Ca_Kabuli_Chr04 | 27267220                | AA                                     | GG                 | GG               | INTRON                |               | 101514135          | sugar transport protein 10-like |
| SNP_24666_A_27267294 | NC_021163.1    | Ca_Kabuli_Chr04 | 27267294                | CC                                     | TT                 | TT               | INTRON                |               | 101514135          | sugar transport protein 10-like |
| SNP_24667_A_27270611 | NC_021163.1    | Ca_Kabuli_Chr04 | 27270611                | TT                                     | GG                 | GG               | NON_SYNONYMOUS_CODING |               | 101514135          | sugar transport protein 10-like |
| SNP_24668_A_27270763 | NC_021163.1    | Ca_Kabuli_Chr04 | 27270763                | TT                                     | CC                 | CC               | INTRON                |               | 101514135          | sugar transport protein 10-like |
| SNP_24669_A_27270894 | NC_021163.1    | Ca_Kabuli_Chr04 | 27270894                | AA                                     | GG                 | GG               | INTRON                |               | 101514135          | sugar transport protein 10-like |
| SNP_24670_A_27270957 | NC_021163.1    | Ca_Kabuli_Chr04 | 27270957                | CC                                     | AA                 | AA               | INTRON                |               | 101514135          | sugar transport protein 10-like |
| SNP_24671_A_27272328 | NC_021163.1    | Ca_Kabuli_Chr04 | 27272328                | AA                                     | CC                 | CC               | URR                   |               | 101514135          | sugar transport protein 10-like |
| SNP_24672_A_27272604 | NC_021163.1    | Ca_Kabuli_Chr04 | 27272604                | CC                                     | TT                 | TT               | URR                   |               | 101514135          | sugar transport protein 10-like |
| SNP_24673_A_27274165 | NC_021163.1    | Ca_Kabuli_Chr04 | 27274165                | CC                                     | GG                 | GG               | URR                   |               | 101514135          | sugar transport protein 10-like |
| SNP_24674_A_27274172 | NC_021163.1    | Ca_Kabuli_Chr04 | 27274172                | CC                                     | TT                 | TT               | URR                   |               | 101514135          | sugar transport protein 10-like |

| SNPs IDs             | Chromosome IDs | Chromosomes     | Physical positions (bp) | CDC Frontier (Reference genome) | (Pusa 1103 & HPNB) | (ILWC 46 & LPNB) | Sequence Components of genome | Gene accession IDs | Putative functions              |
|----------------------|----------------|-----------------|-------------------------|---------------------------------|--------------------|------------------|-------------------------------|--------------------|---------------------------------|
| SNP_24675_A_27274177 | NC_021163.1    | Ca_Kabuli_Chr04 | 27274177                | TT                              | AA                 | AA               | URR                           | 101514135          | sugar transport protein 10-like |
| SNP_24676_A_27274413 | NC_021163.1    | Ca_Kabuli_Chr04 | 27274413                | CC                              | TT                 | TT               | INTERGENIC                    |                    |                                 |
| SNP_24677_A_27283442 | NC_021163.1    | Ca_Kabuli_Chr04 | 27283442                | AA                              | GG                 | GG               | INTERGENIC                    |                    |                                 |
| SNP_24679_A_27283904 | NC_021163.1    | Ca_Kabuli_Chr04 | 27283904                | TT                              | CC                 | CC               | INTERGENIC                    |                    |                                 |
| SNP_24680_A_27283910 | NC_021163.1    | Ca_Kabuli_Chr04 | 27283910                | AA                              | TT                 | TT               | INTERGENIC                    |                    |                                 |
| SNP_24681_A_27285126 | NC_021163.1    | Ca_Kabuli_Chr04 | 27285126                | TT                              | CC                 | CC               | INTERGENIC                    |                    |                                 |
| SNP_24682_A_27285248 | NC_021163.1    | Ca_Kabuli_Chr04 | 27285248                | GG                              | AA                 | AA               | INTERGENIC                    |                    |                                 |
| SNP_24683_A_27285379 | NC_021163.1    | Ca_Kabuli_Chr04 | 27285379                | AA                              | GG                 | GG               | INTERGENIC                    |                    |                                 |
| SNP_24684_A_27285392 | NC_021163.1    | Ca_Kabuli_Chr04 | 27285392                | GG                              | TT                 | TT               | INTERGENIC                    |                    |                                 |
| SNP_24685_A_27285455 | NC_021163.1    | Ca_Kabuli_Chr04 | 27285455                | AA                              | TT                 | TT               | INTERGENIC                    |                    |                                 |
| SNP_24686_A_27285601 | NC_021163.1    | Ca_Kabuli_Chr04 | 27285601                | AA                              | CC                 | CC               | INTERGENIC                    |                    |                                 |
| SNP_24688_A_27313644 | NC_021163.1    | Ca_Kabuli_Chr04 | 27313644                | TT                              | AA                 | AA               | INTERGENIC                    |                    |                                 |
| SNP_24689_A_27314472 | NC_021163.1    | Ca_Kabuli_Chr04 | 27314472                | CC                              | AA                 | AA               | INTERGENIC                    |                    |                                 |
| SNP_24690_A_27314646 | NC_021163.1    | Ca_Kabuli_Chr04 | 27314646                | GG                              | AA                 | AA               | INTERGENIC                    |                    |                                 |
| SNP_24691_A_27314703 | NC_021163.1    | Ca_Kabuli_Chr04 | 27314703                | TT                              | CC                 | CC               | INTERGENIC                    |                    |                                 |
| SNP_24692_A_27314837 | NC_021163.1    | Ca_Kabuli_Chr04 | 27314837                | CC                              | TT                 | TT               | INTERGENIC                    |                    |                                 |
| SNP_24693_A_27314843 | NC_021163.1    | Ca_Kabuli_Chr04 | 27314843                | AA                              | GG                 | GG               | INTERGENIC                    |                    |                                 |
| SNP_24694_A_27314971 | NC_021163.1    | Ca_Kabuli_Chr04 | 27314971                | TT                              | AA                 | AA               | INTERGENIC                    |                    |                                 |
| SNP_24695_A_27316083 | NC_021163.1    | Ca_Kabuli_Chr04 | 27316083                | CC                              | TT                 | TT               | INTERGENIC                    |                    |                                 |
| SNP_24696_A_27316088 | NC_021163.1    | Ca_Kabuli_Chr04 | 27316088                | TT                              | CC                 | CC               | INTERGENIC                    |                    |                                 |
| SNP_24697_A_27316090 | NC_021163.1    | Ca_Kabuli_Chr04 | 27316090                | GG                              | AA                 | AA               | INTERGENIC                    |                    |                                 |
| SNP_24698_A_27316130 | NC_021163.1    | Ca_Kabuli_Chr04 | 27316130                | TT                              | CC                 | CC               | INTERGENIC                    |                    |                                 |

| SNPs IDs             | Chromosome IDs | Chromosomes     | Physical positions (bp) | CDC Frontier genome (Reference genome) | (Pusa 1103 & HPNB) | (ILWC 46 & LPNB) | Sequence genome | Components of | Gene accession IDs | Putative functions |
|----------------------|----------------|-----------------|-------------------------|----------------------------------------|--------------------|------------------|-----------------|---------------|--------------------|--------------------|
| SNP_24699_A_27316161 | NC_021163.1    | Ca_Kabuli_Chr04 | 27316161                | CC                                     | TT                 | TT               | INTERGENIC      |               |                    |                    |
| SNP_24700_A_27316220 | NC_021163.1    | Ca_Kabuli_Chr04 | 27316220                | CC                                     | TT                 | TT               | INTERGENIC      |               |                    |                    |
| SNP_24701_A_27316221 | NC_021163.1    | Ca_Kabuli_Chr04 | 27316221                | GG                                     | AA                 | AA               | INTERGENIC      |               |                    |                    |
| SNP_24702_A_27316294 | NC_021163.1    | Ca_Kabuli_Chr04 | 27316294                | GG                                     | AA                 | AA               | INTERGENIC      |               |                    |                    |
| SNP_24703_A_27316319 | NC_021163.1    | Ca_Kabuli_Chr04 | 27316319                | CC                                     | GG                 | GG               | INTERGENIC      |               |                    |                    |
| SNP_24704_A_27316645 | NC_021163.1    | Ca_Kabuli_Chr04 | 27316645                | TT                                     | CC                 | CC               | INTERGENIC      |               |                    |                    |
| SNP_24705_A_27319291 | NC_021163.1    | Ca_Kabuli_Chr04 | 27319291                | GG                                     | AA                 | AA               | INTERGENIC      |               |                    |                    |
| SNP_24706_A_27319325 | NC_021163.1    | Ca_Kabuli_Chr04 | 27319325                | GG                                     | AA                 | AA               | INTERGENIC      |               |                    |                    |
| SNP_24707_A_27319331 | NC_021163.1    | Ca_Kabuli_Chr04 | 27319331                | AA                                     | TT                 | TT               | INTERGENIC      |               |                    |                    |
| SNP_24708_A_27319333 | NC_021163.1    | Ca_Kabuli_Chr04 | 27319333                | CC                                     | AA                 | AA               | INTERGENIC      |               |                    |                    |
| SNP_24709_A_27319359 | NC_021163.1    | Ca_Kabuli_Chr04 | 27319359                | TT                                     | CC                 | CC               | INTERGENIC      |               |                    |                    |
| SNP_24710_A_27319363 | NC_021163.1    | Ca_Kabuli_Chr04 | 27319363                | AA                                     | CC                 | CC               | INTERGENIC      |               |                    |                    |
| SNP_24711_A_27323548 | NC_021163.1    | Ca_Kabuli_Chr04 | 27323548                | AA                                     | GG                 | GG               | INTERGENIC      |               |                    |                    |
| SNP_24712_A_27323843 | NC_021163.1    | Ca_Kabuli_Chr04 | 27323843                | AA                                     | GG                 | GG               | INTERGENIC      |               |                    |                    |
| SNP_24713_A_27324635 | NC_021163.1    | Ca_Kabuli_Chr04 | 27324635                | TT                                     | AA                 | AA               | INTERGENIC      |               |                    |                    |
| SNP_24714_A_27325016 | NC_021163.1    | Ca_Kabuli_Chr04 | 27325016                | AA                                     | CC                 | CC               | INTERGENIC      |               |                    |                    |
| SNP_24715_A_27325413 | NC_021163.1    | Ca_Kabuli_Chr04 | 27325413                | CC                                     | GG                 | GG               | INTERGENIC      |               |                    |                    |
| SNP_24716_A_27325415 | NC_021163.1    | Ca_Kabuli_Chr04 | 27325415                | GG                                     | AA                 | AA               | INTERGENIC      |               |                    |                    |
| SNP_24717_A_27328654 | NC_021163.1    | Ca_Kabuli_Chr04 | 27328654                | CC                                     | TT                 | TT               | INTERGENIC      |               |                    |                    |
| SNP_24718_A_27330237 | NC_021163.1    | Ca_Kabuli_Chr04 | 27330237                | TT                                     | AA                 | AA               | INTERGENIC      |               |                    |                    |
| SNP_24719_A_27331956 | NC_021163.1    | Ca_Kabuli_Chr04 | 27331956                | TT                                     | CC                 | CC               | INTERGENIC      |               |                    |                    |
| SNP_24720_A_27332028 | NC_021163.1    | Ca_Kabuli_Chr04 | 27332028                | AA                                     | TT                 | TT               | INTERGENIC      |               |                    |                    |

| SNPs IDs             | Chromosome IDs | Chromosomes     | Physical positions (bp) | CDC Frontier genome (Reference genome) | (Pusa 1103 & HPNB) | (ILWC 46 & LPNB) | Sequence genome | Components of | Gene accession IDs | Putative functions |
|----------------------|----------------|-----------------|-------------------------|----------------------------------------|--------------------|------------------|-----------------|---------------|--------------------|--------------------|
| SNP_24721_A_27336031 | NC_021163.1    | Ca_Kabuli_Chr04 | 27336031                | CC                                     | GG                 | GG               | INTERGENIC      |               |                    |                    |
| SNP_24722_A_27336044 | NC_021163.1    | Ca_Kabuli_Chr04 | 27336044                | AA                                     | GG                 | GG               | INTERGENIC      |               |                    |                    |
| SNP_24723_A_27336052 | NC_021163.1    | Ca_Kabuli_Chr04 | 27336052                | TT                                     | AA                 | AA               | INTERGENIC      |               |                    |                    |
| SNP_24724_A_27336075 | NC_021163.1    | Ca_Kabuli_Chr04 | 27336075                | TT                                     | AA                 | AA               | INTERGENIC      |               |                    |                    |
| SNP_24725_A_27336091 | NC_021163.1    | Ca_Kabuli_Chr04 | 27336091                | AA                                     | GG                 | GG               | INTERGENIC      |               |                    |                    |
| SNP_24726_A_27336102 | NC_021163.1    | Ca_Kabuli_Chr04 | 27336102                | TT                                     | CC                 | CC               | INTERGENIC      |               |                    |                    |
| SNP_24727_A_27340551 | NC_021163.1    | Ca_Kabuli_Chr04 | 27340551                | GG                                     | TT                 | TT               | INTERGENIC      |               |                    |                    |
| SNP_24728_A_27340903 | NC_021163.1    | Ca_Kabuli_Chr04 | 27340903                | TT                                     | AA                 | AA               | INTERGENIC      |               |                    |                    |
| SNP_24729_A_27340909 | NC_021163.1    | Ca_Kabuli_Chr04 | 27340909                | GG                                     | AA                 | AA               | INTERGENIC      |               |                    |                    |
| SNP_24730_A_27348079 | NC_021163.1    | Ca_Kabuli_Chr04 | 27348079                | CC                                     | TT                 | TT               | INTERGENIC      |               |                    |                    |
| SNP_24731_A_27350788 | NC_021163.1    | Ca_Kabuli_Chr04 | 27350788                | TT                                     | CC                 | CC               | INTERGENIC      |               |                    |                    |
| SNP_24732_A_27350791 | NC_021163.1    | Ca_Kabuli_Chr04 | 27350791                | CC                                     | AA                 | AA               | INTERGENIC      |               |                    |                    |
| SNP_24733_A_27350806 | NC_021163.1    | Ca_Kabuli_Chr04 | 27350806                | TT                                     | CC                 | CC               | INTERGENIC      |               |                    |                    |
| SNP_24734_A_27350852 | NC_021163.1    | Ca_Kabuli_Chr04 | 27350852                | TT                                     | CC                 | CC               | INTERGENIC      |               |                    |                    |
| SNP_24735_A_27350883 | NC_021163.1    | Ca_Kabuli_Chr04 | 27350883                | GG                                     | AA                 | AA               | INTERGENIC      |               |                    |                    |
| SNP_24736_A_27351761 | NC_021163.1    | Ca_Kabuli_Chr04 | 27351761                | CC                                     | GG                 | GG               | INTERGENIC      |               |                    |                    |
| SNP_24737_A_27351766 | NC_021163.1    | Ca_Kabuli_Chr04 | 27351766                | TT                                     | CC                 | CC               | INTERGENIC      |               |                    |                    |
| SNP_24738_A_27354125 | NC_021163.1    | Ca_Kabuli_Chr04 | 27354125                | AA                                     | GG                 | GG               | INTERGENIC      |               |                    |                    |
| SNP_24739_A_27354313 | NC_021163.1    | Ca_Kabuli_Chr04 | 27354313                | CC                                     | GG                 | GG               | INTERGENIC      |               |                    |                    |
| SNP_24740_A_27354359 | NC_021163.1    | Ca_Kabuli_Chr04 | 27354359                | CC                                     | TT                 | TT               | INTERGENIC      |               |                    |                    |
| SNP_24741_A_27354366 | NC_021163.1    | Ca_Kabuli_Chr04 | 27354366                | CC                                     | TT                 | TT               | INTERGENIC      |               |                    |                    |
| SNP_24742_A_27354386 | NC_021163.1    | Ca_Kabuli_Chr04 | 27354386                | AA                                     | GG                 | GG               | INTERGENIC      |               |                    |                    |

| SNPs IDs             | Chromosome IDs | Chromosomes     | Physical positions (bp) | CDC Frontier genome (Reference genome) | (Pusa 1103 & HPNB) | (ILWC 46 & LPNB) | Sequence genome | Components of | Gene accession IDs | Putative functions |
|----------------------|----------------|-----------------|-------------------------|----------------------------------------|--------------------|------------------|-----------------|---------------|--------------------|--------------------|
| SNP_24743_A_27355158 | NC_021163.1    | Ca_Kabuli_Chr04 | 27355158                | AA                                     | TT                 | TT               | INTERGENIC      |               |                    |                    |
| SNP_24744_A_27355160 | NC_021163.1    | Ca_Kabuli_Chr04 | 27355160                | GG                                     | TT                 | TT               | INTERGENIC      |               |                    |                    |
| SNP_24746_A_27356489 | NC_021163.1    | Ca_Kabuli_Chr04 | 27356489                | GG                                     | TT                 | TT               | INTERGENIC      |               |                    |                    |
| SNP_24747_A_27356502 | NC_021163.1    | Ca_Kabuli_Chr04 | 27356502                | CC                                     | AA                 | AA               | INTERGENIC      |               |                    |                    |
| SNP_24748_A_27356798 | NC_021163.1    | Ca_Kabuli_Chr04 | 27356798                | AA                                     | CC                 | CC               | INTERGENIC      |               |                    |                    |
| SNP_24749_A_27356803 | NC_021163.1    | Ca_Kabuli_Chr04 | 27356803                | AA                                     | GG                 | GG               | INTERGENIC      |               |                    |                    |
| SNP_24750_A_27357115 | NC_021163.1    | Ca_Kabuli_Chr04 | 27357115                | AA                                     | GG                 | GG               | INTERGENIC      |               |                    |                    |
| SNP_24752_A_27357170 | NC_021163.1    | Ca_Kabuli_Chr04 | 27357170                | AA                                     | GG                 | GG               | INTERGENIC      |               |                    |                    |
| SNP_24753_A_27360426 | NC_021163.1    | Ca_Kabuli_Chr04 | 27360426                | TT                                     | GG                 | GG               | INTERGENIC      |               |                    |                    |
| SNP_24754_A_27362164 | NC_021163.1    | Ca_Kabuli_Chr04 | 27362164                | AA                                     | GG                 | GG               | INTERGENIC      |               |                    |                    |
| SNP_24755_A_27362210 | NC_021163.1    | Ca_Kabuli_Chr04 | 27362210                | CC                                     | TT                 | TT               | INTERGENIC      |               |                    |                    |
| SNP_24756_A_27362228 | NC_021163.1    | Ca_Kabuli_Chr04 | 27362228                | AA                                     | TT                 | TT               | INTERGENIC      |               |                    |                    |
| SNP_24757_A_27362558 | NC_021163.1    | Ca_Kabuli_Chr04 | 27362558                | AA                                     | GG                 | GG               | INTERGENIC      |               |                    |                    |
| SNP_24758_A_27364312 | NC_021163.1    | Ca_Kabuli_Chr04 | 27364312                | AA                                     | GG                 | GG               | INTERGENIC      |               |                    |                    |
| SNP_24759_A_27365360 | NC_021163.1    | Ca_Kabuli_Chr04 | 27365360                | TT                                     | AA                 | AA               | INTERGENIC      |               |                    |                    |
| SNP_24760_A_27366720 | NC_021163.1    | Ca_Kabuli_Chr04 | 27366720                | GG                                     | AA                 | AA               | INTERGENIC      |               |                    |                    |
| SNP_24761_A_27366729 | NC_021163.1    | Ca_Kabuli_Chr04 | 27366729                | TT                                     | CC                 | CC               | INTERGENIC      |               |                    |                    |
| SNP_24762_A_27367025 | NC_021163.1    | Ca_Kabuli_Chr04 | 27367025                | GG                                     | AA                 | AA               | INTERGENIC      |               |                    |                    |
| SNP_24763_A_27367242 | NC_021163.1    | Ca_Kabuli_Chr04 | 27367242                | TT                                     | CC                 | CC               | INTERGENIC      |               |                    |                    |
| SNP_24764_A_27367763 | NC_021163.1    | Ca_Kabuli_Chr04 | 27367763                | AA                                     | TT                 | TT               | INTERGENIC      |               |                    |                    |
| SNP_24767_A_27368181 | NC_021163.1    | Ca_Kabuli_Chr04 | 27368181                | AA                                     | CC                 | CC               | INTERGENIC      |               |                    |                    |
| SNP_24768_A_27368324 | NC_021163.1    | Ca_Kabuli_Chr04 | 27368324                | AA                                     | CC                 | CC               | INTERGENIC      |               |                    |                    |

| SNPs IDs             | Chromosome IDs | Chromosomes     | Physical positions (bp) | CDC Frontier genome (Reference genome) | (Pusa 1103 & HPNB) | (ILWC 46 & LPNB) | Sequence genome | Components of | Gene accession IDs                                 | Putative functions |
|----------------------|----------------|-----------------|-------------------------|----------------------------------------|--------------------|------------------|-----------------|---------------|----------------------------------------------------|--------------------|
| SNP_24769_A_27368326 | NC_021163.1    | Ca_Kabuli_Chr04 | 27368326                | CC                                     | TT                 | TT               | INTERGENIC      |               |                                                    |                    |
| SNP_24770_A_27368375 | NC_021163.1    | Ca_Kabuli_Chr04 | 27368375                | TT                                     | CC                 | CC               | INTERGENIC      |               |                                                    |                    |
| SNP_24771_A_27368382 | NC_021163.1    | Ca_Kabuli_Chr04 | 27368382                | GG                                     | CC                 | CC               | INTERGENIC      |               |                                                    |                    |
| SNP_24772_A_27368409 | NC_021163.1    | Ca_Kabuli_Chr04 | 27368409                | CC                                     | TT                 | TT               | INTERGENIC      |               |                                                    |                    |
| SNP_24773_A_27368698 | NC_021163.1    | Ca_Kabuli_Chr04 | 27368698                | TT                                     | CC                 | CC               | INTERGENIC      |               |                                                    |                    |
| SNP_24774_A_27368700 | NC_021163.1    | Ca_Kabuli_Chr04 | 27368700                | AA                                     | GG                 | GG               | INTERGENIC      |               |                                                    |                    |
| SNP_24775_A_27368731 | NC_021163.1    | Ca_Kabuli_Chr04 | 27368731                | GG                                     | AA                 | AA               | INTERGENIC      |               |                                                    |                    |
| SNP_24776_A_27368987 | NC_021163.1    | Ca_Kabuli_Chr04 | 27368987                | TT                                     | CC                 | CC               | INTERGENIC      |               |                                                    |                    |
| SNP_24777_A_27369003 | NC_021163.1    | Ca_Kabuli_Chr04 | 27369003                | AA                                     | GG                 | GG               | INTERGENIC      |               |                                                    |                    |
| SNP_24779_A_27377850 | NC_021163.1    | Ca_Kabuli_Chr04 | 27377850                | TT                                     | GG                 | GG               | INTERGENIC      |               |                                                    |                    |
| SNP_24782_A_27380028 | NC_021163.1    | Ca_Kabuli_Chr04 | 27380028                | TT                                     | CC                 | CC               | URR             | 101514462     | uncharacterized LOC101514462                       |                    |
| SNP_24783_A_27381684 | NC_021163.1    | Ca_Kabuli_Chr04 | 27381684                | TT                                     | CC                 | CC               | INTERGENIC      |               |                                                    |                    |
| SNP_24784_A_27383574 | NC_021163.1    | Ca_Kabuli_Chr04 | 27383574                | GG                                     | AA                 | AA               | URR             | 101490715     | Unknown function                                   |                    |
| SNP_24785_A_27383983 | NC_021163.1    | Ca_Kabuli_Chr04 | 27383983                | GG                                     | AA                 | AA               | URR             | 101490715     | Unknown function                                   |                    |
| SNP_24786_A_27384002 | NC_021163.1    | Ca_Kabuli_Chr04 | 27384002                | AA                                     | GG                 | GG               | URR             | 101490715     | Unknown function                                   |                    |
| SNP_24787_A_27386379 | NC_021163.1    | Ca_Kabuli_Chr04 | 27386379                | TT                                     | AA                 | AA               | URR             | 101514787     | single-stranded DNA-binding protein, mitochondrial |                    |
| SNP_24788_A_27386689 | NC_021163.1    | Ca_Kabuli_Chr04 | 27386689                | AA                                     | TT                 | TT               | URR             | 101514787     | single-stranded DNA-binding protein, mitochondrial |                    |
| SNP_24789_A_27389074 | NC_021163.1    | Ca_Kabuli_Chr04 | 27389074                | TT                                     | CC                 | CC               | INTERGENIC      |               |                                                    |                    |
| SNP_24790_A_27390770 | NC_021163.1    | Ca_Kabuli_Chr04 | 27390770                | TT                                     | CC                 | CC               | INTERGENIC      |               |                                                    |                    |
| SNP_24791_A_27396609 | NC_021163.1    | Ca_Kabuli_Chr04 | 27396609                | GG                                     | AA                 | AA               | INTERGENIC      |               |                                                    |                    |
| SNP_24792_A_27397210 | NC_021163.1    | Ca_Kabuli_Chr04 | 27397210                | CC                                     | TT                 | TT               | INTERGENIC      |               |                                                    |                    |
| SNP_24793_A_27397315 | NC_021163.1    | Ca_Kabuli_Chr04 | 27397315                | GG                                     | AA                 | AA               | INTERGENIC      |               |                                                    |                    |



| SNPs IDs             | Chromosome IDs | Chromosomes     | Physical positions (bp) | CDC Frontier genome (Reference genome) | (Pusa 1103 & HPNB) | (ILWC 46 & LPNB) | Sequence genome | Components of | Gene accession IDs | Putative functions |
|----------------------|----------------|-----------------|-------------------------|----------------------------------------|--------------------|------------------|-----------------|---------------|--------------------|--------------------|
| SNP_24794_A_27397348 | NC_021163.1    | Ca_Kabuli_Chr04 | 27397348                | CC                                     | TT                 | TT               | INTERGENIC      |               |                    |                    |
| SNP_24795_A_27397365 | NC_021163.1    | Ca_Kabuli_Chr04 | 27397365                | GG                                     | AA                 | AA               | INTERGENIC      |               |                    |                    |
| SNP_24796_A_27397366 | NC_021163.1    | Ca_Kabuli_Chr04 | 27397366                | AA                                     | GG                 | GG               | INTERGENIC      |               |                    |                    |
| SNP_24797_A_27397387 | NC_021163.1    | Ca_Kabuli_Chr04 | 27397387                | AA                                     | CC                 | CC               | INTERGENIC      |               |                    |                    |
| SNP_24798_A_27397389 | NC_021163.1    | Ca_Kabuli_Chr04 | 27397389                | CC                                     | AA                 | AA               | INTERGENIC      |               |                    |                    |
| SNP_24799_A_27397564 | NC_021163.1    | Ca_Kabuli_Chr04 | 27397564                | TT                                     | GG                 | GG               | INTERGENIC      |               |                    |                    |
| SNP_24800_A_27397579 | NC_021163.1    | Ca_Kabuli_Chr04 | 27397579                | TT                                     | CC                 | CC               | INTERGENIC      |               |                    |                    |
| SNP_24801_A_27398013 | NC_021163.1    | Ca_Kabuli_Chr04 | 27398013                | CC                                     | TT                 | TT               | INTERGENIC      |               |                    |                    |
| SNP_24802_A_27398512 | NC_021163.1    | Ca_Kabuli_Chr04 | 27398512                | GG                                     | TT                 | TT               | INTERGENIC      |               |                    |                    |
| SNP_24803_A_27398513 | NC_021163.1    | Ca_Kabuli_Chr04 | 27398513                | CC                                     | TT                 | TT               | INTERGENIC      |               |                    |                    |
| SNP_24804_A_27402189 | NC_021163.1    | Ca_Kabuli_Chr04 | 27402189                | GG                                     | AA                 | AA               | INTERGENIC      |               |                    |                    |
| SNP_24805_A_27403405 | NC_021163.1    | Ca_Kabuli_Chr04 | 27403405                | GG                                     | AA                 | AA               | INTERGENIC      |               |                    |                    |
| SNP_24806_A_27403448 | NC_021163.1    | Ca_Kabuli_Chr04 | 27403448                | CC                                     | AA                 | AA               | INTERGENIC      |               |                    |                    |
| SNP_24808_A_27403850 | NC_021163.1    | Ca_Kabuli_Chr04 | 27403850                | GG                                     | AA                 | AA               | INTERGENIC      |               |                    |                    |
| SNP_24809_A_27404252 | NC_021163.1    | Ca_Kabuli_Chr04 | 27404252                | GG                                     | CC                 | CC               | INTERGENIC      |               |                    |                    |
| SNP_24811_A_27405724 | NC_021163.1    | Ca_Kabuli_Chr04 | 27405724                | GG                                     | CC                 | CC               | INTERGENIC      |               |                    |                    |
| SNP_24812_A_27410826 | NC_021163.1    | Ca_Kabuli_Chr04 | 27410826                | CC                                     | TT                 | TT               | INTERGENIC      |               |                    |                    |
| SNP_24813_A_27417678 | NC_021163.1    | Ca_Kabuli_Chr04 | 27417678                | GG                                     | CC                 | CC               | INTERGENIC      |               |                    |                    |
| SNP_24814_A_27419865 | NC_021163.1    | Ca_Kabuli_Chr04 | 27419865                | GG                                     | AA                 | AA               | DRR             | 101515110     | acid phosphatase 1 |                    |
| SNP_24815_A_27420145 | NC_021163.1    | Ca_Kabuli_Chr04 | 27420145                | CC                                     | TT                 | TT               | DRR             | 101515110     | acid phosphatase 1 |                    |
| SNP_24816_A_27424209 | NC_021163.1    | Ca_Kabuli_Chr04 | 27424209                | CC                                     | TT                 | TT               | URR             | 101515110     | acid phosphatase 1 |                    |
| SNP_24817_A_27424280 | NC_021163.1    | Ca_Kabuli_Chr04 | 27424280                | CC                                     | TT                 | TT               | URR             | 101515110     | acid phosphatase 1 |                    |

| SNPs IDs             | Chromosome IDs | Chromosomes     | Physical positions (bp) | CDC Frontier genome (Reference genome) | (Pusa 1103 & HPNB) | (ILWC 46 & LPNB) | Sequence Components of genome | Gene accession IDs | Putative functions                                  |
|----------------------|----------------|-----------------|-------------------------|----------------------------------------|--------------------|------------------|-------------------------------|--------------------|-----------------------------------------------------|
| SNP_24818_A_27424306 | NC_021163.1    | Ca_Kabuli_Chr04 | 27424306                | AA                                     | GG                 | GG               | URR                           | 101515110          | acid phosphatase 1                                  |
| SNP_24819_A_27427230 | NC_021163.1    | Ca_Kabuli_Chr04 | 27427230                | GG                                     | AA                 | AA               | INTERGENIC                    |                    |                                                     |
| SNP_24820_A_27433835 | NC_021163.1    | Ca_Kabuli_Chr04 | 27433835                | CC                                     | AA                 | AA               | INTERGENIC                    |                    |                                                     |
| SNP_24821_A_27433851 | NC_021163.1    | Ca_Kabuli_Chr04 | 27433851                | CC                                     | GG                 | GG               | INTERGENIC                    |                    |                                                     |
| SNP_24822_A_27433857 | NC_021163.1    | Ca_Kabuli_Chr04 | 27433857                | TT                                     | AA                 | AA               | INTERGENIC                    |                    |                                                     |
| SNP_24823_A_27433888 | NC_021163.1    | Ca_Kabuli_Chr04 | 27433888                | TT                                     | CC                 | CC               | INTERGENIC                    |                    |                                                     |
| SNP_24824_A_27433923 | NC_021163.1    | Ca_Kabuli_Chr04 | 27433923                | CC                                     | TT                 | TT               | INTERGENIC                    |                    |                                                     |
| SNP_24825_A_27434972 | NC_021163.1    | Ca_Kabuli_Chr04 | 27434972                | TT                                     | GG                 | GG               | INTERGENIC                    |                    |                                                     |
| SNP_24826_A_27440475 | NC_021163.1    | Ca_Kabuli_Chr04 | 27440475                | GG                                     | AA                 | AA               | INTERGENIC                    |                    |                                                     |
| SNP_24827_A_27478446 | NC_021163.1    | Ca_Kabuli_Chr04 | 27478446                | AA                                     | GG                 | GG               | INTERGENIC                    |                    |                                                     |
| SNP_24828_A_27481545 | NC_021163.1    | Ca_Kabuli_Chr04 | 27481545                | TT                                     | CC                 | CC               | DRR                           | 101515763          | protein PROTON GRADIENT REGULATION 5, chloroplastic |
| SNP_24829_A_27481551 | NC_021163.1    | Ca_Kabuli_Chr04 | 27481551                | CC                                     | GG                 | GG               | DRR                           | 101515763          | protein PROTON GRADIENT REGULATION 5, chloroplastic |
| SNP_24830_A_27481599 | NC_021163.1    | Ca_Kabuli_Chr04 | 27481599                | CC                                     | TT                 | TT               | DRR                           | 101515763          | protein PROTON GRADIENT REGULATION 5, chloroplastic |
| SNP_24831_A_27481605 | NC_021163.1    | Ca_Kabuli_Chr04 | 27481605                | GG                                     | AA                 | AA               | DRR                           | 101515763          | protein PROTON GRADIENT REGULATION 5, chloroplastic |
| SNP_24832_A_27481607 | NC_021163.1    | Ca_Kabuli_Chr04 | 27481607                | AA                                     | TT                 | TT               | DRR                           | 101515763          | protein PROTON GRADIENT REGULATION 5, chloroplastic |
| SNP_24833_A_27481613 | NC_021163.1    | Ca_Kabuli_Chr04 | 27481613                | AA                                     | TT                 | TT               | DRR                           | 101515763          | protein PROTON GRADIENT REGULATION 5, chloroplastic |
| SNP_24834_A_27481840 | NC_021163.1    | Ca_Kabuli_Chr04 | 27481840                | GG                                     | AA                 | AA               | DRR                           | 101515763          | protein PROTON GRADIENT REGULATION 5, chloroplastic |
| SNP_24835_A_27481856 | NC_021163.1    | Ca_Kabuli_Chr04 | 27481856                | CC                                     | TT                 | TT               | DRR                           | 101515763          | protein PROTON GRADIENT REGULATION 5, chloroplastic |
| SNP_24836_A_27481863 | NC_021163.1    | Ca_Kabuli_Chr04 | 27481863                | TT                                     | AA                 | AA               | DRR                           | 101515763          | protein PROTON GRADIENT REGULATION 5, chloroplastic |
| SNP_24837_A_27481867 | NC_021163.1    | Ca_Kabuli_Chr04 | 27481867                | GG                                     | AA                 | AA               | DRR                           | 101515763          | protein PROTON GRADIENT REGULATION 5, chloroplastic |
| SNP_24838_A_27481877 | NC_021163.1    | Ca_Kabuli_Chr04 | 27481877                | TT                                     | CC                 | CC               | DRR                           | 101515763          | protein PROTON GRADIENT REGULATION 5, chloroplastic |
| SNP_24839_A_27481891 | NC_021163.1    | Ca_Kabuli_Chr04 | 27481891                | TT                                     | CC                 | CC               | DRR                           | 101515763          | protein PROTON GRADIENT REGULATION 5, chloroplastic |

| SNPs IDs             | Chromosome IDs | Chromosomes     | Physical positions (bp) | CDC Frontier genome (Reference genome) | (Pusa 1103 & HPNB) | (ILWC 46 & LPNB) | Sequence Components of genome | Gene accession IDs | Putative functions                                  |
|----------------------|----------------|-----------------|-------------------------|----------------------------------------|--------------------|------------------|-------------------------------|--------------------|-----------------------------------------------------|
| SNP_24840_A_27481900 | NC_021163.1    | Ca_Kabuli_Chr04 | 27481900                | CC                                     | TT                 | TT               | DRR                           | 101515763          | protein PROTON GRADIENT REGULATION 5, chloroplastic |
| SNP_24841_A_27481901 | NC_021163.1    | Ca_Kabuli_Chr04 | 27481901                | CC                                     | TT                 | TT               | DRR                           | 101515763          | protein PROTON GRADIENT REGULATION 5, chloroplastic |
| SNP_24842_A_27481916 | NC_021163.1    | Ca_Kabuli_Chr04 | 27481916                | GG                                     | AA                 | AA               | DRR                           | 101515763          | protein PROTON GRADIENT REGULATION 5, chloroplastic |
| SNP_24843_A_27482382 | NC_021163.1    | Ca_Kabuli_Chr04 | 27482382                | TT                                     | CC                 | CC               | DRR                           | 101515763          | protein PROTON GRADIENT REGULATION 5, chloroplastic |
| SNP_24845_A_27484314 | NC_021163.1    | Ca_Kabuli_Chr04 | 27484314                | TT                                     | AA                 | AA               | URR                           | 101515763          | protein PROTON GRADIENT REGULATION 5, chloroplastic |
| SNP_24846_A_27484380 | NC_021163.1    | Ca_Kabuli_Chr04 | 27484380                | GG                                     | AA                 | AA               | URR                           | 101515763          | protein PROTON GRADIENT REGULATION 5, chloroplastic |
| SNP_24847_A_27484439 | NC_021163.1    | Ca_Kabuli_Chr04 | 27484439                | AA                                     | GG                 | GG               | URR                           | 101515763          | protein PROTON GRADIENT REGULATION 5, chloroplastic |
| SNP_24848_A_27484467 | NC_021163.1    | Ca_Kabuli_Chr04 | 27484467                | CC                                     | TT                 | TT               | URR                           | 101515763          | protein PROTON GRADIENT REGULATION 5, chloroplastic |
| SNP_24849_A_27487442 | NC_021163.1    | Ca_Kabuli_Chr04 | 27487442                | AA                                     | CC                 | CC               | INTERGENIC                    |                    |                                                     |
| SNP_24851_A_27491829 | NC_021163.1    | Ca_Kabuli_Chr04 | 27491829                | TT                                     | AA                 | AA               | DRR                           | 101491036          | uncharacterized LOC101491036                        |
| SNP_24853_A_27491879 | NC_021163.1    | Ca_Kabuli_Chr04 | 27491879                | GG                                     | AA                 | AA               | DRR                           | 101491036          | uncharacterized LOC101491036                        |
| SNP_24854_A_27493403 | NC_021163.1    | Ca_Kabuli_Chr04 | 27493403                | TT                                     | AA                 | AA               | DRR                           | 101488522          | actin-related protein 2/3 complex subunit 2B        |
| SNP_24855_A_27496098 | NC_021163.1    | Ca_Kabuli_Chr04 | 27496098                | CC                                     | TT                 | TT               | INTERGENIC                    |                    |                                                     |
| SNP_24856_A_27496381 | NC_021163.1    | Ca_Kabuli_Chr04 | 27496381                | GG                                     | CC                 | CC               | INTERGENIC                    |                    |                                                     |
| SNP_24858_A_27497443 | NC_021163.1    | Ca_Kabuli_Chr04 | 27497443                | GG                                     | CC                 | CC               | INTERGENIC                    |                    |                                                     |
| SNP_24860_A_27499387 | NC_021163.1    | Ca_Kabuli_Chr04 | 27499387                | TT                                     | AA                 | AA               | INTRON                        | 101488522          | actin-related protein 2/3 complex subunit 2B        |
| SNP_24861_A_27499408 | NC_021163.1    | Ca_Kabuli_Chr04 | 27499408                | TT                                     | CC                 | CC               | INTRON                        | 101488522          | actin-related protein 2/3 complex subunit 2B        |
| SNP_24862_A_27499760 | NC_021163.1    | Ca_Kabuli_Chr04 | 27499760                | GG                                     | AA                 | AA               | INTRON                        | 101488522          | actin-related protein 2/3 complex subunit 2B        |
| SNP_24863_A_27499805 | NC_021163.1    | Ca_Kabuli_Chr04 | 27499805                | TT                                     | AA                 | AA               | INTRON                        | 101488522          | actin-related protein 2/3 complex subunit 2B        |
| SNP_24864_A_27499827 | NC_021163.1    | Ca_Kabuli_Chr04 | 27499827                | CC                                     | TT                 | TT               | INTRON                        | 101488522          | actin-related protein 2/3 complex subunit 2B        |
| SNP_24866_A_27503309 | NC_021163.1    | Ca_Kabuli_Chr04 | 27503309                | CC                                     | AA                 | AA               | INTRON                        | 101488522          | actin-related protein 2/3 complex subunit 2B        |
| SNP_24867_A_27503548 | NC_021163.1    | Ca_Kabuli_Chr04 | 27503548                | CC                                     | GG                 | GG               | INTRON                        | 101488522          | actin-related protein 2/3 complex subunit 2B        |

| SNPs IDs             | Chromosome IDs | Chromosomes     | Physical positions (bp) | CDC Frontier genome (Reference genome) | (Pusa 1103 & HPNB) | (ILWC 46 & LPNB) | Sequence Components of genome | Gene accession IDs | Putative functions                           |
|----------------------|----------------|-----------------|-------------------------|----------------------------------------|--------------------|------------------|-------------------------------|--------------------|----------------------------------------------|
| SNP_24868_A_27504826 | NC_021163.1    | Ca_Kabuli_Chr04 | 27504826                | TT                                     | CC                 | CC               | INTRON                        | 101488522          | actin-related protein 2/3 complex subunit 2B |
| SNP_24869_A_27506590 | NC_021163.1    | Ca_Kabuli_Chr04 | 27506590                | GG                                     | AA                 | AA               | INTRON                        | 101488522          | actin-related protein 2/3 complex subunit 2B |
| SNP_24870_A_27506612 | NC_021163.1    | Ca_Kabuli_Chr04 | 27506612                | AA                                     | GG                 | GG               | INTRON                        | 101488522          | actin-related protein 2/3 complex subunit 2B |
| SNP_24871_A_27506990 | NC_021163.1    | Ca_Kabuli_Chr04 | 27506990                | TT                                     | AA                 | AA               | INTRON                        | 101488522          | actin-related protein 2/3 complex subunit 2B |
| SNP_24872_A_27507006 | NC_021163.1    | Ca_Kabuli_Chr04 | 27507006                | TT                                     | CC                 | CC               | INTRON                        | 101488522          | actin-related protein 2/3 complex subunit 2B |
| SNP_24873_A_27509182 | NC_021163.1    | Ca_Kabuli_Chr04 | 27509182                | AA                                     | GG                 | GG               | INTRON                        | 101488522          | actin-related protein 2/3 complex subunit 2B |
| SNP_24874_A_27509357 | NC_021163.1    | Ca_Kabuli_Chr04 | 27509357                | AA                                     | GG                 | GG               | INTRON                        | 101488522          | actin-related protein 2/3 complex subunit 2B |
| SNP_24875_A_27511009 | NC_021163.1    | Ca_Kabuli_Chr04 | 27511009                | GG                                     | AA                 | AA               | URR                           | 101488522          | actin-related protein 2/3 complex subunit 2B |
| SNP_24876_A_27511047 | NC_021163.1    | Ca_Kabuli_Chr04 | 27511047                | CC                                     | TT                 | TT               | URR                           | 101488522          | actin-related protein 2/3 complex subunit 2B |
| SNP_24877_A_27511078 | NC_021163.1    | Ca_Kabuli_Chr04 | 27511078                | TT                                     | AA                 | AA               | URR                           | 101488522          | actin-related protein 2/3 complex subunit 2B |
| SNP_24878_A_27512129 | NC_021163.1    | Ca_Kabuli_Chr04 | 27512129                | AA                                     | GG                 | GG               | URR                           | 101488522          | actin-related protein 2/3 complex subunit 2B |
| SNP_24879_A_27512358 | NC_021163.1    | Ca_Kabuli_Chr04 | 27512358                | TT                                     | GG                 | GG               | URR                           | 101488522          | actin-related protein 2/3 complex subunit 2B |
| SNP_24881_A_27512648 | NC_021163.1    | Ca_Kabuli_Chr04 | 27512648                | TT                                     | CC                 | CC               | INTERGENIC                    |                    |                                              |
| SNP_24882_A_27512703 | NC_021163.1    | Ca_Kabuli_Chr04 | 27512703                | TT                                     | CC                 | CC               | INTERGENIC                    |                    |                                              |
| SNP_24883_A_27512846 | NC_021163.1    | Ca_Kabuli_Chr04 | 27512846                | GG                                     | TT                 | TT               | INTERGENIC                    |                    |                                              |
| SNP_24884_A_27513960 | NC_021163.1    | Ca_Kabuli_Chr04 | 27513960                | GG                                     | AA                 | AA               | INTERGENIC                    |                    |                                              |
| SNP_24885_A_27513962 | NC_021163.1    | Ca_Kabuli_Chr04 | 27513962                | TT                                     | CC                 | CC               | INTERGENIC                    |                    |                                              |
| SNP_24886_A_27513982 | NC_021163.1    | Ca_Kabuli_Chr04 | 27513982                | AA                                     | GG                 | GG               | INTERGENIC                    |                    |                                              |
| SNP_24887_A_27517310 | NC_021163.1    | Ca_Kabuli_Chr04 | 27517310                | CC                                     | TT                 | TT               | DRR                           | 101489085          | uncharacterized LOC101489085                 |
| SNP_24888_A_27523296 | NC_021163.1    | Ca_Kabuli_Chr04 | 27523296                | GG                                     | AA                 | AA               | URR                           | 101489085          | uncharacterized LOC101489085                 |
| SNP_24890_A_27530375 | NC_021163.1    | Ca_Kabuli_Chr04 | 27530375                | CC                                     | AA                 | AA               | INTERGENIC                    |                    |                                              |
| SNP_24891_A_27532701 | NC_021163.1    | Ca_Kabuli_Chr04 | 27532701                | TT                                     | AA                 | AA               | INTERGENIC                    |                    |                                              |

| SNPs IDs             | Chromosome IDs | Chromosomes     | Physical positions (bp) | CDC Frontier genome (Reference genome) | (Pusa 1103 & HPNB) | (ILWC 46 & LPNB) | Sequence genome | Components of | Gene accession IDs | Putative functions |
|----------------------|----------------|-----------------|-------------------------|----------------------------------------|--------------------|------------------|-----------------|---------------|--------------------|--------------------|
| SNP_24892_A_27536778 | NC_021163.1    | Ca_Kabuli_Chr04 | 27536778                | GG                                     | TT                 | TT               | INTERGENIC      |               |                    |                    |
| SNP_24893_A_27540062 | NC_021163.1    | Ca_Kabuli_Chr04 | 27540062                | TT                                     | AA                 | AA               | INTERGENIC      |               |                    |                    |
| SNP_24894_A_27545195 | NC_021163.1    | Ca_Kabuli_Chr04 | 27545195                | AA                                     | CC                 | CC               | INTERGENIC      |               |                    |                    |
| SNP_24895_A_27545196 | NC_021163.1    | Ca_Kabuli_Chr04 | 27545196                | TT                                     | CC                 | CC               | INTERGENIC      |               |                    |                    |
| SNP_24896_A_27545242 | NC_021163.1    | Ca_Kabuli_Chr04 | 27545242                | CC                                     | TT                 | TT               | INTERGENIC      |               |                    |                    |
| SNP_24897_A_27545247 | NC_021163.1    | Ca_Kabuli_Chr04 | 27545247                | CC                                     | TT                 | TT               | INTERGENIC      |               |                    |                    |
| SNP_24899_A_27547780 | NC_021163.1    | Ca_Kabuli_Chr04 | 27547780                | AA                                     | GG                 | GG               | INTERGENIC      |               |                    |                    |
| SNP_24901_A_27547906 | NC_021163.1    | Ca_Kabuli_Chr04 | 27547906                | CC                                     | AA                 | AA               | INTERGENIC      |               |                    |                    |
| SNP_24903_A_27548872 | NC_021163.1    | Ca_Kabuli_Chr04 | 27548872                | CC                                     | AA                 | AA               | INTERGENIC      |               |                    |                    |
| SNP_24904_A_27549284 | NC_021163.1    | Ca_Kabuli_Chr04 | 27549284                | AA                                     | GG                 | GG               | INTERGENIC      |               |                    |                    |
| SNP_24905_A_27554405 | NC_021163.1    | Ca_Kabuli_Chr04 | 27554405                | TT                                     | CC                 | CC               | INTERGENIC      |               |                    |                    |
| SNP_24906_A_27554408 | NC_021163.1    | Ca_Kabuli_Chr04 | 27554408                | TT                                     | CC                 | CC               | INTERGENIC      |               |                    |                    |
| SNP_24907_A_27554412 | NC_021163.1    | Ca_Kabuli_Chr04 | 27554412                | AA                                     | GG                 | GG               | INTERGENIC      |               |                    |                    |
| SNP_24908_A_27554429 | NC_021163.1    | Ca_Kabuli_Chr04 | 27554429                | TT                                     | CC                 | CC               | INTERGENIC      |               |                    |                    |
| SNP_24909_A_27554465 | NC_021163.1    | Ca_Kabuli_Chr04 | 27554465                | CC                                     | TT                 | TT               | INTERGENIC      |               |                    |                    |
| SNP_24910_A_27554548 | NC_021163.1    | Ca_Kabuli_Chr04 | 27554548                | AA                                     | GG                 | GG               | INTERGENIC      |               |                    |                    |
| SNP_24911_A_27554579 | NC_021163.1    | Ca_Kabuli_Chr04 | 27554579                | AA                                     | GG                 | GG               | INTERGENIC      |               |                    |                    |
| SNP_24913_A_27554669 | NC_021163.1    | Ca_Kabuli_Chr04 | 27554669                | GG                                     | TT                 | TT               | INTERGENIC      |               |                    |                    |
| SNP_24914_A_27554675 | NC_021163.1    | Ca_Kabuli_Chr04 | 27554675                | AA                                     | GG                 | GG               | INTERGENIC      |               |                    |                    |
| SNP_24915_A_27554681 | NC_021163.1    | Ca_Kabuli_Chr04 | 27554681                | TT                                     | CC                 | CC               | INTERGENIC      |               |                    |                    |
| SNP_24916_A_27554831 | NC_021163.1    | Ca_Kabuli_Chr04 | 27554831                | TT                                     | CC                 | CC               | INTERGENIC      |               |                    |                    |
| SNP_24917_A_27554975 | NC_021163.1    | Ca_Kabuli_Chr04 | 27554975                | AA                                     | GG                 | GG               | INTERGENIC      |               |                    |                    |

| SNPs IDs             | Chromosome IDs | Chromosomes     | Physical positions (bp) | CDC Frontier genome (Reference genome) | (Pusa 1103 & HPNB) | (ILWC 46 & LPNB) | Sequence genome | Components of | Gene accession IDs | Putative functions           |
|----------------------|----------------|-----------------|-------------------------|----------------------------------------|--------------------|------------------|-----------------|---------------|--------------------|------------------------------|
| SNP_24918_A_27555581 | NC_021163.1    | Ca_Kabuli_Chr04 | 27555581                | TT                                     | CC                 | CC               | INTERGENIC      |               |                    |                              |
| SNP_24919_A_27555664 | NC_021163.1    | Ca_Kabuli_Chr04 | 27555664                | CC                                     | AA                 | AA               | INTERGENIC      |               |                    |                              |
| SNP_24920_A_27558181 | NC_021163.1    | Ca_Kabuli_Chr04 | 27558181                | GG                                     | AA                 | AA               | INTERGENIC      |               |                    |                              |
| SNP_24921_A_27561737 | NC_021163.1    | Ca_Kabuli_Chr04 | 27561737                | GG                                     | AA                 | AA               | URR             | 101491671     |                    | uncharacterized LOC101491671 |
| SNP_24922_A_27562427 | NC_021163.1    | Ca_Kabuli_Chr04 | 27562427                | TT                                     | CC                 | CC               | URR             | 101491671     |                    | uncharacterized LOC101491671 |
| SNP_24923_A_27565132 | NC_021163.1    | Ca_Kabuli_Chr04 | 27565132                | CC                                     | TT                 | TT               | INTERGENIC      |               |                    |                              |
| SNP_24924_A_27567843 | NC_021163.1    | Ca_Kabuli_Chr04 | 27567843                | CC                                     | TT                 | TT               | INTERGENIC      |               |                    |                              |
| SNP_24925_A_27571007 | NC_021163.1    | Ca_Kabuli_Chr04 | 27571007                | AA                                     | CC                 | CC               | INTERGENIC      |               |                    |                              |
| SNP_24926_A_27571161 | NC_021163.1    | Ca_Kabuli_Chr04 | 27571161                | GG                                     | AA                 | AA               | INTERGENIC      |               |                    |                              |
| SNP_24928_A_27575781 | NC_021163.1    | Ca_Kabuli_Chr04 | 27575781                | AA                                     | GG                 | GG               | INTERGENIC      |               |                    |                              |
| SNP_24929_A_27579967 | NC_021163.1    | Ca_Kabuli_Chr04 | 27579967                | GG                                     | AA                 | AA               | INTERGENIC      |               |                    |                              |
| SNP_24930_A_27580012 | NC_021163.1    | Ca_Kabuli_Chr04 | 27580012                | AA                                     | GG                 | GG               | INTERGENIC      |               |                    |                              |
| SNP_24932_A_27583286 | NC_021163.1    | Ca_Kabuli_Chr04 | 27583286                | AA                                     | GG                 | GG               | INTERGENIC      |               |                    |                              |
| SNP_24933_A_27585149 | NC_021163.1    | Ca_Kabuli_Chr04 | 27585149                | AA                                     | TT                 | TT               | INTERGENIC      |               |                    |                              |
| SNP_24934_A_27587074 | NC_021163.1    | Ca_Kabuli_Chr04 | 27587074                | AA                                     | CC                 | CC               | INTERGENIC      |               |                    |                              |
| SNP_24935_A_27587221 | NC_021163.1    | Ca_Kabuli_Chr04 | 27587221                | GG                                     | AA                 | AA               | INTERGENIC      |               |                    |                              |
| SNP_24936_A_27587423 | NC_021163.1    | Ca_Kabuli_Chr04 | 27587423                | AA                                     | CC                 | CC               | INTERGENIC      |               |                    |                              |
| SNP_24937_A_27587446 | NC_021163.1    | Ca_Kabuli_Chr04 | 27587446                | AA                                     | GG                 | GG               | INTERGENIC      |               |                    |                              |
| SNP_24938_A_27588308 | NC_021163.1    | Ca_Kabuli_Chr04 | 27588308                | GG                                     | AA                 | AA               | INTERGENIC      |               |                    |                              |
| SNP_24939_A_27588313 | NC_021163.1    | Ca_Kabuli_Chr04 | 27588313                | TT                                     | GG                 | GG               | INTERGENIC      |               |                    |                              |
| SNP_24942_A_27604761 | NC_021163.1    | Ca_Kabuli_Chr04 | 27604761                | AA                                     | GG                 | GG               | INTRON          | 101492315     |                    | uncharacterized LOC101492315 |
| SNP_24943_A_27611195 | NC_021163.1    | Ca_Kabuli_Chr04 | 27611195                | AA                                     | GG                 | GG               | INTRON          | 101492315     |                    | uncharacterized LOC101492315 |

| SNPs IDs             | Chromosome IDs | Chromosomes     | Physical positions (bp) | CDC Frontier (Reference genome) | (Pusa 1103 & HPNB) | (ILWC 46 & LPNB) | Sequence Components of genome | Gene accession IDs | Putative functions           |
|----------------------|----------------|-----------------|-------------------------|---------------------------------|--------------------|------------------|-------------------------------|--------------------|------------------------------|
| SNP_24944_A_27611445 | NC_021163.1    | Ca_Kabuli_Chr04 | 27611445                | TT                              | AA                 | AA               | INTRON                        | 101492315          | uncharacterized LOC101492315 |
| SNP_24945_A_27611598 | NC_021163.1    | Ca_Kabuli_Chr04 | 27611598                | AA                              | GG                 | GG               | INTRON                        | 101492315          | uncharacterized LOC101492315 |
| SNP_24946_A_27622768 | NC_021163.1    | Ca_Kabuli_Chr04 | 27622768                | CC                              | TT                 | TT               | INTRON                        | 101489418          | uncharacterized LOC101489418 |
| SNP_24947_A_27625368 | NC_021163.1    | Ca_Kabuli_Chr04 | 27625368                | AA                              | TT                 | TT               | INTRON                        | 101489418          | uncharacterized LOC101489418 |
| SNP_24948_A_27628186 | NC_021163.1    | Ca_Kabuli_Chr04 | 27628186                | AA                              | GG                 | GG               | URR                           | 101489418          | uncharacterized LOC101489418 |
| SNP_24949_A_27628240 | NC_021163.1    | Ca_Kabuli_Chr04 | 27628240                | TT                              | CC                 | CC               | URR                           | 101489418          | uncharacterized LOC101489418 |
| SNP_24950_A_27631249 | NC_021163.1    | Ca_Kabuli_Chr04 | 27631249                | TT                              | AA                 | AA               | INTERGENIC                    |                    |                              |
| SNP_24951_A_27631660 | NC_021163.1    | Ca_Kabuli_Chr04 | 27631660                | TT                              | CC                 | CC               | INTERGENIC                    |                    |                              |
| SNP_24952_A_27631675 | NC_021163.1    | Ca_Kabuli_Chr04 | 27631675                | CC                              | TT                 | TT               | INTERGENIC                    |                    |                              |
| SNP_24953_A_27631680 | NC_021163.1    | Ca_Kabuli_Chr04 | 27631680                | TT                              | CC                 | CC               | INTERGENIC                    |                    |                              |
| SNP_24954_A_27631922 | NC_021163.1    | Ca_Kabuli_Chr04 | 27631922                | AA                              | GG                 | GG               | INTERGENIC                    |                    |                              |
| SNP_24955_A_27631930 | NC_021163.1    | Ca_Kabuli_Chr04 | 27631930                | AA                              | GG                 | GG               | INTERGENIC                    |                    |                              |
| SNP_24956_A_27631943 | NC_021163.1    | Ca_Kabuli_Chr04 | 27631943                | AA                              | TT                 | TT               | INTERGENIC                    |                    |                              |
| SNP_24957_A_27632026 | NC_021163.1    | Ca_Kabuli_Chr04 | 27632026                | TT                              | CC                 | CC               | INTERGENIC                    |                    |                              |
| SNP_24958_A_27632029 | NC_021163.1    | Ca_Kabuli_Chr04 | 27632029                | TT                              | GG                 | GG               | INTERGENIC                    |                    |                              |
| SNP_24959_A_27634925 | NC_021163.1    | Ca_Kabuli_Chr04 | 27634925                | AA                              | GG                 | GG               | INTERGENIC                    |                    |                              |
| SNP_24960_A_27635193 | NC_021163.1    | Ca_Kabuli_Chr04 | 27635193                | TT                              | CC                 | CC               | INTERGENIC                    |                    |                              |
| SNP_24962_A_27637506 | NC_021163.1    | Ca_Kabuli_Chr04 | 27637506                | TT                              | AA                 | AA               | INTERGENIC                    |                    |                              |
| SNP_24963_A_27647558 | NC_021163.1    | Ca_Kabuli_Chr04 | 27647558                | CC                              | TT                 | TT               | INTERGENIC                    |                    |                              |
| SNP_24964_A_27648022 | NC_021163.1    | Ca_Kabuli_Chr04 | 27648022                | GG                              | AA                 | AA               | INTERGENIC                    |                    |                              |
| SNP_24966_A_27653878 | NC_021163.1    | Ca_Kabuli_Chr04 | 27653878                | AA                              | GG                 | GG               | INTERGENIC                    |                    |                              |
| SNP_24968_A_27657055 | NC_021163.1    | Ca_Kabuli_Chr04 | 27657055                | TT                              | CC                 | CC               | INTERGENIC                    |                    |                              |

| SNPs IDs             | Chromosome IDs | Chromosomes     | Physical positions (bp) | CDC Frontier genome (Reference genome) | (Pusa 1103 & HPNB) | (ILWC 46 & LPNB) | Sequence genome | Components of | Gene accession IDs | Putative functions                            |
|----------------------|----------------|-----------------|-------------------------|----------------------------------------|--------------------|------------------|-----------------|---------------|--------------------|-----------------------------------------------|
| SNP_24969_A_27657071 | NC_021163.1    | Ca_Kabuli_Chr04 | 27657071                | TT                                     | GG                 | GG               | INTERGENIC      |               |                    |                                               |
| SNP_24970_A_27657148 | NC_021163.1    | Ca_Kabuli_Chr04 | 27657148                | TT                                     | AA                 | AA               | INTERGENIC      |               |                    |                                               |
| SNP_24971_A_27657272 | NC_021163.1    | Ca_Kabuli_Chr04 | 27657272                | AA                                     | GG                 | GG               | INTERGENIC      |               |                    |                                               |
| SNP_24972_A_27659499 | NC_021163.1    | Ca_Kabuli_Chr04 | 27659499                | AA                                     | GG                 | GG               | DRR             | 101489738     |                    | MATH domain-containing protein At5g43560-like |
| SNP_24973_A_27674517 | NC_021163.1    | Ca_Kabuli_Chr04 | 27674517                | CC                                     | TT                 | TT               | URR             | 101489738     |                    | MATH domain-containing protein At5g43560-like |
| SNP_24974_A_27675479 | NC_021163.1    | Ca_Kabuli_Chr04 | 27675479                | CC                                     | TT                 | TT               | URR             | 101489738     |                    | MATH domain-containing protein At5g43560-like |
| SNP_24975_A_27675820 | NC_021163.1    | Ca_Kabuli_Chr04 | 27675820                | CC                                     | GG                 | GG               | INTERGENIC      |               |                    |                                               |
| SNP_24976_A_27687134 | NC_021163.1    | Ca_Kabuli_Chr04 | 27687134                | AA                                     | GG                 | GG               | INTERGENIC      |               |                    |                                               |
| SNP_24977_A_27687143 | NC_021163.1    | Ca_Kabuli_Chr04 | 27687143                | AA                                     | GG                 | GG               | INTERGENIC      |               |                    |                                               |
| SNP_24978_A_27688118 | NC_021163.1    | Ca_Kabuli_Chr04 | 27688118                | CC                                     | TT                 | TT               | INTERGENIC      |               |                    |                                               |
| SNP_24979_A_27689605 | NC_021163.1    | Ca_Kabuli_Chr04 | 27689605                | GG                                     | TT                 | TT               | INTERGENIC      |               |                    |                                               |
| SNP_24980_A_27690130 | NC_021163.1    | Ca_Kabuli_Chr04 | 27690130                | TT                                     | CC                 | CC               | INTERGENIC      |               |                    |                                               |
| SNP_24981_A_27690599 | NC_021163.1    | Ca_Kabuli_Chr04 | 27690599                | GG                                     | AA                 | AA               | INTERGENIC      |               |                    |                                               |
| SNP_24982_A_27692897 | NC_021163.1    | Ca_Kabuli_Chr04 | 27692897                | AA                                     | TT                 | TT               | INTERGENIC      |               |                    |                                               |
| SNP_24983_A_27695347 | NC_021163.1    | Ca_Kabuli_Chr04 | 27695347                | CC                                     | GG                 | GG               | INTERGENIC      |               |                    |                                               |
| SNP_24984_A_27696132 | NC_021163.1    | Ca_Kabuli_Chr04 | 27696132                | AA                                     | GG                 | GG               | INTERGENIC      |               |                    |                                               |
| SNP_24985_A_27702143 | NC_021163.1    | Ca_Kabuli_Chr04 | 27702143                | AA                                     | GG                 | GG               | INTERGENIC      |               |                    |                                               |
| SNP_24986_A_27703378 | NC_021163.1    | Ca_Kabuli_Chr04 | 27703378                | AA                                     | TT                 | TT               | INTERGENIC      |               |                    |                                               |
| SNP_24987_A_27710396 | NC_021163.1    | Ca_Kabuli_Chr04 | 27710396                | AA                                     | GG                 | GG               | INTERGENIC      |               |                    |                                               |
| SNP_24988_A_27710474 | NC_021163.1    | Ca_Kabuli_Chr04 | 27710474                | GG                                     | CC                 | CC               | INTERGENIC      |               |                    |                                               |
| SNP_24989_A_27715661 | NC_021163.1    | Ca_Kabuli_Chr04 | 27715661                | AA                                     | GG                 | GG               | INTERGENIC      |               |                    |                                               |
| SNP_24990_A_27715717 | NC_021163.1    | Ca_Kabuli_Chr04 | 27715717                | CC                                     | AA                 | AA               | INTERGENIC      |               |                    |                                               |



| SNPs IDs             | Chromosome IDs | Chromosomes     | Physical positions (bp) | CDC Frontier genome (Reference genome) | (Pusa 1103 & HPNB) | (ILWC 46 & LPNB) | Sequence Components of genome | Gene accession IDs | Putative functions           |
|----------------------|----------------|-----------------|-------------------------|----------------------------------------|--------------------|------------------|-------------------------------|--------------------|------------------------------|
| SNP_24991_A_27720921 | NC_021163.1    | Ca_Kabuli_Chr04 | 27720921                | TT                                     | CC                 | CC               | INTERGENIC                    |                    |                              |
| SNP_24992_A_27724832 | NC_021163.1    | Ca_Kabuli_Chr04 | 27724832                | GG                                     | TT                 | TT               | INTERGENIC                    |                    |                              |
| SNP_24993_A_27724894 | NC_021163.1    | Ca_Kabuli_Chr04 | 27724894                | CC                                     | TT                 | TT               | INTERGENIC                    |                    |                              |
| SNP_24994_A_27724947 | NC_021163.1    | Ca_Kabuli_Chr04 | 27724947                | GG                                     | CC                 | CC               | INTERGENIC                    |                    |                              |
| SNP_24995_A_27724987 | NC_021163.1    | Ca_Kabuli_Chr04 | 27724987                | GG                                     | CC                 | CC               | INTERGENIC                    |                    |                              |
| SNP_24996_A_27725196 | NC_021163.1    | Ca_Kabuli_Chr04 | 27725196                | AA                                     | TT                 | TT               | INTERGENIC                    |                    |                              |
| SNP_24997_A_27725264 | NC_021163.1    | Ca_Kabuli_Chr04 | 27725264                | TT                                     | CC                 | CC               | INTERGENIC                    |                    |                              |
| SNP_24998_A_27730392 | NC_021163.1    | Ca_Kabuli_Chr04 | 27730392                | GG                                     | TT                 | TT               | INTRON                        | 101492979          | uncharacterized LOC101492979 |
| SNP_24999_A_27731122 | NC_021163.1    | Ca_Kabuli_Chr04 | 27731122                | AA                                     | GG                 | GG               | URR                           | 101492979          | uncharacterized LOC101492979 |
| SNP_25000_A_27731359 | NC_021163.1    | Ca_Kabuli_Chr04 | 27731359                | CC                                     | AA                 | AA               | URR                           | 101492979          | uncharacterized LOC101492979 |
| SNP_25001_A_27731577 | NC_021163.1    | Ca_Kabuli_Chr04 | 27731577                | AA                                     | GG                 | GG               | URR                           | 101492979          | uncharacterized LOC101492979 |
| SNP_25002_A_27731585 | NC_021163.1    | Ca_Kabuli_Chr04 | 27731585                | GG                                     | TT                 | TT               | URR                           | 101492979          | uncharacterized LOC101492979 |
| SNP_25003_A_27733890 | NC_021163.1    | Ca_Kabuli_Chr04 | 27733890                | CC                                     | TT                 | TT               | INTERGENIC                    |                    |                              |
| SNP_25004_A_27734472 | NC_021163.1    | Ca_Kabuli_Chr04 | 27734472                | CC                                     | AA                 | AA               | INTERGENIC                    |                    |                              |
| SNP_25005_A_27735338 | NC_021163.1    | Ca_Kabuli_Chr04 | 27735338                | GG                                     | AA                 | AA               | INTERGENIC                    |                    |                              |
| SNP_25007_A_27739097 | NC_021163.1    | Ca_Kabuli_Chr04 | 27739097                | CC                                     | TT                 | TT               | INTERGENIC                    |                    |                              |
| SNP_25008_A_27744929 | NC_021163.1    | Ca_Kabuli_Chr04 | 27744929                | CC                                     | AA                 | AA               | INTERGENIC                    |                    |                              |
| SNP_25009_A_27746551 | NC_021163.1    | Ca_Kabuli_Chr04 | 27746551                | CC                                     | TT                 | TT               | INTERGENIC                    |                    |                              |
| SNP_25010_A_27746689 | NC_021163.1    | Ca_Kabuli_Chr04 | 27746689                | CC                                     | TT                 | TT               | INTERGENIC                    |                    |                              |
| SNP_25011_A_27746721 | NC_021163.1    | Ca_Kabuli_Chr04 | 27746721                | TT                                     | CC                 | CC               | INTERGENIC                    |                    |                              |
| SNP_25012_A_27749992 | NC_021163.1    | Ca_Kabuli_Chr04 | 27749992                | AA                                     | GG                 | GG               | INTERGENIC                    |                    |                              |
| SNP_25013_A_27750371 | NC_021163.1    | Ca_Kabuli_Chr04 | 27750371                | CC                                     | TT                 | TT               | INTERGENIC                    |                    |                              |

| SNPs IDs             | Chromosome IDs | Chromosomes     | Physical positions (bp) | CDC Frontier genome (Reference genome) | (Pusa 1103 & HPNB) | (ILWC 46 & LPNB) | Sequence genome | Components of | Gene accession IDs | Putative functions |
|----------------------|----------------|-----------------|-------------------------|----------------------------------------|--------------------|------------------|-----------------|---------------|--------------------|--------------------|
| SNP_25014_A_27752848 | NC_021163.1    | Ca_Kabuli_Chr04 | 27752848                | CC                                     | TT                 | TT               | INTERGENIC      |               |                    |                    |
| SNP_25015_A_27752949 | NC_021163.1    | Ca_Kabuli_Chr04 | 27752949                | CC                                     | GG                 | GG               | INTERGENIC      |               |                    |                    |
| SNP_25016_A_27753296 | NC_021163.1    | Ca_Kabuli_Chr04 | 27753296                | AA                                     | TT                 | TT               | INTERGENIC      |               |                    |                    |
| SNP_25017_A_27762211 | NC_021163.1    | Ca_Kabuli_Chr04 | 27762211                | TT                                     | GG                 | GG               | INTERGENIC      |               |                    |                    |
| SNP_25018_A_27801321 | NC_021163.1    | Ca_Kabuli_Chr04 | 27801321                | TT                                     | CC                 | CC               | INTERGENIC      |               |                    |                    |
| SNP_25019_A_27803160 | NC_021163.1    | Ca_Kabuli_Chr04 | 27803160                | TT                                     | CC                 | CC               | INTERGENIC      |               |                    |                    |
| SNP_25020_A_27810340 | NC_021163.1    | Ca_Kabuli_Chr04 | 27810340                | GG                                     | AA                 | AA               | INTERGENIC      |               |                    |                    |
| SNP_25022_A_27837312 | NC_021163.1    | Ca_Kabuli_Chr04 | 27837312                | AA                                     | GG                 | GG               | INTERGENIC      |               |                    |                    |
| SNP_25023_A_27843865 | NC_021163.1    | Ca_Kabuli_Chr04 | 27843865                | GG                                     | AA                 | AA               | INTERGENIC      |               |                    |                    |
| SNP_25024_A_27844124 | NC_021163.1    | Ca_Kabuli_Chr04 | 27844124                | AA                                     | CC                 | CC               | INTERGENIC      |               |                    |                    |
| SNP_25025_A_27844147 | NC_021163.1    | Ca_Kabuli_Chr04 | 27844147                | GG                                     | TT                 | TT               | INTERGENIC      |               |                    |                    |
| SNP_25026_A_27852555 | NC_021163.1    | Ca_Kabuli_Chr04 | 27852555                | GG                                     | CC                 | CC               | INTERGENIC      |               |                    |                    |
| SNP_25027_A_27853143 | NC_021163.1    | Ca_Kabuli_Chr04 | 27853143                | GG                                     | AA                 | AA               | INTERGENIC      |               |                    |                    |
| SNP_25028_A_27856629 | NC_021163.1    | Ca_Kabuli_Chr04 | 27856629                | GG                                     | AA                 | AA               | INTERGENIC      |               |                    |                    |
| SNP_25030_A_27861846 | NC_021163.1    | Ca_Kabuli_Chr04 | 27861846                | AA                                     | TT                 | TT               | INTERGENIC      |               |                    |                    |
| SNP_25031_A_27861847 | NC_021163.1    | Ca_Kabuli_Chr04 | 27861847                | GG                                     | AA                 | AA               | INTERGENIC      |               |                    |                    |
| SNP_25032_A_27862465 | NC_021163.1    | Ca_Kabuli_Chr04 | 27862465                | TT                                     | GG                 | GG               | INTERGENIC      |               |                    |                    |
| SNP_25033_A_27863484 | NC_021163.1    | Ca_Kabuli_Chr04 | 27863484                | CC                                     | AA                 | AA               | INTERGENIC      |               |                    |                    |
| SNP_25034_A_27864632 | NC_021163.1    | Ca_Kabuli_Chr04 | 27864632                | TT                                     | CC                 | CC               | INTERGENIC      |               |                    |                    |
| SNP_25037_A_27875128 | NC_021163.1    | Ca_Kabuli_Chr04 | 27875128                | GG                                     | TT                 | TT               | INTERGENIC      |               |                    |                    |
| SNP_25038_A_27876906 | NC_021163.1    | Ca_Kabuli_Chr04 | 27876906                | CC                                     | AA                 | AA               | INTERGENIC      |               |                    |                    |
| SNP_25039_A_27876907 | NC_021163.1    | Ca_Kabuli_Chr04 | 27876907                | AA                                     | TT                 | TT               | INTERGENIC      |               |                    |                    |

| SNPs IDs             | Chromosome IDs | Chromosomes     | Physical positions (bp) | CDC Frontier (Reference genome) | (Pusa 1103 & HPNB) | (ILWC 46 & LPNB) | Sequence Components of genome | Gene accession IDs | Putative functions                  |
|----------------------|----------------|-----------------|-------------------------|---------------------------------|--------------------|------------------|-------------------------------|--------------------|-------------------------------------|
| SNP_25041_A_27890810 | NC_021163.1    | Ca_Kabuli_Chr04 | 27890810                | GG                              | AA                 | AA               | NON_SYNONYMOUS_CODING         | 101493951          | Unknown function                    |
| SNP_25042_A_27896321 | NC_021163.1    | Ca_Kabuli_Chr04 | 27896321                | GG                              | AA                 | AA               | INTERGENIC                    |                    |                                     |
| SNP_25043_A_27901737 | NC_021163.1    | Ca_Kabuli_Chr04 | 27901737                | TT                              | AA                 | AA               | INTERGENIC                    |                    |                                     |
| SNP_25044_A_27907822 | NC_021163.1    | Ca_Kabuli_Chr04 | 27907822                | GG                              | CC                 | CC               | INTERGENIC                    |                    |                                     |
| SNP_25045_A_27910206 | NC_021163.1    | Ca_Kabuli_Chr04 | 27910206                | TT                              | CC                 | CC               | INTERGENIC                    |                    |                                     |
| SNP_25047_A_27924438 | NC_021163.1    | Ca_Kabuli_Chr04 | 27924438                | TT                              | GG                 | GG               | URR                           | 101494278          | transcriptional regulator TAC1-like |
| SNP_25048_A_27926088 | NC_021163.1    | Ca_Kabuli_Chr04 | 27926088                | AA                              | GG                 | GG               | INTERGENIC                    |                    |                                     |
| SNP_25049_A_27927897 | NC_021163.1    | Ca_Kabuli_Chr04 | 27927897                | GG                              | AA                 | AA               | INTERGENIC                    |                    |                                     |
| SNP_25050_A_27928746 | NC_021163.1    | Ca_Kabuli_Chr04 | 27928746                | TT                              | CC                 | CC               | INTERGENIC                    |                    |                                     |
| SNP_25051_A_27928758 | NC_021163.1    | Ca_Kabuli_Chr04 | 27928758                | GG                              | TT                 | TT               | INTERGENIC                    |                    |                                     |
| SNP_25052_A_27928793 | NC_021163.1    | Ca_Kabuli_Chr04 | 27928793                | CC                              | TT                 | TT               | INTERGENIC                    |                    |                                     |
| SNP_25053_A_27928804 | NC_021163.1    | Ca_Kabuli_Chr04 | 27928804                | AA                              | CC                 | CC               | INTERGENIC                    |                    |                                     |
| SNP_25054_A_27928809 | NC_021163.1    | Ca_Kabuli_Chr04 | 27928809                | CC                              | AA                 | AA               | INTERGENIC                    |                    |                                     |
| SNP_25056_A_27928844 | NC_021163.1    | Ca_Kabuli_Chr04 | 27928844                | TT                              | CC                 | CC               | INTERGENIC                    |                    |                                     |
| SNP_25057_A_27928869 | NC_021163.1    | Ca_Kabuli_Chr04 | 27928869                | CC                              | TT                 | TT               | INTERGENIC                    |                    |                                     |
| SNP_25059_A_27928914 | NC_021163.1    | Ca_Kabuli_Chr04 | 27928914                | TT                              | AA                 | AA               | INTERGENIC                    |                    |                                     |
| SNP_25060_A_27928930 | NC_021163.1    | Ca_Kabuli_Chr04 | 27928930                | TT                              | GG                 | GG               | INTERGENIC                    |                    |                                     |
| SNP_25061_A_27928936 | NC_021163.1    | Ca_Kabuli_Chr04 | 27928936                | CC                              | GG                 | GG               | INTERGENIC                    |                    |                                     |
| SNP_25062_A_27928937 | NC_021163.1    | Ca_Kabuli_Chr04 | 27928937                | CC                              | TT                 | TT               | INTERGENIC                    |                    |                                     |
| SNP_25063_A_27928958 | NC_021163.1    | Ca_Kabuli_Chr04 | 27928958                | AA                              | CC                 | CC               | INTERGENIC                    |                    |                                     |
| SNP_25065_A_27930479 | NC_021163.1    | Ca_Kabuli_Chr04 | 27930479                | TT                              | CC                 | CC               | INTERGENIC                    |                    |                                     |
| SNP_25066_A_27930489 | NC_021163.1    | Ca_Kabuli_Chr04 | 27930489                | TT                              | CC                 | CC               | INTERGENIC                    |                    |                                     |

| SNPs IDs             | Chromosome IDs | Chromosomes     | Physical positions (bp) | CDC Frontier genome (Reference genome) | (Pusa 1103 & HPNB) | (ILWC 46 & LPNB) | Sequence genome | Components of | Gene accession IDs | Putative functions |
|----------------------|----------------|-----------------|-------------------------|----------------------------------------|--------------------|------------------|-----------------|---------------|--------------------|--------------------|
| SNP_25067_A_27930548 | NC_021163.1    | Ca_Kabuli_Chr04 | 27930548                | AA                                     | GG                 | GG               | INTERGENIC      |               |                    |                    |
| SNP_25068_A_27930558 | NC_021163.1    | Ca_Kabuli_Chr04 | 27930558                | AA                                     | CC                 | CC               | INTERGENIC      |               |                    |                    |
| SNP_25069_A_27930572 | NC_021163.1    | Ca_Kabuli_Chr04 | 27930572                | TT                                     | CC                 | CC               | INTERGENIC      |               |                    |                    |
| SNP_25070_A_27930590 | NC_021163.1    | Ca_Kabuli_Chr04 | 27930590                | AA                                     | GG                 | GG               | INTERGENIC      |               |                    |                    |
| SNP_25071_A_27930596 | NC_021163.1    | Ca_Kabuli_Chr04 | 27930596                | TT                                     | GG                 | GG               | INTERGENIC      |               |                    |                    |
| SNP_25072_A_27943642 | NC_021163.1    | Ca_Kabuli_Chr04 | 27943642                | CC                                     | TT                 | TT               | INTERGENIC      |               |                    |                    |
| SNP_25073_A_27943693 | NC_021163.1    | Ca_Kabuli_Chr04 | 27943693                | TT                                     | CC                 | CC               | INTERGENIC      |               |                    |                    |
| SNP_25076_A_27954781 | NC_021163.1    | Ca_Kabuli_Chr04 | 27954781                | TT                                     | CC                 | CC               | INTERGENIC      |               |                    |                    |
| SNP_25077_A_27956558 | NC_021163.1    | Ca_Kabuli_Chr04 | 27956558                | AA                                     | GG                 | GG               | INTERGENIC      |               |                    |                    |
| SNP_25078_A_27962250 | NC_021163.1    | Ca_Kabuli_Chr04 | 27962250                | TT                                     | CC                 | CC               | INTERGENIC      |               |                    |                    |
| SNP_25079_A_27964661 | NC_021163.1    | Ca_Kabuli_Chr04 | 27964661                | GG                                     | AA                 | AA               | INTERGENIC      |               |                    |                    |
| SNP_25080_A_27965546 | NC_021163.1    | Ca_Kabuli_Chr04 | 27965546                | TT                                     | CC                 | CC               | INTERGENIC      |               |                    |                    |
| SNP_25081_A_27983516 | NC_021163.1    | Ca_Kabuli_Chr04 | 27983516                | GG                                     | AA                 | AA               | INTERGENIC      |               |                    |                    |
| SNP_25082_A_27983785 | NC_021163.1    | Ca_Kabuli_Chr04 | 27983785                | TT                                     | AA                 | AA               | INTERGENIC      |               |                    |                    |
| SNP_25083_A_27992144 | NC_021163.1    | Ca_Kabuli_Chr04 | 27992144                | TT                                     | CC                 | CC               | INTERGENIC      |               |                    |                    |
| SNP_25084_A_27996949 | NC_021163.1    | Ca_Kabuli_Chr04 | 27996949                | CC                                     | TT                 | TT               | INTERGENIC      |               |                    |                    |
| SNP_25085_A_27996958 | NC_021163.1    | Ca_Kabuli_Chr04 | 27996958                | CC                                     | AA                 | AA               | INTERGENIC      |               |                    |                    |
| SNP_25087_A_27997230 | NC_021163.1    | Ca_Kabuli_Chr04 | 27997230                | CC                                     | TT                 | TT               | INTERGENIC      |               |                    |                    |
| SNP_25088_A_27997235 | NC_021163.1    | Ca_Kabuli_Chr04 | 27997235                | CC                                     | TT                 | TT               | INTERGENIC      |               |                    |                    |
| SNP_25089_A_27997243 | NC_021163.1    | Ca_Kabuli_Chr04 | 27997243                | AA                                     | TT                 | TT               | INTERGENIC      |               |                    |                    |
| SNP_25090_A_27997335 | NC_021163.1    | Ca_Kabuli_Chr04 | 27997335                | CC                                     | TT                 | TT               | INTERGENIC      |               |                    |                    |
| SNP_25091_A_27997512 | NC_021163.1    | Ca_Kabuli_Chr04 | 27997512                | AA                                     | CC                 | CC               | INTERGENIC      |               |                    |                    |

| SNPs IDs             | Chromosome IDs | Chromosomes     | Physical positions (bp) | CDC Frontier (Reference genome) | (Pusa 1103 & HPNB) | (ILWC 46 & LPNB) | Sequence genome | Components of | Gene accession IDs | Putative functions |
|----------------------|----------------|-----------------|-------------------------|---------------------------------|--------------------|------------------|-----------------|---------------|--------------------|--------------------|
| SNP_25092_A_27997527 | NC_021163.1    | Ca_Kabuli_Chr04 | 27997527                | CC                              | TT                 | TT               | INTERGENIC      |               |                    |                    |
| SNP_25093_A_27997536 | NC_021163.1    | Ca_Kabuli_Chr04 | 27997536                | AA                              | TT                 | TT               | INTERGENIC      |               |                    |                    |
| SNP_25094_A_27997538 | NC_021163.1    | Ca_Kabuli_Chr04 | 27997538                | TT                              | GG                 | GG               | INTERGENIC      |               |                    |                    |
| SNP_25095_A_27997568 | NC_021163.1    | Ca_Kabuli_Chr04 | 27997568                | TT                              | CC                 | CC               | INTERGENIC      |               |                    |                    |
| SNP_25096_A_27997595 | NC_021163.1    | Ca_Kabuli_Chr04 | 27997595                | AA                              | GG                 | GG               | INTERGENIC      |               |                    |                    |
| SNP_25097_A_28013390 | NC_021163.1    | Ca_Kabuli_Chr04 | 28013390                | TT                              | GG                 | GG               | INTERGENIC      |               |                    |                    |
| SNP_25098_A_28013393 | NC_021163.1    | Ca_Kabuli_Chr04 | 28013393                | GG                              | AA                 | AA               | INTERGENIC      |               |                    |                    |
| SNP_25099_A_28013429 | NC_021163.1    | Ca_Kabuli_Chr04 | 28013429                | AA                              | TT                 | TT               | INTERGENIC      |               |                    |                    |
| SNP_25101_A_28019122 | NC_021163.1    | Ca_Kabuli_Chr04 | 28019122                | TT                              | AA                 | AA               | INTERGENIC      |               |                    |                    |
| SNP_25102_A_28019171 | NC_021163.1    | Ca_Kabuli_Chr04 | 28019171                | GG                              | CC                 | CC               | INTERGENIC      |               |                    |                    |
| SNP_25103_A_28021094 | NC_021163.1    | Ca_Kabuli_Chr04 | 28021094                | GG                              | AA                 | AA               | INTERGENIC      |               |                    |                    |
| SNP_25104_A_28021116 | NC_021163.1    | Ca_Kabuli_Chr04 | 28021116                | AA                              | GG                 | GG               | INTERGENIC      |               |                    |                    |
| SNP_25105_A_28021128 | NC_021163.1    | Ca_Kabuli_Chr04 | 28021128                | AA                              | CC                 | CC               | INTERGENIC      |               |                    |                    |
| SNP_25106_A_28021130 | NC_021163.1    | Ca_Kabuli_Chr04 | 28021130                | GG                              | TT                 | TT               | INTERGENIC      |               |                    |                    |
| SNP_25107_A_28021446 | NC_021163.1    | Ca_Kabuli_Chr04 | 28021446                | CC                              | TT                 | TT               | INTERGENIC      |               |                    |                    |
| SNP_25108_A_28021466 | NC_021163.1    | Ca_Kabuli_Chr04 | 28021466                | TT                              | CC                 | CC               | INTERGENIC      |               |                    |                    |
| SNP_25109_A_28021948 | NC_021163.1    | Ca_Kabuli_Chr04 | 28021948                | AA                              | GG                 | GG               | INTERGENIC      |               |                    |                    |
| SNP_25110_A_28021950 | NC_021163.1    | Ca_Kabuli_Chr04 | 28021950                | AA                              | GG                 | GG               | INTERGENIC      |               |                    |                    |
| SNP_25111_A_28022319 | NC_021163.1    | Ca_Kabuli_Chr04 | 28022319                | CC                              | TT                 | TT               | INTERGENIC      |               |                    |                    |
| SNP_25112_A_28024676 | NC_021163.1    | Ca_Kabuli_Chr04 | 28024676                | CC                              | GG                 | GG               | INTERGENIC      |               |                    |                    |
| SNP_25113_A_28024679 | NC_021163.1    | Ca_Kabuli_Chr04 | 28024679                | AA                              | GG                 | GG               | INTERGENIC      |               |                    |                    |
| SNP_25114_A_28026947 | NC_021163.1    | Ca_Kabuli_Chr04 | 28026947                | CC                              | AA                 | AA               | INTERGENIC      |               |                    |                    |

| SNPs IDs             | Chromosome IDs | Chromosomes     | Physical positions (bp) | CDC Frontier genome (Reference genome) | (Pusa 1103 & HPNB) | (ILWC 46 & LPNB) | Sequence genome | Components of | Gene accession IDs | Putative functions |
|----------------------|----------------|-----------------|-------------------------|----------------------------------------|--------------------|------------------|-----------------|---------------|--------------------|--------------------|
| SNP_25115_A_28026960 | NC_021163.1    | Ca_Kabuli_Chr04 | 28026960                | CC                                     | TT                 | TT               | INTERGENIC      |               |                    |                    |
| SNP_25116_A_28027003 | NC_021163.1    | Ca_Kabuli_Chr04 | 28027003                | GG                                     | AA                 | AA               | INTERGENIC      |               |                    |                    |
| SNP_25117_A_28027030 | NC_021163.1    | Ca_Kabuli_Chr04 | 28027030                | AA                                     | TT                 | TT               | INTERGENIC      |               |                    |                    |
| SNP_25118_A_28027040 | NC_021163.1    | Ca_Kabuli_Chr04 | 28027040                | TT                                     | GG                 | GG               | INTERGENIC      |               |                    |                    |
| SNP_25119_A_28027043 | NC_021163.1    | Ca_Kabuli_Chr04 | 28027043                | AA                                     | CC                 | CC               | INTERGENIC      |               |                    |                    |
| SNP_25120_A_28027049 | NC_021163.1    | Ca_Kabuli_Chr04 | 28027049                | GG                                     | TT                 | TT               | INTERGENIC      |               |                    |                    |
| SNP_25121_A_28027167 | NC_021163.1    | Ca_Kabuli_Chr04 | 28027167                | GG                                     | TT                 | TT               | INTERGENIC      |               |                    |                    |
| SNP_25122_A_28027173 | NC_021163.1    | Ca_Kabuli_Chr04 | 28027173                | AA                                     | GG                 | GG               | INTERGENIC      |               |                    |                    |
| SNP_25123_A_28027209 | NC_021163.1    | Ca_Kabuli_Chr04 | 28027209                | GG                                     | AA                 | AA               | INTERGENIC      |               |                    |                    |
| SNP_25124_A_28027233 | NC_021163.1    | Ca_Kabuli_Chr04 | 28027233                | TT                                     | GG                 | GG               | INTERGENIC      |               |                    |                    |
| SNP_25125_A_28027454 | NC_021163.1    | Ca_Kabuli_Chr04 | 28027454                | CC                                     | TT                 | TT               | INTERGENIC      |               |                    |                    |
| SNP_25126_A_28034970 | NC_021163.1    | Ca_Kabuli_Chr04 | 28034970                | TT                                     | CC                 | CC               | INTERGENIC      |               |                    |                    |
| SNP_25127_A_28035044 | NC_021163.1    | Ca_Kabuli_Chr04 | 28035044                | TT                                     | GG                 | GG               | INTERGENIC      |               |                    |                    |
| SNP_25128_A_28035330 | NC_021163.1    | Ca_Kabuli_Chr04 | 28035330                | AA                                     | TT                 | TT               | INTERGENIC      |               |                    |                    |
| SNP_25129_A_28041841 | NC_021163.1    | Ca_Kabuli_Chr04 | 28041841                | TT                                     | GG                 | GG               | INTERGENIC      |               |                    |                    |
| SNP_25130_A_28042214 | NC_021163.1    | Ca_Kabuli_Chr04 | 28042214                | AA                                     | GG                 | GG               | INTERGENIC      |               |                    |                    |
| SNP_25131_A_28042217 | NC_021163.1    | Ca_Kabuli_Chr04 | 28042217                | CC                                     | TT                 | TT               | INTERGENIC      |               |                    |                    |
| SNP_25132_A_28042250 | NC_021163.1    | Ca_Kabuli_Chr04 | 28042250                | AA                                     | GG                 | GG               | INTERGENIC      |               |                    |                    |
| SNP_25133_A_28042439 | NC_021163.1    | Ca_Kabuli_Chr04 | 28042439                | TT                                     | AA                 | AA               | INTERGENIC      |               |                    |                    |
| SNP_25134_A_28042442 | NC_021163.1    | Ca_Kabuli_Chr04 | 28042442                | GG                                     | TT                 | TT               | INTERGENIC      |               |                    |                    |
| SNP_25135_A_28042454 | NC_021163.1    | Ca_Kabuli_Chr04 | 28042454                | CC                                     | TT                 | TT               | INTERGENIC      |               |                    |                    |
| SNP_25137_A_28042525 | NC_021163.1    | Ca_Kabuli_Chr04 | 28042525                | CC                                     | AA                 | AA               | INTERGENIC      |               |                    |                    |

| SNPs IDs             | Chromosome IDs | Chromosomes     | Physical positions (bp) | CDC Frontier genome (Reference genome) | (Pusa 1103 & HPNB) | (ILWC 46 & LPNB) | Sequence genome | Components of | Gene accession IDs | Putative functions |
|----------------------|----------------|-----------------|-------------------------|----------------------------------------|--------------------|------------------|-----------------|---------------|--------------------|--------------------|
| SNP_25138_A_28042938 | NC_021163.1    | Ca_Kabuli_Chr04 | 28042938                | GG                                     | AA                 | AA               | INTERGENIC      |               |                    |                    |
| SNP_25139_A_28043120 | NC_021163.1    | Ca_Kabuli_Chr04 | 28043120                | GG                                     | AA                 | AA               | INTERGENIC      |               |                    |                    |
| SNP_25140_A_28043128 | NC_021163.1    | Ca_Kabuli_Chr04 | 28043128                | AA                                     | GG                 | GG               | INTERGENIC      |               |                    |                    |
| SNP_25141_A_28043182 | NC_021163.1    | Ca_Kabuli_Chr04 | 28043182                | CC                                     | GG                 | GG               | INTERGENIC      |               |                    |                    |
| SNP_25142_A_28043554 | NC_021163.1    | Ca_Kabuli_Chr04 | 28043554                | CC                                     | TT                 | TT               | INTERGENIC      |               |                    |                    |
| SNP_25143_A_28043725 | NC_021163.1    | Ca_Kabuli_Chr04 | 28043725                | TT                                     | AA                 | AA               | INTERGENIC      |               |                    |                    |
| SNP_25144_A_28043762 | NC_021163.1    | Ca_Kabuli_Chr04 | 28043762                | AA                                     | GG                 | GG               | INTERGENIC      |               |                    |                    |
| SNP_25145_A_28043764 | NC_021163.1    | Ca_Kabuli_Chr04 | 28043764                | GG                                     | TT                 | TT               | INTERGENIC      |               |                    |                    |
| SNP_25146_A_28043771 | NC_021163.1    | Ca_Kabuli_Chr04 | 28043771                | TT                                     | CC                 | CC               | INTERGENIC      |               |                    |                    |
| SNP_25147_A_28045413 | NC_021163.1    | Ca_Kabuli_Chr04 | 28045413                | CC                                     | TT                 | TT               | INTERGENIC      |               |                    |                    |
| SNP_25148_A_28045426 | NC_021163.1    | Ca_Kabuli_Chr04 | 28045426                | GG                                     | CC                 | CC               | INTERGENIC      |               |                    |                    |
| SNP_25149_A_28045722 | NC_021163.1    | Ca_Kabuli_Chr04 | 28045722                | GG                                     | AA                 | AA               | INTERGENIC      |               |                    |                    |
| SNP_25150_A_28046780 | NC_021163.1    | Ca_Kabuli_Chr04 | 28046780                | CC                                     | AA                 | AA               | INTERGENIC      |               |                    |                    |
| SNP_25151_A_28050881 | NC_021163.1    | Ca_Kabuli_Chr04 | 28050881                | CC                                     | AA                 | AA               | INTERGENIC      |               |                    |                    |
| SNP_25152_A_28052480 | NC_021163.1    | Ca_Kabuli_Chr04 | 28052480                | GG                                     | TT                 | TT               | INTERGENIC      |               |                    |                    |
| SNP_25153_A_28053023 | NC_021163.1    | Ca_Kabuli_Chr04 | 28053023                | GG                                     | AA                 | AA               | INTERGENIC      |               |                    |                    |
| SNP_25154_A_28053240 | NC_021163.1    | Ca_Kabuli_Chr04 | 28053240                | TT                                     | CC                 | CC               | INTERGENIC      |               |                    |                    |
| SNP_25155_A_28054620 | NC_021163.1    | Ca_Kabuli_Chr04 | 28054620                | TT                                     | CC                 | CC               | INTERGENIC      |               |                    |                    |
| SNP_25156_A_28054799 | NC_021163.1    | Ca_Kabuli_Chr04 | 28054799                | TT                                     | GG                 | GG               | INTERGENIC      |               |                    |                    |
| SNP_25157_A_28055709 | NC_021163.1    | Ca_Kabuli_Chr04 | 28055709                | AA                                     | GG                 | GG               | INTERGENIC      |               |                    |                    |
| SNP_25158_A_28057433 | NC_021163.1    | Ca_Kabuli_Chr04 | 28057433                | CC                                     | GG                 | GG               | INTERGENIC      |               |                    |                    |
| SNP_25159_A_28057441 | NC_021163.1    | Ca_Kabuli_Chr04 | 28057441                | GG                                     | AA                 | AA               | INTERGENIC      |               |                    |                    |

| SNPs IDs             | Chromosome IDs | Chromosomes     | Physical positions (bp) | CDC Frontier genome (Reference genome) | (Pusa 1103 & HPNB) | (ILWC 46 & LPNB) | Sequence Components of genome | Gene accession IDs | Putative functions                |
|----------------------|----------------|-----------------|-------------------------|----------------------------------------|--------------------|------------------|-------------------------------|--------------------|-----------------------------------|
| SNP_25160_A_28059653 | NC_021163.1    | Ca_Kabuli_Chr04 | 28059653                | AA                                     | GG                 | GG               | DRR                           | 101494588          | Unknown function                  |
| SNP_25161_A_28061983 | NC_021163.1    | Ca_Kabuli_Chr04 | 28061983                | TT                                     | CC                 | CC               | URR                           | 101494588          | Unknown function                  |
| SNP_25162_A_28062097 | NC_021163.1    | Ca_Kabuli_Chr04 | 28062097                | CC                                     | AA                 | AA               | URR                           | 101494588          | Unknown function                  |
| SNP_25163_A_28063377 | NC_021163.1    | Ca_Kabuli_Chr04 | 28063377                | GG                                     | AA                 | AA               | INTERGENIC                    |                    |                                   |
| SNP_25164_A_28066160 | NC_021163.1    | Ca_Kabuli_Chr04 | 28066160                | TT                                     | CC                 | CC               | INTRON                        | 101498939          | Unknown function                  |
| SNP_25165_A_28073450 | NC_021163.1    | Ca_Kabuli_Chr04 | 28073450                | TT                                     | GG                 | GG               | INTERGENIC                    |                    |                                   |
| SNP_25166_A_28075664 | NC_021163.1    | Ca_Kabuli_Chr04 | 28075664                | CC                                     | TT                 | TT               | INTERGENIC                    |                    |                                   |
| SNP_25167_A_28089178 | NC_021163.1    | Ca_Kabuli_Chr04 | 28089178                | GG                                     | AA                 | AA               | INTERGENIC                    |                    |                                   |
| SNP_25168_A_28092867 | NC_021163.1    | Ca_Kabuli_Chr04 | 28092867                | TT                                     | GG                 | GG               | INTERGENIC                    |                    |                                   |
| SNP_25170_A_28100807 | NC_021163.1    | Ca_Kabuli_Chr04 | 28100807                | GG                                     | AA                 | AA               | INTRON                        | 101499265          | uncharacterized LOC101499265      |
| SNP_25171_A_28101520 | NC_021163.1    | Ca_Kabuli_Chr04 | 28101520                | CC                                     | AA                 | AA               | INTRON                        | 101499265          | uncharacterized LOC101499265      |
| SNP_25172_A_28101540 | NC_021163.1    | Ca_Kabuli_Chr04 | 28101540                | CC                                     | AA                 | AA               | INTRON                        | 101499265          | uncharacterized LOC101499265      |
| SNP_25173_A_28101918 | NC_021163.1    | Ca_Kabuli_Chr04 | 28101918                | GG                                     | AA                 | AA               | INTRON                        | 101499265          | uncharacterized LOC101499265      |
| SNP_25176_A_28119542 | NC_021163.1    | Ca_Kabuli_Chr04 | 28119542                | CC                                     | TT                 | TT               | INTERGENIC                    |                    |                                   |
| SNP_25179_A_28122480 | NC_021163.1    | Ca_Kabuli_Chr04 | 28122480                | GG                                     | AA                 | AA               | INTERGENIC                    |                    |                                   |
| SNP_25181_A_28123621 | NC_021163.1    | Ca_Kabuli_Chr04 | 28123621                | AA                                     | TT                 | TT               | INTERGENIC                    |                    |                                   |
| SNP_25182_A_28124815 | NC_021163.1    | Ca_Kabuli_Chr04 | 28124815                | AA                                     | TT                 | TT               | DRR                           | 101495548          | transcription factor bHLH104-like |
| SNP_25183_A_28132157 | NC_021163.1    | Ca_Kabuli_Chr04 | 28132157                | GG                                     | AA                 | AA               | INTERGENIC                    |                    |                                   |
| SNP_25185_A_28139779 | NC_021163.1    | Ca_Kabuli_Chr04 | 28139779                | CC                                     | AA                 | AA               | INTERGENIC                    |                    |                                   |
| SNP_25186_A_28139781 | NC_021163.1    | Ca_Kabuli_Chr04 | 28139781                | AA                                     | GG                 | GG               | INTERGENIC                    |                    |                                   |
| SNP_25187_A_28139795 | NC_021163.1    | Ca_Kabuli_Chr04 | 28139795                | GG                                     | AA                 | AA               | INTERGENIC                    |                    |                                   |
| SNP_25188_A_28139797 | NC_021163.1    | Ca_Kabuli_Chr04 | 28139797                | CC                                     | TT                 | TT               | INTERGENIC                    |                    |                                   |



| SNPs IDs             | Chromosome IDs | Chromosomes     | Physical positions (bp) | CDC Frontier genome (Reference genome) | (Pusa 1103 & HPNB) | (ILWC 46 & LPNB) | Sequence genome | Components of | Gene accession IDs | Putative functions |
|----------------------|----------------|-----------------|-------------------------|----------------------------------------|--------------------|------------------|-----------------|---------------|--------------------|--------------------|
| SNP_25189_A_28139838 | NC_021163.1    | Ca_Kabuli_Chr04 | 28139838                | TT                                     | CC                 | CC               | INTERGENIC      |               |                    |                    |
| SNP_25190_A_28139930 | NC_021163.1    | Ca_Kabuli_Chr04 | 28139930                | CC                                     | AA                 | AA               | INTERGENIC      |               |                    |                    |
| SNP_25191_A_28139968 | NC_021163.1    | Ca_Kabuli_Chr04 | 28139968                | GG                                     | TT                 | TT               | INTERGENIC      |               |                    |                    |
| SNP_25192_A_28140018 | NC_021163.1    | Ca_Kabuli_Chr04 | 28140018                | CC                                     | AA                 | AA               | INTERGENIC      |               |                    |                    |
| SNP_25193_A_28140051 | NC_021163.1    | Ca_Kabuli_Chr04 | 28140051                | CC                                     | GG                 | GG               | INTERGENIC      |               |                    |                    |
| SNP_25194_A_28140073 | NC_021163.1    | Ca_Kabuli_Chr04 | 28140073                | AA                                     | GG                 | GG               | INTERGENIC      |               |                    |                    |
| SNP_25195_A_28140074 | NC_021163.1    | Ca_Kabuli_Chr04 | 28140074                | GG                                     | TT                 | TT               | INTERGENIC      |               |                    |                    |
| SNP_25196_A_28140090 | NC_021163.1    | Ca_Kabuli_Chr04 | 28140090                | TT                                     | CC                 | CC               | INTERGENIC      |               |                    |                    |
| SNP_25197_A_28140094 | NC_021163.1    | Ca_Kabuli_Chr04 | 28140094                | TT                                     | CC                 | CC               | INTERGENIC      |               |                    |                    |
| SNP_25198_A_28140170 | NC_021163.1    | Ca_Kabuli_Chr04 | 28140170                | GG                                     | TT                 | TT               | INTERGENIC      |               |                    |                    |
| SNP_25199_A_28140226 | NC_021163.1    | Ca_Kabuli_Chr04 | 28140226                | AA                                     | GG                 | GG               | INTERGENIC      |               |                    |                    |
| SNP_25200_A_28140234 | NC_021163.1    | Ca_Kabuli_Chr04 | 28140234                | GG                                     | AA                 | AA               | INTERGENIC      |               |                    |                    |
| SNP_25201_A_28140309 | NC_021163.1    | Ca_Kabuli_Chr04 | 28140309                | CC                                     | TT                 | TT               | INTERGENIC      |               |                    |                    |
| SNP_25202_A_28140331 | NC_021163.1    | Ca_Kabuli_Chr04 | 28140331                | TT                                     | CC                 | CC               | INTERGENIC      |               |                    |                    |
| SNP_25203_A_28144941 | NC_021163.1    | Ca_Kabuli_Chr04 | 28144941                | TT                                     | CC                 | CC               | INTERGENIC      |               |                    |                    |
| SNP_25204_A_28144968 | NC_021163.1    | Ca_Kabuli_Chr04 | 28144968                | AA                                     | TT                 | TT               | INTERGENIC      |               |                    |                    |
| SNP_25205_A_28144990 | NC_021163.1    | Ca_Kabuli_Chr04 | 28144990                | AA                                     | GG                 | GG               | INTERGENIC      |               |                    |                    |
| SNP_25206_A_28145310 | NC_021163.1    | Ca_Kabuli_Chr04 | 28145310                | TT                                     | CC                 | CC               | INTERGENIC      |               |                    |                    |
| SNP_25207_A_28145351 | NC_021163.1    | Ca_Kabuli_Chr04 | 28145351                | GG                                     | AA                 | AA               | INTERGENIC      |               |                    |                    |
| SNP_25208_A_28145378 | NC_021163.1    | Ca_Kabuli_Chr04 | 28145378                | GG                                     | AA                 | AA               | INTERGENIC      |               |                    |                    |
| SNP_25210_A_28151113 | NC_021163.1    | Ca_Kabuli_Chr04 | 28151113                | TT                                     | CC                 | CC               | INTERGENIC      |               |                    |                    |
| SNP_25211_A_28151406 | NC_021163.1    | Ca_Kabuli_Chr04 | 28151406                | CC                                     | TT                 | TT               | INTERGENIC      |               |                    |                    |

| SNPs IDs             | Chromosome IDs | Chromosomes     | Physical positions (bp) | CDC Frontier genome (Reference genome) | (Pusa 1103 & HPNB) | (ILWC 46 & LPNB) | Sequence genome | Components of | Gene accession IDs | Putative functions |
|----------------------|----------------|-----------------|-------------------------|----------------------------------------|--------------------|------------------|-----------------|---------------|--------------------|--------------------|
| SNP_25212_A_28151729 | NC_021163.1    | Ca_Kabuli_Chr04 | 28151729                | TT                                     | CC                 | CC               | INTERGENIC      |               |                    |                    |
| SNP_25213_A_28152415 | NC_021163.1    | Ca_Kabuli_Chr04 | 28152415                | CC                                     | TT                 | TT               | INTERGENIC      |               |                    |                    |
| SNP_25214_A_28152462 | NC_021163.1    | Ca_Kabuli_Chr04 | 28152462                | GG                                     | CC                 | CC               | INTERGENIC      |               |                    |                    |
| SNP_25217_A_28160031 | NC_021163.1    | Ca_Kabuli_Chr04 | 28160031                | GG                                     | AA                 | AA               | INTERGENIC      |               |                    |                    |
| SNP_25218_A_28160041 | NC_021163.1    | Ca_Kabuli_Chr04 | 28160041                | AA                                     | GG                 | GG               | INTERGENIC      |               |                    |                    |
| SNP_25219_A_28160163 | NC_021163.1    | Ca_Kabuli_Chr04 | 28160163                | AA                                     | CC                 | CC               | INTERGENIC      |               |                    |                    |
| SNP_25220_A_28160339 | NC_021163.1    | Ca_Kabuli_Chr04 | 28160339                | AA                                     | TT                 | TT               | INTERGENIC      |               |                    |                    |
| SNP_25221_A_28160341 | NC_021163.1    | Ca_Kabuli_Chr04 | 28160341                | TT                                     | AA                 | AA               | INTERGENIC      |               |                    |                    |
| SNP_25223_A_28160454 | NC_021163.1    | Ca_Kabuli_Chr04 | 28160454                | TT                                     | CC                 | CC               | INTERGENIC      |               |                    |                    |
| SNP_25224_A_28160464 | NC_021163.1    | Ca_Kabuli_Chr04 | 28160464                | CC                                     | TT                 | TT               | INTERGENIC      |               |                    |                    |
| SNP_25225_A_28162300 | NC_021163.1    | Ca_Kabuli_Chr04 | 28162300                | CC                                     | AA                 | AA               | INTERGENIC      |               |                    |                    |
| SNP_25226_A_28162488 | NC_021163.1    | Ca_Kabuli_Chr04 | 28162488                | AA                                     | TT                 | TT               | INTERGENIC      |               |                    |                    |
| SNP_25227_A_28162562 | NC_021163.1    | Ca_Kabuli_Chr04 | 28162562                | GG                                     | AA                 | AA               | INTERGENIC      |               |                    |                    |
| SNP_25228_A_28167173 | NC_021163.1    | Ca_Kabuli_Chr04 | 28167173                | GG                                     | AA                 | AA               | INTERGENIC      |               |                    |                    |
| SNP_25229_A_28168989 | NC_021163.1    | Ca_Kabuli_Chr04 | 28168989                | AA                                     | GG                 | GG               | INTERGENIC      |               |                    |                    |
| SNP_25230_A_28168994 | NC_021163.1    | Ca_Kabuli_Chr04 | 28168994                | AA                                     | CC                 | CC               | INTERGENIC      |               |                    |                    |
| SNP_25231_A_28168998 | NC_021163.1    | Ca_Kabuli_Chr04 | 28168998                | TT                                     | GG                 | GG               | INTERGENIC      |               |                    |                    |
| SNP_25232_A_28171054 | NC_021163.1    | Ca_Kabuli_Chr04 | 28171054                | TT                                     | AA                 | AA               | INTERGENIC      |               |                    |                    |
| SNP_25233_A_28171063 | NC_021163.1    | Ca_Kabuli_Chr04 | 28171063                | AA                                     | GG                 | GG               | INTERGENIC      |               |                    |                    |
| SNP_25234_A_28171134 | NC_021163.1    | Ca_Kabuli_Chr04 | 28171134                | TT                                     | AA                 | AA               | INTERGENIC      |               |                    |                    |
| SNP_25235_A_28175294 | NC_021163.1    | Ca_Kabuli_Chr04 | 28175294                | GG                                     | AA                 | AA               | INTERGENIC      |               |                    |                    |
| SNP_25236_A_28176480 | NC_021163.1    | Ca_Kabuli_Chr04 | 28176480                | AA                                     | GG                 | GG               | INTERGENIC      |               |                    |                    |

| SNPs IDs             | Chromosome IDs | Chromosomes     | Physical positions (bp) | CDC Frontier genome (Reference genome) | (Pusa 1103 & HPNB) | (ILWC 46 & LPNB) | Sequence genome   | Components of | Gene accession IDs | Putative functions                               |
|----------------------|----------------|-----------------|-------------------------|----------------------------------------|--------------------|------------------|-------------------|---------------|--------------------|--------------------------------------------------|
| SNP_25237_A_28178322 | NC_021163.1    | Ca_Kabuli_Chr04 | 28178322                | TT                                     | CC                 | CC               | INTERGENIC        |               |                    |                                                  |
| SNP_25238_A_28178352 | NC_021163.1    | Ca_Kabuli_Chr04 | 28178352                | TT                                     | CC                 | CC               | INTERGENIC        |               |                    |                                                  |
| SNP_25239_A_28179352 | NC_021163.1    | Ca_Kabuli_Chr04 | 28179352                | CC                                     | AA                 | AA               | INTERGENIC        |               |                    |                                                  |
| SNP_25240_A_28179560 | NC_021163.1    | Ca_Kabuli_Chr04 | 28179560                | TT                                     | CC                 | CC               | INTERGENIC        |               |                    |                                                  |
| SNP_25242_A_28179859 | NC_021163.1    | Ca_Kabuli_Chr04 | 28179859                | CC                                     | TT                 | TT               | INTERGENIC        |               |                    |                                                  |
| SNP_25244_A_28180114 | NC_021163.1    | Ca_Kabuli_Chr04 | 28180114                | GG                                     | AA                 | AA               | INTERGENIC        |               |                    |                                                  |
| SNP_25245_A_28180155 | NC_021163.1    | Ca_Kabuli_Chr04 | 28180155                | AA                                     | TT                 | TT               | INTERGENIC        |               |                    |                                                  |
| SNP_25246_A_28180218 | NC_021163.1    | Ca_Kabuli_Chr04 | 28180218                | GG                                     | TT                 | TT               | INTERGENIC        |               |                    |                                                  |
| SNP_25247_A_28180402 | NC_021163.1    | Ca_Kabuli_Chr04 | 28180402                | AA                                     | GG                 | GG               | INTERGENIC        |               |                    |                                                  |
| SNP_25248_A_28182098 | NC_021163.1    | Ca_Kabuli_Chr04 | 28182098                | TT                                     | AA                 | AA               | INTERGENIC        |               |                    |                                                  |
| SNP_25249_A_28182209 | NC_021163.1    | Ca_Kabuli_Chr04 | 28182209                | AA                                     | CC                 | CC               | INTERGENIC        |               |                    |                                                  |
| SNP_25251_A_28183460 | NC_021163.1    | Ca_Kabuli_Chr04 | 28183460                | AA                                     | GG                 | GG               | INTERGENIC        |               |                    |                                                  |
| SNP_25252_A_28183480 | NC_021163.1    | Ca_Kabuli_Chr04 | 28183480                | AA                                     | TT                 | TT               | INTERGENIC        |               |                    |                                                  |
| SNP_25253_A_28184239 | NC_021163.1    | Ca_Kabuli_Chr04 | 28184239                | TT                                     | GG                 | GG               | INTERGENIC        |               |                    |                                                  |
| SNP_25254_A_28184320 | NC_021163.1    | Ca_Kabuli_Chr04 | 28184320                | GG                                     | TT                 | TT               | INTERGENIC        |               |                    |                                                  |
| SNP_25255_A_28184532 | NC_021163.1    | Ca_Kabuli_Chr04 | 28184532                | AA                                     | GG                 | GG               | INTERGENIC        |               |                    |                                                  |
| SNP_25257_A_28202501 | NC_021163.1    | Ca_Kabuli_Chr04 | 28202501                | AA                                     | CC                 | CC               | SYNONYMOUS_CODING | 101496212     |                    | ethylene-responsive transcription factor 1B-like |
| SNP_25258_A_28202994 | NC_021163.1    | Ca_Kabuli_Chr04 | 28202994                | CC                                     | TT                 | TT               | DRR               | 101496212     |                    | ethylene-responsive transcription factor 1B-like |
| SNP_25259_A_28206945 | NC_021163.1    | Ca_Kabuli_Chr04 | 28206945                | CC                                     | TT                 | TT               | INTERGENIC        |               |                    |                                                  |
| SNP_25260_A_28207426 | NC_021163.1    | Ca_Kabuli_Chr04 | 28207426                | TT                                     | GG                 | GG               | INTERGENIC        |               |                    |                                                  |
| SNP_25262_A_28212156 | NC_021163.1    | Ca_Kabuli_Chr04 | 28212156                | CC                                     | TT                 | TT               | INTERGENIC        |               |                    |                                                  |
| SNP_25263_A_28213443 | NC_021163.1    | Ca_Kabuli_Chr04 | 28213443                | CC                                     | TT                 | TT               | INTERGENIC        |               |                    |                                                  |

| SNPs IDs             | Chromosome IDs | Chromosomes     | Physical positions (bp) | CDC Frontier genome (Reference genome) | (Pusa 1103 & HPNB) | (ILWC 46 & LPNB) | Sequence genome | Components of | Gene accession IDs | Putative functions |
|----------------------|----------------|-----------------|-------------------------|----------------------------------------|--------------------|------------------|-----------------|---------------|--------------------|--------------------|
| SNP_25264_A_28235600 | NC_021163.1    | Ca_Kabuli_Chr04 | 28235600                | CC                                     | AA                 | AA               | INTERGENIC      |               |                    |                    |
| SNP_25265_A_28235615 | NC_021163.1    | Ca_Kabuli_Chr04 | 28235615                | AA                                     | CC                 | CC               | INTERGENIC      |               |                    |                    |
| SNP_25266_A_28235835 | NC_021163.1    | Ca_Kabuli_Chr04 | 28235835                | CC                                     | AA                 | AA               | INTERGENIC      |               |                    |                    |
| SNP_25267_A_28235845 | NC_021163.1    | Ca_Kabuli_Chr04 | 28235845                | GG                                     | CC                 | CC               | INTERGENIC      |               |                    |                    |
| SNP_25268_A_28235852 | NC_021163.1    | Ca_Kabuli_Chr04 | 28235852                | AA                                     | GG                 | GG               | INTERGENIC      |               |                    |                    |
| SNP_25269_A_28235881 | NC_021163.1    | Ca_Kabuli_Chr04 | 28235881                | AA                                     | GG                 | GG               | INTERGENIC      |               |                    |                    |
| SNP_25270_A_28235891 | NC_021163.1    | Ca_Kabuli_Chr04 | 28235891                | AA                                     | TT                 | TT               | INTERGENIC      |               |                    |                    |
| SNP_25271_A_28235924 | NC_021163.1    | Ca_Kabuli_Chr04 | 28235924                | TT                                     | CC                 | CC               | INTERGENIC      |               |                    |                    |
| SNP_25272_A_28235941 | NC_021163.1    | Ca_Kabuli_Chr04 | 28235941                | AA                                     | GG                 | GG               | INTERGENIC      |               |                    |                    |
| SNP_25273_A_28239091 | NC_021163.1    | Ca_Kabuli_Chr04 | 28239091                | CC                                     | TT                 | TT               | INTERGENIC      |               |                    |                    |
| SNP_25274_A_28239098 | NC_021163.1    | Ca_Kabuli_Chr04 | 28239098                | GG                                     | TT                 | TT               | INTERGENIC      |               |                    |                    |
| SNP_25275_A_28239099 | NC_021163.1    | Ca_Kabuli_Chr04 | 28239099                | CC                                     | GG                 | GG               | INTERGENIC      |               |                    |                    |
| SNP_25276_A_28239105 | NC_021163.1    | Ca_Kabuli_Chr04 | 28239105                | CC                                     | AA                 | AA               | INTERGENIC      |               |                    |                    |
| SNP_25277_A_28239115 | NC_021163.1    | Ca_Kabuli_Chr04 | 28239115                | TT                                     | GG                 | GG               | INTERGENIC      |               |                    |                    |
| SNP_25278_A_28239123 | NC_021163.1    | Ca_Kabuli_Chr04 | 28239123                | CC                                     | AA                 | AA               | INTERGENIC      |               |                    |                    |
| SNP_25279_A_28242459 | NC_021163.1    | Ca_Kabuli_Chr04 | 28242459                | CC                                     | TT                 | TT               | INTERGENIC      |               |                    |                    |
| SNP_25280_A_28246772 | NC_021163.1    | Ca_Kabuli_Chr04 | 28246772                | TT                                     | GG                 | GG               | INTERGENIC      |               |                    |                    |
| SNP_25281_A_28247059 | NC_021163.1    | Ca_Kabuli_Chr04 | 28247059                | GG                                     | AA                 | AA               | INTERGENIC      |               |                    |                    |
| SNP_25283_A_28263977 | NC_021163.1    | Ca_Kabuli_Chr04 | 28263977                | GG                                     | AA                 | AA               | INTERGENIC      |               |                    |                    |
| SNP_25284_A_28266562 | NC_021163.1    | Ca_Kabuli_Chr04 | 28266562                | TT                                     | AA                 | AA               | DRR             | 101501179     | Unknown function   |                    |
| SNP_25285_A_28274059 | NC_021163.1    | Ca_Kabuli_Chr04 | 28274059                | GG                                     | AA                 | AA               | INTERGENIC      |               |                    |                    |
| SNP_25287_A_28276221 | NC_021163.1    | Ca_Kabuli_Chr04 | 28276221                | CC                                     | TT                 | TT               | INTERGENIC      |               |                    |                    |

| SNPs IDs             | Chromosome IDs | Chromosomes     | Physical positions (bp) | CDC Frontier genome (Reference genome) | (Pusa 1103 & HPNB) | (ILWC 46 & LPNB) | Sequence Components of genome | Gene accession IDs | Putative functions                            |
|----------------------|----------------|-----------------|-------------------------|----------------------------------------|--------------------|------------------|-------------------------------|--------------------|-----------------------------------------------|
| SNP_25288_A_28276232 | NC_021163.1    | Ca_Kabuli_Chr04 | 28276232                | TT                                     | CC                 | CC               | INTERGENIC                    |                    |                                               |
| SNP_25289_A_28276576 | NC_021163.1    | Ca_Kabuli_Chr04 | 28276576                | TT                                     | GG                 | GG               | INTERGENIC                    |                    |                                               |
| SNP_25290_A_28276587 | NC_021163.1    | Ca_Kabuli_Chr04 | 28276587                | GG                                     | AA                 | AA               | INTERGENIC                    |                    |                                               |
| SNP_25291_A_28276591 | NC_021163.1    | Ca_Kabuli_Chr04 | 28276591                | CC                                     | TT                 | TT               | INTERGENIC                    |                    |                                               |
| SNP_25292_A_28276596 | NC_021163.1    | Ca_Kabuli_Chr04 | 28276596                | AA                                     | TT                 | TT               | INTERGENIC                    |                    |                                               |
| SNP_25293_A_28276600 | NC_021163.1    | Ca_Kabuli_Chr04 | 28276600                | AA                                     | TT                 | TT               | INTERGENIC                    |                    |                                               |
| SNP_25294_A_28276616 | NC_021163.1    | Ca_Kabuli_Chr04 | 28276616                | AA                                     | GG                 | GG               | INTERGENIC                    |                    |                                               |
| SNP_25295_A_28277250 | NC_021163.1    | Ca_Kabuli_Chr04 | 28277250                | TT                                     | GG                 | GG               | INTERGENIC                    |                    |                                               |
| SNP_25296_A_28277618 | NC_021163.1    | Ca_Kabuli_Chr04 | 28277618                | TT                                     | AA                 | AA               | INTERGENIC                    |                    |                                               |
| SNP_25297_A_28277621 | NC_021163.1    | Ca_Kabuli_Chr04 | 28277621                | AA                                     | GG                 | GG               | INTERGENIC                    |                    |                                               |
| SNP_25299_A_28282508 | NC_021163.1    | Ca_Kabuli_Chr04 | 28282508                | AA                                     | GG                 | GG               | URR                           | 101496537          | serine/threonine-protein phosphatase PP1-like |
| SNP_25300_A_28282630 | NC_021163.1    | Ca_Kabuli_Chr04 | 28282630                | GG                                     | AA                 | AA               | URR                           | 101496537          | serine/threonine-protein phosphatase PP1-like |
| SNP_25301_A_28282865 | NC_021163.1    | Ca_Kabuli_Chr04 | 28282865                | GG                                     | TT                 | TT               | URR                           | 101496537          | serine/threonine-protein phosphatase PP1-like |
| SNP_25302_A_28282869 | NC_021163.1    | Ca_Kabuli_Chr04 | 28282869                | TT                                     | CC                 | CC               | URR                           | 101496537          | serine/threonine-protein phosphatase PP1-like |
| SNP_25303_A_28285600 | NC_021163.1    | Ca_Kabuli_Chr04 | 28285600                | GG                                     | AA                 | AA               | INTERGENIC                    |                    |                                               |
| SNP_25304_A_28285904 | NC_021163.1    | Ca_Kabuli_Chr04 | 28285904                | TT                                     | CC                 | CC               | INTERGENIC                    |                    |                                               |
| SNP_25305_A_28288875 | NC_021163.1    | Ca_Kabuli_Chr04 | 28288875                | GG                                     | AA                 | AA               | INTERGENIC                    |                    |                                               |
| SNP_25306_A_28289227 | NC_021163.1    | Ca_Kabuli_Chr04 | 28289227                | AA                                     | GG                 | GG               | INTERGENIC                    |                    |                                               |
| SNP_25307_A_28289416 | NC_021163.1    | Ca_Kabuli_Chr04 | 28289416                | CC                                     | TT                 | TT               | INTERGENIC                    |                    |                                               |
| SNP_25308_A_28290409 | NC_021163.1    | Ca_Kabuli_Chr04 | 28290409                | TT                                     | CC                 | CC               | INTERGENIC                    |                    |                                               |
| SNP_25309_A_28290809 | NC_021163.1    | Ca_Kabuli_Chr04 | 28290809                | TT                                     | AA                 | AA               | INTERGENIC                    |                    |                                               |
| SNP_25310_A_28290896 | NC_021163.1    | Ca_Kabuli_Chr04 | 28290896                | GG                                     | AA                 | AA               | INTERGENIC                    |                    |                                               |

| SNPs IDs             | Chromosome IDs | Chromosomes     | Physical positions (bp) | CDC Frontier genome (Reference genome) | (Pusa 1103 & HPNB) | (ILWC 46 & LPNB) | Sequence genome | Components of | Gene accession IDs | Putative functions |
|----------------------|----------------|-----------------|-------------------------|----------------------------------------|--------------------|------------------|-----------------|---------------|--------------------|--------------------|
| SNP_25312_A_28314924 | NC_021163.1    | Ca_Kabuli_Chr04 | 28314924                | TT                                     | CC                 | CC               | INTERGENIC      |               |                    |                    |
| SNP_25313_A_28315035 | NC_021163.1    | Ca_Kabuli_Chr04 | 28315035                | AA                                     | GG                 | GG               | INTERGENIC      |               |                    |                    |
| SNP_25314_A_28315224 | NC_021163.1    | Ca_Kabuli_Chr04 | 28315224                | TT                                     | CC                 | CC               | INTERGENIC      |               |                    |                    |
| SNP_25315_A_28315240 | NC_021163.1    | Ca_Kabuli_Chr04 | 28315240                | AA                                     | GG                 | GG               | INTERGENIC      |               |                    |                    |
| SNP_25316_A_28317701 | NC_021163.1    | Ca_Kabuli_Chr04 | 28317701                | GG                                     | AA                 | AA               | INTERGENIC      |               |                    |                    |
| SNP_25317_A_28317725 | NC_021163.1    | Ca_Kabuli_Chr04 | 28317725                | CC                                     | TT                 | TT               | INTERGENIC      |               |                    |                    |
| SNP_25318_A_28318587 | NC_021163.1    | Ca_Kabuli_Chr04 | 28318587                | CC                                     | GG                 | GG               | INTERGENIC      |               |                    |                    |
| SNP_25320_A_28322708 | NC_021163.1    | Ca_Kabuli_Chr04 | 28322708                | CC                                     | TT                 | TT               | INTERGENIC      |               |                    |                    |
| SNP_25321_A_28322733 | NC_021163.1    | Ca_Kabuli_Chr04 | 28322733                | CC                                     | TT                 | TT               | INTERGENIC      |               |                    |                    |
| SNP_25322_A_28330245 | NC_021163.1    | Ca_Kabuli_Chr04 | 28330245                | AA                                     | CC                 | CC               | INTERGENIC      |               |                    |                    |
| SNP_25323_A_28330904 | NC_021163.1    | Ca_Kabuli_Chr04 | 28330904                | GG                                     | TT                 | TT               | INTERGENIC      |               |                    |                    |
| SNP_25325_A_28331319 | NC_021163.1    | Ca_Kabuli_Chr04 | 28331319                | TT                                     | AA                 | AA               | INTERGENIC      |               |                    |                    |
| SNP_25326_A_28334415 | NC_021163.1    | Ca_Kabuli_Chr04 | 28334415                | TT                                     | CC                 | CC               | INTERGENIC      |               |                    |                    |
| SNP_25327_A_28336192 | NC_021163.1    | Ca_Kabuli_Chr04 | 28336192                | TT                                     | AA                 | AA               | INTERGENIC      |               |                    |                    |
| SNP_25328_A_28336438 | NC_021163.1    | Ca_Kabuli_Chr04 | 28336438                | AA                                     | GG                 | GG               | INTERGENIC      |               |                    |                    |
| SNP_25330_A_28337372 | NC_021163.1    | Ca_Kabuli_Chr04 | 28337372                | CC                                     | TT                 | TT               | INTERGENIC      |               |                    |                    |
| SNP_25331_A_28337667 | NC_021163.1    | Ca_Kabuli_Chr04 | 28337667                | AA                                     | GG                 | GG               | INTERGENIC      |               |                    |                    |
| SNP_25332_A_28337831 | NC_021163.1    | Ca_Kabuli_Chr04 | 28337831                | AA                                     | GG                 | GG               | INTERGENIC      |               |                    |                    |
| SNP_25333_A_28338095 | NC_021163.1    | Ca_Kabuli_Chr04 | 28338095                | TT                                     | GG                 | GG               | INTERGENIC      |               |                    |                    |
| SNP_25335_A_28339959 | NC_021163.1    | Ca_Kabuli_Chr04 | 28339959                | AA                                     | TT                 | TT               | INTERGENIC      |               |                    |                    |
| SNP_25336_A_28340192 | NC_021163.1    | Ca_Kabuli_Chr04 | 28340192                | CC                                     | AA                 | AA               | INTERGENIC      |               |                    |                    |
| SNP_25337_A_28340316 | NC_021163.1    | Ca_Kabuli_Chr04 | 28340316                | CC                                     | TT                 | TT               | INTERGENIC      |               |                    |                    |

| SNPs IDs             | Chromosome IDs | Chromosomes     | Physical positions (bp) | CDC Frontier genome (Reference genome) | (Pusa 1103 & HPNB) | (ILWC 46 & LPNB) | Sequence genome | Components of | Gene accession IDs | Putative functions |
|----------------------|----------------|-----------------|-------------------------|----------------------------------------|--------------------|------------------|-----------------|---------------|--------------------|--------------------|
| SNP_25338_A_28340736 | NC_021163.1    | Ca_Kabuli_Chr04 | 28340736                | AA                                     | GG                 | GG               | INTERGENIC      |               |                    |                    |
| SNP_25339_A_28340956 | NC_021163.1    | Ca_Kabuli_Chr04 | 28340956                | AA                                     | TT                 | TT               | INTERGENIC      |               |                    |                    |
| SNP_25340_A_28342625 | NC_021163.1    | Ca_Kabuli_Chr04 | 28342625                | AA                                     | GG                 | GG               | INTERGENIC      |               |                    |                    |
| SNP_25342_A_28343097 | NC_021163.1    | Ca_Kabuli_Chr04 | 28343097                | GG                                     | AA                 | AA               | INTERGENIC      |               |                    |                    |
| SNP_25343_A_28343496 | NC_021163.1    | Ca_Kabuli_Chr04 | 28343496                | AA                                     | GG                 | GG               | INTERGENIC      |               |                    |                    |
| SNP_25344_A_28344282 | NC_021163.1    | Ca_Kabuli_Chr04 | 28344282                | GG                                     | TT                 | TT               | INTERGENIC      |               |                    |                    |
| SNP_25345_A_28344284 | NC_021163.1    | Ca_Kabuli_Chr04 | 28344284                | CC                                     | TT                 | TT               | INTERGENIC      |               |                    |                    |
| SNP_25346_A_28345953 | NC_021163.1    | Ca_Kabuli_Chr04 | 28345953                | GG                                     | AA                 | AA               | INTERGENIC      |               |                    |                    |
| SNP_25348_A_28346711 | NC_021163.1    | Ca_Kabuli_Chr04 | 28346711                | AA                                     | TT                 | TT               | INTERGENIC      |               |                    |                    |
| SNP_25349_A_28347578 | NC_021163.1    | Ca_Kabuli_Chr04 | 28347578                | CC                                     | TT                 | TT               | INTERGENIC      |               |                    |                    |
| SNP_25350_A_28351919 | NC_021163.1    | Ca_Kabuli_Chr04 | 28351919                | TT                                     | CC                 | CC               | INTERGENIC      |               |                    |                    |
| SNP_25351_A_28352009 | NC_021163.1    | Ca_Kabuli_Chr04 | 28352009                | CC                                     | AA                 | AA               | INTERGENIC      |               |                    |                    |
| SNP_25352_A_28352034 | NC_021163.1    | Ca_Kabuli_Chr04 | 28352034                | GG                                     | AA                 | AA               | INTERGENIC      |               |                    |                    |
| SNP_25354_A_28352979 | NC_021163.1    | Ca_Kabuli_Chr04 | 28352979                | CC                                     | TT                 | TT               | INTERGENIC      |               |                    |                    |
| SNP_25355_A_28352991 | NC_021163.1    | Ca_Kabuli_Chr04 | 28352991                | AA                                     | GG                 | GG               | INTERGENIC      |               |                    |                    |
| SNP_25356_A_28356339 | NC_021163.1    | Ca_Kabuli_Chr04 | 28356339                | CC                                     | TT                 | TT               | INTERGENIC      |               |                    |                    |
| SNP_25357_A_28357937 | NC_021163.1    | Ca_Kabuli_Chr04 | 28357937                | CC                                     | TT                 | TT               | INTERGENIC      |               |                    |                    |
| SNP_25358_A_28358293 | NC_021163.1    | Ca_Kabuli_Chr04 | 28358293                | GG                                     | AA                 | AA               | INTERGENIC      |               |                    |                    |
| SNP_25359_A_28358422 | NC_021163.1    | Ca_Kabuli_Chr04 | 28358422                | CC                                     | GG                 | GG               | INTERGENIC      |               |                    |                    |
| SNP_25360_A_28358561 | NC_021163.1    | Ca_Kabuli_Chr04 | 28358561                | TT                                     | GG                 | GG               | INTERGENIC      |               |                    |                    |
| SNP_25361_A_28358587 | NC_021163.1    | Ca_Kabuli_Chr04 | 28358587                | AA                                     | TT                 | TT               | INTERGENIC      |               |                    |                    |
| SNP_25362_A_28358952 | NC_021163.1    | Ca_Kabuli_Chr04 | 28358952                | TT                                     | CC                 | CC               | INTERGENIC      |               |                    |                    |

| SNPs IDs             | Chromosome IDs | Chromosomes     | Physical positions (bp) | CDC Frontier genome (Reference genome) | (Pusa 1103 & HPNB) | (ILWC 46 & LPNB) | Sequence Components of genome | Gene accession IDs | Putative functions                     |
|----------------------|----------------|-----------------|-------------------------|----------------------------------------|--------------------|------------------|-------------------------------|--------------------|----------------------------------------|
| SNP_25363_A_28363615 | NC_021163.1    | Ca_Kabuli_Chr04 | 28363615                | GG                                     | AA                 | AA               | URR                           | 101497945          | myb-related protein Myb4-like          |
| SNP_25364_A_28363621 | NC_021163.1    | Ca_Kabuli_Chr04 | 28363621                | CC                                     | TT                 | TT               | URR                           | 101497945          | myb-related protein Myb4-like          |
| SNP_25365_A_28363945 | NC_021163.1    | Ca_Kabuli_Chr04 | 28363945                | CC                                     | GG                 | GG               | URR                           | 101497945          | myb-related protein Myb4-like          |
| SNP_25366_A_28364769 | NC_021163.1    | Ca_Kabuli_Chr04 | 28364769                | GG                                     | AA                 | AA               | INTERGENIC                    |                    |                                        |
| SNP_25370_A_28372886 | NC_021163.1    | Ca_Kabuli_Chr04 | 28372886                | GG                                     | TT                 | TT               | INTERGENIC                    |                    |                                        |
| SNP_25371_A_28375006 | NC_021163.1    | Ca_Kabuli_Chr04 | 28375006                | CC                                     | GG                 | GG               | DRR                           | 101498271          | malate dehydrogenase, cytoplasmic-like |
| SNP_25372_A_28375268 | NC_021163.1    | Ca_Kabuli_Chr04 | 28375268                | AA                                     | GG                 | GG               | DRR                           | 101498271          | malate dehydrogenase, cytoplasmic-like |
| SNP_25373_A_28380264 | NC_021163.1    | Ca_Kabuli_Chr04 | 28380264                | TT                                     | GG                 | GG               | URR                           | 101498271          | malate dehydrogenase, cytoplasmic-like |
| SNP_25374_A_28380278 | NC_021163.1    | Ca_Kabuli_Chr04 | 28380278                | TT                                     | GG                 | GG               | URR                           | 101498271          | malate dehydrogenase, cytoplasmic-like |
| SNP_25376_A_28380629 | NC_021163.1    | Ca_Kabuli_Chr04 | 28380629                | CC                                     | TT                 | TT               | URR                           | 101498271          | malate dehydrogenase, cytoplasmic-like |
| SNP_25377_A_28384832 | NC_021163.1    | Ca_Kabuli_Chr04 | 28384832                | AA                                     | GG                 | GG               | INTERGENIC                    |                    |                                        |
| SNP_25378_A_28384849 | NC_021163.1    | Ca_Kabuli_Chr04 | 28384849                | AA                                     | GG                 | GG               | INTERGENIC                    |                    |                                        |
| SNP_25379_A_28385150 | NC_021163.1    | Ca_Kabuli_Chr04 | 28385150                | TT                                     | CC                 | CC               | INTERGENIC                    |                    |                                        |
| SNP_25380_A_28385164 | NC_021163.1    | Ca_Kabuli_Chr04 | 28385164                | GG                                     | CC                 | CC               | INTERGENIC                    |                    |                                        |
| SNP_25381_A_28385206 | NC_021163.1    | Ca_Kabuli_Chr04 | 28385206                | AA                                     | GG                 | GG               | INTERGENIC                    |                    |                                        |
| SNP_25382_A_28386598 | NC_021163.1    | Ca_Kabuli_Chr04 | 28386598                | TT                                     | AA                 | AA               | INTERGENIC                    |                    |                                        |
| SNP_25383_A_28386613 | NC_021163.1    | Ca_Kabuli_Chr04 | 28386613                | CC                                     | AA                 | AA               | INTERGENIC                    |                    |                                        |
| SNP_25384_A_28386897 | NC_021163.1    | Ca_Kabuli_Chr04 | 28386897                | GG                                     | AA                 | AA               | INTERGENIC                    |                    |                                        |
| SNP_25385_A_28387699 | NC_021163.1    | Ca_Kabuli_Chr04 | 28387699                | TT                                     | CC                 | CC               | INTERGENIC                    |                    |                                        |
| SNP_25386_A_28388496 | NC_021163.1    | Ca_Kabuli_Chr04 | 28388496                | CC                                     | TT                 | TT               | INTERGENIC                    |                    |                                        |
| SNP_25387_A_28388498 | NC_021163.1    | Ca_Kabuli_Chr04 | 28388498                | TT                                     | GG                 | GG               | INTERGENIC                    |                    |                                        |
| SNP_25388_A_28388604 | NC_021163.1    | Ca_Kabuli_Chr04 | 28388604                | GG                                     | AA                 | AA               | INTERGENIC                    |                    |                                        |



| SNPs IDs             | Chromosome IDs | Chromosomes     | Physical positions (bp) | CDC Frontier genome (Reference genome) | (Pusa 1103 & HPNB) | (ILWC 46 & LPNB) | Sequence genome | Components of | Gene accession IDs | Putative functions |
|----------------------|----------------|-----------------|-------------------------|----------------------------------------|--------------------|------------------|-----------------|---------------|--------------------|--------------------|
| SNP_25389_A_28388743 | NC_021163.1    | Ca_Kabuli_Chr04 | 28388743                | CC                                     | TT                 | TT               | INTERGENIC      |               |                    |                    |
| SNP_25390_A_28388744 | NC_021163.1    | Ca_Kabuli_Chr04 | 28388744                | AA                                     | GG                 | GG               | INTERGENIC      |               |                    |                    |
| SNP_25391_A_28388748 | NC_021163.1    | Ca_Kabuli_Chr04 | 28388748                | GG                                     | CC                 | CC               | INTERGENIC      |               |                    |                    |
| SNP_25392_A_28389956 | NC_021163.1    | Ca_Kabuli_Chr04 | 28389956                | AA                                     | CC                 | CC               | INTERGENIC      |               |                    |                    |
| SNP_25393_A_28389957 | NC_021163.1    | Ca_Kabuli_Chr04 | 28389957                | AA                                     | TT                 | TT               | INTERGENIC      |               |                    |                    |
| SNP_25394_A_28389958 | NC_021163.1    | Ca_Kabuli_Chr04 | 28389958                | AA                                     | TT                 | TT               | INTERGENIC      |               |                    |                    |
| SNP_25395_A_28390229 | NC_021163.1    | Ca_Kabuli_Chr04 | 28390229                | AA                                     | CC                 | CC               | INTERGENIC      |               |                    |                    |
| SNP_25396_A_28390231 | NC_021163.1    | Ca_Kabuli_Chr04 | 28390231                | TT                                     | CC                 | CC               | INTERGENIC      |               |                    |                    |
| SNP_25398_A_28390285 | NC_021163.1    | Ca_Kabuli_Chr04 | 28390285                | TT                                     | CC                 | CC               | INTERGENIC      |               |                    |                    |
| SNP_25399_A_28390330 | NC_021163.1    | Ca_Kabuli_Chr04 | 28390330                | AA                                     | CC                 | CC               | INTERGENIC      |               |                    |                    |
| SNP_25400_A_28390342 | NC_021163.1    | Ca_Kabuli_Chr04 | 28390342                | GG                                     | AA                 | AA               | INTERGENIC      |               |                    |                    |
| SNP_25402_A_28390532 | NC_021163.1    | Ca_Kabuli_Chr04 | 28390532                | CC                                     | TT                 | TT               | INTERGENIC      |               |                    |                    |
| SNP_25403_A_28390546 | NC_021163.1    | Ca_Kabuli_Chr04 | 28390546                | AA                                     | GG                 | GG               | INTERGENIC      |               |                    |                    |
| SNP_25404_A_28390570 | NC_021163.1    | Ca_Kabuli_Chr04 | 28390570                | AA                                     | CC                 | CC               | INTERGENIC      |               |                    |                    |
| SNP_25405_A_28390580 | NC_021163.1    | Ca_Kabuli_Chr04 | 28390580                | AA                                     | CC                 | CC               | INTERGENIC      |               |                    |                    |
| SNP_25406_A_28390720 | NC_021163.1    | Ca_Kabuli_Chr04 | 28390720                | AA                                     | GG                 | GG               | INTERGENIC      |               |                    |                    |
| SNP_25407_A_28390723 | NC_021163.1    | Ca_Kabuli_Chr04 | 28390723                | AA                                     | CC                 | CC               | INTERGENIC      |               |                    |                    |
| SNP_25408_A_28390772 | NC_021163.1    | Ca_Kabuli_Chr04 | 28390772                | AA                                     | CC                 | CC               | INTERGENIC      |               |                    |                    |
| SNP_25409_A_28390937 | NC_021163.1    | Ca_Kabuli_Chr04 | 28390937                | GG                                     | TT                 | TT               | INTERGENIC      |               |                    |                    |
| SNP_25410_A_28390971 | NC_021163.1    | Ca_Kabuli_Chr04 | 28390971                | AA                                     | GG                 | GG               | INTERGENIC      |               |                    |                    |
| SNP_25412_A_28402883 | NC_021163.1    | Ca_Kabuli_Chr04 | 28402883                | AA                                     | CC                 | CC               | INTERGENIC      |               |                    |                    |
| SNP_25413_A_28402908 | NC_021163.1    | Ca_Kabuli_Chr04 | 28402908                | CC                                     | TT                 | TT               | INTERGENIC      |               |                    |                    |

| SNPs IDs             | Chromosome IDs | Chromosomes     | Physical positions (bp) | CDC Frontier genome (Reference genome) | (Pusa 1103 & HPNB) | (ILWC 46 & LPNB) | Sequence genome | Components of | Gene accession IDs | Putative functions |
|----------------------|----------------|-----------------|-------------------------|----------------------------------------|--------------------|------------------|-----------------|---------------|--------------------|--------------------|
| SNP_25414_A_28403280 | NC_021163.1    | Ca_Kabuli_Chr04 | 28403280                | CC                                     | TT                 | TT               | INTERGENIC      |               |                    |                    |
| SNP_25415_A_28404488 | NC_021163.1    | Ca_Kabuli_Chr04 | 28404488                | GG                                     | AA                 | AA               | INTERGENIC      |               |                    |                    |
| SNP_25416_A_28404826 | NC_021163.1    | Ca_Kabuli_Chr04 | 28404826                | AA                                     | GG                 | GG               | INTERGENIC      |               |                    |                    |
| SNP_25417_A_28405622 | NC_021163.1    | Ca_Kabuli_Chr04 | 28405622                | AA                                     | TT                 | TT               | INTERGENIC      |               |                    |                    |
| SNP_25418_A_28405743 | NC_021163.1    | Ca_Kabuli_Chr04 | 28405743                | AA                                     | TT                 | TT               | INTERGENIC      |               |                    |                    |
| SNP_25419_A_28406142 | NC_021163.1    | Ca_Kabuli_Chr04 | 28406142                | CC                                     | TT                 | TT               | INTERGENIC      |               |                    |                    |
| SNP_25420_A_28408501 | NC_021163.1    | Ca_Kabuli_Chr04 | 28408501                | CC                                     | TT                 | TT               | INTERGENIC      |               |                    |                    |
| SNP_25421_A_28409345 | NC_021163.1    | Ca_Kabuli_Chr04 | 28409345                | TT                                     | CC                 | CC               | INTERGENIC      |               |                    |                    |
| SNP_25422_A_28409655 | NC_021163.1    | Ca_Kabuli_Chr04 | 28409655                | CC                                     | TT                 | TT               | INTERGENIC      |               |                    |                    |
| SNP_25423_A_28409884 | NC_021163.1    | Ca_Kabuli_Chr04 | 28409884                | GG                                     | AA                 | AA               | INTERGENIC      |               |                    |                    |
| SNP_25424_A_28409888 | NC_021163.1    | Ca_Kabuli_Chr04 | 28409888                | GG                                     | AA                 | AA               | INTERGENIC      |               |                    |                    |
| SNP_25425_A_28409889 | NC_021163.1    | Ca_Kabuli_Chr04 | 28409889                | CC                                     | TT                 | TT               | INTERGENIC      |               |                    |                    |
| SNP_25426_A_28410172 | NC_021163.1    | Ca_Kabuli_Chr04 | 28410172                | GG                                     | AA                 | AA               | INTERGENIC      |               |                    |                    |
| SNP_25427_A_28410349 | NC_021163.1    | Ca_Kabuli_Chr04 | 28410349                | AA                                     | TT                 | TT               | INTERGENIC      |               |                    |                    |
| SNP_25428_A_28410359 | NC_021163.1    | Ca_Kabuli_Chr04 | 28410359                | AA                                     | GG                 | GG               | INTERGENIC      |               |                    |                    |
| SNP_25429_A_28412377 | NC_021163.1    | Ca_Kabuli_Chr04 | 28412377                | AA                                     | GG                 | GG               | INTERGENIC      |               |                    |                    |
| SNP_25430_A_28412669 | NC_021163.1    | Ca_Kabuli_Chr04 | 28412669                | GG                                     | AA                 | AA               | INTERGENIC      |               |                    |                    |
| SNP_25431_A_28414260 | NC_021163.1    | Ca_Kabuli_Chr04 | 28414260                | CC                                     | GG                 | GG               | INTERGENIC      |               |                    |                    |
| SNP_25432_A_28414277 | NC_021163.1    | Ca_Kabuli_Chr04 | 28414277                | AA                                     | GG                 | GG               | INTERGENIC      |               |                    |                    |
| SNP_25434_A_28415659 | NC_021163.1    | Ca_Kabuli_Chr04 | 28415659                | GG                                     | AA                 | AA               | INTERGENIC      |               |                    |                    |
| SNP_25435_A_28418016 | NC_021163.1    | Ca_Kabuli_Chr04 | 28418016                | TT                                     | GG                 | GG               | INTERGENIC      |               |                    |                    |
| SNP_25436_A_28418278 | NC_021163.1    | Ca_Kabuli_Chr04 | 28418278                | AA                                     | TT                 | TT               | INTERGENIC      |               |                    |                    |

| SNPs IDs             | Chromosome IDs | Chromosomes     | Physical positions (bp) | CDC Frontier genome (Reference genome) | (Pusa 1103 & HPNB) | (ILWC 46 & LPNB) | Sequence Components of genome | Gene accession IDs | Putative functions           |
|----------------------|----------------|-----------------|-------------------------|----------------------------------------|--------------------|------------------|-------------------------------|--------------------|------------------------------|
| SNP_25437_A_28418594 | NC_021163.1    | Ca_Kabuli_Chr04 | 28418594                | AA                                     | GG                 | GG               | INTERGENIC                    |                    |                              |
| SNP_25438_A_28418611 | NC_021163.1    | Ca_Kabuli_Chr04 | 28418611                | GG                                     | TT                 | TT               | INTERGENIC                    |                    |                              |
| SNP_25439_A_28418743 | NC_021163.1    | Ca_Kabuli_Chr04 | 28418743                | TT                                     | CC                 | CC               | INTERGENIC                    |                    |                              |
| SNP_25440_A_28418967 | NC_021163.1    | Ca_Kabuli_Chr04 | 28418967                | CC                                     | AA                 | AA               | INTERGENIC                    |                    |                              |
| SNP_25441_A_28419019 | NC_021163.1    | Ca_Kabuli_Chr04 | 28419019                | CC                                     | GG                 | GG               | INTERGENIC                    |                    |                              |
| SNP_25442_A_28419223 | NC_021163.1    | Ca_Kabuli_Chr04 | 28419223                | AA                                     | GG                 | GG               | INTERGENIC                    |                    |                              |
| SNP_25445_A_28435085 | NC_021163.1    | Ca_Kabuli_Chr04 | 28435085                | TT                                     | CC                 | CC               | URR                           | 101502133          | uncharacterized LOC101502133 |
| SNP_25446_A_28435101 | NC_021163.1    | Ca_Kabuli_Chr04 | 28435101                | TT                                     | CC                 | CC               | URR                           | 101502133          | uncharacterized LOC101502133 |
| SNP_25447_A_28440594 | NC_021163.1    | Ca_Kabuli_Chr04 | 28440594                | GG                                     | AA                 | AA               | INTERGENIC                    |                    |                              |
| SNP_25448_A_28440627 | NC_021163.1    | Ca_Kabuli_Chr04 | 28440627                | TT                                     | CC                 | CC               | INTERGENIC                    |                    |                              |
| SNP_25450_A_28449130 | NC_021163.1    | Ca_Kabuli_Chr04 | 28449130                | CC                                     | TT                 | TT               | INTERGENIC                    |                    |                              |
| SNP_25451_A_28449503 | NC_021163.1    | Ca_Kabuli_Chr04 | 28449503                | TT                                     | AA                 | AA               | INTERGENIC                    |                    |                              |
| SNP_25452_A_28450186 | NC_021163.1    | Ca_Kabuli_Chr04 | 28450186                | AA                                     | TT                 | TT               | INTERGENIC                    |                    |                              |
| SNP_25453_A_28451481 | NC_021163.1    | Ca_Kabuli_Chr04 | 28451481                | TT                                     | CC                 | CC               | INTERGENIC                    |                    |                              |
| SNP_25454_A_28451927 | NC_021163.1    | Ca_Kabuli_Chr04 | 28451927                | AA                                     | TT                 | TT               | INTERGENIC                    |                    |                              |
| SNP_25455_A_28452617 | NC_021163.1    | Ca_Kabuli_Chr04 | 28452617                | CC                                     | TT                 | TT               | INTERGENIC                    |                    |                              |
| SNP_25456_A_28452892 | NC_021163.1    | Ca_Kabuli_Chr04 | 28452892                | TT                                     | CC                 | CC               | INTERGENIC                    |                    |                              |
| SNP_25457_A_28453371 | NC_021163.1    | Ca_Kabuli_Chr04 | 28453371                | GG                                     | TT                 | TT               | INTERGENIC                    |                    |                              |
| SNP_25458_A_28455161 | NC_021163.1    | Ca_Kabuli_Chr04 | 28455161                | GG                                     | CC                 | CC               | INTERGENIC                    |                    |                              |
| SNP_25459_A_28455327 | NC_021163.1    | Ca_Kabuli_Chr04 | 28455327                | GG                                     | TT                 | TT               | INTERGENIC                    |                    |                              |
| SNP_25460_A_28457625 | NC_021163.1    | Ca_Kabuli_Chr04 | 28457625                | AA                                     | CC                 | CC               | INTERGENIC                    |                    |                              |
| SNP_25462_A_28484288 | NC_021163.1    | Ca_Kabuli_Chr04 | 28484288                | CC                                     | AA                 | AA               | INTERGENIC                    |                    |                              |

| SNPs IDs             | Chromosome IDs | Chromosomes     | Physical positions (bp) | CDC Frontier genome (Reference genome) | (Pusa 1103 & HPNB) | (ILWC 46 & LPNB) | Sequence genome | Components of | Gene accession IDs                  | Putative functions |
|----------------------|----------------|-----------------|-------------------------|----------------------------------------|--------------------|------------------|-----------------|---------------|-------------------------------------|--------------------|
| SNP_25466_A_28505507 | NC_021163.1    | Ca_Kabuli_Chr04 | 28505507                | CC                                     | AA                 | AA               | INTERGENIC      |               |                                     |                    |
| SNP_25467_A_28507452 | NC_021163.1    | Ca_Kabuli_Chr04 | 28507452                | CC                                     | TT                 | TT               | INTERGENIC      |               |                                     |                    |
| SNP_25468_A_28507533 | NC_021163.1    | Ca_Kabuli_Chr04 | 28507533                | TT                                     | CC                 | CC               | INTERGENIC      |               |                                     |                    |
| SNP_25469_A_28524838 | NC_021163.1    | Ca_Kabuli_Chr04 | 28524838                | TT                                     | GG                 | GG               | INTERGENIC      |               |                                     |                    |
| SNP_25470_A_28525317 | NC_021163.1    | Ca_Kabuli_Chr04 | 28525317                | AA                                     | TT                 | TT               | INTERGENIC      |               |                                     |                    |
| SNP_25471_A_28525892 | NC_021163.1    | Ca_Kabuli_Chr04 | 28525892                | AA                                     | GG                 | GG               | INTERGENIC      |               |                                     |                    |
| SNP_25472_A_28526559 | NC_021163.1    | Ca_Kabuli_Chr04 | 28526559                | CC                                     | TT                 | TT               | INTERGENIC      |               |                                     |                    |
| SNP_25473_A_28527045 | NC_021163.1    | Ca_Kabuli_Chr04 | 28527045                | TT                                     | GG                 | GG               | INTERGENIC      |               |                                     |                    |
| SNP_25474_A_28530408 | NC_021163.1    | Ca_Kabuli_Chr04 | 28530408                | CC                                     | TT                 | TT               | INTERGENIC      |               |                                     |                    |
| SNP_25475_A_28531269 | NC_021163.1    | Ca_Kabuli_Chr04 | 28531269                | TT                                     | CC                 | CC               | INTERGENIC      |               |                                     |                    |
| SNP_25476_A_28531376 | NC_021163.1    | Ca_Kabuli_Chr04 | 28531376                | CC                                     | GG                 | GG               | INTERGENIC      |               |                                     |                    |
| SNP_25477_A_28533437 | NC_021163.1    | Ca_Kabuli_Chr04 | 28533437                | GG                                     | AA                 | AA               | INTERGENIC      |               |                                     |                    |
| SNP_25479_A_28535424 | NC_021163.1    | Ca_Kabuli_Chr04 | 28535424                | AA                                     | GG                 | GG               | INTERGENIC      |               |                                     |                    |
| SNP_25480_A_28535437 | NC_021163.1    | Ca_Kabuli_Chr04 | 28535437                | GG                                     | AA                 | AA               | INTERGENIC      |               |                                     |                    |
| SNP_25482_A_28535830 | NC_021163.1    | Ca_Kabuli_Chr04 | 28535830                | GG                                     | AA                 | AA               | INTERGENIC      |               |                                     |                    |
| SNP_25483_A_28535872 | NC_021163.1    | Ca_Kabuli_Chr04 | 28535872                | GG                                     | AA                 | AA               | INTERGENIC      |               |                                     |                    |
| SNP_25484_A_28536182 | NC_021163.1    | Ca_Kabuli_Chr04 | 28536182                | CC                                     | GG                 | GG               | INTERGENIC      |               |                                     |                    |
| SNP_25485_A_28559899 | NC_021163.1    | Ca_Kabuli_Chr04 | 28559899                | GG                                     | TT                 | TT               | INTERGENIC      |               |                                     |                    |
| SNP_25486_A_28572562 | NC_021163.1    | Ca_Kabuli_Chr04 | 28572562                | AA                                     | TT                 | TT               | INTERGENIC      |               |                                     |                    |
| SNP_25488_A_28581984 | NC_021163.1    | Ca_Kabuli_Chr04 | 28581984                | AA                                     | GG                 | GG               | URR             | 101503067     | zinc finger MYM-type protein 1-like |                    |
| SNP_25490_A_28583725 | NC_021163.1    | Ca_Kabuli_Chr04 | 28583725                | AA                                     | GG                 | GG               | INTERGENIC      |               |                                     |                    |
| SNP_25491_A_28583734 | NC_021163.1    | Ca_Kabuli_Chr04 | 28583734                | GG                                     | AA                 | AA               | INTERGENIC      |               |                                     |                    |

| SNPs IDs             | Chromosome IDs | Chromosomes     | Physical positions (bp) | CDC Frontier genome (Reference genome) | (Pusa 1103 & HPNB) | (ILWC 46 & LPNB) | Sequence genome | Components of | Gene accession IDs | Putative functions |
|----------------------|----------------|-----------------|-------------------------|----------------------------------------|--------------------|------------------|-----------------|---------------|--------------------|--------------------|
| SNP_25492_A_28583738 | NC_021163.1    | Ca_Kabuli_Chr04 | 28583738                | TT                                     | CC                 | CC               | INTERGENIC      |               |                    |                    |
| SNP_25493_A_28584103 | NC_021163.1    | Ca_Kabuli_Chr04 | 28584103                | GG                                     | TT                 | TT               | INTERGENIC      |               |                    |                    |
| SNP_25494_A_28585200 | NC_021163.1    | Ca_Kabuli_Chr04 | 28585200                | TT                                     | CC                 | CC               | INTERGENIC      |               |                    |                    |
| SNP_25495_A_28585237 | NC_021163.1    | Ca_Kabuli_Chr04 | 28585237                | AA                                     | GG                 | GG               | INTERGENIC      |               |                    |                    |
| SNP_25496_A_28585571 | NC_021163.1    | Ca_Kabuli_Chr04 | 28585571                | TT                                     | GG                 | GG               | INTERGENIC      |               |                    |                    |
| SNP_25497_A_28585581 | NC_021163.1    | Ca_Kabuli_Chr04 | 28585581                | GG                                     | AA                 | AA               | INTERGENIC      |               |                    |                    |
| SNP_25498_A_28585654 | NC_021163.1    | Ca_Kabuli_Chr04 | 28585654                | TT                                     | AA                 | AA               | INTERGENIC      |               |                    |                    |
| SNP_25499_A_28608085 | NC_021163.1    | Ca_Kabuli_Chr04 | 28608085                | CC                                     | TT                 | TT               | INTERGENIC      |               |                    |                    |
| SNP_25500_A_28608308 | NC_021163.1    | Ca_Kabuli_Chr04 | 28608308                | AA                                     | GG                 | GG               | INTERGENIC      |               |                    |                    |
| SNP_25501_A_28617167 | NC_021163.1    | Ca_Kabuli_Chr04 | 28617167                | AA                                     | TT                 | TT               | INTERGENIC      |               |                    |                    |
| SNP_25503_A_28624792 | NC_021163.1    | Ca_Kabuli_Chr04 | 28624792                | TT                                     | AA                 | AA               | INTERGENIC      |               |                    |                    |
| SNP_25504_A_28627600 | NC_021163.1    | Ca_Kabuli_Chr04 | 28627600                | GG                                     | AA                 | AA               | INTERGENIC      |               |                    |                    |
| SNP_25505_A_28631070 | NC_021163.1    | Ca_Kabuli_Chr04 | 28631070                | AA                                     | GG                 | GG               | INTERGENIC      |               |                    |                    |
| SNP_25506_A_28633960 | NC_021163.1    | Ca_Kabuli_Chr04 | 28633960                | TT                                     | CC                 | CC               | INTERGENIC      |               |                    |                    |
| SNP_25507_A_28634953 | NC_021163.1    | Ca_Kabuli_Chr04 | 28634953                | TT                                     | CC                 | CC               | INTERGENIC      |               |                    |                    |
| SNP_25508_A_28635821 | NC_021163.1    | Ca_Kabuli_Chr04 | 28635821                | CC                                     | TT                 | TT               | INTERGENIC      |               |                    |                    |
| SNP_25509_A_28635850 | NC_021163.1    | Ca_Kabuli_Chr04 | 28635850                | TT                                     | CC                 | CC               | INTERGENIC      |               |                    |                    |
| SNP_25511_A_28640117 | NC_021163.1    | Ca_Kabuli_Chr04 | 28640117                | GG                                     | AA                 | AA               | INTERGENIC      |               |                    |                    |
| SNP_25512_A_28640316 | NC_021163.1    | Ca_Kabuli_Chr04 | 28640316                | TT                                     | AA                 | AA               | INTERGENIC      |               |                    |                    |
| SNP_25513_A_28640374 | NC_021163.1    | Ca_Kabuli_Chr04 | 28640374                | CC                                     | TT                 | TT               | INTERGENIC      |               |                    |                    |
| SNP_25514_A_28663748 | NC_021163.1    | Ca_Kabuli_Chr04 | 28663748                | GG                                     | AA                 | AA               | INTERGENIC      |               |                    |                    |
| SNP_25515_A_28669450 | NC_021163.1    | Ca_Kabuli_Chr04 | 28669450                | CC                                     | AA                 | AA               | INTERGENIC      |               |                    |                    |

| SNPs IDs             | Chromosome IDs | Chromosomes     | Physical positions (bp) | CDC Frontier genome (Reference genome) | (Pusa 1103 & HPNB) | (ILWC 46 & LPNB) | Sequence genome | Components of | Gene accession IDs                                            | Putative functions |
|----------------------|----------------|-----------------|-------------------------|----------------------------------------|--------------------|------------------|-----------------|---------------|---------------------------------------------------------------|--------------------|
| SNP_25516_A_28675065 | NC_021163.1    | Ca_Kabuli_Chr04 | 28675065                | AA                                     | GG                 | GG               | INTERGENIC      |               |                                                               |                    |
| SNP_25517_A_28675074 | NC_021163.1    | Ca_Kabuli_Chr04 | 28675074                | AA                                     | GG                 | GG               | INTERGENIC      |               |                                                               |                    |
| SNP_25518_A_28675083 | NC_021163.1    | Ca_Kabuli_Chr04 | 28675083                | TT                                     | AA                 | AA               | INTERGENIC      |               |                                                               |                    |
| SNP_25519_A_28693393 | NC_021163.1    | Ca_Kabuli_Chr04 | 28693393                | CC                                     | AA                 | AA               | INTERGENIC      |               |                                                               |                    |
| SNP_25520_A_28714936 | NC_021163.1    | Ca_Kabuli_Chr04 | 28714936                | AA                                     | GG                 | GG               | INTERGENIC      |               |                                                               |                    |
| SNP_25521_A_28714950 | NC_021163.1    | Ca_Kabuli_Chr04 | 28714950                | CC                                     | TT                 | TT               | INTERGENIC      |               |                                                               |                    |
| SNP_25522_A_28714986 | NC_021163.1    | Ca_Kabuli_Chr04 | 28714986                | GG                                     | AA                 | AA               | INTERGENIC      |               |                                                               |                    |
| SNP_25524_A_28715024 | NC_021163.1    | Ca_Kabuli_Chr04 | 28715024                | GG                                     | AA                 | AA               | INTERGENIC      |               |                                                               |                    |
| SNP_25525_A_28715129 | NC_021163.1    | Ca_Kabuli_Chr04 | 28715129                | CC                                     | TT                 | TT               | INTERGENIC      |               |                                                               |                    |
| SNP_25526_A_28715137 | NC_021163.1    | Ca_Kabuli_Chr04 | 28715137                | TT                                     | GG                 | GG               | INTERGENIC      |               |                                                               |                    |
| SNP_25527_A_28715227 | NC_021163.1    | Ca_Kabuli_Chr04 | 28715227                | AA                                     | GG                 | GG               | INTERGENIC      |               |                                                               |                    |
| SNP_25528_A_28715242 | NC_021163.1    | Ca_Kabuli_Chr04 | 28715242                | GG                                     | AA                 | AA               | INTERGENIC      |               |                                                               |                    |
| SNP_25529_A_28727210 | NC_021163.1    | Ca_Kabuli_Chr04 | 28727210                | CC                                     | TT                 | TT               | INTERGENIC      |               |                                                               |                    |
| SNP_25530_A_28772013 | NC_021163.1    | Ca_Kabuli_Chr04 | 28772013                | TT                                     | CC                 | CC               | INTERGENIC      |               |                                                               |                    |
| SNP_25531_A_28774644 | NC_021163.1    | Ca_Kabuli_Chr04 | 28774644                | CC                                     | TT                 | TT               | INTERGENIC      |               |                                                               |                    |
| SNP_25532_A_28776487 | NC_021163.1    | Ca_Kabuli_Chr04 | 28776487                | AA                                     | TT                 | TT               | INTERGENIC      |               |                                                               |                    |
| SNP_25533_A_28777601 | NC_021163.1    | Ca_Kabuli_Chr04 | 28777601                | CC                                     | TT                 | TT               | INTERGENIC      |               |                                                               |                    |
| SNP_25534_A_28778150 | NC_021163.1    | Ca_Kabuli_Chr04 | 28778150                | TT                                     | AA                 | AA               | INTERGENIC      |               |                                                               |                    |
| SNP_25535_A_28778167 | NC_021163.1    | Ca_Kabuli_Chr04 | 28778167                | CC                                     | TT                 | TT               | INTERGENIC      |               |                                                               |                    |
| SNP_25536_A_28783252 | NC_021163.1    | Ca_Kabuli_Chr04 | 28783252                | CC                                     | TT                 | TT               | DRR             | 101508229     | protein NRT1/ PTR FAMILY 5.2-like                             |                    |
| SNP_25538_A_28784308 | NC_021163.1    | Ca_Kabuli_Chr04 | 28784308                | CC                                     | TT                 | TT               | INTERGENIC      |               |                                                               |                    |
| SNP_25541_A_28793924 | NC_021163.1    | Ca_Kabuli_Chr04 | 28793924                | GG                                     | AA                 | AA               | URR             | 101504056     | NADH dehydrogenase [ubiquinone] flavoprotein 1, mitochondrial |                    |

| SNPs IDs             | Chromosome IDs | Chromosomes     | Physical positions (bp) | CDC Frontier (Reference genome) | (Pusa 1103 & HPNB) | (ILWC 46 & LPNB) | Sequence Components of genome | Gene accession IDs | Putative functions                                            |
|----------------------|----------------|-----------------|-------------------------|---------------------------------|--------------------|------------------|-------------------------------|--------------------|---------------------------------------------------------------|
| SNP_25542_A_28794380 | NC_021163.1    | Ca_Kabuli_Chr04 | 28794380                | CC                              | TT                 | TT               | URR                           | 101504056          | NADH dehydrogenase [ubiquinone] flavoprotein 1, mitochondrial |
| SNP_25543_A_28794384 | NC_021163.1    | Ca_Kabuli_Chr04 | 28794384                | TT                              | CC                 | CC               | URR                           | 101504056          | NADH dehydrogenase [ubiquinone] flavoprotein 1, mitochondrial |
| SNP_25544_A_28794903 | NC_021163.1    | Ca_Kabuli_Chr04 | 28794903                | GG                              | TT                 | TT               | INTERGENIC                    |                    |                                                               |
| SNP_25545_A_28794911 | NC_021163.1    | Ca_Kabuli_Chr04 | 28794911                | TT                              | CC                 | CC               | INTERGENIC                    |                    |                                                               |
| SNP_25546_A_28794921 | NC_021163.1    | Ca_Kabuli_Chr04 | 28794921                | GG                              | TT                 | TT               | INTERGENIC                    |                    |                                                               |
| SNP_25547_A_28795023 | NC_021163.1    | Ca_Kabuli_Chr04 | 28795023                | GG                              | TT                 | TT               | INTERGENIC                    |                    |                                                               |
| SNP_25548_A_28800834 | NC_021163.1    | Ca_Kabuli_Chr04 | 28800834                | GG                              | TT                 | TT               | INTERGENIC                    |                    |                                                               |
| SNP_25549_A_28801674 | NC_021163.1    | Ca_Kabuli_Chr04 | 28801674                | CC                              | TT                 | TT               | INTERGENIC                    |                    |                                                               |
| SNP_25550_A_28801930 | NC_021163.1    | Ca_Kabuli_Chr04 | 28801930                | TT                              | CC                 | CC               | INTERGENIC                    |                    |                                                               |
| SNP_25551_A_28801944 | NC_021163.1    | Ca_Kabuli_Chr04 | 28801944                | GG                              | TT                 | TT               | INTERGENIC                    |                    |                                                               |
| SNP_25552_A_28801974 | NC_021163.1    | Ca_Kabuli_Chr04 | 28801974                | CC                              | GG                 | GG               | INTERGENIC                    |                    |                                                               |
| SNP_25553_A_28802405 | NC_021163.1    | Ca_Kabuli_Chr04 | 28802405                | TT                              | CC                 | CC               | INTERGENIC                    |                    |                                                               |
| SNP_25554_A_28805319 | NC_021163.1    | Ca_Kabuli_Chr04 | 28805319                | AA                              | GG                 | GG               | INTERGENIC                    |                    |                                                               |
| SNP_25555_A_28805322 | NC_021163.1    | Ca_Kabuli_Chr04 | 28805322                | CC                              | TT                 | TT               | INTERGENIC                    |                    |                                                               |
| SNP_25556_A_28805327 | NC_021163.1    | Ca_Kabuli_Chr04 | 28805327                | GG                              | AA                 | AA               | INTERGENIC                    |                    |                                                               |
| SNP_25557_A_28805536 | NC_021163.1    | Ca_Kabuli_Chr04 | 28805536                | GG                              | AA                 | AA               | INTERGENIC                    |                    |                                                               |
| SNP_25558_A_28805539 | NC_021163.1    | Ca_Kabuli_Chr04 | 28805539                | AA                              | GG                 | GG               | INTERGENIC                    |                    |                                                               |
| SNP_25560_A_28806639 | NC_021163.1    | Ca_Kabuli_Chr04 | 28806639                | CC                              | TT                 | TT               | INTERGENIC                    |                    |                                                               |
| SNP_25561_A_28806835 | NC_021163.1    | Ca_Kabuli_Chr04 | 28806835                | CC                              | TT                 | TT               | INTERGENIC                    |                    |                                                               |
| SNP_25562_A_28806847 | NC_021163.1    | Ca_Kabuli_Chr04 | 28806847                | AA                              | TT                 | TT               | INTERGENIC                    |                    |                                                               |
| SNP_25563_A_28806856 | NC_021163.1    | Ca_Kabuli_Chr04 | 28806856                | CC                              | TT                 | TT               | INTERGENIC                    |                    |                                                               |
| SNP_25564_A_28818436 | NC_021163.1    | Ca_Kabuli_Chr04 | 28818436                | TT                              | CC                 | CC               | INTERGENIC                    |                    |                                                               |

| SNPs IDs             | Chromosome IDs | Chromosomes     | Physical positions (bp) | CDC Frontier genome (Reference genome) | (Pusa 1103 & HPNB) | (ILWC 46 & LPNB) | Sequence genome | Components of | Gene accession IDs           | Putative functions |
|----------------------|----------------|-----------------|-------------------------|----------------------------------------|--------------------|------------------|-----------------|---------------|------------------------------|--------------------|
| SNP_25566_A_28818438 | NC_021163.1    | Ca_Kabuli_Chr04 | 28818438                | GG                                     | AA                 | AA               | INTERGENIC      |               |                              |                    |
| SNP_25566_A_28818738 | NC_021163.1    | Ca_Kabuli_Chr04 | 28818738                | AA                                     | GG                 | GG               | INTERGENIC      |               |                              |                    |
| SNP_25567_A_28822918 | NC_021163.1    | Ca_Kabuli_Chr04 | 28822918                | AA                                     | GG                 | GG               | INTERGENIC      |               |                              |                    |
| SNP_25568_A_28823721 | NC_021163.1    | Ca_Kabuli_Chr04 | 28823721                | AA                                     | GG                 | GG               | INTERGENIC      |               |                              |                    |
| SNP_25569_A_28824613 | NC_021163.1    | Ca_Kabuli_Chr04 | 28824613                | AA                                     | TT                 | TT               | INTERGENIC      |               |                              |                    |
| SNP_25570_A_28824619 | NC_021163.1    | Ca_Kabuli_Chr04 | 28824619                | GG                                     | CC                 | CC               | INTERGENIC      |               |                              |                    |
| SNP_25571_A_28824814 | NC_021163.1    | Ca_Kabuli_Chr04 | 28824814                | GG                                     | AA                 | AA               | INTERGENIC      |               |                              |                    |
| SNP_25572_A_28824903 | NC_021163.1    | Ca_Kabuli_Chr04 | 28824903                | AA                                     | TT                 | TT               | INTERGENIC      |               |                              |                    |
| SNP_25573_A_28827525 | NC_021163.1    | Ca_Kabuli_Chr04 | 28827525                | GG                                     | CC                 | CC               | INTERGENIC      |               |                              |                    |
| SNP_25574_A_28828726 | NC_021163.1    | Ca_Kabuli_Chr04 | 28828726                | TT                                     | CC                 | CC               | INTERGENIC      |               |                              |                    |
| SNP_25575_A_28829846 | NC_021163.1    | Ca_Kabuli_Chr04 | 28829846                | GG                                     | AA                 | AA               | INTERGENIC      |               |                              |                    |
| SNP_25576_A_28830758 | NC_021163.1    | Ca_Kabuli_Chr04 | 28830758                | GG                                     | AA                 | AA               | INTERGENIC      |               |                              |                    |
| SNP_25577_A_28835332 | NC_021163.1    | Ca_Kabuli_Chr04 | 28835332                | GG                                     | AA                 | AA               | INTERGENIC      |               |                              |                    |
| SNP_25578_A_28835752 | NC_021163.1    | Ca_Kabuli_Chr04 | 28835752                | TT                                     | AA                 | AA               | INTERGENIC      |               |                              |                    |
| SNP_25579_A_28842263 | NC_021163.1    | Ca_Kabuli_Chr04 | 28842263                | AA                                     | GG                 | GG               | INTERGENIC      |               |                              |                    |
| SNP_25580_A_28842278 | NC_021163.1    | Ca_Kabuli_Chr04 | 28842278                | GG                                     | AA                 | AA               | INTERGENIC      |               |                              |                    |
| SNP_25581_A_28844854 | NC_021163.1    | Ca_Kabuli_Chr04 | 28844854                | TT                                     | CC                 | CC               | INTERGENIC      |               |                              |                    |
| SNP_25585_A_28856543 | NC_021163.1    | Ca_Kabuli_Chr04 | 28856543                | AA                                     | CC                 | CC               | INTRON          | 101504598     | casein kinase I-like         |                    |
| SNP_25586_A_28859064 | NC_021163.1    | Ca_Kabuli_Chr04 | 28859064                | CC                                     | TT                 | TT               | INTRON          | 101504598     | casein kinase I-like         |                    |
| SNP_25587_A_28865948 | NC_021163.1    | Ca_Kabuli_Chr04 | 28865948                | CC                                     | GG                 | GG               | URR             | 101508550     | uncharacterized LOC101508550 |                    |
| SNP_25588_A_28865952 | NC_021163.1    | Ca_Kabuli_Chr04 | 28865952                | GG                                     | AA                 | AA               | URR             | 101508550     | uncharacterized LOC101508550 |                    |
| SNP_25589_A_28865954 | NC_021163.1    | Ca_Kabuli_Chr04 | 28865954                | AA                                     | TT                 | TT               | URR             | 101508550     | uncharacterized LOC101508550 |                    |



| SNPs IDs             | Chromosome IDs | Chromosomes     | Physical positions (bp) | CDC Frontier genome (Reference genome) | (Pusa 1103 & HPNB) | (ILWC 46 & LPNB) | Sequence Components of genome | Gene accession IDs | Putative functions                                     |
|----------------------|----------------|-----------------|-------------------------|----------------------------------------|--------------------|------------------|-------------------------------|--------------------|--------------------------------------------------------|
| SNP_25590_A_28871254 | NC_021163.1    | Ca_Kabuli_Chr04 | 28871254                | GG                                     | AA                 | AA               | URR                           | 101504916          | cell division cycle 20.2, cofactor of APC complex-like |
| SNP_25591_A_28871266 | NC_021163.1    | Ca_Kabuli_Chr04 | 28871266                | AA                                     | GG                 | GG               | URR                           | 101504916          | cell division cycle 20.2, cofactor of APC complex-like |
| SNP_25592_A_28871843 | NC_021163.1    | Ca_Kabuli_Chr04 | 28871843                | CC                                     | AA                 | AA               | DRR                           | 101505219          | serine/threonine-protein kinase tricorner-like         |
| SNP_25593_A_28871908 | NC_021163.1    | Ca_Kabuli_Chr04 | 28871908                | CC                                     | TT                 | TT               | DRR                           | 101505219          | serine/threonine-protein kinase tricorner-like         |
| SNP_25594_A_28871910 | NC_021163.1    | Ca_Kabuli_Chr04 | 28871910                | GG                                     | AA                 | AA               | DRR                           | 101505219          | serine/threonine-protein kinase tricorner-like         |
| SNP_25595_A_28871967 | NC_021163.1    | Ca_Kabuli_Chr04 | 28871967                | TT                                     | CC                 | CC               | DRR                           | 101505219          | serine/threonine-protein kinase tricorner-like         |
| SNP_25596_A_28872796 | NC_021163.1    | Ca_Kabuli_Chr04 | 28872796                | AA                                     | GG                 | GG               | INTRON                        | 101505219          | serine/threonine-protein kinase tricorner-like         |
| SNP_25597_A_28880039 | NC_021163.1    | Ca_Kabuli_Chr04 | 28880039                | GG                                     | AA                 | AA               | URR                           | 101505219          | serine/threonine-protein kinase tricorner-like         |
| SNP_25598_A_28881618 | NC_021163.1    | Ca_Kabuli_Chr04 | 28881618                | AA                                     | TT                 | TT               | INTERGENIC                    |                    |                                                        |
| SNP_25599_A_28885394 | NC_021163.1    | Ca_Kabuli_Chr04 | 28885394                | TT                                     | AA                 | AA               | INTERGENIC                    |                    |                                                        |
| SNP_25600_A_28887677 | NC_021163.1    | Ca_Kabuli_Chr04 | 28887677                | CC                                     | AA                 | AA               | INTERGENIC                    |                    |                                                        |
| SNP_25602_A_28887948 | NC_021163.1    | Ca_Kabuli_Chr04 | 28887948                | CC                                     | TT                 | TT               | INTERGENIC                    |                    |                                                        |
| SNP_25603_A_28900358 | NC_021163.1    | Ca_Kabuli_Chr04 | 28900358                | CC                                     | TT                 | TT               | NON_SYNONYMOUS_CODING         | 101508868          | probable polygalacturonase At3g15720                   |
| SNP_25604_A_28904559 | NC_021163.1    | Ca_Kabuli_Chr04 | 28904559                | AA                                     | GG                 | GG               | INTERGENIC                    |                    |                                                        |
| SNP_25606_A_28907815 | NC_021163.1    | Ca_Kabuli_Chr04 | 28907815                | TT                                     | CC                 | CC               | INTERGENIC                    |                    |                                                        |
| SNP_25607_A_28909081 | NC_021163.1    | Ca_Kabuli_Chr04 | 28909081                | CC                                     | TT                 | TT               | INTERGENIC                    |                    |                                                        |
| SNP_25610_A_28911272 | NC_021163.1    | Ca_Kabuli_Chr04 | 28911272                | TT                                     | AA                 | AA               | INTERGENIC                    |                    |                                                        |
| SNP_25613_A_28914556 | NC_021163.1    | Ca_Kabuli_Chr04 | 28914556                | TT                                     | CC                 | CC               | INTERGENIC                    |                    |                                                        |
| SNP_25614_A_28915537 | NC_021163.1    | Ca_Kabuli_Chr04 | 28915537                | TT                                     | AA                 | AA               | INTERGENIC                    |                    |                                                        |
| SNP_25615_A_28922045 | NC_021163.1    | Ca_Kabuli_Chr04 | 28922045                | CC                                     | TT                 | TT               | INTERGENIC                    |                    |                                                        |
| SNP_25616_A_28924607 | NC_021163.1    | Ca_Kabuli_Chr04 | 28924607                | AA                                     | TT                 | TT               | INTERGENIC                    |                    |                                                        |
| SNP_25617_A_28924939 | NC_021163.1    | Ca_Kabuli_Chr04 | 28924939                | AA                                     | TT                 | TT               | INTERGENIC                    |                    |                                                        |

| SNPs IDs             | Chromosome IDs | Chromosomes     | Physical positions (bp) | CDC Frontier (Reference genome) | (Pusa 1103 & HPNB) | (ILWC 46 & LPNB) | Sequence genome | Components of | Gene accession IDs | Putative functions |
|----------------------|----------------|-----------------|-------------------------|---------------------------------|--------------------|------------------|-----------------|---------------|--------------------|--------------------|
| SNP_25620_A_28925791 | NC_021163.1    | Ca_Kabuli_Chr04 | 28925791                | AA                              | GG                 | GG               | INTERGENIC      |               |                    |                    |
| SNP_25621_A_28926706 | NC_021163.1    | Ca_Kabuli_Chr04 | 28926706                | GG                              | AA                 | AA               | INTERGENIC      |               |                    |                    |
| SNP_25622_A_28929197 | NC_021163.1    | Ca_Kabuli_Chr04 | 28929197                | CC                              | TT                 | TT               | INTERGENIC      |               |                    |                    |
| SNP_25623_A_28929198 | NC_021163.1    | Ca_Kabuli_Chr04 | 28929198                | AA                              | GG                 | GG               | INTERGENIC      |               |                    |                    |
| SNP_25624_A_28929199 | NC_021163.1    | Ca_Kabuli_Chr04 | 28929199                | GG                              | AA                 | AA               | INTERGENIC      |               |                    |                    |
| SNP_25625_A_28930161 | NC_021163.1    | Ca_Kabuli_Chr04 | 28930161                | CC                              | AA                 | AA               | INTERGENIC      |               |                    |                    |
| SNP_25626_A_28953540 | NC_021163.1    | Ca_Kabuli_Chr04 | 28953540                | GG                              | AA                 | AA               | INTERGENIC      |               |                    |                    |
| SNP_25627_A_28954090 | NC_021163.1    | Ca_Kabuli_Chr04 | 28954090                | AA                              | GG                 | GG               | INTERGENIC      |               |                    |                    |
| SNP_25628_A_28956453 | NC_021163.1    | Ca_Kabuli_Chr04 | 28956453                | TT                              | CC                 | CC               | INTERGENIC      |               |                    |                    |
| SNP_25629_A_28959658 | NC_021163.1    | Ca_Kabuli_Chr04 | 28959658                | AA                              | GG                 | GG               | INTERGENIC      |               |                    |                    |
| SNP_25630_A_28959981 | NC_021163.1    | Ca_Kabuli_Chr04 | 28959981                | AA                              | GG                 | GG               | INTERGENIC      |               |                    |                    |
| SNP_25631_A_28965648 | NC_021163.1    | Ca_Kabuli_Chr04 | 28965648                | TT                              | GG                 | GG               | INTERGENIC      |               |                    |                    |
| SNP_25632_A_28966378 | NC_021163.1    | Ca_Kabuli_Chr04 | 28966378                | TT                              | GG                 | GG               | INTERGENIC      |               |                    |                    |
| SNP_25633_A_28966397 | NC_021163.1    | Ca_Kabuli_Chr04 | 28966397                | TT                              | CC                 | CC               | INTERGENIC      |               |                    |                    |
| SNP_25634_A_28966628 | NC_021163.1    | Ca_Kabuli_Chr04 | 28966628                | CC                              | TT                 | TT               | INTERGENIC      |               |                    |                    |
| SNP_25635_A_28981315 | NC_021163.1    | Ca_Kabuli_Chr04 | 28981315                | GG                              | TT                 | TT               | INTERGENIC      |               |                    |                    |
| SNP_25636_A_28981396 | NC_021163.1    | Ca_Kabuli_Chr04 | 28981396                | CC                              | TT                 | TT               | INTERGENIC      |               |                    |                    |
| SNP_25637_A_28981476 | NC_021163.1    | Ca_Kabuli_Chr04 | 28981476                | CC                              | TT                 | TT               | INTERGENIC      |               |                    |                    |
| SNP_25638_A_28982942 | NC_021163.1    | Ca_Kabuli_Chr04 | 28982942                | CC                              | TT                 | TT               | INTERGENIC      |               |                    |                    |
| SNP_25639_A_28986395 | NC_021163.1    | Ca_Kabuli_Chr04 | 28986395                | CC                              | TT                 | TT               | INTERGENIC      |               |                    |                    |
| SNP_25640_A_28986423 | NC_021163.1    | Ca_Kabuli_Chr04 | 28986423                | GG                              | AA                 | AA               | INTERGENIC      |               |                    |                    |
| SNP_25641_A_28986433 | NC_021163.1    | Ca_Kabuli_Chr04 | 28986433                | AA                              | TT                 | TT               | INTERGENIC      |               |                    |                    |

| SNPs IDs             | Chromosome IDs | Chromosomes     | Physical positions (bp) | CDC Frontier genome (Reference genome) | (Pusa 1103 & HPNB) | (ILWC 46 & LPNB) | Sequence Components of genome | Gene accession IDs | Putative functions              |
|----------------------|----------------|-----------------|-------------------------|----------------------------------------|--------------------|------------------|-------------------------------|--------------------|---------------------------------|
| SNP_25642_A_28986491 | NC_021163.1    | Ca_Kabuli_Chr04 | 28986491                | AA                                     | GG                 | GG               | INTERGENIC                    |                    |                                 |
| SNP_25643_A_28986676 | NC_021163.1    | Ca_Kabuli_Chr04 | 28986676                | CC                                     | TT                 | TT               | INTERGENIC                    |                    |                                 |
| SNP_25644_A_28986727 | NC_021163.1    | Ca_Kabuli_Chr04 | 28986727                | TT                                     | GG                 | GG               | INTERGENIC                    |                    |                                 |
| SNP_25646_A_28990295 | NC_021163.1    | Ca_Kabuli_Chr04 | 28990295                | GG                                     | AA                 | AA               | INTRON                        | 101506306          | probable methyltransferase PMT3 |
| SNP_25648_A_28990355 | NC_021163.1    | Ca_Kabuli_Chr04 | 28990355                | GG                                     | AA                 | AA               | INTRON                        | 101506306          | probable methyltransferase PMT3 |
| SNP_25649_A_28990651 | NC_021163.1    | Ca_Kabuli_Chr04 | 28990651                | TT                                     | GG                 | GG               | INTRON                        | 101506306          | probable methyltransferase PMT3 |
| SNP_25650_A_28990668 | NC_021163.1    | Ca_Kabuli_Chr04 | 28990668                | GG                                     | AA                 | AA               | INTRON                        | 101506306          | probable methyltransferase PMT3 |
| SNP_25651_A_28992349 | NC_021163.1    | Ca_Kabuli_Chr04 | 28992349                | AA                                     | GG                 | GG               | INTRON                        | 101506306          | probable methyltransferase PMT3 |
| SNP_25652_A_28992407 | NC_021163.1    | Ca_Kabuli_Chr04 | 28992407                | TT                                     | CC                 | CC               | INTRON                        | 101506306          | probable methyltransferase PMT3 |
| SNP_25653_A_28994453 | NC_021163.1    | Ca_Kabuli_Chr04 | 28994453                | GG                                     | TT                 | TT               | INTRON                        | 101506306          | probable methyltransferase PMT3 |
| SNP_25654_A_28994482 | NC_021163.1    | Ca_Kabuli_Chr04 | 28994482                | AA                                     | TT                 | TT               | INTRON                        | 101506306          | probable methyltransferase PMT3 |
| SNP_25655_A_28995783 | NC_021163.1    | Ca_Kabuli_Chr04 | 28995783                | AA                                     | GG                 | GG               | SYNONYMOUS_CODING             | 101506306          | probable methyltransferase PMT3 |
| SNP_25656_A_28995805 | NC_021163.1    | Ca_Kabuli_Chr04 | 28995805                | CC                                     | TT                 | TT               | SYNONYMOUS_CODING             | 101506306          | probable methyltransferase PMT3 |
| SNP_25657_A_28995876 | NC_021163.1    | Ca_Kabuli_Chr04 | 28995876                | TT                                     | CC                 | CC               | SYNONYMOUS_CODING             | 101506306          | probable methyltransferase PMT3 |
| SNP_25659_A_29019660 | NC_021163.1    | Ca_Kabuli_Chr04 | 29019660                | AA                                     | TT                 | TT               | INTERGENIC                    |                    |                                 |
| SNP_25660_A_29019671 | NC_021163.1    | Ca_Kabuli_Chr04 | 29019671                | TT                                     | GG                 | GG               | INTERGENIC                    |                    |                                 |
| SNP_25661_A_29019673 | NC_021163.1    | Ca_Kabuli_Chr04 | 29019673                | AA                                     | TT                 | TT               | INTERGENIC                    |                    |                                 |
| SNP_25662_A_29028269 | NC_021163.1    | Ca_Kabuli_Chr04 | 29028269                | AA                                     | GG                 | GG               | INTERGENIC                    |                    |                                 |
| SNP_25663_A_29028271 | NC_021163.1    | Ca_Kabuli_Chr04 | 29028271                | AA                                     | GG                 | GG               | INTERGENIC                    |                    |                                 |
| SNP_25664_A_29028279 | NC_021163.1    | Ca_Kabuli_Chr04 | 29028279                | TT                                     | CC                 | CC               | INTERGENIC                    |                    |                                 |
| SNP_25665_A_29028299 | NC_021163.1    | Ca_Kabuli_Chr04 | 29028299                | GG                                     | TT                 | AA               | INTERGENIC                    |                    |                                 |
| SNP_25666_A_29028317 | NC_021163.1    | Ca_Kabuli_Chr04 | 29028317                | CC                                     | GG                 | GG               | INTERGENIC                    |                    |                                 |

| SNPs IDs             | Chromosome IDs | Chromosomes     | Physical positions (bp) | CDC Frontier genome (Reference genome) | (Pusa 1103 & HPNB) | (ILWC 46 & LPNB) | Sequence genome | Components of | Gene accession IDs                              | Putative functions |
|----------------------|----------------|-----------------|-------------------------|----------------------------------------|--------------------|------------------|-----------------|---------------|-------------------------------------------------|--------------------|
| SNP_25667_A_29030290 | NC_021163.1    | Ca_Kabuli_Chr04 | 29030290                | TT                                     | CC                 | CC               | INTERGENIC      |               |                                                 |                    |
| SNP_25668_A_29030946 | NC_021163.1    | Ca_Kabuli_Chr04 | 29030946                | AA                                     | TT                 | TT               | INTERGENIC      |               |                                                 |                    |
| SNP_25669_A_29034254 | NC_021163.1    | Ca_Kabuli_Chr04 | 29034254                | CC                                     | TT                 | TT               | INTERGENIC      |               |                                                 |                    |
| SNP_25670_A_29035116 | NC_021163.1    | Ca_Kabuli_Chr04 | 29035116                | AA                                     | TT                 | TT               | INTERGENIC      |               |                                                 |                    |
| SNP_25671_A_29035147 | NC_021163.1    | Ca_Kabuli_Chr04 | 29035147                | GG                                     | AA                 | AA               | INTERGENIC      |               |                                                 |                    |
| SNP_25672_A_29035389 | NC_021163.1    | Ca_Kabuli_Chr04 | 29035389                | AA                                     | GG                 | GG               | INTERGENIC      |               |                                                 |                    |
| SNP_25673_A_29035418 | NC_021163.1    | Ca_Kabuli_Chr04 | 29035418                | TT                                     | CC                 | CC               | INTERGENIC      |               |                                                 |                    |
| SNP_25674_A_29035433 | NC_021163.1    | Ca_Kabuli_Chr04 | 29035433                | AA                                     | CC                 | CC               | INTERGENIC      |               |                                                 |                    |
| SNP_25675_A_29035434 | NC_021163.1    | Ca_Kabuli_Chr04 | 29035434                | TT                                     | GG                 | GG               | INTERGENIC      |               |                                                 |                    |
| SNP_25676_A_29036387 | NC_021163.1    | Ca_Kabuli_Chr04 | 29036387                | GG                                     | AA                 | AA               | INTERGENIC      |               |                                                 |                    |
| SNP_25677_A_29036478 | NC_021163.1    | Ca_Kabuli_Chr04 | 29036478                | TT                                     | GG                 | GG               | INTERGENIC      |               |                                                 |                    |
| SNP_25678_A_29037006 | NC_021163.1    | Ca_Kabuli_Chr04 | 29037006                | AA                                     | CC                 | CC               | INTERGENIC      |               |                                                 |                    |
| SNP_25679_A_29037010 | NC_021163.1    | Ca_Kabuli_Chr04 | 29037010                | TT                                     | AA                 | AA               | INTERGENIC      |               |                                                 |                    |
| SNP_25681_A_29037347 | NC_021163.1    | Ca_Kabuli_Chr04 | 29037347                | CC                                     | TT                 | TT               | INTERGENIC      |               |                                                 |                    |
| SNP_25682_A_29037669 | NC_021163.1    | Ca_Kabuli_Chr04 | 29037669                | TT                                     | CC                 | CC               | DRR             | 101506852     | protein LIGHT-DEPENDENT SHORT HYPOCOTYLS 4-like |                    |
| SNP_25683_A_29049664 | NC_021163.1    | Ca_Kabuli_Chr04 | 29049664                | TT                                     | CC                 | CC               | INTERGENIC      |               |                                                 |                    |
| SNP_25685_A_29051717 | NC_021163.1    | Ca_Kabuli_Chr04 | 29051717                | CC                                     | TT                 | TT               | INTERGENIC      |               |                                                 |                    |
| SNP_25686_A_29052024 | NC_021163.1    | Ca_Kabuli_Chr04 | 29052024                | AA                                     | GG                 | GG               | INTERGENIC      |               |                                                 |                    |
| SNP_25687_A_29052309 | NC_021163.1    | Ca_Kabuli_Chr04 | 29052309                | TT                                     | AA                 | AA               | INTERGENIC      |               |                                                 |                    |
| SNP_25688_A_29055788 | NC_021163.1    | Ca_Kabuli_Chr04 | 29055788                | TT                                     | CC                 | CC               | INTERGENIC      |               |                                                 |                    |
| SNP_25689_A_29055834 | NC_021163.1    | Ca_Kabuli_Chr04 | 29055834                | GG                                     | TT                 | TT               | INTERGENIC      |               |                                                 |                    |
| SNP_25690_A_29056146 | NC_021163.1    | Ca_Kabuli_Chr04 | 29056146                | GG                                     | AA                 | AA               | INTERGENIC      |               |                                                 |                    |

| SNPs IDs             | Chromosome IDs | Chromosomes     | Physical positions (bp) | CDC Frontier genome (Reference genome) | (Pusa 1103 & HPNB) | (ILWC 46 & LPNB) | Sequence genome | Components of | Gene accession IDs | Putative functions |
|----------------------|----------------|-----------------|-------------------------|----------------------------------------|--------------------|------------------|-----------------|---------------|--------------------|--------------------|
| SNP_25691_A_29056271 | NC_021163.1    | Ca_Kabuli_Chr04 | 29056271                | CC                                     | TT                 | TT               | INTERGENIC      |               |                    |                    |
| SNP_25692_A_29056423 | NC_021163.1    | Ca_Kabuli_Chr04 | 29056423                | GG                                     | AA                 | AA               | INTERGENIC      |               |                    |                    |
| SNP_25693_A_29059555 | NC_021163.1    | Ca_Kabuli_Chr04 | 29059555                | TT                                     | CC                 | CC               | INTERGENIC      |               |                    |                    |
| SNP_25694_A_29060384 | NC_021163.1    | Ca_Kabuli_Chr04 | 29060384                | CC                                     | AA                 | AA               | INTERGENIC      |               |                    |                    |
| SNP_25695_A_29060395 | NC_021163.1    | Ca_Kabuli_Chr04 | 29060395                | TT                                     | CC                 | CC               | INTERGENIC      |               |                    |                    |
| SNP_25696_A_29060708 | NC_021163.1    | Ca_Kabuli_Chr04 | 29060708                | TT                                     | CC                 | CC               | INTERGENIC      |               |                    |                    |
| SNP_25697_A_29060709 | NC_021163.1    | Ca_Kabuli_Chr04 | 29060709                | CC                                     | TT                 | TT               | INTERGENIC      |               |                    |                    |
| SNP_25698_A_29060841 | NC_021163.1    | Ca_Kabuli_Chr04 | 29060841                | GG                                     | AA                 | AA               | INTERGENIC      |               |                    |                    |
| SNP_25699_A_29061004 | NC_021163.1    | Ca_Kabuli_Chr04 | 29061004                | CC                                     | TT                 | TT               | INTERGENIC      |               |                    |                    |
| SNP_25700_A_29061050 | NC_021163.1    | Ca_Kabuli_Chr04 | 29061050                | AA                                     | GG                 | GG               | INTERGENIC      |               |                    |                    |
| SNP_25701_A_29061051 | NC_021163.1    | Ca_Kabuli_Chr04 | 29061051                | GG                                     | AA                 | AA               | INTERGENIC      |               |                    |                    |
| SNP_25702_A_29061258 | NC_021163.1    | Ca_Kabuli_Chr04 | 29061258                | AA                                     | CC                 | CC               | INTERGENIC      |               |                    |                    |
| SNP_25703_A_29061259 | NC_021163.1    | Ca_Kabuli_Chr04 | 29061259                | TT                                     | GG                 | GG               | INTERGENIC      |               |                    |                    |
| SNP_25704_A_29062607 | NC_021163.1    | Ca_Kabuli_Chr04 | 29062607                | TT                                     | CC                 | CC               | INTERGENIC      |               |                    |                    |
| SNP_25705_A_29063052 | NC_021163.1    | Ca_Kabuli_Chr04 | 29063052                | TT                                     | GG                 | GG               | INTERGENIC      |               |                    |                    |
| SNP_25707_A_29064979 | NC_021163.1    | Ca_Kabuli_Chr04 | 29064979                | AA                                     | GG                 | GG               | INTERGENIC      |               |                    |                    |
| SNP_25708_A_29065110 | NC_021163.1    | Ca_Kabuli_Chr04 | 29065110                | TT                                     | CC                 | CC               | INTERGENIC      |               |                    |                    |
| SNP_25709_A_29065113 | NC_021163.1    | Ca_Kabuli_Chr04 | 29065113                | CC                                     | AA                 | AA               | INTERGENIC      |               |                    |                    |
| SNP_25711_A_29066199 | NC_021163.1    | Ca_Kabuli_Chr04 | 29066199                | GG                                     | TT                 | TT               | INTERGENIC      |               |                    |                    |
| SNP_25712_A_29066222 | NC_021163.1    | Ca_Kabuli_Chr04 | 29066222                | AA                                     | GG                 | GG               | INTERGENIC      |               |                    |                    |
| SNP_25713_A_29071770 | NC_021163.1    | Ca_Kabuli_Chr04 | 29071770                | CC                                     | GG                 | GG               | INTERGENIC      |               |                    |                    |
| SNP_25714_A_29084530 | NC_021163.1    | Ca_Kabuli_Chr04 | 29084530                | CC                                     | TT                 | TT               | INTERGENIC      |               |                    |                    |

| SNPs IDs             | Chromosome IDs | Chromosomes     | Physical positions (bp) | CDC Frontier genome (Reference genome) | (Pusa 1103 & HPNB) | (ILWC 46 & LPNB) | Sequence genome | Components of | Gene accession IDs | Putative functions  |
|----------------------|----------------|-----------------|-------------------------|----------------------------------------|--------------------|------------------|-----------------|---------------|--------------------|---------------------|
| SNP_25716_A_29085123 | NC_021163.1    | Ca_Kabuli_Chr04 | 29085123                | TT                                     | CC                 | CC               | INTERGENIC      |               |                    |                     |
| SNP_25717_A_29085142 | NC_021163.1    | Ca_Kabuli_Chr04 | 29085142                | TT                                     | CC                 | CC               | INTERGENIC      |               |                    |                     |
| SNP_25718_A_29085144 | NC_021163.1    | Ca_Kabuli_Chr04 | 29085144                | GG                                     | AA                 | AA               | INTERGENIC      |               |                    |                     |
| SNP_25719_A_29085178 | NC_021163.1    | Ca_Kabuli_Chr04 | 29085178                | CC                                     | TT                 | TT               | INTERGENIC      |               |                    |                     |
| SNP_25720_A_29091793 | NC_021163.1    | Ca_Kabuli_Chr04 | 29091793                | TT                                     | GG                 | GG               | DRR             | 101507914     |                    | aldo-keto reductase |
| SNP_25721_A_29094271 | NC_021163.1    | Ca_Kabuli_Chr04 | 29094271                | AA                                     | GG                 | GG               | INTRON          | 101507914     |                    | aldo-keto reductase |
| SNP_25722_A_29097122 | NC_021163.1    | Ca_Kabuli_Chr04 | 29097122                | GG                                     | AA                 | AA               | URR             | 101507914     |                    | aldo-keto reductase |
| SNP_25723_A_29099071 | NC_021163.1    | Ca_Kabuli_Chr04 | 29099071                | GG                                     | AA                 | AA               | INTERGENIC      |               |                    |                     |
| SNP_25724_A_29099082 | NC_021163.1    | Ca_Kabuli_Chr04 | 29099082                | AA                                     | GG                 | GG               | INTERGENIC      |               |                    |                     |
| SNP_25725_A_29100761 | NC_021163.1    | Ca_Kabuli_Chr04 | 29100761                | CC                                     | TT                 | TT               | INTERGENIC      |               |                    |                     |
| SNP_25726_A_29100999 | NC_021163.1    | Ca_Kabuli_Chr04 | 29100999                | TT                                     | CC                 | CC               | INTERGENIC      |               |                    |                     |
| SNP_25727_A_29109149 | NC_021163.1    | Ca_Kabuli_Chr04 | 29109149                | AA                                     | GG                 | GG               | INTERGENIC      |               |                    |                     |
| SNP_25728_A_29109152 | NC_021163.1    | Ca_Kabuli_Chr04 | 29109152                | GG                                     | CC                 | CC               | INTERGENIC      |               |                    |                     |
| SNP_25729_A_29109154 | NC_021163.1    | Ca_Kabuli_Chr04 | 29109154                | TT                                     | CC                 | CC               | INTERGENIC      |               |                    |                     |
| SNP_25730_A_29109185 | NC_021163.1    | Ca_Kabuli_Chr04 | 29109185                | CC                                     | AA                 | AA               | INTERGENIC      |               |                    |                     |
| SNP_25732_A_29110555 | NC_021163.1    | Ca_Kabuli_Chr04 | 29110555                | TT                                     | CC                 | CC               | INTERGENIC      |               |                    |                     |
| SNP_25733_A_29110558 | NC_021163.1    | Ca_Kabuli_Chr04 | 29110558                | GG                                     | TT                 | TT               | INTERGENIC      |               |                    |                     |
| SNP_25734_A_29111773 | NC_021163.1    | Ca_Kabuli_Chr04 | 29111773                | GG                                     | TT                 | TT               | INTERGENIC      |               |                    |                     |
| SNP_25735_A_29111776 | NC_021163.1    | Ca_Kabuli_Chr04 | 29111776                | AA                                     | CC                 | CC               | INTERGENIC      |               |                    |                     |
| SNP_25736_A_29112084 | NC_021163.1    | Ca_Kabuli_Chr04 | 29112084                | GG                                     | AA                 | AA               | INTERGENIC      |               |                    |                     |
| SNP_25737_A_29112415 | NC_021163.1    | Ca_Kabuli_Chr04 | 29112415                | CC                                     | AA                 | AA               | INTERGENIC      |               |                    |                     |
| SNP_25738_A_29112994 | NC_021163.1    | Ca_Kabuli_Chr04 | 29112994                | GG                                     | AA                 | AA               | INTERGENIC      |               |                    |                     |

| SNPs IDs             | Chromosome IDs | Chromosomes     | Physical positions (bp) | CDC Frontier genome (Reference genome) | (Pusa 1103 & HPNB) | (ILWC 46 & LPNB) | Sequence genome | Components of | Gene accession IDs | Putative functions |
|----------------------|----------------|-----------------|-------------------------|----------------------------------------|--------------------|------------------|-----------------|---------------|--------------------|--------------------|
| SNP_25739_A_29113008 | NC_021163.1    | Ca_Kabuli_Chr04 | 29113008                | CC                                     | TT                 | TT               | INTERGENIC      |               |                    |                    |
| SNP_25740_A_29113010 | NC_021163.1    | Ca_Kabuli_Chr04 | 29113010                | AA                                     | GG                 | GG               | INTERGENIC      |               |                    |                    |
| SNP_25741_A_29114941 | NC_021163.1    | Ca_Kabuli_Chr04 | 29114941                | TT                                     | CC                 | CC               | INTERGENIC      |               |                    |                    |
| SNP_25742_A_29115513 | NC_021163.1    | Ca_Kabuli_Chr04 | 29115513                | GG                                     | TT                 | TT               | INTERGENIC      |               |                    |                    |
| SNP_25743_A_29115771 | NC_021163.1    | Ca_Kabuli_Chr04 | 29115771                | TT                                     | CC                 | CC               | INTERGENIC      |               |                    |                    |
| SNP_25744_A_29117913 | NC_021163.1    | Ca_Kabuli_Chr04 | 29117913                | TT                                     | CC                 | CC               | INTERGENIC      |               |                    |                    |
| SNP_25745_A_29117934 | NC_021163.1    | Ca_Kabuli_Chr04 | 29117934                | CC                                     | TT                 | TT               | INTERGENIC      |               |                    |                    |
| SNP_25746_A_29117956 | NC_021163.1    | Ca_Kabuli_Chr04 | 29117956                | AA                                     | GG                 | GG               | INTERGENIC      |               |                    |                    |
| SNP_25747_A_29119884 | NC_021163.1    | Ca_Kabuli_Chr04 | 29119884                | GG                                     | TT                 | TT               | INTERGENIC      |               |                    |                    |
| SNP_25748_A_29120158 | NC_021163.1    | Ca_Kabuli_Chr04 | 29120158                | AA                                     | GG                 | GG               | INTERGENIC      |               |                    |                    |
| SNP_25750_A_29120543 | NC_021163.1    | Ca_Kabuli_Chr04 | 29120543                | CC                                     | TT                 | TT               | INTERGENIC      |               |                    |                    |
| SNP_25751_A_29120806 | NC_021163.1    | Ca_Kabuli_Chr04 | 29120806                | TT                                     | CC                 | CC               | INTERGENIC      |               |                    |                    |
| SNP_25752_A_29123272 | NC_021163.1    | Ca_Kabuli_Chr04 | 29123272                | TT                                     | AA                 | AA               | INTERGENIC      |               |                    |                    |
| SNP_25753_A_29130805 | NC_021163.1    | Ca_Kabuli_Chr04 | 29130805                | AA                                     | TT                 | TT               | INTERGENIC      |               |                    |                    |
| SNP_25754_A_29130867 | NC_021163.1    | Ca_Kabuli_Chr04 | 29130867                | TT                                     | GG                 | GG               | INTERGENIC      |               |                    |                    |
| SNP_25755_A_29130923 | NC_021163.1    | Ca_Kabuli_Chr04 | 29130923                | AA                                     | GG                 | GG               | INTERGENIC      |               |                    |                    |
| SNP_25756_A_29131082 | NC_021163.1    | Ca_Kabuli_Chr04 | 29131082                | GG                                     | TT                 | TT               | INTERGENIC      |               |                    |                    |
| SNP_25757_A_29131102 | NC_021163.1    | Ca_Kabuli_Chr04 | 29131102                | CC                                     | AA                 | AA               | INTERGENIC      |               |                    |                    |
| SNP_25758_A_29131104 | NC_021163.1    | Ca_Kabuli_Chr04 | 29131104                | AA                                     | GG                 | GG               | INTERGENIC      |               |                    |                    |
| SNP_25759_A_29131280 | NC_021163.1    | Ca_Kabuli_Chr04 | 29131280                | TT                                     | CC                 | CC               | INTERGENIC      |               |                    |                    |
| SNP_25760_A_29133501 | NC_021163.1    | Ca_Kabuli_Chr04 | 29133501                | GG                                     | AA                 | AA               | INTERGENIC      |               |                    |                    |
| SNP_25761_A_29133689 | NC_021163.1    | Ca_Kabuli_Chr04 | 29133689                | GG                                     | AA                 | AA               | INTERGENIC      |               |                    |                    |

| SNPs IDs             | Chromosome IDs | Chromosomes     | Physical positions (bp) | CDC Frontier genome (Reference genome) | (Pusa 1103 & HPNB) | (ILWC 46 & LPNB) | Sequence Components of genome | Gene accession IDs | Putative functions                              |
|----------------------|----------------|-----------------|-------------------------|----------------------------------------|--------------------|------------------|-------------------------------|--------------------|-------------------------------------------------|
| SNP_25762_A_29133738 | NC_021163.1    | Ca_Kabuli_Chr04 | 29133738                | CC                                     | AA                 | AA               | INTERGENIC                    |                    |                                                 |
| SNP_25763_A_29134019 | NC_021163.1    | Ca_Kabuli_Chr04 | 29134019                | AA                                     | CC                 | CC               | INTERGENIC                    |                    |                                                 |
| SNP_25765_A_29134277 | NC_021163.1    | Ca_Kabuli_Chr04 | 29134277                | AA                                     | CC                 | CC               | INTERGENIC                    |                    |                                                 |
| SNP_25766_A_29134592 | NC_021163.1    | Ca_Kabuli_Chr04 | 29134592                | GG                                     | AA                 | AA               | INTERGENIC                    |                    |                                                 |
| SNP_25767_A_29134873 | NC_021163.1    | Ca_Kabuli_Chr04 | 29134873                | AA                                     | GG                 | GG               | INTERGENIC                    |                    |                                                 |
| SNP_25768_A_29134887 | NC_021163.1    | Ca_Kabuli_Chr04 | 29134887                | CC                                     | GG                 | GG               | INTERGENIC                    |                    |                                                 |
| SNP_25769_A_29134896 | NC_021163.1    | Ca_Kabuli_Chr04 | 29134896                | CC                                     | TT                 | TT               | INTERGENIC                    |                    |                                                 |
| SNP_25770_A_29134910 | NC_021163.1    | Ca_Kabuli_Chr04 | 29134910                | GG                                     | AA                 | AA               | INTERGENIC                    |                    |                                                 |
| SNP_25771_A_29135208 | NC_021163.1    | Ca_Kabuli_Chr04 | 29135208                | TT                                     | GG                 | GG               | INTERGENIC                    |                    |                                                 |
| SNP_25772_A_29135330 | NC_021163.1    | Ca_Kabuli_Chr04 | 29135330                | AA                                     | TT                 | TT               | INTERGENIC                    |                    |                                                 |
| SNP_25773_A_29137530 | NC_021163.1    | Ca_Kabuli_Chr04 | 29137530                | CC                                     | AA                 | AA               | INTERGENIC                    |                    |                                                 |
| SNP_25774_A_29156497 | NC_021163.1    | Ca_Kabuli_Chr04 | 29156497                | CC                                     | GG                 | GG               | DRR                           | 101509190          | AT-hook motif nuclear-localized protein 16-like |
| SNP_25775_A_29156652 | NC_021163.1    | Ca_Kabuli_Chr04 | 29156652                | TT                                     | GG                 | GG               | DRR                           | 101509190          | AT-hook motif nuclear-localized protein 16-like |
| SNP_25777_A_29158242 | NC_021163.1    | Ca_Kabuli_Chr04 | 29158242                | AA                                     | GG                 | GG               | URR                           | 101509190          | AT-hook motif nuclear-localized protein 16-like |
| SNP_25780_A_29174942 | NC_021163.1    | Ca_Kabuli_Chr04 | 29174942                | TT                                     | AA                 | AA               | INTERGENIC                    |                    |                                                 |
| SNP_25781_A_29175948 | NC_021163.1    | Ca_Kabuli_Chr04 | 29175948                | TT                                     | CC                 | CC               | INTERGENIC                    |                    |                                                 |
| SNP_25782_A_29176299 | NC_021163.1    | Ca_Kabuli_Chr04 | 29176299                | GG                                     | AA                 | AA               | INTERGENIC                    |                    |                                                 |
| SNP_25783_A_29176336 | NC_021163.1    | Ca_Kabuli_Chr04 | 29176336                | AA                                     | TT                 | TT               | INTERGENIC                    |                    |                                                 |
| SNP_25784_A_29176417 | NC_021163.1    | Ca_Kabuli_Chr04 | 29176417                | GG                                     | AA                 | AA               | INTERGENIC                    |                    |                                                 |
| SNP_25785_A_29176761 | NC_021163.1    | Ca_Kabuli_Chr04 | 29176761                | TT                                     | CC                 | CC               | INTERGENIC                    |                    |                                                 |
| SNP_25786_A_29185941 | NC_021163.1    | Ca_Kabuli_Chr04 | 29185941                | GG                                     | TT                 | TT               | INTERGENIC                    |                    |                                                 |
| SNP_25787_A_29185967 | NC_021163.1    | Ca_Kabuli_Chr04 | 29185967                | CC                                     | TT                 | TT               | INTERGENIC                    |                    |                                                 |



| SNPs IDs             | Chromosome IDs | Chromosomes     | Physical positions (bp) | CDC Frontier genome (Reference genome) | (Pusa 1103 & HPNB) | (ILWC 46 & LPNB) | Sequence genome | Components of | Gene accession IDs | Putative functions |
|----------------------|----------------|-----------------|-------------------------|----------------------------------------|--------------------|------------------|-----------------|---------------|--------------------|--------------------|
| SNP_25788_A_29185994 | NC_021163.1    | Ca_Kabuli_Chr04 | 29185994                | CC                                     | TT                 | TT               | INTERGENIC      |               |                    |                    |
| SNP_25789_A_29186334 | NC_021163.1    | Ca_Kabuli_Chr04 | 29186334                | TT                                     | CC                 | CC               | INTERGENIC      |               |                    |                    |
| SNP_25790_A_29186828 | NC_021163.1    | Ca_Kabuli_Chr04 | 29186828                | TT                                     | GG                 | GG               | INTERGENIC      |               |                    |                    |
| SNP_25791_A_29187841 | NC_021163.1    | Ca_Kabuli_Chr04 | 29187841                | AA                                     | GG                 | GG               | INTERGENIC      |               |                    |                    |
| SNP_25792_A_29188293 | NC_021163.1    | Ca_Kabuli_Chr04 | 29188293                | AA                                     | TT                 | TT               | INTERGENIC      |               |                    |                    |
| SNP_25793_A_29188369 | NC_021163.1    | Ca_Kabuli_Chr04 | 29188369                | GG                                     | AA                 | AA               | INTERGENIC      |               |                    |                    |
| SNP_25797_A_29191427 | NC_021163.1    | Ca_Kabuli_Chr04 | 29191427                | TT                                     | GG                 | GG               | INTERGENIC      |               |                    |                    |
| SNP_25798_A_29191741 | NC_021163.1    | Ca_Kabuli_Chr04 | 29191741                | TT                                     | CC                 | CC               | INTERGENIC      |               |                    |                    |
| SNP_25799_A_29194782 | NC_021163.1    | Ca_Kabuli_Chr04 | 29194782                | TT                                     | GG                 | GG               | INTERGENIC      |               |                    |                    |
| SNP_25800_A_29194990 | NC_021163.1    | Ca_Kabuli_Chr04 | 29194990                | TT                                     | CC                 | CC               | INTERGENIC      |               |                    |                    |
| SNP_25801_A_29195594 | NC_021163.1    | Ca_Kabuli_Chr04 | 29195594                | AA                                     | TT                 | TT               | INTERGENIC      |               |                    |                    |
| SNP_25802_A_29195595 | NC_021163.1    | Ca_Kabuli_Chr04 | 29195595                | AA                                     | TT                 | TT               | INTERGENIC      |               |                    |                    |
| SNP_25803_A_29195598 | NC_021163.1    | Ca_Kabuli_Chr04 | 29195598                | AA                                     | CC                 | CC               | INTERGENIC      |               |                    |                    |
| SNP_25804_A_29196647 | NC_021163.1    | Ca_Kabuli_Chr04 | 29196647                | GG                                     | AA                 | AA               | INTERGENIC      |               |                    |                    |
| SNP_25805_A_29202507 | NC_021163.1    | Ca_Kabuli_Chr04 | 29202507                | AA                                     | CC                 | CC               | INTERGENIC      |               |                    |                    |
| SNP_25806_A_29202728 | NC_021163.1    | Ca_Kabuli_Chr04 | 29202728                | TT                                     | CC                 | CC               | INTERGENIC      |               |                    |                    |
| SNP_25807_A_29202955 | NC_021163.1    | Ca_Kabuli_Chr04 | 29202955                | TT                                     | GG                 | GG               | INTERGENIC      |               |                    |                    |
| SNP_25809_A_29203853 | NC_021163.1    | Ca_Kabuli_Chr04 | 29203853                | GG                                     | CC                 | CC               | INTERGENIC      |               |                    |                    |
| SNP_25811_A_29205123 | NC_021163.1    | Ca_Kabuli_Chr04 | 29205123                | GG                                     | AA                 | AA               | INTERGENIC      |               |                    |                    |
| SNP_25812_A_29205135 | NC_021163.1    | Ca_Kabuli_Chr04 | 29205135                | AA                                     | GG                 | GG               | INTERGENIC      |               |                    |                    |
| SNP_25813_A_29207499 | NC_021163.1    | Ca_Kabuli_Chr04 | 29207499                | CC                                     | TT                 | TT               | INTERGENIC      |               |                    |                    |
| SNP_25814_A_29207541 | NC_021163.1    | Ca_Kabuli_Chr04 | 29207541                | TT                                     | AA                 | AA               | INTERGENIC      |               |                    |                    |

| SNPs IDs             | Chromosome IDs | Chromosomes     | Physical positions (bp) | CDC Frontier genome (Reference genome) | (Pusa 1103 & HPNB) | (ILWC 46 & LPNB) | Sequence genome | Components of | Gene accession IDs | Putative functions |
|----------------------|----------------|-----------------|-------------------------|----------------------------------------|--------------------|------------------|-----------------|---------------|--------------------|--------------------|
| SNP_25815_A_29207979 | NC_021163.1    | Ca_Kabuli_Chr04 | 29207979                | TT                                     | CC                 | CC               | INTERGENIC      |               |                    |                    |
| SNP_25816_A_29208305 | NC_021163.1    | Ca_Kabuli_Chr04 | 29208305                | GG                                     | AA                 | AA               | INTERGENIC      |               |                    |                    |
| SNP_25817_A_29208695 | NC_021163.1    | Ca_Kabuli_Chr04 | 29208695                | AA                                     | GG                 | GG               | INTERGENIC      |               |                    |                    |
| SNP_25818_A_29209260 | NC_021163.1    | Ca_Kabuli_Chr04 | 29209260                | CC                                     | TT                 | TT               | INTERGENIC      |               |                    |                    |
| SNP_25819_A_29212986 | NC_021163.1    | Ca_Kabuli_Chr04 | 29212986                | AA                                     | GG                 | GG               | INTERGENIC      |               |                    |                    |
| SNP_25820_A_29213924 | NC_021163.1    | Ca_Kabuli_Chr04 | 29213924                | CC                                     | AA                 | AA               | INTERGENIC      |               |                    |                    |
| SNP_25821_A_29216158 | NC_021163.1    | Ca_Kabuli_Chr04 | 29216158                | GG                                     | CC                 | CC               | INTERGENIC      |               |                    |                    |
| SNP_25822_A_29216206 | NC_021163.1    | Ca_Kabuli_Chr04 | 29216206                | TT                                     | CC                 | CC               | INTERGENIC      |               |                    |                    |
| SNP_25823_A_29220773 | NC_021163.1    | Ca_Kabuli_Chr04 | 29220773                | AA                                     | GG                 | GG               | INTERGENIC      |               |                    |                    |
| SNP_25824_A_29221387 | NC_021163.1    | Ca_Kabuli_Chr04 | 29221387                | AA                                     | GG                 | GG               | INTERGENIC      |               |                    |                    |
| SNP_25825_A_29221391 | NC_021163.1    | Ca_Kabuli_Chr04 | 29221391                | CC                                     | AA                 | AA               | INTERGENIC      |               |                    |                    |
| SNP_25826_A_29222271 | NC_021163.1    | Ca_Kabuli_Chr04 | 29222271                | AA                                     | TT                 | TT               | INTERGENIC      |               |                    |                    |
| SNP_25827_A_29222491 | NC_021163.1    | Ca_Kabuli_Chr04 | 29222491                | GG                                     | TT                 | TT               | INTERGENIC      |               |                    |                    |
| SNP_25828_A_29222582 | NC_021163.1    | Ca_Kabuli_Chr04 | 29222582                | CC                                     | TT                 | TT               | INTERGENIC      |               |                    |                    |
| SNP_25829_A_29222909 | NC_021163.1    | Ca_Kabuli_Chr04 | 29222909                | GG                                     | CC                 | CC               | INTERGENIC      |               |                    |                    |
| SNP_25830_A_29222959 | NC_021163.1    | Ca_Kabuli_Chr04 | 29222959                | GG                                     | CC                 | CC               | INTERGENIC      |               |                    |                    |
| SNP_25831_A_29223202 | NC_021163.1    | Ca_Kabuli_Chr04 | 29223202                | CC                                     | TT                 | TT               | INTERGENIC      |               |                    |                    |
| SNP_25832_A_29224586 | NC_021163.1    | Ca_Kabuli_Chr04 | 29224586                | GG                                     | AA                 | AA               | INTERGENIC      |               |                    |                    |
| SNP_25833_A_29225595 | NC_021163.1    | Ca_Kabuli_Chr04 | 29225595                | GG                                     | AA                 | AA               | INTERGENIC      |               |                    |                    |
| SNP_25834_A_29225997 | NC_021163.1    | Ca_Kabuli_Chr04 | 29225997                | CC                                     | AA                 | AA               | INTERGENIC      |               |                    |                    |
| SNP_25835_A_29226318 | NC_021163.1    | Ca_Kabuli_Chr04 | 29226318                | AA                                     | TT                 | TT               | INTERGENIC      |               |                    |                    |
| SNP_25837_A_29230721 | NC_021163.1    | Ca_Kabuli_Chr04 | 29230721                | GG                                     | AA                 | AA               | INTERGENIC      |               |                    |                    |

| SNPs IDs             | Chromosome IDs | Chromosomes     | Physical positions (bp) | CDC Frontier genome (Reference genome) | (Pusa 1103 & HPNB) | (ILWC 46 & LPNB) | Sequence genome | Components of | Gene accession IDs | Putative functions |
|----------------------|----------------|-----------------|-------------------------|----------------------------------------|--------------------|------------------|-----------------|---------------|--------------------|--------------------|
| SNP_25838_A_29230723 | NC_021163.1    | Ca_Kabuli_Chr04 | 29230723                | CC                                     | TT                 | TT               | INTERGENIC      |               |                    |                    |
| SNP_25839_A_29230763 | NC_021163.1    | Ca_Kabuli_Chr04 | 29230763                | TT                                     | AA                 | AA               | INTERGENIC      |               |                    |                    |
| SNP_25840_A_29230920 | NC_021163.1    | Ca_Kabuli_Chr04 | 29230920                | CC                                     | TT                 | TT               | INTERGENIC      |               |                    |                    |
| SNP_25841_A_29231938 | NC_021163.1    | Ca_Kabuli_Chr04 | 29231938                | TT                                     | GG                 | GG               | INTERGENIC      |               |                    |                    |
| SNP_25842_A_29232068 | NC_021163.1    | Ca_Kabuli_Chr04 | 29232068                | CC                                     | TT                 | TT               | INTERGENIC      |               |                    |                    |
| SNP_25843_A_29232107 | NC_021163.1    | Ca_Kabuli_Chr04 | 29232107                | GG                                     | AA                 | AA               | INTERGENIC      |               |                    |                    |
| SNP_25844_A_29232153 | NC_021163.1    | Ca_Kabuli_Chr04 | 29232153                | TT                                     | CC                 | CC               | INTERGENIC      |               |                    |                    |
| SNP_25845_A_29232895 | NC_021163.1    | Ca_Kabuli_Chr04 | 29232895                | CC                                     | GG                 | GG               | INTERGENIC      |               |                    |                    |
| SNP_25846_A_29233095 | NC_021163.1    | Ca_Kabuli_Chr04 | 29233095                | CC                                     | TT                 | TT               | INTERGENIC      |               |                    |                    |
| SNP_25847_A_29233118 | NC_021163.1    | Ca_Kabuli_Chr04 | 29233118                | GG                                     | AA                 | AA               | INTERGENIC      |               |                    |                    |
| SNP_25848_A_29233255 | NC_021163.1    | Ca_Kabuli_Chr04 | 29233255                | AA                                     | GG                 | GG               | INTERGENIC      |               |                    |                    |
| SNP_25849_A_29233258 | NC_021163.1    | Ca_Kabuli_Chr04 | 29233258                | AA                                     | GG                 | GG               | INTERGENIC      |               |                    |                    |
| SNP_25850_A_29233571 | NC_021163.1    | Ca_Kabuli_Chr04 | 29233571                | TT                                     | GG                 | GG               | INTERGENIC      |               |                    |                    |
| SNP_25851_A_29235180 | NC_021163.1    | Ca_Kabuli_Chr04 | 29235180                | TT                                     | AA                 | AA               | INTERGENIC      |               |                    |                    |
| SNP_25852_A_29235476 | NC_021163.1    | Ca_Kabuli_Chr04 | 29235476                | AA                                     | GG                 | GG               | INTERGENIC      |               |                    |                    |
| SNP_25853_A_29235538 | NC_021163.1    | Ca_Kabuli_Chr04 | 29235538                | CC                                     | TT                 | TT               | INTERGENIC      |               |                    |                    |
| SNP_25854_A_29236913 | NC_021163.1    | Ca_Kabuli_Chr04 | 29236913                | AA                                     | GG                 | GG               | INTERGENIC      |               |                    |                    |
| SNP_25855_A_29238397 | NC_021163.1    | Ca_Kabuli_Chr04 | 29238397                | CC                                     | TT                 | TT               | INTERGENIC      |               |                    |                    |
| SNP_25856_A_29238680 | NC_021163.1    | Ca_Kabuli_Chr04 | 29238680                | GG                                     | AA                 | AA               | INTERGENIC      |               |                    |                    |
| SNP_25857_A_29238702 | NC_021163.1    | Ca_Kabuli_Chr04 | 29238702                | CC                                     | TT                 | TT               | INTERGENIC      |               |                    |                    |
| SNP_25860_A_29244529 | NC_021163.1    | Ca_Kabuli_Chr04 | 29244529                | GG                                     | CC                 | CC               | INTERGENIC      |               |                    |                    |
| SNP_25862_A_29244845 | NC_021163.1    | Ca_Kabuli_Chr04 | 29244845                | CC                                     | GG                 | GG               | INTERGENIC      |               |                    |                    |

| SNPs IDs             | Chromosome IDs | Chromosomes     | Physical positions (bp) | CDC Frontier genome (Reference genome) | (Pusa 1103 & HPNB) | (ILWC 46 & LPNB) | Sequence Components of genome | Gene accession IDs | Putative functions           |
|----------------------|----------------|-----------------|-------------------------|----------------------------------------|--------------------|------------------|-------------------------------|--------------------|------------------------------|
| SNP_25863_A_29244857 | NC_021163.1    | Ca_Kabuli_Chr04 | 29244857                | TT                                     | GG                 | GG               | INTERGENIC                    |                    |                              |
| SNP_25864_A_29244881 | NC_021163.1    | Ca_Kabuli_Chr04 | 29244881                | GG                                     | AA                 | AA               | INTERGENIC                    |                    |                              |
| SNP_25866_A_29245115 | NC_021163.1    | Ca_Kabuli_Chr04 | 29245115                | AA                                     | CC                 | CC               | INTERGENIC                    |                    |                              |
| SNP_25867_A_29245157 | NC_021163.1    | Ca_Kabuli_Chr04 | 29245157                | TT                                     | AA                 | AA               | INTERGENIC                    |                    |                              |
| SNP_25868_A_29248104 | NC_021163.1    | Ca_Kabuli_Chr04 | 29248104                | TT                                     | AA                 | AA               | INTERGENIC                    |                    |                              |
| SNP_25869_A_29262046 | NC_021163.1    | Ca_Kabuli_Chr04 | 29262046                | GG                                     | CC                 | CC               | INTERGENIC                    |                    |                              |
| SNP_25870_A_29262073 | NC_021163.1    | Ca_Kabuli_Chr04 | 29262073                | AA                                     | GG                 | GG               | INTERGENIC                    |                    |                              |
| SNP_25871_A_29262264 | NC_021163.1    | Ca_Kabuli_Chr04 | 29262264                | CC                                     | GG                 | GG               | INTERGENIC                    |                    |                              |
| SNP_25872_A_29263074 | NC_021163.1    | Ca_Kabuli_Chr04 | 29263074                | GG                                     | AA                 | AA               | INTERGENIC                    |                    |                              |
| SNP_25873_A_29263237 | NC_021163.1    | Ca_Kabuli_Chr04 | 29263237                | GG                                     | AA                 | AA               | INTERGENIC                    |                    |                              |
| SNP_25874_A_29263251 | NC_021163.1    | Ca_Kabuli_Chr04 | 29263251                | TT                                     | CC                 | CC               | INTERGENIC                    |                    |                              |
| SNP_25876_A_29266856 | NC_021163.1    | Ca_Kabuli_Chr04 | 29266856                | CC                                     | TT                 | TT               | DRR                           | 101504491          | uncharacterized LOC101504491 |
| SNP_25877_A_29266857 | NC_021163.1    | Ca_Kabuli_Chr04 | 29266857                | TT                                     | AA                 | AA               | DRR                           | 101504491          | uncharacterized LOC101504491 |
| SNP_25879_A_29273574 | NC_021163.1    | Ca_Kabuli_Chr04 | 29273574                | GG                                     | AA                 | AA               | INTERGENIC                    |                    |                              |
| SNP_25882_A_29292314 | NC_021163.1    | Ca_Kabuli_Chr04 | 29292314                | GG                                     | AA                 | AA               | INTERGENIC                    |                    |                              |
| SNP_25884_A_29305055 | NC_021163.1    | Ca_Kabuli_Chr04 | 29305055                | TT                                     | GG                 | GG               | INTERGENIC                    |                    |                              |
| SNP_25885_A_29305060 | NC_021163.1    | Ca_Kabuli_Chr04 | 29305060                | GG                                     | AA                 | AA               | INTERGENIC                    |                    |                              |
| SNP_25886_A_29305061 | NC_021163.1    | Ca_Kabuli_Chr04 | 29305061                | TT                                     | CC                 | CC               | INTERGENIC                    |                    |                              |
| SNP_25887_A_29305094 | NC_021163.1    | Ca_Kabuli_Chr04 | 29305094                | CC                                     | TT                 | TT               | INTERGENIC                    |                    |                              |
| SNP_25888_A_29306913 | NC_021163.1    | Ca_Kabuli_Chr04 | 29306913                | GG                                     | TT                 | TT               | INTERGENIC                    |                    |                              |
| SNP_25889_A_29308145 | NC_021163.1    | Ca_Kabuli_Chr04 | 29308145                | TT                                     | AA                 | AA               | INTERGENIC                    |                    |                              |
| SNP_25890_A_29308168 | NC_021163.1    | Ca_Kabuli_Chr04 | 29308168                | CC                                     | TT                 | TT               | INTERGENIC                    |                    |                              |

| SNPs IDs             | Chromosome IDs | Chromosomes     | Physical positions (bp) | CDC Frontier genome (Reference genome) | (Pusa 1103 & HPNB) | (ILWC 46 & LPNB) | Sequence genome | Components of | Gene accession IDs | Putative functions |
|----------------------|----------------|-----------------|-------------------------|----------------------------------------|--------------------|------------------|-----------------|---------------|--------------------|--------------------|
| SNP_25891_A_29310017 | NC_021163.1    | Ca_Kabuli_Chr04 | 29310017                | AA                                     | CC                 | CC               | INTERGENIC      |               |                    |                    |
| SNP_25892_A_29310019 | NC_021163.1    | Ca_Kabuli_Chr04 | 29310019                | CC                                     | AA                 | AA               | INTERGENIC      |               |                    |                    |
| SNP_25893_A_29310384 | NC_021163.1    | Ca_Kabuli_Chr04 | 29310384                | AA                                     | TT                 | TT               | INTERGENIC      |               |                    |                    |
| SNP_25894_A_29310387 | NC_021163.1    | Ca_Kabuli_Chr04 | 29310387                | GG                                     | TT                 | TT               | INTERGENIC      |               |                    |                    |
| SNP_25895_A_29310472 | NC_021163.1    | Ca_Kabuli_Chr04 | 29310472                | GG                                     | AA                 | AA               | INTERGENIC      |               |                    |                    |
| SNP_25896_A_29310604 | NC_021163.1    | Ca_Kabuli_Chr04 | 29310604                | AA                                     | GG                 | GG               | INTERGENIC      |               |                    |                    |
| SNP_25897_A_29310650 | NC_021163.1    | Ca_Kabuli_Chr04 | 29310650                | AA                                     | GG                 | GG               | INTERGENIC      |               |                    |                    |
| SNP_25899_A_29310965 | NC_021163.1    | Ca_Kabuli_Chr04 | 29310965                | TT                                     | GG                 | GG               | INTERGENIC      |               |                    |                    |
| SNP_25901_A_29312398 | NC_021163.1    | Ca_Kabuli_Chr04 | 29312398                | AA                                     | CC                 | CC               | INTERGENIC      |               |                    |                    |
| SNP_25902_A_29313097 | NC_021163.1    | Ca_Kabuli_Chr04 | 29313097                | CC                                     | TT                 | TT               | INTERGENIC      |               |                    |                    |
| SNP_25903_A_29313310 | NC_021163.1    | Ca_Kabuli_Chr04 | 29313310                | GG                                     | AA                 | AA               | INTERGENIC      |               |                    |                    |
| SNP_25904_A_29313323 | NC_021163.1    | Ca_Kabuli_Chr04 | 29313323                | CC                                     | TT                 | TT               | INTERGENIC      |               |                    |                    |
| SNP_25905_A_29314646 | NC_021163.1    | Ca_Kabuli_Chr04 | 29314646                | AA                                     | GG                 | GG               | INTERGENIC      |               |                    |                    |
| SNP_25906_A_29314869 | NC_021163.1    | Ca_Kabuli_Chr04 | 29314869                | TT                                     | GG                 | GG               | INTERGENIC      |               |                    |                    |
| SNP_25907_A_29316725 | NC_021163.1    | Ca_Kabuli_Chr04 | 29316725                | TT                                     | GG                 | GG               | INTERGENIC      |               |                    |                    |
| SNP_25908_A_29317419 | NC_021163.1    | Ca_Kabuli_Chr04 | 29317419                | CC                                     | TT                 | TT               | INTERGENIC      |               |                    |                    |
| SNP_25909_A_29317539 | NC_021163.1    | Ca_Kabuli_Chr04 | 29317539                | GG                                     | AA                 | AA               | INTERGENIC      |               |                    |                    |
| SNP_25910_A_29317612 | NC_021163.1    | Ca_Kabuli_Chr04 | 29317612                | GG                                     | AA                 | AA               | INTERGENIC      |               |                    |                    |
| SNP_25911_A_29317888 | NC_021163.1    | Ca_Kabuli_Chr04 | 29317888                | CC                                     | TT                 | TT               | INTERGENIC      |               |                    |                    |
| SNP_25912_A_29320553 | NC_021163.1    | Ca_Kabuli_Chr04 | 29320553                | GG                                     | AA                 | AA               | INTERGENIC      |               |                    |                    |
| SNP_25913_A_29320881 | NC_021163.1    | Ca_Kabuli_Chr04 | 29320881                | CC                                     | TT                 | TT               | INTERGENIC      |               |                    |                    |
| SNP_25914_A_29320898 | NC_021163.1    | Ca_Kabuli_Chr04 | 29320898                | CC                                     | AA                 | AA               | INTERGENIC      |               |                    |                    |

| SNPs IDs             | Chromosome IDs | Chromosomes     | Physical positions (bp) | CDC Frontier genome (Reference genome) | (Pusa 1103 & HPNB) | (ILWC 46 & LPNB) | Sequence genome | Components of | Gene accession IDs | Putative functions |
|----------------------|----------------|-----------------|-------------------------|----------------------------------------|--------------------|------------------|-----------------|---------------|--------------------|--------------------|
| SNP_25916_A_29321375 | NC_021163.1    | Ca_Kabuli_Chr04 | 29321375                | GG                                     | CC                 | CC               | INTERGENIC      |               |                    |                    |
| SNP_25917_A_29321393 | NC_021163.1    | Ca_Kabuli_Chr04 | 29321393                | TT                                     | CC                 | CC               | INTERGENIC      |               |                    |                    |
| SNP_25918_A_29321416 | NC_021163.1    | Ca_Kabuli_Chr04 | 29321416                | AA                                     | TT                 | TT               | INTERGENIC      |               |                    |                    |
| SNP_25919_A_29325295 | NC_021163.1    | Ca_Kabuli_Chr04 | 29325295                | GG                                     | AA                 | AA               | INTERGENIC      |               |                    |                    |
| SNP_25920_A_29326084 | NC_021163.1    | Ca_Kabuli_Chr04 | 29326084                | TT                                     | GG                 | GG               | INTERGENIC      |               |                    |                    |
| SNP_25921_A_29326100 | NC_021163.1    | Ca_Kabuli_Chr04 | 29326100                | CC                                     | TT                 | TT               | INTERGENIC      |               |                    |                    |
| SNP_25922_A_29326572 | NC_021163.1    | Ca_Kabuli_Chr04 | 29326572                | TT                                     | CC                 | CC               | INTERGENIC      |               |                    |                    |
| SNP_25923_A_29326889 | NC_021163.1    | Ca_Kabuli_Chr04 | 29326889                | CC                                     | AA                 | AA               | INTERGENIC      |               |                    |                    |
| SNP_25924_A_29327656 | NC_021163.1    | Ca_Kabuli_Chr04 | 29327656                | TT                                     | CC                 | CC               | INTERGENIC      |               |                    |                    |
| SNP_25925_A_29329268 | NC_021163.1    | Ca_Kabuli_Chr04 | 29329268                | AA                                     | GG                 | GG               | INTERGENIC      |               |                    |                    |
| SNP_25926_A_29329524 | NC_021163.1    | Ca_Kabuli_Chr04 | 29329524                | CC                                     | TT                 | TT               | INTERGENIC      |               |                    |                    |
| SNP_25927_A_29329832 | NC_021163.1    | Ca_Kabuli_Chr04 | 29329832                | TT                                     | CC                 | CC               | INTERGENIC      |               |                    |                    |
| SNP_25928_A_29329860 | NC_021163.1    | Ca_Kabuli_Chr04 | 29329860                | GG                                     | TT                 | TT               | INTERGENIC      |               |                    |                    |
| SNP_25929_A_29330012 | NC_021163.1    | Ca_Kabuli_Chr04 | 29330012                | TT                                     | CC                 | CC               | INTERGENIC      |               |                    |                    |
| SNP_25931_A_29330265 | NC_021163.1    | Ca_Kabuli_Chr04 | 29330265                | CC                                     | AA                 | AA               | INTERGENIC      |               |                    |                    |
| SNP_25932_A_29334387 | NC_021163.1    | Ca_Kabuli_Chr04 | 29334387                | AA                                     | GG                 | GG               | INTERGENIC      |               |                    |                    |
| SNP_25933_A_29334435 | NC_021163.1    | Ca_Kabuli_Chr04 | 29334435                | TT                                     | CC                 | CC               | INTERGENIC      |               |                    |                    |
| SNP_25934_A_29338541 | NC_021163.1    | Ca_Kabuli_Chr04 | 29338541                | TT                                     | CC                 | CC               | INTERGENIC      |               |                    |                    |
| SNP_25935_A_29338931 | NC_021163.1    | Ca_Kabuli_Chr04 | 29338931                | CC                                     | TT                 | TT               | INTERGENIC      |               |                    |                    |
| SNP_25937_A_29349220 | NC_021163.1    | Ca_Kabuli_Chr04 | 29349220                | CC                                     | AA                 | AA               | INTERGENIC      |               |                    |                    |
| SNP_25938_A_29349288 | NC_021163.1    | Ca_Kabuli_Chr04 | 29349288                | AA                                     | GG                 | GG               | INTERGENIC      |               |                    |                    |
| SNP_25939_A_29349360 | NC_021163.1    | Ca_Kabuli_Chr04 | 29349360                | GG                                     | AA                 | AA               | INTERGENIC      |               |                    |                    |

| SNPs IDs             | Chromosome IDs | Chromosomes     | Physical positions (bp) | CDC Frontier genome (Reference genome) | (Pusa 1103 & HPNB) | (ILWC 46 & LPNB) | Sequence genome | Components of | Gene accession IDs         | Putative functions |
|----------------------|----------------|-----------------|-------------------------|----------------------------------------|--------------------|------------------|-----------------|---------------|----------------------------|--------------------|
| SNP_25940_A_29349386 | NC_021163.1    | Ca_Kabuli_Chr04 | 29349386                | TT                                     | GG                 | GG               | INTERGENIC      |               |                            |                    |
| SNP_25941_A_29349443 | NC_021163.1    | Ca_Kabuli_Chr04 | 29349443                | CC                                     | TT                 | TT               | INTERGENIC      |               |                            |                    |
| SNP_25942_A_29349604 | NC_021163.1    | Ca_Kabuli_Chr04 | 29349604                | GG                                     | TT                 | TT               | INTERGENIC      |               |                            |                    |
| SNP_25943_A_29350981 | NC_021163.1    | Ca_Kabuli_Chr04 | 29350981                | AA                                     | TT                 | TT               | INTERGENIC      |               |                            |                    |
| SNP_25944_A_29351273 | NC_021163.1    | Ca_Kabuli_Chr04 | 29351273                | AA                                     | GG                 | GG               | INTERGENIC      |               |                            |                    |
| SNP_25945_A_29351293 | NC_021163.1    | Ca_Kabuli_Chr04 | 29351293                | AA                                     | GG                 | GG               | INTERGENIC      |               |                            |                    |
| SNP_25947_A_29351629 | NC_021163.1    | Ca_Kabuli_Chr04 | 29351629                | AA                                     | GG                 | GG               | INTERGENIC      |               |                            |                    |
| SNP_25949_A_29351728 | NC_021163.1    | Ca_Kabuli_Chr04 | 29351728                | AA                                     | GG                 | GG               | INTERGENIC      |               |                            |                    |
| SNP_25951_A_29356158 | NC_021163.1    | Ca_Kabuli_Chr04 | 29356158                | TT                                     | CC                 | CC               | INTERGENIC      |               |                            |                    |
| SNP_25953_A_29356238 | NC_021163.1    | Ca_Kabuli_Chr04 | 29356238                | GG                                     | AA                 | AA               | INTERGENIC      |               |                            |                    |
| SNP_25955_A_29357366 | NC_021163.1    | Ca_Kabuli_Chr04 | 29357366                | TT                                     | AA                 | AA               | INTERGENIC      |               |                            |                    |
| SNP_25956_A_29357620 | NC_021163.1    | Ca_Kabuli_Chr04 | 29357620                | CC                                     | AA                 | AA               | INTERGENIC      |               |                            |                    |
| SNP_25957_A_29359252 | NC_021163.1    | Ca_Kabuli_Chr04 | 29359252                | TT                                     | AA                 | AA               | INTERGENIC      |               |                            |                    |
| SNP_25959_A_29366114 | NC_021163.1    | Ca_Kabuli_Chr04 | 29366114                | GG                                     | AA                 | AA               | INTERGENIC      |               |                            |                    |
| SNP_25961_A_29368779 | NC_021163.1    | Ca_Kabuli_Chr04 | 29368779                | CC                                     | TT                 | TT               | INTERGENIC      |               |                            |                    |
| SNP_25962_A_29368792 | NC_021163.1    | Ca_Kabuli_Chr04 | 29368792                | GG                                     | AA                 | AA               | INTERGENIC      |               |                            |                    |
| SNP_25963_A_29368822 | NC_021163.1    | Ca_Kabuli_Chr04 | 29368822                | CC                                     | TT                 | TT               | INTERGENIC      |               |                            |                    |
| SNP_25964_A_29369054 | NC_021163.1    | Ca_Kabuli_Chr04 | 29369054                | AA                                     | GG                 | GG               | INTERGENIC      |               |                            |                    |
| SNP_25966_A_29391474 | NC_021163.1    | Ca_Kabuli_Chr04 | 29391474                | TT                                     | GG                 | GG               | INTERGENIC      |               |                            |                    |
| SNP_25967_A_29400754 | NC_021163.1    | Ca_Kabuli_Chr04 | 29400754                | GG                                     | AA                 | AA               | INTERGENIC      |               |                            |                    |
| SNP_25968_A_29415669 | NC_021163.1    | Ca_Kabuli_Chr04 | 29415669                | GG                                     | AA                 | AA               | URR             | 101505119     | zinc finger protein 7-like |                    |
| SNP_25969_A_29416428 | NC_021163.1    | Ca_Kabuli_Chr04 | 29416428                | CC                                     | TT                 | TT               | INTERGENIC      |               |                            |                    |

| SNPs IDs             | Chromosome IDs | Chromosomes     | Physical positions (bp) | CDC Frontier (Reference genome) | (Pusa 1103 & HPNB) | (ILWC 46 & LPNB) | Sequence Components of genome | Gene accession IDs | Putative functions                           |
|----------------------|----------------|-----------------|-------------------------|---------------------------------|--------------------|------------------|-------------------------------|--------------------|----------------------------------------------|
| SNP_25970_A_29416442 | NC_021163.1    | Ca_Kabuli_Chr04 | 29416442                | TT                              | CC                 | CC               | INTERGENIC                    |                    |                                              |
| SNP_25971_A_29416444 | NC_021163.1    | Ca_Kabuli_Chr04 | 29416444                | GG                              | AA                 | AA               | INTERGENIC                    |                    |                                              |
| SNP_25972_A_29416901 | NC_021163.1    | Ca_Kabuli_Chr04 | 29416901                | AA                              | GG                 | GG               | INTERGENIC                    |                    |                                              |
| SNP_25974_A_29418241 | NC_021163.1    | Ca_Kabuli_Chr04 | 29418241                | TT                              | GG                 | GG               | INTERGENIC                    |                    |                                              |
| SNP_25977_A_29419929 | NC_021163.1    | Ca_Kabuli_Chr04 | 29419929                | GG                              | AA                 | AA               | INTERGENIC                    |                    |                                              |
| SNP_25978_A_29419933 | NC_021163.1    | Ca_Kabuli_Chr04 | 29419933                | TT                              | CC                 | CC               | INTERGENIC                    |                    |                                              |
| SNP_25979_A_29419964 | NC_021163.1    | Ca_Kabuli_Chr04 | 29419964                | AA                              | TT                 | TT               | INTERGENIC                    |                    |                                              |
| SNP_25980_A_29420332 | NC_021163.1    | Ca_Kabuli_Chr04 | 29420332                | GG                              | CC                 | CC               | INTERGENIC                    |                    |                                              |
| SNP_25982_A_29423618 | NC_021163.1    | Ca_Kabuli_Chr04 | 29423618                | GG                              | AA                 | AA               | INTERGENIC                    |                    |                                              |
| SNP_25983_A_29426287 | NC_021163.1    | Ca_Kabuli_Chr04 | 29426287                | TT                              | AA                 | AA               | INTERGENIC                    |                    |                                              |
| SNP_25985_A_29429036 | NC_021163.1    | Ca_Kabuli_Chr04 | 29429036                | CC                              | TT                 | TT               | INTERGENIC                    |                    |                                              |
| SNP_25986_A_29429672 | NC_021163.1    | Ca_Kabuli_Chr04 | 29429672                | AA                              | GG                 | GG               | INTERGENIC                    |                    |                                              |
| SNP_25987_A_29433159 | NC_021163.1    | Ca_Kabuli_Chr04 | 29433159                | AA                              | GG                 | GG               | INTERGENIC                    |                    |                                              |
| SNP_25988_A_29433360 | NC_021163.1    | Ca_Kabuli_Chr04 | 29433360                | AA                              | GG                 | GG               | INTERGENIC                    |                    |                                              |
| SNP_25989_A_29441675 | NC_021163.1    | Ca_Kabuli_Chr04 | 29441675                | CC                              | TT                 | TT               | INTERGENIC                    |                    |                                              |
| SNP_25990_A_29444655 | NC_021163.1    | Ca_Kabuli_Chr04 | 29444655                | TT                              | CC                 | CC               | INTERGENIC                    |                    |                                              |
| SNP_25991_A_29452375 | NC_021163.1    | Ca_Kabuli_Chr04 | 29452375                | CC                              | TT                 | TT               | INTERGENIC                    |                    |                                              |
| SNP_25992_A_29455652 | NC_021163.1    | Ca_Kabuli_Chr04 | 29455652                | AA                              | CC                 | CC               | INTERGENIC                    |                    |                                              |
| SNP_25993_A_29472301 | NC_021163.1    | Ca_Kabuli_Chr04 | 29472301                | TT                              | CC                 | CC               | DRR                           | 101505442          | 28 kDa ribonucleoprotein, chloroplastic-like |
| SNP_25994_A_29473976 | NC_021163.1    | Ca_Kabuli_Chr04 | 29473976                | AA                              | GG                 | GG               | SYNONYMOUS_CODING             | 101505442          | 28 kDa ribonucleoprotein, chloroplastic-like |
| SNP_25995_A_29477954 | NC_021163.1    | Ca_Kabuli_Chr04 | 29477954                | GG                              | AA                 | AA               | INTERGENIC                    |                    |                                              |
| SNP_25996_A_29481187 | NC_021163.1    | Ca_Kabuli_Chr04 | 29481187                | AA                              | CC                 | CC               | INTERGENIC                    |                    |                                              |



| SNPs IDs             | Chromosome IDs | Chromosomes     | Physical positions (bp) | CDC Frontier genome (Reference genome) | (Pusa 1103 & HPNB) | (ILWC 46 & LPNB) | Sequence Components of genome | Gene accession IDs | Putative functions           |
|----------------------|----------------|-----------------|-------------------------|----------------------------------------|--------------------|------------------|-------------------------------|--------------------|------------------------------|
| SNP_25997_A_29482750 | NC_021163.1    | Ca_Kabuli_Chr04 | 29482750                | TT                                     | CC                 | CC               | INTERGENIC                    |                    |                              |
| SNP_25998_A_29483102 | NC_021163.1    | Ca_Kabuli_Chr04 | 29483102                | AA                                     | TT                 | TT               | INTERGENIC                    |                    |                              |
| SNP_25999_A_29490702 | NC_021163.1    | Ca_Kabuli_Chr04 | 29490702                | TT                                     | GG                 | GG               | INTERGENIC                    |                    |                              |
| SNP_26000_A_29490800 | NC_021163.1    | Ca_Kabuli_Chr04 | 29490800                | TT                                     | AA                 | AA               | INTERGENIC                    |                    |                              |
| SNP_26001_A_29490826 | NC_021163.1    | Ca_Kabuli_Chr04 | 29490826                | GG                                     | AA                 | AA               | INTERGENIC                    |                    |                              |
| SNP_26002_A_29490839 | NC_021163.1    | Ca_Kabuli_Chr04 | 29490839                | AA                                     | GG                 | GG               | INTERGENIC                    |                    |                              |
| SNP_26003_A_29490857 | NC_021163.1    | Ca_Kabuli_Chr04 | 29490857                | AA                                     | GG                 | GG               | INTERGENIC                    |                    |                              |
| SNP_26004_A_29491024 | NC_021163.1    | Ca_Kabuli_Chr04 | 29491024                | TT                                     | GG                 | GG               | INTERGENIC                    |                    |                              |
| SNP_26005_A_29491031 | NC_021163.1    | Ca_Kabuli_Chr04 | 29491031                | CC                                     | TT                 | TT               | INTERGENIC                    |                    |                              |
| SNP_26006_A_29491130 | NC_021163.1    | Ca_Kabuli_Chr04 | 29491130                | CC                                     | TT                 | TT               | INTERGENIC                    |                    |                              |
| SNP_26008_A_29499002 | NC_021163.1    | Ca_Kabuli_Chr04 | 29499002                | GG                                     | CC                 | CC               | INTERGENIC                    |                    |                              |
| SNP_26009_A_29499912 | NC_021163.1    | Ca_Kabuli_Chr04 | 29499912                | GG                                     | AA                 | AA               | INTERGENIC                    |                    |                              |
| SNP_26010_A_29501252 | NC_021163.1    | Ca_Kabuli_Chr04 | 29501252                | AA                                     | GG                 | GG               | INTERGENIC                    |                    |                              |
| SNP_26012_A_29503551 | NC_021163.1    | Ca_Kabuli_Chr04 | 29503551                | CC                                     | TT                 | TT               | DRR                           | 101509517          | uncharacterized LOC101509517 |
| SNP_26013_A_29508005 | NC_021163.1    | Ca_Kabuli_Chr04 | 29508005                | GG                                     | AA                 | AA               | URR                           | 101509517          | uncharacterized LOC101509517 |
| SNP_26014_A_29509576 | NC_021163.1    | Ca_Kabuli_Chr04 | 29509576                | AA                                     | TT                 | TT               | INTERGENIC                    |                    |                              |
| SNP_26015_A_29510178 | NC_021163.1    | Ca_Kabuli_Chr04 | 29510178                | AA                                     | GG                 | GG               | INTERGENIC                    |                    |                              |
| SNP_26017_A_29519227 | NC_021163.1    | Ca_Kabuli_Chr04 | 29519227                | AA                                     | GG                 | GG               | INTERGENIC                    |                    |                              |
| SNP_26018_A_29519247 | NC_021163.1    | Ca_Kabuli_Chr04 | 29519247                | TT                                     | CC                 | CC               | INTERGENIC                    |                    |                              |
| SNP_26019_A_29520652 | NC_021163.1    | Ca_Kabuli_Chr04 | 29520652                | GG                                     | TT                 | TT               | INTERGENIC                    |                    |                              |
| SNP_26020_A_29521744 | NC_021163.1    | Ca_Kabuli_Chr04 | 29521744                | GG                                     | AA                 | AA               | DRR                           | 101509839          | uncharacterized LOC101509839 |
| SNP_26021_A_29528110 | NC_021163.1    | Ca_Kabuli_Chr04 | 29528110                | TT                                     | CC                 | CC               | INTRON                        | 101509839          | uncharacterized LOC101509839 |

| SNPs IDs             | Chromosome IDs | Chromosomes     | Physical positions (bp) | CDC Frontier genome (Reference genome) | (Pusa 1103 & HPNB) | (ILWC 46 & LPNB) | Sequence genome | Components of | Gene accession IDs | Putative functions                      |
|----------------------|----------------|-----------------|-------------------------|----------------------------------------|--------------------|------------------|-----------------|---------------|--------------------|-----------------------------------------|
| SNP_26022_A_29534163 | NC_021163.1    | Ca_Kabuli_Chr04 | 29534163                | CC                                     | TT                 | TT               | INTERGENIC      |               |                    |                                         |
| SNP_26023_A_29534241 | NC_021163.1    | Ca_Kabuli_Chr04 | 29534241                | GG                                     | AA                 | AA               | INTERGENIC      |               |                    |                                         |
| SNP_26024_A_29539268 | NC_021163.1    | Ca_Kabuli_Chr04 | 29539268                | CC                                     | AA                 | AA               | INTERGENIC      |               |                    |                                         |
| SNP_26025_A_29543716 | NC_021163.1    | Ca_Kabuli_Chr04 | 29543716                | CC                                     | AA                 | AA               | INTERGENIC      |               |                    |                                         |
| SNP_26028_A_29547339 | NC_021163.1    | Ca_Kabuli_Chr04 | 29547339                | AA                                     | CC                 | CC               | INTERGENIC      |               |                    |                                         |
| SNP_26030_A_29551996 | NC_021163.1    | Ca_Kabuli_Chr04 | 29551996                | GG                                     | AA                 | AA               | INTERGENIC      |               |                    |                                         |
| SNP_26031_A_29558632 | NC_021163.1    | Ca_Kabuli_Chr04 | 29558632                | CC                                     | TT                 | TT               | INTERGENIC      |               |                    |                                         |
| SNP_26032_A_29564341 | NC_021163.1    | Ca_Kabuli_Chr04 | 29564341                | GG                                     | CC                 | CC               | INTERGENIC      |               |                    |                                         |
| SNP_26033_A_29564349 | NC_021163.1    | Ca_Kabuli_Chr04 | 29564349                | TT                                     | CC                 | CC               | INTERGENIC      |               |                    |                                         |
| SNP_26034_A_29564541 | NC_021163.1    | Ca_Kabuli_Chr04 | 29564541                | CC                                     | TT                 | TT               | INTERGENIC      |               |                    |                                         |
| SNP_26035_A_29564590 | NC_021163.1    | Ca_Kabuli_Chr04 | 29564590                | CC                                     | TT                 | TT               | INTERGENIC      |               |                    |                                         |
| SNP_26037_A_29564779 | NC_021163.1    | Ca_Kabuli_Chr04 | 29564779                | CC                                     | TT                 | TT               | INTERGENIC      |               |                    |                                         |
| SNP_26038_A_29564840 | NC_021163.1    | Ca_Kabuli_Chr04 | 29564840                | GG                                     | AA                 | AA               | INTERGENIC      |               |                    |                                         |
| SNP_26039_A_29566559 | NC_021163.1    | Ca_Kabuli_Chr04 | 29566559                | CC                                     | TT                 | TT               | INTERGENIC      |               |                    |                                         |
| SNP_26041_A_29571385 | NC_021163.1    | Ca_Kabuli_Chr04 | 29571385                | GG                                     | AA                 | AA               | INTERGENIC      |               |                    |                                         |
| SNP_26042_A_29571466 | NC_021163.1    | Ca_Kabuli_Chr04 | 29571466                | TT                                     | AA                 | AA               | INTERGENIC      |               |                    |                                         |
| SNP_26043_A_29575141 | NC_021163.1    | Ca_Kabuli_Chr04 | 29575141                | TT                                     | AA                 | AA               | INTERGENIC      |               |                    |                                         |
| SNP_26044_A_29575365 | NC_021163.1    | Ca_Kabuli_Chr04 | 29575365                | AA                                     | CC                 | CC               | INTERGENIC      |               |                    |                                         |
| SNP_26045_A_29575416 | NC_021163.1    | Ca_Kabuli_Chr04 | 29575416                | GG                                     | TT                 | TT               | INTERGENIC      |               |                    |                                         |
| SNP_26046_A_29575420 | NC_021163.1    | Ca_Kabuli_Chr04 | 29575420                | AA                                     | TT                 | TT               | INTERGENIC      |               |                    |                                         |
| SNP_26048_A_29584417 | NC_021163.1    | Ca_Kabuli_Chr04 | 29584417                | TT                                     | CC                 | CC               | INTERGENIC      |               |                    |                                         |
| SNP_26049_A_29602773 | NC_021163.1    | Ca_Kabuli_Chr04 | 29602773                | GG                                     | AA                 | AA               | URR             |               | 101510922          | E3 ubiquitin-protein ligase SINAT2-like |

| SNPs IDs             | Chromosome IDs | Chromosomes     | Physical positions (bp) | CDC Frontier (Reference genome) | (Pusa 1103 & HPNB) | (ILWC 46 & LPNB) | Sequence Components of genome | Gene accession IDs | Putative functions                                           |
|----------------------|----------------|-----------------|-------------------------|---------------------------------|--------------------|------------------|-------------------------------|--------------------|--------------------------------------------------------------|
| SNP_26050_A_29602919 | NC_021163.1    | Ca_Kabuli_Chr04 | 29602919                | GG                              | AA                 | AA               | URR                           | 101510922          | E3 ubiquitin-protein ligase SINAT2-like                      |
| SNP_26051_A_29602975 | NC_021163.1    | Ca_Kabuli_Chr04 | 29602975                | AA                              | GG                 | GG               | URR                           | 101510922          | E3 ubiquitin-protein ligase SINAT2-like                      |
| SNP_26052_A_29602989 | NC_021163.1    | Ca_Kabuli_Chr04 | 29602989                | TT                              | AA                 | AA               | URR                           | 101510922          | E3 ubiquitin-protein ligase SINAT2-like                      |
| SNP_26053_A_29605527 | NC_021163.1    | Ca_Kabuli_Chr04 | 29605527                | TT                              | CC                 | CC               | INTERGENIC                    |                    |                                                              |
| SNP_26054_A_29618577 | NC_021163.1    | Ca_Kabuli_Chr04 | 29618577                | TT                              | GG                 | GG               | INTERGENIC                    |                    |                                                              |
| SNP_26055_A_29618654 | NC_021163.1    | Ca_Kabuli_Chr04 | 29618654                | AA                              | GG                 | GG               | INTERGENIC                    |                    |                                                              |
| SNP_26056_A_29618965 | NC_021163.1    | Ca_Kabuli_Chr04 | 29618965                | CC                              | TT                 | TT               | INTERGENIC                    |                    |                                                              |
| SNP_26057_A_29618974 | NC_021163.1    | Ca_Kabuli_Chr04 | 29618974                | TT                              | GG                 | GG               | INTERGENIC                    |                    |                                                              |
| SNP_26058_A_29618975 | NC_021163.1    | Ca_Kabuli_Chr04 | 29618975                | CC                              | TT                 | TT               | INTERGENIC                    |                    |                                                              |
| SNP_26059_A_29619069 | NC_021163.1    | Ca_Kabuli_Chr04 | 29619069                | CC                              | AA                 | AA               | INTERGENIC                    |                    |                                                              |
| SNP_26061_A_29619239 | NC_021163.1    | Ca_Kabuli_Chr04 | 29619239                | TT                              | CC                 | CC               | INTERGENIC                    |                    |                                                              |
| SNP_26062_A_29619252 | NC_021163.1    | Ca_Kabuli_Chr04 | 29619252                | CC                              | TT                 | TT               | INTERGENIC                    |                    |                                                              |
| SNP_26063_A_29620624 | NC_021163.1    | Ca_Kabuli_Chr04 | 29620624                | CC                              | TT                 | TT               | INTERGENIC                    |                    |                                                              |
| SNP_26065_A_29625418 | NC_021163.1    | Ca_Kabuli_Chr04 | 29625418                | AA                              | CC                 | CC               | INTERGENIC                    |                    |                                                              |
| SNP_26066_A_29625433 | NC_021163.1    | Ca_Kabuli_Chr04 | 29625433                | AA                              | GG                 | GG               | INTERGENIC                    |                    |                                                              |
| SNP_26068_A_29626630 | NC_021163.1    | Ca_Kabuli_Chr04 | 29626630                | TT                              | GG                 | GG               | INTERGENIC                    |                    |                                                              |
| SNP_26069_A_29626802 | NC_021163.1    | Ca_Kabuli_Chr04 | 29626802                | GG                              | AA                 | AA               | INTERGENIC                    |                    |                                                              |
| SNP_26071_A_29639234 | NC_021163.1    | Ca_Kabuli_Chr04 | 29639234                | GG                              | AA                 | AA               | INTERGENIC                    |                    |                                                              |
| SNP_26073_A_29640388 | NC_021163.1    | Ca_Kabuli_Chr04 | 29640388                | GG                              | AA                 | AA               | INTERGENIC                    |                    |                                                              |
| SNP_26074_A_29641472 | NC_021163.1    | Ca_Kabuli_Chr04 | 29641472                | TT                              | CC                 | CC               | INTERGENIC                    |                    |                                                              |
| SNP_26075_A_29644066 | NC_021163.1    | Ca_Kabuli_Chr04 | 29644066                | CC                              | TT                 | TT               | DRR                           | 101511432          | activator of 90 kDa heat shock protein ATPase homolog 1-like |
| SNP_26076_A_29646966 | NC_021163.1    | Ca_Kabuli_Chr04 | 29646966                | GG                              | AA                 | AA               | URR                           | 101511432          | activator of 90 kDa heat shock protein ATPase homolog 1-like |

| SNPs IDs             | Chromosome IDs | Chromosomes     | Physical positions (bp) | CDC Frontier genome (Reference genome) | (Pusa 1103 & HPNB) | (ILWC 46 & LPNB) | Sequence Components of genome | Gene accession IDs | Putative functions                                           |
|----------------------|----------------|-----------------|-------------------------|----------------------------------------|--------------------|------------------|-------------------------------|--------------------|--------------------------------------------------------------|
| SNP_26077_A_29647835 | NC_021163.1    | Ca_Kabuli_Chr04 | 29647835                | GG                                     | AA                 | AA               | URR                           | 101511432          | activator of 90 kDa heat shock protein ATPase homolog 1-like |
| SNP_26078_A_29647884 | NC_021163.1    | Ca_Kabuli_Chr04 | 29647884                | TT                                     | AA                 | AA               | URR                           | 101511432          | activator of 90 kDa heat shock protein ATPase homolog 1-like |
| SNP_26079_A_29648237 | NC_021163.1    | Ca_Kabuli_Chr04 | 29648237                | TT                                     | CC                 | CC               | URR                           | 101511432          | activator of 90 kDa heat shock protein ATPase homolog 1-like |
| SNP_26080_A_29648259 | NC_021163.1    | Ca_Kabuli_Chr04 | 29648259                | CC                                     | TT                 | TT               | URR                           | 101511432          | activator of 90 kDa heat shock protein ATPase homolog 1-like |
| SNP_26081_A_29652595 | NC_021163.1    | Ca_Kabuli_Chr04 | 29652595                | TT                                     | CC                 | CC               | INTERGENIC                    |                    |                                                              |
| SNP_26082_A_29652838 | NC_021163.1    | Ca_Kabuli_Chr04 | 29652838                | GG                                     | AA                 | AA               | INTERGENIC                    |                    |                                                              |
| SNP_26083_A_29653075 | NC_021163.1    | Ca_Kabuli_Chr04 | 29653075                | AA                                     | CC                 | CC               | INTERGENIC                    |                    |                                                              |
| SNP_26084_A_29653155 | NC_021163.1    | Ca_Kabuli_Chr04 | 29653155                | CC                                     | TT                 | TT               | INTERGENIC                    |                    |                                                              |
| SNP_26085_A_29653797 | NC_021163.1    | Ca_Kabuli_Chr04 | 29653797                | GG                                     | AA                 | AA               | INTERGENIC                    |                    |                                                              |
| SNP_26086_A_29653813 | NC_021163.1    | Ca_Kabuli_Chr04 | 29653813                | CC                                     | TT                 | TT               | INTERGENIC                    |                    |                                                              |
| SNP_26087_A_29654837 | NC_021163.1    | Ca_Kabuli_Chr04 | 29654837                | GG                                     | AA                 | AA               | INTERGENIC                    |                    |                                                              |
| SNP_26088_A_29656422 | NC_021163.1    | Ca_Kabuli_Chr04 | 29656422                | GG                                     | AA                 | AA               | INTERGENIC                    |                    |                                                              |
| SNP_26089_A_29656765 | NC_021163.1    | Ca_Kabuli_Chr04 | 29656765                | CC                                     | TT                 | TT               | INTERGENIC                    |                    |                                                              |
| SNP_26091_A_29659255 | NC_021163.1    | Ca_Kabuli_Chr04 | 29659255                | AA                                     | GG                 | GG               | INTERGENIC                    |                    |                                                              |
| SNP_26092_A_29659258 | NC_021163.1    | Ca_Kabuli_Chr04 | 29659258                | GG                                     | AA                 | AA               | INTERGENIC                    |                    |                                                              |
| SNP_26093_A_29660754 | NC_021163.1    | Ca_Kabuli_Chr04 | 29660754                | GG                                     | AA                 | AA               | INTERGENIC                    |                    |                                                              |
| SNP_26094_A_29670010 | NC_021163.1    | Ca_Kabuli_Chr04 | 29670010                | GG                                     | AA                 | AA               | INTERGENIC                    |                    |                                                              |
| SNP_26095_A_29671363 | NC_021163.1    | Ca_Kabuli_Chr04 | 29671363                | CC                                     | TT                 | TT               | INTERGENIC                    |                    |                                                              |
| SNP_26096_A_29671990 | NC_021163.1    | Ca_Kabuli_Chr04 | 29671990                | CC                                     | TT                 | TT               | DRR                           | 101511764          | centromere-associated protein E                              |
| SNP_26097_A_29674884 | NC_021163.1    | Ca_Kabuli_Chr04 | 29674884                | GG                                     | AA                 | AA               | INTRON                        | 101511764          | centromere-associated protein E                              |
| SNP_26098_A_29680412 | NC_021163.1    | Ca_Kabuli_Chr04 | 29680412                | TT                                     | CC                 | CC               | INTRON                        | 101511764          | centromere-associated protein E                              |
| SNP_26100_A_29684633 | NC_021163.1    | Ca_Kabuli_Chr04 | 29684633                | TT                                     | CC                 | CC               | INTRON                        | 101511764          | centromere-associated protein E                              |

| SNPs IDs             | Chromosome IDs | Chromosomes     | Physical positions (bp) | CDC Frontier genome (Reference genome) | (Pusa 1103 & HPNB) | (ILWC 46 & LPNB) | Sequence Components of genome | Gene accession IDs | Putative functions                  |
|----------------------|----------------|-----------------|-------------------------|----------------------------------------|--------------------|------------------|-------------------------------|--------------------|-------------------------------------|
| SNP_26102_A_29686848 | NC_021163.1    | Ca_Kabuli_Chr04 | 29686848                | CC                                     | AA                 | AA               | INTRON                        | 101511764          | centromere-associated protein E     |
| SNP_26104_A_29700681 | NC_021163.1    | Ca_Kabuli_Chr04 | 29700681                | GG                                     | AA                 | AA               | URR                           | 101511764          | centromere-associated protein E     |
| SNP_26106_A_29702101 | NC_021163.1    | Ca_Kabuli_Chr04 | 29702101                | TT                                     | CC                 | CC               | INTERGENIC                    |                    |                                     |
| SNP_26107_A_29702105 | NC_021163.1    | Ca_Kabuli_Chr04 | 29702105                | GG                                     | TT                 | TT               | INTERGENIC                    |                    |                                     |
| SNP_26109_A_29702439 | NC_021163.1    | Ca_Kabuli_Chr04 | 29702439                | AA                                     | GG                 | GG               | INTERGENIC                    |                    |                                     |
| SNP_26110_A_29702460 | NC_021163.1    | Ca_Kabuli_Chr04 | 29702460                | CC                                     | TT                 | TT               | INTERGENIC                    |                    |                                     |
| SNP_26111_A_29703282 | NC_021163.1    | Ca_Kabuli_Chr04 | 29703282                | TT                                     | AA                 | AA               | INTERGENIC                    |                    |                                     |
| SNP_26112_A_29711467 | NC_021163.1    | Ca_Kabuli_Chr04 | 29711467                | AA                                     | GG                 | GG               | INTERGENIC                    |                    |                                     |
| SNP_26113_A_29715615 | NC_021163.1    | Ca_Kabuli_Chr04 | 29715615                | TT                                     | GG                 | GG               | INTERGENIC                    |                    |                                     |
| SNP_26114_A_29715781 | NC_021163.1    | Ca_Kabuli_Chr04 | 29715781                | CC                                     | TT                 | TT               | INTERGENIC                    |                    |                                     |
| SNP_26115_A_29716050 | NC_021163.1    | Ca_Kabuli_Chr04 | 29716050                | TT                                     | GG                 | GG               | INTERGENIC                    |                    |                                     |
| SNP_26116_A_29716693 | NC_021163.1    | Ca_Kabuli_Chr04 | 29716693                | TT                                     | CC                 | CC               | INTERGENIC                    |                    |                                     |
| SNP_26117_A_29716776 | NC_021163.1    | Ca_Kabuli_Chr04 | 29716776                | TT                                     | CC                 | CC               | INTERGENIC                    |                    |                                     |
| SNP_26120_A_29722288 | NC_021163.1    | Ca_Kabuli_Chr04 | 29722288                | AA                                     | GG                 | GG               | URR                           | 101512080          | protein trichome birefringence-like |
| SNP_26121_A_29722567 | NC_021163.1    | Ca_Kabuli_Chr04 | 29722567                | AA                                     | GG                 | GG               | URR                           | 101512080          | protein trichome birefringence-like |
| SNP_26122_A_29722588 | NC_021163.1    | Ca_Kabuli_Chr04 | 29722588                | AA                                     | CC                 | CC               | URR                           | 101512080          | protein trichome birefringence-like |
| SNP_26123_A_29722604 | NC_021163.1    | Ca_Kabuli_Chr04 | 29722604                | CC                                     | TT                 | TT               | URR                           | 101512080          | protein trichome birefringence-like |
| SNP_26124_A_29722607 | NC_021163.1    | Ca_Kabuli_Chr04 | 29722607                | TT                                     | CC                 | CC               | URR                           | 101512080          | protein trichome birefringence-like |
| SNP_26125_A_29747755 | NC_021163.1    | Ca_Kabuli_Chr04 | 29747755                | CC                                     | GG                 | GG               | INTERGENIC                    |                    |                                     |
| SNP_26127_A_29762505 | NC_021163.1    | Ca_Kabuli_Chr04 | 29762505                | CC                                     | TT                 | TT               | INTERGENIC                    |                    |                                     |
| SNP_26128_A_29762507 | NC_021163.1    | Ca_Kabuli_Chr04 | 29762507                | GG                                     | TT                 | TT               | INTERGENIC                    |                    |                                     |
| SNP_26129_A_29762509 | NC_021163.1    | Ca_Kabuli_Chr04 | 29762509                | TT                                     | CC                 | CC               | INTERGENIC                    |                    |                                     |

| SNPs IDs             | Chromosome IDs | Chromosomes     | Physical positions (bp) | CDC Frontier genome (Reference genome) | (Pusa 1103 & HPNB) | (ILWC 46 & LPNB) | Sequence Components of genome | Gene accession IDs | Putative functions |
|----------------------|----------------|-----------------|-------------------------|----------------------------------------|--------------------|------------------|-------------------------------|--------------------|--------------------|
| SNP_26130_A_29769366 | NC_021163.1    | Ca_Kabuli_Chr04 | 29769366                | AA                                     | CC                 | CC               | INTERGENIC                    |                    |                    |
| SNP_26131_A_29771364 | NC_021163.1    | Ca_Kabuli_Chr04 | 29771364                | AA                                     | CC                 | CC               | INTERGENIC                    |                    |                    |
| SNP_26132_A_29771602 | NC_021163.1    | Ca_Kabuli_Chr04 | 29771602                | AA                                     | CC                 | CC               | INTERGENIC                    |                    |                    |
| SNP_26133_A_29771810 | NC_021163.1    | Ca_Kabuli_Chr04 | 29771810                | AA                                     | TT                 | TT               | INTERGENIC                    |                    |                    |
| SNP_26135_A_29784257 | NC_021163.1    | Ca_Kabuli_Chr04 | 29784257                | GG                                     | AA                 | AA               | INTERGENIC                    |                    |                    |
| SNP_26137_A_29794119 | NC_021163.1    | Ca_Kabuli_Chr04 | 29794119                | TT                                     | AA                 | AA               | INTERGENIC                    |                    |                    |
| SNP_26138_A_29803660 | NC_021163.1    | Ca_Kabuli_Chr04 | 29803660                | AA                                     | CC                 | CC               | SYNONYMOUS_CODING             | 101506090          | Unknown function   |
| SNP_26139_A_29805092 | NC_021163.1    | Ca_Kabuli_Chr04 | 29805092                | AA                                     | TT                 | TT               | INTRON                        | 101506090          | Unknown function   |
| SNP_26140_A_29805204 | NC_021163.1    | Ca_Kabuli_Chr04 | 29805204                | GG                                     | AA                 | AA               | NON_SYNONYMOUS_CODING         | 101506090          | Unknown function   |
| SNP_26141_A_29820145 | NC_021163.1    | Ca_Kabuli_Chr04 | 29820145                | GG                                     | TT                 | TT               | INTERGENIC                    |                    |                    |
| SNP_26142_A_29821599 | NC_021163.1    | Ca_Kabuli_Chr04 | 29821599                | GG                                     | TT                 | TT               | INTERGENIC                    |                    |                    |
| SNP_26144_A_29826330 | NC_021163.1    | Ca_Kabuli_Chr04 | 29826330                | AA                                     | GG                 | GG               | INTERGENIC                    |                    |                    |
| SNP_26145_A_29832274 | NC_021163.1    | Ca_Kabuli_Chr04 | 29832274                | TT                                     | CC                 | CC               | INTERGENIC                    |                    |                    |
| SNP_26146_A_29851520 | NC_021163.1    | Ca_Kabuli_Chr04 | 29851520                | AA                                     | GG                 | GG               | INTERGENIC                    |                    |                    |
| SNP_26147_A_29851737 | NC_021163.1    | Ca_Kabuli_Chr04 | 29851737                | TT                                     | CC                 | CC               | INTERGENIC                    |                    |                    |
| SNP_26149_A_29859792 | NC_021163.1    | Ca_Kabuli_Chr04 | 29859792                | CC                                     | TT                 | TT               | INTERGENIC                    |                    |                    |
| SNP_26150_A_29859960 | NC_021163.1    | Ca_Kabuli_Chr04 | 29859960                | GG                                     | AA                 | AA               | INTERGENIC                    |                    |                    |
| SNP_26152_A_29875712 | NC_021163.1    | Ca_Kabuli_Chr04 | 29875712                | GG                                     | TT                 | TT               | INTERGENIC                    |                    |                    |
| SNP_26153_A_29875756 | NC_021163.1    | Ca_Kabuli_Chr04 | 29875756                | GG                                     | CC                 | CC               | INTERGENIC                    |                    |                    |
| SNP_26154_A_29876292 | NC_021163.1    | Ca_Kabuli_Chr04 | 29876292                | AA                                     | GG                 | GG               | INTERGENIC                    |                    |                    |
| SNP_26155_A_29885108 | NC_021163.1    | Ca_Kabuli_Chr04 | 29885108                | CC                                     | TT                 | TT               | INTERGENIC                    |                    |                    |
| SNP_26156_A_29885695 | NC_021163.1    | Ca_Kabuli_Chr04 | 29885695                | TT                                     | GG                 | GG               | INTERGENIC                    |                    |                    |

| SNPs IDs             | Chromosome IDs | Chromosomes     | Physical positions (bp) | CDC Frontier genome (Reference genome) | (Pusa 1103 & HPNB) | (ILWC 46 & LPNB) | Sequence Components of genome | Gene accession IDs | Putative functions |
|----------------------|----------------|-----------------|-------------------------|----------------------------------------|--------------------|------------------|-------------------------------|--------------------|--------------------|
| SNP_26158_A_29886744 | NC_021163.1    | Ca_Kabuli_Chr04 | 29886744                | CC                                     | TT                 | TT               | INTERGENIC                    |                    |                    |
| SNP_26159_A_29886761 | NC_021163.1    | Ca_Kabuli_Chr04 | 29886761                | GG                                     | AA                 | AA               | INTERGENIC                    |                    |                    |
| SNP_26160_A_29900191 | NC_021163.1    | Ca_Kabuli_Chr04 | 29900191                | CC                                     | TT                 | TT               | INTERGENIC                    |                    |                    |
| SNP_26161_A_29900266 | NC_021163.1    | Ca_Kabuli_Chr04 | 29900266                | TT                                     | AA                 | AA               | INTERGENIC                    |                    |                    |
| SNP_26163_A_29900787 | NC_021163.1    | Ca_Kabuli_Chr04 | 29900787                | TT                                     | AA                 | AA               | INTERGENIC                    |                    |                    |
| SNP_26164_A_29902511 | NC_021163.1    | Ca_Kabuli_Chr04 | 29902511                | TT                                     | GG                 | GG               | INTERGENIC                    |                    |                    |
| SNP_26165_A_29907943 | NC_021163.1    | Ca_Kabuli_Chr04 | 29907943                | AA                                     | TT                 | TT               | URR                           | 101512726          | peroxidase A2-like |
| SNP_26166_A_29907944 | NC_021163.1    | Ca_Kabuli_Chr04 | 29907944                | TT                                     | GG                 | GG               | URR                           | 101512726          | peroxidase A2-like |
| SNP_26168_A_29925504 | NC_021163.1    | Ca_Kabuli_Chr04 | 29925504                | GG                                     | TT                 | TT               | URR                           | 101513054          | peroxidase A2-like |
| SNP_26169_A_29930748 | NC_021163.1    | Ca_Kabuli_Chr04 | 29930748                | CC                                     | TT                 | TT               | DRR                           | 101513380          | Unknown function   |
| SNP_26170_A_29930916 | NC_021163.1    | Ca_Kabuli_Chr04 | 29930916                | AA                                     | CC                 | CC               | DRR                           | 101513380          | Unknown function   |
| SNP_26171_A_29931040 | NC_021163.1    | Ca_Kabuli_Chr04 | 29931040                | CC                                     | TT                 | TT               | DRR                           | 101513380          | Unknown function   |
| SNP_26172_A_29931103 | NC_021163.1    | Ca_Kabuli_Chr04 | 29931103                | AA                                     | GG                 | GG               | INTERGENIC                    |                    |                    |
| SNP_26173_A_29931374 | NC_021163.1    | Ca_Kabuli_Chr04 | 29931374                | TT                                     | GG                 | GG               | INTERGENIC                    |                    |                    |
| SNP_26174_A_29932374 | NC_021163.1    | Ca_Kabuli_Chr04 | 29932374                | GG                                     | CC                 | CC               | DRR                           | 101513694          | Unknown function   |
| SNP_26176_A_29932843 | NC_021163.1    | Ca_Kabuli_Chr04 | 29932843                | GG                                     | TT                 | TT               | DRR                           | 101513694          | Unknown function   |
| SNP_26177_A_29932863 | NC_021163.1    | Ca_Kabuli_Chr04 | 29932863                | TT                                     | CC                 | CC               | DRR                           | 101513694          | Unknown function   |
| SNP_26178_A_29932885 | NC_021163.1    | Ca_Kabuli_Chr04 | 29932885                | AA                                     | CC                 | CC               | DRR                           | 101513694          | Unknown function   |
| SNP_26179_A_29932895 | NC_021163.1    | Ca_Kabuli_Chr04 | 29932895                | AA                                     | TT                 | TT               | DRR                           | 101513694          | Unknown function   |
| SNP_26180_A_29933037 | NC_021163.1    | Ca_Kabuli_Chr04 | 29933037                | AA                                     | GG                 | GG               | DRR                           | 101513694          | Unknown function   |
| SNP_26181_A_29933372 | NC_021163.1    | Ca_Kabuli_Chr04 | 29933372                | GG                                     | CC                 | CC               | DRR                           | 101507080          | Unknown function   |
| SNP_26182_A_29933678 | NC_021163.1    | Ca_Kabuli_Chr04 | 29933678                | AA                                     | GG                 | GG               | DRR                           | 101507080          | Unknown function   |

| SNPs IDs             | Chromosome IDs | Chromosomes     | Physical positions (bp) | CDC Frontier genome (Reference genome) | (Pusa 1103 & HPNB) | (ILWC 46 & LPNB) | Sequence Components of genome | Gene accession IDs | Putative functions |
|----------------------|----------------|-----------------|-------------------------|----------------------------------------|--------------------|------------------|-------------------------------|--------------------|--------------------|
| SNP_26183_A_29933718 | NC_021163.1    | Ca_Kabuli_Chr04 | 29933718                | CC                                     | GG                 | GG               | DRR                           | 101507080          | Unknown function   |
| SNP_26184_A_29933734 | NC_021163.1    | Ca_Kabuli_Chr04 | 29933734                | AA                                     | CC                 | CC               | DRR                           | 101507080          | Unknown function   |
| SNP_26186_A_29933794 | NC_021163.1    | Ca_Kabuli_Chr04 | 29933794                | TT                                     | GG                 | GG               | DRR                           | 101507080          | Unknown function   |
| SNP_26187_A_29933800 | NC_021163.1    | Ca_Kabuli_Chr04 | 29933800                | GG                                     | TT                 | TT               | DRR                           | 101507080          | Unknown function   |
| SNP_26188_A_29934081 | NC_021163.1    | Ca_Kabuli_Chr04 | 29934081                | TT                                     | CC                 | CC               | URR                           | 101513694          | Unknown function   |
| SNP_26189_A_29934139 | NC_021163.1    | Ca_Kabuli_Chr04 | 29934139                | AA                                     | GG                 | GG               | URR                           | 101513694          | Unknown function   |
| SNP_26190_A_29934143 | NC_021163.1    | Ca_Kabuli_Chr04 | 29934143                | TT                                     | CC                 | CC               | URR                           | 101513694          | Unknown function   |
| SNP_26191_A_29934176 | NC_021163.1    | Ca_Kabuli_Chr04 | 29934176                | GG                                     | CC                 | CC               | URR                           | 101513694          | Unknown function   |
| SNP_26192_A_29934197 | NC_021163.1    | Ca_Kabuli_Chr04 | 29934197                | TT                                     | CC                 | CC               | URR                           | 101513694          | Unknown function   |
| SNP_26193_A_29934403 | NC_021163.1    | Ca_Kabuli_Chr04 | 29934403                | GG                                     | TT                 | TT               | URR                           | 101513694          | Unknown function   |
| SNP_26194_A_29934405 | NC_021163.1    | Ca_Kabuli_Chr04 | 29934405                | AA                                     | CC                 | CC               | URR                           | 101513694          | Unknown function   |
| SNP_26195_A_29934425 | NC_021163.1    | Ca_Kabuli_Chr04 | 29934425                | TT                                     | AA                 | AA               | URR                           | 101513694          | Unknown function   |
| SNP_26196_A_29934561 | NC_021163.1    | Ca_Kabuli_Chr04 | 29934561                | GG                                     | TT                 | TT               | URR                           | 101513694          | Unknown function   |
| SNP_26197_A_29936472 | NC_021163.1    | Ca_Kabuli_Chr04 | 29936472                | TT                                     | CC                 | CC               | URR                           | 101507080          | Unknown function   |
| SNP_26198_A_29939231 | NC_021163.1    | Ca_Kabuli_Chr04 | 29939231                | GG                                     | TT                 | TT               | INTERGENIC                    |                    |                    |
| SNP_26199_A_29939273 | NC_021163.1    | Ca_Kabuli_Chr04 | 29939273                | AA                                     | GG                 | GG               | INTERGENIC                    |                    |                    |
| SNP_26200_A_29940130 | NC_021163.1    | Ca_Kabuli_Chr04 | 29940130                | CC                                     | TT                 | TT               | INTERGENIC                    |                    |                    |
| SNP_26202_A_29942480 | NC_021163.1    | Ca_Kabuli_Chr04 | 29942480                | TT                                     | CC                 | CC               | INTERGENIC                    |                    |                    |
| SNP_26203_A_29942529 | NC_021163.1    | Ca_Kabuli_Chr04 | 29942529                | CC                                     | GG                 | GG               | INTERGENIC                    |                    |                    |
| SNP_26204_A_29942545 | NC_021163.1    | Ca_Kabuli_Chr04 | 29942545                | TT                                     | CC                 | CC               | INTERGENIC                    |                    |                    |
| SNP_26205_A_29943003 | NC_021163.1    | Ca_Kabuli_Chr04 | 29943003                | AA                                     | TT                 | TT               | INTERGENIC                    |                    |                    |
| SNP_26206_A_29943004 | NC_021163.1    | Ca_Kabuli_Chr04 | 29943004                | AA                                     | GG                 | GG               | INTERGENIC                    |                    |                    |



| SNPs IDs             | Chromosome IDs | Chromosomes     | Physical positions (bp) | CDC Frontier genome (Reference genome) | (Pusa 1103 & HPNB) | (ILWC 46 & LPNB) | Sequence genome | Components of | Gene accession IDs | Putative functions |
|----------------------|----------------|-----------------|-------------------------|----------------------------------------|--------------------|------------------|-----------------|---------------|--------------------|--------------------|
| SNP_26207_A_29943245 | NC_021163.1    | Ca_Kabuli_Chr04 | 29943245                | AA                                     | CC                 | CC               | INTERGENIC      |               |                    |                    |
| SNP_26208_A_29943402 | NC_021163.1    | Ca_Kabuli_Chr04 | 29943402                | CC                                     | TT                 | TT               | INTERGENIC      |               |                    |                    |
| SNP_26209_A_29943403 | NC_021163.1    | Ca_Kabuli_Chr04 | 29943403                | GG                                     | AA                 | AA               | INTERGENIC      |               |                    |                    |
| SNP_26210_A_29943794 | NC_021163.1    | Ca_Kabuli_Chr04 | 29943794                | CC                                     | AA                 | AA               | INTERGENIC      |               |                    |                    |
| SNP_26211_A_29944382 | NC_021163.1    | Ca_Kabuli_Chr04 | 29944382                | GG                                     | CC                 | CC               | INTERGENIC      |               |                    |                    |
| SNP_26212_A_29945900 | NC_021163.1    | Ca_Kabuli_Chr04 | 29945900                | TT                                     | AA                 | AA               | INTERGENIC      |               |                    |                    |
| SNP_26213_A_29961394 | NC_021163.1    | Ca_Kabuli_Chr04 | 29961394                | TT                                     | CC                 | CC               | INTERGENIC      |               |                    |                    |
| SNP_26214_A_29961401 | NC_021163.1    | Ca_Kabuli_Chr04 | 29961401                | CC                                     | TT                 | TT               | INTERGENIC      |               |                    |                    |
| SNP_26215_A_29961897 | NC_021163.1    | Ca_Kabuli_Chr04 | 29961897                | AA                                     | GG                 | GG               | INTERGENIC      |               |                    |                    |
| SNP_26216_A_29979601 | NC_021163.1    | Ca_Kabuli_Chr04 | 29979601                | TT                                     | CC                 | CC               | INTERGENIC      |               |                    |                    |
| SNP_26217_A_29985667 | NC_021163.1    | Ca_Kabuli_Chr04 | 29985667                | AA                                     | TT                 | TT               | INTERGENIC      |               |                    |                    |
| SNP_26218_A_29985691 | NC_021163.1    | Ca_Kabuli_Chr04 | 29985691                | CC                                     | AA                 | AA               | INTERGENIC      |               |                    |                    |
| SNP_26220_A_29987939 | NC_021163.1    | Ca_Kabuli_Chr04 | 29987939                | GG                                     | TT                 | TT               | INTRON          | id85867       | Unknown function   |                    |
| SNP_26221_A_29987940 | NC_021163.1    | Ca_Kabuli_Chr04 | 29987940                | CC                                     | AA                 | AA               | INTRON          | id85867       | Unknown function   |                    |
| SNP_26222_A_29987948 | NC_021163.1    | Ca_Kabuli_Chr04 | 29987948                | AA                                     | CC                 | CC               | INTRON          | id85867       | Unknown function   |                    |
| SNP_26223_A_29987956 | NC_021163.1    | Ca_Kabuli_Chr04 | 29987956                | CC                                     | TT                 | TT               | INTRON          | id85867       | Unknown function   |                    |
| SNP_26224_A_30005759 | NC_021163.1    | Ca_Kabuli_Chr04 | 30005759                | GG                                     | AA                 | AA               | INTERGENIC      |               |                    |                    |
| SNP_26225_A_30005763 | NC_021163.1    | Ca_Kabuli_Chr04 | 30005763                | TT                                     | GG                 | GG               | INTERGENIC      |               |                    |                    |
| SNP_26226_A_30009241 | NC_021163.1    | Ca_Kabuli_Chr04 | 30009241                | CC                                     | AA                 | AA               | INTERGENIC      |               |                    |                    |
| SNP_26227_A_30019888 | NC_021163.1    | Ca_Kabuli_Chr04 | 30019888                | TT                                     | CC                 | CC               | INTERGENIC      |               |                    |                    |
| SNP_26228_A_30019892 | NC_021163.1    | Ca_Kabuli_Chr04 | 30019892                | AA                                     | GG                 | GG               | INTERGENIC      |               |                    |                    |
| SNP_26229_A_30019895 | NC_021163.1    | Ca_Kabuli_Chr04 | 30019895                | GG                                     | AA                 | AA               | INTERGENIC      |               |                    |                    |

| SNPs IDs             | Chromosome IDs | Chromosomes     | Physical positions (bp) | CDC Frontier (Reference genome) | (Pusa 1103 & HPNB) | (ILWC 46 & LPNB) | Sequence Components of genome | Gene accession IDs | Putative functions                                           |
|----------------------|----------------|-----------------|-------------------------|---------------------------------|--------------------|------------------|-------------------------------|--------------------|--------------------------------------------------------------|
| SNP_26230_A_30019941 | NC_021163.1    | Ca_Kabuli_Chr04 | 30019941                | GG                              | TT                 | TT               | INTERGENIC                    |                    |                                                              |
| SNP_26231_A_30019956 | NC_021163.1    | Ca_Kabuli_Chr04 | 30019956                | GG                              | TT                 | TT               | INTERGENIC                    |                    |                                                              |
| SNP_26232_A_30025676 | NC_021163.1    | Ca_Kabuli_Chr04 | 30025676                | TT                              | CC                 | CC               | INTERGENIC                    |                    |                                                              |
| SNP_26233_A_30025708 | NC_021163.1    | Ca_Kabuli_Chr04 | 30025708                | AA                              | GG                 | GG               | INTERGENIC                    |                    |                                                              |
| SNP_26234_A_30025716 | NC_021163.1    | Ca_Kabuli_Chr04 | 30025716                | TT                              | CC                 | CC               | INTERGENIC                    |                    |                                                              |
| SNP_26235_A_30025751 | NC_021163.1    | Ca_Kabuli_Chr04 | 30025751                | CC                              | TT                 | TT               | INTERGENIC                    |                    |                                                              |
| SNP_26237_A_30033348 | NC_021163.1    | Ca_Kabuli_Chr04 | 30033348                | GG                              | TT                 | TT               | INTERGENIC                    |                    |                                                              |
| SNP_26238_A_30033429 | NC_021163.1    | Ca_Kabuli_Chr04 | 30033429                | GG                              | CC                 | CC               | INTERGENIC                    |                    |                                                              |
| SNP_26239_A_30042887 | NC_021163.1    | Ca_Kabuli_Chr04 | 30042887                | CC                              | AA                 | AA               | NON_SYNONYMOUS_CODING         | 101514267          | probable L-type lectin-domain containing receptor kinase S.5 |
| SNP_26240_A_30042921 | NC_021163.1    | Ca_Kabuli_Chr04 | 30042921                | CC                              | TT                 | TT               | SYNONYMOUS_CODING             | 101514267          | probable L-type lectin-domain containing receptor kinase S.5 |
| SNP_26242_A_30046009 | NC_021163.1    | Ca_Kabuli_Chr04 | 30046009                | TT                              | AA                 | AA               | URR                           | 101514267          | probable L-type lectin-domain containing receptor kinase S.5 |
| SNP_26244_A_30047154 | NC_021163.1    | Ca_Kabuli_Chr04 | 30047154                | TT                              | AA                 | AA               | INTERGENIC                    |                    |                                                              |
| SNP_26245_A_30049368 | NC_021163.1    | Ca_Kabuli_Chr04 | 30049368                | TT                              | CC                 | CC               | INTERGENIC                    |                    |                                                              |
| SNP_26246_A_30050904 | NC_021163.1    | Ca_Kabuli_Chr04 | 30050904                | GG                              | AA                 | AA               | INTERGENIC                    |                    |                                                              |
| SNP_26247_A_30055018 | NC_021163.1    | Ca_Kabuli_Chr04 | 30055018                | GG                              | AA                 | AA               | INTERGENIC                    |                    |                                                              |
| SNP_26248_A_30060330 | NC_021163.1    | Ca_Kabuli_Chr04 | 30060330                | GG                              | AA                 | AA               | INTERGENIC                    |                    |                                                              |
| SNP_26249_A_30073274 | NC_021163.1    | Ca_Kabuli_Chr04 | 30073274                | AA                              | GG                 | GG               | INTERGENIC                    |                    |                                                              |
| SNP_26250_A_30074960 | NC_021163.1    | Ca_Kabuli_Chr04 | 30074960                | GG                              | AA                 | AA               | INTERGENIC                    |                    |                                                              |
| SNP_26252_A_30075871 | NC_021163.1    | Ca_Kabuli_Chr04 | 30075871                | GG                              | AA                 | AA               | INTERGENIC                    |                    |                                                              |
| SNP_26253_A_30076753 | NC_021163.1    | Ca_Kabuli_Chr04 | 30076753                | CC                              | TT                 | TT               | INTERGENIC                    |                    |                                                              |
| SNP_26255_A_30078123 | NC_021163.1    | Ca_Kabuli_Chr04 | 30078123                | AA                              | GG                 | GG               | INTERGENIC                    |                    |                                                              |
| SNP_26256_A_30080423 | NC_021163.1    | Ca_Kabuli_Chr04 | 30080423                | TT                              | CC                 | CC               | INTRON                        | id85880            | Unknown function                                             |

| SNPs IDs             | Chromosome IDs | Chromosomes     | Physical positions (bp) | CDC Frontier (Reference genome) | (Pusa 1103 & HPNB) | (ILWC 46 & LPNB) | Sequence Components of genome | Gene accession IDs | Putative functions                 |
|----------------------|----------------|-----------------|-------------------------|---------------------------------|--------------------|------------------|-------------------------------|--------------------|------------------------------------|
| SNP_26257_A_30080426 | NC_021163.1    | Ca_Kabuli_Chr04 | 30080426                | CC                              | AA                 | AA               | INTRON                        | id85880            | Unknown function                   |
| SNP_26258_A_30082701 | NC_021163.1    | Ca_Kabuli_Chr04 | 30082701                | GG                              | AA                 | AA               | NON_SYNONYMOUS_CODING         | id85880            | Unknown function                   |
| SNP_26260_A_30085411 | NC_021163.1    | Ca_Kabuli_Chr04 | 30085411                | AA                              | GG                 | GG               | URR                           | 101514906          | uncharacterized LOC101514906       |
| SNP_26263_A_30086961 | NC_021163.1    | Ca_Kabuli_Chr04 | 30086961                | AA                              | CC                 | CC               | INTERGENIC                    |                    |                                    |
| SNP_26264_A_30086966 | NC_021163.1    | Ca_Kabuli_Chr04 | 30086966                | TT                              | CC                 | CC               | INTERGENIC                    |                    |                                    |
| SNP_26265_A_30087209 | NC_021163.1    | Ca_Kabuli_Chr04 | 30087209                | AA                              | GG                 | GG               | INTERGENIC                    |                    |                                    |
| SNP_26266_A_30096648 | NC_021163.1    | Ca_Kabuli_Chr04 | 30096648                | AA                              | GG                 | GG               | INTERGENIC                    |                    |                                    |
| SNP_26267_A_30097454 | NC_021163.1    | Ca_Kabuli_Chr04 | 30097454                | GG                              | AA                 | AA               | INTERGENIC                    |                    |                                    |
| SNP_26269_A_30102025 | NC_021163.1    | Ca_Kabuli_Chr04 | 30102025                | GG                              | TT                 | TT               | DRR                           | 101515111          | probable protein phosphatase 2C 25 |
| SNP_26270_A_30102048 | NC_021163.1    | Ca_Kabuli_Chr04 | 30102048                | TT                              | GG                 | GG               | DRR                           | 101515111          | probable protein phosphatase 2C 25 |
| SNP_26271_A_30102049 | NC_021163.1    | Ca_Kabuli_Chr04 | 30102049                | CC                              | TT                 | TT               | DRR                           | 101515111          | probable protein phosphatase 2C 25 |
| SNP_26272_A_30102116 | NC_021163.1    | Ca_Kabuli_Chr04 | 30102116                | AA                              | GG                 | GG               | DRR                           | 101515111          | probable protein phosphatase 2C 25 |
| SNP_26273_A_30102341 | NC_021163.1    | Ca_Kabuli_Chr04 | 30102341                | GG                              | AA                 | AA               | DRR                           | 101515111          | probable protein phosphatase 2C 25 |
| SNP_26274_A_30107431 | NC_021163.1    | Ca_Kabuli_Chr04 | 30107431                | AA                              | GG                 | GG               | DRR                           | 101515664          | actin-97                           |
| SNP_26275_A_30107453 | NC_021163.1    | Ca_Kabuli_Chr04 | 30107453                | CC                              | TT                 | TT               | DRR                           | 101515664          | actin-97                           |
| SNP_26276_A_30111815 | NC_021163.1    | Ca_Kabuli_Chr04 | 30111815                | AA                              | CC                 | CC               | URR                           | 101515664          | actin-97                           |
| SNP_26277_A_30116775 | NC_021163.1    | Ca_Kabuli_Chr04 | 30116775                | TT                              | CC                 | CC               | INTERGENIC                    |                    |                                    |
| SNP_26278_A_30116813 | NC_021163.1    | Ca_Kabuli_Chr04 | 30116813                | AA                              | TT                 | TT               | INTERGENIC                    |                    |                                    |
| SNP_26279_A_30117018 | NC_021163.1    | Ca_Kabuli_Chr04 | 30117018                | AA                              | GG                 | GG               | INTERGENIC                    |                    |                                    |
| SNP_26280_A_30117023 | NC_021163.1    | Ca_Kabuli_Chr04 | 30117023                | CC                              | GG                 | GG               | INTERGENIC                    |                    |                                    |
| SNP_26281_A_30117063 | NC_021163.1    | Ca_Kabuli_Chr04 | 30117063                | CC                              | TT                 | TT               | INTERGENIC                    |                    |                                    |
| SNP_26282_A_30118013 | NC_021163.1    | Ca_Kabuli_Chr04 | 30118013                | GG                              | AA                 | AA               | INTERGENIC                    |                    |                                    |

| SNPs IDs             | Chromosome IDs | Chromosomes     | Physical positions (bp) | CDC Frontier (Reference genome) | (Pusa 1103 & HPNB) | (ILWC 46 & LPNB) | Sequence genome | Components of | Gene accession IDs | Putative functions |
|----------------------|----------------|-----------------|-------------------------|---------------------------------|--------------------|------------------|-----------------|---------------|--------------------|--------------------|
| SNP_26283_A_30118046 | NC_021163.1    | Ca_Kabuli_Chr04 | 30118046                | AA                              | GG                 | GG               | INTERGENIC      |               |                    |                    |
| SNP_26284_A_30118055 | NC_021163.1    | Ca_Kabuli_Chr04 | 30118055                | GG                              | AA                 | AA               | INTERGENIC      |               |                    |                    |
| SNP_26286_A_30118706 | NC_021163.1    | Ca_Kabuli_Chr04 | 30118706                | GG                              | AA                 | AA               | INTERGENIC      |               |                    |                    |
| SNP_26287_A_30119008 | NC_021163.1    | Ca_Kabuli_Chr04 | 30119008                | TT                              | CC                 | CC               | INTERGENIC      |               |                    |                    |
| SNP_26288_A_30119397 | NC_021163.1    | Ca_Kabuli_Chr04 | 30119397                | CC                              | TT                 | TT               | INTERGENIC      |               |                    |                    |
| SNP_26289_A_30120224 | NC_021163.1    | Ca_Kabuli_Chr04 | 30120224                | GG                              | AA                 | AA               | INTERGENIC      |               |                    |                    |
| SNP_26290_A_30120254 | NC_021163.1    | Ca_Kabuli_Chr04 | 30120254                | GG                              | TT                 | TT               | INTERGENIC      |               |                    |                    |
| SNP_26292_A_30120593 | NC_021163.1    | Ca_Kabuli_Chr04 | 30120593                | TT                              | CC                 | CC               | INTERGENIC      |               |                    |                    |
| SNP_26293_A_30120651 | NC_021163.1    | Ca_Kabuli_Chr04 | 30120651                | TT                              | CC                 | CC               | INTERGENIC      |               |                    |                    |
| SNP_26295_A_30120709 | NC_021163.1    | Ca_Kabuli_Chr04 | 30120709                | CC                              | TT                 | TT               | INTERGENIC      |               |                    |                    |
| SNP_26297_A_30125409 | NC_021163.1    | Ca_Kabuli_Chr04 | 30125409                | GG                              | AA                 | AA               | INTERGENIC      |               |                    |                    |
| SNP_26298_A_30125960 | NC_021163.1    | Ca_Kabuli_Chr04 | 30125960                | GG                              | AA                 | AA               | INTERGENIC      |               |                    |                    |
| SNP_26300_A_30134467 | NC_021163.1    | Ca_Kabuli_Chr04 | 30134467                | TT                              | CC                 | CC               | INTERGENIC      |               |                    |                    |
| SNP_26301_A_30138427 | NC_021163.1    | Ca_Kabuli_Chr04 | 30138427                | GG                              | AA                 | AA               | INTERGENIC      |               |                    |                    |
| SNP_26302_A_30138865 | NC_021163.1    | Ca_Kabuli_Chr04 | 30138865                | CC                              | TT                 | TT               | INTERGENIC      |               |                    |                    |
| SNP_26303_A_30139170 | NC_021163.1    | Ca_Kabuli_Chr04 | 30139170                | GG                              | AA                 | AA               | INTERGENIC      |               |                    |                    |
| SNP_26304_A_30139203 | NC_021163.1    | Ca_Kabuli_Chr04 | 30139203                | TT                              | CC                 | CC               | INTERGENIC      |               |                    |                    |
| SNP_26305_A_30140083 | NC_021163.1    | Ca_Kabuli_Chr04 | 30140083                | TT                              | GG                 | GG               | INTERGENIC      |               |                    |                    |
| SNP_26306_A_30140860 | NC_021163.1    | Ca_Kabuli_Chr04 | 30140860                | AA                              | CC                 | CC               | INTERGENIC      |               |                    |                    |
| SNP_26308_A_30142340 | NC_021163.1    | Ca_Kabuli_Chr04 | 30142340                | TT                              | AA                 | AA               | INTERGENIC      |               |                    |                    |
| SNP_26309_A_30142343 | NC_021163.1    | Ca_Kabuli_Chr04 | 30142343                | GG                              | CC                 | CC               | INTERGENIC      |               |                    |                    |
| SNP_26310_A_30143775 | NC_021163.1    | Ca_Kabuli_Chr04 | 30143775                | GG                              | CC                 | CC               | INTERGENIC      |               |                    |                    |

| SNPs IDs             | Chromosome IDs | Chromosomes     | Physical positions (bp) | CDC Frontier genome (Reference genome) | (Pusa 1103 & HPNB) | (ILWC 46 & LPNB) | Sequence Components of genome | Gene accession IDs | Putative functions                                          |
|----------------------|----------------|-----------------|-------------------------|----------------------------------------|--------------------|------------------|-------------------------------|--------------------|-------------------------------------------------------------|
| SNP_26311_A_30148017 | NC_021163.1    | Ca_Kabuli_Chr04 | 30148017                | TT                                     | AA                 | AA               | INTRON                        | 101488751          | probable plastid-lipid-associated protein 13, chloroplastic |
| SNP_26313_A_30149278 | NC_021163.1    | Ca_Kabuli_Chr04 | 30149278                | TT                                     | AA                 | AA               | INTRON                        | 101488751          | probable plastid-lipid-associated protein 13, chloroplastic |
| SNP_26314_A_30149318 | NC_021163.1    | Ca_Kabuli_Chr04 | 30149318                | TT                                     | CC                 | CC               | INTRON                        | 101488751          | probable plastid-lipid-associated protein 13, chloroplastic |
| SNP_26315_A_30149705 | NC_021163.1    | Ca_Kabuli_Chr04 | 30149705                | TT                                     | AA                 | AA               | INTRON                        | 101488751          | probable plastid-lipid-associated protein 13, chloroplastic |
| SNP_26316_A_30152236 | NC_021163.1    | Ca_Kabuli_Chr04 | 30152236                | TT                                     | CC                 | CC               | DRR                           | 101488418          | Unknown function                                            |
| SNP_26317_A_30152739 | NC_021163.1    | Ca_Kabuli_Chr04 | 30152739                | AA                                     | GG                 | GG               | NON_SYNONYMOUS_CODING         | 101488418          | Unknown function                                            |
| SNP_26318_A_30152959 | NC_021163.1    | Ca_Kabuli_Chr04 | 30152959                | CC                                     | TT                 | TT               | NON_SYNONYMOUS_CODING         | 101488418          | Unknown function                                            |
| SNP_26319_A_30171014 | NC_021163.1    | Ca_Kabuli_Chr04 | 30171014                | AA                                     | CC                 | CC               | INTERGENIC                    |                    |                                                             |
| SNP_26320_A_30171038 | NC_021163.1    | Ca_Kabuli_Chr04 | 30171038                | TT                                     | AA                 | AA               | INTERGENIC                    |                    |                                                             |
| SNP_26321_A_30171404 | NC_021163.1    | Ca_Kabuli_Chr04 | 30171404                | AA                                     | TT                 | TT               | INTERGENIC                    |                    |                                                             |
| SNP_26322_A_30171671 | NC_021163.1    | Ca_Kabuli_Chr04 | 30171671                | TT                                     | CC                 | CC               | INTERGENIC                    |                    |                                                             |
| SNP_26323_A_30171681 | NC_021163.1    | Ca_Kabuli_Chr04 | 30171681                | AA                                     | CC                 | CC               | INTERGENIC                    |                    |                                                             |
| SNP_26324_A_30171713 | NC_021163.1    | Ca_Kabuli_Chr04 | 30171713                | TT                                     | CC                 | CC               | INTERGENIC                    |                    |                                                             |
| SNP_26326_A_30171902 | NC_021163.1    | Ca_Kabuli_Chr04 | 30171902                | CC                                     | GG                 | GG               | INTERGENIC                    |                    |                                                             |
| SNP_26327_A_30171974 | NC_021163.1    | Ca_Kabuli_Chr04 | 30171974                | AA                                     | TT                 | TT               | INTERGENIC                    |                    |                                                             |
| SNP_26328_A_30171977 | NC_021163.1    | Ca_Kabuli_Chr04 | 30171977                | TT                                     | CC                 | CC               | INTERGENIC                    |                    |                                                             |
| SNP_26329_A_30171978 | NC_021163.1    | Ca_Kabuli_Chr04 | 30171978                | TT                                     | CC                 | CC               | INTERGENIC                    |                    |                                                             |
| SNP_26330_A_30172144 | NC_021163.1    | Ca_Kabuli_Chr04 | 30172144                | AA                                     | GG                 | GG               | INTERGENIC                    |                    |                                                             |
| SNP_26331_A_30172660 | NC_021163.1    | Ca_Kabuli_Chr04 | 30172660                | GG                                     | TT                 | TT               | INTERGENIC                    |                    |                                                             |
| SNP_26332_A_30172739 | NC_021163.1    | Ca_Kabuli_Chr04 | 30172739                | CC                                     | AA                 | AA               | INTERGENIC                    |                    |                                                             |
| SNP_26333_A_30172742 | NC_021163.1    | Ca_Kabuli_Chr04 | 30172742                | TT                                     | AA                 | AA               | INTERGENIC                    |                    |                                                             |
| SNP_26334_A_30175997 | NC_021163.1    | Ca_Kabuli_Chr04 | 30175997                | GG                                     | AA                 | AA               | INTERGENIC                    |                    |                                                             |

| SNPs IDs             | Chromosome IDs | Chromosomes     | Physical positions (bp) | CDC Frontier genome (Reference genome) | (Pusa 1103 & HPNB) | (ILWC 46 & LPNB) | Sequence genome | Components of | Gene accession IDs | Putative functions |
|----------------------|----------------|-----------------|-------------------------|----------------------------------------|--------------------|------------------|-----------------|---------------|--------------------|--------------------|
| SNP_26335_A_30176022 | NC_021163.1    | Ca_Kabuli_Chr04 | 30176022                | AA                                     | GG                 | GG               | INTERGENIC      |               |                    |                    |
| SNP_26336_A_30176026 | NC_021163.1    | Ca_Kabuli_Chr04 | 30176026                | AA                                     | CC                 | CC               | INTERGENIC      |               |                    |                    |
| SNP_26337_A_30176165 | NC_021163.1    | Ca_Kabuli_Chr04 | 30176165                | AA                                     | CC                 | CC               | INTERGENIC      |               |                    |                    |
| SNP_26338_A_30176180 | NC_021163.1    | Ca_Kabuli_Chr04 | 30176180                | AA                                     | TT                 | TT               | INTERGENIC      |               |                    |                    |
| SNP_26339_A_30176825 | NC_021163.1    | Ca_Kabuli_Chr04 | 30176825                | AA                                     | GG                 | GG               | INTERGENIC      |               |                    |                    |
| SNP_26341_A_30178667 | NC_021163.1    | Ca_Kabuli_Chr04 | 30178667                | CC                                     | TT                 | TT               | INTERGENIC      |               |                    |                    |
| SNP_26342_A_30178670 | NC_021163.1    | Ca_Kabuli_Chr04 | 30178670                | GG                                     | TT                 | TT               | INTERGENIC      |               |                    |                    |
| SNP_26343_A_30184330 | NC_021163.1    | Ca_Kabuli_Chr04 | 30184330                | TT                                     | CC                 | CC               | INTERGENIC      |               |                    |                    |
| SNP_26344_A_30184513 | NC_021163.1    | Ca_Kabuli_Chr04 | 30184513                | TT                                     | AA                 | AA               | INTERGENIC      |               |                    |                    |
| SNP_26346_A_30184558 | NC_021163.1    | Ca_Kabuli_Chr04 | 30184558                | AA                                     | GG                 | GG               | INTERGENIC      |               |                    |                    |
| SNP_26347_A_30184603 | NC_021163.1    | Ca_Kabuli_Chr04 | 30184603                | CC                                     | TT                 | TT               | INTERGENIC      |               |                    |                    |
| SNP_26348_A_30184868 | NC_021163.1    | Ca_Kabuli_Chr04 | 30184868                | TT                                     | GG                 | GG               | INTERGENIC      |               |                    |                    |
| SNP_26349_A_30184876 | NC_021163.1    | Ca_Kabuli_Chr04 | 30184876                | CC                                     | GG                 | GG               | INTERGENIC      |               |                    |                    |
| SNP_26351_A_30187765 | NC_021163.1    | Ca_Kabuli_Chr04 | 30187765                | GG                                     | AA                 | AA               | INTERGENIC      |               |                    |                    |
| SNP_26352_A_30188122 | NC_021163.1    | Ca_Kabuli_Chr04 | 30188122                | GG                                     | TT                 | TT               | INTERGENIC      |               |                    |                    |
| SNP_26353_A_30188128 | NC_021163.1    | Ca_Kabuli_Chr04 | 30188128                | GG                                     | AA                 | AA               | INTERGENIC      |               |                    |                    |
| SNP_26354_A_30188141 | NC_021163.1    | Ca_Kabuli_Chr04 | 30188141                | AA                                     | GG                 | GG               | INTERGENIC      |               |                    |                    |
| SNP_26355_A_30188346 | NC_021163.1    | Ca_Kabuli_Chr04 | 30188346                | TT                                     | CC                 | CC               | INTERGENIC      |               |                    |                    |
| SNP_26356_A_30194750 | NC_021163.1    | Ca_Kabuli_Chr04 | 30194750                | AA                                     | CC                 | CC               | INTERGENIC      |               |                    |                    |
| SNP_26357_A_30200964 | NC_021163.1    | Ca_Kabuli_Chr04 | 30200964                | TT                                     | AA                 | AA               | INTERGENIC      |               |                    |                    |
| SNP_26358_A_30200978 | NC_021163.1    | Ca_Kabuli_Chr04 | 30200978                | CC                                     | TT                 | TT               | INTERGENIC      |               |                    |                    |
| SNP_26359_A_30201192 | NC_021163.1    | Ca_Kabuli_Chr04 | 30201192                | AA                                     | GG                 | GG               | INTERGENIC      |               |                    |                    |

| SNPs IDs             | Chromosome IDs | Chromosomes     | Physical positions (bp) | CDC Frontier genome (Reference genome) | (Pusa 1103 & HPNB) | (ILWC 46 & LPNB) | Sequence Components of genome | Gene accession IDs | Putative functions                  |
|----------------------|----------------|-----------------|-------------------------|----------------------------------------|--------------------|------------------|-------------------------------|--------------------|-------------------------------------|
| SNP_26360_A_30203884 | NC_021163.1    | Ca_Kabuli_Chr04 | 30203884                | AA                                     | GG                 | GG               | INTERGENIC                    |                    |                                     |
| SNP_26361_A_30203886 | NC_021163.1    | Ca_Kabuli_Chr04 | 30203886                | TT                                     | CC                 | CC               | INTERGENIC                    |                    |                                     |
| SNP_26362_A_30204981 | NC_021163.1    | Ca_Kabuli_Chr04 | 30204981                | CC                                     | TT                 | TT               | INTERGENIC                    |                    |                                     |
| SNP_26363_A_30204984 | NC_021163.1    | Ca_Kabuli_Chr04 | 30204984                | GG                                     | AA                 | AA               | INTERGENIC                    |                    |                                     |
| SNP_26364_A_30205586 | NC_021163.1    | Ca_Kabuli_Chr04 | 30205586                | TT                                     | AA                 | AA               | INTERGENIC                    |                    |                                     |
| SNP_26365_A_30207377 | NC_021163.1    | Ca_Kabuli_Chr04 | 30207377                | GG                                     | TT                 | TT               | DRR                           | 101489086          | VQ motif-containing protein 25-like |
| SNP_26366_A_30207459 | NC_021163.1    | Ca_Kabuli_Chr04 | 30207459                | AA                                     | GG                 | GG               | DRR                           | 101489086          | VQ motif-containing protein 25-like |
| SNP_26367_A_30209017 | NC_021163.1    | Ca_Kabuli_Chr04 | 30209017                | TT                                     | CC                 | CC               | URR                           | 101489086          | VQ motif-containing protein 25-like |
| SNP_26370_A_30211746 | NC_021163.1    | Ca_Kabuli_Chr04 | 30211746                | GG                                     | AA                 | AA               | INTERGENIC                    |                    |                                     |
| SNP_26371_A_30211785 | NC_021163.1    | Ca_Kabuli_Chr04 | 30211785                | AA                                     | GG                 | GG               | INTERGENIC                    |                    |                                     |
| SNP_26372_A_30211898 | NC_021163.1    | Ca_Kabuli_Chr04 | 30211898                | AA                                     | TT                 | TT               | INTERGENIC                    |                    |                                     |
| SNP_26373_A_30212245 | NC_021163.1    | Ca_Kabuli_Chr04 | 30212245                | AA                                     | TT                 | TT               | INTERGENIC                    |                    |                                     |
| SNP_26374_A_30214012 | NC_021163.1    | Ca_Kabuli_Chr04 | 30214012                | TT                                     | CC                 | CC               | INTERGENIC                    |                    |                                     |
| SNP_26375_A_30216190 | NC_021163.1    | Ca_Kabuli_Chr04 | 30216190                | CC                                     | TT                 | TT               | INTERGENIC                    |                    |                                     |
| SNP_26377_A_30227064 | NC_021163.1    | Ca_Kabuli_Chr04 | 30227064                | CC                                     | TT                 | TT               | INTERGENIC                    |                    |                                     |
| SNP_26378_A_30227750 | NC_021163.1    | Ca_Kabuli_Chr04 | 30227750                | AA                                     | GG                 | GG               | INTERGENIC                    |                    |                                     |
| SNP_26379_A_30251096 | NC_021163.1    | Ca_Kabuli_Chr04 | 30251096                | TT                                     | CC                 | CC               | INTERGENIC                    |                    |                                     |
| SNP_26380_A_30267289 | NC_021163.1    | Ca_Kabuli_Chr04 | 30267289                | GG                                     | TT                 | TT               | INTERGENIC                    |                    |                                     |
| SNP_26381_A_30267852 | NC_021163.1    | Ca_Kabuli_Chr04 | 30267852                | AA                                     | GG                 | GG               | INTERGENIC                    |                    |                                     |
| SNP_26382_A_30276680 | NC_021163.1    | Ca_Kabuli_Chr04 | 30276680                | CC                                     | TT                 | TT               | INTERGENIC                    |                    |                                     |
| SNP_26383_A_30279102 | NC_021163.1    | Ca_Kabuli_Chr04 | 30279102                | CC                                     | TT                 | TT               | INTERGENIC                    |                    |                                     |
| SNP_26384_A_30279441 | NC_021163.1    | Ca_Kabuli_Chr04 | 30279441                | CC                                     | TT                 | TT               | INTERGENIC                    |                    |                                     |

| SNPs IDs             | Chromosome IDs | Chromosomes     | Physical positions (bp) | CDC Frontier genome (Reference genome) | (Pusa 1103 & HPNB) | (ILWC 46 & LPNB) | Sequence Components of genome | Gene accession IDs | Putative functions                                |
|----------------------|----------------|-----------------|-------------------------|----------------------------------------|--------------------|------------------|-------------------------------|--------------------|---------------------------------------------------|
| SNP_26385_A_30279892 | NC_021163.1    | Ca_Kabuli_Chr04 | 30279892                | AA                                     | GG                 | GG               | INTERGENIC                    |                    |                                                   |
| SNP_26386_A_30286155 | NC_021163.1    | Ca_Kabuli_Chr04 | 30286155                | AA                                     | TT                 | TT               | INTERGENIC                    |                    |                                                   |
| SNP_26387_A_30286561 | NC_021163.1    | Ca_Kabuli_Chr04 | 30286561                | TT                                     | GG                 | GG               | INTERGENIC                    |                    |                                                   |
| SNP_26388_A_30286777 | NC_021163.1    | Ca_Kabuli_Chr04 | 30286777                | CC                                     | AA                 | AA               | INTERGENIC                    |                    |                                                   |
| SNP_26389_A_30287850 | NC_021163.1    | Ca_Kabuli_Chr04 | 30287850                | AA                                     | GG                 | GG               | INTERGENIC                    |                    |                                                   |
| SNP_26390_A_30288238 | NC_021163.1    | Ca_Kabuli_Chr04 | 30288238                | GG                                     | AA                 | AA               | INTERGENIC                    |                    |                                                   |
| SNP_26391_A_30293515 | NC_021163.1    | Ca_Kabuli_Chr04 | 30293515                | GG                                     | AA                 | AA               | INTERGENIC                    |                    |                                                   |
| SNP_26392_A_30317952 | NC_021163.1    | Ca_Kabuli_Chr04 | 30317952                | CC                                     | AA                 | AA               | URR                           | 101490716          | protein PHOTOPERIOD-INDEPENDENT EARLY FLOWERING 1 |
| SNP_26393_A_30317953 | NC_021163.1    | Ca_Kabuli_Chr04 | 30317953                | TT                                     | AA                 | AA               | URR                           | 101490716          | protein PHOTOPERIOD-INDEPENDENT EARLY FLOWERING 1 |
| SNP_26394_A_30318294 | NC_021163.1    | Ca_Kabuli_Chr04 | 30318294                | AA                                     | TT                 | TT               | URR                           | 101490716          | protein PHOTOPERIOD-INDEPENDENT EARLY FLOWERING 1 |
| SNP_26395_A_30322866 | NC_021163.1    | Ca_Kabuli_Chr04 | 30322866                | GG                                     | AA                 | AA               | INTERGENIC                    |                    |                                                   |
| SNP_26396_A_30325067 | NC_021163.1    | Ca_Kabuli_Chr04 | 30325067                | AA                                     | GG                 | GG               | INTERGENIC                    |                    |                                                   |
| SNP_26398_A_30330603 | NC_021163.1    | Ca_Kabuli_Chr04 | 30330603                | AA                                     | CC                 | CC               | INTERGENIC                    |                    |                                                   |
| SNP_26399_A_30330604 | NC_021163.1    | Ca_Kabuli_Chr04 | 30330604                | TT                                     | AA                 | AA               | INTERGENIC                    |                    |                                                   |
| SNP_26400_A_30336644 | NC_021163.1    | Ca_Kabuli_Chr04 | 30336644                | TT                                     | CC                 | CC               | URR                           | 101509942          | uncharacterized LOC101509942                      |
| SNP_26402_A_30352177 | NC_021163.1    | Ca_Kabuli_Chr04 | 30352177                | AA                                     | GG                 | GG               | INTERGENIC                    |                    |                                                   |
| SNP_26403_A_30355179 | NC_021163.1    | Ca_Kabuli_Chr04 | 30355179                | GG                                     | AA                 | AA               | DRR                           | 101510266          | Unknown function                                  |
| SNP_26405_A_30368207 | NC_021163.1    | Ca_Kabuli_Chr04 | 30368207                | TT                                     | CC                 | CC               | INTRON                        | 101510266          | Unknown function                                  |
| SNP_26406_A_30369181 | NC_021163.1    | Ca_Kabuli_Chr04 | 30369181                | GG                                     | AA                 | AA               | INTRON                        | 101510266          | Unknown function                                  |
| SNP_26407_A_30373287 | NC_021163.1    | Ca_Kabuli_Chr04 | 30373287                | GG                                     | AA                 | AA               | INTERGENIC                    |                    |                                                   |
| SNP_26408_A_30377583 | NC_021163.1    | Ca_Kabuli_Chr04 | 30377583                | CC                                     | TT                 | TT               | INTERGENIC                    |                    |                                                   |
| SNP_26409_A_30377597 | NC_021163.1    | Ca_Kabuli_Chr04 | 30377597                | GG                                     | AA                 | AA               | INTERGENIC                    |                    |                                                   |



| SNPs IDs             | Chromosome IDs | Chromosomes     | Physical positions (bp) | CDC Frontier genome (Reference genome) | (Pusa 1103 & HPNB) | (ILWC 46 & LPNB) | Sequence genome | Components of | Gene accession IDs | Putative functions |
|----------------------|----------------|-----------------|-------------------------|----------------------------------------|--------------------|------------------|-----------------|---------------|--------------------|--------------------|
| SNP_26410_A_30379297 | NC_021163.1    | Ca_Kabuli_Chr04 | 30379297                | AA                                     | GG                 | GG               | INTERGENIC      |               |                    |                    |
| SNP_26411_A_30390642 | NC_021163.1    | Ca_Kabuli_Chr04 | 30390642                | CC                                     | TT                 | TT               | INTERGENIC      |               |                    |                    |
| SNP_26413_A_30390717 | NC_021163.1    | Ca_Kabuli_Chr04 | 30390717                | GG                                     | TT                 | TT               | INTERGENIC      |               |                    |                    |
| SNP_26414_A_30398634 | NC_021163.1    | Ca_Kabuli_Chr04 | 30398634                | AA                                     | GG                 | GG               | INTERGENIC      |               |                    |                    |
| SNP_26415_A_30398650 | NC_021163.1    | Ca_Kabuli_Chr04 | 30398650                | AA                                     | CC                 | CC               | INTERGENIC      |               |                    |                    |
| SNP_26416_A_30398803 | NC_021163.1    | Ca_Kabuli_Chr04 | 30398803                | AA                                     | GG                 | GG               | INTERGENIC      |               |                    |                    |
| SNP_26417_A_30398817 | NC_021163.1    | Ca_Kabuli_Chr04 | 30398817                | TT                                     | CC                 | CC               | INTERGENIC      |               |                    |                    |
| SNP_26419_A_30405123 | NC_021163.1    | Ca_Kabuli_Chr04 | 30405123                | CC                                     | TT                 | TT               | INTERGENIC      |               |                    |                    |
| SNP_26420_A_30406118 | NC_021163.1    | Ca_Kabuli_Chr04 | 30406118                | AA                                     | CC                 | CC               | INTERGENIC      |               |                    |                    |
| SNP_26421_A_30406125 | NC_021163.1    | Ca_Kabuli_Chr04 | 30406125                | GG                                     | CC                 | CC               | INTERGENIC      |               |                    |                    |
| SNP_26422_A_30413516 | NC_021163.1    | Ca_Kabuli_Chr04 | 30413516                | GG                                     | AA                 | AA               | INTERGENIC      |               |                    |                    |
| SNP_26423_A_30413798 | NC_021163.1    | Ca_Kabuli_Chr04 | 30413798                | GG                                     | AA                 | AA               | INTERGENIC      |               |                    |                    |
| SNP_26425_A_30421577 | NC_021163.1    | Ca_Kabuli_Chr04 | 30421577                | TT                                     | AA                 | AA               | INTERGENIC      |               |                    |                    |
| SNP_26426_A_30422885 | NC_021163.1    | Ca_Kabuli_Chr04 | 30422885                | AA                                     | GG                 | GG               | INTERGENIC      |               |                    |                    |
| SNP_26427_A_30423062 | NC_021163.1    | Ca_Kabuli_Chr04 | 30423062                | GG                                     | AA                 | AA               | INTERGENIC      |               |                    |                    |
| SNP_26429_A_30423166 | NC_021163.1    | Ca_Kabuli_Chr04 | 30423166                | AA                                     | CC                 | CC               | INTERGENIC      |               |                    |                    |
| SNP_26430_A_30423751 | NC_021163.1    | Ca_Kabuli_Chr04 | 30423751                | TT                                     | CC                 | CC               | INTERGENIC      |               |                    |                    |
| SNP_26431_A_30423757 | NC_021163.1    | Ca_Kabuli_Chr04 | 30423757                | TT                                     | CC                 | CC               | INTERGENIC      |               |                    |                    |
| SNP_26432_A_30423776 | NC_021163.1    | Ca_Kabuli_Chr04 | 30423776                | GG                                     | AA                 | AA               | INTERGENIC      |               |                    |                    |
| SNP_26433_A_30423781 | NC_021163.1    | Ca_Kabuli_Chr04 | 30423781                | AA                                     | GG                 | GG               | INTERGENIC      |               |                    |                    |
| SNP_26434_A_30424032 | NC_021163.1    | Ca_Kabuli_Chr04 | 30424032                | GG                                     | AA                 | AA               | INTERGENIC      |               |                    |                    |
| SNP_26435_A_30425827 | NC_021163.1    | Ca_Kabuli_Chr04 | 30425827                | AA                                     | GG                 | GG               | INTERGENIC      |               |                    |                    |

| SNPs IDs             | Chromosome IDs | Chromosomes     | Physical positions (bp) | CDC Frontier genome (Reference genome) | (Pusa 1103 & HPNB) | (ILWC 46 & LPNB) | Sequence Components of genome | Gene accession IDs | Putative functions           |
|----------------------|----------------|-----------------|-------------------------|----------------------------------------|--------------------|------------------|-------------------------------|--------------------|------------------------------|
| SNP_26436_A_30426393 | NC_021163.1    | Ca_Kabuli_Chr04 | 30426393                | AA                                     | GG                 | GG               | INTERGENIC                    |                    |                              |
| SNP_26438_A_30429386 | NC_021163.1    | Ca_Kabuli_Chr04 | 30429386                | AA                                     | GG                 | GG               | INTERGENIC                    |                    |                              |
| SNP_26439_A_30429391 | NC_021163.1    | Ca_Kabuli_Chr04 | 30429391                | AA                                     | GG                 | GG               | INTERGENIC                    |                    |                              |
| SNP_26440_A_30429554 | NC_021163.1    | Ca_Kabuli_Chr04 | 30429554                | GG                                     | AA                 | AA               | INTERGENIC                    |                    |                              |
| SNP_26441_A_30429575 | NC_021163.1    | Ca_Kabuli_Chr04 | 30429575                | TT                                     | CC                 | CC               | INTERGENIC                    |                    |                              |
| SNP_26442_A_30429972 | NC_021163.1    | Ca_Kabuli_Chr04 | 30429972                | CC                                     | TT                 | TT               | INTERGENIC                    |                    |                              |
| SNP_26443_A_30451217 | NC_021163.1    | Ca_Kabuli_Chr04 | 30451217                | AA                                     | TT                 | TT               | INTERGENIC                    |                    |                              |
| SNP_26444_A_30451219 | NC_021163.1    | Ca_Kabuli_Chr04 | 30451219                | CC                                     | AA                 | AA               | INTERGENIC                    |                    |                              |
| SNP_26445_A_30464381 | NC_021163.1    | Ca_Kabuli_Chr04 | 30464381                | CC                                     | GG                 | GG               | INTERGENIC                    |                    |                              |
| SNP_26446_A_30464600 | NC_021163.1    | Ca_Kabuli_Chr04 | 30464600                | AA                                     | GG                 | GG               | INTERGENIC                    |                    |                              |
| SNP_26447_A_30465357 | NC_021163.1    | Ca_Kabuli_Chr04 | 30465357                | CC                                     | TT                 | TT               | DRR                           | 101492316          | uncharacterized LOC101492316 |
| SNP_26448_A_30465495 | NC_021163.1    | Ca_Kabuli_Chr04 | 30465495                | CC                                     | TT                 | TT               | DRR                           | 101492316          | uncharacterized LOC101492316 |
| SNP_26449_A_30465504 | NC_021163.1    | Ca_Kabuli_Chr04 | 30465504                | AA                                     | GG                 | GG               | DRR                           | 101492316          | uncharacterized LOC101492316 |
| SNP_26450_A_30467982 | NC_021163.1    | Ca_Kabuli_Chr04 | 30467982                | TT                                     | CC                 | CC               | INTRON                        | 101492316          | uncharacterized LOC101492316 |
| SNP_26451_A_30468199 | NC_021163.1    | Ca_Kabuli_Chr04 | 30468199                | GG                                     | AA                 | AA               | NON_SYNONYMOUS_CODING         | 101492316          | uncharacterized LOC101492316 |
| SNP_26454_A_30470099 | NC_021163.1    | Ca_Kabuli_Chr04 | 30470099                | GG                                     | TT                 | TT               | URR                           | 101492316          | uncharacterized LOC101492316 |
| SNP_26455_A_30470105 | NC_021163.1    | Ca_Kabuli_Chr04 | 30470105                | TT                                     | GG                 | GG               | URR                           | 101492316          | uncharacterized LOC101492316 |
| SNP_26456_A_30470325 | NC_021163.1    | Ca_Kabuli_Chr04 | 30470325                | CC                                     | TT                 | TT               | URR                           | 101492316          | uncharacterized LOC101492316 |
| SNP_26457_A_30470357 | NC_021163.1    | Ca_Kabuli_Chr04 | 30470357                | AA                                     | GG                 | GG               | URR                           | 101492316          | uncharacterized LOC101492316 |
| SNP_26458_A_30470746 | NC_021163.1    | Ca_Kabuli_Chr04 | 30470746                | TT                                     | CC                 | CC               | URR                           | 101492316          | uncharacterized LOC101492316 |
| SNP_26459_A_30477504 | NC_021163.1    | Ca_Kabuli_Chr04 | 30477504                | GG                                     | AA                 | AA               | INTERGENIC                    |                    |                              |
| SNP_26460_A_30477538 | NC_021163.1    | Ca_Kabuli_Chr04 | 30477538                | AA                                     | GG                 | GG               | INTERGENIC                    |                    |                              |

| SNPs IDs             | Chromosome IDs | Chromosomes     | Physical positions (bp) | CDC Frontier (Reference genome) | (Pusa 1103 & HPNB) | (ILWC 46 & LPNB) | Sequence Components of genome | Gene accession IDs | Putative functions                       |
|----------------------|----------------|-----------------|-------------------------|---------------------------------|--------------------|------------------|-------------------------------|--------------------|------------------------------------------|
| SNP_26462_A_30480276 | NC_021163.1    | Ca_Kabuli_Chr04 | 30480276                | GG                              | AA                 | AA               | DRR                           | 101492646          | squamosa promoter-binding-like protein 9 |
| SNP_26463_A_30480963 | NC_021163.1    | Ca_Kabuli_Chr04 | 30480963                | TT                              | GG                 | GG               | DRR                           | 101492646          | squamosa promoter-binding-like protein 9 |
| SNP_26464_A_30487123 | NC_021163.1    | Ca_Kabuli_Chr04 | 30487123                | GG                              | AA                 | AA               | URR                           | 101492646          | squamosa promoter-binding-like protein 9 |
| SNP_26465_A_30495760 | NC_021163.1    | Ca_Kabuli_Chr04 | 30495760                | CC                              | TT                 | TT               | INTERGENIC                    |                    |                                          |
| SNP_26466_A_30498838 | NC_021163.1    | Ca_Kabuli_Chr04 | 30498838                | TT                              | AA                 | AA               | INTERGENIC                    |                    |                                          |
| SNP_26467_A_30498849 | NC_021163.1    | Ca_Kabuli_Chr04 | 30498849                | AA                              | GG                 | GG               | INTERGENIC                    |                    |                                          |
| SNP_26468_A_30498898 | NC_021163.1    | Ca_Kabuli_Chr04 | 30498898                | TT                              | CC                 | CC               | INTERGENIC                    |                    |                                          |
| SNP_26470_A_30506004 | NC_021163.1    | Ca_Kabuli_Chr04 | 30506004                | GG                              | AA                 | AA               | INTERGENIC                    |                    |                                          |
| SNP_26471_A_30508140 | NC_021163.1    | Ca_Kabuli_Chr04 | 30508140                | AA                              | CC                 | CC               | INTERGENIC                    |                    |                                          |
| SNP_26472_A_30510406 | NC_021163.1    | Ca_Kabuli_Chr04 | 30510406                | GG                              | TT                 | TT               | INTERGENIC                    |                    |                                          |
| SNP_26473_A_30510411 | NC_021163.1    | Ca_Kabuli_Chr04 | 30510411                | CC                              | TT                 | TT               | INTERGENIC                    |                    |                                          |
| SNP_26474_A_30510420 | NC_021163.1    | Ca_Kabuli_Chr04 | 30510420                | GG                              | AA                 | AA               | INTERGENIC                    |                    |                                          |
| SNP_26475_A_30520011 | NC_021163.1    | Ca_Kabuli_Chr04 | 30520011                | TT                              | CC                 | CC               | INTERGENIC                    |                    |                                          |
| SNP_26476_A_30521115 | NC_021163.1    | Ca_Kabuli_Chr04 | 30521115                | TT                              | CC                 | CC               | INTERGENIC                    |                    |                                          |
| SNP_26477_A_30521185 | NC_021163.1    | Ca_Kabuli_Chr04 | 30521185                | AA                              | GG                 | GG               | INTERGENIC                    |                    |                                          |
| SNP_26479_A_30521275 | NC_021163.1    | Ca_Kabuli_Chr04 | 30521275                | AA                              | TT                 | TT               | INTERGENIC                    |                    |                                          |
| SNP_26480_A_30521409 | NC_021163.1    | Ca_Kabuli_Chr04 | 30521409                | TT                              | CC                 | CC               | INTERGENIC                    |                    |                                          |
| SNP_26481_A_30521893 | NC_021163.1    | Ca_Kabuli_Chr04 | 30521893                | TT                              | CC                 | CC               | INTERGENIC                    |                    |                                          |
| SNP_26483_A_30527618 | NC_021163.1    | Ca_Kabuli_Chr04 | 30527618                | GG                              | CC                 | CC               | INTERGENIC                    |                    |                                          |
| SNP_26484_A_30528295 | NC_021163.1    | Ca_Kabuli_Chr04 | 30528295                | GG                              | AA                 | AA               | INTERGENIC                    |                    |                                          |
| SNP_26485_A_30529574 | NC_021163.1    | Ca_Kabuli_Chr04 | 30529574                | CC                              | AA                 | AA               | INTERGENIC                    |                    |                                          |
| SNP_26486_A_30534343 | NC_021163.1    | Ca_Kabuli_Chr04 | 30534343                | CC                              | TT                 | TT               | INTERGENIC                    |                    |                                          |

| SNPs IDs             | Chromosome IDs | Chromosomes     | Physical positions (bp) | CDC Frontier (Reference genome) | (Pusa 1103 & HPNB) | (ILWC 46 & LPNB) | Sequence Components of genome | Gene accession IDs | Putative functions           |
|----------------------|----------------|-----------------|-------------------------|---------------------------------|--------------------|------------------|-------------------------------|--------------------|------------------------------|
| SNP_26487_A_30535768 | NC_021163.1    | Ca_Kabuli_Chr04 | 30535768                | AA                              | GG                 | GG               | DRR                           | 101512204          | uncharacterized LOC101512204 |
| SNP_26488_A_30535820 | NC_021163.1    | Ca_Kabuli_Chr04 | 30535820                | AA                              | GG                 | GG               | DRR                           | 101512204          | uncharacterized LOC101512204 |
| SNP_26490_A_30536004 | NC_021163.1    | Ca_Kabuli_Chr04 | 30536004                | CC                              | TT                 | TT               | SYNONYMOUS_CODING             | 101512204          | uncharacterized LOC101512204 |
| SNP_26491_A_30536366 | NC_021163.1    | Ca_Kabuli_Chr04 | 30536366                | AA                              | GG                 | GG               | NON_SYNONYMOUS_CODING         | 101512204          | uncharacterized LOC101512204 |
| SNP_26493_A_30537134 | NC_021163.1    | Ca_Kabuli_Chr04 | 30537134                | TT                              | GG                 | GG               | INTRON                        | 101512204          | uncharacterized LOC101512204 |
| SNP_26494_A_30537349 | NC_021163.1    | Ca_Kabuli_Chr04 | 30537349                | CC                              | TT                 | TT               | INTRON                        | 101512204          | uncharacterized LOC101512204 |
| SNP_26496_A_30537740 | NC_021163.1    | Ca_Kabuli_Chr04 | 30537740                | CC                              | TT                 | TT               | INTRON                        | 101512204          | uncharacterized LOC101512204 |
| SNP_26497_A_30537764 | NC_021163.1    | Ca_Kabuli_Chr04 | 30537764                | CC                              | AA                 | AA               | INTRON                        | 101512204          | uncharacterized LOC101512204 |
| SNP_26499_A_30538533 | NC_021163.1    | Ca_Kabuli_Chr04 | 30538533                | CC                              | TT                 | TT               | URR                           | 101512204          | uncharacterized LOC101512204 |
| SNP_26500_A_30538580 | NC_021163.1    | Ca_Kabuli_Chr04 | 30538580                | AA                              | GG                 | GG               | URR                           | 101512204          | uncharacterized LOC101512204 |
| SNP_26501_A_30538964 | NC_021163.1    | Ca_Kabuli_Chr04 | 30538964                | CC                              | AA                 | AA               | URR                           | 101512204          | uncharacterized LOC101512204 |
| SNP_26502_A_30539049 | NC_021163.1    | Ca_Kabuli_Chr04 | 30539049                | AA                              | GG                 | GG               | URR                           | 101512204          | uncharacterized LOC101512204 |
| SNP_26503_A_30539053 | NC_021163.1    | Ca_Kabuli_Chr04 | 30539053                | GG                              | CC                 | CC               | URR                           | 101512204          | uncharacterized LOC101512204 |
| SNP_26504_A_30539062 | NC_021163.1    | Ca_Kabuli_Chr04 | 30539062                | TT                              | GG                 | GG               | URR                           | 101512204          | uncharacterized LOC101512204 |
| SNP_26505_A_30539154 | NC_021163.1    | Ca_Kabuli_Chr04 | 30539154                | GG                              | AA                 | AA               | URR                           | 101512204          | uncharacterized LOC101512204 |
| SNP_26506_A_30539162 | NC_021163.1    | Ca_Kabuli_Chr04 | 30539162                | CC                              | TT                 | TT               | URR                           | 101512204          | uncharacterized LOC101512204 |
| SNP_26507_A_30539175 | NC_021163.1    | Ca_Kabuli_Chr04 | 30539175                | GG                              | AA                 | AA               | URR                           | 101512204          | uncharacterized LOC101512204 |
| SNP_26508_A_30539198 | NC_021163.1    | Ca_Kabuli_Chr04 | 30539198                | TT                              | CC                 | CC               | URR                           | 101512204          | uncharacterized LOC101512204 |
| SNP_26509_A_30539301 | NC_021163.1    | Ca_Kabuli_Chr04 | 30539301                | GG                              | AA                 | AA               | URR                           | 101512204          | uncharacterized LOC101512204 |
| SNP_26510_A_30539306 | NC_021163.1    | Ca_Kabuli_Chr04 | 30539306                | GG                              | AA                 | AA               | URR                           | 101512204          | uncharacterized LOC101512204 |
| SNP_26511_A_30539313 | NC_021163.1    | Ca_Kabuli_Chr04 | 30539313                | TT                              | GG                 | GG               | URR                           | 101512204          | uncharacterized LOC101512204 |
| SNP_26512_A_30539353 | NC_021163.1    | Ca_Kabuli_Chr04 | 30539353                | GG                              | AA                 | AA               | URR                           | 101512204          | uncharacterized LOC101512204 |

| SNPs IDs             | Chromosome IDs | Chromosomes     | Physical positions (bp) | CDC Frontier (Reference genome) | (Pusa 1103 & HPNB) | (ILWC 46 & LPNB) | Sequence Components of genome | Gene accession IDs | Putative functions           |
|----------------------|----------------|-----------------|-------------------------|---------------------------------|--------------------|------------------|-------------------------------|--------------------|------------------------------|
| SNP_26513_A_30539369 | NC_021163.1    | Ca_Kabuli_Chr04 | 30539369                | GG                              | AA                 | AA               | URR                           | 101512204          | uncharacterized LOC101512204 |
| SNP_26514_A_30539412 | NC_021163.1    | Ca_Kabuli_Chr04 | 30539412                | GG                              | AA                 | AA               | URR                           | 101512204          | uncharacterized LOC101512204 |
| SNP_26515_A_30539416 | NC_021163.1    | Ca_Kabuli_Chr04 | 30539416                | GG                              | CC                 | CC               | URR                           | 101512204          | uncharacterized LOC101512204 |
| SNP_26516_A_30539430 | NC_021163.1    | Ca_Kabuli_Chr04 | 30539430                | TT                              | CC                 | CC               | URR                           | 101512204          | uncharacterized LOC101512204 |
| SNP_26517_A_30539545 | NC_021163.1    | Ca_Kabuli_Chr04 | 30539545                | CC                              | AA                 | AA               | URR                           | 101512204          | uncharacterized LOC101512204 |
| SNP_26518_A_30539584 | NC_021163.1    | Ca_Kabuli_Chr04 | 30539584                | TT                              | GG                 | GG               | URR                           | 101512204          | uncharacterized LOC101512204 |
| SNP_26519_A_30539707 | NC_021163.1    | Ca_Kabuli_Chr04 | 30539707                | AA                              | CC                 | CC               | URR                           | 101512204          | uncharacterized LOC101512204 |
| SNP_26520_A_30540704 | NC_021163.1    | Ca_Kabuli_Chr04 | 30540704                | TT                              | AA                 | AA               | INTERGENIC                    |                    |                              |
| SNP_26521_A_30540932 | NC_021163.1    | Ca_Kabuli_Chr04 | 30540932                | GG                              | AA                 | AA               | INTERGENIC                    |                    |                              |
| SNP_26522_A_30540954 | NC_021163.1    | Ca_Kabuli_Chr04 | 30540954                | CC                              | TT                 | TT               | INTERGENIC                    |                    |                              |
| SNP_26523_A_30541034 | NC_021163.1    | Ca_Kabuli_Chr04 | 30541034                | CC                              | TT                 | TT               | INTERGENIC                    |                    |                              |
| SNP_26524_A_30541158 | NC_021163.1    | Ca_Kabuli_Chr04 | 30541158                | TT                              | AA                 | AA               | INTERGENIC                    |                    |                              |
| SNP_26525_A_30541352 | NC_021163.1    | Ca_Kabuli_Chr04 | 30541352                | AA                              | GG                 | GG               | INTERGENIC                    |                    |                              |
| SNP_26526_A_30541371 | NC_021163.1    | Ca_Kabuli_Chr04 | 30541371                | GG                              | AA                 | AA               | INTERGENIC                    |                    |                              |
| SNP_26527_A_30541374 | NC_021163.1    | Ca_Kabuli_Chr04 | 30541374                | CC                              | TT                 | TT               | INTERGENIC                    |                    |                              |
| SNP_26528_A_30541418 | NC_021163.1    | Ca_Kabuli_Chr04 | 30541418                | TT                              | AA                 | AA               | INTERGENIC                    |                    |                              |
| SNP_26529_A_30541444 | NC_021163.1    | Ca_Kabuli_Chr04 | 30541444                | GG                              | AA                 | AA               | INTERGENIC                    |                    |                              |
| SNP_26530_A_30541497 | NC_021163.1    | Ca_Kabuli_Chr04 | 30541497                | TT                              | CC                 | CC               | INTERGENIC                    |                    |                              |
| SNP_26531_A_30541598 | NC_021163.1    | Ca_Kabuli_Chr04 | 30541598                | CC                              | TT                 | TT               | INTERGENIC                    |                    |                              |
| SNP_26532_A_30541607 | NC_021163.1    | Ca_Kabuli_Chr04 | 30541607                | AA                              | GG                 | GG               | INTERGENIC                    |                    |                              |
| SNP_26533_A_30541634 | NC_021163.1    | Ca_Kabuli_Chr04 | 30541634                | AA                              | GG                 | GG               | INTERGENIC                    |                    |                              |
| SNP_26534_A_30541645 | NC_021163.1    | Ca_Kabuli_Chr04 | 30541645                | GG                              | AA                 | AA               | INTERGENIC                    |                    |                              |

| SNPs IDs             | Chromosome IDs | Chromosomes     | Physical positions (bp) | CDC Frontier genome (Reference genome) | (Pusa 1103 & HPNB) | (ILWC 46 & LPNB) | Sequence genome | Components of | Gene accession IDs | Putative functions |
|----------------------|----------------|-----------------|-------------------------|----------------------------------------|--------------------|------------------|-----------------|---------------|--------------------|--------------------|
| SNP_26535_A_30541656 | NC_021163.1    | Ca_Kabuli_Chr04 | 30541656                | TT                                     | CC                 | CC               | INTERGENIC      |               |                    |                    |
| SNP_26536_A_30541657 | NC_021163.1    | Ca_Kabuli_Chr04 | 30541657                | TT                                     | CC                 | CC               | INTERGENIC      |               |                    |                    |
| SNP_26537_A_30541736 | NC_021163.1    | Ca_Kabuli_Chr04 | 30541736                | GG                                     | AA                 | AA               | INTERGENIC      |               |                    |                    |
| SNP_26538_A_30541791 | NC_021163.1    | Ca_Kabuli_Chr04 | 30541791                | TT                                     | CC                 | CC               | INTERGENIC      |               |                    |                    |
| SNP_26539_A_30541795 | NC_021163.1    | Ca_Kabuli_Chr04 | 30541795                | CC                                     | TT                 | TT               | INTERGENIC      |               |                    |                    |
| SNP_26540_A_30541812 | NC_021163.1    | Ca_Kabuli_Chr04 | 30541812                | AA                                     | GG                 | GG               | INTERGENIC      |               |                    |                    |
| SNP_26541_A_30541818 | NC_021163.1    | Ca_Kabuli_Chr04 | 30541818                | AA                                     | GG                 | GG               | INTERGENIC      |               |                    |                    |
| SNP_26542_A_30541866 | NC_021163.1    | Ca_Kabuli_Chr04 | 30541866                | AA                                     | GG                 | GG               | INTERGENIC      |               |                    |                    |
| SNP_26543_A_30541868 | NC_021163.1    | Ca_Kabuli_Chr04 | 30541868                | AA                                     | GG                 | GG               | INTERGENIC      |               |                    |                    |
| SNP_26544_A_30541918 | NC_021163.1    | Ca_Kabuli_Chr04 | 30541918                | CC                                     | AA                 | AA               | INTERGENIC      |               |                    |                    |
| SNP_26545_A_30541936 | NC_021163.1    | Ca_Kabuli_Chr04 | 30541936                | AA                                     | GG                 | GG               | INTERGENIC      |               |                    |                    |
| SNP_26546_A_30541961 | NC_021163.1    | Ca_Kabuli_Chr04 | 30541961                | GG                                     | AA                 | AA               | INTERGENIC      |               |                    |                    |
| SNP_26547_A_30541998 | NC_021163.1    | Ca_Kabuli_Chr04 | 30541998                | AA                                     | CC                 | CC               | INTERGENIC      |               |                    |                    |
| SNP_26548_A_30542003 | NC_021163.1    | Ca_Kabuli_Chr04 | 30542003                | TT                                     | CC                 | CC               | INTERGENIC      |               |                    |                    |
| SNP_26549_A_30542004 | NC_021163.1    | Ca_Kabuli_Chr04 | 30542004                | TT                                     | AA                 | AA               | INTERGENIC      |               |                    |                    |
| SNP_26550_A_30542063 | NC_021163.1    | Ca_Kabuli_Chr04 | 30542063                | AA                                     | TT                 | TT               | INTERGENIC      |               |                    |                    |
| SNP_26551_A_30542074 | NC_021163.1    | Ca_Kabuli_Chr04 | 30542074                | TT                                     | CC                 | CC               | INTERGENIC      |               |                    |                    |
| SNP_26552_A_30542076 | NC_021163.1    | Ca_Kabuli_Chr04 | 30542076                | CC                                     | AA                 | AA               | INTERGENIC      |               |                    |                    |
| SNP_26553_A_30542090 | NC_021163.1    | Ca_Kabuli_Chr04 | 30542090                | AA                                     | GG                 | GG               | INTERGENIC      |               |                    |                    |
| SNP_26554_A_30542109 | NC_021163.1    | Ca_Kabuli_Chr04 | 30542109                | AA                                     | CC                 | CC               | INTERGENIC      |               |                    |                    |
| SNP_26555_A_30542124 | NC_021163.1    | Ca_Kabuli_Chr04 | 30542124                | TT                                     | AA                 | AA               | INTERGENIC      |               |                    |                    |
| SNP_26557_A_30542184 | NC_021163.1    | Ca_Kabuli_Chr04 | 30542184                | CC                                     | TT                 | TT               | INTERGENIC      |               |                    |                    |

| SNPs IDs             | Chromosome IDs | Chromosomes     | Physical positions (bp) | CDC Frontier genome (Reference genome) | (Pusa 1103 & HPNB) | (ILWC 46 & LPNB) | Sequence genome | Components of | Gene accession IDs | Putative functions |
|----------------------|----------------|-----------------|-------------------------|----------------------------------------|--------------------|------------------|-----------------|---------------|--------------------|--------------------|
| SNP_26558_A_30542288 | NC_021163.1    | Ca_Kabuli_Chr04 | 30542288                | CC                                     | AA                 | AA               | INTERGENIC      |               |                    |                    |
| SNP_26559_A_30542428 | NC_021163.1    | Ca_Kabuli_Chr04 | 30542428                | AA                                     | GG                 | GG               | INTERGENIC      |               |                    |                    |
| SNP_26560_A_30542541 | NC_021163.1    | Ca_Kabuli_Chr04 | 30542541                | TT                                     | GG                 | GG               | INTERGENIC      |               |                    |                    |
| SNP_26561_A_30542598 | NC_021163.1    | Ca_Kabuli_Chr04 | 30542598                | GG                                     | AA                 | AA               | INTERGENIC      |               |                    |                    |
| SNP_26562_A_30542611 | NC_021163.1    | Ca_Kabuli_Chr04 | 30542611                | GG                                     | CC                 | CC               | INTERGENIC      |               |                    |                    |
| SNP_26563_A_30542638 | NC_021163.1    | Ca_Kabuli_Chr04 | 30542638                | TT                                     | CC                 | CC               | INTERGENIC      |               |                    |                    |
| SNP_26564_A_30542640 | NC_021163.1    | Ca_Kabuli_Chr04 | 30542640                | TT                                     | GG                 | GG               | INTERGENIC      |               |                    |                    |
| SNP_26565_A_30542659 | NC_021163.1    | Ca_Kabuli_Chr04 | 30542659                | CC                                     | TT                 | TT               | INTERGENIC      |               |                    |                    |
| SNP_26566_A_30542702 | NC_021163.1    | Ca_Kabuli_Chr04 | 30542702                | GG                                     | TT                 | TT               | INTERGENIC      |               |                    |                    |
| SNP_26567_A_30542765 | NC_021163.1    | Ca_Kabuli_Chr04 | 30542765                | GG                                     | AA                 | AA               | INTERGENIC      |               |                    |                    |
| SNP_26568_A_30542778 | NC_021163.1    | Ca_Kabuli_Chr04 | 30542778                | GG                                     | AA                 | AA               | INTERGENIC      |               |                    |                    |
| SNP_26569_A_30542815 | NC_021163.1    | Ca_Kabuli_Chr04 | 30542815                | AA                                     | CC                 | CC               | INTERGENIC      |               |                    |                    |
| SNP_26570_A_30542905 | NC_021163.1    | Ca_Kabuli_Chr04 | 30542905                | CC                                     | GG                 | GG               | INTERGENIC      |               |                    |                    |
| SNP_26571_A_30543039 | NC_021163.1    | Ca_Kabuli_Chr04 | 30543039                | AA                                     | GG                 | GG               | INTERGENIC      |               |                    |                    |
| SNP_26572_A_30543048 | NC_021163.1    | Ca_Kabuli_Chr04 | 30543048                | AA                                     | GG                 | GG               | INTERGENIC      |               |                    |                    |
| SNP_26573_A_30543053 | NC_021163.1    | Ca_Kabuli_Chr04 | 30543053                | GG                                     | TT                 | TT               | INTERGENIC      |               |                    |                    |
| SNP_26574_A_30543156 | NC_021163.1    | Ca_Kabuli_Chr04 | 30543156                | GG                                     | AA                 | AA               | INTERGENIC      |               |                    |                    |
| SNP_26575_A_30543159 | NC_021163.1    | Ca_Kabuli_Chr04 | 30543159                | AA                                     | GG                 | GG               | INTERGENIC      |               |                    |                    |
| SNP_26576_A_30543170 | NC_021163.1    | Ca_Kabuli_Chr04 | 30543170                | GG                                     | AA                 | AA               | INTERGENIC      |               |                    |                    |
| SNP_26577_A_30543173 | NC_021163.1    | Ca_Kabuli_Chr04 | 30543173                | AA                                     | GG                 | GG               | INTERGENIC      |               |                    |                    |
| SNP_26578_A_30543208 | NC_021163.1    | Ca_Kabuli_Chr04 | 30543208                | AA                                     | CC                 | CC               | INTERGENIC      |               |                    |                    |
| SNP_26579_A_30543229 | NC_021163.1    | Ca_Kabuli_Chr04 | 30543229                | CC                                     | TT                 | TT               | INTERGENIC      |               |                    |                    |

| SNPs IDs             | Chromosome IDs | Chromosomes     | Physical positions (bp) | CDC Frontier genome (Reference genome) | (Pusa 1103 & HPNB) | (ILWC 46 & LPNB) | Sequence genome | Components of | Gene accession IDs | Putative functions |
|----------------------|----------------|-----------------|-------------------------|----------------------------------------|--------------------|------------------|-----------------|---------------|--------------------|--------------------|
| SNP_26580_A_30543761 | NC_021163.1    | Ca_Kabuli_Chr04 | 30543761                | GG                                     | CC                 | CC               | INTERGENIC      |               |                    |                    |
| SNP_26581_A_30544027 | NC_021163.1    | Ca_Kabuli_Chr04 | 30544027                | GG                                     | CC                 | CC               | INTERGENIC      |               |                    |                    |
| SNP_26582_A_30544047 | NC_021163.1    | Ca_Kabuli_Chr04 | 30544047                | GG                                     | AA                 | AA               | INTERGENIC      |               |                    |                    |
| SNP_26583_A_30544180 | NC_021163.1    | Ca_Kabuli_Chr04 | 30544180                | CC                                     | TT                 | TT               | INTERGENIC      |               |                    |                    |
| SNP_26584_A_30544188 | NC_021163.1    | Ca_Kabuli_Chr04 | 30544188                | CC                                     | TT                 | TT               | INTERGENIC      |               |                    |                    |
| SNP_26585_A_30544231 | NC_021163.1    | Ca_Kabuli_Chr04 | 30544231                | AA                                     | GG                 | GG               | INTERGENIC      |               |                    |                    |
| SNP_26586_A_30544249 | NC_021163.1    | Ca_Kabuli_Chr04 | 30544249                | GG                                     | TT                 | TT               | INTERGENIC      |               |                    |                    |
| SNP_26587_A_30544282 | NC_021163.1    | Ca_Kabuli_Chr04 | 30544282                | CC                                     | TT                 | TT               | INTERGENIC      |               |                    |                    |
| SNP_26588_A_30544300 | NC_021163.1    | Ca_Kabuli_Chr04 | 30544300                | AA                                     | CC                 | CC               | INTERGENIC      |               |                    |                    |
| SNP_26589_A_30544481 | NC_021163.1    | Ca_Kabuli_Chr04 | 30544481                | CC                                     | TT                 | TT               | INTERGENIC      |               |                    |                    |
| SNP_26590_A_30544486 | NC_021163.1    | Ca_Kabuli_Chr04 | 30544486                | CC                                     | TT                 | TT               | INTERGENIC      |               |                    |                    |
| SNP_26591_A_30544545 | NC_021163.1    | Ca_Kabuli_Chr04 | 30544545                | GG                                     | AA                 | AA               | INTERGENIC      |               |                    |                    |
| SNP_26592_A_30544574 | NC_021163.1    | Ca_Kabuli_Chr04 | 30544574                | AA                                     | CC                 | CC               | INTERGENIC      |               |                    |                    |
| SNP_26593_A_30545518 | NC_021163.1    | Ca_Kabuli_Chr04 | 30545518                | CC                                     | TT                 | TT               | INTERGENIC      |               |                    |                    |
| SNP_26594_A_30546358 | NC_021163.1    | Ca_Kabuli_Chr04 | 30546358                | CC                                     | TT                 | TT               | INTERGENIC      |               |                    |                    |
| SNP_26595_A_30546379 | NC_021163.1    | Ca_Kabuli_Chr04 | 30546379                | TT                                     | CC                 | CC               | INTERGENIC      |               |                    |                    |
| SNP_26596_A_30546452 | NC_021163.1    | Ca_Kabuli_Chr04 | 30546452                | CC                                     | TT                 | TT               | INTERGENIC      |               |                    |                    |
| SNP_26597_A_30546464 | NC_021163.1    | Ca_Kabuli_Chr04 | 30546464                | TT                                     | GG                 | GG               | INTERGENIC      |               |                    |                    |
| SNP_26598_A_30546666 | NC_021163.1    | Ca_Kabuli_Chr04 | 30546666                | TT                                     | GG                 | GG               | INTERGENIC      |               |                    |                    |
| SNP_26599_A_30546684 | NC_021163.1    | Ca_Kabuli_Chr04 | 30546684                | AA                                     | GG                 | GG               | INTERGENIC      |               |                    |                    |
| SNP_26600_A_30546688 | NC_021163.1    | Ca_Kabuli_Chr04 | 30546688                | TT                                     | AA                 | AA               | INTERGENIC      |               |                    |                    |
| SNP_26601_A_30546695 | NC_021163.1    | Ca_Kabuli_Chr04 | 30546695                | CC                                     | TT                 | TT               | INTERGENIC      |               |                    |                    |



| SNPs IDs             | Chromosome IDs | Chromosomes     | Physical positions (bp) | CDC Frontier genome (Reference genome) | (Pusa 1103 & HPNB) | (ILWC 46 & LPNB) | Sequence genome | Components of | Gene accession IDs | Putative functions |
|----------------------|----------------|-----------------|-------------------------|----------------------------------------|--------------------|------------------|-----------------|---------------|--------------------|--------------------|
| SNP_26602_A_30546701 | NC_021163.1    | Ca_Kabuli_Chr04 | 30546701                | CC                                     | TT                 | TT               | INTERGENIC      |               |                    |                    |
| SNP_26603_A_30546702 | NC_021163.1    | Ca_Kabuli_Chr04 | 30546702                | CC                                     | TT                 | TT               | INTERGENIC      |               |                    |                    |
| SNP_26604_A_30546716 | NC_021163.1    | Ca_Kabuli_Chr04 | 30546716                | TT                                     | CC                 | CC               | INTERGENIC      |               |                    |                    |
| SNP_26605_A_30546780 | NC_021163.1    | Ca_Kabuli_Chr04 | 30546780                | AA                                     | CC                 | CC               | INTERGENIC      |               |                    |                    |
| SNP_26606_A_30546795 | NC_021163.1    | Ca_Kabuli_Chr04 | 30546795                | CC                                     | TT                 | TT               | INTERGENIC      |               |                    |                    |
| SNP_26607_A_30546872 | NC_021163.1    | Ca_Kabuli_Chr04 | 30546872                | TT                                     | GG                 | GG               | INTERGENIC      |               |                    |                    |
| SNP_26608_A_30548178 | NC_021163.1    | Ca_Kabuli_Chr04 | 30548178                | TT                                     | CC                 | CC               | INTERGENIC      |               |                    |                    |
| SNP_26609_A_30548374 | NC_021163.1    | Ca_Kabuli_Chr04 | 30548374                | CC                                     | AA                 | AA               | INTERGENIC      |               |                    |                    |
| SNP_26610_A_30548606 | NC_021163.1    | Ca_Kabuli_Chr04 | 30548606                | AA                                     | GG                 | GG               | INTERGENIC      |               |                    |                    |
| SNP_26612_A_30549082 | NC_021163.1    | Ca_Kabuli_Chr04 | 30549082                | CC                                     | TT                 | TT               | INTERGENIC      |               |                    |                    |
| SNP_26613_A_30549098 | NC_021163.1    | Ca_Kabuli_Chr04 | 30549098                | AA                                     | GG                 | GG               | INTERGENIC      |               |                    |                    |
| SNP_26614_A_30549246 | NC_021163.1    | Ca_Kabuli_Chr04 | 30549246                | CC                                     | TT                 | TT               | INTERGENIC      |               |                    |                    |
| SNP_26615_A_30549549 | NC_021163.1    | Ca_Kabuli_Chr04 | 30549549                | TT                                     | CC                 | CC               | INTERGENIC      |               |                    |                    |
| SNP_26616_A_30550557 | NC_021163.1    | Ca_Kabuli_Chr04 | 30550557                | AA                                     | CC                 | CC               | INTERGENIC      |               |                    |                    |
| SNP_26617_A_30551420 | NC_021163.1    | Ca_Kabuli_Chr04 | 30551420                | TT                                     | CC                 | CC               | INTERGENIC      |               |                    |                    |
| SNP_26618_A_30551717 | NC_021163.1    | Ca_Kabuli_Chr04 | 30551717                | TT                                     | CC                 | CC               | INTERGENIC      |               |                    |                    |
| SNP_26620_A_30554089 | NC_021163.1    | Ca_Kabuli_Chr04 | 30554089                | TT                                     | CC                 | CC               | INTERGENIC      |               |                    |                    |
| SNP_26621_A_30554894 | NC_021163.1    | Ca_Kabuli_Chr04 | 30554894                | AA                                     | CC                 | CC               | INTERGENIC      |               |                    |                    |
| SNP_26622_A_30554901 | NC_021163.1    | Ca_Kabuli_Chr04 | 30554901                | GG                                     | AA                 | AA               | INTERGENIC      |               |                    |                    |
| SNP_26623_A_30556597 | NC_021163.1    | Ca_Kabuli_Chr04 | 30556597                | AA                                     | TT                 | TT               | INTERGENIC      |               |                    |                    |
| SNP_26624_A_30556723 | NC_021163.1    | Ca_Kabuli_Chr04 | 30556723                | GG                                     | CC                 | CC               | INTERGENIC      |               |                    |                    |
| SNP_26625_A_30556725 | NC_021163.1    | Ca_Kabuli_Chr04 | 30556725                | AA                                     | TT                 | TT               | INTERGENIC      |               |                    |                    |

| SNPs IDs             | Chromosome IDs | Chromosomes     | Physical positions (bp) | CDC Frontier genome (Reference genome) | (Pusa 1103 & HPNB) | (ILWC 46 & LPNB) | Sequence genome | Components of | Gene accession IDs    | Putative functions |
|----------------------|----------------|-----------------|-------------------------|----------------------------------------|--------------------|------------------|-----------------|---------------|-----------------------|--------------------|
| SNP_26626_A_30557093 | NC_021163.1    | Ca_Kabuli_Chr04 | 30557093                | TT                                     | CC                 | CC               | INTERGENIC      |               |                       |                    |
| SNP_26627_A_30557390 | NC_021163.1    | Ca_Kabuli_Chr04 | 30557390                | AA                                     | GG                 | GG               | INTERGENIC      |               |                       |                    |
| SNP_26629_A_30559323 | NC_021163.1    | Ca_Kabuli_Chr04 | 30559323                | TT                                     | AA                 | AA               | INTERGENIC      |               |                       |                    |
| SNP_26630_A_30559401 | NC_021163.1    | Ca_Kabuli_Chr04 | 30559401                | AA                                     | GG                 | GG               | INTERGENIC      |               |                       |                    |
| SNP_26631_A_30559428 | NC_021163.1    | Ca_Kabuli_Chr04 | 30559428                | GG                                     | AA                 | AA               | INTERGENIC      |               |                       |                    |
| SNP_26633_A_30565022 | NC_021163.1    | Ca_Kabuli_Chr04 | 30565022                | CC                                     | AA                 | AA               | INTERGENIC      |               |                       |                    |
| SNP_26634_A_30565679 | NC_021163.1    | Ca_Kabuli_Chr04 | 30565679                | AA                                     | GG                 | GG               | INTERGENIC      |               |                       |                    |
| SNP_26635_A_30565855 | NC_021163.1    | Ca_Kabuli_Chr04 | 30565855                | AA                                     | CC                 | CC               | INTERGENIC      |               |                       |                    |
| SNP_26641_A_30583906 | NC_021163.1    | Ca_Kabuli_Chr04 | 30583906                | CC                                     | GG                 | GG               | INTERGENIC      |               |                       |                    |
| SNP_26642_A_30584465 | NC_021163.1    | Ca_Kabuli_Chr04 | 30584465                | GG                                     | AA                 | AA               | INTERGENIC      |               |                       |                    |
| SNP_26643_A_30584660 | NC_021163.1    | Ca_Kabuli_Chr04 | 30584660                | CC                                     | AA                 | AA               | INTERGENIC      |               |                       |                    |
| SNP_26644_A_30585443 | NC_021163.1    | Ca_Kabuli_Chr04 | 30585443                | AA                                     | GG                 | GG               | INTERGENIC      |               |                       |                    |
| SNP_26646_A_30586268 | NC_021163.1    | Ca_Kabuli_Chr04 | 30586268                | TT                                     | CC                 | CC               | INTERGENIC      |               |                       |                    |
| SNP_26647_A_30589164 | NC_021163.1    | Ca_Kabuli_Chr04 | 30589164                | AA                                     | GG                 | GG               | INTERGENIC      |               |                       |                    |
| SNP_26648_A_30591350 | NC_021163.1    | Ca_Kabuli_Chr04 | 30591350                | GG                                     | AA                 | AA               | INTERGENIC      |               |                       |                    |
| SNP_26649_A_30591581 | NC_021163.1    | Ca_Kabuli_Chr04 | 30591581                | AA                                     | GG                 | GG               | INTERGENIC      |               |                       |                    |
| SNP_26650_A_30592540 | NC_021163.1    | Ca_Kabuli_Chr04 | 30592540                | AA                                     | CC                 | CC               | INTERGENIC      |               |                       |                    |
| SNP_26651_A_30606102 | NC_021163.1    | Ca_Kabuli_Chr04 | 30606102                | CC                                     | TT                 | TT               | URR             | 101498500     | CDK5RAP3-like protein |                    |
| SNP_26652_A_30607701 | NC_021163.1    | Ca_Kabuli_Chr04 | 30607701                | CC                                     | TT                 | TT               | INTERGENIC      |               |                       |                    |
| SNP_26653_A_30607740 | NC_021163.1    | Ca_Kabuli_Chr04 | 30607740                | GG                                     | AA                 | AA               | INTERGENIC      |               |                       |                    |
| SNP_26654_A_30616250 | NC_021163.1    | Ca_Kabuli_Chr04 | 30616250                | CC                                     | TT                 | TT               | INTERGENIC      |               |                       |                    |
| SNP_26655_A_30617528 | NC_021163.1    | Ca_Kabuli_Chr04 | 30617528                | CC                                     | AA                 | AA               | INTERGENIC      |               |                       |                    |

| SNPs IDs             | Chromosome IDs | Chromosomes     | Physical positions (bp) | CDC Frontier genome (Reference genome) | (Pusa 1103 & HPNB) | (ILWC 46 & LPNB) | Sequence Components of genome | Gene accession IDs | Putative functions               |
|----------------------|----------------|-----------------|-------------------------|----------------------------------------|--------------------|------------------|-------------------------------|--------------------|----------------------------------|
| SNP_26656_A_30617540 | NC_021163.1    | Ca_Kabuli_Chr04 | 30617540                | CC                                     | TT                 | TT               | INTERGENIC                    |                    |                                  |
| SNP_26657_A_30618472 | NC_021163.1    | Ca_Kabuli_Chr04 | 30618472                | AA                                     | GG                 | GG               | INTERGENIC                    |                    |                                  |
| SNP_26659_A_30619688 | NC_021163.1    | Ca_Kabuli_Chr04 | 30619688                | AA                                     | TT                 | TT               | INTERGENIC                    |                    |                                  |
| SNP_26661_A_30621920 | NC_021163.1    | Ca_Kabuli_Chr04 | 30621920                | TT                                     | CC                 | CC               | INTERGENIC                    |                    |                                  |
| SNP_26662_A_30629546 | NC_021163.1    | Ca_Kabuli_Chr04 | 30629546                | CC                                     | TT                 | TT               | INTERGENIC                    |                    |                                  |
| SNP_26663_A_30633040 | NC_021163.1    | Ca_Kabuli_Chr04 | 30633040                | CC                                     | TT                 | TT               | INTERGENIC                    |                    |                                  |
| SNP_26664_A_30634076 | NC_021163.1    | Ca_Kabuli_Chr04 | 30634076                | GG                                     | TT                 | TT               | INTERGENIC                    |                    |                                  |
| SNP_26665_A_30635770 | NC_021163.1    | Ca_Kabuli_Chr04 | 30635770                | TT                                     | CC                 | CC               | INTERGENIC                    |                    |                                  |
| SNP_26666_A_30641877 | NC_021163.1    | Ca_Kabuli_Chr04 | 30641877                | AA                                     | GG                 | GG               | INTERGENIC                    |                    |                                  |
| SNP_26667_A_30650447 | NC_021163.1    | Ca_Kabuli_Chr04 | 30650447                | CC                                     | TT                 | TT               | INTERGENIC                    |                    |                                  |
| SNP_26668_A_30653466 | NC_021163.1    | Ca_Kabuli_Chr04 | 30653466                | GG                                     | AA                 | AA               | INTERGENIC                    |                    |                                  |
| SNP_26669_A_30653480 | NC_021163.1    | Ca_Kabuli_Chr04 | 30653480                | CC                                     | TT                 | TT               | INTERGENIC                    |                    |                                  |
| SNP_26671_A_30673458 | NC_021163.1    | Ca_Kabuli_Chr04 | 30673458                | AA                                     | TT                 | TT               | INTRON                        | 101498846          | TBCC domain-containing protein 1 |
| SNP_26673_A_30688901 | NC_021163.1    | Ca_Kabuli_Chr04 | 30688901                | GG                                     | AA                 | AA               | INTERGENIC                    |                    |                                  |
| SNP_26674_A_30690709 | NC_021163.1    | Ca_Kabuli_Chr04 | 30690709                | GG                                     | AA                 | AA               | INTERGENIC                    |                    |                                  |
| SNP_26675_A_30693784 | NC_021163.1    | Ca_Kabuli_Chr04 | 30693784                | AA                                     | CC                 | CC               | INTERGENIC                    |                    |                                  |
| SNP_26677_A_30705142 | NC_021163.1    | Ca_Kabuli_Chr04 | 30705142                | CC                                     | TT                 | TT               | INTERGENIC                    |                    |                                  |
| SNP_26678_A_30705853 | NC_021163.1    | Ca_Kabuli_Chr04 | 30705853                | CC                                     | AA                 | AA               | INTERGENIC                    |                    |                                  |
| SNP_26680_A_30716351 | NC_021163.1    | Ca_Kabuli_Chr04 | 30716351                | CC                                     | AA                 | AA               | URR                           | 101513164          | uncharacterized LOC101513164     |
| SNP_26681_A_30716774 | NC_021163.1    | Ca_Kabuli_Chr04 | 30716774                | AA                                     | GG                 | GG               | URR                           | 101513164          | uncharacterized LOC101513164     |
| SNP_26682_A_30717378 | NC_021163.1    | Ca_Kabuli_Chr04 | 30717378                | TT                                     | GG                 | GG               | INTERGENIC                    |                    |                                  |
| SNP_26683_A_30717561 | NC_021163.1    | Ca_Kabuli_Chr04 | 30717561                | CC                                     | AA                 | AA               | INTERGENIC                    |                    |                                  |

| SNPs IDs             | Chromosome IDs | Chromosomes     | Physical positions (bp) | CDC Frontier genome (Reference genome) | (Pusa 1103 & HPNB) | (ILWC 46 & LPNB) | Sequence Components of genome | Gene accession IDs | Putative functions |
|----------------------|----------------|-----------------|-------------------------|----------------------------------------|--------------------|------------------|-------------------------------|--------------------|--------------------|
| SNP_26684_A_30717651 | NC_021163.1    | Ca_Kabuli_Chr04 | 30717651                | CC                                     | TT                 | TT               | INTERGENIC                    |                    |                    |
| SNP_26685_A_30718057 | NC_021163.1    | Ca_Kabuli_Chr04 | 30718057                | GG                                     | TT                 | TT               | INTERGENIC                    |                    |                    |
| SNP_26686_A_30718353 | NC_021163.1    | Ca_Kabuli_Chr04 | 30718353                | AA                                     | GG                 | GG               | INTERGENIC                    |                    |                    |
| SNP_26687_A_30718491 | NC_021163.1    | Ca_Kabuli_Chr04 | 30718491                | AA                                     | TT                 | TT               | INTERGENIC                    |                    |                    |
| SNP_26688_A_30718897 | NC_021163.1    | Ca_Kabuli_Chr04 | 30718897                | GG                                     | CC                 | CC               | INTERGENIC                    |                    |                    |
| SNP_26689_A_30718914 | NC_021163.1    | Ca_Kabuli_Chr04 | 30718914                | AA                                     | TT                 | TT               | INTERGENIC                    |                    |                    |
| SNP_26690_A_30719029 | NC_021163.1    | Ca_Kabuli_Chr04 | 30719029                | CC                                     | TT                 | TT               | INTERGENIC                    |                    |                    |
| SNP_26691_A_30719079 | NC_021163.1    | Ca_Kabuli_Chr04 | 30719079                | AA                                     | TT                 | TT               | INTERGENIC                    |                    |                    |
| SNP_26692_A_30719647 | NC_021163.1    | Ca_Kabuli_Chr04 | 30719647                | TT                                     | GG                 | GG               | INTERGENIC                    |                    |                    |
| SNP_26693_A_30719648 | NC_021163.1    | Ca_Kabuli_Chr04 | 30719648                | TT                                     | AA                 | AA               | INTERGENIC                    |                    |                    |
| SNP_26694_A_30719760 | NC_021163.1    | Ca_Kabuli_Chr04 | 30719760                | TT                                     | GG                 | GG               | INTERGENIC                    |                    |                    |
| SNP_26695_A_30720012 | NC_021163.1    | Ca_Kabuli_Chr04 | 30720012                | TT                                     | GG                 | GG               | INTERGENIC                    |                    |                    |
| SNP_26696_A_30720276 | NC_021163.1    | Ca_Kabuli_Chr04 | 30720276                | CC                                     | TT                 | TT               | INTERGENIC                    |                    |                    |
| SNP_26697_A_30720316 | NC_021163.1    | Ca_Kabuli_Chr04 | 30720316                | AA                                     | TT                 | TT               | INTERGENIC                    |                    |                    |
| SNP_26698_A_30727067 | NC_021163.1    | Ca_Kabuli_Chr04 | 30727067                | TT                                     | CC                 | CC               | INTERGENIC                    |                    |                    |
| SNP_26699_A_30739210 | NC_021163.1    | Ca_Kabuli_Chr04 | 30739210                | AA                                     | TT                 | TT               | INTERGENIC                    |                    |                    |
| SNP_26700_A_30741541 | NC_021163.1    | Ca_Kabuli_Chr04 | 30741541                | GG                                     | TT                 | TT               | INTERGENIC                    |                    |                    |
| SNP_26701_A_30741904 | NC_021163.1    | Ca_Kabuli_Chr04 | 30741904                | TT                                     | CC                 | CC               | INTERGENIC                    |                    |                    |
| SNP_26703_A_30746076 | NC_021163.1    | Ca_Kabuli_Chr04 | 30746076                | CC                                     | TT                 | TT               | INTERGENIC                    |                    |                    |
| SNP_26704_A_30747206 | NC_021163.1    | Ca_Kabuli_Chr04 | 30747206                | AA                                     | GG                 | GG               | INTERGENIC                    |                    |                    |
| SNP_26705_A_30754779 | NC_021163.1    | Ca_Kabuli_Chr04 | 30754779                | CC                                     | TT                 | TT               | DRR                           | 101499168          | protein QUIRKY     |
| SNP_26708_A_30768458 | NC_021163.1    | Ca_Kabuli_Chr04 | 30768458                | GG                                     | TT                 | TT               | INTERGENIC                    |                    |                    |

| SNPs IDs             | Chromosome IDs | Chromosomes     | Physical positions (bp) | CDC Frontier genome (Reference genome) | (Pusa 1103 & HPNB) | (ILWC 46 & LPNB) | Sequence genome | Components of | Gene accession IDs | Putative functions |
|----------------------|----------------|-----------------|-------------------------|----------------------------------------|--------------------|------------------|-----------------|---------------|--------------------|--------------------|
| SNP_26709_A_30769032 | NC_021163.1    | Ca_Kabuli_Chr04 | 30769032                | TT                                     | CC                 | CC               | INTERGENIC      |               |                    |                    |
| SNP_26710_A_30779069 | NC_021163.1    | Ca_Kabuli_Chr04 | 30779069                | TT                                     | GG                 | GG               | INTERGENIC      |               |                    |                    |
| SNP_26711_A_30783288 | NC_021163.1    | Ca_Kabuli_Chr04 | 30783288                | CC                                     | GG                 | GG               | INTERGENIC      |               |                    |                    |
| SNP_26712_A_30784671 | NC_021163.1    | Ca_Kabuli_Chr04 | 30784671                | TT                                     | GG                 | GG               | INTERGENIC      |               |                    |                    |
| SNP_26713_A_30786029 | NC_021163.1    | Ca_Kabuli_Chr04 | 30786029                | GG                                     | AA                 | AA               | INTERGENIC      |               |                    |                    |
| SNP_26715_A_30795094 | NC_021163.1    | Ca_Kabuli_Chr04 | 30795094                | TT                                     | CC                 | CC               | INTERGENIC      |               |                    |                    |
| SNP_26716_A_30795434 | NC_021163.1    | Ca_Kabuli_Chr04 | 30795434                | GG                                     | AA                 | AA               | INTERGENIC      |               |                    |                    |
| SNP_26717_A_30799090 | NC_021163.1    | Ca_Kabuli_Chr04 | 30799090                | TT                                     | CC                 | CC               | INTERGENIC      |               |                    |                    |
| SNP_26718_A_30805916 | NC_021163.1    | Ca_Kabuli_Chr04 | 30805916                | TT                                     | AA                 | AA               | INTERGENIC      |               |                    |                    |
| SNP_26719_A_30819879 | NC_021163.1    | Ca_Kabuli_Chr04 | 30819879                | GG                                     | AA                 | AA               | INTERGENIC      |               |                    |                    |
| SNP_26720_A_30820129 | NC_021163.1    | Ca_Kabuli_Chr04 | 30820129                | CC                                     | TT                 | TT               | INTERGENIC      |               |                    |                    |
| SNP_26721_A_30820738 | NC_021163.1    | Ca_Kabuli_Chr04 | 30820738                | TT                                     | CC                 | CC               | INTERGENIC      |               |                    |                    |
| SNP_26722_A_30821461 | NC_021163.1    | Ca_Kabuli_Chr04 | 30821461                | AA                                     | CC                 | CC               | INTERGENIC      |               |                    |                    |
| SNP_26723_A_30822862 | NC_021163.1    | Ca_Kabuli_Chr04 | 30822862                | GG                                     | AA                 | AA               | INTERGENIC      |               |                    |                    |
| SNP_26724_A_30827427 | NC_021163.1    | Ca_Kabuli_Chr04 | 30827427                | GG                                     | AA                 | AA               | INTERGENIC      |               |                    |                    |
| SNP_26725_A_30828641 | NC_021163.1    | Ca_Kabuli_Chr04 | 30828641                | CC                                     | TT                 | TT               | INTERGENIC      |               |                    |                    |
| SNP_26726_A_30828729 | NC_021163.1    | Ca_Kabuli_Chr04 | 30828729                | GG                                     | AA                 | AA               | INTERGENIC      |               |                    |                    |
| SNP_26727_A_30828938 | NC_021163.1    | Ca_Kabuli_Chr04 | 30828938                | TT                                     | GG                 | GG               | INTERGENIC      |               |                    |                    |
| SNP_26728_A_30829404 | NC_021163.1    | Ca_Kabuli_Chr04 | 30829404                | AA                                     | GG                 | GG               | INTERGENIC      |               |                    |                    |
| SNP_26729_A_30829655 | NC_021163.1    | Ca_Kabuli_Chr04 | 30829655                | TT                                     | CC                 | CC               | INTERGENIC      |               |                    |                    |
| SNP_26730_A_30829681 | NC_021163.1    | Ca_Kabuli_Chr04 | 30829681                | AA                                     | CC                 | CC               | INTERGENIC      |               |                    |                    |
| SNP_26731_A_30829706 | NC_021163.1    | Ca_Kabuli_Chr04 | 30829706                | TT                                     | GG                 | GG               | INTERGENIC      |               |                    |                    |

| SNPs IDs             | Chromosome IDs | Chromosomes     | Physical positions (bp) | CDC Frontier (Reference genome) | (Pusa 1103 & HPNB) | (ILWC 46 & LPNB) | Sequence Components of genome | Gene accession IDs | Putative functions               |
|----------------------|----------------|-----------------|-------------------------|---------------------------------|--------------------|------------------|-------------------------------|--------------------|----------------------------------|
| SNP_26732_A_30830786 | NC_021163.1    | Ca_Kabuli_Chr04 | 30830786                | AA                              | CC                 | CC               | INTERGENIC                    |                    |                                  |
| SNP_26733_A_30831972 | NC_021163.1    | Ca_Kabuli_Chr04 | 30831972                | TT                              | CC                 | CC               | INTERGENIC                    |                    |                                  |
| SNP_26734_A_30832393 | NC_021163.1    | Ca_Kabuli_Chr04 | 30832393                | GG                              | AA                 | AA               | INTERGENIC                    |                    |                                  |
| SNP_26735_A_30844323 | NC_021163.1    | Ca_Kabuli_Chr04 | 30844323                | TT                              | CC                 | CC               | INTERGENIC                    |                    |                                  |
| SNP_26737_A_30858519 | NC_021163.1    | Ca_Kabuli_Chr04 | 30858519                | GG                              | AA                 | AA               | INTRON                        | 101500106          | transcription factor HBP-1b(c38) |
| SNP_26738_A_30861558 | NC_021163.1    | Ca_Kabuli_Chr04 | 30861558                | TT                              | AA                 | AA               | INTERGENIC                    |                    |                                  |
| SNP_26739_A_30861571 | NC_021163.1    | Ca_Kabuli_Chr04 | 30861571                | GG                              | TT                 | TT               | INTERGENIC                    |                    |                                  |
| SNP_26740_A_30861584 | NC_021163.1    | Ca_Kabuli_Chr04 | 30861584                | GG                              | AA                 | AA               | INTERGENIC                    |                    |                                  |
| SNP_26741_A_30861613 | NC_021163.1    | Ca_Kabuli_Chr04 | 30861613                | GG                              | AA                 | AA               | INTERGENIC                    |                    |                                  |
| SNP_26742_A_30861885 | NC_021163.1    | Ca_Kabuli_Chr04 | 30861885                | CC                              | AA                 | AA               | INTERGENIC                    |                    |                                  |
| SNP_26743_A_30863687 | NC_021163.1    | Ca_Kabuli_Chr04 | 30863687                | GG                              | AA                 | AA               | INTERGENIC                    |                    |                                  |
| SNP_26745_A_30868832 | NC_021163.1    | Ca_Kabuli_Chr04 | 30868832                | GG                              | TT                 | TT               | INTERGENIC                    |                    |                                  |
| SNP_26746_A_30868857 | NC_021163.1    | Ca_Kabuli_Chr04 | 30868857                | AA                              | CC                 | CC               | INTERGENIC                    |                    |                                  |
| SNP_26747_A_30869883 | NC_021163.1    | Ca_Kabuli_Chr04 | 30869883                | AA                              | GG                 | GG               | INTERGENIC                    |                    |                                  |
| SNP_26748_A_30869887 | NC_021163.1    | Ca_Kabuli_Chr04 | 30869887                | TT                              | AA                 | AA               | INTERGENIC                    |                    |                                  |
| SNP_26749_A_30869888 | NC_021163.1    | Ca_Kabuli_Chr04 | 30869888                | CC                              | TT                 | TT               | INTERGENIC                    |                    |                                  |
| SNP_26750_A_30870323 | NC_021163.1    | Ca_Kabuli_Chr04 | 30870323                | CC                              | AA                 | AA               | INTERGENIC                    |                    |                                  |
| SNP_26751_A_30870375 | NC_021163.1    | Ca_Kabuli_Chr04 | 30870375                | AA                              | CC                 | CC               | INTERGENIC                    |                    |                                  |
| SNP_26752_A_30870835 | NC_021163.1    | Ca_Kabuli_Chr04 | 30870835                | TT                              | CC                 | CC               | INTERGENIC                    |                    |                                  |
| SNP_26753_A_30870851 | NC_021163.1    | Ca_Kabuli_Chr04 | 30870851                | CC                              | AA                 | AA               | INTERGENIC                    |                    |                                  |
| SNP_26754_A_30873278 | NC_021163.1    | Ca_Kabuli_Chr04 | 30873278                | TT                              | GG                 | GG               | INTERGENIC                    |                    |                                  |
| SNP_26755_A_30873299 | NC_021163.1    | Ca_Kabuli_Chr04 | 30873299                | TT                              | AA                 | AA               | INTERGENIC                    |                    |                                  |

| SNPs IDs             | Chromosome IDs | Chromosomes     | Physical positions (bp) | CDC Frontier genome (Reference genome) | (Pusa 1103 & HPNB) | (ILWC 46 & LPNB) | Sequence genome | Components of | Gene accession IDs | Putative functions |
|----------------------|----------------|-----------------|-------------------------|----------------------------------------|--------------------|------------------|-----------------|---------------|--------------------|--------------------|
| SNP_26756_A_30873300 | NC_021163.1    | Ca_Kabuli_Chr04 | 30873300                | AA                                     | GG                 | GG               | INTERGENIC      |               |                    |                    |
| SNP_26757_A_30873336 | NC_021163.1    | Ca_Kabuli_Chr04 | 30873336                | GG                                     | TT                 | TT               | INTERGENIC      |               |                    |                    |
| SNP_26758_A_30873502 | NC_021163.1    | Ca_Kabuli_Chr04 | 30873502                | CC                                     | TT                 | TT               | INTERGENIC      |               |                    |                    |
| SNP_26759_A_30873509 | NC_021163.1    | Ca_Kabuli_Chr04 | 30873509                | GG                                     | AA                 | AA               | INTERGENIC      |               |                    |                    |
| SNP_26760_A_30873532 | NC_021163.1    | Ca_Kabuli_Chr04 | 30873532                | AA                                     | TT                 | TT               | INTERGENIC      |               |                    |                    |
| SNP_26761_A_30873544 | NC_021163.1    | Ca_Kabuli_Chr04 | 30873544                | TT                                     | CC                 | CC               | INTERGENIC      |               |                    |                    |
| SNP_26762_A_30873603 | NC_021163.1    | Ca_Kabuli_Chr04 | 30873603                | CC                                     | TT                 | TT               | INTERGENIC      |               |                    |                    |
| SNP_26763_A_30873619 | NC_021163.1    | Ca_Kabuli_Chr04 | 30873619                | TT                                     | CC                 | CC               | INTERGENIC      |               |                    |                    |
| SNP_26765_A_30874307 | NC_021163.1    | Ca_Kabuli_Chr04 | 30874307                | TT                                     | CC                 | CC               | INTERGENIC      |               |                    |                    |
| SNP_26766_A_30874310 | NC_021163.1    | Ca_Kabuli_Chr04 | 30874310                | CC                                     | GG                 | GG               | INTERGENIC      |               |                    |                    |
| SNP_26767_A_30874314 | NC_021163.1    | Ca_Kabuli_Chr04 | 30874314                | CC                                     | GG                 | GG               | INTERGENIC      |               |                    |                    |
| SNP_26771_A_30883532 | NC_021163.1    | Ca_Kabuli_Chr04 | 30883532                | CC                                     | TT                 | TT               | INTERGENIC      |               |                    |                    |
| SNP_26772_A_30883548 | NC_021163.1    | Ca_Kabuli_Chr04 | 30883548                | AA                                     | GG                 | GG               | INTERGENIC      |               |                    |                    |
| SNP_26773_A_30886921 | NC_021163.1    | Ca_Kabuli_Chr04 | 30886921                | GG                                     | AA                 | AA               | INTERGENIC      |               |                    |                    |
| SNP_26774_A_30886936 | NC_021163.1    | Ca_Kabuli_Chr04 | 30886936                | TT                                     | CC                 | CC               | INTERGENIC      |               |                    |                    |
| SNP_26775_A_30886940 | NC_021163.1    | Ca_Kabuli_Chr04 | 30886940                | TT                                     | CC                 | CC               | INTERGENIC      |               |                    |                    |
| SNP_26776_A_30886960 | NC_021163.1    | Ca_Kabuli_Chr04 | 30886960                | AA                                     | GG                 | GG               | INTERGENIC      |               |                    |                    |
| SNP_26777_A_30886971 | NC_021163.1    | Ca_Kabuli_Chr04 | 30886971                | GG                                     | TT                 | TT               | INTERGENIC      |               |                    |                    |
| SNP_26778_A_30886997 | NC_021163.1    | Ca_Kabuli_Chr04 | 30886997                | TT                                     | AA                 | AA               | INTERGENIC      |               |                    |                    |
| SNP_26780_A_30887217 | NC_021163.1    | Ca_Kabuli_Chr04 | 30887217                | AA                                     | GG                 | GG               | INTERGENIC      |               |                    |                    |
| SNP_26781_A_30887277 | NC_021163.1    | Ca_Kabuli_Chr04 | 30887277                | GG                                     | AA                 | AA               | INTERGENIC      |               |                    |                    |
| SNP_26782_A_30887281 | NC_021163.1    | Ca_Kabuli_Chr04 | 30887281                | GG                                     | AA                 | AA               | INTERGENIC      |               |                    |                    |

| SNPs IDs             | Chromosome IDs | Chromosomes     | Physical positions (bp) | CDC Frontier genome (Reference genome) | (Pusa 1103 & HPNB) | (ILWC 46 & LPNB) | Sequence genome | Components of | Gene accession IDs | Putative functions |
|----------------------|----------------|-----------------|-------------------------|----------------------------------------|--------------------|------------------|-----------------|---------------|--------------------|--------------------|
| SNP_26783_A_30887289 | NC_021163.1    | Ca_Kabuli_Chr04 | 30887289                | CC                                     | AA                 | AA               | INTERGENIC      |               |                    |                    |
| SNP_26785_A_30887500 | NC_021163.1    | Ca_Kabuli_Chr04 | 30887500                | TT                                     | GG                 | GG               | INTERGENIC      |               |                    |                    |
| SNP_26787_A_30887506 | NC_021163.1    | Ca_Kabuli_Chr04 | 30887506                | AA                                     | GG                 | GG               | INTERGENIC      |               |                    |                    |
| SNP_26788_A_30887617 | NC_021163.1    | Ca_Kabuli_Chr04 | 30887617                | GG                                     | TT                 | TT               | INTERGENIC      |               |                    |                    |
| SNP_26789_A_30887879 | NC_021163.1    | Ca_Kabuli_Chr04 | 30887879                | CC                                     | TT                 | TT               | INTERGENIC      |               |                    |                    |
| SNP_26790_A_30888141 | NC_021163.1    | Ca_Kabuli_Chr04 | 30888141                | CC                                     | TT                 | TT               | INTERGENIC      |               |                    |                    |
| SNP_26791_A_30888238 | NC_021163.1    | Ca_Kabuli_Chr04 | 30888238                | TT                                     | CC                 | CC               | INTERGENIC      |               |                    |                    |
| SNP_26792_A_30888249 | NC_021163.1    | Ca_Kabuli_Chr04 | 30888249                | TT                                     | GG                 | GG               | INTERGENIC      |               |                    |                    |
| SNP_26793_A_30888257 | NC_021163.1    | Ca_Kabuli_Chr04 | 30888257                | CC                                     | TT                 | TT               | INTERGENIC      |               |                    |                    |
| SNP_26794_A_30888477 | NC_021163.1    | Ca_Kabuli_Chr04 | 30888477                | CC                                     | GG                 | GG               | INTERGENIC      |               |                    |                    |
| SNP_26795_A_30888535 | NC_021163.1    | Ca_Kabuli_Chr04 | 30888535                | TT                                     | CC                 | CC               | INTERGENIC      |               |                    |                    |
| SNP_26796_A_30888626 | NC_021163.1    | Ca_Kabuli_Chr04 | 30888626                | CC                                     | AA                 | AA               | INTERGENIC      |               |                    |                    |
| SNP_26797_A_30889010 | NC_021163.1    | Ca_Kabuli_Chr04 | 30889010                | TT                                     | CC                 | CC               | INTERGENIC      |               |                    |                    |
| SNP_26798_A_30897372 | NC_021163.1    | Ca_Kabuli_Chr04 | 30897372                | TT                                     | CC                 | CC               | INTERGENIC      |               |                    |                    |
| SNP_26799_A_30897398 | NC_021163.1    | Ca_Kabuli_Chr04 | 30897398                | TT                                     | CC                 | CC               | INTERGENIC      |               |                    |                    |
| SNP_26800_A_30897428 | NC_021163.1    | Ca_Kabuli_Chr04 | 30897428                | TT                                     | CC                 | CC               | INTERGENIC      |               |                    |                    |
| SNP_26801_A_30897467 | NC_021163.1    | Ca_Kabuli_Chr04 | 30897467                | GG                                     | AA                 | AA               | INTERGENIC      |               |                    |                    |
| SNP_26803_A_30897594 | NC_021163.1    | Ca_Kabuli_Chr04 | 30897594                | GG                                     | AA                 | AA               | INTERGENIC      |               |                    |                    |
| SNP_26804_A_30897873 | NC_021163.1    | Ca_Kabuli_Chr04 | 30897873                | TT                                     | GG                 | GG               | INTERGENIC      |               |                    |                    |
| SNP_26805_A_30897903 | NC_021163.1    | Ca_Kabuli_Chr04 | 30897903                | TT                                     | CC                 | CC               | INTERGENIC      |               |                    |                    |
| SNP_26806_A_30924415 | NC_021163.1    | Ca_Kabuli_Chr04 | 30924415                | AA                                     | GG                 | GG               | INTERGENIC      |               |                    |                    |
| SNP_26807_A_30924650 | NC_021163.1    | Ca_Kabuli_Chr04 | 30924650                | AA                                     | TT                 | TT               | INTERGENIC      |               |                    |                    |



| SNPs IDs             | Chromosome IDs | Chromosomes     | Physical positions (bp) | CDC Frontier genome (Reference genome) | (Pusa 1103 & HPNB) | (ILWC 46 & LPNB) | Sequence Components of genome | Gene accession IDs | Putative functions  |
|----------------------|----------------|-----------------|-------------------------|----------------------------------------|--------------------|------------------|-------------------------------|--------------------|---------------------|
| SNP_26808_A_30928446 | NC_021163.1    | Ca_Kabuli_Chr04 | 30928446                | TT                                     | CC                 | CC               | URR                           | 101514464          | Unknown function    |
| SNP_26809_A_30928611 | NC_021163.1    | Ca_Kabuli_Chr04 | 30928611                | CC                                     | TT                 | TT               | URR                           | 101514464          | Unknown function    |
| SNP_26810_A_30928633 | NC_021163.1    | Ca_Kabuli_Chr04 | 30928633                | GG                                     | AA                 | AA               | URR                           | 101514464          | Unknown function    |
| SNP_26811_A_30928669 | NC_021163.1    | Ca_Kabuli_Chr04 | 30928669                | AA                                     | GG                 | GG               | URR                           | 101514464          | Unknown function    |
| SNP_26812_A_30928671 | NC_021163.1    | Ca_Kabuli_Chr04 | 30928671                | GG                                     | TT                 | TT               | URR                           | 101514464          | Unknown function    |
| SNP_26813_A_30928674 | NC_021163.1    | Ca_Kabuli_Chr04 | 30928674                | CC                                     | GG                 | GG               | URR                           | 101514464          | Unknown function    |
| SNP_26815_A_30940519 | NC_021163.1    | Ca_Kabuli_Chr04 | 30940519                | GG                                     | TT                 | TT               | INTERGENIC                    |                    |                     |
| SNP_26816_A_30940531 | NC_021163.1    | Ca_Kabuli_Chr04 | 30940531                | GG                                     | AA                 | AA               | INTERGENIC                    |                    |                     |
| SNP_26817_A_30940707 | NC_021163.1    | Ca_Kabuli_Chr04 | 30940707                | TT                                     | CC                 | CC               | INTERGENIC                    |                    |                     |
| SNP_26818_A_30941445 | NC_021163.1    | Ca_Kabuli_Chr04 | 30941445                | TT                                     | CC                 | CC               | INTERGENIC                    |                    |                     |
| SNP_26819_A_30941779 | NC_021163.1    | Ca_Kabuli_Chr04 | 30941779                | TT                                     | CC                 | CC               | INTERGENIC                    |                    |                     |
| SNP_26820_A_30942712 | NC_021163.1    | Ca_Kabuli_Chr04 | 30942712                | TT                                     | CC                 | CC               | INTERGENIC                    |                    |                     |
| SNP_26821_A_30944399 | NC_021163.1    | Ca_Kabuli_Chr04 | 30944399                | TT                                     | CC                 | CC               | INTERGENIC                    |                    |                     |
| SNP_26822_A_30950781 | NC_021163.1    | Ca_Kabuli_Chr04 | 30950781                | GG                                     | AA                 | AA               | URR                           | 101500750          | protein QUIRKY-like |
| SNP_26823_A_30952222 | NC_021163.1    | Ca_Kabuli_Chr04 | 30952222                | TT                                     | AA                 | AA               | INTERGENIC                    |                    |                     |
| SNP_26824_A_30952237 | NC_021163.1    | Ca_Kabuli_Chr04 | 30952237                | TT                                     | CC                 | CC               | INTERGENIC                    |                    |                     |
| SNP_26825_A_30953866 | NC_021163.1    | Ca_Kabuli_Chr04 | 30953866                | CC                                     | TT                 | TT               | INTERGENIC                    |                    |                     |
| SNP_26826_A_30953921 | NC_021163.1    | Ca_Kabuli_Chr04 | 30953921                | TT                                     | AA                 | AA               | INTERGENIC                    |                    |                     |
| SNP_26827_A_30954113 | NC_021163.1    | Ca_Kabuli_Chr04 | 30954113                | TT                                     | CC                 | CC               | INTERGENIC                    |                    |                     |
| SNP_26828_A_30955981 | NC_021163.1    | Ca_Kabuli_Chr04 | 30955981                | GG                                     | AA                 | AA               | INTERGENIC                    |                    |                     |
| SNP_26829_A_30958512 | NC_021163.1    | Ca_Kabuli_Chr04 | 30958512                | GG                                     | AA                 | AA               | INTERGENIC                    |                    |                     |
| SNP_26830_A_30958534 | NC_021163.1    | Ca_Kabuli_Chr04 | 30958534                | AA                                     | TT                 | TT               | INTERGENIC                    |                    |                     |

| SNPs IDs             | Chromosome IDs | Chromosomes     | Physical positions (bp) | CDC Frontier genome (Reference genome) | (Pusa 1103 & HPNB) | (ILWC 46 & LPNB) | Sequence genome | Components of | Gene accession IDs | Putative functions |
|----------------------|----------------|-----------------|-------------------------|----------------------------------------|--------------------|------------------|-----------------|---------------|--------------------|--------------------|
| SNP_26831_A_30958679 | NC_021163.1    | Ca_Kabuli_Chr04 | 30958679                | AA                                     | GG                 | GG               | INTERGENIC      |               |                    |                    |
| SNP_26832_A_30958702 | NC_021163.1    | Ca_Kabuli_Chr04 | 30958702                | GG                                     | TT                 | TT               | INTERGENIC      |               |                    |                    |
| SNP_26833_A_30958703 | NC_021163.1    | Ca_Kabuli_Chr04 | 30958703                | TT                                     | GG                 | GG               | INTERGENIC      |               |                    |                    |
| SNP_26834_A_30958858 | NC_021163.1    | Ca_Kabuli_Chr04 | 30958858                | CC                                     | TT                 | TT               | INTERGENIC      |               |                    |                    |
| SNP_26835_A_30959106 | NC_021163.1    | Ca_Kabuli_Chr04 | 30959106                | GG                                     | AA                 | AA               | INTERGENIC      |               |                    |                    |
| SNP_26836_A_30961715 | NC_021163.1    | Ca_Kabuli_Chr04 | 30961715                | TT                                     | AA                 | AA               | INTERGENIC      |               |                    |                    |
| SNP_26837_A_30961744 | NC_021163.1    | Ca_Kabuli_Chr04 | 30961744                | AA                                     | CC                 | CC               | INTERGENIC      |               |                    |                    |
| SNP_26838_A_30961750 | NC_021163.1    | Ca_Kabuli_Chr04 | 30961750                | AA                                     | GG                 | GG               | INTERGENIC      |               |                    |                    |
| SNP_26839_A_30965040 | NC_021163.1    | Ca_Kabuli_Chr04 | 30965040                | CC                                     | TT                 | TT               | INTERGENIC      |               |                    |                    |
| SNP_26841_A_30968235 | NC_021163.1    | Ca_Kabuli_Chr04 | 30968235                | CC                                     | TT                 | TT               | INTERGENIC      |               |                    |                    |
| SNP_26842_A_30979799 | NC_021163.1    | Ca_Kabuli_Chr04 | 30979799                | GG                                     | CC                 | CC               | INTERGENIC      |               |                    |                    |
| SNP_26843_A_30979803 | NC_021163.1    | Ca_Kabuli_Chr04 | 30979803                | TT                                     | AA                 | AA               | INTERGENIC      |               |                    |                    |
| SNP_26844_A_30979804 | NC_021163.1    | Ca_Kabuli_Chr04 | 30979804                | TT                                     | AA                 | AA               | INTERGENIC      |               |                    |                    |
| SNP_26845_A_30980013 | NC_021163.1    | Ca_Kabuli_Chr04 | 30980013                | CC                                     | AA                 | AA               | INTERGENIC      |               |                    |                    |
| SNP_26846_A_30980299 | NC_021163.1    | Ca_Kabuli_Chr04 | 30980299                | CC                                     | GG                 | GG               | INTERGENIC      |               |                    |                    |
| SNP_26847_A_30980344 | NC_021163.1    | Ca_Kabuli_Chr04 | 30980344                | CC                                     | TT                 | TT               | INTERGENIC      |               |                    |                    |
| SNP_26848_A_30980357 | NC_021163.1    | Ca_Kabuli_Chr04 | 30980357                | CC                                     | TT                 | TT               | INTERGENIC      |               |                    |                    |
| SNP_26849_A_30980363 | NC_021163.1    | Ca_Kabuli_Chr04 | 30980363                | CC                                     | TT                 | TT               | INTERGENIC      |               |                    |                    |
| SNP_26850_A_30981869 | NC_021163.1    | Ca_Kabuli_Chr04 | 30981869                | CC                                     | AA                 | AA               | INTERGENIC      |               |                    |                    |
| SNP_26851_A_30983100 | NC_021163.1    | Ca_Kabuli_Chr04 | 30983100                | AA                                     | GG                 | GG               | INTERGENIC      |               |                    |                    |
| SNP_26852_A_30984151 | NC_021163.1    | Ca_Kabuli_Chr04 | 30984151                | TT                                     | CC                 | CC               | INTERGENIC      |               |                    |                    |
| SNP_26853_A_30998072 | NC_021163.1    | Ca_Kabuli_Chr04 | 30998072                | AA                                     | GG                 | GG               | INTERGENIC      |               |                    |                    |

| SNPs IDs             | Chromosome IDs | Chromosomes     | Physical positions (bp) | CDC Frontier genome (Reference genome) | (Pusa 1103 & HPNB) | (ILWC 46 & LPNB) | Sequence Components of genome | Gene accession IDs | Putative functions           |
|----------------------|----------------|-----------------|-------------------------|----------------------------------------|--------------------|------------------|-------------------------------|--------------------|------------------------------|
| SNP_26854_A_30998109 | NC_021163.1    | Ca_Kabuli_Chr04 | 30998109                | AA                                     | GG                 | GG               | INTERGENIC                    |                    |                              |
| SNP_26855_A_30998369 | NC_021163.1    | Ca_Kabuli_Chr04 | 30998369                | TT                                     | AA                 | AA               | INTERGENIC                    |                    |                              |
| SNP_26856_A_30999991 | NC_021163.1    | Ca_Kabuli_Chr04 | 30999991                | TT                                     | AA                 | AA               | INTERGENIC                    |                    |                              |
| SNP_26857_A_31000049 | NC_021163.1    | Ca_Kabuli_Chr04 | 31000049                | AA                                     | GG                 | GG               | INTERGENIC                    |                    |                              |
| SNP_26858_A_31001187 | NC_021163.1    | Ca_Kabuli_Chr04 | 31001187                | AA                                     | TT                 | TT               | INTERGENIC                    |                    |                              |
| SNP_26859_A_31001558 | NC_021163.1    | Ca_Kabuli_Chr04 | 31001558                | CC                                     | AA                 | AA               | INTERGENIC                    |                    |                              |
| SNP_26860_A_31001952 | NC_021163.1    | Ca_Kabuli_Chr04 | 31001952                | TT                                     | CC                 | CC               | INTERGENIC                    |                    |                              |
| SNP_26861_A_31016155 | NC_021163.1    | Ca_Kabuli_Chr04 | 31016155                | TT                                     | GG                 | GG               | INTERGENIC                    |                    |                              |
| SNP_26862_A_31016182 | NC_021163.1    | Ca_Kabuli_Chr04 | 31016182                | TT                                     | AA                 | AA               | INTERGENIC                    |                    |                              |
| SNP_26863_A_31016547 | NC_021163.1    | Ca_Kabuli_Chr04 | 31016547                | GG                                     | AA                 | AA               | INTERGENIC                    |                    |                              |
| SNP_26864_A_31022581 | NC_021163.1    | Ca_Kabuli_Chr04 | 31022581                | GG                                     | AA                 | AA               | INTERGENIC                    |                    |                              |
| SNP_26865_A_31022602 | NC_021163.1    | Ca_Kabuli_Chr04 | 31022602                | GG                                     | AA                 | AA               | INTERGENIC                    |                    |                              |
| SNP_26866_A_31023021 | NC_021163.1    | Ca_Kabuli_Chr04 | 31023021                | CC                                     | AA                 | AA               | INTERGENIC                    |                    |                              |
| SNP_26867_A_31023322 | NC_021163.1    | Ca_Kabuli_Chr04 | 31023322                | TT                                     | CC                 | CC               | INTERGENIC                    |                    |                              |
| SNP_26868_A_31023341 | NC_021163.1    | Ca_Kabuli_Chr04 | 31023341                | AA                                     | GG                 | GG               | INTERGENIC                    |                    |                              |
| SNP_26869_A_31023638 | NC_021163.1    | Ca_Kabuli_Chr04 | 31023638                | TT                                     | AA                 | AA               | INTERGENIC                    |                    |                              |
| SNP_26870_A_31024397 | NC_021163.1    | Ca_Kabuli_Chr04 | 31024397                | CC                                     | AA                 | AA               | INTERGENIC                    |                    |                              |
| SNP_26871_A_31024409 | NC_021163.1    | Ca_Kabuli_Chr04 | 31024409                | TT                                     | CC                 | CC               | INTERGENIC                    |                    |                              |
| SNP_26872_A_31024411 | NC_021163.1    | Ca_Kabuli_Chr04 | 31024411                | CC                                     | TT                 | TT               | INTERGENIC                    |                    |                              |
| SNP_26873_A_31027051 | NC_021163.1    | Ca_Kabuli_Chr04 | 31027051                | CC                                     | GG                 | GG               | INTRON                        | 101515765          | uncharacterized LOC101515765 |
| SNP_26874_A_31027166 | NC_021163.1    | Ca_Kabuli_Chr04 | 31027166                | GG                                     | AA                 | AA               | INTRON                        | 101515765          | uncharacterized LOC101515765 |
| SNP_26875_A_31029010 | NC_021163.1    | Ca_Kabuli_Chr04 | 31029010                | CC                                     | AA                 | AA               | URR                           | 101515765          | uncharacterized LOC101515765 |

| SNPs IDs             | Chromosome IDs | Chromosomes     | Physical positions (bp) | CDC Frontier genome (Reference genome) | (Pusa 1103 & HPNB) | (ILWC 46 & LPNB) | Sequence genome | Components of | Gene accession IDs | Putative functions |
|----------------------|----------------|-----------------|-------------------------|----------------------------------------|--------------------|------------------|-----------------|---------------|--------------------|--------------------|
| SNP_26876_A_31051280 | NC_021163.1    | Ca_Kabuli_Chr04 | 31051280                | GG                                     | TT                 | TT               | INTERGENIC      |               |                    |                    |
| SNP_26877_A_31051358 | NC_021163.1    | Ca_Kabuli_Chr04 | 31051358                | GG                                     | AA                 | AA               | INTERGENIC      |               |                    |                    |
| SNP_26878_A_31051361 | NC_021163.1    | Ca_Kabuli_Chr04 | 31051361                | TT                                     | CC                 | CC               | INTERGENIC      |               |                    |                    |
| SNP_26879_A_31051424 | NC_021163.1    | Ca_Kabuli_Chr04 | 31051424                | CC                                     | TT                 | TT               | INTERGENIC      |               |                    |                    |
| SNP_26880_A_31051426 | NC_021163.1    | Ca_Kabuli_Chr04 | 31051426                | AA                                     | GG                 | GG               | INTERGENIC      |               |                    |                    |
| SNP_26881_A_31051447 | NC_021163.1    | Ca_Kabuli_Chr04 | 31051447                | GG                                     | AA                 | AA               | INTERGENIC      |               |                    |                    |
| SNP_26882_A_31051453 | NC_021163.1    | Ca_Kabuli_Chr04 | 31051453                | TT                                     | CC                 | CC               | INTERGENIC      |               |                    |                    |
| SNP_26883_A_31051481 | NC_021163.1    | Ca_Kabuli_Chr04 | 31051481                | GG                                     | AA                 | AA               | INTERGENIC      |               |                    |                    |
| SNP_26884_A_31052905 | NC_021163.1    | Ca_Kabuli_Chr04 | 31052905                | GG                                     | TT                 | TT               | INTERGENIC      |               |                    |                    |
| SNP_26885_A_31053281 | NC_021163.1    | Ca_Kabuli_Chr04 | 31053281                | GG                                     | TT                 | TT               | INTERGENIC      |               |                    |                    |
| SNP_26886_A_31054527 | NC_021163.1    | Ca_Kabuli_Chr04 | 31054527                | GG                                     | AA                 | AA               | INTERGENIC      |               |                    |                    |
| SNP_26887_A_31054564 | NC_021163.1    | Ca_Kabuli_Chr04 | 31054564                | GG                                     | TT                 | TT               | INTERGENIC      |               |                    |                    |
| SNP_26888_A_31054596 | NC_021163.1    | Ca_Kabuli_Chr04 | 31054596                | CC                                     | TT                 | TT               | INTERGENIC      |               |                    |                    |
| SNP_26889_A_31054598 | NC_021163.1    | Ca_Kabuli_Chr04 | 31054598                | GG                                     | TT                 | TT               | INTERGENIC      |               |                    |                    |
| SNP_26890_A_31054858 | NC_021163.1    | Ca_Kabuli_Chr04 | 31054858                | AA                                     | GG                 | GG               | INTERGENIC      |               |                    |                    |
| SNP_26891_A_31054896 | NC_021163.1    | Ca_Kabuli_Chr04 | 31054896                | GG                                     | AA                 | AA               | INTERGENIC      |               |                    |                    |
| SNP_26892_A_31054900 | NC_021163.1    | Ca_Kabuli_Chr04 | 31054900                | TT                                     | CC                 | CC               | INTERGENIC      |               |                    |                    |
| SNP_26893_A_31054902 | NC_021163.1    | Ca_Kabuli_Chr04 | 31054902                | TT                                     | CC                 | CC               | INTERGENIC      |               |                    |                    |
| SNP_26894_A_31055949 | NC_021163.1    | Ca_Kabuli_Chr04 | 31055949                | TT                                     | CC                 | CC               | INTERGENIC      |               |                    |                    |
| SNP_26895_A_31056363 | NC_021163.1    | Ca_Kabuli_Chr04 | 31056363                | GG                                     | TT                 | TT               | INTERGENIC      |               |                    |                    |
| SNP_26896_A_31056375 | NC_021163.1    | Ca_Kabuli_Chr04 | 31056375                | TT                                     | GG                 | GG               | INTERGENIC      |               |                    |                    |
| SNP_26897_A_31056782 | NC_021163.1    | Ca_Kabuli_Chr04 | 31056782                | CC                                     | AA                 | AA               | INTERGENIC      |               |                    |                    |

| SNPs IDs             | Chromosome IDs | Chromosomes     | Physical positions (bp) | CDC Frontier (Reference genome) | (Pusa 1103 & HPNB) | (ILWC 46 & LPNB) | Sequence Components of genome | Gene accession IDs | Putative functions         |
|----------------------|----------------|-----------------|-------------------------|---------------------------------|--------------------|------------------|-------------------------------|--------------------|----------------------------|
| SNP_26899_A_31057891 | NC_021163.1    | Ca_Kabuli_Chr04 | 31057891                | AA                              | GG                 | GG               | INTERGENIC                    |                    |                            |
| SNP_26901_A_31063439 | NC_021163.1    | Ca_Kabuli_Chr04 | 31063439                | AA                              | GG                 | GG               | INTERGENIC                    |                    |                            |
| SNP_26902_A_31063989 | NC_021163.1    | Ca_Kabuli_Chr04 | 31063989                | CC                              | TT                 | TT               | INTERGENIC                    |                    |                            |
| SNP_26903_A_31064178 | NC_021163.1    | Ca_Kabuli_Chr04 | 31064178                | AA                              | GG                 | GG               | DRR                           | 101501375          | cytochrome P450 93A3-like  |
| SNP_26904_A_31064199 | NC_021163.1    | Ca_Kabuli_Chr04 | 31064199                | TT                              | CC                 | CC               | DRR                           | 101501375          | cytochrome P450 93A3-like  |
| SNP_26905_A_31064532 | NC_021163.1    | Ca_Kabuli_Chr04 | 31064532                | AA                              | TT                 | TT               | DRR                           | 101501375          | cytochrome P450 93A3-like  |
| SNP_26906_A_31066094 | NC_021163.1    | Ca_Kabuli_Chr04 | 31066094                | TT                              | GG                 | GG               | NON_SYNONYMOUS_CODING         | 101501375          | cytochrome P450 93A3-like  |
| SNP_26907_A_31066124 | NC_021163.1    | Ca_Kabuli_Chr04 | 31066124                | AA                              | GG                 | GG               | NON_SYNONYMOUS_CODING         | 101501375          | cytochrome P450 93A3-like  |
| SNP_26908_A_31070692 | NC_021163.1    | Ca_Kabuli_Chr04 | 31070692                | AA                              | GG                 | GG               | INTERGENIC                    |                    |                            |
| SNP_26909_A_31070934 | NC_021163.1    | Ca_Kabuli_Chr04 | 31070934                | CC                              | GG                 | GG               | INTERGENIC                    |                    |                            |
| SNP_26910_A_31071299 | NC_021163.1    | Ca_Kabuli_Chr04 | 31071299                | GG                              | AA                 | AA               | INTERGENIC                    |                    |                            |
| SNP_26911_A_31071302 | NC_021163.1    | Ca_Kabuli_Chr04 | 31071302                | TT                              | CC                 | CC               | INTERGENIC                    |                    |                            |
| SNP_26912_A_31071802 | NC_021163.1    | Ca_Kabuli_Chr04 | 31071802                | GG                              | CC                 | CC               | INTERGENIC                    |                    |                            |
| SNP_26913_A_31079529 | NC_021163.1    | Ca_Kabuli_Chr04 | 31079529                | AA                              | GG                 | GG               | INTERGENIC                    |                    |                            |
| SNP_26914_A_31079573 | NC_021163.1    | Ca_Kabuli_Chr04 | 31079573                | TT                              | CC                 | CC               | INTERGENIC                    |                    |                            |
| SNP_26915_A_31079641 | NC_021163.1    | Ca_Kabuli_Chr04 | 31079641                | CC                              | TT                 | TT               | INTERGENIC                    |                    |                            |
| SNP_26917_A_31079702 | NC_021163.1    | Ca_Kabuli_Chr04 | 31079702                | GG                              | TT                 | TT               | INTERGENIC                    |                    |                            |
| SNP_26918_A_31079881 | NC_021163.1    | Ca_Kabuli_Chr04 | 31079881                | TT                              | GG                 | GG               | INTERGENIC                    |                    |                            |
| SNP_26920_A_31107076 | NC_021163.1    | Ca_Kabuli_Chr04 | 31107076                | AA                              | GG                 | GG               | URR                           | 101501691          | ras-related protein RABA4d |
| SNP_26921_A_31107139 | NC_021163.1    | Ca_Kabuli_Chr04 | 31107139                | GG                              | TT                 | TT               | URR                           | 101501691          | ras-related protein RABA4d |
| SNP_26922_A_31107199 | NC_021163.1    | Ca_Kabuli_Chr04 | 31107199                | GG                              | CC                 | CC               | URR                           | 101501691          | ras-related protein RABA4d |
| SNP_26923_A_31107271 | NC_021163.1    | Ca_Kabuli_Chr04 | 31107271                | CC                              | AA                 | AA               | URR                           | 101501691          | ras-related protein RABA4d |

| SNPs IDs             | Chromosome IDs | Chromosomes     | Physical positions (bp) | CDC Frontier genome (Reference genome) | (Pusa 1103 & HPNB) | (ILWC 46 & LPNB) | Sequence Components of genome | Gene accession IDs | Putative functions         |
|----------------------|----------------|-----------------|-------------------------|----------------------------------------|--------------------|------------------|-------------------------------|--------------------|----------------------------|
| SNP_26924_A_31107627 | NC_021163.1    | Ca_Kabuli_Chr04 | 31107627                | CC                                     | AA                 | AA               | URR                           | 101501691          | ras-related protein RABA4d |
| SNP_26925_A_31108308 | NC_021163.1    | Ca_Kabuli_Chr04 | 31108308                | GG                                     | AA                 | AA               | INTERGENIC                    |                    |                            |
| SNP_26926_A_31108555 | NC_021163.1    | Ca_Kabuli_Chr04 | 31108555                | GG                                     | AA                 | AA               | INTERGENIC                    |                    |                            |
| SNP_26927_A_31108570 | NC_021163.1    | Ca_Kabuli_Chr04 | 31108570                | CC                                     | TT                 | TT               | INTERGENIC                    |                    |                            |
| SNP_26929_A_31108832 | NC_021163.1    | Ca_Kabuli_Chr04 | 31108832                | CC                                     | TT                 | TT               | INTERGENIC                    |                    |                            |
| SNP_26930_A_31108844 | NC_021163.1    | Ca_Kabuli_Chr04 | 31108844                | GG                                     | AA                 | AA               | INTERGENIC                    |                    |                            |
| SNP_26931_A_31108981 | NC_021163.1    | Ca_Kabuli_Chr04 | 31108981                | AA                                     | GG                 | GG               | INTERGENIC                    |                    |                            |
| SNP_26932_A_31109912 | NC_021163.1    | Ca_Kabuli_Chr04 | 31109912                | AA                                     | GG                 | GG               | INTERGENIC                    |                    |                            |
| SNP_26933_A_31110370 | NC_021163.1    | Ca_Kabuli_Chr04 | 31110370                | CC                                     | TT                 | TT               | INTERGENIC                    |                    |                            |
| SNP_26934_A_31110876 | NC_021163.1    | Ca_Kabuli_Chr04 | 31110876                | TT                                     | AA                 | AA               | INTERGENIC                    |                    |                            |
| SNP_26935_A_31110901 | NC_021163.1    | Ca_Kabuli_Chr04 | 31110901                | GG                                     | TT                 | TT               | INTERGENIC                    |                    |                            |
| SNP_26937_A_31110959 | NC_021163.1    | Ca_Kabuli_Chr04 | 31110959                | TT                                     | CC                 | CC               | INTERGENIC                    |                    |                            |
| SNP_26938_A_31111415 | NC_021163.1    | Ca_Kabuli_Chr04 | 31111415                | GG                                     | TT                 | TT               | INTERGENIC                    |                    |                            |
| SNP_26939_A_31112224 | NC_021163.1    | Ca_Kabuli_Chr04 | 31112224                | CC                                     | AA                 | AA               | INTERGENIC                    |                    |                            |
| SNP_26940_A_31112519 | NC_021163.1    | Ca_Kabuli_Chr04 | 31112519                | GG                                     | AA                 | AA               | INTERGENIC                    |                    |                            |
| SNP_26941_A_31114661 | NC_021163.1    | Ca_Kabuli_Chr04 | 31114661                | GG                                     | AA                 | AA               | INTERGENIC                    |                    |                            |
| SNP_26942_A_31115049 | NC_021163.1    | Ca_Kabuli_Chr04 | 31115049                | CC                                     | TT                 | TT               | INTERGENIC                    |                    |                            |
| SNP_26943_A_31115068 | NC_021163.1    | Ca_Kabuli_Chr04 | 31115068                | TT                                     | CC                 | CC               | INTERGENIC                    |                    |                            |
| SNP_26944_A_31115586 | NC_021163.1    | Ca_Kabuli_Chr04 | 31115586                | AA                                     | TT                 | TT               | INTERGENIC                    |                    |                            |
| SNP_26945_A_31117254 | NC_021163.1    | Ca_Kabuli_Chr04 | 31117254                | GG                                     | AA                 | AA               | INTERGENIC                    |                    |                            |
| SNP_26946_A_31117283 | NC_021163.1    | Ca_Kabuli_Chr04 | 31117283                | CC                                     | TT                 | TT               | INTERGENIC                    |                    |                            |
| SNP_26947_A_31117291 | NC_021163.1    | Ca_Kabuli_Chr04 | 31117291                | TT                                     | AA                 | AA               | INTERGENIC                    |                    |                            |

| SNPs IDs             | Chromosome IDs | Chromosomes     | Physical positions (bp) | CDC Frontier genome (Reference genome) | (Pusa 1103 & HPNB) | (ILWC 46 & LPNB) | Sequence genome | Components of | Gene accession IDs | Putative functions |
|----------------------|----------------|-----------------|-------------------------|----------------------------------------|--------------------|------------------|-----------------|---------------|--------------------|--------------------|
| SNP_26948_A_31118081 | NC_021163.1    | Ca_Kabuli_Chr04 | 31118081                | GG                                     | TT                 | TT               | INTERGENIC      |               |                    |                    |
| SNP_26949_A_31120736 | NC_021163.1    | Ca_Kabuli_Chr04 | 31120736                | CC                                     | GG                 | GG               | INTERGENIC      |               |                    |                    |
| SNP_26950_A_31121012 | NC_021163.1    | Ca_Kabuli_Chr04 | 31121012                | GG                                     | AA                 | AA               | INTERGENIC      |               |                    |                    |
| SNP_26951_A_31121027 | NC_021163.1    | Ca_Kabuli_Chr04 | 31121027                | AA                                     | GG                 | GG               | INTERGENIC      |               |                    |                    |
| SNP_26952_A_31121074 | NC_021163.1    | Ca_Kabuli_Chr04 | 31121074                | TT                                     | CC                 | CC               | INTERGENIC      |               |                    |                    |
| SNP_26953_A_31121079 | NC_021163.1    | Ca_Kabuli_Chr04 | 31121079                | CC                                     | TT                 | TT               | INTERGENIC      |               |                    |                    |
| SNP_26954_A_31121092 | NC_021163.1    | Ca_Kabuli_Chr04 | 31121092                | CC                                     | GG                 | GG               | INTERGENIC      |               |                    |                    |
| SNP_26955_A_31121601 | NC_021163.1    | Ca_Kabuli_Chr04 | 31121601                | CC                                     | AA                 | AA               | INTERGENIC      |               |                    |                    |
| SNP_26956_A_31121631 | NC_021163.1    | Ca_Kabuli_Chr04 | 31121631                | CC                                     | GG                 | GG               | INTERGENIC      |               |                    |                    |
| SNP_26957_A_31122093 | NC_021163.1    | Ca_Kabuli_Chr04 | 31122093                | TT                                     | CC                 | CC               | INTERGENIC      |               |                    |                    |
| SNP_26958_A_31122111 | NC_021163.1    | Ca_Kabuli_Chr04 | 31122111                | TT                                     | AA                 | AA               | INTERGENIC      |               |                    |                    |
| SNP_26959_A_31122338 | NC_021163.1    | Ca_Kabuli_Chr04 | 31122338                | CC                                     | AA                 | AA               | INTERGENIC      |               |                    |                    |
| SNP_26960_A_31122352 | NC_021163.1    | Ca_Kabuli_Chr04 | 31122352                | CC                                     | GG                 | GG               | INTERGENIC      |               |                    |                    |
| SNP_26961_A_31122360 | NC_021163.1    | Ca_Kabuli_Chr04 | 31122360                | TT                                     | CC                 | CC               | INTERGENIC      |               |                    |                    |
| SNP_26962_A_31122365 | NC_021163.1    | Ca_Kabuli_Chr04 | 31122365                | TT                                     | CC                 | CC               | INTERGENIC      |               |                    |                    |
| SNP_26963_A_31124926 | NC_021163.1    | Ca_Kabuli_Chr04 | 31124926                | GG                                     | AA                 | AA               | INTERGENIC      |               |                    |                    |
| SNP_26964_A_31126663 | NC_021163.1    | Ca_Kabuli_Chr04 | 31126663                | AA                                     | GG                 | GG               | INTERGENIC      |               |                    |                    |
| SNP_26965_A_31127968 | NC_021163.1    | Ca_Kabuli_Chr04 | 31127968                | AA                                     | TT                 | TT               | INTERGENIC      |               |                    |                    |
| SNP_26966_A_31128025 | NC_021163.1    | Ca_Kabuli_Chr04 | 31128025                | GG                                     | AA                 | AA               | INTERGENIC      |               |                    |                    |
| SNP_26967_A_31136153 | NC_021163.1    | Ca_Kabuli_Chr04 | 31136153                | AA                                     | GG                 | GG               | INTERGENIC      |               |                    |                    |
| SNP_26968_A_31136453 | NC_021163.1    | Ca_Kabuli_Chr04 | 31136453                | GG                                     | AA                 | AA               | INTERGENIC      |               |                    |                    |
| SNP_26969_A_31136492 | NC_021163.1    | Ca_Kabuli_Chr04 | 31136492                | GG                                     | AA                 | AA               | INTERGENIC      |               |                    |                    |

| SNPs IDs             | Chromosome IDs | Chromosomes     | Physical positions (bp) | CDC Frontier (Reference genome) | (Pusa 1103 & HPNB) | (ILWC 46 & LPNB) | Sequence Components of genome | Gene accession IDs | Putative functions                                                           |
|----------------------|----------------|-----------------|-------------------------|---------------------------------|--------------------|------------------|-------------------------------|--------------------|------------------------------------------------------------------------------|
| SNP_26970_A_31136514 | NC_021163.1    | Ca_Kabuli_Chr04 | 31136514                | TT                              | GG                 | GG               | INTERGENIC                    |                    |                                                                              |
| SNP_26972_A_31138320 | NC_021163.1    | Ca_Kabuli_Chr04 | 31138320                | AA                              | GG                 | GG               | DRR                           | 101502017          | transcription factor bHLH130                                                 |
| SNP_26973_A_31138715 | NC_021163.1    | Ca_Kabuli_Chr04 | 31138715                | CC                              | TT                 | TT               | NON_SYNONYMOUS_CODING         | 101502017          | transcription factor bHLH130                                                 |
| SNP_26975_A_31145115 | NC_021163.1    | Ca_Kabuli_Chr04 | 31145115                | AA                              | GG                 | GG               | INTERGENIC                    |                    |                                                                              |
| SNP_26976_A_31147612 | NC_021163.1    | Ca_Kabuli_Chr04 | 31147612                | CC                              | TT                 | TT               | INTERGENIC                    |                    |                                                                              |
| SNP_26978_A_31173305 | NC_021163.1    | Ca_Kabuli_Chr04 | 31173305                | CC                              | TT                 | TT               | INTERGENIC                    |                    |                                                                              |
| SNP_26979_A_31173711 | NC_021163.1    | Ca_Kabuli_Chr04 | 31173711                | CC                              | TT                 | TT               | INTERGENIC                    |                    |                                                                              |
| SNP_26980_A_31178878 | NC_021163.1    | Ca_Kabuli_Chr04 | 31178878                | TT                              | CC                 | CC               | INTERGENIC                    |                    |                                                                              |
| SNP_26981_A_31182635 | NC_021163.1    | Ca_Kabuli_Chr04 | 31182635                | TT                              | AA                 | AA               | INTERGENIC                    |                    |                                                                              |
| SNP_26983_A_31184630 | NC_021163.1    | Ca_Kabuli_Chr04 | 31184630                | AA                              | GG                 | GG               | INTERGENIC                    |                    |                                                                              |
| SNP_26984_A_31189289 | NC_021163.1    | Ca_Kabuli_Chr04 | 31189289                | CC                              | TT                 | TT               | INTERGENIC                    |                    |                                                                              |
| SNP_26985_A_31189621 | NC_021163.1    | Ca_Kabuli_Chr04 | 31189621                | AA                              | CC                 | CC               | INTERGENIC                    |                    |                                                                              |
| SNP_26986_A_31189832 | NC_021163.1    | Ca_Kabuli_Chr04 | 31189832                | AA                              | GG                 | GG               | INTERGENIC                    |                    |                                                                              |
| SNP_26987_A_31190120 | NC_021163.1    | Ca_Kabuli_Chr04 | 31190120                | TT                              | CC                 | CC               | INTERGENIC                    |                    |                                                                              |
| SNP_26988_A_31190782 | NC_021163.1    | Ca_Kabuli_Chr04 | 31190782                | AA                              | GG                 | GG               | INTERGENIC                    |                    |                                                                              |
| SNP_26990_A_31194330 | NC_021163.1    | Ca_Kabuli_Chr04 | 31194330                | AA                              | GG                 | GG               | INTERGENIC                    |                    |                                                                              |
| SNP_26992_A_31195142 | NC_021163.1    | Ca_Kabuli_Chr04 | 31195142                | GG                              | AA                 | AA               | DRR                           | 101502346          | probable inactive leucine-rich repeat receptor-like protein kinase At1g66830 |
| SNP_26995_A_31206607 | NC_021163.1    | Ca_Kabuli_Chr04 | 31206607                | TT                              | GG                 | GG               | INTERGENIC                    |                    |                                                                              |
| SNP_26996_A_31217673 | NC_021163.1    | Ca_Kabuli_Chr04 | 31217673                | GG                              | TT                 | TT               | INTRON                        | 101502655          | OTU domain-containing protein At3g57810-like                                 |
| SNP_26997_A_31217763 | NC_021163.1    | Ca_Kabuli_Chr04 | 31217763                | AA                              | CC                 | CC               | INTRON                        | 101502655          | OTU domain-containing protein At3g57810-like                                 |
| SNP_26998_A_31217797 | NC_021163.1    | Ca_Kabuli_Chr04 | 31217797                | TT                              | CC                 | CC               | INTRON                        | 101502655          | OTU domain-containing protein At3g57810-like                                 |
| SNP_26999_A_31221993 | NC_021163.1    | Ca_Kabuli_Chr04 | 31221993                | GG                              | AA                 | AA               | URR                           | 101502655          | OTU domain-containing protein At3g57810-like                                 |



| SNPs IDs             | Chromosome IDs | Chromosomes     | Physical positions (bp) | CDC Frontier genome (Reference genome) | (Pusa 1103 & HPNB) | (ILWC 46 & LPNB) | Sequence Components of genome | Gene accession IDs | Putative functions                                                            |
|----------------------|----------------|-----------------|-------------------------|----------------------------------------|--------------------|------------------|-------------------------------|--------------------|-------------------------------------------------------------------------------|
| SNP_27000_A_31228804 | NC_021163.1    | Ca_Kabuli_Chr04 | 31228804                | TT                                     | CC                 | CC               | URR                           | 101502969          | internal alternative NAD(P)H-ubiquinone oxidoreductase A2, mitochondrial-like |
| SNP_27004_A_31233818 | NC_021163.1    | Ca_Kabuli_Chr04 | 31233818                | CC                                     | TT                 | TT               | INTERGENIC                    |                    |                                                                               |
| SNP_27005_A_31233820 | NC_021163.1    | Ca_Kabuli_Chr04 | 31233820                | TT                                     | CC                 | CC               | INTERGENIC                    |                    |                                                                               |
| SNP_27006_A_31234456 | NC_021163.1    | Ca_Kabuli_Chr04 | 31234456                | TT                                     | CC                 | CC               | INTERGENIC                    |                    |                                                                               |
| SNP_27007_A_31235318 | NC_021163.1    | Ca_Kabuli_Chr04 | 31235318                | AA                                     | GG                 | GG               | INTERGENIC                    |                    |                                                                               |
| SNP_27010_A_31237500 | NC_021163.1    | Ca_Kabuli_Chr04 | 31237500                | CC                                     | TT                 | TT               | INTERGENIC                    |                    |                                                                               |
| SNP_27011_A_31248907 | NC_021163.1    | Ca_Kabuli_Chr04 | 31248907                | GG                                     | AA                 | AA               | INTERGENIC                    |                    |                                                                               |
| SNP_27012_A_31248909 | NC_021163.1    | Ca_Kabuli_Chr04 | 31248909                | GG                                     | AA                 | AA               | INTERGENIC                    |                    |                                                                               |
| SNP_27013_A_31249893 | NC_021163.1    | Ca_Kabuli_Chr04 | 31249893                | GG                                     | AA                 | AA               | INTERGENIC                    |                    |                                                                               |
| SNP_27014_A_31254223 | NC_021163.1    | Ca_Kabuli_Chr04 | 31254223                | CC                                     | GG                 | GG               | DRR                           | 101503292          | putative pentatricopeptide repeat-containing protein At3g13770, mitochondrial |
| SNP_27015_A_31254227 | NC_021163.1    | Ca_Kabuli_Chr04 | 31254227                | CC                                     | TT                 | TT               | DRR                           | 101503292          | putative pentatricopeptide repeat-containing protein At3g13770, mitochondrial |
| SNP_27016_A_31258557 | NC_021163.1    | Ca_Kabuli_Chr04 | 31258557                | TT                                     | CC                 | CC               | URR                           | 101503292          | putative pentatricopeptide repeat-containing protein At3g13770, mitochondrial |
| SNP_27017_A_31258640 | NC_021163.1    | Ca_Kabuli_Chr04 | 31258640                | AA                                     | GG                 | GG               | URR                           | 101503292          | putative pentatricopeptide repeat-containing protein At3g13770, mitochondrial |
| SNP_27019_A_31258925 | NC_021163.1    | Ca_Kabuli_Chr04 | 31258925                | GG                                     | CC                 | CC               | URR                           | 101503292          | putative pentatricopeptide repeat-containing protein At3g13770, mitochondrial |
| SNP_27020_A_31259002 | NC_021163.1    | Ca_Kabuli_Chr04 | 31259002                | AA                                     | CC                 | CC               | URR                           | 101503292          | putative pentatricopeptide repeat-containing protein At3g13770, mitochondrial |
| SNP_27022_A_31259214 | NC_021163.1    | Ca_Kabuli_Chr04 | 31259214                | GG                                     | TT                 | TT               | URR                           | 101503292          | putative pentatricopeptide repeat-containing protein At3g13770, mitochondrial |
| SNP_27023_A_31268319 | NC_021163.1    | Ca_Kabuli_Chr04 | 31268319                | AA                                     | CC                 | CC               | INTERGENIC                    |                    |                                                                               |
| SNP_27024_A_31271539 | NC_021163.1    | Ca_Kabuli_Chr04 | 31271539                | TT                                     | GG                 | GG               | INTERGENIC                    |                    |                                                                               |
| SNP_27026_A_31275218 | NC_021163.1    | Ca_Kabuli_Chr04 | 31275218                | GG                                     | CC                 | CC               | INTERGENIC                    |                    |                                                                               |
| SNP_27027_A_31275342 | NC_021163.1    | Ca_Kabuli_Chr04 | 31275342                | TT                                     | CC                 | CC               | INTERGENIC                    |                    |                                                                               |
| SNP_27029_A_31276286 | NC_021163.1    | Ca_Kabuli_Chr04 | 31276286                | AA                                     | GG                 | GG               | INTERGENIC                    |                    |                                                                               |
| SNP_27031_A_31281324 | NC_021163.1    | Ca_Kabuli_Chr04 | 31281324                | GG                                     | TT                 | TT               | INTERGENIC                    |                    |                                                                               |

| SNPs IDs             | Chromosome IDs | Chromosomes     | Physical positions (bp) | CDC Frontier genome (Reference genome) | (Pusa 1103 & HPNB) | (ILWC 46 & LPNB) | Sequence Components of genome | Gene accession IDs | Putative functions               |
|----------------------|----------------|-----------------|-------------------------|----------------------------------------|--------------------|------------------|-------------------------------|--------------------|----------------------------------|
| SNP_27032_A_31282238 | NC_021163.1    | Ca_Kabuli_Chr04 | 31282238                | TT                                     | CC                 | CC               | INTERGENIC                    |                    |                                  |
| SNP_27033_A_31283222 | NC_021163.1    | Ca_Kabuli_Chr04 | 31283222                | CC                                     | GG                 | GG               | INTERGENIC                    |                    |                                  |
| SNP_27034_A_31284173 | NC_021163.1    | Ca_Kabuli_Chr04 | 31284173                | TT                                     | CC                 | CC               | INTERGENIC                    |                    |                                  |
| SNP_27035_A_31284208 | NC_021163.1    | Ca_Kabuli_Chr04 | 31284208                | GG                                     | TT                 | TT               | INTERGENIC                    |                    |                                  |
| SNP_27037_A_31284508 | NC_021163.1    | Ca_Kabuli_Chr04 | 31284508                | CC                                     | TT                 | TT               | INTERGENIC                    |                    |                                  |
| SNP_27038_A_31285313 | NC_021163.1    | Ca_Kabuli_Chr04 | 31285313                | CC                                     | TT                 | TT               | INTERGENIC                    |                    |                                  |
| SNP_27039_A_31285331 | NC_021163.1    | Ca_Kabuli_Chr04 | 31285331                | CC                                     | GG                 | GG               | INTERGENIC                    |                    |                                  |
| SNP_27040_A_31289075 | NC_021163.1    | Ca_Kabuli_Chr04 | 31289075                | AA                                     | CC                 | CC               | INTERGENIC                    |                    |                                  |
| SNP_27041_A_31290653 | NC_021163.1    | Ca_Kabuli_Chr04 | 31290653                | TT                                     | CC                 | CC               | INTERGENIC                    |                    |                                  |
| SNP_27042_A_31290712 | NC_021163.1    | Ca_Kabuli_Chr04 | 31290712                | GG                                     | CC                 | CC               | INTERGENIC                    |                    |                                  |
| SNP_27043_A_31290747 | NC_021163.1    | Ca_Kabuli_Chr04 | 31290747                | CC                                     | GG                 | GG               | INTERGENIC                    |                    |                                  |
| SNP_27044_A_31294414 | NC_021163.1    | Ca_Kabuli_Chr04 | 31294414                | CC                                     | TT                 | TT               | INTERGENIC                    |                    |                                  |
| SNP_27045_A_31294460 | NC_021163.1    | Ca_Kabuli_Chr04 | 31294460                | TT                                     | GG                 | GG               | INTERGENIC                    |                    |                                  |
| SNP_27046_A_31295707 | NC_021163.1    | Ca_Kabuli_Chr04 | 31295707                | GG                                     | AA                 | AA               | INTERGENIC                    |                    |                                  |
| SNP_27047_A_31296537 | NC_021163.1    | Ca_Kabuli_Chr04 | 31296537                | TT                                     | CC                 | CC               | INTERGENIC                    |                    |                                  |
| SNP_27048_A_31298101 | NC_021163.1    | Ca_Kabuli_Chr04 | 31298101                | GG                                     | AA                 | AA               | DRR                           | 101503950          | transcription factor bHLH48-like |
| SNP_27049_A_31298267 | NC_021163.1    | Ca_Kabuli_Chr04 | 31298267                | TT                                     | GG                 | GG               | DRR                           | 101503950          | transcription factor bHLH48-like |
| SNP_27050_A_31298354 | NC_021163.1    | Ca_Kabuli_Chr04 | 31298354                | GG                                     | AA                 | AA               | DRR                           | 101503950          | transcription factor bHLH48-like |
| SNP_27053_A_31307147 | NC_021163.1    | Ca_Kabuli_Chr04 | 31307147                | TT                                     | CC                 | CC               | URR                           | 101503950          | transcription factor bHLH48-like |
| SNP_27054_A_31307179 | NC_021163.1    | Ca_Kabuli_Chr04 | 31307179                | TT                                     | GG                 | GG               | URR                           | 101503950          | transcription factor bHLH48-like |
| SNP_27055_A_31307280 | NC_021163.1    | Ca_Kabuli_Chr04 | 31307280                | AA                                     | GG                 | GG               | URR                           | 101503950          | transcription factor bHLH48-like |
| SNP_27056_A_31307414 | NC_021163.1    | Ca_Kabuli_Chr04 | 31307414                | GG                                     | AA                 | AA               | URR                           | 101503950          | transcription factor bHLH48-like |

| SNPs IDs             | Chromosome IDs | Chromosomes     | Physical positions (bp) | CDC Frontier genome (Reference genome) | (Pusa 1103 & HPNB) | (ILWC 46 & LPNB) | Sequence genome | Components of | Gene accession IDs | Putative functions |
|----------------------|----------------|-----------------|-------------------------|----------------------------------------|--------------------|------------------|-----------------|---------------|--------------------|--------------------|
| SNP_27057_A_31307518 | NC_021163.1    | Ca_Kabuli_Chr04 | 31307518                | CC                                     | AA                 | AA               | INTERGENIC      |               |                    |                    |
| SNP_27058_A_31307763 | NC_021163.1    | Ca_Kabuli_Chr04 | 31307763                | GG                                     | AA                 | AA               | INTERGENIC      |               |                    |                    |
| SNP_27059_A_31308295 | NC_021163.1    | Ca_Kabuli_Chr04 | 31308295                | CC                                     | AA                 | AA               | INTERGENIC      |               |                    |                    |
| SNP_27060_A_31310477 | NC_021163.1    | Ca_Kabuli_Chr04 | 31310477                | AA                                     | GG                 | GG               | INTERGENIC      |               |                    |                    |
| SNP_27061_A_31312606 | NC_021163.1    | Ca_Kabuli_Chr04 | 31312606                | AA                                     | GG                 | GG               | INTERGENIC      |               |                    |                    |
| SNP_27062_A_31316121 | NC_021163.1    | Ca_Kabuli_Chr04 | 31316121                | AA                                     | GG                 | GG               | INTERGENIC      |               |                    |                    |
| SNP_27063_A_31317047 | NC_021163.1    | Ca_Kabuli_Chr04 | 31317047                | AA                                     | TT                 | TT               | INTERGENIC      |               |                    |                    |
| SNP_27064_A_31317072 | NC_021163.1    | Ca_Kabuli_Chr04 | 31317072                | CC                                     | GG                 | GG               | INTERGENIC      |               |                    |                    |
| SNP_27065_A_31317436 | NC_021163.1    | Ca_Kabuli_Chr04 | 31317436                | CC                                     | AA                 | AA               | INTERGENIC      |               |                    |                    |
| SNP_27068_A_31319076 | NC_021163.1    | Ca_Kabuli_Chr04 | 31319076                | CC                                     | AA                 | AA               | INTERGENIC      |               |                    |                    |
| SNP_27069_A_31321639 | NC_021163.1    | Ca_Kabuli_Chr04 | 31321639                | TT                                     | CC                 | CC               | INTERGENIC      |               |                    |                    |
| SNP_27070_A_31322262 | NC_021163.1    | Ca_Kabuli_Chr04 | 31322262                | CC                                     | AA                 | AA               | INTERGENIC      |               |                    |                    |
| SNP_27072_A_31323223 | NC_021163.1    | Ca_Kabuli_Chr04 | 31323223                | TT                                     | CC                 | CC               | INTERGENIC      |               |                    |                    |
| SNP_27073_A_31324273 | NC_021163.1    | Ca_Kabuli_Chr04 | 31324273                | GG                                     | AA                 | AA               | INTERGENIC      |               |                    |                    |
| SNP_27074_A_31325773 | NC_021163.1    | Ca_Kabuli_Chr04 | 31325773                | TT                                     | CC                 | CC               | INTERGENIC      |               |                    |                    |
| SNP_27075_A_31326049 | NC_021163.1    | Ca_Kabuli_Chr04 | 31326049                | GG                                     | AA                 | AA               | INTERGENIC      |               |                    |                    |
| SNP_27076_A_31332382 | NC_021163.1    | Ca_Kabuli_Chr04 | 31332382                | CC                                     | AA                 | AA               | INTERGENIC      |               |                    |                    |
| SNP_27077_A_31332435 | NC_021163.1    | Ca_Kabuli_Chr04 | 31332435                | TT                                     | AA                 | AA               | INTERGENIC      |               |                    |                    |
| SNP_27078_A_31334684 | NC_021163.1    | Ca_Kabuli_Chr04 | 31334684                | TT                                     | CC                 | CC               | INTERGENIC      |               |                    |                    |
| SNP_27079_A_31334894 | NC_021163.1    | Ca_Kabuli_Chr04 | 31334894                | TT                                     | AA                 | AA               | INTERGENIC      |               |                    |                    |
| SNP_27080_A_31334898 | NC_021163.1    | Ca_Kabuli_Chr04 | 31334898                | AA                                     | TT                 | TT               | INTERGENIC      |               |                    |                    |
| SNP_27081_A_31336053 | NC_021163.1    | Ca_Kabuli_Chr04 | 31336053                | AA                                     | TT                 | TT               | INTERGENIC      |               |                    |                    |

| SNPs IDs             | Chromosome IDs | Chromosomes     | Physical positions (bp) | CDC Frontier genome (Reference genome) | (Pusa 1103 & HPNB) | (ILWC 46 & LPNB) | Sequence Components of genome | Gene accession IDs | Putative functions           |
|----------------------|----------------|-----------------|-------------------------|----------------------------------------|--------------------|------------------|-------------------------------|--------------------|------------------------------|
| SNP_27082_A_31336364 | NC_021163.1    | Ca_Kabuli_Chr04 | 31336364                | CC                                     | TT                 | TT               | INTERGENIC                    |                    |                              |
| SNP_27083_A_31343995 | NC_021163.1    | Ca_Kabuli_Chr04 | 31343995                | GG                                     | AA                 | AA               | INTERGENIC                    |                    |                              |
| SNP_27084_A_31344029 | NC_021163.1    | Ca_Kabuli_Chr04 | 31344029                | CC                                     | TT                 | TT               | INTERGENIC                    |                    |                              |
| SNP_27085_A_31360724 | NC_021163.1    | Ca_Kabuli_Chr04 | 31360724                | GG                                     | CC                 | CC               | INTERGENIC                    |                    |                              |
| SNP_27086_A_31365215 | NC_021163.1    | Ca_Kabuli_Chr04 | 31365215                | GG                                     | AA                 | AA               | INTERGENIC                    |                    |                              |
| SNP_27087_A_31366062 | NC_021163.1    | Ca_Kabuli_Chr04 | 31366062                | GG                                     | AA                 | AA               | INTERGENIC                    |                    |                              |
| SNP_27088_A_31376118 | NC_021163.1    | Ca_Kabuli_Chr04 | 31376118                | AA                                     | TT                 | TT               | INTERGENIC                    |                    |                              |
| SNP_27089_A_31376342 | NC_021163.1    | Ca_Kabuli_Chr04 | 31376342                | CC                                     | GG                 | GG               | INTERGENIC                    |                    |                              |
| SNP_27090_A_31379089 | NC_021163.1    | Ca_Kabuli_Chr04 | 31379089                | AA                                     | GG                 | GG               | SYNONYMOUS_CODING             | 101491139          | Unknown function             |
| SNP_27091_A_31379386 | NC_021163.1    | Ca_Kabuli_Chr04 | 31379386                | AA                                     | GG                 | GG               | INTRON                        | 101491139          | Unknown function             |
| SNP_27092_A_31379607 | NC_021163.1    | Ca_Kabuli_Chr04 | 31379607                | CC                                     | TT                 | TT               | INTRON                        | 101491139          | Unknown function             |
| SNP_27093_A_31385616 | NC_021163.1    | Ca_Kabuli_Chr04 | 31385616                | GG                                     | AA                 | AA               | INTRON                        | 101491139          | Unknown function             |
| SNP_27094_A_31385853 | NC_021163.1    | Ca_Kabuli_Chr04 | 31385853                | TT                                     | GG                 | GG               | INTRON                        | 101491139          | Unknown function             |
| SNP_27095_A_31385863 | NC_021163.1    | Ca_Kabuli_Chr04 | 31385863                | CC                                     | TT                 | TT               | INTRON                        | 101491139          | Unknown function             |
| SNP_27096_A_31388578 | NC_021163.1    | Ca_Kabuli_Chr04 | 31388578                | CC                                     | AA                 | AA               | INTRON                        | 101491139          | Unknown function             |
| SNP_27097_A_31389570 | NC_021163.1    | Ca_Kabuli_Chr04 | 31389570                | GG                                     | CC                 | CC               | INTRON                        | 101491139          | Unknown function             |
| SNP_27098_A_31394981 | NC_021163.1    | Ca_Kabuli_Chr04 | 31394981                | AA                                     | GG                 | GG               | INTERGENIC                    |                    |                              |
| SNP_27099_A_31399917 | NC_021163.1    | Ca_Kabuli_Chr04 | 31399917                | GG                                     | TT                 | TT               | URR                           | 101491761          | uncharacterized LOC101491761 |
| SNP_27101_A_31400814 | NC_021163.1    | Ca_Kabuli_Chr04 | 31400814                | AA                                     | GG                 | GG               | URR                           | 101491761          | uncharacterized LOC101491761 |
| SNP_27102_A_31400823 | NC_021163.1    | Ca_Kabuli_Chr04 | 31400823                | CC                                     | TT                 | TT               | URR                           | 101491761          | uncharacterized LOC101491761 |
| SNP_27103_A_31400828 | NC_021163.1    | Ca_Kabuli_Chr04 | 31400828                | TT                                     | CC                 | CC               | URR                           | 101491761          | uncharacterized LOC101491761 |
| SNP_27105_A_31410522 | NC_021163.1    | Ca_Kabuli_Chr04 | 31410522                | AA                                     | TT                 | TT               | INTRON                        | 101492429          | uncharacterized LOC101492429 |

| SNPs IDs             | Chromosome IDs | Chromosomes     | Physical positions (bp) | CDC Frontier genome (Reference genome) | (Pusa 1103 & HPNB) | (ILWC 46 & LPNB) | Sequence Components of genome | Gene accession IDs | Putative functions                |
|----------------------|----------------|-----------------|-------------------------|----------------------------------------|--------------------|------------------|-------------------------------|--------------------|-----------------------------------|
| SNP_27106_A_31410541 | NC_021163.1    | Ca_Kabuli_Chr04 | 31410541                | AA                                     | CC                 | CC               | INTRON                        | 101492429          | uncharacterized LOC101492429      |
| SNP_27107_A_31410580 | NC_021163.1    | Ca_Kabuli_Chr04 | 31410580                | AA                                     | TT                 | TT               | INTRON                        | 101492429          | uncharacterized LOC101492429      |
| SNP_27108_A_31414748 | NC_021163.1    | Ca_Kabuli_Chr04 | 31414748                | TT                                     | CC                 | CC               | DRR                           | 101492762          | uncharacterized LOC101492762      |
| SNP_27109_A_31416258 | NC_021163.1    | Ca_Kabuli_Chr04 | 31416258                | CC                                     | TT                 | TT               | INTERGENIC                    |                    |                                   |
| SNP_27110_A_31416297 | NC_021163.1    | Ca_Kabuli_Chr04 | 31416297                | AA                                     | CC                 | CC               | INTERGENIC                    |                    |                                   |
| SNP_27111_A_31417388 | NC_021163.1    | Ca_Kabuli_Chr04 | 31417388                | GG                                     | AA                 | AA               | INTERGENIC                    |                    |                                   |
| SNP_27113_A_31424774 | NC_021163.1    | Ca_Kabuli_Chr04 | 31424774                | TT                                     | CC                 | CC               | INTRON                        | 101492762          | uncharacterized LOC101492762      |
| SNP_27114_A_31424858 | NC_021163.1    | Ca_Kabuli_Chr04 | 31424858                | GG                                     | AA                 | AA               | INTRON                        | 101492762          | uncharacterized LOC101492762      |
| SNP_27115_A_31424909 | NC_021163.1    | Ca_Kabuli_Chr04 | 31424909                | CC                                     | TT                 | TT               | INTRON                        | 101492762          | uncharacterized LOC101492762      |
| SNP_27116_A_31425097 | NC_021163.1    | Ca_Kabuli_Chr04 | 31425097                | TT                                     | CC                 | CC               | SYNONYMOUS_CODING             | 101492762          | uncharacterized LOC101492762      |
| SNP_27117_A_31444983 | NC_021163.1    | Ca_Kabuli_Chr04 | 31444983                | TT                                     | CC                 | CC               | INTERGENIC                    |                    |                                   |
| SNP_27118_A_31445165 | NC_021163.1    | Ca_Kabuli_Chr04 | 31445165                | TT                                     | CC                 | CC               | INTERGENIC                    |                    |                                   |
| SNP_27119_A_31445198 | NC_021163.1    | Ca_Kabuli_Chr04 | 31445198                | TT                                     | CC                 | CC               | INTERGENIC                    |                    |                                   |
| SNP_27120_A_31445200 | NC_021163.1    | Ca_Kabuli_Chr04 | 31445200                | AA                                     | GG                 | GG               | INTERGENIC                    |                    |                                   |
| SNP_27121_A_31445232 | NC_021163.1    | Ca_Kabuli_Chr04 | 31445232                | TT                                     | CC                 | CC               | INTERGENIC                    |                    |                                   |
| SNP_27122_A_31445237 | NC_021163.1    | Ca_Kabuli_Chr04 | 31445237                | TT                                     | AA                 | AA               | INTERGENIC                    |                    |                                   |
| SNP_27124_A_31448800 | NC_021163.1    | Ca_Kabuli_Chr04 | 31448800                | CC                                     | TT                 | TT               | DRR                           | 101508453          | protein NRT1/ PTR FAMILY 5.2-like |
| SNP_27125_A_31451584 | NC_021163.1    | Ca_Kabuli_Chr04 | 31451584                | AA                                     | GG                 | GG               | INTRON                        | 101508453          | protein NRT1/ PTR FAMILY 5.2-like |
| SNP_27126_A_31452254 | NC_021163.1    | Ca_Kabuli_Chr04 | 31452254                | TT                                     | CC                 | CC               | INTRON                        | 101508453          | protein NRT1/ PTR FAMILY 5.2-like |
| SNP_27128_A_31460469 | NC_021163.1    | Ca_Kabuli_Chr04 | 31460469                | TT                                     | AA                 | AA               | INTRON                        | 101508453          | protein NRT1/ PTR FAMILY 5.2-like |
| SNP_27129_A_31460482 | NC_021163.1    | Ca_Kabuli_Chr04 | 31460482                | AA                                     | CC                 | CC               | INTRON                        | 101508453          | protein NRT1/ PTR FAMILY 5.2-like |
| SNP_27130_A_31460520 | NC_021163.1    | Ca_Kabuli_Chr04 | 31460520                | GG                                     | TT                 | TT               | INTRON                        | 101508453          | protein NRT1/ PTR FAMILY 5.2-like |

| SNPs IDs             | Chromosome IDs | Chromosomes     | Physical positions (bp) | CDC Frontier (Reference genome) | (Pusa 1103 & HPNB) | (ILWC 46 & LPNB) | Sequence Components of genome | Gene accession IDs | Putative functions                |
|----------------------|----------------|-----------------|-------------------------|---------------------------------|--------------------|------------------|-------------------------------|--------------------|-----------------------------------|
| SNP_27131_A_31460561 | NC_021163.1    | Ca_Kabuli_Chr04 | 31460561                | TT                              | CC                 | CC               | INTRON                        | 101508453          | protein NRT1/ PTR FAMILY 5.2-like |
| SNP_27132_A_31462980 | NC_021163.1    | Ca_Kabuli_Chr04 | 31462980                | CC                              | TT                 | TT               | URR                           | 101508453          | protein NRT1/ PTR FAMILY 5.2-like |
| SNP_27133_A_31463326 | NC_021163.1    | Ca_Kabuli_Chr04 | 31463326                | GG                              | AA                 | AA               | INTERGENIC                    |                    |                                   |
| SNP_27134_A_31467918 | NC_021163.1    | Ca_Kabuli_Chr04 | 31467918                | TT                              | CC                 | CC               | INTERGENIC                    |                    |                                   |
| SNP_27135_A_31468245 | NC_021163.1    | Ca_Kabuli_Chr04 | 31468245                | AA                              | GG                 | GG               | INTERGENIC                    |                    |                                   |
| SNP_27136_A_31469546 | NC_021163.1    | Ca_Kabuli_Chr04 | 31469546                | GG                              | TT                 | TT               | INTERGENIC                    |                    |                                   |
| SNP_27137_A_31471156 | NC_021163.1    | Ca_Kabuli_Chr04 | 31471156                | GG                              | AA                 | AA               | INTERGENIC                    |                    |                                   |
| SNP_27138_A_31472734 | NC_021163.1    | Ca_Kabuli_Chr04 | 31472734                | TT                              | GG                 | GG               | INTERGENIC                    |                    |                                   |
| SNP_27139_A_31473952 | NC_021163.1    | Ca_Kabuli_Chr04 | 31473952                | CC                              | TT                 | TT               | INTERGENIC                    |                    |                                   |
| SNP_27140_A_31491317 | NC_021163.1    | Ca_Kabuli_Chr04 | 31491317                | GG                              | TT                 | TT               | INTERGENIC                    |                    |                                   |
| SNP_27141_A_31518716 | NC_021163.1    | Ca_Kabuli_Chr04 | 31518716                | AA                              | TT                 | TT               | INTERGENIC                    |                    |                                   |
| SNP_27142_A_31522982 | NC_021163.1    | Ca_Kabuli_Chr04 | 31522982                | AA                              | GG                 | GG               | INTERGENIC                    |                    |                                   |
| SNP_27143_A_31527203 | NC_021163.1    | Ca_Kabuli_Chr04 | 31527203                | CC                              | TT                 | TT               | INTERGENIC                    |                    |                                   |
| SNP_27145_A_31531499 | NC_021163.1    | Ca_Kabuli_Chr04 | 31531499                | AA                              | GG                 | GG               | INTERGENIC                    |                    |                                   |
| SNP_27146_A_31531507 | NC_021163.1    | Ca_Kabuli_Chr04 | 31531507                | GG                              | AA                 | AA               | INTERGENIC                    |                    |                                   |
| SNP_27148_A_31531644 | NC_021163.1    | Ca_Kabuli_Chr04 | 31531644                | GG                              | TT                 | TT               | INTERGENIC                    |                    |                                   |
| SNP_27150_A_31534777 | NC_021163.1    | Ca_Kabuli_Chr04 | 31534777                | TT                              | CC                 | CC               | INTERGENIC                    |                    |                                   |
| SNP_27151_A_31534845 | NC_021163.1    | Ca_Kabuli_Chr04 | 31534845                | CC                              | AA                 | AA               | INTERGENIC                    |                    |                                   |
| SNP_27152_A_31534850 | NC_021163.1    | Ca_Kabuli_Chr04 | 31534850                | TT                              | GG                 | GG               | INTERGENIC                    |                    |                                   |
| SNP_27153_A_31546099 | NC_021163.1    | Ca_Kabuli_Chr04 | 31546099                | GG                              | TT                 | TT               | INTERGENIC                    |                    |                                   |
| SNP_27154_A_31550440 | NC_021163.1    | Ca_Kabuli_Chr04 | 31550440                | CC                              | TT                 | TT               | SYNONYMOUS_CODING             | 101493097          | cyanate hydratase                 |
| SNP_27155_A_31552621 | NC_021163.1    | Ca_Kabuli_Chr04 | 31552621                | CC                              | TT                 | TT               | INTRON                        | 101493097          | cyanate hydratase                 |

| SNPs IDs             | Chromosome IDs | Chromosomes     | Physical positions (bp) | CDC Frontier genome (Reference genome) | (Pusa 1103 & HPNB) | (ILWC 46 & LPNB) | Sequence Components of genome | Gene accession IDs | Putative functions                                           |
|----------------------|----------------|-----------------|-------------------------|----------------------------------------|--------------------|------------------|-------------------------------|--------------------|--------------------------------------------------------------|
| SNP_27156_A_31556005 | NC_021163.1    | Ca_Kabuli_Chr04 | 31556005                | GG                                     | AA                 | AA               | INTERGENIC                    |                    |                                                              |
| SNP_27157_A_31556815 | NC_021163.1    | Ca_Kabuli_Chr04 | 31556815                | GG                                     | AA                 | AA               | INTERGENIC                    |                    |                                                              |
| SNP_27158_A_31560812 | NC_021163.1    | Ca_Kabuli_Chr04 | 31560812                | AA                                     | TT                 | TT               | INTERGENIC                    |                    |                                                              |
| SNP_27159_A_31561426 | NC_021163.1    | Ca_Kabuli_Chr04 | 31561426                | CC                                     | TT                 | TT               | INTERGENIC                    |                    |                                                              |
| SNP_27160_A_31561903 | NC_021163.1    | Ca_Kabuli_Chr04 | 31561903                | AA                                     | GG                 | GG               | INTERGENIC                    |                    |                                                              |
| SNP_27161_A_31562726 | NC_021163.1    | Ca_Kabuli_Chr04 | 31562726                | CC                                     | TT                 | TT               | DRR                           | 101493425          | multiple organellar RNA editing factor 2, chloroplastic-like |
| SNP_27162_A_31562736 | NC_021163.1    | Ca_Kabuli_Chr04 | 31562736                | AA                                     | GG                 | GG               | DRR                           | 101493425          | multiple organellar RNA editing factor 2, chloroplastic-like |
| SNP_27163_A_31569765 | NC_021163.1    | Ca_Kabuli_Chr04 | 31569765                | TT                                     | CC                 | CC               | URR                           | 101509075          | uncharacterized LOC101509075                                 |
| SNP_27164_A_31569977 | NC_021163.1    | Ca_Kabuli_Chr04 | 31569977                | GG                                     | AA                 | AA               | URR                           | 101509075          | uncharacterized LOC101509075                                 |
| SNP_27166_A_31570196 | NC_021163.1    | Ca_Kabuli_Chr04 | 31570196                | CC                                     | TT                 | TT               | URR                           | 101509075          | uncharacterized LOC101509075                                 |
| SNP_27167_A_31578906 | NC_021163.1    | Ca_Kabuli_Chr04 | 31578906                | CC                                     | TT                 | TT               | INTERGENIC                    |                    |                                                              |
| SNP_27168_A_31579229 | NC_021163.1    | Ca_Kabuli_Chr04 | 31579229                | AA                                     | GG                 | GG               | INTERGENIC                    |                    |                                                              |
| SNP_27169_A_31580495 | NC_021163.1    | Ca_Kabuli_Chr04 | 31580495                | CC                                     | TT                 | TT               | DRR                           | 101509404          | uncharacterized LOC101509404                                 |
| SNP_27171_A_31581349 | NC_021163.1    | Ca_Kabuli_Chr04 | 31581349                | TT                                     | GG                 | GG               | NON_SYNONYMOUS_CODING         | 101509404          | uncharacterized LOC101509404                                 |
| SNP_27172_A_31582060 | NC_021163.1    | Ca_Kabuli_Chr04 | 31582060                | GG                                     | AA                 | AA               | NON_SYNONYMOUS_CODING         | 101509404          | uncharacterized LOC101509404                                 |
| SNP_27173_A_31582791 | NC_021163.1    | Ca_Kabuli_Chr04 | 31582791                | GG                                     | AA                 | AA               | URR                           | 101509404          | uncharacterized LOC101509404                                 |
| SNP_27174_A_31582840 | NC_021163.1    | Ca_Kabuli_Chr04 | 31582840                | GG                                     | TT                 | TT               | URR                           | 101509404          | uncharacterized LOC101509404                                 |
| SNP_27176_A_31611392 | NC_021163.1    | Ca_Kabuli_Chr04 | 31611392                | GG                                     | AA                 | AA               | INTERGENIC                    |                    |                                                              |
| SNP_27177_A_31611826 | NC_021163.1    | Ca_Kabuli_Chr04 | 31611826                | GG                                     | AA                 | AA               | INTERGENIC                    |                    |                                                              |
| SNP_27180_A_31612446 | NC_021163.1    | Ca_Kabuli_Chr04 | 31612446                | CC                                     | TT                 | TT               | INTERGENIC                    |                    |                                                              |
| SNP_27182_A_31613775 | NC_021163.1    | Ca_Kabuli_Chr04 | 31613775                | GG                                     | CC                 | CC               | INTERGENIC                    |                    |                                                              |
| SNP_27183_A_31614685 | NC_021163.1    | Ca_Kabuli_Chr04 | 31614685                | TT                                     | GG                 | GG               | INTERGENIC                    |                    |                                                              |

| SNPs IDs             | Chromosome IDs | Chromosomes     | Physical positions (bp) | CDC Frontier genome (Reference genome) | (Pusa 1103 & HPNB) | (ILWC 46 & LPNB) | Sequence genome | Components of | Gene accession IDs | Putative functions |
|----------------------|----------------|-----------------|-------------------------|----------------------------------------|--------------------|------------------|-----------------|---------------|--------------------|--------------------|
| SNP_27184_A_31615434 | NC_021163.1    | Ca_Kabuli_Chr04 | 31615434                | TT                                     | CC                 | CC               | INTERGENIC      |               |                    |                    |
| SNP_27185_A_31615439 | NC_021163.1    | Ca_Kabuli_Chr04 | 31615439                | GG                                     | AA                 | AA               | INTERGENIC      |               |                    |                    |
| SNP_27186_A_31617270 | NC_021163.1    | Ca_Kabuli_Chr04 | 31617270                | AA                                     | GG                 | GG               | INTERGENIC      |               |                    |                    |
| SNP_27187_A_31617707 | NC_021163.1    | Ca_Kabuli_Chr04 | 31617707                | AA                                     | TT                 | TT               | INTERGENIC      |               |                    |                    |
| SNP_27188_A_31618001 | NC_021163.1    | Ca_Kabuli_Chr04 | 31618001                | TT                                     | CC                 | CC               | INTERGENIC      |               |                    |                    |
| SNP_27189_A_31618031 | NC_021163.1    | Ca_Kabuli_Chr04 | 31618031                | TT                                     | GG                 | GG               | INTERGENIC      |               |                    |                    |
| SNP_27190_A_31618179 | NC_021163.1    | Ca_Kabuli_Chr04 | 31618179                | CC                                     | TT                 | TT               | INTERGENIC      |               |                    |                    |
| SNP_27191_A_31618217 | NC_021163.1    | Ca_Kabuli_Chr04 | 31618217                | CC                                     | AA                 | AA               | INTERGENIC      |               |                    |                    |
| SNP_27192_A_31619074 | NC_021163.1    | Ca_Kabuli_Chr04 | 31619074                | GG                                     | AA                 | AA               | INTERGENIC      |               |                    |                    |
| SNP_27193_A_31619397 | NC_021163.1    | Ca_Kabuli_Chr04 | 31619397                | AA                                     | GG                 | GG               | INTERGENIC      |               |                    |                    |
| SNP_27194_A_31619416 | NC_021163.1    | Ca_Kabuli_Chr04 | 31619416                | AA                                     | GG                 | GG               | INTERGENIC      |               |                    |                    |
| SNP_27195_A_31619891 | NC_021163.1    | Ca_Kabuli_Chr04 | 31619891                | AA                                     | GG                 | GG               | INTERGENIC      |               |                    |                    |
| SNP_27196_A_31621387 | NC_021163.1    | Ca_Kabuli_Chr04 | 31621387                | TT                                     | CC                 | CC               | INTERGENIC      |               |                    |                    |
| SNP_27197_A_31622077 | NC_021163.1    | Ca_Kabuli_Chr04 | 31622077                | CC                                     | TT                 | TT               | INTERGENIC      |               |                    |                    |
| SNP_27198_A_31626665 | NC_021163.1    | Ca_Kabuli_Chr04 | 31626665                | AA                                     | GG                 | GG               | INTERGENIC      |               |                    |                    |
| SNP_27199_A_31626809 | NC_021163.1    | Ca_Kabuli_Chr04 | 31626809                | CC                                     | GG                 | GG               | INTERGENIC      |               |                    |                    |
| SNP_27200_A_31628016 | NC_021163.1    | Ca_Kabuli_Chr04 | 31628016                | CC                                     | AA                 | AA               | INTERGENIC      |               |                    |                    |
| SNP_27201_A_31630110 | NC_021163.1    | Ca_Kabuli_Chr04 | 31630110                | AA                                     | GG                 | GG               | INTERGENIC      |               |                    |                    |
| SNP_27202_A_31630493 | NC_021163.1    | Ca_Kabuli_Chr04 | 31630493                | AA                                     | GG                 | GG               | INTERGENIC      |               |                    |                    |
| SNP_27204_A_31630560 | NC_021163.1    | Ca_Kabuli_Chr04 | 31630560                | AA                                     | GG                 | GG               | INTERGENIC      |               |                    |                    |
| SNP_27206_A_31630605 | NC_021163.1    | Ca_Kabuli_Chr04 | 31630605                | AA                                     | GG                 | GG               | INTERGENIC      |               |                    |                    |
| SNP_27207_A_31630959 | NC_021163.1    | Ca_Kabuli_Chr04 | 31630959                | GG                                     | AA                 | AA               | INTERGENIC      |               |                    |                    |



| SNPs IDs             | Chromosome IDs | Chromosomes     | Physical positions (bp) | CDC Frontier (Reference genome) | (Pusa 1103 & HPNB) | (ILWC 46 & LPNB) | Sequence genome | Components of | Gene accession IDs | Putative functions |
|----------------------|----------------|-----------------|-------------------------|---------------------------------|--------------------|------------------|-----------------|---------------|--------------------|--------------------|
| SNP_27209_A_31631026 | NC_021163.1    | Ca_Kabuli_Chr04 | 31631026                | TT                              | GG                 | GG               | INTERGENIC      |               |                    |                    |
| SNP_27210_A_31631050 | NC_021163.1    | Ca_Kabuli_Chr04 | 31631050                | AA                              | GG                 | GG               | INTERGENIC      |               |                    |                    |
| SNP_27212_A_31631910 | NC_021163.1    | Ca_Kabuli_Chr04 | 31631910                | GG                              | AA                 | AA               | INTERGENIC      |               |                    |                    |
| SNP_27213_A_31632134 | NC_021163.1    | Ca_Kabuli_Chr04 | 31632134                | TT                              | CC                 | CC               | INTERGENIC      |               |                    |                    |
| SNP_27214_A_31632152 | NC_021163.1    | Ca_Kabuli_Chr04 | 31632152                | TT                              | CC                 | CC               | INTERGENIC      |               |                    |                    |
| SNP_27215_A_31632210 | NC_021163.1    | Ca_Kabuli_Chr04 | 31632210                | TT                              | CC                 | CC               | INTERGENIC      |               |                    |                    |
| SNP_27219_A_31635903 | NC_021163.1    | Ca_Kabuli_Chr04 | 31635903                | CC                              | TT                 | TT               | INTERGENIC      |               |                    |                    |
| SNP_27220_A_31635943 | NC_021163.1    | Ca_Kabuli_Chr04 | 31635943                | GG                              | AA                 | AA               | INTERGENIC      |               |                    |                    |
| SNP_27221_A_31635946 | NC_021163.1    | Ca_Kabuli_Chr04 | 31635946                | GG                              | AA                 | AA               | INTERGENIC      |               |                    |                    |
| SNP_27222_A_31635950 | NC_021163.1    | Ca_Kabuli_Chr04 | 31635950                | CC                              | TT                 | TT               | INTERGENIC      |               |                    |                    |
| SNP_27223_A_31635956 | NC_021163.1    | Ca_Kabuli_Chr04 | 31635956                | GG                              | AA                 | AA               | INTERGENIC      |               |                    |                    |
| SNP_27224_A_31637108 | NC_021163.1    | Ca_Kabuli_Chr04 | 31637108                | CC                              | GG                 | GG               | INTERGENIC      |               |                    |                    |
| SNP_27225_A_31637109 | NC_021163.1    | Ca_Kabuli_Chr04 | 31637109                | AA                              | GG                 | GG               | INTERGENIC      |               |                    |                    |
| SNP_27226_A_31637118 | NC_021163.1    | Ca_Kabuli_Chr04 | 31637118                | AA                              | GG                 | GG               | INTERGENIC      |               |                    |                    |
| SNP_27227_A_31637141 | NC_021163.1    | Ca_Kabuli_Chr04 | 31637141                | AA                              | GG                 | GG               | INTERGENIC      |               |                    |                    |
| SNP_27228_A_31638771 | NC_021163.1    | Ca_Kabuli_Chr04 | 31638771                | CC                              | TT                 | TT               | INTERGENIC      |               |                    |                    |
| SNP_27229_A_31638781 | NC_021163.1    | Ca_Kabuli_Chr04 | 31638781                | AA                              | GG                 | GG               | INTERGENIC      |               |                    |                    |
| SNP_27230_A_31638803 | NC_021163.1    | Ca_Kabuli_Chr04 | 31638803                | TT                              | AA                 | AA               | INTERGENIC      |               |                    |                    |
| SNP_27231_A_31639023 | NC_021163.1    | Ca_Kabuli_Chr04 | 31639023                | AA                              | CC                 | CC               | INTERGENIC      |               |                    |                    |
| SNP_27232_A_31639191 | NC_021163.1    | Ca_Kabuli_Chr04 | 31639191                | AA                              | GG                 | GG               | INTERGENIC      |               |                    |                    |
| SNP_27233_A_31639195 | NC_021163.1    | Ca_Kabuli_Chr04 | 31639195                | GG                              | TT                 | TT               | INTERGENIC      |               |                    |                    |
| SNP_27234_A_31639199 | NC_021163.1    | Ca_Kabuli_Chr04 | 31639199                | AA                              | GG                 | GG               | INTERGENIC      |               |                    |                    |

| SNPs IDs             | Chromosome IDs | Chromosomes     | Physical positions (bp) | CDC Frontier genome (Reference genome) | (Pusa 1103 & HPNB) | (ILWC 46 & LPNB) | Sequence Components of genome | Gene accession IDs | Putative functions              |
|----------------------|----------------|-----------------|-------------------------|----------------------------------------|--------------------|------------------|-------------------------------|--------------------|---------------------------------|
| SNP_27236_A_31639732 | NC_021163.1    | Ca_Kabuli_Chr04 | 31639732                | AA                                     | TT                 | TT               | INTERGENIC                    |                    |                                 |
| SNP_27237_A_31639795 | NC_021163.1    | Ca_Kabuli_Chr04 | 31639795                | TT                                     | CC                 | CC               | INTERGENIC                    |                    |                                 |
| SNP_27238_A_31639807 | NC_021163.1    | Ca_Kabuli_Chr04 | 31639807                | AA                                     | GG                 | GG               | INTERGENIC                    |                    |                                 |
| SNP_27240_A_31642511 | NC_021163.1    | Ca_Kabuli_Chr04 | 31642511                | GG                                     | AA                 | AA               | INTRON                        | 101494472          | phosphate transporter PHO1-like |
| SNP_27241_A_31642513 | NC_021163.1    | Ca_Kabuli_Chr04 | 31642513                | AA                                     | GG                 | GG               | INTRON                        | 101494472          | phosphate transporter PHO1-like |
| SNP_27242_A_31642620 | NC_021163.1    | Ca_Kabuli_Chr04 | 31642620                | GG                                     | CC                 | CC               | INTRON                        | 101494472          | phosphate transporter PHO1-like |
| SNP_27243_A_31642683 | NC_021163.1    | Ca_Kabuli_Chr04 | 31642683                | CC                                     | TT                 | TT               | INTRON                        | 101494472          | phosphate transporter PHO1-like |
| SNP_27244_A_31642801 | NC_021163.1    | Ca_Kabuli_Chr04 | 31642801                | CC                                     | TT                 | TT               | INTRON                        | 101494472          | phosphate transporter PHO1-like |
| SNP_27245_A_31643450 | NC_021163.1    | Ca_Kabuli_Chr04 | 31643450                | AA                                     | GG                 | GG               | INTRON                        | 101494472          | phosphate transporter PHO1-like |
| SNP_27246_A_31643688 | NC_021163.1    | Ca_Kabuli_Chr04 | 31643688                | GG                                     | AA                 | AA               | INTRON                        | 101494472          | phosphate transporter PHO1-like |
| SNP_27247_A_31644155 | NC_021163.1    | Ca_Kabuli_Chr04 | 31644155                | CC                                     | TT                 | TT               | INTRON                        | 101494472          | phosphate transporter PHO1-like |
| SNP_27248_A_31644162 | NC_021163.1    | Ca_Kabuli_Chr04 | 31644162                | CC                                     | TT                 | TT               | INTRON                        | 101494472          | phosphate transporter PHO1-like |
| SNP_27249_A_31644164 | NC_021163.1    | Ca_Kabuli_Chr04 | 31644164                | AA                                     | GG                 | GG               | INTRON                        | 101494472          | phosphate transporter PHO1-like |
| SNP_27250_A_31644181 | NC_021163.1    | Ca_Kabuli_Chr04 | 31644181                | TT                                     | GG                 | GG               | INTRON                        | 101494472          | phosphate transporter PHO1-like |
| SNP_27251_A_31644360 | NC_021163.1    | Ca_Kabuli_Chr04 | 31644360                | AA                                     | CC                 | CC               | INTRON                        | 101494472          | phosphate transporter PHO1-like |
| SNP_27253_A_31644770 | NC_021163.1    | Ca_Kabuli_Chr04 | 31644770                | AA                                     | TT                 | TT               | INTRON                        | 101494472          | phosphate transporter PHO1-like |
| SNP_27254_A_31646461 | NC_021163.1    | Ca_Kabuli_Chr04 | 31646461                | AA                                     | CC                 | CC               | INTRON                        | 101494472          | phosphate transporter PHO1-like |
| SNP_27256_A_31647379 | NC_021163.1    | Ca_Kabuli_Chr04 | 31647379                | AA                                     | GG                 | GG               | INTRON                        | 101494472          | phosphate transporter PHO1-like |
| SNP_27259_A_31647808 | NC_021163.1    | Ca_Kabuli_Chr04 | 31647808                | GG                                     | TT                 | TT               | INTRON                        | 101494472          | phosphate transporter PHO1-like |
| SNP_27260_A_31647841 | NC_021163.1    | Ca_Kabuli_Chr04 | 31647841                | TT                                     | CC                 | CC               | INTRON                        | 101494472          | phosphate transporter PHO1-like |
| SNP_27261_A_31648189 | NC_021163.1    | Ca_Kabuli_Chr04 | 31648189                | AA                                     | TT                 | TT               | SYNONYMOUS_CODING             | 101494472          | phosphate transporter PHO1-like |
| SNP_27265_A_31652463 | NC_021163.1    | Ca_Kabuli_Chr04 | 31652463                | GG                                     | AA                 | AA               | URR                           | 101494472          | phosphate transporter PHO1-like |

| SNPs IDs             | Chromosome IDs | Chromosomes     | Physical positions (bp) | CDC Frontier (Reference genome) | (Pusa 1103 & HPNB) | (ILWC 46 & LPNB) | Sequence Components of genome | Gene accession IDs | Putative functions                       |
|----------------------|----------------|-----------------|-------------------------|---------------------------------|--------------------|------------------|-------------------------------|--------------------|------------------------------------------|
| SNP_27266_A_31653167 | NC_021163.1    | Ca_Kabuli_Chr04 | 31653167                | CC                              | AA                 | AA               | URR                           | 101494472          | phosphate transporter PHO1-like          |
| SNP_27267_A_31653177 | NC_021163.1    | Ca_Kabuli_Chr04 | 31653177                | GG                              | TT                 | TT               | URR                           | 101494472          | phosphate transporter PHO1-like          |
| SNP_27269_A_31653455 | NC_021163.1    | Ca_Kabuli_Chr04 | 31653455                | TT                              | CC                 | CC               | URR                           | 101494472          | phosphate transporter PHO1-like          |
| SNP_27270_A_31653900 | NC_021163.1    | Ca_Kabuli_Chr04 | 31653900                | TT                              | CC                 | CC               | URR                           | 101494472          | phosphate transporter PHO1-like          |
| SNP_27271_A_31654089 | NC_021163.1    | Ca_Kabuli_Chr04 | 31654089                | TT                              | CC                 | CC               | INTERGENIC                    |                    |                                          |
| SNP_27272_A_31654104 | NC_021163.1    | Ca_Kabuli_Chr04 | 31654104                | AA                              | GG                 | GG               | INTERGENIC                    |                    |                                          |
| SNP_27273_A_31671713 | NC_021163.1    | Ca_Kabuli_Chr04 | 31671713                | CC                              | AA                 | AA               | INTERGENIC                    |                    |                                          |
| SNP_27274_A_31671930 | NC_021163.1    | Ca_Kabuli_Chr04 | 31671930                | GG                              | AA                 | AA               | INTERGENIC                    |                    |                                          |
| SNP_27275_A_31672244 | NC_021163.1    | Ca_Kabuli_Chr04 | 31672244                | TT                              | CC                 | CC               | INTERGENIC                    |                    |                                          |
| SNP_27276_A_31683874 | NC_021163.1    | Ca_Kabuli_Chr04 | 31683874                | CC                              | AA                 | AA               | INTERGENIC                    |                    |                                          |
| SNP_27277_A_31684236 | NC_021163.1    | Ca_Kabuli_Chr04 | 31684236                | CC                              | AA                 | AA               | INTERGENIC                    |                    |                                          |
| SNP_27278_A_31690535 | NC_021163.1    | Ca_Kabuli_Chr04 | 31690535                | TT                              | CC                 | CC               | INTERGENIC                    |                    |                                          |
| SNP_27279_A_31690709 | NC_021163.1    | Ca_Kabuli_Chr04 | 31690709                | CC                              | TT                 | TT               | INTERGENIC                    |                    |                                          |
| SNP_27280_A_31706897 | NC_021163.1    | Ca_Kabuli_Chr04 | 31706897                | CC                              | TT                 | TT               | INTERGENIC                    |                    |                                          |
| SNP_27281_A_31715121 | NC_021163.1    | Ca_Kabuli_Chr04 | 31715121                | CC                              | AA                 | AA               | INTERGENIC                    |                    |                                          |
| SNP_27282_A_31715143 | NC_021163.1    | Ca_Kabuli_Chr04 | 31715143                | AA                              | TT                 | TT               | INTERGENIC                    |                    |                                          |
| SNP_27283_A_31716961 | NC_021163.1    | Ca_Kabuli_Chr04 | 31716961                | GG                              | AA                 | AA               | INTERGENIC                    |                    |                                          |
| SNP_27285_A_31719900 | NC_021163.1    | Ca_Kabuli_Chr04 | 31719900                | AA                              | GG                 | GG               | INTERGENIC                    |                    |                                          |
| SNP_27286_A_31722151 | NC_021163.1    | Ca_Kabuli_Chr04 | 31722151                | CC                              | AA                 | AA               | DRR                           | 101495123          | CRIB domain-containing protein RIC1-like |
| SNP_27288_A_31734364 | NC_021163.1    | Ca_Kabuli_Chr04 | 31734364                | GG                              | AA                 | AA               | URR                           | 101495661          | glycolipid transfer protein 1-like       |
| SNP_27289_A_31737101 | NC_021163.1    | Ca_Kabuli_Chr04 | 31737101                | CC                              | TT                 | TT               | INTERGENIC                    |                    |                                          |
| SNP_27290_A_31737608 | NC_021163.1    | Ca_Kabuli_Chr04 | 31737608                | GG                              | AA                 | AA               | INTERGENIC                    |                    |                                          |

| SNPs IDs             | Chromosome IDs | Chromosomes     | Physical positions (bp) | CDC Frontier genome (Reference genome) | (Pusa 1103 & HPNB) | (ILWC 46 & LPNB) | Sequence Components of genome | Gene accession IDs | Putative functions                        |
|----------------------|----------------|-----------------|-------------------------|----------------------------------------|--------------------|------------------|-------------------------------|--------------------|-------------------------------------------|
| SNP_27291_A_31745404 | NC_021163.1    | Ca_Kabuli_Chr04 | 31745404                | GG                                     | TT                 | TT               | INTERGENIC                    |                    |                                           |
| SNP_27292_A_31751653 | NC_021163.1    | Ca_Kabuli_Chr04 | 31751653                | CC                                     | TT                 | TT               | INTERGENIC                    |                    |                                           |
| SNP_27294_A_31758342 | NC_021163.1    | Ca_Kabuli_Chr04 | 31758342                | GG                                     | AA                 | AA               | URR                           | 101510047          | proline-rich protein 2-like               |
| SNP_27295_A_31758641 | NC_021163.1    | Ca_Kabuli_Chr04 | 31758641                | GG                                     | AA                 | AA               | URR                           | 101510047          | proline-rich protein 2-like               |
| SNP_27296_A_31765055 | NC_021163.1    | Ca_Kabuli_Chr04 | 31765055                | AA                                     | TT                 | TT               | INTRON                        | 101510376          | F-box/kelch-repeat protein At1g55270-like |
| SNP_27297_A_31765077 | NC_021163.1    | Ca_Kabuli_Chr04 | 31765077                | CC                                     | TT                 | TT               | INTRON                        | 101510376          | F-box/kelch-repeat protein At1g55270-like |
| SNP_27298_A_31774775 | NC_021163.1    | Ca_Kabuli_Chr04 | 31774775                | TT                                     | CC                 | CC               | INTERGENIC                    |                    |                                           |
| SNP_27299_A_31775130 | NC_021163.1    | Ca_Kabuli_Chr04 | 31775130                | TT                                     | CC                 | CC               | INTERGENIC                    |                    |                                           |
| SNP_27301_A_31781811 | NC_021163.1    | Ca_Kabuli_Chr04 | 31781811                | CC                                     | TT                 | TT               | INTERGENIC                    |                    |                                           |
| SNP_27302_A_31781847 | NC_021163.1    | Ca_Kabuli_Chr04 | 31781847                | AA                                     | TT                 | TT               | INTERGENIC                    |                    |                                           |
| SNP_27303_A_31781857 | NC_021163.1    | Ca_Kabuli_Chr04 | 31781857                | TT                                     | CC                 | CC               | INTERGENIC                    |                    |                                           |
| SNP_27304_A_31781878 | NC_021163.1    | Ca_Kabuli_Chr04 | 31781878                | TT                                     | CC                 | CC               | INTERGENIC                    |                    |                                           |
| SNP_27305_A_31794144 | NC_021163.1    | Ca_Kabuli_Chr04 | 31794144                | CC                                     | TT                 | TT               | INTERGENIC                    |                    |                                           |
| SNP_27306_A_31797527 | NC_021163.1    | Ca_Kabuli_Chr04 | 31797527                | TT                                     | CC                 | CC               | INTERGENIC                    |                    |                                           |
| SNP_27307_A_31797959 | NC_021163.1    | Ca_Kabuli_Chr04 | 31797959                | CC                                     | TT                 | TT               | INTERGENIC                    |                    |                                           |
| SNP_27308_A_31800667 | NC_021163.1    | Ca_Kabuli_Chr04 | 31800667                | TT                                     | AA                 | AA               | INTERGENIC                    |                    |                                           |
| SNP_27309_A_31801374 | NC_021163.1    | Ca_Kabuli_Chr04 | 31801374                | AA                                     | CC                 | CC               | INTERGENIC                    |                    |                                           |
| SNP_27310_A_31801621 | NC_021163.1    | Ca_Kabuli_Chr04 | 31801621                | GG                                     | AA                 | AA               | INTERGENIC                    |                    |                                           |
| SNP_27312_A_31814643 | NC_021163.1    | Ca_Kabuli_Chr04 | 31814643                | TT                                     | CC                 | CC               | INTERGENIC                    |                    |                                           |
| SNP_27313_A_31815905 | NC_021163.1    | Ca_Kabuli_Chr04 | 31815905                | AA                                     | CC                 | CC               | INTERGENIC                    |                    |                                           |
| SNP_27315_A_31816921 | NC_021163.1    | Ca_Kabuli_Chr04 | 31816921                | TT                                     | AA                 | AA               | INTERGENIC                    |                    |                                           |
| SNP_27317_A_31822942 | NC_021163.1    | Ca_Kabuli_Chr04 | 31822942                | TT                                     | CC                 | CC               | INTERGENIC                    |                    |                                           |

| SNPs IDs             | Chromosome IDs | Chromosomes     | Physical positions (bp) | CDC Frontier genome (Reference genome) | (Pusa 1103 & HPNB) | (ILWC 46 & LPNB) | Sequence Components of genome | Gene accession IDs | Putative functions                     |
|----------------------|----------------|-----------------|-------------------------|----------------------------------------|--------------------|------------------|-------------------------------|--------------------|----------------------------------------|
| SNP_27318_A_31823317 | NC_021163.1    | Ca_Kabuli_Chr04 | 31823317                | CC                                     | TT                 | TT               | INTERGENIC                    |                    |                                        |
| SNP_27319_A_31824905 | NC_021163.1    | Ca_Kabuli_Chr04 | 31824905                | CC                                     | TT                 | TT               | INTERGENIC                    |                    |                                        |
| SNP_27320_A_31826422 | NC_021163.1    | Ca_Kabuli_Chr04 | 31826422                | CC                                     | TT                 | TT               | INTERGENIC                    |                    |                                        |
| SNP_27321_A_31832079 | NC_021163.1    | Ca_Kabuli_Chr04 | 31832079                | TT                                     | CC                 | CC               | SYNONYMOUS_CODING             | 101511025          | uncharacterized LOC101511025           |
| SNP_27322_A_31832157 | NC_021163.1    | Ca_Kabuli_Chr04 | 31832157                | GG                                     | TT                 | TT               | SYNONYMOUS_CODING             | 101511025          | uncharacterized LOC101511025           |
| SNP_27323_A_31832471 | NC_021163.1    | Ca_Kabuli_Chr04 | 31832471                | TT                                     | CC                 | CC               | NON_SYNONYMOUS_CODING         | 101511025          | uncharacterized LOC101511025           |
| SNP_27325_A_31855791 | NC_021163.1    | Ca_Kabuli_Chr04 | 31855791                | TT                                     | CC                 | CC               | INTERGENIC                    |                    |                                        |
| SNP_27327_A_31860862 | NC_021163.1    | Ca_Kabuli_Chr04 | 31860862                | CC                                     | GG                 | GG               | INTERGENIC                    |                    |                                        |
| SNP_27328_A_31870053 | NC_021163.1    | Ca_Kabuli_Chr04 | 31870053                | TT                                     | CC                 | CC               | INTERGENIC                    |                    |                                        |
| SNP_27329_A_31873134 | NC_021163.1    | Ca_Kabuli_Chr04 | 31873134                | AA                                     | TT                 | TT               | INTERGENIC                    |                    |                                        |
| SNP_27330_A_31873218 | NC_021163.1    | Ca_Kabuli_Chr04 | 31873218                | CC                                     | AA                 | AA               | DRR                           | 101497529          | serine/threonine-protein phosphatase 5 |
| SNP_27331_A_31873791 | NC_021163.1    | Ca_Kabuli_Chr04 | 31873791                | TT                                     | GG                 | GG               | DRR                           | 101497529          | serine/threonine-protein phosphatase 5 |
| SNP_27332_A_31873796 | NC_021163.1    | Ca_Kabuli_Chr04 | 31873796                | TT                                     | CC                 | CC               | DRR                           | 101497529          | serine/threonine-protein phosphatase 5 |
| SNP_27333_A_31881740 | NC_021163.1    | Ca_Kabuli_Chr04 | 31881740                | GG                                     | TT                 | TT               | URR                           | 101497529          | serine/threonine-protein phosphatase 5 |
| SNP_27334_A_31887000 | NC_021163.1    | Ca_Kabuli_Chr04 | 31887000                | CC                                     | TT                 | TT               | INTERGENIC                    |                    |                                        |
| SNP_27335_A_31887538 | NC_021163.1    | Ca_Kabuli_Chr04 | 31887538                | TT                                     | AA                 | AA               | INTERGENIC                    |                    |                                        |
| SNP_27336_A_31887541 | NC_021163.1    | Ca_Kabuli_Chr04 | 31887541                | GG                                     | AA                 | AA               | INTERGENIC                    |                    |                                        |
| SNP_27337_A_31887569 | NC_021163.1    | Ca_Kabuli_Chr04 | 31887569                | GG                                     | AA                 | AA               | INTERGENIC                    |                    |                                        |
| SNP_27339_A_31892272 | NC_021163.1    | Ca_Kabuli_Chr04 | 31892272                | TT                                     | CC                 | CC               | INTERGENIC                    |                    |                                        |
| SNP_27340_A_31894327 | NC_021163.1    | Ca_Kabuli_Chr04 | 31894327                | TT                                     | CC                 | CC               | INTERGENIC                    |                    |                                        |
| SNP_27341_A_31895654 | NC_021163.1    | Ca_Kabuli_Chr04 | 31895654                | CC                                     | AA                 | AA               | INTERGENIC                    |                    |                                        |
| SNP_27342_A_31895665 | NC_021163.1    | Ca_Kabuli_Chr04 | 31895665                | TT                                     | CC                 | CC               | INTERGENIC                    |                    |                                        |

| SNPs IDs             | Chromosome IDs | Chromosomes     | Physical positions (bp) | CDC Frontier genome (Reference genome) | (Pusa 1103 & HPNB) | (ILWC 46 & LPNB) | Sequence Components of genome | Gene accession IDs | Putative functions                     |
|----------------------|----------------|-----------------|-------------------------|----------------------------------------|--------------------|------------------|-------------------------------|--------------------|----------------------------------------|
| SNP_27343_A_31908095 | NC_021163.1    | Ca_Kabuli_Chr04 | 31908095                | TT                                     | CC                 | CC               | INTERGENIC                    |                    |                                        |
| SNP_27344_A_31908146 | NC_021163.1    | Ca_Kabuli_Chr04 | 31908146                | TT                                     | CC                 | CC               | INTERGENIC                    |                    |                                        |
| SNP_27345_A_31911863 | NC_021163.1    | Ca_Kabuli_Chr04 | 31911863                | CC                                     | TT                 | TT               | INTERGENIC                    |                    |                                        |
| SNP_27346_A_31915274 | NC_021163.1    | Ca_Kabuli_Chr04 | 31915274                | GG                                     | AA                 | AA               | INTERGENIC                    |                    |                                        |
| SNP_27347_A_31916136 | NC_021163.1    | Ca_Kabuli_Chr04 | 31916136                | TT                                     | CC                 | CC               | DRR                           | 101511655          | uncharacterized protein At4g04775-like |
| SNP_27348_A_31916306 | NC_021163.1    | Ca_Kabuli_Chr04 | 31916306                | TT                                     | GG                 | GG               | DRR                           | 101511655          | uncharacterized protein At4g04775-like |
| SNP_27349_A_31916541 | NC_021163.1    | Ca_Kabuli_Chr04 | 31916541                | AA                                     | CC                 | GG               | DRR                           | 101511655          | uncharacterized protein At4g04775-like |
| SNP_27350_A_31916552 | NC_021163.1    | Ca_Kabuli_Chr04 | 31916552                | GG                                     | TT                 | TT               | DRR                           | 101511655          | uncharacterized protein At4g04775-like |
| SNP_27351_A_31917717 | NC_021163.1    | Ca_Kabuli_Chr04 | 31917717                | CC                                     | TT                 | TT               | URR                           | 101511655          | uncharacterized protein At4g04775-like |
| SNP_27352_A_31920299 | NC_021163.1    | Ca_Kabuli_Chr04 | 31920299                | CC                                     | GG                 | GG               | NON_SYNONYMOUS_CODING         | id86414            | Unknown function                       |
| SNP_27353_A_31925411 | NC_021163.1    | Ca_Kabuli_Chr04 | 31925411                | TT                                     | CC                 | CC               | URR                           | 101498177          | uncharacterized LOC101498177           |
| SNP_27356_A_31936145 | NC_021163.1    | Ca_Kabuli_Chr04 | 31936145                | GG                                     | AA                 | AA               | INTERGENIC                    |                    |                                        |
| SNP_27357_A_31936751 | NC_021163.1    | Ca_Kabuli_Chr04 | 31936751                | AA                                     | GG                 | GG               | DRR                           | 101512306          | Unknown function                       |
| SNP_27359_A_31938071 | NC_021163.1    | Ca_Kabuli_Chr04 | 31938071                | AA                                     | CC                 | CC               | NON_SYNONYMOUS_CODING         | 101512306          | Unknown function                       |
| SNP_27360_A_31950256 | NC_021163.1    | Ca_Kabuli_Chr04 | 31950256                | AA                                     | GG                 | GG               | INTRON                        | 101512946          | protein jagged-1b-like                 |
| SNP_27361_A_31950501 | NC_021163.1    | Ca_Kabuli_Chr04 | 31950501                | GG                                     | AA                 | AA               | INTRON                        | 101512946          | protein jagged-1b-like                 |
| SNP_27362_A_31950527 | NC_021163.1    | Ca_Kabuli_Chr04 | 31950527                | AA                                     | GG                 | GG               | INTRON                        | 101512946          | protein jagged-1b-like                 |
| SNP_27363_A_31959945 | NC_021163.1    | Ca_Kabuli_Chr04 | 31959945                | AA                                     | GG                 | GG               | INTRON                        | 101512946          | protein jagged-1b-like                 |
| SNP_27364_A_31960227 | NC_021163.1    | Ca_Kabuli_Chr04 | 31960227                | GG                                     | CC                 | CC               | INTRON                        | 101512946          | protein jagged-1b-like                 |
| SNP_27365_A_31960231 | NC_021163.1    | Ca_Kabuli_Chr04 | 31960231                | TT                                     | CC                 | CC               | INTRON                        | 101512946          | protein jagged-1b-like                 |
| SNP_27366_A_31962515 | NC_021163.1    | Ca_Kabuli_Chr04 | 31962515                | CC                                     | TT                 | TT               | INTRON                        | 101512946          | protein jagged-1b-like                 |
| SNP_27367_A_31962545 | NC_021163.1    | Ca_Kabuli_Chr04 | 31962545                | CC                                     | TT                 | TT               | INTRON                        | 101512946          | protein jagged-1b-like                 |

| SNPs IDs             | Chromosome IDs | Chromosomes     | Physical positions (bp) | CDC Frontier (Reference genome) | (Pusa 1103 & HPNB) | (ILWC 46 & LPNB) | Sequence Components of genome | Gene accession IDs | Putative functions     |
|----------------------|----------------|-----------------|-------------------------|---------------------------------|--------------------|------------------|-------------------------------|--------------------|------------------------|
| SNP_27368_A_31966284 | NC_021163.1    | Ca_Kabuli_Chr04 | 31966284                | TT                              | CC                 | CC               | INTRON                        | 101512946          | protein jagged-1b-like |
| SNP_27369_A_31966328 | NC_021163.1    | Ca_Kabuli_Chr04 | 31966328                | AA                              | CC                 | CC               | INTRON                        | 101512946          | protein jagged-1b-like |
| SNP_27372_A_31973264 | NC_021163.1    | Ca_Kabuli_Chr04 | 31973264                | AA                              | CC                 | CC               | INTERGENIC                    |                    |                        |
| SNP_27373_A_31973278 | NC_021163.1    | Ca_Kabuli_Chr04 | 31973278                | TT                              | CC                 | CC               | INTERGENIC                    |                    |                        |
| SNP_27374_A_31973523 | NC_021163.1    | Ca_Kabuli_Chr04 | 31973523                | GG                              | AA                 | AA               | INTERGENIC                    |                    |                        |
| SNP_27375_A_31973534 | NC_021163.1    | Ca_Kabuli_Chr04 | 31973534                | AA                              | GG                 | GG               | INTERGENIC                    |                    |                        |
| SNP_27376_A_31973553 | NC_021163.1    | Ca_Kabuli_Chr04 | 31973553                | CC                              | TT                 | TT               | INTERGENIC                    |                    |                        |
| SNP_27377_A_31973554 | NC_021163.1    | Ca_Kabuli_Chr04 | 31973554                | AA                              | TT                 | TT               | INTERGENIC                    |                    |                        |
| SNP_27379_A_31974414 | NC_021163.1    | Ca_Kabuli_Chr04 | 31974414                | AA                              | GG                 | GG               | INTERGENIC                    |                    |                        |
| SNP_27380_A_31974424 | NC_021163.1    | Ca_Kabuli_Chr04 | 31974424                | GG                              | AA                 | AA               | INTERGENIC                    |                    |                        |
| SNP_27381_A_31974429 | NC_021163.1    | Ca_Kabuli_Chr04 | 31974429                | TT                              | AA                 | AA               | INTERGENIC                    |                    |                        |
| SNP_27382_A_31975784 | NC_021163.1    | Ca_Kabuli_Chr04 | 31975784                | CC                              | AA                 | AA               | INTERGENIC                    |                    |                        |
| SNP_27383_A_31975804 | NC_021163.1    | Ca_Kabuli_Chr04 | 31975804                | AA                              | GG                 | GG               | INTERGENIC                    |                    |                        |
| SNP_27384_A_31975816 | NC_021163.1    | Ca_Kabuli_Chr04 | 31975816                | CC                              | TT                 | TT               | INTERGENIC                    |                    |                        |
| SNP_27385_A_31975936 | NC_021163.1    | Ca_Kabuli_Chr04 | 31975936                | TT                              | CC                 | CC               | INTERGENIC                    |                    |                        |
| SNP_27386_A_31975997 | NC_021163.1    | Ca_Kabuli_Chr04 | 31975997                | AA                              | GG                 | GG               | INTERGENIC                    |                    |                        |
| SNP_27387_A_31976005 | NC_021163.1    | Ca_Kabuli_Chr04 | 31976005                | CC                              | TT                 | TT               | INTERGENIC                    |                    |                        |
| SNP_27388_A_31977395 | NC_021163.1    | Ca_Kabuli_Chr04 | 31977395                | TT                              | CC                 | CC               | INTERGENIC                    |                    |                        |
| SNP_27389_A_31978138 | NC_021163.1    | Ca_Kabuli_Chr04 | 31978138                | CC                              | AA                 | AA               | INTERGENIC                    |                    |                        |
| SNP_27390_A_31978282 | NC_021163.1    | Ca_Kabuli_Chr04 | 31978282                | AA                              | TT                 | TT               | INTERGENIC                    |                    |                        |
| SNP_27391_A_31978505 | NC_021163.1    | Ca_Kabuli_Chr04 | 31978505                | CC                              | TT                 | TT               | INTERGENIC                    |                    |                        |
| SNP_27392_A_31978506 | NC_021163.1    | Ca_Kabuli_Chr04 | 31978506                | CC                              | TT                 | TT               | INTERGENIC                    |                    |                        |

| SNPs IDs             | Chromosome IDs | Chromosomes     | Physical positions (bp) | CDC Frontier (Reference genome) | (Pusa 1103 & HPNB) | (ILWC 46 & LPNB) | Sequence Components of genome | Gene accession IDs | Putative functions                        |
|----------------------|----------------|-----------------|-------------------------|---------------------------------|--------------------|------------------|-------------------------------|--------------------|-------------------------------------------|
| SNP_27393_A_31980790 | NC_021163.1    | Ca_Kabuli_Chr04 | 31980790                | CC                              | TT                 | TT               | INTERGENIC                    |                    |                                           |
| SNP_27394_A_31986635 | NC_021163.1    | Ca_Kabuli_Chr04 | 31986635                | GG                              | AA                 | AA               | INTRON                        | 101498404          | CCR4-NOT transcription complex subunit 11 |
| SNP_27395_A_31989501 | NC_021163.1    | Ca_Kabuli_Chr04 | 31989501                | GG                              | AA                 | AA               | URR                           | 101498404          | CCR4-NOT transcription complex subunit 11 |
| SNP_27397_A_31990203 | NC_021163.1    | Ca_Kabuli_Chr04 | 31990203                | TT                              | CC                 | CC               | INTERGENIC                    |                    |                                           |
| SNP_27398_A_31991273 | NC_021163.1    | Ca_Kabuli_Chr04 | 31991273                | TT                              | GG                 | GG               | INTERGENIC                    |                    |                                           |
| SNP_27400_A_31991578 | NC_021163.1    | Ca_Kabuli_Chr04 | 31991578                | AA                              | GG                 | GG               | INTERGENIC                    |                    |                                           |
| SNP_27401_A_31992197 | NC_021163.1    | Ca_Kabuli_Chr04 | 31992197                | GG                              | CC                 | CC               | INTERGENIC                    |                    |                                           |
| SNP_27402_A_31992434 | NC_021163.1    | Ca_Kabuli_Chr04 | 31992434                | GG                              | CC                 | CC               | INTERGENIC                    |                    |                                           |
| SNP_27403_A_31992481 | NC_021163.1    | Ca_Kabuli_Chr04 | 31992481                | AA                              | GG                 | GG               | INTERGENIC                    |                    |                                           |
| SNP_27404_A_31992502 | NC_021163.1    | Ca_Kabuli_Chr04 | 31992502                | TT                              | CC                 | CC               | INTERGENIC                    |                    |                                           |
| SNP_27405_A_31992690 | NC_021163.1    | Ca_Kabuli_Chr04 | 31992690                | GG                              | AA                 | AA               | INTERGENIC                    |                    |                                           |
| SNP_27406_A_31994223 | NC_021163.1    | Ca_Kabuli_Chr04 | 31994223                | TT                              | GG                 | GG               | INTERGENIC                    |                    |                                           |
| SNP_27408_A_31996621 | NC_021163.1    | Ca_Kabuli_Chr04 | 31996621                | GG                              | AA                 | AA               | INTERGENIC                    |                    |                                           |
| SNP_27409_A_31996622 | NC_021163.1    | Ca_Kabuli_Chr04 | 31996622                | AA                              | GG                 | GG               | INTERGENIC                    |                    |                                           |
| SNP_27410_A_31998044 | NC_021163.1    | Ca_Kabuli_Chr04 | 31998044                | GG                              | AA                 | AA               | INTERGENIC                    |                    |                                           |
| SNP_27411_A_31999557 | NC_021163.1    | Ca_Kabuli_Chr04 | 31999557                | CC                              | GG                 | GG               | INTERGENIC                    |                    |                                           |
| SNP_27412_A_31999785 | NC_021163.1    | Ca_Kabuli_Chr04 | 31999785                | TT                              | CC                 | CC               | INTERGENIC                    |                    |                                           |
| SNP_27413_A_32000189 | NC_021163.1    | Ca_Kabuli_Chr04 | 32000189                | AA                              | GG                 | GG               | INTERGENIC                    |                    |                                           |
| SNP_27414_A_32000214 | NC_021163.1    | Ca_Kabuli_Chr04 | 32000214                | AA                              | GG                 | GG               | INTERGENIC                    |                    |                                           |
| SNP_27415_A_32000217 | NC_021163.1    | Ca_Kabuli_Chr04 | 32000217                | AA                              | TT                 | TT               | INTERGENIC                    |                    |                                           |
| SNP_27416_A_32000308 | NC_021163.1    | Ca_Kabuli_Chr04 | 32000308                | AA                              | CC                 | CC               | INTERGENIC                    |                    |                                           |
| SNP_27417_A_32003308 | NC_021163.1    | Ca_Kabuli_Chr04 | 32003308                | CC                              | TT                 | TT               | INTERGENIC                    |                    |                                           |



| SNPs IDs             | Chromosome IDs | Chromosomes     | Physical positions (bp) | CDC Frontier genome (Reference genome) | (Pusa 1103 & HPNB) | (ILWC 46 & LPNB) | Sequence genome | Components of | Gene accession IDs | Putative functions |
|----------------------|----------------|-----------------|-------------------------|----------------------------------------|--------------------|------------------|-----------------|---------------|--------------------|--------------------|
| SNP_27418_A_32004310 | NC_021163.1    | Ca_Kabuli_Chr04 | 32004310                | GG                                     | AA                 | AA               | INTERGENIC      |               |                    |                    |
| SNP_27419_A_32006858 | NC_021163.1    | Ca_Kabuli_Chr04 | 32006858                | CC                                     | TT                 | TT               | INTERGENIC      |               |                    |                    |
| SNP_27420_A_32008504 | NC_021163.1    | Ca_Kabuli_Chr04 | 32008504                | CC                                     | AA                 | AA               | INTERGENIC      |               |                    |                    |
| SNP_27422_A_32008705 | NC_021163.1    | Ca_Kabuli_Chr04 | 32008705                | TT                                     | CC                 | CC               | INTERGENIC      |               |                    |                    |
| SNP_27423_A_32008780 | NC_021163.1    | Ca_Kabuli_Chr04 | 32008780                | AA                                     | GG                 | GG               | INTERGENIC      |               |                    |                    |
| SNP_27424_A_32008964 | NC_021163.1    | Ca_Kabuli_Chr04 | 32008964                | GG                                     | AA                 | AA               | INTERGENIC      |               |                    |                    |
| SNP_27425_A_32011367 | NC_021163.1    | Ca_Kabuli_Chr04 | 32011367                | TT                                     | CC                 | CC               | INTERGENIC      |               |                    |                    |
| SNP_27426_A_32012191 | NC_021163.1    | Ca_Kabuli_Chr04 | 32012191                | CC                                     | TT                 | TT               | INTERGENIC      |               |                    |                    |
| SNP_27427_A_32012195 | NC_021163.1    | Ca_Kabuli_Chr04 | 32012195                | GG                                     | TT                 | TT               | INTERGENIC      |               |                    |                    |
| SNP_27428_A_32013235 | NC_021163.1    | Ca_Kabuli_Chr04 | 32013235                | CC                                     | TT                 | TT               | INTERGENIC      |               |                    |                    |
| SNP_27429_A_32013368 | NC_021163.1    | Ca_Kabuli_Chr04 | 32013368                | TT                                     | CC                 | CC               | INTERGENIC      |               |                    |                    |
| SNP_27430_A_32013381 | NC_021163.1    | Ca_Kabuli_Chr04 | 32013381                | AA                                     | TT                 | TT               | INTERGENIC      |               |                    |                    |
| SNP_27431_A_32013741 | NC_021163.1    | Ca_Kabuli_Chr04 | 32013741                | TT                                     | GG                 | GG               | INTERGENIC      |               |                    |                    |
| SNP_27432_A_32014388 | NC_021163.1    | Ca_Kabuli_Chr04 | 32014388                | TT                                     | CC                 | CC               | INTERGENIC      |               |                    |                    |
| SNP_27433_A_32014577 | NC_021163.1    | Ca_Kabuli_Chr04 | 32014577                | CC                                     | TT                 | TT               | INTERGENIC      |               |                    |                    |
| SNP_27434_A_32014587 | NC_021163.1    | Ca_Kabuli_Chr04 | 32014587                | TT                                     | AA                 | AA               | INTERGENIC      |               |                    |                    |
| SNP_27435_A_32014632 | NC_021163.1    | Ca_Kabuli_Chr04 | 32014632                | TT                                     | CC                 | CC               | INTERGENIC      |               |                    |                    |
| SNP_27436_A_32014684 | NC_021163.1    | Ca_Kabuli_Chr04 | 32014684                | GG                                     | AA                 | AA               | INTERGENIC      |               |                    |                    |
| SNP_27437_A_32014711 | NC_021163.1    | Ca_Kabuli_Chr04 | 32014711                | GG                                     | AA                 | AA               | INTERGENIC      |               |                    |                    |
| SNP_27438_A_32014765 | NC_021163.1    | Ca_Kabuli_Chr04 | 32014765                | AA                                     | TT                 | TT               | INTERGENIC      |               |                    |                    |
| SNP_27439_A_32014784 | NC_021163.1    | Ca_Kabuli_Chr04 | 32014784                | AA                                     | CC                 | CC               | INTERGENIC      |               |                    |                    |
| SNP_27440_A_32016421 | NC_021163.1    | Ca_Kabuli_Chr04 | 32016421                | GG                                     | AA                 | AA               | INTERGENIC      |               |                    |                    |

| SNPs IDs             | Chromosome IDs | Chromosomes     | Physical positions (bp) | CDC Frontier genome (Reference genome) | (Pusa 1103 & HPNB) | (ILWC 46 & LPNB) | Sequence Components of genome | Gene accession IDs | Putative functions           |
|----------------------|----------------|-----------------|-------------------------|----------------------------------------|--------------------|------------------|-------------------------------|--------------------|------------------------------|
| SNP_27441_A_32018084 | NC_021163.1    | Ca_Kabuli_Chr04 | 32018084                | AA                                     | GG                 | GG               | INTERGENIC                    |                    |                              |
| SNP_27442_A_32018089 | NC_021163.1    | Ca_Kabuli_Chr04 | 32018089                | CC                                     | AA                 | AA               | INTERGENIC                    |                    |                              |
| SNP_27443_A_32019098 | NC_021163.1    | Ca_Kabuli_Chr04 | 32019098                | TT                                     | AA                 | AA               | INTERGENIC                    |                    |                              |
| SNP_27444_A_32019150 | NC_021163.1    | Ca_Kabuli_Chr04 | 32019150                | AA                                     | TT                 | TT               | INTERGENIC                    |                    |                              |
| SNP_27445_A_32021521 | NC_021163.1    | Ca_Kabuli_Chr04 | 32021521                | AA                                     | GG                 | GG               | INTERGENIC                    |                    |                              |
| SNP_27446_A_32021523 | NC_021163.1    | Ca_Kabuli_Chr04 | 32021523                | TT                                     | CC                 | CC               | INTERGENIC                    |                    |                              |
| SNP_27447_A_32022630 | NC_021163.1    | Ca_Kabuli_Chr04 | 32022630                | TT                                     | CC                 | CC               | INTERGENIC                    |                    |                              |
| SNP_27448_A_32031912 | NC_021163.1    | Ca_Kabuli_Chr04 | 32031912                | CC                                     | TT                 | TT               | INTERGENIC                    |                    |                              |
| SNP_27449_A_32032014 | NC_021163.1    | Ca_Kabuli_Chr04 | 32032014                | TT                                     | CC                 | CC               | INTERGENIC                    |                    |                              |
| SNP_27450_A_32032074 | NC_021163.1    | Ca_Kabuli_Chr04 | 32032074                | GG                                     | AA                 | AA               | INTERGENIC                    |                    |                              |
| SNP_27451_A_32035991 | NC_021163.1    | Ca_Kabuli_Chr04 | 32035991                | GG                                     | AA                 | AA               | INTERGENIC                    |                    |                              |
| SNP_27452_A_32036317 | NC_021163.1    | Ca_Kabuli_Chr04 | 32036317                | CC                                     | TT                 | TT               | INTERGENIC                    |                    |                              |
| SNP_27453_A_32038974 | NC_021163.1    | Ca_Kabuli_Chr04 | 32038974                | TT                                     | CC                 | CC               | DRR                           | 101499062          | uncharacterized LOC101499062 |
| SNP_27454_A_32039018 | NC_021163.1    | Ca_Kabuli_Chr04 | 32039018                | AA                                     | TT                 | TT               | DRR                           | 101499062          | uncharacterized LOC101499062 |
| SNP_27455_A_32041276 | NC_021163.1    | Ca_Kabuli_Chr04 | 32041276                | CC                                     | TT                 | TT               | INTRON                        | 101499062          | uncharacterized LOC101499062 |
| SNP_27456_A_32041317 | NC_021163.1    | Ca_Kabuli_Chr04 | 32041317                | CC                                     | TT                 | TT               | INTRON                        | 101499062          | uncharacterized LOC101499062 |
| SNP_27457_A_32045288 | NC_021163.1    | Ca_Kabuli_Chr04 | 32045288                | CC                                     | TT                 | TT               | SYNONYMOUS_CODING             | 101499062          | uncharacterized LOC101499062 |
| SNP_27458_A_32045642 | NC_021163.1    | Ca_Kabuli_Chr04 | 32045642                | AA                                     | GG                 | GG               | DRR                           | 101499062          | uncharacterized LOC101499062 |
| SNP_27459_A_32045654 | NC_021163.1    | Ca_Kabuli_Chr04 | 32045654                | TT                                     | AA                 | AA               | DRR                           | 101499062          | uncharacterized LOC101499062 |
| SNP_27460_A_32045684 | NC_021163.1    | Ca_Kabuli_Chr04 | 32045684                | AA                                     | TT                 | TT               | DRR                           | 101499062          | uncharacterized LOC101499062 |
| SNP_27462_A_32047164 | NC_021163.1    | Ca_Kabuli_Chr04 | 32047164                | TT                                     | GG                 | GG               | URR                           | 101499062          | uncharacterized LOC101499062 |
| SNP_27464_A_32047797 | NC_021163.1    | Ca_Kabuli_Chr04 | 32047797                | TT                                     | CC                 | CC               | URR                           | 101499062          | uncharacterized LOC101499062 |

| SNPs IDs             | Chromosome IDs | Chromosomes     | Physical positions (bp) | CDC Frontier genome (Reference genome) | (Pusa 1103 & HPNB) | (ILWC 46 & LPNB) | Sequence genome | Components of | Gene accession IDs | Putative functions                               |
|----------------------|----------------|-----------------|-------------------------|----------------------------------------|--------------------|------------------|-----------------|---------------|--------------------|--------------------------------------------------|
| SNP_27468_A_32047967 | NC_021163.1    | Ca_Kabuli_Chr04 | 32047967                | AA                                     | GG                 | GG               | INTERGENIC      |               |                    |                                                  |
| SNP_27467_A_32049681 | NC_021163.1    | Ca_Kabuli_Chr04 | 32049681                | GG                                     | CC                 | CC               | INTERGENIC      |               |                    |                                                  |
| SNP_27468_A_32051612 | NC_021163.1    | Ca_Kabuli_Chr04 | 32051612                | TT                                     | CC                 | CC               | INTERGENIC      |               |                    |                                                  |
| SNP_27469_A_32054553 | NC_021163.1    | Ca_Kabuli_Chr04 | 32054553                | CC                                     | AA                 | AA               | INTERGENIC      |               |                    |                                                  |
| SNP_27470_A_32055251 | NC_021163.1    | Ca_Kabuli_Chr04 | 32055251                | AA                                     | CC                 | CC               | INTERGENIC      |               |                    |                                                  |
| SNP_27471_A_32055252 | NC_021163.1    | Ca_Kabuli_Chr04 | 32055252                | GG                                     | AA                 | AA               | INTERGENIC      |               |                    |                                                  |
| SNP_27472_A_32055262 | NC_021163.1    | Ca_Kabuli_Chr04 | 32055262                | AA                                     | GG                 | GG               | INTERGENIC      |               |                    |                                                  |
| SNP_27473_A_32055406 | NC_021163.1    | Ca_Kabuli_Chr04 | 32055406                | GG                                     | TT                 | TT               | INTERGENIC      |               |                    |                                                  |
| SNP_27474_A_32055541 | NC_021163.1    | Ca_Kabuli_Chr04 | 32055541                | TT                                     | AA                 | AA               | INTERGENIC      |               |                    |                                                  |
| SNP_27475_A_32055891 | NC_021163.1    | Ca_Kabuli_Chr04 | 32055891                | AA                                     | GG                 | GG               | INTERGENIC      |               |                    |                                                  |
| SNP_27476_A_32057534 | NC_021163.1    | Ca_Kabuli_Chr04 | 32057534                | TT                                     | AA                 | AA               | INTERGENIC      |               |                    |                                                  |
| SNP_27477_A_32061555 | NC_021163.1    | Ca_Kabuli_Chr04 | 32061555                | GG                                     | AA                 | AA               | INTRON          | 101499374     |                    | stem-specific protein TSJT1-like                 |
| SNP_27478_A_32067594 | NC_021163.1    | Ca_Kabuli_Chr04 | 32067594                | TT                                     | CC                 | CC               | DRR             | 101499682     |                    | ankyrin repeat-containing protein P16F5.05c-like |
| SNP_27479_A_32067596 | NC_021163.1    | Ca_Kabuli_Chr04 | 32067596                | GG                                     | AA                 | AA               | DRR             | 101499682     |                    | ankyrin repeat-containing protein P16F5.05c-like |
| SNP_27481_A_32069414 | NC_021163.1    | Ca_Kabuli_Chr04 | 32069414                | GG                                     | CC                 | CC               | DRR             | 101499682     |                    | ankyrin repeat-containing protein P16F5.05c-like |
| SNP_27482_A_32069431 | NC_021163.1    | Ca_Kabuli_Chr04 | 32069431                | TT                                     | CC                 | CC               | DRR             | 101499682     |                    | ankyrin repeat-containing protein P16F5.05c-like |
| SNP_27483_A_32083185 | NC_021163.1    | Ca_Kabuli_Chr04 | 32083185                | AA                                     | GG                 | GG               | URR             | 101513272     |                    | Unknown function                                 |
| SNP_27484_A_32083299 | NC_021163.1    | Ca_Kabuli_Chr04 | 32083299                | AA                                     | GG                 | GG               | URR             | 101513272     |                    | Unknown function                                 |
| SNP_27485_A_32083302 | NC_021163.1    | Ca_Kabuli_Chr04 | 32083302                | AA                                     | TT                 | TT               | URR             | 101513272     |                    | Unknown function                                 |
| SNP_27486_A_32083354 | NC_021163.1    | Ca_Kabuli_Chr04 | 32083354                | GG                                     | AA                 | AA               | URR             | 101513272     |                    | Unknown function                                 |
| SNP_27487_A_32083372 | NC_021163.1    | Ca_Kabuli_Chr04 | 32083372                | GG                                     | AA                 | AA               | URR             | 101513272     |                    | Unknown function                                 |
| SNP_27488_A_32083421 | NC_021163.1    | Ca_Kabuli_Chr04 | 32083421                | AA                                     | GG                 | GG               | URR             | 101513272     |                    | Unknown function                                 |

| SNPs IDs             | Chromosome IDs | Chromosomes     | Physical positions (bp) | CDC Frontier genome (Reference genome) | (Pusa 1103 & HPNB) | (ILWC 46 & LPNB) | Sequence Components of genome | Gene accession IDs | Putative functions |
|----------------------|----------------|-----------------|-------------------------|----------------------------------------|--------------------|------------------|-------------------------------|--------------------|--------------------|
| SNP_27489_A_32083491 | NC_021163.1    | Ca_Kabuli_Chr04 | 32083491                | AA                                     | GG                 | GG               | URR                           | 101513272          | Unknown function   |
| SNP_27490_A_32083500 | NC_021163.1    | Ca_Kabuli_Chr04 | 32083500                | GG                                     | AA                 | AA               | URR                           | 101513272          | Unknown function   |
| SNP_27491_A_32083760 | NC_021163.1    | Ca_Kabuli_Chr04 | 32083760                | AA                                     | GG                 | GG               | URR                           | 101513272          | Unknown function   |
| SNP_27492_A_32083774 | NC_021163.1    | Ca_Kabuli_Chr04 | 32083774                | TT                                     | CC                 | CC               | URR                           | 101513272          | Unknown function   |
| SNP_27493_A_32101235 | NC_021163.1    | Ca_Kabuli_Chr04 | 32101235                | TT                                     | AA                 | AA               | INTERGENIC                    |                    |                    |
| SNP_27495_A_32101949 | NC_021163.1    | Ca_Kabuli_Chr04 | 32101949                | AA                                     | CC                 | CC               | INTERGENIC                    |                    |                    |
| SNP_27496_A_32101951 | NC_021163.1    | Ca_Kabuli_Chr04 | 32101951                | AA                                     | GG                 | GG               | INTERGENIC                    |                    |                    |
| SNP_27497_A_32101984 | NC_021163.1    | Ca_Kabuli_Chr04 | 32101984                | GG                                     | AA                 | AA               | INTERGENIC                    |                    |                    |
| SNP_27498_A_32102895 | NC_021163.1    | Ca_Kabuli_Chr04 | 32102895                | AA                                     | GG                 | GG               | INTERGENIC                    |                    |                    |
| SNP_27499_A_32103440 | NC_021163.1    | Ca_Kabuli_Chr04 | 32103440                | GG                                     | AA                 | AA               | INTERGENIC                    |                    |                    |
| SNP_27500_A_32103458 | NC_021163.1    | Ca_Kabuli_Chr04 | 32103458                | AA                                     | GG                 | GG               | INTERGENIC                    |                    |                    |
| SNP_27501_A_32103464 | NC_021163.1    | Ca_Kabuli_Chr04 | 32103464                | GG                                     | AA                 | AA               | INTERGENIC                    |                    |                    |
| SNP_27502_A_32104328 | NC_021163.1    | Ca_Kabuli_Chr04 | 32104328                | GG                                     | TT                 | TT               | INTERGENIC                    |                    |                    |
| SNP_27503_A_32104882 | NC_021163.1    | Ca_Kabuli_Chr04 | 32104882                | GG                                     | TT                 | TT               | INTERGENIC                    |                    |                    |
| SNP_27504_A_32105279 | NC_021163.1    | Ca_Kabuli_Chr04 | 32105279                | CC                                     | TT                 | TT               | INTERGENIC                    |                    |                    |
| SNP_27505_A_32112198 | NC_021163.1    | Ca_Kabuli_Chr04 | 32112198                | GG                                     | AA                 | AA               | INTERGENIC                    |                    |                    |
| SNP_27506_A_32112369 | NC_021163.1    | Ca_Kabuli_Chr04 | 32112369                | CC                                     | AA                 | AA               | INTERGENIC                    |                    |                    |
| SNP_27507_A_32116248 | NC_021163.1    | Ca_Kabuli_Chr04 | 32116248                | AA                                     | TT                 | TT               | INTERGENIC                    |                    |                    |
| SNP_27508_A_32116554 | NC_021163.1    | Ca_Kabuli_Chr04 | 32116554                | AA                                     | GG                 | GG               | INTERGENIC                    |                    |                    |
| SNP_27509_A_32116580 | NC_021163.1    | Ca_Kabuli_Chr04 | 32116580                | CC                                     | AA                 | AA               | INTERGENIC                    |                    |                    |
| SNP_27510_A_32117153 | NC_021163.1    | Ca_Kabuli_Chr04 | 32117153                | TT                                     | CC                 | CC               | INTERGENIC                    |                    |                    |
| SNP_27511_A_32117155 | NC_021163.1    | Ca_Kabuli_Chr04 | 32117155                | GG                                     | AA                 | AA               | INTERGENIC                    |                    |                    |

| SNPs IDs             | Chromosome IDs | Chromosomes     | Physical positions (bp) | CDC Frontier genome (Reference genome) | (Pusa 1103 & HPNB) | (ILWC 46 & LPNB) | Sequence Components of genome | Gene accession IDs | Putative functions        |
|----------------------|----------------|-----------------|-------------------------|----------------------------------------|--------------------|------------------|-------------------------------|--------------------|---------------------------|
| SNP_27516_A_32122399 | NC_021163.1    | Ca_Kabuli_Chr04 | 32122399                | CC                                     | TT                 | TT               | INTERGENIC                    |                    |                           |
| SNP_27517_A_32123141 | NC_021163.1    | Ca_Kabuli_Chr04 | 32123141                | TT                                     | CC                 | CC               | INTERGENIC                    |                    |                           |
| SNP_27518_A_32123143 | NC_021163.1    | Ca_Kabuli_Chr04 | 32123143                | GG                                     | TT                 | TT               | INTERGENIC                    |                    |                           |
| SNP_27519_A_32123169 | NC_021163.1    | Ca_Kabuli_Chr04 | 32123169                | GG                                     | AA                 | AA               | INTERGENIC                    |                    |                           |
| SNP_27520_A_32123184 | NC_021163.1    | Ca_Kabuli_Chr04 | 32123184                | GG                                     | CC                 | CC               | INTERGENIC                    |                    |                           |
| SNP_27521_A_32124562 | NC_021163.1    | Ca_Kabuli_Chr04 | 32124562                | GG                                     | AA                 | AA               | INTERGENIC                    |                    |                           |
| SNP_27522_A_32124564 | NC_021163.1    | Ca_Kabuli_Chr04 | 32124564                | GG                                     | AA                 | AA               | INTERGENIC                    |                    |                           |
| SNP_27523_A_32124818 | NC_021163.1    | Ca_Kabuli_Chr04 | 32124818                | TT                                     | CC                 | CC               | INTERGENIC                    |                    |                           |
| SNP_27524_A_32125657 | NC_021163.1    | Ca_Kabuli_Chr04 | 32125657                | AA                                     | GG                 | GG               | INTERGENIC                    |                    |                           |
| SNP_27525_A_32125979 | NC_021163.1    | Ca_Kabuli_Chr04 | 32125979                | TT                                     | CC                 | CC               | INTERGENIC                    |                    |                           |
| SNP_27526_A_32138080 | NC_021163.1    | Ca_Kabuli_Chr04 | 32138080                | CC                                     | AA                 | AA               | URR                           | 101499992          | protein argonaute 10-like |
| SNP_27527_A_32138124 | NC_021163.1    | Ca_Kabuli_Chr04 | 32138124                | AA                                     | TT                 | TT               | URR                           | 101499992          | protein argonaute 10-like |
| SNP_27528_A_32139848 | NC_021163.1    | Ca_Kabuli_Chr04 | 32139848                | AA                                     | GG                 | GG               | INTERGENIC                    |                    |                           |
| SNP_27529_A_32140641 | NC_021163.1    | Ca_Kabuli_Chr04 | 32140641                | TT                                     | CC                 | CC               | INTERGENIC                    |                    |                           |
| SNP_27530_A_32140672 | NC_021163.1    | Ca_Kabuli_Chr04 | 32140672                | AA                                     | TT                 | TT               | INTERGENIC                    |                    |                           |
| SNP_27531_A_32140774 | NC_021163.1    | Ca_Kabuli_Chr04 | 32140774                | TT                                     | GG                 | GG               | INTERGENIC                    |                    |                           |
| SNP_27532_A_32140776 | NC_021163.1    | Ca_Kabuli_Chr04 | 32140776                | GG                                     | AA                 | AA               | INTERGENIC                    |                    |                           |
| SNP_27533_A_32140794 | NC_021163.1    | Ca_Kabuli_Chr04 | 32140794                | GG                                     | TT                 | TT               | INTERGENIC                    |                    |                           |
| SNP_27534_A_32141170 | NC_021163.1    | Ca_Kabuli_Chr04 | 32141170                | AA                                     | GG                 | GG               | INTERGENIC                    |                    |                           |
| SNP_27535_A_32141398 | NC_021163.1    | Ca_Kabuli_Chr04 | 32141398                | GG                                     | AA                 | AA               | INTERGENIC                    |                    |                           |
| SNP_27536_A_32141403 | NC_021163.1    | Ca_Kabuli_Chr04 | 32141403                | AA                                     | GG                 | GG               | INTERGENIC                    |                    |                           |
| SNP_27537_A_32141405 | NC_021163.1    | Ca_Kabuli_Chr04 | 32141405                | AA                                     | GG                 | GG               | INTERGENIC                    |                    |                           |

| SNPs IDs             | Chromosome IDs | Chromosomes     | Physical positions (bp) | CDC Frontier genome (Reference genome) | (Pusa 1103 & HPNB) | (ILWC 46 & LPNB) | Sequence genome | Components of | Gene accession IDs | Putative functions |
|----------------------|----------------|-----------------|-------------------------|----------------------------------------|--------------------|------------------|-----------------|---------------|--------------------|--------------------|
| SNP_27538_A_32141411 | NC_021163.1    | Ca_Kabuli_Chr04 | 32141411                | TT                                     | GG                 | GG               | INTERGENIC      |               |                    |                    |
| SNP_27539_A_32141447 | NC_021163.1    | Ca_Kabuli_Chr04 | 32141447                | CC                                     | TT                 | TT               | INTERGENIC      |               |                    |                    |
| SNP_27540_A_32141472 | NC_021163.1    | Ca_Kabuli_Chr04 | 32141472                | GG                                     | AA                 | AA               | INTERGENIC      |               |                    |                    |
| SNP_27541_A_32141475 | NC_021163.1    | Ca_Kabuli_Chr04 | 32141475                | TT                                     | GG                 | GG               | INTERGENIC      |               |                    |                    |
| SNP_27542_A_32143721 | NC_021163.1    | Ca_Kabuli_Chr04 | 32143721                | AA                                     | GG                 | GG               | INTERGENIC      |               |                    |                    |
| SNP_27544_A_32144052 | NC_021163.1    | Ca_Kabuli_Chr04 | 32144052                | CC                                     | AA                 | AA               | INTERGENIC      |               |                    |                    |
| SNP_27545_A_32144075 | NC_021163.1    | Ca_Kabuli_Chr04 | 32144075                | AA                                     | GG                 | GG               | INTERGENIC      |               |                    |                    |
| SNP_27546_A_32144338 | NC_021163.1    | Ca_Kabuli_Chr04 | 32144338                | AA                                     | GG                 | GG               | INTERGENIC      |               |                    |                    |
| SNP_27547_A_32144364 | NC_021163.1    | Ca_Kabuli_Chr04 | 32144364                | TT                                     | CC                 | CC               | INTERGENIC      |               |                    |                    |
| SNP_27549_A_32144423 | NC_021163.1    | Ca_Kabuli_Chr04 | 32144423                | GG                                     | AA                 | AA               | INTERGENIC      |               |                    |                    |
| SNP_27550_A_32146975 | NC_021163.1    | Ca_Kabuli_Chr04 | 32146975                | CC                                     | TT                 | TT               | INTERGENIC      |               |                    |                    |
| SNP_27551_A_32147443 | NC_021163.1    | Ca_Kabuli_Chr04 | 32147443                | CC                                     | GG                 | GG               | INTERGENIC      |               |                    |                    |
| SNP_27552_A_32152340 | NC_021163.1    | Ca_Kabuli_Chr04 | 32152340                | GG                                     | TT                 | TT               | INTERGENIC      |               |                    |                    |
| SNP_27553_A_32152529 | NC_021163.1    | Ca_Kabuli_Chr04 | 32152529                | GG                                     | AA                 | AA               | INTERGENIC      |               |                    |                    |
| SNP_27554_A_32152533 | NC_021163.1    | Ca_Kabuli_Chr04 | 32152533                | TT                                     | CC                 | CC               | INTERGENIC      |               |                    |                    |
| SNP_27555_A_32152534 | NC_021163.1    | Ca_Kabuli_Chr04 | 32152534                | CC                                     | TT                 | TT               | INTERGENIC      |               |                    |                    |
| SNP_27556_A_32152546 | NC_021163.1    | Ca_Kabuli_Chr04 | 32152546                | TT                                     | AA                 | AA               | INTERGENIC      |               |                    |                    |
| SNP_27557_A_32155158 | NC_021163.1    | Ca_Kabuli_Chr04 | 32155158                | AA                                     | GG                 | GG               | INTERGENIC      |               |                    |                    |
| SNP_27558_A_32155700 | NC_021163.1    | Ca_Kabuli_Chr04 | 32155700                | TT                                     | CC                 | CC               | INTERGENIC      |               |                    |                    |
| SNP_27559_A_32155716 | NC_021163.1    | Ca_Kabuli_Chr04 | 32155716                | TT                                     | AA                 | AA               | INTERGENIC      |               |                    |                    |
| SNP_27560_A_32155865 | NC_021163.1    | Ca_Kabuli_Chr04 | 32155865                | CC                                     | TT                 | TT               | INTERGENIC      |               |                    |                    |
| SNP_27561_A_32155907 | NC_021163.1    | Ca_Kabuli_Chr04 | 32155907                | AA                                     | CC                 | CC               | INTERGENIC      |               |                    |                    |

| SNPs IDs             | Chromosome IDs | Chromosomes     | Physical positions (bp) | CDC Frontier genome (Reference genome) | (Pusa 1103 & HPNB) | (ILWC 46 & LPNB) | Sequence Components of genome | Gene accession IDs | Putative functions                                         |
|----------------------|----------------|-----------------|-------------------------|----------------------------------------|--------------------|------------------|-------------------------------|--------------------|------------------------------------------------------------|
| SNP_27562_A_32156008 | NC_021163.1    | Ca_Kabuli_Chr04 | 32156008                | TT                                     | AA                 | AA               | INTERGENIC                    |                    |                                                            |
| SNP_27563_A_32156181 | NC_021163.1    | Ca_Kabuli_Chr04 | 32156181                | AA                                     | CC                 | CC               | INTERGENIC                    |                    |                                                            |
| SNP_27564_A_32156188 | NC_021163.1    | Ca_Kabuli_Chr04 | 32156188                | TT                                     | CC                 | CC               | INTERGENIC                    |                    |                                                            |
| SNP_27565_A_32156214 | NC_021163.1    | Ca_Kabuli_Chr04 | 32156214                | CC                                     | GG                 | GG               | INTERGENIC                    |                    |                                                            |
| SNP_27566_A_32156217 | NC_021163.1    | Ca_Kabuli_Chr04 | 32156217                | CC                                     | TT                 | TT               | INTERGENIC                    |                    |                                                            |
| SNP_27567_A_32156220 | NC_021163.1    | Ca_Kabuli_Chr04 | 32156220                | CC                                     | TT                 | TT               | INTERGENIC                    |                    |                                                            |
| SNP_27568_A_32156485 | NC_021163.1    | Ca_Kabuli_Chr04 | 32156485                | AA                                     | GG                 | GG               | INTERGENIC                    |                    |                                                            |
| SNP_27569_A_32156489 | NC_021163.1    | Ca_Kabuli_Chr04 | 32156489                | GG                                     | AA                 | AA               | INTERGENIC                    |                    |                                                            |
| SNP_27573_A_32166266 | NC_021163.1    | Ca_Kabuli_Chr04 | 32166266                | TT                                     | CC                 | CC               | INTERGENIC                    |                    |                                                            |
| SNP_27574_A_32167684 | NC_021163.1    | Ca_Kabuli_Chr04 | 32167684                | AA                                     | GG                 | GG               | INTERGENIC                    |                    |                                                            |
| SNP_27575_A_32168126 | NC_021163.1    | Ca_Kabuli_Chr04 | 32168126                | AA                                     | GG                 | GG               | INTERGENIC                    |                    |                                                            |
| SNP_27576_A_32168136 | NC_021163.1    | Ca_Kabuli_Chr04 | 32168136                | CC                                     | AA                 | AA               | INTERGENIC                    |                    |                                                            |
| SNP_27577_A_32173684 | NC_021163.1    | Ca_Kabuli_Chr04 | 32173684                | TT                                     | GG                 | GG               | INTRON                        | 101500333          | 50S ribosomal protein L28, chloroplastic                   |
| SNP_27579_A_32173942 | NC_021163.1    | Ca_Kabuli_Chr04 | 32173942                | AA                                     | TT                 | TT               | INTRON                        | 101500333          | 50S ribosomal protein L28, chloroplastic                   |
| SNP_27580_A_32176926 | NC_021163.1    | Ca_Kabuli_Chr04 | 32176926                | GG                                     | AA                 | AA               | INTERGENIC                    |                    |                                                            |
| SNP_27583_A_32180255 | NC_021163.1    | Ca_Kabuli_Chr04 | 32180255                | GG                                     | AA                 | AA               | INTERGENIC                    |                    |                                                            |
| SNP_27584_A_32180397 | NC_021163.1    | Ca_Kabuli_Chr04 | 32180397                | AA                                     | GG                 | GG               | INTERGENIC                    |                    |                                                            |
| SNP_27585_A_32180412 | NC_021163.1    | Ca_Kabuli_Chr04 | 32180412                | TT                                     | CC                 | CC               | INTERGENIC                    |                    |                                                            |
| SNP_27587_A_32182796 | NC_021163.1    | Ca_Kabuli_Chr04 | 32182796                | AA                                     | TT                 | TT               | DRR                           | 101500648          | pentatricopeptide repeat-containing protein At4g21300-like |
| SNP_27588_A_32183493 | NC_021163.1    | Ca_Kabuli_Chr04 | 32183493                | GG                                     | AA                 | AA               | NON_SYNONYMOUS_CODING         | 101500648          | pentatricopeptide repeat-containing protein At4g21300-like |
| SNP_27589_A_32183968 | NC_021163.1    | Ca_Kabuli_Chr04 | 32183968                | GG                                     | AA                 | AA               | SYNONYMOUS_CODING             | 101500648          | pentatricopeptide repeat-containing protein At4g21300-like |
| SNP_27590_A_32186520 | NC_021163.1    | Ca_Kabuli_Chr04 | 32186520                | CC                                     | TT                 | TT               | URR                           | 101500648          | pentatricopeptide repeat-containing protein At4g21300-like |

| SNPs IDs             | Chromosome IDs | Chromosomes     | Physical positions (bp) | CDC Frontier genome | (Reference genome) | (Pusa 1103 & HPNB) | (ILWC 46 & LPNB) | Sequence Components of genome | Gene accession IDs | Putative functions                                         |
|----------------------|----------------|-----------------|-------------------------|---------------------|--------------------|--------------------|------------------|-------------------------------|--------------------|------------------------------------------------------------|
| SNP_27591_A_32186823 | NC_021163.1    | Ca_Kabuli_Chr04 | 32186823                | CC                  |                    | GG                 | GG               | URR                           | 101500648          | pentatricopeptide repeat-containing protein At4g21300-like |
| SNP_27592_A_32187180 | NC_021163.1    | Ca_Kabuli_Chr04 | 32187180                | CC                  |                    | AA                 | AA               | URR                           | 101500648          | pentatricopeptide repeat-containing protein At4g21300-like |
| SNP_27593_A_32187181 | NC_021163.1    | Ca_Kabuli_Chr04 | 32187181                | CC                  |                    | TT                 | TT               | URR                           | 101500648          | pentatricopeptide repeat-containing protein At4g21300-like |
| SNP_27594_A_32187185 | NC_021163.1    | Ca_Kabuli_Chr04 | 32187185                | AA                  |                    | TT                 | TT               | URR                           | 101500648          | pentatricopeptide repeat-containing protein At4g21300-like |
| SNP_27595_A_32189188 | NC_021163.1    | Ca_Kabuli_Chr04 | 32189188                | AA                  |                    | CC                 | CC               | INTERGENIC                    |                    |                                                            |
| SNP_27596_A_32189226 | NC_021163.1    | Ca_Kabuli_Chr04 | 32189226                | GG                  |                    | TT                 | TT               | INTERGENIC                    |                    |                                                            |
| SNP_27597_A_32189253 | NC_021163.1    | Ca_Kabuli_Chr04 | 32189253                | GG                  |                    | AA                 | AA               | INTERGENIC                    |                    |                                                            |
| SNP_27598_A_32209659 | NC_021163.1    | Ca_Kabuli_Chr04 | 32209659                | GG                  |                    | AA                 | AA               | DRR                           | 101514583          | Unknown function                                           |
| SNP_27599_A_32209725 | NC_021163.1    | Ca_Kabuli_Chr04 | 32209725                | AA                  |                    | GG                 | GG               | DRR                           | 101514583          | Unknown function                                           |
| SNP_27600_A_32210075 | NC_021163.1    | Ca_Kabuli_Chr04 | 32210075                | GG                  |                    | AA                 | AA               | DRR                           | 101514583          | Unknown function                                           |
| SNP_27602_A_32212899 | NC_021163.1    | Ca_Kabuli_Chr04 | 32212899                | GG                  |                    | AA                 | AA               | URR                           | 101514583          | Unknown function                                           |
| SNP_27603_A_32213153 | NC_021163.1    | Ca_Kabuli_Chr04 | 32213153                | CC                  |                    | TT                 | TT               | URR                           | 101514583          | Unknown function                                           |
| SNP_27604_A_32213502 | NC_021163.1    | Ca_Kabuli_Chr04 | 32213502                | AA                  |                    | GG                 | GG               | DRR                           | 101501496          | calmodulin-like protein 11                                 |
| SNP_27606_A_32215070 | NC_021163.1    | Ca_Kabuli_Chr04 | 32215070                | AA                  |                    | CC                 | CC               | INTERGENIC                    |                    |                                                            |
| SNP_27607_A_32215071 | NC_021163.1    | Ca_Kabuli_Chr04 | 32215071                | TT                  |                    | GG                 | GG               | INTERGENIC                    |                    |                                                            |
| SNP_27608_A_32215072 | NC_021163.1    | Ca_Kabuli_Chr04 | 32215072                | GG                  |                    | AA                 | AA               | INTERGENIC                    |                    |                                                            |
| SNP_27610_A_32215685 | NC_021163.1    | Ca_Kabuli_Chr04 | 32215685                | TT                  |                    | AA                 | AA               | INTERGENIC                    |                    |                                                            |
| SNP_27611_A_32215717 | NC_021163.1    | Ca_Kabuli_Chr04 | 32215717                | TT                  |                    | AA                 | AA               | INTERGENIC                    |                    |                                                            |
| SNP_27612_A_32215733 | NC_021163.1    | Ca_Kabuli_Chr04 | 32215733                | TT                  |                    | GG                 | GG               | INTERGENIC                    |                    |                                                            |
| SNP_27613_A_32216641 | NC_021163.1    | Ca_Kabuli_Chr04 | 32216641                | AA                  |                    | GG                 | GG               | URR                           | 101501496          | calmodulin-like protein 11                                 |
| SNP_27614_A_32216929 | NC_021163.1    | Ca_Kabuli_Chr04 | 32216929                | GG                  |                    | AA                 | AA               | URR                           | 101501496          | calmodulin-like protein 11                                 |
| SNP_27615_A_32216987 | NC_021163.1    | Ca_Kabuli_Chr04 | 32216987                | GG                  |                    | AA                 | AA               | URR                           | 101501496          | calmodulin-like protein 11                                 |



| SNPs IDs             | Chromosome IDs | Chromosomes     | Physical positions (bp) | CDC Frontier genome (Reference genome) | (Pusa 1103 & HPNB) | (ILWC 46 & LPNB) | Sequence Components of genome | Gene accession IDs | Putative functions         |
|----------------------|----------------|-----------------|-------------------------|----------------------------------------|--------------------|------------------|-------------------------------|--------------------|----------------------------|
| SNP_27616_A_32217864 | NC_021163.1    | Ca_Kabuli_Chr04 | 32217864                | CC                                     | TT                 | TT               | URR                           | 101501496          | calmodulin-like protein 11 |
| SNP_27618_A_32222851 | NC_021163.1    | Ca_Kabuli_Chr04 | 32222851                | TT                                     | AA                 | AA               | INTERGENIC                    |                    |                            |
| SNP_27620_A_32222931 | NC_021163.1    | Ca_Kabuli_Chr04 | 32222931                | TT                                     | AA                 | AA               | INTERGENIC                    |                    |                            |
| SNP_27621_A_32222933 | NC_021163.1    | Ca_Kabuli_Chr04 | 32222933                | GG                                     | AA                 | AA               | INTERGENIC                    |                    |                            |
| SNP_27622_A_32222949 | NC_021163.1    | Ca_Kabuli_Chr04 | 32222949                | GG                                     | TT                 | TT               | INTERGENIC                    |                    |                            |
| SNP_27623_A_32222989 | NC_021163.1    | Ca_Kabuli_Chr04 | 32222989                | AA                                     | GG                 | GG               | INTERGENIC                    |                    |                            |
| SNP_27624_A_32223029 | NC_021163.1    | Ca_Kabuli_Chr04 | 32223029                | GG                                     | AA                 | AA               | INTERGENIC                    |                    |                            |
| SNP_27625_A_32223066 | NC_021163.1    | Ca_Kabuli_Chr04 | 32223066                | TT                                     | CC                 | CC               | INTERGENIC                    |                    |                            |
| SNP_27626_A_32223074 | NC_021163.1    | Ca_Kabuli_Chr04 | 32223074                | TT                                     | GG                 | GG               | INTERGENIC                    |                    |                            |
| SNP_27627_A_32223105 | NC_021163.1    | Ca_Kabuli_Chr04 | 32223105                | TT                                     | AA                 | AA               | INTERGENIC                    |                    |                            |
| SNP_27628_A_32223153 | NC_021163.1    | Ca_Kabuli_Chr04 | 32223153                | AA                                     | GG                 | GG               | INTERGENIC                    |                    |                            |
| SNP_27629_A_32223199 | NC_021163.1    | Ca_Kabuli_Chr04 | 32223199                | GG                                     | TT                 | TT               | INTERGENIC                    |                    |                            |
| SNP_27630_A_32223214 | NC_021163.1    | Ca_Kabuli_Chr04 | 32223214                | GG                                     | AA                 | AA               | INTERGENIC                    |                    |                            |
| SNP_27631_A_32223228 | NC_021163.1    | Ca_Kabuli_Chr04 | 32223228                | GG                                     | TT                 | TT               | INTERGENIC                    |                    |                            |
| SNP_27632_A_32223258 | NC_021163.1    | Ca_Kabuli_Chr04 | 32223258                | TT                                     | GG                 | GG               | INTERGENIC                    |                    |                            |
| SNP_27633_A_32223292 | NC_021163.1    | Ca_Kabuli_Chr04 | 32223292                | GG                                     | AA                 | AA               | INTERGENIC                    |                    |                            |
| SNP_27634_A_32223320 | NC_021163.1    | Ca_Kabuli_Chr04 | 32223320                | CC                                     | TT                 | TT               | INTERGENIC                    |                    |                            |
| SNP_27635_A_32223430 | NC_021163.1    | Ca_Kabuli_Chr04 | 32223430                | CC                                     | AA                 | AA               | INTERGENIC                    |                    |                            |
| SNP_27636_A_32223464 | NC_021163.1    | Ca_Kabuli_Chr04 | 32223464                | GG                                     | TT                 | TT               | INTERGENIC                    |                    |                            |
| SNP_27637_A_32223510 | NC_021163.1    | Ca_Kabuli_Chr04 | 32223510                | GG                                     | AA                 | AA               | INTERGENIC                    |                    |                            |
| SNP_27638_A_32223522 | NC_021163.1    | Ca_Kabuli_Chr04 | 32223522                | TT                                     | GG                 | GG               | INTERGENIC                    |                    |                            |
| SNP_27639_A_32223592 | NC_021163.1    | Ca_Kabuli_Chr04 | 32223592                | CC                                     | AA                 | AA               | INTERGENIC                    |                    |                            |

| SNPs IDs             | Chromosome IDs | Chromosomes     | Physical positions (bp) | CDC Frontier genome (Reference genome) | (Pusa 1103 & HPNB) | (ILWC 46 & LPNB) | Sequence genome | Components of | Gene accession IDs | Putative functions |
|----------------------|----------------|-----------------|-------------------------|----------------------------------------|--------------------|------------------|-----------------|---------------|--------------------|--------------------|
| SNP_27640_A_32224942 | NC_021163.1    | Ca_Kabuli_Chr04 | 32224942                | CC                                     | TT                 | TT               | INTERGENIC      |               |                    |                    |
| SNP_27641_A_32225081 | NC_021163.1    | Ca_Kabuli_Chr04 | 32225081                | AA                                     | GG                 | GG               | INTERGENIC      |               |                    |                    |
| SNP_27642_A_32225100 | NC_021163.1    | Ca_Kabuli_Chr04 | 32225100                | TT                                     | AA                 | AA               | INTERGENIC      |               |                    |                    |
| SNP_27643_A_32225231 | NC_021163.1    | Ca_Kabuli_Chr04 | 32225231                | AA                                     | GG                 | GG               | INTERGENIC      |               |                    |                    |
| SNP_27644_A_32225649 | NC_021163.1    | Ca_Kabuli_Chr04 | 32225649                | TT                                     | CC                 | CC               | INTERGENIC      |               |                    |                    |
| SNP_27645_A_32225850 | NC_021163.1    | Ca_Kabuli_Chr04 | 32225850                | TT                                     | CC                 | CC               | INTERGENIC      |               |                    |                    |
| SNP_27647_A_32225894 | NC_021163.1    | Ca_Kabuli_Chr04 | 32225894                | AA                                     | GG                 | GG               | INTERGENIC      |               |                    |                    |
| SNP_27648_A_32226218 | NC_021163.1    | Ca_Kabuli_Chr04 | 32226218                | TT                                     | AA                 | AA               | INTERGENIC      |               |                    |                    |
| SNP_27650_A_32236466 | NC_021163.1    | Ca_Kabuli_Chr04 | 32236466                | AA                                     | CC                 | CC               | INTERGENIC      |               |                    |                    |
| SNP_27651_A_32236498 | NC_021163.1    | Ca_Kabuli_Chr04 | 32236498                | TT                                     | CC                 | CC               | INTERGENIC      |               |                    |                    |
| SNP_27652_A_32239917 | NC_021163.1    | Ca_Kabuli_Chr04 | 32239917                | AA                                     | TT                 | TT               | INTERGENIC      |               |                    |                    |
| SNP_27654_A_32239935 | NC_021163.1    | Ca_Kabuli_Chr04 | 32239935                | TT                                     | AA                 | AA               | INTERGENIC      |               |                    |                    |
| SNP_27655_A_32240176 | NC_021163.1    | Ca_Kabuli_Chr04 | 32240176                | GG                                     | AA                 | AA               | INTERGENIC      |               |                    |                    |
| SNP_27656_A_32240221 | NC_021163.1    | Ca_Kabuli_Chr04 | 32240221                | CC                                     | TT                 | TT               | INTERGENIC      |               |                    |                    |
| SNP_27657_A_32240242 | NC_021163.1    | Ca_Kabuli_Chr04 | 32240242                | CC                                     | TT                 | TT               | INTERGENIC      |               |                    |                    |
| SNP_27658_A_32240284 | NC_021163.1    | Ca_Kabuli_Chr04 | 32240284                | GG                                     | AA                 | AA               | INTERGENIC      |               |                    |                    |
| SNP_27659_A_32241804 | NC_021163.1    | Ca_Kabuli_Chr04 | 32241804                | AA                                     | GG                 | GG               | INTERGENIC      |               |                    |                    |
| SNP_27660_A_32241812 | NC_021163.1    | Ca_Kabuli_Chr04 | 32241812                | GG                                     | AA                 | AA               | INTERGENIC      |               |                    |                    |
| SNP_27661_A_32243858 | NC_021163.1    | Ca_Kabuli_Chr04 | 32243858                | TT                                     | CC                 | CC               | INTERGENIC      |               |                    |                    |
| SNP_27662_A_32243892 | NC_021163.1    | Ca_Kabuli_Chr04 | 32243892                | TT                                     | CC                 | CC               | INTERGENIC      |               |                    |                    |
| SNP_27663_A_32255413 | NC_021163.1    | Ca_Kabuli_Chr04 | 32255413                | AA                                     | GG                 | GG               | INTERGENIC      |               |                    |                    |
| SNP_27664_A_32255456 | NC_021163.1    | Ca_Kabuli_Chr04 | 32255456                | TT                                     | CC                 | CC               | INTERGENIC      |               |                    |                    |

| SNPs IDs             | Chromosome IDs | Chromosomes     | Physical positions (bp) | CDC Frontier genome (Reference genome) | (Pusa 1103 & HPNB) | (ILWC 46 & LPNB) | Sequence genome | Components of | Gene accession IDs | Putative functions                                     |
|----------------------|----------------|-----------------|-------------------------|----------------------------------------|--------------------|------------------|-----------------|---------------|--------------------|--------------------------------------------------------|
| SNP_27665_A_32255481 | NC_021163.1    | Ca_Kabuli_Chr04 | 32255481                | GG                                     | AA                 | AA               | INTERGENIC      |               |                    |                                                        |
| SNP_27666_A_32255779 | NC_021163.1    | Ca_Kabuli_Chr04 | 32255779                | AA                                     | GG                 | GG               | INTERGENIC      |               |                    |                                                        |
| SNP_27667_A_32255795 | NC_021163.1    | Ca_Kabuli_Chr04 | 32255795                | GG                                     | AA                 | AA               | INTERGENIC      |               |                    |                                                        |
| SNP_27668_A_32256410 | NC_021163.1    | Ca_Kabuli_Chr04 | 32256410                | TT                                     | AA                 | AA               | INTERGENIC      |               |                    |                                                        |
| SNP_27669_A_32257438 | NC_021163.1    | Ca_Kabuli_Chr04 | 32257438                | TT                                     | CC                 | CC               | INTERGENIC      |               |                    |                                                        |
| SNP_27670_A_32262884 | NC_021163.1    | Ca_Kabuli_Chr04 | 32262884                | GG                                     | AA                 | AA               | INTERGENIC      |               |                    |                                                        |
| SNP_27672_A_32263815 | NC_021163.1    | Ca_Kabuli_Chr04 | 32263815                | TT                                     | CC                 | CC               | INTERGENIC      |               |                    |                                                        |
| SNP_27673_A_32264129 | NC_021163.1    | Ca_Kabuli_Chr04 | 32264129                | CC                                     | TT                 | TT               | INTERGENIC      |               |                    |                                                        |
| SNP_27674_A_32264588 | NC_021163.1    | Ca_Kabuli_Chr04 | 32264588                | GG                                     | AA                 | AA               | INTERGENIC      |               |                    |                                                        |
| SNP_27677_A_32266662 | NC_021163.1    | Ca_Kabuli_Chr04 | 32266662                | CC                                     | TT                 | TT               | INTERGENIC      |               |                    |                                                        |
| SNP_27678_A_32296442 | NC_021163.1    | Ca_Kabuli_Chr04 | 32296442                | AA                                     | TT                 | TT               | INTRON          | 101515556     |                    | uncharacterized LOC101515556                           |
| SNP_27679_A_32300356 | NC_021163.1    | Ca_Kabuli_Chr04 | 32300356                | GG                                     | AA                 | AA               | URR             | 101488310     |                    | cell division cycle 20.5, cofactor of APC complex-like |
| SNP_27680_A_32300636 | NC_021163.1    | Ca_Kabuli_Chr04 | 32300636                | TT                                     | CC                 | CC               | URR             | 101488310     |                    | cell division cycle 20.5, cofactor of APC complex-like |
| SNP_27681_A_32301279 | NC_021163.1    | Ca_Kabuli_Chr04 | 32301279                | CC                                     | GG                 | GG               | URR             | 101488310     |                    | cell division cycle 20.5, cofactor of APC complex-like |
| SNP_27684_A_32302228 | NC_021163.1    | Ca_Kabuli_Chr04 | 32302228                | AA                                     | GG                 | GG               | DRR             | 101488633     |                    | superoxide dismutase [Fe] 2, chloroplastic-like        |
| SNP_27685_A_32302748 | NC_021163.1    | Ca_Kabuli_Chr04 | 32302748                | AA                                     | GG                 | GG               | INTERGENIC      |               |                    |                                                        |
| SNP_27686_A_32302791 | NC_021163.1    | Ca_Kabuli_Chr04 | 32302791                | GG                                     | AA                 | AA               | INTERGENIC      |               |                    |                                                        |
| SNP_27687_A_32315405 | NC_021163.1    | Ca_Kabuli_Chr04 | 32315405                | AA                                     | GG                 | GG               | URR             | 101488633     |                    | superoxide dismutase [Fe] 2, chloroplastic-like        |
| SNP_27688_A_32315727 | NC_021163.1    | Ca_Kabuli_Chr04 | 32315727                | AA                                     | CC                 | CC               | URR             | 101488633     |                    | superoxide dismutase [Fe] 2, chloroplastic-like        |
| SNP_27689_A_32321615 | NC_021163.1    | Ca_Kabuli_Chr04 | 32321615                | GG                                     | TT                 | TT               | INTERGENIC      |               |                    |                                                        |
| SNP_27690_A_32321674 | NC_021163.1    | Ca_Kabuli_Chr04 | 32321674                | GG                                     | AA                 | AA               | INTERGENIC      |               |                    |                                                        |
| SNP_27691_A_32335153 | NC_021163.1    | Ca_Kabuli_Chr04 | 32335153                | TT                                     | CC                 | CC               | INTERGENIC      |               |                    |                                                        |

| SNPs IDs             | Chromosome IDs | Chromosomes     | Physical positions (bp) | CDC Frontier genome (Reference genome) | (Pusa 1103 & HPNB) | (ILWC 46 & LPNB) | Sequence genome | Components of | Gene accession IDs | Putative functions |
|----------------------|----------------|-----------------|-------------------------|----------------------------------------|--------------------|------------------|-----------------|---------------|--------------------|--------------------|
| SNP_27692_A_32335160 | NC_021163.1    | Ca_Kabuli_Chr04 | 32335160                | CC                                     | TT                 | TT               | INTERGENIC      |               |                    |                    |
| SNP_27694_A_32335220 | NC_021163.1    | Ca_Kabuli_Chr04 | 32335220                | TT                                     | AA                 | AA               | INTERGENIC      |               |                    |                    |
| SNP_27695_A_32335401 | NC_021163.1    | Ca_Kabuli_Chr04 | 32335401                | CC                                     | TT                 | TT               | INTERGENIC      |               |                    |                    |
| SNP_27696_A_32335461 | NC_021163.1    | Ca_Kabuli_Chr04 | 32335461                | TT                                     | CC                 | CC               | INTERGENIC      |               |                    |                    |
| SNP_27697_A_32335699 | NC_021163.1    | Ca_Kabuli_Chr04 | 32335699                | TT                                     | CC                 | CC               | INTERGENIC      |               |                    |                    |
| SNP_27698_A_32335720 | NC_021163.1    | Ca_Kabuli_Chr04 | 32335720                | CC                                     | TT                 | TT               | INTERGENIC      |               |                    |                    |
| SNP_27699_A_32335742 | NC_021163.1    | Ca_Kabuli_Chr04 | 32335742                | TT                                     | GG                 | GG               | INTERGENIC      |               |                    |                    |
| SNP_27700_A_32339316 | NC_021163.1    | Ca_Kabuli_Chr04 | 32339316                | AA                                     | GG                 | GG               | INTERGENIC      |               |                    |                    |
| SNP_27701_A_32345169 | NC_021163.1    | Ca_Kabuli_Chr04 | 32345169                | GG                                     | CC                 | CC               | INTERGENIC      |               |                    |                    |
| SNP_27702_A_32345176 | NC_021163.1    | Ca_Kabuli_Chr04 | 32345176                | GG                                     | TT                 | TT               | INTERGENIC      |               |                    |                    |
| SNP_27703_A_32345177 | NC_021163.1    | Ca_Kabuli_Chr04 | 32345177                | AA                                     | CC                 | CC               | INTERGENIC      |               |                    |                    |
| SNP_27704_A_32352874 | NC_021163.1    | Ca_Kabuli_Chr04 | 32352874                | CC                                     | TT                 | TT               | INTERGENIC      |               |                    |                    |
| SNP_27705_A_32352877 | NC_021163.1    | Ca_Kabuli_Chr04 | 32352877                | TT                                     | CC                 | CC               | INTERGENIC      |               |                    |                    |
| SNP_27706_A_32355632 | NC_021163.1    | Ca_Kabuli_Chr04 | 32355632                | TT                                     | CC                 | CC               | INTERGENIC      |               |                    |                    |
| SNP_27707_A_32355640 | NC_021163.1    | Ca_Kabuli_Chr04 | 32355640                | TT                                     | CC                 | CC               | INTERGENIC      |               |                    |                    |
| SNP_27708_A_32355642 | NC_021163.1    | Ca_Kabuli_Chr04 | 32355642                | GG                                     | AA                 | AA               | INTERGENIC      |               |                    |                    |
| SNP_27709_A_32355655 | NC_021163.1    | Ca_Kabuli_Chr04 | 32355655                | GG                                     | CC                 | CC               | INTERGENIC      |               |                    |                    |
| SNP_27710_A_32363943 | NC_021163.1    | Ca_Kabuli_Chr04 | 32363943                | GG                                     | AA                 | AA               | INTERGENIC      |               |                    |                    |
| SNP_27711_A_32365010 | NC_021163.1    | Ca_Kabuli_Chr04 | 32365010                | TT                                     | CC                 | CC               | INTERGENIC      |               |                    |                    |
| SNP_27714_A_32369639 | NC_021163.1    | Ca_Kabuli_Chr04 | 32369639                | TT                                     | AA                 | AA               | INTERGENIC      |               |                    |                    |
| SNP_27715_A_32370746 | NC_021163.1    | Ca_Kabuli_Chr04 | 32370746                | AA                                     | CC                 | CC               | INTERGENIC      |               |                    |                    |
| SNP_27716_A_32371309 | NC_021163.1    | Ca_Kabuli_Chr04 | 32371309                | AA                                     | GG                 | GG               | INTERGENIC      |               |                    |                    |

| SNPs IDs             | Chromosome IDs | Chromosomes     | Physical positions (bp) | CDC Frontier genome (Reference genome) | (Pusa 1103 & HPNB) | (ILWC 46 & LPNB) | Sequence genome | Components of | Gene accession IDs           | Putative functions |
|----------------------|----------------|-----------------|-------------------------|----------------------------------------|--------------------|------------------|-----------------|---------------|------------------------------|--------------------|
| SNP_27717_A_32373772 | NC_021163.1    | Ca_Kabuli_Chr04 | 32373772                | AA                                     | TT                 | TT               | INTERGENIC      |               |                              |                    |
| SNP_27718_A_32373773 | NC_021163.1    | Ca_Kabuli_Chr04 | 32373773                | AA                                     | TT                 | TT               | INTERGENIC      |               |                              |                    |
| SNP_27719_A_32373774 | NC_021163.1    | Ca_Kabuli_Chr04 | 32373774                | AA                                     | TT                 | TT               | INTERGENIC      |               |                              |                    |
| SNP_27720_A_32374242 | NC_021163.1    | Ca_Kabuli_Chr04 | 32374242                | TT                                     | CC                 | CC               | INTERGENIC      |               |                              |                    |
| SNP_27721_A_32374500 | NC_021163.1    | Ca_Kabuli_Chr04 | 32374500                | TT                                     | CC                 | CC               | INTERGENIC      |               |                              |                    |
| SNP_27722_A_32376355 | NC_021163.1    | Ca_Kabuli_Chr04 | 32376355                | CC                                     | TT                 | TT               | INTERGENIC      |               |                              |                    |
| SNP_27723_A_32376357 | NC_021163.1    | Ca_Kabuli_Chr04 | 32376357                | GG                                     | TT                 | TT               | INTERGENIC      |               |                              |                    |
| SNP_27724_A_32377997 | NC_021163.1    | Ca_Kabuli_Chr04 | 32377997                | TT                                     | CC                 | CC               | INTERGENIC      |               |                              |                    |
| SNP_27725_A_32380863 | NC_021163.1    | Ca_Kabuli_Chr04 | 32380863                | CC                                     | TT                 | TT               | INTERGENIC      |               |                              |                    |
| SNP_27726_A_32381535 | NC_021163.1    | Ca_Kabuli_Chr04 | 32381535                | TT                                     | CC                 | CC               | INTERGENIC      |               |                              |                    |
| SNP_27727_A_32381537 | NC_021163.1    | Ca_Kabuli_Chr04 | 32381537                | AA                                     | GG                 | GG               | INTERGENIC      |               |                              |                    |
| SNP_27728_A_32381574 | NC_021163.1    | Ca_Kabuli_Chr04 | 32381574                | TT                                     | CC                 | CC               | INTERGENIC      |               |                              |                    |
| SNP_27729_A_32381903 | NC_021163.1    | Ca_Kabuli_Chr04 | 32381903                | TT                                     | AA                 | AA               | INTERGENIC      |               |                              |                    |
| SNP_27730_A_32381917 | NC_021163.1    | Ca_Kabuli_Chr04 | 32381917                | TT                                     | CC                 | CC               | INTERGENIC      |               |                              |                    |
| SNP_27731_A_32387283 | NC_021163.1    | Ca_Kabuli_Chr04 | 32387283                | GG                                     | TT                 | TT               | INTERGENIC      |               |                              |                    |
| SNP_27732_A_32387346 | NC_021163.1    | Ca_Kabuli_Chr04 | 32387346                | AA                                     | GG                 | GG               | INTERGENIC      |               |                              |                    |
| SNP_27733_A_32392237 | NC_021163.1    | Ca_Kabuli_Chr04 | 32392237                | CC                                     | TT                 | TT               | URR             | 101505674     | uncharacterized LOC101505674 |                    |
| SNP_27736_A_32396863 | NC_021163.1    | Ca_Kabuli_Chr04 | 32396863                | GG                                     | AA                 | AA               | INTERGENIC      |               |                              |                    |
| SNP_27737_A_32397745 | NC_021163.1    | Ca_Kabuli_Chr04 | 32397745                | TT                                     | AA                 | AA               | INTERGENIC      |               |                              |                    |
| SNP_27738_A_32397791 | NC_021163.1    | Ca_Kabuli_Chr04 | 32397791                | CC                                     | TT                 | TT               | INTERGENIC      |               |                              |                    |
| SNP_27739_A_32397804 | NC_021163.1    | Ca_Kabuli_Chr04 | 32397804                | GG                                     | AA                 | AA               | INTERGENIC      |               |                              |                    |
| SNP_27740_A_32397823 | NC_021163.1    | Ca_Kabuli_Chr04 | 32397823                | TT                                     | CC                 | CC               | INTERGENIC      |               |                              |                    |

| SNPs IDs             | Chromosome IDs | Chromosomes     | Physical positions (bp) | CDC Frontier genome (Reference genome) | (Pusa 1103 & HPNB) | (ILWC 46 & LPNB) | Sequence genome | Components of | Gene accession IDs                      | Putative functions |
|----------------------|----------------|-----------------|-------------------------|----------------------------------------|--------------------|------------------|-----------------|---------------|-----------------------------------------|--------------------|
| SNP_27741_A_32397844 | NC_021163.1    | Ca_Kabuli_Chr04 | 32397844                | CC                                     | TT                 | TT               | INTERGENIC      |               |                                         |                    |
| SNP_27742_A_32397975 | NC_021163.1    | Ca_Kabuli_Chr04 | 32397975                | CC                                     | TT                 | TT               | INTERGENIC      |               |                                         |                    |
| SNP_27743_A_32398075 | NC_021163.1    | Ca_Kabuli_Chr04 | 32398075                | TT                                     | CC                 | CC               | INTERGENIC      |               |                                         |                    |
| SNP_27744_A_32398089 | NC_021163.1    | Ca_Kabuli_Chr04 | 32398089                | AA                                     | GG                 | GG               | INTERGENIC      |               |                                         |                    |
| SNP_27745_A_32404197 | NC_021163.1    | Ca_Kabuli_Chr04 | 32404197                | TT                                     | CC                 | CC               | INTERGENIC      |               |                                         |                    |
| SNP_27746_A_32404258 | NC_021163.1    | Ca_Kabuli_Chr04 | 32404258                | TT                                     | AA                 | AA               | INTERGENIC      |               |                                         |                    |
| SNP_27747_A_32404268 | NC_021163.1    | Ca_Kabuli_Chr04 | 32404268                | CC                                     | TT                 | TT               | INTERGENIC      |               |                                         |                    |
| SNP_27748_A_32404276 | NC_021163.1    | Ca_Kabuli_Chr04 | 32404276                | AA                                     | GG                 | GG               | INTERGENIC      |               |                                         |                    |
| SNP_27749_A_32404326 | NC_021163.1    | Ca_Kabuli_Chr04 | 32404326                | TT                                     | CC                 | CC               | INTERGENIC      |               |                                         |                    |
| SNP_27750_A_32404559 | NC_021163.1    | Ca_Kabuli_Chr04 | 32404559                | TT                                     | CC                 | CC               | INTERGENIC      |               |                                         |                    |
| SNP_27751_A_32404571 | NC_021163.1    | Ca_Kabuli_Chr04 | 32404571                | TT                                     | CC                 | CC               | INTERGENIC      |               |                                         |                    |
| SNP_27753_A_32411746 | NC_021163.1    | Ca_Kabuli_Chr04 | 32411746                | GG                                     | AA                 | AA               | INTERGENIC      |               |                                         |                    |
| SNP_27754_A_32413091 | NC_021163.1    | Ca_Kabuli_Chr04 | 32413091                | AA                                     | CC                 | CC               | INTERGENIC      |               |                                         |                    |
| SNP_27755_A_32413107 | NC_021163.1    | Ca_Kabuli_Chr04 | 32413107                | GG                                     | TT                 | TT               | INTERGENIC      |               |                                         |                    |
| SNP_27756_A_32413910 | NC_021163.1    | Ca_Kabuli_Chr04 | 32413910                | AA                                     | TT                 | TT               | INTERGENIC      |               |                                         |                    |
| SNP_27757_A_32414840 | NC_021163.1    | Ca_Kabuli_Chr04 | 32414840                | CC                                     | GG                 | GG               | INTERGENIC      |               |                                         |                    |
| SNP_27758_A_32415652 | NC_021163.1    | Ca_Kabuli_Chr04 | 32415652                | AA                                     | TT                 | TT               | INTERGENIC      |               |                                         |                    |
| SNP_27759_A_32416917 | NC_021163.1    | Ca_Kabuli_Chr04 | 32416917                | TT                                     | CC                 | CC               | INTERGENIC      |               |                                         |                    |
| SNP_27761_A_32432124 | NC_021163.1    | Ca_Kabuli_Chr04 | 32432124                | GG                                     | AA                 | AA               | URR             | 101505343     | armadillo repeat-containing protein LFR |                    |
| SNP_27762_A_32432148 | NC_021163.1    | Ca_Kabuli_Chr04 | 32432148                | TT                                     | CC                 | CC               | INTERGENIC      |               |                                         |                    |
| SNP_27763_A_32432422 | NC_021163.1    | Ca_Kabuli_Chr04 | 32432422                | AA                                     | GG                 | GG               | INTERGENIC      |               |                                         |                    |
| SNP_27764_A_32432693 | NC_021163.1    | Ca_Kabuli_Chr04 | 32432693                | GG                                     | AA                 | AA               | INTERGENIC      |               |                                         |                    |

| SNPs IDs             | Chromosome IDs | Chromosomes     | Physical positions (bp) | CDC Frontier (Reference genome) | (Pusa 1103 & HPNB) | (ILWC 46 & LPNB) | Sequence Components of genome | Gene accession IDs | Putative functions              |
|----------------------|----------------|-----------------|-------------------------|---------------------------------|--------------------|------------------|-------------------------------|--------------------|---------------------------------|
| SNP_27765_A_32432703 | NC_021163.1    | Ca_Kabuli_Chr04 | 32432703                | AA                              | CC                 | CC               | INTERGENIC                    |                    |                                 |
| SNP_27766_A_32432736 | NC_021163.1    | Ca_Kabuli_Chr04 | 32432736                | TT                              | CC                 | CC               | INTERGENIC                    |                    |                                 |
| SNP_27767_A_32432762 | NC_021163.1    | Ca_Kabuli_Chr04 | 32432762                | GG                              | AA                 | AA               | INTERGENIC                    |                    |                                 |
| SNP_27768_A_32450719 | NC_021163.1    | Ca_Kabuli_Chr04 | 32450719                | TT                              | CC                 | CC               | INTERGENIC                    |                    |                                 |
| SNP_27770_A_32463411 | NC_021163.1    | Ca_Kabuli_Chr04 | 32463411                | TT                              | GG                 | GG               | INTRON                        | 101505022          | 3-ketoacyl-CoA synthase 11-like |
| SNP_27771_A_32466258 | NC_021163.1    | Ca_Kabuli_Chr04 | 32466258                | AA                              | CC                 | CC               | URR                           | 101505022          | 3-ketoacyl-CoA synthase 11-like |
| SNP_27772_A_32466650 | NC_021163.1    | Ca_Kabuli_Chr04 | 32466650                | CC                              | GG                 | GG               | URR                           | 101505022          | 3-ketoacyl-CoA synthase 11-like |
| SNP_27773_A_32466921 | NC_021163.1    | Ca_Kabuli_Chr04 | 32466921                | CC                              | TT                 | TT               | URR                           | 101505022          | 3-ketoacyl-CoA synthase 11-like |
| SNP_27774_A_32471835 | NC_021163.1    | Ca_Kabuli_Chr04 | 32471835                | GG                              | AA                 | AA               | INTERGENIC                    |                    |                                 |
| SNP_27775_A_32472090 | NC_021163.1    | Ca_Kabuli_Chr04 | 32472090                | GG                              | TT                 | TT               | INTERGENIC                    |                    |                                 |
| SNP_27777_A_32480846 | NC_021163.1    | Ca_Kabuli_Chr04 | 32480846                | CC                              | TT                 | TT               | INTERGENIC                    |                    |                                 |
| SNP_27778_A_32482047 | NC_021163.1    | Ca_Kabuli_Chr04 | 32482047                | GG                              | TT                 | TT               | INTERGENIC                    |                    |                                 |
| SNP_27779_A_32482531 | NC_021163.1    | Ca_Kabuli_Chr04 | 32482531                | CC                              | AA                 | AA               | INTERGENIC                    |                    |                                 |
| SNP_27781_A_32483254 | NC_021163.1    | Ca_Kabuli_Chr04 | 32483254                | CC                              | AA                 | AA               | INTERGENIC                    |                    |                                 |
| SNP_27782_A_32483260 | NC_021163.1    | Ca_Kabuli_Chr04 | 32483260                | AA                              | TT                 | TT               | INTERGENIC                    |                    |                                 |
| SNP_27783_A_32483585 | NC_021163.1    | Ca_Kabuli_Chr04 | 32483585                | CC                              | TT                 | TT               | INTERGENIC                    |                    |                                 |
| SNP_27784_A_32484090 | NC_021163.1    | Ca_Kabuli_Chr04 | 32484090                | CC                              | AA                 | AA               | INTERGENIC                    |                    |                                 |
| SNP_27785_A_32484233 | NC_021163.1    | Ca_Kabuli_Chr04 | 32484233                | TT                              | CC                 | CC               | INTERGENIC                    |                    |                                 |
| SNP_27787_A_32484429 | NC_021163.1    | Ca_Kabuli_Chr04 | 32484429                | AA                              | GG                 | GG               | INTERGENIC                    |                    |                                 |
| SNP_27788_A_32485060 | NC_021163.1    | Ca_Kabuli_Chr04 | 32485060                | AA                              | TT                 | TT               | INTERGENIC                    |                    |                                 |
| SNP_27789_A_32487014 | NC_021163.1    | Ca_Kabuli_Chr04 | 32487014                | TT                              | AA                 | AA               | INTERGENIC                    |                    |                                 |
| SNP_27790_A_32488071 | NC_021163.1    | Ca_Kabuli_Chr04 | 32488071                | CC                              | TT                 | TT               | INTERGENIC                    |                    |                                 |

| SNPs IDs             | Chromosome IDs | Chromosomes     | Physical positions (bp) | CDC Frontier genome (Reference genome) | (Pusa 1103 & HPNB) | (ILWC 46 & LPNB) | Sequence Components of genome | Gene accession IDs | Putative functions           |
|----------------------|----------------|-----------------|-------------------------|----------------------------------------|--------------------|------------------|-------------------------------|--------------------|------------------------------|
| SNP_27791_A_32488083 | NC_021163.1    | Ca_Kabuli_Chr04 | 32488083                | TT                                     | GG                 | GG               | INTERGENIC                    |                    |                              |
| SNP_27793_A_32491434 | NC_021163.1    | Ca_Kabuli_Chr04 | 32491434                | AA                                     | GG                 | GG               | INTERGENIC                    |                    |                              |
| SNP_27794_A_32492464 | NC_021163.1    | Ca_Kabuli_Chr04 | 32492464                | AA                                     | GG                 | GG               | INTERGENIC                    |                    |                              |
| SNP_27796_A_32494521 | NC_021163.1    | Ca_Kabuli_Chr04 | 32494521                | AA                                     | CC                 | CC               | INTERGENIC                    |                    |                              |
| SNP_27799_A_32494741 | NC_021163.1    | Ca_Kabuli_Chr04 | 32494741                | AA                                     | TT                 | TT               | INTERGENIC                    |                    |                              |
| SNP_27800_A_32497256 | NC_021163.1    | Ca_Kabuli_Chr04 | 32497256                | GG                                     | AA                 | AA               | INTERGENIC                    |                    |                              |
| SNP_27801_A_32497288 | NC_021163.1    | Ca_Kabuli_Chr04 | 32497288                | TT                                     | CC                 | CC               | INTERGENIC                    |                    |                              |
| SNP_27802_A_32497567 | NC_021163.1    | Ca_Kabuli_Chr04 | 32497567                | CC                                     | TT                 | TT               | INTERGENIC                    |                    |                              |
| SNP_27803_A_32498617 | NC_021163.1    | Ca_Kabuli_Chr04 | 32498617                | AA                                     | CC                 | CC               | INTERGENIC                    |                    |                              |
| SNP_27804_A_32498636 | NC_021163.1    | Ca_Kabuli_Chr04 | 32498636                | CC                                     | TT                 | TT               | INTERGENIC                    |                    |                              |
| SNP_27806_A_32499032 | NC_021163.1    | Ca_Kabuli_Chr04 | 32499032                | GG                                     | TT                 | TT               | INTERGENIC                    |                    |                              |
| SNP_27807_A_32499843 | NC_021163.1    | Ca_Kabuli_Chr04 | 32499843                | TT                                     | GG                 | GG               | INTERGENIC                    |                    |                              |
| SNP_27808_A_32501968 | NC_021163.1    | Ca_Kabuli_Chr04 | 32501968                | TT                                     | CC                 | CC               | INTERGENIC                    |                    |                              |
| SNP_27809_A_32506522 | NC_021163.1    | Ca_Kabuli_Chr04 | 32506522                | AA                                     | GG                 | GG               | INTERGENIC                    |                    |                              |
| SNP_27810_A_32510977 | NC_021163.1    | Ca_Kabuli_Chr04 | 32510977                | TT                                     | CC                 | CC               | INTERGENIC                    |                    |                              |
| SNP_27812_A_32512478 | NC_021163.1    | Ca_Kabuli_Chr04 | 32512478                | TT                                     | GG                 | GG               | INTERGENIC                    |                    |                              |
| SNP_27813_A_32512558 | NC_021163.1    | Ca_Kabuli_Chr04 | 32512558                | AA                                     | GG                 | GG               | INTERGENIC                    |                    |                              |
| SNP_27814_A_32512670 | NC_021163.1    | Ca_Kabuli_Chr04 | 32512670                | GG                                     | TT                 | TT               | INTERGENIC                    |                    |                              |
| SNP_27815_A_32512857 | NC_021163.1    | Ca_Kabuli_Chr04 | 32512857                | TT                                     | CC                 | CC               | INTERGENIC                    |                    |                              |
| SNP_27817_A_32519120 | NC_021163.1    | Ca_Kabuli_Chr04 | 32519120                | TT                                     | GG                 | GG               | DRR                           | 101504697          | uncharacterized LOC101504697 |
| SNP_27819_A_32522537 | NC_021163.1    | Ca_Kabuli_Chr04 | 32522537                | TT                                     | GG                 | GG               | URR                           | 101504697          | uncharacterized LOC101504697 |
| SNP_27820_A_32522556 | NC_021163.1    | Ca_Kabuli_Chr04 | 32522556                | CC                                     | TT                 | TT               | URR                           | 101504697          | uncharacterized LOC101504697 |



| SNPs IDs             | Chromosome IDs | Chromosomes     | Physical positions (bp) | CDC Frontier genome (Reference genome) | (Pusa 1103 & HPNB) | (ILWC 46 & LPNB) | Sequence Components of genome | Gene accession IDs | Putative functions |
|----------------------|----------------|-----------------|-------------------------|----------------------------------------|--------------------|------------------|-------------------------------|--------------------|--------------------|
| SNP_27821_A_32525765 | NC_021163.1    | Ca_Kabuli_Chr04 | 32525765                | TT                                     | CC                 | CC               | INTERGENIC                    |                    |                    |
| SNP_27822_A_32526807 | NC_021163.1    | Ca_Kabuli_Chr04 | 32526807                | TT                                     | CC                 | CC               | INTERGENIC                    |                    |                    |
| SNP_27823_A_32526905 | NC_021163.1    | Ca_Kabuli_Chr04 | 32526905                | CC                                     | TT                 | TT               | INTERGENIC                    |                    |                    |
| SNP_27824_A_32526920 | NC_021163.1    | Ca_Kabuli_Chr04 | 32526920                | GG                                     | AA                 | AA               | INTERGENIC                    |                    |                    |
| SNP_27825_A_32527622 | NC_021163.1    | Ca_Kabuli_Chr04 | 32527622                | CC                                     | AA                 | AA               | INTERGENIC                    |                    |                    |
| SNP_27826_A_32527947 | NC_021163.1    | Ca_Kabuli_Chr04 | 32527947                | CC                                     | TT                 | TT               | INTERGENIC                    |                    |                    |
| SNP_27827_A_32528882 | NC_021163.1    | Ca_Kabuli_Chr04 | 32528882                | CC                                     | AA                 | AA               | INTERGENIC                    |                    |                    |
| SNP_27829_A_32529413 | NC_021163.1    | Ca_Kabuli_Chr04 | 32529413                | TT                                     | AA                 | AA               | INTERGENIC                    |                    |                    |
| SNP_27830_A_32529608 | NC_021163.1    | Ca_Kabuli_Chr04 | 32529608                | TT                                     | AA                 | AA               | INTERGENIC                    |                    |                    |
| SNP_27831_A_32529653 | NC_021163.1    | Ca_Kabuli_Chr04 | 32529653                | CC                                     | TT                 | TT               | INTERGENIC                    |                    |                    |
| SNP_27832_A_32530517 | NC_021163.1    | Ca_Kabuli_Chr04 | 32530517                | GG                                     | AA                 | AA               | INTERGENIC                    |                    |                    |
| SNP_27834_A_32531488 | NC_021163.1    | Ca_Kabuli_Chr04 | 32531488                | GG                                     | CC                 | CC               | INTERGENIC                    |                    |                    |
| SNP_27835_A_32531596 | NC_021163.1    | Ca_Kabuli_Chr04 | 32531596                | GG                                     | AA                 | AA               | INTERGENIC                    |                    |                    |
| SNP_27836_A_32533302 | NC_021163.1    | Ca_Kabuli_Chr04 | 32533302                | TT                                     | GG                 | GG               | INTERGENIC                    |                    |                    |
| SNP_27837_A_32540476 | NC_021163.1    | Ca_Kabuli_Chr04 | 32540476                | GG                                     | TT                 | TT               | NON_SYNONYMOUS_CODING         | 101490601          | Unknown function   |
| SNP_27838_A_32540485 | NC_021163.1    | Ca_Kabuli_Chr04 | 32540485                | CC                                     | TT                 | TT               | NON_SYNONYMOUS_CODING         | 101490601          | Unknown function   |
| SNP_27839_A_32544531 | NC_021163.1    | Ca_Kabuli_Chr04 | 32544531                | AA                                     | CC                 | CC               | INTERGENIC                    |                    |                    |
| SNP_27840_A_32548886 | NC_021163.1    | Ca_Kabuli_Chr04 | 32548886                | CC                                     | TT                 | TT               | INTERGENIC                    |                    |                    |
| SNP_27842_A_32549121 | NC_021163.1    | Ca_Kabuli_Chr04 | 32549121                | TT                                     | CC                 | CC               | INTERGENIC                    |                    |                    |
| SNP_27843_A_32549221 | NC_021163.1    | Ca_Kabuli_Chr04 | 32549221                | AA                                     | GG                 | GG               | INTERGENIC                    |                    |                    |
| SNP_27844_A_32549314 | NC_021163.1    | Ca_Kabuli_Chr04 | 32549314                | AA                                     | TT                 | TT               | INTERGENIC                    |                    |                    |
| SNP_27846_A_32550342 | NC_021163.1    | Ca_Kabuli_Chr04 | 32550342                | AA                                     | GG                 | GG               | INTERGENIC                    |                    |                    |

| SNPs IDs             | Chromosome IDs | Chromosomes     | Physical positions (bp) | CDC Frontier (Reference genome) | (Pusa 1103 & HPNB) | (ILWC 46 & LPNB) | Sequence genome | Components of | Gene accession IDs | Putative functions |
|----------------------|----------------|-----------------|-------------------------|---------------------------------|--------------------|------------------|-----------------|---------------|--------------------|--------------------|
| SNP_27848_A_32550405 | NC_021163.1    | Ca_Kabuli_Chr04 | 32550405                | TT                              | CC                 | CC               | INTERGENIC      |               |                    |                    |
| SNP_27849_A_32550418 | NC_021163.1    | Ca_Kabuli_Chr04 | 32550418                | AA                              | GG                 | GG               | INTERGENIC      |               |                    |                    |
| SNP_27850_A_32550486 | NC_021163.1    | Ca_Kabuli_Chr04 | 32550486                | AA                              | GG                 | GG               | INTERGENIC      |               |                    |                    |
| SNP_27851_A_32550488 | NC_021163.1    | Ca_Kabuli_Chr04 | 32550488                | AA                              | GG                 | GG               | INTERGENIC      |               |                    |                    |
| SNP_27852_A_32550517 | NC_021163.1    | Ca_Kabuli_Chr04 | 32550517                | AA                              | GG                 | GG               | INTERGENIC      |               |                    |                    |
| SNP_27853_A_32551343 | NC_021163.1    | Ca_Kabuli_Chr04 | 32551343                | GG                              | AA                 | AA               | INTERGENIC      |               |                    |                    |
| SNP_27854_A_32551390 | NC_021163.1    | Ca_Kabuli_Chr04 | 32551390                | AA                              | GG                 | GG               | INTERGENIC      |               |                    |                    |
| SNP_27855_A_32552292 | NC_021163.1    | Ca_Kabuli_Chr04 | 32552292                | GG                              | TT                 | TT               | INTERGENIC      |               |                    |                    |
| SNP_27856_A_32554164 | NC_021163.1    | Ca_Kabuli_Chr04 | 32554164                | CC                              | TT                 | TT               | INTERGENIC      |               |                    |                    |
| SNP_27858_A_32558071 | NC_021163.1    | Ca_Kabuli_Chr04 | 32558071                | AA                              | GG                 | GG               | INTERGENIC      |               |                    |                    |
| SNP_27859_A_32559005 | NC_021163.1    | Ca_Kabuli_Chr04 | 32559005                | GG                              | AA                 | AA               | INTERGENIC      |               |                    |                    |
| SNP_27860_A_32559032 | NC_021163.1    | Ca_Kabuli_Chr04 | 32559032                | GG                              | AA                 | AA               | INTERGENIC      |               |                    |                    |
| SNP_27862_A_32561953 | NC_021163.1    | Ca_Kabuli_Chr04 | 32561953                | TT                              | CC                 | CC               | INTERGENIC      |               |                    |                    |
| SNP_27863_A_32562148 | NC_021163.1    | Ca_Kabuli_Chr04 | 32562148                | GG                              | AA                 | AA               | INTERGENIC      |               |                    |                    |
| SNP_27865_A_32569008 | NC_021163.1    | Ca_Kabuli_Chr04 | 32569008                | CC                              | GG                 | GG               | INTERGENIC      |               |                    |                    |
| SNP_27866_A_32569383 | NC_021163.1    | Ca_Kabuli_Chr04 | 32569383                | CC                              | TT                 | TT               | INTERGENIC      |               |                    |                    |
| SNP_27867_A_32570115 | NC_021163.1    | Ca_Kabuli_Chr04 | 32570115                | TT                              | AA                 | AA               | INTERGENIC      |               |                    |                    |
| SNP_27868_A_32570501 | NC_021163.1    | Ca_Kabuli_Chr04 | 32570501                | GG                              | AA                 | AA               | INTERGENIC      |               |                    |                    |
| SNP_27869_A_32573819 | NC_021163.1    | Ca_Kabuli_Chr04 | 32573819                | TT                              | CC                 | CC               | INTERGENIC      |               |                    |                    |
| SNP_27870_A_32576268 | NC_021163.1    | Ca_Kabuli_Chr04 | 32576268                | CC                              | AA                 | AA               | INTERGENIC      |               |                    |                    |
| SNP_27871_A_32576520 | NC_021163.1    | Ca_Kabuli_Chr04 | 32576520                | GG                              | TT                 | TT               | INTERGENIC      |               |                    |                    |
| SNP_27872_A_32576546 | NC_021163.1    | Ca_Kabuli_Chr04 | 32576546                | AA                              | GG                 | GG               | INTERGENIC      |               |                    |                    |

| SNPs IDs             | Chromosome IDs | Chromosomes     | Physical positions (bp) | CDC Frontier genome (Reference genome) | (Pusa 1103 & HPNB) | (ILWC 46 & LPNB) | Sequence genome | Components of | Gene accession IDs | Putative functions |
|----------------------|----------------|-----------------|-------------------------|----------------------------------------|--------------------|------------------|-----------------|---------------|--------------------|--------------------|
| SNP_27873_A_32576558 | NC_021163.1    | Ca_Kabuli_Chr04 | 32576558                | AA                                     | CC                 | CC               | INTERGENIC      |               |                    |                    |
| SNP_27874_A_32576581 | NC_021163.1    | Ca_Kabuli_Chr04 | 32576581                | TT                                     | CC                 | CC               | INTERGENIC      |               |                    |                    |
| SNP_27875_A_32576622 | NC_021163.1    | Ca_Kabuli_Chr04 | 32576622                | TT                                     | AA                 | AA               | INTERGENIC      |               |                    |                    |
| SNP_27876_A_32576638 | NC_021163.1    | Ca_Kabuli_Chr04 | 32576638                | AA                                     | GG                 | GG               | INTERGENIC      |               |                    |                    |
| SNP_27877_A_32578950 | NC_021163.1    | Ca_Kabuli_Chr04 | 32578950                | GG                                     | TT                 | TT               | INTERGENIC      |               |                    |                    |
| SNP_27878_A_32579244 | NC_021163.1    | Ca_Kabuli_Chr04 | 32579244                | TT                                     | CC                 | CC               | INTERGENIC      |               |                    |                    |
| SNP_27879_A_32579253 | NC_021163.1    | Ca_Kabuli_Chr04 | 32579253                | TT                                     | CC                 | CC               | INTERGENIC      |               |                    |                    |
| SNP_27880_A_32581366 | NC_021163.1    | Ca_Kabuli_Chr04 | 32581366                | TT                                     | GG                 | GG               | INTERGENIC      |               |                    |                    |
| SNP_27881_A_32581371 | NC_021163.1    | Ca_Kabuli_Chr04 | 32581371                | TT                                     | CC                 | CC               | INTERGENIC      |               |                    |                    |
| SNP_27882_A_32581393 | NC_021163.1    | Ca_Kabuli_Chr04 | 32581393                | AA                                     | GG                 | GG               | INTERGENIC      |               |                    |                    |
| SNP_27883_A_32581441 | NC_021163.1    | Ca_Kabuli_Chr04 | 32581441                | GG                                     | TT                 | TT               | INTERGENIC      |               |                    |                    |
| SNP_27884_A_32581442 | NC_021163.1    | Ca_Kabuli_Chr04 | 32581442                | AA                                     | GG                 | GG               | INTERGENIC      |               |                    |                    |
| SNP_27885_A_32581460 | NC_021163.1    | Ca_Kabuli_Chr04 | 32581460                | CC                                     | AA                 | AA               | INTERGENIC      |               |                    |                    |
| SNP_27886_A_32581734 | NC_021163.1    | Ca_Kabuli_Chr04 | 32581734                | GG                                     | AA                 | AA               | INTERGENIC      |               |                    |                    |
| SNP_27887_A_32581878 | NC_021163.1    | Ca_Kabuli_Chr04 | 32581878                | GG                                     | AA                 | AA               | INTERGENIC      |               |                    |                    |
| SNP_27888_A_32584056 | NC_021163.1    | Ca_Kabuli_Chr04 | 32584056                | CC                                     | TT                 | TT               | INTERGENIC      |               |                    |                    |
| SNP_27889_A_32584139 | NC_021163.1    | Ca_Kabuli_Chr04 | 32584139                | CC                                     | TT                 | TT               | INTERGENIC      |               |                    |                    |
| SNP_27890_A_32586682 | NC_021163.1    | Ca_Kabuli_Chr04 | 32586682                | AA                                     | GG                 | GG               | INTERGENIC      |               |                    |                    |
| SNP_27892_A_32590130 | NC_021163.1    | Ca_Kabuli_Chr04 | 32590130                | GG                                     | TT                 | TT               | INTERGENIC      |               |                    |                    |
| SNP_27894_A_32590591 | NC_021163.1    | Ca_Kabuli_Chr04 | 32590591                | TT                                     | CC                 | CC               | INTERGENIC      |               |                    |                    |
| SNP_27895_A_32590667 | NC_021163.1    | Ca_Kabuli_Chr04 | 32590667                | GG                                     | TT                 | TT               | INTERGENIC      |               |                    |                    |
| SNP_27896_A_32593611 | NC_021163.1    | Ca_Kabuli_Chr04 | 32593611                | AA                                     | GG                 | GG               | INTERGENIC      |               |                    |                    |

| SNPs IDs             | Chromosome IDs | Chromosomes     | Physical positions (bp) | CDC Frontier genome (Reference genome) | (Pusa 1103 & HPNB) | (ILWC 46 & LPNB) | Sequence Components of genome | Gene accession IDs | Putative functions                                         |
|----------------------|----------------|-----------------|-------------------------|----------------------------------------|--------------------|------------------|-------------------------------|--------------------|------------------------------------------------------------|
| SNP_27897_A_32594619 | NC_021163.1    | Ca_Kabuli_Chr04 | 32594619                | TT                                     | CC                 | CC               | INTERGENIC                    |                    |                                                            |
| SNP_27898_A_32596706 | NC_021163.1    | Ca_Kabuli_Chr04 | 32596706                | AA                                     | GG                 | GG               | INTERGENIC                    |                    |                                                            |
| SNP_27899_A_32601398 | NC_021163.1    | Ca_Kabuli_Chr04 | 32601398                | GG                                     | CC                 | CC               | INTERGENIC                    |                    |                                                            |
| SNP_27900_A_32602070 | NC_021163.1    | Ca_Kabuli_Chr04 | 32602070                | CC                                     | TT                 | TT               | DRR                           | 101504058          | pentatricopeptide repeat-containing protein At3g23020-like |
| SNP_27901_A_32605848 | NC_021163.1    | Ca_Kabuli_Chr04 | 32605848                | AA                                     | TT                 | TT               | NON_SYNONYMOUS_CODING         | 101504058          | pentatricopeptide repeat-containing protein At3g23020-like |
| SNP_27902_A_32608905 | NC_021163.1    | Ca_Kabuli_Chr04 | 32608905                | GG                                     | AA                 | AA               | INTERGENIC                    |                    |                                                            |
| SNP_27903_A_32610160 | NC_021163.1    | Ca_Kabuli_Chr04 | 32610160                | AA                                     | GG                 | GG               | INTERGENIC                    |                    |                                                            |
| SNP_27904_A_32615069 | NC_021163.1    | Ca_Kabuli_Chr04 | 32615069                | GG                                     | AA                 | AA               | URR                           | 101503729          | zinc finger MYM-type protein 1-like                        |
| SNP_27905_A_32615115 | NC_021163.1    | Ca_Kabuli_Chr04 | 32615115                | AA                                     | CC                 | CC               | URR                           | 101503729          | zinc finger MYM-type protein 1-like                        |
| SNP_27906_A_32617703 | NC_021163.1    | Ca_Kabuli_Chr04 | 32617703                | GG                                     | AA                 | AA               | INTERGENIC                    |                    |                                                            |
| SNP_27907_A_32617968 | NC_021163.1    | Ca_Kabuli_Chr04 | 32617968                | AA                                     | GG                 | GG               | INTERGENIC                    |                    |                                                            |
| SNP_27908_A_32620667 | NC_021163.1    | Ca_Kabuli_Chr04 | 32620667                | CC                                     | TT                 | TT               | INTERGENIC                    |                    |                                                            |
| SNP_27909_A_32621087 | NC_021163.1    | Ca_Kabuli_Chr04 | 32621087                | CC                                     | TT                 | TT               | INTERGENIC                    |                    |                                                            |
| SNP_27912_A_32623274 | NC_021163.1    | Ca_Kabuli_Chr04 | 32623274                | GG                                     | CC                 | CC               | DRR                           | 101502347          | acylamino-acid-releasing enzyme                            |
| SNP_27913_A_32626017 | NC_021163.1    | Ca_Kabuli_Chr04 | 32626017                | GG                                     | AA                 | AA               | INTRON                        | 101502347          | acylamino-acid-releasing enzyme                            |
| SNP_27914_A_32626047 | NC_021163.1    | Ca_Kabuli_Chr04 | 32626047                | TT                                     | AA                 | AA               | INTRON                        | 101502347          | acylamino-acid-releasing enzyme                            |
| SNP_27916_A_32635128 | NC_021163.1    | Ca_Kabuli_Chr04 | 32635128                | AA                                     | CC                 | CC               | INTERGENIC                    |                    |                                                            |
| SNP_27917_A_32635135 | NC_021163.1    | Ca_Kabuli_Chr04 | 32635135                | GG                                     | TT                 | TT               | INTERGENIC                    |                    |                                                            |
| SNP_27918_A_32638022 | NC_021163.1    | Ca_Kabuli_Chr04 | 32638022                | GG                                     | TT                 | TT               | NON_SYNONYMOUS_CODING         | 101490923          | pentatricopeptide repeat-containing protein At1g52620-like |
| SNP_27919_A_32640058 | NC_021163.1    | Ca_Kabuli_Chr04 | 32640058                | CC                                     | TT                 | TT               | URR                           | 101490923          | pentatricopeptide repeat-containing protein At1g52620-like |
| SNP_27920_A_32644084 | NC_021163.1    | Ca_Kabuli_Chr04 | 32644084                | AA                                     | CC                 | CC               | INTERGENIC                    |                    |                                                            |
| SNP_27921_A_32644122 | NC_021163.1    | Ca_Kabuli_Chr04 | 32644122                | CC                                     | TT                 | TT               | INTERGENIC                    |                    |                                                            |

| SNPs IDs             | Chromosome IDs | Chromosomes     | Physical positions (bp) | CDC Frontier (Reference genome) | (Pusa 1103 & HPNB) | (ILWC 46 & LPNB) | Sequence Components of genome | Gene accession IDs | Putative functions                                         |
|----------------------|----------------|-----------------|-------------------------|---------------------------------|--------------------|------------------|-------------------------------|--------------------|------------------------------------------------------------|
| SNP_27922_A_32646882 | NC_021163.1    | Ca_Kabuli_Chr04 | 32646882                | TT                              | CC                 | CC               | INTRON                        | 101505997          | photosynthetic NDH subunit of subcomplex B 5, chloroplatic |
| SNP_27923_A_32654541 | NC_021163.1    | Ca_Kabuli_Chr04 | 32654541                | TT                              | AA                 | AA               | INTERGENIC                    |                    |                                                            |
| SNP_27924_A_32664304 | NC_021163.1    | Ca_Kabuli_Chr04 | 32664304                | TT                              | CC                 | CC               | INTRON                        | 101491875          | Unknown function                                           |
| SNP_27925_A_32665248 | NC_021163.1    | Ca_Kabuli_Chr04 | 32665248                | TT                              | CC                 | CC               | INTRON                        | 101491875          | Unknown function                                           |
| SNP_27926_A_32666585 | NC_021163.1    | Ca_Kabuli_Chr04 | 32666585                | CC                              | TT                 | TT               | INTRON                        | 101491875          | Unknown function                                           |
| SNP_27927_A_32666589 | NC_021163.1    | Ca_Kabuli_Chr04 | 32666589                | TT                              | CC                 | CC               | INTRON                        | 101491875          | Unknown function                                           |
| SNP_27928_A_32667452 | NC_021163.1    | Ca_Kabuli_Chr04 | 32667452                | AA                              | CC                 | CC               | INTRON                        | 101491875          | Unknown function                                           |
| SNP_27929_A_32673191 | NC_021163.1    | Ca_Kabuli_Chr04 | 32673191                | AA                              | GG                 | GG               | INTERGENIC                    |                    |                                                            |
| SNP_27930_A_32673237 | NC_021163.1    | Ca_Kabuli_Chr04 | 32673237                | AA                              | GG                 | GG               | INTERGENIC                    |                    |                                                            |
| SNP_27931_A_32682883 | NC_021163.1    | Ca_Kabuli_Chr04 | 32682883                | GG                              | AA                 | AA               | INTERGENIC                    |                    |                                                            |
| SNP_27933_A_32700170 | NC_021163.1    | Ca_Kabuli_Chr04 | 32700170                | CC                              | TT                 | TT               | INTERGENIC                    |                    |                                                            |
| SNP_27934_A_32700171 | NC_021163.1    | Ca_Kabuli_Chr04 | 32700171                | AA                              | GG                 | GG               | INTERGENIC                    |                    |                                                            |
| SNP_27935_A_32717726 | NC_021163.1    | Ca_Kabuli_Chr04 | 32717726                | TT                              | GG                 | GG               | INTRON                        | 101492209          | Unknown function                                           |
| SNP_27936_A_32763381 | NC_021163.1    | Ca_Kabuli_Chr04 | 32763381                | AA                              | TT                 | TT               | INTRON                        | 101492546          | uncharacterized protein PB18E9.04c-like                    |
| SNP_27937_A_32763391 | NC_021163.1    | Ca_Kabuli_Chr04 | 32763391                | TT                              | GG                 | GG               | INTRON                        | 101492546          | uncharacterized protein PB18E9.04c-like                    |
| SNP_27938_A_32765112 | NC_021163.1    | Ca_Kabuli_Chr04 | 32765112                | TT                              | CC                 | CC               | NON_SYNONYMOUS_CODING         | 101492546          | uncharacterized protein PB18E9.04c-like                    |
| SNP_27939_A_32765146 | NC_021163.1    | Ca_Kabuli_Chr04 | 32765146                | GG                              | AA                 | AA               | NON_SYNONYMOUS_CODING         | 101492546          | uncharacterized protein PB18E9.04c-like                    |
| SNP_27940_A_32766058 | NC_021163.1    | Ca_Kabuli_Chr04 | 32766058                | TT                              | CC                 | CC               | URR                           | 101492546          | uncharacterized protein PB18E9.04c-like                    |
| SNP_27941_A_32766152 | NC_021163.1    | Ca_Kabuli_Chr04 | 32766152                | CC                              | TT                 | TT               | URR                           | 101492546          | uncharacterized protein PB18E9.04c-like                    |
| SNP_27942_A_32767267 | NC_021163.1    | Ca_Kabuli_Chr04 | 32767267                | AA                              | GG                 | GG               | URR                           | 101492546          | uncharacterized protein PB18E9.04c-like                    |
| SNP_27943_A_32767272 | NC_021163.1    | Ca_Kabuli_Chr04 | 32767272                | CC                              | TT                 | TT               | URR                           | 101492546          | uncharacterized protein PB18E9.04c-like                    |
| SNP_27944_A_32767287 | NC_021163.1    | Ca_Kabuli_Chr04 | 32767287                | CC                              | TT                 | TT               | URR                           | 101492546          | uncharacterized protein PB18E9.04c-like                    |

| SNPs IDs             | Chromosome IDs | Chromosomes     | Physical positions (bp) | CDC Frontier (Reference genome) | (Pusa 1103 & HPNB) | (ILWC 46 & LPNB) | Sequence Components of genome | Gene accession IDs | Putative functions                      |
|----------------------|----------------|-----------------|-------------------------|---------------------------------|--------------------|------------------|-------------------------------|--------------------|-----------------------------------------|
| SNP_27945_A_32767306 | NC_021163.1    | Ca_Kabuli_Chr04 | 32767306                | TT                              | CC                 | CC               | URR                           | 101492546          | uncharacterized protein PB18E9.04c-like |
| SNP_27946_A_32767318 | NC_021163.1    | Ca_Kabuli_Chr04 | 32767318                | AA                              | CC                 | CC               | URR                           | 101492546          | uncharacterized protein PB18E9.04c-like |
| SNP_27947_A_32770378 | NC_021163.1    | Ca_Kabuli_Chr04 | 32770378                | AA                              | GG                 | GG               | INTERGENIC                    |                    |                                         |
| SNP_27948_A_32791080 | NC_021163.1    | Ca_Kabuli_Chr04 | 32791080                | GG                              | AA                 | AA               | INTERGENIC                    |                    |                                         |
| SNP_27949_A_32793483 | NC_021163.1    | Ca_Kabuli_Chr04 | 32793483                | AA                              | GG                 | GG               | INTERGENIC                    |                    |                                         |
| SNP_27950_A_32793967 | NC_021163.1    | Ca_Kabuli_Chr04 | 32793967                | AA                              | GG                 | GG               | INTERGENIC                    |                    |                                         |
| SNP_27951_A_32830178 | NC_021163.1    | Ca_Kabuli_Chr04 | 32830178                | TT                              | CC                 | CC               | INTERGENIC                    |                    |                                         |
| SNP_27952_A_32861899 | NC_021163.1    | Ca_Kabuli_Chr04 | 32861899                | AA                              | GG                 | GG               | URR                           | 101507814          | DNA topoisomerase 1-like                |
| SNP_27953_A_32861926 | NC_021163.1    | Ca_Kabuli_Chr04 | 32861926                | GG                              | AA                 | AA               | URR                           | 101507814          | DNA topoisomerase 1-like                |
| SNP_27954_A_32884368 | NC_021163.1    | Ca_Kabuli_Chr04 | 32884368                | AA                              | GG                 | GG               | INTERGENIC                    |                    |                                         |
| SNP_27955_A_32885342 | NC_021163.1    | Ca_Kabuli_Chr04 | 32885342                | AA                              | GG                 | GG               | INTERGENIC                    |                    |                                         |
| SNP_27956_A_32885346 | NC_021163.1    | Ca_Kabuli_Chr04 | 32885346                | CC                              | TT                 | TT               | INTERGENIC                    |                    |                                         |
| SNP_27957_A_32885360 | NC_021163.1    | Ca_Kabuli_Chr04 | 32885360                | AA                              | GG                 | GG               | INTERGENIC                    |                    |                                         |
| SNP_27958_A_32885364 | NC_021163.1    | Ca_Kabuli_Chr04 | 32885364                | CC                              | TT                 | TT               | INTERGENIC                    |                    |                                         |
| SNP_27959_A_32885377 | NC_021163.1    | Ca_Kabuli_Chr04 | 32885377                | AA                              | GG                 | GG               | INTERGENIC                    |                    |                                         |
| SNP_27960_A_32885397 | NC_021163.1    | Ca_Kabuli_Chr04 | 32885397                | CC                              | AA                 | AA               | INTERGENIC                    |                    |                                         |
| SNP_27961_A_32885425 | NC_021163.1    | Ca_Kabuli_Chr04 | 32885425                | CC                              | TT                 | TT               | INTERGENIC                    |                    |                                         |
| SNP_27963_A_32885560 | NC_021163.1    | Ca_Kabuli_Chr04 | 32885560                | GG                              | AA                 | AA               | INTERGENIC                    |                    |                                         |
| SNP_27964_A_32885592 | NC_021163.1    | Ca_Kabuli_Chr04 | 32885592                | CC                              | GG                 | GG               | INTERGENIC                    |                    |                                         |
| SNP_27965_A_32885614 | NC_021163.1    | Ca_Kabuli_Chr04 | 32885614                | AA                              | GG                 | GG               | INTERGENIC                    |                    |                                         |
| SNP_27966_A_32885640 | NC_021163.1    | Ca_Kabuli_Chr04 | 32885640                | TT                              | CC                 | CC               | INTERGENIC                    |                    |                                         |
| SNP_27967_A_32885657 | NC_021163.1    | Ca_Kabuli_Chr04 | 32885657                | CC                              | TT                 | TT               | INTERGENIC                    |                    |                                         |

| SNPs IDs             | Chromosome IDs | Chromosomes     | Physical positions (bp) | CDC Frontier genome (Reference genome) | (Pusa 1103 & HPNB) | (ILWC 46 & LPNB) | Sequence genome | Components of | Gene accession IDs | Putative functions |
|----------------------|----------------|-----------------|-------------------------|----------------------------------------|--------------------|------------------|-----------------|---------------|--------------------|--------------------|
| SNP_27968_A_32885673 | NC_021163.1    | Ca_Kabuli_Chr04 | 32885673                | CC                                     | TT                 | TT               | INTERGENIC      |               |                    |                    |
| SNP_27969_A_32885694 | NC_021163.1    | Ca_Kabuli_Chr04 | 32885694                | AA                                     | CC                 | CC               | INTERGENIC      |               |                    |                    |
| SNP_27970_A_32885734 | NC_021163.1    | Ca_Kabuli_Chr04 | 32885734                | TT                                     | CC                 | CC               | INTERGENIC      |               |                    |                    |
| SNP_27971_A_32885912 | NC_021163.1    | Ca_Kabuli_Chr04 | 32885912                | GG                                     | AA                 | AA               | INTERGENIC      |               |                    |                    |
| SNP_27972_A_32886023 | NC_021163.1    | Ca_Kabuli_Chr04 | 32886023                | CC                                     | TT                 | TT               | INTERGENIC      |               |                    |                    |
| SNP_27973_A_32886065 | NC_021163.1    | Ca_Kabuli_Chr04 | 32886065                | GG                                     | AA                 | AA               | INTERGENIC      |               |                    |                    |
| SNP_27974_A_32886108 | NC_021163.1    | Ca_Kabuli_Chr04 | 32886108                | TT                                     | CC                 | CC               | INTERGENIC      |               |                    |                    |
| SNP_27975_A_32886149 | NC_021163.1    | Ca_Kabuli_Chr04 | 32886149                | AA                                     | CC                 | CC               | INTERGENIC      |               |                    |                    |
| SNP_27976_A_32886157 | NC_021163.1    | Ca_Kabuli_Chr04 | 32886157                | TT                                     | GG                 | GG               | INTERGENIC      |               |                    |                    |
| SNP_27977_A_32886200 | NC_021163.1    | Ca_Kabuli_Chr04 | 32886200                | AA                                     | TT                 | TT               | INTERGENIC      |               |                    |                    |
| SNP_27978_A_32886233 | NC_021163.1    | Ca_Kabuli_Chr04 | 32886233                | GG                                     | AA                 | AA               | INTERGENIC      |               |                    |                    |
| SNP_27979_A_32886314 | NC_021163.1    | Ca_Kabuli_Chr04 | 32886314                | AA                                     | GG                 | GG               | INTERGENIC      |               |                    |                    |
| SNP_27980_A_32886372 | NC_021163.1    | Ca_Kabuli_Chr04 | 32886372                | AA                                     | GG                 | GG               | INTERGENIC      |               |                    |                    |
| SNP_27982_A_32886408 | NC_021163.1    | Ca_Kabuli_Chr04 | 32886408                | TT                                     | CC                 | CC               | INTERGENIC      |               |                    |                    |
| SNP_27983_A_32886442 | NC_021163.1    | Ca_Kabuli_Chr04 | 32886442                | TT                                     | CC                 | CC               | INTERGENIC      |               |                    |                    |
| SNP_27984_A_32886446 | NC_021163.1    | Ca_Kabuli_Chr04 | 32886446                | CC                                     | TT                 | TT               | INTERGENIC      |               |                    |                    |
| SNP_27986_A_32886496 | NC_021163.1    | Ca_Kabuli_Chr04 | 32886496                | TT                                     | CC                 | CC               | INTERGENIC      |               |                    |                    |
| SNP_27987_A_32886676 | NC_021163.1    | Ca_Kabuli_Chr04 | 32886676                | AA                                     | GG                 | GG               | INTERGENIC      |               |                    |                    |
| SNP_27988_A_32886801 | NC_021163.1    | Ca_Kabuli_Chr04 | 32886801                | TT                                     | CC                 | CC               | INTERGENIC      |               |                    |                    |
| SNP_27989_A_32888760 | NC_021163.1    | Ca_Kabuli_Chr04 | 32888760                | AA                                     | CC                 | CC               | INTERGENIC      |               |                    |                    |
| SNP_27990_A_32888845 | NC_021163.1    | Ca_Kabuli_Chr04 | 32888845                | TT                                     | CC                 | CC               | INTERGENIC      |               |                    |                    |
| SNP_27991_A_32888869 | NC_021163.1    | Ca_Kabuli_Chr04 | 32888869                | AA                                     | GG                 | GG               | INTERGENIC      |               |                    |                    |

| SNPs IDs             | Chromosome IDs | Chromosomes     | Physical positions (bp) | CDC Frontier genome (Reference genome) | (Pusa 1103 & HPNB) | (ILWC 46 & LPNB) | Sequence genome | Components of | Gene accession IDs | Putative functions |
|----------------------|----------------|-----------------|-------------------------|----------------------------------------|--------------------|------------------|-----------------|---------------|--------------------|--------------------|
| SNP_27992_A_32902298 | NC_021163.1    | Ca_Kabuli_Chr04 | 32902298                | AA                                     | GG                 | GG               | INTERGENIC      |               |                    |                    |
| SNP_27993_A_32902358 | NC_021163.1    | Ca_Kabuli_Chr04 | 32902358                | CC                                     | TT                 | TT               | INTERGENIC      |               |                    |                    |
| SNP_27994_A_32902475 | NC_021163.1    | Ca_Kabuli_Chr04 | 32902475                | CC                                     | AA                 | AA               | INTERGENIC      |               |                    |                    |
| SNP_27995_A_32902670 | NC_021163.1    | Ca_Kabuli_Chr04 | 32902670                | CC                                     | GG                 | GG               | INTERGENIC      |               |                    |                    |
| SNP_27996_A_32902704 | NC_021163.1    | Ca_Kabuli_Chr04 | 32902704                | GG                                     | AA                 | AA               | INTERGENIC      |               |                    |                    |
| SNP_27997_A_32902771 | NC_021163.1    | Ca_Kabuli_Chr04 | 32902771                | CC                                     | TT                 | TT               | INTERGENIC      |               |                    |                    |
| SNP_27998_A_32902786 | NC_021163.1    | Ca_Kabuli_Chr04 | 32902786                | TT                                     | CC                 | CC               | INTERGENIC      |               |                    |                    |
| SNP_27999_A_32902993 | NC_021163.1    | Ca_Kabuli_Chr04 | 32902993                | TT                                     | CC                 | CC               | INTERGENIC      |               |                    |                    |
| SNP_28000_A_32913496 | NC_021163.1    | Ca_Kabuli_Chr04 | 32913496                | TT                                     | AA                 | AA               | INTERGENIC      |               |                    |                    |
| SNP_28001_A_32967406 | NC_021163.1    | Ca_Kabuli_Chr04 | 32967406                | CC                                     | TT                 | TT               | INTERGENIC      |               |                    |                    |
| SNP_28003_A_32994889 | NC_021163.1    | Ca_Kabuli_Chr04 | 32994889                | CC                                     | TT                 | TT               | INTERGENIC      |               |                    |                    |
| SNP_28004_A_33037850 | NC_021163.1    | Ca_Kabuli_Chr04 | 33037850                | AA                                     | TT                 | TT               | INTERGENIC      |               |                    |                    |
| SNP_28005_A_33050006 | NC_021163.1    | Ca_Kabuli_Chr04 | 33050006                | GG                                     | AA                 | AA               | INTERGENIC      |               |                    |                    |
| SNP_28006_A_33050359 | NC_021163.1    | Ca_Kabuli_Chr04 | 33050359                | CC                                     | TT                 | TT               | INTERGENIC      |               |                    |                    |
| SNP_28008_A_33050470 | NC_021163.1    | Ca_Kabuli_Chr04 | 33050470                | TT                                     | CC                 | CC               | INTERGENIC      |               |                    |                    |
| SNP_28009_A_33050523 | NC_021163.1    | Ca_Kabuli_Chr04 | 33050523                | AA                                     | GG                 | GG               | INTERGENIC      |               |                    |                    |
| SNP_28012_A_33058834 | NC_021163.1    | Ca_Kabuli_Chr04 | 33058834                | CC                                     | TT                 | TT               | INTERGENIC      |               |                    |                    |
| SNP_28013_A_33059835 | NC_021163.1    | Ca_Kabuli_Chr04 | 33059835                | CC                                     | TT                 | TT               | INTERGENIC      |               |                    |                    |
| SNP_28015_A_33065222 | NC_021163.1    | Ca_Kabuli_Chr04 | 33065222                | GG                                     | AA                 | AA               | INTERGENIC      |               |                    |                    |
| SNP_28016_A_33067342 | NC_021163.1    | Ca_Kabuli_Chr04 | 33067342                | TT                                     | CC                 | CC               | INTERGENIC      |               |                    |                    |
| SNP_28017_A_33068382 | NC_021163.1    | Ca_Kabuli_Chr04 | 33068382                | TT                                     | AA                 | AA               | INTERGENIC      |               |                    |                    |
| SNP_28018_A_33076776 | NC_021163.1    | Ca_Kabuli_Chr04 | 33076776                | AA                                     | GG                 | GG               | INTERGENIC      |               |                    |                    |



| SNPs IDs             | Chromosome IDs | Chromosomes     | Physical positions (bp) | CDC Frontier genome (Reference genome) | (Pusa 1103 & HPNB) | (ILWC 46 & LPNB) | Sequence genome | Components of | Gene accession IDs | Putative functions |
|----------------------|----------------|-----------------|-------------------------|----------------------------------------|--------------------|------------------|-----------------|---------------|--------------------|--------------------|
| SNP_28019_A_33076781 | NC_021163.1    | Ca_Kabuli_Chr04 | 33076781                | GG                                     | AA                 | AA               | INTERGENIC      |               |                    |                    |
| SNP_28020_A_33080677 | NC_021163.1    | Ca_Kabuli_Chr04 | 33080677                | TT                                     | AA                 | AA               | INTERGENIC      |               |                    |                    |
| SNP_28021_A_33091730 | NC_021163.1    | Ca_Kabuli_Chr04 | 33091730                | AA                                     | TT                 | TT               | INTERGENIC      |               |                    |                    |
| SNP_28022_A_33094046 | NC_021163.1    | Ca_Kabuli_Chr04 | 33094046                | GG                                     | CC                 | CC               | INTERGENIC      |               |                    |                    |
| SNP_28025_A_33101216 | NC_021163.1    | Ca_Kabuli_Chr04 | 33101216                | AA                                     | GG                 | GG               | INTERGENIC      |               |                    |                    |
| SNP_28026_A_33101544 | NC_021163.1    | Ca_Kabuli_Chr04 | 33101544                | TT                                     | CC                 | CC               | INTERGENIC      |               |                    |                    |
| SNP_28027_A_33102256 | NC_021163.1    | Ca_Kabuli_Chr04 | 33102256                | TT                                     | CC                 | CC               | INTERGENIC      |               |                    |                    |
| SNP_28028_A_33103398 | NC_021163.1    | Ca_Kabuli_Chr04 | 33103398                | CC                                     | GG                 | GG               | INTERGENIC      |               |                    |                    |
| SNP_28029_A_33107865 | NC_021163.1    | Ca_Kabuli_Chr04 | 33107865                | AA                                     | GG                 | GG               | INTERGENIC      |               |                    |                    |
| SNP_28030_A_33111315 | NC_021163.1    | Ca_Kabuli_Chr04 | 33111315                | CC                                     | AA                 | AA               | INTERGENIC      |               |                    |                    |
| SNP_28031_A_33121083 | NC_021163.1    | Ca_Kabuli_Chr04 | 33121083                | CC                                     | TT                 | TT               | INTERGENIC      |               |                    |                    |
| SNP_28032_A_33133917 | NC_021163.1    | Ca_Kabuli_Chr04 | 33133917                | TT                                     | AA                 | AA               | INTERGENIC      |               |                    |                    |
| SNP_28033_A_33136950 | NC_021163.1    | Ca_Kabuli_Chr04 | 33136950                | GG                                     | AA                 | AA               | INTERGENIC      |               |                    |                    |
| SNP_28034_A_33140829 | NC_021163.1    | Ca_Kabuli_Chr04 | 33140829                | TT                                     | AA                 | AA               | INTERGENIC      |               |                    |                    |
| SNP_28035_A_33140913 | NC_021163.1    | Ca_Kabuli_Chr04 | 33140913                | TT                                     | AA                 | AA               | INTERGENIC      |               |                    |                    |
| SNP_28037_A_33150934 | NC_021163.1    | Ca_Kabuli_Chr04 | 33150934                | CC                                     | AA                 | AA               | INTERGENIC      |               |                    |                    |
| SNP_28038_A_33152502 | NC_021163.1    | Ca_Kabuli_Chr04 | 33152502                | CC                                     | TT                 | TT               | INTERGENIC      |               |                    |                    |
| SNP_28039_A_33163562 | NC_021163.1    | Ca_Kabuli_Chr04 | 33163562                | TT                                     | AA                 | AA               | INTERGENIC      |               |                    |                    |
| SNP_28040_A_33166087 | NC_021163.1    | Ca_Kabuli_Chr04 | 33166087                | TT                                     | CC                 | CC               | INTERGENIC      |               |                    |                    |
| SNP_28041_A_33167701 | NC_021163.1    | Ca_Kabuli_Chr04 | 33167701                | TT                                     | CC                 | CC               | INTERGENIC      |               |                    |                    |
| SNP_28042_A_33167951 | NC_021163.1    | Ca_Kabuli_Chr04 | 33167951                | AA                                     | CC                 | CC               | INTERGENIC      |               |                    |                    |
| SNP_28043_A_33168012 | NC_021163.1    | Ca_Kabuli_Chr04 | 33168012                | CC                                     | TT                 | TT               | INTERGENIC      |               |                    |                    |

| SNPs IDs             | Chromosome IDs | Chromosomes     | Physical positions (bp) | CDC Frontier genome (Reference genome) | (Pusa 1103 & HPNB) | (ILWC 46 & LPNB) | Sequence genome | Components of | Gene accession IDs | Putative functions                                  |
|----------------------|----------------|-----------------|-------------------------|----------------------------------------|--------------------|------------------|-----------------|---------------|--------------------|-----------------------------------------------------|
| SNP_28044_A_33170489 | NC_021163.1    | Ca_Kabuli_Chr04 | 33170489                | GG                                     | AA                 | AA               | INTERGENIC      |               |                    |                                                     |
| SNP_28045_A_33173580 | NC_021163.1    | Ca_Kabuli_Chr04 | 33173580                | TT                                     | GG                 | GG               | INTERGENIC      |               |                    |                                                     |
| SNP_28046_A_33179286 | NC_021163.1    | Ca_Kabuli_Chr04 | 33179286                | AA                                     | GG                 | GG               | INTERGENIC      |               |                    |                                                     |
| SNP_28047_A_33179298 | NC_021163.1    | Ca_Kabuli_Chr04 | 33179298                | AA                                     | GG                 | GG               | INTERGENIC      |               |                    |                                                     |
| SNP_28048_A_33179805 | NC_021163.1    | Ca_Kabuli_Chr04 | 33179805                | AA                                     | TT                 | TT               | INTERGENIC      |               |                    |                                                     |
| SNP_28049_A_33179813 | NC_021163.1    | Ca_Kabuli_Chr04 | 33179813                | TT                                     | GG                 | GG               | INTERGENIC      |               |                    |                                                     |
| SNP_28050_A_33189518 | NC_021163.1    | Ca_Kabuli_Chr04 | 33189518                | AA                                     | TT                 | TT               | INTERGENIC      |               |                    |                                                     |
| SNP_28051_A_33189730 | NC_021163.1    | Ca_Kabuli_Chr04 | 33189730                | CC                                     | AA                 | AA               | INTERGENIC      |               |                    |                                                     |
| SNP_28052_A_33190174 | NC_021163.1    | Ca_Kabuli_Chr04 | 33190174                | GG                                     | CC                 | CC               | INTERGENIC      |               |                    |                                                     |
| SNP_28053_A_33194723 | NC_021163.1    | Ca_Kabuli_Chr04 | 33194723                | AA                                     | GG                 | GG               | INTERGENIC      |               |                    |                                                     |
| SNP_28055_A_33195088 | NC_021163.1    | Ca_Kabuli_Chr04 | 33195088                | TT                                     | CC                 | CC               | INTERGENIC      |               |                    |                                                     |
| SNP_28056_A_33195226 | NC_021163.1    | Ca_Kabuli_Chr04 | 33195226                | GG                                     | AA                 | AA               | INTERGENIC      |               |                    |                                                     |
| SNP_28057_A_33195284 | NC_021163.1    | Ca_Kabuli_Chr04 | 33195284                | GG                                     | AA                 | AA               | INTERGENIC      |               |                    |                                                     |
| SNP_28058_A_33195296 | NC_021163.1    | Ca_Kabuli_Chr04 | 33195296                | AA                                     | CC                 | CC               | INTERGENIC      |               |                    |                                                     |
| SNP_28059_A_33195625 | NC_021163.1    | Ca_Kabuli_Chr04 | 33195625                | CC                                     | AA                 | AA               | INTERGENIC      |               |                    |                                                     |
| SNP_28060_A_33200124 | NC_021163.1    | Ca_Kabuli_Chr04 | 33200124                | TT                                     | GG                 | GG               | INTERGENIC      |               |                    |                                                     |
| SNP_28061_A_33200704 | NC_021163.1    | Ca_Kabuli_Chr04 | 33200704                | AA                                     | GG                 | GG               | INTERGENIC      |               |                    |                                                     |
| SNP_28062_A_33208327 | NC_021163.1    | Ca_Kabuli_Chr04 | 33208327                | CC                                     | AA                 | AA               | INTERGENIC      |               |                    |                                                     |
| SNP_28063_A_33215269 | NC_021163.1    | Ca_Kabuli_Chr04 | 33215269                | TT                                     | CC                 | CC               | INTERGENIC      |               |                    |                                                     |
| SNP_28064_A_33223101 | NC_021163.1    | Ca_Kabuli_Chr04 | 33223101                | TT                                     | CC                 | CC               | INTRON          | 101494795     |                    | calcium-transporting ATPase 4, plasma membrane-type |
| SNP_28065_A_33239832 | NC_021163.1    | Ca_Kabuli_Chr04 | 33239832                | CC                                     | GG                 | GG               | INTERGENIC      |               |                    |                                                     |
| SNP_28066_A_33240264 | NC_021163.1    | Ca_Kabuli_Chr04 | 33240264                | CC                                     | AA                 | AA               | INTERGENIC      |               |                    |                                                     |

| SNPs IDs             | Chromosome IDs | Chromosomes     | Physical positions (bp) | CDC Frontier genome (Reference genome) | (Pusa 1103 & HPNB) | (ILWC 46 & LPNB) | Sequence genome | Components of | Gene accession IDs | Putative functions       |
|----------------------|----------------|-----------------|-------------------------|----------------------------------------|--------------------|------------------|-----------------|---------------|--------------------|--------------------------|
| SNP_28067_A_33242258 | NC_021163.1    | Ca_Kabuli_Chr04 | 33242258                | TT                                     | AA                 | AA               | INTERGENIC      |               |                    |                          |
| SNP_28068_A_33242663 | NC_021163.1    | Ca_Kabuli_Chr04 | 33242663                | GG                                     | AA                 | AA               | INTERGENIC      |               |                    |                          |
| SNP_28069_A_33255566 | NC_021163.1    | Ca_Kabuli_Chr04 | 33255566                | AA                                     | GG                 | GG               | INTERGENIC      |               |                    |                          |
| SNP_28070_A_33255589 | NC_021163.1    | Ca_Kabuli_Chr04 | 33255589                | GG                                     | AA                 | AA               | INTERGENIC      |               |                    |                          |
| SNP_28071_A_33255613 | NC_021163.1    | Ca_Kabuli_Chr04 | 33255613                | CC                                     | TT                 | TT               | INTERGENIC      |               |                    |                          |
| SNP_28072_A_33255725 | NC_021163.1    | Ca_Kabuli_Chr04 | 33255725                | AA                                     | GG                 | GG               | INTERGENIC      |               |                    |                          |
| SNP_28073_A_33258912 | NC_021163.1    | Ca_Kabuli_Chr04 | 33258912                | AA                                     | GG                 | GG               | INTERGENIC      |               |                    |                          |
| SNP_28074_A_33260415 | NC_021163.1    | Ca_Kabuli_Chr04 | 33260415                | AA                                     | GG                 | GG               | INTERGENIC      |               |                    |                          |
| SNP_28075_A_33262293 | NC_021163.1    | Ca_Kabuli_Chr04 | 33262293                | GG                                     | CC                 | CC               | INTERGENIC      |               |                    |                          |
| SNP_28076_A_33269906 | NC_021163.1    | Ca_Kabuli_Chr04 | 33269906                | CC                                     | TT                 | TT               | INTERGENIC      |               |                    |                          |
| SNP_28077_A_33269958 | NC_021163.1    | Ca_Kabuli_Chr04 | 33269958                | AA                                     | GG                 | GG               | INTERGENIC      |               |                    |                          |
| SNP_28079_A_33300429 | NC_021163.1    | Ca_Kabuli_Chr04 | 33300429                | CC                                     | GG                 | GG               | INTERGENIC      |               |                    |                          |
| SNP_28080_A_33302295 | NC_021163.1    | Ca_Kabuli_Chr04 | 33302295                | GG                                     | TT                 | TT               | INTERGENIC      |               |                    |                          |
| SNP_28081_A_33306195 | NC_021163.1    | Ca_Kabuli_Chr04 | 33306195                | TT                                     | CC                 | CC               | INTERGENIC      |               |                    |                          |
| SNP_28083_A_33309002 | NC_021163.1    | Ca_Kabuli_Chr04 | 33309002                | TT                                     | CC                 | CC               | URR             | 101497742     |                    | protein odd-skipped-like |
| SNP_28084_A_33310211 | NC_021163.1    | Ca_Kabuli_Chr04 | 33310211                | AA                                     | TT                 | TT               | URR             | 101497742     |                    | protein odd-skipped-like |
| SNP_28085_A_33312791 | NC_021163.1    | Ca_Kabuli_Chr04 | 33312791                | CC                                     | TT                 | TT               | INTERGENIC      |               |                    |                          |
| SNP_28087_A_33314592 | NC_021163.1    | Ca_Kabuli_Chr04 | 33314592                | GG                                     | TT                 | TT               | INTERGENIC      |               |                    |                          |
| SNP_28089_A_33314669 | NC_021163.1    | Ca_Kabuli_Chr04 | 33314669                | AA                                     | GG                 | GG               | INTERGENIC      |               |                    |                          |
| SNP_28090_A_33315689 | NC_021163.1    | Ca_Kabuli_Chr04 | 33315689                | CC                                     | TT                 | TT               | INTERGENIC      |               |                    |                          |
| SNP_28091_A_33315735 | NC_021163.1    | Ca_Kabuli_Chr04 | 33315735                | GG                                     | TT                 | TT               | INTERGENIC      |               |                    |                          |
| SNP_28093_A_33317464 | NC_021163.1    | Ca_Kabuli_Chr04 | 33317464                | GG                                     | TT                 | TT               | INTERGENIC      |               |                    |                          |

| SNPs IDs             | Chromosome IDs | Chromosomes     | Physical positions (bp) | CDC Frontier genome (Reference genome) | (Pusa 1103 & HPNB) | (ILWC 46 & LPNB) | Sequence genome | Components of | Gene accession IDs | Putative functions |
|----------------------|----------------|-----------------|-------------------------|----------------------------------------|--------------------|------------------|-----------------|---------------|--------------------|--------------------|
| SNP_28095_A_33327497 | NC_021163.1    | Ca_Kabuli_Chr04 | 33327497                | TT                                     | CC                 | CC               | INTERGENIC      |               |                    |                    |
| SNP_28097_A_33328016 | NC_021163.1    | Ca_Kabuli_Chr04 | 33328016                | CC                                     | TT                 | TT               | INTERGENIC      |               |                    |                    |
| SNP_28098_A_33329320 | NC_021163.1    | Ca_Kabuli_Chr04 | 33329320                | GG                                     | AA                 | AA               | INTERGENIC      |               |                    |                    |
| SNP_28099_A_33329327 | NC_021163.1    | Ca_Kabuli_Chr04 | 33329327                | GG                                     | AA                 | AA               | INTERGENIC      |               |                    |                    |
| SNP_28100_A_33329329 | NC_021163.1    | Ca_Kabuli_Chr04 | 33329329                | CC                                     | AA                 | AA               | INTERGENIC      |               |                    |                    |
| SNP_28101_A_33329337 | NC_021163.1    | Ca_Kabuli_Chr04 | 33329337                | GG                                     | CC                 | CC               | INTERGENIC      |               |                    |                    |
| SNP_28102_A_33329447 | NC_021163.1    | Ca_Kabuli_Chr04 | 33329447                | AA                                     | GG                 | GG               | INTERGENIC      |               |                    |                    |
| SNP_28103_A_33329448 | NC_021163.1    | Ca_Kabuli_Chr04 | 33329448                | GG                                     | AA                 | AA               | INTERGENIC      |               |                    |                    |
| SNP_28104_A_33331916 | NC_021163.1    | Ca_Kabuli_Chr04 | 33331916                | CC                                     | TT                 | TT               | INTERGENIC      |               |                    |                    |
| SNP_28105_A_33337562 | NC_021163.1    | Ca_Kabuli_Chr04 | 33337562                | AA                                     | GG                 | GG               | INTERGENIC      |               |                    |                    |
| SNP_28106_A_33337573 | NC_021163.1    | Ca_Kabuli_Chr04 | 33337573                | CC                                     | TT                 | TT               | INTERGENIC      |               |                    |                    |
| SNP_28107_A_33339017 | NC_021163.1    | Ca_Kabuli_Chr04 | 33339017                | TT                                     | CC                 | CC               | INTERGENIC      |               |                    |                    |
| SNP_28108_A_33339414 | NC_021163.1    | Ca_Kabuli_Chr04 | 33339414                | TT                                     | CC                 | CC               | INTERGENIC      |               |                    |                    |
| SNP_28110_A_33340309 | NC_021163.1    | Ca_Kabuli_Chr04 | 33340309                | TT                                     | CC                 | CC               | INTERGENIC      |               |                    |                    |
| SNP_28111_A_33340662 | NC_021163.1    | Ca_Kabuli_Chr04 | 33340662                | AA                                     | GG                 | GG               | INTERGENIC      |               |                    |                    |
| SNP_28112_A_33340669 | NC_021163.1    | Ca_Kabuli_Chr04 | 33340669                | GG                                     | AA                 | AA               | INTERGENIC      |               |                    |                    |
| SNP_28113_A_33341045 | NC_021163.1    | Ca_Kabuli_Chr04 | 33341045                | CC                                     | AA                 | AA               | INTERGENIC      |               |                    |                    |
| SNP_28114_A_33343032 | NC_021163.1    | Ca_Kabuli_Chr04 | 33343032                | GG                                     | AA                 | AA               | INTERGENIC      |               |                    |                    |
| SNP_28115_A_33346340 | NC_021163.1    | Ca_Kabuli_Chr04 | 33346340                | TT                                     | GG                 | GG               | INTERGENIC      |               |                    |                    |
| SNP_28116_A_33346347 | NC_021163.1    | Ca_Kabuli_Chr04 | 33346347                | TT                                     | GG                 | GG               | INTERGENIC      |               |                    |                    |
| SNP_28117_A_33346358 | NC_021163.1    | Ca_Kabuli_Chr04 | 33346358                | AA                                     | TT                 | TT               | INTERGENIC      |               |                    |                    |
| SNP_28118_A_33346395 | NC_021163.1    | Ca_Kabuli_Chr04 | 33346395                | AA                                     | CC                 | CC               | INTERGENIC      |               |                    |                    |

| SNPs IDs             | Chromosome IDs | Chromosomes     | Physical positions (bp) | CDC Frontier genome (Reference genome) | (Pusa 1103 & HPNB) | (ILWC 46 & LPNB) | Sequence genome | Components of | Gene accession IDs | Putative functions |
|----------------------|----------------|-----------------|-------------------------|----------------------------------------|--------------------|------------------|-----------------|---------------|--------------------|--------------------|
| SNP_28119_A_33346565 | NC_021163.1    | Ca_Kabuli_Chr04 | 33346565                | TT                                     | AA                 | AA               | INTERGENIC      |               |                    |                    |
| SNP_28120_A_33346573 | NC_021163.1    | Ca_Kabuli_Chr04 | 33346573                | TT                                     | CC                 | CC               | INTERGENIC      |               |                    |                    |
| SNP_28121_A_33346582 | NC_021163.1    | Ca_Kabuli_Chr04 | 33346582                | GG                                     | TT                 | TT               | INTERGENIC      |               |                    |                    |
| SNP_28122_A_33346586 | NC_021163.1    | Ca_Kabuli_Chr04 | 33346586                | AA                                     | TT                 | TT               | INTERGENIC      |               |                    |                    |
| SNP_28123_A_33346604 | NC_021163.1    | Ca_Kabuli_Chr04 | 33346604                | GG                                     | AA                 | AA               | INTERGENIC      |               |                    |                    |
| SNP_28124_A_33346741 | NC_021163.1    | Ca_Kabuli_Chr04 | 33346741                | AA                                     | GG                 | GG               | INTERGENIC      |               |                    |                    |
| SNP_28125_A_33346804 | NC_021163.1    | Ca_Kabuli_Chr04 | 33346804                | GG                                     | TT                 | TT               | INTERGENIC      |               |                    |                    |
| SNP_28126_A_33346832 | NC_021163.1    | Ca_Kabuli_Chr04 | 33346832                | TT                                     | GG                 | GG               | INTERGENIC      |               |                    |                    |
| SNP_28128_A_33347072 | NC_021163.1    | Ca_Kabuli_Chr04 | 33347072                | CC                                     | TT                 | TT               | INTERGENIC      |               |                    |                    |
| SNP_28129_A_33347134 | NC_021163.1    | Ca_Kabuli_Chr04 | 33347134                | AA                                     | TT                 | TT               | INTERGENIC      |               |                    |                    |
| SNP_28130_A_33347258 | NC_021163.1    | Ca_Kabuli_Chr04 | 33347258                | AA                                     | CC                 | CC               | INTERGENIC      |               |                    |                    |
| SNP_28131_A_33347299 | NC_021163.1    | Ca_Kabuli_Chr04 | 33347299                | TT                                     | CC                 | CC               | INTERGENIC      |               |                    |                    |
| SNP_28132_A_33347416 | NC_021163.1    | Ca_Kabuli_Chr04 | 33347416                | GG                                     | TT                 | TT               | INTERGENIC      |               |                    |                    |
| SNP_28133_A_33347451 | NC_021163.1    | Ca_Kabuli_Chr04 | 33347451                | TT                                     | AA                 | AA               | INTERGENIC      |               |                    |                    |
| SNP_28134_A_33347508 | NC_021163.1    | Ca_Kabuli_Chr04 | 33347508                | TT                                     | GG                 | GG               | INTERGENIC      |               |                    |                    |
| SNP_28135_A_33347516 | NC_021163.1    | Ca_Kabuli_Chr04 | 33347516                | TT                                     | CC                 | CC               | INTERGENIC      |               |                    |                    |
| SNP_28136_A_33347529 | NC_021163.1    | Ca_Kabuli_Chr04 | 33347529                | CC                                     | TT                 | TT               | INTERGENIC      |               |                    |                    |
| SNP_28137_A_33347559 | NC_021163.1    | Ca_Kabuli_Chr04 | 33347559                | GG                                     | AA                 | AA               | INTERGENIC      |               |                    |                    |
| SNP_28138_A_33347589 | NC_021163.1    | Ca_Kabuli_Chr04 | 33347589                | AA                                     | CC                 | CC               | INTERGENIC      |               |                    |                    |
| SNP_28139_A_33347651 | NC_021163.1    | Ca_Kabuli_Chr04 | 33347651                | TT                                     | CC                 | CC               | INTERGENIC      |               |                    |                    |
| SNP_28140_A_33347670 | NC_021163.1    | Ca_Kabuli_Chr04 | 33347670                | AA                                     | CC                 | CC               | INTERGENIC      |               |                    |                    |
| SNP_28141_A_33347692 | NC_021163.1    | Ca_Kabuli_Chr04 | 33347692                | TT                                     | CC                 | CC               | INTERGENIC      |               |                    |                    |

| SNPs IDs             | Chromosome IDs | Chromosomes     | Physical positions (bp) | CDC Frontier genome (Reference genome) | (Pusa 1103 & HPNB) | (ILWC 46 & LPNB) | Sequence genome | Components of | Gene accession IDs | Putative functions |
|----------------------|----------------|-----------------|-------------------------|----------------------------------------|--------------------|------------------|-----------------|---------------|--------------------|--------------------|
| SNP_28142_A_33347726 | NC_021163.1    | Ca_Kabuli_Chr04 | 33347726                | CC                                     | TT                 | TT               | INTERGENIC      |               |                    |                    |
| SNP_28143_A_33347732 | NC_021163.1    | Ca_Kabuli_Chr04 | 33347732                | GG                                     | AA                 | AA               | INTERGENIC      |               |                    |                    |
| SNP_28144_A_33347736 | NC_021163.1    | Ca_Kabuli_Chr04 | 33347736                | TT                                     | CC                 | CC               | INTERGENIC      |               |                    |                    |
| SNP_28145_A_33347746 | NC_021163.1    | Ca_Kabuli_Chr04 | 33347746                | AA                                     | GG                 | GG               | INTERGENIC      |               |                    |                    |
| SNP_28146_A_33347829 | NC_021163.1    | Ca_Kabuli_Chr04 | 33347829                | AA                                     | TT                 | TT               | INTERGENIC      |               |                    |                    |
| SNP_28147_A_33347870 | NC_021163.1    | Ca_Kabuli_Chr04 | 33347870                | AA                                     | GG                 | GG               | INTERGENIC      |               |                    |                    |
| SNP_28148_A_33347913 | NC_021163.1    | Ca_Kabuli_Chr04 | 33347913                | CC                                     | TT                 | TT               | INTERGENIC      |               |                    |                    |
| SNP_28149_A_33347924 | NC_021163.1    | Ca_Kabuli_Chr04 | 33347924                | AA                                     | TT                 | TT               | INTERGENIC      |               |                    |                    |
| SNP_28150_A_33348054 | NC_021163.1    | Ca_Kabuli_Chr04 | 33348054                | CC                                     | TT                 | TT               | INTERGENIC      |               |                    |                    |
| SNP_28151_A_33348285 | NC_021163.1    | Ca_Kabuli_Chr04 | 33348285                | GG                                     | TT                 | TT               | INTERGENIC      |               |                    |                    |
| SNP_28152_A_33348530 | NC_021163.1    | Ca_Kabuli_Chr04 | 33348530                | GG                                     | TT                 | TT               | INTERGENIC      |               |                    |                    |
| SNP_28153_A_33348677 | NC_021163.1    | Ca_Kabuli_Chr04 | 33348677                | GG                                     | TT                 | TT               | INTERGENIC      |               |                    |                    |
| SNP_28154_A_33349889 | NC_021163.1    | Ca_Kabuli_Chr04 | 33349889                | AA                                     | TT                 | TT               | INTERGENIC      |               |                    |                    |
| SNP_28155_A_33356302 | NC_021163.1    | Ca_Kabuli_Chr04 | 33356302                | CC                                     | TT                 | TT               | INTERGENIC      |               |                    |                    |
| SNP_28156_A_33356972 | NC_021163.1    | Ca_Kabuli_Chr04 | 33356972                | CC                                     | TT                 | TT               | INTERGENIC      |               |                    |                    |
| SNP_28157_A_33357117 | NC_021163.1    | Ca_Kabuli_Chr04 | 33357117                | TT                                     | CC                 | CC               | INTERGENIC      |               |                    |                    |
| SNP_28158_A_33357125 | NC_021163.1    | Ca_Kabuli_Chr04 | 33357125                | TT                                     | AA                 | AA               | INTERGENIC      |               |                    |                    |
| SNP_28159_A_33357147 | NC_021163.1    | Ca_Kabuli_Chr04 | 33357147                | GG                                     | AA                 | AA               | INTERGENIC      |               |                    |                    |
| SNP_28160_A_33359621 | NC_021163.1    | Ca_Kabuli_Chr04 | 33359621                | CC                                     | TT                 | TT               | INTERGENIC      |               |                    |                    |
| SNP_28161_A_33359657 | NC_021163.1    | Ca_Kabuli_Chr04 | 33359657                | CC                                     | TT                 | TT               | INTERGENIC      |               |                    |                    |
| SNP_28162_A_33359687 | NC_021163.1    | Ca_Kabuli_Chr04 | 33359687                | TT                                     | GG                 | GG               | INTERGENIC      |               |                    |                    |
| SNP_28163_A_33359709 | NC_021163.1    | Ca_Kabuli_Chr04 | 33359709                | CC                                     | AA                 | AA               | INTERGENIC      |               |                    |                    |

| SNPs IDs             | Chromosome IDs | Chromosomes     | Physical positions (bp) | CDC Frontier genome (Reference genome) | (Pusa 1103 & HPNB) | (ILWC 46 & LPNB) | Sequence Components of genome | Gene accession IDs | Putative functions           |
|----------------------|----------------|-----------------|-------------------------|----------------------------------------|--------------------|------------------|-------------------------------|--------------------|------------------------------|
| SNP_28164_A_33360020 | NC_021163.1    | Ca_Kabuli_Chr04 | 33360020                | TT                                     | CC                 | CC               | INTERGENIC                    |                    |                              |
| SNP_28165_A_33363214 | NC_021163.1    | Ca_Kabuli_Chr04 | 33363214                | GG                                     | AA                 | AA               | INTERGENIC                    |                    |                              |
| SNP_28166_A_33373780 | NC_021163.1    | Ca_Kabuli_Chr04 | 33373780                | CC                                     | TT                 | TT               | INTERGENIC                    |                    |                              |
| SNP_28167_A_33376154 | NC_021163.1    | Ca_Kabuli_Chr04 | 33376154                | AA                                     | TT                 | TT               | INTERGENIC                    |                    |                              |
| SNP_28168_A_33376399 | NC_021163.1    | Ca_Kabuli_Chr04 | 33376399                | GG                                     | AA                 | AA               | INTERGENIC                    |                    |                              |
| SNP_28169_A_33376753 | NC_021163.1    | Ca_Kabuli_Chr04 | 33376753                | AA                                     | CC                 | CC               | INTERGENIC                    |                    |                              |
| SNP_28170_A_33377567 | NC_021163.1    | Ca_Kabuli_Chr04 | 33377567                | CC                                     | TT                 | TT               | INTERGENIC                    |                    |                              |
| SNP_28171_A_33387019 | NC_021163.1    | Ca_Kabuli_Chr04 | 33387019                | CC                                     | TT                 | TT               | INTERGENIC                    |                    |                              |
| SNP_28172_A_33387031 | NC_021163.1    | Ca_Kabuli_Chr04 | 33387031                | GG                                     | AA                 | AA               | INTERGENIC                    |                    |                              |
| SNP_28173_A_33387033 | NC_021163.1    | Ca_Kabuli_Chr04 | 33387033                | AA                                     | GG                 | GG               | INTERGENIC                    |                    |                              |
| SNP_28174_A_33390388 | NC_021163.1    | Ca_Kabuli_Chr04 | 33390388                | GG                                     | AA                 | AA               | INTERGENIC                    |                    |                              |
| SNP_28176_A_33394085 | NC_021163.1    | Ca_Kabuli_Chr04 | 33394085                | GG                                     | AA                 | AA               | INTRON                        | 101498742          | Unknown function             |
| SNP_28179_A_33401199 | NC_021163.1    | Ca_Kabuli_Chr04 | 33401199                | CC                                     | TT                 | TT               | INTERGENIC                    |                    |                              |
| SNP_28180_A_33401318 | NC_021163.1    | Ca_Kabuli_Chr04 | 33401318                | GG                                     | AA                 | AA               | INTERGENIC                    |                    |                              |
| SNP_28181_A_33405478 | NC_021163.1    | Ca_Kabuli_Chr04 | 33405478                | TT                                     | GG                 | GG               | INTERGENIC                    |                    |                              |
| SNP_28182_A_33410713 | NC_021163.1    | Ca_Kabuli_Chr04 | 33410713                | TT                                     | GG                 | GG               | INTERGENIC                    |                    |                              |
| SNP_28183_A_33416600 | NC_021163.1    | Ca_Kabuli_Chr04 | 33416600                | AA                                     | TT                 | TT               | INTERGENIC                    |                    |                              |
| SNP_28184_A_33419034 | NC_021163.1    | Ca_Kabuli_Chr04 | 33419034                | AA                                     | CC                 | CC               | INTERGENIC                    |                    |                              |
| SNP_28185_A_33419035 | NC_021163.1    | Ca_Kabuli_Chr04 | 33419035                | CC                                     | AA                 | AA               | INTERGENIC                    |                    |                              |
| SNP_28186_A_33429489 | NC_021163.1    | Ca_Kabuli_Chr04 | 33429489                | GG                                     | AA                 | AA               | INTRON                        | 101495451          | uncharacterized LOC101495451 |
| SNP_28188_A_33434221 | NC_021163.1    | Ca_Kabuli_Chr04 | 33434221                | TT                                     | CC                 | CC               | INTERGENIC                    |                    |                              |
| SNP_28189_A_33434446 | NC_021163.1    | Ca_Kabuli_Chr04 | 33434446                | AA                                     | GG                 | GG               | INTERGENIC                    |                    |                              |

| SNPs IDs             | Chromosome IDs | Chromosomes     | Physical positions (bp) | CDC Frontier genome (Reference genome) | (Pusa 1103 & HPNB) | (ILWC 46 & LPNB) | Sequence genome | Components of | Gene accession IDs | Putative functions |
|----------------------|----------------|-----------------|-------------------------|----------------------------------------|--------------------|------------------|-----------------|---------------|--------------------|--------------------|
| SNP_28190_A_33439401 | NC_021163.1    | Ca_Kabuli_Chr04 | 33439401                | TT                                     | AA                 | AA               | INTERGENIC      |               |                    |                    |
| SNP_28191_A_33443138 | NC_021163.1    | Ca_Kabuli_Chr04 | 33443138                | TT                                     | GG                 | GG               | INTERGENIC      |               |                    |                    |
| SNP_28192_A_33443188 | NC_021163.1    | Ca_Kabuli_Chr04 | 33443188                | GG                                     | AA                 | AA               | INTERGENIC      |               |                    |                    |
| SNP_28193_A_33454315 | NC_021163.1    | Ca_Kabuli_Chr04 | 33454315                | TT                                     | CC                 | CC               | INTERGENIC      |               |                    |                    |
| SNP_28196_A_33468261 | NC_021163.1    | Ca_Kabuli_Chr04 | 33468261                | AA                                     | TT                 | TT               | INTERGENIC      |               |                    |                    |
| SNP_28197_A_33478889 | NC_021163.1    | Ca_Kabuli_Chr04 | 33478889                | GG                                     | AA                 | AA               | INTERGENIC      |               |                    |                    |
| SNP_28198_A_33489856 | NC_021163.1    | Ca_Kabuli_Chr04 | 33489856                | AA                                     | CC                 | CC               | INTERGENIC      |               |                    |                    |
| SNP_28199_A_33493411 | NC_021163.1    | Ca_Kabuli_Chr04 | 33493411                | GG                                     | AA                 | AA               | INTERGENIC      |               |                    |                    |
| SNP_28200_A_33493435 | NC_021163.1    | Ca_Kabuli_Chr04 | 33493435                | AA                                     | GG                 | GG               | INTERGENIC      |               |                    |                    |
| SNP_28201_A_33493448 | NC_021163.1    | Ca_Kabuli_Chr04 | 33493448                | AA                                     | GG                 | GG               | INTERGENIC      |               |                    |                    |
| SNP_28202_A_33493743 | NC_021163.1    | Ca_Kabuli_Chr04 | 33493743                | TT                                     | GG                 | GG               | INTERGENIC      |               |                    |                    |
| SNP_28203_A_33493747 | NC_021163.1    | Ca_Kabuli_Chr04 | 33493747                | TT                                     | CC                 | CC               | INTERGENIC      |               |                    |                    |
| SNP_28204_A_33493763 | NC_021163.1    | Ca_Kabuli_Chr04 | 33493763                | GG                                     | AA                 | AA               | INTERGENIC      |               |                    |                    |
| SNP_28205_A_33494322 | NC_021163.1    | Ca_Kabuli_Chr04 | 33494322                | AA                                     | GG                 | GG               | INTERGENIC      |               |                    |                    |
| SNP_28206_A_33497460 | NC_021163.1    | Ca_Kabuli_Chr04 | 33497460                | AA                                     | TT                 | TT               | INTERGENIC      |               |                    |                    |
| SNP_28207_A_33498155 | NC_021163.1    | Ca_Kabuli_Chr04 | 33498155                | GG                                     | TT                 | TT               | INTERGENIC      |               |                    |                    |
| SNP_28208_A_33503710 | NC_021163.1    | Ca_Kabuli_Chr04 | 33503710                | AA                                     | TT                 | TT               | INTERGENIC      |               |                    |                    |
| SNP_28209_A_33515442 | NC_021163.1    | Ca_Kabuli_Chr04 | 33515442                | AA                                     | GG                 | GG               | INTERGENIC      |               |                    |                    |
| SNP_28210_A_33516045 | NC_021163.1    | Ca_Kabuli_Chr04 | 33516045                | AA                                     | GG                 | GG               | INTERGENIC      |               |                    |                    |
| SNP_28211_A_33518478 | NC_021163.1    | Ca_Kabuli_Chr04 | 33518478                | AA                                     | CC                 | CC               | INTERGENIC      |               |                    |                    |
| SNP_28212_A_33529437 | NC_021163.1    | Ca_Kabuli_Chr04 | 33529437                | CC                                     | TT                 | TT               | INTERGENIC      |               |                    |                    |
| SNP_28213_A_33529587 | NC_021163.1    | Ca_Kabuli_Chr04 | 33529587                | TT                                     | CC                 | CC               | INTERGENIC      |               |                    |                    |



| SNPs IDs             | Chromosome IDs | Chromosomes     | Physical positions (bp) | CDC Frontier genome (Reference genome) | (Pusa 1103 & HPNB) | (ILWC 46 & LPNB) | Sequence genome | Components of | Gene accession IDs | Putative functions |
|----------------------|----------------|-----------------|-------------------------|----------------------------------------|--------------------|------------------|-----------------|---------------|--------------------|--------------------|
| SNP_28214_A_33533340 | NC_021163.1    | Ca_Kabuli_Chr04 | 33533340                | AA                                     | GG                 | GG               | INTERGENIC      |               |                    |                    |
| SNP_28215_A_33533586 | NC_021163.1    | Ca_Kabuli_Chr04 | 33533586                | CC                                     | AA                 | AA               | INTERGENIC      |               |                    |                    |
| SNP_28216_A_33539520 | NC_021163.1    | Ca_Kabuli_Chr04 | 33539520                | CC                                     | TT                 | TT               | INTERGENIC      |               |                    |                    |
| SNP_28217_A_33543054 | NC_021163.1    | Ca_Kabuli_Chr04 | 33543054                | AA                                     | TT                 | TT               | INTERGENIC      |               |                    |                    |
| SNP_28218_A_33553524 | NC_021163.1    | Ca_Kabuli_Chr04 | 33553524                | CC                                     | AA                 | AA               | INTERGENIC      |               |                    |                    |
| SNP_28219_A_33553655 | NC_021163.1    | Ca_Kabuli_Chr04 | 33553655                | CC                                     | TT                 | TT               | INTERGENIC      |               |                    |                    |
| SNP_28220_A_33554568 | NC_021163.1    | Ca_Kabuli_Chr04 | 33554568                | TT                                     | CC                 | CC               | INTERGENIC      |               |                    |                    |
| SNP_28221_A_33555136 | NC_021163.1    | Ca_Kabuli_Chr04 | 33555136                | GG                                     | AA                 | AA               | INTERGENIC      |               |                    |                    |
| SNP_28222_A_33561198 | NC_021163.1    | Ca_Kabuli_Chr04 | 33561198                | GG                                     | TT                 | TT               | INTERGENIC      |               |                    |                    |
| SNP_28223_A_33561268 | NC_021163.1    | Ca_Kabuli_Chr04 | 33561268                | CC                                     | TT                 | TT               | INTERGENIC      |               |                    |                    |
| SNP_28224_A_33561399 | NC_021163.1    | Ca_Kabuli_Chr04 | 33561399                | GG                                     | AA                 | AA               | INTERGENIC      |               |                    |                    |
| SNP_28225_A_33561415 | NC_021163.1    | Ca_Kabuli_Chr04 | 33561415                | AA                                     | TT                 | TT               | INTERGENIC      |               |                    |                    |
| SNP_28226_A_33561440 | NC_021163.1    | Ca_Kabuli_Chr04 | 33561440                | TT                                     | CC                 | CC               | INTERGENIC      |               |                    |                    |
| SNP_28227_A_33561516 | NC_021163.1    | Ca_Kabuli_Chr04 | 33561516                | TT                                     | AA                 | AA               | INTERGENIC      |               |                    |                    |
| SNP_28228_A_33561915 | NC_021163.1    | Ca_Kabuli_Chr04 | 33561915                | GG                                     | TT                 | TT               | INTERGENIC      |               |                    |                    |
| SNP_28229_A_33566124 | NC_021163.1    | Ca_Kabuli_Chr04 | 33566124                | AA                                     | GG                 | GG               | INTERGENIC      |               |                    |                    |
| SNP_28230_A_33566129 | NC_021163.1    | Ca_Kabuli_Chr04 | 33566129                | AA                                     | CC                 | CC               | INTERGENIC      |               |                    |                    |
| SNP_28231_A_33568649 | NC_021163.1    | Ca_Kabuli_Chr04 | 33568649                | TT                                     | CC                 | CC               | INTERGENIC      |               |                    |                    |
| SNP_28232_A_33570222 | NC_021163.1    | Ca_Kabuli_Chr04 | 33570222                | TT                                     | AA                 | AA               | INTERGENIC      |               |                    |                    |
| SNP_28233_A_33570374 | NC_021163.1    | Ca_Kabuli_Chr04 | 33570374                | TT                                     | CC                 | CC               | INTERGENIC      |               |                    |                    |
| SNP_28234_A_33570375 | NC_021163.1    | Ca_Kabuli_Chr04 | 33570375                | TT                                     | CC                 | CC               | INTERGENIC      |               |                    |                    |
| SNP_28235_A_33570515 | NC_021163.1    | Ca_Kabuli_Chr04 | 33570515                | CC                                     | GG                 | GG               | INTERGENIC      |               |                    |                    |

| SNPs IDs             | Chromosome IDs | Chromosomes     | Physical positions (bp) | CDC Frontier genome (Reference genome) | (Pusa 1103 & HPNB) | (ILWC 46 & LPNB) | Sequence genome | Components of | Gene accession IDs                 | Putative functions |
|----------------------|----------------|-----------------|-------------------------|----------------------------------------|--------------------|------------------|-----------------|---------------|------------------------------------|--------------------|
| SNP_28236_A_33570574 | NC_021163.1    | Ca_Kabuli_Chr04 | 33570574                | TT                                     | AA                 | AA               | INTERGENIC      |               |                                    |                    |
| SNP_28237_A_33570620 | NC_021163.1    | Ca_Kabuli_Chr04 | 33570620                | AA                                     | CC                 | CC               | INTERGENIC      |               |                                    |                    |
| SNP_28238_A_33570653 | NC_021163.1    | Ca_Kabuli_Chr04 | 33570653                | GG                                     | TT                 | TT               | INTERGENIC      |               |                                    |                    |
| SNP_28239_A_33570654 | NC_021163.1    | Ca_Kabuli_Chr04 | 33570654                | TT                                     | CC                 | CC               | INTERGENIC      |               |                                    |                    |
| SNP_28240_A_33571306 | NC_021163.1    | Ca_Kabuli_Chr04 | 33571306                | TT                                     | CC                 | CC               | INTERGENIC      |               |                                    |                    |
| SNP_28241_A_33572340 | NC_021163.1    | Ca_Kabuli_Chr04 | 33572340                | AA                                     | GG                 | GG               | INTERGENIC      |               |                                    |                    |
| SNP_28242_A_33575071 | NC_021163.1    | Ca_Kabuli_Chr04 | 33575071                | TT                                     | CC                 | CC               | INTERGENIC      |               |                                    |                    |
| SNP_28243_A_33579772 | NC_021163.1    | Ca_Kabuli_Chr04 | 33579772                | CC                                     | TT                 | TT               | INTERGENIC      |               |                                    |                    |
| SNP_28244_A_33583801 | NC_021163.1    | Ca_Kabuli_Chr04 | 33583801                | TT                                     | CC                 | CC               | INTERGENIC      |               |                                    |                    |
| SNP_28246_A_33586521 | NC_021163.1    | Ca_Kabuli_Chr04 | 33586521                | GG                                     | AA                 | AA               | INTERGENIC      |               |                                    |                    |
| SNP_28247_A_33591335 | NC_021163.1    | Ca_Kabuli_Chr04 | 33591335                | AA                                     | GG                 | GG               | INTERGENIC      |               |                                    |                    |
| SNP_28248_A_33611761 | NC_021163.1    | Ca_Kabuli_Chr04 | 33611761                | GG                                     | TT                 | TT               | URR             | 101496102     | S-formylglutathione hydrolase-like |                    |
| SNP_28249_A_33614767 | NC_021163.1    | Ca_Kabuli_Chr04 | 33614767                | CC                                     | AA                 | AA               | INTERGENIC      |               |                                    |                    |
| SNP_28250_A_33614768 | NC_021163.1    | Ca_Kabuli_Chr04 | 33614768                | TT                                     | AA                 | AA               | INTERGENIC      |               |                                    |                    |
| SNP_28251_A_33614769 | NC_021163.1    | Ca_Kabuli_Chr04 | 33614769                | TT                                     | AA                 | AA               | INTERGENIC      |               |                                    |                    |
| SNP_28252_A_33614853 | NC_021163.1    | Ca_Kabuli_Chr04 | 33614853                | TT                                     | AA                 | AA               | INTERGENIC      |               |                                    |                    |
| SNP_28253_A_33615115 | NC_021163.1    | Ca_Kabuli_Chr04 | 33615115                | GG                                     | TT                 | TT               | INTERGENIC      |               |                                    |                    |
| SNP_28254_A_33615195 | NC_021163.1    | Ca_Kabuli_Chr04 | 33615195                | CC                                     | TT                 | TT               | INTERGENIC      |               |                                    |                    |
| SNP_28255_A_33615454 | NC_021163.1    | Ca_Kabuli_Chr04 | 33615454                | TT                                     | CC                 | CC               | INTERGENIC      |               |                                    |                    |
| SNP_28257_A_33615503 | NC_021163.1    | Ca_Kabuli_Chr04 | 33615503                | AA                                     | GG                 | GG               | INTERGENIC      |               |                                    |                    |
| SNP_28259_A_33615675 | NC_021163.1    | Ca_Kabuli_Chr04 | 33615675                | CC                                     | AA                 | AA               | INTERGENIC      |               |                                    |                    |
| SNP_28260_A_33615795 | NC_021163.1    | Ca_Kabuli_Chr04 | 33615795                | AA                                     | GG                 | GG               | INTERGENIC      |               |                                    |                    |

| SNPs IDs             | Chromosome IDs | Chromosomes     | Physical positions (bp) | CDC Frontier genome (Reference genome) | (Pusa 1103 & HPNB) | (ILWC 46 & LPNB) | Sequence genome | Components of | Gene accession IDs | Putative functions |
|----------------------|----------------|-----------------|-------------------------|----------------------------------------|--------------------|------------------|-----------------|---------------|--------------------|--------------------|
| SNP_28261_A_33615837 | NC_021163.1    | Ca_Kabuli_Chr04 | 33615837                | CC                                     | TT                 | TT               | INTERGENIC      |               |                    |                    |
| SNP_28262_A_33616030 | NC_021163.1    | Ca_Kabuli_Chr04 | 33616030                | CC                                     | TT                 | TT               | INTERGENIC      |               |                    |                    |
| SNP_28263_A_33616090 | NC_021163.1    | Ca_Kabuli_Chr04 | 33616090                | CC                                     | AA                 | AA               | INTERGENIC      |               |                    |                    |
| SNP_28264_A_33616162 | NC_021163.1    | Ca_Kabuli_Chr04 | 33616162                | TT                                     | CC                 | CC               | INTERGENIC      |               |                    |                    |
| SNP_28265_A_33616165 | NC_021163.1    | Ca_Kabuli_Chr04 | 33616165                | AA                                     | TT                 | TT               | INTERGENIC      |               |                    |                    |
| SNP_28266_A_33616178 | NC_021163.1    | Ca_Kabuli_Chr04 | 33616178                | CC                                     | TT                 | TT               | INTERGENIC      |               |                    |                    |
| SNP_28267_A_33616432 | NC_021163.1    | Ca_Kabuli_Chr04 | 33616432                | CC                                     | AA                 | AA               | INTERGENIC      |               |                    |                    |
| SNP_28268_A_33616469 | NC_021163.1    | Ca_Kabuli_Chr04 | 33616469                | AA                                     | CC                 | CC               | INTERGENIC      |               |                    |                    |
| SNP_28269_A_33616550 | NC_021163.1    | Ca_Kabuli_Chr04 | 33616550                | AA                                     | GG                 | GG               | INTERGENIC      |               |                    |                    |
| SNP_28270_A_33616676 | NC_021163.1    | Ca_Kabuli_Chr04 | 33616676                | AA                                     | GG                 | GG               | INTERGENIC      |               |                    |                    |
| SNP_28271_A_33616999 | NC_021163.1    | Ca_Kabuli_Chr04 | 33616999                | CC                                     | TT                 | TT               | INTERGENIC      |               |                    |                    |
| SNP_28272_A_33617101 | NC_021163.1    | Ca_Kabuli_Chr04 | 33617101                | TT                                     | CC                 | CC               | INTERGENIC      |               |                    |                    |
| SNP_28273_A_33618689 | NC_021163.1    | Ca_Kabuli_Chr04 | 33618689                | CC                                     | TT                 | TT               | INTERGENIC      |               |                    |                    |
| SNP_28274_A_33618888 | NC_021163.1    | Ca_Kabuli_Chr04 | 33618888                | TT                                     | CC                 | CC               | INTERGENIC      |               |                    |                    |
| SNP_28275_A_33619084 | NC_021163.1    | Ca_Kabuli_Chr04 | 33619084                | AA                                     | GG                 | GG               | INTERGENIC      |               |                    |                    |
| SNP_28276_A_33619100 | NC_021163.1    | Ca_Kabuli_Chr04 | 33619100                | TT                                     | AA                 | AA               | INTERGENIC      |               |                    |                    |
| SNP_28277_A_33619106 | NC_021163.1    | Ca_Kabuli_Chr04 | 33619106                | CC                                     | AA                 | AA               | INTERGENIC      |               |                    |                    |
| SNP_28278_A_33619267 | NC_021163.1    | Ca_Kabuli_Chr04 | 33619267                | TT                                     | GG                 | GG               | INTERGENIC      |               |                    |                    |
| SNP_28279_A_33619709 | NC_021163.1    | Ca_Kabuli_Chr04 | 33619709                | GG                                     | CC                 | CC               | INTERGENIC      |               |                    |                    |
| SNP_28280_A_33619854 | NC_021163.1    | Ca_Kabuli_Chr04 | 33619854                | CC                                     | AA                 | AA               | INTERGENIC      |               |                    |                    |
| SNP_28281_A_33620078 | NC_021163.1    | Ca_Kabuli_Chr04 | 33620078                | CC                                     | AA                 | AA               | INTERGENIC      |               |                    |                    |
| SNP_28282_A_33620129 | NC_021163.1    | Ca_Kabuli_Chr04 | 33620129                | GG                                     | TT                 | TT               | INTERGENIC      |               |                    |                    |

| SNPs IDs             | Chromosome IDs | Chromosomes     | Physical positions (bp) | CDC Frontier genome (Reference genome) | (Pusa 1103 & HPNB) | (ILWC 46 & LPNB) | Sequence genome | Components of | Gene accession IDs | Putative functions |
|----------------------|----------------|-----------------|-------------------------|----------------------------------------|--------------------|------------------|-----------------|---------------|--------------------|--------------------|
| SNP_28283_A_33620543 | NC_021163.1    | Ca_Kabuli_Chr04 | 33620543                | CC                                     | TT                 | TT               | INTERGENIC      |               |                    |                    |
| SNP_28284_A_33620552 | NC_021163.1    | Ca_Kabuli_Chr04 | 33620552                | TT                                     | CC                 | CC               | INTERGENIC      |               |                    |                    |
| SNP_28285_A_33620567 | NC_021163.1    | Ca_Kabuli_Chr04 | 33620567                | TT                                     | CC                 | CC               | INTERGENIC      |               |                    |                    |
| SNP_28286_A_33620607 | NC_021163.1    | Ca_Kabuli_Chr04 | 33620607                | CC                                     | TT                 | TT               | INTERGENIC      |               |                    |                    |
| SNP_28287_A_33620611 | NC_021163.1    | Ca_Kabuli_Chr04 | 33620611                | GG                                     | AA                 | AA               | INTERGENIC      |               |                    |                    |
| SNP_28288_A_33620619 | NC_021163.1    | Ca_Kabuli_Chr04 | 33620619                | AA                                     | GG                 | GG               | INTERGENIC      |               |                    |                    |
| SNP_28289_A_33620823 | NC_021163.1    | Ca_Kabuli_Chr04 | 33620823                | TT                                     | CC                 | CC               | INTERGENIC      |               |                    |                    |
| SNP_28290_A_33620843 | NC_021163.1    | Ca_Kabuli_Chr04 | 33620843                | CC                                     | TT                 | TT               | INTERGENIC      |               |                    |                    |
| SNP_28291_A_33620861 | NC_021163.1    | Ca_Kabuli_Chr04 | 33620861                | TT                                     | CC                 | CC               | INTERGENIC      |               |                    |                    |
| SNP_28292_A_33620867 | NC_021163.1    | Ca_Kabuli_Chr04 | 33620867                | TT                                     | CC                 | CC               | INTERGENIC      |               |                    |                    |
| SNP_28293_A_33620876 | NC_021163.1    | Ca_Kabuli_Chr04 | 33620876                | GG                                     | CC                 | CC               | INTERGENIC      |               |                    |                    |
| SNP_28294_A_33620880 | NC_021163.1    | Ca_Kabuli_Chr04 | 33620880                | AA                                     | GG                 | GG               | INTERGENIC      |               |                    |                    |
| SNP_28295_A_33620908 | NC_021163.1    | Ca_Kabuli_Chr04 | 33620908                | AA                                     | GG                 | GG               | INTERGENIC      |               |                    |                    |
| SNP_28296_A_33620984 | NC_021163.1    | Ca_Kabuli_Chr04 | 33620984                | TT                                     | CC                 | CC               | INTERGENIC      |               |                    |                    |
| SNP_28297_A_33621016 | NC_021163.1    | Ca_Kabuli_Chr04 | 33621016                | TT                                     | CC                 | CC               | INTERGENIC      |               |                    |                    |
| SNP_28298_A_33621040 | NC_021163.1    | Ca_Kabuli_Chr04 | 33621040                | AA                                     | TT                 | TT               | INTERGENIC      |               |                    |                    |
| SNP_28299_A_33621109 | NC_021163.1    | Ca_Kabuli_Chr04 | 33621109                | CC                                     | AA                 | AA               | INTERGENIC      |               |                    |                    |
| SNP_28300_A_33621110 | NC_021163.1    | Ca_Kabuli_Chr04 | 33621110                | TT                                     | CC                 | CC               | INTERGENIC      |               |                    |                    |
| SNP_28301_A_33621111 | NC_021163.1    | Ca_Kabuli_Chr04 | 33621111                | AA                                     | GG                 | GG               | INTERGENIC      |               |                    |                    |
| SNP_28302_A_33621114 | NC_021163.1    | Ca_Kabuli_Chr04 | 33621114                | AA                                     | TT                 | TT               | INTERGENIC      |               |                    |                    |
| SNP_28303_A_33621150 | NC_021163.1    | Ca_Kabuli_Chr04 | 33621150                | AA                                     | GG                 | GG               | INTERGENIC      |               |                    |                    |
| SNP_28304_A_33621681 | NC_021163.1    | Ca_Kabuli_Chr04 | 33621681                | CC                                     | TT                 | TT               | INTERGENIC      |               |                    |                    |

| SNPs IDs             | Chromosome IDs | Chromosomes     | Physical positions (bp) | CDC Frontier genome (Reference genome) | (Pusa 1103 & HPNB) | (ILWC 46 & LPNB) | Sequence Components of genome | Gene accession IDs | Putative functions           |
|----------------------|----------------|-----------------|-------------------------|----------------------------------------|--------------------|------------------|-------------------------------|--------------------|------------------------------|
| SNP_28305_A_33625860 | NC_021163.1    | Ca_Kabuli_Chr04 | 33625860                | CC                                     | TT                 | TT               | URR                           | 101499683          | uncharacterized LOC101499683 |
| SNP_28306_A_33626015 | NC_021163.1    | Ca_Kabuli_Chr04 | 33626015                | AA                                     | TT                 | TT               | URR                           | 101499683          | uncharacterized LOC101499683 |
| SNP_28307_A_33626018 | NC_021163.1    | Ca_Kabuli_Chr04 | 33626018                | TT                                     | GG                 | GG               | URR                           | 101499683          | uncharacterized LOC101499683 |
| SNP_28308_A_33626038 | NC_021163.1    | Ca_Kabuli_Chr04 | 33626038                | AA                                     | CC                 | CC               | URR                           | 101499683          | uncharacterized LOC101499683 |
| SNP_28309_A_33626039 | NC_021163.1    | Ca_Kabuli_Chr04 | 33626039                | AA                                     | GG                 | GG               | URR                           | 101499683          | uncharacterized LOC101499683 |
| SNP_28310_A_33626146 | NC_021163.1    | Ca_Kabuli_Chr04 | 33626146                | CC                                     | GG                 | GG               | URR                           | 101499683          | uncharacterized LOC101499683 |
| SNP_28311_A_33626160 | NC_021163.1    | Ca_Kabuli_Chr04 | 33626160                | CC                                     | TT                 | TT               | URR                           | 101499683          | uncharacterized LOC101499683 |
| SNP_28312_A_33626163 | NC_021163.1    | Ca_Kabuli_Chr04 | 33626163                | CC                                     | GG                 | GG               | URR                           | 101499683          | uncharacterized LOC101499683 |
| SNP_28313_A_33626165 | NC_021163.1    | Ca_Kabuli_Chr04 | 33626165                | CC                                     | TT                 | TT               | URR                           | 101499683          | uncharacterized LOC101499683 |
| SNP_28314_A_33626194 | NC_021163.1    | Ca_Kabuli_Chr04 | 33626194                | AA                                     | TT                 | TT               | URR                           | 101499683          | uncharacterized LOC101499683 |
| SNP_28315_A_33626214 | NC_021163.1    | Ca_Kabuli_Chr04 | 33626214                | GG                                     | CC                 | CC               | URR                           | 101499683          | uncharacterized LOC101499683 |
| SNP_28316_A_33626220 | NC_021163.1    | Ca_Kabuli_Chr04 | 33626220                | GG                                     | AA                 | AA               | URR                           | 101499683          | uncharacterized LOC101499683 |
| SNP_28317_A_33626232 | NC_021163.1    | Ca_Kabuli_Chr04 | 33626232                | AA                                     | TT                 | TT               | URR                           | 101499683          | uncharacterized LOC101499683 |
| SNP_28318_A_33626233 | NC_021163.1    | Ca_Kabuli_Chr04 | 33626233                | TT                                     | CC                 | CC               | URR                           | 101499683          | uncharacterized LOC101499683 |
| SNP_28319_A_33626245 | NC_021163.1    | Ca_Kabuli_Chr04 | 33626245                | AA                                     | GG                 | GG               | URR                           | 101499683          | uncharacterized LOC101499683 |
| SNP_28320_A_33626250 | NC_021163.1    | Ca_Kabuli_Chr04 | 33626250                | CC                                     | TT                 | TT               | URR                           | 101499683          | uncharacterized LOC101499683 |
| SNP_28321_A_33626257 | NC_021163.1    | Ca_Kabuli_Chr04 | 33626257                | CC                                     | TT                 | TT               | URR                           | 101499683          | uncharacterized LOC101499683 |
| SNP_28322_A_33626279 | NC_021163.1    | Ca_Kabuli_Chr04 | 33626279                | CC                                     | TT                 | TT               | URR                           | 101499683          | uncharacterized LOC101499683 |
| SNP_28323_A_33626283 | NC_021163.1    | Ca_Kabuli_Chr04 | 33626283                | AA                                     | CC                 | CC               | URR                           | 101499683          | uncharacterized LOC101499683 |
| SNP_28324_A_33626286 | NC_021163.1    | Ca_Kabuli_Chr04 | 33626286                | AA                                     | CC                 | CC               | URR                           | 101499683          | uncharacterized LOC101499683 |
| SNP_28325_A_33626346 | NC_021163.1    | Ca_Kabuli_Chr04 | 33626346                | AA                                     | GG                 | GG               | URR                           | 101499683          | uncharacterized LOC101499683 |
| SNP_28326_A_33626384 | NC_021163.1    | Ca_Kabuli_Chr04 | 33626384                | CC                                     | TT                 | TT               | URR                           | 101499683          | uncharacterized LOC101499683 |

| SNPs IDs             | Chromosome IDs | Chromosomes     | Physical positions (bp) | CDC Frontier (Reference genome) | (Pusa 1103 & HPNB) | (ILWC 46 & LPNB) | Sequence Components of genome | Gene accession IDs | Putative functions           |
|----------------------|----------------|-----------------|-------------------------|---------------------------------|--------------------|------------------|-------------------------------|--------------------|------------------------------|
| SNP_28327_A_33626401 | NC_021163.1    | Ca_Kabuli_Chr04 | 33626401                | AA                              | CC                 | CC               | URR                           | 101499683          | uncharacterized LOC101499683 |
| SNP_28328_A_33626417 | NC_021163.1    | Ca_Kabuli_Chr04 | 33626417                | TT                              | CC                 | CC               | URR                           | 101499683          | uncharacterized LOC101499683 |
| SNP_28329_A_33627131 | NC_021163.1    | Ca_Kabuli_Chr04 | 33627131                | GG                              | AA                 | AA               | INTERGENIC                    |                    |                              |
| SNP_28331_A_33629872 | NC_021163.1    | Ca_Kabuli_Chr04 | 33629872                | TT                              | CC                 | CC               | INTERGENIC                    |                    |                              |
| SNP_28332_A_33629887 | NC_021163.1    | Ca_Kabuli_Chr04 | 33629887                | GG                              | AA                 | AA               | INTERGENIC                    |                    |                              |
| SNP_28333_A_33629992 | NC_021163.1    | Ca_Kabuli_Chr04 | 33629992                | TT                              | CC                 | CC               | INTERGENIC                    |                    |                              |
| SNP_28334_A_33629995 | NC_021163.1    | Ca_Kabuli_Chr04 | 33629995                | AA                              | CC                 | CC               | INTERGENIC                    |                    |                              |
| SNP_28335_A_33630007 | NC_021163.1    | Ca_Kabuli_Chr04 | 33630007                | GG                              | AA                 | AA               | INTERGENIC                    |                    |                              |
| SNP_28336_A_33630014 | NC_021163.1    | Ca_Kabuli_Chr04 | 33630014                | TT                              | CC                 | CC               | INTERGENIC                    |                    |                              |
| SNP_28337_A_33630038 | NC_021163.1    | Ca_Kabuli_Chr04 | 33630038                | GG                              | CC                 | CC               | INTERGENIC                    |                    |                              |
| SNP_28339_A_33654178 | NC_021163.1    | Ca_Kabuli_Chr04 | 33654178                | AA                              | TT                 | TT               | INTERGENIC                    |                    |                              |
| SNP_28340_A_33662113 | NC_021163.1    | Ca_Kabuli_Chr04 | 33662113                | AA                              | TT                 | TT               | INTERGENIC                    |                    |                              |
| SNP_28341_A_33662114 | NC_021163.1    | Ca_Kabuli_Chr04 | 33662114                | AA                              | CC                 | CC               | INTERGENIC                    |                    |                              |
| SNP_28342_A_33663078 | NC_021163.1    | Ca_Kabuli_Chr04 | 33663078                | TT                              | CC                 | CC               | INTERGENIC                    |                    |                              |
| SNP_28343_A_33675919 | NC_021163.1    | Ca_Kabuli_Chr04 | 33675919                | TT                              | CC                 | CC               | INTERGENIC                    |                    |                              |
| SNP_28344_A_33692125 | NC_021163.1    | Ca_Kabuli_Chr04 | 33692125                | AA                              | GG                 | GG               | INTERGENIC                    |                    |                              |
| SNP_28345_A_33702642 | NC_021163.1    | Ca_Kabuli_Chr04 | 33702642                | GG                              | AA                 | AA               | INTERGENIC                    |                    |                              |
| SNP_28346_A_33709111 | NC_021163.1    | Ca_Kabuli_Chr04 | 33709111                | GG                              | AA                 | AA               | INTERGENIC                    |                    |                              |
| SNP_28347_A_33713233 | NC_021163.1    | Ca_Kabuli_Chr04 | 33713233                | TT                              | CC                 | CC               | INTERGENIC                    |                    |                              |
| SNP_28348_A_33713320 | NC_021163.1    | Ca_Kabuli_Chr04 | 33713320                | CC                              | TT                 | TT               | INTERGENIC                    |                    |                              |
| SNP_28349_A_33713866 | NC_021163.1    | Ca_Kabuli_Chr04 | 33713866                | TT                              | CC                 | CC               | INTERGENIC                    |                    |                              |
| SNP_28350_A_33713955 | NC_021163.1    | Ca_Kabuli_Chr04 | 33713955                | CC                              | AA                 | AA               | INTERGENIC                    |                    |                              |

| SNPs IDs             | Chromosome IDs | Chromosomes     | Physical positions (bp) | CDC Frontier genome (Reference genome) | (Pusa 1103 & HPNB) | (ILWC 46 & LPNB) | Sequence genome | Components of | Gene accession IDs | Putative functions |
|----------------------|----------------|-----------------|-------------------------|----------------------------------------|--------------------|------------------|-----------------|---------------|--------------------|--------------------|
| SNP_28351_A_33714031 | NC_021163.1    | Ca_Kabuli_Chr04 | 33714031                | GG                                     | AA                 | AA               | INTERGENIC      |               |                    |                    |
| SNP_28352_A_33714074 | NC_021163.1    | Ca_Kabuli_Chr04 | 33714074                | TT                                     | AA                 | AA               | INTERGENIC      |               |                    |                    |
| SNP_28355_A_33714593 | NC_021163.1    | Ca_Kabuli_Chr04 | 33714593                | GG                                     | TT                 | TT               | INTERGENIC      |               |                    |                    |
| SNP_28356_A_33714737 | NC_021163.1    | Ca_Kabuli_Chr04 | 33714737                | AA                                     | GG                 | GG               | INTERGENIC      |               |                    |                    |
| SNP_28357_A_33715120 | NC_021163.1    | Ca_Kabuli_Chr04 | 33715120                | GG                                     | AA                 | AA               | INTERGENIC      |               |                    |                    |
| SNP_28358_A_33715134 | NC_021163.1    | Ca_Kabuli_Chr04 | 33715134                | CC                                     | TT                 | TT               | INTERGENIC      |               |                    |                    |
| SNP_28359_A_33715138 | NC_021163.1    | Ca_Kabuli_Chr04 | 33715138                | GG                                     | AA                 | AA               | INTERGENIC      |               |                    |                    |
| SNP_28360_A_33715217 | NC_021163.1    | Ca_Kabuli_Chr04 | 33715217                | AA                                     | GG                 | GG               | INTERGENIC      |               |                    |                    |
| SNP_28363_A_33716339 | NC_021163.1    | Ca_Kabuli_Chr04 | 33716339                | AA                                     | TT                 | TT               | INTERGENIC      |               |                    |                    |
| SNP_28364_A_33716607 | NC_021163.1    | Ca_Kabuli_Chr04 | 33716607                | GG                                     | CC                 | AA               | INTERGENIC      |               |                    |                    |
| SNP_28365_A_33717044 | NC_021163.1    | Ca_Kabuli_Chr04 | 33717044                | GG                                     | AA                 | AA               | INTERGENIC      |               |                    |                    |
| SNP_28366_A_33717195 | NC_021163.1    | Ca_Kabuli_Chr04 | 33717195                | AA                                     | CC                 | CC               | INTERGENIC      |               |                    |                    |
| SNP_28367_A_33717350 | NC_021163.1    | Ca_Kabuli_Chr04 | 33717350                | TT                                     | CC                 | CC               | INTERGENIC      |               |                    |                    |
| SNP_28368_A_33717427 | NC_021163.1    | Ca_Kabuli_Chr04 | 33717427                | AA                                     | GG                 | GG               | INTERGENIC      |               |                    |                    |
| SNP_28369_A_33717748 | NC_021163.1    | Ca_Kabuli_Chr04 | 33717748                | GG                                     | AA                 | AA               | INTERGENIC      |               |                    |                    |
| SNP_28370_A_33717802 | NC_021163.1    | Ca_Kabuli_Chr04 | 33717802                | TT                                     | AA                 | AA               | INTERGENIC      |               |                    |                    |
| SNP_28371_A_33717957 | NC_021163.1    | Ca_Kabuli_Chr04 | 33717957                | AA                                     | CC                 | CC               | INTERGENIC      |               |                    |                    |
| SNP_28372_A_33717964 | NC_021163.1    | Ca_Kabuli_Chr04 | 33717964                | GG                                     | TT                 | TT               | INTERGENIC      |               |                    |                    |
| SNP_28373_A_33718341 | NC_021163.1    | Ca_Kabuli_Chr04 | 33718341                | TT                                     | CC                 | CC               | INTERGENIC      |               |                    |                    |
| SNP_28374_A_33718355 | NC_021163.1    | Ca_Kabuli_Chr04 | 33718355                | TT                                     | GG                 | GG               | INTERGENIC      |               |                    |                    |
| SNP_28375_A_33718511 | NC_021163.1    | Ca_Kabuli_Chr04 | 33718511                | CC                                     | TT                 | TT               | INTERGENIC      |               |                    |                    |
| SNP_28376_A_33719215 | NC_021163.1    | Ca_Kabuli_Chr04 | 33719215                | TT                                     | CC                 | CC               | INTERGENIC      |               |                    |                    |

| SNPs IDs             | Chromosome IDs | Chromosomes     | Physical positions (bp) | CDC Frontier genome (Reference genome) | (Pusa 1103 & HPNB) | (ILWC 46 & LPNB) | Sequence genome | Components of | Gene accession IDs | Putative functions |
|----------------------|----------------|-----------------|-------------------------|----------------------------------------|--------------------|------------------|-----------------|---------------|--------------------|--------------------|
| SNP_28377_A_33719243 | NC_021163.1    | Ca_Kabuli_Chr04 | 33719243                | CC                                     | AA                 | AA               | INTERGENIC      |               |                    |                    |
| SNP_28378_A_33719502 | NC_021163.1    | Ca_Kabuli_Chr04 | 33719502                | AA                                     | GG                 | GG               | INTERGENIC      |               |                    |                    |
| SNP_28379_A_33719553 | NC_021163.1    | Ca_Kabuli_Chr04 | 33719553                | CC                                     | GG                 | GG               | INTERGENIC      |               |                    |                    |
| SNP_28380_A_33719576 | NC_021163.1    | Ca_Kabuli_Chr04 | 33719576                | TT                                     | AA                 | AA               | INTERGENIC      |               |                    |                    |
| SNP_28381_A_33719687 | NC_021163.1    | Ca_Kabuli_Chr04 | 33719687                | AA                                     | GG                 | GG               | INTERGENIC      |               |                    |                    |
| SNP_28382_A_33720042 | NC_021163.1    | Ca_Kabuli_Chr04 | 33720042                | CC                                     | TT                 | TT               | INTERGENIC      |               |                    |                    |
| SNP_28383_A_33720303 | NC_021163.1    | Ca_Kabuli_Chr04 | 33720303                | CC                                     | AA                 | AA               | INTERGENIC      |               |                    |                    |
| SNP_28384_A_33720513 | NC_021163.1    | Ca_Kabuli_Chr04 | 33720513                | AA                                     | CC                 | CC               | INTERGENIC      |               |                    |                    |
| SNP_28385_A_33720742 | NC_021163.1    | Ca_Kabuli_Chr04 | 33720742                | AA                                     | CC                 | CC               | INTERGENIC      |               |                    |                    |
| SNP_28386_A_33721019 | NC_021163.1    | Ca_Kabuli_Chr04 | 33721019                | TT                                     | AA                 | AA               | INTERGENIC      |               |                    |                    |
| SNP_28387_A_33721381 | NC_021163.1    | Ca_Kabuli_Chr04 | 33721381                | AA                                     | TT                 | TT               | INTERGENIC      |               |                    |                    |
| SNP_28388_A_33721404 | NC_021163.1    | Ca_Kabuli_Chr04 | 33721404                | TT                                     | AA                 | AA               | INTERGENIC      |               |                    |                    |
| SNP_28389_A_33721410 | NC_021163.1    | Ca_Kabuli_Chr04 | 33721410                | AA                                     | GG                 | GG               | INTERGENIC      |               |                    |                    |
| SNP_28390_A_33721483 | NC_021163.1    | Ca_Kabuli_Chr04 | 33721483                | GG                                     | AA                 | AA               | INTERGENIC      |               |                    |                    |
| SNP_28391_A_33721536 | NC_021163.1    | Ca_Kabuli_Chr04 | 33721536                | CC                                     | TT                 | TT               | INTERGENIC      |               |                    |                    |
| SNP_28392_A_33721846 | NC_021163.1    | Ca_Kabuli_Chr04 | 33721846                | GG                                     | AA                 | AA               | INTERGENIC      |               |                    |                    |
| SNP_28393_A_33721975 | NC_021163.1    | Ca_Kabuli_Chr04 | 33721975                | GG                                     | AA                 | AA               | INTERGENIC      |               |                    |                    |
| SNP_28394_A_33721990 | NC_021163.1    | Ca_Kabuli_Chr04 | 33721990                | TT                                     | CC                 | CC               | INTERGENIC      |               |                    |                    |
| SNP_28395_A_33722064 | NC_021163.1    | Ca_Kabuli_Chr04 | 33722064                | TT                                     | CC                 | CC               | INTERGENIC      |               |                    |                    |
| SNP_28396_A_33722159 | NC_021163.1    | Ca_Kabuli_Chr04 | 33722159                | GG                                     | CC                 | CC               | INTERGENIC      |               |                    |                    |
| SNP_28397_A_33722277 | NC_021163.1    | Ca_Kabuli_Chr04 | 33722277                | TT                                     | AA                 | AA               | INTERGENIC      |               |                    |                    |
| SNP_28398_A_33733178 | NC_021163.1    | Ca_Kabuli_Chr04 | 33733178                | GG                                     | AA                 | AA               | INTERGENIC      |               |                    |                    |



| SNPs IDs             | Chromosome IDs | Chromosomes     | Physical positions (bp) | CDC Frontier genome (Reference genome) | (Pusa 1103 & HPNB) | (ILWC 46 & LPNB) | Sequence Components of genome | Gene accession IDs | Putative functions                  |
|----------------------|----------------|-----------------|-------------------------|----------------------------------------|--------------------|------------------|-------------------------------|--------------------|-------------------------------------|
| SNP_28399_A_33734041 | NC_021163.1    | Ca_Kabuli_Chr04 | 33734041                | CC                                     | TT                 | TT               | INTERGENIC                    |                    |                                     |
| SNP_28400_A_33736859 | NC_021163.1    | Ca_Kabuli_Chr04 | 33736859                | GG                                     | AA                 | AA               | INTERGENIC                    |                    |                                     |
| SNP_28404_A_33743686 | NC_021163.1    | Ca_Kabuli_Chr04 | 33743686                | AA                                     | GG                 | GG               | INTERGENIC                    |                    |                                     |
| SNP_28405_A_33743732 | NC_021163.1    | Ca_Kabuli_Chr04 | 33743732                | AA                                     | TT                 | TT               | INTERGENIC                    |                    |                                     |
| SNP_28406_A_33744839 | NC_021163.1    | Ca_Kabuli_Chr04 | 33744839                | TT                                     | CC                 | CC               | INTERGENIC                    |                    |                                     |
| SNP_28407_A_33746987 | NC_021163.1    | Ca_Kabuli_Chr04 | 33746987                | AA                                     | TT                 | TT               | INTERGENIC                    |                    |                                     |
| SNP_28409_A_33747360 | NC_021163.1    | Ca_Kabuli_Chr04 | 33747360                | CC                                     | TT                 | TT               | INTERGENIC                    |                    |                                     |
| SNP_28410_A_33747366 | NC_021163.1    | Ca_Kabuli_Chr04 | 33747366                | CC                                     | GG                 | GG               | INTERGENIC                    |                    |                                     |
| SNP_28411_A_33750122 | NC_021163.1    | Ca_Kabuli_Chr04 | 33750122                | AA                                     | GG                 | GG               | DRR                           | 101505998          | zinc finger MYM-type protein 1-like |
| SNP_28412_A_33751570 | NC_021163.1    | Ca_Kabuli_Chr04 | 33751570                | GG                                     | AA                 | AA               | INTRON                        | 101505998          | zinc finger MYM-type protein 1-like |
| SNP_28413_A_33756706 | NC_021163.1    | Ca_Kabuli_Chr04 | 33756706                | TT                                     | GG                 | GG               | INTERGENIC                    |                    |                                     |
| SNP_28414_A_33757300 | NC_021163.1    | Ca_Kabuli_Chr04 | 33757300                | GG                                     | AA                 | AA               | INTERGENIC                    |                    |                                     |
| SNP_28415_A_33758612 | NC_021163.1    | Ca_Kabuli_Chr04 | 33758612                | CC                                     | TT                 | TT               | INTERGENIC                    |                    |                                     |
| SNP_28416_A_33760231 | NC_021163.1    | Ca_Kabuli_Chr04 | 33760231                | AA                                     | GG                 | GG               | INTERGENIC                    |                    |                                     |
| SNP_28417_A_33760426 | NC_021163.1    | Ca_Kabuli_Chr04 | 33760426                | AA                                     | GG                 | GG               | INTERGENIC                    |                    |                                     |
| SNP_28418_A_33760484 | NC_021163.1    | Ca_Kabuli_Chr04 | 33760484                | GG                                     | TT                 | TT               | INTERGENIC                    |                    |                                     |
| SNP_28419_A_33771388 | NC_021163.1    | Ca_Kabuli_Chr04 | 33771388                | CC                                     | TT                 | TT               | INTRON                        | 101506631          | Unknown function                    |
| SNP_28420_A_33775530 | NC_021163.1    | Ca_Kabuli_Chr04 | 33775530                | TT                                     | GG                 | GG               | NON_SYNONYMOUS_CODING         | 101507292          | Unknown function                    |
| SNP_28421_A_33776042 | NC_021163.1    | Ca_Kabuli_Chr04 | 33776042                | AA                                     | GG                 | GG               | SYNONYMOUS_CODING             | 101507292          | Unknown function                    |
| SNP_28422_A_33776070 | NC_021163.1    | Ca_Kabuli_Chr04 | 33776070                | AA                                     | GG                 | GG               | URR                           | 101507292          | Unknown function                    |
| SNP_28423_A_33776568 | NC_021163.1    | Ca_Kabuli_Chr04 | 33776568                | GG                                     | AA                 | AA               | URR                           | 101507292          | Unknown function                    |
| SNP_28424_A_33777582 | NC_021163.1    | Ca_Kabuli_Chr04 | 33777582                | TT                                     | GG                 | GG               | URR                           | 101507292          | Unknown function                    |

| SNPs IDs             | Chromosome IDs | Chromosomes     | Physical positions (bp) | CDC Frontier genome (Reference genome) | (Pusa 1103 & HPNB) | (ILWC 46 & LPNB) | Sequence Components of genome | Gene accession IDs | Putative functions                                           |
|----------------------|----------------|-----------------|-------------------------|----------------------------------------|--------------------|------------------|-------------------------------|--------------------|--------------------------------------------------------------|
| SNP_28425_A_33777860 | NC_021163.1    | Ca_Kabuli_Chr04 | 33777860                | TT                                     | GG                 | GG               | URR                           | 101507292          | Unknown function                                             |
| SNP_28426_A_33779429 | NC_021163.1    | Ca_Kabuli_Chr04 | 33779429                | GG                                     | AA                 | AA               | INTERGENIC                    |                    |                                                              |
| SNP_28427_A_33779430 | NC_021163.1    | Ca_Kabuli_Chr04 | 33779430                | AA                                     | GG                 | GG               | INTERGENIC                    |                    |                                                              |
| SNP_28428_A_33782846 | NC_021163.1    | Ca_Kabuli_Chr04 | 33782846                | GG                                     | AA                 | AA               | URR                           | 101507598          | alkane hydroxylase MAH1                                      |
| SNP_28431_A_33796584 | NC_021163.1    | Ca_Kabuli_Chr04 | 33796584                | GG                                     | TT                 | TT               | INTERGENIC                    |                    |                                                              |
| SNP_28432_A_33800789 | NC_021163.1    | Ca_Kabuli_Chr04 | 33800789                | GG                                     | TT                 | TT               | INTERGENIC                    |                    |                                                              |
| SNP_28433_A_33801598 | NC_021163.1    | Ca_Kabuli_Chr04 | 33801598                | CC                                     | AA                 | AA               | INTERGENIC                    |                    |                                                              |
| SNP_28434_A_33802157 | NC_021163.1    | Ca_Kabuli_Chr04 | 33802157                | AA                                     | GG                 | GG               | INTERGENIC                    |                    |                                                              |
| SNP_28435_A_33804795 | NC_021163.1    | Ca_Kabuli_Chr04 | 33804795                | GG                                     | AA                 | AA               | INTERGENIC                    |                    |                                                              |
| SNP_28436_A_33805458 | NC_021163.1    | Ca_Kabuli_Chr04 | 33805458                | TT                                     | CC                 | CC               | INTERGENIC                    |                    |                                                              |
| SNP_28438_A_33807542 | NC_021163.1    | Ca_Kabuli_Chr04 | 33807542                | AA                                     | TT                 | TT               | INTERGENIC                    |                    |                                                              |
| SNP_28439_A_33807597 | NC_021163.1    | Ca_Kabuli_Chr04 | 33807597                | AA                                     | GG                 | GG               | INTERGENIC                    |                    |                                                              |
| SNP_28440_A_33808066 | NC_021163.1    | Ca_Kabuli_Chr04 | 33808066                | GG                                     | AA                 | AA               | INTERGENIC                    |                    |                                                              |
| SNP_28441_A_33810648 | NC_021163.1    | Ca_Kabuli_Chr04 | 33810648                | TT                                     | GG                 | GG               | INTERGENIC                    |                    |                                                              |
| SNP_28442_A_33810691 | NC_021163.1    | Ca_Kabuli_Chr04 | 33810691                | AA                                     | TT                 | TT               | INTERGENIC                    |                    |                                                              |
| SNP_28443_A_33810713 | NC_021163.1    | Ca_Kabuli_Chr04 | 33810713                | AA                                     | TT                 | TT               | INTERGENIC                    |                    |                                                              |
| SNP_28444_A_33810950 | NC_021163.1    | Ca_Kabuli_Chr04 | 33810950                | GG                                     | AA                 | AA               | INTERGENIC                    |                    |                                                              |
| SNP_28445_A_33811060 | NC_021163.1    | Ca_Kabuli_Chr04 | 33811060                | AA                                     | GG                 | GG               | DRR                           | 101508230          | uncharacterized LOC101508230                                 |
| SNP_28447_A_33814480 | NC_021163.1    | Ca_Kabuli_Chr04 | 33814480                | TT                                     | GG                 | GG               | INTRON                        | 101508230          | uncharacterized LOC101508230                                 |
| SNP_28448_A_33822204 | NC_021163.1    | Ca_Kabuli_Chr04 | 33822204                | TT                                     | AA                 | AA               | DRR                           | 101508552          | probable L-type lectin-domain containing receptor kinase S.5 |
| SNP_28451_A_33835189 | NC_021163.1    | Ca_Kabuli_Chr04 | 33835189                | CC                                     | TT                 | TT               | URR                           | 101500535          | uncase-2 isozyme 1-like                                      |
| SNP_28453_A_33837672 | NC_021163.1    | Ca_Kabuli_Chr04 | 33837672                | TT                                     | GG                 | GG               | INTERGENIC                    |                    |                                                              |

| SNPs IDs             | Chromosome IDs | Chromosomes     | Physical positions (bp) | CDC Frontier (Reference genome) | (Pusa 1103 & HPNB) | (ILWC 46 & LPNB) | Sequence genome | Components of | Gene accession IDs | Putative functions |
|----------------------|----------------|-----------------|-------------------------|---------------------------------|--------------------|------------------|-----------------|---------------|--------------------|--------------------|
| SNP_28454_A_33839138 | NC_021163.1    | Ca_Kabuli_Chr04 | 33839138                | CC                              | TT                 | TT               | INTERGENIC      |               |                    |                    |
| SNP_28455_A_33841511 | NC_021163.1    | Ca_Kabuli_Chr04 | 33841511                | TT                              | CC                 | CC               | INTERGENIC      |               |                    |                    |
| SNP_28456_A_33841715 | NC_021163.1    | Ca_Kabuli_Chr04 | 33841715                | TT                              | CC                 | CC               | INTERGENIC      |               |                    |                    |
| SNP_28457_A_33842809 | NC_021163.1    | Ca_Kabuli_Chr04 | 33842809                | GG                              | AA                 | AA               | INTERGENIC      |               |                    |                    |
| SNP_28458_A_33844805 | NC_021163.1    | Ca_Kabuli_Chr04 | 33844805                | AA                              | CC                 | CC               | INTERGENIC      |               |                    |                    |
| SNP_28459_A_33845123 | NC_021163.1    | Ca_Kabuli_Chr04 | 33845123                | GG                              | AA                 | AA               | INTERGENIC      |               |                    |                    |
| SNP_28460_A_33849400 | NC_021163.1    | Ca_Kabuli_Chr04 | 33849400                | CC                              | TT                 | TT               | INTERGENIC      |               |                    |                    |
| SNP_28461_A_33849651 | NC_021163.1    | Ca_Kabuli_Chr04 | 33849651                | CC                              | TT                 | TT               | INTERGENIC      |               |                    |                    |
| SNP_28462_A_33853391 | NC_021163.1    | Ca_Kabuli_Chr04 | 33853391                | TT                              | AA                 | AA               | INTERGENIC      |               |                    |                    |
| SNP_28463_A_33853402 | NC_021163.1    | Ca_Kabuli_Chr04 | 33853402                | AA                              | TT                 | TT               | INTERGENIC      |               |                    |                    |
| SNP_28464_A_33853438 | NC_021163.1    | Ca_Kabuli_Chr04 | 33853438                | CC                              | TT                 | TT               | INTERGENIC      |               |                    |                    |
| SNP_28465_A_33853439 | NC_021163.1    | Ca_Kabuli_Chr04 | 33853439                | AA                              | GG                 | GG               | INTERGENIC      |               |                    |                    |
| SNP_28466_A_33853792 | NC_021163.1    | Ca_Kabuli_Chr04 | 33853792                | TT                              | CC                 | CC               | INTERGENIC      |               |                    |                    |
| SNP_28468_A_33857976 | NC_021163.1    | Ca_Kabuli_Chr04 | 33857976                | GG                              | AA                 | AA               | INTERGENIC      |               |                    |                    |
| SNP_28469_A_33861472 | NC_021163.1    | Ca_Kabuli_Chr04 | 33861472                | GG                              | CC                 | CC               | INTERGENIC      |               |                    |                    |
| SNP_28470_A_33866416 | NC_021163.1    | Ca_Kabuli_Chr04 | 33866416                | AA                              | GG                 | GG               | INTERGENIC      |               |                    |                    |
| SNP_28471_A_33871111 | NC_021163.1    | Ca_Kabuli_Chr04 | 33871111                | AA                              | GG                 | GG               | INTERGENIC      |               |                    |                    |
| SNP_28472_A_33871350 | NC_021163.1    | Ca_Kabuli_Chr04 | 33871350                | AA                              | GG                 | GG               | INTERGENIC      |               |                    |                    |
| SNP_28473_A_33871356 | NC_021163.1    | Ca_Kabuli_Chr04 | 33871356                | TT                              | CC                 | CC               | INTERGENIC      |               |                    |                    |
| SNP_28474_A_33871358 | NC_021163.1    | Ca_Kabuli_Chr04 | 33871358                | GG                              | AA                 | AA               | INTERGENIC      |               |                    |                    |
| SNP_28475_A_33871368 | NC_021163.1    | Ca_Kabuli_Chr04 | 33871368                | CC                              | TT                 | TT               | INTERGENIC      |               |                    |                    |
| SNP_28476_A_33871451 | NC_021163.1    | Ca_Kabuli_Chr04 | 33871451                | CC                              | TT                 | TT               | INTERGENIC      |               |                    |                    |

| SNPs IDs             | Chromosome IDs | Chromosomes     | Physical positions (bp) | CDC Frontier genome (Reference genome) | (Pusa 1103 & HPNB) | (ILWC 46 & LPNB) | Sequence Components of genome | Gene accession IDs | Putative functions                            |
|----------------------|----------------|-----------------|-------------------------|----------------------------------------|--------------------|------------------|-------------------------------|--------------------|-----------------------------------------------|
| SNP_28477_A_33871508 | NC_021163.1    | Ca_Kabuli_Chr04 | 33871508                | AA                                     | TT                 | TT               | INTERGENIC                    |                    |                                               |
| SNP_28478_A_33871509 | NC_021163.1    | Ca_Kabuli_Chr04 | 33871509                | CC                                     | GG                 | GG               | INTERGENIC                    |                    |                                               |
| SNP_28480_A_33871525 | NC_021163.1    | Ca_Kabuli_Chr04 | 33871525                | CC                                     | AA                 | AA               | INTERGENIC                    |                    |                                               |
| SNP_28481_A_33871623 | NC_021163.1    | Ca_Kabuli_Chr04 | 33871623                | AA                                     | CC                 | CC               | INTERGENIC                    |                    |                                               |
| SNP_28482_A_33871660 | NC_021163.1    | Ca_Kabuli_Chr04 | 33871660                | GG                                     | TT                 | TT               | INTERGENIC                    |                    |                                               |
| SNP_28483_A_33873396 | NC_021163.1    | Ca_Kabuli_Chr04 | 33873396                | AA                                     | GG                 | GG               | INTERGENIC                    |                    |                                               |
| SNP_28484_A_33873453 | NC_021163.1    | Ca_Kabuli_Chr04 | 33873453                | TT                                     | CC                 | CC               | INTERGENIC                    |                    |                                               |
| SNP_28485_A_33879869 | NC_021163.1    | Ca_Kabuli_Chr04 | 33879869                | GG                                     | AA                 | AA               | INTERGENIC                    |                    |                                               |
| SNP_28486_A_33886847 | NC_021163.1    | Ca_Kabuli_Chr04 | 33886847                | CC                                     | TT                 | TT               | INTERGENIC                    |                    |                                               |
| SNP_28487_A_33887010 | NC_021163.1    | Ca_Kabuli_Chr04 | 33887010                | AA                                     | TT                 | TT               | INTERGENIC                    |                    |                                               |
| SNP_28488_A_33895904 | NC_021163.1    | Ca_Kabuli_Chr04 | 33895904                | CC                                     | AA                 | AA               | INTERGENIC                    |                    |                                               |
| SNP_28489_A_33908525 | NC_021163.1    | Ca_Kabuli_Chr04 | 33908525                | CC                                     | TT                 | TT               | INTERGENIC                    |                    |                                               |
| SNP_28492_A_33927212 | NC_021163.1    | Ca_Kabuli_Chr04 | 33927212                | GG                                     | CC                 | CC               | SYNONYMOUS_CODING             | 101501692          | ubiquitin carboxyl-terminal hydrolase 12-like |
| SNP_28493_A_33931825 | NC_021163.1    | Ca_Kabuli_Chr04 | 33931825                | TT                                     | CC                 | CC               | INTRON                        | 101501692          | ubiquitin carboxyl-terminal hydrolase 12-like |
| SNP_28494_A_33935950 | NC_021163.1    | Ca_Kabuli_Chr04 | 33935950                | AA                                     | CC                 | CC               | INTRON                        | 101501692          | ubiquitin carboxyl-terminal hydrolase 12-like |
| SNP_28495_A_33936941 | NC_021163.1    | Ca_Kabuli_Chr04 | 33936941                | CC                                     | TT                 | TT               | INTRON                        | 101501692          | ubiquitin carboxyl-terminal hydrolase 12-like |
| SNP_28496_A_33973071 | NC_021163.1    | Ca_Kabuli_Chr04 | 33973071                | CC                                     | TT                 | TT               | INTERGENIC                    |                    |                                               |
| SNP_28497_A_33979532 | NC_021163.1    | Ca_Kabuli_Chr04 | 33979532                | CC                                     | TT                 | TT               | INTERGENIC                    |                    |                                               |
| SNP_28498_A_33979914 | NC_021163.1    | Ca_Kabuli_Chr04 | 33979914                | CC                                     | TT                 | TT               | INTERGENIC                    |                    |                                               |
| SNP_28499_A_33986213 | NC_021163.1    | Ca_Kabuli_Chr04 | 33986213                | CC                                     | TT                 | TT               | INTERGENIC                    |                    |                                               |
| SNP_28500_A_33995329 | NC_021163.1    | Ca_Kabuli_Chr04 | 33995329                | CC                                     | TT                 | TT               | INTERGENIC                    |                    |                                               |
| SNP_28501_A_34003493 | NC_021163.1    | Ca_Kabuli_Chr04 | 34003493                | GG                                     | CC                 | CC               | INTERGENIC                    |                    |                                               |

| SNPs IDs             | Chromosome IDs | Chromosomes     | Physical positions (bp) | CDC Frontier genome (Reference genome) | (Pusa 1103 & HPNB) | (ILWC 46 & LPNB) | Sequence genome | Components of | Gene accession IDs | Putative functions |
|----------------------|----------------|-----------------|-------------------------|----------------------------------------|--------------------|------------------|-----------------|---------------|--------------------|--------------------|
| SNP_28502_A_34010625 | NC_021163.1    | Ca_Kabuli_Chr04 | 34010625                | CC                                     | TT                 | TT               | INTERGENIC      |               |                    |                    |
| SNP_28506_A_34040219 | NC_021163.1    | Ca_Kabuli_Chr04 | 34040219                | AA                                     | GG                 | GG               | INTERGENIC      |               |                    |                    |
| SNP_28507_A_34052308 | NC_021163.1    | Ca_Kabuli_Chr04 | 34052308                | TT                                     | CC                 | CC               | INTERGENIC      |               |                    |                    |
| SNP_28509_A_34078656 | NC_021163.1    | Ca_Kabuli_Chr04 | 34078656                | AA                                     | GG                 | GG               | INTERGENIC      |               |                    |                    |
| SNP_28510_A_34078723 | NC_021163.1    | Ca_Kabuli_Chr04 | 34078723                | TT                                     | AA                 | AA               | INTERGENIC      |               |                    |                    |
| SNP_28511_A_34082541 | NC_021163.1    | Ca_Kabuli_Chr04 | 34082541                | TT                                     | CC                 | CC               | INTERGENIC      |               |                    |                    |
| SNP_28512_A_34082674 | NC_021163.1    | Ca_Kabuli_Chr04 | 34082674                | CC                                     | TT                 | TT               | INTERGENIC      |               |                    |                    |
| SNP_28513_A_34088866 | NC_021163.1    | Ca_Kabuli_Chr04 | 34088866                | AA                                     | GG                 | GG               | INTERGENIC      |               |                    |                    |
| SNP_28514_A_34092094 | NC_021163.1    | Ca_Kabuli_Chr04 | 34092094                | GG                                     | TT                 | TT               | INTERGENIC      |               |                    |                    |
| SNP_28515_A_34093390 | NC_021163.1    | Ca_Kabuli_Chr04 | 34093390                | GG                                     | AA                 | AA               | INTERGENIC      |               |                    |                    |
| SNP_28516_A_34094951 | NC_021163.1    | Ca_Kabuli_Chr04 | 34094951                | AA                                     | GG                 | GG               | INTERGENIC      |               |                    |                    |
| SNP_28517_A_34095398 | NC_021163.1    | Ca_Kabuli_Chr04 | 34095398                | TT                                     | AA                 | AA               | INTERGENIC      |               |                    |                    |
| SNP_28518_A_34097515 | NC_021163.1    | Ca_Kabuli_Chr04 | 34097515                | AA                                     | CC                 | CC               | INTERGENIC      |               |                    |                    |
| SNP_28519_A_34120464 | NC_021163.1    | Ca_Kabuli_Chr04 | 34120464                | CC                                     | TT                 | TT               | INTERGENIC      |               |                    |                    |
| SNP_28520_A_34126429 | NC_021163.1    | Ca_Kabuli_Chr04 | 34126429                | AA                                     | TT                 | TT               | INTERGENIC      |               |                    |                    |
| SNP_28521_A_34126738 | NC_021163.1    | Ca_Kabuli_Chr04 | 34126738                | AA                                     | TT                 | TT               | INTERGENIC      |               |                    |                    |
| SNP_28522_A_34152846 | NC_021163.1    | Ca_Kabuli_Chr04 | 34152846                | AA                                     | GG                 | GG               | INTRON          | 101509840     | Unknown function   |                    |
| SNP_28523_A_34152859 | NC_021163.1    | Ca_Kabuli_Chr04 | 34152859                | CC                                     | TT                 | TT               | INTRON          | 101509840     | Unknown function   |                    |
| SNP_28524_A_34156391 | NC_021163.1    | Ca_Kabuli_Chr04 | 34156391                | CC                                     | TT                 | TT               | INTRON          | 101509840     | Unknown function   |                    |
| SNP_28525_A_34158344 | NC_021163.1    | Ca_Kabuli_Chr04 | 34158344                | GG                                     | AA                 | AA               | URR             | 101509840     | Unknown function   |                    |
| SNP_28526_A_34161398 | NC_021163.1    | Ca_Kabuli_Chr04 | 34161398                | CC                                     | GG                 | GG               | INTERGENIC      |               |                    |                    |
| SNP_28527_A_34161400 | NC_021163.1    | Ca_Kabuli_Chr04 | 34161400                | CC                                     | TT                 | TT               | INTERGENIC      |               |                    |                    |

| SNPs IDs             | Chromosome IDs | Chromosomes     | Physical positions (bp) | CDC Frontier genome (Reference genome) | (Pusa 1103 & HPNB) | (ILWC 46 & LPNB) | Sequence genome | Components of | Gene accession IDs                                   | Putative functions |
|----------------------|----------------|-----------------|-------------------------|----------------------------------------|--------------------|------------------|-----------------|---------------|------------------------------------------------------|--------------------|
| SNP_28528_A_34161476 | NC_021163.1    | Ca_Kabuli_Chr04 | 34161476                | GG                                     | AA                 | AA               | INTERGENIC      |               |                                                      |                    |
| SNP_28529_A_34168193 | NC_021163.1    | Ca_Kabuli_Chr04 | 34168193                | AA                                     | GG                 | GG               | INTERGENIC      |               |                                                      |                    |
| SNP_28531_A_34180208 | NC_021163.1    | Ca_Kabuli_Chr04 | 34180208                | AA                                     | TT                 | TT               | INTERGENIC      |               |                                                      |                    |
| SNP_28532_A_34188494 | NC_021163.1    | Ca_Kabuli_Chr04 | 34188494                | TT                                     | CC                 | CC               | INTERGENIC      |               |                                                      |                    |
| SNP_28533_A_34201060 | NC_021163.1    | Ca_Kabuli_Chr04 | 34201060                | CC                                     | TT                 | TT               | INTERGENIC      |               |                                                      |                    |
| SNP_28534_A_34201856 | NC_021163.1    | Ca_Kabuli_Chr04 | 34201856                | GG                                     | AA                 | AA               | INTERGENIC      |               |                                                      |                    |
| SNP_28535_A_34203096 | NC_021163.1    | Ca_Kabuli_Chr04 | 34203096                | AA                                     | GG                 | GG               | INTERGENIC      |               |                                                      |                    |
| SNP_28536_A_34203130 | NC_021163.1    | Ca_Kabuli_Chr04 | 34203130                | TT                                     | CC                 | CC               | INTERGENIC      |               |                                                      |                    |
| SNP_28537_A_34206349 | NC_021163.1    | Ca_Kabuli_Chr04 | 34206349                | AA                                     | GG                 | GG               | INTERGENIC      |               |                                                      |                    |
| SNP_28538_A_34215265 | NC_021163.1    | Ca_Kabuli_Chr04 | 34215265                | CC                                     | TT                 | TT               | INTERGENIC      |               |                                                      |                    |
| SNP_28539_A_34222156 | NC_021163.1    | Ca_Kabuli_Chr04 | 34222156                | TT                                     | AA                 | AA               | INTERGENIC      |               |                                                      |                    |
| SNP_28540_A_34222537 | NC_021163.1    | Ca_Kabuli_Chr04 | 34222537                | TT                                     | CC                 | CC               | INTERGENIC      |               |                                                      |                    |
| SNP_28541_A_34224273 | NC_021163.1    | Ca_Kabuli_Chr04 | 34224273                | TT                                     | CC                 | CC               | INTERGENIC      |               |                                                      |                    |
| SNP_28542_A_34225229 | NC_021163.1    | Ca_Kabuli_Chr04 | 34225229                | AA                                     | GG                 | GG               | INTERGENIC      |               |                                                      |                    |
| SNP_28544_A_34233421 | NC_021163.1    | Ca_Kabuli_Chr04 | 34233421                | AA                                     | TT                 | TT               | URR             | 101503198     | DNA mismatch repair protein MSH1, mitochondrial-like |                    |
| SNP_28545_A_34233462 | NC_021163.1    | Ca_Kabuli_Chr04 | 34233462                | GG                                     | CC                 | CC               | URR             | 101503198     | DNA mismatch repair protein MSH1, mitochondrial-like |                    |
| SNP_28546_A_34237505 | NC_021163.1    | Ca_Kabuli_Chr04 | 34237505                | GG                                     | TT                 | TT               | INTERGENIC      |               |                                                      |                    |
| SNP_28547_A_34237535 | NC_021163.1    | Ca_Kabuli_Chr04 | 34237535                | GG                                     | TT                 | TT               | INTERGENIC      |               |                                                      |                    |
| SNP_28548_A_34240005 | NC_021163.1    | Ca_Kabuli_Chr04 | 34240005                | CC                                     | GG                 | GG               | INTERGENIC      |               |                                                      |                    |
| SNP_28550_A_34240408 | NC_021163.1    | Ca_Kabuli_Chr04 | 34240408                | CC                                     | TT                 | TT               | INTERGENIC      |               |                                                      |                    |
| SNP_28551_A_34240727 | NC_021163.1    | Ca_Kabuli_Chr04 | 34240727                | TT                                     | AA                 | AA               | INTERGENIC      |               |                                                      |                    |
| SNP_28552_A_34245322 | NC_021163.1    | Ca_Kabuli_Chr04 | 34245322                | GG                                     | AA                 | AA               | INTERGENIC      |               |                                                      |                    |

| SNPs IDs             | Chromosome IDs | Chromosomes     | Physical positions (bp) | CDC Frontier (Reference genome) | (Pusa 1103 & HPNB) | (ILWC 46 & LPNB) | Sequence Components of genome | Gene accession IDs | Putative functions                     |
|----------------------|----------------|-----------------|-------------------------|---------------------------------|--------------------|------------------|-------------------------------|--------------------|----------------------------------------|
| SNP_28555_A_34257322 | NC_021163.1    | Ca_Kabuli_Chr04 | 34257322                | TT                              | CC                 | CC               | INTERGENIC                    |                    |                                        |
| SNP_28556_A_34266313 | NC_021163.1    | Ca_Kabuli_Chr04 | 34266313                | AA                              | GG                 | GG               | INTRON                        | 101510473          | uncharacterized LOC101510473           |
| SNP_28557_A_34266328 | NC_021163.1    | Ca_Kabuli_Chr04 | 34266328                | GG                              | AA                 | AA               | INTRON                        | 101510473          | uncharacterized LOC101510473           |
| SNP_28558_A_34266579 | NC_021163.1    | Ca_Kabuli_Chr04 | 34266579                | TT                              | CC                 | CC               | INTRON                        | 101510473          | uncharacterized LOC101510473           |
| SNP_28559_A_34266588 | NC_021163.1    | Ca_Kabuli_Chr04 | 34266588                | AA                              | TT                 | TT               | INTRON                        | 101510473          | uncharacterized LOC101510473           |
| SNP_28560_A_34271113 | NC_021163.1    | Ca_Kabuli_Chr04 | 34271113                | TT                              | CC                 | CC               | INTRON                        | 101510473          | uncharacterized LOC101510473           |
| SNP_28561_A_34272520 | NC_021163.1    | Ca_Kabuli_Chr04 | 34272520                | CC                              | TT                 | TT               | INTRON                        | 101510473          | uncharacterized LOC101510473           |
| SNP_28562_A_34280644 | NC_021163.1    | Ca_Kabuli_Chr04 | 34280644                | CC                              | TT                 | TT               | INTERGENIC                    |                    |                                        |
| SNP_28563_A_34283148 | NC_021163.1    | Ca_Kabuli_Chr04 | 34283148                | AA                              | CC                 | CC               | INTERGENIC                    |                    |                                        |
| SNP_28564_A_34286807 | NC_021163.1    | Ca_Kabuli_Chr04 | 34286807                | CC                              | TT                 | TT               | INTERGENIC                    |                    |                                        |
| SNP_28565_A_34287065 | NC_021163.1    | Ca_Kabuli_Chr04 | 34287065                | TT                              | AA                 | AA               | INTERGENIC                    |                    |                                        |
| SNP_28566_A_34291370 | NC_021163.1    | Ca_Kabuli_Chr04 | 34291370                | CC                              | AA                 | AA               | INTERGENIC                    |                    |                                        |
| SNP_28567_A_34301574 | NC_021163.1    | Ca_Kabuli_Chr04 | 34301574                | CC                              | TT                 | TT               | URR                           | 101510802          | uncharacterized LOC101510802           |
| SNP_28568_A_34312150 | NC_021163.1    | Ca_Kabuli_Chr04 | 34312150                | CC                              | TT                 | TT               | INTRON                        | 101503730          | nuclear pore complex protein NUP1-like |
| SNP_28569_A_34319362 | NC_021163.1    | Ca_Kabuli_Chr04 | 34319362                | AA                              | GG                 | GG               | URR                           | 101503730          | nuclear pore complex protein NUP1-like |
| SNP_28571_A_34332957 | NC_021163.1    | Ca_Kabuli_Chr04 | 34332957                | TT                              | CC                 | CC               | INTERGENIC                    |                    |                                        |
| SNP_28572_A_34353857 | NC_021163.1    | Ca_Kabuli_Chr04 | 34353857                | GG                              | CC                 | CC               | INTRON                        | 101505023          | sucrose-phosphatase 1-like             |
| SNP_28573_A_34369186 | NC_021163.1    | Ca_Kabuli_Chr04 | 34369186                | CC                              | GG                 | GG               | URR                           | 101505023          | sucrose-phosphatase 1-like             |
| SNP_28574_A_34374353 | NC_021163.1    | Ca_Kabuli_Chr04 | 34374353                | AA                              | TT                 | TT               | INTERGENIC                    |                    |                                        |
| SNP_28577_A_34387715 | NC_021163.1    | Ca_Kabuli_Chr04 | 34387715                | TT                              | CC                 | CC               | INTERGENIC                    |                    |                                        |
| SNP_28578_A_34387803 | NC_021163.1    | Ca_Kabuli_Chr04 | 34387803                | AA                              | CC                 | CC               | INTERGENIC                    |                    |                                        |
| SNP_28579_A_34387924 | NC_021163.1    | Ca_Kabuli_Chr04 | 34387924                | CC                              | TT                 | TT               | INTERGENIC                    |                    |                                        |

| SNPs IDs             | Chromosome IDs | Chromosomes     | Physical positions (bp) | CDC Frontier (Reference genome) | (Pusa 1103 & HPNB) | (ILWC 46 & LPNB) | Sequence Components of genome | Gene accession IDs | Putative functions                              |
|----------------------|----------------|-----------------|-------------------------|---------------------------------|--------------------|------------------|-------------------------------|--------------------|-------------------------------------------------|
| SNP_28580_A_34387996 | NC_021163.1    | Ca_Kabuli_Chr04 | 34387996                | TT                              | GG                 | GG               | INTERGENIC                    |                    |                                                 |
| SNP_28583_A_34389100 | NC_021163.1    | Ca_Kabuli_Chr04 | 34389100                | AA                              | GG                 | GG               | DRR                           | 101511124          | glycerol-3-phosphate 2-O-acyltransferase 6-like |
| SNP_28584_A_34401463 | NC_021163.1    | Ca_Kabuli_Chr04 | 34401463                | GG                              | AA                 | AA               | INTERGENIC                    |                    |                                                 |
| SNP_28585_A_34409541 | NC_021163.1    | Ca_Kabuli_Chr04 | 34409541                | AA                              | GG                 | GG               | INTERGENIC                    |                    |                                                 |
| SNP_28586_A_34414942 | NC_021163.1    | Ca_Kabuli_Chr04 | 34414942                | GG                              | AA                 | AA               | INTERGENIC                    |                    |                                                 |
| SNP_28587_A_34415433 | NC_021163.1    | Ca_Kabuli_Chr04 | 34415433                | GG                              | TT                 | TT               | INTERGENIC                    |                    |                                                 |
| SNP_28588_A_34420159 | NC_021163.1    | Ca_Kabuli_Chr04 | 34420159                | AA                              | GG                 | GG               | INTERGENIC                    |                    |                                                 |
| SNP_28589_A_34421547 | NC_021163.1    | Ca_Kabuli_Chr04 | 34421547                | AA                              | TT                 | TT               | INTERGENIC                    |                    |                                                 |
| SNP_28590_A_34421726 | NC_021163.1    | Ca_Kabuli_Chr04 | 34421726                | CC                              | AA                 | AA               | INTERGENIC                    |                    |                                                 |
| SNP_28591_A_34423282 | NC_021163.1    | Ca_Kabuli_Chr04 | 34423282                | CC                              | TT                 | TT               | INTERGENIC                    |                    |                                                 |
| SNP_28592_A_34430231 | NC_021163.1    | Ca_Kabuli_Chr04 | 34430231                | AA                              | GG                 | GG               | INTERGENIC                    |                    |                                                 |
| SNP_28593_A_34430364 | NC_021163.1    | Ca_Kabuli_Chr04 | 34430364                | AA                              | GG                 | GG               | INTERGENIC                    |                    |                                                 |
| SNP_28594_A_34431258 | NC_021163.1    | Ca_Kabuli_Chr04 | 34431258                | CC                              | TT                 | TT               | INTERGENIC                    |                    |                                                 |
| SNP_28595_A_34442355 | NC_021163.1    | Ca_Kabuli_Chr04 | 34442355                | TT                              | CC                 | CC               | INTERGENIC                    |                    |                                                 |
| SNP_28596_A_34442705 | NC_021163.1    | Ca_Kabuli_Chr04 | 34442705                | TT                              | CC                 | CC               | INTERGENIC                    |                    |                                                 |
| SNP_28597_A_34446220 | NC_021163.1    | Ca_Kabuli_Chr04 | 34446220                | TT                              | CC                 | CC               | DRR                           | 101511434          | Unknown function                                |
| SNP_28598_A_34449078 | NC_021163.1    | Ca_Kabuli_Chr04 | 34449078                | TT                              | AA                 | AA               | NON_SYNONYMOUS_CODING         | 101511434          | Unknown function                                |
| SNP_28599_A_34468114 | NC_021163.1    | Ca_Kabuli_Chr04 | 34468114                | AA                              | CC                 | CC               | INTERGENIC                    |                    |                                                 |
| SNP_28600_A_34468315 | NC_021163.1    | Ca_Kabuli_Chr04 | 34468315                | AA                              | GG                 | GG               | INTERGENIC                    |                    |                                                 |
| SNP_28601_A_34472342 | NC_021163.1    | Ca_Kabuli_Chr04 | 34472342                | TT                              | CC                 | CC               | INTERGENIC                    |                    |                                                 |
| SNP_28605_A_34482247 | NC_021163.1    | Ca_Kabuli_Chr04 | 34482247                | TT                              | CC                 | CC               | INTRON                        | 101505344          | putative lipase YOR059C                         |
| SNP_28607_A_34493325 | NC_021163.1    | Ca_Kabuli_Chr04 | 34493325                | CC                              | TT                 | TT               | URR                           | 101505344          | putative lipase YOR059C                         |



| SNPs IDs             | Chromosome IDs | Chromosomes     | Physical positions (bp) | CDC Frontier genome (Reference genome) | (Pusa 1103 & HPNB) | (ILWC 46 & LPNB) | Sequence genome | Components of | Gene accession IDs | Putative functions |
|----------------------|----------------|-----------------|-------------------------|----------------------------------------|--------------------|------------------|-----------------|---------------|--------------------|--------------------|
| SNP_28608_A_34503637 | NC_021163.1    | Ca_Kabuli_Chr04 | 34503637                | CC                                     | TT                 | TT               | INTERGENIC      |               |                    |                    |
| SNP_28609_A_34503644 | NC_021163.1    | Ca_Kabuli_Chr04 | 34503644                | AA                                     | GG                 | GG               | INTERGENIC      |               |                    |                    |
| SNP_28610_A_34503797 | NC_021163.1    | Ca_Kabuli_Chr04 | 34503797                | CC                                     | TT                 | TT               | INTERGENIC      |               |                    |                    |
| SNP_28611_A_34515810 | NC_021163.1    | Ca_Kabuli_Chr04 | 34515810                | TT                                     | CC                 | CC               | INTERGENIC      |               |                    |                    |
| SNP_28613_A_34520614 | NC_021163.1    | Ca_Kabuli_Chr04 | 34520614                | TT                                     | AA                 | AA               | INTERGENIC      |               |                    |                    |
| SNP_28614_A_34520775 | NC_021163.1    | Ca_Kabuli_Chr04 | 34520775                | AA                                     | TT                 | TT               | INTERGENIC      |               |                    |                    |
| SNP_28615_A_34520878 | NC_021163.1    | Ca_Kabuli_Chr04 | 34520878                | TT                                     | CC                 | CC               | INTERGENIC      |               |                    |                    |
| SNP_28616_A_34520935 | NC_021163.1    | Ca_Kabuli_Chr04 | 34520935                | TT                                     | GG                 | GG               | INTERGENIC      |               |                    |                    |
| SNP_28617_A_34525236 | NC_021163.1    | Ca_Kabuli_Chr04 | 34525236                | TT                                     | CC                 | CC               | INTERGENIC      |               |                    |                    |
| SNP_28618_A_34526980 | NC_021163.1    | Ca_Kabuli_Chr04 | 34526980                | AA                                     | GG                 | GG               | INTERGENIC      |               |                    |                    |
| SNP_28619_A_34527008 | NC_021163.1    | Ca_Kabuli_Chr04 | 34527008                | AA                                     | GG                 | GG               | INTERGENIC      |               |                    |                    |
| SNP_28620_A_34527026 | NC_021163.1    | Ca_Kabuli_Chr04 | 34527026                | AA                                     | GG                 | GG               | INTERGENIC      |               |                    |                    |
| SNP_28621_A_34566308 | NC_021163.1    | Ca_Kabuli_Chr04 | 34566308                | TT                                     | AA                 | AA               | INTERGENIC      |               |                    |                    |
| SNP_28623_A_34566765 | NC_021163.1    | Ca_Kabuli_Chr04 | 34566765                | AA                                     | CC                 | CC               | INTERGENIC      |               |                    |                    |
| SNP_28624_A_34566767 | NC_021163.1    | Ca_Kabuli_Chr04 | 34566767                | CC                                     | TT                 | TT               | INTERGENIC      |               |                    |                    |
| SNP_28625_A_34582114 | NC_021163.1    | Ca_Kabuli_Chr04 | 34582114                | CC                                     | TT                 | TT               | INTERGENIC      |               |                    |                    |
| SNP_28626_A_34586566 | NC_021163.1    | Ca_Kabuli_Chr04 | 34586566                | AA                                     | GG                 | GG               | INTERGENIC      |               |                    |                    |
| SNP_28627_A_34586570 | NC_021163.1    | Ca_Kabuli_Chr04 | 34586570                | AA                                     | TT                 | TT               | INTERGENIC      |               |                    |                    |
| SNP_28628_A_34586657 | NC_021163.1    | Ca_Kabuli_Chr04 | 34586657                | TT                                     | GG                 | GG               | INTERGENIC      |               |                    |                    |
| SNP_28629_A_34586668 | NC_021163.1    | Ca_Kabuli_Chr04 | 34586668                | AA                                     | CC                 | CC               | INTERGENIC      |               |                    |                    |
| SNP_28630_A_34586669 | NC_021163.1    | Ca_Kabuli_Chr04 | 34586669                | TT                                     | AA                 | AA               | INTERGENIC      |               |                    |                    |
| SNP_28631_A_34586683 | NC_021163.1    | Ca_Kabuli_Chr04 | 34586683                | TT                                     | AA                 | AA               | INTERGENIC      |               |                    |                    |

| SNPs IDs             | Chromosome IDs | Chromosomes     | Physical positions (bp) | CDC Frontier genome (Reference genome) | (Pusa 1103 & HPNB) | (ILWC 46 & LPNB) | Sequence genome | Components of | Gene accession IDs | Putative functions |
|----------------------|----------------|-----------------|-------------------------|----------------------------------------|--------------------|------------------|-----------------|---------------|--------------------|--------------------|
| SNP_28632_A_34586762 | NC_021163.1    | Ca_Kabuli_Chr04 | 34586762                | CC                                     | TT                 | TT               | INTERGENIC      |               |                    |                    |
| SNP_28633_A_34586792 | NC_021163.1    | Ca_Kabuli_Chr04 | 34586792                | TT                                     | AA                 | AA               | INTERGENIC      |               |                    |                    |
| SNP_28634_A_34587220 | NC_021163.1    | Ca_Kabuli_Chr04 | 34587220                | TT                                     | AA                 | AA               | INTERGENIC      |               |                    |                    |
| SNP_28635_A_34587221 | NC_021163.1    | Ca_Kabuli_Chr04 | 34587221                | CC                                     | AA                 | AA               | INTERGENIC      |               |                    |                    |
| SNP_28636_A_34588666 | NC_021163.1    | Ca_Kabuli_Chr04 | 34588666                | AA                                     | GG                 | GG               | INTERGENIC      |               |                    |                    |
| SNP_28637_A_34588670 | NC_021163.1    | Ca_Kabuli_Chr04 | 34588670                | GG                                     | AA                 | AA               | INTERGENIC      |               |                    |                    |
| SNP_28638_A_34588673 | NC_021163.1    | Ca_Kabuli_Chr04 | 34588673                | CC                                     | GG                 | GG               | INTERGENIC      |               |                    |                    |
| SNP_28639_A_34588696 | NC_021163.1    | Ca_Kabuli_Chr04 | 34588696                | GG                                     | CC                 | CC               | INTERGENIC      |               |                    |                    |
| SNP_28640_A_34588959 | NC_021163.1    | Ca_Kabuli_Chr04 | 34588959                | GG                                     | TT                 | TT               | INTERGENIC      |               |                    |                    |
| SNP_28641_A_34588960 | NC_021163.1    | Ca_Kabuli_Chr04 | 34588960                | TT                                     | CC                 | CC               | INTERGENIC      |               |                    |                    |
| SNP_28642_A_34590430 | NC_021163.1    | Ca_Kabuli_Chr04 | 34590430                | TT                                     | CC                 | CC               | INTERGENIC      |               |                    |                    |
| SNP_28643_A_34590446 | NC_021163.1    | Ca_Kabuli_Chr04 | 34590446                | TT                                     | CC                 | CC               | INTERGENIC      |               |                    |                    |
| SNP_28644_A_34590510 | NC_021163.1    | Ca_Kabuli_Chr04 | 34590510                | TT                                     | AA                 | AA               | INTERGENIC      |               |                    |                    |
| SNP_28645_A_34590511 | NC_021163.1    | Ca_Kabuli_Chr04 | 34590511                | AA                                     | GG                 | GG               | INTERGENIC      |               |                    |                    |
| SNP_28646_A_34590757 | NC_021163.1    | Ca_Kabuli_Chr04 | 34590757                | GG                                     | CC                 | CC               | INTERGENIC      |               |                    |                    |
| SNP_28647_A_34590761 | NC_021163.1    | Ca_Kabuli_Chr04 | 34590761                | AA                                     | GG                 | GG               | INTERGENIC      |               |                    |                    |
| SNP_28648_A_34590806 | NC_021163.1    | Ca_Kabuli_Chr04 | 34590806                | CC                                     | AA                 | AA               | INTERGENIC      |               |                    |                    |
| SNP_28649_A_34598732 | NC_021163.1    | Ca_Kabuli_Chr04 | 34598732                | TT                                     | GG                 | GG               | INTERGENIC      |               |                    |                    |
| SNP_28650_A_34598904 | NC_021163.1    | Ca_Kabuli_Chr04 | 34598904                | AA                                     | TT                 | TT               | INTERGENIC      |               |                    |                    |
| SNP_28651_A_34598994 | NC_021163.1    | Ca_Kabuli_Chr04 | 34598994                | AA                                     | GG                 | GG               | INTERGENIC      |               |                    |                    |
| SNP_28653_A_34599239 | NC_021163.1    | Ca_Kabuli_Chr04 | 34599239                | GG                                     | CC                 | CC               | INTERGENIC      |               |                    |                    |
| SNP_28654_A_34601854 | NC_021163.1    | Ca_Kabuli_Chr04 | 34601854                | CC                                     | TT                 | TT               | INTERGENIC      |               |                    |                    |

| SNPs IDs             | Chromosome IDs | Chromosomes     | Physical positions (bp) | CDC Frontier genome (Reference genome) | (Pusa 1103 & HPNB) | (ILWC 46 & LPNB) | Sequence Components of genome | Gene accession IDs | Putative functions |
|----------------------|----------------|-----------------|-------------------------|----------------------------------------|--------------------|------------------|-------------------------------|--------------------|--------------------|
| SNP_28655_A_34601884 | NC_021163.1    | Ca_Kabuli_Chr04 | 34601884                | GG                                     | TT                 | TT               | INTERGENIC                    |                    |                    |
| SNP_28656_A_34614429 | NC_021163.1    | Ca_Kabuli_Chr04 | 34614429                | AA                                     | TT                 | TT               | INTERGENIC                    |                    |                    |
| SNP_28657_A_34664986 | NC_021163.1    | Ca_Kabuli_Chr04 | 34664986                | AA                                     | GG                 | GG               | INTERGENIC                    |                    |                    |
| SNP_28658_A_34683645 | NC_021163.1    | Ca_Kabuli_Chr04 | 34683645                | GG                                     | AA                 | AA               | INTERGENIC                    |                    |                    |
| SNP_28659_A_34683690 | NC_021163.1    | Ca_Kabuli_Chr04 | 34683690                | TT                                     | CC                 | CC               | INTERGENIC                    |                    |                    |
| SNP_28660_A_34683694 | NC_021163.1    | Ca_Kabuli_Chr04 | 34683694                | GG                                     | AA                 | AA               | INTERGENIC                    |                    |                    |
| SNP_28661_A_34704249 | NC_021163.1    | Ca_Kabuli_Chr04 | 34704249                | CC                                     | GG                 | GG               | INTERGENIC                    |                    |                    |
| SNP_28662_A_34712359 | NC_021163.1    | Ca_Kabuli_Chr04 | 34712359                | TT                                     | AA                 | AA               | INTERGENIC                    |                    |                    |
| SNP_28663_A_34712524 | NC_021163.1    | Ca_Kabuli_Chr04 | 34712524                | TT                                     | CC                 | CC               | INTERGENIC                    |                    |                    |
| SNP_28664_A_34712553 | NC_021163.1    | Ca_Kabuli_Chr04 | 34712553                | TT                                     | CC                 | CC               | INTERGENIC                    |                    |                    |
| SNP_28665_A_34712771 | NC_021163.1    | Ca_Kabuli_Chr04 | 34712771                | AA                                     | CC                 | CC               | INTERGENIC                    |                    |                    |
| SNP_28666_A_34712775 | NC_021163.1    | Ca_Kabuli_Chr04 | 34712775                | GG                                     | CC                 | CC               | INTERGENIC                    |                    |                    |
| SNP_28667_A_34731645 | NC_021163.1    | Ca_Kabuli_Chr04 | 34731645                | AA                                     | GG                 | GG               | INTERGENIC                    |                    |                    |
| SNP_28668_A_34774008 | NC_021163.1    | Ca_Kabuli_Chr04 | 34774008                | AA                                     | TT                 | TT               | INTERGENIC                    |                    |                    |
| SNP_28669_A_34833971 | NC_021163.1    | Ca_Kabuli_Chr04 | 34833971                | AA                                     | GG                 | GG               | INTERGENIC                    |                    |                    |
| SNP_28670_A_34834395 | NC_021163.1    | Ca_Kabuli_Chr04 | 34834395                | TT                                     | CC                 | CC               | INTERGENIC                    |                    |                    |
| SNP_28671_A_34834565 | NC_021163.1    | Ca_Kabuli_Chr04 | 34834565                | TT                                     | CC                 | CC               | INTERGENIC                    |                    |                    |
| SNP_28672_A_34834569 | NC_021163.1    | Ca_Kabuli_Chr04 | 34834569                | AA                                     | GG                 | GG               | INTERGENIC                    |                    |                    |
| SNP_28673_A_34834582 | NC_021163.1    | Ca_Kabuli_Chr04 | 34834582                | CC                                     | AA                 | AA               | INTERGENIC                    |                    |                    |
| SNP_28674_A_34883315 | NC_021163.1    | Ca_Kabuli_Chr04 | 34883315                | TT                                     | CC                 | CC               | INTRON                        | 101493952          | Unknown function   |
| SNP_28675_A_34883316 | NC_021163.1    | Ca_Kabuli_Chr04 | 34883316                | TT                                     | CC                 | CC               | INTRON                        | 101493952          | Unknown function   |
| SNP_28676_A_34883320 | NC_021163.1    | Ca_Kabuli_Chr04 | 34883320                | CC                                     | TT                 | TT               | INTRON                        | 101493952          | Unknown function   |

| SNPs IDs             | Chromosome IDs | Chromosomes     | Physical positions (bp) | CDC Frontier (Reference genome) | (Pusa 1103 & HPNB) | (ILWC 46 & LPNB) | Sequence genome | Components of | Gene accession IDs | Putative functions |
|----------------------|----------------|-----------------|-------------------------|---------------------------------|--------------------|------------------|-----------------|---------------|--------------------|--------------------|
| SNP_28677_A_34883366 | NC_021163.1    | Ca_Kabuli_Chr04 | 34883366                | AA                              | GG                 | GG               | INTRON          |               | 101493952          | Unknown function   |
| SNP_28678_A_34883461 | NC_021163.1    | Ca_Kabuli_Chr04 | 34883461                | AA                              | GG                 | GG               | INTRON          |               | 101493952          | Unknown function   |
| SNP_28679_A_34883508 | NC_021163.1    | Ca_Kabuli_Chr04 | 34883508                | TT                              | GG                 | GG               | INTRON          |               | 101493952          | Unknown function   |
| SNP_28680_A_34883519 | NC_021163.1    | Ca_Kabuli_Chr04 | 34883519                | TT                              | CC                 | CC               | INTRON          |               | 101493952          | Unknown function   |
| SNP_28681_A_34883526 | NC_021163.1    | Ca_Kabuli_Chr04 | 34883526                | TT                              | CC                 | CC               | INTRON          |               | 101493952          | Unknown function   |
| SNP_28682_A_34883528 | NC_021163.1    | Ca_Kabuli_Chr04 | 34883528                | CC                              | TT                 | TT               | INTRON          |               | 101493952          | Unknown function   |
| SNP_28683_A_34883539 | NC_021163.1    | Ca_Kabuli_Chr04 | 34883539                | TT                              | CC                 | CC               | INTRON          |               | 101493952          | Unknown function   |
| SNP_28684_A_34883620 | NC_021163.1    | Ca_Kabuli_Chr04 | 34883620                | AA                              | GG                 | GG               | INTRON          |               | 101493952          | Unknown function   |
| SNP_28685_A_34883627 | NC_021163.1    | Ca_Kabuli_Chr04 | 34883627                | AA                              | GG                 | GG               | INTRON          |               | 101493952          | Unknown function   |
| SNP_28686_A_34883652 | NC_021163.1    | Ca_Kabuli_Chr04 | 34883652                | AA                              | GG                 | GG               | INTRON          |               | 101493952          | Unknown function   |
| SNP_28687_A_34883678 | NC_021163.1    | Ca_Kabuli_Chr04 | 34883678                | CC                              | TT                 | TT               | INTRON          |               | 101493952          | Unknown function   |
| SNP_28688_A_34883724 | NC_021163.1    | Ca_Kabuli_Chr04 | 34883724                | AA                              | CC                 | CC               | INTRON          |               | 101493952          | Unknown function   |
| SNP_28689_A_34883727 | NC_021163.1    | Ca_Kabuli_Chr04 | 34883727                | TT                              | AA                 | AA               | INTRON          |               | 101493952          | Unknown function   |
| SNP_28690_A_34883734 | NC_021163.1    | Ca_Kabuli_Chr04 | 34883734                | AA                              | GG                 | GG               | INTRON          |               | 101493952          | Unknown function   |
| SNP_28691_A_34883750 | NC_021163.1    | Ca_Kabuli_Chr04 | 34883750                | TT                              | AA                 | AA               | INTRON          |               | 101493952          | Unknown function   |
| SNP_28692_A_34883768 | NC_021163.1    | Ca_Kabuli_Chr04 | 34883768                | GG                              | AA                 | AA               | INTRON          |               | 101493952          | Unknown function   |
| SNP_28693_A_34883796 | NC_021163.1    | Ca_Kabuli_Chr04 | 34883796                | TT                              | GG                 | GG               | INTRON          |               | 101493952          | Unknown function   |
| SNP_28694_A_34883858 | NC_021163.1    | Ca_Kabuli_Chr04 | 34883858                | AA                              | GG                 | GG               | INTRON          |               | 101493952          | Unknown function   |
| SNP_28695_A_34883885 | NC_021163.1    | Ca_Kabuli_Chr04 | 34883885                | TT                              | AA                 | AA               | DRR             |               | 101494279          | Unknown function   |
| SNP_28696_A_34883887 | NC_021163.1    | Ca_Kabuli_Chr04 | 34883887                | TT                              | CC                 | CC               | DRR             |               | 101494279          | Unknown function   |
| SNP_28697_A_34883893 | NC_021163.1    | Ca_Kabuli_Chr04 | 34883893                | TT                              | AA                 | AA               | DRR             |               | 101494279          | Unknown function   |
| SNP_28698_A_34883941 | NC_021163.1    | Ca_Kabuli_Chr04 | 34883941                | CC                              | AA                 | AA               | DRR             |               | 101494279          | Unknown function   |

| SNPs IDs             | Chromosome IDs | Chromosomes     | Physical positions (bp) | CDC Frontier genome (Reference genome) | (Pusa 1103 & HPNB) | (ILWC 46 & LPNB) | Sequence Components of genome | Gene accession IDs | Putative functions                              |
|----------------------|----------------|-----------------|-------------------------|----------------------------------------|--------------------|------------------|-------------------------------|--------------------|-------------------------------------------------|
| SNP_28699_A_34883945 | NC_021163.1    | Ca_Kabuli_Chr04 | 34883945                | GG                                     | AA                 | AA               | DRR                           | 101494279          | Unknown function                                |
| SNP_28700_A_34883960 | NC_021163.1    | Ca_Kabuli_Chr04 | 34883960                | AA                                     | GG                 | GG               | DRR                           | 101494279          | Unknown function                                |
| SNP_28701_A_34883965 | NC_021163.1    | Ca_Kabuli_Chr04 | 34883965                | TT                                     | GG                 | GG               | DRR                           | 101494279          | Unknown function                                |
| SNP_28702_A_34883996 | NC_021163.1    | Ca_Kabuli_Chr04 | 34883996                | AA                                     | TT                 | TT               | DRR                           | 101494279          | Unknown function                                |
| SNP_28703_A_34884646 | NC_021163.1    | Ca_Kabuli_Chr04 | 34884646                | TT                                     | CC                 | CC               | DRR                           | 101494279          | Unknown function                                |
| SNP_28704_A_34884737 | NC_021163.1    | Ca_Kabuli_Chr04 | 34884737                | AA                                     | TT                 | TT               | DRR                           | 101494279          | Unknown function                                |
| SNP_28705_A_34897889 | NC_021163.1    | Ca_Kabuli_Chr04 | 34897889                | GG                                     | CC                 | CC               | INTERGENIC                    |                    |                                                 |
| SNP_28706_A_34910402 | NC_021163.1    | Ca_Kabuli_Chr04 | 34910402                | CC                                     | TT                 | TT               | INTERGENIC                    |                    |                                                 |
| SNP_28707_A_34910846 | NC_021163.1    | Ca_Kabuli_Chr04 | 34910846                | AA                                     | GG                 | GG               | INTERGENIC                    |                    |                                                 |
| SNP_28708_A_34912961 | NC_021163.1    | Ca_Kabuli_Chr04 | 34912961                | CC                                     | TT                 | TT               | INTERGENIC                    |                    |                                                 |
| SNP_28709_A_34912990 | NC_021163.1    | Ca_Kabuli_Chr04 | 34912990                | TT                                     | CC                 | CC               | INTERGENIC                    |                    |                                                 |
| SNP_28710_A_34913083 | NC_021163.1    | Ca_Kabuli_Chr04 | 34913083                | AA                                     | GG                 | GG               | INTERGENIC                    |                    |                                                 |
| SNP_28711_A_34937139 | NC_021163.1    | Ca_Kabuli_Chr04 | 34937139                | GG                                     | AA                 | AA               | INTERGENIC                    |                    |                                                 |
| SNP_28712_A_34937644 | NC_021163.1    | Ca_Kabuli_Chr04 | 34937644                | CC                                     | TT                 | TT               | INTERGENIC                    |                    |                                                 |
| SNP_28713_A_34955174 | NC_021163.1    | Ca_Kabuli_Chr04 | 34955174                | GG                                     | TT                 | TT               | INTERGENIC                    |                    |                                                 |
| SNP_28714_A_35002930 | NC_021163.1    | Ca_Kabuli_Chr04 | 35002930                | TT                                     | CC                 | CC               | INTERGENIC                    |                    |                                                 |
| SNP_28715_A_35043751 | NC_021163.1    | Ca_Kabuli_Chr04 | 35043751                | CC                                     | TT                 | TT               | INTERGENIC                    |                    |                                                 |
| SNP_28716_A_35053421 | NC_021163.1    | Ca_Kabuli_Chr04 | 35053421                | GG                                     | AA                 | AA               | INTRON                        | 101489300          | probable protein arginine N-methyltransferase 6 |
| SNP_28717_A_35077593 | NC_021163.1    | Ca_Kabuli_Chr04 | 35077593                | CC                                     | AA                 | AA               | INTERGENIC                    |                    |                                                 |
| SNP_28718_A_35083657 | NC_021163.1    | Ca_Kabuli_Chr04 | 35083657                | GG                                     | TT                 | TT               | INTERGENIC                    |                    |                                                 |
| SNP_28719_A_35092096 | NC_021163.1    | Ca_Kabuli_Chr04 | 35092096                | TT                                     | AA                 | AA               | INTERGENIC                    |                    |                                                 |
| SNP_28720_A_35111353 | NC_021163.1    | Ca_Kabuli_Chr04 | 35111353                | AA                                     | CC                 | CC               | INTERGENIC                    |                    |                                                 |

| SNPs IDs             | Chromosome IDs | Chromosomes     | Physical positions (bp) | CDC Frontier genome (Reference genome) | (Pusa 1103 & HPNB) | (ILWC 46 & LPNB) | Sequence Components of genome | Gene accession IDs | Putative functions           |
|----------------------|----------------|-----------------|-------------------------|----------------------------------------|--------------------|------------------|-------------------------------|--------------------|------------------------------|
| SNP_28721_A_35114825 | NC_021163.1    | Ca_Kabuli_Chr04 | 35114825                | AA                                     | CC                 | CC               | INTERGENIC                    |                    |                              |
| SNP_28722_A_35115012 | NC_021163.1    | Ca_Kabuli_Chr04 | 35115012                | CC                                     | AA                 | AA               | INTERGENIC                    |                    |                              |
| SNP_28723_A_35115086 | NC_021163.1    | Ca_Kabuli_Chr04 | 35115086                | TT                                     | CC                 | CC               | INTERGENIC                    |                    |                              |
| SNP_28724_A_35115181 | NC_021163.1    | Ca_Kabuli_Chr04 | 35115181                | TT                                     | CC                 | CC               | INTERGENIC                    |                    |                              |
| SNP_28725_A_35115209 | NC_021163.1    | Ca_Kabuli_Chr04 | 35115209                | GG                                     | AA                 | AA               | INTERGENIC                    |                    |                              |
| SNP_28726_A_35139446 | NC_021163.1    | Ca_Kabuli_Chr04 | 35139446                | AA                                     | TT                 | TT               | DRR                           | 101495231          | endoglucanase 14-like        |
| SNP_28727_A_35143733 | NC_021163.1    | Ca_Kabuli_Chr04 | 35143733                | AA                                     | GG                 | GG               | URR                           | 101495231          | endoglucanase 14-like        |
| SNP_28728_A_35151300 | NC_021163.1    | Ca_Kabuli_Chr04 | 35151300                | CC                                     | TT                 | TT               | INTERGENIC                    |                    |                              |
| SNP_28729_A_35185386 | NC_021163.1    | Ca_Kabuli_Chr04 | 35185386                | CC                                     | TT                 | TT               | INTERGENIC                    |                    |                              |
| SNP_28730_A_35187464 | NC_021163.1    | Ca_Kabuli_Chr04 | 35187464                | AA                                     | GG                 | GG               | INTERGENIC                    |                    |                              |
| SNP_28731_A_35187517 | NC_021163.1    | Ca_Kabuli_Chr04 | 35187517                | AA                                     | TT                 | TT               | INTERGENIC                    |                    |                              |
| SNP_28732_A_35187536 | NC_021163.1    | Ca_Kabuli_Chr04 | 35187536                | AA                                     | TT                 | TT               | INTERGENIC                    |                    |                              |
| SNP_28733_A_35194805 | NC_021163.1    | Ca_Kabuli_Chr04 | 35194805                | GG                                     | AA                 | AA               | INTERGENIC                    |                    |                              |
| SNP_28734_A_35194807 | NC_021163.1    | Ca_Kabuli_Chr04 | 35194807                | AA                                     | TT                 | TT               | INTERGENIC                    |                    |                              |
| SNP_28735_A_35194809 | NC_021163.1    | Ca_Kabuli_Chr04 | 35194809                | CC                                     | AA                 | AA               | INTERGENIC                    |                    |                              |
| SNP_28737_A_35257617 | NC_021163.1    | Ca_Kabuli_Chr04 | 35257617                | CC                                     | AA                 | AA               | INTRON                        | 101495549          | Unknown function             |
| SNP_28738_A_35258030 | NC_021163.1    | Ca_Kabuli_Chr04 | 35258030                | AA                                     | CC                 | CC               | INTRON                        | 101495549          | Unknown function             |
| SNP_28739_A_35263301 | NC_021163.1    | Ca_Kabuli_Chr04 | 35263301                | CC                                     | TT                 | TT               | INTERGENIC                    |                    |                              |
| SNP_28740_A_35279705 | NC_021163.1    | Ca_Kabuli_Chr04 | 35279705                | CC                                     | TT                 | TT               | INTERGENIC                    |                    |                              |
| SNP_28741_A_35284433 | NC_021163.1    | Ca_Kabuli_Chr04 | 35284433                | TT                                     | AA                 | AA               | INTERGENIC                    |                    |                              |
| SNP_28743_A_35303884 | NC_021163.1    | Ca_Kabuli_Chr04 | 35303884                | CC                                     | AA                 | AA               | NON_SYNONYMOUS_CODING         | 101491762          | uncharacterized LOC101491762 |
| SNP_28745_A_35320735 | NC_021163.1    | Ca_Kabuli_Chr04 | 35320735                | AA                                     | GG                 | GG               | INTERGENIC                    |                    |                              |

| SNPs IDs             | Chromosome IDs | Chromosomes     | Physical positions (bp) | CDC Frontier genome (Reference genome) | (Pusa 1103 & HPNB) | (ILWC 46 & LPNB) | Sequence Components of genome | Gene accession IDs | Putative functions |
|----------------------|----------------|-----------------|-------------------------|----------------------------------------|--------------------|------------------|-------------------------------|--------------------|--------------------|
| SNP_28746_A_35329300 | NC_021163.1    | Ca_Kabuli_Chr04 | 35329300                | AA                                     | CC                 | CC               | NON_SYNONYMOUS_CODING         | 101492317          | myosin-1-like      |
| SNP_28747_A_35342329 | NC_021163.1    | Ca_Kabuli_Chr04 | 35342329                | CC                                     | TT                 | TT               | INTRON                        | 101492317          | myosin-1-like      |
| SNP_28748_A_35342386 | NC_021163.1    | Ca_Kabuli_Chr04 | 35342386                | GG                                     | AA                 | AA               | INTRON                        | 101492317          | myosin-1-like      |
| SNP_28749_A_35342701 | NC_021163.1    | Ca_Kabuli_Chr04 | 35342701                | CC                                     | TT                 | TT               | INTRON                        | 101492317          | myosin-1-like      |
| SNP_28750_A_35342724 | NC_021163.1    | Ca_Kabuli_Chr04 | 35342724                | AA                                     | GG                 | GG               | INTRON                        | 101492317          | myosin-1-like      |
| SNP_28751_A_35342858 | NC_021163.1    | Ca_Kabuli_Chr04 | 35342858                | TT                                     | CC                 | CC               | INTRON                        | 101492317          | myosin-1-like      |
| SNP_28753_A_35343917 | NC_021163.1    | Ca_Kabuli_Chr04 | 35343917                | CC                                     | TT                 | TT               | INTRON                        | 101492317          | myosin-1-like      |
| SNP_28754_A_35343974 | NC_021163.1    | Ca_Kabuli_Chr04 | 35343974                | CC                                     | TT                 | TT               | INTRON                        | 101492317          | myosin-1-like      |
| SNP_28755_A_35349896 | NC_021163.1    | Ca_Kabuli_Chr04 | 35349896                | TT                                     | GG                 | GG               | URR                           | 101492317          | myosin-1-like      |
| SNP_28756_A_35349898 | NC_021163.1    | Ca_Kabuli_Chr04 | 35349898                | TT                                     | CC                 | CC               | URR                           | 101492317          | myosin-1-like      |
| SNP_28757_A_35369564 | NC_021163.1    | Ca_Kabuli_Chr04 | 35369564                | TT                                     | GG                 | GG               | INTERGENIC                    |                    |                    |
| SNP_28758_A_35369722 | NC_021163.1    | Ca_Kabuli_Chr04 | 35369722                | TT                                     | CC                 | CC               | INTERGENIC                    |                    |                    |
| SNP_28760_A_35430241 | NC_021163.1    | Ca_Kabuli_Chr04 | 35430241                | GG                                     | AA                 | AA               | INTERGENIC                    |                    |                    |
| SNP_28761_A_35430317 | NC_021163.1    | Ca_Kabuli_Chr04 | 35430317                | GG                                     | AA                 | AA               | INTERGENIC                    |                    |                    |
| SNP_28762_A_35430892 | NC_021163.1    | Ca_Kabuli_Chr04 | 35430892                | TT                                     | AA                 | AA               | INTERGENIC                    |                    |                    |
| SNP_28763_A_35430948 | NC_021163.1    | Ca_Kabuli_Chr04 | 35430948                | TT                                     | CC                 | CC               | INTERGENIC                    |                    |                    |
| SNP_28764_A_35431031 | NC_021163.1    | Ca_Kabuli_Chr04 | 35431031                | AA                                     | GG                 | GG               | INTERGENIC                    |                    |                    |
| SNP_28765_A_35431538 | NC_021163.1    | Ca_Kabuli_Chr04 | 35431538                | AA                                     | CC                 | CC               | INTERGENIC                    |                    |                    |
| SNP_28766_A_35431567 | NC_021163.1    | Ca_Kabuli_Chr04 | 35431567                | CC                                     | GG                 | GG               | INTERGENIC                    |                    |                    |
| SNP_28767_A_35431680 | NC_021163.1    | Ca_Kabuli_Chr04 | 35431680                | CC                                     | AA                 | AA               | INTERGENIC                    |                    |                    |
| SNP_28768_A_35431816 | NC_021163.1    | Ca_Kabuli_Chr04 | 35431816                | CC                                     | TT                 | TT               | INTERGENIC                    |                    |                    |
| SNP_28769_A_35431897 | NC_021163.1    | Ca_Kabuli_Chr04 | 35431897                | AA                                     | CC                 | CC               | INTERGENIC                    |                    |                    |

| SNPs IDs             | Chromosome IDs | Chromosomes     | Physical positions (bp) | CDC Frontier genome (Reference genome) | (Pusa 1103 & HPNB) | (ILWC 46 & LPNB) | Sequence genome       | Components of | Gene accession IDs                                                        | Putative functions |
|----------------------|----------------|-----------------|-------------------------|----------------------------------------|--------------------|------------------|-----------------------|---------------|---------------------------------------------------------------------------|--------------------|
| SNP_28770_A_35431910 | NC_021163.1    | Ca_Kabuli_Chr04 | 35431910                | AA                                     | GG                 | GG               | INTERGENIC            |               |                                                                           |                    |
| SNP_28771_A_35431944 | NC_021163.1    | Ca_Kabuli_Chr04 | 35431944                | CC                                     | AA                 | AA               | INTERGENIC            |               |                                                                           |                    |
| SNP_28772_A_35431977 | NC_021163.1    | Ca_Kabuli_Chr04 | 35431977                | TT                                     | CC                 | CC               | INTERGENIC            |               |                                                                           |                    |
| SNP_28773_A_35431995 | NC_021163.1    | Ca_Kabuli_Chr04 | 35431995                | CC                                     | TT                 | TT               | INTERGENIC            |               |                                                                           |                    |
| SNP_28775_A_35432022 | NC_021163.1    | Ca_Kabuli_Chr04 | 35432022                | GG                                     | AA                 | AA               | INTERGENIC            |               |                                                                           |                    |
| SNP_28776_A_35432082 | NC_021163.1    | Ca_Kabuli_Chr04 | 35432082                | GG                                     | AA                 | AA               | INTERGENIC            |               |                                                                           |                    |
| SNP_28777_A_35432335 | NC_021163.1    | Ca_Kabuli_Chr04 | 35432335                | AA                                     | GG                 | GG               | INTERGENIC            |               |                                                                           |                    |
| SNP_28778_A_35432465 | NC_021163.1    | Ca_Kabuli_Chr04 | 35432465                | GG                                     | AA                 | AA               | INTERGENIC            |               |                                                                           |                    |
| SNP_28779_A_35432506 | NC_021163.1    | Ca_Kabuli_Chr04 | 35432506                | TT                                     | CC                 | CC               | INTERGENIC            |               |                                                                           |                    |
| SNP_28780_A_35432513 | NC_021163.1    | Ca_Kabuli_Chr04 | 35432513                | GG                                     | CC                 | CC               | INTERGENIC            |               |                                                                           |                    |
| SNP_28781_A_35432547 | NC_021163.1    | Ca_Kabuli_Chr04 | 35432547                | TT                                     | CC                 | CC               | INTERGENIC            |               |                                                                           |                    |
| SNP_28782_A_35432552 | NC_021163.1    | Ca_Kabuli_Chr04 | 35432552                | GG                                     | AA                 | AA               | INTERGENIC            |               |                                                                           |                    |
| SNP_28783_A_35432599 | NC_021163.1    | Ca_Kabuli_Chr04 | 35432599                | GG                                     | TT                 | TT               | INTERGENIC            |               |                                                                           |                    |
| SNP_28784_A_35432683 | NC_021163.1    | Ca_Kabuli_Chr04 | 35432683                | TT                                     | GG                 | GG               | INTERGENIC            |               |                                                                           |                    |
| SNP_28785_A_35432763 | NC_021163.1    | Ca_Kabuli_Chr04 | 35432763                | TT                                     | GG                 | GG               | INTERGENIC            |               |                                                                           |                    |
| SNP_28786_A_35432814 | NC_021163.1    | Ca_Kabuli_Chr04 | 35432814                | CC                                     | TT                 | TT               | INTERGENIC            |               |                                                                           |                    |
| SNP_28787_A_35432824 | NC_021163.1    | Ca_Kabuli_Chr04 | 35432824                | GG                                     | AA                 | AA               | INTERGENIC            |               |                                                                           |                    |
| SNP_28789_A_35432884 | NC_021163.1    | Ca_Kabuli_Chr04 | 35432884                | TT                                     | GG                 | GG               | INTERGENIC            |               |                                                                           |                    |
| SNP_28790_A_35433183 | NC_021163.1    | Ca_Kabuli_Chr04 | 35433183                | GG                                     | TT                 | TT               | INTERGENIC            |               |                                                                           |                    |
| SNP_28791_A_35446156 | NC_021163.1    | Ca_Kabuli_Chr04 | 35446156                | TT                                     | AA                 | AA               | INTERGENIC            |               |                                                                           |                    |
| SNP_28792_A_35452728 | NC_021163.1    | Ca_Kabuli_Chr04 | 35452728                | AA                                     | CC                 | CC               | DRR                   | 101495879     | pentatricopeptide repeat-containing protein At3g22470, mitochondrial-like |                    |
| SNP_28793_A_35453583 | NC_021163.1    | Ca_Kabuli_Chr04 | 35453583                | TT                                     | CC                 | CC               | NON_SYNONYMOUS_CODING | 101495879     | pentatricopeptide repeat-containing protein At3g22470, mitochondrial-like |                    |



| SNPs IDs             | Chromosome IDs | Chromosomes     | Physical positions (bp) | CDC Frontier genome (Reference genome) | (Pusa 1103 & HPNB) | (ILWC 46 & LPNB) | Sequence Components of genome | Gene accession IDs | Putative functions                                                        |
|----------------------|----------------|-----------------|-------------------------|----------------------------------------|--------------------|------------------|-------------------------------|--------------------|---------------------------------------------------------------------------|
| SNP_28794_A_35453584 | NC_021163.1    | Ca_Kabuli_Chr04 | 35453584                | CC                                     | GG                 | GG               | NON_SYNONYMOUS_CODING         | 101495879          | pentatricopeptide repeat-containing protein mitochondrial-like At3g22470, |
| SNP_28795_A_35453631 | NC_021163.1    | Ca_Kabuli_Chr04 | 35453631                | GG                                     | AA                 | AA               | NON_SYNONYMOUS_CODING         | 101495879          | pentatricopeptide repeat-containing protein mitochondrial-like At3g22470, |
| SNP_28796_A_35454842 | NC_021163.1    | Ca_Kabuli_Chr04 | 35454842                | CC                                     | AA                 | AA               | SYNONYMOUS_CODING             | 101495879          | pentatricopeptide repeat-containing protein mitochondrial-like At3g22470, |
| SNP_28797_A_35454883 | NC_021163.1    | Ca_Kabuli_Chr04 | 35454883                | CC                                     | AA                 | AA               | NON_SYNONYMOUS_CODING         | 101495879          | pentatricopeptide repeat-containing protein mitochondrial-like At3g22470, |
| SNP_28798_A_35455062 | NC_021163.1    | Ca_Kabuli_Chr04 | 35455062                | TT                                     | AA                 | AA               | INTRON                        | 101495879          | pentatricopeptide repeat-containing protein mitochondrial-like At3g22470, |
| SNP_28800_A_35457119 | NC_021163.1    | Ca_Kabuli_Chr04 | 35457119                | TT                                     | AA                 | AA               | URR                           | 101495879          | pentatricopeptide repeat-containing protein mitochondrial-like At3g22470, |
| SNP_28801_A_35457161 | NC_021163.1    | Ca_Kabuli_Chr04 | 35457161                | GG                                     | TT                 | TT               | URR                           | 101495879          | pentatricopeptide repeat-containing protein mitochondrial-like At3g22470, |
| SNP_28802_A_35457316 | NC_021163.1    | Ca_Kabuli_Chr04 | 35457316                | TT                                     | CC                 | CC               | URR                           | 101495879          | pentatricopeptide repeat-containing protein mitochondrial-like At3g22470, |
| SNP_28803_A_35457511 | NC_021163.1    | Ca_Kabuli_Chr04 | 35457511                | CC                                     | GG                 | GG               | URR                           | 101495879          | pentatricopeptide repeat-containing protein mitochondrial-like At3g22470, |
| SNP_28804_A_35457613 | NC_021163.1    | Ca_Kabuli_Chr04 | 35457613                | AA                                     | CC                 | CC               | URR                           | 101495879          | pentatricopeptide repeat-containing protein mitochondrial-like At3g22470, |
| SNP_28805_A_35457639 | NC_021163.1    | Ca_Kabuli_Chr04 | 35457639                | TT                                     | AA                 | AA               | URR                           | 101495879          | pentatricopeptide repeat-containing protein mitochondrial-like At3g22470, |
| SNP_28806_A_35462130 | NC_021163.1    | Ca_Kabuli_Chr04 | 35462130                | TT                                     | AA                 | AA               | INTERGENIC                    |                    |                                                                           |
| SNP_28807_A_35462202 | NC_021163.1    | Ca_Kabuli_Chr04 | 35462202                | TT                                     | GG                 | GG               | INTERGENIC                    |                    |                                                                           |
| SNP_28808_A_35469224 | NC_021163.1    | Ca_Kabuli_Chr04 | 35469224                | TT                                     | CC                 | CC               | SYNONYMOUS_CODING             | 101496213          | sugar transport protein 10-like                                           |
| SNP_28809_A_35469304 | NC_021163.1    | Ca_Kabuli_Chr04 | 35469304                | GG                                     | AA                 | AA               | NON_SYNONYMOUS_CODING         | 101496213          | sugar transport protein 10-like                                           |
| SNP_28810_A_35469394 | NC_021163.1    | Ca_Kabuli_Chr04 | 35469394                | CC                                     | TT                 | TT               | NON_SYNONYMOUS_CODING         | 101496213          | sugar transport protein 10-like                                           |
| SNP_28811_A_35469506 | NC_021163.1    | Ca_Kabuli_Chr04 | 35469506                | CC                                     | TT                 | TT               | URR                           | 101496213          | sugar transport protein 10-like                                           |
| SNP_28812_A_35469609 | NC_021163.1    | Ca_Kabuli_Chr04 | 35469609                | CC                                     | TT                 | TT               | URR                           | 101496213          | sugar transport protein 10-like                                           |
| SNP_28813_A_35469667 | NC_021163.1    | Ca_Kabuli_Chr04 | 35469667                | AA                                     | CC                 | CC               | URR                           | 101496213          | sugar transport protein 10-like                                           |
| SNP_28814_A_35469740 | NC_021163.1    | Ca_Kabuli_Chr04 | 35469740                | AA                                     | TT                 | TT               | URR                           | 101496213          | sugar transport protein 10-like                                           |
| SNP_28815_A_35469741 | NC_021163.1    | Ca_Kabuli_Chr04 | 35469741                | TT                                     | GG                 | GG               | URR                           | 101496213          | sugar transport protein 10-like                                           |
| SNP_28816_A_35469851 | NC_021163.1    | Ca_Kabuli_Chr04 | 35469851                | GG                                     | AA                 | AA               | URR                           | 101496213          | sugar transport protein 10-like                                           |

| SNPs IDs             | Chromosome IDs | Chromosomes     | Physical positions (bp) | CDC Frontier genome (Reference genome) | (Pusa 1103 & HPNB) | (ILWC 46 & LPNB) | Sequence Components of genome | Gene accession IDs | Putative functions                 |
|----------------------|----------------|-----------------|-------------------------|----------------------------------------|--------------------|------------------|-------------------------------|--------------------|------------------------------------|
| SNP_28817_A_35469868 | NC_021163.1    | Ca_Kabuli_Chr04 | 35469868                | GG                                     | AA                 | AA               | URR                           | 101496213          | sugar transport protein 10-like    |
| SNP_28818_A_35469894 | NC_021163.1    | Ca_Kabuli_Chr04 | 35469894                | AA                                     | TT                 | TT               | URR                           | 101496213          | sugar transport protein 10-like    |
| SNP_28819_A_35469930 | NC_021163.1    | Ca_Kabuli_Chr04 | 35469930                | AA                                     | TT                 | TT               | URR                           | 101496213          | sugar transport protein 10-like    |
| SNP_28820_A_35469972 | NC_021163.1    | Ca_Kabuli_Chr04 | 35469972                | GG                                     | AA                 | AA               | URR                           | 101496213          | sugar transport protein 10-like    |
| SNP_28821_A_35470016 | NC_021163.1    | Ca_Kabuli_Chr04 | 35470016                | AA                                     | GG                 | GG               | URR                           | 101496213          | sugar transport protein 10-like    |
| SNP_28822_A_35470027 | NC_021163.1    | Ca_Kabuli_Chr04 | 35470027                | CC                                     | TT                 | TT               | URR                           | 101496213          | sugar transport protein 10-like    |
| SNP_28823_A_35470103 | NC_021163.1    | Ca_Kabuli_Chr04 | 35470103                | TT                                     | AA                 | AA               | URR                           | 101496213          | sugar transport protein 10-like    |
| SNP_28824_A_35470158 | NC_021163.1    | Ca_Kabuli_Chr04 | 35470158                | GG                                     | CC                 | CC               | URR                           | 101496213          | sugar transport protein 10-like    |
| SNP_28825_A_35470160 | NC_021163.1    | Ca_Kabuli_Chr04 | 35470160                | TT                                     | CC                 | CC               | URR                           | 101496213          | sugar transport protein 10-like    |
| SNP_28826_A_35470167 | NC_021163.1    | Ca_Kabuli_Chr04 | 35470167                | CC                                     | TT                 | TT               | URR                           | 101496213          | sugar transport protein 10-like    |
| SNP_28827_A_35470186 | NC_021163.1    | Ca_Kabuli_Chr04 | 35470186                | TT                                     | CC                 | CC               | URR                           | 101496213          | sugar transport protein 10-like    |
| SNP_28828_A_35470200 | NC_021163.1    | Ca_Kabuli_Chr04 | 35470200                | CC                                     | TT                 | TT               | URR                           | 101496213          | sugar transport protein 10-like    |
| SNP_28829_A_35470241 | NC_021163.1    | Ca_Kabuli_Chr04 | 35470241                | GG                                     | AA                 | AA               | URR                           | 101496213          | sugar transport protein 10-like    |
| SNP_28830_A_35470291 | NC_021163.1    | Ca_Kabuli_Chr04 | 35470291                | GG                                     | AA                 | AA               | URR                           | 101496213          | sugar transport protein 10-like    |
| SNP_28831_A_35470304 | NC_021163.1    | Ca_Kabuli_Chr04 | 35470304                | TT                                     | CC                 | CC               | URR                           | 101496213          | sugar transport protein 10-like    |
| SNP_28832_A_35470319 | NC_021163.1    | Ca_Kabuli_Chr04 | 35470319                | GG                                     | AA                 | AA               | URR                           | 101496213          | sugar transport protein 10-like    |
| SNP_28833_A_35470390 | NC_021163.1    | Ca_Kabuli_Chr04 | 35470390                | AA                                     | TT                 | TT               | URR                           | 101496213          | sugar transport protein 10-like    |
| SNP_28834_A_35470398 | NC_021163.1    | Ca_Kabuli_Chr04 | 35470398                | GG                                     | AA                 | AA               | URR                           | 101496213          | sugar transport protein 10-like    |
| SNP_28835_A_35487121 | NC_021163.1    | Ca_Kabuli_Chr04 | 35487121                | GG                                     | AA                 | AA               | NON_SYNONYMOUS_CODING         | 101496538          | sugar transport protein 10-like    |
| SNP_28836_A_35511873 | NC_021163.1    | Ca_Kabuli_Chr04 | 35511873                | TT                                     | CC                 | CC               | INTRON                        | 101497199          | HAUS augmin-like complex subunit 3 |
| SNP_28837_A_35511955 | NC_021163.1    | Ca_Kabuli_Chr04 | 35511955                | GG                                     | CC                 | CC               | INTRON                        | 101497199          | HAUS augmin-like complex subunit 3 |
| SNP_28838_A_35512303 | NC_021163.1    | Ca_Kabuli_Chr04 | 35512303                | GG                                     | AA                 | AA               | INTRON                        | 101497199          | HAUS augmin-like complex subunit 3 |

| SNPs IDs             | Chromosome IDs | Chromosomes     | Physical positions (bp) | CDC Frontier (Reference genome) | (Pusa 1103 & HPNB) | (ILWC 46 & LPNB) | Sequence Components of genome | Gene accession IDs | Putative functions                 |
|----------------------|----------------|-----------------|-------------------------|---------------------------------|--------------------|------------------|-------------------------------|--------------------|------------------------------------|
| SNP_28839_A_35521739 | NC_021163.1    | Ca_Kabuli_Chr04 | 35521739                | AA                              | TT                 | TT               | INTRON                        | 101497199          | HAUS augmin-like complex subunit 3 |
| SNP_28840_A_35521740 | NC_021163.1    | Ca_Kabuli_Chr04 | 35521740                | TT                              | AA                 | AA               | INTRON                        | 101497199          | HAUS augmin-like complex subunit 3 |
| SNP_28841_A_3553928  | NC_021163.1    | Ca_Kabuli_Chr04 | 3553928                 | GG                              | AA                 | AA               | INTERGENIC                    |                    |                                    |
| SNP_28842_A_3553949  | NC_021163.1    | Ca_Kabuli_Chr04 | 3553949                 | CC                              | TT                 | TT               | INTERGENIC                    |                    |                                    |
| SNP_28843_A_35580332 | NC_021163.1    | Ca_Kabuli_Chr04 | 35580332                | TT                              | GG                 | GG               | INTERGENIC                    |                    |                                    |
| SNP_28844_A_35580336 | NC_021163.1    | Ca_Kabuli_Chr04 | 35580336                | AA                              | GG                 | GG               | INTERGENIC                    |                    |                                    |
| SNP_28845_A_35598746 | NC_021163.1    | Ca_Kabuli_Chr04 | 35598746                | CC                              | TT                 | TT               | INTERGENIC                    |                    |                                    |
| SNP_28846_A_35598781 | NC_021163.1    | Ca_Kabuli_Chr04 | 35598781                | AA                              | GG                 | GG               | INTERGENIC                    |                    |                                    |
| SNP_28847_A_35598847 | NC_021163.1    | Ca_Kabuli_Chr04 | 35598847                | TT                              | CC                 | CC               | INTERGENIC                    |                    |                                    |
| SNP_28848_A_35598861 | NC_021163.1    | Ca_Kabuli_Chr04 | 35598861                | TT                              | GG                 | GG               | INTERGENIC                    |                    |                                    |
| SNP_28849_A_35599144 | NC_021163.1    | Ca_Kabuli_Chr04 | 35599144                | CC                              | TT                 | TT               | INTERGENIC                    |                    |                                    |
| SNP_28850_A_35599151 | NC_021163.1    | Ca_Kabuli_Chr04 | 35599151                | AA                              | GG                 | GG               | INTERGENIC                    |                    |                                    |
| SNP_28851_A_35599167 | NC_021163.1    | Ca_Kabuli_Chr04 | 35599167                | AA                              | GG                 | GG               | INTERGENIC                    |                    |                                    |
| SNP_28852_A_35599188 | NC_021163.1    | Ca_Kabuli_Chr04 | 35599188                | CC                              | TT                 | TT               | INTERGENIC                    |                    |                                    |
| SNP_28853_A_35600793 | NC_021163.1    | Ca_Kabuli_Chr04 | 35600793                | CC                              | TT                 | TT               | INTERGENIC                    |                    |                                    |
| SNP_28854_A_35615895 | NC_021163.1    | Ca_Kabuli_Chr04 | 35615895                | AA                              | GG                 | GG               | INTERGENIC                    |                    |                                    |
| SNP_28856_A_35616942 | NC_021163.1    | Ca_Kabuli_Chr04 | 35616942                | CC                              | AA                 | AA               | INTERGENIC                    |                    |                                    |
| SNP_28857_A_35617112 | NC_021163.1    | Ca_Kabuli_Chr04 | 35617112                | AA                              | GG                 | GG               | INTERGENIC                    |                    |                                    |
| SNP_28858_A_35617119 | NC_021163.1    | Ca_Kabuli_Chr04 | 35617119                | AA                              | GG                 | GG               | INTERGENIC                    |                    |                                    |
| SNP_28859_A_35617122 | NC_021163.1    | Ca_Kabuli_Chr04 | 35617122                | TT                              | CC                 | CC               | INTERGENIC                    |                    |                                    |
| SNP_28860_A_35617195 | NC_021163.1    | Ca_Kabuli_Chr04 | 35617195                | TT                              | CC                 | CC               | INTERGENIC                    |                    |                                    |
| SNP_28863_A_35691584 | NC_021163.1    | Ca_Kabuli_Chr04 | 35691584                | CC                              | TT                 | TT               | INTERGENIC                    |                    |                                    |

| SNPs IDs             | Chromosome IDs | Chromosomes     | Physical positions (bp) | CDC Frontier genome (Reference genome) | (Pusa 1103 & HPNB) | (ILWC 46 & LPNB) | Sequence genome | Components of | Gene accession IDs | Putative functions |
|----------------------|----------------|-----------------|-------------------------|----------------------------------------|--------------------|------------------|-----------------|---------------|--------------------|--------------------|
| SNP_28864_A_35691657 | NC_021163.1    | Ca_Kabuli_Chr04 | 35691657                | CC                                     | AA                 | AA               | INTERGENIC      |               |                    |                    |
| SNP_28865_A_35695354 | NC_021163.1    | Ca_Kabuli_Chr04 | 35695354                | GG                                     | AA                 | AA               | INTERGENIC      |               |                    |                    |
| SNP_28866_A_35695400 | NC_021163.1    | Ca_Kabuli_Chr04 | 35695400                | CC                                     | AA                 | AA               | INTERGENIC      |               |                    |                    |
| SNP_28867_A_35695641 | NC_021163.1    | Ca_Kabuli_Chr04 | 35695641                | AA                                     | GG                 | GG               | INTERGENIC      |               |                    |                    |
| SNP_28868_A_35695818 | NC_021163.1    | Ca_Kabuli_Chr04 | 35695818                | CC                                     | GG                 | GG               | INTERGENIC      |               |                    |                    |
| SNP_28869_A_35708597 | NC_021163.1    | Ca_Kabuli_Chr04 | 35708597                | CC                                     | AA                 | AA               | INTERGENIC      |               |                    |                    |
| SNP_28870_A_35708734 | NC_021163.1    | Ca_Kabuli_Chr04 | 35708734                | AA                                     | GG                 | GG               | INTERGENIC      |               |                    |                    |
| SNP_28871_A_35708738 | NC_021163.1    | Ca_Kabuli_Chr04 | 35708738                | GG                                     | AA                 | AA               | INTERGENIC      |               |                    |                    |
| SNP_28872_A_35711966 | NC_021163.1    | Ca_Kabuli_Chr04 | 35711966                | TT                                     | GG                 | GG               | INTERGENIC      |               |                    |                    |
| SNP_28873_A_35711998 | NC_021163.1    | Ca_Kabuli_Chr04 | 35711998                | TT                                     | GG                 | GG               | INTERGENIC      |               |                    |                    |
| SNP_28874_A_35712354 | NC_021163.1    | Ca_Kabuli_Chr04 | 35712354                | AA                                     | GG                 | GG               | INTERGENIC      |               |                    |                    |
| SNP_28875_A_35712394 | NC_021163.1    | Ca_Kabuli_Chr04 | 35712394                | AA                                     | CC                 | CC               | INTERGENIC      |               |                    |                    |
| SNP_28876_A_35767480 | NC_021163.1    | Ca_Kabuli_Chr04 | 35767480                | AA                                     | GG                 | GG               | INTERGENIC      |               |                    |                    |
| SNP_28877_A_35768557 | NC_021163.1    | Ca_Kabuli_Chr04 | 35768557                | AA                                     | TT                 | TT               | INTERGENIC      |               |                    |                    |
| SNP_28878_A_35768610 | NC_021163.1    | Ca_Kabuli_Chr04 | 35768610                | AA                                     | GG                 | GG               | INTERGENIC      |               |                    |                    |
| SNP_28879_A_35779968 | NC_021163.1    | Ca_Kabuli_Chr04 | 35779968                | TT                                     | AA                 | AA               | INTERGENIC      |               |                    |                    |
| SNP_28880_A_35779972 | NC_021163.1    | Ca_Kabuli_Chr04 | 35779972                | AA                                     | TT                 | TT               | INTERGENIC      |               |                    |                    |
| SNP_28881_A_35780234 | NC_021163.1    | Ca_Kabuli_Chr04 | 35780234                | CC                                     | AA                 | AA               | INTERGENIC      |               |                    |                    |
| SNP_28882_A_35780302 | NC_021163.1    | Ca_Kabuli_Chr04 | 35780302                | TT                                     | AA                 | AA               | INTERGENIC      |               |                    |                    |
| SNP_28883_A_35780428 | NC_021163.1    | Ca_Kabuli_Chr04 | 35780428                | GG                                     | AA                 | AA               | INTERGENIC      |               |                    |                    |
| SNP_28884_A_35780538 | NC_021163.1    | Ca_Kabuli_Chr04 | 35780538                | CC                                     | TT                 | TT               | INTERGENIC      |               |                    |                    |
| SNP_28885_A_35780549 | NC_021163.1    | Ca_Kabuli_Chr04 | 35780549                | GG                                     | AA                 | AA               | INTERGENIC      |               |                    |                    |

| SNPs IDs             | Chromosome IDs | Chromosomes     | Physical positions (bp) | CDC Frontier genome (Reference genome) | (Pusa 1103 & HPNB) | (ILWC 46 & LPNB) | Sequence genome | Components of | Gene accession IDs | Putative functions |
|----------------------|----------------|-----------------|-------------------------|----------------------------------------|--------------------|------------------|-----------------|---------------|--------------------|--------------------|
| SNP_28886_A_35780671 | NC_021163.1    | Ca_Kabuli_Chr04 | 35780671                | AA                                     | GG                 | GG               | INTERGENIC      |               |                    |                    |
| SNP_28887_A_35791340 | NC_021163.1    | Ca_Kabuli_Chr04 | 35791340                | CC                                     | GG                 | GG               | INTERGENIC      |               |                    |                    |
| SNP_28888_A_35791401 | NC_021163.1    | Ca_Kabuli_Chr04 | 35791401                | GG                                     | AA                 | AA               | INTERGENIC      |               |                    |                    |
| SNP_28889_A_35791482 | NC_021163.1    | Ca_Kabuli_Chr04 | 35791482                | GG                                     | TT                 | TT               | INTERGENIC      |               |                    |                    |
| SNP_28890_A_35791567 | NC_021163.1    | Ca_Kabuli_Chr04 | 35791567                | AA                                     | TT                 | TT               | INTERGENIC      |               |                    |                    |
| SNP_28891_A_35791676 | NC_021163.1    | Ca_Kabuli_Chr04 | 35791676                | GG                                     | CC                 | CC               | INTERGENIC      |               |                    |                    |
| SNP_28892_A_35792208 | NC_021163.1    | Ca_Kabuli_Chr04 | 35792208                | GG                                     | AA                 | AA               | INTERGENIC      |               |                    |                    |
| SNP_28893_A_35793320 | NC_021163.1    | Ca_Kabuli_Chr04 | 35793320                | AA                                     | TT                 | TT               | INTERGENIC      |               |                    |                    |
| SNP_28894_A_35793350 | NC_021163.1    | Ca_Kabuli_Chr04 | 35793350                | TT                                     | CC                 | CC               | INTERGENIC      |               |                    |                    |
| SNP_28895_A_35796585 | NC_021163.1    | Ca_Kabuli_Chr04 | 35796585                | GG                                     | AA                 | AA               | INTERGENIC      |               |                    |                    |
| SNP_28896_A_35798427 | NC_021163.1    | Ca_Kabuli_Chr04 | 35798427                | TT                                     | AA                 | AA               | INTERGENIC      |               |                    |                    |
| SNP_28898_A_35822156 | NC_021163.1    | Ca_Kabuli_Chr04 | 35822156                | TT                                     | CC                 | CC               | INTERGENIC      |               |                    |                    |
| SNP_28899_A_35822162 | NC_021163.1    | Ca_Kabuli_Chr04 | 35822162                | CC                                     | TT                 | TT               | INTERGENIC      |               |                    |                    |
| SNP_28901_A_35822553 | NC_021163.1    | Ca_Kabuli_Chr04 | 35822553                | TT                                     | CC                 | CC               | INTERGENIC      |               |                    |                    |
| SNP_28902_A_35822690 | NC_021163.1    | Ca_Kabuli_Chr04 | 35822690                | CC                                     | TT                 | TT               | INTERGENIC      |               |                    |                    |
| SNP_28903_A_35828798 | NC_021163.1    | Ca_Kabuli_Chr04 | 35828798                | AA                                     | GG                 | GG               | INTERGENIC      |               |                    |                    |
| SNP_28904_A_35828819 | NC_021163.1    | Ca_Kabuli_Chr04 | 35828819                | AA                                     | CC                 | CC               | INTERGENIC      |               |                    |                    |
| SNP_28905_A_35831770 | NC_021163.1    | Ca_Kabuli_Chr04 | 35831770                | CC                                     | GG                 | GG               | INTERGENIC      |               |                    |                    |
| SNP_28907_A_35846939 | NC_021163.1    | Ca_Kabuli_Chr04 | 35846939                | CC                                     | AA                 | AA               | INTERGENIC      |               |                    |                    |
| SNP_28908_A_35853606 | NC_021163.1    | Ca_Kabuli_Chr04 | 35853606                | GG                                     | CC                 | CC               | INTERGENIC      |               |                    |                    |
| SNP_28909_A_35885262 | NC_021163.1    | Ca_Kabuli_Chr04 | 35885262                | CC                                     | AA                 | AA               | INTERGENIC      |               |                    |                    |
| SNP_28910_A_35897765 | NC_021163.1    | Ca_Kabuli_Chr04 | 35897765                | CC                                     | TT                 | TT               | INTERGENIC      |               |                    |                    |

| SNPs IDs             | Chromosome IDs | Chromosomes     | Physical positions (bp) | CDC Frontier genome (Reference genome) | (Pusa 1103 & HPNB) | (ILWC 46 & LPNB) | Sequence Components of genome | Gene accession IDs | Putative functions                          |
|----------------------|----------------|-----------------|-------------------------|----------------------------------------|--------------------|------------------|-------------------------------|--------------------|---------------------------------------------|
| SNP_28911_A_35913995 | NC_021163.1    | Ca_Kabuli_Chr04 | 35913995                | TT                                     | AA                 | AA               | INTRON                        | 101499994          | serine/threonine-protein kinase TNNI3K-like |
| SNP_28912_A_35944938 | NC_021163.1    | Ca_Kabuli_Chr04 | 35944938                | TT                                     | CC                 | CC               | INTRON                        | 101500335          | probable purine permease 9                  |
| SNP_28913_A_35944976 | NC_021163.1    | Ca_Kabuli_Chr04 | 35944976                | AA                                     | GG                 | GG               | INTRON                        | 101500335          | probable purine permease 9                  |
| SNP_28915_A_36027244 | NC_021163.1    | Ca_Kabuli_Chr04 | 36027244                | CC                                     | GG                 | GG               | INTERGENIC                    |                    |                                             |
| SNP_28916_A_36027246 | NC_021163.1    | Ca_Kabuli_Chr04 | 36027246                | TT                                     | GG                 | GG               | INTERGENIC                    |                    |                                             |
| SNP_28918_A_36079543 | NC_021163.1    | Ca_Kabuli_Chr04 | 36079543                | CC                                     | TT                 | TT               | NON_SYNONYMOUS_CODING         | 101505676          | uncharacterized LOC101505676                |
| SNP_28919_A_36093890 | NC_021163.1    | Ca_Kabuli_Chr04 | 36093890                | AA                                     | GG                 | GG               | INTERGENIC                    |                    |                                             |
| SNP_28920_A_36094281 | NC_021163.1    | Ca_Kabuli_Chr04 | 36094281                | TT                                     | CC                 | CC               | INTERGENIC                    |                    |                                             |
| SNP_28922_A_36099100 | NC_021163.1    | Ca_Kabuli_Chr04 | 36099100                | TT                                     | AA                 | AA               | INTERGENIC                    |                    |                                             |
| SNP_28923_A_36189697 | NC_021163.1    | Ca_Kabuli_Chr04 | 36189697                | GG                                     | AA                 | AA               | INTERGENIC                    |                    |                                             |
| SNP_28924_A_36225468 | NC_021163.1    | Ca_Kabuli_Chr04 | 36225468                | AA                                     | GG                 | GG               | URR                           | 101508668          | ABC transporter G family member 26-like     |
| SNP_28928_A_36300103 | NC_021163.1    | Ca_Kabuli_Chr04 | 36300103                | TT                                     | CC                 | CC               | INTERGENIC                    |                    |                                             |
| SNP_28929_A_36300222 | NC_021163.1    | Ca_Kabuli_Chr04 | 36300222                | AA                                     | GG                 | GG               | INTERGENIC                    |                    |                                             |
| SNP_28930_A_36300473 | NC_021163.1    | Ca_Kabuli_Chr04 | 36300473                | AA                                     | CC                 | CC               | INTERGENIC                    |                    |                                             |
| SNP_28931_A_36334952 | NC_021163.1    | Ca_Kabuli_Chr04 | 36334952                | AA                                     | GG                 | GG               | INTERGENIC                    |                    |                                             |
| SNP_28932_A_36334981 | NC_021163.1    | Ca_Kabuli_Chr04 | 36334981                | CC                                     | TT                 | TT               | INTERGENIC                    |                    |                                             |
| SNP_28933_A_36335023 | NC_021163.1    | Ca_Kabuli_Chr04 | 36335023                | TT                                     | AA                 | AA               | INTERGENIC                    |                    |                                             |
| SNP_28934_A_36335296 | NC_021163.1    | Ca_Kabuli_Chr04 | 36335296                | CC                                     | TT                 | TT               | INTERGENIC                    |                    |                                             |
| SNP_28936_A_36335449 | NC_021163.1    | Ca_Kabuli_Chr04 | 36335449                | GG                                     | AA                 | AA               | INTERGENIC                    |                    |                                             |
| SNP_28937_A_36335495 | NC_021163.1    | Ca_Kabuli_Chr04 | 36335495                | CC                                     | TT                 | TT               | INTERGENIC                    |                    |                                             |
| SNP_28938_A_36335532 | NC_021163.1    | Ca_Kabuli_Chr04 | 36335532                | TT                                     | CC                 | CC               | INTERGENIC                    |                    |                                             |
| SNP_28939_A_36335717 | NC_021163.1    | Ca_Kabuli_Chr04 | 36335717                | CC                                     | TT                 | TT               | INTERGENIC                    |                    |                                             |

| SNPs IDs             | Chromosome IDs | Chromosomes     | Physical positions (bp) | CDC Frontier genome (Reference genome) | (Pusa 1103 & HPNB) | (ILWC 46 & LPNB) | Sequence genome | Components of | Gene accession IDs | Putative functions |
|----------------------|----------------|-----------------|-------------------------|----------------------------------------|--------------------|------------------|-----------------|---------------|--------------------|--------------------|
| SNP_28940_A_36335766 | NC_021163.1    | Ca_Kabuli_Chr04 | 36335766                | CC                                     | TT                 | TT               | INTERGENIC      |               |                    |                    |
| SNP_28941_A_36335873 | NC_021163.1    | Ca_Kabuli_Chr04 | 36335873                | CC                                     | TT                 | TT               | INTERGENIC      |               |                    |                    |
| SNP_28942_A_36335983 | NC_021163.1    | Ca_Kabuli_Chr04 | 36335983                | TT                                     | CC                 | CC               | INTERGENIC      |               |                    |                    |
| SNP_28943_A_36336107 | NC_021163.1    | Ca_Kabuli_Chr04 | 36336107                | TT                                     | CC                 | CC               | INTERGENIC      |               |                    |                    |
| SNP_28944_A_36336128 | NC_021163.1    | Ca_Kabuli_Chr04 | 36336128                | AA                                     | GG                 | GG               | INTERGENIC      |               |                    |                    |
| SNP_28945_A_36336201 | NC_021163.1    | Ca_Kabuli_Chr04 | 36336201                | CC                                     | TT                 | TT               | INTERGENIC      |               |                    |                    |
| SNP_28946_A_36336220 | NC_021163.1    | Ca_Kabuli_Chr04 | 36336220                | CC                                     | TT                 | TT               | INTERGENIC      |               |                    |                    |
| SNP_28947_A_36336293 | NC_021163.1    | Ca_Kabuli_Chr04 | 36336293                | CC                                     | AA                 | AA               | INTERGENIC      |               |                    |                    |
| SNP_28948_A_36336701 | NC_021163.1    | Ca_Kabuli_Chr04 | 36336701                | GG                                     | AA                 | AA               | INTERGENIC      |               |                    |                    |
| SNP_28949_A_36336712 | NC_021163.1    | Ca_Kabuli_Chr04 | 36336712                | TT                                     | AA                 | AA               | INTERGENIC      |               |                    |                    |
| SNP_28950_A_36336741 | NC_021163.1    | Ca_Kabuli_Chr04 | 36336741                | TT                                     | CC                 | CC               | INTERGENIC      |               |                    |                    |
| SNP_28951_A_36336755 | NC_021163.1    | Ca_Kabuli_Chr04 | 36336755                | CC                                     | GG                 | GG               | INTERGENIC      |               |                    |                    |
| SNP_28952_A_36336860 | NC_021163.1    | Ca_Kabuli_Chr04 | 36336860                | TT                                     | GG                 | GG               | INTERGENIC      |               |                    |                    |
| SNP_28953_A_36336872 | NC_021163.1    | Ca_Kabuli_Chr04 | 36336872                | GG                                     | AA                 | AA               | INTERGENIC      |               |                    |                    |
| SNP_28955_A_36336927 | NC_021163.1    | Ca_Kabuli_Chr04 | 36336927                | CC                                     | AA                 | AA               | INTERGENIC      |               |                    |                    |
| SNP_28956_A_36336951 | NC_021163.1    | Ca_Kabuli_Chr04 | 36336951                | CC                                     | TT                 | TT               | INTERGENIC      |               |                    |                    |
| SNP_28957_A_36336968 | NC_021163.1    | Ca_Kabuli_Chr04 | 36336968                | AA                                     | GG                 | GG               | INTERGENIC      |               |                    |                    |
| SNP_28958_A_36337004 | NC_021163.1    | Ca_Kabuli_Chr04 | 36337004                | AA                                     | GG                 | GG               | INTERGENIC      |               |                    |                    |
| SNP_28959_A_36337010 | NC_021163.1    | Ca_Kabuli_Chr04 | 36337010                | CC                                     | TT                 | TT               | INTERGENIC      |               |                    |                    |
| SNP_28960_A_36337106 | NC_021163.1    | Ca_Kabuli_Chr04 | 36337106                | AA                                     | GG                 | GG               | INTERGENIC      |               |                    |                    |
| SNP_28961_A_36337115 | NC_021163.1    | Ca_Kabuli_Chr04 | 36337115                | AA                                     | GG                 | GG               | INTERGENIC      |               |                    |                    |
| SNP_28963_A_36337230 | NC_021163.1    | Ca_Kabuli_Chr04 | 36337230                | GG                                     | AA                 | AA               | INTERGENIC      |               |                    |                    |

| SNPs IDs             | Chromosome IDs | Chromosomes     | Physical positions (bp) | CDC Frontier genome (Reference genome) | (Pusa 1103 & HPNB) | (ILWC 46 & LPNB) | Sequence Components of genome | Gene accession IDs | Putative functions                             |
|----------------------|----------------|-----------------|-------------------------|----------------------------------------|--------------------|------------------|-------------------------------|--------------------|------------------------------------------------|
| SNP_28964_A_36337313 | NC_021163.1    | Ca_Kabuli_Chr04 | 36337313                | AA                                     | GG                 | GG               | INTERGENIC                    |                    |                                                |
| SNP_28965_A_36337318 | NC_021163.1    | Ca_Kabuli_Chr04 | 36337318                | CC                                     | GG                 | GG               | INTERGENIC                    |                    |                                                |
| SNP_28967_A_36389354 | NC_021163.1    | Ca_Kabuli_Chr04 | 36389354                | TT                                     | CC                 | CC               | INTERGENIC                    |                    |                                                |
| SNP_28969_A_36485346 | NC_021163.1    | Ca_Kabuli_Chr04 | 36485346                | CC                                     | TT                 | TT               | DRR                           | 101514908          | flavonol synthase/flavanone 3-hydroxylase-like |
| SNP_28970_A_36499553 | NC_021163.1    | Ca_Kabuli_Chr04 | 36499553                | GG                                     | AA                 | AA               | INTERGENIC                    |                    |                                                |
| SNP_28972_A_36550280 | NC_021163.1    | Ca_Kabuli_Chr04 | 36550280                | AA                                     | TT                 | TT               | INTERGENIC                    |                    |                                                |
| SNP_28973_A_36550802 | NC_021163.1    | Ca_Kabuli_Chr04 | 36550802                | CC                                     | AA                 | AA               | INTERGENIC                    |                    |                                                |
| SNP_28974_A_36550822 | NC_021163.1    | Ca_Kabuli_Chr04 | 36550822                | CC                                     | AA                 | AA               | INTERGENIC                    |                    |                                                |
| SNP_28975_A_36550918 | NC_021163.1    | Ca_Kabuli_Chr04 | 36550918                | CC                                     | TT                 | TT               | INTERGENIC                    |                    |                                                |
| SNP_28977_A_36615879 | NC_021163.1    | Ca_Kabuli_Chr04 | 36615879                | GG                                     | AA                 | AA               | DRR                           | 101490490          | long chain acyl-CoA synthetase 2-like          |
| SNP_28978_A_36615887 | NC_021163.1    | Ca_Kabuli_Chr04 | 36615887                | GG                                     | TT                 | TT               | DRR                           | 101490490          | long chain acyl-CoA synthetase 2-like          |
| SNP_28979_A_36629787 | NC_021163.1    | Ca_Kabuli_Chr04 | 36629787                | GG                                     | AA                 | AA               | INTERGENIC                    |                    |                                                |
| SNP_28980_A_36682523 | NC_021163.1    | Ca_Kabuli_Chr04 | 36682523                | AA                                     | GG                 | GG               | INTERGENIC                    |                    |                                                |
| SNP_28982_A_36726657 | NC_021163.1    | Ca_Kabuli_Chr04 | 36726657                | TT                                     | CC                 | CC               | INTERGENIC                    |                    |                                                |
| SNP_28983_A_36726660 | NC_021163.1    | Ca_Kabuli_Chr04 | 36726660                | TT                                     | CC                 | CC               | INTERGENIC                    |                    |                                                |
| SNP_28984_A_36726681 | NC_021163.1    | Ca_Kabuli_Chr04 | 36726681                | CC                                     | TT                 | TT               | INTERGENIC                    |                    |                                                |
| SNP_28985_A_36726704 | NC_021163.1    | Ca_Kabuli_Chr04 | 36726704                | TT                                     | CC                 | CC               | INTERGENIC                    |                    |                                                |
| SNP_28986_A_36726720 | NC_021163.1    | Ca_Kabuli_Chr04 | 36726720                | AA                                     | CC                 | CC               | INTERGENIC                    |                    |                                                |
| SNP_28987_A_36726745 | NC_021163.1    | Ca_Kabuli_Chr04 | 36726745                | TT                                     | CC                 | CC               | INTERGENIC                    |                    |                                                |
| SNP_28990_A_36726986 | NC_021163.1    | Ca_Kabuli_Chr04 | 36726986                | AA                                     | GG                 | GG               | INTERGENIC                    |                    |                                                |
| SNP_28991_A_36727121 | NC_021163.1    | Ca_Kabuli_Chr04 | 36727121                | TT                                     | AA                 | AA               | INTERGENIC                    |                    |                                                |
| SNP_28992_A_36727163 | NC_021163.1    | Ca_Kabuli_Chr04 | 36727163                | TT                                     | CC                 | CC               | INTERGENIC                    |                    |                                                |



| SNPs IDs             | Chromosome IDs | Chromosomes     | Physical positions (bp) | CDC Frontier (Reference genome) | (Pusa 1103 & HPNB) | (ILWC 46 & LPNB) | Sequence Components of genome | Gene accession IDs | Putative functions                                 |
|----------------------|----------------|-----------------|-------------------------|---------------------------------|--------------------|------------------|-------------------------------|--------------------|----------------------------------------------------|
| SNP_28993_A_36735153 | NC_021163.1    | Ca_Kabuli_Chr04 | 36735153                | CC                              | TT                 | TT               | INTERGENIC                    |                    |                                                    |
| SNP_28994_A_36842665 | NC_021163.1    | Ca_Kabuli_Chr04 | 36842665                | CC                              | GG                 | GG               | NON_SYNONYMOUS_CODING         | 101506418          | titin                                              |
| SNP_28995_A_36853057 | NC_021163.1    | Ca_Kabuli_Chr04 | 36853057                | TT                              | AA                 | AA               | URR                           | 101495335          | uncharacterized LOC101495335                       |
| SNP_28996_A_36882619 | NC_021163.1    | Ca_Kabuli_Chr04 | 36882619                | TT                              | CC                 | CC               | INTERGENIC                    |                    |                                                    |
| SNP_28997_A_36897993 | NC_021163.1    | Ca_Kabuli_Chr04 | 36897993                | CC                              | AA                 | AA               | INTERGENIC                    |                    |                                                    |
| SNP_28998_A_36931789 | NC_021163.1    | Ca_Kabuli_Chr04 | 36931789                | TT                              | CC                 | CC               | INTERGENIC                    |                    |                                                    |
| SNP_28999_A_36931832 | NC_021163.1    | Ca_Kabuli_Chr04 | 36931832                | CC                              | TT                 | TT               | INTERGENIC                    |                    |                                                    |
| SNP_29000_A_36932554 | NC_021163.1    | Ca_Kabuli_Chr04 | 36932554                | CC                              | TT                 | TT               | INTERGENIC                    |                    |                                                    |
| SNP_29001_A_36952569 | NC_021163.1    | Ca_Kabuli_Chr04 | 36952569                | GG                              | TT                 | TT               | INTRON                        | 101496648          | protein indeterminate-domain 5, chloroplastic-like |
| SNP_29002_A_36952588 | NC_021163.1    | Ca_Kabuli_Chr04 | 36952588                | GG                              | TT                 | TT               | INTRON                        | 101496648          | protein indeterminate-domain 5, chloroplastic-like |
| SNP_29005_A_36961310 | NC_021163.1    | Ca_Kabuli_Chr04 | 36961310                | GG                              | AA                 | AA               | INTERGENIC                    |                    |                                                    |
| SNP_29006_A_36962418 | NC_021163.1    | Ca_Kabuli_Chr04 | 36962418                | AA                              | GG                 | GG               | INTERGENIC                    |                    |                                                    |
| SNP_29007_A_36962419 | NC_021163.1    | Ca_Kabuli_Chr04 | 36962419                | AA                              | GG                 | GG               | INTERGENIC                    |                    |                                                    |
| SNP_29008_A_36964357 | NC_021163.1    | Ca_Kabuli_Chr04 | 36964357                | TT                              | CC                 | CC               | INTERGENIC                    |                    |                                                    |
| SNP_29009_A_36964885 | NC_021163.1    | Ca_Kabuli_Chr04 | 36964885                | AA                              | GG                 | GG               | INTERGENIC                    |                    |                                                    |
| SNP_29010_A_36964889 | NC_021163.1    | Ca_Kabuli_Chr04 | 36964889                | GG                              | AA                 | AA               | INTERGENIC                    |                    |                                                    |
| SNP_29011_A_36964922 | NC_021163.1    | Ca_Kabuli_Chr04 | 36964922                | CC                              | TT                 | TT               | INTERGENIC                    |                    |                                                    |
| SNP_29013_A_36968258 | NC_021163.1    | Ca_Kabuli_Chr04 | 36968258                | TT                              | AA                 | AA               | INTERGENIC                    |                    |                                                    |
| SNP_29015_A_36968337 | NC_021163.1    | Ca_Kabuli_Chr04 | 36968337                | TT                              | GG                 | GG               | INTERGENIC                    |                    |                                                    |
| SNP_29019_A_36973155 | NC_021163.1    | Ca_Kabuli_Chr04 | 36973155                | CC                              | TT                 | TT               | INTERGENIC                    |                    |                                                    |
| SNP_29020_A_36974609 | NC_021163.1    | Ca_Kabuli_Chr04 | 36974609                | CC                              | TT                 | TT               | DRR                           | 101497407          | protein CHROMATIN REMODELING 19                    |
| SNP_29021_A_36979016 | NC_021163.1    | Ca_Kabuli_Chr04 | 36979016                | GG                              | AA                 | AA               | INTRON                        | 101497407          | protein CHROMATIN REMODELING 19                    |

| SNPs IDs             | Chromosome IDs | Chromosomes     | Physical positions (bp) | CDC Frontier (Reference genome) | (Pusa 1103 & HPNB) | (ILWC 46 & LPNB) | Sequence Components of genome | Gene accession IDs | Putative functions              |
|----------------------|----------------|-----------------|-------------------------|---------------------------------|--------------------|------------------|-------------------------------|--------------------|---------------------------------|
| SNP_29022_A_36986933 | NC_021163.1    | Ca_Kabuli_Chr04 | 36986933                | AA                              | GG                 | GG               | URR                           | 101497407          | protein CHROMATIN REMODELING 19 |
| SNP_29023_A_37007310 | NC_021163.1    | Ca_Kabuli_Chr04 | 37007310                | TT                              | GG                 | GG               | INTERGENIC                    |                    |                                 |
| SNP_29024_A_37007624 | NC_021163.1    | Ca_Kabuli_Chr04 | 37007624                | GG                              | AA                 | AA               | INTERGENIC                    |                    |                                 |
| SNP_29025_A_37007640 | NC_021163.1    | Ca_Kabuli_Chr04 | 37007640                | TT                              | CC                 | CC               | INTERGENIC                    |                    |                                 |
| SNP_29026_A_37007692 | NC_021163.1    | Ca_Kabuli_Chr04 | 37007692                | GG                              | TT                 | TT               | INTERGENIC                    |                    |                                 |
| SNP_29027_A_37008969 | NC_021163.1    | Ca_Kabuli_Chr04 | 37008969                | CC                              | AA                 | AA               | INTERGENIC                    |                    |                                 |
| SNP_29028_A_37012192 | NC_021163.1    | Ca_Kabuli_Chr04 | 37012192                | TT                              | AA                 | AA               | INTERGENIC                    |                    |                                 |
| SNP_29029_A_37012201 | NC_021163.1    | Ca_Kabuli_Chr04 | 37012201                | CC                              | AA                 | AA               | INTERGENIC                    |                    |                                 |
| SNP_29030_A_37012493 | NC_021163.1    | Ca_Kabuli_Chr04 | 37012493                | TT                              | CC                 | CC               | INTERGENIC                    |                    |                                 |
| SNP_29031_A_37012616 | NC_021163.1    | Ca_Kabuli_Chr04 | 37012616                | TT                              | CC                 | CC               | INTERGENIC                    |                    |                                 |
| SNP_29032_A_37012778 | NC_021163.1    | Ca_Kabuli_Chr04 | 37012778                | TT                              | GG                 | GG               | INTERGENIC                    |                    |                                 |
| SNP_29033_A_37013005 | NC_021163.1    | Ca_Kabuli_Chr04 | 37013005                | AA                              | TT                 | TT               | INTERGENIC                    |                    |                                 |
| SNP_29034_A_37013336 | NC_021163.1    | Ca_Kabuli_Chr04 | 37013336                | GG                              | AA                 | AA               | INTERGENIC                    |                    |                                 |
| SNP_29035_A_37013498 | NC_021163.1    | Ca_Kabuli_Chr04 | 37013498                | AA                              | CC                 | CC               | INTERGENIC                    |                    |                                 |
| SNP_29036_A_37013520 | NC_021163.1    | Ca_Kabuli_Chr04 | 37013520                | CC                              | TT                 | TT               | INTERGENIC                    |                    |                                 |
| SNP_29037_A_37013556 | NC_021163.1    | Ca_Kabuli_Chr04 | 37013556                | CC                              | TT                 | TT               | INTERGENIC                    |                    |                                 |
| SNP_29038_A_37013579 | NC_021163.1    | Ca_Kabuli_Chr04 | 37013579                | AA                              | TT                 | TT               | INTERGENIC                    |                    |                                 |
| SNP_29040_A_37025436 | NC_021163.1    | Ca_Kabuli_Chr04 | 37025436                | AA                              | CC                 | CC               | INTERGENIC                    |                    |                                 |
| SNP_29041_A_37025479 | NC_021163.1    | Ca_Kabuli_Chr04 | 37025479                | AA                              | TT                 | TT               | INTERGENIC                    |                    |                                 |
| SNP_29042_A_37025510 | NC_021163.1    | Ca_Kabuli_Chr04 | 37025510                | AA                              | GG                 | GG               | INTERGENIC                    |                    |                                 |
| SNP_29043_A_37025697 | NC_021163.1    | Ca_Kabuli_Chr04 | 37025697                | TT                              | CC                 | CC               | INTERGENIC                    |                    |                                 |
| SNP_29044_A_37025750 | NC_021163.1    | Ca_Kabuli_Chr04 | 37025750                | TT                              | AA                 | AA               | INTERGENIC                    |                    |                                 |

| SNPs IDs             | Chromosome IDs | Chromosomes     | Physical positions (bp) | CDC Frontier (Reference genome) | (Pusa 1103 & HPNB) | (ILWC 46 & LPNB) | Sequence Components of genome | Gene accession IDs | Putative functions                               |
|----------------------|----------------|-----------------|-------------------------|---------------------------------|--------------------|------------------|-------------------------------|--------------------|--------------------------------------------------|
| SNP_29045_A_37027073 | NC_021163.1    | Ca_Kabuli_Chr04 | 37027073                | CC                              | TT                 | TT               | INTERGENIC                    |                    |                                                  |
| SNP_29046_A_37027097 | NC_021163.1    | Ca_Kabuli_Chr04 | 37027097                | GG                              | TT                 | TT               | INTERGENIC                    |                    |                                                  |
| SNP_29047_A_37027462 | NC_021163.1    | Ca_Kabuli_Chr04 | 37027462                | GG                              | AA                 | AA               | INTERGENIC                    |                    |                                                  |
| SNP_29048_A_37027465 | NC_021163.1    | Ca_Kabuli_Chr04 | 37027465                | CC                              | TT                 | TT               | INTERGENIC                    |                    |                                                  |
| SNP_29049_A_37027471 | NC_021163.1    | Ca_Kabuli_Chr04 | 37027471                | GG                              | CC                 | CC               | INTERGENIC                    |                    |                                                  |
| SNP_29050_A_37027496 | NC_021163.1    | Ca_Kabuli_Chr04 | 37027496                | TT                              | AA                 | AA               | INTERGENIC                    |                    |                                                  |
| SNP_29051_A_37027508 | NC_021163.1    | Ca_Kabuli_Chr04 | 37027508                | GG                              | AA                 | AA               | INTERGENIC                    |                    |                                                  |
| SNP_29052_A_37032909 | NC_021163.1    | Ca_Kabuli_Chr04 | 37032909                | TT                              | CC                 | CC               | INTERGENIC                    |                    |                                                  |
| SNP_29053_A_37032921 | NC_021163.1    | Ca_Kabuli_Chr04 | 37032921                | TT                              | CC                 | CC               | INTERGENIC                    |                    |                                                  |
| SNP_29054_A_37032989 | NC_021163.1    | Ca_Kabuli_Chr04 | 37032989                | TT                              | CC                 | CC               | INTERGENIC                    |                    |                                                  |
| SNP_29055_A_37034149 | NC_021163.1    | Ca_Kabuli_Chr04 | 37034149                | TT                              | GG                 | GG               | INTERGENIC                    |                    |                                                  |
| SNP_29057_A_37034722 | NC_021163.1    | Ca_Kabuli_Chr04 | 37034722                | TT                              | CC                 | CC               | INTERGENIC                    |                    |                                                  |
| SNP_29058_A_37034737 | NC_021163.1    | Ca_Kabuli_Chr04 | 37034737                | TT                              | CC                 | CC               | INTERGENIC                    |                    |                                                  |
| SNP_29059_A_37034767 | NC_021163.1    | Ca_Kabuli_Chr04 | 37034767                | GG                              | AA                 | AA               | INTERGENIC                    |                    |                                                  |
| SNP_29060_A_37035055 | NC_021163.1    | Ca_Kabuli_Chr04 | 37035055                | AA                              | CC                 | CC               | INTERGENIC                    |                    |                                                  |
| SNP_29063_A_37035779 | NC_021163.1    | Ca_Kabuli_Chr04 | 37035779                | AA                              | GG                 | GG               | INTERGENIC                    |                    |                                                  |
| SNP_29065_A_37038568 | NC_021163.1    | Ca_Kabuli_Chr04 | 37038568                | AA                              | GG                 | GG               | INTERGENIC                    |                    |                                                  |
| SNP_29066_A_37039530 | NC_021163.1    | Ca_Kabuli_Chr04 | 37039530                | AA                              | CC                 | CC               | DRR                           | 101497743          | peptidyl-prolyl cis-trans isomerase CYP21-4-like |
| SNP_29068_A_37039555 | NC_021163.1    | Ca_Kabuli_Chr04 | 37039555                | CC                              | GG                 | GG               | DRR                           | 101497743          | peptidyl-prolyl cis-trans isomerase CYP21-4-like |
| SNP_29069_A_37041145 | NC_021163.1    | Ca_Kabuli_Chr04 | 37041145                | GG                              | TT                 | TT               | INTRON                        | 101497743          | peptidyl-prolyl cis-trans isomerase CYP21-4-like |
| SNP_29070_A_37041154 | NC_021163.1    | Ca_Kabuli_Chr04 | 37041154                | GG                              | TT                 | TT               | INTRON                        | 101497743          | peptidyl-prolyl cis-trans isomerase CYP21-4-like |
| SNP_29072_A_37041164 | NC_021163.1    | Ca_Kabuli_Chr04 | 37041164                | AA                              | GG                 | GG               | INTRON                        | 101497743          | peptidyl-prolyl cis-trans isomerase CYP21-4-like |

| SNPs IDs             | Chromosome IDs | Chromosomes     | Physical positions (bp) | CDC Frontier (Reference genome) | (Pusa 1103 & HPNB) | (ILWC 46 & LPNB) | Sequence Components of genome | Gene accession IDs | Putative functions                                          |
|----------------------|----------------|-----------------|-------------------------|---------------------------------|--------------------|------------------|-------------------------------|--------------------|-------------------------------------------------------------|
| SNP_29073_A_37041187 | NC_021163.1    | Ca_Kabuli_Chr04 | 37041187                | TT                              | CC                 | CC               | INTRON                        | 101497743          | peptidyl-prolyl cis-trans isomerase CYP21-4-like            |
| SNP_29074_A_37041399 | NC_021163.1    | Ca_Kabuli_Chr04 | 37041399                | AA                              | GG                 | GG               | INTRON                        | 101497743          | peptidyl-prolyl cis-trans isomerase CYP21-4-like            |
| SNP_29075_A_37043461 | NC_021163.1    | Ca_Kabuli_Chr04 | 37043461                | CC                              | AA                 | AA               | URR                           | 101497743          | peptidyl-prolyl cis-trans isomerase CYP21-4-like            |
| SNP_29077_A_37044407 | NC_021163.1    | Ca_Kabuli_Chr04 | 37044407                | TT                              | CC                 | CC               | URR                           | 101497743          | peptidyl-prolyl cis-trans isomerase CYP21-4-like            |
| SNP_29078_A_37046494 | NC_021163.1    | Ca_Kabuli_Chr04 | 37046494                | TT                              | CC                 | CC               | INTERGENIC                    |                    |                                                             |
| SNP_29081_A_37047817 | NC_021163.1    | Ca_Kabuli_Chr04 | 37047817                | CC                              | TT                 | TT               | INTERGENIC                    |                    |                                                             |
| SNP_29082_A_37055701 | NC_021163.1    | Ca_Kabuli_Chr04 | 37055701                | AA                              | GG                 | GG               | INTERGENIC                    |                    |                                                             |
| SNP_29084_A_37057944 | NC_021163.1    | Ca_Kabuli_Chr04 | 37057944                | TT                              | GG                 | GG               | INTERGENIC                    |                    |                                                             |
| SNP_29086_A_37057977 | NC_021163.1    | Ca_Kabuli_Chr04 | 37057977                | CC                              | TT                 | TT               | INTERGENIC                    |                    |                                                             |
| SNP_29087_A_37057983 | NC_021163.1    | Ca_Kabuli_Chr04 | 37057983                | TT                              | CC                 | CC               | INTERGENIC                    |                    |                                                             |
| SNP_29088_A_37059778 | NC_021163.1    | Ca_Kabuli_Chr04 | 37059778                | TT                              | CC                 | CC               | URR                           | 101498068          | histone-lysine N-methyltransferase family member SUVH9-like |
| SNP_29089_A_37061423 | NC_021163.1    | Ca_Kabuli_Chr04 | 37061423                | GG                              | AA                 | AA               | SYNONYMOUS_CODING             | 101498068          | histone-lysine N-methyltransferase family member SUVH9-like |
| SNP_29090_A_37067907 | NC_021163.1    | Ca_Kabuli_Chr04 | 37067907                | TT                              | AA                 | AA               | INTERGENIC                    |                    |                                                             |
| SNP_29091_A_37069216 | NC_021163.1    | Ca_Kabuli_Chr04 | 37069216                | TT                              | CC                 | CC               | URR                           | 101498068          | histone-lysine N-methyltransferase family member SUVH9-like |
| SNP_29092_A_37069963 | NC_021163.1    | Ca_Kabuli_Chr04 | 37069963                | TT                              | AA                 | AA               | URR                           | 101498068          | histone-lysine N-methyltransferase family member SUVH9-like |
| SNP_29093_A_37070153 | NC_021163.1    | Ca_Kabuli_Chr04 | 37070153                | TT                              | CC                 | CC               | URR                           | 101498068          | histone-lysine N-methyltransferase family member SUVH9-like |
| SNP_29094_A_37070422 | NC_021163.1    | Ca_Kabuli_Chr04 | 37070422                | AA                              | GG                 | GG               | URR                           | 101498068          | histone-lysine N-methyltransferase family member SUVH9-like |
| SNP_29095_A_37083223 | NC_021163.1    | Ca_Kabuli_Chr04 | 37083223                | TT                              | GG                 | GG               | INTRON                        | 101507403          | B3 domain-containing transcription factor VRN1-like         |
| SNP_29096_A_37083253 | NC_021163.1    | Ca_Kabuli_Chr04 | 37083253                | CC                              | AA                 | AA               | INTRON                        | 101507403          | B3 domain-containing transcription factor VRN1-like         |
| SNP_29097_A_37087956 | NC_021163.1    | Ca_Kabuli_Chr04 | 37087956                | TT                              | AA                 | AA               | URR                           | 101507403          | B3 domain-containing transcription factor VRN1-like         |
| SNP_29098_A_37089757 | NC_021163.1    | Ca_Kabuli_Chr04 | 37089757                | GG                              | AA                 | AA               | INTERGENIC                    |                    |                                                             |
| SNP_29099_A_37089777 | NC_021163.1    | Ca_Kabuli_Chr04 | 37089777                | GG                              | TT                 | TT               | INTERGENIC                    |                    |                                                             |

| SNPs IDs             | Chromosome IDs | Chromosomes     | Physical positions (bp) | CDC Frontier genome (Reference genome) | (Pusa 1103 & HPNB) | (ILWC 46 & LPNB) | Sequence Components of genome | Gene accession IDs | Putative functions                               |
|----------------------|----------------|-----------------|-------------------------|----------------------------------------|--------------------|------------------|-------------------------------|--------------------|--------------------------------------------------|
| SNP_29100_A_37089783 | NC_021163.1    | Ca_Kabuli_Chr04 | 37089783                | AA                                     | GG                 | GG               | INTERGENIC                    |                    |                                                  |
| SNP_29101_A_37090036 | NC_021163.1    | Ca_Kabuli_Chr04 | 37090036                | GG                                     | AA                 | AA               | INTERGENIC                    |                    |                                                  |
| SNP_29103_A_37092840 | NC_021163.1    | Ca_Kabuli_Chr04 | 37092840                | TT                                     | CC                 | CC               | INTERGENIC                    |                    |                                                  |
| SNP_29104_A_37093357 | NC_021163.1    | Ca_Kabuli_Chr04 | 37093357                | GG                                     | TT                 | TT               | INTERGENIC                    |                    |                                                  |
| SNP_29105_A_37093415 | NC_021163.1    | Ca_Kabuli_Chr04 | 37093415                | CC                                     | AA                 | AA               | INTERGENIC                    |                    |                                                  |
| SNP_29106_A_37093646 | NC_021163.1    | Ca_Kabuli_Chr04 | 37093646                | AA                                     | CC                 | CC               | INTERGENIC                    |                    |                                                  |
| SNP_29107_A_37093986 | NC_021163.1    | Ca_Kabuli_Chr04 | 37093986                | TT                                     | AA                 | AA               | DRR                           | 101498848          | B3 domain-containing protein LOC_Os12g40080-like |
| SNP_29108_A_37094010 | NC_021163.1    | Ca_Kabuli_Chr04 | 37094010                | CC                                     | TT                 | TT               | DRR                           | 101498848          | B3 domain-containing protein LOC_Os12g40080-like |
| SNP_29109_A_37095597 | NC_021163.1    | Ca_Kabuli_Chr04 | 37095597                | GG                                     | AA                 | AA               | NON_SYNONYMOUS_CODING         | 101498848          | B3 domain-containing protein LOC_Os12g40080-like |
| SNP_29110_A_37099437 | NC_021163.1    | Ca_Kabuli_Chr04 | 37099437                | GG                                     | TT                 | TT               | URR                           | 101498848          | B3 domain-containing protein LOC_Os12g40080-like |
| SNP_29111_A_37099785 | NC_021163.1    | Ca_Kabuli_Chr04 | 37099785                | AA                                     | CC                 | CC               | URR                           | 101498848          | B3 domain-containing protein LOC_Os12g40080-like |
| SNP_29113_A_37100839 | NC_021163.1    | Ca_Kabuli_Chr04 | 37100839                | CC                                     | TT                 | TT               | INTERGENIC                    |                    |                                                  |
| SNP_29114_A_37100859 | NC_021163.1    | Ca_Kabuli_Chr04 | 37100859                | AA                                     | CC                 | CC               | INTERGENIC                    |                    |                                                  |
| SNP_29115_A_37100863 | NC_021163.1    | Ca_Kabuli_Chr04 | 37100863                | CC                                     | TT                 | TT               | INTERGENIC                    |                    |                                                  |
| SNP_29116_A_37100953 | NC_021163.1    | Ca_Kabuli_Chr04 | 37100953                | CC                                     | AA                 | AA               | INTERGENIC                    |                    |                                                  |
| SNP_29117_A_37105541 | NC_021163.1    | Ca_Kabuli_Chr04 | 37105541                | GG                                     | AA                 | AA               | INTERGENIC                    |                    |                                                  |
| SNP_29118_A_37105545 | NC_021163.1    | Ca_Kabuli_Chr04 | 37105545                | CC                                     | AA                 | AA               | INTERGENIC                    |                    |                                                  |
| SNP_29119_A_37105967 | NC_021163.1    | Ca_Kabuli_Chr04 | 37105967                | TT                                     | AA                 | AA               | INTERGENIC                    |                    |                                                  |
| SNP_29120_A_37107356 | NC_021163.1    | Ca_Kabuli_Chr04 | 37107356                | GG                                     | AA                 | AA               | INTERGENIC                    |                    |                                                  |
| SNP_29121_A_37107366 | NC_021163.1    | Ca_Kabuli_Chr04 | 37107366                | CC                                     | GG                 | GG               | INTERGENIC                    |                    |                                                  |
| SNP_29122_A_37107371 | NC_021163.1    | Ca_Kabuli_Chr04 | 37107371                | GG                                     | TT                 | TT               | INTERGENIC                    |                    |                                                  |
| SNP_29123_A_37108610 | NC_021163.1    | Ca_Kabuli_Chr04 | 37108610                | TT                                     | AA                 | AA               | INTERGENIC                    |                    |                                                  |

| SNPs IDs             | Chromosome IDs | Chromosomes     | Physical positions (bp) | CDC Frontier genome (Reference genome) | (Pusa 1103 & HPNB) | (ILWC 46 & LPNB) | Sequence Components of genome | Gene accession IDs | Putative functions                                            |
|----------------------|----------------|-----------------|-------------------------|----------------------------------------|--------------------|------------------|-------------------------------|--------------------|---------------------------------------------------------------|
| SNP_29124_A_37108623 | NC_021163.1    | Ca_Kabuli_Chr04 | 37108623                | CC                                     | TT                 | TT               | INTERGENIC                    |                    |                                                               |
| SNP_29125_A_37108637 | NC_021163.1    | Ca_Kabuli_Chr04 | 37108637                | CC                                     | GG                 | GG               | INTERGENIC                    |                    |                                                               |
| SNP_29126_A_37117734 | NC_021163.1    | Ca_Kabuli_Chr04 | 37117734                | GG                                     | AA                 | AA               | DRR                           | 101507713          | B3 domain-containing transcription factor VRN1-like           |
| SNP_29127_A_37117810 | NC_021163.1    | Ca_Kabuli_Chr04 | 37117810                | CC                                     | TT                 | TT               | DRR                           | 101507713          | B3 domain-containing transcription factor VRN1-like           |
| SNP_29129_A_37118170 | NC_021163.1    | Ca_Kabuli_Chr04 | 37118170                | TT                                     | GG                 | GG               | DRR                           | 101507713          | B3 domain-containing transcription factor VRN1-like           |
| SNP_29130_A_37118183 | NC_021163.1    | Ca_Kabuli_Chr04 | 37118183                | AA                                     | CC                 | CC               | DRR                           | 101507713          | B3 domain-containing transcription factor VRN1-like           |
| SNP_29132_A_37121914 | NC_021163.1    | Ca_Kabuli_Chr04 | 37121914                | CC                                     | TT                 | TT               | URR                           | 101507713          | B3 domain-containing transcription factor VRN1-like           |
| SNP_29133_A_37122631 | NC_021163.1    | Ca_Kabuli_Chr04 | 37122631                | AA                                     | TT                 | TT               | URR                           | 101507713          | B3 domain-containing transcription factor VRN1-like           |
| SNP_29135_A_37128744 | NC_021163.1    | Ca_Kabuli_Chr04 | 37128744                | CC                                     | GG                 | GG               | DRR                           | 101508042          | B3 domain-containing transcription factor VRN1-like           |
| SNP_29136_A_37128789 | NC_021163.1    | Ca_Kabuli_Chr04 | 37128789                | CC                                     | TT                 | TT               | DRR                           | 101508042          | B3 domain-containing transcription factor VRN1-like           |
| SNP_29137_A_37129906 | NC_021163.1    | Ca_Kabuli_Chr04 | 37129906                | CC                                     | AA                 | AA               | NON_SYNONYMOUS_CODING         | 101508042          | B3 domain-containing transcription factor VRN1-like           |
| SNP_29139_A_37130941 | NC_021163.1    | Ca_Kabuli_Chr04 | 37130941                | TT                                     | GG                 | GG               | INTRON                        | 101508042          | B3 domain-containing transcription factor VRN1-like           |
| SNP_29140_A_37131039 | NC_021163.1    | Ca_Kabuli_Chr04 | 37131039                | CC                                     | GG                 | GG               | NON_SYNONYMOUS_CODING         | 101508042          | B3 domain-containing transcription factor VRN1-like           |
| SNP_29142_A_37131367 | NC_021163.1    | Ca_Kabuli_Chr04 | 37131367                | AA                                     | GG                 | GG               | INTRON                        | 101508042          | B3 domain-containing transcription factor VRN1-like           |
| SNP_29143_A_37154671 | NC_021163.1    | Ca_Kabuli_Chr04 | 37154671                | CC                                     | TT                 | TT               | URR                           | 101508553          | alpha,alpha-trehalose-phosphate synthase [UDP-forming] 6-like |
| SNP_29144_A_37158713 | NC_021163.1    | Ca_Kabuli_Chr04 | 37158713                | TT                                     | AA                 | AA               | DRR                           | 101504599          | Unknown function                                              |
| SNP_29145_A_37206035 | NC_021163.1    | Ca_Kabuli_Chr04 | 37206035                | GG                                     | AA                 | AA               | INTERGENIC                    |                    |                                                               |
| SNP_29146_A_37206036 | NC_021163.1    | Ca_Kabuli_Chr04 | 37206036                | CC                                     | TT                 | TT               | INTERGENIC                    |                    |                                                               |
| SNP_29147_A_37246133 | NC_021163.1    | Ca_Kabuli_Chr04 | 37246133                | TT                                     | CC                 | CC               | INTERGENIC                    |                    |                                                               |
| SNP_29148_A_37247305 | NC_021163.1    | Ca_Kabuli_Chr04 | 37247305                | GG                                     | AA                 | AA               | INTERGENIC                    |                    |                                                               |
| SNP_29149_A_37257699 | NC_021163.1    | Ca_Kabuli_Chr04 | 37257699                | AA                                     | GG                 | GG               | INTERGENIC                    |                    |                                                               |
| SNP_29150_A_37265638 | NC_021163.1    | Ca_Kabuli_Chr04 | 37265638                | TT                                     | CC                 | CC               | INTRON                        | 101511125          | dynammin-related protein 1C-like                              |

| SNPs IDs             | Chromosome IDs | Chromosomes     | Physical positions (bp) | CDC Frontier (Reference genome) | (Pusa 1103 & HPNB) | (ILWC 46 & LPNB) | Sequence Components of genome | Gene accession IDs | Putative functions                     |
|----------------------|----------------|-----------------|-------------------------|---------------------------------|--------------------|------------------|-------------------------------|--------------------|----------------------------------------|
| SNP_29151_A_37305058 | NC_021163.1    | Ca_Kabuli_Chr04 | 37305058                | CC                              | AA                 | AA               | URR                           | 101512637          | 40S ribosomal protein S2-4-like        |
| SNP_29152_A_37311794 | NC_021163.1    | Ca_Kabuli_Chr04 | 37311794                | TT                              | CC                 | CC               | INTERGENIC                    |                    |                                        |
| SNP_29154_A_37321808 | NC_021163.1    | Ca_Kabuli_Chr04 | 37321808                | CC                              | TT                 | TT               | INTERGENIC                    |                    |                                        |
| SNP_29155_A_37365603 | NC_021163.1    | Ca_Kabuli_Chr04 | 37365603                | GG                              | TT                 | TT               | INTERGENIC                    |                    |                                        |
| SNP_29156_A_37382555 | NC_021163.1    | Ca_Kabuli_Chr04 | 37382555                | GG                              | AA                 | AA               | INTERGENIC                    |                    |                                        |
| SNP_29157_A_37384531 | NC_021163.1    | Ca_Kabuli_Chr04 | 37384531                | TT                              | AA                 | AA               | DRR                           | 101514789          | probable calcium-binding protein CML25 |
| SNP_29158_A_37397154 | NC_021163.1    | Ca_Kabuli_Chr04 | 37397154                | AA                              | GG                 | GG               | INTERGENIC                    |                    |                                        |
| SNP_29159_A_37404226 | NC_021163.1    | Ca_Kabuli_Chr04 | 37404226                | GG                              | AA                 | AA               | INTERGENIC                    |                    |                                        |
| SNP_29161_A_37476154 | NC_021163.1    | Ca_Kabuli_Chr04 | 37476154                | CC                              | GG                 | GG               | INTERGENIC                    |                    |                                        |
| SNP_29162_A_37519455 | NC_021163.1    | Ca_Kabuli_Chr04 | 37519455                | TT                              | CC                 | CC               | INTERGENIC                    |                    |                                        |
| SNP_29164_A_37519804 | NC_021163.1    | Ca_Kabuli_Chr04 | 37519804                | AA                              | GG                 | GG               | INTERGENIC                    |                    |                                        |
| SNP_29165_A_37519893 | NC_021163.1    | Ca_Kabuli_Chr04 | 37519893                | AA                              | GG                 | GG               | INTERGENIC                    |                    |                                        |
| SNP_29166_A_37595161 | NC_021163.1    | Ca_Kabuli_Chr04 | 37595161                | CC                              | AA                 | AA               | INTERGENIC                    |                    |                                        |
| SNP_29167_A_37621752 | NC_021163.1    | Ca_Kabuli_Chr04 | 37621752                | TT                              | CC                 | CC               | INTERGENIC                    |                    |                                        |
| SNP_29168_A_37621940 | NC_021163.1    | Ca_Kabuli_Chr04 | 37621940                | AA                              | CC                 | CC               | INTERGENIC                    |                    |                                        |
| SNP_29169_A_37622100 | NC_021163.1    | Ca_Kabuli_Chr04 | 37622100                | AA                              | CC                 | CC               | INTERGENIC                    |                    |                                        |
| SNP_29170_A_37622110 | NC_021163.1    | Ca_Kabuli_Chr04 | 37622110                | CC                              | TT                 | TT               | INTERGENIC                    |                    |                                        |
| SNP_29171_A_37623624 | NC_021163.1    | Ca_Kabuli_Chr04 | 37623624                | TT                              | GG                 | GG               | INTERGENIC                    |                    |                                        |
| SNP_29172_A_37623718 | NC_021163.1    | Ca_Kabuli_Chr04 | 37623718                | AA                              | CC                 | CC               | INTERGENIC                    |                    |                                        |
| SNP_29173_A_37671115 | NC_021163.1    | Ca_Kabuli_Chr04 | 37671115                | TT                              | GG                 | GG               | INTERGENIC                    |                    |                                        |
| SNP_29174_A_37682636 | NC_021163.1    | Ca_Kabuli_Chr04 | 37682636                | AA                              | GG                 | GG               | DRR                           | 101494066          | uncharacterized LOC101494066           |
| SNP_29175_A_37703722 | NC_021163.1    | Ca_Kabuli_Chr04 | 37703722                | CC                              | TT                 | TT               | DRR                           | 101496649          | cytochrome c oxidase subunit 2         |

| SNPs IDs             | Chromosome IDs | Chromosomes     | Physical positions (bp) | CDC Frontier (Reference genome) | (Pusa 1103 & HPNB) | (ILWC 46 & LPNB) | Sequence Components of genome | Gene accession IDs | Putative functions             |
|----------------------|----------------|-----------------|-------------------------|---------------------------------|--------------------|------------------|-------------------------------|--------------------|--------------------------------|
| SNP_29176_A_37703751 | NC_021163.1    | Ca_Kabuli_Chr04 | 37703751                | TT                              | CC                 | CC               | DRR                           | 101496649          | cytochrome c oxidase subunit 2 |
| SNP_29177_A_37703863 | NC_021163.1    | Ca_Kabuli_Chr04 | 37703863                | AA                              | TT                 | TT               | DRR                           | 101496649          | cytochrome c oxidase subunit 2 |
| SNP_29178_A_37703941 | NC_021163.1    | Ca_Kabuli_Chr04 | 37703941                | AA                              | GG                 | GG               | DRR                           | 101496649          | cytochrome c oxidase subunit 2 |
| SNP_29179_A_37704106 | NC_021163.1    | Ca_Kabuli_Chr04 | 37704106                | CC                              | AA                 | AA               | INTERGENIC                    |                    |                                |
| SNP_29180_A_37704109 | NC_021163.1    | Ca_Kabuli_Chr04 | 37704109                | AA                              | CC                 | CC               | INTERGENIC                    |                    |                                |
| SNP_29181_A_37704307 | NC_021163.1    | Ca_Kabuli_Chr04 | 37704307                | GG                              | AA                 | AA               | INTERGENIC                    |                    |                                |
| SNP_29182_A_37704345 | NC_021163.1    | Ca_Kabuli_Chr04 | 37704345                | AA                              | GG                 | GG               | INTERGENIC                    |                    |                                |
| SNP_29183_A_37704705 | NC_021163.1    | Ca_Kabuli_Chr04 | 37704705                | TT                              | GG                 | GG               | INTERGENIC                    |                    |                                |
| SNP_29184_A_37704755 | NC_021163.1    | Ca_Kabuli_Chr04 | 37704755                | AA                              | CC                 | CC               | INTERGENIC                    |                    |                                |
| SNP_29185_A_37704782 | NC_021163.1    | Ca_Kabuli_Chr04 | 37704782                | CC                              | AA                 | AA               | INTERGENIC                    |                    |                                |
| SNP_29186_A_37705061 | NC_021163.1    | Ca_Kabuli_Chr04 | 37705061                | TT                              | AA                 | AA               | INTERGENIC                    |                    |                                |
| SNP_29187_A_37705224 | NC_021163.1    | Ca_Kabuli_Chr04 | 37705224                | GG                              | TT                 | TT               | INTERGENIC                    |                    |                                |
| SNP_29188_A_37705317 | NC_021163.1    | Ca_Kabuli_Chr04 | 37705317                | AA                              | GG                 | GG               | INTERGENIC                    |                    |                                |
| SNP_29189_A_37705335 | NC_021163.1    | Ca_Kabuli_Chr04 | 37705335                | TT                              | CC                 | CC               | INTERGENIC                    |                    |                                |
| SNP_29190_A_37705349 | NC_021163.1    | Ca_Kabuli_Chr04 | 37705349                | CC                              | TT                 | TT               | INTERGENIC                    |                    |                                |
| SNP_29191_A_37705350 | NC_021163.1    | Ca_Kabuli_Chr04 | 37705350                | GG                              | AA                 | AA               | INTERGENIC                    |                    |                                |
| SNP_29192_A_37707088 | NC_021163.1    | Ca_Kabuli_Chr04 | 37707088                | CC                              | TT                 | TT               | URR                           | 101496649          | cytochrome c oxidase subunit 2 |
| SNP_29193_A_37707106 | NC_021163.1    | Ca_Kabuli_Chr04 | 37707106                | GG                              | CC                 | CC               | URR                           | 101496649          | cytochrome c oxidase subunit 2 |
| SNP_29194_A_37708911 | NC_021163.1    | Ca_Kabuli_Chr04 | 37708911                | GG                              | CC                 | CC               | URR                           | 101496649          | cytochrome c oxidase subunit 2 |
| SNP_29195_A_37708964 | NC_021163.1    | Ca_Kabuli_Chr04 | 37708964                | GG                              | TT                 | TT               | URR                           | 101496649          | cytochrome c oxidase subunit 2 |
| SNP_29196_A_37708976 | NC_021163.1    | Ca_Kabuli_Chr04 | 37708976                | TT                              | CC                 | CC               | URR                           | 101496649          | cytochrome c oxidase subunit 2 |
| SNP_29197_A_37709043 | NC_021163.1    | Ca_Kabuli_Chr04 | 37709043                | GG                              | TT                 | TT               | INTERGENIC                    |                    |                                |



| SNPs IDs             | Chromosome IDs | Chromosomes     | Physical positions (bp) | CDC Frontier genome (Reference genome) | (Pusa 1103 & HPNB) | (ILWC 46 & LPNB) | Sequence Components of genome | Gene accession IDs | Putative functions                        |
|----------------------|----------------|-----------------|-------------------------|----------------------------------------|--------------------|------------------|-------------------------------|--------------------|-------------------------------------------|
| SNP_29198_A_37709255 | NC_021163.1    | Ca_Kabuli_Chr04 | 37709255                | AA                                     | CC                 | CC               | INTERGENIC                    |                    |                                           |
| SNP_29199_A_37732531 | NC_021163.1    | Ca_Kabuli_Chr04 | 37732531                | CC                                     | TT                 | TT               | INTERGENIC                    |                    |                                           |
| SNP_29200_A_37761879 | NC_021163.1    | Ca_Kabuli_Chr04 | 37761879                | AA                                     | GG                 | GG               | INTERGENIC                    |                    |                                           |
| SNP_29201_A_37761946 | NC_021163.1    | Ca_Kabuli_Chr04 | 37761946                | GG                                     | CC                 | CC               | INTERGENIC                    |                    |                                           |
| SNP_29202_A_37761981 | NC_021163.1    | Ca_Kabuli_Chr04 | 37761981                | GG                                     | AA                 | AA               | INTERGENIC                    |                    |                                           |
| SNP_29204_A_37818793 | NC_021163.1    | Ca_Kabuli_Chr04 | 37818793                | GG                                     | AA                 | AA               | INTRON                        | 101501281          | uncharacterized LOC101501281              |
| SNP_29206_A_37842425 | NC_021163.1    | Ca_Kabuli_Chr04 | 37842425                | CC                                     | TT                 | TT               | INTERGENIC                    |                    |                                           |
| SNP_29207_A_37883861 | NC_021163.1    | Ca_Kabuli_Chr04 | 37883861                | AA                                     | TT                 | TT               | INTERGENIC                    |                    |                                           |
| SNP_29208_A_37883863 | NC_021163.1    | Ca_Kabuli_Chr04 | 37883863                | TT                                     | CC                 | CC               | INTERGENIC                    |                    |                                           |
| SNP_29209_A_37930949 | NC_021163.1    | Ca_Kabuli_Chr04 | 37930949                | TT                                     | CC                 | CC               | DRR                           | 101507816          | F-box/kelch-repeat protein At3g23880-like |
| SNP_29210_A_38045168 | NC_021163.1    | Ca_Kabuli_Chr04 | 38045168                | TT                                     | CC                 | CC               | INTERGENIC                    |                    |                                           |
| SNP_29211_A_38049134 | NC_021163.1    | Ca_Kabuli_Chr04 | 38049134                | AA                                     | CC                 | CC               | INTERGENIC                    |                    |                                           |
| SNP_29212_A_38050298 | NC_021163.1    | Ca_Kabuli_Chr04 | 38050298                | AA                                     | GG                 | GG               | INTERGENIC                    |                    |                                           |
| SNP_29214_A_38102726 | NC_021163.1    | Ca_Kabuli_Chr04 | 38102726                | AA                                     | GG                 | GG               | INTRON                        | 101512949          | WAT1-related protein At4g08290-like       |
| SNP_29215_A_38117792 | NC_021163.1    | Ca_Kabuli_Chr04 | 38117792                | GG                                     | AA                 | AA               | INTERGENIC                    |                    |                                           |
| SNP_29216_A_38142906 | NC_021163.1    | Ca_Kabuli_Chr04 | 38142906                | CC                                     | TT                 | TT               | INTERGENIC                    |                    |                                           |
| SNP_29217_A_38273306 | NC_021163.1    | Ca_Kabuli_Chr04 | 38273306                | AA                                     | GG                 | GG               | INTERGENIC                    |                    |                                           |
| SNP_29218_A_38299922 | NC_021163.1    | Ca_Kabuli_Chr04 | 38299922                | TT                                     | CC                 | CC               | INTRON                        | 101515232          | chlorophyllide a oxygenase, chloroplastic |
| SNP_29219_A_38335933 | NC_021163.1    | Ca_Kabuli_Chr04 | 38335933                | TT                                     | GG                 | GG               | INTERGENIC                    |                    |                                           |
| SNP_29220_A_38336050 | NC_021163.1    | Ca_Kabuli_Chr04 | 38336050                | GG                                     | AA                 | AA               | INTERGENIC                    |                    |                                           |
| SNP_29221_A_38336229 | NC_021163.1    | Ca_Kabuli_Chr04 | 38336229                | GG                                     | TT                 | TT               | INTERGENIC                    |                    |                                           |
| SNP_29222_A_38336251 | NC_021163.1    | Ca_Kabuli_Chr04 | 38336251                | TT                                     | CC                 | CC               | INTERGENIC                    |                    |                                           |

| SNPs IDs             | Chromosome IDs | Chromosomes     | Physical positions (bp) | CDC Frontier genome (Reference genome) | (Pusa 1103 & HPNB) | (ILWC 46 & LPNB) | Sequence Components of genome | Gene accession IDs | Putative functions            |
|----------------------|----------------|-----------------|-------------------------|----------------------------------------|--------------------|------------------|-------------------------------|--------------------|-------------------------------|
| SNP_29223_A_38336291 | NC_021163.1    | Ca_Kabuli_Chr04 | 38336291                | CC                                     | TT                 | TT               | INTERGENIC                    |                    |                               |
| SNP_29224_A_38336312 | NC_021163.1    | Ca_Kabuli_Chr04 | 38336312                | TT                                     | CC                 | CC               | INTERGENIC                    |                    |                               |
| SNP_29225_A_38339575 | NC_021163.1    | Ca_Kabuli_Chr04 | 38339575                | GG                                     | AA                 | AA               | DRR                           | 101488525          | aspartic proteinase Asp1-like |
| SNP_29226_A_38367342 | NC_021163.1    | Ca_Kabuli_Chr04 | 38367342                | AA                                     | GG                 | GG               | URR                           | 101488871          | uncharacterized LOC101488871  |
| SNP_29227_A_38604234 | NC_021163.1    | Ca_Kabuli_Chr04 | 38604234                | TT                                     | AA                 | AA               | INTERGENIC                    |                    |                               |
| SNP_29228_A_38604238 | NC_021163.1    | Ca_Kabuli_Chr04 | 38604238                | AA                                     | CC                 | CC               | INTERGENIC                    |                    |                               |
| SNP_29229_A_38607587 | NC_021163.1    | Ca_Kabuli_Chr04 | 38607587                | GG                                     | CC                 | CC               | INTERGENIC                    |                    |                               |
| SNP_29230_A_38607669 | NC_021163.1    | Ca_Kabuli_Chr04 | 38607669                | AA                                     | GG                 | GG               | INTERGENIC                    |                    |                               |
| SNP_29231_A_38633917 | NC_021163.1    | Ca_Kabuli_Chr04 | 38633917                | AA                                     | GG                 | GG               | INTERGENIC                    |                    |                               |
| SNP_29232_A_38633918 | NC_021163.1    | Ca_Kabuli_Chr04 | 38633918                | AA                                     | TT                 | TT               | INTERGENIC                    |                    |                               |
| SNP_29233_A_38633929 | NC_021163.1    | Ca_Kabuli_Chr04 | 38633929                | CC                                     | AA                 | AA               | INTERGENIC                    |                    |                               |
| SNP_29234_A_38635271 | NC_021163.1    | Ca_Kabuli_Chr04 | 38635271                | CC                                     | TT                 | TT               | INTERGENIC                    |                    |                               |
| SNP_29235_A_38637722 | NC_021163.1    | Ca_Kabuli_Chr04 | 38637722                | TT                                     | GG                 | GG               | INTERGENIC                    |                    |                               |
| SNP_29236_A_38643054 | NC_021163.1    | Ca_Kabuli_Chr04 | 38643054                | TT                                     | CC                 | CC               | NON_SYNONYMOUS_CODING         | 101490285          | uncharacterized LOC101490285  |
| SNP_29237_A_38655152 | NC_021163.1    | Ca_Kabuli_Chr04 | 38655152                | AA                                     | GG                 | GG               | INTERGENIC                    |                    |                               |
| SNP_29239_A_38692790 | NC_021163.1    | Ca_Kabuli_Chr04 | 38692790                | TT                                     | GG                 | GG               | INTERGENIC                    |                    |                               |
| SNP_29240_A_38793368 | NC_021163.1    | Ca_Kabuli_Chr04 | 38793368                | AA                                     | TT                 | TT               | INTERGENIC                    |                    |                               |
| SNP_29241_A_38840151 | NC_021163.1    | Ca_Kabuli_Chr04 | 38840151                | TT                                     | CC                 | CC               | INTERGENIC                    |                    |                               |
| SNP_29242_A_38840204 | NC_021163.1    | Ca_Kabuli_Chr04 | 38840204                | TT                                     | CC                 | CC               | INTERGENIC                    |                    |                               |
| SNP_29243_A_38840564 | NC_021163.1    | Ca_Kabuli_Chr04 | 38840564                | CC                                     | TT                 | TT               | INTERGENIC                    |                    |                               |
| SNP_29244_A_38856489 | NC_021163.1    | Ca_Kabuli_Chr04 | 38856489                | GG                                     | AA                 | AA               | INTERGENIC                    |                    |                               |
| SNP_29246_A_39003052 | NC_021163.1    | Ca_Kabuli_Chr04 | 39003052                | AA                                     | GG                 | GG               | INTERGENIC                    |                    |                               |

| SNPs IDs             | Chromosome IDs | Chromosomes     | Physical positions (bp) | CDC Frontier genome (Reference genome) | (Pusa 1103 & HPNB) | (ILWC 46 & LPNB) | Sequence Components of genome | Gene accession IDs | Putative functions                                                                   |
|----------------------|----------------|-----------------|-------------------------|----------------------------------------|--------------------|------------------|-------------------------------|--------------------|--------------------------------------------------------------------------------------|
| SNP_29251_A_39070306 | NC_021163.1    | Ca_Kabuli_Chr04 | 39070306                | GG                                     | AA                 | AA               | INTERGENIC                    |                    |                                                                                      |
| SNP_29252_A_39070326 | NC_021163.1    | Ca_Kabuli_Chr04 | 39070326                | TT                                     | AA                 | AA               | INTERGENIC                    |                    |                                                                                      |
| SNP_29253_A_39070328 | NC_021163.1    | Ca_Kabuli_Chr04 | 39070328                | TT                                     | GG                 | GG               | INTERGENIC                    |                    |                                                                                      |
| SNP_29254_A_39070683 | NC_021163.1    | Ca_Kabuli_Chr04 | 39070683                | TT                                     | CC                 | CC               | INTERGENIC                    |                    |                                                                                      |
| SNP_29255_A_39072949 | NC_021163.1    | Ca_Kabuli_Chr04 | 39072949                | TT                                     | GG                 | GG               | INTERGENIC                    |                    |                                                                                      |
| SNP_29257_A_39153741 | NC_021163.1    | Ca_Kabuli_Chr04 | 39153741                | TT                                     | AA                 | AA               | URR                           | 101493206          | probable receptor-like protein kinase At5g39030                                      |
| SNP_29259_A_39189724 | NC_021163.1    | Ca_Kabuli_Chr04 | 39189724                | TT                                     | CC                 | CC               | INTERGENIC                    |                    |                                                                                      |
| SNP_29260_A_39189849 | NC_021163.1    | Ca_Kabuli_Chr04 | 39189849                | AA                                     | GG                 | GG               | INTERGENIC                    |                    |                                                                                      |
| SNP_29261_A_39190055 | NC_021163.1    | Ca_Kabuli_Chr04 | 39190055                | GG                                     | AA                 | AA               | INTERGENIC                    |                    |                                                                                      |
| SNP_29262_A_39298732 | NC_021163.1    | Ca_Kabuli_Chr04 | 39298732                | AA                                     | GG                 | GG               | INTERGENIC                    |                    |                                                                                      |
| SNP_29263_A_39298762 | NC_021163.1    | Ca_Kabuli_Chr04 | 39298762                | AA                                     | TT                 | TT               | INTERGENIC                    |                    |                                                                                      |
| SNP_29264_A_39299037 | NC_021163.1    | Ca_Kabuli_Chr04 | 39299037                | GG                                     | TT                 | TT               | INTERGENIC                    |                    |                                                                                      |
| SNP_29265_A_39304335 | NC_021163.1    | Ca_Kabuli_Chr04 | 39304335                | TT                                     | GG                 | GG               | INTERGENIC                    |                    |                                                                                      |
| SNP_29266_A_39342791 | NC_021163.1    | Ca_Kabuli_Chr04 | 39342791                | CC                                     | TT                 | TT               | INTERGENIC                    |                    |                                                                                      |
| SNP_29267_A_39378568 | NC_021163.1    | Ca_Kabuli_Chr04 | 39378568                | AA                                     | GG                 | GG               | URR                           | 101510377          | glycerophosphodiester phosphodiesterase protein kinase domain-containing GDPDL2-like |
| SNP_29268_A_39644758 | NC_021163.1    | Ca_Kabuli_Chr04 | 39644758                | TT                                     | CC                 | CC               | URR                           | 101492764          | Unknown function                                                                     |
| SNP_29269_A_39644867 | NC_021163.1    | Ca_Kabuli_Chr04 | 39644867                | TT                                     | CC                 | CC               | URR                           | 101492764          | Unknown function                                                                     |
| SNP_29270_A_39645077 | NC_021163.1    | Ca_Kabuli_Chr04 | 39645077                | CC                                     | AA                 | AA               | URR                           | 101492764          | Unknown function                                                                     |
| SNP_29271_A_39647285 | NC_021163.1    | Ca_Kabuli_Chr04 | 39647285                | CC                                     | TT                 | TT               | INTERGENIC                    |                    |                                                                                      |
| SNP_29272_A_39648930 | NC_021163.1    | Ca_Kabuli_Chr04 | 39648930                | TT                                     | AA                 | AA               | INTERGENIC                    |                    |                                                                                      |
| SNP_29273_A_39649336 | NC_021163.1    | Ca_Kabuli_Chr04 | 39649336                | CC                                     | TT                 | TT               | DRR                           | 101493098          | Unknown function                                                                     |
| SNP_29274_A_39688910 | NC_021163.1    | Ca_Kabuli_Chr04 | 39688910                | AA                                     | CC                 | CC               | INTRON                        | 101509945          | G-type lectin S-receptor-like serine/threonine-protein kinase B120                   |

| SNPs IDs             | Chromosome IDs | Chromosomes     | Physical positions (bp) | CDC Frontier genome (Reference genome) | (Pusa 1103 & HPNB) | (ILWC 46 & LPNB) | Sequence Components of genome | Gene accession IDs | Putative functions                                                 |
|----------------------|----------------|-----------------|-------------------------|----------------------------------------|--------------------|------------------|-------------------------------|--------------------|--------------------------------------------------------------------|
| SNP_29277_A_39689210 | NC_021163.1    | Ca_Kabuli_Chr04 | 39689210                | GG                                     | AA                 | AA               | INTRON                        | 101509945          | G-type lectin S-receptor-like serine/threonine-protein kinase B120 |
| SNP_29278_A_39689278 | NC_021163.1    | Ca_Kabuli_Chr04 | 39689278                | AA                                     | CC                 | CC               | INTRON                        | 101509945          | G-type lectin S-receptor-like serine/threonine-protein kinase B120 |
| SNP_29280_A_39689301 | NC_021163.1    | Ca_Kabuli_Chr04 | 39689301                | AA                                     | CC                 | CC               | INTRON                        | 101509945          | G-type lectin S-receptor-like serine/threonine-protein kinase B120 |
| SNP_29281_A_39689308 | NC_021163.1    | Ca_Kabuli_Chr04 | 39689308                | AA                                     | GG                 | GG               | INTRON                        | 101509945          | G-type lectin S-receptor-like serine/threonine-protein kinase B120 |
| SNP_29282_A_39689320 | NC_021163.1    | Ca_Kabuli_Chr04 | 39689320                | TT                                     | CC                 | CC               | INTRON                        | 101509945          | G-type lectin S-receptor-like serine/threonine-protein kinase B120 |
| SNP_29283_A_39689349 | NC_021163.1    | Ca_Kabuli_Chr04 | 39689349                | GG                                     | AA                 | AA               | INTRON                        | 101509945          | G-type lectin S-receptor-like serine/threonine-protein kinase B120 |
| SNP_29284_A_39689386 | NC_021163.1    | Ca_Kabuli_Chr04 | 39689386                | TT                                     | AA                 | AA               | INTRON                        | 101509945          | G-type lectin S-receptor-like serine/threonine-protein kinase B120 |
| SNP_29285_A_39689408 | NC_021163.1    | Ca_Kabuli_Chr04 | 39689408                | GG                                     | TT                 | TT               | INTRON                        | 101509945          | G-type lectin S-receptor-like serine/threonine-protein kinase B120 |
| SNP_29286_A_39689423 | NC_021163.1    | Ca_Kabuli_Chr04 | 39689423                | GG                                     | TT                 | TT               | INTRON                        | 101509945          | G-type lectin S-receptor-like serine/threonine-protein kinase B120 |
| SNP_29287_A_39691197 | NC_021163.1    | Ca_Kabuli_Chr04 | 39691197                | TT                                     | CC                 | CC               | INTERGENIC                    |                    |                                                                    |
| SNP_29288_A_39691217 | NC_021163.1    | Ca_Kabuli_Chr04 | 39691217                | TT                                     | CC                 | CC               | INTERGENIC                    |                    |                                                                    |
| SNP_29289_A_39691522 | NC_021163.1    | Ca_Kabuli_Chr04 | 39691522                | AA                                     | TT                 | TT               | INTERGENIC                    |                    |                                                                    |
| SNP_29290_A_39691529 | NC_021163.1    | Ca_Kabuli_Chr04 | 39691529                | TT                                     | CC                 | CC               | INTERGENIC                    |                    |                                                                    |
| SNP_29291_A_39691540 | NC_021163.1    | Ca_Kabuli_Chr04 | 39691540                | AA                                     | GG                 | GG               | INTERGENIC                    |                    |                                                                    |
| SNP_29292_A_39697730 | NC_021163.1    | Ca_Kabuli_Chr04 | 39697730                | AA                                     | CC                 | CC               | INTRON                        | 101509945          | G-type lectin S-receptor-like serine/threonine-protein kinase B120 |
| SNP_29293_A_39734909 | NC_021163.1    | Ca_Kabuli_Chr04 | 39734909                | AA                                     | GG                 | GG               | INTERGENIC                    |                    |                                                                    |
| SNP_29295_A_39850341 | NC_021163.1    | Ca_Kabuli_Chr04 | 39850341                | AA                                     | GG                 | GG               | INTERGENIC                    |                    |                                                                    |
| SNP_29296_A_39850343 | NC_021163.1    | Ca_Kabuli_Chr04 | 39850343                | AA                                     | TT                 | TT               | INTERGENIC                    |                    |                                                                    |
| SNP_29297_A_39876640 | NC_021163.1    | Ca_Kabuli_Chr04 | 39876640                | AA                                     | CC                 | CC               | INTRON                        | 101505780          | L-gulonolactone oxidase 3                                          |
| SNP_29298_A_39889447 | NC_021163.1    | Ca_Kabuli_Chr04 | 39889447                | GG                                     | AA                 | AA               | INTERGENIC                    |                    |                                                                    |
| SNP_29299_A_39889473 | NC_021163.1    | Ca_Kabuli_Chr04 | 39889473                | GG                                     | AA                 | AA               | INTERGENIC                    |                    |                                                                    |
| SNP_29300_A_39889534 | NC_021163.1    | Ca_Kabuli_Chr04 | 39889534                | GG                                     | AA                 | AA               | INTERGENIC                    |                    |                                                                    |

| SNPs IDs             | Chromosome IDs | Chromosomes     | Physical positions (bp) | CDC Frontier genome (Reference genome) | (Pusa 1103 & HPNB) | (ILWC 46 & LPNB) | Sequence Components of genome | Gene accession IDs | Putative functions                                            |
|----------------------|----------------|-----------------|-------------------------|----------------------------------------|--------------------|------------------|-------------------------------|--------------------|---------------------------------------------------------------|
| SNP_29301_A_39892228 | NC_021163.1    | Ca_Kabuli_Chr04 | 39892228                | AA                                     | CC                 | CC               | INTERGENIC                    |                    |                                                               |
| SNP_29302_A_39904157 | NC_021163.1    | Ca_Kabuli_Chr04 | 39904157                | TT                                     | CC                 | CC               | INTERGENIC                    |                    |                                                               |
| SNP_29303_A_39929609 | NC_021163.1    | Ca_Kabuli_Chr04 | 39929609                | CC                                     | TT                 | TT               | INTERGENIC                    |                    |                                                               |
| SNP_29304_A_39967584 | NC_021163.1    | Ca_Kabuli_Chr04 | 39967584                | TT                                     | CC                 | CC               | URR                           | 101504059          | probable glycosyltransferase At5g03795                        |
| SNP_29305_A_39967917 | NC_021163.1    | Ca_Kabuli_Chr04 | 39967917                | CC                                     | TT                 | TT               | INTERGENIC                    |                    |                                                               |
| SNP_29306_A_39973935 | NC_021163.1    | Ca_Kabuli_Chr04 | 39973935                | TT                                     | GG                 | GG               | URR                           | 101503732          | uncharacterized LOC101503732                                  |
| SNP_29307_A_39986690 | NC_021163.1    | Ca_Kabuli_Chr04 | 39986690                | AA                                     | TT                 | TT               | INTERGENIC                    |                    |                                                               |
| SNP_29308_A_39986743 | NC_021163.1    | Ca_Kabuli_Chr04 | 39986743                | GG                                     | AA                 | AA               | INTERGENIC                    |                    |                                                               |
| SNP_29309_A_39986757 | NC_021163.1    | Ca_Kabuli_Chr04 | 39986757                | CC                                     | AA                 | TT               | INTERGENIC                    |                    |                                                               |
| SNP_29310_A_39986759 | NC_021163.1    | Ca_Kabuli_Chr04 | 39986759                | GG                                     | AA                 | AA               | INTERGENIC                    |                    |                                                               |
| SNP_29311_A_39986965 | NC_021163.1    | Ca_Kabuli_Chr04 | 39986965                | TT                                     | CC                 | CC               | INTERGENIC                    |                    |                                                               |
| SNP_29312_A_39987165 | NC_021163.1    | Ca_Kabuli_Chr04 | 39987165                | TT                                     | CC                 | CC               | INTERGENIC                    |                    |                                                               |
| SNP_29313_A_39987259 | NC_021163.1    | Ca_Kabuli_Chr04 | 39987259                | AA                                     | CC                 | CC               | INTERGENIC                    |                    |                                                               |
| SNP_29315_A_40049663 | NC_021163.1    | Ca_Kabuli_Chr04 | 40049663                | AA                                     | CC                 | CC               | INTERGENIC                    |                    |                                                               |
| SNP_29316_A_40114557 | NC_021163.1    | Ca_Kabuli_Chr04 | 40114557                | TT                                     | CC                 | CC               | INTERGENIC                    |                    |                                                               |
| SNP_29317_A_40114572 | NC_021163.1    | Ca_Kabuli_Chr04 | 40114572                | AA                                     | GG                 | GG               | INTERGENIC                    |                    |                                                               |
| SNP_29318_A_40114613 | NC_021163.1    | Ca_Kabuli_Chr04 | 40114613                | AA                                     | GG                 | GG               | INTERGENIC                    |                    |                                                               |
| SNP_29319_A_40171789 | NC_021163.1    | Ca_Kabuli_Chr04 | 40171789                | GG                                     | AA                 | AA               | INTRON                        | 101500851          | phosphoribosylglycinamide formyltransferase, chloroplast-like |
| SNP_29320_A_40171953 | NC_021163.1    | Ca_Kabuli_Chr04 | 40171953                | GG                                     | TT                 | TT               | NON_SYNONYMOUS_CODING         | 101500851          | phosphoribosylglycinamide formyltransferase, chloroplast-like |
| SNP_29321_A_40171978 | NC_021163.1    | Ca_Kabuli_Chr04 | 40171978                | TT                                     | CC                 | CC               | INTRON                        | 101500851          | phosphoribosylglycinamide formyltransferase, chloroplast-like |
| SNP_29322_A_40334922 | NC_021163.1    | Ca_Kabuli_Chr04 | 40334922                | TT                                     | CC                 | CC               | INTERGENIC                    |                    |                                                               |
| SNP_29323_A_40334979 | NC_021163.1    | Ca_Kabuli_Chr04 | 40334979                | CC                                     | TT                 | TT               | INTERGENIC                    |                    |                                                               |

| SNPs IDs             | Chromosome IDs | Chromosomes     | Physical positions (bp) | CDC Frontier (Reference genome) | (Pusa 1103 & HPNB) | (ILWC 46 & LPNB) | Sequence Components of genome | Gene accession IDs | Putative functions                                                        |
|----------------------|----------------|-----------------|-------------------------|---------------------------------|--------------------|------------------|-------------------------------|--------------------|---------------------------------------------------------------------------|
| SNP_29324_A_40335095 | NC_021163.1    | Ca_Kabuli_Chr04 | 40335095                | AA                              | GG                 | GG               | INTERGENIC                    |                    |                                                                           |
| SNP_29325_A_40335096 | NC_021163.1    | Ca_Kabuli_Chr04 | 40335096                | GG                              | AA                 | AA               | INTERGENIC                    |                    |                                                                           |
| SNP_29326_A_40335178 | NC_021163.1    | Ca_Kabuli_Chr04 | 40335178                | TT                              | CC                 | CC               | INTERGENIC                    |                    |                                                                           |
| SNP_29327_A_40335291 | NC_021163.1    | Ca_Kabuli_Chr04 | 40335291                | TT                              | CC                 | CC               | INTERGENIC                    |                    |                                                                           |
| SNP_29328_A_40335297 | NC_021163.1    | Ca_Kabuli_Chr04 | 40335297                | AA                              | CC                 | CC               | INTERGENIC                    |                    |                                                                           |
| SNP_29329_A_40335317 | NC_021163.1    | Ca_Kabuli_Chr04 | 40335317                | CC                              | AA                 | AA               | INTERGENIC                    |                    |                                                                           |
| SNP_29330_A_40335348 | NC_021163.1    | Ca_Kabuli_Chr04 | 40335348                | TT                              | GG                 | GG               | INTERGENIC                    |                    |                                                                           |
| SNP_29331_A_40335430 | NC_021163.1    | Ca_Kabuli_Chr04 | 40335430                | AA                              | GG                 | GG               | INTERGENIC                    |                    |                                                                           |
| SNP_29332_A_40335438 | NC_021163.1    | Ca_Kabuli_Chr04 | 40335438                | TT                              | CC                 | CC               | INTERGENIC                    |                    |                                                                           |
| SNP_29333_A_40341905 | NC_021163.1    | Ca_Kabuli_Chr04 | 40341905                | AA                              | GG                 | GG               | NON_SYNONYMOUS_CODING         | 101497408          | pentatricopeptide repeat-containing protein At1g63080, mitochondrial-like |
| SNP_29334_A_40342229 | NC_021163.1    | Ca_Kabuli_Chr04 | 40342229                | TT                              | CC                 | CC               | SYNONYMOUS_CODING             | 101497408          | pentatricopeptide repeat-containing protein At1g63080, mitochondrial-like |
| SNP_29335_A_40342230 | NC_021163.1    | Ca_Kabuli_Chr04 | 40342230                | TT                              | AA                 | AA               | STOP_GAINED                   | 101497408          | pentatricopeptide repeat-containing protein At1g63080, mitochondrial-like |
| SNP_29336_A_40342231 | NC_021163.1    | Ca_Kabuli_Chr04 | 40342231                | GG                              | TT                 | TT               | NON_SYNONYMOUS_CODING         | 101497408          | pentatricopeptide repeat-containing protein At1g63080, mitochondrial-like |
| SNP_29337_A_40342235 | NC_021163.1    | Ca_Kabuli_Chr04 | 40342235                | GG                              | TT                 | TT               | NON_SYNONYMOUS_CODING         | 101497408          | pentatricopeptide repeat-containing protein At1g63080, mitochondrial-like |
| SNP_29338_A_40406311 | NC_021163.1    | Ca_Kabuli_Chr04 | 40406311                | GG                              | AA                 | AA               | INTERGENIC                    |                    |                                                                           |
| SNP_29339_A_40468689 | NC_021163.1    | Ca_Kabuli_Chr04 | 40468689                | AA                              | TT                 | TT               | URR                           | 101488313          | reticulocalbin-2                                                          |
| SNP_29340_A_40473259 | NC_021163.1    | Ca_Kabuli_Chr04 | 40473259                | CC                              | TT                 | TT               | URR                           | 101488636          | uncharacterized LOC101488636                                              |
| SNP_29341_A_40478942 | NC_021163.1    | Ca_Kabuli_Chr04 | 40478942                | TT                              | CC                 | CC               | INTRON                        | 101488974          | uncharacterized LOC101488974                                              |
| SNP_29342_A_40484393 | NC_021163.1    | Ca_Kabuli_Chr04 | 40484393                | TT                              | AA                 | AA               | URR                           | 101488974          | uncharacterized LOC101488974                                              |
| SNP_29343_A_40484690 | NC_021163.1    | Ca_Kabuli_Chr04 | 40484690                | GG                              | AA                 | AA               | URR                           | 101488974          | uncharacterized LOC101488974                                              |
| SNP_29344_A_40484694 | NC_021163.1    | Ca_Kabuli_Chr04 | 40484694                | AA                              | GG                 | GG               | URR                           | 101488974          | uncharacterized LOC101488974                                              |
| SNP_29345_A_40484761 | NC_021163.1    | Ca_Kabuli_Chr04 | 40484761                | AA                              | GG                 | GG               | URR                           | 101488974          | uncharacterized LOC101488974                                              |

| SNPs IDs             | Chromosome IDs | Chromosomes     | Physical positions (bp) | CDC Frontier (Reference genome) | (Pusa 1103 & HPNB) | (ILWC 46 & LPNB) | Sequence Components of genome | Gene accession IDs | Putative functions                     |
|----------------------|----------------|-----------------|-------------------------|---------------------------------|--------------------|------------------|-------------------------------|--------------------|----------------------------------------|
| SNP_29346_A_40485356 | NC_021163.1    | Ca_Kabuli_Chr04 | 40485356                | AA                              | GG                 | GG               | URR                           | 101488974          | uncharacterized LOC101488974           |
| SNP_29348_A_40485518 | NC_021163.1    | Ca_Kabuli_Chr04 | 40485518                | CC                              | AA                 | AA               | URR                           | 101488974          | uncharacterized LOC101488974           |
| SNP_29349_A_40485519 | NC_021163.1    | Ca_Kabuli_Chr04 | 40485519                | AA                              | TT                 | TT               | URR                           | 101488974          | uncharacterized LOC101488974           |
| SNP_29350_A_40487840 | NC_021163.1    | Ca_Kabuli_Chr04 | 40487840                | TT                              | CC                 | CC               | INTERGENIC                    |                    |                                        |
| SNP_29351_A_40489878 | NC_021163.1    | Ca_Kabuli_Chr04 | 40489878                | GG                              | TT                 | TT               | INTRON                        | 101489421          | protein ABIL2-like                     |
| SNP_29352_A_40490374 | NC_021163.1    | Ca_Kabuli_Chr04 | 40490374                | GG                              | TT                 | TT               | INTRON                        | 101489421          | protein ABIL2-like                     |
| SNP_29353_A_40490560 | NC_021163.1    | Ca_Kabuli_Chr04 | 40490560                | TT                              | CC                 | CC               | INTRON                        | 101489421          | protein ABIL2-like                     |
| SNP_29354_A_40490561 | NC_021163.1    | Ca_Kabuli_Chr04 | 40490561                | GG                              | AA                 | AA               | INTRON                        | 101489421          | protein ABIL2-like                     |
| SNP_29355_A_40491651 | NC_021163.1    | Ca_Kabuli_Chr04 | 40491651                | CC                              | TT                 | TT               | SYNONYMOUS_CODING             | 101489421          | protein ABIL2-like                     |
| SNP_29356_A_40492047 | NC_021163.1    | Ca_Kabuli_Chr04 | 40492047                | TT                              | CC                 | CC               | INTRON                        | 101489421          | protein ABIL2-like                     |
| SNP_29357_A_40494750 | NC_021163.1    | Ca_Kabuli_Chr04 | 40494750                | AA                              | GG                 | GG               | URR                           | 101489421          | protein ABIL2-like                     |
| SNP_29358_A_40497257 | NC_021163.1    | Ca_Kabuli_Chr04 | 40497257                | AA                              | TT                 | TT               | DRR                           | 101490168          | uncharacterized protein At4g00950-like |
| SNP_29359_A_40498035 | NC_021163.1    | Ca_Kabuli_Chr04 | 40498035                | GG                              | AA                 | AA               | INTRON                        | 101490168          | uncharacterized protein At4g00950-like |
| SNP_29361_A_40498181 | NC_021163.1    | Ca_Kabuli_Chr04 | 40498181                | GG                              | CC                 | CC               | INTRON                        | 101490168          | uncharacterized protein At4g00950-like |
| SNP_29362_A_40498187 | NC_021163.1    | Ca_Kabuli_Chr04 | 40498187                | AA                              | GG                 | GG               | INTRON                        | 101490168          | uncharacterized protein At4g00950-like |
| SNP_29363_A_40498228 | NC_021163.1    | Ca_Kabuli_Chr04 | 40498228                | CC                              | TT                 | TT               | INTRON                        | 101490168          | uncharacterized protein At4g00950-like |
| SNP_29364_A_40498267 | NC_021163.1    | Ca_Kabuli_Chr04 | 40498267                | AA                              | CC                 | CC               | INTRON                        | 101490168          | uncharacterized protein At4g00950-like |
| SNP_29366_A_40501854 | NC_021163.1    | Ca_Kabuli_Chr04 | 40501854                | AA                              | TT                 | TT               | URR                           | 101490168          | uncharacterized protein At4g00950-like |
| SNP_29368_A_40501894 | NC_021163.1    | Ca_Kabuli_Chr04 | 40501894                | CC                              | TT                 | TT               | URR                           | 101490168          | uncharacterized protein At4g00950-like |
| SNP_29369_A_40504626 | NC_021163.1    | Ca_Kabuli_Chr04 | 40504626                | CC                              | TT                 | TT               | INTERGENIC                    |                    |                                        |
| SNP_29370_A_40504901 | NC_021163.1    | Ca_Kabuli_Chr04 | 40504901                | TT                              | CC                 | CC               | INTERGENIC                    |                    |                                        |
| SNP_29371_A_40506622 | NC_021163.1    | Ca_Kabuli_Chr04 | 40506622                | TT                              | CC                 | CC               | INTERGENIC                    |                    |                                        |

| SNPs IDs             | Chromosome IDs | Chromosomes     | Physical positions (bp) | CDC Frontier genome (Reference genome) | (Pusa 1103 & HPNB) | (ILWC 46 & LPNB) | Sequence Components of genome | Gene accession IDs | Putative functions       |
|----------------------|----------------|-----------------|-------------------------|----------------------------------------|--------------------|------------------|-------------------------------|--------------------|--------------------------|
| SNP_29372_A_40506635 | NC_021163.1    | Ca_Kabuli_Chr04 | 40506635                | TT                                     | CC                 | CC               | INTERGENIC                    |                    |                          |
| SNP_29373_A_40506649 | NC_021163.1    | Ca_Kabuli_Chr04 | 40506649                | TT                                     | GG                 | GG               | INTERGENIC                    |                    |                          |
| SNP_29374_A_40508240 | NC_021163.1    | Ca_Kabuli_Chr04 | 40508240                | AA                                     | GG                 | GG               | INTERGENIC                    |                    |                          |
| SNP_29376_A_40511234 | NC_021163.1    | Ca_Kabuli_Chr04 | 40511234                | CC                                     | TT                 | TT               | NON_SYNONYMOUS_CODING         | 101490491          | protein IQ-DOMAIN 1-like |
| SNP_29377_A_40513037 | NC_021163.1    | Ca_Kabuli_Chr04 | 40513037                | GG                                     | AA                 | AA               | INTRON                        | 101490491          | protein IQ-DOMAIN 1-like |
| SNP_29378_A_40514850 | NC_021163.1    | Ca_Kabuli_Chr04 | 40514850                | CC                                     | GG                 | GG               | INTRON                        | 101490491          | protein IQ-DOMAIN 1-like |
| SNP_29379_A_40514865 | NC_021163.1    | Ca_Kabuli_Chr04 | 40514865                | TT                                     | AA                 | AA               | INTRON                        | 101490491          | protein IQ-DOMAIN 1-like |
| SNP_29381_A_40515976 | NC_021163.1    | Ca_Kabuli_Chr04 | 40515976                | TT                                     | CC                 | CC               | URR                           | 101490491          | protein IQ-DOMAIN 1-like |
| SNP_29382_A_40516032 | NC_021163.1    | Ca_Kabuli_Chr04 | 40516032                | GG                                     | AA                 | AA               | URR                           | 101490491          | protein IQ-DOMAIN 1-like |
| SNP_29383_A_40516043 | NC_021163.1    | Ca_Kabuli_Chr04 | 40516043                | GG                                     | AA                 | AA               | URR                           | 101490491          | protein IQ-DOMAIN 1-like |
| SNP_29384_A_40516052 | NC_021163.1    | Ca_Kabuli_Chr04 | 40516052                | AA                                     | GG                 | GG               | URR                           | 101490491          | protein IQ-DOMAIN 1-like |
| SNP_29385_A_40516089 | NC_021163.1    | Ca_Kabuli_Chr04 | 40516089                | AA                                     | GG                 | GG               | URR                           | 101490491          | protein IQ-DOMAIN 1-like |
| SNP_29386_A_40516414 | NC_021163.1    | Ca_Kabuli_Chr04 | 40516414                | TT                                     | GG                 | GG               | URR                           | 101490491          | protein IQ-DOMAIN 1-like |
| SNP_29387_A_40516475 | NC_021163.1    | Ca_Kabuli_Chr04 | 40516475                | AA                                     | CC                 | CC               | URR                           | 101490491          | protein IQ-DOMAIN 1-like |
| SNP_29388_A_40516526 | NC_021163.1    | Ca_Kabuli_Chr04 | 40516526                | AA                                     | GG                 | GG               | URR                           | 101490491          | protein IQ-DOMAIN 1-like |
| SNP_29389_A_40516656 | NC_021163.1    | Ca_Kabuli_Chr04 | 40516656                | TT                                     | CC                 | CC               | URR                           | 101490491          | protein IQ-DOMAIN 1-like |
| SNP_29390_A_40516667 | NC_021163.1    | Ca_Kabuli_Chr04 | 40516667                | AA                                     | GG                 | GG               | URR                           | 101490491          | protein IQ-DOMAIN 1-like |
| SNP_29391_A_40517778 | NC_021163.1    | Ca_Kabuli_Chr04 | 40517778                | TT                                     | CC                 | CC               | INTERGENIC                    |                    |                          |
| SNP_29392_A_40517790 | NC_021163.1    | Ca_Kabuli_Chr04 | 40517790                | TT                                     | CC                 | CC               | INTERGENIC                    |                    |                          |
| SNP_29393_A_40519431 | NC_021163.1    | Ca_Kabuli_Chr04 | 40519431                | CC                                     | TT                 | TT               | INTERGENIC                    |                    |                          |
| SNP_29394_A_40519446 | NC_021163.1    | Ca_Kabuli_Chr04 | 40519446                | AA                                     | TT                 | TT               | INTERGENIC                    |                    |                          |
| SNP_29395_A_40520030 | NC_021163.1    | Ca_Kabuli_Chr04 | 40520030                | GG                                     | TT                 | TT               | INTERGENIC                    |                    |                          |



| SNPs IDs             | Chromosome IDs | Chromosomes     | Physical positions (bp) | CDC Frontier genome (Reference genome) | (Pusa 1103 & HPNB) | (ILWC 46 & LPNB) | Sequence Components of genome | Gene accession IDs | Putative functions           |
|----------------------|----------------|-----------------|-------------------------|----------------------------------------|--------------------|------------------|-------------------------------|--------------------|------------------------------|
| SNP_29396_A_40521247 | NC_021163.1    | Ca_Kabuli_Chr04 | 40521247                | GG                                     | TT                 | TT               | INTERGENIC                    |                    |                              |
| SNP_29398_A_40521684 | NC_021163.1    | Ca_Kabuli_Chr04 | 40521684                | AA                                     | GG                 | GG               | INTERGENIC                    |                    |                              |
| SNP_29401_A_40523864 | NC_021163.1    | Ca_Kabuli_Chr04 | 40523864                | TT                                     | CC                 | CC               | INTERGENIC                    |                    |                              |
| SNP_29402_A_40528156 | NC_021163.1    | Ca_Kabuli_Chr04 | 40528156                | CC                                     | TT                 | TT               | DRR                           | 101490815          | uncharacterized LOC101490815 |
| SNP_29403_A_40528471 | NC_021163.1    | Ca_Kabuli_Chr04 | 40528471                | AA                                     | GG                 | GG               | DRR                           | 101490815          | uncharacterized LOC101490815 |
| SNP_29406_A_40529599 | NC_021163.1    | Ca_Kabuli_Chr04 | 40529599                | AA                                     | TT                 | TT               | INTRON                        | 101490815          | uncharacterized LOC101490815 |
| SNP_29407_A_40533165 | NC_021163.1    | Ca_Kabuli_Chr04 | 40533165                | GG                                     | CC                 | CC               | INTRON                        | 101490815          | uncharacterized LOC101490815 |
| SNP_29408_A_40533785 | NC_021163.1    | Ca_Kabuli_Chr04 | 40533785                | TT                                     | CC                 | CC               | INTRON                        | 101490815          | uncharacterized LOC101490815 |
| SNP_29410_A_40533858 | NC_021163.1    | Ca_Kabuli_Chr04 | 40533858                | AA                                     | GG                 | GG               | INTRON                        | 101490815          | uncharacterized LOC101490815 |
| SNP_29411_A_40534053 | NC_021163.1    | Ca_Kabuli_Chr04 | 40534053                | CC                                     | TT                 | TT               | INTRON                        | 101490815          | uncharacterized LOC101490815 |
| SNP_29412_A_40534086 | NC_021163.1    | Ca_Kabuli_Chr04 | 40534086                | AA                                     | CC                 | CC               | INTRON                        | 101490815          | uncharacterized LOC101490815 |
| SNP_29413_A_40534423 | NC_021163.1    | Ca_Kabuli_Chr04 | 40534423                | AA                                     | CC                 | CC               | INTRON                        | 101490815          | uncharacterized LOC101490815 |
| SNP_29414_A_40534425 | NC_021163.1    | Ca_Kabuli_Chr04 | 40534425                | AA                                     | CC                 | CC               | INTRON                        | 101490815          | uncharacterized LOC101490815 |
| SNP_29415_A_40534809 | NC_021163.1    | Ca_Kabuli_Chr04 | 40534809                | GG                                     | CC                 | CC               | INTRON                        | 101490815          | uncharacterized LOC101490815 |
| SNP_29416_A_40539457 | NC_021163.1    | Ca_Kabuli_Chr04 | 40539457                | TT                                     | GG                 | GG               | INTRON                        | 101490815          | uncharacterized LOC101490815 |
| SNP_29417_A_40540384 | NC_021163.1    | Ca_Kabuli_Chr04 | 40540384                | CC                                     | TT                 | TT               | INTRON                        | 101490815          | uncharacterized LOC101490815 |
| SNP_29418_A_40541296 | NC_021163.1    | Ca_Kabuli_Chr04 | 40541296                | AA                                     | GG                 | GG               | INTRON                        | 101490815          | uncharacterized LOC101490815 |
| SNP_29419_A_40541376 | NC_021163.1    | Ca_Kabuli_Chr04 | 40541376                | CC                                     | TT                 | TT               | INTRON                        | 101490815          | uncharacterized LOC101490815 |
| SNP_29420_A_40541430 | NC_021163.1    | Ca_Kabuli_Chr04 | 40541430                | AA                                     | TT                 | TT               | INTRON                        | 101490815          | uncharacterized LOC101490815 |
| SNP_29421_A_40543723 | NC_021163.1    | Ca_Kabuli_Chr04 | 40543723                | TT                                     | CC                 | CC               | INTRON                        | 101490815          | uncharacterized LOC101490815 |
| SNP_29422_A_40548044 | NC_021163.1    | Ca_Kabuli_Chr04 | 40548044                | TT                                     | AA                 | AA               | INTRON                        | 101490815          | uncharacterized LOC101490815 |
| SNP_29423_A_40551366 | NC_021163.1    | Ca_Kabuli_Chr04 | 40551366                | CC                                     | TT                 | TT               | INTRON                        | 101490815          | uncharacterized LOC101490815 |

| SNPs IDs             | Chromosome IDs | Chromosomes     | Physical positions (bp) | CDC Frontier (Reference genome) | (Pusa 1103 & HPNB) | (ILWC 46 & LPNB) | Sequence Components of genome | Gene accession IDs | Putative functions           |
|----------------------|----------------|-----------------|-------------------------|---------------------------------|--------------------|------------------|-------------------------------|--------------------|------------------------------|
| SNP_29424_A_40553964 | NC_021163.1    | Ca_Kabuli_Chr04 | 40553964                | GG                              | TT                 | TT               | INTRON                        | 101490815          | uncharacterized LOC101490815 |
| SNP_29425_A_40553971 | NC_021163.1    | Ca_Kabuli_Chr04 | 40553971                | GG                              | CC                 | CC               | INTRON                        | 101490815          | uncharacterized LOC101490815 |
| SNP_29426_A_40558964 | NC_021163.1    | Ca_Kabuli_Chr04 | 40558964                | AA                              | GG                 | GG               | URR                           | 101490815          | uncharacterized LOC101490815 |
| SNP_29427_A_40559003 | NC_021163.1    | Ca_Kabuli_Chr04 | 40559003                | TT                              | GG                 | GG               | URR                           | 101490815          | uncharacterized LOC101490815 |
| SNP_29429_A_40559037 | NC_021163.1    | Ca_Kabuli_Chr04 | 40559037                | GG                              | AA                 | AA               | URR                           | 101490815          | uncharacterized LOC101490815 |
| SNP_29430_A_40560051 | NC_021163.1    | Ca_Kabuli_Chr04 | 40560051                | CC                              | AA                 | AA               | INTERGENIC                    |                    |                              |
| SNP_29431_A_40560055 | NC_021163.1    | Ca_Kabuli_Chr04 | 40560055                | CC                              | GG                 | GG               | INTERGENIC                    |                    |                              |
| SNP_29433_A_40560600 | NC_021163.1    | Ca_Kabuli_Chr04 | 40560600                | TT                              | CC                 | CC               | INTERGENIC                    |                    |                              |
| SNP_29434_A_40560603 | NC_021163.1    | Ca_Kabuli_Chr04 | 40560603                | GG                              | TT                 | TT               | INTERGENIC                    |                    |                              |
| SNP_29436_A_40572167 | NC_021163.1    | Ca_Kabuli_Chr04 | 40572167                | CC                              | AA                 | AA               | INTERGENIC                    |                    |                              |
| SNP_29437_A_40573659 | NC_021163.1    | Ca_Kabuli_Chr04 | 40573659                | AA                              | TT                 | TT               | INTERGENIC                    |                    |                              |
| SNP_29439_A_40574758 | NC_021163.1    | Ca_Kabuli_Chr04 | 40574758                | AA                              | GG                 | GG               | INTERGENIC                    |                    |                              |
| SNP_29441_A_40575102 | NC_021163.1    | Ca_Kabuli_Chr04 | 40575102                | CC                              | TT                 | TT               | INTERGENIC                    |                    |                              |
| SNP_29442_A_40575586 | NC_021163.1    | Ca_Kabuli_Chr04 | 40575586                | AA                              | TT                 | TT               | INTERGENIC                    |                    |                              |
| SNP_29444_A_40576541 | NC_021163.1    | Ca_Kabuli_Chr04 | 40576541                | TT                              | AA                 | AA               | INTERGENIC                    |                    |                              |
| SNP_29445_A_40577324 | NC_021163.1    | Ca_Kabuli_Chr04 | 40577324                | AA                              | TT                 | TT               | DRR                           | 101491141          | uncharacterized LOC101491141 |
| SNP_29446_A_40577333 | NC_021163.1    | Ca_Kabuli_Chr04 | 40577333                | TT                              | CC                 | CC               | DRR                           | 101491141          | uncharacterized LOC101491141 |
| SNP_29447_A_40577339 | NC_021163.1    | Ca_Kabuli_Chr04 | 40577339                | TT                              | CC                 | CC               | DRR                           | 101491141          | uncharacterized LOC101491141 |
| SNP_29450_A_40599928 | NC_021163.1    | Ca_Kabuli_Chr04 | 40599928                | CC                              | AA                 | AA               | INTERGENIC                    |                    |                              |
| SNP_29451_A_40603625 | NC_021163.1    | Ca_Kabuli_Chr04 | 40603625                | AA                              | CC                 | CC               | INTRON                        | 101498276          | Unknown function             |
| SNP_29452_A_40603644 | NC_021163.1    | Ca_Kabuli_Chr04 | 40603644                | CC                              | TT                 | TT               | INTRON                        | 101498276          | Unknown function             |
| SNP_29453_A_40604187 | NC_021163.1    | Ca_Kabuli_Chr04 | 40604187                | AA                              | CC                 | CC               | INTRON                        | 101498276          | Unknown function             |

| SNPs IDs             | Chromosome IDs | Chromosomes     | Physical positions (bp) | CDC Frontier genome (Reference genome) | (Pusa 1103 & HPNB) | (ILWC 46 & LPNB) | Sequence Components of genome | Gene accession IDs | Putative functions          |
|----------------------|----------------|-----------------|-------------------------|----------------------------------------|--------------------|------------------|-------------------------------|--------------------|-----------------------------|
| SNP_29454_A_40604188 | NC_021163.1    | Ca_Kabuli_Chr04 | 40604188                | GG                                     | CC                 | CC               | INTRON                        | 101498276          | Unknown function            |
| SNP_29455_A_40608892 | NC_021163.1    | Ca_Kabuli_Chr04 | 40608892                | TT                                     | GG                 | GG               | INTRON                        | 101498276          | Unknown function            |
| SNP_29456_A_40612623 | NC_021163.1    | Ca_Kabuli_Chr04 | 40612623                | AA                                     | GG                 | GG               | INTRON                        | 101498276          | Unknown function            |
| SNP_29458_A_40615140 | NC_021163.1    | Ca_Kabuli_Chr04 | 40615140                | CC                                     | AA                 | AA               | INTRON                        | 101498276          | Unknown function            |
| SNP_29459_A_40616993 | NC_021163.1    | Ca_Kabuli_Chr04 | 40616993                | AA                                     | GG                 | GG               | INTRON                        | 101498276          | Unknown function            |
| SNP_29462_A_40624377 | NC_021163.1    | Ca_Kabuli_Chr04 | 40624377                | GG                                     | CC                 | CC               | URR                           | 101498276          | Unknown function            |
| SNP_29464_A_40628882 | NC_021163.1    | Ca_Kabuli_Chr04 | 40628882                | AA                                     | GG                 | GG               | INTERGENIC                    |                    |                             |
| SNP_29465_A_40630022 | NC_021163.1    | Ca_Kabuli_Chr04 | 40630022                | AA                                     | CC                 | CC               | INTERGENIC                    |                    |                             |
| SNP_29466_A_40630366 | NC_021163.1    | Ca_Kabuli_Chr04 | 40630366                | TT                                     | CC                 | CC               | INTERGENIC                    |                    |                             |
| SNP_29467_A_40630367 | NC_021163.1    | Ca_Kabuli_Chr04 | 40630367                | AA                                     | CC                 | CC               | INTERGENIC                    |                    |                             |
| SNP_29468_A_40630368 | NC_021163.1    | Ca_Kabuli_Chr04 | 40630368                | GG                                     | AA                 | AA               | INTERGENIC                    |                    |                             |
| SNP_29469_A_40630369 | NC_021163.1    | Ca_Kabuli_Chr04 | 40630369                | TT                                     | AA                 | AA               | INTERGENIC                    |                    |                             |
| SNP_29470_A_40630370 | NC_021163.1    | Ca_Kabuli_Chr04 | 40630370                | TT                                     | CC                 | CC               | INTERGENIC                    |                    |                             |
| SNP_29471_A_40630411 | NC_021163.1    | Ca_Kabuli_Chr04 | 40630411                | GG                                     | AA                 | AA               | INTERGENIC                    |                    |                             |
| SNP_29472_A_40634570 | NC_021163.1    | Ca_Kabuli_Chr04 | 40634570                | GG                                     | AA                 | AA               | INTERGENIC                    |                    |                             |
| SNP_29473_A_40637900 | NC_021163.1    | Ca_Kabuli_Chr04 | 40637900                | AA                                     | CC                 | CC               | DRR                           | 101492088          | O-acyltransferase WSD1-like |
| SNP_29474_A_40639338 | NC_021163.1    | Ca_Kabuli_Chr04 | 40639338                | GG                                     | AA                 | AA               | INTRON                        | 101492088          | O-acyltransferase WSD1-like |
| SNP_29475_A_40639403 | NC_021163.1    | Ca_Kabuli_Chr04 | 40639403                | TT                                     | AA                 | AA               | INTRON                        | 101492088          | O-acyltransferase WSD1-like |
| SNP_29476_A_40639635 | NC_021163.1    | Ca_Kabuli_Chr04 | 40639635                | AA                                     | GG                 | GG               | INTRON                        | 101492088          | O-acyltransferase WSD1-like |
| SNP_29477_A_40639653 | NC_021163.1    | Ca_Kabuli_Chr04 | 40639653                | TT                                     | CC                 | CC               | INTRON                        | 101492088          | O-acyltransferase WSD1-like |
| SNP_29478_A_40641164 | NC_021163.1    | Ca_Kabuli_Chr04 | 40641164                | GG                                     | AA                 | AA               | INTRON                        | 101492088          | O-acyltransferase WSD1-like |
| SNP_29479_A_40648205 | NC_021163.1    | Ca_Kabuli_Chr04 | 40648205                | GG                                     | AA                 | AA               | URR                           | 101492088          | O-acyltransferase WSD1-like |

| SNPs IDs             | Chromosome IDs | Chromosomes     | Physical positions (bp) | CDC Frontier (Reference genome) | (Pusa 1103 & HPNB) | (ILWC 46 & LPNB) | Sequence Components of genome | Gene accession IDs | Putative functions                           |
|----------------------|----------------|-----------------|-------------------------|---------------------------------|--------------------|------------------|-------------------------------|--------------------|----------------------------------------------|
| SNP_29480_A_40648207 | NC_021163.1    | Ca_Kabuli_Chr04 | 40648207                | CC                              | TT                 | TT               | URR                           | 101492088          | O-acyltransferase WSD1-like                  |
| SNP_29481_A_40648618 | NC_021163.1    | Ca_Kabuli_Chr04 | 40648618                | CC                              | TT                 | TT               | URR                           | 101492088          | O-acyltransferase WSD1-like                  |
| SNP_29482_A_40648899 | NC_021163.1    | Ca_Kabuli_Chr04 | 40648899                | GG                              | AA                 | AA               | DRR                           | 101492432          | protein BOBBER 1                             |
| SNP_29483_A_40648933 | NC_021163.1    | Ca_Kabuli_Chr04 | 40648933                | CC                              | TT                 | TT               | DRR                           | 101492432          | protein BOBBER 1                             |
| SNP_29485_A_40649219 | NC_021163.1    | Ca_Kabuli_Chr04 | 40649219                | AA                              | TT                 | TT               | DRR                           | 101492432          | protein BOBBER 1                             |
| SNP_29486_A_40649305 | NC_021163.1    | Ca_Kabuli_Chr04 | 40649305                | CC                              | AA                 | AA               | DRR                           | 101492432          | protein BOBBER 1                             |
| SNP_29487_A_40652279 | NC_021163.1    | Ca_Kabuli_Chr04 | 40652279                | AA                              | GG                 | GG               | INTRON                        | 101492432          | protein BOBBER 1                             |
| SNP_29489_A_40653565 | NC_021163.1    | Ca_Kabuli_Chr04 | 40653565                | TT                              | CC                 | CC               | URR                           | 101492432          | protein BOBBER 1                             |
| SNP_29491_A_40702673 | NC_021163.1    | Ca_Kabuli_Chr04 | 40702673                | AA                              | GG                 | GG               | INTERGENIC                    |                    |                                              |
| SNP_29493_A_40702816 | NC_021163.1    | Ca_Kabuli_Chr04 | 40702816                | GG                              | AA                 | AA               | INTERGENIC                    |                    |                                              |
| SNP_29494_A_40703042 | NC_021163.1    | Ca_Kabuli_Chr04 | 40703042                | CC                              | AA                 | AA               | INTERGENIC                    |                    |                                              |
| SNP_29495_A_40703270 | NC_021163.1    | Ca_Kabuli_Chr04 | 40703270                | CC                              | AA                 | AA               | INTERGENIC                    |                    |                                              |
| SNP_29497_A_40716090 | NC_021163.1    | Ca_Kabuli_Chr04 | 40716090                | AA                              | TT                 | TT               | INTRON                        | 101499063          | histone-lysine N-methyltransferase ATX5-like |
| SNP_29498_A_40716428 | NC_021163.1    | Ca_Kabuli_Chr04 | 40716428                | GG                              | AA                 | AA               | INTRON                        | 101499063          | histone-lysine N-methyltransferase ATX5-like |
| SNP_29499_A_40718660 | NC_021163.1    | Ca_Kabuli_Chr04 | 40718660                | AA                              | GG                 | GG               | INTERGENIC                    |                    |                                              |
| SNP_29501_A_40720663 | NC_021163.1    | Ca_Kabuli_Chr04 | 40720663                | TT                              | CC                 | CC               | INTERGENIC                    |                    |                                              |
| SNP_29502_A_40723208 | NC_021163.1    | Ca_Kabuli_Chr04 | 40723208                | GG                              | CC                 | CC               | INTERGENIC                    |                    |                                              |
| SNP_29504_A_40729049 | NC_021163.1    | Ca_Kabuli_Chr04 | 40729049                | CC                              | GG                 | GG               | URR                           | 101499376          | signal peptide peptidase-like                |
| SNP_29506_A_40729647 | NC_021163.1    | Ca_Kabuli_Chr04 | 40729647                | CC                              | TT                 | TT               | URR                           | 101499376          | signal peptide peptidase-like                |
| SNP_29507_A_40729668 | NC_021163.1    | Ca_Kabuli_Chr04 | 40729668                | TT                              | AA                 | AA               | URR                           | 101499376          | signal peptide peptidase-like                |
| SNP_29508_A_40729744 | NC_021163.1    | Ca_Kabuli_Chr04 | 40729744                | GG                              | AA                 | AA               | URR                           | 101499376          | signal peptide peptidase-like                |
| SNP_29509_A_40730032 | NC_021163.1    | Ca_Kabuli_Chr04 | 40730032                | AA                              | GG                 | GG               | URR                           | 101499376          | signal peptide peptidase-like                |

| SNPs IDs             | Chromosome IDs | Chromosomes     | Physical positions (bp) | CDC Frontier genome (Reference genome) | (Pusa 1103 & HPNB) | (ILWC 46 & LPNB) | Sequence Components of genome | Gene accession IDs | Putative functions                                         |
|----------------------|----------------|-----------------|-------------------------|----------------------------------------|--------------------|------------------|-------------------------------|--------------------|------------------------------------------------------------|
| SNP_29510_A_40730038 | NC_021163.1    | Ca_Kabuli_Chr04 | 40730038                | TT                                     | CC                 | CC               | URR                           | 101499376          | signal peptide peptidase-like                              |
| SNP_29511_A_40731207 | NC_021163.1    | Ca_Kabuli_Chr04 | 40731207                | GG                                     | AA                 | AA               | DRR                           | 101499684          | uncharacterized LOC101499684                               |
| SNP_29512_A_40733601 | NC_021163.1    | Ca_Kabuli_Chr04 | 40733601                | TT                                     | AA                 | AA               | INTERGENIC                    |                    |                                                            |
| SNP_29513_A_40734461 | NC_021163.1    | Ca_Kabuli_Chr04 | 40734461                | CC                                     | TT                 | TT               | INTERGENIC                    |                    |                                                            |
| SNP_29514_A_40737662 | NC_021163.1    | Ca_Kabuli_Chr04 | 40737662                | AA                                     | TT                 | TT               | DRR                           | 101499995          | pentatricopeptide repeat-containing protein At5g25630-like |
| SNP_29515_A_40737819 | NC_021163.1    | Ca_Kabuli_Chr04 | 40737819                | TT                                     | CC                 | CC               | DRR                           | 101499995          | pentatricopeptide repeat-containing protein At5g25630-like |
| SNP_29516_A_40738475 | NC_021163.1    | Ca_Kabuli_Chr04 | 40738475                | AA                                     | TT                 | TT               | DRR                           | 101499995          | pentatricopeptide repeat-containing protein At5g25630-like |
| SNP_29517_A_40742532 | NC_021163.1    | Ca_Kabuli_Chr04 | 40742532                | TT                                     | CC                 | CC               | INTRON                        | 101499995          | pentatricopeptide repeat-containing protein At5g25630-like |
| SNP_29519_A_40743838 | NC_021163.1    | Ca_Kabuli_Chr04 | 40743838                | GG                                     | CC                 | CC               | URR                           | 101499995          | pentatricopeptide repeat-containing protein At5g25630-like |
| SNP_29520_A_40743850 | NC_021163.1    | Ca_Kabuli_Chr04 | 40743850                | TT                                     | AA                 | AA               | URR                           | 101499995          | pentatricopeptide repeat-containing protein At5g25630-like |
| SNP_29521_A_40743944 | NC_021163.1    | Ca_Kabuli_Chr04 | 40743944                | AA                                     | GG                 | GG               | URR                           | 101499995          | pentatricopeptide repeat-containing protein At5g25630-like |
| SNP_29523_A_40744009 | NC_021163.1    | Ca_Kabuli_Chr04 | 40744009                | GG                                     | AA                 | AA               | URR                           | 101499995          | pentatricopeptide repeat-containing protein At5g25630-like |
| SNP_29524_A_40744190 | NC_021163.1    | Ca_Kabuli_Chr04 | 40744190                | CC                                     | TT                 | TT               | URR                           | 101499995          | pentatricopeptide repeat-containing protein At5g25630-like |
| SNP_29525_A_40747377 | NC_021163.1    | Ca_Kabuli_Chr04 | 40747377                | CC                                     | AA                 | AA               | INTERGENIC                    |                    |                                                            |
| SNP_29526_A_40749792 | NC_021163.1    | Ca_Kabuli_Chr04 | 40749792                | CC                                     | TT                 | TT               | DRR                           | 101500852          | pentatricopeptide repeat-containing protein At2g30780-like |
| SNP_29527_A_40749812 | NC_021163.1    | Ca_Kabuli_Chr04 | 40749812                | GG                                     | CC                 | CC               | DRR                           | 101500852          | pentatricopeptide repeat-containing protein At2g30780-like |
| SNP_29528_A_40749818 | NC_021163.1    | Ca_Kabuli_Chr04 | 40749818                | TT                                     | CC                 | CC               | DRR                           | 101500852          | pentatricopeptide repeat-containing protein At2g30780-like |
| SNP_29529_A_40749870 | NC_021163.1    | Ca_Kabuli_Chr04 | 40749870                | AA                                     | TT                 | TT               | DRR                           | 101500852          | pentatricopeptide repeat-containing protein At2g30780-like |
| SNP_29530_A_40749915 | NC_021163.1    | Ca_Kabuli_Chr04 | 40749915                | TT                                     | CC                 | CC               | DRR                           | 101500852          | pentatricopeptide repeat-containing protein At2g30780-like |
| SNP_29531_A_40749937 | NC_021163.1    | Ca_Kabuli_Chr04 | 40749937                | AA                                     | GG                 | GG               | DRR                           | 101500852          | pentatricopeptide repeat-containing protein At2g30780-like |
| SNP_29532_A_40749947 | NC_021163.1    | Ca_Kabuli_Chr04 | 40749947                | AA                                     | CC                 | CC               | DRR                           | 101500852          | pentatricopeptide repeat-containing protein At2g30780-like |
| SNP_29533_A_40750114 | NC_021163.1    | Ca_Kabuli_Chr04 | 40750114                | GG                                     | AA                 | AA               | DRR                           | 101500852          | pentatricopeptide repeat-containing protein At2g30780-like |

| SNPs IDs             | Chromosome IDs | Chromosomes     | Physical positions (bp) | CDC Frontier genome (Reference genome) | (Pusa 1103 & HPNB) | (ILWC 46 & LPNB) | Sequence Components of genome | Gene accession IDs | Putative functions                                         |
|----------------------|----------------|-----------------|-------------------------|----------------------------------------|--------------------|------------------|-------------------------------|--------------------|------------------------------------------------------------|
| SNP_29534_A_40750173 | NC_021163.1    | Ca_Kabuli_Chr04 | 40750173                | CC                                     | TT                 | TT               | DRR                           | 101500852          | pentatricopeptide repeat-containing protein At2g30780-like |
| SNP_29535_A_40751630 | NC_021163.1    | Ca_Kabuli_Chr04 | 40751630                | TT                                     | CC                 | CC               | INTERGENIC                    |                    |                                                            |
| SNP_29536_A_40751951 | NC_021163.1    | Ca_Kabuli_Chr04 | 40751951                | AA                                     | GG                 | GG               | INTERGENIC                    |                    |                                                            |
| SNP_29537_A_40752317 | NC_021163.1    | Ca_Kabuli_Chr04 | 40752317                | AA                                     | GG                 | GG               | INTERGENIC                    |                    |                                                            |
| SNP_29539_A_40754579 | NC_021163.1    | Ca_Kabuli_Chr04 | 40754579                | AA                                     | TT                 | TT               | URR                           | 101500852          | pentatricopeptide repeat-containing protein At2g30780-like |
| SNP_29540_A_40754833 | NC_021163.1    | Ca_Kabuli_Chr04 | 40754833                | AA                                     | GG                 | GG               | URR                           | 101500852          | pentatricopeptide repeat-containing protein At2g30780-like |
| SNP_29541_A_40755127 | NC_021163.1    | Ca_Kabuli_Chr04 | 40755127                | GG                                     | AA                 | AA               | INTRON                        | 101501182          | diphthamide biosynthesis protein 2                         |
| SNP_29542_A_40755181 | NC_021163.1    | Ca_Kabuli_Chr04 | 40755181                | TT                                     | GG                 | GG               | NON_SYNONYMOUS_CODING         | 101501182          | diphthamide biosynthesis protein 2                         |
| SNP_29543_A_40755879 | NC_021163.1    | Ca_Kabuli_Chr04 | 40755879                | TT                                     | CC                 | CC               | INTRON                        | 101501182          | diphthamide biosynthesis protein 2                         |
| SNP_29544_A_40761315 | NC_021163.1    | Ca_Kabuli_Chr04 | 40761315                | AA                                     | TT                 | TT               | INTERGENIC                    |                    |                                                            |
| SNP_29545_A_40761320 | NC_021163.1    | Ca_Kabuli_Chr04 | 40761320                | AA                                     | CC                 | CC               | INTERGENIC                    |                    |                                                            |
| SNP_29546_A_40761323 | NC_021163.1    | Ca_Kabuli_Chr04 | 40761323                | AA                                     | TT                 | TT               | INTERGENIC                    |                    |                                                            |
| SNP_29548_A_40763204 | NC_021163.1    | Ca_Kabuli_Chr04 | 40763204                | TT                                     | AA                 | AA               | INTERGENIC                    |                    |                                                            |
| SNP_29549_A_40763209 | NC_021163.1    | Ca_Kabuli_Chr04 | 40763209                | CC                                     | TT                 | TT               | INTERGENIC                    |                    |                                                            |
| SNP_29550_A_40765229 | NC_021163.1    | Ca_Kabuli_Chr04 | 40765229                | CC                                     | TT                 | TT               | INTERGENIC                    |                    |                                                            |
| SNP_29551_A_40765251 | NC_021163.1    | Ca_Kabuli_Chr04 | 40765251                | GG                                     | TT                 | TT               | INTERGENIC                    |                    |                                                            |
| SNP_29552_A_40765280 | NC_021163.1    | Ca_Kabuli_Chr04 | 40765280                | CC                                     | TT                 | TT               | DRR                           | 101501498          | indole-3-pyruvate monooxygenase YUCCA6-like                |
| SNP_29553_A_40765343 | NC_021163.1    | Ca_Kabuli_Chr04 | 40765343                | TT                                     | AA                 | AA               | DRR                           | 101501498          | indole-3-pyruvate monooxygenase YUCCA6-like                |
| SNP_29554_A_40765401 | NC_021163.1    | Ca_Kabuli_Chr04 | 40765401                | GG                                     | AA                 | AA               | DRR                           | 101501498          | indole-3-pyruvate monooxygenase YUCCA6-like                |
| SNP_29555_A_40766796 | NC_021163.1    | Ca_Kabuli_Chr04 | 40766796                | GG                                     | TT                 | TT               | DRR                           | 101501498          | indole-3-pyruvate monooxygenase YUCCA6-like                |
| SNP_29556_A_40767395 | NC_021163.1    | Ca_Kabuli_Chr04 | 40767395                | CC                                     | AA                 | AA               | INTRON                        | 101501498          | indole-3-pyruvate monooxygenase YUCCA6-like                |
| SNP_29558_A_40773088 | NC_021163.1    | Ca_Kabuli_Chr04 | 40773088                | GG                                     | AA                 | AA               | URR                           | 101501498          | indole-3-pyruvate monooxygenase YUCCA6-like                |

| SNPs IDs             | Chromosome IDs | Chromosomes     | Physical positions (bp) | CDC Frontier genome (Reference genome) | (Pusa 1103 & HPNB) | (ILWC 46 & LPNB) | Sequence Components of genome | Gene accession IDs | Putative functions                          |
|----------------------|----------------|-----------------|-------------------------|----------------------------------------|--------------------|------------------|-------------------------------|--------------------|---------------------------------------------|
| SNP_29559_A_40773126 | NC_021163.1    | Ca_Kabuli_Chr04 | 40773126                | GG                                     | AA                 | AA               | URR                           | 101501498          | indole-3-pyruvate monooxygenase YUCCA6-like |
| SNP_29560_A_40773148 | NC_021163.1    | Ca_Kabuli_Chr04 | 40773148                | CC                                     | TT                 | TT               | URR                           | 101501498          | indole-3-pyruvate monooxygenase YUCCA6-like |
| SNP_29561_A_40773150 | NC_021163.1    | Ca_Kabuli_Chr04 | 40773150                | TT                                     | GG                 | GG               | URR                           | 101501498          | indole-3-pyruvate monooxygenase YUCCA6-like |
| SNP_29562_A_40773160 | NC_021163.1    | Ca_Kabuli_Chr04 | 40773160                | GG                                     | AA                 | AA               | URR                           | 101501498          | indole-3-pyruvate monooxygenase YUCCA6-like |
| SNP_29563_A_40773335 | NC_021163.1    | Ca_Kabuli_Chr04 | 40773335                | TT                                     | GG                 | GG               | INTERGENIC                    |                    |                                             |
| SNP_29564_A_40773343 | NC_021163.1    | Ca_Kabuli_Chr04 | 40773343                | CC                                     | TT                 | TT               | INTERGENIC                    |                    |                                             |
| SNP_29565_A_40773354 | NC_021163.1    | Ca_Kabuli_Chr04 | 40773354                | GG                                     | TT                 | TT               | INTERGENIC                    |                    |                                             |
| SNP_29566_A_40773359 | NC_021163.1    | Ca_Kabuli_Chr04 | 40773359                | AA                                     | TT                 | TT               | INTERGENIC                    |                    |                                             |
| SNP_29567_A_40773372 | NC_021163.1    | Ca_Kabuli_Chr04 | 40773372                | GG                                     | CC                 | CC               | INTERGENIC                    |                    |                                             |
| SNP_29568_A_40773492 | NC_021163.1    | Ca_Kabuli_Chr04 | 40773492                | GG                                     | TT                 | TT               | INTERGENIC                    |                    |                                             |
| SNP_29569_A_40773516 | NC_021163.1    | Ca_Kabuli_Chr04 | 40773516                | TT                                     | CC                 | CC               | INTERGENIC                    |                    |                                             |
| SNP_29570_A_40773919 | NC_021163.1    | Ca_Kabuli_Chr04 | 40773919                | GG                                     | AA                 | AA               | INTERGENIC                    |                    |                                             |
| SNP_29572_A_40777956 | NC_021163.1    | Ca_Kabuli_Chr04 | 40777956                | AA                                     | CC                 | CC               | INTERGENIC                    |                    |                                             |
| SNP_29573_A_40778783 | NC_021163.1    | Ca_Kabuli_Chr04 | 40778783                | TT                                     | GG                 | GG               | INTERGENIC                    |                    |                                             |
| SNP_29574_A_40779494 | NC_021163.1    | Ca_Kabuli_Chr04 | 40779494                | CC                                     | TT                 | TT               | INTERGENIC                    |                    |                                             |
| SNP_29575_A_40779517 | NC_021163.1    | Ca_Kabuli_Chr04 | 40779517                | TT                                     | CC                 | CC               | INTERGENIC                    |                    |                                             |
| SNP_29577_A_40782191 | NC_021163.1    | Ca_Kabuli_Chr04 | 40782191                | CC                                     | TT                 | TT               | INTERGENIC                    |                    |                                             |
| SNP_29578_A_40783810 | NC_021163.1    | Ca_Kabuli_Chr04 | 40783810                | AA                                     | GG                 | GG               | INTERGENIC                    |                    |                                             |
| SNP_29579_A_40786004 | NC_021163.1    | Ca_Kabuli_Chr04 | 40786004                | TT                                     | CC                 | CC               | INTERGENIC                    |                    |                                             |
| SNP_29580_A_40786715 | NC_021163.1    | Ca_Kabuli_Chr04 | 40786715                | TT                                     | CC                 | CC               | INTERGENIC                    |                    |                                             |
| SNP_29581_A_40786760 | NC_021163.1    | Ca_Kabuli_Chr04 | 40786760                | TT                                     | CC                 | CC               | INTERGENIC                    |                    |                                             |
| SNP_29582_A_40787229 | NC_021163.1    | Ca_Kabuli_Chr04 | 40787229                | TT                                     | CC                 | CC               | INTERGENIC                    |                    |                                             |

| SNPs IDs             | Chromosome IDs | Chromosomes     | Physical positions (bp) | CDC Frontier genome (Reference genome) | (Pusa 1103 & HPNB) | (ILWC 46 & LPNB) | Sequence genome | Components of | Gene accession IDs                                 | Putative functions |
|----------------------|----------------|-----------------|-------------------------|----------------------------------------|--------------------|------------------|-----------------|---------------|----------------------------------------------------|--------------------|
| SNP_29584_A_40790489 | NC_021163.1    | Ca_Kabuli_Chr04 | 40790489                | AA                                     | TT                 | TT               | INTERGENIC      |               |                                                    |                    |
| SNP_29585_A_40790490 | NC_021163.1    | Ca_Kabuli_Chr04 | 40790490                | TT                                     | GG                 | GG               | INTERGENIC      |               |                                                    |                    |
| SNP_29586_A_40790669 | NC_021163.1    | Ca_Kabuli_Chr04 | 40790669                | GG                                     | TT                 | TT               | INTERGENIC      |               |                                                    |                    |
| SNP_29587_A_40790940 | NC_021163.1    | Ca_Kabuli_Chr04 | 40790940                | GG                                     | AA                 | AA               | DRR             | 101502135     | dehydration-responsive protein RD22                |                    |
| SNP_29588_A_40795306 | NC_021163.1    | Ca_Kabuli_Chr04 | 40795306                | CC                                     | GG                 | GG               | URR             | 101502135     | dehydration-responsive protein RD22                |                    |
| SNP_29589_A_40795319 | NC_021163.1    | Ca_Kabuli_Chr04 | 40795319                | TT                                     | CC                 | CC               | URR             | 101502135     | dehydration-responsive protein RD22                |                    |
| SNP_29590_A_40795384 | NC_021163.1    | Ca_Kabuli_Chr04 | 40795384                | CC                                     | TT                 | TT               | URR             | 101502135     | dehydration-responsive protein RD22                |                    |
| SNP_29592_A_40797583 | NC_021163.1    | Ca_Kabuli_Chr04 | 40797583                | CC                                     | TT                 | TT               | INTERGENIC      |               |                                                    |                    |
| SNP_29593_A_40797950 | NC_021163.1    | Ca_Kabuli_Chr04 | 40797950                | CC                                     | TT                 | TT               | INTERGENIC      |               |                                                    |                    |
| SNP_29594_A_40797952 | NC_021163.1    | Ca_Kabuli_Chr04 | 40797952                | TT                                     | GG                 | GG               | INTERGENIC      |               |                                                    |                    |
| SNP_29595_A_40798003 | NC_021163.1    | Ca_Kabuli_Chr04 | 40798003                | CC                                     | TT                 | TT               | INTERGENIC      |               |                                                    |                    |
| SNP_29596_A_40799147 | NC_021163.1    | Ca_Kabuli_Chr04 | 40799147                | CC                                     | TT                 | TT               | DRR             | 101501811     | helicase and polymerase-containing protein TEBICHI |                    |
| SNP_29598_A_40799460 | NC_021163.1    | Ca_Kabuli_Chr04 | 40799460                | TT                                     | GG                 | GG               | DRR             | 101501811     | helicase and polymerase-containing protein TEBICHI |                    |
| SNP_29599_A_40799476 | NC_021163.1    | Ca_Kabuli_Chr04 | 40799476                | GG                                     | TT                 | TT               | DRR             | 101501811     | helicase and polymerase-containing protein TEBICHI |                    |
| SNP_29602_A_40799765 | NC_021163.1    | Ca_Kabuli_Chr04 | 40799765                | GG                                     | AA                 | AA               | DRR             | 101501811     | helicase and polymerase-containing protein TEBICHI |                    |
| SNP_29603_A_40799850 | NC_021163.1    | Ca_Kabuli_Chr04 | 40799850                | AA                                     | CC                 | CC               | DRR             | 101501811     | helicase and polymerase-containing protein TEBICHI |                    |
| SNP_29604_A_40800480 | NC_021163.1    | Ca_Kabuli_Chr04 | 40800480                | CC                                     | TT                 | TT               | INTRON          | 101501811     | helicase and polymerase-containing protein TEBICHI |                    |
| SNP_29605_A_40801287 | NC_021163.1    | Ca_Kabuli_Chr04 | 40801287                | GG                                     | AA                 | AA               | INTRON          | 101501811     | helicase and polymerase-containing protein TEBICHI |                    |
| SNP_29607_A_40801999 | NC_021163.1    | Ca_Kabuli_Chr04 | 40801999                | AA                                     | GG                 | GG               | INTRON          | 101501811     | helicase and polymerase-containing protein TEBICHI |                    |
| SNP_29609_A_40803324 | NC_021163.1    | Ca_Kabuli_Chr04 | 40803324                | CC                                     | TT                 | TT               | INTRON          | 101501811     | helicase and polymerase-containing protein TEBICHI |                    |
| SNP_29610_A_40803368 | NC_021163.1    | Ca_Kabuli_Chr04 | 40803368                | CC                                     | TT                 | TT               | INTRON          | 101501811     | helicase and polymerase-containing protein TEBICHI |                    |
| SNP_29611_A_40803370 | NC_021163.1    | Ca_Kabuli_Chr04 | 40803370                | GG                                     | AA                 | AA               | INTRON          | 101501811     | helicase and polymerase-containing protein TEBICHI |                    |



| SNPs IDs             | Chromosome IDs | Chromosomes     | Physical positions (bp) | CDC Frontier genome (Reference genome) | (Pusa 1103 & HPNB) | (ILWC 46 & LPNB) | Sequence Components of genome | Gene accession IDs | Putative functions                                 |
|----------------------|----------------|-----------------|-------------------------|----------------------------------------|--------------------|------------------|-------------------------------|--------------------|----------------------------------------------------|
| SNP_29612_A_40803398 | NC_021163.1    | Ca_Kabuli_Chr04 | 40803398                | TT                                     | CC                 | CC               | INTRON                        | 101501811          | helicase and polymerase-containing protein TEBICHI |
| SNP_29613_A_40809554 | NC_021163.1    | Ca_Kabuli_Chr04 | 40809554                | AA                                     | CC                 | CC               | INTRON                        | 101501811          | helicase and polymerase-containing protein TEBICHI |
| SNP_29616_A_40810424 | NC_021163.1    | Ca_Kabuli_Chr04 | 40810424                | GG                                     | AA                 | AA               | INTRON                        | 101501811          | helicase and polymerase-containing protein TEBICHI |
| SNP_29617_A_40811162 | NC_021163.1    | Ca_Kabuli_Chr04 | 40811162                | CC                                     | AA                 | AA               | INTRON                        | 101501811          | helicase and polymerase-containing protein TEBICHI |
| SNP_29618_A_40811441 | NC_021163.1    | Ca_Kabuli_Chr04 | 40811441                | GG                                     | AA                 | AA               | INTRON                        | 101501811          | helicase and polymerase-containing protein TEBICHI |
| SNP_29619_A_40812029 | NC_021163.1    | Ca_Kabuli_Chr04 | 40812029                | TT                                     | GG                 | GG               | INTRON                        | 101501811          | helicase and polymerase-containing protein TEBICHI |
| SNP_29620_A_40818184 | NC_021163.1    | Ca_Kabuli_Chr04 | 40818184                | AA                                     | GG                 | GG               | SYNONYMOUS_CODING             | 101501811          | helicase and polymerase-containing protein TEBICHI |
| SNP_29622_A_40823345 | NC_021163.1    | Ca_Kabuli_Chr04 | 40823345                | TT                                     | GG                 | GG               | INTRON                        | 101503071          | uncharacterized LOC101503071                       |
| SNP_29623_A_40827434 | NC_021163.1    | Ca_Kabuli_Chr04 | 40827434                | CC                                     | TT                 | TT               | INTRON                        | 101503071          | uncharacterized LOC101503071                       |
| SNP_29624_A_40827614 | NC_021163.1    | Ca_Kabuli_Chr04 | 40827614                | CC                                     | TT                 | TT               | INTRON                        | 101503071          | uncharacterized LOC101503071                       |
| SNP_29625_A_40827696 | NC_021163.1    | Ca_Kabuli_Chr04 | 40827696                | AA                                     | GG                 | GG               | INTRON                        | 101503071          | uncharacterized LOC101503071                       |
| SNP_29626_A_40830856 | NC_021163.1    | Ca_Kabuli_Chr04 | 40830856                | CC                                     | TT                 | TT               | INTRON                        | 101503071          | uncharacterized LOC101503071                       |
| SNP_29627_A_40830886 | NC_021163.1    | Ca_Kabuli_Chr04 | 40830886                | TT                                     | CC                 | CC               | INTRON                        | 101503071          | uncharacterized LOC101503071                       |
| SNP_29628_A_40832447 | NC_021163.1    | Ca_Kabuli_Chr04 | 40832447                | GG                                     | TT                 | TT               | INTRON                        | 101503071          | uncharacterized LOC101503071                       |
| SNP_29629_A_40833847 | NC_021163.1    | Ca_Kabuli_Chr04 | 40833847                | CC                                     | TT                 | TT               | INTRON                        | 101503071          | uncharacterized LOC101503071                       |
| SNP_29630_A_40834616 | NC_021163.1    | Ca_Kabuli_Chr04 | 40834616                | TT                                     | CC                 | CC               | INTRON                        | 101503071          | uncharacterized LOC101503071                       |
| SNP_29631_A_40835832 | NC_021163.1    | Ca_Kabuli_Chr04 | 40835832                | AA                                     | GG                 | GG               | INTRON                        | 101503071          | uncharacterized LOC101503071                       |
| SNP_29633_A_40837373 | NC_021163.1    | Ca_Kabuli_Chr04 | 40837373                | AA                                     | TT                 | TT               | INTERGENIC                    |                    |                                                    |
| SNP_29635_A_40839448 | NC_021163.1    | Ca_Kabuli_Chr04 | 40839448                | GG                                     | AA                 | AA               | INTERGENIC                    |                    |                                                    |
| SNP_29636_A_40840573 | NC_021163.1    | Ca_Kabuli_Chr04 | 40840573                | TT                                     | AA                 | AA               | INTERGENIC                    |                    |                                                    |
| SNP_29637_A_40840674 | NC_021163.1    | Ca_Kabuli_Chr04 | 40840674                | AA                                     | CC                 | CC               | INTERGENIC                    |                    |                                                    |
| SNP_29638_A_40841360 | NC_021163.1    | Ca_Kabuli_Chr04 | 40841360                | CC                                     | TT                 | TT               | DRR                           | 101502452          | uncharacterized LOC101502452                       |

| SNPs IDs             | Chromosome IDs | Chromosomes     | Physical positions (bp) | CDC Frontier genome (Reference genome) | (Pusa 1103 & HPNB) | (ILWC 46 & LPNB) | Sequence Components of genome | Gene accession IDs | Putative functions                   |
|----------------------|----------------|-----------------|-------------------------|----------------------------------------|--------------------|------------------|-------------------------------|--------------------|--------------------------------------|
| SNP_29639_A_40841567 | NC_021163.1    | Ca_Kabuli_Chr04 | 40841567                | CC                                     | GG                 | GG               | DRR                           | 101502452          | uncharacterized LOC101502452         |
| SNP_29641_A_40843829 | NC_021163.1    | Ca_Kabuli_Chr04 | 40843829                | AA                                     | CC                 | CC               | URR                           | 101502452          | uncharacterized LOC101502452         |
| SNP_29643_A_40845641 | NC_021163.1    | Ca_Kabuli_Chr04 | 40845641                | CC                                     | AA                 | AA               | INTERGENIC                    |                    |                                      |
| SNP_29644_A_40846813 | NC_021163.1    | Ca_Kabuli_Chr04 | 40846813                | CC                                     | TT                 | TT               | INTERGENIC                    |                    |                                      |
| SNP_29645_A_40851320 | NC_021163.1    | Ca_Kabuli_Chr04 | 40851320                | TT                                     | GG                 | GG               | INTRON                        | 101502758          | two-on-two hemoglobin-3              |
| SNP_29646_A_40852288 | NC_021163.1    | Ca_Kabuli_Chr04 | 40852288                | GG                                     | AA                 | AA               | SYNONYMOUS_CODING             | 101502758          | two-on-two hemoglobin-3              |
| SNP_29647_A_40852602 | NC_021163.1    | Ca_Kabuli_Chr04 | 40852602                | TT                                     | AA                 | AA               | DRR                           | 101502758          | two-on-two hemoglobin-3              |
| SNP_29648_A_40852611 | NC_021163.1    | Ca_Kabuli_Chr04 | 40852611                | CC                                     | TT                 | TT               | DRR                           | 101502758          | two-on-two hemoglobin-3              |
| SNP_29649_A_40852649 | NC_021163.1    | Ca_Kabuli_Chr04 | 40852649                | TT                                     | AA                 | AA               | DRR                           | 101502758          | two-on-two hemoglobin-3              |
| SNP_29650_A_40852653 | NC_021163.1    | Ca_Kabuli_Chr04 | 40852653                | GG                                     | AA                 | AA               | DRR                           | 101502758          | two-on-two hemoglobin-3              |
| SNP_29651_A_40879902 | NC_021163.1    | Ca_Kabuli_Chr04 | 40879902                | AA                                     | CC                 | CC               | INTRON                        | 101492766          | Unknown function                     |
| SNP_29652_A_40879911 | NC_021163.1    | Ca_Kabuli_Chr04 | 40879911                | TT                                     | AA                 | AA               | INTRON                        | 101492766          | Unknown function                     |
| SNP_29653_A_40879933 | NC_021163.1    | Ca_Kabuli_Chr04 | 40879933                | CC                                     | TT                 | TT               | INTRON                        | 101492766          | Unknown function                     |
| SNP_29654_A_40880048 | NC_021163.1    | Ca_Kabuli_Chr04 | 40880048                | CC                                     | AA                 | AA               | INTRON                        | 101492766          | Unknown function                     |
| SNP_29655_A_40880068 | NC_021163.1    | Ca_Kabuli_Chr04 | 40880068                | CC                                     | TT                 | TT               | INTRON                        | 101492766          | Unknown function                     |
| SNP_29656_A_40880073 | NC_021163.1    | Ca_Kabuli_Chr04 | 40880073                | AA                                     | TT                 | TT               | NON_SYNONYMOUS_CODING         | 101492766          | Unknown function                     |
| SNP_29657_A_40880138 | NC_021163.1    | Ca_Kabuli_Chr04 | 40880138                | GG                                     | AA                 | AA               | SYNONYMOUS_CODING             | 101492766          | Unknown function                     |
| SNP_29658_A_40881532 | NC_021163.1    | Ca_Kabuli_Chr04 | 40881532                | TT                                     | AA                 | AA               | URR                           | 101492766          | Unknown function                     |
| SNP_29659_A_40883688 | NC_021163.1    | Ca_Kabuli_Chr04 | 40883688                | TT                                     | CC                 | CC               | DRR                           | 101410551          | transfer RNA leucine (anticodon AAG) |
| SNP_29661_A_40891503 | NC_021163.1    | Ca_Kabuli_Chr04 | 40891503                | TT                                     | AA                 | AA               | INTRON                        | 101493100          | elicitor-responsive protein 3-like   |
| SNP_29663_A_40891595 | NC_021163.1    | Ca_Kabuli_Chr04 | 40891595                | TT                                     | CC                 | CC               | INTRON                        | 101493100          | elicitor-responsive protein 3-like   |
| SNP_29665_A_40891724 | NC_021163.1    | Ca_Kabuli_Chr04 | 40891724                | AA                                     | TT                 | TT               | INTRON                        | 101493100          | elicitor-responsive protein 3-like   |

| SNPs IDs             | Chromosome IDs | Chromosomes     | Physical positions (bp) | CDC Frontier genome (Reference genome) | (Pusa 1103 & HPNB) | (ILWC 46 & LPNB) | Sequence Components of genome | Gene accession IDs | Putative functions                 |
|----------------------|----------------|-----------------|-------------------------|----------------------------------------|--------------------|------------------|-------------------------------|--------------------|------------------------------------|
| SNP_29666_A_40891862 | NC_021163.1    | Ca_Kabuli_Chr04 | 40891862                | AA                                     | CC                 | CC               | INTRON                        | 101493100          | elicitor-responsive protein 3-like |
| SNP_29667_A_40899064 | NC_021163.1    | Ca_Kabuli_Chr04 | 40899064                | GG                                     | TT                 | TT               | INTRON                        | 101493427          | transcriptional activator Myb-like |
| SNP_29669_A_40902035 | NC_021163.1    | Ca_Kabuli_Chr04 | 40902035                | TT                                     | CC                 | CC               | URR                           | 101493427          | transcriptional activator Myb-like |
| SNP_29670_A_40902038 | NC_021163.1    | Ca_Kabuli_Chr04 | 40902038                | TT                                     | CC                 | CC               | URR                           | 101493427          | transcriptional activator Myb-like |
| SNP_29671_A_40902066 | NC_021163.1    | Ca_Kabuli_Chr04 | 40902066                | CC                                     | TT                 | TT               | URR                           | 101493427          | transcriptional activator Myb-like |
| SNP_29674_A_40911249 | NC_021163.1    | Ca_Kabuli_Chr04 | 40911249                | TT                                     | CC                 | CC               | INTRON                        | 101504060          | uncharacterized LOC101504060       |
| SNP_29675_A_40911326 | NC_021163.1    | Ca_Kabuli_Chr04 | 40911326                | GG                                     | AA                 | AA               | INTRON                        | 101504060          | uncharacterized LOC101504060       |
| SNP_29676_A_40911658 | NC_021163.1    | Ca_Kabuli_Chr04 | 40911658                | TT                                     | CC                 | CC               | INTRON                        | 101504060          | uncharacterized LOC101504060       |
| SNP_29677_A_40913200 | NC_021163.1    | Ca_Kabuli_Chr04 | 40913200                | GG                                     | CC                 | CC               | INTRON                        | 101504060          | uncharacterized LOC101504060       |
| SNP_29678_A_40914691 | NC_021163.1    | Ca_Kabuli_Chr04 | 40914691                | CC                                     | GG                 | GG               | INTRON                        | 101504060          | uncharacterized LOC101504060       |
| SNP_29679_A_40916282 | NC_021163.1    | Ca_Kabuli_Chr04 | 40916282                | AA                                     | TT                 | TT               | INTRON                        | 101504060          | uncharacterized LOC101504060       |
| SNP_29680_A_40919165 | NC_021163.1    | Ca_Kabuli_Chr04 | 40919165                | AA                                     | GG                 | GG               | INTRON                        | 101504060          | uncharacterized LOC101504060       |
| SNP_29681_A_40919196 | NC_021163.1    | Ca_Kabuli_Chr04 | 40919196                | TT                                     | CC                 | CC               | INTRON                        | 101504060          | uncharacterized LOC101504060       |
| SNP_29682_A_40919728 | NC_021163.1    | Ca_Kabuli_Chr04 | 40919728                | AA                                     | TT                 | TT               | NON_SYNONYMOUS_CODING         | 101504060          | uncharacterized LOC101504060       |
| SNP_29683_A_40926669 | NC_021163.1    | Ca_Kabuli_Chr04 | 40926669                | GG                                     | AA                 | AA               | INTERGENIC                    |                    |                                    |
| SNP_29684_A_40926747 | NC_021163.1    | Ca_Kabuli_Chr04 | 40926747                | TT                                     | CC                 | CC               | INTERGENIC                    |                    |                                    |
| SNP_29685_A_40927161 | NC_021163.1    | Ca_Kabuli_Chr04 | 40927161                | TT                                     | CC                 | CC               | INTERGENIC                    |                    |                                    |
| SNP_29687_A_40930155 | NC_021163.1    | Ca_Kabuli_Chr04 | 40930155                | CC                                     | TT                 | TT               | INTRON                        | 101504372          | basic leucine zipper 9             |
| SNP_29688_A_40931433 | NC_021163.1    | Ca_Kabuli_Chr04 | 40931433                | AA                                     | CC                 | CC               | INTRON                        | 101504372          | basic leucine zipper 9             |
| SNP_29690_A_40933390 | NC_021163.1    | Ca_Kabuli_Chr04 | 40933390                | AA                                     | TT                 | TT               | URR                           | 101504372          | basic leucine zipper 9             |
| SNP_29691_A_40933614 | NC_021163.1    | Ca_Kabuli_Chr04 | 40933614                | AA                                     | GG                 | GG               | URR                           | 101504372          | basic leucine zipper 9             |
| SNP_29692_A_40934332 | NC_021163.1    | Ca_Kabuli_Chr04 | 40934332                | GG                                     | AA                 | AA               | URR                           | 101504372          | basic leucine zipper 9             |

| SNPs IDs             | Chromosome IDs | Chromosomes     | Physical positions (bp) | CDC Frontier (Reference genome) | (Pusa 1103 & HPNB) | (ILWC 46 & LPNB) | Sequence Components of genome | Gene accession IDs | Putative functions           |
|----------------------|----------------|-----------------|-------------------------|---------------------------------|--------------------|------------------|-------------------------------|--------------------|------------------------------|
| SNP_29693_A_40934364 | NC_021163.1    | Ca_Kabuli_Chr04 | 40934364                | AA                              | CC                 | CC               | URR                           | 101504372          | basic leucine zipper 9       |
| SNP_29694_A_40935297 | NC_021163.1    | Ca_Kabuli_Chr04 | 40935297                | GG                              | AA                 | AA               | URR                           | 101504372          | basic leucine zipper 9       |
| SNP_29695_A_40935323 | NC_021163.1    | Ca_Kabuli_Chr04 | 40935323                | AA                              | GG                 | GG               | URR                           | 101504372          | basic leucine zipper 9       |
| SNP_29696_A_40935330 | NC_021163.1    | Ca_Kabuli_Chr04 | 40935330                | GG                              | AA                 | AA               | URR                           | 101504372          | basic leucine zipper 9       |
| SNP_29699_A_40937526 | NC_021163.1    | Ca_Kabuli_Chr04 | 40937526                | CC                              | TT                 | TT               | INTERGENIC                    |                    |                              |
| SNP_29700_A_40937527 | NC_021163.1    | Ca_Kabuli_Chr04 | 40937527                | GG                              | AA                 | AA               | INTERGENIC                    |                    |                              |
| SNP_29701_A_40938992 | NC_021163.1    | Ca_Kabuli_Chr04 | 40938992                | CC                              | AA                 | AA               | INTERGENIC                    |                    |                              |
| SNP_29702_A_40939018 | NC_021163.1    | Ca_Kabuli_Chr04 | 40939018                | GG                              | AA                 | AA               | INTERGENIC                    |                    |                              |
| SNP_29704_A_40949761 | NC_021163.1    | Ca_Kabuli_Chr04 | 40949761                | GG                              | AA                 | AA               | INTRON                        | 101505025          | uncharacterized LOC101505025 |
| SNP_29705_A_40950320 | NC_021163.1    | Ca_Kabuli_Chr04 | 40950320                | GG                              | TT                 | TT               | INTRON                        | 101505025          | uncharacterized LOC101505025 |
| SNP_29706_A_40950452 | NC_021163.1    | Ca_Kabuli_Chr04 | 40950452                | GG                              | AA                 | AA               | INTRON                        | 101505025          | uncharacterized LOC101505025 |
| SNP_29707_A_40950637 | NC_021163.1    | Ca_Kabuli_Chr04 | 40950637                | TT                              | AA                 | AA               | SYNONYMOUS_CODING             | 101505025          | uncharacterized LOC101505025 |
| SNP_29708_A_40954163 | NC_021163.1    | Ca_Kabuli_Chr04 | 40954163                | GG                              | AA                 | AA               | INTERGENIC                    |                    |                              |
| SNP_29709_A_40955348 | NC_021163.1    | Ca_Kabuli_Chr04 | 40955348                | CC                              | TT                 | TT               | INTERGENIC                    |                    |                              |
| SNP_29710_A_40955379 | NC_021163.1    | Ca_Kabuli_Chr04 | 40955379                | AA                              | CC                 | CC               | INTERGENIC                    |                    |                              |
| SNP_29711_A_40955767 | NC_021163.1    | Ca_Kabuli_Chr04 | 40955767                | AA                              | GG                 | GG               | INTERGENIC                    |                    |                              |
| SNP_29712_A_40955903 | NC_021163.1    | Ca_Kabuli_Chr04 | 40955903                | GG                              | TT                 | TT               | INTERGENIC                    |                    |                              |
| SNP_29713_A_40955956 | NC_021163.1    | Ca_Kabuli_Chr04 | 40955956                | GG                              | AA                 | AA               | INTERGENIC                    |                    |                              |
| SNP_29714_A_40956033 | NC_021163.1    | Ca_Kabuli_Chr04 | 40956033                | AA                              | GG                 | GG               | INTERGENIC                    |                    |                              |
| SNP_29715_A_40957565 | NC_021163.1    | Ca_Kabuli_Chr04 | 40957565                | GG                              | TT                 | TT               | INTERGENIC                    |                    |                              |
| SNP_29717_A_40959042 | NC_021163.1    | Ca_Kabuli_Chr04 | 40959042                | TT                              | CC                 | CC               | INTERGENIC                    |                    |                              |
| SNP_29718_A_40959080 | NC_021163.1    | Ca_Kabuli_Chr04 | 40959080                | TT                              | GG                 | GG               | INTERGENIC                    |                    |                              |

| SNPs IDs             | Chromosome IDs | Chromosomes     | Physical positions (bp) | CDC Frontier genome (Reference genome) | (Pusa 1103 & HPNB) | (ILWC 46 & LPNB) | Sequence genome | Components of | Gene accession IDs | Putative functions |
|----------------------|----------------|-----------------|-------------------------|----------------------------------------|--------------------|------------------|-----------------|---------------|--------------------|--------------------|
| SNP_29719_A_40959087 | NC_021163.1    | Ca_Kabuli_Chr04 | 40959087                | AA                                     | CC                 | CC               | INTERGENIC      |               |                    |                    |
| SNP_29720_A_40959110 | NC_021163.1    | Ca_Kabuli_Chr04 | 40959110                | CC                                     | TT                 | TT               | INTERGENIC      |               |                    |                    |
| SNP_29721_A_40963211 | NC_021163.1    | Ca_Kabuli_Chr04 | 40963211                | GG                                     | TT                 | TT               | INTERGENIC      |               |                    |                    |
| SNP_29722_A_40966046 | NC_021163.1    | Ca_Kabuli_Chr04 | 40966046                | TT                                     | AA                 | AA               | INTERGENIC      |               |                    |                    |
| SNP_29723_A_40966419 | NC_021163.1    | Ca_Kabuli_Chr04 | 40966419                | CC                                     | GG                 | GG               | INTERGENIC      |               |                    |                    |
| SNP_29725_A_40967715 | NC_021163.1    | Ca_Kabuli_Chr04 | 40967715                | GG                                     | AA                 | AA               | INTERGENIC      |               |                    |                    |
| SNP_29726_A_40968003 | NC_021163.1    | Ca_Kabuli_Chr04 | 40968003                | AA                                     | GG                 | GG               | INTERGENIC      |               |                    |                    |
| SNP_29727_A_40968230 | NC_021163.1    | Ca_Kabuli_Chr04 | 40968230                | CC                                     | TT                 | TT               | INTERGENIC      |               |                    |                    |
| SNP_29728_A_40968426 | NC_021163.1    | Ca_Kabuli_Chr04 | 40968426                | GG                                     | TT                 | TT               | INTERGENIC      |               |                    |                    |
| SNP_29729_A_40968600 | NC_021163.1    | Ca_Kabuli_Chr04 | 40968600                | CC                                     | TT                 | TT               | INTERGENIC      |               |                    |                    |
| SNP_29730_A_40968705 | NC_021163.1    | Ca_Kabuli_Chr04 | 40968705                | GG                                     | AA                 | AA               | INTERGENIC      |               |                    |                    |
| SNP_29731_A_40968766 | NC_021163.1    | Ca_Kabuli_Chr04 | 40968766                | CC                                     | GG                 | GG               | INTERGENIC      |               |                    |                    |
| SNP_29734_A_40969350 | NC_021163.1    | Ca_Kabuli_Chr04 | 40969350                | TT                                     | GG                 | GG               | INTERGENIC      |               |                    |                    |
| SNP_29735_A_40969383 | NC_021163.1    | Ca_Kabuli_Chr04 | 40969383                | AA                                     | CC                 | CC               | INTERGENIC      |               |                    |                    |
| SNP_29736_A_40969626 | NC_021163.1    | Ca_Kabuli_Chr04 | 40969626                | CC                                     | TT                 | TT               | INTERGENIC      |               |                    |                    |
| SNP_29737_A_40969632 | NC_021163.1    | Ca_Kabuli_Chr04 | 40969632                | TT                                     | CC                 | CC               | INTERGENIC      |               |                    |                    |
| SNP_29738_A_40972028 | NC_021163.1    | Ca_Kabuli_Chr04 | 40972028                | CC                                     | TT                 | TT               | INTERGENIC      |               |                    |                    |
| SNP_29739_A_40972058 | NC_021163.1    | Ca_Kabuli_Chr04 | 40972058                | TT                                     | AA                 | AA               | INTERGENIC      |               |                    |                    |
| SNP_29740_A_40972115 | NC_021163.1    | Ca_Kabuli_Chr04 | 40972115                | TT                                     | CC                 | CC               | INTERGENIC      |               |                    |                    |
| SNP_29741_A_40972359 | NC_021163.1    | Ca_Kabuli_Chr04 | 40972359                | TT                                     | CC                 | CC               | INTERGENIC      |               |                    |                    |
| SNP_29742_A_40974198 | NC_021163.1    | Ca_Kabuli_Chr04 | 40974198                | TT                                     | CC                 | CC               | INTERGENIC      |               |                    |                    |
| SNP_29743_A_40974200 | NC_021163.1    | Ca_Kabuli_Chr04 | 40974200                | GG                                     | AA                 | AA               | INTERGENIC      |               |                    |                    |

| SNPs IDs             | Chromosome IDs | Chromosomes     | Physical positions (bp) | CDC Frontier genome (Reference genome) | (Pusa 1103 & HPNB) | (ILWC 46 & LPNB) | Sequence genome | Components of | Gene accession IDs | Putative functions |
|----------------------|----------------|-----------------|-------------------------|----------------------------------------|--------------------|------------------|-----------------|---------------|--------------------|--------------------|
| SNP_29744_A_40974270 | NC_021163.1    | Ca_Kabuli_Chr04 | 40974270                | GG                                     | AA                 | AA               | INTERGENIC      |               |                    |                    |
| SNP_29745_A_40974484 | NC_021163.1    | Ca_Kabuli_Chr04 | 40974484                | TT                                     | CC                 | CC               | INTERGENIC      |               |                    |                    |
| SNP_29746_A_40976654 | NC_021163.1    | Ca_Kabuli_Chr04 | 40976654                | AA                                     | GG                 | GG               | INTERGENIC      |               |                    |                    |
| SNP_29747_A_40976749 | NC_021163.1    | Ca_Kabuli_Chr04 | 40976749                | CC                                     | TT                 | TT               | INTERGENIC      |               |                    |                    |
| SNP_29748_A_40977295 | NC_021163.1    | Ca_Kabuli_Chr04 | 40977295                | CC                                     | TT                 | TT               | INTERGENIC      |               |                    |                    |
| SNP_29749_A_40978300 | NC_021163.1    | Ca_Kabuli_Chr04 | 40978300                | CC                                     | AA                 | AA               | INTERGENIC      |               |                    |                    |
| SNP_29750_A_40978329 | NC_021163.1    | Ca_Kabuli_Chr04 | 40978329                | TT                                     | GG                 | GG               | INTERGENIC      |               |                    |                    |
| SNP_29751_A_40982157 | NC_021163.1    | Ca_Kabuli_Chr04 | 40982157                | CC                                     | TT                 | TT               | INTERGENIC      |               |                    |                    |
| SNP_29752_A_40982191 | NC_021163.1    | Ca_Kabuli_Chr04 | 40982191                | CC                                     | TT                 | TT               | INTERGENIC      |               |                    |                    |
| SNP_29753_A_40982217 | NC_021163.1    | Ca_Kabuli_Chr04 | 40982217                | AA                                     | GG                 | GG               | INTERGENIC      |               |                    |                    |
| SNP_29754_A_40982228 | NC_021163.1    | Ca_Kabuli_Chr04 | 40982228                | AA                                     | GG                 | GG               | INTERGENIC      |               |                    |                    |
| SNP_29755_A_40982233 | NC_021163.1    | Ca_Kabuli_Chr04 | 40982233                | CC                                     | TT                 | TT               | INTERGENIC      |               |                    |                    |
| SNP_29756_A_40982236 | NC_021163.1    | Ca_Kabuli_Chr04 | 40982236                | TT                                     | CC                 | CC               | INTERGENIC      |               |                    |                    |
| SNP_29757_A_40982388 | NC_021163.1    | Ca_Kabuli_Chr04 | 40982388                | TT                                     | GG                 | GG               | INTERGENIC      |               |                    |                    |
| SNP_29758_A_40982419 | NC_021163.1    | Ca_Kabuli_Chr04 | 40982419                | TT                                     | AA                 | AA               | INTERGENIC      |               |                    |                    |
| SNP_29759_A_40982420 | NC_021163.1    | Ca_Kabuli_Chr04 | 40982420                | TT                                     | CC                 | CC               | INTERGENIC      |               |                    |                    |
| SNP_29760_A_40982478 | NC_021163.1    | Ca_Kabuli_Chr04 | 40982478                | CC                                     | TT                 | TT               | INTERGENIC      |               |                    |                    |
| SNP_29761_A_40984550 | NC_021163.1    | Ca_Kabuli_Chr04 | 40984550                | AA                                     | TT                 | TT               | INTERGENIC      |               |                    |                    |
| SNP_29762_A_40988747 | NC_021163.1    | Ca_Kabuli_Chr04 | 40988747                | TT                                     | GG                 | GG               | INTERGENIC      |               |                    |                    |
| SNP_29763_A_40990470 | NC_021163.1    | Ca_Kabuli_Chr04 | 40990470                | GG                                     | AA                 | AA               | INTERGENIC      |               |                    |                    |
| SNP_29764_A_40990480 | NC_021163.1    | Ca_Kabuli_Chr04 | 40990480                | TT                                     | GG                 | GG               | INTERGENIC      |               |                    |                    |
| SNP_29765_A_40996341 | NC_021163.1    | Ca_Kabuli_Chr04 | 40996341                | CC                                     | TT                 | TT               | INTERGENIC      |               |                    |                    |

| SNPs IDs             | Chromosome IDs | Chromosomes     | Physical positions (bp) | CDC Frontier genome (Reference genome) | (Pusa 1103 & HPNB) | (ILWC 46 & LPNB) | Sequence genome | Components of | Gene accession IDs | Putative functions |
|----------------------|----------------|-----------------|-------------------------|----------------------------------------|--------------------|------------------|-----------------|---------------|--------------------|--------------------|
| SNP_29767_A_40996610 | NC_021163.1    | Ca_Kabuli_Chr04 | 40996610                | GG                                     | TT                 | TT               | INTERGENIC      |               |                    |                    |
| SNP_29768_A_40996645 | NC_021163.1    | Ca_Kabuli_Chr04 | 40996645                | TT                                     | AA                 | AA               | INTERGENIC      |               |                    |                    |
| SNP_29769_A_40996709 | NC_021163.1    | Ca_Kabuli_Chr04 | 40996709                | CC                                     | TT                 | TT               | INTERGENIC      |               |                    |                    |
| SNP_29770_A_40996966 | NC_021163.1    | Ca_Kabuli_Chr04 | 40996966                | GG                                     | AA                 | AA               | INTERGENIC      |               |                    |                    |
| SNP_29772_A_40997128 | NC_021163.1    | Ca_Kabuli_Chr04 | 40997128                | CC                                     | AA                 | AA               | INTERGENIC      |               |                    |                    |
| SNP_29773_A_40997149 | NC_021163.1    | Ca_Kabuli_Chr04 | 40997149                | TT                                     | GG                 | GG               | INTERGENIC      |               |                    |                    |
| SNP_29775_A_40998920 | NC_021163.1    | Ca_Kabuli_Chr04 | 40998920                | TT                                     | CC                 | CC               | INTERGENIC      |               |                    |                    |
| SNP_29776_A_40998946 | NC_021163.1    | Ca_Kabuli_Chr04 | 40998946                | TT                                     | CC                 | CC               | INTERGENIC      |               |                    |                    |
| SNP_29777_A_40999191 | NC_021163.1    | Ca_Kabuli_Chr04 | 40999191                | GG                                     | AA                 | AA               | INTERGENIC      |               |                    |                    |
| SNP_29778_A_41000426 | NC_021163.1    | Ca_Kabuli_Chr04 | 41000426                | CC                                     | TT                 | TT               | INTERGENIC      |               |                    |                    |
| SNP_29779_A_41000546 | NC_021163.1    | Ca_Kabuli_Chr04 | 41000546                | AA                                     | GG                 | GG               | INTERGENIC      |               |                    |                    |
| SNP_29780_A_41002243 | NC_021163.1    | Ca_Kabuli_Chr04 | 41002243                | GG                                     | AA                 | AA               | INTERGENIC      |               |                    |                    |
| SNP_29781_A_41002253 | NC_021163.1    | Ca_Kabuli_Chr04 | 41002253                | CC                                     | GG                 | GG               | INTERGENIC      |               |                    |                    |
| SNP_29782_A_41006773 | NC_021163.1    | Ca_Kabuli_Chr04 | 41006773                | CC                                     | TT                 | TT               | INTERGENIC      |               |                    |                    |
| SNP_29783_A_41006781 | NC_021163.1    | Ca_Kabuli_Chr04 | 41006781                | TT                                     | AA                 | AA               | INTERGENIC      |               |                    |                    |
| SNP_29784_A_41007026 | NC_021163.1    | Ca_Kabuli_Chr04 | 41007026                | AA                                     | GG                 | GG               | INTERGENIC      |               |                    |                    |
| SNP_29785_A_41007040 | NC_021163.1    | Ca_Kabuli_Chr04 | 41007040                | AA                                     | GG                 | GG               | INTERGENIC      |               |                    |                    |
| SNP_29786_A_41007042 | NC_021163.1    | Ca_Kabuli_Chr04 | 41007042                | AA                                     | GG                 | GG               | INTERGENIC      |               |                    |                    |
| SNP_29787_A_41007052 | NC_021163.1    | Ca_Kabuli_Chr04 | 41007052                | TT                                     | GG                 | GG               | INTERGENIC      |               |                    |                    |
| SNP_29788_A_41007074 | NC_021163.1    | Ca_Kabuli_Chr04 | 41007074                | GG                                     | AA                 | AA               | INTERGENIC      |               |                    |                    |
| SNP_29789_A_41007080 | NC_021163.1    | Ca_Kabuli_Chr04 | 41007080                | GG                                     | CC                 | CC               | INTERGENIC      |               |                    |                    |
| SNP_29790_A_41007085 | NC_021163.1    | Ca_Kabuli_Chr04 | 41007085                | CC                                     | TT                 | TT               | INTERGENIC      |               |                    |                    |

| SNPs IDs             | Chromosome IDs | Chromosomes     | Physical positions (bp) | CDC Frontier genome (Reference genome) | (Pusa 1103 & HPNB) | (ILWC 46 & LPNB) | Sequence Components of genome | Gene accession IDs | Putative functions                         |
|----------------------|----------------|-----------------|-------------------------|----------------------------------------|--------------------|------------------|-------------------------------|--------------------|--------------------------------------------|
| SNP_29791_A_41007146 | NC_021163.1    | Ca_Kabuli_Chr04 | 41007146                | CC                                     | AA                 | AA               | INTERGENIC                    |                    |                                            |
| SNP_29792_A_41007745 | NC_021163.1    | Ca_Kabuli_Chr04 | 41007745                | CC                                     | TT                 | TT               | INTERGENIC                    |                    |                                            |
| SNP_29793_A_41010995 | NC_021163.1    | Ca_Kabuli_Chr04 | 41010995                | AA                                     | TT                 | TT               | INTERGENIC                    |                    |                                            |
| SNP_29794_A_41012156 | NC_021163.1    | Ca_Kabuli_Chr04 | 41012156                | TT                                     | GG                 | GG               | DRR                           | 101505346          | uncharacterized LOC101505346               |
| SNP_29795_A_41013373 | NC_021163.1    | Ca_Kabuli_Chr04 | 41013373                | AA                                     | GG                 | GG               | SYNONYMOUS_CODING             | 101505346          | uncharacterized LOC101505346               |
| SNP_29796_A_41013428 | NC_021163.1    | Ca_Kabuli_Chr04 | 41013428                | CC                                     | TT                 | TT               | URR                           | 101505346          | uncharacterized LOC101505346               |
| SNP_29797_A_41015646 | NC_021163.1    | Ca_Kabuli_Chr04 | 41015646                | TT                                     | CC                 | CC               | INTERGENIC                    |                    |                                            |
| SNP_29798_A_41015652 | NC_021163.1    | Ca_Kabuli_Chr04 | 41015652                | AA                                     | GG                 | GG               | INTERGENIC                    |                    |                                            |
| SNP_29799_A_41015670 | NC_021163.1    | Ca_Kabuli_Chr04 | 41015670                | AA                                     | TT                 | TT               | INTERGENIC                    |                    |                                            |
| SNP_29800_A_41015706 | NC_021163.1    | Ca_Kabuli_Chr04 | 41015706                | GG                                     | CC                 | CC               | INTERGENIC                    |                    |                                            |
| SNP_29802_A_41016412 | NC_021163.1    | Ca_Kabuli_Chr04 | 41016412                | GG                                     | CC                 | CC               | INTERGENIC                    |                    |                                            |
| SNP_29803_A_41016744 | NC_021163.1    | Ca_Kabuli_Chr04 | 41016744                | AA                                     | CC                 | CC               | INTERGENIC                    |                    |                                            |
| SNP_29806_A_41124768 | NC_021163.1    | Ca_Kabuli_Chr04 | 41124768                | TT                                     | AA                 | AA               | INTRON                        | 101508669          | serine/arginine-rich splicing factor RSZ22 |
| SNP_29807_A_41126152 | NC_021163.1    | Ca_Kabuli_Chr04 | 41126152                | AA                                     | TT                 | TT               | INTRON                        | 101508669          | serine/arginine-rich splicing factor RSZ22 |
| SNP_29808_A_41158060 | NC_021163.1    | Ca_Kabuli_Chr04 | 41158060                | TT                                     | CC                 | CC               | INTERGENIC                    |                    |                                            |
| SNP_29810_A_41161022 | NC_021163.1    | Ca_Kabuli_Chr04 | 41161022                | CC                                     | TT                 | TT               | INTERGENIC                    |                    |                                            |
| SNP_29811_A_41172737 | NC_021163.1    | Ca_Kabuli_Chr04 | 41172737                | AA                                     | GG                 | GG               | INTERGENIC                    |                    |                                            |
| SNP_29812_A_41176389 | NC_021163.1    | Ca_Kabuli_Chr04 | 41176389                | AA                                     | GG                 | GG               | INTERGENIC                    |                    |                                            |
| SNP_29813_A_41245162 | NC_021163.1    | Ca_Kabuli_Chr04 | 41245162                | AA                                     | GG                 | GG               | INTERGENIC                    |                    |                                            |
| SNP_29814_A_41245174 | NC_021163.1    | Ca_Kabuli_Chr04 | 41245174                | CC                                     | AA                 | AA               | INTERGENIC                    |                    |                                            |
| SNP_29815_A_41246812 | NC_021163.1    | Ca_Kabuli_Chr04 | 41246812                | AA                                     | CC                 | CC               | INTERGENIC                    |                    |                                            |
| SNP_29816_A_41247087 | NC_021163.1    | Ca_Kabuli_Chr04 | 41247087                | AA                                     | CC                 | CC               | INTERGENIC                    |                    |                                            |



| SNPs IDs             | Chromosome IDs | Chromosomes     | Physical positions (bp) | CDC Frontier (Reference genome) | (Pusa 1103 & HPNB) | (ILWC 46 & LPNB) | Sequence Components of genome | Gene accession IDs | Putative functions                                               |
|----------------------|----------------|-----------------|-------------------------|---------------------------------|--------------------|------------------|-------------------------------|--------------------|------------------------------------------------------------------|
| SNP_29818_A_41367764 | NC_021163.1    | Ca_Kabuli_Chr04 | 41367764                | AA                              | GG                 | GG               | INTERGENIC                    |                    |                                                                  |
| SNP_29819_A_41478524 | NC_021163.1    | Ca_Kabuli_Chr04 | 41478524                | AA                              | CC                 | CC               | INTERGENIC                    |                    |                                                                  |
| SNP_29820_A_41495464 | NC_021163.1    | Ca_Kabuli_Chr04 | 41495464                | TT                              | GG                 | GG               | INTERGENIC                    |                    |                                                                  |
| SNP_29821_A_41578384 | NC_021163.1    | Ca_Kabuli_Chr04 | 41578384                | GG                              | AA                 | AA               | DRR                           | 101496652          | protein FAR1-RELATED SEQUENCE 7-like                             |
| SNP_29822_A_41615136 | NC_021163.1    | Ca_Kabuli_Chr04 | 41615136                | GG                              | CC                 | CC               | INTERGENIC                    |                    |                                                                  |
| SNP_29823_A_41624975 | NC_021163.1    | Ca_Kabuli_Chr04 | 41624975                | GG                              | AA                 | AA               | DRR                           | 101496966          | RING finger and CHY zinc finger domain-containing protein 1-like |
| SNP_29824_A_41646106 | NC_021163.1    | Ca_Kabuli_Chr04 | 41646106                | AA                              | GG                 | GG               | INTERGENIC                    |                    |                                                                  |
| SNP_29825_A_41660890 | NC_021163.1    | Ca_Kabuli_Chr04 | 41660890                | CC                              | TT                 | TT               | INTERGENIC                    |                    |                                                                  |
| SNP_29826_A_41696034 | NC_021163.1    | Ca_Kabuli_Chr04 | 41696034                | AA                              | GG                 | GG               | URR                           | 101499268          | probable ADP-ribosylation factor GTPase-activating protein AGD14 |
| SNP_29828_A_41810267 | NC_021163.1    | Ca_Kabuli_Chr04 | 41810267                | GG                              | AA                 | AA               | INTERGENIC                    |                    |                                                                  |
| SNP_29829_A_41824656 | NC_021163.1    | Ca_Kabuli_Chr04 | 41824656                | AA                              | GG                 | GG               | DRR                           | 101498613          | uncharacterized LOC101498613                                     |
| SNP_29830_A_41829938 | NC_021163.1    | Ca_Kabuli_Chr04 | 41829938                | TT                              | CC                 | CC               | INTERGENIC                    |                    |                                                                  |
| SNP_29831_A_41888464 | NC_021163.1    | Ca_Kabuli_Chr04 | 41888464                | TT                              | AA                 | AA               | URR                           | 101504495          | probable indole-3-pyruvate monooxygenase YUCCA4                  |
| SNP_29832_A_41912580 | NC_021163.1    | Ca_Kabuli_Chr04 | 41912580                | AA                              | CC                 | CC               | INTERGENIC                    |                    |                                                                  |
| SNP_29833_A_41930750 | NC_021163.1    | Ca_Kabuli_Chr04 | 41930750                | CC                              | TT                 | TT               | DRR                           | 101505347          | pleiotropic drug resistance protein 1-like                       |
| SNP_29834_A_41983293 | NC_021163.1    | Ca_Kabuli_Chr04 | 41983293                | GG                              | AA                 | AA               | URR                           | 101499890          | serine/threonine-protein phosphatase 7 long form homolog         |
| SNP_29835_A_42013050 | NC_021163.1    | Ca_Kabuli_Chr04 | 42013050                | AA                              | TT                 | TT               | DRR                           | 101508456          | cytochrome b-c1 complex subunit 7-2-like                         |
| SNP_29836_A_42018363 | NC_021163.1    | Ca_Kabuli_Chr04 | 42018363                | CC                              | GG                 | GG               | INTERGENIC                    |                    |                                                                  |
| SNP_29837_A_42034865 | NC_021163.1    | Ca_Kabuli_Chr04 | 42034865                | TT                              | AA                 | AA               | INTERGENIC                    |                    |                                                                  |
| SNP_29838_A_42034874 | NC_021163.1    | Ca_Kabuli_Chr04 | 42034874                | TT                              | AA                 | AA               | INTERGENIC                    |                    |                                                                  |
| SNP_29839_A_42034875 | NC_021163.1    | Ca_Kabuli_Chr04 | 42034875                | AA                              | TT                 | TT               | INTERGENIC                    |                    |                                                                  |
| SNP_29840_A_42034876 | NC_021163.1    | Ca_Kabuli_Chr04 | 42034876                | TT                              | AA                 | AA               | INTERGENIC                    |                    |                                                                  |

| SNPs IDs             | Chromosome IDs | Chromosomes     | Physical positions (bp) | CDC Frontier genome (Reference genome) | (Pusa 1103 & HPNB) | (ILWC 46 & LPNB) | Sequence Components of genome | Gene accession IDs | Putative functions                                         |
|----------------------|----------------|-----------------|-------------------------|----------------------------------------|--------------------|------------------|-------------------------------|--------------------|------------------------------------------------------------|
| SNP_29841_A_42039236 | NC_021163.1    | Ca_Kabuli_Chr04 | 42039236                | AA                                     | TT                 | TT               | INTERGENIC                    |                    |                                                            |
| SNP_29843_A_42078837 | NC_021163.1    | Ca_Kabuli_Chr04 | 42078837                | TT                                     | CC                 | CC               | DRR                           | 101500538          | exopolygalacturonase-like                                  |
| SNP_29844_A_42078844 | NC_021163.1    | Ca_Kabuli_Chr04 | 42078844                | CC                                     | TT                 | TT               | DRR                           | 101500538          | exopolygalacturonase-like                                  |
| SNP_29845_A_42078865 | NC_021163.1    | Ca_Kabuli_Chr04 | 42078865                | AA                                     | TT                 | TT               | DRR                           | 101500538          | exopolygalacturonase-like                                  |
| SNP_29847_A_42083393 | NC_021163.1    | Ca_Kabuli_Chr04 | 42083393                | AA                                     | TT                 | TT               | INTRON                        | 101500538          | exopolygalacturonase-like                                  |
| SNP_29848_A_42083487 | NC_021163.1    | Ca_Kabuli_Chr04 | 42083487                | TT                                     | AA                 | AA               | INTERGENIC                    |                    |                                                            |
| SNP_29849_A_42083506 | NC_021163.1    | Ca_Kabuli_Chr04 | 42083506                | AA                                     | GG                 | GG               | INTERGENIC                    |                    |                                                            |
| SNP_29850_A_42083557 | NC_021163.1    | Ca_Kabuli_Chr04 | 42083557                | CC                                     | GG                 | GG               | INTERGENIC                    |                    |                                                            |
| SNP_29851_A_42083558 | NC_021163.1    | Ca_Kabuli_Chr04 | 42083558                | GG                                     | AA                 | AA               | INTERGENIC                    |                    |                                                            |
| SNP_29852_A_42083560 | NC_021163.1    | Ca_Kabuli_Chr04 | 42083560                | CC                                     | AA                 | AA               | INTERGENIC                    |                    |                                                            |
| SNP_29853_A_42083601 | NC_021163.1    | Ca_Kabuli_Chr04 | 42083601                | TT                                     | CC                 | CC               | INTERGENIC                    |                    |                                                            |
| SNP_29854_A_42083770 | NC_021163.1    | Ca_Kabuli_Chr04 | 42083770                | TT                                     | CC                 | CC               | INTERGENIC                    |                    |                                                            |
| SNP_29855_A_42083840 | NC_021163.1    | Ca_Kabuli_Chr04 | 42083840                | GG                                     | AA                 | AA               | INTERGENIC                    |                    |                                                            |
| SNP_29856_A_42086459 | NC_021163.1    | Ca_Kabuli_Chr04 | 42086459                | CC                                     | AA                 | AA               | INTERGENIC                    |                    |                                                            |
| SNP_29857_A_42095853 | NC_021163.1    | Ca_Kabuli_Chr04 | 42095853                | TT                                     | CC                 | CC               | INTERGENIC                    |                    |                                                            |
| SNP_29858_A_42119016 | NC_021163.1    | Ca_Kabuli_Chr04 | 42119016                | AA                                     | CC                 | CC               | URR                           | 101511128          | pentatricopeptide repeat-containing protein At4g21065-like |
| SNP_29859_A_42119020 | NC_021163.1    | Ca_Kabuli_Chr04 | 42119020                | TT                                     | AA                 | AA               | URR                           | 101511128          | pentatricopeptide repeat-containing protein At4g21065-like |
| SNP_29860_A_42119024 | NC_021163.1    | Ca_Kabuli_Chr04 | 42119024                | CC                                     | TT                 | TT               | URR                           | 101511128          | pentatricopeptide repeat-containing protein At4g21065-like |
| SNP_29861_A_42119025 | NC_021163.1    | Ca_Kabuli_Chr04 | 42119025                | CC                                     | TT                 | TT               | URR                           | 101511128          | pentatricopeptide repeat-containing protein At4g21065-like |
| SNP_29862_A_42119027 | NC_021163.1    | Ca_Kabuli_Chr04 | 42119027                | CC                                     | GG                 | GG               | URR                           | 101511128          | pentatricopeptide repeat-containing protein At4g21065-like |
| SNP_29863_A_42119062 | NC_021163.1    | Ca_Kabuli_Chr04 | 42119062                | AA                                     | GG                 | GG               | URR                           | 101511128          | pentatricopeptide repeat-containing protein At4g21065-like |
| SNP_29864_A_42119130 | NC_021163.1    | Ca_Kabuli_Chr04 | 42119130                | TT                                     | AA                 | AA               | URR                           | 101511128          | pentatricopeptide repeat-containing protein At4g21065-like |

| SNPs IDs             | Chromosome IDs | Chromosomes     | Physical positions (bp) | CDC Frontier genome (Reference genome) | (Pusa 1103 & HPNB) | (ILWC 46 & LPNB) | Sequence Components of genome | Gene accession IDs | Putative functions                                         |
|----------------------|----------------|-----------------|-------------------------|----------------------------------------|--------------------|------------------|-------------------------------|--------------------|------------------------------------------------------------|
| SNP_29865_A_42119215 | NC_021163.1    | Ca_Kabuli_Chr04 | 42119215                | AA                                     | GG                 | GG               | URR                           | 101511128          | pentatricopeptide repeat-containing protein At4g21065-like |
| SNP_29866_A_42119232 | NC_021163.1    | Ca_Kabuli_Chr04 | 42119232                | AA                                     | CC                 | CC               | URR                           | 101511128          | pentatricopeptide repeat-containing protein At4g21065-like |
| SNP_29867_A_42119269 | NC_021163.1    | Ca_Kabuli_Chr04 | 42119269                | CC                                     | TT                 | TT               | URR                           | 101511128          | pentatricopeptide repeat-containing protein At4g21065-like |
| SNP_29868_A_42119401 | NC_021163.1    | Ca_Kabuli_Chr04 | 42119401                | CC                                     | GG                 | GG               | URR                           | 101511128          | pentatricopeptide repeat-containing protein At4g21065-like |
| SNP_29869_A_42119423 | NC_021163.1    | Ca_Kabuli_Chr04 | 42119423                | GG                                     | AA                 | AA               | URR                           | 101511128          | pentatricopeptide repeat-containing protein At4g21065-like |
| SNP_29870_A_42119513 | NC_021163.1    | Ca_Kabuli_Chr04 | 42119513                | TT                                     | GG                 | GG               | URR                           | 101511128          | pentatricopeptide repeat-containing protein At4g21065-like |
| SNP_29871_A_42119554 | NC_021163.1    | Ca_Kabuli_Chr04 | 42119554                | GG                                     | TT                 | TT               | INTERGENIC                    |                    |                                                            |
| SNP_29872_A_42119704 | NC_021163.1    | Ca_Kabuli_Chr04 | 42119704                | TT                                     | AA                 | AA               | INTERGENIC                    |                    |                                                            |
| SNP_29873_A_42119716 | NC_021163.1    | Ca_Kabuli_Chr04 | 42119716                | GG                                     | AA                 | AA               | INTERGENIC                    |                    |                                                            |
| SNP_29874_A_42119757 | NC_021163.1    | Ca_Kabuli_Chr04 | 42119757                | GG                                     | AA                 | AA               | INTERGENIC                    |                    |                                                            |
| SNP_29875_A_42119889 | NC_021163.1    | Ca_Kabuli_Chr04 | 42119889                | AA                                     | CC                 | CC               | INTERGENIC                    |                    |                                                            |
| SNP_29876_A_42119936 | NC_021163.1    | Ca_Kabuli_Chr04 | 42119936                | GG                                     | CC                 | CC               | INTERGENIC                    |                    |                                                            |
| SNP_29877_A_42119945 | NC_021163.1    | Ca_Kabuli_Chr04 | 42119945                | TT                                     | AA                 | AA               | INTERGENIC                    |                    |                                                            |
| SNP_29878_A_42120012 | NC_021163.1    | Ca_Kabuli_Chr04 | 42120012                | CC                                     | GG                 | GG               | INTERGENIC                    |                    |                                                            |
| SNP_29879_A_42120055 | NC_021163.1    | Ca_Kabuli_Chr04 | 42120055                | AA                                     | GG                 | GG               | INTERGENIC                    |                    |                                                            |
| SNP_29880_A_42120201 | NC_021163.1    | Ca_Kabuli_Chr04 | 42120201                | GG                                     | CC                 | CC               | INTERGENIC                    |                    |                                                            |
| SNP_29881_A_42120202 | NC_021163.1    | Ca_Kabuli_Chr04 | 42120202                | GG                                     | TT                 | TT               | INTERGENIC                    |                    |                                                            |
| SNP_29882_A_42120203 | NC_021163.1    | Ca_Kabuli_Chr04 | 42120203                | AA                                     | GG                 | GG               | INTERGENIC                    |                    |                                                            |
| SNP_29883_A_42120236 | NC_021163.1    | Ca_Kabuli_Chr04 | 42120236                | TT                                     | CC                 | CC               | INTERGENIC                    |                    |                                                            |
| SNP_29884_A_42120290 | NC_021163.1    | Ca_Kabuli_Chr04 | 42120290                | CC                                     | TT                 | TT               | INTERGENIC                    |                    |                                                            |
| SNP_29885_A_42120295 | NC_021163.1    | Ca_Kabuli_Chr04 | 42120295                | AA                                     | GG                 | GG               | INTERGENIC                    |                    |                                                            |
| SNP_29886_A_42120323 | NC_021163.1    | Ca_Kabuli_Chr04 | 42120323                | AA                                     | GG                 | GG               | INTERGENIC                    |                    |                                                            |

| SNPs IDs             | Chromosome IDs | Chromosomes     | Physical positions (bp) | CDC Frontier genome (Reference genome) | (Pusa 1103 & HPNB) | (ILWC 46 & LPNB) | Sequence Components of genome | Gene accession IDs | Putative functions    |
|----------------------|----------------|-----------------|-------------------------|----------------------------------------|--------------------|------------------|-------------------------------|--------------------|-----------------------|
| SNP_29887_A_42120377 | NC_021163.1    | Ca_Kabuli_Chr04 | 42120377                | GG                                     | AA                 | AA               | INTERGENIC                    |                    |                       |
| SNP_29888_A_42120426 | NC_021163.1    | Ca_Kabuli_Chr04 | 42120426                | AA                                     | GG                 | GG               | INTERGENIC                    |                    |                       |
| SNP_29890_A_42120452 | NC_021163.1    | Ca_Kabuli_Chr04 | 42120452                | TT                                     | CC                 | CC               | INTERGENIC                    |                    |                       |
| SNP_29892_A_42120505 | NC_021163.1    | Ca_Kabuli_Chr04 | 42120505                | GG                                     | AA                 | AA               | INTERGENIC                    |                    |                       |
| SNP_29893_A_42120649 | NC_021163.1    | Ca_Kabuli_Chr04 | 42120649                | CC                                     | AA                 | AA               | INTERGENIC                    |                    |                       |
| SNP_29894_A_42120655 | NC_021163.1    | Ca_Kabuli_Chr04 | 42120655                | GG                                     | TT                 | TT               | INTERGENIC                    |                    |                       |
| SNP_29895_A_42147955 | NC_021163.1    | Ca_Kabuli_Chr04 | 42147955                | TT                                     | AA                 | AA               | INTERGENIC                    |                    |                       |
| SNP_29896_A_42147961 | NC_021163.1    | Ca_Kabuli_Chr04 | 42147961                | TT                                     | CC                 | CC               | INTERGENIC                    |                    |                       |
| SNP_29897_A_42148102 | NC_021163.1    | Ca_Kabuli_Chr04 | 42148102                | AA                                     | GG                 | GG               | INTERGENIC                    |                    |                       |
| SNP_29898_A_42148118 | NC_021163.1    | Ca_Kabuli_Chr04 | 42148118                | AA                                     | GG                 | GG               | INTERGENIC                    |                    |                       |
| SNP_29899_A_42148119 | NC_021163.1    | Ca_Kabuli_Chr04 | 42148119                | TT                                     | CC                 | CC               | INTERGENIC                    |                    |                       |
| SNP_29900_A_42148121 | NC_021163.1    | Ca_Kabuli_Chr04 | 42148121                | TT                                     | GG                 | GG               | INTERGENIC                    |                    |                       |
| SNP_29901_A_42148122 | NC_021163.1    | Ca_Kabuli_Chr04 | 42148122                | TT                                     | AA                 | AA               | INTERGENIC                    |                    |                       |
| SNP_29902_A_42148229 | NC_021163.1    | Ca_Kabuli_Chr04 | 42148229                | TT                                     | CC                 | CC               | INTERGENIC                    |                    |                       |
| SNP_29903_A_42196134 | NC_021163.1    | Ca_Kabuli_Chr04 | 42196134                | TT                                     | AA                 | AA               | INTRON                        | 101513603          | THO complex subunit 1 |
| SNP_29904_A_42259780 | NC_021163.1    | Ca_Kabuli_Chr04 | 42259780                | TT                                     | GG                 | GG               | INTERGENIC                    |                    |                       |
| SNP_29905_A_42259788 | NC_021163.1    | Ca_Kabuli_Chr04 | 42259788                | AA                                     | GG                 | GG               | INTERGENIC                    |                    |                       |
| SNP_29906_A_42259802 | NC_021163.1    | Ca_Kabuli_Chr04 | 42259802                | TT                                     | GG                 | GG               | INTERGENIC                    |                    |                       |
| SNP_29907_A_42259808 | NC_021163.1    | Ca_Kabuli_Chr04 | 42259808                | GG                                     | AA                 | AA               | INTERGENIC                    |                    |                       |
| SNP_29908_A_42284904 | NC_021163.1    | Ca_Kabuli_Chr04 | 42284904                | AA                                     | GG                 | GG               | INTERGENIC                    |                    |                       |
| SNP_29909_A_42285202 | NC_021163.1    | Ca_Kabuli_Chr04 | 42285202                | TT                                     | CC                 | CC               | INTERGENIC                    |                    |                       |
| SNP_29910_A_42285380 | NC_021163.1    | Ca_Kabuli_Chr04 | 42285380                | TT                                     | AA                 | AA               | INTERGENIC                    |                    |                       |

| SNPs IDs             | Chromosome IDs | Chromosomes     | Physical positions (bp) | CDC Frontier genome (Reference genome) | (Pusa 1103 & HPNB) | (ILWC 46 & LPNB) | Sequence Components of genome | Gene accession IDs | Putative functions              |
|----------------------|----------------|-----------------|-------------------------|----------------------------------------|--------------------|------------------|-------------------------------|--------------------|---------------------------------|
| SNP_29911_A_42285407 | NC_021163.1    | Ca_Kabuli_Chr04 | 42285407                | GG                                     | AA                 | AA               | INTERGENIC                    |                    |                                 |
| SNP_29912_A_42286597 | NC_021163.1    | Ca_Kabuli_Chr04 | 42286597                | GG                                     | CC                 | CC               | INTERGENIC                    |                    |                                 |
| SNP_29913_A_42305917 | NC_021163.1    | Ca_Kabuli_Chr04 | 42305917                | GG                                     | AA                 | AA               | INTERGENIC                    |                    |                                 |
| SNP_29916_A_42407140 | NC_021163.1    | Ca_Kabuli_Chr04 | 42407140                | AA                                     | GG                 | GG               | INTERGENIC                    |                    |                                 |
| SNP_29917_A_42407151 | NC_021163.1    | Ca_Kabuli_Chr04 | 42407151                | TT                                     | CC                 | CC               | INTERGENIC                    |                    |                                 |
| SNP_29918_A_42439251 | NC_021163.1    | Ca_Kabuli_Chr04 | 42439251                | TT                                     | CC                 | CC               | INTERGENIC                    |                    |                                 |
| SNP_29919_A_42439297 | NC_021163.1    | Ca_Kabuli_Chr04 | 42439297                | AA                                     | CC                 | CC               | INTERGENIC                    |                    |                                 |
| SNP_29920_A_42439353 | NC_021163.1    | Ca_Kabuli_Chr04 | 42439353                | TT                                     | GG                 | GG               | INTERGENIC                    |                    |                                 |
| SNP_29921_A_42439589 | NC_021163.1    | Ca_Kabuli_Chr04 | 42439589                | AA                                     | GG                 | GG               | INTERGENIC                    |                    |                                 |
| SNP_29922_A_42439613 | NC_021163.1    | Ca_Kabuli_Chr04 | 42439613                | TT                                     | CC                 | CC               | INTERGENIC                    |                    |                                 |
| SNP_29923_A_42439694 | NC_021163.1    | Ca_Kabuli_Chr04 | 42439694                | GG                                     | AA                 | AA               | INTERGENIC                    |                    |                                 |
| SNP_29924_A_42445514 | NC_021163.1    | Ca_Kabuli_Chr04 | 42445514                | GG                                     | TT                 | TT               | INTERGENIC                    |                    |                                 |
| SNP_29925_A_42477586 | NC_021163.1    | Ca_Kabuli_Chr04 | 42477586                | CC                                     | TT                 | TT               | INTERGENIC                    |                    |                                 |
| SNP_29926_A_42507696 | NC_021163.1    | Ca_Kabuli_Chr04 | 42507696                | AA                                     | CC                 | CC               | INTRON                        | 101489954          | E3 ubiquitin-protein ligase KEG |
| SNP_29927_A_42507705 | NC_021163.1    | Ca_Kabuli_Chr04 | 42507705                | TT                                     | CC                 | CC               | INTRON                        | 101489954          | E3 ubiquitin-protein ligase KEG |
| SNP_29928_A_42517079 | NC_021163.1    | Ca_Kabuli_Chr04 | 42517079                | AA                                     | GG                 | GG               | INTERGENIC                    |                    |                                 |
| SNP_29930_A_42546825 | NC_021163.1    | Ca_Kabuli_Chr04 | 42546825                | AA                                     | CC                 | CC               | INTERGENIC                    |                    |                                 |
| SNP_29931_A_42546842 | NC_021163.1    | Ca_Kabuli_Chr04 | 42546842                | TT                                     | GG                 | GG               | INTERGENIC                    |                    |                                 |
| SNP_29934_A_42561382 | NC_021163.1    | Ca_Kabuli_Chr04 | 42561382                | AA                                     | TT                 | TT               | INTERGENIC                    |                    |                                 |
| SNP_29935_A_42561400 | NC_021163.1    | Ca_Kabuli_Chr04 | 42561400                | CC                                     | TT                 | TT               | INTERGENIC                    |                    |                                 |
| SNP_29936_A_42561444 | NC_021163.1    | Ca_Kabuli_Chr04 | 42561444                | AA                                     | GG                 | GG               | INTERGENIC                    |                    |                                 |
| SNP_29937_A_42580703 | NC_021163.1    | Ca_Kabuli_Chr04 | 42580703                | AA                                     | CC                 | CC               | INTERGENIC                    |                    |                                 |

| SNPs IDs             | Chromosome IDs | Chromosomes     | Physical positions (bp) | CDC Frontier genome (Reference genome) | (Pusa 1103 & HPNB) | (ILWC 46 & LPNB) | Sequence Components of genome | Gene accession IDs | Putative functions                               |
|----------------------|----------------|-----------------|-------------------------|----------------------------------------|--------------------|------------------|-------------------------------|--------------------|--------------------------------------------------|
| SNP_29938_A_42580795 | NC_021163.1    | Ca_Kabuli_Chr04 | 42580795                | AA                                     | GG                 | GG               | INTERGENIC                    |                    |                                                  |
| SNP_29939_A_42588557 | NC_021163.1    | Ca_Kabuli_Chr04 | 42588557                | TT                                     | CC                 | CC               | INTERGENIC                    |                    |                                                  |
| SNP_29940_A_42588903 | NC_021163.1    | Ca_Kabuli_Chr04 | 42588903                | AA                                     | GG                 | GG               | INTERGENIC                    |                    |                                                  |
| SNP_29941_A_42588937 | NC_021163.1    | Ca_Kabuli_Chr04 | 42588937                | CC                                     | TT                 | TT               | INTERGENIC                    |                    |                                                  |
| SNP_29942_A_42588951 | NC_021163.1    | Ca_Kabuli_Chr04 | 42588951                | GG                                     | AA                 | AA               | INTERGENIC                    |                    |                                                  |
| SNP_29943_A_42588975 | NC_021163.1    | Ca_Kabuli_Chr04 | 42588975                | GG                                     | AA                 | AA               | INTERGENIC                    |                    |                                                  |
| SNP_29944_A_42589571 | NC_021163.1    | Ca_Kabuli_Chr04 | 42589571                | TT                                     | CC                 | CC               | INTERGENIC                    |                    |                                                  |
| SNP_29945_A_42609857 | NC_021163.1    | Ca_Kabuli_Chr04 | 42609857                | AA                                     | GG                 | GG               | INTERGENIC                    |                    |                                                  |
| SNP_29947_A_42671170 | NC_021163.1    | Ca_Kabuli_Chr04 | 42671170                | CC                                     | TT                 | TT               | INTERGENIC                    |                    |                                                  |
| SNP_29949_A_42733231 | NC_021163.1    | Ca_Kabuli_Chr04 | 42733231                | GG                                     | AA                 | AA               | INTERGENIC                    |                    |                                                  |
| SNP_29950_A_42737373 | NC_021163.1    | Ca_Kabuli_Chr04 | 42737373                | GG                                     | TT                 | TT               | INTERGENIC                    |                    |                                                  |
| SNP_29951_A_42755287 | NC_021163.1    | Ca_Kabuli_Chr04 | 42755287                | GG                                     | AA                 | AA               | INTERGENIC                    |                    |                                                  |
| SNP_29952_A_42755289 | NC_021163.1    | Ca_Kabuli_Chr04 | 42755289                | GG                                     | AA                 | AA               | INTERGENIC                    |                    |                                                  |
| SNP_29953_A_42755291 | NC_021163.1    | Ca_Kabuli_Chr04 | 42755291                | TT                                     | GG                 | GG               | INTERGENIC                    |                    |                                                  |
| SNP_29954_A_42755413 | NC_021163.1    | Ca_Kabuli_Chr04 | 42755413                | TT                                     | CC                 | CC               | INTERGENIC                    |                    |                                                  |
| SNP_29955_A_42755511 | NC_021163.1    | Ca_Kabuli_Chr04 | 42755511                | TT                                     | CC                 | CC               | INTERGENIC                    |                    |                                                  |
| SNP_29956_A_42764987 | NC_021163.1    | Ca_Kabuli_Chr04 | 42764987                | TT                                     | CC                 | CC               | INTRON                        | 101491765          | phosphatidylinositol 4-phosphate 5-kinase 6-like |
| SNP_29957_A_42765105 | NC_021163.1    | Ca_Kabuli_Chr04 | 42765105                | TT                                     | CC                 | CC               | INTRON                        | 101491765          | phosphatidylinositol 4-phosphate 5-kinase 6-like |
| SNP_29958_A_42807518 | NC_021163.1    | Ca_Kabuli_Chr04 | 42807518                | AA                                     | GG                 | GG               | INTERGENIC                    |                    |                                                  |
| SNP_29959_A_42807534 | NC_021163.1    | Ca_Kabuli_Chr04 | 42807534                | TT                                     | GG                 | GG               | INTERGENIC                    |                    |                                                  |
| SNP_29960_A_42807539 | NC_021163.1    | Ca_Kabuli_Chr04 | 42807539                | AA                                     | GG                 | GG               | INTERGENIC                    |                    |                                                  |
| SNP_29961_A_42807957 | NC_021163.1    | Ca_Kabuli_Chr04 | 42807957                | AA                                     | GG                 | GG               | INTERGENIC                    |                    |                                                  |

| SNPs IDs             | Chromosome IDs | Chromosomes     | Physical positions (bp) | CDC Frontier (Reference genome) | (Pusa 1103 & HPNB) | (ILWC 46 & LPNB) | Sequence Components of genome | Gene accession IDs | Putative functions |
|----------------------|----------------|-----------------|-------------------------|---------------------------------|--------------------|------------------|-------------------------------|--------------------|--------------------|
| SNP_29962_A_42816710 | NC_021163.1    | Ca_Kabuli_Chr04 | 42816710                | TT                              | AA                 | AA               | INTRON                        | 101504061          | Unknown function   |
| SNP_29963_A_42817819 | NC_021163.1    | Ca_Kabuli_Chr04 | 42817819                | CC                              | TT                 | TT               | INTRON                        | 101504061          | Unknown function   |
| SNP_29964_A_42820788 | NC_021163.1    | Ca_Kabuli_Chr04 | 42820788                | GG                              | AA                 | AA               | INTERGENIC                    |                    |                    |
| SNP_29965_A_42821106 | NC_021163.1    | Ca_Kabuli_Chr04 | 42821106                | GG                              | AA                 | AA               | INTERGENIC                    |                    |                    |
| SNP_29966_A_42821130 | NC_021163.1    | Ca_Kabuli_Chr04 | 42821130                | AA                              | CC                 | CC               | INTERGENIC                    |                    |                    |
| SNP_29967_A_42829258 | NC_021163.1    | Ca_Kabuli_Chr04 | 42829258                | TT                              | CC                 | CC               | INTERGENIC                    |                    |                    |
| SNP_29968_A_42829263 | NC_021163.1    | Ca_Kabuli_Chr04 | 42829263                | CC                              | TT                 | TT               | INTERGENIC                    |                    |                    |
| SNP_29969_A_42829265 | NC_021163.1    | Ca_Kabuli_Chr04 | 42829265                | AA                              | GG                 | GG               | INTERGENIC                    |                    |                    |
| SNP_29970_A_42829346 | NC_021163.1    | Ca_Kabuli_Chr04 | 42829346                | TT                              | CC                 | CC               | INTERGENIC                    |                    |                    |
| SNP_29971_A_42829370 | NC_021163.1    | Ca_Kabuli_Chr04 | 42829370                | AA                              | TT                 | TT               | INTERGENIC                    |                    |                    |
| SNP_29972_A_42829710 | NC_021163.1    | Ca_Kabuli_Chr04 | 42829710                | TT                              | CC                 | CC               | INTERGENIC                    |                    |                    |
| SNP_29973_A_42829720 | NC_021163.1    | Ca_Kabuli_Chr04 | 42829720                | TT                              | CC                 | CC               | INTERGENIC                    |                    |                    |
| SNP_29974_A_42844531 | NC_021163.1    | Ca_Kabuli_Chr04 | 42844531                | AA                              | TT                 | TT               | INTERGENIC                    |                    |                    |
| SNP_29975_A_42845469 | NC_021163.1    | Ca_Kabuli_Chr04 | 42845469                | TT                              | AA                 | AA               | INTERGENIC                    |                    |                    |
| SNP_29976_A_42845517 | NC_021163.1    | Ca_Kabuli_Chr04 | 42845517                | AA                              | CC                 | CC               | INTERGENIC                    |                    |                    |
| SNP_29977_A_42845599 | NC_021163.1    | Ca_Kabuli_Chr04 | 42845599                | AA                              | GG                 | GG               | INTERGENIC                    |                    |                    |
| SNP_29978_A_42892600 | NC_021163.1    | Ca_Kabuli_Chr04 | 42892600                | TT                              | GG                 | GG               | INTERGENIC                    |                    |                    |
| SNP_29979_A_42892839 | NC_021163.1    | Ca_Kabuli_Chr04 | 42892839                | CC                              | AA                 | AA               | INTERGENIC                    |                    |                    |
| SNP_29980_A_42892850 | NC_021163.1    | Ca_Kabuli_Chr04 | 42892850                | CC                              | TT                 | TT               | INTERGENIC                    |                    |                    |
| SNP_29981_A_42893318 | NC_021163.1    | Ca_Kabuli_Chr04 | 42893318                | AA                              | GG                 | GG               | INTERGENIC                    |                    |                    |
| SNP_29982_A_42893382 | NC_021163.1    | Ca_Kabuli_Chr04 | 42893382                | TT                              | AA                 | AA               | INTERGENIC                    |                    |                    |
| SNP_29983_A_42893394 | NC_021163.1    | Ca_Kabuli_Chr04 | 42893394                | CC                              | TT                 | TT               | INTERGENIC                    |                    |                    |

| SNPs IDs             | Chromosome IDs | Chromosomes     | Physical positions (bp) | CDC Frontier (Reference genome) | (Pusa 1103 & HPNB) | (ILWC 46 & LPNB) | Sequence genome | Components of | Gene accession IDs | Putative functions |
|----------------------|----------------|-----------------|-------------------------|---------------------------------|--------------------|------------------|-----------------|---------------|--------------------|--------------------|
| SNP_29984_A_42893400 | NC_021163.1    | Ca_Kabuli_Chr04 | 42893400                | GG                              | AA                 | AA               | INTERGENIC      |               |                    |                    |
| SNP_29985_A_42897101 | NC_021163.1    | Ca_Kabuli_Chr04 | 42897101                | AA                              | GG                 | GG               | INTERGENIC      |               |                    |                    |
| SNP_29986_A_42904493 | NC_021163.1    | Ca_Kabuli_Chr04 | 42904493                | TT                              | AA                 | AA               | INTERGENIC      |               |                    |                    |
| SNP_29988_A_42947372 | NC_021163.1    | Ca_Kabuli_Chr04 | 42947372                | AA                              | CC                 | CC               | INTERGENIC      |               |                    |                    |
| SNP_29989_A_42947414 | NC_021163.1    | Ca_Kabuli_Chr04 | 42947414                | TT                              | CC                 | CC               | INTERGENIC      |               |                    |                    |
| SNP_29990_A_42947519 | NC_021163.1    | Ca_Kabuli_Chr04 | 42947519                | AA                              | TT                 | TT               | INTERGENIC      |               |                    |                    |
| SNP_29991_A_42973919 | NC_021163.1    | Ca_Kabuli_Chr04 | 42973919                | CC                              | TT                 | TT               | INTERGENIC      |               |                    |                    |
| SNP_29992_A_42973982 | NC_021163.1    | Ca_Kabuli_Chr04 | 42973982                | TT                              | CC                 | CC               | INTERGENIC      |               |                    |                    |
| SNP_29993_A_43002069 | NC_021163.1    | Ca_Kabuli_Chr04 | 43002069                | AA                              | CC                 | CC               | INTERGENIC      |               |                    |                    |
| SNP_29994_A_43002146 | NC_021163.1    | Ca_Kabuli_Chr04 | 43002146                | AA                              | GG                 | GG               | INTERGENIC      |               |                    |                    |
| SNP_29995_A_43002155 | NC_021163.1    | Ca_Kabuli_Chr04 | 43002155                | GG                              | TT                 | TT               | INTERGENIC      |               |                    |                    |
| SNP_29996_A_43002184 | NC_021163.1    | Ca_Kabuli_Chr04 | 43002184                | AA                              | GG                 | GG               | INTERGENIC      |               |                    |                    |
| SNP_29997_A_43002200 | NC_021163.1    | Ca_Kabuli_Chr04 | 43002200                | CC                              | TT                 | TT               | INTERGENIC      |               |                    |                    |
| SNP_29998_A_43002309 | NC_021163.1    | Ca_Kabuli_Chr04 | 43002309                | AA                              | TT                 | TT               | INTERGENIC      |               |                    |                    |
| SNP_29999_A_43002331 | NC_021163.1    | Ca_Kabuli_Chr04 | 43002331                | AA                              | TT                 | TT               | INTERGENIC      |               |                    |                    |
| SNP_30000_A_43002349 | NC_021163.1    | Ca_Kabuli_Chr04 | 43002349                | AA                              | TT                 | TT               | INTERGENIC      |               |                    |                    |
| SNP_30001_A_43002463 | NC_021163.1    | Ca_Kabuli_Chr04 | 43002463                | GG                              | TT                 | TT               | INTERGENIC      |               |                    |                    |
| SNP_30002_A_43002611 | NC_021163.1    | Ca_Kabuli_Chr04 | 43002611                | TT                              | CC                 | CC               | INTERGENIC      |               |                    |                    |
| SNP_30003_A_43005274 | NC_021163.1    | Ca_Kabuli_Chr04 | 43005274                | GG                              | AA                 | AA               | INTERGENIC      |               |                    |                    |
| SNP_30005_A_43006059 | NC_021163.1    | Ca_Kabuli_Chr04 | 43006059                | GG                              | TT                 | TT               | INTERGENIC      |               |                    |                    |
| SNP_30006_A_43006101 | NC_021163.1    | Ca_Kabuli_Chr04 | 43006101                | GG                              | AA                 | AA               | INTERGENIC      |               |                    |                    |
| SNP_30007_A_43006123 | NC_021163.1    | Ca_Kabuli_Chr04 | 43006123                | CC                              | TT                 | TT               | INTERGENIC      |               |                    |                    |



| SNPs IDs             | Chromosome IDs | Chromosomes     | Physical positions (bp) | CDC Frontier genome (Reference genome) | (Pusa 1103 & HPNB) | (ILWC 46 & LPNB) | Sequence genome | Components of | Gene accession IDs | Putative functions |
|----------------------|----------------|-----------------|-------------------------|----------------------------------------|--------------------|------------------|-----------------|---------------|--------------------|--------------------|
| SNP_30008_A_43009914 | NC_021163.1    | Ca_Kabuli_Chr04 | 43009914                | TT                                     | AA                 | AA               | INTERGENIC      |               |                    |                    |
| SNP_30009_A_43009986 | NC_021163.1    | Ca_Kabuli_Chr04 | 43009986                | GG                                     | TT                 | TT               | INTERGENIC      |               |                    |                    |
| SNP_30010_A_43010396 | NC_021163.1    | Ca_Kabuli_Chr04 | 43010396                | GG                                     | AA                 | AA               | INTERGENIC      |               |                    |                    |
| SNP_30011_A_43015191 | NC_021163.1    | Ca_Kabuli_Chr04 | 43015191                | CC                                     | TT                 | TT               | INTERGENIC      |               |                    |                    |
| SNP_30012_A_43030798 | NC_021163.1    | Ca_Kabuli_Chr04 | 43030798                | GG                                     | AA                 | AA               | INTERGENIC      |               |                    |                    |
| SNP_30013_A_43032487 | NC_021163.1    | Ca_Kabuli_Chr04 | 43032487                | TT                                     | CC                 | CC               | INTERGENIC      |               |                    |                    |
| SNP_30014_A_43064526 | NC_021163.1    | Ca_Kabuli_Chr04 | 43064526                | AA                                     | GG                 | GG               | INTERGENIC      |               |                    |                    |
| SNP_30015_A_43082224 | NC_021163.1    | Ca_Kabuli_Chr04 | 43082224                | AA                                     | CC                 | CC               | INTERGENIC      |               |                    |                    |
| SNP_30016_A_43082453 | NC_021163.1    | Ca_Kabuli_Chr04 | 43082453                | GG                                     | AA                 | AA               | INTERGENIC      |               |                    |                    |
| SNP_30017_A_43082643 | NC_021163.1    | Ca_Kabuli_Chr04 | 43082643                | CC                                     | TT                 | TT               | INTERGENIC      |               |                    |                    |
| SNP_30018_A_43083696 | NC_021163.1    | Ca_Kabuli_Chr04 | 43083696                | CC                                     | AA                 | AA               | INTERGENIC      |               |                    |                    |
| SNP_30019_A_43093192 | NC_021163.1    | Ca_Kabuli_Chr04 | 43093192                | AA                                     | GG                 | GG               | INTERGENIC      |               |                    |                    |
| SNP_30020_A_43093213 | NC_021163.1    | Ca_Kabuli_Chr04 | 43093213                | AA                                     | CC                 | CC               | INTERGENIC      |               |                    |                    |
| SNP_30021_A_43093457 | NC_021163.1    | Ca_Kabuli_Chr04 | 43093457                | AA                                     | CC                 | CC               | INTERGENIC      |               |                    |                    |
| SNP_30022_A_43093771 | NC_021163.1    | Ca_Kabuli_Chr04 | 43093771                | CC                                     | AA                 | AA               | INTERGENIC      |               |                    |                    |
| SNP_30023_A_43093796 | NC_021163.1    | Ca_Kabuli_Chr04 | 43093796                | CC                                     | TT                 | TT               | INTERGENIC      |               |                    |                    |
| SNP_30024_A_43111734 | NC_021163.1    | Ca_Kabuli_Chr04 | 43111734                | GG                                     | AA                 | AA               | INTERGENIC      |               |                    |                    |
| SNP_30025_A_43115388 | NC_021163.1    | Ca_Kabuli_Chr04 | 43115388                | GG                                     | AA                 | AA               | INTERGENIC      |               |                    |                    |
| SNP_30026_A_43120029 | NC_021163.1    | Ca_Kabuli_Chr04 | 43120029                | CC                                     | AA                 | AA               | INTERGENIC      |               |                    |                    |
| SNP_30027_A_43128315 | NC_021163.1    | Ca_Kabuli_Chr04 | 43128315                | GG                                     | AA                 | AA               | INTERGENIC      |               |                    |                    |
| SNP_30028_A_43146786 | NC_021163.1    | Ca_Kabuli_Chr04 | 43146786                | AA                                     | TT                 | TT               | INTERGENIC      |               |                    |                    |
| SNP_30029_A_43146812 | NC_021163.1    | Ca_Kabuli_Chr04 | 43146812                | TT                                     | CC                 | CC               | INTERGENIC      |               |                    |                    |

| SNPs IDs             | Chromosome IDs | Chromosomes     | Physical positions (bp) | CDC Frontier genome (Reference genome) | (Pusa 1103 & HPNB) | (ILWC 46 & LPNB) | Sequence genome | Components of | Gene accession IDs | Putative functions |
|----------------------|----------------|-----------------|-------------------------|----------------------------------------|--------------------|------------------|-----------------|---------------|--------------------|--------------------|
| SNP_30030_A_43146878 | NC_021163.1    | Ca_Kabuli_Chr04 | 43146878                | CC                                     | GG                 | GG               | INTERGENIC      |               |                    |                    |
| SNP_30031_A_43146893 | NC_021163.1    | Ca_Kabuli_Chr04 | 43146893                | GG                                     | AA                 | AA               | INTERGENIC      |               |                    |                    |
| SNP_30032_A_43146954 | NC_021163.1    | Ca_Kabuli_Chr04 | 43146954                | CC                                     | TT                 | TT               | INTERGENIC      |               |                    |                    |
| SNP_30033_A_43146975 | NC_021163.1    | Ca_Kabuli_Chr04 | 43146975                | CC                                     | TT                 | TT               | INTERGENIC      |               |                    |                    |
| SNP_30034_A_43146983 | NC_021163.1    | Ca_Kabuli_Chr04 | 43146983                | CC                                     | TT                 | TT               | INTERGENIC      |               |                    |                    |
| SNP_30035_A_43146991 | NC_021163.1    | Ca_Kabuli_Chr04 | 43146991                | CC                                     | TT                 | TT               | INTERGENIC      |               |                    |                    |
| SNP_30036_A_43146996 | NC_021163.1    | Ca_Kabuli_Chr04 | 43146996                | CC                                     | TT                 | TT               | INTERGENIC      |               |                    |                    |
| SNP_30037_A_43165531 | NC_021163.1    | Ca_Kabuli_Chr04 | 43165531                | AA                                     | TT                 | TT               | INTERGENIC      |               |                    |                    |
| SNP_30038_A_43171381 | NC_021163.1    | Ca_Kabuli_Chr04 | 43171381                | GG                                     | CC                 | CC               | INTERGENIC      |               |                    |                    |
| SNP_30039_A_43173864 | NC_021163.1    | Ca_Kabuli_Chr04 | 43173864                | AA                                     | TT                 | TT               | INTERGENIC      |               |                    |                    |
| SNP_30040_A_43200277 | NC_021163.1    | Ca_Kabuli_Chr04 | 43200277                | AA                                     | CC                 | CC               | INTERGENIC      |               |                    |                    |
| SNP_30041_A_43205245 | NC_021163.1    | Ca_Kabuli_Chr04 | 43205245                | CC                                     | TT                 | TT               | INTERGENIC      |               |                    |                    |
| SNP_30042_A_43212036 | NC_021163.1    | Ca_Kabuli_Chr04 | 43212036                | TT                                     | AA                 | AA               | INTERGENIC      |               |                    |                    |
| SNP_30044_A_43240062 | NC_021163.1    | Ca_Kabuli_Chr04 | 43240062                | GG                                     | AA                 | AA               | INTERGENIC      |               |                    |                    |
| SNP_30045_A_43240667 | NC_021163.1    | Ca_Kabuli_Chr04 | 43240667                | AA                                     | CC                 | CC               | INTERGENIC      |               |                    |                    |
| SNP_30046_A_43241011 | NC_021163.1    | Ca_Kabuli_Chr04 | 43241011                | AA                                     | GG                 | GG               | INTERGENIC      |               |                    |                    |
| SNP_30047_A_43242982 | NC_021163.1    | Ca_Kabuli_Chr04 | 43242982                | GG                                     | AA                 | AA               | INTERGENIC      |               |                    |                    |
| SNP_30048_A_43243610 | NC_021163.1    | Ca_Kabuli_Chr04 | 43243610                | GG                                     | AA                 | AA               | INTERGENIC      |               |                    |                    |
| SNP_30049_A_43243713 | NC_021163.1    | Ca_Kabuli_Chr04 | 43243713                | TT                                     | GG                 | GG               | INTERGENIC      |               |                    |                    |
| SNP_30050_A_43243718 | NC_021163.1    | Ca_Kabuli_Chr04 | 43243718                | TT                                     | CC                 | CC               | INTERGENIC      |               |                    |                    |
| SNP_30051_A_43243945 | NC_021163.1    | Ca_Kabuli_Chr04 | 43243945                | GG                                     | AA                 | AA               | INTERGENIC      |               |                    |                    |
| SNP_30052_A_43244073 | NC_021163.1    | Ca_Kabuli_Chr04 | 43244073                | CC                                     | TT                 | TT               | INTERGENIC      |               |                    |                    |

| SNPs IDs             | Chromosome IDs | Chromosomes     | Physical positions (bp) | CDC Frontier genome (Reference genome) | (Pusa 1103 & HPNB) | (ILWC 46 & LPNB) | Sequence Components of genome | Gene accession IDs | Putative functions                                                      |
|----------------------|----------------|-----------------|-------------------------|----------------------------------------|--------------------|------------------|-------------------------------|--------------------|-------------------------------------------------------------------------|
| SNP_30053_A_43247567 | NC_021163.1    | Ca_Kabuli_Chr04 | 43247567                | CC                                     | TT                 | TT               | INTERGENIC                    |                    |                                                                         |
| SNP_30054_A_43247808 | NC_021163.1    | Ca_Kabuli_Chr04 | 43247808                | CC                                     | GG                 | GG               | INTERGENIC                    |                    |                                                                         |
| SNP_30055_A_43270325 | NC_021163.1    | Ca_Kabuli_Chr04 | 43270325                | AA                                     | TT                 | TT               | INTRON                        | 101508457          | uncharacterized LOC101508457                                            |
| SNP_30056_A_43274798 | NC_021163.1    | Ca_Kabuli_Chr04 | 43274798                | GG                                     | AA                 | AA               | INTRON                        | 101508457          | uncharacterized LOC101508457                                            |
| SNP_30057_A_43274816 | NC_021163.1    | Ca_Kabuli_Chr04 | 43274816                | GG                                     | AA                 | AA               | INTRON                        | 101508457          | uncharacterized LOC101508457                                            |
| SNP_30058_A_43274864 | NC_021163.1    | Ca_Kabuli_Chr04 | 43274864                | TT                                     | CC                 | CC               | INTRON                        | 101508457          | uncharacterized LOC101508457                                            |
| SNP_30059_A_43274894 | NC_021163.1    | Ca_Kabuli_Chr04 | 43274894                | CC                                     | TT                 | TT               | INTRON                        | 101508457          | uncharacterized LOC101508457                                            |
| SNP_30060_A_43274909 | NC_021163.1    | Ca_Kabuli_Chr04 | 43274909                | TT                                     | GG                 | GG               | INTRON                        | 101508457          | uncharacterized LOC101508457                                            |
| SNP_30061_A_43274911 | NC_021163.1    | Ca_Kabuli_Chr04 | 43274911                | TT                                     | CC                 | CC               | INTRON                        | 101508457          | uncharacterized LOC101508457                                            |
| SNP_30062_A_43274919 | NC_021163.1    | Ca_Kabuli_Chr04 | 43274919                | AA                                     | CC                 | CC               | INTRON                        | 101508457          | uncharacterized LOC101508457                                            |
| SNP_30063_A_43275190 | NC_021163.1    | Ca_Kabuli_Chr04 | 43275190                | AA                                     | GG                 | GG               | INTRON                        | 101508457          | uncharacterized LOC101508457                                            |
| SNP_30064_A_43275206 | NC_021163.1    | Ca_Kabuli_Chr04 | 43275206                | CC                                     | TT                 | TT               | INTRON                        | 101508457          | uncharacterized LOC101508457                                            |
| SNP_30065_A_43275239 | NC_021163.1    | Ca_Kabuli_Chr04 | 43275239                | TT                                     | CC                 | CC               | INTRON                        | 101508457          | uncharacterized LOC101508457                                            |
| SNP_30066_A_43275244 | NC_021163.1    | Ca_Kabuli_Chr04 | 43275244                | CC                                     | TT                 | TT               | INTRON                        | 101508457          | uncharacterized LOC101508457                                            |
| SNP_30071_A_43304339 | NC_021163.1    | Ca_Kabuli_Chr04 | 43304339                | AA                                     | TT                 | TT               | INTRON                        | 101508760          | homeobox protein rough sheath 1-like                                    |
| SNP_30072_A_43304346 | NC_021163.1    | Ca_Kabuli_Chr04 | 43304346                | AA                                     | TT                 | TT               | INTRON                        | 101508760          | homeobox protein rough sheath 1-like                                    |
| SNP_30073_A_43345831 | NC_021163.1    | Ca_Kabuli_Chr04 | 43345831                | AA                                     | TT                 | TT               | DRR                           | 101506092          | G-type lectin S-receptor-like serine/threonine-protein kinase At1g34300 |
| SNP_30074_A_43362622 | NC_021163.1    | Ca_Kabuli_Chr04 | 43362622                | CC                                     | TT                 | TT               | URR                           | 101506746          | uncharacterized LOC101506746                                            |
| SNP_30075_A_43362633 | NC_021163.1    | Ca_Kabuli_Chr04 | 43362633                | GG                                     | AA                 | AA               | URR                           | 101506746          | uncharacterized LOC101506746                                            |
| SNP_30077_A_43434195 | NC_021163.1    | Ca_Kabuli_Chr04 | 43434195                | TT                                     | AA                 | AA               | INTERGENIC                    |                    |                                                                         |
| SNP_30078_A_43468308 | NC_021163.1    | Ca_Kabuli_Chr04 | 43468308                | TT                                     | CC                 | CC               | NON_SYNONYMOUS_CODING         | 101510378          | arogenate dehydratase/prephenate dehydratase 2, chloroplastic-like      |
| SNP_30079_A_43468320 | NC_021163.1    | Ca_Kabuli_Chr04 | 43468320                | AA                                     | CC                 | CC               | URR                           | 101510378          | arogenate dehydratase/prephenate dehydratase 2, chloroplastic-like      |

| SNPs IDs             | Chromosome IDs | Chromosomes     | Physical positions (bp) | CDC Frontier genome (Reference genome) | (Pusa 1103 & HPNB) | (ILWC 46 & LPNB) | Sequence Components of genome | Gene accession IDs | Putative functions                                                 |
|----------------------|----------------|-----------------|-------------------------|----------------------------------------|--------------------|------------------|-------------------------------|--------------------|--------------------------------------------------------------------|
| SNP_30080_A_43468324 | NC_021163.1    | Ca_Kabuli_Chr04 | 43468324                | AA                                     | GG                 | GG               | URR                           | 101510378          | arogenate dehydratase/prephenate dehydratase 2, chloroplastic-like |
| SNP_30081_A_43468348 | NC_021163.1    | Ca_Kabuli_Chr04 | 43468348                | CC                                     | AA                 | AA               | URR                           | 101510378          | arogenate dehydratase/prephenate dehydratase 2, chloroplastic-like |
| SNP_30082_A_43468666 | NC_021163.1    | Ca_Kabuli_Chr04 | 43468666                | AA                                     | CC                 | CC               | URR                           | 101510378          | arogenate dehydratase/prephenate dehydratase 2, chloroplastic-like |
| SNP_30083_A_43468726 | NC_021163.1    | Ca_Kabuli_Chr04 | 43468726                | AA                                     | GG                 | GG               | URR                           | 101510378          | arogenate dehydratase/prephenate dehydratase 2, chloroplastic-like |
| SNP_30084_A_43495781 | NC_021163.1    | Ca_Kabuli_Chr04 | 43495781                | TT                                     | CC                 | CC               | URR                           | 101508137          | transcription factor ABORTED MICROSPORES-like                      |
| SNP_30085_A_43497749 | NC_021163.1    | Ca_Kabuli_Chr04 | 43497749                | AA                                     | GG                 | GG               | INTERGENIC                    |                    |                                                                    |
| SNP_30086_A_43510707 | NC_021163.1    | Ca_Kabuli_Chr04 | 43510707                | TT                                     | CC                 | CC               | INTERGENIC                    |                    |                                                                    |
| SNP_30087_A_43510740 | NC_021163.1    | Ca_Kabuli_Chr04 | 43510740                | TT                                     | CC                 | CC               | DRR                           | 101511332          | transcription factor ABORTED MICROSPORES-like                      |
| SNP_30088_A_43511017 | NC_021163.1    | Ca_Kabuli_Chr04 | 43511017                | AA                                     | CC                 | CC               | DRR                           | 101511332          | transcription factor ABORTED MICROSPORES-like                      |
| SNP_30089_A_43511021 | NC_021163.1    | Ca_Kabuli_Chr04 | 43511021                | TT                                     | CC                 | CC               | DRR                           | 101511332          | transcription factor ABORTED MICROSPORES-like                      |
| SNP_30090_A_43511036 | NC_021163.1    | Ca_Kabuli_Chr04 | 43511036                | AA                                     | TT                 | TT               | DRR                           | 101511332          | transcription factor ABORTED MICROSPORES-like                      |
| SNP_30091_A_43511091 | NC_021163.1    | Ca_Kabuli_Chr04 | 43511091                | TT                                     | CC                 | CC               | DRR                           | 101511332          | transcription factor ABORTED MICROSPORES-like                      |
| SNP_30092_A_43511098 | NC_021163.1    | Ca_Kabuli_Chr04 | 43511098                | TT                                     | CC                 | CC               | DRR                           | 101511332          | transcription factor ABORTED MICROSPORES-like                      |
| SNP_30093_A_43511101 | NC_021163.1    | Ca_Kabuli_Chr04 | 43511101                | TT                                     | CC                 | CC               | DRR                           | 101511332          | transcription factor ABORTED MICROSPORES-like                      |
| SNP_30094_A_43511104 | NC_021163.1    | Ca_Kabuli_Chr04 | 43511104                | CC                                     | TT                 | TT               | DRR                           | 101511332          | transcription factor ABORTED MICROSPORES-like                      |
| SNP_30095_A_43511138 | NC_021163.1    | Ca_Kabuli_Chr04 | 43511138                | GG                                     | AA                 | AA               | DRR                           | 101511332          | transcription factor ABORTED MICROSPORES-like                      |
| SNP_30096_A_43511259 | NC_021163.1    | Ca_Kabuli_Chr04 | 43511259                | GG                                     | AA                 | AA               | DRR                           | 101511332          | transcription factor ABORTED MICROSPORES-like                      |
| SNP_30097_A_43533427 | NC_021163.1    | Ca_Kabuli_Chr04 | 43533427                | GG                                     | AA                 | AA               | INTERGENIC                    |                    |                                                                    |
| SNP_30098_A_43533662 | NC_021163.1    | Ca_Kabuli_Chr04 | 43533662                | GG                                     | TT                 | TT               | INTERGENIC                    |                    |                                                                    |
| SNP_30099_A_43636143 | NC_021163.1    | Ca_Kabuli_Chr04 | 43636143                | CC                                     | TT                 | TT               | INTERGENIC                    |                    |                                                                    |
| SNP_30100_A_43658079 | NC_021163.1    | Ca_Kabuli_Chr04 | 43658079                | AA                                     | GG                 | GG               | INTERGENIC                    |                    |                                                                    |
| SNP_30101_A_43664086 | NC_021163.1    | Ca_Kabuli_Chr04 | 43664086                | AA                                     | GG                 | GG               | INTERGENIC                    |                    |                                                                    |

| SNPs IDs             | Chromosome IDs | Chromosomes     | Physical positions (bp) | CDC Frontier genome (Reference genome) | (Pusa 1103 & HPNB) | (ILWC 46 & LPNB) | Sequence Components of genome | Gene accession IDs | Putative functions                              |
|----------------------|----------------|-----------------|-------------------------|----------------------------------------|--------------------|------------------|-------------------------------|--------------------|-------------------------------------------------|
| SNP_30102_A_43757371 | NC_021163.1    | Ca_Kabuli_Chr04 | 43757371                | CC                                     | GG                 | GG               | INTERGENIC                    |                    |                                                 |
| SNP_30103_A_43757413 | NC_021163.1    | Ca_Kabuli_Chr04 | 43757413                | AA                                     | GG                 | GG               | INTERGENIC                    |                    |                                                 |
| SNP_30104_A_43757476 | NC_021163.1    | Ca_Kabuli_Chr04 | 43757476                | TT                                     | CC                 | CC               | INTERGENIC                    |                    |                                                 |
| SNP_30105_A_43757505 | NC_021163.1    | Ca_Kabuli_Chr04 | 43757505                | AA                                     | GG                 | GG               | INTERGENIC                    |                    |                                                 |
| SNP_30106_A_43821429 | NC_021163.1    | Ca_Kabuli_Chr04 | 43821429                | CC                                     | GG                 | GG               | NON_SYNONYMOUS_CODING         | 101491143          | protein MEMO1                                   |
| SNP_30107_A_43825341 | NC_021163.1    | Ca_Kabuli_Chr04 | 43825341                | GG                                     | AA                 | AA               | URR                           | 101491143          | protein MEMO1                                   |
| SNP_30108_A_43881923 | NC_021163.1    | Ca_Kabuli_Chr04 | 43881923                | CC                                     | TT                 | TT               | DRR                           | 101494167          | uncharacterized LOC101494167                    |
| SNP_30109_A_43970370 | NC_021163.1    | Ca_Kabuli_Chr04 | 43970370                | AA                                     | CC                 | CC               | DRR                           | 101497075          | probable receptor-like protein kinase At1g80640 |
| SNP_30110_A_44022085 | NC_021163.1    | Ca_Kabuli_Chr04 | 44022085                | CC                                     | AA                 | AA               | INTERGENIC                    |                    |                                                 |
| SNP_30112_A_44093240 | NC_021163.1    | Ca_Kabuli_Chr04 | 44093240                | AA                                     | CC                 | CC               | URR                           | 101500962          | U-box domain-containing protein 6               |
| SNP_30113_A_44093241 | NC_021163.1    | Ca_Kabuli_Chr04 | 44093241                | AA                                     | CC                 | CC               | URR                           | 101500962          | U-box domain-containing protein 6               |
| SNP_30114_A_44093255 | NC_021163.1    | Ca_Kabuli_Chr04 | 44093255                | CC                                     | AA                 | AA               | URR                           | 101500962          | U-box domain-containing protein 6               |
| SNP_30115_A_44093256 | NC_021163.1    | Ca_Kabuli_Chr04 | 44093256                | CC                                     | AA                 | AA               | URR                           | 101500962          | U-box domain-containing protein 6               |
| SNP_30118_A_44134606 | NC_021163.1    | Ca_Kabuli_Chr04 | 44134606                | AA                                     | GG                 | GG               | INTERGENIC                    |                    |                                                 |
| SNP_30119_A_44134635 | NC_021163.1    | Ca_Kabuli_Chr04 | 44134635                | AA                                     | GG                 | GG               | INTERGENIC                    |                    |                                                 |
| SNP_30120_A_44134774 | NC_021163.1    | Ca_Kabuli_Chr04 | 44134774                | AA                                     | GG                 | GG               | INTERGENIC                    |                    |                                                 |
| SNP_30121_A_44134836 | NC_021163.1    | Ca_Kabuli_Chr04 | 44134836                | CC                                     | TT                 | TT               | INTERGENIC                    |                    |                                                 |
| SNP_30122_A_44135175 | NC_021163.1    | Ca_Kabuli_Chr04 | 44135175                | TT                                     | CC                 | CC               | INTERGENIC                    |                    |                                                 |
| SNP_30123_A_44135203 | NC_021163.1    | Ca_Kabuli_Chr04 | 44135203                | TT                                     | AA                 | AA               | INTERGENIC                    |                    |                                                 |
| SNP_30124_A_44135205 | NC_021163.1    | Ca_Kabuli_Chr04 | 44135205                | TT                                     | CC                 | CC               | INTERGENIC                    |                    |                                                 |
| SNP_30125_A_44165370 | NC_021163.1    | Ca_Kabuli_Chr04 | 44165370                | AA                                     | GG                 | GG               | INTERGENIC                    |                    |                                                 |
| SNP_30126_A_44198072 | NC_021163.1    | Ca_Kabuli_Chr04 | 44198072                | CC                                     | TT                 | TT               | DRR                           | 101506522          | WAT1-related protein At5g40240-like             |

| SNPs IDs             | Chromosome IDs | Chromosomes     | Physical positions (bp) | CDC Frontier (Reference genome) | (Pusa 1103 & HPNB) | (ILWC 46 & LPNB) | Sequence Components of genome | Gene accession IDs | Putative functions                     |
|----------------------|----------------|-----------------|-------------------------|---------------------------------|--------------------|------------------|-------------------------------|--------------------|----------------------------------------|
| SNP_30127_A_44207729 | NC_021163.1    | Ca_Kabuli_Chr04 | 44207729                | TT                              | GG                 | GG               | INTRON                        | 101507082          | transmembrane 9 superfamily member 8   |
| SNP_30128_A_44214239 | NC_021163.1    | Ca_Kabuli_Chr04 | 44214239                | TT                              | CC                 | CC               | INTERGENIC                    |                    |                                        |
| SNP_30129_A_44214247 | NC_021163.1    | Ca_Kabuli_Chr04 | 44214247                | TT                              | GG                 | GG               | INTERGENIC                    |                    |                                        |
| SNP_30130_A_44214250 | NC_021163.1    | Ca_Kabuli_Chr04 | 44214250                | AA                              | CC                 | CC               | INTERGENIC                    |                    |                                        |
| SNP_30131_A_44214528 | NC_021163.1    | Ca_Kabuli_Chr04 | 44214528                | AA                              | GG                 | GG               | INTERGENIC                    |                    |                                        |
| SNP_30132_A_44214538 | NC_021163.1    | Ca_Kabuli_Chr04 | 44214538                | AA                              | CC                 | CC               | INTERGENIC                    |                    |                                        |
| SNP_30133_A_44214566 | NC_021163.1    | Ca_Kabuli_Chr04 | 44214566                | TT                              | AA                 | AA               | INTERGENIC                    |                    |                                        |
| SNP_30134_A_44214680 | NC_021163.1    | Ca_Kabuli_Chr04 | 44214680                | TT                              | CC                 | CC               | INTERGENIC                    |                    |                                        |
| SNP_30135_A_44214704 | NC_021163.1    | Ca_Kabuli_Chr04 | 44214704                | AA                              | GG                 | GG               | INTERGENIC                    |                    |                                        |
| SNP_30136_A_44235280 | NC_021163.1    | Ca_Kabuli_Chr04 | 44235280                | AA                              | GG                 | GG               | DRR                           | 101507404          | BTB/POZ domain-containing protein NPY1 |
| SNP_30137_A_44292792 | NC_021163.1    | Ca_Kabuli_Chr04 | 44292792                | GG                              | AA                 | AA               | INTERGENIC                    |                    |                                        |
| SNP_30138_A_44293777 | NC_021163.1    | Ca_Kabuli_Chr04 | 44293777                | AA                              | GG                 | GG               | INTERGENIC                    |                    |                                        |
| SNP_30139_A_44294024 | NC_021163.1    | Ca_Kabuli_Chr04 | 44294024                | CC                              | TT                 | TT               | DRR                           | 101509520          | uncharacterized LOC101509520           |
| SNP_30140_A_44294073 | NC_021163.1    | Ca_Kabuli_Chr04 | 44294073                | AA                              | GG                 | GG               | DRR                           | 101509520          | uncharacterized LOC101509520           |
| SNP_30141_A_44294102 | NC_021163.1    | Ca_Kabuli_Chr04 | 44294102                | AA                              | TT                 | TT               | DRR                           | 101509520          | uncharacterized LOC101509520           |
| SNP_30142_A_44294103 | NC_021163.1    | Ca_Kabuli_Chr04 | 44294103                | CC                              | GG                 | GG               | DRR                           | 101509520          | uncharacterized LOC101509520           |
| SNP_30143_A_44294308 | NC_021163.1    | Ca_Kabuli_Chr04 | 44294308                | GG                              | TT                 | TT               | DRR                           | 101509520          | uncharacterized LOC101509520           |
| SNP_30144_A_44294440 | NC_021163.1    | Ca_Kabuli_Chr04 | 44294440                | TT                              | GG                 | GG               | DRR                           | 101509520          | uncharacterized LOC101509520           |
| SNP_30145_A_44294514 | NC_021163.1    | Ca_Kabuli_Chr04 | 44294514                | TT                              | CC                 | CC               | DRR                           | 101509520          | uncharacterized LOC101509520           |
| SNP_30146_A_44294585 | NC_021163.1    | Ca_Kabuli_Chr04 | 44294585                | GG                              | TT                 | TT               | DRR                           | 101509520          | uncharacterized LOC101509520           |
| SNP_30147_A_44294595 | NC_021163.1    | Ca_Kabuli_Chr04 | 44294595                | TT                              | CC                 | CC               | DRR                           | 101509520          | uncharacterized LOC101509520           |
| SNP_30148_A_44294621 | NC_021163.1    | Ca_Kabuli_Chr04 | 44294621                | AA                              | GG                 | GG               | DRR                           | 101509520          | uncharacterized LOC101509520           |

| SNPs IDs             | Chromosome IDs | Chromosomes     | Physical positions (bp) | CDC Frontier genome (Reference genome) | (Pusa 1103 & HPNB) | (ILWC 46 & LPNB) | Sequence Components of genome | Gene accession IDs | Putative functions                 |
|----------------------|----------------|-----------------|-------------------------|----------------------------------------|--------------------|------------------|-------------------------------|--------------------|------------------------------------|
| SNP_30149_A_44294737 | NC_021163.1    | Ca_Kabuli_Chr04 | 44294737                | TT                                     | CC                 | CC               | DRR                           | 101509520          | uncharacterized LOC101509520       |
| SNP_30150_A_44295002 | NC_021163.1    | Ca_Kabuli_Chr04 | 44295002                | TT                                     | GG                 | GG               | INTRON                        | 101509520          | uncharacterized LOC101509520       |
| SNP_30151_A_44295073 | NC_021163.1    | Ca_Kabuli_Chr04 | 44295073                | AA                                     | GG                 | GG               | INTRON                        | 101509520          | uncharacterized LOC101509520       |
| SNP_30152_A_44295280 | NC_021163.1    | Ca_Kabuli_Chr04 | 44295280                | AA                                     | CC                 | CC               | INTRON                        | 101509520          | uncharacterized LOC101509520       |
| SNP_30153_A_44295325 | NC_021163.1    | Ca_Kabuli_Chr04 | 44295325                | TT                                     | CC                 | CC               | INTRON                        | 101509520          | uncharacterized LOC101509520       |
| SNP_30154_A_44295378 | NC_021163.1    | Ca_Kabuli_Chr04 | 44295378                | TT                                     | CC                 | CC               | INTRON                        | 101509520          | uncharacterized LOC101509520       |
| SNP_30155_A_44301957 | NC_021163.1    | Ca_Kabuli_Chr04 | 44301957                | GG                                     | AA                 | AA               | INTERGENIC                    |                    |                                    |
| SNP_30156_A_44383617 | NC_021163.1    | Ca_Kabuli_Chr04 | 44383617                | GG                                     | AA                 | AA               | DRR                           | 101511660          | probable protein phosphatase 2C 59 |
| SNP_30157_A_44403371 | NC_021163.1    | Ca_Kabuli_Chr04 | 44403371                | AA                                     | TT                 | TT               | URR                           | 101512530          | protein GLUTAMINE DUMPER 5-like    |
| SNP_30159_A_44489494 | NC_021163.1    | Ca_Kabuli_Chr04 | 44489494                | AA                                     | GG                 | GG               | INTERGENIC                    |                    |                                    |
| SNP_30160_A_44490430 | NC_021163.1    | Ca_Kabuli_Chr04 | 44490430                | TT                                     | CC                 | CC               | INTERGENIC                    |                    |                                    |
| SNP_30161_A_44491847 | NC_021163.1    | Ca_Kabuli_Chr04 | 44491847                | AA                                     | TT                 | TT               | INTERGENIC                    |                    |                                    |
| SNP_30162_A_44492651 | NC_021163.1    | Ca_Kabuli_Chr04 | 44492651                | CC                                     | AA                 | AA               | INTERGENIC                    |                    |                                    |
| SNP_30163_A_44492693 | NC_021163.1    | Ca_Kabuli_Chr04 | 44492693                | TT                                     | CC                 | CC               | INTERGENIC                    |                    |                                    |
| SNP_30164_A_44492728 | NC_021163.1    | Ca_Kabuli_Chr04 | 44492728                | TT                                     | CC                 | CC               | INTERGENIC                    |                    |                                    |
| SNP_30165_A_44493029 | NC_021163.1    | Ca_Kabuli_Chr04 | 44493029                | TT                                     | CC                 | CC               | INTERGENIC                    |                    |                                    |
| SNP_30166_A_44493109 | NC_021163.1    | Ca_Kabuli_Chr04 | 44493109                | TT                                     | CC                 | CC               | INTERGENIC                    |                    |                                    |
| SNP_30168_A_44495123 | NC_021163.1    | Ca_Kabuli_Chr04 | 44495123                | AA                                     | GG                 | GG               | SYNONYMOUS_CODING             | 101502455          | uncharacterized LOC101502455       |
| SNP_30169_A_44497089 | NC_021163.1    | Ca_Kabuli_Chr04 | 44497089                | CC                                     | TT                 | TT               | URR                           | 101502455          | uncharacterized LOC101502455       |
| SNP_30170_A_44497122 | NC_021163.1    | Ca_Kabuli_Chr04 | 44497122                | AA                                     | GG                 | GG               | URR                           | 101502455          | uncharacterized LOC101502455       |
| SNP_30171_A_44497124 | NC_021163.1    | Ca_Kabuli_Chr04 | 44497124                | CC                                     | TT                 | TT               | URR                           | 101502455          | uncharacterized LOC101502455       |
| SNP_30173_A_44499253 | NC_021163.1    | Ca_Kabuli_Chr04 | 44499253                | GG                                     | TT                 | TT               | INTERGENIC                    |                    |                                    |

| SNPs IDs             | Chromosome IDs | Chromosomes     | Physical positions (bp) | CDC Frontier genome (Reference genome) | (Pusa 1103 & HPNB) | (ILWC 46 & LPNB) | Sequence genome | Components of | Gene accession IDs | Putative functions |
|----------------------|----------------|-----------------|-------------------------|----------------------------------------|--------------------|------------------|-----------------|---------------|--------------------|--------------------|
| SNP_30174_A_44499287 | NC_021163.1    | Ca_Kabuli_Chr04 | 44499287                | GG                                     | AA                 | AA               | INTERGENIC      |               |                    |                    |
| SNP_30175_A_44500506 | NC_021163.1    | Ca_Kabuli_Chr04 | 44500506                | CC                                     | TT                 | TT               | INTERGENIC      |               |                    |                    |
| SNP_30176_A_44500792 | NC_021163.1    | Ca_Kabuli_Chr04 | 44500792                | CC                                     | TT                 | TT               | INTERGENIC      |               |                    |                    |
| SNP_30177_A_44501589 | NC_021163.1    | Ca_Kabuli_Chr04 | 44501589                | CC                                     | TT                 | TT               | INTERGENIC      |               |                    |                    |
| SNP_30178_A_44503643 | NC_021163.1    | Ca_Kabuli_Chr04 | 44503643                | CC                                     | GG                 | GG               | INTERGENIC      |               |                    |                    |
| SNP_30179_A_44503658 | NC_021163.1    | Ca_Kabuli_Chr04 | 44503658                | CC                                     | TT                 | TT               | INTERGENIC      |               |                    |                    |
| SNP_30180_A_44503989 | NC_021163.1    | Ca_Kabuli_Chr04 | 44503989                | TT                                     | CC                 | CC               | INTERGENIC      |               |                    |                    |
| SNP_30181_A_44504177 | NC_021163.1    | Ca_Kabuli_Chr04 | 44504177                | TT                                     | CC                 | CC               | INTERGENIC      |               |                    |                    |
| SNP_30182_A_44504412 | NC_021163.1    | Ca_Kabuli_Chr04 | 44504412                | GG                                     | CC                 | CC               | INTERGENIC      |               |                    |                    |
| SNP_30183_A_44505436 | NC_021163.1    | Ca_Kabuli_Chr04 | 44505436                | AA                                     | GG                 | GG               | INTERGENIC      |               |                    |                    |
| SNP_30184_A_44506559 | NC_021163.1    | Ca_Kabuli_Chr04 | 44506559                | TT                                     | GG                 | GG               | INTERGENIC      |               |                    |                    |
| SNP_30185_A_44507168 | NC_021163.1    | Ca_Kabuli_Chr04 | 44507168                | AA                                     | GG                 | GG               | INTERGENIC      |               |                    |                    |
| SNP_30186_A_44507396 | NC_021163.1    | Ca_Kabuli_Chr04 | 44507396                | GG                                     | AA                 | AA               | INTERGENIC      |               |                    |                    |
| SNP_30189_A_44507910 | NC_021163.1    | Ca_Kabuli_Chr04 | 44507910                | TT                                     | AA                 | AA               | INTERGENIC      |               |                    |                    |
| SNP_30190_A_44508098 | NC_021163.1    | Ca_Kabuli_Chr04 | 44508098                | CC                                     | GG                 | GG               | INTERGENIC      |               |                    |                    |
| SNP_30191_A_44508115 | NC_021163.1    | Ca_Kabuli_Chr04 | 44508115                | CC                                     | TT                 | TT               | INTERGENIC      |               |                    |                    |
| SNP_30192_A_44508991 | NC_021163.1    | Ca_Kabuli_Chr04 | 44508991                | TT                                     | AA                 | AA               | INTERGENIC      |               |                    |                    |
| SNP_30194_A_44509221 | NC_021163.1    | Ca_Kabuli_Chr04 | 44509221                | CC                                     | AA                 | AA               | INTERGENIC      |               |                    |                    |
| SNP_30195_A_44510392 | NC_021163.1    | Ca_Kabuli_Chr04 | 44510392                | CC                                     | AA                 | AA               | INTERGENIC      |               |                    |                    |
| SNP_30196_A_44510404 | NC_021163.1    | Ca_Kabuli_Chr04 | 44510404                | TT                                     | AA                 | AA               | INTERGENIC      |               |                    |                    |
| SNP_30197_A_44511295 | NC_021163.1    | Ca_Kabuli_Chr04 | 44511295                | CC                                     | TT                 | TT               | INTERGENIC      |               |                    |                    |
| SNP_30199_A_44511435 | NC_021163.1    | Ca_Kabuli_Chr04 | 44511435                | AA                                     | CC                 | CC               | INTERGENIC      |               |                    |                    |



| SNPs IDs             | Chromosome IDs | Chromosomes     | Physical positions (bp) | CDC Frontier genome (Reference genome) | (Pusa 1103 & HPNB) | (ILWC 46 & LPNB) | Sequence Components of genome | Gene accession IDs | Putative functions                                   |
|----------------------|----------------|-----------------|-------------------------|----------------------------------------|--------------------|------------------|-------------------------------|--------------------|------------------------------------------------------|
| SNP_30200_A_44511477 | NC_021163.1    | Ca_Kabuli_Chr04 | 44511477                | TT                                     | CC                 | CC               | INTERGENIC                    |                    |                                                      |
| SNP_30201_A_44511691 | NC_021163.1    | Ca_Kabuli_Chr04 | 44511691                | AA                                     | TT                 | TT               | INTERGENIC                    |                    |                                                      |
| SNP_30202_A_44511825 | NC_021163.1    | Ca_Kabuli_Chr04 | 44511825                | TT                                     | CC                 | CC               | INTERGENIC                    |                    |                                                      |
| SNP_30203_A_44511862 | NC_021163.1    | Ca_Kabuli_Chr04 | 44511862                | GG                                     | TT                 | TT               | INTERGENIC                    |                    |                                                      |
| SNP_30204_A_44511867 | NC_021163.1    | Ca_Kabuli_Chr04 | 44511867                | AA                                     | GG                 | GG               | INTERGENIC                    |                    |                                                      |
| SNP_30205_A_44512089 | NC_021163.1    | Ca_Kabuli_Chr04 | 44512089                | GG                                     | AA                 | AA               | INTERGENIC                    |                    |                                                      |
| SNP_30206_A_44512091 | NC_021163.1    | Ca_Kabuli_Chr04 | 44512091                | AA                                     | CC                 | CC               | INTERGENIC                    |                    |                                                      |
| SNP_30207_A_44513092 | NC_021163.1    | Ca_Kabuli_Chr04 | 44513092                | GG                                     | CC                 | CC               | INTERGENIC                    |                    |                                                      |
| SNP_30208_A_44513113 | NC_021163.1    | Ca_Kabuli_Chr04 | 44513113                | GG                                     | TT                 | TT               | INTERGENIC                    |                    |                                                      |
| SNP_30209_A_44513116 | NC_021163.1    | Ca_Kabuli_Chr04 | 44513116                | TT                                     | CC                 | CC               | INTERGENIC                    |                    |                                                      |
| SNP_30210_A_44513125 | NC_021163.1    | Ca_Kabuli_Chr04 | 44513125                | CC                                     | AA                 | AA               | INTERGENIC                    |                    |                                                      |
| SNP_30211_A_44513553 | NC_021163.1    | Ca_Kabuli_Chr04 | 44513553                | AA                                     | TT                 | TT               | INTERGENIC                    |                    |                                                      |
| SNP_30212_A_44513566 | NC_021163.1    | Ca_Kabuli_Chr04 | 44513566                | TT                                     | CC                 | CC               | INTERGENIC                    |                    |                                                      |
| SNP_30213_A_44513602 | NC_021163.1    | Ca_Kabuli_Chr04 | 44513602                | TT                                     | CC                 | CC               | INTERGENIC                    |                    |                                                      |
| SNP_30214_A_44514917 | NC_021163.1    | Ca_Kabuli_Chr04 | 44514917                | GG                                     | AA                 | AA               | INTERGENIC                    |                    |                                                      |
| SNP_30215_A_44514943 | NC_021163.1    | Ca_Kabuli_Chr04 | 44514943                | TT                                     | AA                 | AA               | INTERGENIC                    |                    |                                                      |
| SNP_30216_A_44515240 | NC_021163.1    | Ca_Kabuli_Chr04 | 44515240                | TT                                     | GG                 | GG               | INTERGENIC                    |                    |                                                      |
| SNP_30217_A_44517024 | NC_021163.1    | Ca_Kabuli_Chr04 | 44517024                | CC                                     | TT                 | TT               | INTERGENIC                    |                    |                                                      |
| SNP_30218_A_44519190 | NC_021163.1    | Ca_Kabuli_Chr04 | 44519190                | CC                                     | TT                 | TT               | INTERGENIC                    |                    |                                                      |
| SNP_30219_A_44522281 | NC_021163.1    | Ca_Kabuli_Chr04 | 44522281                | CC                                     | TT                 | TT               | SYNONYMOUS_CODING             | 101502760          | ethylene-responsive transcription factor ERF018-like |
| SNP_30221_A_44523560 | NC_021163.1    | Ca_Kabuli_Chr04 | 44523560                | TT                                     | AA                 | AA               | URR                           | 101502760          | ethylene-responsive transcription factor ERF018-like |
| SNP_30224_A_44523978 | NC_021163.1    | Ca_Kabuli_Chr04 | 44523978                | CC                                     | AA                 | AA               | URR                           | 101502760          | ethylene-responsive transcription factor ERF018-like |

| SNPs IDs             | Chromosome IDs | Chromosomes     | Physical positions (bp) | CDC Frontier genome (Reference genome) | (Pusa 1103 & HPNB) | (ILWC 46 & LPNB) | Sequence genome | Components of | Gene accession IDs | Putative functions                                   |
|----------------------|----------------|-----------------|-------------------------|----------------------------------------|--------------------|------------------|-----------------|---------------|--------------------|------------------------------------------------------|
| SNP_30225_A_44523998 | NC_021163.1    | Ca_Kabuli_Chr04 | 44523998                | AA                                     | GG                 | GG               | URR             |               | 101502760          | ethylene-responsive transcription factor ERF018-like |
| SNP_30228_A_44527162 | NC_021163.1    | Ca_Kabuli_Chr04 | 44527162                | CC                                     | AA                 | AA               | INTERGENIC      |               |                    |                                                      |
| SNP_30229_A_44529202 | NC_021163.1    | Ca_Kabuli_Chr04 | 44529202                | AA                                     | GG                 | GG               | INTERGENIC      |               |                    |                                                      |
| SNP_30230_A_44529420 | NC_021163.1    | Ca_Kabuli_Chr04 | 44529420                | TT                                     | AA                 | AA               | INTERGENIC      |               |                    |                                                      |
| SNP_30233_A_44543057 | NC_021163.1    | Ca_Kabuli_Chr04 | 44543057                | CC                                     | AA                 | AA               | INTERGENIC      |               |                    |                                                      |
| SNP_30234_A_44543364 | NC_021163.1    | Ca_Kabuli_Chr04 | 44543364                | TT                                     | AA                 | AA               | INTERGENIC      |               |                    |                                                      |
| SNP_30235_A_44543367 | NC_021163.1    | Ca_Kabuli_Chr04 | 44543367                | CC                                     | TT                 | TT               | INTERGENIC      |               |                    |                                                      |
| SNP_30236_A_44543487 | NC_021163.1    | Ca_Kabuli_Chr04 | 44543487                | GG                                     | CC                 | CC               | INTERGENIC      |               |                    |                                                      |
| SNP_30237_A_44543492 | NC_021163.1    | Ca_Kabuli_Chr04 | 44543492                | GG                                     | CC                 | CC               | INTERGENIC      |               |                    |                                                      |
| SNP_30238_A_44543510 | NC_021163.1    | Ca_Kabuli_Chr04 | 44543510                | AA                                     | GG                 | GG               | INTERGENIC      |               |                    |                                                      |
| SNP_30239_A_44543548 | NC_021163.1    | Ca_Kabuli_Chr04 | 44543548                | CC                                     | TT                 | TT               | INTERGENIC      |               |                    |                                                      |
| SNP_30240_A_44543595 | NC_021163.1    | Ca_Kabuli_Chr04 | 44543595                | TT                                     | AA                 | AA               | INTERGENIC      |               |                    |                                                      |
| SNP_30241_A_44543658 | NC_021163.1    | Ca_Kabuli_Chr04 | 44543658                | CC                                     | TT                 | TT               | INTERGENIC      |               |                    |                                                      |
| SNP_30242_A_44543707 | NC_021163.1    | Ca_Kabuli_Chr04 | 44543707                | AA                                     | CC                 | CC               | INTERGENIC      |               |                    |                                                      |
| SNP_30243_A_44543721 | NC_021163.1    | Ca_Kabuli_Chr04 | 44543721                | GG                                     | AA                 | AA               | INTERGENIC      |               |                    |                                                      |
| SNP_30244_A_44543761 | NC_021163.1    | Ca_Kabuli_Chr04 | 44543761                | TT                                     | AA                 | AA               | INTERGENIC      |               |                    |                                                      |
| SNP_30245_A_44543821 | NC_021163.1    | Ca_Kabuli_Chr04 | 44543821                | CC                                     | TT                 | TT               | INTERGENIC      |               |                    |                                                      |
| SNP_30246_A_44543828 | NC_021163.1    | Ca_Kabuli_Chr04 | 44543828                | CC                                     | TT                 | TT               | INTERGENIC      |               |                    |                                                      |
| SNP_30247_A_44543851 | NC_021163.1    | Ca_Kabuli_Chr04 | 44543851                | CC                                     | AA                 | AA               | INTERGENIC      |               |                    |                                                      |
| SNP_30248_A_44543858 | NC_021163.1    | Ca_Kabuli_Chr04 | 44543858                | AA                                     | CC                 | CC               | INTERGENIC      |               |                    |                                                      |
| SNP_30249_A_44543889 | NC_021163.1    | Ca_Kabuli_Chr04 | 44543889                | TT                                     | CC                 | CC               | INTERGENIC      |               |                    |                                                      |
| SNP_30250_A_44543890 | NC_021163.1    | Ca_Kabuli_Chr04 | 44543890                | AA                                     | GG                 | GG               | INTERGENIC      |               |                    |                                                      |

| SNPs IDs             | Chromosome IDs | Chromosomes     | Physical positions (bp) | CDC Frontier genome (Reference genome) | (Pusa 1103 & HPNB) | (ILWC 46 & LPNB) | Sequence genome | Components of | Gene accession IDs | Putative functions |
|----------------------|----------------|-----------------|-------------------------|----------------------------------------|--------------------|------------------|-----------------|---------------|--------------------|--------------------|
| SNP_30251_A_44543912 | NC_021163.1    | Ca_Kabuli_Chr04 | 44543912                | TT                                     | AA                 | AA               | INTERGENIC      |               |                    |                    |
| SNP_30252_A_44543916 | NC_021163.1    | Ca_Kabuli_Chr04 | 44543916                | AA                                     | CC                 | CC               | INTERGENIC      |               |                    |                    |
| SNP_30253_A_44543924 | NC_021163.1    | Ca_Kabuli_Chr04 | 44543924                | GG                                     | AA                 | AA               | INTERGENIC      |               |                    |                    |
| SNP_30254_A_44543974 | NC_021163.1    | Ca_Kabuli_Chr04 | 44543974                | CC                                     | GG                 | GG               | INTERGENIC      |               |                    |                    |
| SNP_30255_A_44543998 | NC_021163.1    | Ca_Kabuli_Chr04 | 44543998                | GG                                     | AA                 | AA               | INTERGENIC      |               |                    |                    |
| SNP_30256_A_44543999 | NC_021163.1    | Ca_Kabuli_Chr04 | 44543999                | GG                                     | AA                 | AA               | INTERGENIC      |               |                    |                    |
| SNP_30257_A_44544442 | NC_021163.1    | Ca_Kabuli_Chr04 | 44544442                | TT                                     | AA                 | AA               | INTERGENIC      |               |                    |                    |
| SNP_30258_A_44544469 | NC_021163.1    | Ca_Kabuli_Chr04 | 44544469                | GG                                     | TT                 | TT               | INTERGENIC      |               |                    |                    |
| SNP_30259_A_44549250 | NC_021163.1    | Ca_Kabuli_Chr04 | 44549250                | TT                                     | CC                 | CC               | INTERGENIC      |               |                    |                    |
| SNP_30260_A_44550135 | NC_021163.1    | Ca_Kabuli_Chr04 | 44550135                | TT                                     | CC                 | CC               | INTERGENIC      |               |                    |                    |
| SNP_30261_A_44550168 | NC_021163.1    | Ca_Kabuli_Chr04 | 44550168                | CC                                     | AA                 | AA               | INTERGENIC      |               |                    |                    |
| SNP_30262_A_44550985 | NC_021163.1    | Ca_Kabuli_Chr04 | 44550985                | GG                                     | TT                 | TT               | INTERGENIC      |               |                    |                    |
| SNP_30263_A_44551042 | NC_021163.1    | Ca_Kabuli_Chr04 | 44551042                | CC                                     | AA                 | AA               | INTERGENIC      |               |                    |                    |
| SNP_30264_A_44551046 | NC_021163.1    | Ca_Kabuli_Chr04 | 44551046                | TT                                     | AA                 | AA               | INTERGENIC      |               |                    |                    |
| SNP_30265_A_44551063 | NC_021163.1    | Ca_Kabuli_Chr04 | 44551063                | AA                                     | GG                 | GG               | INTERGENIC      |               |                    |                    |
| SNP_30266_A_44551551 | NC_021163.1    | Ca_Kabuli_Chr04 | 44551551                | AA                                     | GG                 | GG               | INTERGENIC      |               |                    |                    |
| SNP_30267_A_44551998 | NC_021163.1    | Ca_Kabuli_Chr04 | 44551998                | TT                                     | CC                 | CC               | INTERGENIC      |               |                    |                    |
| SNP_30268_A_44552027 | NC_021163.1    | Ca_Kabuli_Chr04 | 44552027                | CC                                     | TT                 | TT               | INTERGENIC      |               |                    |                    |
| SNP_30269_A_44552050 | NC_021163.1    | Ca_Kabuli_Chr04 | 44552050                | CC                                     | TT                 | TT               | INTERGENIC      |               |                    |                    |
| SNP_30270_A_44554094 | NC_021163.1    | Ca_Kabuli_Chr04 | 44554094                | CC                                     | TT                 | TT               | INTERGENIC      |               |                    |                    |
| SNP_30271_A_44554268 | NC_021163.1    | Ca_Kabuli_Chr04 | 44554268                | CC                                     | TT                 | TT               | INTERGENIC      |               |                    |                    |
| SNP_30272_A_44554270 | NC_021163.1    | Ca_Kabuli_Chr04 | 44554270                | TT                                     | GG                 | GG               | INTERGENIC      |               |                    |                    |

| SNPs IDs             | Chromosome IDs | Chromosomes     | Physical positions (bp) | CDC Frontier genome (Reference genome) | (Pusa 1103 & HPNB) | (ILWC 46 & LPNB) | Sequence Components of genome | Gene accession IDs | Putative functions                      |
|----------------------|----------------|-----------------|-------------------------|----------------------------------------|--------------------|------------------|-------------------------------|--------------------|-----------------------------------------|
| SNP_30273_A_44554271 | NC_021163.1    | Ca_Kabuli_Chr04 | 44554271                | AA                                     | GG                 | GG               | INTERGENIC                    |                    |                                         |
| SNP_30274_A_44559167 | NC_021163.1    | Ca_Kabuli_Chr04 | 44559167                | TT                                     | AA                 | AA               | INTRON                        | 101488315          | uncharacterized LOC101488315            |
| SNP_30275_A_44559172 | NC_021163.1    | Ca_Kabuli_Chr04 | 44559172                | CC                                     | GG                 | GG               | INTRON                        | 101488315          | uncharacterized LOC101488315            |
| SNP_30276_A_44559193 | NC_021163.1    | Ca_Kabuli_Chr04 | 44559193                | GG                                     | CC                 | CC               | INTRON                        | 101488315          | uncharacterized LOC101488315            |
| SNP_30277_A_44559626 | NC_021163.1    | Ca_Kabuli_Chr04 | 44559626                | GG                                     | AA                 | AA               | URR                           | 101488315          | uncharacterized LOC101488315            |
| SNP_30278_A_44559695 | NC_021163.1    | Ca_Kabuli_Chr04 | 44559695                | TT                                     | GG                 | GG               | URR                           | 101488315          | uncharacterized LOC101488315            |
| SNP_30279_A_44559697 | NC_021163.1    | Ca_Kabuli_Chr04 | 44559697                | CC                                     | TT                 | TT               | URR                           | 101488315          | uncharacterized LOC101488315            |
| SNP_30281_A_44561347 | NC_021163.1    | Ca_Kabuli_Chr04 | 44561347                | TT                                     | AA                 | AA               | URR                           | 101488315          | uncharacterized LOC101488315            |
| SNP_30282_A_44565075 | NC_021163.1    | Ca_Kabuli_Chr04 | 44565075                | AA                                     | TT                 | TT               | INTERGENIC                    |                    |                                         |
| SNP_30283_A_44570969 | NC_021163.1    | Ca_Kabuli_Chr04 | 44570969                | CC                                     | TT                 | TT               | INTERGENIC                    |                    |                                         |
| SNP_30284_A_44598987 | NC_021163.1    | Ca_Kabuli_Chr04 | 44598987                | CC                                     | AA                 | AA               | INTERGENIC                    |                    |                                         |
| SNP_30285_A_44616416 | NC_021163.1    | Ca_Kabuli_Chr04 | 44616416                | AA                                     | TT                 | TT               | INTERGENIC                    |                    |                                         |
| SNP_30286_A_44616883 | NC_021163.1    | Ca_Kabuli_Chr04 | 44616883                | AA                                     | GG                 | GG               | INTERGENIC                    |                    |                                         |
| SNP_30287_A_44624474 | NC_021163.1    | Ca_Kabuli_Chr04 | 44624474                | AA                                     | CC                 | CC               | DRR                           | 101492319          | uncharacterized LOC101492319            |
| SNP_30288_A_44624522 | NC_021163.1    | Ca_Kabuli_Chr04 | 44624522                | TT                                     | AA                 | AA               | DRR                           | 101492319          | uncharacterized LOC101492319            |
| SNP_30289_A_44629045 | NC_021163.1    | Ca_Kabuli_Chr04 | 44629045                | CC                                     | TT                 | TT               | INTERGENIC                    |                    |                                         |
| SNP_30290_A_44638401 | NC_021163.1    | Ca_Kabuli_Chr04 | 44638401                | AA                                     | TT                 | TT               | URR                           | 101492648          | protein RBL-like                        |
| SNP_30291_A_44649399 | NC_021163.1    | Ca_Kabuli_Chr04 | 44649399                | GG                                     | AA                 | AA               | INTRON                        | 101492983          | FAD-linked sulfhydryl oxidase ERV1-like |
| SNP_30292_A_44649410 | NC_021163.1    | Ca_Kabuli_Chr04 | 44649410                | CC                                     | GG                 | GG               | INTRON                        | 101492983          | FAD-linked sulfhydryl oxidase ERV1-like |
| SNP_30293_A_44656817 | NC_021163.1    | Ca_Kabuli_Chr04 | 44656817                | TT                                     | AA                 | AA               | INTRON                        | 101493315          | PHD finger protein ALFIN-LIKE 4-like    |
| SNP_30294_A_44666868 | NC_021163.1    | Ca_Kabuli_Chr04 | 44666868                | AA                                     | GG                 | GG               | URR                           | 101493840          | uncharacterized LOC101493840            |
| SNP_30295_A_44666871 | NC_021163.1    | Ca_Kabuli_Chr04 | 44666871                | AA                                     | GG                 | GG               | URR                           | 101493840          | uncharacterized LOC101493840            |

| SNPs IDs             | Chromosome IDs | Chromosomes     | Physical positions (bp) | CDC Frontier genome (Reference genome) | (Pusa 1103 & HPNB) | (ILWC 46 & LPNB) | Sequence Components of genome | Gene accession IDs | Putative functions           |
|----------------------|----------------|-----------------|-------------------------|----------------------------------------|--------------------|------------------|-------------------------------|--------------------|------------------------------|
| SNP_30296_A_44667240 | NC_021163.1    | Ca_Kabuli_Chr04 | 44667240                | TT                                     | CC                 | CC               | URR                           | 101493840          | uncharacterized LOC101493840 |
| SNP_30297_A_44669027 | NC_021163.1    | Ca_Kabuli_Chr04 | 44669027                | GG                                     | AA                 | AA               | INTERGENIC                    |                    |                              |
| SNP_30298_A_44672488 | NC_021163.1    | Ca_Kabuli_Chr04 | 44672488                | CC                                     | TT                 | TT               | URR                           | 101494478          | uncharacterized LOC101494478 |
| SNP_30299_A_44679607 | NC_021163.1    | Ca_Kabuli_Chr04 | 44679607                | GG                                     | TT                 | TT               | INTERGENIC                    |                    |                              |
| SNP_30300_A_44694695 | NC_021163.1    | Ca_Kabuli_Chr04 | 44694695                | TT                                     | GG                 | GG               | INTERGENIC                    |                    |                              |
| SNP_30302_A_44694795 | NC_021163.1    | Ca_Kabuli_Chr04 | 44694795                | TT                                     | GG                 | GG               | INTERGENIC                    |                    |                              |
| SNP_30303_A_44694872 | NC_021163.1    | Ca_Kabuli_Chr04 | 44694872                | AA                                     | CC                 | CC               | INTERGENIC                    |                    |                              |
| SNP_30304_A_44694957 | NC_021163.1    | Ca_Kabuli_Chr04 | 44694957                | TT                                     | GG                 | GG               | INTERGENIC                    |                    |                              |
| SNP_30305_A_44718666 | NC_021163.1    | Ca_Kabuli_Chr04 | 44718666                | CC                                     | TT                 | TT               | INTERGENIC                    |                    |                              |
| SNP_30306_A_44723486 | NC_021163.1    | Ca_Kabuli_Chr04 | 44723486                | CC                                     | TT                 | TT               | INTERGENIC                    |                    |                              |
| SNP_30307_A_44724648 | NC_021163.1    | Ca_Kabuli_Chr04 | 44724648                | AA                                     | GG                 | GG               | INTERGENIC                    |                    |                              |
| SNP_30308_A_44725551 | NC_021163.1    | Ca_Kabuli_Chr04 | 44725551                | TT                                     | AA                 | AA               | INTERGENIC                    |                    |                              |
| SNP_30309_A_44742952 | NC_021163.1    | Ca_Kabuli_Chr04 | 44742952                | TT                                     | CC                 | CC               | INTERGENIC                    |                    |                              |
| SNP_30310_A_44743289 | NC_021163.1    | Ca_Kabuli_Chr04 | 44743289                | AA                                     | CC                 | CC               | INTERGENIC                    |                    |                              |
| SNP_30311_A_44744632 | NC_021163.1    | Ca_Kabuli_Chr04 | 44744632                | TT                                     | CC                 | CC               | INTERGENIC                    |                    |                              |
| SNP_30312_A_44744642 | NC_021163.1    | Ca_Kabuli_Chr04 | 44744642                | TT                                     | AA                 | AA               | INTERGENIC                    |                    |                              |
| SNP_30313_A_44747818 | NC_021163.1    | Ca_Kabuli_Chr04 | 44747818                | CC                                     | TT                 | TT               | INTERGENIC                    |                    |                              |
| SNP_30314_A_44760169 | NC_021163.1    | Ca_Kabuli_Chr04 | 44760169                | GG                                     | AA                 | AA               | URR                           | 101495453          | F-box/LRR-repeat protein 15  |
| SNP_30315_A_44760171 | NC_021163.1    | Ca_Kabuli_Chr04 | 44760171                | CC                                     | TT                 | TT               | URR                           | 101495453          | F-box/LRR-repeat protein 15  |
| SNP_30316_A_44773392 | NC_021163.1    | Ca_Kabuli_Chr04 | 44773392                | CC                                     | TT                 | TT               | INTERGENIC                    |                    |                              |
| SNP_30318_A_44773925 | NC_021163.1    | Ca_Kabuli_Chr04 | 44773925                | GG                                     | AA                 | AA               | INTERGENIC                    |                    |                              |
| SNP_30319_A_44773926 | NC_021163.1    | Ca_Kabuli_Chr04 | 44773926                | AA                                     | GG                 | GG               | INTERGENIC                    |                    |                              |

| SNPs IDs             | Chromosome IDs | Chromosomes     | Physical positions (bp) | CDC Frontier genome (Reference genome) | (Pusa 1103 & HPNB) | (ILWC 46 & LPNB) | Sequence Components of genome | Gene accession IDs | Putative functions  |
|----------------------|----------------|-----------------|-------------------------|----------------------------------------|--------------------|------------------|-------------------------------|--------------------|---------------------|
| SNP_30320_A_44773963 | NC_021163.1    | Ca_Kabuli_Chr04 | 44773963                | AA                                     | GG                 | GG               | INTERGENIC                    |                    |                     |
| SNP_30321_A_44773967 | NC_021163.1    | Ca_Kabuli_Chr04 | 44773967                | AA                                     | GG                 | GG               | INTERGENIC                    |                    |                     |
| SNP_30322_A_44776328 | NC_021163.1    | Ca_Kabuli_Chr04 | 44776328                | TT                                     | CC                 | CC               | INTERGENIC                    |                    |                     |
| SNP_30323_A_44779242 | NC_021163.1    | Ca_Kabuli_Chr04 | 44779242                | GG                                     | CC                 | CC               | INTERGENIC                    |                    |                     |
| SNP_30324_A_44779458 | NC_021163.1    | Ca_Kabuli_Chr04 | 44779458                | GG                                     | AA                 | AA               | INTERGENIC                    |                    |                     |
| SNP_30325_A_44786588 | NC_021163.1    | Ca_Kabuli_Chr04 | 44786588                | TT                                     | AA                 | AA               | INTERGENIC                    |                    |                     |
| SNP_30326_A_44790608 | NC_021163.1    | Ca_Kabuli_Chr04 | 44790608                | AA                                     | TT                 | TT               | DRR                           | 101503736          | protein QUIRKY-like |
| SNP_30327_A_44790618 | NC_021163.1    | Ca_Kabuli_Chr04 | 44790618                | TT                                     | CC                 | CC               | DRR                           | 101503736          | protein QUIRKY-like |
| SNP_30328_A_44816284 | NC_021163.1    | Ca_Kabuli_Chr04 | 44816284                | CC                                     | TT                 | TT               | INTRON                        | 101496541          | myosin-15-like      |
| SNP_30329_A_44819653 | NC_021163.1    | Ca_Kabuli_Chr04 | 44819653                | AA                                     | GG                 | GG               | INTRON                        | 101496541          | myosin-15-like      |
| SNP_30330_A_44819671 | NC_021163.1    | Ca_Kabuli_Chr04 | 44819671                | CC                                     | TT                 | TT               | INTRON                        | 101496541          | myosin-15-like      |
| SNP_30331_A_44819682 | NC_021163.1    | Ca_Kabuli_Chr04 | 44819682                | AA                                     | GG                 | GG               | INTRON                        | 101496541          | myosin-15-like      |
| SNP_30332_A_44819941 | NC_021163.1    | Ca_Kabuli_Chr04 | 44819941                | TT                                     | CC                 | CC               | INTRON                        | 101496541          | myosin-15-like      |
| SNP_30333_A_44819988 | NC_021163.1    | Ca_Kabuli_Chr04 | 44819988                | CC                                     | TT                 | TT               | INTRON                        | 101496541          | myosin-15-like      |
| SNP_30334_A_44836845 | NC_021163.1    | Ca_Kabuli_Chr04 | 44836845                | TT                                     | AA                 | AA               | INTERGENIC                    |                    |                     |
| SNP_30335_A_44837685 | NC_021163.1    | Ca_Kabuli_Chr04 | 44837685                | CC                                     | TT                 | TT               | INTERGENIC                    |                    |                     |
| SNP_30336_A_44843332 | NC_021163.1    | Ca_Kabuli_Chr04 | 44843332                | TT                                     | CC                 | CC               | INTERGENIC                    |                    |                     |
| SNP_30337_A_44844003 | NC_021163.1    | Ca_Kabuli_Chr04 | 44844003                | AA                                     | GG                 | GG               | INTERGENIC                    |                    |                     |
| SNP_30338_A_44844021 | NC_021163.1    | Ca_Kabuli_Chr04 | 44844021                | TT                                     | CC                 | CC               | INTERGENIC                    |                    |                     |
| SNP_30339_A_44844039 | NC_021163.1    | Ca_Kabuli_Chr04 | 44844039                | GG                                     | CC                 | CC               | INTERGENIC                    |                    |                     |
| SNP_30340_A_44844064 | NC_021163.1    | Ca_Kabuli_Chr04 | 44844064                | CC                                     | TT                 | TT               | INTERGENIC                    |                    |                     |
| SNP_30341_A_44844077 | NC_021163.1    | Ca_Kabuli_Chr04 | 44844077                | CC                                     | TT                 | TT               | INTERGENIC                    |                    |                     |

| SNPs IDs             | Chromosome IDs | Chromosomes     | Physical positions (bp) | CDC Frontier genome (Reference genome) | (Pusa 1103 & HPNB) | (ILWC 46 & LPNB) | Sequence Components of genome | Gene accession IDs | Putative functions                                 |
|----------------------|----------------|-----------------|-------------------------|----------------------------------------|--------------------|------------------|-------------------------------|--------------------|----------------------------------------------------|
| SNP_30342_A_44854797 | NC_021163.1    | Ca_Kabuli_Chr04 | 44854797                | TT                                     | AA                 | AA               | URR                           | 101497410          | fatty-acid-binding protein 2                       |
| SNP_30343_A_44861486 | NC_021163.1    | Ca_Kabuli_Chr04 | 44861486                | CC                                     | GG                 | GG               | INTRON                        | 101497747          | guanine nucleotide-binding protein alpha-1 subunit |
| SNP_30344_A_44865527 | NC_021163.1    | Ca_Kabuli_Chr04 | 44865527                | TT                                     | CC                 | CC               | INTERGENIC                    |                    |                                                    |
| SNP_30345_A_44866494 | NC_021163.1    | Ca_Kabuli_Chr04 | 44866494                | TT                                     | CC                 | CC               | DRR                           | 101498279          | uncharacterized LOC101498279                       |
| SNP_30346_A_44872676 | NC_021163.1    | Ca_Kabuli_Chr04 | 44872676                | GG                                     | AA                 | AA               | URR                           | 101498279          | uncharacterized LOC101498279                       |
| SNP_30347_A_44872699 | NC_021163.1    | Ca_Kabuli_Chr04 | 44872699                | AA                                     | GG                 | GG               | URR                           | 101498279          | uncharacterized LOC101498279                       |
| SNP_30348_A_44885934 | NC_021163.1    | Ca_Kabuli_Chr04 | 44885934                | CC                                     | TT                 | TT               | INTERGENIC                    |                    |                                                    |
| SNP_30350_A_44889809 | NC_021163.1    | Ca_Kabuli_Chr04 | 44889809                | CC                                     | TT                 | TT               | INTERGENIC                    |                    |                                                    |
| SNP_30351_A_44890724 | NC_021163.1    | Ca_Kabuli_Chr04 | 44890724                | CC                                     | TT                 | TT               | INTERGENIC                    |                    |                                                    |
| SNP_30352_A_44890774 | NC_021163.1    | Ca_Kabuli_Chr04 | 44890774                | AA                                     | GG                 | GG               | INTERGENIC                    |                    |                                                    |
| SNP_30353_A_44890798 | NC_021163.1    | Ca_Kabuli_Chr04 | 44890798                | TT                                     | GG                 | GG               | INTERGENIC                    |                    |                                                    |
| SNP_30355_A_44910706 | NC_021163.1    | Ca_Kabuli_Chr04 | 44910706                | GG                                     | CC                 | CC               | INTERGENIC                    |                    |                                                    |
| SNP_30356_A_44915585 | NC_021163.1    | Ca_Kabuli_Chr04 | 44915585                | CC                                     | TT                 | TT               | INTERGENIC                    |                    |                                                    |
| SNP_30357_A_44918612 | NC_021163.1    | Ca_Kabuli_Chr04 | 44918612                | GG                                     | AA                 | AA               | URR                           | 101499587          | uncharacterized LOC101499587                       |
| SNP_30358_A_44921563 | NC_021163.1    | Ca_Kabuli_Chr04 | 44921563                | TT                                     | CC                 | CC               | URR                           | 101499891          | cytochrome P450 711A1                              |
| SNP_30359_A_44921579 | NC_021163.1    | Ca_Kabuli_Chr04 | 44921579                | GG                                     | AA                 | AA               | URR                           | 101499891          | cytochrome P450 711A1                              |
| SNP_30360_A_44921594 | NC_021163.1    | Ca_Kabuli_Chr04 | 44921594                | AA                                     | GG                 | GG               | URR                           | 101499891          | cytochrome P450 711A1                              |
| SNP_30361_A_44921685 | NC_021163.1    | Ca_Kabuli_Chr04 | 44921685                | CC                                     | TT                 | TT               | URR                           | 101499891          | cytochrome P450 711A1                              |
| SNP_30362_A_44928800 | NC_021163.1    | Ca_Kabuli_Chr04 | 44928800                | TT                                     | CC                 | CC               | INTERGENIC                    |                    |                                                    |
| SNP_30363_A_44936793 | NC_021163.1    | Ca_Kabuli_Chr04 | 44936793                | AA                                     | GG                 | GG               | INTERGENIC                    |                    |                                                    |
| SNP_30364_A_44938892 | NC_021163.1    | Ca_Kabuli_Chr04 | 44938892                | GG                                     | AA                 | AA               | INTERGENIC                    |                    |                                                    |
| SNP_30365_A_44938896 | NC_021163.1    | Ca_Kabuli_Chr04 | 44938896                | GG                                     | AA                 | AA               | INTERGENIC                    |                    |                                                    |

| SNPs IDs             | Chromosome IDs | Chromosomes     | Physical positions (bp) | CDC Frontier genome (Reference genome) | (Pusa 1103 & HPNB) | (ILWC 46 & LPNB) | Sequence Components of genome | Gene accession IDs | Putative functions                  |
|----------------------|----------------|-----------------|-------------------------|----------------------------------------|--------------------|------------------|-------------------------------|--------------------|-------------------------------------|
| SNP_30366_A_44938902 | NC_021163.1    | Ca_Kabuli_Chr04 | 44938902                | GG                                     | AA                 | AA               | INTERGENIC                    |                    |                                     |
| SNP_30367_A_44947406 | NC_021163.1    | Ca_Kabuli_Chr04 | 44947406                | GG                                     | AA                 | AA               | INTERGENIC                    |                    |                                     |
| SNP_30369_A_44953454 | NC_021163.1    | Ca_Kabuli_Chr04 | 44953454                | TT                                     | AA                 | AA               | URR                           | 101501064          | uncharacterized LOC101501064        |
| SNP_30370_A_44953743 | NC_021163.1    | Ca_Kabuli_Chr04 | 44953743                | TT                                     | AA                 | AA               | URR                           | 101501064          | uncharacterized LOC101501064        |
| SNP_30371_A_44953759 | NC_021163.1    | Ca_Kabuli_Chr04 | 44953759                | AA                                     | TT                 | TT               | URR                           | 101501064          | uncharacterized LOC101501064        |
| SNP_30372_A_44953848 | NC_021163.1    | Ca_Kabuli_Chr04 | 44953848                | GG                                     | TT                 | TT               | URR                           | 101501064          | uncharacterized LOC101501064        |
| SNP_30374_A_44967333 | NC_021163.1    | Ca_Kabuli_Chr04 | 44967333                | GG                                     | CC                 | CC               | INTRON                        | 101501694          | protein indeterminate-domain 7-like |
| SNP_30376_A_44970217 | NC_021163.1    | Ca_Kabuli_Chr04 | 44970217                | GG                                     | AA                 | AA               | URR                           | 101501694          | protein indeterminate-domain 7-like |
| SNP_30377_A_44970229 | NC_021163.1    | Ca_Kabuli_Chr04 | 44970229                | TT                                     | CC                 | CC               | URR                           | 101501694          | protein indeterminate-domain 7-like |
| SNP_30378_A_44970247 | NC_021163.1    | Ca_Kabuli_Chr04 | 44970247                | CC                                     | GG                 | GG               | URR                           | 101501694          | protein indeterminate-domain 7-like |
| SNP_30379_A_44970250 | NC_021163.1    | Ca_Kabuli_Chr04 | 44970250                | AA                                     | GG                 | GG               | URR                           | 101501694          | protein indeterminate-domain 7-like |
| SNP_30380_A_44970263 | NC_021163.1    | Ca_Kabuli_Chr04 | 44970263                | AA                                     | TT                 | TT               | URR                           | 101501694          | protein indeterminate-domain 7-like |
| SNP_30381_A_44970445 | NC_021163.1    | Ca_Kabuli_Chr04 | 44970445                | CC                                     | AA                 | AA               | URR                           | 101501694          | protein indeterminate-domain 7-like |
| SNP_30383_A_44972279 | NC_021163.1    | Ca_Kabuli_Chr04 | 44972279                | TT                                     | CC                 | CC               | INTERGENIC                    |                    |                                     |
| SNP_30384_A_44982730 | NC_021163.1    | Ca_Kabuli_Chr04 | 44982730                | AA                                     | CC                 | CC               | INTRON                        | 101502020          | uncharacterized LOC101502020        |
| SNP_30385_A_44985074 | NC_021163.1    | Ca_Kabuli_Chr04 | 44985074                | CC                                     | AA                 | AA               | URR                           | 101502020          | uncharacterized LOC101502020        |
| SNP_30386_A_44986690 | NC_021163.1    | Ca_Kabuli_Chr04 | 44986690                | AA                                     | CC                 | CC               | INTERGENIC                    |                    |                                     |
| SNP_30387_A_44987409 | NC_021163.1    | Ca_Kabuli_Chr04 | 44987409                | AA                                     | GG                 | GG               | INTERGENIC                    |                    |                                     |
| SNP_30389_A_44987741 | NC_021163.1    | Ca_Kabuli_Chr04 | 44987741                | TT                                     | CC                 | CC               | DRR                           | 101502873          | delta(8)-fatty-acid desaturase-like |
| SNP_30391_A_44988165 | NC_021163.1    | Ca_Kabuli_Chr04 | 44988165                | AA                                     | CC                 | CC               | DRR                           | 101502873          | delta(8)-fatty-acid desaturase-like |
| SNP_30392_A_44990800 | NC_021163.1    | Ca_Kabuli_Chr04 | 44990800                | TT                                     | AA                 | AA               | URR                           | 101502873          | delta(8)-fatty-acid desaturase-like |
| SNP_30393_A_44990827 | NC_021163.1    | Ca_Kabuli_Chr04 | 44990827                | TT                                     | GG                 | GG               | URR                           | 101502873          | delta(8)-fatty-acid desaturase-like |



| SNPs IDs             | Chromosome IDs | Chromosomes     | Physical positions (bp) | CDC Frontier genome (Reference genome) | (Pusa 1103 & HPNB) | (ILWC 46 & LPNB) | Sequence Components of genome | Gene accession IDs | Putative functions                           |
|----------------------|----------------|-----------------|-------------------------|----------------------------------------|--------------------|------------------|-------------------------------|--------------------|----------------------------------------------|
| SNP_30394_A_44993897 | NC_021163.1    | Ca_Kabuli_Chr04 | 44993897                | GG                                     | AA                 | AA               | DRR                           | 101503202          | uncharacterized LOC101503202                 |
| SNP_30395_A_44993936 | NC_021163.1    | Ca_Kabuli_Chr04 | 44993936                | GG                                     | AA                 | AA               | DRR                           | 101503202          | uncharacterized LOC101503202                 |
| SNP_30396_A_44998377 | NC_021163.1    | Ca_Kabuli_Chr04 | 44998377                | AA                                     | GG                 | GG               | URR                           | 101503202          | uncharacterized LOC101503202                 |
| SNP_30397_A_44998393 | NC_021163.1    | Ca_Kabuli_Chr04 | 44998393                | AA                                     | TT                 | TT               | URR                           | 101503202          | uncharacterized LOC101503202                 |
| SNP_30399_A_45002487 | NC_021163.1    | Ca_Kabuli_Chr04 | 45002487                | TT                                     | GG                 | GG               | INTERGENIC                    |                    |                                              |
| SNP_30400_A_45002706 | NC_021163.1    | Ca_Kabuli_Chr04 | 45002706                | CC                                     | TT                 | TT               | INTERGENIC                    |                    |                                              |
| SNP_30401_A_45002757 | NC_021163.1    | Ca_Kabuli_Chr04 | 45002757                | TT                                     | GG                 | GG               | INTERGENIC                    |                    |                                              |
| SNP_30403_A_45006430 | NC_021163.1    | Ca_Kabuli_Chr04 | 45006430                | TT                                     | CC                 | CC               | INTERGENIC                    |                    |                                              |
| SNP_30404_A_45011145 | NC_021163.1    | Ca_Kabuli_Chr04 | 45011145                | AA                                     | GG                 | GG               | URR                           | 101503735          | uncharacterized LOC101503735                 |
| SNP_30405_A_45011644 | NC_021163.1    | Ca_Kabuli_Chr04 | 45011644                | CC                                     | GG                 | GG               | URR                           | 101503735          | uncharacterized LOC101503735                 |
| SNP_30406_A_45014747 | NC_021163.1    | Ca_Kabuli_Chr04 | 45014747                | TT                                     | GG                 | GG               | INTERGENIC                    |                    |                                              |
| SNP_30407_A_45014764 | NC_021163.1    | Ca_Kabuli_Chr04 | 45014764                | CC                                     | TT                 | TT               | INTERGENIC                    |                    |                                              |
| SNP_30408_A_45014777 | NC_021163.1    | Ca_Kabuli_Chr04 | 45014777                | CC                                     | TT                 | TT               | INTERGENIC                    |                    |                                              |
| SNP_30409_A_45016634 | NC_021163.1    | Ca_Kabuli_Chr04 | 45016634                | AA                                     | CC                 | CC               | INTERGENIC                    |                    |                                              |
| SNP_30410_A_45016635 | NC_021163.1    | Ca_Kabuli_Chr04 | 45016635                | AA                                     | TT                 | TT               | INTERGENIC                    |                    |                                              |
| SNP_30411_A_45016657 | NC_021163.1    | Ca_Kabuli_Chr04 | 45016657                | TT                                     | CC                 | CC               | INTERGENIC                    |                    |                                              |
| SNP_30412_A_45016967 | NC_021163.1    | Ca_Kabuli_Chr04 | 45016967                | CC                                     | GG                 | GG               | INTERGENIC                    |                    |                                              |
| SNP_30413_A_45016979 | NC_021163.1    | Ca_Kabuli_Chr04 | 45016979                | AA                                     | GG                 | GG               | INTERGENIC                    |                    |                                              |
| SNP_30414_A_45022260 | NC_021163.1    | Ca_Kabuli_Chr04 | 45022260                | GG                                     | CC                 | CC               | INTRON                        | 101504063          | cytosolic Fe-S cluster assembly factor NBP35 |
| SNP_30415_A_45022287 | NC_021163.1    | Ca_Kabuli_Chr04 | 45022287                | TT                                     | CC                 | CC               | INTRON                        | 101504063          | cytosolic Fe-S cluster assembly factor NBP35 |
| SNP_30416_A_45030799 | NC_021163.1    | Ca_Kabuli_Chr04 | 45030799                | TT                                     | CC                 | CC               | INTERGENIC                    |                    |                                              |
| SNP_30417_A_45036117 | NC_021163.1    | Ca_Kabuli_Chr04 | 45036117                | GG                                     | AA                 | AA               | URR                           | 101504600          | zinc transporter 4, chloroplastic-like       |

| SNPs IDs             | Chromosome IDs | Chromosomes     | Physical positions (bp) | CDC Frontier genome (Reference genome) | (Pusa 1103 & HPNB) | (ILWC 46 & LPNB) | Sequence genome       | Components of | Gene accession IDs | Putative functions                     |
|----------------------|----------------|-----------------|-------------------------|----------------------------------------|--------------------|------------------|-----------------------|---------------|--------------------|----------------------------------------|
| SNP_30418_A_45036328 | NC_021163.1    | Ca_Kabuli_Chr04 | 45036328                | CC                                     | TT                 | TT               | URR                   |               | 101504600          | zinc transporter 4, chloroplastic-like |
| SNP_30419_A_45036368 | NC_021163.1    | Ca_Kabuli_Chr04 | 45036368                | AA                                     | GG                 | GG               | URR                   |               | 101504600          | zinc transporter 4, chloroplastic-like |
| SNP_30420_A_45036372 | NC_021163.1    | Ca_Kabuli_Chr04 | 45036372                | CC                                     | TT                 | TT               | URR                   |               | 101504600          | zinc transporter 4, chloroplastic-like |
| SNP_30421_A_45036382 | NC_021163.1    | Ca_Kabuli_Chr04 | 45036382                | GG                                     | CC                 | CC               | URR                   |               | 101504600          | zinc transporter 4, chloroplastic-like |
| SNP_30422_A_45036395 | NC_021163.1    | Ca_Kabuli_Chr04 | 45036395                | CC                                     | TT                 | TT               | URR                   |               | 101504600          | zinc transporter 4, chloroplastic-like |
| SNP_30423_A_45036829 | NC_021163.1    | Ca_Kabuli_Chr04 | 45036829                | GG                                     | TT                 | TT               | URR                   |               | 101504600          | zinc transporter 4, chloroplastic-like |
| SNP_30424_A_45048418 | NC_021163.1    | Ca_Kabuli_Chr04 | 45048418                | TT                                     | CC                 | CC               | INTERGENIC            |               |                    |                                        |
| SNP_30425_A_45048564 | NC_021163.1    | Ca_Kabuli_Chr04 | 45048564                | GG                                     | AA                 | AA               | INTERGENIC            |               |                    |                                        |
| SNP_30426_A_45048918 | NC_021163.1    | Ca_Kabuli_Chr04 | 45048918                | AA                                     | TT                 | TT               | INTERGENIC            |               |                    |                                        |
| SNP_30427_A_45049400 | NC_021163.1    | Ca_Kabuli_Chr04 | 45049400                | AA                                     | CC                 | CC               | INTERGENIC            |               |                    |                                        |
| SNP_30428_A_45049465 | NC_021163.1    | Ca_Kabuli_Chr04 | 45049465                | CC                                     | TT                 | TT               | INTERGENIC            |               |                    |                                        |
| SNP_30429_A_45049484 | NC_021163.1    | Ca_Kabuli_Chr04 | 45049484                | GG                                     | AA                 | AA               | INTERGENIC            |               |                    |                                        |
| SNP_30430_A_45049782 | NC_021163.1    | Ca_Kabuli_Chr04 | 45049782                | GG                                     | AA                 | AA               | INTERGENIC            |               |                    |                                        |
| SNP_30431_A_45051585 | NC_021163.1    | Ca_Kabuli_Chr04 | 45051585                | AA                                     | GG                 | GG               | DRR                   |               | 101504919          | putative GATA transcription factor 22  |
| SNP_30432_A_45051741 | NC_021163.1    | Ca_Kabuli_Chr04 | 45051741                | GG                                     | AA                 | AA               | DRR                   |               | 101504919          | putative GATA transcription factor 22  |
| SNP_30433_A_45053771 | NC_021163.1    | Ca_Kabuli_Chr04 | 45053771                | CC                                     | GG                 | GG               | NON_SYNONYMOUS_CODING |               | 101504919          | putative GATA transcription factor 22  |
| SNP_30434_A_45060115 | NC_021163.1    | Ca_Kabuli_Chr04 | 45060115                | GG                                     | AA                 | AA               | INTERGENIC            |               |                    |                                        |
| SNP_30435_A_45060344 | NC_021163.1    | Ca_Kabuli_Chr04 | 45060344                | GG                                     | TT                 | TT               | INTERGENIC            |               |                    |                                        |
| SNP_30436_A_45068007 | NC_021163.1    | Ca_Kabuli_Chr04 | 45068007                | TT                                     | AA                 | AA               | DRR                   |               | 101505222          | disease resistance protein RPM1-like   |
| SNP_30438_A_45069869 | NC_021163.1    | Ca_Kabuli_Chr04 | 45069869                | CC                                     | TT                 | TT               | INTRON                |               | 101505222          | disease resistance protein RPM1-like   |
| SNP_30440_A_45076917 | NC_021163.1    | Ca_Kabuli_Chr04 | 45076917                | AA                                     | CC                 | CC               | INTERGENIC            |               |                    |                                        |
| SNP_30441_A_45077225 | NC_021163.1    | Ca_Kabuli_Chr04 | 45077225                | CC                                     | AA                 | AA               | INTERGENIC            |               |                    |                                        |

| SNPs IDs             | Chromosome IDs | Chromosomes     | Physical positions (bp) | CDC Frontier (Reference genome) | (Pusa 1103 & HPNB) | (ILWC 46 & LPNB) | Sequence Components of genome | Gene accession IDs | Putative functions                                            |
|----------------------|----------------|-----------------|-------------------------|---------------------------------|--------------------|------------------|-------------------------------|--------------------|---------------------------------------------------------------|
| SNP_30442_A_45078689 | NC_021163.1    | Ca_Kabuli_Chr04 | 45078689                | AA                              | CC                 | CC               | INTERGENIC                    |                    |                                                               |
| SNP_30443_A_45078709 | NC_021163.1    | Ca_Kabuli_Chr04 | 45078709                | TT                              | AA                 | AA               | INTERGENIC                    |                    |                                                               |
| SNP_30444_A_45104524 | NC_021163.1    | Ca_Kabuli_Chr04 | 45104524                | GG                              | AA                 | AA               | DRR                           | 101506856          | DNA topoisomerase 1-like                                      |
| SNP_30445_A_45152192 | NC_021163.1    | Ca_Kabuli_Chr04 | 45152192                | AA                              | CC                 | CC               | INTRON                        | 101510154          | histone deacetylase 2                                         |
| SNP_30446_A_45154017 | NC_021163.1    | Ca_Kabuli_Chr04 | 45154017                | CC                              | TT                 | TT               | INTRON                        | 101510154          | histone deacetylase 2                                         |
| SNP_30447_A_45154060 | NC_021163.1    | Ca_Kabuli_Chr04 | 45154060                | AA                              | TT                 | TT               | INTRON                        | 101510154          | histone deacetylase 2                                         |
| SNP_30448_A_45163619 | NC_021163.1    | Ca_Kabuli_Chr04 | 45163619                | AA                              | CC                 | CC               | INTRON                        | 101510477          | K(+) efflux antiporter 6                                      |
| SNP_30449_A_45163621 | NC_021163.1    | Ca_Kabuli_Chr04 | 45163621                | TT                              | CC                 | CC               | INTRON                        | 101510477          | K(+) efflux antiporter 6                                      |
| SNP_30450_A_45164118 | NC_021163.1    | Ca_Kabuli_Chr04 | 45164118                | CC                              | TT                 | TT               | DRR                           | 101510477          | K(+) efflux antiporter 6                                      |
| SNP_30451_A_45166970 | NC_021163.1    | Ca_Kabuli_Chr04 | 45166970                | CC                              | AA                 | AA               | INTERGENIC                    |                    |                                                               |
| SNP_30452_A_45168187 | NC_021163.1    | Ca_Kabuli_Chr04 | 45168187                | TT                              | CC                 | CC               | INTERGENIC                    |                    |                                                               |
| SNP_30453_A_45169960 | NC_021163.1    | Ca_Kabuli_Chr04 | 45169960                | AA                              | GG                 | GG               | INTERGENIC                    |                    |                                                               |
| SNP_30454_A_45169973 | NC_021163.1    | Ca_Kabuli_Chr04 | 45169973                | AA                              | GG                 | GG               | INTERGENIC                    |                    |                                                               |
| SNP_30455_A_45176290 | NC_021163.1    | Ca_Kabuli_Chr04 | 45176290                | CC                              | TT                 | TT               | INTERGENIC                    |                    |                                                               |
| SNP_30456_A_45178239 | NC_021163.1    | Ca_Kabuli_Chr04 | 45178239                | AA                              | GG                 | GG               | INTERGENIC                    |                    |                                                               |
| SNP_30457_A_45186495 | NC_021163.1    | Ca_Kabuli_Chr04 | 45186495                | TT                              | AA                 | AA               | INTERGENIC                    |                    |                                                               |
| SNP_30458_A_45195778 | NC_021163.1    | Ca_Kabuli_Chr04 | 45195778                | GG                              | AA                 | AA               | INTERGENIC                    |                    |                                                               |
| SNP_30459_A_45196108 | NC_021163.1    | Ca_Kabuli_Chr04 | 45196108                | GG                              | AA                 | AA               | INTERGENIC                    |                    |                                                               |
| SNP_30460_A_45211440 | NC_021163.1    | Ca_Kabuli_Chr04 | 45211440                | GG                              | CC                 | CC               | URR                           | 101512310          | 26S proteasome non-ATPase regulatory subunit 8 homolog A-like |
| SNP_30461_A_45221891 | NC_021163.1    | Ca_Kabuli_Chr04 | 45221891                | CC                              | GG                 | GG               | URR                           | 101512639          | far upstream element-binding protein 1-like                   |
| SNP_30462_A_45232330 | NC_021163.1    | Ca_Kabuli_Chr04 | 45232330                | AA                              | GG                 | GG               | DRR                           | 101513604          | uncharacterized LOC101513604                                  |
| SNP_30463_A_45234950 | NC_021163.1    | Ca_Kabuli_Chr04 | 45234950                | GG                              | AA                 | AA               | INTERGENIC                    |                    |                                                               |

| SNPs IDs             | Chromosome IDs | Chromosomes     | Physical positions (bp) | CDC Frontier genome (Reference genome) | (Pusa 1103 & HPNB) | (ILWC 46 & LPNB) | Sequence Components of genome | Gene accession IDs | Putative functions                          |
|----------------------|----------------|-----------------|-------------------------|----------------------------------------|--------------------|------------------|-------------------------------|--------------------|---------------------------------------------|
| SNP_30464_A_45265979 | NC_021163.1    | Ca_Kabuli_Chr04 | 45265979                | GG                                     | CC                 | CC               | INTRON                        | 101513930          | SWI5-dependent HO expression protein 3-like |
| SNP_30465_A_45270172 | NC_021163.1    | Ca_Kabuli_Chr04 | 45270172                | CC                                     | TT                 | TT               | URR                           | 101513930          | SWI5-dependent HO expression protein 3-like |
| SNP_30466_A_45273148 | NC_021163.1    | Ca_Kabuli_Chr04 | 45273148                | AA                                     | GG                 | GG               | INTERGENIC                    |                    |                                             |
| SNP_30467_A_45273150 | NC_021163.1    | Ca_Kabuli_Chr04 | 45273150                | TT                                     | AA                 | AA               | INTERGENIC                    |                    |                                             |
| SNP_30468_A_45273174 | NC_021163.1    | Ca_Kabuli_Chr04 | 45273174                | AA                                     | TT                 | TT               | INTERGENIC                    |                    |                                             |
| SNP_30469_A_45273185 | NC_021163.1    | Ca_Kabuli_Chr04 | 45273185                | AA                                     | GG                 | GG               | INTERGENIC                    |                    |                                             |
| SNP_30470_A_45273283 | NC_021163.1    | Ca_Kabuli_Chr04 | 45273283                | AA                                     | CC                 | CC               | INTERGENIC                    |                    |                                             |
| SNP_30471_A_45289658 | NC_021163.1    | Ca_Kabuli_Chr04 | 45289658                | TT                                     | CC                 | CC               | INTERGENIC                    |                    |                                             |
| SNP_30472_A_45289977 | NC_021163.1    | Ca_Kabuli_Chr04 | 45289977                | AA                                     | GG                 | GG               | INTERGENIC                    |                    |                                             |
| SNP_30473_A_45290052 | NC_021163.1    | Ca_Kabuli_Chr04 | 45290052                | CC                                     | AA                 | AA               | INTERGENIC                    |                    |                                             |
| SNP_30474_A_45298548 | NC_021163.1    | Ca_Kabuli_Chr04 | 45298548                | TT                                     | CC                 | CC               | INTERGENIC                    |                    |                                             |
| SNP_30475_A_45308193 | NC_021163.1    | Ca_Kabuli_Chr04 | 45308193                | AA                                     | GG                 | GG               | INTRON                        | 101515562          | UPF0587 protein C1orf123 homolog            |
| SNP_30476_A_45318102 | NC_021163.1    | Ca_Kabuli_Chr04 | 45318102                | CC                                     | AA                 | AA               | INTERGENIC                    |                    |                                             |
| SNP_30477_A_45320414 | NC_021163.1    | Ca_Kabuli_Chr04 | 45320414                | TT                                     | CC                 | CC               | INTERGENIC                    |                    |                                             |
| SNP_30478_A_45320430 | NC_021163.1    | Ca_Kabuli_Chr04 | 45320430                | TT                                     | GG                 | GG               | INTERGENIC                    |                    |                                             |
| SNP_30479_A_45320639 | NC_021163.1    | Ca_Kabuli_Chr04 | 45320639                | TT                                     | CC                 | CC               | INTERGENIC                    |                    |                                             |
| SNP_30480_A_45323730 | NC_021163.1    | Ca_Kabuli_Chr04 | 45323730                | TT                                     | CC                 | CC               | DRR                           | 101489305          | uncharacterized LOC101489305                |
| SNP_30481_A_45326033 | NC_021163.1    | Ca_Kabuli_Chr04 | 45326033                | GG                                     | AA                 | AA               | INTERGENIC                    |                    |                                             |
| SNP_30482_A_45328251 | NC_021163.1    | Ca_Kabuli_Chr04 | 45328251                | CC                                     | TT                 | TT               | INTERGENIC                    |                    |                                             |
| SNP_30483_A_45339379 | NC_021163.1    | Ca_Kabuli_Chr04 | 45339379                | GG                                     | AA                 | AA               | INTERGENIC                    |                    |                                             |
| SNP_30485_A_45350274 | NC_021163.1    | Ca_Kabuli_Chr04 | 45350274                | TT                                     | AA                 | AA               | INTERGENIC                    |                    |                                             |
| SNP_30486_A_45366071 | NC_021163.1    | Ca_Kabuli_Chr04 | 45366071                | CC                                     | TT                 | TT               | INTRON                        | 101490288          | transcription factor RAX2-like              |

| SNPs IDs             | Chromosome IDs | Chromosomes     | Physical positions (bp) | CDC Frontier genome (Reference genome) | (Pusa 1103 & HPNB) | (ILWC 46 & LPNB) | Sequence Components of genome | Gene accession IDs | Putative functions             |
|----------------------|----------------|-----------------|-------------------------|----------------------------------------|--------------------|------------------|-------------------------------|--------------------|--------------------------------|
| SNP_30488_A_45367103 | NC_021163.1    | Ca_Kabuli_Chr04 | 45367103                | CC                                     | GG                 | GG               | INTRON                        | 101490288          | transcription factor RAX2-like |
| SNP_30489_A_45368488 | NC_021163.1    | Ca_Kabuli_Chr04 | 45368488                | AA                                     | CC                 | CC               | URR                           | 101490288          | transcription factor RAX2-like |
| SNP_30491_A_45369208 | NC_021163.1    | Ca_Kabuli_Chr04 | 45369208                | GG                                     | AA                 | AA               | URR                           | 101490288          | transcription factor RAX2-like |
| SNP_30492_A_45370338 | NC_021163.1    | Ca_Kabuli_Chr04 | 45370338                | TT                                     | CC                 | CC               | DRR                           | 101490606          | uncharacterized LOC101490606   |
| SNP_30493_A_45370387 | NC_021163.1    | Ca_Kabuli_Chr04 | 45370387                | TT                                     | AA                 | AA               | DRR                           | 101490606          | uncharacterized LOC101490606   |
| SNP_30494_A_45370503 | NC_021163.1    | Ca_Kabuli_Chr04 | 45370503                | TT                                     | GG                 | GG               | DRR                           | 101490606          | uncharacterized LOC101490606   |
| SNP_30495_A_45370569 | NC_021163.1    | Ca_Kabuli_Chr04 | 45370569                | TT                                     | AA                 | AA               | DRR                           | 101490606          | uncharacterized LOC101490606   |
| SNP_30496_A_45371075 | NC_021163.1    | Ca_Kabuli_Chr04 | 45371075                | CC                                     | TT                 | TT               | DRR                           | 101490606          | uncharacterized LOC101490606   |
| SNP_30497_A_45371478 | NC_021163.1    | Ca_Kabuli_Chr04 | 45371478                | TT                                     | CC                 | CC               | INTERGENIC                    |                    |                                |
| SNP_30498_A_45374397 | NC_021163.1    | Ca_Kabuli_Chr04 | 45374397                | GG                                     | CC                 | CC               | NON_SYNONYMOUS_CODING         | 101490606          | uncharacterized LOC101490606   |
| SNP_30500_A_45380439 | NC_021163.1    | Ca_Kabuli_Chr04 | 45380439                | GG                                     | AA                 | AA               | INTERGENIC                    |                    |                                |
| SNP_30501_A_45382361 | NC_021163.1    | Ca_Kabuli_Chr04 | 45382361                | GG                                     | TT                 | TT               | INTERGENIC                    |                    |                                |
| SNP_30502_A_45384448 | NC_021163.1    | Ca_Kabuli_Chr04 | 45384448                | TT                                     | AA                 | AA               | INTERGENIC                    |                    |                                |
| SNP_30503_A_45385510 | NC_021163.1    | Ca_Kabuli_Chr04 | 45385510                | CC                                     | AA                 | AA               | INTERGENIC                    |                    |                                |
| SNP_30504_A_45389265 | NC_021163.1    | Ca_Kabuli_Chr04 | 45389265                | AA                                     | GG                 | GG               | INTERGENIC                    |                    |                                |
| SNP_30505_A_45389371 | NC_021163.1    | Ca_Kabuli_Chr04 | 45389371                | GG                                     | CC                 | CC               | INTERGENIC                    |                    |                                |
| SNP_30506_A_45389682 | NC_021163.1    | Ca_Kabuli_Chr04 | 45389682                | TT                                     | CC                 | CC               | INTERGENIC                    |                    |                                |
| SNP_30507_A_45390374 | NC_021163.1    | Ca_Kabuli_Chr04 | 45390374                | CC                                     | AA                 | AA               | INTERGENIC                    |                    |                                |
| SNP_30508_A_45393555 | NC_021163.1    | Ca_Kabuli_Chr04 | 45393555                | AA                                     | CC                 | CC               | INTERGENIC                    |                    |                                |
| SNP_30509_A_45393760 | NC_021163.1    | Ca_Kabuli_Chr04 | 45393760                | CC                                     | AA                 | AA               | INTERGENIC                    |                    |                                |
| SNP_30510_A_45397369 | NC_021163.1    | Ca_Kabuli_Chr04 | 45397369                | CC                                     | TT                 | TT               | INTERGENIC                    |                    |                                |
| SNP_30512_A_45399259 | NC_021163.1    | Ca_Kabuli_Chr04 | 45399259                | TT                                     | AA                 | AA               | INTERGENIC                    |                    |                                |

| SNPs IDs             | Chromosome IDs | Chromosomes     | Physical positions (bp) | CDC Frontier genome (Reference genome) | (Pusa 1103 & HPNB) | (ILWC 46 & LPNB) | Sequence Components of genome | Gene accession IDs | Putative functions                     |
|----------------------|----------------|-----------------|-------------------------|----------------------------------------|--------------------|------------------|-------------------------------|--------------------|----------------------------------------|
| SNP_30513_A_45399263 | NC_021163.1    | Ca_Kabuli_Chr04 | 45399263                | TT                                     | CC                 | CC               | INTERGENIC                    |                    |                                        |
| SNP_30514_A_45399295 | NC_021163.1    | Ca_Kabuli_Chr04 | 45399295                | AA                                     | TT                 | TT               | INTERGENIC                    |                    |                                        |
| SNP_30515_A_45399316 | NC_021163.1    | Ca_Kabuli_Chr04 | 45399316                | TT                                     | CC                 | CC               | INTERGENIC                    |                    |                                        |
| SNP_30518_A_45406090 | NC_021163.1    | Ca_Kabuli_Chr04 | 45406090                | CC                                     | TT                 | TT               | INTERGENIC                    |                    |                                        |
| SNP_30519_A_45406111 | NC_021163.1    | Ca_Kabuli_Chr04 | 45406111                | GG                                     | AA                 | AA               | INTERGENIC                    |                    |                                        |
| SNP_30520_A_45408412 | NC_021163.1    | Ca_Kabuli_Chr04 | 45408412                | CC                                     | TT                 | TT               | INTERGENIC                    |                    |                                        |
| SNP_30521_A_45408781 | NC_021163.1    | Ca_Kabuli_Chr04 | 45408781                | AA                                     | GG                 | GG               | INTERGENIC                    |                    |                                        |
| SNP_30522_A_45409157 | NC_021163.1    | Ca_Kabuli_Chr04 | 45409157                | GG                                     | AA                 | AA               | INTERGENIC                    |                    |                                        |
| SNP_30523_A_45411454 | NC_021163.1    | Ca_Kabuli_Chr04 | 45411454                | GG                                     | AA                 | AA               | INTERGENIC                    |                    |                                        |
| SNP_30524_A_45414357 | NC_021163.1    | Ca_Kabuli_Chr04 | 45414357                | CC                                     | AA                 | AA               | DRR                           | 101490927          | homeotic protein knotted-1             |
| SNP_30525_A_45414452 | NC_021163.1    | Ca_Kabuli_Chr04 | 45414452                | AA                                     | CC                 | CC               | DRR                           | 101490927          | homeotic protein knotted-1             |
| SNP_30526_A_45414472 | NC_021163.1    | Ca_Kabuli_Chr04 | 45414472                | CC                                     | TT                 | TT               | DRR                           | 101490927          | homeotic protein knotted-1             |
| SNP_30527_A_45438289 | NC_021163.1    | Ca_Kabuli_Chr04 | 45438289                | AA                                     | GG                 | GG               | INTERGENIC                    |                    |                                        |
| SNP_30528_A_45438290 | NC_021163.1    | Ca_Kabuli_Chr04 | 45438290                | CC                                     | TT                 | TT               | INTERGENIC                    |                    |                                        |
| SNP_30529_A_45442224 | NC_021163.1    | Ca_Kabuli_Chr04 | 45442224                | AA                                     | GG                 | GG               | INTERGENIC                    |                    |                                        |
| SNP_30530_A_45471679 | NC_021163.1    | Ca_Kabuli_Chr04 | 45471679                | GG                                     | AA                 | AA               | DRR                           | 101492549          | uncharacterized protein At3g49720-like |
| SNP_30531_A_45471964 | NC_021163.1    | Ca_Kabuli_Chr04 | 45471964                | GG                                     | AA                 | AA               | DRR                           | 101492549          | uncharacterized protein At3g49720-like |
| SNP_30532_A_45472183 | NC_021163.1    | Ca_Kabuli_Chr04 | 45472183                | AA                                     | GG                 | GG               | DRR                           | 101492549          | uncharacterized protein At3g49720-like |
| SNP_30533_A_45490011 | NC_021163.1    | Ca_Kabuli_Chr04 | 45490011                | GG                                     | AA                 | AA               | INTERGENIC                    |                    |                                        |
| SNP_30536_A_45582951 | NC_021163.1    | Ca_Kabuli_Chr04 | 45582951                | AA                                     | GG                 | GG               | INTERGENIC                    |                    |                                        |
| SNP_30537_A_45584639 | NC_021163.1    | Ca_Kabuli_Chr04 | 45584639                | AA                                     | TT                 | TT               | INTERGENIC                    |                    |                                        |
| SNP_30538_A_45590166 | NC_021163.1    | Ca_Kabuli_Chr04 | 45590166                | GG                                     | AA                 | AA               | INTERGENIC                    |                    |                                        |

| SNPs IDs             | Chromosome IDs | Chromosomes     | Physical positions (bp) | CDC Frontier genome (Reference genome) | (Pusa 1103 & HPNB) | (ILWC 46 & LPNB) | Sequence genome | Components of | Gene accession IDs | Putative functions            |
|----------------------|----------------|-----------------|-------------------------|----------------------------------------|--------------------|------------------|-----------------|---------------|--------------------|-------------------------------|
| SNP_30540_A_45645663 | NC_021163.1    | Ca_Kabuli_Chr04 | 45645663                | GG                                     | AA                 | AA               | INTERGENIC      |               |                    |                               |
| SNP_30541_A_45646086 | NC_021163.1    | Ca_Kabuli_Chr04 | 45646086                | TT                                     | AA                 | AA               | INTERGENIC      |               |                    |                               |
| SNP_30542_A_45646089 | NC_021163.1    | Ca_Kabuli_Chr04 | 45646089                | CC                                     | AA                 | AA               | INTERGENIC      |               |                    |                               |
| SNP_30543_A_45756241 | NC_021163.1    | Ca_Kabuli_Chr04 | 45756241                | AA                                     | GG                 | GG               | URR             | 101509617     |                    | uncharacterized LOC101509617  |
| SNP_30544_A_45756408 | NC_021163.1    | Ca_Kabuli_Chr04 | 45756408                | GG                                     | TT                 | TT               | URR             | 101509617     |                    | uncharacterized LOC101509617  |
| SNP_30545_A_45756433 | NC_021163.1    | Ca_Kabuli_Chr04 | 45756433                | TT                                     | CC                 | CC               | URR             | 101509617     |                    | uncharacterized LOC101509617  |
| SNP_30547_A_45756597 | NC_021163.1    | Ca_Kabuli_Chr04 | 45756597                | TT                                     | AA                 | AA               | URR             | 101509617     |                    | uncharacterized LOC101509617  |
| SNP_30548_A_45807485 | NC_021163.1    | Ca_Kabuli_Chr04 | 45807485                | AA                                     | GG                 | GG               | DRR             | 101511029     |                    | uncharacterized LOC101511029  |
| SNP_30549_A_45826278 | NC_021163.1    | Ca_Kabuli_Chr04 | 45826278                | TT                                     | CC                 | CC               | INTERGENIC      |               |                    |                               |
| SNP_30550_A_45922929 | NC_021163.1    | Ca_Kabuli_Chr04 | 45922929                | AA                                     | GG                 | GG               | INTERGENIC      |               |                    |                               |
| SNP_30556_A_46005851 | NC_021163.1    | Ca_Kabuli_Chr04 | 46005851                | GG                                     | AA                 | AA               | INTERGENIC      |               |                    |                               |
| SNP_30557_A_46005941 | NC_021163.1    | Ca_Kabuli_Chr04 | 46005941                | CC                                     | TT                 | TT               | INTERGENIC      |               |                    |                               |
| SNP_30558_A_46015823 | NC_021163.1    | Ca_Kabuli_Chr04 | 46015823                | AA                                     | TT                 | TT               | INTERGENIC      |               |                    |                               |
| SNP_30559_A_46060549 | NC_021163.1    | Ca_Kabuli_Chr04 | 46060549                | AA                                     | GG                 | GG               | INTERGENIC      |               |                    |                               |
| SNP_30560_A_46113467 | NC_021163.1    | Ca_Kabuli_Chr04 | 46113467                | GG                                     | AA                 | AA               | INTERGENIC      |               |                    |                               |
| SNP_30561_A_46171113 | NC_021163.1    | Ca_Kabuli_Chr04 | 46171113                | CC                                     | TT                 | TT               | INTERGENIC      |               |                    |                               |
| SNP_30562_A_46210567 | NC_021163.1    | Ca_Kabuli_Chr04 | 46210567                | AA                                     | GG                 | GG               | URR             | 101492320     |                    | MFP1 attachment factor 1-like |
| SNP_30564_A_46321989 | NC_021163.1    | Ca_Kabuli_Chr04 | 46321989                | AA                                     | GG                 | GG               | INTERGENIC      |               |                    |                               |
| SNP_30565_A_46322024 | NC_021163.1    | Ca_Kabuli_Chr04 | 46322024                | AA                                     | GG                 | GG               | INTERGENIC      |               |                    |                               |
| SNP_30566_A_46322268 | NC_021163.1    | Ca_Kabuli_Chr04 | 46322268                | AA                                     | GG                 | GG               | INTERGENIC      |               |                    |                               |
| SNP_30567_A_46322341 | NC_021163.1    | Ca_Kabuli_Chr04 | 46322341                | GG                                     | AA                 | AA               | INTERGENIC      |               |                    |                               |
| SNP_30568_A_46322553 | NC_021163.1    | Ca_Kabuli_Chr04 | 46322553                | GG                                     | TT                 | TT               | INTERGENIC      |               |                    |                               |

| SNPs IDs             | Chromosome IDs | Chromosomes     | Physical positions (bp) | CDC Frontier genome (Reference genome) | (Pusa 1103 & HPNB) | (ILWC 46 & LPNB) | Sequence Components of genome | Gene accession IDs | Putative functions                                       |
|----------------------|----------------|-----------------|-------------------------|----------------------------------------|--------------------|------------------|-------------------------------|--------------------|----------------------------------------------------------|
| SNP_30569_A_46338501 | NC_021163.1    | Ca_Kabuli_Chr04 | 46338501                | TT                                     | AA                 | AA               | DRR                           | 101499271          | uncharacterized LOC101499271                             |
| SNP_30570_A_46338504 | NC_021163.1    | Ca_Kabuli_Chr04 | 46338504                | GG                                     | AA                 | AA               | DRR                           | 101499271          | uncharacterized LOC101499271                             |
| SNP_30571_A_46338506 | NC_021163.1    | Ca_Kabuli_Chr04 | 46338506                | CC                                     | TT                 | TT               | DRR                           | 101499271          | uncharacterized LOC101499271                             |
| SNP_30573_A_46385956 | NC_021163.1    | Ca_Kabuli_Chr04 | 46385956                | CC                                     | AA                 | AA               | SYNONYMOUS_CODING             | 101488526          | serine/threonine-protein phosphatase 7 long form homolog |
| SNP_30575_A_46387920 | NC_021163.1    | Ca_Kabuli_Chr04 | 46387920                | TT                                     | CC                 | CC               | URR                           | 101488526          | serine/threonine-protein phosphatase 7 long form homolog |
| SNP_30576_A_46387930 | NC_021163.1    | Ca_Kabuli_Chr04 | 46387930                | TT                                     | CC                 | CC               | URR                           | 101488526          | serine/threonine-protein phosphatase 7 long form homolog |
| SNP_30577_A_46388170 | NC_021163.1    | Ca_Kabuli_Chr04 | 46388170                | GG                                     | TT                 | TT               | URR                           | 101488526          | serine/threonine-protein phosphatase 7 long form homolog |
| SNP_30578_A_46471787 | NC_021163.1    | Ca_Kabuli_Chr04 | 46471787                | AA                                     | GG                 | GG               | INTERGENIC                    |                    |                                                          |
| SNP_30579_A_46495131 | NC_021163.1    | Ca_Kabuli_Chr04 | 46495131                | AA                                     | CC                 | CC               | DRR                           | 101489522          | Unknown function                                         |
| SNP_30580_A_46495311 | NC_021163.1    | Ca_Kabuli_Chr04 | 46495311                | TT                                     | AA                 | AA               | INTERGENIC                    |                    |                                                          |
| SNP_30581_A_46495580 | NC_021163.1    | Ca_Kabuli_Chr04 | 46495580                | AA                                     | GG                 | GG               | INTERGENIC                    |                    |                                                          |
| SNP_30582_A_46495585 | NC_021163.1    | Ca_Kabuli_Chr04 | 46495585                | GG                                     | AA                 | AA               | INTERGENIC                    |                    |                                                          |
| SNP_30584_A_46557122 | NC_021163.1    | Ca_Kabuli_Chr04 | 46557122                | AA                                     | GG                 | GG               | INTRON                        | 101506002          | uncharacterized LOC101506002                             |
| SNP_30585_A_46638287 | NC_021163.1    | Ca_Kabuli_Chr04 | 46638287                | TT                                     | CC                 | CC               | INTERGENIC                    |                    |                                                          |
| SNP_30586_A_46657858 | NC_021163.1    | Ca_Kabuli_Chr04 | 46657858                | TT                                     | AA                 | AA               | INTERGENIC                    |                    |                                                          |
| SNP_30587_A_46658242 | NC_021163.1    | Ca_Kabuli_Chr04 | 46658242                | AA                                     | CC                 | CC               | DRR                           | 101490493          | BR11 kinase inhibitor 1-like                             |
| SNP_30592_A_47239282 | NC_021163.1    | Ca_Kabuli_Chr04 | 47239282                | TT                                     | CC                 | CC               | URR                           | 101493524          | uncharacterized LOC101493524                             |
| SNP_30593_A_47239422 | NC_021163.1    | Ca_Kabuli_Chr04 | 47239422                | TT                                     | CC                 | CC               | URR                           | 101493524          | uncharacterized LOC101493524                             |
| SNP_30594_A_47245906 | NC_021163.1    | Ca_Kabuli_Chr04 | 47245906                | AA                                     | GG                 | GG               | URR                           | 101493841          | B3 domain-containing protein Os01g0723500-like           |
| SNP_30595_A_47247264 | NC_021163.1    | Ca_Kabuli_Chr04 | 47247264                | CC                                     | TT                 | TT               | URR                           | 101493841          | B3 domain-containing protein Os01g0723500-like           |
| SNP_30596_A_47247327 | NC_021163.1    | Ca_Kabuli_Chr04 | 47247327                | TT                                     | AA                 | AA               | URR                           | 101493841          | B3 domain-containing protein Os01g0723500-like           |
| SNP_30597_A_47249943 | NC_021163.1    | Ca_Kabuli_Chr04 | 47249943                | CC                                     | TT                 | TT               | URR                           | 101494169          | B3 domain-containing protein REM16-like                  |



| SNPs IDs             | Chromosome IDs | Chromosomes     | Physical positions (bp) | CDC Frontier genome (Reference genome) | (Pusa 1103 & HPNB) | (ILWC 46 & LPNB) | Sequence Components of genome | Gene accession IDs | Putative functions                                   |
|----------------------|----------------|-----------------|-------------------------|----------------------------------------|--------------------|------------------|-------------------------------|--------------------|------------------------------------------------------|
| SNP_30598_A_47249952 | NC_021163.1    | Ca_Kabuli_Chr04 | 47249952                | TT                                     | CC                 | CC               | URR                           | 101494169          | B3 domain-containing protein REM16-like              |
| SNP_30599_A_47249987 | NC_021163.1    | Ca_Kabuli_Chr04 | 47249987                | CC                                     | TT                 | TT               | URR                           | 101494169          | B3 domain-containing protein REM16-like              |
| SNP_30600_A_47250057 | NC_021163.1    | Ca_Kabuli_Chr04 | 47250057                | CC                                     | TT                 | TT               | URR                           | 101494169          | B3 domain-containing protein REM16-like              |
| SNP_30601_A_47250101 | NC_021163.1    | Ca_Kabuli_Chr04 | 47250101                | TT                                     | AA                 | AA               | URR                           | 101494169          | B3 domain-containing protein REM16-like              |
| SNP_30602_A_47250136 | NC_021163.1    | Ca_Kabuli_Chr04 | 47250136                | TT                                     | CC                 | CC               | URR                           | 101494169          | B3 domain-containing protein REM16-like              |
| SNP_30603_A_47254574 | NC_021163.1    | Ca_Kabuli_Chr04 | 47254574                | AA                                     | CC                 | CC               | INTERGENIC                    |                    |                                                      |
| SNP_30604_A_47256588 | NC_021163.1    | Ca_Kabuli_Chr04 | 47256588                | AA                                     | GG                 | GG               | INTRON                        | 101494479          | B3 domain-containing protein REM16-like              |
| SNP_30605_A_47262682 | NC_021163.1    | Ca_Kabuli_Chr04 | 47262682                | TT                                     | CC                 | CC               | INTERGENIC                    |                    |                                                      |
| SNP_30606_A_47262683 | NC_021163.1    | Ca_Kabuli_Chr04 | 47262683                | GG                                     | AA                 | AA               | INTERGENIC                    |                    |                                                      |
| SNP_30607_A_47289009 | NC_021163.1    | Ca_Kabuli_Chr04 | 47289009                | CC                                     | TT                 | TT               | INTRON                        | 101495338          | inactive protein kinase SELMODRAFT_444075-like       |
| SNP_30608_A_47316398 | NC_021163.1    | Ca_Kabuli_Chr04 | 47316398                | CC                                     | AA                 | AA               | URR                           | 101513385          | uncharacterized LOC101513385                         |
| SNP_30609_A_47363089 | NC_021163.1    | Ca_Kabuli_Chr04 | 47363089                | AA                                     | GG                 | GG               | INTERGENIC                    |                    |                                                      |
| SNP_30610_A_47385806 | NC_021163.1    | Ca_Kabuli_Chr04 | 47385806                | CC                                     | AA                 | AA               | INTERGENIC                    |                    |                                                      |
| SNP_30611_A_47437581 | NC_021163.1    | Ca_Kabuli_Chr04 | 47437581                | GG                                     | CC                 | CC               | DRR                           | 101499064          | type I inositol 1,4,5-trisphosphate 5-phosphatase 11 |
| SNP_30613_A_47504606 | NC_021163.1    | Ca_Kabuli_Chr04 | 47504606                | TT                                     | CC                 | CC               | URR                           | 101501185          | pathogenesis-related protein 5-like                  |
| SNP_30614_A_47522875 | NC_021163.1    | Ca_Kabuli_Chr04 | 47522875                | AA                                     | GG                 | GG               | INTERGENIC                    |                    |                                                      |
| SNP_30615_A_47522915 | NC_021163.1    | Ca_Kabuli_Chr04 | 47522915                | TT                                     | AA                 | AA               | INTERGENIC                    |                    |                                                      |
| SNP_30616_A_47530905 | NC_021163.1    | Ca_Kabuli_Chr04 | 47530905                | AA                                     | GG                 | GG               | INTERGENIC                    |                    |                                                      |
| SNP_30617_A_47552320 | NC_021163.1    | Ca_Kabuli_Chr04 | 47552320                | TT                                     | CC                 | CC               | INTERGENIC                    |                    |                                                      |
| SNP_30618_A_47552332 | NC_021163.1    | Ca_Kabuli_Chr04 | 47552332                | GG                                     | TT                 | TT               | INTERGENIC                    |                    |                                                      |
| SNP_30619_A_47573766 | NC_021163.1    | Ca_Kabuli_Chr04 | 47573766                | AA                                     | TT                 | TT               | INTERGENIC                    |                    |                                                      |
| SNP_30620_A_47674690 | NC_021163.1    | Ca_Kabuli_Chr04 | 47674690                | TT                                     | CC                 | CC               | SYNONYMOUS_CODING             | 101507508          | uncharacterized LOC101507508                         |

| SNPs IDs             | Chromosome IDs | Chromosomes     | Physical positions (bp) | CDC Frontier (Reference genome) | (Pusa 1103 & HPNB) | (ILWC 46 & LPNB) | Sequence Components of genome | Gene accession IDs | Putative functions           |
|----------------------|----------------|-----------------|-------------------------|---------------------------------|--------------------|------------------|-------------------------------|--------------------|------------------------------|
| SNP_30621_A_47686118 | NC_021163.1    | Ca_Kabuli_Chr04 | 47686118                | AA                              | GG                 | GG               | INTERGENIC                    |                    |                              |
| SNP_30622_A_47686129 | NC_021163.1    | Ca_Kabuli_Chr04 | 47686129                | CC                              | TT                 | TT               | INTERGENIC                    |                    |                              |
| SNP_30623_A_47686187 | NC_021163.1    | Ca_Kabuli_Chr04 | 47686187                | AA                              | CC                 | CC               | INTERGENIC                    |                    |                              |
| SNP_30624_A_47704370 | NC_021163.1    | Ca_Kabuli_Chr04 | 47704370                | GG                              | AA                 | AA               | INTERGENIC                    |                    |                              |
| SNP_30626_A_47744137 | NC_021163.1    | Ca_Kabuli_Chr04 | 47744137                | TT                              | CC                 | CC               | INTERGENIC                    |                    |                              |
| SNP_30630_A_47875036 | NC_021163.1    | Ca_Kabuli_Chr04 | 47875036                | AA                              | CC                 | CC               | INTERGENIC                    |                    |                              |
| SNP_30631_A_47875038 | NC_021163.1    | Ca_Kabuli_Chr04 | 47875038                | GG                              | AA                 | AA               | INTERGENIC                    |                    |                              |
| SNP_30633_A_47916249 | NC_021163.1    | Ca_Kabuli_Chr04 | 47916249                | AA                              | CC                 | CC               | URR                           | 101488756          | uncharacterized LOC101488756 |
| SNP_30634_A_47939930 | NC_021163.1    | Ca_Kabuli_Chr04 | 47939930                | AA                              | GG                 | GG               | URR                           | 101489090          | auxin response factor 5-like |
| SNP_30635_A_47955555 | NC_021163.1    | Ca_Kabuli_Chr04 | 47955555                | CC                              | TT                 | TT               | INTRON                        | 101489744          | auxin response factor 5-like |
| SNP_30636_A_47955573 | NC_021163.1    | Ca_Kabuli_Chr04 | 47955573                | TT                              | GG                 | GG               | INTRON                        | 101489744          | auxin response factor 5-like |
| SNP_30637_A_47958880 | NC_021163.1    | Ca_Kabuli_Chr04 | 47958880                | TT                              | GG                 | GG               | NON_SYNONYMOUS_CODING         | 101489744          | auxin response factor 5-like |
| SNP_30638_A_47958940 | NC_021163.1    | Ca_Kabuli_Chr04 | 47958940                | CC                              | AA                 | AA               | SPLICE_SITE_REGION            | 101489744          | auxin response factor 5-like |
| SNP_30639_A_47958955 | NC_021163.1    | Ca_Kabuli_Chr04 | 47958955                | GG                              | AA                 | AA               | INTRON                        | 101489744          | auxin response factor 5-like |
| SNP_30640_A_47959199 | NC_021163.1    | Ca_Kabuli_Chr04 | 47959199                | GG                              | TT                 | TT               | INTRON                        | 101489744          | auxin response factor 5-like |
| SNP_30641_A_47959260 | NC_021163.1    | Ca_Kabuli_Chr04 | 47959260                | AA                              | GG                 | GG               | NON_SYNONYMOUS_CODING         | 101489744          | auxin response factor 5-like |
| SNP_30642_A_47960862 | NC_021163.1    | Ca_Kabuli_Chr04 | 47960862                | CC                              | GG                 | GG               | INTRON                        | 101489744          | auxin response factor 5-like |
| SNP_30643_A_47960882 | NC_021163.1    | Ca_Kabuli_Chr04 | 47960882                | CC                              | TT                 | TT               | INTRON                        | 101489744          | auxin response factor 5-like |
| SNP_30644_A_47960958 | NC_021163.1    | Ca_Kabuli_Chr04 | 47960958                | AA                              | TT                 | TT               | INTRON                        | 101489744          | auxin response factor 5-like |
| SNP_30645_A_47960966 | NC_021163.1    | Ca_Kabuli_Chr04 | 47960966                | GG                              | AA                 | AA               | INTRON                        | 101489744          | auxin response factor 5-like |
| SNP_30647_A_47961018 | NC_021163.1    | Ca_Kabuli_Chr04 | 47961018                | CC                              | AA                 | AA               | INTRON                        | 101489744          | auxin response factor 5-like |
| SNP_30649_A_47961212 | NC_021163.1    | Ca_Kabuli_Chr04 | 47961212                | AA                              | TT                 | TT               | INTRON                        | 101489744          | auxin response factor 5-like |

| SNPs IDs             | Chromosome IDs | Chromosomes     | Physical positions (bp) | CDC Frontier genome (Reference genome) | (Pusa 1103 & HPNB) | (ILWC 46 & LPNB) | Sequence Components of genome | Gene accession IDs | Putative functions           |
|----------------------|----------------|-----------------|-------------------------|----------------------------------------|--------------------|------------------|-------------------------------|--------------------|------------------------------|
| SNP_30651_A_47961535 | NC_021163.1    | Ca_Kabuli_Chr04 | 47961535                | TT                                     | CC                 | CC               | INTRON                        | 101489744          | auxin response factor 5-like |
| SNP_30652_A_47961649 | NC_021163.1    | Ca_Kabuli_Chr04 | 47961649                | CC                                     | TT                 | TT               | INTRON                        | 101489744          | auxin response factor 5-like |
| SNP_30653_A_47961664 | NC_021163.1    | Ca_Kabuli_Chr04 | 47961664                | CC                                     | TT                 | TT               | INTRON                        | 101489744          | auxin response factor 5-like |
| SNP_30654_A_47961758 | NC_021163.1    | Ca_Kabuli_Chr04 | 47961758                | CC                                     | AA                 | AA               | INTRON                        | 101489744          | auxin response factor 5-like |
| SNP_30655_A_47961908 | NC_021163.1    | Ca_Kabuli_Chr04 | 47961908                | TT                                     | GG                 | GG               | INTRON                        | 101489744          | auxin response factor 5-like |
| SNP_30656_A_47961956 | NC_021163.1    | Ca_Kabuli_Chr04 | 47961956                | AA                                     | CC                 | CC               | INTRON                        | 101489744          | auxin response factor 5-like |
| SNP_30657_A_47962076 | NC_021163.1    | Ca_Kabuli_Chr04 | 47962076                | TT                                     | CC                 | CC               | INTRON                        | 101489744          | auxin response factor 5-like |
| SNP_30658_A_47962711 | NC_021163.1    | Ca_Kabuli_Chr04 | 47962711                | GG                                     | AA                 | AA               | INTRON                        | 101489744          | auxin response factor 5-like |
| SNP_30659_A_47962778 | NC_021163.1    | Ca_Kabuli_Chr04 | 47962778                | GG                                     | AA                 | AA               | NON_SYNONYMOUS_CODING         | 101489744          | auxin response factor 5-like |
| SNP_30660_A_47962978 | NC_021163.1    | Ca_Kabuli_Chr04 | 47962978                | CC                                     | GG                 | GG               | NON_SYNONYMOUS_CODING         | 101489744          | auxin response factor 5-like |
| SNP_30661_A_47962981 | NC_021163.1    | Ca_Kabuli_Chr04 | 47962981                | CC                                     | TT                 | TT               | SYNONYMOUS_CODING             | 101489744          | auxin response factor 5-like |
| SNP_30662_A_47963111 | NC_021163.1    | Ca_Kabuli_Chr04 | 47963111                | GG                                     | AA                 | AA               | DRR                           | 101490059          | Unknown function             |
| SNP_30663_A_47966373 | NC_021163.1    | Ca_Kabuli_Chr04 | 47966373                | CC                                     | TT                 | TT               | URR                           | 101490059          | Unknown function             |
| SNP_30665_A_47966420 | NC_021163.1    | Ca_Kabuli_Chr04 | 47966420                | GG                                     | TT                 | TT               | URR                           | 101490059          | Unknown function             |
| SNP_30666_A_47966431 | NC_021163.1    | Ca_Kabuli_Chr04 | 47966431                | TT                                     | CC                 | CC               | URR                           | 101490059          | Unknown function             |
| SNP_30667_A_47966441 | NC_021163.1    | Ca_Kabuli_Chr04 | 47966441                | TT                                     | CC                 | CC               | URR                           | 101490059          | Unknown function             |
| SNP_30668_A_47966447 | NC_021163.1    | Ca_Kabuli_Chr04 | 47966447                | GG                                     | TT                 | TT               | URR                           | 101490059          | Unknown function             |
| SNP_30669_A_47966476 | NC_021163.1    | Ca_Kabuli_Chr04 | 47966476                | AA                                     | GG                 | GG               | URR                           | 101490059          | Unknown function             |
| SNP_30670_A_47966500 | NC_021163.1    | Ca_Kabuli_Chr04 | 47966500                | GG                                     | AA                 | AA               | URR                           | 101490059          | Unknown function             |
| SNP_30671_A_47966508 | NC_021163.1    | Ca_Kabuli_Chr04 | 47966508                | CC                                     | GG                 | GG               | URR                           | 101490059          | Unknown function             |
| SNP_30672_A_47967757 | NC_021163.1    | Ca_Kabuli_Chr04 | 47967757                | AA                                     | GG                 | GG               | URR                           | 101490059          | Unknown function             |
| SNP_30673_A_47967800 | NC_021163.1    | Ca_Kabuli_Chr04 | 47967800                | AA                                     | TT                 | TT               | URR                           | 101490059          | Unknown function             |

| SNPs IDs             | Chromosome IDs | Chromosomes     | Physical positions (bp) | CDC Frontier genome (Reference genome) | (Pusa 1103 & HPNB) | (ILWC 46 & LPNB) | Sequence Components of genome | Gene accession IDs | Putative functions             |
|----------------------|----------------|-----------------|-------------------------|----------------------------------------|--------------------|------------------|-------------------------------|--------------------|--------------------------------|
| SNP_30674_A_47967817 | NC_021163.1    | Ca_Kabuli_Chr04 | 47967817                | CC                                     | AA                 | AA               | URR                           | 101490059          | Unknown function               |
| SNP_30675_A_47980870 | NC_021163.1    | Ca_Kabuli_Chr04 | 47980870                | GG                                     | AA                 | AA               | URR                           | 101490719          | uncharacterized LOC101490719   |
| SNP_30676_A_47981093 | NC_021163.1    | Ca_Kabuli_Chr04 | 47981093                | AA                                     | CC                 | CC               | URR                           | 101490719          | uncharacterized LOC101490719   |
| SNP_30677_A_47981097 | NC_021163.1    | Ca_Kabuli_Chr04 | 47981097                | AA                                     | TT                 | TT               | URR                           | 101490719          | uncharacterized LOC101490719   |
| SNP_30678_A_47982180 | NC_021163.1    | Ca_Kabuli_Chr04 | 47982180                | CC                                     | GG                 | GG               | URR                           | 101491040          | Unknown function               |
| SNP_30679_A_47982273 | NC_021163.1    | Ca_Kabuli_Chr04 | 47982273                | CC                                     | TT                 | TT               | URR                           | 101491040          | Unknown function               |
| SNP_30680_A_47982429 | NC_021163.1    | Ca_Kabuli_Chr04 | 47982429                | TT                                     | AA                 | AA               | URR                           | 101491040          | Unknown function               |
| SNP_30681_A_47982487 | NC_021163.1    | Ca_Kabuli_Chr04 | 47982487                | GG                                     | TT                 | TT               | URR                           | 101491040          | Unknown function               |
| SNP_30682_A_47982587 | NC_021163.1    | Ca_Kabuli_Chr04 | 47982587                | TT                                     | AA                 | AA               | URR                           | 101491040          | Unknown function               |
| SNP_30685_A_47982839 | NC_021163.1    | Ca_Kabuli_Chr04 | 47982839                | CC                                     | TT                 | TT               | URR                           | 101491040          | Unknown function               |
| SNP_30686_A_47983040 | NC_021163.1    | Ca_Kabuli_Chr04 | 47983040                | AA                                     | TT                 | TT               | DRR                           | 101491354          | Unknown function               |
| SNP_30687_A_47983062 | NC_021163.1    | Ca_Kabuli_Chr04 | 47983062                | TT                                     | CC                 | CC               | DRR                           | 101491354          | Unknown function               |
| SNP_30690_A_47988089 | NC_021163.1    | Ca_Kabuli_Chr04 | 47988089                | GG                                     | TT                 | TT               | URR                           | 101491354          | Unknown function               |
| SNP_30691_A_47988136 | NC_021163.1    | Ca_Kabuli_Chr04 | 47988136                | CC                                     | GG                 | GG               | URR                           | 101491354          | Unknown function               |
| SNP_30692_A_47988421 | NC_021163.1    | Ca_Kabuli_Chr04 | 47988421                | TT                                     | AA                 | AA               | URR                           | 101491354          | Unknown function               |
| SNP_30693_A_47991452 | NC_021163.1    | Ca_Kabuli_Chr04 | 47991452                | AA                                     | GG                 | GG               | INTERGENIC                    |                    |                                |
| SNP_30694_A_47997421 | NC_021163.1    | Ca_Kabuli_Chr04 | 47997421                | CC                                     | GG                 | GG               | INTERGENIC                    |                    |                                |
| SNP_30695_A_48016249 | NC_021163.1    | Ca_Kabuli_Chr04 | 48016249                | CC                                     | TT                 | TT               | INTERGENIC                    |                    |                                |
| SNP_30697_A_48048951 | NC_021163.1    | Ca_Kabuli_Chr04 | 48048951                | GG                                     | TT                 | TT               | INTERGENIC                    |                    |                                |
| SNP_30698_A_48112961 | NC_021163.1    | Ca_Kabuli_Chr04 | 48112961                | CC                                     | TT                 | TT               | URR                           | 101499488          | putative GTP-binding protein 6 |
| SNP_30699_A_48114167 | NC_021163.1    | Ca_Kabuli_Chr04 | 48114167                | CC                                     | TT                 | TT               | INTERGENIC                    |                    |                                |
| SNP_30701_A_48138236 | NC_021163.1    | Ca_Kabuli_Chr04 | 48138236                | TT                                     | CC                 | CC               | INTERGENIC                    |                    |                                |

| SNPs IDs             | Chromosome IDs | Chromosomes     | Physical positions (bp) | CDC Frontier genome (Reference genome) | (Pusa 1103 & HPNB) | (ILWC 46 & LPNB) | Sequence genome | Components of | Gene accession IDs | Putative functions |
|----------------------|----------------|-----------------|-------------------------|----------------------------------------|--------------------|------------------|-----------------|---------------|--------------------|--------------------|
| SNP_30702_A_48182857 | NC_021163.1    | Ca_Kabuli_Chr04 | 48182857                | AA                                     | GG                 | GG               | INTERGENIC      |               |                    |                    |
| SNP_30704_A_48204157 | NC_021163.1    | Ca_Kabuli_Chr04 | 48204157                | TT                                     | GG                 | GG               | INTERGENIC      |               |                    |                    |
| SNP_30705_A_48204519 | NC_021163.1    | Ca_Kabuli_Chr04 | 48204519                | TT                                     | AA                 | AA               | INTERGENIC      |               |                    |                    |
| SNP_30706_A_48204526 | NC_021163.1    | Ca_Kabuli_Chr04 | 48204526                | AA                                     | TT                 | TT               | INTERGENIC      |               |                    |                    |
| SNP_30708_A_48205784 | NC_021163.1    | Ca_Kabuli_Chr04 | 48205784                | GG                                     | CC                 | CC               | INTERGENIC      |               |                    |                    |
| SNP_30709_A_48205955 | NC_021163.1    | Ca_Kabuli_Chr04 | 48205955                | TT                                     | CC                 | CC               | INTERGENIC      |               |                    |                    |
| SNP_30710_A_48205966 | NC_021163.1    | Ca_Kabuli_Chr04 | 48205966                | TT                                     | GG                 | GG               | INTERGENIC      |               |                    |                    |
| SNP_30711_A_48205968 | NC_021163.1    | Ca_Kabuli_Chr04 | 48205968                | AA                                     | GG                 | GG               | INTERGENIC      |               |                    |                    |
| SNP_30712_A_48206205 | NC_021163.1    | Ca_Kabuli_Chr04 | 48206205                | CC                                     | TT                 | TT               | INTERGENIC      |               |                    |                    |
| SNP_30713_A_48207010 | NC_021163.1    | Ca_Kabuli_Chr04 | 48207010                | CC                                     | TT                 | TT               | INTERGENIC      |               |                    |                    |
| SNP_30714_A_48207370 | NC_021163.1    | Ca_Kabuli_Chr04 | 48207370                | TT                                     | GG                 | GG               | INTERGENIC      |               |                    |                    |
| SNP_30716_A_48207632 | NC_021163.1    | Ca_Kabuli_Chr04 | 48207632                | CC                                     | TT                 | TT               | INTERGENIC      |               |                    |                    |
| SNP_30717_A_48209446 | NC_021163.1    | Ca_Kabuli_Chr04 | 48209446                | CC                                     | GG                 | GG               | INTERGENIC      |               |                    |                    |
| SNP_30718_A_48211170 | NC_021163.1    | Ca_Kabuli_Chr04 | 48211170                | AA                                     | TT                 | TT               | INTERGENIC      |               |                    |                    |
| SNP_30719_A_48214666 | NC_021163.1    | Ca_Kabuli_Chr04 | 48214666                | CC                                     | TT                 | TT               | INTERGENIC      |               |                    |                    |
| SNP_30721_A_48216935 | NC_021163.1    | Ca_Kabuli_Chr04 | 48216935                | AA                                     | GG                 | GG               | INTERGENIC      |               |                    |                    |
| SNP_30722_A_48216966 | NC_021163.1    | Ca_Kabuli_Chr04 | 48216966                | AA                                     | CC                 | CC               | INTERGENIC      |               |                    |                    |
| SNP_30723_A_48217916 | NC_021163.1    | Ca_Kabuli_Chr04 | 48217916                | GG                                     | AA                 | AA               | INTERGENIC      |               |                    |                    |
| SNP_30724_A_48219525 | NC_021163.1    | Ca_Kabuli_Chr04 | 48219525                | CC                                     | TT                 | TT               | INTERGENIC      |               |                    |                    |
| SNP_30725_A_48222641 | NC_021163.1    | Ca_Kabuli_Chr04 | 48222641                | AA                                     | GG                 | GG               | INTERGENIC      |               |                    |                    |
| SNP_30727_A_48228299 | NC_021163.1    | Ca_Kabuli_Chr04 | 48228299                | CC                                     | TT                 | TT               | INTERGENIC      |               |                    |                    |
| SNP_30728_A_48229807 | NC_021163.1    | Ca_Kabuli_Chr04 | 48229807                | TT                                     | CC                 | CC               | INTERGENIC      |               |                    |                    |

| SNPs IDs             | Chromosome IDs | Chromosomes     | Physical positions (bp) | CDC Frontier genome (Reference genome) | (Pusa 1103 & HPNB) | (ILWC 46 & LPNB) | Sequence Components of genome | Gene accession IDs | Putative functions                                                    |
|----------------------|----------------|-----------------|-------------------------|----------------------------------------|--------------------|------------------|-------------------------------|--------------------|-----------------------------------------------------------------------|
| SNP_30729_A_48229915 | NC_021163.1    | Ca_Kabuli_Chr04 | 48229915                | TT                                     | CC                 | CC               | INTERGENIC                    |                    |                                                                       |
| SNP_30730_A_48229925 | NC_021163.1    | Ca_Kabuli_Chr04 | 48229925                | CC                                     | TT                 | TT               | INTERGENIC                    |                    |                                                                       |
| SNP_30731_A_48229926 | NC_021163.1    | Ca_Kabuli_Chr04 | 48229926                | TT                                     | CC                 | CC               | INTERGENIC                    |                    |                                                                       |
| SNP_30732_A_48229937 | NC_021163.1    | Ca_Kabuli_Chr04 | 48229937                | AA                                     | GG                 | GG               | INTERGENIC                    |                    |                                                                       |
| SNP_30733_A_48229962 | NC_021163.1    | Ca_Kabuli_Chr04 | 48229962                | CC                                     | TT                 | TT               | INTERGENIC                    |                    |                                                                       |
| SNP_30734_A_48229984 | NC_021163.1    | Ca_Kabuli_Chr04 | 48229984                | CC                                     | TT                 | TT               | INTERGENIC                    |                    |                                                                       |
| SNP_30735_A_48229987 | NC_021163.1    | Ca_Kabuli_Chr04 | 48229987                | AA                                     | GG                 | GG               | INTERGENIC                    |                    |                                                                       |
| SNP_30737_A_48231748 | NC_021163.1    | Ca_Kabuli_Chr04 | 48231748                | TT                                     | CC                 | CC               | INTERGENIC                    |                    |                                                                       |
| SNP_30738_A_48231948 | NC_021163.1    | Ca_Kabuli_Chr04 | 48231948                | CC                                     | TT                 | TT               | DRR                           | 101492321          | abscisic acid and environmental stress-inducible protein-like         |
| SNP_30739_A_48232281 | NC_021163.1    | Ca_Kabuli_Chr04 | 48232281                | CC                                     | GG                 | GG               | DRR                           | 101492321          | abscisic acid and environmental stress-inducible protein-like         |
| SNP_30740_A_48232326 | NC_021163.1    | Ca_Kabuli_Chr04 | 48232326                | CC                                     | TT                 | TT               | DRR                           | 101492321          | abscisic acid and environmental stress-inducible protein-like         |
| SNP_30741_A_48232328 | NC_021163.1    | Ca_Kabuli_Chr04 | 48232328                | AA                                     | GG                 | GG               | DRR                           | 101492321          | abscisic acid and environmental stress-inducible protein-like         |
| SNP_30742_A_48232731 | NC_021163.1    | Ca_Kabuli_Chr04 | 48232731                | GG                                     | TT                 | TT               | DRR                           | 101492321          | abscisic acid and environmental stress-inducible protein-like         |
| SNP_30743_A_48232748 | NC_021163.1    | Ca_Kabuli_Chr04 | 48232748                | CC                                     | AA                 | AA               | DRR                           | 101492321          | abscisic acid and environmental stress-inducible protein-like         |
| SNP_30744_A_48236026 | NC_021163.1    | Ca_Kabuli_Chr04 | 48236026                | TT                                     | CC                 | CC               | INTERGENIC                    |                    |                                                                       |
| SNP_30745_A_48240509 | NC_021163.1    | Ca_Kabuli_Chr04 | 48240509                | GG                                     | AA                 | AA               | INTRON                        | 101503073          | protein ACCUMULATION AND REPLICATION OF CHLOROPLASTS 6, chloroplastic |
| SNP_30746_A_48240735 | NC_021163.1    | Ca_Kabuli_Chr04 | 48240735                | AA                                     | TT                 | TT               | INTRON                        | 101503073          | protein ACCUMULATION AND REPLICATION OF CHLOROPLASTS 6, chloroplastic |
| SNP_30747_A_48240743 | NC_021163.1    | Ca_Kabuli_Chr04 | 48240743                | TT                                     | AA                 | AA               | INTRON                        | 101503073          | protein ACCUMULATION AND REPLICATION OF CHLOROPLASTS 6, chloroplastic |
| SNP_30749_A_48243418 | NC_021163.1    | Ca_Kabuli_Chr04 | 48243418                | AA                                     | TT                 | TT               | URR                           | 101503073          | protein ACCUMULATION AND REPLICATION OF CHLOROPLASTS 6, chloroplastic |
| SNP_30750_A_48244186 | NC_021163.1    | Ca_Kabuli_Chr04 | 48244186                | TT                                     | CC                 | CC               | INTERGENIC                    |                    |                                                                       |
| SNP_30751_A_48244212 | NC_021163.1    | Ca_Kabuli_Chr04 | 48244212                | GG                                     | AA                 | AA               | INTERGENIC                    |                    |                                                                       |
| SNP_30752_A_48244213 | NC_021163.1    | Ca_Kabuli_Chr04 | 48244213                | TT                                     | CC                 | CC               | INTERGENIC                    |                    |                                                                       |

| SNPs IDs             | Chromosome IDs | Chromosomes     | Physical positions (bp) | CDC Frontier genome (Reference genome) | (Pusa 1103 & HPNB) | (ILWC 46 & LPNB) | Sequence Components of genome | Gene accession IDs | Putative functions                                    |
|----------------------|----------------|-----------------|-------------------------|----------------------------------------|--------------------|------------------|-------------------------------|--------------------|-------------------------------------------------------|
| SNP_30753_A_48244234 | NC_021163.1    | Ca_Kabuli_Chr04 | 48244234                | AA                                     | GG                 | GG               | INTERGENIC                    |                    |                                                       |
| SNP_30754_A_48251530 | NC_021163.1    | Ca_Kabuli_Chr04 | 48251530                | CC                                     | TT                 | TT               | INTERGENIC                    |                    |                                                       |
| SNP_30755_A_48253808 | NC_021163.1    | Ca_Kabuli_Chr04 | 48253808                | TT                                     | GG                 | GG               | URR                           | 101503856          | probable 1-acylglycerol-3-phosphate O-acyltransferase |
| SNP_30756_A_48253823 | NC_021163.1    | Ca_Kabuli_Chr04 | 48253823                | AA                                     | GG                 | GG               | URR                           | 101503856          | probable 1-acylglycerol-3-phosphate O-acyltransferase |
| SNP_30757_A_48253826 | NC_021163.1    | Ca_Kabuli_Chr04 | 48253826                | AA                                     | TT                 | TT               | URR                           | 101503856          | probable 1-acylglycerol-3-phosphate O-acyltransferase |
| SNP_30758_A_48253934 | NC_021163.1    | Ca_Kabuli_Chr04 | 48253934                | AA                                     | TT                 | TT               | URR                           | 101503856          | probable 1-acylglycerol-3-phosphate O-acyltransferase |
| SNP_30759_A_48254037 | NC_021163.1    | Ca_Kabuli_Chr04 | 48254037                | GG                                     | AA                 | AA               | URR                           | 101503856          | probable 1-acylglycerol-3-phosphate O-acyltransferase |
| SNP_30760_A_48256428 | NC_021163.1    | Ca_Kabuli_Chr04 | 48256428                | GG                                     | CC                 | CC               | INTRON                        | 101504170          | DNA-directed RNA polymerase II subunit RPB2           |
| SNP_30761_A_48259853 | NC_021163.1    | Ca_Kabuli_Chr04 | 48259853                | GG                                     | TT                 | TT               | SYNONYMOUS_CODING             | 101504170          | DNA-directed RNA polymerase II subunit RPB2           |
| SNP_30763_A_48261439 | NC_021163.1    | Ca_Kabuli_Chr04 | 48261439                | AA                                     | CC                 | CC               | INTERGENIC                    |                    |                                                       |
| SNP_30764_A_48262072 | NC_021163.1    | Ca_Kabuli_Chr04 | 48262072                | TT                                     | GG                 | GG               | INTERGENIC                    |                    |                                                       |
| SNP_30765_A_48262092 | NC_021163.1    | Ca_Kabuli_Chr04 | 48262092                | CC                                     | TT                 | TT               | INTERGENIC                    |                    |                                                       |
| SNP_30766_A_48267957 | NC_021163.1    | Ca_Kabuli_Chr04 | 48267957                | TT                                     | AA                 | AA               | INTERGENIC                    |                    |                                                       |
| SNP_30767_A_48269698 | NC_021163.1    | Ca_Kabuli_Chr04 | 48269698                | AA                                     | GG                 | GG               | SYNONYMOUS_CODING             | 101504496          | lysine-specific histone demethylase 1 homolog 3       |
| SNP_30768_A_48269878 | NC_021163.1    | Ca_Kabuli_Chr04 | 48269878                | TT                                     | GG                 | GG               | SYNONYMOUS_CODING             | 101504496          | lysine-specific histone demethylase 1 homolog 3       |
| SNP_30769_A_48270212 | NC_021163.1    | Ca_Kabuli_Chr04 | 48270212                | CC                                     | AA                 | AA               | INTRON                        | 101504496          | lysine-specific histone demethylase 1 homolog 3       |
| SNP_30770_A_48277240 | NC_021163.1    | Ca_Kabuli_Chr04 | 48277240                | TT                                     | AA                 | AA               | URR                           | 101504496          | lysine-specific histone demethylase 1 homolog 3       |
| SNP_30771_A_48277302 | NC_021163.1    | Ca_Kabuli_Chr04 | 48277302                | CC                                     | TT                 | TT               | URR                           | 101504496          | lysine-specific histone demethylase 1 homolog 3       |
| SNP_30772_A_48277582 | NC_021163.1    | Ca_Kabuli_Chr04 | 48277582                | GG                                     | AA                 | AA               | URR                           | 101504496          | lysine-specific histone demethylase 1 homolog 3       |
| SNP_30773_A_48277932 | NC_021163.1    | Ca_Kabuli_Chr04 | 48277932                | TT                                     | CC                 | CC               | URR                           | 101504496          | lysine-specific histone demethylase 1 homolog 3       |
| SNP_30774_A_48278246 | NC_021163.1    | Ca_Kabuli_Chr04 | 48278246                | TT                                     | CC                 | CC               | URR                           | 101504496          | lysine-specific histone demethylase 1 homolog 3       |
| SNP_30776_A_48278424 | NC_021163.1    | Ca_Kabuli_Chr04 | 48278424                | TT                                     | CC                 | CC               | URR                           | 101504496          | lysine-specific histone demethylase 1 homolog 3       |

| SNPs IDs             | Chromosome IDs | Chromosomes     | Physical positions (bp) | CDC Frontier (Reference genome) | (Pusa 1103 & HPNB) | (ILWC 46 & LPNB) | Sequence Components of genome | Gene accession IDs | Putative functions                              |
|----------------------|----------------|-----------------|-------------------------|---------------------------------|--------------------|------------------|-------------------------------|--------------------|-------------------------------------------------|
| SNP_30777_A_48278468 | NC_021163.1    | Ca_Kabuli_Chr04 | 48278468                | GG                              | AA                 | AA               | URR                           | 101504496          | lysine-specific histone demethylase 1 homolog 3 |
| SNP_30778_A_48278473 | NC_021163.1    | Ca_Kabuli_Chr04 | 48278473                | TT                              | CC                 | CC               | URR                           | 101504496          | lysine-specific histone demethylase 1 homolog 3 |
| SNP_30779_A_48278693 | NC_021163.1    | Ca_Kabuli_Chr04 | 48278693                | GG                              | AA                 | AA               | URR                           | 101504496          | lysine-specific histone demethylase 1 homolog 3 |
| SNP_30780_A_48278743 | NC_021163.1    | Ca_Kabuli_Chr04 | 48278743                | TT                              | CC                 | CC               | URR                           | 101504496          | lysine-specific histone demethylase 1 homolog 3 |
| SNP_30781_A_48297177 | NC_021163.1    | Ca_Kabuli_Chr04 | 48297177                | TT                              | GG                 | GG               | URR                           | 101505879          | uncharacterized LOC101505879                    |
| SNP_30782_A_48297226 | NC_021163.1    | Ca_Kabuli_Chr04 | 48297226                | GG                              | AA                 | AA               | URR                           | 101505879          | uncharacterized LOC101505879                    |
| SNP_30783_A_48297434 | NC_021163.1    | Ca_Kabuli_Chr04 | 48297434                | AA                              | GG                 | GG               | URR                           | 101505879          | uncharacterized LOC101505879                    |
| SNP_30784_A_48297439 | NC_021163.1    | Ca_Kabuli_Chr04 | 48297439                | GG                              | AA                 | AA               | URR                           | 101505879          | uncharacterized LOC101505879                    |
| SNP_30785_A_48298186 | NC_021163.1    | Ca_Kabuli_Chr04 | 48298186                | TT                              | AA                 | AA               | URR                           | 101505879          | uncharacterized LOC101505879                    |
| SNP_30786_A_48298592 | NC_021163.1    | Ca_Kabuli_Chr04 | 48298592                | GG                              | CC                 | CC               | URR                           | 101505879          | uncharacterized LOC101505879                    |
| SNP_30787_A_48299940 | NC_021163.1    | Ca_Kabuli_Chr04 | 48299940                | GG                              | AA                 | AA               | DRR                           | 101508045          | 60S ribosomal protein L13a-4                    |
| SNP_30788_A_48299997 | NC_021163.1    | Ca_Kabuli_Chr04 | 48299997                | CC                              | TT                 | TT               | DRR                           | 101508045          | 60S ribosomal protein L13a-4                    |
| SNP_30789_A_48299998 | NC_021163.1    | Ca_Kabuli_Chr04 | 48299998                | CC                              | AA                 | AA               | DRR                           | 101508045          | 60S ribosomal protein L13a-4                    |
| SNP_30790_A_48300241 | NC_021163.1    | Ca_Kabuli_Chr04 | 48300241                | GG                              | AA                 | AA               | DRR                           | 101508045          | 60S ribosomal protein L13a-4                    |
| SNP_30791_A_48300604 | NC_021163.1    | Ca_Kabuli_Chr04 | 48300604                | CC                              | TT                 | TT               | INTERGENIC                    |                    |                                                 |
| SNP_30792_A_48300825 | NC_021163.1    | Ca_Kabuli_Chr04 | 48300825                | CC                              | GG                 | GG               | INTERGENIC                    |                    |                                                 |
| SNP_30793_A_48300826 | NC_021163.1    | Ca_Kabuli_Chr04 | 48300826                | TT                              | GG                 | GG               | INTERGENIC                    |                    |                                                 |
| SNP_30794_A_48308529 | NC_021163.1    | Ca_Kabuli_Chr04 | 48308529                | CC                              | TT                 | TT               | INTERGENIC                    |                    |                                                 |
| SNP_30795_A_48308607 | NC_021163.1    | Ca_Kabuli_Chr04 | 48308607                | TT                              | AA                 | AA               | INTERGENIC                    |                    |                                                 |
| SNP_30796_A_48308851 | NC_021163.1    | Ca_Kabuli_Chr04 | 48308851                | GG                              | TT                 | TT               | INTERGENIC                    |                    |                                                 |
| SNP_30797_A_48308931 | NC_021163.1    | Ca_Kabuli_Chr04 | 48308931                | CC                              | AA                 | AA               | INTERGENIC                    |                    |                                                 |
| SNP_30798_A_48310688 | NC_021163.1    | Ca_Kabuli_Chr04 | 48310688                | TT                              | AA                 | AA               | INTRON                        | 101507405          | protein BASIC PENTACYSSTEINE6                   |



| SNPs IDs             | Chromosome IDs | Chromosomes     | Physical positions (bp) | CDC Frontier genome (Reference genome) | (Pusa 1103 & HPNB) | (ILWC 46 & LPNB) | Sequence Components of genome | Gene accession IDs | Putative functions                                           |
|----------------------|----------------|-----------------|-------------------------|----------------------------------------|--------------------|------------------|-------------------------------|--------------------|--------------------------------------------------------------|
| SNP_30799_A_48314503 | NC_021163.1    | Ca_Kabuli_Chr04 | 48314503                | AA                                     | CC                 | CC               | URR                           | 101507405          | protein BASIC PENTACYSSTEINE6                                |
| SNP_30801_A_48314865 | NC_021163.1    | Ca_Kabuli_Chr04 | 48314865                | TT                                     | CC                 | CC               | URR                           | 101507405          | protein BASIC PENTACYSSTEINE6                                |
| SNP_30803_A_48315535 | NC_021163.1    | Ca_Kabuli_Chr04 | 48315535                | TT                                     | AA                 | AA               | URR                           | 101507405          | protein BASIC PENTACYSSTEINE6                                |
| SNP_30804_A_48315862 | NC_021163.1    | Ca_Kabuli_Chr04 | 48315862                | AA                                     | CC                 | CC               | URR                           | 101507405          | protein BASIC PENTACYSSTEINE6                                |
| SNP_30807_A_48323610 | NC_021163.1    | Ca_Kabuli_Chr04 | 48323610                | AA                                     | GG                 | GG               | DRR                           | 101506523          | cytochrome P450 71A1-like                                    |
| SNP_30808_A_48325611 | NC_021163.1    | Ca_Kabuli_Chr04 | 48325611                | GG                                     | AA                 | AA               | INTERGENIC                    |                    |                                                              |
| SNP_30809_A_48326201 | NC_021163.1    | Ca_Kabuli_Chr04 | 48326201                | CC                                     | TT                 | TT               | URR                           | 101506523          | cytochrome P450 71A1-like                                    |
| SNP_30810_A_48326976 | NC_021163.1    | Ca_Kabuli_Chr04 | 48326976                | TT                                     | AA                 | AA               | URR                           | 101506523          | cytochrome P450 71A1-like                                    |
| SNP_30812_A_48332798 | NC_021163.1    | Ca_Kabuli_Chr04 | 48332798                | CC                                     | AA                 | AA               | URR                           | 101506194          | 60S ribosomal protein L13a-4                                 |
| SNP_30813_A_48332847 | NC_021163.1    | Ca_Kabuli_Chr04 | 48332847                | CC                                     | TT                 | TT               | URR                           | 101506194          | 60S ribosomal protein L13a-4                                 |
| SNP_30814_A_48336266 | NC_021163.1    | Ca_Kabuli_Chr04 | 48336266                | GG                                     | TT                 | TT               | INTERGENIC                    |                    |                                                              |
| SNP_30815_A_48336334 | NC_021163.1    | Ca_Kabuli_Chr04 | 48336334                | GG                                     | AA                 | AA               | INTERGENIC                    |                    |                                                              |
| SNP_30816_A_48336555 | NC_021163.1    | Ca_Kabuli_Chr04 | 48336555                | GG                                     | AA                 | AA               | INTERGENIC                    |                    |                                                              |
| SNP_30817_A_48343118 | NC_021163.1    | Ca_Kabuli_Chr04 | 48343118                | GG                                     | AA                 | AA               | DRR                           | 101492650          | protein IQ-DOMAIN 32                                         |
| SNP_30818_A_48344797 | NC_021163.1    | Ca_Kabuli_Chr04 | 48344797                | CC                                     | GG                 | GG               | INTRON                        | 101492650          | protein IQ-DOMAIN 32                                         |
| SNP_30819_A_48349706 | NC_021163.1    | Ca_Kabuli_Chr04 | 48349706                | CC                                     | TT                 | TT               | INTERGENIC                    |                    |                                                              |
| SNP_30820_A_48350095 | NC_021163.1    | Ca_Kabuli_Chr04 | 48350095                | AA                                     | CC                 | CC               | URR                           | 101492650          | protein IQ-DOMAIN 32                                         |
| SNP_30822_A_48352278 | NC_021163.1    | Ca_Kabuli_Chr04 | 48352278                | TT                                     | CC                 | CC               | DRR                           | 101508355          | small RNA degrading nuclease 1-like                          |
| SNP_30823_A_48352940 | NC_021163.1    | Ca_Kabuli_Chr04 | 48352940                | CC                                     | AA                 | AA               | INTERGENIC                    |                    |                                                              |
| SNP_30824_A_48355916 | NC_021163.1    | Ca_Kabuli_Chr04 | 48355916                | TT                                     | CC                 | CC               | INTRON                        | 101508355          | small RNA degrading nuclease 1-like                          |
| SNP_30825_A_48359244 | NC_021163.1    | Ca_Kabuli_Chr04 | 48359244                | CC                                     | TT                 | TT               | DRR                           | 101508671          | probable pre-mRNA-splicing factor ATP-dependent RNA helicase |
| SNP_30826_A_48365388 | NC_021163.1    | Ca_Kabuli_Chr04 | 48365388                | GG                                     | AA                 | AA               | URR                           | 101508671          | probable pre-mRNA-splicing factor ATP-dependent RNA helicase |

| SNPs IDs             | Chromosome IDs | Chromosomes     | Physical positions (bp) | CDC Frontier genome (Reference genome) | (Pusa 1103 & HPNB) | (ILWC 46 & LPNB) | Sequence Components of genome | Gene accession IDs | Putative functions                                           |
|----------------------|----------------|-----------------|-------------------------|----------------------------------------|--------------------|------------------|-------------------------------|--------------------|--------------------------------------------------------------|
| SNP_30827_A_48365729 | NC_021163.1    | Ca_Kabuli_Chr04 | 48365729                | CC                                     | TT                 | TT               | URR                           | 101508671          | probable pre-mRNA-splicing factor ATP-dependent RNA helicase |
| SNP_30828_A_48365965 | NC_021163.1    | Ca_Kabuli_Chr04 | 48365965                | CC                                     | AA                 | AA               | URR                           | 101508671          | probable pre-mRNA-splicing factor ATP-dependent RNA helicase |
| SNP_30830_A_48368820 | NC_021163.1    | Ca_Kabuli_Chr04 | 48368820                | TT                                     | CC                 | CC               | INTERGENIC                    |                    |                                                              |
| SNP_30831_A_48368890 | NC_021163.1    | Ca_Kabuli_Chr04 | 48368890                | TT                                     | GG                 | GG               | INTERGENIC                    |                    |                                                              |
| SNP_30832_A_48371212 | NC_021163.1    | Ca_Kabuli_Chr04 | 48371212                | GG                                     | CC                 | CC               | URR                           | 101508990          | uncharacterized LOC101508990                                 |
| SNP_30833_A_48371479 | NC_021163.1    | Ca_Kabuli_Chr04 | 48371479                | TT                                     | AA                 | AA               | URR                           | 101508990          | uncharacterized LOC101508990                                 |
| SNP_30834_A_48382603 | NC_021163.1    | Ca_Kabuli_Chr04 | 48382603                | CC                                     | TT                 | TT               | NON_SYNONYMOUS_CODING         | 101509304          | auxin response factor 5                                      |
| SNP_30835_A_48383263 | NC_021163.1    | Ca_Kabuli_Chr04 | 48383263                | GG                                     | AA                 | AA               | INTRON                        | 101509304          | auxin response factor 5                                      |
| SNP_30836_A_48383538 | NC_021163.1    | Ca_Kabuli_Chr04 | 48383538                | AA                                     | GG                 | GG               | INTRON                        | 101509304          | auxin response factor 5                                      |
| SNP_30837_A_48384876 | NC_021163.1    | Ca_Kabuli_Chr04 | 48384876                | GG                                     | AA                 | AA               | INTRON                        | 101509304          | auxin response factor 5                                      |
| SNP_30838_A_48384886 | NC_021163.1    | Ca_Kabuli_Chr04 | 48384886                | TT                                     | GG                 | GG               | INTRON                        | 101509304          | auxin response factor 5                                      |
| SNP_30839_A_48384899 | NC_021163.1    | Ca_Kabuli_Chr04 | 48384899                | TT                                     | GG                 | GG               | INTRON                        | 101509304          | auxin response factor 5                                      |
| SNP_30840_A_48389820 | NC_021163.1    | Ca_Kabuli_Chr04 | 48389820                | TT                                     | GG                 | GG               | INTERGENIC                    |                    |                                                              |
| SNP_30841_A_48393244 | NC_021163.1    | Ca_Kabuli_Chr04 | 48393244                | GG                                     | AA                 | AA               | INTERGENIC                    |                    |                                                              |
| SNP_30842_A_48393296 | NC_021163.1    | Ca_Kabuli_Chr04 | 48393296                | AA                                     | TT                 | TT               | INTERGENIC                    |                    |                                                              |
| SNP_30843_A_48395108 | NC_021163.1    | Ca_Kabuli_Chr04 | 48395108                | TT                                     | CC                 | CC               | INTERGENIC                    |                    |                                                              |
| SNP_30844_A_48395284 | NC_021163.1    | Ca_Kabuli_Chr04 | 48395284                | TT                                     | AA                 | AA               | INTERGENIC                    |                    |                                                              |
| SNP_30845_A_48395286 | NC_021163.1    | Ca_Kabuli_Chr04 | 48395286                | TT                                     | CC                 | CC               | INTERGENIC                    |                    |                                                              |
| SNP_30846_A_48395581 | NC_021163.1    | Ca_Kabuli_Chr04 | 48395581                | TT                                     | CC                 | CC               | INTERGENIC                    |                    |                                                              |
| SNP_30847_A_48396190 | NC_021163.1    | Ca_Kabuli_Chr04 | 48396190                | TT                                     | CC                 | CC               | INTERGENIC                    |                    |                                                              |
| SNP_30848_A_48396559 | NC_021163.1    | Ca_Kabuli_Chr04 | 48396559                | TT                                     | CC                 | CC               | INTERGENIC                    |                    |                                                              |
| SNP_30849_A_48397363 | NC_021163.1    | Ca_Kabuli_Chr04 | 48397363                | CC                                     | AA                 | AA               | INTERGENIC                    |                    |                                                              |

| SNPs IDs             | Chromosome IDs | Chromosomes     | Physical positions (bp) | CDC Frontier genome (Reference genome) | (Pusa 1103 & HPNB) | (ILWC 46 & LPNB) | Sequence genome | Components of | Gene accession IDs            | Putative functions |
|----------------------|----------------|-----------------|-------------------------|----------------------------------------|--------------------|------------------|-----------------|---------------|-------------------------------|--------------------|
| SNP_30850_A_48398289 | NC_021163.1    | Ca_Kabuli_Chr04 | 48398289                | AA                                     | GG                 | GG               | INTERGENIC      |               |                               |                    |
| SNP_30852_A_48401285 | NC_021163.1    | Ca_Kabuli_Chr04 | 48401285                | GG                                     | AA                 | AA               | INTERGENIC      |               |                               |                    |
| SNP_30853_A_48401321 | NC_021163.1    | Ca_Kabuli_Chr04 | 48401321                | GG                                     | TT                 | TT               | INTERGENIC      |               |                               |                    |
| SNP_30854_A_48402195 | NC_021163.1    | Ca_Kabuli_Chr04 | 48402195                | TT                                     | GG                 | GG               | INTERGENIC      |               |                               |                    |
| SNP_30855_A_48402412 | NC_021163.1    | Ca_Kabuli_Chr04 | 48402412                | CC                                     | TT                 | TT               | INTERGENIC      |               |                               |                    |
| SNP_30856_A_48403967 | NC_021163.1    | Ca_Kabuli_Chr04 | 48403967                | TT                                     | CC                 | CC               | INTERGENIC      |               |                               |                    |
| SNP_30858_A_48414225 | NC_021163.1    | Ca_Kabuli_Chr04 | 48414225                | GG                                     | CC                 | CC               | INTERGENIC      |               |                               |                    |
| SNP_30859_A_48419096 | NC_021163.1    | Ca_Kabuli_Chr04 | 48419096                | TT                                     | CC                 | CC               | INTERGENIC      |               |                               |                    |
| SNP_30860_A_48419145 | NC_021163.1    | Ca_Kabuli_Chr04 | 48419145                | CC                                     | AA                 | AA               | INTERGENIC      |               |                               |                    |
| SNP_30861_A_48419147 | NC_021163.1    | Ca_Kabuli_Chr04 | 48419147                | GG                                     | AA                 | AA               | INTERGENIC      |               |                               |                    |
| SNP_30862_A_48427867 | NC_021163.1    | Ca_Kabuli_Chr04 | 48427867                | GG                                     | TT                 | TT               | INTERGENIC      |               |                               |                    |
| SNP_30863_A_48428670 | NC_021163.1    | Ca_Kabuli_Chr04 | 48428670                | CC                                     | TT                 | TT               | DRR             | 101509619     | auxin-induced protein 6B-like |                    |
| SNP_30864_A_48428689 | NC_021163.1    | Ca_Kabuli_Chr04 | 48428689                | TT                                     | CC                 | CC               | DRR             | 101509619     | auxin-induced protein 6B-like |                    |
| SNP_30865_A_48428721 | NC_021163.1    | Ca_Kabuli_Chr04 | 48428721                | GG                                     | AA                 | AA               | DRR             | 101509619     | auxin-induced protein 6B-like |                    |
| SNP_30866_A_48430436 | NC_021163.1    | Ca_Kabuli_Chr04 | 48430436                | GG                                     | TT                 | TT               | URR             | 101509619     | auxin-induced protein 6B-like |                    |
| SNP_30867_A_48430444 | NC_021163.1    | Ca_Kabuli_Chr04 | 48430444                | CC                                     | AA                 | AA               | URR             | 101509619     | auxin-induced protein 6B-like |                    |
| SNP_30868_A_48430445 | NC_021163.1    | Ca_Kabuli_Chr04 | 48430445                | AA                                     | GG                 | GG               | URR             | 101509619     | auxin-induced protein 6B-like |                    |
| SNP_30869_A_48431510 | NC_021163.1    | Ca_Kabuli_Chr04 | 48431510                | CC                                     | TT                 | TT               | URR             | 101509619     | auxin-induced protein 6B-like |                    |
| SNP_30870_A_48434556 | NC_021163.1    | Ca_Kabuli_Chr04 | 48434556                | AA                                     | GG                 | GG               | INTERGENIC      |               |                               |                    |
| SNP_30871_A_48434580 | NC_021163.1    | Ca_Kabuli_Chr04 | 48434580                | AA                                     | GG                 | GG               | INTERGENIC      |               |                               |                    |
| SNP_30872_A_48434640 | NC_021163.1    | Ca_Kabuli_Chr04 | 48434640                | TT                                     | CC                 | CC               | INTERGENIC      |               |                               |                    |
| SNP_30873_A_48435124 | NC_021163.1    | Ca_Kabuli_Chr04 | 48435124                | GG                                     | AA                 | AA               | INTERGENIC      |               |                               |                    |

| SNPs IDs             | Chromosome IDs | Chromosomes     | Physical positions (bp) | CDC Frontier genome (Reference genome) | (Pusa 1103 & HPNB) | (ILWC 46 & LPNB) | Sequence Components of genome | Gene accession IDs | Putative functions            |
|----------------------|----------------|-----------------|-------------------------|----------------------------------------|--------------------|------------------|-------------------------------|--------------------|-------------------------------|
| SNP_30875_A_48441697 | NC_021163.1    | Ca_Kabuli_Chr04 | 48441697                | GG                                     | AA                 | AA               | INTERGENIC                    |                    |                               |
| SNP_30877_A_48446045 | NC_021163.1    | Ca_Kabuli_Chr04 | 48446045                | GG                                     | AA                 | AA               | INTERGENIC                    |                    |                               |
| SNP_30878_A_48448273 | NC_021163.1    | Ca_Kabuli_Chr04 | 48448273                | TT                                     | CC                 | CC               | INTERGENIC                    |                    |                               |
| SNP_30879_A_48448774 | NC_021163.1    | Ca_Kabuli_Chr04 | 48448774                | AA                                     | GG                 | GG               | INTERGENIC                    |                    |                               |
| SNP_30880_A_48448788 | NC_021163.1    | Ca_Kabuli_Chr04 | 48448788                | AA                                     | TT                 | TT               | INTERGENIC                    |                    |                               |
| SNP_30881_A_48448797 | NC_021163.1    | Ca_Kabuli_Chr04 | 48448797                | AA                                     | GG                 | GG               | INTERGENIC                    |                    |                               |
| SNP_30882_A_48449180 | NC_021163.1    | Ca_Kabuli_Chr04 | 48449180                | AA                                     | GG                 | GG               | INTERGENIC                    |                    |                               |
| SNP_30883_A_48450159 | NC_021163.1    | Ca_Kabuli_Chr04 | 48450159                | TT                                     | CC                 | CC               | INTERGENIC                    |                    |                               |
| SNP_30884_A_48450167 | NC_021163.1    | Ca_Kabuli_Chr04 | 48450167                | AA                                     | GG                 | GG               | INTERGENIC                    |                    |                               |
| SNP_30885_A_48450367 | NC_021163.1    | Ca_Kabuli_Chr04 | 48450367                | GG                                     | AA                 | AA               | INTERGENIC                    |                    |                               |
| SNP_30886_A_48450454 | NC_021163.1    | Ca_Kabuli_Chr04 | 48450454                | AA                                     | TT                 | TT               | INTERGENIC                    |                    |                               |
| SNP_30888_A_48459089 | NC_021163.1    | Ca_Kabuli_Chr04 | 48459089                | TT                                     | GG                 | GG               | URR                           | 101509947          | filament-like plant protein 4 |
| SNP_30891_A_48469270 | NC_021163.1    | Ca_Kabuli_Chr04 | 48469270                | TT                                     | CC                 | CC               | INTRON                        | 101510269          | 5'-3' exoribonuclease 3       |
| SNP_30892_A_48472897 | NC_021163.1    | Ca_Kabuli_Chr04 | 48472897                | CC                                     | TT                 | TT               | INTERGENIC                    |                    |                               |
| SNP_30893_A_48479045 | NC_021163.1    | Ca_Kabuli_Chr04 | 48479045                | AA                                     | GG                 | GG               | INTRON                        | 101510807          | transcription factor bHLH140  |
| SNP_30894_A_48479175 | NC_021163.1    | Ca_Kabuli_Chr04 | 48479175                | CC                                     | TT                 | TT               | SYNONYMOUS_CODING             | 101510807          | transcription factor bHLH140  |
| SNP_30895_A_48479329 | NC_021163.1    | Ca_Kabuli_Chr04 | 48479329                | CC                                     | TT                 | TT               | SYNONYMOUS_CODING             | 101510807          | transcription factor bHLH140  |
| SNP_30896_A_48481327 | NC_021163.1    | Ca_Kabuli_Chr04 | 48481327                | AA                                     | CC                 | CC               | URR                           | 101510807          | transcription factor bHLH140  |
| SNP_30897_A_48481335 | NC_021163.1    | Ca_Kabuli_Chr04 | 48481335                | AA                                     | TT                 | TT               | URR                           | 101510807          | transcription factor bHLH140  |
| SNP_30898_A_48481978 | NC_021163.1    | Ca_Kabuli_Chr04 | 48481978                | GG                                     | AA                 | AA               | DRR                           | 101511337          | uncharacterized LOC101511337  |
| SNP_30899_A_48481983 | NC_021163.1    | Ca_Kabuli_Chr04 | 48481983                | AA                                     | CC                 | CC               | DRR                           | 101511337          | uncharacterized LOC101511337  |
| SNP_30900_A_48482008 | NC_021163.1    | Ca_Kabuli_Chr04 | 48482008                | AA                                     | GG                 | GG               | DRR                           | 101511337          | uncharacterized LOC101511337  |

| SNPs IDs             | Chromosome IDs | Chromosomes     | Physical positions (bp) | CDC Frontier genome (Reference genome) | (Pusa 1103 & HPNB) | (ILWC 46 & LPNB) | Sequence Components of genome | Gene accession IDs | Putative functions                                                   |
|----------------------|----------------|-----------------|-------------------------|----------------------------------------|--------------------|------------------|-------------------------------|--------------------|----------------------------------------------------------------------|
| SNP_30901_A_48482028 | NC_021163.1    | Ca_Kabuli_Chr04 | 48482028                | GG                                     | AA                 | AA               | DRR                           | 101511337          | uncharacterized LOC101511337                                         |
| SNP_30902_A_48487324 | NC_021163.1    | Ca_Kabuli_Chr04 | 48487324                | GG                                     | AA                 | AA               | URR                           | 101511337          | uncharacterized LOC101511337                                         |
| SNP_30903_A_48493645 | NC_021163.1    | Ca_Kabuli_Chr04 | 48493645                | CC                                     | TT                 | TT               | INTERGENIC                    |                    |                                                                      |
| SNP_30904_A_48493684 | NC_021163.1    | Ca_Kabuli_Chr04 | 48493684                | GG                                     | CC                 | CC               | INTERGENIC                    |                    |                                                                      |
| SNP_30905_A_48495196 | NC_021163.1    | Ca_Kabuli_Chr04 | 48495196                | AA                                     | GG                 | GG               | INTERGENIC                    |                    |                                                                      |
| SNP_30906_A_48495934 | NC_021163.1    | Ca_Kabuli_Chr04 | 48495934                | TT                                     | GG                 | GG               | INTERGENIC                    |                    |                                                                      |
| SNP_30907_A_48497234 | NC_021163.1    | Ca_Kabuli_Chr04 | 48497234                | AA                                     | GG                 | GG               | INTERGENIC                    |                    |                                                                      |
| SNP_30908_A_48497282 | NC_021163.1    | Ca_Kabuli_Chr04 | 48497282                | GG                                     | AA                 | AA               | INTERGENIC                    |                    |                                                                      |
| SNP_30909_A_48498750 | NC_021163.1    | Ca_Kabuli_Chr04 | 48498750                | TT                                     | AA                 | AA               | URR                           | 101512208          | HVA22-like protein i                                                 |
| SNP_30910_A_48499355 | NC_021163.1    | Ca_Kabuli_Chr04 | 48499355                | CC                                     | TT                 | TT               | DRR                           | 101512731          | tRNA (adenine(58)-N(1))-methyltransferase non-catalytic subunit trm6 |
| SNP_30911_A_48500618 | NC_021163.1    | Ca_Kabuli_Chr04 | 48500618                | CC                                     | AA                 | AA               | INTERGENIC                    |                    |                                                                      |
| SNP_30912_A_48500642 | NC_021163.1    | Ca_Kabuli_Chr04 | 48500642                | CC                                     | TT                 | TT               | INTERGENIC                    |                    |                                                                      |
| SNP_30913_A_48504604 | NC_021163.1    | Ca_Kabuli_Chr04 | 48504604                | AA                                     | GG                 | GG               | INTRON                        | 101512731          | tRNA (adenine(58)-N(1))-methyltransferase non-catalytic subunit trm6 |
| SNP_30914_A_48505333 | NC_021163.1    | Ca_Kabuli_Chr04 | 48505333                | TT                                     | CC                 | CC               | INTRON                        | 101512731          | tRNA (adenine(58)-N(1))-methyltransferase non-catalytic subunit trm6 |
| SNP_30915_A_48506464 | NC_021163.1    | Ca_Kabuli_Chr04 | 48506464                | CC                                     | TT                 | TT               | URR                           | 101512731          | tRNA (adenine(58)-N(1))-methyltransferase non-catalytic subunit trm6 |
| SNP_30916_A_48506726 | NC_021163.1    | Ca_Kabuli_Chr04 | 48506726                | TT                                     | CC                 | CC               | URR                           | 101512731          | tRNA (adenine(58)-N(1))-methyltransferase non-catalytic subunit trm6 |
| SNP_30917_A_48507436 | NC_021163.1    | Ca_Kabuli_Chr04 | 48507436                | CC                                     | TT                 | TT               | URR                           | 101512731          | tRNA (adenine(58)-N(1))-methyltransferase non-catalytic subunit trm6 |
| SNP_30918_A_48507786 | NC_021163.1    | Ca_Kabuli_Chr04 | 48507786                | AA                                     | TT                 | TT               | URR                           | 101512731          | tRNA (adenine(58)-N(1))-methyltransferase non-catalytic subunit trm6 |
| SNP_30919_A_48509356 | NC_021163.1    | Ca_Kabuli_Chr04 | 48509356                | CC                                     | GG                 | GG               | INTERGENIC                    |                    |                                                                      |
| SNP_30920_A_48512643 | NC_021163.1    | Ca_Kabuli_Chr04 | 48512643                | AA                                     | TT                 | TT               | INTERGENIC                    |                    |                                                                      |
| SNP_30921_A_48512927 | NC_021163.1    | Ca_Kabuli_Chr04 | 48512927                | GG                                     | TT                 | TT               | INTERGENIC                    |                    |                                                                      |
| SNP_30922_A_48513071 | NC_021163.1    | Ca_Kabuli_Chr04 | 48513071                | CC                                     | TT                 | TT               | INTERGENIC                    |                    |                                                                      |

| SNPs IDs             | Chromosome IDs | Chromosomes     | Physical positions (bp) | CDC Frontier (Reference genome) | (Pusa 1103 & HPNB) | (ILWC 46 & LPNB) | Sequence Components of genome | Gene accession IDs | Putative functions           |
|----------------------|----------------|-----------------|-------------------------|---------------------------------|--------------------|------------------|-------------------------------|--------------------|------------------------------|
| SNP_30923_A_48514227 | NC_021163.1    | Ca_Kabuli_Chr04 | 48514227                | TT                              | AA                 | AA               | INTERGENIC                    |                    |                              |
| SNP_30924_A_48514244 | NC_021163.1    | Ca_Kabuli_Chr04 | 48514244                | GG                              | TT                 | TT               | INTERGENIC                    |                    |                              |
| SNP_30925_A_48514304 | NC_021163.1    | Ca_Kabuli_Chr04 | 48514304                | CC                              | TT                 | TT               | INTERGENIC                    |                    |                              |
| SNP_30926_A_48514465 | NC_021163.1    | Ca_Kabuli_Chr04 | 48514465                | CC                              | AA                 | AA               | INTERGENIC                    |                    |                              |
| SNP_30927_A_48515196 | NC_021163.1    | Ca_Kabuli_Chr04 | 48515196                | CC                              | TT                 | TT               | INTERGENIC                    |                    |                              |
| SNP_30928_A_48515757 | NC_021163.1    | Ca_Kabuli_Chr04 | 48515757                | CC                              | GG                 | GG               | INTERGENIC                    |                    |                              |
| SNP_30929_A_48515774 | NC_021163.1    | Ca_Kabuli_Chr04 | 48515774                | CC                              | TT                 | TT               | INTERGENIC                    |                    |                              |
| SNP_30930_A_48519369 | NC_021163.1    | Ca_Kabuli_Chr04 | 48519369                | AA                              | TT                 | TT               | INTRON                        | 101513058          | uncharacterized LOC101513058 |
| SNP_30931_A_48519371 | NC_021163.1    | Ca_Kabuli_Chr04 | 48519371                | CC                              | GG                 | GG               | INTRON                        | 101513058          | uncharacterized LOC101513058 |
| SNP_30933_A_48530418 | NC_021163.1    | Ca_Kabuli_Chr04 | 48530418                | AA                              | GG                 | GG               | INTERGENIC                    |                    |                              |
| SNP_30934_A_48530662 | NC_021163.1    | Ca_Kabuli_Chr04 | 48530662                | TT                              | AA                 | AA               | INTERGENIC                    |                    |                              |
| SNP_30935_A_48541105 | NC_021163.1    | Ca_Kabuli_Chr04 | 48541105                | GG                              | TT                 | TT               | INTERGENIC                    |                    |                              |
| SNP_30937_A_48546378 | NC_021163.1    | Ca_Kabuli_Chr04 | 48546378                | TT                              | GG                 | GG               | INTERGENIC                    |                    |                              |
| SNP_30938_A_48546379 | NC_021163.1    | Ca_Kabuli_Chr04 | 48546379                | AA                              | TT                 | TT               | INTERGENIC                    |                    |                              |
| SNP_30939_A_48546381 | NC_021163.1    | Ca_Kabuli_Chr04 | 48546381                | GG                              | AA                 | AA               | INTERGENIC                    |                    |                              |
| SNP_30940_A_48546382 | NC_021163.1    | Ca_Kabuli_Chr04 | 48546382                | GG                              | CC                 | CC               | INTERGENIC                    |                    |                              |
| SNP_30941_A_48546404 | NC_021163.1    | Ca_Kabuli_Chr04 | 48546404                | AA                              | TT                 | TT               | INTERGENIC                    |                    |                              |
| SNP_30942_A_48546407 | NC_021163.1    | Ca_Kabuli_Chr04 | 48546407                | GG                              | AA                 | AA               | INTERGENIC                    |                    |                              |
| SNP_30943_A_48546811 | NC_021163.1    | Ca_Kabuli_Chr04 | 48546811                | TT                              | CC                 | CC               | INTERGENIC                    |                    |                              |
| SNP_30947_A_48602156 | NC_021163.1    | Ca_Kabuli_Chr04 | 48602156                | CC                              | TT                 | TT               | INTERGENIC                    |                    |                              |
| SNP_30948_A_48603067 | NC_021163.1    | Ca_Kabuli_Chr04 | 48603067                | TT                              | AA                 | AA               | INTERGENIC                    |                    |                              |
| SNP_30949_A_48603076 | NC_021163.1    | Ca_Kabuli_Chr04 | 48603076                | TT                              | GG                 | GG               | INTERGENIC                    |                    |                              |

| SNPs IDs             | Chromosome IDs | Chromosomes     | Physical positions (bp) | CDC Frontier genome (Reference genome) | (Pusa 1103 & HPNB) | (ILWC 46 & LPNB) | Sequence Components of genome | Gene accession IDs | Putative functions           |
|----------------------|----------------|-----------------|-------------------------|----------------------------------------|--------------------|------------------|-------------------------------|--------------------|------------------------------|
| SNP_30950_A_48627122 | NC_021163.1    | Ca_Kabuli_Chr04 | 48627122                | CC                                     | TT                 | TT               | INTERGENIC                    |                    |                              |
| SNP_30951_A_48629930 | NC_021163.1    | Ca_Kabuli_Chr04 | 48629930                | AA                                     | GG                 | GG               | INTERGENIC                    |                    |                              |
| SNP_30952_A_48646239 | NC_021163.1    | Ca_Kabuli_Chr04 | 48646239                | TT                                     | CC                 | CC               | URR                           | 101497079          | thaumatin-like protein 1b    |
| SNP_30954_A_48658981 | NC_021163.1    | Ca_Kabuli_Chr04 | 48658981                | TT                                     | AA                 | AA               | URR                           | 101497414          | endoplasmic homolog          |
| SNP_30955_A_48664853 | NC_021163.1    | Ca_Kabuli_Chr04 | 48664853                | GG                                     | AA                 | AA               | INTERGENIC                    |                    |                              |
| SNP_30956_A_48665225 | NC_021163.1    | Ca_Kabuli_Chr04 | 48665225                | TT                                     | CC                 | CC               | INTERGENIC                    |                    |                              |
| SNP_30957_A_48669460 | NC_021163.1    | Ca_Kabuli_Chr04 | 48669460                | CC                                     | TT                 | TT               | INTERGENIC                    |                    |                              |
| SNP_30958_A_48669470 | NC_021163.1    | Ca_Kabuli_Chr04 | 48669470                | CC                                     | TT                 | TT               | INTERGENIC                    |                    |                              |
| SNP_30959_A_48670878 | NC_021163.1    | Ca_Kabuli_Chr04 | 48670878                | CC                                     | TT                 | TT               | INTERGENIC                    |                    |                              |
| SNP_30960_A_48675225 | NC_021163.1    | Ca_Kabuli_Chr04 | 48675225                | AA                                     | TT                 | TT               | INTERGENIC                    |                    |                              |
| SNP_30961_A_48676361 | NC_021163.1    | Ca_Kabuli_Chr04 | 48676361                | AA                                     | GG                 | GG               | DRR                           | 101498745          | uncharacterized LOC101498745 |
| SNP_30963_A_48683966 | NC_021163.1    | Ca_Kabuli_Chr04 | 48683966                | AA                                     | TT                 | TT               | URR                           | 101498745          | uncharacterized LOC101498745 |
| SNP_30964_A_48683991 | NC_021163.1    | Ca_Kabuli_Chr04 | 48683991                | TT                                     | AA                 | AA               | URR                           | 101498745          | uncharacterized LOC101498745 |
| SNP_30966_A_48690947 | NC_021163.1    | Ca_Kabuli_Chr04 | 48690947                | GG                                     | AA                 | AA               | URR                           | 101499272          | synaptotagmin-2-like         |
| SNP_30967_A_48691146 | NC_021163.1    | Ca_Kabuli_Chr04 | 48691146                | CC                                     | GG                 | GG               | URR                           | 101499272          | synaptotagmin-2-like         |
| SNP_30968_A_48691173 | NC_021163.1    | Ca_Kabuli_Chr04 | 48691173                | GG                                     | TT                 | TT               | URR                           | 101499272          | synaptotagmin-2-like         |
| SNP_30969_A_48691193 | NC_021163.1    | Ca_Kabuli_Chr04 | 48691193                | TT                                     | AA                 | AA               | URR                           | 101499272          | synaptotagmin-2-like         |
| SNP_30970_A_48691207 | NC_021163.1    | Ca_Kabuli_Chr04 | 48691207                | TT                                     | GG                 | GG               | URR                           | 101499272          | synaptotagmin-2-like         |
| SNP_30971_A_48691618 | NC_021163.1    | Ca_Kabuli_Chr04 | 48691618                | GG                                     | TT                 | TT               | URR                           | 101499272          | synaptotagmin-2-like         |
| SNP_30972_A_48692474 | NC_021163.1    | Ca_Kabuli_Chr04 | 48692474                | TT                                     | CC                 | CC               | URR                           | 101499272          | synaptotagmin-2-like         |
| SNP_30973_A_48692811 | NC_021163.1    | Ca_Kabuli_Chr04 | 48692811                | CC                                     | TT                 | TT               | INTERGENIC                    |                    |                              |
| SNP_30974_A_48692903 | NC_021163.1    | Ca_Kabuli_Chr04 | 48692903                | CC                                     | TT                 | TT               | INTERGENIC                    |                    |                              |

| SNPs IDs             | Chromosome IDs | Chromosomes     | Physical positions (bp) | CDC Frontier (Reference genome) | (Pusa 1103 & HPNB) | (ILWC 46 & LPNB) | Sequence genome | Components of | Gene accession IDs | Putative functions                              |
|----------------------|----------------|-----------------|-------------------------|---------------------------------|--------------------|------------------|-----------------|---------------|--------------------|-------------------------------------------------|
| SNP_30975_A_48693235 | NC_021163.1    | Ca_Kabuli_Chr04 | 48693235                | CC                              | TT                 | TT               | INTERGENIC      |               |                    |                                                 |
| SNP_30976_A_48693269 | NC_021163.1    | Ca_Kabuli_Chr04 | 48693269                | CC                              | TT                 | TT               | INTERGENIC      |               |                    |                                                 |
| SNP_30977_A_48693280 | NC_021163.1    | Ca_Kabuli_Chr04 | 48693280                | CC                              | TT                 | TT               | INTERGENIC      |               |                    |                                                 |
| SNP_30978_A_48693303 | NC_021163.1    | Ca_Kabuli_Chr04 | 48693303                | AA                              | GG                 | GG               | INTERGENIC      |               |                    |                                                 |
| SNP_30979_A_48693306 | NC_021163.1    | Ca_Kabuli_Chr04 | 48693306                | AA                              | GG                 | GG               | INTERGENIC      |               |                    |                                                 |
| SNP_30980_A_48693320 | NC_021163.1    | Ca_Kabuli_Chr04 | 48693320                | AA                              | CC                 | CC               | INTERGENIC      |               |                    |                                                 |
| SNP_30981_A_48693361 | NC_021163.1    | Ca_Kabuli_Chr04 | 48693361                | TT                              | CC                 | CC               | INTERGENIC      |               |                    |                                                 |
| SNP_30982_A_48693364 | NC_021163.1    | Ca_Kabuli_Chr04 | 48693364                | TT                              | CC                 | CC               | INTERGENIC      |               |                    |                                                 |
| SNP_30983_A_48693367 | NC_021163.1    | Ca_Kabuli_Chr04 | 48693367                | AA                              | GG                 | GG               | INTERGENIC      |               |                    |                                                 |
| SNP_30984_A_48693370 | NC_021163.1    | Ca_Kabuli_Chr04 | 48693370                | GG                              | AA                 | AA               | INTERGENIC      |               |                    |                                                 |
| SNP_30985_A_48693373 | NC_021163.1    | Ca_Kabuli_Chr04 | 48693373                | GG                              | AA                 | AA               | INTERGENIC      |               |                    |                                                 |
| SNP_30986_A_48693375 | NC_021163.1    | Ca_Kabuli_Chr04 | 48693375                | GG                              | AA                 | AA               | INTERGENIC      |               |                    |                                                 |
| SNP_30987_A_48697745 | NC_021163.1    | Ca_Kabuli_Chr04 | 48697745                | AA                              | GG                 | GG               | INTERGENIC      |               |                    |                                                 |
| SNP_30988_A_48697751 | NC_021163.1    | Ca_Kabuli_Chr04 | 48697751                | TT                              | CC                 | CC               | INTERGENIC      |               |                    |                                                 |
| SNP_30989_A_48698005 | NC_021163.1    | Ca_Kabuli_Chr04 | 48698005                | AA                              | GG                 | GG               | INTERGENIC      |               |                    |                                                 |
| SNP_30990_A_48698006 | NC_021163.1    | Ca_Kabuli_Chr04 | 48698006                | AA                              | GG                 | GG               | INTERGENIC      |               |                    |                                                 |
| SNP_30991_A_48702807 | NC_021163.1    | Ca_Kabuli_Chr04 | 48702807                | CC                              | TT                 | TT               | INTRON          | 101499791     |                    | ABC transporter B family member 13-like         |
| SNP_30992_A_48708364 | NC_021163.1    | Ca_Kabuli_Chr04 | 48708364                | GG                              | AA                 | AA               | DRR             | 101500111     |                    | vacuolar protein sorting-associated protein 35B |
| SNP_30993_A_48711790 | NC_021163.1    | Ca_Kabuli_Chr04 | 48711790                | TT                              | CC                 | CC               | INTERGENIC      |               |                    |                                                 |
| SNP_30994_A_48720942 | NC_021163.1    | Ca_Kabuli_Chr04 | 48720942                | GG                              | TT                 | TT               | INTRON          | 101500442     |                    | DNA ligase 1-like                               |
| SNP_30995_A_48720962 | NC_021163.1    | Ca_Kabuli_Chr04 | 48720962                | GG                              | AA                 | AA               | INTRON          | 101500442     |                    | DNA ligase 1-like                               |
| SNP_30996_A_48723914 | NC_021163.1    | Ca_Kabuli_Chr04 | 48723914                | CC                              | AA                 | AA               | INTERGENIC      |               |                    |                                                 |



| SNPs IDs             | Chromosome IDs | Chromosomes     | Physical positions (bp) | CDC Frontier genome (Reference genome) | (Pusa 1103 & HPNB) | (ILWC 46 & LPNB) | Sequence Components of genome | Gene accession IDs | Putative functions                      |
|----------------------|----------------|-----------------|-------------------------|----------------------------------------|--------------------|------------------|-------------------------------|--------------------|-----------------------------------------|
| SNP_30997_A_48725637 | NC_021163.1    | Ca_Kabuli_Chr04 | 48725637                | AA                                     | GG                 | GG               | INTERGENIC                    |                    |                                         |
| SNP_30998_A_48740475 | NC_021163.1    | Ca_Kabuli_Chr04 | 48740475                | AA                                     | GG                 | GG               | INTRON                        | 101500754          | GDSL esterase/lipase EXL1-like          |
| SNP_30999_A_48742455 | NC_021163.1    | Ca_Kabuli_Chr04 | 48742455                | TT                                     | CC                 | CC               | INTRON                        | 101500754          | GDSL esterase/lipase EXL1-like          |
| SNP_31001_A_48742500 | NC_021163.1    | Ca_Kabuli_Chr04 | 48742500                | GG                                     | CC                 | CC               | INTRON                        | 101500754          | GDSL esterase/lipase EXL1-like          |
| SNP_31002_A_48755059 | NC_021163.1    | Ca_Kabuli_Chr04 | 48755059                | AA                                     | GG                 | GG               | INTERGENIC                    |                    |                                         |
| SNP_31003_A_48758250 | NC_021163.1    | Ca_Kabuli_Chr04 | 48758250                | TT                                     | AA                 | AA               | INTERGENIC                    |                    |                                         |
| SNP_31004_A_48758398 | NC_021163.1    | Ca_Kabuli_Chr04 | 48758398                | AA                                     | CC                 | CC               | INTERGENIC                    |                    |                                         |
| SNP_31005_A_48758501 | NC_021163.1    | Ca_Kabuli_Chr04 | 48758501                | GG                                     | AA                 | AA               | INTERGENIC                    |                    |                                         |
| SNP_31006_A_48758516 | NC_021163.1    | Ca_Kabuli_Chr04 | 48758516                | GG                                     | TT                 | TT               | INTERGENIC                    |                    |                                         |
| SNP_31007_A_48758756 | NC_021163.1    | Ca_Kabuli_Chr04 | 48758756                | CC                                     | AA                 | AA               | INTERGENIC                    |                    |                                         |
| SNP_31008_A_48759050 | NC_021163.1    | Ca_Kabuli_Chr04 | 48759050                | TT                                     | AA                 | AA               | INTERGENIC                    |                    |                                         |
| SNP_31009_A_48760624 | NC_021163.1    | Ca_Kabuli_Chr04 | 48760624                | CC                                     | AA                 | AA               | INTERGENIC                    |                    |                                         |
| SNP_31010_A_48760983 | NC_021163.1    | Ca_Kabuli_Chr04 | 48760983                | AA                                     | GG                 | GG               | INTERGENIC                    |                    |                                         |
| SNP_31012_A_48767559 | NC_021163.1    | Ca_Kabuli_Chr04 | 48767559                | TT                                     | GG                 | GG               | URR                           | 101502021          | mitochondrial outer membrane porin-like |
| SNP_31013_A_48767615 | NC_021163.1    | Ca_Kabuli_Chr04 | 48767615                | CC                                     | TT                 | TT               | URR                           | 101502021          | mitochondrial outer membrane porin-like |
| SNP_31014_A_48772144 | NC_021163.1    | Ca_Kabuli_Chr04 | 48772144                | AA                                     | CC                 | CC               | URR                           | 101502350          | GDSL esterase/lipase At1g73610-like     |
| SNP_31016_A_48772729 | NC_021163.1    | Ca_Kabuli_Chr04 | 48772729                | TT                                     | CC                 | CC               | URR                           | 101502350          | GDSL esterase/lipase At1g73610-like     |
| SNP_31017_A_48772748 | NC_021163.1    | Ca_Kabuli_Chr04 | 48772748                | AA                                     | TT                 | TT               | URR                           | 101502350          | GDSL esterase/lipase At1g73610-like     |
| SNP_31018_A_48774044 | NC_021163.1    | Ca_Kabuli_Chr04 | 48774044                | CC                                     | AA                 | AA               | INTERGENIC                    |                    |                                         |
| SNP_31019_A_48779803 | NC_021163.1    | Ca_Kabuli_Chr04 | 48779803                | AA                                     | GG                 | GG               | INTERGENIC                    |                    |                                         |
| SNP_31021_A_48781307 | NC_021163.1    | Ca_Kabuli_Chr04 | 48781307                | GG                                     | AA                 | AA               | INTERGENIC                    |                    |                                         |
| SNP_31022_A_48783030 | NC_021163.1    | Ca_Kabuli_Chr04 | 48783030                | TT                                     | CC                 | CC               | INTERGENIC                    |                    |                                         |

| SNPs IDs             | Chromosome IDs | Chromosomes     | Physical positions (bp) | CDC Frontier genome (Reference genome) | (Pusa 1103 & HPNB) | (ILWC 46 & LPNB) | Sequence Components of genome | Gene accession IDs | Putative functions             |
|----------------------|----------------|-----------------|-------------------------|----------------------------------------|--------------------|------------------|-------------------------------|--------------------|--------------------------------|
| SNP_31023_A_48784151 | NC_021163.1    | Ca_Kabuli_Chr04 | 48784151                | TT                                     | GG                 | GG               | INTERGENIC                    |                    |                                |
| SNP_31024_A_48786950 | NC_021163.1    | Ca_Kabuli_Chr04 | 48786950                | CC                                     | TT                 | TT               | INTRON                        | 101502657          | GDSL esterase/lipase EXL1-like |
| SNP_31025_A_48788838 | NC_021163.1    | Ca_Kabuli_Chr04 | 48788838                | GG                                     | TT                 | TT               | URR                           | 101502657          | GDSL esterase/lipase EXL1-like |
| SNP_31026_A_48788881 | NC_021163.1    | Ca_Kabuli_Chr04 | 48788881                | GG                                     | AA                 | AA               | URR                           | 101502657          | GDSL esterase/lipase EXL1-like |
| SNP_31027_A_48789249 | NC_021163.1    | Ca_Kabuli_Chr04 | 48789249                | TT                                     | CC                 | CC               | URR                           | 101502657          | GDSL esterase/lipase EXL1-like |
| SNP_31028_A_48789286 | NC_021163.1    | Ca_Kabuli_Chr04 | 48789286                | GG                                     | AA                 | AA               | URR                           | 101502657          | GDSL esterase/lipase EXL1-like |
| SNP_31029_A_48789555 | NC_021163.1    | Ca_Kabuli_Chr04 | 48789555                | TT                                     | GG                 | GG               | URR                           | 101502657          | GDSL esterase/lipase EXL1-like |
| SNP_31030_A_48789618 | NC_021163.1    | Ca_Kabuli_Chr04 | 48789618                | AA                                     | GG                 | GG               | URR                           | 101502657          | GDSL esterase/lipase EXL1-like |
| SNP_31031_A_48790552 | NC_021163.1    | Ca_Kabuli_Chr04 | 48790552                | CC                                     | TT                 | TT               | URR                           | 101502657          | GDSL esterase/lipase EXL1-like |
| SNP_31032_A_48790712 | NC_021163.1    | Ca_Kabuli_Chr04 | 48790712                | CC                                     | AA                 | AA               | INTERGENIC                    |                    |                                |
| SNP_31033_A_48791269 | NC_021163.1    | Ca_Kabuli_Chr04 | 48791269                | GG                                     | AA                 | AA               | INTERGENIC                    |                    |                                |
| SNP_31035_A_48794407 | NC_021163.1    | Ca_Kabuli_Chr04 | 48794407                | GG                                     | TT                 | TT               | INTERGENIC                    |                    |                                |
| SNP_31036_A_48796347 | NC_021163.1    | Ca_Kabuli_Chr04 | 48796347                | GG                                     | TT                 | TT               | INTRON                        | 101502971          | GDSL esterase/lipase EXL1-like |
| SNP_31037_A_48796356 | NC_021163.1    | Ca_Kabuli_Chr04 | 48796356                | AA                                     | GG                 | GG               | INTRON                        | 101502971          | GDSL esterase/lipase EXL1-like |
| SNP_31038_A_48796373 | NC_021163.1    | Ca_Kabuli_Chr04 | 48796373                | TT                                     | GG                 | GG               | INTRON                        | 101502971          | GDSL esterase/lipase EXL1-like |
| SNP_31039_A_48797137 | NC_021163.1    | Ca_Kabuli_Chr04 | 48797137                | TT                                     | AA                 | AA               | INTRON                        | 101502971          | GDSL esterase/lipase EXL1-like |
| SNP_31040_A_48798668 | NC_021163.1    | Ca_Kabuli_Chr04 | 48798668                | GG                                     | AA                 | AA               | URR                           | 101502971          | GDSL esterase/lipase EXL1-like |
| SNP_31041_A_48798849 | NC_021163.1    | Ca_Kabuli_Chr04 | 48798849                | TT                                     | CC                 | CC               | URR                           | 101502971          | GDSL esterase/lipase EXL1-like |
| SNP_31042_A_48798921 | NC_021163.1    | Ca_Kabuli_Chr04 | 48798921                | CC                                     | AA                 | AA               | URR                           | 101502971          | GDSL esterase/lipase EXL1-like |
| SNP_31043_A_48799415 | NC_021163.1    | Ca_Kabuli_Chr04 | 48799415                | TT                                     | AA                 | AA               | URR                           | 101502971          | GDSL esterase/lipase EXL1-like |
| SNP_31044_A_48809005 | NC_021163.1    | Ca_Kabuli_Chr04 | 48809005                | TT                                     | AA                 | AA               | INTERGENIC                    |                    |                                |
| SNP_31045_A_48809340 | NC_021163.1    | Ca_Kabuli_Chr04 | 48809340                | CC                                     | TT                 | TT               | INTERGENIC                    |                    |                                |

| SNPs IDs             | Chromosome IDs | Chromosomes     | Physical positions (bp) | CDC Frontier genome (Reference genome) | (Pusa 1103 & HPNB) | (ILWC 46 & LPNB) | Sequence Components of genome | Gene accession IDs | Putative functions             |
|----------------------|----------------|-----------------|-------------------------|----------------------------------------|--------------------|------------------|-------------------------------|--------------------|--------------------------------|
| SNP_31047_A_48813762 | NC_021163.1    | Ca_Kabuli_Chr04 | 48813762                | GG                                     | CC                 | CC               | INTERGENIC                    |                    |                                |
| SNP_31048_A_48814637 | NC_021163.1    | Ca_Kabuli_Chr04 | 48814637                | GG                                     | AA                 | AA               | INTERGENIC                    |                    |                                |
| SNP_31049_A_48815970 | NC_021163.1    | Ca_Kabuli_Chr04 | 48815970                | CC                                     | TT                 | TT               | INTERGENIC                    |                    |                                |
| SNP_31050_A_48815973 | NC_021163.1    | Ca_Kabuli_Chr04 | 48815973                | CC                                     | AA                 | AA               | INTERGENIC                    |                    |                                |
| SNP_31051_A_48815983 | NC_021163.1    | Ca_Kabuli_Chr04 | 48815983                | CC                                     | TT                 | TT               | INTERGENIC                    |                    |                                |
| SNP_31052_A_48817637 | NC_021163.1    | Ca_Kabuli_Chr04 | 48817637                | CC                                     | TT                 | TT               | INTERGENIC                    |                    |                                |
| SNP_31053_A_48817647 | NC_021163.1    | Ca_Kabuli_Chr04 | 48817647                | CC                                     | TT                 | TT               | INTERGENIC                    |                    |                                |
| SNP_31054_A_48820386 | NC_021163.1    | Ca_Kabuli_Chr04 | 48820386                | AA                                     | CC                 | CC               | INTERGENIC                    |                    |                                |
| SNP_31055_A_48830133 | NC_021163.1    | Ca_Kabuli_Chr04 | 48830133                | GG                                     | CC                 | CC               | URR                           | 101503294          | GDSL esterase/lipase EXL1-like |
| SNP_31056_A_48830427 | NC_021163.1    | Ca_Kabuli_Chr04 | 48830427                | TT                                     | AA                 | AA               | DRR                           | 101501066          | GDSL esterase/lipase EXL3-like |
| SNP_31058_A_48836503 | NC_021163.1    | Ca_Kabuli_Chr04 | 48836503                | CC                                     | TT                 | TT               | INTRON                        | 101501066          | GDSL esterase/lipase EXL3-like |
| SNP_31059_A_48845993 | NC_021163.1    | Ca_Kabuli_Chr04 | 48845993                | CC                                     | TT                 | TT               | INTERGENIC                    |                    |                                |
| SNP_31060_A_48846670 | NC_021163.1    | Ca_Kabuli_Chr04 | 48846670                | GG                                     | AA                 | AA               | INTERGENIC                    |                    |                                |
| SNP_31061_A_48846728 | NC_021163.1    | Ca_Kabuli_Chr04 | 48846728                | TT                                     | CC                 | CC               | INTERGENIC                    |                    |                                |
| SNP_31063_A_48847873 | NC_021163.1    | Ca_Kabuli_Chr04 | 48847873                | CC                                     | TT                 | TT               | INTERGENIC                    |                    |                                |
| SNP_31064_A_48850011 | NC_021163.1    | Ca_Kabuli_Chr04 | 48850011                | CC                                     | TT                 | TT               | INTERGENIC                    |                    |                                |
| SNP_31066_A_48850064 | NC_021163.1    | Ca_Kabuli_Chr04 | 48850064                | GG                                     | TT                 | TT               | INTERGENIC                    |                    |                                |
| SNP_31067_A_48850351 | NC_021163.1    | Ca_Kabuli_Chr04 | 48850351                | AA                                     | GG                 | GG               | INTERGENIC                    |                    |                                |
| SNP_31068_A_48879841 | NC_021163.1    | Ca_Kabuli_Chr04 | 48879841                | GG                                     | AA                 | AA               | INTERGENIC                    |                    |                                |
| SNP_31069_A_48879970 | NC_021163.1    | Ca_Kabuli_Chr04 | 48879970                | AA                                     | GG                 | GG               | INTERGENIC                    |                    |                                |
| SNP_31070_A_48880209 | NC_021163.1    | Ca_Kabuli_Chr04 | 48880209                | AA                                     | GG                 | GG               | INTERGENIC                    |                    |                                |
| SNP_31071_A_48884858 | NC_021163.1    | Ca_Kabuli_Chr04 | 48884858                | GG                                     | AA                 | AA               | INTRON                        | 101504065          | 1a-related protein 1B-like     |

| SNPs IDs             | Chromosome IDs | Chromosomes     | Physical positions (bp) | CDC Frontier genome (Reference genome) | (Pusa 1103 & HPNB) | (ILWC 46 & LPNB) | Sequence Components of genome | Gene accession IDs | Putative functions                         |
|----------------------|----------------|-----------------|-------------------------|----------------------------------------|--------------------|------------------|-------------------------------|--------------------|--------------------------------------------|
| SNP_31072_A_48905989 | NC_021163.1    | Ca_Kabuli_Chr04 | 48905989                | AA                                     | GG                 | GG               | INTERGENIC                    |                    |                                            |
| SNP_31073_A_48906398 | NC_021163.1    | Ca_Kabuli_Chr04 | 48906398                | GG                                     | CC                 | CC               | INTERGENIC                    |                    |                                            |
| SNP_31074_A_48909082 | NC_021163.1    | Ca_Kabuli_Chr04 | 48909082                | AA                                     | GG                 | GG               | INTERGENIC                    |                    |                                            |
| SNP_31075_A_48916601 | NC_021163.1    | Ca_Kabuli_Chr04 | 48916601                | TT                                     | GG                 | GG               | INTRON                        | 101504377          | probable cinnamyl alcohol dehydrogenase 6  |
| SNP_31076_A_48923967 | NC_021163.1    | Ca_Kabuli_Chr04 | 48923967                | TT                                     | AA                 | AA               | INTERGENIC                    |                    |                                            |
| SNP_31077_A_48926406 | NC_021163.1    | Ca_Kabuli_Chr04 | 48926406                | AA                                     | GG                 | GG               | URR                           | 101504701          | UPF0496 protein At1g20180-like             |
| SNP_31078_A_48950341 | NC_021163.1    | Ca_Kabuli_Chr04 | 48950341                | TT                                     | CC                 | CC               | INTERGENIC                    |                    |                                            |
| SNP_31079_A_48950948 | NC_021163.1    | Ca_Kabuli_Chr04 | 48950948                | GG                                     | AA                 | AA               | INTERGENIC                    |                    |                                            |
| SNP_31080_A_48975030 | NC_021163.1    | Ca_Kabuli_Chr04 | 48975030                | AA                                     | GG                 | GG               | INTERGENIC                    |                    |                                            |
| SNP_31081_A_48975084 | NC_021163.1    | Ca_Kabuli_Chr04 | 48975084                | GG                                     | AA                 | AA               | INTERGENIC                    |                    |                                            |
| SNP_31082_A_48975423 | NC_021163.1    | Ca_Kabuli_Chr04 | 48975423                | TT                                     | GG                 | GG               | INTERGENIC                    |                    |                                            |
| SNP_31083_A_49043513 | NC_021163.1    | Ca_Kabuli_Chr04 | 49043513                | AA                                     | CC                 | CC               | INTERGENIC                    |                    |                                            |
| SNP_31084_A_49043515 | NC_021163.1    | Ca_Kabuli_Chr04 | 49043515                | AA                                     | TT                 | TT               | INTERGENIC                    |                    |                                            |
| SNP_31088_A_49135659 | NC_021163.1    | Ca_Kabuli_Chr04 | 49135659                | CC                                     | TT                 | TT               | INTERGENIC                    |                    |                                            |
| SNP_31089_A_49161217 | NC_021163.1    | Ca_Kabuli_Chr04 | 49161217                | TT                                     | CC                 | CC               | INTERGENIC                    |                    |                                            |
| SNP_31090_A_49163046 | NC_021163.1    | Ca_Kabuli_Chr04 | 49163046                | AA                                     | GG                 | GG               | INTERGENIC                    |                    |                                            |
| SNP_31091_A_49168775 | NC_021163.1    | Ca_Kabuli_Chr04 | 49168775                | GG                                     | TT                 | TT               | INTRON                        | 101515116          | ATP-dependent DNA helicase DDM1-like       |
| SNP_31092_A_44701    | NC_021164.1    | Ca_Kabuli_Chr05 | 44701                   | TT                                     | CC                 | CC               | INTRON                        | 101503521          | microtubule-associated protein futsch-like |
| SNP_31093_A_44722    | NC_021164.1    | Ca_Kabuli_Chr05 | 44722                   | AA                                     | CC                 | CC               | INTRON                        | 101503521          | microtubule-associated protein futsch-like |
| SNP_31094_A_44883    | NC_021164.1    | Ca_Kabuli_Chr05 | 44883                   | GG                                     | AA                 | AA               | SYNONYMOUS_CODING             | 101503521          | microtubule-associated protein futsch-like |
| SNP_31095_A_44889    | NC_021164.1    | Ca_Kabuli_Chr05 | 44889                   | TT                                     | CC                 | CC               | SYNONYMOUS_CODING             | 101503521          | microtubule-associated protein futsch-like |
| SNP_31096_A_45198    | NC_021164.1    | Ca_Kabuli_Chr05 | 45198                   | CC                                     | AA                 | AA               | NON_SYNONYMOUS_CODING         | 101503521          | microtubule-associated protein futsch-like |

| SNPs IDs           | Chromosome IDs | Chromosomes     | Physical positions (bp) | CDC Frontier (Reference genome) | (Pusa 1103 & HPNB) | (ILWC 46 & LPNB) | Sequence Components of genome | Gene accession IDs | Putative functions               |
|--------------------|----------------|-----------------|-------------------------|---------------------------------|--------------------|------------------|-------------------------------|--------------------|----------------------------------|
| SNP_31097_A_50507  | NC_021164.1    | Ca_Kabuli_Chr05 | 50507                   | TT                              | AA                 | AA               | INTERGENIC                    |                    |                                  |
| SNP_31098_A_56588  | NC_021164.1    | Ca_Kabuli_Chr05 | 56588                   | TT                              | CC                 | CC               | NON_SYNONYMOUS_CODING         | 101503857          | Unknown function                 |
| SNP_31099_A_76223  | NC_021164.1    | Ca_Kabuli_Chr05 | 76223                   | TT                              | CC                 | CC               | URR                           | 101504497          | uncharacterized LOC101504497     |
| SNP_31100_A_96455  | NC_021164.1    | Ca_Kabuli_Chr05 | 96455                   | GG                              | AA                 | AA               | DRR                           | 101504811          | histone H2B.11-like              |
| SNP_31105_A_133441 | NC_021164.1    | Ca_Kabuli_Chr05 | 133441                  | TT                              | CC                 | CC               | URR                           | 101491246          | PCTP-like protein                |
| SNP_31106_A_134128 | NC_021164.1    | Ca_Kabuli_Chr05 | 134128                  | TT                              | CC                 | CC               | URR                           | 101491246          | PCTP-like protein                |
| SNP_31107_A_134320 | NC_021164.1    | Ca_Kabuli_Chr05 | 134320                  | TT                              | CC                 | CC               | INTERGENIC                    |                    |                                  |
| SNP_31109_A_134392 | NC_021164.1    | Ca_Kabuli_Chr05 | 134392                  | GG                              | AA                 | AA               | INTERGENIC                    |                    |                                  |
| SNP_31110_A_134435 | NC_021164.1    | Ca_Kabuli_Chr05 | 134435                  | CC                              | TT                 | TT               | INTERGENIC                    |                    |                                  |
| SNP_31111_A_134450 | NC_021164.1    | Ca_Kabuli_Chr05 | 134450                  | AA                              | GG                 | GG               | INTERGENIC                    |                    |                                  |
| SNP_31112_A_134487 | NC_021164.1    | Ca_Kabuli_Chr05 | 134487                  | CC                              | AA                 | AA               | INTERGENIC                    |                    |                                  |
| SNP_31113_A_134778 | NC_021164.1    | Ca_Kabuli_Chr05 | 134778                  | AA                              | GG                 | GG               | INTERGENIC                    |                    |                                  |
| SNP_31114_A_135685 | NC_021164.1    | Ca_Kabuli_Chr05 | 135685                  | GG                              | AA                 | AA               | DRR                           | 101491768          | uncharacterized LOC101491768     |
| SNP_31115_A_146543 | NC_021164.1    | Ca_Kabuli_Chr05 | 146543                  | AA                              | GG                 | GG               | INTERGENIC                    |                    |                                  |
| SNP_31119_A_159054 | NC_021164.1    | Ca_Kabuli_Chr05 | 159054                  | CC                              | TT                 | TT               | INTERGENIC                    |                    |                                  |
| SNP_31120_A_159072 | NC_021164.1    | Ca_Kabuli_Chr05 | 159072                  | GG                              | AA                 | AA               | INTERGENIC                    |                    |                                  |
| SNP_31121_A_160378 | NC_021164.1    | Ca_Kabuli_Chr05 | 160378                  | TT                              | CC                 | CC               | INTERGENIC                    |                    |                                  |
| SNP_31122_A_162662 | NC_021164.1    | Ca_Kabuli_Chr05 | 162662                  | AA                              | TT                 | TT               | INTERGENIC                    |                    |                                  |
| SNP_31124_A_164185 | NC_021164.1    | Ca_Kabuli_Chr05 | 164185                  | TT                              | GG                 | GG               | DRR                           | 101492434          | NAC domain-containing protein 72 |
| SNP_31125_A_164396 | NC_021164.1    | Ca_Kabuli_Chr05 | 164396                  | AA                              | TT                 | TT               | DRR                           | 101492434          | NAC domain-containing protein 72 |
| SNP_31126_A_167037 | NC_021164.1    | Ca_Kabuli_Chr05 | 167037                  | CC                              | TT                 | TT               | URR                           | 101492434          | NAC domain-containing protein 72 |
| SNP_31127_A_168522 | NC_021164.1    | Ca_Kabuli_Chr05 | 168522                  | AA                              | TT                 | TT               | URR                           | 101492434          | NAC domain-containing protein 72 |

| SNPs IDs           | Chromosome IDs | Chromosomes     | Physical positions (bp) | CDC Frontier (Reference genome) | (Pusa 1103 & HPNB) | (ILWC 46 & LPNB) | Sequence Components of genome | Gene accession IDs | Putative functions               |
|--------------------|----------------|-----------------|-------------------------|---------------------------------|--------------------|------------------|-------------------------------|--------------------|----------------------------------|
| SNP_31128_A_168529 | NC_021164.1    | Ca_Kabuli_Chr05 | 168529                  | GG                              | AA                 | AA               | URR                           | 101492434          | NAC domain-containing protein 72 |
| SNP_31129_A_170049 | NC_021164.1    | Ca_Kabuli_Chr05 | 170049                  | TT                              | AA                 | AA               | INTERGENIC                    |                    |                                  |
| SNP_31131_A_171376 | NC_021164.1    | Ca_Kabuli_Chr05 | 171376                  | TT                              | CC                 | CC               | INTERGENIC                    |                    |                                  |
| SNP_31132_A_171378 | NC_021164.1    | Ca_Kabuli_Chr05 | 171378                  | AA                              | CC                 | CC               | INTERGENIC                    |                    |                                  |
| SNP_31133_A_171383 | NC_021164.1    | Ca_Kabuli_Chr05 | 171383                  | GG                              | CC                 | CC               | INTERGENIC                    |                    |                                  |
| SNP_31134_A_171793 | NC_021164.1    | Ca_Kabuli_Chr05 | 171793                  | GG                              | CC                 | CC               | INTERGENIC                    |                    |                                  |
| SNP_31135_A_172369 | NC_021164.1    | Ca_Kabuli_Chr05 | 172369                  | AA                              | TT                 | TT               | INTERGENIC                    |                    |                                  |
| SNP_31136_A_172962 | NC_021164.1    | Ca_Kabuli_Chr05 | 172962                  | CC                              | TT                 | TT               | DRR                           | 101492768          | uncharacterized LOC101492768     |
| SNP_31137_A_174101 | NC_021164.1    | Ca_Kabuli_Chr05 | 174101                  | CC                              | TT                 | TT               | NON_SYNONYMOUS_CODING         | 101492768          | uncharacterized LOC101492768     |
| SNP_31138_A_175240 | NC_021164.1    | Ca_Kabuli_Chr05 | 175240                  | CC                              | TT                 | TT               | INTRON                        | 101492768          | uncharacterized LOC101492768     |
| SNP_31139_A_178534 | NC_021164.1    | Ca_Kabuli_Chr05 | 178534                  | GG                              | AA                 | AA               | INTRON                        | 101492768          | uncharacterized LOC101492768     |
| SNP_31140_A_178549 | NC_021164.1    | Ca_Kabuli_Chr05 | 178549                  | TT                              | GG                 | GG               | INTRON                        | 101492768          | uncharacterized LOC101492768     |
| SNP_31141_A_178588 | NC_021164.1    | Ca_Kabuli_Chr05 | 178588                  | GG                              | AA                 | AA               | INTRON                        | 101492768          | uncharacterized LOC101492768     |
| SNP_31143_A_180581 | NC_021164.1    | Ca_Kabuli_Chr05 | 180581                  | CC                              | AA                 | AA               | URR                           | 101492768          | uncharacterized LOC101492768     |
| SNP_31144_A_180588 | NC_021164.1    | Ca_Kabuli_Chr05 | 180588                  | CC                              | TT                 | TT               | URR                           | 101492768          | uncharacterized LOC101492768     |
| SNP_31145_A_180707 | NC_021164.1    | Ca_Kabuli_Chr05 | 180707                  | TT                              | AA                 | AA               | URR                           | 101492768          | uncharacterized LOC101492768     |
| SNP_31146_A_180748 | NC_021164.1    | Ca_Kabuli_Chr05 | 180748                  | AA                              | TT                 | TT               | URR                           | 101492768          | uncharacterized LOC101492768     |
| SNP_31147_A_184483 | NC_021164.1    | Ca_Kabuli_Chr05 | 184483                  | AA                              | TT                 | TT               | INTRON                        | 101493102          | PHD finger protein Affin1        |
| SNP_31148_A_184615 | NC_021164.1    | Ca_Kabuli_Chr05 | 184615                  | GG                              | TT                 | TT               | INTRON                        | 101493102          | PHD finger protein Affin1        |
| SNP_31149_A_184851 | NC_021164.1    | Ca_Kabuli_Chr05 | 184851                  | AA                              | GG                 | GG               | INTRON                        | 101493102          | PHD finger protein Affin1        |
| SNP_31150_A_184940 | NC_021164.1    | Ca_Kabuli_Chr05 | 184940                  | AA                              | CC                 | CC               | INTRON                        | 101493102          | PHD finger protein Affin1        |
| SNP_31151_A_185682 | NC_021164.1    | Ca_Kabuli_Chr05 | 185682                  | CC                              | TT                 | TT               | INTRON                        | 101493102          | PHD finger protein Affin1        |

| SNPs IDs           | Chromosome IDs | Chromosomes     | Physical positions (bp) | CDC Frontier genome (Reference genome) | (Pusa 1103 & HPNB) | (ILWC 46 & LPNB) | Sequence Components of genome | Gene accession IDs | Putative functions                                                    |
|--------------------|----------------|-----------------|-------------------------|----------------------------------------|--------------------|------------------|-------------------------------|--------------------|-----------------------------------------------------------------------|
| SNP_31156_A_197940 | NC_021164.1    | Ca_Kabuli_Chr05 | 197940                  | CC                                     | TT                 | TT               | INTERGENIC                    |                    |                                                                       |
| SNP_31159_A_200962 | NC_021164.1    | Ca_Kabuli_Chr05 | 200962                  | TT                                     | CC                 | CC               | DRR                           | 101493955          | 2-C-methyl-D-erythritol 4-phosphate cytidyltransferase, chloroplastic |
| SNP_31160_A_201053 | NC_021164.1    | Ca_Kabuli_Chr05 | 201053                  | AA                                     | TT                 | TT               | INTERGENIC                    |                    |                                                                       |
| SNP_31161_A_201926 | NC_021164.1    | Ca_Kabuli_Chr05 | 201926                  | TT                                     | CC                 | CC               | INTERGENIC                    |                    |                                                                       |
| SNP_31162_A_201943 | NC_021164.1    | Ca_Kabuli_Chr05 | 201943                  | AA                                     | GG                 | GG               | INTERGENIC                    |                    |                                                                       |
| SNP_31163_A_203100 | NC_021164.1    | Ca_Kabuli_Chr05 | 203100                  | AA                                     | CC                 | CC               | INTERGENIC                    |                    |                                                                       |
| SNP_31164_A_203499 | NC_021164.1    | Ca_Kabuli_Chr05 | 203499                  | CC                                     | AA                 | AA               | INTRON                        | 101493955          | 2-C-methyl-D-erythritol 4-phosphate cytidyltransferase, chloroplastic |
| SNP_31165_A_203651 | NC_021164.1    | Ca_Kabuli_Chr05 | 203651                  | CC                                     | AA                 | AA               | INTRON                        | 101493955          | 2-C-methyl-D-erythritol 4-phosphate cytidyltransferase, chloroplastic |
| SNP_31166_A_205212 | NC_021164.1    | Ca_Kabuli_Chr05 | 205212                  | GG                                     | CC                 | CC               | INTRON                        | 101493955          | 2-C-methyl-D-erythritol 4-phosphate cytidyltransferase, chloroplastic |
| SNP_31167_A_206497 | NC_021164.1    | Ca_Kabuli_Chr05 | 206497                  | GG                                     | TT                 | TT               | DRR                           | 101494280          | NADH dehydrogenase [ubiquinone] 1 beta subcomplex subunit 3-B         |
| SNP_31168_A_206766 | NC_021164.1    | Ca_Kabuli_Chr05 | 206766                  | AA                                     | CC                 | CC               | DRR                           | 101494280          | NADH dehydrogenase [ubiquinone] 1 beta subcomplex subunit 3-B         |
| SNP_31169_A_206823 | NC_021164.1    | Ca_Kabuli_Chr05 | 206823                  | AA                                     | GG                 | GG               | DRR                           | 101494280          | NADH dehydrogenase [ubiquinone] 1 beta subcomplex subunit 3-B         |
| SNP_31170_A_207884 | NC_021164.1    | Ca_Kabuli_Chr05 | 207884                  | CC                                     | TT                 | TT               | URR                           | 101493955          | 2-C-methyl-D-erythritol 4-phosphate cytidyltransferase, chloroplastic |
| SNP_31171_A_207917 | NC_021164.1    | Ca_Kabuli_Chr05 | 207917                  | GG                                     | AA                 | AA               | URR                           | 101493955          | 2-C-methyl-D-erythritol 4-phosphate cytidyltransferase, chloroplastic |
| SNP_31173_A_210232 | NC_021164.1    | Ca_Kabuli_Chr05 | 210232                  | CC                                     | GG                 | GG               | DRR                           | 101505447          | F-box/kelch-repeat protein At3g23880-like                             |
| SNP_31175_A_212742 | NC_021164.1    | Ca_Kabuli_Chr05 | 212742                  | CC                                     | GG                 | GG               | URR                           | 101505447          | F-box/kelch-repeat protein At3g23880-like                             |
| SNP_31176_A_212808 | NC_021164.1    | Ca_Kabuli_Chr05 | 212808                  | AA                                     | CC                 | CC               | URR                           | 101505447          | F-box/kelch-repeat protein At3g23880-like                             |
| SNP_31177_A_212828 | NC_021164.1    | Ca_Kabuli_Chr05 | 212828                  | AA                                     | GG                 | GG               | URR                           | 101505447          | F-box/kelch-repeat protein At3g23880-like                             |
| SNP_31178_A_214557 | NC_021164.1    | Ca_Kabuli_Chr05 | 214557                  | TT                                     | CC                 | CC               | INTERGENIC                    |                    |                                                                       |
| SNP_31180_A_218418 | NC_021164.1    | Ca_Kabuli_Chr05 | 218418                  | GG                                     | CC                 | CC               | INTERGENIC                    |                    |                                                                       |
| SNP_31182_A_225652 | NC_021164.1    | Ca_Kabuli_Chr05 | 225652                  | TT                                     | CC                 | CC               | URR                           | 101494591          | zinc-finger homeodomain protein 2                                     |
| SNP_31183_A_225682 | NC_021164.1    | Ca_Kabuli_Chr05 | 225682                  | AA                                     | GG                 | GG               | URR                           | 101494591          | zinc-finger homeodomain protein 2                                     |

| SNPs IDs           | Chromosome IDs | Chromosomes     | Physical positions (bp) | CDC Frontier (Reference genome) | (Pusa 1103 & HPNB) | (ILWC 46 & LPNB) | Sequence Components of genome | Gene accession IDs | Putative functions                                  |
|--------------------|----------------|-----------------|-------------------------|---------------------------------|--------------------|------------------|-------------------------------|--------------------|-----------------------------------------------------|
| SNP_31184_A_226488 | NC_021164.1    | Ca_Kabuli_Chr05 | 226488                  | AA                              | TT                 | TT               | DRR                           | 101494905          | protein root UVB sensitive 6                        |
| SNP_31185_A_226498 | NC_021164.1    | Ca_Kabuli_Chr05 | 226498                  | TT                              | CC                 | CC               | DRR                           | 101494905          | protein root UVB sensitive 6                        |
| SNP_31186_A_230575 | NC_021164.1    | Ca_Kabuli_Chr05 | 230575                  | CC                              | TT                 | TT               | INTRON                        | 101494905          | protein root UVB sensitive 6                        |
| SNP_31188_A_236822 | NC_021164.1    | Ca_Kabuli_Chr05 | 236822                  | TT                              | CC                 | CC               | URR                           | 101494905          | protein root UVB sensitive 6                        |
| SNP_31189_A_237020 | NC_021164.1    | Ca_Kabuli_Chr05 | 237020                  | GG                              | TT                 | TT               | URR                           | 101494905          | protein root UVB sensitive 6                        |
| SNP_31190_A_237057 | NC_021164.1    | Ca_Kabuli_Chr05 | 237057                  | TT                              | CC                 | CC               | URR                           | 101494905          | protein root UVB sensitive 6                        |
| SNP_31191_A_237489 | NC_021164.1    | Ca_Kabuli_Chr05 | 237489                  | TT                              | GG                 | GG               | URR                           | 101494905          | protein root UVB sensitive 6                        |
| SNP_31192_A_237538 | NC_021164.1    | Ca_Kabuli_Chr05 | 237538                  | GG                              | AA                 | AA               | URR                           | 101494905          | protein root UVB sensitive 6                        |
| SNP_31193_A_237612 | NC_021164.1    | Ca_Kabuli_Chr05 | 237612                  | TT                              | CC                 | CC               | URR                           | 101494905          | protein root UVB sensitive 6                        |
| SNP_31194_A_237682 | NC_021164.1    | Ca_Kabuli_Chr05 | 237682                  | TT                              | CC                 | CC               | URR                           | 101494905          | protein root UVB sensitive 6                        |
| SNP_31195_A_239784 | NC_021164.1    | Ca_Kabuli_Chr05 | 239784                  | GG                              | AA                 | AA               | INTERGENIC                    |                    |                                                     |
| SNP_31196_A_240070 | NC_021164.1    | Ca_Kabuli_Chr05 | 240070                  | GG                              | AA                 | AA               | INTERGENIC                    |                    |                                                     |
| SNP_31197_A_240094 | NC_021164.1    | Ca_Kabuli_Chr05 | 240094                  | AA                              | GG                 | GG               | INTERGENIC                    |                    |                                                     |
| SNP_31198_A_240098 | NC_021164.1    | Ca_Kabuli_Chr05 | 240098                  | TT                              | CC                 | CC               | INTERGENIC                    |                    |                                                     |
| SNP_31199_A_241154 | NC_021164.1    | Ca_Kabuli_Chr05 | 241154                  | CC                              | AA                 | AA               | INTERGENIC                    |                    |                                                     |
| SNP_31200_A_241159 | NC_021164.1    | Ca_Kabuli_Chr05 | 241159                  | TT                              | AA                 | AA               | INTERGENIC                    |                    |                                                     |
| SNP_31202_A_241209 | NC_021164.1    | Ca_Kabuli_Chr05 | 241209                  | GG                              | TT                 | TT               | INTERGENIC                    |                    |                                                     |
| SNP_31203_A_244004 | NC_021164.1    | Ca_Kabuli_Chr05 | 244004                  | AA                              | GG                 | GG               | INTERGENIC                    |                    |                                                     |
| SNP_31204_A_244034 | NC_021164.1    | Ca_Kabuli_Chr05 | 244034                  | TT                              | CC                 | CC               | DRR                           | 101495236          | cullin-associated NEDD8-dissociated protein 1       |
| SNP_31207_A_246466 | NC_021164.1    | Ca_Kabuli_Chr05 | 246466                  | TT                              | AA                 | AA               | INTRON                        | 101495236          | cullin-associated NEDD8-dissociated protein 1       |
| SNP_31208_A_247485 | NC_021164.1    | Ca_Kabuli_Chr05 | 247485                  | TT                              | GG                 | GG               | INTRON                        | 101495236          | cullin-associated NEDD8-dissociated protein 1       |
| SNP_31209_A_260915 | NC_021164.1    | Ca_Kabuli_Chr05 | 260915                  | AA                              | CC                 | CC               | DRR                           | 101495555          | survival of motor neuron-related-splicing factor 30 |



| SNPs IDs           | Chromosome IDs | Chromosomes     | Physical positions (bp) | CDC Frontier (Reference genome) | (Pusa 1103 & HPNB) | (ILWC 46 & LPNB) | Sequence Components of genome | Gene accession IDs | Putative functions                             |
|--------------------|----------------|-----------------|-------------------------|---------------------------------|--------------------|------------------|-------------------------------|--------------------|------------------------------------------------|
| SNP_31211_A_275427 | NC_021164.1    | Ca_Kabuli_Chr05 | 275427                  | GG                              | AA                 | AA               | INTRON                        | 101495887          | mitotic spindle checkpoint protein MAD1        |
| SNP_31212_A_275428 | NC_021164.1    | Ca_Kabuli_Chr05 | 275428                  | AA                              | GG                 | GG               | INTRON                        | 101495887          | mitotic spindle checkpoint protein MAD1        |
| SNP_31214_A_278551 | NC_021164.1    | Ca_Kabuli_Chr05 | 278551                  | AA                              | GG                 | GG               | URR                           | 101495887          | mitotic spindle checkpoint protein MAD1        |
| SNP_31216_A_287671 | NC_021164.1    | Ca_Kabuli_Chr05 | 287671                  | AA                              | GG                 | GG               | DRR                           | 101497080          | H/ACA ribonucleoprotein complex subunit 4-like |
| SNP_31217_A_287850 | NC_021164.1    | Ca_Kabuli_Chr05 | 287850                  | GG                              | AA                 | AA               | DRR                           | 101497080          | H/ACA ribonucleoprotein complex subunit 4-like |
| SNP_31218_A_287913 | NC_021164.1    | Ca_Kabuli_Chr05 | 287913                  | AA                              | GG                 | GG               | DRR                           | 101497080          | H/ACA ribonucleoprotein complex subunit 4-like |
| SNP_31219_A_289781 | NC_021164.1    | Ca_Kabuli_Chr05 | 289781                  | TT                              | AA                 | AA               | INTERGENIC                    |                    |                                                |
| SNP_31220_A_289794 | NC_021164.1    | Ca_Kabuli_Chr05 | 289794                  | GG                              | AA                 | AA               | INTERGENIC                    |                    |                                                |
| SNP_31221_A_290050 | NC_021164.1    | Ca_Kabuli_Chr05 | 290050                  | AA                              | TT                 | TT               | INTERGENIC                    |                    |                                                |
| SNP_31222_A_290051 | NC_021164.1    | Ca_Kabuli_Chr05 | 290051                  | TT                              | AA                 | AA               | INTERGENIC                    |                    |                                                |
| SNP_31223_A_290136 | NC_021164.1    | Ca_Kabuli_Chr05 | 290136                  | AA                              | GG                 | GG               | INTERGENIC                    |                    |                                                |
| SNP_31224_A_290304 | NC_021164.1    | Ca_Kabuli_Chr05 | 290304                  | AA                              | CC                 | CC               | INTERGENIC                    |                    |                                                |
| SNP_31225_A_290885 | NC_021164.1    | Ca_Kabuli_Chr05 | 290885                  | AA                              | TT                 | TT               | INTERGENIC                    |                    |                                                |
| SNP_31226_A_291039 | NC_021164.1    | Ca_Kabuli_Chr05 | 291039                  | AA                              | TT                 | TT               | INTERGENIC                    |                    |                                                |
| SNP_31227_A_291040 | NC_021164.1    | Ca_Kabuli_Chr05 | 291040                  | GG                              | CC                 | CC               | INTERGENIC                    |                    |                                                |
| SNP_31229_A_291116 | NC_021164.1    | Ca_Kabuli_Chr05 | 291116                  | TT                              | CC                 | CC               | INTERGENIC                    |                    |                                                |
| SNP_31230_A_291177 | NC_021164.1    | Ca_Kabuli_Chr05 | 291177                  | CC                              | TT                 | TT               | INTERGENIC                    |                    |                                                |
| SNP_31231_A_291228 | NC_021164.1    | Ca_Kabuli_Chr05 | 291228                  | GG                              | AA                 | AA               | INTERGENIC                    |                    |                                                |
| SNP_31232_A_291250 | NC_021164.1    | Ca_Kabuli_Chr05 | 291250                  | GG                              | AA                 | AA               | INTERGENIC                    |                    |                                                |
| SNP_31233_A_291296 | NC_021164.1    | Ca_Kabuli_Chr05 | 291296                  | GG                              | AA                 | AA               | URR                           | 101505782          | MATE efflux family protein 5-like              |
| SNP_31234_A_291301 | NC_021164.1    | Ca_Kabuli_Chr05 | 291301                  | AA                              | TT                 | TT               | URR                           | 101505782          | MATE efflux family protein 5-like              |
| SNP_31235_A_291315 | NC_021164.1    | Ca_Kabuli_Chr05 | 291315                  | GG                              | AA                 | AA               | URR                           | 101505782          | MATE efflux family protein 5-like              |

| SNPs IDs           | Chromosome IDs | Chromosomes     | Physical positions (bp) | CDC Frontier genome (Reference genome) | (Pusa 1103 & HPNB) | (ILWC 46 & LPNB) | Sequence Components of genome | Gene accession IDs | Putative functions                             |
|--------------------|----------------|-----------------|-------------------------|----------------------------------------|--------------------|------------------|-------------------------------|--------------------|------------------------------------------------|
| SNP_31236_A_291347 | NC_021164.1    | Ca_Kabuli_Chr05 | 291347                  | AA                                     | GG                 | GG               | URR                           | 101505782          | MATE efflux family protein 5-like              |
| SNP_31238_A_291393 | NC_021164.1    | Ca_Kabuli_Chr05 | 291393                  | AA                                     | CC                 | CC               | URR                           | 101505782          | MATE efflux family protein 5-like              |
| SNP_31239_A_291421 | NC_021164.1    | Ca_Kabuli_Chr05 | 291421                  | GG                                     | AA                 | AA               | URR                           | 101505782          | MATE efflux family protein 5-like              |
| SNP_31240_A_291439 | NC_021164.1    | Ca_Kabuli_Chr05 | 291439                  | GG                                     | AA                 | AA               | URR                           | 101505782          | MATE efflux family protein 5-like              |
| SNP_31241_A_291545 | NC_021164.1    | Ca_Kabuli_Chr05 | 291545                  | CC                                     | GG                 | GG               | URR                           | 101505782          | MATE efflux family protein 5-like              |
| SNP_31242_A_291546 | NC_021164.1    | Ca_Kabuli_Chr05 | 291546                  | AA                                     | TT                 | TT               | URR                           | 101505782          | MATE efflux family protein 5-like              |
| SNP_31245_A_291981 | NC_021164.1    | Ca_Kabuli_Chr05 | 291981                  | AA                                     | CC                 | CC               | URR                           | 101505782          | MATE efflux family protein 5-like              |
| SNP_31246_A_291986 | NC_021164.1    | Ca_Kabuli_Chr05 | 291986                  | GG                                     | AA                 | AA               | URR                           | 101505782          | MATE efflux family protein 5-like              |
| SNP_31247_A_292029 | NC_021164.1    | Ca_Kabuli_Chr05 | 292029                  | TT                                     | AA                 | AA               | URR                           | 101505782          | MATE efflux family protein 5-like              |
| SNP_31250_A_292255 | NC_021164.1    | Ca_Kabuli_Chr05 | 292255                  | CC                                     | TT                 | TT               | URR                           | 101505782          | MATE efflux family protein 5-like              |
| SNP_31251_A_292286 | NC_021164.1    | Ca_Kabuli_Chr05 | 292286                  | AA                                     | GG                 | GG               | URR                           | 101505782          | MATE efflux family protein 5-like              |
| SNP_31252_A_292296 | NC_021164.1    | Ca_Kabuli_Chr05 | 292296                  | TT                                     | AA                 | AA               | URR                           | 101505782          | MATE efflux family protein 5-like              |
| SNP_31253_A_292460 | NC_021164.1    | Ca_Kabuli_Chr05 | 292460                  | AA                                     | CC                 | CC               | URR                           | 101505782          | MATE efflux family protein 5-like              |
| SNP_31254_A_292517 | NC_021164.1    | Ca_Kabuli_Chr05 | 292517                  | CC                                     | AA                 | AA               | URR                           | 101505782          | MATE efflux family protein 5-like              |
| SNP_31255_A_292525 | NC_021164.1    | Ca_Kabuli_Chr05 | 292525                  | GG                                     | TT                 | TT               | URR                           | 101505782          | MATE efflux family protein 5-like              |
| SNP_31256_A_292652 | NC_021164.1    | Ca_Kabuli_Chr05 | 292652                  | CC                                     | TT                 | TT               | URR                           | 101505782          | MATE efflux family protein 5-like              |
| SNP_31257_A_292653 | NC_021164.1    | Ca_Kabuli_Chr05 | 292653                  | AA                                     | CC                 | CC               | URR                           | 101505782          | MATE efflux family protein 5-like              |
| SNP_31258_A_293197 | NC_021164.1    | Ca_Kabuli_Chr05 | 293197                  | TT                                     | GG                 | GG               | URR                           | 101505782          | MATE efflux family protein 5-like              |
| SNP_31259_A_294815 | NC_021164.1    | Ca_Kabuli_Chr05 | 294815                  | CC                                     | TT                 | TT               | INTRON                        | 101497080          | H/ACA ribonucleoprotein complex subunit 4-like |
| SNP_31260_A_307609 | NC_021164.1    | Ca_Kabuli_Chr05 | 307609                  | TT                                     | GG                 | GG               | INTRON                        | 101498746          | dynammin-2A                                    |
| SNP_31261_A_316526 | NC_021164.1    | Ca_Kabuli_Chr05 | 316526                  | GG                                     | TT                 | TT               | URR                           | 101498746          | dynammin-2A                                    |
| SNP_31262_A_340362 | NC_021164.1    | Ca_Kabuli_Chr05 | 340362                  | GG                                     | AA                 | AA               | INTERGENIC                    |                    |                                                |

| SNPs IDs           | Chromosome IDs | Chromosomes     | Physical positions (bp) | CDC Frontier (Reference genome) | (Pusa 1103 & HPNB) | (ILWC 46 & LPNB) | Sequence Components of genome | Gene accession IDs | Putative functions                 |
|--------------------|----------------|-----------------|-------------------------|---------------------------------|--------------------|------------------|-------------------------------|--------------------|------------------------------------|
| SNP_31263_A_347634 | NC_021164.1    | Ca_Kabuli_Chr05 | 347634                  | AA                              | TT                 | TT               | INTRON                        | 101500963          | ATP-dependent RNA helicase DHX36   |
| SNP_31264_A_347645 | NC_021164.1    | Ca_Kabuli_Chr05 | 347645                  | CC                              | TT                 | TT               | INTRON                        | 101500963          | ATP-dependent RNA helicase DHX36   |
| SNP_31265_A_347656 | NC_021164.1    | Ca_Kabuli_Chr05 | 347656                  | GG                              | AA                 | AA               | INTRON                        | 101500963          | ATP-dependent RNA helicase DHX36   |
| SNP_31266_A_347675 | NC_021164.1    | Ca_Kabuli_Chr05 | 347675                  | GG                              | AA                 | AA               | INTRON                        | 101500963          | ATP-dependent RNA helicase DHX36   |
| SNP_31267_A_348034 | NC_021164.1    | Ca_Kabuli_Chr05 | 348034                  | GG                              | AA                 | AA               | INTRON                        | 101500963          | ATP-dependent RNA helicase DHX36   |
| SNP_31269_A_362389 | NC_021164.1    | Ca_Kabuli_Chr05 | 362389                  | AA                              | GG                 | GG               | INTRON                        | 101500963          | ATP-dependent RNA helicase DHX36   |
| SNP_31270_A_362831 | NC_021164.1    | Ca_Kabuli_Chr05 | 362831                  | TT                              | AA                 | AA               | INTRON                        | 101500963          | ATP-dependent RNA helicase DHX36   |
| SNP_31271_A_362851 | NC_021164.1    | Ca_Kabuli_Chr05 | 362851                  | AA                              | CC                 | CC               | INTRON                        | 101500963          | ATP-dependent RNA helicase DHX36   |
| SNP_31272_A_362971 | NC_021164.1    | Ca_Kabuli_Chr05 | 362971                  | AA                              | GG                 | GG               | INTRON                        | 101500963          | ATP-dependent RNA helicase DHX36   |
| SNP_31273_A_372127 | NC_021164.1    | Ca_Kabuli_Chr05 | 372127                  | GG                              | AA                 | AA               | INTRON                        | 101500963          | ATP-dependent RNA helicase DHX36   |
| SNP_31274_A_372532 | NC_021164.1    | Ca_Kabuli_Chr05 | 372532                  | TT                              | CC                 | CC               | INTRON                        | 101500963          | ATP-dependent RNA helicase DHX36   |
| SNP_31275_A_378223 | NC_021164.1    | Ca_Kabuli_Chr05 | 378223                  | CC                              | TT                 | TT               | INTRON                        | 101500963          | ATP-dependent RNA helicase DHX36   |
| SNP_31277_A_396969 | NC_021164.1    | Ca_Kabuli_Chr05 | 396969                  | CC                              | TT                 | TT               | INTRON                        | 101500963          | ATP-dependent RNA helicase DHX36   |
| SNP_31278_A_413918 | NC_021164.1    | Ca_Kabuli_Chr05 | 413918                  | CC                              | TT                 | TT               | URR                           | 101500963          | ATP-dependent RNA helicase DHX36   |
| SNP_31279_A_414258 | NC_021164.1    | Ca_Kabuli_Chr05 | 414258                  | GG                              | CC                 | CC               | URR                           | 101500963          | ATP-dependent RNA helicase DHX36   |
| SNP_31280_A_414555 | NC_021164.1    | Ca_Kabuli_Chr05 | 414555                  | CC                              | TT                 | TT               | URR                           | 101500963          | ATP-dependent RNA helicase DHX36   |
| SNP_31281_A_420397 | NC_021164.1    | Ca_Kabuli_Chr05 | 420397                  | TT                              | CC                 | CC               | INTERGENIC                    |                    |                                    |
| SNP_31282_A_420581 | NC_021164.1    | Ca_Kabuli_Chr05 | 420581                  | AA                              | TT                 | TT               | INTERGENIC                    |                    |                                    |
| SNP_31283_A_425659 | NC_021164.1    | Ca_Kabuli_Chr05 | 425659                  | AA                              | GG                 | GG               | INTERGENIC                    |                    |                                    |
| SNP_31284_A_426169 | NC_021164.1    | Ca_Kabuli_Chr05 | 426169                  | AA                              | GG                 | GG               | DRR                           | 101501502          | uncharacterized LOC101501502       |
| SNP_31286_A_440628 | NC_021164.1    | Ca_Kabuli_Chr05 | 440628                  | TT                              | CC                 | CC               | URR                           | 101501502          | uncharacterized LOC101501502       |
| SNP_31287_A_446162 | NC_021164.1    | Ca_Kabuli_Chr05 | 446162                  | TT                              | CC                 | CC               | INTRON                        | 101501816          | ankyrin repeat protein SKIP35-like |

| SNPs IDs           | Chromosome IDs | Chromosomes     | Physical positions (bp) | CDC Frontier (Reference genome) | (Pusa 1103 & HPNB) | (ILWC 46 & LPNB) | Sequence Components of genome | Gene accession IDs | Putative functions                                   |
|--------------------|----------------|-----------------|-------------------------|---------------------------------|--------------------|------------------|-------------------------------|--------------------|------------------------------------------------------|
| SNP_31288_A_456129 | NC_021164.1    | Ca_Kabuli_Chr05 | 456129                  | TT                              | GG                 | GG               | INTERGENIC                    |                    |                                                      |
| SNP_31292_A_464328 | NC_021164.1    | Ca_Kabuli_Chr05 | 464328                  | GG                              | AA                 | AA               | URR                           | 101502140          | outer envelope pore protein 37, chloroplastic        |
| SNP_31293_A_471157 | NC_021164.1    | Ca_Kabuli_Chr05 | 471157                  | AA                              | GG                 | GG               | INTRON                        | 101502458          | type I inositol 1,4,5-trisphosphate 5-phosphatase 12 |
| SNP_31294_A_480948 | NC_021164.1    | Ca_Kabuli_Chr05 | 480948                  | GG                              | AA                 | AA               | INTERGENIC                    |                    |                                                      |
| SNP_31295_A_482795 | NC_021164.1    | Ca_Kabuli_Chr05 | 482795                  | GG                              | AA                 | AA               | INTERGENIC                    |                    |                                                      |
| SNP_31296_A_483187 | NC_021164.1    | Ca_Kabuli_Chr05 | 483187                  | AA                              | GG                 | GG               | INTERGENIC                    |                    |                                                      |
| SNP_31297_A_483359 | NC_021164.1    | Ca_Kabuli_Chr05 | 483359                  | CC                              | TT                 | TT               | INTERGENIC                    |                    |                                                      |
| SNP_31298_A_485226 | NC_021164.1    | Ca_Kabuli_Chr05 | 485226                  | TT                              | AA                 | AA               | DRR                           | 101502972          | uncharacterized LOC101502972                         |
| SNP_31299_A_487304 | NC_021164.1    | Ca_Kabuli_Chr05 | 487304                  | CC                              | TT                 | TT               | SYNONYMOUS_CODING             | id96723            | Unknown function                                     |
| SNP_31300_A_488291 | NC_021164.1    | Ca_Kabuli_Chr05 | 488291                  | GG                              | TT                 | TT               | NON_SYNONYMOUS_CODING         | id96723            | Unknown function                                     |
| SNP_31301_A_490258 | NC_021164.1    | Ca_Kabuli_Chr05 | 490258                  | GG                              | AA                 | AA               | NON_SYNONYMOUS_CODING         | id96723            | Unknown function                                     |
| SNP_31302_A_490263 | NC_021164.1    | Ca_Kabuli_Chr05 | 490263                  | AA                              | GG                 | GG               | NON_SYNONYMOUS_CODING         | id96723            | Unknown function                                     |
| SNP_31303_A_492090 | NC_021164.1    | Ca_Kabuli_Chr05 | 492090                  | TT                              | CC                 | CC               | URR                           | 101502972          | uncharacterized LOC101502972                         |
| SNP_31304_A_492145 | NC_021164.1    | Ca_Kabuli_Chr05 | 492145                  | AA                              | TT                 | TT               | URR                           | 101502972          | uncharacterized LOC101502972                         |
| SNP_31305_A_492148 | NC_021164.1    | Ca_Kabuli_Chr05 | 492148                  | CC                              | TT                 | TT               | URR                           | 101502972          | uncharacterized LOC101502972                         |
| SNP_31306_A_492196 | NC_021164.1    | Ca_Kabuli_Chr05 | 492196                  | TT                              | AA                 | AA               | URR                           | 101502972          | uncharacterized LOC101502972                         |
| SNP_31307_A_492197 | NC_021164.1    | Ca_Kabuli_Chr05 | 492197                  | TT                              | CC                 | CC               | URR                           | 101502972          | uncharacterized LOC101502972                         |
| SNP_31308_A_492198 | NC_021164.1    | Ca_Kabuli_Chr05 | 492198                  | TT                              | CC                 | CC               | URR                           | 101502972          | uncharacterized LOC101502972                         |
| SNP_31309_A_492203 | NC_021164.1    | Ca_Kabuli_Chr05 | 492203                  | AA                              | GG                 | GG               | URR                           | 101502972          | uncharacterized LOC101502972                         |
| SNP_31310_A_492251 | NC_021164.1    | Ca_Kabuli_Chr05 | 492251                  | CC                              | AA                 | AA               | URR                           | 101502972          | uncharacterized LOC101502972                         |
| SNP_31311_A_492252 | NC_021164.1    | Ca_Kabuli_Chr05 | 492252                  | AA                              | TT                 | TT               | URR                           | 101502972          | uncharacterized LOC101502972                         |
| SNP_31312_A_492292 | NC_021164.1    | Ca_Kabuli_Chr05 | 492292                  | CC                              | GG                 | GG               | URR                           | 101502972          | uncharacterized LOC101502972                         |

| SNPs IDs           | Chromosome IDs | Chromosomes     | Physical positions (bp) | CDC Frontier genome (Reference genome) | (Pusa 1103 & HPNB) | (ILWC 46 & LPNB) | Sequence Components of genome | Gene accession IDs | Putative functions           |
|--------------------|----------------|-----------------|-------------------------|----------------------------------------|--------------------|------------------|-------------------------------|--------------------|------------------------------|
| SNP_31313_A_492447 | NC_021164.1    | Ca_Kabuli_Chr05 | 492447                  | AA                                     | GG                 | GG               | URR                           | 101502972          | uncharacterized LOC101502972 |
| SNP_31314_A_492471 | NC_021164.1    | Ca_Kabuli_Chr05 | 492471                  | CC                                     | TT                 | TT               | URR                           | 101502972          | uncharacterized LOC101502972 |
| SNP_31315_A_492511 | NC_021164.1    | Ca_Kabuli_Chr05 | 492511                  | AA                                     | GG                 | GG               | URR                           | 101502972          | uncharacterized LOC101502972 |
| SNP_31316_A_492516 | NC_021164.1    | Ca_Kabuli_Chr05 | 492516                  | GG                                     | TT                 | TT               | URR                           | 101502972          | uncharacterized LOC101502972 |
| SNP_31317_A_492583 | NC_021164.1    | Ca_Kabuli_Chr05 | 492583                  | AA                                     | TT                 | TT               | URR                           | 101502972          | uncharacterized LOC101502972 |
| SNP_31318_A_492585 | NC_021164.1    | Ca_Kabuli_Chr05 | 492585                  | TT                                     | AA                 | AA               | URR                           | 101502972          | uncharacterized LOC101502972 |
| SNP_31319_A_492675 | NC_021164.1    | Ca_Kabuli_Chr05 | 492675                  | TT                                     | GG                 | GG               | URR                           | 101502972          | uncharacterized LOC101502972 |
| SNP_31320_A_492679 | NC_021164.1    | Ca_Kabuli_Chr05 | 492679                  | TT                                     | CC                 | CC               | URR                           | 101502972          | uncharacterized LOC101502972 |
| SNP_31321_A_492735 | NC_021164.1    | Ca_Kabuli_Chr05 | 492735                  | GG                                     | TT                 | TT               | URR                           | 101502972          | uncharacterized LOC101502972 |
| SNP_31322_A_492868 | NC_021164.1    | Ca_Kabuli_Chr05 | 492868                  | AA                                     | GG                 | GG               | URR                           | 101502972          | uncharacterized LOC101502972 |
| SNP_31323_A_492892 | NC_021164.1    | Ca_Kabuli_Chr05 | 492892                  | TT                                     | AA                 | AA               | URR                           | 101502972          | uncharacterized LOC101502972 |
| SNP_31324_A_497203 | NC_021164.1    | Ca_Kabuli_Chr05 | 497203                  | TT                                     | CC                 | CC               | INTERGENIC                    |                    |                              |
| SNP_31325_A_497210 | NC_021164.1    | Ca_Kabuli_Chr05 | 497210                  | TT                                     | GG                 | GG               | INTERGENIC                    |                    |                              |
| SNP_31326_A_497215 | NC_021164.1    | Ca_Kabuli_Chr05 | 497215                  | CC                                     | AA                 | AA               | INTERGENIC                    |                    |                              |
| SNP_31327_A_497479 | NC_021164.1    | Ca_Kabuli_Chr05 | 497479                  | TT                                     | GG                 | GG               | INTERGENIC                    |                    |                              |
| SNP_31328_A_497512 | NC_021164.1    | Ca_Kabuli_Chr05 | 497512                  | AA                                     | GG                 | GG               | INTERGENIC                    |                    |                              |
| SNP_31329_A_497519 | NC_021164.1    | Ca_Kabuli_Chr05 | 497519                  | AA                                     | CC                 | CC               | INTERGENIC                    |                    |                              |
| SNP_31330_A_497552 | NC_021164.1    | Ca_Kabuli_Chr05 | 497552                  | AA                                     | CC                 | CC               | INTERGENIC                    |                    |                              |
| SNP_31331_A_509313 | NC_021164.1    | Ca_Kabuli_Chr05 | 509313                  | AA                                     | CC                 | CC               | INTERGENIC                    |                    |                              |
| SNP_31332_A_509359 | NC_021164.1    | Ca_Kabuli_Chr05 | 509359                  | CC                                     | TT                 | TT               | INTERGENIC                    |                    |                              |
| SNP_31333_A_509362 | NC_021164.1    | Ca_Kabuli_Chr05 | 509362                  | TT                                     | CC                 | CC               | INTERGENIC                    |                    |                              |
| SNP_31334_A_516844 | NC_021164.1    | Ca_Kabuli_Chr05 | 516844                  | CC                                     | GG                 | GG               | INTERGENIC                    |                    |                              |

| SNPs IDs           | Chromosome IDs | Chromosomes     | Physical positions (bp) | CDC Frontier genome (Reference genome) | (Pusa 1103 & HPNB) | (ILWC 46 & LPNB) | Sequence Components of genome | Gene accession IDs | Putative functions           |
|--------------------|----------------|-----------------|-------------------------|----------------------------------------|--------------------|------------------|-------------------------------|--------------------|------------------------------|
| SNP_31335_A_516935 | NC_021164.1    | Ca_Kabuli_Chr05 | 516935                  | CC                                     | TT                 | TT               | INTERGENIC                    |                    |                              |
| SNP_31336_A_529003 | NC_021164.1    | Ca_Kabuli_Chr05 | 529003                  | GG                                     | AA                 | AA               | INTERGENIC                    |                    |                              |
| SNP_31337_A_529250 | NC_021164.1    | Ca_Kabuli_Chr05 | 529250                  | CC                                     | AA                 | AA               | INTERGENIC                    |                    |                              |
| SNP_31338_A_553076 | NC_021164.1    | Ca_Kabuli_Chr05 | 553076                  | GG                                     | TT                 | TT               | INTRON                        | 101507716          | uncharacterized LOC101507716 |
| SNP_31339_A_561604 | NC_021164.1    | Ca_Kabuli_Chr05 | 561604                  | TT                                     | AA                 | AA               | INTRON                        | 101507716          | uncharacterized LOC101507716 |
| SNP_31340_A_613122 | NC_021164.1    | Ca_Kabuli_Chr05 | 613122                  | TT                                     | AA                 | AA               | INTERGENIC                    |                    |                              |
| SNP_31341_A_622549 | NC_021164.1    | Ca_Kabuli_Chr05 | 622549                  | TT                                     | CC                 | CC               | INTERGENIC                    |                    |                              |
| SNP_31343_A_622725 | NC_021164.1    | Ca_Kabuli_Chr05 | 622725                  | AA                                     | GG                 | GG               | INTERGENIC                    |                    |                              |
| SNP_31344_A_622729 | NC_021164.1    | Ca_Kabuli_Chr05 | 622729                  | GG                                     | AA                 | AA               | INTERGENIC                    |                    |                              |
| SNP_31345_A_622737 | NC_021164.1    | Ca_Kabuli_Chr05 | 622737                  | GG                                     | AA                 | AA               | INTERGENIC                    |                    |                              |
| SNP_31346_A_622774 | NC_021164.1    | Ca_Kabuli_Chr05 | 622774                  | GG                                     | TT                 | TT               | INTERGENIC                    |                    |                              |
| SNP_31347_A_622782 | NC_021164.1    | Ca_Kabuli_Chr05 | 622782                  | TT                                     | CC                 | CC               | INTERGENIC                    |                    |                              |
| SNP_31348_A_622828 | NC_021164.1    | Ca_Kabuli_Chr05 | 622828                  | AA                                     | GG                 | GG               | INTERGENIC                    |                    |                              |
| SNP_31349_A_622837 | NC_021164.1    | Ca_Kabuli_Chr05 | 622837                  | CC                                     | GG                 | GG               | INTERGENIC                    |                    |                              |
| SNP_31350_A_622906 | NC_021164.1    | Ca_Kabuli_Chr05 | 622906                  | GG                                     | TT                 | TT               | INTERGENIC                    |                    |                              |
| SNP_31351_A_625529 | NC_021164.1    | Ca_Kabuli_Chr05 | 625529                  | CC                                     | AA                 | AA               | INTERGENIC                    |                    |                              |
| SNP_31352_A_643166 | NC_021164.1    | Ca_Kabuli_Chr05 | 643166                  | GG                                     | AA                 | AA               | INTERGENIC                    |                    |                              |
| SNP_31353_A_643678 | NC_021164.1    | Ca_Kabuli_Chr05 | 643678                  | TT                                     | AA                 | AA               | INTERGENIC                    |                    |                              |
| SNP_31354_A_643684 | NC_021164.1    | Ca_Kabuli_Chr05 | 643684                  | CC                                     | TT                 | TT               | INTERGENIC                    |                    |                              |
| SNP_31355_A_643701 | NC_021164.1    | Ca_Kabuli_Chr05 | 643701                  | TT                                     | CC                 | CC               | INTERGENIC                    |                    |                              |
| SNP_31356_A_655517 | NC_021164.1    | Ca_Kabuli_Chr05 | 655517                  | GG                                     | AA                 | AA               | INTERGENIC                    |                    |                              |
| SNP_31357_A_655518 | NC_021164.1    | Ca_Kabuli_Chr05 | 655518                  | CC                                     | TT                 | TT               | INTERGENIC                    |                    |                              |

| SNPs IDs           | Chromosome IDs | Chromosomes     | Physical positions (bp) | CDC Frontier genome (Reference genome) | (Pusa 1103 & HPNB) | (ILWC 46 & LPNB) | Sequence genome | Components of | Gene accession IDs | Putative functions |
|--------------------|----------------|-----------------|-------------------------|----------------------------------------|--------------------|------------------|-----------------|---------------|--------------------|--------------------|
| SNP_31358_A_657118 | NC_021164.1    | Ca_Kabuli_Chr05 | 657118                  | AA                                     | GG                 | GG               | INTERGENIC      |               |                    |                    |
| SNP_31359_A_657353 | NC_021164.1    | Ca_Kabuli_Chr05 | 657353                  | CC                                     | TT                 | TT               | INTERGENIC      |               |                    |                    |
| SNP_31360_A_657380 | NC_021164.1    | Ca_Kabuli_Chr05 | 657380                  | GG                                     | CC                 | CC               | INTERGENIC      |               |                    |                    |
| SNP_31361_A_657390 | NC_021164.1    | Ca_Kabuli_Chr05 | 657390                  | TT                                     | CC                 | CC               | INTERGENIC      |               |                    |                    |
| SNP_31362_A_659724 | NC_021164.1    | Ca_Kabuli_Chr05 | 659724                  | AA                                     | GG                 | GG               | INTERGENIC      |               |                    |                    |
| SNP_31363_A_659733 | NC_021164.1    | Ca_Kabuli_Chr05 | 659733                  | AA                                     | TT                 | TT               | INTERGENIC      |               |                    |                    |
| SNP_31364_A_660006 | NC_021164.1    | Ca_Kabuli_Chr05 | 660006                  | GG                                     | CC                 | CC               | INTERGENIC      |               |                    |                    |
| SNP_31365_A_664544 | NC_021164.1    | Ca_Kabuli_Chr05 | 664544                  | TT                                     | AA                 | AA               | INTERGENIC      |               |                    |                    |
| SNP_31366_A_664702 | NC_021164.1    | Ca_Kabuli_Chr05 | 664702                  | TT                                     | CC                 | CC               | INTERGENIC      |               |                    |                    |
| SNP_31367_A_664946 | NC_021164.1    | Ca_Kabuli_Chr05 | 664946                  | TT                                     | CC                 | CC               | INTERGENIC      |               |                    |                    |
| SNP_31368_A_666157 | NC_021164.1    | Ca_Kabuli_Chr05 | 666157                  | AA                                     | GG                 | GG               | INTERGENIC      |               |                    |                    |
| SNP_31369_A_666369 | NC_021164.1    | Ca_Kabuli_Chr05 | 666369                  | AA                                     | TT                 | TT               | INTERGENIC      |               |                    |                    |
| SNP_31370_A_666468 | NC_021164.1    | Ca_Kabuli_Chr05 | 666468                  | AA                                     | TT                 | TT               | INTERGENIC      |               |                    |                    |
| SNP_31371_A_666500 | NC_021164.1    | Ca_Kabuli_Chr05 | 666500                  | CC                                     | AA                 | AA               | INTERGENIC      |               |                    |                    |
| SNP_31372_A_666502 | NC_021164.1    | Ca_Kabuli_Chr05 | 666502                  | GG                                     | TT                 | TT               | INTERGENIC      |               |                    |                    |
| SNP_31373_A_666524 | NC_021164.1    | Ca_Kabuli_Chr05 | 666524                  | TT                                     | CC                 | CC               | INTERGENIC      |               |                    |                    |
| SNP_31374_A_666539 | NC_021164.1    | Ca_Kabuli_Chr05 | 666539                  | AA                                     | CC                 | CC               | INTERGENIC      |               |                    |                    |
| SNP_31375_A_666879 | NC_021164.1    | Ca_Kabuli_Chr05 | 666879                  | GG                                     | TT                 | TT               | INTERGENIC      |               |                    |                    |
| SNP_31376_A_667266 | NC_021164.1    | Ca_Kabuli_Chr05 | 667266                  | TT                                     | CC                 | CC               | INTERGENIC      |               |                    |                    |
| SNP_31377_A_667292 | NC_021164.1    | Ca_Kabuli_Chr05 | 667292                  | AA                                     | GG                 | GG               | INTERGENIC      |               |                    |                    |
| SNP_31378_A_667304 | NC_021164.1    | Ca_Kabuli_Chr05 | 667304                  | GG                                     | AA                 | AA               | INTERGENIC      |               |                    |                    |
| SNP_31379_A_667307 | NC_021164.1    | Ca_Kabuli_Chr05 | 667307                  | AA                                     | GG                 | GG               | INTERGENIC      |               |                    |                    |

| SNPs IDs           | Chromosome IDs | Chromosomes     | Physical positions (bp) | CDC Frontier genome (Reference genome) | (Pusa 1103 & HPNB) | (ILWC 46 & LPNB) | Sequence genome | Components of | Gene accession IDs | Putative functions |
|--------------------|----------------|-----------------|-------------------------|----------------------------------------|--------------------|------------------|-----------------|---------------|--------------------|--------------------|
| SNP_31380_A_667378 | NC_021164.1    | Ca_Kabuli_Chr05 | 667378                  | AA                                     | GG                 | GG               | INTERGENIC      |               |                    |                    |
| SNP_31381_A_667392 | NC_021164.1    | Ca_Kabuli_Chr05 | 667392                  | TT                                     | CC                 | CC               | INTERGENIC      |               |                    |                    |
| SNP_31382_A_667834 | NC_021164.1    | Ca_Kabuli_Chr05 | 667834                  | CC                                     | TT                 | TT               | INTERGENIC      |               |                    |                    |
| SNP_31383_A_668029 | NC_021164.1    | Ca_Kabuli_Chr05 | 668029                  | CC                                     | GG                 | GG               | INTERGENIC      |               |                    |                    |
| SNP_31384_A_668142 | NC_021164.1    | Ca_Kabuli_Chr05 | 668142                  | AA                                     | TT                 | TT               | INTERGENIC      |               |                    |                    |
| SNP_31385_A_668157 | NC_021164.1    | Ca_Kabuli_Chr05 | 668157                  | AA                                     | CC                 | CC               | INTERGENIC      |               |                    |                    |
| SNP_31386_A_668378 | NC_021164.1    | Ca_Kabuli_Chr05 | 668378                  | GG                                     | TT                 | TT               | INTERGENIC      |               |                    |                    |
| SNP_31387_A_671543 | NC_021164.1    | Ca_Kabuli_Chr05 | 671543                  | CC                                     | AA                 | AA               | INTERGENIC      |               |                    |                    |
| SNP_31388_A_672174 | NC_021164.1    | Ca_Kabuli_Chr05 | 672174                  | CC                                     | TT                 | TT               | INTERGENIC      |               |                    |                    |
| SNP_31389_A_676853 | NC_021164.1    | Ca_Kabuli_Chr05 | 676853                  | AA                                     | TT                 | TT               | INTERGENIC      |               |                    |                    |
| SNP_31390_A_677056 | NC_021164.1    | Ca_Kabuli_Chr05 | 677056                  | AA                                     | GG                 | GG               | INTERGENIC      |               |                    |                    |
| SNP_31391_A_677287 | NC_021164.1    | Ca_Kabuli_Chr05 | 677287                  | GG                                     | AA                 | AA               | INTERGENIC      |               |                    |                    |
| SNP_31392_A_681330 | NC_021164.1    | Ca_Kabuli_Chr05 | 681330                  | AA                                     | TT                 | TT               | INTERGENIC      |               |                    |                    |
| SNP_31393_A_681362 | NC_021164.1    | Ca_Kabuli_Chr05 | 681362                  | AA                                     | CC                 | CC               | INTERGENIC      |               |                    |                    |
| SNP_31394_A_681363 | NC_021164.1    | Ca_Kabuli_Chr05 | 681363                  | AA                                     | TT                 | TT               | INTERGENIC      |               |                    |                    |
| SNP_31395_A_681374 | NC_021164.1    | Ca_Kabuli_Chr05 | 681374                  | TT                                     | CC                 | CC               | INTERGENIC      |               |                    |                    |
| SNP_31396_A_681375 | NC_021164.1    | Ca_Kabuli_Chr05 | 681375                  | GG                                     | AA                 | AA               | INTERGENIC      |               |                    |                    |
| SNP_31397_A_681977 | NC_021164.1    | Ca_Kabuli_Chr05 | 681977                  | GG                                     | CC                 | CC               | INTERGENIC      |               |                    |                    |
| SNP_31398_A_681994 | NC_021164.1    | Ca_Kabuli_Chr05 | 681994                  | CC                                     | TT                 | TT               | INTERGENIC      |               |                    |                    |
| SNP_31399_A_682010 | NC_021164.1    | Ca_Kabuli_Chr05 | 682010                  | GG                                     | AA                 | AA               | INTERGENIC      |               |                    |                    |
| SNP_31400_A_682020 | NC_021164.1    | Ca_Kabuli_Chr05 | 682020                  | CC                                     | TT                 | TT               | INTERGENIC      |               |                    |                    |
| SNP_31401_A_682055 | NC_021164.1    | Ca_Kabuli_Chr05 | 682055                  | TT                                     | CC                 | CC               | INTERGENIC      |               |                    |                    |



| SNPs IDs           | Chromosome IDs | Chromosomes     | Physical positions (bp) | CDC Frontier genome (Reference genome) | (Pusa 1103 & HPNB) | (ILWC 46 & LPNB) | Sequence genome | Components of | Gene accession IDs | Putative functions |
|--------------------|----------------|-----------------|-------------------------|----------------------------------------|--------------------|------------------|-----------------|---------------|--------------------|--------------------|
| SNP_31402_A_682084 | NC_021164.1    | Ca_Kabuli_Chr05 | 682084                  | GG                                     | CC                 | CC               | INTERGENIC      |               |                    |                    |
| SNP_31403_A_682085 | NC_021164.1    | Ca_Kabuli_Chr05 | 682085                  | TT                                     | CC                 | CC               | INTERGENIC      |               |                    |                    |
| SNP_31404_A_688826 | NC_021164.1    | Ca_Kabuli_Chr05 | 688826                  | GG                                     | AA                 | AA               | INTERGENIC      |               |                    |                    |
| SNP_31405_A_696508 | NC_021164.1    | Ca_Kabuli_Chr05 | 696508                  | TT                                     | CC                 | CC               | INTERGENIC      |               |                    |                    |
| SNP_31407_A_696546 | NC_021164.1    | Ca_Kabuli_Chr05 | 696546                  | CC                                     | TT                 | TT               | INTERGENIC      |               |                    |                    |
| SNP_31408_A_697825 | NC_021164.1    | Ca_Kabuli_Chr05 | 697825                  | CC                                     | TT                 | TT               | INTERGENIC      |               |                    |                    |
| SNP_31409_A_715272 | NC_021164.1    | Ca_Kabuli_Chr05 | 715272                  | CC                                     | AA                 | AA               | INTERGENIC      |               |                    |                    |
| SNP_31410_A_715380 | NC_021164.1    | Ca_Kabuli_Chr05 | 715380                  | AA                                     | CC                 | CC               | INTERGENIC      |               |                    |                    |
| SNP_31411_A_715582 | NC_021164.1    | Ca_Kabuli_Chr05 | 715582                  | CC                                     | TT                 | TT               | INTERGENIC      |               |                    |                    |
| SNP_31412_A_738239 | NC_021164.1    | Ca_Kabuli_Chr05 | 738239                  | TT                                     | AA                 | AA               | INTERGENIC      |               |                    |                    |
| SNP_31413_A_738240 | NC_021164.1    | Ca_Kabuli_Chr05 | 738240                  | GG                                     | TT                 | TT               | INTERGENIC      |               |                    |                    |
| SNP_31414_A_738249 | NC_021164.1    | Ca_Kabuli_Chr05 | 738249                  | GG                                     | CC                 | CC               | INTERGENIC      |               |                    |                    |
| SNP_31415_A_738250 | NC_021164.1    | Ca_Kabuli_Chr05 | 738250                  | GG                                     | TT                 | TT               | INTERGENIC      |               |                    |                    |
| SNP_31416_A_752456 | NC_021164.1    | Ca_Kabuli_Chr05 | 752456                  | GG                                     | AA                 | AA               | INTERGENIC      |               |                    |                    |
| SNP_31417_A_805859 | NC_021164.1    | Ca_Kabuli_Chr05 | 805859                  | CC                                     | TT                 | TT               | INTERGENIC      |               |                    |                    |
| SNP_31418_A_853328 | NC_021164.1    | Ca_Kabuli_Chr05 | 853328                  | CC                                     | TT                 | TT               | INTERGENIC      |               |                    |                    |
| SNP_31419_A_897331 | NC_021164.1    | Ca_Kabuli_Chr05 | 897331                  | TT                                     | GG                 | GG               | INTERGENIC      |               |                    |                    |
| SNP_31420_A_897346 | NC_021164.1    | Ca_Kabuli_Chr05 | 897346                  | AA                                     | TT                 | TT               | INTERGENIC      |               |                    |                    |
| SNP_31422_A_927701 | NC_021164.1    | Ca_Kabuli_Chr05 | 927701                  | AA                                     | GG                 | GG               | INTERGENIC      |               |                    |                    |
| SNP_31423_A_927931 | NC_021164.1    | Ca_Kabuli_Chr05 | 927931                  | TT                                     | CC                 | CC               | INTERGENIC      |               |                    |                    |
| SNP_31424_A_931154 | NC_021164.1    | Ca_Kabuli_Chr05 | 931154                  | CC                                     | TT                 | TT               | INTERGENIC      |               |                    |                    |
| SNP_31425_A_944816 | NC_021164.1    | Ca_Kabuli_Chr05 | 944816                  | GG                                     | TT                 | TT               | INTERGENIC      |               |                    |                    |

| SNPs IDs            | Chromosome IDs | Chromosomes     | Physical positions (bp) | CDC Frontier genome (Reference genome) | (Pusa 1103 & HPNB) | (ILWC 46 & LPNB) | Sequence genome | Components of | Gene accession IDs | Putative functions |
|---------------------|----------------|-----------------|-------------------------|----------------------------------------|--------------------|------------------|-----------------|---------------|--------------------|--------------------|
| SNP_31426_A_1001792 | NC_021164.1    | Ca_Kabuli_Chr05 | 1001792                 | AA                                     | GG                 | GG               | INTERGENIC      |               |                    |                    |
| SNP_31427_A_1001803 | NC_021164.1    | Ca_Kabuli_Chr05 | 1001803                 | GG                                     | AA                 | AA               | INTERGENIC      |               |                    |                    |
| SNP_31428_A_1001814 | NC_021164.1    | Ca_Kabuli_Chr05 | 1001814                 | TT                                     | CC                 | CC               | INTERGENIC      |               |                    |                    |
| SNP_31429_A_1001817 | NC_021164.1    | Ca_Kabuli_Chr05 | 1001817                 | GG                                     | AA                 | AA               | INTERGENIC      |               |                    |                    |
| SNP_31430_A_1001823 | NC_021164.1    | Ca_Kabuli_Chr05 | 1001823                 | AA                                     | TT                 | TT               | INTERGENIC      |               |                    |                    |
| SNP_31431_A_1001839 | NC_021164.1    | Ca_Kabuli_Chr05 | 1001839                 | TT                                     | CC                 | CC               | INTERGENIC      |               |                    |                    |
| SNP_31432_A_1001840 | NC_021164.1    | Ca_Kabuli_Chr05 | 1001840                 | TT                                     | CC                 | CC               | INTERGENIC      |               |                    |                    |
| SNP_31433_A_1012077 | NC_021164.1    | Ca_Kabuli_Chr05 | 1012077                 | TT                                     | CC                 | CC               | INTERGENIC      |               |                    |                    |
| SNP_31434_A_1012080 | NC_021164.1    | Ca_Kabuli_Chr05 | 1012080                 | AA                                     | GG                 | GG               | INTERGENIC      |               |                    |                    |
| SNP_31435_A_1012338 | NC_021164.1    | Ca_Kabuli_Chr05 | 1012338                 | CC                                     | TT                 | TT               | INTERGENIC      |               |                    |                    |
| SNP_31436_A_1012410 | NC_021164.1    | Ca_Kabuli_Chr05 | 1012410                 | GG                                     | AA                 | AA               | INTERGENIC      |               |                    |                    |
| SNP_31437_A_1023143 | NC_021164.1    | Ca_Kabuli_Chr05 | 1023143                 | GG                                     | AA                 | AA               | INTERGENIC      |               |                    |                    |
| SNP_31438_A_1027950 | NC_021164.1    | Ca_Kabuli_Chr05 | 1027950                 | TT                                     | CC                 | CC               | INTERGENIC      |               |                    |                    |
| SNP_31439_A_1029591 | NC_021164.1    | Ca_Kabuli_Chr05 | 1029591                 | GG                                     | AA                 | AA               | INTERGENIC      |               |                    |                    |
| SNP_31440_A_1030240 | NC_021164.1    | Ca_Kabuli_Chr05 | 1030240                 | AA                                     | GG                 | GG               | INTERGENIC      |               |                    |                    |
| SNP_31442_A_1037037 | NC_021164.1    | Ca_Kabuli_Chr05 | 1037037                 | CC                                     | TT                 | TT               | INTERGENIC      |               |                    |                    |
| SNP_31443_A_1038921 | NC_021164.1    | Ca_Kabuli_Chr05 | 1038921                 | GG                                     | AA                 | AA               | INTERGENIC      |               |                    |                    |
| SNP_31444_A_1055297 | NC_021164.1    | Ca_Kabuli_Chr05 | 1055297                 | AA                                     | GG                 | GG               | INTERGENIC      |               |                    |                    |
| SNP_31445_A_1055302 | NC_021164.1    | Ca_Kabuli_Chr05 | 1055302                 | AA                                     | GG                 | GG               | INTERGENIC      |               |                    |                    |
| SNP_31447_A_1065536 | NC_021164.1    | Ca_Kabuli_Chr05 | 1065536                 | CC                                     | TT                 | TT               | INTERGENIC      |               |                    |                    |
| SNP_31448_A_1127691 | NC_021164.1    | Ca_Kabuli_Chr05 | 1127691                 | AA                                     | GG                 | GG               | INTERGENIC      |               |                    |                    |
| SNP_31449_A_1143674 | NC_021164.1    | Ca_Kabuli_Chr05 | 1143674                 | TT                                     | AA                 | AA               | INTERGENIC      |               |                    |                    |

| SNPs IDs            | Chromosome IDs | Chromosomes     | Physical positions (bp) | CDC Frontier genome (Reference genome) | (Pusa 1103 & HPNB) | (ILWC 46 & LPNB) | Sequence genome | Components of | Gene accession IDs | Putative functions                                 |
|---------------------|----------------|-----------------|-------------------------|----------------------------------------|--------------------|------------------|-----------------|---------------|--------------------|----------------------------------------------------|
| SNP_31450_A_1159999 | NC_021164.1    | Ca_Kabuli_Chr05 | 1159999                 | CC                                     | TT                 | TT               | INTERGENIC      |               |                    |                                                    |
| SNP_31451_A_1172038 | NC_021164.1    | Ca_Kabuli_Chr05 | 1172038                 | TT                                     | CC                 | CC               | URR             | 101510270     |                    | uncharacterized LOC101510270                       |
| SNP_31452_A_1230375 | NC_021164.1    | Ca_Kabuli_Chr05 | 1230375                 | TT                                     | CC                 | CC               | INTERGENIC      |               |                    |                                                    |
| SNP_31453_A_1230531 | NC_021164.1    | Ca_Kabuli_Chr05 | 1230531                 | TT                                     | GG                 | GG               | INTERGENIC      |               |                    |                                                    |
| SNP_31454_A_1238027 | NC_021164.1    | Ca_Kabuli_Chr05 | 1238027                 | CC                                     | TT                 | TT               | INTERGENIC      |               |                    |                                                    |
| SNP_31455_A_1242457 | NC_021164.1    | Ca_Kabuli_Chr05 | 1242457                 | CC                                     | TT                 | TT               | INTERGENIC      |               |                    |                                                    |
| SNP_31456_A_1318557 | NC_021164.1    | Ca_Kabuli_Chr05 | 1318557                 | GG                                     | AA                 | AA               | INTERGENIC      |               |                    |                                                    |
| SNP_31457_A_1318592 | NC_021164.1    | Ca_Kabuli_Chr05 | 1318592                 | AA                                     | GG                 | GG               | INTERGENIC      |               |                    |                                                    |
| SNP_31458_A_1318593 | NC_021164.1    | Ca_Kabuli_Chr05 | 1318593                 | AA                                     | TT                 | TT               | INTERGENIC      |               |                    |                                                    |
| SNP_31459_A_1318652 | NC_021164.1    | Ca_Kabuli_Chr05 | 1318652                 | CC                                     | TT                 | TT               | INTERGENIC      |               |                    |                                                    |
| SNP_31460_A_1330752 | NC_021164.1    | Ca_Kabuli_Chr05 | 1330752                 | TT                                     | CC                 | CC               | INTERGENIC      |               |                    |                                                    |
| SNP_31461_A_1330754 | NC_021164.1    | Ca_Kabuli_Chr05 | 1330754                 | GG                                     | AA                 | AA               | INTERGENIC      |               |                    |                                                    |
| SNP_31462_A_1343471 | NC_021164.1    | Ca_Kabuli_Chr05 | 1343471                 | CC                                     | GG                 | GG               | URR             | 101513168     |                    | probable BOI-related E3 ubiquitin-protein ligase 3 |
| SNP_31463_A_1346253 | NC_021164.1    | Ca_Kabuli_Chr05 | 1346253                 | CC                                     | TT                 | TT               | INTERGENIC      |               |                    |                                                    |
| SNP_31464_A_1369629 | NC_021164.1    | Ca_Kabuli_Chr05 | 1369629                 | AA                                     | CC                 | CC               | INTERGENIC      |               |                    |                                                    |
| SNP_31465_A_1372095 | NC_021164.1    | Ca_Kabuli_Chr05 | 1372095                 | GG                                     | AA                 | AA               | INTERGENIC      |               |                    |                                                    |
| SNP_31466_A_1377765 | NC_021164.1    | Ca_Kabuli_Chr05 | 1377765                 | AA                                     | GG                 | GG               | INTERGENIC      |               |                    |                                                    |
| SNP_31467_A_1378008 | NC_021164.1    | Ca_Kabuli_Chr05 | 1378008                 | CC                                     | TT                 | TT               | INTERGENIC      |               |                    |                                                    |
| SNP_31468_A_1378261 | NC_021164.1    | Ca_Kabuli_Chr05 | 1378261                 | GG                                     | TT                 | TT               | INTERGENIC      |               |                    |                                                    |
| SNP_31469_A_1381130 | NC_021164.1    | Ca_Kabuli_Chr05 | 1381130                 | AA                                     | GG                 | GG               | INTERGENIC      |               |                    |                                                    |
| SNP_31470_A_1381184 | NC_021164.1    | Ca_Kabuli_Chr05 | 1381184                 | AA                                     | GG                 | GG               | INTERGENIC      |               |                    |                                                    |
| SNP_31471_A_1381542 | NC_021164.1    | Ca_Kabuli_Chr05 | 1381542                 | GG                                     | AA                 | AA               | INTERGENIC      |               |                    |                                                    |

| SNPs IDs            | Chromosome IDs | Chromosomes     | Physical positions (bp) | CDC Frontier genome (Reference genome) | (Pusa 1103 & HPNB) | (ILWC 46 & LPNB) | Sequence genome | Components of | Gene accession IDs | Putative functions |
|---------------------|----------------|-----------------|-------------------------|----------------------------------------|--------------------|------------------|-----------------|---------------|--------------------|--------------------|
| SNP_31472_A_1429371 | NC_021164.1    | Ca_Kabuli_Chr05 | 1429371                 | GG                                     | CC                 | CC               | INTERGENIC      |               |                    |                    |
| SNP_31473_A_1429380 | NC_021164.1    | Ca_Kabuli_Chr05 | 1429380                 | AA                                     | CC                 | CC               | INTERGENIC      |               |                    |                    |
| SNP_31474_A_1444270 | NC_021164.1    | Ca_Kabuli_Chr05 | 1444270                 | TT                                     | CC                 | CC               | INTERGENIC      |               |                    |                    |
| SNP_31475_A_1444273 | NC_021164.1    | Ca_Kabuli_Chr05 | 1444273                 | TT                                     | AA                 | AA               | INTERGENIC      |               |                    |                    |
| SNP_31476_A_1457014 | NC_021164.1    | Ca_Kabuli_Chr05 | 1457014                 | TT                                     | AA                 | AA               | INTERGENIC      |               |                    |                    |
| SNP_31477_A_1457054 | NC_021164.1    | Ca_Kabuli_Chr05 | 1457054                 | CC                                     | AA                 | AA               | INTERGENIC      |               |                    |                    |
| SNP_31478_A_1457222 | NC_021164.1    | Ca_Kabuli_Chr05 | 1457222                 | AA                                     | GG                 | GG               | INTERGENIC      |               |                    |                    |
| SNP_31479_A_1457460 | NC_021164.1    | Ca_Kabuli_Chr05 | 1457460                 | CC                                     | TT                 | TT               | INTERGENIC      |               |                    |                    |
| SNP_31480_A_1457500 | NC_021164.1    | Ca_Kabuli_Chr05 | 1457500                 | AA                                     | CC                 | CC               | INTERGENIC      |               |                    |                    |
| SNP_31481_A_1457506 | NC_021164.1    | Ca_Kabuli_Chr05 | 1457506                 | CC                                     | TT                 | TT               | INTERGENIC      |               |                    |                    |
| SNP_31482_A_1457528 | NC_021164.1    | Ca_Kabuli_Chr05 | 1457528                 | TT                                     | CC                 | CC               | INTERGENIC      |               |                    |                    |
| SNP_31483_A_1483052 | NC_021164.1    | Ca_Kabuli_Chr05 | 1483052                 | TT                                     | AA                 | AA               | INTERGENIC      |               |                    |                    |
| SNP_31484_A_1510776 | NC_021164.1    | Ca_Kabuli_Chr05 | 1510776                 | GG                                     | AA                 | AA               | INTERGENIC      |               |                    |                    |
| SNP_31485_A_1510784 | NC_021164.1    | Ca_Kabuli_Chr05 | 1510784                 | CC                                     | TT                 | TT               | INTERGENIC      |               |                    |                    |
| SNP_31486_A_1510984 | NC_021164.1    | Ca_Kabuli_Chr05 | 1510984                 | AA                                     | GG                 | GG               | INTERGENIC      |               |                    |                    |
| SNP_31487_A_1511055 | NC_021164.1    | Ca_Kabuli_Chr05 | 1511055                 | TT                                     | GG                 | GG               | INTERGENIC      |               |                    |                    |
| SNP_31488_A_1511058 | NC_021164.1    | Ca_Kabuli_Chr05 | 1511058                 | AA                                     | GG                 | GG               | INTERGENIC      |               |                    |                    |
| SNP_31489_A_1511105 | NC_021164.1    | Ca_Kabuli_Chr05 | 1511105                 | GG                                     | TT                 | TT               | INTERGENIC      |               |                    |                    |
| SNP_31490_A_1511132 | NC_021164.1    | Ca_Kabuli_Chr05 | 1511132                 | CC                                     | TT                 | TT               | INTERGENIC      |               |                    |                    |
| SNP_31491_A_1511146 | NC_021164.1    | Ca_Kabuli_Chr05 | 1511146                 | AA                                     | CC                 | CC               | INTERGENIC      |               |                    |                    |
| SNP_31492_A_1526713 | NC_021164.1    | Ca_Kabuli_Chr05 | 1526713                 | CC                                     | TT                 | TT               | INTERGENIC      |               |                    |                    |
| SNP_31493_A_1526732 | NC_021164.1    | Ca_Kabuli_Chr05 | 1526732                 | TT                                     | GG                 | GG               | INTERGENIC      |               |                    |                    |

| SNPs IDs            | Chromosome IDs | Chromosomes     | Physical positions (bp) | CDC Frontier genome (Reference genome) | (Pusa 1103 & HPNB) | (ILWC 46 & LPNB) | Sequence genome | Components of | Gene accession IDs | Putative functions |
|---------------------|----------------|-----------------|-------------------------|----------------------------------------|--------------------|------------------|-----------------|---------------|--------------------|--------------------|
| SNP_31494_A_1526793 | NC_021164.1    | Ca_Kabuli_Chr05 | 1526793                 | AA                                     | GG                 | GG               | INTERGENIC      |               |                    |                    |
| SNP_31495_A_1528101 | NC_021164.1    | Ca_Kabuli_Chr05 | 1528101                 | AA                                     | GG                 | GG               | INTERGENIC      |               |                    |                    |
| SNP_31496_A_1531685 | NC_021164.1    | Ca_Kabuli_Chr05 | 1531685                 | CC                                     | AA                 | AA               | INTERGENIC      |               |                    |                    |
| SNP_31497_A_1535157 | NC_021164.1    | Ca_Kabuli_Chr05 | 1535157                 | TT                                     | CC                 | CC               | INTERGENIC      |               |                    |                    |
| SNP_31498_A_1535169 | NC_021164.1    | Ca_Kabuli_Chr05 | 1535169                 | CC                                     | AA                 | AA               | INTERGENIC      |               |                    |                    |
| SNP_31499_A_1535175 | NC_021164.1    | Ca_Kabuli_Chr05 | 1535175                 | TT                                     | AA                 | AA               | INTERGENIC      |               |                    |                    |
| SNP_31500_A_1535311 | NC_021164.1    | Ca_Kabuli_Chr05 | 1535311                 | AA                                     | CC                 | CC               | INTERGENIC      |               |                    |                    |
| SNP_31501_A_1535321 | NC_021164.1    | Ca_Kabuli_Chr05 | 1535321                 | GG                                     | CC                 | CC               | INTERGENIC      |               |                    |                    |
| SNP_31502_A_1535360 | NC_021164.1    | Ca_Kabuli_Chr05 | 1535360                 | TT                                     | AA                 | AA               | INTERGENIC      |               |                    |                    |
| SNP_31503_A_1535364 | NC_021164.1    | Ca_Kabuli_Chr05 | 1535364                 | CC                                     | TT                 | TT               | INTERGENIC      |               |                    |                    |
| SNP_31504_A_1535373 | NC_021164.1    | Ca_Kabuli_Chr05 | 1535373                 | AA                                     | GG                 | GG               | INTERGENIC      |               |                    |                    |
| SNP_31505_A_1535501 | NC_021164.1    | Ca_Kabuli_Chr05 | 1535501                 | TT                                     | AA                 | AA               | INTERGENIC      |               |                    |                    |
| SNP_31506_A_1541309 | NC_021164.1    | Ca_Kabuli_Chr05 | 1541309                 | CC                                     | GG                 | GG               | INTERGENIC      |               |                    |                    |
| SNP_31507_A_1558351 | NC_021164.1    | Ca_Kabuli_Chr05 | 1558351                 | AA                                     | TT                 | TT               | INTERGENIC      |               |                    |                    |
| SNP_31508_A_1571927 | NC_021164.1    | Ca_Kabuli_Chr05 | 1571927                 | CC                                     | TT                 | TT               | INTERGENIC      |               |                    |                    |
| SNP_31510_A_1679508 | NC_021164.1    | Ca_Kabuli_Chr05 | 1679508                 | AA                                     | GG                 | GG               | INTERGENIC      |               |                    |                    |
| SNP_31511_A_1679521 | NC_021164.1    | Ca_Kabuli_Chr05 | 1679521                 | CC                                     | TT                 | TT               | INTERGENIC      |               |                    |                    |
| SNP_31512_A_1679540 | NC_021164.1    | Ca_Kabuli_Chr05 | 1679540                 | GG                                     | CC                 | CC               | INTERGENIC      |               |                    |                    |
| SNP_31513_A_1679881 | NC_021164.1    | Ca_Kabuli_Chr05 | 1679881                 | AA                                     | TT                 | TT               | INTERGENIC      |               |                    |                    |
| SNP_31514_A_1706428 | NC_021164.1    | Ca_Kabuli_Chr05 | 1706428                 | GG                                     | AA                 | AA               | INTERGENIC      |               |                    |                    |
| SNP_31516_A_1709773 | NC_021164.1    | Ca_Kabuli_Chr05 | 1709773                 | CC                                     | AA                 | AA               | INTERGENIC      |               |                    |                    |
| SNP_31517_A_1763605 | NC_021164.1    | Ca_Kabuli_Chr05 | 1763605                 | GG                                     | TT                 | TT               | INTERGENIC      |               |                    |                    |

| SNPs IDs            | Chromosome IDs | Chromosomes     | Physical positions (bp) | CDC Frontier genome (Reference genome) | (Pusa 1103 & HPNB) | (ILWC 46 & LPNB) | Sequence genome | Components of | Gene accession IDs | Putative functions |
|---------------------|----------------|-----------------|-------------------------|----------------------------------------|--------------------|------------------|-----------------|---------------|--------------------|--------------------|
| SNP_31518_A_1770300 | NC_021164.1    | Ca_Kabuli_Chr05 | 1770300                 | TT                                     | CC                 | CC               | INTERGENIC      |               |                    |                    |
| SNP_31519_A_1770552 | NC_021164.1    | Ca_Kabuli_Chr05 | 1770552                 | TT                                     | CC                 | CC               | INTERGENIC      |               |                    |                    |
| SNP_31520_A_1770556 | NC_021164.1    | Ca_Kabuli_Chr05 | 1770556                 | TT                                     | AA                 | AA               | INTERGENIC      |               |                    |                    |
| SNP_31522_A_1780075 | NC_021164.1    | Ca_Kabuli_Chr05 | 1780075                 | CC                                     | TT                 | TT               | INTERGENIC      |               |                    |                    |
| SNP_31523_A_1780096 | NC_021164.1    | Ca_Kabuli_Chr05 | 1780096                 | AA                                     | GG                 | GG               | INTERGENIC      |               |                    |                    |
| SNP_31524_A_1808744 | NC_021164.1    | Ca_Kabuli_Chr05 | 1808744                 | GG                                     | AA                 | AA               | INTERGENIC      |               |                    |                    |
| SNP_31525_A_1808785 | NC_021164.1    | Ca_Kabuli_Chr05 | 1808785                 | CC                                     | TT                 | TT               | INTERGENIC      |               |                    |                    |
| SNP_31526_A_1808860 | NC_021164.1    | Ca_Kabuli_Chr05 | 1808860                 | TT                                     | CC                 | CC               | INTERGENIC      |               |                    |                    |
| SNP_31527_A_1809094 | NC_021164.1    | Ca_Kabuli_Chr05 | 1809094                 | GG                                     | TT                 | TT               | INTERGENIC      |               |                    |                    |
| SNP_31528_A_1809399 | NC_021164.1    | Ca_Kabuli_Chr05 | 1809399                 | AA                                     | GG                 | GG               | INTERGENIC      |               |                    |                    |
| SNP_31529_A_1809839 | NC_021164.1    | Ca_Kabuli_Chr05 | 1809839                 | GG                                     | TT                 | TT               | INTERGENIC      |               |                    |                    |
| SNP_31530_A_1809842 | NC_021164.1    | Ca_Kabuli_Chr05 | 1809842                 | AA                                     | CC                 | CC               | INTERGENIC      |               |                    |                    |
| SNP_31531_A_1813576 | NC_021164.1    | Ca_Kabuli_Chr05 | 1813576                 | AA                                     | GG                 | GG               | INTERGENIC      |               |                    |                    |
| SNP_31532_A_1814836 | NC_021164.1    | Ca_Kabuli_Chr05 | 1814836                 | TT                                     | GG                 | GG               | INTERGENIC      |               |                    |                    |
| SNP_31533_A_1815812 | NC_021164.1    | Ca_Kabuli_Chr05 | 1815812                 | AA                                     | GG                 | GG               | INTERGENIC      |               |                    |                    |
| SNP_31534_A_1815886 | NC_021164.1    | Ca_Kabuli_Chr05 | 1815886                 | GG                                     | AA                 | AA               | INTERGENIC      |               |                    |                    |
| SNP_31535_A_1816062 | NC_021164.1    | Ca_Kabuli_Chr05 | 1816062                 | AA                                     | TT                 | TT               | INTERGENIC      |               |                    |                    |
| SNP_31536_A_1816123 | NC_021164.1    | Ca_Kabuli_Chr05 | 1816123                 | TT                                     | AA                 | AA               | INTERGENIC      |               |                    |                    |
| SNP_31537_A_1816273 | NC_021164.1    | Ca_Kabuli_Chr05 | 1816273                 | GG                                     | TT                 | TT               | INTERGENIC      |               |                    |                    |
| SNP_31538_A_1819071 | NC_021164.1    | Ca_Kabuli_Chr05 | 1819071                 | AA                                     | TT                 | TT               | INTERGENIC      |               |                    |                    |
| SNP_31539_A_1819315 | NC_021164.1    | Ca_Kabuli_Chr05 | 1819315                 | TT                                     | CC                 | CC               | INTERGENIC      |               |                    |                    |
| SNP_31540_A_1819778 | NC_021164.1    | Ca_Kabuli_Chr05 | 1819778                 | CC                                     | TT                 | TT               | INTERGENIC      |               |                    |                    |

| SNPs IDs            | Chromosome IDs | Chromosomes     | Physical positions (bp) | CDC Frontier genome (Reference genome) | (Pusa 1103 & HPNB) | (ILWC 46 & LPNB) | Sequence genome | Components of | Gene accession IDs | Putative functions |
|---------------------|----------------|-----------------|-------------------------|----------------------------------------|--------------------|------------------|-----------------|---------------|--------------------|--------------------|
| SNP_31541_A_1819781 | NC_021164.1    | Ca_Kabuli_Chr05 | 1819781                 | GG                                     | TT                 | TT               | INTERGENIC      |               |                    |                    |
| SNP_31542_A_1821016 | NC_021164.1    | Ca_Kabuli_Chr05 | 1821016                 | CC                                     | GG                 | GG               | INTERGENIC      |               |                    |                    |
| SNP_31543_A_1825489 | NC_021164.1    | Ca_Kabuli_Chr05 | 1825489                 | AA                                     | CC                 | CC               | INTERGENIC      |               |                    |                    |
| SNP_31544_A_1829280 | NC_021164.1    | Ca_Kabuli_Chr05 | 1829280                 | CC                                     | GG                 | GG               | INTERGENIC      |               |                    |                    |
| SNP_31545_A_1829568 | NC_021164.1    | Ca_Kabuli_Chr05 | 1829568                 | GG                                     | AA                 | AA               | INTERGENIC      |               |                    |                    |
| SNP_31546_A_1829577 | NC_021164.1    | Ca_Kabuli_Chr05 | 1829577                 | AA                                     | TT                 | TT               | INTERGENIC      |               |                    |                    |
| SNP_31547_A_1829597 | NC_021164.1    | Ca_Kabuli_Chr05 | 1829597                 | TT                                     | CC                 | CC               | INTERGENIC      |               |                    |                    |
| SNP_31548_A_1829609 | NC_021164.1    | Ca_Kabuli_Chr05 | 1829609                 | AA                                     | GG                 | GG               | INTERGENIC      |               |                    |                    |
| SNP_31549_A_1829682 | NC_021164.1    | Ca_Kabuli_Chr05 | 1829682                 | TT                                     | GG                 | GG               | INTERGENIC      |               |                    |                    |
| SNP_31550_A_1836026 | NC_021164.1    | Ca_Kabuli_Chr05 | 1836026                 | CC                                     | TT                 | TT               | INTERGENIC      |               |                    |                    |
| SNP_31551_A_1837567 | NC_021164.1    | Ca_Kabuli_Chr05 | 1837567                 | CC                                     | TT                 | TT               | INTERGENIC      |               |                    |                    |
| SNP_31552_A_1837964 | NC_021164.1    | Ca_Kabuli_Chr05 | 1837964                 | CC                                     | GG                 | GG               | INTERGENIC      |               |                    |                    |
| SNP_31553_A_1839258 | NC_021164.1    | Ca_Kabuli_Chr05 | 1839258                 | AA                                     | GG                 | GG               | INTERGENIC      |               |                    |                    |
| SNP_31554_A_1839395 | NC_021164.1    | Ca_Kabuli_Chr05 | 1839395                 | GG                                     | AA                 | AA               | INTERGENIC      |               |                    |                    |
| SNP_31555_A_1839403 | NC_021164.1    | Ca_Kabuli_Chr05 | 1839403                 | TT                                     | AA                 | AA               | INTERGENIC      |               |                    |                    |
| SNP_31556_A_1839441 | NC_021164.1    | Ca_Kabuli_Chr05 | 1839441                 | TT                                     | AA                 | AA               | INTERGENIC      |               |                    |                    |
| SNP_31557_A_1849198 | NC_021164.1    | Ca_Kabuli_Chr05 | 1849198                 | AA                                     | GG                 | GG               | INTERGENIC      |               |                    |                    |
| SNP_31558_A_1849394 | NC_021164.1    | Ca_Kabuli_Chr05 | 1849394                 | TT                                     | CC                 | CC               | INTERGENIC      |               |                    |                    |
| SNP_31559_A_1864412 | NC_021164.1    | Ca_Kabuli_Chr05 | 1864412                 | CC                                     | TT                 | TT               | INTERGENIC      |               |                    |                    |
| SNP_31560_A_1876046 | NC_021164.1    | Ca_Kabuli_Chr05 | 1876046                 | GG                                     | TT                 | TT               | INTRON          | 101515668     | Unknown function   |                    |
| SNP_31561_A_1876054 | NC_021164.1    | Ca_Kabuli_Chr05 | 1876054                 | GG                                     | AA                 | AA               | INTRON          | 101515668     | Unknown function   |                    |
| SNP_31562_A_1876080 | NC_021164.1    | Ca_Kabuli_Chr05 | 1876080                 | AA                                     | GG                 | GG               | INTRON          | 101515668     | Unknown function   |                    |

| SNPs IDs            | Chromosome IDs | Chromosomes     | Physical positions (bp) | CDC Frontier genome (Reference genome) | (Pusa 1103 & HPNB) | (ILWC 46 & LPNB) | Sequence Components of genome | Gene accession IDs | Putative functions |
|---------------------|----------------|-----------------|-------------------------|----------------------------------------|--------------------|------------------|-------------------------------|--------------------|--------------------|
| SNP_31563_A_1876108 | NC_021164.1    | Ca_Kabuli_Chr05 | 1876108                 | CC                                     | TT                 | TT               | INTRON                        | 101515668          | Unknown function   |
| SNP_31565_A_1887646 | NC_021164.1    | Ca_Kabuli_Chr05 | 1887646                 | GG                                     | AA                 | AA               | INTRON                        | 101515668          | Unknown function   |
| SNP_31567_A_1887892 | NC_021164.1    | Ca_Kabuli_Chr05 | 1887892                 | CC                                     | AA                 | AA               | INTRON                        | 101515668          | Unknown function   |
| SNP_31568_A_1887971 | NC_021164.1    | Ca_Kabuli_Chr05 | 1887971                 | CC                                     | TT                 | TT               | INTRON                        | 101515668          | Unknown function   |
| SNP_31569_A_1892451 | NC_021164.1    | Ca_Kabuli_Chr05 | 1892451                 | AA                                     | GG                 | GG               | INTRON                        | 101515668          | Unknown function   |
| SNP_31570_A_1899081 | NC_021164.1    | Ca_Kabuli_Chr05 | 1899081                 | GG                                     | AA                 | AA               | SYNONYMOUS_CODING             | 101515668          | Unknown function   |
| SNP_31571_A_1899471 | NC_021164.1    | Ca_Kabuli_Chr05 | 1899471                 | AA                                     | TT                 | TT               | NON_SYNONYMOUS_CODING         | 101515668          | Unknown function   |
| SNP_31572_A_1899530 | NC_021164.1    | Ca_Kabuli_Chr05 | 1899530                 | TT                                     | CC                 | CC               | STOP_LOST                     | 101515668          | Unknown function   |
| SNP_31573_A_1902831 | NC_021164.1    | Ca_Kabuli_Chr05 | 1902831                 | CC                                     | TT                 | TT               | NON_SYNONYMOUS_CODING         | 101515668          | Unknown function   |
| SNP_31574_A_1905448 | NC_021164.1    | Ca_Kabuli_Chr05 | 1905448                 | AA                                     | GG                 | GG               | INTERGENIC                    |                    |                    |
| SNP_31575_A_1905821 | NC_021164.1    | Ca_Kabuli_Chr05 | 1905821                 | TT                                     | GG                 | GG               | INTERGENIC                    |                    |                    |
| SNP_31576_A_1911394 | NC_021164.1    | Ca_Kabuli_Chr05 | 1911394                 | GG                                     | CC                 | CC               | INTERGENIC                    |                    |                    |
| SNP_31577_A_1911672 | NC_021164.1    | Ca_Kabuli_Chr05 | 1911672                 | TT                                     | AA                 | AA               | INTERGENIC                    |                    |                    |
| SNP_31578_A_1925627 | NC_021164.1    | Ca_Kabuli_Chr05 | 1925627                 | AA                                     | GG                 | GG               | INTERGENIC                    |                    |                    |
| SNP_31579_A_1925675 | NC_021164.1    | Ca_Kabuli_Chr05 | 1925675                 | CC                                     | TT                 | TT               | INTERGENIC                    |                    |                    |
| SNP_31580_A_1925719 | NC_021164.1    | Ca_Kabuli_Chr05 | 1925719                 | GG                                     | AA                 | AA               | INTERGENIC                    |                    |                    |
| SNP_31581_A_1925741 | NC_021164.1    | Ca_Kabuli_Chr05 | 1925741                 | AA                                     | CC                 | CC               | INTERGENIC                    |                    |                    |
| SNP_31582_A_1925939 | NC_021164.1    | Ca_Kabuli_Chr05 | 1925939                 | CC                                     | TT                 | TT               | INTERGENIC                    |                    |                    |
| SNP_31583_A_1925976 | NC_021164.1    | Ca_Kabuli_Chr05 | 1925976                 | GG                                     | CC                 | CC               | INTERGENIC                    |                    |                    |
| SNP_31584_A_1926016 | NC_021164.1    | Ca_Kabuli_Chr05 | 1926016                 | AA                                     | CC                 | CC               | INTERGENIC                    |                    |                    |
| SNP_31585_A_1926041 | NC_021164.1    | Ca_Kabuli_Chr05 | 1926041                 | AA                                     | GG                 | GG               | INTERGENIC                    |                    |                    |
| SNP_31586_A_1926073 | NC_021164.1    | Ca_Kabuli_Chr05 | 1926073                 | GG                                     | TT                 | TT               | INTERGENIC                    |                    |                    |



| SNPs IDs            | Chromosome IDs | Chromosomes     | Physical positions (bp) | CDC Frontier genome (Reference genome) | (Pusa 1103 & HPNB) | (ILWC 46 & LPNB) | Sequence genome | Components of | Gene accession IDs | Putative functions |
|---------------------|----------------|-----------------|-------------------------|----------------------------------------|--------------------|------------------|-----------------|---------------|--------------------|--------------------|
| SNP_31587_A_1948399 | NC_021164.1    | Ca_Kabuli_Chr05 | 1948399                 | GG                                     | AA                 | AA               | INTERGENIC      |               |                    |                    |
| SNP_31589_A_1973944 | NC_021164.1    | Ca_Kabuli_Chr05 | 1973944                 | CC                                     | GG                 | GG               | INTERGENIC      |               |                    |                    |
| SNP_31590_A_1983494 | NC_021164.1    | Ca_Kabuli_Chr05 | 1983494                 | TT                                     | CC                 | CC               | INTERGENIC      |               |                    |                    |
| SNP_31591_A_1986257 | NC_021164.1    | Ca_Kabuli_Chr05 | 1986257                 | TT                                     | AA                 | AA               | INTERGENIC      |               |                    |                    |
| SNP_31592_A_1994738 | NC_021164.1    | Ca_Kabuli_Chr05 | 1994738                 | CC                                     | GG                 | GG               | INTERGENIC      |               |                    |                    |
| SNP_31593_A_1994936 | NC_021164.1    | Ca_Kabuli_Chr05 | 1994936                 | CC                                     | TT                 | TT               | INTERGENIC      |               |                    |                    |
| SNP_31594_A_1995023 | NC_021164.1    | Ca_Kabuli_Chr05 | 1995023                 | AA                                     | TT                 | TT               | INTERGENIC      |               |                    |                    |
| SNP_31595_A_1995157 | NC_021164.1    | Ca_Kabuli_Chr05 | 1995157                 | CC                                     | GG                 | GG               | INTERGENIC      |               |                    |                    |
| SNP_31596_A_1995279 | NC_021164.1    | Ca_Kabuli_Chr05 | 1995279                 | TT                                     | AA                 | AA               | INTERGENIC      |               |                    |                    |
| SNP_31597_A_1995396 | NC_021164.1    | Ca_Kabuli_Chr05 | 1995396                 | TT                                     | AA                 | AA               | INTERGENIC      |               |                    |                    |
| SNP_31598_A_1995414 | NC_021164.1    | Ca_Kabuli_Chr05 | 1995414                 | CC                                     | TT                 | TT               | INTERGENIC      |               |                    |                    |
| SNP_31599_A_2000474 | NC_021164.1    | Ca_Kabuli_Chr05 | 2000474                 | AA                                     | GG                 | GG               | INTERGENIC      |               |                    |                    |
| SNP_31600_A_2000494 | NC_021164.1    | Ca_Kabuli_Chr05 | 2000494                 | AA                                     | GG                 | GG               | INTERGENIC      |               |                    |                    |
| SNP_31601_A_2000590 | NC_021164.1    | Ca_Kabuli_Chr05 | 2000590                 | TT                                     | CC                 | CC               | INTERGENIC      |               |                    |                    |
| SNP_31602_A_2000669 | NC_021164.1    | Ca_Kabuli_Chr05 | 2000669                 | CC                                     | TT                 | TT               | INTERGENIC      |               |                    |                    |
| SNP_31603_A_2000695 | NC_021164.1    | Ca_Kabuli_Chr05 | 2000695                 | AA                                     | TT                 | TT               | INTERGENIC      |               |                    |                    |
| SNP_31604_A_2000730 | NC_021164.1    | Ca_Kabuli_Chr05 | 2000730                 | AA                                     | TT                 | TT               | INTERGENIC      |               |                    |                    |
| SNP_31605_A_2006878 | NC_021164.1    | Ca_Kabuli_Chr05 | 2006878                 | AA                                     | TT                 | TT               | INTERGENIC      |               |                    |                    |
| SNP_31606_A_2008849 | NC_021164.1    | Ca_Kabuli_Chr05 | 2008849                 | TT                                     | CC                 | CC               | INTERGENIC      |               |                    |                    |
| SNP_31607_A_2008870 | NC_021164.1    | Ca_Kabuli_Chr05 | 2008870                 | AA                                     | CC                 | CC               | INTERGENIC      |               |                    |                    |
| SNP_31608_A_2008885 | NC_021164.1    | Ca_Kabuli_Chr05 | 2008885                 | TT                                     | CC                 | CC               | INTERGENIC      |               |                    |                    |
| SNP_31609_A_2008903 | NC_021164.1    | Ca_Kabuli_Chr05 | 2008903                 | CC                                     | TT                 | TT               | INTERGENIC      |               |                    |                    |

| SNPs IDs            | Chromosome IDs | Chromosomes     | Physical positions (bp) | CDC Frontier genome (Reference genome) | (Pusa 1103 & HPNB) | (ILWC 46 & LPNB) | Sequence genome | Components of | Gene accession IDs | Putative functions |
|---------------------|----------------|-----------------|-------------------------|----------------------------------------|--------------------|------------------|-----------------|---------------|--------------------|--------------------|
| SNP_31610_A_2017091 | NC_021164.1    | Ca_Kabuli_Chr05 | 2017091                 | AA                                     | GG                 | GG               | INTERGENIC      |               |                    |                    |
| SNP_31611_A_2017230 | NC_021164.1    | Ca_Kabuli_Chr05 | 2017230                 | TT                                     | AA                 | AA               | INTERGENIC      |               |                    |                    |
| SNP_31612_A_2018786 | NC_021164.1    | Ca_Kabuli_Chr05 | 2018786                 | TT                                     | AA                 | AA               | INTERGENIC      |               |                    |                    |
| SNP_31613_A_2018814 | NC_021164.1    | Ca_Kabuli_Chr05 | 2018814                 | AA                                     | GG                 | GG               | INTERGENIC      |               |                    |                    |
| SNP_31614_A_2019065 | NC_021164.1    | Ca_Kabuli_Chr05 | 2019065                 | AA                                     | TT                 | TT               | INTERGENIC      |               |                    |                    |
| SNP_31615_A_2034538 | NC_021164.1    | Ca_Kabuli_Chr05 | 2034538                 | AA                                     | GG                 | GG               | INTERGENIC      |               |                    |                    |
| SNP_31616_A_2034770 | NC_021164.1    | Ca_Kabuli_Chr05 | 2034770                 | TT                                     | CC                 | CC               | INTERGENIC      |               |                    |                    |
| SNP_31617_A_2043286 | NC_021164.1    | Ca_Kabuli_Chr05 | 2043286                 | GG                                     | AA                 | AA               | INTERGENIC      |               |                    |                    |
| SNP_31618_A_2043314 | NC_021164.1    | Ca_Kabuli_Chr05 | 2043314                 | AA                                     | CC                 | CC               | INTERGENIC      |               |                    |                    |
| SNP_31619_A_2085566 | NC_021164.1    | Ca_Kabuli_Chr05 | 2085566                 | TT                                     | GG                 | GG               | INTERGENIC      |               |                    |                    |
| SNP_31620_A_2095028 | NC_021164.1    | Ca_Kabuli_Chr05 | 2095028                 | GG                                     | AA                 | AA               | INTERGENIC      |               |                    |                    |
| SNP_31621_A_2095029 | NC_021164.1    | Ca_Kabuli_Chr05 | 2095029                 | TT                                     | AA                 | AA               | INTERGENIC      |               |                    |                    |
| SNP_31622_A_2095051 | NC_021164.1    | Ca_Kabuli_Chr05 | 2095051                 | AA                                     | GG                 | GG               | INTERGENIC      |               |                    |                    |
| SNP_31623_A_2096641 | NC_021164.1    | Ca_Kabuli_Chr05 | 2096641                 | TT                                     | CC                 | CC               | INTERGENIC      |               |                    |                    |
| SNP_31624_A_2096856 | NC_021164.1    | Ca_Kabuli_Chr05 | 2096856                 | GG                                     | CC                 | CC               | INTERGENIC      |               |                    |                    |
| SNP_31625_A_2096863 | NC_021164.1    | Ca_Kabuli_Chr05 | 2096863                 | AA                                     | GG                 | GG               | INTERGENIC      |               |                    |                    |
| SNP_31626_A_2097032 | NC_021164.1    | Ca_Kabuli_Chr05 | 2097032                 | TT                                     | AA                 | AA               | INTERGENIC      |               |                    |                    |
| SNP_31627_A_2097357 | NC_021164.1    | Ca_Kabuli_Chr05 | 2097357                 | AA                                     | CC                 | CC               | INTERGENIC      |               |                    |                    |
| SNP_31628_A_2098803 | NC_021164.1    | Ca_Kabuli_Chr05 | 2098803                 | GG                                     | AA                 | AA               | INTERGENIC      |               |                    |                    |
| SNP_31630_A_2131461 | NC_021164.1    | Ca_Kabuli_Chr05 | 2131461                 | TT                                     | CC                 | CC               | INTERGENIC      |               |                    |                    |
| SNP_31631_A_2131587 | NC_021164.1    | Ca_Kabuli_Chr05 | 2131587                 | CC                                     | TT                 | TT               | INTERGENIC      |               |                    |                    |
| SNP_31632_A_2131647 | NC_021164.1    | Ca_Kabuli_Chr05 | 2131647                 | GG                                     | TT                 | TT               | INTERGENIC      |               |                    |                    |

| SNPs IDs            | Chromosome IDs | Chromosomes     | Physical positions (bp) | CDC Frontier (Reference genome) | (Pusa 1103 & HPNB) | (ILWC 46 & LPNB) | Sequence Components of genome | Gene accession IDs | Putative functions                             |
|---------------------|----------------|-----------------|-------------------------|---------------------------------|--------------------|------------------|-------------------------------|--------------------|------------------------------------------------|
| SNP_31633_A_2131711 | NC_021164.1    | Ca_Kabuli_Chr05 | 2131711                 | AA                              | GG                 | GG               | INTERGENIC                    |                    |                                                |
| SNP_31635_A_2140843 | NC_021164.1    | Ca_Kabuli_Chr05 | 2140843                 | TT                              | AA                 | AA               | INTRON                        | 101489091          | DNA annealing helicase and endonuclease ZRANB3 |
| SNP_31636_A_2141214 | NC_021164.1    | Ca_Kabuli_Chr05 | 2141214                 | GG                              | AA                 | AA               | INTRON                        | 101489091          | DNA annealing helicase and endonuclease ZRANB3 |
| SNP_31637_A_2192022 | NC_021164.1    | Ca_Kabuli_Chr05 | 2192022                 | CC                              | AA                 | AA               | INTRON                        | 101490290          | uncharacterized LOC101490290                   |
| SNP_31638_A_2192099 | NC_021164.1    | Ca_Kabuli_Chr05 | 2192099                 | GG                              | AA                 | AA               | INTRON                        | 101490290          | uncharacterized LOC101490290                   |
| SNP_31639_A_2192120 | NC_021164.1    | Ca_Kabuli_Chr05 | 2192120                 | TT                              | AA                 | AA               | INTRON                        | 101490290          | uncharacterized LOC101490290                   |
| SNP_31640_A_2237012 | NC_021164.1    | Ca_Kabuli_Chr05 | 2237012                 | TT                              | AA                 | AA               | INTERGENIC                    |                    |                                                |
| SNP_31641_A_2247015 | NC_021164.1    | Ca_Kabuli_Chr05 | 2247015                 | AA                              | GG                 | GG               | INTERGENIC                    |                    |                                                |
| SNP_31642_A_2247024 | NC_021164.1    | Ca_Kabuli_Chr05 | 2247024                 | AA                              | GG                 | GG               | INTERGENIC                    |                    |                                                |
| SNP_31643_A_2247032 | NC_021164.1    | Ca_Kabuli_Chr05 | 2247032                 | AA                              | GG                 | GG               | INTERGENIC                    |                    |                                                |
| SNP_31644_A_2272415 | NC_021164.1    | Ca_Kabuli_Chr05 | 2272415                 | TT                              | AA                 | AA               | URR                           | 101489631          | glutathione S-transferase T3-like              |
| SNP_31645_A_2291160 | NC_021164.1    | Ca_Kabuli_Chr05 | 2291160                 | CC                              | TT                 | TT               | INTERGENIC                    |                    |                                                |
| SNP_31646_A_2293943 | NC_021164.1    | Ca_Kabuli_Chr05 | 2293943                 | CC                              | GG                 | GG               | INTERGENIC                    |                    |                                                |
| SNP_31647_A_2295090 | NC_021164.1    | Ca_Kabuli_Chr05 | 2295090                 | TT                              | CC                 | CC               | INTERGENIC                    |                    |                                                |
| SNP_31649_A_2296517 | NC_021164.1    | Ca_Kabuli_Chr05 | 2296517                 | GG                              | AA                 | AA               | INTERGENIC                    |                    |                                                |
| SNP_31650_A_2302945 | NC_021164.1    | Ca_Kabuli_Chr05 | 2302945                 | AA                              | GG                 | GG               | INTERGENIC                    |                    |                                                |
| SNP_31651_A_2304566 | NC_021164.1    | Ca_Kabuli_Chr05 | 2304566                 | TT                              | CC                 | CC               | INTERGENIC                    |                    |                                                |
| SNP_31652_A_2305207 | NC_021164.1    | Ca_Kabuli_Chr05 | 2305207                 | CC                              | AA                 | AA               | INTERGENIC                    |                    |                                                |
| SNP_31653_A_2305434 | NC_021164.1    | Ca_Kabuli_Chr05 | 2305434                 | TT                              | CC                 | CC               | INTERGENIC                    |                    |                                                |
| SNP_31654_A_2323228 | NC_021164.1    | Ca_Kabuli_Chr05 | 2323228                 | CC                              | TT                 | TT               | INTERGENIC                    |                    |                                                |
| SNP_31655_A_2323342 | NC_021164.1    | Ca_Kabuli_Chr05 | 2323342                 | TT                              | CC                 | CC               | INTERGENIC                    |                    |                                                |
| SNP_31657_A_2323476 | NC_021164.1    | Ca_Kabuli_Chr05 | 2323476                 | TT                              | GG                 | GG               | INTERGENIC                    |                    |                                                |

| SNPs IDs            | Chromosome IDs | Chromosomes     | Physical positions (bp) | CDC Frontier (Reference genome) | (Pusa 1103 & HPNB) | (ILWC 46 & LPNB) | Sequence genome | Components of | Gene accession IDs | Putative functions |
|---------------------|----------------|-----------------|-------------------------|---------------------------------|--------------------|------------------|-----------------|---------------|--------------------|--------------------|
| SNP_31658_A_2323564 | NC_021164.1    | Ca_Kabuli_Chr05 | 2323564                 | GG                              | AA                 | AA               | INTERGENIC      |               |                    |                    |
| SNP_31659_A_2323590 | NC_021164.1    | Ca_Kabuli_Chr05 | 2323590                 | AA                              | GG                 | GG               | INTERGENIC      |               |                    |                    |
| SNP_31660_A_2323599 | NC_021164.1    | Ca_Kabuli_Chr05 | 2323599                 | AA                              | CC                 | CC               | INTERGENIC      |               |                    |                    |
| SNP_31661_A_2323727 | NC_021164.1    | Ca_Kabuli_Chr05 | 2323727                 | TT                              | CC                 | CC               | INTERGENIC      |               |                    |                    |
| SNP_31662_A_2323868 | NC_021164.1    | Ca_Kabuli_Chr05 | 2323868                 | CC                              | TT                 | TT               | INTERGENIC      |               |                    |                    |
| SNP_31663_A_2323904 | NC_021164.1    | Ca_Kabuli_Chr05 | 2323904                 | TT                              | CC                 | CC               | INTERGENIC      |               |                    |                    |
| SNP_31664_A_2323965 | NC_021164.1    | Ca_Kabuli_Chr05 | 2323965                 | GG                              | AA                 | AA               | INTERGENIC      |               |                    |                    |
| SNP_31665_A_2324109 | NC_021164.1    | Ca_Kabuli_Chr05 | 2324109                 | TT                              | CC                 | CC               | INTERGENIC      |               |                    |                    |
| SNP_31666_A_2324326 | NC_021164.1    | Ca_Kabuli_Chr05 | 2324326                 | AA                              | CC                 | CC               | INTERGENIC      |               |                    |                    |
| SNP_31667_A_2324410 | NC_021164.1    | Ca_Kabuli_Chr05 | 2324410                 | TT                              | GG                 | GG               | INTERGENIC      |               |                    |                    |
| SNP_31668_A_2324454 | NC_021164.1    | Ca_Kabuli_Chr05 | 2324454                 | AA                              | TT                 | TT               | INTERGENIC      |               |                    |                    |
| SNP_31669_A_2324535 | NC_021164.1    | Ca_Kabuli_Chr05 | 2324535                 | TT                              | GG                 | GG               | INTERGENIC      |               |                    |                    |
| SNP_31670_A_2324665 | NC_021164.1    | Ca_Kabuli_Chr05 | 2324665                 | AA                              | GG                 | GG               | INTERGENIC      |               |                    |                    |
| SNP_31671_A_2324721 | NC_021164.1    | Ca_Kabuli_Chr05 | 2324721                 | GG                              | AA                 | AA               | INTERGENIC      |               |                    |                    |
| SNP_31672_A_2324845 | NC_021164.1    | Ca_Kabuli_Chr05 | 2324845                 | TT                              | AA                 | AA               | INTERGENIC      |               |                    |                    |
| SNP_31673_A_2324934 | NC_021164.1    | Ca_Kabuli_Chr05 | 2324934                 | TT                              | CC                 | CC               | INTERGENIC      |               |                    |                    |
| SNP_31674_A_2325042 | NC_021164.1    | Ca_Kabuli_Chr05 | 2325042                 | TT                              | CC                 | CC               | INTERGENIC      |               |                    |                    |
| SNP_31675_A_2325063 | NC_021164.1    | Ca_Kabuli_Chr05 | 2325063                 | TT                              | AA                 | AA               | INTERGENIC      |               |                    |                    |
| SNP_31676_A_2325064 | NC_021164.1    | Ca_Kabuli_Chr05 | 2325064                 | AA                              | GG                 | GG               | INTERGENIC      |               |                    |                    |
| SNP_31677_A_2325154 | NC_021164.1    | Ca_Kabuli_Chr05 | 2325154                 | TT                              | AA                 | AA               | INTERGENIC      |               |                    |                    |
| SNP_31678_A_2325270 | NC_021164.1    | Ca_Kabuli_Chr05 | 2325270                 | AA                              | TT                 | TT               | INTERGENIC      |               |                    |                    |
| SNP_31679_A_2325458 | NC_021164.1    | Ca_Kabuli_Chr05 | 2325458                 | GG                              | AA                 | AA               | INTERGENIC      |               |                    |                    |

| SNPs IDs            | Chromosome IDs | Chromosomes     | Physical positions (bp) | CDC Frontier genome (Reference genome) | (Pusa 1103 & HPNB) | (ILWC 46 & LPNB) | Sequence genome | Components of | Gene accession IDs | Putative functions |
|---------------------|----------------|-----------------|-------------------------|----------------------------------------|--------------------|------------------|-----------------|---------------|--------------------|--------------------|
| SNP_31680_A_2325624 | NC_021164.1    | Ca_Kabuli_Chr05 | 2325624                 | GG                                     | TT                 | TT               | INTERGENIC      |               |                    |                    |
| SNP_31681_A_2325629 | NC_021164.1    | Ca_Kabuli_Chr05 | 2325629                 | TT                                     | CC                 | CC               | INTERGENIC      |               |                    |                    |
| SNP_31682_A_2325635 | NC_021164.1    | Ca_Kabuli_Chr05 | 2325635                 | TT                                     | GG                 | GG               | INTERGENIC      |               |                    |                    |
| SNP_31683_A_2325928 | NC_021164.1    | Ca_Kabuli_Chr05 | 2325928                 | TT                                     | CC                 | CC               | INTERGENIC      |               |                    |                    |
| SNP_31684_A_2326014 | NC_021164.1    | Ca_Kabuli_Chr05 | 2326014                 | GG                                     | CC                 | CC               | INTERGENIC      |               |                    |                    |
| SNP_31685_A_2326349 | NC_021164.1    | Ca_Kabuli_Chr05 | 2326349                 | TT                                     | AA                 | AA               | INTERGENIC      |               |                    |                    |
| SNP_31686_A_2326682 | NC_021164.1    | Ca_Kabuli_Chr05 | 2326682                 | AA                                     | CC                 | CC               | INTERGENIC      |               |                    |                    |
| SNP_31687_A_2326793 | NC_021164.1    | Ca_Kabuli_Chr05 | 2326793                 | AA                                     | CC                 | CC               | INTERGENIC      |               |                    |                    |
| SNP_31688_A_2326919 | NC_021164.1    | Ca_Kabuli_Chr05 | 2326919                 | AA                                     | TT                 | TT               | INTERGENIC      |               |                    |                    |
| SNP_31689_A_2326968 | NC_021164.1    | Ca_Kabuli_Chr05 | 2326968                 | AA                                     | GG                 | GG               | INTERGENIC      |               |                    |                    |
| SNP_31690_A_2327108 | NC_021164.1    | Ca_Kabuli_Chr05 | 2327108                 | AA                                     | CC                 | CC               | INTERGENIC      |               |                    |                    |
| SNP_31691_A_2327170 | NC_021164.1    | Ca_Kabuli_Chr05 | 2327170                 | CC                                     | AA                 | AA               | INTERGENIC      |               |                    |                    |
| SNP_31692_A_2327178 | NC_021164.1    | Ca_Kabuli_Chr05 | 2327178                 | AA                                     | TT                 | TT               | INTERGENIC      |               |                    |                    |
| SNP_31693_A_2327210 | NC_021164.1    | Ca_Kabuli_Chr05 | 2327210                 | TT                                     | GG                 | GG               | INTERGENIC      |               |                    |                    |
| SNP_31694_A_2327225 | NC_021164.1    | Ca_Kabuli_Chr05 | 2327225                 | TT                                     | CC                 | CC               | INTERGENIC      |               |                    |                    |
| SNP_31696_A_2327313 | NC_021164.1    | Ca_Kabuli_Chr05 | 2327313                 | AA                                     | GG                 | GG               | INTERGENIC      |               |                    |                    |
| SNP_31697_A_2327323 | NC_021164.1    | Ca_Kabuli_Chr05 | 2327323                 | AA                                     | GG                 | GG               | INTERGENIC      |               |                    |                    |
| SNP_31698_A_2327360 | NC_021164.1    | Ca_Kabuli_Chr05 | 2327360                 | AA                                     | GG                 | GG               | INTERGENIC      |               |                    |                    |
| SNP_31699_A_2327383 | NC_021164.1    | Ca_Kabuli_Chr05 | 2327383                 | TT                                     | CC                 | CC               | INTERGENIC      |               |                    |                    |
| SNP_31700_A_2327390 | NC_021164.1    | Ca_Kabuli_Chr05 | 2327390                 | GG                                     | TT                 | TT               | INTERGENIC      |               |                    |                    |
| SNP_31701_A_2327440 | NC_021164.1    | Ca_Kabuli_Chr05 | 2327440                 | AA                                     | CC                 | CC               | INTERGENIC      |               |                    |                    |
| SNP_31702_A_2327472 | NC_021164.1    | Ca_Kabuli_Chr05 | 2327472                 | AA                                     | GG                 | GG               | INTERGENIC      |               |                    |                    |

| SNPs IDs            | Chromosome IDs | Chromosomes     | Physical positions (bp) | CDC Frontier genome (Reference genome) | (Pusa 1103 & HPNB) | (ILWC 46 & LPNB) | Sequence genome | Components of | Gene accession IDs | Putative functions |
|---------------------|----------------|-----------------|-------------------------|----------------------------------------|--------------------|------------------|-----------------|---------------|--------------------|--------------------|
| SNP_31703_A_2327524 | NC_021164.1    | Ca_Kabuli_Chr05 | 2327524                 | TT                                     | CC                 | CC               | INTERGENIC      |               |                    |                    |
| SNP_31704_A_2327591 | NC_021164.1    | Ca_Kabuli_Chr05 | 2327591                 | TT                                     | CC                 | CC               | INTERGENIC      |               |                    |                    |
| SNP_31705_A_2327912 | NC_021164.1    | Ca_Kabuli_Chr05 | 2327912                 | TT                                     | AA                 | AA               | INTERGENIC      |               |                    |                    |
| SNP_31706_A_2327955 | NC_021164.1    | Ca_Kabuli_Chr05 | 2327955                 | CC                                     | TT                 | TT               | INTERGENIC      |               |                    |                    |
| SNP_31707_A_2327980 | NC_021164.1    | Ca_Kabuli_Chr05 | 2327980                 | CC                                     | TT                 | TT               | INTERGENIC      |               |                    |                    |
| SNP_31708_A_2328128 | NC_021164.1    | Ca_Kabuli_Chr05 | 2328128                 | TT                                     | CC                 | CC               | INTERGENIC      |               |                    |                    |
| SNP_31709_A_2328450 | NC_021164.1    | Ca_Kabuli_Chr05 | 2328450                 | GG                                     | AA                 | AA               | INTERGENIC      |               |                    |                    |
| SNP_31710_A_2328451 | NC_021164.1    | Ca_Kabuli_Chr05 | 2328451                 | GG                                     | AA                 | AA               | INTERGENIC      |               |                    |                    |
| SNP_31711_A_2328485 | NC_021164.1    | Ca_Kabuli_Chr05 | 2328485                 | AA                                     | GG                 | GG               | INTERGENIC      |               |                    |                    |
| SNP_31712_A_2340150 | NC_021164.1    | Ca_Kabuli_Chr05 | 2340150                 | GG                                     | AA                 | AA               | INTERGENIC      |               |                    |                    |
| SNP_31713_A_2340183 | NC_021164.1    | Ca_Kabuli_Chr05 | 2340183                 | TT                                     | CC                 | CC               | INTERGENIC      |               |                    |                    |
| SNP_31714_A_2340729 | NC_021164.1    | Ca_Kabuli_Chr05 | 2340729                 | TT                                     | GG                 | GG               | INTERGENIC      |               |                    |                    |
| SNP_31715_A_2355661 | NC_021164.1    | Ca_Kabuli_Chr05 | 2355661                 | GG                                     | TT                 | TT               | INTERGENIC      |               |                    |                    |
| SNP_31716_A_2355776 | NC_021164.1    | Ca_Kabuli_Chr05 | 2355776                 | AA                                     | CC                 | CC               | INTERGENIC      |               |                    |                    |
| SNP_31717_A_2375401 | NC_021164.1    | Ca_Kabuli_Chr05 | 2375401                 | AA                                     | GG                 | GG               | INTERGENIC      |               |                    |                    |
| SNP_31719_A_2375490 | NC_021164.1    | Ca_Kabuli_Chr05 | 2375490                 | TT                                     | GG                 | GG               | INTERGENIC      |               |                    |                    |
| SNP_31720_A_2375722 | NC_021164.1    | Ca_Kabuli_Chr05 | 2375722                 | AA                                     | TT                 | TT               | INTERGENIC      |               |                    |                    |
| SNP_31721_A_2384952 | NC_021164.1    | Ca_Kabuli_Chr05 | 2384952                 | TT                                     | CC                 | CC               | INTERGENIC      |               |                    |                    |
| SNP_31722_A_2402545 | NC_021164.1    | Ca_Kabuli_Chr05 | 2402545                 | AA                                     | CC                 | CC               | INTERGENIC      |               |                    |                    |
| SNP_31723_A_2409065 | NC_021164.1    | Ca_Kabuli_Chr05 | 2409065                 | GG                                     | AA                 | AA               | INTERGENIC      |               |                    |                    |
| SNP_31724_A_2420874 | NC_021164.1    | Ca_Kabuli_Chr05 | 2420874                 | TT                                     | CC                 | CC               | INTERGENIC      |               |                    |                    |
| SNP_31725_A_2421104 | NC_021164.1    | Ca_Kabuli_Chr05 | 2421104                 | CC                                     | GG                 | GG               | INTERGENIC      |               |                    |                    |

| SNPs IDs            | Chromosome IDs | Chromosomes     | Physical positions (bp) | CDC Frontier (Reference genome) | (Pusa 1103 & HPNB) | (ILWC 46 & LPNB) | Sequence genome | Components of | Gene accession IDs                        | Putative functions |
|---------------------|----------------|-----------------|-------------------------|---------------------------------|--------------------|------------------|-----------------|---------------|-------------------------------------------|--------------------|
| SNP_31726_A_2421141 | NC_021164.1    | Ca_Kabuli_Chr05 | 2421141                 | TT                              | CC                 | CC               | INTERGENIC      |               |                                           |                    |
| SNP_31727_A_2454809 | NC_021164.1    | Ca_Kabuli_Chr05 | 2454809                 | AA                              | CC                 | CC               | INTERGENIC      |               |                                           |                    |
| SNP_31728_A_2504088 | NC_021164.1    | Ca_Kabuli_Chr05 | 2504088                 | TT                              | AA                 | AA               | INTERGENIC      |               |                                           |                    |
| SNP_31729_A_2504098 | NC_021164.1    | Ca_Kabuli_Chr05 | 2504098                 | TT                              | AA                 | AA               | INTERGENIC      |               |                                           |                    |
| SNP_31730_A_2508755 | NC_021164.1    | Ca_Kabuli_Chr05 | 2508755                 | GG                              | AA                 | AA               | INTERGENIC      |               |                                           |                    |
| SNP_31731_A_2508757 | NC_021164.1    | Ca_Kabuli_Chr05 | 2508757                 | GG                              | CC                 | CC               | INTERGENIC      |               |                                           |                    |
| SNP_31732_A_2508771 | NC_021164.1    | Ca_Kabuli_Chr05 | 2508771                 | TT                              | CC                 | CC               | INTERGENIC      |               |                                           |                    |
| SNP_31733_A_2519218 | NC_021164.1    | Ca_Kabuli_Chr05 | 2519218                 | CC                              | TT                 | TT               | INTERGENIC      |               |                                           |                    |
| SNP_31734_A_2519587 | NC_021164.1    | Ca_Kabuli_Chr05 | 2519587                 | AA                              | GG                 | GG               | INTERGENIC      |               |                                           |                    |
| SNP_31735_A_2519816 | NC_021164.1    | Ca_Kabuli_Chr05 | 2519816                 | CC                              | AA                 | AA               | INTERGENIC      |               |                                           |                    |
| SNP_31736_A_2540108 | NC_021164.1    | Ca_Kabuli_Chr05 | 2540108                 | TT                              | GG                 | GG               | INTERGENIC      |               |                                           |                    |
| SNP_31737_A_2540446 | NC_021164.1    | Ca_Kabuli_Chr05 | 2540446                 | TT                              | CC                 | CC               | INTERGENIC      |               |                                           |                    |
| SNP_31738_A_2552288 | NC_021164.1    | Ca_Kabuli_Chr05 | 2552288                 | AA                              | CC                 | CC               | INTERGENIC      |               |                                           |                    |
| SNP_31739_A_2552289 | NC_021164.1    | Ca_Kabuli_Chr05 | 2552289                 | TT                              | AA                 | AA               | INTERGENIC      |               |                                           |                    |
| SNP_31740_A_2552300 | NC_021164.1    | Ca_Kabuli_Chr05 | 2552300                 | TT                              | GG                 | GG               | INTERGENIC      |               |                                           |                    |
| SNP_31741_A_2619175 | NC_021164.1    | Ca_Kabuli_Chr05 | 2619175                 | TT                              | GG                 | GG               | URR             | 101497949     | uncharacterized protein DDB_G0283697-like |                    |
| SNP_31742_A_2626781 | NC_021164.1    | Ca_Kabuli_Chr05 | 2626781                 | AA                              | TT                 | TT               | INTERGENIC      |               |                                           |                    |
| SNP_31743_A_2628499 | NC_021164.1    | Ca_Kabuli_Chr05 | 2628499                 | AA                              | TT                 | TT               | INTERGENIC      |               |                                           |                    |
| SNP_31744_A_2628508 | NC_021164.1    | Ca_Kabuli_Chr05 | 2628508                 | TT                              | CC                 | CC               | INTERGENIC      |               |                                           |                    |
| SNP_31745_A_2628538 | NC_021164.1    | Ca_Kabuli_Chr05 | 2628538                 | CC                              | TT                 | TT               | INTERGENIC      |               |                                           |                    |
| SNP_31746_A_2628594 | NC_021164.1    | Ca_Kabuli_Chr05 | 2628594                 | GG                              | AA                 | AA               | INTERGENIC      |               |                                           |                    |
| SNP_31747_A_2639069 | NC_021164.1    | Ca_Kabuli_Chr05 | 2639069                 | GG                              | AA                 | AA               | INTERGENIC      |               |                                           |                    |

| SNPs IDs            | Chromosome IDs | Chromosomes     | Physical positions (bp) | CDC Frontier genome (Reference genome) | (Pusa 1103 & HPNB) | (ILWC 46 & LPNB) | Sequence genome | Components of | Gene accession IDs | Putative functions |
|---------------------|----------------|-----------------|-------------------------|----------------------------------------|--------------------|------------------|-----------------|---------------|--------------------|--------------------|
| SNP_31748_A_2641065 | NC_021164.1    | Ca_Kabuli_Chr05 | 2641065                 | CC                                     | TT                 | TT               | INTERGENIC      |               |                    |                    |
| SNP_31749_A_2641145 | NC_021164.1    | Ca_Kabuli_Chr05 | 2641145                 | CC                                     | AA                 | AA               | INTERGENIC      |               |                    |                    |
| SNP_31750_A_2658390 | NC_021164.1    | Ca_Kabuli_Chr05 | 2658390                 | AA                                     | CC                 | CC               | INTERGENIC      |               |                    |                    |
| SNP_31751_A_2659156 | NC_021164.1    | Ca_Kabuli_Chr05 | 2659156                 | TT                                     | CC                 | CC               | INTERGENIC      |               |                    |                    |
| SNP_31752_A_2663834 | NC_021164.1    | Ca_Kabuli_Chr05 | 2663834                 | CC                                     | TT                 | TT               | INTERGENIC      |               |                    |                    |
| SNP_31753_A_2663865 | NC_021164.1    | Ca_Kabuli_Chr05 | 2663865                 | AA                                     | GG                 | GG               | INTERGENIC      |               |                    |                    |
| SNP_31754_A_2664041 | NC_021164.1    | Ca_Kabuli_Chr05 | 2664041                 | GG                                     | AA                 | AA               | INTERGENIC      |               |                    |                    |
| SNP_31755_A_2664079 | NC_021164.1    | Ca_Kabuli_Chr05 | 2664079                 | TT                                     | GG                 | GG               | INTERGENIC      |               |                    |                    |
| SNP_31756_A_2664226 | NC_021164.1    | Ca_Kabuli_Chr05 | 2664226                 | AA                                     | TT                 | TT               | INTERGENIC      |               |                    |                    |
| SNP_31757_A_2666610 | NC_021164.1    | Ca_Kabuli_Chr05 | 2666610                 | TT                                     | CC                 | CC               | INTERGENIC      |               |                    |                    |
| SNP_31758_A_2666747 | NC_021164.1    | Ca_Kabuli_Chr05 | 2666747                 | CC                                     | TT                 | TT               | INTERGENIC      |               |                    |                    |
| SNP_31759_A_2666766 | NC_021164.1    | Ca_Kabuli_Chr05 | 2666766                 | TT                                     | CC                 | CC               | INTERGENIC      |               |                    |                    |
| SNP_31760_A_2669009 | NC_021164.1    | Ca_Kabuli_Chr05 | 2669009                 | TT                                     | CC                 | CC               | INTERGENIC      |               |                    |                    |
| SNP_31761_A_2698882 | NC_021164.1    | Ca_Kabuli_Chr05 | 2698882                 | TT                                     | AA                 | AA               | INTERGENIC      |               |                    |                    |
| SNP_31762_A_2698923 | NC_021164.1    | Ca_Kabuli_Chr05 | 2698923                 | CC                                     | TT                 | TT               | INTERGENIC      |               |                    |                    |
| SNP_31763_A_2698932 | NC_021164.1    | Ca_Kabuli_Chr05 | 2698932                 | TT                                     | GG                 | GG               | INTERGENIC      |               |                    |                    |
| SNP_31764_A_2698940 | NC_021164.1    | Ca_Kabuli_Chr05 | 2698940                 | AA                                     | GG                 | GG               | INTERGENIC      |               |                    |                    |
| SNP_31765_A_2698949 | NC_021164.1    | Ca_Kabuli_Chr05 | 2698949                 | GG                                     | AA                 | AA               | INTERGENIC      |               |                    |                    |
| SNP_31766_A_2698983 | NC_021164.1    | Ca_Kabuli_Chr05 | 2698983                 | GG                                     | AA                 | AA               | INTERGENIC      |               |                    |                    |
| SNP_31767_A_2698998 | NC_021164.1    | Ca_Kabuli_Chr05 | 2698998                 | AA                                     | GG                 | GG               | INTERGENIC      |               |                    |                    |
| SNP_31768_A_2740956 | NC_021164.1    | Ca_Kabuli_Chr05 | 2740956                 | TT                                     | CC                 | CC               | INTERGENIC      |               |                    |                    |
| SNP_31769_A_2744336 | NC_021164.1    | Ca_Kabuli_Chr05 | 2744336                 | GG                                     | AA                 | AA               | INTERGENIC      |               |                    |                    |



| SNPs IDs            | Chromosome IDs | Chromosomes     | Physical positions (bp) | CDC Frontier (Reference genome) | (Pusa 1103 & HPNB) | (ILWC 46 & LPNB) | Sequence Components of genome | Gene accession IDs | Putative functions                                               |
|---------------------|----------------|-----------------|-------------------------|---------------------------------|--------------------|------------------|-------------------------------|--------------------|------------------------------------------------------------------|
| SNP_31770_A_2744383 | NC_021164.1    | Ca_Kabuli_Chr05 | 2744383                 | CC                              | TT                 | TT               | INTERGENIC                    |                    |                                                                  |
| SNP_31771_A_2744390 | NC_021164.1    | Ca_Kabuli_Chr05 | 2744390                 | TT                              | CC                 | CC               | INTERGENIC                    |                    |                                                                  |
| SNP_31772_A_2744431 | NC_021164.1    | Ca_Kabuli_Chr05 | 2744431                 | GG                              | AA                 | AA               | INTERGENIC                    |                    |                                                                  |
| SNP_31773_A_2744686 | NC_021164.1    | Ca_Kabuli_Chr05 | 2744686                 | TT                              | CC                 | CC               | INTERGENIC                    |                    |                                                                  |
| SNP_31774_A_2753644 | NC_021164.1    | Ca_Kabuli_Chr05 | 2753644                 | AA                              | GG                 | GG               | INTERGENIC                    |                    |                                                                  |
| SNP_31775_A_2753645 | NC_021164.1    | Ca_Kabuli_Chr05 | 2753645                 | CC                              | AA                 | AA               | INTERGENIC                    |                    |                                                                  |
| SNP_31777_A_2791773 | NC_021164.1    | Ca_Kabuli_Chr05 | 2791773                 | TT                              | AA                 | AA               | INTRON                        | 101503205          | uncharacterized LOC101503205                                     |
| SNP_31778_A_2791775 | NC_021164.1    | Ca_Kabuli_Chr05 | 2791775                 | AA                              | GG                 | GG               | INTRON                        | 101503205          | uncharacterized LOC101503205                                     |
| SNP_31779_A_2831574 | NC_021164.1    | Ca_Kabuli_Chr05 | 2831574                 | AA                              | TT                 | TT               | INTRON                        | 101503858          | Unknown function                                                 |
| SNP_31780_A_2870797 | NC_021164.1    | Ca_Kabuli_Chr05 | 2870797                 | CC                              | TT                 | TT               | URR                           | 101496653          | 4-diphosphocytidyl-2-C-methyl-D-erythritol kinase, chloroplastic |
| SNP_31781_A_2912543 | NC_021164.1    | Ca_Kabuli_Chr05 | 2912543                 | AA                              | GG                 | GG               | INTERGENIC                    |                    |                                                                  |
| SNP_31782_A_2915930 | NC_021164.1    | Ca_Kabuli_Chr05 | 2915930                 | GG                              | AA                 | AA               | INTERGENIC                    |                    |                                                                  |
| SNP_31783_A_2947217 | NC_021164.1    | Ca_Kabuli_Chr05 | 2947217                 | TT                              | GG                 | GG               | INTRON                        | 101496325          | nudix hydrolase 3                                                |
| SNP_31784_A_2947219 | NC_021164.1    | Ca_Kabuli_Chr05 | 2947219                 | AA                              | GG                 | GG               | INTRON                        | 101496325          | nudix hydrolase 3                                                |
| SNP_31785_A_3014997 | NC_021164.1    | Ca_Kabuli_Chr05 | 3014997                 | CC                              | TT                 | TT               | URR                           | 101495128          | ABC transporter A family member 7-like                           |
| SNP_31786_A_3031448 | NC_021164.1    | Ca_Kabuli_Chr05 | 3031448                 | GG                              | AA                 | AA               | URR                           | 101504172          | Unknown function                                                 |
| SNP_31788_A_3066729 | NC_021164.1    | Ca_Kabuli_Chr05 | 3066729                 | AA                              | GG                 | GG               | INTERGENIC                    |                    |                                                                  |
| SNP_31789_A_3067090 | NC_021164.1    | Ca_Kabuli_Chr05 | 3067090                 | GG                              | AA                 | AA               | INTERGENIC                    |                    |                                                                  |
| SNP_31790_A_3067114 | NC_021164.1    | Ca_Kabuli_Chr05 | 3067114                 | CC                              | TT                 | TT               | INTERGENIC                    |                    |                                                                  |
| SNP_31791_A_3067141 | NC_021164.1    | Ca_Kabuli_Chr05 | 3067141                 | AA                              | GG                 | GG               | INTERGENIC                    |                    |                                                                  |
| SNP_31792_A_3067204 | NC_021164.1    | Ca_Kabuli_Chr05 | 3067204                 | CC                              | TT                 | TT               | INTERGENIC                    |                    |                                                                  |
| SNP_31793_A_3070498 | NC_021164.1    | Ca_Kabuli_Chr05 | 3070498                 | AA                              | CC                 | CC               | INTERGENIC                    |                    |                                                                  |

| SNPs IDs            | Chromosome IDs | Chromosomes     | Physical positions (bp) | CDC Frontier (Reference genome) | (Pusa 1103 & HPNB) | (ILWC 46 & LPNB) | Sequence Components of genome | Gene accession IDs | Putative functions     |
|---------------------|----------------|-----------------|-------------------------|---------------------------------|--------------------|------------------|-------------------------------|--------------------|------------------------|
| SNP_31794_A_3070542 | NC_021164.1    | Ca_Kabuli_Chr05 | 3070542                 | AA                              | GG                 | GG               | INTERGENIC                    |                    |                        |
| SNP_31795_A_3070557 | NC_021164.1    | Ca_Kabuli_Chr05 | 3070557                 | GG                              | AA                 | AA               | INTERGENIC                    |                    |                        |
| SNP_31796_A_3083532 | NC_021164.1    | Ca_Kabuli_Chr05 | 3083532                 | GG                              | AA                 | AA               | INTERGENIC                    |                    |                        |
| SNP_31798_A_3117498 | NC_021164.1    | Ca_Kabuli_Chr05 | 3117498                 | AA                              | CC                 | CC               | INTERGENIC                    |                    |                        |
| SNP_31799_A_3117517 | NC_021164.1    | Ca_Kabuli_Chr05 | 3117517                 | TT                              | GG                 | GG               | INTERGENIC                    |                    |                        |
| SNP_31800_A_3117523 | NC_021164.1    | Ca_Kabuli_Chr05 | 3117523                 | TT                              | CC                 | CC               | INTERGENIC                    |                    |                        |
| SNP_31801_A_3117639 | NC_021164.1    | Ca_Kabuli_Chr05 | 3117639                 | TT                              | CC                 | CC               | INTERGENIC                    |                    |                        |
| SNP_31802_A_3117888 | NC_021164.1    | Ca_Kabuli_Chr05 | 3117888                 | TT                              | GG                 | GG               | INTERGENIC                    |                    |                        |
| SNP_31803_A_3117892 | NC_021164.1    | Ca_Kabuli_Chr05 | 3117892                 | TT                              | GG                 | GG               | INTERGENIC                    |                    |                        |
| SNP_31804_A_3118035 | NC_021164.1    | Ca_Kabuli_Chr05 | 3118035                 | CC                              | TT                 | TT               | INTERGENIC                    |                    |                        |
| SNP_31805_A_3118085 | NC_021164.1    | Ca_Kabuli_Chr05 | 3118085                 | TT                              | CC                 | CC               | INTERGENIC                    |                    |                        |
| SNP_31806_A_3170635 | NC_021164.1    | Ca_Kabuli_Chr05 | 3170635                 | TT                              | CC                 | CC               | INTERGENIC                    |                    |                        |
| SNP_31807_A_3219708 | NC_021164.1    | Ca_Kabuli_Chr05 | 3219708                 | GG                              | AA                 | AA               | DRR                           | 101492322          | NAP1-related protein 2 |
| SNP_31808_A_3252523 | NC_021164.1    | Ca_Kabuli_Chr05 | 3252523                 | TT                              | CC                 | CC               | INTERGENIC                    |                    |                        |
| SNP_31809_A_3252925 | NC_021164.1    | Ca_Kabuli_Chr05 | 3252925                 | GG                              | TT                 | TT               | INTERGENIC                    |                    |                        |
| SNP_31810_A_3270090 | NC_021164.1    | Ca_Kabuli_Chr05 | 3270090                 | TT                              | CC                 | CC               | INTERGENIC                    |                    |                        |
| SNP_31811_A_3279744 | NC_021164.1    | Ca_Kabuli_Chr05 | 3279744                 | TT                              | CC                 | CC               | INTERGENIC                    |                    |                        |
| SNP_31812_A_3285575 | NC_021164.1    | Ca_Kabuli_Chr05 | 3285575                 | AA                              | GG                 | GG               | INTERGENIC                    |                    |                        |
| SNP_31813_A_3303597 | NC_021164.1    | Ca_Kabuli_Chr05 | 3303597                 | TT                              | CC                 | CC               | INTERGENIC                    |                    |                        |
| SNP_31814_A_3323328 | NC_021164.1    | Ca_Kabuli_Chr05 | 3323328                 | CC                              | TT                 | TT               | INTERGENIC                    |                    |                        |
| SNP_31818_A_3353139 | NC_021164.1    | Ca_Kabuli_Chr05 | 3353139                 | TT                              | CC                 | CC               | INTERGENIC                    |                    |                        |
| SNP_31819_A_3353375 | NC_021164.1    | Ca_Kabuli_Chr05 | 3353375                 | AA                              | GG                 | GG               | INTERGENIC                    |                    |                        |

| SNPs IDs            | Chromosome IDs | Chromosomes     | Physical positions (bp) | CDC Frontier genome (Reference genome) | (Pusa 1103 & HPNB) | (ILWC 46 & LPNB) | Sequence genome | Components of | Gene accession IDs | Putative functions |
|---------------------|----------------|-----------------|-------------------------|----------------------------------------|--------------------|------------------|-----------------|---------------|--------------------|--------------------|
| SNP_31820_A_3413079 | NC_021164.1    | Ca_Kabuli_Chr05 | 3413079                 | AA                                     | CC                 | CC               | INTERGENIC      |               |                    |                    |
| SNP_31821_A_3415302 | NC_021164.1    | Ca_Kabuli_Chr05 | 3415302                 | CC                                     | TT                 | TT               | INTERGENIC      |               |                    |                    |
| SNP_31822_A_3445320 | NC_021164.1    | Ca_Kabuli_Chr05 | 3445320                 | TT                                     | AA                 | AA               | INTERGENIC      |               |                    |                    |
| SNP_31823_A_3472814 | NC_021164.1    | Ca_Kabuli_Chr05 | 3472814                 | GG                                     | AA                 | AA               | INTERGENIC      |               |                    |                    |
| SNP_31824_A_3570468 | NC_021164.1    | Ca_Kabuli_Chr05 | 3570468                 | AA                                     | GG                 | GG               | INTERGENIC      |               |                    |                    |
| SNP_31825_A_3570602 | NC_021164.1    | Ca_Kabuli_Chr05 | 3570602                 | GG                                     | AA                 | AA               | INTERGENIC      |               |                    |                    |
| SNP_31826_A_3570619 | NC_021164.1    | Ca_Kabuli_Chr05 | 3570619                 | CC                                     | TT                 | TT               | INTERGENIC      |               |                    |                    |
| SNP_31827_A_3570654 | NC_021164.1    | Ca_Kabuli_Chr05 | 3570654                 | TT                                     | AA                 | AA               | INTERGENIC      |               |                    |                    |
| SNP_31828_A_3570676 | NC_021164.1    | Ca_Kabuli_Chr05 | 3570676                 | TT                                     | GG                 | GG               | INTERGENIC      |               |                    |                    |
| SNP_31829_A_3570746 | NC_021164.1    | Ca_Kabuli_Chr05 | 3570746                 | GG                                     | AA                 | AA               | INTERGENIC      |               |                    |                    |
| SNP_31830_A_3570788 | NC_021164.1    | Ca_Kabuli_Chr05 | 3570788                 | AA                                     | TT                 | TT               | INTERGENIC      |               |                    |                    |
| SNP_31831_A_3570796 | NC_021164.1    | Ca_Kabuli_Chr05 | 3570796                 | AA                                     | TT                 | TT               | INTERGENIC      |               |                    |                    |
| SNP_31833_A_3577759 | NC_021164.1    | Ca_Kabuli_Chr05 | 3577759                 | TT                                     | CC                 | CC               | INTERGENIC      |               |                    |                    |
| SNP_31834_A_3577762 | NC_021164.1    | Ca_Kabuli_Chr05 | 3577762                 | AA                                     | GG                 | GG               | INTERGENIC      |               |                    |                    |
| SNP_31835_A_3577837 | NC_021164.1    | Ca_Kabuli_Chr05 | 3577837                 | AA                                     | CC                 | CC               | INTERGENIC      |               |                    |                    |
| SNP_31836_A_3578200 | NC_021164.1    | Ca_Kabuli_Chr05 | 3578200                 | AA                                     | GG                 | GG               | INTERGENIC      |               |                    |                    |
| SNP_31837_A_3578205 | NC_021164.1    | Ca_Kabuli_Chr05 | 3578205                 | AA                                     | CC                 | CC               | INTERGENIC      |               |                    |                    |
| SNP_31838_A_3578208 | NC_021164.1    | Ca_Kabuli_Chr05 | 3578208                 | CC                                     | AA                 | AA               | INTERGENIC      |               |                    |                    |
| SNP_31839_A_3589828 | NC_021164.1    | Ca_Kabuli_Chr05 | 3589828                 | CC                                     | TT                 | TT               | INTRON          | 101507084     | Unknown function   |                    |
| SNP_31840_A_3589834 | NC_021164.1    | Ca_Kabuli_Chr05 | 3589834                 | TT                                     | CC                 | CC               | INTRON          | 101507084     | Unknown function   |                    |
| SNP_31841_A_3594387 | NC_021164.1    | Ca_Kabuli_Chr05 | 3594387                 | AA                                     | GG                 | GG               | INTRON          | 101507084     | Unknown function   |                    |
| SNP_31842_A_3610816 | NC_021164.1    | Ca_Kabuli_Chr05 | 3610816                 | GG                                     | AA                 | AA               | INTERGENIC      |               |                    |                    |

| SNPs IDs            | Chromosome IDs | Chromosomes     | Physical positions (bp) | CDC Frontier genome (Reference genome) | (Pusa 1103 & HPNB) | (ILWC 46 & LPNB) | Sequence genome | Components of | Gene accession IDs | Putative functions |
|---------------------|----------------|-----------------|-------------------------|----------------------------------------|--------------------|------------------|-----------------|---------------|--------------------|--------------------|
| SNP_31843_A_3639262 | NC_021164.1    | Ca_Kabuli_Chr05 | 3639262                 | TT                                     | CC                 | CC               | INTERGENIC      |               |                    |                    |
| SNP_31844_A_3639823 | NC_021164.1    | Ca_Kabuli_Chr05 | 3639823                 | AA                                     | GG                 | GG               | INTERGENIC      |               |                    |                    |
| SNP_31845_A_3639824 | NC_021164.1    | Ca_Kabuli_Chr05 | 3639824                 | TT                                     | CC                 | CC               | INTERGENIC      |               |                    |                    |
| SNP_31846_A_3639847 | NC_021164.1    | Ca_Kabuli_Chr05 | 3639847                 | TT                                     | CC                 | CC               | INTERGENIC      |               |                    |                    |
| SNP_31847_A_3640677 | NC_021164.1    | Ca_Kabuli_Chr05 | 3640677                 | AA                                     | CC                 | CC               | INTERGENIC      |               |                    |                    |
| SNP_31848_A_3668838 | NC_021164.1    | Ca_Kabuli_Chr05 | 3668838                 | CC                                     | TT                 | TT               | INTERGENIC      |               |                    |                    |
| SNP_31849_A_3668840 | NC_021164.1    | Ca_Kabuli_Chr05 | 3668840                 | AA                                     | GG                 | GG               | INTERGENIC      |               |                    |                    |
| SNP_31850_A_3668850 | NC_021164.1    | Ca_Kabuli_Chr05 | 3668850                 | CC                                     | AA                 | AA               | INTERGENIC      |               |                    |                    |
| SNP_31852_A_3742124 | NC_021164.1    | Ca_Kabuli_Chr05 | 3742124                 | GG                                     | AA                 | AA               | INTERGENIC      |               |                    |                    |
| SNP_31853_A_3742626 | NC_021164.1    | Ca_Kabuli_Chr05 | 3742626                 | AA                                     | GG                 | GG               | INTERGENIC      |               |                    |                    |
| SNP_31855_A_3742702 | NC_021164.1    | Ca_Kabuli_Chr05 | 3742702                 | TT                                     | AA                 | AA               | INTERGENIC      |               |                    |                    |
| SNP_31856_A_3742766 | NC_021164.1    | Ca_Kabuli_Chr05 | 3742766                 | AA                                     | GG                 | GG               | INTERGENIC      |               |                    |                    |
| SNP_31857_A_3781331 | NC_021164.1    | Ca_Kabuli_Chr05 | 3781331                 | GG                                     | AA                 | AA               | INTERGENIC      |               |                    |                    |
| SNP_31858_A_3796043 | NC_021164.1    | Ca_Kabuli_Chr05 | 3796043                 | AA                                     | GG                 | GG               | INTERGENIC      |               |                    |                    |
| SNP_31859_A_3798618 | NC_021164.1    | Ca_Kabuli_Chr05 | 3798618                 | AA                                     | GG                 | GG               | INTERGENIC      |               |                    |                    |
| SNP_31860_A_3798982 | NC_021164.1    | Ca_Kabuli_Chr05 | 3798982                 | TT                                     | AA                 | AA               | INTERGENIC      |               |                    |                    |
| SNP_31861_A_3798988 | NC_021164.1    | Ca_Kabuli_Chr05 | 3798988                 | AA                                     | CC                 | CC               | INTERGENIC      |               |                    |                    |
| SNP_31862_A_3799007 | NC_021164.1    | Ca_Kabuli_Chr05 | 3799007                 | GG                                     | AA                 | AA               | INTERGENIC      |               |                    |                    |
| SNP_31863_A_3808798 | NC_021164.1    | Ca_Kabuli_Chr05 | 3808798                 | TT                                     | CC                 | CC               | INTERGENIC      |               |                    |                    |
| SNP_31864_A_3808882 | NC_021164.1    | Ca_Kabuli_Chr05 | 3808882                 | TT                                     | CC                 | CC               | INTERGENIC      |               |                    |                    |
| SNP_31865_A_3808905 | NC_021164.1    | Ca_Kabuli_Chr05 | 3808905                 | TT                                     | CC                 | CC               | INTERGENIC      |               |                    |                    |
| SNP_31866_A_3822473 | NC_021164.1    | Ca_Kabuli_Chr05 | 3822473                 | AA                                     | CC                 | CC               | INTERGENIC      |               |                    |                    |

| SNPs IDs            | Chromosome IDs | Chromosomes     | Physical positions (bp) | CDC Frontier genome (Reference genome) | (Pusa 1103 & HPNB) | (ILWC 46 & LPNB) | Sequence genome | Components of | Gene accession IDs | Putative functions |
|---------------------|----------------|-----------------|-------------------------|----------------------------------------|--------------------|------------------|-----------------|---------------|--------------------|--------------------|
| SNP_31867_A_3830276 | NC_021164.1    | Ca_Kabuli_Chr05 | 3830276                 | CC                                     | TT                 | TT               | INTERGENIC      |               |                    |                    |
| SNP_31868_A_3837827 | NC_021164.1    | Ca_Kabuli_Chr05 | 3837827                 | TT                                     | CC                 | CC               | INTERGENIC      |               |                    |                    |
| SNP_31869_A_3839179 | NC_021164.1    | Ca_Kabuli_Chr05 | 3839179                 | GG                                     | AA                 | AA               | INTERGENIC      |               |                    |                    |
| SNP_31870_A_3839183 | NC_021164.1    | Ca_Kabuli_Chr05 | 3839183                 | AA                                     | TT                 | TT               | INTERGENIC      |               |                    |                    |
| SNP_31871_A_3843442 | NC_021164.1    | Ca_Kabuli_Chr05 | 3843442                 | TT                                     | CC                 | CC               | INTERGENIC      |               |                    |                    |
| SNP_31872_A_3843820 | NC_021164.1    | Ca_Kabuli_Chr05 | 3843820                 | AA                                     | GG                 | GG               | INTERGENIC      |               |                    |                    |
| SNP_31873_A_3847922 | NC_021164.1    | Ca_Kabuli_Chr05 | 3847922                 | CC                                     | TT                 | TT               | INTERGENIC      |               |                    |                    |
| SNP_31874_A_3848325 | NC_021164.1    | Ca_Kabuli_Chr05 | 3848325                 | GG                                     | AA                 | AA               | INTERGENIC      |               |                    |                    |
| SNP_31877_A_3864961 | NC_021164.1    | Ca_Kabuli_Chr05 | 3864961                 | TT                                     | AA                 | AA               | INTERGENIC      |               |                    |                    |
| SNP_31878_A_3865035 | NC_021164.1    | Ca_Kabuli_Chr05 | 3865035                 | AA                                     | TT                 | TT               | INTERGENIC      |               |                    |                    |
| SNP_31879_A_3865052 | NC_021164.1    | Ca_Kabuli_Chr05 | 3865052                 | AA                                     | TT                 | TT               | INTERGENIC      |               |                    |                    |
| SNP_31880_A_3865098 | NC_021164.1    | Ca_Kabuli_Chr05 | 3865098                 | TT                                     | AA                 | AA               | INTERGENIC      |               |                    |                    |
| SNP_31881_A_3865353 | NC_021164.1    | Ca_Kabuli_Chr05 | 3865353                 | AA                                     | TT                 | TT               | INTERGENIC      |               |                    |                    |
| SNP_31882_A_3865363 | NC_021164.1    | Ca_Kabuli_Chr05 | 3865363                 | AA                                     | TT                 | TT               | INTERGENIC      |               |                    |                    |
| SNP_31883_A_3865364 | NC_021164.1    | Ca_Kabuli_Chr05 | 3865364                 | GG                                     | AA                 | AA               | INTERGENIC      |               |                    |                    |
| SNP_31884_A_3865497 | NC_021164.1    | Ca_Kabuli_Chr05 | 3865497                 | CC                                     | TT                 | TT               | INTERGENIC      |               |                    |                    |
| SNP_31885_A_3865616 | NC_021164.1    | Ca_Kabuli_Chr05 | 3865616                 | AA                                     | TT                 | TT               | INTERGENIC      |               |                    |                    |
| SNP_31886_A_3865747 | NC_021164.1    | Ca_Kabuli_Chr05 | 3865747                 | GG                                     | AA                 | AA               | INTERGENIC      |               |                    |                    |
| SNP_31887_A_3865756 | NC_021164.1    | Ca_Kabuli_Chr05 | 3865756                 | CC                                     | AA                 | AA               | INTERGENIC      |               |                    |                    |
| SNP_31888_A_3865773 | NC_021164.1    | Ca_Kabuli_Chr05 | 3865773                 | AA                                     | GG                 | GG               | INTERGENIC      |               |                    |                    |
| SNP_31889_A_3865925 | NC_021164.1    | Ca_Kabuli_Chr05 | 3865925                 | GG                                     | TT                 | TT               | INTERGENIC      |               |                    |                    |
| SNP_31890_A_3866005 | NC_021164.1    | Ca_Kabuli_Chr05 | 3866005                 | AA                                     | CC                 | CC               | INTERGENIC      |               |                    |                    |

| SNPs IDs            | Chromosome IDs | Chromosomes     | Physical positions (bp) | CDC Frontier (Reference genome) | (Pusa 1103 & HPNB) | (ILWC 46 & LPNB) | Sequence Components of genome | Gene accession IDs | Putative functions                              |
|---------------------|----------------|-----------------|-------------------------|---------------------------------|--------------------|------------------|-------------------------------|--------------------|-------------------------------------------------|
| SNP_31891_A_3869349 | NC_021164.1    | Ca_Kabuli_Chr05 | 3869349                 | TT                              | AA                 | AA               | INTERGENIC                    |                    |                                                 |
| SNP_31893_A_3874624 | NC_021164.1    | Ca_Kabuli_Chr05 | 3874624                 | GG                              | AA                 | AA               | INTERGENIC                    |                    |                                                 |
| SNP_31894_A_3874676 | NC_021164.1    | Ca_Kabuli_Chr05 | 3874676                 | TT                              | CC                 | CC               | INTERGENIC                    |                    |                                                 |
| SNP_31895_A_3928907 | NC_021164.1    | Ca_Kabuli_Chr05 | 3928907                 | AA                              | GG                 | GG               | INTRON                        | 101513605          | uncharacterized membrane protein At1g06890-like |
| SNP_31896_A_3993169 | NC_021164.1    | Ca_Kabuli_Chr05 | 3993169                 | TT                              | AA                 | AA               | INTERGENIC                    |                    |                                                 |
| SNP_31897_A_3993219 | NC_021164.1    | Ca_Kabuli_Chr05 | 3993219                 | CC                              | AA                 | AA               | INTERGENIC                    |                    |                                                 |
| SNP_31898_A_3993444 | NC_021164.1    | Ca_Kabuli_Chr05 | 3993444                 | GG                              | TT                 | TT               | INTERGENIC                    |                    |                                                 |
| SNP_31899_A_4004823 | NC_021164.1    | Ca_Kabuli_Chr05 | 4004823                 | GG                              | AA                 | AA               | INTERGENIC                    |                    |                                                 |
| SNP_31902_A_4064778 | NC_021164.1    | Ca_Kabuli_Chr05 | 4064778                 | GG                              | AA                 | AA               | DRR                           | 101514271          | uncharacterized LOC101514271                    |
| SNP_31903_A_4141138 | NC_021164.1    | Ca_Kabuli_Chr05 | 4141138                 | AA                              | GG                 | GG               | INTERGENIC                    |                    |                                                 |
| SNP_31904_A_4141170 | NC_021164.1    | Ca_Kabuli_Chr05 | 4141170                 | CC                              | AA                 | AA               | INTERGENIC                    |                    |                                                 |
| SNP_31905_A_4141255 | NC_021164.1    | Ca_Kabuli_Chr05 | 4141255                 | AA                              | CC                 | CC               | INTERGENIC                    |                    |                                                 |
| SNP_31906_A_4141447 | NC_021164.1    | Ca_Kabuli_Chr05 | 4141447                 | CC                              | TT                 | TT               | INTERGENIC                    |                    |                                                 |
| SNP_31907_A_4141482 | NC_021164.1    | Ca_Kabuli_Chr05 | 4141482                 | TT                              | CC                 | CC               | INTERGENIC                    |                    |                                                 |
| SNP_31908_A_4141484 | NC_021164.1    | Ca_Kabuli_Chr05 | 4141484                 | GG                              | AA                 | AA               | INTERGENIC                    |                    |                                                 |
| SNP_31909_A_4141486 | NC_021164.1    | Ca_Kabuli_Chr05 | 4141486                 | GG                              | TT                 | TT               | INTERGENIC                    |                    |                                                 |
| SNP_31910_A_4141551 | NC_021164.1    | Ca_Kabuli_Chr05 | 4141551                 | GG                              | CC                 | CC               | INTERGENIC                    |                    |                                                 |
| SNP_31911_A_4141582 | NC_021164.1    | Ca_Kabuli_Chr05 | 4141582                 | TT                              | AA                 | AA               | INTERGENIC                    |                    |                                                 |
| SNP_31912_A_4141765 | NC_021164.1    | Ca_Kabuli_Chr05 | 4141765                 | CC                              | TT                 | TT               | INTERGENIC                    |                    |                                                 |
| SNP_31913_A_4141806 | NC_021164.1    | Ca_Kabuli_Chr05 | 4141806                 | AA                              | GG                 | GG               | INTERGENIC                    |                    |                                                 |
| SNP_31914_A_4141811 | NC_021164.1    | Ca_Kabuli_Chr05 | 4141811                 | GG                              | AA                 | AA               | INTERGENIC                    |                    |                                                 |
| SNP_31915_A_4142004 | NC_021164.1    | Ca_Kabuli_Chr05 | 4142004                 | GG                              | TT                 | TT               | INTERGENIC                    |                    |                                                 |

| SNPs IDs            | Chromosome IDs | Chromosomes     | Physical positions (bp) | CDC Frontier genome (Reference genome) | (Pusa 1103 & HPNB) | (ILWC 46 & LPNB) | Sequence genome | Components of | Gene accession IDs | Putative functions |
|---------------------|----------------|-----------------|-------------------------|----------------------------------------|--------------------|------------------|-----------------|---------------|--------------------|--------------------|
| SNP_31916_A_4142010 | NC_021164.1    | Ca_Kabuli_Chr05 | 4142010                 | AA                                     | GG                 | GG               | INTERGENIC      |               |                    |                    |
| SNP_31917_A_4155758 | NC_021164.1    | Ca_Kabuli_Chr05 | 4155758                 | CC                                     | TT                 | TT               | INTERGENIC      |               |                    |                    |
| SNP_31918_A_4156295 | NC_021164.1    | Ca_Kabuli_Chr05 | 4156295                 | AA                                     | GG                 | GG               | INTERGENIC      |               |                    |                    |
| SNP_31919_A_4157200 | NC_021164.1    | Ca_Kabuli_Chr05 | 4157200                 | GG                                     | AA                 | AA               | INTERGENIC      |               |                    |                    |
| SNP_31920_A_4157553 | NC_021164.1    | Ca_Kabuli_Chr05 | 4157553                 | CC                                     | TT                 | TT               | INTERGENIC      |               |                    |                    |
| SNP_31921_A_4157670 | NC_021164.1    | Ca_Kabuli_Chr05 | 4157670                 | AA                                     | TT                 | TT               | INTERGENIC      |               |                    |                    |
| SNP_31922_A_4157717 | NC_021164.1    | Ca_Kabuli_Chr05 | 4157717                 | AA                                     | CC                 | CC               | INTERGENIC      |               |                    |                    |
| SNP_31923_A_4157901 | NC_021164.1    | Ca_Kabuli_Chr05 | 4157901                 | TT                                     | CC                 | CC               | INTERGENIC      |               |                    |                    |
| SNP_31924_A_4158810 | NC_021164.1    | Ca_Kabuli_Chr05 | 4158810                 | TT                                     | GG                 | GG               | INTERGENIC      |               |                    |                    |
| SNP_31925_A_4158877 | NC_021164.1    | Ca_Kabuli_Chr05 | 4158877                 | AA                                     | CC                 | CC               | INTERGENIC      |               |                    |                    |
| SNP_31926_A_4159018 | NC_021164.1    | Ca_Kabuli_Chr05 | 4159018                 | GG                                     | AA                 | AA               | INTERGENIC      |               |                    |                    |
| SNP_31927_A_4159032 | NC_021164.1    | Ca_Kabuli_Chr05 | 4159032                 | AA                                     | GG                 | GG               | INTERGENIC      |               |                    |                    |
| SNP_31928_A_4169387 | NC_021164.1    | Ca_Kabuli_Chr05 | 4169387                 | TT                                     | CC                 | CC               | INTERGENIC      |               |                    |                    |
| SNP_31929_A_4172730 | NC_021164.1    | Ca_Kabuli_Chr05 | 4172730                 | TT                                     | AA                 | AA               | INTERGENIC      |               |                    |                    |
| SNP_31930_A_4172823 | NC_021164.1    | Ca_Kabuli_Chr05 | 4172823                 | AA                                     | GG                 | GG               | INTERGENIC      |               |                    |                    |
| SNP_31931_A_4173226 | NC_021164.1    | Ca_Kabuli_Chr05 | 4173226                 | GG                                     | AA                 | AA               | INTERGENIC      |               |                    |                    |
| SNP_31932_A_4176329 | NC_021164.1    | Ca_Kabuli_Chr05 | 4176329                 | AA                                     | TT                 | TT               | INTERGENIC      |               |                    |                    |
| SNP_31933_A_4176341 | NC_021164.1    | Ca_Kabuli_Chr05 | 4176341                 | CC                                     | GG                 | GG               | INTERGENIC      |               |                    |                    |
| SNP_31934_A_4176346 | NC_021164.1    | Ca_Kabuli_Chr05 | 4176346                 | AA                                     | GG                 | GG               | INTERGENIC      |               |                    |                    |
| SNP_31936_A_4176379 | NC_021164.1    | Ca_Kabuli_Chr05 | 4176379                 | GG                                     | AA                 | AA               | INTERGENIC      |               |                    |                    |
| SNP_31937_A_4178539 | NC_021164.1    | Ca_Kabuli_Chr05 | 4178539                 | TT                                     | GG                 | GG               | INTERGENIC      |               |                    |                    |
| SNP_31938_A_4179186 | NC_021164.1    | Ca_Kabuli_Chr05 | 4179186                 | GG                                     | AA                 | AA               | INTERGENIC      |               |                    |                    |

| SNPs IDs            | Chromosome IDs | Chromosomes     | Physical positions (bp) | CDC Frontier genome (Reference genome) | (Pusa 1103 & HPNB) | (ILWC 46 & LPNB) | Sequence Components of genome | Gene accession IDs | Putative functions           |
|---------------------|----------------|-----------------|-------------------------|----------------------------------------|--------------------|------------------|-------------------------------|--------------------|------------------------------|
| SNP_31939_A_4179222 | NC_021164.1    | Ca_Kabuli_Chr05 | 4179222                 | GG                                     | CC                 | CC               | INTERGENIC                    |                    |                              |
| SNP_31941_A_4194979 | NC_021164.1    | Ca_Kabuli_Chr05 | 4194979                 | GG                                     | AA                 | AA               | INTERGENIC                    |                    |                              |
| SNP_31942_A_4198567 | NC_021164.1    | Ca_Kabuli_Chr05 | 4198567                 | AA                                     | GG                 | GG               | INTERGENIC                    |                    |                              |
| SNP_31943_A_4198593 | NC_021164.1    | Ca_Kabuli_Chr05 | 4198593                 | GG                                     | AA                 | AA               | INTERGENIC                    |                    |                              |
| SNP_31944_A_4209327 | NC_021164.1    | Ca_Kabuli_Chr05 | 4209327                 | GG                                     | TT                 | TT               | INTERGENIC                    |                    |                              |
| SNP_31945_A_4213289 | NC_021164.1    | Ca_Kabuli_Chr05 | 4213289                 | TT                                     | AA                 | AA               | NON_SYNONYMOUS_CODING         | 101514915          | uncharacterized LOC101514915 |
| SNP_31946_A_4217592 | NC_021164.1    | Ca_Kabuli_Chr05 | 4217592                 | TT                                     | AA                 | AA               | URR                           | 101514915          | uncharacterized LOC101514915 |
| SNP_31947_A_4217747 | NC_021164.1    | Ca_Kabuli_Chr05 | 4217747                 | GG                                     | TT                 | TT               | URR                           | 101514915          | uncharacterized LOC101514915 |
| SNP_31948_A_4219744 | NC_021164.1    | Ca_Kabuli_Chr05 | 4219744                 | AA                                     | GG                 | GG               | INTERGENIC                    |                    |                              |
| SNP_31949_A_4219809 | NC_021164.1    | Ca_Kabuli_Chr05 | 4219809                 | CC                                     | AA                 | AA               | INTERGENIC                    |                    |                              |
| SNP_31950_A_4219843 | NC_021164.1    | Ca_Kabuli_Chr05 | 4219843                 | GG                                     | AA                 | AA               | INTERGENIC                    |                    |                              |
| SNP_31951_A_4219858 | NC_021164.1    | Ca_Kabuli_Chr05 | 4219858                 | GG                                     | TT                 | TT               | INTERGENIC                    |                    |                              |
| SNP_31952_A_4219867 | NC_021164.1    | Ca_Kabuli_Chr05 | 4219867                 | AA                                     | CC                 | CC               | INTERGENIC                    |                    |                              |
| SNP_31953_A_4220114 | NC_021164.1    | Ca_Kabuli_Chr05 | 4220114                 | AA                                     | GG                 | GG               | INTERGENIC                    |                    |                              |
| SNP_31954_A_4220154 | NC_021164.1    | Ca_Kabuli_Chr05 | 4220154                 | GG                                     | AA                 | AA               | INTERGENIC                    |                    |                              |
| SNP_31955_A_4220191 | NC_021164.1    | Ca_Kabuli_Chr05 | 4220191                 | TT                                     | CC                 | CC               | INTERGENIC                    |                    |                              |
| SNP_31956_A_4220212 | NC_021164.1    | Ca_Kabuli_Chr05 | 4220212                 | CC                                     | TT                 | TT               | INTERGENIC                    |                    |                              |
| SNP_31957_A_4220239 | NC_021164.1    | Ca_Kabuli_Chr05 | 4220239                 | CC                                     | TT                 | TT               | INTERGENIC                    |                    |                              |
| SNP_31958_A_4221019 | NC_021164.1    | Ca_Kabuli_Chr05 | 4221019                 | AA                                     | GG                 | GG               | INTERGENIC                    |                    |                              |
| SNP_31959_A_4221096 | NC_021164.1    | Ca_Kabuli_Chr05 | 4221096                 | AA                                     | GG                 | GG               | INTERGENIC                    |                    |                              |
| SNP_31960_A_4222649 | NC_021164.1    | Ca_Kabuli_Chr05 | 4222649                 | AA                                     | GG                 | GG               | INTERGENIC                    |                    |                              |
| SNP_31961_A_4222661 | NC_021164.1    | Ca_Kabuli_Chr05 | 4222661                 | AA                                     | CC                 | CC               | INTERGENIC                    |                    |                              |



| SNPs IDs            | Chromosome IDs | Chromosomes     | Physical positions (bp) | CDC Frontier genome (Reference genome) | (Pusa 1103 & HPNB) | (ILWC 46 & LPNB) | Sequence genome | Components of | Gene accession IDs | Putative functions |
|---------------------|----------------|-----------------|-------------------------|----------------------------------------|--------------------|------------------|-----------------|---------------|--------------------|--------------------|
| SNP_31962_A_4222770 | NC_021164.1    | Ca_Kabuli_Chr05 | 4222770                 | AA                                     | GG                 | GG               | INTERGENIC      |               |                    |                    |
| SNP_31963_A_4223036 | NC_021164.1    | Ca_Kabuli_Chr05 | 4223036                 | CC                                     | TT                 | TT               | INTERGENIC      |               |                    |                    |
| SNP_31964_A_4223039 | NC_021164.1    | Ca_Kabuli_Chr05 | 4223039                 | AA                                     | GG                 | GG               | INTERGENIC      |               |                    |                    |
| SNP_31965_A_4223052 | NC_021164.1    | Ca_Kabuli_Chr05 | 4223052                 | AA                                     | GG                 | GG               | INTERGENIC      |               |                    |                    |
| SNP_31966_A_4223064 | NC_021164.1    | Ca_Kabuli_Chr05 | 4223064                 | GG                                     | AA                 | AA               | INTERGENIC      |               |                    |                    |
| SNP_31967_A_4225214 | NC_021164.1    | Ca_Kabuli_Chr05 | 4225214                 | AA                                     | TT                 | TT               | INTERGENIC      |               |                    |                    |
| SNP_31968_A_4231739 | NC_021164.1    | Ca_Kabuli_Chr05 | 4231739                 | GG                                     | AA                 | AA               | INTERGENIC      |               |                    |                    |
| SNP_31969_A_4233433 | NC_021164.1    | Ca_Kabuli_Chr05 | 4233433                 | GG                                     | AA                 | AA               | INTERGENIC      |               |                    |                    |
| SNP_31970_A_4234576 | NC_021164.1    | Ca_Kabuli_Chr05 | 4234576                 | AA                                     | CC                 | CC               | INTERGENIC      |               |                    |                    |
| SNP_31971_A_4234580 | NC_021164.1    | Ca_Kabuli_Chr05 | 4234580                 | GG                                     | TT                 | TT               | INTERGENIC      |               |                    |                    |
| SNP_31972_A_4236547 | NC_021164.1    | Ca_Kabuli_Chr05 | 4236547                 | CC                                     | AA                 | AA               | INTERGENIC      |               |                    |                    |
| SNP_31973_A_4237407 | NC_021164.1    | Ca_Kabuli_Chr05 | 4237407                 | TT                                     | AA                 | AA               | INTERGENIC      |               |                    |                    |
| SNP_31974_A_4238251 | NC_021164.1    | Ca_Kabuli_Chr05 | 4238251                 | GG                                     | AA                 | AA               | INTERGENIC      |               |                    |                    |
| SNP_31975_A_4242013 | NC_021164.1    | Ca_Kabuli_Chr05 | 4242013                 | GG                                     | AA                 | AA               | INTERGENIC      |               |                    |                    |
| SNP_31976_A_4242015 | NC_021164.1    | Ca_Kabuli_Chr05 | 4242015                 | CC                                     | TT                 | TT               | INTERGENIC      |               |                    |                    |
| SNP_31977_A_4242016 | NC_021164.1    | Ca_Kabuli_Chr05 | 4242016                 | CC                                     | TT                 | TT               | INTERGENIC      |               |                    |                    |
| SNP_31978_A_4242265 | NC_021164.1    | Ca_Kabuli_Chr05 | 4242265                 | GG                                     | AA                 | AA               | INTERGENIC      |               |                    |                    |
| SNP_31979_A_4242339 | NC_021164.1    | Ca_Kabuli_Chr05 | 4242339                 | TT                                     | AA                 | AA               | INTERGENIC      |               |                    |                    |
| SNP_31980_A_4242388 | NC_021164.1    | Ca_Kabuli_Chr05 | 4242388                 | TT                                     | CC                 | CC               | INTERGENIC      |               |                    |                    |
| SNP_31981_A_4247753 | NC_021164.1    | Ca_Kabuli_Chr05 | 4247753                 | GG                                     | TT                 | TT               | INTERGENIC      |               |                    |                    |
| SNP_31982_A_4250201 | NC_021164.1    | Ca_Kabuli_Chr05 | 4250201                 | GG                                     | AA                 | AA               | INTERGENIC      |               |                    |                    |
| SNP_31983_A_4263884 | NC_021164.1    | Ca_Kabuli_Chr05 | 4263884                 | GG                                     | AA                 | AA               | INTERGENIC      |               |                    |                    |

| SNPs IDs            | Chromosome IDs | Chromosomes     | Physical positions (bp) | CDC Frontier genome (Reference genome) | (Pusa 1103 & HPNB) | (ILWC 46 & LPNB) | Sequence genome | Components of | Gene accession IDs | Putative functions |
|---------------------|----------------|-----------------|-------------------------|----------------------------------------|--------------------|------------------|-----------------|---------------|--------------------|--------------------|
| SNP_31984_A_4263891 | NC_021164.1    | Ca_Kabuli_Chr05 | 4263891                 | AA                                     | GG                 | GG               | INTERGENIC      |               |                    |                    |
| SNP_31986_A_4280605 | NC_021164.1    | Ca_Kabuli_Chr05 | 4280605                 | AA                                     | GG                 | GG               | INTERGENIC      |               |                    |                    |
| SNP_31988_A_4297737 | NC_021164.1    | Ca_Kabuli_Chr05 | 4297737                 | CC                                     | TT                 | TT               | INTERGENIC      |               |                    |                    |
| SNP_31989_A_4297870 | NC_021164.1    | Ca_Kabuli_Chr05 | 4297870                 | CC                                     | TT                 | TT               | INTERGENIC      |               |                    |                    |
| SNP_31990_A_4297983 | NC_021164.1    | Ca_Kabuli_Chr05 | 4297983                 | TT                                     | GG                 | GG               | INTERGENIC      |               |                    |                    |
| SNP_31991_A_4298054 | NC_021164.1    | Ca_Kabuli_Chr05 | 4298054                 | AA                                     | GG                 | GG               | INTERGENIC      |               |                    |                    |
| SNP_31992_A_4298070 | NC_021164.1    | Ca_Kabuli_Chr05 | 4298070                 | TT                                     | CC                 | CC               | INTERGENIC      |               |                    |                    |
| SNP_31993_A_4305792 | NC_021164.1    | Ca_Kabuli_Chr05 | 4305792                 | AA                                     | TT                 | TT               | INTERGENIC      |               |                    |                    |
| SNP_31994_A_4306195 | NC_021164.1    | Ca_Kabuli_Chr05 | 4306195                 | AA                                     | TT                 | TT               | INTERGENIC      |               |                    |                    |
| SNP_31996_A_4313525 | NC_021164.1    | Ca_Kabuli_Chr05 | 4313525                 | CC                                     | TT                 | TT               | INTERGENIC      |               |                    |                    |
| SNP_31997_A_4314623 | NC_021164.1    | Ca_Kabuli_Chr05 | 4314623                 | GG                                     | AA                 | AA               | INTERGENIC      |               |                    |                    |
| SNP_31998_A_4314908 | NC_021164.1    | Ca_Kabuli_Chr05 | 4314908                 | GG                                     | TT                 | TT               | INTERGENIC      |               |                    |                    |
| SNP_31999_A_4314909 | NC_021164.1    | Ca_Kabuli_Chr05 | 4314909                 | TT                                     | AA                 | AA               | INTERGENIC      |               |                    |                    |
| SNP_32000_A_4314961 | NC_021164.1    | Ca_Kabuli_Chr05 | 4314961                 | TT                                     | AA                 | AA               | INTERGENIC      |               |                    |                    |
| SNP_32001_A_4315683 | NC_021164.1    | Ca_Kabuli_Chr05 | 4315683                 | CC                                     | GG                 | GG               | INTERGENIC      |               |                    |                    |
| SNP_32002_A_4361914 | NC_021164.1    | Ca_Kabuli_Chr05 | 4361914                 | AA                                     | GG                 | GG               | URR             | 101488758     | Unknown function   |                    |
| SNP_32003_A_4433503 | NC_021164.1    | Ca_Kabuli_Chr05 | 4433503                 | CC                                     | AA                 | AA               | INTERGENIC      |               |                    |                    |
| SNP_32004_A_4433506 | NC_021164.1    | Ca_Kabuli_Chr05 | 4433506                 | TT                                     | CC                 | CC               | INTERGENIC      |               |                    |                    |
| SNP_32005_A_4433515 | NC_021164.1    | Ca_Kabuli_Chr05 | 4433515                 | AA                                     | TT                 | TT               | INTERGENIC      |               |                    |                    |
| SNP_32006_A_4433778 | NC_021164.1    | Ca_Kabuli_Chr05 | 4433778                 | AA                                     | TT                 | TT               | INTERGENIC      |               |                    |                    |
| SNP_32007_A_4433783 | NC_021164.1    | Ca_Kabuli_Chr05 | 4433783                 | TT                                     | AA                 | AA               | INTERGENIC      |               |                    |                    |
| SNP_32008_A_4433829 | NC_021164.1    | Ca_Kabuli_Chr05 | 4433829                 | GG                                     | AA                 | AA               | INTERGENIC      |               |                    |                    |

| SNPs IDs            | Chromosome IDs | Chromosomes     | Physical positions (bp) | CDC Frontier genome (Reference genome) | (Pusa 1103 & HPNB) | (ILWC 46 & LPNB) | Sequence Components of genome | Gene accession IDs | Putative functions                                             |
|---------------------|----------------|-----------------|-------------------------|----------------------------------------|--------------------|------------------|-------------------------------|--------------------|----------------------------------------------------------------|
| SNP_32009_A_4434019 | NC_021164.1    | Ca_Kabuli_Chr05 | 4434019                 | TT                                     | GG                 | GG               | INTERGENIC                    |                    |                                                                |
| SNP_32010_A_4437038 | NC_021164.1    | Ca_Kabuli_Chr05 | 4437038                 | GG                                     | CC                 | CC               | INTERGENIC                    |                    |                                                                |
| SNP_32012_A_4536055 | NC_021164.1    | Ca_Kabuli_Chr05 | 4536055                 | AA                                     | GG                 | GG               | INTERGENIC                    |                    |                                                                |
| SNP_32013_A_4541754 | NC_021164.1    | Ca_Kabuli_Chr05 | 4541754                 | CC                                     | TT                 | TT               | INTERGENIC                    |                    |                                                                |
| SNP_32014_A_4541758 | NC_021164.1    | Ca_Kabuli_Chr05 | 4541758                 | AA                                     | GG                 | GG               | INTERGENIC                    |                    |                                                                |
| SNP_32015_A_4542076 | NC_021164.1    | Ca_Kabuli_Chr05 | 4542076                 | GG                                     | AA                 | AA               | INTERGENIC                    |                    |                                                                |
| SNP_32016_A_4542198 | NC_021164.1    | Ca_Kabuli_Chr05 | 4542198                 | CC                                     | GG                 | GG               | INTERGENIC                    |                    |                                                                |
| SNP_32017_A_4542230 | NC_021164.1    | Ca_Kabuli_Chr05 | 4542230                 | GG                                     | TT                 | TT               | INTERGENIC                    |                    |                                                                |
| SNP_32018_A_4542271 | NC_021164.1    | Ca_Kabuli_Chr05 | 4542271                 | CC                                     | TT                 | TT               | INTERGENIC                    |                    |                                                                |
| SNP_32019_A_4542276 | NC_021164.1    | Ca_Kabuli_Chr05 | 4542276                 | GG                                     | AA                 | AA               | INTERGENIC                    |                    |                                                                |
| SNP_32020_A_4556981 | NC_021164.1    | Ca_Kabuli_Chr05 | 4556981                 | AA                                     | TT                 | TT               | INTERGENIC                    |                    |                                                                |
| SNP_32021_A_4575962 | NC_021164.1    | Ca_Kabuli_Chr05 | 4575962                 | AA                                     | GG                 | GG               | INTERGENIC                    |                    |                                                                |
| SNP_32022_A_4593499 | NC_021164.1    | Ca_Kabuli_Chr05 | 4593499                 | CC                                     | TT                 | TT               | NON_SYNONYMOUS_CODING         | 101490060          | glyoxylate/succinic semialdehyde reductase 2, chloroplast-like |
| SNP_32023_A_4616303 | NC_021164.1    | Ca_Kabuli_Chr05 | 4616303                 | AA                                     | GG                 | GG               | INTERGENIC                    |                    |                                                                |
| SNP_32024_A_4616320 | NC_021164.1    | Ca_Kabuli_Chr05 | 4616320                 | TT                                     | CC                 | CC               | INTERGENIC                    |                    |                                                                |
| SNP_32025_A_4616321 | NC_021164.1    | Ca_Kabuli_Chr05 | 4616321                 | GG                                     | AA                 | AA               | INTERGENIC                    |                    |                                                                |
| SNP_32026_A_4616361 | NC_021164.1    | Ca_Kabuli_Chr05 | 4616361                 | GG                                     | AA                 | AA               | INTERGENIC                    |                    |                                                                |
| SNP_32027_A_4620723 | NC_021164.1    | Ca_Kabuli_Chr05 | 4620723                 | GG                                     | AA                 | AA               | URR                           | 101491041          | glycine-rich cell wall structural protein 1-like               |
| SNP_32028_A_4673053 | NC_021164.1    | Ca_Kabuli_Chr05 | 4673053                 | CC                                     | AA                 | AA               | INTERGENIC                    |                    |                                                                |
| SNP_32029_A_4673215 | NC_021164.1    | Ca_Kabuli_Chr05 | 4673215                 | GG                                     | AA                 | AA               | INTERGENIC                    |                    |                                                                |
| SNP_32030_A_4673220 | NC_021164.1    | Ca_Kabuli_Chr05 | 4673220                 | AA                                     | GG                 | GG               | INTERGENIC                    |                    |                                                                |
| SNP_32031_A_4673246 | NC_021164.1    | Ca_Kabuli_Chr05 | 4673246                 | CC                                     | TT                 | TT               | INTERGENIC                    |                    |                                                                |

| SNPs IDs            | Chromosome IDs | Chromosomes     | Physical positions (bp) | CDC Frontier (Reference genome) | (Pusa 1103 & HPNB) | (ILWC 46 & LPNB) | Sequence genome | Components of | Gene accession IDs | Putative functions |
|---------------------|----------------|-----------------|-------------------------|---------------------------------|--------------------|------------------|-----------------|---------------|--------------------|--------------------|
| SNP_32032_A_4689578 | NC_021164.1    | Ca_Kabuli_Chr05 | 4689578                 | TT                              | GG                 | GG               | INTERGENIC      |               |                    |                    |
| SNP_32033_A_4690461 | NC_021164.1    | Ca_Kabuli_Chr05 | 4690461                 | AA                              | TT                 | TT               | INTERGENIC      |               |                    |                    |
| SNP_32034_A_4694344 | NC_021164.1    | Ca_Kabuli_Chr05 | 4694344                 | TT                              | CC                 | CC               | INTERGENIC      |               |                    |                    |
| SNP_32035_A_4713707 | NC_021164.1    | Ca_Kabuli_Chr05 | 4713707                 | TT                              | GG                 | GG               | INTERGENIC      |               |                    |                    |
| SNP_32036_A_4717819 | NC_021164.1    | Ca_Kabuli_Chr05 | 4717819                 | AA                              | GG                 | GG               | INTERGENIC      |               |                    |                    |
| SNP_32037_A_4731052 | NC_021164.1    | Ca_Kabuli_Chr05 | 4731052                 | GG                              | AA                 | AA               | INTERGENIC      |               |                    |                    |
| SNP_32038_A_4731379 | NC_021164.1    | Ca_Kabuli_Chr05 | 4731379                 | TT                              | CC                 | CC               | INTERGENIC      |               |                    |                    |
| SNP_32039_A_4731615 | NC_021164.1    | Ca_Kabuli_Chr05 | 4731615                 | AA                              | GG                 | GG               | INTERGENIC      |               |                    |                    |
| SNP_32040_A_4737099 | NC_021164.1    | Ca_Kabuli_Chr05 | 4737099                 | GG                              | AA                 | AA               | INTERGENIC      |               |                    |                    |
| SNP_32041_A_4737129 | NC_021164.1    | Ca_Kabuli_Chr05 | 4737129                 | GG                              | AA                 | AA               | INTERGENIC      |               |                    |                    |
| SNP_32042_A_4747663 | NC_021164.1    | Ca_Kabuli_Chr05 | 4747663                 | TT                              | GG                 | GG               | INTERGENIC      |               |                    |                    |
| SNP_32043_A_4747981 | NC_021164.1    | Ca_Kabuli_Chr05 | 4747981                 | AA                              | TT                 | TT               | INTERGENIC      |               |                    |                    |
| SNP_32044_A_4748102 | NC_021164.1    | Ca_Kabuli_Chr05 | 4748102                 | TT                              | CC                 | CC               | INTERGENIC      |               |                    |                    |
| SNP_32045_A_4748580 | NC_021164.1    | Ca_Kabuli_Chr05 | 4748580                 | TT                              | AA                 | AA               | INTERGENIC      |               |                    |                    |
| SNP_32046_A_4748760 | NC_021164.1    | Ca_Kabuli_Chr05 | 4748760                 | TT                              | AA                 | AA               | INTERGENIC      |               |                    |                    |
| SNP_32047_A_4748935 | NC_021164.1    | Ca_Kabuli_Chr05 | 4748935                 | AA                              | TT                 | TT               | INTERGENIC      |               |                    |                    |
| SNP_32048_A_4751874 | NC_021164.1    | Ca_Kabuli_Chr05 | 4751874                 | TT                              | GG                 | GG               | INTERGENIC      |               |                    |                    |
| SNP_32049_A_4763141 | NC_021164.1    | Ca_Kabuli_Chr05 | 4763141                 | CC                              | GG                 | GG               | INTERGENIC      |               |                    |                    |
| SNP_32050_A_4763146 | NC_021164.1    | Ca_Kabuli_Chr05 | 4763146                 | GG                              | AA                 | AA               | INTERGENIC      |               |                    |                    |
| SNP_32051_A_4763170 | NC_021164.1    | Ca_Kabuli_Chr05 | 4763170                 | CC                              | TT                 | TT               | INTERGENIC      |               |                    |                    |
| SNP_32052_A_4767646 | NC_021164.1    | Ca_Kabuli_Chr05 | 4767646                 | AA                              | GG                 | GG               | INTERGENIC      |               |                    |                    |
| SNP_32053_A_4767944 | NC_021164.1    | Ca_Kabuli_Chr05 | 4767944                 | CC                              | TT                 | TT               | INTERGENIC      |               |                    |                    |

| SNPs IDs            | Chromosome IDs | Chromosomes     | Physical positions (bp) | CDC Frontier genome (Reference genome) | (Pusa 1103 & HPNB) | (ILWC 46 & LPNB) | Sequence genome | Components of | Gene accession IDs | Putative functions |
|---------------------|----------------|-----------------|-------------------------|----------------------------------------|--------------------|------------------|-----------------|---------------|--------------------|--------------------|
| SNP_32054_A_4768004 | NC_021164.1    | Ca_Kabuli_Chr05 | 4768004                 | AA                                     | TT                 | TT               | INTERGENIC      |               |                    |                    |
| SNP_32055_A_4768020 | NC_021164.1    | Ca_Kabuli_Chr05 | 4768020                 | GG                                     | TT                 | TT               | INTERGENIC      |               |                    |                    |
| SNP_32056_A_4768040 | NC_021164.1    | Ca_Kabuli_Chr05 | 4768040                 | AA                                     | GG                 | GG               | INTERGENIC      |               |                    |                    |
| SNP_32057_A_4768343 | NC_021164.1    | Ca_Kabuli_Chr05 | 4768343                 | TT                                     | CC                 | CC               | INTERGENIC      |               |                    |                    |
| SNP_32058_A_4768369 | NC_021164.1    | Ca_Kabuli_Chr05 | 4768369                 | TT                                     | CC                 | CC               | INTERGENIC      |               |                    |                    |
| SNP_32059_A_4768376 | NC_021164.1    | Ca_Kabuli_Chr05 | 4768376                 | GG                                     | AA                 | AA               | INTERGENIC      |               |                    |                    |
| SNP_32060_A_4768387 | NC_021164.1    | Ca_Kabuli_Chr05 | 4768387                 | TT                                     | GG                 | GG               | INTERGENIC      |               |                    |                    |
| SNP_32061_A_4768408 | NC_021164.1    | Ca_Kabuli_Chr05 | 4768408                 | GG                                     | AA                 | AA               | INTERGENIC      |               |                    |                    |
| SNP_32062_A_4768427 | NC_021164.1    | Ca_Kabuli_Chr05 | 4768427                 | TT                                     | CC                 | CC               | INTERGENIC      |               |                    |                    |
| SNP_32063_A_4768442 | NC_021164.1    | Ca_Kabuli_Chr05 | 4768442                 | TT                                     | CC                 | CC               | INTERGENIC      |               |                    |                    |
| SNP_32064_A_4768595 | NC_021164.1    | Ca_Kabuli_Chr05 | 4768595                 | CC                                     | TT                 | TT               | INTERGENIC      |               |                    |                    |
| SNP_32065_A_4768638 | NC_021164.1    | Ca_Kabuli_Chr05 | 4768638                 | GG                                     | TT                 | TT               | INTERGENIC      |               |                    |                    |
| SNP_32066_A_4768668 | NC_021164.1    | Ca_Kabuli_Chr05 | 4768668                 | AA                                     | TT                 | TT               | INTERGENIC      |               |                    |                    |
| SNP_32067_A_4768706 | NC_021164.1    | Ca_Kabuli_Chr05 | 4768706                 | CC                                     | TT                 | TT               | INTERGENIC      |               |                    |                    |
| SNP_32068_A_4768723 | NC_021164.1    | Ca_Kabuli_Chr05 | 4768723                 | GG                                     | AA                 | AA               | INTERGENIC      |               |                    |                    |
| SNP_32069_A_4768730 | NC_021164.1    | Ca_Kabuli_Chr05 | 4768730                 | CC                                     | TT                 | TT               | INTERGENIC      |               |                    |                    |
| SNP_32070_A_4793230 | NC_021164.1    | Ca_Kabuli_Chr05 | 4793230                 | AA                                     | GG                 | GG               | INTERGENIC      |               |                    |                    |
| SNP_32071_A_4794635 | NC_021164.1    | Ca_Kabuli_Chr05 | 4794635                 | GG                                     | AA                 | AA               | INTERGENIC      |               |                    |                    |
| SNP_32072_A_4794649 | NC_021164.1    | Ca_Kabuli_Chr05 | 4794649                 | CC                                     | TT                 | TT               | INTERGENIC      |               |                    |                    |
| SNP_32073_A_4794650 | NC_021164.1    | Ca_Kabuli_Chr05 | 4794650                 | AA                                     | GG                 | GG               | INTERGENIC      |               |                    |                    |
| SNP_32074_A_4794651 | NC_021164.1    | Ca_Kabuli_Chr05 | 4794651                 | AA                                     | TT                 | TT               | INTERGENIC      |               |                    |                    |
| SNP_32075_A_4794656 | NC_021164.1    | Ca_Kabuli_Chr05 | 4794656                 | TT                                     | CC                 | CC               | INTERGENIC      |               |                    |                    |

| SNPs IDs            | Chromosome IDs | Chromosomes     | Physical positions (bp) | CDC Frontier genome (Reference genome) | (Pusa 1103 & HPNB) | (ILWC 46 & LPNB) | Sequence genome | Components of | Gene accession IDs | Putative functions |
|---------------------|----------------|-----------------|-------------------------|----------------------------------------|--------------------|------------------|-----------------|---------------|--------------------|--------------------|
| SNP_32076_A_4794657 | NC_021164.1    | Ca_Kabuli_Chr05 | 4794657                 | GG                                     | TT                 | TT               | INTERGENIC      |               |                    |                    |
| SNP_32077_A_4830840 | NC_021164.1    | Ca_Kabuli_Chr05 | 4830840                 | TT                                     | CC                 | CC               | INTERGENIC      |               |                    |                    |
| SNP_32078_A_4855874 | NC_021164.1    | Ca_Kabuli_Chr05 | 4855874                 | GG                                     | AA                 | AA               | INTERGENIC      |               |                    |                    |
| SNP_32079_A_4855961 | NC_021164.1    | Ca_Kabuli_Chr05 | 4855961                 | TT                                     | CC                 | CC               | INTERGENIC      |               |                    |                    |
| SNP_32080_A_4856044 | NC_021164.1    | Ca_Kabuli_Chr05 | 4856044                 | GG                                     | AA                 | AA               | INTERGENIC      |               |                    |                    |
| SNP_32081_A_4856183 | NC_021164.1    | Ca_Kabuli_Chr05 | 4856183                 | TT                                     | CC                 | CC               | INTERGENIC      |               |                    |                    |
| SNP_32082_A_4856227 | NC_021164.1    | Ca_Kabuli_Chr05 | 4856227                 | AA                                     | GG                 | GG               | INTERGENIC      |               |                    |                    |
| SNP_32083_A_4856228 | NC_021164.1    | Ca_Kabuli_Chr05 | 4856228                 | GG                                     | TT                 | TT               | INTERGENIC      |               |                    |                    |
| SNP_32084_A_4856543 | NC_021164.1    | Ca_Kabuli_Chr05 | 4856543                 | AA                                     | CC                 | CC               | INTERGENIC      |               |                    |                    |
| SNP_32085_A_4857288 | NC_021164.1    | Ca_Kabuli_Chr05 | 4857288                 | AA                                     | CC                 | CC               | INTERGENIC      |               |                    |                    |
| SNP_32086_A_4869494 | NC_021164.1    | Ca_Kabuli_Chr05 | 4869494                 | GG                                     | TT                 | TT               | INTERGENIC      |               |                    |                    |
| SNP_32087_A_4869935 | NC_021164.1    | Ca_Kabuli_Chr05 | 4869935                 | CC                                     | TT                 | TT               | INTERGENIC      |               |                    |                    |
| SNP_32088_A_4870151 | NC_021164.1    | Ca_Kabuli_Chr05 | 4870151                 | TT                                     | CC                 | CC               | INTERGENIC      |               |                    |                    |
| SNP_32089_A_4870185 | NC_021164.1    | Ca_Kabuli_Chr05 | 4870185                 | GG                                     | AA                 | AA               | INTERGENIC      |               |                    |                    |
| SNP_32090_A_4870492 | NC_021164.1    | Ca_Kabuli_Chr05 | 4870492                 | CC                                     | TT                 | TT               | INTERGENIC      |               |                    |                    |
| SNP_32091_A_4870528 | NC_021164.1    | Ca_Kabuli_Chr05 | 4870528                 | GG                                     | AA                 | AA               | INTERGENIC      |               |                    |                    |
| SNP_32092_A_4885274 | NC_021164.1    | Ca_Kabuli_Chr05 | 4885274                 | GG                                     | TT                 | TT               | DRR             | 101491675     | Unknown function   |                    |
| SNP_32093_A_4910639 | NC_021164.1    | Ca_Kabuli_Chr05 | 4910639                 | GG                                     | AA                 | AA               | INTERGENIC      |               |                    |                    |
| SNP_32094_A_4920527 | NC_021164.1    | Ca_Kabuli_Chr05 | 4920527                 | TT                                     | CC                 | CC               | INTERGENIC      |               |                    |                    |
| SNP_32095_A_4920528 | NC_021164.1    | Ca_Kabuli_Chr05 | 4920528                 | AA                                     | TT                 | TT               | INTERGENIC      |               |                    |                    |
| SNP_32096_A_4957941 | NC_021164.1    | Ca_Kabuli_Chr05 | 4957941                 | CC                                     | TT                 | TT               | DRR             | 101495991     | Unknown function   |                    |
| SNP_32097_A_4958722 | NC_021164.1    | Ca_Kabuli_Chr05 | 4958722                 | AA                                     | GG                 | GG               | INTERGENIC      |               |                    |                    |

| SNPs IDs            | Chromosome IDs | Chromosomes     | Physical positions (bp) | CDC Frontier genome (Reference genome) | (Pusa 1103 & HPNB) | (ILWC 46 & LPNB) | Sequence genome | Components of | Gene accession IDs | Putative functions           |
|---------------------|----------------|-----------------|-------------------------|----------------------------------------|--------------------|------------------|-----------------|---------------|--------------------|------------------------------|
| SNP_32098_A_4959352 | NC_021164.1    | Ca_Kabuli_Chr05 | 4959352                 | AA                                     | TT                 | TT               | INTERGENIC      |               |                    |                              |
| SNP_32099_A_4959425 | NC_021164.1    | Ca_Kabuli_Chr05 | 4959425                 | CC                                     | TT                 | TT               | INTERGENIC      |               |                    |                              |
| SNP_32100_A_4959436 | NC_021164.1    | Ca_Kabuli_Chr05 | 4959436                 | AA                                     | CC                 | CC               | URR             | 101495991     |                    | Unknown function             |
| SNP_32101_A_4959462 | NC_021164.1    | Ca_Kabuli_Chr05 | 4959462                 | TT                                     | CC                 | CC               | URR             | 101495991     |                    | Unknown function             |
| SNP_32102_A_4959467 | NC_021164.1    | Ca_Kabuli_Chr05 | 4959467                 | TT                                     | GG                 | GG               | URR             | 101495991     |                    | Unknown function             |
| SNP_32103_A_4962394 | NC_021164.1    | Ca_Kabuli_Chr05 | 4962394                 | CC                                     | AA                 | AA               | DRR             | 101496326     |                    | uncharacterized LOC101496326 |
| SNP_32105_A_4969267 | NC_021164.1    | Ca_Kabuli_Chr05 | 4969267                 | GG                                     | AA                 | AA               | INTERGENIC      |               |                    |                              |
| SNP_32106_A_4969274 | NC_021164.1    | Ca_Kabuli_Chr05 | 4969274                 | TT                                     | CC                 | CC               | INTERGENIC      |               |                    |                              |
| SNP_32107_A_4969348 | NC_021164.1    | Ca_Kabuli_Chr05 | 4969348                 | TT                                     | CC                 | CC               | INTERGENIC      |               |                    |                              |
| SNP_32108_A_4969350 | NC_021164.1    | Ca_Kabuli_Chr05 | 4969350                 | TT                                     | CC                 | CC               | INTERGENIC      |               |                    |                              |
| SNP_32109_A_4969579 | NC_021164.1    | Ca_Kabuli_Chr05 | 4969579                 | CC                                     | TT                 | TT               | INTERGENIC      |               |                    |                              |
| SNP_32110_A_4969686 | NC_021164.1    | Ca_Kabuli_Chr05 | 4969686                 | AA                                     | TT                 | TT               | INTERGENIC      |               |                    |                              |
| SNP_32111_A_4969758 | NC_021164.1    | Ca_Kabuli_Chr05 | 4969758                 | AA                                     | GG                 | GG               | INTERGENIC      |               |                    |                              |
| SNP_32112_A_4969792 | NC_021164.1    | Ca_Kabuli_Chr05 | 4969792                 | AA                                     | GG                 | GG               | INTERGENIC      |               |                    |                              |
| SNP_32113_A_5012894 | NC_021164.1    | Ca_Kabuli_Chr05 | 5012894                 | TT                                     | AA                 | AA               | URR             | 101492985     |                    | Unknown function             |
| SNP_32114_A_5012936 | NC_021164.1    | Ca_Kabuli_Chr05 | 5012936                 | GG                                     | AA                 | AA               | URR             | 101492985     |                    | Unknown function             |
| SNP_32115_A_5083388 | NC_021164.1    | Ca_Kabuli_Chr05 | 5083388                 | GG                                     | AA                 | AA               | INTRON          | 101497298     |                    | Unknown function             |
| SNP_32116_A_5147401 | NC_021164.1    | Ca_Kabuli_Chr05 | 5147401                 | TT                                     | CC                 | CC               | URR             | 101495666     |                    | uncharacterized LOC101495666 |
| SNP_32118_A_5193962 | NC_021164.1    | Ca_Kabuli_Chr05 | 5193962                 | CC                                     | TT                 | TT               | INTERGENIC      |               |                    |                              |
| SNP_32119_A_5194011 | NC_021164.1    | Ca_Kabuli_Chr05 | 5194011                 | AA                                     | GG                 | GG               | INTERGENIC      |               |                    |                              |
| SNP_32120_A_5194030 | NC_021164.1    | Ca_Kabuli_Chr05 | 5194030                 | GG                                     | TT                 | TT               | INTERGENIC      |               |                    |                              |
| SNP_32121_A_5194031 | NC_021164.1    | Ca_Kabuli_Chr05 | 5194031                 | AA                                     | GG                 | GG               | INTERGENIC      |               |                    |                              |

| SNPs IDs            | Chromosome IDs | Chromosomes     | Physical positions (bp) | CDC Frontier genome (Reference genome) | (Pusa 1103 & HPNB) | (ILWC 46 & LPNB) | Sequence genome | Components of | Gene accession IDs | Putative functions |
|---------------------|----------------|-----------------|-------------------------|----------------------------------------|--------------------|------------------|-----------------|---------------|--------------------|--------------------|
| SNP_32122_A_5194049 | NC_021164.1    | Ca_Kabuli_Chr05 | 5194049                 | AA                                     | GG                 | GG               | INTERGENIC      |               |                    |                    |
| SNP_32123_A_5194103 | NC_021164.1    | Ca_Kabuli_Chr05 | 5194103                 | TT                                     | CC                 | CC               | INTERGENIC      |               |                    |                    |
| SNP_32124_A_5194140 | NC_021164.1    | Ca_Kabuli_Chr05 | 5194140                 | TT                                     | GG                 | GG               | INTERGENIC      |               |                    |                    |
| SNP_32125_A_5194168 | NC_021164.1    | Ca_Kabuli_Chr05 | 5194168                 | TT                                     | CC                 | CC               | INTERGENIC      |               |                    |                    |
| SNP_32126_A_5194177 | NC_021164.1    | Ca_Kabuli_Chr05 | 5194177                 | AA                                     | GG                 | GG               | INTERGENIC      |               |                    |                    |
| SNP_32128_A_5269099 | NC_021164.1    | Ca_Kabuli_Chr05 | 5269099                 | AA                                     | CC                 | CC               | INTERGENIC      |               |                    |                    |
| SNP_32129_A_5269122 | NC_021164.1    | Ca_Kabuli_Chr05 | 5269122                 | TT                                     | CC                 | CC               | INTERGENIC      |               |                    |                    |
| SNP_32130_A_5269228 | NC_021164.1    | Ca_Kabuli_Chr05 | 5269228                 | TT                                     | AA                 | AA               | INTERGENIC      |               |                    |                    |
| SNP_32131_A_5269246 | NC_021164.1    | Ca_Kabuli_Chr05 | 5269246                 | AA                                     | GG                 | GG               | INTERGENIC      |               |                    |                    |
| SNP_32132_A_5269255 | NC_021164.1    | Ca_Kabuli_Chr05 | 5269255                 | TT                                     | CC                 | CC               | INTERGENIC      |               |                    |                    |
| SNP_32133_A_5269276 | NC_021164.1    | Ca_Kabuli_Chr05 | 5269276                 | TT                                     | CC                 | CC               | INTERGENIC      |               |                    |                    |
| SNP_32134_A_5299414 | NC_021164.1    | Ca_Kabuli_Chr05 | 5299414                 | CC                                     | GG                 | GG               | INTERGENIC      |               |                    |                    |
| SNP_32135_A_5299472 | NC_021164.1    | Ca_Kabuli_Chr05 | 5299472                 | CC                                     | TT                 | TT               | INTERGENIC      |               |                    |                    |
| SNP_32136_A_5299505 | NC_021164.1    | Ca_Kabuli_Chr05 | 5299505                 | CC                                     | TT                 | TT               | INTERGENIC      |               |                    |                    |
| SNP_32137_A_5299520 | NC_021164.1    | Ca_Kabuli_Chr05 | 5299520                 | TT                                     | CC                 | CC               | INTERGENIC      |               |                    |                    |
| SNP_32138_A_5299830 | NC_021164.1    | Ca_Kabuli_Chr05 | 5299830                 | AA                                     | GG                 | GG               | INTERGENIC      |               |                    |                    |
| SNP_32139_A_5299870 | NC_021164.1    | Ca_Kabuli_Chr05 | 5299870                 | AA                                     | CC                 | CC               | INTERGENIC      |               |                    |                    |
| SNP_32141_A_5299898 | NC_021164.1    | Ca_Kabuli_Chr05 | 5299898                 | TT                                     | CC                 | CC               | INTERGENIC      |               |                    |                    |
| SNP_32142_A_5299936 | NC_021164.1    | Ca_Kabuli_Chr05 | 5299936                 | AA                                     | GG                 | GG               | INTERGENIC      |               |                    |                    |
| SNP_32143_A_5300015 | NC_021164.1    | Ca_Kabuli_Chr05 | 5300015                 | CC                                     | TT                 | TT               | INTERGENIC      |               |                    |                    |
| SNP_32145_A_5318972 | NC_021164.1    | Ca_Kabuli_Chr05 | 5318972                 | CC                                     | GG                 | GG               | INTERGENIC      |               |                    |                    |
| SNP_32146_A_5319575 | NC_021164.1    | Ca_Kabuli_Chr05 | 5319575                 | TT                                     | GG                 | GG               | INTERGENIC      |               |                    |                    |



| SNPs IDs            | Chromosome IDs | Chromosomes     | Physical positions (bp) | CDC Frontier (Reference genome) | (Pusa 1103 & HPNB) | (ILWC 46 & LPNB) | Sequence genome | Components of | Gene accession IDs | Putative functions |
|---------------------|----------------|-----------------|-------------------------|---------------------------------|--------------------|------------------|-----------------|---------------|--------------------|--------------------|
| SNP_32147_A_5352803 | NC_021164.1    | Ca_Kabuli_Chr05 | 5352803                 | AA                              | TT                 | TT               | INTERGENIC      |               |                    |                    |
| SNP_32148_A_5352858 | NC_021164.1    | Ca_Kabuli_Chr05 | 5352858                 | TT                              | AA                 | AA               | INTERGENIC      |               |                    |                    |
| SNP_32149_A_5363215 | NC_021164.1    | Ca_Kabuli_Chr05 | 5363215                 | TT                              | GG                 | GG               | INTERGENIC      |               |                    |                    |
| SNP_32150_A_5363260 | NC_021164.1    | Ca_Kabuli_Chr05 | 5363260                 | TT                              | GG                 | GG               | INTERGENIC      |               |                    |                    |
| SNP_32151_A_5363282 | NC_021164.1    | Ca_Kabuli_Chr05 | 5363282                 | TT                              | CC                 | CC               | INTERGENIC      |               |                    |                    |
| SNP_32152_A_5363286 | NC_021164.1    | Ca_Kabuli_Chr05 | 5363286                 | CC                              | GG                 | GG               | INTERGENIC      |               |                    |                    |
| SNP_32153_A_5363375 | NC_021164.1    | Ca_Kabuli_Chr05 | 5363375                 | AA                              | CC                 | CC               | INTERGENIC      |               |                    |                    |
| SNP_32154_A_5363524 | NC_021164.1    | Ca_Kabuli_Chr05 | 5363524                 | TT                              | GG                 | GG               | INTERGENIC      |               |                    |                    |
| SNP_32155_A_5363545 | NC_021164.1    | Ca_Kabuli_Chr05 | 5363545                 | AA                              | CC                 | CC               | INTERGENIC      |               |                    |                    |
| SNP_32156_A_5363665 | NC_021164.1    | Ca_Kabuli_Chr05 | 5363665                 | GG                              | AA                 | AA               | INTERGENIC      |               |                    |                    |
| SNP_32157_A_5397086 | NC_021164.1    | Ca_Kabuli_Chr05 | 5397086                 | TT                              | AA                 | AA               | INTERGENIC      |               |                    |                    |
| SNP_32158_A_5415961 | NC_021164.1    | Ca_Kabuli_Chr05 | 5415961                 | AA                              | CC                 | CC               | INTERGENIC      |               |                    |                    |
| SNP_32159_A_5436551 | NC_021164.1    | Ca_Kabuli_Chr05 | 5436551                 | AA                              | GG                 | GG               | INTERGENIC      |               |                    |                    |
| SNP_32160_A_5436962 | NC_021164.1    | Ca_Kabuli_Chr05 | 5436962                 | AA                              | GG                 | GG               | INTERGENIC      |               |                    |                    |
| SNP_32161_A_5436969 | NC_021164.1    | Ca_Kabuli_Chr05 | 5436969                 | CC                              | AA                 | AA               | INTERGENIC      |               |                    |                    |
| SNP_32162_A_5469332 | NC_021164.1    | Ca_Kabuli_Chr05 | 5469332                 | CC                              | GG                 | GG               | INTERGENIC      |               |                    |                    |
| SNP_32163_A_5481085 | NC_021164.1    | Ca_Kabuli_Chr05 | 5481085                 | AA                              | GG                 | GG               | INTERGENIC      |               |                    |                    |
| SNP_32164_A_5544592 | NC_021164.1    | Ca_Kabuli_Chr05 | 5544592                 | CC                              | TT                 | TT               | INTERGENIC      |               |                    |                    |
| SNP_32165_A_5586003 | NC_021164.1    | Ca_Kabuli_Chr05 | 5586003                 | TT                              | CC                 | CC               | INTERGENIC      |               |                    |                    |
| SNP_32166_A_5586059 | NC_021164.1    | Ca_Kabuli_Chr05 | 5586059                 | TT                              | CC                 | CC               | INTERGENIC      |               |                    |                    |
| SNP_32167_A_5586094 | NC_021164.1    | Ca_Kabuli_Chr05 | 5586094                 | GG                              | CC                 | CC               | INTERGENIC      |               |                    |                    |
| SNP_32168_A_5586104 | NC_021164.1    | Ca_Kabuli_Chr05 | 5586104                 | AA                              | GG                 | GG               | INTERGENIC      |               |                    |                    |

| SNPs IDs            | Chromosome IDs | Chromosomes     | Physical positions (bp) | CDC Frontier genome (Reference genome) | (Pusa 1103 & HPNB) | (ILWC 46 & LPNB) | Sequence genome | Components of | Gene accession IDs | Putative functions |
|---------------------|----------------|-----------------|-------------------------|----------------------------------------|--------------------|------------------|-----------------|---------------|--------------------|--------------------|
| SNP_32169_A_5586245 | NC_021164.1    | Ca_Kabuli_Chr05 | 5586245                 | GG                                     | TT                 | TT               | INTERGENIC      |               |                    |                    |
| SNP_32170_A_5586247 | NC_021164.1    | Ca_Kabuli_Chr05 | 5586247                 | TT                                     | CC                 | CC               | INTERGENIC      |               |                    |                    |
| SNP_32171_A_5586251 | NC_021164.1    | Ca_Kabuli_Chr05 | 5586251                 | CC                                     | TT                 | TT               | INTERGENIC      |               |                    |                    |
| SNP_32172_A_5586286 | NC_021164.1    | Ca_Kabuli_Chr05 | 5586286                 | CC                                     | TT                 | TT               | INTERGENIC      |               |                    |                    |
| SNP_32173_A_5586411 | NC_021164.1    | Ca_Kabuli_Chr05 | 5586411                 | CC                                     | TT                 | TT               | INTERGENIC      |               |                    |                    |
| SNP_32174_A_5586412 | NC_021164.1    | Ca_Kabuli_Chr05 | 5586412                 | CC                                     | TT                 | TT               | INTERGENIC      |               |                    |                    |
| SNP_32175_A_5586416 | NC_021164.1    | Ca_Kabuli_Chr05 | 5586416                 | GG                                     | TT                 | TT               | INTERGENIC      |               |                    |                    |
| SNP_32176_A_5586448 | NC_021164.1    | Ca_Kabuli_Chr05 | 5586448                 | CC                                     | TT                 | TT               | INTERGENIC      |               |                    |                    |
| SNP_32177_A_5590618 | NC_021164.1    | Ca_Kabuli_Chr05 | 5590618                 | TT                                     | CC                 | CC               | INTERGENIC      |               |                    |                    |
| SNP_32178_A_5590635 | NC_021164.1    | Ca_Kabuli_Chr05 | 5590635                 | GG                                     | CC                 | CC               | INTERGENIC      |               |                    |                    |
| SNP_32179_A_5590638 | NC_021164.1    | Ca_Kabuli_Chr05 | 5590638                 | CC                                     | TT                 | TT               | INTERGENIC      |               |                    |                    |
| SNP_32180_A_5590639 | NC_021164.1    | Ca_Kabuli_Chr05 | 5590639                 | AA                                     | GG                 | GG               | INTERGENIC      |               |                    |                    |
| SNP_32181_A_5590660 | NC_021164.1    | Ca_Kabuli_Chr05 | 5590660                 | AA                                     | GG                 | GG               | INTERGENIC      |               |                    |                    |
| SNP_32182_A_5590827 | NC_021164.1    | Ca_Kabuli_Chr05 | 5590827                 | TT                                     | GG                 | GG               | INTERGENIC      |               |                    |                    |
| SNP_32184_A_5735419 | NC_021164.1    | Ca_Kabuli_Chr05 | 5735419                 | AA                                     | TT                 | TT               | INTERGENIC      |               |                    |                    |
| SNP_32185_A_5735426 | NC_021164.1    | Ca_Kabuli_Chr05 | 5735426                 | TT                                     | CC                 | CC               | INTERGENIC      |               |                    |                    |
| SNP_32186_A_5769482 | NC_021164.1    | Ca_Kabuli_Chr05 | 5769482                 | TT                                     | CC                 | CC               | INTERGENIC      |               |                    |                    |
| SNP_32187_A_5788971 | NC_021164.1    | Ca_Kabuli_Chr05 | 5788971                 | GG                                     | TT                 | TT               | INTERGENIC      |               |                    |                    |
| SNP_32188_A_5825113 | NC_021164.1    | Ca_Kabuli_Chr05 | 5825113                 | GG                                     | AA                 | AA               | INTERGENIC      |               |                    |                    |
| SNP_32189_A_5825142 | NC_021164.1    | Ca_Kabuli_Chr05 | 5825142                 | TT                                     | GG                 | GG               | INTERGENIC      |               |                    |                    |
| SNP_32190_A_5825443 | NC_021164.1    | Ca_Kabuli_Chr05 | 5825443                 | AA                                     | GG                 | GG               | INTERGENIC      |               |                    |                    |
| SNP_32191_A_5825469 | NC_021164.1    | Ca_Kabuli_Chr05 | 5825469                 | TT                                     | GG                 | GG               | INTERGENIC      |               |                    |                    |

| SNPs IDs            | Chromosome IDs | Chromosomes     | Physical positions (bp) | CDC Frontier genome (Reference genome) | (Pusa 1103 & HPNB) | (ILWC 46 & LPNB) | Sequence genome | Components of | Gene accession IDs | Putative functions |
|---------------------|----------------|-----------------|-------------------------|----------------------------------------|--------------------|------------------|-----------------|---------------|--------------------|--------------------|
| SNP_32192_A_5827337 | NC_021164.1    | Ca_Kabuli_Chr05 | 5827337                 | CC                                     | TT                 | TT               | INTERGENIC      |               |                    |                    |
| SNP_32193_A_5827357 | NC_021164.1    | Ca_Kabuli_Chr05 | 5827357                 | TT                                     | CC                 | CC               | INTERGENIC      |               |                    |                    |
| SNP_32194_A_5827445 | NC_021164.1    | Ca_Kabuli_Chr05 | 5827445                 | AA                                     | CC                 | CC               | INTERGENIC      |               |                    |                    |
| SNP_32195_A_5827458 | NC_021164.1    | Ca_Kabuli_Chr05 | 5827458                 | TT                                     | GG                 | GG               | INTERGENIC      |               |                    |                    |
| SNP_32196_A_5827525 | NC_021164.1    | Ca_Kabuli_Chr05 | 5827525                 | CC                                     | TT                 | TT               | INTERGENIC      |               |                    |                    |
| SNP_32197_A_5827550 | NC_021164.1    | Ca_Kabuli_Chr05 | 5827550                 | AA                                     | CC                 | CC               | INTERGENIC      |               |                    |                    |
| SNP_32198_A_5827566 | NC_021164.1    | Ca_Kabuli_Chr05 | 5827566                 | AA                                     | GG                 | GG               | INTERGENIC      |               |                    |                    |
| SNP_32199_A_5827585 | NC_021164.1    | Ca_Kabuli_Chr05 | 5827585                 | TT                                     | GG                 | GG               | INTERGENIC      |               |                    |                    |
| SNP_32200_A_5827634 | NC_021164.1    | Ca_Kabuli_Chr05 | 5827634                 | CC                                     | TT                 | TT               | INTERGENIC      |               |                    |                    |
| SNP_32201_A_5827823 | NC_021164.1    | Ca_Kabuli_Chr05 | 5827823                 | CC                                     | TT                 | TT               | INTERGENIC      |               |                    |                    |
| SNP_32202_A_5827833 | NC_021164.1    | Ca_Kabuli_Chr05 | 5827833                 | GG                                     | AA                 | AA               | INTERGENIC      |               |                    |                    |
| SNP_32203_A_5827835 | NC_021164.1    | Ca_Kabuli_Chr05 | 5827835                 | CC                                     | TT                 | TT               | INTERGENIC      |               |                    |                    |
| SNP_32205_A_5828170 | NC_021164.1    | Ca_Kabuli_Chr05 | 5828170                 | AA                                     | GG                 | GG               | INTERGENIC      |               |                    |                    |
| SNP_32206_A_5831378 | NC_021164.1    | Ca_Kabuli_Chr05 | 5831378                 | TT                                     | GG                 | GG               | INTERGENIC      |               |                    |                    |
| SNP_32207_A_5831649 | NC_021164.1    | Ca_Kabuli_Chr05 | 5831649                 | TT                                     | CC                 | CC               | INTERGENIC      |               |                    |                    |
| SNP_32208_A_5833063 | NC_021164.1    | Ca_Kabuli_Chr05 | 5833063                 | GG                                     | TT                 | TT               | INTERGENIC      |               |                    |                    |
| SNP_32209_A_5835241 | NC_021164.1    | Ca_Kabuli_Chr05 | 5835241                 | TT                                     | CC                 | CC               | INTERGENIC      |               |                    |                    |
| SNP_32210_A_5835250 | NC_021164.1    | Ca_Kabuli_Chr05 | 5835250                 | AA                                     | CC                 | CC               | INTERGENIC      |               |                    |                    |
| SNP_32211_A_5835428 | NC_021164.1    | Ca_Kabuli_Chr05 | 5835428                 | TT                                     | AA                 | AA               | INTERGENIC      |               |                    |                    |
| SNP_32212_A_5835517 | NC_021164.1    | Ca_Kabuli_Chr05 | 5835517                 | AA                                     | GG                 | GG               | INTERGENIC      |               |                    |                    |
| SNP_32213_A_5835725 | NC_021164.1    | Ca_Kabuli_Chr05 | 5835725                 | GG                                     | TT                 | TT               | INTERGENIC      |               |                    |                    |
| SNP_32214_A_5836252 | NC_021164.1    | Ca_Kabuli_Chr05 | 5836252                 | AA                                     | GG                 | GG               | INTERGENIC      |               |                    |                    |

| SNPs IDs            | Chromosome IDs | Chromosomes     | Physical positions (bp) | CDC Frontier genome (Reference genome) | (Pusa 1103 & HPNB) | (ILWC 46 & LPNB) | Sequence genome | Components of | Gene accession IDs | Putative functions |
|---------------------|----------------|-----------------|-------------------------|----------------------------------------|--------------------|------------------|-----------------|---------------|--------------------|--------------------|
| SNP_32215_A_5836280 | NC_021164.1    | Ca_Kabuli_Chr05 | 5836280                 | TT                                     | CC                 | CC               | INTERGENIC      |               |                    |                    |
| SNP_32216_A_5836284 | NC_021164.1    | Ca_Kabuli_Chr05 | 5836284                 | CC                                     | AA                 | AA               | INTERGENIC      |               |                    |                    |
| SNP_32217_A_5836402 | NC_021164.1    | Ca_Kabuli_Chr05 | 5836402                 | TT                                     | GG                 | GG               | INTERGENIC      |               |                    |                    |
| SNP_32218_A_5836407 | NC_021164.1    | Ca_Kabuli_Chr05 | 5836407                 | GG                                     | TT                 | TT               | INTERGENIC      |               |                    |                    |
| SNP_32219_A_5836473 | NC_021164.1    | Ca_Kabuli_Chr05 | 5836473                 | CC                                     | TT                 | TT               | INTERGENIC      |               |                    |                    |
| SNP_32220_A_5836528 | NC_021164.1    | Ca_Kabuli_Chr05 | 5836528                 | AA                                     | CC                 | CC               | INTERGENIC      |               |                    |                    |
| SNP_32221_A_5836709 | NC_021164.1    | Ca_Kabuli_Chr05 | 5836709                 | CC                                     | AA                 | AA               | INTERGENIC      |               |                    |                    |
| SNP_32222_A_5836718 | NC_021164.1    | Ca_Kabuli_Chr05 | 5836718                 | GG                                     | AA                 | AA               | INTERGENIC      |               |                    |                    |
| SNP_32223_A_5836721 | NC_021164.1    | Ca_Kabuli_Chr05 | 5836721                 | GG                                     | AA                 | AA               | INTERGENIC      |               |                    |                    |
| SNP_32225_A_5836913 | NC_021164.1    | Ca_Kabuli_Chr05 | 5836913                 | CC                                     | GG                 | GG               | INTERGENIC      |               |                    |                    |
| SNP_32226_A_5836920 | NC_021164.1    | Ca_Kabuli_Chr05 | 5836920                 | TT                                     | GG                 | GG               | INTERGENIC      |               |                    |                    |
| SNP_32227_A_5836955 | NC_021164.1    | Ca_Kabuli_Chr05 | 5836955                 | TT                                     | GG                 | GG               | INTERGENIC      |               |                    |                    |
| SNP_32228_A_5836999 | NC_021164.1    | Ca_Kabuli_Chr05 | 5836999                 | TT                                     | AA                 | AA               | INTERGENIC      |               |                    |                    |
| SNP_32229_A_5837024 | NC_021164.1    | Ca_Kabuli_Chr05 | 5837024                 | GG                                     | AA                 | AA               | INTERGENIC      |               |                    |                    |
| SNP_32231_A_5837131 | NC_021164.1    | Ca_Kabuli_Chr05 | 5837131                 | TT                                     | CC                 | CC               | INTERGENIC      |               |                    |                    |
| SNP_32232_A_5837271 | NC_021164.1    | Ca_Kabuli_Chr05 | 5837271                 | TT                                     | CC                 | CC               | INTERGENIC      |               |                    |                    |
| SNP_32233_A_5837283 | NC_021164.1    | Ca_Kabuli_Chr05 | 5837283                 | AA                                     | GG                 | GG               | INTERGENIC      |               |                    |                    |
| SNP_32234_A_5837327 | NC_021164.1    | Ca_Kabuli_Chr05 | 5837327                 | TT                                     | AA                 | AA               | INTERGENIC      |               |                    |                    |
| SNP_32235_A_5854984 | NC_021164.1    | Ca_Kabuli_Chr05 | 5854984                 | TT                                     | CC                 | CC               | INTERGENIC      |               |                    |                    |
| SNP_32236_A_5855795 | NC_021164.1    | Ca_Kabuli_Chr05 | 5855795                 | AA                                     | GG                 | GG               | INTERGENIC      |               |                    |                    |
| SNP_32237_A_5857839 | NC_021164.1    | Ca_Kabuli_Chr05 | 5857839                 | TT                                     | CC                 | CC               | INTERGENIC      |               |                    |                    |
| SNP_32238_A_5868375 | NC_021164.1    | Ca_Kabuli_Chr05 | 5868375                 | CC                                     | TT                 | TT               | INTERGENIC      |               |                    |                    |

| SNPs IDs            | Chromosome IDs | Chromosomes     | Physical positions (bp) | CDC Frontier genome (Reference genome) | (Pusa 1103 & HPNB) | (ILWC 46 & LPNB) | Sequence genome | Components of | Gene accession IDs | Putative functions |
|---------------------|----------------|-----------------|-------------------------|----------------------------------------|--------------------|------------------|-----------------|---------------|--------------------|--------------------|
| SNP_32239_A_5868381 | NC_021164.1    | Ca_Kabuli_Chr05 | 5868381                 | CC                                     | AA                 | AA               | INTERGENIC      |               |                    |                    |
| SNP_32240_A_5868385 | NC_021164.1    | Ca_Kabuli_Chr05 | 5868385                 | CC                                     | GG                 | GG               | INTERGENIC      |               |                    |                    |
| SNP_32241_A_5869851 | NC_021164.1    | Ca_Kabuli_Chr05 | 5869851                 | AA                                     | GG                 | GG               | INTERGENIC      |               |                    |                    |
| SNP_32242_A_5870240 | NC_021164.1    | Ca_Kabuli_Chr05 | 5870240                 | GG                                     | TT                 | TT               | INTERGENIC      |               |                    |                    |
| SNP_32243_A_5870259 | NC_021164.1    | Ca_Kabuli_Chr05 | 5870259                 | AA                                     | GG                 | GG               | INTERGENIC      |               |                    |                    |
| SNP_32244_A_5873106 | NC_021164.1    | Ca_Kabuli_Chr05 | 5873106                 | TT                                     | CC                 | CC               | INTERGENIC      |               |                    |                    |
| SNP_32245_A_5953277 | NC_021164.1    | Ca_Kabuli_Chr05 | 5953277                 | AA                                     | GG                 | GG               | INTERGENIC      |               |                    |                    |
| SNP_32246_A_5957172 | NC_021164.1    | Ca_Kabuli_Chr05 | 5957172                 | AA                                     | CC                 | CC               | INTERGENIC      |               |                    |                    |
| SNP_32247_A_5963711 | NC_021164.1    | Ca_Kabuli_Chr05 | 5963711                 | TT                                     | AA                 | AA               | INTERGENIC      |               |                    |                    |
| SNP_32248_A_5969749 | NC_021164.1    | Ca_Kabuli_Chr05 | 5969749                 | TT                                     | AA                 | AA               | INTERGENIC      |               |                    |                    |
| SNP_32249_A_5969770 | NC_021164.1    | Ca_Kabuli_Chr05 | 5969770                 | AA                                     | TT                 | TT               | INTERGENIC      |               |                    |                    |
| SNP_32250_A_5969798 | NC_021164.1    | Ca_Kabuli_Chr05 | 5969798                 | TT                                     | CC                 | CC               | INTERGENIC      |               |                    |                    |
| SNP_32251_A_5969953 | NC_021164.1    | Ca_Kabuli_Chr05 | 5969953                 | AA                                     | CC                 | CC               | INTERGENIC      |               |                    |                    |
| SNP_32252_A_5969957 | NC_021164.1    | Ca_Kabuli_Chr05 | 5969957                 | AA                                     | CC                 | CC               | INTERGENIC      |               |                    |                    |
| SNP_32253_A_5969974 | NC_021164.1    | Ca_Kabuli_Chr05 | 5969974                 | GG                                     | TT                 | TT               | INTERGENIC      |               |                    |                    |
| SNP_32254_A_5969978 | NC_021164.1    | Ca_Kabuli_Chr05 | 5969978                 | GG                                     | TT                 | TT               | INTERGENIC      |               |                    |                    |
| SNP_32255_A_5970021 | NC_021164.1    | Ca_Kabuli_Chr05 | 5970021                 | AA                                     | TT                 | TT               | INTERGENIC      |               |                    |                    |
| SNP_32256_A_5970030 | NC_021164.1    | Ca_Kabuli_Chr05 | 5970030                 | AA                                     | GG                 | GG               | INTERGENIC      |               |                    |                    |
| SNP_32257_A_5970043 | NC_021164.1    | Ca_Kabuli_Chr05 | 5970043                 | AA                                     | CC                 | CC               | INTERGENIC      |               |                    |                    |
| SNP_32258_A_5970132 | NC_021164.1    | Ca_Kabuli_Chr05 | 5970132                 | TT                                     | CC                 | CC               | INTERGENIC      |               |                    |                    |
| SNP_32259_A_5970141 | NC_021164.1    | Ca_Kabuli_Chr05 | 5970141                 | AA                                     | GG                 | GG               | INTERGENIC      |               |                    |                    |
| SNP_32260_A_5970145 | NC_021164.1    | Ca_Kabuli_Chr05 | 5970145                 | GG                                     | AA                 | AA               | INTERGENIC      |               |                    |                    |

| SNPs IDs            | Chromosome IDs | Chromosomes     | Physical positions (bp) | CDC Frontier genome (Reference genome) | (Pusa 1103 & HPNB) | (ILWC 46 & LPNB) | Sequence genome | Components of | Gene accession IDs | Putative functions |
|---------------------|----------------|-----------------|-------------------------|----------------------------------------|--------------------|------------------|-----------------|---------------|--------------------|--------------------|
| SNP_32261_A_5970148 | NC_021164.1    | Ca_Kabuli_Chr05 | 5970148                 | AA                                     | CC                 | CC               | INTERGENIC      |               |                    |                    |
| SNP_32262_A_5970184 | NC_021164.1    | Ca_Kabuli_Chr05 | 5970184                 | CC                                     | GG                 | GG               | INTERGENIC      |               |                    |                    |
| SNP_32263_A_5970262 | NC_021164.1    | Ca_Kabuli_Chr05 | 5970262                 | CC                                     | TT                 | TT               | INTERGENIC      |               |                    |                    |
| SNP_32264_A_5970267 | NC_021164.1    | Ca_Kabuli_Chr05 | 5970267                 | CC                                     | AA                 | AA               | INTERGENIC      |               |                    |                    |
| SNP_32265_A_5970295 | NC_021164.1    | Ca_Kabuli_Chr05 | 5970295                 | TT                                     | CC                 | CC               | INTERGENIC      |               |                    |                    |
| SNP_32266_A_5970420 | NC_021164.1    | Ca_Kabuli_Chr05 | 5970420                 | AA                                     | GG                 | GG               | INTERGENIC      |               |                    |                    |
| SNP_32267_A_5970626 | NC_021164.1    | Ca_Kabuli_Chr05 | 5970626                 | GG                                     | CC                 | CC               | INTERGENIC      |               |                    |                    |
| SNP_32268_A_5974943 | NC_021164.1    | Ca_Kabuli_Chr05 | 5974943                 | TT                                     | AA                 | AA               | INTERGENIC      |               |                    |                    |
| SNP_32269_A_5975265 | NC_021164.1    | Ca_Kabuli_Chr05 | 5975265                 | AA                                     | TT                 | TT               | INTERGENIC      |               |                    |                    |
| SNP_32270_A_5991325 | NC_021164.1    | Ca_Kabuli_Chr05 | 5991325                 | GG                                     | TT                 | TT               | INTERGENIC      |               |                    |                    |
| SNP_32271_A_5991344 | NC_021164.1    | Ca_Kabuli_Chr05 | 5991344                 | GG                                     | AA                 | AA               | INTERGENIC      |               |                    |                    |
| SNP_32272_A_5991485 | NC_021164.1    | Ca_Kabuli_Chr05 | 5991485                 | GG                                     | AA                 | AA               | INTERGENIC      |               |                    |                    |
| SNP_32273_A_5991840 | NC_021164.1    | Ca_Kabuli_Chr05 | 5991840                 | CC                                     | TT                 | TT               | INTERGENIC      |               |                    |                    |
| SNP_32274_A_5994806 | NC_021164.1    | Ca_Kabuli_Chr05 | 5994806                 | TT                                     | AA                 | AA               | INTERGENIC      |               |                    |                    |
| SNP_32275_A_6045852 | NC_021164.1    | Ca_Kabuli_Chr05 | 6045852                 | AA                                     | GG                 | GG               | INTERGENIC      |               |                    |                    |
| SNP_32276_A_6045913 | NC_021164.1    | Ca_Kabuli_Chr05 | 6045913                 | AA                                     | CC                 | CC               | INTERGENIC      |               |                    |                    |
| SNP_32277_A_6045918 | NC_021164.1    | Ca_Kabuli_Chr05 | 6045918                 | CC                                     | AA                 | AA               | INTERGENIC      |               |                    |                    |
| SNP_32278_A_6045923 | NC_021164.1    | Ca_Kabuli_Chr05 | 6045923                 | TT                                     | CC                 | CC               | INTERGENIC      |               |                    |                    |
| SNP_32279_A_6045944 | NC_021164.1    | Ca_Kabuli_Chr05 | 6045944                 | AA                                     | GG                 | GG               | INTERGENIC      |               |                    |                    |
| SNP_32280_A_6045958 | NC_021164.1    | Ca_Kabuli_Chr05 | 6045958                 | TT                                     | CC                 | CC               | INTERGENIC      |               |                    |                    |
| SNP_32281_A_6045972 | NC_021164.1    | Ca_Kabuli_Chr05 | 6045972                 | AA                                     | CC                 | CC               | INTERGENIC      |               |                    |                    |
| SNP_32283_A_6200078 | NC_021164.1    | Ca_Kabuli_Chr05 | 6200078                 | GG                                     | TT                 | TT               | INTERGENIC      |               |                    |                    |

| SNPs IDs            | Chromosome IDs | Chromosomes     | Physical positions (bp) | CDC Frontier (Reference genome) | (Pusa 1103 & HPNB) | (ILWC 46 & LPNB) | Sequence genome | Components of | Gene accession IDs     | Putative functions |
|---------------------|----------------|-----------------|-------------------------|---------------------------------|--------------------|------------------|-----------------|---------------|------------------------|--------------------|
| SNP_32285_A_6200128 | NC_021164.1    | Ca_Kabuli_Chr05 | 6200128                 | CC                              | TT                 | TT               | INTERGENIC      |               |                        |                    |
| SNP_32286_A_6200225 | NC_021164.1    | Ca_Kabuli_Chr05 | 6200225                 | CC                              | TT                 | TT               | INTERGENIC      |               |                        |                    |
| SNP_32287_A_6200270 | NC_021164.1    | Ca_Kabuli_Chr05 | 6200270                 | AA                              | GG                 | GG               | INTERGENIC      |               |                        |                    |
| SNP_32288_A_6200347 | NC_021164.1    | Ca_Kabuli_Chr05 | 6200347                 | GG                              | TT                 | TT               | INTERGENIC      |               |                        |                    |
| SNP_32289_A_6200375 | NC_021164.1    | Ca_Kabuli_Chr05 | 6200375                 | TT                              | GG                 | GG               | INTERGENIC      |               |                        |                    |
| SNP_32290_A_6200468 | NC_021164.1    | Ca_Kabuli_Chr05 | 6200468                 | AA                              | GG                 | GG               | INTERGENIC      |               |                        |                    |
| SNP_32291_A_6200526 | NC_021164.1    | Ca_Kabuli_Chr05 | 6200526                 | TT                              | AA                 | AA               | INTERGENIC      |               |                        |                    |
| SNP_32292_A_6237171 | NC_021164.1    | Ca_Kabuli_Chr05 | 6237171                 | CC                              | TT                 | TT               | INTERGENIC      |               |                        |                    |
| SNP_32293_A_6237181 | NC_021164.1    | Ca_Kabuli_Chr05 | 6237181                 | TT                              | CC                 | CC               | INTERGENIC      |               |                        |                    |
| SNP_32294_A_6239343 | NC_021164.1    | Ca_Kabuli_Chr05 | 6239343                 | AA                              | GG                 | GG               | INTERGENIC      |               |                        |                    |
| SNP_32295_A_6263717 | NC_021164.1    | Ca_Kabuli_Chr05 | 6263717                 | TT                              | CC                 | CC               | INTERGENIC      |               |                        |                    |
| SNP_32296_A_6263756 | NC_021164.1    | Ca_Kabuli_Chr05 | 6263756                 | GG                              | AA                 | AA               | INTERGENIC      |               |                        |                    |
| SNP_32297_A_6263884 | NC_021164.1    | Ca_Kabuli_Chr05 | 6263884                 | AA                              | GG                 | GG               | INTERGENIC      |               |                        |                    |
| SNP_32298_A_6266666 | NC_021164.1    | Ca_Kabuli_Chr05 | 6266666                 | GG                              | AA                 | AA               | INTERGENIC      |               |                        |                    |
| SNP_32299_A_6307578 | NC_021164.1    | Ca_Kabuli_Chr05 | 6307578                 | CC                              | TT                 | TT               | INTRON          | 101505448     | formin-like protein 20 |                    |
| SNP_32300_A_6310483 | NC_021164.1    | Ca_Kabuli_Chr05 | 6310483                 | GG                              | CC                 | CC               | INTRON          | 101505448     | formin-like protein 20 |                    |
| SNP_32301_A_6310498 | NC_021164.1    | Ca_Kabuli_Chr05 | 6310498                 | AA                              | GG                 | GG               | INTRON          | 101505448     | formin-like protein 20 |                    |
| SNP_32302_A_6310740 | NC_021164.1    | Ca_Kabuli_Chr05 | 6310740                 | AA                              | CC                 | CC               | INTRON          | 101505448     | formin-like protein 20 |                    |
| SNP_32303_A_6311053 | NC_021164.1    | Ca_Kabuli_Chr05 | 6311053                 | GG                              | AA                 | AA               | INTRON          | 101505448     | formin-like protein 20 |                    |
| SNP_32304_A_6348212 | NC_021164.1    | Ca_Kabuli_Chr05 | 6348212                 | GG                              | TT                 | TT               | INTERGENIC      |               |                        |                    |
| SNP_32305_A_6348242 | NC_021164.1    | Ca_Kabuli_Chr05 | 6348242                 | AA                              | TT                 | TT               | INTERGENIC      |               |                        |                    |
| SNP_32306_A_6369197 | NC_021164.1    | Ca_Kabuli_Chr05 | 6369197                 | TT                              | AA                 | AA               | INTERGENIC      |               |                        |                    |

| SNPs IDs            | Chromosome IDs | Chromosomes     | Physical positions (bp) | CDC Frontier genome (Reference genome) | (Pusa 1103 & HPNB) | (ILWC 46 & LPNB) | Sequence genome | Components of | Gene accession IDs | Putative functions |
|---------------------|----------------|-----------------|-------------------------|----------------------------------------|--------------------|------------------|-----------------|---------------|--------------------|--------------------|
| SNP_32307_A_6369251 | NC_021164.1    | Ca_Kabuli_Chr05 | 6369251                 | GG                                     | CC                 | CC               | INTERGENIC      |               |                    |                    |
| SNP_32308_A_6369404 | NC_021164.1    | Ca_Kabuli_Chr05 | 6369404                 | GG                                     | AA                 | AA               | INTERGENIC      |               |                    |                    |
| SNP_32309_A_6369424 | NC_021164.1    | Ca_Kabuli_Chr05 | 6369424                 | TT                                     | GG                 | GG               | INTERGENIC      |               |                    |                    |
| SNP_32310_A_6369543 | NC_021164.1    | Ca_Kabuli_Chr05 | 6369543                 | AA                                     | CC                 | CC               | INTERGENIC      |               |                    |                    |
| SNP_32312_A_6369679 | NC_021164.1    | Ca_Kabuli_Chr05 | 6369679                 | CC                                     | TT                 | TT               | INTERGENIC      |               |                    |                    |
| SNP_32313_A_6369731 | NC_021164.1    | Ca_Kabuli_Chr05 | 6369731                 | GG                                     | AA                 | AA               | INTERGENIC      |               |                    |                    |
| SNP_32314_A_6369736 | NC_021164.1    | Ca_Kabuli_Chr05 | 6369736                 | CC                                     | TT                 | TT               | INTERGENIC      |               |                    |                    |
| SNP_32315_A_6369769 | NC_021164.1    | Ca_Kabuli_Chr05 | 6369769                 | GG                                     | AA                 | AA               | INTERGENIC      |               |                    |                    |
| SNP_32316_A_6369878 | NC_021164.1    | Ca_Kabuli_Chr05 | 6369878                 | CC                                     | AA                 | AA               | INTERGENIC      |               |                    |                    |
| SNP_32318_A_6416182 | NC_021164.1    | Ca_Kabuli_Chr05 | 6416182                 | CC                                     | TT                 | TT               | INTERGENIC      |               |                    |                    |
| SNP_32319_A_6416194 | NC_021164.1    | Ca_Kabuli_Chr05 | 6416194                 | GG                                     | AA                 | AA               | INTERGENIC      |               |                    |                    |
| SNP_32320_A_6416355 | NC_021164.1    | Ca_Kabuli_Chr05 | 6416355                 | AA                                     | CC                 | CC               | INTERGENIC      |               |                    |                    |
| SNP_32322_A_6416673 | NC_021164.1    | Ca_Kabuli_Chr05 | 6416673                 | AA                                     | GG                 | GG               | INTERGENIC      |               |                    |                    |
| SNP_32323_A_6416698 | NC_021164.1    | Ca_Kabuli_Chr05 | 6416698                 | TT                                     | CC                 | CC               | INTERGENIC      |               |                    |                    |
| SNP_32324_A_6416755 | NC_021164.1    | Ca_Kabuli_Chr05 | 6416755                 | GG                                     | AA                 | AA               | INTERGENIC      |               |                    |                    |
| SNP_32325_A_6416761 | NC_021164.1    | Ca_Kabuli_Chr05 | 6416761                 | GG                                     | AA                 | AA               | INTERGENIC      |               |                    |                    |
| SNP_32326_A_6416769 | NC_021164.1    | Ca_Kabuli_Chr05 | 6416769                 | TT                                     | CC                 | CC               | INTERGENIC      |               |                    |                    |
| SNP_32327_A_6420544 | NC_021164.1    | Ca_Kabuli_Chr05 | 6420544                 | TT                                     | CC                 | CC               | INTERGENIC      |               |                    |                    |
| SNP_32328_A_6421036 | NC_021164.1    | Ca_Kabuli_Chr05 | 6421036                 | TT                                     | AA                 | AA               | INTERGENIC      |               |                    |                    |
| SNP_32329_A_6421051 | NC_021164.1    | Ca_Kabuli_Chr05 | 6421051                 | TT                                     | CC                 | CC               | INTERGENIC      |               |                    |                    |
| SNP_32330_A_6421484 | NC_021164.1    | Ca_Kabuli_Chr05 | 6421484                 | AA                                     | CC                 | CC               | INTERGENIC      |               |                    |                    |
| SNP_32331_A_6421534 | NC_021164.1    | Ca_Kabuli_Chr05 | 6421534                 | TT                                     | CC                 | CC               | INTERGENIC      |               |                    |                    |



| SNPs IDs            | Chromosome IDs | Chromosomes     | Physical positions (bp) | CDC Frontier genome (Reference genome) | (Pusa 1103 & HPNB) | (ILWC 46 & LPNB) | Sequence Components of genome | Gene accession IDs | Putative functions                 |
|---------------------|----------------|-----------------|-------------------------|----------------------------------------|--------------------|------------------|-------------------------------|--------------------|------------------------------------|
| SNP_32332_A_6421573 | NC_021164.1    | Ca_Kabuli_Chr05 | 6421573                 | GG                                     | AA                 | AA               | INTERGENIC                    |                    |                                    |
| SNP_32333_A_6421773 | NC_021164.1    | Ca_Kabuli_Chr05 | 6421773                 | GG                                     | AA                 | AA               | INTERGENIC                    |                    |                                    |
| SNP_32334_A_6421867 | NC_021164.1    | Ca_Kabuli_Chr05 | 6421867                 | TT                                     | GG                 | GG               | INTERGENIC                    |                    |                                    |
| SNP_32335_A_6421934 | NC_021164.1    | Ca_Kabuli_Chr05 | 6421934                 | GG                                     | TT                 | TT               | INTERGENIC                    |                    |                                    |
| SNP_32336_A_6421942 | NC_021164.1    | Ca_Kabuli_Chr05 | 6421942                 | CC                                     | TT                 | TT               | INTERGENIC                    |                    |                                    |
| SNP_32337_A_6427618 | NC_021164.1    | Ca_Kabuli_Chr05 | 6427618                 | CC                                     | AA                 | AA               | INTERGENIC                    |                    |                                    |
| SNP_32338_A_6441376 | NC_021164.1    | Ca_Kabuli_Chr05 | 6441376                 | CC                                     | TT                 | TT               | INTRON                        | 101507085          | mediator-associated protein 2-like |
| SNP_32339_A_6478082 | NC_021164.1    | Ca_Kabuli_Chr05 | 6478082                 | TT                                     | AA                 | AA               | INTERGENIC                    |                    |                                    |
| SNP_32340_A_6478917 | NC_021164.1    | Ca_Kabuli_Chr05 | 6478917                 | TT                                     | CC                 | CC               | INTERGENIC                    |                    |                                    |
| SNP_32341_A_6494037 | NC_021164.1    | Ca_Kabuli_Chr05 | 6494037                 | TT                                     | CC                 | CC               | INTERGENIC                    |                    |                                    |
| SNP_32342_A_6494063 | NC_021164.1    | Ca_Kabuli_Chr05 | 6494063                 | AA                                     | GG                 | GG               | INTERGENIC                    |                    |                                    |
| SNP_32343_A_6494099 | NC_021164.1    | Ca_Kabuli_Chr05 | 6494099                 | GG                                     | AA                 | AA               | INTERGENIC                    |                    |                                    |
| SNP_32344_A_6494111 | NC_021164.1    | Ca_Kabuli_Chr05 | 6494111                 | TT                                     | CC                 | CC               | INTERGENIC                    |                    |                                    |
| SNP_32345_A_6494123 | NC_021164.1    | Ca_Kabuli_Chr05 | 6494123                 | AA                                     | GG                 | GG               | INTERGENIC                    |                    |                                    |
| SNP_32346_A_6494152 | NC_021164.1    | Ca_Kabuli_Chr05 | 6494152                 | TT                                     | CC                 | CC               | INTERGENIC                    |                    |                                    |
| SNP_32347_A_6494156 | NC_021164.1    | Ca_Kabuli_Chr05 | 6494156                 | TT                                     | GG                 | GG               | INTERGENIC                    |                    |                                    |
| SNP_32348_A_6494159 | NC_021164.1    | Ca_Kabuli_Chr05 | 6494159                 | TT                                     | CC                 | CC               | INTERGENIC                    |                    |                                    |
| SNP_32349_A_6494162 | NC_021164.1    | Ca_Kabuli_Chr05 | 6494162                 | TT                                     | CC                 | CC               | INTERGENIC                    |                    |                                    |
| SNP_32350_A_6494243 | NC_021164.1    | Ca_Kabuli_Chr05 | 6494243                 | AA                                     | GG                 | GG               | INTERGENIC                    |                    |                                    |
| SNP_32351_A_6494252 | NC_021164.1    | Ca_Kabuli_Chr05 | 6494252                 | CC                                     | TT                 | TT               | INTERGENIC                    |                    |                                    |
| SNP_32352_A_6494255 | NC_021164.1    | Ca_Kabuli_Chr05 | 6494255                 | AA                                     | TT                 | TT               | INTERGENIC                    |                    |                                    |
| SNP_32353_A_6494257 | NC_021164.1    | Ca_Kabuli_Chr05 | 6494257                 | GG                                     | AA                 | AA               | INTERGENIC                    |                    |                                    |

| SNPs IDs            | Chromosome IDs | Chromosomes     | Physical positions (bp) | CDC Frontier genome (Reference genome) | (Pusa 1103 & HPNB) | (ILWC 46 & LPNB) | Sequence Components of genome | Gene accession IDs | Putative functions               |
|---------------------|----------------|-----------------|-------------------------|----------------------------------------|--------------------|------------------|-------------------------------|--------------------|----------------------------------|
| SNP_32354_A_6494263 | NC_021164.1    | Ca_Kabuli_Chr05 | 6494263                 | AA                                     | GG                 | GG               | INTERGENIC                    |                    |                                  |
| SNP_32355_A_6494494 | NC_021164.1    | Ca_Kabuli_Chr05 | 6494494                 | TT                                     | CC                 | CC               | INTERGENIC                    |                    |                                  |
| SNP_32356_A_6494518 | NC_021164.1    | Ca_Kabuli_Chr05 | 6494518                 | CC                                     | TT                 | TT               | INTERGENIC                    |                    |                                  |
| SNP_32357_A_6494520 | NC_021164.1    | Ca_Kabuli_Chr05 | 6494520                 | AA                                     | GG                 | GG               | INTERGENIC                    |                    |                                  |
| SNP_32358_A_6497027 | NC_021164.1    | Ca_Kabuli_Chr05 | 6497027                 | GG                                     | CC                 | CC               | NON_SYNONYMOUS_CODING         | 101512210          | factor of DNA methylation 1-like |
| SNP_32359_A_6512942 | NC_021164.1    | Ca_Kabuli_Chr05 | 6512942                 | GG                                     | AA                 | AA               | INTERGENIC                    |                    |                                  |
| SNP_32360_A_6532183 | NC_021164.1    | Ca_Kabuli_Chr05 | 6532183                 | GG                                     | AA                 | AA               | INTERGENIC                    |                    |                                  |
| SNP_32362_A_6532709 | NC_021164.1    | Ca_Kabuli_Chr05 | 6532709                 | AA                                     | TT                 | TT               | INTERGENIC                    |                    |                                  |
| SNP_32363_A_6535226 | NC_021164.1    | Ca_Kabuli_Chr05 | 6535226                 | CC                                     | TT                 | TT               | INTERGENIC                    |                    |                                  |
| SNP_32364_A_6535261 | NC_021164.1    | Ca_Kabuli_Chr05 | 6535261                 | TT                                     | CC                 | CC               | INTERGENIC                    |                    |                                  |
| SNP_32365_A_6535322 | NC_021164.1    | Ca_Kabuli_Chr05 | 6535322                 | AA                                     | GG                 | GG               | INTERGENIC                    |                    |                                  |
| SNP_32366_A_6535340 | NC_021164.1    | Ca_Kabuli_Chr05 | 6535340                 | AA                                     | TT                 | TT               | INTERGENIC                    |                    |                                  |
| SNP_32367_A_6535346 | NC_021164.1    | Ca_Kabuli_Chr05 | 6535346                 | CC                                     | TT                 | TT               | INTERGENIC                    |                    |                                  |
| SNP_32368_A_6535353 | NC_021164.1    | Ca_Kabuli_Chr05 | 6535353                 | AA                                     | GG                 | GG               | INTERGENIC                    |                    |                                  |
| SNP_32369_A_6535385 | NC_021164.1    | Ca_Kabuli_Chr05 | 6535385                 | AA                                     | CC                 | CC               | INTERGENIC                    |                    |                                  |
| SNP_32370_A_6535391 | NC_021164.1    | Ca_Kabuli_Chr05 | 6535391                 | AA                                     | GG                 | GG               | INTERGENIC                    |                    |                                  |
| SNP_32371_A_6535439 | NC_021164.1    | Ca_Kabuli_Chr05 | 6535439                 | CC                                     | TT                 | TT               | INTERGENIC                    |                    |                                  |
| SNP_32373_A_6535594 | NC_021164.1    | Ca_Kabuli_Chr05 | 6535594                 | TT                                     | CC                 | CC               | INTERGENIC                    |                    |                                  |
| SNP_32374_A_6535747 | NC_021164.1    | Ca_Kabuli_Chr05 | 6535747                 | AA                                     | CC                 | CC               | INTERGENIC                    |                    |                                  |
| SNP_32375_A_6535765 | NC_021164.1    | Ca_Kabuli_Chr05 | 6535765                 | AA                                     | TT                 | TT               | INTERGENIC                    |                    |                                  |
| SNP_32376_A_6535780 | NC_021164.1    | Ca_Kabuli_Chr05 | 6535780                 | TT                                     | AA                 | AA               | INTERGENIC                    |                    |                                  |
| SNP_32377_A_6535835 | NC_021164.1    | Ca_Kabuli_Chr05 | 6535835                 | TT                                     | CC                 | CC               | INTERGENIC                    |                    |                                  |

| SNPs IDs            | Chromosome IDs | Chromosomes     | Physical positions (bp) | CDC Frontier genome (Reference genome) | (Pusa 1103 & HPNB) | (ILWC 46 & LPNB) | Sequence genome | Components of | Gene accession IDs | Putative functions |
|---------------------|----------------|-----------------|-------------------------|----------------------------------------|--------------------|------------------|-----------------|---------------|--------------------|--------------------|
| SNP_32378_A_6535837 | NC_021164.1    | Ca_Kabuli_Chr05 | 6535837                 | AA                                     | GG                 | GG               | INTERGENIC      |               |                    |                    |
| SNP_32379_A_6535843 | NC_021164.1    | Ca_Kabuli_Chr05 | 6535843                 | AA                                     | GG                 | GG               | INTERGENIC      |               |                    |                    |
| SNP_32380_A_6535919 | NC_021164.1    | Ca_Kabuli_Chr05 | 6535919                 | AA                                     | GG                 | GG               | INTERGENIC      |               |                    |                    |
| SNP_32381_A_6535932 | NC_021164.1    | Ca_Kabuli_Chr05 | 6535932                 | AA                                     | GG                 | GG               | INTERGENIC      |               |                    |                    |
| SNP_32382_A_6535935 | NC_021164.1    | Ca_Kabuli_Chr05 | 6535935                 | TT                                     | CC                 | CC               | INTERGENIC      |               |                    |                    |
| SNP_32383_A_6536207 | NC_021164.1    | Ca_Kabuli_Chr05 | 6536207                 | AA                                     | CC                 | CC               | INTERGENIC      |               |                    |                    |
| SNP_32384_A_6536258 | NC_021164.1    | Ca_Kabuli_Chr05 | 6536258                 | CC                                     | AA                 | AA               | INTERGENIC      |               |                    |                    |
| SNP_32385_A_6536265 | NC_021164.1    | Ca_Kabuli_Chr05 | 6536265                 | AA                                     | GG                 | GG               | INTERGENIC      |               |                    |                    |
| SNP_32386_A_6536303 | NC_021164.1    | Ca_Kabuli_Chr05 | 6536303                 | AA                                     | CC                 | CC               | INTERGENIC      |               |                    |                    |
| SNP_32387_A_6536372 | NC_021164.1    | Ca_Kabuli_Chr05 | 6536372                 | GG                                     | AA                 | AA               | INTERGENIC      |               |                    |                    |
| SNP_32388_A_6536595 | NC_021164.1    | Ca_Kabuli_Chr05 | 6536595                 | AA                                     | TT                 | TT               | INTERGENIC      |               |                    |                    |
| SNP_32389_A_6536597 | NC_021164.1    | Ca_Kabuli_Chr05 | 6536597                 | CC                                     | TT                 | TT               | INTERGENIC      |               |                    |                    |
| SNP_32390_A_6536750 | NC_021164.1    | Ca_Kabuli_Chr05 | 6536750                 | GG                                     | AA                 | AA               | INTERGENIC      |               |                    |                    |
| SNP_32391_A_6536761 | NC_021164.1    | Ca_Kabuli_Chr05 | 6536761                 | CC                                     | AA                 | AA               | INTERGENIC      |               |                    |                    |
| SNP_32392_A_6590144 | NC_021164.1    | Ca_Kabuli_Chr05 | 6590144                 | CC                                     | AA                 | AA               | INTERGENIC      |               |                    |                    |
| SNP_32393_A_6590167 | NC_021164.1    | Ca_Kabuli_Chr05 | 6590167                 | GG                                     | AA                 | AA               | INTERGENIC      |               |                    |                    |
| SNP_32394_A_6590220 | NC_021164.1    | Ca_Kabuli_Chr05 | 6590220                 | AA                                     | GG                 | GG               | INTERGENIC      |               |                    |                    |
| SNP_32395_A_6590284 | NC_021164.1    | Ca_Kabuli_Chr05 | 6590284                 | GG                                     | CC                 | CC               | INTERGENIC      |               |                    |                    |
| SNP_32396_A_6590310 | NC_021164.1    | Ca_Kabuli_Chr05 | 6590310                 | GG                                     | CC                 | CC               | INTERGENIC      |               |                    |                    |
| SNP_32397_A_6590329 | NC_021164.1    | Ca_Kabuli_Chr05 | 6590329                 | CC                                     | AA                 | AA               | INTERGENIC      |               |                    |                    |
| SNP_32398_A_6590415 | NC_021164.1    | Ca_Kabuli_Chr05 | 6590415                 | CC                                     | AA                 | AA               | INTERGENIC      |               |                    |                    |
| SNP_32399_A_6590548 | NC_021164.1    | Ca_Kabuli_Chr05 | 6590548                 | GG                                     | CC                 | CC               | INTERGENIC      |               |                    |                    |

| SNPs IDs            | Chromosome IDs | Chromosomes     | Physical positions (bp) | CDC Frontier genome (Reference genome) | (Pusa 1103 & HPNB) | (ILWC 46 & LPNB) | Sequence genome | Components of | Gene accession IDs | Putative functions |
|---------------------|----------------|-----------------|-------------------------|----------------------------------------|--------------------|------------------|-----------------|---------------|--------------------|--------------------|
| SNP_32400_A_6590755 | NC_021164.1    | Ca_Kabuli_Chr05 | 6590755                 | TT                                     | AA                 | AA               | INTERGENIC      |               |                    |                    |
| SNP_32401_A_6590821 | NC_021164.1    | Ca_Kabuli_Chr05 | 6590821                 | GG                                     | AA                 | AA               | INTERGENIC      |               |                    |                    |
| SNP_32402_A_6591050 | NC_021164.1    | Ca_Kabuli_Chr05 | 6591050                 | TT                                     | GG                 | GG               | INTERGENIC      |               |                    |                    |
| SNP_32403_A_6591087 | NC_021164.1    | Ca_Kabuli_Chr05 | 6591087                 | CC                                     | TT                 | TT               | INTERGENIC      |               |                    |                    |
| SNP_32404_A_6591493 | NC_021164.1    | Ca_Kabuli_Chr05 | 6591493                 | TT                                     | CC                 | CC               | INTERGENIC      |               |                    |                    |
| SNP_32405_A_6591590 | NC_021164.1    | Ca_Kabuli_Chr05 | 6591590                 | TT                                     | GG                 | GG               | INTERGENIC      |               |                    |                    |
| SNP_32406_A_6607382 | NC_021164.1    | Ca_Kabuli_Chr05 | 6607382                 | GG                                     | TT                 | TT               | INTERGENIC      |               |                    |                    |
| SNP_32407_A_6607386 | NC_021164.1    | Ca_Kabuli_Chr05 | 6607386                 | AA                                     | CC                 | CC               | INTERGENIC      |               |                    |                    |
| SNP_32408_A_6607387 | NC_021164.1    | Ca_Kabuli_Chr05 | 6607387                 | GG                                     | AA                 | AA               | INTERGENIC      |               |                    |                    |
| SNP_32409_A_6607388 | NC_021164.1    | Ca_Kabuli_Chr05 | 6607388                 | GG                                     | AA                 | AA               | INTERGENIC      |               |                    |                    |
| SNP_32410_A_6607971 | NC_021164.1    | Ca_Kabuli_Chr05 | 6607971                 | AA                                     | CC                 | CC               | INTERGENIC      |               |                    |                    |
| SNP_32411_A_6609715 | NC_021164.1    | Ca_Kabuli_Chr05 | 6609715                 | CC                                     | GG                 | GG               | INTERGENIC      |               |                    |                    |
| SNP_32412_A_6609993 | NC_021164.1    | Ca_Kabuli_Chr05 | 6609993                 | TT                                     | CC                 | CC               | INTERGENIC      |               |                    |                    |
| SNP_32413_A_6622833 | NC_021164.1    | Ca_Kabuli_Chr05 | 6622833                 | AA                                     | CC                 | CC               | INTERGENIC      |               |                    |                    |
| SNP_32414_A_6637303 | NC_021164.1    | Ca_Kabuli_Chr05 | 6637303                 | TT                                     | CC                 | CC               | INTERGENIC      |               |                    |                    |
| SNP_32415_A_6646569 | NC_021164.1    | Ca_Kabuli_Chr05 | 6646569                 | CC                                     | GG                 | GG               | INTERGENIC      |               |                    |                    |
| SNP_32416_A_6646887 | NC_021164.1    | Ca_Kabuli_Chr05 | 6646887                 | GG                                     | AA                 | AA               | INTERGENIC      |               |                    |                    |
| SNP_32417_A_6646910 | NC_021164.1    | Ca_Kabuli_Chr05 | 6646910                 | AA                                     | TT                 | TT               | INTERGENIC      |               |                    |                    |
| SNP_32418_A_6646921 | NC_021164.1    | Ca_Kabuli_Chr05 | 6646921                 | GG                                     | TT                 | TT               | INTERGENIC      |               |                    |                    |
| SNP_32419_A_6647033 | NC_021164.1    | Ca_Kabuli_Chr05 | 6647033                 | TT                                     | GG                 | GG               | INTERGENIC      |               |                    |                    |
| SNP_32420_A_6647237 | NC_021164.1    | Ca_Kabuli_Chr05 | 6647237                 | TT                                     | GG                 | GG               | INTERGENIC      |               |                    |                    |
| SNP_32421_A_6647311 | NC_021164.1    | Ca_Kabuli_Chr05 | 6647311                 | TT                                     | GG                 | GG               | INTERGENIC      |               |                    |                    |

| SNPs IDs            | Chromosome IDs | Chromosomes     | Physical positions (bp) | CDC Frontier genome (Reference genome) | (Pusa 1103 & HPNB) | (ILWC 46 & LPNB) | Sequence genome | Components of | Gene accession IDs | Putative functions |
|---------------------|----------------|-----------------|-------------------------|----------------------------------------|--------------------|------------------|-----------------|---------------|--------------------|--------------------|
| SNP_32422_A_6647844 | NC_021164.1    | Ca_Kabuli_Chr05 | 6647844                 | CC                                     | TT                 | TT               | INTERGENIC      |               |                    |                    |
| SNP_32423_A_6647860 | NC_021164.1    | Ca_Kabuli_Chr05 | 6647860                 | AA                                     | TT                 | TT               | INTERGENIC      |               |                    |                    |
| SNP_32424_A_6647861 | NC_021164.1    | Ca_Kabuli_Chr05 | 6647861                 | CC                                     | TT                 | TT               | INTERGENIC      |               |                    |                    |
| SNP_32425_A_6647890 | NC_021164.1    | Ca_Kabuli_Chr05 | 6647890                 | GG                                     | CC                 | CC               | INTERGENIC      |               |                    |                    |
| SNP_32426_A_6648795 | NC_021164.1    | Ca_Kabuli_Chr05 | 6648795                 | AA                                     | TT                 | TT               | INTERGENIC      |               |                    |                    |
| SNP_32427_A_6674875 | NC_021164.1    | Ca_Kabuli_Chr05 | 6674875                 | GG                                     | AA                 | AA               | INTERGENIC      |               |                    |                    |
| SNP_32428_A_6674876 | NC_021164.1    | Ca_Kabuli_Chr05 | 6674876                 | TT                                     | AA                 | AA               | INTERGENIC      |               |                    |                    |
| SNP_32429_A_6674882 | NC_021164.1    | Ca_Kabuli_Chr05 | 6674882                 | GG                                     | CC                 | CC               | INTERGENIC      |               |                    |                    |
| SNP_32430_A_6674895 | NC_021164.1    | Ca_Kabuli_Chr05 | 6674895                 | GG                                     | AA                 | AA               | INTERGENIC      |               |                    |                    |
| SNP_32431_A_6674988 | NC_021164.1    | Ca_Kabuli_Chr05 | 6674988                 | CC                                     | TT                 | TT               | INTERGENIC      |               |                    |                    |
| SNP_32432_A_6675011 | NC_021164.1    | Ca_Kabuli_Chr05 | 6675011                 | CC                                     | GG                 | GG               | INTERGENIC      |               |                    |                    |
| SNP_32433_A_6675073 | NC_021164.1    | Ca_Kabuli_Chr05 | 6675073                 | AA                                     | TT                 | TT               | INTERGENIC      |               |                    |                    |
| SNP_32434_A_6675183 | NC_021164.1    | Ca_Kabuli_Chr05 | 6675183                 | AA                                     | GG                 | GG               | INTERGENIC      |               |                    |                    |
| SNP_32435_A_6675300 | NC_021164.1    | Ca_Kabuli_Chr05 | 6675300                 | CC                                     | GG                 | GG               | INTERGENIC      |               |                    |                    |
| SNP_32436_A_6675342 | NC_021164.1    | Ca_Kabuli_Chr05 | 6675342                 | GG                                     | TT                 | TT               | INTERGENIC      |               |                    |                    |
| SNP_32437_A_6685531 | NC_021164.1    | Ca_Kabuli_Chr05 | 6685531                 | AA                                     | GG                 | GG               | INTERGENIC      |               |                    |                    |
| SNP_32438_A_6720815 | NC_021164.1    | Ca_Kabuli_Chr05 | 6720815                 | CC                                     | TT                 | TT               | INTERGENIC      |               |                    |                    |
| SNP_32439_A_6723702 | NC_021164.1    | Ca_Kabuli_Chr05 | 6723702                 | GG                                     | TT                 | TT               | INTERGENIC      |               |                    |                    |
| SNP_32440_A_6723706 | NC_021164.1    | Ca_Kabuli_Chr05 | 6723706                 | TT                                     | CC                 | CC               | INTERGENIC      |               |                    |                    |
| SNP_32441_A_6723707 | NC_021164.1    | Ca_Kabuli_Chr05 | 6723707                 | TT                                     | AA                 | AA               | INTERGENIC      |               |                    |                    |
| SNP_32442_A_6723718 | NC_021164.1    | Ca_Kabuli_Chr05 | 6723718                 | AA                                     | TT                 | TT               | INTERGENIC      |               |                    |                    |
| SNP_32444_A_6739672 | NC_021164.1    | Ca_Kabuli_Chr05 | 6739672                 | AA                                     | GG                 | GG               | INTERGENIC      |               |                    |                    |

| SNPs IDs            | Chromosome IDs | Chromosomes     | Physical positions (bp) | CDC Frontier (Reference genome) | (Pusa 1103 & HPNB) | (ILWC 46 & LPNB) | Sequence genome | Components of | Gene accession IDs | Putative functions |
|---------------------|----------------|-----------------|-------------------------|---------------------------------|--------------------|------------------|-----------------|---------------|--------------------|--------------------|
| SNP_32445_A_6739681 | NC_021164.1    | Ca_Kabuli_Chr05 | 6739681                 | TT                              | CC                 | CC               | INTERGENIC      |               |                    |                    |
| SNP_32446_A_6739719 | NC_021164.1    | Ca_Kabuli_Chr05 | 6739719                 | CC                              | TT                 | TT               | INTERGENIC      |               |                    |                    |
| SNP_32447_A_6739736 | NC_021164.1    | Ca_Kabuli_Chr05 | 6739736                 | CC                              | TT                 | TT               | INTERGENIC      |               |                    |                    |
| SNP_32448_A_6739788 | NC_021164.1    | Ca_Kabuli_Chr05 | 6739788                 | TT                              | AA                 | AA               | INTERGENIC      |               |                    |                    |
| SNP_32449_A_6739921 | NC_021164.1    | Ca_Kabuli_Chr05 | 6739921                 | TT                              | CC                 | CC               | INTERGENIC      |               |                    |                    |
| SNP_32450_A_6740034 | NC_021164.1    | Ca_Kabuli_Chr05 | 6740034                 | AA                              | GG                 | GG               | INTERGENIC      |               |                    |                    |
| SNP_32451_A_6740080 | NC_021164.1    | Ca_Kabuli_Chr05 | 6740080                 | CC                              | TT                 | TT               | INTERGENIC      |               |                    |                    |
| SNP_32452_A_6740120 | NC_021164.1    | Ca_Kabuli_Chr05 | 6740120                 | GG                              | AA                 | AA               | INTERGENIC      |               |                    |                    |
| SNP_32453_A_6740122 | NC_021164.1    | Ca_Kabuli_Chr05 | 6740122                 | TT                              | GG                 | GG               | INTERGENIC      |               |                    |                    |
| SNP_32454_A_6749930 | NC_021164.1    | Ca_Kabuli_Chr05 | 6749930                 | GG                              | AA                 | AA               | URR             | 101512843     | Unknown function   |                    |
| SNP_32455_A_6754055 | NC_021164.1    | Ca_Kabuli_Chr05 | 6754055                 | TT                              | CC                 | CC               | INTERGENIC      |               |                    |                    |
| SNP_32456_A_6761059 | NC_021164.1    | Ca_Kabuli_Chr05 | 6761059                 | CC                              | AA                 | AA               | INTERGENIC      |               |                    |                    |
| SNP_32457_A_6763918 | NC_021164.1    | Ca_Kabuli_Chr05 | 6763918                 | AA                              | GG                 | GG               | INTERGENIC      |               |                    |                    |
| SNP_32459_A_6764239 | NC_021164.1    | Ca_Kabuli_Chr05 | 6764239                 | CC                              | TT                 | TT               | INTERGENIC      |               |                    |                    |
| SNP_32460_A_6764258 | NC_021164.1    | Ca_Kabuli_Chr05 | 6764258                 | TT                              | AA                 | AA               | INTERGENIC      |               |                    |                    |
| SNP_32461_A_6764313 | NC_021164.1    | Ca_Kabuli_Chr05 | 6764313                 | CC                              | TT                 | TT               | INTERGENIC      |               |                    |                    |
| SNP_32463_A_6765436 | NC_021164.1    | Ca_Kabuli_Chr05 | 6765436                 | AA                              | GG                 | GG               | INTERGENIC      |               |                    |                    |
| SNP_32464_A_6769183 | NC_021164.1    | Ca_Kabuli_Chr05 | 6769183                 | GG                              | AA                 | AA               | INTERGENIC      |               |                    |                    |
| SNP_32465_A_6769194 | NC_021164.1    | Ca_Kabuli_Chr05 | 6769194                 | TT                              | CC                 | CC               | INTERGENIC      |               |                    |                    |
| SNP_32466_A_6771855 | NC_021164.1    | Ca_Kabuli_Chr05 | 6771855                 | CC                              | TT                 | TT               | INTERGENIC      |               |                    |                    |
| SNP_32467_A_6771981 | NC_021164.1    | Ca_Kabuli_Chr05 | 6771981                 | TT                              | CC                 | CC               | INTERGENIC      |               |                    |                    |
| SNP_32468_A_6772186 | NC_021164.1    | Ca_Kabuli_Chr05 | 6772186                 | AA                              | TT                 | TT               | INTERGENIC      |               |                    |                    |

| SNPs IDs            | Chromosome IDs | Chromosomes     | Physical positions (bp) | CDC Frontier genome (Reference genome) | (Pusa 1103 & HPNB) | (ILWC 46 & LPNB) | Sequence genome | Components of | Gene accession IDs | Putative functions |
|---------------------|----------------|-----------------|-------------------------|----------------------------------------|--------------------|------------------|-----------------|---------------|--------------------|--------------------|
| SNP_32469_A_6772228 | NC_021164.1    | Ca_Kabuli_Chr05 | 6772228                 | TT                                     | GG                 | GG               | INTERGENIC      |               |                    |                    |
| SNP_32471_A_6772313 | NC_021164.1    | Ca_Kabuli_Chr05 | 6772313                 | TT                                     | CC                 | CC               | INTERGENIC      |               |                    |                    |
| SNP_32472_A_6772366 | NC_021164.1    | Ca_Kabuli_Chr05 | 6772366                 | CC                                     | TT                 | TT               | INTERGENIC      |               |                    |                    |
| SNP_32473_A_6772374 | NC_021164.1    | Ca_Kabuli_Chr05 | 6772374                 | TT                                     | CC                 | CC               | INTERGENIC      |               |                    |                    |
| SNP_32475_A_6772502 | NC_021164.1    | Ca_Kabuli_Chr05 | 6772502                 | AA                                     | CC                 | CC               | INTERGENIC      |               |                    |                    |
| SNP_32476_A_6772506 | NC_021164.1    | Ca_Kabuli_Chr05 | 6772506                 | CC                                     | GG                 | GG               | INTERGENIC      |               |                    |                    |
| SNP_32477_A_6772577 | NC_021164.1    | Ca_Kabuli_Chr05 | 6772577                 | CC                                     | GG                 | GG               | INTERGENIC      |               |                    |                    |
| SNP_32478_A_6772781 | NC_021164.1    | Ca_Kabuli_Chr05 | 6772781                 | TT                                     | CC                 | CC               | INTERGENIC      |               |                    |                    |
| SNP_32479_A_6772856 | NC_021164.1    | Ca_Kabuli_Chr05 | 6772856                 | GG                                     | AA                 | AA               | INTERGENIC      |               |                    |                    |
| SNP_32480_A_6772898 | NC_021164.1    | Ca_Kabuli_Chr05 | 6772898                 | CC                                     | TT                 | TT               | INTERGENIC      |               |                    |                    |
| SNP_32481_A_6772974 | NC_021164.1    | Ca_Kabuli_Chr05 | 6772974                 | GG                                     | AA                 | AA               | INTERGENIC      |               |                    |                    |
| SNP_32482_A_6772983 | NC_021164.1    | Ca_Kabuli_Chr05 | 6772983                 | TT                                     | CC                 | CC               | INTERGENIC      |               |                    |                    |
| SNP_32483_A_6773134 | NC_021164.1    | Ca_Kabuli_Chr05 | 6773134                 | AA                                     | GG                 | GG               | INTERGENIC      |               |                    |                    |
| SNP_32484_A_6773348 | NC_021164.1    | Ca_Kabuli_Chr05 | 6773348                 | TT                                     | AA                 | AA               | INTERGENIC      |               |                    |                    |
| SNP_32486_A_6773405 | NC_021164.1    | Ca_Kabuli_Chr05 | 6773405                 | GG                                     | TT                 | TT               | INTERGENIC      |               |                    |                    |
| SNP_32487_A_6773487 | NC_021164.1    | Ca_Kabuli_Chr05 | 6773487                 | AA                                     | GG                 | GG               | INTERGENIC      |               |                    |                    |
| SNP_32489_A_6791996 | NC_021164.1    | Ca_Kabuli_Chr05 | 6791996                 | TT                                     | GG                 | GG               | INTERGENIC      |               |                    |                    |
| SNP_32490_A_6825812 | NC_021164.1    | Ca_Kabuli_Chr05 | 6825812                 | AA                                     | TT                 | TT               | INTERGENIC      |               |                    |                    |
| SNP_32491_A_6825835 | NC_021164.1    | Ca_Kabuli_Chr05 | 6825835                 | CC                                     | TT                 | TT               | INTERGENIC      |               |                    |                    |
| SNP_32492_A_6825838 | NC_021164.1    | Ca_Kabuli_Chr05 | 6825838                 | AA                                     | TT                 | TT               | INTERGENIC      |               |                    |                    |
| SNP_32493_A_6825842 | NC_021164.1    | Ca_Kabuli_Chr05 | 6825842                 | TT                                     | AA                 | AA               | INTERGENIC      |               |                    |                    |
| SNP_32494_A_6826368 | NC_021164.1    | Ca_Kabuli_Chr05 | 6826368                 | CC                                     | TT                 | TT               | INTERGENIC      |               |                    |                    |

| SNPs IDs            | Chromosome IDs | Chromosomes     | Physical positions (bp) | CDC Frontier genome (Reference genome) | (Pusa 1103 & HPNB) | (ILWC 46 & LPNB) | Sequence genome | Components of | Gene accession IDs | Putative functions |
|---------------------|----------------|-----------------|-------------------------|----------------------------------------|--------------------|------------------|-----------------|---------------|--------------------|--------------------|
| SNP_32495_A_6830190 | NC_021164.1    | Ca_Kabuli_Chr05 | 6830190                 | GG                                     | AA                 | AA               | INTERGENIC      |               |                    |                    |
| SNP_32496_A_6830206 | NC_021164.1    | Ca_Kabuli_Chr05 | 6830206                 | CC                                     | GG                 | GG               | INTERGENIC      |               |                    |                    |
| SNP_32497_A_6830293 | NC_021164.1    | Ca_Kabuli_Chr05 | 6830293                 | TT                                     | GG                 | GG               | INTERGENIC      |               |                    |                    |
| SNP_32498_A_6830429 | NC_021164.1    | Ca_Kabuli_Chr05 | 6830429                 | TT                                     | GG                 | GG               | INTERGENIC      |               |                    |                    |
| SNP_32499_A_6830446 | NC_021164.1    | Ca_Kabuli_Chr05 | 6830446                 | CC                                     | TT                 | TT               | INTERGENIC      |               |                    |                    |
| SNP_32500_A_6830578 | NC_021164.1    | Ca_Kabuli_Chr05 | 6830578                 | CC                                     | TT                 | TT               | INTERGENIC      |               |                    |                    |
| SNP_32501_A_6830589 | NC_021164.1    | Ca_Kabuli_Chr05 | 6830589                 | CC                                     | TT                 | TT               | INTERGENIC      |               |                    |                    |
| SNP_32502_A_6830679 | NC_021164.1    | Ca_Kabuli_Chr05 | 6830679                 | CC                                     | TT                 | TT               | INTERGENIC      |               |                    |                    |
| SNP_32503_A_6830797 | NC_021164.1    | Ca_Kabuli_Chr05 | 6830797                 | AA                                     | GG                 | GG               | INTERGENIC      |               |                    |                    |
| SNP_32504_A_6830875 | NC_021164.1    | Ca_Kabuli_Chr05 | 6830875                 | TT                                     | GG                 | GG               | INTERGENIC      |               |                    |                    |
| SNP_32505_A_6830893 | NC_021164.1    | Ca_Kabuli_Chr05 | 6830893                 | AA                                     | GG                 | GG               | INTERGENIC      |               |                    |                    |
| SNP_32506_A_6830920 | NC_021164.1    | Ca_Kabuli_Chr05 | 6830920                 | AA                                     | GG                 | GG               | INTERGENIC      |               |                    |                    |
| SNP_32507_A_6830930 | NC_021164.1    | Ca_Kabuli_Chr05 | 6830930                 | CC                                     | AA                 | AA               | INTERGENIC      |               |                    |                    |
| SNP_32508_A_6830933 | NC_021164.1    | Ca_Kabuli_Chr05 | 6830933                 | CC                                     | TT                 | TT               | INTERGENIC      |               |                    |                    |
| SNP_32509_A_6830948 | NC_021164.1    | Ca_Kabuli_Chr05 | 6830948                 | AA                                     | GG                 | GG               | INTERGENIC      |               |                    |                    |
| SNP_32510_A_6831383 | NC_021164.1    | Ca_Kabuli_Chr05 | 6831383                 | AA                                     | GG                 | GG               | INTERGENIC      |               |                    |                    |
| SNP_32511_A_6831456 | NC_021164.1    | Ca_Kabuli_Chr05 | 6831456                 | AA                                     | GG                 | GG               | INTERGENIC      |               |                    |                    |
| SNP_32512_A_6831507 | NC_021164.1    | Ca_Kabuli_Chr05 | 6831507                 | GG                                     | AA                 | AA               | INTERGENIC      |               |                    |                    |
| SNP_32513_A_6831715 | NC_021164.1    | Ca_Kabuli_Chr05 | 6831715                 | AA                                     | GG                 | GG               | INTERGENIC      |               |                    |                    |
| SNP_32514_A_6832854 | NC_021164.1    | Ca_Kabuli_Chr05 | 6832854                 | TT                                     | CC                 | CC               | INTERGENIC      |               |                    |                    |
| SNP_32515_A_6832855 | NC_021164.1    | Ca_Kabuli_Chr05 | 6832855                 | CC                                     | TT                 | TT               | INTERGENIC      |               |                    |                    |
| SNP_32516_A_6832958 | NC_021164.1    | Ca_Kabuli_Chr05 | 6832958                 | GG                                     | AA                 | AA               | INTERGENIC      |               |                    |                    |



| SNPs IDs            | Chromosome IDs | Chromosomes     | Physical positions (bp) | CDC Frontier genome (Reference genome) | (Pusa 1103 & HPNB) | (ILWC 46 & LPNB) | Sequence genome | Components of | Gene accession IDs | Putative functions |
|---------------------|----------------|-----------------|-------------------------|----------------------------------------|--------------------|------------------|-----------------|---------------|--------------------|--------------------|
| SNP_32517_A_6832968 | NC_021164.1    | Ca_Kabuli_Chr05 | 6832968                 | TT                                     | AA                 | AA               | INTERGENIC      |               |                    |                    |
| SNP_32518_A_6832972 | NC_021164.1    | Ca_Kabuli_Chr05 | 6832972                 | TT                                     | GG                 | GG               | INTERGENIC      |               |                    |                    |
| SNP_32520_A_6833259 | NC_021164.1    | Ca_Kabuli_Chr05 | 6833259                 | AA                                     | CC                 | CC               | INTERGENIC      |               |                    |                    |
| SNP_32521_A_6833658 | NC_021164.1    | Ca_Kabuli_Chr05 | 6833658                 | TT                                     | AA                 | AA               | INTERGENIC      |               |                    |                    |
| SNP_32523_A_6833713 | NC_021164.1    | Ca_Kabuli_Chr05 | 6833713                 | GG                                     | CC                 | CC               | INTERGENIC      |               |                    |                    |
| SNP_32524_A_6833769 | NC_021164.1    | Ca_Kabuli_Chr05 | 6833769                 | CC                                     | TT                 | TT               | INTERGENIC      |               |                    |                    |
| SNP_32526_A_6833877 | NC_021164.1    | Ca_Kabuli_Chr05 | 6833877                 | GG                                     | AA                 | AA               | INTERGENIC      |               |                    |                    |
| SNP_32530_A_6834319 | NC_021164.1    | Ca_Kabuli_Chr05 | 6834319                 | AA                                     | TT                 | TT               | INTERGENIC      |               |                    |                    |
| SNP_32531_A_6834384 | NC_021164.1    | Ca_Kabuli_Chr05 | 6834384                 | CC                                     | AA                 | AA               | INTERGENIC      |               |                    |                    |
| SNP_32532_A_6834393 | NC_021164.1    | Ca_Kabuli_Chr05 | 6834393                 | TT                                     | GG                 | GG               | INTERGENIC      |               |                    |                    |
| SNP_32533_A_6834577 | NC_021164.1    | Ca_Kabuli_Chr05 | 6834577                 | GG                                     | AA                 | AA               | INTERGENIC      |               |                    |                    |
| SNP_32534_A_6834613 | NC_021164.1    | Ca_Kabuli_Chr05 | 6834613                 | AA                                     | TT                 | TT               | INTERGENIC      |               |                    |                    |
| SNP_32535_A_6834614 | NC_021164.1    | Ca_Kabuli_Chr05 | 6834614                 | CC                                     | TT                 | TT               | INTERGENIC      |               |                    |                    |
| SNP_32536_A_6834624 | NC_021164.1    | Ca_Kabuli_Chr05 | 6834624                 | GG                                     | TT                 | TT               | INTERGENIC      |               |                    |                    |
| SNP_32537_A_6834675 | NC_021164.1    | Ca_Kabuli_Chr05 | 6834675                 | AA                                     | CC                 | CC               | INTERGENIC      |               |                    |                    |
| SNP_32538_A_6834690 | NC_021164.1    | Ca_Kabuli_Chr05 | 6834690                 | TT                                     | CC                 | CC               | INTERGENIC      |               |                    |                    |
| SNP_32539_A_6834698 | NC_021164.1    | Ca_Kabuli_Chr05 | 6834698                 | AA                                     | CC                 | CC               | INTERGENIC      |               |                    |                    |
| SNP_32541_A_6834755 | NC_021164.1    | Ca_Kabuli_Chr05 | 6834755                 | AA                                     | TT                 | TT               | INTERGENIC      |               |                    |                    |
| SNP_32542_A_6834775 | NC_021164.1    | Ca_Kabuli_Chr05 | 6834775                 | TT                                     | AA                 | AA               | INTERGENIC      |               |                    |                    |
| SNP_32543_A_6834835 | NC_021164.1    | Ca_Kabuli_Chr05 | 6834835                 | TT                                     | AA                 | AA               | INTERGENIC      |               |                    |                    |
| SNP_32544_A_6835015 | NC_021164.1    | Ca_Kabuli_Chr05 | 6835015                 | TT                                     | GG                 | GG               | INTERGENIC      |               |                    |                    |
| SNP_32545_A_6835152 | NC_021164.1    | Ca_Kabuli_Chr05 | 6835152                 | GG                                     | TT                 | TT               | INTERGENIC      |               |                    |                    |

| SNPs IDs            | Chromosome IDs | Chromosomes     | Physical positions (bp) | CDC Frontier genome (Reference genome) | (Pusa 1103 & HPNB) | (ILWC 46 & LPNB) | Sequence genome | Components of | Gene accession IDs | Putative functions |
|---------------------|----------------|-----------------|-------------------------|----------------------------------------|--------------------|------------------|-----------------|---------------|--------------------|--------------------|
| SNP_32546_A_6835200 | NC_021164.1    | Ca_Kabuli_Chr05 | 6835200                 | TT                                     | CC                 | CC               | INTERGENIC      |               |                    |                    |
| SNP_32547_A_6835399 | NC_021164.1    | Ca_Kabuli_Chr05 | 6835399                 | AA                                     | TT                 | TT               | INTERGENIC      |               |                    |                    |
| SNP_32548_A_6835690 | NC_021164.1    | Ca_Kabuli_Chr05 | 6835690                 | TT                                     | AA                 | AA               | INTERGENIC      |               |                    |                    |
| SNP_32549_A_6835695 | NC_021164.1    | Ca_Kabuli_Chr05 | 6835695                 | TT                                     | GG                 | GG               | INTERGENIC      |               |                    |                    |
| SNP_32550_A_6835750 | NC_021164.1    | Ca_Kabuli_Chr05 | 6835750                 | GG                                     | AA                 | AA               | INTERGENIC      |               |                    |                    |
| SNP_32551_A_6835751 | NC_021164.1    | Ca_Kabuli_Chr05 | 6835751                 | TT                                     | CC                 | CC               | INTERGENIC      |               |                    |                    |
| SNP_32552_A_6835784 | NC_021164.1    | Ca_Kabuli_Chr05 | 6835784                 | GG                                     | AA                 | AA               | INTERGENIC      |               |                    |                    |
| SNP_32553_A_6835863 | NC_021164.1    | Ca_Kabuli_Chr05 | 6835863                 | TT                                     | CC                 | CC               | INTERGENIC      |               |                    |                    |
| SNP_32554_A_6836020 | NC_021164.1    | Ca_Kabuli_Chr05 | 6836020                 | CC                                     | TT                 | TT               | INTERGENIC      |               |                    |                    |
| SNP_32555_A_6836059 | NC_021164.1    | Ca_Kabuli_Chr05 | 6836059                 | TT                                     | CC                 | CC               | INTERGENIC      |               |                    |                    |
| SNP_32556_A_6836141 | NC_021164.1    | Ca_Kabuli_Chr05 | 6836141                 | AA                                     | GG                 | GG               | INTERGENIC      |               |                    |                    |
| SNP_32557_A_6836160 | NC_021164.1    | Ca_Kabuli_Chr05 | 6836160                 | TT                                     | CC                 | CC               | INTERGENIC      |               |                    |                    |
| SNP_32558_A_6836214 | NC_021164.1    | Ca_Kabuli_Chr05 | 6836214                 | CC                                     | GG                 | GG               | INTERGENIC      |               |                    |                    |
| SNP_32559_A_6836350 | NC_021164.1    | Ca_Kabuli_Chr05 | 6836350                 | AA                                     | TT                 | TT               | INTERGENIC      |               |                    |                    |
| SNP_32560_A_6836450 | NC_021164.1    | Ca_Kabuli_Chr05 | 6836450                 | CC                                     | GG                 | GG               | INTERGENIC      |               |                    |                    |
| SNP_32561_A_6836513 | NC_021164.1    | Ca_Kabuli_Chr05 | 6836513                 | CC                                     | TT                 | TT               | INTERGENIC      |               |                    |                    |
| SNP_32562_A_6836567 | NC_021164.1    | Ca_Kabuli_Chr05 | 6836567                 | CC                                     | TT                 | TT               | INTERGENIC      |               |                    |                    |
| SNP_32563_A_6836571 | NC_021164.1    | Ca_Kabuli_Chr05 | 6836571                 | AA                                     | CC                 | CC               | INTERGENIC      |               |                    |                    |
| SNP_32564_A_6836615 | NC_021164.1    | Ca_Kabuli_Chr05 | 6836615                 | AA                                     | GG                 | GG               | INTERGENIC      |               |                    |                    |
| SNP_32565_A_6837180 | NC_021164.1    | Ca_Kabuli_Chr05 | 6837180                 | TT                                     | CC                 | CC               | INTERGENIC      |               |                    |                    |
| SNP_32566_A_6837235 | NC_021164.1    | Ca_Kabuli_Chr05 | 6837235                 | GG                                     | AA                 | AA               | INTERGENIC      |               |                    |                    |
| SNP_32567_A_6837326 | NC_021164.1    | Ca_Kabuli_Chr05 | 6837326                 | TT                                     | CC                 | CC               | INTERGENIC      |               |                    |                    |

| SNPs IDs            | Chromosome IDs | Chromosomes     | Physical positions (bp) | CDC Frontier genome (Reference genome) | (Pusa 1103 & HPNB) | (ILWC 46 & LPNB) | Sequence Components of genome | Gene accession IDs | Putative functions           |
|---------------------|----------------|-----------------|-------------------------|----------------------------------------|--------------------|------------------|-------------------------------|--------------------|------------------------------|
| SNP_32568_A_6837352 | NC_021164.1    | Ca_Kabuli_Chr05 | 6837352                 | AA                                     | CC                 | CC               | INTERGENIC                    |                    |                              |
| SNP_32569_A_6837767 | NC_021164.1    | Ca_Kabuli_Chr05 | 6837767                 | CC                                     | GG                 | GG               | INTERGENIC                    |                    |                              |
| SNP_32570_A_6837905 | NC_021164.1    | Ca_Kabuli_Chr05 | 6837905                 | GG                                     | AA                 | AA               | INTERGENIC                    |                    |                              |
| SNP_32571_A_6837956 | NC_021164.1    | Ca_Kabuli_Chr05 | 6837956                 | AA                                     | GG                 | GG               | INTERGENIC                    |                    |                              |
| SNP_32573_A_6838027 | NC_021164.1    | Ca_Kabuli_Chr05 | 6838027                 | AA                                     | GG                 | GG               | INTERGENIC                    |                    |                              |
| SNP_32574_A_6838074 | NC_021164.1    | Ca_Kabuli_Chr05 | 6838074                 | GG                                     | AA                 | AA               | INTERGENIC                    |                    |                              |
| SNP_32575_A_6850056 | NC_021164.1    | Ca_Kabuli_Chr05 | 6850056                 | GG                                     | AA                 | AA               | INTERGENIC                    |                    |                              |
| SNP_32576_A_6850068 | NC_021164.1    | Ca_Kabuli_Chr05 | 6850068                 | TT                                     | GG                 | GG               | INTERGENIC                    |                    |                              |
| SNP_32577_A_6850082 | NC_021164.1    | Ca_Kabuli_Chr05 | 6850082                 | AA                                     | GG                 | GG               | INTERGENIC                    |                    |                              |
| SNP_32578_A_6872226 | NC_021164.1    | Ca_Kabuli_Chr05 | 6872226                 | GG                                     | CC                 | CC               | DRR                           | 101490061          | uncharacterized LOC101490061 |
| SNP_32579_A_6872262 | NC_021164.1    | Ca_Kabuli_Chr05 | 6872262                 | CC                                     | TT                 | TT               | DRR                           | 101490061          | uncharacterized LOC101490061 |
| SNP_32580_A_6872417 | NC_021164.1    | Ca_Kabuli_Chr05 | 6872417                 | GG                                     | AA                 | AA               | DRR                           | 101490061          | uncharacterized LOC101490061 |
| SNP_32582_A_6875426 | NC_021164.1    | Ca_Kabuli_Chr05 | 6875426                 | AA                                     | GG                 | GG               | URR                           | 101490061          | uncharacterized LOC101490061 |
| SNP_32583_A_6896735 | NC_021164.1    | Ca_Kabuli_Chr05 | 6896735                 | GG                                     | AA                 | AA               | INTERGENIC                    |                    |                              |
| SNP_32584_A_6897083 | NC_021164.1    | Ca_Kabuli_Chr05 | 6897083                 | TT                                     | GG                 | GG               | INTERGENIC                    |                    |                              |
| SNP_32585_A_6897825 | NC_021164.1    | Ca_Kabuli_Chr05 | 6897825                 | TT                                     | GG                 | GG               | INTERGENIC                    |                    |                              |
| SNP_32586_A_6897939 | NC_021164.1    | Ca_Kabuli_Chr05 | 6897939                 | AA                                     | TT                 | TT               | INTERGENIC                    |                    |                              |
| SNP_32587_A_6897958 | NC_021164.1    | Ca_Kabuli_Chr05 | 6897958                 | GG                                     | AA                 | AA               | INTERGENIC                    |                    |                              |
| SNP_32588_A_6906431 | NC_021164.1    | Ca_Kabuli_Chr05 | 6906431                 | AA                                     | GG                 | GG               | INTRON                        | 101490721          | uncharacterized LOC101490721 |
| SNP_32589_A_6906454 | NC_021164.1    | Ca_Kabuli_Chr05 | 6906454                 | GG                                     | AA                 | AA               | INTRON                        | 101490721          | uncharacterized LOC101490721 |
| SNP_32590_A_6906629 | NC_021164.1    | Ca_Kabuli_Chr05 | 6906629                 | CC                                     | TT                 | TT               | INTRON                        | 101490721          | uncharacterized LOC101490721 |
| SNP_32591_A_6906636 | NC_021164.1    | Ca_Kabuli_Chr05 | 6906636                 | AA                                     | GG                 | GG               | INTRON                        | 101490721          | uncharacterized LOC101490721 |

| SNPs IDs            | Chromosome IDs | Chromosomes     | Physical positions (bp) | CDC Frontier genome (Reference genome) | (Pusa 1103 & HPNB) | (ILWC 46 & LPNB) | Sequence Components of genome | Gene accession IDs | Putative functions           |
|---------------------|----------------|-----------------|-------------------------|----------------------------------------|--------------------|------------------|-------------------------------|--------------------|------------------------------|
| SNP_32592_A_6906665 | NC_021164.1    | Ca_Kabuli_Chr05 | 6906665                 | CC                                     | AA                 | AA               | INTRON                        | 101490721          | uncharacterized LOC101490721 |
| SNP_32593_A_6906755 | NC_021164.1    | Ca_Kabuli_Chr05 | 6906755                 | TT                                     | CC                 | CC               | INTRON                        | 101490721          | uncharacterized LOC101490721 |
| SNP_32594_A_6906930 | NC_021164.1    | Ca_Kabuli_Chr05 | 6906930                 | GG                                     | TT                 | TT               | INTRON                        | 101490721          | uncharacterized LOC101490721 |
| SNP_32595_A_6907109 | NC_021164.1    | Ca_Kabuli_Chr05 | 6907109                 | CC                                     | TT                 | TT               | INTRON                        | 101490721          | uncharacterized LOC101490721 |
| SNP_32596_A_6907236 | NC_021164.1    | Ca_Kabuli_Chr05 | 6907236                 | GG                                     | AA                 | AA               | INTRON                        | 101490721          | uncharacterized LOC101490721 |
| SNP_32597_A_6907237 | NC_021164.1    | Ca_Kabuli_Chr05 | 6907237                 | TT                                     | AA                 | AA               | INTRON                        | 101490721          | uncharacterized LOC101490721 |
| SNP_32598_A_6907329 | NC_021164.1    | Ca_Kabuli_Chr05 | 6907329                 | TT                                     | CC                 | CC               | INTRON                        | 101490721          | uncharacterized LOC101490721 |
| SNP_32599_A_6907335 | NC_021164.1    | Ca_Kabuli_Chr05 | 6907335                 | AA                                     | GG                 | GG               | INTRON                        | 101490721          | uncharacterized LOC101490721 |
| SNP_32600_A_6907399 | NC_021164.1    | Ca_Kabuli_Chr05 | 6907399                 | GG                                     | TT                 | TT               | INTRON                        | 101490721          | uncharacterized LOC101490721 |
| SNP_32601_A_6907403 | NC_021164.1    | Ca_Kabuli_Chr05 | 6907403                 | CC                                     | TT                 | TT               | INTRON                        | 101490721          | uncharacterized LOC101490721 |
| SNP_32602_A_6907407 | NC_021164.1    | Ca_Kabuli_Chr05 | 6907407                 | AA                                     | CC                 | CC               | INTRON                        | 101490721          | uncharacterized LOC101490721 |
| SNP_32603_A_6907409 | NC_021164.1    | Ca_Kabuli_Chr05 | 6907409                 | AA                                     | GG                 | GG               | INTRON                        | 101490721          | uncharacterized LOC101490721 |
| SNP_32604_A_6907474 | NC_021164.1    | Ca_Kabuli_Chr05 | 6907474                 | TT                                     | CC                 | CC               | INTRON                        | 101490721          | uncharacterized LOC101490721 |
| SNP_32605_A_6907524 | NC_021164.1    | Ca_Kabuli_Chr05 | 6907524                 | GG                                     | AA                 | AA               | INTRON                        | 101490721          | uncharacterized LOC101490721 |
| SNP_32606_A_6907546 | NC_021164.1    | Ca_Kabuli_Chr05 | 6907546                 | AA                                     | GG                 | GG               | INTRON                        | 101490721          | uncharacterized LOC101490721 |
| SNP_32608_A_6907661 | NC_021164.1    | Ca_Kabuli_Chr05 | 6907661                 | CC                                     | TT                 | TT               | INTRON                        | 101490721          | uncharacterized LOC101490721 |
| SNP_32609_A_6907712 | NC_021164.1    | Ca_Kabuli_Chr05 | 6907712                 | GG                                     | CC                 | CC               | INTRON                        | 101490721          | uncharacterized LOC101490721 |
| SNP_32610_A_6907713 | NC_021164.1    | Ca_Kabuli_Chr05 | 6907713                 | AA                                     | GG                 | GG               | INTRON                        | 101490721          | uncharacterized LOC101490721 |
| SNP_32611_A_6907720 | NC_021164.1    | Ca_Kabuli_Chr05 | 6907720                 | GG                                     | AA                 | AA               | INTRON                        | 101490721          | uncharacterized LOC101490721 |
| SNP_32612_A_6907781 | NC_021164.1    | Ca_Kabuli_Chr05 | 6907781                 | AA                                     | GG                 | GG               | INTRON                        | 101490721          | uncharacterized LOC101490721 |
| SNP_32614_A_6908161 | NC_021164.1    | Ca_Kabuli_Chr05 | 6908161                 | TT                                     | CC                 | CC               | INTRON                        | 101490721          | uncharacterized LOC101490721 |
| SNP_32616_A_6908242 | NC_021164.1    | Ca_Kabuli_Chr05 | 6908242                 | AA                                     | GG                 | GG               | INTRON                        | 101490721          | uncharacterized LOC101490721 |

| SNPs IDs            | Chromosome IDs | Chromosomes     | Physical positions (bp) | CDC Frontier genome (Reference genome) | (Pusa 1103 & HPNB) | (ILWC 46 & LPNB) | Sequence Components of genome | Gene accession IDs | Putative functions           |
|---------------------|----------------|-----------------|-------------------------|----------------------------------------|--------------------|------------------|-------------------------------|--------------------|------------------------------|
| SNP_32618_A_6909659 | NC_021164.1    | Ca_Kabuli_Chr05 | 6909659                 | AA                                     | TT                 | TT               | INTRON                        | 101490721          | uncharacterized LOC101490721 |
| SNP_32619_A_6909720 | NC_021164.1    | Ca_Kabuli_Chr05 | 6909720                 | GG                                     | AA                 | AA               | INTRON                        | 101490721          | uncharacterized LOC101490721 |
| SNP_32620_A_6909722 | NC_021164.1    | Ca_Kabuli_Chr05 | 6909722                 | TT                                     | CC                 | CC               | INTRON                        | 101490721          | uncharacterized LOC101490721 |
| SNP_32621_A_6909725 | NC_021164.1    | Ca_Kabuli_Chr05 | 6909725                 | TT                                     | CC                 | CC               | INTRON                        | 101490721          | uncharacterized LOC101490721 |
| SNP_32622_A_6909817 | NC_021164.1    | Ca_Kabuli_Chr05 | 6909817                 | GG                                     | AA                 | AA               | INTRON                        | 101490721          | uncharacterized LOC101490721 |
| SNP_32623_A_6909903 | NC_021164.1    | Ca_Kabuli_Chr05 | 6909903                 | CC                                     | TT                 | TT               | INTRON                        | 101490721          | uncharacterized LOC101490721 |
| SNP_32624_A_6909912 | NC_021164.1    | Ca_Kabuli_Chr05 | 6909912                 | CC                                     | TT                 | TT               | INTRON                        | 101490721          | uncharacterized LOC101490721 |
| SNP_32626_A_6911850 | NC_021164.1    | Ca_Kabuli_Chr05 | 6911850                 | CC                                     | GG                 | GG               | INTRON                        | 101490721          | uncharacterized LOC101490721 |
| SNP_32627_A_6912482 | NC_021164.1    | Ca_Kabuli_Chr05 | 6912482                 | CC                                     | AA                 | AA               | INTRON                        | 101490721          | uncharacterized LOC101490721 |
| SNP_32628_A_6912639 | NC_021164.1    | Ca_Kabuli_Chr05 | 6912639                 | AA                                     | GG                 | GG               | INTRON                        | 101490721          | uncharacterized LOC101490721 |
| SNP_32629_A_6912653 | NC_021164.1    | Ca_Kabuli_Chr05 | 6912653                 | CC                                     | TT                 | TT               | INTRON                        | 101490721          | uncharacterized LOC101490721 |
| SNP_32630_A_6913570 | NC_021164.1    | Ca_Kabuli_Chr05 | 6913570                 | CC                                     | TT                 | TT               | INTRON                        | 101490721          | uncharacterized LOC101490721 |
| SNP_32631_A_6913609 | NC_021164.1    | Ca_Kabuli_Chr05 | 6913609                 | AA                                     | GG                 | GG               | INTRON                        | 101490721          | uncharacterized LOC101490721 |
| SNP_32632_A_6913632 | NC_021164.1    | Ca_Kabuli_Chr05 | 6913632                 | CC                                     | AA                 | AA               | INTRON                        | 101490721          | uncharacterized LOC101490721 |
| SNP_32633_A_6913835 | NC_021164.1    | Ca_Kabuli_Chr05 | 6913835                 | TT                                     | GG                 | GG               | INTRON                        | 101490721          | uncharacterized LOC101490721 |
| SNP_32634_A_6913853 | NC_021164.1    | Ca_Kabuli_Chr05 | 6913853                 | CC                                     | TT                 | TT               | INTRON                        | 101490721          | uncharacterized LOC101490721 |
| SNP_32635_A_6913861 | NC_021164.1    | Ca_Kabuli_Chr05 | 6913861                 | TT                                     | GG                 | GG               | INTRON                        | 101490721          | uncharacterized LOC101490721 |
| SNP_32636_A_6914049 | NC_021164.1    | Ca_Kabuli_Chr05 | 6914049                 | CC                                     | TT                 | TT               | INTRON                        | 101490721          | uncharacterized LOC101490721 |
| SNP_32637_A_6914052 | NC_021164.1    | Ca_Kabuli_Chr05 | 6914052                 | AA                                     | GG                 | GG               | INTRON                        | 101490721          | uncharacterized LOC101490721 |
| SNP_32638_A_6914094 | NC_021164.1    | Ca_Kabuli_Chr05 | 6914094                 | GG                                     | AA                 | AA               | INTRON                        | 101490721          | uncharacterized LOC101490721 |
| SNP_32639_A_6914631 | NC_021164.1    | Ca_Kabuli_Chr05 | 6914631                 | GG                                     | TT                 | TT               | INTRON                        | 101490721          | uncharacterized LOC101490721 |
| SNP_32640_A_6914729 | NC_021164.1    | Ca_Kabuli_Chr05 | 6914729                 | AA                                     | GG                 | GG               | INTRON                        | 101490721          | uncharacterized LOC101490721 |

| SNPs IDs            | Chromosome IDs | Chromosomes     | Physical positions (bp) | CDC Frontier genome (Reference genome) | (Pusa 1103 & HPNB) | (ILWC 46 & LPNB) | Sequence Components of genome | Gene accession IDs | Putative functions              |
|---------------------|----------------|-----------------|-------------------------|----------------------------------------|--------------------|------------------|-------------------------------|--------------------|---------------------------------|
| SNP_32641_A_6914776 | NC_021164.1    | Ca_Kabuli_Chr05 | 6914776                 | CC                                     | AA                 | AA               | INTRON                        | 101490721          | uncharacterized LOC101490721    |
| SNP_32642_A_6914793 | NC_021164.1    | Ca_Kabuli_Chr05 | 6914793                 | CC                                     | TT                 | TT               | INTRON                        | 101490721          | uncharacterized LOC101490721    |
| SNP_32643_A_6914913 | NC_021164.1    | Ca_Kabuli_Chr05 | 6914913                 | CC                                     | TT                 | TT               | INTRON                        | 101490721          | uncharacterized LOC101490721    |
| SNP_32644_A_6914934 | NC_021164.1    | Ca_Kabuli_Chr05 | 6914934                 | GG                                     | TT                 | TT               | INTRON                        | 101490721          | uncharacterized LOC101490721    |
| SNP_32645_A_6915081 | NC_021164.1    | Ca_Kabuli_Chr05 | 6915081                 | CC                                     | TT                 | TT               | INTRON                        | 101490721          | uncharacterized LOC101490721    |
| SNP_32646_A_6915088 | NC_021164.1    | Ca_Kabuli_Chr05 | 6915088                 | GG                                     | AA                 | AA               | INTRON                        | 101490721          | uncharacterized LOC101490721    |
| SNP_32647_A_6915112 | NC_021164.1    | Ca_Kabuli_Chr05 | 6915112                 | GG                                     | AA                 | AA               | INTRON                        | 101490721          | uncharacterized LOC101490721    |
| SNP_32648_A_6915173 | NC_021164.1    | Ca_Kabuli_Chr05 | 6915173                 | TT                                     | GG                 | GG               | INTRON                        | 101490721          | uncharacterized LOC101490721    |
| SNP_32649_A_6940550 | NC_021164.1    | Ca_Kabuli_Chr05 | 6940550                 | AA                                     | TT                 | TT               | URR                           | 101513169          | transmembrane protein 56-B-like |
| SNP_32651_A_6987107 | NC_021164.1    | Ca_Kabuli_Chr05 | 6987107                 | GG                                     | TT                 | TT               | INTERGENIC                    |                    |                                 |
| SNP_32652_A_7003872 | NC_021164.1    | Ca_Kabuli_Chr05 | 7003872                 | TT                                     | CC                 | CC               | INTERGENIC                    |                    |                                 |
| SNP_32653_A_7019184 | NC_021164.1    | Ca_Kabuli_Chr05 | 7019184                 | TT                                     | AA                 | AA               | INTERGENIC                    |                    |                                 |
| SNP_32654_A_7019185 | NC_021164.1    | Ca_Kabuli_Chr05 | 7019185                 | AA                                     | TT                 | TT               | INTERGENIC                    |                    |                                 |
| SNP_32655_A_7021637 | NC_021164.1    | Ca_Kabuli_Chr05 | 7021637                 | AA                                     | GG                 | GG               | INTERGENIC                    |                    |                                 |
| SNP_32656_A_7035822 | NC_021164.1    | Ca_Kabuli_Chr05 | 7035822                 | CC                                     | GG                 | GG               | INTERGENIC                    |                    |                                 |
| SNP_32657_A_7037494 | NC_021164.1    | Ca_Kabuli_Chr05 | 7037494                 | TT                                     | AA                 | AA               | INTERGENIC                    |                    |                                 |
| SNP_32658_A_7037505 | NC_021164.1    | Ca_Kabuli_Chr05 | 7037505                 | AA                                     | GG                 | GG               | INTERGENIC                    |                    |                                 |
| SNP_32659_A_7092556 | NC_021164.1    | Ca_Kabuli_Chr05 | 7092556                 | TT                                     | CC                 | CC               | INTERGENIC                    |                    |                                 |
| SNP_32660_A_7092589 | NC_021164.1    | Ca_Kabuli_Chr05 | 7092589                 | AA                                     | GG                 | GG               | INTERGENIC                    |                    |                                 |
| SNP_32661_A_7092612 | NC_021164.1    | Ca_Kabuli_Chr05 | 7092612                 | TT                                     | CC                 | CC               | INTERGENIC                    |                    |                                 |
| SNP_32662_A_7092636 | NC_021164.1    | Ca_Kabuli_Chr05 | 7092636                 | AA                                     | TT                 | TT               | INTERGENIC                    |                    |                                 |
| SNP_32663_A_7092763 | NC_021164.1    | Ca_Kabuli_Chr05 | 7092763                 | TT                                     | CC                 | CC               | INTERGENIC                    |                    |                                 |

| SNPs IDs            | Chromosome IDs | Chromosomes     | Physical positions (bp) | CDC Frontier genome (Reference genome) | (Pusa 1103 & HPNB) | (ILWC 46 & LPNB) | Sequence Components of genome | Gene accession IDs | Putative functions                                       |
|---------------------|----------------|-----------------|-------------------------|----------------------------------------|--------------------|------------------|-------------------------------|--------------------|----------------------------------------------------------|
| SNP_32664_A_7092866 | NC_021164.1    | Ca_Kabuli_Chr05 | 7092866                 | TT                                     | CC                 | CC               | INTERGENIC                    |                    |                                                          |
| SNP_32665_A_7092870 | NC_021164.1    | Ca_Kabuli_Chr05 | 7092870                 | AA                                     | GG                 | GG               | INTERGENIC                    |                    |                                                          |
| SNP_32666_A_7093141 | NC_021164.1    | Ca_Kabuli_Chr05 | 7093141                 | GG                                     | AA                 | AA               | INTERGENIC                    |                    |                                                          |
| SNP_32667_A_7093148 | NC_021164.1    | Ca_Kabuli_Chr05 | 7093148                 | TT                                     | CC                 | CC               | INTERGENIC                    |                    |                                                          |
| SNP_32668_A_7102951 | NC_021164.1    | Ca_Kabuli_Chr05 | 7102951                 | TT                                     | AA                 | AA               | INTERGENIC                    |                    |                                                          |
| SNP_32669_A_7107342 | NC_021164.1    | Ca_Kabuli_Chr05 | 7107342                 | AA                                     | CC                 | CC               | INTERGENIC                    |                    |                                                          |
| SNP_32670_A_7120141 | NC_021164.1    | Ca_Kabuli_Chr05 | 7120141                 | CC                                     | TT                 | TT               | INTERGENIC                    |                    |                                                          |
| SNP_32671_A_7123642 | NC_021164.1    | Ca_Kabuli_Chr05 | 7123642                 | AA                                     | GG                 | GG               | INTERGENIC                    |                    |                                                          |
| SNP_32672_A_7125218 | NC_021164.1    | Ca_Kabuli_Chr05 | 7125218                 | GG                                     | TT                 | TT               | INTERGENIC                    |                    |                                                          |
| SNP_32673_A_7125227 | NC_021164.1    | Ca_Kabuli_Chr05 | 7125227                 | AA                                     | CC                 | CC               | INTERGENIC                    |                    |                                                          |
| SNP_32674_A_7125229 | NC_021164.1    | Ca_Kabuli_Chr05 | 7125229                 | GG                                     | AA                 | AA               | INTERGENIC                    |                    |                                                          |
| SNP_32675_A_7125260 | NC_021164.1    | Ca_Kabuli_Chr05 | 7125260                 | GG                                     | AA                 | AA               | INTERGENIC                    |                    |                                                          |
| SNP_32676_A_7125503 | NC_021164.1    | Ca_Kabuli_Chr05 | 7125503                 | TT                                     | CC                 | CC               | INTERGENIC                    |                    |                                                          |
| SNP_32677_A_7175024 | NC_021164.1    | Ca_Kabuli_Chr05 | 7175024                 | AA                                     | GG                 | GG               | INTRON                        | 101491676          | serine/threonine-protein phosphatase 7 long form homolog |
| SNP_32678_A_7221850 | NC_021164.1    | Ca_Kabuli_Chr05 | 7221850                 | AA                                     | CC                 | CC               | INTRON                        | 101515239          | reticulon-like protein B8                                |
| SNP_32679_A_7226874 | NC_021164.1    | Ca_Kabuli_Chr05 | 7226874                 | CC                                     | AA                 | AA               | INTERGENIC                    |                    |                                                          |
| SNP_32680_A_7226893 | NC_021164.1    | Ca_Kabuli_Chr05 | 7226893                 | AA                                     | GG                 | GG               | INTERGENIC                    |                    |                                                          |
| SNP_32681_A_7227493 | NC_021164.1    | Ca_Kabuli_Chr05 | 7227493                 | AA                                     | GG                 | GG               | INTERGENIC                    |                    |                                                          |
| SNP_32682_A_7227497 | NC_021164.1    | Ca_Kabuli_Chr05 | 7227497                 | TT                                     | GG                 | GG               | INTERGENIC                    |                    |                                                          |
| SNP_32683_A_7227651 | NC_021164.1    | Ca_Kabuli_Chr05 | 7227651                 | AA                                     | CC                 | CC               | INTERGENIC                    |                    |                                                          |
| SNP_32684_A_7227719 | NC_021164.1    | Ca_Kabuli_Chr05 | 7227719                 | GG                                     | CC                 | CC               | INTERGENIC                    |                    |                                                          |
| SNP_32685_A_7227740 | NC_021164.1    | Ca_Kabuli_Chr05 | 7227740                 | GG                                     | CC                 | CC               | INTERGENIC                    |                    |                                                          |

| SNPs IDs            | Chromosome IDs | Chromosomes     | Physical positions (bp) | CDC Frontier genome (Reference genome) | (Pusa 1103 & HPNB) | (ILWC 46 & LPNB) | Sequence Components of genome | Gene accession IDs | Putative functions                            |
|---------------------|----------------|-----------------|-------------------------|----------------------------------------|--------------------|------------------|-------------------------------|--------------------|-----------------------------------------------|
| SNP_32686_A_7236239 | NC_021164.1    | Ca_Kabuli_Chr05 | 7236239                 | AA                                     | GG                 | GG               | INTERGENIC                    |                    |                                               |
| SNP_32687_A_7272184 | NC_021164.1    | Ca_Kabuli_Chr05 | 7272184                 | CC                                     | TT                 | TT               | URR                           | 101491987          | protein YLS9-like                             |
| SNP_32688_A_7297481 | NC_021164.1    | Ca_Kabuli_Chr05 | 7297481                 | TT                                     | CC                 | CC               | NON_SYNONYMOUS_CODING         | id97633            | Unknown function                              |
| SNP_32689_A_7317569 | NC_021164.1    | Ca_Kabuli_Chr05 | 7317569                 | TT                                     | CC                 | CC               | INTERGENIC                    |                    |                                               |
| SNP_32690_A_7317788 | NC_021164.1    | Ca_Kabuli_Chr05 | 7317788                 | TT                                     | GG                 | GG               | INTERGENIC                    |                    |                                               |
| SNP_32691_A_7326932 | NC_021164.1    | Ca_Kabuli_Chr05 | 7326932                 | AA                                     | TT                 | TT               | INTERGENIC                    |                    |                                               |
| SNP_32692_A_7327010 | NC_021164.1    | Ca_Kabuli_Chr05 | 7327010                 | AA                                     | GG                 | GG               | INTERGENIC                    |                    |                                               |
| SNP_32693_A_7327274 | NC_021164.1    | Ca_Kabuli_Chr05 | 7327274                 | AA                                     | GG                 | GG               | INTERGENIC                    |                    |                                               |
| SNP_32694_A_7359142 | NC_021164.1    | Ca_Kabuli_Chr05 | 7359142                 | AA                                     | GG                 | GG               | INTERGENIC                    |                    |                                               |
| SNP_32695_A_7359185 | NC_021164.1    | Ca_Kabuli_Chr05 | 7359185                 | TT                                     | CC                 | CC               | INTERGENIC                    |                    |                                               |
| SNP_32696_A_7359222 | NC_021164.1    | Ca_Kabuli_Chr05 | 7359222                 | TT                                     | CC                 | CC               | INTERGENIC                    |                    |                                               |
| SNP_32697_A_7359325 | NC_021164.1    | Ca_Kabuli_Chr05 | 7359325                 | GG                                     | CC                 | CC               | INTERGENIC                    |                    |                                               |
| SNP_32698_A_7359550 | NC_021164.1    | Ca_Kabuli_Chr05 | 7359550                 | TT                                     | GG                 | GG               | INTERGENIC                    |                    |                                               |
| SNP_32699_A_7359610 | NC_021164.1    | Ca_Kabuli_Chr05 | 7359610                 | AA                                     | GG                 | GG               | INTERGENIC                    |                    |                                               |
| SNP_32700_A_7359725 | NC_021164.1    | Ca_Kabuli_Chr05 | 7359725                 | GG                                     | TT                 | TT               | INTERGENIC                    |                    |                                               |
| SNP_32701_A_7359738 | NC_021164.1    | Ca_Kabuli_Chr05 | 7359738                 | TT                                     | GG                 | GG               | INTERGENIC                    |                    |                                               |
| SNP_32702_A_7385679 | NC_021164.1    | Ca_Kabuli_Chr05 | 7385679                 | TT                                     | AA                 | AA               | INTERGENIC                    |                    |                                               |
| SNP_32703_A_7394075 | NC_021164.1    | Ca_Kabuli_Chr05 | 7394075                 | TT                                     | CC                 | CC               | INTERGENIC                    |                    |                                               |
| SNP_32706_A_7497429 | NC_021164.1    | Ca_Kabuli_Chr05 | 7497429                 | AA                                     | TT                 | TT               | INTRON                        | 101505224          | vacuolar-processing enzyme delta-isozyme-like |
| SNP_32707_A_7497908 | NC_021164.1    | Ca_Kabuli_Chr05 | 7497908                 | GG                                     | AA                 | AA               | NON_SYNONYMOUS_CODING         | 101505224          | vacuolar-processing enzyme delta-isozyme-like |
| SNP_32708_A_7509277 | NC_021164.1    | Ca_Kabuli_Chr05 | 7509277                 | AA                                     | TT                 | TT               | INTERGENIC                    |                    |                                               |
| SNP_32709_A_7519252 | NC_021164.1    | Ca_Kabuli_Chr05 | 7519252                 | AA                                     | TT                 | TT               | INTERGENIC                    |                    |                                               |



| SNPs IDs            | Chromosome IDs | Chromosomes     | Physical positions (bp) | CDC Frontier genome (Reference genome) | (Pusa 1103 & HPNB) | (ILWC 46 & LPNB) | Sequence Components of genome | Gene accession IDs | Putative functions                            |
|---------------------|----------------|-----------------|-------------------------|----------------------------------------|--------------------|------------------|-------------------------------|--------------------|-----------------------------------------------|
| SNP_32710_A_7519563 | NC_021164.1    | Ca_Kabuli_Chr05 | 7519563                 | GG                                     | TT                 | TT               | INTERGENIC                    |                    |                                               |
| SNP_32711_A_7522338 | NC_021164.1    | Ca_Kabuli_Chr05 | 7522338                 | AA                                     | GG                 | GG               | DRR                           | 101505549          | vacuolar-processing enzyme gamma-isozyme-like |
| SNP_32713_A_7539128 | NC_021164.1    | Ca_Kabuli_Chr05 | 7539128                 | TT                                     | GG                 | GG               | INTERGENIC                    |                    |                                               |
| SNP_32714_A_7564530 | NC_021164.1    | Ca_Kabuli_Chr05 | 7564530                 | AA                                     | GG                 | GG               | INTERGENIC                    |                    |                                               |
| SNP_32715_A_7574364 | NC_021164.1    | Ca_Kabuli_Chr05 | 7574364                 | CC                                     | TT                 | TT               | INTERGENIC                    |                    |                                               |
| SNP_32716_A_7577852 | NC_021164.1    | Ca_Kabuli_Chr05 | 7577852                 | AA                                     | GG                 | GG               | INTERGENIC                    |                    |                                               |
| SNP_32717_A_7577999 | NC_021164.1    | Ca_Kabuli_Chr05 | 7577999                 | CC                                     | TT                 | TT               | INTERGENIC                    |                    |                                               |
| SNP_32718_A_7578001 | NC_021164.1    | Ca_Kabuli_Chr05 | 7578001                 | CC                                     | AA                 | AA               | INTERGENIC                    |                    |                                               |
| SNP_32719_A_7578845 | NC_021164.1    | Ca_Kabuli_Chr05 | 7578845                 | GG                                     | CC                 | CC               | INTERGENIC                    |                    |                                               |
| SNP_32720_A_7579087 | NC_021164.1    | Ca_Kabuli_Chr05 | 7579087                 | TT                                     | AA                 | AA               | INTERGENIC                    |                    |                                               |
| SNP_32721_A_7579100 | NC_021164.1    | Ca_Kabuli_Chr05 | 7579100                 | TT                                     | GG                 | GG               | INTERGENIC                    |                    |                                               |
| SNP_32722_A_7589278 | NC_021164.1    | Ca_Kabuli_Chr05 | 7589278                 | TT                                     | CC                 | CC               | INTRON                        | id97751            | Unknown function                              |
| SNP_32723_A_7590811 | NC_021164.1    | Ca_Kabuli_Chr05 | 7590811                 | AA                                     | CC                 | CC               | URR                           | 101494800          | uncharacterized LOC101494800                  |
| SNP_32724_A_7591043 | NC_021164.1    | Ca_Kabuli_Chr05 | 7591043                 | AA                                     | GG                 | GG               | URR                           | 101494800          | uncharacterized LOC101494800                  |
| SNP_32726_A_7595455 | NC_021164.1    | Ca_Kabuli_Chr05 | 7595455                 | CC                                     | AA                 | AA               | INTERGENIC                    |                    |                                               |
| SNP_32727_A_7595592 | NC_021164.1    | Ca_Kabuli_Chr05 | 7595592                 | AA                                     | GG                 | GG               | INTERGENIC                    |                    |                                               |
| SNP_32728_A_7601296 | NC_021164.1    | Ca_Kabuli_Chr05 | 7601296                 | GG                                     | AA                 | AA               | INTERGENIC                    |                    |                                               |
| SNP_32729_A_7601317 | NC_021164.1    | Ca_Kabuli_Chr05 | 7601317                 | GG                                     | AA                 | AA               | INTERGENIC                    |                    |                                               |
| SNP_32730_A_7602358 | NC_021164.1    | Ca_Kabuli_Chr05 | 7602358                 | TT                                     | CC                 | CC               | INTERGENIC                    |                    |                                               |
| SNP_32731_A_7603426 | NC_021164.1    | Ca_Kabuli_Chr05 | 7603426                 | CC                                     | TT                 | TT               | INTERGENIC                    |                    |                                               |
| SNP_32732_A_7604915 | NC_021164.1    | Ca_Kabuli_Chr05 | 7604915                 | GG                                     | AA                 | AA               | INTERGENIC                    |                    |                                               |
| SNP_32733_A_7604954 | NC_021164.1    | Ca_Kabuli_Chr05 | 7604954                 | TT                                     | CC                 | CC               | INTERGENIC                    |                    |                                               |

| SNPs IDs            | Chromosome IDs | Chromosomes     | Physical positions (bp) | CDC Frontier (Reference genome) | (Pusa 1103 & HPNB) | (ILWC 46 & LPNB) | Sequence Components of genome | Gene accession IDs | Putative functions                                 |
|---------------------|----------------|-----------------|-------------------------|---------------------------------|--------------------|------------------|-------------------------------|--------------------|----------------------------------------------------|
| SNP_32734_A_7604957 | NC_021164.1    | Ca_Kabuli_Chr05 | 7604957                 | CC                              | TT                 | TT               | INTERGENIC                    |                    |                                                    |
| SNP_32735_A_7605271 | NC_021164.1    | Ca_Kabuli_Chr05 | 7605271                 | CC                              | TT                 | TT               | INTERGENIC                    |                    |                                                    |
| SNP_32737_A_7606821 | NC_021164.1    | Ca_Kabuli_Chr05 | 7606821                 | GG                              | AA                 | AA               | URR                           | 101495556          | uncharacterized protein At1g04910                  |
| SNP_32738_A_7609096 | NC_021164.1    | Ca_Kabuli_Chr05 | 7609096                 | CC                              | TT                 | TT               | SYNONYMOUS_CODING             | 101495556          | uncharacterized protein At1g04910                  |
| SNP_32739_A_7610574 | NC_021164.1    | Ca_Kabuli_Chr05 | 7610574                 | CC                              | AA                 | AA               | INTERGENIC                    |                    |                                                    |
| SNP_32740_A_7620253 | NC_021164.1    | Ca_Kabuli_Chr05 | 7620253                 | GG                              | AA                 | AA               | INTERGENIC                    |                    |                                                    |
| SNP_32741_A_7620291 | NC_021164.1    | Ca_Kabuli_Chr05 | 7620291                 | AA                              | TT                 | TT               | INTERGENIC                    |                    |                                                    |
| SNP_32742_A_7620572 | NC_021164.1    | Ca_Kabuli_Chr05 | 7620572                 | GG                              | AA                 | AA               | INTERGENIC                    |                    |                                                    |
| SNP_32743_A_7621831 | NC_021164.1    | Ca_Kabuli_Chr05 | 7621831                 | AA                              | GG                 | GG               | INTERGENIC                    |                    |                                                    |
| SNP_32744_A_7622582 | NC_021164.1    | Ca_Kabuli_Chr05 | 7622582                 | AA                              | GG                 | GG               | INTERGENIC                    |                    |                                                    |
| SNP_32745_A_7626260 | NC_021164.1    | Ca_Kabuli_Chr05 | 7626260                 | TT                              | CC                 | CC               | INTERGENIC                    |                    |                                                    |
| SNP_32746_A_7626386 | NC_021164.1    | Ca_Kabuli_Chr05 | 7626386                 | CC                              | AA                 | AA               | INTERGENIC                    |                    |                                                    |
| SNP_32747_A_7631146 | NC_021164.1    | Ca_Kabuli_Chr05 | 7631146                 | GG                              | AA                 | AA               | URR                           | 101496436          | putative methylesterase 12, chloroplastic          |
| SNP_32748_A_7631150 | NC_021164.1    | Ca_Kabuli_Chr05 | 7631150                 | CC                              | TT                 | TT               | URR                           | 101496436          | putative methylesterase 12, chloroplastic          |
| SNP_32749_A_7631158 | NC_021164.1    | Ca_Kabuli_Chr05 | 7631158                 | GG                              | AA                 | AA               | URR                           | 101496436          | putative methylesterase 12, chloroplastic          |
| SNP_32750_A_7631503 | NC_021164.1    | Ca_Kabuli_Chr05 | 7631503                 | GG                              | AA                 | AA               | INTERGENIC                    |                    |                                                    |
| SNP_32751_A_7631516 | NC_021164.1    | Ca_Kabuli_Chr05 | 7631516                 | AA                              | CC                 | CC               | INTERGENIC                    |                    |                                                    |
| SNP_32752_A_7631519 | NC_021164.1    | Ca_Kabuli_Chr05 | 7631519                 | AA                              | GG                 | GG               | INTERGENIC                    |                    |                                                    |
| SNP_32753_A_7633875 | NC_021164.1    | Ca_Kabuli_Chr05 | 7633875                 | AA                              | GG                 | GG               | INTERGENIC                    |                    |                                                    |
| SNP_32754_A_7634296 | NC_021164.1    | Ca_Kabuli_Chr05 | 7634296                 | TT                              | CC                 | CC               | INTERGENIC                    |                    |                                                    |
| SNP_32755_A_7634775 | NC_021164.1    | Ca_Kabuli_Chr05 | 7634775                 | GG                              | AA                 | AA               | INTRON                        | 101496766          | putative B3 domain-containing protein Os03g0621600 |
| SNP_32756_A_7634794 | NC_021164.1    | Ca_Kabuli_Chr05 | 7634794                 | TT                              | CC                 | CC               | INTRON                        | 101496766          | putative B3 domain-containing protein Os03g0621600 |

| SNPs IDs            | Chromosome IDs | Chromosomes     | Physical positions (bp) | CDC Frontier (Reference genome) | (Pusa 1103 & HPNB) | (ILWC 46 & LPNB) | Sequence Components of genome | Gene accession IDs | Putative functions                                 |
|---------------------|----------------|-----------------|-------------------------|---------------------------------|--------------------|------------------|-------------------------------|--------------------|----------------------------------------------------|
| SNP_32757_A_7635901 | NC_021164.1    | Ca_Kabuli_Chr05 | 7635901                 | GG                              | AA                 | AA               | INTRON                        | 101496766          | putative B3 domain-containing protein Os03g0621600 |
| SNP_32758_A_7635909 | NC_021164.1    | Ca_Kabuli_Chr05 | 7635909                 | TT                              | CC                 | CC               | INTRON                        | 101496766          | putative B3 domain-containing protein Os03g0621600 |
| SNP_32759_A_7635971 | NC_021164.1    | Ca_Kabuli_Chr05 | 7635971                 | TT                              | CC                 | CC               | INTRON                        | 101496766          | putative B3 domain-containing protein Os03g0621600 |
| SNP_32760_A_7639149 | NC_021164.1    | Ca_Kabuli_Chr05 | 7639149                 | CC                              | TT                 | TT               | INTRON                        | 101496766          | putative B3 domain-containing protein Os03g0621600 |
| SNP_32761_A_7639178 | NC_021164.1    | Ca_Kabuli_Chr05 | 7639178                 | CC                              | GG                 | GG               | INTRON                        | 101496766          | putative B3 domain-containing protein Os03g0621600 |
| SNP_32762_A_7639444 | NC_021164.1    | Ca_Kabuli_Chr05 | 7639444                 | CC                              | TT                 | TT               | INTRON                        | 101496766          | putative B3 domain-containing protein Os03g0621600 |
| SNP_32764_A_7648928 | NC_021164.1    | Ca_Kabuli_Chr05 | 7648928                 | CC                              | TT                 | TT               | INTRON                        | 101505880          | proline-rich receptor-like protein kinase PERK10   |
| SNP_32765_A_7648988 | NC_021164.1    | Ca_Kabuli_Chr05 | 7648988                 | TT                              | CC                 | CC               | INTRON                        | 101505880          | proline-rich receptor-like protein kinase PERK10   |
| SNP_32766_A_7649002 | NC_021164.1    | Ca_Kabuli_Chr05 | 7649002                 | GG                              | AA                 | AA               | INTRON                        | 101505880          | proline-rich receptor-like protein kinase PERK10   |
| SNP_32767_A_7657789 | NC_021164.1    | Ca_Kabuli_Chr05 | 7657789                 | CC                              | TT                 | TT               | INTERGENIC                    |                    |                                                    |
| SNP_32768_A_7660112 | NC_021164.1    | Ca_Kabuli_Chr05 | 7660112                 | CC                              | TT                 | TT               | INTERGENIC                    |                    |                                                    |
| SNP_32769_A_7660114 | NC_021164.1    | Ca_Kabuli_Chr05 | 7660114                 | TT                              | CC                 | CC               | INTERGENIC                    |                    |                                                    |
| SNP_32770_A_7661453 | NC_021164.1    | Ca_Kabuli_Chr05 | 7661453                 | TT                              | CC                 | CC               | DRR                           | 101497081          | regulator of nonsense transcripts UPF3             |
| SNP_32771_A_7661455 | NC_021164.1    | Ca_Kabuli_Chr05 | 7661455                 | CC                              | TT                 | TT               | DRR                           | 101497081          | regulator of nonsense transcripts UPF3             |
| SNP_32773_A_7661606 | NC_021164.1    | Ca_Kabuli_Chr05 | 7661606                 | AA                              | GG                 | GG               | DRR                           | 101497081          | regulator of nonsense transcripts UPF3             |
| SNP_32777_A_7663312 | NC_021164.1    | Ca_Kabuli_Chr05 | 7663312                 | AA                              | GG                 | GG               | INTRON                        | 101497081          | regulator of nonsense transcripts UPF3             |
| SNP_32778_A_7663318 | NC_021164.1    | Ca_Kabuli_Chr05 | 7663318                 | TT                              | AA                 | AA               | INTRON                        | 101497081          | regulator of nonsense transcripts UPF3             |
| SNP_32779_A_7666520 | NC_021164.1    | Ca_Kabuli_Chr05 | 7666520                 | AA                              | GG                 | GG               | INTRON                        | 101497081          | regulator of nonsense transcripts UPF3             |
| SNP_32781_A_7666539 | NC_021164.1    | Ca_Kabuli_Chr05 | 7666539                 | CC                              | AA                 | AA               | INTRON                        | 101497081          | regulator of nonsense transcripts UPF3             |
| SNP_32782_A_7667490 | NC_021164.1    | Ca_Kabuli_Chr05 | 7667490                 | CC                              | TT                 | TT               | INTRON                        | 101497081          | regulator of nonsense transcripts UPF3             |
| SNP_32783_A_7667506 | NC_021164.1    | Ca_Kabuli_Chr05 | 7667506                 | TT                              | CC                 | CC               | INTRON                        | 101497081          | regulator of nonsense transcripts UPF3             |
| SNP_32784_A_7667909 | NC_021164.1    | Ca_Kabuli_Chr05 | 7667909                 | GG                              | TT                 | TT               | INTRON                        | 101497081          | regulator of nonsense transcripts UPF3             |

| SNPs IDs            | Chromosome IDs | Chromosomes     | Physical positions (bp) | CDC Frontier (Reference genome) | (Pusa 1103 & HPNB) | (ILWC 46 & LPNB) | Sequence Components of genome | Gene accession IDs | Putative functions                  |
|---------------------|----------------|-----------------|-------------------------|---------------------------------|--------------------|------------------|-------------------------------|--------------------|-------------------------------------|
| SNP_32787_A_7674368 | NC_021164.1    | Ca_Kabuli_Chr05 | 7674368                 | AA                              | GG                 | GG               | INTERGENIC                    |                    |                                     |
| SNP_32788_A_7674385 | NC_021164.1    | Ca_Kabuli_Chr05 | 7674385                 | TT                              | CC                 | CC               | INTERGENIC                    |                    |                                     |
| SNP_32789_A_7674395 | NC_021164.1    | Ca_Kabuli_Chr05 | 7674395                 | GG                              | CC                 | CC               | INTERGENIC                    |                    |                                     |
| SNP_32790_A_7674434 | NC_021164.1    | Ca_Kabuli_Chr05 | 7674434                 | GG                              | TT                 | TT               | INTERGENIC                    |                    |                                     |
| SNP_32791_A_7678111 | NC_021164.1    | Ca_Kabuli_Chr05 | 7678111                 | GG                              | CC                 | CC               | INTRON                        | 101498947          | agamous-like MADS-box protein AGL11 |
| SNP_32792_A_7678121 | NC_021164.1    | Ca_Kabuli_Chr05 | 7678121                 | TT                              | CC                 | CC               | INTRON                        | 101498947          | agamous-like MADS-box protein AGL11 |
| SNP_32795_A_7682070 | NC_021164.1    | Ca_Kabuli_Chr05 | 7682070                 | AA                              | TT                 | TT               | INTRON                        | 101498947          | agamous-like MADS-box protein AGL11 |
| SNP_32796_A_7684296 | NC_021164.1    | Ca_Kabuli_Chr05 | 7684296                 | CC                              | AA                 | AA               | URR                           | 101498947          | agamous-like MADS-box protein AGL11 |
| SNP_32797_A_7690891 | NC_021164.1    | Ca_Kabuli_Chr05 | 7690891                 | TT                              | CC                 | CC               | INTERGENIC                    |                    |                                     |
| SNP_32798_A_7690928 | NC_021164.1    | Ca_Kabuli_Chr05 | 7690928                 | AA                              | GG                 | GG               | INTERGENIC                    |                    |                                     |
| SNP_32799_A_7691045 | NC_021164.1    | Ca_Kabuli_Chr05 | 7691045                 | CC                              | TT                 | TT               | INTERGENIC                    |                    |                                     |
| SNP_32800_A_7692092 | NC_021164.1    | Ca_Kabuli_Chr05 | 7692092                 | AA                              | CC                 | CC               | INTERGENIC                    |                    |                                     |
| SNP_32801_A_7692151 | NC_021164.1    | Ca_Kabuli_Chr05 | 7692151                 | CC                              | TT                 | TT               | INTERGENIC                    |                    |                                     |
| SNP_32802_A_7692170 | NC_021164.1    | Ca_Kabuli_Chr05 | 7692170                 | AA                              | GG                 | GG               | INTERGENIC                    |                    |                                     |
| SNP_32803_A_7692200 | NC_021164.1    | Ca_Kabuli_Chr05 | 7692200                 | CC                              | TT                 | TT               | INTERGENIC                    |                    |                                     |
| SNP_32804_A_7692377 | NC_021164.1    | Ca_Kabuli_Chr05 | 7692377                 | AA                              | GG                 | GG               | INTERGENIC                    |                    |                                     |
| SNP_32805_A_7692402 | NC_021164.1    | Ca_Kabuli_Chr05 | 7692402                 | TT                              | CC                 | CC               | INTERGENIC                    |                    |                                     |
| SNP_32806_A_7692474 | NC_021164.1    | Ca_Kabuli_Chr05 | 7692474                 | AA                              | TT                 | TT               | INTERGENIC                    |                    |                                     |
| SNP_32807_A_7695264 | NC_021164.1    | Ca_Kabuli_Chr05 | 7695264                 | AA                              | GG                 | GG               | INTERGENIC                    |                    |                                     |
| SNP_32808_A_7695290 | NC_021164.1    | Ca_Kabuli_Chr05 | 7695290                 | CC                              | TT                 | TT               | INTERGENIC                    |                    |                                     |
| SNP_32809_A_7695294 | NC_021164.1    | Ca_Kabuli_Chr05 | 7695294                 | AA                              | GG                 | GG               | INTERGENIC                    |                    |                                     |
| SNP_32810_A_7695329 | NC_021164.1    | Ca_Kabuli_Chr05 | 7695329                 | GG                              | AA                 | AA               | INTERGENIC                    |                    |                                     |

| SNPs IDs            | Chromosome IDs | Chromosomes     | Physical positions (bp) | CDC Frontier genome (Reference genome) | (Pusa 1103 & HPNB) | (ILWC 46 & LPNB) | Sequence genome | Components of | Gene accession IDs | Putative functions |
|---------------------|----------------|-----------------|-------------------------|----------------------------------------|--------------------|------------------|-----------------|---------------|--------------------|--------------------|
| SNP_32812_A_7695621 | NC_021164.1    | Ca_Kabuli_Chr05 | 7695621                 | CC                                     | AA                 | AA               | INTERGENIC      |               |                    |                    |
| SNP_32815_A_7696438 | NC_021164.1    | Ca_Kabuli_Chr05 | 7696438                 | AA                                     | TT                 | TT               | INTERGENIC      |               |                    |                    |
| SNP_32816_A_7696472 | NC_021164.1    | Ca_Kabuli_Chr05 | 7696472                 | TT                                     | AA                 | AA               | INTERGENIC      |               |                    |                    |
| SNP_32817_A_7696673 | NC_021164.1    | Ca_Kabuli_Chr05 | 7696673                 | AA                                     | GG                 | GG               | INTERGENIC      |               |                    |                    |
| SNP_32819_A_7696703 | NC_021164.1    | Ca_Kabuli_Chr05 | 7696703                 | AA                                     | GG                 | GG               | INTERGENIC      |               |                    |                    |
| SNP_32820_A_7696734 | NC_021164.1    | Ca_Kabuli_Chr05 | 7696734                 | TT                                     | CC                 | CC               | INTERGENIC      |               |                    |                    |
| SNP_32822_A_7700899 | NC_021164.1    | Ca_Kabuli_Chr05 | 7700899                 | TT                                     | GG                 | GG               | INTERGENIC      |               |                    |                    |
| SNP_32823_A_7701146 | NC_021164.1    | Ca_Kabuli_Chr05 | 7701146                 | AA                                     | GG                 | GG               | INTERGENIC      |               |                    |                    |
| SNP_32824_A_7702579 | NC_021164.1    | Ca_Kabuli_Chr05 | 7702579                 | GG                                     | AA                 | AA               | INTERGENIC      |               |                    |                    |
| SNP_32825_A_7707391 | NC_021164.1    | Ca_Kabuli_Chr05 | 7707391                 | GG                                     | TT                 | TT               | INTERGENIC      |               |                    |                    |
| SNP_32826_A_7707402 | NC_021164.1    | Ca_Kabuli_Chr05 | 7707402                 | AA                                     | CC                 | CC               | INTERGENIC      |               |                    |                    |
| SNP_32827_A_7707511 | NC_021164.1    | Ca_Kabuli_Chr05 | 7707511                 | TT                                     | AA                 | AA               | INTERGENIC      |               |                    |                    |
| SNP_32828_A_7707521 | NC_021164.1    | Ca_Kabuli_Chr05 | 7707521                 | TT                                     | CC                 | CC               | INTERGENIC      |               |                    |                    |
| SNP_32829_A_7707526 | NC_021164.1    | Ca_Kabuli_Chr05 | 7707526                 | TT                                     | CC                 | CC               | INTERGENIC      |               |                    |                    |
| SNP_32830_A_7707536 | NC_021164.1    | Ca_Kabuli_Chr05 | 7707536                 | AA                                     | GG                 | GG               | INTERGENIC      |               |                    |                    |
| SNP_32831_A_7707558 | NC_021164.1    | Ca_Kabuli_Chr05 | 7707558                 | AA                                     | GG                 | GG               | INTERGENIC      |               |                    |                    |
| SNP_32832_A_7707569 | NC_021164.1    | Ca_Kabuli_Chr05 | 7707569                 | AA                                     | CC                 | CC               | INTERGENIC      |               |                    |                    |
| SNP_32833_A_7707599 | NC_021164.1    | Ca_Kabuli_Chr05 | 7707599                 | TT                                     | CC                 | CC               | INTERGENIC      |               |                    |                    |
| SNP_32834_A_7707637 | NC_021164.1    | Ca_Kabuli_Chr05 | 7707637                 | AA                                     | GG                 | GG               | INTERGENIC      |               |                    |                    |
| SNP_32835_A_7707650 | NC_021164.1    | Ca_Kabuli_Chr05 | 7707650                 | AA                                     | CC                 | CC               | INTERGENIC      |               |                    |                    |
| SNP_32836_A_7707665 | NC_021164.1    | Ca_Kabuli_Chr05 | 7707665                 | AA                                     | GG                 | GG               | INTERGENIC      |               |                    |                    |
| SNP_32838_A_7707869 | NC_021164.1    | Ca_Kabuli_Chr05 | 7707869                 | TT                                     | CC                 | CC               | INTERGENIC      |               |                    |                    |

| SNPs IDs            | Chromosome IDs | Chromosomes     | Physical positions (bp) | CDC Frontier genome (Reference genome) | (Pusa 1103 & HPNB) | (ILWC 46 & LPNB) | Sequence genome | Components of | Gene accession IDs | Putative functions |
|---------------------|----------------|-----------------|-------------------------|----------------------------------------|--------------------|------------------|-----------------|---------------|--------------------|--------------------|
| SNP_32839_A_7713224 | NC_021164.1    | Ca_Kabuli_Chr05 | 7713224                 | AA                                     | TT                 | TT               | INTERGENIC      |               |                    |                    |
| SNP_32840_A_7713493 | NC_021164.1    | Ca_Kabuli_Chr05 | 7713493                 | CC                                     | AA                 | AA               | INTERGENIC      |               |                    |                    |
| SNP_32841_A_7713508 | NC_021164.1    | Ca_Kabuli_Chr05 | 7713508                 | GG                                     | AA                 | AA               | INTERGENIC      |               |                    |                    |
| SNP_32842_A_7713861 | NC_021164.1    | Ca_Kabuli_Chr05 | 7713861                 | TT                                     | CC                 | CC               | INTERGENIC      |               |                    |                    |
| SNP_32843_A_7714194 | NC_021164.1    | Ca_Kabuli_Chr05 | 7714194                 | GG                                     | AA                 | AA               | INTERGENIC      |               |                    |                    |
| SNP_32844_A_7714215 | NC_021164.1    | Ca_Kabuli_Chr05 | 7714215                 | CC                                     | TT                 | TT               | INTERGENIC      |               |                    |                    |
| SNP_32845_A_7714713 | NC_021164.1    | Ca_Kabuli_Chr05 | 7714713                 | AA                                     | GG                 | GG               | INTERGENIC      |               |                    |                    |
| SNP_32846_A_7728774 | NC_021164.1    | Ca_Kabuli_Chr05 | 7728774                 | AA                                     | GG                 | GG               | INTERGENIC      |               |                    |                    |
| SNP_32847_A_7731162 | NC_021164.1    | Ca_Kabuli_Chr05 | 7731162                 | TT                                     | CC                 | CC               | INTERGENIC      |               |                    |                    |
| SNP_32848_A_7731166 | NC_021164.1    | Ca_Kabuli_Chr05 | 7731166                 | GG                                     | AA                 | AA               | INTERGENIC      |               |                    |                    |
| SNP_32849_A_7732887 | NC_021164.1    | Ca_Kabuli_Chr05 | 7732887                 | AA                                     | CC                 | CC               | INTERGENIC      |               |                    |                    |
| SNP_32850_A_7733862 | NC_021164.1    | Ca_Kabuli_Chr05 | 7733862                 | CC                                     | TT                 | TT               | INTERGENIC      |               |                    |                    |
| SNP_32851_A_7733966 | NC_021164.1    | Ca_Kabuli_Chr05 | 7733966                 | TT                                     | GG                 | GG               | INTERGENIC      |               |                    |                    |
| SNP_32852_A_7734614 | NC_021164.1    | Ca_Kabuli_Chr05 | 7734614                 | GG                                     | AA                 | AA               | INTERGENIC      |               |                    |                    |
| SNP_32853_A_7734690 | NC_021164.1    | Ca_Kabuli_Chr05 | 7734690                 | GG                                     | AA                 | AA               | INTERGENIC      |               |                    |                    |
| SNP_32854_A_7734693 | NC_021164.1    | Ca_Kabuli_Chr05 | 7734693                 | AA                                     | TT                 | TT               | INTERGENIC      |               |                    |                    |
| SNP_32855_A_7734750 | NC_021164.1    | Ca_Kabuli_Chr05 | 7734750                 | AA                                     | GG                 | GG               | INTERGENIC      |               |                    |                    |
| SNP_32856_A_7734762 | NC_021164.1    | Ca_Kabuli_Chr05 | 7734762                 | CC                                     | AA                 | AA               | INTERGENIC      |               |                    |                    |
| SNP_32857_A_7734875 | NC_021164.1    | Ca_Kabuli_Chr05 | 7734875                 | AA                                     | CC                 | CC               | INTERGENIC      |               |                    |                    |
| SNP_32858_A_7734981 | NC_021164.1    | Ca_Kabuli_Chr05 | 7734981                 | GG                                     | AA                 | AA               | INTERGENIC      |               |                    |                    |
| SNP_32859_A_7734991 | NC_021164.1    | Ca_Kabuli_Chr05 | 7734991                 | GG                                     | AA                 | AA               | INTERGENIC      |               |                    |                    |
| SNP_32860_A_7734993 | NC_021164.1    | Ca_Kabuli_Chr05 | 7734993                 | CC                                     | TT                 | TT               | INTERGENIC      |               |                    |                    |

| SNPs IDs            | Chromosome IDs | Chromosomes     | Physical positions (bp) | CDC Frontier (Reference genome) | (Pusa 1103 & HPNB) | (ILWC 46 & LPNB) | Sequence Components of genome | Gene accession IDs | Putative functions                 |
|---------------------|----------------|-----------------|-------------------------|---------------------------------|--------------------|------------------|-------------------------------|--------------------|------------------------------------|
| SNP_32861_A_7735388 | NC_021164.1    | Ca_Kabuli_Chr05 | 7735388                 | CC                              | TT                 | TT               | INTERGENIC                    |                    |                                    |
| SNP_32862_A_7735408 | NC_021164.1    | Ca_Kabuli_Chr05 | 7735408                 | AA                              | GG                 | GG               | INTERGENIC                    |                    |                                    |
| SNP_32863_A_7736721 | NC_021164.1    | Ca_Kabuli_Chr05 | 7736721                 | AA                              | GG                 | GG               | INTERGENIC                    |                    |                                    |
| SNP_32864_A_7736738 | NC_021164.1    | Ca_Kabuli_Chr05 | 7736738                 | AA                              | GG                 | GG               | INTERGENIC                    |                    |                                    |
| SNP_32865_A_7738776 | NC_021164.1    | Ca_Kabuli_Chr05 | 7738776                 | CC                              | TT                 | TT               | DRR                           | 101499686          | cellulose synthase-like protein G1 |
| SNP_32866_A_7742768 | NC_021164.1    | Ca_Kabuli_Chr05 | 7742768                 | GG                              | CC                 | CC               | INTRON                        | 101499686          | cellulose synthase-like protein G1 |
| SNP_32868_A_7749438 | NC_021164.1    | Ca_Kabuli_Chr05 | 7749438                 | GG                              | AA                 | AA               | DRR                           | 101506196          | Unknown function                   |
| SNP_32870_A_7751659 | NC_021164.1    | Ca_Kabuli_Chr05 | 7751659                 | TT                              | GG                 | GG               | SYNONYMOUS_CODING             | 101506196          | Unknown function                   |
| SNP_32871_A_7751934 | NC_021164.1    | Ca_Kabuli_Chr05 | 7751934                 | CC                              | TT                 | TT               | SYNONYMOUS_CODING             | 101506196          | Unknown function                   |
| SNP_32872_A_7751961 | NC_021164.1    | Ca_Kabuli_Chr05 | 7751961                 | AA                              | TT                 | TT               | URR                           | 101506196          | Unknown function                   |
| SNP_32873_A_7752108 | NC_021164.1    | Ca_Kabuli_Chr05 | 7752108                 | AA                              | GG                 | GG               | URR                           | 101506196          | Unknown function                   |
| SNP_32874_A_7752256 | NC_021164.1    | Ca_Kabuli_Chr05 | 7752256                 | GG                              | AA                 | AA               | URR                           | 101506196          | Unknown function                   |
| SNP_32875_A_7752284 | NC_021164.1    | Ca_Kabuli_Chr05 | 7752284                 | TT                              | AA                 | AA               | URR                           | 101506196          | Unknown function                   |
| SNP_32876_A_7752321 | NC_021164.1    | Ca_Kabuli_Chr05 | 7752321                 | CC                              | TT                 | TT               | URR                           | 101506196          | Unknown function                   |
| SNP_32877_A_7752381 | NC_021164.1    | Ca_Kabuli_Chr05 | 7752381                 | TT                              | AA                 | AA               | URR                           | 101506196          | Unknown function                   |
| SNP_32878_A_7767476 | NC_021164.1    | Ca_Kabuli_Chr05 | 7767476                 | AA                              | TT                 | TT               | INTERGENIC                    |                    |                                    |
| SNP_32879_A_7767667 | NC_021164.1    | Ca_Kabuli_Chr05 | 7767667                 | GG                              | AA                 | AA               | INTERGENIC                    |                    |                                    |
| SNP_32880_A_7768764 | NC_021164.1    | Ca_Kabuli_Chr05 | 7768764                 | GG                              | CC                 | CC               | INTERGENIC                    |                    |                                    |
| SNP_32881_A_7771246 | NC_021164.1    | Ca_Kabuli_Chr05 | 7771246                 | GG                              | AA                 | AA               | INTERGENIC                    |                    |                                    |
| SNP_32882_A_7771268 | NC_021164.1    | Ca_Kabuli_Chr05 | 7771268                 | GG                              | TT                 | TT               | INTERGENIC                    |                    |                                    |
| SNP_32883_A_7771547 | NC_021164.1    | Ca_Kabuli_Chr05 | 7771547                 | CC                              | AA                 | AA               | INTERGENIC                    |                    |                                    |
| SNP_32884_A_7771550 | NC_021164.1    | Ca_Kabuli_Chr05 | 7771550                 | AA                              | TT                 | TT               | INTERGENIC                    |                    |                                    |

| SNPs IDs            | Chromosome IDs | Chromosomes     | Physical positions (bp) | CDC Frontier (Reference genome) | (Pusa 1103 & HPNB) | (ILWC 46 & LPNB) | Sequence Components of genome | Gene accession IDs | Putative functions                            |
|---------------------|----------------|-----------------|-------------------------|---------------------------------|--------------------|------------------|-------------------------------|--------------------|-----------------------------------------------|
| SNP_32885_A_7771568 | NC_021164.1    | Ca_Kabuli_Chr05 | 7771568                 | CC                              | TT                 | TT               | INTERGENIC                    |                    |                                               |
| SNP_32886_A_7771579 | NC_021164.1    | Ca_Kabuli_Chr05 | 7771579                 | AA                              | CC                 | CC               | INTERGENIC                    |                    |                                               |
| SNP_32887_A_7772046 | NC_021164.1    | Ca_Kabuli_Chr05 | 7772046                 | AA                              | GG                 | GG               | INTERGENIC                    |                    |                                               |
| SNP_32888_A_7772682 | NC_021164.1    | Ca_Kabuli_Chr05 | 7772682                 | CC                              | TT                 | TT               | INTERGENIC                    |                    |                                               |
| SNP_32889_A_7772708 | NC_021164.1    | Ca_Kabuli_Chr05 | 7772708                 | GG                              | AA                 | AA               | INTERGENIC                    |                    |                                               |
| SNP_32890_A_7772711 | NC_021164.1    | Ca_Kabuli_Chr05 | 7772711                 | CC                              | GG                 | GG               | INTERGENIC                    |                    |                                               |
| SNP_32891_A_7772717 | NC_021164.1    | Ca_Kabuli_Chr05 | 7772717                 | GG                              | AA                 | AA               | INTERGENIC                    |                    |                                               |
| SNP_32892_A_7773019 | NC_021164.1    | Ca_Kabuli_Chr05 | 7773019                 | TT                              | AA                 | AA               | INTERGENIC                    |                    |                                               |
| SNP_32893_A_7773160 | NC_021164.1    | Ca_Kabuli_Chr05 | 7773160                 | GG                              | TT                 | TT               | INTERGENIC                    |                    |                                               |
| SNP_32894_A_7773329 | NC_021164.1    | Ca_Kabuli_Chr05 | 7773329                 | TT                              | AA                 | AA               | INTERGENIC                    |                    |                                               |
| SNP_32895_A_7773427 | NC_021164.1    | Ca_Kabuli_Chr05 | 7773427                 | CC                              | TT                 | TT               | INTERGENIC                    |                    |                                               |
| SNP_32896_A_7773453 | NC_021164.1    | Ca_Kabuli_Chr05 | 7773453                 | CC                              | GG                 | GG               | INTERGENIC                    |                    |                                               |
| SNP_32897_A_7774464 | NC_021164.1    | Ca_Kabuli_Chr05 | 7774464                 | AA                              | CC                 | CC               | DRR                           | 101499997          | putative disease resistance protein At3g14460 |
| SNP_32898_A_7774816 | NC_021164.1    | Ca_Kabuli_Chr05 | 7774816                 | CC                              | GG                 | GG               | DRR                           | 101499997          | putative disease resistance protein At3g14460 |
| SNP_32899_A_7774913 | NC_021164.1    | Ca_Kabuli_Chr05 | 7774913                 | CC                              | AA                 | AA               | DRR                           | 101499997          | putative disease resistance protein At3g14460 |
| SNP_32900_A_7775038 | NC_021164.1    | Ca_Kabuli_Chr05 | 7775038                 | TT                              | CC                 | CC               | NON_SYNONYMOUS_CODING         | 101499997          | putative disease resistance protein At3g14460 |
| SNP_32901_A_7775055 | NC_021164.1    | Ca_Kabuli_Chr05 | 7775055                 | GG                              | AA                 | AA               | NON_SYNONYMOUS_CODING         | 101499997          | putative disease resistance protein At3g14460 |
| SNP_32902_A_7778938 | NC_021164.1    | Ca_Kabuli_Chr05 | 7778938                 | AA                              | GG                 | GG               | URR                           | 101499997          | putative disease resistance protein At3g14460 |
| SNP_32903_A_7781547 | NC_021164.1    | Ca_Kabuli_Chr05 | 7781547                 | TT                              | CC                 | CC               | INTERGENIC                    |                    |                                               |
| SNP_32904_A_7786063 | NC_021164.1    | Ca_Kabuli_Chr05 | 7786063                 | AA                              | TT                 | TT               | INTERGENIC                    |                    |                                               |
| SNP_32906_A_7786616 | NC_021164.1    | Ca_Kabuli_Chr05 | 7786616                 | GG                              | AA                 | AA               | INTERGENIC                    |                    |                                               |
| SNP_32907_A_7789695 | NC_021164.1    | Ca_Kabuli_Chr05 | 7789695                 | AA                              | GG                 | GG               | INTERGENIC                    |                    |                                               |



| SNPs IDs            | Chromosome IDs | Chromosomes     | Physical positions (bp) | CDC Frontier genome (Reference genome) | (Pusa 1103 & HPNB) | (ILWC 46 & LPNB) | Sequence Components of genome | Gene accession IDs | Putative functions                     |
|---------------------|----------------|-----------------|-------------------------|----------------------------------------|--------------------|------------------|-------------------------------|--------------------|----------------------------------------|
| SNP_32908_A_7812724 | NC_021164.1    | Ca_Kabuli_Chr05 | 7812724                 | AA                                     | GG                 | GG               | INTERGENIC                    |                    |                                        |
| SNP_32909_A_7812831 | NC_021164.1    | Ca_Kabuli_Chr05 | 7812831                 | AA                                     | GG                 | GG               | INTERGENIC                    |                    |                                        |
| SNP_32910_A_7828559 | NC_021164.1    | Ca_Kabuli_Chr05 | 7828559                 | CC                                     | TT                 | TT               | INTERGENIC                    |                    |                                        |
| SNP_32911_A_7828566 | NC_021164.1    | Ca_Kabuli_Chr05 | 7828566                 | GG                                     | TT                 | TT               | INTERGENIC                    |                    |                                        |
| SNP_32913_A_7831029 | NC_021164.1    | Ca_Kabuli_Chr05 | 7831029                 | TT                                     | AA                 | AA               | INTERGENIC                    |                    |                                        |
| SNP_32914_A_7832429 | NC_021164.1    | Ca_Kabuli_Chr05 | 7832429                 | CC                                     | AA                 | AA               | INTERGENIC                    |                    |                                        |
| SNP_32915_A_7832619 | NC_021164.1    | Ca_Kabuli_Chr05 | 7832619                 | AA                                     | CC                 | CC               | INTERGENIC                    |                    |                                        |
| SNP_32916_A_7832651 | NC_021164.1    | Ca_Kabuli_Chr05 | 7832651                 | TT                                     | CC                 | CC               | INTERGENIC                    |                    |                                        |
| SNP_32917_A_7832876 | NC_021164.1    | Ca_Kabuli_Chr05 | 7832876                 | CC                                     | TT                 | TT               | INTERGENIC                    |                    |                                        |
| SNP_32918_A_7843382 | NC_021164.1    | Ca_Kabuli_Chr05 | 7843382                 | TT                                     | CC                 | CC               | URR                           | 101500338          | GDSL esterase/lipase At1g71691         |
| SNP_32919_A_7843388 | NC_021164.1    | Ca_Kabuli_Chr05 | 7843388                 | CC                                     | TT                 | TT               | URR                           | 101500338          | GDSL esterase/lipase At1g71691         |
| SNP_32920_A_7843423 | NC_021164.1    | Ca_Kabuli_Chr05 | 7843423                 | TT                                     | CC                 | CC               | URR                           | 101500338          | GDSL esterase/lipase At1g71691         |
| SNP_32921_A_7843432 | NC_021164.1    | Ca_Kabuli_Chr05 | 7843432                 | TT                                     | AA                 | AA               | URR                           | 101500338          | GDSL esterase/lipase At1g71691         |
| SNP_32923_A_7858750 | NC_021164.1    | Ca_Kabuli_Chr05 | 7858750                 | GG                                     | AA                 | AA               | INTERGENIC                    |                    |                                        |
| SNP_32925_A_7863279 | NC_021164.1    | Ca_Kabuli_Chr05 | 7863279                 | AA                                     | GG                 | GG               | URR                           | 101501696          | glucuronoxylan 4-O-methyltransferase 3 |
| SNP_32926_A_7863283 | NC_021164.1    | Ca_Kabuli_Chr05 | 7863283                 | CC                                     | GG                 | GG               | URR                           | 101501696          | glucuronoxylan 4-O-methyltransferase 3 |
| SNP_32927_A_7863309 | NC_021164.1    | Ca_Kabuli_Chr05 | 7863309                 | TT                                     | CC                 | CC               | URR                           | 101501696          | glucuronoxylan 4-O-methyltransferase 3 |
| SNP_32928_A_7863346 | NC_021164.1    | Ca_Kabuli_Chr05 | 7863346                 | CC                                     | TT                 | TT               | URR                           | 101501696          | glucuronoxylan 4-O-methyltransferase 3 |
| SNP_32929_A_7863402 | NC_021164.1    | Ca_Kabuli_Chr05 | 7863402                 | AA                                     | GG                 | GG               | URR                           | 101501696          | glucuronoxylan 4-O-methyltransferase 3 |
| SNP_32930_A_7863633 | NC_021164.1    | Ca_Kabuli_Chr05 | 7863633                 | TT                                     | GG                 | GG               | INTERGENIC                    |                    |                                        |
| SNP_32931_A_7863637 | NC_021164.1    | Ca_Kabuli_Chr05 | 7863637                 | CC                                     | AA                 | AA               | INTERGENIC                    |                    |                                        |
| SNP_32932_A_7863796 | NC_021164.1    | Ca_Kabuli_Chr05 | 7863796                 | CC                                     | TT                 | TT               | INTERGENIC                    |                    |                                        |

| SNPs IDs            | Chromosome IDs | Chromosomes     | Physical positions (bp) | CDC Frontier genome (Reference genome) | (Pusa 1103 & HPNB) | (ILWC 46 & LPNB) | Sequence Components of genome | Gene accession IDs | Putative functions                   |
|---------------------|----------------|-----------------|-------------------------|----------------------------------------|--------------------|------------------|-------------------------------|--------------------|--------------------------------------|
| SNP_32933_A_7866123 | NC_021164.1    | Ca_Kabuli_Chr05 | 7866123                 | CC                                     | TT                 | TT               | INTERGENIC                    |                    |                                      |
| SNP_32935_A_7868804 | NC_021164.1    | Ca_Kabuli_Chr05 | 7868804                 | AA                                     | CC                 | CC               | INTRON                        | 101502022          | uncharacterized LOC101502022         |
| SNP_32936_A_7869610 | NC_021164.1    | Ca_Kabuli_Chr05 | 7869610                 | TT                                     | CC                 | CC               | INTRON                        | 101502022          | uncharacterized LOC101502022         |
| SNP_32937_A_7869991 | NC_021164.1    | Ca_Kabuli_Chr05 | 7869991                 | CC                                     | TT                 | TT               | INTRON                        | 101502022          | uncharacterized LOC101502022         |
| SNP_32938_A_7870075 | NC_021164.1    | Ca_Kabuli_Chr05 | 7870075                 | AA                                     | GG                 | GG               | INTRON                        | 101502022          | uncharacterized LOC101502022         |
| SNP_32939_A_7872637 | NC_021164.1    | Ca_Kabuli_Chr05 | 7872637                 | AA                                     | CC                 | CC               | INTRON                        | 101502022          | uncharacterized LOC101502022         |
| SNP_32940_A_7873041 | NC_021164.1    | Ca_Kabuli_Chr05 | 7873041                 | GG                                     | TT                 | TT               | INTRON                        | 101502022          | uncharacterized LOC101502022         |
| SNP_32941_A_7873975 | NC_021164.1    | Ca_Kabuli_Chr05 | 7873975                 | AA                                     | GG                 | GG               | INTRON                        | 101502022          | uncharacterized LOC101502022         |
| SNP_32942_A_7874038 | NC_021164.1    | Ca_Kabuli_Chr05 | 7874038                 | CC                                     | TT                 | TT               | INTRON                        | 101502022          | uncharacterized LOC101502022         |
| SNP_32943_A_7874039 | NC_021164.1    | Ca_Kabuli_Chr05 | 7874039                 | AA                                     | GG                 | GG               | INTRON                        | 101502022          | uncharacterized LOC101502022         |
| SNP_32944_A_7874049 | NC_021164.1    | Ca_Kabuli_Chr05 | 7874049                 | CC                                     | AA                 | AA               | INTRON                        | 101502022          | uncharacterized LOC101502022         |
| SNP_32945_A_7874053 | NC_021164.1    | Ca_Kabuli_Chr05 | 7874053                 | AA                                     | GG                 | GG               | INTRON                        | 101502022          | uncharacterized LOC101502022         |
| SNP_32946_A_7874448 | NC_021164.1    | Ca_Kabuli_Chr05 | 7874448                 | AA                                     | TT                 | TT               | INTRON                        | 101502022          | uncharacterized LOC101502022         |
| SNP_32947_A_7878566 | NC_021164.1    | Ca_Kabuli_Chr05 | 7878566                 | TT                                     | GG                 | GG               | INTERGENIC                    |                    |                                      |
| SNP_32948_A_7878790 | NC_021164.1    | Ca_Kabuli_Chr05 | 7878790                 | TT                                     | CC                 | CC               | INTERGENIC                    |                    |                                      |
| SNP_32949_A_7883426 | NC_021164.1    | Ca_Kabuli_Chr05 | 7883426                 | CC                                     | AA                 | AA               | INTERGENIC                    |                    |                                      |
| SNP_32950_A_7883611 | NC_021164.1    | Ca_Kabuli_Chr05 | 7883611                 | TT                                     | CC                 | CC               | INTERGENIC                    |                    |                                      |
| SNP_32951_A_7886979 | NC_021164.1    | Ca_Kabuli_Chr05 | 7886979                 | AA                                     | CC                 | CC               | DRR                           | 101502351          | putative methyltransferase At1g22800 |
| SNP_32954_A_7894862 | NC_021164.1    | Ca_Kabuli_Chr05 | 7894862                 | GG                                     | AA                 | AA               | INTRON                        | 101502351          | putative methyltransferase At1g22800 |
| SNP_32955_A_7899117 | NC_021164.1    | Ca_Kabuli_Chr05 | 7899117                 | TT                                     | CC                 | CC               | INTRON                        | 101502351          | putative methyltransferase At1g22800 |
| SNP_32956_A_7907840 | NC_021164.1    | Ca_Kabuli_Chr05 | 7907840                 | GG                                     | AA                 | AA               | INTERGENIC                    |                    |                                      |
| SNP_32957_A_7907886 | NC_021164.1    | Ca_Kabuli_Chr05 | 7907886                 | GG                                     | AA                 | AA               | INTERGENIC                    |                    |                                      |

| SNPs IDs            | Chromosome IDs | Chromosomes     | Physical positions (bp) | CDC Frontier genome (Reference genome) | (Pusa 1103 & HPNB) | (ILWC 46 & LPNB) | Sequence genome | Components of | Gene accession IDs | Putative functions |
|---------------------|----------------|-----------------|-------------------------|----------------------------------------|--------------------|------------------|-----------------|---------------|--------------------|--------------------|
| SNP_32958_A_7909065 | NC_021164.1    | Ca_Kabuli_Chr05 | 7909065                 | AA                                     | TT                 | TT               | INTERGENIC      |               |                    |                    |
| SNP_32959_A_7909066 | NC_021164.1    | Ca_Kabuli_Chr05 | 7909066                 | TT                                     | AA                 | AA               | INTERGENIC      |               |                    |                    |
| SNP_32961_A_7909179 | NC_021164.1    | Ca_Kabuli_Chr05 | 7909179                 | GG                                     | AA                 | AA               | INTERGENIC      |               |                    |                    |
| SNP_32962_A_7911699 | NC_021164.1    | Ca_Kabuli_Chr05 | 7911699                 | TT                                     | GG                 | GG               | INTERGENIC      |               |                    |                    |
| SNP_32963_A_7911794 | NC_021164.1    | Ca_Kabuli_Chr05 | 7911794                 | AA                                     | CC                 | CC               | INTERGENIC      |               |                    |                    |
| SNP_32964_A_7911802 | NC_021164.1    | Ca_Kabuli_Chr05 | 7911802                 | AA                                     | GG                 | GG               | INTERGENIC      |               |                    |                    |
| SNP_32965_A_7911814 | NC_021164.1    | Ca_Kabuli_Chr05 | 7911814                 | AA                                     | GG                 | GG               | INTERGENIC      |               |                    |                    |
| SNP_32966_A_7911954 | NC_021164.1    | Ca_Kabuli_Chr05 | 7911954                 | GG                                     | AA                 | AA               | INTERGENIC      |               |                    |                    |
| SNP_32967_A_7911955 | NC_021164.1    | Ca_Kabuli_Chr05 | 7911955                 | CC                                     | TT                 | TT               | INTERGENIC      |               |                    |                    |
| SNP_32968_A_7912015 | NC_021164.1    | Ca_Kabuli_Chr05 | 7912015                 | CC                                     | GG                 | GG               | INTERGENIC      |               |                    |                    |
| SNP_32969_A_7912066 | NC_021164.1    | Ca_Kabuli_Chr05 | 7912066                 | AA                                     | TT                 | TT               | INTERGENIC      |               |                    |                    |
| SNP_32970_A_7912073 | NC_021164.1    | Ca_Kabuli_Chr05 | 7912073                 | AA                                     | GG                 | GG               | INTERGENIC      |               |                    |                    |
| SNP_32971_A_7912092 | NC_021164.1    | Ca_Kabuli_Chr05 | 7912092                 | AA                                     | GG                 | GG               | INTERGENIC      |               |                    |                    |
| SNP_32972_A_7912265 | NC_021164.1    | Ca_Kabuli_Chr05 | 7912265                 | GG                                     | CC                 | CC               | INTERGENIC      |               |                    |                    |
| SNP_32973_A_7912361 | NC_021164.1    | Ca_Kabuli_Chr05 | 7912361                 | CC                                     | TT                 | TT               | INTERGENIC      |               |                    |                    |
| SNP_32974_A_7912364 | NC_021164.1    | Ca_Kabuli_Chr05 | 7912364                 | GG                                     | AA                 | AA               | INTERGENIC      |               |                    |                    |
| SNP_32975_A_7912370 | NC_021164.1    | Ca_Kabuli_Chr05 | 7912370                 | AA                                     | GG                 | GG               | INTERGENIC      |               |                    |                    |
| SNP_32976_A_7912381 | NC_021164.1    | Ca_Kabuli_Chr05 | 7912381                 | TT                                     | CC                 | CC               | INTERGENIC      |               |                    |                    |
| SNP_32978_A_7913121 | NC_021164.1    | Ca_Kabuli_Chr05 | 7913121                 | AA                                     | GG                 | GG               | INTERGENIC      |               |                    |                    |
| SNP_32979_A_7913138 | NC_021164.1    | Ca_Kabuli_Chr05 | 7913138                 | TT                                     | GG                 | GG               | INTERGENIC      |               |                    |                    |
| SNP_32980_A_7913362 | NC_021164.1    | Ca_Kabuli_Chr05 | 7913362                 | AA                                     | GG                 | GG               | INTERGENIC      |               |                    |                    |
| SNP_32981_A_7913376 | NC_021164.1    | Ca_Kabuli_Chr05 | 7913376                 | CC                                     | TT                 | TT               | INTERGENIC      |               |                    |                    |

| SNPs IDs            | Chromosome IDs | Chromosomes     | Physical positions (bp) | CDC Frontier genome (Reference genome) | (Pusa 1103 & HPNB) | (ILWC 46 & LPNB) | Sequence genome | Components of | Gene accession IDs | Putative functions |
|---------------------|----------------|-----------------|-------------------------|----------------------------------------|--------------------|------------------|-----------------|---------------|--------------------|--------------------|
| SNP_32982_A_7913387 | NC_021164.1    | Ca_Kabuli_Chr05 | 7913387                 | TT                                     | AA                 | AA               | INTERGENIC      |               |                    |                    |
| SNP_32983_A_7914161 | NC_021164.1    | Ca_Kabuli_Chr05 | 7914161                 | AA                                     | GG                 | GG               | INTERGENIC      |               |                    |                    |
| SNP_32984_A_7914456 | NC_021164.1    | Ca_Kabuli_Chr05 | 7914456                 | AA                                     | GG                 | GG               | INTERGENIC      |               |                    |                    |
| SNP_32985_A_7914475 | NC_021164.1    | Ca_Kabuli_Chr05 | 7914475                 | GG                                     | AA                 | AA               | INTERGENIC      |               |                    |                    |
| SNP_32986_A_7914517 | NC_021164.1    | Ca_Kabuli_Chr05 | 7914517                 | TT                                     | CC                 | CC               | INTERGENIC      |               |                    |                    |
| SNP_32987_A_7914783 | NC_021164.1    | Ca_Kabuli_Chr05 | 7914783                 | CC                                     | TT                 | TT               | INTERGENIC      |               |                    |                    |
| SNP_32988_A_7914796 | NC_021164.1    | Ca_Kabuli_Chr05 | 7914796                 | AA                                     | GG                 | GG               | INTERGENIC      |               |                    |                    |
| SNP_32989_A_7914820 | NC_021164.1    | Ca_Kabuli_Chr05 | 7914820                 | TT                                     | GG                 | GG               | INTERGENIC      |               |                    |                    |
| SNP_32990_A_7914927 | NC_021164.1    | Ca_Kabuli_Chr05 | 7914927                 | TT                                     | CC                 | CC               | INTERGENIC      |               |                    |                    |
| SNP_32992_A_7915998 | NC_021164.1    | Ca_Kabuli_Chr05 | 7915998                 | TT                                     | CC                 | CC               | INTERGENIC      |               |                    |                    |
| SNP_32993_A_7916256 | NC_021164.1    | Ca_Kabuli_Chr05 | 7916256                 | CC                                     | AA                 | AA               | INTERGENIC      |               |                    |                    |
| SNP_32994_A_7916966 | NC_021164.1    | Ca_Kabuli_Chr05 | 7916966                 | CC                                     | TT                 | TT               | INTERGENIC      |               |                    |                    |
| SNP_32995_A_7916975 | NC_021164.1    | Ca_Kabuli_Chr05 | 7916975                 | TT                                     | CC                 | CC               | INTERGENIC      |               |                    |                    |
| SNP_32998_A_7941440 | NC_021164.1    | Ca_Kabuli_Chr05 | 7941440                 | TT                                     | AA                 | AA               | INTERGENIC      |               |                    |                    |
| SNP_32999_A_7951762 | NC_021164.1    | Ca_Kabuli_Chr05 | 7951762                 | TT                                     | AA                 | AA               | INTERGENIC      |               |                    |                    |
| SNP_33000_A_7951766 | NC_021164.1    | Ca_Kabuli_Chr05 | 7951766                 | GG                                     | CC                 | CC               | INTERGENIC      |               |                    |                    |
| SNP_33001_A_7951781 | NC_021164.1    | Ca_Kabuli_Chr05 | 7951781                 | CC                                     | TT                 | TT               | INTERGENIC      |               |                    |                    |
| SNP_33002_A_7951803 | NC_021164.1    | Ca_Kabuli_Chr05 | 7951803                 | AA                                     | GG                 | GG               | INTERGENIC      |               |                    |                    |
| SNP_33003_A_7956734 | NC_021164.1    | Ca_Kabuli_Chr05 | 7956734                 | TT                                     | CC                 | CC               | INTERGENIC      |               |                    |                    |
| SNP_33004_A_7956737 | NC_021164.1    | Ca_Kabuli_Chr05 | 7956737                 | CC                                     | TT                 | TT               | INTERGENIC      |               |                    |                    |
| SNP_33005_A_7956782 | NC_021164.1    | Ca_Kabuli_Chr05 | 7956782                 | CC                                     | TT                 | TT               | INTERGENIC      |               |                    |                    |
| SNP_33006_A_7956794 | NC_021164.1    | Ca_Kabuli_Chr05 | 7956794                 | TT                                     | CC                 | CC               | INTERGENIC      |               |                    |                    |

| SNPs IDs            | Chromosome IDs | Chromosomes     | Physical positions (bp) | CDC Frontier genome (Reference genome) | (Pusa 1103 & HPNB) | (ILWC 46 & LPNB) | Sequence genome | Components of | Gene accession IDs | Putative functions |
|---------------------|----------------|-----------------|-------------------------|----------------------------------------|--------------------|------------------|-----------------|---------------|--------------------|--------------------|
| SNP_33007_A_7957377 | NC_021164.1    | Ca_Kabuli_Chr05 | 7957377                 | CC                                     | TT                 | TT               | INTERGENIC      |               |                    |                    |
| SNP_33008_A_7957656 | NC_021164.1    | Ca_Kabuli_Chr05 | 7957656                 | CC                                     | TT                 | TT               | INTERGENIC      |               |                    |                    |
| SNP_33010_A_7957731 | NC_021164.1    | Ca_Kabuli_Chr05 | 7957731                 | AA                                     | GG                 | GG               | INTERGENIC      |               |                    |                    |
| SNP_33011_A_7963096 | NC_021164.1    | Ca_Kabuli_Chr05 | 7963096                 | AA                                     | GG                 | GG               | INTERGENIC      |               |                    |                    |
| SNP_33012_A_7963162 | NC_021164.1    | Ca_Kabuli_Chr05 | 7963162                 | CC                                     | AA                 | AA               | INTERGENIC      |               |                    |                    |
| SNP_33013_A_7963190 | NC_021164.1    | Ca_Kabuli_Chr05 | 7963190                 | AA                                     | TT                 | TT               | INTERGENIC      |               |                    |                    |
| SNP_33014_A_7963351 | NC_021164.1    | Ca_Kabuli_Chr05 | 7963351                 | AA                                     | GG                 | GG               | INTERGENIC      |               |                    |                    |
| SNP_33015_A_7963397 | NC_021164.1    | Ca_Kabuli_Chr05 | 7963397                 | TT                                     | CC                 | CC               | INTERGENIC      |               |                    |                    |
| SNP_33016_A_7963403 | NC_021164.1    | Ca_Kabuli_Chr05 | 7963403                 | CC                                     | TT                 | TT               | INTERGENIC      |               |                    |                    |
| SNP_33017_A_7963448 | NC_021164.1    | Ca_Kabuli_Chr05 | 7963448                 | GG                                     | AA                 | AA               | INTERGENIC      |               |                    |                    |
| SNP_33018_A_7963829 | NC_021164.1    | Ca_Kabuli_Chr05 | 7963829                 | AA                                     | TT                 | TT               | INTERGENIC      |               |                    |                    |
| SNP_33019_A_7963836 | NC_021164.1    | Ca_Kabuli_Chr05 | 7963836                 | CC                                     | TT                 | TT               | INTERGENIC      |               |                    |                    |
| SNP_33021_A_7965046 | NC_021164.1    | Ca_Kabuli_Chr05 | 7965046                 | TT                                     | CC                 | CC               | INTERGENIC      |               |                    |                    |
| SNP_33022_A_7965067 | NC_021164.1    | Ca_Kabuli_Chr05 | 7965067                 | AA                                     | TT                 | TT               | INTERGENIC      |               |                    |                    |
| SNP_33023_A_7966585 | NC_021164.1    | Ca_Kabuli_Chr05 | 7966585                 | GG                                     | AA                 | AA               | INTERGENIC      |               |                    |                    |
| SNP_33025_A_7967433 | NC_021164.1    | Ca_Kabuli_Chr05 | 7967433                 | CC                                     | TT                 | TT               | INTERGENIC      |               |                    |                    |
| SNP_33026_A_7967485 | NC_021164.1    | Ca_Kabuli_Chr05 | 7967485                 | CC                                     | AA                 | AA               | INTERGENIC      |               |                    |                    |
| SNP_33028_A_7967537 | NC_021164.1    | Ca_Kabuli_Chr05 | 7967537                 | CC                                     | TT                 | TT               | INTERGENIC      |               |                    |                    |
| SNP_33029_A_7967576 | NC_021164.1    | Ca_Kabuli_Chr05 | 7967576                 | AA                                     | GG                 | GG               | INTERGENIC      |               |                    |                    |
| SNP_33030_A_7967583 | NC_021164.1    | Ca_Kabuli_Chr05 | 7967583                 | CC                                     | GG                 | GG               | INTERGENIC      |               |                    |                    |
| SNP_33032_A_7968030 | NC_021164.1    | Ca_Kabuli_Chr05 | 7968030                 | AA                                     | GG                 | GG               | INTERGENIC      |               |                    |                    |
| SNP_33033_A_7968068 | NC_021164.1    | Ca_Kabuli_Chr05 | 7968068                 | TT                                     | GG                 | GG               | INTERGENIC      |               |                    |                    |

| SNPs IDs            | Chromosome IDs | Chromosomes     | Physical positions (bp) | CDC Frontier genome (Reference genome) | (Pusa 1103 & HPNB) | (ILWC 46 & LPNB) | Sequence Components of genome | Gene accession IDs | Putative functions                  |
|---------------------|----------------|-----------------|-------------------------|----------------------------------------|--------------------|------------------|-------------------------------|--------------------|-------------------------------------|
| SNP_33034_A_7968265 | NC_021164.1    | Ca_Kabuli_Chr05 | 7968265                 | CC                                     | AA                 | AA               | INTERGENIC                    |                    |                                     |
| SNP_33035_A_7972028 | NC_021164.1    | Ca_Kabuli_Chr05 | 7972028                 | GG                                     | AA                 | AA               | INTERGENIC                    |                    |                                     |
| SNP_33036_A_7973281 | NC_021164.1    | Ca_Kabuli_Chr05 | 7973281                 | CC                                     | TT                 | TT               | INTERGENIC                    |                    |                                     |
| SNP_33037_A_7974206 | NC_021164.1    | Ca_Kabuli_Chr05 | 7974206                 | GG                                     | AA                 | AA               | INTERGENIC                    |                    |                                     |
| SNP_33038_A_7974231 | NC_021164.1    | Ca_Kabuli_Chr05 | 7974231                 | AA                                     | CC                 | CC               | INTERGENIC                    |                    |                                     |
| SNP_33039_A_7974277 | NC_021164.1    | Ca_Kabuli_Chr05 | 7974277                 | GG                                     | AA                 | AA               | INTERGENIC                    |                    |                                     |
| SNP_33040_A_7974287 | NC_021164.1    | Ca_Kabuli_Chr05 | 7974287                 | AA                                     | GG                 | GG               | INTERGENIC                    |                    |                                     |
| SNP_33041_A_7974886 | NC_021164.1    | Ca_Kabuli_Chr05 | 7974886                 | GG                                     | TT                 | TT               | INTERGENIC                    |                    |                                     |
| SNP_33042_A_7975917 | NC_021164.1    | Ca_Kabuli_Chr05 | 7975917                 | GG                                     | AA                 | AA               | INTERGENIC                    |                    |                                     |
| SNP_33043_A_7976860 | NC_021164.1    | Ca_Kabuli_Chr05 | 7976860                 | AA                                     | GG                 | GG               | DRR                           | 101502973          | lysine histidine transporter-like 5 |
| SNP_33045_A_7979123 | NC_021164.1    | Ca_Kabuli_Chr05 | 7979123                 | AA                                     | GG                 | GG               | INTRON                        | 101502973          | lysine histidine transporter-like 5 |
| SNP_33046_A_7981389 | NC_021164.1    | Ca_Kabuli_Chr05 | 7981389                 | AA                                     | GG                 | GG               | URR                           | 101502973          | lysine histidine transporter-like 5 |
| SNP_33047_A_7981469 | NC_021164.1    | Ca_Kabuli_Chr05 | 7981469                 | GG                                     | AA                 | AA               | URR                           | 101502973          | lysine histidine transporter-like 5 |
| SNP_33048_A_7982039 | NC_021164.1    | Ca_Kabuli_Chr05 | 7982039                 | AA                                     | GG                 | GG               | URR                           | 101502973          | lysine histidine transporter-like 5 |
| SNP_33050_A_7982994 | NC_021164.1    | Ca_Kabuli_Chr05 | 7982994                 | CC                                     | TT                 | TT               | INTERGENIC                    |                    |                                     |
| SNP_33051_A_7983267 | NC_021164.1    | Ca_Kabuli_Chr05 | 7983267                 | AA                                     | TT                 | TT               | INTERGENIC                    |                    |                                     |
| SNP_33052_A_7984160 | NC_021164.1    | Ca_Kabuli_Chr05 | 7984160                 | TT                                     | CC                 | CC               | INTERGENIC                    |                    |                                     |
| SNP_33053_A_7984291 | NC_021164.1    | Ca_Kabuli_Chr05 | 7984291                 | CC                                     | TT                 | TT               | INTERGENIC                    |                    |                                     |
| SNP_33054_A_7984340 | NC_021164.1    | Ca_Kabuli_Chr05 | 7984340                 | AA                                     | GG                 | GG               | INTERGENIC                    |                    |                                     |
| SNP_33055_A_7984752 | NC_021164.1    | Ca_Kabuli_Chr05 | 7984752                 | GG                                     | TT                 | TT               | INTERGENIC                    |                    |                                     |
| SNP_33056_A_7985813 | NC_021164.1    | Ca_Kabuli_Chr05 | 7985813                 | GG                                     | CC                 | CC               | INTERGENIC                    |                    |                                     |
| SNP_33057_A_7986231 | NC_021164.1    | Ca_Kabuli_Chr05 | 7986231                 | TT                                     | CC                 | CC               | INTERGENIC                    |                    |                                     |

| SNPs IDs            | Chromosome IDs | Chromosomes     | Physical positions (bp) | CDC Frontier (Reference genome) | (Pusa 1103 & HPNB) | (ILWC 46 & LPNB) | Sequence Components of genome | Gene accession IDs | Putative functions                      |
|---------------------|----------------|-----------------|-------------------------|---------------------------------|--------------------|------------------|-------------------------------|--------------------|-----------------------------------------|
| SNP_33058_A_7986232 | NC_021164.1    | Ca_Kabuli_Chr05 | 7986232                 | TT                              | CC                 | CC               | INTERGENIC                    |                    |                                         |
| SNP_33059_A_7986547 | NC_021164.1    | Ca_Kabuli_Chr05 | 7986547                 | CC                              | AA                 | AA               | INTERGENIC                    |                    |                                         |
| SNP_33060_A_7987418 | NC_021164.1    | Ca_Kabuli_Chr05 | 7987418                 | GG                              | TT                 | TT               | INTERGENIC                    |                    |                                         |
| SNP_33061_A_7987431 | NC_021164.1    | Ca_Kabuli_Chr05 | 7987431                 | TT                              | CC                 | CC               | INTERGENIC                    |                    |                                         |
| SNP_33062_A_7987843 | NC_021164.1    | Ca_Kabuli_Chr05 | 7987843                 | GG                              | CC                 | CC               | INTERGENIC                    |                    |                                         |
| SNP_33063_A_7990101 | NC_021164.1    | Ca_Kabuli_Chr05 | 7990101                 | TT                              | CC                 | CC               | INTERGENIC                    |                    |                                         |
| SNP_33065_A_7990444 | NC_021164.1    | Ca_Kabuli_Chr05 | 7990444                 | CC                              | TT                 | TT               | INTERGENIC                    |                    |                                         |
| SNP_33066_A_7990884 | NC_021164.1    | Ca_Kabuli_Chr05 | 7990884                 | AA                              | CC                 | CC               | INTERGENIC                    |                    |                                         |
| SNP_33067_A_7990898 | NC_021164.1    | Ca_Kabuli_Chr05 | 7990898                 | TT                              | AA                 | AA               | INTERGENIC                    |                    |                                         |
| SNP_33068_A_7991039 | NC_021164.1    | Ca_Kabuli_Chr05 | 7991039                 | TT                              | CC                 | CC               | INTERGENIC                    |                    |                                         |
| SNP_33069_A_7991077 | NC_021164.1    | Ca_Kabuli_Chr05 | 7991077                 | CC                              | TT                 | TT               | INTERGENIC                    |                    |                                         |
| SNP_33070_A_7991139 | NC_021164.1    | Ca_Kabuli_Chr05 | 7991139                 | GG                              | AA                 | AA               | INTERGENIC                    |                    |                                         |
| SNP_33071_A_7991196 | NC_021164.1    | Ca_Kabuli_Chr05 | 7991196                 | AA                              | GG                 | GG               | INTERGENIC                    |                    |                                         |
| SNP_33072_A_7991665 | NC_021164.1    | Ca_Kabuli_Chr05 | 7991665                 | AA                              | GG                 | GG               | INTERGENIC                    |                    |                                         |
| SNP_33073_A_7992248 | NC_021164.1    | Ca_Kabuli_Chr05 | 7992248                 | AA                              | TT                 | TT               | INTERGENIC                    |                    |                                         |
| SNP_33074_A_7992784 | NC_021164.1    | Ca_Kabuli_Chr05 | 7992784                 | CC                              | TT                 | TT               | INTERGENIC                    |                    |                                         |
| SNP_33075_A_7993121 | NC_021164.1    | Ca_Kabuli_Chr05 | 7993121                 | CC                              | AA                 | AA               | INTERGENIC                    |                    |                                         |
| SNP_33076_A_7993529 | NC_021164.1    | Ca_Kabuli_Chr05 | 7993529                 | GG                              | AA                 | AA               | INTERGENIC                    |                    |                                         |
| SNP_33077_A_8001062 | NC_021164.1    | Ca_Kabuli_Chr05 | 8001062                 | TT                              | CC                 | CC               | DRR                           | 101503295          | E3 ubiquitin-protein ligase RNF170-like |
| SNP_33078_A_8002073 | NC_021164.1    | Ca_Kabuli_Chr05 | 8002073                 | TT                              | AA                 | AA               | INTERGENIC                    |                    |                                         |
| SNP_33079_A_8003320 | NC_021164.1    | Ca_Kabuli_Chr05 | 8003320                 | TT                              | CC                 | CC               | INTERGENIC                    |                    |                                         |
| SNP_33080_A_8003483 | NC_021164.1    | Ca_Kabuli_Chr05 | 8003483                 | TT                              | CC                 | CC               | INTERGENIC                    |                    |                                         |

| SNPs IDs            | Chromosome IDs | Chromosomes     | Physical positions (bp) | CDC Frontier (Reference genome) | (Pusa 1103 & HPNB) | (ILWC 46 & LPNB) | Sequence Components of genome | Gene accession IDs | Putative functions                             |
|---------------------|----------------|-----------------|-------------------------|---------------------------------|--------------------|------------------|-------------------------------|--------------------|------------------------------------------------|
| SNP_33081_A_8005635 | NC_021164.1    | Ca_Kabuli_Chr05 | 8005635                 | CC                              | GG                 | GG               | DRR                           | 101503626          | DNA mismatch repair protein MLH1               |
| SNP_33082_A_8016947 | NC_021164.1    | Ca_Kabuli_Chr05 | 8016947                 | AA                              | CC                 | CC               | INTRON                        | 101503626          | DNA mismatch repair protein MLH1               |
| SNP_33083_A_8016969 | NC_021164.1    | Ca_Kabuli_Chr05 | 8016969                 | CC                              | TT                 | TT               | INTRON                        | 101503626          | DNA mismatch repair protein MLH1               |
| SNP_33084_A_8018766 | NC_021164.1    | Ca_Kabuli_Chr05 | 8018766                 | AA                              | TT                 | TT               | INTRON                        | 101503626          | DNA mismatch repair protein MLH1               |
| SNP_33085_A_8020455 | NC_021164.1    | Ca_Kabuli_Chr05 | 8020455                 | GG                              | AA                 | AA               | INTRON                        | 101503626          | DNA mismatch repair protein MLH1               |
| SNP_33086_A_8028429 | NC_021164.1    | Ca_Kabuli_Chr05 | 8028429                 | AA                              | GG                 | GG               | INTERGENIC                    |                    |                                                |
| SNP_33087_A_8037579 | NC_021164.1    | Ca_Kabuli_Chr05 | 8037579                 | GG                              | AA                 | AA               | INTERGENIC                    |                    |                                                |
| SNP_33088_A_8040292 | NC_021164.1    | Ca_Kabuli_Chr05 | 8040292                 | AA                              | GG                 | GG               | INTERGENIC                    |                    |                                                |
| SNP_33090_A_8040392 | NC_021164.1    | Ca_Kabuli_Chr05 | 8040392                 | GG                              | AA                 | AA               | INTERGENIC                    |                    |                                                |
| SNP_33092_A_8040483 | NC_021164.1    | Ca_Kabuli_Chr05 | 8040483                 | AA                              | GG                 | GG               | INTERGENIC                    |                    |                                                |
| SNP_33093_A_8040537 | NC_021164.1    | Ca_Kabuli_Chr05 | 8040537                 | TT                              | AA                 | AA               | INTERGENIC                    |                    |                                                |
| SNP_33094_A_8040643 | NC_021164.1    | Ca_Kabuli_Chr05 | 8040643                 | TT                              | GG                 | GG               | INTERGENIC                    |                    |                                                |
| SNP_33096_A_8040703 | NC_021164.1    | Ca_Kabuli_Chr05 | 8040703                 | TT                              | GG                 | GG               | INTERGENIC                    |                    |                                                |
| SNP_33097_A_8044819 | NC_021164.1    | Ca_Kabuli_Chr05 | 8044819                 | CC                              | TT                 | TT               | INTERGENIC                    |                    |                                                |
| SNP_33098_A_8048810 | NC_021164.1    | Ca_Kabuli_Chr05 | 8048810                 | CC                              | TT                 | TT               | INTERGENIC                    |                    |                                                |
| SNP_33099_A_8058351 | NC_021164.1    | Ca_Kabuli_Chr05 | 8058351                 | AA                              | TT                 | TT               | URR                           | 101503953          | glycine-rich cell wall structural protein-like |
| SNP_33100_A_8058354 | NC_021164.1    | Ca_Kabuli_Chr05 | 8058354                 | TT                              | AA                 | AA               | URR                           | 101503953          | glycine-rich cell wall structural protein-like |
| SNP_33101_A_8058355 | NC_021164.1    | Ca_Kabuli_Chr05 | 8058355                 | AA                              | CC                 | CC               | URR                           | 101503953          | glycine-rich cell wall structural protein-like |
| SNP_33102_A_8058375 | NC_021164.1    | Ca_Kabuli_Chr05 | 8058375                 | GG                              | TT                 | TT               | URR                           | 101503953          | glycine-rich cell wall structural protein-like |
| SNP_33103_A_8059622 | NC_021164.1    | Ca_Kabuli_Chr05 | 8059622                 | CC                              | TT                 | TT               | URR                           | 101503953          | glycine-rich cell wall structural protein-like |
| SNP_33104_A_8059652 | NC_021164.1    | Ca_Kabuli_Chr05 | 8059652                 | GG                              | TT                 | TT               | URR                           | 101503953          | glycine-rich cell wall structural protein-like |
| SNP_33105_A_8059684 | NC_021164.1    | Ca_Kabuli_Chr05 | 8059684                 | TT                              | AA                 | AA               | URR                           | 101503953          | glycine-rich cell wall structural protein-like |



| SNPs IDs            | Chromosome IDs | Chromosomes     | Physical positions (bp) | CDC Frontier genome (Reference genome) | (Pusa 1103 & HPNB) | (ILWC 46 & LPNB) | Sequence genome | Components of | Gene accession IDs | Putative functions                             |
|---------------------|----------------|-----------------|-------------------------|----------------------------------------|--------------------|------------------|-----------------|---------------|--------------------|------------------------------------------------|
| SNP_33106_A_8059840 | NC_021164.1    | Ca_Kabuli_Chr05 | 8059840                 | AA                                     | TT                 | TT               | URR             |               | 101503953          | glycine-rich cell wall structural protein-like |
| SNP_33107_A_8059986 | NC_021164.1    | Ca_Kabuli_Chr05 | 8059986                 | GG                                     | CC                 | CC               | URR             |               | 101503953          | glycine-rich cell wall structural protein-like |
| SNP_33108_A_8060000 | NC_021164.1    | Ca_Kabuli_Chr05 | 8060000                 | GG                                     | CC                 | CC               | URR             |               | 101503953          | glycine-rich cell wall structural protein-like |
| SNP_33109_A_8060055 | NC_021164.1    | Ca_Kabuli_Chr05 | 8060055                 | AA                                     | CC                 | CC               | URR             |               | 101503953          | glycine-rich cell wall structural protein-like |
| SNP_33111_A_8073856 | NC_021164.1    | Ca_Kabuli_Chr05 | 8073856                 | GG                                     | AA                 | AA               | INTERGENIC      |               |                    |                                                |
| SNP_33112_A_8079518 | NC_021164.1    | Ca_Kabuli_Chr05 | 8079518                 | TT                                     | AA                 | AA               | DRR             |               | 101504702          | glycerophosphodiester phosphodiesterase GDPD4  |
| SNP_33113_A_8079777 | NC_021164.1    | Ca_Kabuli_Chr05 | 8079777                 | CC                                     | TT                 | TT               | DRR             |               | 101504702          | glycerophosphodiester phosphodiesterase GDPD4  |
| SNP_33114_A_8079779 | NC_021164.1    | Ca_Kabuli_Chr05 | 8079779                 | TT                                     | CC                 | CC               | DRR             |               | 101504702          | glycerophosphodiester phosphodiesterase GDPD4  |
| SNP_33115_A_8079782 | NC_021164.1    | Ca_Kabuli_Chr05 | 8079782                 | AA                                     | GG                 | GG               | DRR             |               | 101504702          | glycerophosphodiester phosphodiesterase GDPD4  |
| SNP_33116_A_8079783 | NC_021164.1    | Ca_Kabuli_Chr05 | 8079783                 | GG                                     | TT                 | TT               | DRR             |               | 101504702          | glycerophosphodiester phosphodiesterase GDPD4  |
| SNP_33117_A_8082439 | NC_021164.1    | Ca_Kabuli_Chr05 | 8082439                 | GG                                     | TT                 | TT               | INTRON          |               | 101504702          | glycerophosphodiester phosphodiesterase GDPD4  |
| SNP_33118_A_8083770 | NC_021164.1    | Ca_Kabuli_Chr05 | 8083770                 | CC                                     | TT                 | TT               | INTRON          |               | 101504702          | glycerophosphodiester phosphodiesterase GDPD4  |
| SNP_33119_A_8088047 | NC_021164.1    | Ca_Kabuli_Chr05 | 8088047                 | AA                                     | GG                 | GG               | URR             |               | 101504702          | glycerophosphodiester phosphodiesterase GDPD4  |
| SNP_33121_A_8088857 | NC_021164.1    | Ca_Kabuli_Chr05 | 8088857                 | AA                                     | GG                 | GG               | URR             |               | 101504702          | glycerophosphodiester phosphodiesterase GDPD4  |
| SNP_33122_A_8089236 | NC_021164.1    | Ca_Kabuli_Chr05 | 8089236                 | CC                                     | TT                 | TT               | URR             |               | 101504702          | glycerophosphodiester phosphodiesterase GDPD4  |
| SNP_33125_A_8093567 | NC_021164.1    | Ca_Kabuli_Chr05 | 8093567                 | TT                                     | AA                 | AA               | INTERGENIC      |               |                    |                                                |
| SNP_33126_A_8093606 | NC_021164.1    | Ca_Kabuli_Chr05 | 8093606                 | AA                                     | GG                 | GG               | INTERGENIC      |               |                    |                                                |
| SNP_33127_A_8094437 | NC_021164.1    | Ca_Kabuli_Chr05 | 8094437                 | CC                                     | TT                 | TT               | INTERGENIC      |               |                    |                                                |
| SNP_33128_A_8096184 | NC_021164.1    | Ca_Kabuli_Chr05 | 8096184                 | TT                                     | CC                 | CC               | INTERGENIC      |               |                    |                                                |
| SNP_33131_A_8099335 | NC_021164.1    | Ca_Kabuli_Chr05 | 8099335                 | AA                                     | GG                 | GG               | INTERGENIC      |               |                    |                                                |
| SNP_33132_A_8099649 | NC_021164.1    | Ca_Kabuli_Chr05 | 8099649                 | AA                                     | TT                 | TT               | INTERGENIC      |               |                    |                                                |
| SNP_33133_A_8100422 | NC_021164.1    | Ca_Kabuli_Chr05 | 8100422                 | CC                                     | TT                 | TT               | INTERGENIC      |               |                    |                                                |

| SNPs IDs            | Chromosome IDs | Chromosomes     | Physical positions (bp) | CDC Frontier genome (Reference genome) | (Pusa 1103 & HPNB) | (ILWC 46 & LPNB) | Sequence genome | Components of | Gene accession IDs | Putative functions |
|---------------------|----------------|-----------------|-------------------------|----------------------------------------|--------------------|------------------|-----------------|---------------|--------------------|--------------------|
| SNP_33135_A_8101988 | NC_021164.1    | Ca_Kabuli_Chr05 | 8101988                 | GG                                     | AA                 | AA               | INTERGENIC      |               |                    |                    |
| SNP_33136_A_8102655 | NC_021164.1    | Ca_Kabuli_Chr05 | 8102655                 | AA                                     | GG                 | GG               | INTERGENIC      |               |                    |                    |
| SNP_33137_A_8105225 | NC_021164.1    | Ca_Kabuli_Chr05 | 8105225                 | AA                                     | GG                 | GG               | INTERGENIC      |               |                    |                    |
| SNP_33138_A_8106073 | NC_021164.1    | Ca_Kabuli_Chr05 | 8106073                 | GG                                     | AA                 | AA               | INTERGENIC      |               |                    |                    |
| SNP_33139_A_8107494 | NC_021164.1    | Ca_Kabuli_Chr05 | 8107494                 | TT                                     | CC                 | CC               | INTERGENIC      |               |                    |                    |
| SNP_33140_A_8110457 | NC_021164.1    | Ca_Kabuli_Chr05 | 8110457                 | TT                                     | GG                 | GG               | INTERGENIC      |               |                    |                    |
| SNP_33141_A_8110472 | NC_021164.1    | Ca_Kabuli_Chr05 | 8110472                 | TT                                     | CC                 | CC               | INTERGENIC      |               |                    |                    |
| SNP_33142_A_8111029 | NC_021164.1    | Ca_Kabuli_Chr05 | 8111029                 | GG                                     | AA                 | AA               | INTERGENIC      |               |                    |                    |
| SNP_33143_A_8111337 | NC_021164.1    | Ca_Kabuli_Chr05 | 8111337                 | GG                                     | CC                 | CC               | INTERGENIC      |               |                    |                    |
| SNP_33144_A_8111356 | NC_021164.1    | Ca_Kabuli_Chr05 | 8111356                 | GG                                     | TT                 | TT               | INTERGENIC      |               |                    |                    |
| SNP_33145_A_8113404 | NC_021164.1    | Ca_Kabuli_Chr05 | 8113404                 | AA                                     | TT                 | TT               | INTERGENIC      |               |                    |                    |
| SNP_33146_A_8113446 | NC_021164.1    | Ca_Kabuli_Chr05 | 8113446                 | CC                                     | TT                 | TT               | INTERGENIC      |               |                    |                    |
| SNP_33147_A_8113460 | NC_021164.1    | Ca_Kabuli_Chr05 | 8113460                 | TT                                     | CC                 | CC               | INTERGENIC      |               |                    |                    |
| SNP_33148_A_8113485 | NC_021164.1    | Ca_Kabuli_Chr05 | 8113485                 | TT                                     | CC                 | CC               | INTERGENIC      |               |                    |                    |
| SNP_33149_A_8120300 | NC_021164.1    | Ca_Kabuli_Chr05 | 8120300                 | TT                                     | GG                 | GG               | INTERGENIC      |               |                    |                    |
| SNP_33150_A_8120310 | NC_021164.1    | Ca_Kabuli_Chr05 | 8120310                 | AA                                     | GG                 | GG               | INTERGENIC      |               |                    |                    |
| SNP_33151_A_8120313 | NC_021164.1    | Ca_Kabuli_Chr05 | 8120313                 | GG                                     | TT                 | TT               | INTERGENIC      |               |                    |                    |
| SNP_33152_A_8122051 | NC_021164.1    | Ca_Kabuli_Chr05 | 8122051                 | TT                                     | CC                 | CC               | INTERGENIC      |               |                    |                    |
| SNP_33153_A_8123510 | NC_021164.1    | Ca_Kabuli_Chr05 | 8123510                 | AA                                     | TT                 | TT               | INTERGENIC      |               |                    |                    |
| SNP_33154_A_8128946 | NC_021164.1    | Ca_Kabuli_Chr05 | 8128946                 | GG                                     | AA                 | AA               | INTERGENIC      |               |                    |                    |
| SNP_33155_A_8130834 | NC_021164.1    | Ca_Kabuli_Chr05 | 8130834                 | TT                                     | CC                 | CC               | INTERGENIC      |               |                    |                    |
| SNP_33156_A_8134013 | NC_021164.1    | Ca_Kabuli_Chr05 | 8134013                 | CC                                     | TT                 | TT               | INTERGENIC      |               |                    |                    |

| SNPs IDs            | Chromosome IDs | Chromosomes     | Physical positions (bp) | CDC Frontier genome (Reference genome) | (Pusa 1103 & HPNB) | (ILWC 46 & LPNB) | Sequence genome | Components of | Gene accession IDs | Putative functions |
|---------------------|----------------|-----------------|-------------------------|----------------------------------------|--------------------|------------------|-----------------|---------------|--------------------|--------------------|
| SNP_33157_A_8136226 | NC_021164.1    | Ca_Kabuli_Chr05 | 8136226                 | CC                                     | TT                 | TT               | INTERGENIC      |               |                    |                    |
| SNP_33158_A_8136534 | NC_021164.1    | Ca_Kabuli_Chr05 | 8136534                 | TT                                     | CC                 | CC               | INTERGENIC      |               |                    |                    |
| SNP_33159_A_8138709 | NC_021164.1    | Ca_Kabuli_Chr05 | 8138709                 | AA                                     | CC                 | CC               | INTERGENIC      |               |                    |                    |
| SNP_33160_A_8138733 | NC_021164.1    | Ca_Kabuli_Chr05 | 8138733                 | TT                                     | CC                 | CC               | INTERGENIC      |               |                    |                    |
| SNP_33161_A_8143035 | NC_021164.1    | Ca_Kabuli_Chr05 | 8143035                 | AA                                     | GG                 | GG               | INTERGENIC      |               |                    |                    |
| SNP_33162_A_8143042 | NC_021164.1    | Ca_Kabuli_Chr05 | 8143042                 | CC                                     | TT                 | TT               | INTERGENIC      |               |                    |                    |
| SNP_33163_A_8143064 | NC_021164.1    | Ca_Kabuli_Chr05 | 8143064                 | CC                                     | TT                 | TT               | INTERGENIC      |               |                    |                    |
| SNP_33164_A_8161144 | NC_021164.1    | Ca_Kabuli_Chr05 | 8161144                 | AA                                     | CC                 | CC               | INTERGENIC      |               |                    |                    |
| SNP_33165_A_8163512 | NC_021164.1    | Ca_Kabuli_Chr05 | 8163512                 | TT                                     | CC                 | CC               | INTERGENIC      |               |                    |                    |
| SNP_33167_A_8164321 | NC_021164.1    | Ca_Kabuli_Chr05 | 8164321                 | TT                                     | AA                 | AA               | INTERGENIC      |               |                    |                    |
| SNP_33168_A_8164630 | NC_021164.1    | Ca_Kabuli_Chr05 | 8164630                 | AA                                     | GG                 | GG               | INTERGENIC      |               |                    |                    |
| SNP_33169_A_8164632 | NC_021164.1    | Ca_Kabuli_Chr05 | 8164632                 | AA                                     | TT                 | TT               | INTERGENIC      |               |                    |                    |
| SNP_33170_A_8164731 | NC_021164.1    | Ca_Kabuli_Chr05 | 8164731                 | AA                                     | GG                 | GG               | INTERGENIC      |               |                    |                    |
| SNP_33171_A_8164974 | NC_021164.1    | Ca_Kabuli_Chr05 | 8164974                 | GG                                     | CC                 | CC               | INTERGENIC      |               |                    |                    |
| SNP_33172_A_8172400 | NC_021164.1    | Ca_Kabuli_Chr05 | 8172400                 | AA                                     | GG                 | GG               | INTERGENIC      |               |                    |                    |
| SNP_33173_A_8173787 | NC_021164.1    | Ca_Kabuli_Chr05 | 8173787                 | TT                                     | AA                 | AA               | INTERGENIC      |               |                    |                    |
| SNP_33174_A_8182110 | NC_021164.1    | Ca_Kabuli_Chr05 | 8182110                 | GG                                     | AA                 | AA               | INTERGENIC      |               |                    |                    |
| SNP_33175_A_8182181 | NC_021164.1    | Ca_Kabuli_Chr05 | 8182181                 | GG                                     | AA                 | AA               | INTERGENIC      |               |                    |                    |
| SNP_33176_A_8185889 | NC_021164.1    | Ca_Kabuli_Chr05 | 8185889                 | AA                                     | GG                 | GG               | INTERGENIC      |               |                    |                    |
| SNP_33177_A_8186271 | NC_021164.1    | Ca_Kabuli_Chr05 | 8186271                 | TT                                     | GG                 | GG               | INTERGENIC      |               |                    |                    |
| SNP_33178_A_8186631 | NC_021164.1    | Ca_Kabuli_Chr05 | 8186631                 | GG                                     | CC                 | CC               | INTERGENIC      |               |                    |                    |
| SNP_33180_A_8203378 | NC_021164.1    | Ca_Kabuli_Chr05 | 8203378                 | TT                                     | CC                 | CC               | INTERGENIC      |               |                    |                    |

| SNPs IDs            | Chromosome IDs | Chromosomes     | Physical positions (bp) | CDC Frontier (Reference genome) | (Pusa 1103 & HPNB) | (ILWC 46 & LPNB) | Sequence Components of genome | Gene accession IDs | Putative functions           |
|---------------------|----------------|-----------------|-------------------------|---------------------------------|--------------------|------------------|-------------------------------|--------------------|------------------------------|
| SNP_33181_A_8206269 | NC_021164.1    | Ca_Kabuli_Chr05 | 8206269                 | CC                              | GG                 | GG               | INTERGENIC                    |                    |                              |
| SNP_33182_A_8207098 | NC_021164.1    | Ca_Kabuli_Chr05 | 8207098                 | AA                              | CC                 | CC               | INTERGENIC                    |                    |                              |
| SNP_33183_A_8208050 | NC_021164.1    | Ca_Kabuli_Chr05 | 8208050                 | AA                              | GG                 | GG               | INTERGENIC                    |                    |                              |
| SNP_33184_A_8212299 | NC_021164.1    | Ca_Kabuli_Chr05 | 8212299                 | AA                              | TT                 | TT               | INTERGENIC                    |                    |                              |
| SNP_33185_A_8212334 | NC_021164.1    | Ca_Kabuli_Chr05 | 8212334                 | CC                              | TT                 | TT               | INTERGENIC                    |                    |                              |
| SNP_33186_A_8216718 | NC_021164.1    | Ca_Kabuli_Chr05 | 8216718                 | AA                              | GG                 | GG               | INTERGENIC                    |                    |                              |
| SNP_33187_A_8216783 | NC_021164.1    | Ca_Kabuli_Chr05 | 8216783                 | TT                              | AA                 | AA               | INTERGENIC                    |                    |                              |
| SNP_33188_A_8217072 | NC_021164.1    | Ca_Kabuli_Chr05 | 8217072                 | AA                              | GG                 | GG               | INTERGENIC                    |                    |                              |
| SNP_33189_A_8241170 | NC_021164.1    | Ca_Kabuli_Chr05 | 8241170                 | TT                              | AA                 | AA               | DRR                           | 101507191          | uncharacterized LOC101507191 |
| SNP_33190_A_8241625 | NC_021164.1    | Ca_Kabuli_Chr05 | 8241625                 | GG                              | AA                 | AA               | DRR                           | 101507191          | uncharacterized LOC101507191 |
| SNP_33192_A_8257776 | NC_021164.1    | Ca_Kabuli_Chr05 | 8257776                 | AA                              | GG                 | GG               | INTERGENIC                    |                    |                              |
| SNP_33193_A_8259413 | NC_021164.1    | Ca_Kabuli_Chr05 | 8259413                 | GG                              | AA                 | AA               | INTERGENIC                    |                    |                              |
| SNP_33194_A_8261487 | NC_021164.1    | Ca_Kabuli_Chr05 | 8261487                 | AA                              | TT                 | TT               | INTERGENIC                    |                    |                              |
| SNP_33195_A_8263249 | NC_021164.1    | Ca_Kabuli_Chr05 | 8263249                 | TT                              | CC                 | CC               | INTERGENIC                    |                    |                              |
| SNP_33196_A_8263264 | NC_021164.1    | Ca_Kabuli_Chr05 | 8263264                 | TT                              | GG                 | GG               | INTERGENIC                    |                    |                              |
| SNP_33197_A_8263304 | NC_021164.1    | Ca_Kabuli_Chr05 | 8263304                 | AA                              | GG                 | GG               | INTERGENIC                    |                    |                              |
| SNP_33198_A_8263310 | NC_021164.1    | Ca_Kabuli_Chr05 | 8263310                 | AA                              | TT                 | TT               | INTERGENIC                    |                    |                              |
| SNP_33199_A_8264231 | NC_021164.1    | Ca_Kabuli_Chr05 | 8264231                 | GG                              | CC                 | CC               | INTERGENIC                    |                    |                              |
| SNP_33200_A_8267148 | NC_021164.1    | Ca_Kabuli_Chr05 | 8267148                 | TT                              | CC                 | CC               | INTERGENIC                    |                    |                              |
| SNP_33202_A_8267675 | NC_021164.1    | Ca_Kabuli_Chr05 | 8267675                 | GG                              | AA                 | AA               | INTERGENIC                    |                    |                              |
| SNP_33203_A_8267972 | NC_021164.1    | Ca_Kabuli_Chr05 | 8267972                 | TT                              | CC                 | CC               | INTERGENIC                    |                    |                              |
| SNP_33204_A_8268054 | NC_021164.1    | Ca_Kabuli_Chr05 | 8268054                 | TT                              | AA                 | AA               | INTERGENIC                    |                    |                              |

| SNPs IDs            | Chromosome IDs | Chromosomes     | Physical positions (bp) | CDC Frontier (Reference genome) | (Pusa 1103 & HPNB) | (ILWC 46 & LPNB) | Sequence Components of genome | Gene accession IDs | Putative functions           |
|---------------------|----------------|-----------------|-------------------------|---------------------------------|--------------------|------------------|-------------------------------|--------------------|------------------------------|
| SNP_33205_A_8271562 | NC_021164.1    | Ca_Kabuli_Chr05 | 8271562                 | AA                              | GG                 | GG               | INTERGENIC                    |                    |                              |
| SNP_33206_A_8271594 | NC_021164.1    | Ca_Kabuli_Chr05 | 8271594                 | GG                              | AA                 | AA               | INTERGENIC                    |                    |                              |
| SNP_33207_A_8284074 | NC_021164.1    | Ca_Kabuli_Chr05 | 8284074                 | TT                              | CC                 | CC               | URR                           | 101505028          | uncharacterized LOC101505028 |
| SNP_33208_A_8284114 | NC_021164.1    | Ca_Kabuli_Chr05 | 8284114                 | CC                              | TT                 | TT               | URR                           | 101505028          | uncharacterized LOC101505028 |
| SNP_33209_A_8284168 | NC_021164.1    | Ca_Kabuli_Chr05 | 8284168                 | AA                              | CC                 | CC               | URR                           | 101505028          | uncharacterized LOC101505028 |
| SNP_33210_A_8286938 | NC_021164.1    | Ca_Kabuli_Chr05 | 8286938                 | AA                              | GG                 | GG               | INTERGENIC                    |                    |                              |
| SNP_33211_A_8287698 | NC_021164.1    | Ca_Kabuli_Chr05 | 8287698                 | AA                              | TT                 | TT               | INTERGENIC                    |                    |                              |
| SNP_33212_A_8293302 | NC_021164.1    | Ca_Kabuli_Chr05 | 8293302                 | TT                              | CC                 | CC               | INTERGENIC                    |                    |                              |
| SNP_33213_A_8293325 | NC_021164.1    | Ca_Kabuli_Chr05 | 8293325                 | TT                              | AA                 | AA               | INTERGENIC                    |                    |                              |
| SNP_33214_A_8293354 | NC_021164.1    | Ca_Kabuli_Chr05 | 8293354                 | TT                              | AA                 | AA               | INTERGENIC                    |                    |                              |
| SNP_33215_A_8293355 | NC_021164.1    | Ca_Kabuli_Chr05 | 8293355                 | TT                              | CC                 | CC               | INTERGENIC                    |                    |                              |
| SNP_33216_A_8293396 | NC_021164.1    | Ca_Kabuli_Chr05 | 8293396                 | AA                              | TT                 | TT               | INTERGENIC                    |                    |                              |
| SNP_33217_A_8293572 | NC_021164.1    | Ca_Kabuli_Chr05 | 8293572                 | GG                              | AA                 | AA               | INTERGENIC                    |                    |                              |
| SNP_33218_A_8296682 | NC_021164.1    | Ca_Kabuli_Chr05 | 8296682                 | GG                              | AA                 | AA               | INTERGENIC                    |                    |                              |
| SNP_33219_A_8301638 | NC_021164.1    | Ca_Kabuli_Chr05 | 8301638                 | TT                              | GG                 | GG               | INTERGENIC                    |                    |                              |
| SNP_33220_A_8305761 | NC_021164.1    | Ca_Kabuli_Chr05 | 8305761                 | CC                              | TT                 | TT               | INTERGENIC                    |                    |                              |
| SNP_33221_A_8311105 | NC_021164.1    | Ca_Kabuli_Chr05 | 8311105                 | GG                              | AA                 | AA               | INTERGENIC                    |                    |                              |
| SNP_33222_A_8311192 | NC_021164.1    | Ca_Kabuli_Chr05 | 8311192                 | TT                              | GG                 | GG               | INTERGENIC                    |                    |                              |
| SNP_33223_A_8312185 | NC_021164.1    | Ca_Kabuli_Chr05 | 8312185                 | TT                              | CC                 | CC               | INTERGENIC                    |                    |                              |
| SNP_33224_A_8314228 | NC_021164.1    | Ca_Kabuli_Chr05 | 8314228                 | AA                              | GG                 | GG               | INTERGENIC                    |                    |                              |
| SNP_33225_A_8314484 | NC_021164.1    | Ca_Kabuli_Chr05 | 8314484                 | AA                              | TT                 | TT               | INTERGENIC                    |                    |                              |
| SNP_33226_A_8315882 | NC_021164.1    | Ca_Kabuli_Chr05 | 8315882                 | AA                              | TT                 | TT               | INTERGENIC                    |                    |                              |

| SNPs IDs            | Chromosome IDs | Chromosomes     | Physical positions (bp) | CDC Frontier genome (Reference genome) | (Pusa 1103 & HPNB) | (ILWC 46 & LPNB) | Sequence Components of genome | Gene accession IDs | Putative functions                          |
|---------------------|----------------|-----------------|-------------------------|----------------------------------------|--------------------|------------------|-------------------------------|--------------------|---------------------------------------------|
| SNP_33228_A_8317327 | NC_021164.1    | Ca_Kabuli_Chr05 | 8317327                 | GG                                     | AA                 | AA               | INTERGENIC                    |                    |                                             |
| SNP_33229_A_8319306 | NC_021164.1    | Ca_Kabuli_Chr05 | 8319306                 | CC                                     | AA                 | AA               | INTERGENIC                    |                    |                                             |
| SNP_33230_A_8320761 | NC_021164.1    | Ca_Kabuli_Chr05 | 8320761                 | AA                                     | TT                 | TT               | INTERGENIC                    |                    |                                             |
| SNP_33231_A_8340362 | NC_021164.1    | Ca_Kabuli_Chr05 | 8340362                 | TT                                     | CC                 | CC               | INTRON                        | 101508461          | bidirectional sugar transporter SWEET2-like |
| SNP_33232_A_8343795 | NC_021164.1    | Ca_Kabuli_Chr05 | 8343795                 | GG                                     | AA                 | AA               | URR                           | 101508461          | bidirectional sugar transporter SWEET2-like |
| SNP_33233_A_8346490 | NC_021164.1    | Ca_Kabuli_Chr05 | 8346490                 | TT                                     | GG                 | GG               | INTERGENIC                    |                    |                                             |
| SNP_33234_A_8346514 | NC_021164.1    | Ca_Kabuli_Chr05 | 8346514                 | AA                                     | CC                 | CC               | INTERGENIC                    |                    |                                             |
| SNP_33235_A_8346570 | NC_021164.1    | Ca_Kabuli_Chr05 | 8346570                 | CC                                     | TT                 | TT               | INTERGENIC                    |                    |                                             |
| SNP_33236_A_8346573 | NC_021164.1    | Ca_Kabuli_Chr05 | 8346573                 | TT                                     | AA                 | AA               | INTERGENIC                    |                    |                                             |
| SNP_33237_A_8346607 | NC_021164.1    | Ca_Kabuli_Chr05 | 8346607                 | AA                                     | GG                 | GG               | INTERGENIC                    |                    |                                             |
| SNP_33238_A_8347007 | NC_021164.1    | Ca_Kabuli_Chr05 | 8347007                 | AA                                     | GG                 | GG               | INTERGENIC                    |                    |                                             |
| SNP_33239_A_8379492 | NC_021164.1    | Ca_Kabuli_Chr05 | 8379492                 | CC                                     | TT                 | TT               | INTERGENIC                    |                    |                                             |
| SNP_33240_A_8413204 | NC_021164.1    | Ca_Kabuli_Chr05 | 8413204                 | AA                                     | TT                 | TT               | INTERGENIC                    |                    |                                             |
| SNP_33241_A_8413434 | NC_021164.1    | Ca_Kabuli_Chr05 | 8413434                 | AA                                     | GG                 | GG               | INTERGENIC                    |                    |                                             |
| SNP_33242_A_8413487 | NC_021164.1    | Ca_Kabuli_Chr05 | 8413487                 | AA                                     | GG                 | GG               | INTERGENIC                    |                    |                                             |
| SNP_33243_A_8473090 | NC_021164.1    | Ca_Kabuli_Chr05 | 8473090                 | TT                                     | AA                 | AA               | INTERGENIC                    |                    |                                             |
| SNP_33244_A_8477375 | NC_021164.1    | Ca_Kabuli_Chr05 | 8477375                 | GG                                     | AA                 | AA               | INTERGENIC                    |                    |                                             |
| SNP_33245_A_8478056 | NC_021164.1    | Ca_Kabuli_Chr05 | 8478056                 | GG                                     | AA                 | AA               | INTERGENIC                    |                    |                                             |
| SNP_33246_A_8482626 | NC_021164.1    | Ca_Kabuli_Chr05 | 8482626                 | TT                                     | CC                 | CC               | INTERGENIC                    |                    |                                             |
| SNP_33247_A_8482629 | NC_021164.1    | Ca_Kabuli_Chr05 | 8482629                 | TT                                     | CC                 | CC               | INTERGENIC                    |                    |                                             |
| SNP_33248_A_8485640 | NC_021164.1    | Ca_Kabuli_Chr05 | 8485640                 | AA                                     | GG                 | GG               | INTERGENIC                    |                    |                                             |
| SNP_33249_A_8485665 | NC_021164.1    | Ca_Kabuli_Chr05 | 8485665                 | GG                                     | AA                 | AA               | INTERGENIC                    |                    |                                             |

| SNPs IDs            | Chromosome IDs | Chromosomes     | Physical positions (bp) | CDC Frontier genome (Reference genome) | (Pusa 1103 & HPNB) | (ILWC 46 & LPNB) | Sequence Components of genome | Gene accession IDs | Putative functions                      |
|---------------------|----------------|-----------------|-------------------------|----------------------------------------|--------------------|------------------|-------------------------------|--------------------|-----------------------------------------|
| SNP_33250_A_8485797 | NC_021164.1    | Ca_Kabuli_Chr05 | 8485797                 | GG                                     | CC                 | CC               | INTERGENIC                    |                    |                                         |
| SNP_33251_A_8485909 | NC_021164.1    | Ca_Kabuli_Chr05 | 8485909                 | AA                                     | GG                 | GG               | INTERGENIC                    |                    |                                         |
| SNP_33252_A_8485920 | NC_021164.1    | Ca_Kabuli_Chr05 | 8485920                 | CC                                     | TT                 | TT               | INTERGENIC                    |                    |                                         |
| SNP_33253_A_8485926 | NC_021164.1    | Ca_Kabuli_Chr05 | 8485926                 | CC                                     | GG                 | GG               | INTERGENIC                    |                    |                                         |
| SNP_33256_A_8694448 | NC_021164.1    | Ca_Kabuli_Chr05 | 8694448                 | GG                                     | TT                 | TT               | INTERGENIC                    |                    |                                         |
| SNP_33257_A_8694451 | NC_021164.1    | Ca_Kabuli_Chr05 | 8694451                 | AA                                     | CC                 | CC               | INTERGENIC                    |                    |                                         |
| SNP_33258_A_8700357 | NC_021164.1    | Ca_Kabuli_Chr05 | 8700357                 | GG                                     | AA                 | AA               | SYNONYMOUS_CODING             | 101513493          | phospholipid-transporting ATPase 1-like |
| SNP_33259_A_8701982 | NC_021164.1    | Ca_Kabuli_Chr05 | 8701982                 | GG                                     | AA                 | AA               | INTRON                        | 101513493          | phospholipid-transporting ATPase 1-like |
| SNP_33260_A_8701984 | NC_021164.1    | Ca_Kabuli_Chr05 | 8701984                 | TT                                     | CC                 | CC               | INTRON                        | 101513493          | phospholipid-transporting ATPase 1-like |
| SNP_33261_A_8701987 | NC_021164.1    | Ca_Kabuli_Chr05 | 8701987                 | CC                                     | GG                 | GG               | INTRON                        | 101513493          | phospholipid-transporting ATPase 1-like |
| SNP_33262_A_8701996 | NC_021164.1    | Ca_Kabuli_Chr05 | 8701996                 | TT                                     | AA                 | AA               | INTRON                        | 101513493          | phospholipid-transporting ATPase 1-like |
| SNP_33263_A_8702481 | NC_021164.1    | Ca_Kabuli_Chr05 | 8702481                 | CC                                     | TT                 | TT               | INTRON                        | 101513493          | phospholipid-transporting ATPase 1-like |
| SNP_33264_A_8704256 | NC_021164.1    | Ca_Kabuli_Chr05 | 8704256                 | GG                                     | AA                 | AA               | INTRON                        | 101513493          | phospholipid-transporting ATPase 1-like |
| SNP_33265_A_8704263 | NC_021164.1    | Ca_Kabuli_Chr05 | 8704263                 | CC                                     | TT                 | TT               | INTRON                        | 101513493          | phospholipid-transporting ATPase 1-like |
| SNP_33266_A_8705875 | NC_021164.1    | Ca_Kabuli_Chr05 | 8705875                 | GG                                     | CC                 | CC               | INTRON                        | 101513493          | phospholipid-transporting ATPase 1-like |
| SNP_33267_A_8706561 | NC_021164.1    | Ca_Kabuli_Chr05 | 8706561                 | CC                                     | GG                 | GG               | URR                           | 101513493          | phospholipid-transporting ATPase 1-like |
| SNP_33268_A_8707975 | NC_021164.1    | Ca_Kabuli_Chr05 | 8707975                 | TT                                     | CC                 | CC               | URR                           | 101513493          | phospholipid-transporting ATPase 1-like |
| SNP_33269_A_8708022 | NC_021164.1    | Ca_Kabuli_Chr05 | 8708022                 | AA                                     | GG                 | GG               | URR                           | 101513493          | phospholipid-transporting ATPase 1-like |
| SNP_33270_A_8708201 | NC_021164.1    | Ca_Kabuli_Chr05 | 8708201                 | CC                                     | TT                 | TT               | URR                           | 101513493          | phospholipid-transporting ATPase 1-like |
| SNP_33271_A_8708324 | NC_021164.1    | Ca_Kabuli_Chr05 | 8708324                 | AA                                     | CC                 | CC               | URR                           | 101513493          | phospholipid-transporting ATPase 1-like |
| SNP_33272_A_8708333 | NC_021164.1    | Ca_Kabuli_Chr05 | 8708333                 | AA                                     | GG                 | GG               | URR                           | 101513493          | phospholipid-transporting ATPase 1-like |
| SNP_33273_A_8708339 | NC_021164.1    | Ca_Kabuli_Chr05 | 8708339                 | CC                                     | TT                 | TT               | URR                           | 101513493          | phospholipid-transporting ATPase 1-like |

| SNPs IDs            | Chromosome IDs | Chromosomes     | Physical positions (bp) | CDC Frontier (Reference genome) | (Pusa 1103 & HPNB) | (ILWC 46 & LPNB) | Sequence Components of genome | Gene accession IDs | Putative functions          |
|---------------------|----------------|-----------------|-------------------------|---------------------------------|--------------------|------------------|-------------------------------|--------------------|-----------------------------|
| SNP_33274_A_8711265 | NC_021164.1    | Ca_Kabuli_Chr05 | 8711265                 | GG                              | AA                 | AA               | INTERGENIC                    |                    |                             |
| SNP_33275_A_8711423 | NC_021164.1    | Ca_Kabuli_Chr05 | 8711423                 | AA                              | CC                 | CC               | INTERGENIC                    |                    |                             |
| SNP_33276_A_8711460 | NC_021164.1    | Ca_Kabuli_Chr05 | 8711460                 | CC                              | TT                 | TT               | INTERGENIC                    |                    |                             |
| SNP_33277_A_8711461 | NC_021164.1    | Ca_Kabuli_Chr05 | 8711461                 | GG                              | AA                 | AA               | INTERGENIC                    |                    |                             |
| SNP_33278_A_8719619 | NC_021164.1    | Ca_Kabuli_Chr05 | 8719619                 | CC                              | GG                 | GG               | INTRON                        | 101513796          | probable prefolin subunit 2 |
| SNP_33279_A_8720692 | NC_021164.1    | Ca_Kabuli_Chr05 | 8720692                 | CC                              | TT                 | TT               | INTRON                        | 101513796          | probable prefolin subunit 2 |
| SNP_33281_A_8724529 | NC_021164.1    | Ca_Kabuli_Chr05 | 8724529                 | TT                              | CC                 | CC               | INTERGENIC                    |                    |                             |
| SNP_33282_A_8724543 | NC_021164.1    | Ca_Kabuli_Chr05 | 8724543                 | GG                              | TT                 | TT               | INTERGENIC                    |                    |                             |
| SNP_33283_A_8724559 | NC_021164.1    | Ca_Kabuli_Chr05 | 8724559                 | AA                              | TT                 | TT               | INTERGENIC                    |                    |                             |
| SNP_33284_A_8724774 | NC_021164.1    | Ca_Kabuli_Chr05 | 8724774                 | CC                              | AA                 | AA               | INTERGENIC                    |                    |                             |
| SNP_33285_A_8724812 | NC_021164.1    | Ca_Kabuli_Chr05 | 8724812                 | TT                              | AA                 | AA               | INTERGENIC                    |                    |                             |
| SNP_33286_A_8724846 | NC_021164.1    | Ca_Kabuli_Chr05 | 8724846                 | CC                              | GG                 | GG               | INTERGENIC                    |                    |                             |
| SNP_33287_A_8726848 | NC_021164.1    | Ca_Kabuli_Chr05 | 8726848                 | TT                              | CC                 | CC               | INTERGENIC                    |                    |                             |
| SNP_33288_A_8726852 | NC_021164.1    | Ca_Kabuli_Chr05 | 8726852                 | CC                              | AA                 | AA               | INTERGENIC                    |                    |                             |
| SNP_33289_A_8729526 | NC_021164.1    | Ca_Kabuli_Chr05 | 8729526                 | CC                              | TT                 | TT               | INTERGENIC                    |                    |                             |
| SNP_33290_A_8729537 | NC_021164.1    | Ca_Kabuli_Chr05 | 8729537                 | TT                              | GG                 | GG               | INTERGENIC                    |                    |                             |
| SNP_33292_A_8729603 | NC_021164.1    | Ca_Kabuli_Chr05 | 8729603                 | GG                              | AA                 | AA               | INTERGENIC                    |                    |                             |
| SNP_33293_A_8730188 | NC_021164.1    | Ca_Kabuli_Chr05 | 8730188                 | AA                              | TT                 | TT               | INTERGENIC                    |                    |                             |
| SNP_33294_A_8731567 | NC_021164.1    | Ca_Kabuli_Chr05 | 8731567                 | TT                              | CC                 | CC               | INTERGENIC                    |                    |                             |
| SNP_33295_A_8732868 | NC_021164.1    | Ca_Kabuli_Chr05 | 8732868                 | GG                              | AA                 | AA               | INTERGENIC                    |                    |                             |
| SNP_33296_A_8733226 | NC_021164.1    | Ca_Kabuli_Chr05 | 8733226                 | TT                              | CC                 | CC               | INTERGENIC                    |                    |                             |
| SNP_33297_A_8733233 | NC_021164.1    | Ca_Kabuli_Chr05 | 8733233                 | AA                              | CC                 | CC               | INTERGENIC                    |                    |                             |



| SNPs IDs            | Chromosome IDs | Chromosomes     | Physical positions (bp) | CDC Frontier (Reference genome) | (Pusa 1103 & HPNB) | (ILWC 46 & LPNB) | Sequence Components of genome | Gene accession IDs | Putative functions                                  |
|---------------------|----------------|-----------------|-------------------------|---------------------------------|--------------------|------------------|-------------------------------|--------------------|-----------------------------------------------------|
| SNP_33298_A_8745222 | NC_021164.1    | Ca_Kabuli_Chr05 | 8745222                 | CC                              | TT                 | TT               | INTERGENIC                    |                    |                                                     |
| SNP_33299_A_8745279 | NC_021164.1    | Ca_Kabuli_Chr05 | 8745279                 | TT                              | CC                 | CC               | INTERGENIC                    |                    |                                                     |
| SNP_33300_A_8745407 | NC_021164.1    | Ca_Kabuli_Chr05 | 8745407                 | CC                              | TT                 | TT               | INTERGENIC                    |                    |                                                     |
| SNP_33301_A_8745926 | NC_021164.1    | Ca_Kabuli_Chr05 | 8745926                 | AA                              | GG                 | GG               | INTERGENIC                    |                    |                                                     |
| SNP_33302_A_8746130 | NC_021164.1    | Ca_Kabuli_Chr05 | 8746130                 | TT                              | CC                 | CC               | INTERGENIC                    |                    |                                                     |
| SNP_33303_A_8749144 | NC_021164.1    | Ca_Kabuli_Chr05 | 8749144                 | GG                              | AA                 | AA               | INTERGENIC                    |                    |                                                     |
| SNP_33304_A_8750097 | NC_021164.1    | Ca_Kabuli_Chr05 | 8750097                 | GG                              | AA                 | AA               | DRR                           | 101514144          | UPF0695 membrane protein C977.11/PB8B6.06c-like     |
| SNP_33305_A_8752977 | NC_021164.1    | Ca_Kabuli_Chr05 | 8752977                 | AA                              | GG                 | GG               | INTERGENIC                    |                    |                                                     |
| SNP_33306_A_8758862 | NC_021164.1    | Ca_Kabuli_Chr05 | 8758862                 | GG                              | CC                 | CC               | URR                           | 101514470          | inactive protein RESTRICTED TEV MOVEMENT 2          |
| SNP_33307_A_8759615 | NC_021164.1    | Ca_Kabuli_Chr05 | 8759615                 | AA                              | CC                 | CC               | DRR                           | 101514794          | bifunctional protein FoD 1, mitochondrial-like      |
| SNP_33308_A_8759637 | NC_021164.1    | Ca_Kabuli_Chr05 | 8759637                 | AA                              | CC                 | CC               | DRR                           | 101514794          | bifunctional protein FoD 1, mitochondrial-like      |
| SNP_33309_A_8768697 | NC_021164.1    | Ca_Kabuli_Chr05 | 8768697                 | TT                              | GG                 | GG               | INTERGENIC                    |                    |                                                     |
| SNP_33311_A_8769186 | NC_021164.1    | Ca_Kabuli_Chr05 | 8769186                 | CC                              | GG                 | GG               | INTERGENIC                    |                    |                                                     |
| SNP_33312_A_8773149 | NC_021164.1    | Ca_Kabuli_Chr05 | 8773149                 | AA                              | GG                 | GG               | SYNONYMOUS_CODING             | 101515117          | inactive protein RESTRICTED TEV MOVEMENT 2-like     |
| SNP_33313_A_8774439 | NC_021164.1    | Ca_Kabuli_Chr05 | 8774439                 | GG                              | AA                 | AA               | INTRON                        | 101515117          | inactive protein RESTRICTED TEV MOVEMENT 2-like     |
| SNP_33314_A_8775036 | NC_021164.1    | Ca_Kabuli_Chr05 | 8775036                 | TT                              | AA                 | AA               | INTRON                        | 101515117          | inactive protein RESTRICTED TEV MOVEMENT 2-like     |
| SNP_33316_A_8776139 | NC_021164.1    | Ca_Kabuli_Chr05 | 8776139                 | TT                              | CC                 | CC               | URR                           | 101515117          | inactive protein RESTRICTED TEV MOVEMENT 2-like     |
| SNP_33317_A_8780641 | NC_021164.1    | Ca_Kabuli_Chr05 | 8780641                 | GG                              | TT                 | TT               | INTERGENIC                    |                    |                                                     |
| SNP_33319_A_8784168 | NC_021164.1    | Ca_Kabuli_Chr05 | 8784168                 | CC                              | TT                 | TT               | INTERGENIC                    |                    |                                                     |
| SNP_33321_A_8794509 | NC_021164.1    | Ca_Kabuli_Chr05 | 8794509                 | TT                              | CC                 | CC               | INTRON                        | 101515768          | 60S ribosomal protein L11-like                      |
| SNP_33323_A_8808654 | NC_021164.1    | Ca_Kabuli_Chr05 | 8808654                 | TT                              | CC                 | CC               | INTERGENIC                    |                    |                                                     |
| SNP_33324_A_8814290 | NC_021164.1    | Ca_Kabuli_Chr05 | 8814290                 | TT                              | CC                 | CC               | INTRON                        | 101488527          | histone acetyltransferase of the MYST family 2-like |

| SNPs IDs            | Chromosome IDs | Chromosomes     | Physical positions (bp) | CDC Frontier (Reference genome) | (Pusa 1103 & HPNB) | (ILWC 46 & LPNB) | Sequence Components of genome | Gene accession IDs | Putative functions                                  |
|---------------------|----------------|-----------------|-------------------------|---------------------------------|--------------------|------------------|-------------------------------|--------------------|-----------------------------------------------------|
| SNP_33325_A_8818989 | NC_021164.1    | Ca_Kabuli_Chr05 | 8818989                 | CC                              | TT                 | TT               | URR                           | 101488527          | histone acetyltransferase of the MYST family 2-like |
| SNP_33326_A_8818990 | NC_021164.1    | Ca_Kabuli_Chr05 | 8818990                 | AA                              | GG                 | GG               | URR                           | 101488527          | histone acetyltransferase of the MYST family 2-like |
| SNP_33327_A_8822195 | NC_021164.1    | Ca_Kabuli_Chr05 | 8822195                 | AA                              | GG                 | GG               | INTERGENIC                    |                    |                                                     |
| SNP_33328_A_8822224 | NC_021164.1    | Ca_Kabuli_Chr05 | 8822224                 | GG                              | AA                 | AA               | INTERGENIC                    |                    |                                                     |
| SNP_33329_A_8822227 | NC_021164.1    | Ca_Kabuli_Chr05 | 8822227                 | CC                              | TT                 | TT               | INTERGENIC                    |                    |                                                     |
| SNP_33330_A_8822296 | NC_021164.1    | Ca_Kabuli_Chr05 | 8822296                 | TT                              | AA                 | AA               | INTERGENIC                    |                    |                                                     |
| SNP_33331_A_8822478 | NC_021164.1    | Ca_Kabuli_Chr05 | 8822478                 | GG                              | CC                 | CC               | INTERGENIC                    |                    |                                                     |
| SNP_33332_A_8822676 | NC_021164.1    | Ca_Kabuli_Chr05 | 8822676                 | TT                              | CC                 | CC               | INTERGENIC                    |                    |                                                     |
| SNP_33333_A_8823091 | NC_021164.1    | Ca_Kabuli_Chr05 | 8823091                 | TT                              | CC                 | CC               | INTERGENIC                    |                    |                                                     |
| SNP_33334_A_8823109 | NC_021164.1    | Ca_Kabuli_Chr05 | 8823109                 | AA                              | GG                 | GG               | INTERGENIC                    |                    |                                                     |
| SNP_33336_A_8823445 | NC_021164.1    | Ca_Kabuli_Chr05 | 8823445                 | AA                              | TT                 | TT               | INTERGENIC                    |                    |                                                     |
| SNP_33338_A_8823785 | NC_021164.1    | Ca_Kabuli_Chr05 | 8823785                 | TT                              | CC                 | CC               | INTERGENIC                    |                    |                                                     |
| SNP_33339_A_8826260 | NC_021164.1    | Ca_Kabuli_Chr05 | 8826260                 | AA                              | TT                 | TT               | INTRON                        | 101489092          | probable dimethyladenosine transferase              |
| SNP_33340_A_8826277 | NC_021164.1    | Ca_Kabuli_Chr05 | 8826277                 | TT                              | CC                 | CC               | INTRON                        | 101489092          | probable dimethyladenosine transferase              |
| SNP_33341_A_8828968 | NC_021164.1    | Ca_Kabuli_Chr05 | 8828968                 | CC                              | TT                 | TT               | URR                           | 101489092          | probable dimethyladenosine transferase              |
| SNP_33342_A_8829353 | NC_021164.1    | Ca_Kabuli_Chr05 | 8829353                 | CC                              | TT                 | TT               | URR                           | 101489092          | probable dimethyladenosine transferase              |
| SNP_33345_A_8837436 | NC_021164.1    | Ca_Kabuli_Chr05 | 8837436                 | CC                              | TT                 | TT               | INTERGENIC                    |                    |                                                     |
| SNP_33346_A_8837737 | NC_021164.1    | Ca_Kabuli_Chr05 | 8837737                 | TT                              | CC                 | CC               | INTERGENIC                    |                    |                                                     |
| SNP_33347_A_8837780 | NC_021164.1    | Ca_Kabuli_Chr05 | 8837780                 | CC                              | AA                 | AA               | INTERGENIC                    |                    |                                                     |
| SNP_33348_A_8837801 | NC_021164.1    | Ca_Kabuli_Chr05 | 8837801                 | AA                              | TT                 | TT               | INTERGENIC                    |                    |                                                     |
| SNP_33349_A_8837809 | NC_021164.1    | Ca_Kabuli_Chr05 | 8837809                 | CC                              | TT                 | TT               | INTERGENIC                    |                    |                                                     |
| SNP_33350_A_8837912 | NC_021164.1    | Ca_Kabuli_Chr05 | 8837912                 | CC                              | TT                 | TT               | INTERGENIC                    |                    |                                                     |

| SNPs IDs            | Chromosome IDs | Chromosomes     | Physical positions (bp) | CDC Frontier genome (Reference genome) | (Pusa 1103 & HPNB) | (ILWC 46 & LPNB) | Sequence Components of genome | Gene accession IDs | Putative functions                                              |
|---------------------|----------------|-----------------|-------------------------|----------------------------------------|--------------------|------------------|-------------------------------|--------------------|-----------------------------------------------------------------|
| SNP_33351_A_8837921 | NC_021164.1    | Ca_Kabuli_Chr05 | 8837921                 | GG                                     | TT                 | TT               | INTERGENIC                    |                    |                                                                 |
| SNP_33352_A_8838192 | NC_021164.1    | Ca_Kabuli_Chr05 | 8838192                 | AA                                     | CC                 | CC               | INTERGENIC                    |                    |                                                                 |
| SNP_33353_A_8838213 | NC_021164.1    | Ca_Kabuli_Chr05 | 8838213                 | TT                                     | CC                 | CC               | INTERGENIC                    |                    |                                                                 |
| SNP_33354_A_8838227 | NC_021164.1    | Ca_Kabuli_Chr05 | 8838227                 | CC                                     | AA                 | AA               | INTERGENIC                    |                    |                                                                 |
| SNP_33355_A_8855249 | NC_021164.1    | Ca_Kabuli_Chr05 | 8855249                 | AA                                     | GG                 | GG               | INTERGENIC                    |                    |                                                                 |
| SNP_33356_A_8858940 | NC_021164.1    | Ca_Kabuli_Chr05 | 8858940                 | AA                                     | TT                 | TT               | INTRON                        | 101489425          | E3 ubiquitin protein ligase RIN2-like                           |
| SNP_33357_A_8867281 | NC_021164.1    | Ca_Kabuli_Chr05 | 8867281                 | AA                                     | GG                 | GG               | INTERGENIC                    |                    |                                                                 |
| SNP_33358_A_8868145 | NC_021164.1    | Ca_Kabuli_Chr05 | 8868145                 | AA                                     | TT                 | TT               | INTERGENIC                    |                    |                                                                 |
| SNP_33359_A_8870118 | NC_021164.1    | Ca_Kabuli_Chr05 | 8870118                 | AA                                     | CC                 | CC               | NON_SYNONYMOUS_CODING         | 101489746          | probable cellulose synthase A catalytic subunit 3 [UDP-forming] |
| SNP_33360_A_8870503 | NC_021164.1    | Ca_Kabuli_Chr05 | 8870503                 | CC                                     | TT                 | TT               | INTRON                        | 101489746          | probable cellulose synthase A catalytic subunit 3 [UDP-forming] |
| SNP_33361_A_8870541 | NC_021164.1    | Ca_Kabuli_Chr05 | 8870541                 | GG                                     | TT                 | TT               | INTRON                        | 101489746          | probable cellulose synthase A catalytic subunit 3 [UDP-forming] |
| SNP_33362_A_8870835 | NC_021164.1    | Ca_Kabuli_Chr05 | 8870835                 | CC                                     | TT                 | TT               | NON_SYNONYMOUS_CODING         | 101489746          | probable cellulose synthase A catalytic subunit 3 [UDP-forming] |
| SNP_33363_A_8870838 | NC_021164.1    | Ca_Kabuli_Chr05 | 8870838                 | CC                                     | TT                 | TT               | NON_SYNONYMOUS_CODING         | 101489746          | probable cellulose synthase A catalytic subunit 3 [UDP-forming] |
| SNP_33364_A_8870842 | NC_021164.1    | Ca_Kabuli_Chr05 | 8870842                 | TT                                     | GG                 | GG               | SYNONYMOUS_CODING             | 101489746          | probable cellulose synthase A catalytic subunit 3 [UDP-forming] |
| SNP_33365_A_8877956 | NC_021164.1    | Ca_Kabuli_Chr05 | 8877956                 | TT                                     | AA                 | AA               | INTRON                        | 101489746          | probable cellulose synthase A catalytic subunit 3 [UDP-forming] |
| SNP_33367_A_8878213 | NC_021164.1    | Ca_Kabuli_Chr05 | 8878213                 | CC                                     | TT                 | TT               | INTRON                        | 101489746          | probable cellulose synthase A catalytic subunit 3 [UDP-forming] |
| SNP_33368_A_8878230 | NC_021164.1    | Ca_Kabuli_Chr05 | 8878230                 | CC                                     | TT                 | TT               | INTRON                        | 101489746          | probable cellulose synthase A catalytic subunit 3 [UDP-forming] |
| SNP_33369_A_8878259 | NC_021164.1    | Ca_Kabuli_Chr05 | 8878259                 | AA                                     | TT                 | TT               | INTRON                        | 101489746          | probable cellulose synthase A catalytic subunit 3 [UDP-forming] |
| SNP_33370_A_8878592 | NC_021164.1    | Ca_Kabuli_Chr05 | 8878592                 | TT                                     | GG                 | GG               | INTRON                        | 101489746          | probable cellulose synthase A catalytic subunit 3 [UDP-forming] |
| SNP_33371_A_8878602 | NC_021164.1    | Ca_Kabuli_Chr05 | 8878602                 | GG                                     | AA                 | AA               | INTRON                        | 101489746          | probable cellulose synthase A catalytic subunit 3 [UDP-forming] |
| SNP_33372_A_8878617 | NC_021164.1    | Ca_Kabuli_Chr05 | 8878617                 | CC                                     | AA                 | AA               | INTRON                        | 101489746          | probable cellulose synthase A catalytic subunit 3 [UDP-forming] |
| SNP_33373_A_8883141 | NC_021164.1    | Ca_Kabuli_Chr05 | 8883141                 | GG                                     | TT                 | TT               | INTRON                        | 101489746          | probable cellulose synthase A catalytic subunit 3 [UDP-forming] |

| SNPs IDs            | Chromosome IDs | Chromosomes     | Physical positions (bp) | CDC Frontier genome (Reference genome) | (Pusa 1103 & HPNB) | (ILWC 46 & LPNB) | Sequence genome | Components of | Gene accession IDs                                      | Putative functions |
|---------------------|----------------|-----------------|-------------------------|----------------------------------------|--------------------|------------------|-----------------|---------------|---------------------------------------------------------|--------------------|
| SNP_33374_A_8927856 | NC_021164.1    | Ca_Kabuli_Chr05 | 8927856                 | TT                                     | CC                 | CC               | INTERGENIC      |               |                                                         |                    |
| SNP_33375_A_8928130 | NC_021164.1    | Ca_Kabuli_Chr05 | 8928130                 | GG                                     | TT                 | TT               | INTERGENIC      |               |                                                         |                    |
| SNP_33376_A_8928176 | NC_021164.1    | Ca_Kabuli_Chr05 | 8928176                 | CC                                     | TT                 | TT               | INTERGENIC      |               |                                                         |                    |
| SNP_33377_A_8929694 | NC_021164.1    | Ca_Kabuli_Chr05 | 8929694                 | CC                                     | AA                 | AA               | INTERGENIC      |               |                                                         |                    |
| SNP_33380_A_8930622 | NC_021164.1    | Ca_Kabuli_Chr05 | 8930622                 | GG                                     | CC                 | CC               | INTERGENIC      |               |                                                         |                    |
| SNP_33381_A_8934179 | NC_021164.1    | Ca_Kabuli_Chr05 | 8934179                 | CC                                     | TT                 | TT               | INTERGENIC      |               |                                                         |                    |
| SNP_33383_A_8936186 | NC_021164.1    | Ca_Kabuli_Chr05 | 8936186                 | GG                                     | AA                 | AA               | INTERGENIC      |               |                                                         |                    |
| SNP_33384_A_8936226 | NC_021164.1    | Ca_Kabuli_Chr05 | 8936226                 | CC                                     | GG                 | GG               | INTERGENIC      |               |                                                         |                    |
| SNP_33385_A_8936459 | NC_021164.1    | Ca_Kabuli_Chr05 | 8936459                 | TT                                     | CC                 | CC               | INTERGENIC      |               |                                                         |                    |
| SNP_33386_A_8936472 | NC_021164.1    | Ca_Kabuli_Chr05 | 8936472                 | AA                                     | GG                 | GG               | INTERGENIC      |               |                                                         |                    |
| SNP_33387_A_8936507 | NC_021164.1    | Ca_Kabuli_Chr05 | 8936507                 | AA                                     | TT                 | TT               | INTERGENIC      |               |                                                         |                    |
| SNP_33389_A_8937247 | NC_021164.1    | Ca_Kabuli_Chr05 | 8937247                 | AA                                     | GG                 | GG               | INTERGENIC      |               |                                                         |                    |
| SNP_33390_A_8937513 | NC_021164.1    | Ca_Kabuli_Chr05 | 8937513                 | TT                                     | CC                 | CC               | DRR             | 101490062     | 2-amino-3-ketobutyrate coenzyme A ligase, mitochondrial |                    |
| SNP_33391_A_8937540 | NC_021164.1    | Ca_Kabuli_Chr05 | 8937540                 | TT                                     | CC                 | CC               | DRR             | 101490062     | 2-amino-3-ketobutyrate coenzyme A ligase, mitochondrial |                    |
| SNP_33392_A_8937651 | NC_021164.1    | Ca_Kabuli_Chr05 | 8937651                 | CC                                     | TT                 | TT               | DRR             | 101490062     | 2-amino-3-ketobutyrate coenzyme A ligase, mitochondrial |                    |
| SNP_33393_A_8941980 | NC_021164.1    | Ca_Kabuli_Chr05 | 8941980                 | GG                                     | TT                 | TT               | INTERGENIC      |               |                                                         |                    |
| SNP_33394_A_8942254 | NC_021164.1    | Ca_Kabuli_Chr05 | 8942254                 | GG                                     | AA                 | AA               | INTERGENIC      |               |                                                         |                    |
| SNP_33395_A_8942309 | NC_021164.1    | Ca_Kabuli_Chr05 | 8942309                 | AA                                     | TT                 | TT               | INTERGENIC      |               |                                                         |                    |
| SNP_33396_A_8943072 | NC_021164.1    | Ca_Kabuli_Chr05 | 8943072                 | TT                                     | CC                 | CC               | INTERGENIC      |               |                                                         |                    |
| SNP_33397_A_8943553 | NC_021164.1    | Ca_Kabuli_Chr05 | 8943553                 | CC                                     | GG                 | GG               | INTERGENIC      |               |                                                         |                    |
| SNP_33398_A_8946558 | NC_021164.1    | Ca_Kabuli_Chr05 | 8946558                 | AA                                     | GG                 | GG               | URR             | 101490062     | 2-amino-3-ketobutyrate coenzyme A ligase, mitochondrial |                    |
| SNP_33400_A_8952530 | NC_021164.1    | Ca_Kabuli_Chr05 | 8952530                 | AA                                     | TT                 | TT               | INTRON          | 101490396     | eugenol synthase 1-like                                 |                    |

| SNPs IDs            | Chromosome IDs | Chromosomes     | Physical positions (bp) | CDC Frontier (Reference genome) | (Pusa 1103 & HPNB) | (ILWC 46 & LPNB) | Sequence Components of genome | Gene accession IDs | Putative functions      |
|---------------------|----------------|-----------------|-------------------------|---------------------------------|--------------------|------------------|-------------------------------|--------------------|-------------------------|
| SNP_33401_A_8952537 | NC_021164.1    | Ca_Kabuli_Chr05 | 8952537                 | GG                              | AA                 | AA               | INTRON                        | 101490396          | eugenol synthase 1-like |
| SNP_33402_A_8955420 | NC_021164.1    | Ca_Kabuli_Chr05 | 8955420                 | TT                              | AA                 | AA               | URR                           | 101490396          | eugenol synthase 1-like |
| SNP_33403_A_8960310 | NC_021164.1    | Ca_Kabuli_Chr05 | 8960310                 | TT                              | GG                 | GG               | INTERGENIC                    |                    |                         |
| SNP_33404_A_8960653 | NC_021164.1    | Ca_Kabuli_Chr05 | 8960653                 | TT                              | CC                 | CC               | INTERGENIC                    |                    |                         |
| SNP_33405_A_8961443 | NC_021164.1    | Ca_Kabuli_Chr05 | 8961443                 | AA                              | TT                 | TT               | INTERGENIC                    |                    |                         |
| SNP_33406_A_8961791 | NC_021164.1    | Ca_Kabuli_Chr05 | 8961791                 | AA                              | GG                 | GG               | INTERGENIC                    |                    |                         |
| SNP_33407_A_8961859 | NC_021164.1    | Ca_Kabuli_Chr05 | 8961859                 | CC                              | TT                 | TT               | INTERGENIC                    |                    |                         |
| SNP_33408_A_8962165 | NC_021164.1    | Ca_Kabuli_Chr05 | 8962165                 | CC                              | GG                 | GG               | INTERGENIC                    |                    |                         |
| SNP_33409_A_8962171 | NC_021164.1    | Ca_Kabuli_Chr05 | 8962171                 | GG                              | AA                 | AA               | INTERGENIC                    |                    |                         |
| SNP_33410_A_8969325 | NC_021164.1    | Ca_Kabuli_Chr05 | 8969325                 | AA                              | TT                 | TT               | INTERGENIC                    |                    |                         |
| SNP_33412_A_8970192 | NC_021164.1    | Ca_Kabuli_Chr05 | 8970192                 | TT                              | AA                 | AA               | INTERGENIC                    |                    |                         |
| SNP_33414_A_8975227 | NC_021164.1    | Ca_Kabuli_Chr05 | 8975227                 | TT                              | CC                 | CC               | INTERGENIC                    |                    |                         |
| SNP_33415_A_8975254 | NC_021164.1    | Ca_Kabuli_Chr05 | 8975254                 | TT                              | CC                 | CC               | INTERGENIC                    |                    |                         |
| SNP_33416_A_8975374 | NC_021164.1    | Ca_Kabuli_Chr05 | 8975374                 | TT                              | AA                 | AA               | INTERGENIC                    |                    |                         |
| SNP_33417_A_8975530 | NC_021164.1    | Ca_Kabuli_Chr05 | 8975530                 | CC                              | TT                 | TT               | INTERGENIC                    |                    |                         |
| SNP_33420_A_8975644 | NC_021164.1    | Ca_Kabuli_Chr05 | 8975644                 | CC                              | GG                 | GG               | INTERGENIC                    |                    |                         |
| SNP_33421_A_8975681 | NC_021164.1    | Ca_Kabuli_Chr05 | 8975681                 | CC                              | AA                 | AA               | INTERGENIC                    |                    |                         |
| SNP_33422_A_8975945 | NC_021164.1    | Ca_Kabuli_Chr05 | 8975945                 | TT                              | GG                 | GG               | INTERGENIC                    |                    |                         |
| SNP_33423_A_8975952 | NC_021164.1    | Ca_Kabuli_Chr05 | 8975952                 | AA                              | TT                 | TT               | INTERGENIC                    |                    |                         |
| SNP_33424_A_8998605 | NC_021164.1    | Ca_Kabuli_Chr05 | 8998605                 | AA                              | TT                 | TT               | INTERGENIC                    |                    |                         |
| SNP_33425_A_8998862 | NC_021164.1    | Ca_Kabuli_Chr05 | 8998862                 | TT                              | CC                 | CC               | INTERGENIC                    |                    |                         |
| SNP_33426_A_8998951 | NC_021164.1    | Ca_Kabuli_Chr05 | 8998951                 | AA                              | GG                 | GG               | INTERGENIC                    |                    |                         |

| SNPs IDs            | Chromosome IDs | Chromosomes     | Physical positions (bp) | CDC Frontier genome (Reference genome) | (Pusa 1103 & HPNB) | (ILWC 46 & LPNB) | Sequence genome | Components of | Gene accession IDs              | Putative functions |
|---------------------|----------------|-----------------|-------------------------|----------------------------------------|--------------------|------------------|-----------------|---------------|---------------------------------|--------------------|
| SNP_33427_A_8999002 | NC_021164.1    | Ca_Kabuli_Chr05 | 8999002                 | TT                                     | AA                 | AA               | INTERGENIC      |               |                                 |                    |
| SNP_33428_A_8999030 | NC_021164.1    | Ca_Kabuli_Chr05 | 8999030                 | TT                                     | CC                 | CC               | INTERGENIC      |               |                                 |                    |
| SNP_33429_A_8999224 | NC_021164.1    | Ca_Kabuli_Chr05 | 8999224                 | CC                                     | TT                 | TT               | INTERGENIC      |               |                                 |                    |
| SNP_33430_A_8999349 | NC_021164.1    | Ca_Kabuli_Chr05 | 8999349                 | CC                                     | TT                 | TT               | INTERGENIC      |               |                                 |                    |
| SNP_33431_A_8999377 | NC_021164.1    | Ca_Kabuli_Chr05 | 8999377                 | TT                                     | GG                 | GG               | INTERGENIC      |               |                                 |                    |
| SNP_33432_A_8999409 | NC_021164.1    | Ca_Kabuli_Chr05 | 8999409                 | GG                                     | CC                 | CC               | INTERGENIC      |               |                                 |                    |
| SNP_33433_A_8999559 | NC_021164.1    | Ca_Kabuli_Chr05 | 8999559                 | GG                                     | AA                 | AA               | INTERGENIC      |               |                                 |                    |
| SNP_33434_A_8999593 | NC_021164.1    | Ca_Kabuli_Chr05 | 8999593                 | TT                                     | GG                 | GG               | INTERGENIC      |               |                                 |                    |
| SNP_33435_A_8999612 | NC_021164.1    | Ca_Kabuli_Chr05 | 8999612                 | CC                                     | AA                 | AA               | INTERGENIC      |               |                                 |                    |
| SNP_33436_A_8999636 | NC_021164.1    | Ca_Kabuli_Chr05 | 8999636                 | GG                                     | AA                 | AA               | INTERGENIC      |               |                                 |                    |
| SNP_33437_A_8999930 | NC_021164.1    | Ca_Kabuli_Chr05 | 8999930                 | GG                                     | AA                 | AA               | INTERGENIC      |               |                                 |                    |
| SNP_33438_A_8999969 | NC_021164.1    | Ca_Kabuli_Chr05 | 8999969                 | CC                                     | AA                 | AA               | INTERGENIC      |               |                                 |                    |
| SNP_33439_A_9000017 | NC_021164.1    | Ca_Kabuli_Chr05 | 9000017                 | AA                                     | GG                 | GG               | INTERGENIC      |               |                                 |                    |
| SNP_33440_A_9000191 | NC_021164.1    | Ca_Kabuli_Chr05 | 9000191                 | CC                                     | TT                 | TT               | INTERGENIC      |               |                                 |                    |
| SNP_33441_A_9001422 | NC_021164.1    | Ca_Kabuli_Chr05 | 9001422                 | GG                                     | AA                 | AA               | INTERGENIC      |               |                                 |                    |
| SNP_33442_A_9001429 | NC_021164.1    | Ca_Kabuli_Chr05 | 9001429                 | GG                                     | AA                 | AA               | INTERGENIC      |               |                                 |                    |
| SNP_33443_A_9001775 | NC_021164.1    | Ca_Kabuli_Chr05 | 9001775                 | CC                                     | TT                 | TT               | DRR             | 101497749     | vacuolar-processing enzyme-like |                    |
| SNP_33444_A_9001840 | NC_021164.1    | Ca_Kabuli_Chr05 | 9001840                 | CC                                     | TT                 | TT               | DRR             | 101497749     | vacuolar-processing enzyme-like |                    |
| SNP_33446_A_9010464 | NC_021164.1    | Ca_Kabuli_Chr05 | 9010464                 | AA                                     | GG                 | GG               | URR             | 101497749     | vacuolar-processing enzyme-like |                    |
| SNP_33447_A_9010971 | NC_021164.1    | Ca_Kabuli_Chr05 | 9010971                 | TT                                     | CC                 | CC               | URR             | 101497749     | vacuolar-processing enzyme-like |                    |
| SNP_33448_A_9010977 | NC_021164.1    | Ca_Kabuli_Chr05 | 9010977                 | CC                                     | TT                 | TT               | URR             | 101497749     | vacuolar-processing enzyme-like |                    |
| SNP_33449_A_9011022 | NC_021164.1    | Ca_Kabuli_Chr05 | 9011022                 | TT                                     | CC                 | CC               | URR             | 101497749     | vacuolar-processing enzyme-like |                    |

| SNPs IDs            | Chromosome IDs | Chromosomes     | Physical positions (bp) | CDC Frontier genome (Reference genome) | (Pusa 1103 & HPNB) | (ILWC 46 & LPNB) | Sequence Components of genome | Gene accession IDs | Putative functions          |
|---------------------|----------------|-----------------|-------------------------|----------------------------------------|--------------------|------------------|-------------------------------|--------------------|-----------------------------|
| SNP_33450_A_9011973 | NC_021164.1    | Ca_Kabuli_Chr05 | 9011973                 | CC                                     | TT                 | TT               | INTERGENIC                    |                    |                             |
| SNP_33451_A_9012055 | NC_021164.1    | Ca_Kabuli_Chr05 | 9012055                 | AA                                     | GG                 | GG               | INTERGENIC                    |                    |                             |
| SNP_33452_A_9012314 | NC_021164.1    | Ca_Kabuli_Chr05 | 9012314                 | GG                                     | AA                 | AA               | INTERGENIC                    |                    |                             |
| SNP_33453_A_9012625 | NC_021164.1    | Ca_Kabuli_Chr05 | 9012625                 | CC                                     | TT                 | TT               | INTERGENIC                    |                    |                             |
| SNP_33454_A_9012869 | NC_021164.1    | Ca_Kabuli_Chr05 | 9012869                 | CC                                     | TT                 | TT               | INTERGENIC                    |                    |                             |
| SNP_33455_A_9013201 | NC_021164.1    | Ca_Kabuli_Chr05 | 9013201                 | TT                                     | AA                 | AA               | INTERGENIC                    |                    |                             |
| SNP_33456_A_9015104 | NC_021164.1    | Ca_Kabuli_Chr05 | 9015104                 | CC                                     | TT                 | TT               | INTERGENIC                    |                    |                             |
| SNP_33457_A_9015123 | NC_021164.1    | Ca_Kabuli_Chr05 | 9015123                 | TT                                     | GG                 | GG               | INTERGENIC                    |                    |                             |
| SNP_33459_A_9015495 | NC_021164.1    | Ca_Kabuli_Chr05 | 9015495                 | AA                                     | GG                 | GG               | INTERGENIC                    |                    |                             |
| SNP_33461_A_9016226 | NC_021164.1    | Ca_Kabuli_Chr05 | 9016226                 | GG                                     | AA                 | AA               | INTERGENIC                    |                    |                             |
| SNP_33462_A_9016247 | NC_021164.1    | Ca_Kabuli_Chr05 | 9016247                 | CC                                     | TT                 | TT               | INTERGENIC                    |                    |                             |
| SNP_33463_A_9016283 | NC_021164.1    | Ca_Kabuli_Chr05 | 9016283                 | CC                                     | AA                 | AA               | INTERGENIC                    |                    |                             |
| SNP_33465_A_9016396 | NC_021164.1    | Ca_Kabuli_Chr05 | 9016396                 | GG                                     | TT                 | TT               | INTERGENIC                    |                    |                             |
| SNP_33466_A_9018695 | NC_021164.1    | Ca_Kabuli_Chr05 | 9018695                 | AA                                     | GG                 | GG               | INTERGENIC                    |                    |                             |
| SNP_33467_A_9020744 | NC_021164.1    | Ca_Kabuli_Chr05 | 9020744                 | TT                                     | GG                 | GG               | INTERGENIC                    |                    |                             |
| SNP_33468_A_9022035 | NC_021164.1    | Ca_Kabuli_Chr05 | 9022035                 | GG                                     | TT                 | TT               | INTERGENIC                    |                    |                             |
| SNP_33469_A_9028866 | NC_021164.1    | Ca_Kabuli_Chr05 | 9028866                 | TT                                     | CC                 | CC               | DRR                           | 101492214          | hexose carrier protein HEX6 |
| SNP_33471_A_9034454 | NC_021164.1    | Ca_Kabuli_Chr05 | 9034454                 | AA                                     | GG                 | GG               | INTERGENIC                    |                    |                             |
| SNP_33473_A_9078195 | NC_021164.1    | Ca_Kabuli_Chr05 | 9078195                 | GG                                     | AA                 | AA               | INTRON                        | 101492879          | prohibitin-3, mitochondrial |
| SNP_33474_A_9078200 | NC_021164.1    | Ca_Kabuli_Chr05 | 9078200                 | TT                                     | CC                 | CC               | INTRON                        | 101492879          | prohibitin-3, mitochondrial |
| SNP_33475_A_9078219 | NC_021164.1    | Ca_Kabuli_Chr05 | 9078219                 | TT                                     | CC                 | CC               | INTRON                        | 101492879          | prohibitin-3, mitochondrial |
| SNP_33476_A_9090753 | NC_021164.1    | Ca_Kabuli_Chr05 | 9090753                 | CC                                     | AA                 | AA               | INTERGENIC                    |                    |                             |

| SNPs IDs            | Chromosome IDs | Chromosomes     | Physical positions (bp) | CDC Frontier genome (Reference genome) | (Pusa 1103 & HPNB) | (ILWC 46 & LPNB) | Sequence Components of genome | Gene accession IDs | Putative functions                      |
|---------------------|----------------|-----------------|-------------------------|----------------------------------------|--------------------|------------------|-------------------------------|--------------------|-----------------------------------------|
| SNP_33477_A_9091072 | NC_021164.1    | Ca_Kabuli_Chr05 | 9091072                 | AA                                     | GG                 | GG               | INTERGENIC                    |                    |                                         |
| SNP_33478_A_9091601 | NC_021164.1    | Ca_Kabuli_Chr05 | 9091601                 | CC                                     | TT                 | TT               | INTERGENIC                    |                    |                                         |
| SNP_33479_A_9091617 | NC_021164.1    | Ca_Kabuli_Chr05 | 9091617                 | AA                                     | GG                 | GG               | INTERGENIC                    |                    |                                         |
| SNP_33480_A_9091726 | NC_021164.1    | Ca_Kabuli_Chr05 | 9091726                 | TT                                     | GG                 | GG               | INTERGENIC                    |                    |                                         |
| SNP_33482_A_9092276 | NC_021164.1    | Ca_Kabuli_Chr05 | 9092276                 | GG                                     | AA                 | AA               | INTERGENIC                    |                    |                                         |
| SNP_33484_A_9092459 | NC_021164.1    | Ca_Kabuli_Chr05 | 9092459                 | TT                                     | GG                 | GG               | INTERGENIC                    |                    |                                         |
| SNP_33485_A_9093457 | NC_021164.1    | Ca_Kabuli_Chr05 | 9093457                 | CC                                     | TT                 | TT               | INTERGENIC                    |                    |                                         |
| SNP_33486_A_9099393 | NC_021164.1    | Ca_Kabuli_Chr05 | 9099393                 | TT                                     | CC                 | CC               | INTERGENIC                    |                    |                                         |
| SNP_33487_A_9099527 | NC_021164.1    | Ca_Kabuli_Chr05 | 9099527                 | CC                                     | TT                 | TT               | INTERGENIC                    |                    |                                         |
| SNP_33488_A_9099560 | NC_021164.1    | Ca_Kabuli_Chr05 | 9099560                 | CC                                     | TT                 | TT               | INTERGENIC                    |                    |                                         |
| SNP_33489_A_9100561 | NC_021164.1    | Ca_Kabuli_Chr05 | 9100561                 | AA                                     | TT                 | TT               | INTERGENIC                    |                    |                                         |
| SNP_33490_A_9100695 | NC_021164.1    | Ca_Kabuli_Chr05 | 9100695                 | CC                                     | AA                 | AA               | INTERGENIC                    |                    |                                         |
| SNP_33491_A_9101289 | NC_021164.1    | Ca_Kabuli_Chr05 | 9101289                 | AA                                     | GG                 | GG               | INTERGENIC                    |                    |                                         |
| SNP_33492_A_9103315 | NC_021164.1    | Ca_Kabuli_Chr05 | 9103315                 | TT                                     | CC                 | CC               | INTERGENIC                    |                    |                                         |
| SNP_33493_A_9107335 | NC_021164.1    | Ca_Kabuli_Chr05 | 9107335                 | CC                                     | TT                 | TT               | DRR                           | 101493210          | ceramide kinase                         |
| SNP_33494_A_9108483 | NC_021164.1    | Ca_Kabuli_Chr05 | 9108483                 | GG                                     | TT                 | TT               | INTRON                        | 101493210          | ceramide kinase                         |
| SNP_33495_A_9112290 | NC_021164.1    | Ca_Kabuli_Chr05 | 9112290                 | AA                                     | GG                 | GG               | INTRON                        | 101493210          | ceramide kinase                         |
| SNP_33497_A_9114210 | NC_021164.1    | Ca_Kabuli_Chr05 | 9114210                 | CC                                     | GG                 | GG               | INTRON                        | 101493210          | ceramide kinase                         |
| SNP_33498_A_9122114 | NC_021164.1    | Ca_Kabuli_Chr05 | 9122114                 | AA                                     | TT                 | TT               | INTERGENIC                    |                    |                                         |
| SNP_33501_A_9129206 | NC_021164.1    | Ca_Kabuli_Chr05 | 9129206                 | GG                                     | CC                 | CC               | INTRON                        | 101493749          | U-box domain-containing protein 35-like |
| SNP_33502_A_9129257 | NC_021164.1    | Ca_Kabuli_Chr05 | 9129257                 | TT                                     | CC                 | CC               | INTRON                        | 101493749          | U-box domain-containing protein 35-like |
| SNP_33503_A_9129898 | NC_021164.1    | Ca_Kabuli_Chr05 | 9129898                 | CC                                     | GG                 | GG               | INTRON                        | 101493749          | U-box domain-containing protein 35-like |



| SNPs IDs            | Chromosome IDs | Chromosomes     | Physical positions (bp) | CDC Frontier (Reference genome) | (Pusa 1103 & HPNB) | (ILWC 46 & LPNB) | Sequence Components of genome | Gene accession IDs | Putative functions                      |
|---------------------|----------------|-----------------|-------------------------|---------------------------------|--------------------|------------------|-------------------------------|--------------------|-----------------------------------------|
| SNP_33505_A_9132913 | NC_021164.1    | Ca_Kabuli_Chr05 | 9132913                 | TT                              | GG                 | GG               | INTRON                        | 101493749          | U-box domain-containing protein 35-like |
| SNP_33506_A_9133426 | NC_021164.1    | Ca_Kabuli_Chr05 | 9133426                 | CC                              | TT                 | TT               | URR                           | 101493749          | U-box domain-containing protein 35-like |
| SNP_33508_A_9135845 | NC_021164.1    | Ca_Kabuli_Chr05 | 9135845                 | CC                              | TT                 | TT               | INTERGENIC                    |                    |                                         |
| SNP_33509_A_9135924 | NC_021164.1    | Ca_Kabuli_Chr05 | 9135924                 | TT                              | AA                 | AA               | INTERGENIC                    |                    |                                         |
| SNP_33510_A_9136147 | NC_021164.1    | Ca_Kabuli_Chr05 | 9136147                 | TT                              | AA                 | AA               | INTERGENIC                    |                    |                                         |
| SNP_33511_A_9136538 | NC_021164.1    | Ca_Kabuli_Chr05 | 9136538                 | TT                              | AA                 | AA               | INTERGENIC                    |                    |                                         |
| SNP_33512_A_9136565 | NC_021164.1    | Ca_Kabuli_Chr05 | 9136565                 | GG                              | CC                 | CC               | INTERGENIC                    |                    |                                         |
| SNP_33513_A_9136584 | NC_021164.1    | Ca_Kabuli_Chr05 | 9136584                 | CC                              | TT                 | TT               | INTERGENIC                    |                    |                                         |
| SNP_33514_A_9138266 | NC_021164.1    | Ca_Kabuli_Chr05 | 9138266                 | AA                              | TT                 | TT               | INTERGENIC                    |                    |                                         |
| SNP_33515_A_9138401 | NC_021164.1    | Ca_Kabuli_Chr05 | 9138401                 | GG                              | AA                 | AA               | INTERGENIC                    |                    |                                         |
| SNP_33516_A_9138444 | NC_021164.1    | Ca_Kabuli_Chr05 | 9138444                 | CC                              | TT                 | TT               | INTERGENIC                    |                    |                                         |
| SNP_33517_A_9138510 | NC_021164.1    | Ca_Kabuli_Chr05 | 9138510                 | TT                              | CC                 | CC               | INTERGENIC                    |                    |                                         |
| SNP_33519_A_9140929 | NC_021164.1    | Ca_Kabuli_Chr05 | 9140929                 | TT                              | CC                 | CC               | INTERGENIC                    |                    |                                         |
| SNP_33520_A_9141015 | NC_021164.1    | Ca_Kabuli_Chr05 | 9141015                 | CC                              | TT                 | TT               | INTERGENIC                    |                    |                                         |
| SNP_33521_A_9141102 | NC_021164.1    | Ca_Kabuli_Chr05 | 9141102                 | AA                              | GG                 | GG               | INTERGENIC                    |                    |                                         |
| SNP_33522_A_9141436 | NC_021164.1    | Ca_Kabuli_Chr05 | 9141436                 | CC                              | TT                 | TT               | INTERGENIC                    |                    |                                         |
| SNP_33523_A_9141496 | NC_021164.1    | Ca_Kabuli_Chr05 | 9141496                 | CC                              | TT                 | TT               | INTERGENIC                    |                    |                                         |
| SNP_33524_A_9141528 | NC_021164.1    | Ca_Kabuli_Chr05 | 9141528                 | TT                              | CC                 | CC               | INTERGENIC                    |                    |                                         |
| SNP_33525_A_9141623 | NC_021164.1    | Ca_Kabuli_Chr05 | 9141623                 | AA                              | TT                 | TT               | INTERGENIC                    |                    |                                         |
| SNP_33526_A_9141633 | NC_021164.1    | Ca_Kabuli_Chr05 | 9141633                 | CC                              | TT                 | TT               | INTERGENIC                    |                    |                                         |
| SNP_33527_A_9141639 | NC_021164.1    | Ca_Kabuli_Chr05 | 9141639                 | CC                              | TT                 | TT               | INTERGENIC                    |                    |                                         |
| SNP_33528_A_9143143 | NC_021164.1    | Ca_Kabuli_Chr05 | 9143143                 | TT                              | CC                 | CC               | INTERGENIC                    |                    |                                         |

| SNPs IDs            | Chromosome IDs | Chromosomes     | Physical positions (bp) | CDC Frontier genome (Reference genome) | (Pusa 1103 & HPNB) | (ILWC 46 & LPNB) | Sequence Components of genome | Gene accession IDs | Putative functions                      |
|---------------------|----------------|-----------------|-------------------------|----------------------------------------|--------------------|------------------|-------------------------------|--------------------|-----------------------------------------|
| SNP_33529_A_9143149 | NC_021164.1    | Ca_Kabuli_Chr05 | 9143149                 | AA                                     | CC                 | CC               | INTERGENIC                    |                    |                                         |
| SNP_33531_A_9144965 | NC_021164.1    | Ca_Kabuli_Chr05 | 9144965                 | GG                                     | AA                 | AA               | INTERGENIC                    |                    |                                         |
| SNP_33532_A_9146302 | NC_021164.1    | Ca_Kabuli_Chr05 | 9146302                 | GG                                     | AA                 | AA               | INTERGENIC                    |                    |                                         |
| SNP_33533_A_9146372 | NC_021164.1    | Ca_Kabuli_Chr05 | 9146372                 | GG                                     | AA                 | AA               | INTERGENIC                    |                    |                                         |
| SNP_33534_A_9147957 | NC_021164.1    | Ca_Kabuli_Chr05 | 9147957                 | CC                                     | TT                 | TT               | INTERGENIC                    |                    |                                         |
| SNP_33535_A_9147960 | NC_021164.1    | Ca_Kabuli_Chr05 | 9147960                 | CC                                     | TT                 | TT               | INTERGENIC                    |                    |                                         |
| SNP_33536_A_9148804 | NC_021164.1    | Ca_Kabuli_Chr05 | 9148804                 | TT                                     | CC                 | CC               | INTERGENIC                    |                    |                                         |
| SNP_33538_A_9149101 | NC_021164.1    | Ca_Kabuli_Chr05 | 9149101                 | GG                                     | AA                 | AA               | INTERGENIC                    |                    |                                         |
| SNP_33539_A_9149913 | NC_021164.1    | Ca_Kabuli_Chr05 | 9149913                 | AA                                     | CC                 | CC               | INTERGENIC                    |                    |                                         |
| SNP_33540_A_9150885 | NC_021164.1    | Ca_Kabuli_Chr05 | 9150885                 | CC                                     | TT                 | TT               | INTERGENIC                    |                    |                                         |
| SNP_33541_A_9151801 | NC_021164.1    | Ca_Kabuli_Chr05 | 9151801                 | AA                                     | TT                 | TT               | DRR                           | 101494906          | U-box domain-containing protein 35-like |
| SNP_33542_A_9151951 | NC_021164.1    | Ca_Kabuli_Chr05 | 9151951                 | CC                                     | TT                 | TT               | DRR                           | 101494906          | U-box domain-containing protein 35-like |
| SNP_33543_A_9151957 | NC_021164.1    | Ca_Kabuli_Chr05 | 9151957                 | AA                                     | GG                 | GG               | DRR                           | 101494906          | U-box domain-containing protein 35-like |
| SNP_33544_A_9152013 | NC_021164.1    | Ca_Kabuli_Chr05 | 9152013                 | CC                                     | TT                 | TT               | DRR                           | 101494906          | U-box domain-containing protein 35-like |
| SNP_33545_A_9157999 | NC_021164.1    | Ca_Kabuli_Chr05 | 9157999                 | GG                                     | AA                 | AA               | INTRON                        | 101494906          | U-box domain-containing protein 35-like |
| SNP_33546_A_9159190 | NC_021164.1    | Ca_Kabuli_Chr05 | 9159190                 | CC                                     | GG                 | GG               | INTRON                        | 101494906          | U-box domain-containing protein 35-like |
| SNP_33547_A_9163253 | NC_021164.1    | Ca_Kabuli_Chr05 | 9163253                 | AA                                     | CC                 | CC               | INTERGENIC                    |                    |                                         |
| SNP_33550_A_9163879 | NC_021164.1    | Ca_Kabuli_Chr05 | 9163879                 | CC                                     | AA                 | AA               | INTERGENIC                    |                    |                                         |
| SNP_33551_A_9164335 | NC_021164.1    | Ca_Kabuli_Chr05 | 9164335                 | TT                                     | CC                 | CC               | INTERGENIC                    |                    |                                         |
| SNP_33552_A_9164336 | NC_021164.1    | Ca_Kabuli_Chr05 | 9164336                 | GG                                     | AA                 | AA               | INTERGENIC                    |                    |                                         |
| SNP_33553_A_9164398 | NC_021164.1    | Ca_Kabuli_Chr05 | 9164398                 | GG                                     | AA                 | AA               | INTERGENIC                    |                    |                                         |
| SNP_33554_A_9164617 | NC_021164.1    | Ca_Kabuli_Chr05 | 9164617                 | GG                                     | AA                 | AA               | INTERGENIC                    |                    |                                         |

| SNPs IDs            | Chromosome IDs | Chromosomes     | Physical positions (bp) | CDC Frontier genome (Reference genome) | (Pusa 1103 & HPNB) | (ILWC 46 & LPNB) | Sequence Components of genome | Gene accession IDs | Putative functions      |
|---------------------|----------------|-----------------|-------------------------|----------------------------------------|--------------------|------------------|-------------------------------|--------------------|-------------------------|
| SNP_33555_A_9164637 | NC_021164.1    | Ca_Kabuli_Chr05 | 9164637                 | GG                                     | AA                 | AA               | INTERGENIC                    |                    |                         |
| SNP_33556_A_9164640 | NC_021164.1    | Ca_Kabuli_Chr05 | 9164640                 | GG                                     | AA                 | AA               | INTERGENIC                    |                    |                         |
| SNP_33557_A_9164645 | NC_021164.1    | Ca_Kabuli_Chr05 | 9164645                 | CC                                     | TT                 | TT               | INTERGENIC                    |                    |                         |
| SNP_33558_A_9171563 | NC_021164.1    | Ca_Kabuli_Chr05 | 9171563                 | AA                                     | GG                 | GG               | SYNONYMOUS_CODING             | 101495454          | derlin-1.1-like         |
| SNP_33559_A_9171566 | NC_021164.1    | Ca_Kabuli_Chr05 | 9171566                 | AA                                     | GG                 | GG               | SYNONYMOUS_CODING             | 101495454          | derlin-1.1-like         |
| SNP_33561_A_9173039 | NC_021164.1    | Ca_Kabuli_Chr05 | 9173039                 | TT                                     | CC                 | CC               | INTRON                        | 101495454          | derlin-1.1-like         |
| SNP_33562_A_9173042 | NC_021164.1    | Ca_Kabuli_Chr05 | 9173042                 | TT                                     | CC                 | CC               | INTRON                        | 101495454          | derlin-1.1-like         |
| SNP_33563_A_9174891 | NC_021164.1    | Ca_Kabuli_Chr05 | 9174891                 | TT                                     | CC                 | CC               | URR                           | 101495454          | derlin-1.1-like         |
| SNP_33564_A_9177148 | NC_021164.1    | Ca_Kabuli_Chr05 | 9177148                 | CC                                     | TT                 | TT               | INTERGENIC                    |                    |                         |
| SNP_33565_A_9177541 | NC_021164.1    | Ca_Kabuli_Chr05 | 9177541                 | AA                                     | GG                 | GG               | INTERGENIC                    |                    |                         |
| SNP_33566_A_9178334 | NC_021164.1    | Ca_Kabuli_Chr05 | 9178334                 | GG                                     | AA                 | AA               | INTERGENIC                    |                    |                         |
| SNP_33567_A_9180034 | NC_021164.1    | Ca_Kabuli_Chr05 | 9180034                 | GG                                     | AA                 | AA               | INTRON                        | 101495783          | cell number regulator 6 |
| SNP_33568_A_9180745 | NC_021164.1    | Ca_Kabuli_Chr05 | 9180745                 | AA                                     | TT                 | TT               | INTRON                        | 101495783          | cell number regulator 6 |
| SNP_33569_A_9184673 | NC_021164.1    | Ca_Kabuli_Chr05 | 9184673                 | AA                                     | TT                 | TT               | URR                           | 101495783          | cell number regulator 6 |
| SNP_33570_A_9184695 | NC_021164.1    | Ca_Kabuli_Chr05 | 9184695                 | AA                                     | GG                 | GG               | URR                           | 101495783          | cell number regulator 6 |
| SNP_33571_A_9184718 | NC_021164.1    | Ca_Kabuli_Chr05 | 9184718                 | GG                                     | AA                 | AA               | URR                           | 101495783          | cell number regulator 6 |
| SNP_33572_A_9184925 | NC_021164.1    | Ca_Kabuli_Chr05 | 9184925                 | GG                                     | CC                 | CC               | URR                           | 101495783          | cell number regulator 6 |
| SNP_33573_A_9184952 | NC_021164.1    | Ca_Kabuli_Chr05 | 9184952                 | GG                                     | AA                 | AA               | URR                           | 101495783          | cell number regulator 6 |
| SNP_33574_A_9185180 | NC_021164.1    | Ca_Kabuli_Chr05 | 9185180                 | TT                                     | AA                 | AA               | URR                           | 101495783          | cell number regulator 6 |
| SNP_33575_A_9187695 | NC_021164.1    | Ca_Kabuli_Chr05 | 9187695                 | CC                                     | TT                 | TT               | INTERGENIC                    |                    |                         |
| SNP_33576_A_9188466 | NC_021164.1    | Ca_Kabuli_Chr05 | 9188466                 | CC                                     | GG                 | GG               | INTERGENIC                    |                    |                         |
| SNP_33577_A_9188660 | NC_021164.1    | Ca_Kabuli_Chr05 | 9188660                 | CC                                     | TT                 | TT               | INTERGENIC                    |                    |                         |

| SNPs IDs            | Chromosome IDs | Chromosomes     | Physical positions (bp) | CDC Frontier genome (Reference genome) | (Pusa 1103 & HPNB) | (ILWC 46 & LPNB) | Sequence Components of genome | Gene accession IDs | Putative functions                                         |
|---------------------|----------------|-----------------|-------------------------|----------------------------------------|--------------------|------------------|-------------------------------|--------------------|------------------------------------------------------------|
| SNP_33578_A_9188680 | NC_021164.1    | Ca_Kabuli_Chr05 | 9188680                 | CC                                     | TT                 | TT               | INTERGENIC                    |                    |                                                            |
| SNP_33579_A_9188840 | NC_021164.1    | Ca_Kabuli_Chr05 | 9188840                 | AA                                     | TT                 | TT               | INTERGENIC                    |                    |                                                            |
| SNP_33580_A_9194036 | NC_021164.1    | Ca_Kabuli_Chr05 | 9194036                 | AA                                     | GG                 | GG               | INTERGENIC                    |                    |                                                            |
| SNP_33581_A_9194076 | NC_021164.1    | Ca_Kabuli_Chr05 | 9194076                 | TT                                     | CC                 | CC               | INTERGENIC                    |                    |                                                            |
| SNP_33583_A_9212652 | NC_021164.1    | Ca_Kabuli_Chr05 | 9212652                 | TT                                     | GG                 | GG               | NON_SYNONYMOUS_CODING         | 101496105          | deoxyhypusine synthase-like                                |
| SNP_33584_A_9213096 | NC_021164.1    | Ca_Kabuli_Chr05 | 9213096                 | AA                                     | GG                 | GG               | INTRON                        | 101496105          | deoxyhypusine synthase-like                                |
| SNP_33585_A_9215112 | NC_021164.1    | Ca_Kabuli_Chr05 | 9215112                 | TT                                     | CC                 | CC               | INTRON                        | 101496105          | deoxyhypusine synthase-like                                |
| SNP_33586_A_9215762 | NC_021164.1    | Ca_Kabuli_Chr05 | 9215762                 | AA                                     | GG                 | GG               | INTRON                        | 101496105          | deoxyhypusine synthase-like                                |
| SNP_33587_A_9216597 | NC_021164.1    | Ca_Kabuli_Chr05 | 9216597                 | AA                                     | GG                 | GG               | INTRON                        | 101496105          | deoxyhypusine synthase-like                                |
| SNP_33588_A_9217365 | NC_021164.1    | Ca_Kabuli_Chr05 | 9217365                 | CC                                     | TT                 | TT               | INTRON                        | 101496105          | deoxyhypusine synthase-like                                |
| SNP_33589_A_9217597 | NC_021164.1    | Ca_Kabuli_Chr05 | 9217597                 | GG                                     | CC                 | CC               | INTRON                        | 101496105          | deoxyhypusine synthase-like                                |
| SNP_33590_A_9217611 | NC_021164.1    | Ca_Kabuli_Chr05 | 9217611                 | GG                                     | TT                 | TT               | INTRON                        | 101496105          | deoxyhypusine synthase-like                                |
| SNP_33591_A_9217626 | NC_021164.1    | Ca_Kabuli_Chr05 | 9217626                 | AA                                     | GG                 | GG               | INTRON                        | 101496105          | deoxyhypusine synthase-like                                |
| SNP_33592_A_9217634 | NC_021164.1    | Ca_Kabuli_Chr05 | 9217634                 | AA                                     | GG                 | GG               | INTRON                        | 101496105          | deoxyhypusine synthase-like                                |
| SNP_33593_A_9217849 | NC_021164.1    | Ca_Kabuli_Chr05 | 9217849                 | AA                                     | GG                 | GG               | INTRON                        | 101496105          | deoxyhypusine synthase-like                                |
| SNP_33594_A_9222896 | NC_021164.1    | Ca_Kabuli_Chr05 | 9222896                 | GG                                     | TT                 | TT               | INTERGENIC                    |                    |                                                            |
| SNP_33595_A_9230556 | NC_021164.1    | Ca_Kabuli_Chr05 | 9230556                 | CC                                     | GG                 | GG               | NON_SYNONYMOUS_CODING         | 101496437          | peroxisomal (S)-2-hydroxy-acid oxidase-like                |
| SNP_33597_A_9231116 | NC_021164.1    | Ca_Kabuli_Chr05 | 9231116                 | CC                                     | TT                 | TT               | URR                           | 101496437          | peroxisomal (S)-2-hydroxy-acid oxidase-like                |
| SNP_33598_A_9231526 | NC_021164.1    | Ca_Kabuli_Chr05 | 9231526                 | AA                                     | GG                 | GG               | URR                           | 101496437          | peroxisomal (S)-2-hydroxy-acid oxidase-like                |
| SNP_33599_A_9231804 | NC_021164.1    | Ca_Kabuli_Chr05 | 9231804                 | CC                                     | TT                 | TT               | URR                           | 101496437          | peroxisomal (S)-2-hydroxy-acid oxidase-like                |
| SNP_33600_A_9231811 | NC_021164.1    | Ca_Kabuli_Chr05 | 9231811                 | TT                                     | AA                 | AA               | URR                           | 101496437          | peroxisomal (S)-2-hydroxy-acid oxidase-like                |
| SNP_33602_A_9233316 | NC_021164.1    | Ca_Kabuli_Chr05 | 9233316                 | AA                                     | CC                 | CC               | DRR                           | 101499998          | pentatricopeptide repeat-containing protein At5g66520-like |

| SNPs IDs            | Chromosome IDs | Chromosomes     | Physical positions (bp) | CDC Frontier genome (Reference genome) | (Pusa 1103 & HPNB) | (ILWC 46 & LPNB) | Sequence Components of genome | Gene accession IDs | Putative functions           |
|---------------------|----------------|-----------------|-------------------------|----------------------------------------|--------------------|------------------|-------------------------------|--------------------|------------------------------|
| SNP_33603_A_9237651 | NC_021164.1    | Ca_Kabuli_Chr05 | 9237651                 | GG                                     | AA                 | AA               | INTERGENIC                    |                    |                              |
| SNP_33604_A_9239102 | NC_021164.1    | Ca_Kabuli_Chr05 | 9239102                 | GG                                     | AA                 | AA               | INTERGENIC                    |                    |                              |
| SNP_33606_A_9308035 | NC_021164.1    | Ca_Kabuli_Chr05 | 9308035                 | CC                                     | AA                 | AA               | INTRON                        | 101497082          | uncharacterized LOC101497082 |
| SNP_33607_A_9345344 | NC_021164.1    | Ca_Kabuli_Chr05 | 9345344                 | AA                                     | TT                 | TT               | INTERGENIC                    |                    |                              |
| SNP_33608_A_9345768 | NC_021164.1    | Ca_Kabuli_Chr05 | 9345768                 | TT                                     | CC                 | CC               | INTERGENIC                    |                    |                              |
| SNP_33609_A_9346837 | NC_021164.1    | Ca_Kabuli_Chr05 | 9346837                 | AA                                     | TT                 | TT               | INTERGENIC                    |                    |                              |
| SNP_33610_A_9348548 | NC_021164.1    | Ca_Kabuli_Chr05 | 9348548                 | AA                                     | GG                 | GG               | INTERGENIC                    |                    |                              |
| SNP_33613_A_9349873 | NC_021164.1    | Ca_Kabuli_Chr05 | 9349873                 | AA                                     | GG                 | GG               | INTERGENIC                    |                    |                              |
| SNP_33614_A_9350035 | NC_021164.1    | Ca_Kabuli_Chr05 | 9350035                 | GG                                     | TT                 | TT               | DRR                           | 101500653          | actin-related protein 8-like |
| SNP_33615_A_9350668 | NC_021164.1    | Ca_Kabuli_Chr05 | 9350668                 | CC                                     | TT                 | TT               | DRR                           | 101500653          | actin-related protein 8-like |
| SNP_33617_A_9354102 | NC_021164.1    | Ca_Kabuli_Chr05 | 9354102                 | AA                                     | GG                 | GG               | INTRON                        | 101500653          | actin-related protein 8-like |
| SNP_33618_A_9360903 | NC_021164.1    | Ca_Kabuli_Chr05 | 9360903                 | GG                                     | AA                 | AA               | INTRON                        | 101500653          | actin-related protein 8-like |
| SNP_33619_A_9360920 | NC_021164.1    | Ca_Kabuli_Chr05 | 9360920                 | GG                                     | AA                 | AA               | INTRON                        | 101500653          | actin-related protein 8-like |
| SNP_33622_A_9361466 | NC_021164.1    | Ca_Kabuli_Chr05 | 9361466                 | CC                                     | AA                 | AA               | URR                           | 101500653          | actin-related protein 8-like |
| SNP_33624_A_9361892 | NC_021164.1    | Ca_Kabuli_Chr05 | 9361892                 | AA                                     | GG                 | GG               | URR                           | 101500653          | actin-related protein 8-like |
| SNP_33625_A_9362039 | NC_021164.1    | Ca_Kabuli_Chr05 | 9362039                 | GG                                     | CC                 | CC               | URR                           | 101500653          | actin-related protein 8-like |
| SNP_33626_A_9362149 | NC_021164.1    | Ca_Kabuli_Chr05 | 9362149                 | CC                                     | TT                 | TT               | URR                           | 101500653          | actin-related protein 8-like |
| SNP_33627_A_9362887 | NC_021164.1    | Ca_Kabuli_Chr05 | 9362887                 | TT                                     | CC                 | CC               | URR                           | 101500653          | actin-related protein 8-like |
| SNP_33628_A_9362913 | NC_021164.1    | Ca_Kabuli_Chr05 | 9362913                 | AA                                     | GG                 | GG               | URR                           | 101500653          | actin-related protein 8-like |
| SNP_33629_A_9362914 | NC_021164.1    | Ca_Kabuli_Chr05 | 9362914                 | GG                                     | AA                 | AA               | URR                           | 101500653          | actin-related protein 8-like |
| SNP_33630_A_9362958 | NC_021164.1    | Ca_Kabuli_Chr05 | 9362958                 | GG                                     | AA                 | AA               | URR                           | 101500653          | actin-related protein 8-like |
| SNP_33631_A_9362965 | NC_021164.1    | Ca_Kabuli_Chr05 | 9362965                 | GG                                     | TT                 | TT               | URR                           | 101500653          | actin-related protein 8-like |

| SNPs IDs            | Chromosome IDs | Chromosomes     | Physical positions (bp) | CDC Frontier genome (Reference genome) | (Pusa 1103 & HPNB) | (ILWC 46 & LPNB) | Sequence Components of genome | Gene accession IDs | Putative functions           |
|---------------------|----------------|-----------------|-------------------------|----------------------------------------|--------------------|------------------|-------------------------------|--------------------|------------------------------|
| SNP_33632_A_9363156 | NC_021164.1    | Ca_Kabuli_Chr05 | 9363156                 | AA                                     | GG                 | GG               | URR                           | 101500653          | actin-related protein 8-like |
| SNP_33633_A_9363192 | NC_021164.1    | Ca_Kabuli_Chr05 | 9363192                 | GG                                     | CC                 | CC               | URR                           | 101500653          | actin-related protein 8-like |
| SNP_33634_A_9363200 | NC_021164.1    | Ca_Kabuli_Chr05 | 9363200                 | CC                                     | AA                 | AA               | URR                           | 101500653          | actin-related protein 8-like |
| SNP_33635_A_9363228 | NC_021164.1    | Ca_Kabuli_Chr05 | 9363228                 | TT                                     | CC                 | CC               | URR                           | 101500653          | actin-related protein 8-like |
| SNP_33636_A_9363238 | NC_021164.1    | Ca_Kabuli_Chr05 | 9363238                 | GG                                     | CC                 | CC               | URR                           | 101500653          | actin-related protein 8-like |
| SNP_33637_A_9363261 | NC_021164.1    | Ca_Kabuli_Chr05 | 9363261                 | CC                                     | TT                 | TT               | URR                           | 101500653          | actin-related protein 8-like |
| SNP_33638_A_9363451 | NC_021164.1    | Ca_Kabuli_Chr05 | 9363451                 | CC                                     | TT                 | TT               | INTERGENIC                    |                    |                              |
| SNP_33639_A_9363475 | NC_021164.1    | Ca_Kabuli_Chr05 | 9363475                 | TT                                     | GG                 | GG               | INTERGENIC                    |                    |                              |
| SNP_33640_A_9363715 | NC_021164.1    | Ca_Kabuli_Chr05 | 9363715                 | AA                                     | GG                 | GG               | INTERGENIC                    |                    |                              |
| SNP_33642_A_9365865 | NC_021164.1    | Ca_Kabuli_Chr05 | 9365865                 | GG                                     | CC                 | CC               | INTERGENIC                    |                    |                              |
| SNP_33643_A_9365889 | NC_021164.1    | Ca_Kabuli_Chr05 | 9365889                 | TT                                     | CC                 | CC               | INTERGENIC                    |                    |                              |
| SNP_33644_A_9365934 | NC_021164.1    | Ca_Kabuli_Chr05 | 9365934                 | GG                                     | AA                 | AA               | INTERGENIC                    |                    |                              |
| SNP_33645_A_9366003 | NC_021164.1    | Ca_Kabuli_Chr05 | 9366003                 | GG                                     | AA                 | AA               | DRR                           | 101500965          | Unknown function             |
| SNP_33646_A_9366183 | NC_021164.1    | Ca_Kabuli_Chr05 | 9366183                 | AA                                     | TT                 | TT               | DRR                           | 101500965          | Unknown function             |
| SNP_33647_A_9366210 | NC_021164.1    | Ca_Kabuli_Chr05 | 9366210                 | TT                                     | AA                 | AA               | DRR                           | 101500965          | Unknown function             |
| SNP_33648_A_9366262 | NC_021164.1    | Ca_Kabuli_Chr05 | 9366262                 | AA                                     | GG                 | GG               | DRR                           | 101500965          | Unknown function             |
| SNP_33649_A_9366291 | NC_021164.1    | Ca_Kabuli_Chr05 | 9366291                 | TT                                     | CC                 | CC               | DRR                           | 101500965          | Unknown function             |
| SNP_33650_A_9366330 | NC_021164.1    | Ca_Kabuli_Chr05 | 9366330                 | TT                                     | AA                 | AA               | DRR                           | 101500965          | Unknown function             |
| SNP_33651_A_9381811 | NC_021164.1    | Ca_Kabuli_Chr05 | 9381811                 | CC                                     | TT                 | TT               | INTERGENIC                    |                    |                              |
| SNP_33652_A_9382672 | NC_021164.1    | Ca_Kabuli_Chr05 | 9382672                 | TT                                     | AA                 | AA               | INTERGENIC                    |                    |                              |
| SNP_33653_A_9382674 | NC_021164.1    | Ca_Kabuli_Chr05 | 9382674                 | CC                                     | TT                 | TT               | INTERGENIC                    |                    |                              |
| SNP_33654_A_9384005 | NC_021164.1    | Ca_Kabuli_Chr05 | 9384005                 | TT                                     | AA                 | AA               | INTERGENIC                    |                    |                              |

| SNPs IDs            | Chromosome IDs | Chromosomes     | Physical positions (bp) | CDC Frontier genome (Reference genome) | (Pusa 1103 & HPNB) | (ILWC 46 & LPNB) | Sequence Components of genome | Gene accession IDs | Putative functions                   |
|---------------------|----------------|-----------------|-------------------------|----------------------------------------|--------------------|------------------|-------------------------------|--------------------|--------------------------------------|
| SNP_33655_A_9384312 | NC_021164.1    | Ca_Kabuli_Chr05 | 9384312                 | GG                                     | TT                 | TT               | INTERGENIC                    |                    |                                      |
| SNP_33656_A_9393409 | NC_021164.1    | Ca_Kabuli_Chr05 | 9393409                 | AA                                     | GG                 | GG               | INTRON                        | 101501283          | receptor-like protein kinase FERONIA |
| SNP_33657_A_9403081 | NC_021164.1    | Ca_Kabuli_Chr05 | 9403081                 | AA                                     | GG                 | GG               | URR                           | 101501283          | receptor-like protein kinase FERONIA |
| SNP_33658_A_9403091 | NC_021164.1    | Ca_Kabuli_Chr05 | 9403091                 | AA                                     | TT                 | TT               | URR                           | 101501283          | receptor-like protein kinase FERONIA |
| SNP_33659_A_9403160 | NC_021164.1    | Ca_Kabuli_Chr05 | 9403160                 | GG                                     | AA                 | AA               | INTERGENIC                    |                    |                                      |
| SNP_33660_A_9403166 | NC_021164.1    | Ca_Kabuli_Chr05 | 9403166                 | TT                                     | AA                 | AA               | INTERGENIC                    |                    |                                      |
| SNP_33661_A_9403187 | NC_021164.1    | Ca_Kabuli_Chr05 | 9403187                 | CC                                     | TT                 | TT               | INTERGENIC                    |                    |                                      |
| SNP_33662_A_9403389 | NC_021164.1    | Ca_Kabuli_Chr05 | 9403389                 | TT                                     | CC                 | CC               | INTERGENIC                    |                    |                                      |
| SNP_33663_A_9403409 | NC_021164.1    | Ca_Kabuli_Chr05 | 9403409                 | AA                                     | TT                 | TT               | INTERGENIC                    |                    |                                      |
| SNP_33665_A_9403491 | NC_021164.1    | Ca_Kabuli_Chr05 | 9403491                 | TT                                     | CC                 | CC               | INTERGENIC                    |                    |                                      |
| SNP_33666_A_9403605 | NC_021164.1    | Ca_Kabuli_Chr05 | 9403605                 | AA                                     | CC                 | CC               | INTERGENIC                    |                    |                                      |
| SNP_33667_A_9403641 | NC_021164.1    | Ca_Kabuli_Chr05 | 9403641                 | CC                                     | AA                 | AA               | INTERGENIC                    |                    |                                      |
| SNP_33668_A_9405880 | NC_021164.1    | Ca_Kabuli_Chr05 | 9405880                 | TT                                     | GG                 | GG               | INTERGENIC                    |                    |                                      |
| SNP_33669_A_9405889 | NC_021164.1    | Ca_Kabuli_Chr05 | 9405889                 | TT                                     | CC                 | CC               | INTERGENIC                    |                    |                                      |
| SNP_33670_A_9409189 | NC_021164.1    | Ca_Kabuli_Chr05 | 9409189                 | GG                                     | AA                 | AA               | INTERGENIC                    |                    |                                      |
| SNP_33671_A_9416493 | NC_021164.1    | Ca_Kabuli_Chr05 | 9416493                 | TT                                     | GG                 | GG               | URR                           | 101501602          | receptor-like protein kinase FERONIA |
| SNP_33672_A_9416536 | NC_021164.1    | Ca_Kabuli_Chr05 | 9416536                 | GG                                     | TT                 | TT               | URR                           | 101501602          | receptor-like protein kinase FERONIA |
| SNP_33673_A_9416566 | NC_021164.1    | Ca_Kabuli_Chr05 | 9416566                 | AA                                     | CC                 | CC               | URR                           | 101501602          | receptor-like protein kinase FERONIA |
| SNP_33674_A_9416641 | NC_021164.1    | Ca_Kabuli_Chr05 | 9416641                 | AA                                     | GG                 | GG               | URR                           | 101501602          | receptor-like protein kinase FERONIA |
| SNP_33676_A_9422826 | NC_021164.1    | Ca_Kabuli_Chr05 | 9422826                 | AA                                     | CC                 | CC               | INTERGENIC                    |                    |                                      |
| SNP_33677_A_9433389 | NC_021164.1    | Ca_Kabuli_Chr05 | 9433389                 | GG                                     | TT                 | TT               | INTERGENIC                    |                    |                                      |
| SNP_33678_A_9433577 | NC_021164.1    | Ca_Kabuli_Chr05 | 9433577                 | TT                                     | CC                 | CC               | INTERGENIC                    |                    |                                      |

| SNPs IDs            | Chromosome IDs | Chromosomes     | Physical positions (bp) | CDC Frontier (Reference genome) | (Pusa 1103 & HPNB) | (ILWC 46 & LPNB) | Sequence Components of genome | Gene accession IDs | Putative functions                                |
|---------------------|----------------|-----------------|-------------------------|---------------------------------|--------------------|------------------|-------------------------------|--------------------|---------------------------------------------------|
| SNP_33679_A_9433587 | NC_021164.1    | Ca_Kabuli_Chr05 | 9433587                 | TT                              | GG                 | GG               | INTERGENIC                    |                    |                                                   |
| SNP_33680_A_9433683 | NC_021164.1    | Ca_Kabuli_Chr05 | 9433683                 | AA                              | GG                 | GG               | INTERGENIC                    |                    |                                                   |
| SNP_33681_A_9433699 | NC_021164.1    | Ca_Kabuli_Chr05 | 9433699                 | AA                              | CC                 | CC               | INTERGENIC                    |                    |                                                   |
| SNP_33683_A_9436449 | NC_021164.1    | Ca_Kabuli_Chr05 | 9436449                 | GG                              | AA                 | AA               | INTRON                        | 101501914          | QWRF motif-containing protein 7                   |
| SNP_33684_A_9436923 | NC_021164.1    | Ca_Kabuli_Chr05 | 9436923                 | CC                              | GG                 | GG               | INTRON                        | 101501914          | QWRF motif-containing protein 7                   |
| SNP_33685_A_9436938 | NC_021164.1    | Ca_Kabuli_Chr05 | 9436938                 | TT                              | CC                 | CC               | INTRON                        | 101501914          | QWRF motif-containing protein 7                   |
| SNP_33686_A_9436949 | NC_021164.1    | Ca_Kabuli_Chr05 | 9436949                 | CC                              | TT                 | TT               | INTRON                        | 101501914          | QWRF motif-containing protein 7                   |
| SNP_33687_A_9440120 | NC_021164.1    | Ca_Kabuli_Chr05 | 9440120                 | AA                              | GG                 | GG               | URR                           | 101501914          | QWRF motif-containing protein 7                   |
| SNP_33688_A_9441126 | NC_021164.1    | Ca_Kabuli_Chr05 | 9441126                 | GG                              | TT                 | TT               | INTERGENIC                    |                    |                                                   |
| SNP_33691_A_9467705 | NC_021164.1    | Ca_Kabuli_Chr05 | 9467705                 | AA                              | GG                 | GG               | INTERGENIC                    |                    |                                                   |
| SNP_33692_A_9467778 | NC_021164.1    | Ca_Kabuli_Chr05 | 9467778                 | TT                              | AA                 | AA               | INTERGENIC                    |                    |                                                   |
| SNP_33693_A_9467818 | NC_021164.1    | Ca_Kabuli_Chr05 | 9467818                 | AA                              | GG                 | GG               | INTERGENIC                    |                    |                                                   |
| SNP_33694_A_9467905 | NC_021164.1    | Ca_Kabuli_Chr05 | 9467905                 | AA                              | GG                 | GG               | INTERGENIC                    |                    |                                                   |
| SNP_33696_A_9467998 | NC_021164.1    | Ca_Kabuli_Chr05 | 9467998                 | AA                              | GG                 | GG               | INTERGENIC                    |                    |                                                   |
| SNP_33697_A_9468232 | NC_021164.1    | Ca_Kabuli_Chr05 | 9468232                 | TT                              | CC                 | CC               | INTERGENIC                    |                    |                                                   |
| SNP_33698_A_9470460 | NC_021164.1    | Ca_Kabuli_Chr05 | 9470460                 | AA                              | CC                 | CC               | INTERGENIC                    |                    |                                                   |
| SNP_33699_A_9470461 | NC_021164.1    | Ca_Kabuli_Chr05 | 9470461                 | CC                              | AA                 | AA               | INTERGENIC                    |                    |                                                   |
| SNP_33700_A_9475081 | NC_021164.1    | Ca_Kabuli_Chr05 | 9475081                 | AA                              | TT                 | TT               | INTRON                        | 101506637          | beta-fructofuranosidase, soluble isoenzyme I-like |
| SNP_33701_A_9475094 | NC_021164.1    | Ca_Kabuli_Chr05 | 9475094                 | AA                              | TT                 | TT               | INTRON                        | 101506637          | beta-fructofuranosidase, soluble isoenzyme I-like |
| SNP_33702_A_9478500 | NC_021164.1    | Ca_Kabuli_Chr05 | 9478500                 | TT                              | AA                 | AA               | INTRON                        | 101506637          | beta-fructofuranosidase, soluble isoenzyme I-like |
| SNP_33703_A_9478507 | NC_021164.1    | Ca_Kabuli_Chr05 | 9478507                 | CC                              | TT                 | TT               | INTRON                        | 101506637          | beta-fructofuranosidase, soluble isoenzyme I-like |
| SNP_33704_A_9483088 | NC_021164.1    | Ca_Kabuli_Chr05 | 9483088                 | CC                              | TT                 | TT               | INTERGENIC                    |                    |                                                   |



| SNPs IDs            | Chromosome IDs | Chromosomes     | Physical positions (bp) | CDC Frontier genome (Reference genome) | (Pusa 1103 & HPNB) | (ILWC 46 & LPNB) | Sequence Components of genome | Gene accession IDs | Putative functions           |
|---------------------|----------------|-----------------|-------------------------|----------------------------------------|--------------------|------------------|-------------------------------|--------------------|------------------------------|
| SNP_33705_A_9506131 | NC_021164.1    | Ca_Kabuli_Chr05 | 9506131                 | GG                                     | AA                 | AA               | INTERGENIC                    |                    |                              |
| SNP_33706_A_9506146 | NC_021164.1    | Ca_Kabuli_Chr05 | 9506146                 | AA                                     | GG                 | GG               | INTERGENIC                    |                    |                              |
| SNP_33707_A_9506379 | NC_021164.1    | Ca_Kabuli_Chr05 | 9506379                 | TT                                     | CC                 | CC               | INTERGENIC                    |                    |                              |
| SNP_33708_A_9506447 | NC_021164.1    | Ca_Kabuli_Chr05 | 9506447                 | AA                                     | GG                 | GG               | INTERGENIC                    |                    |                              |
| SNP_33709_A_9506700 | NC_021164.1    | Ca_Kabuli_Chr05 | 9506700                 | CC                                     | TT                 | TT               | INTERGENIC                    |                    |                              |
| SNP_33710_A_9506965 | NC_021164.1    | Ca_Kabuli_Chr05 | 9506965                 | TT                                     | CC                 | CC               | INTERGENIC                    |                    |                              |
| SNP_33711_A_9507031 | NC_021164.1    | Ca_Kabuli_Chr05 | 9507031                 | TT                                     | GG                 | GG               | INTERGENIC                    |                    |                              |
| SNP_33712_A_9507879 | NC_021164.1    | Ca_Kabuli_Chr05 | 9507879                 | AA                                     | GG                 | GG               | URR                           | 101502245          | uncharacterized LOC101502245 |
| SNP_33713_A_9508032 | NC_021164.1    | Ca_Kabuli_Chr05 | 9508032                 | AA                                     | GG                 | GG               | URR                           | 101502245          | uncharacterized LOC101502245 |
| SNP_33714_A_9508330 | NC_021164.1    | Ca_Kabuli_Chr05 | 9508330                 | AA                                     | CC                 | CC               | URR                           | 101502245          | uncharacterized LOC101502245 |
| SNP_33715_A_9508764 | NC_021164.1    | Ca_Kabuli_Chr05 | 9508764                 | TT                                     | GG                 | GG               | URR                           | 101502245          | uncharacterized LOC101502245 |
| SNP_33716_A_9518568 | NC_021164.1    | Ca_Kabuli_Chr05 | 9518568                 | AA                                     | CC                 | CC               | INTERGENIC                    |                    |                              |
| SNP_33717_A_9519517 | NC_021164.1    | Ca_Kabuli_Chr05 | 9519517                 | AA                                     | GG                 | GG               | INTERGENIC                    |                    |                              |
| SNP_33720_A_9524074 | NC_021164.1    | Ca_Kabuli_Chr05 | 9524074                 | AA                                     | GG                 | GG               | INTERGENIC                    |                    |                              |
| SNP_33722_A_9524304 | NC_021164.1    | Ca_Kabuli_Chr05 | 9524304                 | GG                                     | AA                 | AA               | INTERGENIC                    |                    |                              |
| SNP_33723_A_9529918 | NC_021164.1    | Ca_Kabuli_Chr05 | 9529918                 | TT                                     | GG                 | GG               | INTERGENIC                    |                    |                              |
| SNP_33724_A_9529941 | NC_021164.1    | Ca_Kabuli_Chr05 | 9529941                 | CC                                     | TT                 | TT               | INTERGENIC                    |                    |                              |
| SNP_33725_A_9532896 | NC_021164.1    | Ca_Kabuli_Chr05 | 9532896                 | GG                                     | TT                 | TT               | INTERGENIC                    |                    |                              |
| SNP_33726_A_9534448 | NC_021164.1    | Ca_Kabuli_Chr05 | 9534448                 | TT                                     | CC                 | CC               | INTERGENIC                    |                    |                              |
| SNP_33727_A_9534487 | NC_021164.1    | Ca_Kabuli_Chr05 | 9534487                 | AA                                     | CC                 | CC               | INTERGENIC                    |                    |                              |
| SNP_33728_A_9534615 | NC_021164.1    | Ca_Kabuli_Chr05 | 9534615                 | AA                                     | TT                 | TT               | INTERGENIC                    |                    |                              |
| SNP_33729_A_9534797 | NC_021164.1    | Ca_Kabuli_Chr05 | 9534797                 | CC                                     | TT                 | TT               | INTERGENIC                    |                    |                              |

| SNPs IDs            | Chromosome IDs | Chromosomes     | Physical positions (bp) | CDC Frontier genome (Reference genome) | (Pusa 1103 & HPNB) | (ILWC 46 & LPNB) | Sequence Components of genome | Gene accession IDs | Putative functions                                       |
|---------------------|----------------|-----------------|-------------------------|----------------------------------------|--------------------|------------------|-------------------------------|--------------------|----------------------------------------------------------|
| SNP_33730_A_9534807 | NC_021164.1    | Ca_Kabuli_Chr05 | 9534807                 | TT                                     | AA                 | AA               | INTERGENIC                    |                    |                                                          |
| SNP_33731_A_9534866 | NC_021164.1    | Ca_Kabuli_Chr05 | 9534866                 | CC                                     | TT                 | TT               | INTERGENIC                    |                    |                                                          |
| SNP_33732_A_9535115 | NC_021164.1    | Ca_Kabuli_Chr05 | 9535115                 | TT                                     | CC                 | CC               | INTERGENIC                    |                    |                                                          |
| SNP_33733_A_9535195 | NC_021164.1    | Ca_Kabuli_Chr05 | 9535195                 | TT                                     | CC                 | CC               | INTERGENIC                    |                    |                                                          |
| SNP_33735_A_9535488 | NC_021164.1    | Ca_Kabuli_Chr05 | 9535488                 | CC                                     | TT                 | TT               | INTERGENIC                    |                    |                                                          |
| SNP_33736_A_9536531 | NC_021164.1    | Ca_Kabuli_Chr05 | 9536531                 | TT                                     | GG                 | GG               | DRR                           | 101503206          | molybdopterin synthase sulfur carrier subunit            |
| SNP_33737_A_9544712 | NC_021164.1    | Ca_Kabuli_Chr05 | 9544712                 | TT                                     | CC                 | CC               | INTRON                        | 101507297          | serine/threonine-protein phosphatase 7 long form homolog |
| SNP_33738_A_9544974 | NC_021164.1    | Ca_Kabuli_Chr05 | 9544974                 | GG                                     | TT                 | TT               | INTRON                        | 101507297          | serine/threonine-protein phosphatase 7 long form homolog |
| SNP_33739_A_9558055 | NC_021164.1    | Ca_Kabuli_Chr05 | 9558055                 | AA                                     | TT                 | TT               | INTERGENIC                    |                    |                                                          |
| SNP_33740_A_9558145 | NC_021164.1    | Ca_Kabuli_Chr05 | 9558145                 | TT                                     | AA                 | AA               | INTERGENIC                    |                    |                                                          |
| SNP_33742_A_9563570 | NC_021164.1    | Ca_Kabuli_Chr05 | 9563570                 | CC                                     | TT                 | TT               | INTERGENIC                    |                    |                                                          |
| SNP_33743_A_9569654 | NC_021164.1    | Ca_Kabuli_Chr05 | 9569654                 | AA                                     | TT                 | TT               | URR                           | 101504066          | pectinesterase-like                                      |
| SNP_33744_A_9569672 | NC_021164.1    | Ca_Kabuli_Chr05 | 9569672                 | GG                                     | AA                 | AA               | URR                           | 101504066          | pectinesterase-like                                      |
| SNP_33745_A_9569690 | NC_021164.1    | Ca_Kabuli_Chr05 | 9569690                 | GG                                     | AA                 | AA               | URR                           | 101504066          | pectinesterase-like                                      |
| SNP_33746_A_9569712 | NC_021164.1    | Ca_Kabuli_Chr05 | 9569712                 | AA                                     | GG                 | GG               | URR                           | 101504066          | pectinesterase-like                                      |
| SNP_33747_A_9569934 | NC_021164.1    | Ca_Kabuli_Chr05 | 9569934                 | AA                                     | GG                 | GG               | URR                           | 101504066          | pectinesterase-like                                      |
| SNP_33748_A_9570663 | NC_021164.1    | Ca_Kabuli_Chr05 | 9570663                 | AA                                     | GG                 | GG               | URR                           | 101504066          | pectinesterase-like                                      |
| SNP_33751_A_9580084 | NC_021164.1    | Ca_Kabuli_Chr05 | 9580084                 | AA                                     | TT                 | TT               | NON_SYNONYMOUS_CODING         | 101507605          | 21 kDa protein-like                                      |
| SNP_33752_A_9581627 | NC_021164.1    | Ca_Kabuli_Chr05 | 9581627                 | CC                                     | AA                 | AA               | URR                           | 101507605          | 21 kDa protein-like                                      |
| SNP_33753_A_9581698 | NC_021164.1    | Ca_Kabuli_Chr05 | 9581698                 | GG                                     | AA                 | AA               | URR                           | 101507605          | 21 kDa protein-like                                      |
| SNP_33755_A_9582366 | NC_021164.1    | Ca_Kabuli_Chr05 | 9582366                 | TT                                     | CC                 | CC               | URR                           | 101507605          | 21 kDa protein-like                                      |
| SNP_33756_A_9583019 | NC_021164.1    | Ca_Kabuli_Chr05 | 9583019                 | AA                                     | GG                 | GG               | INTERGENIC                    |                    |                                                          |

| SNPs IDs            | Chromosome IDs | Chromosomes     | Physical positions (bp) | CDC Frontier (Reference genome) | (Pusa 1103 & HPNB) | (ILWC 46 & LPNB) | Sequence Components of genome | Gene accession IDs | Putative functions  |
|---------------------|----------------|-----------------|-------------------------|---------------------------------|--------------------|------------------|-------------------------------|--------------------|---------------------|
| SNP_33757_A_9583035 | NC_021164.1    | Ca_Kabuli_Chr05 | 9583035                 | AA                              | GG                 | GG               | INTERGENIC                    |                    |                     |
| SNP_33758_A_9583138 | NC_021164.1    | Ca_Kabuli_Chr05 | 9583138                 | CC                              | TT                 | TT               | INTERGENIC                    |                    |                     |
| SNP_33759_A_9583238 | NC_021164.1    | Ca_Kabuli_Chr05 | 9583238                 | TT                              | GG                 | GG               | INTERGENIC                    |                    |                     |
| SNP_33760_A_9583385 | NC_021164.1    | Ca_Kabuli_Chr05 | 9583385                 | AA                              | CC                 | CC               | INTERGENIC                    |                    |                     |
| SNP_33761_A_9583414 | NC_021164.1    | Ca_Kabuli_Chr05 | 9583414                 | CC                              | TT                 | TT               | INTERGENIC                    |                    |                     |
| SNP_33762_A_9583448 | NC_021164.1    | Ca_Kabuli_Chr05 | 9583448                 | TT                              | AA                 | AA               | INTERGENIC                    |                    |                     |
| SNP_33763_A_9583479 | NC_021164.1    | Ca_Kabuli_Chr05 | 9583479                 | GG                              | AA                 | AA               | INTERGENIC                    |                    |                     |
| SNP_33764_A_9583482 | NC_021164.1    | Ca_Kabuli_Chr05 | 9583482                 | TT                              | CC                 | CC               | INTERGENIC                    |                    |                     |
| SNP_33765_A_9583488 | NC_021164.1    | Ca_Kabuli_Chr05 | 9583488                 | AA                              | GG                 | GG               | INTERGENIC                    |                    |                     |
| SNP_33766_A_9583586 | NC_021164.1    | Ca_Kabuli_Chr05 | 9583586                 | TT                              | CC                 | CC               | INTERGENIC                    |                    |                     |
| SNP_33768_A_9583651 | NC_021164.1    | Ca_Kabuli_Chr05 | 9583651                 | TT                              | CC                 | CC               | INTERGENIC                    |                    |                     |
| SNP_33769_A_9583685 | NC_021164.1    | Ca_Kabuli_Chr05 | 9583685                 | TT                              | CC                 | CC               | INTERGENIC                    |                    |                     |
| SNP_33770_A_9583709 | NC_021164.1    | Ca_Kabuli_Chr05 | 9583709                 | GG                              | AA                 | AA               | INTERGENIC                    |                    |                     |
| SNP_33771_A_9583771 | NC_021164.1    | Ca_Kabuli_Chr05 | 9583771                 | GG                              | AA                 | AA               | INTERGENIC                    |                    |                     |
| SNP_33772_A_9583792 | NC_021164.1    | Ca_Kabuli_Chr05 | 9583792                 | TT                              | CC                 | CC               | INTERGENIC                    |                    |                     |
| SNP_33773_A_9583818 | NC_021164.1    | Ca_Kabuli_Chr05 | 9583818                 | TT                              | CC                 | CC               | INTERGENIC                    |                    |                     |
| SNP_33774_A_9583835 | NC_021164.1    | Ca_Kabuli_Chr05 | 9583835                 | TT                              | CC                 | CC               | INTERGENIC                    |                    |                     |
| SNP_33775_A_9583887 | NC_021164.1    | Ca_Kabuli_Chr05 | 9583887                 | TT                              | CC                 | CC               | INTERGENIC                    |                    |                     |
| SNP_33776_A_9583890 | NC_021164.1    | Ca_Kabuli_Chr05 | 9583890                 | AA                              | TT                 | TT               | INTERGENIC                    |                    |                     |
| SNP_33777_A_9583970 | NC_021164.1    | Ca_Kabuli_Chr05 | 9583970                 | CC                              | TT                 | TT               | INTERGENIC                    |                    |                     |
| SNP_33778_A_9587444 | NC_021164.1    | Ca_Kabuli_Chr05 | 9587444                 | GG                              | AA                 | AA               | DRR                           | 101504378          | 21 kDa protein-like |
| SNP_33779_A_9588466 | NC_021164.1    | Ca_Kabuli_Chr05 | 9588466                 | AA                              | CC                 | CC               | SYNONYMOUS_CODING             | 101504378          | 21 kDa protein-like |

| SNPs IDs            | Chromosome IDs | Chromosomes     | Physical positions (bp) | CDC Frontier (Reference genome) | (Pusa 1103 & HPNB) | (ILWC 46 & LPNB) | Sequence Components of genome | Gene accession IDs | Putative functions                                 |
|---------------------|----------------|-----------------|-------------------------|---------------------------------|--------------------|------------------|-------------------------------|--------------------|----------------------------------------------------|
| SNP_33780_A_9588491 | NC_021164.1    | Ca_Kabuli_Chr05 | 9588491                 | AA                              | GG                 | GG               | NON_SYNONYMOUS_CODING         | 101504378          | 21 kDa protein-like                                |
| SNP_33781_A_9589054 | NC_021164.1    | Ca_Kabuli_Chr05 | 9589054                 | TT                              | CC                 | CC               | DRR                           | 101504378          | 21 kDa protein-like                                |
| SNP_33782_A_9589812 | NC_021164.1    | Ca_Kabuli_Chr05 | 9589812                 | AA                              | GG                 | GG               | URR                           | 101504378          | 21 kDa protein-like                                |
| SNP_33783_A_9590088 | NC_021164.1    | Ca_Kabuli_Chr05 | 9590088                 | TT                              | AA                 | AA               | URR                           | 101504378          | 21 kDa protein-like                                |
| SNP_33784_A_9590137 | NC_021164.1    | Ca_Kabuli_Chr05 | 9590137                 | CC                              | TT                 | TT               | URR                           | 101504378          | 21 kDa protein-like                                |
| SNP_33785_A_9615650 | NC_021164.1    | Ca_Kabuli_Chr05 | 9615650                 | CC                              | TT                 | TT               | URR                           | 101504703          | dihydropyridyl dehydrogenase 1, chloroplastic-like |
| SNP_33786_A_9615652 | NC_021164.1    | Ca_Kabuli_Chr05 | 9615652                 | CC                              | TT                 | TT               | URR                           | 101504703          | dihydropyridyl dehydrogenase 1, chloroplastic-like |
| SNP_33787_A_9615724 | NC_021164.1    | Ca_Kabuli_Chr05 | 9615724                 | AA                              | GG                 | GG               | URR                           | 101504703          | dihydropyridyl dehydrogenase 1, chloroplastic-like |
| SNP_33789_A_9616030 | NC_021164.1    | Ca_Kabuli_Chr05 | 9616030                 | CC                              | TT                 | TT               | DRR                           | 101505029          | 60S ribosomal protein L29-1-like                   |
| SNP_33790_A_9616085 | NC_021164.1    | Ca_Kabuli_Chr05 | 9616085                 | GG                              | TT                 | TT               | DRR                           | 101505029          | 60S ribosomal protein L29-1-like                   |
| SNP_33791_A_9617040 | NC_021164.1    | Ca_Kabuli_Chr05 | 9617040                 | TT                              | AA                 | AA               | URR                           | 101504703          | dihydropyridyl dehydrogenase 1, chloroplastic-like |
| SNP_33792_A_9618045 | NC_021164.1    | Ca_Kabuli_Chr05 | 9618045                 | TT                              | GG                 | GG               | URR                           | 101505029          | 60S ribosomal protein L29-1-like                   |
| SNP_33794_A_9624292 | NC_021164.1    | Ca_Kabuli_Chr05 | 9624292                 | AA                              | TT                 | TT               | URR                           | 101507922          | Unknown function                                   |
| SNP_33795_A_9624348 | NC_021164.1    | Ca_Kabuli_Chr05 | 9624348                 | AA                              | GG                 | GG               | URR                           | 101507922          | Unknown function                                   |
| SNP_33796_A_9624385 | NC_021164.1    | Ca_Kabuli_Chr05 | 9624385                 | CC                              | TT                 | TT               | URR                           | 101507922          | Unknown function                                   |
| SNP_33797_A_9624486 | NC_021164.1    | Ca_Kabuli_Chr05 | 9624486                 | CC                              | TT                 | TT               | URR                           | 101507922          | Unknown function                                   |
| SNP_33798_A_9624502 | NC_021164.1    | Ca_Kabuli_Chr05 | 9624502                 | TT                              | CC                 | CC               | URR                           | 101507922          | Unknown function                                   |
| SNP_33799_A_9624522 | NC_021164.1    | Ca_Kabuli_Chr05 | 9624522                 | GG                              | AA                 | AA               | URR                           | 101507922          | Unknown function                                   |
| SNP_33800_A_9624622 | NC_021164.1    | Ca_Kabuli_Chr05 | 9624622                 | AA                              | TT                 | TT               | URR                           | 101507922          | Unknown function                                   |
| SNP_33801_A_9624688 | NC_021164.1    | Ca_Kabuli_Chr05 | 9624688                 | GG                              | AA                 | AA               | URR                           | 101507922          | Unknown function                                   |
| SNP_33802_A_9624706 | NC_021164.1    | Ca_Kabuli_Chr05 | 9624706                 | CC                              | TT                 | TT               | URR                           | 101507922          | Unknown function                                   |
| SNP_33803_A_9624826 | NC_021164.1    | Ca_Kabuli_Chr05 | 9624826                 | TT                              | AA                 | AA               | URR                           | 101507922          | Unknown function                                   |

| SNPs IDs            | Chromosome IDs | Chromosomes     | Physical positions (bp) | CDC Frontier genome (Reference genome) | (Pusa 1103 & HPNB) | (ILWC 46 & LPNB) | Sequence Components of genome | Gene accession IDs | Putative functions               |
|---------------------|----------------|-----------------|-------------------------|----------------------------------------|--------------------|------------------|-------------------------------|--------------------|----------------------------------|
| SNP_33804_A_9624868 | NC_021164.1    | Ca_Kabuli_Chr05 | 9624868                 | TT                                     | AA                 | AA               | URR                           | 101507922          | Unknown function                 |
| SNP_33805_A_9624880 | NC_021164.1    | Ca_Kabuli_Chr05 | 9624880                 | AA                                     | GG                 | GG               | URR                           | 101507922          | Unknown function                 |
| SNP_33806_A_9624904 | NC_021164.1    | Ca_Kabuli_Chr05 | 9624904                 | GG                                     | AA                 | AA               | URR                           | 101507922          | Unknown function                 |
| SNP_33807_A_9624913 | NC_021164.1    | Ca_Kabuli_Chr05 | 9624913                 | GG                                     | AA                 | AA               | URR                           | 101507922          | Unknown function                 |
| SNP_33808_A_9625659 | NC_021164.1    | Ca_Kabuli_Chr05 | 9625659                 | GG                                     | CC                 | CC               | URR                           | 101507922          | Unknown function                 |
| SNP_33809_A_9625705 | NC_021164.1    | Ca_Kabuli_Chr05 | 9625705                 | AA                                     | CC                 | CC               | URR                           | 101507922          | Unknown function                 |
| SNP_33810_A_9625870 | NC_021164.1    | Ca_Kabuli_Chr05 | 9625870                 | AA                                     | TT                 | TT               | INTERGENIC                    |                    |                                  |
| SNP_33811_A_9625871 | NC_021164.1    | Ca_Kabuli_Chr05 | 9625871                 | TT                                     | AA                 | AA               | INTERGENIC                    |                    |                                  |
| SNP_33812_A_9625872 | NC_021164.1    | Ca_Kabuli_Chr05 | 9625872                 | AA                                     | CC                 | CC               | INTERGENIC                    |                    |                                  |
| SNP_33813_A_9625875 | NC_021164.1    | Ca_Kabuli_Chr05 | 9625875                 | GG                                     | AA                 | AA               | INTERGENIC                    |                    |                                  |
| SNP_33815_A_9626089 | NC_021164.1    | Ca_Kabuli_Chr05 | 9626089                 | GG                                     | CC                 | CC               | INTERGENIC                    |                    |                                  |
| SNP_33817_A_9626230 | NC_021164.1    | Ca_Kabuli_Chr05 | 9626230                 | CC                                     | AA                 | AA               | INTERGENIC                    |                    |                                  |
| SNP_33818_A_9634820 | NC_021164.1    | Ca_Kabuli_Chr05 | 9634820                 | AA                                     | GG                 | GG               | INTERGENIC                    |                    |                                  |
| SNP_33819_A_9638524 | NC_021164.1    | Ca_Kabuli_Chr05 | 9638524                 | GG                                     | CC                 | CC               | NON_SYNONYMOUS_CODING         | 101505550          | 60S ribosomal protein L29-1-like |
| SNP_33820_A_9646253 | NC_021164.1    | Ca_Kabuli_Chr05 | 9646253                 | AA                                     | GG                 | GG               | INTERGENIC                    |                    |                                  |
| SNP_33821_A_9649859 | NC_021164.1    | Ca_Kabuli_Chr05 | 9649859                 | TT                                     | GG                 | GG               | URR                           | 101506318          | 21 kDa protein-like              |
| SNP_33822_A_9656851 | NC_021164.1    | Ca_Kabuli_Chr05 | 9656851                 | GG                                     | CC                 | CC               | INTERGENIC                    |                    |                                  |
| SNP_33823_A_9656857 | NC_021164.1    | Ca_Kabuli_Chr05 | 9656857                 | TT                                     | CC                 | CC               | INTERGENIC                    |                    |                                  |
| SNP_33824_A_9656866 | NC_021164.1    | Ca_Kabuli_Chr05 | 9656866                 | CC                                     | TT                 | TT               | INTERGENIC                    |                    |                                  |
| SNP_33825_A_9656881 | NC_021164.1    | Ca_Kabuli_Chr05 | 9656881                 | TT                                     | GG                 | GG               | INTERGENIC                    |                    |                                  |
| SNP_33826_A_9656890 | NC_021164.1    | Ca_Kabuli_Chr05 | 9656890                 | CC                                     | AA                 | AA               | INTERGENIC                    |                    |                                  |
| SNP_33827_A_9657216 | NC_021164.1    | Ca_Kabuli_Chr05 | 9657216                 | AA                                     | GG                 | GG               | INTERGENIC                    |                    |                                  |

| SNPs IDs            | Chromosome IDs | Chromosomes     | Physical positions (bp) | CDC Frontier genome (Reference genome) | (Pusa 1103 & HPNB) | (ILWC 46 & LPNB) | Sequence Components of genome | Gene accession IDs | Putative functions                     |
|---------------------|----------------|-----------------|-------------------------|----------------------------------------|--------------------|------------------|-------------------------------|--------------------|----------------------------------------|
| SNP_33828_A_9657217 | NC_021164.1    | Ca_Kabuli_Chr05 | 9657217                 | AA                                     | TT                 | TT               | INTERGENIC                    |                    |                                        |
| SNP_33829_A_9657323 | NC_021164.1    | Ca_Kabuli_Chr05 | 9657323                 | AA                                     | GG                 | GG               | INTERGENIC                    |                    |                                        |
| SNP_33830_A_9657656 | NC_021164.1    | Ca_Kabuli_Chr05 | 9657656                 | GG                                     | AA                 | AA               | INTERGENIC                    |                    |                                        |
| SNP_33831_A_9657686 | NC_021164.1    | Ca_Kabuli_Chr05 | 9657686                 | GG                                     | AA                 | AA               | INTERGENIC                    |                    |                                        |
| SNP_33832_A_9658778 | NC_021164.1    | Ca_Kabuli_Chr05 | 9658778                 | TT                                     | CC                 | CC               | INTERGENIC                    |                    |                                        |
| SNP_33833_A_9659713 | NC_021164.1    | Ca_Kabuli_Chr05 | 9659713                 | CC                                     | AA                 | AA               | INTERGENIC                    |                    |                                        |
| SNP_33834_A_9705929 | NC_021164.1    | Ca_Kabuli_Chr05 | 9705929                 | AA                                     | GG                 | GG               | INTERGENIC                    |                    |                                        |
| SNP_33835_A_9706018 | NC_021164.1    | Ca_Kabuli_Chr05 | 9706018                 | CC                                     | TT                 | TT               | INTERGENIC                    |                    |                                        |
| SNP_33836_A_9709142 | NC_021164.1    | Ca_Kabuli_Chr05 | 9709142                 | AA                                     | GG                 | GG               | INTERGENIC                    |                    |                                        |
| SNP_33837_A_9710839 | NC_021164.1    | Ca_Kabuli_Chr05 | 9710839                 | CC                                     | AA                 | AA               | DRR                           | 101508234          | probable glucan 1,3-beta-glucosidase A |
| SNP_33838_A_9711068 | NC_021164.1    | Ca_Kabuli_Chr05 | 9711068                 | CC                                     | TT                 | TT               | DRR                           | 101508234          | probable glucan 1,3-beta-glucosidase A |
| SNP_33839_A_9715313 | NC_021164.1    | Ca_Kabuli_Chr05 | 9715313                 | TT                                     | AA                 | AA               | INTRON                        | 101508234          | probable glucan 1,3-beta-glucosidase A |
| SNP_33840_A_9715318 | NC_021164.1    | Ca_Kabuli_Chr05 | 9715318                 | GG                                     | AA                 | AA               | INTRON                        | 101508234          | probable glucan 1,3-beta-glucosidase A |
| SNP_33841_A_9717684 | NC_021164.1    | Ca_Kabuli_Chr05 | 9717684                 | GG                                     | AA                 | AA               | INTRON                        | 101508234          | probable glucan 1,3-beta-glucosidase A |
| SNP_33842_A_9719153 | NC_021164.1    | Ca_Kabuli_Chr05 | 9719153                 | AA                                     | TT                 | TT               | NON_SYNONYMOUS_CODING         | 101508234          | probable glucan 1,3-beta-glucosidase A |
| SNP_33843_A_9720713 | NC_021164.1    | Ca_Kabuli_Chr05 | 9720713                 | AA                                     | GG                 | GG               | URR                           | 101508234          | probable glucan 1,3-beta-glucosidase A |
| SNP_33844_A_9720743 | NC_021164.1    | Ca_Kabuli_Chr05 | 9720743                 | AA                                     | GG                 | GG               | URR                           | 101508234          | probable glucan 1,3-beta-glucosidase A |
| SNP_33845_A_9720773 | NC_021164.1    | Ca_Kabuli_Chr05 | 9720773                 | AA                                     | GG                 | GG               | URR                           | 101508234          | probable glucan 1,3-beta-glucosidase A |
| SNP_33846_A_9720784 | NC_021164.1    | Ca_Kabuli_Chr05 | 9720784                 | AA                                     | GG                 | GG               | URR                           | 101508234          | probable glucan 1,3-beta-glucosidase A |
| SNP_33847_A_9720786 | NC_021164.1    | Ca_Kabuli_Chr05 | 9720786                 | CC                                     | AA                 | AA               | URR                           | 101508234          | probable glucan 1,3-beta-glucosidase A |
| SNP_33848_A_9722766 | NC_021164.1    | Ca_Kabuli_Chr05 | 9722766                 | TT                                     | CC                 | CC               | INTERGENIC                    |                    |                                        |
| SNP_33849_A_9722776 | NC_021164.1    | Ca_Kabuli_Chr05 | 9722776                 | TT                                     | AA                 | AA               | INTERGENIC                    |                    |                                        |

| SNPs IDs            | Chromosome IDs | Chromosomes     | Physical positions (bp) | CDC Frontier (Reference genome) | (Pusa 1103 & HPNB) | (ILWC 46 & LPNB) | Sequence Components of genome | Gene accession IDs | Putative functions                                                  |
|---------------------|----------------|-----------------|-------------------------|---------------------------------|--------------------|------------------|-------------------------------|--------------------|---------------------------------------------------------------------|
| SNP_33850_A_9722802 | NC_021164.1    | Ca_Kabuli_Chr05 | 9722802                 | AA                              | GG                 | GG               | INTERGENIC                    |                    |                                                                     |
| SNP_33851_A_9723174 | NC_021164.1    | Ca_Kabuli_Chr05 | 9723174                 | CC                              | AA                 | AA               | INTERGENIC                    |                    |                                                                     |
| SNP_33852_A_9731741 | NC_021164.1    | Ca_Kabuli_Chr05 | 9731741                 | TT                              | CC                 | CC               | INTERGENIC                    |                    |                                                                     |
| SNP_33853_A_9731925 | NC_021164.1    | Ca_Kabuli_Chr05 | 9731925                 | GG                              | TT                 | TT               | INTERGENIC                    |                    |                                                                     |
| SNP_33854_A_9731927 | NC_021164.1    | Ca_Kabuli_Chr05 | 9731927                 | AA                              | CC                 | CC               | INTERGENIC                    |                    |                                                                     |
| SNP_33855_A_9733195 | NC_021164.1    | Ca_Kabuli_Chr05 | 9733195                 | CC                              | TT                 | TT               | INTERGENIC                    |                    |                                                                     |
| SNP_33856_A_9733673 | NC_021164.1    | Ca_Kabuli_Chr05 | 9733673                 | AA                              | CC                 | CC               | INTERGENIC                    |                    |                                                                     |
| SNP_33858_A_9739888 | NC_021164.1    | Ca_Kabuli_Chr05 | 9739888                 | TT                              | CC                 | CC               | NON_SYNONYMOUS_CODING         | 101489959          | Unknown function                                                    |
| SNP_33859_A_9739890 | NC_021164.1    | Ca_Kabuli_Chr05 | 9739890                 | GG                              | CC                 | CC               | NON_SYNONYMOUS_CODING         | 101489959          | Unknown function                                                    |
| SNP_33860_A_9741041 | NC_021164.1    | Ca_Kabuli_Chr05 | 9741041                 | CC                              | GG                 | GG               | URR                           | 101489959          | Unknown function                                                    |
| SNP_33861_A_9741559 | NC_021164.1    | Ca_Kabuli_Chr05 | 9741559                 | TT                              | CC                 | CC               | URR                           | 101489959          | Unknown function                                                    |
| SNP_33862_A_9767777 | NC_021164.1    | Ca_Kabuli_Chr05 | 9767777                 | CC                              | TT                 | TT               | INTERGENIC                    |                    |                                                                     |
| SNP_33864_A_9768299 | NC_021164.1    | Ca_Kabuli_Chr05 | 9768299                 | AA                              | CC                 | CC               | INTERGENIC                    |                    |                                                                     |
| SNP_33867_A_9773726 | NC_021164.1    | Ca_Kabuli_Chr05 | 9773726                 | CC                              | TT                 | TT               | SYNONYMOUS_CODING             | 101508558          | probable leucine-rich repeat receptor-like protein kinase At1g35710 |
| SNP_33868_A_9773965 | NC_021164.1    | Ca_Kabuli_Chr05 | 9773965                 | AA                              | CC                 | CC               | NON_SYNONYMOUS_CODING         | 101508558          | probable leucine-rich repeat receptor-like protein kinase At1g35710 |
| SNP_33869_A_9773978 | NC_021164.1    | Ca_Kabuli_Chr05 | 9773978                 | GG                              | AA                 | AA               | SYNONYMOUS_CODING             | 101508558          | probable leucine-rich repeat receptor-like protein kinase At1g35710 |
| SNP_33870_A_9773996 | NC_021164.1    | Ca_Kabuli_Chr05 | 9773996                 | CC                              | GG                 | GG               | NON_SYNONYMOUS_CODING         | 101508558          | probable leucine-rich repeat receptor-like protein kinase At1g35710 |
| SNP_33872_A_9774878 | NC_021164.1    | Ca_Kabuli_Chr05 | 9774878                 | TT                              | GG                 | GG               | URR                           | 101508558          | probable leucine-rich repeat receptor-like protein kinase At1g35710 |
| SNP_33873_A_9775356 | NC_021164.1    | Ca_Kabuli_Chr05 | 9775356                 | TT                              | AA                 | AA               | URR                           | 101508558          | probable leucine-rich repeat receptor-like protein kinase At1g35710 |
| SNP_33874_A_9775366 | NC_021164.1    | Ca_Kabuli_Chr05 | 9775366                 | GG                              | AA                 | AA               | URR                           | 101508558          | probable leucine-rich repeat receptor-like protein kinase At1g35710 |
| SNP_33875_A_9775657 | NC_021164.1    | Ca_Kabuli_Chr05 | 9775657                 | AA                              | CC                 | CC               | URR                           | 101508558          | probable leucine-rich repeat receptor-like protein kinase At1g35710 |
| SNP_33876_A_9775663 | NC_021164.1    | Ca_Kabuli_Chr05 | 9775663                 | CC                              | TT                 | TT               | URR                           | 101508558          | probable leucine-rich repeat receptor-like protein kinase At1g35710 |

| SNPs IDs            | Chromosome IDs | Chromosomes     | Physical positions (bp) | CDC Frontier genome (Reference genome) | (Pusa 1103 & HPNB) | (ILWC 46 & LPNB) | Sequence Components of genome | Gene accession IDs | Putative functions                                                  |
|---------------------|----------------|-----------------|-------------------------|----------------------------------------|--------------------|------------------|-------------------------------|--------------------|---------------------------------------------------------------------|
| SNP_33878_A_9775689 | NC_021164.1    | Ca_Kabuli_Chr05 | 9775689                 | CC                                     | TT                 | TT               | URR                           | 101508558          | probable leucine-rich repeat receptor-like protein kinase At1g35710 |
| SNP_33879_A_9776207 | NC_021164.1    | Ca_Kabuli_Chr05 | 9776207                 | CC                                     | TT                 | TT               | URR                           | 101508558          | probable leucine-rich repeat receptor-like protein kinase At1g35710 |
| SNP_33880_A_9776739 | NC_021164.1    | Ca_Kabuli_Chr05 | 9776739                 | CC                                     | TT                 | TT               | INTERGENIC                    |                    |                                                                     |
| SNP_33881_A_9776741 | NC_021164.1    | Ca_Kabuli_Chr05 | 9776741                 | AA                                     | GG                 | GG               | INTERGENIC                    |                    |                                                                     |
| SNP_33882_A_9776745 | NC_021164.1    | Ca_Kabuli_Chr05 | 9776745                 | TT                                     | AA                 | AA               | INTERGENIC                    |                    |                                                                     |
| SNP_33883_A_9778192 | NC_021164.1    | Ca_Kabuli_Chr05 | 9778192                 | TT                                     | CC                 | CC               | INTERGENIC                    |                    |                                                                     |
| SNP_33884_A_9779078 | NC_021164.1    | Ca_Kabuli_Chr05 | 9779078                 | CC                                     | TT                 | TT               | INTERGENIC                    |                    |                                                                     |
| SNP_33885_A_9782517 | NC_021164.1    | Ca_Kabuli_Chr05 | 9782517                 | GG                                     | AA                 | AA               | DRR                           | 101508873          | protein FAM136A-like                                                |
| SNP_33886_A_9782572 | NC_021164.1    | Ca_Kabuli_Chr05 | 9782572                 | AA                                     | GG                 | GG               | DRR                           | 101508873          | protein FAM136A-like                                                |
| SNP_33887_A_9782600 | NC_021164.1    | Ca_Kabuli_Chr05 | 9782600                 | AA                                     | GG                 | GG               | DRR                           | 101508873          | protein FAM136A-like                                                |
| SNP_33888_A_9782817 | NC_021164.1    | Ca_Kabuli_Chr05 | 9782817                 | TT                                     | CC                 | CC               | DRR                           | 101508873          | protein FAM136A-like                                                |
| SNP_33890_A_9784461 | NC_021164.1    | Ca_Kabuli_Chr05 | 9784461                 | CC                                     | AA                 | AA               | INTRON                        | 101508873          | protein FAM136A-like                                                |
| SNP_33891_A_9784608 | NC_021164.1    | Ca_Kabuli_Chr05 | 9784608                 | GG                                     | AA                 | AA               | INTRON                        | 101508873          | protein FAM136A-like                                                |
| SNP_33892_A_9784620 | NC_021164.1    | Ca_Kabuli_Chr05 | 9784620                 | CC                                     | TT                 | TT               | INTRON                        | 101508873          | protein FAM136A-like                                                |
| SNP_33893_A_9784631 | NC_021164.1    | Ca_Kabuli_Chr05 | 9784631                 | CC                                     | GG                 | GG               | INTRON                        | 101508873          | protein FAM136A-like                                                |
| SNP_33894_A_9785494 | NC_021164.1    | Ca_Kabuli_Chr05 | 9785494                 | AA                                     | GG                 | GG               | INTRON                        | 101508873          | protein FAM136A-like                                                |
| SNP_33895_A_9785498 | NC_021164.1    | Ca_Kabuli_Chr05 | 9785498                 | AA                                     | TT                 | TT               | INTRON                        | 101508873          | protein FAM136A-like                                                |
| SNP_33896_A_9785515 | NC_021164.1    | Ca_Kabuli_Chr05 | 9785515                 | TT                                     | CC                 | CC               | INTRON                        | 101508873          | protein FAM136A-like                                                |
| SNP_33897_A_9785524 | NC_021164.1    | Ca_Kabuli_Chr05 | 9785524                 | AA                                     | TT                 | TT               | INTRON                        | 101508873          | protein FAM136A-like                                                |
| SNP_33898_A_9785529 | NC_021164.1    | Ca_Kabuli_Chr05 | 9785529                 | TT                                     | AA                 | AA               | INTRON                        | 101508873          | protein FAM136A-like                                                |
| SNP_33899_A_9788504 | NC_021164.1    | Ca_Kabuli_Chr05 | 9788504                 | CC                                     | TT                 | TT               | URR                           | 101508873          | protein FAM136A-like                                                |
| SNP_33900_A_9788505 | NC_021164.1    | Ca_Kabuli_Chr05 | 9788505                 | AA                                     | GG                 | GG               | URR                           | 101508873          | protein FAM136A-like                                                |



| SNPs IDs            | Chromosome IDs | Chromosomes     | Physical positions (bp) | CDC Frontier (Reference genome) | (Pusa 1103 & HPNB) | (ILWC 46 & LPNB) | Sequence Components of genome | Gene accession IDs | Putative functions   |
|---------------------|----------------|-----------------|-------------------------|---------------------------------|--------------------|------------------|-------------------------------|--------------------|----------------------|
| SNP_33901_A_9788512 | NC_021164.1    | Ca_Kabuli_Chr05 | 9788512                 | AA                              | GG                 | GG               | URR                           | 101508873          | protein FAM136A-like |
| SNP_33902_A_9789143 | NC_021164.1    | Ca_Kabuli_Chr05 | 9789143                 | AA                              | GG                 | GG               | INTERGENIC                    |                    |                      |
| SNP_33903_A_9789467 | NC_021164.1    | Ca_Kabuli_Chr05 | 9789467                 | GG                              | TT                 | TT               | INTERGENIC                    |                    |                      |
| SNP_33904_A_9789965 | NC_021164.1    | Ca_Kabuli_Chr05 | 9789965                 | CC                              | TT                 | TT               | INTERGENIC                    |                    |                      |
| SNP_33905_A_9789976 | NC_021164.1    | Ca_Kabuli_Chr05 | 9789976                 | CC                              | TT                 | TT               | INTERGENIC                    |                    |                      |
| SNP_33906_A_9790356 | NC_021164.1    | Ca_Kabuli_Chr05 | 9790356                 | GG                              | CC                 | CC               | INTERGENIC                    |                    |                      |
| SNP_33907_A_9792568 | NC_021164.1    | Ca_Kabuli_Chr05 | 9792568                 | AA                              | GG                 | GG               | INTERGENIC                    |                    |                      |
| SNP_33908_A_9792754 | NC_021164.1    | Ca_Kabuli_Chr05 | 9792754                 | TT                              | CC                 | CC               | INTERGENIC                    |                    |                      |
| SNP_33909_A_9792762 | NC_021164.1    | Ca_Kabuli_Chr05 | 9792762                 | AA                              | GG                 | GG               | INTERGENIC                    |                    |                      |
| SNP_33910_A_9792913 | NC_021164.1    | Ca_Kabuli_Chr05 | 9792913                 | GG                              | AA                 | AA               | INTERGENIC                    |                    |                      |
| SNP_33911_A_9792987 | NC_021164.1    | Ca_Kabuli_Chr05 | 9792987                 | AA                              | GG                 | GG               | INTERGENIC                    |                    |                      |
| SNP_33912_A_9793343 | NC_021164.1    | Ca_Kabuli_Chr05 | 9793343                 | GG                              | AA                 | AA               | INTERGENIC                    |                    |                      |
| SNP_33913_A_9793369 | NC_021164.1    | Ca_Kabuli_Chr05 | 9793369                 | AA                              | GG                 | GG               | INTERGENIC                    |                    |                      |
| SNP_33914_A_9793655 | NC_021164.1    | Ca_Kabuli_Chr05 | 9793655                 | GG                              | AA                 | AA               | INTERGENIC                    |                    |                      |
| SNP_33915_A_9793963 | NC_021164.1    | Ca_Kabuli_Chr05 | 9793963                 | AA                              | GG                 | GG               | INTERGENIC                    |                    |                      |
| SNP_33916_A_9793987 | NC_021164.1    | Ca_Kabuli_Chr05 | 9793987                 | GG                              | AA                 | AA               | INTERGENIC                    |                    |                      |
| SNP_33917_A_9794133 | NC_021164.1    | Ca_Kabuli_Chr05 | 9794133                 | CC                              | GG                 | GG               | INTERGENIC                    |                    |                      |
| SNP_33918_A_9794164 | NC_021164.1    | Ca_Kabuli_Chr05 | 9794164                 | CC                              | TT                 | TT               | INTERGENIC                    |                    |                      |
| SNP_33919_A_9797852 | NC_021164.1    | Ca_Kabuli_Chr05 | 9797852                 | TT                              | CC                 | CC               | INTERGENIC                    |                    |                      |
| SNP_33920_A_9797859 | NC_021164.1    | Ca_Kabuli_Chr05 | 9797859                 | GG                              | AA                 | AA               | INTERGENIC                    |                    |                      |
| SNP_33921_A_9797861 | NC_021164.1    | Ca_Kabuli_Chr05 | 9797861                 | GG                              | AA                 | AA               | INTERGENIC                    |                    |                      |
| SNP_33922_A_9797864 | NC_021164.1    | Ca_Kabuli_Chr05 | 9797864                 | GG                              | AA                 | AA               | INTERGENIC                    |                    |                      |

| SNPs IDs            | Chromosome IDs | Chromosomes     | Physical positions (bp) | CDC Frontier genome (Reference genome) | (Pusa 1103 & HPNB) | (ILWC 46 & LPNB) | Sequence Components of genome | Gene accession IDs | Putative functions                                           |
|---------------------|----------------|-----------------|-------------------------|----------------------------------------|--------------------|------------------|-------------------------------|--------------------|--------------------------------------------------------------|
| SNP_33923_A_9799550 | NC_021164.1    | Ca_Kabuli_Chr05 | 9799550                 | GG                                     | AA                 | AA               | INTERGENIC                    |                    |                                                              |
| SNP_33924_A_9800376 | NC_021164.1    | Ca_Kabuli_Chr05 | 9800376                 | CC                                     | GG                 | GG               | INTERGENIC                    |                    |                                                              |
| SNP_33925_A_9800389 | NC_021164.1    | Ca_Kabuli_Chr05 | 9800389                 | GG                                     | AA                 | AA               | INTERGENIC                    |                    |                                                              |
| SNP_33926_A_9800397 | NC_021164.1    | Ca_Kabuli_Chr05 | 9800397                 | GG                                     | AA                 | AA               | INTERGENIC                    |                    |                                                              |
| SNP_33927_A_9800438 | NC_021164.1    | Ca_Kabuli_Chr05 | 9800438                 | AA                                     | GG                 | GG               | INTERGENIC                    |                    |                                                              |
| SNP_33928_A_9800441 | NC_021164.1    | Ca_Kabuli_Chr05 | 9800441                 | GG                                     | AA                 | AA               | INTERGENIC                    |                    |                                                              |
| SNP_33929_A_9800443 | NC_021164.1    | Ca_Kabuli_Chr05 | 9800443                 | GG                                     | AA                 | AA               | INTERGENIC                    |                    |                                                              |
| SNP_33930_A_9803483 | NC_021164.1    | Ca_Kabuli_Chr05 | 9803483                 | GG                                     | AA                 | AA               | INTRON                        | 101509192          | uncharacterized LOC101509192                                 |
| SNP_33931_A_9805153 | NC_021164.1    | Ca_Kabuli_Chr05 | 9805153                 | TT                                     | CC                 | CC               | INTRON                        | 101509192          | uncharacterized LOC101509192                                 |
| SNP_33932_A_9806347 | NC_021164.1    | Ca_Kabuli_Chr05 | 9806347                 | AA                                     | CC                 | CC               | INTRON                        | 101509192          | uncharacterized LOC101509192                                 |
| SNP_33934_A_9808567 | NC_021164.1    | Ca_Kabuli_Chr05 | 9808567                 | GG                                     | AA                 | AA               | DRR                           | 101509522          | probable mitochondrial intermediate peptidase, mitochondrial |
| SNP_33935_A_9808657 | NC_021164.1    | Ca_Kabuli_Chr05 | 9808657                 | AA                                     | GG                 | GG               | DRR                           | 101509522          | probable mitochondrial intermediate peptidase, mitochondrial |
| SNP_33936_A_9808952 | NC_021164.1    | Ca_Kabuli_Chr05 | 9808952                 | GG                                     | AA                 | AA               | DRR                           | 101509522          | probable mitochondrial intermediate peptidase, mitochondrial |
| SNP_33938_A_9813813 | NC_021164.1    | Ca_Kabuli_Chr05 | 9813813                 | TT                                     | CC                 | CC               | INTRON                        | 101509522          | probable mitochondrial intermediate peptidase, mitochondrial |
| SNP_33939_A_9816345 | NC_021164.1    | Ca_Kabuli_Chr05 | 9816345                 | TT                                     | CC                 | CC               | INTRON                        | 101509522          | probable mitochondrial intermediate peptidase, mitochondrial |
| SNP_33941_A_9826182 | NC_021164.1    | Ca_Kabuli_Chr05 | 9826182                 | CC                                     | TT                 | TT               | INTERGENIC                    |                    |                                                              |
| SNP_33943_A_9828995 | NC_021164.1    | Ca_Kabuli_Chr05 | 9828995                 | TT                                     | AA                 | AA               | DRR                           | 101510052          | vacuolar protein sorting-associated protein 9A-like          |
| SNP_33944_A_9829026 | NC_021164.1    | Ca_Kabuli_Chr05 | 9829026                 | GG                                     | AA                 | AA               | DRR                           | 101510052          | vacuolar protein sorting-associated protein 9A-like          |
| SNP_33946_A_9831148 | NC_021164.1    | Ca_Kabuli_Chr05 | 9831148                 | CC                                     | TT                 | TT               | INTRON                        | 101510052          | vacuolar protein sorting-associated protein 9A-like          |
| SNP_33947_A_9831556 | NC_021164.1    | Ca_Kabuli_Chr05 | 9831556                 | AA                                     | TT                 | TT               | INTRON                        | 101510052          | vacuolar protein sorting-associated protein 9A-like          |
| SNP_33948_A_9831786 | NC_021164.1    | Ca_Kabuli_Chr05 | 9831786                 | CC                                     | TT                 | TT               | INTRON                        | 101510052          | vacuolar protein sorting-associated protein 9A-like          |
| SNP_33949_A_9831805 | NC_021164.1    | Ca_Kabuli_Chr05 | 9831805                 | AA                                     | GG                 | GG               | INTRON                        | 101510052          | vacuolar protein sorting-associated protein 9A-like          |

| SNPs IDs            | Chromosome IDs | Chromosomes     | Physical positions (bp) | CDC Frontier (Reference genome) | (Pusa 1103 & HPNB) | (ILWC 46 & LPNB) | Sequence Components of genome | Gene accession IDs | Putative functions                                  |
|---------------------|----------------|-----------------|-------------------------|---------------------------------|--------------------|------------------|-------------------------------|--------------------|-----------------------------------------------------|
| SNP_33950_A_9835290 | NC_021164.1    | Ca_Kabuli_Chr05 | 9835290                 | TT                              | AA                 | AA               | URR                           | 101510052          | vacuolar protein sorting-associated protein 9A-like |
| SNP_33953_A_9842695 | NC_021164.1    | Ca_Kabuli_Chr05 | 9842695                 | CC                              | TT                 | TT               | INTRON                        | 101510381          | peroxisome biogenesis protein 5                     |
| SNP_33954_A_9843104 | NC_021164.1    | Ca_Kabuli_Chr05 | 9843104                 | CC                              | GG                 | GG               | INTRON                        | 101510381          | peroxisome biogenesis protein 5                     |
| SNP_33955_A_9847836 | NC_021164.1    | Ca_Kabuli_Chr05 | 9847836                 | AA                              | GG                 | GG               | INTRON                        | 101510381          | peroxisome biogenesis protein 5                     |
| SNP_33956_A_9855808 | NC_021164.1    | Ca_Kabuli_Chr05 | 9855808                 | CC                              | GG                 | GG               | URR                           | 101510381          | peroxisome biogenesis protein 5                     |
| SNP_33957_A_9856424 | NC_021164.1    | Ca_Kabuli_Chr05 | 9856424                 | GG                              | CC                 | CC               | URR                           | 101510381          | peroxisome biogenesis protein 5                     |
| SNP_33958_A_9858795 | NC_021164.1    | Ca_Kabuli_Chr05 | 9858795                 | GG                              | AA                 | AA               | INTERGENIC                    |                    |                                                     |
| SNP_33960_A_9859512 | NC_021164.1    | Ca_Kabuli_Chr05 | 9859512                 | AA                              | TT                 | TT               | INTERGENIC                    |                    |                                                     |
| SNP_33961_A_9864991 | NC_021164.1    | Ca_Kabuli_Chr05 | 9864991                 | CC                              | TT                 | TT               | INTRON                        | 101510709          | ankyrin repeat domain-containing protein 2-like     |
| SNP_33962_A_9868477 | NC_021164.1    | Ca_Kabuli_Chr05 | 9868477                 | AA                              | CC                 | CC               | INTRON                        | 101510709          | ankyrin repeat domain-containing protein 2-like     |
| SNP_33963_A_9869455 | NC_021164.1    | Ca_Kabuli_Chr05 | 9869455                 | TT                              | AA                 | AA               | INTERGENIC                    |                    |                                                     |
| SNP_33964_A_9869487 | NC_021164.1    | Ca_Kabuli_Chr05 | 9869487                 | TT                              | CC                 | CC               | INTERGENIC                    |                    |                                                     |
| SNP_33965_A_9878543 | NC_021164.1    | Ca_Kabuli_Chr05 | 9878543                 | CC                              | TT                 | TT               | INTRON                        | 101511034          | COP9 signalosome complex subunit 6a-like            |
| SNP_33967_A_9883544 | NC_021164.1    | Ca_Kabuli_Chr05 | 9883544                 | GG                              | AA                 | AA               | URR                           | 101511034          | COP9 signalosome complex subunit 6a-like            |
| SNP_33968_A_9884164 | NC_021164.1    | Ca_Kabuli_Chr05 | 9884164                 | TT                              | CC                 | CC               | INTERGENIC                    |                    |                                                     |
| SNP_33969_A_9884169 | NC_021164.1    | Ca_Kabuli_Chr05 | 9884169                 | AA                              | GG                 | GG               | INTERGENIC                    |                    |                                                     |
| SNP_33970_A_9884182 | NC_021164.1    | Ca_Kabuli_Chr05 | 9884182                 | CC                              | TT                 | TT               | INTERGENIC                    |                    |                                                     |
| SNP_33971_A_9884382 | NC_021164.1    | Ca_Kabuli_Chr05 | 9884382                 | CC                              | TT                 | TT               | INTERGENIC                    |                    |                                                     |
| SNP_33972_A_9884386 | NC_021164.1    | Ca_Kabuli_Chr05 | 9884386                 | TT                              | CC                 | CC               | INTERGENIC                    |                    |                                                     |
| SNP_33974_A_9884781 | NC_021164.1    | Ca_Kabuli_Chr05 | 9884781                 | TT                              | CC                 | CC               | INTERGENIC                    |                    |                                                     |
| SNP_33975_A_9885938 | NC_021164.1    | Ca_Kabuli_Chr05 | 9885938                 | AA                              | GG                 | GG               | INTERGENIC                    |                    |                                                     |
| SNP_33976_A_9886628 | NC_021164.1    | Ca_Kabuli_Chr05 | 9886628                 | CC                              | TT                 | TT               | INTERGENIC                    |                    |                                                     |

| SNPs IDs            | Chromosome IDs | Chromosomes     | Physical positions (bp) | CDC Frontier (Reference genome) | (Pusa 1103 & HPNB) | (ILWC 46 & LPNB) | Sequence Components of genome | Gene accession IDs | Putative functions                          |
|---------------------|----------------|-----------------|-------------------------|---------------------------------|--------------------|------------------|-------------------------------|--------------------|---------------------------------------------|
| SNP_33977_A_9887634 | NC_021164.1    | Ca_Kabuli_Chr05 | 9887634                 | TT                              | GG                 | GG               | INTERGENIC                    |                    |                                             |
| SNP_33978_A_9887651 | NC_021164.1    | Ca_Kabuli_Chr05 | 9887651                 | AA                              | GG                 | GG               | INTERGENIC                    |                    |                                             |
| SNP_33979_A_9892990 | NC_021164.1    | Ca_Kabuli_Chr05 | 9892990                 | AA                              | GG                 | GG               | INTERGENIC                    |                    |                                             |
| SNP_33980_A_9893004 | NC_021164.1    | Ca_Kabuli_Chr05 | 9893004                 | GG                              | AA                 | AA               | INTERGENIC                    |                    |                                             |
| SNP_33982_A_9905233 | NC_021164.1    | Ca_Kabuli_Chr05 | 9905233                 | GG                              | AA                 | AA               | SYNONYMOUS_CODING             | 101511340          | serine/threonine-protein kinase BRI1-like 1 |
| SNP_33983_A_9905350 | NC_021164.1    | Ca_Kabuli_Chr05 | 9905350                 | CC                              | TT                 | TT               | SYNONYMOUS_CODING             | 101511340          | serine/threonine-protein kinase BRI1-like 1 |
| SNP_33985_A_9906177 | NC_021164.1    | Ca_Kabuli_Chr05 | 9906177                 | GG                              | AA                 | AA               | URR                           | 101511340          | serine/threonine-protein kinase BRI1-like 1 |
| SNP_33986_A_9906396 | NC_021164.1    | Ca_Kabuli_Chr05 | 9906396                 | TT                              | AA                 | AA               | URR                           | 101511340          | serine/threonine-protein kinase BRI1-like 1 |
| SNP_33987_A_9907450 | NC_021164.1    | Ca_Kabuli_Chr05 | 9907450                 | AA                              | TT                 | TT               | URR                           | 101511340          | serine/threonine-protein kinase BRI1-like 1 |
| SNP_33988_A_9907785 | NC_021164.1    | Ca_Kabuli_Chr05 | 9907785                 | GG                              | CC                 | CC               | URR                           | 101511340          | serine/threonine-protein kinase BRI1-like 1 |
| SNP_33989_A_9908335 | NC_021164.1    | Ca_Kabuli_Chr05 | 9908335                 | TT                              | CC                 | CC               | INTERGENIC                    |                    |                                             |
| SNP_33990_A_9911182 | NC_021164.1    | Ca_Kabuli_Chr05 | 9911182                 | TT                              | GG                 | GG               | INTERGENIC                    |                    |                                             |
| SNP_33991_A_9911863 | NC_021164.1    | Ca_Kabuli_Chr05 | 9911863                 | GG                              | CC                 | CC               | INTERGENIC                    |                    |                                             |
| SNP_33992_A_9911870 | NC_021164.1    | Ca_Kabuli_Chr05 | 9911870                 | CC                              | TT                 | TT               | INTERGENIC                    |                    |                                             |
| SNP_33993_A_9911900 | NC_021164.1    | Ca_Kabuli_Chr05 | 9911900                 | GG                              | TT                 | TT               | INTERGENIC                    |                    |                                             |
| SNP_33994_A_9912453 | NC_021164.1    | Ca_Kabuli_Chr05 | 9912453                 | AA                              | GG                 | GG               | INTERGENIC                    |                    |                                             |
| SNP_33996_A_9913189 | NC_021164.1    | Ca_Kabuli_Chr05 | 9913189                 | TT                              | GG                 | GG               | INTERGENIC                    |                    |                                             |
| SNP_33997_A_9913239 | NC_021164.1    | Ca_Kabuli_Chr05 | 9913239                 | TT                              | AA                 | AA               | INTERGENIC                    |                    |                                             |
| SNP_33998_A_9914424 | NC_021164.1    | Ca_Kabuli_Chr05 | 9914424                 | AA                              | TT                 | TT               | INTERGENIC                    |                    |                                             |
| SNP_33999_A_9915471 | NC_021164.1    | Ca_Kabuli_Chr05 | 9915471                 | CC                              | TT                 | TT               | INTERGENIC                    |                    |                                             |
| SNP_34000_A_9916302 | NC_021164.1    | Ca_Kabuli_Chr05 | 9916302                 | TT                              | AA                 | AA               | INTERGENIC                    |                    |                                             |
| SNP_34001_A_9916311 | NC_021164.1    | Ca_Kabuli_Chr05 | 9916311                 | GG                              | AA                 | AA               | INTERGENIC                    |                    |                                             |

| SNPs IDs            | Chromosome IDs | Chromosomes     | Physical positions (bp) | CDC Frontier genome (Reference genome) | (Pusa 1103 & HPNB) | (ILWC 46 & LPNB) | Sequence genome | Components of | Gene accession IDs | Putative functions |
|---------------------|----------------|-----------------|-------------------------|----------------------------------------|--------------------|------------------|-----------------|---------------|--------------------|--------------------|
| SNP_34002_A_9916887 | NC_021164.1    | Ca_Kabuli_Chr05 | 9916887                 | AA                                     | GG                 | GG               | INTERGENIC      |               |                    |                    |
| SNP_34003_A_9916976 | NC_021164.1    | Ca_Kabuli_Chr05 | 9916976                 | CC                                     | TT                 | TT               | INTERGENIC      |               |                    |                    |
| SNP_34004_A_9916990 | NC_021164.1    | Ca_Kabuli_Chr05 | 9916990                 | TT                                     | CC                 | CC               | INTERGENIC      |               |                    |                    |
| SNP_34005_A_9917546 | NC_021164.1    | Ca_Kabuli_Chr05 | 9917546                 | CC                                     | TT                 | TT               | INTERGENIC      |               |                    |                    |
| SNP_34006_A_9917558 | NC_021164.1    | Ca_Kabuli_Chr05 | 9917558                 | AA                                     | GG                 | GG               | INTERGENIC      |               |                    |                    |
| SNP_34007_A_9917662 | NC_021164.1    | Ca_Kabuli_Chr05 | 9917662                 | GG                                     | AA                 | AA               | INTERGENIC      |               |                    |                    |
| SNP_34009_A_9917756 | NC_021164.1    | Ca_Kabuli_Chr05 | 9917756                 | TT                                     | CC                 | CC               | INTERGENIC      |               |                    |                    |
| SNP_34010_A_9917783 | NC_021164.1    | Ca_Kabuli_Chr05 | 9917783                 | AA                                     | GG                 | GG               | INTERGENIC      |               |                    |                    |
| SNP_34011_A_9917803 | NC_021164.1    | Ca_Kabuli_Chr05 | 9917803                 | GG                                     | TT                 | TT               | INTERGENIC      |               |                    |                    |
| SNP_34012_A_9917875 | NC_021164.1    | Ca_Kabuli_Chr05 | 9917875                 | TT                                     | CC                 | CC               | INTERGENIC      |               |                    |                    |
| SNP_34013_A_9918056 | NC_021164.1    | Ca_Kabuli_Chr05 | 9918056                 | CC                                     | TT                 | TT               | INTERGENIC      |               |                    |                    |
| SNP_34014_A_9918059 | NC_021164.1    | Ca_Kabuli_Chr05 | 9918059                 | GG                                     | TT                 | TT               | INTERGENIC      |               |                    |                    |
| SNP_34015_A_9918064 | NC_021164.1    | Ca_Kabuli_Chr05 | 9918064                 | TT                                     | AA                 | AA               | INTERGENIC      |               |                    |                    |
| SNP_34016_A_9918138 | NC_021164.1    | Ca_Kabuli_Chr05 | 9918138                 | AA                                     | GG                 | GG               | INTERGENIC      |               |                    |                    |
| SNP_34017_A_9918144 | NC_021164.1    | Ca_Kabuli_Chr05 | 9918144                 | AA                                     | GG                 | GG               | INTERGENIC      |               |                    |                    |
| SNP_34018_A_9918150 | NC_021164.1    | Ca_Kabuli_Chr05 | 9918150                 | CC                                     | TT                 | TT               | INTERGENIC      |               |                    |                    |
| SNP_34019_A_9918278 | NC_021164.1    | Ca_Kabuli_Chr05 | 9918278                 | GG                                     | AA                 | AA               | INTERGENIC      |               |                    |                    |
| SNP_34021_A_9919341 | NC_021164.1    | Ca_Kabuli_Chr05 | 9919341                 | CC                                     | AA                 | AA               | INTERGENIC      |               |                    |                    |
| SNP_34022_A_9919349 | NC_021164.1    | Ca_Kabuli_Chr05 | 9919349                 | CC                                     | TT                 | TT               | INTERGENIC      |               |                    |                    |
| SNP_34023_A_9920785 | NC_021164.1    | Ca_Kabuli_Chr05 | 9920785                 | GG                                     | AA                 | AA               | INTERGENIC      |               |                    |                    |
| SNP_34024_A_9937433 | NC_021164.1    | Ca_Kabuli_Chr05 | 9937433                 | TT                                     | AA                 | AA               | INTERGENIC      |               |                    |                    |
| SNP_34025_A_9948977 | NC_021164.1    | Ca_Kabuli_Chr05 | 9948977                 | TT                                     | AA                 | AA               | INTERGENIC      |               |                    |                    |

| SNPs IDs            | Chromosome IDs | Chromosomes     | Physical positions (bp) | CDC Frontier genome (Reference genome) | (Pusa 1103 & HPNB) | (ILWC 46 & LPNB) | Sequence genome       | Components of | Gene accession IDs                   | Putative functions |
|---------------------|----------------|-----------------|-------------------------|----------------------------------------|--------------------|------------------|-----------------------|---------------|--------------------------------------|--------------------|
| SNP_34026_A_9949019 | NC_021164.1    | Ca_Kabuli_Chr05 | 9949019                 | GG                                     | TT                 | TT               | INTERGENIC            |               |                                      |                    |
| SNP_34027_A_9950470 | NC_021164.1    | Ca_Kabuli_Chr05 | 9950470                 | GG                                     | AA                 | AA               | INTERGENIC            |               |                                      |                    |
| SNP_34028_A_9950484 | NC_021164.1    | Ca_Kabuli_Chr05 | 9950484                 | AA                                     | TT                 | TT               | INTERGENIC            |               |                                      |                    |
| SNP_34029_A_9951041 | NC_021164.1    | Ca_Kabuli_Chr05 | 9951041                 | AA                                     | GG                 | GG               | INTERGENIC            |               |                                      |                    |
| SNP_34030_A_9951309 | NC_021164.1    | Ca_Kabuli_Chr05 | 9951309                 | TT                                     | AA                 | AA               | INTERGENIC            |               |                                      |                    |
| SNP_34031_A_9953003 | NC_021164.1    | Ca_Kabuli_Chr05 | 9953003                 | TT                                     | GG                 | GG               | INTERGENIC            |               |                                      |                    |
| SNP_34032_A_9953026 | NC_021164.1    | Ca_Kabuli_Chr05 | 9953026                 | AA                                     | GG                 | GG               | INTERGENIC            |               |                                      |                    |
| SNP_34033_A_9953031 | NC_021164.1    | Ca_Kabuli_Chr05 | 9953031                 | AA                                     | GG                 | GG               | INTERGENIC            |               |                                      |                    |
| SNP_34034_A_9953054 | NC_021164.1    | Ca_Kabuli_Chr05 | 9953054                 | TT                                     | AA                 | AA               | INTERGENIC            |               |                                      |                    |
| SNP_34035_A_9953055 | NC_021164.1    | Ca_Kabuli_Chr05 | 9953055                 | TT                                     | AA                 | AA               | INTERGENIC            |               |                                      |                    |
| SNP_34036_A_9953068 | NC_021164.1    | Ca_Kabuli_Chr05 | 9953068                 | GG                                     | AA                 | AA               | INTERGENIC            |               |                                      |                    |
| SNP_34037_A_9953069 | NC_021164.1    | Ca_Kabuli_Chr05 | 9953069                 | TT                                     | CC                 | CC               | INTERGENIC            |               |                                      |                    |
| SNP_34038_A_9953099 | NC_021164.1    | Ca_Kabuli_Chr05 | 9953099                 | TT                                     | CC                 | CC               | INTERGENIC            |               |                                      |                    |
| SNP_34039_A_9953117 | NC_021164.1    | Ca_Kabuli_Chr05 | 9953117                 | TT                                     | AA                 | AA               | INTERGENIC            |               |                                      |                    |
| SNP_34040_A_9953120 | NC_021164.1    | Ca_Kabuli_Chr05 | 9953120                 | TT                                     | CC                 | CC               | INTERGENIC            |               |                                      |                    |
| SNP_34042_A_9953387 | NC_021164.1    | Ca_Kabuli_Chr05 | 9953387                 | CC                                     | TT                 | TT               | INTERGENIC            |               |                                      |                    |
| SNP_34043_A_9953396 | NC_021164.1    | Ca_Kabuli_Chr05 | 9953396                 | AA                                     | GG                 | GG               | INTERGENIC            |               |                                      |                    |
| SNP_34044_A_9954742 | NC_021164.1    | Ca_Kabuli_Chr05 | 9954742                 | GG                                     | AA                 | AA               | INTERGENIC            |               |                                      |                    |
| SNP_34045_A_9954760 | NC_021164.1    | Ca_Kabuli_Chr05 | 9954760                 | AA                                     | GG                 | GG               | INTERGENIC            |               |                                      |                    |
| SNP_34047_A_9956930 | NC_021164.1    | Ca_Kabuli_Chr05 | 9956930                 | GG                                     | AA                 | AA               | INTRON                | 101511665     | probable WRKY transcription factor 2 |                    |
| SNP_34048_A_9956931 | NC_021164.1    | Ca_Kabuli_Chr05 | 9956931                 | CC                                     | AA                 | AA               | INTRON                | 101511665     | probable WRKY transcription factor 2 |                    |
| SNP_34049_A_9957447 | NC_021164.1    | Ca_Kabuli_Chr05 | 9957447                 | GG                                     | AA                 | AA               | NON_SYNONYMOUS_CODING | 101511665     | probable WRKY transcription factor 2 |                    |

| SNPs IDs            | Chromosome IDs | Chromosomes     | Physical positions (bp) | CDC Frontier (Reference genome) | (Pusa 1103 & HPNB) | (ILWC 46 & LPNB) | Sequence Components of genome | Gene accession IDs | Putative functions                           |
|---------------------|----------------|-----------------|-------------------------|---------------------------------|--------------------|------------------|-------------------------------|--------------------|----------------------------------------------|
| SNP_34050_A_9957876 | NC_021164.1    | Ca_Kabuli_Chr05 | 9957876                 | TT                              | CC                 | CC               | INTRON                        | 101511665          | probable WRKY transcription factor 2         |
| SNP_34052_A_9961996 | NC_021164.1    | Ca_Kabuli_Chr05 | 9961996                 | GG                              | AA                 | AA               | DRR                           | 101511986          | anthocyanidin 5,3-O-glucosyltransferase-like |
| SNP_34053_A_9962248 | NC_021164.1    | Ca_Kabuli_Chr05 | 9962248                 | GG                              | AA                 | AA               | DRR                           | 101511986          | anthocyanidin 5,3-O-glucosyltransferase-like |
| SNP_34055_A_9965203 | NC_021164.1    | Ca_Kabuli_Chr05 | 9965203                 | AA                              | CC                 | CC               | INTERGENIC                    |                    |                                              |
| SNP_34056_A_9965371 | NC_021164.1    | Ca_Kabuli_Chr05 | 9965371                 | AA                              | GG                 | GG               | INTERGENIC                    |                    |                                              |
| SNP_34057_A_9965389 | NC_021164.1    | Ca_Kabuli_Chr05 | 9965389                 | CC                              | TT                 | TT               | INTERGENIC                    |                    |                                              |
| SNP_34059_A_9965686 | NC_021164.1    | Ca_Kabuli_Chr05 | 9965686                 | AA                              | CC                 | CC               | INTERGENIC                    |                    |                                              |
| SNP_34060_A_9965880 | NC_021164.1    | Ca_Kabuli_Chr05 | 9965880                 | GG                              | CC                 | CC               | INTERGENIC                    |                    |                                              |
| SNP_34061_A_9965890 | NC_021164.1    | Ca_Kabuli_Chr05 | 9965890                 | TT                              | CC                 | CC               | INTERGENIC                    |                    |                                              |
| SNP_34062_A_9977664 | NC_021164.1    | Ca_Kabuli_Chr05 | 9977664                 | TT                              | CC                 | CC               | INTERGENIC                    |                    |                                              |
| SNP_34063_A_9978816 | NC_021164.1    | Ca_Kabuli_Chr05 | 9978816                 | TT                              | AA                 | AA               | INTERGENIC                    |                    |                                              |
| SNP_34064_A_9981473 | NC_021164.1    | Ca_Kabuli_Chr05 | 9981473                 | TT                              | CC                 | CC               | URR                           | 101490930          | anthocyanidin 5,3-O-glucosyltransferase      |
| SNP_34066_A_9981614 | NC_021164.1    | Ca_Kabuli_Chr05 | 9981614                 | AA                              | GG                 | GG               | URR                           | 101490930          | anthocyanidin 5,3-O-glucosyltransferase      |
| SNP_34067_A_9981623 | NC_021164.1    | Ca_Kabuli_Chr05 | 9981623                 | TT                              | AA                 | AA               | URR                           | 101490930          | anthocyanidin 5,3-O-glucosyltransferase      |
| SNP_34068_A_9981638 | NC_021164.1    | Ca_Kabuli_Chr05 | 9981638                 | AA                              | CC                 | CC               | URR                           | 101490930          | anthocyanidin 5,3-O-glucosyltransferase      |
| SNP_34069_A_9981820 | NC_021164.1    | Ca_Kabuli_Chr05 | 9981820                 | TT                              | AA                 | AA               | INTERGENIC                    |                    |                                              |
| SNP_34070_A_9981906 | NC_021164.1    | Ca_Kabuli_Chr05 | 9981906                 | GG                              | AA                 | AA               | INTERGENIC                    |                    |                                              |
| SNP_34071_A_9983153 | NC_021164.1    | Ca_Kabuli_Chr05 | 9983153                 | GG                              | AA                 | AA               | INTERGENIC                    |                    |                                              |
| SNP_34072_A_9983154 | NC_021164.1    | Ca_Kabuli_Chr05 | 9983154                 | CC                              | TT                 | TT               | INTERGENIC                    |                    |                                              |
| SNP_34073_A_9983155 | NC_021164.1    | Ca_Kabuli_Chr05 | 9983155                 | TT                              | GG                 | GG               | INTERGENIC                    |                    |                                              |
| SNP_34074_A_9983156 | NC_021164.1    | Ca_Kabuli_Chr05 | 9983156                 | TT                              | CC                 | CC               | INTERGENIC                    |                    |                                              |
| SNP_34075_A_9983218 | NC_021164.1    | Ca_Kabuli_Chr05 | 9983218                 | TT                              | CC                 | CC               | INTERGENIC                    |                    |                                              |

| SNPs IDs             | Chromosome IDs | Chromosomes     | Physical positions (bp) | CDC Frontier genome (Reference genome) | (Pusa 1103 & HPNB) | (ILWC 46 & LPNB) | Sequence Components of genome | Gene accession IDs | Putative functions                |
|----------------------|----------------|-----------------|-------------------------|----------------------------------------|--------------------|------------------|-------------------------------|--------------------|-----------------------------------|
| SNP_34076_A_9983288  | NC_021164.1    | Ca_Kabuli_Chr05 | 9983288                 | CC                                     | AA                 | AA               | INTERGENIC                    |                    |                                   |
| SNP_34077_A_9984128  | NC_021164.1    | Ca_Kabuli_Chr05 | 9984128                 | GG                                     | AA                 | AA               | INTERGENIC                    |                    |                                   |
| SNP_34078_A_9984141  | NC_021164.1    | Ca_Kabuli_Chr05 | 9984141                 | AA                                     | TT                 | TT               | INTERGENIC                    |                    |                                   |
| SNP_34079_A_9986198  | NC_021164.1    | Ca_Kabuli_Chr05 | 9986198                 | CC                                     | AA                 | AA               | INTRON                        | 101512312          | chloride channel protein CLC-f    |
| SNP_34080_A_9986288  | NC_021164.1    | Ca_Kabuli_Chr05 | 9986288                 | CC                                     | TT                 | TT               | INTRON                        | 101512312          | chloride channel protein CLC-f    |
| SNP_34081_A_9986414  | NC_021164.1    | Ca_Kabuli_Chr05 | 9986414                 | CC                                     | TT                 | TT               | INTRON                        | 101512312          | chloride channel protein CLC-f    |
| SNP_34083_A_9986472  | NC_021164.1    | Ca_Kabuli_Chr05 | 9986472                 | GG                                     | AA                 | AA               | INTRON                        | 101512312          | chloride channel protein CLC-f    |
| SNP_34084_A_9986818  | NC_021164.1    | Ca_Kabuli_Chr05 | 9986818                 | GG                                     | AA                 | AA               | INTRON                        | 101512312          | chloride channel protein CLC-f    |
| SNP_34085_A_9993305  | NC_021164.1    | Ca_Kabuli_Chr05 | 9993305                 | CC                                     | AA                 | AA               | INTERGENIC                    |                    |                                   |
| SNP_34086_A_9993389  | NC_021164.1    | Ca_Kabuli_Chr05 | 9993389                 | CC                                     | TT                 | TT               | INTERGENIC                    |                    |                                   |
| SNP_34087_A_9995290  | NC_021164.1    | Ca_Kabuli_Chr05 | 9995290                 | GG                                     | CC                 | CC               | INTERGENIC                    |                    |                                   |
| SNP_34088_A_9995297  | NC_021164.1    | Ca_Kabuli_Chr05 | 9995297                 | AA                                     | GG                 | GG               | INTERGENIC                    |                    |                                   |
| SNP_34089_A_9995299  | NC_021164.1    | Ca_Kabuli_Chr05 | 9995299                 | AA                                     | CC                 | CC               | INTERGENIC                    |                    |                                   |
| SNP_34090_A_9995455  | NC_021164.1    | Ca_Kabuli_Chr05 | 9995455                 | CC                                     | TT                 | TT               | INTERGENIC                    |                    |                                   |
| SNP_34091_A_9995532  | NC_021164.1    | Ca_Kabuli_Chr05 | 9995532                 | TT                                     | GG                 | GG               | INTERGENIC                    |                    |                                   |
| SNP_34092_A_9995540  | NC_021164.1    | Ca_Kabuli_Chr05 | 9995540                 | GG                                     | AA                 | AA               | INTERGENIC                    |                    |                                   |
| SNP_34093_A_10001892 | NC_021164.1    | Ca_Kabuli_Chr05 | 10001892                | TT                                     | AA                 | AA               | INTERGENIC                    |                    |                                   |
| SNP_34094_A_10002943 | NC_021164.1    | Ca_Kabuli_Chr05 | 10002943                | CC                                     | GG                 | GG               | DRR                           | 101512845          | uncharacterized protein At4g26450 |
| SNP_34095_A_10002956 | NC_021164.1    | Ca_Kabuli_Chr05 | 10002956                | TT                                     | CC                 | CC               | DRR                           | 101512845          | uncharacterized protein At4g26450 |
| SNP_34096_A_10002968 | NC_021164.1    | Ca_Kabuli_Chr05 | 10002968                | CC                                     | TT                 | TT               | DRR                           | 101512845          | uncharacterized protein At4g26450 |
| SNP_34098_A_10006269 | NC_021164.1    | Ca_Kabuli_Chr05 | 10006269                | GG                                     | AA                 | AA               | INTRON                        | 101512845          | uncharacterized protein At4g26450 |
| SNP_34099_A_10006702 | NC_021164.1    | Ca_Kabuli_Chr05 | 10006702                | CC                                     | GG                 | GG               | INTRON                        | 101512845          | uncharacterized protein At4g26450 |



| SNPs IDs             | Chromosome IDs | Chromosomes     | Physical positions (bp) | CDC Frontier (Reference genome) | (Pusa 1103 & HPNB) | (ILWC 46 & LPNB) | Sequence Components of genome | Gene accession IDs | Putative functions                            |
|----------------------|----------------|-----------------|-------------------------|---------------------------------|--------------------|------------------|-------------------------------|--------------------|-----------------------------------------------|
| SNP_34100_A_10012718 | NC_021164.1    | Ca_Kabuli_Chr05 | 10012718                | AA                              | GG                 | GG               | URR                           | 101512845          | uncharacterized protein At4g26450             |
| SNP_34101_A_10019567 | NC_021164.1    | Ca_Kabuli_Chr05 | 10019567                | GG                              | CC                 | CC               | INTERGENIC                    |                    |                                               |
| SNP_34102_A_10020246 | NC_021164.1    | Ca_Kabuli_Chr05 | 10020246                | CC                              | AA                 | AA               | INTERGENIC                    |                    |                                               |
| SNP_34103_A_10020248 | NC_021164.1    | Ca_Kabuli_Chr05 | 10020248                | AA                              | GG                 | GG               | INTERGENIC                    |                    |                                               |
| SNP_34104_A_10020291 | NC_021164.1    | Ca_Kabuli_Chr05 | 10020291                | TT                              | CC                 | CC               | INTERGENIC                    |                    |                                               |
| SNP_34105_A_10021568 | NC_021164.1    | Ca_Kabuli_Chr05 | 10021568                | CC                              | TT                 | TT               | INTERGENIC                    |                    |                                               |
| SNP_34106_A_10022067 | NC_021164.1    | Ca_Kabuli_Chr05 | 10022067                | CC                              | TT                 | TT               | INTERGENIC                    |                    |                                               |
| SNP_34107_A_10022180 | NC_021164.1    | Ca_Kabuli_Chr05 | 10022180                | TT                              | AA                 | AA               | INTERGENIC                    |                    |                                               |
| SNP_34108_A_10022251 | NC_021164.1    | Ca_Kabuli_Chr05 | 10022251                | TT                              | CC                 | CC               | INTERGENIC                    |                    |                                               |
| SNP_34109_A_10022691 | NC_021164.1    | Ca_Kabuli_Chr05 | 10022691                | TT                              | CC                 | CC               | INTERGENIC                    |                    |                                               |
| SNP_34110_A_10022712 | NC_021164.1    | Ca_Kabuli_Chr05 | 10022712                | GG                              | TT                 | TT               | INTERGENIC                    |                    |                                               |
| SNP_34111_A_10024292 | NC_021164.1    | Ca_Kabuli_Chr05 | 10024292                | CC                              | TT                 | TT               | INTERGENIC                    |                    |                                               |
| SNP_34112_A_10024327 | NC_021164.1    | Ca_Kabuli_Chr05 | 10024327                | CC                              | TT                 | TT               | INTERGENIC                    |                    |                                               |
| SNP_34113_A_10024363 | NC_021164.1    | Ca_Kabuli_Chr05 | 10024363                | TT                              | GG                 | GG               | INTERGENIC                    |                    |                                               |
| SNP_34115_A_10025017 | NC_021164.1    | Ca_Kabuli_Chr05 | 10025017                | CC                              | TT                 | TT               | INTERGENIC                    |                    |                                               |
| SNP_34117_A_10047844 | NC_021164.1    | Ca_Kabuli_Chr05 | 10047844                | TT                              | CC                 | CC               | INTERGENIC                    |                    |                                               |
| SNP_34119_A_10050660 | NC_021164.1    | Ca_Kabuli_Chr05 | 10050660                | AA                              | TT                 | TT               | DRR                           | 101513494          | uncharacterized LOC101513494                  |
| SNP_34120_A_10051078 | NC_021164.1    | Ca_Kabuli_Chr05 | 10051078                | TT                              | GG                 | GG               | NON_SYNONYMOUS_CODING         | 101513494          | uncharacterized LOC101513494                  |
| SNP_34122_A_10057164 | NC_021164.1    | Ca_Kabuli_Chr05 | 10057164                | CC                              | TT                 | TT               | URR                           | 101513494          | uncharacterized LOC101513494                  |
| SNP_34123_A_10057308 | NC_021164.1    | Ca_Kabuli_Chr05 | 10057308                | CC                              | AA                 | AA               | URR                           | 101513494          | uncharacterized LOC101513494                  |
| SNP_34124_A_10059936 | NC_021164.1    | Ca_Kabuli_Chr05 | 10059936                | AA                              | GG                 | GG               | INTERGENIC                    |                    |                                               |
| SNP_34125_A_10060813 | NC_021164.1    | Ca_Kabuli_Chr05 | 10060813                | CC                              | TT                 | TT               | DRR                           | 101513797          | choline/ethanolaminephosphotransferase 1-like |

| SNPs IDs             | Chromosome IDs | Chromosomes     | Physical positions (bp) | CDC Frontier (Reference genome) | (Pusa 1103 & HPNB) | (ILWC 46 & LPNB) | Sequence Components of genome | Gene accession IDs | Putative functions                               |
|----------------------|----------------|-----------------|-------------------------|---------------------------------|--------------------|------------------|-------------------------------|--------------------|--------------------------------------------------|
| SNP_34126_A_10064380 | NC_021164.1    | Ca_Kabuli_Chr05 | 10064380                | GG                              | AA                 | AA               | INTRON                        | 101513797          | choline/ethanolaminephosphotransferase 1-like    |
| SNP_34127_A_10076275 | NC_021164.1    | Ca_Kabuli_Chr05 | 10076275                | GG                              | AA                 | AA               | INTERGENIC                    |                    |                                                  |
| SNP_34128_A_10077971 | NC_021164.1    | Ca_Kabuli_Chr05 | 10077971                | TT                              | AA                 | AA               | DRR                           | 101514362          | cyclin-D-binding Myb-like transcription factor 1 |
| SNP_34130_A_10084767 | NC_021164.1    | Ca_Kabuli_Chr05 | 10084767                | AA                              | TT                 | TT               | DRR                           | 101514917          | hydroquinone glucosyltransferase-like            |
| SNP_34131_A_10084891 | NC_021164.1    | Ca_Kabuli_Chr05 | 10084891                | TT                              | AA                 | AA               | DRR                           | 101514917          | hydroquinone glucosyltransferase-like            |
| SNP_34132_A_10085113 | NC_021164.1    | Ca_Kabuli_Chr05 | 10085113                | CC                              | GG                 | GG               | DRR                           | 101514917          | hydroquinone glucosyltransferase-like            |
| SNP_34133_A_10085146 | NC_021164.1    | Ca_Kabuli_Chr05 | 10085146                | GG                              | CC                 | CC               | DRR                           | 101514917          | hydroquinone glucosyltransferase-like            |
| SNP_34134_A_10085436 | NC_021164.1    | Ca_Kabuli_Chr05 | 10085436                | TT                              | CC                 | CC               | INTERGENIC                    |                    |                                                  |
| SNP_34135_A_10087685 | NC_021164.1    | Ca_Kabuli_Chr05 | 10087685                | TT                              | CC                 | CC               | URR                           | 101514917          | hydroquinone glucosyltransferase-like            |
| SNP_34136_A_10093934 | NC_021164.1    | Ca_Kabuli_Chr05 | 10093934                | GG                              | TT                 | TT               | INTERGENIC                    |                    |                                                  |
| SNP_34137_A_10094269 | NC_021164.1    | Ca_Kabuli_Chr05 | 10094269                | GG                              | AA                 | AA               | INTERGENIC                    |                    |                                                  |
| SNP_34138_A_10097979 | NC_021164.1    | Ca_Kabuli_Chr05 | 10097979                | AA                              | GG                 | GG               | URR                           | 101491569          | uncharacterized LOC101491569                     |
| SNP_34139_A_10100715 | NC_021164.1    | Ca_Kabuli_Chr05 | 10100715                | CC                              | TT                 | TT               | INTERGENIC                    |                    |                                                  |
| SNP_34140_A_10113755 | NC_021164.1    | Ca_Kabuli_Chr05 | 10113755                | CC                              | TT                 | TT               | INTERGENIC                    |                    |                                                  |
| SNP_34141_A_10113764 | NC_021164.1    | Ca_Kabuli_Chr05 | 10113764                | GG                              | AA                 | AA               | INTERGENIC                    |                    |                                                  |
| SNP_34142_A_10114060 | NC_021164.1    | Ca_Kabuli_Chr05 | 10114060                | CC                              | TT                 | TT               | INTERGENIC                    |                    |                                                  |
| SNP_34143_A_10114329 | NC_021164.1    | Ca_Kabuli_Chr05 | 10114329                | AA                              | CC                 | CC               | INTERGENIC                    |                    |                                                  |
| SNP_34144_A_10114362 | NC_021164.1    | Ca_Kabuli_Chr05 | 10114362                | AA                              | GG                 | GG               | INTERGENIC                    |                    |                                                  |
| SNP_34145_A_10114367 | NC_021164.1    | Ca_Kabuli_Chr05 | 10114367                | GG                              | AA                 | AA               | INTERGENIC                    |                    |                                                  |
| SNP_34146_A_10115471 | NC_021164.1    | Ca_Kabuli_Chr05 | 10115471                | TT                              | CC                 | CC               | INTERGENIC                    |                    |                                                  |
| SNP_34147_A_10115509 | NC_021164.1    | Ca_Kabuli_Chr05 | 10115509                | TT                              | AA                 | AA               | INTERGENIC                    |                    |                                                  |
| SNP_34148_A_10119455 | NC_021164.1    | Ca_Kabuli_Chr05 | 10119455                | AA                              | GG                 | GG               | INTERGENIC                    |                    |                                                  |

| SNPs IDs             | Chromosome IDs | Chromosomes     | Physical positions (bp) | CDC Frontier genome (Reference genome) | (Pusa 1103 & HPNB) | (ILWC 46 & LPNB) | Sequence Components of genome | Gene accession IDs | Putative functions                    |
|----------------------|----------------|-----------------|-------------------------|----------------------------------------|--------------------|------------------|-------------------------------|--------------------|---------------------------------------|
| SNP_34149_A_10119585 | NC_021164.1    | Ca_Kabuli_Chr05 | 10119585                | GG                                     | AA                 | AA               | INTERGENIC                    |                    |                                       |
| SNP_34150_A_10124444 | NC_021164.1    | Ca_Kabuli_Chr05 | 10124444                | TT                                     | CC                 | CC               | DRR                           | 101491880          | Unknown function                      |
| SNP_34151_A_10124494 | NC_021164.1    | Ca_Kabuli_Chr05 | 10124494                | AA                                     | GG                 | GG               | DRR                           | 101491880          | Unknown function                      |
| SNP_34154_A_10132225 | NC_021164.1    | Ca_Kabuli_Chr05 | 10132225                | GG                                     | AA                 | AA               | URR                           | 101515240          | WPP domain-interacting protein 2-like |
| SNP_34155_A_10140442 | NC_021164.1    | Ca_Kabuli_Chr05 | 10140442                | GG                                     | AA                 | AA               | INTERGENIC                    |                    |                                       |
| SNP_34156_A_10141116 | NC_021164.1    | Ca_Kabuli_Chr05 | 10141116                | GG                                     | TT                 | TT               | INTERGENIC                    |                    |                                       |
| SNP_34157_A_10141124 | NC_021164.1    | Ca_Kabuli_Chr05 | 10141124                | TT                                     | GG                 | GG               | INTERGENIC                    |                    |                                       |
| SNP_34158_A_10141207 | NC_021164.1    | Ca_Kabuli_Chr05 | 10141207                | TT                                     | CC                 | CC               | INTERGENIC                    |                    |                                       |
| SNP_34159_A_10141250 | NC_021164.1    | Ca_Kabuli_Chr05 | 10141250                | TT                                     | CC                 | CC               | INTERGENIC                    |                    |                                       |
| SNP_34160_A_10141303 | NC_021164.1    | Ca_Kabuli_Chr05 | 10141303                | AA                                     | GG                 | GG               | INTERGENIC                    |                    |                                       |
| SNP_34161_A_10141381 | NC_021164.1    | Ca_Kabuli_Chr05 | 10141381                | CC                                     | TT                 | TT               | INTERGENIC                    |                    |                                       |
| SNP_34162_A_10141579 | NC_021164.1    | Ca_Kabuli_Chr05 | 10141579                | TT                                     | CC                 | CC               | INTERGENIC                    |                    |                                       |
| SNP_34163_A_10141680 | NC_021164.1    | Ca_Kabuli_Chr05 | 10141680                | CC                                     | TT                 | TT               | INTERGENIC                    |                    |                                       |
| SNP_34164_A_10141700 | NC_021164.1    | Ca_Kabuli_Chr05 | 10141700                | CC                                     | TT                 | TT               | INTERGENIC                    |                    |                                       |
| SNP_34165_A_10141744 | NC_021164.1    | Ca_Kabuli_Chr05 | 10141744                | AA                                     | GG                 | GG               | INTERGENIC                    |                    |                                       |
| SNP_34166_A_10141755 | NC_021164.1    | Ca_Kabuli_Chr05 | 10141755                | TT                                     | AA                 | AA               | INTERGENIC                    |                    |                                       |
| SNP_34167_A_10142027 | NC_021164.1    | Ca_Kabuli_Chr05 | 10142027                | TT                                     | CC                 | CC               | INTERGENIC                    |                    |                                       |
| SNP_34168_A_10142849 | NC_021164.1    | Ca_Kabuli_Chr05 | 10142849                | GG                                     | AA                 | AA               | INTERGENIC                    |                    |                                       |
| SNP_34169_A_10142859 | NC_021164.1    | Ca_Kabuli_Chr05 | 10142859                | TT                                     | CC                 | CC               | INTERGENIC                    |                    |                                       |
| SNP_34170_A_10143260 | NC_021164.1    | Ca_Kabuli_Chr05 | 10143260                | TT                                     | CC                 | CC               | INTERGENIC                    |                    |                                       |
| SNP_34171_A_10143514 | NC_021164.1    | Ca_Kabuli_Chr05 | 10143514                | GG                                     | AA                 | AA               | INTERGENIC                    |                    |                                       |
| SNP_34172_A_10143526 | NC_021164.1    | Ca_Kabuli_Chr05 | 10143526                | CC                                     | AA                 | AA               | INTERGENIC                    |                    |                                       |

| SNPs IDs             | Chromosome IDs | Chromosomes     | Physical positions (bp) | CDC Frontier genome (Reference genome) | (Pusa 1103 & HPNB) | (ILWC 46 & LPNB) | Sequence genome | Components of | Gene accession IDs                                   | Putative functions |
|----------------------|----------------|-----------------|-------------------------|----------------------------------------|--------------------|------------------|-----------------|---------------|------------------------------------------------------|--------------------|
| SNP_34173_A_10143565 | NC_021164.1    | Ca_Kabuli_Chr05 | 10143565                | AA                                     | GG                 | GG               | INTERGENIC      |               |                                                      |                    |
| SNP_34174_A_10143600 | NC_021164.1    | Ca_Kabuli_Chr05 | 10143600                | TT                                     | GG                 | GG               | INTERGENIC      |               |                                                      |                    |
| SNP_34175_A_10143633 | NC_021164.1    | Ca_Kabuli_Chr05 | 10143633                | TT                                     | GG                 | GG               | INTERGENIC      |               |                                                      |                    |
| SNP_34176_A_10144875 | NC_021164.1    | Ca_Kabuli_Chr05 | 10144875                | CC                                     | GG                 | GG               | INTERGENIC      |               |                                                      |                    |
| SNP_34177_A_10144906 | NC_021164.1    | Ca_Kabuli_Chr05 | 10144906                | GG                                     | AA                 | AA               | INTERGENIC      |               |                                                      |                    |
| SNP_34178_A_10145126 | NC_021164.1    | Ca_Kabuli_Chr05 | 10145126                | CC                                     | GG                 | GG               | INTERGENIC      |               |                                                      |                    |
| SNP_34179_A_10145156 | NC_021164.1    | Ca_Kabuli_Chr05 | 10145156                | TT                                     | CC                 | CC               | INTERGENIC      |               |                                                      |                    |
| SNP_34180_A_10145567 | NC_021164.1    | Ca_Kabuli_Chr05 | 10145567                | TT                                     | GG                 | GG               | INTERGENIC      |               |                                                      |                    |
| SNP_34181_A_10146030 | NC_021164.1    | Ca_Kabuli_Chr05 | 10146030                | CC                                     | TT                 | TT               | INTERGENIC      |               |                                                      |                    |
| SNP_34182_A_10146828 | NC_021164.1    | Ca_Kabuli_Chr05 | 10146828                | TT                                     | CC                 | CC               | INTERGENIC      |               |                                                      |                    |
| SNP_34183_A_10146874 | NC_021164.1    | Ca_Kabuli_Chr05 | 10146874                | CC                                     | TT                 | TT               | INTERGENIC      |               |                                                      |                    |
| SNP_34184_A_10147275 | NC_021164.1    | Ca_Kabuli_Chr05 | 10147275                | CC                                     | TT                 | TT               | INTERGENIC      |               |                                                      |                    |
| SNP_34185_A_10149044 | NC_021164.1    | Ca_Kabuli_Chr05 | 10149044                | AA                                     | GG                 | GG               | INTERGENIC      |               |                                                      |                    |
| SNP_34186_A_10150239 | NC_021164.1    | Ca_Kabuli_Chr05 | 10150239                | AA                                     | GG                 | GG               | INTERGENIC      |               |                                                      |                    |
| SNP_34187_A_10150353 | NC_021164.1    | Ca_Kabuli_Chr05 | 10150353                | GG                                     | AA                 | AA               | INTERGENIC      |               |                                                      |                    |
| SNP_34188_A_10150363 | NC_021164.1    | Ca_Kabuli_Chr05 | 10150363                | CC                                     | TT                 | TT               | INTERGENIC      |               |                                                      |                    |
| SNP_34189_A_10151746 | NC_021164.1    | Ca_Kabuli_Chr05 | 10151746                | AA                                     | GG                 | GG               | DRR             | 101492215     | tetrahydrocannabinolic acid synthase                 |                    |
| SNP_34191_A_10160362 | NC_021164.1    | Ca_Kabuli_Chr05 | 10160362                | TT                                     | CC                 | CC               | INTERGENIC      |               |                                                      |                    |
| SNP_34192_A_10160440 | NC_021164.1    | Ca_Kabuli_Chr05 | 10160440                | TT                                     | AA                 | AA               | INTERGENIC      |               |                                                      |                    |
| SNP_34193_A_10161989 | NC_021164.1    | Ca_Kabuli_Chr05 | 10161989                | AA                                     | TT                 | TT               | DRR             | 101488760     | uncharacterized WD repeat-containing protein C2A9.03 |                    |
| SNP_34194_A_10162003 | NC_021164.1    | Ca_Kabuli_Chr05 | 10162003                | TT                                     | AA                 | AA               | DRR             | 101488760     | uncharacterized WD repeat-containing protein C2A9.03 |                    |
| SNP_34195_A_10165801 | NC_021164.1    | Ca_Kabuli_Chr05 | 10165801                | TT                                     | CC                 | CC               | INTRON          | 101488760     | uncharacterized WD repeat-containing protein C2A9.03 |                    |

| SNPs IDs             | Chromosome IDs | Chromosomes     | Physical positions (bp) | CDC Frontier genome (Reference genome) | (Pusa 1103 & HPNB) | (ILWC 46 & LPNB) | Sequence Components of genome | Gene accession IDs | Putative functions                                              |
|----------------------|----------------|-----------------|-------------------------|----------------------------------------|--------------------|------------------|-------------------------------|--------------------|-----------------------------------------------------------------|
| SNP_34196_A_10173122 | NC_021164.1    | Ca_Kabuli_Chr05 | 10173122                | CC                                     | TT                 | TT               | INTERGENIC                    |                    |                                                                 |
| SNP_34198_A_10176771 | NC_021164.1    | Ca_Kabuli_Chr05 | 10176771                | GG                                     | AA                 | AA               | DRR                           | 101489308          | actin-related protein 8                                         |
| SNP_34199_A_10185171 | NC_021164.1    | Ca_Kabuli_Chr05 | 10185171                | AA                                     | TT                 | TT               | INTERGENIC                    |                    |                                                                 |
| SNP_34200_A_10185172 | NC_021164.1    | Ca_Kabuli_Chr05 | 10185172                | CC                                     | TT                 | TT               | INTERGENIC                    |                    |                                                                 |
| SNP_34201_A_10185686 | NC_021164.1    | Ca_Kabuli_Chr05 | 10185686                | GG                                     | AA                 | AA               | DRR                           | 101489632          | GPI-anchored protein LORELEI-like                               |
| SNP_34202_A_10187624 | NC_021164.1    | Ca_Kabuli_Chr05 | 10187624                | TT                                     | GG                 | GG               | URR                           | 101489308          | actin-related protein 8                                         |
| SNP_34203_A_10187822 | NC_021164.1    | Ca_Kabuli_Chr05 | 10187822                | GG                                     | CC                 | CC               | INTERGENIC                    |                    |                                                                 |
| SNP_34205_A_10194749 | NC_021164.1    | Ca_Kabuli_Chr05 | 10194749                | GG                                     | AA                 | AA               | INTERGENIC                    |                    |                                                                 |
| SNP_34206_A_10223096 | NC_021164.1    | Ca_Kabuli_Chr05 | 10223096                | AA                                     | GG                 | GG               | INTERGENIC                    |                    |                                                                 |
| SNP_34208_A_10223676 | NC_021164.1    | Ca_Kabuli_Chr05 | 10223676                | AA                                     | CC                 | CC               | INTERGENIC                    |                    |                                                                 |
| SNP_34209_A_10223748 | NC_021164.1    | Ca_Kabuli_Chr05 | 10223748                | TT                                     | AA                 | AA               | INTERGENIC                    |                    |                                                                 |
| SNP_34210_A_10224794 | NC_021164.1    | Ca_Kabuli_Chr05 | 10224794                | AA                                     | GG                 | GG               | INTERGENIC                    |                    |                                                                 |
| SNP_34211_A_10225510 | NC_021164.1    | Ca_Kabuli_Chr05 | 10225510                | TT                                     | AA                 | AA               | INTERGENIC                    |                    |                                                                 |
| SNP_34212_A_10227162 | NC_021164.1    | Ca_Kabuli_Chr05 | 10227162                | AA                                     | GG                 | GG               | INTERGENIC                    |                    |                                                                 |
| SNP_34213_A_10234886 | NC_021164.1    | Ca_Kabuli_Chr05 | 10234886                | GG                                     | AA                 | AA               | URR                           | 101492552          | phosphatidylinositol/phosphatidylcholine transfer protein SFH13 |
| SNP_34214_A_10244571 | NC_021164.1    | Ca_Kabuli_Chr05 | 10244571                | AA                                     | CC                 | CC               | INTERGENIC                    |                    |                                                                 |
| SNP_34215_A_10266507 | NC_021164.1    | Ca_Kabuli_Chr05 | 10266507                | AA                                     | CC                 | CC               | URR                           | 101493430          | KH domain-containing protein At5g56140-like                     |
| SNP_34216_A_10266675 | NC_021164.1    | Ca_Kabuli_Chr05 | 10266675                | GG                                     | CC                 | CC               | URR                           | 101493430          | KH domain-containing protein At5g56140-like                     |
| SNP_34217_A_10267750 | NC_021164.1    | Ca_Kabuli_Chr05 | 10267750                | TT                                     | CC                 | CC               | INTERGENIC                    |                    |                                                                 |
| SNP_34218_A_10267766 | NC_021164.1    | Ca_Kabuli_Chr05 | 10267766                | AA                                     | GG                 | GG               | INTERGENIC                    |                    |                                                                 |
| SNP_34219_A_10267827 | NC_021164.1    | Ca_Kabuli_Chr05 | 10267827                | GG                                     | AA                 | AA               | INTERGENIC                    |                    |                                                                 |
| SNP_34220_A_10268649 | NC_021164.1    | Ca_Kabuli_Chr05 | 10268649                | GG                                     | AA                 | AA               | INTERGENIC                    |                    |                                                                 |

| SNPs IDs             | Chromosome IDs | Chromosomes     | Physical positions (bp) | CDC Frontier genome (Reference genome) | (Pusa 1103 & HPNB) | (ILWC 46 & LPNB) | Sequence Components of genome | Gene accession IDs | Putative functions                          |
|----------------------|----------------|-----------------|-------------------------|----------------------------------------|--------------------|------------------|-------------------------------|--------------------|---------------------------------------------|
| SNP_34221_A_10268651 | NC_021164.1    | Ca_Kabuli_Chr05 | 10268651                | TT                                     | CC                 | CC               | INTERGENIC                    |                    |                                             |
| SNP_34222_A_10270192 | NC_021164.1    | Ca_Kabuli_Chr05 | 10270192                | GG                                     | AA                 | AA               | INTERGENIC                    |                    |                                             |
| SNP_34223_A_10270829 | NC_021164.1    | Ca_Kabuli_Chr05 | 10270829                | AA                                     | GG                 | GG               | INTERGENIC                    |                    |                                             |
| SNP_34224_A_10270838 | NC_021164.1    | Ca_Kabuli_Chr05 | 10270838                | TT                                     | GG                 | GG               | INTERGENIC                    |                    |                                             |
| SNP_34225_A_10275985 | NC_021164.1    | Ca_Kabuli_Chr05 | 10275985                | TT                                     | GG                 | GG               | INTERGENIC                    |                    |                                             |
| SNP_34226_A_10275986 | NC_021164.1    | Ca_Kabuli_Chr05 | 10275986                | CC                                     | TT                 | TT               | INTERGENIC                    |                    |                                             |
| SNP_34227_A_10275987 | NC_021164.1    | Ca_Kabuli_Chr05 | 10275987                | TT                                     | AA                 | AA               | INTERGENIC                    |                    |                                             |
| SNP_34228_A_10279518 | NC_021164.1    | Ca_Kabuli_Chr05 | 10279518                | CC                                     | TT                 | TT               | INTERGENIC                    |                    |                                             |
| SNP_34229_A_10283179 | NC_021164.1    | Ca_Kabuli_Chr05 | 10283179                | GG                                     | AA                 | AA               | SYNONYMOUS_CODING             | 101499490          | uncharacterized LOC101499490                |
| SNP_34230_A_10283863 | NC_021164.1    | Ca_Kabuli_Chr05 | 10283863                | AA                                     | GG                 | GG               | NON_SYNONYMOUS_CODING         | 101499490          | uncharacterized LOC101499490                |
| SNP_34231_A_10284583 | NC_021164.1    | Ca_Kabuli_Chr05 | 10284583                | CC                                     | TT                 | TT               | URR                           | 101499490          | uncharacterized LOC101499490                |
| SNP_34232_A_10284854 | NC_021164.1    | Ca_Kabuli_Chr05 | 10284854                | GG                                     | AA                 | AA               | URR                           | 101499490          | uncharacterized LOC101499490                |
| SNP_34233_A_10287059 | NC_021164.1    | Ca_Kabuli_Chr05 | 10287059                | TT                                     | AA                 | AA               | INTERGENIC                    |                    |                                             |
| SNP_34234_A_10287069 | NC_021164.1    | Ca_Kabuli_Chr05 | 10287069                | TT                                     | CC                 | CC               | INTERGENIC                    |                    |                                             |
| SNP_34235_A_10288891 | NC_021164.1    | Ca_Kabuli_Chr05 | 10288891                | TT                                     | AA                 | AA               | INTERGENIC                    |                    |                                             |
| SNP_34237_A_10291732 | NC_021164.1    | Ca_Kabuli_Chr05 | 10291732                | AA                                     | GG                 | GG               | INTERGENIC                    |                    |                                             |
| SNP_34238_A_10293128 | NC_021164.1    | Ca_Kabuli_Chr05 | 10293128                | CC                                     | TT                 | TT               | DRR                           | 101493750          | serine/threonine-protein kinase D6PKL1-like |
| SNP_34241_A_10312222 | NC_021164.1    | Ca_Kabuli_Chr05 | 10312222                | TT                                     | AA                 | AA               | URR                           | 101494070          | probable VAMP-like protein At1g33475        |
| SNP_34242_A_10331643 | NC_021164.1    | Ca_Kabuli_Chr05 | 10331643                | TT                                     | GG                 | GG               | INTRON                        | 101495784          | 14-3-3-like protein                         |
| SNP_34244_A_10332054 | NC_021164.1    | Ca_Kabuli_Chr05 | 10332054                | AA                                     | GG                 | GG               | INTRON                        | 101495784          | 14-3-3-like protein                         |
| SNP_34245_A_10341379 | NC_021164.1    | Ca_Kabuli_Chr05 | 10341379                | CC                                     | TT                 | TT               | URR                           | 101495784          | 14-3-3-like protein                         |
| SNP_34246_A_10341384 | NC_021164.1    | Ca_Kabuli_Chr05 | 10341384                | TT                                     | CC                 | CC               | URR                           | 101495784          | 14-3-3-like protein                         |

| SNPs IDs             | Chromosome IDs | Chromosomes     | Physical positions (bp) | CDC Frontier genome (Reference genome) | (Pusa 1103 & HPNB) | (ILWC 46 & LPNB) | Sequence genome       | Components of | Gene accession IDs | Putative functions                             |
|----------------------|----------------|-----------------|-------------------------|----------------------------------------|--------------------|------------------|-----------------------|---------------|--------------------|------------------------------------------------|
| SNP_34247_A_10343634 | NC_021164.1    | Ca_Kabuli_Chr05 | 10343634                | AA                                     | GG                 | GG               | INTERGENIC            |               |                    |                                                |
| SNP_34248_A_10343780 | NC_021164.1    | Ca_Kabuli_Chr05 | 10343780                | GG                                     | CC                 | CC               | INTERGENIC            |               |                    |                                                |
| SNP_34249_A_10348320 | NC_021164.1    | Ca_Kabuli_Chr05 | 10348320                | AA                                     | GG                 | GG               | INTERGENIC            |               |                    |                                                |
| SNP_34250_A_10348388 | NC_021164.1    | Ca_Kabuli_Chr05 | 10348388                | AA                                     | GG                 | GG               | INTERGENIC            |               |                    |                                                |
| SNP_34251_A_10348765 | NC_021164.1    | Ca_Kabuli_Chr05 | 10348765                | CC                                     | TT                 | TT               | INTERGENIC            |               |                    |                                                |
| SNP_34253_A_10348857 | NC_021164.1    | Ca_Kabuli_Chr05 | 10348857                | GG                                     | AA                 | AA               | INTERGENIC            |               |                    |                                                |
| SNP_34254_A_10349158 | NC_021164.1    | Ca_Kabuli_Chr05 | 10349158                | GG                                     | CC                 | CC               | INTERGENIC            |               |                    |                                                |
| SNP_34255_A_10349164 | NC_021164.1    | Ca_Kabuli_Chr05 | 10349164                | AA                                     | CC                 | CC               | INTERGENIC            |               |                    |                                                |
| SNP_34256_A_10349191 | NC_021164.1    | Ca_Kabuli_Chr05 | 10349191                | AA                                     | GG                 | GG               | INTERGENIC            |               |                    |                                                |
| SNP_34257_A_10349686 | NC_021164.1    | Ca_Kabuli_Chr05 | 10349686                | AA                                     | TT                 | TT               | INTERGENIC            |               |                    |                                                |
| SNP_34258_A_10349694 | NC_021164.1    | Ca_Kabuli_Chr05 | 10349694                | TT                                     | GG                 | GG               | INTERGENIC            |               |                    |                                                |
| SNP_34259_A_10363219 | NC_021164.1    | Ca_Kabuli_Chr05 | 10363219                | GG                                     | AA                 | AA               | DRR                   | 101496106     |                    | dual specificity protein phosphatase PHS1-like |
| SNP_34260_A_10363412 | NC_021164.1    | Ca_Kabuli_Chr05 | 10363412                | CC                                     | TT                 | TT               | DRR                   | 101496106     |                    | dual specificity protein phosphatase PHS1-like |
| SNP_34261_A_10363449 | NC_021164.1    | Ca_Kabuli_Chr05 | 10363449                | AA                                     | GG                 | GG               | DRR                   | 101496106     |                    | dual specificity protein phosphatase PHS1-like |
| SNP_34262_A_10366741 | NC_021164.1    | Ca_Kabuli_Chr05 | 10366741                | AA                                     | GG                 | GG               | INTERGENIC            |               |                    |                                                |
| SNP_34263_A_10374404 | NC_021164.1    | Ca_Kabuli_Chr05 | 10374404                | CC                                     | TT                 | TT               | INTRON                | 101500113     |                    | zinc finger protein CONSTANS-LIKE 4-like       |
| SNP_34264_A_10376091 | NC_021164.1    | Ca_Kabuli_Chr05 | 10376091                | AA                                     | CC                 | CC               | INTERGENIC            |               |                    |                                                |
| SNP_34266_A_10376341 | NC_021164.1    | Ca_Kabuli_Chr05 | 10376341                | TT                                     | CC                 | CC               | INTERGENIC            |               |                    |                                                |
| SNP_34267_A_10376353 | NC_021164.1    | Ca_Kabuli_Chr05 | 10376353                | CC                                     | TT                 | TT               | INTERGENIC            |               |                    |                                                |
| SNP_34268_A_10376428 | NC_021164.1    | Ca_Kabuli_Chr05 | 10376428                | AA                                     | GG                 | GG               | INTERGENIC            |               |                    |                                                |
| SNP_34269_A_10379347 | NC_021164.1    | Ca_Kabuli_Chr05 | 10379347                | GG                                     | AA                 | AA               | URR                   | 101500113     |                    | zinc finger protein CONSTANS-LIKE 4-like       |
| SNP_34270_A_10381744 | NC_021164.1    | Ca_Kabuli_Chr05 | 10381744                | AA                                     | GG                 | GG               | NON_SYNONYMOUS_CODING | 101500443     |                    | Unknown function                               |

| SNPs IDs             | Chromosome IDs | Chromosomes     | Physical positions (bp) | CDC Frontier genome (Reference genome) | (Pusa 1103 & HPNB) | (ILWC 46 & LPNB) | Sequence Components of genome | Gene accession IDs | Putative functions   |
|----------------------|----------------|-----------------|-------------------------|----------------------------------------|--------------------|------------------|-------------------------------|--------------------|----------------------|
| SNP_34271_A_10381855 | NC_021164.1    | Ca_Kabuli_Chr05 | 10381855                | GG                                     | TT                 | TT               | NON_SYNONYMOUS_CODING         | 101500443          | Unknown function     |
| SNP_34272_A_10382625 | NC_021164.1    | Ca_Kabuli_Chr05 | 10382625                | GG                                     | AA                 | AA               | SYNONYMOUS_CODING             | 101500443          | Unknown function     |
| SNP_34273_A_10382665 | NC_021164.1    | Ca_Kabuli_Chr05 | 10382665                | GG                                     | AA                 | AA               | NON_SYNONYMOUS_CODING         | 101500443          | Unknown function     |
| SNP_34274_A_10382815 | NC_021164.1    | Ca_Kabuli_Chr05 | 10382815                | GG                                     | AA                 | AA               | NON_SYNONYMOUS_CODING         | 101500443          | Unknown function     |
| SNP_34275_A_10383226 | NC_021164.1    | Ca_Kabuli_Chr05 | 10383226                | GG                                     | AA                 | AA               | NON_SYNONYMOUS_CODING         | 101500443          | Unknown function     |
| SNP_34276_A_10383276 | NC_021164.1    | Ca_Kabuli_Chr05 | 10383276                | TT                                     | GG                 | GG               | SYNONYMOUS_CODING             | 101500443          | Unknown function     |
| SNP_34277_A_10383353 | NC_021164.1    | Ca_Kabuli_Chr05 | 10383353                | GG                                     | AA                 | AA               | STOP_GAINED                   | 101500443          | Unknown function     |
| SNP_34278_A_10383579 | NC_021164.1    | Ca_Kabuli_Chr05 | 10383579                | AA                                     | GG                 | GG               | SYNONYMOUS_CODING             | 101500443          | Unknown function     |
| SNP_34279_A_10387086 | NC_021164.1    | Ca_Kabuli_Chr05 | 10387086                | TT                                     | AA                 | AA               | URR                           | 101500443          | Unknown function     |
| SNP_34280_A_10387700 | NC_021164.1    | Ca_Kabuli_Chr05 | 10387700                | AA                                     | TT                 | TT               | URR                           | 101500443          | Unknown function     |
| SNP_34282_A_10394194 | NC_021164.1    | Ca_Kabuli_Chr05 | 10394194                | TT                                     | GG                 | GG               | INTERGENIC                    |                    |                      |
| SNP_34283_A_10394241 | NC_021164.1    | Ca_Kabuli_Chr05 | 10394241                | AA                                     | TT                 | TT               | INTERGENIC                    |                    |                      |
| SNP_34284_A_10394249 | NC_021164.1    | Ca_Kabuli_Chr05 | 10394249                | TT                                     | CC                 | CC               | INTERGENIC                    |                    |                      |
| SNP_34285_A_10394325 | NC_021164.1    | Ca_Kabuli_Chr05 | 10394325                | TT                                     | CC                 | CC               | INTERGENIC                    |                    |                      |
| SNP_34286_A_10394435 | NC_021164.1    | Ca_Kabuli_Chr05 | 10394435                | TT                                     | CC                 | CC               | INTERGENIC                    |                    |                      |
| SNP_34287_A_10396651 | NC_021164.1    | Ca_Kabuli_Chr05 | 10396651                | GG                                     | AA                 | AA               | INTERGENIC                    |                    |                      |
| SNP_34288_A_10396652 | NC_021164.1    | Ca_Kabuli_Chr05 | 10396652                | AA                                     | GG                 | GG               | INTERGENIC                    |                    |                      |
| SNP_34290_A_10402348 | NC_021164.1    | Ca_Kabuli_Chr05 | 10402348                | AA                                     | TT                 | TT               | INTERGENIC                    |                    |                      |
| SNP_34291_A_10405040 | NC_021164.1    | Ca_Kabuli_Chr05 | 10405040                | AA                                     | GG                 | GG               | INTERGENIC                    |                    |                      |
| SNP_34293_A_10411308 | NC_021164.1    | Ca_Kabuli_Chr05 | 10411308                | AA                                     | GG                 | GG               | INTERGENIC                    |                    |                      |
| SNP_34294_A_10413739 | NC_021164.1    | Ca_Kabuli_Chr05 | 10413739                | AA                                     | GG                 | GG               | URR                           | 101497416          | endoglucanase 9-like |
| SNP_34296_A_10413954 | NC_021164.1    | Ca_Kabuli_Chr05 | 10413954                | AA                                     | GG                 | GG               | URR                           | 101497416          | endoglucanase 9-like |



| SNPs IDs             | Chromosome IDs | Chromosomes     | Physical positions (bp) | CDC Frontier genome (Reference genome) | (Pusa 1103 & HPNB) | (ILWC 46 & LPNB) | Sequence Components of genome | Gene accession IDs | Putative functions           |
|----------------------|----------------|-----------------|-------------------------|----------------------------------------|--------------------|------------------|-------------------------------|--------------------|------------------------------|
| SNP_34298_A_10414078 | NC_021164.1    | Ca_Kabuli_Chr05 | 10414078                | CC                                     | TT                 | TT               | URR                           | 101497416          | endoglucanase 9-like         |
| SNP_34299_A_10414094 | NC_021164.1    | Ca_Kabuli_Chr05 | 10414094                | AA                                     | TT                 | TT               | URR                           | 101497416          | endoglucanase 9-like         |
| SNP_34300_A_10414113 | NC_021164.1    | Ca_Kabuli_Chr05 | 10414113                | AA                                     | TT                 | TT               | URR                           | 101497416          | endoglucanase 9-like         |
| SNP_34301_A_10414125 | NC_021164.1    | Ca_Kabuli_Chr05 | 10414125                | AA                                     | TT                 | TT               | URR                           | 101497416          | endoglucanase 9-like         |
| SNP_34302_A_10414173 | NC_021164.1    | Ca_Kabuli_Chr05 | 10414173                | CC                                     | AA                 | AA               | URR                           | 101497416          | endoglucanase 9-like         |
| SNP_34303_A_10414513 | NC_021164.1    | Ca_Kabuli_Chr05 | 10414513                | TT                                     | CC                 | CC               | URR                           | 101497416          | endoglucanase 9-like         |
| SNP_34304_A_10414570 | NC_021164.1    | Ca_Kabuli_Chr05 | 10414570                | TT                                     | AA                 | AA               | URR                           | 101497416          | endoglucanase 9-like         |
| SNP_34305_A_10419055 | NC_021164.1    | Ca_Kabuli_Chr05 | 10419055                | CC                                     | TT                 | TT               | INTERGENIC                    |                    |                              |
| SNP_34306_A_10423615 | NC_021164.1    | Ca_Kabuli_Chr05 | 10423615                | AA                                     | GG                 | GG               | INTERGENIC                    |                    |                              |
| SNP_34307_A_10433844 | NC_021164.1    | Ca_Kabuli_Chr05 | 10433844                | GG                                     | AA                 | AA               | INTERGENIC                    |                    |                              |
| SNP_34308_A_10433945 | NC_021164.1    | Ca_Kabuli_Chr05 | 10433945                | CC                                     | AA                 | AA               | INTERGENIC                    |                    |                              |
| SNP_34309_A_10433946 | NC_021164.1    | Ca_Kabuli_Chr05 | 10433946                | CC                                     | TT                 | TT               | INTERGENIC                    |                    |                              |
| SNP_34310_A_10434040 | NC_021164.1    | Ca_Kabuli_Chr05 | 10434040                | AA                                     | GG                 | GG               | INTERGENIC                    |                    |                              |
| SNP_34311_A_10437120 | NC_021164.1    | Ca_Kabuli_Chr05 | 10437120                | GG                                     | AA                 | AA               | INTERGENIC                    |                    |                              |
| SNP_34312_A_10440331 | NC_021164.1    | Ca_Kabuli_Chr05 | 10440331                | CC                                     | TT                 | TT               | INTERGENIC                    |                    |                              |
| SNP_34313_A_10440916 | NC_021164.1    | Ca_Kabuli_Chr05 | 10440916                | TT                                     | AA                 | AA               | INTERGENIC                    |                    |                              |
| SNP_34314_A_10443692 | NC_021164.1    | Ca_Kabuli_Chr05 | 10443692                | CC                                     | TT                 | TT               | INTERGENIC                    |                    |                              |
| SNP_34315_A_10443758 | NC_021164.1    | Ca_Kabuli_Chr05 | 10443758                | CC                                     | GG                 | GG               | INTERGENIC                    |                    |                              |
| SNP_34316_A_10444061 | NC_021164.1    | Ca_Kabuli_Chr05 | 10444061                | GG                                     | AA                 | AA               | INTERGENIC                    |                    |                              |
| SNP_34317_A_10446169 | NC_021164.1    | Ca_Kabuli_Chr05 | 10446169                | TT                                     | CC                 | CC               | URR                           | 101500755          | uncharacterized LOC101500755 |
| SNP_34318_A_10446189 | NC_021164.1    | Ca_Kabuli_Chr05 | 10446189                | TT                                     | CC                 | CC               | URR                           | 101500755          | uncharacterized LOC101500755 |
| SNP_34319_A_10447817 | NC_021164.1    | Ca_Kabuli_Chr05 | 10447817                | GG                                     | AA                 | AA               | URR                           | 101500755          | uncharacterized LOC101500755 |

| SNPs IDs             | Chromosome IDs | Chromosomes     | Physical positions (bp) | CDC Frontier genome (Reference genome) | (Pusa 1103 & HPNB) | (ILWC 46 & LPNB) | Sequence genome | Components of | Gene accession IDs | Putative functions |
|----------------------|----------------|-----------------|-------------------------|----------------------------------------|--------------------|------------------|-----------------|---------------|--------------------|--------------------|
| SNP_34320_A_10448454 | NC_021164.1    | Ca_Kabuli_Chr05 | 10448454                | AA                                     | GG                 | GG               | INTERGENIC      |               |                    |                    |
| SNP_34321_A_10449851 | NC_021164.1    | Ca_Kabuli_Chr05 | 10449851                | GG                                     | TT                 | TT               | INTERGENIC      |               |                    |                    |
| SNP_34322_A_10449852 | NC_021164.1    | Ca_Kabuli_Chr05 | 10449852                | TT                                     | GG                 | GG               | INTERGENIC      |               |                    |                    |
| SNP_34323_A_10450651 | NC_021164.1    | Ca_Kabuli_Chr05 | 10450651                | AA                                     | GG                 | GG               | INTERGENIC      |               |                    |                    |
| SNP_34324_A_10452721 | NC_021164.1    | Ca_Kabuli_Chr05 | 10452721                | GG                                     | AA                 | AA               | INTERGENIC      |               |                    |                    |
| SNP_34325_A_10453513 | NC_021164.1    | Ca_Kabuli_Chr05 | 10453513                | GG                                     | AA                 | AA               | INTERGENIC      |               |                    |                    |
| SNP_34327_A_10470703 | NC_021164.1    | Ca_Kabuli_Chr05 | 10470703                | CC                                     | AA                 | AA               | INTERGENIC      |               |                    |                    |
| SNP_34328_A_10470992 | NC_021164.1    | Ca_Kabuli_Chr05 | 10470992                | CC                                     | TT                 | TT               | INTERGENIC      |               |                    |                    |
| SNP_34329_A_10471842 | NC_021164.1    | Ca_Kabuli_Chr05 | 10471842                | CC                                     | GG                 | GG               | INTERGENIC      |               |                    |                    |
| SNP_34330_A_10474365 | NC_021164.1    | Ca_Kabuli_Chr05 | 10474365                | GG                                     | AA                 | AA               | INTERGENIC      |               |                    |                    |
| SNP_34331_A_10474577 | NC_021164.1    | Ca_Kabuli_Chr05 | 10474577                | CC                                     | GG                 | GG               | INTERGENIC      |               |                    |                    |
| SNP_34332_A_10474591 | NC_021164.1    | Ca_Kabuli_Chr05 | 10474591                | GG                                     | AA                 | AA               | INTERGENIC      |               |                    |                    |
| SNP_34333_A_10474594 | NC_021164.1    | Ca_Kabuli_Chr05 | 10474594                | CC                                     | TT                 | TT               | INTERGENIC      |               |                    |                    |
| SNP_34334_A_10475743 | NC_021164.1    | Ca_Kabuli_Chr05 | 10475743                | AA                                     | CC                 | CC               | INTERGENIC      |               |                    |                    |
| SNP_34335_A_10476100 | NC_021164.1    | Ca_Kabuli_Chr05 | 10476100                | GG                                     | AA                 | AA               | INTERGENIC      |               |                    |                    |
| SNP_34336_A_10476235 | NC_021164.1    | Ca_Kabuli_Chr05 | 10476235                | GG                                     | AA                 | AA               | INTERGENIC      |               |                    |                    |
| SNP_34337_A_10476250 | NC_021164.1    | Ca_Kabuli_Chr05 | 10476250                | GG                                     | AA                 | AA               | INTERGENIC      |               |                    |                    |
| SNP_34338_A_10477999 | NC_021164.1    | Ca_Kabuli_Chr05 | 10477999                | AA                                     | GG                 | GG               | INTERGENIC      |               |                    |                    |
| SNP_34339_A_10478204 | NC_021164.1    | Ca_Kabuli_Chr05 | 10478204                | AA                                     | CC                 | CC               | INTERGENIC      |               |                    |                    |
| SNP_34340_A_10485904 | NC_021164.1    | Ca_Kabuli_Chr05 | 10485904                | TT                                     | GG                 | GG               | INTERGENIC      |               |                    |                    |
| SNP_34341_A_10487489 | NC_021164.1    | Ca_Kabuli_Chr05 | 10487489                | TT                                     | CC                 | CC               | INTERGENIC      |               |                    |                    |
| SNP_34342_A_10490577 | NC_021164.1    | Ca_Kabuli_Chr05 | 10490577                | GG                                     | TT                 | TT               | INTERGENIC      |               |                    |                    |

| SNPs IDs             | Chromosome IDs | Chromosomes     | Physical positions (bp) | CDC Frontier genome (Reference genome) | (Pusa 1103 & HPNB) | (ILWC 46 & LPNB) | Sequence Components of genome | Gene accession IDs | Putative functions                             |
|----------------------|----------------|-----------------|-------------------------|----------------------------------------|--------------------|------------------|-------------------------------|--------------------|------------------------------------------------|
| SNP_34343_A_10491090 | NC_021164.1    | Ca_Kabuli_Chr05 | 10491090                | CC                                     | TT                 | TT               | INTERGENIC                    |                    |                                                |
| SNP_34344_A_10494822 | NC_021164.1    | Ca_Kabuli_Chr05 | 10494822                | AA                                     | CC                 | CC               | INTERGENIC                    |                    |                                                |
| SNP_34345_A_10495053 | NC_021164.1    | Ca_Kabuli_Chr05 | 10495053                | CC                                     | TT                 | TT               | INTERGENIC                    |                    |                                                |
| SNP_34346_A_10495851 | NC_021164.1    | Ca_Kabuli_Chr05 | 10495851                | GG                                     | TT                 | TT               | INTERGENIC                    |                    |                                                |
| SNP_34347_A_10496904 | NC_021164.1    | Ca_Kabuli_Chr05 | 10496904                | CC                                     | TT                 | TT               | INTERGENIC                    |                    |                                                |
| SNP_34348_A_10496908 | NC_021164.1    | Ca_Kabuli_Chr05 | 10496908                | AA                                     | GG                 | GG               | INTERGENIC                    |                    |                                                |
| SNP_34349_A_10497209 | NC_021164.1    | Ca_Kabuli_Chr05 | 10497209                | AA                                     | CC                 | CC               | INTERGENIC                    |                    |                                                |
| SNP_34351_A_10499262 | NC_021164.1    | Ca_Kabuli_Chr05 | 10499262                | GG                                     | AA                 | AA               | URR                           | 101410557          | transfer RNA isoleucine (anticodon UAU)        |
| SNP_34352_A_10504811 | NC_021164.1    | Ca_Kabuli_Chr05 | 10504811                | TT                                     | AA                 | AA               | INTERGENIC                    |                    |                                                |
| SNP_34353_A_10504817 | NC_021164.1    | Ca_Kabuli_Chr05 | 10504817                | GG                                     | AA                 | AA               | INTERGENIC                    |                    |                                                |
| SNP_34354_A_10507057 | NC_021164.1    | Ca_Kabuli_Chr05 | 10507057                | CC                                     | AA                 | AA               | DRR                           | 101497750          | uncharacterized LOC101497750                   |
| SNP_34355_A_10507236 | NC_021164.1    | Ca_Kabuli_Chr05 | 10507236                | AA                                     | TT                 | TT               | DRR                           | 101497750          | uncharacterized LOC101497750                   |
| SNP_34357_A_10510378 | NC_021164.1    | Ca_Kabuli_Chr05 | 10510378                | AA                                     | GG                 | GG               | INTRON                        | 101497750          | uncharacterized LOC101497750                   |
| SNP_34358_A_10513982 | NC_021164.1    | Ca_Kabuli_Chr05 | 10513982                | AA                                     | TT                 | TT               | INTERGENIC                    |                    |                                                |
| SNP_34361_A_10516316 | NC_021164.1    | Ca_Kabuli_Chr05 | 10516316                | TT                                     | CC                 | CC               | INTRON                        | 101501697          | SUN domain-containing ossification factor-like |
| SNP_34362_A_10519133 | NC_021164.1    | Ca_Kabuli_Chr05 | 10519133                | AA                                     | TT                 | TT               | INTRON                        | 101501697          | SUN domain-containing ossification factor-like |
| SNP_34363_A_10521475 | NC_021164.1    | Ca_Kabuli_Chr05 | 10521475                | CC                                     | GG                 | GG               | URR                           | 101501697          | SUN domain-containing ossification factor-like |
| SNP_34364_A_10521476 | NC_021164.1    | Ca_Kabuli_Chr05 | 10521476                | AA                                     | CC                 | CC               | URR                           | 101501697          | SUN domain-containing ossification factor-like |
| SNP_34365_A_10523477 | NC_021164.1    | Ca_Kabuli_Chr05 | 10523477                | TT                                     | CC                 | CC               | INTERGENIC                    |                    |                                                |
| SNP_34366_A_10524133 | NC_021164.1    | Ca_Kabuli_Chr05 | 10524133                | AA                                     | TT                 | TT               | INTERGENIC                    |                    |                                                |
| SNP_34367_A_10527959 | NC_021164.1    | Ca_Kabuli_Chr05 | 10527959                | TT                                     | CC                 | CC               | INTRON                        | 101502023          | uncharacterized LOC101502023                   |
| SNP_34368_A_10531040 | NC_021164.1    | Ca_Kabuli_Chr05 | 10531040                | GG                                     | CC                 | CC               | INTRON                        | 101502023          | uncharacterized LOC101502023                   |

| SNPs IDs             | Chromosome IDs | Chromosomes     | Physical positions (bp) | CDC Frontier genome (Reference genome) | (Pusa 1103 & HPNB) | (ILWC 46 & LPNB) | Sequence Components of genome | Gene accession IDs | Putative functions                        |
|----------------------|----------------|-----------------|-------------------------|----------------------------------------|--------------------|------------------|-------------------------------|--------------------|-------------------------------------------|
| SNP_34370_A_10532921 | NC_021164.1    | Ca_Kabuli_Chr05 | 10532921                | AA                                     | GG                 | GG               | INTERGENIC                    |                    |                                           |
| SNP_34371_A_10532923 | NC_021164.1    | Ca_Kabuli_Chr05 | 10532923                | CC                                     | TT                 | TT               | INTERGENIC                    |                    |                                           |
| SNP_34372_A_10544643 | NC_021164.1    | Ca_Kabuli_Chr05 | 10544643                | CC                                     | TT                 | TT               | SYNONYMOUS_CODING             | 101498072          | glyoxylate/hydroxypyruvate reductase HPR3 |
| SNP_34374_A_10550882 | NC_021164.1    | Ca_Kabuli_Chr05 | 10550882                | GG                                     | AA                 | AA               | URR                           | 101498072          | glyoxylate/hydroxypyruvate reductase HPR3 |
| SNP_34375_A_10551066 | NC_021164.1    | Ca_Kabuli_Chr05 | 10551066                | GG                                     | AA                 | AA               | URR                           | 101498072          | glyoxylate/hydroxypyruvate reductase HPR3 |
| SNP_34376_A_10554017 | NC_021164.1    | Ca_Kabuli_Chr05 | 10554017                | GG                                     | TT                 | TT               | INTERGENIC                    |                    |                                           |
| SNP_34377_A_10555422 | NC_021164.1    | Ca_Kabuli_Chr05 | 10555422                | CC                                     | TT                 | TT               | INTERGENIC                    |                    |                                           |
| SNP_34378_A_10555747 | NC_021164.1    | Ca_Kabuli_Chr05 | 10555747                | AA                                     | GG                 | GG               | INTERGENIC                    |                    |                                           |
| SNP_34379_A_10558727 | NC_021164.1    | Ca_Kabuli_Chr05 | 10558727                | CC                                     | GG                 | GG               | INTERGENIC                    |                    |                                           |
| SNP_34380_A_10558736 | NC_021164.1    | Ca_Kabuli_Chr05 | 10558736                | AA                                     | GG                 | GG               | INTERGENIC                    |                    |                                           |
| SNP_34381_A_10559024 | NC_021164.1    | Ca_Kabuli_Chr05 | 10559024                | AA                                     | GG                 | GG               | INTERGENIC                    |                    |                                           |
| SNP_34383_A_10560774 | NC_021164.1    | Ca_Kabuli_Chr05 | 10560774                | GG                                     | AA                 | AA               | DRR                           | 101498616          | uncharacterized LOC101498616              |
| SNP_34384_A_10564554 | NC_021164.1    | Ca_Kabuli_Chr05 | 10564554                | TT                                     | CC                 | CC               | INTRON                        | 101498616          | uncharacterized LOC101498616              |
| SNP_34386_A_10575420 | NC_021164.1    | Ca_Kabuli_Chr05 | 10575420                | AA                                     | GG                 | GG               | INTERGENIC                    |                    |                                           |
| SNP_34387_A_10588406 | NC_021164.1    | Ca_Kabuli_Chr05 | 10588406                | AA                                     | GG                 | GG               | INTERGENIC                    |                    |                                           |
| SNP_34388_A_10592033 | NC_021164.1    | Ca_Kabuli_Chr05 | 10592033                | GG                                     | AA                 | AA               | INTERGENIC                    |                    |                                           |
| SNP_34389_A_10592057 | NC_021164.1    | Ca_Kabuli_Chr05 | 10592057                | AA                                     | TT                 | TT               | INTERGENIC                    |                    |                                           |
| SNP_34390_A_10592058 | NC_021164.1    | Ca_Kabuli_Chr05 | 10592058                | AA                                     | GG                 | GG               | INTERGENIC                    |                    |                                           |
| SNP_34391_A_10592978 | NC_021164.1    | Ca_Kabuli_Chr05 | 10592978                | AA                                     | GG                 | GG               | INTERGENIC                    |                    |                                           |
| SNP_34392_A_10594591 | NC_021164.1    | Ca_Kabuli_Chr05 | 10594591                | TT                                     | AA                 | AA               | INTERGENIC                    |                    |                                           |
| SNP_34393_A_10596949 | NC_021164.1    | Ca_Kabuli_Chr05 | 10596949                | TT                                     | AA                 | AA               | INTERGENIC                    |                    |                                           |
| SNP_34394_A_10597085 | NC_021164.1    | Ca_Kabuli_Chr05 | 10597085                | GG                                     | AA                 | AA               | INTERGENIC                    |                    |                                           |

| SNPs IDs             | Chromosome IDs | Chromosomes     | Physical positions (bp) | CDC Frontier genome (Reference genome) | (Pusa 1103 & HPNB) | (ILWC 46 & LPNB) | Sequence genome | Components of | Gene accession IDs           | Putative functions |
|----------------------|----------------|-----------------|-------------------------|----------------------------------------|--------------------|------------------|-----------------|---------------|------------------------------|--------------------|
| SNP_34395_A_10598419 | NC_021164.1    | Ca_Kabuli_Chr05 | 10598419                | AA                                     | CC                 | CC               | INTERGENIC      |               |                              |                    |
| SNP_34396_A_10598822 | NC_021164.1    | Ca_Kabuli_Chr05 | 10598822                | TT                                     | CC                 | CC               | INTERGENIC      |               |                              |                    |
| SNP_34397_A_10600508 | NC_021164.1    | Ca_Kabuli_Chr05 | 10600508                | AA                                     | GG                 | GG               | INTERGENIC      |               |                              |                    |
| SNP_34398_A_10603049 | NC_021164.1    | Ca_Kabuli_Chr05 | 10603049                | AA                                     | GG                 | GG               | INTERGENIC      |               |                              |                    |
| SNP_34399_A_10604953 | NC_021164.1    | Ca_Kabuli_Chr05 | 10604953                | AA                                     | GG                 | GG               | INTERGENIC      |               |                              |                    |
| SNP_34400_A_10605204 | NC_021164.1    | Ca_Kabuli_Chr05 | 10605204                | GG                                     | AA                 | AA               | INTERGENIC      |               |                              |                    |
| SNP_34401_A_10605238 | NC_021164.1    | Ca_Kabuli_Chr05 | 10605238                | CC                                     | AA                 | AA               | INTERGENIC      |               |                              |                    |
| SNP_34402_A_10605274 | NC_021164.1    | Ca_Kabuli_Chr05 | 10605274                | CC                                     | TT                 | TT               | INTERGENIC      |               |                              |                    |
| SNP_34403_A_10605397 | NC_021164.1    | Ca_Kabuli_Chr05 | 10605397                | TT                                     | AA                 | AA               | INTERGENIC      |               |                              |                    |
| SNP_34405_A_10605652 | NC_021164.1    | Ca_Kabuli_Chr05 | 10605652                | TT                                     | GG                 | GG               | INTERGENIC      |               |                              |                    |
| SNP_34407_A_10634191 | NC_021164.1    | Ca_Kabuli_Chr05 | 10634191                | CC                                     | TT                 | TT               | INTERGENIC      |               |                              |                    |
| SNP_34408_A_10647540 | NC_021164.1    | Ca_Kabuli_Chr05 | 10647540                | GG                                     | AA                 | AA               | INTERGENIC      |               |                              |                    |
| SNP_34409_A_10659976 | NC_021164.1    | Ca_Kabuli_Chr05 | 10659976                | AA                                     | GG                 | GG               | INTERGENIC      |               |                              |                    |
| SNP_34410_A_10668048 | NC_021164.1    | Ca_Kabuli_Chr05 | 10668048                | GG                                     | TT                 | TT               | URR             | 101503627     | uncharacterized LOC101503627 |                    |
| SNP_34411_A_10671767 | NC_021164.1    | Ca_Kabuli_Chr05 | 10671767                | TT                                     | AA                 | AA               | INTERGENIC      |               |                              |                    |
| SNP_34412_A_10672038 | NC_021164.1    | Ca_Kabuli_Chr05 | 10672038                | CC                                     | TT                 | TT               | INTERGENIC      |               |                              |                    |
| SNP_34413_A_10672102 | NC_021164.1    | Ca_Kabuli_Chr05 | 10672102                | CC                                     | TT                 | TT               | INTERGENIC      |               |                              |                    |
| SNP_34414_A_10672108 | NC_021164.1    | Ca_Kabuli_Chr05 | 10672108                | TT                                     | CC                 | CC               | INTERGENIC      |               |                              |                    |
| SNP_34415_A_10672242 | NC_021164.1    | Ca_Kabuli_Chr05 | 10672242                | GG                                     | TT                 | TT               | INTERGENIC      |               |                              |                    |
| SNP_34416_A_10672246 | NC_021164.1    | Ca_Kabuli_Chr05 | 10672246                | CC                                     | AA                 | AA               | INTERGENIC      |               |                              |                    |
| SNP_34417_A_10672313 | NC_021164.1    | Ca_Kabuli_Chr05 | 10672313                | AA                                     | GG                 | GG               | INTERGENIC      |               |                              |                    |
| SNP_34418_A_10672325 | NC_021164.1    | Ca_Kabuli_Chr05 | 10672325                | CC                                     | TT                 | TT               | INTERGENIC      |               |                              |                    |

| SNPs IDs             | Chromosome IDs | Chromosomes     | Physical positions (bp) | CDC Frontier genome (Reference genome) | (Pusa 1103 & HPNB) | (ILWC 46 & LPNB) | Sequence genome | Components of | Gene accession IDs | Putative functions |
|----------------------|----------------|-----------------|-------------------------|----------------------------------------|--------------------|------------------|-----------------|---------------|--------------------|--------------------|
| SNP_34419_A_10672377 | NC_021164.1    | Ca_Kabuli_Chr05 | 10672377                | GG                                     | CC                 | CC               | INTERGENIC      |               |                    |                    |
| SNP_34420_A_10672390 | NC_021164.1    | Ca_Kabuli_Chr05 | 10672390                | GG                                     | AA                 | AA               | INTERGENIC      |               |                    |                    |
| SNP_34421_A_10672510 | NC_021164.1    | Ca_Kabuli_Chr05 | 10672510                | CC                                     | TT                 | TT               | INTERGENIC      |               |                    |                    |
| SNP_34422_A_10672635 | NC_021164.1    | Ca_Kabuli_Chr05 | 10672635                | GG                                     | AA                 | AA               | INTERGENIC      |               |                    |                    |
| SNP_34423_A_10672969 | NC_021164.1    | Ca_Kabuli_Chr05 | 10672969                | TT                                     | CC                 | CC               | INTERGENIC      |               |                    |                    |
| SNP_34424_A_10673009 | NC_021164.1    | Ca_Kabuli_Chr05 | 10673009                | TT                                     | CC                 | CC               | INTERGENIC      |               |                    |                    |
| SNP_34425_A_10673520 | NC_021164.1    | Ca_Kabuli_Chr05 | 10673520                | GG                                     | AA                 | AA               | INTERGENIC      |               |                    |                    |
| SNP_34426_A_10673524 | NC_021164.1    | Ca_Kabuli_Chr05 | 10673524                | GG                                     | AA                 | AA               | INTERGENIC      |               |                    |                    |
| SNP_34427_A_10673542 | NC_021164.1    | Ca_Kabuli_Chr05 | 10673542                | GG                                     | AA                 | AA               | INTERGENIC      |               |                    |                    |
| SNP_34428_A_10673602 | NC_021164.1    | Ca_Kabuli_Chr05 | 10673602                | TT                                     | AA                 | AA               | INTERGENIC      |               |                    |                    |
| SNP_34429_A_10673605 | NC_021164.1    | Ca_Kabuli_Chr05 | 10673605                | TT                                     | CC                 | CC               | INTERGENIC      |               |                    |                    |
| SNP_34430_A_10673619 | NC_021164.1    | Ca_Kabuli_Chr05 | 10673619                | GG                                     | CC                 | CC               | INTERGENIC      |               |                    |                    |
| SNP_34431_A_10673831 | NC_021164.1    | Ca_Kabuli_Chr05 | 10673831                | GG                                     | TT                 | TT               | INTERGENIC      |               |                    |                    |
| SNP_34432_A_10673882 | NC_021164.1    | Ca_Kabuli_Chr05 | 10673882                | TT                                     | AA                 | AA               | INTERGENIC      |               |                    |                    |
| SNP_34433_A_10674211 | NC_021164.1    | Ca_Kabuli_Chr05 | 10674211                | CC                                     | TT                 | TT               | INTERGENIC      |               |                    |                    |
| SNP_34434_A_10674303 | NC_021164.1    | Ca_Kabuli_Chr05 | 10674303                | AA                                     | TT                 | TT               | INTERGENIC      |               |                    |                    |
| SNP_34435_A_10674506 | NC_021164.1    | Ca_Kabuli_Chr05 | 10674506                | GG                                     | TT                 | TT               | INTERGENIC      |               |                    |                    |
| SNP_34436_A_10674546 | NC_021164.1    | Ca_Kabuli_Chr05 | 10674546                | AA                                     | GG                 | GG               | INTERGENIC      |               |                    |                    |
| SNP_34437_A_10674718 | NC_021164.1    | Ca_Kabuli_Chr05 | 10674718                | AA                                     | GG                 | GG               | INTERGENIC      |               |                    |                    |
| SNP_34438_A_10674731 | NC_021164.1    | Ca_Kabuli_Chr05 | 10674731                | CC                                     | TT                 | TT               | INTERGENIC      |               |                    |                    |
| SNP_34439_A_10674732 | NC_021164.1    | Ca_Kabuli_Chr05 | 10674732                | TT                                     | CC                 | CC               | INTERGENIC      |               |                    |                    |
| SNP_34440_A_10674884 | NC_021164.1    | Ca_Kabuli_Chr05 | 10674884                | CC                                     | TT                 | TT               | INTERGENIC      |               |                    |                    |

| SNPs IDs             | Chromosome IDs | Chromosomes     | Physical positions (bp) | CDC Frontier genome (Reference genome) | (Pusa 1103 & HPNB) | (ILWC 46 & LPNB) | Sequence genome | Components of | Gene accession IDs | Putative functions |
|----------------------|----------------|-----------------|-------------------------|----------------------------------------|--------------------|------------------|-----------------|---------------|--------------------|--------------------|
| SNP_34441_A_10675863 | NC_021164.1    | Ca_Kabuli_Chr05 | 10675863                | GG                                     | AA                 | AA               | INTERGENIC      |               |                    |                    |
| SNP_34442_A_10676063 | NC_021164.1    | Ca_Kabuli_Chr05 | 10676063                | GG                                     | CC                 | CC               | INTERGENIC      |               |                    |                    |
| SNP_34443_A_10676093 | NC_021164.1    | Ca_Kabuli_Chr05 | 10676093                | CC                                     | TT                 | TT               | INTERGENIC      |               |                    |                    |
| SNP_34444_A_10676159 | NC_021164.1    | Ca_Kabuli_Chr05 | 10676159                | GG                                     | AA                 | AA               | INTERGENIC      |               |                    |                    |
| SNP_34445_A_10676416 | NC_021164.1    | Ca_Kabuli_Chr05 | 10676416                | GG                                     | AA                 | AA               | INTERGENIC      |               |                    |                    |
| SNP_34446_A_10676548 | NC_021164.1    | Ca_Kabuli_Chr05 | 10676548                | AA                                     | TT                 | TT               | INTERGENIC      |               |                    |                    |
| SNP_34447_A_10676603 | NC_021164.1    | Ca_Kabuli_Chr05 | 10676603                | TT                                     | CC                 | CC               | INTERGENIC      |               |                    |                    |
| SNP_34448_A_10676608 | NC_021164.1    | Ca_Kabuli_Chr05 | 10676608                | AA                                     | GG                 | GG               | INTERGENIC      |               |                    |                    |
| SNP_34449_A_10676623 | NC_021164.1    | Ca_Kabuli_Chr05 | 10676623                | GG                                     | AA                 | AA               | INTERGENIC      |               |                    |                    |
| SNP_34450_A_10676630 | NC_021164.1    | Ca_Kabuli_Chr05 | 10676630                | CC                                     | TT                 | TT               | INTERGENIC      |               |                    |                    |
| SNP_34451_A_10676638 | NC_021164.1    | Ca_Kabuli_Chr05 | 10676638                | CC                                     | AA                 | AA               | INTERGENIC      |               |                    |                    |
| SNP_34452_A_10676761 | NC_021164.1    | Ca_Kabuli_Chr05 | 10676761                | TT                                     | GG                 | GG               | INTERGENIC      |               |                    |                    |
| SNP_34453_A_10677209 | NC_021164.1    | Ca_Kabuli_Chr05 | 10677209                | TT                                     | CC                 | CC               | INTERGENIC      |               |                    |                    |
| SNP_34454_A_10677868 | NC_021164.1    | Ca_Kabuli_Chr05 | 10677868                | GG                                     | AA                 | AA               | INTERGENIC      |               |                    |                    |
| SNP_34455_A_10678033 | NC_021164.1    | Ca_Kabuli_Chr05 | 10678033                | CC                                     | TT                 | TT               | INTERGENIC      |               |                    |                    |
| SNP_34456_A_10678076 | NC_021164.1    | Ca_Kabuli_Chr05 | 10678076                | GG                                     | CC                 | CC               | INTERGENIC      |               |                    |                    |
| SNP_34457_A_10678206 | NC_021164.1    | Ca_Kabuli_Chr05 | 10678206                | AA                                     | GG                 | GG               | INTERGENIC      |               |                    |                    |
| SNP_34458_A_10678331 | NC_021164.1    | Ca_Kabuli_Chr05 | 10678331                | GG                                     | AA                 | AA               | INTERGENIC      |               |                    |                    |
| SNP_34460_A_10679884 | NC_021164.1    | Ca_Kabuli_Chr05 | 10679884                | TT                                     | AA                 | AA               | INTERGENIC      |               |                    |                    |
| SNP_34461_A_10679910 | NC_021164.1    | Ca_Kabuli_Chr05 | 10679910                | CC                                     | TT                 | TT               | INTERGENIC      |               |                    |                    |
| SNP_34462_A_10679919 | NC_021164.1    | Ca_Kabuli_Chr05 | 10679919                | TT                                     | CC                 | CC               | INTERGENIC      |               |                    |                    |
| SNP_34463_A_10679967 | NC_021164.1    | Ca_Kabuli_Chr05 | 10679967                | TT                                     | GG                 | GG               | INTERGENIC      |               |                    |                    |

| SNPs IDs             | Chromosome IDs | Chromosomes     | Physical positions (bp) | CDC Frontier (Reference genome) | (Pusa 1103 & HPNB) | (ILWC 46 & LPNB) | Sequence genome | Components of | Gene accession IDs | Putative functions |
|----------------------|----------------|-----------------|-------------------------|---------------------------------|--------------------|------------------|-----------------|---------------|--------------------|--------------------|
| SNP_34464_A_10679989 | NC_021164.1    | Ca_Kabuli_Chr05 | 10679989                | GG                              | CC                 | CC               | INTERGENIC      |               |                    |                    |
| SNP_34465_A_10680016 | NC_021164.1    | Ca_Kabuli_Chr05 | 10680016                | CC                              | TT                 | TT               | INTERGENIC      |               |                    |                    |
| SNP_34466_A_10680056 | NC_021164.1    | Ca_Kabuli_Chr05 | 10680056                | GG                              | AA                 | AA               | INTERGENIC      |               |                    |                    |
| SNP_34467_A_10680152 | NC_021164.1    | Ca_Kabuli_Chr05 | 10680152                | AA                              | TT                 | TT               | INTERGENIC      |               |                    |                    |
| SNP_34468_A_10680168 | NC_021164.1    | Ca_Kabuli_Chr05 | 10680168                | AA                              | TT                 | TT               | INTERGENIC      |               |                    |                    |
| SNP_34469_A_10680170 | NC_021164.1    | Ca_Kabuli_Chr05 | 10680170                | GG                              | AA                 | AA               | INTERGENIC      |               |                    |                    |
| SNP_34470_A_10680185 | NC_021164.1    | Ca_Kabuli_Chr05 | 10680185                | CC                              | TT                 | TT               | INTERGENIC      |               |                    |                    |
| SNP_34471_A_10680193 | NC_021164.1    | Ca_Kabuli_Chr05 | 10680193                | TT                              | GG                 | GG               | INTERGENIC      |               |                    |                    |
| SNP_34472_A_10686889 | NC_021164.1    | Ca_Kabuli_Chr05 | 10686889                | AA                              | GG                 | GG               | INTERGENIC      |               |                    |                    |
| SNP_34473_A_10686922 | NC_021164.1    | Ca_Kabuli_Chr05 | 10686922                | CC                              | TT                 | TT               | INTERGENIC      |               |                    |                    |
| SNP_34474_A_10686942 | NC_021164.1    | Ca_Kabuli_Chr05 | 10686942                | TT                              | GG                 | GG               | INTERGENIC      |               |                    |                    |
| SNP_34475_A_10686975 | NC_021164.1    | Ca_Kabuli_Chr05 | 10686975                | TT                              | CC                 | CC               | INTERGENIC      |               |                    |                    |
| SNP_34477_A_10687100 | NC_021164.1    | Ca_Kabuli_Chr05 | 10687100                | TT                              | GG                 | GG               | INTERGENIC      |               |                    |                    |
| SNP_34478_A_10687251 | NC_021164.1    | Ca_Kabuli_Chr05 | 10687251                | GG                              | AA                 | AA               | INTERGENIC      |               |                    |                    |
| SNP_34479_A_10687281 | NC_021164.1    | Ca_Kabuli_Chr05 | 10687281                | GG                              | TT                 | TT               | INTERGENIC      |               |                    |                    |
| SNP_34480_A_10687320 | NC_021164.1    | Ca_Kabuli_Chr05 | 10687320                | GG                              | TT                 | TT               | INTERGENIC      |               |                    |                    |
| SNP_34481_A_10687375 | NC_021164.1    | Ca_Kabuli_Chr05 | 10687375                | TT                              | GG                 | GG               | INTERGENIC      |               |                    |                    |
| SNP_34482_A_10687455 | NC_021164.1    | Ca_Kabuli_Chr05 | 10687455                | AA                              | CC                 | CC               | INTERGENIC      |               |                    |                    |
| SNP_34483_A_10687490 | NC_021164.1    | Ca_Kabuli_Chr05 | 10687490                | TT                              | CC                 | CC               | INTERGENIC      |               |                    |                    |
| SNP_34484_A_10687500 | NC_021164.1    | Ca_Kabuli_Chr05 | 10687500                | TT                              | AA                 | AA               | INTERGENIC      |               |                    |                    |
| SNP_34485_A_10687502 | NC_021164.1    | Ca_Kabuli_Chr05 | 10687502                | CC                              | TT                 | TT               | INTERGENIC      |               |                    |                    |
| SNP_34486_A_10687823 | NC_021164.1    | Ca_Kabuli_Chr05 | 10687823                | TT                              | AA                 | AA               | INTERGENIC      |               |                    |                    |



| SNPs IDs             | Chromosome IDs | Chromosomes     | Physical positions (bp) | CDC Frontier genome (Reference genome) | (Pusa 1103 & HPNB) | (ILWC 46 & LPNB) | Sequence genome | Components of | Gene accession IDs | Putative functions                                  |
|----------------------|----------------|-----------------|-------------------------|----------------------------------------|--------------------|------------------|-----------------|---------------|--------------------|-----------------------------------------------------|
| SNP_34487_A_10687859 | NC_021164.1    | Ca_Kabuli_Chr05 | 10687859                | AA                                     | GG                 | GG               | INTERGENIC      |               |                    |                                                     |
| SNP_34488_A_10688106 | NC_021164.1    | Ca_Kabuli_Chr05 | 10688106                | CC                                     | TT                 | TT               | INTERGENIC      |               |                    |                                                     |
| SNP_34489_A_10688368 | NC_021164.1    | Ca_Kabuli_Chr05 | 10688368                | TT                                     | GG                 | GG               | INTERGENIC      |               |                    |                                                     |
| SNP_34490_A_10688549 | NC_021164.1    | Ca_Kabuli_Chr05 | 10688549                | GG                                     | CC                 | CC               | INTERGENIC      |               |                    |                                                     |
| SNP_34491_A_10688585 | NC_021164.1    | Ca_Kabuli_Chr05 | 10688585                | CC                                     | TT                 | TT               | INTERGENIC      |               |                    |                                                     |
| SNP_34492_A_10688847 | NC_021164.1    | Ca_Kabuli_Chr05 | 10688847                | GG                                     | TT                 | TT               | INTERGENIC      |               |                    |                                                     |
| SNP_34493_A_10688886 | NC_021164.1    | Ca_Kabuli_Chr05 | 10688886                | CC                                     | TT                 | TT               | INTERGENIC      |               |                    |                                                     |
| SNP_34494_A_10688896 | NC_021164.1    | Ca_Kabuli_Chr05 | 10688896                | TT                                     | AA                 | AA               | INTERGENIC      |               |                    |                                                     |
| SNP_34495_A_10688907 | NC_021164.1    | Ca_Kabuli_Chr05 | 10688907                | AA                                     | CC                 | CC               | INTERGENIC      |               |                    |                                                     |
| SNP_34497_A_10689167 | NC_021164.1    | Ca_Kabuli_Chr05 | 10689167                | TT                                     | CC                 | CC               | INTERGENIC      |               |                    |                                                     |
| SNP_34498_A_10689239 | NC_021164.1    | Ca_Kabuli_Chr05 | 10689239                | CC                                     | TT                 | TT               | INTERGENIC      |               |                    |                                                     |
| SNP_34499_A_10689433 | NC_021164.1    | Ca_Kabuli_Chr05 | 10689433                | TT                                     | CC                 | CC               | INTERGENIC      |               |                    |                                                     |
| SNP_34501_A_10689693 | NC_021164.1    | Ca_Kabuli_Chr05 | 10689693                | GG                                     | CC                 | CC               | INTERGENIC      |               |                    |                                                     |
| SNP_34502_A_10690076 | NC_021164.1    | Ca_Kabuli_Chr05 | 10690076                | TT                                     | AA                 | AA               | INTERGENIC      |               |                    |                                                     |
| SNP_34503_A_10690942 | NC_021164.1    | Ca_Kabuli_Chr05 | 10690942                | TT                                     | CC                 | CC               | INTERGENIC      |               |                    |                                                     |
| SNP_34504_A_10692068 | NC_021164.1    | Ca_Kabuli_Chr05 | 10692068                | AA                                     | GG                 | GG               | INTERGENIC      |               |                    |                                                     |
| SNP_34506_A_10704670 | NC_021164.1    | Ca_Kabuli_Chr05 | 10704670                | AA                                     | CC                 | CC               | INTERGENIC      |               |                    |                                                     |
| SNP_34507_A_10759700 | NC_021164.1    | Ca_Kabuli_Chr05 | 10759700                | TT                                     | CC                 | CC               | URR             | 101507718     |                    | uncharacterized LOC101507718                        |
| SNP_34508_A_10759855 | NC_021164.1    | Ca_Kabuli_Chr05 | 10759855                | GG                                     | TT                 | TT               | URR             | 101507718     |                    | uncharacterized LOC101507718                        |
| SNP_34509_A_10953802 | NC_021164.1    | Ca_Kabuli_Chr05 | 10953802                | GG                                     | AA                 | AA               | INTERGENIC      |               |                    |                                                     |
| SNP_34510_A_10954884 | NC_021164.1    | Ca_Kabuli_Chr05 | 10954884                | TT                                     | CC                 | CC               | INTERGENIC      |               |                    |                                                     |
| SNP_34512_A_11075430 | NC_021164.1    | Ca_Kabuli_Chr05 | 11075430                | AA                                     | GG                 | GG               | URR             | 101506422     |                    | putative pectinesterase/pectinesterase inhibitor 24 |

| SNPs IDs             | Chromosome IDs | Chromosomes     | Physical positions (bp) | CDC Frontier genome (Reference genome) | (Pusa 1103 & HPNB) | (ILWC 46 & LPNB) | Sequence Components of genome | Gene accession IDs | Putative functions                                  |
|----------------------|----------------|-----------------|-------------------------|----------------------------------------|--------------------|------------------|-------------------------------|--------------------|-----------------------------------------------------|
| SNP_34513_A_11075442 | NC_021164.1    | Ca_Kabuli_Chr05 | 11075442                | AA                                     | GG                 | GG               | URR                           | 101506422          | putative pectinesterase/pectinesterase inhibitor 24 |
| SNP_34514_A_11075448 | NC_021164.1    | Ca_Kabuli_Chr05 | 11075448                | AA                                     | GG                 | GG               | URR                           | 101506422          | putative pectinesterase/pectinesterase inhibitor 24 |
| SNP_34515_A_11075471 | NC_021164.1    | Ca_Kabuli_Chr05 | 11075471                | AA                                     | GG                 | GG               | URR                           | 101506422          | putative pectinesterase/pectinesterase inhibitor 24 |
| SNP_34516_A_11075490 | NC_021164.1    | Ca_Kabuli_Chr05 | 11075490                | AA                                     | GG                 | GG               | URR                           | 101506422          | putative pectinesterase/pectinesterase inhibitor 24 |
| SNP_34517_A_11075517 | NC_021164.1    | Ca_Kabuli_Chr05 | 11075517                | AA                                     | CC                 | CC               | URR                           | 101506422          | putative pectinesterase/pectinesterase inhibitor 24 |
| SNP_34518_A_11075547 | NC_021164.1    | Ca_Kabuli_Chr05 | 11075547                | CC                                     | TT                 | TT               | URR                           | 101506422          | putative pectinesterase/pectinesterase inhibitor 24 |
| SNP_34519_A_11075567 | NC_021164.1    | Ca_Kabuli_Chr05 | 11075567                | TT                                     | AA                 | AA               | URR                           | 101506422          | putative pectinesterase/pectinesterase inhibitor 24 |
| SNP_34520_A_11117178 | NC_021164.1    | Ca_Kabuli_Chr05 | 11117178                | TT                                     | CC                 | CC               | INTERGENIC                    |                    |                                                     |
| SNP_34522_A_11131266 | NC_021164.1    | Ca_Kabuli_Chr05 | 11131266                | GG                                     | TT                 | TT               | INTERGENIC                    |                    |                                                     |
| SNP_34523_A_11131356 | NC_021164.1    | Ca_Kabuli_Chr05 | 11131356                | TT                                     | CC                 | CC               | INTERGENIC                    |                    |                                                     |
| SNP_34524_A_11131592 | NC_021164.1    | Ca_Kabuli_Chr05 | 11131592                | GG                                     | AA                 | AA               | INTERGENIC                    |                    |                                                     |
| SNP_34525_A_11132450 | NC_021164.1    | Ca_Kabuli_Chr05 | 11132450                | AA                                     | TT                 | TT               | INTERGENIC                    |                    |                                                     |
| SNP_34527_A_11132559 | NC_021164.1    | Ca_Kabuli_Chr05 | 11132559                | TT                                     | AA                 | AA               | INTERGENIC                    |                    |                                                     |
| SNP_34528_A_11132567 | NC_021164.1    | Ca_Kabuli_Chr05 | 11132567                | TT                                     | CC                 | CC               | INTERGENIC                    |                    |                                                     |
| SNP_34529_A_11132616 | NC_021164.1    | Ca_Kabuli_Chr05 | 11132616                | AA                                     | TT                 | TT               | INTERGENIC                    |                    |                                                     |
| SNP_34530_A_11132747 | NC_021164.1    | Ca_Kabuli_Chr05 | 11132747                | TT                                     | CC                 | CC               | INTERGENIC                    |                    |                                                     |
| SNP_34531_A_11132768 | NC_021164.1    | Ca_Kabuli_Chr05 | 11132768                | AA                                     | GG                 | GG               | INTERGENIC                    |                    |                                                     |
| SNP_34532_A_11132778 | NC_021164.1    | Ca_Kabuli_Chr05 | 11132778                | CC                                     | TT                 | TT               | INTERGENIC                    |                    |                                                     |
| SNP_34533_A_11132876 | NC_021164.1    | Ca_Kabuli_Chr05 | 11132876                | AA                                     | TT                 | TT               | INTERGENIC                    |                    |                                                     |
| SNP_34534_A_11132945 | NC_021164.1    | Ca_Kabuli_Chr05 | 11132945                | GG                                     | TT                 | TT               | INTERGENIC                    |                    |                                                     |
| SNP_34535_A_11167551 | NC_021164.1    | Ca_Kabuli_Chr05 | 11167551                | TT                                     | AA                 | AA               | NON_SYNONYMOUS_CODING         | 101509622          | probable CCR4-associated factor 1 homolog 11        |
| SNP_34536_A_11167607 | NC_021164.1    | Ca_Kabuli_Chr05 | 11167607                | AA                                     | GG                 | GG               | NON_SYNONYMOUS_CODING         | 101509622          | probable CCR4-associated factor 1 homolog 11        |

| SNPs IDs             | Chromosome IDs | Chromosomes     | Physical positions (bp) | CDC Frontier (Reference genome) | (Pusa 1103 & HPNB) | (ILWC 46 & LPNB) | Sequence Components of genome | Gene accession IDs | Putative functions                           |
|----------------------|----------------|-----------------|-------------------------|---------------------------------|--------------------|------------------|-------------------------------|--------------------|----------------------------------------------|
| SNP_34537_A_11167756 | NC_021164.1    | Ca_Kabuli_Chr05 | 11167756                | GG                              | AA                 | AA               | INTRON                        | 101509622          | probable CCR4-associated factor 1 homolog 11 |
| SNP_34538_A_11167766 | NC_021164.1    | Ca_Kabuli_Chr05 | 11167766                | TT                              | CC                 | CC               | INTRON                        | 101509622          | probable CCR4-associated factor 1 homolog 11 |
| SNP_34539_A_11167791 | NC_021164.1    | Ca_Kabuli_Chr05 | 11167791                | AA                              | GG                 | GG               | INTRON                        | 101509622          | probable CCR4-associated factor 1 homolog 11 |
| SNP_34540_A_11167841 | NC_021164.1    | Ca_Kabuli_Chr05 | 11167841                | TT                              | AA                 | AA               | INTRON                        | 101509622          | probable CCR4-associated factor 1 homolog 11 |
| SNP_34541_A_11167868 | NC_021164.1    | Ca_Kabuli_Chr05 | 11167868                | GG                              | CC                 | CC               | INTRON                        | 101509622          | probable CCR4-associated factor 1 homolog 11 |
| SNP_34542_A_11167878 | NC_021164.1    | Ca_Kabuli_Chr05 | 11167878                | TT                              | CC                 | CC               | INTRON                        | 101509622          | probable CCR4-associated factor 1 homolog 11 |
| SNP_34543_A_11167883 | NC_021164.1    | Ca_Kabuli_Chr05 | 11167883                | AA                              | CC                 | CC               | INTRON                        | 101509622          | probable CCR4-associated factor 1 homolog 11 |
| SNP_34544_A_11167887 | NC_021164.1    | Ca_Kabuli_Chr05 | 11167887                | TT                              | CC                 | CC               | INTRON                        | 101509622          | probable CCR4-associated factor 1 homolog 11 |
| SNP_34545_A_11167891 | NC_021164.1    | Ca_Kabuli_Chr05 | 11167891                | GG                              | AA                 | AA               | INTRON                        | 101509622          | probable CCR4-associated factor 1 homolog 11 |
| SNP_34546_A_11167892 | NC_021164.1    | Ca_Kabuli_Chr05 | 11167892                | TT                              | CC                 | CC               | INTRON                        | 101509622          | probable CCR4-associated factor 1 homolog 11 |
| SNP_34547_A_11167898 | NC_021164.1    | Ca_Kabuli_Chr05 | 11167898                | AA                              | GG                 | GG               | INTRON                        | 101509622          | probable CCR4-associated factor 1 homolog 11 |
| SNP_34548_A_11167900 | NC_021164.1    | Ca_Kabuli_Chr05 | 11167900                | TT                              | GG                 | GG               | INTRON                        | 101509622          | probable CCR4-associated factor 1 homolog 11 |
| SNP_34549_A_11167944 | NC_021164.1    | Ca_Kabuli_Chr05 | 11167944                | GG                              | CC                 | CC               | INTRON                        | 101509622          | probable CCR4-associated factor 1 homolog 11 |
| SNP_34550_A_11167948 | NC_021164.1    | Ca_Kabuli_Chr05 | 11167948                | CC                              | TT                 | TT               | INTRON                        | 101509622          | probable CCR4-associated factor 1 homolog 11 |
| SNP_34551_A_11167975 | NC_021164.1    | Ca_Kabuli_Chr05 | 11167975                | TT                              | CC                 | CC               | INTRON                        | 101509622          | probable CCR4-associated factor 1 homolog 11 |
| SNP_34552_A_11167977 | NC_021164.1    | Ca_Kabuli_Chr05 | 11167977                | CC                              | AA                 | AA               | INTRON                        | 101509622          | probable CCR4-associated factor 1 homolog 11 |
| SNP_34553_A_11167986 | NC_021164.1    | Ca_Kabuli_Chr05 | 11167986                | TT                              | GG                 | GG               | INTRON                        | 101509622          | probable CCR4-associated factor 1 homolog 11 |
| SNP_34554_A_11167997 | NC_021164.1    | Ca_Kabuli_Chr05 | 11167997                | CC                              | GG                 | GG               | INTRON                        | 101509622          | probable CCR4-associated factor 1 homolog 11 |
| SNP_34555_A_11168012 | NC_021164.1    | Ca_Kabuli_Chr05 | 11168012                | GG                              | AA                 | AA               | INTRON                        | 101509622          | probable CCR4-associated factor 1 homolog 11 |
| SNP_34556_A_11168022 | NC_021164.1    | Ca_Kabuli_Chr05 | 11168022                | TT                              | CC                 | CC               | INTRON                        | 101509622          | probable CCR4-associated factor 1 homolog 11 |
| SNP_34557_A_11168046 | NC_021164.1    | Ca_Kabuli_Chr05 | 11168046                | TT                              | AA                 | AA               | INTRON                        | 101509622          | probable CCR4-associated factor 1 homolog 11 |
| SNP_34558_A_11168052 | NC_021164.1    | Ca_Kabuli_Chr05 | 11168052                | TT                              | CC                 | CC               | INTRON                        | 101509622          | probable CCR4-associated factor 1 homolog 11 |

| SNPs IDs             | Chromosome IDs | Chromosomes     | Physical positions (bp) | CDC Frontier genome (Reference genome) | (Pusa 1103 & HPNB) | (ILWC 46 & LPNB) | Sequence Components of genome | Gene accession IDs | Putative functions                           |
|----------------------|----------------|-----------------|-------------------------|----------------------------------------|--------------------|------------------|-------------------------------|--------------------|----------------------------------------------|
| SNP_34559_A_11168112 | NC_021164.1    | Ca_Kabuli_Chr05 | 11168112                | CC                                     | AA                 | AA               | INTRON                        | 101509622          | probable CCR4-associated factor 1 homolog 11 |
| SNP_34560_A_11168115 | NC_021164.1    | Ca_Kabuli_Chr05 | 11168115                | CC                                     | TT                 | TT               | INTRON                        | 101509622          | probable CCR4-associated factor 1 homolog 11 |
| SNP_34561_A_11168142 | NC_021164.1    | Ca_Kabuli_Chr05 | 11168142                | AA                                     | TT                 | TT               | INTRON                        | 101509622          | probable CCR4-associated factor 1 homolog 11 |
| SNP_34562_A_11168165 | NC_021164.1    | Ca_Kabuli_Chr05 | 11168165                | GG                                     | CC                 | CC               | INTRON                        | 101509622          | probable CCR4-associated factor 1 homolog 11 |
| SNP_34563_A_11168237 | NC_021164.1    | Ca_Kabuli_Chr05 | 11168237                | AA                                     | CC                 | CC               | INTRON                        | 101509622          | probable CCR4-associated factor 1 homolog 11 |
| SNP_34564_A_11168238 | NC_021164.1    | Ca_Kabuli_Chr05 | 11168238                | AA                                     | TT                 | TT               | INTRON                        | 101509622          | probable CCR4-associated factor 1 homolog 11 |
| SNP_34566_A_11168454 | NC_021164.1    | Ca_Kabuli_Chr05 | 11168454                | TT                                     | CC                 | CC               | INTRON                        | 101509622          | probable CCR4-associated factor 1 homolog 11 |
| SNP_34567_A_11168644 | NC_021164.1    | Ca_Kabuli_Chr05 | 11168644                | TT                                     | CC                 | CC               | INTRON                        | 101509622          | probable CCR4-associated factor 1 homolog 11 |
| SNP_34568_A_11168669 | NC_021164.1    | Ca_Kabuli_Chr05 | 11168669                | AA                                     | GG                 | GG               | INTRON                        | 101509622          | probable CCR4-associated factor 1 homolog 11 |
| SNP_34569_A_11168754 | NC_021164.1    | Ca_Kabuli_Chr05 | 11168754                | AA                                     | GG                 | GG               | INTRON                        | 101509622          | probable CCR4-associated factor 1 homolog 11 |
| SNP_34571_A_11168861 | NC_021164.1    | Ca_Kabuli_Chr05 | 11168861                | GG                                     | AA                 | AA               | INTRON                        | 101509622          | probable CCR4-associated factor 1 homolog 11 |
| SNP_34572_A_11168864 | NC_021164.1    | Ca_Kabuli_Chr05 | 11168864                | TT                                     | AA                 | AA               | INTRON                        | 101509622          | probable CCR4-associated factor 1 homolog 11 |
| SNP_34573_A_11168881 | NC_021164.1    | Ca_Kabuli_Chr05 | 11168881                | CC                                     | TT                 | TT               | INTRON                        | 101509622          | probable CCR4-associated factor 1 homolog 11 |
| SNP_34574_A_11168882 | NC_021164.1    | Ca_Kabuli_Chr05 | 11168882                | CC                                     | TT                 | TT               | INTRON                        | 101509622          | probable CCR4-associated factor 1 homolog 11 |
| SNP_34576_A_11168986 | NC_021164.1    | Ca_Kabuli_Chr05 | 11168986                | CC                                     | AA                 | AA               | INTRON                        | 101509622          | probable CCR4-associated factor 1 homolog 11 |
| SNP_34578_A_11169069 | NC_021164.1    | Ca_Kabuli_Chr05 | 11169069                | GG                                     | AA                 | AA               | INTRON                        | 101509622          | probable CCR4-associated factor 1 homolog 11 |
| SNP_34579_A_11169094 | NC_021164.1    | Ca_Kabuli_Chr05 | 11169094                | GG                                     | TT                 | TT               | NON_SYNONYMOUS_CODING         | 101509622          | probable CCR4-associated factor 1 homolog 11 |
| SNP_34580_A_11169151 | NC_021164.1    | Ca_Kabuli_Chr05 | 11169151                | AA                                     | GG                 | GG               | NON_SYNONYMOUS_CODING         | 101509622          | probable CCR4-associated factor 1 homolog 11 |
| SNP_34581_A_11169198 | NC_021164.1    | Ca_Kabuli_Chr05 | 11169198                | CC                                     | AA                 | AA               | SYNONYMOUS_CODING             | 101509622          | probable CCR4-associated factor 1 homolog 11 |
| SNP_34582_A_11169218 | NC_021164.1    | Ca_Kabuli_Chr05 | 11169218                | TT                                     | CC                 | CC               | NON_SYNONYMOUS_CODING         | 101509622          | probable CCR4-associated factor 1 homolog 11 |
| SNP_34583_A_11169228 | NC_021164.1    | Ca_Kabuli_Chr05 | 11169228                | CC                                     | TT                 | TT               | SYNONYMOUS_CODING             | 101509622          | probable CCR4-associated factor 1 homolog 11 |
| SNP_34584_A_11169234 | NC_021164.1    | Ca_Kabuli_Chr05 | 11169234                | AA                                     | CC                 | CC               | SYNONYMOUS_CODING             | 101509622          | probable CCR4-associated factor 1 homolog 11 |

| SNPs IDs             | Chromosome IDs | Chromosomes     | Physical positions (bp) | CDC Frontier (Reference genome) | (Pusa 1103 & HPNB) | (ILWC 46 & LPNB) | Sequence Components of genome | Gene accession IDs | Putative functions                           |
|----------------------|----------------|-----------------|-------------------------|---------------------------------|--------------------|------------------|-------------------------------|--------------------|----------------------------------------------|
| SNP_34585_A_11169282 | NC_021164.1    | Ca_Kabuli_Chr05 | 11169282                | GG                              | AA                 | AA               | SYNONYMOUS_CODING             | 101509622          | probable CCR4-associated factor 1 homolog 11 |
| SNP_34586_A_11169372 | NC_021164.1    | Ca_Kabuli_Chr05 | 11169372                | TT                              | CC                 | CC               | SYNONYMOUS_CODING             | 101509622          | probable CCR4-associated factor 1 homolog 11 |
| SNP_34587_A_11169396 | NC_021164.1    | Ca_Kabuli_Chr05 | 11169396                | CC                              | AA                 | AA               | NON_SYNONYMOUS_CODING         | 101509622          | probable CCR4-associated factor 1 homolog 11 |
| SNP_34588_A_11169409 | NC_021164.1    | Ca_Kabuli_Chr05 | 11169409                | AA                              | GG                 | GG               | NON_SYNONYMOUS_CODING         | 101509622          | probable CCR4-associated factor 1 homolog 11 |
| SNP_34589_A_11169531 | NC_021164.1    | Ca_Kabuli_Chr05 | 11169531                | TT                              | GG                 | GG               | SYNONYMOUS_CODING             | 101509622          | probable CCR4-associated factor 1 homolog 11 |
| SNP_34591_A_11169550 | NC_021164.1    | Ca_Kabuli_Chr05 | 11169550                | GG                              | TT                 | TT               | NON_SYNONYMOUS_CODING         | 101509622          | probable CCR4-associated factor 1 homolog 11 |
| SNP_34592_A_11169552 | NC_021164.1    | Ca_Kabuli_Chr05 | 11169552                | AA                              | GG                 | GG               | SYNONYMOUS_CODING             | 101509622          | probable CCR4-associated factor 1 homolog 11 |
| SNP_34593_A_11169578 | NC_021164.1    | Ca_Kabuli_Chr05 | 11169578                | CC                              | GG                 | GG               | NON_SYNONYMOUS_CODING         | 101509622          | probable CCR4-associated factor 1 homolog 11 |
| SNP_34594_A_11169588 | NC_021164.1    | Ca_Kabuli_Chr05 | 11169588                | CC                              | TT                 | TT               | SYNONYMOUS_CODING             | 101509622          | probable CCR4-associated factor 1 homolog 11 |
| SNP_34595_A_11169627 | NC_021164.1    | Ca_Kabuli_Chr05 | 11169627                | AA                              | CC                 | CC               | SYNONYMOUS_CODING             | 101509622          | probable CCR4-associated factor 1 homolog 11 |
| SNP_34596_A_11169638 | NC_021164.1    | Ca_Kabuli_Chr05 | 11169638                | AA                              | GG                 | GG               | NON_SYNONYMOUS_CODING         | 101509622          | probable CCR4-associated factor 1 homolog 11 |
| SNP_34597_A_11181865 | NC_021164.1    | Ca_Kabuli_Chr05 | 11181865                | TT                              | CC                 | CC               | INTERGENIC                    |                    |                                              |
| SNP_34598_A_11181896 | NC_021164.1    | Ca_Kabuli_Chr05 | 11181896                | GG                              | CC                 | CC               | INTERGENIC                    |                    |                                              |
| SNP_34599_A_11181899 | NC_021164.1    | Ca_Kabuli_Chr05 | 11181899                | GG                              | AA                 | AA               | INTERGENIC                    |                    |                                              |
| SNP_34600_A_11181963 | NC_021164.1    | Ca_Kabuli_Chr05 | 11181963                | CC                              | TT                 | TT               | INTERGENIC                    |                    |                                              |
| SNP_34601_A_11181988 | NC_021164.1    | Ca_Kabuli_Chr05 | 11181988                | TT                              | CC                 | CC               | INTERGENIC                    |                    |                                              |
| SNP_34602_A_11182020 | NC_021164.1    | Ca_Kabuli_Chr05 | 11182020                | AA                              | GG                 | GG               | INTERGENIC                    |                    |                                              |
| SNP_34603_A_11182140 | NC_021164.1    | Ca_Kabuli_Chr05 | 11182140                | GG                              | TT                 | TT               | INTERGENIC                    |                    |                                              |
| SNP_34604_A_11182235 | NC_021164.1    | Ca_Kabuli_Chr05 | 11182235                | CC                              | AA                 | AA               | INTERGENIC                    |                    |                                              |
| SNP_34605_A_11182292 | NC_021164.1    | Ca_Kabuli_Chr05 | 11182292                | CC                              | TT                 | TT               | INTERGENIC                    |                    |                                              |
| SNP_34606_A_11182506 | NC_021164.1    | Ca_Kabuli_Chr05 | 11182506                | AA                              | TT                 | TT               | INTERGENIC                    |                    |                                              |
| SNP_34607_A_11182561 | NC_021164.1    | Ca_Kabuli_Chr05 | 11182561                | TT                              | AA                 | AA               | INTERGENIC                    |                    |                                              |

| SNPs IDs             | Chromosome IDs | Chromosomes     | Physical positions (bp) | CDC Frontier genome (Reference genome) | (Pusa 1103 & HPNB) | (ILWC 46 & LPNB) | Sequence genome | Components of | Gene accession IDs                                                   | Putative functions |
|----------------------|----------------|-----------------|-------------------------|----------------------------------------|--------------------|------------------|-----------------|---------------|----------------------------------------------------------------------|--------------------|
| SNP_34608_A_11182617 | NC_021164.1    | Ca_Kabuli_Chr05 | 11182617                | CC                                     | GG                 | GG               | INTERGENIC      |               |                                                                      |                    |
| SNP_34609_A_11230713 | NC_021164.1    | Ca_Kabuli_Chr05 | 11230713                | TT                                     | CC                 | CC               | INTERGENIC      |               |                                                                      |                    |
| SNP_34610_A_11230777 | NC_021164.1    | Ca_Kabuli_Chr05 | 11230777                | CC                                     | TT                 | TT               | INTERGENIC      |               |                                                                      |                    |
| SNP_34611_A_11232966 | NC_021164.1    | Ca_Kabuli_Chr05 | 11232966                | GG                                     | AA                 | AA               | INTERGENIC      |               |                                                                      |                    |
| SNP_34612_A_11232984 | NC_021164.1    | Ca_Kabuli_Chr05 | 11232984                | CC                                     | AA                 | AA               | INTERGENIC      |               |                                                                      |                    |
| SNP_34614_A_11233259 | NC_021164.1    | Ca_Kabuli_Chr05 | 11233259                | CC                                     | TT                 | TT               | INTERGENIC      |               |                                                                      |                    |
| SNP_34615_A_11243728 | NC_021164.1    | Ca_Kabuli_Chr05 | 11243728                | TT                                     | CC                 | CC               | INTERGENIC      |               |                                                                      |                    |
| SNP_34616_A_11244028 | NC_021164.1    | Ca_Kabuli_Chr05 | 11244028                | AA                                     | CC                 | CC               | INTERGENIC      |               |                                                                      |                    |
| SNP_34617_A_11244064 | NC_021164.1    | Ca_Kabuli_Chr05 | 11244064                | GG                                     | TT                 | TT               | INTERGENIC      |               |                                                                      |                    |
| SNP_34618_A_11244084 | NC_021164.1    | Ca_Kabuli_Chr05 | 11244084                | TT                                     | CC                 | CC               | INTERGENIC      |               |                                                                      |                    |
| SNP_34619_A_11244182 | NC_021164.1    | Ca_Kabuli_Chr05 | 11244182                | AA                                     | TT                 | TT               | INTERGENIC      |               |                                                                      |                    |
| SNP_34620_A_11244241 | NC_021164.1    | Ca_Kabuli_Chr05 | 11244241                | TT                                     | GG                 | GG               | INTERGENIC      |               |                                                                      |                    |
| SNP_34621_A_11258644 | NC_021164.1    | Ca_Kabuli_Chr05 | 11258644                | TT                                     | CC                 | CC               | INTERGENIC      |               |                                                                      |                    |
| SNP_34622_A_11271174 | NC_021164.1    | Ca_Kabuli_Chr05 | 11271174                | GG                                     | TT                 | TT               | INTERGENIC      |               |                                                                      |                    |
| SNP_34623_A_11291199 | NC_021164.1    | Ca_Kabuli_Chr05 | 11291199                | TT                                     | AA                 | AA               | URR             | 101510808     | pentatricopeptide repeat-containing protein At4g18975, chloroplastic |                    |
| SNP_34624_A_11321238 | NC_021164.1    | Ca_Kabuli_Chr05 | 11321238                | AA                                     | CC                 | CC               | INTERGENIC      |               |                                                                      |                    |
| SNP_34625_A_11321267 | NC_021164.1    | Ca_Kabuli_Chr05 | 11321267                | TT                                     | GG                 | GG               | INTERGENIC      |               |                                                                      |                    |
| SNP_34626_A_11324605 | NC_021164.1    | Ca_Kabuli_Chr05 | 11324605                | GG                                     | AA                 | AA               | INTERGENIC      |               |                                                                      |                    |
| SNP_34628_A_11324668 | NC_021164.1    | Ca_Kabuli_Chr05 | 11324668                | CC                                     | TT                 | TT               | INTERGENIC      |               |                                                                      |                    |
| SNP_34629_A_11346317 | NC_021164.1    | Ca_Kabuli_Chr05 | 11346317                | TT                                     | GG                 | GG               | INTERGENIC      |               |                                                                      |                    |
| SNP_34630_A_11346407 | NC_021164.1    | Ca_Kabuli_Chr05 | 11346407                | CC                                     | AA                 | AA               | INTERGENIC      |               |                                                                      |                    |
| SNP_34631_A_11346428 | NC_021164.1    | Ca_Kabuli_Chr05 | 11346428                | GG                                     | CC                 | CC               | INTERGENIC      |               |                                                                      |                    |

| SNPs IDs             | Chromosome IDs | Chromosomes     | Physical positions (bp) | CDC Frontier genome (Reference genome) | (Pusa 1103 & HPNB) | (ILWC 46 & LPNB) | Sequence genome       | Components of | Gene accession IDs                 | Putative functions |
|----------------------|----------------|-----------------|-------------------------|----------------------------------------|--------------------|------------------|-----------------------|---------------|------------------------------------|--------------------|
| SNP_34632_A_11346441 | NC_021164.1    | Ca_Kabuli_Chr05 | 11346441                | TT                                     | CC                 | CC               | INTERGENIC            |               |                                    |                    |
| SNP_34633_A_11346647 | NC_021164.1    | Ca_Kabuli_Chr05 | 11346647                | TT                                     | CC                 | CC               | INTERGENIC            |               |                                    |                    |
| SNP_34634_A_11346677 | NC_021164.1    | Ca_Kabuli_Chr05 | 11346677                | AA                                     | CC                 | CC               | INTERGENIC            |               |                                    |                    |
| SNP_34635_A_11346683 | NC_021164.1    | Ca_Kabuli_Chr05 | 11346683                | TT                                     | CC                 | CC               | INTERGENIC            |               |                                    |                    |
| SNP_34636_A_11346704 | NC_021164.1    | Ca_Kabuli_Chr05 | 11346704                | GG                                     | AA                 | AA               | INTERGENIC            |               |                                    |                    |
| SNP_34637_A_11346760 | NC_021164.1    | Ca_Kabuli_Chr05 | 11346760                | GG                                     | TT                 | TT               | INTERGENIC            |               |                                    |                    |
| SNP_34638_A_11346766 | NC_021164.1    | Ca_Kabuli_Chr05 | 11346766                | AA                                     | GG                 | GG               | INTERGENIC            |               |                                    |                    |
| SNP_34639_A_11346825 | NC_021164.1    | Ca_Kabuli_Chr05 | 11346825                | TT                                     | CC                 | CC               | INTERGENIC            |               |                                    |                    |
| SNP_34640_A_11346864 | NC_021164.1    | Ca_Kabuli_Chr05 | 11346864                | CC                                     | GG                 | GG               | INTERGENIC            |               |                                    |                    |
| SNP_34641_A_11346866 | NC_021164.1    | Ca_Kabuli_Chr05 | 11346866                | TT                                     | CC                 | CC               | INTERGENIC            |               |                                    |                    |
| SNP_34642_A_11360170 | NC_021164.1    | Ca_Kabuli_Chr05 | 11360170                | CC                                     | GG                 | GG               | INTERGENIC            |               |                                    |                    |
| SNP_34643_A_11420751 | NC_021164.1    | Ca_Kabuli_Chr05 | 11420751                | AA                                     | CC                 | CC               | INTERGENIC            |               |                                    |                    |
| SNP_34645_A_11427806 | NC_021164.1    | Ca_Kabuli_Chr05 | 11427806                | AA                                     | GG                 | GG               | INTERGENIC            |               |                                    |                    |
| SNP_34646_A_11435128 | NC_021164.1    | Ca_Kabuli_Chr05 | 11435128                | TT                                     | CC                 | CC               | INTERGENIC            |               |                                    |                    |
| SNP_34647_A_11447965 | NC_021164.1    | Ca_Kabuli_Chr05 | 11447965                | CC                                     | TT                 | TT               | INTERGENIC            |               |                                    |                    |
| SNP_34648_A_11476552 | NC_021164.1    | Ca_Kabuli_Chr05 | 11476552                | GG                                     | AA                 | AA               | URR                   | 101513495     | uncharacterized LOC101513495       |                    |
| SNP_34649_A_11483531 | NC_021164.1    | Ca_Kabuli_Chr05 | 11483531                | TT                                     | CC                 | CC               | NON_SYNONYMOUS_CODING | 101514036     | protein NRT1/ PTR FAMILY 5.10-like |                    |
| SNP_34651_A_11512157 | NC_021164.1    | Ca_Kabuli_Chr05 | 11512157                | TT                                     | CC                 | CC               | INTERGENIC            |               |                                    |                    |
| SNP_34652_A_11512269 | NC_021164.1    | Ca_Kabuli_Chr05 | 11512269                | GG                                     | AA                 | AA               | INTERGENIC            |               |                                    |                    |
| SNP_34653_A_11512541 | NC_021164.1    | Ca_Kabuli_Chr05 | 11512541                | TT                                     | CC                 | CC               | INTERGENIC            |               |                                    |                    |
| SNP_34654_A_11512560 | NC_021164.1    | Ca_Kabuli_Chr05 | 11512560                | AA                                     | GG                 | GG               | INTERGENIC            |               |                                    |                    |
| SNP_34655_A_11512593 | NC_021164.1    | Ca_Kabuli_Chr05 | 11512593                | AA                                     | GG                 | GG               | INTERGENIC            |               |                                    |                    |

| SNPs IDs             | Chromosome IDs | Chromosomes     | Physical positions (bp) | CDC Frontier genome (Reference genome) | (Pusa 1103 & HPNB) | (ILWC 46 & LPNB) | Sequence genome | Components of | Gene accession IDs | Putative functions |
|----------------------|----------------|-----------------|-------------------------|----------------------------------------|--------------------|------------------|-----------------|---------------|--------------------|--------------------|
| SNP_34656_A_11512617 | NC_021164.1    | Ca_Kabuli_Chr05 | 11512617                | TT                                     | CC                 | CC               | INTERGENIC      |               |                    |                    |
| SNP_34657_A_11512686 | NC_021164.1    | Ca_Kabuli_Chr05 | 11512686                | TT                                     | CC                 | CC               | INTERGENIC      |               |                    |                    |
| SNP_34658_A_11512703 | NC_021164.1    | Ca_Kabuli_Chr05 | 11512703                | TT                                     | GG                 | GG               | INTERGENIC      |               |                    |                    |
| SNP_34659_A_11512706 | NC_021164.1    | Ca_Kabuli_Chr05 | 11512706                | AA                                     | GG                 | GG               | INTERGENIC      |               |                    |                    |
| SNP_34660_A_11512715 | NC_021164.1    | Ca_Kabuli_Chr05 | 11512715                | GG                                     | TT                 | TT               | INTERGENIC      |               |                    |                    |
| SNP_34661_A_11512739 | NC_021164.1    | Ca_Kabuli_Chr05 | 11512739                | TT                                     | AA                 | AA               | INTERGENIC      |               |                    |                    |
| SNP_34662_A_11512774 | NC_021164.1    | Ca_Kabuli_Chr05 | 11512774                | GG                                     | AA                 | AA               | INTERGENIC      |               |                    |                    |
| SNP_34663_A_11512801 | NC_021164.1    | Ca_Kabuli_Chr05 | 11512801                | AA                                     | GG                 | GG               | INTERGENIC      |               |                    |                    |
| SNP_34664_A_11512806 | NC_021164.1    | Ca_Kabuli_Chr05 | 11512806                | CC                                     | TT                 | TT               | INTERGENIC      |               |                    |                    |
| SNP_34665_A_11516472 | NC_021164.1    | Ca_Kabuli_Chr05 | 11516472                | GG                                     | AA                 | AA               | INTERGENIC      |               |                    |                    |
| SNP_34666_A_11535406 | NC_021164.1    | Ca_Kabuli_Chr05 | 11535406                | GG                                     | TT                 | TT               | INTERGENIC      |               |                    |                    |
| SNP_34667_A_11535714 | NC_021164.1    | Ca_Kabuli_Chr05 | 11535714                | GG                                     | AA                 | AA               | INTERGENIC      |               |                    |                    |
| SNP_34668_A_11535716 | NC_021164.1    | Ca_Kabuli_Chr05 | 11535716                | TT                                     | CC                 | CC               | INTERGENIC      |               |                    |                    |
| SNP_34669_A_11584531 | NC_021164.1    | Ca_Kabuli_Chr05 | 11584531                | GG                                     | AA                 | AA               | INTERGENIC      |               |                    |                    |
| SNP_34670_A_11584534 | NC_021164.1    | Ca_Kabuli_Chr05 | 11584534                | CC                                     | TT                 | TT               | INTERGENIC      |               |                    |                    |
| SNP_34672_A_11648799 | NC_021164.1    | Ca_Kabuli_Chr05 | 11648799                | GG                                     | AA                 | AA               | INTERGENIC      |               |                    |                    |
| SNP_34673_A_11667517 | NC_021164.1    | Ca_Kabuli_Chr05 | 11667517                | TT                                     | CC                 | CC               | INTERGENIC      |               |                    |                    |
| SNP_34674_A_11667531 | NC_021164.1    | Ca_Kabuli_Chr05 | 11667531                | AA                                     | GG                 | GG               | INTERGENIC      |               |                    |                    |
| SNP_34675_A_11667574 | NC_021164.1    | Ca_Kabuli_Chr05 | 11667574                | TT                                     | CC                 | CC               | INTERGENIC      |               |                    |                    |
| SNP_34676_A_11703777 | NC_021164.1    | Ca_Kabuli_Chr05 | 11703777                | TT                                     | GG                 | GG               | INTERGENIC      |               |                    |                    |
| SNP_34677_A_11703790 | NC_021164.1    | Ca_Kabuli_Chr05 | 11703790                | AA                                     | GG                 | GG               | INTERGENIC      |               |                    |                    |
| SNP_34678_A_11703849 | NC_021164.1    | Ca_Kabuli_Chr05 | 11703849                | TT                                     | AA                 | AA               | INTERGENIC      |               |                    |                    |



| SNPs IDs             | Chromosome IDs | Chromosomes     | Physical positions (bp) | CDC Frontier genome (Reference genome) | (Pusa 1103 & HPNB) | (ILWC 46 & LPNB) | Sequence genome | Components of | Gene accession IDs                      | Putative functions |
|----------------------|----------------|-----------------|-------------------------|----------------------------------------|--------------------|------------------|-----------------|---------------|-----------------------------------------|--------------------|
| SNP_34679_A_11703852 | NC_021164.1    | Ca_Kabuli_Chr05 | 11703852                | AA                                     | GG                 | GG               | INTERGENIC      |               |                                         |                    |
| SNP_34680_A_11703872 | NC_021164.1    | Ca_Kabuli_Chr05 | 11703872                | AA                                     | GG                 | GG               | INTERGENIC      |               |                                         |                    |
| SNP_34681_A_11703923 | NC_021164.1    | Ca_Kabuli_Chr05 | 11703923                | GG                                     | AA                 | AA               | INTERGENIC      |               |                                         |                    |
| SNP_34682_A_11703947 | NC_021164.1    | Ca_Kabuli_Chr05 | 11703947                | AA                                     | TT                 | TT               | INTERGENIC      |               |                                         |                    |
| SNP_34683_A_11703953 | NC_021164.1    | Ca_Kabuli_Chr05 | 11703953                | GG                                     | TT                 | TT               | INTERGENIC      |               |                                         |                    |
| SNP_34684_A_11704218 | NC_021164.1    | Ca_Kabuli_Chr05 | 11704218                | GG                                     | AA                 | AA               | INTERGENIC      |               |                                         |                    |
| SNP_34685_A_11704287 | NC_021164.1    | Ca_Kabuli_Chr05 | 11704287                | TT                                     | CC                 | CC               | INTERGENIC      |               |                                         |                    |
| SNP_34686_A_11704294 | NC_021164.1    | Ca_Kabuli_Chr05 | 11704294                | CC                                     | TT                 | TT               | INTERGENIC      |               |                                         |                    |
| SNP_34687_A_11704315 | NC_021164.1    | Ca_Kabuli_Chr05 | 11704315                | CC                                     | TT                 | TT               | INTERGENIC      |               |                                         |                    |
| SNP_34688_A_11713305 | NC_021164.1    | Ca_Kabuli_Chr05 | 11713305                | TT                                     | GG                 | GG               | INTERGENIC      |               |                                         |                    |
| SNP_34689_A_11722285 | NC_021164.1    | Ca_Kabuli_Chr05 | 11722285                | TT                                     | AA                 | AA               | INTERGENIC      |               |                                         |                    |
| SNP_34690_A_11722474 | NC_021164.1    | Ca_Kabuli_Chr05 | 11722474                | CC                                     | TT                 | TT               | INTERGENIC      |               |                                         |                    |
| SNP_34691_A_11727515 | NC_021164.1    | Ca_Kabuli_Chr05 | 11727515                | TT                                     | GG                 | GG               | INTERGENIC      |               |                                         |                    |
| SNP_34692_A_11727588 | NC_021164.1    | Ca_Kabuli_Chr05 | 11727588                | AA                                     | GG                 | GG               | INTERGENIC      |               |                                         |                    |
| SNP_34693_A_11729289 | NC_021164.1    | Ca_Kabuli_Chr05 | 11729289                | CC                                     | AA                 | AA               | INTERGENIC      |               |                                         |                    |
| SNP_34694_A_11729551 | NC_021164.1    | Ca_Kabuli_Chr05 | 11729551                | AA                                     | GG                 | GG               | INTERGENIC      |               |                                         |                    |
| SNP_34695_A_11729556 | NC_021164.1    | Ca_Kabuli_Chr05 | 11729556                | AA                                     | TT                 | TT               | INTERGENIC      |               |                                         |                    |
| SNP_34697_A_11729745 | NC_021164.1    | Ca_Kabuli_Chr05 | 11729745                | AA                                     | GG                 | GG               | INTERGENIC      |               |                                         |                    |
| SNP_34698_A_11729839 | NC_021164.1    | Ca_Kabuli_Chr05 | 11729839                | AA                                     | GG                 | GG               | INTERGENIC      |               |                                         |                    |
| SNP_34699_A_11730834 | NC_021164.1    | Ca_Kabuli_Chr05 | 11730834                | CC                                     | AA                 | AA               | INTERGENIC      |               |                                         |                    |
| SNP_34700_A_11730839 | NC_021164.1    | Ca_Kabuli_Chr05 | 11730839                | CC                                     | TT                 | TT               | INTERGENIC      |               |                                         |                    |
| SNP_34701_A_11762982 | NC_021164.1    | Ca_Kabuli_Chr05 | 11762982                | AA                                     | CC                 | CC               | DRR             | 101489523     | ABC transporter C family member 12-like |                    |

| SNPs IDs             | Chromosome IDs | Chromosomes     | Physical positions (bp) | CDC Frontier (Reference genome) | (Pusa 1103 & HPNB) | (ILWC 46 & LPNB) | Sequence Components of genome | Gene accession IDs | Putative functions                      |
|----------------------|----------------|-----------------|-------------------------|---------------------------------|--------------------|------------------|-------------------------------|--------------------|-----------------------------------------|
| SNP_34702_A_11823098 | NC_021164.1    | Ca_Kabuli_Chr05 | 11823098                | GG                              | AA                 | AA               | URR                           | 101489523          | ABC transporter C family member 12-like |
| SNP_34703_A_11829850 | NC_021164.1    | Ca_Kabuli_Chr05 | 11829850                | TT                              | CC                 | CC               | INTERGENIC                    |                    |                                         |
| SNP_34704_A_11830140 | NC_021164.1    | Ca_Kabuli_Chr05 | 11830140                | CC                              | AA                 | AA               | INTERGENIC                    |                    |                                         |
| SNP_34705_A_11830155 | NC_021164.1    | Ca_Kabuli_Chr05 | 11830155                | TT                              | CC                 | CC               | INTERGENIC                    |                    |                                         |
| SNP_34708_A_11879333 | NC_021164.1    | Ca_Kabuli_Chr05 | 11879333                | TT                              | CC                 | CC               | INTERGENIC                    |                    |                                         |
| SNP_34711_A_11896232 | NC_021164.1    | Ca_Kabuli_Chr05 | 11896232                | AA                              | GG                 | GG               | NON_SYNONYMOUS_CODING         | 101503402          | uncharacterized LOC101503402            |
| SNP_34712_A_11900472 | NC_021164.1    | Ca_Kabuli_Chr05 | 11900472                | TT                              | CC                 | CC               | INTERGENIC                    |                    |                                         |
| SNP_34713_A_11913352 | NC_021164.1    | Ca_Kabuli_Chr05 | 11913352                | TT                              | CC                 | CC               | INTERGENIC                    |                    |                                         |
| SNP_34714_A_11913362 | NC_021164.1    | Ca_Kabuli_Chr05 | 11913362                | TT                              | GG                 | GG               | INTERGENIC                    |                    |                                         |
| SNP_34715_A_11913390 | NC_021164.1    | Ca_Kabuli_Chr05 | 11913390                | AA                              | GG                 | GG               | INTERGENIC                    |                    |                                         |
| SNP_34716_A_11913391 | NC_021164.1    | Ca_Kabuli_Chr05 | 11913391                | GG                              | CC                 | CC               | INTERGENIC                    |                    |                                         |
| SNP_34717_A_11913408 | NC_021164.1    | Ca_Kabuli_Chr05 | 11913408                | CC                              | TT                 | TT               | INTERGENIC                    |                    |                                         |
| SNP_34718_A_11927562 | NC_021164.1    | Ca_Kabuli_Chr05 | 11927562                | CC                              | TT                 | TT               | INTERGENIC                    |                    |                                         |
| SNP_34719_A_11927570 | NC_021164.1    | Ca_Kabuli_Chr05 | 11927570                | TT                              | CC                 | CC               | INTERGENIC                    |                    |                                         |
| SNP_34721_A_12010232 | NC_021164.1    | Ca_Kabuli_Chr05 | 12010232                | AA                              | TT                 | TT               | INTERGENIC                    |                    |                                         |
| SNP_34722_A_12010468 | NC_021164.1    | Ca_Kabuli_Chr05 | 12010468                | AA                              | GG                 | GG               | INTERGENIC                    |                    |                                         |
| SNP_34723_A_12010580 | NC_021164.1    | Ca_Kabuli_Chr05 | 12010580                | CC                              | TT                 | TT               | INTERGENIC                    |                    |                                         |
| SNP_34726_A_12079099 | NC_021164.1    | Ca_Kabuli_Chr05 | 12079099                | GG                              | AA                 | AA               | INTERGENIC                    |                    |                                         |
| SNP_34727_A_12091099 | NC_021164.1    | Ca_Kabuli_Chr05 | 12091099                | AA                              | GG                 | GG               | INTERGENIC                    |                    |                                         |
| SNP_34728_A_12091100 | NC_021164.1    | Ca_Kabuli_Chr05 | 12091100                | CC                              | TT                 | TT               | INTERGENIC                    |                    |                                         |
| SNP_34729_A_12091153 | NC_021164.1    | Ca_Kabuli_Chr05 | 12091153                | GG                              | AA                 | AA               | INTERGENIC                    |                    |                                         |
| SNP_34730_A_12091332 | NC_021164.1    | Ca_Kabuli_Chr05 | 12091332                | CC                              | AA                 | AA               | INTERGENIC                    |                    |                                         |

| SNPs IDs             | Chromosome IDs | Chromosomes     | Physical positions (bp) | CDC Frontier genome (Reference genome) | (Pusa 1103 & HPNB) | (ILWC 46 & LPNB) | Sequence Components of genome | Gene accession IDs | Putative functions           |
|----------------------|----------------|-----------------|-------------------------|----------------------------------------|--------------------|------------------|-------------------------------|--------------------|------------------------------|
| SNP_34731_A_12093404 | NC_021164.1    | Ca_Kabuli_Chr05 | 12093404                | TT                                     | CC                 | CC               | INTERGENIC                    |                    |                              |
| SNP_34732_A_12093637 | NC_021164.1    | Ca_Kabuli_Chr05 | 12093637                | TT                                     | CC                 | CC               | INTERGENIC                    |                    |                              |
| SNP_34733_A_12093639 | NC_021164.1    | Ca_Kabuli_Chr05 | 12093639                | GG                                     | AA                 | AA               | INTERGENIC                    |                    |                              |
| SNP_34734_A_12093643 | NC_021164.1    | Ca_Kabuli_Chr05 | 12093643                | TT                                     | GG                 | GG               | INTERGENIC                    |                    |                              |
| SNP_34735_A_12093649 | NC_021164.1    | Ca_Kabuli_Chr05 | 12093649                | AA                                     | CC                 | GG               | INTERGENIC                    |                    |                              |
| SNP_34736_A_12093706 | NC_021164.1    | Ca_Kabuli_Chr05 | 12093706                | TT                                     | CC                 | CC               | INTERGENIC                    |                    |                              |
| SNP_34737_A_12093747 | NC_021164.1    | Ca_Kabuli_Chr05 | 12093747                | GG                                     | AA                 | AA               | INTERGENIC                    |                    |                              |
| SNP_34738_A_12093764 | NC_021164.1    | Ca_Kabuli_Chr05 | 12093764                | GG                                     | TT                 | TT               | INTERGENIC                    |                    |                              |
| SNP_34739_A_12093793 | NC_021164.1    | Ca_Kabuli_Chr05 | 12093793                | TT                                     | CC                 | CC               | INTERGENIC                    |                    |                              |
| SNP_34740_A_12095764 | NC_021164.1    | Ca_Kabuli_Chr05 | 12095764                | CC                                     | TT                 | TT               | INTERGENIC                    |                    |                              |
| SNP_34741_A_12095768 | NC_021164.1    | Ca_Kabuli_Chr05 | 12095768                | AA                                     | GG                 | GG               | INTERGENIC                    |                    |                              |
| SNP_34742_A_12095769 | NC_021164.1    | Ca_Kabuli_Chr05 | 12095769                | TT                                     | CC                 | CC               | INTERGENIC                    |                    |                              |
| SNP_34743_A_12096238 | NC_021164.1    | Ca_Kabuli_Chr05 | 12096238                | AA                                     | GG                 | GG               | INTERGENIC                    |                    |                              |
| SNP_34744_A_12101420 | NC_021164.1    | Ca_Kabuli_Chr05 | 12101420                | AA                                     | GG                 | GG               | URR                           | 101505030          | uncharacterized LOC101505030 |
| SNP_34746_A_12146898 | NC_021164.1    | Ca_Kabuli_Chr05 | 12146898                | AA                                     | GG                 | GG               | INTERGENIC                    |                    |                              |
| SNP_34747_A_12157014 | NC_021164.1    | Ca_Kabuli_Chr05 | 12157014                | GG                                     | AA                 | AA               | INTERGENIC                    |                    |                              |
| SNP_34748_A_12161660 | NC_021164.1    | Ca_Kabuli_Chr05 | 12161660                | CC                                     | TT                 | TT               | INTERGENIC                    |                    |                              |
| SNP_34749_A_12161802 | NC_021164.1    | Ca_Kabuli_Chr05 | 12161802                | GG                                     | AA                 | AA               | INTERGENIC                    |                    |                              |
| SNP_34750_A_12161871 | NC_021164.1    | Ca_Kabuli_Chr05 | 12161871                | AA                                     | GG                 | GG               | INTERGENIC                    |                    |                              |
| SNP_34751_A_12161933 | NC_021164.1    | Ca_Kabuli_Chr05 | 12161933                | CC                                     | GG                 | GG               | INTERGENIC                    |                    |                              |
| SNP_34752_A_12165921 | NC_021164.1    | Ca_Kabuli_Chr05 | 12165921                | AA                                     | CC                 | CC               | URR                           | 101494380          | uncharacterized LOC101494380 |
| SNP_34753_A_12165922 | NC_021164.1    | Ca_Kabuli_Chr05 | 12165922                | GG                                     | AA                 | AA               | URR                           | 101494380          | uncharacterized LOC101494380 |

| SNPs IDs             | Chromosome IDs | Chromosomes     | Physical positions (bp) | CDC Frontier genome (Reference genome) | (Pusa 1103 & HPNB) | (ILWC 46 & LPNB) | Sequence Components of genome | Gene accession IDs | Putative functions                                  |
|----------------------|----------------|-----------------|-------------------------|----------------------------------------|--------------------|------------------|-------------------------------|--------------------|-----------------------------------------------------|
| SNP_34754_A_12272966 | NC_021164.1    | Ca_Kabuli_Chr05 | 12272966                | TT                                     | AA                 | AA               | INTERGENIC                    |                    |                                                     |
| SNP_34755_A_12273385 | NC_021164.1    | Ca_Kabuli_Chr05 | 12273385                | AA                                     | CC                 | CC               | INTERGENIC                    |                    |                                                     |
| SNP_34756_A_12273390 | NC_021164.1    | Ca_Kabuli_Chr05 | 12273390                | CC                                     | TT                 | TT               | INTERGENIC                    |                    |                                                     |
| SNP_34757_A_12273410 | NC_021164.1    | Ca_Kabuli_Chr05 | 12273410                | TT                                     | GG                 | GG               | INTERGENIC                    |                    |                                                     |
| SNP_34758_A_12302273 | NC_021164.1    | Ca_Kabuli_Chr05 | 12302273                | TT                                     | CC                 | CC               | INTERGENIC                    |                    |                                                     |
| SNP_34759_A_12343114 | NC_021164.1    | Ca_Kabuli_Chr05 | 12343114                | TT                                     | CC                 | CC               | INTERGENIC                    |                    |                                                     |
| SNP_34760_A_12360829 | NC_021164.1    | Ca_Kabuli_Chr05 | 12360829                | GG                                     | AA                 | AA               | INTERGENIC                    |                    |                                                     |
| SNP_34762_A_12532763 | NC_021164.1    | Ca_Kabuli_Chr05 | 12532763                | AA                                     | CC                 | CC               | INTRON                        | 101509844          | Unknown function                                    |
| SNP_34763_A_12532785 | NC_021164.1    | Ca_Kabuli_Chr05 | 12532785                | AA                                     | CC                 | CC               | INTRON                        | 101509844          | Unknown function                                    |
| SNP_34764_A_12535216 | NC_021164.1    | Ca_Kabuli_Chr05 | 12535216                | AA                                     | GG                 | GG               | INTERGENIC                    |                    |                                                     |
| SNP_34765_A_12561356 | NC_021164.1    | Ca_Kabuli_Chr05 | 12561356                | TT                                     | CC                 | CC               | INTERGENIC                    |                    |                                                     |
| SNP_34766_A_12588306 | NC_021164.1    | Ca_Kabuli_Chr05 | 12588306                | GG                                     | AA                 | AA               | STOP_GAINED                   | 101500543          | glycerophosphodiester phosphodiesterase GDPDL3-like |
| SNP_34767_A_12588682 | NC_021164.1    | Ca_Kabuli_Chr05 | 12588682                | AA                                     | CC                 | CC               | INTRON                        | 101500543          | glycerophosphodiester phosphodiesterase GDPDL3-like |
| SNP_34768_A_12590676 | NC_021164.1    | Ca_Kabuli_Chr05 | 12590676                | CC                                     | GG                 | GG               | NON_SYNONYMOUS_CODING         | 101500543          | glycerophosphodiester phosphodiesterase GDPDL3-like |
| SNP_34769_A_12591170 | NC_021164.1    | Ca_Kabuli_Chr05 | 12591170                | CC                                     | GG                 | GG               | DRR                           | 101500543          | glycerophosphodiester phosphodiesterase GDPDL3-like |
| SNP_34770_A_12606302 | NC_021164.1    | Ca_Kabuli_Chr05 | 12606302                | TT                                     | CC                 | CC               | NON_SYNONYMOUS_CODING         | 101500858          | bifunctional protein FoID 2-like                    |
| SNP_34771_A_12606303 | NC_021164.1    | Ca_Kabuli_Chr05 | 12606303                | CC                                     | AA                 | AA               | STOP_GAINED                   | 101500858          | bifunctional protein FoID 2-like                    |
| SNP_34773_A_12628453 | NC_021164.1    | Ca_Kabuli_Chr05 | 12628453                | CC                                     | TT                 | TT               | DRR                           | 101510809          | receptor-like protein kinase FERONIA                |
| SNP_34775_A_12634177 | NC_021164.1    | Ca_Kabuli_Chr05 | 12634177                | GG                                     | TT                 | TT               | URR                           | 101510809          | receptor-like protein kinase FERONIA                |
| SNP_34776_A_12658868 | NC_021164.1    | Ca_Kabuli_Chr05 | 12658868                | AA                                     | TT                 | TT               | URR                           | 101511439          | receptor-like protein kinase FERONIA                |
| SNP_34777_A_12658882 | NC_021164.1    | Ca_Kabuli_Chr05 | 12658882                | CC                                     | TT                 | TT               | URR                           | 101511439          | receptor-like protein kinase FERONIA                |
| SNP_34778_A_12659040 | NC_021164.1    | Ca_Kabuli_Chr05 | 12659040                | GG                                     | AA                 | AA               | URR                           | 101511439          | receptor-like protein kinase FERONIA                |

| SNPs IDs             | Chromosome IDs | Chromosomes     | Physical positions (bp) | CDC Frontier (Reference genome) | (Pusa 1103 & HPNB) | (ILWC 46 & LPNB) | Sequence Components of genome | Gene accession IDs | Putative functions                   |
|----------------------|----------------|-----------------|-------------------------|---------------------------------|--------------------|------------------|-------------------------------|--------------------|--------------------------------------|
| SNP_34779_A_12659142 | NC_021164.1    | Ca_Kabuli_Chr05 | 12659142                | TT                              | GG                 | GG               | URR                           | 101511439          | receptor-like protein kinase FERONIA |
| SNP_34780_A_12659210 | NC_021164.1    | Ca_Kabuli_Chr05 | 12659210                | TT                              | CC                 | CC               | URR                           | 101511439          | receptor-like protein kinase FERONIA |
| SNP_34781_A_12659218 | NC_021164.1    | Ca_Kabuli_Chr05 | 12659218                | CC                              | AA                 | AA               | URR                           | 101511439          | receptor-like protein kinase FERONIA |
| SNP_34782_A_12672401 | NC_021164.1    | Ca_Kabuli_Chr05 | 12672401                | AA                              | TT                 | TT               | INTERGENIC                    |                    |                                      |
| SNP_34783_A_12672873 | NC_021164.1    | Ca_Kabuli_Chr05 | 12672873                | GG                              | AA                 | AA               | INTERGENIC                    |                    |                                      |
| SNP_34784_A_12672886 | NC_021164.1    | Ca_Kabuli_Chr05 | 12672886                | CC                              | TT                 | TT               | INTERGENIC                    |                    |                                      |
| SNP_34785_A_12673242 | NC_021164.1    | Ca_Kabuli_Chr05 | 12673242                | TT                              | CC                 | CC               | INTERGENIC                    |                    |                                      |
| SNP_34786_A_12673256 | NC_021164.1    | Ca_Kabuli_Chr05 | 12673256                | AA                              | GG                 | GG               | INTERGENIC                    |                    |                                      |
| SNP_34787_A_12673284 | NC_021164.1    | Ca_Kabuli_Chr05 | 12673284                | CC                              | TT                 | TT               | INTERGENIC                    |                    |                                      |
| SNP_34788_A_12673305 | NC_021164.1    | Ca_Kabuli_Chr05 | 12673305                | AA                              | CC                 | CC               | INTERGENIC                    |                    |                                      |
| SNP_34789_A_13581723 | NC_021164.1    | Ca_Kabuli_Chr05 | 13581723                | TT                              | CC                 | CC               | INTERGENIC                    |                    |                                      |
| SNP_34790_A_13581784 | NC_021164.1    | Ca_Kabuli_Chr05 | 13581784                | TT                              | AA                 | AA               | INTERGENIC                    |                    |                                      |
| SNP_34791_A_13610999 | NC_021164.1    | Ca_Kabuli_Chr05 | 13610999                | AA                              | GG                 | GG               | INTERGENIC                    |                    |                                      |
| SNP_34792_A_13611853 | NC_021164.1    | Ca_Kabuli_Chr05 | 13611853                | AA                              | TT                 | TT               | INTERGENIC                    |                    |                                      |
| SNP_34793_A_13611905 | NC_021164.1    | Ca_Kabuli_Chr05 | 13611905                | GG                              | AA                 | AA               | INTERGENIC                    |                    |                                      |
| SNP_34794_A_13612084 | NC_021164.1    | Ca_Kabuli_Chr05 | 13612084                | CC                              | GG                 | GG               | INTERGENIC                    |                    |                                      |
| SNP_34795_A_13612107 | NC_021164.1    | Ca_Kabuli_Chr05 | 13612107                | CC                              | TT                 | TT               | INTERGENIC                    |                    |                                      |
| SNP_34796_A_13612188 | NC_021164.1    | Ca_Kabuli_Chr05 | 13612188                | TT                              | CC                 | CC               | INTERGENIC                    |                    |                                      |
| SNP_34797_A_13612192 | NC_021164.1    | Ca_Kabuli_Chr05 | 13612192                | GG                              | AA                 | AA               | INTERGENIC                    |                    |                                      |
| SNP_34798_A_13612196 | NC_021164.1    | Ca_Kabuli_Chr05 | 13612196                | GG                              | AA                 | AA               | INTERGENIC                    |                    |                                      |
| SNP_34799_A_13612212 | NC_021164.1    | Ca_Kabuli_Chr05 | 13612212                | TT                              | CC                 | CC               | INTERGENIC                    |                    |                                      |
| SNP_34800_A_13612221 | NC_021164.1    | Ca_Kabuli_Chr05 | 13612221                | AA                              | GG                 | GG               | INTERGENIC                    |                    |                                      |

| SNPs IDs             | Chromosome IDs | Chromosomes     | Physical positions (bp) | CDC Frontier genome (Reference genome) | (Pusa 1103 & HPNB) | (ILWC 46 & LPNB) | Sequence genome | Components of | Gene accession IDs | Putative functions |
|----------------------|----------------|-----------------|-------------------------|----------------------------------------|--------------------|------------------|-----------------|---------------|--------------------|--------------------|
| SNP_34801_A_13620679 | NC_021164.1    | Ca_Kabuli_Chr05 | 13620679                | AA                                     | CC                 | CC               | INTERGENIC      |               |                    |                    |
| SNP_34802_A_13623833 | NC_021164.1    | Ca_Kabuli_Chr05 | 13623833                | GG                                     | AA                 | AA               | INTERGENIC      |               |                    |                    |
| SNP_34803_A_13623877 | NC_021164.1    | Ca_Kabuli_Chr05 | 13623877                | AA                                     | GG                 | GG               | INTERGENIC      |               |                    |                    |
| SNP_34804_A_13623898 | NC_021164.1    | Ca_Kabuli_Chr05 | 13623898                | TT                                     | GG                 | GG               | INTERGENIC      |               |                    |                    |
| SNP_34805_A_13623978 | NC_021164.1    | Ca_Kabuli_Chr05 | 13623978                | GG                                     | AA                 | AA               | INTERGENIC      |               |                    |                    |
| SNP_34806_A_13623983 | NC_021164.1    | Ca_Kabuli_Chr05 | 13623983                | GG                                     | AA                 | AA               | INTERGENIC      |               |                    |                    |
| SNP_34807_A_13623989 | NC_021164.1    | Ca_Kabuli_Chr05 | 13623989                | GG                                     | CC                 | CC               | INTERGENIC      |               |                    |                    |
| SNP_34808_A_13624047 | NC_021164.1    | Ca_Kabuli_Chr05 | 13624047                | AA                                     | GG                 | GG               | INTERGENIC      |               |                    |                    |
| SNP_34809_A_13624077 | NC_021164.1    | Ca_Kabuli_Chr05 | 13624077                | GG                                     | AA                 | AA               | INTERGENIC      |               |                    |                    |
| SNP_34810_A_13624275 | NC_021164.1    | Ca_Kabuli_Chr05 | 13624275                | TT                                     | CC                 | CC               | INTERGENIC      |               |                    |                    |
| SNP_34811_A_13624305 | NC_021164.1    | Ca_Kabuli_Chr05 | 13624305                | TT                                     | CC                 | CC               | INTERGENIC      |               |                    |                    |
| SNP_34812_A_13624307 | NC_021164.1    | Ca_Kabuli_Chr05 | 13624307                | TT                                     | AA                 | AA               | INTERGENIC      |               |                    |                    |
| SNP_34813_A_13624388 | NC_021164.1    | Ca_Kabuli_Chr05 | 13624388                | AA                                     | GG                 | GG               | INTERGENIC      |               |                    |                    |
| SNP_34814_A_13628491 | NC_021164.1    | Ca_Kabuli_Chr05 | 13628491                | TT                                     | GG                 | GG               | INTERGENIC      |               |                    |                    |
| SNP_34815_A_13628512 | NC_021164.1    | Ca_Kabuli_Chr05 | 13628512                | GG                                     | TT                 | TT               | INTERGENIC      |               |                    |                    |
| SNP_34816_A_13628536 | NC_021164.1    | Ca_Kabuli_Chr05 | 13628536                | GG                                     | TT                 | TT               | INTERGENIC      |               |                    |                    |
| SNP_34817_A_13628593 | NC_021164.1    | Ca_Kabuli_Chr05 | 13628593                | TT                                     | GG                 | GG               | INTERGENIC      |               |                    |                    |
| SNP_34818_A_13628598 | NC_021164.1    | Ca_Kabuli_Chr05 | 13628598                | TT                                     | CC                 | CC               | INTERGENIC      |               |                    |                    |
| SNP_34819_A_13628660 | NC_021164.1    | Ca_Kabuli_Chr05 | 13628660                | AA                                     | CC                 | CC               | INTERGENIC      |               |                    |                    |
| SNP_34820_A_13628697 | NC_021164.1    | Ca_Kabuli_Chr05 | 13628697                | TT                                     | CC                 | CC               | INTERGENIC      |               |                    |                    |
| SNP_34821_A_13628746 | NC_021164.1    | Ca_Kabuli_Chr05 | 13628746                | CC                                     | AA                 | AA               | INTERGENIC      |               |                    |                    |
| SNP_34822_A_13628773 | NC_021164.1    | Ca_Kabuli_Chr05 | 13628773                | CC                                     | TT                 | TT               | INTERGENIC      |               |                    |                    |

| SNPs IDs             | Chromosome IDs | Chromosomes     | Physical positions (bp) | CDC Frontier genome (Reference genome) | (Pusa 1103 & HPNB) | (ILWC 46 & LPNB) | Sequence genome | Components of | Gene accession IDs | Putative functions |
|----------------------|----------------|-----------------|-------------------------|----------------------------------------|--------------------|------------------|-----------------|---------------|--------------------|--------------------|
| SNP_34823_A_13628789 | NC_021164.1    | Ca_Kabuli_Chr05 | 13628789                | TT                                     | GG                 | GG               | INTERGENIC      |               |                    |                    |
| SNP_34824_A_13629051 | NC_021164.1    | Ca_Kabuli_Chr05 | 13629051                | CC                                     | GG                 | GG               | INTERGENIC      |               |                    |                    |
| SNP_34825_A_13629066 | NC_021164.1    | Ca_Kabuli_Chr05 | 13629066                | TT                                     | AA                 | AA               | INTERGENIC      |               |                    |                    |
| SNP_34826_A_13629100 | NC_021164.1    | Ca_Kabuli_Chr05 | 13629100                | TT                                     | AA                 | AA               | INTERGENIC      |               |                    |                    |
| SNP_34828_A_13636558 | NC_021164.1    | Ca_Kabuli_Chr05 | 13636558                | AA                                     | CC                 | CC               | INTERGENIC      |               |                    |                    |
| SNP_34829_A_13636663 | NC_021164.1    | Ca_Kabuli_Chr05 | 13636663                | TT                                     | CC                 | CC               | INTERGENIC      |               |                    |                    |
| SNP_34830_A_13636815 | NC_021164.1    | Ca_Kabuli_Chr05 | 13636815                | TT                                     | CC                 | CC               | INTERGENIC      |               |                    |                    |
| SNP_34831_A_13636852 | NC_021164.1    | Ca_Kabuli_Chr05 | 13636852                | AA                                     | TT                 | TT               | INTERGENIC      |               |                    |                    |
| SNP_34832_A_13636910 | NC_021164.1    | Ca_Kabuli_Chr05 | 13636910                | CC                                     | GG                 | GG               | INTERGENIC      |               |                    |                    |
| SNP_34834_A_13637142 | NC_021164.1    | Ca_Kabuli_Chr05 | 13637142                | AA                                     | GG                 | GG               | INTERGENIC      |               |                    |                    |
| SNP_34835_A_13637167 | NC_021164.1    | Ca_Kabuli_Chr05 | 13637167                | AA                                     | GG                 | GG               | INTERGENIC      |               |                    |                    |
| SNP_34836_A_13650792 | NC_021164.1    | Ca_Kabuli_Chr05 | 13650792                | CC                                     | GG                 | GG               | INTERGENIC      |               |                    |                    |
| SNP_34837_A_13651001 | NC_021164.1    | Ca_Kabuli_Chr05 | 13651001                | CC                                     | AA                 | AA               | INTERGENIC      |               |                    |                    |
| SNP_34838_A_13651287 | NC_021164.1    | Ca_Kabuli_Chr05 | 13651287                | GG                                     | AA                 | AA               | INTERGENIC      |               |                    |                    |
| SNP_34839_A_13651299 | NC_021164.1    | Ca_Kabuli_Chr05 | 13651299                | AA                                     | GG                 | GG               | INTERGENIC      |               |                    |                    |
| SNP_34840_A_13695831 | NC_021164.1    | Ca_Kabuli_Chr05 | 13695831                | GG                                     | AA                 | AA               | INTERGENIC      |               |                    |                    |
| SNP_34841_A_13712581 | NC_021164.1    | Ca_Kabuli_Chr05 | 13712581                | CC                                     | TT                 | TT               | INTERGENIC      |               |                    |                    |
| SNP_34843_A_13737116 | NC_021164.1    | Ca_Kabuli_Chr05 | 13737116                | CC                                     | TT                 | TT               | INTERGENIC      |               |                    |                    |
| SNP_34844_A_13811722 | NC_021164.1    | Ca_Kabuli_Chr05 | 13811722                | TT                                     | GG                 | GG               | INTRON          | id99707       | Unknown function   |                    |
| SNP_34846_A_13821961 | NC_021164.1    | Ca_Kabuli_Chr05 | 13821961                | AA                                     | GG                 | GG               | INTERGENIC      |               |                    |                    |
| SNP_34847_A_13821979 | NC_021164.1    | Ca_Kabuli_Chr05 | 13821979                | AA                                     | TT                 | TT               | INTERGENIC      |               |                    |                    |
| SNP_34848_A_13822002 | NC_021164.1    | Ca_Kabuli_Chr05 | 13822002                | CC                                     | TT                 | TT               | INTERGENIC      |               |                    |                    |

| SNPs IDs             | Chromosome IDs | Chromosomes     | Physical positions (bp) | CDC Frontier (Reference genome) | (Pusa 1103 & HPNB) | (ILWC 46 & LPNB) | Sequence Components of genome | Gene accession IDs | Putative functions           |
|----------------------|----------------|-----------------|-------------------------|---------------------------------|--------------------|------------------|-------------------------------|--------------------|------------------------------|
| SNP_34849_A_13822003 | NC_021164.1    | Ca_Kabuli_Chr05 | 13822003                | GG                              | CC                 | CC               | INTERGENIC                    |                    |                              |
| SNP_34850_A_13822022 | NC_021164.1    | Ca_Kabuli_Chr05 | 13822022                | TT                              | GG                 | GG               | INTERGENIC                    |                    |                              |
| SNP_34851_A_13823669 | NC_021164.1    | Ca_Kabuli_Chr05 | 13823669                | TT                              | AA                 | AA               | INTERGENIC                    |                    |                              |
| SNP_34852_A_13823670 | NC_021164.1    | Ca_Kabuli_Chr05 | 13823670                | TT                              | AA                 | AA               | INTERGENIC                    |                    |                              |
| SNP_34854_A_13834304 | NC_021164.1    | Ca_Kabuli_Chr05 | 13834304                | CC                              | AA                 | AA               | DRR                           | 101513386          | uncharacterized LOC101513386 |
| SNP_34855_A_13834404 | NC_021164.1    | Ca_Kabuli_Chr05 | 13834404                | CC                              | TT                 | TT               | DRR                           | 101513386          | uncharacterized LOC101513386 |
| SNP_34856_A_13837457 | NC_021164.1    | Ca_Kabuli_Chr05 | 13837457                | TT                              | CC                 | CC               | URR                           | 101513386          | uncharacterized LOC101513386 |
| SNP_34857_A_13850015 | NC_021164.1    | Ca_Kabuli_Chr05 | 13850015                | AA                              | GG                 | GG               | INTERGENIC                    |                    |                              |
| SNP_34858_A_13854216 | NC_021164.1    | Ca_Kabuli_Chr05 | 13854216                | CC                              | TT                 | TT               | INTERGENIC                    |                    |                              |
| SNP_34859_A_13854362 | NC_021164.1    | Ca_Kabuli_Chr05 | 13854362                | TT                              | CC                 | CC               | INTERGENIC                    |                    |                              |
| SNP_34860_A_13854614 | NC_021164.1    | Ca_Kabuli_Chr05 | 13854614                | AA                              | GG                 | GG               | INTERGENIC                    |                    |                              |
| SNP_34861_A_13854627 | NC_021164.1    | Ca_Kabuli_Chr05 | 13854627                | AA                              | GG                 | GG               | INTERGENIC                    |                    |                              |
| SNP_34862_A_13854631 | NC_021164.1    | Ca_Kabuli_Chr05 | 13854631                | GG                              | AA                 | AA               | INTERGENIC                    |                    |                              |
| SNP_34863_A_13854652 | NC_021164.1    | Ca_Kabuli_Chr05 | 13854652                | GG                              | AA                 | AA               | INTERGENIC                    |                    |                              |
| SNP_34864_A_13854655 | NC_021164.1    | Ca_Kabuli_Chr05 | 13854655                | TT                              | CC                 | CC               | INTERGENIC                    |                    |                              |
| SNP_34865_A_13854663 | NC_021164.1    | Ca_Kabuli_Chr05 | 13854663                | TT                              | GG                 | GG               | INTERGENIC                    |                    |                              |
| SNP_34866_A_13854677 | NC_021164.1    | Ca_Kabuli_Chr05 | 13854677                | CC                              | TT                 | TT               | INTERGENIC                    |                    |                              |
| SNP_34867_A_13854694 | NC_021164.1    | Ca_Kabuli_Chr05 | 13854694                | CC                              | AA                 | AA               | INTERGENIC                    |                    |                              |
| SNP_34868_A_13854730 | NC_021164.1    | Ca_Kabuli_Chr05 | 13854730                | GG                              | AA                 | AA               | INTERGENIC                    |                    |                              |
| SNP_34869_A_13854739 | NC_021164.1    | Ca_Kabuli_Chr05 | 13854739                | TT                              | CC                 | CC               | INTERGENIC                    |                    |                              |
| SNP_34870_A_13854751 | NC_021164.1    | Ca_Kabuli_Chr05 | 13854751                | CC                              | AA                 | AA               | INTERGENIC                    |                    |                              |
| SNP_34871_A_13854757 | NC_021164.1    | Ca_Kabuli_Chr05 | 13854757                | CC                              | TT                 | TT               | INTERGENIC                    |                    |                              |



| SNPs IDs             | Chromosome IDs | Chromosomes     | Physical positions (bp) | CDC Frontier genome (Reference genome) | (Pusa 1103 & HPNB) | (ILWC 46 & LPNB) | Sequence genome | Components of | Gene accession IDs | Putative functions |
|----------------------|----------------|-----------------|-------------------------|----------------------------------------|--------------------|------------------|-----------------|---------------|--------------------|--------------------|
| SNP_34872_A_13854775 | NC_021164.1    | Ca_Kabuli_Chr05 | 13854775                | TT                                     | AA                 | AA               | INTERGENIC      |               |                    |                    |
| SNP_34873_A_13855449 | NC_021164.1    | Ca_Kabuli_Chr05 | 13855449                | CC                                     | AA                 | AA               | INTERGENIC      |               |                    |                    |
| SNP_34874_A_13855459 | NC_021164.1    | Ca_Kabuli_Chr05 | 13855459                | GG                                     | AA                 | AA               | INTERGENIC      |               |                    |                    |
| SNP_34875_A_13855484 | NC_021164.1    | Ca_Kabuli_Chr05 | 13855484                | AA                                     | GG                 | GG               | INTERGENIC      |               |                    |                    |
| SNP_34876_A_13855569 | NC_021164.1    | Ca_Kabuli_Chr05 | 13855569                | TT                                     | AA                 | AA               | INTERGENIC      |               |                    |                    |
| SNP_34877_A_13855650 | NC_021164.1    | Ca_Kabuli_Chr05 | 13855650                | TT                                     | CC                 | CC               | INTERGENIC      |               |                    |                    |
| SNP_34879_A_13855736 | NC_021164.1    | Ca_Kabuli_Chr05 | 13855736                | AA                                     | TT                 | TT               | INTERGENIC      |               |                    |                    |
| SNP_34880_A_13855777 | NC_021164.1    | Ca_Kabuli_Chr05 | 13855777                | TT                                     | CC                 | CC               | INTERGENIC      |               |                    |                    |
| SNP_34881_A_13855841 | NC_021164.1    | Ca_Kabuli_Chr05 | 13855841                | GG                                     | AA                 | AA               | INTERGENIC      |               |                    |                    |
| SNP_34882_A_13855892 | NC_021164.1    | Ca_Kabuli_Chr05 | 13855892                | TT                                     | CC                 | CC               | INTERGENIC      |               |                    |                    |
| SNP_34883_A_13856002 | NC_021164.1    | Ca_Kabuli_Chr05 | 13856002                | GG                                     | TT                 | TT               | INTERGENIC      |               |                    |                    |
| SNP_34884_A_13856038 | NC_021164.1    | Ca_Kabuli_Chr05 | 13856038                | TT                                     | GG                 | GG               | INTERGENIC      |               |                    |                    |
| SNP_34885_A_13856113 | NC_021164.1    | Ca_Kabuli_Chr05 | 13856113                | AA                                     | GG                 | GG               | INTERGENIC      |               |                    |                    |
| SNP_34886_A_13856307 | NC_021164.1    | Ca_Kabuli_Chr05 | 13856307                | TT                                     | CC                 | CC               | INTERGENIC      |               |                    |                    |
| SNP_34887_A_13858135 | NC_021164.1    | Ca_Kabuli_Chr05 | 13858135                | TT                                     | CC                 | CC               | INTERGENIC      |               |                    |                    |
| SNP_34888_A_13858149 | NC_021164.1    | Ca_Kabuli_Chr05 | 13858149                | GG                                     | AA                 | AA               | INTERGENIC      |               |                    |                    |
| SNP_34889_A_13858475 | NC_021164.1    | Ca_Kabuli_Chr05 | 13858475                | GG                                     | AA                 | AA               | INTERGENIC      |               |                    |                    |
| SNP_34890_A_13858924 | NC_021164.1    | Ca_Kabuli_Chr05 | 13858924                | AA                                     | CC                 | CC               | INTERGENIC      |               |                    |                    |
| SNP_34892_A_13877854 | NC_021164.1    | Ca_Kabuli_Chr05 | 13877854                | GG                                     | AA                 | AA               | INTERGENIC      |               |                    |                    |
| SNP_34893_A_13892549 | NC_021164.1    | Ca_Kabuli_Chr05 | 13892549                | CC                                     | TT                 | TT               | INTERGENIC      |               |                    |                    |
| SNP_34894_A_13892575 | NC_021164.1    | Ca_Kabuli_Chr05 | 13892575                | AA                                     | GG                 | GG               | INTERGENIC      |               |                    |                    |
| SNP_34895_A_13892590 | NC_021164.1    | Ca_Kabuli_Chr05 | 13892590                | AA                                     | GG                 | GG               | INTERGENIC      |               |                    |                    |

| SNPs IDs             | Chromosome IDs | Chromosomes     | Physical positions (bp) | CDC Frontier genome (Reference genome) | (Pusa 1103 & HPNB) | (ILWC 46 & LPNB) | Sequence Components of genome | Gene accession IDs | Putative functions                                                  |
|----------------------|----------------|-----------------|-------------------------|----------------------------------------|--------------------|------------------|-------------------------------|--------------------|---------------------------------------------------------------------|
| SNP_34896_A_13892637 | NC_021164.1    | Ca_Kabuli_Chr05 | 13892637                | TT                                     | CC                 | CC               | INTERGENIC                    |                    |                                                                     |
| SNP_34897_A_13892648 | NC_021164.1    | Ca_Kabuli_Chr05 | 13892648                | GG                                     | TT                 | TT               | INTERGENIC                    |                    |                                                                     |
| SNP_34898_A_13892670 | NC_021164.1    | Ca_Kabuli_Chr05 | 13892670                | CC                                     | TT                 | TT               | INTERGENIC                    |                    |                                                                     |
| SNP_34899_A_13892679 | NC_021164.1    | Ca_Kabuli_Chr05 | 13892679                | CC                                     | TT                 | TT               | INTERGENIC                    |                    |                                                                     |
| SNP_34900_A_13892699 | NC_021164.1    | Ca_Kabuli_Chr05 | 13892699                | AA                                     | GG                 | GG               | INTERGENIC                    |                    |                                                                     |
| SNP_34901_A_13892711 | NC_021164.1    | Ca_Kabuli_Chr05 | 13892711                | AA                                     | GG                 | GG               | INTERGENIC                    |                    |                                                                     |
| SNP_34902_A_13892799 | NC_021164.1    | Ca_Kabuli_Chr05 | 13892799                | CC                                     | TT                 | TT               | INTERGENIC                    |                    |                                                                     |
| SNP_34903_A_13892969 | NC_021164.1    | Ca_Kabuli_Chr05 | 13892969                | CC                                     | TT                 | TT               | INTERGENIC                    |                    |                                                                     |
| SNP_34904_A_13893013 | NC_021164.1    | Ca_Kabuli_Chr05 | 13893013                | TT                                     | CC                 | CC               | INTERGENIC                    |                    |                                                                     |
| SNP_34905_A_13893036 | NC_021164.1    | Ca_Kabuli_Chr05 | 13893036                | TT                                     | CC                 | CC               | INTERGENIC                    |                    |                                                                     |
| SNP_34906_A_13893112 | NC_021164.1    | Ca_Kabuli_Chr05 | 13893112                | GG                                     | AA                 | AA               | INTERGENIC                    |                    |                                                                     |
| SNP_34907_A_13893148 | NC_021164.1    | Ca_Kabuli_Chr05 | 13893148                | TT                                     | GG                 | GG               | INTERGENIC                    |                    |                                                                     |
| SNP_34908_A_13893161 | NC_021164.1    | Ca_Kabuli_Chr05 | 13893161                | AA                                     | CC                 | CC               | INTERGENIC                    |                    |                                                                     |
| SNP_34909_A_13893173 | NC_021164.1    | Ca_Kabuli_Chr05 | 13893173                | TT                                     | CC                 | CC               | INTERGENIC                    |                    |                                                                     |
| SNP_34910_A_13936232 | NC_021164.1    | Ca_Kabuli_Chr05 | 13936232                | AA                                     | CC                 | CC               | INTERGENIC                    |                    |                                                                     |
| SNP_34911_A_13936250 | NC_021164.1    | Ca_Kabuli_Chr05 | 13936250                | AA                                     | GG                 | GG               | INTERGENIC                    |                    |                                                                     |
| SNP_34912_A_13936923 | NC_021164.1    | Ca_Kabuli_Chr05 | 13936923                | GG                                     | AA                 | AA               | INTERGENIC                    |                    |                                                                     |
| SNP_34913_A_13939251 | NC_021164.1    | Ca_Kabuli_Chr05 | 13939251                | GG                                     | CC                 | CC               | INTERGENIC                    |                    |                                                                     |
| SNP_34914_A_13939270 | NC_021164.1    | Ca_Kabuli_Chr05 | 13939270                | AA                                     | GG                 | GG               | INTERGENIC                    |                    |                                                                     |
| SNP_34915_A_13939286 | NC_021164.1    | Ca_Kabuli_Chr05 | 13939286                | CC                                     | TT                 | TT               | INTERGENIC                    |                    |                                                                     |
| SNP_34916_A_13939465 | NC_021164.1    | Ca_Kabuli_Chr05 | 13939465                | AA                                     | CC                 | CC               | INTERGENIC                    |                    |                                                                     |
| SNP_34917_A_13971986 | NC_021164.1    | Ca_Kabuli_Chr05 | 13971986                | CC                                     | AA                 | AA               | INTRON                        | 101513699          | G-type lectin S-receptor-like serine/threonine-protein kinase SD1-1 |

| SNPs IDs             | Chromosome IDs | Chromosomes     | Physical positions (bp) | CDC Frontier (Reference genome) | (Pusa 1103 & HPNB) | (ILWC 46 & LPNB) | Sequence Components of genome | Gene accession IDs | Putative functions                                                  |
|----------------------|----------------|-----------------|-------------------------|---------------------------------|--------------------|------------------|-------------------------------|--------------------|---------------------------------------------------------------------|
| SNP_34918_A_13972029 | NC_021164.1    | Ca_Kabuli_Chr05 | 13972029                | TT                              | CC                 | CC               | INTRON                        | 101513699          | G-type lectin S-receptor-like serine/threonine-protein kinase SD1-1 |
| SNP_34919_A_13972686 | NC_021164.1    | Ca_Kabuli_Chr05 | 13972686                | AA                              | GG                 | GG               | INTRON                        | 101513699          | G-type lectin S-receptor-like serine/threonine-protein kinase SD1-1 |
| SNP_34920_A_13980494 | NC_021164.1    | Ca_Kabuli_Chr05 | 13980494                | GG                              | AA                 | AA               | INTRON                        | 101513699          | G-type lectin S-receptor-like serine/threonine-protein kinase SD1-1 |
| SNP_34921_A_14004922 | NC_021164.1    | Ca_Kabuli_Chr05 | 14004922                | CC                              | TT                 | TT               | INTERGENIC                    |                    |                                                                     |
| SNP_34922_A_14018190 | NC_021164.1    | Ca_Kabuli_Chr05 | 14018190                | AA                              | GG                 | GG               | INTERGENIC                    |                    |                                                                     |
| SNP_34923_A_14018512 | NC_021164.1    | Ca_Kabuli_Chr05 | 14018512                | TT                              | CC                 | CC               | INTERGENIC                    |                    |                                                                     |
| SNP_34924_A_14020378 | NC_021164.1    | Ca_Kabuli_Chr05 | 14020378                | AA                              | GG                 | GG               | INTERGENIC                    |                    |                                                                     |
| SNP_34926_A_14022512 | NC_021164.1    | Ca_Kabuli_Chr05 | 14022512                | AA                              | TT                 | TT               | INTERGENIC                    |                    |                                                                     |
| SNP_34927_A_14022577 | NC_021164.1    | Ca_Kabuli_Chr05 | 14022577                | TT                              | CC                 | CC               | INTERGENIC                    |                    |                                                                     |
| SNP_34928_A_14022688 | NC_021164.1    | Ca_Kabuli_Chr05 | 14022688                | GG                              | AA                 | AA               | INTERGENIC                    |                    |                                                                     |
| SNP_34929_A_14022690 | NC_021164.1    | Ca_Kabuli_Chr05 | 14022690                | TT                              | CC                 | CC               | INTERGENIC                    |                    |                                                                     |
| SNP_34930_A_14022846 | NC_021164.1    | Ca_Kabuli_Chr05 | 14022846                | AA                              | GG                 | GG               | INTERGENIC                    |                    |                                                                     |
| SNP_34931_A_14022857 | NC_021164.1    | Ca_Kabuli_Chr05 | 14022857                | GG                              | CC                 | CC               | INTERGENIC                    |                    |                                                                     |
| SNP_34932_A_14022863 | NC_021164.1    | Ca_Kabuli_Chr05 | 14022863                | AA                              | GG                 | GG               | INTERGENIC                    |                    |                                                                     |
| SNP_34933_A_14022888 | NC_021164.1    | Ca_Kabuli_Chr05 | 14022888                | TT                              | CC                 | CC               | INTERGENIC                    |                    |                                                                     |
| SNP_34934_A_14022906 | NC_021164.1    | Ca_Kabuli_Chr05 | 14022906                | AA                              | GG                 | GG               | INTERGENIC                    |                    |                                                                     |
| SNP_34935_A_14031286 | NC_021164.1    | Ca_Kabuli_Chr05 | 14031286                | AA                              | TT                 | TT               | INTERGENIC                    |                    |                                                                     |
| SNP_34936_A_14058218 | NC_021164.1    | Ca_Kabuli_Chr05 | 14058218                | AA                              | GG                 | GG               | INTERGENIC                    |                    |                                                                     |
| SNP_34937_A_14058224 | NC_021164.1    | Ca_Kabuli_Chr05 | 14058224                | CC                              | TT                 | TT               | INTERGENIC                    |                    |                                                                     |
| SNP_34938_A_14058233 | NC_021164.1    | Ca_Kabuli_Chr05 | 14058233                | CC                              | TT                 | TT               | INTERGENIC                    |                    |                                                                     |
| SNP_34939_A_14058275 | NC_021164.1    | Ca_Kabuli_Chr05 | 14058275                | TT                              | AA                 | AA               | INTERGENIC                    |                    |                                                                     |
| SNP_34940_A_14058299 | NC_021164.1    | Ca_Kabuli_Chr05 | 14058299                | TT                              | CC                 | CC               | INTERGENIC                    |                    |                                                                     |

| SNPs IDs             | Chromosome IDs | Chromosomes     | Physical positions (bp) | CDC Frontier genome (Reference genome) | (Pusa 1103 & HPNB) | (ILWC 46 & LPNB) | Sequence genome | Components of | Gene accession IDs | Putative functions |
|----------------------|----------------|-----------------|-------------------------|----------------------------------------|--------------------|------------------|-----------------|---------------|--------------------|--------------------|
| SNP_34941_A_14058315 | NC_021164.1    | Ca_Kabuli_Chr05 | 14058315                | CC                                     | TT                 | TT               | INTERGENIC      |               |                    |                    |
| SNP_34942_A_14058329 | NC_021164.1    | Ca_Kabuli_Chr05 | 14058329                | GG                                     | AA                 | AA               | INTERGENIC      |               |                    |                    |
| SNP_34943_A_14058360 | NC_021164.1    | Ca_Kabuli_Chr05 | 14058360                | GG                                     | AA                 | AA               | INTERGENIC      |               |                    |                    |
| SNP_34944_A_14058363 | NC_021164.1    | Ca_Kabuli_Chr05 | 14058363                | TT                                     | CC                 | CC               | INTERGENIC      |               |                    |                    |
| SNP_34945_A_14058380 | NC_021164.1    | Ca_Kabuli_Chr05 | 14058380                | TT                                     | AA                 | AA               | INTERGENIC      |               |                    |                    |
| SNP_34946_A_14058384 | NC_021164.1    | Ca_Kabuli_Chr05 | 14058384                | CC                                     | AA                 | AA               | INTERGENIC      |               |                    |                    |
| SNP_34947_A_14058395 | NC_021164.1    | Ca_Kabuli_Chr05 | 14058395                | TT                                     | CC                 | CC               | INTERGENIC      |               |                    |                    |
| SNP_34948_A_14058398 | NC_021164.1    | Ca_Kabuli_Chr05 | 14058398                | CC                                     | TT                 | TT               | INTERGENIC      |               |                    |                    |
| SNP_34949_A_14058633 | NC_021164.1    | Ca_Kabuli_Chr05 | 14058633                | AA                                     | GG                 | GG               | INTERGENIC      |               |                    |                    |
| SNP_34950_A_14059159 | NC_021164.1    | Ca_Kabuli_Chr05 | 14059159                | TT                                     | GG                 | GG               | INTERGENIC      |               |                    |                    |
| SNP_34952_A_14115827 | NC_021164.1    | Ca_Kabuli_Chr05 | 14115827                | TT                                     | AA                 | AA               | DRR             | 101495668     | Unknown function   |                    |
| SNP_34953_A_14115845 | NC_021164.1    | Ca_Kabuli_Chr05 | 14115845                | AA                                     | GG                 | GG               | DRR             | 101495668     | Unknown function   |                    |
| SNP_34955_A_14194808 | NC_021164.1    | Ca_Kabuli_Chr05 | 14194808                | AA                                     | GG                 | GG               | INTERGENIC      |               |                    |                    |
| SNP_34956_A_14229363 | NC_021164.1    | Ca_Kabuli_Chr05 | 14229363                | GG                                     | TT                 | TT               | INTERGENIC      |               |                    |                    |
| SNP_34957_A_14229379 | NC_021164.1    | Ca_Kabuli_Chr05 | 14229379                | CC                                     | TT                 | TT               | INTERGENIC      |               |                    |                    |
| SNP_34958_A_14272964 | NC_021164.1    | Ca_Kabuli_Chr05 | 14272964                | GG                                     | AA                 | AA               | INTERGENIC      |               |                    |                    |
| SNP_34959_A_14273342 | NC_021164.1    | Ca_Kabuli_Chr05 | 14273342                | CC                                     | TT                 | TT               | INTERGENIC      |               |                    |                    |
| SNP_34960_A_14273343 | NC_021164.1    | Ca_Kabuli_Chr05 | 14273343                | AA                                     | GG                 | GG               | INTERGENIC      |               |                    |                    |
| SNP_34961_A_14273411 | NC_021164.1    | Ca_Kabuli_Chr05 | 14273411                | TT                                     | CC                 | CC               | INTERGENIC      |               |                    |                    |
| SNP_34964_A_14336764 | NC_021164.1    | Ca_Kabuli_Chr05 | 14336764                | TT                                     | AA                 | AA               | INTERGENIC      |               |                    |                    |
| SNP_34965_A_14339530 | NC_021164.1    | Ca_Kabuli_Chr05 | 14339530                | AA                                     | GG                 | GG               | INTERGENIC      |               |                    |                    |
| SNP_34966_A_14339533 | NC_021164.1    | Ca_Kabuli_Chr05 | 14339533                | TT                                     | GG                 | GG               | INTERGENIC      |               |                    |                    |

| SNPs IDs             | Chromosome IDs | Chromosomes     | Physical positions (bp) | CDC Frontier genome (Reference genome) | (Pusa 1103 & HPNB) | (ILWC 46 & LPNB) | Sequence genome | Components of | Gene accession IDs | Putative functions |
|----------------------|----------------|-----------------|-------------------------|----------------------------------------|--------------------|------------------|-----------------|---------------|--------------------|--------------------|
| SNP_34967_A_14371475 | NC_021164.1    | Ca_Kabuli_Chr05 | 14371475                | CC                                     | TT                 | TT               | INTERGENIC      |               |                    |                    |
| SNP_34968_A_14394741 | NC_021164.1    | Ca_Kabuli_Chr05 | 14394741                | CC                                     | TT                 | TT               | INTERGENIC      |               |                    |                    |
| SNP_34969_A_14394802 | NC_021164.1    | Ca_Kabuli_Chr05 | 14394802                | CC                                     | GG                 | GG               | INTERGENIC      |               |                    |                    |
| SNP_34971_A_14395026 | NC_021164.1    | Ca_Kabuli_Chr05 | 14395026                | TT                                     | CC                 | CC               | INTERGENIC      |               |                    |                    |
| SNP_34972_A_14395028 | NC_021164.1    | Ca_Kabuli_Chr05 | 14395028                | TT                                     | CC                 | CC               | INTERGENIC      |               |                    |                    |
| SNP_34973_A_14395043 | NC_021164.1    | Ca_Kabuli_Chr05 | 14395043                | AA                                     | CC                 | CC               | INTERGENIC      |               |                    |                    |
| SNP_34974_A_14395108 | NC_021164.1    | Ca_Kabuli_Chr05 | 14395108                | AA                                     | CC                 | CC               | INTERGENIC      |               |                    |                    |
| SNP_34975_A_14395132 | NC_021164.1    | Ca_Kabuli_Chr05 | 14395132                | TT                                     | CC                 | CC               | INTERGENIC      |               |                    |                    |
| SNP_34976_A_14395139 | NC_021164.1    | Ca_Kabuli_Chr05 | 14395139                | TT                                     | CC                 | CC               | INTERGENIC      |               |                    |                    |
| SNP_34977_A_14395272 | NC_021164.1    | Ca_Kabuli_Chr05 | 14395272                | TT                                     | CC                 | CC               | INTERGENIC      |               |                    |                    |
| SNP_34978_A_14395286 | NC_021164.1    | Ca_Kabuli_Chr05 | 14395286                | CC                                     | TT                 | TT               | INTERGENIC      |               |                    |                    |
| SNP_34979_A_14395299 | NC_021164.1    | Ca_Kabuli_Chr05 | 14395299                | GG                                     | TT                 | TT               | INTERGENIC      |               |                    |                    |
| SNP_34980_A_14395319 | NC_021164.1    | Ca_Kabuli_Chr05 | 14395319                | AA                                     | GG                 | GG               | INTERGENIC      |               |                    |                    |
| SNP_34981_A_14395322 | NC_021164.1    | Ca_Kabuli_Chr05 | 14395322                | AA                                     | GG                 | GG               | INTERGENIC      |               |                    |                    |
| SNP_34982_A_14395347 | NC_021164.1    | Ca_Kabuli_Chr05 | 14395347                | AA                                     | TT                 | TT               | INTERGENIC      |               |                    |                    |
| SNP_34983_A_14395372 | NC_021164.1    | Ca_Kabuli_Chr05 | 14395372                | CC                                     | GG                 | GG               | INTERGENIC      |               |                    |                    |
| SNP_34984_A_14403755 | NC_021164.1    | Ca_Kabuli_Chr05 | 14403755                | AA                                     | CC                 | CC               | INTERGENIC      |               |                    |                    |
| SNP_34985_A_15126573 | NC_021164.1    | Ca_Kabuli_Chr05 | 15126573                | TT                                     | AA                 | AA               | INTERGENIC      |               |                    |                    |
| SNP_34986_A_15132122 | NC_021164.1    | Ca_Kabuli_Chr05 | 15132122                | TT                                     | CC                 | CC               | INTERGENIC      |               |                    |                    |
| SNP_34987_A_15158049 | NC_021164.1    | Ca_Kabuli_Chr05 | 15158049                | GG                                     | TT                 | TT               | INTERGENIC      |               |                    |                    |
| SNP_34988_A_15162884 | NC_021164.1    | Ca_Kabuli_Chr05 | 15162884                | GG                                     | AA                 | AA               | INTERGENIC      |               |                    |                    |
| SNP_34989_A_15166269 | NC_021164.1    | Ca_Kabuli_Chr05 | 15166269                | CC                                     | TT                 | TT               | DRR             | 101501284     | Unknown function   |                    |

| SNPs IDs             | Chromosome IDs | Chromosomes     | Physical positions (bp) | CDC Frontier genome (Reference genome) | (Pusa 1103 & HPNB) | (ILWC 46 & LPNB) | Sequence Components of genome | Gene accession IDs | Putative functions |
|----------------------|----------------|-----------------|-------------------------|----------------------------------------|--------------------|------------------|-------------------------------|--------------------|--------------------|
| SNP_34990_A_15166327 | NC_021164.1    | Ca_Kabuli_Chr05 | 15166327                | TT                                     | CC                 | CC               | DRR                           | 101501284          | Unknown function   |
| SNP_34991_A_15166359 | NC_021164.1    | Ca_Kabuli_Chr05 | 15166359                | TT                                     | CC                 | CC               | DRR                           | 101501284          | Unknown function   |
| SNP_34992_A_15166405 | NC_021164.1    | Ca_Kabuli_Chr05 | 15166405                | GG                                     | AA                 | AA               | DRR                           | 101501284          | Unknown function   |
| SNP_34993_A_15166422 | NC_021164.1    | Ca_Kabuli_Chr05 | 15166422                | GG                                     | AA                 | AA               | DRR                           | 101501284          | Unknown function   |
| SNP_34994_A_15166439 | NC_021164.1    | Ca_Kabuli_Chr05 | 15166439                | AA                                     | GG                 | GG               | DRR                           | 101501284          | Unknown function   |
| SNP_34995_A_15166456 | NC_021164.1    | Ca_Kabuli_Chr05 | 15166456                | CC                                     | AA                 | AA               | DRR                           | 101501284          | Unknown function   |
| SNP_34996_A_15166612 | NC_021164.1    | Ca_Kabuli_Chr05 | 15166612                | TT                                     | CC                 | CC               | DRR                           | 101501284          | Unknown function   |
| SNP_34997_A_15166626 | NC_021164.1    | Ca_Kabuli_Chr05 | 15166626                | AA                                     | CC                 | CC               | DRR                           | 101501284          | Unknown function   |
| SNP_34998_A_15166718 | NC_021164.1    | Ca_Kabuli_Chr05 | 15166718                | AA                                     | CC                 | CC               | NON_SYNONYMOUS_CODING         | 101501284          | Unknown function   |
| SNP_34999_A_15166750 | NC_021164.1    | Ca_Kabuli_Chr05 | 15166750                | TT                                     | CC                 | CC               | NON_SYNONYMOUS_CODING         | 101501284          | Unknown function   |
| SNP_35000_A_15169997 | NC_021164.1    | Ca_Kabuli_Chr05 | 15169997                | CC                                     | TT                 | TT               | URR                           | 101501284          | Unknown function   |
| SNP_35001_A_15170912 | NC_021164.1    | Ca_Kabuli_Chr05 | 15170912                | GG                                     | AA                 | AA               | URR                           | 101501284          | Unknown function   |
| SNP_35002_A_15171026 | NC_021164.1    | Ca_Kabuli_Chr05 | 15171026                | TT                                     | CC                 | CC               | URR                           | 101501284          | Unknown function   |
| SNP_35005_A_15199085 | NC_021164.1    | Ca_Kabuli_Chr05 | 15199085                | CC                                     | TT                 | TT               | INTERGENIC                    |                    |                    |
| SNP_35006_A_15199155 | NC_021164.1    | Ca_Kabuli_Chr05 | 15199155                | AA                                     | TT                 | TT               | INTERGENIC                    |                    |                    |
| SNP_35007_A_15199156 | NC_021164.1    | Ca_Kabuli_Chr05 | 15199156                | GG                                     | AA                 | AA               | INTERGENIC                    |                    |                    |
| SNP_35008_A_15205030 | NC_021164.1    | Ca_Kabuli_Chr05 | 15205030                | AA                                     | GG                 | GG               | INTERGENIC                    |                    |                    |
| SNP_35009_A_15205033 | NC_021164.1    | Ca_Kabuli_Chr05 | 15205033                | AA                                     | CC                 | CC               | INTERGENIC                    |                    |                    |
| SNP_35010_A_15205070 | NC_021164.1    | Ca_Kabuli_Chr05 | 15205070                | AA                                     | GG                 | GG               | INTERGENIC                    |                    |                    |
| SNP_35011_A_15205076 | NC_021164.1    | Ca_Kabuli_Chr05 | 15205076                | GG                                     | TT                 | TT               | INTERGENIC                    |                    |                    |
| SNP_35012_A_15205145 | NC_021164.1    | Ca_Kabuli_Chr05 | 15205145                | GG                                     | AA                 | AA               | INTERGENIC                    |                    |                    |
| SNP_35013_A_15205166 | NC_021164.1    | Ca_Kabuli_Chr05 | 15205166                | CC                                     | AA                 | AA               | INTERGENIC                    |                    |                    |

| SNPs IDs             | Chromosome IDs | Chromosomes     | Physical positions (bp) | CDC Frontier genome (Reference genome) | (Pusa 1103 & HPNB) | (ILWC 46 & LPNB) | Sequence genome | Components of | Gene accession IDs | Putative functions |
|----------------------|----------------|-----------------|-------------------------|----------------------------------------|--------------------|------------------|-----------------|---------------|--------------------|--------------------|
| SNP_35014_A_15205180 | NC_021164.1    | Ca_Kabuli_Chr05 | 15205180                | CC                                     | TT                 | TT               | INTERGENIC      |               |                    |                    |
| SNP_35015_A_15205486 | NC_021164.1    | Ca_Kabuli_Chr05 | 15205486                | TT                                     | GG                 | GG               | INTERGENIC      |               |                    |                    |
| SNP_35016_A_15205493 | NC_021164.1    | Ca_Kabuli_Chr05 | 15205493                | AA                                     | GG                 | GG               | INTERGENIC      |               |                    |                    |
| SNP_35017_A_15205659 | NC_021164.1    | Ca_Kabuli_Chr05 | 15205659                | GG                                     | CC                 | CC               | INTERGENIC      |               |                    |                    |
| SNP_35018_A_15205679 | NC_021164.1    | Ca_Kabuli_Chr05 | 15205679                | CC                                     | AA                 | AA               | INTERGENIC      |               |                    |                    |
| SNP_35019_A_15205706 | NC_021164.1    | Ca_Kabuli_Chr05 | 15205706                | CC                                     | TT                 | TT               | INTERGENIC      |               |                    |                    |
| SNP_35020_A_15205767 | NC_021164.1    | Ca_Kabuli_Chr05 | 15205767                | GG                                     | TT                 | TT               | INTERGENIC      |               |                    |                    |
| SNP_35021_A_15232671 | NC_021164.1    | Ca_Kabuli_Chr05 | 15232671                | CC                                     | AA                 | AA               | INTERGENIC      |               |                    |                    |
| SNP_35022_A_15241564 | NC_021164.1    | Ca_Kabuli_Chr05 | 15241564                | AA                                     | TT                 | TT               | INTERGENIC      |               |                    |                    |
| SNP_35024_A_15362485 | NC_021164.1    | Ca_Kabuli_Chr05 | 15362485                | TT                                     | AA                 | AA               | INTERGENIC      |               |                    |                    |
| SNP_35025_A_15362508 | NC_021164.1    | Ca_Kabuli_Chr05 | 15362508                | GG                                     | AA                 | AA               | INTERGENIC      |               |                    |                    |
| SNP_35026_A_15362529 | NC_021164.1    | Ca_Kabuli_Chr05 | 15362529                | GG                                     | AA                 | AA               | INTERGENIC      |               |                    |                    |
| SNP_35027_A_15363023 | NC_021164.1    | Ca_Kabuli_Chr05 | 15363023                | CC                                     | TT                 | TT               | INTERGENIC      |               |                    |                    |
| SNP_35028_A_15363031 | NC_021164.1    | Ca_Kabuli_Chr05 | 15363031                | TT                                     | CC                 | CC               | INTERGENIC      |               |                    |                    |
| SNP_35029_A_15381577 | NC_021164.1    | Ca_Kabuli_Chr05 | 15381577                | GG                                     | AA                 | AA               | INTERGENIC      |               |                    |                    |
| SNP_35030_A_15408665 | NC_021164.1    | Ca_Kabuli_Chr05 | 15408665                | TT                                     | GG                 | GG               | INTERGENIC      |               |                    |                    |
| SNP_35031_A_15415022 | NC_021164.1    | Ca_Kabuli_Chr05 | 15415022                | AA                                     | TT                 | TT               | INTERGENIC      |               |                    |                    |
| SNP_35032_A_15417246 | NC_021164.1    | Ca_Kabuli_Chr05 | 15417246                | CC                                     | GG                 | GG               | INTERGENIC      |               |                    |                    |
| SNP_35033_A_15417248 | NC_021164.1    | Ca_Kabuli_Chr05 | 15417248                | GG                                     | TT                 | TT               | INTERGENIC      |               |                    |                    |
| SNP_35034_A_15417251 | NC_021164.1    | Ca_Kabuli_Chr05 | 15417251                | AA                                     | CC                 | CC               | INTERGENIC      |               |                    |                    |
| SNP_35035_A_15417266 | NC_021164.1    | Ca_Kabuli_Chr05 | 15417266                | TT                                     | CC                 | CC               | INTERGENIC      |               |                    |                    |
| SNP_35036_A_15417274 | NC_021164.1    | Ca_Kabuli_Chr05 | 15417274                | CC                                     | GG                 | GG               | INTERGENIC      |               |                    |                    |

| SNPs IDs             | Chromosome IDs | Chromosomes     | Physical positions (bp) | CDC Frontier genome (Reference genome) | (Pusa 1103 & HPNB) | (ILWC 46 & LPNB) | Sequence Components of genome | Gene accession IDs | Putative functions |
|----------------------|----------------|-----------------|-------------------------|----------------------------------------|--------------------|------------------|-------------------------------|--------------------|--------------------|
| SNP_35037_A_15417286 | NC_021164.1    | Ca_Kabuli_Chr05 | 15417286                | TT                                     | CC                 | CC               | INTERGENIC                    |                    |                    |
| SNP_35038_A_15417313 | NC_021164.1    | Ca_Kabuli_Chr05 | 15417313                | GG                                     | AA                 | AA               | INTERGENIC                    |                    |                    |
| SNP_35039_A_15417315 | NC_021164.1    | Ca_Kabuli_Chr05 | 15417315                | TT                                     | AA                 | AA               | INTERGENIC                    |                    |                    |
| SNP_35040_A_15417363 | NC_021164.1    | Ca_Kabuli_Chr05 | 15417363                | TT                                     | CC                 | CC               | INTERGENIC                    |                    |                    |
| SNP_35041_A_15417396 | NC_021164.1    | Ca_Kabuli_Chr05 | 15417396                | AA                                     | TT                 | TT               | INTERGENIC                    |                    |                    |
| SNP_35042_A_15417397 | NC_021164.1    | Ca_Kabuli_Chr05 | 15417397                | CC                                     | TT                 | TT               | INTERGENIC                    |                    |                    |
| SNP_35043_A_15417398 | NC_021164.1    | Ca_Kabuli_Chr05 | 15417398                | AA                                     | TT                 | TT               | INTERGENIC                    |                    |                    |
| SNP_35044_A_15417544 | NC_021164.1    | Ca_Kabuli_Chr05 | 15417544                | CC                                     | TT                 | TT               | INTERGENIC                    |                    |                    |
| SNP_35045_A_15417550 | NC_021164.1    | Ca_Kabuli_Chr05 | 15417550                | AA                                     | GG                 | GG               | INTERGENIC                    |                    |                    |
| SNP_35046_A_15417605 | NC_021164.1    | Ca_Kabuli_Chr05 | 15417605                | TT                                     | GG                 | GG               | INTERGENIC                    |                    |                    |
| SNP_35047_A_15417608 | NC_021164.1    | Ca_Kabuli_Chr05 | 15417608                | CC                                     | AA                 | AA               | INTERGENIC                    |                    |                    |
| SNP_35048_A_15417626 | NC_021164.1    | Ca_Kabuli_Chr05 | 15417626                | AA                                     | GG                 | GG               | INTERGENIC                    |                    |                    |
| SNP_35049_A_15417723 | NC_021164.1    | Ca_Kabuli_Chr05 | 15417723                | GG                                     | AA                 | AA               | INTERGENIC                    |                    |                    |
| SNP_35050_A_15417740 | NC_021164.1    | Ca_Kabuli_Chr05 | 15417740                | CC                                     | TT                 | TT               | INTERGENIC                    |                    |                    |
| SNP_35051_A_15417752 | NC_021164.1    | Ca_Kabuli_Chr05 | 15417752                | GG                                     | AA                 | AA               | INTERGENIC                    |                    |                    |
| SNP_35052_A_15417822 | NC_021164.1    | Ca_Kabuli_Chr05 | 15417822                | GG                                     | AA                 | AA               | INTERGENIC                    |                    |                    |
| SNP_35053_A_15424446 | NC_021164.1    | Ca_Kabuli_Chr05 | 15424446                | TT                                     | CC                 | CC               | DRR                           | 101498617          | Unknown function   |
| SNP_35054_A_15424560 | NC_021164.1    | Ca_Kabuli_Chr05 | 15424560                | CC                                     | TT                 | TT               | DRR                           | 101498617          | Unknown function   |
| SNP_35055_A_15424561 | NC_021164.1    | Ca_Kabuli_Chr05 | 15424561                | AA                                     | GG                 | GG               | DRR                           | 101498617          | Unknown function   |
| SNP_35056_A_15424586 | NC_021164.1    | Ca_Kabuli_Chr05 | 15424586                | GG                                     | CC                 | CC               | DRR                           | 101498617          | Unknown function   |
| SNP_35057_A_15424626 | NC_021164.1    | Ca_Kabuli_Chr05 | 15424626                | AA                                     | GG                 | GG               | DRR                           | 101498617          | Unknown function   |
| SNP_35058_A_15424649 | NC_021164.1    | Ca_Kabuli_Chr05 | 15424649                | AA                                     | GG                 | GG               | DRR                           | 101498617          | Unknown function   |



| SNPs IDs             | Chromosome IDs | Chromosomes     | Physical positions (bp) | CDC Frontier (Reference genome) | (Pusa 1103 & HPNB) | (ILWC 46 & LPNB) | Sequence Components of genome | Gene accession IDs | Putative functions |
|----------------------|----------------|-----------------|-------------------------|---------------------------------|--------------------|------------------|-------------------------------|--------------------|--------------------|
| SNP_35059_A_15424705 | NC_021164.1    | Ca_Kabuli_Chr05 | 15424705                | TT                              | GG                 | GG               | DRR                           | 101498617          | Unknown function   |
| SNP_35060_A_15424974 | NC_021164.1    | Ca_Kabuli_Chr05 | 15424974                | AA                              | GG                 | GG               | DRR                           | 101498617          | Unknown function   |
| SNP_35061_A_15424997 | NC_021164.1    | Ca_Kabuli_Chr05 | 15424997                | CC                              | AA                 | AA               | DRR                           | 101498617          | Unknown function   |
| SNP_35062_A_15444218 | NC_021164.1    | Ca_Kabuli_Chr05 | 15444218                | GG                              | AA                 | AA               | INTERGENIC                    |                    |                    |
| SNP_35063_A_15448131 | NC_021164.1    | Ca_Kabuli_Chr05 | 15448131                | GG                              | AA                 | AA               | INTERGENIC                    |                    |                    |
| SNP_35064_A_15448328 | NC_021164.1    | Ca_Kabuli_Chr05 | 15448328                | GG                              | AA                 | AA               | INTERGENIC                    |                    |                    |
| SNP_35065_A_15488126 | NC_021164.1    | Ca_Kabuli_Chr05 | 15488126                | TT                              | AA                 | AA               | INTERGENIC                    |                    |                    |
| SNP_35066_A_15488849 | NC_021164.1    | Ca_Kabuli_Chr05 | 15488849                | TT                              | GG                 | GG               | INTERGENIC                    |                    |                    |
| SNP_35067_A_15511389 | NC_021164.1    | Ca_Kabuli_Chr05 | 15511389                | TT                              | AA                 | AA               | INTERGENIC                    |                    |                    |
| SNP_35068_A_15526431 | NC_021164.1    | Ca_Kabuli_Chr05 | 15526431                | TT                              | AA                 | AA               | INTERGENIC                    |                    |                    |
| SNP_35069_A_15526483 | NC_021164.1    | Ca_Kabuli_Chr05 | 15526483                | TT                              | CC                 | CC               | INTERGENIC                    |                    |                    |
| SNP_35070_A_15535289 | NC_021164.1    | Ca_Kabuli_Chr05 | 15535289                | TT                              | GG                 | GG               | INTERGENIC                    |                    |                    |
| SNP_35071_A_15535303 | NC_021164.1    | Ca_Kabuli_Chr05 | 15535303                | AA                              | CC                 | CC               | INTERGENIC                    |                    |                    |
| SNP_35072_A_15570853 | NC_021164.1    | Ca_Kabuli_Chr05 | 15570853                | AA                              | GG                 | GG               | INTERGENIC                    |                    |                    |
| SNP_35073_A_15604004 | NC_021164.1    | Ca_Kabuli_Chr05 | 15604004                | CC                              | TT                 | TT               | INTERGENIC                    |                    |                    |
| SNP_35074_A_15604502 | NC_021164.1    | Ca_Kabuli_Chr05 | 15604502                | GG                              | TT                 | TT               | INTERGENIC                    |                    |                    |
| SNP_35075_A_15611629 | NC_021164.1    | Ca_Kabuli_Chr05 | 15611629                | AA                              | GG                 | GG               | INTERGENIC                    |                    |                    |
| SNP_35076_A_15640857 | NC_021164.1    | Ca_Kabuli_Chr05 | 15640857                | GG                              | TT                 | TT               | INTERGENIC                    |                    |                    |
| SNP_35077_A_15716864 | NC_021164.1    | Ca_Kabuli_Chr05 | 15716864                | AA                              | TT                 | TT               | INTERGENIC                    |                    |                    |
| SNP_35078_A_15746506 | NC_021164.1    | Ca_Kabuli_Chr05 | 15746506                | GG                              | TT                 | TT               | INTERGENIC                    |                    |                    |
| SNP_35079_A_15754804 | NC_021164.1    | Ca_Kabuli_Chr05 | 15754804                | CC                              | AA                 | AA               | INTERGENIC                    |                    |                    |
| SNP_35082_A_15834892 | NC_021164.1    | Ca_Kabuli_Chr05 | 15834892                | AA                              | GG                 | GG               | INTERGENIC                    |                    |                    |

| SNPs IDs             | Chromosome IDs | Chromosomes     | Physical positions (bp) | CDC Frontier genome (Reference genome) | (Pusa 1103 & HPNB) | (ILWC 46 & LPNB) | Sequence genome | Components of | Gene accession IDs | Putative functions |
|----------------------|----------------|-----------------|-------------------------|----------------------------------------|--------------------|------------------|-----------------|---------------|--------------------|--------------------|
| SNP_35083_A_15834987 | NC_021164.1    | Ca_Kabuli_Chr05 | 15834987                | GG                                     | AA                 | AA               | INTERGENIC      |               |                    |                    |
| SNP_35084_A_15835203 | NC_021164.1    | Ca_Kabuli_Chr05 | 15835203                | CC                                     | AA                 | AA               | INTERGENIC      |               |                    |                    |
| SNP_35085_A_15835242 | NC_021164.1    | Ca_Kabuli_Chr05 | 15835242                | TT                                     | AA                 | AA               | INTERGENIC      |               |                    |                    |
| SNP_35086_A_15835278 | NC_021164.1    | Ca_Kabuli_Chr05 | 15835278                | TT                                     | CC                 | CC               | INTERGENIC      |               |                    |                    |
| SNP_35087_A_15835338 | NC_021164.1    | Ca_Kabuli_Chr05 | 15835338                | AA                                     | GG                 | GG               | INTERGENIC      |               |                    |                    |
| SNP_35088_A_15835371 | NC_021164.1    | Ca_Kabuli_Chr05 | 15835371                | GG                                     | AA                 | AA               | INTERGENIC      |               |                    |                    |
| SNP_35089_A_15835401 | NC_021164.1    | Ca_Kabuli_Chr05 | 15835401                | CC                                     | TT                 | TT               | INTERGENIC      |               |                    |                    |
| SNP_35091_A_15875910 | NC_021164.1    | Ca_Kabuli_Chr05 | 15875910                | AA                                     | CC                 | CC               | INTERGENIC      |               |                    |                    |
| SNP_35092_A_15876888 | NC_021164.1    | Ca_Kabuli_Chr05 | 15876888                | AA                                     | TT                 | TT               | INTERGENIC      |               |                    |                    |
| SNP_35093_A_15876897 | NC_021164.1    | Ca_Kabuli_Chr05 | 15876897                | AA                                     | CC                 | CC               | INTERGENIC      |               |                    |                    |
| SNP_35094_A_15876930 | NC_021164.1    | Ca_Kabuli_Chr05 | 15876930                | GG                                     | AA                 | AA               | INTERGENIC      |               |                    |                    |
| SNP_35095_A_15876969 | NC_021164.1    | Ca_Kabuli_Chr05 | 15876969                | GG                                     | TT                 | TT               | INTERGENIC      |               |                    |                    |
| SNP_35096_A_15876973 | NC_021164.1    | Ca_Kabuli_Chr05 | 15876973                | TT                                     | AA                 | AA               | INTERGENIC      |               |                    |                    |
| SNP_35097_A_15877053 | NC_021164.1    | Ca_Kabuli_Chr05 | 15877053                | GG                                     | CC                 | CC               | INTERGENIC      |               |                    |                    |
| SNP_35098_A_15877056 | NC_021164.1    | Ca_Kabuli_Chr05 | 15877056                | GG                                     | CC                 | CC               | INTERGENIC      |               |                    |                    |
| SNP_35099_A_15877077 | NC_021164.1    | Ca_Kabuli_Chr05 | 15877077                | AA                                     | GG                 | GG               | INTERGENIC      |               |                    |                    |
| SNP_35100_A_15877179 | NC_021164.1    | Ca_Kabuli_Chr05 | 15877179                | GG                                     | AA                 | AA               | INTERGENIC      |               |                    |                    |
| SNP_35101_A_15877242 | NC_021164.1    | Ca_Kabuli_Chr05 | 15877242                | TT                                     | AA                 | AA               | INTERGENIC      |               |                    |                    |
| SNP_35102_A_15877335 | NC_021164.1    | Ca_Kabuli_Chr05 | 15877335                | TT                                     | CC                 | CC               | INTERGENIC      |               |                    |                    |
| SNP_35104_A_15894842 | NC_021164.1    | Ca_Kabuli_Chr05 | 15894842                | TT                                     | AA                 | AA               | INTERGENIC      |               |                    |                    |
| SNP_35105_A_15894906 | NC_021164.1    | Ca_Kabuli_Chr05 | 15894906                | AA                                     | GG                 | GG               | INTERGENIC      |               |                    |                    |
| SNP_35106_A_15897835 | NC_021164.1    | Ca_Kabuli_Chr05 | 15897835                | CC                                     | AA                 | AA               | INTERGENIC      |               |                    |                    |

| SNPs IDs             | Chromosome IDs | Chromosomes     | Physical positions (bp) | CDC Frontier genome (Reference genome) | (Pusa 1103 & HPNB) | (ILWC 46 & LPNB) | Sequence genome | Components of | Gene accession IDs | Putative functions |
|----------------------|----------------|-----------------|-------------------------|----------------------------------------|--------------------|------------------|-----------------|---------------|--------------------|--------------------|
| SNP_35107_A_15908497 | NC_021164.1    | Ca_Kabuli_Chr05 | 15908497                | AA                                     | GG                 | GG               | INTERGENIC      |               |                    |                    |
| SNP_35108_A_15908509 | NC_021164.1    | Ca_Kabuli_Chr05 | 15908509                | AA                                     | GG                 | GG               | INTERGENIC      |               |                    |                    |
| SNP_35109_A_15910607 | NC_021164.1    | Ca_Kabuli_Chr05 | 15910607                | TT                                     | CC                 | CC               | INTERGENIC      |               |                    |                    |
| SNP_35110_A_15910620 | NC_021164.1    | Ca_Kabuli_Chr05 | 15910620                | GG                                     | AA                 | AA               | INTERGENIC      |               |                    |                    |
| SNP_35111_A_15910628 | NC_021164.1    | Ca_Kabuli_Chr05 | 15910628                | GG                                     | AA                 | AA               | INTERGENIC      |               |                    |                    |
| SNP_35112_A_15910634 | NC_021164.1    | Ca_Kabuli_Chr05 | 15910634                | TT                                     | CC                 | CC               | INTERGENIC      |               |                    |                    |
| SNP_35113_A_15910636 | NC_021164.1    | Ca_Kabuli_Chr05 | 15910636                | GG                                     | AA                 | AA               | INTERGENIC      |               |                    |                    |
| SNP_35114_A_15910869 | NC_021164.1    | Ca_Kabuli_Chr05 | 15910869                | CC                                     | AA                 | AA               | INTERGENIC      |               |                    |                    |
| SNP_35115_A_15910947 | NC_021164.1    | Ca_Kabuli_Chr05 | 15910947                | GG                                     | AA                 | AA               | INTERGENIC      |               |                    |                    |
| SNP_35117_A_15923733 | NC_021164.1    | Ca_Kabuli_Chr05 | 15923733                | TT                                     | CC                 | CC               | INTERGENIC      |               |                    |                    |
| SNP_35118_A_15929189 | NC_021164.1    | Ca_Kabuli_Chr05 | 15929189                | TT                                     | GG                 | GG               | INTERGENIC      |               |                    |                    |
| SNP_35119_A_15929288 | NC_021164.1    | Ca_Kabuli_Chr05 | 15929288                | TT                                     | AA                 | AA               | INTERGENIC      |               |                    |                    |
| SNP_35121_A_15929617 | NC_021164.1    | Ca_Kabuli_Chr05 | 15929617                | AA                                     | CC                 | CC               | INTERGENIC      |               |                    |                    |
| SNP_35122_A_15929658 | NC_021164.1    | Ca_Kabuli_Chr05 | 15929658                | AA                                     | TT                 | TT               | INTERGENIC      |               |                    |                    |
| SNP_35123_A_15929716 | NC_021164.1    | Ca_Kabuli_Chr05 | 15929716                | AA                                     | CC                 | CC               | INTERGENIC      |               |                    |                    |
| SNP_35124_A_15931178 | NC_021164.1    | Ca_Kabuli_Chr05 | 15931178                | AA                                     | GG                 | GG               | INTERGENIC      |               |                    |                    |
| SNP_35125_A_15931556 | NC_021164.1    | Ca_Kabuli_Chr05 | 15931556                | TT                                     | AA                 | AA               | INTERGENIC      |               |                    |                    |
| SNP_35126_A_15948315 | NC_021164.1    | Ca_Kabuli_Chr05 | 15948315                | AA                                     | CC                 | CC               | URR             | 101515019     | Unknown function   |                    |
| SNP_35127_A_15957391 | NC_021164.1    | Ca_Kabuli_Chr05 | 15957391                | CC                                     | TT                 | TT               | INTERGENIC      |               |                    |                    |
| SNP_35128_A_16002048 | NC_021164.1    | Ca_Kabuli_Chr05 | 16002048                | TT                                     | CC                 | CC               | INTERGENIC      |               |                    |                    |
| SNP_35129_A_16004439 | NC_021164.1    | Ca_Kabuli_Chr05 | 16004439                | CC                                     | TT                 | TT               | INTERGENIC      |               |                    |                    |
| SNP_35130_A_16005498 | NC_021164.1    | Ca_Kabuli_Chr05 | 16005498                | TT                                     | CC                 | CC               | INTERGENIC      |               |                    |                    |

| SNPs IDs             | Chromosome IDs | Chromosomes     | Physical positions (bp) | CDC Frontier genome (Reference genome) | (Pusa 1103 & HPNB) | (ILWC 46 & LPNB) | Sequence genome | Components of | Gene accession IDs | Putative functions |
|----------------------|----------------|-----------------|-------------------------|----------------------------------------|--------------------|------------------|-----------------|---------------|--------------------|--------------------|
| SNP_35131_A_16005551 | NC_021164.1    | Ca_Kabuli_Chr05 | 16005551                | TT                                     | CC                 | CC               | INTERGENIC      |               |                    |                    |
| SNP_35132_A_16022067 | NC_021164.1    | Ca_Kabuli_Chr05 | 16022067                | TT                                     | CC                 | CC               | INTERGENIC      |               |                    |                    |
| SNP_35133_A_16022350 | NC_021164.1    | Ca_Kabuli_Chr05 | 16022350                | GG                                     | TT                 | TT               | INTERGENIC      |               |                    |                    |
| SNP_35134_A_16022728 | NC_021164.1    | Ca_Kabuli_Chr05 | 16022728                | TT                                     | CC                 | CC               | INTERGENIC      |               |                    |                    |
| SNP_35135_A_16083241 | NC_021164.1    | Ca_Kabuli_Chr05 | 16083241                | AA                                     | GG                 | GG               | INTERGENIC      |               |                    |                    |
| SNP_35136_A_16083267 | NC_021164.1    | Ca_Kabuli_Chr05 | 16083267                | GG                                     | AA                 | AA               | INTERGENIC      |               |                    |                    |
| SNP_35137_A_16083503 | NC_021164.1    | Ca_Kabuli_Chr05 | 16083503                | TT                                     | GG                 | GG               | INTERGENIC      |               |                    |                    |
| SNP_35138_A_16083504 | NC_021164.1    | Ca_Kabuli_Chr05 | 16083504                | TT                                     | CC                 | CC               | INTERGENIC      |               |                    |                    |
| SNP_35139_A_16083549 | NC_021164.1    | Ca_Kabuli_Chr05 | 16083549                | TT                                     | AA                 | AA               | INTERGENIC      |               |                    |                    |
| SNP_35140_A_16089552 | NC_021164.1    | Ca_Kabuli_Chr05 | 16089552                | AA                                     | GG                 | GG               | INTERGENIC      |               |                    |                    |
| SNP_35141_A_16108587 | NC_021164.1    | Ca_Kabuli_Chr05 | 16108587                | GG                                     | AA                 | AA               | INTERGENIC      |               |                    |                    |
| SNP_35142_A_16113656 | NC_021164.1    | Ca_Kabuli_Chr05 | 16113656                | AA                                     | GG                 | GG               | INTERGENIC      |               |                    |                    |
| SNP_35143_A_16113664 | NC_021164.1    | Ca_Kabuli_Chr05 | 16113664                | TT                                     | CC                 | CC               | INTERGENIC      |               |                    |                    |
| SNP_35144_A_16129917 | NC_021164.1    | Ca_Kabuli_Chr05 | 16129917                | TT                                     | AA                 | AA               | INTERGENIC      |               |                    |                    |
| SNP_35145_A_16129939 | NC_021164.1    | Ca_Kabuli_Chr05 | 16129939                | TT                                     | CC                 | CC               | INTERGENIC      |               |                    |                    |
| SNP_35146_A_16152144 | NC_021164.1    | Ca_Kabuli_Chr05 | 16152144                | GG                                     | TT                 | TT               | INTERGENIC      |               |                    |                    |
| SNP_35147_A_16152239 | NC_021164.1    | Ca_Kabuli_Chr05 | 16152239                | GG                                     | AA                 | AA               | INTERGENIC      |               |                    |                    |
| SNP_35148_A_16152299 | NC_021164.1    | Ca_Kabuli_Chr05 | 16152299                | AA                                     | TT                 | TT               | INTERGENIC      |               |                    |                    |
| SNP_35149_A_16152304 | NC_021164.1    | Ca_Kabuli_Chr05 | 16152304                | GG                                     | TT                 | TT               | INTERGENIC      |               |                    |                    |
| SNP_35150_A_16152340 | NC_021164.1    | Ca_Kabuli_Chr05 | 16152340                | AA                                     | GG                 | GG               | INTERGENIC      |               |                    |                    |
| SNP_35151_A_16152444 | NC_021164.1    | Ca_Kabuli_Chr05 | 16152444                | TT                                     | CC                 | CC               | INTERGENIC      |               |                    |                    |
| SNP_35152_A_16203602 | NC_021164.1    | Ca_Kabuli_Chr05 | 16203602                | TT                                     | GG                 | GG               | INTERGENIC      |               |                    |                    |

| SNPs IDs             | Chromosome IDs | Chromosomes     | Physical positions (bp) | CDC Frontier genome (Reference genome) | (Pusa 1103 & HPNB) | (ILWC 46 & LPNB) | Sequence Components of genome | Gene accession IDs | Putative functions           |
|----------------------|----------------|-----------------|-------------------------|----------------------------------------|--------------------|------------------|-------------------------------|--------------------|------------------------------|
| SNP_35153_A_16203643 | NC_021164.1    | Ca_Kabuli_Chr05 | 16203643                | GG                                     | AA                 | AA               | INTERGENIC                    |                    |                              |
| SNP_35154_A_16230576 | NC_021164.1    | Ca_Kabuli_Chr05 | 16230576                | AA                                     | CC                 | CC               | INTERGENIC                    |                    |                              |
| SNP_35155_A_16230633 | NC_021164.1    | Ca_Kabuli_Chr05 | 16230633                | CC                                     | AA                 | AA               | INTERGENIC                    |                    |                              |
| SNP_35156_A_16256210 | NC_021164.1    | Ca_Kabuli_Chr05 | 16256210                | GG                                     | AA                 | AA               | INTERGENIC                    |                    |                              |
| SNP_35157_A_16298078 | NC_021164.1    | Ca_Kabuli_Chr05 | 16298078                | GG                                     | TT                 | TT               | DRR                           | 101507509          | uncharacterized LOC101507509 |
| SNP_35158_A_16319742 | NC_021164.1    | Ca_Kabuli_Chr05 | 16319742                | TT                                     | CC                 | CC               | INTERGENIC                    |                    |                              |
| SNP_35159_A_16319793 | NC_021164.1    | Ca_Kabuli_Chr05 | 16319793                | TT                                     | CC                 | CC               | INTERGENIC                    |                    |                              |
| SNP_35160_A_16319801 | NC_021164.1    | Ca_Kabuli_Chr05 | 16319801                | GG                                     | CC                 | CC               | INTERGENIC                    |                    |                              |
| SNP_35161_A_16319897 | NC_021164.1    | Ca_Kabuli_Chr05 | 16319897                | GG                                     | CC                 | CC               | INTERGENIC                    |                    |                              |
| SNP_35163_A_16320013 | NC_021164.1    | Ca_Kabuli_Chr05 | 16320013                | CC                                     | TT                 | TT               | INTERGENIC                    |                    |                              |
| SNP_35164_A_16320045 | NC_021164.1    | Ca_Kabuli_Chr05 | 16320045                | CC                                     | TT                 | TT               | INTERGENIC                    |                    |                              |
| SNP_35165_A_16322082 | NC_021164.1    | Ca_Kabuli_Chr05 | 16322082                | TT                                     | CC                 | CC               | INTERGENIC                    |                    |                              |
| SNP_35167_A_16387704 | NC_021164.1    | Ca_Kabuli_Chr05 | 16387704                | GG                                     | AA                 | AA               | INTERGENIC                    |                    |                              |
| SNP_35171_A_16417762 | NC_021164.1    | Ca_Kabuli_Chr05 | 16417762                | CC                                     | TT                 | TT               | INTERGENIC                    |                    |                              |
| SNP_35172_A_16429702 | NC_021164.1    | Ca_Kabuli_Chr05 | 16429702                | AA                                     | TT                 | TT               | INTRON                        | 101492324          | Unknown function             |
| SNP_35173_A_16441489 | NC_021164.1    | Ca_Kabuli_Chr05 | 16441489                | GG                                     | AA                 | AA               | INTRON                        | 101492324          | Unknown function             |
| SNP_35174_A_16487834 | NC_021164.1    | Ca_Kabuli_Chr05 | 16487834                | AA                                     | CC                 | CC               | INTERGENIC                    |                    |                              |
| SNP_35175_A_16487836 | NC_021164.1    | Ca_Kabuli_Chr05 | 16487836                | AA                                     | TT                 | TT               | INTERGENIC                    |                    |                              |
| SNP_35176_A_16493893 | NC_021164.1    | Ca_Kabuli_Chr05 | 16493893                | AA                                     | TT                 | TT               | INTERGENIC                    |                    |                              |
| SNP_35177_A_16493894 | NC_021164.1    | Ca_Kabuli_Chr05 | 16493894                | TT                                     | CC                 | CC               | INTERGENIC                    |                    |                              |
| SNP_35178_A_16556430 | NC_021164.1    | Ca_Kabuli_Chr05 | 16556430                | TT                                     | AA                 | AA               | INTERGENIC                    |                    |                              |
| SNP_35179_A_16556466 | NC_021164.1    | Ca_Kabuli_Chr05 | 16556466                | CC                                     | TT                 | TT               | INTERGENIC                    |                    |                              |

| SNPs IDs             | Chromosome IDs | Chromosomes     | Physical positions (bp) | CDC Frontier genome (Reference genome) | (Pusa 1103 & HPNB) | (ILWC 46 & LPNB) | Sequence genome | Components of | Gene accession IDs | Putative functions                                                        |
|----------------------|----------------|-----------------|-------------------------|----------------------------------------|--------------------|------------------|-----------------|---------------|--------------------|---------------------------------------------------------------------------|
| SNP_35180_A_16556578 | NC_021164.1    | Ca_Kabuli_Chr05 | 16556578                | GG                                     | AA                 | AA               | INTERGENIC      |               |                    |                                                                           |
| SNP_35181_A_16650646 | NC_021164.1    | Ca_Kabuli_Chr05 | 16650646                | AA                                     | GG                 | GG               | INTERGENIC      |               |                    |                                                                           |
| SNP_35182_A_16650737 | NC_021164.1    | Ca_Kabuli_Chr05 | 16650737                | GG                                     | AA                 | AA               | INTERGENIC      |               |                    |                                                                           |
| SNP_35183_A_16650783 | NC_021164.1    | Ca_Kabuli_Chr05 | 16650783                | TT                                     | CC                 | CC               | INTERGENIC      |               |                    |                                                                           |
| SNP_35184_A_16651514 | NC_021164.1    | Ca_Kabuli_Chr05 | 16651514                | TT                                     | GG                 | GG               | INTERGENIC      |               |                    |                                                                           |
| SNP_35185_A_16651521 | NC_021164.1    | Ca_Kabuli_Chr05 | 16651521                | TT                                     | CC                 | CC               | INTERGENIC      |               |                    |                                                                           |
| SNP_35186_A_16703465 | NC_021164.1    | Ca_Kabuli_Chr05 | 16703465                | AA                                     | GG                 | GG               | INTERGENIC      |               |                    |                                                                           |
| SNP_35187_A_16703469 | NC_021164.1    | Ca_Kabuli_Chr05 | 16703469                | AA                                     | GG                 | GG               | INTERGENIC      |               |                    |                                                                           |
| SNP_35188_A_16703494 | NC_021164.1    | Ca_Kabuli_Chr05 | 16703494                | TT                                     | CC                 | CC               | INTERGENIC      |               |                    |                                                                           |
| SNP_35189_A_16703529 | NC_021164.1    | Ca_Kabuli_Chr05 | 16703529                | TT                                     | GG                 | GG               | INTERGENIC      |               |                    |                                                                           |
| SNP_35190_A_16703531 | NC_021164.1    | Ca_Kabuli_Chr05 | 16703531                | AA                                     | CC                 | CC               | INTERGENIC      |               |                    |                                                                           |
| SNP_35191_A_16703701 | NC_021164.1    | Ca_Kabuli_Chr05 | 16703701                | TT                                     | CC                 | CC               | INTERGENIC      |               |                    |                                                                           |
| SNP_35192_A_16744662 | NC_021164.1    | Ca_Kabuli_Chr05 | 16744662                | TT                                     | AA                 | AA               | INTRON          |               | 101510480          | pentatricopeptide repeat-containing protein At1g80270, mitochondrial-like |
| SNP_35194_A_16765983 | NC_021164.1    | Ca_Kabuli_Chr05 | 16765983                | CC                                     | TT                 | TT               | URR             |               | 101493641          | pentatricopeptide repeat-containing protein At1g80270, mitochondrial-like |
| SNP_35195_A_16766060 | NC_021164.1    | Ca_Kabuli_Chr05 | 16766060                | GG                                     | TT                 | TT               | URR             |               | 101493641          | pentatricopeptide repeat-containing protein At1g80270, mitochondrial-like |
| SNP_35196_A_16766167 | NC_021164.1    | Ca_Kabuli_Chr05 | 16766167                | CC                                     | GG                 | GG               | INTERGENIC      |               |                    |                                                                           |
| SNP_35197_A_16766290 | NC_021164.1    | Ca_Kabuli_Chr05 | 16766290                | GG                                     | AA                 | AA               | INTERGENIC      |               |                    |                                                                           |
| SNP_35198_A_16766978 | NC_021164.1    | Ca_Kabuli_Chr05 | 16766978                | AA                                     | TT                 | TT               | INTERGENIC      |               |                    |                                                                           |
| SNP_35199_A_16814475 | NC_021164.1    | Ca_Kabuli_Chr05 | 16814475                | AA                                     | CC                 | CC               | INTERGENIC      |               |                    |                                                                           |
| SNP_35200_A_16828085 | NC_021164.1    | Ca_Kabuli_Chr05 | 16828085                | GG                                     | TT                 | TT               | INTERGENIC      |               |                    |                                                                           |
| SNP_35201_A_16863646 | NC_021164.1    | Ca_Kabuli_Chr05 | 16863646                | TT                                     | CC                 | CC               | INTERGENIC      |               |                    |                                                                           |
| SNP_35202_A_16863986 | NC_021164.1    | Ca_Kabuli_Chr05 | 16863986                | TT                                     | CC                 | CC               | INTERGENIC      |               |                    |                                                                           |

| SNPs IDs             | Chromosome IDs | Chromosomes     | Physical positions (bp) | CDC Frontier (Reference genome) | (Pusa 1103 & HPNB) | (ILWC 46 & LPNB) | Sequence genome | Components of | Gene accession IDs | Putative functions |
|----------------------|----------------|-----------------|-------------------------|---------------------------------|--------------------|------------------|-----------------|---------------|--------------------|--------------------|
| SNP_35203_A_16878790 | NC_021164.1    | Ca_Kabuli_Chr05 | 16878790                | AA                              | CC                 | CC               | INTERGENIC      |               |                    |                    |
| SNP_35205_A_16942251 | NC_021164.1    | Ca_Kabuli_Chr05 | 16942251                | GG                              | AA                 | AA               | INTERGENIC      |               |                    |                    |
| SNP_35206_A_16957693 | NC_021164.1    | Ca_Kabuli_Chr05 | 16957693                | TT                              | AA                 | AA               | INTERGENIC      |               |                    |                    |
| SNP_35207_A_16957697 | NC_021164.1    | Ca_Kabuli_Chr05 | 16957697                | GG                              | TT                 | TT               | INTERGENIC      |               |                    |                    |
| SNP_35208_A_16957706 | NC_021164.1    | Ca_Kabuli_Chr05 | 16957706                | GG                              | AA                 | AA               | INTERGENIC      |               |                    |                    |
| SNP_35209_A_16957721 | NC_021164.1    | Ca_Kabuli_Chr05 | 16957721                | GG                              | CC                 | CC               | INTERGENIC      |               |                    |                    |
| SNP_35210_A_16957739 | NC_021164.1    | Ca_Kabuli_Chr05 | 16957739                | CC                              | TT                 | TT               | INTERGENIC      |               |                    |                    |
| SNP_35211_A_16958048 | NC_021164.1    | Ca_Kabuli_Chr05 | 16958048                | GG                              | AA                 | AA               | INTERGENIC      |               |                    |                    |
| SNP_35212_A_16958100 | NC_021164.1    | Ca_Kabuli_Chr05 | 16958100                | GG                              | AA                 | AA               | INTERGENIC      |               |                    |                    |
| SNP_35214_A_17012320 | NC_021164.1    | Ca_Kabuli_Chr05 | 17012320                | TT                              | CC                 | CC               | INTERGENIC      |               |                    |                    |
| SNP_35215_A_17012608 | NC_021164.1    | Ca_Kabuli_Chr05 | 17012608                | GG                              | AA                 | AA               | INTERGENIC      |               |                    |                    |
| SNP_35216_A_17012635 | NC_021164.1    | Ca_Kabuli_Chr05 | 17012635                | TT                              | CC                 | CC               | INTERGENIC      |               |                    |                    |
| SNP_35217_A_17012653 | NC_021164.1    | Ca_Kabuli_Chr05 | 17012653                | AA                              | GG                 | GG               | INTERGENIC      |               |                    |                    |
| SNP_35218_A_17012686 | NC_021164.1    | Ca_Kabuli_Chr05 | 17012686                | TT                              | AA                 | AA               | INTERGENIC      |               |                    |                    |
| SNP_35219_A_17012701 | NC_021164.1    | Ca_Kabuli_Chr05 | 17012701                | CC                              | TT                 | TT               | INTERGENIC      |               |                    |                    |
| SNP_35220_A_17012740 | NC_021164.1    | Ca_Kabuli_Chr05 | 17012740                | AA                              | GG                 | GG               | INTERGENIC      |               |                    |                    |
| SNP_35221_A_17012751 | NC_021164.1    | Ca_Kabuli_Chr05 | 17012751                | AA                              | GG                 | GG               | INTERGENIC      |               |                    |                    |
| SNP_35222_A_17013708 | NC_021164.1    | Ca_Kabuli_Chr05 | 17013708                | AA                              | CC                 | CC               | INTERGENIC      |               |                    |                    |
| SNP_35223_A_17062990 | NC_021164.1    | Ca_Kabuli_Chr05 | 17062990                | CC                              | TT                 | TT               | INTERGENIC      |               |                    |                    |
| SNP_35224_A_17063013 | NC_021164.1    | Ca_Kabuli_Chr05 | 17063013                | AA                              | GG                 | GG               | INTERGENIC      |               |                    |                    |
| SNP_35225_A_17063047 | NC_021164.1    | Ca_Kabuli_Chr05 | 17063047                | AA                              | GG                 | GG               | INTERGENIC      |               |                    |                    |
| SNP_35226_A_17063048 | NC_021164.1    | Ca_Kabuli_Chr05 | 17063048                | AA                              | GG                 | GG               | INTERGENIC      |               |                    |                    |

| SNPs IDs             | Chromosome IDs | Chromosomes     | Physical positions (bp) | CDC Frontier genome (Reference genome) | (Pusa 1103 & HPNB) | (ILWC 46 & LPNB) | Sequence genome | Components of | Gene accession IDs | Putative functions |
|----------------------|----------------|-----------------|-------------------------|----------------------------------------|--------------------|------------------|-----------------|---------------|--------------------|--------------------|
| SNP_35227_A_17063068 | NC_021164.1    | Ca_Kabuli_Chr05 | 17063068                | AA                                     | GG                 | GG               | INTERGENIC      |               |                    |                    |
| SNP_35228_A_17063074 | NC_021164.1    | Ca_Kabuli_Chr05 | 17063074                | GG                                     | AA                 | AA               | INTERGENIC      |               |                    |                    |
| SNP_35229_A_17063092 | NC_021164.1    | Ca_Kabuli_Chr05 | 17063092                | TT                                     | CC                 | CC               | INTERGENIC      |               |                    |                    |
| SNP_35230_A_17063121 | NC_021164.1    | Ca_Kabuli_Chr05 | 17063121                | AA                                     | GG                 | GG               | INTERGENIC      |               |                    |                    |
| SNP_35231_A_17063129 | NC_021164.1    | Ca_Kabuli_Chr05 | 17063129                | TT                                     | AA                 | AA               | INTERGENIC      |               |                    |                    |
| SNP_35232_A_17063150 | NC_021164.1    | Ca_Kabuli_Chr05 | 17063150                | AA                                     | GG                 | GG               | INTERGENIC      |               |                    |                    |
| SNP_35233_A_17127298 | NC_021164.1    | Ca_Kabuli_Chr05 | 17127298                | AA                                     | GG                 | GG               | INTERGENIC      |               |                    |                    |
| SNP_35234_A_17163637 | NC_021164.1    | Ca_Kabuli_Chr05 | 17163637                | TT                                     | AA                 | AA               | INTERGENIC      |               |                    |                    |
| SNP_35235_A_17208508 | NC_021164.1    | Ca_Kabuli_Chr05 | 17208508                | GG                                     | AA                 | AA               | INTERGENIC      |               |                    |                    |
| SNP_35236_A_17233854 | NC_021164.1    | Ca_Kabuli_Chr05 | 17233854                | AA                                     | TT                 | TT               | INTERGENIC      |               |                    |                    |
| SNP_35237_A_17233872 | NC_021164.1    | Ca_Kabuli_Chr05 | 17233872                | CC                                     | TT                 | TT               | INTERGENIC      |               |                    |                    |
| SNP_35238_A_17233881 | NC_021164.1    | Ca_Kabuli_Chr05 | 17233881                | CC                                     | TT                 | TT               | INTERGENIC      |               |                    |                    |
| SNP_35239_A_17233897 | NC_021164.1    | Ca_Kabuli_Chr05 | 17233897                | AA                                     | GG                 | GG               | INTERGENIC      |               |                    |                    |
| SNP_35240_A_17233907 | NC_021164.1    | Ca_Kabuli_Chr05 | 17233907                | GG                                     | AA                 | AA               | INTERGENIC      |               |                    |                    |
| SNP_35241_A_17233968 | NC_021164.1    | Ca_Kabuli_Chr05 | 17233968                | AA                                     | GG                 | GG               | INTERGENIC      |               |                    |                    |
| SNP_35242_A_17233976 | NC_021164.1    | Ca_Kabuli_Chr05 | 17233976                | GG                                     | AA                 | AA               | INTERGENIC      |               |                    |                    |
| SNP_35243_A_17233989 | NC_021164.1    | Ca_Kabuli_Chr05 | 17233989                | TT                                     | CC                 | CC               | INTERGENIC      |               |                    |                    |
| SNP_35244_A_17233995 | NC_021164.1    | Ca_Kabuli_Chr05 | 17233995                | AA                                     | GG                 | GG               | INTERGENIC      |               |                    |                    |
| SNP_35245_A_17234235 | NC_021164.1    | Ca_Kabuli_Chr05 | 17234235                | CC                                     | TT                 | TT               | INTERGENIC      |               |                    |                    |
| SNP_35246_A_17234361 | NC_021164.1    | Ca_Kabuli_Chr05 | 17234361                | CC                                     | AA                 | AA               | INTERGENIC      |               |                    |                    |
| SNP_35247_A_17234362 | NC_021164.1    | Ca_Kabuli_Chr05 | 17234362                | AA                                     | GG                 | GG               | INTERGENIC      |               |                    |                    |
| SNP_35248_A_17234704 | NC_021164.1    | Ca_Kabuli_Chr05 | 17234704                | GG                                     | AA                 | AA               | INTERGENIC      |               |                    |                    |



| SNPs IDs             | Chromosome IDs | Chromosomes     | Physical positions (bp) | CDC Frontier (Reference genome) | (Pusa 1103 & HPNB) | (ILWC 46 & LPNB) | Sequence genome | Components of | Gene accession IDs | Putative functions |
|----------------------|----------------|-----------------|-------------------------|---------------------------------|--------------------|------------------|-----------------|---------------|--------------------|--------------------|
| SNP_35249_A_17239539 | NC_021164.1    | Ca_Kabuli_Chr05 | 17239539                | CC                              | TT                 | TT               | INTERGENIC      |               |                    |                    |
| SNP_35250_A_17239623 | NC_021164.1    | Ca_Kabuli_Chr05 | 17239623                | GG                              | AA                 | AA               | INTERGENIC      |               |                    |                    |
| SNP_35251_A_17241041 | NC_021164.1    | Ca_Kabuli_Chr05 | 17241041                | GG                              | AA                 | AA               | INTERGENIC      |               |                    |                    |
| SNP_35252_A_17244321 | NC_021164.1    | Ca_Kabuli_Chr05 | 17244321                | AA                              | TT                 | TT               | INTERGENIC      |               |                    |                    |
| SNP_35253_A_17249461 | NC_021164.1    | Ca_Kabuli_Chr05 | 17249461                | AA                              | CC                 | CC               | INTERGENIC      |               |                    |                    |
| SNP_35254_A_17254721 | NC_021164.1    | Ca_Kabuli_Chr05 | 17254721                | TT                              | GG                 | GG               | INTERGENIC      |               |                    |                    |
| SNP_35255_A_17254722 | NC_021164.1    | Ca_Kabuli_Chr05 | 17254722                | TT                              | CC                 | CC               | INTERGENIC      |               |                    |                    |
| SNP_35256_A_17254742 | NC_021164.1    | Ca_Kabuli_Chr05 | 17254742                | TT                              | GG                 | GG               | INTERGENIC      |               |                    |                    |
| SNP_35257_A_17254825 | NC_021164.1    | Ca_Kabuli_Chr05 | 17254825                | TT                              | AA                 | AA               | INTERGENIC      |               |                    |                    |
| SNP_35258_A_17255078 | NC_021164.1    | Ca_Kabuli_Chr05 | 17255078                | TT                              | CC                 | CC               | INTERGENIC      |               |                    |                    |
| SNP_35259_A_17301378 | NC_021164.1    | Ca_Kabuli_Chr05 | 17301378                | GG                              | AA                 | AA               | INTERGENIC      |               |                    |                    |
| SNP_35260_A_17323827 | NC_021164.1    | Ca_Kabuli_Chr05 | 17323827                | AA                              | GG                 | GG               | INTERGENIC      |               |                    |                    |
| SNP_35261_A_17324019 | NC_021164.1    | Ca_Kabuli_Chr05 | 17324019                | AA                              | TT                 | TT               | INTERGENIC      |               |                    |                    |
| SNP_35262_A_17324040 | NC_021164.1    | Ca_Kabuli_Chr05 | 17324040                | TT                              | CC                 | CC               | INTERGENIC      |               |                    |                    |
| SNP_35263_A_17324080 | NC_021164.1    | Ca_Kabuli_Chr05 | 17324080                | AA                              | GG                 | GG               | INTERGENIC      |               |                    |                    |
| SNP_35264_A_17324102 | NC_021164.1    | Ca_Kabuli_Chr05 | 17324102                | TT                              | GG                 | GG               | INTERGENIC      |               |                    |                    |
| SNP_35265_A_17324168 | NC_021164.1    | Ca_Kabuli_Chr05 | 17324168                | GG                              | TT                 | TT               | INTERGENIC      |               |                    |                    |
| SNP_35266_A_17324224 | NC_021164.1    | Ca_Kabuli_Chr05 | 17324224                | TT                              | CC                 | CC               | INTERGENIC      |               |                    |                    |
| SNP_35267_A_17324251 | NC_021164.1    | Ca_Kabuli_Chr05 | 17324251                | CC                              | AA                 | AA               | INTERGENIC      |               |                    |                    |
| SNP_35268_A_17369906 | NC_021164.1    | Ca_Kabuli_Chr05 | 17369906                | CC                              | TT                 | TT               | INTERGENIC      |               |                    |                    |
| SNP_35269_A_17369908 | NC_021164.1    | Ca_Kabuli_Chr05 | 17369908                | AA                              | TT                 | TT               | INTERGENIC      |               |                    |                    |
| SNP_35270_A_17369931 | NC_021164.1    | Ca_Kabuli_Chr05 | 17369931                | AA                              | GG                 | GG               | INTERGENIC      |               |                    |                    |

| SNPs IDs             | Chromosome IDs | Chromosomes     | Physical positions (bp) | CDC Frontier genome (Reference genome) | (Pusa 1103 & HPNB) | (ILWC 46 & LPNB) | Sequence genome | Components of | Gene accession IDs | Putative functions |
|----------------------|----------------|-----------------|-------------------------|----------------------------------------|--------------------|------------------|-----------------|---------------|--------------------|--------------------|
| SNP_35271_A_17369954 | NC_021164.1    | Ca_Kabuli_Chr05 | 17369954                | GG                                     | AA                 | AA               | INTERGENIC      |               |                    |                    |
| SNP_35272_A_17371043 | NC_021164.1    | Ca_Kabuli_Chr05 | 17371043                | TT                                     | GG                 | GG               | INTERGENIC      |               |                    |                    |
| SNP_35273_A_17395559 | NC_021164.1    | Ca_Kabuli_Chr05 | 17395559                | TT                                     | CC                 | CC               | INTERGENIC      |               |                    |                    |
| SNP_35274_A_17463174 | NC_021164.1    | Ca_Kabuli_Chr05 | 17463174                | AA                                     | GG                 | GG               | INTERGENIC      |               |                    |                    |
| SNP_35276_A_17474270 | NC_021164.1    | Ca_Kabuli_Chr05 | 17474270                | AA                                     | GG                 | GG               | INTERGENIC      |               |                    |                    |
| SNP_35277_A_17494731 | NC_021164.1    | Ca_Kabuli_Chr05 | 17494731                | AA                                     | CC                 | CC               | INTERGENIC      |               |                    |                    |
| SNP_35278_A_17494742 | NC_021164.1    | Ca_Kabuli_Chr05 | 17494742                | TT                                     | GG                 | GG               | INTERGENIC      |               |                    |                    |
| SNP_35279_A_17494750 | NC_021164.1    | Ca_Kabuli_Chr05 | 17494750                | GG                                     | AA                 | AA               | INTERGENIC      |               |                    |                    |
| SNP_35280_A_17494840 | NC_021164.1    | Ca_Kabuli_Chr05 | 17494840                | AA                                     | GG                 | GG               | INTERGENIC      |               |                    |                    |
| SNP_35282_A_17494898 | NC_021164.1    | Ca_Kabuli_Chr05 | 17494898                | AA                                     | GG                 | GG               | INTERGENIC      |               |                    |                    |
| SNP_35283_A_17495060 | NC_021164.1    | Ca_Kabuli_Chr05 | 17495060                | AA                                     | GG                 | GG               | INTERGENIC      |               |                    |                    |
| SNP_35284_A_17512978 | NC_021164.1    | Ca_Kabuli_Chr05 | 17512978                | TT                                     | AA                 | AA               | INTERGENIC      |               |                    |                    |
| SNP_35285_A_17512982 | NC_021164.1    | Ca_Kabuli_Chr05 | 17512982                | AA                                     | TT                 | TT               | INTERGENIC      |               |                    |                    |
| SNP_35286_A_17537066 | NC_021164.1    | Ca_Kabuli_Chr05 | 17537066                | AA                                     | GG                 | GG               | INTERGENIC      |               |                    |                    |
| SNP_35287_A_17542796 | NC_021164.1    | Ca_Kabuli_Chr05 | 17542796                | AA                                     | GG                 | GG               | INTERGENIC      |               |                    |                    |
| SNP_35288_A_17542853 | NC_021164.1    | Ca_Kabuli_Chr05 | 17542853                | AA                                     | TT                 | TT               | INTERGENIC      |               |                    |                    |
| SNP_35289_A_17543066 | NC_021164.1    | Ca_Kabuli_Chr05 | 17543066                | GG                                     | AA                 | AA               | INTERGENIC      |               |                    |                    |
| SNP_35290_A_17543069 | NC_021164.1    | Ca_Kabuli_Chr05 | 17543069                | AA                                     | TT                 | TT               | INTERGENIC      |               |                    |                    |
| SNP_35291_A_17570491 | NC_021164.1    | Ca_Kabuli_Chr05 | 17570491                | TT                                     | CC                 | CC               | INTERGENIC      |               |                    |                    |
| SNP_35292_A_17575344 | NC_021164.1    | Ca_Kabuli_Chr05 | 17575344                | TT                                     | CC                 | CC               | INTERGENIC      |               |                    |                    |
| SNP_35293_A_17575508 | NC_021164.1    | Ca_Kabuli_Chr05 | 17575508                | CC                                     | TT                 | TT               | INTERGENIC      |               |                    |                    |
| SNP_35294_A_17595567 | NC_021164.1    | Ca_Kabuli_Chr05 | 17595567                | GG                                     | AA                 | AA               | INTERGENIC      |               |                    |                    |

| SNPs IDs             | Chromosome IDs | Chromosomes     | Physical positions (bp) | CDC Frontier genome (Reference genome) | (Pusa 1103 & HPNB) | (ILWC 46 & LPNB) | Sequence genome | Components of | Gene accession IDs | Putative functions                                         |
|----------------------|----------------|-----------------|-------------------------|----------------------------------------|--------------------|------------------|-----------------|---------------|--------------------|------------------------------------------------------------|
| SNP_35295_A_17595576 | NC_021164.1    | Ca_Kabuli_Chr05 | 17595576                | TT                                     | GG                 | GG               | INTERGENIC      |               |                    |                                                            |
| SNP_35296_A_17606759 | NC_021164.1    | Ca_Kabuli_Chr05 | 17606759                | TT                                     | GG                 | GG               | INTERGENIC      |               |                    |                                                            |
| SNP_35297_A_17610535 | NC_021164.1    | Ca_Kabuli_Chr05 | 17610535                | CC                                     | TT                 | TT               | INTERGENIC      |               |                    |                                                            |
| SNP_35298_A_17612346 | NC_021164.1    | Ca_Kabuli_Chr05 | 17612346                | GG                                     | AA                 | AA               | INTERGENIC      |               |                    |                                                            |
| SNP_35299_A_17612347 | NC_021164.1    | Ca_Kabuli_Chr05 | 17612347                | TT                                     | AA                 | AA               | INTERGENIC      |               |                    |                                                            |
| SNP_35300_A_17612381 | NC_021164.1    | Ca_Kabuli_Chr05 | 17612381                | AA                                     | GG                 | GG               | INTERGENIC      |               |                    |                                                            |
| SNP_35301_A_17612405 | NC_021164.1    | Ca_Kabuli_Chr05 | 17612405                | CC                                     | AA                 | AA               | INTERGENIC      |               |                    |                                                            |
| SNP_35302_A_17612495 | NC_021164.1    | Ca_Kabuli_Chr05 | 17612495                | CC                                     | TT                 | TT               | INTERGENIC      |               |                    |                                                            |
| SNP_35303_A_17612521 | NC_021164.1    | Ca_Kabuli_Chr05 | 17612521                | CC                                     | TT                 | TT               | INTERGENIC      |               |                    |                                                            |
| SNP_35304_A_17612559 | NC_021164.1    | Ca_Kabuli_Chr05 | 17612559                | GG                                     | AA                 | AA               | INTERGENIC      |               |                    |                                                            |
| SNP_35306_A_17612680 | NC_021164.1    | Ca_Kabuli_Chr05 | 17612680                | TT                                     | AA                 | AA               | INTERGENIC      |               |                    |                                                            |
| SNP_35307_A_17612718 | NC_021164.1    | Ca_Kabuli_Chr05 | 17612718                | TT                                     | AA                 | AA               | INTERGENIC      |               |                    |                                                            |
| SNP_35308_A_17612758 | NC_021164.1    | Ca_Kabuli_Chr05 | 17612758                | AA                                     | GG                 | GG               | INTERGENIC      |               |                    |                                                            |
| SNP_35309_A_17612770 | NC_021164.1    | Ca_Kabuli_Chr05 | 17612770                | AA                                     | CC                 | CC               | INTERGENIC      |               |                    |                                                            |
| SNP_35311_A_17672076 | NC_021164.1    | Ca_Kabuli_Chr05 | 17672076                | CC                                     | GG                 | GG               | URR             |               | 101498503          | pentatricopeptide repeat-containing protein At3g53170-like |
| SNP_35312_A_17672092 | NC_021164.1    | Ca_Kabuli_Chr05 | 17672092                | GG                                     | AA                 | AA               | URR             |               | 101498503          | pentatricopeptide repeat-containing protein At3g53170-like |
| SNP_35313_A_17672137 | NC_021164.1    | Ca_Kabuli_Chr05 | 17672137                | AA                                     | GG                 | GG               | URR             |               | 101498503          | pentatricopeptide repeat-containing protein At3g53170-like |
| SNP_35314_A_17672313 | NC_021164.1    | Ca_Kabuli_Chr05 | 17672313                | GG                                     | CC                 | CC               | URR             |               | 101498503          | pentatricopeptide repeat-containing protein At3g53170-like |
| SNP_35315_A_17672406 | NC_021164.1    | Ca_Kabuli_Chr05 | 17672406                | GG                                     | AA                 | AA               | INTERGENIC      |               |                    |                                                            |
| SNP_35316_A_17672420 | NC_021164.1    | Ca_Kabuli_Chr05 | 17672420                | TT                                     | CC                 | CC               | INTERGENIC      |               |                    |                                                            |
| SNP_35317_A_17693909 | NC_021164.1    | Ca_Kabuli_Chr05 | 17693909                | CC                                     | TT                 | TT               | INTERGENIC      |               |                    |                                                            |
| SNP_35318_A_17693922 | NC_021164.1    | Ca_Kabuli_Chr05 | 17693922                | CC                                     | AA                 | AA               | INTERGENIC      |               |                    |                                                            |

| SNPs IDs             | Chromosome IDs | Chromosomes     | Physical positions (bp) | CDC Frontier genome (Reference genome) | (Pusa 1103 & HPNB) | (ILWC 46 & LPNB) | Sequence Components of genome | Gene accession IDs | Putative functions    |
|----------------------|----------------|-----------------|-------------------------|----------------------------------------|--------------------|------------------|-------------------------------|--------------------|-----------------------|
| SNP_35319_A_17694337 | NC_021164.1    | Ca_Kabuli_Chr05 | 17694337                | AA                                     | CC                 | CC               | INTERGENIC                    |                    |                       |
| SNP_35320_A_17694346 | NC_021164.1    | Ca_Kabuli_Chr05 | 17694346                | TT                                     | AA                 | AA               | INTERGENIC                    |                    |                       |
| SNP_35323_A_17848749 | NC_021164.1    | Ca_Kabuli_Chr05 | 17848749                | AA                                     | CC                 | CC               | INTERGENIC                    |                    |                       |
| SNP_35324_A_17848957 | NC_021164.1    | Ca_Kabuli_Chr05 | 17848957                | TT                                     | AA                 | AA               | INTERGENIC                    |                    |                       |
| SNP_35325_A_17858371 | NC_021164.1    | Ca_Kabuli_Chr05 | 17858371                | GG                                     | AA                 | AA               | DRR                           | 101508763          | aquaporin NIP6-1-like |
| SNP_35326_A_17861020 | NC_021164.1    | Ca_Kabuli_Chr05 | 17861020                | CC                                     | AA                 | AA               | INTERGENIC                    |                    |                       |
| SNP_35327_A_17867094 | NC_021164.1    | Ca_Kabuli_Chr05 | 17867094                | GG                                     | AA                 | AA               | INTRON                        | id100317           | Unknown function      |
| SNP_35328_A_17867151 | NC_021164.1    | Ca_Kabuli_Chr05 | 17867151                | AA                                     | CC                 | CC               | INTRON                        | id100317           | Unknown function      |
| SNP_35329_A_17867397 | NC_021164.1    | Ca_Kabuli_Chr05 | 17867397                | CC                                     | TT                 | TT               | INTRON                        | id100317           | Unknown function      |
| SNP_35330_A_17867556 | NC_021164.1    | Ca_Kabuli_Chr05 | 17867556                | TT                                     | CC                 | AA               | INTRON                        | id100317           | Unknown function      |
| SNP_35331_A_17867844 | NC_021164.1    | Ca_Kabuli_Chr05 | 17867844                | TT                                     | GG                 | GG               | INTRON                        | id100317           | Unknown function      |
| SNP_35332_A_17868148 | NC_021164.1    | Ca_Kabuli_Chr05 | 17868148                | GG                                     | CC                 | CC               | INTRON                        | id100317           | Unknown function      |
| SNP_35333_A_17868162 | NC_021164.1    | Ca_Kabuli_Chr05 | 17868162                | TT                                     | CC                 | CC               | INTRON                        | id100317           | Unknown function      |
| SNP_35334_A_17868190 | NC_021164.1    | Ca_Kabuli_Chr05 | 17868190                | AA                                     | CC                 | CC               | INTRON                        | id100317           | Unknown function      |
| SNP_35335_A_17868231 | NC_021164.1    | Ca_Kabuli_Chr05 | 17868231                | CC                                     | AA                 | AA               | INTRON                        | id100317           | Unknown function      |
| SNP_35336_A_17868931 | NC_021164.1    | Ca_Kabuli_Chr05 | 17868931                | AA                                     | GG                 | GG               | INTRON                        | id100317           | Unknown function      |
| SNP_35337_A_17874796 | NC_021164.1    | Ca_Kabuli_Chr05 | 17874796                | CC                                     | GG                 | GG               | INTRON                        | id100317           | Unknown function      |
| SNP_35338_A_17876433 | NC_021164.1    | Ca_Kabuli_Chr05 | 17876433                | GG                                     | AA                 | AA               | SYNONYMOUS_CODING             | id100317           | Unknown function      |
| SNP_35340_A_17876580 | NC_021164.1    | Ca_Kabuli_Chr05 | 17876580                | GG                                     | TT                 | TT               | URR                           | 101504268          | Unknown function      |
| SNP_35341_A_17876611 | NC_021164.1    | Ca_Kabuli_Chr05 | 17876611                | TT                                     | AA                 | AA               | URR                           | 101504268          | Unknown function      |
| SNP_35343_A_17899727 | NC_021164.1    | Ca_Kabuli_Chr05 | 17899727                | AA                                     | TT                 | TT               | INTERGENIC                    |                    |                       |
| SNP_35344_A_17899737 | NC_021164.1    | Ca_Kabuli_Chr05 | 17899737                | TT                                     | AA                 | AA               | INTERGENIC                    |                    |                       |

| SNPs IDs             | Chromosome IDs | Chromosomes     | Physical positions (bp) | CDC Frontier genome (Reference genome) | (Pusa 1103 & HPNB) | (ILWC 46 & LPNB) | Sequence Components of genome | Gene accession IDs | Putative functions                              |
|----------------------|----------------|-----------------|-------------------------|----------------------------------------|--------------------|------------------|-------------------------------|--------------------|-------------------------------------------------|
| SNP_35345_A_17900074 | NC_021164.1    | Ca_Kabuli_Chr05 | 17900074                | AA                                     | TT                 | TT               | INTERGENIC                    |                    |                                                 |
| SNP_35346_A_17900091 | NC_021164.1    | Ca_Kabuli_Chr05 | 17900091                | CC                                     | TT                 | TT               | INTERGENIC                    |                    |                                                 |
| SNP_35347_A_17987711 | NC_021164.1    | Ca_Kabuli_Chr05 | 17987711                | AA                                     | CC                 | CC               | INTERGENIC                    |                    |                                                 |
| SNP_35348_A_18003629 | NC_021164.1    | Ca_Kabuli_Chr05 | 18003629                | GG                                     | AA                 | AA               | INTERGENIC                    |                    |                                                 |
| SNP_35350_A_18062620 | NC_021164.1    | Ca_Kabuli_Chr05 | 18062620                | CC                                     | TT                 | TT               | DRR                           | 101509081          | uncharacterized LOC101509081                    |
| SNP_35351_A_18078809 | NC_021164.1    | Ca_Kabuli_Chr05 | 18078809                | AA                                     | CC                 | CC               | INTERGENIC                    |                    |                                                 |
| SNP_35352_A_18078976 | NC_021164.1    | Ca_Kabuli_Chr05 | 18078976                | GG                                     | TT                 | TT               | INTERGENIC                    |                    |                                                 |
| SNP_35353_A_18079120 | NC_021164.1    | Ca_Kabuli_Chr05 | 18079120                | CC                                     | TT                 | TT               | INTERGENIC                    |                    |                                                 |
| SNP_35354_A_18079206 | NC_021164.1    | Ca_Kabuli_Chr05 | 18079206                | GG                                     | AA                 | AA               | INTERGENIC                    |                    |                                                 |
| SNP_35355_A_18111420 | NC_021164.1    | Ca_Kabuli_Chr05 | 18111420                | AA                                     | GG                 | GG               | INTERGENIC                    |                    |                                                 |
| SNP_35356_A_18111431 | NC_021164.1    | Ca_Kabuli_Chr05 | 18111431                | AA                                     | GG                 | GG               | INTERGENIC                    |                    |                                                 |
| SNP_35357_A_18111447 | NC_021164.1    | Ca_Kabuli_Chr05 | 18111447                | AA                                     | CC                 | CC               | INTERGENIC                    |                    |                                                 |
| SNP_35358_A_18111697 | NC_021164.1    | Ca_Kabuli_Chr05 | 18111697                | AA                                     | GG                 | GG               | INTERGENIC                    |                    |                                                 |
| SNP_35360_A_18126697 | NC_021164.1    | Ca_Kabuli_Chr05 | 18126697                | GG                                     | CC                 | CC               | INTERGENIC                    |                    |                                                 |
| SNP_35361_A_18127054 | NC_021164.1    | Ca_Kabuli_Chr05 | 18127054                | AA                                     | GG                 | GG               | INTERGENIC                    |                    |                                                 |
| SNP_35362_A_18127075 | NC_021164.1    | Ca_Kabuli_Chr05 | 18127075                | TT                                     | CC                 | CC               | INTERGENIC                    |                    |                                                 |
| SNP_35363_A_18127091 | NC_021164.1    | Ca_Kabuli_Chr05 | 18127091                | TT                                     | GG                 | GG               | INTERGENIC                    |                    |                                                 |
| SNP_35364_A_18136075 | NC_021164.1    | Ca_Kabuli_Chr05 | 18136075                | TT                                     | CC                 | CC               | INTERGENIC                    |                    |                                                 |
| SNP_35366_A_18167755 | NC_021164.1    | Ca_Kabuli_Chr05 | 18167755                | AA                                     | CC                 | CC               | INTRON                        | 101505882          | structural maintenance of chromosomes protein 5 |
| SNP_35367_A_18167757 | NC_021164.1    | Ca_Kabuli_Chr05 | 18167757                | AA                                     | CC                 | CC               | INTRON                        | 101505882          | structural maintenance of chromosomes protein 5 |
| SNP_35370_A_18201657 | NC_021164.1    | Ca_Kabuli_Chr05 | 18201657                | CC                                     | TT                 | TT               | INTERGENIC                    |                    |                                                 |
| SNP_35371_A_18209981 | NC_021164.1    | Ca_Kabuli_Chr05 | 18209981                | AA                                     | GG                 | GG               | NON_SYNONYMOUS_CODING         | 101510382          | proline-rich receptor-like protein kinase PERK9 |

| SNPs IDs             | Chromosome IDs | Chromosomes     | Physical positions (bp) | CDC Frontier (Reference genome) | (Pusa 1103 & HPNB) | (ILWC 46 & LPNB) | Sequence Components of genome | Gene accession IDs | Putative functions                              |
|----------------------|----------------|-----------------|-------------------------|---------------------------------|--------------------|------------------|-------------------------------|--------------------|-------------------------------------------------|
| SNP_35372_A_18210001 | NC_021164.1    | Ca_Kabuli_Chr05 | 18210001                | AA                              | GG                 | GG               | NON_SYNONYMOUS_CODING         | 101510382          | proline-rich receptor-like protein kinase PERK9 |
| SNP_35373_A_18233194 | NC_021164.1    | Ca_Kabuli_Chr05 | 18233194                | TT                              | CC                 | CC               | INTRON                        | 101510710          | uncharacterized LOC101510710                    |
| SNP_35374_A_18280514 | NC_021164.1    | Ca_Kabuli_Chr05 | 18280514                | AA                              | TT                 | TT               | INTERGENIC                    |                    |                                                 |
| SNP_35375_A_18280655 | NC_021164.1    | Ca_Kabuli_Chr05 | 18280655                | GG                              | AA                 | AA               | INTERGENIC                    |                    |                                                 |
| SNP_35376_A_18282835 | NC_021164.1    | Ca_Kabuli_Chr05 | 18282835                | TT                              | CC                 | CC               | INTERGENIC                    |                    |                                                 |
| SNP_35377_A_18282849 | NC_021164.1    | Ca_Kabuli_Chr05 | 18282849                | TT                              | CC                 | CC               | INTERGENIC                    |                    |                                                 |
| SNP_35378_A_18282873 | NC_021164.1    | Ca_Kabuli_Chr05 | 18282873                | AA                              | CC                 | CC               | INTERGENIC                    |                    |                                                 |
| SNP_35379_A_18282875 | NC_021164.1    | Ca_Kabuli_Chr05 | 18282875                | TT                              | GG                 | GG               | INTERGENIC                    |                    |                                                 |
| SNP_35380_A_18282916 | NC_021164.1    | Ca_Kabuli_Chr05 | 18282916                | TT                              | CC                 | CC               | INTERGENIC                    |                    |                                                 |
| SNP_35381_A_18282944 | NC_021164.1    | Ca_Kabuli_Chr05 | 18282944                | TT                              | CC                 | CC               | INTERGENIC                    |                    |                                                 |
| SNP_35382_A_18282952 | NC_021164.1    | Ca_Kabuli_Chr05 | 18282952                | CC                              | TT                 | TT               | INTERGENIC                    |                    |                                                 |
| SNP_35383_A_18282985 | NC_021164.1    | Ca_Kabuli_Chr05 | 18282985                | CC                              | TT                 | TT               | INTERGENIC                    |                    |                                                 |
| SNP_35384_A_18282988 | NC_021164.1    | Ca_Kabuli_Chr05 | 18282988                | GG                              | AA                 | AA               | INTERGENIC                    |                    |                                                 |
| SNP_35385_A_18282997 | NC_021164.1    | Ca_Kabuli_Chr05 | 18282997                | TT                              | CC                 | CC               | INTERGENIC                    |                    |                                                 |
| SNP_35386_A_18283009 | NC_021164.1    | Ca_Kabuli_Chr05 | 18283009                | GG                              | AA                 | AA               | INTERGENIC                    |                    |                                                 |
| SNP_35387_A_18283197 | NC_021164.1    | Ca_Kabuli_Chr05 | 18283197                | TT                              | CC                 | CC               | INTERGENIC                    |                    |                                                 |
| SNP_35388_A_18283237 | NC_021164.1    | Ca_Kabuli_Chr05 | 18283237                | AA                              | GG                 | GG               | INTERGENIC                    |                    |                                                 |
| SNP_35389_A_18285826 | NC_021164.1    | Ca_Kabuli_Chr05 | 18285826                | CC                              | TT                 | TT               | INTERGENIC                    |                    |                                                 |
| SNP_35390_A_18286181 | NC_021164.1    | Ca_Kabuli_Chr05 | 18286181                | TT                              | CC                 | CC               | INTERGENIC                    |                    |                                                 |
| SNP_35391_A_18290490 | NC_021164.1    | Ca_Kabuli_Chr05 | 18290490                | TT                              | AA                 | AA               | INTERGENIC                    |                    |                                                 |
| SNP_35393_A_18314132 | NC_021164.1    | Ca_Kabuli_Chr05 | 18314132                | CC                              | TT                 | TT               | INTERGENIC                    |                    |                                                 |
| SNP_35394_A_18318680 | NC_021164.1    | Ca_Kabuli_Chr05 | 18318680                | CC                              | TT                 | TT               | INTERGENIC                    |                    |                                                 |

| SNPs IDs             | Chromosome IDs | Chromosomes     | Physical positions (bp) | CDC Frontier genome (Reference genome) | (Pusa 1103 & HPNB) | (ILWC 46 & LPNB) | Sequence genome | Components of | Gene accession IDs | Putative functions            |
|----------------------|----------------|-----------------|-------------------------|----------------------------------------|--------------------|------------------|-----------------|---------------|--------------------|-------------------------------|
| SNP_35395_A_18318702 | NC_021164.1    | Ca_Kabuli_Chr05 | 18318702                | TT                                     | CC                 | CC               | INTERGENIC      |               |                    |                               |
| SNP_35396_A_18318709 | NC_021164.1    | Ca_Kabuli_Chr05 | 18318709                | AA                                     | GG                 | GG               | INTERGENIC      |               |                    |                               |
| SNP_35397_A_18319890 | NC_021164.1    | Ca_Kabuli_Chr05 | 18319890                | AA                                     | GG                 | GG               | INTERGENIC      |               |                    |                               |
| SNP_35398_A_18320214 | NC_021164.1    | Ca_Kabuli_Chr05 | 18320214                | GG                                     | AA                 | AA               | INTERGENIC      |               |                    |                               |
| SNP_35399_A_18320280 | NC_021164.1    | Ca_Kabuli_Chr05 | 18320280                | AA                                     | GG                 | GG               | INTERGENIC      |               |                    |                               |
| SNP_35400_A_18320355 | NC_021164.1    | Ca_Kabuli_Chr05 | 18320355                | TT                                     | GG                 | GG               | INTERGENIC      |               |                    |                               |
| SNP_35401_A_18325448 | NC_021164.1    | Ca_Kabuli_Chr05 | 18325448                | TT                                     | CC                 | CC               | INTERGENIC      |               |                    |                               |
| SNP_35402_A_18365592 | NC_021164.1    | Ca_Kabuli_Chr05 | 18365592                | AA                                     | GG                 | GG               | INTRON          | 101508141     |                    | alpha-N-acetylglucosaminidase |
| SNP_35404_A_18531745 | NC_021164.1    | Ca_Kabuli_Chr05 | 18531745                | CC                                     | AA                 | AA               | INTERGENIC      |               |                    |                               |
| SNP_35406_A_18590368 | NC_021164.1    | Ca_Kabuli_Chr05 | 18590368                | TT                                     | AA                 | AA               | INTERGENIC      |               |                    |                               |
| SNP_35407_A_18590395 | NC_021164.1    | Ca_Kabuli_Chr05 | 18590395                | TT                                     | AA                 | AA               | INTERGENIC      |               |                    |                               |
| SNP_35408_A_18590692 | NC_021164.1    | Ca_Kabuli_Chr05 | 18590692                | CC                                     | TT                 | TT               | INTERGENIC      |               |                    |                               |
| SNP_35409_A_18590738 | NC_021164.1    | Ca_Kabuli_Chr05 | 18590738                | AA                                     | GG                 | GG               | INTERGENIC      |               |                    |                               |
| SNP_35410_A_18590750 | NC_021164.1    | Ca_Kabuli_Chr05 | 18590750                | TT                                     | CC                 | CC               | INTERGENIC      |               |                    |                               |
| SNP_35411_A_18592979 | NC_021164.1    | Ca_Kabuli_Chr05 | 18592979                | AA                                     | GG                 | GG               | INTERGENIC      |               |                    |                               |
| SNP_35412_A_18593104 | NC_021164.1    | Ca_Kabuli_Chr05 | 18593104                | AA                                     | GG                 | GG               | INTERGENIC      |               |                    |                               |
| SNP_35413_A_18593110 | NC_021164.1    | Ca_Kabuli_Chr05 | 18593110                | AA                                     | GG                 | GG               | INTERGENIC      |               |                    |                               |
| SNP_35414_A_18593141 | NC_021164.1    | Ca_Kabuli_Chr05 | 18593141                | AA                                     | GG                 | GG               | INTERGENIC      |               |                    |                               |
| SNP_35415_A_18593146 | NC_021164.1    | Ca_Kabuli_Chr05 | 18593146                | AA                                     | GG                 | GG               | INTERGENIC      |               |                    |                               |
| SNP_35416_A_18593178 | NC_021164.1    | Ca_Kabuli_Chr05 | 18593178                | TT                                     | GG                 | GG               | INTERGENIC      |               |                    |                               |
| SNP_35417_A_18593202 | NC_021164.1    | Ca_Kabuli_Chr05 | 18593202                | AA                                     | GG                 | GG               | INTERGENIC      |               |                    |                               |
| SNP_35418_A_18593223 | NC_021164.1    | Ca_Kabuli_Chr05 | 18593223                | TT                                     | GG                 | GG               | INTERGENIC      |               |                    |                               |

| SNPs IDs             | Chromosome IDs | Chromosomes     | Physical positions (bp) | CDC Frontier genome (Reference genome) | (Pusa 1103 & HPNB) | (ILWC 46 & LPNB) | Sequence genome | Components of | Gene accession IDs | Putative functions |
|----------------------|----------------|-----------------|-------------------------|----------------------------------------|--------------------|------------------|-----------------|---------------|--------------------|--------------------|
| SNP_35419_A_18593365 | NC_021164.1    | Ca_Kabuli_Chr05 | 18593365                | GG                                     | AA                 | AA               | INTERGENIC      |               |                    |                    |
| SNP_35420_A_18593383 | NC_021164.1    | Ca_Kabuli_Chr05 | 18593383                | GG                                     | TT                 | TT               | INTERGENIC      |               |                    |                    |
| SNP_35421_A_18593642 | NC_021164.1    | Ca_Kabuli_Chr05 | 18593642                | GG                                     | AA                 | AA               | INTERGENIC      |               |                    |                    |
| SNP_35422_A_18593649 | NC_021164.1    | Ca_Kabuli_Chr05 | 18593649                | GG                                     | CC                 | CC               | INTERGENIC      |               |                    |                    |
| SNP_35423_A_18593830 | NC_021164.1    | Ca_Kabuli_Chr05 | 18593830                | GG                                     | AA                 | AA               | INTERGENIC      |               |                    |                    |
| SNP_35424_A_18593932 | NC_021164.1    | Ca_Kabuli_Chr05 | 18593932                | AA                                     | GG                 | GG               | INTERGENIC      |               |                    |                    |
| SNP_35425_A_18593958 | NC_021164.1    | Ca_Kabuli_Chr05 | 18593958                | AA                                     | GG                 | GG               | INTERGENIC      |               |                    |                    |
| SNP_35426_A_18593960 | NC_021164.1    | Ca_Kabuli_Chr05 | 18593960                | GG                                     | TT                 | TT               | INTERGENIC      |               |                    |                    |
| SNP_35427_A_18594132 | NC_021164.1    | Ca_Kabuli_Chr05 | 18594132                | GG                                     | TT                 | TT               | INTERGENIC      |               |                    |                    |
| SNP_35428_A_18594303 | NC_021164.1    | Ca_Kabuli_Chr05 | 18594303                | AA                                     | TT                 | TT               | INTERGENIC      |               |                    |                    |
| SNP_35429_A_18678592 | NC_021164.1    | Ca_Kabuli_Chr05 | 18678592                | TT                                     | GG                 | GG               | URR             | 101489841     | Unknown function   |                    |
| SNP_35430_A_18678615 | NC_021164.1    | Ca_Kabuli_Chr05 | 18678615                | TT                                     | CC                 | CC               | URR             | 101489841     | Unknown function   |                    |
| SNP_35431_A_18678649 | NC_021164.1    | Ca_Kabuli_Chr05 | 18678649                | AA                                     | GG                 | GG               | URR             | 101489841     | Unknown function   |                    |
| SNP_35432_A_18678701 | NC_021164.1    | Ca_Kabuli_Chr05 | 18678701                | AA                                     | CC                 | CC               | URR             | 101489841     | Unknown function   |                    |
| SNP_35433_A_18678703 | NC_021164.1    | Ca_Kabuli_Chr05 | 18678703                | GG                                     | CC                 | CC               | URR             | 101489841     | Unknown function   |                    |
| SNP_35434_A_18678736 | NC_021164.1    | Ca_Kabuli_Chr05 | 18678736                | AA                                     | CC                 | CC               | URR             | 101489841     | Unknown function   |                    |
| SNP_35435_A_18679655 | NC_021164.1    | Ca_Kabuli_Chr05 | 18679655                | AA                                     | GG                 | GG               | URR             | 101489841     | Unknown function   |                    |
| SNP_35436_A_18679660 | NC_021164.1    | Ca_Kabuli_Chr05 | 18679660                | GG                                     | CC                 | CC               | URR             | 101489841     | Unknown function   |                    |
| SNP_35437_A_18679730 | NC_021164.1    | Ca_Kabuli_Chr05 | 18679730                | TT                                     | CC                 | CC               | URR             | 101489841     | Unknown function   |                    |
| SNP_35438_A_18679734 | NC_021164.1    | Ca_Kabuli_Chr05 | 18679734                | AA                                     | CC                 | CC               | URR             | 101489841     | Unknown function   |                    |
| SNP_35439_A_18683047 | NC_021164.1    | Ca_Kabuli_Chr05 | 18683047                | GG                                     | CC                 | CC               | INTERGENIC      |               |                    |                    |
| SNP_35440_A_18683064 | NC_021164.1    | Ca_Kabuli_Chr05 | 18683064                | TT                                     | CC                 | CC               | INTERGENIC      |               |                    |                    |



| SNPs IDs             | Chromosome IDs | Chromosomes     | Physical positions (bp) | CDC Frontier (Reference genome) | (Pusa 1103 & HPNB) | (ILWC 46 & LPNB) | Sequence Components of genome | Gene accession IDs | Putative functions           |
|----------------------|----------------|-----------------|-------------------------|---------------------------------|--------------------|------------------|-------------------------------|--------------------|------------------------------|
| SNP_35441_A_18683067 | NC_021164.1    | Ca_Kabuli_Chr05 | 18683067                | AA                              | GG                 | GG               | INTERGENIC                    |                    |                              |
| SNP_35442_A_18683174 | NC_021164.1    | Ca_Kabuli_Chr05 | 18683174                | AA                              | GG                 | GG               | NON_SYNONYMOUS_CODING         | id100502           | Unknown function             |
| SNP_35444_A_18683922 | NC_021164.1    | Ca_Kabuli_Chr05 | 18683922                | AA                              | TT                 | TT               | NON_SYNONYMOUS_CODING         | id100502           | Unknown function             |
| SNP_35445_A_18683950 | NC_021164.1    | Ca_Kabuli_Chr05 | 18683950                | TT                              | CC                 | CC               | NON_SYNONYMOUS_CODING         | id100502           | Unknown function             |
| SNP_35446_A_18694562 | NC_021164.1    | Ca_Kabuli_Chr05 | 18694562                | AA                              | GG                 | GG               | INTERGENIC                    |                    |                              |
| SNP_35447_A_18694592 | NC_021164.1    | Ca_Kabuli_Chr05 | 18694592                | CC                              | TT                 | TT               | INTERGENIC                    |                    |                              |
| SNP_35448_A_18694638 | NC_021164.1    | Ca_Kabuli_Chr05 | 18694638                | CC                              | TT                 | TT               | INTERGENIC                    |                    |                              |
| SNP_35449_A_18794060 | NC_021164.1    | Ca_Kabuli_Chr05 | 18794060                | AA                              | GG                 | GG               | INTERGENIC                    |                    |                              |
| SNP_35450_A_18794069 | NC_021164.1    | Ca_Kabuli_Chr05 | 18794069                | AA                              | GG                 | GG               | INTERGENIC                    |                    |                              |
| SNP_35451_A_18794114 | NC_021164.1    | Ca_Kabuli_Chr05 | 18794114                | GG                              | AA                 | AA               | INTERGENIC                    |                    |                              |
| SNP_35452_A_18794162 | NC_021164.1    | Ca_Kabuli_Chr05 | 18794162                | TT                              | CC                 | CC               | INTERGENIC                    |                    |                              |
| SNP_35453_A_18820952 | NC_021164.1    | Ca_Kabuli_Chr05 | 18820952                | TT                              | AA                 | AA               | URR                           | 101490170          | uncharacterized LOC101490170 |
| SNP_35454_A_18831778 | NC_021164.1    | Ca_Kabuli_Chr05 | 18831778                | AA                              | CC                 | CC               | INTERGENIC                    |                    |                              |
| SNP_35455_A_18831787 | NC_021164.1    | Ca_Kabuli_Chr05 | 18831787                | GG                              | AA                 | AA               | INTERGENIC                    |                    |                              |
| SNP_35456_A_18834783 | NC_021164.1    | Ca_Kabuli_Chr05 | 18834783                | TT                              | GG                 | GG               | INTERGENIC                    |                    |                              |
| SNP_35457_A_18834908 | NC_021164.1    | Ca_Kabuli_Chr05 | 18834908                | CC                              | AA                 | AA               | INTERGENIC                    |                    |                              |
| SNP_35458_A_18846053 | NC_021164.1    | Ca_Kabuli_Chr05 | 18846053                | AA                              | GG                 | GG               | INTERGENIC                    |                    |                              |
| SNP_35459_A_18846111 | NC_021164.1    | Ca_Kabuli_Chr05 | 18846111                | AA                              | GG                 | GG               | INTERGENIC                    |                    |                              |
| SNP_35460_A_18846112 | NC_021164.1    | Ca_Kabuli_Chr05 | 18846112                | AA                              | GG                 | GG               | INTERGENIC                    |                    |                              |
| SNP_35461_A_18869478 | NC_021164.1    | Ca_Kabuli_Chr05 | 18869478                | TT                              | GG                 | GG               | INTERGENIC                    |                    |                              |
| SNP_35462_A_18923780 | NC_021164.1    | Ca_Kabuli_Chr05 | 18923780                | AA                              | GG                 | GG               | INTERGENIC                    |                    |                              |
| SNP_35463_A_18923834 | NC_021164.1    | Ca_Kabuli_Chr05 | 18923834                | AA                              | TT                 | TT               | INTERGENIC                    |                    |                              |

| SNPs IDs             | Chromosome IDs | Chromosomes     | Physical positions (bp) | CDC Frontier genome (Reference genome) | (Pusa 1103 & HPNB) | (ILWC 46 & LPNB) | Sequence genome | Components of | Gene accession IDs | Putative functions |
|----------------------|----------------|-----------------|-------------------------|----------------------------------------|--------------------|------------------|-----------------|---------------|--------------------|--------------------|
| SNP_35464_A_18944209 | NC_021164.1    | Ca_Kabuli_Chr05 | 18944209                | CC                                     | TT                 | TT               | INTERGENIC      |               |                    |                    |
| SNP_35465_A_18944273 | NC_021164.1    | Ca_Kabuli_Chr05 | 18944273                | GG                                     | AA                 | AA               | INTERGENIC      |               |                    |                    |
| SNP_35466_A_18944292 | NC_021164.1    | Ca_Kabuli_Chr05 | 18944292                | AA                                     | TT                 | TT               | INTERGENIC      |               |                    |                    |
| SNP_35467_A_18944547 | NC_021164.1    | Ca_Kabuli_Chr05 | 18944547                | GG                                     | CC                 | CC               | INTERGENIC      |               |                    |                    |
| SNP_35468_A_18944571 | NC_021164.1    | Ca_Kabuli_Chr05 | 18944571                | AA                                     | TT                 | TT               | INTERGENIC      |               |                    |                    |
| SNP_35470_A_18945599 | NC_021164.1    | Ca_Kabuli_Chr05 | 18945599                | GG                                     | AA                 | AA               | INTERGENIC      |               |                    |                    |
| SNP_35471_A_19306189 | NC_021164.1    | Ca_Kabuli_Chr05 | 19306189                | CC                                     | AA                 | AA               | INTERGENIC      |               |                    |                    |
| SNP_35472_A_19331809 | NC_021164.1    | Ca_Kabuli_Chr05 | 19331809                | TT                                     | CC                 | CC               | INTERGENIC      |               |                    |                    |
| SNP_35474_A_19375029 | NC_021164.1    | Ca_Kabuli_Chr05 | 19375029                | CC                                     | TT                 | TT               | INTERGENIC      |               |                    |                    |
| SNP_35475_A_19375034 | NC_021164.1    | Ca_Kabuli_Chr05 | 19375034                | GG                                     | AA                 | AA               | INTERGENIC      |               |                    |                    |
| SNP_35476_A_19375035 | NC_021164.1    | Ca_Kabuli_Chr05 | 19375035                | CC                                     | TT                 | TT               | INTERGENIC      |               |                    |                    |
| SNP_35477_A_19375042 | NC_021164.1    | Ca_Kabuli_Chr05 | 19375042                | CC                                     | AA                 | AA               | INTERGENIC      |               |                    |                    |
| SNP_35478_A_19375062 | NC_021164.1    | Ca_Kabuli_Chr05 | 19375062                | CC                                     | TT                 | TT               | INTERGENIC      |               |                    |                    |
| SNP_35479_A_19375063 | NC_021164.1    | Ca_Kabuli_Chr05 | 19375063                | AA                                     | CC                 | CC               | INTERGENIC      |               |                    |                    |
| SNP_35480_A_19385951 | NC_021164.1    | Ca_Kabuli_Chr05 | 19385951                | CC                                     | TT                 | TT               | INTERGENIC      |               |                    |                    |
| SNP_35481_A_19386391 | NC_021164.1    | Ca_Kabuli_Chr05 | 19386391                | CC                                     | AA                 | TT               | INTERGENIC      |               |                    |                    |
| SNP_35482_A_19386493 | NC_021164.1    | Ca_Kabuli_Chr05 | 19386493                | TT                                     | CC                 | CC               | INTERGENIC      |               |                    |                    |
| SNP_35483_A_19386643 | NC_021164.1    | Ca_Kabuli_Chr05 | 19386643                | AA                                     | GG                 | GG               | INTERGENIC      |               |                    |                    |
| SNP_35484_A_19386704 | NC_021164.1    | Ca_Kabuli_Chr05 | 19386704                | TT                                     | GG                 | GG               | INTERGENIC      |               |                    |                    |
| SNP_35485_A_19386920 | NC_021164.1    | Ca_Kabuli_Chr05 | 19386920                | CC                                     | TT                 | TT               | INTERGENIC      |               |                    |                    |
| SNP_35487_A_19399641 | NC_021164.1    | Ca_Kabuli_Chr05 | 19399641                | GG                                     | AA                 | AA               | INTERGENIC      |               |                    |                    |
| SNP_35488_A_19442031 | NC_021164.1    | Ca_Kabuli_Chr05 | 19442031                | GG                                     | AA                 | AA               | INTERGENIC      |               |                    |                    |

| SNPs IDs             | Chromosome IDs | Chromosomes     | Physical positions (bp) | CDC Frontier (Reference genome) | (Pusa 1103 & HPNB) | (ILWC 46 & LPNB) | Sequence Components of genome | Gene accession IDs | Putative functions |
|----------------------|----------------|-----------------|-------------------------|---------------------------------|--------------------|------------------|-------------------------------|--------------------|--------------------|
| SNP_35489_A_19477902 | NC_021164.1    | Ca_Kabuli_Chr05 | 19477902                | AA                              | GG                 | GG               | INTERGENIC                    |                    |                    |
| SNP_35490_A_19478219 | NC_021164.1    | Ca_Kabuli_Chr05 | 19478219                | TT                              | AA                 | AA               | INTERGENIC                    |                    |                    |
| SNP_35491_A_19478393 | NC_021164.1    | Ca_Kabuli_Chr05 | 19478393                | AA                              | GG                 | GG               | INTERGENIC                    |                    |                    |
| SNP_35493_A_19482511 | NC_021164.1    | Ca_Kabuli_Chr05 | 19482511                | AA                              | GG                 | GG               | INTERGENIC                    |                    |                    |
| SNP_35494_A_19497458 | NC_021164.1    | Ca_Kabuli_Chr05 | 19497458                | AA                              | GG                 | GG               | INTERGENIC                    |                    |                    |
| SNP_35495_A_19498200 | NC_021164.1    | Ca_Kabuli_Chr05 | 19498200                | CC                              | AA                 | AA               | INTERGENIC                    |                    |                    |
| SNP_35496_A_19498331 | NC_021164.1    | Ca_Kabuli_Chr05 | 19498331                | GG                              | TT                 | TT               | INTERGENIC                    |                    |                    |
| SNP_35497_A_19498692 | NC_021164.1    | Ca_Kabuli_Chr05 | 19498692                | AA                              | GG                 | GG               | INTERGENIC                    |                    |                    |
| SNP_35498_A_19531083 | NC_021164.1    | Ca_Kabuli_Chr05 | 19531083                | AA                              | GG                 | GG               | INTERGENIC                    |                    |                    |
| SNP_35499_A_19531091 | NC_021164.1    | Ca_Kabuli_Chr05 | 19531091                | GG                              | AA                 | AA               | INTERGENIC                    |                    |                    |
| SNP_35500_A_19533871 | NC_021164.1    | Ca_Kabuli_Chr05 | 19533871                | TT                              | CC                 | CC               | INTERGENIC                    |                    |                    |
| SNP_35501_A_19533911 | NC_021164.1    | Ca_Kabuli_Chr05 | 19533911                | CC                              | GG                 | GG               | INTERGENIC                    |                    |                    |
| SNP_35502_A_19533955 | NC_021164.1    | Ca_Kabuli_Chr05 | 19533955                | TT                              | CC                 | CC               | INTERGENIC                    |                    |                    |
| SNP_35503_A_19533992 | NC_021164.1    | Ca_Kabuli_Chr05 | 19533992                | CC                              | TT                 | TT               | INTERGENIC                    |                    |                    |
| SNP_35504_A_19534218 | NC_021164.1    | Ca_Kabuli_Chr05 | 19534218                | CC                              | TT                 | TT               | INTERGENIC                    |                    |                    |
| SNP_35505_A_19536081 | NC_021164.1    | Ca_Kabuli_Chr05 | 19536081                | TT                              | CC                 | CC               | INTERGENIC                    |                    |                    |
| SNP_35506_A_19538882 | NC_021164.1    | Ca_Kabuli_Chr05 | 19538882                | TT                              | GG                 | GG               | INTERGENIC                    |                    |                    |
| SNP_35507_A_19544987 | NC_021164.1    | Ca_Kabuli_Chr05 | 19544987                | GG                              | TT                 | TT               | NON_SYNONYMOUS_CODING         | 101494801          | Unknown function   |
| SNP_35508_A_19545111 | NC_021164.1    | Ca_Kabuli_Chr05 | 19545111                | TT                              | CC                 | CC               | URR                           | 101494801          | Unknown function   |
| SNP_35509_A_19545167 | NC_021164.1    | Ca_Kabuli_Chr05 | 19545167                | AA                              | CC                 | CC               | URR                           | 101494801          | Unknown function   |
| SNP_35510_A_19545177 | NC_021164.1    | Ca_Kabuli_Chr05 | 19545177                | AA                              | GG                 | GG               | URR                           | 101494801          | Unknown function   |
| SNP_35511_A_19545525 | NC_021164.1    | Ca_Kabuli_Chr05 | 19545525                | TT                              | CC                 | CC               | URR                           | 101494801          | Unknown function   |

| SNPs IDs             | Chromosome IDs | Chromosomes     | Physical positions (bp) | CDC Frontier genome (Reference genome) | (Pusa 1103 & HPNB) | (ILWC 46 & LPNB) | Sequence genome | Components of | Gene accession IDs | Putative functions |
|----------------------|----------------|-----------------|-------------------------|----------------------------------------|--------------------|------------------|-----------------|---------------|--------------------|--------------------|
| SNP_35513_A_19590084 | NC_021164.1    | Ca_Kabuli_Chr05 | 19590084                | TT                                     | CC                 | CC               | INTERGENIC      |               |                    |                    |
| SNP_35514_A_19590149 | NC_021164.1    | Ca_Kabuli_Chr05 | 19590149                | GG                                     | TT                 | TT               | INTERGENIC      |               |                    |                    |
| SNP_35515_A_19590673 | NC_021164.1    | Ca_Kabuli_Chr05 | 19590673                | TT                                     | CC                 | CC               | INTERGENIC      |               |                    |                    |
| SNP_35516_A_19590750 | NC_021164.1    | Ca_Kabuli_Chr05 | 19590750                | GG                                     | TT                 | TT               | INTERGENIC      |               |                    |                    |
| SNP_35517_A_19590759 | NC_021164.1    | Ca_Kabuli_Chr05 | 19590759                | TT                                     | CC                 | CC               | INTERGENIC      |               |                    |                    |
| SNP_35518_A_19590856 | NC_021164.1    | Ca_Kabuli_Chr05 | 19590856                | AA                                     | TT                 | TT               | INTERGENIC      |               |                    |                    |
| SNP_35519_A_19591054 | NC_021164.1    | Ca_Kabuli_Chr05 | 19591054                | TT                                     | AA                 | AA               | INTERGENIC      |               |                    |                    |
| SNP_35520_A_19591147 | NC_021164.1    | Ca_Kabuli_Chr05 | 19591147                | TT                                     | CC                 | CC               | INTERGENIC      |               |                    |                    |
| SNP_35521_A_19591156 | NC_021164.1    | Ca_Kabuli_Chr05 | 19591156                | TT                                     | AA                 | AA               | INTERGENIC      |               |                    |                    |
| SNP_35523_A_19610964 | NC_021164.1    | Ca_Kabuli_Chr05 | 19610964                | AA                                     | CC                 | CC               | INTERGENIC      |               |                    |                    |
| SNP_35524_A_19667587 | NC_021164.1    | Ca_Kabuli_Chr05 | 19667587                | GG                                     | TT                 | TT               | INTERGENIC      |               |                    |                    |
| SNP_35525_A_19667626 | NC_021164.1    | Ca_Kabuli_Chr05 | 19667626                | AA                                     | GG                 | GG               | INTERGENIC      |               |                    |                    |
| SNP_35526_A_19668690 | NC_021164.1    | Ca_Kabuli_Chr05 | 19668690                | CC                                     | TT                 | TT               | INTERGENIC      |               |                    |                    |
| SNP_35527_A_19702828 | NC_021164.1    | Ca_Kabuli_Chr05 | 19702828                | GG                                     | AA                 | AA               | INTERGENIC      |               |                    |                    |
| SNP_35528_A_19703017 | NC_021164.1    | Ca_Kabuli_Chr05 | 19703017                | GG                                     | AA                 | AA               | INTERGENIC      |               |                    |                    |
| SNP_35529_A_19725589 | NC_021164.1    | Ca_Kabuli_Chr05 | 19725589                | AA                                     | GG                 | GG               | INTERGENIC      |               |                    |                    |
| SNP_35530_A_19725685 | NC_021164.1    | Ca_Kabuli_Chr05 | 19725685                | CC                                     | TT                 | TT               | INTERGENIC      |               |                    |                    |
| SNP_35531_A_19725706 | NC_021164.1    | Ca_Kabuli_Chr05 | 19725706                | TT                                     | CC                 | CC               | INTERGENIC      |               |                    |                    |
| SNP_35532_A_19725708 | NC_021164.1    | Ca_Kabuli_Chr05 | 19725708                | AA                                     | GG                 | GG               | INTERGENIC      |               |                    |                    |
| SNP_35533_A_19725742 | NC_021164.1    | Ca_Kabuli_Chr05 | 19725742                | TT                                     | GG                 | GG               | INTERGENIC      |               |                    |                    |
| SNP_35534_A_19725958 | NC_021164.1    | Ca_Kabuli_Chr05 | 19725958                | GG                                     | TT                 | TT               | INTERGENIC      |               |                    |                    |
| SNP_35535_A_19725982 | NC_021164.1    | Ca_Kabuli_Chr05 | 19725982                | GG                                     | AA                 | AA               | INTERGENIC      |               |                    |                    |

| SNPs IDs             | Chromosome IDs | Chromosomes     | Physical positions (bp) | CDC Frontier genome (Reference genome) | (Pusa 1103 & HPNB) | (ILWC 46 & LPNB) | Sequence genome | Components of | Gene accession IDs | Putative functions |
|----------------------|----------------|-----------------|-------------------------|----------------------------------------|--------------------|------------------|-----------------|---------------|--------------------|--------------------|
| SNP_35536_A_19726114 | NC_021164.1    | Ca_Kabuli_Chr05 | 19726114                | GG                                     | AA                 | AA               | INTERGENIC      |               |                    |                    |
| SNP_35537_A_19726832 | NC_021164.1    | Ca_Kabuli_Chr05 | 19726832                | AA                                     | GG                 | GG               | INTERGENIC      |               |                    |                    |
| SNP_35538_A_19727203 | NC_021164.1    | Ca_Kabuli_Chr05 | 19727203                | CC                                     | TT                 | TT               | INTERGENIC      |               |                    |                    |
| SNP_35539_A_19729692 | NC_021164.1    | Ca_Kabuli_Chr05 | 19729692                | GG                                     | AA                 | AA               | INTERGENIC      |               |                    |                    |
| SNP_35540_A_19729737 | NC_021164.1    | Ca_Kabuli_Chr05 | 19729737                | AA                                     | TT                 | TT               | INTERGENIC      |               |                    |                    |
| SNP_35541_A_19729740 | NC_021164.1    | Ca_Kabuli_Chr05 | 19729740                | TT                                     | CC                 | CC               | INTERGENIC      |               |                    |                    |
| SNP_35542_A_19729743 | NC_021164.1    | Ca_Kabuli_Chr05 | 19729743                | GG                                     | AA                 | AA               | INTERGENIC      |               |                    |                    |
| SNP_35543_A_19729747 | NC_021164.1    | Ca_Kabuli_Chr05 | 19729747                | CC                                     | TT                 | TT               | INTERGENIC      |               |                    |                    |
| SNP_35544_A_19729749 | NC_021164.1    | Ca_Kabuli_Chr05 | 19729749                | GG                                     | AA                 | AA               | INTERGENIC      |               |                    |                    |
| SNP_35545_A_19729785 | NC_021164.1    | Ca_Kabuli_Chr05 | 19729785                | CC                                     | TT                 | TT               | INTERGENIC      |               |                    |                    |
| SNP_35546_A_19740875 | NC_021164.1    | Ca_Kabuli_Chr05 | 19740875                | GG                                     | CC                 | CC               | INTERGENIC      |               |                    |                    |
| SNP_35547_A_19740877 | NC_021164.1    | Ca_Kabuli_Chr05 | 19740877                | TT                                     | GG                 | GG               | INTERGENIC      |               |                    |                    |
| SNP_35548_A_19740945 | NC_021164.1    | Ca_Kabuli_Chr05 | 19740945                | AA                                     | CC                 | CC               | INTERGENIC      |               |                    |                    |
| SNP_35550_A_19777085 | NC_021164.1    | Ca_Kabuli_Chr05 | 19777085                | AA                                     | CC                 | CC               | INTERGENIC      |               |                    |                    |
| SNP_35551_A_19814550 | NC_021164.1    | Ca_Kabuli_Chr05 | 19814550                | CC                                     | AA                 | AA               | INTERGENIC      |               |                    |                    |
| SNP_35553_A_19824306 | NC_021164.1    | Ca_Kabuli_Chr05 | 19824306                | TT                                     | CC                 | CC               | INTERGENIC      |               |                    |                    |
| SNP_35554_A_19830784 | NC_021164.1    | Ca_Kabuli_Chr05 | 19830784                | GG                                     | AA                 | AA               | INTERGENIC      |               |                    |                    |
| SNP_35555_A_19830806 | NC_021164.1    | Ca_Kabuli_Chr05 | 19830806                | TT                                     | CC                 | CC               | INTERGENIC      |               |                    |                    |
| SNP_35556_A_19830985 | NC_021164.1    | Ca_Kabuli_Chr05 | 19830985                | GG                                     | AA                 | AA               | INTERGENIC      |               |                    |                    |
| SNP_35557_A_19830997 | NC_021164.1    | Ca_Kabuli_Chr05 | 19830997                | GG                                     | AA                 | AA               | INTERGENIC      |               |                    |                    |
| SNP_35559_A_19908926 | NC_021164.1    | Ca_Kabuli_Chr05 | 19908926                | AA                                     | CC                 | CC               | INTERGENIC      |               |                    |                    |
| SNP_35560_A_19908957 | NC_021164.1    | Ca_Kabuli_Chr05 | 19908957                | TT                                     | AA                 | AA               | INTERGENIC      |               |                    |                    |

| SNPs IDs             | Chromosome IDs | Chromosomes     | Physical positions (bp) | CDC Frontier (Reference genome) | (Pusa 1103 & HPNB) | (ILWC 46 & LPNB) | Sequence Components of genome | Gene accession IDs | Putative functions                                       |
|----------------------|----------------|-----------------|-------------------------|---------------------------------|--------------------|------------------|-------------------------------|--------------------|----------------------------------------------------------|
| SNP_35561_A_19910123 | NC_021164.1    | Ca_Kabuli_Chr05 | 19910123                | AA                              | CC                 | CC               | INTERGENIC                    |                    |                                                          |
| SNP_35562_A_19914314 | NC_021164.1    | Ca_Kabuli_Chr05 | 19914314                | AA                              | GG                 | GG               | INTERGENIC                    |                    |                                                          |
| SNP_35563_A_19914397 | NC_021164.1    | Ca_Kabuli_Chr05 | 19914397                | AA                              | GG                 | GG               | INTERGENIC                    |                    |                                                          |
| SNP_35564_A_19914504 | NC_021164.1    | Ca_Kabuli_Chr05 | 19914504                | GG                              | CC                 | CC               | INTERGENIC                    |                    |                                                          |
| SNP_35565_A_19914536 | NC_021164.1    | Ca_Kabuli_Chr05 | 19914536                | TT                              | CC                 | CC               | INTERGENIC                    |                    |                                                          |
| SNP_35568_A_19914599 | NC_021164.1    | Ca_Kabuli_Chr05 | 19914599                | CC                              | TT                 | TT               | INTERGENIC                    |                    |                                                          |
| SNP_35569_A_19914602 | NC_021164.1    | Ca_Kabuli_Chr05 | 19914602                | GG                              | AA                 | AA               | INTERGENIC                    |                    |                                                          |
| SNP_35570_A_19914604 | NC_021164.1    | Ca_Kabuli_Chr05 | 19914604                | CC                              | TT                 | TT               | INTERGENIC                    |                    |                                                          |
| SNP_35571_A_19914611 | NC_021164.1    | Ca_Kabuli_Chr05 | 19914611                | TT                              | AA                 | AA               | INTERGENIC                    |                    |                                                          |
| SNP_35572_A_19922129 | NC_021164.1    | Ca_Kabuli_Chr05 | 19922129                | AA                              | GG                 | GG               | INTERGENIC                    |                    |                                                          |
| SNP_35573_A_19922157 | NC_021164.1    | Ca_Kabuli_Chr05 | 19922157                | TT                              | CC                 | CC               | INTERGENIC                    |                    |                                                          |
| SNP_35574_A_19922292 | NC_021164.1    | Ca_Kabuli_Chr05 | 19922292                | TT                              | CC                 | CC               | INTERGENIC                    |                    |                                                          |
| SNP_35576_A_19922350 | NC_021164.1    | Ca_Kabuli_Chr05 | 19922350                | GG                              | TT                 | TT               | INTERGENIC                    |                    |                                                          |
| SNP_35577_A_19922486 | NC_021164.1    | Ca_Kabuli_Chr05 | 19922486                | AA                              | GG                 | GG               | INTERGENIC                    |                    |                                                          |
| SNP_35578_A_19922498 | NC_021164.1    | Ca_Kabuli_Chr05 | 19922498                | TT                              | AA                 | AA               | INTERGENIC                    |                    |                                                          |
| SNP_35579_A_19922550 | NC_021164.1    | Ca_Kabuli_Chr05 | 19922550                | TT                              | CC                 | CC               | INTERGENIC                    |                    |                                                          |
| SNP_35580_A_19945887 | NC_021164.1    | Ca_Kabuli_Chr05 | 19945887                | GG                              | TT                 | TT               | INTERGENIC                    |                    |                                                          |
| SNP_35581_A_19957218 | NC_021164.1    | Ca_Kabuli_Chr05 | 19957218                | TT                              | AA                 | AA               | INTRON                        | 101498948          | cytochrome b561 domain-containing protein At2g30890-like |
| SNP_35582_A_19961222 | NC_021164.1    | Ca_Kabuli_Chr05 | 19961222                | TT                              | AA                 | AA               | URR                           | 101498948          | cytochrome b561 domain-containing protein At2g30890-like |
| SNP_35583_A_19998061 | NC_021164.1    | Ca_Kabuli_Chr05 | 19998061                | CC                              | TT                 | TT               | DRR                           | 101503075          | uncharacterized LOC101503075                             |
| SNP_35584_A_19998317 | NC_021164.1    | Ca_Kabuli_Chr05 | 19998317                | TT                              | CC                 | CC               | DRR                           | 101503075          | uncharacterized LOC101503075                             |
| SNP_35585_A_20017774 | NC_021164.1    | Ca_Kabuli_Chr05 | 20017774                | GG                              | AA                 | AA               | DRR                           | 101500232          | callose synthase 7                                       |

| SNPs IDs             | Chromosome IDs | Chromosomes     | Physical positions (bp) | CDC Frontier (Reference genome) | (Pusa 1103 & HPNB) | (ILWC 46 & LPNB) | Sequence Components of genome | Gene accession IDs | Putative functions           |
|----------------------|----------------|-----------------|-------------------------|---------------------------------|--------------------|------------------|-------------------------------|--------------------|------------------------------|
| SNP_35586_A_20064854 | NC_021164.1    | Ca_Kabuli_Chr05 | 20064854                | GG                              | AA                 | AA               | INTERGENIC                    |                    |                              |
| SNP_35587_A_20072763 | NC_021164.1    | Ca_Kabuli_Chr05 | 20072763                | AA                              | GG                 | GG               | INTERGENIC                    |                    |                              |
| SNP_35588_A_20072765 | NC_021164.1    | Ca_Kabuli_Chr05 | 20072765                | TT                              | CC                 | CC               | INTERGENIC                    |                    |                              |
| SNP_35589_A_20074004 | NC_021164.1    | Ca_Kabuli_Chr05 | 20074004                | TT                              | CC                 | CC               | INTERGENIC                    |                    |                              |
| SNP_35590_A_20074263 | NC_021164.1    | Ca_Kabuli_Chr05 | 20074263                | CC                              | AA                 | AA               | INTERGENIC                    |                    |                              |
| SNP_35591_A_20074517 | NC_021164.1    | Ca_Kabuli_Chr05 | 20074517                | GG                              | AA                 | AA               | INTERGENIC                    |                    |                              |
| SNP_35592_A_20074622 | NC_021164.1    | Ca_Kabuli_Chr05 | 20074622                | TT                              | CC                 | CC               | INTERGENIC                    |                    |                              |
| SNP_35594_A_20305040 | NC_021164.1    | Ca_Kabuli_Chr05 | 20305040                | GG                              | AA                 | AA               | INTERGENIC                    |                    |                              |
| SNP_35595_A_20373417 | NC_021164.1    | Ca_Kabuli_Chr05 | 20373417                | CC                              | AA                 | AA               | INTERGENIC                    |                    |                              |
| SNP_35596_A_20373608 | NC_021164.1    | Ca_Kabuli_Chr05 | 20373608                | CC                              | AA                 | AA               | INTERGENIC                    |                    |                              |
| SNP_35597_A_20374583 | NC_021164.1    | Ca_Kabuli_Chr05 | 20374583                | AA                              | CC                 | CC               | DRR                           | 101505681          | uncharacterized LOC101505681 |
| SNP_35598_A_20374586 | NC_021164.1    | Ca_Kabuli_Chr05 | 20374586                | TT                              | CC                 | CC               | DRR                           | 101505681          | uncharacterized LOC101505681 |
| SNP_35599_A_20374601 | NC_021164.1    | Ca_Kabuli_Chr05 | 20374601                | TT                              | CC                 | CC               | DRR                           | 101505681          | uncharacterized LOC101505681 |
| SNP_35600_A_20374674 | NC_021164.1    | Ca_Kabuli_Chr05 | 20374674                | TT                              | CC                 | CC               | DRR                           | 101505681          | uncharacterized LOC101505681 |
| SNP_35601_A_20374678 | NC_021164.1    | Ca_Kabuli_Chr05 | 20374678                | CC                              | TT                 | TT               | DRR                           | 101505681          | uncharacterized LOC101505681 |
| SNP_35602_A_20374936 | NC_021164.1    | Ca_Kabuli_Chr05 | 20374936                | TT                              | GG                 | GG               | DRR                           | 101505681          | uncharacterized LOC101505681 |
| SNP_35603_A_20374944 | NC_021164.1    | Ca_Kabuli_Chr05 | 20374944                | GG                              | AA                 | AA               | DRR                           | 101505681          | uncharacterized LOC101505681 |
| SNP_35604_A_20378406 | NC_021164.1    | Ca_Kabuli_Chr05 | 20378406                | GG                              | TT                 | TT               | INTERGENIC                    |                    |                              |
| SNP_35605_A_20378461 | NC_021164.1    | Ca_Kabuli_Chr05 | 20378461                | GG                              | TT                 | TT               | INTERGENIC                    |                    |                              |
| SNP_35606_A_20392750 | NC_021164.1    | Ca_Kabuli_Chr05 | 20392750                | CC                              | TT                 | TT               | INTERGENIC                    |                    |                              |
| SNP_35607_A_20394342 | NC_021164.1    | Ca_Kabuli_Chr05 | 20394342                | TT                              | GG                 | GG               | INTERGENIC                    |                    |                              |
| SNP_35608_A_20394374 | NC_021164.1    | Ca_Kabuli_Chr05 | 20394374                | TT                              | CC                 | CC               | INTERGENIC                    |                    |                              |

| SNPs IDs             | Chromosome IDs | Chromosomes     | Physical positions (bp) | CDC Frontier (Reference genome) | (Pusa 1103 & HPNB) | (ILWC 46 & LPNB) | Sequence genome | Components of | Gene accession IDs | Putative functions |
|----------------------|----------------|-----------------|-------------------------|---------------------------------|--------------------|------------------|-----------------|---------------|--------------------|--------------------|
| SNP_35609_A_20394377 | NC_021164.1    | Ca_Kabuli_Chr05 | 20394377                | AA                              | GG                 | GG               | INTERGENIC      |               |                    |                    |
| SNP_35610_A_20394386 | NC_021164.1    | Ca_Kabuli_Chr05 | 20394386                | AA                              | CC                 | CC               | INTERGENIC      |               |                    |                    |
| SNP_35611_A_20394645 | NC_021164.1    | Ca_Kabuli_Chr05 | 20394645                | AA                              | GG                 | GG               | INTERGENIC      |               |                    |                    |
| SNP_35612_A_20394651 | NC_021164.1    | Ca_Kabuli_Chr05 | 20394651                | GG                              | CC                 | CC               | INTERGENIC      |               |                    |                    |
| SNP_35613_A_20394662 | NC_021164.1    | Ca_Kabuli_Chr05 | 20394662                | TT                              | AA                 | AA               | INTERGENIC      |               |                    |                    |
| SNP_35614_A_20394674 | NC_021164.1    | Ca_Kabuli_Chr05 | 20394674                | TT                              | GG                 | GG               | INTERGENIC      |               |                    |                    |
| SNP_35615_A_20394694 | NC_021164.1    | Ca_Kabuli_Chr05 | 20394694                | CC                              | TT                 | TT               | INTERGENIC      |               |                    |                    |
| SNP_35616_A_20394717 | NC_021164.1    | Ca_Kabuli_Chr05 | 20394717                | TT                              | CC                 | CC               | INTERGENIC      |               |                    |                    |
| SNP_35617_A_20398248 | NC_021164.1    | Ca_Kabuli_Chr05 | 20398248                | CC                              | AA                 | AA               | INTERGENIC      |               |                    |                    |
| SNP_35618_A_20398261 | NC_021164.1    | Ca_Kabuli_Chr05 | 20398261                | TT                              | AA                 | AA               | INTERGENIC      |               |                    |                    |
| SNP_35619_A_20398289 | NC_021164.1    | Ca_Kabuli_Chr05 | 20398289                | GG                              | AA                 | AA               | INTERGENIC      |               |                    |                    |
| SNP_35620_A_20406334 | NC_021164.1    | Ca_Kabuli_Chr05 | 20406334                | GG                              | TT                 | TT               | INTERGENIC      |               |                    |                    |
| SNP_35621_A_20406364 | NC_021164.1    | Ca_Kabuli_Chr05 | 20406364                | TT                              | GG                 | GG               | INTERGENIC      |               |                    |                    |
| SNP_35622_A_20406370 | NC_021164.1    | Ca_Kabuli_Chr05 | 20406370                | TT                              | GG                 | GG               | INTERGENIC      |               |                    |                    |
| SNP_35623_A_20411012 | NC_021164.1    | Ca_Kabuli_Chr05 | 20411012                | AA                              | TT                 | TT               | INTERGENIC      |               |                    |                    |
| SNP_35625_A_20433138 | NC_021164.1    | Ca_Kabuli_Chr05 | 20433138                | TT                              | CC                 | CC               | INTERGENIC      |               |                    |                    |
| SNP_35626_A_20433227 | NC_021164.1    | Ca_Kabuli_Chr05 | 20433227                | TT                              | AA                 | AA               | INTERGENIC      |               |                    |                    |
| SNP_35627_A_20433559 | NC_021164.1    | Ca_Kabuli_Chr05 | 20433559                | AA                              | GG                 | GG               | INTERGENIC      |               |                    |                    |
| SNP_35628_A_20433864 | NC_021164.1    | Ca_Kabuli_Chr05 | 20433864                | AA                              | CC                 | CC               | INTERGENIC      |               |                    |                    |
| SNP_35629_A_20433926 | NC_021164.1    | Ca_Kabuli_Chr05 | 20433926                | AA                              | GG                 | GG               | INTERGENIC      |               |                    |                    |
| SNP_35630_A_20434667 | NC_021164.1    | Ca_Kabuli_Chr05 | 20434667                | CC                              | AA                 | AA               | INTERGENIC      |               |                    |                    |
| SNP_35631_A_20439812 | NC_021164.1    | Ca_Kabuli_Chr05 | 20439812                | CC                              | TT                 | TT               | INTERGENIC      |               |                    |                    |



| SNPs IDs             | Chromosome IDs | Chromosomes     | Physical positions (bp) | CDC Frontier genome (Reference genome) | (Pusa 1103 & HPNB) | (ILWC 46 & LPNB) | Sequence genome | Components of | Gene accession IDs | Putative functions |
|----------------------|----------------|-----------------|-------------------------|----------------------------------------|--------------------|------------------|-----------------|---------------|--------------------|--------------------|
| SNP_35632_A_20453168 | NC_021164.1    | Ca_Kabuli_Chr05 | 20453168                | CC                                     | TT                 | TT               | INTERGENIC      |               |                    |                    |
| SNP_35633_A_20454320 | NC_021164.1    | Ca_Kabuli_Chr05 | 20454320                | TT                                     | CC                 | CC               | INTERGENIC      |               |                    |                    |
| SNP_35634_A_20454329 | NC_021164.1    | Ca_Kabuli_Chr05 | 20454329                | AA                                     | GG                 | GG               | INTERGENIC      |               |                    |                    |
| SNP_35635_A_20454386 | NC_021164.1    | Ca_Kabuli_Chr05 | 20454386                | CC                                     | TT                 | TT               | INTERGENIC      |               |                    |                    |
| SNP_35636_A_20454388 | NC_021164.1    | Ca_Kabuli_Chr05 | 20454388                | CC                                     | TT                 | TT               | INTERGENIC      |               |                    |                    |
| SNP_35638_A_20520638 | NC_021164.1    | Ca_Kabuli_Chr05 | 20520638                | AA                                     | GG                 | GG               | INTERGENIC      |               |                    |                    |
| SNP_35639_A_20520673 | NC_021164.1    | Ca_Kabuli_Chr05 | 20520673                | CC                                     | TT                 | TT               | INTERGENIC      |               |                    |                    |
| SNP_35640_A_20547265 | NC_021164.1    | Ca_Kabuli_Chr05 | 20547265                | GG                                     | TT                 | TT               | INTERGENIC      |               |                    |                    |
| SNP_35642_A_20547373 | NC_021164.1    | Ca_Kabuli_Chr05 | 20547373                | GG                                     | AA                 | AA               | INTERGENIC      |               |                    |                    |
| SNP_35643_A_20547724 | NC_021164.1    | Ca_Kabuli_Chr05 | 20547724                | AA                                     | GG                 | GG               | INTERGENIC      |               |                    |                    |
| SNP_35644_A_20547725 | NC_021164.1    | Ca_Kabuli_Chr05 | 20547725                | GG                                     | AA                 | AA               | INTERGENIC      |               |                    |                    |
| SNP_35645_A_20547781 | NC_021164.1    | Ca_Kabuli_Chr05 | 20547781                | CC                                     | AA                 | AA               | INTERGENIC      |               |                    |                    |
| SNP_35646_A_20548242 | NC_021164.1    | Ca_Kabuli_Chr05 | 20548242                | TT                                     | GG                 | GG               | INTERGENIC      |               |                    |                    |
| SNP_35647_A_20554208 | NC_021164.1    | Ca_Kabuli_Chr05 | 20554208                | CC                                     | TT                 | TT               | INTERGENIC      |               |                    |                    |
| SNP_35648_A_20562922 | NC_021164.1    | Ca_Kabuli_Chr05 | 20562922                | GG                                     | AA                 | AA               | INTERGENIC      |               |                    |                    |
| SNP_35649_A_20572378 | NC_021164.1    | Ca_Kabuli_Chr05 | 20572378                | CC                                     | TT                 | TT               | INTERGENIC      |               |                    |                    |
| SNP_35650_A_20623962 | NC_021164.1    | Ca_Kabuli_Chr05 | 20623962                | GG                                     | AA                 | AA               | INTERGENIC      |               |                    |                    |
| SNP_35651_A_20627266 | NC_021164.1    | Ca_Kabuli_Chr05 | 20627266                | TT                                     | CC                 | CC               | INTERGENIC      |               |                    |                    |
| SNP_35652_A_20654590 | NC_021164.1    | Ca_Kabuli_Chr05 | 20654590                | GG                                     | AA                 | AA               | INTERGENIC      |               |                    |                    |
| SNP_35653_A_20701061 | NC_021164.1    | Ca_Kabuli_Chr05 | 20701061                | GG                                     | TT                 | TT               | INTERGENIC      |               |                    |                    |
| SNP_35654_A_20701118 | NC_021164.1    | Ca_Kabuli_Chr05 | 20701118                | TT                                     | GG                 | GG               | INTERGENIC      |               |                    |                    |
| SNP_35656_A_20701157 | NC_021164.1    | Ca_Kabuli_Chr05 | 20701157                | CC                                     | TT                 | TT               | INTERGENIC      |               |                    |                    |

| SNPs IDs             | Chromosome IDs | Chromosomes     | Physical positions (bp) | CDC Frontier genome (Reference genome) | (Pusa 1103 & HPNB) | (ILWC 46 & LPNB) | Sequence Components of genome | Gene accession IDs | Putative functions                           |
|----------------------|----------------|-----------------|-------------------------|----------------------------------------|--------------------|------------------|-------------------------------|--------------------|----------------------------------------------|
| SNP_35657_A_20735568 | NC_021164.1    | Ca_Kabuli_Chr05 | 20735568                | CC                                     | GG                 | GG               | INTERGENIC                    |                    |                                              |
| SNP_35658_A_20738471 | NC_021164.1    | Ca_Kabuli_Chr05 | 20738471                | GG                                     | AA                 | AA               | INTERGENIC                    |                    |                                              |
| SNP_35659_A_20743456 | NC_021164.1    | Ca_Kabuli_Chr05 | 20743456                | AA                                     | TT                 | TT               | INTERGENIC                    |                    |                                              |
| SNP_35662_A_20777377 | NC_021164.1    | Ca_Kabuli_Chr05 | 20777377                | TT                                     | CC                 | CC               | DRR                           | 101510481          | spermidine hydroxycinnamoyl transferase-like |
| SNP_35663_A_20791653 | NC_021164.1    | Ca_Kabuli_Chr05 | 20791653                | CC                                     | GG                 | GG               | INTRON                        | 101492216          | threonine-tRNA ligase, cytoplasmic-like      |
| SNP_35664_A_20791695 | NC_021164.1    | Ca_Kabuli_Chr05 | 20791695                | AA                                     | GG                 | GG               | INTRON                        | 101492216          | threonine-tRNA ligase, cytoplasmic-like      |
| SNP_35665_A_20814302 | NC_021164.1    | Ca_Kabuli_Chr05 | 20814302                | TT                                     | GG                 | GG               | NON_SYNONYMOUS_CODING         | 101510811          | protein trichome birefringence-like 43       |
| SNP_35667_A_20856693 | NC_021164.1    | Ca_Kabuli_Chr05 | 20856693                | TT                                     | CC                 | CC               | INTERGENIC                    |                    |                                              |
| SNP_35668_A_20856696 | NC_021164.1    | Ca_Kabuli_Chr05 | 20856696                | TT                                     | AA                 | AA               | INTERGENIC                    |                    |                                              |
| SNP_35669_A_20856701 | NC_021164.1    | Ca_Kabuli_Chr05 | 20856701                | TT                                     | CC                 | CC               | INTERGENIC                    |                    |                                              |
| SNP_35670_A_20856775 | NC_021164.1    | Ca_Kabuli_Chr05 | 20856775                | TT                                     | CC                 | CC               | INTERGENIC                    |                    |                                              |
| SNP_35671_A_20856826 | NC_021164.1    | Ca_Kabuli_Chr05 | 20856826                | CC                                     | TT                 | TT               | INTERGENIC                    |                    |                                              |
| SNP_35672_A_20857019 | NC_021164.1    | Ca_Kabuli_Chr05 | 20857019                | GG                                     | AA                 | AA               | INTERGENIC                    |                    |                                              |
| SNP_35673_A_20857028 | NC_021164.1    | Ca_Kabuli_Chr05 | 20857028                | TT                                     | GG                 | GG               | INTERGENIC                    |                    |                                              |
| SNP_35674_A_20971337 | NC_021164.1    | Ca_Kabuli_Chr05 | 20971337                | CC                                     | GG                 | GG               | INTERGENIC                    |                    |                                              |
| SNP_35675_A_20971389 | NC_021164.1    | Ca_Kabuli_Chr05 | 20971389                | AA                                     | GG                 | GG               | INTERGENIC                    |                    |                                              |
| SNP_35676_A_20971552 | NC_021164.1    | Ca_Kabuli_Chr05 | 20971552                | AA                                     | CC                 | CC               | INTERGENIC                    |                    |                                              |
| SNP_35677_A_20976943 | NC_021164.1    | Ca_Kabuli_Chr05 | 20976943                | TT                                     | CC                 | CC               | SYNONYMOUS_CODING             | Gene_ma15463       | Unknown function                             |
| SNP_35678_A_20976957 | NC_021164.1    | Ca_Kabuli_Chr05 | 20976957                | GG                                     | TT                 | TT               | NON_SYNONYMOUS_CODING         | Gene_ma15463       | Unknown function                             |
| SNP_35679_A_21066307 | NC_021164.1    | Ca_Kabuli_Chr05 | 21066307                | AA                                     | GG                 | GG               | INTERGENIC                    |                    |                                              |
| SNP_35680_A_21066317 | NC_021164.1    | Ca_Kabuli_Chr05 | 21066317                | AA                                     | GG                 | GG               | INTERGENIC                    |                    |                                              |
| SNP_35681_A_21066334 | NC_021164.1    | Ca_Kabuli_Chr05 | 21066334                | GG                                     | AA                 | AA               | INTERGENIC                    |                    |                                              |

| SNPs IDs             | Chromosome IDs | Chromosomes     | Physical positions (bp) | CDC Frontier genome (Reference genome) | (Pusa 1103 & HPNB) | (ILWC 46 & LPNB) | Sequence Components of genome | Gene accession IDs | Putative functions                                       |
|----------------------|----------------|-----------------|-------------------------|----------------------------------------|--------------------|------------------|-------------------------------|--------------------|----------------------------------------------------------|
| SNP_35682_A_21072470 | NC_021164.1    | Ca_Kabuli_Chr05 | 21072470                | CC                                     | TT                 | TT               | INTERGENIC                    |                    |                                                          |
| SNP_35684_A_21100438 | NC_021164.1    | Ca_Kabuli_Chr05 | 21100438                | CC                                     | TT                 | TT               | DRR                           | 101495786          | uncharacterized LOC101495786                             |
| SNP_35686_A_21116527 | NC_021164.1    | Ca_Kabuli_Chr05 | 21116527                | GG                                     | AA                 | AA               | INTRON                        | 101496438          | uncharacterized LOC101496438                             |
| SNP_35687_A_21117105 | NC_021164.1    | Ca_Kabuli_Chr05 | 21117105                | AA                                     | GG                 | GG               | INTRON                        | 101496438          | uncharacterized LOC101496438                             |
| SNP_35689_A_21127290 | NC_021164.1    | Ca_Kabuli_Chr05 | 21127290                | TT                                     | CC                 | CC               | INTERGENIC                    |                    |                                                          |
| SNP_35690_A_21141391 | NC_021164.1    | Ca_Kabuli_Chr05 | 21141391                | CC                                     | TT                 | TT               | INTERGENIC                    |                    |                                                          |
| SNP_35693_A_21224751 | NC_021164.1    | Ca_Kabuli_Chr05 | 21224751                | AA                                     | CC                 | CC               | INTERGENIC                    |                    |                                                          |
| SNP_35694_A_21258545 | NC_021164.1    | Ca_Kabuli_Chr05 | 21258545                | GG                                     | AA                 | AA               | INTERGENIC                    |                    |                                                          |
| SNP_35695_A_21267551 | NC_021164.1    | Ca_Kabuli_Chr05 | 21267551                | TT                                     | AA                 | AA               | INTERGENIC                    |                    |                                                          |
| SNP_35697_A_21284103 | NC_021164.1    | Ca_Kabuli_Chr05 | 21284103                | CC                                     | TT                 | TT               | INTERGENIC                    |                    |                                                          |
| SNP_35698_A_21345443 | NC_021164.1    | Ca_Kabuli_Chr05 | 21345443                | TT                                     | GG                 | GG               | INTERGENIC                    |                    |                                                          |
| SNP_35700_A_21448692 | NC_021164.1    | Ca_Kabuli_Chr05 | 21448692                | TT                                     | CC                 | CC               | INTERGENIC                    |                    |                                                          |
| SNP_35701_A_21498128 | NC_021164.1    | Ca_Kabuli_Chr05 | 21498128                | TT                                     | AA                 | AA               | URR                           | 101499381          | serine/threonine-protein phosphatase 7 long form homolog |
| SNP_35702_A_21498142 | NC_021164.1    | Ca_Kabuli_Chr05 | 21498142                | TT                                     | CC                 | CC               | URR                           | 101499381          | serine/threonine-protein phosphatase 7 long form homolog |
| SNP_35703_A_21498147 | NC_021164.1    | Ca_Kabuli_Chr05 | 21498147                | GG                                     | TT                 | TT               | URR                           | 101499381          | serine/threonine-protein phosphatase 7 long form homolog |
| SNP_35704_A_21498206 | NC_021164.1    | Ca_Kabuli_Chr05 | 21498206                | AA                                     | TT                 | TT               | URR                           | 101499381          | serine/threonine-protein phosphatase 7 long form homolog |
| SNP_35705_A_21526772 | NC_021164.1    | Ca_Kabuli_Chr05 | 21526772                | CC                                     | TT                 | TT               | INTERGENIC                    |                    |                                                          |
| SNP_35706_A_21557498 | NC_021164.1    | Ca_Kabuli_Chr05 | 21557498                | AA                                     | GG                 | GG               | INTERGENIC                    |                    |                                                          |
| SNP_35707_A_21559517 | NC_021164.1    | Ca_Kabuli_Chr05 | 21559517                | CC                                     | GG                 | GG               | INTERGENIC                    |                    |                                                          |
| SNP_35708_A_21559585 | NC_021164.1    | Ca_Kabuli_Chr05 | 21559585                | CC                                     | TT                 | TT               | INTERGENIC                    |                    |                                                          |
| SNP_35709_A_21570025 | NC_021164.1    | Ca_Kabuli_Chr05 | 21570025                | GG                                     | TT                 | TT               | INTERGENIC                    |                    |                                                          |
| SNP_35710_A_21577325 | NC_021164.1    | Ca_Kabuli_Chr05 | 21577325                | CC                                     | TT                 | TT               | INTERGENIC                    |                    |                                                          |

| SNPs IDs             | Chromosome IDs | Chromosomes     | Physical positions (bp) | CDC Frontier genome (Reference genome) | (Pusa 1103 & HPNB) | (ILWC 46 & LPNB) | Sequence genome | Components of | Gene accession IDs | Putative functions |
|----------------------|----------------|-----------------|-------------------------|----------------------------------------|--------------------|------------------|-----------------|---------------|--------------------|--------------------|
| SNP_35711_A_21577337 | NC_021164.1    | Ca_Kabuli_Chr05 | 21577337                | TT                                     | AA                 | AA               | INTERGENIC      |               |                    |                    |
| SNP_35712_A_21597910 | NC_021164.1    | Ca_Kabuli_Chr05 | 21597910                | CC                                     | TT                 | TT               | INTERGENIC      |               |                    |                    |
| SNP_35713_A_21623168 | NC_021164.1    | Ca_Kabuli_Chr05 | 21623168                | CC                                     | TT                 | TT               | INTERGENIC      |               |                    |                    |
| SNP_35714_A_21623397 | NC_021164.1    | Ca_Kabuli_Chr05 | 21623397                | AA                                     | TT                 | TT               | INTERGENIC      |               |                    |                    |
| SNP_35716_A_21623579 | NC_021164.1    | Ca_Kabuli_Chr05 | 21623579                | CC                                     | TT                 | TT               | INTERGENIC      |               |                    |                    |
| SNP_35717_A_21623842 | NC_021164.1    | Ca_Kabuli_Chr05 | 21623842                | AA                                     | TT                 | TT               | INTERGENIC      |               |                    |                    |
| SNP_35718_A_21623847 | NC_021164.1    | Ca_Kabuli_Chr05 | 21623847                | TT                                     | GG                 | GG               | INTERGENIC      |               |                    |                    |
| SNP_35719_A_21623986 | NC_021164.1    | Ca_Kabuli_Chr05 | 21623986                | AA                                     | GG                 | GG               | INTERGENIC      |               |                    |                    |
| SNP_35720_A_21624086 | NC_021164.1    | Ca_Kabuli_Chr05 | 21624086                | GG                                     | CC                 | CC               | INTERGENIC      |               |                    |                    |
| SNP_35721_A_21624281 | NC_021164.1    | Ca_Kabuli_Chr05 | 21624281                | AA                                     | CC                 | CC               | INTERGENIC      |               |                    |                    |
| SNP_35722_A_21658704 | NC_021164.1    | Ca_Kabuli_Chr05 | 21658704                | GG                                     | TT                 | TT               | INTERGENIC      |               |                    |                    |
| SNP_35723_A_21658904 | NC_021164.1    | Ca_Kabuli_Chr05 | 21658904                | CC                                     | TT                 | TT               | INTERGENIC      |               |                    |                    |
| SNP_35724_A_21658905 | NC_021164.1    | Ca_Kabuli_Chr05 | 21658905                | TT                                     | GG                 | GG               | INTERGENIC      |               |                    |                    |
| SNP_35725_A_21661572 | NC_021164.1    | Ca_Kabuli_Chr05 | 21661572                | AA                                     | TT                 | TT               | INTERGENIC      |               |                    |                    |
| SNP_35726_A_21663762 | NC_021164.1    | Ca_Kabuli_Chr05 | 21663762                | GG                                     | AA                 | AA               | INTERGENIC      |               |                    |                    |
| SNP_35727_A_21663806 | NC_021164.1    | Ca_Kabuli_Chr05 | 21663806                | AA                                     | GG                 | GG               | INTERGENIC      |               |                    |                    |
| SNP_35728_A_21665906 | NC_021164.1    | Ca_Kabuli_Chr05 | 21665906                | GG                                     | AA                 | AA               | INTERGENIC      |               |                    |                    |
| SNP_35729_A_21665931 | NC_021164.1    | Ca_Kabuli_Chr05 | 21665931                | GG                                     | TT                 | TT               | INTERGENIC      |               |                    |                    |
| SNP_35730_A_21666258 | NC_021164.1    | Ca_Kabuli_Chr05 | 21666258                | TT                                     | CC                 | CC               | INTERGENIC      |               |                    |                    |
| SNP_35731_A_21670974 | NC_021164.1    | Ca_Kabuli_Chr05 | 21670974                | CC                                     | TT                 | TT               | INTERGENIC      |               |                    |                    |
| SNP_35732_A_21670976 | NC_021164.1    | Ca_Kabuli_Chr05 | 21670976                | AA                                     | GG                 | GG               | INTERGENIC      |               |                    |                    |
| SNP_35733_A_21675813 | NC_021164.1    | Ca_Kabuli_Chr05 | 21675813                | AA                                     | GG                 | GG               | INTERGENIC      |               |                    |                    |

| SNPs IDs             | Chromosome IDs | Chromosomes     | Physical positions (bp) | CDC Frontier genome (Reference genome) | (Pusa 1103 & HPNB) | (ILWC 46 & LPNB) | Sequence genome | Components of | Gene accession IDs | Putative functions |
|----------------------|----------------|-----------------|-------------------------|----------------------------------------|--------------------|------------------|-----------------|---------------|--------------------|--------------------|
| SNP_35734_A_21677793 | NC_021164.1    | Ca_Kabuli_Chr05 | 21677793                | CC                                     | AA                 | AA               | INTERGENIC      |               |                    |                    |
| SNP_35735_A_21681648 | NC_021164.1    | Ca_Kabuli_Chr05 | 21681648                | GG                                     | TT                 | TT               | INTERGENIC      |               |                    |                    |
| SNP_35736_A_21681649 | NC_021164.1    | Ca_Kabuli_Chr05 | 21681649                | TT                                     | GG                 | GG               | INTERGENIC      |               |                    |                    |
| SNP_35737_A_21681655 | NC_021164.1    | Ca_Kabuli_Chr05 | 21681655                | CC                                     | TT                 | TT               | INTERGENIC      |               |                    |                    |
| SNP_35738_A_21683445 | NC_021164.1    | Ca_Kabuli_Chr05 | 21683445                | CC                                     | TT                 | TT               | INTERGENIC      |               |                    |                    |
| SNP_35739_A_21683461 | NC_021164.1    | Ca_Kabuli_Chr05 | 21683461                | GG                                     | TT                 | TT               | INTERGENIC      |               |                    |                    |
| SNP_35740_A_21684225 | NC_021164.1    | Ca_Kabuli_Chr05 | 21684225                | AA                                     | TT                 | TT               | INTERGENIC      |               |                    |                    |
| SNP_35741_A_21684245 | NC_021164.1    | Ca_Kabuli_Chr05 | 21684245                | AA                                     | GG                 | GG               | INTERGENIC      |               |                    |                    |
| SNP_35742_A_21684529 | NC_021164.1    | Ca_Kabuli_Chr05 | 21684529                | AA                                     | GG                 | GG               | INTERGENIC      |               |                    |                    |
| SNP_35743_A_21684537 | NC_021164.1    | Ca_Kabuli_Chr05 | 21684537                | TT                                     | CC                 | CC               | INTERGENIC      |               |                    |                    |
| SNP_35744_A_21684553 | NC_021164.1    | Ca_Kabuli_Chr05 | 21684553                | CC                                     | AA                 | AA               | INTERGENIC      |               |                    |                    |
| SNP_35745_A_21684906 | NC_021164.1    | Ca_Kabuli_Chr05 | 21684906                | GG                                     | CC                 | CC               | INTERGENIC      |               |                    |                    |
| SNP_35746_A_21684929 | NC_021164.1    | Ca_Kabuli_Chr05 | 21684929                | CC                                     | TT                 | TT               | INTERGENIC      |               |                    |                    |
| SNP_35747_A_21692423 | NC_021164.1    | Ca_Kabuli_Chr05 | 21692423                | TT                                     | AA                 | AA               | INTERGENIC      |               |                    |                    |
| SNP_35748_A_21692447 | NC_021164.1    | Ca_Kabuli_Chr05 | 21692447                | CC                                     | GG                 | GG               | INTERGENIC      |               |                    |                    |
| SNP_35749_A_21692488 | NC_021164.1    | Ca_Kabuli_Chr05 | 21692488                | TT                                     | GG                 | GG               | INTERGENIC      |               |                    |                    |
| SNP_35750_A_21692530 | NC_021164.1    | Ca_Kabuli_Chr05 | 21692530                | AA                                     | GG                 | GG               | INTERGENIC      |               |                    |                    |
| SNP_35751_A_21692548 | NC_021164.1    | Ca_Kabuli_Chr05 | 21692548                | AA                                     | TT                 | TT               | INTERGENIC      |               |                    |                    |
| SNP_35752_A_21692570 | NC_021164.1    | Ca_Kabuli_Chr05 | 21692570                | GG                                     | AA                 | AA               | INTERGENIC      |               |                    |                    |
| SNP_35753_A_21692581 | NC_021164.1    | Ca_Kabuli_Chr05 | 21692581                | TT                                     | CC                 | CC               | INTERGENIC      |               |                    |                    |
| SNP_35754_A_21692711 | NC_021164.1    | Ca_Kabuli_Chr05 | 21692711                | AA                                     | GG                 | GG               | INTERGENIC      |               |                    |                    |
| SNP_35755_A_21692816 | NC_021164.1    | Ca_Kabuli_Chr05 | 21692816                | AA                                     | TT                 | TT               | INTERGENIC      |               |                    |                    |

| SNPs IDs             | Chromosome IDs | Chromosomes     | Physical positions (bp) | CDC Frontier genome (Reference genome) | (Pusa 1103 & HPNB) | (ILWC 46 & LPNB) | Sequence genome | Components of | Gene accession IDs | Putative functions |
|----------------------|----------------|-----------------|-------------------------|----------------------------------------|--------------------|------------------|-----------------|---------------|--------------------|--------------------|
| SNP_35756_A_21693382 | NC_021164.1    | Ca_Kabuli_Chr05 | 21693382                | AA                                     | GG                 | GG               | INTERGENIC      |               |                    |                    |
| SNP_35757_A_21693530 | NC_021164.1    | Ca_Kabuli_Chr05 | 21693530                | TT                                     | GG                 | GG               | INTERGENIC      |               |                    |                    |
| SNP_35758_A_21693671 | NC_021164.1    | Ca_Kabuli_Chr05 | 21693671                | GG                                     | AA                 | AA               | INTERGENIC      |               |                    |                    |
| SNP_35759_A_21693672 | NC_021164.1    | Ca_Kabuli_Chr05 | 21693672                | TT                                     | GG                 | GG               | INTERGENIC      |               |                    |                    |
| SNP_35760_A_21699154 | NC_021164.1    | Ca_Kabuli_Chr05 | 21699154                | GG                                     | TT                 | TT               | INTERGENIC      |               |                    |                    |
| SNP_35761_A_21699491 | NC_021164.1    | Ca_Kabuli_Chr05 | 21699491                | CC                                     | AA                 | AA               | INTERGENIC      |               |                    |                    |
| SNP_35762_A_21714135 | NC_021164.1    | Ca_Kabuli_Chr05 | 21714135                | AA                                     | GG                 | GG               | INTERGENIC      |               |                    |                    |
| SNP_35763_A_21714136 | NC_021164.1    | Ca_Kabuli_Chr05 | 21714136                | AA                                     | GG                 | GG               | INTERGENIC      |               |                    |                    |
| SNP_35764_A_21720516 | NC_021164.1    | Ca_Kabuli_Chr05 | 21720516                | GG                                     | TT                 | TT               | INTERGENIC      |               |                    |                    |
| SNP_35765_A_21720786 | NC_021164.1    | Ca_Kabuli_Chr05 | 21720786                | CC                                     | TT                 | TT               | INTERGENIC      |               |                    |                    |
| SNP_35766_A_21720826 | NC_021164.1    | Ca_Kabuli_Chr05 | 21720826                | AA                                     | CC                 | CC               | INTERGENIC      |               |                    |                    |
| SNP_35767_A_21720909 | NC_021164.1    | Ca_Kabuli_Chr05 | 21720909                | CC                                     | TT                 | TT               | INTERGENIC      |               |                    |                    |
| SNP_35768_A_21721001 | NC_021164.1    | Ca_Kabuli_Chr05 | 21721001                | CC                                     | TT                 | TT               | INTERGENIC      |               |                    |                    |
| SNP_35769_A_21723302 | NC_021164.1    | Ca_Kabuli_Chr05 | 21723302                | TT                                     | CC                 | CC               | INTERGENIC      |               |                    |                    |
| SNP_35770_A_21740939 | NC_021164.1    | Ca_Kabuli_Chr05 | 21740939                | TT                                     | CC                 | CC               | INTERGENIC      |               |                    |                    |
| SNP_35771_A_21740948 | NC_021164.1    | Ca_Kabuli_Chr05 | 21740948                | CC                                     | TT                 | TT               | INTERGENIC      |               |                    |                    |
| SNP_35772_A_21740970 | NC_021164.1    | Ca_Kabuli_Chr05 | 21740970                | TT                                     | CC                 | CC               | INTERGENIC      |               |                    |                    |
| SNP_35773_A_21740972 | NC_021164.1    | Ca_Kabuli_Chr05 | 21740972                | TT                                     | AA                 | AA               | INTERGENIC      |               |                    |                    |
| SNP_35774_A_21740990 | NC_021164.1    | Ca_Kabuli_Chr05 | 21740990                | CC                                     | TT                 | TT               | INTERGENIC      |               |                    |                    |
| SNP_35775_A_21741001 | NC_021164.1    | Ca_Kabuli_Chr05 | 21741001                | AA                                     | CC                 | CC               | INTERGENIC      |               |                    |                    |
| SNP_35776_A_21741063 | NC_021164.1    | Ca_Kabuli_Chr05 | 21741063                | CC                                     | TT                 | TT               | INTERGENIC      |               |                    |                    |
| SNP_35777_A_21741339 | NC_021164.1    | Ca_Kabuli_Chr05 | 21741339                | GG                                     | AA                 | AA               | INTERGENIC      |               |                    |                    |

| SNPs IDs             | Chromosome IDs | Chromosomes     | Physical positions (bp) | CDC Frontier genome (Reference genome) | (Pusa 1103 & HPNB) | (ILWC 46 & LPNB) | Sequence genome | Components of | Gene accession IDs | Putative functions |
|----------------------|----------------|-----------------|-------------------------|----------------------------------------|--------------------|------------------|-----------------|---------------|--------------------|--------------------|
| SNP_35778_A_21745782 | NC_021164.1    | Ca_Kabuli_Chr05 | 21745782                | AA                                     | TT                 | TT               | INTERGENIC      |               |                    |                    |
| SNP_35779_A_21745884 | NC_021164.1    | Ca_Kabuli_Chr05 | 21745884                | AA                                     | CC                 | CC               | INTERGENIC      |               |                    |                    |
| SNP_35780_A_21746170 | NC_021164.1    | Ca_Kabuli_Chr05 | 21746170                | TT                                     | CC                 | CC               | INTERGENIC      |               |                    |                    |
| SNP_35781_A_21746172 | NC_021164.1    | Ca_Kabuli_Chr05 | 21746172                | TT                                     | CC                 | CC               | INTERGENIC      |               |                    |                    |
| SNP_35782_A_21746181 | NC_021164.1    | Ca_Kabuli_Chr05 | 21746181                | TT                                     | CC                 | CC               | INTERGENIC      |               |                    |                    |
| SNP_35783_A_21746241 | NC_021164.1    | Ca_Kabuli_Chr05 | 21746241                | TT                                     | GG                 | GG               | INTERGENIC      |               |                    |                    |
| SNP_35784_A_21746247 | NC_021164.1    | Ca_Kabuli_Chr05 | 21746247                | CC                                     | GG                 | GG               | INTERGENIC      |               |                    |                    |
| SNP_35785_A_21746262 | NC_021164.1    | Ca_Kabuli_Chr05 | 21746262                | TT                                     | CC                 | CC               | INTERGENIC      |               |                    |                    |
| SNP_35787_A_21777860 | NC_021164.1    | Ca_Kabuli_Chr05 | 21777860                | AA                                     | GG                 | GG               | INTERGENIC      |               |                    |                    |
| SNP_35788_A_21845225 | NC_021164.1    | Ca_Kabuli_Chr05 | 21845225                | TT                                     | CC                 | CC               | INTERGENIC      |               |                    |                    |
| SNP_35789_A_21846444 | NC_021164.1    | Ca_Kabuli_Chr05 | 21846444                | TT                                     | AA                 | AA               | INTERGENIC      |               |                    |                    |
| SNP_35790_A_21846449 | NC_021164.1    | Ca_Kabuli_Chr05 | 21846449                | AA                                     | GG                 | GG               | INTERGENIC      |               |                    |                    |
| SNP_35791_A_21846567 | NC_021164.1    | Ca_Kabuli_Chr05 | 21846567                | AA                                     | TT                 | TT               | INTERGENIC      |               |                    |                    |
| SNP_35792_A_21846662 | NC_021164.1    | Ca_Kabuli_Chr05 | 21846662                | TT                                     | GG                 | GG               | INTERGENIC      |               |                    |                    |
| SNP_35793_A_21846677 | NC_021164.1    | Ca_Kabuli_Chr05 | 21846677                | TT                                     | CC                 | CC               | INTERGENIC      |               |                    |                    |
| SNP_35794_A_21846685 | NC_021164.1    | Ca_Kabuli_Chr05 | 21846685                | AA                                     | GG                 | GG               | INTERGENIC      |               |                    |                    |
| SNP_35795_A_21846725 | NC_021164.1    | Ca_Kabuli_Chr05 | 21846725                | AA                                     | CC                 | CC               | INTERGENIC      |               |                    |                    |
| SNP_35796_A_21846743 | NC_021164.1    | Ca_Kabuli_Chr05 | 21846743                | GG                                     | TT                 | TT               | INTERGENIC      |               |                    |                    |
| SNP_35797_A_21846807 | NC_021164.1    | Ca_Kabuli_Chr05 | 21846807                | AA                                     | TT                 | TT               | INTERGENIC      |               |                    |                    |
| SNP_35798_A_21846832 | NC_021164.1    | Ca_Kabuli_Chr05 | 21846832                | AA                                     | GG                 | GG               | INTERGENIC      |               |                    |                    |
| SNP_35799_A_21846876 | NC_021164.1    | Ca_Kabuli_Chr05 | 21846876                | AA                                     | GG                 | GG               | INTERGENIC      |               |                    |                    |
| SNP_35800_A_21851286 | NC_021164.1    | Ca_Kabuli_Chr05 | 21851286                | GG                                     | TT                 | TT               | DRR             | 101503629     |                    | Unknown function   |

| SNPs IDs             | Chromosome IDs | Chromosomes     | Physical positions (bp) | CDC Frontier (Reference genome) | (Pusa 1103 & HPNB) | (ILWC 46 & LPNB) | Sequence Components of genome | Gene accession IDs | Putative functions |
|----------------------|----------------|-----------------|-------------------------|---------------------------------|--------------------|------------------|-------------------------------|--------------------|--------------------|
| SNP_35801_A_21851290 | NC_021164.1    | Ca_Kabuli_Chr05 | 21851290                | GG                              | AA                 | AA               | DRR                           | 101503629          | Unknown function   |
| SNP_35802_A_21851369 | NC_021164.1    | Ca_Kabuli_Chr05 | 21851369                | TT                              | GG                 | GG               | NON_SYNONYMOUS_CODING         | 101503629          | Unknown function   |
| SNP_35803_A_21853701 | NC_021164.1    | Ca_Kabuli_Chr05 | 21853701                | TT                              | CC                 | CC               | INTRON                        | 101503629          | Unknown function   |
| SNP_35804_A_21865444 | NC_021164.1    | Ca_Kabuli_Chr05 | 21865444                | TT                              | CC                 | CC               | INTERGENIC                    |                    |                    |
| SNP_35805_A_21865490 | NC_021164.1    | Ca_Kabuli_Chr05 | 21865490                | TT                              | CC                 | CC               | INTERGENIC                    |                    |                    |
| SNP_35806_A_21865540 | NC_021164.1    | Ca_Kabuli_Chr05 | 21865540                | AA                              | GG                 | GG               | INTERGENIC                    |                    |                    |
| SNP_35807_A_21865543 | NC_021164.1    | Ca_Kabuli_Chr05 | 21865543                | AA                              | GG                 | GG               | INTERGENIC                    |                    |                    |
| SNP_35809_A_21867725 | NC_021164.1    | Ca_Kabuli_Chr05 | 21867725                | TT                              | CC                 | CC               | INTERGENIC                    |                    |                    |
| SNP_35810_A_21867734 | NC_021164.1    | Ca_Kabuli_Chr05 | 21867734                | AA                              | GG                 | GG               | INTERGENIC                    |                    |                    |
| SNP_35811_A_21867781 | NC_021164.1    | Ca_Kabuli_Chr05 | 21867781                | TT                              | AA                 | AA               | INTERGENIC                    |                    |                    |
| SNP_35812_A_21867902 | NC_021164.1    | Ca_Kabuli_Chr05 | 21867902                | TT                              | GG                 | GG               | INTERGENIC                    |                    |                    |
| SNP_35813_A_21867963 | NC_021164.1    | Ca_Kabuli_Chr05 | 21867963                | AA                              | GG                 | GG               | INTERGENIC                    |                    |                    |
| SNP_35814_A_21867965 | NC_021164.1    | Ca_Kabuli_Chr05 | 21867965                | AA                              | GG                 | GG               | INTERGENIC                    |                    |                    |
| SNP_35815_A_21867967 | NC_021164.1    | Ca_Kabuli_Chr05 | 21867967                | TT                              | CC                 | CC               | INTERGENIC                    |                    |                    |
| SNP_35817_A_21892004 | NC_021164.1    | Ca_Kabuli_Chr05 | 21892004                | AA                              | GG                 | GG               | INTERGENIC                    |                    |                    |
| SNP_35818_A_21898491 | NC_021164.1    | Ca_Kabuli_Chr05 | 21898491                | GG                              | CC                 | CC               | INTERGENIC                    |                    |                    |
| SNP_35819_A_21898552 | NC_021164.1    | Ca_Kabuli_Chr05 | 21898552                | GG                              | AA                 | AA               | INTERGENIC                    |                    |                    |
| SNP_35820_A_21899296 | NC_021164.1    | Ca_Kabuli_Chr05 | 21899296                | AA                              | GG                 | GG               | INTERGENIC                    |                    |                    |
| SNP_35822_A_21901046 | NC_021164.1    | Ca_Kabuli_Chr05 | 21901046                | AA                              | TT                 | TT               | INTERGENIC                    |                    |                    |
| SNP_35823_A_21901049 | NC_021164.1    | Ca_Kabuli_Chr05 | 21901049                | TT                              | AA                 | AA               | INTERGENIC                    |                    |                    |
| SNP_35824_A_21901069 | NC_021164.1    | Ca_Kabuli_Chr05 | 21901069                | TT                              | CC                 | CC               | INTERGENIC                    |                    |                    |
| SNP_35825_A_21901094 | NC_021164.1    | Ca_Kabuli_Chr05 | 21901094                | GG                              | AA                 | AA               | INTERGENIC                    |                    |                    |



| SNPs IDs             | Chromosome IDs | Chromosomes     | Physical positions (bp) | CDC Frontier genome (Reference genome) | (Pusa 1103 & HPNB) | (ILWC 46 & LPNB) | Sequence Components of genome | Gene accession IDs | Putative functions                   |
|----------------------|----------------|-----------------|-------------------------|----------------------------------------|--------------------|------------------|-------------------------------|--------------------|--------------------------------------|
| SNP_35826_A_21901113 | NC_021164.1    | Ca_Kabuli_Chr05 | 21901113                | TT                                     | CC                 | CC               | INTERGENIC                    |                    |                                      |
| SNP_35827_A_21901124 | NC_021164.1    | Ca_Kabuli_Chr05 | 21901124                | GG                                     | TT                 | TT               | INTERGENIC                    |                    |                                      |
| SNP_35828_A_21901149 | NC_021164.1    | Ca_Kabuli_Chr05 | 21901149                | AA                                     | CC                 | CC               | INTERGENIC                    |                    |                                      |
| SNP_35829_A_21908929 | NC_021164.1    | Ca_Kabuli_Chr05 | 21908929                | GG                                     | TT                 | TT               | INTERGENIC                    |                    |                                      |
| SNP_35830_A_21909350 | NC_021164.1    | Ca_Kabuli_Chr05 | 21909350                | TT                                     | CC                 | CC               | INTERGENIC                    |                    |                                      |
| SNP_35831_A_21917379 | NC_021164.1    | Ca_Kabuli_Chr05 | 21917379                | AA                                     | GG                 | GG               | INTERGENIC                    |                    |                                      |
| SNP_35832_A_21917422 | NC_021164.1    | Ca_Kabuli_Chr05 | 21917422                | TT                                     | CC                 | CC               | INTERGENIC                    |                    |                                      |
| SNP_35833_A_21918719 | NC_021164.1    | Ca_Kabuli_Chr05 | 21918719                | TT                                     | CC                 | CC               | INTERGENIC                    |                    |                                      |
| SNP_35834_A_21918804 | NC_021164.1    | Ca_Kabuli_Chr05 | 21918804                | AA                                     | CC                 | CC               | INTERGENIC                    |                    |                                      |
| SNP_35835_A_21918813 | NC_021164.1    | Ca_Kabuli_Chr05 | 21918813                | AA                                     | GG                 | GG               | INTERGENIC                    |                    |                                      |
| SNP_35836_A_21918846 | NC_021164.1    | Ca_Kabuli_Chr05 | 21918846                | TT                                     | CC                 | CC               | INTERGENIC                    |                    |                                      |
| SNP_35837_A_21918863 | NC_021164.1    | Ca_Kabuli_Chr05 | 21918863                | CC                                     | GG                 | GG               | INTERGENIC                    |                    |                                      |
| SNP_35838_A_21918870 | NC_021164.1    | Ca_Kabuli_Chr05 | 21918870                | CC                                     | TT                 | TT               | INTERGENIC                    |                    |                                      |
| SNP_35839_A_21918876 | NC_021164.1    | Ca_Kabuli_Chr05 | 21918876                | AA                                     | GG                 | GG               | INTERGENIC                    |                    |                                      |
| SNP_35840_A_21921362 | NC_021164.1    | Ca_Kabuli_Chr05 | 21921362                | TT                                     | GG                 | GG               | DRR                           | 101504921          | probable polygalacturonase At3g15720 |
| SNP_35841_A_21921387 | NC_021164.1    | Ca_Kabuli_Chr05 | 21921387                | GG                                     | AA                 | AA               | NON_SYNONYMOUS_CODING         | 101504921          | probable polygalacturonase At3g15720 |
| SNP_35842_A_21921388 | NC_021164.1    | Ca_Kabuli_Chr05 | 21921388                | TT                                     | GG                 | GG               | NON_SYNONYMOUS_CODING         | 101504921          | probable polygalacturonase At3g15720 |
| SNP_35843_A_21921409 | NC_021164.1    | Ca_Kabuli_Chr05 | 21921409                | TT                                     | AA                 | AA               | SYNONYMOUS_CODING             | 101504921          | probable polygalacturonase At3g15720 |
| SNP_35844_A_21921463 | NC_021164.1    | Ca_Kabuli_Chr05 | 21921463                | AA                                     | GG                 | GG               | SYNONYMOUS_CODING             | 101504921          | probable polygalacturonase At3g15720 |
| SNP_35845_A_21921472 | NC_021164.1    | Ca_Kabuli_Chr05 | 21921472                | TT                                     | AA                 | AA               | SYNONYMOUS_CODING             | 101504921          | probable polygalacturonase At3g15720 |
| SNP_35846_A_21921528 | NC_021164.1    | Ca_Kabuli_Chr05 | 21921528                | AA                                     | TT                 | TT               | NON_SYNONYMOUS_CODING         | 101504921          | probable polygalacturonase At3g15720 |
| SNP_35847_A_21921543 | NC_021164.1    | Ca_Kabuli_Chr05 | 21921543                | TT                                     | AA                 | AA               | NON_SYNONYMOUS_CODING         | 101504921          | probable polygalacturonase At3g15720 |

| SNPs IDs             | Chromosome IDs | Chromosomes     | Physical positions (bp) | CDC Frontier genome (Reference genome) | (Pusa 1103 & HPNB) | (ILWC 46 & LPNB) | Sequence Components of genome | Gene accession IDs | Putative functions                          |
|----------------------|----------------|-----------------|-------------------------|----------------------------------------|--------------------|------------------|-------------------------------|--------------------|---------------------------------------------|
| SNP_35848_A_21921590 | NC_021164.1    | Ca_Kabuli_Chr05 | 21921590                | TT                                     | GG                 | GG               | INTRON                        | 101504921          | probable polygalacturonase At3g15720        |
| SNP_35849_A_21921609 | NC_021164.1    | Ca_Kabuli_Chr05 | 21921609                | TT                                     | CC                 | CC               | INTRON                        | 101504921          | probable polygalacturonase At3g15720        |
| SNP_35850_A_21921783 | NC_021164.1    | Ca_Kabuli_Chr05 | 21921783                | TT                                     | AA                 | AA               | INTRON                        | 101504921          | probable polygalacturonase At3g15720        |
| SNP_35851_A_21921803 | NC_021164.1    | Ca_Kabuli_Chr05 | 21921803                | TT                                     | AA                 | AA               | INTRON                        | 101504921          | probable polygalacturonase At3g15720        |
| SNP_35852_A_21944872 | NC_021164.1    | Ca_Kabuli_Chr05 | 21944872                | GG                                     | AA                 | AA               | INTERGENIC                    |                    |                                             |
| SNP_35854_A_21998824 | NC_021164.1    | Ca_Kabuli_Chr05 | 21998824                | TT                                     | CC                 | CC               | INTERGENIC                    |                    |                                             |
| SNP_35855_A_21998825 | NC_021164.1    | Ca_Kabuli_Chr05 | 21998825                | TT                                     | CC                 | CC               | INTERGENIC                    |                    |                                             |
| SNP_35856_A_22058575 | NC_021164.1    | Ca_Kabuli_Chr05 | 22058575                | AA                                     | GG                 | GG               | INTERGENIC                    |                    |                                             |
| SNP_35857_A_22139095 | NC_021164.1    | Ca_Kabuli_Chr05 | 22139095                | GG                                     | TT                 | TT               | INTERGENIC                    |                    |                                             |
| SNP_35858_A_22189432 | NC_021164.1    | Ca_Kabuli_Chr05 | 22189432                | GG                                     | AA                 | AA               | URR                           | 101509845          | peptide methionine sulfoxide reductase-like |
| SNP_35859_A_22189433 | NC_021164.1    | Ca_Kabuli_Chr05 | 22189433                | TT                                     | CC                 | CC               | URR                           | 101509845          | peptide methionine sulfoxide reductase-like |
| SNP_35860_A_22205883 | NC_021164.1    | Ca_Kabuli_Chr05 | 22205883                | AA                                     | TT                 | TT               | INTERGENIC                    |                    |                                             |
| SNP_35861_A_22205901 | NC_021164.1    | Ca_Kabuli_Chr05 | 22205901                | CC                                     | TT                 | TT               | INTERGENIC                    |                    |                                             |
| SNP_35862_A_22205934 | NC_021164.1    | Ca_Kabuli_Chr05 | 22205934                | TT                                     | GG                 | GG               | INTERGENIC                    |                    |                                             |
| SNP_35863_A_22210180 | NC_021164.1    | Ca_Kabuli_Chr05 | 22210180                | TT                                     | CC                 | CC               | INTERGENIC                    |                    |                                             |
| SNP_35864_A_22210532 | NC_021164.1    | Ca_Kabuli_Chr05 | 22210532                | CC                                     | TT                 | TT               | INTERGENIC                    |                    |                                             |
| SNP_35866_A_22255850 | NC_021164.1    | Ca_Kabuli_Chr05 | 22255850                | AA                                     | GG                 | GG               | INTERGENIC                    |                    |                                             |
| SNP_35867_A_22290931 | NC_021164.1    | Ca_Kabuli_Chr05 | 22290931                | AA                                     | CC                 | CC               | INTERGENIC                    |                    |                                             |
| SNP_35868_A_22290935 | NC_021164.1    | Ca_Kabuli_Chr05 | 22290935                | GG                                     | TT                 | TT               | INTERGENIC                    |                    |                                             |
| SNP_35869_A_22291211 | NC_021164.1    | Ca_Kabuli_Chr05 | 22291211                | TT                                     | CC                 | CC               | INTERGENIC                    |                    |                                             |
| SNP_35870_A_22293745 | NC_021164.1    | Ca_Kabuli_Chr05 | 22293745                | AA                                     | GG                 | GG               | INTERGENIC                    |                    |                                             |
| SNP_35871_A_22293768 | NC_021164.1    | Ca_Kabuli_Chr05 | 22293768                | TT                                     | CC                 | CC               | INTERGENIC                    |                    |                                             |

| SNPs IDs             | Chromosome IDs | Chromosomes     | Physical positions (bp) | CDC Frontier (Reference genome) | (Pusa 1103 & HPNB) | (ILWC 46 & LPNB) | Sequence Components of genome | Gene accession IDs | Putative functions                        |
|----------------------|----------------|-----------------|-------------------------|---------------------------------|--------------------|------------------|-------------------------------|--------------------|-------------------------------------------|
| SNP_35872_A_22293778 | NC_021164.1    | Ca_Kabuli_Chr05 | 22293778                | TT                              | CC                 | CC               | INTERGENIC                    |                    |                                           |
| SNP_35873_A_22293826 | NC_021164.1    | Ca_Kabuli_Chr05 | 22293826                | TT                              | CC                 | CC               | INTERGENIC                    |                    |                                           |
| SNP_35874_A_22294110 | NC_021164.1    | Ca_Kabuli_Chr05 | 22294110                | AA                              | GG                 | GG               | INTERGENIC                    |                    |                                           |
| SNP_35875_A_22294142 | NC_021164.1    | Ca_Kabuli_Chr05 | 22294142                | GG                              | AA                 | AA               | INTERGENIC                    |                    |                                           |
| SNP_35876_A_22294157 | NC_021164.1    | Ca_Kabuli_Chr05 | 22294157                | TT                              | CC                 | CC               | INTERGENIC                    |                    |                                           |
| SNP_35877_A_22294175 | NC_021164.1    | Ca_Kabuli_Chr05 | 22294175                | GG                              | AA                 | AA               | INTERGENIC                    |                    |                                           |
| SNP_35878_A_22294247 | NC_021164.1    | Ca_Kabuli_Chr05 | 22294247                | CC                              | TT                 | TT               | INTERGENIC                    |                    |                                           |
| SNP_35879_A_22294329 | NC_021164.1    | Ca_Kabuli_Chr05 | 22294329                | AA                              | GG                 | GG               | INTERGENIC                    |                    |                                           |
| SNP_35880_A_22359694 | NC_021164.1    | Ca_Kabuli_Chr05 | 22359694                | TT                              | AA                 | AA               | INTERGENIC                    |                    |                                           |
| SNP_35881_A_22393071 | NC_021164.1    | Ca_Kabuli_Chr05 | 22393071                | TT                              | CC                 | CC               | INTERGENIC                    |                    |                                           |
| SNP_35882_A_22401676 | NC_021164.1    | Ca_Kabuli_Chr05 | 22401676                | TT                              | CC                 | CC               | INTERGENIC                    |                    |                                           |
| SNP_35883_A_22413301 | NC_021164.1    | Ca_Kabuli_Chr05 | 22413301                | GG                              | AA                 | AA               | INTERGENIC                    |                    |                                           |
| SNP_35884_A_22419092 | NC_021164.1    | Ca_Kabuli_Chr05 | 22419092                | GG                              | AA                 | AA               | NON_SYNONYMOUS_CODING         | 101512087          | protein translation factor SUI1 homolog 2 |
| SNP_35885_A_22465662 | NC_021164.1    | Ca_Kabuli_Chr05 | 22465662                | CC                              | TT                 | TT               | INTERGENIC                    |                    |                                           |
| SNP_35886_A_22615555 | NC_021164.1    | Ca_Kabuli_Chr05 | 22615555                | CC                              | TT                 | TT               | DRR                           | 101497533          | uncharacterized LOC101497533              |
| SNP_35887_A_22615803 | NC_021164.1    | Ca_Kabuli_Chr05 | 22615803                | TT                              | CC                 | CC               | DRR                           | 101497533          | uncharacterized LOC101497533              |
| SNP_35888_A_22616048 | NC_021164.1    | Ca_Kabuli_Chr05 | 22616048                | TT                              | AA                 | AA               | INTERGENIC                    |                    |                                           |
| SNP_35890_A_22649731 | NC_021164.1    | Ca_Kabuli_Chr05 | 22649731                | AA                              | GG                 | GG               | INTERGENIC                    |                    |                                           |
| SNP_35891_A_22649742 | NC_021164.1    | Ca_Kabuli_Chr05 | 22649742                | CC                              | TT                 | TT               | INTERGENIC                    |                    |                                           |
| SNP_35892_A_22649749 | NC_021164.1    | Ca_Kabuli_Chr05 | 22649749                | CC                              | AA                 | AA               | INTERGENIC                    |                    |                                           |
| SNP_35893_A_22649772 | NC_021164.1    | Ca_Kabuli_Chr05 | 22649772                | TT                              | CC                 | CC               | INTERGENIC                    |                    |                                           |
| SNP_35894_A_22649779 | NC_021164.1    | Ca_Kabuli_Chr05 | 22649779                | CC                              | TT                 | TT               | INTERGENIC                    |                    |                                           |

| SNPs IDs             | Chromosome IDs | Chromosomes     | Physical positions (bp) | CDC Frontier genome (Reference genome) | (Pusa 1103 & HPNB) | (ILWC 46 & LPNB) | Sequence Components of genome | Gene accession IDs | Putative functions |
|----------------------|----------------|-----------------|-------------------------|----------------------------------------|--------------------|------------------|-------------------------------|--------------------|--------------------|
| SNP_35895_A_22650321 | NC_021164.1    | Ca_Kabuli_Chr05 | 22650321                | AA                                     | TT                 | TT               | DRR                           | 101498181          | Unknown function   |
| SNP_35896_A_22650327 | NC_021164.1    | Ca_Kabuli_Chr05 | 22650327                | TT                                     | AA                 | AA               | DRR                           | 101498181          | Unknown function   |
| SNP_35897_A_22650333 | NC_021164.1    | Ca_Kabuli_Chr05 | 22650333                | CC                                     | TT                 | TT               | DRR                           | 101498181          | Unknown function   |
| SNP_35898_A_22654918 | NC_021164.1    | Ca_Kabuli_Chr05 | 22654918                | AA                                     | GG                 | GG               | URR                           | 101498181          | Unknown function   |
| SNP_35899_A_22654925 | NC_021164.1    | Ca_Kabuli_Chr05 | 22654925                | AA                                     | CC                 | CC               | URR                           | 101498181          | Unknown function   |
| SNP_35900_A_22654939 | NC_021164.1    | Ca_Kabuli_Chr05 | 22654939                | TT                                     | CC                 | CC               | URR                           | 101498181          | Unknown function   |
| SNP_35901_A_22659218 | NC_021164.1    | Ca_Kabuli_Chr05 | 22659218                | CC                                     | GG                 | GG               | INTERGENIC                    |                    |                    |
| SNP_35902_A_22659403 | NC_021164.1    | Ca_Kabuli_Chr05 | 22659403                | AA                                     | TT                 | TT               | INTERGENIC                    |                    |                    |
| SNP_35903_A_22668920 | NC_021164.1    | Ca_Kabuli_Chr05 | 22668920                | CC                                     | AA                 | AA               | INTERGENIC                    |                    |                    |
| SNP_35904_A_22691819 | NC_021164.1    | Ca_Kabuli_Chr05 | 22691819                | GG                                     | TT                 | TT               | DRR                           | 101491144          | Unknown function   |
| SNP_35905_A_22691820 | NC_021164.1    | Ca_Kabuli_Chr05 | 22691820                | AA                                     | TT                 | TT               | DRR                           | 101491144          | Unknown function   |
| SNP_35906_A_22691831 | NC_021164.1    | Ca_Kabuli_Chr05 | 22691831                | TT                                     | GG                 | GG               | DRR                           | 101491144          | Unknown function   |
| SNP_35907_A_22691832 | NC_021164.1    | Ca_Kabuli_Chr05 | 22691832                | GG                                     | CC                 | CC               | DRR                           | 101491144          | Unknown function   |
| SNP_35908_A_22691841 | NC_021164.1    | Ca_Kabuli_Chr05 | 22691841                | CC                                     | AA                 | AA               | DRR                           | 101491144          | Unknown function   |
| SNP_35909_A_22691844 | NC_021164.1    | Ca_Kabuli_Chr05 | 22691844                | CC                                     | GG                 | GG               | DRR                           | 101491144          | Unknown function   |
| SNP_35910_A_22691874 | NC_021164.1    | Ca_Kabuli_Chr05 | 22691874                | CC                                     | AA                 | AA               | DRR                           | 101491144          | Unknown function   |
| SNP_35911_A_22691876 | NC_021164.1    | Ca_Kabuli_Chr05 | 22691876                | TT                                     | GG                 | GG               | DRR                           | 101491144          | Unknown function   |
| SNP_35912_A_22691880 | NC_021164.1    | Ca_Kabuli_Chr05 | 22691880                | GG                                     | AA                 | AA               | DRR                           | 101491144          | Unknown function   |
| SNP_35913_A_22691910 | NC_021164.1    | Ca_Kabuli_Chr05 | 22691910                | TT                                     | CC                 | CC               | DRR                           | 101491144          | Unknown function   |
| SNP_35914_A_22691957 | NC_021164.1    | Ca_Kabuli_Chr05 | 22691957                | CC                                     | GG                 | GG               | DRR                           | 101491144          | Unknown function   |
| SNP_35915_A_22691958 | NC_021164.1    | Ca_Kabuli_Chr05 | 22691958                | AA                                     | GG                 | GG               | DRR                           | 101491144          | Unknown function   |
| SNP_35916_A_22692002 | NC_021164.1    | Ca_Kabuli_Chr05 | 22692002                | TT                                     | CC                 | CC               | DRR                           | 101491144          | Unknown function   |

| SNPs IDs             | Chromosome IDs | Chromosomes     | Physical positions (bp) | CDC Frontier genome (Reference genome) | (Pusa 1103 & HPNB) | (ILWC 46 & LPNB) | Sequence Components of genome | Gene accession IDs | Putative functions                                       |
|----------------------|----------------|-----------------|-------------------------|----------------------------------------|--------------------|------------------|-------------------------------|--------------------|----------------------------------------------------------|
| SNP_35917_A_22692075 | NC_021164.1    | Ca_Kabuli_Chr05 | 22692075                | CC                                     | TT                 | TT               | DRR                           | 101491144          | Unknown function                                         |
| SNP_35918_A_22693505 | NC_021164.1    | Ca_Kabuli_Chr05 | 22693505                | AA                                     | TT                 | TT               | DRR                           | 101490819          | NADH-ubiquinone oxidoreductase chain 1                   |
| SNP_35919_A_22693788 | NC_021164.1    | Ca_Kabuli_Chr05 | 22693788                | GG                                     | TT                 | TT               | URR                           | 101491144          | Unknown function                                         |
| SNP_35920_A_22693789 | NC_021164.1    | Ca_Kabuli_Chr05 | 22693789                | AA                                     | CC                 | CC               | URR                           | 101491144          | Unknown function                                         |
| SNP_35921_A_22693936 | NC_021164.1    | Ca_Kabuli_Chr05 | 22693936                | CC                                     | AA                 | AA               | URR                           | 101491144          | Unknown function                                         |
| SNP_35922_A_22694037 | NC_021164.1    | Ca_Kabuli_Chr05 | 22694037                | CC                                     | AA                 | AA               | URR                           | 101491144          | Unknown function                                         |
| SNP_35923_A_22694063 | NC_021164.1    | Ca_Kabuli_Chr05 | 22694063                | AA                                     | GG                 | GG               | URR                           | 101491144          | Unknown function                                         |
| SNP_35924_A_22751653 | NC_021164.1    | Ca_Kabuli_Chr05 | 22751653                | TT                                     | CC                 | CC               | INTERGENIC                    |                    |                                                          |
| SNP_35925_A_22751661 | NC_021164.1    | Ca_Kabuli_Chr05 | 22751661                | AA                                     | CC                 | CC               | INTERGENIC                    |                    |                                                          |
| SNP_35926_A_22752118 | NC_021164.1    | Ca_Kabuli_Chr05 | 22752118                | GG                                     | AA                 | AA               | INTERGENIC                    |                    |                                                          |
| SNP_35927_A_22781176 | NC_021164.1    | Ca_Kabuli_Chr05 | 22781176                | AA                                     | GG                 | GG               | INTERGENIC                    |                    |                                                          |
| SNP_35928_A_22864574 | NC_021164.1    | Ca_Kabuli_Chr05 | 22864574                | GG                                     | TT                 | TT               | INTRON                        | 101499492          | serine/threonine-protein phosphatase 7 long form homolog |
| SNP_35929_A_22864595 | NC_021164.1    | Ca_Kabuli_Chr05 | 22864595                | TT                                     | CC                 | CC               | INTRON                        | 101499492          | serine/threonine-protein phosphatase 7 long form homolog |
| SNP_35930_A_22864602 | NC_021164.1    | Ca_Kabuli_Chr05 | 22864602                | CC                                     | TT                 | TT               | INTRON                        | 101499492          | serine/threonine-protein phosphatase 7 long form homolog |
| SNP_35931_A_22864635 | NC_021164.1    | Ca_Kabuli_Chr05 | 22864635                | TT                                     | CC                 | CC               | NON_SYNONYMOUS_CODING         | 101499492          | serine/threonine-protein phosphatase 7 long form homolog |
| SNP_35932_A_22864643 | NC_021164.1    | Ca_Kabuli_Chr05 | 22864643                | AA                                     | GG                 | GG               | NON_SYNONYMOUS_CODING         | 101499492          | serine/threonine-protein phosphatase 7 long form homolog |
| SNP_35933_A_22865487 | NC_021164.1    | Ca_Kabuli_Chr05 | 22865487                | GG                                     | CC                 | CC               | URR                           | 101499492          | serine/threonine-protein phosphatase 7 long form homolog |
| SNP_35934_A_22865575 | NC_021164.1    | Ca_Kabuli_Chr05 | 22865575                | TT                                     | CC                 | CC               | URR                           | 101499492          | serine/threonine-protein phosphatase 7 long form homolog |
| SNP_35935_A_22867509 | NC_021164.1    | Ca_Kabuli_Chr05 | 22867509                | TT                                     | CC                 | CC               | INTERGENIC                    |                    |                                                          |
| SNP_35936_A_22867936 | NC_021164.1    | Ca_Kabuli_Chr05 | 22867936                | TT                                     | CC                 | CC               | INTERGENIC                    |                    |                                                          |
| SNP_35937_A_22867956 | NC_021164.1    | Ca_Kabuli_Chr05 | 22867956                | AA                                     | GG                 | GG               | INTERGENIC                    |                    |                                                          |
| SNP_35938_A_22879856 | NC_021164.1    | Ca_Kabuli_Chr05 | 22879856                | CC                                     | GG                 | GG               | INTERGENIC                    |                    |                                                          |

| SNPs IDs             | Chromosome IDs | Chromosomes     | Physical positions (bp) | CDC Frontier genome (Reference genome) | (Pusa 1103 & HPNB) | (ILWC 46 & LPNB) | Sequence genome | Components of | Gene accession IDs | Putative functions |
|----------------------|----------------|-----------------|-------------------------|----------------------------------------|--------------------|------------------|-----------------|---------------|--------------------|--------------------|
| SNP_35939_A_22880160 | NC_021164.1    | Ca_Kabuli_Chr05 | 22880160                | CC                                     | AA                 | AA               | INTERGENIC      |               |                    |                    |
| SNP_35940_A_22880346 | NC_021164.1    | Ca_Kabuli_Chr05 | 22880346                | CC                                     | TT                 | TT               | INTERGENIC      |               |                    |                    |
| SNP_35941_A_22884337 | NC_021164.1    | Ca_Kabuli_Chr05 | 22884337                | TT                                     | CC                 | CC               | INTERGENIC      |               |                    |                    |
| SNP_35942_A_22896066 | NC_021164.1    | Ca_Kabuli_Chr05 | 22896066                | TT                                     | CC                 | CC               | INTERGENIC      |               |                    |                    |
| SNP_35943_A_22896139 | NC_021164.1    | Ca_Kabuli_Chr05 | 22896139                | CC                                     | TT                 | TT               | INTERGENIC      |               |                    |                    |
| SNP_35944_A_22896259 | NC_021164.1    | Ca_Kabuli_Chr05 | 22896259                | GG                                     | AA                 | AA               | INTERGENIC      |               |                    |                    |
| SNP_35945_A_22896273 | NC_021164.1    | Ca_Kabuli_Chr05 | 22896273                | TT                                     | CC                 | CC               | INTERGENIC      |               |                    |                    |
| SNP_35946_A_22915970 | NC_021164.1    | Ca_Kabuli_Chr05 | 22915970                | TT                                     | AA                 | AA               | INTERGENIC      |               |                    |                    |
| SNP_35947_A_22918209 | NC_021164.1    | Ca_Kabuli_Chr05 | 22918209                | AA                                     | GG                 | GG               | INTERGENIC      |               |                    |                    |
| SNP_35948_A_22918293 | NC_021164.1    | Ca_Kabuli_Chr05 | 22918293                | AA                                     | TT                 | TT               | INTERGENIC      |               |                    |                    |
| SNP_35949_A_22918353 | NC_021164.1    | Ca_Kabuli_Chr05 | 22918353                | TT                                     | CC                 | CC               | INTERGENIC      |               |                    |                    |
| SNP_35950_A_22918357 | NC_021164.1    | Ca_Kabuli_Chr05 | 22918357                | CC                                     | TT                 | TT               | INTERGENIC      |               |                    |                    |
| SNP_35951_A_22918439 | NC_021164.1    | Ca_Kabuli_Chr05 | 22918439                | CC                                     | GG                 | GG               | INTERGENIC      |               |                    |                    |
| SNP_35954_A_22918579 | NC_021164.1    | Ca_Kabuli_Chr05 | 22918579                | AA                                     | TT                 | TT               | INTERGENIC      |               |                    |                    |
| SNP_35955_A_22918580 | NC_021164.1    | Ca_Kabuli_Chr05 | 22918580                | TT                                     | GG                 | GG               | INTERGENIC      |               |                    |                    |
| SNP_35956_A_22918582 | NC_021164.1    | Ca_Kabuli_Chr05 | 22918582                | AA                                     | GG                 | GG               | INTERGENIC      |               |                    |                    |
| SNP_35957_A_22918600 | NC_021164.1    | Ca_Kabuli_Chr05 | 22918600                | CC                                     | GG                 | GG               | INTERGENIC      |               |                    |                    |
| SNP_35958_A_22918622 | NC_021164.1    | Ca_Kabuli_Chr05 | 22918622                | CC                                     | TT                 | TT               | INTERGENIC      |               |                    |                    |
| SNP_35959_A_22918640 | NC_021164.1    | Ca_Kabuli_Chr05 | 22918640                | AA                                     | TT                 | TT               | INTERGENIC      |               |                    |                    |
| SNP_35960_A_22918677 | NC_021164.1    | Ca_Kabuli_Chr05 | 22918677                | AA                                     | GG                 | GG               | INTERGENIC      |               |                    |                    |
| SNP_35961_A_22918684 | NC_021164.1    | Ca_Kabuli_Chr05 | 22918684                | TT                                     | CC                 | CC               | INTERGENIC      |               |                    |                    |
| SNP_35962_A_22918685 | NC_021164.1    | Ca_Kabuli_Chr05 | 22918685                | CC                                     | AA                 | AA               | INTERGENIC      |               |                    |                    |

| SNPs IDs             | Chromosome IDs | Chromosomes     | Physical positions (bp) | CDC Frontier genome (Reference genome) | (Pusa 1103 & HPNB) | (ILWC 46 & LPNB) | Sequence genome | Components of | Gene accession IDs | Putative functions                       |
|----------------------|----------------|-----------------|-------------------------|----------------------------------------|--------------------|------------------|-----------------|---------------|--------------------|------------------------------------------|
| SNP_35963_A_22918694 | NC_021164.1    | Ca_Kabuli_Chr05 | 22918694                | TT                                     | CC                 | CC               | INTERGENIC      |               |                    |                                          |
| SNP_35964_A_22919298 | NC_021164.1    | Ca_Kabuli_Chr05 | 22919298                | GG                                     | AA                 | AA               | INTERGENIC      |               |                    |                                          |
| SNP_35965_A_22919314 | NC_021164.1    | Ca_Kabuli_Chr05 | 22919314                | TT                                     | AA                 | AA               | INTERGENIC      |               |                    |                                          |
| SNP_35966_A_22919387 | NC_021164.1    | Ca_Kabuli_Chr05 | 22919387                | AA                                     | GG                 | GG               | INTERGENIC      |               |                    |                                          |
| SNP_35967_A_22919393 | NC_021164.1    | Ca_Kabuli_Chr05 | 22919393                | TT                                     | AA                 | AA               | INTERGENIC      |               |                    |                                          |
| SNP_35968_A_22919430 | NC_021164.1    | Ca_Kabuli_Chr05 | 22919430                | AA                                     | GG                 | GG               | INTERGENIC      |               |                    |                                          |
| SNP_35969_A_22919484 | NC_021164.1    | Ca_Kabuli_Chr05 | 22919484                | TT                                     | CC                 | CC               | INTERGENIC      |               |                    |                                          |
| SNP_35971_A_22919703 | NC_021164.1    | Ca_Kabuli_Chr05 | 22919703                | GG                                     | AA                 | AA               | INTERGENIC      |               |                    |                                          |
| SNP_35973_A_22919734 | NC_021164.1    | Ca_Kabuli_Chr05 | 22919734                | GG                                     | AA                 | AA               | INTERGENIC      |               |                    |                                          |
| SNP_35974_A_22919760 | NC_021164.1    | Ca_Kabuli_Chr05 | 22919760                | TT                                     | CC                 | CC               | INTERGENIC      |               |                    |                                          |
| SNP_35975_A_22932556 | NC_021164.1    | Ca_Kabuli_Chr05 | 22932556                | TT                                     | CC                 | CC               | INTERGENIC      |               |                    |                                          |
| SNP_35976_A_22952012 | NC_021164.1    | Ca_Kabuli_Chr05 | 22952012                | CC                                     | GG                 | GG               | URR             |               | 101500115          | upstream activation factor subunit UAF30 |
| SNP_35978_A_23085223 | NC_021164.1    | Ca_Kabuli_Chr05 | 23085223                | AA                                     | GG                 | GG               | INTERGENIC      |               |                    |                                          |
| SNP_35980_A_23096622 | NC_021164.1    | Ca_Kabuli_Chr05 | 23096622                | TT                                     | CC                 | CC               | INTERGENIC      |               |                    |                                          |
| SNP_35981_A_23096939 | NC_021164.1    | Ca_Kabuli_Chr05 | 23096939                | CC                                     | TT                 | TT               | INTERGENIC      |               |                    |                                          |
| SNP_35982_A_23099260 | NC_021164.1    | Ca_Kabuli_Chr05 | 23099260                | GG                                     | TT                 | TT               | INTERGENIC      |               |                    |                                          |
| SNP_35984_A_23117235 | NC_021164.1    | Ca_Kabuli_Chr05 | 23117235                | TT                                     | CC                 | CC               | INTERGENIC      |               |                    |                                          |
| SNP_35985_A_23165902 | NC_021164.1    | Ca_Kabuli_Chr05 | 23165902                | TT                                     | GG                 | GG               | INTERGENIC      |               |                    |                                          |
| SNP_35986_A_23179158 | NC_021164.1    | Ca_Kabuli_Chr05 | 23179158                | CC                                     | TT                 | TT               | INTERGENIC      |               |                    |                                          |
| SNP_35987_A_23258353 | NC_021164.1    | Ca_Kabuli_Chr05 | 23258353                | GG                                     | AA                 | AA               | INTERGENIC      |               |                    |                                          |
| SNP_35988_A_23313684 | NC_021164.1    | Ca_Kabuli_Chr05 | 23313684                | TT                                     | CC                 | CC               | URR             |               | 101507410          | beta-(1,2)-xylosyltransferase            |
| SNP_35989_A_23313686 | NC_021164.1    | Ca_Kabuli_Chr05 | 23313686                | TT                                     | GG                 | GG               | URR             |               | 101507410          | beta-(1,2)-xylosyltransferase            |

| SNPs IDs             | Chromosome IDs | Chromosomes     | Physical positions (bp) | CDC Frontier genome (Reference genome) | (Pusa 1103 & HPNB) | (ILWC 46 & LPNB) | Sequence genome | Components of | Gene accession IDs                                   | Putative functions |
|----------------------|----------------|-----------------|-------------------------|----------------------------------------|--------------------|------------------|-----------------|---------------|------------------------------------------------------|--------------------|
| SNP_35990_A_23336129 | NC_021164.1    | Ca_Kabuli_Chr05 | 23336129                | TT                                     | AA                 | AA               | INTERGENIC      |               |                                                      |                    |
| SNP_35991_A_23336130 | NC_021164.1    | Ca_Kabuli_Chr05 | 23336130                | AA                                     | TT                 | TT               | INTERGENIC      |               |                                                      |                    |
| SNP_35992_A_23336151 | NC_021164.1    | Ca_Kabuli_Chr05 | 23336151                | CC                                     | TT                 | TT               | INTERGENIC      |               |                                                      |                    |
| SNP_35993_A_23336212 | NC_021164.1    | Ca_Kabuli_Chr05 | 23336212                | AA                                     | CC                 | CC               | INTERGENIC      |               |                                                      |                    |
| SNP_35994_A_23336547 | NC_021164.1    | Ca_Kabuli_Chr05 | 23336547                | TT                                     | AA                 | AA               | INTERGENIC      |               |                                                      |                    |
| SNP_35995_A_23336556 | NC_021164.1    | Ca_Kabuli_Chr05 | 23336556                | AA                                     | GG                 | GG               | INTERGENIC      |               |                                                      |                    |
| SNP_35996_A_23336615 | NC_021164.1    | Ca_Kabuli_Chr05 | 23336615                | AA                                     | GG                 | GG               | INTERGENIC      |               |                                                      |                    |
| SNP_35997_A_23338134 | NC_021164.1    | Ca_Kabuli_Chr05 | 23338134                | CC                                     | TT                 | TT               | INTERGENIC      |               |                                                      |                    |
| SNP_35998_A_23355099 | NC_021164.1    | Ca_Kabuli_Chr05 | 23355099                | TT                                     | CC                 | CC               | INTERGENIC      |               |                                                      |                    |
| SNP_35999_A_23355106 | NC_021164.1    | Ca_Kabuli_Chr05 | 23355106                | CC                                     | TT                 | TT               | INTERGENIC      |               |                                                      |                    |
| SNP_36000_A_23355112 | NC_021164.1    | Ca_Kabuli_Chr05 | 23355112                | AA                                     | GG                 | GG               | INTERGENIC      |               |                                                      |                    |
| SNP_36001_A_23378176 | NC_021164.1    | Ca_Kabuli_Chr05 | 23378176                | GG                                     | AA                 | AA               | INTERGENIC      |               |                                                      |                    |
| SNP_36002_A_23394759 | NC_021164.1    | Ca_Kabuli_Chr05 | 23394759                | TT                                     | CC                 | CC               | INTERGENIC      |               |                                                      |                    |
| SNP_36003_A_23394760 | NC_021164.1    | Ca_Kabuli_Chr05 | 23394760                | TT                                     | AA                 | AA               | INTERGENIC      |               |                                                      |                    |
| SNP_36004_A_23437164 | NC_021164.1    | Ca_Kabuli_Chr05 | 23437164                | GG                                     | CC                 | CC               | INTERGENIC      |               |                                                      |                    |
| SNP_36005_A_23462452 | NC_021164.1    | Ca_Kabuli_Chr05 | 23462452                | GG                                     | TT                 | TT               | URR             | 101510274     | DNA polymerase I B, chloroplastic/mitochondrial-like |                    |
| SNP_36006_A_23462461 | NC_021164.1    | Ca_Kabuli_Chr05 | 23462461                | TT                                     | CC                 | CC               | URR             | 101510274     | DNA polymerase I B, chloroplastic/mitochondrial-like |                    |
| SNP_36007_A_23464636 | NC_021164.1    | Ca_Kabuli_Chr05 | 23464636                | AA                                     | GG                 | GG               | INTERGENIC      |               |                                                      |                    |
| SNP_36008_A_23471798 | NC_021164.1    | Ca_Kabuli_Chr05 | 23471798                | TT                                     | GG                 | GG               | INTRON          | 101495787     | beta-glucosidase 13-like                             |                    |
| SNP_36009_A_23487805 | NC_021164.1    | Ca_Kabuli_Chr05 | 23487805                | GG                                     | AA                 | AA               | INTRON          | 101495787     | beta-glucosidase 13-like                             |                    |
| SNP_36010_A_23487809 | NC_021164.1    | Ca_Kabuli_Chr05 | 23487809                | AA                                     | TT                 | TT               | INTRON          | 101495787     | beta-glucosidase 13-like                             |                    |
| SNP_36011_A_23487904 | NC_021164.1    | Ca_Kabuli_Chr05 | 23487904                | AA                                     | GG                 | GG               | INTRON          | 101495787     | beta-glucosidase 13-like                             |                    |



| SNPs IDs             | Chromosome IDs | Chromosomes     | Physical positions (bp) | CDC Frontier genome (Reference genome) | (Pusa 1103 & HPNB) | (ILWC 46 & LPNB) | Sequence Components of genome | Gene accession IDs | Putative functions           |
|----------------------|----------------|-----------------|-------------------------|----------------------------------------|--------------------|------------------|-------------------------------|--------------------|------------------------------|
| SNP_36012_A_23488076 | NC_021164.1    | Ca_Kabuli_Chr05 | 23488076                | AA                                     | CC                 | CC               | INTRON                        | 101495787          | beta-glucosidase 13-like     |
| SNP_36013_A_23508982 | NC_021164.1    | Ca_Kabuli_Chr05 | 23508982                | TT                                     | CC                 | CC               | INTERGENIC                    |                    |                              |
| SNP_36014_A_23544470 | NC_021164.1    | Ca_Kabuli_Chr05 | 23544470                | AA                                     | GG                 | GG               | INTERGENIC                    |                    |                              |
| SNP_36015_A_23557505 | NC_021164.1    | Ca_Kabuli_Chr05 | 23557505                | AA                                     | GG                 | GG               | DRR                           | 101496108          | Unknown function             |
| SNP_36016_A_23557661 | NC_021164.1    | Ca_Kabuli_Chr05 | 23557661                | CC                                     | AA                 | AA               | DRR                           | 101496108          | Unknown function             |
| SNP_36017_A_23557662 | NC_021164.1    | Ca_Kabuli_Chr05 | 23557662                | GG                                     | TT                 | TT               | DRR                           | 101496108          | Unknown function             |
| SNP_36018_A_23557666 | NC_021164.1    | Ca_Kabuli_Chr05 | 23557666                | AA                                     | GG                 | GG               | DRR                           | 101496108          | Unknown function             |
| SNP_36019_A_23557703 | NC_021164.1    | Ca_Kabuli_Chr05 | 23557703                | TT                                     | CC                 | CC               | DRR                           | 101496108          | Unknown function             |
| SNP_36020_A_23557735 | NC_021164.1    | Ca_Kabuli_Chr05 | 23557735                | TT                                     | AA                 | AA               | DRR                           | 101496108          | Unknown function             |
| SNP_36021_A_23557754 | NC_021164.1    | Ca_Kabuli_Chr05 | 23557754                | TT                                     | CC                 | CC               | DRR                           | 101496108          | Unknown function             |
| SNP_36022_A_23558076 | NC_021164.1    | Ca_Kabuli_Chr05 | 23558076                | TT                                     | CC                 | CC               | INTERGENIC                    |                    |                              |
| SNP_36023_A_23558112 | NC_021164.1    | Ca_Kabuli_Chr05 | 23558112                | TT                                     | CC                 | CC               | INTERGENIC                    |                    |                              |
| SNP_36024_A_23559200 | NC_021164.1    | Ca_Kabuli_Chr05 | 23559200                | TT                                     | CC                 | CC               | DRR                           | 101513061          | uncharacterized LOC101513061 |
| SNP_36025_A_23559208 | NC_021164.1    | Ca_Kabuli_Chr05 | 23559208                | TT                                     | AA                 | AA               | DRR                           | 101513061          | uncharacterized LOC101513061 |
| SNP_36026_A_23559219 | NC_021164.1    | Ca_Kabuli_Chr05 | 23559219                | TT                                     | CC                 | CC               | DRR                           | 101513061          | uncharacterized LOC101513061 |
| SNP_36027_A_23559226 | NC_021164.1    | Ca_Kabuli_Chr05 | 23559226                | TT                                     | CC                 | CC               | DRR                           | 101513061          | uncharacterized LOC101513061 |
| SNP_36028_A_23559237 | NC_021164.1    | Ca_Kabuli_Chr05 | 23559237                | TT                                     | AA                 | AA               | DRR                           | 101513061          | uncharacterized LOC101513061 |
| SNP_36029_A_23559271 | NC_021164.1    | Ca_Kabuli_Chr05 | 23559271                | CC                                     | GG                 | GG               | DRR                           | 101513061          | uncharacterized LOC101513061 |
| SNP_36030_A_23559280 | NC_021164.1    | Ca_Kabuli_Chr05 | 23559280                | TT                                     | AA                 | AA               | DRR                           | 101513061          | uncharacterized LOC101513061 |
| SNP_36031_A_23559292 | NC_021164.1    | Ca_Kabuli_Chr05 | 23559292                | TT                                     | CC                 | CC               | DRR                           | 101513061          | uncharacterized LOC101513061 |
| SNP_36032_A_23559294 | NC_021164.1    | Ca_Kabuli_Chr05 | 23559294                | AA                                     | CC                 | CC               | DRR                           | 101513061          | uncharacterized LOC101513061 |
| SNP_36033_A_23559296 | NC_021164.1    | Ca_Kabuli_Chr05 | 23559296                | GG                                     | CC                 | CC               | DRR                           | 101513061          | uncharacterized LOC101513061 |

| SNPs IDs             | Chromosome IDs | Chromosomes     | Physical positions (bp) | CDC Frontier genome (Reference genome) | (Pusa 1103 & HPNB) | (ILWC 46 & LPNB) | Sequence Components of genome | Gene accession IDs | Putative functions           |
|----------------------|----------------|-----------------|-------------------------|----------------------------------------|--------------------|------------------|-------------------------------|--------------------|------------------------------|
| SNP_36034_A_23559302 | NC_021164.1    | Ca_Kabuli_Chr05 | 23559302                | GG                                     | AA                 | AA               | DRR                           | 101513061          | uncharacterized LOC101513061 |
| SNP_36035_A_23559310 | NC_021164.1    | Ca_Kabuli_Chr05 | 23559310                | AA                                     | CC                 | CC               | DRR                           | 101513061          | uncharacterized LOC101513061 |
| SNP_36036_A_23559311 | NC_021164.1    | Ca_Kabuli_Chr05 | 23559311                | TT                                     | CC                 | CC               | DRR                           | 101513061          | uncharacterized LOC101513061 |
| SNP_36037_A_23567091 | NC_021164.1    | Ca_Kabuli_Chr05 | 23567091                | AA                                     | CC                 | CC               | URR                           | 101512416          | Unknown function             |
| SNP_36038_A_23567114 | NC_021164.1    | Ca_Kabuli_Chr05 | 23567114                | TT                                     | GG                 | GG               | URR                           | 101512416          | Unknown function             |
| SNP_36039_A_23583692 | NC_021164.1    | Ca_Kabuli_Chr05 | 23583692                | AA                                     | GG                 | GG               | URR                           | 101496769          | uncharacterized LOC101496769 |
| SNP_36040_A_23585048 | NC_021164.1    | Ca_Kabuli_Chr05 | 23585048                | CC                                     | AA                 | AA               | INTERGENIC                    |                    |                              |
| SNP_36041_A_23585118 | NC_021164.1    | Ca_Kabuli_Chr05 | 23585118                | TT                                     | CC                 | CC               | INTERGENIC                    |                    |                              |
| SNP_36042_A_23585130 | NC_021164.1    | Ca_Kabuli_Chr05 | 23585130                | GG                                     | TT                 | TT               | INTERGENIC                    |                    |                              |
| SNP_36043_A_23585491 | NC_021164.1    | Ca_Kabuli_Chr05 | 23585491                | TT                                     | CC                 | CC               | INTERGENIC                    |                    |                              |
| SNP_36044_A_23588479 | NC_021164.1    | Ca_Kabuli_Chr05 | 23588479                | TT                                     | CC                 | CC               | INTERGENIC                    |                    |                              |
| SNP_36045_A_23593955 | NC_021164.1    | Ca_Kabuli_Chr05 | 23593955                | CC                                     | AA                 | AA               | INTERGENIC                    |                    |                              |
| SNP_36046_A_23595400 | NC_021164.1    | Ca_Kabuli_Chr05 | 23595400                | GG                                     | TT                 | TT               | INTERGENIC                    |                    |                              |
| SNP_36047_A_23595435 | NC_021164.1    | Ca_Kabuli_Chr05 | 23595435                | TT                                     | GG                 | GG               | INTERGENIC                    |                    |                              |
| SNP_36048_A_23595484 | NC_021164.1    | Ca_Kabuli_Chr05 | 23595484                | CC                                     | TT                 | TT               | INTERGENIC                    |                    |                              |
| SNP_36049_A_23595666 | NC_021164.1    | Ca_Kabuli_Chr05 | 23595666                | AA                                     | TT                 | TT               | INTERGENIC                    |                    |                              |
| SNP_36050_A_23596430 | NC_021164.1    | Ca_Kabuli_Chr05 | 23596430                | GG                                     | AA                 | AA               | INTERGENIC                    |                    |                              |
| SNP_36051_A_23596643 | NC_021164.1    | Ca_Kabuli_Chr05 | 23596643                | AA                                     | GG                 | GG               | INTERGENIC                    |                    |                              |
| SNP_36052_A_23596690 | NC_021164.1    | Ca_Kabuli_Chr05 | 23596690                | TT                                     | CC                 | CC               | INTERGENIC                    |                    |                              |
| SNP_36053_A_23596784 | NC_021164.1    | Ca_Kabuli_Chr05 | 23596784                | GG                                     | AA                 | AA               | INTERGENIC                    |                    |                              |
| SNP_36054_A_23606244 | NC_021164.1    | Ca_Kabuli_Chr05 | 23606244                | GG                                     | AA                 | AA               | INTERGENIC                    |                    |                              |
| SNP_36055_A_23606472 | NC_021164.1    | Ca_Kabuli_Chr05 | 23606472                | GG                                     | AA                 | AA               | INTERGENIC                    |                    |                              |

| SNPs IDs             | Chromosome IDs | Chromosomes     | Physical positions (bp) | CDC Frontier (Reference genome) | (Pusa 1103 & HPNB) | (ILWC 46 & LPNB) | Sequence Components of genome | Gene accession IDs | Putative functions |
|----------------------|----------------|-----------------|-------------------------|---------------------------------|--------------------|------------------|-------------------------------|--------------------|--------------------|
| SNP_36056_A_23606509 | NC_021164.1    | Ca_Kabuli_Chr05 | 23606509                | AA                              | CC                 | CC               | DRR                           | 101497085          | Unknown function   |
| SNP_36057_A_23606527 | NC_021164.1    | Ca_Kabuli_Chr05 | 23606527                | TT                              | CC                 | CC               | DRR                           | 101497085          | Unknown function   |
| SNP_36058_A_23643158 | NC_021164.1    | Ca_Kabuli_Chr05 | 23643158                | TT                              | GG                 | GG               | INTERGENIC                    |                    |                    |
| SNP_36059_A_23644704 | NC_021164.1    | Ca_Kabuli_Chr05 | 23644704                | TT                              | CC                 | CC               | DRR                           | 101497752          | Unknown function   |
| SNP_36060_A_23644770 | NC_021164.1    | Ca_Kabuli_Chr05 | 23644770                | TT                              | CC                 | CC               | DRR                           | 101497752          | Unknown function   |
| SNP_36061_A_23645021 | NC_021164.1    | Ca_Kabuli_Chr05 | 23645021                | GG                              | TT                 | TT               | DRR                           | 101497752          | Unknown function   |
| SNP_36062_A_23645153 | NC_021164.1    | Ca_Kabuli_Chr05 | 23645153                | GG                              | AA                 | AA               | DRR                           | 101497752          | Unknown function   |
| SNP_36063_A_23645186 | NC_021164.1    | Ca_Kabuli_Chr05 | 23645186                | AA                              | GG                 | GG               | DRR                           | 101497752          | Unknown function   |
| SNP_36064_A_23645206 | NC_021164.1    | Ca_Kabuli_Chr05 | 23645206                | AA                              | TT                 | TT               | DRR                           | 101497752          | Unknown function   |
| SNP_36065_A_23645213 | NC_021164.1    | Ca_Kabuli_Chr05 | 23645213                | AA                              | GG                 | GG               | DRR                           | 101497752          | Unknown function   |
| SNP_36066_A_23645228 | NC_021164.1    | Ca_Kabuli_Chr05 | 23645228                | AA                              | GG                 | GG               | DRR                           | 101497752          | Unknown function   |
| SNP_36067_A_23645241 | NC_021164.1    | Ca_Kabuli_Chr05 | 23645241                | TT                              | CC                 | CC               | DRR                           | 101497752          | Unknown function   |
| SNP_36068_A_23645243 | NC_021164.1    | Ca_Kabuli_Chr05 | 23645243                | TT                              | GG                 | GG               | DRR                           | 101497752          | Unknown function   |
| SNP_36069_A_23645295 | NC_021164.1    | Ca_Kabuli_Chr05 | 23645295                | GG                              | AA                 | AA               | DRR                           | 101497752          | Unknown function   |
| SNP_36070_A_23645380 | NC_021164.1    | Ca_Kabuli_Chr05 | 23645380                | TT                              | CC                 | CC               | NON_SYNONYMOUS_CODING         | 101497752          | Unknown function   |
| SNP_36071_A_23646400 | NC_021164.1    | Ca_Kabuli_Chr05 | 23646400                | TT                              | CC                 | CC               | INTRON                        | 101497752          | Unknown function   |
| SNP_36073_A_23646559 | NC_021164.1    | Ca_Kabuli_Chr05 | 23646559                | AA                              | TT                 | TT               | INTRON                        | 101497752          | Unknown function   |
| SNP_36074_A_23646560 | NC_021164.1    | Ca_Kabuli_Chr05 | 23646560                | GG                              | TT                 | TT               | INTRON                        | 101497752          | Unknown function   |
| SNP_36075_A_23663069 | NC_021164.1    | Ca_Kabuli_Chr05 | 23663069                | TT                              | GG                 | GG               | INTERGENIC                    |                    |                    |
| SNP_36076_A_23663093 | NC_021164.1    | Ca_Kabuli_Chr05 | 23663093                | AA                              | CC                 | CC               | INTERGENIC                    |                    |                    |
| SNP_36078_A_23663168 | NC_021164.1    | Ca_Kabuli_Chr05 | 23663168                | AA                              | GG                 | GG               | INTERGENIC                    |                    |                    |
| SNP_36079_A_23663195 | NC_021164.1    | Ca_Kabuli_Chr05 | 23663195                | CC                              | AA                 | AA               | INTERGENIC                    |                    |                    |

| SNPs IDs             | Chromosome IDs | Chromosomes     | Physical positions (bp) | CDC Frontier genome (Reference genome) | (Pusa 1103 & HPNB) | (ILWC 46 & LPNB) | Sequence genome | Components of | Gene accession IDs | Putative functions |
|----------------------|----------------|-----------------|-------------------------|----------------------------------------|--------------------|------------------|-----------------|---------------|--------------------|--------------------|
| SNP_36080_A_23664201 | NC_021164.1    | Ca_Kabuli_Chr05 | 23664201                | AA                                     | GG                 | GG               | INTERGENIC      |               |                    |                    |
| SNP_36081_A_23664245 | NC_021164.1    | Ca_Kabuli_Chr05 | 23664245                | TT                                     | CC                 | CC               | INTERGENIC      |               |                    |                    |
| SNP_36082_A_23664292 | NC_021164.1    | Ca_Kabuli_Chr05 | 23664292                | AA                                     | CC                 | CC               | INTERGENIC      |               |                    |                    |
| SNP_36083_A_23664301 | NC_021164.1    | Ca_Kabuli_Chr05 | 23664301                | AA                                     | GG                 | GG               | INTERGENIC      |               |                    |                    |
| SNP_36084_A_23664373 | NC_021164.1    | Ca_Kabuli_Chr05 | 23664373                | AA                                     | CC                 | CC               | INTERGENIC      |               |                    |                    |
| SNP_36085_A_23664483 | NC_021164.1    | Ca_Kabuli_Chr05 | 23664483                | AA                                     | GG                 | GG               | INTERGENIC      |               |                    |                    |
| SNP_36086_A_23664514 | NC_021164.1    | Ca_Kabuli_Chr05 | 23664514                | AA                                     | GG                 | GG               | INTERGENIC      |               |                    |                    |
| SNP_36087_A_23664561 | NC_021164.1    | Ca_Kabuli_Chr05 | 23664561                | TT                                     | CC                 | CC               | INTERGENIC      |               |                    |                    |
| SNP_36089_A_23668830 | NC_021164.1    | Ca_Kabuli_Chr05 | 23668830                | GG                                     | TT                 | TT               | INTERGENIC      |               |                    |                    |
| SNP_36090_A_23668919 | NC_021164.1    | Ca_Kabuli_Chr05 | 23668919                | GG                                     | TT                 | TT               | INTERGENIC      |               |                    |                    |
| SNP_36091_A_23668943 | NC_021164.1    | Ca_Kabuli_Chr05 | 23668943                | GG                                     | AA                 | AA               | INTERGENIC      |               |                    |                    |
| SNP_36092_A_23669358 | NC_021164.1    | Ca_Kabuli_Chr05 | 23669358                | TT                                     | CC                 | CC               | INTERGENIC      |               |                    |                    |
| SNP_36093_A_23669370 | NC_021164.1    | Ca_Kabuli_Chr05 | 23669370                | TT                                     | CC                 | CC               | INTERGENIC      |               |                    |                    |
| SNP_36094_A_23670085 | NC_021164.1    | Ca_Kabuli_Chr05 | 23670085                | TT                                     | CC                 | CC               | INTERGENIC      |               |                    |                    |
| SNP_36095_A_23670111 | NC_021164.1    | Ca_Kabuli_Chr05 | 23670111                | AA                                     | GG                 | GG               | INTERGENIC      |               |                    |                    |
| SNP_36096_A_23670171 | NC_021164.1    | Ca_Kabuli_Chr05 | 23670171                | AA                                     | CC                 | CC               | INTERGENIC      |               |                    |                    |
| SNP_36097_A_23670548 | NC_021164.1    | Ca_Kabuli_Chr05 | 23670548                | AA                                     | GG                 | GG               | INTERGENIC      |               |                    |                    |
| SNP_36098_A_23670567 | NC_021164.1    | Ca_Kabuli_Chr05 | 23670567                | AA                                     | GG                 | GG               | INTERGENIC      |               |                    |                    |
| SNP_36099_A_23670617 | NC_021164.1    | Ca_Kabuli_Chr05 | 23670617                | CC                                     | TT                 | TT               | INTERGENIC      |               |                    |                    |
| SNP_36100_A_23670762 | NC_021164.1    | Ca_Kabuli_Chr05 | 23670762                | AA                                     | GG                 | GG               | INTERGENIC      |               |                    |                    |
| SNP_36101_A_23670780 | NC_021164.1    | Ca_Kabuli_Chr05 | 23670780                | TT                                     | CC                 | CC               | INTERGENIC      |               |                    |                    |
| SNP_36102_A_23670875 | NC_021164.1    | Ca_Kabuli_Chr05 | 23670875                | TT                                     | CC                 | CC               | INTERGENIC      |               |                    |                    |

| SNPs IDs             | Chromosome IDs | Chromosomes     | Physical positions (bp) | CDC Frontier genome (Reference genome) | (Pusa 1103 & HPNB) | (ILWC 46 & LPNB) | Sequence Components of genome | Gene accession IDs | Putative functions |
|----------------------|----------------|-----------------|-------------------------|----------------------------------------|--------------------|------------------|-------------------------------|--------------------|--------------------|
| SNP_36103_A_23670919 | NC_021164.1    | Ca_Kabuli_Chr05 | 23670919                | TT                                     | AA                 | AA               | INTERGENIC                    |                    |                    |
| SNP_36104_A_23670932 | NC_021164.1    | Ca_Kabuli_Chr05 | 23670932                | AA                                     | CC                 | CC               | INTERGENIC                    |                    |                    |
| SNP_36105_A_23671224 | NC_021164.1    | Ca_Kabuli_Chr05 | 23671224                | TT                                     | CC                 | CC               | DRR                           | 101514146          | Unknown function   |
| SNP_36106_A_23671250 | NC_021164.1    | Ca_Kabuli_Chr05 | 23671250                | AA                                     | GG                 | GG               | DRR                           | 101514146          | Unknown function   |
| SNP_36107_A_23671278 | NC_021164.1    | Ca_Kabuli_Chr05 | 23671278                | TT                                     | CC                 | CC               | DRR                           | 101514146          | Unknown function   |
| SNP_36108_A_23671337 | NC_021164.1    | Ca_Kabuli_Chr05 | 23671337                | TT                                     | CC                 | CC               | DRR                           | 101514146          | Unknown function   |
| SNP_36109_A_23671356 | NC_021164.1    | Ca_Kabuli_Chr05 | 23671356                | CC                                     | AA                 | AA               | DRR                           | 101514146          | Unknown function   |
| SNP_36110_A_23671386 | NC_021164.1    | Ca_Kabuli_Chr05 | 23671386                | TT                                     | CC                 | CC               | DRR                           | 101514146          | Unknown function   |
| SNP_36112_A_23674026 | NC_021164.1    | Ca_Kabuli_Chr05 | 23674026                | CC                                     | TT                 | TT               | URR                           | 101514146          | Unknown function   |
| SNP_36113_A_23674057 | NC_021164.1    | Ca_Kabuli_Chr05 | 23674057                | AA                                     | GG                 | GG               | URR                           | 101514146          | Unknown function   |
| SNP_36114_A_23674065 | NC_021164.1    | Ca_Kabuli_Chr05 | 23674065                | AA                                     | CC                 | CC               | URR                           | 101514146          | Unknown function   |
| SNP_36115_A_23674462 | NC_021164.1    | Ca_Kabuli_Chr05 | 23674462                | TT                                     | CC                 | CC               | URR                           | 101514146          | Unknown function   |
| SNP_36116_A_23674485 | NC_021164.1    | Ca_Kabuli_Chr05 | 23674485                | AA                                     | GG                 | GG               | URR                           | 101514146          | Unknown function   |
| SNP_36117_A_23674525 | NC_021164.1    | Ca_Kabuli_Chr05 | 23674525                | TT                                     | CC                 | CC               | URR                           | 101514146          | Unknown function   |
| SNP_36118_A_23674586 | NC_021164.1    | Ca_Kabuli_Chr05 | 23674586                | TT                                     | CC                 | CC               | URR                           | 101514146          | Unknown function   |
| SNP_36119_A_23674595 | NC_021164.1    | Ca_Kabuli_Chr05 | 23674595                | TT                                     | CC                 | CC               | URR                           | 101514146          | Unknown function   |
| SNP_36120_A_23674758 | NC_021164.1    | Ca_Kabuli_Chr05 | 23674758                | TT                                     | CC                 | CC               | URR                           | 101514146          | Unknown function   |
| SNP_36121_A_23674768 | NC_021164.1    | Ca_Kabuli_Chr05 | 23674768                | CC                                     | TT                 | TT               | URR                           | 101514146          | Unknown function   |
| SNP_36122_A_23674846 | NC_021164.1    | Ca_Kabuli_Chr05 | 23674846                | TT                                     | CC                 | CC               | URR                           | 101514146          | Unknown function   |
| SNP_36123_A_23674893 | NC_021164.1    | Ca_Kabuli_Chr05 | 23674893                | AA                                     | GG                 | GG               | URR                           | 101514146          | Unknown function   |
| SNP_36127_A_24007395 | NC_021164.1    | Ca_Kabuli_Chr05 | 24007395                | CC                                     | TT                 | TT               | INTERGENIC                    |                    |                    |
| SNP_36128_A_24007396 | NC_021164.1    | Ca_Kabuli_Chr05 | 24007396                | AA                                     | CC                 | CC               | INTERGENIC                    |                    |                    |

| SNPs IDs             | Chromosome IDs | Chromosomes     | Physical positions (bp) | CDC Frontier genome (Reference genome) | (Pusa 1103 & HPNB) | (ILWC 46 & LPNB) | Sequence genome | Components of | Gene accession IDs                  | Putative functions |
|----------------------|----------------|-----------------|-------------------------|----------------------------------------|--------------------|------------------|-----------------|---------------|-------------------------------------|--------------------|
| SNP_36129_A_24007434 | NC_021164.1    | Ca_Kabuli_Chr05 | 24007434                | GG                                     | AA                 | AA               | INTERGENIC      |               |                                     |                    |
| SNP_36130_A_24008088 | NC_021164.1    | Ca_Kabuli_Chr05 | 24008088                | CC                                     | AA                 | AA               | INTERGENIC      |               |                                     |                    |
| SNP_36131_A_24032275 | NC_021164.1    | Ca_Kabuli_Chr05 | 24032275                | TT                                     | CC                 | CC               | INTERGENIC      |               |                                     |                    |
| SNP_36132_A_24095818 | NC_021164.1    | Ca_Kabuli_Chr05 | 24095818                | AA                                     | TT                 | TT               | INTERGENIC      |               |                                     |                    |
| SNP_36133_A_24097291 | NC_021164.1    | Ca_Kabuli_Chr05 | 24097291                | TT                                     | CC                 | CC               | INTERGENIC      |               |                                     |                    |
| SNP_36135_A_24124147 | NC_021164.1    | Ca_Kabuli_Chr05 | 24124147                | TT                                     | CC                 | CC               | INTERGENIC      |               |                                     |                    |
| SNP_36136_A_24124148 | NC_021164.1    | Ca_Kabuli_Chr05 | 24124148                | CC                                     | AA                 | AA               | INTERGENIC      |               |                                     |                    |
| SNP_36137_A_24124239 | NC_021164.1    | Ca_Kabuli_Chr05 | 24124239                | AA                                     | GG                 | GG               | INTERGENIC      |               |                                     |                    |
| SNP_36138_A_24124499 | NC_021164.1    | Ca_Kabuli_Chr05 | 24124499                | AA                                     | GG                 | GG               | INTERGENIC      |               |                                     |                    |
| SNP_36139_A_24124520 | NC_021164.1    | Ca_Kabuli_Chr05 | 24124520                | AA                                     | GG                 | GG               | INTERGENIC      |               |                                     |                    |
| SNP_36140_A_24147920 | NC_021164.1    | Ca_Kabuli_Chr05 | 24147920                | GG                                     | TT                 | TT               | INTERGENIC      |               |                                     |                    |
| SNP_36141_A_24147951 | NC_021164.1    | Ca_Kabuli_Chr05 | 24147951                | TT                                     | GG                 | GG               | INTERGENIC      |               |                                     |                    |
| SNP_36142_A_24147960 | NC_021164.1    | Ca_Kabuli_Chr05 | 24147960                | CC                                     | AA                 | AA               | INTERGENIC      |               |                                     |                    |
| SNP_36143_A_24171391 | NC_021164.1    | Ca_Kabuli_Chr05 | 24171391                | AA                                     | GG                 | GG               | INTRON          | 101494174     | proteasome activator subunit 4-like |                    |
| SNP_36144_A_24235883 | NC_021164.1    | Ca_Kabuli_Chr05 | 24235883                | CC                                     | TT                 | TT               | INTRON          | id102153      | Unknown function                    |                    |
| SNP_36145_A_24235923 | NC_021164.1    | Ca_Kabuli_Chr05 | 24235923                | GG                                     | AA                 | AA               | INTRON          | id102153      | Unknown function                    |                    |
| SNP_36146_A_24270348 | NC_021164.1    | Ca_Kabuli_Chr05 | 24270348                | TT                                     | GG                 | GG               | INTERGENIC      |               |                                     |                    |
| SNP_36147_A_24270727 | NC_021164.1    | Ca_Kabuli_Chr05 | 24270727                | AA                                     | GG                 | GG               | INTERGENIC      |               |                                     |                    |
| SNP_36148_A_24270798 | NC_021164.1    | Ca_Kabuli_Chr05 | 24270798                | TT                                     | GG                 | GG               | INTERGENIC      |               |                                     |                    |
| SNP_36149_A_24270884 | NC_021164.1    | Ca_Kabuli_Chr05 | 24270884                | TT                                     | CC                 | CC               | INTERGENIC      |               |                                     |                    |
| SNP_36150_A_24277168 | NC_021164.1    | Ca_Kabuli_Chr05 | 24277168                | AA                                     | GG                 | GG               | INTERGENIC      |               |                                     |                    |
| SNP_36151_A_24297764 | NC_021164.1    | Ca_Kabuli_Chr05 | 24297764                | AA                                     | TT                 | TT               | INTERGENIC      |               |                                     |                    |

| SNPs IDs             | Chromosome IDs | Chromosomes     | Physical positions (bp) | CDC Frontier genome (Reference genome) | (Pusa 1103 & HPNB) | (ILWC 46 & LPNB) | Sequence Components of genome | Gene accession IDs | Putative functions                                        |
|----------------------|----------------|-----------------|-------------------------|----------------------------------------|--------------------|------------------|-------------------------------|--------------------|-----------------------------------------------------------|
| SNP_36152_A_24302427 | NC_021164.1    | Ca_Kabuli_Chr05 | 24302427                | CC                                     | AA                 | AA               | INTERGENIC                    |                    |                                                           |
| SNP_36153_A_24302479 | NC_021164.1    | Ca_Kabuli_Chr05 | 24302479                | AA                                     | TT                 | TT               | INTERGENIC                    |                    |                                                           |
| SNP_36154_A_24327693 | NC_021164.1    | Ca_Kabuli_Chr05 | 24327693                | AA                                     | CC                 | CC               | NON_SYNONYMOUS_CODING         | 101495132          | Unknown function                                          |
| SNP_36155_A_24327708 | NC_021164.1    | Ca_Kabuli_Chr05 | 24327708                | AA                                     | GG                 | GG               | NON_SYNONYMOUS_CODING         | 101495132          | Unknown function                                          |
| SNP_36156_A_24327903 | NC_021164.1    | Ca_Kabuli_Chr05 | 24327903                | CC                                     | TT                 | TT               | NON_SYNONYMOUS_CODING         | 101495132          | Unknown function                                          |
| SNP_36157_A_24334434 | NC_021164.1    | Ca_Kabuli_Chr05 | 24334434                | AA                                     | GG                 | GG               | INTERGENIC                    |                    |                                                           |
| SNP_36158_A_24461225 | NC_021164.1    | Ca_Kabuli_Chr05 | 24461225                | CC                                     | GG                 | GG               | INTRON                        | 101506970          | neutral ceramidase                                        |
| SNP_36159_A_24488052 | NC_021164.1    | Ca_Kabuli_Chr05 | 24488052                | TT                                     | CC                 | CC               | URR                           | 101508142          | probable sugar phosphate/phosphate translocator At3g11320 |
| SNP_36160_A_24505774 | NC_021164.1    | Ca_Kabuli_Chr05 | 24505774                | TT                                     | GG                 | GG               | INTERGENIC                    |                    |                                                           |
| SNP_36161_A_24505821 | NC_021164.1    | Ca_Kabuli_Chr05 | 24505821                | CC                                     | TT                 | TT               | INTERGENIC                    |                    |                                                           |
| SNP_36162_A_24505836 | NC_021164.1    | Ca_Kabuli_Chr05 | 24505836                | AA                                     | GG                 | GG               | INTERGENIC                    |                    |                                                           |
| SNP_36164_A_24532449 | NC_021164.1    | Ca_Kabuli_Chr05 | 24532449                | CC                                     | TT                 | TT               | INTERGENIC                    |                    |                                                           |
| SNP_36165_A_24532530 | NC_021164.1    | Ca_Kabuli_Chr05 | 24532530                | CC                                     | TT                 | TT               | INTERGENIC                    |                    |                                                           |
| SNP_36166_A_24532540 | NC_021164.1    | Ca_Kabuli_Chr05 | 24532540                | AA                                     | GG                 | GG               | INTERGENIC                    |                    |                                                           |
| SNP_36167_A_24532548 | NC_021164.1    | Ca_Kabuli_Chr05 | 24532548                | TT                                     | CC                 | CC               | INTERGENIC                    |                    |                                                           |
| SNP_36168_A_24532604 | NC_021164.1    | Ca_Kabuli_Chr05 | 24532604                | GG                                     | AA                 | AA               | INTERGENIC                    |                    |                                                           |
| SNP_36169_A_24532819 | NC_021164.1    | Ca_Kabuli_Chr05 | 24532819                | AA                                     | TT                 | TT               | INTERGENIC                    |                    |                                                           |
| SNP_36170_A_24532823 | NC_021164.1    | Ca_Kabuli_Chr05 | 24532823                | GG                                     | TT                 | TT               | INTERGENIC                    |                    |                                                           |
| SNP_36171_A_24532855 | NC_021164.1    | Ca_Kabuli_Chr05 | 24532855                | TT                                     | CC                 | CC               | INTERGENIC                    |                    |                                                           |
| SNP_36172_A_24532904 | NC_021164.1    | Ca_Kabuli_Chr05 | 24532904                | CC                                     | TT                 | TT               | INTERGENIC                    |                    |                                                           |
| SNP_36174_A_24639135 | NC_021164.1    | Ca_Kabuli_Chr05 | 24639135                | TT                                     | GG                 | GG               | INTRON                        | 101497753          | disease resistance protein At4g27190-like                 |
| SNP_36175_A_24639254 | NC_021164.1    | Ca_Kabuli_Chr05 | 24639254                | TT                                     | CC                 | CC               | INTRON                        | 101497753          | disease resistance protein At4g27190-like                 |

| SNPs IDs             | Chromosome IDs | Chromosomes     | Physical positions (bp) | CDC Frontier genome (Reference genome) | (Pusa 1103 & HPNB) | (ILWC 46 & LPNB) | Sequence Components of genome | Gene accession IDs | Putative functions |
|----------------------|----------------|-----------------|-------------------------|----------------------------------------|--------------------|------------------|-------------------------------|--------------------|--------------------|
| SNP_36176_A_24688483 | NC_021164.1    | Ca_Kabuli_Chr05 | 24688483                | CC                                     | TT                 | TT               | URR                           | 101513932          | laccase-4-like     |
| SNP_36177_A_24712731 | NC_021164.1    | Ca_Kabuli_Chr05 | 24712731                | AA                                     | TT                 | TT               | INTERGENIC                    |                    |                    |
| SNP_36178_A_24743080 | NC_021164.1    | Ca_Kabuli_Chr05 | 24743080                | TT                                     | GG                 | GG               | INTERGENIC                    |                    |                    |
| SNP_36179_A_24755893 | NC_021164.1    | Ca_Kabuli_Chr05 | 24755893                | GG                                     | TT                 | TT               | INTERGENIC                    |                    |                    |
| SNP_36180_A_24761256 | NC_021164.1    | Ca_Kabuli_Chr05 | 24761256                | TT                                     | GG                 | GG               | INTERGENIC                    |                    |                    |
| SNP_36181_A_24761274 | NC_021164.1    | Ca_Kabuli_Chr05 | 24761274                | GG                                     | AA                 | AA               | INTERGENIC                    |                    |                    |
| SNP_36182_A_24764639 | NC_021164.1    | Ca_Kabuli_Chr05 | 24764639                | CC                                     | GG                 | GG               | INTERGENIC                    |                    |                    |
| SNP_36183_A_24764659 | NC_021164.1    | Ca_Kabuli_Chr05 | 24764659                | AA                                     | TT                 | TT               | INTERGENIC                    |                    |                    |
| SNP_36184_A_24764942 | NC_021164.1    | Ca_Kabuli_Chr05 | 24764942                | TT                                     | CC                 | CC               | INTERGENIC                    |                    |                    |
| SNP_36185_A_24764979 | NC_021164.1    | Ca_Kabuli_Chr05 | 24764979                | CC                                     | TT                 | TT               | INTERGENIC                    |                    |                    |
| SNP_36186_A_24764996 | NC_021164.1    | Ca_Kabuli_Chr05 | 24764996                | CC                                     | AA                 | AA               | INTERGENIC                    |                    |                    |
| SNP_36187_A_24764999 | NC_021164.1    | Ca_Kabuli_Chr05 | 24764999                | GG                                     | AA                 | AA               | INTERGENIC                    |                    |                    |
| SNP_36188_A_24862023 | NC_021164.1    | Ca_Kabuli_Chr05 | 24862023                | TT                                     | AA                 | AA               | INTERGENIC                    |                    |                    |
| SNP_36189_A_24862085 | NC_021164.1    | Ca_Kabuli_Chr05 | 24862085                | TT                                     | CC                 | CC               | INTERGENIC                    |                    |                    |
| SNP_36190_A_24862734 | NC_021164.1    | Ca_Kabuli_Chr05 | 24862734                | TT                                     | AA                 | AA               | INTERGENIC                    |                    |                    |
| SNP_36191_A_24863175 | NC_021164.1    | Ca_Kabuli_Chr05 | 24863175                | AA                                     | GG                 | GG               | INTERGENIC                    |                    |                    |
| SNP_36192_A_24863994 | NC_021164.1    | Ca_Kabuli_Chr05 | 24863994                | AA                                     | CC                 | CC               | INTERGENIC                    |                    |                    |
| SNP_36194_A_24910390 | NC_021164.1    | Ca_Kabuli_Chr05 | 24910390                | AA                                     | GG                 | GG               | INTERGENIC                    |                    |                    |
| SNP_36195_A_24910412 | NC_021164.1    | Ca_Kabuli_Chr05 | 24910412                | AA                                     | GG                 | GG               | INTERGENIC                    |                    |                    |
| SNP_36196_A_24922969 | NC_021164.1    | Ca_Kabuli_Chr05 | 24922969                | TT                                     | GG                 | GG               | INTERGENIC                    |                    |                    |
| SNP_36197_A_24922987 | NC_021164.1    | Ca_Kabuli_Chr05 | 24922987                | CC                                     | AA                 | AA               | INTERGENIC                    |                    |                    |
| SNP_36198_A_24923142 | NC_021164.1    | Ca_Kabuli_Chr05 | 24923142                | CC                                     | TT                 | TT               | INTERGENIC                    |                    |                    |



| SNPs IDs             | Chromosome IDs | Chromosomes     | Physical positions (bp) | CDC Frontier genome (Reference genome) | (Pusa 1103 & HPNB) | (ILWC 46 & LPNB) | Sequence genome | Components of | Gene accession IDs                             | Putative functions |
|----------------------|----------------|-----------------|-------------------------|----------------------------------------|--------------------|------------------|-----------------|---------------|------------------------------------------------|--------------------|
| SNP_36199_A_24923333 | NC_021164.1    | Ca_Kabuli_Chr05 | 24923333                | GG                                     | AA                 | AA               | INTERGENIC      |               |                                                |                    |
| SNP_36200_A_24923377 | NC_021164.1    | Ca_Kabuli_Chr05 | 24923377                | CC                                     | TT                 | TT               | INTERGENIC      |               |                                                |                    |
| SNP_36201_A_24923424 | NC_021164.1    | Ca_Kabuli_Chr05 | 24923424                | AA                                     | GG                 | GG               | INTERGENIC      |               |                                                |                    |
| SNP_36202_A_24928850 | NC_021164.1    | Ca_Kabuli_Chr05 | 24928850                | GG                                     | AA                 | AA               | INTERGENIC      |               |                                                |                    |
| SNP_36204_A_24981772 | NC_021164.1    | Ca_Kabuli_Chr05 | 24981772                | TT                                     | AA                 | AA               | INTERGENIC      |               |                                                |                    |
| SNP_36205_A_24982143 | NC_021164.1    | Ca_Kabuli_Chr05 | 24982143                | GG                                     | AA                 | AA               | INTERGENIC      |               |                                                |                    |
| SNP_36207_A_24983287 | NC_021164.1    | Ca_Kabuli_Chr05 | 24983287                | TT                                     | CC                 | CC               | INTERGENIC      |               |                                                |                    |
| SNP_36208_A_24983327 | NC_021164.1    | Ca_Kabuli_Chr05 | 24983327                | AA                                     | CC                 | CC               | INTERGENIC      |               |                                                |                    |
| SNP_36209_A_24983566 | NC_021164.1    | Ca_Kabuli_Chr05 | 24983566                | TT                                     | CC                 | CC               | INTERGENIC      |               |                                                |                    |
| SNP_36210_A_24994915 | NC_021164.1    | Ca_Kabuli_Chr05 | 24994915                | AA                                     | GG                 | GG               | INTERGENIC      |               |                                                |                    |
| SNP_36211_A_24998254 | NC_021164.1    | Ca_Kabuli_Chr05 | 24998254                | GG                                     | AA                 | AA               | INTERGENIC      |               |                                                |                    |
| SNP_36213_A_25055499 | NC_021164.1    | Ca_Kabuli_Chr05 | 25055499                | CC                                     | TT                 | TT               | DRR             | 101491045     | cell division control protein 6 homolog B-like |                    |
| SNP_36214_A_25106662 | NC_021164.1    | Ca_Kabuli_Chr05 | 25106662                | AA                                     | GG                 | GG               | INTERGENIC      |               |                                                |                    |
| SNP_36215_A_25107702 | NC_021164.1    | Ca_Kabuli_Chr05 | 25107702                | CC                                     | TT                 | TT               | INTERGENIC      |               |                                                |                    |
| SNP_36216_A_25124326 | NC_021164.1    | Ca_Kabuli_Chr05 | 25124326                | TT                                     | CC                 | CC               | INTERGENIC      |               |                                                |                    |
| SNP_36219_A_25230933 | NC_021164.1    | Ca_Kabuli_Chr05 | 25230933                | GG                                     | TT                 | TT               | INTERGENIC      |               |                                                |                    |
| SNP_36220_A_25232440 | NC_021164.1    | Ca_Kabuli_Chr05 | 25232440                | TT                                     | CC                 | CC               | INTERGENIC      |               |                                                |                    |
| SNP_36221_A_25232455 | NC_021164.1    | Ca_Kabuli_Chr05 | 25232455                | GG                                     | CC                 | CC               | INTERGENIC      |               |                                                |                    |
| SNP_36222_A_25232466 | NC_021164.1    | Ca_Kabuli_Chr05 | 25232466                | AA                                     | CC                 | CC               | INTERGENIC      |               |                                                |                    |
| SNP_36223_A_25232512 | NC_021164.1    | Ca_Kabuli_Chr05 | 25232512                | AA                                     | CC                 | CC               | INTERGENIC      |               |                                                |                    |
| SNP_36224_A_25232520 | NC_021164.1    | Ca_Kabuli_Chr05 | 25232520                | TT                                     | CC                 | CC               | INTERGENIC      |               |                                                |                    |
| SNP_36225_A_25232530 | NC_021164.1    | Ca_Kabuli_Chr05 | 25232530                | GG                                     | AA                 | AA               | INTERGENIC      |               |                                                |                    |

| SNPs IDs             | Chromosome IDs | Chromosomes     | Physical positions (bp) | CDC Frontier genome (Reference genome) | (Pusa 1103 & HPNB) | (ILWC 46 & LPNB) | Sequence Components of genome | Gene accession IDs | Putative functions           |
|----------------------|----------------|-----------------|-------------------------|----------------------------------------|--------------------|------------------|-------------------------------|--------------------|------------------------------|
| SNP_36226_A_25232566 | NC_021164.1    | Ca_Kabuli_Chr05 | 25232566                | AA                                     | TT                 | TT               | INTERGENIC                    |                    |                              |
| SNP_36227_A_25232566 | NC_021164.1    | Ca_Kabuli_Chr05 | 25232566                | TT                                     | AA                 | AA               | INTERGENIC                    |                    |                              |
| SNP_36228_A_25232711 | NC_021164.1    | Ca_Kabuli_Chr05 | 25232711                | AA                                     | TT                 | TT               | INTERGENIC                    |                    |                              |
| SNP_36229_A_25240259 | NC_021164.1    | Ca_Kabuli_Chr05 | 25240259                | AA                                     | GG                 | GG               | INTERGENIC                    |                    |                              |
| SNP_36230_A_25242183 | NC_021164.1    | Ca_Kabuli_Chr05 | 25242183                | CC                                     | GG                 | GG               | INTERGENIC                    |                    |                              |
| SNP_36231_A_25242488 | NC_021164.1    | Ca_Kabuli_Chr05 | 25242488                | TT                                     | AA                 | AA               | DRR                           | 101500342          | uncharacterized LOC101500342 |
| SNP_36232_A_25246214 | NC_021164.1    | Ca_Kabuli_Chr05 | 25246214                | TT                                     | CC                 | CC               | NON_SYNONYMOUS_CODING         | 101500342          | uncharacterized LOC101500342 |
| SNP_36233_A_25246248 | NC_021164.1    | Ca_Kabuli_Chr05 | 25246248                | AA                                     | CC                 | CC               | NON_SYNONYMOUS_CODING         | 101500342          | uncharacterized LOC101500342 |
| SNP_36235_A_25287534 | NC_021164.1    | Ca_Kabuli_Chr05 | 25287534                | GG                                     | TT                 | TT               | INTERGENIC                    |                    |                              |
| SNP_36237_A_25298833 | NC_021164.1    | Ca_Kabuli_Chr05 | 25298833                | AA                                     | TT                 | TT               | INTERGENIC                    |                    |                              |
| SNP_36238_A_25298888 | NC_021164.1    | Ca_Kabuli_Chr05 | 25298888                | TT                                     | AA                 | AA               | INTERGENIC                    |                    |                              |
| SNP_36239_A_25298890 | NC_021164.1    | Ca_Kabuli_Chr05 | 25298890                | CC                                     | TT                 | TT               | INTERGENIC                    |                    |                              |
| SNP_36240_A_25298896 | NC_021164.1    | Ca_Kabuli_Chr05 | 25298896                | TT                                     | CC                 | CC               | INTERGENIC                    |                    |                              |
| SNP_36241_A_25298901 | NC_021164.1    | Ca_Kabuli_Chr05 | 25298901                | CC                                     | AA                 | AA               | INTERGENIC                    |                    |                              |
| SNP_36242_A_25299038 | NC_021164.1    | Ca_Kabuli_Chr05 | 25299038                | GG                                     | AA                 | TT               | INTERGENIC                    |                    |                              |
| SNP_36243_A_25299069 | NC_021164.1    | Ca_Kabuli_Chr05 | 25299069                | CC                                     | TT                 | TT               | INTERGENIC                    |                    |                              |
| SNP_36244_A_25301448 | NC_021164.1    | Ca_Kabuli_Chr05 | 25301448                | CC                                     | TT                 | TT               | INTERGENIC                    |                    |                              |
| SNP_36245_A_25304307 | NC_021164.1    | Ca_Kabuli_Chr05 | 25304307                | TT                                     | CC                 | CC               | INTERGENIC                    |                    |                              |
| SNP_36246_A_25304311 | NC_021164.1    | Ca_Kabuli_Chr05 | 25304311                | GG                                     | TT                 | TT               | INTERGENIC                    |                    |                              |
| SNP_36247_A_25308653 | NC_021164.1    | Ca_Kabuli_Chr05 | 25308653                | CC                                     | TT                 | TT               | INTERGENIC                    |                    |                              |
| SNP_36248_A_25424017 | NC_021164.1    | Ca_Kabuli_Chr05 | 25424017                | AA                                     | CC                 | CC               | INTERGENIC                    |                    |                              |
| SNP_36249_A_25424032 | NC_021164.1    | Ca_Kabuli_Chr05 | 25424032                | CC                                     | TT                 | TT               | INTERGENIC                    |                    |                              |

| SNPs IDs             | Chromosome IDs | Chromosomes     | Physical positions (bp) | CDC Frontier genome (Reference genome) | (Pusa 1103 & HPNB) | (ILWC 46 & LPNB) | Sequence Components of genome | Gene accession IDs | Putative functions                         |
|----------------------|----------------|-----------------|-------------------------|----------------------------------------|--------------------|------------------|-------------------------------|--------------------|--------------------------------------------|
| SNP_36250_A_25440599 | NC_021164.1    | Ca_Kabuli_Chr05 | 25440599                | CC                                     | TT                 | TT               | INTERGENIC                    |                    |                                            |
| SNP_36251_A_25461866 | NC_021164.1    | Ca_Kabuli_Chr05 | 25461866                | TT                                     | CC                 | CC               | INTERGENIC                    |                    |                                            |
| SNP_36252_A_25464920 | NC_021164.1    | Ca_Kabuli_Chr05 | 25464920                | AA                                     | GG                 | GG               | INTERGENIC                    |                    |                                            |
| SNP_36253_A_25534738 | NC_021164.1    | Ca_Kabuli_Chr05 | 25534738                | AA                                     | GG                 | GG               | INTERGENIC                    |                    |                                            |
| SNP_36254_A_25534789 | NC_021164.1    | Ca_Kabuli_Chr05 | 25534789                | GG                                     | AA                 | AA               | INTERGENIC                    |                    |                                            |
| SNP_36255_A_25566173 | NC_021164.1    | Ca_Kabuli_Chr05 | 25566173                | TT                                     | GG                 | GG               | INTRON                        | 101504070          | gibberellin 2-beta-dioxygenase 8           |
| SNP_36258_A_25690627 | NC_021164.1    | Ca_Kabuli_Chr05 | 25690627                | TT                                     | AA                 | AA               | URR                           | 101505351          | clathrin heavy chain 1-like                |
| SNP_36259_A_25690880 | NC_021164.1    | Ca_Kabuli_Chr05 | 25690880                | AA                                     | GG                 | GG               | URR                           | 101505351          | clathrin heavy chain 1-like                |
| SNP_36260_A_25690882 | NC_021164.1    | Ca_Kabuli_Chr05 | 25690882                | TT                                     | GG                 | GG               | URR                           | 101505351          | clathrin heavy chain 1-like                |
| SNP_36261_A_25719053 | NC_021164.1    | Ca_Kabuli_Chr05 | 25719053                | AA                                     | GG                 | GG               | INTERGENIC                    |                    |                                            |
| SNP_36263_A_25733650 | NC_021164.1    | Ca_Kabuli_Chr05 | 25733650                | AA                                     | GG                 | GG               | INTERGENIC                    |                    |                                            |
| SNP_36264_A_25733677 | NC_021164.1    | Ca_Kabuli_Chr05 | 25733677                | TT                                     | CC                 | CC               | INTERGENIC                    |                    |                                            |
| SNP_36265_A_25733686 | NC_021164.1    | Ca_Kabuli_Chr05 | 25733686                | AA                                     | CC                 | CC               | INTERGENIC                    |                    |                                            |
| SNP_36266_A_25756745 | NC_021164.1    | Ca_Kabuli_Chr05 | 25756745                | AA                                     | GG                 | GG               | INTERGENIC                    |                    |                                            |
| SNP_36268_A_25791477 | NC_021164.1    | Ca_Kabuli_Chr05 | 25791477                | AA                                     | GG                 | GG               | DRR                           | 101410592          | transfer RNA glutamic acid (anticodon CUC) |
| SNP_36269_A_25803726 | NC_021164.1    | Ca_Kabuli_Chr05 | 25803726                | CC                                     | GG                 | GG               | INTERGENIC                    |                    |                                            |
| SNP_36270_A_25803731 | NC_021164.1    | Ca_Kabuli_Chr05 | 25803731                | CC                                     | TT                 | TT               | INTERGENIC                    |                    |                                            |
| SNP_36272_A_25803883 | NC_021164.1    | Ca_Kabuli_Chr05 | 25803883                | TT                                     | GG                 | GG               | INTERGENIC                    |                    |                                            |
| SNP_36273_A_25803912 | NC_021164.1    | Ca_Kabuli_Chr05 | 25803912                | TT                                     | CC                 | CC               | INTERGENIC                    |                    |                                            |
| SNP_36275_A_25804029 | NC_021164.1    | Ca_Kabuli_Chr05 | 25804029                | GG                                     | AA                 | AA               | INTERGENIC                    |                    |                                            |
| SNP_36276_A_25804038 | NC_021164.1    | Ca_Kabuli_Chr05 | 25804038                | TT                                     | AA                 | AA               | INTERGENIC                    |                    |                                            |
| SNP_36277_A_25804149 | NC_021164.1    | Ca_Kabuli_Chr05 | 25804149                | GG                                     | AA                 | AA               | INTERGENIC                    |                    |                                            |

| SNPs IDs             | Chromosome IDs | Chromosomes     | Physical positions (bp) | CDC Frontier genome (Reference genome) | (Pusa 1103 & HPNB) | (ILWC 46 & LPNB) | Sequence genome | Components of | Gene accession IDs | Putative functions |
|----------------------|----------------|-----------------|-------------------------|----------------------------------------|--------------------|------------------|-----------------|---------------|--------------------|--------------------|
| SNP_36278_A_25804151 | NC_021164.1    | Ca_Kabuli_Chr05 | 25804151                | AA                                     | GG                 | GG               | INTERGENIC      |               |                    |                    |
| SNP_36279_A_25804156 | NC_021164.1    | Ca_Kabuli_Chr05 | 25804156                | AA                                     | CC                 | CC               | INTERGENIC      |               |                    |                    |
| SNP_36280_A_25804159 | NC_021164.1    | Ca_Kabuli_Chr05 | 25804159                | GG                                     | CC                 | CC               | INTERGENIC      |               |                    |                    |
| SNP_36281_A_25804165 | NC_021164.1    | Ca_Kabuli_Chr05 | 25804165                | CC                                     | GG                 | GG               | INTERGENIC      |               |                    |                    |
| SNP_36282_A_25804190 | NC_021164.1    | Ca_Kabuli_Chr05 | 25804190                | CC                                     | TT                 | TT               | INTERGENIC      |               |                    |                    |
| SNP_36283_A_25804195 | NC_021164.1    | Ca_Kabuli_Chr05 | 25804195                | TT                                     | AA                 | AA               | INTERGENIC      |               |                    |                    |
| SNP_36284_A_25804256 | NC_021164.1    | Ca_Kabuli_Chr05 | 25804256                | AA                                     | TT                 | TT               | INTERGENIC      |               |                    |                    |
| SNP_36285_A_25804289 | NC_021164.1    | Ca_Kabuli_Chr05 | 25804289                | TT                                     | CC                 | CC               | INTERGENIC      |               |                    |                    |
| SNP_36286_A_25836446 | NC_021164.1    | Ca_Kabuli_Chr05 | 25836446                | CC                                     | AA                 | AA               | INTERGENIC      |               |                    |                    |
| SNP_36288_A_25836538 | NC_021164.1    | Ca_Kabuli_Chr05 | 25836538                | TT                                     | AA                 | AA               | INTERGENIC      |               |                    |                    |
| SNP_36289_A_25836682 | NC_021164.1    | Ca_Kabuli_Chr05 | 25836682                | AA                                     | GG                 | GG               | INTERGENIC      |               |                    |                    |
| SNP_36290_A_25836690 | NC_021164.1    | Ca_Kabuli_Chr05 | 25836690                | AA                                     | CC                 | CC               | INTERGENIC      |               |                    |                    |
| SNP_36291_A_25836706 | NC_021164.1    | Ca_Kabuli_Chr05 | 25836706                | TT                                     | CC                 | CC               | INTERGENIC      |               |                    |                    |
| SNP_36292_A_25840256 | NC_021164.1    | Ca_Kabuli_Chr05 | 25840256                | AA                                     | GG                 | GG               | INTERGENIC      |               |                    |                    |
| SNP_36293_A_25847880 | NC_021164.1    | Ca_Kabuli_Chr05 | 25847880                | AA                                     | CC                 | CC               | INTERGENIC      |               |                    |                    |
| SNP_36294_A_25848101 | NC_021164.1    | Ca_Kabuli_Chr05 | 25848101                | TT                                     | CC                 | CC               | INTERGENIC      |               |                    |                    |
| SNP_36295_A_25861494 | NC_021164.1    | Ca_Kabuli_Chr05 | 25861494                | TT                                     | CC                 | CC               | INTERGENIC      |               |                    |                    |
| SNP_36296_A_25861512 | NC_021164.1    | Ca_Kabuli_Chr05 | 25861512                | TT                                     | AA                 | AA               | INTERGENIC      |               |                    |                    |
| SNP_36297_A_25861617 | NC_021164.1    | Ca_Kabuli_Chr05 | 25861617                | TT                                     | CC                 | CC               | INTERGENIC      |               |                    |                    |
| SNP_36298_A_25861960 | NC_021164.1    | Ca_Kabuli_Chr05 | 25861960                | GG                                     | AA                 | AA               | INTERGENIC      |               |                    |                    |
| SNP_36299_A_25861967 | NC_021164.1    | Ca_Kabuli_Chr05 | 25861967                | AA                                     | TT                 | TT               | INTERGENIC      |               |                    |                    |
| SNP_36300_A_25863687 | NC_021164.1    | Ca_Kabuli_Chr05 | 25863687                | CC                                     | TT                 | TT               | INTERGENIC      |               |                    |                    |

| SNPs IDs             | Chromosome IDs | Chromosomes     | Physical positions (bp) | CDC Frontier genome (Reference genome) | (Pusa 1103 & HPNB) | (ILWC 46 & LPNB) | Sequence Components of genome | Gene accession IDs | Putative functions                                |
|----------------------|----------------|-----------------|-------------------------|----------------------------------------|--------------------|------------------|-------------------------------|--------------------|---------------------------------------------------|
| SNP_36301_A_25878933 | NC_021164.1    | Ca_Kabuli_Chr05 | 25878933                | GG                                     | AA                 | AA               | INTERGENIC                    |                    |                                                   |
| SNP_36303_A_25948263 | NC_021164.1    | Ca_Kabuli_Chr05 | 25948263                | TT                                     | GG                 | GG               | INTRON                        | 101502562          | uncharacterized LOC101502562                      |
| SNP_36304_A_25967565 | NC_021164.1    | Ca_Kabuli_Chr05 | 25967565                | CC                                     | TT                 | TT               | INTRON                        | 101502878          | isoleucine N-monooxygenase 2-like                 |
| SNP_36305_A_26046181 | NC_021164.1    | Ca_Kabuli_Chr05 | 26046181                | GG                                     | CC                 | CC               | INTERGENIC                    |                    |                                                   |
| SNP_36306_A_26077393 | NC_021164.1    | Ca_Kabuli_Chr05 | 26077393                | AA                                     | GG                 | GG               | INTERGENIC                    |                    |                                                   |
| SNP_36307_A_26077524 | NC_021164.1    | Ca_Kabuli_Chr05 | 26077524                | CC                                     | AA                 | AA               | INTERGENIC                    |                    |                                                   |
| SNP_36308_A_26077754 | NC_021164.1    | Ca_Kabuli_Chr05 | 26077754                | GG                                     | TT                 | TT               | INTERGENIC                    |                    |                                                   |
| SNP_36309_A_26077808 | NC_021164.1    | Ca_Kabuli_Chr05 | 26077808                | CC                                     | TT                 | TT               | INTERGENIC                    |                    |                                                   |
| SNP_36310_A_26077864 | NC_021164.1    | Ca_Kabuli_Chr05 | 26077864                | TT                                     | GG                 | GG               | INTERGENIC                    |                    |                                                   |
| SNP_36311_A_26077896 | NC_021164.1    | Ca_Kabuli_Chr05 | 26077896                | AA                                     | CC                 | CC               | INTERGENIC                    |                    |                                                   |
| SNP_36312_A_26107247 | NC_021164.1    | Ca_Kabuli_Chr05 | 26107247                | AA                                     | CC                 | CC               | URR                           | 101512315          | mitogen-activated protein kinase kinase kinase 10 |
| SNP_36313_A_26141735 | NC_021164.1    | Ca_Kabuli_Chr05 | 26141735                | TT                                     | CC                 | CC               | INTERGENIC                    |                    |                                                   |
| SNP_36314_A_26151521 | NC_021164.1    | Ca_Kabuli_Chr05 | 26151521                | CC                                     | TT                 | TT               | INTERGENIC                    |                    |                                                   |
| SNP_36315_A_26156981 | NC_021164.1    | Ca_Kabuli_Chr05 | 26156981                | AA                                     | TT                 | TT               | INTERGENIC                    |                    |                                                   |
| SNP_36316_A_26160149 | NC_021164.1    | Ca_Kabuli_Chr05 | 26160149                | AA                                     | GG                 | GG               | INTERGENIC                    |                    |                                                   |
| SNP_36317_A_26240544 | NC_021164.1    | Ca_Kabuli_Chr05 | 26240544                | TT                                     | GG                 | GG               | INTERGENIC                    |                    |                                                   |
| SNP_36318_A_26263298 | NC_021164.1    | Ca_Kabuli_Chr05 | 26263298                | TT                                     | CC                 | CC               | INTERGENIC                    |                    |                                                   |
| SNP_36319_A_26285349 | NC_021164.1    | Ca_Kabuli_Chr05 | 26285349                | AA                                     | GG                 | GG               | URR                           | 101488643          | UDP-glycosyltransferase 87A1-like                 |
| SNP_36320_A_26285352 | NC_021164.1    | Ca_Kabuli_Chr05 | 26285352                | GG                                     | AA                 | AA               | URR                           | 101488643          | UDP-glycosyltransferase 87A1-like                 |
| SNP_36321_A_26285356 | NC_021164.1    | Ca_Kabuli_Chr05 | 26285356                | CC                                     | TT                 | TT               | URR                           | 101488643          | UDP-glycosyltransferase 87A1-like                 |
| SNP_36322_A_26285357 | NC_021164.1    | Ca_Kabuli_Chr05 | 26285357                | AA                                     | CC                 | CC               | URR                           | 101488643          | UDP-glycosyltransferase 87A1-like                 |
| SNP_36323_A_26285369 | NC_021164.1    | Ca_Kabuli_Chr05 | 26285369                | TT                                     | AA                 | AA               | URR                           | 101488643          | UDP-glycosyltransferase 87A1-like                 |

| SNPs IDs             | Chromosome IDs | Chromosomes     | Physical positions (bp) | CDC Frontier (Reference genome) | (Pusa 1103 & HPNB) | (ILWC 46 & LPNB) | Sequence Components of genome | Gene accession IDs | Putative functions                                       |
|----------------------|----------------|-----------------|-------------------------|---------------------------------|--------------------|------------------|-------------------------------|--------------------|----------------------------------------------------------|
| SNP_36324_A_26285370 | NC_021164.1    | Ca_Kabuli_Chr05 | 26285370                | TT                              | CC                 | CC               | URR                           | 101488643          | UDP-glycosyltransferase 87A1-like                        |
| SNP_36325_A_26285400 | NC_021164.1    | Ca_Kabuli_Chr05 | 26285400                | TT                              | AA                 | AA               | URR                           | 101488643          | UDP-glycosyltransferase 87A1-like                        |
| SNP_36326_A_26285409 | NC_021164.1    | Ca_Kabuli_Chr05 | 26285409                | CC                              | TT                 | TT               | URR                           | 101488643          | UDP-glycosyltransferase 87A1-like                        |
| SNP_36327_A_26308258 | NC_021164.1    | Ca_Kabuli_Chr05 | 26308258                | CC                              | TT                 | TT               | DRR                           | 101505129          | triosephosphate isomerase, cytosolic-like                |
| SNP_36328_A_26327343 | NC_021164.1    | Ca_Kabuli_Chr05 | 26327343                | TT                              | CC                 | CC               | INTERGENIC                    |                    |                                                          |
| SNP_36329_A_26327344 | NC_021164.1    | Ca_Kabuli_Chr05 | 26327344                | TT                              | CC                 | CC               | INTERGENIC                    |                    |                                                          |
| SNP_36330_A_26330011 | NC_021164.1    | Ca_Kabuli_Chr05 | 26330011                | TT                              | AA                 | AA               | INTERGENIC                    |                    |                                                          |
| SNP_36331_A_26435982 | NC_021164.1    | Ca_Kabuli_Chr05 | 26435982                | GG                              | AA                 | AA               | INTERGENIC                    |                    |                                                          |
| SNP_36332_A_26449326 | NC_021164.1    | Ca_Kabuli_Chr05 | 26449326                | CC                              | TT                 | TT               | INTERGENIC                    |                    |                                                          |
| SNP_36333_A_26454172 | NC_021164.1    | Ca_Kabuli_Chr05 | 26454172                | GG                              | AA                 | AA               | INTERGENIC                    |                    |                                                          |
| SNP_36334_A_26454469 | NC_021164.1    | Ca_Kabuli_Chr05 | 26454469                | AA                              | TT                 | TT               | INTERGENIC                    |                    |                                                          |
| SNP_36335_A_26454475 | NC_021164.1    | Ca_Kabuli_Chr05 | 26454475                | TT                              | GG                 | GG               | INTERGENIC                    |                    |                                                          |
| SNP_36336_A_26454480 | NC_021164.1    | Ca_Kabuli_Chr05 | 26454480                | TT                              | CC                 | CC               | INTERGENIC                    |                    |                                                          |
| SNP_36337_A_26454499 | NC_021164.1    | Ca_Kabuli_Chr05 | 26454499                | AA                              | GG                 | GG               | INTERGENIC                    |                    |                                                          |
| SNP_36339_A_26457121 | NC_021164.1    | Ca_Kabuli_Chr05 | 26457121                | TT                              | CC                 | CC               | INTERGENIC                    |                    |                                                          |
| SNP_36340_A_26457135 | NC_021164.1    | Ca_Kabuli_Chr05 | 26457135                | TT                              | GG                 | GG               | INTERGENIC                    |                    |                                                          |
| SNP_36342_A_26457176 | NC_021164.1    | Ca_Kabuli_Chr05 | 26457176                | AA                              | CC                 | CC               | INTERGENIC                    |                    |                                                          |
| SNP_36343_A_26457181 | NC_021164.1    | Ca_Kabuli_Chr05 | 26457181                | TT                              | CC                 | CC               | INTERGENIC                    |                    |                                                          |
| SNP_36344_A_26457198 | NC_021164.1    | Ca_Kabuli_Chr05 | 26457198                | TT                              | CC                 | CC               | INTERGENIC                    |                    |                                                          |
| SNP_36345_A_26457219 | NC_021164.1    | Ca_Kabuli_Chr05 | 26457219                | AA                              | GG                 | GG               | INTERGENIC                    |                    |                                                          |
| SNP_36346_A_26461676 | NC_021164.1    | Ca_Kabuli_Chr05 | 26461676                | CC                              | TT                 | TT               | INTERGENIC                    |                    |                                                          |
| SNP_36347_A_26512780 | NC_021164.1    | Ca_Kabuli_Chr05 | 26512780                | TT                              | CC                 | CC               | DRR                           | 101507411          | serine/threonine-protein phosphatase 7 long form homolog |

| SNPs IDs             | Chromosome IDs | Chromosomes     | Physical positions (bp) | CDC Frontier (Reference genome) | (Pusa 1103 & HPNB) | (ILWC 46 & LPNB) | Sequence Components of genome | Gene accession IDs | Putative functions                |
|----------------------|----------------|-----------------|-------------------------|---------------------------------|--------------------|------------------|-------------------------------|--------------------|-----------------------------------|
| SNP_36348_A_26514204 | NC_021164.1    | Ca_Kabuli_Chr05 | 26514204                | CC                              | TT                 | TT               | URR                           | 101507090          | uncharacterized LOC101507090      |
| SNP_36349_A_26522992 | NC_021164.1    | Ca_Kabuli_Chr05 | 26522992                | TT                              | CC                 | CC               | INTERGENIC                    |                    |                                   |
| SNP_36350_A_26523392 | NC_021164.1    | Ca_Kabuli_Chr05 | 26523392                | AA                              | GG                 | GG               | INTERGENIC                    |                    |                                   |
| SNP_36351_A_26523419 | NC_021164.1    | Ca_Kabuli_Chr05 | 26523419                | TT                              | CC                 | CC               | INTERGENIC                    |                    |                                   |
| SNP_36352_A_26541490 | NC_021164.1    | Ca_Kabuli_Chr05 | 26541490                | GG                              | AA                 | AA               | INTERGENIC                    |                    |                                   |
| SNP_36353_A_26614787 | NC_021164.1    | Ca_Kabuli_Chr05 | 26614787                | AA                              | GG                 | GG               | DRR                           | 101497086          | U-box domain-containing protein 4 |
| SNP_36354_A_26629572 | NC_021164.1    | Ca_Kabuli_Chr05 | 26629572                | TT                              | AA                 | AA               | INTERGENIC                    |                    |                                   |
| SNP_36355_A_26706705 | NC_021164.1    | Ca_Kabuli_Chr05 | 26706705                | AA                              | GG                 | GG               | INTERGENIC                    |                    |                                   |
| SNP_36356_A_26706708 | NC_021164.1    | Ca_Kabuli_Chr05 | 26706708                | TT                              | GG                 | GG               | INTERGENIC                    |                    |                                   |
| SNP_36359_A_26889308 | NC_021164.1    | Ca_Kabuli_Chr05 | 26889308                | CC                              | TT                 | TT               | INTERGENIC                    |                    |                                   |
| SNP_36360_A_26889327 | NC_021164.1    | Ca_Kabuli_Chr05 | 26889327                | TT                              | AA                 | AA               | INTERGENIC                    |                    |                                   |
| SNP_36361_A_26889404 | NC_021164.1    | Ca_Kabuli_Chr05 | 26889404                | CC                              | TT                 | TT               | INTERGENIC                    |                    |                                   |
| SNP_36362_A_26889407 | NC_021164.1    | Ca_Kabuli_Chr05 | 26889407                | TT                              | GG                 | GG               | INTERGENIC                    |                    |                                   |
| SNP_36364_A_26889538 | NC_021164.1    | Ca_Kabuli_Chr05 | 26889538                | GG                              | AA                 | AA               | INTERGENIC                    |                    |                                   |
| SNP_36365_A_26889539 | NC_021164.1    | Ca_Kabuli_Chr05 | 26889539                | TT                              | CC                 | CC               | INTERGENIC                    |                    |                                   |
| SNP_36366_A_26889555 | NC_021164.1    | Ca_Kabuli_Chr05 | 26889555                | GG                              | AA                 | AA               | INTERGENIC                    |                    |                                   |
| SNP_36367_A_26889557 | NC_021164.1    | Ca_Kabuli_Chr05 | 26889557                | TT                              | CC                 | CC               | INTERGENIC                    |                    |                                   |
| SNP_36369_A_26987528 | NC_021164.1    | Ca_Kabuli_Chr05 | 26987528                | AA                              | CC                 | CC               | NON_SYNONYMOUS_CODING         | 101513174          | uncharacterized LOC101513174      |
| SNP_36370_A_26987645 | NC_021164.1    | Ca_Kabuli_Chr05 | 26987645                | TT                              | AA                 | AA               | SYNONYMOUS_CODING             | 101513174          | uncharacterized LOC101513174      |
| SNP_36371_A_26987679 | NC_021164.1    | Ca_Kabuli_Chr05 | 26987679                | AA                              | GG                 | GG               | NON_SYNONYMOUS_CODING         | 101513174          | uncharacterized LOC101513174      |
| SNP_36372_A_26987707 | NC_021164.1    | Ca_Kabuli_Chr05 | 26987707                | TT                              | CC                 | CC               | NON_SYNONYMOUS_CODING         | 101513174          | uncharacterized LOC101513174      |
| SNP_36373_A_26987788 | NC_021164.1    | Ca_Kabuli_Chr05 | 26987788                | AA                              | GG                 | GG               | STOP_LOST                     | 101513174          | uncharacterized LOC101513174      |

| SNPs IDs             | Chromosome IDs | Chromosomes     | Physical positions (bp) | CDC Frontier genome (Reference genome) | (Pusa 1103 & HPNB) | (ILWC 46 & LPNB) | Sequence Components of genome | Gene accession IDs | Putative functions           |
|----------------------|----------------|-----------------|-------------------------|----------------------------------------|--------------------|------------------|-------------------------------|--------------------|------------------------------|
| SNP_36374_A_26988136 | NC_021164.1    | Ca_Kabuli_Chr05 | 26988136                | GG                                     | TT                 | TT               | URR                           | 101513174          | uncharacterized LOC101513174 |
| SNP_36375_A_26988162 | NC_021164.1    | Ca_Kabuli_Chr05 | 26988162                | TT                                     | CC                 | CC               | URR                           | 101513174          | uncharacterized LOC101513174 |
| SNP_36376_A_26988206 | NC_021164.1    | Ca_Kabuli_Chr05 | 26988206                | CC                                     | TT                 | TT               | URR                           | 101513174          | uncharacterized LOC101513174 |
| SNP_36377_A_26988211 | NC_021164.1    | Ca_Kabuli_Chr05 | 26988211                | CC                                     | TT                 | TT               | URR                           | 101513174          | uncharacterized LOC101513174 |
| SNP_36378_A_26988271 | NC_021164.1    | Ca_Kabuli_Chr05 | 26988271                | TT                                     | CC                 | CC               | URR                           | 101513174          | uncharacterized LOC101513174 |
| SNP_36379_A_26988367 | NC_021164.1    | Ca_Kabuli_Chr05 | 26988367                | TT                                     | CC                 | CC               | URR                           | 101513174          | uncharacterized LOC101513174 |
| SNP_36380_A_26988417 | NC_021164.1    | Ca_Kabuli_Chr05 | 26988417                | TT                                     | CC                 | CC               | URR                           | 101513174          | uncharacterized LOC101513174 |
| SNP_36381_A_26988445 | NC_021164.1    | Ca_Kabuli_Chr05 | 26988445                | TT                                     | CC                 | CC               | URR                           | 101513174          | uncharacterized LOC101513174 |
| SNP_36382_A_26988967 | NC_021164.1    | Ca_Kabuli_Chr05 | 26988967                | AA                                     | GG                 | GG               | URR                           | 101513174          | uncharacterized LOC101513174 |
| SNP_36383_A_26989268 | NC_021164.1    | Ca_Kabuli_Chr05 | 26989268                | TT                                     | AA                 | AA               | URR                           | 101513174          | uncharacterized LOC101513174 |
| SNP_36384_A_26989282 | NC_021164.1    | Ca_Kabuli_Chr05 | 26989282                | AA                                     | CC                 | CC               | URR                           | 101513174          | uncharacterized LOC101513174 |
| SNP_36385_A_26989457 | NC_021164.1    | Ca_Kabuli_Chr05 | 26989457                | GG                                     | AA                 | AA               | URR                           | 101513174          | uncharacterized LOC101513174 |
| SNP_36386_A_26991431 | NC_021164.1    | Ca_Kabuli_Chr05 | 26991431                | AA                                     | GG                 | GG               | INTERGENIC                    |                    |                              |
| SNP_36387_A_26994821 | NC_021164.1    | Ca_Kabuli_Chr05 | 26994821                | TT                                     | GG                 | GG               | INTERGENIC                    |                    |                              |
| SNP_36388_A_26994864 | NC_021164.1    | Ca_Kabuli_Chr05 | 26994864                | TT                                     | CC                 | CC               | INTERGENIC                    |                    |                              |
| SNP_36389_A_26994930 | NC_021164.1    | Ca_Kabuli_Chr05 | 26994930                | TT                                     | CC                 | CC               | INTERGENIC                    |                    |                              |
| SNP_36390_A_26994958 | NC_021164.1    | Ca_Kabuli_Chr05 | 26994958                | TT                                     | CC                 | CC               | INTERGENIC                    |                    |                              |
| SNP_36391_A_26994986 | NC_021164.1    | Ca_Kabuli_Chr05 | 26994986                | TT                                     | CC                 | CC               | INTERGENIC                    |                    |                              |
| SNP_36392_A_26995062 | NC_021164.1    | Ca_Kabuli_Chr05 | 26995062                | AA                                     | GG                 | GG               | INTERGENIC                    |                    |                              |
| SNP_36393_A_26995118 | NC_021164.1    | Ca_Kabuli_Chr05 | 26995118                | GG                                     | AA                 | AA               | INTERGENIC                    |                    |                              |
| SNP_36394_A_26995132 | NC_021164.1    | Ca_Kabuli_Chr05 | 26995132                | AA                                     | TT                 | TT               | INTERGENIC                    |                    |                              |
| SNP_36396_A_26996013 | NC_021164.1    | Ca_Kabuli_Chr05 | 26996013                | TT                                     | CC                 | CC               | DRR                           | 101503208          | Unknown function             |



| SNPs IDs             | Chromosome IDs | Chromosomes     | Physical positions (bp) | CDC Frontier genome (Reference genome) | (Pusa 1103 & HPNB) | (ILWC 46 & LPNB) | Sequence Components of genome | Gene accession IDs | Putative functions |
|----------------------|----------------|-----------------|-------------------------|----------------------------------------|--------------------|------------------|-------------------------------|--------------------|--------------------|
| SNP_36397_A_26996045 | NC_021164.1    | Ca_Kabuli_Chr05 | 26996045                | CC                                     | AA                 | AA               | DRR                           | 101503208          | Unknown function   |
| SNP_36398_A_26996074 | NC_021164.1    | Ca_Kabuli_Chr05 | 26996074                | TT                                     | CC                 | CC               | DRR                           | 101503208          | Unknown function   |
| SNP_36399_A_26996096 | NC_021164.1    | Ca_Kabuli_Chr05 | 26996096                | AA                                     | GG                 | GG               | DRR                           | 101503208          | Unknown function   |
| SNP_36400_A_26996104 | NC_021164.1    | Ca_Kabuli_Chr05 | 26996104                | TT                                     | CC                 | CC               | DRR                           | 101503208          | Unknown function   |
| SNP_36401_A_26996105 | NC_021164.1    | Ca_Kabuli_Chr05 | 26996105                | TT                                     | CC                 | CC               | DRR                           | 101503208          | Unknown function   |
| SNP_36402_A_26996106 | NC_021164.1    | Ca_Kabuli_Chr05 | 26996106                | AA                                     | GG                 | GG               | DRR                           | 101503208          | Unknown function   |
| SNP_36403_A_26996197 | NC_021164.1    | Ca_Kabuli_Chr05 | 26996197                | AA                                     | GG                 | GG               | DRR                           | 101503208          | Unknown function   |
| SNP_36404_A_26996207 | NC_021164.1    | Ca_Kabuli_Chr05 | 26996207                | TT                                     | CC                 | CC               | DRR                           | 101503208          | Unknown function   |
| SNP_36405_A_26996218 | NC_021164.1    | Ca_Kabuli_Chr05 | 26996218                | TT                                     | GG                 | GG               | DRR                           | 101503208          | Unknown function   |
| SNP_36406_A_26996236 | NC_021164.1    | Ca_Kabuli_Chr05 | 26996236                | AA                                     | GG                 | GG               | DRR                           | 101503208          | Unknown function   |
| SNP_36407_A_26996283 | NC_021164.1    | Ca_Kabuli_Chr05 | 26996283                | TT                                     | CC                 | CC               | DRR                           | 101503208          | Unknown function   |
| SNP_36408_A_26996286 | NC_021164.1    | Ca_Kabuli_Chr05 | 26996286                | TT                                     | CC                 | CC               | INTERGENIC                    |                    |                    |
| SNP_36409_A_26996289 | NC_021164.1    | Ca_Kabuli_Chr05 | 26996289                | AA                                     | GG                 | GG               | INTERGENIC                    |                    |                    |
| SNP_36410_A_26996293 | NC_021164.1    | Ca_Kabuli_Chr05 | 26996293                | TT                                     | CC                 | CC               | INTERGENIC                    |                    |                    |
| SNP_36411_A_26996302 | NC_021164.1    | Ca_Kabuli_Chr05 | 26996302                | TT                                     | GG                 | GG               | INTERGENIC                    |                    |                    |
| SNP_36412_A_26996347 | NC_021164.1    | Ca_Kabuli_Chr05 | 26996347                | AA                                     | GG                 | GG               | INTERGENIC                    |                    |                    |
| SNP_36413_A_26996352 | NC_021164.1    | Ca_Kabuli_Chr05 | 26996352                | TT                                     | CC                 | CC               | INTERGENIC                    |                    |                    |
| SNP_36414_A_26996382 | NC_021164.1    | Ca_Kabuli_Chr05 | 26996382                | AA                                     | GG                 | GG               | INTERGENIC                    |                    |                    |
| SNP_36415_A_26996391 | NC_021164.1    | Ca_Kabuli_Chr05 | 26996391                | TT                                     | GG                 | GG               | INTERGENIC                    |                    |                    |
| SNP_36416_A_26996409 | NC_021164.1    | Ca_Kabuli_Chr05 | 26996409                | AA                                     | CC                 | CC               | INTERGENIC                    |                    |                    |
| SNP_36417_A_26996436 | NC_021164.1    | Ca_Kabuli_Chr05 | 26996436                | AA                                     | GG                 | GG               | INTERGENIC                    |                    |                    |
| SNP_36418_A_26996475 | NC_021164.1    | Ca_Kabuli_Chr05 | 26996475                | AA                                     | GG                 | GG               | INTERGENIC                    |                    |                    |

| SNPs IDs             | Chromosome IDs | Chromosomes     | Physical positions (bp) | CDC Frontier genome (Reference genome) | (Pusa 1103 & HPNB) | (ILWC 46 & LPNB) | Sequence genome | Components of | Gene accession IDs | Putative functions |
|----------------------|----------------|-----------------|-------------------------|----------------------------------------|--------------------|------------------|-----------------|---------------|--------------------|--------------------|
| SNP_36419_A_26996485 | NC_021164.1    | Ca_Kabuli_Chr05 | 26996485                | AA                                     | GG                 | GG               | INTERGENIC      |               |                    |                    |
| SNP_36420_A_26996515 | NC_021164.1    | Ca_Kabuli_Chr05 | 26996515                | TT                                     | CC                 | CC               | INTERGENIC      |               |                    |                    |
| SNP_36421_A_26996536 | NC_021164.1    | Ca_Kabuli_Chr05 | 26996536                | TT                                     | GG                 | GG               | INTERGENIC      |               |                    |                    |
| SNP_36422_A_26996555 | NC_021164.1    | Ca_Kabuli_Chr05 | 26996555                | TT                                     | CC                 | CC               | INTERGENIC      |               |                    |                    |
| SNP_36423_A_26996764 | NC_021164.1    | Ca_Kabuli_Chr05 | 26996764                | AA                                     | GG                 | GG               | INTERGENIC      |               |                    |                    |
| SNP_36424_A_26996793 | NC_021164.1    | Ca_Kabuli_Chr05 | 26996793                | AA                                     | GG                 | GG               | INTERGENIC      |               |                    |                    |
| SNP_36426_A_26996819 | NC_021164.1    | Ca_Kabuli_Chr05 | 26996819                | CC                                     | TT                 | TT               | INTERGENIC      |               |                    |                    |
| SNP_36427_A_26996903 | NC_021164.1    | Ca_Kabuli_Chr05 | 26996903                | GG                                     | AA                 | AA               | INTERGENIC      |               |                    |                    |
| SNP_36428_A_26996912 | NC_021164.1    | Ca_Kabuli_Chr05 | 26996912                | GG                                     | AA                 | AA               | INTERGENIC      |               |                    |                    |
| SNP_36429_A_26996927 | NC_021164.1    | Ca_Kabuli_Chr05 | 26996927                | AA                                     | GG                 | GG               | INTERGENIC      |               |                    |                    |
| SNP_36430_A_26997057 | NC_021164.1    | Ca_Kabuli_Chr05 | 26997057                | TT                                     | CC                 | CC               | INTERGENIC      |               |                    |                    |
| SNP_36431_A_26997067 | NC_021164.1    | Ca_Kabuli_Chr05 | 26997067                | AA                                     | GG                 | GG               | INTERGENIC      |               |                    |                    |
| SNP_36432_A_26997209 | NC_021164.1    | Ca_Kabuli_Chr05 | 26997209                | TT                                     | CC                 | CC               | INTERGENIC      |               |                    |                    |
| SNP_36433_A_26997245 | NC_021164.1    | Ca_Kabuli_Chr05 | 26997245                | TT                                     | CC                 | CC               | INTERGENIC      |               |                    |                    |
| SNP_36434_A_26997263 | NC_021164.1    | Ca_Kabuli_Chr05 | 26997263                | AA                                     | CC                 | CC               | INTERGENIC      |               |                    |                    |
| SNP_36435_A_26997489 | NC_021164.1    | Ca_Kabuli_Chr05 | 26997489                | AA                                     | GG                 | GG               | INTERGENIC      |               |                    |                    |
| SNP_36436_A_26997512 | NC_021164.1    | Ca_Kabuli_Chr05 | 26997512                | TT                                     | CC                 | CC               | INTERGENIC      |               |                    |                    |
| SNP_36437_A_26997632 | NC_021164.1    | Ca_Kabuli_Chr05 | 26997632                | TT                                     | GG                 | GG               | INTERGENIC      |               |                    |                    |
| SNP_36438_A_26997647 | NC_021164.1    | Ca_Kabuli_Chr05 | 26997647                | TT                                     | CC                 | CC               | INTERGENIC      |               |                    |                    |
| SNP_36439_A_26997826 | NC_021164.1    | Ca_Kabuli_Chr05 | 26997826                | TT                                     | CC                 | CC               | DRR             |               | 101502877          | Unknown function   |
| SNP_36440_A_26997832 | NC_021164.1    | Ca_Kabuli_Chr05 | 26997832                | TT                                     | CC                 | CC               | DRR             |               | 101502877          | Unknown function   |
| SNP_36441_A_26997868 | NC_021164.1    | Ca_Kabuli_Chr05 | 26997868                | AA                                     | CC                 | CC               | DRR             |               | 101502877          | Unknown function   |

| SNPs IDs             | Chromosome IDs | Chromosomes     | Physical positions (bp) | CDC Frontier (Reference genome) | (Pusa 1103 & HPNB) | (ILWC 46 & LPNB) | Sequence Components of genome | Gene accession IDs | Putative functions |
|----------------------|----------------|-----------------|-------------------------|---------------------------------|--------------------|------------------|-------------------------------|--------------------|--------------------|
| SNP_36442_A_26997927 | NC_021164.1    | Ca_Kabuli_Chr05 | 26997927                | AA                              | CC                 | CC               | DRR                           | 101502877          | Unknown function   |
| SNP_36443_A_26997937 | NC_021164.1    | Ca_Kabuli_Chr05 | 26997937                | TT                              | CC                 | CC               | DRR                           | 101502877          | Unknown function   |
| SNP_36444_A_26997968 | NC_021164.1    | Ca_Kabuli_Chr05 | 26997968                | AA                              | GG                 | GG               | DRR                           | 101502877          | Unknown function   |
| SNP_36445_A_26997987 | NC_021164.1    | Ca_Kabuli_Chr05 | 26997987                | TT                              | CC                 | CC               | DRR                           | 101502877          | Unknown function   |
| SNP_36446_A_26997997 | NC_021164.1    | Ca_Kabuli_Chr05 | 26997997                | TT                              | GG                 | GG               | DRR                           | 101502877          | Unknown function   |
| SNP_36447_A_26998004 | NC_021164.1    | Ca_Kabuli_Chr05 | 26998004                | TT                              | CC                 | CC               | DRR                           | 101502877          | Unknown function   |
| SNP_36448_A_26998028 | NC_021164.1    | Ca_Kabuli_Chr05 | 26998028                | TT                              | CC                 | CC               | DRR                           | 101502877          | Unknown function   |
| SNP_36449_A_26998036 | NC_021164.1    | Ca_Kabuli_Chr05 | 26998036                | AA                              | CC                 | CC               | DRR                           | 101502877          | Unknown function   |
| SNP_36450_A_26998051 | NC_021164.1    | Ca_Kabuli_Chr05 | 26998051                | AA                              | GG                 | GG               | DRR                           | 101502877          | Unknown function   |
| SNP_36451_A_26998141 | NC_021164.1    | Ca_Kabuli_Chr05 | 26998141                | AA                              | GG                 | GG               | DRR                           | 101502877          | Unknown function   |
| SNP_36452_A_26998172 | NC_021164.1    | Ca_Kabuli_Chr05 | 26998172                | AA                              | CC                 | CC               | DRR                           | 101502877          | Unknown function   |
| SNP_36453_A_26998219 | NC_021164.1    | Ca_Kabuli_Chr05 | 26998219                | TT                              | CC                 | CC               | DRR                           | 101502877          | Unknown function   |
| SNP_36454_A_26998354 | NC_021164.1    | Ca_Kabuli_Chr05 | 26998354                | TT                              | CC                 | CC               | DRR                           | 101502877          | Unknown function   |
| SNP_36455_A_26998414 | NC_021164.1    | Ca_Kabuli_Chr05 | 26998414                | TT                              | CC                 | CC               | DRR                           | 101502877          | Unknown function   |
| SNP_36456_A_26998429 | NC_021164.1    | Ca_Kabuli_Chr05 | 26998429                | TT                              | CC                 | CC               | DRR                           | 101502877          | Unknown function   |
| SNP_36457_A_26998483 | NC_021164.1    | Ca_Kabuli_Chr05 | 26998483                | TT                              | CC                 | CC               | DRR                           | 101502877          | Unknown function   |
| SNP_36458_A_26998558 | NC_021164.1    | Ca_Kabuli_Chr05 | 26998558                | GG                              | CC                 | CC               | DRR                           | 101502877          | Unknown function   |
| SNP_36459_A_26998599 | NC_021164.1    | Ca_Kabuli_Chr05 | 26998599                | TT                              | CC                 | CC               | DRR                           | 101502877          | Unknown function   |
| SNP_36460_A_26998614 | NC_021164.1    | Ca_Kabuli_Chr05 | 26998614                | CC                              | GG                 | GG               | DRR                           | 101502877          | Unknown function   |
| SNP_36461_A_26998624 | NC_021164.1    | Ca_Kabuli_Chr05 | 26998624                | TT                              | CC                 | CC               | DRR                           | 101502877          | Unknown function   |
| SNP_36462_A_26998653 | NC_021164.1    | Ca_Kabuli_Chr05 | 26998653                | AA                              | GG                 | GG               | DRR                           | 101502877          | Unknown function   |
| SNP_36463_A_26998683 | NC_021164.1    | Ca_Kabuli_Chr05 | 26998683                | TT                              | CC                 | CC               | DRR                           | 101502877          | Unknown function   |

| SNPs IDs             | Chromosome IDs | Chromosomes     | Physical positions (bp) | CDC Frontier genome (Reference genome) | (Pusa 1103 & HPNB) | (ILWC 46 & LPNB) | Sequence Components of genome | Gene accession IDs | Putative functions                      |
|----------------------|----------------|-----------------|-------------------------|----------------------------------------|--------------------|------------------|-------------------------------|--------------------|-----------------------------------------|
| SNP_36464_A_26998848 | NC_021164.1    | Ca_Kabuli_Chr05 | 26998848                | AA                                     | CC                 | CC               | INTERGENIC                    |                    |                                         |
| SNP_36465_A_26998866 | NC_021164.1    | Ca_Kabuli_Chr05 | 26998866                | AA                                     | GG                 | GG               | INTERGENIC                    |                    |                                         |
| SNP_36466_A_26998891 | NC_021164.1    | Ca_Kabuli_Chr05 | 26998891                | AA                                     | GG                 | GG               | INTERGENIC                    |                    |                                         |
| SNP_36467_A_26998900 | NC_021164.1    | Ca_Kabuli_Chr05 | 26998900                | AA                                     | GG                 | GG               | INTERGENIC                    |                    |                                         |
| SNP_36468_A_26998937 | NC_021164.1    | Ca_Kabuli_Chr05 | 26998937                | GG                                     | TT                 | TT               | INTERGENIC                    |                    |                                         |
| SNP_36469_A_26999584 | NC_021164.1    | Ca_Kabuli_Chr05 | 26999584                | TT                                     | CC                 | CC               | URR                           | 101503208          | Unknown function                        |
| SNP_36470_A_26999645 | NC_021164.1    | Ca_Kabuli_Chr05 | 26999645                | GG                                     | TT                 | TT               | URR                           | 101503208          | Unknown function                        |
| SNP_36471_A_26999681 | NC_021164.1    | Ca_Kabuli_Chr05 | 26999681                | AA                                     | CC                 | CC               | URR                           | 101503208          | Unknown function                        |
| SNP_36472_A_26999797 | NC_021164.1    | Ca_Kabuli_Chr05 | 26999797                | AA                                     | GG                 | GG               | URR                           | 101503208          | Unknown function                        |
| SNP_36473_A_26999813 | NC_021164.1    | Ca_Kabuli_Chr05 | 26999813                | TT                                     | GG                 | GG               | URR                           | 101503208          | Unknown function                        |
| SNP_36474_A_26999851 | NC_021164.1    | Ca_Kabuli_Chr05 | 26999851                | CC                                     | AA                 | AA               | URR                           | 101503208          | Unknown function                        |
| SNP_36475_A_26999898 | NC_021164.1    | Ca_Kabuli_Chr05 | 26999898                | AA                                     | GG                 | GG               | URR                           | 101503208          | Unknown function                        |
| SNP_36476_A_26999903 | NC_021164.1    | Ca_Kabuli_Chr05 | 26999903                | TT                                     | AA                 | AA               | URR                           | 101503208          | Unknown function                        |
| SNP_36477_A_26999950 | NC_021164.1    | Ca_Kabuli_Chr05 | 26999950                | AA                                     | TT                 | TT               | URR                           | 101503208          | Unknown function                        |
| SNP_36479_A_27000104 | NC_021164.1    | Ca_Kabuli_Chr05 | 27000104                | AA                                     | CC                 | CC               | URR                           | 101503208          | Unknown function                        |
| SNP_36481_A_27000280 | NC_021164.1    | Ca_Kabuli_Chr05 | 27000280                | TT                                     | GG                 | GG               | DRR                           | 101410558          | transfer RNA methionine (anticodon CAU) |
| SNP_36482_A_27000295 | NC_021164.1    | Ca_Kabuli_Chr05 | 27000295                | AA                                     | CC                 | CC               | DRR                           | 101410558          | transfer RNA methionine (anticodon CAU) |
| SNP_36483_A_27000343 | NC_021164.1    | Ca_Kabuli_Chr05 | 27000343                | TT                                     | CC                 | CC               | DRR                           | 101410558          | transfer RNA methionine (anticodon CAU) |
| SNP_36484_A_27000385 | NC_021164.1    | Ca_Kabuli_Chr05 | 27000385                | TT                                     | CC                 | CC               | DRR                           | 101410558          | transfer RNA methionine (anticodon CAU) |
| SNP_36486_A_27000545 | NC_021164.1    | Ca_Kabuli_Chr05 | 27000545                | GG                                     | TT                 | TT               | DRR                           | 101410558          | transfer RNA methionine (anticodon CAU) |
| SNP_36487_A_27000550 | NC_021164.1    | Ca_Kabuli_Chr05 | 27000550                | CC                                     | TT                 | TT               | DRR                           | 101410558          | transfer RNA methionine (anticodon CAU) |
| SNP_36488_A_27000627 | NC_021164.1    | Ca_Kabuli_Chr05 | 27000627                | AA                                     | CC                 | CC               | DRR                           | 101410558          | transfer RNA methionine (anticodon CAU) |

| SNPs IDs             | Chromosome IDs | Chromosomes     | Physical positions (bp) | CDC Frontier genome (Reference genome) | (Pusa 1103 & HPNB) | (ILWC 46 & LPNB) | Sequence genome | Components of | Gene accession IDs | Putative functions                      |
|----------------------|----------------|-----------------|-------------------------|----------------------------------------|--------------------|------------------|-----------------|---------------|--------------------|-----------------------------------------|
| SNP_36489_A_27000630 | NC_021164.1    | Ca_Kabuli_Chr05 | 27000630                | AA                                     | GG                 | GG               | DRR             |               | 101410558          | transfer RNA methionine (anticodon CAU) |
| SNP_36490_A_27000723 | NC_021164.1    | Ca_Kabuli_Chr05 | 27000723                | CC                                     | TT                 | TT               | DRR             |               | 101410558          | transfer RNA methionine (anticodon CAU) |
| SNP_36492_A_27000810 | NC_021164.1    | Ca_Kabuli_Chr05 | 27000810                | CC                                     | TT                 | TT               | DRR             |               | 101410558          | transfer RNA methionine (anticodon CAU) |
| SNP_36494_A_27000878 | NC_021164.1    | Ca_Kabuli_Chr05 | 27000878                | TT                                     | AA                 | AA               | DRR             |               | 101410558          | transfer RNA methionine (anticodon CAU) |
| SNP_36495_A_27000886 | NC_021164.1    | Ca_Kabuli_Chr05 | 27000886                | AA                                     | CC                 | CC               | DRR             |               | 101410558          | transfer RNA methionine (anticodon CAU) |
| SNP_36496_A_27000994 | NC_021164.1    | Ca_Kabuli_Chr05 | 27000994                | AA                                     | CC                 | CC               | DRR             |               | 101410558          | transfer RNA methionine (anticodon CAU) |
| SNP_36497_A_27001020 | NC_021164.1    | Ca_Kabuli_Chr05 | 27001020                | AA                                     | CC                 | CC               | DRR             |               | 101410558          | transfer RNA methionine (anticodon CAU) |
| SNP_36498_A_27089812 | NC_021164.1    | Ca_Kabuli_Chr05 | 27089812                | CC                                     | GG                 | GG               | INTERGENIC      |               |                    |                                         |
| SNP_36499_A_27090240 | NC_021164.1    | Ca_Kabuli_Chr05 | 27090240                | GG                                     | AA                 | AA               | INTERGENIC      |               |                    |                                         |
| SNP_36500_A_27099221 | NC_021164.1    | Ca_Kabuli_Chr05 | 27099221                | GG                                     | AA                 | AA               | INTERGENIC      |               |                    |                                         |
| SNP_36502_A_27099232 | NC_021164.1    | Ca_Kabuli_Chr05 | 27099232                | TT                                     | AA                 | AA               | INTERGENIC      |               |                    |                                         |
| SNP_36503_A_27107256 | NC_021164.1    | Ca_Kabuli_Chr05 | 27107256                | TT                                     | CC                 | CC               | INTERGENIC      |               |                    |                                         |
| SNP_36504_A_27107343 | NC_021164.1    | Ca_Kabuli_Chr05 | 27107343                | AA                                     | TT                 | TT               | INTERGENIC      |               |                    |                                         |
| SNP_36505_A_27107349 | NC_021164.1    | Ca_Kabuli_Chr05 | 27107349                | TT                                     | CC                 | CC               | INTERGENIC      |               |                    |                                         |
| SNP_36506_A_27107383 | NC_021164.1    | Ca_Kabuli_Chr05 | 27107383                | AA                                     | TT                 | TT               | INTERGENIC      |               |                    |                                         |
| SNP_36507_A_27107639 | NC_021164.1    | Ca_Kabuli_Chr05 | 27107639                | CC                                     | TT                 | TT               | INTERGENIC      |               |                    |                                         |
| SNP_36508_A_27107725 | NC_021164.1    | Ca_Kabuli_Chr05 | 27107725                | TT                                     | AA                 | AA               | INTERGENIC      |               |                    |                                         |
| SNP_36509_A_27183668 | NC_021164.1    | Ca_Kabuli_Chr05 | 27183668                | GG                                     | AA                 | AA               | URR             |               | 101506096          | uncharacterized LOC101506096            |
| SNP_36510_A_27245485 | NC_021164.1    | Ca_Kabuli_Chr05 | 27245485                | GG                                     | AA                 | AA               | INTERGENIC      |               |                    |                                         |
| SNP_36511_A_27269651 | NC_021164.1    | Ca_Kabuli_Chr05 | 27269651                | CC                                     | TT                 | TT               | INTERGENIC      |               |                    |                                         |
| SNP_36512_A_27276804 | NC_021164.1    | Ca_Kabuli_Chr05 | 27276804                | AA                                     | GG                 | GG               | INTERGENIC      |               |                    |                                         |
| SNP_36514_A_27367607 | NC_021164.1    | Ca_Kabuli_Chr05 | 27367607                | AA                                     | CC                 | CC               | INTERGENIC      |               |                    |                                         |

| SNPs IDs             | Chromosome IDs | Chromosomes     | Physical positions (bp) | CDC Frontier (Reference genome) | (Pusa 1103 & HPNB) | (ILWC 46 & LPNB) | Sequence genome | Components of | Gene accession IDs           | Putative functions |
|----------------------|----------------|-----------------|-------------------------|---------------------------------|--------------------|------------------|-----------------|---------------|------------------------------|--------------------|
| SNP_36516_A_27392954 | NC_021164.1    | Ca_Kabuli_Chr05 | 27392954                | TT                              | CC                 | CC               | INTERGENIC      |               |                              |                    |
| SNP_36518_A_27401836 | NC_021164.1    | Ca_Kabuli_Chr05 | 27401836                | TT                              | CC                 | CC               | INTERGENIC      |               |                              |                    |
| SNP_36519_A_27427468 | NC_021164.1    | Ca_Kabuli_Chr05 | 27427468                | AA                              | TT                 | TT               | INTERGENIC      |               |                              |                    |
| SNP_36520_A_27427473 | NC_021164.1    | Ca_Kabuli_Chr05 | 27427473                | TT                              | CC                 | CC               | INTERGENIC      |               |                              |                    |
| SNP_36521_A_27427508 | NC_021164.1    | Ca_Kabuli_Chr05 | 27427508                | AA                              | GG                 | GG               | INTERGENIC      |               |                              |                    |
| SNP_36522_A_27427515 | NC_021164.1    | Ca_Kabuli_Chr05 | 27427515                | CC                              | AA                 | AA               | INTERGENIC      |               |                              |                    |
| SNP_36523_A_27427530 | NC_021164.1    | Ca_Kabuli_Chr05 | 27427530                | AA                              | CC                 | CC               | INTERGENIC      |               |                              |                    |
| SNP_36524_A_27427533 | NC_021164.1    | Ca_Kabuli_Chr05 | 27427533                | GG                              | TT                 | TT               | INTERGENIC      |               |                              |                    |
| SNP_36525_A_27427534 | NC_021164.1    | Ca_Kabuli_Chr05 | 27427534                | AA                              | TT                 | TT               | INTERGENIC      |               |                              |                    |
| SNP_36526_A_27427556 | NC_021164.1    | Ca_Kabuli_Chr05 | 27427556                | AA                              | CC                 | CC               | INTERGENIC      |               |                              |                    |
| SNP_36527_A_27427557 | NC_021164.1    | Ca_Kabuli_Chr05 | 27427557                | CC                              | AA                 | AA               | INTERGENIC      |               |                              |                    |
| SNP_36528_A_27427565 | NC_021164.1    | Ca_Kabuli_Chr05 | 27427565                | TT                              | AA                 | AA               | INTERGENIC      |               |                              |                    |
| SNP_36529_A_27427608 | NC_021164.1    | Ca_Kabuli_Chr05 | 27427608                | AA                              | GG                 | GG               | INTERGENIC      |               |                              |                    |
| SNP_36530_A_27427622 | NC_021164.1    | Ca_Kabuli_Chr05 | 27427622                | AA                              | CC                 | CC               | INTERGENIC      |               |                              |                    |
| SNP_36531_A_27433779 | NC_021164.1    | Ca_Kabuli_Chr05 | 27433779                | TT                              | CC                 | CC               | INTERGENIC      |               |                              |                    |
| SNP_36532_A_27458394 | NC_021164.1    | Ca_Kabuli_Chr05 | 27458394                | AA                              | TT                 | TT               | INTERGENIC      |               |                              |                    |
| SNP_36533_A_27458395 | NC_021164.1    | Ca_Kabuli_Chr05 | 27458395                | TT                              | CC                 | CC               | INTERGENIC      |               |                              |                    |
| SNP_36536_A_27469165 | NC_021164.1    | Ca_Kabuli_Chr05 | 27469165                | AA                              | GG                 | GG               | INTERGENIC      |               |                              |                    |
| SNP_36539_A_27558093 | NC_021164.1    | Ca_Kabuli_Chr05 | 27558093                | TT                              | CC                 | CC               | URR             | 101515342     | uncharacterized LOC101515342 |                    |
| SNP_36540_A_27558302 | NC_021164.1    | Ca_Kabuli_Chr05 | 27558302                | AA                              | GG                 | GG               | INTERGENIC      |               |                              |                    |
| SNP_36541_A_27563077 | NC_021164.1    | Ca_Kabuli_Chr05 | 27563077                | TT                              | AA                 | AA               | INTERGENIC      |               |                              |                    |
| SNP_36542_A_27564998 | NC_021164.1    | Ca_Kabuli_Chr05 | 27564998                | GG                              | AA                 | AA               | INTERGENIC      |               |                              |                    |

| SNPs IDs             | Chromosome IDs | Chromosomes     | Physical positions (bp) | CDC Frontier genome (Reference genome) | (Pusa 1103 & HPNB) | (ILWC 46 & LPNB) | Sequence Components of genome | Gene accession IDs | Putative functions                                   |
|----------------------|----------------|-----------------|-------------------------|----------------------------------------|--------------------|------------------|-------------------------------|--------------------|------------------------------------------------------|
| SNP_36543_A_27567171 | NC_021164.1    | Ca_Kabuli_Chr05 | 27567171                | AA                                     | GG                 | GG               | INTERGENIC                    |                    |                                                      |
| SNP_36544_A_27567197 | NC_021164.1    | Ca_Kabuli_Chr05 | 27567197                | AA                                     | CC                 | CC               | INTERGENIC                    |                    |                                                      |
| SNP_36545_A_27567200 | NC_021164.1    | Ca_Kabuli_Chr05 | 27567200                | CC                                     | AA                 | AA               | INTERGENIC                    |                    |                                                      |
| SNP_36546_A_27567237 | NC_021164.1    | Ca_Kabuli_Chr05 | 27567237                | TT                                     | GG                 | GG               | INTERGENIC                    |                    |                                                      |
| SNP_36547_A_27567254 | NC_021164.1    | Ca_Kabuli_Chr05 | 27567254                | AA                                     | CC                 | CC               | INTERGENIC                    |                    |                                                      |
| SNP_36548_A_27567545 | NC_021164.1    | Ca_Kabuli_Chr05 | 27567545                | GG                                     | AA                 | AA               | INTERGENIC                    |                    |                                                      |
| SNP_36549_A_27567659 | NC_021164.1    | Ca_Kabuli_Chr05 | 27567659                | TT                                     | GG                 | GG               | INTERGENIC                    |                    |                                                      |
| SNP_36550_A_27567675 | NC_021164.1    | Ca_Kabuli_Chr05 | 27567675                | TT                                     | CC                 | CC               | INTERGENIC                    |                    |                                                      |
| SNP_36551_A_27567681 | NC_021164.1    | Ca_Kabuli_Chr05 | 27567681                | TT                                     | CC                 | CC               | INTERGENIC                    |                    |                                                      |
| SNP_36552_A_27567710 | NC_021164.1    | Ca_Kabuli_Chr05 | 27567710                | AA                                     | GG                 | GG               | INTERGENIC                    |                    |                                                      |
| SNP_36553_A_27567730 | NC_021164.1    | Ca_Kabuli_Chr05 | 27567730                | GG                                     | AA                 | AA               | INTERGENIC                    |                    |                                                      |
| SNP_36554_A_27567731 | NC_021164.1    | Ca_Kabuli_Chr05 | 27567731                | TT                                     | CC                 | CC               | INTERGENIC                    |                    |                                                      |
| SNP_36556_A_27662506 | NC_021164.1    | Ca_Kabuli_Chr05 | 27662506                | GG                                     | TT                 | TT               | URR                           | 101491570          | transmembrane protein 56-B                           |
| SNP_36557_A_27673125 | NC_021164.1    | Ca_Kabuli_Chr05 | 27673125                | AA                                     | GG                 | GG               | INTERGENIC                    |                    |                                                      |
| SNP_36558_A_27674402 | NC_021164.1    | Ca_Kabuli_Chr05 | 27674402                | TT                                     | CC                 | CC               | DRR                           | 101492096          | deoxyuridine 5-triphosphate nucleotidohydrolase-like |
| SNP_36560_A_27694847 | NC_021164.1    | Ca_Kabuli_Chr05 | 27694847                | CC                                     | TT                 | TT               | INTERGENIC                    |                    |                                                      |
| SNP_36561_A_27723398 | NC_021164.1    | Ca_Kabuli_Chr05 | 27723398                | CC                                     | TT                 | TT               | INTERGENIC                    |                    |                                                      |
| SNP_36562_A_27723692 | NC_021164.1    | Ca_Kabuli_Chr05 | 27723692                | AA                                     | GG                 | GG               | INTERGENIC                    |                    |                                                      |
| SNP_36563_A_27723695 | NC_021164.1    | Ca_Kabuli_Chr05 | 27723695                | TT                                     | GG                 | GG               | INTERGENIC                    |                    |                                                      |
| SNP_36564_A_27724342 | NC_021164.1    | Ca_Kabuli_Chr05 | 27724342                | GG                                     | CC                 | CC               | URR                           | 101494805          | uncharacterized LOC101494805                         |
| SNP_36565_A_27724367 | NC_021164.1    | Ca_Kabuli_Chr05 | 27724367                | AA                                     | CC                 | CC               | URR                           | 101494805          | uncharacterized LOC101494805                         |
| SNP_36567_A_27737309 | NC_021164.1    | Ca_Kabuli_Chr05 | 27737309                | AA                                     | GG                 | GG               | SYNONYMOUS_CODING             | 101495459          | uncharacterized LOC101495459                         |

| SNPs IDs             | Chromosome IDs | Chromosomes     | Physical positions (bp) | CDC Frontier genome (Reference genome) | (Pusa 1103 & HPNB) | (ILWC 46 & LPNB) | Sequence Components of genome | Gene accession IDs | Putative functions                                                           |
|----------------------|----------------|-----------------|-------------------------|----------------------------------------|--------------------|------------------|-------------------------------|--------------------|------------------------------------------------------------------------------|
| SNP_36568_A_27761086 | NC_021164.1    | Ca_Kabuli_Chr05 | 27761086                | CC                                     | AA                 | AA               | INTERGENIC                    |                    |                                                                              |
| SNP_36570_A_27775301 | NC_021164.1    | Ca_Kabuli_Chr05 | 27775301                | AA                                     | GG                 | GG               | INTERGENIC                    |                    |                                                                              |
| SNP_36571_A_27782370 | NC_021164.1    | Ca_Kabuli_Chr05 | 27782370                | AA                                     | CC                 | CC               | INTERGENIC                    |                    |                                                                              |
| SNP_36572_A_27783132 | NC_021164.1    | Ca_Kabuli_Chr05 | 27783132                | AA                                     | GG                 | GG               | INTERGENIC                    |                    |                                                                              |
| SNP_36573_A_27800772 | NC_021164.1    | Ca_Kabuli_Chr05 | 27800772                | TT                                     | CC                 | CC               | URR                           | 101496771          | chloroplastic group IIA intron splicing facilitator CRS1, chloroplastic-like |
| SNP_36574_A_27811474 | NC_021164.1    | Ca_Kabuli_Chr05 | 27811474                | CC                                     | GG                 | GG               | INTERGENIC                    |                    |                                                                              |
| SNP_36575_A_27811625 | NC_021164.1    | Ca_Kabuli_Chr05 | 27811625                | CC                                     | TT                 | TT               | INTERGENIC                    |                    |                                                                              |
| SNP_36576_A_27812035 | NC_021164.1    | Ca_Kabuli_Chr05 | 27812035                | GG                                     | AA                 | AA               | INTERGENIC                    |                    |                                                                              |
| SNP_36577_A_27813905 | NC_021164.1    | Ca_Kabuli_Chr05 | 27813905                | GG                                     | AA                 | AA               | INTERGENIC                    |                    |                                                                              |
| SNP_36578_A_27814278 | NC_021164.1    | Ca_Kabuli_Chr05 | 27814278                | CC                                     | TT                 | TT               | INTERGENIC                    |                    |                                                                              |
| SNP_36579_A_27835228 | NC_021164.1    | Ca_Kabuli_Chr05 | 27835228                | AA                                     | GG                 | GG               | URR                           | 101493322          | deoxyuridine 5'-triphosphate nucleotidohydrolase-like                        |
| SNP_36580_A_27835250 | NC_021164.1    | Ca_Kabuli_Chr05 | 27835250                | CC                                     | AA                 | AA               | URR                           | 101493322          | deoxyuridine 5'-triphosphate nucleotidohydrolase-like                        |
| SNP_36581_A_27835545 | NC_021164.1    | Ca_Kabuli_Chr05 | 27835545                | CC                                     | TT                 | TT               | URR                           | 101493322          | deoxyuridine 5'-triphosphate nucleotidohydrolase-like                        |
| SNP_36582_A_27835663 | NC_021164.1    | Ca_Kabuli_Chr05 | 27835663                | TT                                     | CC                 | CC               | URR                           | 101493322          | deoxyuridine 5'-triphosphate nucleotidohydrolase-like                        |
| SNP_36583_A_27835701 | NC_021164.1    | Ca_Kabuli_Chr05 | 27835701                | CC                                     | TT                 | TT               | URR                           | 101493322          | deoxyuridine 5'-triphosphate nucleotidohydrolase-like                        |
| SNP_36585_A_27883626 | NC_021164.1    | Ca_Kabuli_Chr05 | 27883626                | GG                                     | AA                 | AA               | DRR                           | 101495134          | beta-catenin-like protein 1                                                  |
| SNP_36586_A_27923211 | NC_021164.1    | Ca_Kabuli_Chr05 | 27923211                | AA                                     | GG                 | GG               | URR                           | 101495791          | nuclear pore complex protein NUP88                                           |
| SNP_36587_A_27925621 | NC_021164.1    | Ca_Kabuli_Chr05 | 27925621                | GG                                     | AA                 | AA               | DRR                           | 101496112          | uncharacterized LOC101496112                                                 |
| SNP_36589_A_27945137 | NC_021164.1    | Ca_Kabuli_Chr05 | 27945137                | AA                                     | TT                 | TT               | INTRON                        | 101496972          | probable amino acid permease 7                                               |
| SNP_36590_A_27950052 | NC_021164.1    | Ca_Kabuli_Chr05 | 27950052                | AA                                     | TT                 | TT               | INTRON                        | 101496972          | probable amino acid permease 7                                               |
| SNP_36591_A_27953475 | NC_021164.1    | Ca_Kabuli_Chr05 | 27953475                | GG                                     | CC                 | CC               | INTRON                        | 101496972          | probable amino acid permease 7                                               |
| SNP_36592_A_27953505 | NC_021164.1    | Ca_Kabuli_Chr05 | 27953505                | CC                                     | GG                 | GG               | INTRON                        | 101496972          | probable amino acid permease 7                                               |



| SNPs IDs             | Chromosome IDs | Chromosomes     | Physical positions (bp) | CDC Frontier genome (Reference genome) | (Pusa 1103 & HPNB) | (ILWC 46 & LPNB) | Sequence Components of genome | Gene accession IDs | Putative functions                            |
|----------------------|----------------|-----------------|-------------------------|----------------------------------------|--------------------|------------------|-------------------------------|--------------------|-----------------------------------------------|
| SNP_36593_A_27953650 | NC_021164.1    | Ca_Kabuli_Chr05 | 27953650                | TT                                     | CC                 | CC               | INTRON                        | 101496972          | probable amino acid permease 7                |
| SNP_36594_A_27953654 | NC_021164.1    | Ca_Kabuli_Chr05 | 27953654                | AA                                     | GG                 | GG               | INTRON                        | 101496972          | probable amino acid permease 7                |
| SNP_36595_A_27954333 | NC_021164.1    | Ca_Kabuli_Chr05 | 27954333                | GG                                     | CC                 | CC               | INTRON                        | 101496972          | probable amino acid permease 7                |
| SNP_36596_A_27954369 | NC_021164.1    | Ca_Kabuli_Chr05 | 27954369                | AA                                     | TT                 | TT               | INTRON                        | 101496972          | probable amino acid permease 7                |
| SNP_36597_A_27954692 | NC_021164.1    | Ca_Kabuli_Chr05 | 27954692                | GG                                     | AA                 | AA               | INTRON                        | 101496972          | probable amino acid permease 7                |
| SNP_36598_A_27954712 | NC_021164.1    | Ca_Kabuli_Chr05 | 27954712                | GG                                     | AA                 | AA               | INTRON                        | 101496972          | probable amino acid permease 7                |
| SNP_36599_A_27954714 | NC_021164.1    | Ca_Kabuli_Chr05 | 27954714                | AA                                     | TT                 | TT               | INTRON                        | 101496972          | probable amino acid permease 7                |
| SNP_36600_A_27954722 | NC_021164.1    | Ca_Kabuli_Chr05 | 27954722                | TT                                     | AA                 | AA               | INTRON                        | 101496972          | probable amino acid permease 7                |
| SNP_36601_A_27954723 | NC_021164.1    | Ca_Kabuli_Chr05 | 27954723                | TT                                     | AA                 | AA               | INTRON                        | 101496972          | probable amino acid permease 7                |
| SNP_36602_A_27954801 | NC_021164.1    | Ca_Kabuli_Chr05 | 27954801                | AA                                     | GG                 | GG               | INTRON                        | 101496972          | probable amino acid permease 7                |
| SNP_36603_A_27954850 | NC_021164.1    | Ca_Kabuli_Chr05 | 27954850                | TT                                     | GG                 | GG               | INTRON                        | 101496972          | probable amino acid permease 7                |
| SNP_36604_A_28010050 | NC_021164.1    | Ca_Kabuli_Chr05 | 28010050                | CC                                     | GG                 | GG               | INTERGENIC                    |                    |                                               |
| SNP_36606_A_28025975 | NC_021164.1    | Ca_Kabuli_Chr05 | 28025975                | CC                                     | TT                 | TT               | DRR                           | 101499385          | phosphoinositide phospholipase C 2            |
| SNP_36607_A_28056188 | NC_021164.1    | Ca_Kabuli_Chr05 | 28056188                | GG                                     | AA                 | AA               | NON_SYNONYMOUS_CODING         | 101497951          | Unknown function                              |
| SNP_36608_A_28058213 | NC_021164.1    | Ca_Kabuli_Chr05 | 28058213                | TT                                     | CC                 | AA               | URR                           | 101497951          | Unknown function                              |
| SNP_36610_A_28088515 | NC_021164.1    | Ca_Kabuli_Chr05 | 28088515                | CC                                     | TT                 | TT               | INTERGENIC                    |                    |                                               |
| SNP_36611_A_28106519 | NC_021164.1    | Ca_Kabuli_Chr05 | 28106519                | CC                                     | TT                 | TT               | INTERGENIC                    |                    |                                               |
| SNP_36615_A_28251301 | NC_021164.1    | Ca_Kabuli_Chr05 | 28251301                | CC                                     | TT                 | TT               | INTERGENIC                    |                    |                                               |
| SNP_36616_A_28341927 | NC_021164.1    | Ca_Kabuli_Chr05 | 28341927                | TT                                     | AA                 | AA               | URR                           | 101507608          | multiple inositol polyphosphate phosphatase 1 |
| SNP_36618_A_28391729 | NC_021164.1    | Ca_Kabuli_Chr05 | 28391729                | CC                                     | TT                 | TT               | INTERGENIC                    |                    |                                               |
| SNP_36619_A_28391780 | NC_021164.1    | Ca_Kabuli_Chr05 | 28391780                | TT                                     | CC                 | CC               | INTERGENIC                    |                    |                                               |
| SNP_36620_A_28392189 | NC_021164.1    | Ca_Kabuli_Chr05 | 28392189                | AA                                     | TT                 | TT               | INTERGENIC                    |                    |                                               |

| SNPs IDs             | Chromosome IDs | Chromosomes     | Physical positions (bp) | CDC Frontier (Reference genome) | (Pusa 1103 & HPNB) | (ILWC 46 & LPNB) | Sequence Components of genome | Gene accession IDs | Putative functions                                       |
|----------------------|----------------|-----------------|-------------------------|---------------------------------|--------------------|------------------|-------------------------------|--------------------|----------------------------------------------------------|
| SNP_36621_A_28409782 | NC_021164.1    | Ca_Kabuli_Chr05 | 28409782                | TT                              | CC                 | CC               | URR                           | 101499592          | serine/threonine-protein phosphatase 7 long form homolog |
| SNP_36623_A_28413409 | NC_021164.1    | Ca_Kabuli_Chr05 | 28413409                | CC                              | AA                 | AA               | INTERGENIC                    |                    |                                                          |
| SNP_36624_A_28435124 | NC_021164.1    | Ca_Kabuli_Chr05 | 28435124                | TT                              | AA                 | AA               | INTERGENIC                    |                    |                                                          |
| SNP_36625_A_28466907 | NC_021164.1    | Ca_Kabuli_Chr05 | 28466907                | TT                              | CC                 | CC               | INTERGENIC                    |                    |                                                          |
| SNP_36626_A_28466923 | NC_021164.1    | Ca_Kabuli_Chr05 | 28466923                | CC                              | TT                 | TT               | INTERGENIC                    |                    |                                                          |
| SNP_36627_A_28466940 | NC_021164.1    | Ca_Kabuli_Chr05 | 28466940                | GG                              | AA                 | AA               | INTERGENIC                    |                    |                                                          |
| SNP_36628_A_28480505 | NC_021164.1    | Ca_Kabuli_Chr05 | 28480505                | TT                              | CC                 | CC               | NON_SYNONYMOUS_CODING         | 101500861          | uncharacterized LOC101500861                             |
| SNP_36629_A_28480511 | NC_021164.1    | Ca_Kabuli_Chr05 | 28480511                | TT                              | GG                 | GG               | NON_SYNONYMOUS_CODING         | 101500861          | uncharacterized LOC101500861                             |
| SNP_36630_A_28480574 | NC_021164.1    | Ca_Kabuli_Chr05 | 28480574                | TT                              | CC                 | CC               | NON_SYNONYMOUS_CODING         | 101500861          | uncharacterized LOC101500861                             |
| SNP_36631_A_28502705 | NC_021164.1    | Ca_Kabuli_Chr05 | 28502705                | AA                              | CC                 | CC               | INTERGENIC                    |                    |                                                          |
| SNP_36632_A_28515721 | NC_021164.1    | Ca_Kabuli_Chr05 | 28515721                | AA                              | TT                 | TT               | INTERGENIC                    |                    |                                                          |
| SNP_36633_A_28515723 | NC_021164.1    | Ca_Kabuli_Chr05 | 28515723                | TT                              | AA                 | AA               | INTERGENIC                    |                    |                                                          |
| SNP_36634_A_28520791 | NC_021164.1    | Ca_Kabuli_Chr05 | 28520791                | AA                              | GG                 | GG               | INTERGENIC                    |                    |                                                          |
| SNP_36635_A_28525088 | NC_021164.1    | Ca_Kabuli_Chr05 | 28525088                | TT                              | CC                 | CC               | INTERGENIC                    |                    |                                                          |
| SNP_36636_A_28525162 | NC_021164.1    | Ca_Kabuli_Chr05 | 28525162                | AA                              | GG                 | GG               | INTERGENIC                    |                    |                                                          |
| SNP_36637_A_28525200 | NC_021164.1    | Ca_Kabuli_Chr05 | 28525200                | AA                              | GG                 | GG               | INTERGENIC                    |                    |                                                          |
| SNP_36638_A_28525309 | NC_021164.1    | Ca_Kabuli_Chr05 | 28525309                | GG                              | AA                 | AA               | INTERGENIC                    |                    |                                                          |
| SNP_36639_A_28525383 | NC_021164.1    | Ca_Kabuli_Chr05 | 28525383                | AA                              | GG                 | GG               | INTERGENIC                    |                    |                                                          |
| SNP_36640_A_28525415 | NC_021164.1    | Ca_Kabuli_Chr05 | 28525415                | GG                              | AA                 | AA               | INTERGENIC                    |                    |                                                          |
| SNP_36641_A_28525437 | NC_021164.1    | Ca_Kabuli_Chr05 | 28525437                | TT                              | CC                 | CC               | INTERGENIC                    |                    |                                                          |
| SNP_36642_A_28525444 | NC_021164.1    | Ca_Kabuli_Chr05 | 28525444                | AA                              | GG                 | GG               | INTERGENIC                    |                    |                                                          |
| SNP_36643_A_28525478 | NC_021164.1    | Ca_Kabuli_Chr05 | 28525478                | GG                              | AA                 | AA               | INTERGENIC                    |                    |                                                          |

| SNPs IDs             | Chromosome IDs | Chromosomes     | Physical positions (bp) | CDC Frontier genome (Reference genome) | (Pusa 1103 & HPNB) | (ILWC 46 & LPNB) | Sequence genome | Components of | Gene accession IDs           | Putative functions |
|----------------------|----------------|-----------------|-------------------------|----------------------------------------|--------------------|------------------|-----------------|---------------|------------------------------|--------------------|
| SNP_36644_A_28525514 | NC_021164.1    | Ca_Kabuli_Chr05 | 28525514                | GG                                     | CC                 | CC               | INTERGENIC      |               |                              |                    |
| SNP_36645_A_28525547 | NC_021164.1    | Ca_Kabuli_Chr05 | 28525547                | AA                                     | TT                 | TT               | INTERGENIC      |               |                              |                    |
| SNP_36646_A_28525586 | NC_021164.1    | Ca_Kabuli_Chr05 | 28525586                | CC                                     | TT                 | TT               | INTERGENIC      |               |                              |                    |
| SNP_36647_A_28525622 | NC_021164.1    | Ca_Kabuli_Chr05 | 28525622                | TT                                     | CC                 | CC               | INTERGENIC      |               |                              |                    |
| SNP_36648_A_28525630 | NC_021164.1    | Ca_Kabuli_Chr05 | 28525630                | AA                                     | TT                 | TT               | INTERGENIC      |               |                              |                    |
| SNP_36649_A_28525635 | NC_021164.1    | Ca_Kabuli_Chr05 | 28525635                | AA                                     | GG                 | GG               | INTERGENIC      |               |                              |                    |
| SNP_36650_A_28525662 | NC_021164.1    | Ca_Kabuli_Chr05 | 28525662                | TT                                     | CC                 | CC               | INTERGENIC      |               |                              |                    |
| SNP_36651_A_28525687 | NC_021164.1    | Ca_Kabuli_Chr05 | 28525687                | TT                                     | CC                 | CC               | INTERGENIC      |               |                              |                    |
| SNP_36652_A_28569583 | NC_021164.1    | Ca_Kabuli_Chr05 | 28569583                | GG                                     | CC                 | CC               | INTERGENIC      |               |                              |                    |
| SNP_36653_A_28569873 | NC_021164.1    | Ca_Kabuli_Chr05 | 28569873                | TT                                     | CC                 | CC               | INTERGENIC      |               |                              |                    |
| SNP_36654_A_28569962 | NC_021164.1    | Ca_Kabuli_Chr05 | 28569962                | AA                                     | CC                 | CC               | INTERGENIC      |               |                              |                    |
| SNP_36656_A_28616955 | NC_021164.1    | Ca_Kabuli_Chr05 | 28616955                | CC                                     | TT                 | TT               | INTERGENIC      |               |                              |                    |
| SNP_36657_A_28651625 | NC_021164.1    | Ca_Kabuli_Chr05 | 28651625                | CC                                     | GG                 | GG               | INTERGENIC      |               |                              |                    |
| SNP_36658_A_28651771 | NC_021164.1    | Ca_Kabuli_Chr05 | 28651771                | AA                                     | GG                 | GG               | INTERGENIC      |               |                              |                    |
| SNP_36659_A_28651907 | NC_021164.1    | Ca_Kabuli_Chr05 | 28651907                | GG                                     | TT                 | TT               | INTERGENIC      |               |                              |                    |
| SNP_36660_A_28689697 | NC_021164.1    | Ca_Kabuli_Chr05 | 28689697                | AA                                     | GG                 | GG               | INTERGENIC      |               |                              |                    |
| SNP_36661_A_28750365 | NC_021164.1    | Ca_Kabuli_Chr05 | 28750365                | TT                                     | AA                 | AA               | URR             | 101490400     | uncharacterized LOC101490400 |                    |
| SNP_36662_A_28750614 | NC_021164.1    | Ca_Kabuli_Chr05 | 28750614                | CC                                     | AA                 | AA               | URR             | 101490400     | uncharacterized LOC101490400 |                    |
| SNP_36663_A_28766391 | NC_021164.1    | Ca_Kabuli_Chr05 | 28766391                | GG                                     | AA                 | AA               | INTERGENIC      |               |                              |                    |
| SNP_36664_A_28767700 | NC_021164.1    | Ca_Kabuli_Chr05 | 28767700                | TT                                     | GG                 | GG               | INTERGENIC      |               |                              |                    |
| SNP_36665_A_28800271 | NC_021164.1    | Ca_Kabuli_Chr05 | 28800271                | CC                                     | TT                 | TT               | INTERGENIC      |               |                              |                    |
| SNP_36666_A_28809387 | NC_021164.1    | Ca_Kabuli_Chr05 | 28809387                | CC                                     | TT                 | TT               | INTERGENIC      |               |                              |                    |

| SNPs IDs             | Chromosome IDs | Chromosomes     | Physical positions (bp) | CDC Frontier (Reference genome) | (Pusa 1103 & HPNB) | (ILWC 46 & LPNB) | Sequence Components of genome | Gene accession IDs | Putative functions                                                      |
|----------------------|----------------|-----------------|-------------------------|---------------------------------|--------------------|------------------|-------------------------------|--------------------|-------------------------------------------------------------------------|
| SNP_36667_A_28842159 | NC_021164.1    | Ca_Kabuli_Chr05 | 28842159                | AA                              | TT                 | TT               | NON_SYNONYMOUS_CODING         | 101492990          | lysM domain-containing GPI-anchored protein 1-like                      |
| SNP_36669_A_28864402 | NC_021164.1    | Ca_Kabuli_Chr05 | 28864402                | CC                              | AA                 | AA               | URR                           | 101494073          | DNA ligase 1                                                            |
| SNP_36671_A_28895474 | NC_021164.1    | Ca_Kabuli_Chr05 | 28895474                | AA                              | GG                 | GG               | INTERGENIC                    |                    |                                                                         |
| SNP_36673_A_28978002 | NC_021164.1    | Ca_Kabuli_Chr05 | 28978002                | AA                              | GG                 | GG               | URR                           | 101503405          | activating signal cointegrator 1 complex subunit 2 homolog              |
| SNP_36674_A_28999129 | NC_021164.1    | Ca_Kabuli_Chr05 | 28999129                | GG                              | TT                 | TT               | URR                           | 101504271          | G-type lectin S-receptor-like serine/threonine-protein kinase At5g35370 |
| SNP_36675_A_29046172 | NC_021164.1    | Ca_Kabuli_Chr05 | 29046172                | CC                              | TT                 | TT               | URR                           | 101505554          | auxin transporter-like protein 3                                        |
| SNP_36677_A_29298206 | NC_021164.1    | Ca_Kabuli_Chr05 | 29298206                | TT                              | GG                 | GG               | INTERGENIC                    |                    |                                                                         |
| SNP_36679_A_29504537 | NC_021164.1    | Ca_Kabuli_Chr05 | 29504537                | AA                              | TT                 | TT               | INTERGENIC                    |                    |                                                                         |
| SNP_36680_A_29536303 | NC_021164.1    | Ca_Kabuli_Chr05 | 29536303                | TT                              | CC                 | CC               | DRR                           | 101503631          | Unknown function                                                        |
| SNP_36683_A_29670495 | NC_021164.1    | Ca_Kabuli_Chr05 | 29670495                | CC                              | TT                 | TT               | INTERGENIC                    |                    |                                                                         |
| SNP_36684_A_29706447 | NC_021164.1    | Ca_Kabuli_Chr05 | 29706447                | TT                              | CC                 | CC               | INTERGENIC                    |                    |                                                                         |
| SNP_36685_A_29739368 | NC_021164.1    | Ca_Kabuli_Chr05 | 29739368                | TT                              | CC                 | CC               | INTERGENIC                    |                    |                                                                         |
| SNP_36686_A_29759720 | NC_021164.1    | Ca_Kabuli_Chr05 | 29759720                | TT                              | AA                 | AA               | URR                           | 101505555          | nucleotide pyrophosphatase/phosphodiesterase                            |
| SNP_36687_A_29759752 | NC_021164.1    | Ca_Kabuli_Chr05 | 29759752                | AA                              | GG                 | GG               | URR                           | 101505555          | nucleotide pyrophosphatase/phosphodiesterase                            |
| SNP_36691_A_29902979 | NC_021164.1    | Ca_Kabuli_Chr05 | 29902979                | GG                              | AA                 | AA               | INTERGENIC                    |                    |                                                                         |
| SNP_36692_A_29904792 | NC_021164.1    | Ca_Kabuli_Chr05 | 29904792                | CC                              | TT                 | TT               | INTERGENIC                    |                    |                                                                         |
| SNP_36693_A_29917613 | NC_021164.1    | Ca_Kabuli_Chr05 | 29917613                | CC                              | TT                 | TT               | DRR                           | 101506201          | uncharacterized LOC101506201                                            |
| SNP_36694_A_29917651 | NC_021164.1    | Ca_Kabuli_Chr05 | 29917651                | TT                              | GG                 | GG               | DRR                           | 101506201          | uncharacterized LOC101506201                                            |
| SNP_36695_A_29917680 | NC_021164.1    | Ca_Kabuli_Chr05 | 29917680                | TT                              | AA                 | AA               | DRR                           | 101506201          | uncharacterized LOC101506201                                            |
| SNP_36696_A_29920999 | NC_021164.1    | Ca_Kabuli_Chr05 | 29920999                | AA                              | CC                 | CC               | INTRON                        | 101506201          | uncharacterized LOC101506201                                            |
| SNP_36697_A_29921043 | NC_021164.1    | Ca_Kabuli_Chr05 | 29921043                | CC                              | TT                 | TT               | INTRON                        | 101506201          | uncharacterized LOC101506201                                            |
| SNP_36698_A_29921081 | NC_021164.1    | Ca_Kabuli_Chr05 | 29921081                | AA                              | TT                 | TT               | INTRON                        | 101506201          | uncharacterized LOC101506201                                            |

| SNPs IDs             | Chromosome IDs | Chromosomes     | Physical positions (bp) | CDC Frontier genome (Reference genome) | (Pusa 1103 & HPNB) | (ILWC 46 & LPNB) | Sequence Components of genome | Gene accession IDs | Putative functions           |
|----------------------|----------------|-----------------|-------------------------|----------------------------------------|--------------------|------------------|-------------------------------|--------------------|------------------------------|
| SNP_36699_A_29921082 | NC_021164.1    | Ca_Kabuli_Chr05 | 29921082                | AA                                     | GG                 | GG               | INTRON                        | 101506201          | uncharacterized LOC101506201 |
| SNP_36700_A_29921320 | NC_021164.1    | Ca_Kabuli_Chr05 | 29921320                | TT                                     | CC                 | CC               | INTRON                        | 101506201          | uncharacterized LOC101506201 |
| SNP_36701_A_29921326 | NC_021164.1    | Ca_Kabuli_Chr05 | 29921326                | CC                                     | TT                 | TT               | INTRON                        | 101506201          | uncharacterized LOC101506201 |
| SNP_36702_A_29929369 | NC_021164.1    | Ca_Kabuli_Chr05 | 29929369                | AA                                     | TT                 | TT               | INTRON                        | 101506530          | uncharacterized LOC101506530 |
| SNP_36703_A_29929408 | NC_021164.1    | Ca_Kabuli_Chr05 | 29929408                | CC                                     | TT                 | TT               | NON_SYNONYMOUS_CODING         | 101506530          | uncharacterized LOC101506530 |
| SNP_36704_A_29932064 | NC_021164.1    | Ca_Kabuli_Chr05 | 29932064                | TT                                     | CC                 | CC               | URR                           | 101506530          | uncharacterized LOC101506530 |
| SNP_36705_A_29932135 | NC_021164.1    | Ca_Kabuli_Chr05 | 29932135                | GG                                     | TT                 | TT               | URR                           | 101506530          | uncharacterized LOC101506530 |
| SNP_36706_A_29932159 | NC_021164.1    | Ca_Kabuli_Chr05 | 29932159                | CC                                     | TT                 | TT               | URR                           | 101506530          | uncharacterized LOC101506530 |
| SNP_36707_A_29932160 | NC_021164.1    | Ca_Kabuli_Chr05 | 29932160                | CC                                     | GG                 | GG               | URR                           | 101506530          | uncharacterized LOC101506530 |
| SNP_36708_A_29932161 | NC_021164.1    | Ca_Kabuli_Chr05 | 29932161                | TT                                     | AA                 | AA               | URR                           | 101506530          | uncharacterized LOC101506530 |
| SNP_36709_A_29932355 | NC_021164.1    | Ca_Kabuli_Chr05 | 29932355                | GG                                     | AA                 | AA               | INTERGENIC                    |                    |                              |
| SNP_36710_A_29932374 | NC_021164.1    | Ca_Kabuli_Chr05 | 29932374                | GG                                     | AA                 | AA               | INTERGENIC                    |                    |                              |
| SNP_36711_A_29933084 | NC_021164.1    | Ca_Kabuli_Chr05 | 29933084                | CC                                     | GG                 | GG               | INTERGENIC                    |                    |                              |
| SNP_36715_A_29934615 | NC_021164.1    | Ca_Kabuli_Chr05 | 29934615                | CC                                     | TT                 | TT               | INTERGENIC                    |                    |                              |
| SNP_36716_A_29938136 | NC_021164.1    | Ca_Kabuli_Chr05 | 29938136                | GG                                     | AA                 | AA               | DRR                           | 101502463          | Unknown function             |
| SNP_36718_A_29938497 | NC_021164.1    | Ca_Kabuli_Chr05 | 29938497                | TT                                     | GG                 | GG               | URR                           | 101506863          | uncharacterized LOC101506863 |
| SNP_36720_A_29999476 | NC_021164.1    | Ca_Kabuli_Chr05 | 29999476                | AA                                     | GG                 | GG               | INTERGENIC                    |                    |                              |
| SNP_36721_A_30028536 | NC_021164.1    | Ca_Kabuli_Chr05 | 30028536                | CC                                     | TT                 | TT               | INTERGENIC                    |                    |                              |
| SNP_36722_A_30040605 | NC_021164.1    | Ca_Kabuli_Chr05 | 30040605                | TT                                     | AA                 | AA               | INTERGENIC                    |                    |                              |
| SNP_36724_A_30106187 | NC_021164.1    | Ca_Kabuli_Chr05 | 30106187                | AA                                     | GG                 | GG               | INTERGENIC                    |                    |                              |
| SNP_36725_A_30107037 | NC_021164.1    | Ca_Kabuli_Chr05 | 30107037                | GG                                     | AA                 | AA               | DRR                           | 101513800          | uncharacterized LOC101513800 |
| SNP_36726_A_30107041 | NC_021164.1    | Ca_Kabuli_Chr05 | 30107041                | CC                                     | TT                 | TT               | DRR                           | 101513800          | uncharacterized LOC101513800 |

| SNPs IDs             | Chromosome IDs | Chromosomes     | Physical positions (bp) | CDC Frontier (Reference genome) | (Pusa 1103 & HPNB) | (ILWC 46 & LPNB) | Sequence Components of genome | Gene accession IDs | Putative functions           |
|----------------------|----------------|-----------------|-------------------------|---------------------------------|--------------------|------------------|-------------------------------|--------------------|------------------------------|
| SNP_36727_A_30107049 | NC_021164.1    | Ca_Kabuli_Chr05 | 30107049                | TT                              | CC                 | CC               | DRR                           | 101513800          | uncharacterized LOC101513800 |
| SNP_36728_A_30107279 | NC_021164.1    | Ca_Kabuli_Chr05 | 30107279                | AA                              | GG                 | GG               | DRR                           | 101513800          | uncharacterized LOC101513800 |
| SNP_36729_A_30107307 | NC_021164.1    | Ca_Kabuli_Chr05 | 30107307                | TT                              | AA                 | AA               | DRR                           | 101513800          | uncharacterized LOC101513800 |
| SNP_36730_A_30107315 | NC_021164.1    | Ca_Kabuli_Chr05 | 30107315                | CC                              | TT                 | TT               | DRR                           | 101513800          | uncharacterized LOC101513800 |
| SNP_36732_A_30107448 | NC_021164.1    | Ca_Kabuli_Chr05 | 30107448                | AA                              | GG                 | GG               | DRR                           | 101513800          | uncharacterized LOC101513800 |
| SNP_36733_A_30107550 | NC_021164.1    | Ca_Kabuli_Chr05 | 30107550                | TT                              | CC                 | CC               | DRR                           | 101513800          | uncharacterized LOC101513800 |
| SNP_36734_A_30107576 | NC_021164.1    | Ca_Kabuli_Chr05 | 30107576                | AA                              | CC                 | CC               | DRR                           | 101513800          | uncharacterized LOC101513800 |
| SNP_36735_A_30107661 | NC_021164.1    | Ca_Kabuli_Chr05 | 30107661                | AA                              | GG                 | GG               | DRR                           | 101513800          | uncharacterized LOC101513800 |
| SNP_36736_A_30108652 | NC_021164.1    | Ca_Kabuli_Chr05 | 30108652                | TT                              | GG                 | GG               | NON_SYNONYMOUS_CODING         | 101513800          | uncharacterized LOC101513800 |
| SNP_36737_A_30108824 | NC_021164.1    | Ca_Kabuli_Chr05 | 30108824                | CC                              | GG                 | GG               | NON_SYNONYMOUS_CODING         | 101513800          | uncharacterized LOC101513800 |
| SNP_36738_A_30108829 | NC_021164.1    | Ca_Kabuli_Chr05 | 30108829                | CC                              | TT                 | TT               | NON_SYNONYMOUS_CODING         | 101513800          | uncharacterized LOC101513800 |
| SNP_36739_A_30109040 | NC_021164.1    | Ca_Kabuli_Chr05 | 30109040                | TT                              | CC                 | CC               | NON_SYNONYMOUS_CODING         | 101513800          | uncharacterized LOC101513800 |
| SNP_36740_A_30109116 | NC_021164.1    | Ca_Kabuli_Chr05 | 30109116                | TT                              | AA                 | AA               | SYNONYMOUS_CODING             | 101513800          | uncharacterized LOC101513800 |
| SNP_36741_A_30109197 | NC_021164.1    | Ca_Kabuli_Chr05 | 30109197                | GG                              | AA                 | AA               | SYNONYMOUS_CODING             | 101513800          | uncharacterized LOC101513800 |
| SNP_36742_A_30109266 | NC_021164.1    | Ca_Kabuli_Chr05 | 30109266                | AA                              | GG                 | GG               | SYNONYMOUS_CODING             | 101513800          | uncharacterized LOC101513800 |
| SNP_36743_A_30109382 | NC_021164.1    | Ca_Kabuli_Chr05 | 30109382                | TT                              | CC                 | CC               | NON_SYNONYMOUS_CODING         | 101513800          | uncharacterized LOC101513800 |
| SNP_36744_A_30111927 | NC_021164.1    | Ca_Kabuli_Chr05 | 30111927                | CC                              | GG                 | GG               | INTRON                        | 101513800          | uncharacterized LOC101513800 |
| SNP_36745_A_30111943 | NC_021164.1    | Ca_Kabuli_Chr05 | 30111943                | AA                              | TT                 | TT               | INTRON                        | 101513800          | uncharacterized LOC101513800 |
| SNP_36746_A_30112051 | NC_021164.1    | Ca_Kabuli_Chr05 | 30112051                | CC                              | GG                 | GG               | INTRON                        | 101513800          | uncharacterized LOC101513800 |
| SNP_36747_A_30112210 | NC_021164.1    | Ca_Kabuli_Chr05 | 30112210                | TT                              | CC                 | CC               | INTRON                        | 101513800          | uncharacterized LOC101513800 |
| SNP_36748_A_30112270 | NC_021164.1    | Ca_Kabuli_Chr05 | 30112270                | CC                              | TT                 | TT               | INTRON                        | 101513800          | uncharacterized LOC101513800 |
| SNP_36750_A_30119135 | NC_021164.1    | Ca_Kabuli_Chr05 | 30119135                | CC                              | TT                 | TT               | URR                           | 101513497          | endochitinase A2-like        |

| SNPs IDs             | Chromosome IDs | Chromosomes     | Physical positions (bp) | CDC Frontier (Reference genome) | (Pusa 1103 & HPNB) | (ILWC 46 & LPNB) | Sequence Components of genome | Gene accession IDs | Putative functions                     |
|----------------------|----------------|-----------------|-------------------------|---------------------------------|--------------------|------------------|-------------------------------|--------------------|----------------------------------------|
| SNP_36751_A_30119743 | NC_021164.1    | Ca_Kabuli_Chr05 | 30119743                | TT                              | GG                 | GG               | URR                           | 101513497          | endochitinase A2-like                  |
| SNP_36752_A_30119775 | NC_021164.1    | Ca_Kabuli_Chr05 | 30119775                | TT                              | CC                 | CC               | URR                           | 101513497          | endochitinase A2-like                  |
| SNP_36753_A_30120257 | NC_021164.1    | Ca_Kabuli_Chr05 | 30120257                | AA                              | GG                 | GG               | INTERGENIC                    |                    |                                        |
| SNP_36754_A_30120264 | NC_021164.1    | Ca_Kabuli_Chr05 | 30120264                | GG                              | AA                 | AA               | INTERGENIC                    |                    |                                        |
| SNP_36755_A_30123327 | NC_021164.1    | Ca_Kabuli_Chr05 | 30123327                | CC                              | TT                 | TT               | NON_SYNONYMOUS_CODING         | 101512317          | uncharacterized LOC101512317           |
| SNP_36756_A_30123407 | NC_021164.1    | Ca_Kabuli_Chr05 | 30123407                | GG                              | CC                 | CC               | NON_SYNONYMOUS_CODING         | 101512317          | uncharacterized LOC101512317           |
| SNP_36757_A_30123675 | NC_021164.1    | Ca_Kabuli_Chr05 | 30123675                | GG                              | CC                 | CC               | NON_SYNONYMOUS_CODING         | 101512317          | uncharacterized LOC101512317           |
| SNP_36758_A_30123687 | NC_021164.1    | Ca_Kabuli_Chr05 | 30123687                | CC                              | AA                 | AA               | NON_SYNONYMOUS_CODING         | 101512317          | uncharacterized LOC101512317           |
| SNP_36759_A_30125552 | NC_021164.1    | Ca_Kabuli_Chr05 | 30125552                | AA                              | TT                 | TT               | INTRON                        | 101512317          | uncharacterized LOC101512317           |
| SNP_36761_A_30127094 | NC_021164.1    | Ca_Kabuli_Chr05 | 30127094                | TT                              | AA                 | AA               | URR                           | 101512317          | uncharacterized LOC101512317           |
| SNP_36762_A_30127852 | NC_021164.1    | Ca_Kabuli_Chr05 | 30127852                | CC                              | TT                 | TT               | URR                           | 101512317          | uncharacterized LOC101512317           |
| SNP_36763_A_30128630 | NC_021164.1    | Ca_Kabuli_Chr05 | 30128630                | GG                              | TT                 | TT               | URR                           | 101512317          | uncharacterized LOC101512317           |
| SNP_36764_A_30128762 | NC_021164.1    | Ca_Kabuli_Chr05 | 30128762                | CC                              | TT                 | TT               | URR                           | 101512317          | uncharacterized LOC101512317           |
| SNP_36766_A_30129022 | NC_021164.1    | Ca_Kabuli_Chr05 | 30129022                | AA                              | TT                 | TT               | INTERGENIC                    |                    |                                        |
| SNP_36767_A_30129094 | NC_021164.1    | Ca_Kabuli_Chr05 | 30129094                | CC                              | TT                 | TT               | INTERGENIC                    |                    |                                        |
| SNP_36769_A_30131107 | NC_021164.1    | Ca_Kabuli_Chr05 | 30131107                | TT                              | GG                 | GG               | INTERGENIC                    |                    |                                        |
| SNP_36770_A_30132470 | NC_021164.1    | Ca_Kabuli_Chr05 | 30132470                | TT                              | CC                 | CC               | INTERGENIC                    |                    |                                        |
| SNP_36772_A_30240429 | NC_021164.1    | Ca_Kabuli_Chr05 | 30240429                | CC                              | TT                 | TT               | DRR                           | 101492097          | DEAD-box ATP-dependent RNA helicase 50 |
| SNP_36774_A_30381419 | NC_021164.1    | Ca_Kabuli_Chr05 | 30381419                | CC                              | TT                 | TT               | URR                           | 101496442          | E3 ubiquitin-protein ligase UPL3       |
| SNP_36776_A_30396428 | NC_021164.1    | Ca_Kabuli_Chr05 | 30396428                | CC                              | GG                 | GG               | INTERGENIC                    |                    |                                        |
| SNP_36777_A_30396495 | NC_021164.1    | Ca_Kabuli_Chr05 | 30396495                | AA                              | GG                 | GG               | INTERGENIC                    |                    |                                        |
| SNP_36778_A_30396786 | NC_021164.1    | Ca_Kabuli_Chr05 | 30396786                | TT                              | GG                 | GG               | INTERGENIC                    |                    |                                        |

| SNPs IDs             | Chromosome IDs | Chromosomes     | Physical positions (bp) | CDC Frontier genome (Reference genome) | (Pusa 1103 & HPNB) | (ILWC 46 & LPNB) | Sequence Components of genome | Gene accession IDs | Putative functions                                |
|----------------------|----------------|-----------------|-------------------------|----------------------------------------|--------------------|------------------|-------------------------------|--------------------|---------------------------------------------------|
| SNP_36779_A_30396821 | NC_021164.1    | Ca_Kabuli_Chr05 | 30396821                | AA                                     | TT                 | TT               | INTERGENIC                    |                    |                                                   |
| SNP_36780_A_30397101 | NC_021164.1    | Ca_Kabuli_Chr05 | 30397101                | GG                                     | TT                 | TT               | INTERGENIC                    |                    |                                                   |
| SNP_36781_A_30398522 | NC_021164.1    | Ca_Kabuli_Chr05 | 30398522                | AA                                     | TT                 | TT               | INTERGENIC                    |                    |                                                   |
| SNP_36782_A_30547556 | NC_021164.1    | Ca_Kabuli_Chr05 | 30547556                | AA                                     | TT                 | TT               | DRR                           | 101506864          | tRNA-dihydrouridine(47) synthase [NAD(P)(+)]-like |
| SNP_36783_A_30547557 | NC_021164.1    | Ca_Kabuli_Chr05 | 30547557                | CC                                     | TT                 | TT               | DRR                           | 101506864          | tRNA-dihydrouridine(47) synthase [NAD(P)(+)]-like |
| SNP_36784_A_30614560 | NC_021164.1    | Ca_Kabuli_Chr05 | 30614560                | TT                                     | CC                 | CC               | DRR                           | 101509846          | GATA transcription factor 7                       |
| SNP_36785_A_30621409 | NC_021164.1    | Ca_Kabuli_Chr05 | 30621409                | CC                                     | TT                 | TT               | INTERGENIC                    |                    |                                                   |
| SNP_36786_A_30644437 | NC_021164.1    | Ca_Kabuli_Chr05 | 30644437                | AA                                     | TT                 | TT               | INTERGENIC                    |                    |                                                   |
| SNP_36787_A_30670011 | NC_021164.1    | Ca_Kabuli_Chr05 | 30670011                | CC                                     | TT                 | TT               | INTERGENIC                    |                    |                                                   |
| SNP_36788_A_30672490 | NC_021164.1    | Ca_Kabuli_Chr05 | 30672490                | TT                                     | AA                 | AA               | INTERGENIC                    |                    |                                                   |
| SNP_36789_A_30703102 | NC_021164.1    | Ca_Kabuli_Chr05 | 30703102                | TT                                     | AA                 | AA               | INTERGENIC                    |                    |                                                   |
| SNP_36790_A_30710575 | NC_021164.1    | Ca_Kabuli_Chr05 | 30710575                | GG                                     | AA                 | AA               | INTERGENIC                    |                    |                                                   |
| SNP_36792_A_30737668 | NC_021164.1    | Ca_Kabuli_Chr05 | 30737668                | GG                                     | TT                 | TT               | INTERGENIC                    |                    |                                                   |
| SNP_36793_A_30764928 | NC_021164.1    | Ca_Kabuli_Chr05 | 30764928                | TT                                     | AA                 | AA               | URR                           | 101490611          | theobromine synthase 2-like                       |
| SNP_36794_A_30767299 | NC_021164.1    | Ca_Kabuli_Chr05 | 30767299                | TT                                     | AA                 | AA               | INTERGENIC                    |                    |                                                   |
| SNP_36795_A_30777712 | NC_021164.1    | Ca_Kabuli_Chr05 | 30777712                | GG                                     | AA                 | AA               | DRR                           | 101491250          | uncharacterized LOC101491250                      |
| SNP_36796_A_30777735 | NC_021164.1    | Ca_Kabuli_Chr05 | 30777735                | GG                                     | AA                 | AA               | DRR                           | 101491250          | uncharacterized LOC101491250                      |
| SNP_36797_A_30818525 | NC_021164.1    | Ca_Kabuli_Chr05 | 30818525                | AA                                     | CC                 | CC               | URR                           | 101493214          | transcription factor bHLH63-like                  |
| SNP_36798_A_30828276 | NC_021164.1    | Ca_Kabuli_Chr05 | 30828276                | AA                                     | GG                 | GG               | DRR                           | 101493531          | protein RADIALIS-like 6                           |
| SNP_36799_A_30828536 | NC_021164.1    | Ca_Kabuli_Chr05 | 30828536                | GG                                     | AA                 | AA               | DRR                           | 101493531          | protein RADIALIS-like 6                           |
| SNP_36800_A_30829996 | NC_021164.1    | Ca_Kabuli_Chr05 | 30829996                | GG                                     | CC                 | CC               | URR                           | 101493531          | protein RADIALIS-like 6                           |
| SNP_36801_A_30830020 | NC_021164.1    | Ca_Kabuli_Chr05 | 30830020                | GG                                     | AA                 | AA               | URR                           | 101493531          | protein RADIALIS-like 6                           |



| SNPs IDs             | Chromosome IDs | Chromosomes     | Physical positions (bp) | CDC Frontier (Reference genome) | (Pusa 1103 & HPNB) | (ILWC 46 & LPNB) | Sequence Components of genome | Gene accession IDs | Putative functions                                                   |
|----------------------|----------------|-----------------|-------------------------|---------------------------------|--------------------|------------------|-------------------------------|--------------------|----------------------------------------------------------------------|
| SNP_36802_A_30830084 | NC_021164.1    | Ca_Kabuli_Chr05 | 30830084                | AA                              | TT                 | TT               | URR                           | 101493531          | protein RADIALIS-like 6                                              |
| SNP_36803_A_30830483 | NC_021164.1    | Ca_Kabuli_Chr05 | 30830483                | TT                              | GG                 | GG               | URR                           | 101493531          | protein RADIALIS-like 6                                              |
| SNP_36804_A_30830895 | NC_021164.1    | Ca_Kabuli_Chr05 | 30830895                | CC                              | TT                 | TT               | URR                           | 101493531          | protein RADIALIS-like 6                                              |
| SNP_36805_A_30835037 | NC_021164.1    | Ca_Kabuli_Chr05 | 30835037                | CC                              | TT                 | TT               | URR                           | 101493850          | glycine-rich RNA-binding protein-like                                |
| SNP_36807_A_30836003 | NC_021164.1    | Ca_Kabuli_Chr05 | 30836003                | CC                              | AA                 | AA               | URR                           | 101493850          | glycine-rich RNA-binding protein-like                                |
| SNP_36808_A_30836757 | NC_021164.1    | Ca_Kabuli_Chr05 | 30836757                | AA                              | GG                 | GG               | INTERGENIC                    |                    |                                                                      |
| SNP_36809_A_30838205 | NC_021164.1    | Ca_Kabuli_Chr05 | 30838205                | GG                              | AA                 | AA               | INTERGENIC                    |                    |                                                                      |
| SNP_36810_A_30838564 | NC_021164.1    | Ca_Kabuli_Chr05 | 30838564                | TT                              | AA                 | AA               | INTERGENIC                    |                    |                                                                      |
| SNP_36811_A_30840962 | NC_021164.1    | Ca_Kabuli_Chr05 | 30840962                | AA                              | GG                 | GG               | INTERGENIC                    |                    |                                                                      |
| SNP_36812_A_30840963 | NC_021164.1    | Ca_Kabuli_Chr05 | 30840963                | CC                              | AA                 | AA               | INTERGENIC                    |                    |                                                                      |
| SNP_36813_A_30840967 | NC_021164.1    | Ca_Kabuli_Chr05 | 30840967                | CC                              | TT                 | TT               | INTERGENIC                    |                    |                                                                      |
| SNP_36814_A_30840996 | NC_021164.1    | Ca_Kabuli_Chr05 | 30840996                | CC                              | TT                 | TT               | INTERGENIC                    |                    |                                                                      |
| SNP_36815_A_30841174 | NC_021164.1    | Ca_Kabuli_Chr05 | 30841174                | TT                              | CC                 | CC               | INTERGENIC                    |                    |                                                                      |
| SNP_36816_A_30841184 | NC_021164.1    | Ca_Kabuli_Chr05 | 30841184                | TT                              | AA                 | AA               | INTERGENIC                    |                    |                                                                      |
| SNP_36817_A_30844742 | NC_021164.1    | Ca_Kabuli_Chr05 | 30844742                | GG                              | TT                 | TT               | INTERGENIC                    |                    |                                                                      |
| SNP_36818_A_30844924 | NC_021164.1    | Ca_Kabuli_Chr05 | 30844924                | TT                              | CC                 | CC               | INTERGENIC                    |                    |                                                                      |
| SNP_36819_A_30845161 | NC_021164.1    | Ca_Kabuli_Chr05 | 30845161                | TT                              | CC                 | CC               | INTERGENIC                    |                    |                                                                      |
| SNP_36820_A_30846382 | NC_021164.1    | Ca_Kabuli_Chr05 | 30846382                | AA                              | TT                 | TT               | INTERGENIC                    |                    |                                                                      |
| SNP_36821_A_30847690 | NC_021164.1    | Ca_Kabuli_Chr05 | 30847690                | TT                              | CC                 | CC               | INTERGENIC                    |                    |                                                                      |
| SNP_36822_A_30849509 | NC_021164.1    | Ca_Kabuli_Chr05 | 30849509                | AA                              | TT                 | TT               | INTERGENIC                    |                    |                                                                      |
| SNP_36823_A_30849575 | NC_021164.1    | Ca_Kabuli_Chr05 | 30849575                | CC                              | AA                 | AA               | INTERGENIC                    |                    |                                                                      |
| SNP_36824_A_30851075 | NC_021164.1    | Ca_Kabuli_Chr05 | 30851075                | GG                              | AA                 | AA               | DRR                           | 101494178          | probable LRR receptor-like serine/threonine-protein kinase At2g16250 |

| SNPs IDs             | Chromosome IDs | Chromosomes     | Physical positions (bp) | CDC Frontier genome (Reference genome) | (Pusa 1103 & HPNB) | (ILWC 46 & LPNB) | Sequence Components of genome | Gene accession IDs | Putative functions                                                   |
|----------------------|----------------|-----------------|-------------------------|----------------------------------------|--------------------|------------------|-------------------------------|--------------------|----------------------------------------------------------------------|
| SNP_36825_A_30851076 | NC_021164.1    | Ca_Kabuli_Chr05 | 30851076                | TT                                     | CC                 | CC               | DRR                           | 101494178          | probable LRR receptor-like serine/threonine-protein kinase At2g16250 |
| SNP_36826_A_30851087 | NC_021164.1    | Ca_Kabuli_Chr05 | 30851087                | TT                                     | CC                 | CC               | DRR                           | 101494178          | probable LRR receptor-like serine/threonine-protein kinase At2g16250 |
| SNP_36827_A_30853152 | NC_021164.1    | Ca_Kabuli_Chr05 | 30853152                | TT                                     | CC                 | CC               | NON_SYNONYMOUS_CODING         | 101494178          | probable LRR receptor-like serine/threonine-protein kinase At2g16250 |
| SNP_36828_A_30858980 | NC_021164.1    | Ca_Kabuli_Chr05 | 30858980                | TT                                     | CC                 | CC               | URR                           | 101494178          | probable LRR receptor-like serine/threonine-protein kinase At2g16250 |
| SNP_36830_A_30859189 | NC_021164.1    | Ca_Kabuli_Chr05 | 30859189                | TT                                     | CC                 | CC               | URR                           | 101494178          | probable LRR receptor-like serine/threonine-protein kinase At2g16250 |
| SNP_36831_A_30860154 | NC_021164.1    | Ca_Kabuli_Chr05 | 30860154                | TT                                     | CC                 | CC               | URR                           | 101410584          | transfer RNA glutamine (anticodon CUG)                               |
| SNP_36832_A_30860486 | NC_021164.1    | Ca_Kabuli_Chr05 | 30860486                | GG                                     | AA                 | AA               | INTERGENIC                    |                    |                                                                      |
| SNP_36834_A_30860804 | NC_021164.1    | Ca_Kabuli_Chr05 | 30860804                | CC                                     | TT                 | TT               | INTERGENIC                    |                    |                                                                      |
| SNP_36836_A_30864200 | NC_021164.1    | Ca_Kabuli_Chr05 | 30864200                | AA                                     | TT                 | TT               | NON_SYNONYMOUS_CODING         | 101494487          | probable receptor-like serine/threonine-protein kinase At4g34500     |
| SNP_36838_A_30866323 | NC_021164.1    | Ca_Kabuli_Chr05 | 30866323                | AA                                     | GG                 | GG               | INTRON                        | 101494487          | probable receptor-like serine/threonine-protein kinase At4g34500     |
| SNP_36840_A_30872890 | NC_021164.1    | Ca_Kabuli_Chr05 | 30872890                | GG                                     | CC                 | CC               | INTRON                        | 101494808          | glucan endo-1,3-beta-D-glucosidase-like                              |
| SNP_36841_A_30872898 | NC_021164.1    | Ca_Kabuli_Chr05 | 30872898                | CC                                     | AA                 | AA               | INTRON                        | 101494808          | glucan endo-1,3-beta-D-glucosidase-like                              |
| SNP_36842_A_30873165 | NC_021164.1    | Ca_Kabuli_Chr05 | 30873165                | GG                                     | TT                 | TT               | INTRON                        | 101494808          | glucan endo-1,3-beta-D-glucosidase-like                              |
| SNP_36843_A_30873377 | NC_021164.1    | Ca_Kabuli_Chr05 | 30873377                | AA                                     | TT                 | TT               | INTRON                        | 101494808          | glucan endo-1,3-beta-D-glucosidase-like                              |
| SNP_36844_A_30874279 | NC_021164.1    | Ca_Kabuli_Chr05 | 30874279                | AA                                     | TT                 | TT               | INTRON                        | 101494808          | glucan endo-1,3-beta-D-glucosidase-like                              |
| SNP_36845_A_30874608 | NC_021164.1    | Ca_Kabuli_Chr05 | 30874608                | GG                                     | AA                 | AA               | UPSTREAM                      | Gene_ma16320       | Unknown function                                                     |
| SNP_36847_A_30875927 | NC_021164.1    | Ca_Kabuli_Chr05 | 30875927                | AA                                     | TT                 | TT               | URR                           | 101494808          | glucan endo-1,3-beta-D-glucosidase-like                              |
| SNP_36848_A_30876254 | NC_021164.1    | Ca_Kabuli_Chr05 | 30876254                | GG                                     | TT                 | TT               | URR                           | 101494808          | glucan endo-1,3-beta-D-glucosidase-like                              |
| SNP_36849_A_30876277 | NC_021164.1    | Ca_Kabuli_Chr05 | 30876277                | CC                                     | AA                 | AA               | URR                           | 101494808          | glucan endo-1,3-beta-D-glucosidase-like                              |
| SNP_36850_A_30876596 | NC_021164.1    | Ca_Kabuli_Chr05 | 30876596                | CC                                     | TT                 | TT               | DRR                           | 101495136          | guanine nucleotide-binding protein subunit beta-2                    |
| SNP_36851_A_30876599 | NC_021164.1    | Ca_Kabuli_Chr05 | 30876599                | GG                                     | AA                 | AA               | DRR                           | 101495136          | guanine nucleotide-binding protein subunit beta-2                    |
| SNP_36852_A_30876882 | NC_021164.1    | Ca_Kabuli_Chr05 | 30876882                | TT                                     | AA                 | AA               | DRR                           | 101495136          | guanine nucleotide-binding protein subunit beta-2                    |

| SNPs IDs             | Chromosome IDs | Chromosomes     | Physical positions (bp) | CDC Frontier genome (Reference genome) | (Pusa 1103 & HPNB) | (ILWC 46 & LPNB) | Sequence Components of genome | Gene accession IDs | Putative functions                                       |
|----------------------|----------------|-----------------|-------------------------|----------------------------------------|--------------------|------------------|-------------------------------|--------------------|----------------------------------------------------------|
| SNP_36853_A_30885546 | NC_021164.1    | Ca_Kabuli_Chr05 | 30885546                | TT                                     | CC                 | CC               | INTERGENIC                    |                    |                                                          |
| SNP_36854_A_30886160 | NC_021164.1    | Ca_Kabuli_Chr05 | 30886160                | GG                                     | CC                 | CC               | INTERGENIC                    |                    |                                                          |
| SNP_36856_A_30888794 | NC_021164.1    | Ca_Kabuli_Chr05 | 30888794                | TT                                     | GG                 | GG               | DRR                           | 101495461          | coatomer subunit gamma-like                              |
| SNP_36857_A_30889089 | NC_021164.1    | Ca_Kabuli_Chr05 | 30889089                | AA                                     | TT                 | TT               | DRR                           | 101495461          | coatomer subunit gamma-like                              |
| SNP_36858_A_30890285 | NC_021164.1    | Ca_Kabuli_Chr05 | 30890285                | CC                                     | AA                 | AA               | INTERGENIC                    |                    |                                                          |
| SNP_36859_A_30892589 | NC_021164.1    | Ca_Kabuli_Chr05 | 30892589                | GG                                     | CC                 | CC               | INTRON                        | 101495461          | coatomer subunit gamma-like                              |
| SNP_36860_A_30896693 | NC_021164.1    | Ca_Kabuli_Chr05 | 30896693                | AA                                     | CC                 | CC               | INTERGENIC                    |                    |                                                          |
| SNP_36861_A_30896801 | NC_021164.1    | Ca_Kabuli_Chr05 | 30896801                | CC                                     | TT                 | TT               | INTERGENIC                    |                    |                                                          |
| SNP_36862_A_30897982 | NC_021164.1    | Ca_Kabuli_Chr05 | 30897982                | CC                                     | AA                 | AA               | URR                           | 101495461          | coatomer subunit gamma-like                              |
| SNP_36863_A_30899468 | NC_021164.1    | Ca_Kabuli_Chr05 | 30899468                | TT                                     | AA                 | AA               | INTERGENIC                    |                    |                                                          |
| SNP_36865_A_30900965 | NC_021164.1    | Ca_Kabuli_Chr05 | 30900965                | GG                                     | CC                 | CC               | DRR                           | 101505888          | putative proline-rich receptor-like protein kinase PERK6 |
| SNP_36866_A_30907076 | NC_021164.1    | Ca_Kabuli_Chr05 | 30907076                | GG                                     | TT                 | TT               | INTRON                        | 101495793          | MATH and LRR domain-containing protein PFE0570w          |
| SNP_36867_A_30907129 | NC_021164.1    | Ca_Kabuli_Chr05 | 30907129                | CC                                     | TT                 | TT               | INTRON                        | 101495793          | MATH and LRR domain-containing protein PFE0570w          |
| SNP_36868_A_30907425 | NC_021164.1    | Ca_Kabuli_Chr05 | 30907425                | AA                                     | GG                 | GG               | INTRON                        | 101495793          | MATH and LRR domain-containing protein PFE0570w          |
| SNP_36869_A_30907963 | NC_021164.1    | Ca_Kabuli_Chr05 | 30907963                | AA                                     | GG                 | GG               | URR                           | 101495793          | MATH and LRR domain-containing protein PFE0570w          |
| SNP_36870_A_30909282 | NC_021164.1    | Ca_Kabuli_Chr05 | 30909282                | CC                                     | TT                 | TT               | URR                           | 101495793          | MATH and LRR domain-containing protein PFE0570w          |
| SNP_36871_A_30909284 | NC_021164.1    | Ca_Kabuli_Chr05 | 30909284                | AA                                     | GG                 | GG               | URR                           | 101495793          | MATH and LRR domain-containing protein PFE0570w          |
| SNP_36872_A_30909412 | NC_021164.1    | Ca_Kabuli_Chr05 | 30909412                | TT                                     | CC                 | CC               | URR                           | 101495793          | MATH and LRR domain-containing protein PFE0570w          |
| SNP_36873_A_30910476 | NC_021164.1    | Ca_Kabuli_Chr05 | 30910476                | AA                                     | GG                 | GG               | INTERGENIC                    |                    |                                                          |
| SNP_36874_A_30912231 | NC_021164.1    | Ca_Kabuli_Chr05 | 30912231                | TT                                     | AA                 | AA               | INTERGENIC                    |                    |                                                          |
| SNP_36875_A_30912259 | NC_021164.1    | Ca_Kabuli_Chr05 | 30912259                | CC                                     | TT                 | TT               | INTERGENIC                    |                    |                                                          |
| SNP_36876_A_30912263 | NC_021164.1    | Ca_Kabuli_Chr05 | 30912263                | GG                                     | AA                 | AA               | INTERGENIC                    |                    |                                                          |

| SNPs IDs             | Chromosome IDs | Chromosomes     | Physical positions (bp) | CDC Frontier genome (Reference genome) | (Pusa 1103 & HPNB) | (ILWC 46 & LPNB) | Sequence Components of genome | Gene accession IDs | Putative functions                                     |
|----------------------|----------------|-----------------|-------------------------|----------------------------------------|--------------------|------------------|-------------------------------|--------------------|--------------------------------------------------------|
| SNP_36877_A_30924520 | NC_021164.1    | Ca_Kabuli_Chr05 | 30924520                | CC                                     | AA                 | AA               | INTERGENIC                    |                    |                                                        |
| SNP_36878_A_30925236 | NC_021164.1    | Ca_Kabuli_Chr05 | 30925236                | CC                                     | TT                 | TT               | INTERGENIC                    |                    |                                                        |
| SNP_36879_A_30925709 | NC_021164.1    | Ca_Kabuli_Chr05 | 30925709                | TT                                     | CC                 | CC               | INTERGENIC                    |                    |                                                        |
| SNP_36880_A_30925934 | NC_021164.1    | Ca_Kabuli_Chr05 | 30925934                | CC                                     | AA                 | AA               | INTERGENIC                    |                    |                                                        |
| SNP_36881_A_30925966 | NC_021164.1    | Ca_Kabuli_Chr05 | 30925966                | CC                                     | GG                 | GG               | INTERGENIC                    |                    |                                                        |
| SNP_36882_A_30933247 | NC_021164.1    | Ca_Kabuli_Chr05 | 30933247                | GG                                     | TT                 | TT               | NON_SYNONYMOUS_CODING         | 101496874          | dehydration-responsive protein RD22-like               |
| SNP_36883_A_30933277 | NC_021164.1    | Ca_Kabuli_Chr05 | 30933277                | CC                                     | AA                 | AA               | NON_SYNONYMOUS_CODING         | 101496874          | dehydration-responsive protein RD22-like               |
| SNP_36884_A_30935504 | NC_021164.1    | Ca_Kabuli_Chr05 | 30935504                | AA                                     | CC                 | CC               | URR                           | 101496874          | dehydration-responsive protein RD22-like               |
| SNP_36885_A_30939569 | NC_021164.1    | Ca_Kabuli_Chr05 | 30939569                | GG                                     | TT                 | TT               | URR                           | 101506202          | BURP domain-containing protein 17-like                 |
| SNP_36886_A_30940316 | NC_021164.1    | Ca_Kabuli_Chr05 | 30940316                | TT                                     | CC                 | CC               | URR                           | 101497203          | mediator of RNA polymerase II transcription subunit 32 |
| SNP_36887_A_30940335 | NC_021164.1    | Ca_Kabuli_Chr05 | 30940335                | AA                                     | GG                 | GG               | URR                           | 101497203          | mediator of RNA polymerase II transcription subunit 32 |
| SNP_36888_A_30940340 | NC_021164.1    | Ca_Kabuli_Chr05 | 30940340                | CC                                     | TT                 | TT               | URR                           | 101497203          | mediator of RNA polymerase II transcription subunit 32 |
| SNP_36889_A_30941350 | NC_021164.1    | Ca_Kabuli_Chr05 | 30941350                | CC                                     | TT                 | TT               | URR                           | 101497203          | mediator of RNA polymerase II transcription subunit 32 |
| SNP_36890_A_30942053 | NC_021164.1    | Ca_Kabuli_Chr05 | 30942053                | CC                                     | TT                 | TT               | INTERGENIC                    |                    |                                                        |
| SNP_36891_A_30944055 | NC_021164.1    | Ca_Kabuli_Chr05 | 30944055                | AA                                     | CC                 | CC               | NON_SYNONYMOUS_CODING         | 101506532          | Unknown function                                       |
| SNP_36892_A_30947140 | NC_021164.1    | Ca_Kabuli_Chr05 | 30947140                | GG                                     | CC                 | CC               | INTRON                        | 101506532          | Unknown function                                       |
| SNP_36893_A_30947408 | NC_021164.1    | Ca_Kabuli_Chr05 | 30947408                | TT                                     | AA                 | AA               | INTRON                        | 101506532          | Unknown function                                       |
| SNP_36895_A_30949006 | NC_021164.1    | Ca_Kabuli_Chr05 | 30949006                | CC                                     | AA                 | AA               | INTRON                        | 101506532          | Unknown function                                       |
| SNP_36896_A_30949060 | NC_021164.1    | Ca_Kabuli_Chr05 | 30949060                | AA                                     | GG                 | GG               | INTRON                        | 101506532          | Unknown function                                       |
| SNP_36898_A_30950281 | NC_021164.1    | Ca_Kabuli_Chr05 | 30950281                | AA                                     | TT                 | TT               | INTRON                        | 101506532          | Unknown function                                       |
| SNP_36899_A_30950291 | NC_021164.1    | Ca_Kabuli_Chr05 | 30950291                | CC                                     | AA                 | AA               | INTRON                        | 101506532          | Unknown function                                       |
| SNP_36900_A_30950551 | NC_021164.1    | Ca_Kabuli_Chr05 | 30950551                | TT                                     | AA                 | AA               | INTRON                        | 101506532          | Unknown function                                       |

| SNPs IDs             | Chromosome IDs | Chromosomes     | Physical positions (bp) | CDC Frontier genome (Reference genome) | (Pusa 1103 & HPNB) | (ILWC 46 & LPNB) | Sequence Components of genome | Gene accession IDs | Putative functions                    |
|----------------------|----------------|-----------------|-------------------------|----------------------------------------|--------------------|------------------|-------------------------------|--------------------|---------------------------------------|
| SNP_36901_A_30953432 | NC_021164.1    | Ca_Kabuli_Chr05 | 30953432                | CC                                     | TT                 | TT               | INTERGENIC                    |                    |                                       |
| SNP_36902_A_30953433 | NC_021164.1    | Ca_Kabuli_Chr05 | 30953433                | TT                                     | AA                 | AA               | INTERGENIC                    |                    |                                       |
| SNP_36903_A_30954390 | NC_021164.1    | Ca_Kabuli_Chr05 | 30954390                | CC                                     | TT                 | TT               | INTERGENIC                    |                    |                                       |
| SNP_36904_A_30954926 | NC_021164.1    | Ca_Kabuli_Chr05 | 30954926                | GG                                     | AA                 | AA               | INTERGENIC                    |                    |                                       |
| SNP_36905_A_30958709 | NC_021164.1    | Ca_Kabuli_Chr05 | 30958709                | AA                                     | GG                 | GG               | INTERGENIC                    |                    |                                       |
| SNP_36906_A_30958766 | NC_021164.1    | Ca_Kabuli_Chr05 | 30958766                | TT                                     | CC                 | CC               | INTERGENIC                    |                    |                                       |
| SNP_36909_A_30960669 | NC_021164.1    | Ca_Kabuli_Chr05 | 30960669                | TT                                     | GG                 | GG               | DRR                           | 101497534          | polyol transporter 5-like             |
| SNP_36910_A_30960716 | NC_021164.1    | Ca_Kabuli_Chr05 | 30960716                | AA                                     | GG                 | GG               | DRR                           | 101497534          | polyol transporter 5-like             |
| SNP_36911_A_30961637 | NC_021164.1    | Ca_Kabuli_Chr05 | 30961637                | CC                                     | GG                 | GG               | INTERGENIC                    |                    |                                       |
| SNP_36912_A_30961648 | NC_021164.1    | Ca_Kabuli_Chr05 | 30961648                | TT                                     | AA                 | AA               | INTERGENIC                    |                    |                                       |
| SNP_36914_A_30965228 | NC_021164.1    | Ca_Kabuli_Chr05 | 30965228                | AA                                     | TT                 | TT               | URR                           | 101497534          | polyol transporter 5-like             |
| SNP_36915_A_30966855 | NC_021164.1    | Ca_Kabuli_Chr05 | 30966855                | CC                                     | GG                 | GG               | INTERGENIC                    |                    |                                       |
| SNP_36916_A_30967660 | NC_021164.1    | Ca_Kabuli_Chr05 | 30967660                | GG                                     | TT                 | TT               | INTERGENIC                    |                    |                                       |
| SNP_36917_A_30970426 | NC_021164.1    | Ca_Kabuli_Chr05 | 30970426                | GG                                     | AA                 | AA               | INTRON                        | 101497866          | phosphatidylinositol 4-kinase alpha 1 |
| SNP_36918_A_30972080 | NC_021164.1    | Ca_Kabuli_Chr05 | 30972080                | CC                                     | TT                 | TT               | INTRON                        | 101497866          | phosphatidylinositol 4-kinase alpha 1 |
| SNP_36919_A_30981970 | NC_021164.1    | Ca_Kabuli_Chr05 | 30981970                | CC                                     | TT                 | TT               | INTRON                        | 101497866          | phosphatidylinositol 4-kinase alpha 1 |
| SNP_36920_A_30981982 | NC_021164.1    | Ca_Kabuli_Chr05 | 30981982                | AA                                     | TT                 | TT               | INTRON                        | 101497866          | phosphatidylinositol 4-kinase alpha 1 |
| SNP_36921_A_30981983 | NC_021164.1    | Ca_Kabuli_Chr05 | 30981983                | GG                                     | AA                 | AA               | INTRON                        | 101497866          | phosphatidylinositol 4-kinase alpha 1 |
| SNP_36922_A_30986470 | NC_021164.1    | Ca_Kabuli_Chr05 | 30986470                | AA                                     | GG                 | GG               | URR                           | 101497866          | phosphatidylinositol 4-kinase alpha 1 |
| SNP_36923_A_30986685 | NC_021164.1    | Ca_Kabuli_Chr05 | 30986685                | CC                                     | TT                 | TT               | URR                           | 101497866          | phosphatidylinositol 4-kinase alpha 1 |
| SNP_36925_A_30986876 | NC_021164.1    | Ca_Kabuli_Chr05 | 30986876                | GG                                     | AA                 | AA               | URR                           | 101497866          | phosphatidylinositol 4-kinase alpha 1 |
| SNP_36926_A_30986932 | NC_021164.1    | Ca_Kabuli_Chr05 | 30986932                | AA                                     | GG                 | GG               | URR                           | 101497866          | phosphatidylinositol 4-kinase alpha 1 |

| SNPs IDs             | Chromosome IDs | Chromosomes     | Physical positions (bp) | CDC Frontier (Reference genome) | (Pusa 1103 & HPNB) | (ILWC 46 & LPNB) | Sequence Components of genome | Gene accession IDs | Putative functions                                   |
|----------------------|----------------|-----------------|-------------------------|---------------------------------|--------------------|------------------|-------------------------------|--------------------|------------------------------------------------------|
| SNP_36927_A_30992909 | NC_021164.1    | Ca_Kabuli_Chr05 | 30992909                | GG                              | AA                 | AA               | INTRON                        | 101498413          | AT-rich interactive domain-containing protein 5-like |
| SNP_36929_A_30997375 | NC_021164.1    | Ca_Kabuli_Chr05 | 30997375                | TT                              | AA                 | AA               | URR                           | 101498413          | AT-rich interactive domain-containing protein 5-like |
| SNP_36930_A_30998503 | NC_021164.1    | Ca_Kabuli_Chr05 | 30998503                | GG                              | AA                 | AA               | URR                           | 101498413          | AT-rich interactive domain-containing protein 5-like |
| SNP_36931_A_31000350 | NC_021164.1    | Ca_Kabuli_Chr05 | 31000350                | AA                              | TT                 | TT               | DRR                           | 101506865          | AT-hook motif nuclear-localized protein 20-like      |
| SNP_36932_A_31000357 | NC_021164.1    | Ca_Kabuli_Chr05 | 31000357                | AA                              | GG                 | GG               | DRR                           | 101506865          | AT-hook motif nuclear-localized protein 20-like      |
| SNP_36933_A_31001519 | NC_021164.1    | Ca_Kabuli_Chr05 | 31001519                | GG                              | AA                 | AA               | NON_SYNONYMOUS_CODING         | 101506865          | AT-hook motif nuclear-localized protein 20-like      |
| SNP_36935_A_31003522 | NC_021164.1    | Ca_Kabuli_Chr05 | 31003522                | GG                              | CC                 | CC               | URR                           | 101506865          | AT-hook motif nuclear-localized protein 20-like      |
| SNP_36936_A_31003860 | NC_021164.1    | Ca_Kabuli_Chr05 | 31003860                | TT                              | CC                 | CC               | INTERGENIC                    |                    |                                                      |
| SNP_36937_A_31007528 | NC_021164.1    | Ca_Kabuli_Chr05 | 31007528                | TT                              | CC                 | CC               | INTERGENIC                    |                    |                                                      |
| SNP_36938_A_31007839 | NC_021164.1    | Ca_Kabuli_Chr05 | 31007839                | AA                              | TT                 | TT               | INTERGENIC                    |                    |                                                      |
| SNP_36939_A_31008252 | NC_021164.1    | Ca_Kabuli_Chr05 | 31008252                | AA                              | TT                 | TT               | DRR                           | 101498951          | uncharacterized LOC101498951                         |
| SNP_36940_A_31009492 | NC_021164.1    | Ca_Kabuli_Chr05 | 31009492                | GG                              | TT                 | TT               | DRR                           | 101498951          | uncharacterized LOC101498951                         |
| SNP_36941_A_31011542 | NC_021164.1    | Ca_Kabuli_Chr05 | 31011542                | TT                              | CC                 | CC               | INTRON                        | 101498951          | uncharacterized LOC101498951                         |
| SNP_36942_A_31011576 | NC_021164.1    | Ca_Kabuli_Chr05 | 31011576                | TT                              | CC                 | CC               | INTRON                        | 101498951          | uncharacterized LOC101498951                         |
| SNP_36943_A_31011822 | NC_021164.1    | Ca_Kabuli_Chr05 | 31011822                | CC                              | TT                 | TT               | INTRON                        | 101498951          | uncharacterized LOC101498951                         |
| SNP_36944_A_31012656 | NC_021164.1    | Ca_Kabuli_Chr05 | 31012656                | CC                              | TT                 | TT               | URR                           | 101498951          | uncharacterized LOC101498951                         |
| SNP_36945_A_31013422 | NC_021164.1    | Ca_Kabuli_Chr05 | 31013422                | AA                              | GG                 | GG               | URR                           | 101498951          | uncharacterized LOC101498951                         |
| SNP_36946_A_31013429 | NC_021164.1    | Ca_Kabuli_Chr05 | 31013429                | AA                              | GG                 | GG               | URR                           | 101498951          | uncharacterized LOC101498951                         |
| SNP_36947_A_31016215 | NC_021164.1    | Ca_Kabuli_Chr05 | 31016215                | CC                              | TT                 | TT               | INTERGENIC                    |                    |                                                      |
| SNP_36948_A_31022790 | NC_021164.1    | Ca_Kabuli_Chr05 | 31022790                | CC                              | TT                 | TT               | INTERGENIC                    |                    |                                                      |
| SNP_36949_A_31027925 | NC_021164.1    | Ca_Kabuli_Chr05 | 31027925                | AA                              | CC                 | CC               | URR                           | 101499275          | RNA-binding protein 24-A                             |
| SNP_36950_A_31027943 | NC_021164.1    | Ca_Kabuli_Chr05 | 31027943                | CC                              | TT                 | TT               | URR                           | 101499275          | RNA-binding protein 24-A                             |

| SNPs IDs             | Chromosome IDs | Chromosomes     | Physical positions (bp) | CDC Frontier genome (Reference genome) | (Pusa 1103 & HPNB) | (ILWC 46 & LPNB) | Sequence Components of genome | Gene accession IDs | Putative functions                              |
|----------------------|----------------|-----------------|-------------------------|----------------------------------------|--------------------|------------------|-------------------------------|--------------------|-------------------------------------------------|
| SNP_36951_A_31028175 | NC_021164.1    | Ca_Kabuli_Chr05 | 31028175                | GG                                     | AA                 | AA               | URR                           | 101499275          | RNA-binding protein 24-A                        |
| SNP_36952_A_31029164 | NC_021164.1    | Ca_Kabuli_Chr05 | 31029164                | CC                                     | TT                 | TT               | URR                           | 101499275          | RNA-binding protein 24-A                        |
| SNP_36953_A_31033246 | NC_021164.1    | Ca_Kabuli_Chr05 | 31033246                | TT                                     | GG                 | GG               | DRR                           | 101499898          | psbP domain-containing protein 3, chloroplastic |
| SNP_36954_A_31037729 | NC_021164.1    | Ca_Kabuli_Chr05 | 31037729                | GG                                     | AA                 | AA               | URR                           | 101499898          | psbP domain-containing protein 3, chloroplastic |
| SNP_36955_A_31037779 | NC_021164.1    | Ca_Kabuli_Chr05 | 31037779                | CC                                     | TT                 | TT               | URR                           | 101499898          | psbP domain-containing protein 3, chloroplastic |
| SNP_36956_A_31038089 | NC_021164.1    | Ca_Kabuli_Chr05 | 31038089                | GG                                     | AA                 | AA               | URR                           | 101499898          | psbP domain-containing protein 3, chloroplastic |
| SNP_36958_A_31038825 | NC_021164.1    | Ca_Kabuli_Chr05 | 31038825                | CC                                     | GG                 | GG               | URR                           | 101499898          | psbP domain-containing protein 3, chloroplastic |
| SNP_36959_A_31039652 | NC_021164.1    | Ca_Kabuli_Chr05 | 31039652                | CC                                     | TT                 | TT               | DRR                           | 101507512          | AT-hook motif nuclear-localized protein 10-like |
| SNP_36960_A_31039661 | NC_021164.1    | Ca_Kabuli_Chr05 | 31039661                | CC                                     | TT                 | TT               | DRR                           | 101507512          | AT-hook motif nuclear-localized protein 10-like |
| SNP_36961_A_31042040 | NC_021164.1    | Ca_Kabuli_Chr05 | 31042040                | GG                                     | CC                 | CC               | INTERGENIC                    |                    |                                                 |
| SNP_36962_A_31044689 | NC_021164.1    | Ca_Kabuli_Chr05 | 31044689                | GG                                     | AA                 | AA               | DRR                           | 101500447          | xylem cysteine proteinase 2                     |
| SNP_36963_A_31044731 | NC_021164.1    | Ca_Kabuli_Chr05 | 31044731                | TT                                     | CC                 | CC               | DRR                           | 101500447          | xylem cysteine proteinase 2                     |
| SNP_36964_A_31044869 | NC_021164.1    | Ca_Kabuli_Chr05 | 31044869                | TT                                     | CC                 | CC               | DRR                           | 101500447          | xylem cysteine proteinase 2                     |
| SNP_36965_A_31045511 | NC_021164.1    | Ca_Kabuli_Chr05 | 31045511                | AA                                     | CC                 | CC               | URR                           | 101507512          | AT-hook motif nuclear-localized protein 10-like |
| SNP_36966_A_31045540 | NC_021164.1    | Ca_Kabuli_Chr05 | 31045540                | TT                                     | CC                 | CC               | URR                           | 101507512          | AT-hook motif nuclear-localized protein 10-like |
| SNP_36968_A_31052387 | NC_021164.1    | Ca_Kabuli_Chr05 | 31052387                | AA                                     | TT                 | TT               | DRR                           | 101500759          | protein CUP-SHAPED COTYLEDON 3                  |
| SNP_36970_A_31052475 | NC_021164.1    | Ca_Kabuli_Chr05 | 31052475                | CC                                     | TT                 | TT               | DRR                           | 101500759          | protein CUP-SHAPED COTYLEDON 3                  |
| SNP_36971_A_31054293 | NC_021164.1    | Ca_Kabuli_Chr05 | 31054293                | CC                                     | TT                 | TT               | INTRON                        | 101500759          | protein CUP-SHAPED COTYLEDON 3                  |
| SNP_36972_A_31054554 | NC_021164.1    | Ca_Kabuli_Chr05 | 31054554                | CC                                     | AA                 | AA               | INTRON                        | 101500759          | protein CUP-SHAPED COTYLEDON 3                  |
| SNP_36973_A_31054571 | NC_021164.1    | Ca_Kabuli_Chr05 | 31054571                | TT                                     | CC                 | CC               | INTRON                        | 101500759          | protein CUP-SHAPED COTYLEDON 3                  |
| SNP_36974_A_31055251 | NC_021164.1    | Ca_Kabuli_Chr05 | 31055251                | CC                                     | GG                 | GG               | URR                           | 101500759          | protein CUP-SHAPED COTYLEDON 3                  |
| SNP_36975_A_31061099 | NC_021164.1    | Ca_Kabuli_Chr05 | 31061099                | AA                                     | GG                 | GG               | DRR                           | 101501071          | monosaccharide-sensing protein 2-like           |

| SNPs IDs             | Chromosome IDs | Chromosomes     | Physical positions (bp) | CDC Frontier (Reference genome) | (Pusa 1103 & HPNB) | (ILWC 46 & LPNB) | Sequence Components of genome | Gene accession IDs | Putative functions                            |
|----------------------|----------------|-----------------|-------------------------|---------------------------------|--------------------|------------------|-------------------------------|--------------------|-----------------------------------------------|
| SNP_36976_A_31061300 | NC_021164.1    | Ca_Kabuli_Chr05 | 31061300                | TT                              | AA                 | AA               | DRR                           | 101501071          | monosaccharide-sensing protein 2-like         |
| SNP_36977_A_31061340 | NC_021164.1    | Ca_Kabuli_Chr05 | 31061340                | CC                              | TT                 | TT               | DRR                           | 101501071          | monosaccharide-sensing protein 2-like         |
| SNP_36978_A_31063612 | NC_021164.1    | Ca_Kabuli_Chr05 | 31063612                | GG                              | AA                 | AA               | INTRON                        | 101501071          | monosaccharide-sensing protein 2-like         |
| SNP_36980_A_31066402 | NC_021164.1    | Ca_Kabuli_Chr05 | 31066402                | CC                              | GG                 | GG               | URR                           | 101501071          | monosaccharide-sensing protein 2-like         |
| SNP_36981_A_31068700 | NC_021164.1    | Ca_Kabuli_Chr05 | 31068700                | CC                              | TT                 | TT               | INTERGENIC                    |                    |                                               |
| SNP_36982_A_31068751 | NC_021164.1    | Ca_Kabuli_Chr05 | 31068751                | AA                              | GG                 | GG               | INTERGENIC                    |                    |                                               |
| SNP_36984_A_31072848 | NC_021164.1    | Ca_Kabuli_Chr05 | 31072848                | CC                              | GG                 | GG               | URR                           | 101501604          | uncharacterized LOC101501604                  |
| SNP_36985_A_31072861 | NC_021164.1    | Ca_Kabuli_Chr05 | 31072861                | AA                              | GG                 | GG               | URR                           | 101501604          | uncharacterized LOC101501604                  |
| SNP_36986_A_31076227 | NC_021164.1    | Ca_Kabuli_Chr05 | 31076227                | TT                              | AA                 | AA               | INTERGENIC                    |                    |                                               |
| SNP_36987_A_31077219 | NC_021164.1    | Ca_Kabuli_Chr05 | 31077219                | GG                              | AA                 | AA               | INTERGENIC                    |                    |                                               |
| SNP_36988_A_31077220 | NC_021164.1    | Ca_Kabuli_Chr05 | 31077220                | CC                              | AA                 | AA               | INTERGENIC                    |                    |                                               |
| SNP_36989_A_31077704 | NC_021164.1    | Ca_Kabuli_Chr05 | 31077704                | AA                              | GG                 | GG               | INTERGENIC                    |                    |                                               |
| SNP_36990_A_31078723 | NC_021164.1    | Ca_Kabuli_Chr05 | 31078723                | TT                              | AA                 | AA               | INTERGENIC                    |                    |                                               |
| SNP_36991_A_31080455 | NC_021164.1    | Ca_Kabuli_Chr05 | 31080455                | TT                              | CC                 | CC               | DRR                           | 101501916          | RING-H2 finger protein ATL80-like             |
| SNP_36992_A_31080484 | NC_021164.1    | Ca_Kabuli_Chr05 | 31080484                | AA                              | GG                 | GG               | DRR                           | 101501916          | RING-H2 finger protein ATL80-like             |
| SNP_36993_A_31083370 | NC_021164.1    | Ca_Kabuli_Chr05 | 31083370                | AA                              | CC                 | CC               | URR                           | 101501916          | RING-H2 finger protein ATL80-like             |
| SNP_36994_A_31084228 | NC_021164.1    | Ca_Kabuli_Chr05 | 31084228                | TT                              | CC                 | CC               | DRR                           | 101502247          | outer envelope pore protein 21, chloroplastic |
| SNP_36995_A_31084237 | NC_021164.1    | Ca_Kabuli_Chr05 | 31084237                | AA                              | TT                 | TT               | DRR                           | 101502247          | outer envelope pore protein 21, chloroplastic |
| SNP_36997_A_31084430 | NC_021164.1    | Ca_Kabuli_Chr05 | 31084430                | GG                              | TT                 | TT               | URR                           | 101501916          | RING-H2 finger protein ATL80-like             |
| SNP_36998_A_31084431 | NC_021164.1    | Ca_Kabuli_Chr05 | 31084431                | GG                              | TT                 | TT               | URR                           | 101501916          | RING-H2 finger protein ATL80-like             |
| SNP_36999_A_31084754 | NC_021164.1    | Ca_Kabuli_Chr05 | 31084754                | CC                              | TT                 | TT               | INTERGENIC                    |                    |                                               |
| SNP_37000_A_31087265 | NC_021164.1    | Ca_Kabuli_Chr05 | 31087265                | AA                              | TT                 | TT               | URR                           | 101502247          | outer envelope pore protein 21, chloroplastic |



| SNPs IDs             | Chromosome IDs | Chromosomes     | Physical positions (bp) | CDC Frontier genome (Reference genome) | (Pusa 1103 & HPNB) | (ILWC 46 & LPNB) | Sequence Components of genome | Gene accession IDs | Putative functions                                                        |
|----------------------|----------------|-----------------|-------------------------|----------------------------------------|--------------------|------------------|-------------------------------|--------------------|---------------------------------------------------------------------------|
| SNP_37001_A_31087291 | NC_021164.1    | Ca_Kabuli_Chr05 | 31087291                | CC                                     | AA                 | AA               | URR                           | 101502247          | outer envelope pore protein 21, chloroplastic                             |
| SNP_37002_A_31087486 | NC_021164.1    | Ca_Kabuli_Chr05 | 31087486                | TT                                     | CC                 | CC               | DRR                           | 101502563          | dolichyl-diphosphooligosaccharide--protein glycosyltransferase subunit 1A |
| SNP_37003_A_31089953 | NC_021164.1    | Ca_Kabuli_Chr05 | 31089953                | GG                                     | TT                 | TT               | INTERGENIC                    |                    |                                                                           |
| SNP_37005_A_31094177 | NC_021164.1    | Ca_Kabuli_Chr05 | 31094177                | TT                                     | AA                 | AA               | DRR                           | 101502879          | peptidyl-prolyl cis-trans isomerase FKBP18, chloroplastic                 |
| SNP_37006_A_31096753 | NC_021164.1    | Ca_Kabuli_Chr05 | 31096753                | TT                                     | CC                 | CC               | DRR                           | 101503406          | MLO-like protein 9                                                        |
| SNP_37007_A_31096766 | NC_021164.1    | Ca_Kabuli_Chr05 | 31096766                | AA                                     | CC                 | CC               | DRR                           | 101503406          | MLO-like protein 9                                                        |
| SNP_37008_A_31100792 | NC_021164.1    | Ca_Kabuli_Chr05 | 31100792                | AA                                     | TT                 | TT               | INTERGENIC                    |                    |                                                                           |
| SNP_37009_A_31103133 | NC_021164.1    | Ca_Kabuli_Chr05 | 31103133                | TT                                     | AA                 | AA               | INTERGENIC                    |                    |                                                                           |
| SNP_37010_A_31104155 | NC_021164.1    | Ca_Kabuli_Chr05 | 31104155                | AA                                     | TT                 | TT               | DRR                           | 101503956          | protein S-acyltransferase 21                                              |
| SNP_37011_A_31110257 | NC_021164.1    | Ca_Kabuli_Chr05 | 31110257                | CC                                     | TT                 | TT               | URR                           | 101503956          | protein S-acyltransferase 21                                              |
| SNP_37013_A_31111799 | NC_021164.1    | Ca_Kabuli_Chr05 | 31111799                | TT                                     | CC                 | CC               | URR                           | 101503956          | protein S-acyltransferase 21                                              |
| SNP_37014_A_31111800 | NC_021164.1    | Ca_Kabuli_Chr05 | 31111800                | CC                                     | AA                 | AA               | URR                           | 101503956          | protein S-acyltransferase 21                                              |
| SNP_37015_A_31111836 | NC_021164.1    | Ca_Kabuli_Chr05 | 31111836                | GG                                     | AA                 | AA               | URR                           | 101503956          | protein S-acyltransferase 21                                              |
| SNP_37016_A_31111865 | NC_021164.1    | Ca_Kabuli_Chr05 | 31111865                | CC                                     | TT                 | TT               | URR                           | 101503956          | protein S-acyltransferase 21                                              |
| SNP_37017_A_31113502 | NC_021164.1    | Ca_Kabuli_Chr05 | 31113502                | GG                                     | TT                 | TT               | INTERGENIC                    |                    |                                                                           |
| SNP_37018_A_31113552 | NC_021164.1    | Ca_Kabuli_Chr05 | 31113552                | GG                                     | CC                 | CC               | INTERGENIC                    |                    |                                                                           |
| SNP_37019_A_31114681 | NC_021164.1    | Ca_Kabuli_Chr05 | 31114681                | TT                                     | CC                 | CC               | INTERGENIC                    |                    |                                                                           |
| SNP_37020_A_31114797 | NC_021164.1    | Ca_Kabuli_Chr05 | 31114797                | GG                                     | AA                 | AA               | INTERGENIC                    |                    |                                                                           |
| SNP_37021_A_31114878 | NC_021164.1    | Ca_Kabuli_Chr05 | 31114878                | AA                                     | GG                 | GG               | INTERGENIC                    |                    |                                                                           |
| SNP_37022_A_31114986 | NC_021164.1    | Ca_Kabuli_Chr05 | 31114986                | AA                                     | TT                 | TT               | INTERGENIC                    |                    |                                                                           |
| SNP_37023_A_31118940 | NC_021164.1    | Ca_Kabuli_Chr05 | 31118940                | TT                                     | CC                 | CC               | DRR                           | 101504273          | MLO protein homolog 1-like                                                |
| SNP_37025_A_31122426 | NC_021164.1    | Ca_Kabuli_Chr05 | 31122426                | TT                                     | CC                 | CC               | URR                           | 101504273          | MLO protein homolog 1-like                                                |

| SNPs IDs             | Chromosome IDs | Chromosomes     | Physical positions (bp) | CDC Frontier genome (Reference genome) | (Pusa 1103 & HPNB) | (ILWC 46 & LPNB) | Sequence Components of genome | Gene accession IDs | Putative functions                            |
|----------------------|----------------|-----------------|-------------------------|----------------------------------------|--------------------|------------------|-------------------------------|--------------------|-----------------------------------------------|
| SNP_37026_A_31122630 | NC_021164.1    | Ca_Kabuli_Chr05 | 31122630                | CC                                     | AA                 | AA               | URR                           | 101504273          | MLO protein homolog 1-like                    |
| SNP_37027_A_31128860 | NC_021164.1    | Ca_Kabuli_Chr05 | 31128860                | AA                                     | GG                 | GG               | INTERGENIC                    |                    |                                               |
| SNP_37028_A_31129471 | NC_021164.1    | Ca_Kabuli_Chr05 | 31129471                | AA                                     | GG                 | GG               | DRR                           | 101504606          | uncharacterized LOC101504606                  |
| SNP_37029_A_31129668 | NC_021164.1    | Ca_Kabuli_Chr05 | 31129668                | TT                                     | CC                 | CC               | DRR                           | 101504606          | uncharacterized LOC101504606                  |
| SNP_37030_A_31129679 | NC_021164.1    | Ca_Kabuli_Chr05 | 31129679                | GG                                     | AA                 | AA               | DRR                           | 101504606          | uncharacterized LOC101504606                  |
| SNP_37031_A_31129694 | NC_021164.1    | Ca_Kabuli_Chr05 | 31129694                | CC                                     | GG                 | GG               | DRR                           | 101504606          | uncharacterized LOC101504606                  |
| SNP_37032_A_31129724 | NC_021164.1    | Ca_Kabuli_Chr05 | 31129724                | CC                                     | TT                 | TT               | DRR                           | 101504606          | uncharacterized LOC101504606                  |
| SNP_37033_A_31129979 | NC_021164.1    | Ca_Kabuli_Chr05 | 31129979                | AA                                     | GG                 | GG               | DRR                           | 101504606          | uncharacterized LOC101504606                  |
| SNP_37034_A_31130186 | NC_021164.1    | Ca_Kabuli_Chr05 | 31130186                | AA                                     | CC                 | CC               | DRR                           | 101504606          | uncharacterized LOC101504606                  |
| SNP_37035_A_31130187 | NC_021164.1    | Ca_Kabuli_Chr05 | 31130187                | GG                                     | AA                 | AA               | DRR                           | 101504606          | uncharacterized LOC101504606                  |
| SNP_37036_A_31136680 | NC_021164.1    | Ca_Kabuli_Chr05 | 31136680                | GG                                     | AA                 | AA               | INTERGENIC                    |                    |                                               |
| SNP_37037_A_31148684 | NC_021164.1    | Ca_Kabuli_Chr05 | 31148684                | AA                                     | GG                 | GG               | INTRON                        | 101506006          | protein canopy-1                              |
| SNP_37038_A_31153276 | NC_021164.1    | Ca_Kabuli_Chr05 | 31153276                | GG                                     | AA                 | AA               | INTERGENIC                    |                    |                                               |
| SNP_37039_A_31154284 | NC_021164.1    | Ca_Kabuli_Chr05 | 31154284                | AA                                     | CC                 | CC               | INTERGENIC                    |                    |                                               |
| SNP_37040_A_31165225 | NC_021164.1    | Ca_Kabuli_Chr05 | 31165225                | AA                                     | GG                 | GG               | SYNONYMOUS_CODING             | 101507091          | U-box domain-containing protein 44-like       |
| SNP_37041_A_31170202 | NC_021164.1    | Ca_Kabuli_Chr05 | 31170202                | GG                                     | TT                 | TT               | DRR                           | 101508239          | epidermal growth factor receptor substrate 15 |
| SNP_37042_A_31170497 | NC_021164.1    | Ca_Kabuli_Chr05 | 31170497                | AA                                     | GG                 | GG               | DRR                           | 101508239          | epidermal growth factor receptor substrate 15 |
| SNP_37043_A_31173589 | NC_021164.1    | Ca_Kabuli_Chr05 | 31173589                | GG                                     | AA                 | AA               | INTERGENIC                    |                    |                                               |
| SNP_37044_A_31178705 | NC_021164.1    | Ca_Kabuli_Chr05 | 31178705                | AA                                     | CC                 | CC               | INTRON                        | 101508239          | epidermal growth factor receptor substrate 15 |
| SNP_37045_A_31182495 | NC_021164.1    | Ca_Kabuli_Chr05 | 31182495                | AA                                     | TT                 | TT               | INTERGENIC                    |                    |                                               |
| SNP_37046_A_31182760 | NC_021164.1    | Ca_Kabuli_Chr05 | 31182760                | AA                                     | TT                 | TT               | INTERGENIC                    |                    |                                               |
| SNP_37047_A_31182796 | NC_021164.1    | Ca_Kabuli_Chr05 | 31182796                | CC                                     | AA                 | AA               | INTERGENIC                    |                    |                                               |

| SNPs IDs             | Chromosome IDs | Chromosomes     | Physical positions (bp) | CDC Frontier genome (Reference genome) | (Pusa 1103 & HPNB) | (ILWC 46 & LPNB) | Sequence Components of genome | Gene accession IDs | Putative functions                            |
|----------------------|----------------|-----------------|-------------------------|----------------------------------------|--------------------|------------------|-------------------------------|--------------------|-----------------------------------------------|
| SNP_37048_A_31182822 | NC_021164.1    | Ca_Kabuli_Chr05 | 31182822                | AA                                     | GG                 | GG               | INTERGENIC                    |                    |                                               |
| SNP_37049_A_31182826 | NC_021164.1    | Ca_Kabuli_Chr05 | 31182826                | CC                                     | TT                 | TT               | INTERGENIC                    |                    |                                               |
| SNP_37050_A_31182828 | NC_021164.1    | Ca_Kabuli_Chr05 | 31182828                | AA                                     | GG                 | GG               | INTERGENIC                    |                    |                                               |
| SNP_37051_A_31183352 | NC_021164.1    | Ca_Kabuli_Chr05 | 31183352                | CC                                     | AA                 | AA               | INTERGENIC                    |                    |                                               |
| SNP_37052_A_31185410 | NC_021164.1    | Ca_Kabuli_Chr05 | 31185410                | AA                                     | GG                 | GG               | INTRON                        | 101507722          | WUSCHEL-related homeobox 8-like               |
| SNP_37053_A_31185981 | NC_021164.1    | Ca_Kabuli_Chr05 | 31185981                | AA                                     | CC                 | CC               | INTRON                        | 101507722          | WUSCHEL-related homeobox 8-like               |
| SNP_37054_A_31187062 | NC_021164.1    | Ca_Kabuli_Chr05 | 31187062                | GG                                     | AA                 | AA               | URR                           | 101507722          | WUSCHEL-related homeobox 8-like               |
| SNP_37055_A_31187069 | NC_021164.1    | Ca_Kabuli_Chr05 | 31187069                | TT                                     | AA                 | AA               | URR                           | 101507722          | WUSCHEL-related homeobox 8-like               |
| SNP_37057_A_31189330 | NC_021164.1    | Ca_Kabuli_Chr05 | 31189330                | CC                                     | AA                 | AA               | DRR                           | 101510057          | putative 12-oxophytodienoate reductase 11     |
| SNP_37058_A_31189568 | NC_021164.1    | Ca_Kabuli_Chr05 | 31189568                | TT                                     | CC                 | CC               | DRR                           | 101510057          | putative 12-oxophytodienoate reductase 11     |
| SNP_37059_A_31189625 | NC_021164.1    | Ca_Kabuli_Chr05 | 31189625                | CC                                     | TT                 | TT               | DRR                           | 101510057          | putative 12-oxophytodienoate reductase 11     |
| SNP_37060_A_31189915 | NC_021164.1    | Ca_Kabuli_Chr05 | 31189915                | CC                                     | TT                 | TT               | DRR                           | 101510057          | putative 12-oxophytodienoate reductase 11     |
| SNP_37061_A_31189947 | NC_021164.1    | Ca_Kabuli_Chr05 | 31189947                | TT                                     | AA                 | AA               | DRR                           | 101510057          | putative 12-oxophytodienoate reductase 11     |
| SNP_37062_A_31189951 | NC_021164.1    | Ca_Kabuli_Chr05 | 31189951                | TT                                     | AA                 | AA               | DRR                           | 101510057          | putative 12-oxophytodienoate reductase 11     |
| SNP_37063_A_31190807 | NC_021164.1    | Ca_Kabuli_Chr05 | 31190807                | GG                                     | CC                 | CC               | URR                           | 101508239          | epidermal growth factor receptor substrate 15 |
| SNP_37064_A_31191348 | NC_021164.1    | Ca_Kabuli_Chr05 | 31191348                | CC                                     | TT                 | TT               | URR                           | 101508239          | epidermal growth factor receptor substrate 15 |
| SNP_37065_A_31191629 | NC_021164.1    | Ca_Kabuli_Chr05 | 31191629                | TT                                     | AA                 | AA               | INTERGENIC                    |                    |                                               |
| SNP_37066_A_31191741 | NC_021164.1    | Ca_Kabuli_Chr05 | 31191741                | AA                                     | TT                 | TT               | INTERGENIC                    |                    |                                               |
| SNP_37067_A_31191749 | NC_021164.1    | Ca_Kabuli_Chr05 | 31191749                | GG                                     | AA                 | AA               | INTERGENIC                    |                    |                                               |
| SNP_37068_A_31191766 | NC_021164.1    | Ca_Kabuli_Chr05 | 31191766                | AA                                     | GG                 | GG               | INTERGENIC                    |                    |                                               |
| SNP_37069_A_31191770 | NC_021164.1    | Ca_Kabuli_Chr05 | 31191770                | AA                                     | GG                 | GG               | INTERGENIC                    |                    |                                               |
| SNP_37070_A_31191792 | NC_021164.1    | Ca_Kabuli_Chr05 | 31191792                | GG                                     | AA                 | AA               | INTERGENIC                    |                    |                                               |

| SNPs IDs             | Chromosome IDs | Chromosomes     | Physical positions (bp) | CDC Frontier genome (Reference genome) | (Pusa 1103 & HPNB) | (ILWC 46 & LPNB) | Sequence Components of genome | Gene accession IDs | Putative functions                        |
|----------------------|----------------|-----------------|-------------------------|----------------------------------------|--------------------|------------------|-------------------------------|--------------------|-------------------------------------------|
| SNP_37071_A_31192068 | NC_021164.1    | Ca_Kabuli_Chr05 | 31192068                | AA                                     | GG                 | GG               | INTERGENIC                    |                    |                                           |
| SNP_37073_A_31193852 | NC_021164.1    | Ca_Kabuli_Chr05 | 31193852                | AA                                     | TT                 | TT               | DRR                           | 101509084          | HMG1/2-like protein                       |
| SNP_37074_A_31195437 | NC_021164.1    | Ca_Kabuli_Chr05 | 31195437                | AA                                     | CC                 | CC               | URR                           | 101510057          | putative 12-oxophytodienoate reductase 11 |
| SNP_37075_A_31195477 | NC_021164.1    | Ca_Kabuli_Chr05 | 31195477                | CC                                     | GG                 | GG               | URR                           | 101510057          | putative 12-oxophytodienoate reductase 11 |
| SNP_37076_A_31196857 | NC_021164.1    | Ca_Kabuli_Chr05 | 31196857                | CC                                     | AA                 | AA               | URR                           | 101509084          | HMG1/2-like protein                       |
| SNP_37077_A_31197107 | NC_021164.1    | Ca_Kabuli_Chr05 | 31197107                | AA                                     | CC                 | CC               | URR                           | 101509084          | HMG1/2-like protein                       |
| SNP_37078_A_31197142 | NC_021164.1    | Ca_Kabuli_Chr05 | 31197142                | TT                                     | AA                 | AA               | URR                           | 101509084          | HMG1/2-like protein                       |
| SNP_37080_A_31197207 | NC_021164.1    | Ca_Kabuli_Chr05 | 31197207                | AA                                     | GG                 | GG               | URR                           | 101509084          | HMG1/2-like protein                       |
| SNP_37081_A_31228848 | NC_021164.1    | Ca_Kabuli_Chr05 | 31228848                | TT                                     | CC                 | CC               | INTERGENIC                    |                    |                                           |
| SNP_37082_A_31228849 | NC_021164.1    | Ca_Kabuli_Chr05 | 31228849                | CC                                     | TT                 | TT               | INTERGENIC                    |                    |                                           |
| SNP_37083_A_31229556 | NC_021164.1    | Ca_Kabuli_Chr05 | 31229556                | CC                                     | TT                 | TT               | INTERGENIC                    |                    |                                           |
| SNP_37084_A_31229561 | NC_021164.1    | Ca_Kabuli_Chr05 | 31229561                | CC                                     | TT                 | TT               | INTERGENIC                    |                    |                                           |
| SNP_37085_A_31229599 | NC_021164.1    | Ca_Kabuli_Chr05 | 31229599                | GG                                     | AA                 | AA               | INTERGENIC                    |                    |                                           |
| SNP_37086_A_31229729 | NC_021164.1    | Ca_Kabuli_Chr05 | 31229729                | AA                                     | GG                 | GG               | INTERGENIC                    |                    |                                           |
| SNP_37088_A_31229894 | NC_021164.1    | Ca_Kabuli_Chr05 | 31229894                | GG                                     | AA                 | AA               | INTERGENIC                    |                    |                                           |
| SNP_37089_A_31229938 | NC_021164.1    | Ca_Kabuli_Chr05 | 31229938                | GG                                     | AA                 | AA               | INTERGENIC                    |                    |                                           |
| SNP_37090_A_31229943 | NC_021164.1    | Ca_Kabuli_Chr05 | 31229943                | GG                                     | AA                 | AA               | INTERGENIC                    |                    |                                           |
| SNP_37091_A_31230091 | NC_021164.1    | Ca_Kabuli_Chr05 | 31230091                | TT                                     | GG                 | GG               | INTERGENIC                    |                    |                                           |
| SNP_37092_A_31230161 | NC_021164.1    | Ca_Kabuli_Chr05 | 31230161                | AA                                     | CC                 | CC               | INTERGENIC                    |                    |                                           |
| SNP_37093_A_31230192 | NC_021164.1    | Ca_Kabuli_Chr05 | 31230192                | CC                                     | TT                 | TT               | INTERGENIC                    |                    |                                           |
| SNP_37094_A_31230202 | NC_021164.1    | Ca_Kabuli_Chr05 | 31230202                | TT                                     | CC                 | CC               | INTERGENIC                    |                    |                                           |
| SNP_37095_A_31230204 | NC_021164.1    | Ca_Kabuli_Chr05 | 31230204                | GG                                     | AA                 | AA               | INTERGENIC                    |                    |                                           |

| SNPs IDs             | Chromosome IDs | Chromosomes     | Physical positions (bp) | CDC Frontier genome (Reference genome) | (Pusa 1103 & HPNB) | (ILWC 46 & LPNB) | Sequence Components of genome | Gene accession IDs | Putative functions                                           |
|----------------------|----------------|-----------------|-------------------------|----------------------------------------|--------------------|------------------|-------------------------------|--------------------|--------------------------------------------------------------|
| SNP_37096_A_31238626 | NC_021164.1    | Ca_Kabuli_Chr05 | 31238626                | TT                                     | CC                 | CC               | INTERGENIC                    |                    |                                                              |
| SNP_37097_A_31241512 | NC_021164.1    | Ca_Kabuli_Chr05 | 31241512                | AA                                     | GG                 | GG               | INTRON                        | 101510814          | uncharacterized LOC101510814                                 |
| SNP_37099_A_31242998 | NC_021164.1    | Ca_Kabuli_Chr05 | 31242998                | CC                                     | TT                 | TT               | INTRON                        | 101510814          | uncharacterized LOC101510814                                 |
| SNP_37100_A_31242999 | NC_021164.1    | Ca_Kabuli_Chr05 | 31242999                | AA                                     | GG                 | GG               | INTRON                        | 101510814          | uncharacterized LOC101510814                                 |
| SNP_37101_A_31244299 | NC_021164.1    | Ca_Kabuli_Chr05 | 31244299                | TT                                     | GG                 | GG               | INTERGENIC                    |                    |                                                              |
| SNP_37102_A_31245713 | NC_021164.1    | Ca_Kabuli_Chr05 | 31245713                | TT                                     | CC                 | CC               | INTERGENIC                    |                    |                                                              |
| SNP_37103_A_31248758 | NC_021164.1    | Ca_Kabuli_Chr05 | 31248758                | TT                                     | AA                 | AA               | DRR                           | 101508768          | UPF0392 protein At1g27200                                    |
| SNP_37104_A_31249031 | NC_021164.1    | Ca_Kabuli_Chr05 | 31249031                | TT                                     | CC                 | CC               | DRR                           | 101508768          | UPF0392 protein At1g27200                                    |
| SNP_37105_A_31254814 | NC_021164.1    | Ca_Kabuli_Chr05 | 31254814                | TT                                     | CC                 | CC               | URR                           | 101508768          | UPF0392 protein At1g27200                                    |
| SNP_37106_A_31255439 | NC_021164.1    | Ca_Kabuli_Chr05 | 31255439                | AA                                     | GG                 | GG               | INTERGENIC                    |                    |                                                              |
| SNP_37110_A_31266191 | NC_021164.1    | Ca_Kabuli_Chr05 | 31266191                | GG                                     | AA                 | AA               | URR                           | 101511134          | serine/threonine-protein kinase CDL1-like                    |
| SNP_37111_A_31266194 | NC_021164.1    | Ca_Kabuli_Chr05 | 31266194                | TT                                     | GG                 | GG               | URR                           | 101511134          | serine/threonine-protein kinase CDL1-like                    |
| SNP_37112_A_31272103 | NC_021164.1    | Ca_Kabuli_Chr05 | 31272103                | TT                                     | CC                 | CC               | INTRON                        | 101511443          | probable serine/threonine-protein kinase Cx32, chloroplastic |
| SNP_37113_A_31272119 | NC_021164.1    | Ca_Kabuli_Chr05 | 31272119                | CC                                     | TT                 | TT               | INTRON                        | 101511443          | probable serine/threonine-protein kinase Cx32, chloroplastic |
| SNP_37114_A_31272177 | NC_021164.1    | Ca_Kabuli_Chr05 | 31272177                | TT                                     | CC                 | CC               | INTRON                        | 101511443          | probable serine/threonine-protein kinase Cx32, chloroplastic |
| SNP_37115_A_31272183 | NC_021164.1    | Ca_Kabuli_Chr05 | 31272183                | TT                                     | CC                 | CC               | INTRON                        | 101511443          | probable serine/threonine-protein kinase Cx32, chloroplastic |
| SNP_37116_A_31272185 | NC_021164.1    | Ca_Kabuli_Chr05 | 31272185                | TT                                     | CC                 | CC               | INTRON                        | 101511443          | probable serine/threonine-protein kinase Cx32, chloroplastic |
| SNP_37117_A_31272204 | NC_021164.1    | Ca_Kabuli_Chr05 | 31272204                | GG                                     | TT                 | TT               | INTRON                        | 101511443          | probable serine/threonine-protein kinase Cx32, chloroplastic |
| SNP_37118_A_31272286 | NC_021164.1    | Ca_Kabuli_Chr05 | 31272286                | TT                                     | CC                 | CC               | INTRON                        | 101511443          | probable serine/threonine-protein kinase Cx32, chloroplastic |
| SNP_37119_A_31272317 | NC_021164.1    | Ca_Kabuli_Chr05 | 31272317                | GG                                     | TT                 | TT               | INTRON                        | 101511443          | probable serine/threonine-protein kinase Cx32, chloroplastic |
| SNP_37120_A_31272601 | NC_021164.1    | Ca_Kabuli_Chr05 | 31272601                | TT                                     | CC                 | CC               | INTRON                        | 101511443          | probable serine/threonine-protein kinase Cx32, chloroplastic |
| SNP_37121_A_31282581 | NC_021164.1    | Ca_Kabuli_Chr05 | 31282581                | AA                                     | TT                 | TT               | INTERGENIC                    |                    |                                                              |

| SNPs IDs             | Chromosome IDs | Chromosomes     | Physical positions (bp) | CDC Frontier (Reference genome) | (Pusa 1103 & HPNB) | (ILWC 46 & LPNB) | Sequence Components of genome | Gene accession IDs | Putative functions      |
|----------------------|----------------|-----------------|-------------------------|---------------------------------|--------------------|------------------|-------------------------------|--------------------|-------------------------|
| SNP_37122_A_31282877 | NC_021164.1    | Ca_Kabuli_Chr05 | 31282877                | GG                              | AA                 | AA               | INTERGENIC                    |                    |                         |
| SNP_37125_A_31283401 | NC_021164.1    | Ca_Kabuli_Chr05 | 31283401                | AA                              | GG                 | GG               | INTERGENIC                    |                    |                         |
| SNP_37126_A_31286463 | NC_021164.1    | Ca_Kabuli_Chr05 | 31286463                | CC                              | TT                 | TT               | INTERGENIC                    |                    |                         |
| SNP_37127_A_31290133 | NC_021164.1    | Ca_Kabuli_Chr05 | 31290133                | TT                              | CC                 | CC               | INTERGENIC                    |                    |                         |
| SNP_37128_A_31292009 | NC_021164.1    | Ca_Kabuli_Chr05 | 31292009                | TT                              | AA                 | AA               | DRR                           | 101512418          | Niemann-Pick C1 protein |
| SNP_37129_A_31292050 | NC_021164.1    | Ca_Kabuli_Chr05 | 31292050                | AA                              | GG                 | GG               | DRR                           | 101512418          | Niemann-Pick C1 protein |
| SNP_37130_A_31292397 | NC_021164.1    | Ca_Kabuli_Chr05 | 31292397                | GG                              | AA                 | AA               | DRR                           | 101512418          | Niemann-Pick C1 protein |
| SNP_37131_A_31298582 | NC_021164.1    | Ca_Kabuli_Chr05 | 31298582                | GG                              | AA                 | AA               | NON_SYNONYMOUS_CODING         | 101512418          | Niemann-Pick C1 protein |
| SNP_37132_A_31299553 | NC_021164.1    | Ca_Kabuli_Chr05 | 31299553                | CC                              | AA                 | AA               | INTRON                        | 101512418          | Niemann-Pick C1 protein |
| SNP_37133_A_31305079 | NC_021164.1    | Ca_Kabuli_Chr05 | 31305079                | TT                              | CC                 | CC               | INTRON                        | 101512418          | Niemann-Pick C1 protein |
| SNP_37134_A_31306493 | NC_021164.1    | Ca_Kabuli_Chr05 | 31306493                | AA                              | GG                 | GG               | INTRON                        | 101512418          | Niemann-Pick C1 protein |
| SNP_37135_A_31308752 | NC_021164.1    | Ca_Kabuli_Chr05 | 31308752                | CC                              | AA                 | AA               | INTERGENIC                    |                    |                         |
| SNP_37137_A_31311438 | NC_021164.1    | Ca_Kabuli_Chr05 | 31311438                | GG                              | AA                 | AA               | DRR                           | 101512737          | protein NLP4            |
| SNP_37138_A_31314396 | NC_021164.1    | Ca_Kabuli_Chr05 | 31314396                | AA                              | GG                 | GG               | SYNONYMOUS_CODING             | 101512737          | protein NLP4            |
| SNP_37139_A_31314569 | NC_021164.1    | Ca_Kabuli_Chr05 | 31314569                | AA                              | GG                 | GG               | NON_SYNONYMOUS_CODING         | 101512737          | protein NLP4            |
| SNP_37140_A_31319947 | NC_021164.1    | Ca_Kabuli_Chr05 | 31319947                | AA                              | TT                 | TT               | INTERGENIC                    |                    |                         |
| SNP_37141_A_31320144 | NC_021164.1    | Ca_Kabuli_Chr05 | 31320144                | CC                              | TT                 | TT               | INTERGENIC                    |                    |                         |
| SNP_37142_A_31320185 | NC_021164.1    | Ca_Kabuli_Chr05 | 31320185                | TT                              | GG                 | GG               | INTERGENIC                    |                    |                         |
| SNP_37143_A_31322120 | NC_021164.1    | Ca_Kabuli_Chr05 | 31322120                | CC                              | GG                 | GG               | INTERGENIC                    |                    |                         |
| SNP_37144_A_31322842 | NC_021164.1    | Ca_Kabuli_Chr05 | 31322842                | TT                              | CC                 | CC               | INTERGENIC                    |                    |                         |
| SNP_37145_A_31325430 | NC_021164.1    | Ca_Kabuli_Chr05 | 31325430                | GG                              | TT                 | TT               | INTERGENIC                    |                    |                         |
| SNP_37146_A_31325693 | NC_021164.1    | Ca_Kabuli_Chr05 | 31325693                | TT                              | GG                 | GG               | INTERGENIC                    |                    |                         |

| SNPs IDs             | Chromosome IDs | Chromosomes     | Physical positions (bp) | CDC Frontier genome (Reference genome) | (Pusa 1103 & HPNB) | (ILWC 46 & LPNB) | Sequence Components of genome | Gene accession IDs | Putative functions |
|----------------------|----------------|-----------------|-------------------------|----------------------------------------|--------------------|------------------|-------------------------------|--------------------|--------------------|
| SNP_37147_A_31325713 | NC_021164.1    | Ca_Kabuli_Chr05 | 31325713                | CC                                     | AA                 | AA               | INTERGENIC                    |                    |                    |
| SNP_37148_A_31327038 | NC_021164.1    | Ca_Kabuli_Chr05 | 31327038                | TT                                     | CC                 | CC               | INTERGENIC                    |                    |                    |
| SNP_37149_A_31327047 | NC_021164.1    | Ca_Kabuli_Chr05 | 31327047                | TT                                     | CC                 | CC               | INTERGENIC                    |                    |                    |
| SNP_37150_A_31328151 | NC_021164.1    | Ca_Kabuli_Chr05 | 31328151                | TT                                     | CC                 | CC               | INTERGENIC                    |                    |                    |
| SNP_37151_A_31329109 | NC_021164.1    | Ca_Kabuli_Chr05 | 31329109                | GG                                     | AA                 | AA               | DRR                           | 101513499          | catalase-4         |
| SNP_37152_A_31329157 | NC_021164.1    | Ca_Kabuli_Chr05 | 31329157                | TT                                     | CC                 | CC               | DRR                           | 101513499          | catalase-4         |
| SNP_37153_A_31329237 | NC_021164.1    | Ca_Kabuli_Chr05 | 31329237                | TT                                     | CC                 | CC               | DRR                           | 101513499          | catalase-4         |
| SNP_37154_A_31330565 | NC_021164.1    | Ca_Kabuli_Chr05 | 31330565                | CC                                     | TT                 | TT               | INTRON                        | 101513499          | catalase-4         |
| SNP_37155_A_31330627 | NC_021164.1    | Ca_Kabuli_Chr05 | 31330627                | CC                                     | TT                 | TT               | INTRON                        | 101513499          | catalase-4         |
| SNP_37156_A_31332316 | NC_021164.1    | Ca_Kabuli_Chr05 | 31332316                | TT                                     | CC                 | CC               | INTRON                        | 101513499          | catalase-4         |
| SNP_37157_A_31332318 | NC_021164.1    | Ca_Kabuli_Chr05 | 31332318                | TT                                     | AA                 | AA               | INTRON                        | 101513499          | catalase-4         |
| SNP_37159_A_31334233 | NC_021164.1    | Ca_Kabuli_Chr05 | 31334233                | AA                                     | TT                 | TT               | INTERGENIC                    |                    |                    |
| SNP_37160_A_31334580 | NC_021164.1    | Ca_Kabuli_Chr05 | 31334580                | TT                                     | CC                 | CC               | URR                           | 101513499          | catalase-4         |
| SNP_37161_A_31334756 | NC_021164.1    | Ca_Kabuli_Chr05 | 31334756                | GG                                     | AA                 | AA               | URR                           | 101513499          | catalase-4         |
| SNP_37162_A_31334824 | NC_021164.1    | Ca_Kabuli_Chr05 | 31334824                | GG                                     | AA                 | AA               | URR                           | 101513499          | catalase-4         |
| SNP_37164_A_31334928 | NC_021164.1    | Ca_Kabuli_Chr05 | 31334928                | AA                                     | CC                 | CC               | URR                           | 101513499          | catalase-4         |
| SNP_37165_A_31335067 | NC_021164.1    | Ca_Kabuli_Chr05 | 31335067                | TT                                     | AA                 | AA               | URR                           | 101513499          | catalase-4         |
| SNP_37166_A_31335074 | NC_021164.1    | Ca_Kabuli_Chr05 | 31335074                | GG                                     | AA                 | AA               | URR                           | 101513499          | catalase-4         |
| SNP_37167_A_31335132 | NC_021164.1    | Ca_Kabuli_Chr05 | 31335132                | GG                                     | AA                 | AA               | URR                           | 101513499          | catalase-4         |
| SNP_37168_A_31336428 | NC_021164.1    | Ca_Kabuli_Chr05 | 31336428                | CC                                     | TT                 | TT               | INTERGENIC                    |                    |                    |
| SNP_37169_A_31337167 | NC_021164.1    | Ca_Kabuli_Chr05 | 31337167                | CC                                     | GG                 | GG               | INTERGENIC                    |                    |                    |
| SNP_37170_A_31337178 | NC_021164.1    | Ca_Kabuli_Chr05 | 31337178                | TT                                     | AA                 | AA               | INTERGENIC                    |                    |                    |

| SNPs IDs             | Chromosome IDs | Chromosomes     | Physical positions (bp) | CDC Frontier genome (Reference genome) | (Pusa 1103 & HPNB) | (ILWC 46 & LPNB) | Sequence Components of genome | Gene accession IDs | Putative functions                                              |
|----------------------|----------------|-----------------|-------------------------|----------------------------------------|--------------------|------------------|-------------------------------|--------------------|-----------------------------------------------------------------|
| SNP_37171_A_31337180 | NC_021164.1    | Ca_Kabuli_Chr05 | 31337180                | GG                                     | TT                 | TT               | INTERGENIC                    |                    |                                                                 |
| SNP_37172_A_31337211 | NC_021164.1    | Ca_Kabuli_Chr05 | 31337211                | TT                                     | CC                 | CC               | INTERGENIC                    |                    |                                                                 |
| SNP_37173_A_31337213 | NC_021164.1    | Ca_Kabuli_Chr05 | 31337213                | GG                                     | AA                 | AA               | INTERGENIC                    |                    |                                                                 |
| SNP_37174_A_31337438 | NC_021164.1    | Ca_Kabuli_Chr05 | 31337438                | CC                                     | TT                 | TT               | INTERGENIC                    |                    |                                                                 |
| SNP_37175_A_31338771 | NC_021164.1    | Ca_Kabuli_Chr05 | 31338771                | GG                                     | CC                 | CC               | INTERGENIC                    |                    |                                                                 |
| SNP_37176_A_31341276 | NC_021164.1    | Ca_Kabuli_Chr05 | 31341276                | GG                                     | AA                 | AA               | INTERGENIC                    |                    |                                                                 |
| SNP_37177_A_31341297 | NC_021164.1    | Ca_Kabuli_Chr05 | 31341297                | TT                                     | GG                 | GG               | INTERGENIC                    |                    |                                                                 |
| SNP_37178_A_31344652 | NC_021164.1    | Ca_Kabuli_Chr05 | 31344652                | AA                                     | CC                 | CC               | INTRON                        | 101514040          | 1,4-alpha-glucan-branching chloroplastic/amyloplastic enzyme 1, |
| SNP_37179_A_31346495 | NC_021164.1    | Ca_Kabuli_Chr05 | 31346495                | TT                                     | AA                 | AA               | INTRON                        | 101514040          | 1,4-alpha-glucan-branching chloroplastic/amyloplastic enzyme 1, |
| SNP_37180_A_31346496 | NC_021164.1    | Ca_Kabuli_Chr05 | 31346496                | GG                                     | TT                 | TT               | INTRON                        | 101514040          | 1,4-alpha-glucan-branching chloroplastic/amyloplastic enzyme 1, |
| SNP_37181_A_31353118 | NC_021164.1    | Ca_Kabuli_Chr05 | 31353118                | AA                                     | TT                 | TT               | URR                           | 101514040          | 1,4-alpha-glucan-branching chloroplastic/amyloplastic enzyme 1, |
| SNP_37182_A_31353157 | NC_021164.1    | Ca_Kabuli_Chr05 | 31353157                | CC                                     | TT                 | TT               | URR                           | 101514040          | 1,4-alpha-glucan-branching chloroplastic/amyloplastic enzyme 1, |
| SNP_37183_A_31355391 | NC_021164.1    | Ca_Kabuli_Chr05 | 31355391                | AA                                     | GG                 | GG               | INTERGENIC                    |                    |                                                                 |
| SNP_37184_A_31355538 | NC_021164.1    | Ca_Kabuli_Chr05 | 31355538                | TT                                     | GG                 | GG               | INTERGENIC                    |                    |                                                                 |
| SNP_37185_A_31357509 | NC_021164.1    | Ca_Kabuli_Chr05 | 31357509                | GG                                     | CC                 | CC               | INTERGENIC                    |                    |                                                                 |
| SNP_37186_A_31360025 | NC_021164.1    | Ca_Kabuli_Chr05 | 31360025                | TT                                     | GG                 | GG               | DRR                           | 101410588          | transfer RNA lysine (anticodon CUU)                             |
| SNP_37187_A_31361262 | NC_021164.1    | Ca_Kabuli_Chr05 | 31361262                | GG                                     | TT                 | TT               | DRR                           | 101410588          | transfer RNA lysine (anticodon CUU)                             |
| SNP_37188_A_31361295 | NC_021164.1    | Ca_Kabuli_Chr05 | 31361295                | AA                                     | CC                 | CC               | DRR                           | 101410588          | transfer RNA lysine (anticodon CUU)                             |
| SNP_37189_A_31361362 | NC_021164.1    | Ca_Kabuli_Chr05 | 31361362                | GG                                     | AA                 | AA               | DRR                           | 101410588          | transfer RNA lysine (anticodon CUU)                             |
| SNP_37190_A_31361366 | NC_021164.1    | Ca_Kabuli_Chr05 | 31361366                | AA                                     | GG                 | GG               | DRR                           | 101410588          | transfer RNA lysine (anticodon CUU)                             |
| SNP_37191_A_31361538 | NC_021164.1    | Ca_Kabuli_Chr05 | 31361538                | TT                                     | CC                 | CC               | DRR                           | 101410588          | transfer RNA lysine (anticodon CUU)                             |
| SNP_37192_A_31362990 | NC_021164.1    | Ca_Kabuli_Chr05 | 31362990                | CC                                     | GG                 | GG               | URR                           | 101410588          | transfer RNA lysine (anticodon CUU)                             |



| SNPs IDs             | Chromosome IDs | Chromosomes     | Physical positions (bp) | CDC Frontier genome (Reference genome) | (Pusa 1103 & HPNB) | (ILWC 46 & LPNB) | Sequence Components of genome | Gene accession IDs | Putative functions                                                   |
|----------------------|----------------|-----------------|-------------------------|----------------------------------------|--------------------|------------------|-------------------------------|--------------------|----------------------------------------------------------------------|
| SNP_37193_A_31363008 | NC_021164.1    | Ca_Kabuli_Chr05 | 31363008                | CC                                     | TT                 | TT               | URR                           | 101410588          | transfer RNA lysine (anticodon CUU)                                  |
| SNP_37194_A_31363009 | NC_021164.1    | Ca_Kabuli_Chr05 | 31363009                | CC                                     | TT                 | TT               | URR                           | 101410588          | transfer RNA lysine (anticodon CUU)                                  |
| SNP_37195_A_31365418 | NC_021164.1    | Ca_Kabuli_Chr05 | 31365418                | CC                                     | AA                 | AA               | DRR                           | 101514921          | carboxypeptidase A6                                                  |
| SNP_37196_A_31365913 | NC_021164.1    | Ca_Kabuli_Chr05 | 31365913                | AA                                     | GG                 | GG               | DRR                           | 101514921          | carboxypeptidase A6                                                  |
| SNP_37197_A_31367525 | NC_021164.1    | Ca_Kabuli_Chr05 | 31367525                | CC                                     | TT                 | TT               | INTERGENIC                    |                    |                                                                      |
| SNP_37198_A_31368647 | NC_021164.1    | Ca_Kabuli_Chr05 | 31368647                | TT                                     | CC                 | CC               | INTERGENIC                    |                    |                                                                      |
| SNP_37199_A_31371482 | NC_021164.1    | Ca_Kabuli_Chr05 | 31371482                | CC                                     | AA                 | AA               | URR                           | 101514921          | carboxypeptidase A6                                                  |
| SNP_37200_A_31371834 | NC_021164.1    | Ca_Kabuli_Chr05 | 31371834                | AA                                     | CC                 | CC               | URR                           | 101514921          | carboxypeptidase A6                                                  |
| SNP_37201_A_31375146 | NC_021164.1    | Ca_Kabuli_Chr05 | 31375146                | GG                                     | TT                 | TT               | URR                           | 101515244          | pentatricopeptide repeat-containing protein At5g42310, mitochondrial |
| SNP_37203_A_31377661 | NC_021164.1    | Ca_Kabuli_Chr05 | 31377661                | AA                                     | TT                 | TT               | INTRON                        | 101488430          | pre-rRNA-processing protein TSR1 homolog                             |
| SNP_37204_A_31378325 | NC_021164.1    | Ca_Kabuli_Chr05 | 31378325                | TT                                     | CC                 | CC               | INTRON                        | 101488430          | pre-rRNA-processing protein TSR1 homolog                             |
| SNP_37205_A_31379141 | NC_021164.1    | Ca_Kabuli_Chr05 | 31379141                | GG                                     | CC                 | CC               | INTRON                        | 101488430          | pre-rRNA-processing protein TSR1 homolog                             |
| SNP_37206_A_31392553 | NC_021164.1    | Ca_Kabuli_Chr05 | 31392553                | GG                                     | AA                 | AA               | URR                           | 101488766          | uncharacterized LOC101488766                                         |
| SNP_37207_A_31392725 | NC_021164.1    | Ca_Kabuli_Chr05 | 31392725                | GG                                     | TT                 | TT               | URR                           | 101488766          | uncharacterized LOC101488766                                         |
| SNP_37208_A_31393002 | NC_021164.1    | Ca_Kabuli_Chr05 | 31393002                | TT                                     | CC                 | CC               | URR                           | 101488766          | uncharacterized LOC101488766                                         |
| SNP_37209_A_31396811 | NC_021164.1    | Ca_Kabuli_Chr05 | 31396811                | CC                                     | TT                 | TT               | INTRON                        | 101489097          | uncharacterized protein At1g04910-like                               |
| SNP_37211_A_31412603 | NC_021164.1    | Ca_Kabuli_Chr05 | 31412603                | CC                                     | TT                 | TT               | INTERGENIC                    |                    |                                                                      |
| SNP_37212_A_31412605 | NC_021164.1    | Ca_Kabuli_Chr05 | 31412605                | CC                                     | TT                 | TT               | INTERGENIC                    |                    |                                                                      |
| SNP_37213_A_31412613 | NC_021164.1    | Ca_Kabuli_Chr05 | 31412613                | CC                                     | TT                 | TT               | INTERGENIC                    |                    |                                                                      |
| SNP_37214_A_31418172 | NC_021164.1    | Ca_Kabuli_Chr05 | 31418172                | GG                                     | AA                 | AA               | INTRON                        | 101489752          | WD repeat-containing protein DWA2-like                               |
| SNP_37215_A_31420355 | NC_021164.1    | Ca_Kabuli_Chr05 | 31420355                | CC                                     | TT                 | TT               | URR                           | 101489752          | WD repeat-containing protein DWA2-like                               |
| SNP_37216_A_31420365 | NC_021164.1    | Ca_Kabuli_Chr05 | 31420365                | AA                                     | TT                 | TT               | URR                           | 101489752          | WD repeat-containing protein DWA2-like                               |

| SNPs IDs             | Chromosome IDs | Chromosomes     | Physical positions (bp) | CDC Frontier (Reference genome) | (Pusa 1103 & HPNB) | (ILWC 46 & LPNB) | Sequence Components of genome | Gene accession IDs | Putative functions                     |
|----------------------|----------------|-----------------|-------------------------|---------------------------------|--------------------|------------------|-------------------------------|--------------------|----------------------------------------|
| SNP_37217_A_31420366 | NC_021164.1    | Ca_Kabuli_Chr05 | 31420366                | AA                              | TT                 | TT               | URR                           | 101489752          | WD repeat-containing protein DWA2-like |
| SNP_37218_A_31420627 | NC_021164.1    | Ca_Kabuli_Chr05 | 31420627                | AA                              | TT                 | TT               | URR                           | 101489752          | WD repeat-containing protein DWA2-like |
| SNP_37219_A_31421696 | NC_021164.1    | Ca_Kabuli_Chr05 | 31421696                | TT                              | CC                 | CC               | URR                           | 101489752          | WD repeat-containing protein DWA2-like |
| SNP_37220_A_31421697 | NC_021164.1    | Ca_Kabuli_Chr05 | 31421697                | CC                              | TT                 | TT               | URR                           | 101489752          | WD repeat-containing protein DWA2-like |
| SNP_37222_A_31425944 | NC_021164.1    | Ca_Kabuli_Chr05 | 31425944                | TT                              | CC                 | CC               | INTERGENIC                    |                    |                                        |
| SNP_37223_A_31429430 | NC_021164.1    | Ca_Kabuli_Chr05 | 31429430                | TT                              | GG                 | GG               | URR                           | 101490069          | uncharacterized LOC101490069           |
| SNP_37224_A_31429558 | NC_021164.1    | Ca_Kabuli_Chr05 | 31429558                | CC                              | TT                 | TT               | URR                           | 101490401          | uncharacterized LOC101490401           |
| SNP_37225_A_31429601 | NC_021164.1    | Ca_Kabuli_Chr05 | 31429601                | GG                              | AA                 | AA               | URR                           | 101490401          | uncharacterized LOC101490401           |
| SNP_37226_A_31429603 | NC_021164.1    | Ca_Kabuli_Chr05 | 31429603                | TT                              | AA                 | AA               | URR                           | 101490401          | uncharacterized LOC101490401           |
| SNP_37227_A_31429612 | NC_021164.1    | Ca_Kabuli_Chr05 | 31429612                | GG                              | AA                 | AA               | URR                           | 101490401          | uncharacterized LOC101490401           |
| SNP_37228_A_31429638 | NC_021164.1    | Ca_Kabuli_Chr05 | 31429638                | AA                              | CC                 | CC               | URR                           | 101490401          | uncharacterized LOC101490401           |
| SNP_37229_A_31434913 | NC_021164.1    | Ca_Kabuli_Chr05 | 31434913                | CC                              | GG                 | GG               | INTERGENIC                    |                    |                                        |
| SNP_37230_A_31434937 | NC_021164.1    | Ca_Kabuli_Chr05 | 31434937                | CC                              | TT                 | TT               | INTERGENIC                    |                    |                                        |
| SNP_37231_A_31435010 | NC_021164.1    | Ca_Kabuli_Chr05 | 31435010                | GG                              | AA                 | AA               | INTERGENIC                    |                    |                                        |
| SNP_37232_A_31435023 | NC_021164.1    | Ca_Kabuli_Chr05 | 31435023                | AA                              | GG                 | GG               | INTERGENIC                    |                    |                                        |
| SNP_37233_A_31435077 | NC_021164.1    | Ca_Kabuli_Chr05 | 31435077                | AA                              | GG                 | GG               | INTERGENIC                    |                    |                                        |
| SNP_37234_A_31435094 | NC_021164.1    | Ca_Kabuli_Chr05 | 31435094                | CC                              | TT                 | TT               | INTERGENIC                    |                    |                                        |
| SNP_37236_A_31435229 | NC_021164.1    | Ca_Kabuli_Chr05 | 31435229                | TT                              | CC                 | CC               | INTERGENIC                    |                    |                                        |
| SNP_37237_A_31435419 | NC_021164.1    | Ca_Kabuli_Chr05 | 31435419                | TT                              | CC                 | CC               | INTERGENIC                    |                    |                                        |
| SNP_37238_A_31435426 | NC_021164.1    | Ca_Kabuli_Chr05 | 31435426                | CC                              | TT                 | TT               | INTERGENIC                    |                    |                                        |
| SNP_37239_A_31435430 | NC_021164.1    | Ca_Kabuli_Chr05 | 31435430                | CC                              | TT                 | TT               | INTERGENIC                    |                    |                                        |
| SNP_37240_A_31436584 | NC_021164.1    | Ca_Kabuli_Chr05 | 31436584                | AA                              | CC                 | CC               | INTERGENIC                    |                    |                                        |

| SNPs IDs             | Chromosome IDs | Chromosomes     | Physical positions (bp) | CDC Frontier genome (Reference genome) | (Pusa 1103 & HPNB) | (ILWC 46 & LPNB) | Sequence genome | Components of | Gene accession IDs | Putative functions |
|----------------------|----------------|-----------------|-------------------------|----------------------------------------|--------------------|------------------|-----------------|---------------|--------------------|--------------------|
| SNP_37241_A_31436634 | NC_021164.1    | Ca_Kabuli_Chr05 | 31436634                | CC                                     | AA                 | AA               | INTERGENIC      |               |                    |                    |
| SNP_37242_A_31437011 | NC_021164.1    | Ca_Kabuli_Chr05 | 31437011                | CC                                     | TT                 | TT               | INTERGENIC      |               |                    |                    |
| SNP_37243_A_31440235 | NC_021164.1    | Ca_Kabuli_Chr05 | 31440235                | GG                                     | AA                 | AA               | INTERGENIC      |               |                    |                    |
| SNP_37244_A_31440365 | NC_021164.1    | Ca_Kabuli_Chr05 | 31440365                | CC                                     | AA                 | AA               | INTERGENIC      |               |                    |                    |
| SNP_37245_A_31440395 | NC_021164.1    | Ca_Kabuli_Chr05 | 31440395                | CC                                     | GG                 | GG               | INTERGENIC      |               |                    |                    |
| SNP_37246_A_31440578 | NC_021164.1    | Ca_Kabuli_Chr05 | 31440578                | GG                                     | AA                 | AA               | INTERGENIC      |               |                    |                    |
| SNP_37247_A_31440793 | NC_021164.1    | Ca_Kabuli_Chr05 | 31440793                | GG                                     | CC                 | CC               | INTERGENIC      |               |                    |                    |
| SNP_37248_A_31440876 | NC_021164.1    | Ca_Kabuli_Chr05 | 31440876                | TT                                     | AA                 | AA               | INTERGENIC      |               |                    |                    |
| SNP_37249_A_31440923 | NC_021164.1    | Ca_Kabuli_Chr05 | 31440923                | CC                                     | GG                 | GG               | INTERGENIC      |               |                    |                    |
| SNP_37250_A_31440932 | NC_021164.1    | Ca_Kabuli_Chr05 | 31440932                | TT                                     | CC                 | CC               | INTERGENIC      |               |                    |                    |
| SNP_37251_A_31440959 | NC_021164.1    | Ca_Kabuli_Chr05 | 31440959                | GG                                     | TT                 | TT               | INTERGENIC      |               |                    |                    |
| SNP_37252_A_31440962 | NC_021164.1    | Ca_Kabuli_Chr05 | 31440962                | AA                                     | TT                 | TT               | INTERGENIC      |               |                    |                    |
| SNP_37253_A_31440974 | NC_021164.1    | Ca_Kabuli_Chr05 | 31440974                | GG                                     | TT                 | TT               | INTERGENIC      |               |                    |                    |
| SNP_37254_A_31440989 | NC_021164.1    | Ca_Kabuli_Chr05 | 31440989                | TT                                     | AA                 | AA               | INTERGENIC      |               |                    |                    |
| SNP_37255_A_31441007 | NC_021164.1    | Ca_Kabuli_Chr05 | 31441007                | AA                                     | GG                 | GG               | INTERGENIC      |               |                    |                    |
| SNP_37256_A_31441104 | NC_021164.1    | Ca_Kabuli_Chr05 | 31441104                | GG                                     | CC                 | CC               | INTERGENIC      |               |                    |                    |
| SNP_37257_A_31441114 | NC_021164.1    | Ca_Kabuli_Chr05 | 31441114                | AA                                     | TT                 | TT               | INTERGENIC      |               |                    |                    |
| SNP_37258_A_31441143 | NC_021164.1    | Ca_Kabuli_Chr05 | 31441143                | AA                                     | GG                 | GG               | INTERGENIC      |               |                    |                    |
| SNP_37259_A_31441171 | NC_021164.1    | Ca_Kabuli_Chr05 | 31441171                | GG                                     | TT                 | TT               | INTERGENIC      |               |                    |                    |
| SNP_37260_A_31441215 | NC_021164.1    | Ca_Kabuli_Chr05 | 31441215                | TT                                     | AA                 | AA               | INTERGENIC      |               |                    |                    |
| SNP_37261_A_31442393 | NC_021164.1    | Ca_Kabuli_Chr05 | 31442393                | GG                                     | AA                 | AA               | INTERGENIC      |               |                    |                    |
| SNP_37262_A_31442777 | NC_021164.1    | Ca_Kabuli_Chr05 | 31442777                | AA                                     | TT                 | TT               | INTERGENIC      |               |                    |                    |

| SNPs IDs             | Chromosome IDs | Chromosomes     | Physical positions (bp) | CDC Frontier genome (Reference genome) | (Pusa 1103 & HPNB) | (ILWC 46 & LPNB) | Sequence Components of genome | Gene accession IDs | Putative functions                                     |
|----------------------|----------------|-----------------|-------------------------|----------------------------------------|--------------------|------------------|-------------------------------|--------------------|--------------------------------------------------------|
| SNP_37263_A_31446136 | NC_021164.1    | Ca_Kabuli_Chr05 | 31446136                | GG                                     | AA                 | AA               | INTERGENIC                    |                    |                                                        |
| SNP_37264_A_31451854 | NC_021164.1    | Ca_Kabuli_Chr05 | 31451854                | CC                                     | AA                 | AA               | INTERGENIC                    |                    |                                                        |
| SNP_37265_A_31451939 | NC_021164.1    | Ca_Kabuli_Chr05 | 31451939                | GG                                     | AA                 | AA               | INTERGENIC                    |                    |                                                        |
| SNP_37266_A_31455373 | NC_021164.1    | Ca_Kabuli_Chr05 | 31455373                | GG                                     | TT                 | TT               | INTERGENIC                    |                    |                                                        |
| SNP_37267_A_31456559 | NC_021164.1    | Ca_Kabuli_Chr05 | 31456559                | GG                                     | TT                 | TT               | INTERGENIC                    |                    |                                                        |
| SNP_37268_A_31456663 | NC_021164.1    | Ca_Kabuli_Chr05 | 31456663                | TT                                     | GG                 | GG               | INTERGENIC                    |                    |                                                        |
| SNP_37269_A_31457752 | NC_021164.1    | Ca_Kabuli_Chr05 | 31457752                | AA                                     | GG                 | GG               | INTERGENIC                    |                    |                                                        |
| SNP_37270_A_31457753 | NC_021164.1    | Ca_Kabuli_Chr05 | 31457753                | AA                                     | CC                 | CC               | INTERGENIC                    |                    |                                                        |
| SNP_37271_A_31457771 | NC_021164.1    | Ca_Kabuli_Chr05 | 31457771                | CC                                     | TT                 | TT               | INTERGENIC                    |                    |                                                        |
| SNP_37272_A_31457950 | NC_021164.1    | Ca_Kabuli_Chr05 | 31457950                | CC                                     | TT                 | TT               | DRR                           | 101490725          | uncharacterized LOC101490725                           |
| SNP_37273_A_31457970 | NC_021164.1    | Ca_Kabuli_Chr05 | 31457970                | CC                                     | AA                 | AA               | DRR                           | 101490725          | uncharacterized LOC101490725                           |
| SNP_37274_A_31458033 | NC_021164.1    | Ca_Kabuli_Chr05 | 31458033                | CC                                     | GG                 | GG               | DRR                           | 101490725          | uncharacterized LOC101490725                           |
| SNP_37275_A_31458038 | NC_021164.1    | Ca_Kabuli_Chr05 | 31458038                | CC                                     | AA                 | AA               | DRR                           | 101490725          | uncharacterized LOC101490725                           |
| SNP_37276_A_31459557 | NC_021164.1    | Ca_Kabuli_Chr05 | 31459557                | TT                                     | CC                 | CC               | SYNONYMOUS_CODING             | 101490725          | uncharacterized LOC101490725                           |
| SNP_37277_A_31460408 | NC_021164.1    | Ca_Kabuli_Chr05 | 31460408                | GG                                     | CC                 | CC               | URR                           | 101490725          | uncharacterized LOC101490725                           |
| SNP_37278_A_31463009 | NC_021164.1    | Ca_Kabuli_Chr05 | 31463009                | AA                                     | GG                 | GG               | INTERGENIC                    |                    |                                                        |
| SNP_37279_A_31471084 | NC_021164.1    | Ca_Kabuli_Chr05 | 31471084                | TT                                     | GG                 | GG               | DRR                           | 101491047          | uncharacterized LOC101491047                           |
| SNP_37280_A_31474797 | NC_021164.1    | Ca_Kabuli_Chr05 | 31474797                | AA                                     | GG                 | GG               | INTERGENIC                    |                    |                                                        |
| SNP_37281_A_31474922 | NC_021164.1    | Ca_Kabuli_Chr05 | 31474922                | GG                                     | TT                 | TT               | INTERGENIC                    |                    |                                                        |
| SNP_37282_A_31475720 | NC_021164.1    | Ca_Kabuli_Chr05 | 31475720                | AA                                     | TT                 | TT               | INTERGENIC                    |                    |                                                        |
| SNP_37284_A_31482238 | NC_021164.1    | Ca_Kabuli_Chr05 | 31482238                | GG                                     | AA                 | AA               | URR                           | 101491362          | ATP-dependent zinc metalloprotease FTSH, chloroplastic |
| SNP_37285_A_31482242 | NC_021164.1    | Ca_Kabuli_Chr05 | 31482242                | TT                                     | CC                 | CC               | URR                           | 101491362          | ATP-dependent zinc metalloprotease FTSH, chloroplastic |

| SNPs IDs             | Chromosome IDs | Chromosomes     | Physical positions (bp) | CDC Frontier genome (Reference genome) | (Pusa 1103 & HPNB) | (ILWC 46 & LPNB) | Sequence Components of genome | Gene accession IDs | Putative functions                                     |
|----------------------|----------------|-----------------|-------------------------|----------------------------------------|--------------------|------------------|-------------------------------|--------------------|--------------------------------------------------------|
| SNP_37286_A_31482536 | NC_021164.1    | Ca_Kabuli_Chr05 | 31482536                | AA                                     | GG                 | GG               | URR                           | 101491362          | ATP-dependent zinc metalloprotease FTSH, chloroplastic |
| SNP_37287_A_31483245 | NC_021164.1    | Ca_Kabuli_Chr05 | 31483245                | AA                                     | TT                 | TT               | URR                           | 101491362          | ATP-dependent zinc metalloprotease FTSH, chloroplastic |
| SNP_37288_A_31483465 | NC_021164.1    | Ca_Kabuli_Chr05 | 31483465                | CC                                     | TT                 | TT               | URR                           | 101491362          | ATP-dependent zinc metalloprotease FTSH, chloroplastic |
| SNP_37289_A_31483466 | NC_021164.1    | Ca_Kabuli_Chr05 | 31483466                | GG                                     | AA                 | AA               | URR                           | 101491362          | ATP-dependent zinc metalloprotease FTSH, chloroplastic |
| SNP_37290_A_31483475 | NC_021164.1    | Ca_Kabuli_Chr05 | 31483475                | AA                                     | GG                 | GG               | URR                           | 101491362          | ATP-dependent zinc metalloprotease FTSH, chloroplastic |
| SNP_37291_A_31483767 | NC_021164.1    | Ca_Kabuli_Chr05 | 31483767                | GG                                     | AA                 | AA               | URR                           | 101491362          | ATP-dependent zinc metalloprotease FTSH, chloroplastic |
| SNP_37292_A_31483803 | NC_021164.1    | Ca_Kabuli_Chr05 | 31483803                | GG                                     | AA                 | AA               | URR                           | 101491362          | ATP-dependent zinc metalloprotease FTSH, chloroplastic |
| SNP_37293_A_31487315 | NC_021164.1    | Ca_Kabuli_Chr05 | 31487315                | TT                                     | AA                 | AA               | DRR                           | 101491992          | lysine histidine transporter-like 8                    |
| SNP_37294_A_31489240 | NC_021164.1    | Ca_Kabuli_Chr05 | 31489240                | CC                                     | TT                 | TT               | INTERGENIC                    |                    |                                                        |
| SNP_37295_A_31494807 | NC_021164.1    | Ca_Kabuli_Chr05 | 31494807                | CC                                     | GG                 | GG               | URR                           | 101491681          | uncharacterized LOC101491681                           |
| SNP_37296_A_31495607 | NC_021164.1    | Ca_Kabuli_Chr05 | 31495607                | CC                                     | AA                 | AA               | URR                           | 101491681          | uncharacterized LOC101491681                           |
| SNP_37297_A_31498359 | NC_021164.1    | Ca_Kabuli_Chr05 | 31498359                | AA                                     | CC                 | CC               | URR                           | 101492657          | uncharacterized LOC101492657                           |
| SNP_37298_A_31499634 | NC_021164.1    | Ca_Kabuli_Chr05 | 31499634                | AA                                     | TT                 | TT               | URR                           | 101492657          | uncharacterized LOC101492657                           |
| SNP_37299_A_31501302 | NC_021164.1    | Ca_Kabuli_Chr05 | 31501302                | AA                                     | CC                 | CC               | INTERGENIC                    |                    |                                                        |
| SNP_37300_A_31506208 | NC_021164.1    | Ca_Kabuli_Chr05 | 31506208                | CC                                     | TT                 | TT               | INTRON                        | 101492328          | L-ascorbate oxidase homolog                            |
| SNP_37301_A_31506420 | NC_021164.1    | Ca_Kabuli_Chr05 | 31506420                | GG                                     | AA                 | AA               | INTRON                        | 101492328          | L-ascorbate oxidase homolog                            |
| SNP_37302_A_31506424 | NC_021164.1    | Ca_Kabuli_Chr05 | 31506424                | TT                                     | GG                 | GG               | INTRON                        | 101492328          | L-ascorbate oxidase homolog                            |
| SNP_37303_A_31506430 | NC_021164.1    | Ca_Kabuli_Chr05 | 31506430                | AA                                     | GG                 | GG               | INTRON                        | 101492328          | L-ascorbate oxidase homolog                            |
| SNP_37304_A_31508335 | NC_021164.1    | Ca_Kabuli_Chr05 | 31508335                | GG                                     | TT                 | TT               | INTRON                        | 101492328          | L-ascorbate oxidase homolog                            |
| SNP_37305_A_31508374 | NC_021164.1    | Ca_Kabuli_Chr05 | 31508374                | TT                                     | CC                 | CC               | INTRON                        | 101492328          | L-ascorbate oxidase homolog                            |
| SNP_37306_A_31508702 | NC_021164.1    | Ca_Kabuli_Chr05 | 31508702                | TT                                     | GG                 | GG               | INTRON                        | 101492328          | L-ascorbate oxidase homolog                            |
| SNP_37307_A_31515589 | NC_021164.1    | Ca_Kabuli_Chr05 | 31515589                | TT                                     | GG                 | GG               | INTERGENIC                    |                    |                                                        |

| SNPs IDs             | Chromosome IDs | Chromosomes     | Physical positions (bp) | CDC Frontier (Reference genome) | (Pusa 1103 & HPNB) | (ILWC 46 & LPNB) | Sequence genome | Components of | Gene accession IDs | Putative functions |
|----------------------|----------------|-----------------|-------------------------|---------------------------------|--------------------|------------------|-----------------|---------------|--------------------|--------------------|
| SNP_37308_A_31515847 | NC_021164.1    | Ca_Kabuli_Chr05 | 31515847                | TT                              | CC                 | CC               | INTERGENIC      |               |                    |                    |
| SNP_37310_A_31531880 | NC_021164.1    | Ca_Kabuli_Chr05 | 31531880                | AA                              | CC                 | CC               | INTERGENIC      |               |                    |                    |
| SNP_37311_A_31531909 | NC_021164.1    | Ca_Kabuli_Chr05 | 31531909                | TT                              | CC                 | CC               | INTERGENIC      |               |                    |                    |
| SNP_37312_A_31532158 | NC_021164.1    | Ca_Kabuli_Chr05 | 31532158                | AA                              | TT                 | TT               | INTERGENIC      |               |                    |                    |
| SNP_37313_A_31532228 | NC_021164.1    | Ca_Kabuli_Chr05 | 31532228                | AA                              | GG                 | GG               | INTERGENIC      |               |                    |                    |
| SNP_37315_A_31533725 | NC_021164.1    | Ca_Kabuli_Chr05 | 31533725                | CC                              | GG                 | GG               | INTERGENIC      |               |                    |                    |
| SNP_37316_A_31538949 | NC_021164.1    | Ca_Kabuli_Chr05 | 31538949                | GG                              | CC                 | CC               | INTERGENIC      |               |                    |                    |
| SNP_37317_A_31538968 | NC_021164.1    | Ca_Kabuli_Chr05 | 31538968                | TT                              | AA                 | AA               | INTERGENIC      |               |                    |                    |
| SNP_37318_A_31539311 | NC_021164.1    | Ca_Kabuli_Chr05 | 31539311                | GG                              | AA                 | AA               | INTERGENIC      |               |                    |                    |
| SNP_37319_A_31539329 | NC_021164.1    | Ca_Kabuli_Chr05 | 31539329                | GG                              | TT                 | TT               | INTERGENIC      |               |                    |                    |
| SNP_37320_A_31539357 | NC_021164.1    | Ca_Kabuli_Chr05 | 31539357                | TT                              | CC                 | CC               | INTERGENIC      |               |                    |                    |
| SNP_37322_A_31559057 | NC_021164.1    | Ca_Kabuli_Chr05 | 31559057                | CC                              | AA                 | AA               | INTERGENIC      |               |                    |                    |
| SNP_37323_A_31559060 | NC_021164.1    | Ca_Kabuli_Chr05 | 31559060                | GG                              | AA                 | AA               | INTERGENIC      |               |                    |                    |
| SNP_37324_A_31559071 | NC_021164.1    | Ca_Kabuli_Chr05 | 31559071                | TT                              | AA                 | AA               | INTERGENIC      |               |                    |                    |
| SNP_37325_A_31559139 | NC_021164.1    | Ca_Kabuli_Chr05 | 31559139                | TT                              | CC                 | CC               | INTERGENIC      |               |                    |                    |
| SNP_37326_A_31559141 | NC_021164.1    | Ca_Kabuli_Chr05 | 31559141                | AA                              | CC                 | CC               | INTERGENIC      |               |                    |                    |
| SNP_37327_A_31560896 | NC_021164.1    | Ca_Kabuli_Chr05 | 31560896                | TT                              | CC                 | CC               | INTERGENIC      |               |                    |                    |
| SNP_37328_A_31561317 | NC_021164.1    | Ca_Kabuli_Chr05 | 31561317                | TT                              | CC                 | CC               | INTERGENIC      |               |                    |                    |
| SNP_37329_A_31561601 | NC_021164.1    | Ca_Kabuli_Chr05 | 31561601                | TT                              | CC                 | CC               | INTERGENIC      |               |                    |                    |
| SNP_37330_A_31561610 | NC_021164.1    | Ca_Kabuli_Chr05 | 31561610                | CC                              | AA                 | AA               | INTERGENIC      |               |                    |                    |
| SNP_37331_A_31561612 | NC_021164.1    | Ca_Kabuli_Chr05 | 31561612                | AA                              | CC                 | CC               | INTERGENIC      |               |                    |                    |
| SNP_37332_A_31570610 | NC_021164.1    | Ca_Kabuli_Chr05 | 31570610                | AA                              | GG                 | GG               | INTERGENIC      |               |                    |                    |

| SNPs IDs             | Chromosome IDs | Chromosomes     | Physical positions (bp) | CDC Frontier genome (Reference genome) | (Pusa 1103 & HPNB) | (ILWC 46 & LPNB) | Sequence Components of genome | Gene accession IDs | Putative functions                             |
|----------------------|----------------|-----------------|-------------------------|----------------------------------------|--------------------|------------------|-------------------------------|--------------------|------------------------------------------------|
| SNP_37333_A_31584253 | NC_021164.1    | Ca_Kabuli_Chr05 | 31584253                | GG                                     | AA                 | AA               | URR                           | 101494596          | phospholipase D delta-like                     |
| SNP_37334_A_31585599 | NC_021164.1    | Ca_Kabuli_Chr05 | 31585599                | CC                                     | TT                 | TT               | DRR                           | 101495462          | hippocampus abundant transcript-like protein 1 |
| SNP_37335_A_31585622 | NC_021164.1    | Ca_Kabuli_Chr05 | 31585622                | TT                                     | CC                 | CC               | DRR                           | 101495462          | hippocampus abundant transcript-like protein 1 |
| SNP_37336_A_31585628 | NC_021164.1    | Ca_Kabuli_Chr05 | 31585628                | CC                                     | GG                 | GG               | DRR                           | 101495462          | hippocampus abundant transcript-like protein 1 |
| SNP_37338_A_31585806 | NC_021164.1    | Ca_Kabuli_Chr05 | 31585806                | AA                                     | GG                 | GG               | DRR                           | 101495462          | hippocampus abundant transcript-like protein 1 |
| SNP_37339_A_31586241 | NC_021164.1    | Ca_Kabuli_Chr05 | 31586241                | GG                                     | AA                 | AA               | DRR                           | 101495462          | hippocampus abundant transcript-like protein 1 |
| SNP_37340_A_31587139 | NC_021164.1    | Ca_Kabuli_Chr05 | 31587139                | CC                                     | AA                 | AA               | INTERGENIC                    |                    |                                                |
| SNP_37341_A_31587976 | NC_021164.1    | Ca_Kabuli_Chr05 | 31587976                | AA                                     | GG                 | GG               | INTRON                        | 101495462          | hippocampus abundant transcript-like protein 1 |
| SNP_37342_A_31595258 | NC_021164.1    | Ca_Kabuli_Chr05 | 31595258                | AA                                     | GG                 | GG               | INTRON                        | 101495462          | hippocampus abundant transcript-like protein 1 |
| SNP_37343_A_31595315 | NC_021164.1    | Ca_Kabuli_Chr05 | 31595315                | TT                                     | GG                 | GG               | INTRON                        | 101495462          | hippocampus abundant transcript-like protein 1 |
| SNP_37344_A_31596286 | NC_021164.1    | Ca_Kabuli_Chr05 | 31596286                | AA                                     | TT                 | TT               | START_LOST                    | id107289           | Unknown function                               |
| SNP_37345_A_31596287 | NC_021164.1    | Ca_Kabuli_Chr05 | 31596287                | AA                                     | CC                 | CC               | URR                           | 101495462          | hippocampus abundant transcript-like protein 1 |
| SNP_37346_A_31597044 | NC_021164.1    | Ca_Kabuli_Chr05 | 31597044                | AA                                     | GG                 | GG               | URR                           | 101495462          | hippocampus abundant transcript-like protein 1 |
| SNP_37347_A_31597385 | NC_021164.1    | Ca_Kabuli_Chr05 | 31597385                | GG                                     | AA                 | AA               | URR                           | 101495462          | hippocampus abundant transcript-like protein 1 |
| SNP_37348_A_31597389 | NC_021164.1    | Ca_Kabuli_Chr05 | 31597389                | CC                                     | GG                 | GG               | URR                           | 101495462          | hippocampus abundant transcript-like protein 1 |
| SNP_37349_A_31599474 | NC_021164.1    | Ca_Kabuli_Chr05 | 31599474                | GG                                     | AA                 | AA               | INTERGENIC                    |                    |                                                |
| SNP_37350_A_31599846 | NC_021164.1    | Ca_Kabuli_Chr05 | 31599846                | GG                                     | AA                 | AA               | INTERGENIC                    |                    |                                                |
| SNP_37351_A_31600019 | NC_021164.1    | Ca_Kabuli_Chr05 | 31600019                | CC                                     | GG                 | GG               | INTERGENIC                    |                    |                                                |
| SNP_37352_A_31604326 | NC_021164.1    | Ca_Kabuli_Chr05 | 31604326                | TT                                     | CC                 | CC               | INTERGENIC                    |                    |                                                |
| SNP_37353_A_31604368 | NC_021164.1    | Ca_Kabuli_Chr05 | 31604368                | TT                                     | CC                 | CC               | INTERGENIC                    |                    |                                                |
| SNP_37354_A_31604613 | NC_021164.1    | Ca_Kabuli_Chr05 | 31604613                | GG                                     | AA                 | AA               | DRR                           | 101496973          | 24-methylenesterol C-methyltransferase 2       |
| SNP_37355_A_31604633 | NC_021164.1    | Ca_Kabuli_Chr05 | 31604633                | TT                                     | GG                 | GG               | DRR                           | 101496973          | 24-methylenesterol C-methyltransferase 2       |

| SNPs IDs             | Chromosome IDs | Chromosomes     | Physical positions (bp) | CDC Frontier genome (Reference genome) | (Pusa 1103 & HPNB) | (ILWC 46 & LPNB) | Sequence Components of genome | Gene accession IDs | Putative functions                     |
|----------------------|----------------|-----------------|-------------------------|----------------------------------------|--------------------|------------------|-------------------------------|--------------------|----------------------------------------|
| SNP_37356_A_31606850 | NC_021164.1    | Ca_Kabuli_Chr05 | 31606850                | TT                                     | CC                 | CC               | INTERGENIC                    |                    |                                        |
| SNP_37357_A_31606851 | NC_021164.1    | Ca_Kabuli_Chr05 | 31606851                | CC                                     | TT                 | TT               | INTERGENIC                    |                    |                                        |
| SNP_37359_A_31609924 | NC_021164.1    | Ca_Kabuli_Chr05 | 31609924                | CC                                     | GG                 | GG               | DRR                           | 101497303          | uncharacterized protein At1g76070-like |
| SNP_37360_A_31609992 | NC_021164.1    | Ca_Kabuli_Chr05 | 31609992                | TT                                     | AA                 | AA               | DRR                           | 101497303          | uncharacterized protein At1g76070-like |
| SNP_37361_A_31609994 | NC_021164.1    | Ca_Kabuli_Chr05 | 31609994                | TT                                     | CC                 | CC               | DRR                           | 101497303          | uncharacterized protein At1g76070-like |
| SNP_37362_A_31610378 | NC_021164.1    | Ca_Kabuli_Chr05 | 31610378                | TT                                     | AA                 | AA               | DRR                           | 101497303          | uncharacterized protein At1g76070-like |
| SNP_37363_A_31610685 | NC_021164.1    | Ca_Kabuli_Chr05 | 31610685                | TT                                     | CC                 | CC               | INTERGENIC                    |                    |                                        |
| SNP_37365_A_31619486 | NC_021164.1    | Ca_Kabuli_Chr05 | 31619486                | GG                                     | AA                 | AA               | INTERGENIC                    |                    |                                        |
| SNP_37367_A_31623379 | NC_021164.1    | Ca_Kabuli_Chr05 | 31623379                | AA                                     | TT                 | TT               | INTRON                        | 101497954          | proline-tRNA ligase-like               |
| SNP_37368_A_31623687 | NC_021164.1    | Ca_Kabuli_Chr05 | 31623687                | CC                                     | AA                 | AA               | NON_SYNONYMOUS_CODING         | 101497954          | proline-tRNA ligase-like               |
| SNP_37369_A_31626362 | NC_021164.1    | Ca_Kabuli_Chr05 | 31626362                | GG                                     | AA                 | AA               | INTRON                        | 101497954          | proline-tRNA ligase-like               |
| SNP_37370_A_31626368 | NC_021164.1    | Ca_Kabuli_Chr05 | 31626368                | TT                                     | AA                 | AA               | INTRON                        | 101497954          | proline-tRNA ligase-like               |
| SNP_37371_A_31630316 | NC_021164.1    | Ca_Kabuli_Chr05 | 31630316                | CC                                     | TT                 | TT               | INTERGENIC                    |                    |                                        |
| SNP_37372_A_31630473 | NC_021164.1    | Ca_Kabuli_Chr05 | 31630473                | CC                                     | AA                 | AA               | INTERGENIC                    |                    |                                        |
| SNP_37373_A_31630588 | NC_021164.1    | Ca_Kabuli_Chr05 | 31630588                | CC                                     | TT                 | TT               | INTERGENIC                    |                    |                                        |
| SNP_37374_A_31632641 | NC_021164.1    | Ca_Kabuli_Chr05 | 31632641                | CC                                     | TT                 | TT               | INTERGENIC                    |                    |                                        |
| SNP_37375_A_31632681 | NC_021164.1    | Ca_Kabuli_Chr05 | 31632681                | GG                                     | CC                 | CC               | INTERGENIC                    |                    |                                        |
| SNP_37376_A_31632857 | NC_021164.1    | Ca_Kabuli_Chr05 | 31632857                | CC                                     | GG                 | GG               | INTERGENIC                    |                    |                                        |
| SNP_37377_A_31633027 | NC_021164.1    | Ca_Kabuli_Chr05 | 31633027                | TT                                     | CC                 | CC               | INTERGENIC                    |                    |                                        |
| SNP_37378_A_31633867 | NC_021164.1    | Ca_Kabuli_Chr05 | 31633867                | GG                                     | CC                 | CC               | INTERGENIC                    |                    |                                        |
| SNP_37379_A_31636515 | NC_021164.1    | Ca_Kabuli_Chr05 | 31636515                | AA                                     | TT                 | TT               | INTERGENIC                    |                    |                                        |
| SNP_37380_A_31637505 | NC_021164.1    | Ca_Kabuli_Chr05 | 31637505                | TT                                     | GG                 | GG               | INTERGENIC                    |                    |                                        |



| SNPs IDs             | Chromosome IDs | Chromosomes     | Physical positions (bp) | CDC Frontier genome (Reference genome) | (Pusa 1103 & HPNB) | (ILWC 46 & LPNB) | Sequence Components of genome | Gene accession IDs | Putative functions                                      |
|----------------------|----------------|-----------------|-------------------------|----------------------------------------|--------------------|------------------|-------------------------------|--------------------|---------------------------------------------------------|
| SNP_37381_A_31639410 | NC_021164.1    | Ca_Kabuli_Chr05 | 31639410                | GG                                     | AA                 | AA               | INTERGENIC                    |                    |                                                         |
| SNP_37382_A_31639464 | NC_021164.1    | Ca_Kabuli_Chr05 | 31639464                | CC                                     | GG                 | GG               | INTERGENIC                    |                    |                                                         |
| SNP_37383_A_31639793 | NC_021164.1    | Ca_Kabuli_Chr05 | 31639793                | AA                                     | GG                 | GG               | INTERGENIC                    |                    |                                                         |
| SNP_37384_A_31639845 | NC_021164.1    | Ca_Kabuli_Chr05 | 31639845                | TT                                     | CC                 | CC               | INTERGENIC                    |                    |                                                         |
| SNP_37385_A_31649079 | NC_021164.1    | Ca_Kabuli_Chr05 | 31649079                | TT                                     | CC                 | CC               | DRR                           | 101499072          | RNA pseudouridine synthase 2, chloroplastic             |
| SNP_37386_A_31649103 | NC_021164.1    | Ca_Kabuli_Chr05 | 31649103                | GG                                     | AA                 | AA               | DRR                           | 101499072          | RNA pseudouridine synthase 2, chloroplastic             |
| SNP_37387_A_31650214 | NC_021164.1    | Ca_Kabuli_Chr05 | 31650214                | CC                                     | AA                 | AA               | INTERGENIC                    |                    |                                                         |
| SNP_37388_A_31650875 | NC_021164.1    | Ca_Kabuli_Chr05 | 31650875                | GG                                     | TT                 | TT               | INTERGENIC                    |                    |                                                         |
| SNP_37389_A_31651009 | NC_021164.1    | Ca_Kabuli_Chr05 | 31651009                | TT                                     | CC                 | CC               | INTERGENIC                    |                    |                                                         |
| SNP_37390_A_31656163 | NC_021164.1    | Ca_Kabuli_Chr05 | 31656163                | TT                                     | GG                 | GG               | URR                           | 101499072          | RNA pseudouridine synthase 2, chloroplastic             |
| SNP_37391_A_31656544 | NC_021164.1    | Ca_Kabuli_Chr05 | 31656544                | GG                                     | AA                 | AA               | INTRON                        | 101498505          | probable nucleoredoxin 2                                |
| SNP_37392_A_31656649 | NC_021164.1    | Ca_Kabuli_Chr05 | 31656649                | GG                                     | AA                 | AA               | INTRON                        | 101498505          | probable nucleoredoxin 2                                |
| SNP_37393_A_31658120 | NC_021164.1    | Ca_Kabuli_Chr05 | 31658120                | GG                                     | AA                 | AA               | INTRON                        | 101498505          | probable nucleoredoxin 2                                |
| SNP_37394_A_31658157 | NC_021164.1    | Ca_Kabuli_Chr05 | 31658157                | AA                                     | GG                 | GG               | INTRON                        | 101498505          | probable nucleoredoxin 2                                |
| SNP_37395_A_31659775 | NC_021164.1    | Ca_Kabuli_Chr05 | 31659775                | AA                                     | GG                 | GG               | URR                           | 101498505          | probable nucleoredoxin 2                                |
| SNP_37396_A_31659978 | NC_021164.1    | Ca_Kabuli_Chr05 | 31659978                | TT                                     | CC                 | CC               | URR                           | 101498505          | probable nucleoredoxin 2                                |
| SNP_37397_A_31667271 | NC_021164.1    | Ca_Kabuli_Chr05 | 31667271                | AA                                     | TT                 | TT               | URR                           | 101499386          | E3 ubiquitin-protein ligase ATL23-like                  |
| SNP_37398_A_31669911 | NC_021164.1    | Ca_Kabuli_Chr05 | 31669911                | TT                                     | AA                 | AA               | INTERGENIC                    |                    |                                                         |
| SNP_37399_A_31670578 | NC_021164.1    | Ca_Kabuli_Chr05 | 31670578                | AA                                     | CC                 | CC               | INTERGENIC                    |                    |                                                         |
| SNP_37400_A_31671932 | NC_021164.1    | Ca_Kabuli_Chr05 | 31671932                | AA                                     | TT                 | TT               | DRR                           | 101499693          | probable 26S proteasome non-ATPase regulatory subunit 3 |
| SNP_37401_A_31672112 | NC_021164.1    | Ca_Kabuli_Chr05 | 31672112                | GG                                     | AA                 | AA               | DRR                           | 101499693          | probable 26S proteasome non-ATPase regulatory subunit 3 |
| SNP_37402_A_31672142 | NC_021164.1    | Ca_Kabuli_Chr05 | 31672142                | CC                                     | TT                 | TT               | DRR                           | 101499693          | probable 26S proteasome non-ATPase regulatory subunit 3 |

| SNPs IDs             | Chromosome IDs | Chromosomes     | Physical positions (bp) | CDC Frontier (Reference genome) | (Pusa 1103 & HPNB) | (ILWC 46 & LPNB) | Sequence Components of genome | Gene accession IDs | Putative functions                                      |
|----------------------|----------------|-----------------|-------------------------|---------------------------------|--------------------|------------------|-------------------------------|--------------------|---------------------------------------------------------|
| SNP_37403_A_31676371 | NC_021164.1    | Ca_Kabuli_Chr05 | 31676371                | GG                              | AA                 | AA               | SYNONYMOUS_CODING             | 101499693          | probable 26S proteasome non-ATPase regulatory subunit 3 |
| SNP_37404_A_31680020 | NC_021164.1    | Ca_Kabuli_Chr05 | 31680020                | AA                              | TT                 | TT               | INTERGENIC                    |                    |                                                         |
| SNP_37405_A_31681520 | NC_021164.1    | Ca_Kabuli_Chr05 | 31681520                | GG                              | AA                 | AA               | INTERGENIC                    |                    |                                                         |
| SNP_37406_A_31681527 | NC_021164.1    | Ca_Kabuli_Chr05 | 31681527                | GG                              | AA                 | AA               | INTERGENIC                    |                    |                                                         |
| SNP_37407_A_31682635 | NC_021164.1    | Ca_Kabuli_Chr05 | 31682635                | GG                              | AA                 | AA               | DRR                           | 101500344          | UPF0496 protein At1g20180                               |
| SNP_37408_A_31682636 | NC_021164.1    | Ca_Kabuli_Chr05 | 31682636                | GG                              | AA                 | AA               | DRR                           | 101500344          | UPF0496 protein At1g20180                               |
| SNP_37409_A_31684959 | NC_021164.1    | Ca_Kabuli_Chr05 | 31684959                | AA                              | GG                 | GG               | URR                           | 101500344          | UPF0496 protein At1g20180                               |
| SNP_37410_A_31685235 | NC_021164.1    | Ca_Kabuli_Chr05 | 31685235                | CC                              | TT                 | TT               | URR                           | 101500344          | UPF0496 protein At1g20180                               |
| SNP_37411_A_31685584 | NC_021164.1    | Ca_Kabuli_Chr05 | 31685584                | CC                              | AA                 | AA               | URR                           | 101500344          | UPF0496 protein At1g20180                               |
| SNP_37412_A_31685764 | NC_021164.1    | Ca_Kabuli_Chr05 | 31685764                | GG                              | CC                 | CC               | URR                           | 101500344          | UPF0496 protein At1g20180                               |
| SNP_37413_A_31692219 | NC_021164.1    | Ca_Kabuli_Chr05 | 31692219                | GG                              | AA                 | AA               | URR                           | 101500656          | la-related protein 1C-like                              |
| SNP_37414_A_31692226 | NC_021164.1    | Ca_Kabuli_Chr05 | 31692226                | TT                              | GG                 | GG               | URR                           | 101500656          | la-related protein 1C-like                              |
| SNP_37415_A_31692537 | NC_021164.1    | Ca_Kabuli_Chr05 | 31692537                | GG                              | AA                 | AA               | URR                           | 101500656          | la-related protein 1C-like                              |
| SNP_37417_A_31694705 | NC_021164.1    | Ca_Kabuli_Chr05 | 31694705                | AA                              | GG                 | GG               | INTERGENIC                    |                    |                                                         |
| SNP_37418_A_31699320 | NC_021164.1    | Ca_Kabuli_Chr05 | 31699320                | CC                              | TT                 | TT               | URR                           | 101500970          | CO(2)-response secreted protease-like                   |
| SNP_37419_A_31699628 | NC_021164.1    | Ca_Kabuli_Chr05 | 31699628                | AA                              | GG                 | GG               | INTERGENIC                    |                    |                                                         |
| SNP_37420_A_31701199 | NC_021164.1    | Ca_Kabuli_Chr05 | 31701199                | CC                              | TT                 | TT               | INTERGENIC                    |                    |                                                         |
| SNP_37421_A_31705110 | NC_021164.1    | Ca_Kabuli_Chr05 | 31705110                | AA                              | CC                 | CC               | INTERGENIC                    |                    |                                                         |
| SNP_37422_A_31705167 | NC_021164.1    | Ca_Kabuli_Chr05 | 31705167                | TT                              | GG                 | GG               | INTERGENIC                    |                    |                                                         |
| SNP_37423_A_31707111 | NC_021164.1    | Ca_Kabuli_Chr05 | 31707111                | AA                              | TT                 | TT               | INTERGENIC                    |                    |                                                         |
| SNP_37424_A_31708091 | NC_021164.1    | Ca_Kabuli_Chr05 | 31708091                | CC                              | TT                 | TT               | INTERGENIC                    |                    |                                                         |
| SNP_37426_A_31713563 | NC_021164.1    | Ca_Kabuli_Chr05 | 31713563                | CC                              | TT                 | TT               | DRR                           | 101502248          | GDSL esterase/lipase At3g14820-like                     |

| SNPs IDs             | Chromosome IDs | Chromosomes     | Physical positions (bp) | CDC Frontier genome (Reference genome) | (Pusa 1103 & HPNB) | (ILWC 46 & LPNB) | Sequence Components of genome | Gene accession IDs | Putative functions                                         |
|----------------------|----------------|-----------------|-------------------------|----------------------------------------|--------------------|------------------|-------------------------------|--------------------|------------------------------------------------------------|
| SNP_37427_A_31713570 | NC_021164.1    | Ca_Kabuli_Chr05 | 31713570                | AA                                     | GG                 | GG               | DRR                           | 101502248          | GDSL esterase/lipase At3g14820-like                        |
| SNP_37428_A_31714863 | NC_021164.1    | Ca_Kabuli_Chr05 | 31714863                | AA                                     | GG                 | GG               | URR                           | 101501605          | uncharacterized LOC101501605                               |
| SNP_37429_A_31714877 | NC_021164.1    | Ca_Kabuli_Chr05 | 31714877                | CC                                     | GG                 | GG               | URR                           | 101501605          | uncharacterized LOC101501605                               |
| SNP_37431_A_31716075 | NC_021164.1    | Ca_Kabuli_Chr05 | 31716075                | TT                                     | CC                 | CC               | INTRON                        | 101502248          | GDSL esterase/lipase At3g14820-like                        |
| SNP_37432_A_31717906 | NC_021164.1    | Ca_Kabuli_Chr05 | 31717906                | CC                                     | TT                 | TT               | INTRON                        | 101502248          | GDSL esterase/lipase At3g14820-like                        |
| SNP_37433_A_31717919 | NC_021164.1    | Ca_Kabuli_Chr05 | 31717919                | TT                                     | CC                 | CC               | INTRON                        | 101502248          | GDSL esterase/lipase At3g14820-like                        |
| SNP_37434_A_31719545 | NC_021164.1    | Ca_Kabuli_Chr05 | 31719545                | GG                                     | AA                 | AA               | INTERGENIC                    |                    |                                                            |
| SNP_37435_A_31720072 | NC_021164.1    | Ca_Kabuli_Chr05 | 31720072                | AA                                     | TT                 | TT               | INTERGENIC                    |                    |                                                            |
| SNP_37436_A_31720073 | NC_021164.1    | Ca_Kabuli_Chr05 | 31720073                | CC                                     | TT                 | TT               | INTERGENIC                    |                    |                                                            |
| SNP_37437_A_31721088 | NC_021164.1    | Ca_Kabuli_Chr05 | 31721088                | CC                                     | AA                 | AA               | INTERGENIC                    |                    |                                                            |
| SNP_37438_A_31722379 | NC_021164.1    | Ca_Kabuli_Chr05 | 31722379                | CC                                     | GG                 | GG               | DRR                           | 101501917          | pentatricopeptide repeat-containing protein At3g12770-like |
| SNP_37439_A_31722604 | NC_021164.1    | Ca_Kabuli_Chr05 | 31722604                | CC                                     | TT                 | TT               | DRR                           | 101501917          | pentatricopeptide repeat-containing protein At3g12770-like |
| SNP_37440_A_31722866 | NC_021164.1    | Ca_Kabuli_Chr05 | 31722866                | CC                                     | AA                 | AA               | DRR                           | 101501917          | pentatricopeptide repeat-containing protein At3g12770-like |
| SNP_37441_A_31722897 | NC_021164.1    | Ca_Kabuli_Chr05 | 31722897                | TT                                     | AA                 | AA               | DRR                           | 101501917          | pentatricopeptide repeat-containing protein At3g12770-like |
| SNP_37442_A_31728118 | NC_021164.1    | Ca_Kabuli_Chr05 | 31728118                | TT                                     | CC                 | CC               | INTRON                        | 101502248          | GDSL esterase/lipase At3g14820-like                        |
| SNP_37443_A_31728122 | NC_021164.1    | Ca_Kabuli_Chr05 | 31728122                | TT                                     | AA                 | AA               | INTRON                        | 101502248          | GDSL esterase/lipase At3g14820-like                        |
| SNP_37445_A_31733922 | NC_021164.1    | Ca_Kabuli_Chr05 | 31733922                | TT                                     | CC                 | CC               | URR                           | 101502248          | GDSL esterase/lipase At3g14820-like                        |
| SNP_37446_A_31735773 | NC_021164.1    | Ca_Kabuli_Chr05 | 31735773                | TT                                     | CC                 | CC               | INTERGENIC                    |                    |                                                            |
| SNP_37447_A_31735809 | NC_021164.1    | Ca_Kabuli_Chr05 | 31735809                | CC                                     | TT                 | TT               | INTERGENIC                    |                    |                                                            |
| SNP_37448_A_31746597 | NC_021164.1    | Ca_Kabuli_Chr05 | 31746597                | GG                                     | AA                 | AA               | URR                           | 101502880          | uncharacterized LOC101502880                               |
| SNP_37449_A_31746612 | NC_021164.1    | Ca_Kabuli_Chr05 | 31746612                | CC                                     | AA                 | AA               | URR                           | 101502880          | uncharacterized LOC101502880                               |
| SNP_37450_A_31746625 | NC_021164.1    | Ca_Kabuli_Chr05 | 31746625                | CC                                     | TT                 | TT               | URR                           | 101502880          | uncharacterized LOC101502880                               |

| SNPs IDs             | Chromosome IDs | Chromosomes     | Physical positions (bp) | CDC Frontier genome (Reference genome) | (Pusa 1103 & HPNB) | (ILWC 46 & LPNB) | Sequence Components of genome | Gene accession IDs | Putative functions                                 |
|----------------------|----------------|-----------------|-------------------------|----------------------------------------|--------------------|------------------|-------------------------------|--------------------|----------------------------------------------------|
| SNP_37451_A_31746626 | NC_021164.1    | Ca_Kabuli_Chr05 | 31746626                | AA                                     | GG                 | GG               | URR                           | 101502880          | uncharacterized LOC101502880                       |
| SNP_37455_A_31764513 | NC_021164.1    | Ca_Kabuli_Chr05 | 31764513                | AA                                     | GG                 | GG               | URR                           | 101503743          | uncharacterized LOC101503743                       |
| SNP_37456_A_31765515 | NC_021164.1    | Ca_Kabuli_Chr05 | 31765515                | CC                                     | TT                 | TT               | URR                           | 101503743          | uncharacterized LOC101503743                       |
| SNP_37457_A_31768372 | NC_021164.1    | Ca_Kabuli_Chr05 | 31768372                | GG                                     | AA                 | AA               | INTERGENIC                    |                    |                                                    |
| SNP_37458_A_31768418 | NC_021164.1    | Ca_Kabuli_Chr05 | 31768418                | AA                                     | GG                 | GG               | INTERGENIC                    |                    |                                                    |
| SNP_37459_A_31768759 | NC_021164.1    | Ca_Kabuli_Chr05 | 31768759                | TT                                     | AA                 | AA               | INTERGENIC                    |                    |                                                    |
| SNP_37460_A_31771485 | NC_021164.1    | Ca_Kabuli_Chr05 | 31771485                | CC                                     | TT                 | TT               | DRR                           | 101504071          | armadillo repeat-containing kinesin-like protein 1 |
| SNP_37461_A_31771647 | NC_021164.1    | Ca_Kabuli_Chr05 | 31771647                | GG                                     | AA                 | AA               | DRR                           | 101504071          | armadillo repeat-containing kinesin-like protein 1 |
| SNP_37462_A_31771651 | NC_021164.1    | Ca_Kabuli_Chr05 | 31771651                | AA                                     | GG                 | GG               | DRR                           | 101504071          | armadillo repeat-containing kinesin-like protein 1 |
| SNP_37464_A_31774608 | NC_021164.1    | Ca_Kabuli_Chr05 | 31774608                | CC                                     | TT                 | TT               | INTRON                        | 101504071          | armadillo repeat-containing kinesin-like protein 1 |
| SNP_37465_A_31779791 | NC_021164.1    | Ca_Kabuli_Chr05 | 31779791                | TT                                     | CC                 | CC               | NON_SYNONYMOUS_CODING         | 101504071          | armadillo repeat-containing kinesin-like protein 1 |
| SNP_37466_A_31779909 | NC_021164.1    | Ca_Kabuli_Chr05 | 31779909                | AA                                     | CC                 | CC               | INTRON                        | 101504071          | armadillo repeat-containing kinesin-like protein 1 |
| SNP_37467_A_31782024 | NC_021164.1    | Ca_Kabuli_Chr05 | 31782024                | TT                                     | AA                 | AA               | INTRON                        | 101504071          | armadillo repeat-containing kinesin-like protein 1 |
| SNP_37469_A_31788691 | NC_021164.1    | Ca_Kabuli_Chr05 | 31788691                | CC                                     | AA                 | AA               | URR                           | 101504818          | uncharacterized LOC101504818                       |
| SNP_37470_A_31790416 | NC_021164.1    | Ca_Kabuli_Chr05 | 31790416                | AA                                     | TT                 | TT               | DRR                           | 101410550          | transfer RNA leucine (anticodon CAA)               |
| SNP_37471_A_31790744 | NC_021164.1    | Ca_Kabuli_Chr05 | 31790744                | AA                                     | CC                 | CC               | DRR                           | 101410550          | transfer RNA leucine (anticodon CAA)               |
| SNP_37472_A_31790843 | NC_021164.1    | Ca_Kabuli_Chr05 | 31790843                | TT                                     | CC                 | CC               | DRR                           | 101410550          | transfer RNA leucine (anticodon CAA)               |
| SNP_37473_A_31792995 | NC_021164.1    | Ca_Kabuli_Chr05 | 31792995                | TT                                     | CC                 | CC               | DRR                           | 101505131          | thaumatin-like protein 1b                          |
| SNP_37474_A_31795364 | NC_021164.1    | Ca_Kabuli_Chr05 | 31795364                | GG                                     | AA                 | AA               | INTERGENIC                    |                    |                                                    |
| SNP_37475_A_31798008 | NC_021164.1    | Ca_Kabuli_Chr05 | 31798008                | TT                                     | CC                 | CC               | URR                           | 101505131          | thaumatin-like protein 1b                          |
| SNP_37477_A_31798137 | NC_021164.1    | Ca_Kabuli_Chr05 | 31798137                | TT                                     | CC                 | CC               | URR                           | 101505131          | thaumatin-like protein 1b                          |
| SNP_37478_A_31800124 | NC_021164.1    | Ca_Kabuli_Chr05 | 31800124                | CC                                     | GG                 | GG               | INTRON                        | 101505557          | uncharacterized LOC101505557                       |

| SNPs IDs             | Chromosome IDs | Chromosomes     | Physical positions (bp) | CDC Frontier (Reference genome) | (Pusa 1103 & HPNB) | (ILWC 46 & LPNB) | Sequence Components of genome | Gene accession IDs | Putative functions                                   |
|----------------------|----------------|-----------------|-------------------------|---------------------------------|--------------------|------------------|-------------------------------|--------------------|------------------------------------------------------|
| SNP_37479_A_31800149 | NC_021164.1    | Ca_Kabuli_Chr05 | 31800149                | TT                              | CC                 | CC               | NON_SYNONYMOUS_CODING         | 101505557          | uncharacterized LOC101505557                         |
| SNP_37480_A_31800201 | NC_021164.1    | Ca_Kabuli_Chr05 | 31800201                | TT                              | CC                 | CC               | NON_SYNONYMOUS_CODING         | 101505557          | uncharacterized LOC101505557                         |
| SNP_37481_A_31800346 | NC_021164.1    | Ca_Kabuli_Chr05 | 31800346                | GG                              | AA                 | AA               | INTRON                        | 101505557          | uncharacterized LOC101505557                         |
| SNP_37482_A_31801560 | NC_021164.1    | Ca_Kabuli_Chr05 | 31801560                | TT                              | CC                 | CC               | NON_SYNONYMOUS_CODING         | 101505557          | uncharacterized LOC101505557                         |
| SNP_37483_A_31802727 | NC_021164.1    | Ca_Kabuli_Chr05 | 31802727                | GG                              | AA                 | AA               | INTRON                        | 101505557          | uncharacterized LOC101505557                         |
| SNP_37484_A_31803255 | NC_021164.1    | Ca_Kabuli_Chr05 | 31803255                | TT                              | GG                 | GG               | SYNONYMOUS_CODING             | 101505557          | uncharacterized LOC101505557                         |
| SNP_37485_A_31803619 | NC_021164.1    | Ca_Kabuli_Chr05 | 31803619                | AA                              | GG                 | GG               | INTRON                        | 101505557          | uncharacterized LOC101505557                         |
| SNP_37486_A_31803967 | NC_021164.1    | Ca_Kabuli_Chr05 | 31803967                | TT                              | AA                 | AA               | URR                           | 101505557          | uncharacterized LOC101505557                         |
| SNP_37487_A_31804242 | NC_021164.1    | Ca_Kabuli_Chr05 | 31804242                | TT                              | CC                 | CC               | URR                           | 101505557          | uncharacterized LOC101505557                         |
| SNP_37488_A_31804272 | NC_021164.1    | Ca_Kabuli_Chr05 | 31804272                | TT                              | CC                 | CC               | URR                           | 101505557          | uncharacterized LOC101505557                         |
| SNP_37490_A_31805157 | NC_021164.1    | Ca_Kabuli_Chr05 | 31805157                | TT                              | CC                 | CC               | URR                           | 101505557          | uncharacterized LOC101505557                         |
| SNP_37491_A_31807488 | NC_021164.1    | Ca_Kabuli_Chr05 | 31807488                | AA                              | GG                 | GG               | DRR                           | 101506098          | tubulin, beta class I                                |
| SNP_37492_A_31807537 | NC_021164.1    | Ca_Kabuli_Chr05 | 31807537                | CC                              | GG                 | GG               | DRR                           | 101506098          | tubulin, beta class I                                |
| SNP_37493_A_31807852 | NC_021164.1    | Ca_Kabuli_Chr05 | 31807852                | CC                              | TT                 | TT               | DRR                           | 101506098          | tubulin, beta class I                                |
| SNP_37495_A_31809282 | NC_021164.1    | Ca_Kabuli_Chr05 | 31809282                | AA                              | TT                 | TT               | INTRON                        | 101506098          | tubulin, beta class I                                |
| SNP_37497_A_31812154 | NC_021164.1    | Ca_Kabuli_Chr05 | 31812154                | CC                              | GG                 | GG               | URR                           | 101506098          | tubulin, beta class I                                |
| SNP_37498_A_31815542 | NC_021164.1    | Ca_Kabuli_Chr05 | 31815542                | AA                              | GG                 | GG               | DRR                           | 101506427          | nucleolar protein 58                                 |
| SNP_37499_A_31815571 | NC_021164.1    | Ca_Kabuli_Chr05 | 31815571                | TT                              | AA                 | AA               | DRR                           | 101506427          | nucleolar protein 58                                 |
| SNP_37500_A_31817821 | NC_021164.1    | Ca_Kabuli_Chr05 | 31817821                | AA                              | TT                 | TT               | INTRON                        | 101506427          | nucleolar protein 58                                 |
| SNP_37501_A_31818819 | NC_021164.1    | Ca_Kabuli_Chr05 | 31818819                | AA                              | TT                 | TT               | INTRON                        | 101506427          | nucleolar protein 58                                 |
| SNP_37502_A_31819008 | NC_021164.1    | Ca_Kabuli_Chr05 | 31819008                | AA                              | CC                 | CC               | INTRON                        | 101506427          | nucleolar protein 58                                 |
| SNP_37503_A_31832682 | NC_021164.1    | Ca_Kabuli_Chr05 | 31832682                | TT                              | CC                 | CC               | URR                           | 101507413          | putative ER lumen protein-retaining receptor C28H8.4 |

| SNPs IDs             | Chromosome IDs | Chromosomes     | Physical positions (bp) | CDC Frontier (Reference genome) | (Pusa 1103 & HPNB) | (ILWC 46 & LPNB) | Sequence Components of genome | Gene accession IDs | Putative functions                                   |
|----------------------|----------------|-----------------|-------------------------|---------------------------------|--------------------|------------------|-------------------------------|--------------------|------------------------------------------------------|
| SNP_37504_A_31832944 | NC_021164.1    | Ca_Kabuli_Chr05 | 31832944                | CC                              | TT                 | TT               | URR                           | 101507413          | putative ER lumen protein-retaining receptor C28H8.4 |
| SNP_37505_A_31834684 | NC_021164.1    | Ca_Kabuli_Chr05 | 31834684                | CC                              | TT                 | TT               | INTERGENIC                    |                    |                                                      |
| SNP_37506_A_31834943 | NC_021164.1    | Ca_Kabuli_Chr05 | 31834943                | CC                              | AA                 | AA               | INTERGENIC                    |                    |                                                      |
| SNP_37508_A_31835218 | NC_021164.1    | Ca_Kabuli_Chr05 | 31835218                | CC                              | TT                 | TT               | INTERGENIC                    |                    |                                                      |
| SNP_37509_A_31839087 | NC_021164.1    | Ca_Kabuli_Chr05 | 31839087                | TT                              | CC                 | CC               | INTERGENIC                    |                    |                                                      |
| SNP_37510_A_31840722 | NC_021164.1    | Ca_Kabuli_Chr05 | 31840722                | CC                              | AA                 | AA               | URR                           | 101507723          | copper-transporting ATPase RAN1-like                 |
| SNP_37512_A_31847683 | NC_021164.1    | Ca_Kabuli_Chr05 | 31847683                | GG                              | CC                 | CC               | INTERGENIC                    |                    |                                                      |
| SNP_37513_A_31853589 | NC_021164.1    | Ca_Kabuli_Chr05 | 31853589                | TT                              | CC                 | CC               | INTERGENIC                    |                    |                                                      |
| SNP_37514_A_31858778 | NC_021164.1    | Ca_Kabuli_Chr05 | 31858778                | GG                              | TT                 | TT               | INTERGENIC                    |                    |                                                      |
| SNP_37515_A_31860291 | NC_021164.1    | Ca_Kabuli_Chr05 | 31860291                | CC                              | AA                 | AA               | DRR                           | 101508048          | uncharacterized LOC101508048                         |
| SNP_37516_A_31860297 | NC_021164.1    | Ca_Kabuli_Chr05 | 31860297                | CC                              | AA                 | AA               | DRR                           | 101508048          | uncharacterized LOC101508048                         |
| SNP_37517_A_31860409 | NC_021164.1    | Ca_Kabuli_Chr05 | 31860409                | CC                              | GG                 | GG               | DRR                           | 101508048          | uncharacterized LOC101508048                         |
| SNP_37518_A_31860668 | NC_021164.1    | Ca_Kabuli_Chr05 | 31860668                | TT                              | GG                 | GG               | DRR                           | 101508048          | uncharacterized LOC101508048                         |
| SNP_37519_A_31860675 | NC_021164.1    | Ca_Kabuli_Chr05 | 31860675                | AA                              | CC                 | CC               | DRR                           | 101508048          | uncharacterized LOC101508048                         |
| SNP_37520_A_31860740 | NC_021164.1    | Ca_Kabuli_Chr05 | 31860740                | TT                              | AA                 | AA               | DRR                           | 101508048          | uncharacterized LOC101508048                         |
| SNP_37521_A_31867692 | NC_021164.1    | Ca_Kabuli_Chr05 | 31867692                | AA                              | GG                 | GG               | DRR                           | 101508562          | WEB family protein At1g75720                         |
| SNP_37523_A_31872893 | NC_021164.1    | Ca_Kabuli_Chr05 | 31872893                | TT                              | CC                 | CC               | INTERGENIC                    |                    |                                                      |
| SNP_37524_A_31874436 | NC_021164.1    | Ca_Kabuli_Chr05 | 31874436                | AA                              | CC                 | CC               | INTRON                        | 101508876          | transcription factor E2FC                            |
| SNP_37525_A_31876300 | NC_021164.1    | Ca_Kabuli_Chr05 | 31876300                | GG                              | CC                 | CC               | URR                           | 101508876          | transcription factor E2FC                            |
| SNP_37526_A_31880411 | NC_021164.1    | Ca_Kabuli_Chr05 | 31880411                | GG                              | AA                 | AA               | INTERGENIC                    |                    |                                                      |
| SNP_37527_A_31882314 | NC_021164.1    | Ca_Kabuli_Chr05 | 31882314                | AA                              | GG                 | GG               | INTRON                        | 101509410          | putative HVA22-like protein g                        |
| SNP_37528_A_31882633 | NC_021164.1    | Ca_Kabuli_Chr05 | 31882633                | AA                              | TT                 | TT               | URR                           | 101509410          | putative HVA22-like protein g                        |

| SNPs IDs             | Chromosome IDs | Chromosomes     | Physical positions (bp) | CDC Frontier genome (Reference genome) | (Pusa 1103 & HPNB) | (ILWC 46 & LPNB) | Sequence Components of genome | Gene accession IDs | Putative functions                                                    |
|----------------------|----------------|-----------------|-------------------------|----------------------------------------|--------------------|------------------|-------------------------------|--------------------|-----------------------------------------------------------------------|
| SNP_37529_A_31883550 | NC_021164.1    | Ca_Kabuli_Chr05 | 31883550                | TT                                     | AA                 | AA               | URR                           | 101509410          | putative HVA22-like protein g                                         |
| SNP_37531_A_31884212 | NC_021164.1    | Ca_Kabuli_Chr05 | 31884212                | TT                                     | CC                 | CC               | URR                           | 101509410          | putative HVA22-like protein g                                         |
| SNP_37532_A_31886517 | NC_021164.1    | Ca_Kabuli_Chr05 | 31886517                | TT                                     | CC                 | CC               | INTERGENIC                    |                    |                                                                       |
| SNP_37533_A_31886540 | NC_021164.1    | Ca_Kabuli_Chr05 | 31886540                | CC                                     | TT                 | TT               | INTERGENIC                    |                    |                                                                       |
| SNP_37535_A_31886779 | NC_021164.1    | Ca_Kabuli_Chr05 | 31886779                | AA                                     | CC                 | CC               | INTERGENIC                    |                    |                                                                       |
| SNP_37536_A_31887205 | NC_021164.1    | Ca_Kabuli_Chr05 | 31887205                | CC                                     | TT                 | TT               | INTERGENIC                    |                    |                                                                       |
| SNP_37537_A_31887975 | NC_021164.1    | Ca_Kabuli_Chr05 | 31887975                | TT                                     | AA                 | AA               | INTERGENIC                    |                    |                                                                       |
| SNP_37539_A_31897046 | NC_021164.1    | Ca_Kabuli_Chr05 | 31897046                | CC                                     | GG                 | GG               | INTERGENIC                    |                    |                                                                       |
| SNP_37540_A_31897090 | NC_021164.1    | Ca_Kabuli_Chr05 | 31897090                | AA                                     | TT                 | TT               | INTERGENIC                    |                    |                                                                       |
| SNP_37541_A_31897970 | NC_021164.1    | Ca_Kabuli_Chr05 | 31897970                | GG                                     | CC                 | CC               | INTERGENIC                    |                    |                                                                       |
| SNP_37542_A_31898023 | NC_021164.1    | Ca_Kabuli_Chr05 | 31898023                | AA                                     | TT                 | TT               | INTERGENIC                    |                    |                                                                       |
| SNP_37543_A_31900172 | NC_021164.1    | Ca_Kabuli_Chr05 | 31900172                | CC                                     | AA                 | AA               | URR                           | 101510058          | cytokinin riboside 5'-monophosphate phosphoribohydrolase<br>LOG3-like |
| SNP_37545_A_31905179 | NC_021164.1    | Ca_Kabuli_Chr05 | 31905179                | GG                                     | CC                 | CC               | INTERGENIC                    |                    |                                                                       |
| SNP_37546_A_31905645 | NC_021164.1    | Ca_Kabuli_Chr05 | 31905645                | GG                                     | AA                 | AA               | INTERGENIC                    |                    |                                                                       |
| SNP_37547_A_31905962 | NC_021164.1    | Ca_Kabuli_Chr05 | 31905962                | TT                                     | CC                 | CC               | INTERGENIC                    |                    |                                                                       |
| SNP_37548_A_31916153 | NC_021164.1    | Ca_Kabuli_Chr05 | 31916153                | AA                                     | TT                 | TT               | INTERGENIC                    |                    |                                                                       |
| SNP_37549_A_31919438 | NC_021164.1    | Ca_Kabuli_Chr05 | 31919438                | CC                                     | TT                 | TT               | INTERGENIC                    |                    |                                                                       |
| SNP_37550_A_31922051 | NC_021164.1    | Ca_Kabuli_Chr05 | 31922051                | CC                                     | GG                 | GG               | INTERGENIC                    |                    |                                                                       |
| SNP_37551_A_31922077 | NC_021164.1    | Ca_Kabuli_Chr05 | 31922077                | GG                                     | TT                 | TT               | INTERGENIC                    |                    |                                                                       |
| SNP_37552_A_31925427 | NC_021164.1    | Ca_Kabuli_Chr05 | 31925427                | CC                                     | TT                 | TT               | URR                           | 101510386          | auxin-induced protein 15A                                             |
| SNP_37553_A_31926468 | NC_021164.1    | Ca_Kabuli_Chr05 | 31926468                | TT                                     | CC                 | CC               | URR                           | 101510386          | auxin-induced protein 15A                                             |
| SNP_37554_A_31926861 | NC_021164.1    | Ca_Kabuli_Chr05 | 31926861                | TT                                     | CC                 | CC               | INTERGENIC                    |                    |                                                                       |

| SNPs IDs             | Chromosome IDs | Chromosomes     | Physical positions (bp) | CDC Frontier genome (Reference genome) | (Pusa 1103 & HPNB) | (ILWC 46 & LPNB) | Sequence genome | Components of | Gene accession IDs            | Putative functions |
|----------------------|----------------|-----------------|-------------------------|----------------------------------------|--------------------|------------------|-----------------|---------------|-------------------------------|--------------------|
| SNP_37555_A_31926889 | NC_021164.1    | Ca_Kabuli_Chr05 | 31926889                | AA                                     | CC                 | CC               | INTERGENIC      |               |                               |                    |
| SNP_37556_A_31926893 | NC_021164.1    | Ca_Kabuli_Chr05 | 31926893                | GG                                     | AA                 | AA               | INTERGENIC      |               |                               |                    |
| SNP_37557_A_31927193 | NC_021164.1    | Ca_Kabuli_Chr05 | 31927193                | GG                                     | AA                 | AA               | INTERGENIC      |               |                               |                    |
| SNP_37558_A_31927723 | NC_021164.1    | Ca_Kabuli_Chr05 | 31927723                | GG                                     | AA                 | AA               | INTERGENIC      |               |                               |                    |
| SNP_37559_A_31928133 | NC_021164.1    | Ca_Kabuli_Chr05 | 31928133                | GG                                     | AA                 | AA               | INTERGENIC      |               |                               |                    |
| SNP_37560_A_31928136 | NC_021164.1    | Ca_Kabuli_Chr05 | 31928136                | GG                                     | AA                 | AA               | INTERGENIC      |               |                               |                    |
| SNP_37561_A_31928149 | NC_021164.1    | Ca_Kabuli_Chr05 | 31928149                | TT                                     | CC                 | CC               | INTERGENIC      |               |                               |                    |
| SNP_37562_A_31928158 | NC_021164.1    | Ca_Kabuli_Chr05 | 31928158                | TT                                     | CC                 | CC               | INTERGENIC      |               |                               |                    |
| SNP_37563_A_31928236 | NC_021164.1    | Ca_Kabuli_Chr05 | 31928236                | AA                                     | GG                 | GG               | INTERGENIC      |               |                               |                    |
| SNP_37564_A_31928581 | NC_021164.1    | Ca_Kabuli_Chr05 | 31928581                | GG                                     | AA                 | AA               | INTERGENIC      |               |                               |                    |
| SNP_37565_A_31928842 | NC_021164.1    | Ca_Kabuli_Chr05 | 31928842                | GG                                     | CC                 | CC               | INTERGENIC      |               |                               |                    |
| SNP_37566_A_31929158 | NC_021164.1    | Ca_Kabuli_Chr05 | 31929158                | TT                                     | AA                 | AA               | INTERGENIC      |               |                               |                    |
| SNP_37567_A_31929841 | NC_021164.1    | Ca_Kabuli_Chr05 | 31929841                | TT                                     | CC                 | CC               | INTERGENIC      |               |                               |                    |
| SNP_37569_A_31938710 | NC_021164.1    | Ca_Kabuli_Chr05 | 31938710                | AA                                     | CC                 | CC               | URR             | 101510713     | filament-like plant protein 4 |                    |
| SNP_37571_A_31941383 | NC_021164.1    | Ca_Kabuli_Chr05 | 31941383                | AA                                     | GG                 | GG               | INTERGENIC      |               |                               |                    |
| SNP_37572_A_31942991 | NC_021164.1    | Ca_Kabuli_Chr05 | 31942991                | CC                                     | TT                 | TT               | INTERGENIC      |               |                               |                    |
| SNP_37573_A_31944973 | NC_021164.1    | Ca_Kabuli_Chr05 | 31944973                | GG                                     | AA                 | AA               | INTERGENIC      |               |                               |                    |
| SNP_37574_A_31946938 | NC_021164.1    | Ca_Kabuli_Chr05 | 31946938                | TT                                     | CC                 | CC               | INTERGENIC      |               |                               |                    |
| SNP_37575_A_31947020 | NC_021164.1    | Ca_Kabuli_Chr05 | 31947020                | AA                                     | GG                 | GG               | INTERGENIC      |               |                               |                    |
| SNP_37576_A_31947039 | NC_021164.1    | Ca_Kabuli_Chr05 | 31947039                | TT                                     | CC                 | CC               | INTERGENIC      |               |                               |                    |
| SNP_37577_A_31957558 | NC_021164.1    | Ca_Kabuli_Chr05 | 31957558                | CC                                     | TT                 | TT               | URR             | 101511240     | protein RCC2 homolog          |                    |
| SNP_37578_A_31957722 | NC_021164.1    | Ca_Kabuli_Chr05 | 31957722                | AA                                     | GG                 | GG               | URR             | 101511240     | protein RCC2 homolog          |                    |



| SNPs IDs             | Chromosome IDs | Chromosomes     | Physical positions (bp) | CDC Frontier (Reference genome) | (Pusa 1103 & HPNB) | (ILWC 46 & LPNB) | Sequence Components of genome | Gene accession IDs | Putative functions           |
|----------------------|----------------|-----------------|-------------------------|---------------------------------|--------------------|------------------|-------------------------------|--------------------|------------------------------|
| SNP_37579_A_31958962 | NC_021164.1    | Ca_Kabuli_Chr05 | 31958962                | AA                              | TT                 | TT               | INTERGENIC                    |                    |                              |
| SNP_37580_A_31958991 | NC_021164.1    | Ca_Kabuli_Chr05 | 31958991                | TT                              | CC                 | CC               | INTERGENIC                    |                    |                              |
| SNP_37581_A_31959012 | NC_021164.1    | Ca_Kabuli_Chr05 | 31959012                | CC                              | TT                 | TT               | INTERGENIC                    |                    |                              |
| SNP_37582_A_31959310 | NC_021164.1    | Ca_Kabuli_Chr05 | 31959310                | GG                              | CC                 | CC               | INTERGENIC                    |                    |                              |
| SNP_37583_A_31959331 | NC_021164.1    | Ca_Kabuli_Chr05 | 31959331                | GG                              | AA                 | AA               | INTERGENIC                    |                    |                              |
| SNP_37584_A_31960581 | NC_021164.1    | Ca_Kabuli_Chr05 | 31960581                | TT                              | CC                 | CC               | INTERGENIC                    |                    |                              |
| SNP_37585_A_31960582 | NC_021164.1    | Ca_Kabuli_Chr05 | 31960582                | TT                              | CC                 | CC               | INTERGENIC                    |                    |                              |
| SNP_37586_A_31960620 | NC_021164.1    | Ca_Kabuli_Chr05 | 31960620                | TT                              | CC                 | CC               | INTERGENIC                    |                    |                              |
| SNP_37587_A_31964277 | NC_021164.1    | Ca_Kabuli_Chr05 | 31964277                | GG                              | AA                 | AA               | INTERGENIC                    |                    |                              |
| SNP_37588_A_31964321 | NC_021164.1    | Ca_Kabuli_Chr05 | 31964321                | TT                              | CC                 | CC               | INTERGENIC                    |                    |                              |
| SNP_37589_A_31964600 | NC_021164.1    | Ca_Kabuli_Chr05 | 31964600                | CC                              | GG                 | GG               | INTERGENIC                    |                    |                              |
| SNP_37590_A_31965992 | NC_021164.1    | Ca_Kabuli_Chr05 | 31965992                | GG                              | AA                 | AA               | INTERGENIC                    |                    |                              |
| SNP_37591_A_31966895 | NC_021164.1    | Ca_Kabuli_Chr05 | 31966895                | GG                              | TT                 | TT               | DRR                           | 101511561          | uncharacterized LOC101511561 |
| SNP_37592_A_31966922 | NC_021164.1    | Ca_Kabuli_Chr05 | 31966922                | CC                              | AA                 | AA               | DRR                           | 101511561          | uncharacterized LOC101511561 |
| SNP_37594_A_31968397 | NC_021164.1    | Ca_Kabuli_Chr05 | 31968397                | CC                              | TT                 | TT               | SYNONYMOUS_CODING             | 101511561          | uncharacterized LOC101511561 |
| SNP_37595_A_31970051 | NC_021164.1    | Ca_Kabuli_Chr05 | 31970051                | AA                              | TT                 | TT               | URR                           | 101511561          | uncharacterized LOC101511561 |
| SNP_37597_A_31972933 | NC_021164.1    | Ca_Kabuli_Chr05 | 31972933                | GG                              | AA                 | AA               | INTERGENIC                    |                    |                              |
| SNP_37598_A_31972987 | NC_021164.1    | Ca_Kabuli_Chr05 | 31972987                | CC                              | GG                 | GG               | INTERGENIC                    |                    |                              |
| SNP_37599_A_31972993 | NC_021164.1    | Ca_Kabuli_Chr05 | 31972993                | GG                              | AA                 | AA               | INTERGENIC                    |                    |                              |
| SNP_37601_A_31974745 | NC_021164.1    | Ca_Kabuli_Chr05 | 31974745                | TT                              | CC                 | CC               | INTERGENIC                    |                    |                              |
| SNP_37602_A_31975738 | NC_021164.1    | Ca_Kabuli_Chr05 | 31975738                | AA                              | GG                 | GG               | INTERGENIC                    |                    |                              |
| SNP_37603_A_31975772 | NC_021164.1    | Ca_Kabuli_Chr05 | 31975772                | GG                              | CC                 | CC               | INTERGENIC                    |                    |                              |

| SNPs IDs             | Chromosome IDs | Chromosomes     | Physical positions (bp) | CDC Frontier genome (Reference genome) | (Pusa 1103 & HPNB) | (ILWC 46 & LPNB) | Sequence Components of genome | Gene accession IDs | Putative functions                                    |
|----------------------|----------------|-----------------|-------------------------|----------------------------------------|--------------------|------------------|-------------------------------|--------------------|-------------------------------------------------------|
| SNP_37604_A_31975787 | NC_021164.1    | Ca_Kabuli_Chr05 | 31975787                | GG                                     | AA                 | AA               | INTERGENIC                    |                    |                                                       |
| SNP_37605_A_31975790 | NC_021164.1    | Ca_Kabuli_Chr05 | 31975790                | TT                                     | CC                 | CC               | INTERGENIC                    |                    |                                                       |
| SNP_37606_A_31975796 | NC_021164.1    | Ca_Kabuli_Chr05 | 31975796                | CC                                     | TT                 | TT               | INTERGENIC                    |                    |                                                       |
| SNP_37607_A_31975814 | NC_021164.1    | Ca_Kabuli_Chr05 | 31975814                | TT                                     | CC                 | CC               | INTERGENIC                    |                    |                                                       |
| SNP_37608_A_31979372 | NC_021164.1    | Ca_Kabuli_Chr05 | 31979372                | AA                                     | GG                 | GG               | INTERGENIC                    |                    |                                                       |
| SNP_37609_A_31979405 | NC_021164.1    | Ca_Kabuli_Chr05 | 31979405                | TT                                     | CC                 | CC               | INTERGENIC                    |                    |                                                       |
| SNP_37610_A_31979406 | NC_021164.1    | Ca_Kabuli_Chr05 | 31979406                | AA                                     | GG                 | GG               | INTERGENIC                    |                    |                                                       |
| SNP_37611_A_31985921 | NC_021164.1    | Ca_Kabuli_Chr05 | 31985921                | CC                                     | TT                 | TT               | INTRON                        | 101511891          | protein DECREASED SIZE EXCLUSION LIMIT 1              |
| SNP_37612_A_31986787 | NC_021164.1    | Ca_Kabuli_Chr05 | 31986787                | TT                                     | CC                 | CC               | INTRON                        | 101511891          | protein DECREASED SIZE EXCLUSION LIMIT 1              |
| SNP_37613_A_31987019 | NC_021164.1    | Ca_Kabuli_Chr05 | 31987019                | TT                                     | CC                 | CC               | INTRON                        | 101511891          | protein DECREASED SIZE EXCLUSION LIMIT 1              |
| SNP_37614_A_31987083 | NC_021164.1    | Ca_Kabuli_Chr05 | 31987083                | AA                                     | GG                 | GG               | INTRON                        | 101511891          | protein DECREASED SIZE EXCLUSION LIMIT 1              |
| SNP_37615_A_31989180 | NC_021164.1    | Ca_Kabuli_Chr05 | 31989180                | GG                                     | AA                 | AA               | URR                           | 101511891          | protein DECREASED SIZE EXCLUSION LIMIT 1              |
| SNP_37616_A_31989467 | NC_021164.1    | Ca_Kabuli_Chr05 | 31989467                | GG                                     | AA                 | AA               | URR                           | 101511891          | protein DECREASED SIZE EXCLUSION LIMIT 1              |
| SNP_37617_A_31989503 | NC_021164.1    | Ca_Kabuli_Chr05 | 31989503                | TT                                     | CC                 | CC               | URR                           | 101511891          | protein DECREASED SIZE EXCLUSION LIMIT 1              |
| SNP_37618_A_31991188 | NC_021164.1    | Ca_Kabuli_Chr05 | 31991188                | TT                                     | CC                 | CC               | INTERGENIC                    |                    |                                                       |
| SNP_37619_A_31992715 | NC_021164.1    | Ca_Kabuli_Chr05 | 31992715                | TT                                     | CC                 | CC               | INTRON                        | 101512215          | probable 1-acylglycerol-3-phosphate O-acyltransferase |
| SNP_37620_A_31994677 | NC_021164.1    | Ca_Kabuli_Chr05 | 31994677                | TT                                     | AA                 | AA               | INTRON                        | 101512215          | probable 1-acylglycerol-3-phosphate O-acyltransferase |
| SNP_37621_A_31994707 | NC_021164.1    | Ca_Kabuli_Chr05 | 31994707                | AA                                     | TT                 | TT               | INTRON                        | 101512215          | probable 1-acylglycerol-3-phosphate O-acyltransferase |
| SNP_37622_A_31994794 | NC_021164.1    | Ca_Kabuli_Chr05 | 31994794                | AA                                     | GG                 | GG               | INTRON                        | 101512215          | probable 1-acylglycerol-3-phosphate O-acyltransferase |
| SNP_37623_A_31994804 | NC_021164.1    | Ca_Kabuli_Chr05 | 31994804                | CC                                     | TT                 | TT               | INTRON                        | 101512215          | probable 1-acylglycerol-3-phosphate O-acyltransferase |
| SNP_37624_A_31994914 | NC_021164.1    | Ca_Kabuli_Chr05 | 31994914                | TT                                     | CC                 | CC               | INTRON                        | 101512215          | probable 1-acylglycerol-3-phosphate O-acyltransferase |
| SNP_37625_A_31995588 | NC_021164.1    | Ca_Kabuli_Chr05 | 31995588                | GG                                     | AA                 | AA               | INTRON                        | 101512215          | probable 1-acylglycerol-3-phosphate O-acyltransferase |

| SNPs IDs             | Chromosome IDs | Chromosomes     | Physical positions (bp) | CDC Frontier (Reference genome) | (Pusa 1103 & HPNB) | (ILWC 46 & LPNB) | Sequence Components of genome | Gene accession IDs | Putative functions                                             |
|----------------------|----------------|-----------------|-------------------------|---------------------------------|--------------------|------------------|-------------------------------|--------------------|----------------------------------------------------------------|
| SNP_37626_A_31995600 | NC_021164.1    | Ca_Kabuli_Chr05 | 31995600                | TT                              | CC                 | CC               | INTRON                        | 101512215          | probable 1-acylglycerol-3-phosphate O-acyltransferase          |
| SNP_37627_A_31997014 | NC_021164.1    | Ca_Kabuli_Chr05 | 31997014                | AA                              | TT                 | TT               | URR                           | 101512215          | probable 1-acylglycerol-3-phosphate O-acyltransferase          |
| SNP_37629_A_31999621 | NC_021164.1    | Ca_Kabuli_Chr05 | 31999621                | TT                              | CC                 | CC               | INTERGENIC                    |                    |                                                                |
| SNP_37630_A_32001449 | NC_021164.1    | Ca_Kabuli_Chr05 | 32001449                | GG                              | AA                 | AA               | INTERGENIC                    |                    |                                                                |
| SNP_37631_A_32015211 | NC_021164.1    | Ca_Kabuli_Chr05 | 32015211                | TT                              | AA                 | AA               | URR                           | 101513064          | kinesin-like protein NACK1                                     |
| SNP_37632_A_32015282 | NC_021164.1    | Ca_Kabuli_Chr05 | 32015282                | TT                              | CC                 | CC               | URR                           | 101513064          | kinesin-like protein NACK1                                     |
| SNP_37633_A_32017930 | NC_021164.1    | Ca_Kabuli_Chr05 | 32017930                | AA                              | GG                 | GG               | DRR                           | 101513392          | transmembrane and coiled-coil domain-containing protein 4-like |
| SNP_37634_A_32021619 | NC_021164.1    | Ca_Kabuli_Chr05 | 32021619                | AA                              | TT                 | TT               | INTRON                        | 101513392          | transmembrane and coiled-coil domain-containing protein 4-like |
| SNP_37636_A_32023688 | NC_021164.1    | Ca_Kabuli_Chr05 | 32023688                | TT                              | CC                 | CC               | INTRON                        | 101513392          | transmembrane and coiled-coil domain-containing protein 4-like |
| SNP_37637_A_32024285 | NC_021164.1    | Ca_Kabuli_Chr05 | 32024285                | TT                              | AA                 | AA               | INTRON                        | 101513392          | transmembrane and coiled-coil domain-containing protein 4-like |
| SNP_37638_A_32029120 | NC_021164.1    | Ca_Kabuli_Chr05 | 32029120                | GG                              | AA                 | AA               | INTERGENIC                    |                    |                                                                |
| SNP_37639_A_32032455 | NC_021164.1    | Ca_Kabuli_Chr05 | 32032455                | AA                              | GG                 | GG               | DRR                           | 101513703          | uncharacterized LOC101513703                                   |
| SNP_37640_A_32040788 | NC_021164.1    | Ca_Kabuli_Chr05 | 32040788                | GG                              | TT                 | TT               | DRR                           | 101514275          | floral homeotic protein DEFICIENS                              |
| SNP_37641_A_32040800 | NC_021164.1    | Ca_Kabuli_Chr05 | 32040800                | AA                              | GG                 | GG               | DRR                           | 101514275          | floral homeotic protein DEFICIENS                              |
| SNP_37642_A_32041065 | NC_021164.1    | Ca_Kabuli_Chr05 | 32041065                | AA                              | GG                 | GG               | DRR                           | 101514275          | floral homeotic protein DEFICIENS                              |
| SNP_37643_A_32041116 | NC_021164.1    | Ca_Kabuli_Chr05 | 32041116                | CC                              | GG                 | GG               | DRR                           | 101514275          | floral homeotic protein DEFICIENS                              |
| SNP_37644_A_32041374 | NC_021164.1    | Ca_Kabuli_Chr05 | 32041374                | GG                              | AA                 | AA               | INTERGENIC                    |                    |                                                                |
| SNP_37646_A_32041795 | NC_021164.1    | Ca_Kabuli_Chr05 | 32041795                | CC                              | TT                 | TT               | SYNONYMOUS_CODING             | 101514275          | floral homeotic protein DEFICIENS                              |
| SNP_37648_A_32044913 | NC_021164.1    | Ca_Kabuli_Chr05 | 32044913                | AA                              | CC                 | CC               | URR                           | 101514275          | floral homeotic protein DEFICIENS                              |
| SNP_37649_A_32044932 | NC_021164.1    | Ca_Kabuli_Chr05 | 32044932                | GG                              | TT                 | TT               | URR                           | 101514275          | floral homeotic protein DEFICIENS                              |
| SNP_37650_A_32044960 | NC_021164.1    | Ca_Kabuli_Chr05 | 32044960                | AA                              | GG                 | GG               | URR                           | 101514275          | floral homeotic protein DEFICIENS                              |
| SNP_37651_A_32044964 | NC_021164.1    | Ca_Kabuli_Chr05 | 32044964                | TT                              | AA                 | AA               | URR                           | 101514275          | floral homeotic protein DEFICIENS                              |

| SNPs IDs             | Chromosome IDs | Chromosomes     | Physical positions (bp) | CDC Frontier genome (Reference genome) | (Pusa 1103 & HPNB) | (ILWC 46 & LPNB) | Sequence Components of genome | Gene accession IDs | Putative functions                               |
|----------------------|----------------|-----------------|-------------------------|----------------------------------------|--------------------|------------------|-------------------------------|--------------------|--------------------------------------------------|
| SNP_37652_A_32047183 | NC_021164.1    | Ca_Kabuli_Chr05 | 32047183                | GG                                     | AA                 | AA               | INTERGENIC                    |                    |                                                  |
| SNP_37654_A_32063061 | NC_021164.1    | Ca_Kabuli_Chr05 | 32063061                | AA                                     | TT                 | TT               | INTRON                        | 101509738          | S-type anion channel SLAH4-like                  |
| SNP_37655_A_32064916 | NC_021164.1    | Ca_Kabuli_Chr05 | 32064916                | GG                                     | AA                 | AA               | URR                           | 101509738          | S-type anion channel SLAH4-like                  |
| SNP_37656_A_32064944 | NC_021164.1    | Ca_Kabuli_Chr05 | 32064944                | TT                                     | CC                 | CC               | URR                           | 101509738          | S-type anion channel SLAH4-like                  |
| SNP_37657_A_32065596 | NC_021164.1    | Ca_Kabuli_Chr05 | 32065596                | GG                                     | AA                 | AA               | URR                           | 101509738          | S-type anion channel SLAH4-like                  |
| SNP_37659_A_32069349 | NC_021164.1    | Ca_Kabuli_Chr05 | 32069349                | AA                                     | CC                 | CC               | URR                           | 101510059          | protein SHORT INTERNODES-like                    |
| SNP_37660_A_32080772 | NC_021164.1    | Ca_Kabuli_Chr05 | 32080772                | AA                                     | GG                 | GG               | DRR                           | 101514922          | transcription initiation factor IIF subunit beta |
| SNP_37661_A_32082503 | NC_021164.1    | Ca_Kabuli_Chr05 | 32082503                | CC                                     | AA                 | AA               | INTERGENIC                    |                    |                                                  |
| SNP_37662_A_32082877 | NC_021164.1    | Ca_Kabuli_Chr05 | 32082877                | CC                                     | TT                 | TT               | INTERGENIC                    |                    |                                                  |
| SNP_37663_A_32082878 | NC_021164.1    | Ca_Kabuli_Chr05 | 32082878                | AA                                     | GG                 | GG               | INTERGENIC                    |                    |                                                  |
| SNP_37664_A_32083701 | NC_021164.1    | Ca_Kabuli_Chr05 | 32083701                | TT                                     | CC                 | CC               | INTERGENIC                    |                    |                                                  |
| SNP_37665_A_32084287 | NC_021164.1    | Ca_Kabuli_Chr05 | 32084287                | TT                                     | AA                 | AA               | INTRON                        | 101514922          | transcription initiation factor IIF subunit beta |
| SNP_37666_A_32085082 | NC_021164.1    | Ca_Kabuli_Chr05 | 32085082                | GG                                     | CC                 | CC               | INTRON                        | 101514922          | transcription initiation factor IIF subunit beta |
| SNP_37668_A_32087317 | NC_021164.1    | Ca_Kabuli_Chr05 | 32087317                | TT                                     | AA                 | AA               | URR                           | 101514922          | transcription initiation factor IIF subunit beta |
| SNP_37670_A_32094318 | NC_021164.1    | Ca_Kabuli_Chr05 | 32094318                | AA                                     | TT                 | TT               | INTERGENIC                    |                    |                                                  |
| SNP_37671_A_32096143 | NC_021164.1    | Ca_Kabuli_Chr05 | 32096143                | CC                                     | AA                 | AA               | INTERGENIC                    |                    |                                                  |
| SNP_37673_A_32096353 | NC_021164.1    | Ca_Kabuli_Chr05 | 32096353                | TT                                     | CC                 | CC               | INTERGENIC                    |                    |                                                  |
| SNP_37674_A_32096363 | NC_021164.1    | Ca_Kabuli_Chr05 | 32096363                | GG                                     | TT                 | TT               | INTERGENIC                    |                    |                                                  |
| SNP_37675_A_32097064 | NC_021164.1    | Ca_Kabuli_Chr05 | 32097064                | TT                                     | AA                 | AA               | DRR                           | 101515772          | protein WALLS ARE THIN 1                         |
| SNP_37676_A_32097091 | NC_021164.1    | Ca_Kabuli_Chr05 | 32097091                | AA                                     | GG                 | GG               | DRR                           | 101515772          | protein WALLS ARE THIN 1                         |
| SNP_37677_A_32097128 | NC_021164.1    | Ca_Kabuli_Chr05 | 32097128                | GG                                     | AA                 | AA               | DRR                           | 101515772          | protein WALLS ARE THIN 1                         |
| SNP_37678_A_32097136 | NC_021164.1    | Ca_Kabuli_Chr05 | 32097136                | CC                                     | AA                 | AA               | DRR                           | 101515772          | protein WALLS ARE THIN 1                         |

| SNPs IDs             | Chromosome IDs | Chromosomes     | Physical positions (bp) | CDC Frontier (Reference genome) | (Pusa 1103 & HPNB) | (ILWC 46 & LPNB) | Sequence Components of genome | Gene accession IDs | Putative functions                   |
|----------------------|----------------|-----------------|-------------------------|---------------------------------|--------------------|------------------|-------------------------------|--------------------|--------------------------------------|
| SNP_37680_A_32100226 | NC_021164.1    | Ca_Kabuli_Chr05 | 32100226                | TT                              | AA                 | AA               | INTRON                        | 101515772          | protein WALLS ARE THIN 1             |
| SNP_37681_A_32112920 | NC_021164.1    | Ca_Kabuli_Chr05 | 32112920                | CC                              | TT                 | TT               | URR                           | 101515245          | protein NRT1/ PTR FAMILY 8.1-like    |
| SNP_37682_A_32112998 | NC_021164.1    | Ca_Kabuli_Chr05 | 32112998                | TT                              | CC                 | CC               | URR                           | 101515245          | protein NRT1/ PTR FAMILY 8.1-like    |
| SNP_37683_A_32113963 | NC_021164.1    | Ca_Kabuli_Chr05 | 32113963                | AA                              | GG                 | GG               | URR                           | 101515245          | protein NRT1/ PTR FAMILY 8.1-like    |
| SNP_37684_A_32119211 | NC_021164.1    | Ca_Kabuli_Chr05 | 32119211                | AA                              | TT                 | TT               | INTERGENIC                    |                    |                                      |
| SNP_37685_A_32143000 | NC_021164.1    | Ca_Kabuli_Chr05 | 32143000                | AA                              | GG                 | GG               | INTERGENIC                    |                    |                                      |
| SNP_37686_A_32146934 | NC_021164.1    | Ca_Kabuli_Chr05 | 32146934                | TT                              | CC                 | CC               | DRR                           | 101489753          | thioredoxin H-type-like              |
| SNP_37688_A_32156853 | NC_021164.1    | Ca_Kabuli_Chr05 | 32156853                | AA                              | GG                 | GG               | URR                           | 101410575          | transfer RNA alanine (anticodon AGC) |
| SNP_37689_A_32159777 | NC_021164.1    | Ca_Kabuli_Chr05 | 32159777                | GG                              | AA                 | AA               | INTERGENIC                    |                    |                                      |
| SNP_37690_A_32159811 | NC_021164.1    | Ca_Kabuli_Chr05 | 32159811                | TT                              | CC                 | CC               | INTERGENIC                    |                    |                                      |
| SNP_37691_A_32160033 | NC_021164.1    | Ca_Kabuli_Chr05 | 32160033                | CC                              | TT                 | TT               | INTERGENIC                    |                    |                                      |
| SNP_37692_A_32161584 | NC_021164.1    | Ca_Kabuli_Chr05 | 32161584                | TT                              | AA                 | AA               | INTERGENIC                    |                    |                                      |
| SNP_37693_A_32161595 | NC_021164.1    | Ca_Kabuli_Chr05 | 32161595                | AA                              | GG                 | GG               | INTERGENIC                    |                    |                                      |
| SNP_37695_A_32164269 | NC_021164.1    | Ca_Kabuli_Chr05 | 32164269                | AA                              | CC                 | CC               | INTERGENIC                    |                    |                                      |
| SNP_37696_A_32165620 | NC_021164.1    | Ca_Kabuli_Chr05 | 32165620                | TT                              | CC                 | CC               | INTERGENIC                    |                    |                                      |
| SNP_37697_A_32165668 | NC_021164.1    | Ca_Kabuli_Chr05 | 32165668                | AA                              | CC                 | CC               | INTERGENIC                    |                    |                                      |
| SNP_37698_A_32165987 | NC_021164.1    | Ca_Kabuli_Chr05 | 32165987                | TT                              | CC                 | CC               | INTERGENIC                    |                    |                                      |
| SNP_37699_A_32190432 | NC_021164.1    | Ca_Kabuli_Chr05 | 32190432                | CC                              | TT                 | TT               | URR                           | 101491682          | BEL1-like homeodomain protein 7      |
| SNP_37700_A_32190866 | NC_021164.1    | Ca_Kabuli_Chr05 | 32190866                | GG                              | AA                 | AA               | URR                           | 101491682          | BEL1-like homeodomain protein 7      |
| SNP_37702_A_32196986 | NC_021164.1    | Ca_Kabuli_Chr05 | 32196986                | AA                              | GG                 | GG               | URR                           | 101491993          | BEL1-like homeodomain protein 11     |
| SNP_37703_A_32196987 | NC_021164.1    | Ca_Kabuli_Chr05 | 32196987                | AA                              | GG                 | GG               | URR                           | 101491993          | BEL1-like homeodomain protein 11     |
| SNP_37704_A_32196992 | NC_021164.1    | Ca_Kabuli_Chr05 | 32196992                | CC                              | TT                 | TT               | URR                           | 101491993          | BEL1-like homeodomain protein 11     |

| SNPs IDs             | Chromosome IDs | Chromosomes     | Physical positions (bp) | CDC Frontier genome (Reference genome) | (Pusa 1103 & HPNB) | (ILWC 46 & LPNB) | Sequence Components of genome | Gene accession IDs | Putative functions                            |
|----------------------|----------------|-----------------|-------------------------|----------------------------------------|--------------------|------------------|-------------------------------|--------------------|-----------------------------------------------|
| SNP_37705_A_32197004 | NC_021164.1    | Ca_Kabuli_Chr05 | 32197004                | TT                                     | CC                 | CC               | URR                           | 101491993          | BEL1-like homeodomain protein 11              |
| SNP_37706_A_32197011 | NC_021164.1    | Ca_Kabuli_Chr05 | 32197011                | AA                                     | TT                 | TT               | URR                           | 101491993          | BEL1-like homeodomain protein 11              |
| SNP_37707_A_32200735 | NC_021164.1    | Ca_Kabuli_Chr05 | 32200735                | AA                                     | TT                 | TT               | INTERGENIC                    |                    |                                               |
| SNP_37708_A_32200972 | NC_021164.1    | Ca_Kabuli_Chr05 | 32200972                | GG                                     | TT                 | TT               | INTERGENIC                    |                    |                                               |
| SNP_37710_A_32206889 | NC_021164.1    | Ca_Kabuli_Chr05 | 32206889                | GG                                     | AA                 | AA               | URR                           | 101492329          | uncharacterized LOC101492329                  |
| SNP_37711_A_32206960 | NC_021164.1    | Ca_Kabuli_Chr05 | 32206960                | GG                                     | CC                 | CC               | URR                           | 101492329          | uncharacterized LOC101492329                  |
| SNP_37712_A_32207655 | NC_021164.1    | Ca_Kabuli_Chr05 | 32207655                | GG                                     | AA                 | AA               | DRR                           | 101492658          | 26S protease regulatory subunit 10B homolog A |
| SNP_37713_A_32207727 | NC_021164.1    | Ca_Kabuli_Chr05 | 32207727                | CC                                     | TT                 | TT               | DRR                           | 101492658          | 26S protease regulatory subunit 10B homolog A |
| SNP_37714_A_32207729 | NC_021164.1    | Ca_Kabuli_Chr05 | 32207729                | AA                                     | TT                 | TT               | DRR                           | 101492658          | 26S protease regulatory subunit 10B homolog A |
| SNP_37715_A_32207764 | NC_021164.1    | Ca_Kabuli_Chr05 | 32207764                | TT                                     | CC                 | CC               | DRR                           | 101492658          | 26S protease regulatory subunit 10B homolog A |
| SNP_37716_A_32208647 | NC_021164.1    | Ca_Kabuli_Chr05 | 32208647                | AA                                     | CC                 | CC               | INTERGENIC                    |                    |                                               |
| SNP_37717_A_32212965 | NC_021164.1    | Ca_Kabuli_Chr05 | 32212965                | TT                                     | AA                 | AA               | URR                           | 101492658          | 26S protease regulatory subunit 10B homolog A |
| SNP_37718_A_32212972 | NC_021164.1    | Ca_Kabuli_Chr05 | 32212972                | CC                                     | AA                 | AA               | URR                           | 101492658          | 26S protease regulatory subunit 10B homolog A |
| SNP_37719_A_32219318 | NC_021164.1    | Ca_Kabuli_Chr05 | 32219318                | AA                                     | GG                 | GG               | URR                           | 101492993          | uncharacterized LOC101492993                  |
| SNP_37720_A_32221725 | NC_021164.1    | Ca_Kabuli_Chr05 | 32221725                | AA                                     | TT                 | TT               | URR                           | 101493647          | uncharacterized LOC101493647                  |
| SNP_37721_A_32222796 | NC_021164.1    | Ca_Kabuli_Chr05 | 32222796                | CC                                     | TT                 | TT               | URR                           | 101493647          | uncharacterized LOC101493647                  |
| SNP_37722_A_32222979 | NC_021164.1    | Ca_Kabuli_Chr05 | 32222979                | CC                                     | TT                 | TT               | URR                           | 101493647          | uncharacterized LOC101493647                  |
| SNP_37723_A_32224435 | NC_021164.1    | Ca_Kabuli_Chr05 | 32224435                | TT                                     | CC                 | CC               | INTERGENIC                    |                    |                                               |
| SNP_37724_A_32224445 | NC_021164.1    | Ca_Kabuli_Chr05 | 32224445                | CC                                     | GG                 | GG               | INTERGENIC                    |                    |                                               |
| SNP_37725_A_32224713 | NC_021164.1    | Ca_Kabuli_Chr05 | 32224713                | GG                                     | AA                 | AA               | INTERGENIC                    |                    |                                               |
| SNP_37726_A_32224764 | NC_021164.1    | Ca_Kabuli_Chr05 | 32224764                | GG                                     | TT                 | TT               | INTERGENIC                    |                    |                                               |
| SNP_37727_A_32224776 | NC_021164.1    | Ca_Kabuli_Chr05 | 32224776                | CC                                     | TT                 | TT               | INTERGENIC                    |                    |                                               |

| SNPs IDs             | Chromosome IDs | Chromosomes     | Physical positions (bp) | CDC Frontier genome (Reference genome) | (Pusa 1103 & HPNB) | (ILWC 46 & LPNB) | Sequence Components of genome | Gene accession IDs | Putative functions                                       |
|----------------------|----------------|-----------------|-------------------------|----------------------------------------|--------------------|------------------|-------------------------------|--------------------|----------------------------------------------------------|
| SNP_37728_A_32225410 | NC_021164.1    | Ca_Kabuli_Chr05 | 32225410                | TT                                     | CC                 | CC               | INTERGENIC                    |                    |                                                          |
| SNP_37730_A_32226827 | NC_021164.1    | Ca_Kabuli_Chr05 | 32226827                | GG                                     | TT                 | TT               | INTERGENIC                    |                    |                                                          |
| SNP_37731_A_32232233 | NC_021164.1    | Ca_Kabuli_Chr05 | 32232233                | CC                                     | TT                 | TT               | URR                           | 101493960          | mitogen-activated protein kinase homolog NTF3            |
| SNP_37732_A_32235925 | NC_021164.1    | Ca_Kabuli_Chr05 | 32235925                | GG                                     | TT                 | TT               | INTERGENIC                    |                    |                                                          |
| SNP_37733_A_32235926 | NC_021164.1    | Ca_Kabuli_Chr05 | 32235926                | AA                                     | GG                 | GG               | INTERGENIC                    |                    |                                                          |
| SNP_37734_A_32238070 | NC_021164.1    | Ca_Kabuli_Chr05 | 32238070                | TT                                     | CC                 | CC               | INTERGENIC                    |                    |                                                          |
| SNP_37736_A_32243575 | NC_021164.1    | Ca_Kabuli_Chr05 | 32243575                | GG                                     | AA                 | AA               | URR                           | 101494488          | uncharacterized LOC101494488                             |
| SNP_37737_A_32258038 | NC_021164.1    | Ca_Kabuli_Chr05 | 32258038                | CC                                     | TT                 | TT               | INTERGENIC                    |                    |                                                          |
| SNP_37738_A_32258044 | NC_021164.1    | Ca_Kabuli_Chr05 | 32258044                | AA                                     | CC                 | CC               | INTERGENIC                    |                    |                                                          |
| SNP_37739_A_32258946 | NC_021164.1    | Ca_Kabuli_Chr05 | 32258946                | GG                                     | TT                 | TT               | INTERGENIC                    |                    |                                                          |
| SNP_37740_A_32259298 | NC_021164.1    | Ca_Kabuli_Chr05 | 32259298                | TT                                     | AA                 | AA               | INTERGENIC                    |                    |                                                          |
| SNP_37741_A_32259464 | NC_021164.1    | Ca_Kabuli_Chr05 | 32259464                | GG                                     | AA                 | AA               | INTERGENIC                    |                    |                                                          |
| SNP_37742_A_32268446 | NC_021164.1    | Ca_Kabuli_Chr05 | 32268446                | AA                                     | GG                 | GG               | URR                           | 101495014          | AP-4 complex subunit mu-like                             |
| SNP_37743_A_32273468 | NC_021164.1    | Ca_Kabuli_Chr05 | 32273468                | AA                                     | CC                 | CC               | INTERGENIC                    |                    |                                                          |
| SNP_37744_A_32279623 | NC_021164.1    | Ca_Kabuli_Chr05 | 32279623                | GG                                     | TT                 | TT               | DRR                           | 101495342          | omega-hydroxypalmitate O-feruloyl transferase-like       |
| SNP_37745_A_32279729 | NC_021164.1    | Ca_Kabuli_Chr05 | 32279729                | GG                                     | AA                 | AA               | DRR                           | 101495342          | omega-hydroxypalmitate O-feruloyl transferase-like       |
| SNP_37746_A_32292902 | NC_021164.1    | Ca_Kabuli_Chr05 | 32292902                | GG                                     | AA                 | AA               | SYNONYMOUS_CODING             | 101510387          | serine/threonine-protein phosphatase 7 long form homolog |
| SNP_37747_A_32293210 | NC_021164.1    | Ca_Kabuli_Chr05 | 32293210                | GG                                     | AA                 | AA               | URR                           | 101510387          | serine/threonine-protein phosphatase 7 long form homolog |
| SNP_37748_A_32305961 | NC_021164.1    | Ca_Kabuli_Chr05 | 32305961                | TT                                     | AA                 | AA               | INTERGENIC                    |                    |                                                          |
| SNP_37749_A_32307012 | NC_021164.1    | Ca_Kabuli_Chr05 | 32307012                | TT                                     | CC                 | CC               | DRR                           | 101495671          | transcription factor bHLH110                             |
| SNP_37750_A_32307069 | NC_021164.1    | Ca_Kabuli_Chr05 | 32307069                | CC                                     | TT                 | TT               | DRR                           | 101495671          | transcription factor bHLH110                             |
| SNP_37751_A_32307073 | NC_021164.1    | Ca_Kabuli_Chr05 | 32307073                | CC                                     | TT                 | TT               | DRR                           | 101495671          | transcription factor bHLH110                             |

| SNPs IDs             | Chromosome IDs | Chromosomes     | Physical positions (bp) | CDC Frontier genome (Reference genome) | (Pusa 1103 & HPNB) | (ILWC 46 & LPNB) | Sequence Components of genome | Gene accession IDs | Putative functions                                                  |
|----------------------|----------------|-----------------|-------------------------|----------------------------------------|--------------------|------------------|-------------------------------|--------------------|---------------------------------------------------------------------|
| SNP_37752_A_32307629 | NC_021164.1    | Ca_Kabuli_Chr05 | 32307629                | AA                                     | GG                 | GG               | DRR                           | 101495671          | transcription factor bHLH110                                        |
| SNP_37753_A_32317492 | NC_021164.1    | Ca_Kabuli_Chr05 | 32317492                | TT                                     | CC                 | CC               | INTRON                        | 101497091          | bifunctional nuclease 1                                             |
| SNP_37754_A_32317824 | NC_021164.1    | Ca_Kabuli_Chr05 | 32317824                | CC                                     | TT                 | TT               | SPLICE_SITE_REGION            | 101497091          | bifunctional nuclease 1                                             |
| SNP_37755_A_32320354 | NC_021164.1    | Ca_Kabuli_Chr05 | 32320354                | TT                                     | AA                 | AA               | URR                           | 101497091          | bifunctional nuclease 1                                             |
| SNP_37756_A_32320453 | NC_021164.1    | Ca_Kabuli_Chr05 | 32320453                | CC                                     | TT                 | TT               | INTERGENIC                    |                    |                                                                     |
| SNP_37757_A_32321942 | NC_021164.1    | Ca_Kabuli_Chr05 | 32321942                | AA                                     | CC                 | CC               | INTERGENIC                    |                    |                                                                     |
| SNP_37759_A_32324712 | NC_021164.1    | Ca_Kabuli_Chr05 | 32324712                | CC                                     | TT                 | TT               | URR                           | 101496547          | phosphatidylinositol/phosphatidylcholine transfer protein SFH6 like |
| SNP_37760_A_32324721 | NC_021164.1    | Ca_Kabuli_Chr05 | 32324721                | CC                                     | AA                 | AA               | URR                           | 101496547          | phosphatidylinositol/phosphatidylcholine transfer protein SFH6 like |
| SNP_37761_A_32347572 | NC_021164.1    | Ca_Kabuli_Chr05 | 32347572                | CC                                     | GG                 | GG               | INTERGENIC                    |                    |                                                                     |
| SNP_37762_A_32347573 | NC_021164.1    | Ca_Kabuli_Chr05 | 32347573                | TT                                     | GG                 | GG               | INTERGENIC                    |                    |                                                                     |
| SNP_37763_A_32347608 | NC_021164.1    | Ca_Kabuli_Chr05 | 32347608                | CC                                     | TT                 | TT               | INTERGENIC                    |                    |                                                                     |
| SNP_37764_A_32348476 | NC_021164.1    | Ca_Kabuli_Chr05 | 32348476                | TT                                     | CC                 | CC               | URR                           | 101511038          | abscisic acid 8-hydroxylase 4                                       |
| SNP_37766_A_32349779 | NC_021164.1    | Ca_Kabuli_Chr05 | 32349779                | GG                                     | AA                 | AA               | INTERGENIC                    |                    |                                                                     |
| SNP_37767_A_32350157 | NC_021164.1    | Ca_Kabuli_Chr05 | 32350157                | TT                                     | CC                 | CC               | INTERGENIC                    |                    |                                                                     |
| SNP_37768_A_32351429 | NC_021164.1    | Ca_Kabuli_Chr05 | 32351429                | AA                                     | GG                 | GG               | INTERGENIC                    |                    |                                                                     |
| SNP_37769_A_32358086 | NC_021164.1    | Ca_Kabuli_Chr05 | 32358086                | GG                                     | AA                 | AA               | URR                           | 101497622          | 60S ribosome subunit biogenesis protein NIP7 homolog                |
| SNP_37770_A_32361133 | NC_021164.1    | Ca_Kabuli_Chr05 | 32361133                | AA                                     | CC                 | CC               | INTERGENIC                    |                    |                                                                     |
| SNP_37771_A_32380394 | NC_021164.1    | Ca_Kabuli_Chr05 | 32380394                | CC                                     | TT                 | TT               | URR                           | 101499276          | Unknown function                                                    |
| SNP_37772_A_32380740 | NC_021164.1    | Ca_Kabuli_Chr05 | 32380740                | AA                                     | GG                 | GG               | URR                           | 101499276          | Unknown function                                                    |
| SNP_37773_A_32385541 | NC_021164.1    | Ca_Kabuli_Chr05 | 32385541                | GG                                     | TT                 | TT               | INTERGENIC                    |                    |                                                                     |
| SNP_37775_A_32478658 | NC_021164.1    | Ca_Kabuli_Chr05 | 32478658                | AA                                     | TT                 | TT               | INTERGENIC                    |                    |                                                                     |
| SNP_37776_A_32521579 | NC_021164.1    | Ca_Kabuli_Chr05 | 32521579                | AA                                     | GG                 | GG               | INTERGENIC                    |                    |                                                                     |



| SNPs IDs             | Chromosome IDs | Chromosomes     | Physical positions (bp) | CDC Frontier genome (Reference genome) | (Pusa 1103 & HPNB) | (ILWC 46 & LPNB) | Sequence Components of genome | Gene accession IDs | Putative functions                                         |
|----------------------|----------------|-----------------|-------------------------|----------------------------------------|--------------------|------------------|-------------------------------|--------------------|------------------------------------------------------------|
| SNP_37777_A_32521580 | NC_021164.1    | Ca_Kabuli_Chr05 | 32521580                | TT                                     | CC                 | CC               | INTERGENIC                    |                    |                                                            |
| SNP_37779_A_32649556 | NC_021164.1    | Ca_Kabuli_Chr05 | 32649556                | CC                                     | TT                 | TT               | INTERGENIC                    |                    |                                                            |
| SNP_37780_A_32649557 | NC_021164.1    | Ca_Kabuli_Chr05 | 32649557                | CC                                     | TT                 | TT               | INTERGENIC                    |                    |                                                            |
| SNP_37782_A_32664231 | NC_021164.1    | Ca_Kabuli_Chr05 | 32664231                | CC                                     | TT                 | TT               | DRR                           | 101514149          | pentatricopeptide repeat-containing protein At5g66520-like |
| SNP_37783_A_32688413 | NC_021164.1    | Ca_Kabuli_Chr05 | 32688413                | AA                                     | GG                 | GG               | URR                           | 101515673          | probable rhamnogalacturonate lyase B                       |
| SNP_37784_A_32709727 | NC_021164.1    | Ca_Kabuli_Chr05 | 32709727                | TT                                     | AA                 | AA               | URR                           | 101488985          | pentatricopeptide repeat-containing protein At1g09900      |
| SNP_37785_A_32745696 | NC_021164.1    | Ca_Kabuli_Chr05 | 32745696                | GG                                     | AA                 | AA               | INTERGENIC                    |                    |                                                            |
| SNP_37787_A_32764330 | NC_021164.1    | Ca_Kabuli_Chr05 | 32764330                | GG                                     | CC                 | CC               | INTERGENIC                    |                    |                                                            |
| SNP_37790_A_33087711 | NC_021164.1    | Ca_Kabuli_Chr05 | 33087711                | AA                                     | GG                 | GG               | INTRON                        | 101497956          | uncharacterized LOC101497956                               |
| SNP_37791_A_33097290 | NC_021164.1    | Ca_Kabuli_Chr05 | 33097290                | CC                                     | TT                 | TT               | INTERGENIC                    |                    |                                                            |
| SNP_37793_A_33166345 | NC_021164.1    | Ca_Kabuli_Chr05 | 33166345                | CC                                     | TT                 | TT               | INTERGENIC                    |                    |                                                            |
| SNP_37794_A_33166393 | NC_021164.1    | Ca_Kabuli_Chr05 | 33166393                | TT                                     | CC                 | CC               | INTERGENIC                    |                    |                                                            |
| SNP_37795_A_33225210 | NC_021164.1    | Ca_Kabuli_Chr05 | 33225210                | CC                                     | TT                 | TT               | INTERGENIC                    |                    |                                                            |
| SNP_37796_A_33225329 | NC_021164.1    | Ca_Kabuli_Chr05 | 33225329                | CC                                     | TT                 | TT               | INTERGENIC                    |                    |                                                            |
| SNP_37797_A_33225588 | NC_021164.1    | Ca_Kabuli_Chr05 | 33225588                | CC                                     | AA                 | AA               | INTERGENIC                    |                    |                                                            |
| SNP_37798_A_33225721 | NC_021164.1    | Ca_Kabuli_Chr05 | 33225721                | TT                                     | CC                 | CC               | INTERGENIC                    |                    |                                                            |
| SNP_37799_A_33225778 | NC_021164.1    | Ca_Kabuli_Chr05 | 33225778                | GG                                     | AA                 | AA               | INTERGENIC                    |                    |                                                            |
| SNP_37800_A_33390188 | NC_021164.1    | Ca_Kabuli_Chr05 | 33390188                | CC                                     | TT                 | TT               | INTERGENIC                    |                    |                                                            |
| SNP_37801_A_33390198 | NC_021164.1    | Ca_Kabuli_Chr05 | 33390198                | CC                                     | TT                 | TT               | INTERGENIC                    |                    |                                                            |
| SNP_37802_A_33413811 | NC_021164.1    | Ca_Kabuli_Chr05 | 33413811                | AA                                     | TT                 | TT               | DRR                           | 101495889          | peptidyl-tRNA hydrolase 2, mitochondrial                   |
| SNP_37803_A_33441154 | NC_021164.1    | Ca_Kabuli_Chr05 | 33441154                | TT                                     | AA                 | AA               | INTERGENIC                    |                    |                                                            |
| SNP_37804_A_33441522 | NC_021164.1    | Ca_Kabuli_Chr05 | 33441522                | TT                                     | CC                 | CC               | DRR                           | 101496115          | transcription factor DIVARICATA-like                       |

| SNPs IDs             | Chromosome IDs | Chromosomes     | Physical positions (bp) | CDC Frontier genome (Reference genome) | (Pusa 1103 & HPNB) | (ILWC 46 & LPNB) | Sequence Components of genome | Gene accession IDs | Putative functions                                        |
|----------------------|----------------|-----------------|-------------------------|----------------------------------------|--------------------|------------------|-------------------------------|--------------------|-----------------------------------------------------------|
| SNP_37805_A_33441585 | NC_021164.1    | Ca_Kabuli_Chr05 | 33441585                | CC                                     | GG                 | GG               | DRR                           | 101496115          | transcription factor DIVARICATA-like                      |
| SNP_37807_A_33451021 | NC_021164.1    | Ca_Kabuli_Chr05 | 33451021                | CC                                     | AA                 | AA               | INTERGENIC                    |                    |                                                           |
| SNP_37808_A_33454577 | NC_021164.1    | Ca_Kabuli_Chr05 | 33454577                | CC                                     | TT                 | TT               | DRR                           | 101496444          | Unknown function                                          |
| SNP_37812_A_33457504 | NC_021164.1    | Ca_Kabuli_Chr05 | 33457504                | CC                                     | AA                 | AA               | URR                           | 101496444          | Unknown function                                          |
| SNP_37813_A_33457639 | NC_021164.1    | Ca_Kabuli_Chr05 | 33457639                | TT                                     | CC                 | CC               | URR                           | 101496444          | Unknown function                                          |
| SNP_37814_A_33457689 | NC_021164.1    | Ca_Kabuli_Chr05 | 33457689                | CC                                     | TT                 | TT               | URR                           | 101496444          | Unknown function                                          |
| SNP_37815_A_33457884 | NC_021164.1    | Ca_Kabuli_Chr05 | 33457884                | GG                                     | TT                 | TT               | URR                           | 101496444          | Unknown function                                          |
| SNP_37817_A_33457965 | NC_021164.1    | Ca_Kabuli_Chr05 | 33457965                | GG                                     | AA                 | AA               | URR                           | 101496444          | Unknown function                                          |
| SNP_37818_A_33457987 | NC_021164.1    | Ca_Kabuli_Chr05 | 33457987                | TT                                     | CC                 | CC               | INTERGENIC                    |                    |                                                           |
| SNP_37819_A_33465441 | NC_021164.1    | Ca_Kabuli_Chr05 | 33465441                | AA                                     | CC                 | CC               | INTRON                        | 101496774          | probable transcriptional regulatory protein At2g25830     |
| SNP_37820_A_33487219 | NC_021164.1    | Ca_Kabuli_Chr05 | 33487219                | GG                                     | CC                 | CC               | INTERGENIC                    |                    |                                                           |
| SNP_37821_A_33600032 | NC_021164.1    | Ca_Kabuli_Chr05 | 33600032                | AA                                     | CC                 | CC               | DRR                           | 101497756          | Unknown function                                          |
| SNP_37823_A_33652833 | NC_021164.1    | Ca_Kabuli_Chr05 | 33652833                | AA                                     | GG                 | GG               | INTERGENIC                    |                    |                                                           |
| SNP_37825_A_33693547 | NC_021164.1    | Ca_Kabuli_Chr05 | 33693547                | GG                                     | AA                 | AA               | NON_SYNONYMOUS_CODING         | 101505889          | eukaryotic translation initiation factor 3 subunit L-like |
| SNP_37826_A_33831109 | NC_021164.1    | Ca_Kabuli_Chr05 | 33831109                | AA                                     | GG                 | GG               | DRR                           | 101510277          | uncharacterized LOC101510277                              |
| SNP_37827_A_33925646 | NC_021164.1    | Ca_Kabuli_Chr05 | 33925646                | TT                                     | CC                 | CC               | DRR                           | 101515123          | beta-galactosidase 5-like                                 |
| SNP_37828_A_33939131 | NC_021164.1    | Ca_Kabuli_Chr05 | 33939131                | CC                                     | TT                 | TT               | URR                           | 101515441          | uncharacterized LOC101515441                              |
| SNP_37829_A_33939157 | NC_021164.1    | Ca_Kabuli_Chr05 | 33939157                | AA                                     | GG                 | GG               | URR                           | 101515441          | uncharacterized LOC101515441                              |
| SNP_37830_A_33939185 | NC_021164.1    | Ca_Kabuli_Chr05 | 33939185                | GG                                     | AA                 | AA               | URR                           | 101515441          | uncharacterized LOC101515441                              |
| SNP_37831_A_34001987 | NC_021164.1    | Ca_Kabuli_Chr05 | 34001987                | GG                                     | TT                 | TT               | INTERGENIC                    |                    |                                                           |
| SNP_37832_A_34039007 | NC_021164.1    | Ca_Kabuli_Chr05 | 34039007                | TT                                     | CC                 | CC               | INTERGENIC                    |                    |                                                           |
| SNP_37833_A_34066240 | NC_021164.1    | Ca_Kabuli_Chr05 | 34066240                | CC                                     | TT                 | TT               | DRR                           | 101495016          | small ubiquitin-related modifier 2-like                   |

| SNPs IDs             | Chromosome IDs | Chromosomes     | Physical positions (bp) | CDC Frontier genome (Reference genome) | (Pusa 1103 & HPNB) | (ILWC 46 & LPNB) | Sequence Components of genome | Gene accession IDs | Putative functions                             |
|----------------------|----------------|-----------------|-------------------------|----------------------------------------|--------------------|------------------|-------------------------------|--------------------|------------------------------------------------|
| SNP_37835_A_34085893 | NC_021164.1    | Ca_Kabuli_Chr05 | 34085893                | CC                                     | TT                 | TT               | INTERGENIC                    |                    |                                                |
| SNP_37836_A_34090958 | NC_021164.1    | Ca_Kabuli_Chr05 | 34090958                | CC                                     | TT                 | TT               | URR                           | 101496548          | probable inactive protein kinase DDB_G0270444  |
| SNP_37837_A_34096067 | NC_021164.1    | Ca_Kabuli_Chr05 | 34096067                | TT                                     | AA                 | AA               | INTERGENIC                    |                    |                                                |
| SNP_37838_A_34096072 | NC_021164.1    | Ca_Kabuli_Chr05 | 34096072                | AA                                     | TT                 | TT               | INTERGENIC                    |                    |                                                |
| SNP_37840_A_34226108 | NC_021164.1    | Ca_Kabuli_Chr05 | 34226108                | GG                                     | CC                 | CC               | URR                           | 101501291          | uncharacterized LOC101501291                   |
| SNP_37841_A_34254736 | NC_021164.1    | Ca_Kabuli_Chr05 | 34254736                | CC                                     | TT                 | TT               | INTERGENIC                    |                    |                                                |
| SNP_37842_A_34254739 | NC_021164.1    | Ca_Kabuli_Chr05 | 34254739                | GG                                     | AA                 | AA               | INTERGENIC                    |                    |                                                |
| SNP_37843_A_34336411 | NC_021164.1    | Ca_Kabuli_Chr05 | 34336411                | GG                                     | AA                 | AA               | INTERGENIC                    |                    |                                                |
| SNP_37844_A_34380931 | NC_021164.1    | Ca_Kabuli_Chr05 | 34380931                | CC                                     | AA                 | AA               | DRR                           | 101499697          | F-box/FBD/LRR-repeat protein At3g26920-like    |
| SNP_37845_A_34381022 | NC_021164.1    | Ca_Kabuli_Chr05 | 34381022                | GG                                     | AA                 | AA               | NON_SYNONYMOUS_CODING         | 101499697          | F-box/FBD/LRR-repeat protein At3g26920-like    |
| SNP_37846_A_34381037 | NC_021164.1    | Ca_Kabuli_Chr05 | 34381037                | AA                                     | GG                 | GG               | NON_SYNONYMOUS_CODING         | 101499697          | F-box/FBD/LRR-repeat protein At3g26920-like    |
| SNP_37847_A_34381049 | NC_021164.1    | Ca_Kabuli_Chr05 | 34381049                | CC                                     | AA                 | AA               | NON_SYNONYMOUS_CODING         | 101499697          | F-box/FBD/LRR-repeat protein At3g26920-like    |
| SNP_37848_A_34381347 | NC_021164.1    | Ca_Kabuli_Chr05 | 34381347                | CC                                     | GG                 | GG               | INTRON                        | 101499697          | F-box/FBD/LRR-repeat protein At3g26920-like    |
| SNP_37849_A_34381394 | NC_021164.1    | Ca_Kabuli_Chr05 | 34381394                | TT                                     | CC                 | CC               | INTRON                        | 101499697          | F-box/FBD/LRR-repeat protein At3g26920-like    |
| SNP_37850_A_34381463 | NC_021164.1    | Ca_Kabuli_Chr05 | 34381463                | TT                                     | CC                 | CC               | INTRON                        | 101499697          | F-box/FBD/LRR-repeat protein At3g26920-like    |
| SNP_37851_A_34381516 | NC_021164.1    | Ca_Kabuli_Chr05 | 34381516                | TT                                     | CC                 | CC               | NON_SYNONYMOUS_CODING         | 101499697          | F-box/FBD/LRR-repeat protein At3g26920-like    |
| SNP_37852_A_34467633 | NC_021164.1    | Ca_Kabuli_Chr05 | 34467633                | AA                                     | GG                 | GG               | INTERGENIC                    |                    |                                                |
| SNP_37853_A_34500239 | NC_021164.1    | Ca_Kabuli_Chr05 | 34500239                | AA                                     | CC                 | CC               | URR                           | 101511039          | 2-oxoglutarate-dependent dioxygenase AOP3-like |
| SNP_37854_A_34500242 | NC_021164.1    | Ca_Kabuli_Chr05 | 34500242                | AA                                     | TT                 | TT               | URR                           | 101511039          | 2-oxoglutarate-dependent dioxygenase AOP3-like |
| SNP_37855_A_34540152 | NC_021164.1    | Ca_Kabuli_Chr05 | 34540152                | CC                                     | TT                 | TT               | URR                           | 101410606          | transfer RNA glycine (anticodon UCC)           |
| SNP_37856_A_34569372 | NC_021164.1    | Ca_Kabuli_Chr05 | 34569372                | GG                                     | AA                 | AA               | DRR                           | 101514693          | probable boron transporter 7                   |
| SNP_37857_A_34623790 | NC_021164.1    | Ca_Kabuli_Chr05 | 34623790                | CC                                     | TT                 | TT               | INTERGENIC                    |                    |                                                |

| SNPs IDs             | Chromosome IDs | Chromosomes     | Physical positions (bp) | CDC Frontier (Reference genome) | (Pusa 1103 & HPNB) | (ILWC 46 & LPNB) | Sequence Components of genome | Gene accession IDs | Putative functions                                                  |
|----------------------|----------------|-----------------|-------------------------|---------------------------------|--------------------|------------------|-------------------------------|--------------------|---------------------------------------------------------------------|
| SNP_37860_A_34728608 | NC_021164.1    | Ca_Kabuli_Chr05 | 34728608                | AA                              | GG                 | GG               | INTERGENIC                    |                    |                                                                     |
| SNP_37861_A_34777131 | NC_021164.1    | Ca_Kabuli_Chr05 | 34777131                | AA                              | GG                 | GG               | INTERGENIC                    |                    |                                                                     |
| SNP_37862_A_34802899 | NC_021164.1    | Ca_Kabuli_Chr05 | 34802899                | AA                              | GG                 | GG               | INTERGENIC                    |                    |                                                                     |
| SNP_37863_A_34825347 | NC_021164.1    | Ca_Kabuli_Chr05 | 34825347                | AA                              | GG                 | GG               | DRR                           | 101498183          | G-type lectin S-receptor-like serine/threonine-protein kinase SD2-5 |
| SNP_37864_A_34830326 | NC_021164.1    | Ca_Kabuli_Chr05 | 34830326                | AA                              | TT                 | TT               | URR                           | 101498183          | G-type lectin S-receptor-like serine/threonine-protein kinase SD2-5 |
| SNP_37865_A_34843148 | NC_021164.1    | Ca_Kabuli_Chr05 | 34843148                | TT                              | CC                 | CC               | URR                           | 101502567          | uncharacterized LOC101502567                                        |
| SNP_37866_A_34863005 | NC_021164.1    | Ca_Kabuli_Chr05 | 34863005                | TT                              | AA                 | AA               | INTRON                        | 101499177          | UDP-sugar transporter sqv-7-like                                    |
| SNP_37867_A_34863006 | NC_021164.1    | Ca_Kabuli_Chr05 | 34863006                | TT                              | CC                 | CC               | INTRON                        | 101499177          | UDP-sugar transporter sqv-7-like                                    |
| SNP_37868_A_34868354 | NC_021164.1    | Ca_Kabuli_Chr05 | 34868354                | AA                              | CC                 | CC               | URR                           | 101499177          | UDP-sugar transporter sqv-7-like                                    |
| SNP_37869_A_34868782 | NC_021164.1    | Ca_Kabuli_Chr05 | 34868782                | CC                              | TT                 | TT               | INTERGENIC                    |                    |                                                                     |
| SNP_37871_A_34875212 | NC_021164.1    | Ca_Kabuli_Chr05 | 34875212                | AA                              | GG                 | GG               | INTERGENIC                    |                    |                                                                     |
| SNP_37872_A_34883986 | NC_021164.1    | Ca_Kabuli_Chr05 | 34883986                | AA                              | CC                 | CC               | URR                           | 101500760          | ATP synthase subunit b', chloroplastic                              |
| SNP_37874_A_35075694 | NC_021164.1    | Ca_Kabuli_Chr05 | 35075694                | AA                              | GG                 | GG               | INTERGENIC                    |                    |                                                                     |
| SNP_37876_A_35113793 | NC_021164.1    | Ca_Kabuli_Chr05 | 35113793                | AA                              | TT                 | TT               | INTERGENIC                    |                    |                                                                     |
| SNP_37877_A_35139423 | NC_021164.1    | Ca_Kabuli_Chr05 | 35139423                | AA                              | CC                 | CC               | INTRON                        | 101508564          | CHD3-type chromatin-remodeling factor PICKLE                        |
| SNP_37878_A_35161362 | NC_021164.1    | Ca_Kabuli_Chr05 | 35161362                | CC                              | TT                 | TT               | INTERGENIC                    |                    |                                                                     |
| SNP_37880_A_35198529 | NC_021164.1    | Ca_Kabuli_Chr05 | 35198529                | GG                              | AA                 | AA               | INTERGENIC                    |                    |                                                                     |
| SNP_37881_A_35223870 | NC_021164.1    | Ca_Kabuli_Chr05 | 35223870                | AA                              | GG                 | GG               | INTERGENIC                    |                    |                                                                     |
| SNP_37884_A_35364092 | NC_021164.1    | Ca_Kabuli_Chr05 | 35364092                | CC                              | TT                 | TT               | INTERGENIC                    |                    |                                                                     |
| SNP_37886_A_35606571 | NC_021164.1    | Ca_Kabuli_Chr05 | 35606571                | GG                              | AA                 | AA               | INTERGENIC                    |                    |                                                                     |
| SNP_37888_A_35651148 | NC_021164.1    | Ca_Kabuli_Chr05 | 35651148                | TT                              | GG                 | GG               | URR                           | 101500005          | myosin-15-like                                                      |
| SNP_37889_A_35651152 | NC_021164.1    | Ca_Kabuli_Chr05 | 35651152                | AA                              | CC                 | CC               | URR                           | 101500005          | myosin-15-like                                                      |

| SNPs IDs             | Chromosome IDs | Chromosomes     | Physical positions (bp) | CDC Frontier (Reference genome) | (Pusa 1103 & HPNB) | (ILWC 46 & LPNB) | Sequence Components of genome | Gene accession IDs | Putative functions                                        |
|----------------------|----------------|-----------------|-------------------------|---------------------------------|--------------------|------------------|-------------------------------|--------------------|-----------------------------------------------------------|
| SNP_37891_A_35876468 | NC_021164.1    | Ca_Kabuli_Chr05 | 35876468                | CC                              | TT                 | TT               | DRR                           | 101511444          | probable ADP,ATP carrier protein At5g56450                |
| SNP_37892_A_35909424 | NC_021164.1    | Ca_Kabuli_Chr05 | 35909424                | AA                              | TT                 | TT               | INTERGENIC                    |                    |                                                           |
| SNP_37893_A_36086209 | NC_021164.1    | Ca_Kabuli_Chr05 | 36086209                | GG                              | AA                 | AA               | DRR                           | 101509000          | uncharacterized LOC101509000                              |
| SNP_37895_A_36133831 | NC_021164.1    | Ca_Kabuli_Chr05 | 36133831                | GG                              | AA                 | AA               | URR                           | 101493533          | uncharacterized LOC101493533                              |
| SNP_37899_A_36254208 | NC_021164.1    | Ca_Kabuli_Chr05 | 36254208                | CC                              | AA                 | AA               | URR                           | 101497959          | calcium-transporting ATPase 3, endoplasmic reticulum-type |
| SNP_37901_A_36364328 | NC_021164.1    | Ca_Kabuli_Chr05 | 36364328                | TT                              | CC                 | CC               | INTERGENIC                    |                    |                                                           |
| SNP_37902_A_36414153 | NC_021164.1    | Ca_Kabuli_Chr05 | 36414153                | TT                              | AA                 | AA               | DRR                           | 101504819          | uncharacterized LOC101504819                              |
| SNP_37903_A_36444572 | NC_021164.1    | Ca_Kabuli_Chr05 | 36444572                | AA                              | TT                 | TT               | DRR                           | 101505787          | peamaclelin-like                                          |
| SNP_37904_A_36445217 | NC_021164.1    | Ca_Kabuli_Chr05 | 36445217                | AA                              | GG                 | GG               | INTERGENIC                    |                    |                                                           |
| SNP_37905_A_36445229 | NC_021164.1    | Ca_Kabuli_Chr05 | 36445229                | TT                              | AA                 | AA               | INTERGENIC                    |                    |                                                           |
| SNP_37906_A_36445324 | NC_021164.1    | Ca_Kabuli_Chr05 | 36445324                | CC                              | TT                 | TT               | INTERGENIC                    |                    |                                                           |
| SNP_37907_A_36445326 | NC_021164.1    | Ca_Kabuli_Chr05 | 36445326                | CC                              | TT                 | TT               | INTERGENIC                    |                    |                                                           |
| SNP_37908_A_36453515 | NC_021164.1    | Ca_Kabuli_Chr05 | 36453515                | TT                              | GG                 | GG               | INTERGENIC                    |                    |                                                           |
| SNP_37910_A_36492371 | NC_021164.1    | Ca_Kabuli_Chr05 | 36492371                | CC                              | TT                 | TT               | INTERGENIC                    |                    |                                                           |
| SNP_37911_A_36492376 | NC_021164.1    | Ca_Kabuli_Chr05 | 36492376                | CC                              | TT                 | TT               | INTERGENIC                    |                    |                                                           |
| SNP_37912_A_36492381 | NC_021164.1    | Ca_Kabuli_Chr05 | 36492381                | TT                              | AA                 | AA               | INTERGENIC                    |                    |                                                           |
| SNP_37913_A_36492389 | NC_021164.1    | Ca_Kabuli_Chr05 | 36492389                | TT                              | AA                 | AA               | INTERGENIC                    |                    |                                                           |
| SNP_37914_A_36492416 | NC_021164.1    | Ca_Kabuli_Chr05 | 36492416                | TT                              | CC                 | CC               | INTERGENIC                    |                    |                                                           |
| SNP_37915_A_36492417 | NC_021164.1    | Ca_Kabuli_Chr05 | 36492417                | AA                              | GG                 | GG               | INTERGENIC                    |                    |                                                           |
| SNP_37916_A_36492453 | NC_021164.1    | Ca_Kabuli_Chr05 | 36492453                | GG                              | TT                 | TT               | INTERGENIC                    |                    |                                                           |
| SNP_37917_A_36492747 | NC_021164.1    | Ca_Kabuli_Chr05 | 36492747                | GG                              | AA                 | AA               | INTERGENIC                    |                    |                                                           |
| SNP_37918_A_36492753 | NC_021164.1    | Ca_Kabuli_Chr05 | 36492753                | AA                              | GG                 | GG               | INTERGENIC                    |                    |                                                           |

| SNPs IDs             | Chromosome IDs | Chromosomes     | Physical positions (bp) | CDC Frontier genome (Reference genome) | (Pusa 1103 & HPNB) | (ILWC 46 & LPNB) | Sequence Components of genome | Gene accession IDs | Putative functions                                     |
|----------------------|----------------|-----------------|-------------------------|----------------------------------------|--------------------|------------------|-------------------------------|--------------------|--------------------------------------------------------|
| SNP_37919_A_36492851 | NC_021164.1    | Ca_Kabuli_Chr05 | 36492851                | AA                                     | GG                 | GG               | INTERGENIC                    |                    |                                                        |
| SNP_37920_A_36521459 | NC_021164.1    | Ca_Kabuli_Chr05 | 36521459                | AA                                     | GG                 | GG               | INTERGENIC                    |                    |                                                        |
| SNP_37921_A_36564888 | NC_021164.1    | Ca_Kabuli_Chr05 | 36564888                | TT                                     | GG                 | GG               | DRR                           | 101510278          | probable isoaspartyl peptidase/L-asparaginase 2        |
| SNP_37922_A_36583849 | NC_021164.1    | Ca_Kabuli_Chr05 | 36583849                | TT                                     | AA                 | AA               | INTERGENIC                    |                    |                                                        |
| SNP_37923_A_36583851 | NC_021164.1    | Ca_Kabuli_Chr05 | 36583851                | TT                                     | GG                 | GG               | INTERGENIC                    |                    |                                                        |
| SNP_37925_A_36640449 | NC_021164.1    | Ca_Kabuli_Chr05 | 36640449                | GG                                     | AA                 | AA               | INTERGENIC                    |                    |                                                        |
| SNP_37926_A_36641779 | NC_021164.1    | Ca_Kabuli_Chr05 | 36641779                | CC                                     | TT                 | TT               | INTERGENIC                    |                    |                                                        |
| SNP_37927_A_36670844 | NC_021164.1    | Ca_Kabuli_Chr05 | 36670844                | GG                                     | AA                 | AA               | INTRON                        | id112273           | Unknown function                                       |
| SNP_37928_A_36692246 | NC_021164.1    | Ca_Kabuli_Chr05 | 36692246                | GG                                     | AA                 | AA               | INTERGENIC                    |                    |                                                        |
| SNP_37929_A_36692250 | NC_021164.1    | Ca_Kabuli_Chr05 | 36692250                | TT                                     | AA                 | AA               | INTERGENIC                    |                    |                                                        |
| SNP_37931_A_36747984 | NC_021164.1    | Ca_Kabuli_Chr05 | 36747984                | TT                                     | CC                 | CC               | INTERGENIC                    |                    |                                                        |
| SNP_37932_A_36761077 | NC_021164.1    | Ca_Kabuli_Chr05 | 36761077                | GG                                     | AA                 | AA               | INTERGENIC                    |                    |                                                        |
| SNP_37934_A_36957774 | NC_021164.1    | Ca_Kabuli_Chr05 | 36957774                | GG                                     | AA                 | AA               | URR                           | 101513503          | Unknown function                                       |
| SNP_37935_A_36971146 | NC_021164.1    | Ca_Kabuli_Chr05 | 36971146                | AA                                     | GG                 | GG               | URR                           | 101497305          | transcriptional activator Myb-like                     |
| SNP_37937_A_37048668 | NC_021164.1    | Ca_Kabuli_Chr05 | 37048668                | AA                                     | GG                 | GG               | URR                           | 101500974          | DNA-directed RNA polymerase I subunit RPA12-like       |
| SNP_37938_A_37081801 | NC_021164.1    | Ca_Kabuli_Chr05 | 37081801                | TT                                     | CC                 | CC               | DRR                           | 101502361          | GEM-like protein 1                                     |
| SNP_37939_A_37095870 | NC_021164.1    | Ca_Kabuli_Chr05 | 37095870                | GG                                     | AA                 | AA               | INTERGENIC                    |                    |                                                        |
| SNP_37940_A_37131732 | NC_021164.1    | Ca_Kabuli_Chr05 | 37131732                | AA                                     | GG                 | GG               | URR                           | 101503747          | serine/threonine-protein kinase-like protein At1g28390 |
| SNP_37941_A_37131735 | NC_021164.1    | Ca_Kabuli_Chr05 | 37131735                | AA                                     | TT                 | TT               | URR                           | 101503747          | serine/threonine-protein kinase-like protein At1g28390 |
| SNP_37942_A_37145036 | NC_021164.1    | Ca_Kabuli_Chr05 | 37145036                | GG                                     | AA                 | AA               | INTERGENIC                    |                    |                                                        |
| SNP_37943_A_37183684 | NC_021164.1    | Ca_Kabuli_Chr05 | 37183684                | AA                                     | CC                 | CC               | URR                           | 101506324          | mitochondrial uncoupling protein 5-like                |
| SNP_37944_A_37183686 | NC_021164.1    | Ca_Kabuli_Chr05 | 37183686                | AA                                     | CC                 | CC               | URR                           | 101506324          | mitochondrial uncoupling protein 5-like                |

| SNPs IDs             | Chromosome IDs | Chromosomes     | Physical positions (bp) | CDC Frontier (Reference genome) | (Pusa 1103 & HPNB) | (ILWC 46 & LPNB) | Sequence Components of genome | Gene accession IDs | Putative functions                   |
|----------------------|----------------|-----------------|-------------------------|---------------------------------|--------------------|------------------|-------------------------------|--------------------|--------------------------------------|
| SNP_37945_A_37223383 | NC_021164.1    | Ca_Kabuli_Chr05 | 37223383                | CC                              | TT                 | TT               | INTERGENIC                    |                    |                                      |
| SNP_37947_A_37252269 | NC_021164.1    | Ca_Kabuli_Chr05 | 37252269                | AA                              | GG                 | GG               | INTERGENIC                    |                    |                                      |
| SNP_37948_A_37285479 | NC_021164.1    | Ca_Kabuli_Chr05 | 37285479                | TT                              | CC                 | CC               | INTERGENIC                    |                    |                                      |
| SNP_37949_A_37285498 | NC_021164.1    | Ca_Kabuli_Chr05 | 37285498                | TT                              | CC                 | CC               | INTERGENIC                    |                    |                                      |
| SNP_37950_A_37285524 | NC_021164.1    | Ca_Kabuli_Chr05 | 37285524                | CC                              | TT                 | TT               | INTERGENIC                    |                    |                                      |
| SNP_37951_A_37285532 | NC_021164.1    | Ca_Kabuli_Chr05 | 37285532                | AA                              | TT                 | TT               | INTERGENIC                    |                    |                                      |
| SNP_37952_A_37285533 | NC_021164.1    | Ca_Kabuli_Chr05 | 37285533                | TT                              | AA                 | AA               | INTERGENIC                    |                    |                                      |
| SNP_37953_A_37285963 | NC_021164.1    | Ca_Kabuli_Chr05 | 37285963                | TT                              | CC                 | CC               | INTERGENIC                    |                    |                                      |
| SNP_37954_A_37474184 | NC_021164.1    | Ca_Kabuli_Chr05 | 37474184                | CC                              | TT                 | TT               | INTRON                        | 101488879          | BEACH domain-containing protein lvsC |
| SNP_37955_A_37541286 | NC_021164.1    | Ca_Kabuli_Chr05 | 37541286                | CC                              | TT                 | TT               | INTRON                        | 101490938          | protein SABRE                        |
| SNP_37956_A_37567325 | NC_021164.1    | Ca_Kabuli_Chr05 | 37567325                | AA                              | GG                 | GG               | INTERGENIC                    |                    |                                      |
| SNP_37957_A_37567418 | NC_021164.1    | Ca_Kabuli_Chr05 | 37567418                | AA                              | GG                 | GG               | INTERGENIC                    |                    |                                      |
| SNP_37958_A_37567436 | NC_021164.1    | Ca_Kabuli_Chr05 | 37567436                | AA                              | CC                 | CC               | INTERGENIC                    |                    |                                      |
| SNP_37959_A_37567495 | NC_021164.1    | Ca_Kabuli_Chr05 | 37567495                | AA                              | GG                 | GG               | INTERGENIC                    |                    |                                      |
| SNP_37960_A_37567498 | NC_021164.1    | Ca_Kabuli_Chr05 | 37567498                | AA                              | GG                 | GG               | INTERGENIC                    |                    |                                      |
| SNP_37961_A_37567532 | NC_021164.1    | Ca_Kabuli_Chr05 | 37567532                | AA                              | GG                 | GG               | INTERGENIC                    |                    |                                      |
| SNP_37962_A_37567561 | NC_021164.1    | Ca_Kabuli_Chr05 | 37567561                | CC                              | TT                 | TT               | INTERGENIC                    |                    |                                      |
| SNP_37963_A_37567689 | NC_021164.1    | Ca_Kabuli_Chr05 | 37567689                | AA                              | GG                 | GG               | INTERGENIC                    |                    |                                      |
| SNP_37964_A_37567806 | NC_021164.1    | Ca_Kabuli_Chr05 | 37567806                | AA                              | CC                 | CC               | INTERGENIC                    |                    |                                      |
| SNP_37965_A_37567913 | NC_021164.1    | Ca_Kabuli_Chr05 | 37567913                | AA                              | CC                 | CC               | INTERGENIC                    |                    |                                      |
| SNP_37966_A_37567915 | NC_021164.1    | Ca_Kabuli_Chr05 | 37567915                | TT                              | CC                 | CC               | INTERGENIC                    |                    |                                      |
| SNP_37967_A_37673369 | NC_021164.1    | Ca_Kabuli_Chr05 | 37673369                | AA                              | GG                 | GG               | INTERGENIC                    |                    |                                      |

| SNPs IDs             | Chromosome IDs | Chromosomes     | Physical positions (bp) | CDC Frontier (Reference genome) | (Pusa 1103 & HPNB) | (ILWC 46 & LPNB) | Sequence Components of genome | Gene accession IDs | Putative functions                           |
|----------------------|----------------|-----------------|-------------------------|---------------------------------|--------------------|------------------|-------------------------------|--------------------|----------------------------------------------|
| SNP_37968_A_37686471 | NC_021164.1    | Ca_Kabuli_Chr05 | 37686471                | GG                              | AA                 | AA               | INTERGENIC                    |                    |                                              |
| SNP_37969_A_37699701 | NC_021164.1    | Ca_Kabuli_Chr05 | 37699701                | AA                              | TT                 | TT               | INTERGENIC                    |                    |                                              |
| SNP_37970_A_37701887 | NC_021164.1    | Ca_Kabuli_Chr05 | 37701887                | AA                              | TT                 | TT               | INTERGENIC                    |                    |                                              |
| SNP_37971_A_37715689 | NC_021164.1    | Ca_Kabuli_Chr05 | 37715689                | GG                              | TT                 | TT               | INTERGENIC                    |                    |                                              |
| SNP_37973_A_37826277 | NC_021164.1    | Ca_Kabuli_Chr05 | 37826277                | TT                              | AA                 | AA               | INTRON                        | 101501074          | uncharacterized LOC101501074                 |
| SNP_37974_A_37836556 | NC_021164.1    | Ca_Kabuli_Chr05 | 37836556                | CC                              | GG                 | GG               | NON_SYNONYMOUS_CODING         | 101501389          | F-box protein At1g67340                      |
| SNP_37975_A_37839251 | NC_021164.1    | Ca_Kabuli_Chr05 | 37839251                | GG                              | AA                 | AA               | URR                           | 101501389          | F-box protein At1g67340                      |
| SNP_37976_A_37888337 | NC_021164.1    | Ca_Kabuli_Chr05 | 37888337                | AA                              | GG                 | GG               | URR                           | 101502668          | acetolactate synthase 2, chloroplastic-like  |
| SNP_37977_A_37888343 | NC_021164.1    | Ca_Kabuli_Chr05 | 37888343                | AA                              | CC                 | CC               | URR                           | 101502668          | acetolactate synthase 2, chloroplastic-like  |
| SNP_37978_A_37888347 | NC_021164.1    | Ca_Kabuli_Chr05 | 37888347                | AA                              | GG                 | GG               | URR                           | 101502668          | acetolactate synthase 2, chloroplastic-like  |
| SNP_37979_A_37920655 | NC_021164.1    | Ca_Kabuli_Chr05 | 37920655                | TT                              | CC                 | CC               | DRR                           | 101506429          | CBS domain-containing protein CBSCBSPB5-like |
| SNP_37980_A_37981661 | NC_021164.1    | Ca_Kabuli_Chr05 | 37981661                | AA                              | TT                 | TT               | URR                           | 101508243          | HVA22-like protein e                         |
| SNP_37981_A_37981679 | NC_021164.1    | Ca_Kabuli_Chr05 | 37981679                | AA                              | TT                 | TT               | URR                           | 101508243          | HVA22-like protein e                         |
| SNP_37982_A_37982691 | NC_021164.1    | Ca_Kabuli_Chr05 | 37982691                | GG                              | AA                 | AA               | URR                           | 101508243          | HVA22-like protein e                         |
| SNP_37983_A_37984861 | NC_021164.1    | Ca_Kabuli_Chr05 | 37984861                | TT                              | GG                 | GG               | INTERGENIC                    |                    |                                              |
| SNP_37984_A_37986001 | NC_021164.1    | Ca_Kabuli_Chr05 | 37986001                | TT                              | CC                 | CC               | URR                           | 101508771          | SWI/SNF complex subunit SWI3A                |
| SNP_37985_A_37986336 | NC_021164.1    | Ca_Kabuli_Chr05 | 37986336                | CC                              | GG                 | GG               | URR                           | 101508771          | SWI/SNF complex subunit SWI3A                |
| SNP_37986_A_37986409 | NC_021164.1    | Ca_Kabuli_Chr05 | 37986409                | TT                              | AA                 | AA               | URR                           | 101508771          | SWI/SNF complex subunit SWI3A                |
| SNP_37987_A_37986410 | NC_021164.1    | Ca_Kabuli_Chr05 | 37986410                | TT                              | AA                 | AA               | URR                           | 101508771          | SWI/SNF complex subunit SWI3A                |
| SNP_37988_A_37986415 | NC_021164.1    | Ca_Kabuli_Chr05 | 37986415                | TT                              | CC                 | CC               | URR                           | 101508771          | SWI/SNF complex subunit SWI3A                |
| SNP_37989_A_37986745 | NC_021164.1    | Ca_Kabuli_Chr05 | 37986745                | TT                              | CC                 | CC               | URR                           | 101508771          | SWI/SNF complex subunit SWI3A                |
| SNP_37990_A_37988632 | NC_021164.1    | Ca_Kabuli_Chr05 | 37988632                | GG                              | TT                 | TT               | INTERGENIC                    |                    |                                              |



| SNPs IDs             | Chromosome IDs | Chromosomes     | Physical positions (bp) | CDC Frontier genome (Reference genome) | (Pusa 1103 & HPNB) | (ILWC 46 & LPNB) | Sequence Components of genome | Gene accession IDs | Putative functions                      |
|----------------------|----------------|-----------------|-------------------------|----------------------------------------|--------------------|------------------|-------------------------------|--------------------|-----------------------------------------|
| SNP_37991_A_37988821 | NC_021164.1    | Ca_Kabuli_Chr05 | 37988821                | CC                                     | GG                 | GG               | INTERGENIC                    |                    |                                         |
| SNP_37992_A_37989052 | NC_021164.1    | Ca_Kabuli_Chr05 | 37989052                | AA                                     | GG                 | GG               | INTERGENIC                    |                    |                                         |
| SNP_37993_A_37989303 | NC_021164.1    | Ca_Kabuli_Chr05 | 37989303                | CC                                     | TT                 | TT               | INTERGENIC                    |                    |                                         |
| SNP_37994_A_37995674 | NC_021164.1    | Ca_Kabuli_Chr05 | 37995674                | TT                                     | AA                 | AA               | SPLICE_SITE_REGION            | 101509090          | protein DEK                             |
| SNP_37995_A_38001112 | NC_021164.1    | Ca_Kabuli_Chr05 | 38001112                | CC                                     | TT                 | TT               | DRR                           | 101509958          | uncharacterized LOC101509958            |
| SNP_37996_A_38001475 | NC_021164.1    | Ca_Kabuli_Chr05 | 38001475                | CC                                     | TT                 | TT               | DRR                           | 101509958          | uncharacterized LOC101509958            |
| SNP_37997_A_38003094 | NC_021164.1    | Ca_Kabuli_Chr05 | 38003094                | GG                                     | AA                 | AA               | URR                           | 101509958          | uncharacterized LOC101509958            |
| SNP_37998_A_38003126 | NC_021164.1    | Ca_Kabuli_Chr05 | 38003126                | CC                                     | AA                 | AA               | URR                           | 101509958          | uncharacterized LOC101509958            |
| SNP_37999_A_38004397 | NC_021164.1    | Ca_Kabuli_Chr05 | 38004397                | GG                                     | CC                 | CC               | INTERGENIC                    |                    |                                         |
| SNP_38000_A_38005109 | NC_021164.1    | Ca_Kabuli_Chr05 | 38005109                | CC                                     | AA                 | AA               | INTERGENIC                    |                    |                                         |
| SNP_38002_A_38010773 | NC_021164.1    | Ca_Kabuli_Chr05 | 38010773                | GG                                     | CC                 | CC               | INTRON                        | 101509414          | protein TAPETUM DETERMINANT 1-like      |
| SNP_38003_A_38016422 | NC_021164.1    | Ca_Kabuli_Chr05 | 38016422                | GG                                     | TT                 | TT               | INTERGENIC                    |                    |                                         |
| SNP_38005_A_38018634 | NC_021164.1    | Ca_Kabuli_Chr05 | 38018634                | AA                                     | CC                 | CC               | INTERGENIC                    |                    |                                         |
| SNP_38007_A_38020606 | NC_021164.1    | Ca_Kabuli_Chr05 | 38020606                | CC                                     | AA                 | AA               | URR                           | 101510279          | RNA pseudouridine synthase 7            |
| SNP_38008_A_38020607 | NC_021164.1    | Ca_Kabuli_Chr05 | 38020607                | AA                                     | TT                 | TT               | URR                           | 101510279          | RNA pseudouridine synthase 7            |
| SNP_38009_A_38020764 | NC_021164.1    | Ca_Kabuli_Chr05 | 38020764                | GG                                     | AA                 | AA               | INTERGENIC                    |                    |                                         |
| SNP_38010_A_38020785 | NC_021164.1    | Ca_Kabuli_Chr05 | 38020785                | CC                                     | AA                 | AA               | INTERGENIC                    |                    |                                         |
| SNP_38011_A_38020801 | NC_021164.1    | Ca_Kabuli_Chr05 | 38020801                | TT                                     | AA                 | AA               | INTERGENIC                    |                    |                                         |
| SNP_38012_A_38021056 | NC_021164.1    | Ca_Kabuli_Chr05 | 38021056                | AA                                     | GG                 | GG               | INTERGENIC                    |                    |                                         |
| SNP_38013_A_38021238 | NC_021164.1    | Ca_Kabuli_Chr05 | 38021238                | GG                                     | TT                 | TT               | INTERGENIC                    |                    |                                         |
| SNP_38015_A_38021380 | NC_021164.1    | Ca_Kabuli_Chr05 | 38021380                | AA                                     | TT                 | TT               | INTERGENIC                    |                    |                                         |
| SNP_38016_A_38023934 | NC_021164.1    | Ca_Kabuli_Chr05 | 38023934                | AA                                     | TT                 | TT               | INTRON                        | 101488880          | bidirectional sugar transporter SWEET10 |

| SNPs IDs             | Chromosome IDs | Chromosomes     | Physical positions (bp) | CDC Frontier genome (Reference genome) | (Pusa 1103 & HPNB) | (ILWC 46 & LPNB) | Sequence Components of genome | Gene accession IDs | Putative functions                      |
|----------------------|----------------|-----------------|-------------------------|----------------------------------------|--------------------|------------------|-------------------------------|--------------------|-----------------------------------------|
| SNP_38018_A_38024145 | NC_021164.1    | Ca_Kabuli_Chr05 | 38024145                | TT                                     | CC                 | CC               | INTRON                        | 101488880          | bidirectional sugar transporter SWEET10 |
| SNP_38019_A_38024471 | NC_021164.1    | Ca_Kabuli_Chr05 | 38024471                | GG                                     | CC                 | CC               | NON_SYNONYMOUS_CODING         | 101488880          | bidirectional sugar transporter SWEET10 |
| SNP_38020_A_38025739 | NC_021164.1    | Ca_Kabuli_Chr05 | 38025739                | CC                                     | TT                 | TT               | URR                           | 101488880          | bidirectional sugar transporter SWEET10 |
| SNP_38021_A_38025753 | NC_021164.1    | Ca_Kabuli_Chr05 | 38025753                | TT                                     | GG                 | GG               | URR                           | 101488880          | bidirectional sugar transporter SWEET10 |
| SNP_38022_A_38027131 | NC_021164.1    | Ca_Kabuli_Chr05 | 38027131                | TT                                     | AA                 | AA               | URR                           | 101488880          | bidirectional sugar transporter SWEET10 |
| SNP_38023_A_38027133 | NC_021164.1    | Ca_Kabuli_Chr05 | 38027133                | GG                                     | AA                 | AA               | URR                           | 101488880          | bidirectional sugar transporter SWEET10 |
| SNP_38024_A_38027379 | NC_021164.1    | Ca_Kabuli_Chr05 | 38027379                | TT                                     | AA                 | AA               | URR                           | 101488880          | bidirectional sugar transporter SWEET10 |
| SNP_38025_A_38027705 | NC_021164.1    | Ca_Kabuli_Chr05 | 38027705                | AA                                     | CC                 | CC               | URR                           | 101488880          | bidirectional sugar transporter SWEET10 |
| SNP_38026_A_38027994 | NC_021164.1    | Ca_Kabuli_Chr05 | 38027994                | CC                                     | TT                 | TT               | INTERGENIC                    |                    |                                         |
| SNP_38027_A_38028011 | NC_021164.1    | Ca_Kabuli_Chr05 | 38028011                | CC                                     | AA                 | AA               | INTERGENIC                    |                    |                                         |
| SNP_38028_A_38029099 | NC_021164.1    | Ca_Kabuli_Chr05 | 38029099                | CC                                     | TT                 | TT               | DRR                           | 101510607          | bidirectional sugar transporter N3      |
| SNP_38029_A_38029465 | NC_021164.1    | Ca_Kabuli_Chr05 | 38029465                | AA                                     | CC                 | CC               | DRR                           | 101510607          | bidirectional sugar transporter N3      |
| SNP_38030_A_38029823 | NC_021164.1    | Ca_Kabuli_Chr05 | 38029823                | TT                                     | CC                 | CC               | DRR                           | 101510607          | bidirectional sugar transporter N3      |
| SNP_38031_A_38030042 | NC_021164.1    | Ca_Kabuli_Chr05 | 38030042                | AA                                     | TT                 | TT               | INTERGENIC                    |                    |                                         |
| SNP_38033_A_38032068 | NC_021164.1    | Ca_Kabuli_Chr05 | 38032068                | AA                                     | GG                 | GG               | URR                           | 101510607          | bidirectional sugar transporter N3      |
| SNP_38034_A_38034572 | NC_021164.1    | Ca_Kabuli_Chr05 | 38034572                | AA                                     | GG                 | GG               | INTERGENIC                    |                    |                                         |
| SNP_38037_A_38037088 | NC_021164.1    | Ca_Kabuli_Chr05 | 38037088                | AA                                     | GG                 | GG               | INTERGENIC                    |                    |                                         |
| SNP_38040_A_38045838 | NC_021164.1    | Ca_Kabuli_Chr05 | 38045838                | AA                                     | TT                 | TT               | INTERGENIC                    |                    |                                         |
| SNP_38041_A_38045955 | NC_021164.1    | Ca_Kabuli_Chr05 | 38045955                | AA                                     | GG                 | GG               | INTERGENIC                    |                    |                                         |
| SNP_38043_A_38046020 | NC_021164.1    | Ca_Kabuli_Chr05 | 38046020                | TT                                     | AA                 | AA               | INTERGENIC                    |                    |                                         |
| SNP_38044_A_38046034 | NC_021164.1    | Ca_Kabuli_Chr05 | 38046034                | AA                                     | GG                 | GG               | INTERGENIC                    |                    |                                         |
| SNP_38045_A_38050022 | NC_021164.1    | Ca_Kabuli_Chr05 | 38050022                | CC                                     | TT                 | TT               | INTERGENIC                    |                    |                                         |

| SNPs IDs             | Chromosome IDs | Chromosomes     | Physical positions (bp) | CDC Frontier (Reference genome) | (Pusa 1103 & HPNB) | (ILWC 46 & LPNB) | Sequence Components of genome | Gene accession IDs | Putative functions                        |
|----------------------|----------------|-----------------|-------------------------|---------------------------------|--------------------|------------------|-------------------------------|--------------------|-------------------------------------------|
| SNP_38046_A_38050024 | NC_021164.1    | Ca_Kabuli_Chr05 | 38050024                | TT                              | CC                 | CC               | INTERGENIC                    |                    |                                           |
| SNP_38047_A_38050442 | NC_021164.1    | Ca_Kabuli_Chr05 | 38050442                | GG                              | AA                 | AA               | INTERGENIC                    |                    |                                           |
| SNP_38049_A_38052125 | NC_021164.1    | Ca_Kabuli_Chr05 | 38052125                | TT                              | AA                 | AA               | INTERGENIC                    |                    |                                           |
| SNP_38050_A_38053824 | NC_021164.1    | Ca_Kabuli_Chr05 | 38053824                | TT                              | CC                 | CC               | DRR                           | 101510934          | probable protein S-acyltransferase 6      |
| SNP_38051_A_38053858 | NC_021164.1    | Ca_Kabuli_Chr05 | 38053858                | AA                              | GG                 | GG               | DRR                           | 101510934          | probable protein S-acyltransferase 6      |
| SNP_38052_A_38055713 | NC_021164.1    | Ca_Kabuli_Chr05 | 38055713                | AA                              | GG                 | GG               | INTERGENIC                    |                    |                                           |
| SNP_38053_A_38059097 | NC_021164.1    | Ca_Kabuli_Chr05 | 38059097                | TT                              | AA                 | AA               | URR                           | 101510934          | probable protein S-acyltransferase 6      |
| SNP_38054_A_38063448 | NC_021164.1    | Ca_Kabuli_Chr05 | 38063448                | GG                              | AA                 | AA               | DRR                           | 101511564          | NAC transcription factor 29               |
| SNP_38055_A_38063522 | NC_021164.1    | Ca_Kabuli_Chr05 | 38063522                | CC                              | TT                 | TT               | DRR                           | 101511564          | NAC transcription factor 29               |
| SNP_38056_A_38063531 | NC_021164.1    | Ca_Kabuli_Chr05 | 38063531                | CC                              | TT                 | TT               | DRR                           | 101511564          | NAC transcription factor 29               |
| SNP_38057_A_38066224 | NC_021164.1    | Ca_Kabuli_Chr05 | 38066224                | AA                              | GG                 | GG               | URR                           | 101511564          | NAC transcription factor 29               |
| SNP_38058_A_38067221 | NC_021164.1    | Ca_Kabuli_Chr05 | 38067221                | GG                              | TT                 | TT               | URR                           | 101511564          | NAC transcription factor 29               |
| SNP_38059_A_38067249 | NC_021164.1    | Ca_Kabuli_Chr05 | 38067249                | CC                              | GG                 | GG               | URR                           | 101511894          | histone-lysine N-methyltransferase SETD1A |
| SNP_38060_A_38067355 | NC_021164.1    | Ca_Kabuli_Chr05 | 38067355                | TT                              | CC                 | CC               | URR                           | 101511894          | histone-lysine N-methyltransferase SETD1A |
| SNP_38061_A_38067399 | NC_021164.1    | Ca_Kabuli_Chr05 | 38067399                | CC                              | TT                 | TT               | URR                           | 101511894          | histone-lysine N-methyltransferase SETD1A |
| SNP_38064_A_38069326 | NC_021164.1    | Ca_Kabuli_Chr05 | 38069326                | AA                              | GG                 | GG               | INTERGENIC                    |                    |                                           |
| SNP_38065_A_38069360 | NC_021164.1    | Ca_Kabuli_Chr05 | 38069360                | TT                              | AA                 | AA               | INTERGENIC                    |                    |                                           |
| SNP_38066_A_38069372 | NC_021164.1    | Ca_Kabuli_Chr05 | 38069372                | AA                              | GG                 | GG               | INTERGENIC                    |                    |                                           |
| SNP_38067_A_38069503 | NC_021164.1    | Ca_Kabuli_Chr05 | 38069503                | TT                              | AA                 | AA               | INTERGENIC                    |                    |                                           |
| SNP_38068_A_38069504 | NC_021164.1    | Ca_Kabuli_Chr05 | 38069504                | TT                              | AA                 | AA               | INTERGENIC                    |                    |                                           |
| SNP_38069_A_38069544 | NC_021164.1    | Ca_Kabuli_Chr05 | 38069544                | CC                              | TT                 | TT               | INTERGENIC                    |                    |                                           |
| SNP_38070_A_38069549 | NC_021164.1    | Ca_Kabuli_Chr05 | 38069549                | TT                              | CC                 | CC               | INTERGENIC                    |                    |                                           |

| SNPs IDs             | Chromosome IDs | Chromosomes     | Physical positions (bp) | CDC Frontier (Reference genome) | (Pusa 1103 & HPNB) | (ILWC 46 & LPNB) | Sequence Components of genome | Gene accession IDs | Putative functions                                 |
|----------------------|----------------|-----------------|-------------------------|---------------------------------|--------------------|------------------|-------------------------------|--------------------|----------------------------------------------------|
| SNP_38071_A_38069670 | NC_021164.1    | Ca_Kabuli_Chr05 | 38069670                | AA                              | GG                 | GG               | INTERGENIC                    |                    |                                                    |
| SNP_38072_A_38069714 | NC_021164.1    | Ca_Kabuli_Chr05 | 38069714                | GG                              | TT                 | TT               | INTERGENIC                    |                    |                                                    |
| SNP_38073_A_38069847 | NC_021164.1    | Ca_Kabuli_Chr05 | 38069847                | AA                              | GG                 | GG               | INTERGENIC                    |                    |                                                    |
| SNP_38074_A_38069866 | NC_021164.1    | Ca_Kabuli_Chr05 | 38069866                | CC                              | TT                 | TT               | INTERGENIC                    |                    |                                                    |
| SNP_38075_A_38069926 | NC_021164.1    | Ca_Kabuli_Chr05 | 38069926                | CC                              | TT                 | TT               | INTERGENIC                    |                    |                                                    |
| SNP_38076_A_38069968 | NC_021164.1    | Ca_Kabuli_Chr05 | 38069968                | CC                              | TT                 | TT               | INTERGENIC                    |                    |                                                    |
| SNP_38077_A_38070063 | NC_021164.1    | Ca_Kabuli_Chr05 | 38070063                | AA                              | GG                 | GG               | INTERGENIC                    |                    |                                                    |
| SNP_38078_A_38070077 | NC_021164.1    | Ca_Kabuli_Chr05 | 38070077                | GG                              | CC                 | CC               | INTERGENIC                    |                    |                                                    |
| SNP_38079_A_38070084 | NC_021164.1    | Ca_Kabuli_Chr05 | 38070084                | GG                              | AA                 | AA               | INTERGENIC                    |                    |                                                    |
| SNP_38080_A_38070100 | NC_021164.1    | Ca_Kabuli_Chr05 | 38070100                | GG                              | AA                 | AA               | INTERGENIC                    |                    |                                                    |
| SNP_38081_A_38070314 | NC_021164.1    | Ca_Kabuli_Chr05 | 38070314                | GG                              | AA                 | AA               | INTERGENIC                    |                    |                                                    |
| SNP_38082_A_38070321 | NC_021164.1    | Ca_Kabuli_Chr05 | 38070321                | TT                              | CC                 | CC               | INTERGENIC                    |                    |                                                    |
| SNP_38085_A_38078766 | NC_021164.1    | Ca_Kabuli_Chr05 | 38078766                | AA                              | GG                 | GG               | INTERGENIC                    |                    |                                                    |
| SNP_38086_A_38078815 | NC_021164.1    | Ca_Kabuli_Chr05 | 38078815                | TT                              | CC                 | CC               | INTERGENIC                    |                    |                                                    |
| SNP_38087_A_38081917 | NC_021164.1    | Ca_Kabuli_Chr05 | 38081917                | GG                              | AA                 | AA               | URR                           | 101512741          | probable serine/threonine-protein kinase At1g54610 |
| SNP_38088_A_38087357 | NC_021164.1    | Ca_Kabuli_Chr05 | 38087357                | CC                              | TT                 | TT               | URR                           | 101489204          | uncharacterized LOC101489204                       |
| SNP_38089_A_38087417 | NC_021164.1    | Ca_Kabuli_Chr05 | 38087417                | TT                              | CC                 | CC               | URR                           | 101489204          | uncharacterized LOC101489204                       |
| SNP_38090_A_38087419 | NC_021164.1    | Ca_Kabuli_Chr05 | 38087419                | CC                              | TT                 | TT               | URR                           | 101489204          | uncharacterized LOC101489204                       |
| SNP_38091_A_38092889 | NC_021164.1    | Ca_Kabuli_Chr05 | 38092889                | GG                              | AA                 | AA               | URR                           | 101513280          | uncharacterized LOC101513280                       |
| SNP_38092_A_38093111 | NC_021164.1    | Ca_Kabuli_Chr05 | 38093111                | AA                              | GG                 | GG               | INTERGENIC                    |                    |                                                    |
| SNP_38093_A_38094545 | NC_021164.1    | Ca_Kabuli_Chr05 | 38094545                | GG                              | AA                 | AA               | INTERGENIC                    |                    |                                                    |
| SNP_38094_A_38094784 | NC_021164.1    | Ca_Kabuli_Chr05 | 38094784                | GG                              | AA                 | AA               | INTERGENIC                    |                    |                                                    |

| SNPs IDs             | Chromosome IDs | Chromosomes     | Physical positions (bp) | CDC Frontier (Reference genome) | (Pusa 1103 & HPNB) | (ILWC 46 & LPNB) | Sequence Components of genome | Gene accession IDs | Putative functions           |
|----------------------|----------------|-----------------|-------------------------|---------------------------------|--------------------|------------------|-------------------------------|--------------------|------------------------------|
| SNP_38095_A_38095630 | NC_021164.1    | Ca_Kabuli_Chr05 | 38095630                | GG                              | AA                 | AA               | INTERGENIC                    |                    |                              |
| SNP_38096_A_38095851 | NC_021164.1    | Ca_Kabuli_Chr05 | 38095851                | TT                              | AA                 | AA               | INTERGENIC                    |                    |                              |
| SNP_38097_A_38095889 | NC_021164.1    | Ca_Kabuli_Chr05 | 38095889                | TT                              | AA                 | AA               | INTERGENIC                    |                    |                              |
| SNP_38098_A_38096365 | NC_021164.1    | Ca_Kabuli_Chr05 | 38096365                | TT                              | CC                 | CC               | INTERGENIC                    |                    |                              |
| SNP_38099_A_38097204 | NC_021164.1    | Ca_Kabuli_Chr05 | 38097204                | TT                              | CC                 | CC               | DRR                           | 101489528          | Unknown function             |
| SNP_38100_A_38098524 | NC_021164.1    | Ca_Kabuli_Chr05 | 38098524                | AA                              | CC                 | CC               | INTERGENIC                    |                    |                              |
| SNP_38103_A_38110384 | NC_021164.1    | Ca_Kabuli_Chr05 | 38110384                | TT                              | AA                 | AA               | INTERGENIC                    |                    |                              |
| SNP_38105_A_38115639 | NC_021164.1    | Ca_Kabuli_Chr05 | 38115639                | TT                              | AA                 | AA               | URR                           | 101514475          | vacuolar protein 8           |
| SNP_38106_A_38116880 | NC_021164.1    | Ca_Kabuli_Chr05 | 38116880                | TT                              | CC                 | CC               | URR                           | 101514475          | vacuolar protein 8           |
| SNP_38107_A_38116928 | NC_021164.1    | Ca_Kabuli_Chr05 | 38116928                | CC                              | TT                 | TT               | URR                           | 101514475          | vacuolar protein 8           |
| SNP_38109_A_38119448 | NC_021164.1    | Ca_Kabuli_Chr05 | 38119448                | AA                              | GG                 | GG               | INTERGENIC                    |                    |                              |
| SNP_38111_A_38122004 | NC_021164.1    | Ca_Kabuli_Chr05 | 38122004                | TT                              | CC                 | CC               | INTERGENIC                    |                    |                              |
| SNP_38112_A_38122392 | NC_021164.1    | Ca_Kabuli_Chr05 | 38122392                | AA                              | TT                 | TT               | INTERGENIC                    |                    |                              |
| SNP_38113_A_38127702 | NC_021164.1    | Ca_Kabuli_Chr05 | 38127702                | AA                              | GG                 | GG               | INTERGENIC                    |                    |                              |
| SNP_38114_A_38132433 | NC_021164.1    | Ca_Kabuli_Chr05 | 38132433                | AA                              | TT                 | TT               | URR                           | 101514801          | uncharacterized LOC101514801 |
| SNP_38115_A_38132456 | NC_021164.1    | Ca_Kabuli_Chr05 | 38132456                | TT                              | AA                 | AA               | URR                           | 101514801          | uncharacterized LOC101514801 |
| SNP_38116_A_38132897 | NC_021164.1    | Ca_Kabuli_Chr05 | 38132897                | TT                              | CC                 | CC               | INTERGENIC                    |                    |                              |
| SNP_38117_A_38132930 | NC_021164.1    | Ca_Kabuli_Chr05 | 38132930                | CC                              | TT                 | TT               | INTERGENIC                    |                    |                              |
| SNP_38118_A_38132992 | NC_021164.1    | Ca_Kabuli_Chr05 | 38132992                | TT                              | CC                 | CC               | INTERGENIC                    |                    |                              |
| SNP_38119_A_38137857 | NC_021164.1    | Ca_Kabuli_Chr05 | 38137857                | AA                              | GG                 | GG               | INTERGENIC                    |                    |                              |
| SNP_38121_A_38137879 | NC_021164.1    | Ca_Kabuli_Chr05 | 38137879                | CC                              | TT                 | TT               | INTERGENIC                    |                    |                              |
| SNP_38122_A_38137955 | NC_021164.1    | Ca_Kabuli_Chr05 | 38137955                | CC                              | GG                 | GG               | INTERGENIC                    |                    |                              |

| SNPs IDs             | Chromosome IDs | Chromosomes     | Physical positions (bp) | CDC Frontier (Reference genome) | (Pusa 1103 & HPNB) | (ILWC 46 & LPNB) | Sequence Components of genome | Gene accession IDs | Putative functions           |
|----------------------|----------------|-----------------|-------------------------|---------------------------------|--------------------|------------------|-------------------------------|--------------------|------------------------------|
| SNP_38123_A_38141126 | NC_021164.1    | Ca_Kabuli_Chr05 | 38141126                | TT                              | AA                 | AA               | INTERGENIC                    |                    |                              |
| SNP_38124_A_38141204 | NC_021164.1    | Ca_Kabuli_Chr05 | 38141204                | CC                              | TT                 | TT               | INTERGENIC                    |                    |                              |
| SNP_38125_A_38141228 | NC_021164.1    | Ca_Kabuli_Chr05 | 38141228                | CC                              | TT                 | TT               | INTERGENIC                    |                    |                              |
| SNP_38126_A_38142165 | NC_021164.1    | Ca_Kabuli_Chr05 | 38142165                | CC                              | TT                 | TT               | INTERGENIC                    |                    |                              |
| SNP_38127_A_38147051 | NC_021164.1    | Ca_Kabuli_Chr05 | 38147051                | TT                              | CC                 | CC               | INTERGENIC                    |                    |                              |
| SNP_38128_A_38147500 | NC_021164.1    | Ca_Kabuli_Chr05 | 38147500                | AA                              | TT                 | TT               | INTERGENIC                    |                    |                              |
| SNP_38129_A_38147886 | NC_021164.1    | Ca_Kabuli_Chr05 | 38147886                | CC                              | TT                 | TT               | INTERGENIC                    |                    |                              |
| SNP_38130_A_38150992 | NC_021164.1    | Ca_Kabuli_Chr05 | 38150992                | TT                              | CC                 | CC               | INTRON                        | 101515124          | transcription factor bHLH137 |
| SNP_38131_A_38151023 | NC_021164.1    | Ca_Kabuli_Chr05 | 38151023                | GG                              | CC                 | CC               | INTRON                        | 101515124          | transcription factor bHLH137 |
| SNP_38132_A_38152124 | NC_021164.1    | Ca_Kabuli_Chr05 | 38152124                | AA                              | GG                 | GG               | INTRON                        | 101515124          | transcription factor bHLH137 |
| SNP_38133_A_38152895 | NC_021164.1    | Ca_Kabuli_Chr05 | 38152895                | CC                              | TT                 | TT               | URR                           | 101515124          | transcription factor bHLH137 |
| SNP_38134_A_38153143 | NC_021164.1    | Ca_Kabuli_Chr05 | 38153143                | AA                              | CC                 | CC               | URR                           | 101515124          | transcription factor bHLH137 |
| SNP_38135_A_38155914 | NC_021164.1    | Ca_Kabuli_Chr05 | 38155914                | GG                              | AA                 | AA               | INTERGENIC                    |                    |                              |
| SNP_38136_A_38155931 | NC_021164.1    | Ca_Kabuli_Chr05 | 38155931                | AA                              | GG                 | GG               | INTERGENIC                    |                    |                              |
| SNP_38137_A_38156260 | NC_021164.1    | Ca_Kabuli_Chr05 | 38156260                | TT                              | CC                 | CC               | INTERGENIC                    |                    |                              |
| SNP_38138_A_38157238 | NC_021164.1    | Ca_Kabuli_Chr05 | 38157238                | GG                              | TT                 | TT               | INTERGENIC                    |                    |                              |
| SNP_38139_A_38159830 | NC_021164.1    | Ca_Kabuli_Chr05 | 38159830                | AA                              | CC                 | CC               | INTERGENIC                    |                    |                              |
| SNP_38140_A_38159889 | NC_021164.1    | Ca_Kabuli_Chr05 | 38159889                | AA                              | GG                 | GG               | INTERGENIC                    |                    |                              |
| SNP_38141_A_38159890 | NC_021164.1    | Ca_Kabuli_Chr05 | 38159890                | CC                              | TT                 | TT               | INTERGENIC                    |                    |                              |
| SNP_38142_A_38160352 | NC_021164.1    | Ca_Kabuli_Chr05 | 38160352                | TT                              | GG                 | GG               | INTERGENIC                    |                    |                              |
| SNP_38143_A_38160671 | NC_021164.1    | Ca_Kabuli_Chr05 | 38160671                | TT                              | AA                 | AA               | INTERGENIC                    |                    |                              |
| SNP_38144_A_38160679 | NC_021164.1    | Ca_Kabuli_Chr05 | 38160679                | TT                              | CC                 | CC               | INTERGENIC                    |                    |                              |

| SNPs IDs             | Chromosome IDs | Chromosomes     | Physical positions (bp) | CDC Frontier genome (Reference genome) | (Pusa 1103 & HPNB) | (ILWC 46 & LPNB) | Sequence Components of genome | Gene accession IDs | Putative functions                                   |
|----------------------|----------------|-----------------|-------------------------|----------------------------------------|--------------------|------------------|-------------------------------|--------------------|------------------------------------------------------|
| SNP_38145_A_38160730 | NC_021164.1    | Ca_Kabuli_Chr05 | 38160730                | AA                                     | CC                 | CC               | INTERGENIC                    |                    |                                                      |
| SNP_38146_A_38165057 | NC_021164.1    | Ca_Kabuli_Chr05 | 38165057                | GG                                     | CC                 | CC               | INTERGENIC                    |                    |                                                      |
| SNP_38147_A_38165299 | NC_021164.1    | Ca_Kabuli_Chr05 | 38165299                | TT                                     | CC                 | CC               | INTERGENIC                    |                    |                                                      |
| SNP_38148_A_38165335 | NC_021164.1    | Ca_Kabuli_Chr05 | 38165335                | AA                                     | TT                 | TT               | INTERGENIC                    |                    |                                                      |
| SNP_38149_A_38224129 | NC_021164.1    | Ca_Kabuli_Chr05 | 38224129                | GG                                     | AA                 | AA               | INTERGENIC                    |                    |                                                      |
| SNP_38150_A_38228918 | NC_021164.1    | Ca_Kabuli_Chr05 | 38228918                | TT                                     | CC                 | CC               | INTERGENIC                    |                    |                                                      |
| SNP_38151_A_38228977 | NC_021164.1    | Ca_Kabuli_Chr05 | 38228977                | TT                                     | CC                 | CC               | INTERGENIC                    |                    |                                                      |
| SNP_38152_A_38229012 | NC_021164.1    | Ca_Kabuli_Chr05 | 38229012                | TT                                     | CC                 | CC               | INTERGENIC                    |                    |                                                      |
| SNP_38153_A_38261213 | NC_021164.1    | Ca_Kabuli_Chr05 | 38261213                | AA                                     | GG                 | GG               | DRR                           | 101490179          | dual specificity protein phosphatase PHS1-like       |
| SNP_38155_A_38366468 | NC_021164.1    | Ca_Kabuli_Chr05 | 38366468                | AA                                     | TT                 | TT               | DRR                           | 101493329          | ethylene-responsive transcription factor ERF114-like |
| SNP_38158_A_38407290 | NC_021164.1    | Ca_Kabuli_Chr05 | 38407290                | GG                                     | AA                 | AA               | URR                           | 101495140          | uncharacterized protein At4g14100-like               |
| SNP_38159_A_38407291 | NC_021164.1    | Ca_Kabuli_Chr05 | 38407291                | GG                                     | AA                 | AA               | URR                           | 101495140          | uncharacterized protein At4g14100-like               |
| SNP_38160_A_38407302 | NC_021164.1    | Ca_Kabuli_Chr05 | 38407302                | AA                                     | GG                 | GG               | URR                           | 101495140          | uncharacterized protein At4g14100-like               |
| SNP_38161_A_38407316 | NC_021164.1    | Ca_Kabuli_Chr05 | 38407316                | CC                                     | AA                 | AA               | URR                           | 101495140          | uncharacterized protein At4g14100-like               |
| SNP_38162_A_38407331 | NC_021164.1    | Ca_Kabuli_Chr05 | 38407331                | GG                                     | TT                 | TT               | URR                           | 101495140          | uncharacterized protein At4g14100-like               |
| SNP_38163_A_38407349 | NC_021164.1    | Ca_Kabuli_Chr05 | 38407349                | TT                                     | CC                 | CC               | URR                           | 101495140          | uncharacterized protein At4g14100-like               |
| SNP_38164_A_38407362 | NC_021164.1    | Ca_Kabuli_Chr05 | 38407362                | AA                                     | GG                 | GG               | URR                           | 101495140          | uncharacterized protein At4g14100-like               |
| SNP_38165_A_38407397 | NC_021164.1    | Ca_Kabuli_Chr05 | 38407397                | TT                                     | AA                 | AA               | URR                           | 101495140          | uncharacterized protein At4g14100-like               |
| SNP_38166_A_38407399 | NC_021164.1    | Ca_Kabuli_Chr05 | 38407399                | GG                                     | AA                 | AA               | URR                           | 101495140          | uncharacterized protein At4g14100-like               |
| SNP_38167_A_38407420 | NC_021164.1    | Ca_Kabuli_Chr05 | 38407420                | GG                                     | AA                 | AA               | URR                           | 101495140          | uncharacterized protein At4g14100-like               |
| SNP_38168_A_38407428 | NC_021164.1    | Ca_Kabuli_Chr05 | 38407428                | TT                                     | CC                 | CC               | URR                           | 101495140          | uncharacterized protein At4g14100-like               |
| SNP_38169_A_38407439 | NC_021164.1    | Ca_Kabuli_Chr05 | 38407439                | GG                                     | AA                 | AA               | URR                           | 101495140          | uncharacterized protein At4g14100-like               |

| SNPs IDs             | Chromosome IDs | Chromosomes     | Physical positions (bp) | CDC Frontier genome (Reference genome) | (Pusa 1103 & HPNB) | (ILWC 46 & LPNB) | Sequence Components of genome | Gene accession IDs | Putative functions                              |
|----------------------|----------------|-----------------|-------------------------|----------------------------------------|--------------------|------------------|-------------------------------|--------------------|-------------------------------------------------|
| SNP_38170_A_38407532 | NC_021164.1    | Ca_Kabuli_Chr05 | 38407532                | CC                                     | TT                 | TT               | URR                           | 101495140          | uncharacterized protein At4g14100-like          |
| SNP_38171_A_38407630 | NC_021164.1    | Ca_Kabuli_Chr05 | 38407630                | AA                                     | GG                 | GG               | INTERGENIC                    |                    |                                                 |
| SNP_38172_A_38425553 | NC_021164.1    | Ca_Kabuli_Chr05 | 38425553                | CC                                     | TT                 | TT               | INTRON                        | 101500452          | uncharacterized LOC101500452                    |
| SNP_38173_A_38432411 | NC_021164.1    | Ca_Kabuli_Chr05 | 38432411                | AA                                     | TT                 | TT               | INTERGENIC                    |                    |                                                 |
| SNP_38174_A_38432466 | NC_021164.1    | Ca_Kabuli_Chr05 | 38432466                | TT                                     | GG                 | GG               | INTERGENIC                    |                    |                                                 |
| SNP_38175_A_38432585 | NC_021164.1    | Ca_Kabuli_Chr05 | 38432585                | CC                                     | GG                 | GG               | INTERGENIC                    |                    |                                                 |
| SNP_38176_A_38432627 | NC_021164.1    | Ca_Kabuli_Chr05 | 38432627                | TT                                     | AA                 | AA               | INTERGENIC                    |                    |                                                 |
| SNP_38177_A_38432763 | NC_021164.1    | Ca_Kabuli_Chr05 | 38432763                | TT                                     | CC                 | CC               | INTERGENIC                    |                    |                                                 |
| SNP_38178_A_38432881 | NC_021164.1    | Ca_Kabuli_Chr05 | 38432881                | AA                                     | GG                 | GG               | INTERGENIC                    |                    |                                                 |
| SNP_38179_A_38432936 | NC_021164.1    | Ca_Kabuli_Chr05 | 38432936                | AA                                     | CC                 | CC               | INTERGENIC                    |                    |                                                 |
| SNP_38180_A_38432991 | NC_021164.1    | Ca_Kabuli_Chr05 | 38432991                | CC                                     | TT                 | TT               | INTERGENIC                    |                    |                                                 |
| SNP_38181_A_38433089 | NC_021164.1    | Ca_Kabuli_Chr05 | 38433089                | AA                                     | GG                 | GG               | INTERGENIC                    |                    |                                                 |
| SNP_38182_A_38433195 | NC_021164.1    | Ca_Kabuli_Chr05 | 38433195                | AA                                     | GG                 | GG               | INTERGENIC                    |                    |                                                 |
| SNP_38183_A_38433296 | NC_021164.1    | Ca_Kabuli_Chr05 | 38433296                | TT                                     | CC                 | CC               | INTERGENIC                    |                    |                                                 |
| SNP_38184_A_38438221 | NC_021164.1    | Ca_Kabuli_Chr05 | 38438221                | GG                                     | AA                 | AA               | URR                           | 101493219          | uncharacterized LOC101493219                    |
| SNP_38185_A_38463613 | NC_021164.1    | Ca_Kabuli_Chr05 | 38463613                | TT                                     | CC                 | CC               | URR                           | 101493854          | telomere length regulation protein TEL2 homolog |
| SNP_38186_A_38465797 | NC_021164.1    | Ca_Kabuli_Chr05 | 38465797                | TT                                     | CC                 | CC               | DRR                           | 101494384          | elongator complex protein 3                     |
| SNP_38187_A_38476431 | NC_021164.1    | Ca_Kabuli_Chr05 | 38476431                | GG                                     | AA                 | AA               | DRR                           | 101501076          | ATP-dependent DNA helicase PIF6-like            |
| SNP_38188_A_38476563 | NC_021164.1    | Ca_Kabuli_Chr05 | 38476563                | GG                                     | AA                 | AA               | DRR                           | 101501076          | ATP-dependent DNA helicase PIF6-like            |
| SNP_38189_A_38476621 | NC_021164.1    | Ca_Kabuli_Chr05 | 38476621                | GG                                     | TT                 | TT               | DRR                           | 101501076          | ATP-dependent DNA helicase PIF6-like            |
| SNP_38190_A_38476789 | NC_021164.1    | Ca_Kabuli_Chr05 | 38476789                | AA                                     | GG                 | GG               | DRR                           | 101501076          | ATP-dependent DNA helicase PIF6-like            |
| SNP_38191_A_38476801 | NC_021164.1    | Ca_Kabuli_Chr05 | 38476801                | TT                                     | CC                 | CC               | DRR                           | 101501076          | ATP-dependent DNA helicase PIF6-like            |



| SNPs IDs             | Chromosome IDs | Chromosomes     | Physical positions (bp) | CDC Frontier (Reference genome) | (Pusa 1103 & HPNB) | (ILWC 46 & LPNB) | Sequence Components of genome | Gene accession IDs | Putative functions                                 |
|----------------------|----------------|-----------------|-------------------------|---------------------------------|--------------------|------------------|-------------------------------|--------------------|----------------------------------------------------|
| SNP_38192_A_38476869 | NC_021164.1    | Ca_Kabuli_Chr05 | 38476869                | AA                              | GG                 | GG               | DRR                           | 101501076          | ATP-dependent DNA helicase PIF6-like               |
| SNP_38193_A_38476879 | NC_021164.1    | Ca_Kabuli_Chr05 | 38476879                | TT                              | CC                 | CC               | DRR                           | 101501076          | ATP-dependent DNA helicase PIF6-like               |
| SNP_38195_A_38708714 | NC_021164.1    | Ca_Kabuli_Chr05 | 38708714                | TT                              | CC                 | CC               | INTERGENIC                    |                    |                                                    |
| SNP_38197_A_38746928 | NC_021164.1    | Ca_Kabuli_Chr05 | 38746928                | TT                              | GG                 | GG               | URR                           | 101500763          | alpha/beta hydrolase domain-containing protein 17B |
| SNP_38198_A_38754040 | NC_021164.1    | Ca_Kabuli_Chr05 | 38754040                | CC                              | TT                 | TT               | INTERGENIC                    |                    |                                                    |
| SNP_38201_A_38755907 | NC_021164.1    | Ca_Kabuli_Chr05 | 38755907                | TT                              | CC                 | CC               | INTERGENIC                    |                    |                                                    |
| SNP_38203_A_38815282 | NC_021164.1    | Ca_Kabuli_Chr05 | 38815282                | GG                              | CC                 | CC               | INTERGENIC                    |                    |                                                    |
| SNP_38204_A_38849197 | NC_021164.1    | Ca_Kabuli_Chr05 | 38849197                | AA                              | GG                 | GG               | INTERGENIC                    |                    |                                                    |
| SNP_38205_A_38853980 | NC_021164.1    | Ca_Kabuli_Chr05 | 38853980                | TT                              | CC                 | CC               | DRR                           | 101504821          | cytochrome P450 71A1-like                          |
| SNP_38207_A_38887857 | NC_021164.1    | Ca_Kabuli_Chr05 | 38887857                | AA                              | TT                 | TT               | INTERGENIC                    |                    |                                                    |
| SNP_38209_A_39040491 | NC_021164.1    | Ca_Kabuli_Chr05 | 39040491                | TT                              | CC                 | CC               | URR                           | 101512220          | general transcription factor 3C polypeptide 3-like |
| SNP_38210_A_39055630 | NC_021164.1    | Ca_Kabuli_Chr05 | 39055630                | AA                              | GG                 | GG               | INTERGENIC                    |                    |                                                    |
| SNP_38211_A_39056026 | NC_021164.1    | Ca_Kabuli_Chr05 | 39056026                | GG                              | AA                 | AA               | INTERGENIC                    |                    |                                                    |
| SNP_38212_A_39056134 | NC_021164.1    | Ca_Kabuli_Chr05 | 39056134                | TT                              | AA                 | AA               | INTERGENIC                    |                    |                                                    |
| SNP_38213_A_39056187 | NC_021164.1    | Ca_Kabuli_Chr05 | 39056187                | TT                              | CC                 | CC               | INTERGENIC                    |                    |                                                    |
| SNP_38214_A_39056208 | NC_021164.1    | Ca_Kabuli_Chr05 | 39056208                | CC                              | GG                 | GG               | INTERGENIC                    |                    |                                                    |
| SNP_38215_A_39091905 | NC_021164.1    | Ca_Kabuli_Chr05 | 39091905                | GG                              | AA                 | AA               | INTERGENIC                    |                    |                                                    |
| SNP_38216_A_39118865 | NC_021164.1    | Ca_Kabuli_Chr05 | 39118865                | AA                              | CC                 | CC               | INTERGENIC                    |                    |                                                    |
| SNP_38217_A_39150847 | NC_021164.1    | Ca_Kabuli_Chr05 | 39150847                | TT                              | CC                 | CC               | INTERGENIC                    |                    |                                                    |
| SNP_38218_A_39209713 | NC_021164.1    | Ca_Kabuli_Chr05 | 39209713                | GG                              | AA                 | AA               | URR                           | 101515348          | FKBP12-interacting protein of 37 kDa-like          |
| SNP_38219_A_39287696 | NC_021164.1    | Ca_Kabuli_Chr05 | 39287696                | CC                              | GG                 | GG               | INTERGENIC                    |                    |                                                    |
| SNP_38220_A_39292578 | NC_021164.1    | Ca_Kabuli_Chr05 | 39292578                | AA                              | GG                 | GG               | INTERGENIC                    |                    |                                                    |

| SNPs IDs             | Chromosome IDs | Chromosomes     | Physical positions (bp) | CDC Frontier (Reference genome) | (Pusa 1103 & HPNB) | (ILWC 46 & LPNB) | Sequence genome   | Components of | Gene accession IDs              | Putative functions |
|----------------------|----------------|-----------------|-------------------------|---------------------------------|--------------------|------------------|-------------------|---------------|---------------------------------|--------------------|
| SNP_38221_A_39327116 | NC_021164.1    | Ca_Kabuli_Chr05 | 39327116                | CC                              | TT                 | TT               | INTERGENIC        |               |                                 |                    |
| SNP_38222_A_39327154 | NC_021164.1    | Ca_Kabuli_Chr05 | 39327154                | AA                              | GG                 | GG               | INTERGENIC        |               |                                 |                    |
| SNP_38223_A_39327180 | NC_021164.1    | Ca_Kabuli_Chr05 | 39327180                | AA                              | GG                 | GG               | INTERGENIC        |               |                                 |                    |
| SNP_38224_A_39327224 | NC_021164.1    | Ca_Kabuli_Chr05 | 39327224                | TT                              | CC                 | CC               | INTERGENIC        |               |                                 |                    |
| SNP_38225_A_39327431 | NC_021164.1    | Ca_Kabuli_Chr05 | 39327431                | GG                              | AA                 | AA               | INTERGENIC        |               |                                 |                    |
| SNP_38226_A_39331732 | NC_021164.1    | Ca_Kabuli_Chr05 | 39331732                | TT                              | CC                 | CC               | INTERGENIC        |               |                                 |                    |
| SNP_38227_A_39335802 | NC_021164.1    | Ca_Kabuli_Chr05 | 39335802                | CC                              | TT                 | TT               | INTERGENIC        |               |                                 |                    |
| SNP_38228_A_39335879 | NC_021164.1    | Ca_Kabuli_Chr05 | 39335879                | GG                              | AA                 | AA               | INTERGENIC        |               |                                 |                    |
| SNP_38229_A_39360190 | NC_021164.1    | Ca_Kabuli_Chr05 | 39360190                | AA                              | GG                 | GG               | INTERGENIC        |               |                                 |                    |
| SNP_38230_A_39369661 | NC_021164.1    | Ca_Kabuli_Chr05 | 39369661                | GG                              | AA                 | AA               | INTERGENIC        |               |                                 |                    |
| SNP_38231_A_39369686 | NC_021164.1    | Ca_Kabuli_Chr05 | 39369686                | GG                              | AA                 | AA               | INTERGENIC        |               |                                 |                    |
| SNP_38232_A_39369937 | NC_021164.1    | Ca_Kabuli_Chr05 | 39369937                | AA                              | CC                 | CC               | INTERGENIC        |               |                                 |                    |
| SNP_38233_A_39370020 | NC_021164.1    | Ca_Kabuli_Chr05 | 39370020                | GG                              | AA                 | AA               | INTERGENIC        |               |                                 |                    |
| SNP_38234_A_39399486 | NC_021164.1    | Ca_Kabuli_Chr05 | 39399486                | CC                              | TT                 | TT               | INTERGENIC        |               |                                 |                    |
| SNP_38235_A_39468566 | NC_021164.1    | Ca_Kabuli_Chr05 | 39468566                | CC                              | GG                 | GG               | SYNONYMOUS_CODING | 101503635     | transcription factor MYB98-like |                    |
| SNP_38238_A_39525289 | NC_021164.1    | Ca_Kabuli_Chr05 | 39525289                | CC                              | TT                 | TT               | URR               | 101497757     | dof zinc finger protein DOF5.6  |                    |
| SNP_38239_A_39529379 | NC_021164.1    | Ca_Kabuli_Chr05 | 39529379                | GG                              | AA                 | AA               | INTERGENIC        |               |                                 |                    |
| SNP_38240_A_39530192 | NC_021164.1    | Ca_Kabuli_Chr05 | 39530192                | AA                              | GG                 | GG               | INTERGENIC        |               |                                 |                    |
| SNP_38241_A_39530200 | NC_021164.1    | Ca_Kabuli_Chr05 | 39530200                | GG                              | CC                 | CC               | INTERGENIC        |               |                                 |                    |
| SNP_38242_A_39530251 | NC_021164.1    | Ca_Kabuli_Chr05 | 39530251                | AA                              | CC                 | CC               | INTERGENIC        |               |                                 |                    |
| SNP_38243_A_39530323 | NC_021164.1    | Ca_Kabuli_Chr05 | 39530323                | TT                              | CC                 | CC               | INTERGENIC        |               |                                 |                    |
| SNP_38244_A_39530658 | NC_021164.1    | Ca_Kabuli_Chr05 | 39530658                | TT                              | GG                 | GG               | INTERGENIC        |               |                                 |                    |

| SNPs IDs             | Chromosome IDs | Chromosomes     | Physical positions (bp) | CDC Frontier genome (Reference genome) | (Pusa 1103 & HPNB) | (ILWC 46 & LPNB) | Sequence Components of genome | Gene accession IDs | Putative functions                                                |
|----------------------|----------------|-----------------|-------------------------|----------------------------------------|--------------------|------------------|-------------------------------|--------------------|-------------------------------------------------------------------|
| SNP_38245_A_39530670 | NC_021164.1    | Ca_Kabuli_Chr05 | 39530670                | TT                                     | CC                 | CC               | INTERGENIC                    |                    |                                                                   |
| SNP_38247_A_39576384 | NC_021164.1    | Ca_Kabuli_Chr05 | 39576384                | AA                                     | GG                 | GG               | INTRON                        | 101498080          | serine/threonine-protein kinase ATM                               |
| SNP_38248_A_39611887 | NC_021164.1    | Ca_Kabuli_Chr05 | 39611887                | CC                                     | TT                 | TT               | INTRON                        | 101498080          | serine/threonine-protein kinase ATM                               |
| SNP_38249_A_39707201 | NC_021164.1    | Ca_Kabuli_Chr05 | 39707201                | AA                                     | GG                 | GG               | DRR                           | 101500349          | CASP-like protein 4A3                                             |
| SNP_38250_A_39724546 | NC_021164.1    | Ca_Kabuli_Chr05 | 39724546                | GG                                     | AA                 | AA               | DRR                           | 101505561          | cation channel sperm-associated protein 2-like                    |
| SNP_38251_A_39742030 | NC_021164.1    | Ca_Kabuli_Chr05 | 39742030                | CC                                     | TT                 | TT               | INTERGENIC                    |                    |                                                                   |
| SNP_38252_A_39749057 | NC_021164.1    | Ca_Kabuli_Chr05 | 39749057                | CC                                     | TT                 | TT               | INTERGENIC                    |                    |                                                                   |
| SNP_38254_A_39832617 | NC_021164.1    | Ca_Kabuli_Chr05 | 39832617                | TT                                     | CC                 | CC               | URR                           | 101502983          | probable alpha,alpha-trehalose-phosphate synthase [UDP-forming] 9 |
| SNP_38255_A_39835336 | NC_021164.1    | Ca_Kabuli_Chr05 | 39835336                | CC                                     | TT                 | TT               | INTERGENIC                    |                    |                                                                   |
| SNP_38257_A_39872859 | NC_021164.1    | Ca_Kabuli_Chr05 | 39872859                | TT                                     | CC                 | CC               | URR                           | 101504609          | nucleobase-ascorbate transporter 6                                |
| SNP_38258_A_39873433 | NC_021164.1    | Ca_Kabuli_Chr05 | 39873433                | TT                                     | CC                 | CC               | URR                           | 101504609          | nucleobase-ascorbate transporter 6                                |
| SNP_38259_A_39873456 | NC_021164.1    | Ca_Kabuli_Chr05 | 39873456                | AA                                     | GG                 | GG               | URR                           | 101504609          | nucleobase-ascorbate transporter 6                                |
| SNP_38260_A_39873513 | NC_021164.1    | Ca_Kabuli_Chr05 | 39873513                | AA                                     | TT                 | TT               | URR                           | 101504609          | nucleobase-ascorbate transporter 6                                |
| SNP_38261_A_39884387 | NC_021164.1    | Ca_Kabuli_Chr05 | 39884387                | CC                                     | TT                 | TT               | URR                           | 101505135          | uncharacterized LOC101505135                                      |
| SNP_38262_A_39919266 | NC_021164.1    | Ca_Kabuli_Chr05 | 39919266                | GG                                     | AA                 | AA               | INTERGENIC                    |                    |                                                                   |
| SNP_38264_A_39943298 | NC_021164.1    | Ca_Kabuli_Chr05 | 39943298                | TT                                     | CC                 | CC               | INTERGENIC                    |                    |                                                                   |
| SNP_38266_A_40053325 | NC_021164.1    | Ca_Kabuli_Chr05 | 40053325                | AA                                     | GG                 | GG               | INTERGENIC                    |                    |                                                                   |
| SNP_38267_A_40057933 | NC_021164.1    | Ca_Kabuli_Chr05 | 40057933                | TT                                     | GG                 | GG               | INTRON                        | 101511136          | L-ascorbate oxidase                                               |
| SNP_38268_A_40063078 | NC_021164.1    | Ca_Kabuli_Chr05 | 40063078                | AA                                     | CC                 | CC               | URR                           | 101511136          | L-ascorbate oxidase                                               |
| SNP_38269_A_40090170 | NC_021164.1    | Ca_Kabuli_Chr05 | 40090170                | GG                                     | CC                 | CC               | INTERGENIC                    |                    |                                                                   |
| SNP_38271_A_40129873 | NC_021164.1    | Ca_Kabuli_Chr05 | 40129873                | TT                                     | CC                 | CC               | INTERGENIC                    |                    |                                                                   |
| SNP_38274_A_40256857 | NC_021164.1    | Ca_Kabuli_Chr05 | 40256857                | AA                                     | GG                 | GG               | INTERGENIC                    |                    |                                                                   |

| SNPs IDs             | Chromosome IDs | Chromosomes     | Physical positions (bp) | CDC Frontier (Reference genome) | (Pusa 1103 & HPNB) | (ILWC 46 & LPNB) | Sequence Components of genome | Gene accession IDs | Putative functions                                 |
|----------------------|----------------|-----------------|-------------------------|---------------------------------|--------------------|------------------|-------------------------------|--------------------|----------------------------------------------------|
| SNP_38276_A_40290436 | NC_021164.1    | Ca_Kabuli_Chr05 | 40290436                | TT                              | CC                 | CC               | DRR                           | 101491255          | Unknown function                                   |
| SNP_38277_A_40308948 | NC_021164.1    | Ca_Kabuli_Chr05 | 40308948                | TT                              | CC                 | CC               | INTERGENIC                    |                    |                                                    |
| SNP_38278_A_40308989 | NC_021164.1    | Ca_Kabuli_Chr05 | 40308989                | AA                              | GG                 | GG               | INTERGENIC                    |                    |                                                    |
| SNP_38279_A_40316348 | NC_021164.1    | Ca_Kabuli_Chr05 | 40316348                | AA                              | GG                 | GG               | INTRON                        | 101491883          | linoleate 13S-lipoxygenase 2-1, chloroplastic-like |
| SNP_38280_A_40318198 | NC_021164.1    | Ca_Kabuli_Chr05 | 40318198                | TT                              | CC                 | CC               | INTRON                        | 101491883          | linoleate 13S-lipoxygenase 2-1, chloroplastic-like |
| SNP_38281_A_40328636 | NC_021164.1    | Ca_Kabuli_Chr05 | 40328636                | AA                              | TT                 | TT               | INTERGENIC                    |                    |                                                    |
| SNP_38282_A_40328951 | NC_021164.1    | Ca_Kabuli_Chr05 | 40328951                | CC                              | TT                 | TT               | INTERGENIC                    |                    |                                                    |
| SNP_38283_A_40329282 | NC_021164.1    | Ca_Kabuli_Chr05 | 40329282                | AA                              | CC                 | CC               | INTERGENIC                    |                    |                                                    |
| SNP_38284_A_40329311 | NC_021164.1    | Ca_Kabuli_Chr05 | 40329311                | CC                              | TT                 | TT               | INTERGENIC                    |                    |                                                    |
| SNP_38285_A_40330533 | NC_021164.1    | Ca_Kabuli_Chr05 | 40330533                | GG                              | AA                 | AA               | INTERGENIC                    |                    |                                                    |
| SNP_38286_A_40330948 | NC_021164.1    | Ca_Kabuli_Chr05 | 40330948                | GG                              | TT                 | TT               | INTERGENIC                    |                    |                                                    |
| SNP_38287_A_40330958 | NC_021164.1    | Ca_Kabuli_Chr05 | 40330958                | CC                              | GG                 | GG               | INTERGENIC                    |                    |                                                    |
| SNP_38288_A_40332092 | NC_021164.1    | Ca_Kabuli_Chr05 | 40332092                | AA                              | GG                 | GG               | INTERGENIC                    |                    |                                                    |
| SNP_38289_A_40332104 | NC_021164.1    | Ca_Kabuli_Chr05 | 40332104                | AA                              | GG                 | GG               | INTERGENIC                    |                    |                                                    |
| SNP_38290_A_40332106 | NC_021164.1    | Ca_Kabuli_Chr05 | 40332106                | AA                              | CC                 | CC               | INTERGENIC                    |                    |                                                    |
| SNP_38291_A_40332449 | NC_021164.1    | Ca_Kabuli_Chr05 | 40332449                | TT                              | CC                 | CC               | INTERGENIC                    |                    |                                                    |
| SNP_38292_A_40354299 | NC_021164.1    | Ca_Kabuli_Chr05 | 40354299                | CC                              | TT                 | TT               | INTERGENIC                    |                    |                                                    |
| SNP_38293_A_40354335 | NC_021164.1    | Ca_Kabuli_Chr05 | 40354335                | AA                              | GG                 | GG               | INTERGENIC                    |                    |                                                    |
| SNP_38295_A_40436116 | NC_021164.1    | Ca_Kabuli_Chr05 | 40436116                | TT                              | CC                 | CC               | INTERGENIC                    |                    |                                                    |
| SNP_38298_A_40545281 | NC_021164.1    | Ca_Kabuli_Chr05 | 40545281                | CC                              | TT                 | TT               | INTRON                        | 101511350          | ribonuclease 3-like protein 3                      |
| SNP_38299_A_40600636 | NC_021164.1    | Ca_Kabuli_Chr05 | 40600636                | AA                              | GG                 | GG               | INTERGENIC                    |                    |                                                    |
| SNP_38300_A_40600651 | NC_021164.1    | Ca_Kabuli_Chr05 | 40600651                | TT                              | CC                 | CC               | INTERGENIC                    |                    |                                                    |

| SNPs IDs             | Chromosome IDs | Chromosomes     | Physical positions (bp) | CDC Frontier genome (Reference genome) | (Pusa 1103 & HPNB) | (ILWC 46 & LPNB) | Sequence Components of genome | Gene accession IDs | Putative functions                          |
|----------------------|----------------|-----------------|-------------------------|----------------------------------------|--------------------|------------------|-------------------------------|--------------------|---------------------------------------------|
| SNP_38301_A_40604084 | NC_021164.1    | Ca_Kabuli_Chr05 | 40604084                | AA                                     | GG                 | GG               | INTERGENIC                    |                    |                                             |
| SNP_38302_A_40604086 | NC_021164.1    | Ca_Kabuli_Chr05 | 40604086                | CC                                     | GG                 | GG               | INTERGENIC                    |                    |                                             |
| SNP_38303_A_40652461 | NC_021164.1    | Ca_Kabuli_Chr05 | 40652461                | TT                                     | CC                 | CC               | URR                           | 101503532          | endoglucanase 11                            |
| SNP_38305_A_40780343 | NC_021164.1    | Ca_Kabuli_Chr05 | 40780343                | GG                                     | AA                 | AA               | INTRON                        | 101508773          | HEAT repeat-containing protein 6            |
| SNP_38306_A_40780652 | NC_021164.1    | Ca_Kabuli_Chr05 | 40780652                | GG                                     | AA                 | AA               | INTRON                        | 101508773          | HEAT repeat-containing protein 6            |
| SNP_38307_A_40789368 | NC_021164.1    | Ca_Kabuli_Chr05 | 40789368                | TT                                     | GG                 | GG               | INTRON                        | 101508773          | HEAT repeat-containing protein 6            |
| SNP_38308_A_40819925 | NC_021164.1    | Ca_Kabuli_Chr05 | 40819925                | GG                                     | AA                 | AA               | INTERGENIC                    |                    |                                             |
| SNP_38309_A_40858034 | NC_021164.1    | Ca_Kabuli_Chr05 | 40858034                | GG                                     | AA                 | AA               | INTERGENIC                    |                    |                                             |
| SNP_38310_A_40858046 | NC_021164.1    | Ca_Kabuli_Chr05 | 40858046                | AA                                     | GG                 | GG               | INTERGENIC                    |                    |                                             |
| SNP_38311_A_40858054 | NC_021164.1    | Ca_Kabuli_Chr05 | 40858054                | GG                                     | AA                 | AA               | INTERGENIC                    |                    |                                             |
| SNP_38312_A_40858055 | NC_021164.1    | Ca_Kabuli_Chr05 | 40858055                | TT                                     | AA                 | AA               | INTERGENIC                    |                    |                                             |
| SNP_38313_A_40858062 | NC_021164.1    | Ca_Kabuli_Chr05 | 40858062                | AA                                     | CC                 | CC               | INTERGENIC                    |                    |                                             |
| SNP_38314_A_40907708 | NC_021164.1    | Ca_Kabuli_Chr05 | 40907708                | AA                                     | TT                 | TT               | DRR                           | 101512545          | bidirectional sugar transporter SWEET7-like |
| SNP_38315_A_40907709 | NC_021164.1    | Ca_Kabuli_Chr05 | 40907709                | AA                                     | CC                 | CC               | DRR                           | 101512545          | bidirectional sugar transporter SWEET7-like |
| SNP_38316_A_40929783 | NC_021164.1    | Ca_Kabuli_Chr05 | 40929783                | TT                                     | AA                 | AA               | INTERGENIC                    |                    |                                             |
| SNP_38317_A_40935240 | NC_021164.1    | Ca_Kabuli_Chr05 | 40935240                | TT                                     | CC                 | CC               | INTERGENIC                    |                    |                                             |
| SNP_38321_A_40991313 | NC_021164.1    | Ca_Kabuli_Chr05 | 40991313                | CC                                     | TT                 | TT               | INTERGENIC                    |                    |                                             |
| SNP_38322_A_40991918 | NC_021164.1    | Ca_Kabuli_Chr05 | 40991918                | GG                                     | AA                 | AA               | INTERGENIC                    |                    |                                             |
| SNP_38323_A_41063749 | NC_021164.1    | Ca_Kabuli_Chr05 | 41063749                | AA                                     | GG                 | GG               | INTERGENIC                    |                    |                                             |
| SNP_38327_A_41191083 | NC_021164.1    | Ca_Kabuli_Chr05 | 41191083                | AA                                     | CC                 | CC               | INTERGENIC                    |                    |                                             |
| SNP_38328_A_41191126 | NC_021164.1    | Ca_Kabuli_Chr05 | 41191126                | GG                                     | AA                 | AA               | INTERGENIC                    |                    |                                             |
| SNP_38329_A_41191129 | NC_021164.1    | Ca_Kabuli_Chr05 | 41191129                | AA                                     | GG                 | GG               | INTERGENIC                    |                    |                                             |

| SNPs IDs             | Chromosome IDs | Chromosomes     | Physical positions (bp) | CDC Frontier genome (Reference genome) | (Pusa 1103 & HPNB) | (ILWC 46 & LPNB) | Sequence Components of genome | Gene accession IDs | Putative functions           |
|----------------------|----------------|-----------------|-------------------------|----------------------------------------|--------------------|------------------|-------------------------------|--------------------|------------------------------|
| SNP_38330_A_41191153 | NC_021164.1    | Ca_Kabuli_Chr05 | 41191153                | GG                                     | CC                 | CC               | INTERGENIC                    |                    |                              |
| SNP_38331_A_41191156 | NC_021164.1    | Ca_Kabuli_Chr05 | 41191156                | AA                                     | GG                 | GG               | INTERGENIC                    |                    |                              |
| SNP_38332_A_41191469 | NC_021164.1    | Ca_Kabuli_Chr05 | 41191469                | AA                                     | CC                 | CC               | INTERGENIC                    |                    |                              |
| SNP_38334_A_41227201 | NC_021164.1    | Ca_Kabuli_Chr05 | 41227201                | TT                                     | CC                 | CC               | DRR                           | 101496664          | uncharacterized LOC101496664 |
| SNP_38335_A_41227203 | NC_021164.1    | Ca_Kabuli_Chr05 | 41227203                | AA                                     | CC                 | CC               | DRR                           | 101496664          | uncharacterized LOC101496664 |
| SNP_38337_A_41279896 | NC_021164.1    | Ca_Kabuli_Chr05 | 41279896                | GG                                     | AA                 | AA               | INTERGENIC                    |                    |                              |
| SNP_38338_A_41319216 | NC_021164.1    | Ca_Kabuli_Chr05 | 41319216                | CC                                     | TT                 | TT               | INTERGENIC                    |                    |                              |
| SNP_38339_A_41334027 | NC_021164.1    | Ca_Kabuli_Chr05 | 41334027                | GG                                     | CC                 | CC               | INTERGENIC                    |                    |                              |
| SNP_38340_A_41358333 | NC_021164.1    | Ca_Kabuli_Chr05 | 41358333                | CC                                     | TT                 | TT               | INTERGENIC                    |                    |                              |
| SNP_38341_A_41422942 | NC_021164.1    | Ca_Kabuli_Chr05 | 41422942                | CC                                     | TT                 | TT               | URR                           | 101490072          | Unknown function             |
| SNP_38342_A_41423192 | NC_021164.1    | Ca_Kabuli_Chr05 | 41423192                | GG                                     | AA                 | AA               | URR                           | 101490072          | Unknown function             |
| SNP_38343_A_41423210 | NC_021164.1    | Ca_Kabuli_Chr05 | 41423210                | TT                                     | CC                 | CC               | URR                           | 101490072          | Unknown function             |
| SNP_38344_A_41428708 | NC_021164.1    | Ca_Kabuli_Chr05 | 41428708                | CC                                     | TT                 | TT               | INTERGENIC                    |                    |                              |
| SNP_38345_A_41428757 | NC_021164.1    | Ca_Kabuli_Chr05 | 41428757                | AA                                     | TT                 | TT               | INTERGENIC                    |                    |                              |
| SNP_38346_A_41428873 | NC_021164.1    | Ca_Kabuli_Chr05 | 41428873                | AA                                     | GG                 | GG               | INTERGENIC                    |                    |                              |
| SNP_38347_A_41428877 | NC_021164.1    | Ca_Kabuli_Chr05 | 41428877                | TT                                     | AA                 | AA               | INTERGENIC                    |                    |                              |
| SNP_38348_A_41428996 | NC_021164.1    | Ca_Kabuli_Chr05 | 41428996                | AA                                     | GG                 | GG               | INTERGENIC                    |                    |                              |
| SNP_38349_A_41429016 | NC_021164.1    | Ca_Kabuli_Chr05 | 41429016                | TT                                     | AA                 | AA               | INTERGENIC                    |                    |                              |
| SNP_38350_A_41429097 | NC_021164.1    | Ca_Kabuli_Chr05 | 41429097                | AA                                     | GG                 | GG               | INTERGENIC                    |                    |                              |
| SNP_38351_A_41436544 | NC_021164.1    | Ca_Kabuli_Chr05 | 41436544                | AA                                     | GG                 | GG               | INTERGENIC                    |                    |                              |
| SNP_38352_A_41438070 | NC_021164.1    | Ca_Kabuli_Chr05 | 41438070                | GG                                     | CC                 | CC               | INTERGENIC                    |                    |                              |
| SNP_38353_A_41438099 | NC_021164.1    | Ca_Kabuli_Chr05 | 41438099                | GG                                     | TT                 | TT               | INTERGENIC                    |                    |                              |

| SNPs IDs             | Chromosome IDs | Chromosomes     | Physical positions (bp) | CDC Frontier (Reference genome) | (Pusa 1103 & HPNB) | (ILWC 46 & LPNB) | Sequence Components of genome | Gene accession IDs | Putative functions                                    |
|----------------------|----------------|-----------------|-------------------------|---------------------------------|--------------------|------------------|-------------------------------|--------------------|-------------------------------------------------------|
| SNP_38356_A_41463557 | NC_021164.1    | Ca_Kabuli_Chr05 | 41463557                | TT                              | CC                 | CC               | INTRON                        | 101501610          | transcriptional adapter ADA2                          |
| SNP_38357_A_41463574 | NC_021164.1    | Ca_Kabuli_Chr05 | 41463574                | TT                              | CC                 | CC               | INTRON                        | 101501610          | transcriptional adapter ADA2                          |
| SNP_38358_A_41463600 | NC_021164.1    | Ca_Kabuli_Chr05 | 41463600                | CC                              | AA                 | AA               | INTRON                        | 101501610          | transcriptional adapter ADA2                          |
| SNP_38359_A_41463788 | NC_021164.1    | Ca_Kabuli_Chr05 | 41463788                | TT                              | GG                 | GG               | INTRON                        | 101501610          | transcriptional adapter ADA2                          |
| SNP_38361_A_41467616 | NC_021164.1    | Ca_Kabuli_Chr05 | 41467616                | CC                              | AA                 | AA               | INTRON                        | 101501610          | transcriptional adapter ADA2                          |
| SNP_38364_A_41467933 | NC_021164.1    | Ca_Kabuli_Chr05 | 41467933                | TT                              | AA                 | AA               | INTRON                        | 101501610          | transcriptional adapter ADA2                          |
| SNP_38365_A_41467937 | NC_021164.1    | Ca_Kabuli_Chr05 | 41467937                | CC                              | TT                 | TT               | INTRON                        | 101501610          | transcriptional adapter ADA2                          |
| SNP_38366_A_41468132 | NC_021164.1    | Ca_Kabuli_Chr05 | 41468132                | AA                              | GG                 | GG               | INTRON                        | 101501610          | transcriptional adapter ADA2                          |
| SNP_38367_A_41468583 | NC_021164.1    | Ca_Kabuli_Chr05 | 41468583                | AA                              | TT                 | TT               | INTRON                        | 101501610          | transcriptional adapter ADA2                          |
| SNP_38368_A_41468871 | NC_021164.1    | Ca_Kabuli_Chr05 | 41468871                | GG                              | AA                 | AA               | INTRON                        | 101501610          | transcriptional adapter ADA2                          |
| SNP_38369_A_41477660 | NC_021164.1    | Ca_Kabuli_Chr05 | 41477660                | TT                              | CC                 | CC               | INTRON                        | 101501610          | transcriptional adapter ADA2                          |
| SNP_38370_A_41477692 | NC_021164.1    | Ca_Kabuli_Chr05 | 41477692                | TT                              | GG                 | GG               | INTRON                        | 101501610          | transcriptional adapter ADA2                          |
| SNP_38372_A_41586247 | NC_021164.1    | Ca_Kabuli_Chr05 | 41586247                | TT                              | CC                 | CC               | URR                           | 101494184          | uncharacterized LOC101494184                          |
| SNP_38373_A_41591868 | NC_021164.1    | Ca_Kabuli_Chr05 | 41591868                | AA                              | GG                 | GG               | INTERGENIC                    |                    |                                                       |
| SNP_38375_A_41613728 | NC_021164.1    | Ca_Kabuli_Chr05 | 41613728                | CC                              | GG                 | GG               | INTERGENIC                    |                    |                                                       |
| SNP_38377_A_41643697 | NC_021164.1    | Ca_Kabuli_Chr05 | 41643697                | TT                              | AA                 | AA               | INTERGENIC                    |                    |                                                       |
| SNP_38378_A_41644340 | NC_021164.1    | Ca_Kabuli_Chr05 | 41644340                | AA                              | GG                 | GG               | INTERGENIC                    |                    |                                                       |
| SNP_38379_A_41677966 | NC_021164.1    | Ca_Kabuli_Chr05 | 41677966                | TT                              | GG                 | GG               | INTRON                        | 101496222          | protein argonaute 16-like                             |
| SNP_38380_A_41677967 | NC_021164.1    | Ca_Kabuli_Chr05 | 41677967                | AA                              | TT                 | TT               | INTRON                        | 101496222          | protein argonaute 16-like                             |
| SNP_38381_A_41677979 | NC_021164.1    | Ca_Kabuli_Chr05 | 41677979                | CC                              | AA                 | AA               | NON_SYNONYMOUS_CODING         | 101496222          | protein argonaute 16-like                             |
| SNP_38383_A_41708896 | NC_021164.1    | Ca_Kabuli_Chr05 | 41708896                | GG                              | AA                 | AA               | DRR                           | 101498291          | protein BREAST CANCER SUSCEPTIBILITY 2 homolog B-like |
| SNP_38384_A_41727574 | NC_021164.1    | Ca_Kabuli_Chr05 | 41727574                | GG                              | AA                 | AA               | INTERGENIC                    |                    |                                                       |

| SNPs IDs             | Chromosome IDs | Chromosomes     | Physical positions (bp) | CDC Frontier genome (Reference genome) | (Pusa 1103 & HPNB) | (ILWC 46 & LPNB) | Sequence Components of genome | Gene accession IDs | Putative functions                                                        |
|----------------------|----------------|-----------------|-------------------------|----------------------------------------|--------------------|------------------|-------------------------------|--------------------|---------------------------------------------------------------------------|
| SNP_38385_A_41778523 | NC_021164.1    | Ca_Kabuli_Chr05 | 41778523                | AA                                     | GG                 | GG               | INTERGENIC                    |                    |                                                                           |
| SNP_38386_A_41794813 | NC_021164.1    | Ca_Kabuli_Chr05 | 41794813                | TT                                     | GG                 | GG               | INTERGENIC                    |                    |                                                                           |
| SNP_38387_A_41795075 | NC_021164.1    | Ca_Kabuli_Chr05 | 41795075                | CC                                     | TT                 | TT               | INTERGENIC                    |                    |                                                                           |
| SNP_38388_A_41795326 | NC_021164.1    | Ca_Kabuli_Chr05 | 41795326                | AA                                     | GG                 | GG               | INTERGENIC                    |                    |                                                                           |
| SNP_38389_A_41795560 | NC_021164.1    | Ca_Kabuli_Chr05 | 41795560                | CC                                     | GG                 | GG               | INTERGENIC                    |                    |                                                                           |
| SNP_38390_A_41795694 | NC_021164.1    | Ca_Kabuli_Chr05 | 41795694                | GG                                     | AA                 | AA               | INTERGENIC                    |                    |                                                                           |
| SNP_38392_A_41797922 | NC_021164.1    | Ca_Kabuli_Chr05 | 41797922                | GG                                     | AA                 | AA               | DRR                           | 101500350          | titin-like                                                                |
| SNP_38393_A_41800062 | NC_021164.1    | Ca_Kabuli_Chr05 | 41800062                | AA                                     | GG                 | GG               | URR                           | 101500350          | titin-like                                                                |
| SNP_38394_A_41801270 | NC_021164.1    | Ca_Kabuli_Chr05 | 41801270                | TT                                     | CC                 | CC               | URR                           | 101500350          | titin-like                                                                |
| SNP_38395_A_41812775 | NC_021164.1    | Ca_Kabuli_Chr05 | 41812775                | GG                                     | TT                 | TT               | INTERGENIC                    |                    |                                                                           |
| SNP_38396_A_41813446 | NC_021164.1    | Ca_Kabuli_Chr05 | 41813446                | AA                                     | TT                 | TT               | DRR                           | 101505136          | uncharacterized LOC101505136                                              |
| SNP_38399_A_41896537 | NC_021164.1    | Ca_Kabuli_Chr05 | 41896537                | CC                                     | TT                 | TT               | URR                           | 101507827          | glucan endo-1,3-beta-glucosidase 4-like                                   |
| SNP_38400_A_41953245 | NC_021164.1    | Ca_Kabuli_Chr05 | 41953245                | AA                                     | GG                 | GG               | INTERGENIC                    |                    |                                                                           |
| SNP_38401_A_41953253 | NC_021164.1    | Ca_Kabuli_Chr05 | 41953253                | TT                                     | CC                 | CC               | INTERGENIC                    |                    |                                                                           |
| SNP_38402_A_41992570 | NC_021164.1    | Ca_Kabuli_Chr05 | 41992570                | GG                                     | AA                 | AA               | INTERGENIC                    |                    |                                                                           |
| SNP_38403_A_42006680 | NC_021164.1    | Ca_Kabuli_Chr05 | 42006680                | AA                                     | GG                 | GG               | URR                           | 101512321          | TBC1 domain family member 13-like                                         |
| SNP_38404_A_42014869 | NC_021164.1    | Ca_Kabuli_Chr05 | 42014869                | AA                                     | TT                 | TT               | DRR                           | 101514155          | uncharacterized LOC101514155                                              |
| SNP_38405_A_42071808 | NC_021164.1    | Ca_Kabuli_Chr05 | 42071808                | CC                                     | TT                 | TT               | INTERGENIC                    |                    |                                                                           |
| SNP_38406_A_42096054 | NC_021164.1    | Ca_Kabuli_Chr05 | 42096054                | TT                                     | AA                 | AA               | INTERGENIC                    |                    |                                                                           |
| SNP_38408_A_42241279 | NC_021164.1    | Ca_Kabuli_Chr05 | 42241279                | AA                                     | TT                 | TT               | INTERGENIC                    |                    |                                                                           |
| SNP_38409_A_42241290 | NC_021164.1    | Ca_Kabuli_Chr05 | 42241290                | TT                                     | CC                 | CC               | INTERGENIC                    |                    |                                                                           |
| SNP_38410_A_42315059 | NC_021164.1    | Ca_Kabuli_Chr05 | 42315059                | TT                                     | CC                 | CC               | URR                           | 101495466          | bifunctional aspartokinase/homoserine dehydrogenase 2, chloroplastic-like |



| SNPs IDs             | Chromosome IDs | Chromosomes     | Physical positions (bp) | CDC Frontier genome (Reference genome) | (Pusa 1103 & HPNB) | (ILWC 46 & LPNB) | Sequence Components of genome | Gene accession IDs | Putative functions                                  |
|----------------------|----------------|-----------------|-------------------------|----------------------------------------|--------------------|------------------|-------------------------------|--------------------|-----------------------------------------------------|
| SNP_38411_A_42326427 | NC_021164.1    | Ca_Kabuli_Chr05 | 42326427                | AA                                     | GG                 | GG               | INTERGENIC                    |                    |                                                     |
| SNP_38412_A_42342052 | NC_021164.1    | Ca_Kabuli_Chr05 | 42342052                | AA                                     | TT                 | TT               | INTERGENIC                    |                    |                                                     |
| SNP_38413_A_42392616 | NC_021164.1    | Ca_Kabuli_Chr05 | 42392616                | AA                                     | GG                 | GG               | INTERGENIC                    |                    |                                                     |
| SNP_38414_A_42392768 | NC_021164.1    | Ca_Kabuli_Chr05 | 42392768                | AA                                     | TT                 | TT               | INTERGENIC                    |                    |                                                     |
| SNP_38415_A_42407559 | NC_021164.1    | Ca_Kabuli_Chr05 | 42407559                | AA                                     | GG                 | GG               | INTERGENIC                    |                    |                                                     |
| SNP_38418_A_42584544 | NC_021164.1    | Ca_Kabuli_Chr05 | 42584544                | TT                                     | CC                 | CC               | DRR                           | 101505791          | ranBP2-type zinc finger protein At1g67325           |
| SNP_38420_A_42894438 | NC_021164.1    | Ca_Kabuli_Chr05 | 42894438                | TT                                     | AA                 | AA               | URR                           | 101491257          | glyceraldehyde-3-phosphate dehydrogenase, cytosolic |
| SNP_38421_A_42917204 | NC_021164.1    | Ca_Kabuli_Chr05 | 42917204                | AA                                     | GG                 | GG               | INTERGENIC                    |                    |                                                     |
| SNP_38423_A_43050871 | NC_021164.1    | Ca_Kabuli_Chr05 | 43050871                | AA                                     | GG                 | GG               | DRR                           | 101497963          | telomere-associated protein RIF1-like               |
| SNP_38425_A_43074539 | NC_021164.1    | Ca_Kabuli_Chr05 | 43074539                | GG                                     | AA                 | AA               | INTERGENIC                    |                    |                                                     |
| SNP_38428_A_43367091 | NC_021164.1    | Ca_Kabuli_Chr05 | 43367091                | AA                                     | CC                 | CC               | INTRON                        | 101490943          | uncharacterized LOC101490943                        |
| SNP_38429_A_43426338 | NC_021164.1    | Ca_Kabuli_Chr05 | 43426338                | GG                                     | AA                 | AA               | URR                           | 101488989          | tRNA (cytosine(34)-C(5))-methyltransferase-like     |
| SNP_38430_A_43481046 | NC_021164.1    | Ca_Kabuli_Chr05 | 43481046                | GG                                     | AA                 | AA               | URR                           | 101491778          | ubiquitin carboxyl-terminal hydrolase 4-like        |
| SNP_38431_A_43481069 | NC_021164.1    | Ca_Kabuli_Chr05 | 43481069                | TT                                     | CC                 | CC               | URR                           | 101491778          | ubiquitin carboxyl-terminal hydrolase 4-like        |
| SNP_38432_A_43481098 | NC_021164.1    | Ca_Kabuli_Chr05 | 43481098                | AA                                     | CC                 | CC               | URR                           | 101491778          | ubiquitin carboxyl-terminal hydrolase 4-like        |
| SNP_38433_A_43481263 | NC_021164.1    | Ca_Kabuli_Chr05 | 43481263                | CC                                     | AA                 | AA               | URR                           | 101491778          | ubiquitin carboxyl-terminal hydrolase 4-like        |
| SNP_38434_A_43489120 | NC_021164.1    | Ca_Kabuli_Chr05 | 43489120                | GG                                     | AA                 | AA               | URR                           | 101492100          | ubiquitin carboxyl-terminal hydrolase 4-like        |
| SNP_38435_A_43574420 | NC_021164.1    | Ca_Kabuli_Chr05 | 43574420                | TT                                     | AA                 | AA               | INTERGENIC                    |                    |                                                     |
| SNP_38436_A_43599709 | NC_021164.1    | Ca_Kabuli_Chr05 | 43599709                | CC                                     | TT                 | TT               | URR                           | 101410558          | transfer RNA methionine (anticodon CAU)             |
| SNP_38437_A_43614121 | NC_021164.1    | Ca_Kabuli_Chr05 | 43614121                | AA                                     | TT                 | TT               | INTERGENIC                    |                    |                                                     |
| SNP_38438_A_43614878 | NC_021164.1    | Ca_Kabuli_Chr05 | 43614878                | TT                                     | GG                 | GG               | INTERGENIC                    |                    |                                                     |
| SNP_38439_A_43628991 | NC_021164.1    | Ca_Kabuli_Chr05 | 43628991                | CC                                     | TT                 | TT               | INTERGENIC                    |                    |                                                     |

| SNPs IDs             | Chromosome IDs | Chromosomes     | Physical positions (bp) | CDC Frontier genome (Reference genome) | (Pusa 1103 & HPNB) | (ILWC 46 & LPNB) | Sequence Components of genome | Gene accession IDs | Putative functions           |
|----------------------|----------------|-----------------|-------------------------|----------------------------------------|--------------------|------------------|-------------------------------|--------------------|------------------------------|
| SNP_38440_A_43655801 | NC_021164.1    | Ca_Kabuli_Chr05 | 43655801                | AA                                     | TT                 | TT               | INTERGENIC                    |                    |                              |
| SNP_38441_A_43664938 | NC_021164.1    | Ca_Kabuli_Chr05 | 43664938                | CC                                     | AA                 | AA               | INTERGENIC                    |                    |                              |
| SNP_38442_A_43706343 | NC_021164.1    | Ca_Kabuli_Chr05 | 43706343                | AA                                     | GG                 | GG               | INTRON                        | 101491887          | early nodulin-70-like        |
| SNP_38444_A_43734272 | NC_021164.1    | Ca_Kabuli_Chr05 | 43734272                | GG                                     | TT                 | TT               | INTERGENIC                    |                    |                              |
| SNP_38445_A_43871751 | NC_021164.1    | Ca_Kabuli_Chr05 | 43871751                | AA                                     | TT                 | TT               | URR                           | 101506327          | uncharacterized LOC101506327 |
| SNP_38446_A_43871752 | NC_021164.1    | Ca_Kabuli_Chr05 | 43871752                | AA                                     | CC                 | CC               | URR                           | 101506327          | uncharacterized LOC101506327 |
| SNP_38447_A_43904726 | NC_021164.1    | Ca_Kabuli_Chr05 | 43904726                | TT                                     | CC                 | CC               | INTERGENIC                    |                    |                              |
| SNP_38448_A_43904849 | NC_021164.1    | Ca_Kabuli_Chr05 | 43904849                | TT                                     | CC                 | CC               | INTERGENIC                    |                    |                              |
| SNP_38449_A_43904871 | NC_021164.1    | Ca_Kabuli_Chr05 | 43904871                | TT                                     | CC                 | CC               | INTERGENIC                    |                    |                              |
| SNP_38450_A_43904941 | NC_021164.1    | Ca_Kabuli_Chr05 | 43904941                | TT                                     | GG                 | GG               | INTERGENIC                    |                    |                              |
| SNP_38451_A_43905103 | NC_021164.1    | Ca_Kabuli_Chr05 | 43905103                | TT                                     | CC                 | CC               | INTERGENIC                    |                    |                              |
| SNP_38452_A_43905233 | NC_021164.1    | Ca_Kabuli_Chr05 | 43905233                | TT                                     | CC                 | CC               | URR                           | 101507932          | Unknown function             |
| SNP_38453_A_43905274 | NC_021164.1    | Ca_Kabuli_Chr05 | 43905274                | TT                                     | AA                 | AA               | URR                           | 101507932          | Unknown function             |
| SNP_38454_A_43905358 | NC_021164.1    | Ca_Kabuli_Chr05 | 43905358                | AA                                     | GG                 | GG               | URR                           | 101507932          | Unknown function             |
| SNP_38455_A_43918801 | NC_021164.1    | Ca_Kabuli_Chr05 | 43918801                | AA                                     | CC                 | CC               | INTERGENIC                    |                    |                              |
| SNP_38456_A_43918828 | NC_021164.1    | Ca_Kabuli_Chr05 | 43918828                | GG                                     | TT                 | TT               | INTERGENIC                    |                    |                              |
| SNP_38457_A_43918840 | NC_021164.1    | Ca_Kabuli_Chr05 | 43918840                | TT                                     | AA                 | AA               | INTERGENIC                    |                    |                              |
| SNP_38458_A_43918865 | NC_021164.1    | Ca_Kabuli_Chr05 | 43918865                | AA                                     | TT                 | TT               | INTERGENIC                    |                    |                              |
| SNP_38459_A_43918874 | NC_021164.1    | Ca_Kabuli_Chr05 | 43918874                | GG                                     | AA                 | AA               | INTERGENIC                    |                    |                              |
| SNP_38460_A_43919009 | NC_021164.1    | Ca_Kabuli_Chr05 | 43919009                | CC                                     | TT                 | TT               | INTERGENIC                    |                    |                              |
| SNP_38461_A_43919028 | NC_021164.1    | Ca_Kabuli_Chr05 | 43919028                | AA                                     | GG                 | GG               | INTERGENIC                    |                    |                              |
| SNP_38462_A_43919760 | NC_021164.1    | Ca_Kabuli_Chr05 | 43919760                | AA                                     | GG                 | GG               | INTERGENIC                    |                    |                              |

| SNPs IDs             | Chromosome IDs | Chromosomes     | Physical positions (bp) | CDC Frontier genome (Reference genome) | (Pusa 1103 & HPNB) | (ILWC 46 & LPNB) | Sequence genome | Components of | Gene accession IDs            | Putative functions |
|----------------------|----------------|-----------------|-------------------------|----------------------------------------|--------------------|------------------|-----------------|---------------|-------------------------------|--------------------|
| SNP_38463_A_43920706 | NC_021164.1    | Ca_Kabuli_Chr05 | 43920706                | TT                                     | CC                 | CC               | INTERGENIC      |               |                               |                    |
| SNP_38464_A_43920732 | NC_021164.1    | Ca_Kabuli_Chr05 | 43920732                | TT                                     | CC                 | CC               | INTERGENIC      |               |                               |                    |
| SNP_38465_A_43920808 | NC_021164.1    | Ca_Kabuli_Chr05 | 43920808                | AA                                     | CC                 | CC               | INTERGENIC      |               |                               |                    |
| SNP_38466_A_43920809 | NC_021164.1    | Ca_Kabuli_Chr05 | 43920809                | CC                                     | TT                 | TT               | INTERGENIC      |               |                               |                    |
| SNP_38467_A_43920853 | NC_021164.1    | Ca_Kabuli_Chr05 | 43920853                | TT                                     | CC                 | CC               | INTERGENIC      |               |                               |                    |
| SNP_38468_A_43920890 | NC_021164.1    | Ca_Kabuli_Chr05 | 43920890                | TT                                     | AA                 | AA               | INTERGENIC      |               |                               |                    |
| SNP_38469_A_43921026 | NC_021164.1    | Ca_Kabuli_Chr05 | 43921026                | CC                                     | TT                 | TT               | INTERGENIC      |               |                               |                    |
| SNP_38470_A_43921030 | NC_021164.1    | Ca_Kabuli_Chr05 | 43921030                | CC                                     | AA                 | AA               | INTERGENIC      |               |                               |                    |
| SNP_38471_A_43921062 | NC_021164.1    | Ca_Kabuli_Chr05 | 43921062                | TT                                     | AA                 | AA               | INTERGENIC      |               |                               |                    |
| SNP_38472_A_43921068 | NC_021164.1    | Ca_Kabuli_Chr05 | 43921068                | TT                                     | CC                 | CC               | INTERGENIC      |               |                               |                    |
| SNP_38474_A_43921172 | NC_021164.1    | Ca_Kabuli_Chr05 | 43921172                | CC                                     | TT                 | TT               | INTERGENIC      |               |                               |                    |
| SNP_38475_A_44091932 | NC_021164.1    | Ca_Kabuli_Chr05 | 44091932                | GG                                     | AA                 | AA               | INTERGENIC      |               |                               |                    |
| SNP_38476_A_44170131 | NC_021164.1    | Ca_Kabuli_Chr05 | 44170131                | AA                                     | TT                 | TT               | URR             | 101489317     | metal transporter Nramp5-like |                    |
| SNP_38477_A_44177885 | NC_021164.1    | Ca_Kabuli_Chr05 | 44177885                | TT                                     | CC                 | CC               | INTERGENIC      |               |                               |                    |
| SNP_38478_A_44211628 | NC_021164.1    | Ca_Kabuli_Chr05 | 44211628                | CC                                     | AA                 | AA               | INTERGENIC      |               |                               |                    |
| SNP_38479_A_44211645 | NC_021164.1    | Ca_Kabuli_Chr05 | 44211645                | TT                                     | CC                 | CC               | INTERGENIC      |               |                               |                    |
| SNP_38480_A_44211648 | NC_021164.1    | Ca_Kabuli_Chr05 | 44211648                | CC                                     | TT                 | TT               | INTERGENIC      |               |                               |                    |
| SNP_38481_A_44211667 | NC_021164.1    | Ca_Kabuli_Chr05 | 44211667                | GG                                     | AA                 | AA               | INTERGENIC      |               |                               |                    |
| SNP_38482_A_44211673 | NC_021164.1    | Ca_Kabuli_Chr05 | 44211673                | AA                                     | GG                 | GG               | INTERGENIC      |               |                               |                    |
| SNP_38483_A_44211701 | NC_021164.1    | Ca_Kabuli_Chr05 | 44211701                | TT                                     | GG                 | GG               | INTERGENIC      |               |                               |                    |
| SNP_38484_A_44211706 | NC_021164.1    | Ca_Kabuli_Chr05 | 44211706                | AA                                     | GG                 | GG               | INTERGENIC      |               |                               |                    |
| SNP_38486_A_44592006 | NC_021164.1    | Ca_Kabuli_Chr05 | 44592006                | TT                                     | GG                 | GG               | INTERGENIC      |               |                               |                    |

| SNPs IDs             | Chromosome IDs | Chromosomes     | Physical positions (bp) | CDC Frontier genome (Reference genome) | (Pusa 1103 & HPNB) | (ILWC 46 & LPNB) | Sequence genome | Components of | Gene accession IDs                     | Putative functions |
|----------------------|----------------|-----------------|-------------------------|----------------------------------------|--------------------|------------------|-----------------|---------------|----------------------------------------|--------------------|
| SNP_38487_A_44592007 | NC_021164.1    | Ca_Kabuli_Chr05 | 44592007                | AA                                     | GG                 | GG               | INTERGENIC      |               |                                        |                    |
| SNP_38488_A_44592012 | NC_021164.1    | Ca_Kabuli_Chr05 | 44592012                | TT                                     | AA                 | AA               | INTERGENIC      |               |                                        |                    |
| SNP_38489_A_44592021 | NC_021164.1    | Ca_Kabuli_Chr05 | 44592021                | GG                                     | AA                 | AA               | INTERGENIC      |               |                                        |                    |
| SNP_38490_A_44592097 | NC_021164.1    | Ca_Kabuli_Chr05 | 44592097                | CC                                     | AA                 | AA               | INTERGENIC      |               |                                        |                    |
| SNP_38491_A_44592121 | NC_021164.1    | Ca_Kabuli_Chr05 | 44592121                | TT                                     | GG                 | GG               | INTERGENIC      |               |                                        |                    |
| SNP_38492_A_44596762 | NC_021164.1    | Ca_Kabuli_Chr05 | 44596762                | TT                                     | AA                 | AA               | INTERGENIC      |               |                                        |                    |
| SNP_38493_A_44596763 | NC_021164.1    | Ca_Kabuli_Chr05 | 44596763                | TT                                     | AA                 | AA               | INTERGENIC      |               |                                        |                    |
| SNP_38495_A_44596823 | NC_021164.1    | Ca_Kabuli_Chr05 | 44596823                | TT                                     | CC                 | CC               | INTERGENIC      |               |                                        |                    |
| SNP_38496_A_44597003 | NC_021164.1    | Ca_Kabuli_Chr05 | 44597003                | CC                                     | TT                 | TT               | INTERGENIC      |               |                                        |                    |
| SNP_38498_A_44597163 | NC_021164.1    | Ca_Kabuli_Chr05 | 44597163                | TT                                     | AA                 | AA               | INTERGENIC      |               |                                        |                    |
| SNP_38499_A_44597168 | NC_021164.1    | Ca_Kabuli_Chr05 | 44597168                | CC                                     | TT                 | TT               | INTERGENIC      |               |                                        |                    |
| SNP_38500_A_44597207 | NC_021164.1    | Ca_Kabuli_Chr05 | 44597207                | TT                                     | CC                 | CC               | INTERGENIC      |               |                                        |                    |
| SNP_38501_A_44597222 | NC_021164.1    | Ca_Kabuli_Chr05 | 44597222                | TT                                     | CC                 | CC               | INTERGENIC      |               |                                        |                    |
| SNP_38502_A_44728487 | NC_021164.1    | Ca_Kabuli_Chr05 | 44728487                | AA                                     | TT                 | TT               | INTERGENIC      |               |                                        |                    |
| SNP_38503_A_44744513 | NC_021164.1    | Ca_Kabuli_Chr05 | 44744513                | AA                                     | TT                 | TT               | INTRON          | 101513069     | transcription factor MYB44-like        |                    |
| SNP_38504_A_44775282 | NC_021164.1    | Ca_Kabuli_Chr05 | 44775282                | TT                                     | CC                 | CC               | URR             | 101513937     | transcriptional corepressor SEUSS-like |                    |
| SNP_38505_A_44844309 | NC_021164.1    | Ca_Kabuli_Chr05 | 44844309                | AA                                     | GG                 | GG               | DRR             | 101488883     | alcohol dehydrogenase 1                |                    |
| SNP_38506_A_44906511 | NC_021164.1    | Ca_Kabuli_Chr05 | 44906511                | TT                                     | CC                 | CC               | URR             | 101491888     | WAT1-related protein At3g28050-like    |                    |
| SNP_38507_A_44947416 | NC_021164.1    | Ca_Kabuli_Chr05 | 44947416                | CC                                     | TT                 | TT               | DRR             | 101494912     | dof zinc finger protein DOF5.1         |                    |
| SNP_38508_A_45000614 | NC_021164.1    | Ca_Kabuli_Chr05 | 45000614                | CC                                     | AA                 | AA               | INTERGENIC      |               |                                        |                    |
| SNP_38509_A_45086457 | NC_021164.1    | Ca_Kabuli_Chr05 | 45086457                | AA                                     | GG                 | GG               | INTERGENIC      |               |                                        |                    |
| SNP_38510_A_45086611 | NC_021164.1    | Ca_Kabuli_Chr05 | 45086611                | AA                                     | TT                 | TT               | INTERGENIC      |               |                                        |                    |

| SNPs IDs             | Chromosome IDs | Chromosomes     | Physical positions (bp) | CDC Frontier genome (Reference genome) | (Pusa 1103 & HPNB) | (ILWC 46 & LPNB) | Sequence genome | Components of | Gene accession IDs | Putative functions                                                      |
|----------------------|----------------|-----------------|-------------------------|----------------------------------------|--------------------|------------------|-----------------|---------------|--------------------|-------------------------------------------------------------------------|
| SNP_38511_A_45086818 | NC_021164.1    | Ca_Kabuli_Chr05 | 45086818                | CC                                     | TT                 | TT               | INTERGENIC      |               |                    |                                                                         |
| SNP_38513_A_45087028 | NC_021164.1    | Ca_Kabuli_Chr05 | 45087028                | CC                                     | TT                 | TT               | INTERGENIC      |               |                    |                                                                         |
| SNP_38514_A_45094142 | NC_021164.1    | Ca_Kabuli_Chr05 | 45094142                | GG                                     | AA                 | AA               | URR             | 101499800     |                    | bidirectional sugar transporter SWEET3-like                             |
| SNP_38515_A_45094172 | NC_021164.1    | Ca_Kabuli_Chr05 | 45094172                | AA                                     | GG                 | GG               | URR             | 101499800     |                    | bidirectional sugar transporter SWEET3-like                             |
| SNP_38516_A_45094175 | NC_021164.1    | Ca_Kabuli_Chr05 | 45094175                | AA                                     | CC                 | CC               | URR             | 101499800     |                    | bidirectional sugar transporter SWEET3-like                             |
| SNP_38517_A_45094248 | NC_021164.1    | Ca_Kabuli_Chr05 | 45094248                | AA                                     | GG                 | GG               | URR             | 101499800     |                    | bidirectional sugar transporter SWEET3-like                             |
| SNP_38518_A_45094324 | NC_021164.1    | Ca_Kabuli_Chr05 | 45094324                | TT                                     | AA                 | AA               | URR             | 101499800     |                    | bidirectional sugar transporter SWEET3-like                             |
| SNP_38519_A_45094365 | NC_021164.1    | Ca_Kabuli_Chr05 | 45094365                | CC                                     | TT                 | TT               | URR             | 101499800     |                    | bidirectional sugar transporter SWEET3-like                             |
| SNP_38520_A_45096025 | NC_021164.1    | Ca_Kabuli_Chr05 | 45096025                | GG                                     | AA                 | AA               | INTERGENIC      |               |                    |                                                                         |
| SNP_38521_A_45096272 | NC_021164.1    | Ca_Kabuli_Chr05 | 45096272                | GG                                     | AA                 | AA               | INTERGENIC      |               |                    |                                                                         |
| SNP_38522_A_45097448 | NC_021164.1    | Ca_Kabuli_Chr05 | 45097448                | GG                                     | AA                 | AA               | INTERGENIC      |               |                    |                                                                         |
| SNP_38523_A_45097741 | NC_021164.1    | Ca_Kabuli_Chr05 | 45097741                | AA                                     | CC                 | CC               | INTERGENIC      |               |                    |                                                                         |
| SNP_38524_A_45097789 | NC_021164.1    | Ca_Kabuli_Chr05 | 45097789                | TT                                     | AA                 | AA               | INTERGENIC      |               |                    |                                                                         |
| SNP_38526_A_45103103 | NC_021164.1    | Ca_Kabuli_Chr05 | 45103103                | GG                                     | AA                 | AA               | INTERGENIC      |               |                    |                                                                         |
| SNP_38527_A_45140212 | NC_021164.1    | Ca_Kabuli_Chr05 | 45140212                | TT                                     | CC                 | CC               | INTERGENIC      |               |                    |                                                                         |
| SNP_38528_A_45235849 | NC_021164.1    | Ca_Kabuli_Chr05 | 45235849                | CC                                     | TT                 | TT               | DRR             | 101505237     |                    | uncharacterized LOC101505237                                            |
| SNP_38529_A_45257316 | NC_021164.1    | Ca_Kabuli_Chr05 | 45257316                | GG                                     | TT                 | TT               | INTRON          | 101506103     |                    | splicing factor 3A subunit 3                                            |
| SNP_38530_A_45338485 | NC_021164.1    | Ca_Kabuli_Chr05 | 45338485                | TT                                     | AA                 | AA               | INTRON          | 101508247     |                    | probable pectinesterase/pectinesterase inhibitor 34                     |
| SNP_38531_A_45401902 | NC_021164.1    | Ca_Kabuli_Chr05 | 45401902                | TT                                     | GG                 | GG               | URR             | 101510819     |                    | ATP-dependent Clp protease ATP-binding subunit clpX-like, mitochondrial |
| SNP_38533_A_45471185 | NC_021164.1    | Ca_Kabuli_Chr05 | 45471185                | TT                                     | CC                 | CC               | URR             | 101515573     |                    | protein RKD4                                                            |
| SNP_38535_A_45530867 | NC_021164.1    | Ca_Kabuli_Chr05 | 45530867                | TT                                     | CC                 | CC               | URR             | 101491684     |                    | importin subunit beta-1                                                 |
| SNP_38536_A_45574965 | NC_021164.1    | Ca_Kabuli_Chr05 | 45574965                | AA                                     | CC                 | CC               | INTERGENIC      |               |                    |                                                                         |

| SNPs IDs             | Chromosome IDs | Chromosomes     | Physical positions (bp) | CDC Frontier genome (Reference genome) | (Pusa 1103 & HPNB) | (ILWC 46 & LPNB) | Sequence Components of genome | Gene accession IDs | Putative functions                                  |
|----------------------|----------------|-----------------|-------------------------|----------------------------------------|--------------------|------------------|-------------------------------|--------------------|-----------------------------------------------------|
| SNP_38537_A_45584558 | NC_021164.1    | Ca_Kabuli_Chr05 | 45584558                | TT                                     | CC                 | CC               | INTERGENIC                    |                    |                                                     |
| SNP_38538_A_45612646 | NC_021164.1    | Ca_Kabuli_Chr05 | 45612646                | TT                                     | CC                 | CC               | INTERGENIC                    |                    |                                                     |
| SNP_38539_A_45750181 | NC_021164.1    | Ca_Kabuli_Chr05 | 45750181                | CC                                     | GG                 | GG               | INTRON                        | 101501393          | probable 6-phosphogluconolactonase 5, chloroplastic |
| SNP_38540_A_45750222 | NC_021164.1    | Ca_Kabuli_Chr05 | 45750222                | AA                                     | GG                 | GG               | INTRON                        | 101501393          | probable 6-phosphogluconolactonase 5, chloroplastic |
| SNP_38541_A_45750360 | NC_021164.1    | Ca_Kabuli_Chr05 | 45750360                | TT                                     | CC                 | CC               | INTRON                        | 101501393          | probable 6-phosphogluconolactonase 5, chloroplastic |
| SNP_38542_A_45778248 | NC_021164.1    | Ca_Kabuli_Chr05 | 45778248                | AA                                     | GG                 | GG               | INTERGENIC                    |                    |                                                     |
| SNP_38543_A_45801199 | NC_021164.1    | Ca_Kabuli_Chr05 | 45801199                | AA                                     | CC                 | CC               | INTERGENIC                    |                    |                                                     |
| SNP_38544_A_45821193 | NC_021164.1    | Ca_Kabuli_Chr05 | 45821193                | AA                                     | TT                 | TT               | INTERGENIC                    |                    |                                                     |
| SNP_38545_A_45929658 | NC_021164.1    | Ca_Kabuli_Chr05 | 45929658                | GG                                     | AA                 | AA               | URR                           | 101507727          | uncharacterized LOC101507727                        |
| SNP_38547_A_46033980 | NC_021164.1    | Ca_Kabuli_Chr05 | 46033980                | AA                                     | CC                 | CC               | URR                           | 101512423          | Unknown function                                    |
| SNP_38548_A_46034261 | NC_021164.1    | Ca_Kabuli_Chr05 | 46034261                | AA                                     | TT                 | TT               | URR                           | 101512423          | Unknown function                                    |
| SNP_38551_A_46079851 | NC_021164.1    | Ca_Kabuli_Chr05 | 46079851                | GG                                     | AA                 | AA               | INTERGENIC                    |                    |                                                     |
| SNP_38552_A_46122923 | NC_021164.1    | Ca_Kabuli_Chr05 | 46122923                | CC                                     | TT                 | TT               | INTERGENIC                    |                    |                                                     |
| SNP_38555_A_46212055 | NC_021164.1    | Ca_Kabuli_Chr05 | 46212055                | CC                                     | AA                 | AA               | INTERGENIC                    |                    |                                                     |
| SNP_38556_A_46212126 | NC_021164.1    | Ca_Kabuli_Chr05 | 46212126                | CC                                     | AA                 | AA               | INTERGENIC                    |                    |                                                     |
| SNP_38559_A_46267474 | NC_021164.1    | Ca_Kabuli_Chr05 | 46267474                | GG                                     | AA                 | AA               | INTERGENIC                    |                    |                                                     |
| SNP_38561_A_46304727 | NC_021164.1    | Ca_Kabuli_Chr05 | 46304727                | AA                                     | GG                 | GG               | URR                           | 101500011          | uncharacterized LOC101500011                        |
| SNP_38562_A_46333649 | NC_021164.1    | Ca_Kabuli_Chr05 | 46333649                | AA                                     | CC                 | CC               | URR                           | 101499394          | bifunctional epoxide hydrolase 2                    |
| SNP_38563_A_46333651 | NC_021164.1    | Ca_Kabuli_Chr05 | 46333651                | AA                                     | CC                 | CC               | URR                           | 101499394          | bifunctional epoxide hydrolase 2                    |
| SNP_38564_A_46371306 | NC_021164.1    | Ca_Kabuli_Chr05 | 46371306                | AA                                     | CC                 | CC               | INTERGENIC                    |                    |                                                     |
| SNP_38565_A_46394752 | NC_021164.1    | Ca_Kabuli_Chr05 | 46394752                | AA                                     | TT                 | TT               | INTERGENIC                    |                    |                                                     |
| SNP_38568_A_46430706 | NC_021164.1    | Ca_Kabuli_Chr05 | 46430706                | CC                                     | TT                 | TT               | DRR                           | 101506010          | putative F-box protein At3g16210                    |

| SNPs IDs             | Chromosome IDs | Chromosomes     | Physical positions (bp) | CDC Frontier genome (Reference genome) | (Pusa 1103 & HPNB) | (ILWC 46 & LPNB) | Sequence Components of genome | Gene accession IDs | Putative functions                              |
|----------------------|----------------|-----------------|-------------------------|----------------------------------------|--------------------|------------------|-------------------------------|--------------------|-------------------------------------------------|
| SNP_38570_A_46566358 | NC_021164.1    | Ca_Kabuli_Chr05 | 46566358                | TT                                     | CC                 | CC               | INTERGENIC                    |                    |                                                 |
| SNP_38571_A_46611721 | NC_021164.1    | Ca_Kabuli_Chr05 | 46611721                | AA                                     | TT                 | TT               | URR                           | 101514373          | superoxide dismutase [Mn], mitochondrial        |
| SNP_38572_A_46619279 | NC_021164.1    | Ca_Kabuli_Chr05 | 46619279                | TT                                     | GG                 | GG               | DRR                           | 101515252          | uncharacterized membrane protein At1g06890-like |
| SNP_38573_A_46619288 | NC_021164.1    | Ca_Kabuli_Chr05 | 46619288                | TT                                     | CC                 | CC               | DRR                           | 101515252          | uncharacterized membrane protein At1g06890-like |
| SNP_38575_A_46650179 | NC_021164.1    | Ca_Kabuli_Chr05 | 46650179                | TT                                     | GG                 | GG               | INTERGENIC                    |                    |                                                 |
| SNP_38577_A_46655029 | NC_021164.1    | Ca_Kabuli_Chr05 | 46655029                | AA                                     | TT                 | TT               | INTERGENIC                    |                    |                                                 |
| SNP_38579_A_46689108 | NC_021164.1    | Ca_Kabuli_Chr05 | 46689108                | AA                                     | TT                 | TT               | INTERGENIC                    |                    |                                                 |
| SNP_38580_A_46718482 | NC_021164.1    | Ca_Kabuli_Chr05 | 46718482                | CC                                     | TT                 | TT               | INTERGENIC                    |                    |                                                 |
| SNP_38581_A_46870629 | NC_021164.1    | Ca_Kabuli_Chr05 | 46870629                | CC                                     | TT                 | TT               | INTERGENIC                    |                    |                                                 |
| SNP_38582_A_46874829 | NC_021164.1    | Ca_Kabuli_Chr05 | 46874829                | CC                                     | TT                 | TT               | INTERGENIC                    |                    |                                                 |
| SNP_38583_A_46880556 | NC_021164.1    | Ca_Kabuli_Chr05 | 46880556                | GG                                     | CC                 | CC               | INTERGENIC                    |                    |                                                 |
| SNP_38584_A_46886426 | NC_021164.1    | Ca_Kabuli_Chr05 | 46886426                | AA                                     | CC                 | CC               | INTERGENIC                    |                    |                                                 |
| SNP_38586_A_47075997 | NC_021164.1    | Ca_Kabuli_Chr05 | 47075997                | CC                                     | TT                 | TT               | INTERGENIC                    |                    |                                                 |
| SNP_38587_A_47112330 | NC_021164.1    | Ca_Kabuli_Chr05 | 47112330                | AA                                     | GG                 | GG               | INTERGENIC                    |                    |                                                 |
| SNP_38592_A_47272578 | NC_021164.1    | Ca_Kabuli_Chr05 | 47272578                | GG                                     | AA                 | AA               | URR                           | 101511139          | flavone 3'-O-methyltransferase 1-like           |
| SNP_38593_A_47349213 | NC_021164.1    | Ca_Kabuli_Chr05 | 47349213                | AA                                     | TT                 | TT               | INTERGENIC                    |                    |                                                 |
| SNP_38594_A_47349216 | NC_021164.1    | Ca_Kabuli_Chr05 | 47349216                | GG                                     | AA                 | AA               | INTERGENIC                    |                    |                                                 |
| SNP_38595_A_47351544 | NC_021164.1    | Ca_Kabuli_Chr05 | 47351544                | GG                                     | AA                 | AA               | INTERGENIC                    |                    |                                                 |
| SNP_38596_A_47452668 | NC_021164.1    | Ca_Kabuli_Chr05 | 47452668                | CC                                     | TT                 | TT               | DRR                           | 101504511          | flocculation protein FLO11-like                 |
| SNP_38598_A_47453675 | NC_021164.1    | Ca_Kabuli_Chr05 | 47453675                | TT                                     | CC                 | CC               | NON_SYNONYMOUS_CODING         | 101504511          | flocculation protein FLO11-like                 |
| SNP_38599_A_47455240 | NC_021164.1    | Ca_Kabuli_Chr05 | 47455240                | AA                                     | CC                 | CC               | URR                           | 101504511          | flocculation protein FLO11-like                 |
| SNP_38600_A_47455403 | NC_021164.1    | Ca_Kabuli_Chr05 | 47455403                | AA                                     | GG                 | GG               | URR                           | 101504511          | flocculation protein FLO11-like                 |

| SNPs IDs             | Chromosome IDs | Chromosomes     | Physical positions (bp) | CDC Frontier (Reference genome) | (Pusa 1103 & HPNB) | (ILWC 46 & LPNB) | Sequence Components of genome | Gene accession IDs | Putative functions                       |
|----------------------|----------------|-----------------|-------------------------|---------------------------------|--------------------|------------------|-------------------------------|--------------------|------------------------------------------|
| SNP_38601_A_47455417 | NC_021164.1    | Ca_Kabuli_Chr05 | 47455417                | GG                              | AA                 | AA               | URR                           | 101504511          | flocculation protein FLO11-like          |
| SNP_38602_A_47455422 | NC_021164.1    | Ca_Kabuli_Chr05 | 47455422                | GG                              | AA                 | AA               | URR                           | 101504511          | flocculation protein FLO11-like          |
| SNP_38603_A_47455494 | NC_021164.1    | Ca_Kabuli_Chr05 | 47455494                | GG                              | CC                 | CC               | URR                           | 101504511          | flocculation protein FLO11-like          |
| SNP_38604_A_47455509 | NC_021164.1    | Ca_Kabuli_Chr05 | 47455509                | CC                              | TT                 | TT               | URR                           | 101504511          | flocculation protein FLO11-like          |
| SNP_38605_A_47507628 | NC_021164.1    | Ca_Kabuli_Chr05 | 47507628                | AA                              | GG                 | GG               | INTERGENIC                    |                    |                                          |
| SNP_38607_A_47553700 | NC_021164.1    | Ca_Kabuli_Chr05 | 47553700                | TT                              | CC                 | CC               | INTERGENIC                    |                    |                                          |
| SNP_38608_A_47553702 | NC_021164.1    | Ca_Kabuli_Chr05 | 47553702                | AA                              | TT                 | TT               | INTERGENIC                    |                    |                                          |
| SNP_38612_A_47881254 | NC_021164.1    | Ca_Kabuli_Chr05 | 47881254                | CC                              | TT                 | TT               | INTERGENIC                    |                    |                                          |
| SNP_38617_A_48068976 | NC_021164.1    | Ca_Kabuli_Chr05 | 48068976                | TT                              | GG                 | GG               | INTRON                        | 101507419          | GDSL esterase/lipase At5g08460           |
| SNP_38619_A_48130369 | NC_021164.1    | Ca_Kabuli_Chr05 | 48130369                | TT                              | CC                 | CC               | INTERGENIC                    |                    |                                          |
| SNP_38620_A_48153219 | NC_021164.1    | Ca_Kabuli_Chr05 | 48153219                | GG                              | TT                 | TT               | INTERGENIC                    |                    |                                          |
| SNP_38622_A_23737    | NC_021165.1    | Ca_Kabuli_Chr06 | 23737                   | CC                              | TT                 | TT               | URR                           | 101512549          | putative cysteine proteinase inhibitor 7 |
| SNP_38624_A_38603    | NC_021165.1    | Ca_Kabuli_Chr06 | 38603                   | GG                              | TT                 | TT               | INTERGENIC                    |                    |                                          |
| SNP_38625_A_59447    | NC_021165.1    | Ca_Kabuli_Chr06 | 59447                   | TT                              | GG                 | GG               | INTERGENIC                    |                    |                                          |
| SNP_38626_A_88004    | NC_021165.1    | Ca_Kabuli_Chr06 | 88004                   | CC                              | TT                 | TT               | INTERGENIC                    |                    |                                          |
| SNP_38627_A_96613    | NC_021165.1    | Ca_Kabuli_Chr06 | 96613                   | GG                              | AA                 | AA               | INTERGENIC                    |                    |                                          |
| SNP_38628_A_112807   | NC_021165.1    | Ca_Kabuli_Chr06 | 112807                  | AA                              | GG                 | GG               | INTERGENIC                    |                    |                                          |
| SNP_38629_A_112843   | NC_021165.1    | Ca_Kabuli_Chr06 | 112843                  | TT                              | GG                 | GG               | INTERGENIC                    |                    |                                          |
| SNP_38630_A_112866   | NC_021165.1    | Ca_Kabuli_Chr06 | 112866                  | CC                              | AA                 | AA               | INTERGENIC                    |                    |                                          |
| SNP_38632_A_113047   | NC_021165.1    | Ca_Kabuli_Chr06 | 113047                  | CC                              | TT                 | TT               | INTERGENIC                    |                    |                                          |
| SNP_38633_A_113115   | NC_021165.1    | Ca_Kabuli_Chr06 | 113115                  | AA                              | GG                 | GG               | INTERGENIC                    |                    |                                          |
| SNP_38634_A_113128   | NC_021165.1    | Ca_Kabuli_Chr06 | 113128                  | GG                              | CC                 | CC               | INTERGENIC                    |                    |                                          |



| SNPs IDs           | Chromosome IDs | Chromosomes     | Physical positions (bp) | CDC Frontier genome (Reference genome) | (Pusa 1103 & HPNB) | (ILWC 46 & LPNB) | Sequence Components of genome | Gene accession IDs | Putative functions                                        |
|--------------------|----------------|-----------------|-------------------------|----------------------------------------|--------------------|------------------|-------------------------------|--------------------|-----------------------------------------------------------|
| SNP_38635_A_113186 | NC_021165.1    | Ca_Kabuli_Chr06 | 113186                  | AA                                     | GG                 | GG               | INTERGENIC                    |                    |                                                           |
| SNP_38636_A_113213 | NC_021165.1    | Ca_Kabuli_Chr06 | 113213                  | GG                                     | AA                 | AA               | INTERGENIC                    |                    |                                                           |
| SNP_38637_A_113222 | NC_021165.1    | Ca_Kabuli_Chr06 | 113222                  | TT                                     | CC                 | CC               | INTERGENIC                    |                    |                                                           |
| SNP_38638_A_113245 | NC_021165.1    | Ca_Kabuli_Chr06 | 113245                  | CC                                     | TT                 | TT               | INTERGENIC                    |                    |                                                           |
| SNP_38639_A_113251 | NC_021165.1    | Ca_Kabuli_Chr06 | 113251                  | AA                                     | GG                 | GG               | INTERGENIC                    |                    |                                                           |
| SNP_38640_A_113252 | NC_021165.1    | Ca_Kabuli_Chr06 | 113252                  | AA                                     | GG                 | GG               | INTERGENIC                    |                    |                                                           |
| SNP_38641_A_120303 | NC_021165.1    | Ca_Kabuli_Chr06 | 120303                  | GG                                     | TT                 | TT               | INTERGENIC                    |                    |                                                           |
| SNP_38642_A_120556 | NC_021165.1    | Ca_Kabuli_Chr06 | 120556                  | CC                                     | TT                 | TT               | INTERGENIC                    |                    |                                                           |
| SNP_38643_A_127806 | NC_021165.1    | Ca_Kabuli_Chr06 | 127806                  | GG                                     | AA                 | AA               | INTERGENIC                    |                    |                                                           |
| SNP_38644_A_141212 | NC_021165.1    | Ca_Kabuli_Chr06 | 141212                  | AA                                     | TT                 | TT               | URR                           | 101492103          | type I inositol 1,4,5-trisphosphate 5-phosphatase 12-like |
| SNP_38645_A_141213 | NC_021165.1    | Ca_Kabuli_Chr06 | 141213                  | AA                                     | CC                 | CC               | URR                           | 101492103          | type I inositol 1,4,5-trisphosphate 5-phosphatase 12-like |
| SNP_38646_A_141230 | NC_021165.1    | Ca_Kabuli_Chr06 | 141230                  | GG                                     | AA                 | AA               | URR                           | 101492103          | type I inositol 1,4,5-trisphosphate 5-phosphatase 12-like |
| SNP_38647_A_141242 | NC_021165.1    | Ca_Kabuli_Chr06 | 141242                  | AA                                     | TT                 | TT               | URR                           | 101492103          | type I inositol 1,4,5-trisphosphate 5-phosphatase 12-like |
| SNP_38648_A_145629 | NC_021165.1    | Ca_Kabuli_Chr06 | 145629                  | CC                                     | TT                 | TT               | URR                           | 101492443          | endoglucanase 25-like                                     |
| SNP_38649_A_145678 | NC_021165.1    | Ca_Kabuli_Chr06 | 145678                  | AA                                     | TT                 | TT               | URR                           | 101492443          | endoglucanase 25-like                                     |
| SNP_38650_A_146049 | NC_021165.1    | Ca_Kabuli_Chr06 | 146049                  | AA                                     | GG                 | GG               | URR                           | 101492443          | endoglucanase 25-like                                     |
| SNP_38651_A_167979 | NC_021165.1    | Ca_Kabuli_Chr06 | 167979                  | CC                                     | GG                 | GG               | INTRON                        | 101515680          | CASP-like protein 2A2                                     |
| SNP_38652_A_167996 | NC_021165.1    | Ca_Kabuli_Chr06 | 167996                  | GG                                     | AA                 | AA               | INTRON                        | 101515680          | CASP-like protein 2A2                                     |
| SNP_38653_A_168291 | NC_021165.1    | Ca_Kabuli_Chr06 | 168291                  | TT                                     | CC                 | CC               | INTRON                        | 101515680          | CASP-like protein 2A2                                     |
| SNP_38654_A_168304 | NC_021165.1    | Ca_Kabuli_Chr06 | 168304                  | CC                                     | GG                 | GG               | INTRON                        | 101515680          | CASP-like protein 2A2                                     |
| SNP_38655_A_168333 | NC_021165.1    | Ca_Kabuli_Chr06 | 168333                  | AA                                     | CC                 | CC               | INTRON                        | 101515680          | CASP-like protein 2A2                                     |
| SNP_38656_A_189530 | NC_021165.1    | Ca_Kabuli_Chr06 | 189530                  | AA                                     | GG                 | GG               | INTERGENIC                    |                    |                                                           |

| SNPs IDs            | Chromosome IDs | Chromosomes     | Physical positions (bp) | CDC Frontier (Reference genome) | (Pusa 1103 & HPNB) | (ILWC 46 & LPNB) | Sequence Components of genome | Gene accession IDs | Putative functions                                               |
|---------------------|----------------|-----------------|-------------------------|---------------------------------|--------------------|------------------|-------------------------------|--------------------|------------------------------------------------------------------|
| SNP_38660_A_720573  | NC_021165.1    | Ca_Kabuli_Chr06 | 720573                  | AA                              | CC                 | CC               | INTERGENIC                    |                    |                                                                  |
| SNP_38661_A_829879  | NC_021165.1    | Ca_Kabuli_Chr06 | 829879                  | AA                              | TT                 | TT               | INTRON                        | 101504933          | probable ADP-ribosylation factor GTPase-activating protein AGD11 |
| SNP_38662_A_924401  | NC_021165.1    | Ca_Kabuli_Chr06 | 924401                  | TT                              | GG                 | GG               | INTERGENIC                    |                    |                                                                  |
| SNP_38663_A_974372  | NC_021165.1    | Ca_Kabuli_Chr06 | 974372                  | GG                              | AA                 | AA               | INTERGENIC                    |                    |                                                                  |
| SNP_38664_A_982553  | NC_021165.1    | Ca_Kabuli_Chr06 | 982553                  | AA                              | GG                 | GG               | INTERGENIC                    |                    |                                                                  |
| SNP_38665_A_982557  | NC_021165.1    | Ca_Kabuli_Chr06 | 982557                  | TT                              | GG                 | GG               | INTERGENIC                    |                    |                                                                  |
| SNP_38666_A_1070954 | NC_021165.1    | Ca_Kabuli_Chr06 | 1070954                 | AA                              | GG                 | GG               | URR                           | 101509745          | E3 ubiquitin-protein ligase SDIR1                                |
| SNP_38667_A_1137659 | NC_021165.1    | Ca_Kabuli_Chr06 | 1137659                 | AA                              | CC                 | CC               | INTERGENIC                    |                    |                                                                  |
| SNP_38668_A_1175605 | NC_021165.1    | Ca_Kabuli_Chr06 | 1175605                 | TT                              | CC                 | CC               | INTERGENIC                    |                    |                                                                  |
| SNP_38669_A_1175626 | NC_021165.1    | Ca_Kabuli_Chr06 | 1175626                 | TT                              | GG                 | GG               | INTERGENIC                    |                    |                                                                  |
| SNP_38670_A_1175719 | NC_021165.1    | Ca_Kabuli_Chr06 | 1175719                 | AA                              | CC                 | CC               | INTERGENIC                    |                    |                                                                  |
| SNP_38671_A_1175753 | NC_021165.1    | Ca_Kabuli_Chr06 | 1175753                 | AA                              | TT                 | TT               | INTERGENIC                    |                    |                                                                  |
| SNP_38672_A_1175754 | NC_021165.1    | Ca_Kabuli_Chr06 | 1175754                 | TT                              | AA                 | AA               | INTERGENIC                    |                    |                                                                  |
| SNP_38673_A_1175775 | NC_021165.1    | Ca_Kabuli_Chr06 | 1175775                 | CC                              | TT                 | TT               | INTERGENIC                    |                    |                                                                  |
| SNP_38674_A_1176009 | NC_021165.1    | Ca_Kabuli_Chr06 | 1176009                 | CC                              | TT                 | TT               | INTERGENIC                    |                    |                                                                  |
| SNP_38675_A_1190105 | NC_021165.1    | Ca_Kabuli_Chr06 | 1190105                 | GG                              | AA                 | AA               | DRR                           | 101514159          | ARF guanine-nucleotide exchange factor GNOM-like                 |
| SNP_38676_A_1233711 | NC_021165.1    | Ca_Kabuli_Chr06 | 1233711                 | CC                              | TT                 | TT               | INTERGENIC                    |                    |                                                                  |
| SNP_38678_A_1337230 | NC_021165.1    | Ca_Kabuli_Chr06 | 1337230                 | TT                              | CC                 | CC               | INTERGENIC                    |                    |                                                                  |
| SNP_38680_A_1338910 | NC_021165.1    | Ca_Kabuli_Chr06 | 1338910                 | CC                              | AA                 | AA               | INTERGENIC                    |                    |                                                                  |
| SNP_38681_A_1338986 | NC_021165.1    | Ca_Kabuli_Chr06 | 1338986                 | TT                              | CC                 | CC               | INTERGENIC                    |                    |                                                                  |
| SNP_38682_A_1338999 | NC_021165.1    | Ca_Kabuli_Chr06 | 1338999                 | TT                              | GG                 | GG               | INTERGENIC                    |                    |                                                                  |
| SNP_38683_A_1339002 | NC_021165.1    | Ca_Kabuli_Chr06 | 1339002                 | TT                              | GG                 | GG               | INTERGENIC                    |                    |                                                                  |

| SNPs IDs            | Chromosome IDs | Chromosomes     | Physical positions (bp) | CDC Frontier genome (Reference genome) | (Pusa 1103 & HPNB) | (ILWC 46 & LPNB) | Sequence genome | Components of | Gene accession IDs | Putative functions |
|---------------------|----------------|-----------------|-------------------------|----------------------------------------|--------------------|------------------|-----------------|---------------|--------------------|--------------------|
| SNP_38684_A_1339024 | NC_021165.1    | Ca_Kabuli_Chr06 | 1339024                 | CC                                     | TT                 | TT               | INTERGENIC      |               |                    |                    |
| SNP_38685_A_1339034 | NC_021165.1    | Ca_Kabuli_Chr06 | 1339034                 | AA                                     | CC                 | CC               | INTERGENIC      |               |                    |                    |
| SNP_38686_A_1339083 | NC_021165.1    | Ca_Kabuli_Chr06 | 1339083                 | AA                                     | GG                 | GG               | INTERGENIC      |               |                    |                    |
| SNP_38687_A_1339108 | NC_021165.1    | Ca_Kabuli_Chr06 | 1339108                 | TT                                     | CC                 | CC               | INTERGENIC      |               |                    |                    |
| SNP_38688_A_1339112 | NC_021165.1    | Ca_Kabuli_Chr06 | 1339112                 | CC                                     | TT                 | TT               | INTERGENIC      |               |                    |                    |
| SNP_38689_A_1339270 | NC_021165.1    | Ca_Kabuli_Chr06 | 1339270                 | AA                                     | CC                 | CC               | INTERGENIC      |               |                    |                    |
| SNP_38690_A_1339273 | NC_021165.1    | Ca_Kabuli_Chr06 | 1339273                 | GG                                     | TT                 | TT               | INTERGENIC      |               |                    |                    |
| SNP_38691_A_1339274 | NC_021165.1    | Ca_Kabuli_Chr06 | 1339274                 | TT                                     | GG                 | GG               | INTERGENIC      |               |                    |                    |
| SNP_38692_A_1339528 | NC_021165.1    | Ca_Kabuli_Chr06 | 1339528                 | CC                                     | TT                 | TT               | INTERGENIC      |               |                    |                    |
| SNP_38693_A_1339563 | NC_021165.1    | Ca_Kabuli_Chr06 | 1339563                 | GG                                     | AA                 | AA               | INTERGENIC      |               |                    |                    |
| SNP_38694_A_1343521 | NC_021165.1    | Ca_Kabuli_Chr06 | 1343521                 | AA                                     | GG                 | GG               | INTERGENIC      |               |                    |                    |
| SNP_38696_A_1348922 | NC_021165.1    | Ca_Kabuli_Chr06 | 1348922                 | AA                                     | GG                 | GG               | INTERGENIC      |               |                    |                    |
| SNP_38697_A_1348954 | NC_021165.1    | Ca_Kabuli_Chr06 | 1348954                 | TT                                     | CC                 | CC               | INTERGENIC      |               |                    |                    |
| SNP_38698_A_1349069 | NC_021165.1    | Ca_Kabuli_Chr06 | 1349069                 | GG                                     | CC                 | CC               | INTERGENIC      |               |                    |                    |
| SNP_38699_A_1349310 | NC_021165.1    | Ca_Kabuli_Chr06 | 1349310                 | CC                                     | TT                 | TT               | INTERGENIC      |               |                    |                    |
| SNP_38700_A_1349335 | NC_021165.1    | Ca_Kabuli_Chr06 | 1349335                 | TT                                     | CC                 | CC               | INTERGENIC      |               |                    |                    |
| SNP_38701_A_1349389 | NC_021165.1    | Ca_Kabuli_Chr06 | 1349389                 | GG                                     | CC                 | CC               | INTERGENIC      |               |                    |                    |
| SNP_38702_A_1349463 | NC_021165.1    | Ca_Kabuli_Chr06 | 1349463                 | TT                                     | GG                 | GG               | INTERGENIC      |               |                    |                    |
| SNP_38703_A_1349471 | NC_021165.1    | Ca_Kabuli_Chr06 | 1349471                 | AA                                     | CC                 | CC               | INTERGENIC      |               |                    |                    |
| SNP_38704_A_1350103 | NC_021165.1    | Ca_Kabuli_Chr06 | 1350103                 | TT                                     | AA                 | AA               | INTERGENIC      |               |                    |                    |
| SNP_38705_A_1350310 | NC_021165.1    | Ca_Kabuli_Chr06 | 1350310                 | AA                                     | TT                 | TT               | INTERGENIC      |               |                    |                    |
| SNP_38706_A_1350790 | NC_021165.1    | Ca_Kabuli_Chr06 | 1350790                 | TT                                     | GG                 | GG               | INTERGENIC      |               |                    |                    |

| SNPs IDs            | Chromosome IDs | Chromosomes     | Physical positions (bp) | CDC Frontier (Reference genome) | (Pusa 1103 & HPNB) | (ILWC 46 & LPNB) | Sequence genome | Components of | Gene accession IDs | Putative functions |
|---------------------|----------------|-----------------|-------------------------|---------------------------------|--------------------|------------------|-----------------|---------------|--------------------|--------------------|
| SNP_38707_A_1350830 | NC_021165.1    | Ca_Kabuli_Chr06 | 1350830                 | AA                              | GG                 | GG               | INTERGENIC      |               |                    |                    |
| SNP_38709_A_1350965 | NC_021165.1    | Ca_Kabuli_Chr06 | 1350965                 | GG                              | AA                 | AA               | INTERGENIC      |               |                    |                    |
| SNP_38710_A_1351149 | NC_021165.1    | Ca_Kabuli_Chr06 | 1351149                 | TT                              | GG                 | GG               | INTERGENIC      |               |                    |                    |
| SNP_38711_A_1351254 | NC_021165.1    | Ca_Kabuli_Chr06 | 1351254                 | CC                              | GG                 | GG               | INTERGENIC      |               |                    |                    |
| SNP_38712_A_1351545 | NC_021165.1    | Ca_Kabuli_Chr06 | 1351545                 | CC                              | GG                 | GG               | INTERGENIC      |               |                    |                    |
| SNP_38713_A_1351748 | NC_021165.1    | Ca_Kabuli_Chr06 | 1351748                 | GG                              | CC                 | CC               | INTERGENIC      |               |                    |                    |
| SNP_38715_A_1353981 | NC_021165.1    | Ca_Kabuli_Chr06 | 1353981                 | CC                              | TT                 | TT               | INTERGENIC      |               |                    |                    |
| SNP_38716_A_1353990 | NC_021165.1    | Ca_Kabuli_Chr06 | 1353990                 | CC                              | TT                 | TT               | INTERGENIC      |               |                    |                    |
| SNP_38717_A_1354003 | NC_021165.1    | Ca_Kabuli_Chr06 | 1354003                 | TT                              | AA                 | AA               | INTERGENIC      |               |                    |                    |
| SNP_38718_A_1354127 | NC_021165.1    | Ca_Kabuli_Chr06 | 1354127                 | GG                              | AA                 | AA               | INTERGENIC      |               |                    |                    |
| SNP_38719_A_1354306 | NC_021165.1    | Ca_Kabuli_Chr06 | 1354306                 | AA                              | GG                 | GG               | INTERGENIC      |               |                    |                    |
| SNP_38721_A_1354328 | NC_021165.1    | Ca_Kabuli_Chr06 | 1354328                 | CC                              | TT                 | TT               | INTERGENIC      |               |                    |                    |
| SNP_38722_A_1354347 | NC_021165.1    | Ca_Kabuli_Chr06 | 1354347                 | GG                              | AA                 | AA               | INTERGENIC      |               |                    |                    |
| SNP_38723_A_1354351 | NC_021165.1    | Ca_Kabuli_Chr06 | 1354351                 | CC                              | TT                 | TT               | INTERGENIC      |               |                    |                    |
| SNP_38724_A_1354378 | NC_021165.1    | Ca_Kabuli_Chr06 | 1354378                 | AA                              | TT                 | TT               | INTERGENIC      |               |                    |                    |
| SNP_38725_A_1354424 | NC_021165.1    | Ca_Kabuli_Chr06 | 1354424                 | CC                              | TT                 | TT               | INTERGENIC      |               |                    |                    |
| SNP_38726_A_1354467 | NC_021165.1    | Ca_Kabuli_Chr06 | 1354467                 | AA                              | TT                 | TT               | INTERGENIC      |               |                    |                    |
| SNP_38727_A_1354473 | NC_021165.1    | Ca_Kabuli_Chr06 | 1354473                 | GG                              | AA                 | AA               | INTERGENIC      |               |                    |                    |
| SNP_38728_A_1359038 | NC_021165.1    | Ca_Kabuli_Chr06 | 1359038                 | TT                              | AA                 | AA               | INTERGENIC      |               |                    |                    |
| SNP_38729_A_1360619 | NC_021165.1    | Ca_Kabuli_Chr06 | 1360619                 | AA                              | GG                 | GG               | INTERGENIC      |               |                    |                    |
| SNP_38730_A_1361976 | NC_021165.1    | Ca_Kabuli_Chr06 | 1361976                 | TT                              | CC                 | CC               | INTERGENIC      |               |                    |                    |
| SNP_38731_A_1362145 | NC_021165.1    | Ca_Kabuli_Chr06 | 1362145                 | CC                              | AA                 | AA               | INTERGENIC      |               |                    |                    |

| SNPs IDs            | Chromosome IDs | Chromosomes     | Physical positions (bp) | CDC Frontier (Reference genome) | (Pusa 1103 & HPNB) | (ILWC 46 & LPNB) | Sequence Components of genome | Gene accession IDs | Putative functions           |
|---------------------|----------------|-----------------|-------------------------|---------------------------------|--------------------|------------------|-------------------------------|--------------------|------------------------------|
| SNP_38732_A_1362178 | NC_021165.1    | Ca_Kabuli_Chr06 | 1362178                 | AA                              | GG                 | GG               | INTERGENIC                    |                    |                              |
| SNP_38733_A_1362188 | NC_021165.1    | Ca_Kabuli_Chr06 | 1362188                 | TT                              | CC                 | CC               | INTERGENIC                    |                    |                              |
| SNP_38734_A_1362233 | NC_021165.1    | Ca_Kabuli_Chr06 | 1362233                 | TT                              | CC                 | CC               | INTERGENIC                    |                    |                              |
| SNP_38735_A_1362261 | NC_021165.1    | Ca_Kabuli_Chr06 | 1362261                 | AA                              | CC                 | CC               | INTERGENIC                    |                    |                              |
| SNP_38736_A_1362309 | NC_021165.1    | Ca_Kabuli_Chr06 | 1362309                 | TT                              | GG                 | GG               | INTERGENIC                    |                    |                              |
| SNP_38737_A_1362354 | NC_021165.1    | Ca_Kabuli_Chr06 | 1362354                 | GG                              | AA                 | AA               | INTERGENIC                    |                    |                              |
| SNP_38738_A_1362379 | NC_021165.1    | Ca_Kabuli_Chr06 | 1362379                 | AA                              | GG                 | GG               | INTERGENIC                    |                    |                              |
| SNP_38739_A_1369403 | NC_021165.1    | Ca_Kabuli_Chr06 | 1369403                 | AA                              | CC                 | CC               | INTERGENIC                    |                    |                              |
| SNP_38740_A_1369651 | NC_021165.1    | Ca_Kabuli_Chr06 | 1369651                 | AA                              | TT                 | TT               | INTERGENIC                    |                    |                              |
| SNP_38741_A_1369669 | NC_021165.1    | Ca_Kabuli_Chr06 | 1369669                 | GG                              | TT                 | TT               | INTERGENIC                    |                    |                              |
| SNP_38742_A_1369758 | NC_021165.1    | Ca_Kabuli_Chr06 | 1369758                 | TT                              | CC                 | CC               | INTERGENIC                    |                    |                              |
| SNP_38743_A_1369955 | NC_021165.1    | Ca_Kabuli_Chr06 | 1369955                 | AA                              | GG                 | GG               | INTERGENIC                    |                    |                              |
| SNP_38744_A_1369959 | NC_021165.1    | Ca_Kabuli_Chr06 | 1369959                 | CC                              | TT                 | TT               | INTERGENIC                    |                    |                              |
| SNP_38745_A_1369962 | NC_021165.1    | Ca_Kabuli_Chr06 | 1369962                 | TT                              | CC                 | CC               | INTERGENIC                    |                    |                              |
| SNP_38746_A_1376353 | NC_021165.1    | Ca_Kabuli_Chr06 | 1376353                 | CC                              | TT                 | TT               | DRR                           | 101498187          | uncharacterized LOC101498187 |
| SNP_38747_A_1377886 | NC_021165.1    | Ca_Kabuli_Chr06 | 1377886                 | CC                              | TT                 | TT               | URR                           | 101498187          | uncharacterized LOC101498187 |
| SNP_38748_A_1384524 | NC_021165.1    | Ca_Kabuli_Chr06 | 1384524                 | GG                              | AA                 | AA               | INTERGENIC                    |                    |                              |
| SNP_38749_A_1396874 | NC_021165.1    | Ca_Kabuli_Chr06 | 1396874                 | TT                              | CC                 | CC               | URR                           | 101499498          | Unknown function             |
| SNP_38750_A_1410138 | NC_021165.1    | Ca_Kabuli_Chr06 | 1410138                 | GG                              | AA                 | AA               | INTERGENIC                    |                    |                              |
| SNP_38751_A_1434486 | NC_021165.1    | Ca_Kabuli_Chr06 | 1434486                 | AA                              | GG                 | GG               | INTERGENIC                    |                    |                              |
| SNP_38753_A_1491398 | NC_021165.1    | Ca_Kabuli_Chr06 | 1491398                 | CC                              | TT                 | TT               | INTRON                        | 101500456          | folypolyglutamate synthase   |
| SNP_38754_A_1491403 | NC_021165.1    | Ca_Kabuli_Chr06 | 1491403                 | AA                              | GG                 | GG               | INTRON                        | 101500456          | folypolyglutamate synthase   |

| SNPs IDs            | Chromosome IDs | Chromosomes     | Physical positions (bp) | CDC Frontier (Reference genome) | (Pusa 1103 & HPNB) | (ILWC 46 & LPNB) | Sequence Components of genome | Gene accession IDs | Putative functions         |
|---------------------|----------------|-----------------|-------------------------|---------------------------------|--------------------|------------------|-------------------------------|--------------------|----------------------------|
| SNP_38755_A_1491472 | NC_021165.1    | Ca_Kabuli_Chr06 | 1491472                 | AA                              | CC                 | CC               | INTRON                        | 101500456          | folypolyglutamate synthase |
| SNP_38756_A_1491501 | NC_021165.1    | Ca_Kabuli_Chr06 | 1491501                 | TT                              | AA                 | AA               | INTRON                        | 101500456          | folypolyglutamate synthase |
| SNP_38757_A_1491597 | NC_021165.1    | Ca_Kabuli_Chr06 | 1491597                 | TT                              | CC                 | CC               | NON_SYNONYMOUS_CODING         | 101500456          | folypolyglutamate synthase |
| SNP_38758_A_1491610 | NC_021165.1    | Ca_Kabuli_Chr06 | 1491610                 | GG                              | AA                 | AA               | NON_SYNONYMOUS_CODING         | 101500456          | folypolyglutamate synthase |
| SNP_38759_A_1491673 | NC_021165.1    | Ca_Kabuli_Chr06 | 1491673                 | GG                              | CC                 | CC               | INTRON                        | 101500456          | folypolyglutamate synthase |
| SNP_38760_A_1491729 | NC_021165.1    | Ca_Kabuli_Chr06 | 1491729                 | GG                              | TT                 | TT               | INTRON                        | 101500456          | folypolyglutamate synthase |
| SNP_38761_A_1491748 | NC_021165.1    | Ca_Kabuli_Chr06 | 1491748                 | CC                              | TT                 | TT               | INTRON                        | 101500456          | folypolyglutamate synthase |
| SNP_38762_A_1491780 | NC_021165.1    | Ca_Kabuli_Chr06 | 1491780                 | AA                              | GG                 | GG               | INTRON                        | 101500456          | folypolyglutamate synthase |
| SNP_38763_A_1491810 | NC_021165.1    | Ca_Kabuli_Chr06 | 1491810                 | CC                              | TT                 | TT               | INTRON                        | 101500456          | folypolyglutamate synthase |
| SNP_38764_A_1491856 | NC_021165.1    | Ca_Kabuli_Chr06 | 1491856                 | GG                              | AA                 | AA               | INTRON                        | 101500456          | folypolyglutamate synthase |
| SNP_38765_A_1491865 | NC_021165.1    | Ca_Kabuli_Chr06 | 1491865                 | GG                              | AA                 | AA               | INTRON                        | 101500456          | folypolyglutamate synthase |
| SNP_38766_A_1491885 | NC_021165.1    | Ca_Kabuli_Chr06 | 1491885                 | AA                              | TT                 | TT               | INTRON                        | 101500456          | folypolyglutamate synthase |
| SNP_38768_A_1491957 | NC_021165.1    | Ca_Kabuli_Chr06 | 1491957                 | CC                              | TT                 | TT               | INTRON                        | 101500456          | folypolyglutamate synthase |
| SNP_38769_A_1491999 | NC_021165.1    | Ca_Kabuli_Chr06 | 1491999                 | CC                              | AA                 | AA               | NON_SYNONYMOUS_CODING         | 101500456          | folypolyglutamate synthase |
| SNP_38770_A_1492011 | NC_021165.1    | Ca_Kabuli_Chr06 | 1492011                 | GG                              | AA                 | AA               | NON_SYNONYMOUS_CODING         | 101500456          | folypolyglutamate synthase |
| SNP_38771_A_1492061 | NC_021165.1    | Ca_Kabuli_Chr06 | 1492061                 | GG                              | AA                 | AA               | INTRON                        | 101500456          | folypolyglutamate synthase |
| SNP_38772_A_1492064 | NC_021165.1    | Ca_Kabuli_Chr06 | 1492064                 | CC                              | AA                 | AA               | INTRON                        | 101500456          | folypolyglutamate synthase |
| SNP_38773_A_1492142 | NC_021165.1    | Ca_Kabuli_Chr06 | 1492142                 | GG                              | TT                 | TT               | INTRON                        | 101500456          | folypolyglutamate synthase |
| SNP_38774_A_1492144 | NC_021165.1    | Ca_Kabuli_Chr06 | 1492144                 | TT                              | AA                 | AA               | INTRON                        | 101500456          | folypolyglutamate synthase |
| SNP_38776_A_1492246 | NC_021165.1    | Ca_Kabuli_Chr06 | 1492246                 | AA                              | GG                 | GG               | INTRON                        | 101500456          | folypolyglutamate synthase |
| SNP_38777_A_1492272 | NC_021165.1    | Ca_Kabuli_Chr06 | 1492272                 | TT                              | CC                 | CC               | INTRON                        | 101500456          | folypolyglutamate synthase |
| SNP_38778_A_1492280 | NC_021165.1    | Ca_Kabuli_Chr06 | 1492280                 | TT                              | AA                 | AA               | INTRON                        | 101500456          | folypolyglutamate synthase |

| SNPs IDs            | Chromosome IDs | Chromosomes     | Physical positions (bp) | CDC Frontier (Reference genome) | (Pusa 1103 & HPNB) | (ILWC 46 & LPNB) | Sequence Components of genome | Gene accession IDs | Putative functions         |
|---------------------|----------------|-----------------|-------------------------|---------------------------------|--------------------|------------------|-------------------------------|--------------------|----------------------------|
| SNP_38779_A_1492289 | NC_021165.1    | Ca_Kabuli_Chr06 | 1492289                 | AA                              | GG                 | GG               | INTRON                        | 101500456          | folypolyglutamate synthase |
| SNP_38780_A_1492310 | NC_021165.1    | Ca_Kabuli_Chr06 | 1492310                 | CC                              | TT                 | TT               | INTRON                        | 101500456          | folypolyglutamate synthase |
| SNP_38781_A_1492341 | NC_021165.1    | Ca_Kabuli_Chr06 | 1492341                 | CC                              | GG                 | GG               | INTRON                        | 101500456          | folypolyglutamate synthase |
| SNP_38783_A_1492388 | NC_021165.1    | Ca_Kabuli_Chr06 | 1492388                 | CC                              | TT                 | TT               | INTRON                        | 101500456          | folypolyglutamate synthase |
| SNP_38784_A_1492423 | NC_021165.1    | Ca_Kabuli_Chr06 | 1492423                 | GG                              | CC                 | CC               | INTRON                        | 101500456          | folypolyglutamate synthase |
| SNP_38785_A_1492432 | NC_021165.1    | Ca_Kabuli_Chr06 | 1492432                 | CC                              | AA                 | AA               | INTRON                        | 101500456          | folypolyglutamate synthase |
| SNP_38786_A_1492443 | NC_021165.1    | Ca_Kabuli_Chr06 | 1492443                 | GG                              | TT                 | TT               | INTRON                        | 101500456          | folypolyglutamate synthase |
| SNP_38787_A_1492545 | NC_021165.1    | Ca_Kabuli_Chr06 | 1492545                 | TT                              | CC                 | CC               | INTRON                        | 101500456          | folypolyglutamate synthase |
| SNP_38788_A_1492620 | NC_021165.1    | Ca_Kabuli_Chr06 | 1492620                 | AA                              | CC                 | CC               | SYNONYMOUS_CODING             | 101500456          | folypolyglutamate synthase |
| SNP_38789_A_1492681 | NC_021165.1    | Ca_Kabuli_Chr06 | 1492681                 | AA                              | GG                 | GG               | INTRON                        | 101500456          | folypolyglutamate synthase |
| SNP_38790_A_1492682 | NC_021165.1    | Ca_Kabuli_Chr06 | 1492682                 | CC                              | TT                 | TT               | INTRON                        | 101500456          | folypolyglutamate synthase |
| SNP_38791_A_1492721 | NC_021165.1    | Ca_Kabuli_Chr06 | 1492721                 | AA                              | TT                 | TT               | INTRON                        | 101500456          | folypolyglutamate synthase |
| SNP_38793_A_1492822 | NC_021165.1    | Ca_Kabuli_Chr06 | 1492822                 | GG                              | TT                 | TT               | INTRON                        | 101500456          | folypolyglutamate synthase |
| SNP_38794_A_1492844 | NC_021165.1    | Ca_Kabuli_Chr06 | 1492844                 | CC                              | TT                 | TT               | INTRON                        | 101500456          | folypolyglutamate synthase |
| SNP_38795_A_1492939 | NC_021165.1    | Ca_Kabuli_Chr06 | 1492939                 | TT                              | CC                 | CC               | INTRON                        | 101500456          | folypolyglutamate synthase |
| SNP_38796_A_1505916 | NC_021165.1    | Ca_Kabuli_Chr06 | 1505916                 | AA                              | TT                 | TT               | INTERGENIC                    |                    |                            |
| SNP_38798_A_1540000 | NC_021165.1    | Ca_Kabuli_Chr06 | 1540000                 | TT                              | CC                 | CC               | INTERGENIC                    |                    |                            |
| SNP_38799_A_1540006 | NC_021165.1    | Ca_Kabuli_Chr06 | 1540006                 | GG                              | TT                 | TT               | INTERGENIC                    |                    |                            |
| SNP_38800_A_1540094 | NC_021165.1    | Ca_Kabuli_Chr06 | 1540094                 | TT                              | CC                 | CC               | INTERGENIC                    |                    |                            |
| SNP_38801_A_1540110 | NC_021165.1    | Ca_Kabuli_Chr06 | 1540110                 | AA                              | GG                 | GG               | INTERGENIC                    |                    |                            |
| SNP_38802_A_1540170 | NC_021165.1    | Ca_Kabuli_Chr06 | 1540170                 | AA                              | TT                 | TT               | INTERGENIC                    |                    |                            |
| SNP_38803_A_1540298 | NC_021165.1    | Ca_Kabuli_Chr06 | 1540298                 | CC                              | GG                 | GG               | INTERGENIC                    |                    |                            |

| SNPs IDs            | Chromosome IDs | Chromosomes     | Physical positions (bp) | CDC Frontier genome (Reference genome) | (Pusa 1103 & HPNB) | (ILWC 46 & LPNB) | Sequence genome | Components of | Gene accession IDs | Putative functions |
|---------------------|----------------|-----------------|-------------------------|----------------------------------------|--------------------|------------------|-----------------|---------------|--------------------|--------------------|
| SNP_38804_A_1541788 | NC_021165.1    | Ca_Kabuli_Chr06 | 1541788                 | TT                                     | AA                 | AA               | INTERGENIC      |               |                    |                    |
| SNP_38805_A_1541813 | NC_021165.1    | Ca_Kabuli_Chr06 | 1541813                 | AA                                     | GG                 | GG               | INTERGENIC      |               |                    |                    |
| SNP_38806_A_1541888 | NC_021165.1    | Ca_Kabuli_Chr06 | 1541888                 | GG                                     | AA                 | AA               | INTERGENIC      |               |                    |                    |
| SNP_38807_A_1542030 | NC_021165.1    | Ca_Kabuli_Chr06 | 1542030                 | AA                                     | CC                 | CC               | INTERGENIC      |               |                    |                    |
| SNP_38809_A_1542219 | NC_021165.1    | Ca_Kabuli_Chr06 | 1542219                 | TT                                     | AA                 | AA               | INTERGENIC      |               |                    |                    |
| SNP_38810_A_1542255 | NC_021165.1    | Ca_Kabuli_Chr06 | 1542255                 | AA                                     | CC                 | CC               | INTERGENIC      |               |                    |                    |
| SNP_38811_A_1542284 | NC_021165.1    | Ca_Kabuli_Chr06 | 1542284                 | CC                                     | TT                 | TT               | INTERGENIC      |               |                    |                    |
| SNP_38812_A_1542302 | NC_021165.1    | Ca_Kabuli_Chr06 | 1542302                 | TT                                     | AA                 | AA               | INTERGENIC      |               |                    |                    |
| SNP_38813_A_1542375 | NC_021165.1    | Ca_Kabuli_Chr06 | 1542375                 | TT                                     | CC                 | CC               | INTERGENIC      |               |                    |                    |
| SNP_38814_A_1542396 | NC_021165.1    | Ca_Kabuli_Chr06 | 1542396                 | TT                                     | AA                 | AA               | INTERGENIC      |               |                    |                    |
| SNP_38815_A_1542456 | NC_021165.1    | Ca_Kabuli_Chr06 | 1542456                 | TT                                     | CC                 | CC               | INTERGENIC      |               |                    |                    |
| SNP_38816_A_1542606 | NC_021165.1    | Ca_Kabuli_Chr06 | 1542606                 | TT                                     | CC                 | CC               | INTERGENIC      |               |                    |                    |
| SNP_38817_A_1542620 | NC_021165.1    | Ca_Kabuli_Chr06 | 1542620                 | AA                                     | TT                 | TT               | INTERGENIC      |               |                    |                    |
| SNP_38818_A_1542665 | NC_021165.1    | Ca_Kabuli_Chr06 | 1542665                 | TT                                     | AA                 | AA               | INTERGENIC      |               |                    |                    |
| SNP_38819_A_1543726 | NC_021165.1    | Ca_Kabuli_Chr06 | 1543726                 | CC                                     | TT                 | TT               | INTERGENIC      |               |                    |                    |
| SNP_38820_A_1543767 | NC_021165.1    | Ca_Kabuli_Chr06 | 1543767                 | GG                                     | AA                 | AA               | INTERGENIC      |               |                    |                    |
| SNP_38821_A_1543768 | NC_021165.1    | Ca_Kabuli_Chr06 | 1543768                 | AA                                     | GG                 | GG               | INTERGENIC      |               |                    |                    |
| SNP_38822_A_1543785 | NC_021165.1    | Ca_Kabuli_Chr06 | 1543785                 | GG                                     | AA                 | AA               | INTERGENIC      |               |                    |                    |
| SNP_38823_A_1543802 | NC_021165.1    | Ca_Kabuli_Chr06 | 1543802                 | GG                                     | AA                 | AA               | INTERGENIC      |               |                    |                    |
| SNP_38824_A_1543831 | NC_021165.1    | Ca_Kabuli_Chr06 | 1543831                 | CC                                     | TT                 | TT               | INTERGENIC      |               |                    |                    |
| SNP_38825_A_1543865 | NC_021165.1    | Ca_Kabuli_Chr06 | 1543865                 | CC                                     | TT                 | TT               | INTERGENIC      |               |                    |                    |
| SNP_38826_A_1543943 | NC_021165.1    | Ca_Kabuli_Chr06 | 1543943                 | TT                                     | AA                 | AA               | INTERGENIC      |               |                    |                    |



| SNPs IDs            | Chromosome IDs | Chromosomes     | Physical positions (bp) | CDC Frontier genome (Reference genome) | (Pusa 1103 & HPNB) | (ILWC 46 & LPNB) | Sequence genome | Components of | Gene accession IDs | Putative functions |
|---------------------|----------------|-----------------|-------------------------|----------------------------------------|--------------------|------------------|-----------------|---------------|--------------------|--------------------|
| SNP_38827_A_1544021 | NC_021165.1    | Ca_Kabuli_Chr06 | 1544021                 | TT                                     | GG                 | GG               | INTERGENIC      |               |                    |                    |
| SNP_38828_A_1544036 | NC_021165.1    | Ca_Kabuli_Chr06 | 1544036                 | AA                                     | TT                 | TT               | INTERGENIC      |               |                    |                    |
| SNP_38829_A_1544283 | NC_021165.1    | Ca_Kabuli_Chr06 | 1544283                 | AA                                     | TT                 | TT               | INTERGENIC      |               |                    |                    |
| SNP_38830_A_1544395 | NC_021165.1    | Ca_Kabuli_Chr06 | 1544395                 | AA                                     | CC                 | CC               | INTERGENIC      |               |                    |                    |
| SNP_38831_A_1546034 | NC_021165.1    | Ca_Kabuli_Chr06 | 1546034                 | GG                                     | AA                 | AA               | INTERGENIC      |               |                    |                    |
| SNP_38832_A_1546056 | NC_021165.1    | Ca_Kabuli_Chr06 | 1546056                 | AA                                     | TT                 | TT               | INTERGENIC      |               |                    |                    |
| SNP_38833_A_1546108 | NC_021165.1    | Ca_Kabuli_Chr06 | 1546108                 | AA                                     | TT                 | TT               | INTERGENIC      |               |                    |                    |
| SNP_38834_A_1546563 | NC_021165.1    | Ca_Kabuli_Chr06 | 1546563                 | CC                                     | TT                 | TT               | INTERGENIC      |               |                    |                    |
| SNP_38835_A_1547355 | NC_021165.1    | Ca_Kabuli_Chr06 | 1547355                 | AA                                     | GG                 | GG               | INTERGENIC      |               |                    |                    |
| SNP_38836_A_1547377 | NC_021165.1    | Ca_Kabuli_Chr06 | 1547377                 | CC                                     | TT                 | TT               | INTERGENIC      |               |                    |                    |
| SNP_38837_A_1547758 | NC_021165.1    | Ca_Kabuli_Chr06 | 1547758                 | AA                                     | GG                 | GG               | INTERGENIC      |               |                    |                    |
| SNP_38838_A_1547764 | NC_021165.1    | Ca_Kabuli_Chr06 | 1547764                 | TT                                     | CC                 | CC               | INTERGENIC      |               |                    |                    |
| SNP_38839_A_1547784 | NC_021165.1    | Ca_Kabuli_Chr06 | 1547784                 | CC                                     | TT                 | TT               | INTERGENIC      |               |                    |                    |
| SNP_38840_A_1548667 | NC_021165.1    | Ca_Kabuli_Chr06 | 1548667                 | CC                                     | TT                 | TT               | INTERGENIC      |               |                    |                    |
| SNP_38841_A_1548685 | NC_021165.1    | Ca_Kabuli_Chr06 | 1548685                 | GG                                     | AA                 | AA               | INTERGENIC      |               |                    |                    |
| SNP_38842_A_1548907 | NC_021165.1    | Ca_Kabuli_Chr06 | 1548907                 | GG                                     | TT                 | TT               | INTERGENIC      |               |                    |                    |
| SNP_38843_A_1556050 | NC_021165.1    | Ca_Kabuli_Chr06 | 1556050                 | CC                                     | AA                 | AA               | INTERGENIC      |               |                    |                    |
| SNP_38844_A_1556067 | NC_021165.1    | Ca_Kabuli_Chr06 | 1556067                 | GG                                     | AA                 | AA               | INTERGENIC      |               |                    |                    |
| SNP_38846_A_1556407 | NC_021165.1    | Ca_Kabuli_Chr06 | 1556407                 | TT                                     | CC                 | CC               | INTERGENIC      |               |                    |                    |
| SNP_38847_A_1556427 | NC_021165.1    | Ca_Kabuli_Chr06 | 1556427                 | AA                                     | CC                 | CC               | INTERGENIC      |               |                    |                    |
| SNP_38848_A_1556434 | NC_021165.1    | Ca_Kabuli_Chr06 | 1556434                 | CC                                     | TT                 | TT               | INTERGENIC      |               |                    |                    |
| SNP_38849_A_1556538 | NC_021165.1    | Ca_Kabuli_Chr06 | 1556538                 | AA                                     | GG                 | GG               | INTERGENIC      |               |                    |                    |

| SNPs IDs            | Chromosome IDs | Chromosomes     | Physical positions (bp) | CDC Frontier genome (Reference genome) | (Pusa 1103 & HPNB) | (ILWC 46 & LPNB) | Sequence genome | Components of | Gene accession IDs | Putative functions |
|---------------------|----------------|-----------------|-------------------------|----------------------------------------|--------------------|------------------|-----------------|---------------|--------------------|--------------------|
| SNP_38850_A_1556565 | NC_021165.1    | Ca_Kabuli_Chr06 | 1556565                 | GG                                     | AA                 | AA               | INTERGENIC      |               |                    |                    |
| SNP_38851_A_1556677 | NC_021165.1    | Ca_Kabuli_Chr06 | 1556677                 | TT                                     | CC                 | CC               | INTERGENIC      |               |                    |                    |
| SNP_38853_A_1556885 | NC_021165.1    | Ca_Kabuli_Chr06 | 1556885                 | AA                                     | TT                 | TT               | INTERGENIC      |               |                    |                    |
| SNP_38854_A_1556938 | NC_021165.1    | Ca_Kabuli_Chr06 | 1556938                 | CC                                     | TT                 | TT               | INTERGENIC      |               |                    |                    |
| SNP_38855_A_1556939 | NC_021165.1    | Ca_Kabuli_Chr06 | 1556939                 | TT                                     | AA                 | AA               | INTERGENIC      |               |                    |                    |
| SNP_38856_A_1556972 | NC_021165.1    | Ca_Kabuli_Chr06 | 1556972                 | AA                                     | GG                 | GG               | INTERGENIC      |               |                    |                    |
| SNP_38858_A_1557141 | NC_021165.1    | Ca_Kabuli_Chr06 | 1557141                 | AA                                     | GG                 | GG               | INTERGENIC      |               |                    |                    |
| SNP_38859_A_1557358 | NC_021165.1    | Ca_Kabuli_Chr06 | 1557358                 | GG                                     | TT                 | TT               | INTERGENIC      |               |                    |                    |
| SNP_38860_A_1557513 | NC_021165.1    | Ca_Kabuli_Chr06 | 1557513                 | CC                                     | TT                 | TT               | INTERGENIC      |               |                    |                    |
| SNP_38861_A_1557559 | NC_021165.1    | Ca_Kabuli_Chr06 | 1557559                 | TT                                     | GG                 | GG               | INTERGENIC      |               |                    |                    |
| SNP_38862_A_1557565 | NC_021165.1    | Ca_Kabuli_Chr06 | 1557565                 | CC                                     | AA                 | AA               | INTERGENIC      |               |                    |                    |
| SNP_38863_A_1557567 | NC_021165.1    | Ca_Kabuli_Chr06 | 1557567                 | CC                                     | AA                 | AA               | INTERGENIC      |               |                    |                    |
| SNP_38864_A_1557588 | NC_021165.1    | Ca_Kabuli_Chr06 | 1557588                 | AA                                     | GG                 | GG               | INTERGENIC      |               |                    |                    |
| SNP_38866_A_1557610 | NC_021165.1    | Ca_Kabuli_Chr06 | 1557610                 | TT                                     | GG                 | GG               | INTERGENIC      |               |                    |                    |
| SNP_38867_A_1557611 | NC_021165.1    | Ca_Kabuli_Chr06 | 1557611                 | CC                                     | TT                 | TT               | INTERGENIC      |               |                    |                    |
| SNP_38868_A_1557632 | NC_021165.1    | Ca_Kabuli_Chr06 | 1557632                 | AA                                     | GG                 | GG               | INTERGENIC      |               |                    |                    |
| SNP_38869_A_1557637 | NC_021165.1    | Ca_Kabuli_Chr06 | 1557637                 | GG                                     | AA                 | AA               | INTERGENIC      |               |                    |                    |
| SNP_38870_A_1557655 | NC_021165.1    | Ca_Kabuli_Chr06 | 1557655                 | AA                                     | CC                 | CC               | INTERGENIC      |               |                    |                    |
| SNP_38871_A_1557658 | NC_021165.1    | Ca_Kabuli_Chr06 | 1557658                 | CC                                     | GG                 | GG               | INTERGENIC      |               |                    |                    |
| SNP_38872_A_1559161 | NC_021165.1    | Ca_Kabuli_Chr06 | 1559161                 | TT                                     | CC                 | CC               | INTERGENIC      |               |                    |                    |
| SNP_38873_A_1559267 | NC_021165.1    | Ca_Kabuli_Chr06 | 1559267                 | CC                                     | AA                 | AA               | INTERGENIC      |               |                    |                    |
| SNP_38875_A_1559396 | NC_021165.1    | Ca_Kabuli_Chr06 | 1559396                 | GG                                     | AA                 | AA               | INTERGENIC      |               |                    |                    |

| SNPs IDs            | Chromosome IDs | Chromosomes     | Physical positions (bp) | CDC Frontier genome (Reference genome) | (Pusa 1103 & HPNB) | (ILWC 46 & LPNB) | Sequence Components of genome | Gene accession IDs | Putative functions                |
|---------------------|----------------|-----------------|-------------------------|----------------------------------------|--------------------|------------------|-------------------------------|--------------------|-----------------------------------|
| SNP_38876_A_1559398 | NC_021165.1    | Ca_Kabuli_Chr06 | 1559398                 | AA                                     | TT                 | TT               | INTERGENIC                    |                    |                                   |
| SNP_38877_A_1559485 | NC_021165.1    | Ca_Kabuli_Chr06 | 1559485                 | TT                                     | AA                 | AA               | INTERGENIC                    |                    |                                   |
| SNP_38879_A_1559515 | NC_021165.1    | Ca_Kabuli_Chr06 | 1559515                 | CC                                     | TT                 | TT               | INTERGENIC                    |                    |                                   |
| SNP_38880_A_1559555 | NC_021165.1    | Ca_Kabuli_Chr06 | 1559555                 | GG                                     | AA                 | AA               | INTERGENIC                    |                    |                                   |
| SNP_38882_A_1559632 | NC_021165.1    | Ca_Kabuli_Chr06 | 1559632                 | AA                                     | CC                 | CC               | INTERGENIC                    |                    |                                   |
| SNP_38883_A_1559664 | NC_021165.1    | Ca_Kabuli_Chr06 | 1559664                 | AA                                     | TT                 | TT               | INTERGENIC                    |                    |                                   |
| SNP_38884_A_1559836 | NC_021165.1    | Ca_Kabuli_Chr06 | 1559836                 | GG                                     | AA                 | AA               | INTERGENIC                    |                    |                                   |
| SNP_38885_A_1559924 | NC_021165.1    | Ca_Kabuli_Chr06 | 1559924                 | GG                                     | TT                 | TT               | INTERGENIC                    |                    |                                   |
| SNP_38887_A_1596305 | NC_021165.1    | Ca_Kabuli_Chr06 | 1596305                 | TT                                     | CC                 | CC               | INTERGENIC                    |                    |                                   |
| SNP_38888_A_1644851 | NC_021165.1    | Ca_Kabuli_Chr06 | 1644851                 | TT                                     | CC                 | CC               | INTRON                        | 101503217          | protein NRT1/ PTR FAMILY 5.6-like |
| SNP_38889_A_1664884 | NC_021165.1    | Ca_Kabuli_Chr06 | 1664884                 | AA                                     | GG                 | GG               | INTERGENIC                    |                    |                                   |
| SNP_38890_A_1682018 | NC_021165.1    | Ca_Kabuli_Chr06 | 1682018                 | GG                                     | TT                 | TT               | URR                           | 101504080          | uncharacterized LOC101504080      |
| SNP_38891_A_1682060 | NC_021165.1    | Ca_Kabuli_Chr06 | 1682060                 | CC                                     | TT                 | TT               | URR                           | 101504080          | uncharacterized LOC101504080      |
| SNP_38892_A_1682076 | NC_021165.1    | Ca_Kabuli_Chr06 | 1682076                 | CC                                     | TT                 | TT               | URR                           | 101504080          | uncharacterized LOC101504080      |
| SNP_38893_A_1682101 | NC_021165.1    | Ca_Kabuli_Chr06 | 1682101                 | TT                                     | CC                 | CC               | URR                           | 101504080          | uncharacterized LOC101504080      |
| SNP_38894_A_1682105 | NC_021165.1    | Ca_Kabuli_Chr06 | 1682105                 | CC                                     | TT                 | TT               | URR                           | 101504080          | uncharacterized LOC101504080      |
| SNP_38895_A_1682193 | NC_021165.1    | Ca_Kabuli_Chr06 | 1682193                 | GG                                     | AA                 | AA               | URR                           | 101504080          | uncharacterized LOC101504080      |
| SNP_38896_A_1682198 | NC_021165.1    | Ca_Kabuli_Chr06 | 1682198                 | GG                                     | AA                 | AA               | URR                           | 101504080          | uncharacterized LOC101504080      |
| SNP_38897_A_1682219 | NC_021165.1    | Ca_Kabuli_Chr06 | 1682219                 | TT                                     | CC                 | CC               | URR                           | 101504080          | uncharacterized LOC101504080      |
| SNP_38898_A_1682227 | NC_021165.1    | Ca_Kabuli_Chr06 | 1682227                 | AA                                     | CC                 | CC               | URR                           | 101504080          | uncharacterized LOC101504080      |
| SNP_38899_A_1682289 | NC_021165.1    | Ca_Kabuli_Chr06 | 1682289                 | GG                                     | AA                 | AA               | URR                           | 101504080          | uncharacterized LOC101504080      |
| SNP_38900_A_1682390 | NC_021165.1    | Ca_Kabuli_Chr06 | 1682390                 | GG                                     | TT                 | TT               | URR                           | 101504080          | uncharacterized LOC101504080      |

| SNPs IDs            | Chromosome IDs | Chromosomes     | Physical positions (bp) | CDC Frontier (Reference genome) | (Pusa 1103 & HPNB) | (ILWC 46 & LPNB) | Sequence Components of genome | Gene accession IDs | Putative functions           |
|---------------------|----------------|-----------------|-------------------------|---------------------------------|--------------------|------------------|-------------------------------|--------------------|------------------------------|
| SNP_38901_A_1682439 | NC_021165.1    | Ca_Kabuli_Chr06 | 1682439                 | GG                              | AA                 | AA               | URR                           | 101504080          | uncharacterized LOC101504080 |
| SNP_38902_A_1682491 | NC_021165.1    | Ca_Kabuli_Chr06 | 1682491                 | AA                              | CC                 | CC               | URR                           | 101504080          | uncharacterized LOC101504080 |
| SNP_38903_A_1682560 | NC_021165.1    | Ca_Kabuli_Chr06 | 1682560                 | CC                              | TT                 | TT               | URR                           | 101504080          | uncharacterized LOC101504080 |
| SNP_38904_A_1682576 | NC_021165.1    | Ca_Kabuli_Chr06 | 1682576                 | AA                              | GG                 | GG               | URR                           | 101504080          | uncharacterized LOC101504080 |
| SNP_38905_A_1682599 | NC_021165.1    | Ca_Kabuli_Chr06 | 1682599                 | TT                              | AA                 | AA               | URR                           | 101504080          | uncharacterized LOC101504080 |
| SNP_38906_A_1682602 | NC_021165.1    | Ca_Kabuli_Chr06 | 1682602                 | CC                              | TT                 | TT               | URR                           | 101504080          | uncharacterized LOC101504080 |
| SNP_38907_A_1682622 | NC_021165.1    | Ca_Kabuli_Chr06 | 1682622                 | GG                              | AA                 | AA               | URR                           | 101504080          | uncharacterized LOC101504080 |
| SNP_38909_A_1682756 | NC_021165.1    | Ca_Kabuli_Chr06 | 1682756                 | AA                              | GG                 | GG               | DRR                           | 101504387          | uncharacterized LOC101504387 |
| SNP_38910_A_1682769 | NC_021165.1    | Ca_Kabuli_Chr06 | 1682769                 | CC                              | TT                 | TT               | DRR                           | 101504387          | uncharacterized LOC101504387 |
| SNP_38911_A_1682790 | NC_021165.1    | Ca_Kabuli_Chr06 | 1682790                 | AA                              | GG                 | GG               | DRR                           | 101504387          | uncharacterized LOC101504387 |
| SNP_38912_A_1682807 | NC_021165.1    | Ca_Kabuli_Chr06 | 1682807                 | TT                              | CC                 | CC               | DRR                           | 101504387          | uncharacterized LOC101504387 |
| SNP_38913_A_1682836 | NC_021165.1    | Ca_Kabuli_Chr06 | 1682836                 | TT                              | CC                 | CC               | DRR                           | 101504387          | uncharacterized LOC101504387 |
| SNP_38914_A_1682862 | NC_021165.1    | Ca_Kabuli_Chr06 | 1682862                 | CC                              | TT                 | TT               | DRR                           | 101504387          | uncharacterized LOC101504387 |
| SNP_38915_A_1682920 | NC_021165.1    | Ca_Kabuli_Chr06 | 1682920                 | TT                              | CC                 | CC               | DRR                           | 101504387          | uncharacterized LOC101504387 |
| SNP_38916_A_1682921 | NC_021165.1    | Ca_Kabuli_Chr06 | 1682921                 | GG                              | AA                 | AA               | DRR                           | 101504387          | uncharacterized LOC101504387 |
| SNP_38917_A_1683003 | NC_021165.1    | Ca_Kabuli_Chr06 | 1683003                 | CC                              | TT                 | TT               | DRR                           | 101504387          | uncharacterized LOC101504387 |
| SNP_38918_A_1683033 | NC_021165.1    | Ca_Kabuli_Chr06 | 1683033                 | TT                              | CC                 | CC               | DRR                           | 101504387          | uncharacterized LOC101504387 |
| SNP_38919_A_1683045 | NC_021165.1    | Ca_Kabuli_Chr06 | 1683045                 | AA                              | GG                 | GG               | DRR                           | 101504387          | uncharacterized LOC101504387 |
| SNP_38920_A_1683046 | NC_021165.1    | Ca_Kabuli_Chr06 | 1683046                 | AA                              | CC                 | CC               | DRR                           | 101504387          | uncharacterized LOC101504387 |
| SNP_38922_A_1683118 | NC_021165.1    | Ca_Kabuli_Chr06 | 1683118                 | TT                              | CC                 | CC               | DRR                           | 101504387          | uncharacterized LOC101504387 |
| SNP_38923_A_1683190 | NC_021165.1    | Ca_Kabuli_Chr06 | 1683190                 | CC                              | AA                 | AA               | DRR                           | 101504387          | uncharacterized LOC101504387 |
| SNP_38924_A_1683221 | NC_021165.1    | Ca_Kabuli_Chr06 | 1683221                 | TT                              | CC                 | CC               | DRR                           | 101504387          | uncharacterized LOC101504387 |

| SNPs IDs            | Chromosome IDs | Chromosomes     | Physical positions (bp) | CDC Frontier genome (Reference genome) | (Pusa 1103 & HPNB) | (ILWC 46 & LPNB) | Sequence Components of genome | Gene accession IDs | Putative functions                                        |
|---------------------|----------------|-----------------|-------------------------|----------------------------------------|--------------------|------------------|-------------------------------|--------------------|-----------------------------------------------------------|
| SNP_38926_A_1683243 | NC_021165.1    | Ca_Kabuli_Chr06 | 1683243                 | GG                                     | TT                 | TT               | DRR                           | 101504387          | uncharacterized LOC101504387                              |
| SNP_38928_A_1683348 | NC_021165.1    | Ca_Kabuli_Chr06 | 1683348                 | GG                                     | TT                 | TT               | DRR                           | 101504387          | uncharacterized LOC101504387                              |
| SNP_38929_A_1683365 | NC_021165.1    | Ca_Kabuli_Chr06 | 1683365                 | TT                                     | CC                 | CC               | DRR                           | 101504387          | uncharacterized LOC101504387                              |
| SNP_38930_A_1683401 | NC_021165.1    | Ca_Kabuli_Chr06 | 1683401                 | CC                                     | TT                 | TT               | DRR                           | 101504387          | uncharacterized LOC101504387                              |
| SNP_38931_A_1683452 | NC_021165.1    | Ca_Kabuli_Chr06 | 1683452                 | CC                                     | TT                 | TT               | DRR                           | 101504387          | uncharacterized LOC101504387                              |
| SNP_38932_A_1683520 | NC_021165.1    | Ca_Kabuli_Chr06 | 1683520                 | TT                                     | AA                 | AA               | DRR                           | 101504387          | uncharacterized LOC101504387                              |
| SNP_38933_A_1683528 | NC_021165.1    | Ca_Kabuli_Chr06 | 1683528                 | AA                                     | TT                 | TT               | DRR                           | 101504387          | uncharacterized LOC101504387                              |
| SNP_38934_A_1683531 | NC_021165.1    | Ca_Kabuli_Chr06 | 1683531                 | GG                                     | AA                 | AA               | DRR                           | 101504387          | uncharacterized LOC101504387                              |
| SNP_38935_A_1683536 | NC_021165.1    | Ca_Kabuli_Chr06 | 1683536                 | CC                                     | AA                 | AA               | DRR                           | 101504387          | uncharacterized LOC101504387                              |
| SNP_38936_A_1683617 | NC_021165.1    | Ca_Kabuli_Chr06 | 1683617                 | GG                                     | AA                 | AA               | DRR                           | 101504387          | uncharacterized LOC101504387                              |
| SNP_38937_A_1683629 | NC_021165.1    | Ca_Kabuli_Chr06 | 1683629                 | GG                                     | AA                 | AA               | DRR                           | 101504387          | uncharacterized LOC101504387                              |
| SNP_38938_A_1683653 | NC_021165.1    | Ca_Kabuli_Chr06 | 1683653                 | AA                                     | GG                 | GG               | DRR                           | 101410567          | transfer RNA proline (anticodon AGG)                      |
| SNP_38939_A_1683676 | NC_021165.1    | Ca_Kabuli_Chr06 | 1683676                 | TT                                     | GG                 | GG               | DRR                           | 101410567          | transfer RNA proline (anticodon AGG)                      |
| SNP_38940_A_1697930 | NC_021165.1    | Ca_Kabuli_Chr06 | 1697930                 | TT                                     | CC                 | CC               | INTERGENIC                    |                    |                                                           |
| SNP_38942_A_1747393 | NC_021165.1    | Ca_Kabuli_Chr06 | 1747393                 | CC                                     | TT                 | TT               | INTERGENIC                    |                    |                                                           |
| SNP_38943_A_1773438 | NC_021165.1    | Ca_Kabuli_Chr06 | 1773438                 | CC                                     | TT                 | TT               | INTERGENIC                    |                    |                                                           |
| SNP_38944_A_1780020 | NC_021165.1    | Ca_Kabuli_Chr06 | 1780020                 | TT                                     | CC                 | CC               | URR                           | 101506870          | lectin-like protein At1g53070                             |
| SNP_38945_A_1780417 | NC_021165.1    | Ca_Kabuli_Chr06 | 1780417                 | CC                                     | AA                 | AA               | INTERGENIC                    |                    |                                                           |
| SNP_38947_A_1795071 | NC_021165.1    | Ca_Kabuli_Chr06 | 1795071                 | CC                                     | AA                 | AA               | URR                           | 101507200          | proline transporter 1-like                                |
| SNP_38948_A_1808485 | NC_021165.1    | Ca_Kabuli_Chr06 | 1808485                 | TT                                     | CC                 | CC               | URR                           | 101507517          | probable sugar phosphate/phosphate translocator At3g11320 |
| SNP_38949_A_1809940 | NC_021165.1    | Ca_Kabuli_Chr06 | 1809940                 | TT                                     | CC                 | CC               | INTERGENIC                    |                    |                                                           |
| SNP_38950_A_1814037 | NC_021165.1    | Ca_Kabuli_Chr06 | 1814037                 | TT                                     | CC                 | CC               | INTERGENIC                    |                    |                                                           |

| SNPs IDs            | Chromosome IDs | Chromosomes     | Physical positions (bp) | CDC Frontier genome (Reference genome) | (Pusa 1103 & HPNB) | (ILWC 46 & LPNB) | Sequence Components of genome | Gene accession IDs | Putative functions                              |
|---------------------|----------------|-----------------|-------------------------|----------------------------------------|--------------------|------------------|-------------------------------|--------------------|-------------------------------------------------|
| SNP_38951_A_1814356 | NC_021165.1    | Ca_Kabuli_Chr06 | 1814356                 | CC                                     | TT                 | TT               | INTERGENIC                    |                    |                                                 |
| SNP_38952_A_1814384 | NC_021165.1    | Ca_Kabuli_Chr06 | 1814384                 | AA                                     | GG                 | GG               | INTERGENIC                    |                    |                                                 |
| SNP_38953_A_1814606 | NC_021165.1    | Ca_Kabuli_Chr06 | 1814606                 | CC                                     | AA                 | AA               | INTERGENIC                    |                    |                                                 |
| SNP_38954_A_1814893 | NC_021165.1    | Ca_Kabuli_Chr06 | 1814893                 | CC                                     | TT                 | TT               | DRR                           | 101507830          | LIM domain-containing protein WLIM2b-like       |
| SNP_38956_A_1820927 | NC_021165.1    | Ca_Kabuli_Chr06 | 1820927                 | TT                                     | CC                 | CC               | DRR                           | 101508884          | uncharacterized protein At2g39920               |
| SNP_38957_A_1820966 | NC_021165.1    | Ca_Kabuli_Chr06 | 1820966                 | AA                                     | GG                 | GG               | DRR                           | 101508884          | uncharacterized protein At2g39920               |
| SNP_38958_A_1820991 | NC_021165.1    | Ca_Kabuli_Chr06 | 1820991                 | TT                                     | CC                 | CC               | DRR                           | 101508884          | uncharacterized protein At2g39920               |
| SNP_38959_A_1821009 | NC_021165.1    | Ca_Kabuli_Chr06 | 1821009                 | TT                                     | CC                 | CC               | DRR                           | 101508884          | uncharacterized protein At2g39920               |
| SNP_38960_A_1821037 | NC_021165.1    | Ca_Kabuli_Chr06 | 1821037                 | AA                                     | GG                 | GG               | DRR                           | 101508884          | uncharacterized protein At2g39920               |
| SNP_38961_A_1824006 | NC_021165.1    | Ca_Kabuli_Chr06 | 1824006                 | GG                                     | AA                 | AA               | URR                           | 101508884          | uncharacterized protein At2g39920               |
| SNP_38962_A_1824026 | NC_021165.1    | Ca_Kabuli_Chr06 | 1824026                 | TT                                     | GG                 | GG               | URR                           | 101508884          | uncharacterized protein At2g39920               |
| SNP_38964_A_1824167 | NC_021165.1    | Ca_Kabuli_Chr06 | 1824167                 | TT                                     | CC                 | CC               | URR                           | 101508884          | uncharacterized protein At2g39920               |
| SNP_38965_A_1824261 | NC_021165.1    | Ca_Kabuli_Chr06 | 1824261                 | AA                                     | GG                 | GG               | URR                           | 101508884          | uncharacterized protein At2g39920               |
| SNP_38966_A_1824305 | NC_021165.1    | Ca_Kabuli_Chr06 | 1824305                 | AA                                     | GG                 | GG               | URR                           | 101508884          | uncharacterized protein At2g39920               |
| SNP_38967_A_1824306 | NC_021165.1    | Ca_Kabuli_Chr06 | 1824306                 | TT                                     | CC                 | CC               | URR                           | 101508884          | uncharacterized protein At2g39920               |
| SNP_38969_A_1824365 | NC_021165.1    | Ca_Kabuli_Chr06 | 1824365                 | CC                                     | TT                 | TT               | URR                           | 101508884          | uncharacterized protein At2g39920               |
| SNP_38970_A_1825662 | NC_021165.1    | Ca_Kabuli_Chr06 | 1825662                 | AA                                     | TT                 | TT               | URR                           | 101508884          | uncharacterized protein At2g39920               |
| SNP_38971_A_1825668 | NC_021165.1    | Ca_Kabuli_Chr06 | 1825668                 | GG                                     | AA                 | AA               | URR                           | 101508884          | uncharacterized protein At2g39920               |
| SNP_38972_A_1825685 | NC_021165.1    | Ca_Kabuli_Chr06 | 1825685                 | AA                                     | GG                 | GG               | URR                           | 101508884          | uncharacterized protein At2g39920               |
| SNP_38974_A_1831214 | NC_021165.1    | Ca_Kabuli_Chr06 | 1831214                 | AA                                     | TT                 | TT               | URR                           | 101509633          | sedoheptulose-1,7-bisphosphatase, chloroplastic |
| SNP_38975_A_1831215 | NC_021165.1    | Ca_Kabuli_Chr06 | 1831215                 | AA                                     | TT                 | TT               | URR                           | 101509633          | sedoheptulose-1,7-bisphosphatase, chloroplastic |
| SNP_38976_A_1831256 | NC_021165.1    | Ca_Kabuli_Chr06 | 1831256                 | GG                                     | AA                 | AA               | URR                           | 101509633          | sedoheptulose-1,7-bisphosphatase, chloroplastic |

| SNPs IDs            | Chromosome IDs | Chromosomes     | Physical positions (bp) | CDC Frontier genome (Reference genome) | (Pusa 1103 & HPNB) | (ILWC 46 & LPNB) | Sequence Components of genome | Gene accession IDs | Putative functions                                        |
|---------------------|----------------|-----------------|-------------------------|----------------------------------------|--------------------|------------------|-------------------------------|--------------------|-----------------------------------------------------------|
| SNP_38977_A_1831276 | NC_021165.1    | Ca_Kabuli_Chr06 | 1831276                 | AA                                     | TT                 | TT               | URR                           | 101509633          | sedoheptulose-1,7-bisphosphatase, chloroplastic           |
| SNP_38978_A_1831710 | NC_021165.1    | Ca_Kabuli_Chr06 | 1831710                 | TT                                     | GG                 | GG               | URR                           | 101509633          | sedoheptulose-1,7-bisphosphatase, chloroplastic           |
| SNP_38979_A_1832082 | NC_021165.1    | Ca_Kabuli_Chr06 | 1832082                 | GG                                     | AA                 | AA               | URR                           | 101509633          | sedoheptulose-1,7-bisphosphatase, chloroplastic           |
| SNP_38981_A_1842924 | NC_021165.1    | Ca_Kabuli_Chr06 | 1842924                 | GG                                     | AA                 | AA               | INTERGENIC                    |                    |                                                           |
| SNP_38983_A_1843922 | NC_021165.1    | Ca_Kabuli_Chr06 | 1843922                 | AA                                     | GG                 | GG               | URR                           | 101509961          | mediator-associated protein 1-like                        |
| SNP_38984_A_1843949 | NC_021165.1    | Ca_Kabuli_Chr06 | 1843949                 | TT                                     | CC                 | CC               | URR                           | 101509961          | mediator-associated protein 1-like                        |
| SNP_38985_A_1843960 | NC_021165.1    | Ca_Kabuli_Chr06 | 1843960                 | TT                                     | CC                 | CC               | URR                           | 101509961          | mediator-associated protein 1-like                        |
| SNP_38987_A_1846539 | NC_021165.1    | Ca_Kabuli_Chr06 | 1846539                 | GG                                     | CC                 | CC               | DRR                           | 101510282          | coronatine-insensitive protein 1                          |
| SNP_38990_A_1854398 | NC_021165.1    | Ca_Kabuli_Chr06 | 1854398                 | TT                                     | AA                 | AA               | INTERGENIC                    |                    |                                                           |
| SNP_38991_A_1859412 | NC_021165.1    | Ca_Kabuli_Chr06 | 1859412                 | AA                                     | GG                 | GG               | INTERGENIC                    |                    |                                                           |
| SNP_38992_A_1863785 | NC_021165.1    | Ca_Kabuli_Chr06 | 1863785                 | CC                                     | AA                 | AA               | INTERGENIC                    |                    |                                                           |
| SNP_38993_A_1863789 | NC_021165.1    | Ca_Kabuli_Chr06 | 1863789                 | CC                                     | TT                 | TT               | INTERGENIC                    |                    |                                                           |
| SNP_38994_A_1864871 | NC_021165.1    | Ca_Kabuli_Chr06 | 1864871                 | GG                                     | AA                 | AA               | INTERGENIC                    |                    |                                                           |
| SNP_38995_A_1864916 | NC_021165.1    | Ca_Kabuli_Chr06 | 1864916                 | AA                                     | GG                 | GG               | INTERGENIC                    |                    |                                                           |
| SNP_38996_A_1865330 | NC_021165.1    | Ca_Kabuli_Chr06 | 1865330                 | AA                                     | GG                 | GG               | INTERGENIC                    |                    |                                                           |
| SNP_38997_A_1867328 | NC_021165.1    | Ca_Kabuli_Chr06 | 1867328                 | AA                                     | GG                 | GG               | INTRON                        | 101506108          | uncharacterized LOC101506108                              |
| SNP_38998_A_1884444 | NC_021165.1    | Ca_Kabuli_Chr06 | 1884444                 | GG                                     | AA                 | AA               | INTRON                        | 101510610          | 26S proteasome non-ATPase regulatory subunit 7 homolog A  |
| SNP_38999_A_1925114 | NC_021165.1    | Ca_Kabuli_Chr06 | 1925114                 | TT                                     | CC                 | CC               | URR                           | 101511247          | eukaryotic translation initiation factor 3 subunit F      |
| SNP_39000_A_1943184 | NC_021165.1    | Ca_Kabuli_Chr06 | 1943184                 | AA                                     | GG                 | GG               | INTERGENIC                    |                    |                                                           |
| SNP_39004_A_1976884 | NC_021165.1    | Ca_Kabuli_Chr06 | 1976884                 | GG                                     | AA                 | AA               | INTRON                        | 101512424          | rhodanese-like domain-containing protein 8, chloroplastic |
| SNP_39005_A_1976911 | NC_021165.1    | Ca_Kabuli_Chr06 | 1976911                 | AA                                     | GG                 | GG               | INTRON                        | 101512424          | rhodanese-like domain-containing protein 8, chloroplastic |
| SNP_39006_A_1977015 | NC_021165.1    | Ca_Kabuli_Chr06 | 1977015                 | AA                                     | TT                 | TT               | INTRON                        | 101512424          | rhodanese-like domain-containing protein 8, chloroplastic |

| SNPs IDs            | Chromosome IDs | Chromosomes     | Physical positions (bp) | CDC Frontier genome (Reference genome) | (Pusa 1103 & HPNB) | (ILWC 46 & LPNB) | Sequence Components of genome | Gene accession IDs | Putative functions                                               |
|---------------------|----------------|-----------------|-------------------------|----------------------------------------|--------------------|------------------|-------------------------------|--------------------|------------------------------------------------------------------|
| SNP_39007_A_1977026 | NC_021165.1    | Ca_Kabuli_Chr06 | 1977026                 | TT                                     | AA                 | AA               | INTRON                        | 101512424          | rhodanese-like domain-containing protein 8, chloroplastic        |
| SNP_39009_A_1977439 | NC_021165.1    | Ca_Kabuli_Chr06 | 1977439                 | TT                                     | GG                 | GG               | INTRON                        | 101512424          | rhodanese-like domain-containing protein 8, chloroplastic        |
| SNP_39010_A_1977482 | NC_021165.1    | Ca_Kabuli_Chr06 | 1977482                 | TT                                     | CC                 | CC               | INTRON                        | 101512424          | rhodanese-like domain-containing protein 8, chloroplastic        |
| SNP_39011_A_1977604 | NC_021165.1    | Ca_Kabuli_Chr06 | 1977604                 | TT                                     | CC                 | CC               | INTRON                        | 101512424          | rhodanese-like domain-containing protein 8, chloroplastic        |
| SNP_39012_A_1977620 | NC_021165.1    | Ca_Kabuli_Chr06 | 1977620                 | GG                                     | AA                 | AA               | INTRON                        | 101512424          | rhodanese-like domain-containing protein 8, chloroplastic        |
| SNP_39014_A_1978383 | NC_021165.1    | Ca_Kabuli_Chr06 | 1978383                 | TT                                     | CC                 | CC               | INTRON                        | 101512424          | rhodanese-like domain-containing protein 8, chloroplastic        |
| SNP_39015_A_1978421 | NC_021165.1    | Ca_Kabuli_Chr06 | 1978421                 | TT                                     | CC                 | CC               | INTRON                        | 101512424          | rhodanese-like domain-containing protein 8, chloroplastic        |
| SNP_39016_A_1978444 | NC_021165.1    | Ca_Kabuli_Chr06 | 1978444                 | TT                                     | CC                 | CC               | INTRON                        | 101512424          | rhodanese-like domain-containing protein 8, chloroplastic        |
| SNP_39018_A_1978557 | NC_021165.1    | Ca_Kabuli_Chr06 | 1978557                 | AA                                     | CC                 | CC               | INTRON                        | 101512424          | rhodanese-like domain-containing protein 8, chloroplastic        |
| SNP_39019_A_1978629 | NC_021165.1    | Ca_Kabuli_Chr06 | 1978629                 | AA                                     | GG                 | GG               | INTRON                        | 101512424          | rhodanese-like domain-containing protein 8, chloroplastic        |
| SNP_39020_A_1978642 | NC_021165.1    | Ca_Kabuli_Chr06 | 1978642                 | TT                                     | CC                 | CC               | INTRON                        | 101512424          | rhodanese-like domain-containing protein 8, chloroplastic        |
| SNP_39021_A_1978750 | NC_021165.1    | Ca_Kabuli_Chr06 | 1978750                 | TT                                     | CC                 | CC               | INTRON                        | 101512424          | rhodanese-like domain-containing protein 8, chloroplastic        |
| SNP_39022_A_1978792 | NC_021165.1    | Ca_Kabuli_Chr06 | 1978792                 | CC                                     | GG                 | GG               | INTRON                        | 101512424          | rhodanese-like domain-containing protein 8, chloroplastic        |
| SNP_39023_A_2011861 | NC_021165.1    | Ca_Kabuli_Chr06 | 2011861                 | TT                                     | GG                 | GG               | INTRON                        | 101512959          | probable ADP-ribosylation factor GTPase-activating protein AGD15 |
| SNP_39024_A_2111166 | NC_021165.1    | Ca_Kabuli_Chr06 | 2111166                 | TT                                     | AA                 | AA               | DRR                           | 101490505          | nudix hydrolase 18, mitochondrial                                |
| SNP_39026_A_2194081 | NC_021165.1    | Ca_Kabuli_Chr06 | 2194081                 | CC                                     | GG                 | GG               | INTRON                        | 101495470          | probable auxin efflux carrier component 1c                       |
| SNP_39027_A_2212113 | NC_021165.1    | Ca_Kabuli_Chr06 | 2212113                 | AA                                     | TT                 | TT               | INTRON                        | 101496450          | translocon at the outer membrane of chloroplasts 64              |
| SNP_39028_A_2234089 | NC_021165.1    | Ca_Kabuli_Chr06 | 2234089                 | AA                                     | TT                 | TT               | INTRON                        | 101498420          | WUSCHEL-related homeobox 1                                       |
| SNP_39029_A_2247242 | NC_021165.1    | Ca_Kabuli_Chr06 | 2247242                 | AA                                     | CC                 | CC               | URR                           | 101499398          | thaumatin-like protein                                           |
| SNP_39030_A_2250872 | NC_021165.1    | Ca_Kabuli_Chr06 | 2250872                 | AA                                     | TT                 | TT               | INTERGENIC                    |                    |                                                                  |
| SNP_39031_A_2272251 | NC_021165.1    | Ca_Kabuli_Chr06 | 2272251                 | AA                                     | GG                 | GG               | INTRON                        | 101500012          | ras-related protein RABA6a                                       |
| SNP_39032_A_2272734 | NC_021165.1    | Ca_Kabuli_Chr06 | 2272734                 | AA                                     | GG                 | GG               | INTRON                        | 101500012          | ras-related protein RABA6a                                       |



| SNPs IDs            | Chromosome IDs | Chromosomes     | Physical positions (bp) | CDC Frontier (Reference genome) | (Pusa 1103 & HPNB) | (ILWC 46 & LPNB) | Sequence Components of genome | Gene accession IDs | Putative functions                |
|---------------------|----------------|-----------------|-------------------------|---------------------------------|--------------------|------------------|-------------------------------|--------------------|-----------------------------------|
| SNP_39033_A_2307816 | NC_021165.1    | Ca_Kabuli_Chr06 | 2307816                 | AA                              | TT                 | TT               | INTERGENIC                    |                    |                                   |
| SNP_39034_A_2336769 | NC_021165.1    | Ca_Kabuli_Chr06 | 2336769                 | CC                              | TT                 | TT               | INTERGENIC                    |                    |                                   |
| SNP_39035_A_2352507 | NC_021165.1    | Ca_Kabuli_Chr06 | 2352507                 | TT                              | CC                 | CC               | URR                           | 101504081          | protein MOTHER of FT and TF 1     |
| SNP_39036_A_2354442 | NC_021165.1    | Ca_Kabuli_Chr06 | 2354442                 | GG                              | TT                 | TT               | INTERGENIC                    |                    |                                   |
| SNP_39037_A_2354443 | NC_021165.1    | Ca_Kabuli_Chr06 | 2354443                 | TT                              | GG                 | GG               | INTERGENIC                    |                    |                                   |
| SNP_39038_A_2374098 | NC_021165.1    | Ca_Kabuli_Chr06 | 2374098                 | TT                              | CC                 | CC               | INTERGENIC                    |                    |                                   |
| SNP_39039_A_2374199 | NC_021165.1    | Ca_Kabuli_Chr06 | 2374199                 | TT                              | CC                 | CC               | INTERGENIC                    |                    |                                   |
| SNP_39040_A_2374498 | NC_021165.1    | Ca_Kabuli_Chr06 | 2374498                 | AA                              | GG                 | GG               | INTERGENIC                    |                    |                                   |
| SNP_39041_A_2374503 | NC_021165.1    | Ca_Kabuli_Chr06 | 2374503                 | TT                              | CC                 | CC               | INTERGENIC                    |                    |                                   |
| SNP_39042_A_2374547 | NC_021165.1    | Ca_Kabuli_Chr06 | 2374547                 | TT                              | GG                 | GG               | INTERGENIC                    |                    |                                   |
| SNP_39043_A_2436073 | NC_021165.1    | Ca_Kabuli_Chr06 | 2436073                 | AA                              | TT                 | TT               | INTERGENIC                    |                    |                                   |
| SNP_39044_A_2441105 | NC_021165.1    | Ca_Kabuli_Chr06 | 2441105                 | AA                              | CC                 | CC               | INTERGENIC                    |                    |                                   |
| SNP_39045_A_2441131 | NC_021165.1    | Ca_Kabuli_Chr06 | 2441131                 | GG                              | AA                 | AA               | INTERGENIC                    |                    |                                   |
| SNP_39046_A_2472977 | NC_021165.1    | Ca_Kabuli_Chr06 | 2472977                 | CC                              | TT                 | TT               | INTRON                        | 101507730          | Unknown function                  |
| SNP_39047_A_2472991 | NC_021165.1    | Ca_Kabuli_Chr06 | 2472991                 | AA                              | GG                 | GG               | INTRON                        | 101507730          | Unknown function                  |
| SNP_39048_A_2473536 | NC_021165.1    | Ca_Kabuli_Chr06 | 2473536                 | TT                              | CC                 | CC               | INTRON                        | 101507730          | Unknown function                  |
| SNP_39050_A_2512860 | NC_021165.1    | Ca_Kabuli_Chr06 | 2512860                 | TT                              | AA                 | AA               | INTRON                        | 101509200          | nuclear poly(A) polymerase 1-like |
| SNP_39051_A_2512875 | NC_021165.1    | Ca_Kabuli_Chr06 | 2512875                 | GG                              | AA                 | AA               | INTRON                        | 101509200          | nuclear poly(A) polymerase 1-like |
| SNP_39053_A_2518573 | NC_021165.1    | Ca_Kabuli_Chr06 | 2518573                 | CC                              | TT                 | TT               | URR                           | 101509529          | uncharacterized LOC101509529      |
| SNP_39055_A_2518816 | NC_021165.1    | Ca_Kabuli_Chr06 | 2518816                 | GG                              | TT                 | TT               | URR                           | 101509529          | uncharacterized LOC101509529      |
| SNP_39056_A_2518885 | NC_021165.1    | Ca_Kabuli_Chr06 | 2518885                 | TT                              | AA                 | AA               | URR                           | 101509529          | uncharacterized LOC101509529      |
| SNP_39057_A_2519041 | NC_021165.1    | Ca_Kabuli_Chr06 | 2519041                 | AA                              | CC                 | CC               | URR                           | 101509529          | uncharacterized LOC101509529      |

| SNPs IDs            | Chromosome IDs | Chromosomes     | Physical positions (bp) | CDC Frontier genome (Reference genome) | (Pusa 1103 & HPNB) | (ILWC 46 & LPNB) | Sequence Components of genome | Gene accession IDs | Putative functions           |
|---------------------|----------------|-----------------|-------------------------|----------------------------------------|--------------------|------------------|-------------------------------|--------------------|------------------------------|
| SNP_39058_A_2519042 | NC_021165.1    | Ca_Kabuli_Chr06 | 2519042                 | GG                                     | AA                 | AA               | URR                           | 101509529          | uncharacterized LOC101509529 |
| SNP_39059_A_2521142 | NC_021165.1    | Ca_Kabuli_Chr06 | 2521142                 | CC                                     | TT                 | TT               | DRR                           | 101509852          | uncharacterized LOC101509852 |
| SNP_39060_A_2522601 | NC_021165.1    | Ca_Kabuli_Chr06 | 2522601                 | CC                                     | TT                 | TT               | INTERGENIC                    |                    |                              |
| SNP_39061_A_2523028 | NC_021165.1    | Ca_Kabuli_Chr06 | 2523028                 | TT                                     | GG                 | GG               | URR                           | 101509852          | uncharacterized LOC101509852 |
| SNP_39062_A_2523780 | NC_021165.1    | Ca_Kabuli_Chr06 | 2523780                 | TT                                     | AA                 | AA               | URR                           | 101509852          | uncharacterized LOC101509852 |
| SNP_39063_A_2524114 | NC_021165.1    | Ca_Kabuli_Chr06 | 2524114                 | GG                                     | AA                 | AA               | URR                           | 101509852          | uncharacterized LOC101509852 |
| SNP_39064_A_2524211 | NC_021165.1    | Ca_Kabuli_Chr06 | 2524211                 | TT                                     | CC                 | CC               | URR                           | 101509852          | uncharacterized LOC101509852 |
| SNP_39065_A_2524236 | NC_021165.1    | Ca_Kabuli_Chr06 | 2524236                 | TT                                     | GG                 | GG               | URR                           | 101509852          | uncharacterized LOC101509852 |
| SNP_39066_A_2524240 | NC_021165.1    | Ca_Kabuli_Chr06 | 2524240                 | AA                                     | GG                 | GG               | URR                           | 101509852          | uncharacterized LOC101509852 |
| SNP_39067_A_2524256 | NC_021165.1    | Ca_Kabuli_Chr06 | 2524256                 | AA                                     | GG                 | GG               | URR                           | 101509852          | uncharacterized LOC101509852 |
| SNP_39068_A_2524275 | NC_021165.1    | Ca_Kabuli_Chr06 | 2524275                 | GG                                     | TT                 | TT               | URR                           | 101509852          | uncharacterized LOC101509852 |
| SNP_39069_A_2524281 | NC_021165.1    | Ca_Kabuli_Chr06 | 2524281                 | AA                                     | TT                 | TT               | URR                           | 101509852          | uncharacterized LOC101509852 |
| SNP_39071_A_2528181 | NC_021165.1    | Ca_Kabuli_Chr06 | 2528181                 | AA                                     | GG                 | GG               | INTERGENIC                    |                    |                              |
| SNP_39072_A_2528211 | NC_021165.1    | Ca_Kabuli_Chr06 | 2528211                 | AA                                     | GG                 | GG               | INTERGENIC                    |                    |                              |
| SNP_39073_A_2528218 | NC_021165.1    | Ca_Kabuli_Chr06 | 2528218                 | GG                                     | TT                 | TT               | INTERGENIC                    |                    |                              |
| SNP_39074_A_2528609 | NC_021165.1    | Ca_Kabuli_Chr06 | 2528609                 | TT                                     | AA                 | AA               | INTERGENIC                    |                    |                              |
| SNP_39076_A_2529350 | NC_021165.1    | Ca_Kabuli_Chr06 | 2529350                 | CC                                     | TT                 | TT               | INTERGENIC                    |                    |                              |
| SNP_39077_A_2529500 | NC_021165.1    | Ca_Kabuli_Chr06 | 2529500                 | TT                                     | AA                 | AA               | INTERGENIC                    |                    |                              |
| SNP_39078_A_2529510 | NC_021165.1    | Ca_Kabuli_Chr06 | 2529510                 | CC                                     | AA                 | AA               | INTERGENIC                    |                    |                              |
| SNP_39080_A_2533629 | NC_021165.1    | Ca_Kabuli_Chr06 | 2533629                 | TT                                     | CC                 | CC               | INTERGENIC                    |                    |                              |
| SNP_39081_A_2533653 | NC_021165.1    | Ca_Kabuli_Chr06 | 2533653                 | GG                                     | CC                 | CC               | INTERGENIC                    |                    |                              |
| SNP_39082_A_2541915 | NC_021165.1    | Ca_Kabuli_Chr06 | 2541915                 | CC                                     | GG                 | GG               | URR                           | 101509962          | uncharacterized LOC101509962 |

| SNPs IDs            | Chromosome IDs | Chromosomes     | Physical positions (bp) | CDC Frontier genome (Reference genome) | (Pusa 1103 & HPNB) | (ILWC 46 & LPNB) | Sequence Components of genome | Gene accession IDs | Putative functions                    |
|---------------------|----------------|-----------------|-------------------------|----------------------------------------|--------------------|------------------|-------------------------------|--------------------|---------------------------------------|
| SNP_39083_A_2542282 | NC_021165.1    | Ca_Kabuli_Chr06 | 2542282                 | GG                                     | CC                 | CC               | URR                           | 101509962          | uncharacterized LOC101509962          |
| SNP_39084_A_2542351 | NC_021165.1    | Ca_Kabuli_Chr06 | 2542351                 | AA                                     | CC                 | CC               | URR                           | 101509962          | uncharacterized LOC101509962          |
| SNP_39085_A_2543393 | NC_021165.1    | Ca_Kabuli_Chr06 | 2543393                 | CC                                     | TT                 | TT               | URR                           | 101509962          | uncharacterized LOC101509962          |
| SNP_39086_A_2543420 | NC_021165.1    | Ca_Kabuli_Chr06 | 2543420                 | AA                                     | GG                 | GG               | URR                           | 101509962          | uncharacterized LOC101509962          |
| SNP_39087_A_2543431 | NC_021165.1    | Ca_Kabuli_Chr06 | 2543431                 | TT                                     | AA                 | AA               | URR                           | 101509962          | uncharacterized LOC101509962          |
| SNP_39088_A_2543477 | NC_021165.1    | Ca_Kabuli_Chr06 | 2543477                 | GG                                     | TT                 | TT               | URR                           | 101509962          | uncharacterized LOC101509962          |
| SNP_39089_A_2543759 | NC_021165.1    | Ca_Kabuli_Chr06 | 2543759                 | CC                                     | GG                 | GG               | URR                           | 101509962          | uncharacterized LOC101509962          |
| SNP_39090_A_2543972 | NC_021165.1    | Ca_Kabuli_Chr06 | 2543972                 | CC                                     | TT                 | TT               | INTERGENIC                    |                    |                                       |
| SNP_39091_A_2544024 | NC_021165.1    | Ca_Kabuli_Chr06 | 2544024                 | CC                                     | AA                 | AA               | INTERGENIC                    |                    |                                       |
| SNP_39092_A_2544416 | NC_021165.1    | Ca_Kabuli_Chr06 | 2544416                 | CC                                     | TT                 | TT               | INTERGENIC                    |                    |                                       |
| SNP_39093_A_2544417 | NC_021165.1    | Ca_Kabuli_Chr06 | 2544417                 | AA                                     | TT                 | TT               | INTERGENIC                    |                    |                                       |
| SNP_39094_A_2544419 | NC_021165.1    | Ca_Kabuli_Chr06 | 2544419                 | GG                                     | AA                 | AA               | INTERGENIC                    |                    |                                       |
| SNP_39095_A_2544429 | NC_021165.1    | Ca_Kabuli_Chr06 | 2544429                 | CC                                     | GG                 | GG               | INTERGENIC                    |                    |                                       |
| SNP_39096_A_2549497 | NC_021165.1    | Ca_Kabuli_Chr06 | 2549497                 | CC                                     | TT                 | TT               | INTRON                        | 101510167          | putative RING-H2 finger protein ATL71 |
| SNP_39098_A_2565762 | NC_021165.1    | Ca_Kabuli_Chr06 | 2565762                 | TT                                     | AA                 | AA               | URR                           | 101510724          | protein SUPPRESSOR OF FRI 4           |
| SNP_39099_A_2574692 | NC_021165.1    | Ca_Kabuli_Chr06 | 2574692                 | CC                                     | TT                 | TT               | INTERGENIC                    |                    |                                       |
| SNP_39100_A_2574911 | NC_021165.1    | Ca_Kabuli_Chr06 | 2574911                 | GG                                     | AA                 | AA               | INTERGENIC                    |                    |                                       |
| SNP_39102_A_2667543 | NC_021165.1    | Ca_Kabuli_Chr06 | 2667543                 | CC                                     | AA                 | AA               | INTERGENIC                    |                    |                                       |
| SNP_39104_A_2675039 | NC_021165.1    | Ca_Kabuli_Chr06 | 2675039                 | TT                                     | CC                 | CC               | INTERGENIC                    |                    |                                       |
| SNP_39105_A_2675068 | NC_021165.1    | Ca_Kabuli_Chr06 | 2675068                 | AA                                     | GG                 | GG               | INTERGENIC                    |                    |                                       |
| SNP_39106_A_2727043 | NC_021165.1    | Ca_Kabuli_Chr06 | 2727043                 | TT                                     | CC                 | CC               | INTERGENIC                    |                    |                                       |
| SNP_39107_A_2753369 | NC_021165.1    | Ca_Kabuli_Chr06 | 2753369                 | AA                                     | GG                 | GG               | INTERGENIC                    |                    |                                       |

| SNPs IDs            | Chromosome IDs | Chromosomes     | Physical positions (bp) | CDC Frontier (Reference genome) | (Pusa 1103 & HPNB) | (ILWC 46 & LPNB) | Sequence Components of genome | Gene accession IDs | Putative functions           |
|---------------------|----------------|-----------------|-------------------------|---------------------------------|--------------------|------------------|-------------------------------|--------------------|------------------------------|
| SNP_39109_A_2979643 | NC_021165.1    | Ca_Kabuli_Chr06 | 2979643                 | GG                              | AA                 | AA               | INTERGENIC                    |                    |                              |
| SNP_39110_A_3091334 | NC_021165.1    | Ca_Kabuli_Chr06 | 3091334                 | TT                              | CC                 | CC               | DRR                           | 101514700          | uncharacterized LOC101514700 |
| SNP_39111_A_3096293 | NC_021165.1    | Ca_Kabuli_Chr06 | 3096293                 | AA                              | GG                 | GG               | INTERGENIC                    |                    |                              |
| SNP_39112_A_3097631 | NC_021165.1    | Ca_Kabuli_Chr06 | 3097631                 | AA                              | GG                 | GG               | INTERGENIC                    |                    |                              |
| SNP_39113_A_3103939 | NC_021165.1    | Ca_Kabuli_Chr06 | 3103939                 | CC                              | TT                 | TT               | INTERGENIC                    |                    |                              |
| SNP_39114_A_3106978 | NC_021165.1    | Ca_Kabuli_Chr06 | 3106978                 | AA                              | CC                 | CC               | INTERGENIC                    |                    |                              |
| SNP_39116_A_3111776 | NC_021165.1    | Ca_Kabuli_Chr06 | 3111776                 | GG                              | AA                 | AA               | INTERGENIC                    |                    |                              |
| SNP_39117_A_3115709 | NC_021165.1    | Ca_Kabuli_Chr06 | 3115709                 | CC                              | TT                 | TT               | INTERGENIC                    |                    |                              |
| SNP_39118_A_3133237 | NC_021165.1    | Ca_Kabuli_Chr06 | 3133237                 | CC                              | AA                 | AA               | DRR                           | 101515351          | uncharacterized LOC101515351 |
| SNP_39119_A_3133253 | NC_021165.1    | Ca_Kabuli_Chr06 | 3133253                 | TT                              | GG                 | GG               | DRR                           | 101515351          | uncharacterized LOC101515351 |
| SNP_39120_A_3133298 | NC_021165.1    | Ca_Kabuli_Chr06 | 3133298                 | CC                              | GG                 | GG               | DRR                           | 101515351          | uncharacterized LOC101515351 |
| SNP_39121_A_3133876 | NC_021165.1    | Ca_Kabuli_Chr06 | 3133876                 | GG                              | AA                 | AA               | NON_SYNONYMOUS_CODING         | 101515351          | uncharacterized LOC101515351 |
| SNP_39122_A_3134224 | NC_021165.1    | Ca_Kabuli_Chr06 | 3134224                 | GG                              | AA                 | AA               | INTRON                        | 101515351          | uncharacterized LOC101515351 |
| SNP_39123_A_3134251 | NC_021165.1    | Ca_Kabuli_Chr06 | 3134251                 | TT                              | CC                 | CC               | INTRON                        | 101515351          | uncharacterized LOC101515351 |
| SNP_39124_A_3134295 | NC_021165.1    | Ca_Kabuli_Chr06 | 3134295                 | CC                              | AA                 | AA               | INTRON                        | 101515351          | uncharacterized LOC101515351 |
| SNP_39125_A_3134310 | NC_021165.1    | Ca_Kabuli_Chr06 | 3134310                 | GG                              | AA                 | AA               | INTRON                        | 101515351          | uncharacterized LOC101515351 |
| SNP_39126_A_3134311 | NC_021165.1    | Ca_Kabuli_Chr06 | 3134311                 | GG                              | AA                 | AA               | INTRON                        | 101515351          | uncharacterized LOC101515351 |
| SNP_39127_A_3134353 | NC_021165.1    | Ca_Kabuli_Chr06 | 3134353                 | CC                              | GG                 | GG               | INTRON                        | 101515351          | uncharacterized LOC101515351 |
| SNP_39128_A_3134383 | NC_021165.1    | Ca_Kabuli_Chr06 | 3134383                 | GG                              | TT                 | TT               | INTRON                        | 101515351          | uncharacterized LOC101515351 |
| SNP_39129_A_3134384 | NC_021165.1    | Ca_Kabuli_Chr06 | 3134384                 | TT                              | GG                 | GG               | INTRON                        | 101515351          | uncharacterized LOC101515351 |
| SNP_39130_A_3134405 | NC_021165.1    | Ca_Kabuli_Chr06 | 3134405                 | GG                              | AA                 | AA               | INTRON                        | 101515351          | uncharacterized LOC101515351 |
| SNP_39131_A_3134416 | NC_021165.1    | Ca_Kabuli_Chr06 | 3134416                 | TT                              | CC                 | CC               | INTRON                        | 101515351          | uncharacterized LOC101515351 |

| SNPs IDs            | Chromosome IDs | Chromosomes     | Physical positions (bp) | CDC Frontier genome (Reference genome) | (Pusa 1103 & HPNB) | (ILWC 46 & LPNB) | Sequence Components of genome | Gene accession IDs | Putative functions                 |
|---------------------|----------------|-----------------|-------------------------|----------------------------------------|--------------------|------------------|-------------------------------|--------------------|------------------------------------|
| SNP_39132_A_3134501 | NC_021165.1    | Ca_Kabuli_Chr06 | 3134501                 | GG                                     | AA                 | AA               | INTRON                        | 101515351          | uncharacterized LOC101515351       |
| SNP_39133_A_3134507 | NC_021165.1    | Ca_Kabuli_Chr06 | 3134507                 | TT                                     | AA                 | AA               | INTRON                        | 101515351          | uncharacterized LOC101515351       |
| SNP_39134_A_3158919 | NC_021165.1    | Ca_Kabuli_Chr06 | 3158919                 | TT                                     | GG                 | GG               | INTRON                        | 101488774          | uncharacterized LOC101488774       |
| SNP_39135_A_3160548 | NC_021165.1    | Ca_Kabuli_Chr06 | 3160548                 | CC                                     | GG                 | GG               | INTRON                        | 101488774          | uncharacterized LOC101488774       |
| SNP_39136_A_3162421 | NC_021165.1    | Ca_Kabuli_Chr06 | 3162421                 | AA                                     | CC                 | CC               | INTRON                        | 101488774          | uncharacterized LOC101488774       |
| SNP_39137_A_3162424 | NC_021165.1    | Ca_Kabuli_Chr06 | 3162424                 | TT                                     | GG                 | GG               | INTRON                        | 101488774          | uncharacterized LOC101488774       |
| SNP_39138_A_3162446 | NC_021165.1    | Ca_Kabuli_Chr06 | 3162446                 | GG                                     | AA                 | AA               | INTRON                        | 101488774          | uncharacterized LOC101488774       |
| SNP_39139_A_3164467 | NC_021165.1    | Ca_Kabuli_Chr06 | 3164467                 | TT                                     | AA                 | AA               | INTRON                        | 101488774          | uncharacterized LOC101488774       |
| SNP_39140_A_3164558 | NC_021165.1    | Ca_Kabuli_Chr06 | 3164558                 | AA                                     | CC                 | CC               | INTRON                        | 101488774          | uncharacterized LOC101488774       |
| SNP_39141_A_3165404 | NC_021165.1    | Ca_Kabuli_Chr06 | 3165404                 | GG                                     | AA                 | AA               | INTRON                        | 101488774          | uncharacterized LOC101488774       |
| SNP_39142_A_3166264 | NC_021165.1    | Ca_Kabuli_Chr06 | 3166264                 | GG                                     | AA                 | AA               | INTRON                        | 101488774          | uncharacterized LOC101488774       |
| SNP_39143_A_3167493 | NC_021165.1    | Ca_Kabuli_Chr06 | 3167493                 | AA                                     | GG                 | GG               | INTRON                        | 101488774          | uncharacterized LOC101488774       |
| SNP_39144_A_3170181 | NC_021165.1    | Ca_Kabuli_Chr06 | 3170181                 | TT                                     | CC                 | CC               | INTRON                        | 101488774          | uncharacterized LOC101488774       |
| SNP_39145_A_3175668 | NC_021165.1    | Ca_Kabuli_Chr06 | 3175668                 | CC                                     | TT                 | TT               | INTRON                        | 101488774          | uncharacterized LOC101488774       |
| SNP_39146_A_3175694 | NC_021165.1    | Ca_Kabuli_Chr06 | 3175694                 | TT                                     | CC                 | CC               | INTRON                        | 101488774          | uncharacterized LOC101488774       |
| SNP_39147_A_3175728 | NC_021165.1    | Ca_Kabuli_Chr06 | 3175728                 | TT                                     | CC                 | CC               | INTRON                        | 101488774          | uncharacterized LOC101488774       |
| SNP_39148_A_3175780 | NC_021165.1    | Ca_Kabuli_Chr06 | 3175780                 | CC                                     | AA                 | AA               | INTRON                        | 101488774          | uncharacterized LOC101488774       |
| SNP_39149_A_3175788 | NC_021165.1    | Ca_Kabuli_Chr06 | 3175788                 | TT                                     | AA                 | AA               | INTRON                        | 101488774          | uncharacterized LOC101488774       |
| SNP_39151_A_3176058 | NC_021165.1    | Ca_Kabuli_Chr06 | 3176058                 | GG                                     | TT                 | TT               | INTRON                        | 101488774          | uncharacterized LOC101488774       |
| SNP_39152_A_3183181 | NC_021165.1    | Ca_Kabuli_Chr06 | 3183181                 | GG                                     | AA                 | AA               | INTRON                        | 101488774          | uncharacterized LOC101488774       |
| SNP_39153_A_3195869 | NC_021165.1    | Ca_Kabuli_Chr06 | 3195869                 | GG                                     | TT                 | TT               | DRR                           | 101513183          | AMSH-like ubiquitin thioesterase 1 |
| SNP_39155_A_3250130 | NC_021165.1    | Ca_Kabuli_Chr06 | 3250130                 | TT                                     | GG                 | GG               | INTERGENIC                    |                    |                                    |

| SNPs IDs            | Chromosome IDs | Chromosomes     | Physical positions (bp) | CDC Frontier genome (Reference genome) | (Pusa 1103 & HPNB) | (ILWC 46 & LPNB) | Sequence Components of genome | Gene accession IDs | Putative functions                             |
|---------------------|----------------|-----------------|-------------------------|----------------------------------------|--------------------|------------------|-------------------------------|--------------------|------------------------------------------------|
| SNP_39156_A_3250138 | NC_021165.1    | Ca_Kabuli_Chr06 | 3250138                 | AA                                     | GG                 | GG               | INTERGENIC                    |                    |                                                |
| SNP_39157_A_3250227 | NC_021165.1    | Ca_Kabuli_Chr06 | 3250227                 | GG                                     | AA                 | AA               | INTERGENIC                    |                    |                                                |
| SNP_39158_A_3250363 | NC_021165.1    | Ca_Kabuli_Chr06 | 3250363                 | CC                                     | AA                 | AA               | INTERGENIC                    |                    |                                                |
| SNP_39159_A_3250388 | NC_021165.1    | Ca_Kabuli_Chr06 | 3250388                 | CC                                     | AA                 | AA               | INTERGENIC                    |                    |                                                |
| SNP_39160_A_3250429 | NC_021165.1    | Ca_Kabuli_Chr06 | 3250429                 | CC                                     | AA                 | AA               | INTERGENIC                    |                    |                                                |
| SNP_39161_A_3250445 | NC_021165.1    | Ca_Kabuli_Chr06 | 3250445                 | TT                                     | CC                 | CC               | INTERGENIC                    |                    |                                                |
| SNP_39162_A_3250448 | NC_021165.1    | Ca_Kabuli_Chr06 | 3250448                 | GG                                     | AA                 | AA               | INTERGENIC                    |                    |                                                |
| SNP_39163_A_3250482 | NC_021165.1    | Ca_Kabuli_Chr06 | 3250482                 | CC                                     | TT                 | TT               | INTERGENIC                    |                    |                                                |
| SNP_39164_A_3250529 | NC_021165.1    | Ca_Kabuli_Chr06 | 3250529                 | AA                                     | TT                 | TT               | INTERGENIC                    |                    |                                                |
| SNP_39165_A_3250552 | NC_021165.1    | Ca_Kabuli_Chr06 | 3250552                 | GG                                     | AA                 | AA               | INTERGENIC                    |                    |                                                |
| SNP_39166_A_3250564 | NC_021165.1    | Ca_Kabuli_Chr06 | 3250564                 | GG                                     | AA                 | AA               | INTERGENIC                    |                    |                                                |
| SNP_39168_A_3259816 | NC_021165.1    | Ca_Kabuli_Chr06 | 3259816                 | CC                                     | TT                 | TT               | INTERGENIC                    |                    |                                                |
| SNP_39169_A_3267585 | NC_021165.1    | Ca_Kabuli_Chr06 | 3267585                 | AA                                     | TT                 | TT               | URR                           | 101489439          | uncharacterized LOC101489439                   |
| SNP_39170_A_3289066 | NC_021165.1    | Ca_Kabuli_Chr06 | 3289066                 | GG                                     | AA                 | AA               | DRR                           | 101490077          | aldehyde dehydrogenase family 2 member C4-like |
| SNP_39172_A_3346590 | NC_021165.1    | Ca_Kabuli_Chr06 | 3346590                 | GG                                     | AA                 | AA               | INTERGENIC                    |                    |                                                |
| SNP_39173_A_3347279 | NC_021165.1    | Ca_Kabuli_Chr06 | 3347279                 | AA                                     | TT                 | TT               | INTERGENIC                    |                    |                                                |
| SNP_39174_A_3347280 | NC_021165.1    | Ca_Kabuli_Chr06 | 3347280                 | AA                                     | TT                 | TT               | INTERGENIC                    |                    |                                                |
| SNP_39175_A_3347283 | NC_021165.1    | Ca_Kabuli_Chr06 | 3347283                 | TT                                     | CC                 | CC               | INTERGENIC                    |                    |                                                |
| SNP_39176_A_3347304 | NC_021165.1    | Ca_Kabuli_Chr06 | 3347304                 | GG                                     | TT                 | TT               | INTERGENIC                    |                    |                                                |
| SNP_39177_A_3347709 | NC_021165.1    | Ca_Kabuli_Chr06 | 3347709                 | AA                                     | GG                 | GG               | INTERGENIC                    |                    |                                                |
| SNP_39178_A_3348760 | NC_021165.1    | Ca_Kabuli_Chr06 | 3348760                 | TT                                     | GG                 | GG               | INTERGENIC                    |                    |                                                |
| SNP_39179_A_3348780 | NC_021165.1    | Ca_Kabuli_Chr06 | 3348780                 | AA                                     | GG                 | GG               | INTERGENIC                    |                    |                                                |

| SNPs IDs            | Chromosome IDs | Chromosomes     | Physical positions (bp) | CDC Frontier (Reference genome) | (Pusa 1103 & HPNB) | (ILWC 46 & LPNB) | Sequence Components of genome | Gene accession IDs | Putative functions           |
|---------------------|----------------|-----------------|-------------------------|---------------------------------|--------------------|------------------|-------------------------------|--------------------|------------------------------|
| SNP_39180_A_3348847 | NC_021165.1    | Ca_Kabuli_Chr06 | 3348847                 | GG                              | AA                 | AA               | INTERGENIC                    |                    |                              |
| SNP_39181_A_3348891 | NC_021165.1    | Ca_Kabuli_Chr06 | 3348891                 | AA                              | GG                 | GG               | INTERGENIC                    |                    |                              |
| SNP_39182_A_3349145 | NC_021165.1    | Ca_Kabuli_Chr06 | 3349145                 | TT                              | GG                 | GG               | DRR                           | 101493433          | uncharacterized LOC101493433 |
| SNP_39183_A_3349276 | NC_021165.1    | Ca_Kabuli_Chr06 | 3349276                 | CC                              | TT                 | TT               | DRR                           | 101493433          | uncharacterized LOC101493433 |
| SNP_39185_A_3351594 | NC_021165.1    | Ca_Kabuli_Chr06 | 3351594                 | GG                              | TT                 | TT               | URR                           | 101493433          | uncharacterized LOC101493433 |
| SNP_39186_A_3351645 | NC_021165.1    | Ca_Kabuli_Chr06 | 3351645                 | GG                              | CC                 | CC               | URR                           | 101493433          | uncharacterized LOC101493433 |
| SNP_39188_A_3351689 | NC_021165.1    | Ca_Kabuli_Chr06 | 3351689                 | AA                              | GG                 | GG               | URR                           | 101493433          | uncharacterized LOC101493433 |
| SNP_39189_A_3351690 | NC_021165.1    | Ca_Kabuli_Chr06 | 3351690                 | AA                              | GG                 | GG               | URR                           | 101493433          | uncharacterized LOC101493433 |
| SNP_39191_A_3351812 | NC_021165.1    | Ca_Kabuli_Chr06 | 3351812                 | AA                              | GG                 | GG               | URR                           | 101493433          | uncharacterized LOC101493433 |
| SNP_39192_A_3351841 | NC_021165.1    | Ca_Kabuli_Chr06 | 3351841                 | TT                              | CC                 | CC               | URR                           | 101493433          | uncharacterized LOC101493433 |
| SNP_39193_A_3351889 | NC_021165.1    | Ca_Kabuli_Chr06 | 3351889                 | AA                              | GG                 | GG               | URR                           | 101493433          | uncharacterized LOC101493433 |
| SNP_39195_A_3353060 | NC_021165.1    | Ca_Kabuli_Chr06 | 3353060                 | GG                              | AA                 | AA               | INTERGENIC                    |                    |                              |
| SNP_39196_A_3353065 | NC_021165.1    | Ca_Kabuli_Chr06 | 3353065                 | TT                              | CC                 | CC               | INTERGENIC                    |                    |                              |
| SNP_39197_A_3353066 | NC_021165.1    | Ca_Kabuli_Chr06 | 3353066                 | GG                              | AA                 | AA               | INTERGENIC                    |                    |                              |
| SNP_39198_A_3353108 | NC_021165.1    | Ca_Kabuli_Chr06 | 3353108                 | TT                              | AA                 | AA               | INTERGENIC                    |                    |                              |
| SNP_39199_A_3353142 | NC_021165.1    | Ca_Kabuli_Chr06 | 3353142                 | GG                              | TT                 | TT               | INTERGENIC                    |                    |                              |
| SNP_39200_A_3353160 | NC_021165.1    | Ca_Kabuli_Chr06 | 3353160                 | TT                              | AA                 | AA               | INTERGENIC                    |                    |                              |
| SNP_39201_A_3353202 | NC_021165.1    | Ca_Kabuli_Chr06 | 3353202                 | AA                              | CC                 | CC               | INTERGENIC                    |                    |                              |
| SNP_39202_A_3353420 | NC_021165.1    | Ca_Kabuli_Chr06 | 3353420                 | AA                              | CC                 | CC               | INTERGENIC                    |                    |                              |
| SNP_39203_A_3353475 | NC_021165.1    | Ca_Kabuli_Chr06 | 3353475                 | TT                              | AA                 | AA               | INTERGENIC                    |                    |                              |
| SNP_39204_A_3353859 | NC_021165.1    | Ca_Kabuli_Chr06 | 3353859                 | CC                              | AA                 | AA               | INTERGENIC                    |                    |                              |
| SNP_39205_A_3353990 | NC_021165.1    | Ca_Kabuli_Chr06 | 3353990                 | GG                              | TT                 | TT               | INTERGENIC                    |                    |                              |

| SNPs IDs            | Chromosome IDs | Chromosomes     | Physical positions (bp) | CDC Frontier genome (Reference genome) | (Pusa 1103 & HPNB) | (ILWC 46 & LPNB) | Sequence genome | Components of | Gene accession IDs | Putative functions |
|---------------------|----------------|-----------------|-------------------------|----------------------------------------|--------------------|------------------|-----------------|---------------|--------------------|--------------------|
| SNP_39206_A_3354029 | NC_021165.1    | Ca_Kabuli_Chr06 | 3354029                 | TT                                     | AA                 | AA               | INTERGENIC      |               |                    |                    |
| SNP_39207_A_3354042 | NC_021165.1    | Ca_Kabuli_Chr06 | 3354042                 | CC                                     | TT                 | TT               | INTERGENIC      |               |                    |                    |
| SNP_39208_A_3354090 | NC_021165.1    | Ca_Kabuli_Chr06 | 3354090                 | TT                                     | CC                 | CC               | INTERGENIC      |               |                    |                    |
| SNP_39209_A_3354164 | NC_021165.1    | Ca_Kabuli_Chr06 | 3354164                 | TT                                     | CC                 | CC               | INTERGENIC      |               |                    |                    |
| SNP_39210_A_3354179 | NC_021165.1    | Ca_Kabuli_Chr06 | 3354179                 | GG                                     | AA                 | AA               | INTERGENIC      |               |                    |                    |
| SNP_39212_A_3355372 | NC_021165.1    | Ca_Kabuli_Chr06 | 3355372                 | GG                                     | TT                 | TT               | INTERGENIC      |               |                    |                    |
| SNP_39213_A_3355386 | NC_021165.1    | Ca_Kabuli_Chr06 | 3355386                 | CC                                     | AA                 | AA               | INTERGENIC      |               |                    |                    |
| SNP_39214_A_3355644 | NC_021165.1    | Ca_Kabuli_Chr06 | 3355644                 | AA                                     | GG                 | GG               | INTERGENIC      |               |                    |                    |
| SNP_39215_A_3355680 | NC_021165.1    | Ca_Kabuli_Chr06 | 3355680                 | AA                                     | TT                 | TT               | INTERGENIC      |               |                    |                    |
| SNP_39216_A_3355726 | NC_021165.1    | Ca_Kabuli_Chr06 | 3355726                 | CC                                     | AA                 | AA               | INTERGENIC      |               |                    |                    |
| SNP_39217_A_3355753 | NC_021165.1    | Ca_Kabuli_Chr06 | 3355753                 | AA                                     | GG                 | GG               | INTERGENIC      |               |                    |                    |
| SNP_39219_A_3355898 | NC_021165.1    | Ca_Kabuli_Chr06 | 3355898                 | AA                                     | TT                 | TT               | INTERGENIC      |               |                    |                    |
| SNP_39220_A_3355954 | NC_021165.1    | Ca_Kabuli_Chr06 | 3355954                 | CC                                     | TT                 | TT               | INTERGENIC      |               |                    |                    |
| SNP_39221_A_3355961 | NC_021165.1    | Ca_Kabuli_Chr06 | 3355961                 | AA                                     | GG                 | GG               | INTERGENIC      |               |                    |                    |
| SNP_39222_A_3356057 | NC_021165.1    | Ca_Kabuli_Chr06 | 3356057                 | TT                                     | CC                 | CC               | INTERGENIC      |               |                    |                    |
| SNP_39223_A_3356083 | NC_021165.1    | Ca_Kabuli_Chr06 | 3356083                 | AA                                     | GG                 | GG               | INTERGENIC      |               |                    |                    |
| SNP_39224_A_3356120 | NC_021165.1    | Ca_Kabuli_Chr06 | 3356120                 | TT                                     | AA                 | AA               | INTERGENIC      |               |                    |                    |
| SNP_39225_A_3356150 | NC_021165.1    | Ca_Kabuli_Chr06 | 3356150                 | CC                                     | AA                 | AA               | INTERGENIC      |               |                    |                    |
| SNP_39226_A_3356152 | NC_021165.1    | Ca_Kabuli_Chr06 | 3356152                 | GG                                     | AA                 | AA               | INTERGENIC      |               |                    |                    |
| SNP_39227_A_3356222 | NC_021165.1    | Ca_Kabuli_Chr06 | 3356222                 | GG                                     | TT                 | TT               | INTERGENIC      |               |                    |                    |
| SNP_39228_A_3356250 | NC_021165.1    | Ca_Kabuli_Chr06 | 3356250                 | CC                                     | AA                 | AA               | INTERGENIC      |               |                    |                    |
| SNP_39229_A_3356260 | NC_021165.1    | Ca_Kabuli_Chr06 | 3356260                 | GG                                     | AA                 | AA               | INTERGENIC      |               |                    |                    |



| SNPs IDs            | Chromosome IDs | Chromosomes     | Physical positions (bp) | CDC Frontier genome (Reference genome) | (Pusa 1103 & HPNB) | (ILWC 46 & LPNB) | Sequence genome | Components of | Gene accession IDs | Putative functions |
|---------------------|----------------|-----------------|-------------------------|----------------------------------------|--------------------|------------------|-----------------|---------------|--------------------|--------------------|
| SNP_39230_A_3356425 | NC_021165.1    | Ca_Kabuli_Chr06 | 3356425                 | GG                                     | AA                 | AA               | INTERGENIC      |               |                    |                    |
| SNP_39231_A_3356473 | NC_021165.1    | Ca_Kabuli_Chr06 | 3356473                 | TT                                     | CC                 | CC               | INTERGENIC      |               |                    |                    |
| SNP_39232_A_3374657 | NC_021165.1    | Ca_Kabuli_Chr06 | 3374657                 | AA                                     | TT                 | TT               | INTERGENIC      |               |                    |                    |
| SNP_39233_A_3374707 | NC_021165.1    | Ca_Kabuli_Chr06 | 3374707                 | AA                                     | GG                 | GG               | INTERGENIC      |               |                    |                    |
| SNP_39234_A_3374806 | NC_021165.1    | Ca_Kabuli_Chr06 | 3374806                 | AA                                     | GG                 | GG               | INTERGENIC      |               |                    |                    |
| SNP_39235_A_3374986 | NC_021165.1    | Ca_Kabuli_Chr06 | 3374986                 | AA                                     | GG                 | GG               | INTERGENIC      |               |                    |                    |
| SNP_39236_A_3375015 | NC_021165.1    | Ca_Kabuli_Chr06 | 3375015                 | TT                                     | CC                 | CC               | INTERGENIC      |               |                    |                    |
| SNP_39237_A_3375089 | NC_021165.1    | Ca_Kabuli_Chr06 | 3375089                 | AA                                     | TT                 | TT               | INTERGENIC      |               |                    |                    |
| SNP_39238_A_3375209 | NC_021165.1    | Ca_Kabuli_Chr06 | 3375209                 | CC                                     | TT                 | TT               | INTERGENIC      |               |                    |                    |
| SNP_39240_A_3376348 | NC_021165.1    | Ca_Kabuli_Chr06 | 3376348                 | CC                                     | AA                 | AA               | INTERGENIC      |               |                    |                    |
| SNP_39241_A_3376424 | NC_021165.1    | Ca_Kabuli_Chr06 | 3376424                 | AA                                     | GG                 | GG               | INTERGENIC      |               |                    |                    |
| SNP_39242_A_3377575 | NC_021165.1    | Ca_Kabuli_Chr06 | 3377575                 | CC                                     | AA                 | AA               | INTERGENIC      |               |                    |                    |
| SNP_39244_A_3377604 | NC_021165.1    | Ca_Kabuli_Chr06 | 3377604                 | CC                                     | GG                 | GG               | INTERGENIC      |               |                    |                    |
| SNP_39245_A_3377612 | NC_021165.1    | Ca_Kabuli_Chr06 | 3377612                 | TT                                     | CC                 | CC               | INTERGENIC      |               |                    |                    |
| SNP_39246_A_3377644 | NC_021165.1    | Ca_Kabuli_Chr06 | 3377644                 | CC                                     | GG                 | GG               | INTERGENIC      |               |                    |                    |
| SNP_39247_A_3377675 | NC_021165.1    | Ca_Kabuli_Chr06 | 3377675                 | GG                                     | AA                 | AA               | INTERGENIC      |               |                    |                    |
| SNP_39248_A_3378086 | NC_021165.1    | Ca_Kabuli_Chr06 | 3378086                 | AA                                     | CC                 | CC               | INTERGENIC      |               |                    |                    |
| SNP_39249_A_3378096 | NC_021165.1    | Ca_Kabuli_Chr06 | 3378096                 | TT                                     | CC                 | CC               | INTERGENIC      |               |                    |                    |
| SNP_39250_A_3378114 | NC_021165.1    | Ca_Kabuli_Chr06 | 3378114                 | GG                                     | AA                 | AA               | INTERGENIC      |               |                    |                    |
| SNP_39251_A_3378765 | NC_021165.1    | Ca_Kabuli_Chr06 | 3378765                 | CC                                     | TT                 | TT               | INTERGENIC      |               |                    |                    |
| SNP_39252_A_3378773 | NC_021165.1    | Ca_Kabuli_Chr06 | 3378773                 | CC                                     | TT                 | TT               | INTERGENIC      |               |                    |                    |
| SNP_39253_A_3378989 | NC_021165.1    | Ca_Kabuli_Chr06 | 3378989                 | TT                                     | CC                 | CC               | INTERGENIC      |               |                    |                    |

| SNPs IDs            | Chromosome IDs | Chromosomes     | Physical positions (bp) | CDC Frontier genome (Reference genome) | (Pusa 1103 & HPNB) | (ILWC 46 & LPNB) | Sequence Components of genome | Gene accession IDs | Putative functions |
|---------------------|----------------|-----------------|-------------------------|----------------------------------------|--------------------|------------------|-------------------------------|--------------------|--------------------|
| SNP_39254_A_3378992 | NC_021165.1    | Ca_Kabuli_Chr06 | 3378992                 | GG                                     | AA                 | AA               | INTERGENIC                    |                    |                    |
| SNP_39255_A_3379033 | NC_021165.1    | Ca_Kabuli_Chr06 | 3379033                 | AA                                     | GG                 | GG               | INTERGENIC                    |                    |                    |
| SNP_39256_A_3379217 | NC_021165.1    | Ca_Kabuli_Chr06 | 3379217                 | AA                                     | GG                 | GG               | INTERGENIC                    |                    |                    |
| SNP_39257_A_3380832 | NC_021165.1    | Ca_Kabuli_Chr06 | 3380832                 | AA                                     | GG                 | GG               | INTERGENIC                    |                    |                    |
| SNP_39259_A_3382747 | NC_021165.1    | Ca_Kabuli_Chr06 | 3382747                 | GG                                     | AA                 | AA               | INTERGENIC                    |                    |                    |
| SNP_39260_A_3382770 | NC_021165.1    | Ca_Kabuli_Chr06 | 3382770                 | AA                                     | GG                 | GG               | INTERGENIC                    |                    |                    |
| SNP_39261_A_3382771 | NC_021165.1    | Ca_Kabuli_Chr06 | 3382771                 | TT                                     | AA                 | AA               | INTERGENIC                    |                    |                    |
| SNP_39263_A_3382848 | NC_021165.1    | Ca_Kabuli_Chr06 | 3382848                 | GG                                     | TT                 | TT               | INTERGENIC                    |                    |                    |
| SNP_39264_A_3382890 | NC_021165.1    | Ca_Kabuli_Chr06 | 3382890                 | AA                                     | CC                 | CC               | INTERGENIC                    |                    |                    |
| SNP_39266_A_3383066 | NC_021165.1    | Ca_Kabuli_Chr06 | 3383066                 | AA                                     | GG                 | GG               | INTERGENIC                    |                    |                    |
| SNP_39267_A_3387473 | NC_021165.1    | Ca_Kabuli_Chr06 | 3387473                 | TT                                     | AA                 | AA               | URR                           | 101494502          | Unknown function   |
| SNP_39268_A_3387540 | NC_021165.1    | Ca_Kabuli_Chr06 | 3387540                 | AA                                     | GG                 | GG               | URR                           | 101494502          | Unknown function   |
| SNP_39269_A_3387610 | NC_021165.1    | Ca_Kabuli_Chr06 | 3387610                 | CC                                     | TT                 | TT               | URR                           | 101494502          | Unknown function   |
| SNP_39273_A_3392869 | NC_021165.1    | Ca_Kabuli_Chr06 | 3392869                 | AA                                     | GG                 | GG               | INTERGENIC                    |                    |                    |
| SNP_39274_A_3393169 | NC_021165.1    | Ca_Kabuli_Chr06 | 3393169                 | GG                                     | AA                 | AA               | INTERGENIC                    |                    |                    |
| SNP_39275_A_3393223 | NC_021165.1    | Ca_Kabuli_Chr06 | 3393223                 | CC                                     | TT                 | TT               | INTERGENIC                    |                    |                    |
| SNP_39276_A_3393236 | NC_021165.1    | Ca_Kabuli_Chr06 | 3393236                 | AA                                     | TT                 | TT               | INTERGENIC                    |                    |                    |
| SNP_39277_A_3393426 | NC_021165.1    | Ca_Kabuli_Chr06 | 3393426                 | GG                                     | AA                 | AA               | INTERGENIC                    |                    |                    |
| SNP_39278_A_3393462 | NC_021165.1    | Ca_Kabuli_Chr06 | 3393462                 | TT                                     | CC                 | CC               | INTERGENIC                    |                    |                    |
| SNP_39279_A_3393463 | NC_021165.1    | Ca_Kabuli_Chr06 | 3393463                 | TT                                     | GG                 | GG               | INTERGENIC                    |                    |                    |
| SNP_39280_A_3393465 | NC_021165.1    | Ca_Kabuli_Chr06 | 3393465                 | CC                                     | TT                 | TT               | INTERGENIC                    |                    |                    |
| SNP_39281_A_3393497 | NC_021165.1    | Ca_Kabuli_Chr06 | 3393497                 | CC                                     | TT                 | TT               | INTERGENIC                    |                    |                    |

| SNPs IDs            | Chromosome IDs | Chromosomes     | Physical positions (bp) | CDC Frontier genome (Reference genome) | (Pusa 1103 & HPNB) | (ILWC 46 & LPNB) | Sequence Components of genome | Gene accession IDs | Putative functions            |
|---------------------|----------------|-----------------|-------------------------|----------------------------------------|--------------------|------------------|-------------------------------|--------------------|-------------------------------|
| SNP_39282_A_3393513 | NC_021165.1    | Ca_Kabuli_Chr06 | 3393513                 | TT                                     | GG                 | GG               | INTERGENIC                    |                    |                               |
| SNP_39283_A_3393539 | NC_021165.1    | Ca_Kabuli_Chr06 | 3393539                 | CC                                     | GG                 | GG               | INTERGENIC                    |                    |                               |
| SNP_39284_A_3393549 | NC_021165.1    | Ca_Kabuli_Chr06 | 3393549                 | AA                                     | TT                 | TT               | INTERGENIC                    |                    |                               |
| SNP_39285_A_3393562 | NC_021165.1    | Ca_Kabuli_Chr06 | 3393562                 | CC                                     | TT                 | TT               | INTERGENIC                    |                    |                               |
| SNP_39286_A_3393593 | NC_021165.1    | Ca_Kabuli_Chr06 | 3393593                 | GG                                     | AA                 | AA               | INTERGENIC                    |                    |                               |
| SNP_39287_A_3393691 | NC_021165.1    | Ca_Kabuli_Chr06 | 3393691                 | AA                                     | GG                 | GG               | INTERGENIC                    |                    |                               |
| SNP_39288_A_3393740 | NC_021165.1    | Ca_Kabuli_Chr06 | 3393740                 | TT                                     | GG                 | GG               | INTERGENIC                    |                    |                               |
| SNP_39289_A_3393753 | NC_021165.1    | Ca_Kabuli_Chr06 | 3393753                 | AA                                     | GG                 | GG               | INTERGENIC                    |                    |                               |
| SNP_39290_A_3393761 | NC_021165.1    | Ca_Kabuli_Chr06 | 3393761                 | AA                                     | TT                 | TT               | INTERGENIC                    |                    |                               |
| SNP_39291_A_3393782 | NC_021165.1    | Ca_Kabuli_Chr06 | 3393782                 | CC                                     | TT                 | TT               | INTERGENIC                    |                    |                               |
| SNP_39292_A_3393784 | NC_021165.1    | Ca_Kabuli_Chr06 | 3393784                 | TT                                     | CC                 | CC               | INTERGENIC                    |                    |                               |
| SNP_39293_A_3393792 | NC_021165.1    | Ca_Kabuli_Chr06 | 3393792                 | AA                                     | CC                 | CC               | INTERGENIC                    |                    |                               |
| SNP_39294_A_3393817 | NC_021165.1    | Ca_Kabuli_Chr06 | 3393817                 | GG                                     | TT                 | TT               | INTERGENIC                    |                    |                               |
| SNP_39295_A_3393831 | NC_021165.1    | Ca_Kabuli_Chr06 | 3393831                 | TT                                     | GG                 | GG               | INTERGENIC                    |                    |                               |
| SNP_39296_A_3393843 | NC_021165.1    | Ca_Kabuli_Chr06 | 3393843                 | AA                                     | GG                 | GG               | DRR                           | 101494819          | ras-related protein RHN1-like |
| SNP_39297_A_3393850 | NC_021165.1    | Ca_Kabuli_Chr06 | 3393850                 | TT                                     | CC                 | CC               | DRR                           | 101494819          | ras-related protein RHN1-like |
| SNP_39298_A_3393923 | NC_021165.1    | Ca_Kabuli_Chr06 | 3393923                 | AA                                     | GG                 | GG               | DRR                           | 101494819          | ras-related protein RHN1-like |
| SNP_39299_A_3393933 | NC_021165.1    | Ca_Kabuli_Chr06 | 3393933                 | CC                                     | TT                 | TT               | DRR                           | 101494819          | ras-related protein RHN1-like |
| SNP_39300_A_3394013 | NC_021165.1    | Ca_Kabuli_Chr06 | 3394013                 | AA                                     | GG                 | GG               | DRR                           | 101494819          | ras-related protein RHN1-like |
| SNP_39301_A_3394025 | NC_021165.1    | Ca_Kabuli_Chr06 | 3394025                 | TT                                     | CC                 | CC               | DRR                           | 101494819          | ras-related protein RHN1-like |
| SNP_39302_A_3394034 | NC_021165.1    | Ca_Kabuli_Chr06 | 3394034                 | AA                                     | TT                 | TT               | DRR                           | 101494819          | ras-related protein RHN1-like |
| SNP_39303_A_3394044 | NC_021165.1    | Ca_Kabuli_Chr06 | 3394044                 | GG                                     | AA                 | AA               | DRR                           | 101494819          | ras-related protein RHN1-like |

| SNPs IDs            | Chromosome IDs | Chromosomes     | Physical positions (bp) | CDC Frontier genome (Reference genome) | (Pusa 1103 & HPNB) | (ILWC 46 & LPNB) | Sequence Components of genome | Gene accession IDs | Putative functions            |
|---------------------|----------------|-----------------|-------------------------|----------------------------------------|--------------------|------------------|-------------------------------|--------------------|-------------------------------|
| SNP_39304_A_3394064 | NC_021165.1    | Ca_Kabuli_Chr06 | 3394064                 | CC                                     | TT                 | TT               | DRR                           | 101494819          | ras-related protein RHN1-like |
| SNP_39305_A_3394244 | NC_021165.1    | Ca_Kabuli_Chr06 | 3394244                 | AA                                     | GG                 | GG               | DRR                           | 101494819          | ras-related protein RHN1-like |
| SNP_39306_A_3394257 | NC_021165.1    | Ca_Kabuli_Chr06 | 3394257                 | TT                                     | CC                 | CC               | DRR                           | 101494819          | ras-related protein RHN1-like |
| SNP_39307_A_3394293 | NC_021165.1    | Ca_Kabuli_Chr06 | 3394293                 | CC                                     | TT                 | TT               | DRR                           | 101494819          | ras-related protein RHN1-like |
| SNP_39308_A_3394322 | NC_021165.1    | Ca_Kabuli_Chr06 | 3394322                 | TT                                     | GG                 | GG               | DRR                           | 101494819          | ras-related protein RHN1-like |
| SNP_39309_A_3394327 | NC_021165.1    | Ca_Kabuli_Chr06 | 3394327                 | AA                                     | GG                 | GG               | DRR                           | 101494819          | ras-related protein RHN1-like |
| SNP_39310_A_3394383 | NC_021165.1    | Ca_Kabuli_Chr06 | 3394383                 | TT                                     | CC                 | CC               | DRR                           | 101494819          | ras-related protein RHN1-like |
| SNP_39311_A_3394481 | NC_021165.1    | Ca_Kabuli_Chr06 | 3394481                 | TT                                     | AA                 | AA               | DRR                           | 101494819          | ras-related protein RHN1-like |
| SNP_39312_A_3394604 | NC_021165.1    | Ca_Kabuli_Chr06 | 3394604                 | CC                                     | AA                 | AA               | DRR                           | 101494819          | ras-related protein RHN1-like |
| SNP_39313_A_3394656 | NC_021165.1    | Ca_Kabuli_Chr06 | 3394656                 | TT                                     | CC                 | CC               | DRR                           | 101494819          | ras-related protein RHN1-like |
| SNP_39314_A_3394747 | NC_021165.1    | Ca_Kabuli_Chr06 | 3394747                 | CC                                     | TT                 | TT               | DRR                           | 101494819          | ras-related protein RHN1-like |
| SNP_39315_A_3394898 | NC_021165.1    | Ca_Kabuli_Chr06 | 3394898                 | AA                                     | TT                 | TT               | INTERGENIC                    |                    |                               |
| SNP_39316_A_3394908 | NC_021165.1    | Ca_Kabuli_Chr06 | 3394908                 | GG                                     | TT                 | TT               | INTERGENIC                    |                    |                               |
| SNP_39317_A_3394921 | NC_021165.1    | Ca_Kabuli_Chr06 | 3394921                 | AA                                     | GG                 | GG               | INTERGENIC                    |                    |                               |
| SNP_39318_A_3395024 | NC_021165.1    | Ca_Kabuli_Chr06 | 3395024                 | GG                                     | AA                 | AA               | INTERGENIC                    |                    |                               |
| SNP_39319_A_3395253 | NC_021165.1    | Ca_Kabuli_Chr06 | 3395253                 | GG                                     | AA                 | AA               | INTERGENIC                    |                    |                               |
| SNP_39320_A_3395440 | NC_021165.1    | Ca_Kabuli_Chr06 | 3395440                 | AA                                     | GG                 | GG               | INTERGENIC                    |                    |                               |
| SNP_39321_A_3395467 | NC_021165.1    | Ca_Kabuli_Chr06 | 3395467                 | TT                                     | GG                 | GG               | INTERGENIC                    |                    |                               |
| SNP_39322_A_3395491 | NC_021165.1    | Ca_Kabuli_Chr06 | 3395491                 | TT                                     | CC                 | CC               | INTERGENIC                    |                    |                               |
| SNP_39323_A_3395492 | NC_021165.1    | Ca_Kabuli_Chr06 | 3395492                 | GG                                     | AA                 | AA               | INTERGENIC                    |                    |                               |
| SNP_39324_A_3395508 | NC_021165.1    | Ca_Kabuli_Chr06 | 3395508                 | AA                                     | GG                 | GG               | INTERGENIC                    |                    |                               |
| SNP_39325_A_3395512 | NC_021165.1    | Ca_Kabuli_Chr06 | 3395512                 | AA                                     | TT                 | TT               | INTERGENIC                    |                    |                               |

| SNPs IDs            | Chromosome IDs | Chromosomes     | Physical positions (bp) | CDC Frontier (Reference genome) | (Pusa 1103 & HPNB) | (ILWC 46 & LPNB) | Sequence Components of genome | Gene accession IDs | Putative functions                                                 |
|---------------------|----------------|-----------------|-------------------------|---------------------------------|--------------------|------------------|-------------------------------|--------------------|--------------------------------------------------------------------|
| SNP_39326_A_3395528 | NC_021165.1    | Ca_Kabuli_Chr06 | 3395528                 | CC                              | TT                 | TT               | INTERGENIC                    |                    |                                                                    |
| SNP_39327_A_3395546 | NC_021165.1    | Ca_Kabuli_Chr06 | 3395546                 | TT                              | CC                 | CC               | INTERGENIC                    |                    |                                                                    |
| SNP_39328_A_3395590 | NC_021165.1    | Ca_Kabuli_Chr06 | 3395590                 | TT                              | CC                 | CC               | INTERGENIC                    |                    |                                                                    |
| SNP_39329_A_3395651 | NC_021165.1    | Ca_Kabuli_Chr06 | 3395651                 | CC                              | GG                 | AA               | INTERGENIC                    |                    |                                                                    |
| SNP_39330_A_3395654 | NC_021165.1    | Ca_Kabuli_Chr06 | 3395654                 | CC                              | TT                 | TT               | INTERGENIC                    |                    |                                                                    |
| SNP_39331_A_3395676 | NC_021165.1    | Ca_Kabuli_Chr06 | 3395676                 | GG                              | AA                 | AA               | INTERGENIC                    |                    |                                                                    |
| SNP_39332_A_3395698 | NC_021165.1    | Ca_Kabuli_Chr06 | 3395698                 | CC                              | AA                 | AA               | INTERGENIC                    |                    |                                                                    |
| SNP_39333_A_3395700 | NC_021165.1    | Ca_Kabuli_Chr06 | 3395700                 | GG                              | AA                 | AA               | INTERGENIC                    |                    |                                                                    |
| SNP_39334_A_3395715 | NC_021165.1    | Ca_Kabuli_Chr06 | 3395715                 | AA                              | GG                 | GG               | INTERGENIC                    |                    |                                                                    |
| SNP_39335_A_3395769 | NC_021165.1    | Ca_Kabuli_Chr06 | 3395769                 | GG                              | AA                 | AA               | INTERGENIC                    |                    |                                                                    |
| SNP_39336_A_3395782 | NC_021165.1    | Ca_Kabuli_Chr06 | 3395782                 | TT                              | AA                 | AA               | INTERGENIC                    |                    |                                                                    |
| SNP_39338_A_3453525 | NC_021165.1    | Ca_Kabuli_Chr06 | 3453525                 | TT                              | CC                 | CC               | INTERGENIC                    |                    |                                                                    |
| SNP_39341_A_3553527 | NC_021165.1    | Ca_Kabuli_Chr06 | 3553527                 | TT                              | AA                 | AA               | URR                           | 101504283          | probable inactive tRNA-specific adenosine deaminase-like protein 3 |
| SNP_39342_A_3591461 | NC_021165.1    | Ca_Kabuli_Chr06 | 3591461                 | AA                              | GG                 | GG               | URR                           | 101503755          | probable RNA methyltransferase At5g51130                           |
| SNP_39343_A_3591533 | NC_021165.1    | Ca_Kabuli_Chr06 | 3591533                 | AA                              | CC                 | CC               | URR                           | 101503755          | probable RNA methyltransferase At5g51130                           |
| SNP_39344_A_3591539 | NC_021165.1    | Ca_Kabuli_Chr06 | 3591539                 | GG                              | TT                 | TT               | URR                           | 101503755          | probable RNA methyltransferase At5g51130                           |
| SNP_39345_A_3591935 | NC_021165.1    | Ca_Kabuli_Chr06 | 3591935                 | GG                              | AA                 | AA               | URR                           | 101503755          | probable RNA methyltransferase At5g51130                           |
| SNP_39346_A_3591949 | NC_021165.1    | Ca_Kabuli_Chr06 | 3591949                 | CC                              | TT                 | TT               | URR                           | 101503755          | probable RNA methyltransferase At5g51130                           |
| SNP_39347_A_3648098 | NC_021165.1    | Ca_Kabuli_Chr06 | 3648098                 | TT                              | AA                 | AA               | INTERGENIC                    |                    |                                                                    |
| SNP_39348_A_3672364 | NC_021165.1    | Ca_Kabuli_Chr06 | 3672364                 | GG                              | AA                 | AA               | URR                           | 101505897          | uncharacterized LOC101505897                                       |
| SNP_39349_A_3672637 | NC_021165.1    | Ca_Kabuli_Chr06 | 3672637                 | AA                              | GG                 | GG               | URR                           | 101505897          | uncharacterized LOC101505897                                       |
| SNP_39351_A_3751672 | NC_021165.1    | Ca_Kabuli_Chr06 | 3751672                 | CC                              | GG                 | GG               | URR                           | 101510725          | probable protein phosphatase 2C 6                                  |

| SNPs IDs            | Chromosome IDs | Chromosomes     | Physical positions (bp) | CDC Frontier (Reference genome) | (Pusa 1103 & HPNB) | (ILWC 46 & LPNB) | Sequence Components of genome | Gene accession IDs | Putative functions                             |
|---------------------|----------------|-----------------|-------------------------|---------------------------------|--------------------|------------------|-------------------------------|--------------------|------------------------------------------------|
| SNP_39352_A_3753183 | NC_021165.1    | Ca_Kabuli_Chr06 | 3753183                 | CC                              | AA                 | AA               | INTERGENIC                    |                    |                                                |
| SNP_39355_A_3807012 | NC_021165.1    | Ca_Kabuli_Chr06 | 3807012                 | TT                              | CC                 | CC               | URR                           | 101513942          | protein IQ-DOMAIN 14                           |
| SNP_39356_A_3819798 | NC_021165.1    | Ca_Kabuli_Chr06 | 3819798                 | GG                              | AA                 | AA               | URR                           | 101515256          | uncharacterized LOC101515256                   |
| SNP_39358_A_3947639 | NC_021165.1    | Ca_Kabuli_Chr06 | 3947639                 | TT                              | AA                 | AA               | INTERGENIC                    |                    |                                                |
| SNP_39359_A_4058556 | NC_021165.1    | Ca_Kabuli_Chr06 | 4058556                 | TT                              | CC                 | CC               | INTERGENIC                    |                    |                                                |
| SNP_39360_A_4064879 | NC_021165.1    | Ca_Kabuli_Chr06 | 4064879                 | TT                              | AA                 | AA               | DRR                           | 101499599          | inactive protein kinase SELMODRAFT_444075-like |
| SNP_39361_A_4064881 | NC_021165.1    | Ca_Kabuli_Chr06 | 4064881                 | TT                              | AA                 | AA               | DRR                           | 101499599          | inactive protein kinase SELMODRAFT_444075-like |
| SNP_39362_A_4080202 | NC_021165.1    | Ca_Kabuli_Chr06 | 4080202                 | CC                              | TT                 | TT               | INTERGENIC                    |                    |                                                |
| SNP_39363_A_4249280 | NC_021165.1    | Ca_Kabuli_Chr06 | 4249280                 | AA                              | GG                 | GG               | INTERGENIC                    |                    |                                                |
| SNP_39364_A_4249297 | NC_021165.1    | Ca_Kabuli_Chr06 | 4249297                 | CC                              | TT                 | TT               | INTERGENIC                    |                    |                                                |
| SNP_39365_A_4249556 | NC_021165.1    | Ca_Kabuli_Chr06 | 4249556                 | AA                              | GG                 | GG               | INTERGENIC                    |                    |                                                |
| SNP_39367_A_4290648 | NC_021165.1    | Ca_Kabuli_Chr06 | 4290648                 | AA                              | CC                 | CC               | INTERGENIC                    |                    |                                                |
| SNP_39368_A_4291065 | NC_021165.1    | Ca_Kabuli_Chr06 | 4291065                 | GG                              | AA                 | AA               | INTERGENIC                    |                    |                                                |
| SNP_39369_A_4304951 | NC_021165.1    | Ca_Kabuli_Chr06 | 4304951                 | TT                              | CC                 | CC               | DRR                           | 101506765          | uncharacterized LOC101506765                   |
| SNP_39370_A_4323605 | NC_021165.1    | Ca_Kabuli_Chr06 | 4323605                 | AA                              | GG                 | GG               | INTERGENIC                    |                    |                                                |
| SNP_39372_A_4388531 | NC_021165.1    | Ca_Kabuli_Chr06 | 4388531                 | GG                              | AA                 | AA               | URR                           | 101509419          | putative GEM-like protein 8                    |
| SNP_39374_A_4465138 | NC_021165.1    | Ca_Kabuli_Chr06 | 4465138                 | TT                              | AA                 | AA               | INTERGENIC                    |                    |                                                |
| SNP_39375_A_4465294 | NC_021165.1    | Ca_Kabuli_Chr06 | 4465294                 | TT                              | CC                 | CC               | INTERGENIC                    |                    |                                                |
| SNP_39377_A_4638586 | NC_021165.1    | Ca_Kabuli_Chr06 | 4638586                 | AA                              | GG                 | GG               | URR                           | 101495023          | phosphatidylinositol 4-kinase gamma 2-like     |
| SNP_39379_A_4658183 | NC_021165.1    | Ca_Kabuli_Chr06 | 4658183                 | AA                              | GG                 | GG               | INTRON                        | 101496451          | dynammin-related protein 5A                    |
| SNP_39381_A_4692848 | NC_021165.1    | Ca_Kabuli_Chr06 | 4692848                 | TT                              | GG                 | GG               | URR                           | 101497634          | RING-H2 finger protein ATL20-like              |
| SNP_39382_A_4699319 | NC_021165.1    | Ca_Kabuli_Chr06 | 4699319                 | TT                              | GG                 | GG               | INTRON                        | 101508778          | uncharacterized LOC101508778                   |

| SNPs IDs            | Chromosome IDs | Chromosomes     | Physical positions (bp) | CDC Frontier (Reference genome) | (Pusa 1103 & HPNB) | (ILWC 46 & LPNB) | Sequence Components of genome | Gene accession IDs | Putative functions                      |
|---------------------|----------------|-----------------|-------------------------|---------------------------------|--------------------|------------------|-------------------------------|--------------------|-----------------------------------------|
| SNP_39383_A_4699503 | NC_021165.1    | Ca_Kabuli_Chr06 | 4699503                 | GG                              | AA                 | AA               | NON_SYNONYMOUS_CODING         | 101508778          | uncharacterized LOC101508778            |
| SNP_39384_A_4699509 | NC_021165.1    | Ca_Kabuli_Chr06 | 4699509                 | TT                              | GG                 | GG               | SYNONYMOUS_CODING             | 101508778          | uncharacterized LOC101508778            |
| SNP_39385_A_4699725 | NC_021165.1    | Ca_Kabuli_Chr06 | 4699725                 | TT                              | AA                 | AA               | URR                           | 101508778          | uncharacterized LOC101508778            |
| SNP_39386_A_4706159 | NC_021165.1    | Ca_Kabuli_Chr06 | 4706159                 | GG                              | TT                 | TT               | INTERGENIC                    |                    |                                         |
| SNP_39387_A_4712912 | NC_021165.1    | Ca_Kabuli_Chr06 | 4712912                 | AA                              | GG                 | GG               | DRR                           | 101498634          | uncharacterized LOC101498634            |
| SNP_39388_A_4713000 | NC_021165.1    | Ca_Kabuli_Chr06 | 4713000                 | AA                              | GG                 | GG               | DRR                           | 101498634          | uncharacterized LOC101498634            |
| SNP_39389_A_4713103 | NC_021165.1    | Ca_Kabuli_Chr06 | 4713103                 | TT                              | CC                 | CC               | DRR                           | 101498634          | uncharacterized LOC101498634            |
| SNP_39390_A_4713164 | NC_021165.1    | Ca_Kabuli_Chr06 | 4713164                 | AA                              | TT                 | TT               | DRR                           | 101498634          | uncharacterized LOC101498634            |
| SNP_39391_A_4713260 | NC_021165.1    | Ca_Kabuli_Chr06 | 4713260                 | TT                              | AA                 | AA               | DRR                           | 101498634          | uncharacterized LOC101498634            |
| SNP_39392_A_4713325 | NC_021165.1    | Ca_Kabuli_Chr06 | 4713325                 | AA                              | TT                 | TT               | DRR                           | 101498634          | uncharacterized LOC101498634            |
| SNP_39395_A_4823123 | NC_021165.1    | Ca_Kabuli_Chr06 | 4823123                 | AA                              | CC                 | CC               | URR                           | 101503220          | uncharacterized LOC101503220            |
| SNP_39397_A_4849363 | NC_021165.1    | Ca_Kabuli_Chr06 | 4849363                 | GG                              | AA                 | AA               | URR                           | 101504184          | protein trichome birefringence-like 24  |
| SNP_39398_A_4856361 | NC_021165.1    | Ca_Kabuli_Chr06 | 4856361                 | TT                              | CC                 | CC               | INTRON                        | 101509420          | centromere-associated protein E         |
| SNP_39399_A_4868386 | NC_021165.1    | Ca_Kabuli_Chr06 | 4868386                 | AA                              | GG                 | GG               | INTERGENIC                    |                    |                                         |
| SNP_39400_A_4928168 | NC_021165.1    | Ca_Kabuli_Chr06 | 4928168                 | GG                              | AA                 | AA               | INTERGENIC                    |                    |                                         |
| SNP_39401_A_4933393 | NC_021165.1    | Ca_Kabuli_Chr06 | 4933393                 | TT                              | AA                 | AA               | INTERGENIC                    |                    |                                         |
| SNP_39402_A_4983135 | NC_021165.1    | Ca_Kabuli_Chr06 | 4983135                 | AA                              | GG                 | GG               | DRR                           | 101509201          | calcium-dependent protein kinase 3-like |
| SNP_39403_A_4983138 | NC_021165.1    | Ca_Kabuli_Chr06 | 4983138                 | AA                              | GG                 | GG               | DRR                           | 101509201          | calcium-dependent protein kinase 3-like |
| SNP_39404_A_5017334 | NC_021165.1    | Ca_Kabuli_Chr06 | 5017334                 | CC                              | TT                 | TT               | INTRON                        | 101510168          | fidgetin-like protein 1                 |
| SNP_39405_A_5070132 | NC_021165.1    | Ca_Kabuli_Chr06 | 5070132                 | CC                              | TT                 | TT               | INTERGENIC                    |                    |                                         |
| SNP_39406_A_5070138 | NC_021165.1    | Ca_Kabuli_Chr06 | 5070138                 | CC                              | TT                 | TT               | INTERGENIC                    |                    |                                         |
| SNP_39407_A_5070171 | NC_021165.1    | Ca_Kabuli_Chr06 | 5070171                 | CC                              | TT                 | TT               | INTERGENIC                    |                    |                                         |

| SNPs IDs            | Chromosome IDs | Chromosomes     | Physical positions (bp) | CDC Frontier (Reference genome) | (Pusa 1103 & HPNB) | (ILWC 46 & LPNB) | Sequence Components of genome | Gene accession IDs | Putative functions                            |
|---------------------|----------------|-----------------|-------------------------|---------------------------------|--------------------|------------------|-------------------------------|--------------------|-----------------------------------------------|
| SNP_39408_A_5087041 | NC_021165.1    | Ca_Kabuli_Chr06 | 5087041                 | TT                              | GG                 | GG               | INTERGENIC                    |                    |                                               |
| SNP_39409_A_5087042 | NC_021165.1    | Ca_Kabuli_Chr06 | 5087042                 | TT                              | GG                 | GG               | INTERGENIC                    |                    |                                               |
| SNP_39410_A_5100138 | NC_021165.1    | Ca_Kabuli_Chr06 | 5100138                 | TT                              | CC                 | CC               | DRR                           | 101512654          | serine/threonine-protein kinase Aurora-3-like |
| SNP_39411_A_5241162 | NC_021165.1    | Ca_Kabuli_Chr06 | 5241162                 | AA                              | GG                 | GG               | INTERGENIC                    |                    |                                               |
| SNP_39412_A_5287617 | NC_021165.1    | Ca_Kabuli_Chr06 | 5287617                 | GG                              | AA                 | AA               | INTERGENIC                    |                    |                                               |
| SNP_39413_A_5287636 | NC_021165.1    | Ca_Kabuli_Chr06 | 5287636                 | GG                              | AA                 | AA               | INTERGENIC                    |                    |                                               |
| SNP_39414_A_5287885 | NC_021165.1    | Ca_Kabuli_Chr06 | 5287885                 | AA                              | GG                 | GG               | INTERGENIC                    |                    |                                               |
| SNP_39415_A_5287955 | NC_021165.1    | Ca_Kabuli_Chr06 | 5287955                 | TT                              | GG                 | GG               | INTERGENIC                    |                    |                                               |
| SNP_39417_A_5329527 | NC_021165.1    | Ca_Kabuli_Chr06 | 5329527                 | TT                              | CC                 | CC               | INTERGENIC                    |                    |                                               |
| SNP_39418_A_5329528 | NC_021165.1    | Ca_Kabuli_Chr06 | 5329528                 | TT                              | CC                 | CC               | INTERGENIC                    |                    |                                               |
| SNP_39419_A_5335020 | NC_021165.1    | Ca_Kabuli_Chr06 | 5335020                 | TT                              | CC                 | CC               | INTERGENIC                    |                    |                                               |
| SNP_39420_A_5335088 | NC_021165.1    | Ca_Kabuli_Chr06 | 5335088                 | CC                              | TT                 | TT               | INTERGENIC                    |                    |                                               |
| SNP_39421_A_5335382 | NC_021165.1    | Ca_Kabuli_Chr06 | 5335382                 | TT                              | AA                 | AA               | INTERGENIC                    |                    |                                               |
| SNP_39422_A_5335435 | NC_021165.1    | Ca_Kabuli_Chr06 | 5335435                 | TT                              | CC                 | CC               | INTERGENIC                    |                    |                                               |
| SNP_39423_A_5335473 | NC_021165.1    | Ca_Kabuli_Chr06 | 5335473                 | CC                              | TT                 | TT               | INTERGENIC                    |                    |                                               |
| SNP_39424_A_5382071 | NC_021165.1    | Ca_Kabuli_Chr06 | 5382071                 | CC                              | TT                 | TT               | DRR                           | 101494078          | cytochrome P450 89A2-like                     |
| SNP_39425_A_5475973 | NC_021165.1    | Ca_Kabuli_Chr06 | 5475973                 | AA                              | TT                 | TT               | INTERGENIC                    |                    |                                               |
| SNP_39426_A_5499011 | NC_021165.1    | Ca_Kabuli_Chr06 | 5499011                 | GG                              | TT                 | TT               | INTRON                        | 101498297          | GMP synthase [glutamine-hydrolyzing]          |
| SNP_39427_A_5539652 | NC_021165.1    | Ca_Kabuli_Chr06 | 5539652                 | AA                              | GG                 | GG               | URR                           | 101500769          | Unknown function                              |
| SNP_39428_A_5539653 | NC_021165.1    | Ca_Kabuli_Chr06 | 5539653                 | TT                              | GG                 | GG               | URR                           | 101500769          | Unknown function                              |
| SNP_39429_A_5549210 | NC_021165.1    | Ca_Kabuli_Chr06 | 5549210                 | GG                              | CC                 | CC               | URR                           | 101511049          | uncharacterized LOC101511049                  |
| SNP_39430_A_5573443 | NC_021165.1    | Ca_Kabuli_Chr06 | 5573443                 | TT                              | GG                 | GG               | INTERGENIC                    |                    |                                               |



| SNPs IDs            | Chromosome IDs | Chromosomes     | Physical positions (bp) | CDC Frontier (Reference genome) | (Pusa 1103 & HPNB) | (ILWC 46 & LPNB) | Sequence Components of genome | Gene accession IDs | Putative functions                |
|---------------------|----------------|-----------------|-------------------------|---------------------------------|--------------------|------------------|-------------------------------|--------------------|-----------------------------------|
| SNP_39431_A_5668002 | NC_021165.1    | Ca_Kabuli_Chr06 | 5668002                 | AA                              | GG                 | GG               | URR                           | 101513615          | myosin-11-like                    |
| SNP_39432_A_5668006 | NC_021165.1    | Ca_Kabuli_Chr06 | 5668006                 | TT                              | GG                 | GG               | URR                           | 101513615          | myosin-11-like                    |
| SNP_39433_A_5669873 | NC_021165.1    | Ca_Kabuli_Chr06 | 5669873                 | AA                              | GG                 | GG               | INTRON                        | 101504828          | tRNA 2'-phosphotransferase 1-like |
| SNP_39434_A_5739187 | NC_021165.1    | Ca_Kabuli_Chr06 | 5739187                 | AA                              | GG                 | GG               | INTRON                        | 101504828          | tRNA 2'-phosphotransferase 1-like |
| SNP_39435_A_5795764 | NC_021165.1    | Ca_Kabuli_Chr06 | 5795764                 | TT                              | AA                 | AA               | INTRON                        | 101504828          | tRNA 2'-phosphotransferase 1-like |
| SNP_39437_A_5864710 | NC_021165.1    | Ca_Kabuli_Chr06 | 5864710                 | TT                              | AA                 | AA               | INTRON                        | 101504828          | tRNA 2'-phosphotransferase 1-like |
| SNP_39439_A_6012386 | NC_021165.1    | Ca_Kabuli_Chr06 | 6012386                 | AA                              | GG                 | GG               | INTERGENIC                    |                    |                                   |
| SNP_39440_A_6036204 | NC_021165.1    | Ca_Kabuli_Chr06 | 6036204                 | AA                              | GG                 | GG               | INTERGENIC                    |                    |                                   |
| SNP_39441_A_6036910 | NC_021165.1    | Ca_Kabuli_Chr06 | 6036910                 | GG                              | AA                 | AA               | INTERGENIC                    |                    |                                   |
| SNP_39442_A_6150510 | NC_021165.1    | Ca_Kabuli_Chr06 | 6150510                 | TT                              | CC                 | CC               | INTERGENIC                    |                    |                                   |
| SNP_39444_A_6204091 | NC_021165.1    | Ca_Kabuli_Chr06 | 6204091                 | TT                              | CC                 | CC               | URR                           | 101513291          | uncharacterized LOC101513291      |
| SNP_39445_A_6224698 | NC_021165.1    | Ca_Kabuli_Chr06 | 6224698                 | AA                              | TT                 | TT               | DRR                           | 101500555          | uncharacterized LOC101500555      |
| SNP_39446_A_6304962 | NC_021165.1    | Ca_Kabuli_Chr06 | 6304962                 | TT                              | CC                 | CC               | INTERGENIC                    |                    |                                   |
| SNP_39447_A_6305905 | NC_021165.1    | Ca_Kabuli_Chr06 | 6305905                 | AA                              | GG                 | GG               | DRR                           | 101489440          | random slug protein 5-like        |
| SNP_39449_A_6320938 | NC_021165.1    | Ca_Kabuli_Chr06 | 6320938                 | TT                              | CC                 | CC               | INTERGENIC                    |                    |                                   |
| SNP_39450_A_6320940 | NC_021165.1    | Ca_Kabuli_Chr06 | 6320940                 | AA                              | GG                 | GG               | INTERGENIC                    |                    |                                   |
| SNP_39451_A_6321248 | NC_021165.1    | Ca_Kabuli_Chr06 | 6321248                 | AA                              | CC                 | CC               | INTERGENIC                    |                    |                                   |
| SNP_39452_A_6409563 | NC_021165.1    | Ca_Kabuli_Chr06 | 6409563                 | CC                              | TT                 | TT               | INTERGENIC                    |                    |                                   |
| SNP_39454_A_6409977 | NC_021165.1    | Ca_Kabuli_Chr06 | 6409977                 | GG                              | CC                 | CC               | INTERGENIC                    |                    |                                   |
| SNP_39455_A_6410507 | NC_021165.1    | Ca_Kabuli_Chr06 | 6410507                 | GG                              | AA                 | AA               | INTERGENIC                    |                    |                                   |
| SNP_39456_A_6410534 | NC_021165.1    | Ca_Kabuli_Chr06 | 6410534                 | CC                              | AA                 | AA               | INTERGENIC                    |                    |                                   |
| SNP_39457_A_6410715 | NC_021165.1    | Ca_Kabuli_Chr06 | 6410715                 | AA                              | CC                 | CC               | INTERGENIC                    |                    |                                   |

| SNPs IDs            | Chromosome IDs | Chromosomes     | Physical positions (bp) | CDC Frontier (Reference genome) | (Pusa 1103 & HPNB) | (ILWC 46 & LPNB) | Sequence Components of genome | Gene accession IDs | Putative functions                              |
|---------------------|----------------|-----------------|-------------------------|---------------------------------|--------------------|------------------|-------------------------------|--------------------|-------------------------------------------------|
| SNP_39458_A_6411115 | NC_021165.1    | Ca_Kabuli_Chr06 | 6411115                 | CC                              | TT                 | TT               | INTERGENIC                    |                    |                                                 |
| SNP_39461_A_6417589 | NC_021165.1    | Ca_Kabuli_Chr06 | 6417589                 | CC                              | TT                 | TT               | INTERGENIC                    |                    |                                                 |
| SNP_39462_A_6432304 | NC_021165.1    | Ca_Kabuli_Chr06 | 6432304                 | TT                              | CC                 | CC               | DRR                           | 101493435          | E3 ubiquitin-protein ligase CHFR                |
| SNP_39464_A_6495623 | NC_021165.1    | Ca_Kabuli_Chr06 | 6495623                 | CC                              | TT                 | TT               | INTERGENIC                    |                    |                                                 |
| SNP_39465_A_6535371 | NC_021165.1    | Ca_Kabuli_Chr06 | 6535371                 | AA                              | TT                 | TT               | INTERGENIC                    |                    |                                                 |
| SNP_39467_A_6622539 | NC_021165.1    | Ca_Kabuli_Chr06 | 6622539                 | AA                              | CC                 | CC               | URR                           | 101497969          | MACPF domain-containing protein A14g24290-like  |
| SNP_39468_A_6635561 | NC_021165.1    | Ca_Kabuli_Chr06 | 6635561                 | CC                              | TT                 | TT               | INTERGENIC                    |                    |                                                 |
| SNP_39469_A_6645607 | NC_021165.1    | Ca_Kabuli_Chr06 | 6645607                 | AA                              | TT                 | TT               | URR                           | 101410582          | transfer RNA histidine(anticodon GUG)           |
| SNP_39471_A_6749281 | NC_021165.1    | Ca_Kabuli_Chr06 | 6749281                 | AA                              | GG                 | GG               | URR                           | 101511141          | uncharacterized LOC101511141                    |
| SNP_39472_A_6749299 | NC_021165.1    | Ca_Kabuli_Chr06 | 6749299                 | TT                              | CC                 | CC               | URR                           | 101511141          | uncharacterized LOC101511141                    |
| SNP_39473_A_6760396 | NC_021165.1    | Ca_Kabuli_Chr06 | 6760396                 | TT                              | AA                 | AA               | DRR                           | 101501397          | uncharacterized LOC101501397                    |
| SNP_39474_A_6785943 | NC_021165.1    | Ca_Kabuli_Chr06 | 6785943                 | GG                              | TT                 | TT               | INTERGENIC                    |                    |                                                 |
| SNP_39475_A_6797181 | NC_021165.1    | Ca_Kabuli_Chr06 | 6797181                 | AA                              | GG                 | GG               | URR                           | 101503221          | fatty acid amide hydrolase-like                 |
| SNP_39478_A_6922421 | NC_021165.1    | Ca_Kabuli_Chr06 | 6922421                 | AA                              | TT                 | TT               | URR                           | 101508886          | uncharacterized LOC101508886                    |
| SNP_39479_A_6922873 | NC_021165.1    | Ca_Kabuli_Chr06 | 6922873                 | CC                              | AA                 | AA               | URR                           | 101508886          | uncharacterized LOC101508886                    |
| SNP_39480_A_6922928 | NC_021165.1    | Ca_Kabuli_Chr06 | 6922928                 | CC                              | TT                 | TT               | URR                           | 101508886          | uncharacterized LOC101508886                    |
| SNP_39481_A_6922950 | NC_021165.1    | Ca_Kabuli_Chr06 | 6922950                 | TT                              | AA                 | AA               | URR                           | 101508886          | uncharacterized LOC101508886                    |
| SNP_39483_A_6945020 | NC_021165.1    | Ca_Kabuli_Chr06 | 6945020                 | CC                              | AA                 | AA               | URR                           | 101512746          | nuclear transcription factor Y subunit B-7-like |
| SNP_39484_A_6945023 | NC_021165.1    | Ca_Kabuli_Chr06 | 6945023                 | AA                              | TT                 | TT               | URR                           | 101512746          | nuclear transcription factor Y subunit B-7-like |
| SNP_39486_A_7015468 | NC_021165.1    | Ca_Kabuli_Chr06 | 7015468                 | GG                              | AA                 | AA               | INTERGENIC                    |                    |                                                 |
| SNP_39487_A_7015483 | NC_021165.1    | Ca_Kabuli_Chr06 | 7015483                 | AA                              | GG                 | GG               | INTERGENIC                    |                    |                                                 |
| SNP_39488_A_7125932 | NC_021165.1    | Ca_Kabuli_Chr06 | 7125932                 | TT                              | CC                 | CC               | INTRON                        | 101493229          | uncharacterized LOC101493229                    |

| SNPs IDs            | Chromosome IDs | Chromosomes     | Physical positions (bp) | CDC Frontier (Reference genome) | (Pusa 1103 & HPNB) | (ILWC 46 & LPNB) | Sequence Components of genome | Gene accession IDs | Putative functions             |
|---------------------|----------------|-----------------|-------------------------|---------------------------------|--------------------|------------------|-------------------------------|--------------------|--------------------------------|
| SNP_39489_A_7151352 | NC_021165.1    | Ca_Kabuli_Chr06 | 7151352                 | TT                              | GG                 | GG               | URR                           | 101493230          | transcription factor HEC3-like |
| SNP_39490_A_7192204 | NC_021165.1    | Ca_Kabuli_Chr06 | 7192204                 | CC                              | TT                 | TT               | INTERGENIC                    |                    |                                |
| SNP_39491_A_7192206 | NC_021165.1    | Ca_Kabuli_Chr06 | 7192206                 | CC                              | TT                 | TT               | INTERGENIC                    |                    |                                |
| SNP_39492_A_7192215 | NC_021165.1    | Ca_Kabuli_Chr06 | 7192215                 | AA                              | CC                 | CC               | INTERGENIC                    |                    |                                |
| SNP_39494_A_7331668 | NC_021165.1    | Ca_Kabuli_Chr06 | 7331668                 | TT                              | CC                 | CC               | URR                           | 101502470          | histone H3.2                   |
| SNP_39495_A_7342005 | NC_021165.1    | Ca_Kabuli_Chr06 | 7342005                 | GG                              | AA                 | AA               | DRR                           | 101503418          | uncharacterized LOC101503418   |
| SNP_39496_A_7364300 | NC_021165.1    | Ca_Kabuli_Chr06 | 7364300                 | GG                              | AA                 | AA               | INTERGENIC                    |                    |                                |
| SNP_39498_A_7537746 | NC_021165.1    | Ca_Kabuli_Chr06 | 7537746                 | TT                              | CC                 | CC               | INTERGENIC                    |                    |                                |
| SNP_39500_A_7552797 | NC_021165.1    | Ca_Kabuli_Chr06 | 7552797                 | GG                              | AA                 | AA               | NON_SYNONYMOUS_CODING         | 101511453          | uncharacterized LOC101511453   |
| SNP_39502_A_7555855 | NC_021165.1    | Ca_Kabuli_Chr06 | 7555855                 | TT                              | AA                 | AA               | INTRON                        | 101511453          | uncharacterized LOC101511453   |
| SNP_39503_A_7555877 | NC_021165.1    | Ca_Kabuli_Chr06 | 7555877                 | TT                              | CC                 | CC               | INTRON                        | 101511453          | uncharacterized LOC101511453   |
| SNP_39504_A_7556706 | NC_021165.1    | Ca_Kabuli_Chr06 | 7556706                 | AA                              | TT                 | TT               | INTRON                        | 101511453          | uncharacterized LOC101511453   |
| SNP_39505_A_7557831 | NC_021165.1    | Ca_Kabuli_Chr06 | 7557831                 | AA                              | GG                 | GG               | INTRON                        | 101511453          | uncharacterized LOC101511453   |
| SNP_39506_A_7558096 | NC_021165.1    | Ca_Kabuli_Chr06 | 7558096                 | TT                              | CC                 | CC               | INTRON                        | 101511453          | uncharacterized LOC101511453   |
| SNP_39507_A_7558542 | NC_021165.1    | Ca_Kabuli_Chr06 | 7558542                 | AA                              | GG                 | GG               | INTRON                        | 101511453          | uncharacterized LOC101511453   |
| SNP_39508_A_7560714 | NC_021165.1    | Ca_Kabuli_Chr06 | 7560714                 | GG                              | AA                 | AA               | INTRON                        | 101511453          | uncharacterized LOC101511453   |
| SNP_39509_A_7560780 | NC_021165.1    | Ca_Kabuli_Chr06 | 7560780                 | GG                              | TT                 | TT               | INTRON                        | 101511453          | uncharacterized LOC101511453   |
| SNP_39510_A_7561782 | NC_021165.1    | Ca_Kabuli_Chr06 | 7561782                 | TT                              | CC                 | CC               | INTRON                        | 101511453          | uncharacterized LOC101511453   |
| SNP_39511_A_7561865 | NC_021165.1    | Ca_Kabuli_Chr06 | 7561865                 | CC                              | AA                 | AA               | INTRON                        | 101511453          | uncharacterized LOC101511453   |
| SNP_39512_A_7561902 | NC_021165.1    | Ca_Kabuli_Chr06 | 7561902                 | AA                              | GG                 | GG               | INTRON                        | 101511453          | uncharacterized LOC101511453   |
| SNP_39513_A_7563436 | NC_021165.1    | Ca_Kabuli_Chr06 | 7563436                 | AA                              | GG                 | GG               | SYNONYMOUS_CODING             | 101511453          | uncharacterized LOC101511453   |
| SNP_39514_A_7563983 | NC_021165.1    | Ca_Kabuli_Chr06 | 7563983                 | TT                              | CC                 | CC               | SYNONYMOUS_CODING             | 101511453          | uncharacterized LOC101511453   |

| SNPs IDs            | Chromosome IDs | Chromosomes     | Physical positions (bp) | CDC Frontier (Reference genome) | (Pusa 1103 & HPNB) | (ILWC 46 & LPNB) | Sequence Components of genome | Gene accession IDs | Putative functions                                          |
|---------------------|----------------|-----------------|-------------------------|---------------------------------|--------------------|------------------|-------------------------------|--------------------|-------------------------------------------------------------|
| SNP_39515_A_7564186 | NC_021165.1    | Ca_Kabuli_Chr06 | 7564186                 | CC                              | TT                 | TT               | NON_SYNONYMOUS_CODING         | 101511453          | uncharacterized LOC101511453                                |
| SNP_39516_A_7565534 | NC_021165.1    | Ca_Kabuli_Chr06 | 7565534                 | TT                              | AA                 | AA               | INTRON                        | 101511453          | uncharacterized LOC101511453                                |
| SNP_39517_A_7565722 | NC_021165.1    | Ca_Kabuli_Chr06 | 7565722                 | GG                              | AA                 | AA               | INTRON                        | 101511453          | uncharacterized LOC101511453                                |
| SNP_39519_A_7568709 | NC_021165.1    | Ca_Kabuli_Chr06 | 7568709                 | GG                              | AA                 | AA               | INTRON                        | 101511453          | uncharacterized LOC101511453                                |
| SNP_39520_A_7572113 | NC_021165.1    | Ca_Kabuli_Chr06 | 7572113                 | AA                              | TT                 | TT               | INTRON                        | 101511453          | uncharacterized LOC101511453                                |
| SNP_39522_A_7575420 | NC_021165.1    | Ca_Kabuli_Chr06 | 7575420                 | AA                              | GG                 | GG               | INTERGENIC                    |                    |                                                             |
| SNP_39523_A_7575424 | NC_021165.1    | Ca_Kabuli_Chr06 | 7575424                 | CC                              | TT                 | TT               | INTERGENIC                    |                    |                                                             |
| SNP_39524_A_7575995 | NC_021165.1    | Ca_Kabuli_Chr06 | 7575995                 | GG                              | TT                 | TT               | INTERGENIC                    |                    |                                                             |
| SNP_39525_A_7579579 | NC_021165.1    | Ca_Kabuli_Chr06 | 7579579                 | TT                              | CC                 | CC               | DRR                           | 101512003          | S-adenosylmethionine carrier 1, chloroplastic/mitochondrial |
| SNP_39526_A_7581799 | NC_021165.1    | Ca_Kabuli_Chr06 | 7581799                 | TT                              | CC                 | CC               | INTERGENIC                    |                    |                                                             |
| SNP_39527_A_7583682 | NC_021165.1    | Ca_Kabuli_Chr06 | 7583682                 | CC                              | TT                 | TT               | INTERGENIC                    |                    |                                                             |
| SNP_39529_A_7587932 | NC_021165.1    | Ca_Kabuli_Chr06 | 7587932                 | TT                              | AA                 | AA               | URR                           | 101512003          | S-adenosylmethionine carrier 1, chloroplastic/mitochondrial |
| SNP_39530_A_7587971 | NC_021165.1    | Ca_Kabuli_Chr06 | 7587971                 | GG                              | AA                 | AA               | URR                           | 101512003          | S-adenosylmethionine carrier 1, chloroplastic/mitochondrial |
| SNP_39531_A_7588145 | NC_021165.1    | Ca_Kabuli_Chr06 | 7588145                 | GG                              | AA                 | AA               | URR                           | 101512003          | S-adenosylmethionine carrier 1, chloroplastic/mitochondrial |
| SNP_39532_A_7588185 | NC_021165.1    | Ca_Kabuli_Chr06 | 7588185                 | AA                              | TT                 | TT               | URR                           | 101512003          | S-adenosylmethionine carrier 1, chloroplastic/mitochondrial |
| SNP_39534_A_7588371 | NC_021165.1    | Ca_Kabuli_Chr06 | 7588371                 | AA                              | GG                 | GG               | URR                           | 101512003          | S-adenosylmethionine carrier 1, chloroplastic/mitochondrial |
| SNP_39535_A_7588373 | NC_021165.1    | Ca_Kabuli_Chr06 | 7588373                 | AA                              | GG                 | GG               | URR                           | 101512003          | S-adenosylmethionine carrier 1, chloroplastic/mitochondrial |
| SNP_39536_A_7589011 | NC_021165.1    | Ca_Kabuli_Chr06 | 7589011                 | AA                              | GG                 | GG               | INTERGENIC                    |                    |                                                             |
| SNP_39537_A_7589032 | NC_021165.1    | Ca_Kabuli_Chr06 | 7589032                 | TT                              | CC                 | CC               | INTERGENIC                    |                    |                                                             |
| SNP_39538_A_7589461 | NC_021165.1    | Ca_Kabuli_Chr06 | 7589461                 | AA                              | GG                 | GG               | INTERGENIC                    |                    |                                                             |
| SNP_39539_A_7590072 | NC_021165.1    | Ca_Kabuli_Chr06 | 7590072                 | TT                              | GG                 | GG               | INTERGENIC                    |                    |                                                             |
| SNP_39540_A_7590252 | NC_021165.1    | Ca_Kabuli_Chr06 | 7590252                 | TT                              | CC                 | CC               | INTERGENIC                    |                    |                                                             |

| SNPs IDs            | Chromosome IDs | Chromosomes     | Physical positions (bp) | CDC Frontier (Reference genome) | (Pusa 1103 & HPNB) | (ILWC 46 & LPNB) | Sequence Components of genome | Gene accession IDs | Putative functions                                  |
|---------------------|----------------|-----------------|-------------------------|---------------------------------|--------------------|------------------|-------------------------------|--------------------|-----------------------------------------------------|
| SNP_39543_A_7593840 | NC_021165.1    | Ca_Kabuli_Chr06 | 7593840                 | GG                              | AA                 | AA               | URR                           | 101512328          | glucan endo-1,3-beta-glucosidase 8-like             |
| SNP_39544_A_7594168 | NC_021165.1    | Ca_Kabuli_Chr06 | 7594168                 | GG                              | CC                 | CC               | URR                           | 101512328          | glucan endo-1,3-beta-glucosidase 8-like             |
| SNP_39545_A_7596766 | NC_021165.1    | Ca_Kabuli_Chr06 | 7596766                 | TT                              | CC                 | CC               | INTRON                        | 101512656          | UPF0202 protein At1g10490                           |
| SNP_39546_A_7599763 | NC_021165.1    | Ca_Kabuli_Chr06 | 7599763                 | CC                              | TT                 | TT               | INTRON                        | 101512656          | UPF0202 protein At1g10490                           |
| SNP_39547_A_7600072 | NC_021165.1    | Ca_Kabuli_Chr06 | 7600072                 | CC                              | TT                 | TT               | INTRON                        | 101512656          | UPF0202 protein At1g10490                           |
| SNP_39548_A_7604360 | NC_021165.1    | Ca_Kabuli_Chr06 | 7604360                 | AA                              | TT                 | TT               | INTRON                        | 101512656          | UPF0202 protein At1g10490                           |
| SNP_39550_A_7606850 | NC_021165.1    | Ca_Kabuli_Chr06 | 7606850                 | CC                              | TT                 | TT               | INTERGENIC                    |                    |                                                     |
| SNP_39551_A_7609453 | NC_021165.1    | Ca_Kabuli_Chr06 | 7609453                 | TT                              | GG                 | GG               | DRR                           | 101512965          | violaxanthin de-epoxidase, chloroplastic            |
| SNP_39552_A_7609485 | NC_021165.1    | Ca_Kabuli_Chr06 | 7609485                 | GG                              | CC                 | CC               | URR                           | 101512656          | UPF0202 protein At1g10490                           |
| SNP_39553_A_7609573 | NC_021165.1    | Ca_Kabuli_Chr06 | 7609573                 | GG                              | AA                 | AA               | URR                           | 101512656          | UPF0202 protein At1g10490                           |
| SNP_39554_A_7610335 | NC_021165.1    | Ca_Kabuli_Chr06 | 7610335                 | TT                              | CC                 | CC               | URR                           | 101512656          | UPF0202 protein At1g10490                           |
| SNP_39555_A_7611345 | NC_021165.1    | Ca_Kabuli_Chr06 | 7611345                 | TT                              | GG                 | GG               | INTERGENIC                    |                    |                                                     |
| SNP_39556_A_7611356 | NC_021165.1    | Ca_Kabuli_Chr06 | 7611356                 | TT                              | CC                 | CC               | INTERGENIC                    |                    |                                                     |
| SNP_39557_A_7614183 | NC_021165.1    | Ca_Kabuli_Chr06 | 7614183                 | AA                              | GG                 | GG               | DRR                           | 101493867          | Unknown function                                    |
| SNP_39558_A_7614816 | NC_021165.1    | Ca_Kabuli_Chr06 | 7614816                 | CC                              | GG                 | GG               | DRR                           | 101493867          | Unknown function                                    |
| SNP_39559_A_7621736 | NC_021165.1    | Ca_Kabuli_Chr06 | 7621736                 | AA                              | CC                 | CC               | URR                           | 101513292          | probable ATP synthase 24 kDa subunit, mitochondrial |
| SNP_39560_A_7625866 | NC_021165.1    | Ca_Kabuli_Chr06 | 7625866                 | AA                              | GG                 | GG               | INTERGENIC                    |                    |                                                     |
| SNP_39561_A_7628313 | NC_021165.1    | Ca_Kabuli_Chr06 | 7628313                 | GG                              | AA                 | AA               | DRR                           | 101514161          | ras-related protein Rab7-like                       |
| SNP_39562_A_7629102 | NC_021165.1    | Ca_Kabuli_Chr06 | 7629102                 | AA                              | GG                 | GG               | URR                           | 101513816          | iron-sulfur assembly protein IscA, chloroplastic    |
| SNP_39563_A_7629969 | NC_021165.1    | Ca_Kabuli_Chr06 | 7629969                 | AA                              | GG                 | GG               | SYNONYMOUS_CODING             | 101514161          | ras-related protein Rab7-like                       |
| SNP_39564_A_7630374 | NC_021165.1    | Ca_Kabuli_Chr06 | 7630374                 | CC                              | GG                 | GG               | INTRON                        | 101514161          | ras-related protein Rab7-like                       |
| SNP_39566_A_7634202 | NC_021165.1    | Ca_Kabuli_Chr06 | 7634202                 | GG                              | AA                 | AA               | INTERGENIC                    |                    |                                                     |

| SNPs IDs            | Chromosome IDs | Chromosomes     | Physical positions (bp) | CDC Frontier genome (Reference genome) | (Pusa 1103 & HPNB) | (ILWC 46 & LPNB) | Sequence Components of genome | Gene accession IDs | Putative functions                            |
|---------------------|----------------|-----------------|-------------------------|----------------------------------------|--------------------|------------------|-------------------------------|--------------------|-----------------------------------------------|
| SNP_39567_A_7634207 | NC_021165.1    | Ca_Kabuli_Chr06 | 7634207                 | TT                                     | CC                 | CC               | INTERGENIC                    |                    |                                               |
| SNP_39568_A_7634213 | NC_021165.1    | Ca_Kabuli_Chr06 | 7634213                 | AA                                     | CC                 | CC               | INTERGENIC                    |                    |                                               |
| SNP_39570_A_7643440 | NC_021165.1    | Ca_Kabuli_Chr06 | 7643440                 | TT                                     | GG                 | GG               | DRR                           | 101514485          | uncharacterized GTP-binding protein At5g64813 |
| SNP_39572_A_7644183 | NC_021165.1    | Ca_Kabuli_Chr06 | 7644183                 | TT                                     | AA                 | AA               | DRR                           | 101514485          | uncharacterized GTP-binding protein At5g64813 |
| SNP_39573_A_7644510 | NC_021165.1    | Ca_Kabuli_Chr06 | 7644510                 | CC                                     | GG                 | GG               | INTERGENIC                    |                    |                                               |
| SNP_39574_A_7656340 | NC_021165.1    | Ca_Kabuli_Chr06 | 7656340                 | AA                                     | TT                 | TT               | DRR                           | 101515131          | uncharacterized LOC101515131                  |
| SNP_39575_A_7656371 | NC_021165.1    | Ca_Kabuli_Chr06 | 7656371                 | AA                                     | GG                 | GG               | DRR                           | 101515131          | uncharacterized LOC101515131                  |
| SNP_39576_A_7656376 | NC_021165.1    | Ca_Kabuli_Chr06 | 7656376                 | AA                                     | GG                 | GG               | DRR                           | 101515131          | uncharacterized LOC101515131                  |
| SNP_39577_A_7656378 | NC_021165.1    | Ca_Kabuli_Chr06 | 7656378                 | AA                                     | GG                 | GG               | DRR                           | 101515131          | uncharacterized LOC101515131                  |
| SNP_39578_A_7656790 | NC_021165.1    | Ca_Kabuli_Chr06 | 7656790                 | CC                                     | AA                 | AA               | DRR                           | 101515131          | uncharacterized LOC101515131                  |
| SNP_39579_A_7656795 | NC_021165.1    | Ca_Kabuli_Chr06 | 7656795                 | GG                                     | AA                 | AA               | DRR                           | 101515131          | uncharacterized LOC101515131                  |
| SNP_39580_A_7657947 | NC_021165.1    | Ca_Kabuli_Chr06 | 7657947                 | CC                                     | AA                 | AA               | INTRON                        | 101515131          | uncharacterized LOC101515131                  |
| SNP_39582_A_7661635 | NC_021165.1    | Ca_Kabuli_Chr06 | 7661635                 | AA                                     | TT                 | TT               | DRR                           | 101515448          | uncharacterized LOC101515448                  |
| SNP_39583_A_7661636 | NC_021165.1    | Ca_Kabuli_Chr06 | 7661636                 | AA                                     | TT                 | TT               | DRR                           | 101515448          | uncharacterized LOC101515448                  |
| SNP_39584_A_7661649 | NC_021165.1    | Ca_Kabuli_Chr06 | 7661649                 | CC                                     | TT                 | TT               | DRR                           | 101515448          | uncharacterized LOC101515448                  |
| SNP_39585_A_7661656 | NC_021165.1    | Ca_Kabuli_Chr06 | 7661656                 | TT                                     | CC                 | CC               | DRR                           | 101515448          | uncharacterized LOC101515448                  |
| SNP_39586_A_7661659 | NC_021165.1    | Ca_Kabuli_Chr06 | 7661659                 | AA                                     | CC                 | CC               | DRR                           | 101515448          | uncharacterized LOC101515448                  |
| SNP_39587_A_7663493 | NC_021165.1    | Ca_Kabuli_Chr06 | 7663493                 | AA                                     | TT                 | TT               | INTERGENIC                    |                    |                                               |
| SNP_39588_A_7663508 | NC_021165.1    | Ca_Kabuli_Chr06 | 7663508                 | CC                                     | TT                 | TT               | INTERGENIC                    |                    |                                               |
| SNP_39589_A_7663509 | NC_021165.1    | Ca_Kabuli_Chr06 | 7663509                 | GG                                     | AA                 | AA               | INTERGENIC                    |                    |                                               |
| SNP_39590_A_7666377 | NC_021165.1    | Ca_Kabuli_Chr06 | 7666377                 | TT                                     | CC                 | CC               | URR                           | 101515448          | uncharacterized LOC101515448                  |
| SNP_39591_A_7667328 | NC_021165.1    | Ca_Kabuli_Chr06 | 7667328                 | AA                                     | TT                 | TT               | INTERGENIC                    |                    |                                               |

| SNPs IDs            | Chromosome IDs | Chromosomes     | Physical positions (bp) | CDC Frontier (Reference genome) | (Pusa 1103 & HPNB) | (ILWC 46 & LPNB) | Sequence Components of genome | Gene accession IDs | Putative functions                                             |
|---------------------|----------------|-----------------|-------------------------|---------------------------------|--------------------|------------------|-------------------------------|--------------------|----------------------------------------------------------------|
| SNP_39592_A_7669001 | NC_021165.1    | Ca_Kabuli_Chr06 | 7669001                 | GG                              | AA                 | AA               | URR                           | 101515781          | 60S ribosomal protein L6-3-like                                |
| SNP_39593_A_7677029 | NC_021165.1    | Ca_Kabuli_Chr06 | 7677029                 | AA                              | CC                 | CC               | INTERGENIC                    |                    |                                                                |
| SNP_39594_A_7679290 | NC_021165.1    | Ca_Kabuli_Chr06 | 7679290                 | CC                              | TT                 | TT               | URR                           | 101488997          | transcription factor TFIIIB component B"                       |
| SNP_39595_A_7679538 | NC_021165.1    | Ca_Kabuli_Chr06 | 7679538                 | AA                              | GG                 | GG               | INTERGENIC                    |                    |                                                                |
| SNP_39597_A_7705238 | NC_021165.1    | Ca_Kabuli_Chr06 | 7705238                 | CC                              | GG                 | GG               | DRR                           | 101490507          | stress enhanced protein 2, chloroplastic                       |
| SNP_39598_A_7750922 | NC_021165.1    | Ca_Kabuli_Chr06 | 7750922                 | AA                              | CC                 | CC               | DRR                           | 101493108          | cytochrome P450 CYP736A12-like                                 |
| SNP_39599_A_7750924 | NC_021165.1    | Ca_Kabuli_Chr06 | 7750924                 | AA                              | GG                 | GG               | DRR                           | 101493108          | cytochrome P450 CYP736A12-like                                 |
| SNP_39600_A_7750986 | NC_021165.1    | Ca_Kabuli_Chr06 | 7750986                 | AA                              | TT                 | TT               | DRR                           | 101493108          | cytochrome P450 CYP736A12-like                                 |
| SNP_39601_A_7764195 | NC_021165.1    | Ca_Kabuli_Chr06 | 7764195                 | TT                              | GG                 | GG               | DRR                           | 101493970          | alanine-glyoxylate aminotransferase 2 homolog 1, mitochondrial |
| SNP_39602_A_7807086 | NC_021165.1    | Ca_Kabuli_Chr06 | 7807086                 | CC                              | GG                 | GG               | URR                           | 101496008          | apoptotic chromatin condensation inducer in the nucleus        |
| SNP_39603_A_7817157 | NC_021165.1    | Ca_Kabuli_Chr06 | 7817157                 | TT                              | CC                 | CC               | INTRON                        | 101496556          | uncharacterized LOC101496556                                   |
| SNP_39605_A_7867842 | NC_021165.1    | Ca_Kabuli_Chr06 | 7867842                 | AA                              | GG                 | GG               | INTERGENIC                    |                    |                                                                |
| SNP_39606_A_7904406 | NC_021165.1    | Ca_Kabuli_Chr06 | 7904406                 | TT                              | GG                 | GG               | INTERGENIC                    |                    |                                                                |
| SNP_39607_A_7909644 | NC_021165.1    | Ca_Kabuli_Chr06 | 7909644                 | GG                              | AA                 | AA               | INTERGENIC                    |                    |                                                                |
| SNP_39609_A_7912913 | NC_021165.1    | Ca_Kabuli_Chr06 | 7912913                 | CC                              | TT                 | TT               | INTERGENIC                    |                    |                                                                |
| SNP_39610_A_7935487 | NC_021165.1    | Ca_Kabuli_Chr06 | 7935487                 | TT                              | CC                 | CC               | INTERGENIC                    |                    |                                                                |
| SNP_39611_A_7935534 | NC_021165.1    | Ca_Kabuli_Chr06 | 7935534                 | GG                              | AA                 | AA               | INTERGENIC                    |                    |                                                                |
| SNP_39612_A_7951739 | NC_021165.1    | Ca_Kabuli_Chr06 | 7951739                 | TT                              | CC                 | CC               | INTERGENIC                    |                    |                                                                |
| SNP_39613_A_7961933 | NC_021165.1    | Ca_Kabuli_Chr06 | 7961933                 | AA                              | GG                 | GG               | INTERGENIC                    |                    |                                                                |
| SNP_39617_A_8054651 | NC_021165.1    | Ca_Kabuli_Chr06 | 8054651                 | AA                              | GG                 | GG               | URR                           | 101506111          | oxidation resistance protein 1-like                            |
| SNP_39618_A_8079468 | NC_021165.1    | Ca_Kabuli_Chr06 | 8079468                 | GG                              | TT                 | TT               | DRR                           | 101410583          | transfer RNA glutamine (anticodon UUG)                         |
| SNP_39620_A_8124314 | NC_021165.1    | Ca_Kabuli_Chr06 | 8124314                 | AA                              | TT                 | TT               | INTERGENIC                    |                    |                                                                |

| SNPs IDs            | Chromosome IDs | Chromosomes     | Physical positions (bp) | CDC Frontier (Reference genome) | (Pusa 1103 & HPNB) | (ILWC 46 & LPNB) | Sequence Components of genome | Gene accession IDs | Putative functions                                        |
|---------------------|----------------|-----------------|-------------------------|---------------------------------|--------------------|------------------|-------------------------------|--------------------|-----------------------------------------------------------|
| SNP_39621_A_8124759 | NC_021165.1    | Ca_Kabuli_Chr06 | 8124759                 | GG                              | TT                 | TT               | INTERGENIC                    |                    |                                                           |
| SNP_39622_A_8130842 | NC_021165.1    | Ca_Kabuli_Chr06 | 8130842                 | CC                              | TT                 | TT               | DRR                           | 101511569          | probable sugar phosphate/phosphate translocator At5g04160 |
| SNP_39623_A_8133126 | NC_021165.1    | Ca_Kabuli_Chr06 | 8133126                 | GG                              | TT                 | TT               | INTERGENIC                    |                    |                                                           |
| SNP_39624_A_8133148 | NC_021165.1    | Ca_Kabuli_Chr06 | 8133148                 | CC                              | TT                 | TT               | INTERGENIC                    |                    |                                                           |
| SNP_39625_A_8144264 | NC_021165.1    | Ca_Kabuli_Chr06 | 8144264                 | GG                              | AA                 | AA               | URR                           | 101511899          | calcium-transporting ATPase 4, plasma membrane-type-like  |
| SNP_39626_A_8171353 | NC_021165.1    | Ca_Kabuli_Chr06 | 8171353                 | TT                              | CC                 | CC               | INTRON                        | 101513399          | enhancer of polycomb homolog 2                            |
| SNP_39627_A_8182016 | NC_021165.1    | Ca_Kabuli_Chr06 | 8182016                 | TT                              | GG                 | GG               | URR                           | 101410558          | transfer RNA methionine (anticodon CAU)                   |
| SNP_39628_A_8232293 | NC_021165.1    | Ca_Kabuli_Chr06 | 8232293                 | AA                              | CC                 | CC               | INTERGENIC                    |                    |                                                           |
| SNP_39630_A_8318357 | NC_021165.1    | Ca_Kabuli_Chr06 | 8318357                 | TT                              | CC                 | CC               | INTERGENIC                    |                    |                                                           |
| SNP_39631_A_8413443 | NC_021165.1    | Ca_Kabuli_Chr06 | 8413443                 | TT                              | CC                 | CC               | INTERGENIC                    |                    |                                                           |
| SNP_39632_A_8413464 | NC_021165.1    | Ca_Kabuli_Chr06 | 8413464                 | TT                              | GG                 | GG               | INTERGENIC                    |                    |                                                           |
| SNP_39633_A_8433740 | NC_021165.1    | Ca_Kabuli_Chr06 | 8433740                 | AA                              | GG                 | GG               | INTERGENIC                    |                    |                                                           |
| SNP_39634_A_8433743 | NC_021165.1    | Ca_Kabuli_Chr06 | 8433743                 | AA                              | GG                 | GG               | INTERGENIC                    |                    |                                                           |
| SNP_39635_A_8433745 | NC_021165.1    | Ca_Kabuli_Chr06 | 8433745                 | TT                              | AA                 | AA               | INTERGENIC                    |                    |                                                           |
| SNP_39636_A_8448823 | NC_021165.1    | Ca_Kabuli_Chr06 | 8448823                 | CC                              | TT                 | TT               | INTERGENIC                    |                    |                                                           |
| SNP_39637_A_8448825 | NC_021165.1    | Ca_Kabuli_Chr06 | 8448825                 | AA                              | GG                 | GG               | INTERGENIC                    |                    |                                                           |
| SNP_39638_A_8448835 | NC_021165.1    | Ca_Kabuli_Chr06 | 8448835                 | AA                              | GG                 | GG               | INTERGENIC                    |                    |                                                           |
| SNP_39639_A_8448848 | NC_021165.1    | Ca_Kabuli_Chr06 | 8448848                 | AA                              | CC                 | CC               | INTERGENIC                    |                    |                                                           |
| SNP_39640_A_8477671 | NC_021165.1    | Ca_Kabuli_Chr06 | 8477671                 | CC                              | TT                 | TT               | INTERGENIC                    |                    |                                                           |
| SNP_39642_A_8522129 | NC_021165.1    | Ca_Kabuli_Chr06 | 8522129                 | GG                              | AA                 | AA               | INTERGENIC                    |                    |                                                           |
| SNP_39643_A_8522158 | NC_021165.1    | Ca_Kabuli_Chr06 | 8522158                 | TT                              | GG                 | GG               | INTERGENIC                    |                    |                                                           |
| SNP_39644_A_8522244 | NC_021165.1    | Ca_Kabuli_Chr06 | 8522244                 | GG                              | AA                 | AA               | INTERGENIC                    |                    |                                                           |



| SNPs IDs            | Chromosome IDs | Chromosomes     | Physical positions (bp) | CDC Frontier genome (Reference genome) | (Pusa 1103 & HPNB) | (ILWC 46 & LPNB) | Sequence Components of genome | Gene accession IDs | Putative functions                  |
|---------------------|----------------|-----------------|-------------------------|----------------------------------------|--------------------|------------------|-------------------------------|--------------------|-------------------------------------|
| SNP_39645_A_8522512 | NC_021165.1    | Ca_Kabuli_Chr06 | 8522512                 | GG                                     | TT                 | TT               | INTERGENIC                    |                    |                                     |
| SNP_39646_A_8522601 | NC_021165.1    | Ca_Kabuli_Chr06 | 8522601                 | AA                                     | GG                 | GG               | INTERGENIC                    |                    |                                     |
| SNP_39647_A_8522664 | NC_021165.1    | Ca_Kabuli_Chr06 | 8522664                 | GG                                     | AA                 | AA               | INTERGENIC                    |                    |                                     |
| SNP_39648_A_8522671 | NC_021165.1    | Ca_Kabuli_Chr06 | 8522671                 | GG                                     | TT                 | TT               | INTERGENIC                    |                    |                                     |
| SNP_39649_A_8522784 | NC_021165.1    | Ca_Kabuli_Chr06 | 8522784                 | TT                                     | AA                 | AA               | INTERGENIC                    |                    |                                     |
| SNP_39650_A_8522788 | NC_021165.1    | Ca_Kabuli_Chr06 | 8522788                 | CC                                     | GG                 | GG               | INTERGENIC                    |                    |                                     |
| SNP_39651_A_8523061 | NC_021165.1    | Ca_Kabuli_Chr06 | 8523061                 | CC                                     | GG                 | GG               | INTERGENIC                    |                    |                                     |
| SNP_39652_A_8524248 | NC_021165.1    | Ca_Kabuli_Chr06 | 8524248                 | AA                                     | TT                 | TT               | INTERGENIC                    |                    |                                     |
| SNP_39653_A_8527799 | NC_021165.1    | Ca_Kabuli_Chr06 | 8527799                 | AA                                     | GG                 | GG               | INTERGENIC                    |                    |                                     |
| SNP_39654_A_8533132 | NC_021165.1    | Ca_Kabuli_Chr06 | 8533132                 | GG                                     | CC                 | CC               | INTERGENIC                    |                    |                                     |
| SNP_39655_A_8533518 | NC_021165.1    | Ca_Kabuli_Chr06 | 8533518                 | GG                                     | CC                 | CC               | INTERGENIC                    |                    |                                     |
| SNP_39656_A_8536358 | NC_021165.1    | Ca_Kabuli_Chr06 | 8536358                 | TT                                     | AA                 | AA               | INTERGENIC                    |                    |                                     |
| SNP_39657_A_8536359 | NC_021165.1    | Ca_Kabuli_Chr06 | 8536359                 | CC                                     | GG                 | GG               | INTERGENIC                    |                    |                                     |
| SNP_39659_A_8566989 | NC_021165.1    | Ca_Kabuli_Chr06 | 8566989                 | GG                                     | AA                 | AA               | INTERGENIC                    |                    |                                     |
| SNP_39660_A_8663797 | NC_021165.1    | Ca_Kabuli_Chr06 | 8663797                 | AA                                     | GG                 | GG               | URR                           | 101503090          | paramyosin                          |
| SNP_39661_A_8679295 | NC_021165.1    | Ca_Kabuli_Chr06 | 8679295                 | CC                                     | TT                 | TT               | URR                           | 101503968          | uncharacterized LOC101503968        |
| SNP_39662_A_8723630 | NC_021165.1    | Ca_Kabuli_Chr06 | 8723630                 | CC                                     | TT                 | TT               | INTERGENIC                    |                    |                                     |
| SNP_39663_A_8741405 | NC_021165.1    | Ca_Kabuli_Chr06 | 8741405                 | GG                                     | CC                 | CC               | DRR                           | 101506650          | protein ROOT PRIMORDIUM DEFECTIVE 1 |
| SNP_39664_A_8783315 | NC_021165.1    | Ca_Kabuli_Chr06 | 8783315                 | AA                                     | GG                 | GG               | INTERGENIC                    |                    |                                     |
| SNP_39665_A_8796585 | NC_021165.1    | Ca_Kabuli_Chr06 | 8796585                 | TT                                     | AA                 | AA               | INTRON                        | 101491783          | lysine histidine transporter-like 8 |
| SNP_39666_A_8796693 | NC_021165.1    | Ca_Kabuli_Chr06 | 8796693                 | CC                                     | TT                 | TT               | INTRON                        | 101491783          | lysine histidine transporter-like 8 |
| SNP_39667_A_8796701 | NC_021165.1    | Ca_Kabuli_Chr06 | 8796701                 | CC                                     | TT                 | TT               | INTRON                        | 101491783          | lysine histidine transporter-like 8 |

| SNPs IDs            | Chromosome IDs | Chromosomes     | Physical positions (bp) | CDC Frontier (Reference genome) | (Pusa 1103 & HPNB) | (ILWC 46 & LPNB) | Sequence Components of genome | Gene accession IDs | Putative functions                                                |
|---------------------|----------------|-----------------|-------------------------|---------------------------------|--------------------|------------------|-------------------------------|--------------------|-------------------------------------------------------------------|
| SNP_39668_A_8796873 | NC_021165.1    | Ca_Kabuli_Chr06 | 8796873                 | AA                              | CC                 | CC               | INTRON                        | 101491783          | lysine histidine transporter-like 8                               |
| SNP_39669_A_8796939 | NC_021165.1    | Ca_Kabuli_Chr06 | 8796939                 | CC                              | AA                 | AA               | INTRON                        | 101491783          | lysine histidine transporter-like 8                               |
| SNP_39671_A_8829711 | NC_021165.1    | Ca_Kabuli_Chr06 | 8829711                 | GG                              | AA                 | AA               | INTERGENIC                    |                    |                                                                   |
| SNP_39672_A_8847575 | NC_021165.1    | Ca_Kabuli_Chr06 | 8847575                 | TT                              | CC                 | CC               | URR                           | 101510070          | cationic amino acid transporter 1                                 |
| SNP_39673_A_8847577 | NC_021165.1    | Ca_Kabuli_Chr06 | 8847577                 | TT                              | GG                 | GG               | URR                           | 101510070          | cationic amino acid transporter 1                                 |
| SNP_39674_A_8847585 | NC_021165.1    | Ca_Kabuli_Chr06 | 8847585                 | CC                              | TT                 | TT               | URR                           | 101510070          | cationic amino acid transporter 1                                 |
| SNP_39676_A_8944899 | NC_021165.1    | Ca_Kabuli_Chr06 | 8944899                 | AA                              | TT                 | TT               | INTERGENIC                    |                    |                                                                   |
| SNP_39677_A_8979885 | NC_021165.1    | Ca_Kabuli_Chr06 | 8979885                 | CC                              | TT                 | TT               | DRR                           | 101515782          | probable 3-hydroxyisobutyrate dehydrogenase-like 3, mitochondrial |
| SNP_39678_A_9019073 | NC_021165.1    | Ca_Kabuli_Chr06 | 9019073                 | CC                              | TT                 | TT               | INTERGENIC                    |                    |                                                                   |
| SNP_39679_A_9019084 | NC_021165.1    | Ca_Kabuli_Chr06 | 9019084                 | AA                              | GG                 | GG               | INTERGENIC                    |                    |                                                                   |
| SNP_39680_A_9019425 | NC_021165.1    | Ca_Kabuli_Chr06 | 9019425                 | CC                              | TT                 | TT               | INTERGENIC                    |                    |                                                                   |
| SNP_39681_A_9060465 | NC_021165.1    | Ca_Kabuli_Chr06 | 9060465                 | AA                              | CC                 | CC               | DRR                           | 101494079          | lysine histidine transporter-like 8                               |
| SNP_39682_A_9060481 | NC_021165.1    | Ca_Kabuli_Chr06 | 9060481                 | GG                              | TT                 | TT               | DRR                           | 101494079          | lysine histidine transporter-like 8                               |
| SNP_39683_A_9060495 | NC_021165.1    | Ca_Kabuli_Chr06 | 9060495                 | AA                              | CC                 | CC               | DRR                           | 101494079          | lysine histidine transporter-like 8                               |
| SNP_39684_A_9060621 | NC_021165.1    | Ca_Kabuli_Chr06 | 9060621                 | AA                              | GG                 | GG               | DRR                           | 101494079          | lysine histidine transporter-like 8                               |
| SNP_39685_A_9060821 | NC_021165.1    | Ca_Kabuli_Chr06 | 9060821                 | CC                              | TT                 | TT               | DRR                           | 101494079          | lysine histidine transporter-like 8                               |
| SNP_39686_A_9062743 | NC_021165.1    | Ca_Kabuli_Chr06 | 9062743                 | GG                              | TT                 | TT               | INTRON                        | 101494079          | lysine histidine transporter-like 8                               |
| SNP_39687_A_9101468 | NC_021165.1    | Ca_Kabuli_Chr06 | 9101468                 | GG                              | TT                 | TT               | INTERGENIC                    |                    |                                                                   |
| SNP_39688_A_9103094 | NC_021165.1    | Ca_Kabuli_Chr06 | 9103094                 | TT                              | AA                 | AA               | INTERGENIC                    |                    |                                                                   |
| SNP_39690_A_9103639 | NC_021165.1    | Ca_Kabuli_Chr06 | 9103639                 | TT                              | CC                 | CC               | INTERGENIC                    |                    |                                                                   |
| SNP_39693_A_9225074 | NC_021165.1    | Ca_Kabuli_Chr06 | 9225074                 | AA                              | GG                 | GG               | INTRON                        | 101498189          | calpain-type cysteine protease DEK1                               |
| SNP_39695_A_9285476 | NC_021165.1    | Ca_Kabuli_Chr06 | 9285476                 | TT                              | CC                 | CC               | INTERGENIC                    |                    |                                                                   |

| SNPs IDs            | Chromosome IDs | Chromosomes     | Physical positions (bp) | CDC Frontier genome (Reference genome) | (Pusa 1103 & HPNB) | (ILWC 46 & LPNB) | Sequence Components of genome | Gene accession IDs | Putative functions                 |
|---------------------|----------------|-----------------|-------------------------|----------------------------------------|--------------------|------------------|-------------------------------|--------------------|------------------------------------|
| SNP_39696_A_9285477 | NC_021165.1    | Ca_Kabuli_Chr06 | 9285477                 | TT                                     | CC                 | CC               | INTERGENIC                    |                    |                                    |
| SNP_39697_A_9288822 | NC_021165.1    | Ca_Kabuli_Chr06 | 9288822                 | AA                                     | CC                 | CC               | INTERGENIC                    |                    |                                    |
| SNP_39698_A_9288825 | NC_021165.1    | Ca_Kabuli_Chr06 | 9288825                 | AA                                     | TT                 | TT               | INTERGENIC                    |                    |                                    |
| SNP_39699_A_9302361 | NC_021165.1    | Ca_Kabuli_Chr06 | 9302361                 | AA                                     | GG                 | GG               | INTERGENIC                    |                    |                                    |
| SNP_39700_A_9308525 | NC_021165.1    | Ca_Kabuli_Chr06 | 9308525                 | AA                                     | CC                 | CC               | INTERGENIC                    |                    |                                    |
| SNP_39701_A_9313562 | NC_021165.1    | Ca_Kabuli_Chr06 | 9313562                 | AA                                     | GG                 | GG               | INTERGENIC                    |                    |                                    |
| SNP_39703_A_9455000 | NC_021165.1    | Ca_Kabuli_Chr06 | 9455000                 | TT                                     | AA                 | AA               | URR                           | 101508781          | Unknown function                   |
| SNP_39706_A_9704097 | NC_021165.1    | Ca_Kabuli_Chr06 | 9704097                 | AA                                     | GG                 | GG               | INTERGENIC                    |                    |                                    |
| SNP_39707_A_9793117 | NC_021165.1    | Ca_Kabuli_Chr06 | 9793117                 | TT                                     | AA                 | AA               | INTERGENIC                    |                    |                                    |
| SNP_39708_A_9793118 | NC_021165.1    | Ca_Kabuli_Chr06 | 9793118                 | TT                                     | AA                 | AA               | INTERGENIC                    |                    |                                    |
| SNP_39709_A_9876058 | NC_021165.1    | Ca_Kabuli_Chr06 | 9876058                 | GG                                     | AA                 | AA               | URR                           | 101496782          | nucleobase-ascorbate transporter 2 |
| SNP_39710_A_9876976 | NC_021165.1    | Ca_Kabuli_Chr06 | 9876976                 | AA                                     | CC                 | CC               | URR                           | 101496782          | nucleobase-ascorbate transporter 2 |
| SNP_39711_A_9877544 | NC_021165.1    | Ca_Kabuli_Chr06 | 9877544                 | TT                                     | CC                 | CC               | URR                           | 101496782          | nucleobase-ascorbate transporter 2 |
| SNP_39712_A_9877588 | NC_021165.1    | Ca_Kabuli_Chr06 | 9877588                 | TT                                     | GG                 | GG               | URR                           | 101496782          | nucleobase-ascorbate transporter 2 |
| SNP_39713_A_9878388 | NC_021165.1    | Ca_Kabuli_Chr06 | 9878388                 | CC                                     | TT                 | TT               | INTERGENIC                    |                    |                                    |
| SNP_39714_A_9878423 | NC_021165.1    | Ca_Kabuli_Chr06 | 9878423                 | CC                                     | TT                 | TT               | INTERGENIC                    |                    |                                    |
| SNP_39715_A_9878444 | NC_021165.1    | Ca_Kabuli_Chr06 | 9878444                 | GG                                     | AA                 | AA               | INTERGENIC                    |                    |                                    |
| SNP_39716_A_9878451 | NC_021165.1    | Ca_Kabuli_Chr06 | 9878451                 | AA                                     | GG                 | GG               | INTERGENIC                    |                    |                                    |
| SNP_39717_A_9878491 | NC_021165.1    | Ca_Kabuli_Chr06 | 9878491                 | TT                                     | CC                 | CC               | INTERGENIC                    |                    |                                    |
| SNP_39718_A_9878557 | NC_021165.1    | Ca_Kabuli_Chr06 | 9878557                 | TT                                     | CC                 | CC               | INTERGENIC                    |                    |                                    |
| SNP_39719_A_9878847 | NC_021165.1    | Ca_Kabuli_Chr06 | 9878847                 | TT                                     | GG                 | GG               | INTERGENIC                    |                    |                                    |
| SNP_39720_A_9878854 | NC_021165.1    | Ca_Kabuli_Chr06 | 9878854                 | CC                                     | TT                 | TT               | INTERGENIC                    |                    |                                    |

| SNPs IDs            | Chromosome IDs | Chromosomes     | Physical positions (bp) | CDC Frontier (Reference genome) | (Pusa 1103 & HPNB) | (ILWC 46 & LPNB) | Sequence genome | Components of | Gene accession IDs | Putative functions |
|---------------------|----------------|-----------------|-------------------------|---------------------------------|--------------------|------------------|-----------------|---------------|--------------------|--------------------|
| SNP_39721_A_9882098 | NC_021165.1    | Ca_Kabuli_Chr06 | 9882098                 | CC                              | TT                 | TT               | INTERGENIC      |               |                    |                    |
| SNP_39722_A_9882103 | NC_021165.1    | Ca_Kabuli_Chr06 | 9882103                 | AA                              | TT                 | TT               | INTERGENIC      |               |                    |                    |
| SNP_39723_A_9883589 | NC_021165.1    | Ca_Kabuli_Chr06 | 9883589                 | GG                              | TT                 | TT               | INTERGENIC      |               |                    |                    |
| SNP_39724_A_9883597 | NC_021165.1    | Ca_Kabuli_Chr06 | 9883597                 | CC                              | TT                 | TT               | INTERGENIC      |               |                    |                    |
| SNP_39725_A_9883836 | NC_021165.1    | Ca_Kabuli_Chr06 | 9883836                 | GG                              | AA                 | AA               | INTERGENIC      |               |                    |                    |
| SNP_39726_A_9883848 | NC_021165.1    | Ca_Kabuli_Chr06 | 9883848                 | TT                              | CC                 | CC               | INTERGENIC      |               |                    |                    |
| SNP_39727_A_9883858 | NC_021165.1    | Ca_Kabuli_Chr06 | 9883858                 | CC                              | GG                 | GG               | INTERGENIC      |               |                    |                    |
| SNP_39728_A_9883860 | NC_021165.1    | Ca_Kabuli_Chr06 | 9883860                 | GG                              | AA                 | AA               | INTERGENIC      |               |                    |                    |
| SNP_39729_A_9883872 | NC_021165.1    | Ca_Kabuli_Chr06 | 9883872                 | TT                              | CC                 | CC               | INTERGENIC      |               |                    |                    |
| SNP_39730_A_9884080 | NC_021165.1    | Ca_Kabuli_Chr06 | 9884080                 | AA                              | GG                 | GG               | INTERGENIC      |               |                    |                    |
| SNP_39731_A_9884166 | NC_021165.1    | Ca_Kabuli_Chr06 | 9884166                 | TT                              | CC                 | CC               | INTERGENIC      |               |                    |                    |
| SNP_39732_A_9884399 | NC_021165.1    | Ca_Kabuli_Chr06 | 9884399                 | AA                              | GG                 | GG               | INTERGENIC      |               |                    |                    |
| SNP_39733_A_9884430 | NC_021165.1    | Ca_Kabuli_Chr06 | 9884430                 | GG                              | AA                 | AA               | INTERGENIC      |               |                    |                    |
| SNP_39735_A_9884688 | NC_021165.1    | Ca_Kabuli_Chr06 | 9884688                 | TT                              | CC                 | CC               | INTERGENIC      |               |                    |                    |
| SNP_39736_A_9884692 | NC_021165.1    | Ca_Kabuli_Chr06 | 9884692                 | AA                              | TT                 | TT               | INTERGENIC      |               |                    |                    |
| SNP_39737_A_9884694 | NC_021165.1    | Ca_Kabuli_Chr06 | 9884694                 | CC                              | TT                 | TT               | INTERGENIC      |               |                    |                    |
| SNP_39738_A_9884706 | NC_021165.1    | Ca_Kabuli_Chr06 | 9884706                 | GG                              | AA                 | AA               | INTERGENIC      |               |                    |                    |
| SNP_39739_A_9884708 | NC_021165.1    | Ca_Kabuli_Chr06 | 9884708                 | AA                              | CC                 | CC               | INTERGENIC      |               |                    |                    |
| SNP_39740_A_9884729 | NC_021165.1    | Ca_Kabuli_Chr06 | 9884729                 | CC                              | AA                 | AA               | INTERGENIC      |               |                    |                    |
| SNP_39741_A_9884788 | NC_021165.1    | Ca_Kabuli_Chr06 | 9884788                 | GG                              | AA                 | AA               | INTERGENIC      |               |                    |                    |
| SNP_39742_A_9884982 | NC_021165.1    | Ca_Kabuli_Chr06 | 9884982                 | TT                              | CC                 | CC               | INTERGENIC      |               |                    |                    |
| SNP_39743_A_9887419 | NC_021165.1    | Ca_Kabuli_Chr06 | 9887419                 | CC                              | TT                 | TT               | INTERGENIC      |               |                    |                    |

| SNPs IDs            | Chromosome IDs | Chromosomes     | Physical positions (bp) | CDC Frontier (Reference genome) | (Pusa 1103 & HPNB) | (ILWC 46 & LPNB) | Sequence Components of genome | Gene accession IDs | Putative functions                                                   |
|---------------------|----------------|-----------------|-------------------------|---------------------------------|--------------------|------------------|-------------------------------|--------------------|----------------------------------------------------------------------|
| SNP_39744_A_9889091 | NC_021165.1    | Ca_Kabuli_Chr06 | 9889091                 | GG                              | AA                 | AA               | DRR                           | 101497100          | probable LRR receptor-like serine/threonine-protein kinase At2g24230 |
| SNP_39746_A_9893239 | NC_021165.1    | Ca_Kabuli_Chr06 | 9893239                 | TT                              | CC                 | CC               | URR                           | 101497100          | probable LRR receptor-like serine/threonine-protein kinase At2g24230 |
| SNP_39748_A_9894290 | NC_021165.1    | Ca_Kabuli_Chr06 | 9894290                 | TT                              | AA                 | AA               | URR                           | 101497100          | probable LRR receptor-like serine/threonine-protein kinase At2g24230 |
| SNP_39749_A_9894552 | NC_021165.1    | Ca_Kabuli_Chr06 | 9894552                 | GG                              | AA                 | AA               | URR                           | 101497100          | probable LRR receptor-like serine/threonine-protein kinase At2g24230 |
| SNP_39750_A_9894703 | NC_021165.1    | Ca_Kabuli_Chr06 | 9894703                 | GG                              | TT                 | TT               | URR                           | 101497100          | probable LRR receptor-like serine/threonine-protein kinase At2g24230 |
| SNP_39751_A_9894802 | NC_021165.1    | Ca_Kabuli_Chr06 | 9894802                 | AA                              | TT                 | TT               | URR                           | 101497100          | probable LRR receptor-like serine/threonine-protein kinase At2g24230 |
| SNP_39753_A_9894889 | NC_021165.1    | Ca_Kabuli_Chr06 | 9894889                 | AA                              | TT                 | TT               | URR                           | 101497100          | probable LRR receptor-like serine/threonine-protein kinase At2g24230 |
| SNP_39754_A_9896270 | NC_021165.1    | Ca_Kabuli_Chr06 | 9896270                 | AA                              | TT                 | TT               | NON_SYNONYMOUS_CODING         | 101511050          | ervatamin-B-like                                                     |
| SNP_39755_A_9898520 | NC_021165.1    | Ca_Kabuli_Chr06 | 9898520                 | GG                              | AA                 | AA               | URR                           | 101511050          | ervatamin-B-like                                                     |
| SNP_39756_A_9898588 | NC_021165.1    | Ca_Kabuli_Chr06 | 9898588                 | TT                              | CC                 | CC               | URR                           | 101511050          | ervatamin-B-like                                                     |
| SNP_39757_A_9898837 | NC_021165.1    | Ca_Kabuli_Chr06 | 9898837                 | TT                              | AA                 | AA               | URR                           | 101511050          | ervatamin-B-like                                                     |
| SNP_39758_A_9898838 | NC_021165.1    | Ca_Kabuli_Chr06 | 9898838                 | TT                              | AA                 | AA               | URR                           | 101511050          | ervatamin-B-like                                                     |
| SNP_39759_A_9898840 | NC_021165.1    | Ca_Kabuli_Chr06 | 9898840                 | TT                              | GG                 | GG               | URR                           | 101511050          | ervatamin-B-like                                                     |
| SNP_39760_A_9898846 | NC_021165.1    | Ca_Kabuli_Chr06 | 9898846                 | AA                              | TT                 | TT               | URR                           | 101511050          | ervatamin-B-like                                                     |
| SNP_39761_A_9898854 | NC_021165.1    | Ca_Kabuli_Chr06 | 9898854                 | CC                              | TT                 | TT               | URR                           | 101511050          | ervatamin-B-like                                                     |
| SNP_39762_A_9900933 | NC_021165.1    | Ca_Kabuli_Chr06 | 9900933                 | AA                              | CC                 | CC               | URR                           | 101511360          | Unknown function                                                     |
| SNP_39764_A_9901009 | NC_021165.1    | Ca_Kabuli_Chr06 | 9901009                 | TT                              | CC                 | CC               | URR                           | 101511360          | Unknown function                                                     |
| SNP_39765_A_9901073 | NC_021165.1    | Ca_Kabuli_Chr06 | 9901073                 | AA                              | GG                 | GG               | URR                           | 101511360          | Unknown function                                                     |
| SNP_39766_A_9902854 | NC_021165.1    | Ca_Kabuli_Chr06 | 9902854                 | AA                              | GG                 | GG               | URR                           | 101511360          | Unknown function                                                     |
| SNP_39767_A_9902872 | NC_021165.1    | Ca_Kabuli_Chr06 | 9902872                 | TT                              | GG                 | GG               | INTERGENIC                    |                    |                                                                      |
| SNP_39768_A_9902911 | NC_021165.1    | Ca_Kabuli_Chr06 | 9902911                 | TT                              | CC                 | CC               | INTERGENIC                    |                    |                                                                      |
| SNP_39769_A_9902988 | NC_021165.1    | Ca_Kabuli_Chr06 | 9902988                 | CC                              | TT                 | TT               | INTERGENIC                    |                    |                                                                      |

| SNPs IDs            | Chromosome IDs | Chromosomes     | Physical positions (bp) | CDC Frontier genome (Reference genome) | (Pusa 1103 & HPNB) | (ILWC 46 & LPNB) | Sequence Components of genome | Gene accession IDs | Putative functions           |
|---------------------|----------------|-----------------|-------------------------|----------------------------------------|--------------------|------------------|-------------------------------|--------------------|------------------------------|
| SNP_39770_A_9903062 | NC_021165.1    | Ca_Kabuli_Chr06 | 9903062                 | AA                                     | GG                 | GG               | INTERGENIC                    |                    |                              |
| SNP_39771_A_9903135 | NC_021165.1    | Ca_Kabuli_Chr06 | 9903135                 | GG                                     | AA                 | AA               | INTERGENIC                    |                    |                              |
| SNP_39772_A_9903148 | NC_021165.1    | Ca_Kabuli_Chr06 | 9903148                 | GG                                     | CC                 | CC               | INTERGENIC                    |                    |                              |
| SNP_39773_A_9903221 | NC_021165.1    | Ca_Kabuli_Chr06 | 9903221                 | CC                                     | TT                 | TT               | INTERGENIC                    |                    |                              |
| SNP_39774_A_9903229 | NC_021165.1    | Ca_Kabuli_Chr06 | 9903229                 | GG                                     | AA                 | AA               | INTERGENIC                    |                    |                              |
| SNP_39775_A_9903240 | NC_021165.1    | Ca_Kabuli_Chr06 | 9903240                 | CC                                     | TT                 | TT               | INTERGENIC                    |                    |                              |
| SNP_39776_A_9903345 | NC_021165.1    | Ca_Kabuli_Chr06 | 9903345                 | CC                                     | GG                 | GG               | INTERGENIC                    |                    |                              |
| SNP_39778_A_9903395 | NC_021165.1    | Ca_Kabuli_Chr06 | 9903395                 | TT                                     | CC                 | CC               | INTERGENIC                    |                    |                              |
| SNP_39779_A_9903416 | NC_021165.1    | Ca_Kabuli_Chr06 | 9903416                 | GG                                     | AA                 | AA               | INTERGENIC                    |                    |                              |
| SNP_39780_A_9903455 | NC_021165.1    | Ca_Kabuli_Chr06 | 9903455                 | CC                                     | TT                 | TT               | INTERGENIC                    |                    |                              |
| SNP_39781_A_9903478 | NC_021165.1    | Ca_Kabuli_Chr06 | 9903478                 | GG                                     | AA                 | AA               | INTERGENIC                    |                    |                              |
| SNP_39782_A_9903500 | NC_021165.1    | Ca_Kabuli_Chr06 | 9903500                 | CC                                     | AA                 | AA               | INTERGENIC                    |                    |                              |
| SNP_39783_A_9903516 | NC_021165.1    | Ca_Kabuli_Chr06 | 9903516                 | TT                                     | AA                 | AA               | INTERGENIC                    |                    |                              |
| SNP_39784_A_9903517 | NC_021165.1    | Ca_Kabuli_Chr06 | 9903517                 | AA                                     | TT                 | TT               | INTERGENIC                    |                    |                              |
| SNP_39785_A_9903564 | NC_021165.1    | Ca_Kabuli_Chr06 | 9903564                 | CC                                     | TT                 | TT               | INTERGENIC                    |                    |                              |
| SNP_39786_A_9903717 | NC_021165.1    | Ca_Kabuli_Chr06 | 9903717                 | TT                                     | CC                 | CC               | INTERGENIC                    |                    |                              |
| SNP_39787_A_9903736 | NC_021165.1    | Ca_Kabuli_Chr06 | 9903736                 | AA                                     | GG                 | GG               | INTERGENIC                    |                    |                              |
| SNP_39788_A_9903770 | NC_021165.1    | Ca_Kabuli_Chr06 | 9903770                 | GG                                     | AA                 | AA               | INTERGENIC                    |                    |                              |
| SNP_39789_A_9903792 | NC_021165.1    | Ca_Kabuli_Chr06 | 9903792                 | TT                                     | CC                 | CC               | INTERGENIC                    |                    |                              |
| SNP_39790_A_9903878 | NC_021165.1    | Ca_Kabuli_Chr06 | 9903878                 | AA                                     | GG                 | GG               | INTERGENIC                    |                    |                              |
| SNP_39791_A_9904919 | NC_021165.1    | Ca_Kabuli_Chr06 | 9904919                 | TT                                     | CC                 | CC               | INTERGENIC                    |                    |                              |
| SNP_39792_A_9905863 | NC_021165.1    | Ca_Kabuli_Chr06 | 9905863                 | GG                                     | AA                 | AA               | DRR                           | 101497431          | uncharacterized LOC101497431 |

| SNPs IDs            | Chromosome IDs | Chromosomes     | Physical positions (bp) | CDC Frontier genome (Reference genome) | (Pusa 1103 & HPNB) | (ILWC 46 & LPNB) | Sequence genome       | Components of | Gene accession IDs | Putative functions                                              |
|---------------------|----------------|-----------------|-------------------------|----------------------------------------|--------------------|------------------|-----------------------|---------------|--------------------|-----------------------------------------------------------------|
| SNP_39793_A_9906171 | NC_021165.1    | Ca_Kabuli_Chr06 | 9906171                 | AA                                     | TT                 | TT               | DRR                   |               | 101497431          | uncharacterized LOC101497431                                    |
| SNP_39794_A_9906680 | NC_021165.1    | Ca_Kabuli_Chr06 | 9906680                 | GG                                     | AA                 | AA               | DRR                   |               | 101497431          | uncharacterized LOC101497431                                    |
| SNP_39795_A_9907181 | NC_021165.1    | Ca_Kabuli_Chr06 | 9907181                 | GG                                     | AA                 | AA               | URR                   |               | 101497431          | uncharacterized LOC101497431                                    |
| SNP_39796_A_9907186 | NC_021165.1    | Ca_Kabuli_Chr06 | 9907186                 | CC                                     | TT                 | TT               | URR                   |               | 101497431          | uncharacterized LOC101497431                                    |
| SNP_39797_A_9911698 | NC_021165.1    | Ca_Kabuli_Chr06 | 9911698                 | TT                                     | GG                 | GG               | URR                   |               | 101497431          | uncharacterized LOC101497431                                    |
| SNP_39798_A_9913965 | NC_021165.1    | Ca_Kabuli_Chr06 | 9913965                 | CC                                     | TT                 | TT               | INTERGENIC            |               |                    |                                                                 |
| SNP_39799_A_9914414 | NC_021165.1    | Ca_Kabuli_Chr06 | 9914414                 | AA                                     | GG                 | GG               | INTERGENIC            |               |                    |                                                                 |
| SNP_39800_A_9914415 | NC_021165.1    | Ca_Kabuli_Chr06 | 9914415                 | CC                                     | TT                 | TT               | INTERGENIC            |               |                    |                                                                 |
| SNP_39801_A_9914806 | NC_021165.1    | Ca_Kabuli_Chr06 | 9914806                 | TT                                     | CC                 | CC               | INTERGENIC            |               |                    |                                                                 |
| SNP_39802_A_9918487 | NC_021165.1    | Ca_Kabuli_Chr06 | 9918487                 | AA                                     | TT                 | TT               | INTERGENIC            |               |                    |                                                                 |
| SNP_39803_A_9918760 | NC_021165.1    | Ca_Kabuli_Chr06 | 9918760                 | TT                                     | CC                 | CC               | INTERGENIC            |               |                    |                                                                 |
| SNP_39804_A_9918789 | NC_021165.1    | Ca_Kabuli_Chr06 | 9918789                 | GG                                     | AA                 | AA               | INTERGENIC            |               |                    |                                                                 |
| SNP_39805_A_9918795 | NC_021165.1    | Ca_Kabuli_Chr06 | 9918795                 | TT                                     | CC                 | CC               | INTERGENIC            |               |                    |                                                                 |
| SNP_39806_A_9919328 | NC_021165.1    | Ca_Kabuli_Chr06 | 9919328                 | TT                                     | CC                 | CC               | INTERGENIC            |               |                    |                                                                 |
| SNP_39807_A_9922864 | NC_021165.1    | Ca_Kabuli_Chr06 | 9922864                 | CC                                     | GG                 | GG               | NON_SYNONYMOUS_CODING |               | 101497765          | two-component response regulator ARR14-like                     |
| SNP_39808_A_9923025 | NC_021165.1    | Ca_Kabuli_Chr06 | 9923025                 | GG                                     | AA                 | AA               | INTRON                |               | 101497765          | two-component response regulator ARR14-like                     |
| SNP_39809_A_9923266 | NC_021165.1    | Ca_Kabuli_Chr06 | 9923266                 | CC                                     | TT                 | TT               | INTRON                |               | 101497765          | two-component response regulator ARR14-like                     |
| SNP_39810_A_9923281 | NC_021165.1    | Ca_Kabuli_Chr06 | 9923281                 | TT                                     | AA                 | AA               | INTRON                |               | 101497765          | two-component response regulator ARR14-like                     |
| SNP_39812_A_9926195 | NC_021165.1    | Ca_Kabuli_Chr06 | 9926195                 | CC                                     | TT                 | TT               | INTRON                |               | 101497765          | two-component response regulator ARR14-like                     |
| SNP_39813_A_9927434 | NC_021165.1    | Ca_Kabuli_Chr06 | 9927434                 | CC                                     | TT                 | TT               | INTRON                |               | 101497765          | two-component response regulator ARR14-like                     |
| SNP_39815_A_9937300 | NC_021165.1    | Ca_Kabuli_Chr06 | 9937300                 | TT                                     | GG                 | GG               | INTRON                |               | 101498088          | probable LRR receptor-like serine/threonine-protein kinase MRH1 |
| SNP_39816_A_9942534 | NC_021165.1    | Ca_Kabuli_Chr06 | 9942534                 | TT                                     | CC                 | CC               | URR                   |               | 101498088          | probable LRR receptor-like serine/threonine-protein kinase MRH1 |

| SNPs IDs            | Chromosome IDs | Chromosomes     | Physical positions (bp) | CDC Frontier (Reference genome) | (Pusa 1103 & HPNB) | (ILWC 46 & LPNB) | Sequence genome | Components of | Gene accession IDs | Putative functions                                      |
|---------------------|----------------|-----------------|-------------------------|---------------------------------|--------------------|------------------|-----------------|---------------|--------------------|---------------------------------------------------------|
| SNP_39817_A_9942687 | NC_021165.1    | Ca_Kabuli_Chr06 | 9942687                 | CC                              | TT                 | TT               | DRR             |               | 101511686          | CBL-interacting serine/threonine-protein kinase 12-like |
| SNP_39818_A_9942903 | NC_021165.1    | Ca_Kabuli_Chr06 | 9942903                 | GG                              | CC                 | CC               | DRR             |               | 101511686          | CBL-interacting serine/threonine-protein kinase 12-like |
| SNP_39819_A_9942904 | NC_021165.1    | Ca_Kabuli_Chr06 | 9942904                 | CC                              | TT                 | TT               | DRR             |               | 101511686          | CBL-interacting serine/threonine-protein kinase 12-like |
| SNP_39820_A_9942982 | NC_021165.1    | Ca_Kabuli_Chr06 | 9942982                 | TT                              | AA                 | AA               | DRR             |               | 101511686          | CBL-interacting serine/threonine-protein kinase 12-like |
| SNP_39821_A_9942987 | NC_021165.1    | Ca_Kabuli_Chr06 | 9942987                 | TT                              | GG                 | GG               | DRR             |               | 101511686          | CBL-interacting serine/threonine-protein kinase 12-like |
| SNP_39822_A_9949761 | NC_021165.1    | Ca_Kabuli_Chr06 | 9949761                 | AA                              | TT                 | TT               | DRR             |               | 101498424          | protein LIGHT-DEPENDENT SHORT HYPOCOTYLS 10-like        |
| SNP_39823_A_9949762 | NC_021165.1    | Ca_Kabuli_Chr06 | 9949762                 | AA                              | TT                 | TT               | DRR             |               | 101498424          | protein LIGHT-DEPENDENT SHORT HYPOCOTYLS 10-like        |
| SNP_39824_A_9950996 | NC_021165.1    | Ca_Kabuli_Chr06 | 9950996                 | CC                              | GG                 | GG               | INTRON          |               | 101498424          | protein LIGHT-DEPENDENT SHORT HYPOCOTYLS 10-like        |
| SNP_39825_A_9954533 | NC_021165.1    | Ca_Kabuli_Chr06 | 9954533                 | TT                              | CC                 | CC               | URR             |               | 101498424          | protein LIGHT-DEPENDENT SHORT HYPOCOTYLS 10-like        |
| SNP_39826_A_9955933 | NC_021165.1    | Ca_Kabuli_Chr06 | 9955933                 | GG                              | AA                 | AA               | INTERGENIC      |               |                    |                                                         |
| SNP_39827_A_9956447 | NC_021165.1    | Ca_Kabuli_Chr06 | 9956447                 | CC                              | GG                 | GG               | INTERGENIC      |               |                    |                                                         |
| SNP_39828_A_9957478 | NC_021165.1    | Ca_Kabuli_Chr06 | 9957478                 | AA                              | CC                 | CC               | INTERGENIC      |               |                    |                                                         |
| SNP_39829_A_9957489 | NC_021165.1    | Ca_Kabuli_Chr06 | 9957489                 | AA                              | TT                 | TT               | INTERGENIC      |               |                    |                                                         |
| SNP_39831_A_9958147 | NC_021165.1    | Ca_Kabuli_Chr06 | 9958147                 | CC                              | AA                 | AA               | INTERGENIC      |               |                    |                                                         |
| SNP_39832_A_9958435 | NC_021165.1    | Ca_Kabuli_Chr06 | 9958435                 | GG                              | AA                 | AA               | INTERGENIC      |               |                    |                                                         |
| SNP_39833_A_9959354 | NC_021165.1    | Ca_Kabuli_Chr06 | 9959354                 | AA                              | TT                 | TT               | DRR             |               | 101498762          | protein transport protein Sec61 subunit beta-like       |
| SNP_39834_A_9961396 | NC_021165.1    | Ca_Kabuli_Chr06 | 9961396                 | TT                              | CC                 | CC               | URR             |               | 101498762          | protein transport protein Sec61 subunit beta-like       |
| SNP_39836_A_9961900 | NC_021165.1    | Ca_Kabuli_Chr06 | 9961900                 | GG                              | TT                 | TT               | URR             |               | 101498762          | protein transport protein Sec61 subunit beta-like       |
| SNP_39837_A_9962295 | NC_021165.1    | Ca_Kabuli_Chr06 | 9962295                 | AA                              | GG                 | GG               | INTERGENIC      |               |                    |                                                         |
| SNP_39838_A_9962592 | NC_021165.1    | Ca_Kabuli_Chr06 | 9962592                 | GG                              | AA                 | AA               | INTERGENIC      |               |                    |                                                         |
| SNP_39839_A_9963476 | NC_021165.1    | Ca_Kabuli_Chr06 | 9963476                 | AA                              | GG                 | GG               | INTERGENIC      |               |                    |                                                         |
| SNP_39840_A_9964753 | NC_021165.1    | Ca_Kabuli_Chr06 | 9964753                 | TT                              | CC                 | CC               | INTERGENIC      |               |                    |                                                         |



| SNPs IDs            | Chromosome IDs | Chromosomes     | Physical positions (bp) | CDC Frontier genome (Reference genome) | (Pusa 1103 & HPNB) | (ILWC 46 & LPNB) | Sequence Components of genome | Gene accession IDs | Putative functions |
|---------------------|----------------|-----------------|-------------------------|----------------------------------------|--------------------|------------------|-------------------------------|--------------------|--------------------|
| SNP_39841_A_9965682 | NC_021165.1    | Ca_Kabuli_Chr06 | 9965682                 | AA                                     | GG                 | GG               | INTERGENIC                    |                    |                    |
| SNP_39842_A_9977068 | NC_021165.1    | Ca_Kabuli_Chr06 | 9977068                 | GG                                     | AA                 | AA               | NON_SYNONYMOUS_CODING         | 101512005          | Unknown function   |
| SNP_39843_A_9977116 | NC_021165.1    | Ca_Kabuli_Chr06 | 9977116                 | TT                                     | CC                 | CC               | NON_SYNONYMOUS_CODING         | 101512005          | Unknown function   |
| SNP_39844_A_9978641 | NC_021165.1    | Ca_Kabuli_Chr06 | 9978641                 | AA                                     | GG                 | GG               | URR                           | 101512005          | Unknown function   |
| SNP_39845_A_9978645 | NC_021165.1    | Ca_Kabuli_Chr06 | 9978645                 | AA                                     | GG                 | GG               | URR                           | 101512005          | Unknown function   |
| SNP_39846_A_9986255 | NC_021165.1    | Ca_Kabuli_Chr06 | 9986255                 | TT                                     | CC                 | CC               | INTERGENIC                    |                    |                    |
| SNP_39847_A_9986704 | NC_021165.1    | Ca_Kabuli_Chr06 | 9986704                 | TT                                     | CC                 | CC               | INTERGENIC                    |                    |                    |
| SNP_39848_A_9986705 | NC_021165.1    | Ca_Kabuli_Chr06 | 9986705                 | TT                                     | CC                 | CC               | INTERGENIC                    |                    |                    |
| SNP_39849_A_9986879 | NC_021165.1    | Ca_Kabuli_Chr06 | 9986879                 | TT                                     | CC                 | CC               | INTERGENIC                    |                    |                    |
| SNP_39850_A_9987055 | NC_021165.1    | Ca_Kabuli_Chr06 | 9987055                 | AA                                     | GG                 | GG               | INTERGENIC                    |                    |                    |
| SNP_39852_A_9987148 | NC_021165.1    | Ca_Kabuli_Chr06 | 9987148                 | AA                                     | GG                 | GG               | DRR                           | 101499086          | protein SCAR1-like |
| SNP_39853_A_9987639 | NC_021165.1    | Ca_Kabuli_Chr06 | 9987639                 | TT                                     | CC                 | CC               | DRR                           | 101499086          | protein SCAR1-like |
| SNP_39854_A_9991397 | NC_021165.1    | Ca_Kabuli_Chr06 | 9991397                 | AA                                     | GG                 | GG               | SYNONYMOUS_CODING             | 101499086          | protein SCAR1-like |
| SNP_39855_A_9991537 | NC_021165.1    | Ca_Kabuli_Chr06 | 9991537                 | CC                                     | TT                 | TT               | SYNONYMOUS_CODING             | 101499086          | protein SCAR1-like |
| SNP_39856_A_9994292 | NC_021165.1    | Ca_Kabuli_Chr06 | 9994292                 | TT                                     | GG                 | GG               | INTRON                        | 101499086          | protein SCAR1-like |
| SNP_39857_A_9995375 | NC_021165.1    | Ca_Kabuli_Chr06 | 9995375                 | GG                                     | AA                 | AA               | URR                           | 101499086          | protein SCAR1-like |
| SNP_39858_A_9995744 | NC_021165.1    | Ca_Kabuli_Chr06 | 9995744                 | CC                                     | GG                 | GG               | URR                           | 101499086          | protein SCAR1-like |
| SNP_39859_A_9996051 | NC_021165.1    | Ca_Kabuli_Chr06 | 9996051                 | TT                                     | CC                 | CC               | URR                           | 101499086          | protein SCAR1-like |
| SNP_39860_A_9996097 | NC_021165.1    | Ca_Kabuli_Chr06 | 9996097                 | CC                                     | GG                 | GG               | URR                           | 101499086          | protein SCAR1-like |
| SNP_39861_A_9997515 | NC_021165.1    | Ca_Kabuli_Chr06 | 9997515                 | TT                                     | CC                 | CC               | INTERGENIC                    |                    |                    |
| SNP_39862_A_9999024 | NC_021165.1    | Ca_Kabuli_Chr06 | 9999024                 | AA                                     | TT                 | TT               | INTERGENIC                    |                    |                    |
| SNP_39863_A_9999129 | NC_021165.1    | Ca_Kabuli_Chr06 | 9999129                 | CC                                     | TT                 | TT               | INTERGENIC                    |                    |                    |

| SNPs IDs             | Chromosome IDs | Chromosomes     | Physical positions (bp) | CDC Frontier (Reference genome) | (Pusa 1103 & HPNB) | (ILWC 46 & LPNB) | Sequence Components of genome | Gene accession IDs | Putative functions                                         |
|----------------------|----------------|-----------------|-------------------------|---------------------------------|--------------------|------------------|-------------------------------|--------------------|------------------------------------------------------------|
| SNP_39864_A_10000212 | NC_021165.1    | Ca_Kabuli_Chr06 | 10000212                | CC                              | TT                 | TT               | INTERGENIC                    |                    |                                                            |
| SNP_39865_A_10001718 | NC_021165.1    | Ca_Kabuli_Chr06 | 10001718                | CC                              | TT                 | TT               | INTERGENIC                    |                    |                                                            |
| SNP_39867_A_10002366 | NC_021165.1    | Ca_Kabuli_Chr06 | 10002366                | AA                              | CC                 | CC               | INTERGENIC                    |                    |                                                            |
| SNP_39869_A_10006910 | NC_021165.1    | Ca_Kabuli_Chr06 | 10006910                | AA                              | GG                 | GG               | DRR                           | 101500358          | 14-3-3-like protein C                                      |
| SNP_39870_A_10006968 | NC_021165.1    | Ca_Kabuli_Chr06 | 10006968                | CC                              | AA                 | AA               | DRR                           | 101500358          | 14-3-3-like protein C                                      |
| SNP_39871_A_10007018 | NC_021165.1    | Ca_Kabuli_Chr06 | 10007018                | GG                              | AA                 | AA               | DRR                           | 101500358          | 14-3-3-like protein C                                      |
| SNP_39872_A_10007220 | NC_021165.1    | Ca_Kabuli_Chr06 | 10007220                | AA                              | GG                 | GG               | DRR                           | 101500358          | 14-3-3-like protein C                                      |
| SNP_39873_A_10007637 | NC_021165.1    | Ca_Kabuli_Chr06 | 10007637                | GG                              | AA                 | AA               | DRR                           | 101500358          | 14-3-3-like protein C                                      |
| SNP_39874_A_10012321 | NC_021165.1    | Ca_Kabuli_Chr06 | 10012321                | AA                              | TT                 | TT               | DRR                           | 101499907          | uncharacterized LOC101499907                               |
| SNP_39876_A_10013091 | NC_021165.1    | Ca_Kabuli_Chr06 | 10013091                | CC                              | AA                 | AA               | INTERGENIC                    |                    |                                                            |
| SNP_39877_A_10014964 | NC_021165.1    | Ca_Kabuli_Chr06 | 10014964                | TT                              | GG                 | GG               | INTRON                        | 101499907          | uncharacterized LOC101499907                               |
| SNP_39878_A_10017945 | NC_021165.1    | Ca_Kabuli_Chr06 | 10017945                | AA                              | GG                 | GG               | INTERGENIC                    |                    |                                                            |
| SNP_39879_A_10017948 | NC_021165.1    | Ca_Kabuli_Chr06 | 10017948                | CC                              | AA                 | AA               | INTERGENIC                    |                    |                                                            |
| SNP_39880_A_10025995 | NC_021165.1    | Ca_Kabuli_Chr06 | 10025995                | GG                              | AA                 | AA               | INTERGENIC                    |                    |                                                            |
| SNP_39881_A_10026000 | NC_021165.1    | Ca_Kabuli_Chr06 | 10026000                | CC                              | TT                 | TT               | INTERGENIC                    |                    |                                                            |
| SNP_39882_A_10026033 | NC_021165.1    | Ca_Kabuli_Chr06 | 10026033                | GG                              | TT                 | TT               | INTERGENIC                    |                    |                                                            |
| SNP_39883_A_10033386 | NC_021165.1    | Ca_Kabuli_Chr06 | 10033386                | TT                              | CC                 | CC               | URR                           | 101500984          | mitochondrial dicarboxylate/tricarboxylate transporter DTC |
| SNP_39884_A_10033622 | NC_021165.1    | Ca_Kabuli_Chr06 | 10033622                | GG                              | AA                 | AA               | URR                           | 101500984          | mitochondrial dicarboxylate/tricarboxylate transporter DTC |
| SNP_39885_A_10038763 | NC_021165.1    | Ca_Kabuli_Chr06 | 10038763                | AA                              | TT                 | TT               | DRR                           | 101501829          | probable acyl-activating enzyme 18, peroxisomal            |
| SNP_39886_A_10040330 | NC_021165.1    | Ca_Kabuli_Chr06 | 10040330                | CC                              | TT                 | TT               | URR                           | 101501297          | uncharacterized LOC101501297                               |
| SNP_39887_A_10040340 | NC_021165.1    | Ca_Kabuli_Chr06 | 10040340                | CC                              | TT                 | TT               | URR                           | 101501297          | uncharacterized LOC101501297                               |
| SNP_39888_A_10041985 | NC_021165.1    | Ca_Kabuli_Chr06 | 10041985                | AA                              | TT                 | TT               | INTRON                        | 101501829          | probable acyl-activating enzyme 18, peroxisomal            |

| SNPs IDs             | Chromosome IDs | Chromosomes     | Physical positions (bp) | CDC Frontier (Reference genome) | (Pusa 1103 & HPNB) | (ILWC 46 & LPNB) | Sequence Components of genome | Gene accession IDs | Putative functions                               |
|----------------------|----------------|-----------------|-------------------------|---------------------------------|--------------------|------------------|-------------------------------|--------------------|--------------------------------------------------|
| SNP_39889_A_10042391 | NC_021165.1    | Ca_Kabuli_Chr06 | 10042391                | TT                              | CC                 | CC               | INTRON                        | 101501829          | probable acyl-activating enzyme 18, peroxisomal  |
| SNP_39890_A_10042425 | NC_021165.1    | Ca_Kabuli_Chr06 | 10042425                | GG                              | TT                 | TT               | INTRON                        | 101501829          | probable acyl-activating enzyme 18, peroxisomal  |
| SNP_39891_A_10042427 | NC_021165.1    | Ca_Kabuli_Chr06 | 10042427                | AA                              | GG                 | GG               | INTRON                        | 101501829          | probable acyl-activating enzyme 18, peroxisomal  |
| SNP_39893_A_10046155 | NC_021165.1    | Ca_Kabuli_Chr06 | 10046155                | TT                              | GG                 | GG               | URR                           | 101501829          | probable acyl-activating enzyme 18, peroxisomal  |
| SNP_39894_A_10046157 | NC_021165.1    | Ca_Kabuli_Chr06 | 10046157                | TT                              | CC                 | CC               | URR                           | 101501829          | probable acyl-activating enzyme 18, peroxisomal  |
| SNP_39895_A_10046159 | NC_021165.1    | Ca_Kabuli_Chr06 | 10046159                | AA                              | GG                 | GG               | URR                           | 101501829          | probable acyl-activating enzyme 18, peroxisomal  |
| SNP_39896_A_10047770 | NC_021165.1    | Ca_Kabuli_Chr06 | 10047770                | TT                              | CC                 | CC               | URR                           | 101501829          | probable acyl-activating enzyme 18, peroxisomal  |
| SNP_39897_A_10048835 | NC_021165.1    | Ca_Kabuli_Chr06 | 10048835                | TT                              | AA                 | AA               | INTERGENIC                    |                    |                                                  |
| SNP_39900_A_10050434 | NC_021165.1    | Ca_Kabuli_Chr06 | 10050434                | AA                              | CC                 | CC               | INTERGENIC                    |                    |                                                  |
| SNP_39901_A_10055409 | NC_021165.1    | Ca_Kabuli_Chr06 | 10055409                | CC                              | AA                 | AA               | URR                           | 101502676          | ocs element-binding factor 1-like                |
| SNP_39902_A_10056965 | NC_021165.1    | Ca_Kabuli_Chr06 | 10056965                | GG                              | TT                 | TT               | URR                           | 101502371          | uncharacterized LOC101502371                     |
| SNP_39903_A_10056992 | NC_021165.1    | Ca_Kabuli_Chr06 | 10056992                | TT                              | GG                 | GG               | URR                           | 101502371          | uncharacterized LOC101502371                     |
| SNP_39904_A_10058425 | NC_021165.1    | Ca_Kabuli_Chr06 | 10058425                | AA                              | GG                 | GG               | INTERGENIC                    |                    |                                                  |
| SNP_39905_A_10061377 | NC_021165.1    | Ca_Kabuli_Chr06 | 10061377                | TT                              | CC                 | CC               | INTERGENIC                    |                    |                                                  |
| SNP_39907_A_10061439 | NC_021165.1    | Ca_Kabuli_Chr06 | 10061439                | AA                              | GG                 | GG               | INTERGENIC                    |                    |                                                  |
| SNP_39908_A_10061460 | NC_021165.1    | Ca_Kabuli_Chr06 | 10061460                | TT                              | GG                 | GG               | INTERGENIC                    |                    |                                                  |
| SNP_39910_A_10061564 | NC_021165.1    | Ca_Kabuli_Chr06 | 10061564                | GG                              | AA                 | AA               | INTERGENIC                    |                    |                                                  |
| SNP_39911_A_10062461 | NC_021165.1    | Ca_Kabuli_Chr06 | 10062461                | TT                              | CC                 | CC               | INTERGENIC                    |                    |                                                  |
| SNP_39912_A_10080143 | NC_021165.1    | Ca_Kabuli_Chr06 | 10080143                | GG                              | TT                 | TT               | INTERGENIC                    |                    |                                                  |
| SNP_39913_A_10085816 | NC_021165.1    | Ca_Kabuli_Chr06 | 10085816                | AA                              | GG                 | GG               | INTERGENIC                    |                    |                                                  |
| SNP_39914_A_10089391 | NC_021165.1    | Ca_Kabuli_Chr06 | 10089391                | GG                              | AA                 | AA               | INTERGENIC                    |                    |                                                  |
| SNP_39915_A_10093900 | NC_021165.1    | Ca_Kabuli_Chr06 | 10093900                | GG                              | AA                 | AA               | URR                           | 101503308          | ethylene-responsive transcription factor RAP2-11 |

| SNPs IDs             | Chromosome IDs | Chromosomes     | Physical positions (bp) | CDC Frontier genome (Reference genome) | (Pusa 1103 & HPNB) | (ILWC 46 & LPNB) | Sequence Components of genome | Gene accession IDs | Putative functions                     |
|----------------------|----------------|-----------------|-------------------------|----------------------------------------|--------------------|------------------|-------------------------------|--------------------|----------------------------------------|
| SNP_39916_A_10103147 | NC_021165.1    | Ca_Kabuli_Chr06 | 10103147                | TT                                     | AA                 | AA               | URR                           | 101503642          | importin-5                             |
| SNP_39919_A_10107996 | NC_021165.1    | Ca_Kabuli_Chr06 | 10107996                | AA                                     | TT                 | TT               | DRR                           | 101504186          | peptidyl-IRNA hydrolase, mitochondrial |
| SNP_39920_A_10110894 | NC_021165.1    | Ca_Kabuli_Chr06 | 10110894                | GG                                     | AA                 | AA               | INTRON                        | 101504186          | peptidyl-IRNA hydrolase, mitochondrial |
| SNP_39921_A_10111126 | NC_021165.1    | Ca_Kabuli_Chr06 | 10111126                | CC                                     | TT                 | TT               | INTRON                        | 101504186          | peptidyl-IRNA hydrolase, mitochondrial |
| SNP_39922_A_10112956 | NC_021165.1    | Ca_Kabuli_Chr06 | 10112956                | TT                                     | CC                 | CC               | INTRON                        | 101504186          | peptidyl-IRNA hydrolase, mitochondrial |
| SNP_39923_A_10114956 | NC_021165.1    | Ca_Kabuli_Chr06 | 10114956                | TT                                     | CC                 | CC               | INTRON                        | 101504186          | peptidyl-IRNA hydrolase, mitochondrial |
| SNP_39924_A_10114958 | NC_021165.1    | Ca_Kabuli_Chr06 | 10114958                | CC                                     | TT                 | TT               | INTRON                        | 101504186          | peptidyl-IRNA hydrolase, mitochondrial |
| SNP_39925_A_10115728 | NC_021165.1    | Ca_Kabuli_Chr06 | 10115728                | TT                                     | CC                 | CC               | INTRON                        | 101504186          | peptidyl-IRNA hydrolase, mitochondrial |
| SNP_39926_A_10121872 | NC_021165.1    | Ca_Kabuli_Chr06 | 10121872                | GG                                     | TT                 | TT               | INTERGENIC                    |                    |                                        |
| SNP_39927_A_10121887 | NC_021165.1    | Ca_Kabuli_Chr06 | 10121887                | GG                                     | AA                 | AA               | INTERGENIC                    |                    |                                        |
| SNP_39928_A_10121999 | NC_021165.1    | Ca_Kabuli_Chr06 | 10121999                | CC                                     | TT                 | TT               | INTERGENIC                    |                    |                                        |
| SNP_39929_A_10123042 | NC_021165.1    | Ca_Kabuli_Chr06 | 10123042                | TT                                     | CC                 | CC               | INTERGENIC                    |                    |                                        |
| SNP_39930_A_10123088 | NC_021165.1    | Ca_Kabuli_Chr06 | 10123088                | GG                                     | AA                 | AA               | INTERGENIC                    |                    |                                        |
| SNP_39931_A_10123104 | NC_021165.1    | Ca_Kabuli_Chr06 | 10123104                | AA                                     | GG                 | GG               | INTERGENIC                    |                    |                                        |
| SNP_39932_A_10123109 | NC_021165.1    | Ca_Kabuli_Chr06 | 10123109                | AA                                     | GG                 | GG               | INTERGENIC                    |                    |                                        |
| SNP_39933_A_10123110 | NC_021165.1    | Ca_Kabuli_Chr06 | 10123110                | TT                                     | CC                 | CC               | INTERGENIC                    |                    |                                        |
| SNP_39934_A_10123336 | NC_021165.1    | Ca_Kabuli_Chr06 | 10123336                | TT                                     | GG                 | GG               | INTERGENIC                    |                    |                                        |
| SNP_39935_A_10123340 | NC_021165.1    | Ca_Kabuli_Chr06 | 10123340                | AA                                     | GG                 | GG               | INTERGENIC                    |                    |                                        |
| SNP_39937_A_10128586 | NC_021165.1    | Ca_Kabuli_Chr06 | 10128586                | AA                                     | GG                 | GG               | INTERGENIC                    |                    |                                        |
| SNP_39938_A_10130692 | NC_021165.1    | Ca_Kabuli_Chr06 | 10130692                | CC                                     | TT                 | TT               | INTERGENIC                    |                    |                                        |
| SNP_39939_A_10131481 | NC_021165.1    | Ca_Kabuli_Chr06 | 10131481                | AA                                     | TT                 | TT               | INTERGENIC                    |                    |                                        |
| SNP_39940_A_10131762 | NC_021165.1    | Ca_Kabuli_Chr06 | 10131762                | CC                                     | TT                 | TT               | INTERGENIC                    |                    |                                        |

| SNPs IDs             | Chromosome IDs | Chromosomes     | Physical positions (bp) | CDC Frontier genome (Reference genome) | (Pusa 1103 & HPNB) | (ILWC 46 & LPNB) | Sequence Components of genome | Gene accession IDs | Putative functions                                                   |
|----------------------|----------------|-----------------|-------------------------|----------------------------------------|--------------------|------------------|-------------------------------|--------------------|----------------------------------------------------------------------|
| SNP_39941_A_10131794 | NC_021165.1    | Ca_Kabuli_Chr06 | 10131794                | GG                                     | AA                 | AA               | INTERGENIC                    |                    |                                                                      |
| SNP_39942_A_10131799 | NC_021165.1    | Ca_Kabuli_Chr06 | 10131799                | AA                                     | GG                 | GG               | INTERGENIC                    |                    |                                                                      |
| SNP_39944_A_10137673 | NC_021165.1    | Ca_Kabuli_Chr06 | 10137673                | TT                                     | AA                 | AA               | INTRON                        | 101504515          | uncharacterized LOC101504515                                         |
| SNP_39945_A_10138160 | NC_021165.1    | Ca_Kabuli_Chr06 | 10138160                | TT                                     | CC                 | CC               | SYNONYMOUS_CODING             | 101504515          | uncharacterized LOC101504515                                         |
| SNP_39946_A_10139506 | NC_021165.1    | Ca_Kabuli_Chr06 | 10139506                | GG                                     | TT                 | TT               | URR                           | 101504515          | uncharacterized LOC101504515                                         |
| SNP_39947_A_10146976 | NC_021165.1    | Ca_Kabuli_Chr06 | 10146976                | GG                                     | AA                 | AA               | URR                           | 101504830          | uncharacterized LOC101504830                                         |
| SNP_39948_A_10146990 | NC_021165.1    | Ca_Kabuli_Chr06 | 10146990                | GG                                     | AA                 | AA               | URR                           | 101504830          | uncharacterized LOC101504830                                         |
| SNP_39949_A_10147363 | NC_021165.1    | Ca_Kabuli_Chr06 | 10147363                | AA                                     | GG                 | GG               | URR                           | 101504830          | uncharacterized LOC101504830                                         |
| SNP_39950_A_10149941 | NC_021165.1    | Ca_Kabuli_Chr06 | 10149941                | AA                                     | GG                 | GG               | DRR                           | 101505568          | uncharacterized LOC101505568                                         |
| SNP_39951_A_10153601 | NC_021165.1    | Ca_Kabuli_Chr06 | 10153601                | AA                                     | GG                 | GG               | INTERGENIC                    |                    |                                                                      |
| SNP_39952_A_10154186 | NC_021165.1    | Ca_Kabuli_Chr06 | 10154186                | TT                                     | AA                 | AA               | URR                           | 101505568          | uncharacterized LOC101505568                                         |
| SNP_39953_A_10155109 | NC_021165.1    | Ca_Kabuli_Chr06 | 10155109                | AA                                     | TT                 | TT               | URR                           | 101505568          | uncharacterized LOC101505568                                         |
| SNP_39954_A_10155264 | NC_021165.1    | Ca_Kabuli_Chr06 | 10155264                | CC                                     | TT                 | TT               | URR                           | 101505568          | uncharacterized LOC101505568                                         |
| SNP_39955_A_10158850 | NC_021165.1    | Ca_Kabuli_Chr06 | 10158850                | CC                                     | TT                 | TT               | INTRON                        | 101506112          | protochlorophyllide-dependent translocon component 52, chloroplastic |
| SNP_39956_A_10160127 | NC_021165.1    | Ca_Kabuli_Chr06 | 10160127                | TT                                     | CC                 | CC               | URR                           | 101506112          | protochlorophyllide-dependent translocon component 52, chloroplastic |
| SNP_39957_A_10160128 | NC_021165.1    | Ca_Kabuli_Chr06 | 10160128                | TT                                     | AA                 | AA               | URR                           | 101506112          | protochlorophyllide-dependent translocon component 52, chloroplastic |
| SNP_39958_A_10162967 | NC_021165.1    | Ca_Kabuli_Chr06 | 10162967                | GG                                     | AA                 | AA               | INTERGENIC                    |                    |                                                                      |
| SNP_39959_A_10162970 | NC_021165.1    | Ca_Kabuli_Chr06 | 10162970                | CC                                     | TT                 | TT               | INTERGENIC                    |                    |                                                                      |
| SNP_39960_A_10163225 | NC_021165.1    | Ca_Kabuli_Chr06 | 10163225                | AA                                     | GG                 | GG               | INTERGENIC                    |                    |                                                                      |
| SNP_39961_A_10163250 | NC_021165.1    | Ca_Kabuli_Chr06 | 10163250                | TT                                     | AA                 | AA               | INTERGENIC                    |                    |                                                                      |
| SNP_39962_A_10163274 | NC_021165.1    | Ca_Kabuli_Chr06 | 10163274                | GG                                     | TT                 | TT               | INTERGENIC                    |                    |                                                                      |
| SNP_39964_A_10163440 | NC_021165.1    | Ca_Kabuli_Chr06 | 10163440                | AA                                     | GG                 | GG               | INTERGENIC                    |                    |                                                                      |

| SNPs IDs             | Chromosome IDs | Chromosomes     | Physical positions (bp) | CDC Frontier genome (Reference genome) | (Pusa 1103 & HPNB) | (ILWC 46 & LPNB) | Sequence Components of genome | Gene accession IDs | Putative functions                              |
|----------------------|----------------|-----------------|-------------------------|----------------------------------------|--------------------|------------------|-------------------------------|--------------------|-------------------------------------------------|
| SNP_39965_A_10163458 | NC_021165.1    | Ca_Kabuli_Chr06 | 10163458                | GG                                     | TT                 | TT               | INTERGENIC                    |                    |                                                 |
| SNP_39966_A_10163539 | NC_021165.1    | Ca_Kabuli_Chr06 | 10163539                | CC                                     | TT                 | TT               | INTERGENIC                    |                    |                                                 |
| SNP_39967_A_10163542 | NC_021165.1    | Ca_Kabuli_Chr06 | 10163542                | AA                                     | GG                 | GG               | INTERGENIC                    |                    |                                                 |
| SNP_39970_A_10179212 | NC_021165.1    | Ca_Kabuli_Chr06 | 10179212                | AA                                     | GG                 | GG               | INTRON                        | 101507103          | glucan endo-1,3-beta-glucosidase 4              |
| SNP_39972_A_10180797 | NC_021165.1    | Ca_Kabuli_Chr06 | 10180797                | CC                                     | TT                 | TT               | DRR                           | 101507424          | uncharacterized LOC101507424                    |
| SNP_39973_A_10184330 | NC_021165.1    | Ca_Kabuli_Chr06 | 10184330                | GG                                     | AA                 | AA               | INTERGENIC                    |                    |                                                 |
| SNP_39974_A_10184521 | NC_021165.1    | Ca_Kabuli_Chr06 | 10184521                | GG                                     | AA                 | AA               | INTERGENIC                    |                    |                                                 |
| SNP_39975_A_10184736 | NC_021165.1    | Ca_Kabuli_Chr06 | 10184736                | AA                                     | GG                 | GG               | INTERGENIC                    |                    |                                                 |
| SNP_39976_A_10184738 | NC_021165.1    | Ca_Kabuli_Chr06 | 10184738                | CC                                     | GG                 | GG               | INTERGENIC                    |                    |                                                 |
| SNP_39977_A_10185397 | NC_021165.1    | Ca_Kabuli_Chr06 | 10185397                | AA                                     | GG                 | GG               | INTERGENIC                    |                    |                                                 |
| SNP_39979_A_10185472 | NC_021165.1    | Ca_Kabuli_Chr06 | 10185472                | CC                                     | AA                 | AA               | INTERGENIC                    |                    |                                                 |
| SNP_39980_A_10185486 | NC_021165.1    | Ca_Kabuli_Chr06 | 10185486                | TT                                     | GG                 | GG               | INTERGENIC                    |                    |                                                 |
| SNP_39981_A_10185525 | NC_021165.1    | Ca_Kabuli_Chr06 | 10185525                | CC                                     | TT                 | TT               | INTERGENIC                    |                    |                                                 |
| SNP_39982_A_10186123 | NC_021165.1    | Ca_Kabuli_Chr06 | 10186123                | CC                                     | TT                 | TT               | DRR                           | 101507732          | constitutive photomorphogenesis protein 10      |
| SNP_39983_A_10186132 | NC_021165.1    | Ca_Kabuli_Chr06 | 10186132                | CC                                     | TT                 | TT               | DRR                           | 101507732          | constitutive photomorphogenesis protein 10      |
| SNP_39984_A_10186178 | NC_021165.1    | Ca_Kabuli_Chr06 | 10186178                | TT                                     | CC                 | CC               | DRR                           | 101507732          | constitutive photomorphogenesis protein 10      |
| SNP_39985_A_10186445 | NC_021165.1    | Ca_Kabuli_Chr06 | 10186445                | CC                                     | TT                 | TT               | DRR                           | 101507732          | constitutive photomorphogenesis protein 10      |
| SNP_39986_A_10186457 | NC_021165.1    | Ca_Kabuli_Chr06 | 10186457                | AA                                     | TT                 | TT               | DRR                           | 101507732          | constitutive photomorphogenesis protein 10      |
| SNP_39987_A_10188880 | NC_021165.1    | Ca_Kabuli_Chr06 | 10188880                | CC                                     | TT                 | TT               | DRR                           | 101508054          | probable acyl-activating enzyme 18, peroxisomal |
| SNP_39989_A_10192621 | NC_021165.1    | Ca_Kabuli_Chr06 | 10192621                | CC                                     | TT                 | TT               | INTERGENIC                    |                    |                                                 |
| SNP_39990_A_10192683 | NC_021165.1    | Ca_Kabuli_Chr06 | 10192683                | AA                                     | GG                 | GG               | INTERGENIC                    |                    |                                                 |
| SNP_39991_A_10192705 | NC_021165.1    | Ca_Kabuli_Chr06 | 10192705                | GG                                     | AA                 | AA               | INTERGENIC                    |                    |                                                 |

| SNPs IDs             | Chromosome IDs | Chromosomes     | Physical positions (bp) | CDC Frontier genome (Reference genome) | (Pusa 1103 & HPNB) | (ILWC 46 & LPNB) | Sequence Components of genome | Gene accession IDs | Putative functions                              |
|----------------------|----------------|-----------------|-------------------------|----------------------------------------|--------------------|------------------|-------------------------------|--------------------|-------------------------------------------------|
| SNP_39992_A_10192734 | NC_021165.1    | Ca_Kabuli_Chr06 | 10192734                | CC                                     | TT                 | TT               | INTERGENIC                    |                    |                                                 |
| SNP_39993_A_10195870 | NC_021165.1    | Ca_Kabuli_Chr06 | 10195870                | AA                                     | TT                 | TT               | URR                           | 101508054          | probable acyl-activating enzyme 18, peroxisomal |
| SNP_39994_A_10195935 | NC_021165.1    | Ca_Kabuli_Chr06 | 10195935                | AA                                     | GG                 | GG               | URR                           | 101508054          | probable acyl-activating enzyme 18, peroxisomal |
| SNP_39995_A_10195943 | NC_021165.1    | Ca_Kabuli_Chr06 | 10195943                | TT                                     | CC                 | CC               | URR                           | 101508054          | probable acyl-activating enzyme 18, peroxisomal |
| SNP_39996_A_10196167 | NC_021165.1    | Ca_Kabuli_Chr06 | 10196167                | CC                                     | TT                 | TT               | URR                           | 101508054          | probable acyl-activating enzyme 18, peroxisomal |
| SNP_39997_A_10196175 | NC_021165.1    | Ca_Kabuli_Chr06 | 10196175                | TT                                     | CC                 | CC               | URR                           | 101508054          | probable acyl-activating enzyme 18, peroxisomal |
| SNP_39998_A_10196849 | NC_021165.1    | Ca_Kabuli_Chr06 | 10196849                | AA                                     | GG                 | GG               | URR                           | 101508054          | probable acyl-activating enzyme 18, peroxisomal |
| SNP_39999_A_10197272 | NC_021165.1    | Ca_Kabuli_Chr06 | 10197272                | TT                                     | GG                 | GG               | URR                           | 101508054          | probable acyl-activating enzyme 18, peroxisomal |
| SNP_40000_A_10199567 | NC_021165.1    | Ca_Kabuli_Chr06 | 10199567                | GG                                     | AA                 | AA               | INTERGENIC                    |                    |                                                 |
| SNP_40001_A_10200699 | NC_021165.1    | Ca_Kabuli_Chr06 | 10200699                | TT                                     | GG                 | GG               | INTERGENIC                    |                    |                                                 |
| SNP_40002_A_10204349 | NC_021165.1    | Ca_Kabuli_Chr06 | 10204349                | TT                                     | CC                 | CC               | URR                           | 101508373          | F-box/kelch-repeat protein At2g44130-like       |
| SNP_40003_A_10204353 | NC_021165.1    | Ca_Kabuli_Chr06 | 10204353                | TT                                     | CC                 | CC               | URR                           | 101508373          | F-box/kelch-repeat protein At2g44130-like       |
| SNP_40004_A_10204416 | NC_021165.1    | Ca_Kabuli_Chr06 | 10204416                | CC                                     | TT                 | TT               | URR                           | 101508373          | F-box/kelch-repeat protein At2g44130-like       |
| SNP_40005_A_10205440 | NC_021165.1    | Ca_Kabuli_Chr06 | 10205440                | TT                                     | CC                 | CC               | URR                           | 101508373          | F-box/kelch-repeat protein At2g44130-like       |
| SNP_40006_A_10205647 | NC_021165.1    | Ca_Kabuli_Chr06 | 10205647                | AA                                     | TT                 | TT               | INTERGENIC                    |                    |                                                 |
| SNP_40007_A_10205785 | NC_021165.1    | Ca_Kabuli_Chr06 | 10205785                | AA                                     | GG                 | GG               | INTERGENIC                    |                    |                                                 |
| SNP_40008_A_10206335 | NC_021165.1    | Ca_Kabuli_Chr06 | 10206335                | GG                                     | AA                 | AA               | INTERGENIC                    |                    |                                                 |
| SNP_40009_A_10207731 | NC_021165.1    | Ca_Kabuli_Chr06 | 10207731                | CC                                     | GG                 | GG               | INTERGENIC                    |                    |                                                 |
| SNP_40010_A_10207989 | NC_021165.1    | Ca_Kabuli_Chr06 | 10207989                | TT                                     | AA                 | AA               | INTERGENIC                    |                    |                                                 |
| SNP_40011_A_10208077 | NC_021165.1    | Ca_Kabuli_Chr06 | 10208077                | GG                                     | TT                 | TT               | INTERGENIC                    |                    |                                                 |
| SNP_40012_A_10208135 | NC_021165.1    | Ca_Kabuli_Chr06 | 10208135                | CC                                     | TT                 | TT               | INTERGENIC                    |                    |                                                 |
| SNP_40013_A_10208182 | NC_021165.1    | Ca_Kabuli_Chr06 | 10208182                | AA                                     | GG                 | GG               | INTERGENIC                    |                    |                                                 |

| SNPs IDs             | Chromosome IDs | Chromosomes     | Physical positions (bp) | CDC Frontier genome (Reference genome) | (Pusa 1103 & HPNB) | (ILWC 46 & LPNB) | Sequence Components of genome | Gene accession IDs | Putative functions                                          |
|----------------------|----------------|-----------------|-------------------------|----------------------------------------|--------------------|------------------|-------------------------------|--------------------|-------------------------------------------------------------|
| SNP_40014_A_10208200 | NC_021165.1    | Ca_Kabuli_Chr06 | 10208200                | AA                                     | GG                 | GG               | INTERGENIC                    |                    |                                                             |
| SNP_40015_A_10208336 | NC_021165.1    | Ca_Kabuli_Chr06 | 10208336                | TT                                     | GG                 | GG               | INTERGENIC                    |                    |                                                             |
| SNP_40017_A_10208632 | NC_021165.1    | Ca_Kabuli_Chr06 | 10208632                | CC                                     | TT                 | TT               | INTERGENIC                    |                    |                                                             |
| SNP_40018_A_10208942 | NC_021165.1    | Ca_Kabuli_Chr06 | 10208942                | TT                                     | CC                 | CC               | DRR                           | 101508686          | translation initiation factor eIF-2B subunit gamma          |
| SNP_40019_A_10209025 | NC_021165.1    | Ca_Kabuli_Chr06 | 10209025                | GG                                     | AA                 | AA               | DRR                           | 101508686          | translation initiation factor eIF-2B subunit gamma          |
| SNP_40020_A_10209217 | NC_021165.1    | Ca_Kabuli_Chr06 | 10209217                | TT                                     | AA                 | AA               | DRR                           | 101508686          | translation initiation factor eIF-2B subunit gamma          |
| SNP_40021_A_10209232 | NC_021165.1    | Ca_Kabuli_Chr06 | 10209232                | TT                                     | AA                 | AA               | DRR                           | 101508686          | translation initiation factor eIF-2B subunit gamma          |
| SNP_40023_A_10209927 | NC_021165.1    | Ca_Kabuli_Chr06 | 10209927                | GG                                     | TT                 | TT               | INTERGENIC                    |                    |                                                             |
| SNP_40024_A_10209993 | NC_021165.1    | Ca_Kabuli_Chr06 | 10209993                | TT                                     | CC                 | CC               | INTERGENIC                    |                    |                                                             |
| SNP_40025_A_10217071 | NC_021165.1    | Ca_Kabuli_Chr06 | 10217071                | TT                                     | CC                 | CC               | URR                           | 101509005          | probable polyamine transporter At3g13620                    |
| SNP_40026_A_10218341 | NC_021165.1    | Ca_Kabuli_Chr06 | 10218341                | TT                                     | GG                 | GG               | INTERGENIC                    |                    |                                                             |
| SNP_40027_A_10218685 | NC_021165.1    | Ca_Kabuli_Chr06 | 10218685                | TT                                     | AA                 | AA               | DRR                           | 101410606          | transfer RNA glycine (anticodon UCC)                        |
| SNP_40028_A_10219159 | NC_021165.1    | Ca_Kabuli_Chr06 | 10219159                | TT                                     | CC                 | CC               | DRR                           | 101410606          | transfer RNA glycine (anticodon UCC)                        |
| SNP_40029_A_10220112 | NC_021165.1    | Ca_Kabuli_Chr06 | 10220112                | CC                                     | AA                 | AA               | URR                           | 101410606          | transfer RNA glycine (anticodon UCC)                        |
| SNP_40030_A_10222944 | NC_021165.1    | Ca_Kabuli_Chr06 | 10222944                | TT                                     | CC                 | CC               | URR                           | 101509324          | uncharacterized LOC101509324                                |
| SNP_40032_A_10224942 | NC_021165.1    | Ca_Kabuli_Chr06 | 10224942                | TT                                     | GG                 | GG               | DRR                           | 101509639          | serine/threonine-protein phosphatase PP2A catalytic subunit |
| SNP_40033_A_10224976 | NC_021165.1    | Ca_Kabuli_Chr06 | 10224976                | TT                                     | AA                 | AA               | DRR                           | 101509639          | serine/threonine-protein phosphatase PP2A catalytic subunit |
| SNP_40034_A_10225992 | NC_021165.1    | Ca_Kabuli_Chr06 | 10225992                | CC                                     | TT                 | TT               | INTERGENIC                    |                    |                                                             |
| SNP_40035_A_10226669 | NC_021165.1    | Ca_Kabuli_Chr06 | 10226669                | GG                                     | AA                 | AA               | INTERGENIC                    |                    |                                                             |
| SNP_40036_A_10230309 | NC_021165.1    | Ca_Kabuli_Chr06 | 10230309                | AA                                     | GG                 | GG               | INTRON                        | 101509639          | serine/threonine-protein phosphatase PP2A catalytic subunit |
| SNP_40037_A_10230314 | NC_021165.1    | Ca_Kabuli_Chr06 | 10230314                | AA                                     | GG                 | GG               | INTRON                        | 101509639          | serine/threonine-protein phosphatase PP2A catalytic subunit |
| SNP_40038_A_10232759 | NC_021165.1    | Ca_Kabuli_Chr06 | 10232759                | GG                                     | TT                 | TT               | INTRON                        | 101509639          | serine/threonine-protein phosphatase PP2A catalytic subunit |



| SNPs IDs             | Chromosome IDs | Chromosomes     | Physical positions (bp) | CDC Frontier (Reference genome) | (Pusa 1103 & HPNB) | (ILWC 46 & LPNB) | Sequence Components of genome | Gene accession IDs | Putative functions                                          |
|----------------------|----------------|-----------------|-------------------------|---------------------------------|--------------------|------------------|-------------------------------|--------------------|-------------------------------------------------------------|
| SNP_40039_A_10238424 | NC_021165.1    | Ca_Kabuli_Chr06 | 10238424                | GG                              | AA                 | AA               | URR                           | 101509639          | serine/threonine-protein phosphatase PP2A catalytic subunit |
| SNP_40040_A_10238434 | NC_021165.1    | Ca_Kabuli_Chr06 | 10238434                | GG                              | AA                 | AA               | URR                           | 101509639          | serine/threonine-protein phosphatase PP2A catalytic subunit |
| SNP_40041_A_10241578 | NC_021165.1    | Ca_Kabuli_Chr06 | 10241578                | TT                              | CC                 | CC               | INTERGENIC                    |                    |                                                             |
| SNP_40042_A_10241741 | NC_021165.1    | Ca_Kabuli_Chr06 | 10241741                | TT                              | CC                 | CC               | INTERGENIC                    |                    |                                                             |
| SNP_40043_A_10241746 | NC_021165.1    | Ca_Kabuli_Chr06 | 10241746                | AA                              | TT                 | TT               | INTERGENIC                    |                    |                                                             |
| SNP_40044_A_10241753 | NC_021165.1    | Ca_Kabuli_Chr06 | 10241753                | GG                              | AA                 | AA               | INTERGENIC                    |                    |                                                             |
| SNP_40045_A_10241784 | NC_021165.1    | Ca_Kabuli_Chr06 | 10241784                | CC                              | TT                 | TT               | INTERGENIC                    |                    |                                                             |
| SNP_40046_A_10241815 | NC_021165.1    | Ca_Kabuli_Chr06 | 10241815                | TT                              | AA                 | AA               | INTERGENIC                    |                    |                                                             |
| SNP_40047_A_10241882 | NC_021165.1    | Ca_Kabuli_Chr06 | 10241882                | TT                              | GG                 | GG               | INTERGENIC                    |                    |                                                             |
| SNP_40048_A_10241887 | NC_021165.1    | Ca_Kabuli_Chr06 | 10241887                | TT                              | AA                 | AA               | INTERGENIC                    |                    |                                                             |
| SNP_40049_A_10241888 | NC_021165.1    | Ca_Kabuli_Chr06 | 10241888                | TT                              | AA                 | AA               | INTERGENIC                    |                    |                                                             |
| SNP_40050_A_10241890 | NC_021165.1    | Ca_Kabuli_Chr06 | 10241890                | CC                              | TT                 | TT               | INTERGENIC                    |                    |                                                             |
| SNP_40051_A_10241896 | NC_021165.1    | Ca_Kabuli_Chr06 | 10241896                | AA                              | TT                 | TT               | INTERGENIC                    |                    |                                                             |
| SNP_40052_A_10242259 | NC_021165.1    | Ca_Kabuli_Chr06 | 10242259                | GG                              | TT                 | TT               | INTERGENIC                    |                    |                                                             |
| SNP_40053_A_10242266 | NC_021165.1    | Ca_Kabuli_Chr06 | 10242266                | GG                              | AA                 | AA               | INTERGENIC                    |                    |                                                             |
| SNP_40054_A_10242277 | NC_021165.1    | Ca_Kabuli_Chr06 | 10242277                | TT                              | CC                 | CC               | INTERGENIC                    |                    |                                                             |
| SNP_40055_A_10243028 | NC_021165.1    | Ca_Kabuli_Chr06 | 10243028                | GG                              | CC                 | CC               | INTERGENIC                    |                    |                                                             |
| SNP_40056_A_10243029 | NC_021165.1    | Ca_Kabuli_Chr06 | 10243029                | AA                              | GG                 | GG               | INTERGENIC                    |                    |                                                             |
| SNP_40057_A_10245641 | NC_021165.1    | Ca_Kabuli_Chr06 | 10245641                | TT                              | AA                 | AA               | INTRON                        | 101510171          | F-box/kelch-repeat protein At1g55270                        |
| SNP_40058_A_10246667 | NC_021165.1    | Ca_Kabuli_Chr06 | 10246667                | CC                              | TT                 | TT               | INTRON                        | 101510171          | F-box/kelch-repeat protein At1g55270                        |
| SNP_40059_A_10247127 | NC_021165.1    | Ca_Kabuli_Chr06 | 10247127                | CC                              | TT                 | TT               | INTRON                        | 101510171          | F-box/kelch-repeat protein At1g55270                        |
| SNP_40060_A_10249869 | NC_021165.1    | Ca_Kabuli_Chr06 | 10249869                | TT                              | AA                 | AA               | URR                           | 101510171          | F-box/kelch-repeat protein At1g55270                        |

| SNPs IDs             | Chromosome IDs | Chromosomes     | Physical positions (bp) | CDC Frontier genome (Reference genome) | (Pusa 1103 & HPNB) | (ILWC 46 & LPNB) | Sequence Components of genome | Gene accession IDs | Putative functions                                           |
|----------------------|----------------|-----------------|-------------------------|----------------------------------------|--------------------|------------------|-------------------------------|--------------------|--------------------------------------------------------------|
| SNP_40061_A_10250800 | NC_021165.1    | Ca_Kabuli_Chr06 | 10250800                | CC                                     | TT                 | TT               | URR                           | 101510171          | F-box/kelch-repeat protein At1g55270                         |
| SNP_40062_A_10250919 | NC_021165.1    | Ca_Kabuli_Chr06 | 10250919                | AA                                     | GG                 | GG               | DRR                           | 101510496          | uncharacterized LOC101510496                                 |
| SNP_40064_A_10251559 | NC_021165.1    | Ca_Kabuli_Chr06 | 10251559                | GG                                     | AA                 | AA               | DRR                           | 101510496          | uncharacterized LOC101510496                                 |
| SNP_40067_A_10255412 | NC_021165.1    | Ca_Kabuli_Chr06 | 10255412                | TT                                     | CC                 | CC               | URR                           | 101510496          | uncharacterized LOC101510496                                 |
| SNP_40068_A_10255426 | NC_021165.1    | Ca_Kabuli_Chr06 | 10255426                | TT                                     | AA                 | AA               | URR                           | 101510496          | uncharacterized LOC101510496                                 |
| SNP_40069_A_10255427 | NC_021165.1    | Ca_Kabuli_Chr06 | 10255427                | CC                                     | AA                 | AA               | URR                           | 101510496          | uncharacterized LOC101510496                                 |
| SNP_40070_A_10257204 | NC_021165.1    | Ca_Kabuli_Chr06 | 10257204                | AA                                     | GG                 | GG               | URR                           | 101510496          | uncharacterized LOC101510496                                 |
| SNP_40072_A_10259467 | NC_021165.1    | Ca_Kabuli_Chr06 | 10259467                | CC                                     | AA                 | AA               | INTERGENIC                    |                    |                                                              |
| SNP_40073_A_10263769 | NC_021165.1    | Ca_Kabuli_Chr06 | 10263769                | GG                                     | AA                 | AA               | URR                           | 101510824          | mediator of RNA polymerase II transcription subunit 10b-like |
| SNP_40074_A_10263777 | NC_021165.1    | Ca_Kabuli_Chr06 | 10263777                | AA                                     | GG                 | GG               | URR                           | 101510824          | mediator of RNA polymerase II transcription subunit 10b-like |
| SNP_40075_A_10264404 | NC_021165.1    | Ca_Kabuli_Chr06 | 10264404                | AA                                     | GG                 | GG               | URR                           | 101510824          | mediator of RNA polymerase II transcription subunit 10b-like |
| SNP_40076_A_10264603 | NC_021165.1    | Ca_Kabuli_Chr06 | 10264603                | TT                                     | CC                 | CC               | URR                           | 101510824          | mediator of RNA polymerase II transcription subunit 10b-like |
| SNP_40077_A_10264800 | NC_021165.1    | Ca_Kabuli_Chr06 | 10264800                | AA                                     | GG                 | GG               | INTERGENIC                    |                    |                                                              |
| SNP_40079_A_10269272 | NC_021165.1    | Ca_Kabuli_Chr06 | 10269272                | CC                                     | TT                 | TT               | INTERGENIC                    |                    |                                                              |
| SNP_40080_A_10270322 | NC_021165.1    | Ca_Kabuli_Chr06 | 10270322                | CC                                     | TT                 | TT               | URR                           | 101511359          | chromatin-remodeling complex subunit ies6                    |
| SNP_40082_A_10273739 | NC_021165.1    | Ca_Kabuli_Chr06 | 10273739                | CC                                     | TT                 | TT               | DRR                           | 101511900          | protein YLS3-like                                            |
| SNP_40083_A_10273833 | NC_021165.1    | Ca_Kabuli_Chr06 | 10273833                | GG                                     | CC                 | CC               | INTERGENIC                    |                    |                                                              |
| SNP_40084_A_10274201 | NC_021165.1    | Ca_Kabuli_Chr06 | 10274201                | AA                                     | GG                 | GG               | INTERGENIC                    |                    |                                                              |
| SNP_40086_A_10275577 | NC_021165.1    | Ca_Kabuli_Chr06 | 10275577                | CC                                     | TT                 | TT               | URR                           | 101511900          | protein YLS3-like                                            |
| SNP_40087_A_10279387 | NC_021165.1    | Ca_Kabuli_Chr06 | 10279387                | AA                                     | TT                 | TT               | URR                           | 101512227          | thiamine thiazole synthase, chloroplastic-like               |
| SNP_40088_A_10280568 | NC_021165.1    | Ca_Kabuli_Chr06 | 10280568                | TT                                     | GG                 | GG               | URR                           | 101512227          | thiamine thiazole synthase, chloroplastic-like               |
| SNP_40089_A_10280581 | NC_021165.1    | Ca_Kabuli_Chr06 | 10280581                | GG                                     | AA                 | AA               | URR                           | 101512227          | thiamine thiazole synthase, chloroplastic-like               |

| SNPs IDs             | Chromosome IDs | Chromosomes     | Physical positions (bp) | CDC Frontier (Reference genome) | (Pusa 1103 & HPNB) | (ILWC 46 & LPNB) | Sequence Components of genome | Gene accession IDs | Putative functions                             |
|----------------------|----------------|-----------------|-------------------------|---------------------------------|--------------------|------------------|-------------------------------|--------------------|------------------------------------------------|
| SNP_40090_A_10280610 | NC_021165.1    | Ca_Kabuli_Chr06 | 10280610                | AA                              | GG                 | GG               | URR                           | 101512227          | thiamine thiazole synthase, chloroplastic-like |
| SNP_40091_A_10280636 | NC_021165.1    | Ca_Kabuli_Chr06 | 10280636                | AA                              | CC                 | CC               | URR                           | 101512227          | thiamine thiazole synthase, chloroplastic-like |
| SNP_40092_A_10282208 | NC_021165.1    | Ca_Kabuli_Chr06 | 10282208                | AA                              | GG                 | GG               | INTERGENIC                    |                    |                                                |
| SNP_40093_A_10282454 | NC_021165.1    | Ca_Kabuli_Chr06 | 10282454                | GG                              | AA                 | AA               | INTERGENIC                    |                    |                                                |
| SNP_40094_A_10282514 | NC_021165.1    | Ca_Kabuli_Chr06 | 10282514                | TT                              | AA                 | AA               | INTERGENIC                    |                    |                                                |
| SNP_40095_A_10282550 | NC_021165.1    | Ca_Kabuli_Chr06 | 10282550                | CC                              | TT                 | TT               | INTERGENIC                    |                    |                                                |
| SNP_40096_A_10286720 | NC_021165.1    | Ca_Kabuli_Chr06 | 10286720                | TT                              | CC                 | CC               | URR                           | 101512553          | protein YLS3-like                              |
| SNP_40097_A_10293344 | NC_021165.1    | Ca_Kabuli_Chr06 | 10293344                | CC                              | GG                 | GG               | INTERGENIC                    |                    |                                                |
| SNP_40098_A_10297726 | NC_021165.1    | Ca_Kabuli_Chr06 | 10297726                | TT                              | CC                 | CC               | INTERGENIC                    |                    |                                                |
| SNP_40099_A_10297727 | NC_021165.1    | Ca_Kabuli_Chr06 | 10297727                | AA                              | GG                 | GG               | INTERGENIC                    |                    |                                                |
| SNP_40100_A_10298539 | NC_021165.1    | Ca_Kabuli_Chr06 | 10298539                | CC                              | GG                 | GG               | DRR                           | 101512966          | putative RING-H2 finger protein ATL53          |
| SNP_40101_A_10300295 | NC_021165.1    | Ca_Kabuli_Chr06 | 10300295                | TT                              | CC                 | CC               | URR                           | 101512966          | putative RING-H2 finger protein ATL53          |
| SNP_40102_A_10304535 | NC_021165.1    | Ca_Kabuli_Chr06 | 10304535                | AA                              | GG                 | GG               | URR                           | 101513293          | Unknown function                               |
| SNP_40103_A_10304694 | NC_021165.1    | Ca_Kabuli_Chr06 | 10304694                | AA                              | TT                 | TT               | URR                           | 101513293          | Unknown function                               |
| SNP_40104_A_10304703 | NC_021165.1    | Ca_Kabuli_Chr06 | 10304703                | CC                              | TT                 | TT               | URR                           | 101513293          | Unknown function                               |
| SNP_40105_A_10305916 | NC_021165.1    | Ca_Kabuli_Chr06 | 10305916                | GG                              | TT                 | TT               | INTERGENIC                    |                    |                                                |
| SNP_40106_A_10306222 | NC_021165.1    | Ca_Kabuli_Chr06 | 10306222                | AA                              | TT                 | TT               | INTERGENIC                    |                    |                                                |
| SNP_40107_A_10306850 | NC_021165.1    | Ca_Kabuli_Chr06 | 10306850                | TT                              | GG                 | GG               | INTERGENIC                    |                    |                                                |
| SNP_40108_A_10307075 | NC_021165.1    | Ca_Kabuli_Chr06 | 10307075                | AA                              | TT                 | TT               | INTERGENIC                    |                    |                                                |
| SNP_40109_A_10307113 | NC_021165.1    | Ca_Kabuli_Chr06 | 10307113                | GG                              | TT                 | TT               | INTERGENIC                    |                    |                                                |
| SNP_40110_A_10307296 | NC_021165.1    | Ca_Kabuli_Chr06 | 10307296                | TT                              | CC                 | CC               | INTERGENIC                    |                    |                                                |
| SNP_40111_A_10307655 | NC_021165.1    | Ca_Kabuli_Chr06 | 10307655                | TT                              | AA                 | AA               | INTERGENIC                    |                    |                                                |

| SNPs IDs             | Chromosome IDs | Chromosomes     | Physical positions (bp) | CDC Frontier genome (Reference genome) | (Pusa 1103 & HPNB) | (ILWC 46 & LPNB) | Sequence genome | Components of | Gene accession IDs                           | Putative functions |
|----------------------|----------------|-----------------|-------------------------|----------------------------------------|--------------------|------------------|-----------------|---------------|----------------------------------------------|--------------------|
| SNP_40112_A_10307944 | NC_021165.1    | Ca_Kabuli_Chr06 | 10307944                | AA                                     | GG                 | GG               | INTERGENIC      |               |                                              |                    |
| SNP_40113_A_10308070 | NC_021165.1    | Ca_Kabuli_Chr06 | 10308070                | AA                                     | GG                 | GG               | INTERGENIC      |               |                                              |                    |
| SNP_40114_A_10309150 | NC_021165.1    | Ca_Kabuli_Chr06 | 10309150                | GG                                     | AA                 | AA               | INTERGENIC      |               |                                              |                    |
| SNP_40116_A_10317808 | NC_021165.1    | Ca_Kabuli_Chr06 | 10317808                | TT                                     | GG                 | GG               | URR             | 101512857     | uncharacterized LOC101512857                 |                    |
| SNP_40118_A_10327127 | NC_021165.1    | Ca_Kabuli_Chr06 | 10327127                | CC                                     | TT                 | TT               | INTERGENIC      |               |                                              |                    |
| SNP_40119_A_10329800 | NC_021165.1    | Ca_Kabuli_Chr06 | 10329800                | AA                                     | CC                 | CC               | INTERGENIC      |               |                                              |                    |
| SNP_40120_A_10332713 | NC_021165.1    | Ca_Kabuli_Chr06 | 10332713                | CC                                     | TT                 | TT               | INTERGENIC      |               |                                              |                    |
| SNP_40121_A_10332832 | NC_021165.1    | Ca_Kabuli_Chr06 | 10332832                | TT                                     | GG                 | GG               | INTERGENIC      |               |                                              |                    |
| SNP_40122_A_10333828 | NC_021165.1    | Ca_Kabuli_Chr06 | 10333828                | AA                                     | GG                 | GG               | INTERGENIC      |               |                                              |                    |
| SNP_40123_A_10361287 | NC_021165.1    | Ca_Kabuli_Chr06 | 10361287                | GG                                     | AA                 | AA               | INTERGENIC      |               |                                              |                    |
| SNP_40124_A_10361289 | NC_021165.1    | Ca_Kabuli_Chr06 | 10361289                | CC                                     | GG                 | GG               | INTERGENIC      |               |                                              |                    |
| SNP_40125_A_10361292 | NC_021165.1    | Ca_Kabuli_Chr06 | 10361292                | CC                                     | TT                 | TT               | INTERGENIC      |               |                                              |                    |
| SNP_40126_A_10362380 | NC_021165.1    | Ca_Kabuli_Chr06 | 10362380                | CC                                     | TT                 | TT               | INTERGENIC      |               |                                              |                    |
| SNP_40127_A_10364014 | NC_021165.1    | Ca_Kabuli_Chr06 | 10364014                | GG                                     | AA                 | AA               | URR             | 101514933     | Unknown function                             |                    |
| SNP_40128_A_10364040 | NC_021165.1    | Ca_Kabuli_Chr06 | 10364040                | GG                                     | TT                 | TT               | URR             | 101514933     | Unknown function                             |                    |
| SNP_40129_A_10364041 | NC_021165.1    | Ca_Kabuli_Chr06 | 10364041                | TT                                     | GG                 | GG               | URR             | 101514933     | Unknown function                             |                    |
| SNP_40130_A_10364290 | NC_021165.1    | Ca_Kabuli_Chr06 | 10364290                | CC                                     | AA                 | AA               | URR             | 101514933     | Unknown function                             |                    |
| SNP_40131_A_10368149 | NC_021165.1    | Ca_Kabuli_Chr06 | 10368149                | GG                                     | AA                 | AA               | DRR             | 101515260     | Unknown function                             |                    |
| SNP_40132_A_10368283 | NC_021165.1    | Ca_Kabuli_Chr06 | 10368283                | AA                                     | GG                 | GG               | INTERGENIC      |               |                                              |                    |
| SNP_40133_A_10371673 | NC_021165.1    | Ca_Kabuli_Chr06 | 10371673                | CC                                     | TT                 | TT               | INTERGENIC      |               |                                              |                    |
| SNP_40134_A_10372253 | NC_021165.1    | Ca_Kabuli_Chr06 | 10372253                | AA                                     | GG                 | GG               | DRR             | 101513184     | PLASMODESMATA CALLOSE-BINDING PROTEIN 3-like |                    |
| SNP_40135_A_10377489 | NC_021165.1    | Ca_Kabuli_Chr06 | 10377489                | AA                                     | GG                 | GG               | URR             | 101513184     | PLASMODESMATA CALLOSE-BINDING PROTEIN 3-like |                    |

| SNPs IDs             | Chromosome IDs | Chromosomes     | Physical positions (bp) | CDC Frontier genome (Reference genome) | (Pusa 1103 & HPNB) | (ILWC 46 & LPNB) | Sequence Components of genome | Gene accession IDs | Putative functions                              |
|----------------------|----------------|-----------------|-------------------------|----------------------------------------|--------------------|------------------|-------------------------------|--------------------|-------------------------------------------------|
| SNP_40138_A_10381531 | NC_021165.1    | Ca_Kabuli_Chr06 | 10381531                | CC                                     | TT                 | TT               | DRR                           | 101513509          | UBX domain-containing protein 1                 |
| SNP_40139_A_10381626 | NC_021165.1    | Ca_Kabuli_Chr06 | 10381626                | AA                                     | GG                 | GG               | DRR                           | 101513509          | UBX domain-containing protein 1                 |
| SNP_40140_A_10381983 | NC_021165.1    | Ca_Kabuli_Chr06 | 10381983                | AA                                     | GG                 | GG               | DRR                           | 101513509          | UBX domain-containing protein 1                 |
| SNP_40141_A_10389151 | NC_021165.1    | Ca_Kabuli_Chr06 | 10389151                | CC                                     | TT                 | TT               | URR                           | 101513509          | UBX domain-containing protein 1                 |
| SNP_40142_A_10392836 | NC_021165.1    | Ca_Kabuli_Chr06 | 10392836                | CC                                     | TT                 | TT               | INTRON                        | 101513817          | UV radiation resistance-associated gene protein |
| SNP_40143_A_10393315 | NC_021165.1    | Ca_Kabuli_Chr06 | 10393315                | TT                                     | AA                 | AA               | INTRON                        | 101513817          | UV radiation resistance-associated gene protein |
| SNP_40144_A_10393571 | NC_021165.1    | Ca_Kabuli_Chr06 | 10393571                | CC                                     | TT                 | TT               | INTRON                        | 101513817          | UV radiation resistance-associated gene protein |
| SNP_40145_A_10393638 | NC_021165.1    | Ca_Kabuli_Chr06 | 10393638                | CC                                     | TT                 | TT               | INTRON                        | 101513817          | UV radiation resistance-associated gene protein |
| SNP_40146_A_10395035 | NC_021165.1    | Ca_Kabuli_Chr06 | 10395035                | GG                                     | AA                 | AA               | INTRON                        | 101513817          | UV radiation resistance-associated gene protein |
| SNP_40147_A_10395123 | NC_021165.1    | Ca_Kabuli_Chr06 | 10395123                | GG                                     | AA                 | AA               | INTRON                        | 101513817          | UV radiation resistance-associated gene protein |
| SNP_40148_A_10395329 | NC_021165.1    | Ca_Kabuli_Chr06 | 10395329                | AA                                     | GG                 | GG               | INTRON                        | 101513817          | UV radiation resistance-associated gene protein |
| SNP_40150_A_10396324 | NC_021165.1    | Ca_Kabuli_Chr06 | 10396324                | CC                                     | AA                 | AA               | INTRON                        | 101513817          | UV radiation resistance-associated gene protein |
| SNP_40151_A_10396453 | NC_021165.1    | Ca_Kabuli_Chr06 | 10396453                | CC                                     | TT                 | TT               | INTRON                        | 101513817          | UV radiation resistance-associated gene protein |
| SNP_40152_A_10398929 | NC_021165.1    | Ca_Kabuli_Chr06 | 10398929                | TT                                     | GG                 | GG               | URR                           | 101513817          | UV radiation resistance-associated gene protein |
| SNP_40153_A_10406539 | NC_021165.1    | Ca_Kabuli_Chr06 | 10406539                | TT                                     | CC                 | CC               | URR                           | 101515582          | Unknown function                                |
| SNP_40155_A_10414384 | NC_021165.1    | Ca_Kabuli_Chr06 | 10414384                | AA                                     | GG                 | GG               | URR                           | 101488334          | histone-lysine N-methyltransferase setd3-like   |
| SNP_40156_A_10417720 | NC_021165.1    | Ca_Kabuli_Chr06 | 10417720                | GG                                     | AA                 | AA               | DRR                           | 101488658          | PLASMODESMATA CALLOSE-BINDING PROTEIN 2-like    |
| SNP_40158_A_10417958 | NC_021165.1    | Ca_Kabuli_Chr06 | 10417958                | CC                                     | TT                 | TT               | DRR                           | 101488658          | PLASMODESMATA CALLOSE-BINDING PROTEIN 2-like    |
| SNP_40159_A_10419159 | NC_021165.1    | Ca_Kabuli_Chr06 | 10419159                | GG                                     | CC                 | CC               | URR                           | 101488658          | PLASMODESMATA CALLOSE-BINDING PROTEIN 2-like    |
| SNP_40160_A_10419862 | NC_021165.1    | Ca_Kabuli_Chr06 | 10419862                | TT                                     | AA                 | AA               | URR                           | 101488658          | PLASMODESMATA CALLOSE-BINDING PROTEIN 2-like    |
| SNP_40161_A_10420727 | NC_021165.1    | Ca_Kabuli_Chr06 | 10420727                | TT                                     | GG                 | GG               | URR                           | 101488658          | PLASMODESMATA CALLOSE-BINDING PROTEIN 2-like    |
| SNP_40162_A_10420818 | NC_021165.1    | Ca_Kabuli_Chr06 | 10420818                | TT                                     | CC                 | CC               | URR                           | 101488658          | PLASMODESMATA CALLOSE-BINDING PROTEIN 2-like    |

| SNPs IDs             | Chromosome IDs | Chromosomes     | Physical positions (bp) | CDC Frontier (Reference genome) | (Pusa 1103 & HPNB) | (ILWC 46 & LPNB) | Sequence Components of genome | Gene accession IDs | Putative functions                           |
|----------------------|----------------|-----------------|-------------------------|---------------------------------|--------------------|------------------|-------------------------------|--------------------|----------------------------------------------|
| SNP_40163_A_10420820 | NC_021165.1    | Ca_Kabuli_Chr06 | 10420820                | TT                              | AA                 | AA               | URR                           | 101488658          | PLASMODESMATA CALLOSE-BINDING PROTEIN 2-like |
| SNP_40164_A_10423441 | NC_021165.1    | Ca_Kabuli_Chr06 | 10423441                | GG                              | TT                 | TT               | INTERGENIC                    |                    |                                              |
| SNP_40165_A_10425673 | NC_021165.1    | Ca_Kabuli_Chr06 | 10425673                | CC                              | TT                 | TT               | DRR                           | 101514486          | TBC1 domain family member 13-like            |
| SNP_40166_A_10425918 | NC_021165.1    | Ca_Kabuli_Chr06 | 10425918                | CC                              | AA                 | AA               | DRR                           | 101514486          | TBC1 domain family member 13-like            |
| SNP_40167_A_10429230 | NC_021165.1    | Ca_Kabuli_Chr06 | 10429230                | GG                              | AA                 | AA               | INTRON                        | 101514486          | TBC1 domain family member 13-like            |
| SNP_40168_A_10429648 | NC_021165.1    | Ca_Kabuli_Chr06 | 10429648                | AA                              | TT                 | TT               | INTRON                        | 101514486          | TBC1 domain family member 13-like            |
| SNP_40169_A_10430754 | NC_021165.1    | Ca_Kabuli_Chr06 | 10430754                | AA                              | GG                 | GG               | NON_SYNONYMOUS_CODING         | 101514486          | TBC1 domain family member 13-like            |
| SNP_40170_A_10431523 | NC_021165.1    | Ca_Kabuli_Chr06 | 10431523                | GG                              | AA                 | AA               | URR                           | 101514486          | TBC1 domain family member 13-like            |
| SNP_40171_A_10431527 | NC_021165.1    | Ca_Kabuli_Chr06 | 10431527                | TT                              | AA                 | AA               | URR                           | 101514486          | TBC1 domain family member 13-like            |
| SNP_40172_A_10432498 | NC_021165.1    | Ca_Kabuli_Chr06 | 10432498                | GG                              | AA                 | AA               | DRR                           | 101514809          | actin-related protein 2/3 complex subunit 4  |
| SNP_40173_A_10432530 | NC_021165.1    | Ca_Kabuli_Chr06 | 10432530                | GG                              | AA                 | AA               | DRR                           | 101514809          | actin-related protein 2/3 complex subunit 4  |
| SNP_40174_A_10432699 | NC_021165.1    | Ca_Kabuli_Chr06 | 10432699                | GG                              | CC                 | CC               | DRR                           | 101514809          | actin-related protein 2/3 complex subunit 4  |
| SNP_40175_A_10437706 | NC_021165.1    | Ca_Kabuli_Chr06 | 10437706                | AA                              | TT                 | TT               | INTRON                        | 101514809          | actin-related protein 2/3 complex subunit 4  |
| SNP_40177_A_10438893 | NC_021165.1    | Ca_Kabuli_Chr06 | 10438893                | AA                              | TT                 | TT               | URR                           | 101514809          | actin-related protein 2/3 complex subunit 4  |
| SNP_40178_A_10438896 | NC_021165.1    | Ca_Kabuli_Chr06 | 10438896                | CC                              | GG                 | GG               | URR                           | 101514809          | actin-related protein 2/3 complex subunit 4  |
| SNP_40179_A_10439327 | NC_021165.1    | Ca_Kabuli_Chr06 | 10439327                | TT                              | GG                 | GG               | URR                           | 101514809          | actin-related protein 2/3 complex subunit 4  |
| SNP_40180_A_10439336 | NC_021165.1    | Ca_Kabuli_Chr06 | 10439336                | AA                              | GG                 | GG               | URR                           | 101514809          | actin-related protein 2/3 complex subunit 4  |
| SNP_40181_A_10439535 | NC_021165.1    | Ca_Kabuli_Chr06 | 10439535                | GG                              | AA                 | AA               | URR                           | 101514809          | actin-related protein 2/3 complex subunit 4  |
| SNP_40182_A_10439542 | NC_021165.1    | Ca_Kabuli_Chr06 | 10439542                | CC                              | AA                 | AA               | URR                           | 101514809          | actin-related protein 2/3 complex subunit 4  |
| SNP_40183_A_10439545 | NC_021165.1    | Ca_Kabuli_Chr06 | 10439545                | AA                              | GG                 | GG               | URR                           | 101514809          | actin-related protein 2/3 complex subunit 4  |
| SNP_40184_A_10439565 | NC_021165.1    | Ca_Kabuli_Chr06 | 10439565                | GG                              | CC                 | CC               | URR                           | 101514809          | actin-related protein 2/3 complex subunit 4  |
| SNP_40185_A_10439570 | NC_021165.1    | Ca_Kabuli_Chr06 | 10439570                | GG                              | AA                 | AA               | URR                           | 101514809          | actin-related protein 2/3 complex subunit 4  |

| SNPs IDs             | Chromosome IDs | Chromosomes     | Physical positions (bp) | CDC Frontier genome (Reference genome) | (Pusa 1103 & HPNB) | (ILWC 46 & LPNB) | Sequence Components of genome | Gene accession IDs | Putative functions                                  |
|----------------------|----------------|-----------------|-------------------------|----------------------------------------|--------------------|------------------|-------------------------------|--------------------|-----------------------------------------------------|
| SNP_40186_A_10442854 | NC_021165.1    | Ca_Kabuli_Chr06 | 10442854                | AA                                     | CC                 | CC               | INTERGENIC                    |                    |                                                     |
| SNP_40187_A_10442924 | NC_021165.1    | Ca_Kabuli_Chr06 | 10442924                | CC                                     | TT                 | TT               | INTERGENIC                    |                    |                                                     |
| SNP_40188_A_10444068 | NC_021165.1    | Ca_Kabuli_Chr06 | 10444068                | TT                                     | AA                 | AA               | NON_SYNONYMOUS_CODING         | 101515132          | uncharacterized LOC101515132                        |
| SNP_40189_A_10444657 | NC_021165.1    | Ca_Kabuli_Chr06 | 10444657                | TT                                     | CC                 | CC               | INTRON                        | 101515132          | uncharacterized LOC101515132                        |
| SNP_40190_A_10444705 | NC_021165.1    | Ca_Kabuli_Chr06 | 10444705                | GG                                     | AA                 | AA               | INTRON                        | 101515132          | uncharacterized LOC101515132                        |
| SNP_40191_A_10447263 | NC_021165.1    | Ca_Kabuli_Chr06 | 10447263                | TT                                     | CC                 | CC               | INTRON                        | 101515132          | uncharacterized LOC101515132                        |
| SNP_40192_A_10452192 | NC_021165.1    | Ca_Kabuli_Chr06 | 10452192                | TT                                     | CC                 | CC               | SYNONYMOUS_CODING             | 101515132          | uncharacterized LOC101515132                        |
| SNP_40193_A_10455522 | NC_021165.1    | Ca_Kabuli_Chr06 | 10455522                | CC                                     | AA                 | AA               | INTRON                        | 101515132          | uncharacterized LOC101515132                        |
| SNP_40195_A_10458072 | NC_021165.1    | Ca_Kabuli_Chr06 | 10458072                | AA                                     | TT                 | TT               | INTRON                        | 101515132          | uncharacterized LOC101515132                        |
| SNP_40196_A_10458101 | NC_021165.1    | Ca_Kabuli_Chr06 | 10458101                | CC                                     | AA                 | AA               | INTRON                        | 101515132          | uncharacterized LOC101515132                        |
| SNP_40197_A_10458404 | NC_021165.1    | Ca_Kabuli_Chr06 | 10458404                | TT                                     | AA                 | AA               | INTRON                        | 101515132          | uncharacterized LOC101515132                        |
| SNP_40198_A_10458408 | NC_021165.1    | Ca_Kabuli_Chr06 | 10458408                | TT                                     | AA                 | AA               | INTRON                        | 101515132          | uncharacterized LOC101515132                        |
| SNP_40200_A_10458641 | NC_021165.1    | Ca_Kabuli_Chr06 | 10458641                | AA                                     | TT                 | TT               | INTRON                        | 101515132          | uncharacterized LOC101515132                        |
| SNP_40201_A_10469045 | NC_021165.1    | Ca_Kabuli_Chr06 | 10469045                | CC                                     | TT                 | TT               | URR                           | 101488998          | cation/H(+) antiporter 4-like                       |
| SNP_40202_A_10470421 | NC_021165.1    | Ca_Kabuli_Chr06 | 10470421                | TT                                     | CC                 | CC               | INTERGENIC                    |                    |                                                     |
| SNP_40203_A_10470624 | NC_021165.1    | Ca_Kabuli_Chr06 | 10470624                | AA                                     | CC                 | CC               | INTERGENIC                    |                    |                                                     |
| SNP_40204_A_10472694 | NC_021165.1    | Ca_Kabuli_Chr06 | 10472694                | TT                                     | CC                 | CC               | URR                           | 101515449          | geranylgeranyl transferase type-2 subunit beta-like |
| SNP_40206_A_10475831 | NC_021165.1    | Ca_Kabuli_Chr06 | 10475831                | GG                                     | TT                 | TT               | DRR                           | 101515783          | methyltransferase-like protein 13                   |
| SNP_40207_A_10476033 | NC_021165.1    | Ca_Kabuli_Chr06 | 10476033                | AA                                     | CC                 | CC               | DRR                           | 101515783          | methyltransferase-like protein 13                   |
| SNP_40208_A_10476039 | NC_021165.1    | Ca_Kabuli_Chr06 | 10476039                | AA                                     | GG                 | GG               | DRR                           | 101515783          | methyltransferase-like protein 13                   |
| SNP_40209_A_10476070 | NC_021165.1    | Ca_Kabuli_Chr06 | 10476070                | GG                                     | CC                 | CC               | DRR                           | 101515783          | methyltransferase-like protein 13                   |
| SNP_40210_A_10476073 | NC_021165.1    | Ca_Kabuli_Chr06 | 10476073                | TT                                     | CC                 | CC               | DRR                           | 101515783          | methyltransferase-like protein 13                   |

| SNPs IDs             | Chromosome IDs | Chromosomes     | Physical positions (bp) | CDC Frontier (Reference genome) | (Pusa 1103 & HPNB) | (ILWC 46 & LPNB) | Sequence Components of genome | Gene accession IDs | Putative functions                |
|----------------------|----------------|-----------------|-------------------------|---------------------------------|--------------------|------------------|-------------------------------|--------------------|-----------------------------------|
| SNP_40211_A_10476110 | NC_021165.1    | Ca_Kabuli_Chr06 | 10476110                | CC                              | TT                 | TT               | DRR                           | 101515783          | methyltransferase-like protein 13 |
| SNP_40212_A_10476122 | NC_021165.1    | Ca_Kabuli_Chr06 | 10476122                | AA                              | GG                 | GG               | DRR                           | 101515783          | methyltransferase-like protein 13 |
| SNP_40214_A_10478046 | NC_021165.1    | Ca_Kabuli_Chr06 | 10478046                | GG                              | CC                 | CC               | INTRON                        | 101515783          | methyltransferase-like protein 13 |
| SNP_40215_A_10478052 | NC_021165.1    | Ca_Kabuli_Chr06 | 10478052                | TT                              | GG                 | GG               | INTRON                        | 101515783          | methyltransferase-like protein 13 |
| SNP_40216_A_10481192 | NC_021165.1    | Ca_Kabuli_Chr06 | 10481192                | CC                              | GG                 | GG               | INTRON                        | 101515783          | methyltransferase-like protein 13 |
| SNP_40218_A_10484446 | NC_021165.1    | Ca_Kabuli_Chr06 | 10484446                | TT                              | GG                 | GG               | INTERGENIC                    |                    |                                   |
| SNP_40220_A_10486068 | NC_021165.1    | Ca_Kabuli_Chr06 | 10486068                | CC                              | TT                 | TT               | DRR                           | 101488777          | beta-galactosidase 9              |
| SNP_40221_A_10487809 | NC_021165.1    | Ca_Kabuli_Chr06 | 10487809                | GG                              | TT                 | TT               | URR                           | 101515783          | methyltransferase-like protein 13 |
| SNP_40222_A_10488551 | NC_021165.1    | Ca_Kabuli_Chr06 | 10488551                | CC                              | AA                 | AA               | INTERGENIC                    |                    |                                   |
| SNP_40223_A_10488758 | NC_021165.1    | Ca_Kabuli_Chr06 | 10488758                | AA                              | GG                 | GG               | INTERGENIC                    |                    |                                   |
| SNP_40224_A_10488761 | NC_021165.1    | Ca_Kabuli_Chr06 | 10488761                | AA                              | GG                 | GG               | INTERGENIC                    |                    |                                   |
| SNP_40225_A_10490347 | NC_021165.1    | Ca_Kabuli_Chr06 | 10490347                | GG                              | CC                 | CC               | INTERGENIC                    |                    |                                   |
| SNP_40226_A_10490356 | NC_021165.1    | Ca_Kabuli_Chr06 | 10490356                | GG                              | AA                 | AA               | INTERGENIC                    |                    |                                   |
| SNP_40227_A_10490374 | NC_021165.1    | Ca_Kabuli_Chr06 | 10490374                | AA                              | GG                 | GG               | INTERGENIC                    |                    |                                   |
| SNP_40228_A_10490384 | NC_021165.1    | Ca_Kabuli_Chr06 | 10490384                | AA                              | GG                 | GG               | INTERGENIC                    |                    |                                   |
| SNP_40229_A_10491142 | NC_021165.1    | Ca_Kabuli_Chr06 | 10491142                | AA                              | GG                 | GG               | INTRON                        | 101488777          | beta-galactosidase 9              |
| SNP_40230_A_10491261 | NC_021165.1    | Ca_Kabuli_Chr06 | 10491261                | TT                              | AA                 | AA               | SYNONYMOUS_CODING             | 101488777          | beta-galactosidase 9              |
| SNP_40231_A_10491272 | NC_021165.1    | Ca_Kabuli_Chr06 | 10491272                | CC                              | TT                 | TT               | NON_SYNONYMOUS_CODING         | 101488777          | beta-galactosidase 9              |
| SNP_40232_A_10491547 | NC_021165.1    | Ca_Kabuli_Chr06 | 10491547                | CC                              | TT                 | TT               | INTRON                        | 101488777          | beta-galactosidase 9              |
| SNP_40234_A_10498821 | NC_021165.1    | Ca_Kabuli_Chr06 | 10498821                | AA                              | GG                 | GG               | INTERGENIC                    |                    |                                   |
| SNP_40235_A_10499179 | NC_021165.1    | Ca_Kabuli_Chr06 | 10499179                | GG                              | CC                 | CC               | INTERGENIC                    |                    |                                   |
| SNP_40236_A_10499456 | NC_021165.1    | Ca_Kabuli_Chr06 | 10499456                | AA                              | CC                 | CC               | URR                           | 101488777          | beta-galactosidase 9              |



| SNPs IDs             | Chromosome IDs | Chromosomes     | Physical positions (bp) | CDC Frontier genome (Reference genome) | (Pusa 1103 & HPNB) | (ILWC 46 & LPNB) | Sequence Components of genome | Gene accession IDs | Putative functions                   |
|----------------------|----------------|-----------------|-------------------------|----------------------------------------|--------------------|------------------|-------------------------------|--------------------|--------------------------------------|
| SNP_40237_A_10499973 | NC_021165.1    | Ca_Kabuli_Chr06 | 10499973                | GG                                     | AA                 | AA               | DRR                           | 101489106          | chalcone synthase 1                  |
| SNP_40238_A_10502138 | NC_021165.1    | Ca_Kabuli_Chr06 | 10502138                | GG                                     | TT                 | TT               | INTERGENIC                    |                    |                                      |
| SNP_40239_A_10502355 | NC_021165.1    | Ca_Kabuli_Chr06 | 10502355                | AA                                     | GG                 | GG               | URR                           | 101489106          | chalcone synthase 1                  |
| SNP_40240_A_10502595 | NC_021165.1    | Ca_Kabuli_Chr06 | 10502595                | TT                                     | AA                 | AA               | URR                           | 101489106          | chalcone synthase 1                  |
| SNP_40241_A_10503426 | NC_021165.1    | Ca_Kabuli_Chr06 | 10503426                | AA                                     | GG                 | GG               | URR                           | 101489106          | chalcone synthase 1                  |
| SNP_40242_A_10504141 | NC_021165.1    | Ca_Kabuli_Chr06 | 10504141                | AA                                     | CC                 | CC               | DRR                           | 101489441          | uncharacterized LOC101489441         |
| SNP_40243_A_10504500 | NC_021165.1    | Ca_Kabuli_Chr06 | 10504500                | CC                                     | TT                 | TT               | DRR                           | 101489441          | uncharacterized LOC101489441         |
| SNP_40244_A_10507764 | NC_021165.1    | Ca_Kabuli_Chr06 | 10507764                | TT                                     | AA                 | AA               | DRR                           | 101489764          | probable magnesium transporter NIPA1 |
| SNP_40245_A_10507889 | NC_021165.1    | Ca_Kabuli_Chr06 | 10507889                | TT                                     | CC                 | CC               | DRR                           | 101489764          | probable magnesium transporter NIPA1 |
| SNP_40246_A_10508292 | NC_021165.1    | Ca_Kabuli_Chr06 | 10508292                | CC                                     | TT                 | TT               | DRR                           | 101489764          | probable magnesium transporter NIPA1 |
| SNP_40247_A_10508295 | NC_021165.1    | Ca_Kabuli_Chr06 | 10508295                | GG                                     | AA                 | AA               | DRR                           | 101489764          | probable magnesium transporter NIPA1 |
| SNP_40248_A_10511426 | NC_021165.1    | Ca_Kabuli_Chr06 | 10511426                | TT                                     | GG                 | GG               | INTERGENIC                    |                    |                                      |
| SNP_40249_A_10511539 | NC_021165.1    | Ca_Kabuli_Chr06 | 10511539                | CC                                     | TT                 | TT               | INTERGENIC                    |                    |                                      |
| SNP_40250_A_10512021 | NC_021165.1    | Ca_Kabuli_Chr06 | 10512021                | AA                                     | GG                 | GG               | INTERGENIC                    |                    |                                      |
| SNP_40251_A_10514105 | NC_021165.1    | Ca_Kabuli_Chr06 | 10514105                | CC                                     | TT                 | TT               | URR                           | 101489764          | probable magnesium transporter NIPA1 |
| SNP_40253_A_10514610 | NC_021165.1    | Ca_Kabuli_Chr06 | 10514610                | GG                                     | AA                 | AA               | URR                           | 101489764          | probable magnesium transporter NIPA1 |
| SNP_40254_A_10516623 | NC_021165.1    | Ca_Kabuli_Chr06 | 10516623                | AA                                     | TT                 | TT               | INTERGENIC                    |                    |                                      |
| SNP_40255_A_10553555 | NC_021165.1    | Ca_Kabuli_Chr06 | 10553555                | CC                                     | AA                 | AA               | INTERGENIC                    |                    |                                      |
| SNP_40256_A_10553556 | NC_021165.1    | Ca_Kabuli_Chr06 | 10553556                | AA                                     | CC                 | CC               | INTERGENIC                    |                    |                                      |
| SNP_40257_A_10555478 | NC_021165.1    | Ca_Kabuli_Chr06 | 10555478                | GG                                     | AA                 | AA               | INTERGENIC                    |                    |                                      |
| SNP_40258_A_10556311 | NC_021165.1    | Ca_Kabuli_Chr06 | 10556311                | AA                                     | CC                 | CC               | INTERGENIC                    |                    |                                      |
| SNP_40259_A_10556557 | NC_021165.1    | Ca_Kabuli_Chr06 | 10556557                | TT                                     | GG                 | GG               | INTERGENIC                    |                    |                                      |

| SNPs IDs             | Chromosome IDs | Chromosomes     | Physical positions (bp) | CDC Frontier genome (Reference genome) | (Pusa 1103 & HPNB) | (ILWC 46 & LPNB) | Sequence Components of genome | Gene accession IDs | Putative functions                     |
|----------------------|----------------|-----------------|-------------------------|----------------------------------------|--------------------|------------------|-------------------------------|--------------------|----------------------------------------|
| SNP_40261_A_10559666 | NC_021165.1    | Ca_Kabuli_Chr06 | 10559666                | CC                                     | TT                 | TT               | INTERGENIC                    |                    |                                        |
| SNP_40262_A_10564021 | NC_021165.1    | Ca_Kabuli_Chr06 | 10564021                | CC                                     | TT                 | TT               | INTERGENIC                    |                    |                                        |
| SNP_40264_A_10564070 | NC_021165.1    | Ca_Kabuli_Chr06 | 10564070                | AA                                     | GG                 | GG               | INTERGENIC                    |                    |                                        |
| SNP_40266_A_10564356 | NC_021165.1    | Ca_Kabuli_Chr06 | 10564356                | TT                                     | CC                 | CC               | INTERGENIC                    |                    |                                        |
| SNP_40268_A_10564658 | NC_021165.1    | Ca_Kabuli_Chr06 | 10564658                | TT                                     | CC                 | CC               | INTERGENIC                    |                    |                                        |
| SNP_40269_A_10564748 | NC_021165.1    | Ca_Kabuli_Chr06 | 10564748                | CC                                     | GG                 | GG               | INTERGENIC                    |                    |                                        |
| SNP_40270_A_10565828 | NC_021165.1    | Ca_Kabuli_Chr06 | 10565828                | CC                                     | AA                 | AA               | INTERGENIC                    |                    |                                        |
| SNP_40271_A_10565829 | NC_021165.1    | Ca_Kabuli_Chr06 | 10565829                | CC                                     | TT                 | TT               | INTERGENIC                    |                    |                                        |
| SNP_40272_A_10565859 | NC_021165.1    | Ca_Kabuli_Chr06 | 10565859                | CC                                     | TT                 | TT               | INTERGENIC                    |                    |                                        |
| SNP_40274_A_10566241 | NC_021165.1    | Ca_Kabuli_Chr06 | 10566241                | AA                                     | GG                 | GG               | INTERGENIC                    |                    |                                        |
| SNP_40275_A_10566906 | NC_021165.1    | Ca_Kabuli_Chr06 | 10566906                | CC                                     | AA                 | AA               | DRR                           | 101492108          | uncharacterized protein PF11_0207-like |
| SNP_40276_A_10566919 | NC_021165.1    | Ca_Kabuli_Chr06 | 10566919                | TT                                     | GG                 | GG               | DRR                           | 101492108          | uncharacterized protein PF11_0207-like |
| SNP_40277_A_10566962 | NC_021165.1    | Ca_Kabuli_Chr06 | 10566962                | TT                                     | GG                 | GG               | DRR                           | 101492108          | uncharacterized protein PF11_0207-like |
| SNP_40278_A_10566965 | NC_021165.1    | Ca_Kabuli_Chr06 | 10566965                | GG                                     | CC                 | CC               | DRR                           | 101492108          | uncharacterized protein PF11_0207-like |
| SNP_40279_A_10567019 | NC_021165.1    | Ca_Kabuli_Chr06 | 10567019                | TT                                     | CC                 | CC               | DRR                           | 101492108          | uncharacterized protein PF11_0207-like |
| SNP_40280_A_10567086 | NC_021165.1    | Ca_Kabuli_Chr06 | 10567086                | AA                                     | TT                 | TT               | DRR                           | 101492108          | uncharacterized protein PF11_0207-like |
| SNP_40281_A_10567518 | NC_021165.1    | Ca_Kabuli_Chr06 | 10567518                | GG                                     | AA                 | AA               | DRR                           | 101492108          | uncharacterized protein PF11_0207-like |
| SNP_40282_A_10570740 | NC_021165.1    | Ca_Kabuli_Chr06 | 10570740                | GG                                     | AA                 | AA               | INTRON                        | 101492108          | uncharacterized protein PF11_0207-like |
| SNP_40283_A_10571701 | NC_021165.1    | Ca_Kabuli_Chr06 | 10571701                | TT                                     | CC                 | CC               | INTRON                        | 101492108          | uncharacterized protein PF11_0207-like |
| SNP_40284_A_10572388 | NC_021165.1    | Ca_Kabuli_Chr06 | 10572388                | AA                                     | TT                 | TT               | INTRON                        | 101492108          | uncharacterized protein PF11_0207-like |
| SNP_40285_A_10576483 | NC_021165.1    | Ca_Kabuli_Chr06 | 10576483                | AA                                     | GG                 | GG               | URR                           | 101492108          | uncharacterized protein PF11_0207-like |
| SNP_40287_A_10577262 | NC_021165.1    | Ca_Kabuli_Chr06 | 10577262                | GG                                     | AA                 | AA               | URR                           | 101492108          | uncharacterized protein PF11_0207-like |

| SNPs IDs             | Chromosome IDs | Chromosomes     | Physical positions (bp) | CDC Frontier (Reference genome) | (Pusa 1103 & HPNB) | (ILWC 46 & LPNB) | Sequence Components of genome | Gene accession IDs | Putative functions                     |
|----------------------|----------------|-----------------|-------------------------|---------------------------------|--------------------|------------------|-------------------------------|--------------------|----------------------------------------|
| SNP_40288_A_10577328 | NC_021165.1    | Ca_Kabuli_Chr06 | 10577328                | GG                              | AA                 | AA               | URR                           | 101492108          | uncharacterized protein PF11_0207-like |
| SNP_40289_A_10577365 | NC_021165.1    | Ca_Kabuli_Chr06 | 10577365                | TT                              | CC                 | CC               | URR                           | 101492108          | uncharacterized protein PF11_0207-like |
| SNP_40290_A_10577369 | NC_021165.1    | Ca_Kabuli_Chr06 | 10577369                | GG                              | AA                 | AA               | URR                           | 101492108          | uncharacterized protein PF11_0207-like |
| SNP_40291_A_10578307 | NC_021165.1    | Ca_Kabuli_Chr06 | 10578307                | CC                              | GG                 | GG               | INTERGENIC                    |                    |                                        |
| SNP_40292_A_10578325 | NC_021165.1    | Ca_Kabuli_Chr06 | 10578325                | GG                              | AA                 | AA               | INTERGENIC                    |                    |                                        |
| SNP_40293_A_10578811 | NC_021165.1    | Ca_Kabuli_Chr06 | 10578811                | GG                              | AA                 | AA               | INTERGENIC                    |                    |                                        |
| SNP_40294_A_10578822 | NC_021165.1    | Ca_Kabuli_Chr06 | 10578822                | AA                              | GG                 | GG               | INTERGENIC                    |                    |                                        |
| SNP_40295_A_10579593 | NC_021165.1    | Ca_Kabuli_Chr06 | 10579593                | AA                              | GG                 | GG               | INTERGENIC                    |                    |                                        |
| SNP_40296_A_10584035 | NC_021165.1    | Ca_Kabuli_Chr06 | 10584035                | CC                              | TT                 | TT               | INTRON                        | 101492900          | 60S ribosomal protein L10a-like        |
| SNP_40297_A_10586438 | NC_021165.1    | Ca_Kabuli_Chr06 | 10586438                | CC                              | AA                 | AA               | DRR                           | 101493439          | uncharacterized LOC101493439           |
| SNP_40299_A_10587483 | NC_021165.1    | Ca_Kabuli_Chr06 | 10587483                | TT                              | CC                 | CC               | INTERGENIC                    |                    |                                        |
| SNP_40300_A_10592787 | NC_021165.1    | Ca_Kabuli_Chr06 | 10592787                | TT                              | AA                 | AA               | URR                           | 101493761          | serine hydroxymethyltransferase 4-like |
| SNP_40301_A_10594887 | NC_021165.1    | Ca_Kabuli_Chr06 | 10594887                | TT                              | CC                 | CC               | INTERGENIC                    |                    |                                        |
| SNP_40302_A_10594906 | NC_021165.1    | Ca_Kabuli_Chr06 | 10594906                | GG                              | AA                 | AA               | INTERGENIC                    |                    |                                        |
| SNP_40303_A_10596266 | NC_021165.1    | Ca_Kabuli_Chr06 | 10596266                | TT                              | CC                 | CC               | INTERGENIC                    |                    |                                        |
| SNP_40304_A_10596267 | NC_021165.1    | Ca_Kabuli_Chr06 | 10596267                | CC                              | TT                 | TT               | INTERGENIC                    |                    |                                        |
| SNP_40305_A_10596487 | NC_021165.1    | Ca_Kabuli_Chr06 | 10596487                | AA                              | GG                 | GG               | INTERGENIC                    |                    |                                        |
| SNP_40306_A_10601552 | NC_021165.1    | Ca_Kabuli_Chr06 | 10601552                | CC                              | TT                 | TT               | INTERGENIC                    |                    |                                        |
| SNP_40307_A_10601578 | NC_021165.1    | Ca_Kabuli_Chr06 | 10601578                | AA                              | GG                 | GG               | INTERGENIC                    |                    |                                        |
| SNP_40308_A_10602694 | NC_021165.1    | Ca_Kabuli_Chr06 | 10602694                | AA                              | GG                 | GG               | INTERGENIC                    |                    |                                        |
| SNP_40310_A_10606205 | NC_021165.1    | Ca_Kabuli_Chr06 | 10606205                | GG                              | AA                 | AA               | URR                           | 101494081          | adenosylhomocysteinase-like            |
| SNP_40312_A_10608322 | NC_021165.1    | Ca_Kabuli_Chr06 | 10608322                | GG                              | AA                 | AA               | INTERGENIC                    |                    |                                        |

| SNPs IDs             | Chromosome IDs | Chromosomes     | Physical positions (bp) | CDC Frontier genome (Reference genome) | (Pusa 1103 & HPNB) | (ILWC 46 & LPNB) | Sequence genome | Components of | Gene accession IDs                                                            | Putative functions |
|----------------------|----------------|-----------------|-------------------------|----------------------------------------|--------------------|------------------|-----------------|---------------|-------------------------------------------------------------------------------|--------------------|
| SNP_40313_A_10608756 | NC_021165.1    | Ca_Kabuli_Chr06 | 10608756                | TT                                     | AA                 | AA               | INTERGENIC      |               |                                                                               |                    |
| SNP_40314_A_10610779 | NC_021165.1    | Ca_Kabuli_Chr06 | 10610779                | AA                                     | GG                 | GG               | INTERGENIC      |               |                                                                               |                    |
| SNP_40316_A_10611470 | NC_021165.1    | Ca_Kabuli_Chr06 | 10611470                | AA                                     | GG                 | GG               | DRR             | 101494390     | heat stress transcription factor A-5                                          |                    |
| SNP_40317_A_10611506 | NC_021165.1    | Ca_Kabuli_Chr06 | 10611506                | GG                                     | AA                 | AA               | DRR             | 101494390     | heat stress transcription factor A-5                                          |                    |
| SNP_40318_A_10611701 | NC_021165.1    | Ca_Kabuli_Chr06 | 10611701                | AA                                     | CC                 | CC               | DRR             | 101494390     | heat stress transcription factor A-5                                          |                    |
| SNP_40319_A_10617177 | NC_021165.1    | Ca_Kabuli_Chr06 | 10617177                | AA                                     | GG                 | GG               | URR             | 101494390     | heat stress transcription factor A-5                                          |                    |
| SNP_40320_A_10617332 | NC_021165.1    | Ca_Kabuli_Chr06 | 10617332                | TT                                     | GG                 | GG               | URR             | 101494390     | heat stress transcription factor A-5                                          |                    |
| SNP_40321_A_10618619 | NC_021165.1    | Ca_Kabuli_Chr06 | 10618619                | GG                                     | AA                 | AA               | INTERGENIC      |               |                                                                               |                    |
| SNP_40322_A_10619143 | NC_021165.1    | Ca_Kabuli_Chr06 | 10619143                | TT                                     | AA                 | AA               | INTERGENIC      |               |                                                                               |                    |
| SNP_40323_A_10619443 | NC_021165.1    | Ca_Kabuli_Chr06 | 10619443                | TT                                     | AA                 | AA               | INTERGENIC      |               |                                                                               |                    |
| SNP_40324_A_10619567 | NC_021165.1    | Ca_Kabuli_Chr06 | 10619567                | AA                                     | TT                 | TT               | INTERGENIC      |               |                                                                               |                    |
| SNP_40325_A_10622811 | NC_021165.1    | Ca_Kabuli_Chr06 | 10622811                | TT                                     | AA                 | AA               | INTERGENIC      |               |                                                                               |                    |
| SNP_40326_A_10622815 | NC_021165.1    | Ca_Kabuli_Chr06 | 10622815                | TT                                     | CC                 | CC               | INTERGENIC      |               |                                                                               |                    |
| SNP_40327_A_10623939 | NC_021165.1    | Ca_Kabuli_Chr06 | 10623939                | GG                                     | AA                 | AA               | INTERGENIC      |               |                                                                               |                    |
| SNP_40328_A_10624144 | NC_021165.1    | Ca_Kabuli_Chr06 | 10624144                | TT                                     | AA                 | AA               | DRR             | 101494702     | protein BUD31 homolog 2                                                       |                    |
| SNP_40329_A_10624254 | NC_021165.1    | Ca_Kabuli_Chr06 | 10624254                | TT                                     | AA                 | AA               | DRR             | 101494702     | protein BUD31 homolog 2                                                       |                    |
| SNP_40330_A_10631666 | NC_021165.1    | Ca_Kabuli_Chr06 | 10631666                | TT                                     | CC                 | CC               | DRR             | 101495026     | putative pentatricopeptide repeat-containing protein At1g12700, mitochondrial |                    |
| SNP_40332_A_10649603 | NC_021165.1    | Ca_Kabuli_Chr06 | 10649603                | GG                                     | AA                 | AA               | DRR             | 101496344     | protein RALF-like 32                                                          |                    |
| SNP_40333_A_10649610 | NC_021165.1    | Ca_Kabuli_Chr06 | 10649610                | GG                                     | AA                 | AA               | DRR             | 101496344     | protein RALF-like 32                                                          |                    |
| SNP_40334_A_10649613 | NC_021165.1    | Ca_Kabuli_Chr06 | 10649613                | CC                                     | TT                 | TT               | DRR             | 101496344     | protein RALF-like 32                                                          |                    |
| SNP_40335_A_10649625 | NC_021165.1    | Ca_Kabuli_Chr06 | 10649625                | GG                                     | TT                 | TT               | DRR             | 101496344     | protein RALF-like 32                                                          |                    |
| SNP_40336_A_10649825 | NC_021165.1    | Ca_Kabuli_Chr06 | 10649825                | CC                                     | TT                 | TT               | DRR             | 101496344     | protein RALF-like 32                                                          |                    |

| SNPs IDs             | Chromosome IDs | Chromosomes     | Physical positions (bp) | CDC Frontier genome (Reference genome) | (Pusa 1103 & HPNB) | (ILWC 46 & LPNB) | Sequence Components of genome | Gene accession IDs | Putative functions                                                        |
|----------------------|----------------|-----------------|-------------------------|----------------------------------------|--------------------|------------------|-------------------------------|--------------------|---------------------------------------------------------------------------|
| SNP_40337_A_10649881 | NC_021165.1    | Ca_Kabuli_Chr06 | 10649881                | CC                                     | TT                 | TT               | DRR                           | 101496344          | protein RALF-like 32                                                      |
| SNP_40338_A_10649883 | NC_021165.1    | Ca_Kabuli_Chr06 | 10649883                | CC                                     | GG                 | GG               | DRR                           | 101496344          | protein RALF-like 32                                                      |
| SNP_40340_A_10649944 | NC_021165.1    | Ca_Kabuli_Chr06 | 10649944                | GG                                     | TT                 | TT               | DRR                           | 101496344          | protein RALF-like 32                                                      |
| SNP_40341_A_10649961 | NC_021165.1    | Ca_Kabuli_Chr06 | 10649961                | AA                                     | GG                 | GG               | DRR                           | 101496344          | protein RALF-like 32                                                      |
| SNP_40342_A_10652104 | NC_021165.1    | Ca_Kabuli_Chr06 | 10652104                | AA                                     | GG                 | GG               | URR                           | 101496344          | protein RALF-like 32                                                      |
| SNP_40343_A_10652393 | NC_021165.1    | Ca_Kabuli_Chr06 | 10652393                | GG                                     | AA                 | AA               | URR                           | 101496344          | protein RALF-like 32                                                      |
| SNP_40344_A_10653929 | NC_021165.1    | Ca_Kabuli_Chr06 | 10653929                | TT                                     | CC                 | CC               | INTERGENIC                    |                    |                                                                           |
| SNP_40345_A_10656781 | NC_021165.1    | Ca_Kabuli_Chr06 | 10656781                | AA                                     | GG                 | GG               | NON_SYNONYMOUS_CODING         | 101496670          | probable acyl-activating enzyme 16, chloroplastic                         |
| SNP_40347_A_10657543 | NC_021165.1    | Ca_Kabuli_Chr06 | 10657543                | TT                                     | CC                 | CC               | INTRON                        | 101496670          | probable acyl-activating enzyme 16, chloroplastic                         |
| SNP_40348_A_10657683 | NC_021165.1    | Ca_Kabuli_Chr06 | 10657683                | GG                                     | AA                 | AA               | INTRON                        | 101496670          | probable acyl-activating enzyme 16, chloroplastic                         |
| SNP_40349_A_10657975 | NC_021165.1    | Ca_Kabuli_Chr06 | 10657975                | GG                                     | TT                 | TT               | INTRON                        | 101496670          | probable acyl-activating enzyme 16, chloroplastic                         |
| SNP_40350_A_10660057 | NC_021165.1    | Ca_Kabuli_Chr06 | 10660057                | AA                                     | CC                 | CC               | INTRON                        | 101496670          | probable acyl-activating enzyme 16, chloroplastic                         |
| SNP_40352_A_10662537 | NC_021165.1    | Ca_Kabuli_Chr06 | 10662537                | TT                                     | CC                 | CC               | URR                           | 101496670          | probable acyl-activating enzyme 16, chloroplastic                         |
| SNP_40353_A_10663092 | NC_021165.1    | Ca_Kabuli_Chr06 | 10663092                | AA                                     | GG                 | GG               | URR                           | 101496670          | probable acyl-activating enzyme 16, chloroplastic                         |
| SNP_40355_A_10664850 | NC_021165.1    | Ca_Kabuli_Chr06 | 10664850                | TT                                     | CC                 | CC               | INTERGENIC                    |                    |                                                                           |
| SNP_40356_A_10665101 | NC_021165.1    | Ca_Kabuli_Chr06 | 10665101                | GG                                     | AA                 | AA               | INTERGENIC                    |                    |                                                                           |
| SNP_40357_A_10665142 | NC_021165.1    | Ca_Kabuli_Chr06 | 10665142                | TT                                     | AA                 | AA               | INTERGENIC                    |                    |                                                                           |
| SNP_40358_A_10665143 | NC_021165.1    | Ca_Kabuli_Chr06 | 10665143                | AA                                     | GG                 | GG               | INTERGENIC                    |                    |                                                                           |
| SNP_40360_A_10665368 | NC_021165.1    | Ca_Kabuli_Chr06 | 10665368                | AA                                     | CC                 | CC               | INTERGENIC                    |                    |                                                                           |
| SNP_40361_A_10666167 | NC_021165.1    | Ca_Kabuli_Chr06 | 10666167                | TT                                     | CC                 | CC               | INTERGENIC                    |                    |                                                                           |
| SNP_40362_A_10666225 | NC_021165.1    | Ca_Kabuli_Chr06 | 10666225                | TT                                     | CC                 | CC               | INTERGENIC                    |                    |                                                                           |
| SNP_40363_A_10674757 | NC_021165.1    | Ca_Kabuli_Chr06 | 10674757                | AA                                     | GG                 | GG               | INTRON                        | 101496985          | bifunctional aspartokinase/homoserine dehydrogenase 1, chloroplastic-like |

| SNPs IDs             | Chromosome IDs | Chromosomes     | Physical positions (bp) | CDC Frontier (Reference genome) | (Pusa 1103 & HPNB) | (ILWC 46 & LPNB) | Sequence Components of genome | Gene accession IDs | Putative functions                                                        |
|----------------------|----------------|-----------------|-------------------------|---------------------------------|--------------------|------------------|-------------------------------|--------------------|---------------------------------------------------------------------------|
| SNP_40364_A_10675251 | NC_021165.1    | Ca_Kabuli_Chr06 | 10675251                | TT                              | CC                 | CC               | INTRON                        | 101496985          | bifunctional aspartokinase/homoserine dehydrogenase 1, chloroplastic-like |
| SNP_40366_A_10677230 | NC_021165.1    | Ca_Kabuli_Chr06 | 10677230                | CC                              | AA                 | AA               | INTERGENIC                    |                    |                                                                           |
| SNP_40367_A_10677501 | NC_021165.1    | Ca_Kabuli_Chr06 | 10677501                | TT                              | CC                 | CC               | INTERGENIC                    |                    |                                                                           |
| SNP_40368_A_10681376 | NC_021165.1    | Ca_Kabuli_Chr06 | 10681376                | AA                              | TT                 | TT               | DRR                           | 101497314          | subtilisin-like protease SBT3.3                                           |
| SNP_40369_A_10681660 | NC_021165.1    | Ca_Kabuli_Chr06 | 10681660                | TT                              | AA                 | AA               | URR                           | 101496985          | bifunctional aspartokinase/homoserine dehydrogenase 1, chloroplastic-like |
| SNP_40370_A_10682355 | NC_021165.1    | Ca_Kabuli_Chr06 | 10682355                | TT                              | CC                 | CC               | URR                           | 101496985          | bifunctional aspartokinase/homoserine dehydrogenase 1, chloroplastic-like |
| SNP_40371_A_10682358 | NC_021165.1    | Ca_Kabuli_Chr06 | 10682358                | CC                              | TT                 | TT               | URR                           | 101496985          | bifunctional aspartokinase/homoserine dehydrogenase 1, chloroplastic-like |
| SNP_40372_A_10682378 | NC_021165.1    | Ca_Kabuli_Chr06 | 10682378                | AA                              | GG                 | GG               | URR                           | 101496985          | bifunctional aspartokinase/homoserine dehydrogenase 1, chloroplastic-like |
| SNP_40373_A_10684283 | NC_021165.1    | Ca_Kabuli_Chr06 | 10684283                | AA                              | GG                 | GG               | INTERGENIC                    |                    |                                                                           |
| SNP_40374_A_10685186 | NC_021165.1    | Ca_Kabuli_Chr06 | 10685186                | CC                              | TT                 | TT               | INTERGENIC                    |                    |                                                                           |
| SNP_40375_A_10685694 | NC_021165.1    | Ca_Kabuli_Chr06 | 10685694                | CC                              | TT                 | TT               | INTRON                        | 101497314          | subtilisin-like protease SBT3.3                                           |
| SNP_40377_A_10686673 | NC_021165.1    | Ca_Kabuli_Chr06 | 10686673                | CC                              | AA                 | AA               | NON_SYNONYMOUS_CODING         | id132795           | Unknown function                                                          |
| SNP_40378_A_10687336 | NC_021165.1    | Ca_Kabuli_Chr06 | 10687336                | AA                              | GG                 | GG               | URR                           | 101497314          | subtilisin-like protease SBT3.3                                           |
| SNP_40379_A_10689737 | NC_021165.1    | Ca_Kabuli_Chr06 | 10689737                | GG                              | AA                 | AA               | INTERGENIC                    |                    |                                                                           |
| SNP_40380_A_10689738 | NC_021165.1    | Ca_Kabuli_Chr06 | 10689738                | GG                              | CC                 | CC               | INTERGENIC                    |                    |                                                                           |
| SNP_40381_A_10690331 | NC_021165.1    | Ca_Kabuli_Chr06 | 10690331                | GG                              | AA                 | AA               | INTERGENIC                    |                    |                                                                           |
| SNP_40382_A_10693975 | NC_021165.1    | Ca_Kabuli_Chr06 | 10693975                | GG                              | AA                 | AA               | INTERGENIC                    |                    |                                                                           |
| SNP_40383_A_10694197 | NC_021165.1    | Ca_Kabuli_Chr06 | 10694197                | AA                              | TT                 | TT               | INTERGENIC                    |                    |                                                                           |
| SNP_40384_A_10695710 | NC_021165.1    | Ca_Kabuli_Chr06 | 10695710                | TT                              | AA                 | AA               | DRR                           | 101497972          | probable receptor protein kinase TMK1                                     |
| SNP_40385_A_10700535 | NC_021165.1    | Ca_Kabuli_Chr06 | 10700535                | CC                              | AA                 | AA               | URR                           | 101497972          | probable receptor protein kinase TMK1                                     |
| SNP_40386_A_10705384 | NC_021165.1    | Ca_Kabuli_Chr06 | 10705384                | AA                              | GG                 | GG               | INTERGENIC                    |                    |                                                                           |
| SNP_40387_A_10705588 | NC_021165.1    | Ca_Kabuli_Chr06 | 10705588                | AA                              | GG                 | GG               | INTERGENIC                    |                    |                                                                           |

| SNPs IDs             | Chromosome IDs | Chromosomes     | Physical positions (bp) | CDC Frontier (Reference genome) | (Pusa 1103 & HPNB) | (ILWC 46 & LPNB) | Sequence Components of genome | Gene accession IDs | Putative functions           |
|----------------------|----------------|-----------------|-------------------------|---------------------------------|--------------------|------------------|-------------------------------|--------------------|------------------------------|
| SNP_40388_A_10748859 | NC_021165.1    | Ca_Kabuli_Chr06 | 10748859                | AA                              | GG                 | GG               | SYNONYMOUS_CODING             | 101499602          | uncharacterized LOC101499602 |
| SNP_40389_A_10751176 | NC_021165.1    | Ca_Kabuli_Chr06 | 10751176                | TT                              | AA                 | AA               | URR                           | 101499602          | uncharacterized LOC101499602 |
| SNP_40390_A_10751209 | NC_021165.1    | Ca_Kabuli_Chr06 | 10751209                | AA                              | TT                 | TT               | URR                           | 101499602          | uncharacterized LOC101499602 |
| SNP_40391_A_10753535 | NC_021165.1    | Ca_Kabuli_Chr06 | 10753535                | AA                              | GG                 | GG               | INTERGENIC                    |                    |                              |
| SNP_40392_A_10753962 | NC_021165.1    | Ca_Kabuli_Chr06 | 10753962                | AA                              | GG                 | GG               | INTERGENIC                    |                    |                              |
| SNP_40393_A_10780368 | NC_021165.1    | Ca_Kabuli_Chr06 | 10780368                | GG                              | AA                 | AA               | INTRON                        | 101501198          | kinesin-like protein KIN12A  |
| SNP_40394_A_10822229 | NC_021165.1    | Ca_Kabuli_Chr06 | 10822229                | AA                              | CC                 | CC               | INTERGENIC                    |                    |                              |
| SNP_40395_A_10822407 | NC_021165.1    | Ca_Kabuli_Chr06 | 10822407                | TT                              | AA                 | AA               | INTERGENIC                    |                    |                              |
| SNP_40396_A_10822423 | NC_021165.1    | Ca_Kabuli_Chr06 | 10822423                | AA                              | CC                 | CC               | INTERGENIC                    |                    |                              |
| SNP_40397_A_10825376 | NC_021165.1    | Ca_Kabuli_Chr06 | 10825376                | CC                              | TT                 | TT               | INTERGENIC                    |                    |                              |
| SNP_40398_A_10916225 | NC_021165.1    | Ca_Kabuli_Chr06 | 10916225                | AA                              | TT                 | TT               | INTERGENIC                    |                    |                              |
| SNP_40399_A_10930098 | NC_021165.1    | Ca_Kabuli_Chr06 | 10930098                | GG                              | CC                 | CC               | INTERGENIC                    |                    |                              |
| SNP_40400_A_10930263 | NC_021165.1    | Ca_Kabuli_Chr06 | 10930263                | TT                              | CC                 | CC               | INTERGENIC                    |                    |                              |
| SNP_40401_A_10948623 | NC_021165.1    | Ca_Kabuli_Chr06 | 10948623                | TT                              | AA                 | AA               | INTERGENIC                    |                    |                              |
| SNP_40402_A_10948637 | NC_021165.1    | Ca_Kabuli_Chr06 | 10948637                | GG                              | TT                 | TT               | INTERGENIC                    |                    |                              |
| SNP_40403_A_10948679 | NC_021165.1    | Ca_Kabuli_Chr06 | 10948679                | AA                              | GG                 | GG               | INTERGENIC                    |                    |                              |
| SNP_40404_A_10948700 | NC_021165.1    | Ca_Kabuli_Chr06 | 10948700                | GG                              | CC                 | CC               | INTERGENIC                    |                    |                              |
| SNP_40405_A_10957017 | NC_021165.1    | Ca_Kabuli_Chr06 | 10957017                | AA                              | GG                 | GG               | INTERGENIC                    |                    |                              |
| SNP_40406_A_10993479 | NC_021165.1    | Ca_Kabuli_Chr06 | 10993479                | TT                              | CC                 | CC               | URR                           | 101491689          | F-box protein At1g67340-like |
| SNP_40407_A_10998841 | NC_021165.1    | Ca_Kabuli_Chr06 | 10998841                | TT                              | AA                 | AA               | INTERGENIC                    |                    |                              |
| SNP_40408_A_11031538 | NC_021165.1    | Ca_Kabuli_Chr06 | 11031538                | TT                              | CC                 | CC               | INTERGENIC                    |                    |                              |
| SNP_40409_A_11063831 | NC_021165.1    | Ca_Kabuli_Chr06 | 11063831                | GG                              | AA                 | AA               | INTERGENIC                    |                    |                              |

| SNPs IDs             | Chromosome IDs | Chromosomes     | Physical positions (bp) | CDC Frontier genome (Reference genome) | (Pusa 1103 & HPNB) | (ILWC 46 & LPNB) | Sequence Components of genome | Gene accession IDs | Putative functions                                                        |
|----------------------|----------------|-----------------|-------------------------|----------------------------------------|--------------------|------------------|-------------------------------|--------------------|---------------------------------------------------------------------------|
| SNP_40410_A_11077036 | NC_021165.1    | Ca_Kabuli_Chr06 | 11077036                | GG                                     | TT                 | TT               | URR                           | 101494915          | probable glycosyltransferase At5g20260                                    |
| SNP_40411_A_11163190 | NC_021165.1    | Ca_Kabuli_Chr06 | 11163190                | AA                                     | CC                 | CC               | INTRON                        | 101499285          | putative pre-mRNA-splicing factor ATP-dependent RNA helicase PRP1         |
| SNP_40412_A_11174147 | NC_021165.1    | Ca_Kabuli_Chr06 | 11174147                | AA                                     | GG                 | GG               | INTRON                        | 101499603          | lipoxigenase 6, chloroplastic                                             |
| SNP_40413_A_11233607 | NC_021165.1    | Ca_Kabuli_Chr06 | 11233607                | TT                                     | AA                 | AA               | INTERGENIC                    |                    |                                                                           |
| SNP_40414_A_11240699 | NC_021165.1    | Ca_Kabuli_Chr06 | 11240699                | CC                                     | GG                 | GG               | INTERGENIC                    |                    |                                                                           |
| SNP_40415_A_11308748 | NC_021165.1    | Ca_Kabuli_Chr06 | 11308748                | CC                                     | TT                 | TT               | URR                           | 101507313          | vinorine synthase-like                                                    |
| SNP_40416_A_11308881 | NC_021165.1    | Ca_Kabuli_Chr06 | 11308881                | GG                                     | AA                 | AA               | DRR                           | 101507620          | BAHD acyltransferase At5g47980-like                                       |
| SNP_40417_A_11308893 | NC_021165.1    | Ca_Kabuli_Chr06 | 11308893                | TT                                     | AA                 | AA               | DRR                           | 101507620          | BAHD acyltransferase At5g47980-like                                       |
| SNP_40418_A_11308949 | NC_021165.1    | Ca_Kabuli_Chr06 | 11308949                | AA                                     | TT                 | TT               | DRR                           | 101507620          | BAHD acyltransferase At5g47980-like                                       |
| SNP_40419_A_11309346 | NC_021165.1    | Ca_Kabuli_Chr06 | 11309346                | AA                                     | TT                 | TT               | DRR                           | 101507620          | BAHD acyltransferase At5g47980-like                                       |
| SNP_40420_A_11309486 | NC_021165.1    | Ca_Kabuli_Chr06 | 11309486                | GG                                     | AA                 | AA               | DRR                           | 101507620          | BAHD acyltransferase At5g47980-like                                       |
| SNP_40421_A_11309834 | NC_021165.1    | Ca_Kabuli_Chr06 | 11309834                | GG                                     | TT                 | TT               | DRR                           | 101507620          | BAHD acyltransferase At5g47980-like                                       |
| SNP_40422_A_11310559 | NC_021165.1    | Ca_Kabuli_Chr06 | 11310559                | AA                                     | GG                 | GG               | DRR                           | 101505146          | pentatricopeptide repeat-containing protein mitochondrial-like At3g22470, |
| SNP_40423_A_11310610 | NC_021165.1    | Ca_Kabuli_Chr06 | 11310610                | TT                                     | GG                 | GG               | DRR                           | 101505146          | pentatricopeptide repeat-containing protein mitochondrial-like At3g22470, |
| SNP_40424_A_11310678 | NC_021165.1    | Ca_Kabuli_Chr06 | 11310678                | TT                                     | CC                 | CC               | DRR                           | 101505146          | pentatricopeptide repeat-containing protein mitochondrial-like At3g22470, |
| SNP_40425_A_11310736 | NC_021165.1    | Ca_Kabuli_Chr06 | 11310736                | AA                                     | GG                 | GG               | DRR                           | 101505146          | pentatricopeptide repeat-containing protein mitochondrial-like At3g22470, |
| SNP_40426_A_11310810 | NC_021165.1    | Ca_Kabuli_Chr06 | 11310810                | CC                                     | TT                 | TT               | DRR                           | 101505146          | pentatricopeptide repeat-containing protein mitochondrial-like At3g22470, |
| SNP_40427_A_11311012 | NC_021165.1    | Ca_Kabuli_Chr06 | 11311012                | CC                                     | TT                 | TT               | URR                           | 101507620          | BAHD acyltransferase At5g47980-like                                       |
| SNP_40428_A_11311101 | NC_021165.1    | Ca_Kabuli_Chr06 | 11311101                | TT                                     | GG                 | GG               | URR                           | 101507620          | BAHD acyltransferase At5g47980-like                                       |
| SNP_40429_A_11311261 | NC_021165.1    | Ca_Kabuli_Chr06 | 11311261                | CC                                     | TT                 | TT               | URR                           | 101507620          | BAHD acyltransferase At5g47980-like                                       |
| SNP_40430_A_11311281 | NC_021165.1    | Ca_Kabuli_Chr06 | 11311281                | TT                                     | AA                 | AA               | URR                           | 101507620          | BAHD acyltransferase At5g47980-like                                       |
| SNP_40431_A_11311282 | NC_021165.1    | Ca_Kabuli_Chr06 | 11311282                | CC                                     | AA                 | AA               | URR                           | 101507620          | BAHD acyltransferase At5g47980-like                                       |



| SNPs IDs             | Chromosome IDs | Chromosomes     | Physical positions (bp) | CDC Frontier (Reference genome) | (Pusa 1103 & HPNB) | (ILWC 46 & LPNB) | Sequence Components of genome | Gene accession IDs | Putative functions                                                        |
|----------------------|----------------|-----------------|-------------------------|---------------------------------|--------------------|------------------|-------------------------------|--------------------|---------------------------------------------------------------------------|
| SNP_40432_A_11311283 | NC_021165.1    | Ca_Kabuli_Chr06 | 11311283                | AA                              | TT                 | TT               | URR                           | 101507620          | BAHD acyltransferase At5g47980-like                                       |
| SNP_40433_A_11311304 | NC_021165.1    | Ca_Kabuli_Chr06 | 11311304                | TT                              | CC                 | CC               | URR                           | 101507620          | BAHD acyltransferase At5g47980-like                                       |
| SNP_40434_A_11311425 | NC_021165.1    | Ca_Kabuli_Chr06 | 11311425                | TT                              | AA                 | AA               | URR                           | 101507620          | BAHD acyltransferase At5g47980-like                                       |
| SNP_40435_A_11314190 | NC_021165.1    | Ca_Kabuli_Chr06 | 11314190                | TT                              | CC                 | CC               | NON_SYNONYMOUS_CODING         | 101505146          | pentatricopeptide repeat-containing protein mitochondrial-like At3g22470, |
| SNP_40436_A_11314198 | NC_021165.1    | Ca_Kabuli_Chr06 | 11314198                | AA                              | TT                 | TT               | NON_SYNONYMOUS_CODING         | 101505146          | pentatricopeptide repeat-containing protein mitochondrial-like At3g22470, |
| SNP_40440_A_11457238 | NC_021165.1    | Ca_Kabuli_Chr06 | 11457238                | TT                              | CC                 | CC               | INTERGENIC                    |                    |                                                                           |
| SNP_40441_A_11457521 | NC_021165.1    | Ca_Kabuli_Chr06 | 11457521                | TT                              | CC                 | CC               | INTERGENIC                    |                    |                                                                           |
| SNP_40442_A_11457525 | NC_021165.1    | Ca_Kabuli_Chr06 | 11457525                | GG                              | AA                 | AA               | INTERGENIC                    |                    |                                                                           |
| SNP_40444_A_11513694 | NC_021165.1    | Ca_Kabuli_Chr06 | 11513694                | GG                              | CC                 | CC               | INTERGENIC                    |                    |                                                                           |
| SNP_40445_A_11545886 | NC_021165.1    | Ca_Kabuli_Chr06 | 11545886                | TT                              | CC                 | CC               | INTERGENIC                    |                    |                                                                           |
| SNP_40446_A_11545948 | NC_021165.1    | Ca_Kabuli_Chr06 | 11545948                | GG                              | AA                 | AA               | INTERGENIC                    |                    |                                                                           |
| SNP_40447_A_11546167 | NC_021165.1    | Ca_Kabuli_Chr06 | 11546167                | GG                              | CC                 | CC               | INTERGENIC                    |                    |                                                                           |
| SNP_40448_A_11546178 | NC_021165.1    | Ca_Kabuli_Chr06 | 11546178                | GG                              | AA                 | AA               | INTERGENIC                    |                    |                                                                           |
| SNP_40449_A_11546338 | NC_021165.1    | Ca_Kabuli_Chr06 | 11546338                | AA                              | CC                 | CC               | INTERGENIC                    |                    |                                                                           |
| SNP_40450_A_11546401 | NC_021165.1    | Ca_Kabuli_Chr06 | 11546401                | CC                              | TT                 | TT               | INTERGENIC                    |                    |                                                                           |
| SNP_40452_A_11546553 | NC_021165.1    | Ca_Kabuli_Chr06 | 11546553                | AA                              | GG                 | GG               | INTERGENIC                    |                    |                                                                           |
| SNP_40453_A_11546598 | NC_021165.1    | Ca_Kabuli_Chr06 | 11546598                | AA                              | TT                 | TT               | INTERGENIC                    |                    |                                                                           |
| SNP_40454_A_11546645 | NC_021165.1    | Ca_Kabuli_Chr06 | 11546645                | CC                              | GG                 | GG               | INTERGENIC                    |                    |                                                                           |
| SNP_40455_A_11546696 | NC_021165.1    | Ca_Kabuli_Chr06 | 11546696                | AA                              | TT                 | TT               | INTERGENIC                    |                    |                                                                           |
| SNP_40456_A_11568243 | NC_021165.1    | Ca_Kabuli_Chr06 | 11568243                | TT                              | CC                 | CC               | INTERGENIC                    |                    |                                                                           |
| SNP_40457_A_11569090 | NC_021165.1    | Ca_Kabuli_Chr06 | 11569090                | TT                              | AA                 | AA               | INTERGENIC                    |                    |                                                                           |
| SNP_40459_A_11573613 | NC_021165.1    | Ca_Kabuli_Chr06 | 11573613                | TT                              | CC                 | CC               | INTERGENIC                    |                    |                                                                           |

| SNPs IDs             | Chromosome IDs | Chromosomes     | Physical positions (bp) | CDC Frontier genome (Reference genome) | (Pusa 1103 & HPNB) | (ILWC 46 & LPNB) | Sequence genome | Components of | Gene accession IDs | Putative functions |
|----------------------|----------------|-----------------|-------------------------|----------------------------------------|--------------------|------------------|-----------------|---------------|--------------------|--------------------|
| SNP_40460_A_11591470 | NC_021165.1    | Ca_Kabuli_Chr06 | 11591470                | GG                                     | CC                 | CC               | INTERGENIC      |               |                    |                    |
| SNP_40461_A_11591492 | NC_021165.1    | Ca_Kabuli_Chr06 | 11591492                | CC                                     | TT                 | TT               | INTERGENIC      |               |                    |                    |
| SNP_40462_A_11591764 | NC_021165.1    | Ca_Kabuli_Chr06 | 11591764                | TT                                     | CC                 | CC               | INTERGENIC      |               |                    |                    |
| SNP_40463_A_11592878 | NC_021165.1    | Ca_Kabuli_Chr06 | 11592878                | CC                                     | AA                 | AA               | INTERGENIC      |               |                    |                    |
| SNP_40464_A_11592884 | NC_021165.1    | Ca_Kabuli_Chr06 | 11592884                | AA                                     | GG                 | GG               | INTERGENIC      |               |                    |                    |
| SNP_40465_A_11592924 | NC_021165.1    | Ca_Kabuli_Chr06 | 11592924                | GG                                     | TT                 | TT               | INTERGENIC      |               |                    |                    |
| SNP_40466_A_11593198 | NC_021165.1    | Ca_Kabuli_Chr06 | 11593198                | GG                                     | AA                 | AA               | INTERGENIC      |               |                    |                    |
| SNP_40467_A_11593699 | NC_021165.1    | Ca_Kabuli_Chr06 | 11593699                | CC                                     | TT                 | TT               | INTERGENIC      |               |                    |                    |
| SNP_40468_A_11593761 | NC_021165.1    | Ca_Kabuli_Chr06 | 11593761                | GG                                     | TT                 | TT               | INTERGENIC      |               |                    |                    |
| SNP_40469_A_11596237 | NC_021165.1    | Ca_Kabuli_Chr06 | 11596237                | AA                                     | GG                 | GG               | INTERGENIC      |               |                    |                    |
| SNP_40470_A_11597768 | NC_021165.1    | Ca_Kabuli_Chr06 | 11597768                | CC                                     | TT                 | TT               | INTERGENIC      |               |                    |                    |
| SNP_40471_A_11597954 | NC_021165.1    | Ca_Kabuli_Chr06 | 11597954                | CC                                     | TT                 | TT               | INTERGENIC      |               |                    |                    |
| SNP_40472_A_11598011 | NC_021165.1    | Ca_Kabuli_Chr06 | 11598011                | AA                                     | GG                 | GG               | INTERGENIC      |               |                    |                    |
| SNP_40473_A_11598069 | NC_021165.1    | Ca_Kabuli_Chr06 | 11598069                | CC                                     | AA                 | AA               | INTERGENIC      |               |                    |                    |
| SNP_40474_A_11598419 | NC_021165.1    | Ca_Kabuli_Chr06 | 11598419                | GG                                     | AA                 | AA               | INTERGENIC      |               |                    |                    |
| SNP_40475_A_11599084 | NC_021165.1    | Ca_Kabuli_Chr06 | 11599084                | CC                                     | TT                 | TT               | INTERGENIC      |               |                    |                    |
| SNP_40476_A_11600318 | NC_021165.1    | Ca_Kabuli_Chr06 | 11600318                | TT                                     | CC                 | CC               | INTERGENIC      |               |                    |                    |
| SNP_40477_A_11601385 | NC_021165.1    | Ca_Kabuli_Chr06 | 11601385                | TT                                     | AA                 | AA               | INTERGENIC      |               |                    |                    |
| SNP_40478_A_11601771 | NC_021165.1    | Ca_Kabuli_Chr06 | 11601771                | TT                                     | AA                 | AA               | INTERGENIC      |               |                    |                    |
| SNP_40479_A_11601782 | NC_021165.1    | Ca_Kabuli_Chr06 | 11601782                | GG                                     | AA                 | AA               | INTERGENIC      |               |                    |                    |
| SNP_40480_A_11602194 | NC_021165.1    | Ca_Kabuli_Chr06 | 11602194                | TT                                     | CC                 | CC               | INTERGENIC      |               |                    |                    |
| SNP_40481_A_11602198 | NC_021165.1    | Ca_Kabuli_Chr06 | 11602198                | AA                                     | GG                 | GG               | INTERGENIC      |               |                    |                    |

| SNPs IDs             | Chromosome IDs | Chromosomes     | Physical positions (bp) | CDC Frontier genome (Reference genome) | (Pusa 1103 & HPNB) | (ILWC 46 & LPNB) | Sequence Components of genome | Gene accession IDs | Putative functions                                              |
|----------------------|----------------|-----------------|-------------------------|----------------------------------------|--------------------|------------------|-------------------------------|--------------------|-----------------------------------------------------------------|
| SNP_40482_A_11602266 | NC_021165.1    | Ca_Kabuli_Chr06 | 11602266                | AA                                     | TT                 | TT               | INTERGENIC                    |                    |                                                                 |
| SNP_40483_A_11602285 | NC_021165.1    | Ca_Kabuli_Chr06 | 11602285                | GG                                     | AA                 | AA               | INTERGENIC                    |                    |                                                                 |
| SNP_40484_A_11602299 | NC_021165.1    | Ca_Kabuli_Chr06 | 11602299                | AA                                     | GG                 | GG               | INTERGENIC                    |                    |                                                                 |
| SNP_40485_A_11602607 | NC_021165.1    | Ca_Kabuli_Chr06 | 11602607                | TT                                     | CC                 | CC               | INTERGENIC                    |                    |                                                                 |
| SNP_40486_A_11602663 | NC_021165.1    | Ca_Kabuli_Chr06 | 11602663                | CC                                     | AA                 | AA               | INTERGENIC                    |                    |                                                                 |
| SNP_40487_A_11602664 | NC_021165.1    | Ca_Kabuli_Chr06 | 11602664                | TT                                     | CC                 | CC               | INTERGENIC                    |                    |                                                                 |
| SNP_40488_A_11603680 | NC_021165.1    | Ca_Kabuli_Chr06 | 11603680                | AA                                     | CC                 | CC               | INTERGENIC                    |                    |                                                                 |
| SNP_40489_A_11606588 | NC_021165.1    | Ca_Kabuli_Chr06 | 11606588                | AA                                     | GG                 | GG               | DRR                           | 101488887          | MATH domain and coiled-coil domain-containing protein At3g58410 |
| SNP_40490_A_11606633 | NC_021165.1    | Ca_Kabuli_Chr06 | 11606633                | TT                                     | CC                 | CC               | DRR                           | 101488887          | MATH domain and coiled-coil domain-containing protein At3g58410 |
| SNP_40491_A_11610790 | NC_021165.1    | Ca_Kabuli_Chr06 | 11610790                | TT                                     | AA                 | AA               | URR                           | 101488887          | MATH domain and coiled-coil domain-containing protein At3g58410 |
| SNP_40492_A_11613715 | NC_021165.1    | Ca_Kabuli_Chr06 | 11613715                | CC                                     | AA                 | AA               | INTERGENIC                    |                    |                                                                 |
| SNP_40494_A_11617590 | NC_021165.1    | Ca_Kabuli_Chr06 | 11617590                | AA                                     | TT                 | TT               | INTERGENIC                    |                    |                                                                 |
| SNP_40496_A_11622141 | NC_021165.1    | Ca_Kabuli_Chr06 | 11622141                | AA                                     | GG                 | GG               | INTERGENIC                    |                    |                                                                 |
| SNP_40497_A_11622257 | NC_021165.1    | Ca_Kabuli_Chr06 | 11622257                | GG                                     | AA                 | AA               | INTERGENIC                    |                    |                                                                 |
| SNP_40498_A_11627524 | NC_021165.1    | Ca_Kabuli_Chr06 | 11627524                | GG                                     | AA                 | AA               | INTERGENIC                    |                    |                                                                 |
| SNP_40499_A_11627541 | NC_021165.1    | Ca_Kabuli_Chr06 | 11627541                | GG                                     | AA                 | AA               | INTERGENIC                    |                    |                                                                 |
| SNP_40501_A_11630676 | NC_021165.1    | Ca_Kabuli_Chr06 | 11630676                | TT                                     | CC                 | CC               | DRR                           | 101491895          | universal stress protein A-like protein                         |
| SNP_40502_A_11631541 | NC_021165.1    | Ca_Kabuli_Chr06 | 11631541                | AA                                     | CC                 | CC               | INTERGENIC                    |                    |                                                                 |
| SNP_40503_A_11638715 | NC_021165.1    | Ca_Kabuli_Chr06 | 11638715                | TT                                     | CC                 | CC               | INTERGENIC                    |                    |                                                                 |
| SNP_40504_A_11646752 | NC_021165.1    | Ca_Kabuli_Chr06 | 11646752                | GG                                     | AA                 | AA               | INTERGENIC                    |                    |                                                                 |
| SNP_40505_A_11647408 | NC_021165.1    | Ca_Kabuli_Chr06 | 11647408                | TT                                     | CC                 | CC               | INTERGENIC                    |                    |                                                                 |
| SNP_40506_A_11649004 | NC_021165.1    | Ca_Kabuli_Chr06 | 11649004                | AA                                     | GG                 | GG               | INTERGENIC                    |                    |                                                                 |

| SNPs IDs             | Chromosome IDs | Chromosomes     | Physical positions (bp) | CDC Frontier (Reference genome) | (Pusa 1103 & HPNB) | (ILWC 46 & LPNB) | Sequence Components of genome | Gene accession IDs | Putative functions            |
|----------------------|----------------|-----------------|-------------------------|---------------------------------|--------------------|------------------|-------------------------------|--------------------|-------------------------------|
| SNP_40507_A_11649283 | NC_021165.1    | Ca_Kabuli_Chr06 | 11649283                | AA                              | GG                 | GG               | DRR                           | 101489534          | 40S ribosomal protein S5-like |
| SNP_40508_A_11649285 | NC_021165.1    | Ca_Kabuli_Chr06 | 11649285                | TT                              | AA                 | AA               | DRR                           | 101489534          | 40S ribosomal protein S5-like |
| SNP_40509_A_11649444 | NC_021165.1    | Ca_Kabuli_Chr06 | 11649444                | CC                              | TT                 | TT               | DRR                           | 101489534          | 40S ribosomal protein S5-like |
| SNP_40511_A_11650946 | NC_021165.1    | Ca_Kabuli_Chr06 | 11650946                | TT                              | CC                 | CC               | INTRON                        | 101489534          | 40S ribosomal protein S5-like |
| SNP_40512_A_11650978 | NC_021165.1    | Ca_Kabuli_Chr06 | 11650978                | TT                              | AA                 | AA               | INTRON                        | 101489534          | 40S ribosomal protein S5-like |
| SNP_40513_A_11654273 | NC_021165.1    | Ca_Kabuli_Chr06 | 11654273                | TT                              | AA                 | AA               | URR                           | 101489534          | 40S ribosomal protein S5-like |
| SNP_40514_A_11654973 | NC_021165.1    | Ca_Kabuli_Chr06 | 11654973                | CC                              | AA                 | AA               | URR                           | 101489534          | 40S ribosomal protein S5-like |
| SNP_40517_A_11657603 | NC_021165.1    | Ca_Kabuli_Chr06 | 11657603                | CC                              | TT                 | TT               | INTRON                        | 101489853          | uncharacterized LOC101489853  |
| SNP_40518_A_11659814 | NC_021165.1    | Ca_Kabuli_Chr06 | 11659814                | AA                              | GG                 | GG               | SYNONYMOUS_CODING             | 101489853          | uncharacterized LOC101489853  |
| SNP_40519_A_11660434 | NC_021165.1    | Ca_Kabuli_Chr06 | 11660434                | GG                              | CC                 | CC               | INTRON                        | 101489853          | uncharacterized LOC101489853  |
| SNP_40520_A_11660455 | NC_021165.1    | Ca_Kabuli_Chr06 | 11660455                | AA                              | TT                 | TT               | INTRON                        | 101489853          | uncharacterized LOC101489853  |
| SNP_40521_A_11660456 | NC_021165.1    | Ca_Kabuli_Chr06 | 11660456                | AA                              | CC                 | CC               | INTRON                        | 101489853          | uncharacterized LOC101489853  |
| SNP_40522_A_11660458 | NC_021165.1    | Ca_Kabuli_Chr06 | 11660458                | GG                              | CC                 | CC               | INTRON                        | 101489853          | uncharacterized LOC101489853  |
| SNP_40523_A_11660474 | NC_021165.1    | Ca_Kabuli_Chr06 | 11660474                | AA                              | GG                 | GG               | INTRON                        | 101489853          | uncharacterized LOC101489853  |
| SNP_40524_A_11660970 | NC_021165.1    | Ca_Kabuli_Chr06 | 11660970                | TT                              | CC                 | CC               | INTRON                        | 101489853          | uncharacterized LOC101489853  |
| SNP_40525_A_11663253 | NC_021165.1    | Ca_Kabuli_Chr06 | 11663253                | GG                              | AA                 | AA               | INTERGENIC                    |                    |                               |
| SNP_40526_A_11666677 | NC_021165.1    | Ca_Kabuli_Chr06 | 11666677                | AA                              | GG                 | GG               | INTRON                        | 101490188          | protein FLOWERING LOCUS D     |
| SNP_40527_A_11667164 | NC_021165.1    | Ca_Kabuli_Chr06 | 11667164                | AA                              | TT                 | TT               | INTRON                        | 101490188          | protein FLOWERING LOCUS D     |
| SNP_40528_A_11670635 | NC_021165.1    | Ca_Kabuli_Chr06 | 11670635                | GG                              | AA                 | AA               | URR                           | 101490188          | protein FLOWERING LOCUS D     |
| SNP_40529_A_11671920 | NC_021165.1    | Ca_Kabuli_Chr06 | 11671920                | AA                              | TT                 | TT               | URR                           | 101490188          | protein FLOWERING LOCUS D     |
| SNP_40530_A_11672036 | NC_021165.1    | Ca_Kabuli_Chr06 | 11672036                | TT                              | AA                 | AA               | URR                           | 101490188          | protein FLOWERING LOCUS D     |
| SNP_40531_A_11672083 | NC_021165.1    | Ca_Kabuli_Chr06 | 11672083                | GG                              | TT                 | TT               | URR                           | 101490188          | protein FLOWERING LOCUS D     |

| SNPs IDs             | Chromosome IDs | Chromosomes     | Physical positions (bp) | CDC Frontier (Reference genome) | (Pusa 1103 & HPNB) | (ILWC 46 & LPNB) | Sequence genome | Components of | Gene accession IDs | Putative functions |
|----------------------|----------------|-----------------|-------------------------|---------------------------------|--------------------|------------------|-----------------|---------------|--------------------|--------------------|
| SNP_40532_A_11675048 | NC_021165.1    | Ca_Kabuli_Chr06 | 11675048                | CC                              | GG                 | GG               | INTERGENIC      |               |                    |                    |
| SNP_40533_A_11675050 | NC_021165.1    | Ca_Kabuli_Chr06 | 11675050                | AA                              | GG                 | GG               | INTERGENIC      |               |                    |                    |
| SNP_40534_A_11676332 | NC_021165.1    | Ca_Kabuli_Chr06 | 11676332                | GG                              | AA                 | AA               | INTERGENIC      |               |                    |                    |
| SNP_40535_A_11676334 | NC_021165.1    | Ca_Kabuli_Chr06 | 11676334                | CC                              | TT                 | TT               | INTERGENIC      |               |                    |                    |
| SNP_40536_A_11677289 | NC_021165.1    | Ca_Kabuli_Chr06 | 11677289                | TT                              | CC                 | CC               | INTERGENIC      |               |                    |                    |
| SNP_40537_A_11677313 | NC_021165.1    | Ca_Kabuli_Chr06 | 11677313                | GG                              | AA                 | AA               | INTERGENIC      |               |                    |                    |
| SNP_40538_A_11677371 | NC_021165.1    | Ca_Kabuli_Chr06 | 11677371                | AA                              | TT                 | TT               | INTERGENIC      |               |                    |                    |
| SNP_40539_A_11677411 | NC_021165.1    | Ca_Kabuli_Chr06 | 11677411                | TT                              | CC                 | CC               | INTERGENIC      |               |                    |                    |
| SNP_40540_A_11677484 | NC_021165.1    | Ca_Kabuli_Chr06 | 11677484                | GG                              | AA                 | AA               | INTERGENIC      |               |                    |                    |
| SNP_40541_A_11677489 | NC_021165.1    | Ca_Kabuli_Chr06 | 11677489                | AA                              | CC                 | CC               | INTERGENIC      |               |                    |                    |
| SNP_40542_A_11677518 | NC_021165.1    | Ca_Kabuli_Chr06 | 11677518                | GG                              | TT                 | TT               | INTERGENIC      |               |                    |                    |
| SNP_40543_A_11677585 | NC_021165.1    | Ca_Kabuli_Chr06 | 11677585                | TT                              | CC                 | CC               | INTERGENIC      |               |                    |                    |
| SNP_40544_A_11677645 | NC_021165.1    | Ca_Kabuli_Chr06 | 11677645                | AA                              | GG                 | GG               | INTERGENIC      |               |                    |                    |
| SNP_40545_A_11677757 | NC_021165.1    | Ca_Kabuli_Chr06 | 11677757                | CC                              | GG                 | GG               | INTERGENIC      |               |                    |                    |
| SNP_40546_A_11677774 | NC_021165.1    | Ca_Kabuli_Chr06 | 11677774                | GG                              | AA                 | AA               | INTERGENIC      |               |                    |                    |
| SNP_40547_A_11677828 | NC_021165.1    | Ca_Kabuli_Chr06 | 11677828                | TT                              | CC                 | CC               | INTERGENIC      |               |                    |                    |
| SNP_40548_A_11677929 | NC_021165.1    | Ca_Kabuli_Chr06 | 11677929                | GG                              | TT                 | TT               | INTERGENIC      |               |                    |                    |
| SNP_40549_A_11677992 | NC_021165.1    | Ca_Kabuli_Chr06 | 11677992                | TT                              | CC                 | CC               | INTERGENIC      |               |                    |                    |
| SNP_40550_A_11678320 | NC_021165.1    | Ca_Kabuli_Chr06 | 11678320                | AA                              | GG                 | GG               | INTERGENIC      |               |                    |                    |
| SNP_40551_A_11678427 | NC_021165.1    | Ca_Kabuli_Chr06 | 11678427                | TT                              | CC                 | CC               | INTERGENIC      |               |                    |                    |
| SNP_40552_A_11678636 | NC_021165.1    | Ca_Kabuli_Chr06 | 11678636                | AA                              | CC                 | CC               | INTERGENIC      |               |                    |                    |
| SNP_40553_A_11679548 | NC_021165.1    | Ca_Kabuli_Chr06 | 11679548                | CC                              | AA                 | AA               | INTERGENIC      |               |                    |                    |

| SNPs IDs             | Chromosome IDs | Chromosomes     | Physical positions (bp) | CDC Frontier genome (Reference genome) | (Pusa 1103 & HPNB) | (ILWC 46 & LPNB) | Sequence Components of genome | Gene accession IDs | Putative functions           |
|----------------------|----------------|-----------------|-------------------------|----------------------------------------|--------------------|------------------|-------------------------------|--------------------|------------------------------|
| SNP_40554_A_11679562 | NC_021165.1    | Ca_Kabuli_Chr06 | 11679562                | TT                                     | CC                 | CC               | INTERGENIC                    |                    |                              |
| SNP_40555_A_11680706 | NC_021165.1    | Ca_Kabuli_Chr06 | 11680706                | GG                                     | AA                 | AA               | INTERGENIC                    |                    |                              |
| SNP_40558_A_11682748 | NC_021165.1    | Ca_Kabuli_Chr06 | 11682748                | CC                                     | TT                 | TT               | INTERGENIC                    |                    |                              |
| SNP_40559_A_11682751 | NC_021165.1    | Ca_Kabuli_Chr06 | 11682751                | TT                                     | CC                 | CC               | INTERGENIC                    |                    |                              |
| SNP_40560_A_11682782 | NC_021165.1    | Ca_Kabuli_Chr06 | 11682782                | AA                                     | GG                 | GG               | INTERGENIC                    |                    |                              |
| SNP_40561_A_11682789 | NC_021165.1    | Ca_Kabuli_Chr06 | 11682789                | TT                                     | CC                 | CC               | INTERGENIC                    |                    |                              |
| SNP_40562_A_11682816 | NC_021165.1    | Ca_Kabuli_Chr06 | 11682816                | GG                                     | AA                 | AA               | INTERGENIC                    |                    |                              |
| SNP_40563_A_11682833 | NC_021165.1    | Ca_Kabuli_Chr06 | 11682833                | CC                                     | GG                 | GG               | INTERGENIC                    |                    |                              |
| SNP_40564_A_11684215 | NC_021165.1    | Ca_Kabuli_Chr06 | 11684215                | AA                                     | CC                 | CC               | DRR                           | 101492231          | uncharacterized LOC101492231 |
| SNP_40565_A_11684233 | NC_021165.1    | Ca_Kabuli_Chr06 | 11684233                | GG                                     | AA                 | AA               | DRR                           | 101492231          | uncharacterized LOC101492231 |
| SNP_40566_A_11684333 | NC_021165.1    | Ca_Kabuli_Chr06 | 11684333                | AA                                     | CC                 | CC               | DRR                           | 101492231          | uncharacterized LOC101492231 |
| SNP_40568_A_11689480 | NC_021165.1    | Ca_Kabuli_Chr06 | 11689480                | TT                                     | CC                 | CC               | INTERGENIC                    |                    |                              |
| SNP_40571_A_11693413 | NC_021165.1    | Ca_Kabuli_Chr06 | 11693413                | CC                                     | TT                 | TT               | INTERGENIC                    |                    |                              |
| SNP_40572_A_11696444 | NC_021165.1    | Ca_Kabuli_Chr06 | 11696444                | AA                                     | CC                 | CC               | INTERGENIC                    |                    |                              |
| SNP_40573_A_11697697 | NC_021165.1    | Ca_Kabuli_Chr06 | 11697697                | GG                                     | AA                 | AA               | INTERGENIC                    |                    |                              |
| SNP_40574_A_11700400 | NC_021165.1    | Ca_Kabuli_Chr06 | 11700400                | AA                                     | CC                 | CC               | INTERGENIC                    |                    |                              |
| SNP_40575_A_11700432 | NC_021165.1    | Ca_Kabuli_Chr06 | 11700432                | TT                                     | GG                 | GG               | INTERGENIC                    |                    |                              |
| SNP_40576_A_11701474 | NC_021165.1    | Ca_Kabuli_Chr06 | 11701474                | AA                                     | GG                 | GG               | DRR                           | 101492570          | uncharacterized LOC101492570 |
| SNP_40577_A_11703431 | NC_021165.1    | Ca_Kabuli_Chr06 | 11703431                | CC                                     | TT                 | TT               | URR                           | 101492570          | uncharacterized LOC101492570 |
| SNP_40578_A_11703438 | NC_021165.1    | Ca_Kabuli_Chr06 | 11703438                | TT                                     | GG                 | GG               | URR                           | 101492570          | uncharacterized LOC101492570 |
| SNP_40579_A_11707013 | NC_021165.1    | Ca_Kabuli_Chr06 | 11707013                | TT                                     | CC                 | CC               | SYNONYMOUS_CODING             | 101492901          | protein HOTHEAD-like         |
| SNP_40580_A_11707248 | NC_021165.1    | Ca_Kabuli_Chr06 | 11707248                | GG                                     | AA                 | AA               | SYNONYMOUS_CODING             | 101492901          | protein HOTHEAD-like         |

| SNPs IDs             | Chromosome IDs | Chromosomes     | Physical positions (bp) | CDC Frontier genome (Reference genome) | (Pusa 1103 & HPNB) | (ILWC 46 & LPNB) | Sequence genome | Components of | Gene accession IDs | Putative functions |
|----------------------|----------------|-----------------|-------------------------|----------------------------------------|--------------------|------------------|-----------------|---------------|--------------------|--------------------|
| SNP_40581_A_11710129 | NC_021165.1    | Ca_Kabuli_Chr06 | 11710129                | AA                                     | CC                 | CC               | INTERGENIC      |               |                    |                    |
| SNP_40582_A_11710426 | NC_021165.1    | Ca_Kabuli_Chr06 | 11710426                | AA                                     | GG                 | GG               | INTERGENIC      |               |                    |                    |
| SNP_40583_A_11712768 | NC_021165.1    | Ca_Kabuli_Chr06 | 11712768                | CC                                     | AA                 | AA               | INTERGENIC      |               |                    |                    |
| SNP_40584_A_11712794 | NC_021165.1    | Ca_Kabuli_Chr06 | 11712794                | TT                                     | CC                 | CC               | INTERGENIC      |               |                    |                    |
| SNP_40585_A_11714525 | NC_021165.1    | Ca_Kabuli_Chr06 | 11714525                | TT                                     | GG                 | GG               | INTERGENIC      |               |                    |                    |
| SNP_40586_A_11714531 | NC_021165.1    | Ca_Kabuli_Chr06 | 11714531                | AA                                     | GG                 | GG               | INTERGENIC      |               |                    |                    |
| SNP_40587_A_11716452 | NC_021165.1    | Ca_Kabuli_Chr06 | 11716452                | CC                                     | TT                 | TT               | INTERGENIC      |               |                    |                    |
| SNP_40588_A_11718894 | NC_021165.1    | Ca_Kabuli_Chr06 | 11718894                | GG                                     | TT                 | TT               | INTERGENIC      |               |                    |                    |
| SNP_40589_A_11719832 | NC_021165.1    | Ca_Kabuli_Chr06 | 11719832                | CC                                     | TT                 | TT               | INTERGENIC      |               |                    |                    |
| SNP_40590_A_11719837 | NC_021165.1    | Ca_Kabuli_Chr06 | 11719837                | CC                                     | AA                 | AA               | INTERGENIC      |               |                    |                    |
| SNP_40591_A_11720084 | NC_021165.1    | Ca_Kabuli_Chr06 | 11720084                | CC                                     | AA                 | AA               | INTERGENIC      |               |                    |                    |
| SNP_40592_A_11720854 | NC_021165.1    | Ca_Kabuli_Chr06 | 11720854                | GG                                     | AA                 | AA               | INTERGENIC      |               |                    |                    |
| SNP_40593_A_11720856 | NC_021165.1    | Ca_Kabuli_Chr06 | 11720856                | GG                                     | AA                 | AA               | INTERGENIC      |               |                    |                    |
| SNP_40594_A_11721211 | NC_021165.1    | Ca_Kabuli_Chr06 | 11721211                | AA                                     | GG                 | GG               | INTERGENIC      |               |                    |                    |
| SNP_40595_A_11721255 | NC_021165.1    | Ca_Kabuli_Chr06 | 11721255                | GG                                     | AA                 | AA               | INTERGENIC      |               |                    |                    |
| SNP_40596_A_11721272 | NC_021165.1    | Ca_Kabuli_Chr06 | 11721272                | TT                                     | AA                 | AA               | INTERGENIC      |               |                    |                    |
| SNP_40598_A_11726698 | NC_021165.1    | Ca_Kabuli_Chr06 | 11726698                | CC                                     | TT                 | TT               | INTERGENIC      |               |                    |                    |
| SNP_40599_A_11726702 | NC_021165.1    | Ca_Kabuli_Chr06 | 11726702                | TT                                     | CC                 | CC               | INTERGENIC      |               |                    |                    |
| SNP_40600_A_11726993 | NC_021165.1    | Ca_Kabuli_Chr06 | 11726993                | AA                                     | TT                 | TT               | INTERGENIC      |               |                    |                    |
| SNP_40601_A_11730757 | NC_021165.1    | Ca_Kabuli_Chr06 | 11730757                | AA                                     | GG                 | GG               | INTERGENIC      |               |                    |                    |
| SNP_40602_A_11734680 | NC_021165.1    | Ca_Kabuli_Chr06 | 11734680                | GG                                     | AA                 | AA               | INTERGENIC      |               |                    |                    |
| SNP_40603_A_11734946 | NC_021165.1    | Ca_Kabuli_Chr06 | 11734946                | AA                                     | CC                 | CC               | INTERGENIC      |               |                    |                    |

| SNPs IDs             | Chromosome IDs | Chromosomes     | Physical positions (bp) | CDC Frontier genome (Reference genome) | (Pusa 1103 & HPNB) | (ILWC 46 & LPNB) | Sequence genome | Components of | Gene accession IDs | Putative functions |
|----------------------|----------------|-----------------|-------------------------|----------------------------------------|--------------------|------------------|-----------------|---------------|--------------------|--------------------|
| SNP_40605_A_11737127 | NC_021165.1    | Ca_Kabuli_Chr06 | 11737127                | CC                                     | TT                 | TT               | INTERGENIC      |               |                    |                    |
| SNP_40606_A_11737128 | NC_021165.1    | Ca_Kabuli_Chr06 | 11737128                | TT                                     | CC                 | CC               | INTERGENIC      |               |                    |                    |
| SNP_40607_A_11737480 | NC_021165.1    | Ca_Kabuli_Chr06 | 11737480                | AA                                     | TT                 | TT               | INTERGENIC      |               |                    |                    |
| SNP_40609_A_11738329 | NC_021165.1    | Ca_Kabuli_Chr06 | 11738329                | CC                                     | TT                 | TT               | INTERGENIC      |               |                    |                    |
| SNP_40610_A_11738883 | NC_021165.1    | Ca_Kabuli_Chr06 | 11738883                | CC                                     | AA                 | AA               | INTERGENIC      |               |                    |                    |
| SNP_40611_A_11739289 | NC_021165.1    | Ca_Kabuli_Chr06 | 11739289                | TT                                     | AA                 | AA               | INTERGENIC      |               |                    |                    |
| SNP_40612_A_11739294 | NC_021165.1    | Ca_Kabuli_Chr06 | 11739294                | AA                                     | CC                 | CC               | INTERGENIC      |               |                    |                    |
| SNP_40613_A_11739436 | NC_021165.1    | Ca_Kabuli_Chr06 | 11739436                | GG                                     | AA                 | AA               | INTERGENIC      |               |                    |                    |
| SNP_40614_A_11739890 | NC_021165.1    | Ca_Kabuli_Chr06 | 11739890                | GG                                     | AA                 | AA               | INTERGENIC      |               |                    |                    |
| SNP_40615_A_11740214 | NC_021165.1    | Ca_Kabuli_Chr06 | 11740214                | TT                                     | CC                 | CC               | INTERGENIC      |               |                    |                    |
| SNP_40616_A_11740225 | NC_021165.1    | Ca_Kabuli_Chr06 | 11740225                | CC                                     | TT                 | TT               | INTERGENIC      |               |                    |                    |
| SNP_40617_A_11740365 | NC_021165.1    | Ca_Kabuli_Chr06 | 11740365                | AA                                     | TT                 | TT               | INTERGENIC      |               |                    |                    |
| SNP_40618_A_11740760 | NC_021165.1    | Ca_Kabuli_Chr06 | 11740760                | TT                                     | CC                 | CC               | INTERGENIC      |               |                    |                    |
| SNP_40620_A_11742622 | NC_021165.1    | Ca_Kabuli_Chr06 | 11742622                | TT                                     | GG                 | GG               | INTERGENIC      |               |                    |                    |
| SNP_40621_A_11745303 | NC_021165.1    | Ca_Kabuli_Chr06 | 11745303                | TT                                     | CC                 | CC               | URR             | 101493548     | Unknown function   |                    |
| SNP_40623_A_11746285 | NC_021165.1    | Ca_Kabuli_Chr06 | 11746285                | TT                                     | GG                 | GG               | URR             | 101493548     | Unknown function   |                    |
| SNP_40624_A_11755181 | NC_021165.1    | Ca_Kabuli_Chr06 | 11755181                | TT                                     | AA                 | AA               | INTERGENIC      |               |                    |                    |
| SNP_40625_A_11760698 | NC_021165.1    | Ca_Kabuli_Chr06 | 11760698                | GG                                     | TT                 | TT               | INTERGENIC      |               |                    |                    |
| SNP_40627_A_11761357 | NC_021165.1    | Ca_Kabuli_Chr06 | 11761357                | AA                                     | GG                 | GG               | INTERGENIC      |               |                    |                    |
| SNP_40628_A_11761368 | NC_021165.1    | Ca_Kabuli_Chr06 | 11761368                | AA                                     | TT                 | TT               | INTERGENIC      |               |                    |                    |
| SNP_40629_A_11761465 | NC_021165.1    | Ca_Kabuli_Chr06 | 11761465                | TT                                     | CC                 | CC               | INTERGENIC      |               |                    |                    |
| SNP_40630_A_11763052 | NC_021165.1    | Ca_Kabuli_Chr06 | 11763052                | TT                                     | CC                 | CC               | INTERGENIC      |               |                    |                    |



| SNPs IDs             | Chromosome IDs | Chromosomes     | Physical positions (bp) | CDC Frontier genome (Reference genome) | (Pusa 1103 & HPNB) | (ILWC 46 & LPNB) | Sequence genome | Components of | Gene accession IDs | Putative functions |
|----------------------|----------------|-----------------|-------------------------|----------------------------------------|--------------------|------------------|-----------------|---------------|--------------------|--------------------|
| SNP_40631_A_11763097 | NC_021165.1    | Ca_Kabuli_Chr06 | 11763097                | TT                                     | CC                 | CC               | INTERGENIC      |               |                    |                    |
| SNP_40632_A_11763454 | NC_021165.1    | Ca_Kabuli_Chr06 | 11763454                | TT                                     | CC                 | CC               | INTERGENIC      |               |                    |                    |
| SNP_40633_A_11765666 | NC_021165.1    | Ca_Kabuli_Chr06 | 11765666                | GG                                     | TT                 | TT               | INTERGENIC      |               |                    |                    |
| SNP_40634_A_11779365 | NC_021165.1    | Ca_Kabuli_Chr06 | 11779365                | TT                                     | CC                 | CC               | INTERGENIC      |               |                    |                    |
| SNP_40635_A_11781432 | NC_021165.1    | Ca_Kabuli_Chr06 | 11781432                | AA                                     | GG                 | GG               | INTERGENIC      |               |                    |                    |
| SNP_40636_A_11783698 | NC_021165.1    | Ca_Kabuli_Chr06 | 11783698                | AA                                     | GG                 | GG               | INTERGENIC      |               |                    |                    |
| SNP_40637_A_11784395 | NC_021165.1    | Ca_Kabuli_Chr06 | 11784395                | CC                                     | AA                 | AA               | INTERGENIC      |               |                    |                    |
| SNP_40638_A_11784399 | NC_021165.1    | Ca_Kabuli_Chr06 | 11784399                | AA                                     | GG                 | GG               | INTERGENIC      |               |                    |                    |
| SNP_40639_A_11785159 | NC_021165.1    | Ca_Kabuli_Chr06 | 11785159                | CC                                     | TT                 | TT               | INTERGENIC      |               |                    |                    |
| SNP_40641_A_11789119 | NC_021165.1    | Ca_Kabuli_Chr06 | 11789119                | TT                                     | CC                 | CC               | INTERGENIC      |               |                    |                    |
| SNP_40642_A_11790861 | NC_021165.1    | Ca_Kabuli_Chr06 | 11790861                | GG                                     | AA                 | AA               | INTERGENIC      |               |                    |                    |
| SNP_40643_A_11791072 | NC_021165.1    | Ca_Kabuli_Chr06 | 11791072                | CC                                     | TT                 | TT               | INTERGENIC      |               |                    |                    |
| SNP_40646_A_11807351 | NC_021165.1    | Ca_Kabuli_Chr06 | 11807351                | GG                                     | TT                 | TT               | INTERGENIC      |               |                    |                    |
| SNP_40647_A_11809714 | NC_021165.1    | Ca_Kabuli_Chr06 | 11809714                | CC                                     | AA                 | AA               | INTERGENIC      |               |                    |                    |
| SNP_40648_A_11812959 | NC_021165.1    | Ca_Kabuli_Chr06 | 11812959                | AA                                     | CC                 | CC               | INTERGENIC      |               |                    |                    |
| SNP_40649_A_11813918 | NC_021165.1    | Ca_Kabuli_Chr06 | 11813918                | CC                                     | TT                 | TT               | INTERGENIC      |               |                    |                    |
| SNP_40650_A_11827647 | NC_021165.1    | Ca_Kabuli_Chr06 | 11827647                | GG                                     | TT                 | TT               | INTERGENIC      |               |                    |                    |
| SNP_40651_A_11840279 | NC_021165.1    | Ca_Kabuli_Chr06 | 11840279                | GG                                     | AA                 | AA               | INTERGENIC      |               |                    |                    |
| SNP_40652_A_11840287 | NC_021165.1    | Ca_Kabuli_Chr06 | 11840287                | CC                                     | TT                 | TT               | INTERGENIC      |               |                    |                    |
| SNP_40653_A_11840293 | NC_021165.1    | Ca_Kabuli_Chr06 | 11840293                | TT                                     | CC                 | CC               | INTERGENIC      |               |                    |                    |
| SNP_40654_A_11840373 | NC_021165.1    | Ca_Kabuli_Chr06 | 11840373                | TT                                     | CC                 | CC               | INTERGENIC      |               |                    |                    |
| SNP_40656_A_11850507 | NC_021165.1    | Ca_Kabuli_Chr06 | 11850507                | GG                                     | TT                 | TT               | INTERGENIC      |               |                    |                    |

| SNPs IDs             | Chromosome IDs | Chromosomes     | Physical positions (bp) | CDC Frontier genome (Reference genome) | (Pusa 1103 & HPNB) | (ILWC 46 & LPNB) | Sequence Components of genome | Gene accession IDs | Putative functions                                                   |
|----------------------|----------------|-----------------|-------------------------|----------------------------------------|--------------------|------------------|-------------------------------|--------------------|----------------------------------------------------------------------|
| SNP_40657_A_11850537 | NC_021165.1    | Ca_Kabuli_Chr06 | 11850537                | GG                                     | AA                 | AA               | INTERGENIC                    |                    |                                                                      |
| SNP_40658_A_11883910 | NC_021165.1    | Ca_Kabuli_Chr06 | 11883910                | AA                                     | GG                 | GG               | INTERGENIC                    |                    |                                                                      |
| SNP_40659_A_11890200 | NC_021165.1    | Ca_Kabuli_Chr06 | 11890200                | GG                                     | TT                 | TT               | INTERGENIC                    |                    |                                                                      |
| SNP_40660_A_11922689 | NC_021165.1    | Ca_Kabuli_Chr06 | 11922689                | CC                                     | TT                 | TT               | INTERGENIC                    |                    |                                                                      |
| SNP_40661_A_11969224 | NC_021165.1    | Ca_Kabuli_Chr06 | 11969224                | AA                                     | GG                 | GG               | INTERGENIC                    |                    |                                                                      |
| SNP_40662_A_11969297 | NC_021165.1    | Ca_Kabuli_Chr06 | 11969297                | CC                                     | TT                 | TT               | INTERGENIC                    |                    |                                                                      |
| SNP_40663_A_11969366 | NC_021165.1    | Ca_Kabuli_Chr06 | 11969366                | GG                                     | AA                 | AA               | INTERGENIC                    |                    |                                                                      |
| SNP_40664_A_11996943 | NC_021165.1    | Ca_Kabuli_Chr06 | 11996943                | CC                                     | GG                 | GG               | INTRON                        | 101495149          | pentatricopeptide chloroplastic-like repeat-containing protein DOT4, |
| SNP_40665_A_12007280 | NC_021165.1    | Ca_Kabuli_Chr06 | 12007280                | AA                                     | CC                 | CC               | INTRON                        | 101495149          | pentatricopeptide chloroplastic-like repeat-containing protein DOT4, |
| SNP_40666_A_12007780 | NC_021165.1    | Ca_Kabuli_Chr06 | 12007780                | TT                                     | CC                 | CC               | INTRON                        | 101495149          | pentatricopeptide chloroplastic-like repeat-containing protein DOT4, |
| SNP_40667_A_12011876 | NC_021165.1    | Ca_Kabuli_Chr06 | 12011876                | AA                                     | TT                 | TT               | INTRON                        | 101495149          | pentatricopeptide chloroplastic-like repeat-containing protein DOT4, |
| SNP_40669_A_12078344 | NC_021165.1    | Ca_Kabuli_Chr06 | 12078344                | TT                                     | GG                 | GG               | INTRON                        | 101496125          | Unknown function                                                     |
| SNP_40670_A_12089508 | NC_021165.1    | Ca_Kabuli_Chr06 | 12089508                | TT                                     | CC                 | CC               | INTERGENIC                    |                    |                                                                      |
| SNP_40671_A_12089612 | NC_021165.1    | Ca_Kabuli_Chr06 | 12089612                | TT                                     | CC                 | CC               | INTERGENIC                    |                    |                                                                      |
| SNP_40672_A_12089707 | NC_021165.1    | Ca_Kabuli_Chr06 | 12089707                | TT                                     | CC                 | CC               | INTERGENIC                    |                    |                                                                      |
| SNP_40673_A_12089868 | NC_021165.1    | Ca_Kabuli_Chr06 | 12089868                | GG                                     | AA                 | AA               | INTERGENIC                    |                    |                                                                      |
| SNP_40674_A_12090046 | NC_021165.1    | Ca_Kabuli_Chr06 | 12090046                | TT                                     | CC                 | CC               | INTERGENIC                    |                    |                                                                      |
| SNP_40675_A_12090923 | NC_021165.1    | Ca_Kabuli_Chr06 | 12090923                | AA                                     | GG                 | GG               | INTERGENIC                    |                    |                                                                      |
| SNP_40676_A_12091041 | NC_021165.1    | Ca_Kabuli_Chr06 | 12091041                | AA                                     | GG                 | GG               | INTERGENIC                    |                    |                                                                      |
| SNP_40677_A_12091432 | NC_021165.1    | Ca_Kabuli_Chr06 | 12091432                | AA                                     | CC                 | CC               | INTERGENIC                    |                    |                                                                      |
| SNP_40678_A_12091458 | NC_021165.1    | Ca_Kabuli_Chr06 | 12091458                | GG                                     | TT                 | TT               | INTERGENIC                    |                    |                                                                      |
| SNP_40679_A_12091466 | NC_021165.1    | Ca_Kabuli_Chr06 | 12091466                | CC                                     | TT                 | TT               | INTERGENIC                    |                    |                                                                      |

| SNPs IDs             | Chromosome IDs | Chromosomes     | Physical positions (bp) | CDC Frontier genome (Reference genome) | (Pusa 1103 & HPNB) | (ILWC 46 & LPNB) | Sequence Components of genome | Gene accession IDs | Putative functions           |
|----------------------|----------------|-----------------|-------------------------|----------------------------------------|--------------------|------------------|-------------------------------|--------------------|------------------------------|
| SNP_40680_A_12104906 | NC_021165.1    | Ca_Kabuli_Chr06 | 12104906                | CC                                     | TT                 | TT               | INTERGENIC                    |                    |                              |
| SNP_40682_A_12109723 | NC_021165.1    | Ca_Kabuli_Chr06 | 12109723                | AA                                     | CC                 | CC               | DRR                           | 101496783          | uncharacterized LOC101496783 |
| SNP_40683_A_12111972 | NC_021165.1    | Ca_Kabuli_Chr06 | 12111972                | AA                                     | GG                 | GG               | URR                           | 101496783          | uncharacterized LOC101496783 |
| SNP_40685_A_12127440 | NC_021165.1    | Ca_Kabuli_Chr06 | 12127440                | GG                                     | TT                 | TT               | INTERGENIC                    |                    |                              |
| SNP_40686_A_12127481 | NC_021165.1    | Ca_Kabuli_Chr06 | 12127481                | GG                                     | AA                 | AA               | INTERGENIC                    |                    |                              |
| SNP_40687_A_12199901 | NC_021165.1    | Ca_Kabuli_Chr06 | 12199901                | CC                                     | AA                 | AA               | INTERGENIC                    |                    |                              |
| SNP_40688_A_12236494 | NC_021165.1    | Ca_Kabuli_Chr06 | 12236494                | TT                                     | CC                 | CC               | INTERGENIC                    |                    |                              |
| SNP_40689_A_12236535 | NC_021165.1    | Ca_Kabuli_Chr06 | 12236535                | TT                                     | CC                 | CC               | INTERGENIC                    |                    |                              |
| SNP_40690_A_12236576 | NC_021165.1    | Ca_Kabuli_Chr06 | 12236576                | TT                                     | CC                 | CC               | INTERGENIC                    |                    |                              |
| SNP_40691_A_12236595 | NC_021165.1    | Ca_Kabuli_Chr06 | 12236595                | TT                                     | GG                 | GG               | INTERGENIC                    |                    |                              |
| SNP_40692_A_12236640 | NC_021165.1    | Ca_Kabuli_Chr06 | 12236640                | CC                                     | TT                 | TT               | INTERGENIC                    |                    |                              |
| SNP_40693_A_12236814 | NC_021165.1    | Ca_Kabuli_Chr06 | 12236814                | GG                                     | AA                 | AA               | INTERGENIC                    |                    |                              |
| SNP_40694_A_12238250 | NC_021165.1    | Ca_Kabuli_Chr06 | 12238250                | GG                                     | TT                 | TT               | INTERGENIC                    |                    |                              |
| SNP_40695_A_12238253 | NC_021165.1    | Ca_Kabuli_Chr06 | 12238253                | GG                                     | AA                 | AA               | INTERGENIC                    |                    |                              |
| SNP_40697_A_12238293 | NC_021165.1    | Ca_Kabuli_Chr06 | 12238293                | GG                                     | TT                 | TT               | INTERGENIC                    |                    |                              |
| SNP_40698_A_12238809 | NC_021165.1    | Ca_Kabuli_Chr06 | 12238809                | GG                                     | TT                 | TT               | INTERGENIC                    |                    |                              |
| SNP_40699_A_12248814 | NC_021165.1    | Ca_Kabuli_Chr06 | 12248814                | AA                                     | GG                 | GG               | INTERGENIC                    |                    |                              |
| SNP_40700_A_12251664 | NC_021165.1    | Ca_Kabuli_Chr06 | 12251664                | GG                                     | AA                 | AA               | DRR                           | 101497766          | uncharacterized LOC101497766 |
| SNP_40701_A_12252262 | NC_021165.1    | Ca_Kabuli_Chr06 | 12252262                | AA                                     | GG                 | GG               | NON_SYNONYMOUS_CODING         | 101497766          | uncharacterized LOC101497766 |
| SNP_40703_A_12254382 | NC_021165.1    | Ca_Kabuli_Chr06 | 12254382                | AA                                     | CC                 | CC               | URR                           | 101497766          | uncharacterized LOC101497766 |
| SNP_40705_A_12254528 | NC_021165.1    | Ca_Kabuli_Chr06 | 12254528                | CC                                     | TT                 | TT               | URR                           | 101497766          | uncharacterized LOC101497766 |
| SNP_40706_A_12258934 | NC_021165.1    | Ca_Kabuli_Chr06 | 12258934                | AA                                     | GG                 | GG               | INTERGENIC                    |                    |                              |

| SNPs IDs             | Chromosome IDs | Chromosomes     | Physical positions (bp) | CDC Frontier genome (Reference genome) | (Pusa 1103 & HPNB) | (ILWC 46 & LPNB) | Sequence Components of genome | Gene accession IDs | Putative functions                   |
|----------------------|----------------|-----------------|-------------------------|----------------------------------------|--------------------|------------------|-------------------------------|--------------------|--------------------------------------|
| SNP_40707_A_12258948 | NC_021165.1    | Ca_Kabuli_Chr06 | 12258948                | GG                                     | AA                 | AA               | INTERGENIC                    |                    |                                      |
| SNP_40708_A_12258959 | NC_021165.1    | Ca_Kabuli_Chr06 | 12258959                | GG                                     | AA                 | AA               | INTERGENIC                    |                    |                                      |
| SNP_40709_A_12258962 | NC_021165.1    | Ca_Kabuli_Chr06 | 12258962                | CC                                     | GG                 | GG               | INTERGENIC                    |                    |                                      |
| SNP_40710_A_12260137 | NC_021165.1    | Ca_Kabuli_Chr06 | 12260137                | GG                                     | AA                 | AA               | INTERGENIC                    |                    |                                      |
| SNP_40711_A_12260202 | NC_021165.1    | Ca_Kabuli_Chr06 | 12260202                | AA                                     | CC                 | CC               | INTERGENIC                    |                    |                                      |
| SNP_40712_A_12260205 | NC_021165.1    | Ca_Kabuli_Chr06 | 12260205                | CC                                     | TT                 | TT               | INTERGENIC                    |                    |                                      |
| SNP_40713_A_12260311 | NC_021165.1    | Ca_Kabuli_Chr06 | 12260311                | TT                                     | CC                 | CC               | INTERGENIC                    |                    |                                      |
| SNP_40714_A_12260352 | NC_021165.1    | Ca_Kabuli_Chr06 | 12260352                | TT                                     | CC                 | CC               | INTERGENIC                    |                    |                                      |
| SNP_40715_A_12260757 | NC_021165.1    | Ca_Kabuli_Chr06 | 12260757                | GG                                     | AA                 | AA               | INTERGENIC                    |                    |                                      |
| SNP_40716_A_12270658 | NC_021165.1    | Ca_Kabuli_Chr06 | 12270658                | CC                                     | TT                 | TT               | INTERGENIC                    |                    |                                      |
| SNP_40717_A_12309377 | NC_021165.1    | Ca_Kabuli_Chr06 | 12309377                | GG                                     | TT                 | TT               | INTERGENIC                    |                    |                                      |
| SNP_40718_A_12309386 | NC_021165.1    | Ca_Kabuli_Chr06 | 12309386                | TT                                     | CC                 | CC               | INTERGENIC                    |                    |                                      |
| SNP_40719_A_12315495 | NC_021165.1    | Ca_Kabuli_Chr06 | 12315495                | TT                                     | CC                 | CC               | DRR                           | 101498089          | probable polygalacturonase At3g15720 |
| SNP_40720_A_12333862 | NC_021165.1    | Ca_Kabuli_Chr06 | 12333862                | AA                                     | TT                 | TT               | INTERGENIC                    |                    |                                      |
| SNP_40721_A_12335009 | NC_021165.1    | Ca_Kabuli_Chr06 | 12335009                | CC                                     | AA                 | AA               | INTERGENIC                    |                    |                                      |
| SNP_40722_A_12335042 | NC_021165.1    | Ca_Kabuli_Chr06 | 12335042                | TT                                     | CC                 | CC               | INTERGENIC                    |                    |                                      |
| SNP_40723_A_12335259 | NC_021165.1    | Ca_Kabuli_Chr06 | 12335259                | CC                                     | AA                 | AA               | INTERGENIC                    |                    |                                      |
| SNP_40725_A_12335803 | NC_021165.1    | Ca_Kabuli_Chr06 | 12335803                | AA                                     | TT                 | TT               | DRR                           | 101494821          | uncharacterized LOC101494821         |
| SNP_40726_A_12340733 | NC_021165.1    | Ca_Kabuli_Chr06 | 12340733                | CC                                     | TT                 | TT               | INTERGENIC                    |                    |                                      |
| SNP_40727_A_12340748 | NC_021165.1    | Ca_Kabuli_Chr06 | 12340748                | GG                                     | AA                 | AA               | INTERGENIC                    |                    |                                      |
| SNP_40728_A_12357638 | NC_021165.1    | Ca_Kabuli_Chr06 | 12357638                | GG                                     | AA                 | AA               | INTERGENIC                    |                    |                                      |
| SNP_40729_A_12445734 | NC_021165.1    | Ca_Kabuli_Chr06 | 12445734                | CC                                     | GG                 | GG               | URR                           | 101501199          | 60S ribosomal protein L38-like       |

| SNPs IDs             | Chromosome IDs | Chromosomes     | Physical positions (bp) | CDC Frontier genome (Reference genome) | (Pusa 1103 & HPNB) | (ILWC 46 & LPNB) | Sequence Components of genome | Gene accession IDs | Putative functions                              |
|----------------------|----------------|-----------------|-------------------------|----------------------------------------|--------------------|------------------|-------------------------------|--------------------|-------------------------------------------------|
| SNP_40731_A_12549052 | NC_021165.1    | Ca_Kabuli_Chr06 | 12549052                | GG                                     | CC                 | CC               | SYNONYMOUS_CODING             | 101504188          | probable inositol transporter 2                 |
| SNP_40733_A_12665952 | NC_021165.1    | Ca_Kabuli_Chr06 | 12665952                | CC                                     | TT                 | TT               | INTERGENIC                    |                    |                                                 |
| SNP_40734_A_12712884 | NC_021165.1    | Ca_Kabuli_Chr06 | 12712884                | AA                                     | GG                 | GG               | INTERGENIC                    |                    |                                                 |
| SNP_40735_A_12721227 | NC_021165.1    | Ca_Kabuli_Chr06 | 12721227                | TT                                     | CC                 | CC               | INTERGENIC                    |                    |                                                 |
| SNP_40736_A_12724592 | NC_021165.1    | Ca_Kabuli_Chr06 | 12724592                | TT                                     | AA                 | AA               | INTERGENIC                    |                    |                                                 |
| SNP_40737_A_12757635 | NC_021165.1    | Ca_Kabuli_Chr06 | 12757635                | AA                                     | GG                 | GG               | INTERGENIC                    |                    |                                                 |
| SNP_40739_A_12835195 | NC_021165.1    | Ca_Kabuli_Chr06 | 12835195                | TT                                     | CC                 | CC               | INTERGENIC                    |                    |                                                 |
| SNP_40740_A_12835196 | NC_021165.1    | Ca_Kabuli_Chr06 | 12835196                | AA                                     | GG                 | GG               | INTERGENIC                    |                    |                                                 |
| SNP_40741_A_12853552 | NC_021165.1    | Ca_Kabuli_Chr06 | 12853552                | TT                                     | AA                 | AA               | INTRON                        | 101510942          | putative receptor-like protein kinase At4g00960 |
| SNP_40744_A_12856656 | NC_021165.1    | Ca_Kabuli_Chr06 | 12856656                | CC                                     | GG                 | GG               | URR                           | 101510942          | putative receptor-like protein kinase At4g00960 |
| SNP_40745_A_12861040 | NC_021165.1    | Ca_Kabuli_Chr06 | 12861040                | CC                                     | TT                 | TT               | INTERGENIC                    |                    |                                                 |
| SNP_40747_A_12862143 | NC_021165.1    | Ca_Kabuli_Chr06 | 12862143                | CC                                     | TT                 | TT               | INTERGENIC                    |                    |                                                 |
| SNP_40748_A_12862590 | NC_021165.1    | Ca_Kabuli_Chr06 | 12862590                | TT                                     | CC                 | CC               | INTERGENIC                    |                    |                                                 |
| SNP_40749_A_12864202 | NC_021165.1    | Ca_Kabuli_Chr06 | 12864202                | TT                                     | CC                 | CC               | INTRON                        | 101511457          | putative ubiquitin-conjugating enzyme E2 38     |
| SNP_40750_A_12865231 | NC_021165.1    | Ca_Kabuli_Chr06 | 12865231                | CC                                     | TT                 | TT               | INTRON                        | 101511457          | putative ubiquitin-conjugating enzyme E2 38     |
| SNP_40752_A_12868410 | NC_021165.1    | Ca_Kabuli_Chr06 | 12868410                | GG                                     | TT                 | TT               | URR                           | 101511457          | putative ubiquitin-conjugating enzyme E2 38     |
| SNP_40753_A_12869818 | NC_021165.1    | Ca_Kabuli_Chr06 | 12869818                | CC                                     | TT                 | TT               | URR                           | 101511457          | putative ubiquitin-conjugating enzyme E2 38     |
| SNP_40754_A_12871234 | NC_021165.1    | Ca_Kabuli_Chr06 | 12871234                | AA                                     | TT                 | TT               | INTERGENIC                    |                    |                                                 |
| SNP_40755_A_12871268 | NC_021165.1    | Ca_Kabuli_Chr06 | 12871268                | GG                                     | AA                 | AA               | INTERGENIC                    |                    |                                                 |
| SNP_40756_A_12871284 | NC_021165.1    | Ca_Kabuli_Chr06 | 12871284                | TT                                     | AA                 | AA               | INTERGENIC                    |                    |                                                 |
| SNP_40757_A_12871346 | NC_021165.1    | Ca_Kabuli_Chr06 | 12871346                | AA                                     | GG                 | GG               | INTERGENIC                    |                    |                                                 |
| SNP_40758_A_12877206 | NC_021165.1    | Ca_Kabuli_Chr06 | 12877206                | CC                                     | GG                 | GG               | INTERGENIC                    |                    |                                                 |

| SNPs IDs             | Chromosome IDs | Chromosomes     | Physical positions (bp) | CDC Frontier genome (Reference genome) | (Pusa 1103 & HPNB) | (ILWC 46 & LPNB) | Sequence Components of genome | Gene accession IDs | Putative functions                                 |
|----------------------|----------------|-----------------|-------------------------|----------------------------------------|--------------------|------------------|-------------------------------|--------------------|----------------------------------------------------|
| SNP_40760_A_12877357 | NC_021165.1    | Ca_Kabuli_Chr06 | 12877357                | TT                                     | CC                 | CC               | INTERGENIC                    |                    |                                                    |
| SNP_40761_A_12877364 | NC_021165.1    | Ca_Kabuli_Chr06 | 12877364                | CC                                     | TT                 | TT               | INTERGENIC                    |                    |                                                    |
| SNP_40762_A_12877529 | NC_021165.1    | Ca_Kabuli_Chr06 | 12877529                | GG                                     | AA                 | AA               | INTERGENIC                    |                    |                                                    |
| SNP_40763_A_12878854 | NC_021165.1    | Ca_Kabuli_Chr06 | 12878854                | CC                                     | TT                 | TT               | DRR                           | 101511782          | L-Ala-D/L-amino acid epimerase                     |
| SNP_40765_A_12883866 | NC_021165.1    | Ca_Kabuli_Chr06 | 12883866                | TT                                     | AA                 | AA               | URR                           | 101511782          | L-Ala-D/L-amino acid epimerase                     |
| SNP_40766_A_12884163 | NC_021165.1    | Ca_Kabuli_Chr06 | 12884163                | GG                                     | CC                 | CC               | URR                           | 101511782          | L-Ala-D/L-amino acid epimerase                     |
| SNP_40767_A_12885837 | NC_021165.1    | Ca_Kabuli_Chr06 | 12885837                | TT                                     | CC                 | CC               | INTERGENIC                    |                    |                                                    |
| SNP_40768_A_12887005 | NC_021165.1    | Ca_Kabuli_Chr06 | 12887005                | TT                                     | CC                 | CC               | URR                           | 101512095          | uncharacterized LOC101512095                       |
| SNP_40769_A_12887019 | NC_021165.1    | Ca_Kabuli_Chr06 | 12887019                | CC                                     | AA                 | AA               | URR                           | 101512095          | uncharacterized LOC101512095                       |
| SNP_40770_A_12887025 | NC_021165.1    | Ca_Kabuli_Chr06 | 12887025                | GG                                     | AA                 | AA               | URR                           | 101512095          | uncharacterized LOC101512095                       |
| SNP_40771_A_12887027 | NC_021165.1    | Ca_Kabuli_Chr06 | 12887027                | CC                                     | TT                 | TT               | URR                           | 101512095          | uncharacterized LOC101512095                       |
| SNP_40772_A_12887033 | NC_021165.1    | Ca_Kabuli_Chr06 | 12887033                | AA                                     | GG                 | GG               | URR                           | 101512095          | uncharacterized LOC101512095                       |
| SNP_40773_A_12887048 | NC_021165.1    | Ca_Kabuli_Chr06 | 12887048                | AA                                     | GG                 | GG               | URR                           | 101512095          | uncharacterized LOC101512095                       |
| SNP_40776_A_12894082 | NC_021165.1    | Ca_Kabuli_Chr06 | 12894082                | CC                                     | TT                 | TT               | INTRON                        | 101512427          | uncharacterized protein PF07_0086-like             |
| SNP_40777_A_12894142 | NC_021165.1    | Ca_Kabuli_Chr06 | 12894142                | CC                                     | AA                 | AA               | INTRON                        | 101512427          | uncharacterized protein PF07_0086-like             |
| SNP_40778_A_12896969 | NC_021165.1    | Ca_Kabuli_Chr06 | 12896969                | GG                                     | TT                 | TT               | INTRON                        | 101512427          | uncharacterized protein PF07_0086-like             |
| SNP_40779_A_12896991 | NC_021165.1    | Ca_Kabuli_Chr06 | 12896991                | CC                                     | TT                 | TT               | INTRON                        | 101512427          | uncharacterized protein PF07_0086-like             |
| SNP_40780_A_12897002 | NC_021165.1    | Ca_Kabuli_Chr06 | 12897002                | CC                                     | TT                 | TT               | INTRON                        | 101512427          | uncharacterized protein PF07_0086-like             |
| SNP_40781_A_12897040 | NC_021165.1    | Ca_Kabuli_Chr06 | 12897040                | TT                                     | AA                 | AA               | INTRON                        | 101512427          | uncharacterized protein PF07_0086-like             |
| SNP_40783_A_12904402 | NC_021165.1    | Ca_Kabuli_Chr06 | 12904402                | GG                                     | AA                 | AA               | DRR                           | 101512747          | probable serine/threonine-protein kinase At1g18390 |
| SNP_40784_A_12909537 | NC_021165.1    | Ca_Kabuli_Chr06 | 12909537                | AA                                     | CC                 | CC               | URR                           | 101512747          | probable serine/threonine-protein kinase At1g18390 |
| SNP_40786_A_12909913 | NC_021165.1    | Ca_Kabuli_Chr06 | 12909913                | GG                                     | CC                 | CC               | URR                           | 101512747          | probable serine/threonine-protein kinase At1g18390 |

| SNPs IDs             | Chromosome IDs | Chromosomes     | Physical positions (bp) | CDC Frontier (Reference genome) | (Pusa 1103 & HPNB) | (ILWC 46 & LPNB) | Sequence Components of genome | Gene accession IDs | Putative functions                                |
|----------------------|----------------|-----------------|-------------------------|---------------------------------|--------------------|------------------|-------------------------------|--------------------|---------------------------------------------------|
| SNP_40787_A_12916096 | NC_021165.1    | Ca_Kabuli_Chr06 | 12916096                | AA                              | GG                 | GG               | INTERGENIC                    |                    |                                                   |
| SNP_40788_A_12920519 | NC_021165.1    | Ca_Kabuli_Chr06 | 12920519                | AA                              | CC                 | CC               | INTERGENIC                    |                    |                                                   |
| SNP_40789_A_12920535 | NC_021165.1    | Ca_Kabuli_Chr06 | 12920535                | TT                              | CC                 | CC               | INTERGENIC                    |                    |                                                   |
| SNP_40791_A_12920621 | NC_021165.1    | Ca_Kabuli_Chr06 | 12920621                | TT                              | CC                 | CC               | INTERGENIC                    |                    |                                                   |
| SNP_40792_A_12920910 | NC_021165.1    | Ca_Kabuli_Chr06 | 12920910                | AA                              | GG                 | GG               | INTERGENIC                    |                    |                                                   |
| SNP_40793_A_12920915 | NC_021165.1    | Ca_Kabuli_Chr06 | 12920915                | AA                              | TT                 | TT               | INTERGENIC                    |                    |                                                   |
| SNP_40794_A_12921532 | NC_021165.1    | Ca_Kabuli_Chr06 | 12921532                | AA                              | TT                 | TT               | INTERGENIC                    |                    |                                                   |
| SNP_40795_A_12921546 | NC_021165.1    | Ca_Kabuli_Chr06 | 12921546                | CC                              | TT                 | TT               | INTERGENIC                    |                    |                                                   |
| SNP_40797_A_12923136 | NC_021165.1    | Ca_Kabuli_Chr06 | 12923136                | TT                              | AA                 | AA               | DRR                           | 101513074          | zinc finger protein 4-like                        |
| SNP_40798_A_12923830 | NC_021165.1    | Ca_Kabuli_Chr06 | 12923830                | CC                              | TT                 | TT               | DRR                           | 101513074          | zinc finger protein 4-like                        |
| SNP_40799_A_12923844 | NC_021165.1    | Ca_Kabuli_Chr06 | 12923844                | AA                              | CC                 | CC               | DRR                           | 101513074          | zinc finger protein 4-like                        |
| SNP_40800_A_12933646 | NC_021165.1    | Ca_Kabuli_Chr06 | 12933646                | TT                              | CC                 | CC               | INTERGENIC                    |                    |                                                   |
| SNP_40801_A_12934556 | NC_021165.1    | Ca_Kabuli_Chr06 | 12934556                | CC                              | TT                 | TT               | DRR                           | 101513400          | protein OBERON 3                                  |
| SNP_40804_A_12934938 | NC_021165.1    | Ca_Kabuli_Chr06 | 12934938                | GG                              | TT                 | TT               | DRR                           | 101513400          | protein OBERON 3                                  |
| SNP_40806_A_12936126 | NC_021165.1    | Ca_Kabuli_Chr06 | 12936126                | AA                              | TT                 | TT               | INTERGENIC                    |                    |                                                   |
| SNP_40807_A_12936150 | NC_021165.1    | Ca_Kabuli_Chr06 | 12936150                | TT                              | CC                 | CC               | INTERGENIC                    |                    |                                                   |
| SNP_40808_A_12940507 | NC_021165.1    | Ca_Kabuli_Chr06 | 12940507                | AA                              | TT                 | TT               | URR                           | 101513400          | protein OBERON 3                                  |
| SNP_40809_A_12940638 | NC_021165.1    | Ca_Kabuli_Chr06 | 12940638                | CC                              | TT                 | TT               | URR                           | 101513400          | protein OBERON 3                                  |
| SNP_40811_A_12943092 | NC_021165.1    | Ca_Kabuli_Chr06 | 12943092                | GG                              | CC                 | CC               | URR                           | 101513713          | probable transmembrane ascorbate ferrireductase 3 |
| SNP_40812_A_12950093 | NC_021165.1    | Ca_Kabuli_Chr06 | 12950093                | AA                              | GG                 | GG               | INTERGENIC                    |                    |                                                   |
| SNP_40813_A_12950534 | NC_021165.1    | Ca_Kabuli_Chr06 | 12950534                | GG                              | TT                 | TT               | INTERGENIC                    |                    |                                                   |
| SNP_40815_A_12952174 | NC_021165.1    | Ca_Kabuli_Chr06 | 12952174                | CC                              | AA                 | AA               | INTERGENIC                    |                    |                                                   |

| SNPs IDs             | Chromosome IDs | Chromosomes     | Physical positions (bp) | CDC Frontier genome (Reference genome) | (Pusa 1103 & HPNB) | (ILWC 46 & LPNB) | Sequence genome | Components of | Gene accession IDs | Putative functions |
|----------------------|----------------|-----------------|-------------------------|----------------------------------------|--------------------|------------------|-----------------|---------------|--------------------|--------------------|
| SNP_40816_A_12952179 | NC_021165.1    | Ca_Kabuli_Chr06 | 12952179                | CC                                     | GG                 | GG               | INTERGENIC      |               |                    |                    |
| SNP_40819_A_12953183 | NC_021165.1    | Ca_Kabuli_Chr06 | 12953183                | GG                                     | AA                 | AA               | INTERGENIC      |               |                    |                    |
| SNP_40820_A_12954318 | NC_021165.1    | Ca_Kabuli_Chr06 | 12954318                | AA                                     | TT                 | TT               | INTERGENIC      |               |                    |                    |
| SNP_40821_A_12954319 | NC_021165.1    | Ca_Kabuli_Chr06 | 12954319                | CC                                     | TT                 | TT               | INTERGENIC      |               |                    |                    |
| SNP_40822_A_12954374 | NC_021165.1    | Ca_Kabuli_Chr06 | 12954374                | GG                                     | AA                 | AA               | INTERGENIC      |               |                    |                    |
| SNP_40823_A_12954386 | NC_021165.1    | Ca_Kabuli_Chr06 | 12954386                | GG                                     | AA                 | AA               | INTERGENIC      |               |                    |                    |
| SNP_40824_A_12954429 | NC_021165.1    | Ca_Kabuli_Chr06 | 12954429                | TT                                     | AA                 | AA               | INTERGENIC      |               |                    |                    |
| SNP_40826_A_12954619 | NC_021165.1    | Ca_Kabuli_Chr06 | 12954619                | AA                                     | TT                 | TT               | INTERGENIC      |               |                    |                    |
| SNP_40827_A_12954628 | NC_021165.1    | Ca_Kabuli_Chr06 | 12954628                | AA                                     | GG                 | GG               | INTERGENIC      |               |                    |                    |
| SNP_40828_A_12954682 | NC_021165.1    | Ca_Kabuli_Chr06 | 12954682                | CC                                     | AA                 | AA               | INTERGENIC      |               |                    |                    |
| SNP_40829_A_12954951 | NC_021165.1    | Ca_Kabuli_Chr06 | 12954951                | AA                                     | GG                 | GG               | INTERGENIC      |               |                    |                    |
| SNP_40830_A_12954965 | NC_021165.1    | Ca_Kabuli_Chr06 | 12954965                | GG                                     | TT                 | TT               | INTERGENIC      |               |                    |                    |
| SNP_40831_A_12955267 | NC_021165.1    | Ca_Kabuli_Chr06 | 12955267                | AA                                     | CC                 | CC               | INTERGENIC      |               |                    |                    |
| SNP_40832_A_12955292 | NC_021165.1    | Ca_Kabuli_Chr06 | 12955292                | AA                                     | TT                 | TT               | INTERGENIC      |               |                    |                    |
| SNP_40833_A_12955957 | NC_021165.1    | Ca_Kabuli_Chr06 | 12955957                | TT                                     | GG                 | GG               | INTERGENIC      |               |                    |                    |
| SNP_40834_A_12956242 | NC_021165.1    | Ca_Kabuli_Chr06 | 12956242                | CC                                     | TT                 | TT               | INTERGENIC      |               |                    |                    |
| SNP_40835_A_12956492 | NC_021165.1    | Ca_Kabuli_Chr06 | 12956492                | TT                                     | CC                 | CC               | INTERGENIC      |               |                    |                    |
| SNP_40837_A_12957273 | NC_021165.1    | Ca_Kabuli_Chr06 | 12957273                | AA                                     | GG                 | GG               | INTERGENIC      |               |                    |                    |
| SNP_40838_A_12957287 | NC_021165.1    | Ca_Kabuli_Chr06 | 12957287                | CC                                     | TT                 | TT               | INTERGENIC      |               |                    |                    |
| SNP_40839_A_12957374 | NC_021165.1    | Ca_Kabuli_Chr06 | 12957374                | TT                                     | CC                 | CC               | INTERGENIC      |               |                    |                    |
| SNP_40840_A_12957385 | NC_021165.1    | Ca_Kabuli_Chr06 | 12957385                | AA                                     | TT                 | TT               | INTERGENIC      |               |                    |                    |
| SNP_40842_A_12957555 | NC_021165.1    | Ca_Kabuli_Chr06 | 12957555                | CC                                     | TT                 | TT               | INTERGENIC      |               |                    |                    |



| SNPs IDs             | Chromosome IDs | Chromosomes     | Physical positions (bp) | CDC Frontier genome (Reference genome) | (Pusa 1103 & HPNB) | (ILWC 46 & LPNB) | Sequence Components of genome | Gene accession IDs | Putative functions                                            |
|----------------------|----------------|-----------------|-------------------------|----------------------------------------|--------------------|------------------|-------------------------------|--------------------|---------------------------------------------------------------|
| SNP_40843_A_12957998 | NC_021165.1    | Ca_Kabuli_Chr06 | 12957998                | CC                                     | GG                 | GG               | DRR                           | 101514050          | probable xyloglucan endotransglucosylase/hydrolase protein 28 |
| SNP_40845_A_12962484 | NC_021165.1    | Ca_Kabuli_Chr06 | 12962484                | TT                                     | AA                 | AA               | URR                           | 101514050          | probable xyloglucan endotransglucosylase/hydrolase protein 28 |
| SNP_40846_A_12962912 | NC_021165.1    | Ca_Kabuli_Chr06 | 12962912                | AA                                     | GG                 | GG               | URR                           | 101514050          | probable xyloglucan endotransglucosylase/hydrolase protein 28 |
| SNP_40848_A_12964692 | NC_021165.1    | Ca_Kabuli_Chr06 | 12964692                | AA                                     | CC                 | CC               | INTERGENIC                    |                    |                                                               |
| SNP_40849_A_12965016 | NC_021165.1    | Ca_Kabuli_Chr06 | 12965016                | CC                                     | TT                 | TT               | INTERGENIC                    |                    |                                                               |
| SNP_40850_A_12965225 | NC_021165.1    | Ca_Kabuli_Chr06 | 12965225                | TT                                     | AA                 | AA               | INTERGENIC                    |                    |                                                               |
| SNP_40851_A_12965335 | NC_021165.1    | Ca_Kabuli_Chr06 | 12965335                | CC                                     | TT                 | TT               | INTERGENIC                    |                    |                                                               |
| SNP_40854_A_12966061 | NC_021165.1    | Ca_Kabuli_Chr06 | 12966061                | TT                                     | CC                 | CC               | INTERGENIC                    |                    |                                                               |
| SNP_40855_A_12971127 | NC_021165.1    | Ca_Kabuli_Chr06 | 12971127                | GG                                     | AA                 | AA               | INTRON                        | 101514379          | uncharacterized LOC101514379                                  |
| SNP_40856_A_12972137 | NC_021165.1    | Ca_Kabuli_Chr06 | 12972137                | CC                                     | AA                 | AA               | INTRON                        | 101514379          | uncharacterized LOC101514379                                  |
| SNP_40858_A_12977814 | NC_021165.1    | Ca_Kabuli_Chr06 | 12977814                | AA                                     | GG                 | GG               | DRR                           | 101515785          | purple acid phosphatase 7-like                                |
| SNP_40859_A_12977828 | NC_021165.1    | Ca_Kabuli_Chr06 | 12977828                | GG                                     | AA                 | AA               | DRR                           | 101515785          | purple acid phosphatase 7-like                                |
| SNP_40861_A_12981466 | NC_021165.1    | Ca_Kabuli_Chr06 | 12981466                | AA                                     | CC                 | CC               | INTERGENIC                    |                    |                                                               |
| SNP_40862_A_12982839 | NC_021165.1    | Ca_Kabuli_Chr06 | 12982839                | AA                                     | GG                 | GG               | INTERGENIC                    |                    |                                                               |
| SNP_40863_A_13007624 | NC_021165.1    | Ca_Kabuli_Chr06 | 13007624                | TT                                     | CC                 | CC               | URR                           | 101488888          | type I inositol 1,4,5-trisphosphate 5-phosphatase CVP2        |
| SNP_40865_A_13014591 | NC_021165.1    | Ca_Kabuli_Chr06 | 13014591                | TT                                     | AA                 | AA               | URR                           | 101489535          | receptor-like protein kinase FERONIA                          |
| SNP_40866_A_13016486 | NC_021165.1    | Ca_Kabuli_Chr06 | 13016486                | CC                                     | TT                 | TT               | INTERGENIC                    |                    |                                                               |
| SNP_40868_A_13033064 | NC_021165.1    | Ca_Kabuli_Chr06 | 13033064                | TT                                     | CC                 | CC               | INTERGENIC                    |                    |                                                               |
| SNP_40869_A_13033068 | NC_021165.1    | Ca_Kabuli_Chr06 | 13033068                | CC                                     | TT                 | TT               | INTERGENIC                    |                    |                                                               |
| SNP_40870_A_13033078 | NC_021165.1    | Ca_Kabuli_Chr06 | 13033078                | AA                                     | CC                 | CC               | INTERGENIC                    |                    |                                                               |
| SNP_40871_A_13033147 | NC_021165.1    | Ca_Kabuli_Chr06 | 13033147                | GG                                     | AA                 | AA               | INTERGENIC                    |                    |                                                               |
| SNP_40872_A_13033158 | NC_021165.1    | Ca_Kabuli_Chr06 | 13033158                | TT                                     | CC                 | CC               | INTERGENIC                    |                    |                                                               |

| SNPs IDs             | Chromosome IDs | Chromosomes     | Physical positions (bp) | CDC Frontier genome (Reference genome) | (Pusa 1103 & HPNB) | (ILWC 46 & LPNB) | Sequence Components of genome | Gene accession IDs | Putative functions              |
|----------------------|----------------|-----------------|-------------------------|----------------------------------------|--------------------|------------------|-------------------------------|--------------------|---------------------------------|
| SNP_40873_A_13033163 | NC_021165.1    | Ca_Kabuli_Chr06 | 13033163                | GG                                     | AA                 | AA               | INTERGENIC                    |                    |                                 |
| SNP_40874_A_13033195 | NC_021165.1    | Ca_Kabuli_Chr06 | 13033195                | GG                                     | TT                 | TT               | INTERGENIC                    |                    |                                 |
| SNP_40875_A_13033270 | NC_021165.1    | Ca_Kabuli_Chr06 | 13033270                | CC                                     | TT                 | TT               | INTERGENIC                    |                    |                                 |
| SNP_40876_A_13033364 | NC_021165.1    | Ca_Kabuli_Chr06 | 13033364                | TT                                     | CC                 | CC               | INTERGENIC                    |                    |                                 |
| SNP_40877_A_13033578 | NC_021165.1    | Ca_Kabuli_Chr06 | 13033578                | GG                                     | AA                 | AA               | INTERGENIC                    |                    |                                 |
| SNP_40878_A_13033686 | NC_021165.1    | Ca_Kabuli_Chr06 | 13033686                | CC                                     | TT                 | TT               | INTERGENIC                    |                    |                                 |
| SNP_40879_A_13043090 | NC_021165.1    | Ca_Kabuli_Chr06 | 13043090                | CC                                     | TT                 | TT               | INTERGENIC                    |                    |                                 |
| SNP_40880_A_13211054 | NC_021165.1    | Ca_Kabuli_Chr06 | 13211054                | CC                                     | AA                 | AA               | INTERGENIC                    |                    |                                 |
| SNP_40881_A_13285877 | NC_021165.1    | Ca_Kabuli_Chr06 | 13285877                | AA                                     | GG                 | GG               | INTRON                        | 101499404          | V-type proton ATPase subunit F  |
| SNP_40883_A_13330230 | NC_021165.1    | Ca_Kabuli_Chr06 | 13330230                | GG                                     | CC                 | CC               | URR                           | 101500244          | uncharacterized LOC101500244    |
| SNP_40885_A_13369602 | NC_021165.1    | Ca_Kabuli_Chr06 | 13369602                | CC                                     | TT                 | TT               | INTERGENIC                    |                    |                                 |
| SNP_40886_A_13389552 | NC_021165.1    | Ca_Kabuli_Chr06 | 13389552                | AA                                     | GG                 | GG               | INTERGENIC                    |                    |                                 |
| SNP_40887_A_13393678 | NC_021165.1    | Ca_Kabuli_Chr06 | 13393678                | TT                                     | CC                 | CC               | DRR                           | 101502775          | isoflavone 2'-hydroxylase-like  |
| SNP_40889_A_13416643 | NC_021165.1    | Ca_Kabuli_Chr06 | 13416643                | CC                                     | GG                 | GG               | INTERGENIC                    |                    |                                 |
| SNP_40890_A_13417026 | NC_021165.1    | Ca_Kabuli_Chr06 | 13417026                | TT                                     | CC                 | CC               | INTERGENIC                    |                    |                                 |
| SNP_40891_A_13418735 | NC_021165.1    | Ca_Kabuli_Chr06 | 13418735                | CC                                     | TT                 | TT               | DRR                           | 101503091          | isoflavone 2'-hydroxylase-like  |
| SNP_40894_A_13436669 | NC_021165.1    | Ca_Kabuli_Chr06 | 13436669                | CC                                     | GG                 | GG               | INTERGENIC                    |                    |                                 |
| SNP_40895_A_13436682 | NC_021165.1    | Ca_Kabuli_Chr06 | 13436682                | AA                                     | CC                 | CC               | INTERGENIC                    |                    |                                 |
| SNP_40896_A_13450265 | NC_021165.1    | Ca_Kabuli_Chr06 | 13450265                | AA                                     | TT                 | TT               | INTERGENIC                    |                    |                                 |
| SNP_40897_A_13469175 | NC_021165.1    | Ca_Kabuli_Chr06 | 13469175                | AA                                     | GG                 | GG               | INTERGENIC                    |                    |                                 |
| SNP_40900_A_13583086 | NC_021165.1    | Ca_Kabuli_Chr06 | 13583086                | TT                                     | GG                 | GG               | INTERGENIC                    |                    |                                 |
| SNP_40901_A_13652493 | NC_021165.1    | Ca_Kabuli_Chr06 | 13652493                | TT                                     | CC                 | CC               | URR                           | 101509532          | copper-transporting ATPase RAN1 |

| SNPs IDs             | Chromosome IDs | Chromosomes     | Physical positions (bp) | CDC Frontier (Reference genome) | (Pusa 1103 & HPNB) | (ILWC 46 & LPNB) | Sequence Components of genome | Gene accession IDs | Putative functions                                    |
|----------------------|----------------|-----------------|-------------------------|---------------------------------|--------------------|------------------|-------------------------------|--------------------|-------------------------------------------------------|
| SNP_40902_A_13686263 | NC_021165.1    | Ca_Kabuli_Chr06 | 13686263                | GG                              | AA                 | AA               | INTRON                        | 101511901          | uncharacterized LOC101511901                          |
| SNP_40903_A_13738508 | NC_021165.1    | Ca_Kabuli_Chr06 | 13738508                | AA                              | CC                 | CC               | DRR                           | 101513511          | pentatricopeptide repeat-containing protein At2g41080 |
| SNP_40904_A_13738514 | NC_021165.1    | Ca_Kabuli_Chr06 | 13738514                | TT                              | CC                 | CC               | DRR                           | 101513511          | pentatricopeptide repeat-containing protein At2g41080 |
| SNP_40905_A_13782732 | NC_021165.1    | Ca_Kabuli_Chr06 | 13782732                | AA                              | GG                 | GG               | INTERGENIC                    |                    |                                                       |
| SNP_40907_A_13975424 | NC_021165.1    | Ca_Kabuli_Chr06 | 13975424                | CC                              | TT                 | TT               | URR                           | 101510173          | desiccation-related protein PCC13-62-like             |
| SNP_40908_A_14064288 | NC_021165.1    | Ca_Kabuli_Chr06 | 14064288                | GG                              | CC                 | CC               | INTERGENIC                    |                    |                                                       |
| SNP_40909_A_14064489 | NC_021165.1    | Ca_Kabuli_Chr06 | 14064489                | CC                              | TT                 | TT               | INTERGENIC                    |                    |                                                       |
| SNP_40910_A_14084090 | NC_021165.1    | Ca_Kabuli_Chr06 | 14084090                | TT                              | CC                 | CC               | INTERGENIC                    |                    |                                                       |
| SNP_40911_A_14084310 | NC_021165.1    | Ca_Kabuli_Chr06 | 14084310                | CC                              | TT                 | TT               | INTERGENIC                    |                    |                                                       |
| SNP_40913_A_14084335 | NC_021165.1    | Ca_Kabuli_Chr06 | 14084335                | AA                              | TT                 | TT               | INTERGENIC                    |                    |                                                       |
| SNP_40914_A_14139629 | NC_021165.1    | Ca_Kabuli_Chr06 | 14139629                | GG                              | AA                 | AA               | INTERGENIC                    |                    |                                                       |
| SNP_40915_A_14194401 | NC_021165.1    | Ca_Kabuli_Chr06 | 14194401                | GG                              | AA                 | AA               | INTERGENIC                    |                    |                                                       |
| SNP_40918_A_14238511 | NC_021165.1    | Ca_Kabuli_Chr06 | 14238511                | AA                              | CC                 | CC               | INTERGENIC                    |                    |                                                       |
| SNP_40921_A_14351606 | NC_021165.1    | Ca_Kabuli_Chr06 | 14351606                | GG                              | CC                 | CC               | URR                           | 101514381          | uncharacterized LOC101514381                          |
| SNP_40922_A_14351633 | NC_021165.1    | Ca_Kabuli_Chr06 | 14351633                | CC                              | TT                 | TT               | URR                           | 101514381          | uncharacterized LOC101514381                          |
| SNP_40923_A_14351646 | NC_021165.1    | Ca_Kabuli_Chr06 | 14351646                | CC                              | TT                 | TT               | URR                           | 101514381          | uncharacterized LOC101514381                          |
| SNP_40924_A_14392991 | NC_021165.1    | Ca_Kabuli_Chr06 | 14392991                | GG                              | AA                 | AA               | INTERGENIC                    |                    |                                                       |
| SNP_40925_A_14456095 | NC_021165.1    | Ca_Kabuli_Chr06 | 14456095                | AA                              | GG                 | GG               | INTERGENIC                    |                    |                                                       |
| SNP_40926_A_14456106 | NC_021165.1    | Ca_Kabuli_Chr06 | 14456106                | GG                              | TT                 | TT               | INTERGENIC                    |                    |                                                       |
| SNP_40927_A_14456117 | NC_021165.1    | Ca_Kabuli_Chr06 | 14456117                | CC                              | AA                 | AA               | INTERGENIC                    |                    |                                                       |
| SNP_40928_A_14456128 | NC_021165.1    | Ca_Kabuli_Chr06 | 14456128                | TT                              | GG                 | GG               | INTERGENIC                    |                    |                                                       |
| SNP_40929_A_14456179 | NC_021165.1    | Ca_Kabuli_Chr06 | 14456179                | CC                              | TT                 | TT               | INTERGENIC                    |                    |                                                       |

| SNPs IDs             | Chromosome IDs | Chromosomes     | Physical positions (bp) | CDC Frontier genome (Reference genome) | (Pusa 1103 & HPNB) | (ILWC 46 & LPNB) | Sequence Components of genome | Gene accession IDs | Putative functions                        |
|----------------------|----------------|-----------------|-------------------------|----------------------------------------|--------------------|------------------|-------------------------------|--------------------|-------------------------------------------|
| SNP_40930_A_14456188 | NC_021165.1    | Ca_Kabuli_Chr06 | 14456188                | AA                                     | GG                 | GG               | INTERGENIC                    |                    |                                           |
| SNP_40931_A_14469822 | NC_021165.1    | Ca_Kabuli_Chr06 | 14469822                | AA                                     | TT                 | TT               | INTERGENIC                    |                    |                                           |
| SNP_40932_A_14470474 | NC_021165.1    | Ca_Kabuli_Chr06 | 14470474                | CC                                     | TT                 | TT               | INTERGENIC                    |                    |                                           |
| SNP_40933_A_14471677 | NC_021165.1    | Ca_Kabuli_Chr06 | 14471677                | GG                                     | AA                 | AA               | INTERGENIC                    |                    |                                           |
| SNP_40934_A_14471699 | NC_021165.1    | Ca_Kabuli_Chr06 | 14471699                | AA                                     | GG                 | GG               | INTERGENIC                    |                    |                                           |
| SNP_40935_A_14534321 | NC_021165.1    | Ca_Kabuli_Chr06 | 14534321                | CC                                     | AA                 | AA               | INTERGENIC                    |                    |                                           |
| SNP_40936_A_14553476 | NC_021165.1    | Ca_Kabuli_Chr06 | 14553476                | AA                                     | TT                 | TT               | INTERGENIC                    |                    |                                           |
| SNP_40937_A_14553477 | NC_021165.1    | Ca_Kabuli_Chr06 | 14553477                | TT                                     | AA                 | AA               | INTERGENIC                    |                    |                                           |
| SNP_40939_A_14553671 | NC_021165.1    | Ca_Kabuli_Chr06 | 14553671                | AA                                     | GG                 | GG               | INTERGENIC                    |                    |                                           |
| SNP_40940_A_14554090 | NC_021165.1    | Ca_Kabuli_Chr06 | 14554090                | CC                                     | TT                 | TT               | INTERGENIC                    |                    |                                           |
| SNP_40941_A_14554109 | NC_021165.1    | Ca_Kabuli_Chr06 | 14554109                | TT                                     | GG                 | GG               | INTERGENIC                    |                    |                                           |
| SNP_40942_A_14584096 | NC_021165.1    | Ca_Kabuli_Chr06 | 14584096                | TT                                     | AA                 | AA               | INTERGENIC                    |                    |                                           |
| SNP_40943_A_14623790 | NC_021165.1    | Ca_Kabuli_Chr06 | 14623790                | AA                                     | TT                 | TT               | INTERGENIC                    |                    |                                           |
| SNP_40944_A_14673098 | NC_021165.1    | Ca_Kabuli_Chr06 | 14673098                | AA                                     | TT                 | TT               | INTERGENIC                    |                    |                                           |
| SNP_40945_A_14687879 | NC_021165.1    | Ca_Kabuli_Chr06 | 14687879                | GG                                     | CC                 | CC               | URR                           | 101491266          | uncharacterized LOC101491266              |
| SNP_40947_A_14755095 | NC_021165.1    | Ca_Kabuli_Chr06 | 14755095                | CC                                     | TT                 | TT               | INTERGENIC                    |                    |                                           |
| SNP_40948_A_14755186 | NC_021165.1    | Ca_Kabuli_Chr06 | 14755186                | TT                                     | GG                 | GG               | INTERGENIC                    |                    |                                           |
| SNP_40949_A_14755507 | NC_021165.1    | Ca_Kabuli_Chr06 | 14755507                | AA                                     | TT                 | TT               | INTERGENIC                    |                    |                                           |
| SNP_40950_A_14792599 | NC_021165.1    | Ca_Kabuli_Chr06 | 14792599                | AA                                     | GG                 | GG               | DRR                           | 101497767          | ubiquinol oxidase 2, mitochondrial-like   |
| SNP_40951_A_14804713 | NC_021165.1    | Ca_Kabuli_Chr06 | 14804713                | TT                                     | CC                 | CC               | INTRON                        | 101498303          | alternative oxidase 3, mitochondrial-like |
| SNP_40952_A_15046540 | NC_021165.1    | Ca_Kabuli_Chr06 | 15046540                | AA                                     | CC                 | CC               | INTRON                        | 101511688          | beta-ureidopropionase                     |
| SNP_40953_A_15080376 | NC_021165.1    | Ca_Kabuli_Chr06 | 15080376                | CC                                     | GG                 | GG               | INTERGENIC                    |                    |                                           |

| SNPs IDs             | Chromosome IDs | Chromosomes     | Physical positions (bp) | CDC Frontier genome (Reference genome) | (Pusa 1103 & HPNB) | (ILWC 46 & LPNB) | Sequence Components of genome | Gene accession IDs | Putative functions                |
|----------------------|----------------|-----------------|-------------------------|----------------------------------------|--------------------|------------------|-------------------------------|--------------------|-----------------------------------|
| SNP_40954_A_15080393 | NC_021165.1    | Ca_Kabuli_Chr06 | 15080393                | GG                                     | CC                 | CC               | INTERGENIC                    |                    |                                   |
| SNP_40955_A_15083698 | NC_021165.1    | Ca_Kabuli_Chr06 | 15083698                | TT                                     | CC                 | CC               | INTERGENIC                    |                    |                                   |
| SNP_40956_A_15083747 | NC_021165.1    | Ca_Kabuli_Chr06 | 15083747                | GG                                     | AA                 | AA               | INTERGENIC                    |                    |                                   |
| SNP_40957_A_15083754 | NC_021165.1    | Ca_Kabuli_Chr06 | 15083754                | TT                                     | CC                 | CC               | INTERGENIC                    |                    |                                   |
| SNP_40958_A_15083837 | NC_021165.1    | Ca_Kabuli_Chr06 | 15083837                | TT                                     | CC                 | CC               | INTERGENIC                    |                    |                                   |
| SNP_40959_A_15083852 | NC_021165.1    | Ca_Kabuli_Chr06 | 15083852                | CC                                     | TT                 | TT               | INTERGENIC                    |                    |                                   |
| SNP_40960_A_15084047 | NC_021165.1    | Ca_Kabuli_Chr06 | 15084047                | AA                                     | GG                 | GG               | INTERGENIC                    |                    |                                   |
| SNP_40961_A_15084056 | NC_021165.1    | Ca_Kabuli_Chr06 | 15084056                | AA                                     | CC                 | CC               | INTERGENIC                    |                    |                                   |
| SNP_40962_A_15084070 | NC_021165.1    | Ca_Kabuli_Chr06 | 15084070                | CC                                     | TT                 | TT               | INTERGENIC                    |                    |                                   |
| SNP_40963_A_15123086 | NC_021165.1    | Ca_Kabuli_Chr06 | 15123086                | GG                                     | AA                 | AA               | INTRON                        | 101515786          | dynammin-related protein 3A-like  |
| SNP_40964_A_15180846 | NC_021165.1    | Ca_Kabuli_Chr06 | 15180846                | GG                                     | AA                 | AA               | INTERGENIC                    |                    |                                   |
| SNP_40965_A_15193071 | NC_021165.1    | Ca_Kabuli_Chr06 | 15193071                | CC                                     | AA                 | AA               | INTERGENIC                    |                    |                                   |
| SNP_40966_A_15193072 | NC_021165.1    | Ca_Kabuli_Chr06 | 15193072                | GG                                     | AA                 | AA               | INTERGENIC                    |                    |                                   |
| SNP_40967_A_15198153 | NC_021165.1    | Ca_Kabuli_Chr06 | 15198153                | CC                                     | TT                 | TT               | INTERGENIC                    |                    |                                   |
| SNP_40968_A_15373114 | NC_021165.1    | Ca_Kabuli_Chr06 | 15373114                | AA                                     | TT                 | TT               | INTERGENIC                    |                    |                                   |
| SNP_40969_A_15375965 | NC_021165.1    | Ca_Kabuli_Chr06 | 15375965                | CC                                     | TT                 | TT               | INTERGENIC                    |                    |                                   |
| SNP_40971_A_15444820 | NC_021165.1    | Ca_Kabuli_Chr06 | 15444820                | AA                                     | GG                 | GG               | INTERGENIC                    |                    |                                   |
| SNP_40972_A_15493468 | NC_021165.1    | Ca_Kabuli_Chr06 | 15493468                | TT                                     | AA                 | AA               | INTERGENIC                    |                    |                                   |
| SNP_40973_A_15495023 | NC_021165.1    | Ca_Kabuli_Chr06 | 15495023                | AA                                     | GG                 | GG               | INTERGENIC                    |                    |                                   |
| SNP_40974_A_15528993 | NC_021165.1    | Ca_Kabuli_Chr06 | 15528993                | CC                                     | TT                 | TT               | INTERGENIC                    |                    |                                   |
| SNP_40975_A_15555549 | NC_021165.1    | Ca_Kabuli_Chr06 | 15555549                | GG                                     | AA                 | AA               | URR                           | 101494917          | (3S,6E)-nerolidol synthase 1-like |
| SNP_40976_A_15555553 | NC_021165.1    | Ca_Kabuli_Chr06 | 15555553                | TT                                     | CC                 | CC               | URR                           | 101494917          | (3S,6E)-nerolidol synthase 1-like |

| SNPs IDs             | Chromosome IDs | Chromosomes     | Physical positions (bp) | CDC Frontier genome (Reference genome) | (Pusa 1103 & HPNB) | (ILWC 46 & LPNB) | Sequence Components of genome | Gene accession IDs | Putative functions                |
|----------------------|----------------|-----------------|-------------------------|----------------------------------------|--------------------|------------------|-------------------------------|--------------------|-----------------------------------|
| SNP_40977_A_1555582  | NC_021165.1    | Ca_Kabuli_Chr06 | 1555582                 | TT                                     | AA                 | AA               | URR                           | 101494917          | (3S,6E)-nerolidol synthase 1-like |
| SNP_40979_A_15555869 | NC_021165.1    | Ca_Kabuli_Chr06 | 15555869                | AA                                     | GG                 | GG               | INTERGENIC                    |                    |                                   |
| SNP_40980_A_15555891 | NC_021165.1    | Ca_Kabuli_Chr06 | 15555891                | AA                                     | GG                 | GG               | INTERGENIC                    |                    |                                   |
| SNP_40981_A_15555914 | NC_021165.1    | Ca_Kabuli_Chr06 | 15555914                | AA                                     | CC                 | CC               | INTERGENIC                    |                    |                                   |
| SNP_40982_A_15559111 | NC_021165.1    | Ca_Kabuli_Chr06 | 15559111                | AA                                     | GG                 | GG               | INTERGENIC                    |                    |                                   |
| SNP_40984_A_15559178 | NC_021165.1    | Ca_Kabuli_Chr06 | 15559178                | CC                                     | TT                 | TT               | INTERGENIC                    |                    |                                   |
| SNP_40985_A_15562545 | NC_021165.1    | Ca_Kabuli_Chr06 | 15562545                | TT                                     | AA                 | AA               | INTERGENIC                    |                    |                                   |
| SNP_40986_A_15562582 | NC_021165.1    | Ca_Kabuli_Chr06 | 15562582                | TT                                     | CC                 | CC               | INTERGENIC                    |                    |                                   |
| SNP_40987_A_15562631 | NC_021165.1    | Ca_Kabuli_Chr06 | 15562631                | GG                                     | AA                 | AA               | INTERGENIC                    |                    |                                   |
| SNP_40988_A_15562660 | NC_021165.1    | Ca_Kabuli_Chr06 | 15562660                | AA                                     | GG                 | GG               | INTERGENIC                    |                    |                                   |
| SNP_40989_A_15562679 | NC_021165.1    | Ca_Kabuli_Chr06 | 15562679                | GG                                     | AA                 | AA               | INTERGENIC                    |                    |                                   |
| SNP_40990_A_15562687 | NC_021165.1    | Ca_Kabuli_Chr06 | 15562687                | GG                                     | TT                 | TT               | INTERGENIC                    |                    |                                   |
| SNP_40991_A_15564356 | NC_021165.1    | Ca_Kabuli_Chr06 | 15564356                | AA                                     | CC                 | CC               | INTERGENIC                    |                    |                                   |
| SNP_40992_A_15564391 | NC_021165.1    | Ca_Kabuli_Chr06 | 15564391                | GG                                     | AA                 | AA               | INTERGENIC                    |                    |                                   |
| SNP_40993_A_15564439 | NC_021165.1    | Ca_Kabuli_Chr06 | 15564439                | AA                                     | GG                 | GG               | INTERGENIC                    |                    |                                   |
| SNP_40994_A_15564537 | NC_021165.1    | Ca_Kabuli_Chr06 | 15564537                | TT                                     | CC                 | CC               | INTERGENIC                    |                    |                                   |
| SNP_40995_A_15564552 | NC_021165.1    | Ca_Kabuli_Chr06 | 15564552                | GG                                     | TT                 | TT               | INTERGENIC                    |                    |                                   |
| SNP_40996_A_15564557 | NC_021165.1    | Ca_Kabuli_Chr06 | 15564557                | AA                                     | TT                 | TT               | INTERGENIC                    |                    |                                   |
| SNP_40997_A_15564562 | NC_021165.1    | Ca_Kabuli_Chr06 | 15564562                | CC                                     | TT                 | TT               | INTERGENIC                    |                    |                                   |
| SNP_40999_A_15577805 | NC_021165.1    | Ca_Kabuli_Chr06 | 15577805                | AA                                     | GG                 | GG               | INTERGENIC                    |                    |                                   |
| SNP_41000_A_15597960 | NC_021165.1    | Ca_Kabuli_Chr06 | 15597960                | TT                                     | AA                 | AA               | URR                           | 101503644          | (3S,6E)-nerolidol synthase 1-like |
| SNP_41001_A_15598171 | NC_021165.1    | Ca_Kabuli_Chr06 | 15598171                | GG                                     | CC                 | CC               | URR                           | 101503644          | (3S,6E)-nerolidol synthase 1-like |

| SNPs IDs             | Chromosome IDs | Chromosomes     | Physical positions (bp) | CDC Frontier genome (Reference genome) | (Pusa 1103 & HPNB) | (ILWC 46 & LPNB) | Sequence genome | Components of | Gene accession IDs           | Putative functions |
|----------------------|----------------|-----------------|-------------------------|----------------------------------------|--------------------|------------------|-----------------|---------------|------------------------------|--------------------|
| SNP_41002_A_15612607 | NC_021165.1    | Ca_Kabuli_Chr06 | 15612607                | CC                                     | GG                 | GG               | INTERGENIC      |               |                              |                    |
| SNP_41003_A_15612615 | NC_021165.1    | Ca_Kabuli_Chr06 | 15612615                | AA                                     | GG                 | GG               | INTERGENIC      |               |                              |                    |
| SNP_41004_A_15612666 | NC_021165.1    | Ca_Kabuli_Chr06 | 15612666                | AA                                     | CC                 | CC               | INTERGENIC      |               |                              |                    |
| SNP_41005_A_15612690 | NC_021165.1    | Ca_Kabuli_Chr06 | 15612690                | AA                                     | GG                 | GG               | INTERGENIC      |               |                              |                    |
| SNP_41006_A_15613045 | NC_021165.1    | Ca_Kabuli_Chr06 | 15613045                | AA                                     | CC                 | CC               | INTERGENIC      |               |                              |                    |
| SNP_41007_A_15621289 | NC_021165.1    | Ca_Kabuli_Chr06 | 15621289                | CC                                     | TT                 | TT               | INTERGENIC      |               |                              |                    |
| SNP_41009_A_15634708 | NC_021165.1    | Ca_Kabuli_Chr06 | 15634708                | GG                                     | AA                 | AA               | DRR             | 101495251     | probable terpene synthase 13 |                    |
| SNP_41010_A_15656058 | NC_021165.1    | Ca_Kabuli_Chr06 | 15656058                | CC                                     | TT                 | TT               | INTERGENIC      |               |                              |                    |
| SNP_41011_A_15656908 | NC_021165.1    | Ca_Kabuli_Chr06 | 15656908                | AA                                     | TT                 | TT               | INTERGENIC      |               |                              |                    |
| SNP_41012_A_15681020 | NC_021165.1    | Ca_Kabuli_Chr06 | 15681020                | AA                                     | TT                 | CC               | INTERGENIC      |               |                              |                    |
| SNP_41013_A_15713159 | NC_021165.1    | Ca_Kabuli_Chr06 | 15713159                | GG                                     | AA                 | AA               | INTERGENIC      |               |                              |                    |
| SNP_41014_A_15727060 | NC_021165.1    | Ca_Kabuli_Chr06 | 15727060                | CC                                     | AA                 | AA               | INTERGENIC      |               |                              |                    |
| SNP_41016_A_15727213 | NC_021165.1    | Ca_Kabuli_Chr06 | 15727213                | AA                                     | GG                 | GG               | INTERGENIC      |               |                              |                    |
| SNP_41017_A_15727466 | NC_021165.1    | Ca_Kabuli_Chr06 | 15727466                | GG                                     | TT                 | TT               | INTERGENIC      |               |                              |                    |
| SNP_41019_A_15727591 | NC_021165.1    | Ca_Kabuli_Chr06 | 15727591                | TT                                     | CC                 | CC               | INTERGENIC      |               |                              |                    |
| SNP_41020_A_15727635 | NC_021165.1    | Ca_Kabuli_Chr06 | 15727635                | GG                                     | CC                 | CC               | INTERGENIC      |               |                              |                    |
| SNP_41021_A_15727719 | NC_021165.1    | Ca_Kabuli_Chr06 | 15727719                | CC                                     | AA                 | AA               | INTERGENIC      |               |                              |                    |
| SNP_41023_A_15729554 | NC_021165.1    | Ca_Kabuli_Chr06 | 15729554                | TT                                     | AA                 | AA               | INTERGENIC      |               |                              |                    |
| SNP_41024_A_15729555 | NC_021165.1    | Ca_Kabuli_Chr06 | 15729555                | CC                                     | AA                 | AA               | INTERGENIC      |               |                              |                    |
| SNP_41025_A_15729637 | NC_021165.1    | Ca_Kabuli_Chr06 | 15729637                | TT                                     | CC                 | CC               | INTERGENIC      |               |                              |                    |
| SNP_41026_A_15730266 | NC_021165.1    | Ca_Kabuli_Chr06 | 15730266                | TT                                     | GG                 | GG               | INTERGENIC      |               |                              |                    |
| SNP_41027_A_15730611 | NC_021165.1    | Ca_Kabuli_Chr06 | 15730611                | TT                                     | AA                 | AA               | INTERGENIC      |               |                              |                    |

| SNPs IDs             | Chromosome IDs | Chromosomes     | Physical positions (bp) | CDC Frontier genome (Reference genome) | (Pusa 1103 & HPNB) | (ILWC 46 & LPNB) | Sequence genome       | Components of | Gene accession IDs | Putative functions             |
|----------------------|----------------|-----------------|-------------------------|----------------------------------------|--------------------|------------------|-----------------------|---------------|--------------------|--------------------------------|
| SNP_41029_A_15730726 | NC_021165.1    | Ca_Kabuli_Chr06 | 15730726                | GG                                     | CC                 | CC               | INTERGENIC            |               |                    |                                |
| SNP_41030_A_15730751 | NC_021165.1    | Ca_Kabuli_Chr06 | 15730751                | TT                                     | GG                 | GG               | INTERGENIC            |               |                    |                                |
| SNP_41031_A_15730794 | NC_021165.1    | Ca_Kabuli_Chr06 | 15730794                | CC                                     | TT                 | TT               | INTERGENIC            |               |                    |                                |
| SNP_41032_A_15730858 | NC_021165.1    | Ca_Kabuli_Chr06 | 15730858                | AA                                     | GG                 | GG               | INTERGENIC            |               |                    |                                |
| SNP_41033_A_15730874 | NC_021165.1    | Ca_Kabuli_Chr06 | 15730874                | CC                                     | AA                 | AA               | INTERGENIC            |               |                    |                                |
| SNP_41034_A_15730935 | NC_021165.1    | Ca_Kabuli_Chr06 | 15730935                | AA                                     | TT                 | TT               | INTERGENIC            |               |                    |                                |
| SNP_41035_A_15730980 | NC_021165.1    | Ca_Kabuli_Chr06 | 15730980                | AA                                     | GG                 | GG               | INTERGENIC            |               |                    |                                |
| SNP_41036_A_15731043 | NC_021165.1    | Ca_Kabuli_Chr06 | 15731043                | TT                                     | AA                 | AA               | INTERGENIC            |               |                    |                                |
| SNP_41038_A_15731068 | NC_021165.1    | Ca_Kabuli_Chr06 | 15731068                | AA                                     | TT                 | TT               | INTERGENIC            |               |                    |                                |
| SNP_41039_A_15731077 | NC_021165.1    | Ca_Kabuli_Chr06 | 15731077                | CC                                     | GG                 | GG               | INTERGENIC            |               |                    |                                |
| SNP_41041_A_15737095 | NC_021165.1    | Ca_Kabuli_Chr06 | 15737095                | GG                                     | AA                 | AA               | INTERGENIC            |               |                    |                                |
| SNP_41042_A_15752416 | NC_021165.1    | Ca_Kabuli_Chr06 | 15752416                | GG                                     | AA                 | AA               | INTERGENIC            |               |                    |                                |
| SNP_41043_A_15803715 | NC_021165.1    | Ca_Kabuli_Chr06 | 15803715                | GG                                     | AA                 | AA               | NON_SYNONYMOUS_CODING | 101504189     |                    | uncharacterized LOC101504189   |
| SNP_41044_A_15816924 | NC_021165.1    | Ca_Kabuli_Chr06 | 15816924                | CC                                     | TT                 | TT               | INTERGENIC            |               |                    |                                |
| SNP_41045_A_15826128 | NC_021165.1    | Ca_Kabuli_Chr06 | 15826128                | CC                                     | AA                 | AA               | DRR                   | 101499804     |                    | uncharacterized LOC101499804   |
| SNP_41046_A_15826129 | NC_021165.1    | Ca_Kabuli_Chr06 | 15826129                | TT                                     | GG                 | GG               | DRR                   | 101499804     |                    | uncharacterized LOC101499804   |
| SNP_41047_A_15867441 | NC_021165.1    | Ca_Kabuli_Chr06 | 15867441                | TT                                     | CC                 | CC               | DRR                   | 101500770     |                    | myb-related protein 308-like   |
| SNP_41049_A_15882982 | NC_021165.1    | Ca_Kabuli_Chr06 | 15882982                | AA                                     | TT                 | TT               | URR                   | 101501085     |                    | sugar transport protein 1-like |
| SNP_41050_A_15900994 | NC_021165.1    | Ca_Kabuli_Chr06 | 15900994                | AA                                     | GG                 | GG               | INTERGENIC            |               |                    |                                |
| SNP_41051_A_15901002 | NC_021165.1    | Ca_Kabuli_Chr06 | 15901002                | TT                                     | GG                 | GG               | INTERGENIC            |               |                    |                                |
| SNP_41052_A_15906719 | NC_021165.1    | Ca_Kabuli_Chr06 | 15906719                | AA                                     | GG                 | GG               | URR                   | 101501930     |                    | uncharacterized LOC101501930   |
| SNP_41053_A_15944754 | NC_021165.1    | Ca_Kabuli_Chr06 | 15944754                | GG                                     | AA                 | AA               | INTERGENIC            |               |                    |                                |



| SNPs IDs             | Chromosome IDs | Chromosomes     | Physical positions (bp) | CDC Frontier genome (Reference genome) | (Pusa 1103 & HPNB) | (ILWC 46 & LPNB) | Sequence Components of genome | Gene accession IDs | Putative functions               |
|----------------------|----------------|-----------------|-------------------------|----------------------------------------|--------------------|------------------|-------------------------------|--------------------|----------------------------------|
| SNP_41054_A_15945404 | NC_021165.1    | Ca_Kabuli_Chr06 | 15945404                | GG                                     | CC                 | CC               | INTERGENIC                    |                    |                                  |
| SNP_41055_A_15982024 | NC_021165.1    | Ca_Kabuli_Chr06 | 15982024                | AA                                     | TT                 | TT               | INTRON                        | 101505147          | cannabidiolic acid synthase-like |
| SNP_41056_A_15982085 | NC_021165.1    | Ca_Kabuli_Chr06 | 15982085                | GG                                     | CC                 | CC               | INTRON                        | 101505147          | cannabidiolic acid synthase-like |
| SNP_41057_A_15990958 | NC_021165.1    | Ca_Kabuli_Chr06 | 15990958                | TT                                     | CC                 | CC               | SYNONYMOUS_CODING             | 101505463          | reticuline oxidase-like protein  |
| SNP_41058_A_15991143 | NC_021165.1    | Ca_Kabuli_Chr06 | 15991143                | TT                                     | GG                 | GG               | NON_SYNONYMOUS_CODING         | 101505463          | reticuline oxidase-like protein  |
| SNP_41059_A_15991147 | NC_021165.1    | Ca_Kabuli_Chr06 | 15991147                | AA                                     | GG                 | GG               | SYNONYMOUS_CODING             | 101505463          | reticuline oxidase-like protein  |
| SNP_41060_A_15991154 | NC_021165.1    | Ca_Kabuli_Chr06 | 15991154                | GG                                     | CC                 | CC               | NON_SYNONYMOUS_CODING         | 101505463          | reticuline oxidase-like protein  |
| SNP_41061_A_15991177 | NC_021165.1    | Ca_Kabuli_Chr06 | 15991177                | CC                                     | TT                 | TT               | SYNONYMOUS_CODING             | 101505463          | reticuline oxidase-like protein  |
| SNP_41062_A_15991239 | NC_021165.1    | Ca_Kabuli_Chr06 | 15991239                | TT                                     | CC                 | CC               | NON_SYNONYMOUS_CODING         | 101505463          | reticuline oxidase-like protein  |
| SNP_41063_A_15991354 | NC_021165.1    | Ca_Kabuli_Chr06 | 15991354                | GG                                     | CC                 | CC               | SYNONYMOUS_CODING             | 101505463          | reticuline oxidase-like protein  |
| SNP_41064_A_15991357 | NC_021165.1    | Ca_Kabuli_Chr06 | 15991357                | TT                                     | GG                 | GG               | SYNONYMOUS_CODING             | 101505463          | reticuline oxidase-like protein  |
| SNP_41065_A_15991579 | NC_021165.1    | Ca_Kabuli_Chr06 | 15991579                | TT                                     | AA                 | AA               | SYNONYMOUS_CODING             | 101505463          | reticuline oxidase-like protein  |
| SNP_41066_A_15991775 | NC_021165.1    | Ca_Kabuli_Chr06 | 15991775                | GG                                     | AA                 | AA               | NON_SYNONYMOUS_CODING         | 101505463          | reticuline oxidase-like protein  |
| SNP_41067_A_15991852 | NC_021165.1    | Ca_Kabuli_Chr06 | 15991852                | AA                                     | GG                 | GG               | SYNONYMOUS_CODING             | 101505463          | reticuline oxidase-like protein  |
| SNP_41068_A_15993358 | NC_021165.1    | Ca_Kabuli_Chr06 | 15993358                | TT                                     | CC                 | CC               | URR                           | 101505463          | reticuline oxidase-like protein  |
| SNP_41069_A_15993473 | NC_021165.1    | Ca_Kabuli_Chr06 | 15993473                | CC                                     | AA                 | AA               | URR                           | 101505463          | reticuline oxidase-like protein  |
| SNP_41070_A_15993526 | NC_021165.1    | Ca_Kabuli_Chr06 | 15993526                | GG                                     | AA                 | AA               | URR                           | 101505463          | reticuline oxidase-like protein  |
| SNP_41071_A_15999334 | NC_021165.1    | Ca_Kabuli_Chr06 | 15999334                | TT                                     | CC                 | CC               | URR                           | 101505800          | Unknown function                 |
| SNP_41072_A_15999550 | NC_021165.1    | Ca_Kabuli_Chr06 | 15999550                | TT                                     | GG                 | GG               | URR                           | 101505800          | Unknown function                 |
| SNP_41073_A_15999602 | NC_021165.1    | Ca_Kabuli_Chr06 | 15999602                | GG                                     | AA                 | AA               | URR                           | 101505800          | Unknown function                 |
| SNP_41074_A_15999607 | NC_021165.1    | Ca_Kabuli_Chr06 | 15999607                | TT                                     | CC                 | CC               | URR                           | 101505800          | Unknown function                 |
| SNP_41075_A_15999718 | NC_021165.1    | Ca_Kabuli_Chr06 | 15999718                | TT                                     | GG                 | GG               | INTERGENIC                    |                    |                                  |

| SNPs IDs             | Chromosome IDs | Chromosomes     | Physical positions (bp) | CDC Frontier genome (Reference genome) | (Pusa 1103 & HPNB) | (ILWC 46 & LPNB) | Sequence Components of genome | Gene accession IDs | Putative functions                        |
|----------------------|----------------|-----------------|-------------------------|----------------------------------------|--------------------|------------------|-------------------------------|--------------------|-------------------------------------------|
| SNP_41077_A_1599992  | NC_021165.1    | Ca_Kabuli_Chr06 | 1599992                 | CC                                     | AA                 | AA               | INTERGENIC                    |                    |                                           |
| SNP_41078_A_16010494 | NC_021165.1    | Ca_Kabuli_Chr06 | 16010494                | TT                                     | AA                 | AA               | INTERGENIC                    |                    |                                           |
| SNP_41079_A_16010596 | NC_021165.1    | Ca_Kabuli_Chr06 | 16010596                | TT                                     | CC                 | CC               | DRR                           | 101490627          | reticuline oxidase-like protein           |
| SNP_41080_A_16010649 | NC_021165.1    | Ca_Kabuli_Chr06 | 16010649                | TT                                     | AA                 | AA               | DRR                           | 101490627          | reticuline oxidase-like protein           |
| SNP_41081_A_16010743 | NC_021165.1    | Ca_Kabuli_Chr06 | 16010743                | AA                                     | GG                 | GG               | DRR                           | 101490627          | reticuline oxidase-like protein           |
| SNP_41082_A_16010796 | NC_021165.1    | Ca_Kabuli_Chr06 | 16010796                | AA                                     | GG                 | GG               | DRR                           | 101490627          | reticuline oxidase-like protein           |
| SNP_41083_A_16010801 | NC_021165.1    | Ca_Kabuli_Chr06 | 16010801                | GG                                     | CC                 | CC               | DRR                           | 101490627          | reticuline oxidase-like protein           |
| SNP_41084_A_16011070 | NC_021165.1    | Ca_Kabuli_Chr06 | 16011070                | TT                                     | AA                 | AA               | DRR                           | 101490627          | reticuline oxidase-like protein           |
| SNP_41086_A_16013267 | NC_021165.1    | Ca_Kabuli_Chr06 | 16013267                | AA                                     | GG                 | GG               | INTRON                        | 101490627          | reticuline oxidase-like protein           |
| SNP_41087_A_16013527 | NC_021165.1    | Ca_Kabuli_Chr06 | 16013527                | TT                                     | GG                 | GG               | INTRON                        | 101490627          | reticuline oxidase-like protein           |
| SNP_41088_A_16018067 | NC_021165.1    | Ca_Kabuli_Chr06 | 16018067                | CC                                     | TT                 | TT               | INTERGENIC                    |                    |                                           |
| SNP_41089_A_16018103 | NC_021165.1    | Ca_Kabuli_Chr06 | 16018103                | GG                                     | AA                 | AA               | INTERGENIC                    |                    |                                           |
| SNP_41090_A_16018267 | NC_021165.1    | Ca_Kabuli_Chr06 | 16018267                | GG                                     | AA                 | AA               | DRR                           | 101490952          | tetrahydrocannabinolic acid synthase-like |
| SNP_41091_A_16018421 | NC_021165.1    | Ca_Kabuli_Chr06 | 16018421                | CC                                     | GG                 | GG               | DRR                           | 101490952          | tetrahydrocannabinolic acid synthase-like |
| SNP_41092_A_16018794 | NC_021165.1    | Ca_Kabuli_Chr06 | 16018794                | TT                                     | CC                 | CC               | DRR                           | 101490952          | tetrahydrocannabinolic acid synthase-like |
| SNP_41093_A_16018813 | NC_021165.1    | Ca_Kabuli_Chr06 | 16018813                | CC                                     | TT                 | TT               | DRR                           | 101490952          | tetrahydrocannabinolic acid synthase-like |
| SNP_41094_A_16018821 | NC_021165.1    | Ca_Kabuli_Chr06 | 16018821                | AA                                     | GG                 | GG               | DRR                           | 101490952          | tetrahydrocannabinolic acid synthase-like |
| SNP_41095_A_16019074 | NC_021165.1    | Ca_Kabuli_Chr06 | 16019074                | TT                                     | CC                 | CC               | DRR                           | 101490952          | tetrahydrocannabinolic acid synthase-like |
| SNP_41096_A_16019517 | NC_021165.1    | Ca_Kabuli_Chr06 | 16019517                | TT                                     | GG                 | GG               | URR                           | 101490627          | reticuline oxidase-like protein           |
| SNP_41097_A_16019685 | NC_021165.1    | Ca_Kabuli_Chr06 | 16019685                | AA                                     | GG                 | GG               | URR                           | 101490627          | reticuline oxidase-like protein           |
| SNP_41098_A_16019735 | NC_021165.1    | Ca_Kabuli_Chr06 | 16019735                | TT                                     | CC                 | CC               | URR                           | 101490627          | reticuline oxidase-like protein           |
| SNP_41099_A_16019915 | NC_021165.1    | Ca_Kabuli_Chr06 | 16019915                | CC                                     | AA                 | AA               | URR                           | 101490627          | reticuline oxidase-like protein           |

| SNPs IDs             | Chromosome IDs | Chromosomes     | Physical positions (bp) | CDC Frontier genome (Reference genome) | (Pusa 1103 & HPNB) | (ILWC 46 & LPNB) | Sequence Components of genome | Gene accession IDs | Putative functions              |
|----------------------|----------------|-----------------|-------------------------|----------------------------------------|--------------------|------------------|-------------------------------|--------------------|---------------------------------|
| SNP_41100_A_16019934 | NC_021165.1    | Ca_Kabuli_Chr06 | 16019934                | CC                                     | TT                 | TT               | URR                           | 101490627          | reticuline oxidase-like protein |
| SNP_41101_A_16020114 | NC_021165.1    | Ca_Kabuli_Chr06 | 16020114                | GG                                     | TT                 | TT               | URR                           | 101490627          | reticuline oxidase-like protein |
| SNP_41102_A_16020535 | NC_021165.1    | Ca_Kabuli_Chr06 | 16020535                | GG                                     | AA                 | AA               | URR                           | 101490627          | reticuline oxidase-like protein |
| SNP_41103_A_16057274 | NC_021165.1    | Ca_Kabuli_Chr06 | 16057274                | TT                                     | CC                 | CC               | NON_SYNONYMOUS_CODING         | 101492235          | reticuline oxidase-like protein |
| SNP_41104_A_16154108 | NC_021165.1    | Ca_Kabuli_Chr06 | 16154108                | CC                                     | TT                 | TT               | URR                           | 101509425          | uncharacterized LOC101509425    |
| SNP_41105_A_16181607 | NC_021165.1    | Ca_Kabuli_Chr06 | 16181607                | TT                                     | CC                 | CC               | DRR                           | 101510074          | uncharacterized LOC101510074    |
| SNP_41106_A_16237334 | NC_021165.1    | Ca_Kabuli_Chr06 | 16237334                | TT                                     | CC                 | CC               | INTERGENIC                    |                    |                                 |
| SNP_41107_A_16243391 | NC_021165.1    | Ca_Kabuli_Chr06 | 16243391                | TT                                     | CC                 | CC               | INTERGENIC                    |                    |                                 |
| SNP_41109_A_16304307 | NC_021165.1    | Ca_Kabuli_Chr06 | 16304307                | TT                                     | AA                 | AA               | INTERGENIC                    |                    |                                 |
| SNP_41112_A_16425988 | NC_021165.1    | Ca_Kabuli_Chr06 | 16425988                | CC                                     | TT                 | TT               | INTERGENIC                    |                    |                                 |
| SNP_41113_A_16426245 | NC_021165.1    | Ca_Kabuli_Chr06 | 16426245                | AA                                     | CC                 | CC               | INTERGENIC                    |                    |                                 |
| SNP_41114_A_16426262 | NC_021165.1    | Ca_Kabuli_Chr06 | 16426262                | GG                                     | AA                 | AA               | INTERGENIC                    |                    |                                 |
| SNP_41115_A_16426350 | NC_021165.1    | Ca_Kabuli_Chr06 | 16426350                | AA                                     | GG                 | GG               | INTERGENIC                    |                    |                                 |
| SNP_41116_A_16426392 | NC_021165.1    | Ca_Kabuli_Chr06 | 16426392                | TT                                     | GG                 | GG               | INTERGENIC                    |                    |                                 |
| SNP_41117_A_16428132 | NC_021165.1    | Ca_Kabuli_Chr06 | 16428132                | AA                                     | GG                 | GG               | DRR                           | 101494822          | Unknown function                |
| SNP_41118_A_16428134 | NC_021165.1    | Ca_Kabuli_Chr06 | 16428134                | AA                                     | CC                 | CC               | DRR                           | 101494822          | Unknown function                |
| SNP_41119_A_16428164 | NC_021165.1    | Ca_Kabuli_Chr06 | 16428164                | AA                                     | GG                 | GG               | DRR                           | 101494822          | Unknown function                |
| SNP_41120_A_16428202 | NC_021165.1    | Ca_Kabuli_Chr06 | 16428202                | TT                                     | CC                 | CC               | DRR                           | 101494822          | Unknown function                |
| SNP_41121_A_16428364 | NC_021165.1    | Ca_Kabuli_Chr06 | 16428364                | GG                                     | AA                 | AA               | INTERGENIC                    |                    |                                 |
| SNP_41122_A_16428450 | NC_021165.1    | Ca_Kabuli_Chr06 | 16428450                | TT                                     | CC                 | CC               | INTERGENIC                    |                    |                                 |
| SNP_41123_A_16436457 | NC_021165.1    | Ca_Kabuli_Chr06 | 16436457                | TT                                     | CC                 | CC               | INTERGENIC                    |                    |                                 |
| SNP_41125_A_16544877 | NC_021165.1    | Ca_Kabuli_Chr06 | 16544877                | TT                                     | CC                 | CC               | INTRON                        | 101495030          | splicing factor 3B subunit 2    |

| SNPs IDs             | Chromosome IDs | Chromosomes     | Physical positions (bp) | CDC Frontier (Reference genome) | (Pusa 1103 & HPNB) | (ILWC 46 & LPNB) | Sequence Components of genome | Gene accession IDs | Putative functions                                     |
|----------------------|----------------|-----------------|-------------------------|---------------------------------|--------------------|------------------|-------------------------------|--------------------|--------------------------------------------------------|
| SNP_41126_A_16544878 | NC_021165.1    | Ca_Kabuli_Chr06 | 16544878                | TT                              | AA                 | AA               | INTRON                        | 101495030          | splicing factor 3B subunit 2                           |
| SNP_41129_A_16600012 | NC_021165.1    | Ca_Kabuli_Chr06 | 16600012                | GG                              | AA                 | AA               | INTERGENIC                    |                    |                                                        |
| SNP_41130_A_16600116 | NC_021165.1    | Ca_Kabuli_Chr06 | 16600116                | AA                              | CC                 | CC               | INTERGENIC                    |                    |                                                        |
| SNP_41131_A_16629382 | NC_021165.1    | Ca_Kabuli_Chr06 | 16629382                | TT                              | AA                 | AA               | DRR                           | 101499089          | RNA polymerase II C-terminal domain phosphatase-like 1 |
| SNP_41132_A_16686453 | NC_021165.1    | Ca_Kabuli_Chr06 | 16686453                | GG                              | AA                 | AA               | DRR                           | 101501833          | stem-specific protein TSJT1-like                       |
| SNP_41134_A_16822042 | NC_021165.1    | Ca_Kabuli_Chr06 | 16822042                | TT                              | CC                 | CC               | INTRON                        | 101507840          | uncharacterized LOC101507840                           |
| SNP_41135_A_16822056 | NC_021165.1    | Ca_Kabuli_Chr06 | 16822056                | CC                              | TT                 | TT               | INTRON                        | 101507840          | uncharacterized LOC101507840                           |
| SNP_41136_A_16822245 | NC_021165.1    | Ca_Kabuli_Chr06 | 16822245                | AA                              | GG                 | GG               | INTRON                        | 101507840          | uncharacterized LOC101507840                           |
| SNP_41137_A_16822351 | NC_021165.1    | Ca_Kabuli_Chr06 | 16822351                | AA                              | GG                 | GG               | INTRON                        | 101507840          | uncharacterized LOC101507840                           |
| SNP_41138_A_16822352 | NC_021165.1    | Ca_Kabuli_Chr06 | 16822352                | AA                              | GG                 | GG               | INTRON                        | 101507840          | uncharacterized LOC101507840                           |
| SNP_41139_A_16822402 | NC_021165.1    | Ca_Kabuli_Chr06 | 16822402                | TT                              | CC                 | CC               | INTRON                        | 101507840          | uncharacterized LOC101507840                           |
| SNP_41141_A_16874642 | NC_021165.1    | Ca_Kabuli_Chr06 | 16874642                | AA                              | TT                 | TT               | INTERGENIC                    |                    |                                                        |
| SNP_41142_A_16962111 | NC_021165.1    | Ca_Kabuli_Chr06 | 16962111                | GG                              | AA                 | AA               | INTERGENIC                    |                    |                                                        |
| SNP_41143_A_16962131 | NC_021165.1    | Ca_Kabuli_Chr06 | 16962131                | AA                              | GG                 | GG               | INTERGENIC                    |                    |                                                        |
| SNP_41144_A_16962132 | NC_021165.1    | Ca_Kabuli_Chr06 | 16962132                | CC                              | AA                 | AA               | INTERGENIC                    |                    |                                                        |
| SNP_41145_A_16962134 | NC_021165.1    | Ca_Kabuli_Chr06 | 16962134                | AA                              | GG                 | GG               | INTERGENIC                    |                    |                                                        |
| SNP_41146_A_16983399 | NC_021165.1    | Ca_Kabuli_Chr06 | 16983399                | TT                              | AA                 | AA               | INTERGENIC                    |                    |                                                        |
| SNP_41147_A_16983559 | NC_021165.1    | Ca_Kabuli_Chr06 | 16983559                | AA                              | GG                 | GG               | INTERGENIC                    |                    |                                                        |
| SNP_41148_A_16983612 | NC_021165.1    | Ca_Kabuli_Chr06 | 16983612                | TT                              | AA                 | AA               | INTERGENIC                    |                    |                                                        |
| SNP_41149_A_16995808 | NC_021165.1    | Ca_Kabuli_Chr06 | 16995808                | CC                              | TT                 | TT               | URR                           | 101497316          | triosephosphate isomerase, cytosolic-like              |
| SNP_41150_A_16996805 | NC_021165.1    | Ca_Kabuli_Chr06 | 16996805                | TT                              | CC                 | CC               | INTERGENIC                    |                    |                                                        |
| SNP_41151_A_17069704 | NC_021165.1    | Ca_Kabuli_Chr06 | 17069704                | TT                              | CC                 | CC               | INTERGENIC                    |                    |                                                        |

| SNPs IDs             | Chromosome IDs | Chromosomes     | Physical positions (bp) | CDC Frontier genome (Reference genome) | (Pusa 1103 & HPNB) | (ILWC 46 & LPNB) | Sequence genome | Components of | Gene accession IDs                      | Putative functions |
|----------------------|----------------|-----------------|-------------------------|----------------------------------------|--------------------|------------------|-----------------|---------------|-----------------------------------------|--------------------|
| SNP_41152_A_17069729 | NC_021165.1    | Ca_Kabuli_Chr06 | 17069729                | TT                                     | CC                 | CC               | INTERGENIC      |               |                                         |                    |
| SNP_41153_A_17070121 | NC_021165.1    | Ca_Kabuli_Chr06 | 17070121                | AA                                     | GG                 | GG               | INTERGENIC      |               |                                         |                    |
| SNP_41154_A_17070135 | NC_021165.1    | Ca_Kabuli_Chr06 | 17070135                | TT                                     | CC                 | CC               | INTERGENIC      |               |                                         |                    |
| SNP_41155_A_17070244 | NC_021165.1    | Ca_Kabuli_Chr06 | 17070244                | CC                                     | TT                 | TT               | INTERGENIC      |               |                                         |                    |
| SNP_41156_A_17070253 | NC_021165.1    | Ca_Kabuli_Chr06 | 17070253                | AA                                     | GG                 | GG               | INTERGENIC      |               |                                         |                    |
| SNP_41157_A_17070268 | NC_021165.1    | Ca_Kabuli_Chr06 | 17070268                | TT                                     | CC                 | CC               | INTERGENIC      |               |                                         |                    |
| SNP_41158_A_17070296 | NC_021165.1    | Ca_Kabuli_Chr06 | 17070296                | CC                                     | TT                 | TT               | INTERGENIC      |               |                                         |                    |
| SNP_41159_A_17072179 | NC_021165.1    | Ca_Kabuli_Chr06 | 17072179                | GG                                     | AA                 | AA               | INTERGENIC      |               |                                         |                    |
| SNP_41160_A_17072290 | NC_021165.1    | Ca_Kabuli_Chr06 | 17072290                | AA                                     | GG                 | GG               | INTERGENIC      |               |                                         |                    |
| SNP_41161_A_17072392 | NC_021165.1    | Ca_Kabuli_Chr06 | 17072392                | CC                                     | TT                 | TT               | INTERGENIC      |               |                                         |                    |
| SNP_41162_A_17072611 | NC_021165.1    | Ca_Kabuli_Chr06 | 17072611                | CC                                     | TT                 | TT               | INTERGENIC      |               |                                         |                    |
| SNP_41163_A_17072615 | NC_021165.1    | Ca_Kabuli_Chr06 | 17072615                | TT                                     | CC                 | CC               | INTERGENIC      |               |                                         |                    |
| SNP_41164_A_17072623 | NC_021165.1    | Ca_Kabuli_Chr06 | 17072623                | AA                                     | CC                 | CC               | INTERGENIC      |               |                                         |                    |
| SNP_41165_A_17072641 | NC_021165.1    | Ca_Kabuli_Chr06 | 17072641                | AA                                     | GG                 | GG               | INTERGENIC      |               |                                         |                    |
| SNP_41166_A_17072679 | NC_021165.1    | Ca_Kabuli_Chr06 | 17072679                | AA                                     | CC                 | CC               | INTERGENIC      |               |                                         |                    |
| SNP_41167_A_17072693 | NC_021165.1    | Ca_Kabuli_Chr06 | 17072693                | AA                                     | GG                 | GG               | INTERGENIC      |               |                                         |                    |
| SNP_41168_A_17072755 | NC_021165.1    | Ca_Kabuli_Chr06 | 17072755                | GG                                     | AA                 | AA               | INTERGENIC      |               |                                         |                    |
| SNP_41169_A_17072873 | NC_021165.1    | Ca_Kabuli_Chr06 | 17072873                | AA                                     | GG                 | GG               | INTERGENIC      |               |                                         |                    |
| SNP_41171_A_17092636 | NC_021165.1    | Ca_Kabuli_Chr06 | 17092636                | CC                                     | TT                 | TT               | DRR             | 101513295     | mitochondrial arginine transporter BAC1 |                    |
| SNP_41173_A_17102158 | NC_021165.1    | Ca_Kabuli_Chr06 | 17102158                | AA                                     | TT                 | TT               | INTERGENIC      |               |                                         |                    |
| SNP_41174_A_17163379 | NC_021165.1    | Ca_Kabuli_Chr06 | 17163379                | GG                                     | CC                 | CC               | URR             | 101514934     | polyubiquitin                           |                    |
| SNP_41175_A_17184223 | NC_021165.1    | Ca_Kabuli_Chr06 | 17184223                | CC                                     | TT                 | TT               | URR             | 101498304     | Unknown function                        |                    |

| SNPs IDs             | Chromosome IDs | Chromosomes     | Physical positions (bp) | CDC Frontier genome (Reference genome) | (Pusa 1103 & HPNB) | (ILWC 46 & LPNB) | Sequence Components of genome | Gene accession IDs | Putative functions                                     |
|----------------------|----------------|-----------------|-------------------------|----------------------------------------|--------------------|------------------|-------------------------------|--------------------|--------------------------------------------------------|
| SNP_41176_A_17184230 | NC_021165.1    | Ca_Kabuli_Chr06 | 17184230                | CC                                     | TT                 | TT               | URR                           | 101498304          | Unknown function                                       |
| SNP_41177_A_17237161 | NC_021165.1    | Ca_Kabuli_Chr06 | 17237161                | TT                                     | CC                 | CC               | INTERGENIC                    |                    |                                                        |
| SNP_41178_A_17238498 | NC_021165.1    | Ca_Kabuli_Chr06 | 17238498                | GG                                     | AA                 | AA               | INTERGENIC                    |                    |                                                        |
| SNP_41179_A_17246964 | NC_021165.1    | Ca_Kabuli_Chr06 | 17246964                | TT                                     | CC                 | CC               | INTERGENIC                    |                    |                                                        |
| SNP_41181_A_17279277 | NC_021165.1    | Ca_Kabuli_Chr06 | 17279277                | CC                                     | AA                 | AA               | URR                           | 101491269          | triose phosphate/phosphate translocator, chloroplastic |
| SNP_41183_A_17326227 | NC_021165.1    | Ca_Kabuli_Chr06 | 17326227                | AA                                     | GG                 | GG               | INTERGENIC                    |                    |                                                        |
| SNP_41184_A_17347012 | NC_021165.1    | Ca_Kabuli_Chr06 | 17347012                | GG                                     | AA                 | AA               | DRR                           | 101499287          | cellulose synthase-like protein G2                     |
| SNP_41185_A_17376696 | NC_021165.1    | Ca_Kabuli_Chr06 | 17376696                | AA                                     | GG                 | GG               | INTERGENIC                    |                    |                                                        |
| SNP_41186_A_17424931 | NC_021165.1    | Ca_Kabuli_Chr06 | 17424931                | GG                                     | AA                 | AA               | INTERGENIC                    |                    |                                                        |
| SNP_41187_A_17458957 | NC_021165.1    | Ca_Kabuli_Chr06 | 17458957                | TT                                     | CC                 | CC               | INTERGENIC                    |                    |                                                        |
| SNP_41188_A_17521663 | NC_021165.1    | Ca_Kabuli_Chr06 | 17521663                | AA                                     | GG                 | GG               | INTERGENIC                    |                    |                                                        |
| SNP_41189_A_17521712 | NC_021165.1    | Ca_Kabuli_Chr06 | 17521712                | CC                                     | TT                 | TT               | INTERGENIC                    |                    |                                                        |
| SNP_41190_A_17528851 | NC_021165.1    | Ca_Kabuli_Chr06 | 17528851                | CC                                     | TT                 | TT               | INTERGENIC                    |                    |                                                        |
| SNP_41191_A_17536471 | NC_021165.1    | Ca_Kabuli_Chr06 | 17536471                | GG                                     | AA                 | AA               | INTERGENIC                    |                    |                                                        |
| SNP_41192_A_17626941 | NC_021165.1    | Ca_Kabuli_Chr06 | 17626941                | AA                                     | GG                 | GG               | INTERGENIC                    |                    |                                                        |
| SNP_41193_A_17630764 | NC_021165.1    | Ca_Kabuli_Chr06 | 17630764                | AA                                     | TT                 | TT               | URR                           | 101502577          | phospholipase A1-IIgamma-like                          |
| SNP_41194_A_17753138 | NC_021165.1    | Ca_Kabuli_Chr06 | 17753138                | TT                                     | GG                 | GG               | INTRON                        | 101507315          | cysteine synthase, chloroplastic/chromoplastic         |
| SNP_41195_A_17859016 | NC_021165.1    | Ca_Kabuli_Chr06 | 17859016                | GG                                     | CC                 | CC               | INTRON                        | 101511250          | eukaryotic translation initiation factor 2A            |
| SNP_41197_A_17993613 | NC_021165.1    | Ca_Kabuli_Chr06 | 17993613                | TT                                     | CC                 | CC               | INTERGENIC                    |                    |                                                        |
| SNP_41198_A_17993642 | NC_021165.1    | Ca_Kabuli_Chr06 | 17993642                | CC                                     | AA                 | AA               | INTERGENIC                    |                    |                                                        |
| SNP_41199_A_17993649 | NC_021165.1    | Ca_Kabuli_Chr06 | 17993649                | CC                                     | AA                 | AA               | INTERGENIC                    |                    |                                                        |
| SNP_41200_A_17994499 | NC_021165.1    | Ca_Kabuli_Chr06 | 17994499                | GG                                     | AA                 | AA               | INTERGENIC                    |                    |                                                        |

| SNPs IDs             | Chromosome IDs | Chromosomes     | Physical positions (bp) | CDC Frontier genome (Reference genome) | (Pusa 1103 & HPNB) | (ILWC 46 & LPNB) | Sequence Components of genome | Gene accession IDs | Putative functions                           |
|----------------------|----------------|-----------------|-------------------------|----------------------------------------|--------------------|------------------|-------------------------------|--------------------|----------------------------------------------|
| SNP_41201_A_18148514 | NC_021165.1    | Ca_Kabuli_Chr06 | 18148514                | CC                                     | TT                 | TT               | URR                           | 101495029          | probable carboxylesterase 2                  |
| SNP_41202_A_18156735 | NC_021165.1    | Ca_Kabuli_Chr06 | 18156735                | GG                                     | AA                 | AA               | DRR                           | 101495358          | probable carboxylesterase 12                 |
| SNP_41203_A_18156750 | NC_021165.1    | Ca_Kabuli_Chr06 | 18156750                | CC                                     | TT                 | TT               | DRR                           | 101495358          | probable carboxylesterase 12                 |
| SNP_41204_A_18191891 | NC_021165.1    | Ca_Kabuli_Chr06 | 18191891                | AA                                     | TT                 | TT               | INTERGENIC                    |                    |                                              |
| SNP_41205_A_18343651 | NC_021165.1    | Ca_Kabuli_Chr06 | 18343651                | CC                                     | TT                 | TT               | SYNONYMOUS_CODING             | 101503093          | uncharacterized LOC101503093                 |
| SNP_41206_A_18355459 | NC_021165.1    | Ca_Kabuli_Chr06 | 18355459                | AA                                     | GG                 | GG               | INTERGENIC                    |                    |                                              |
| SNP_41207_A_18355460 | NC_021165.1    | Ca_Kabuli_Chr06 | 18355460                | TT                                     | CC                 | CC               | INTERGENIC                    |                    |                                              |
| SNP_41208_A_18355516 | NC_021165.1    | Ca_Kabuli_Chr06 | 18355516                | CC                                     | TT                 | TT               | INTERGENIC                    |                    |                                              |
| SNP_41209_A_18355544 | NC_021165.1    | Ca_Kabuli_Chr06 | 18355544                | CC                                     | TT                 | TT               | INTERGENIC                    |                    |                                              |
| SNP_41210_A_18355579 | NC_021165.1    | Ca_Kabuli_Chr06 | 18355579                | AA                                     | CC                 | CC               | INTERGENIC                    |                    |                                              |
| SNP_41211_A_18355664 | NC_021165.1    | Ca_Kabuli_Chr06 | 18355664                | GG                                     | AA                 | AA               | INTERGENIC                    |                    |                                              |
| SNP_41212_A_18355765 | NC_021165.1    | Ca_Kabuli_Chr06 | 18355765                | CC                                     | TT                 | TT               | INTERGENIC                    |                    |                                              |
| SNP_41213_A_18355771 | NC_021165.1    | Ca_Kabuli_Chr06 | 18355771                | AA                                     | TT                 | TT               | INTERGENIC                    |                    |                                              |
| SNP_41214_A_18355834 | NC_021165.1    | Ca_Kabuli_Chr06 | 18355834                | TT                                     | CC                 | CC               | INTERGENIC                    |                    |                                              |
| SNP_41216_A_18429085 | NC_021165.1    | Ca_Kabuli_Chr06 | 18429085                | GG                                     | AA                 | AA               | INTERGENIC                    |                    |                                              |
| SNP_41217_A_18509483 | NC_021165.1    | Ca_Kabuli_Chr06 | 18509483                | TT                                     | AA                 | AA               | URR                           | 101506445          | PI-PLC X domain-containing protein At5g67130 |
| SNP_41219_A_18543156 | NC_021165.1    | Ca_Kabuli_Chr06 | 18543156                | AA                                     | GG                 | GG               | INTERGENIC                    |                    |                                              |
| SNP_41220_A_18575315 | NC_021165.1    | Ca_Kabuli_Chr06 | 18575315                | TT                                     | GG                 | GG               | INTERGENIC                    |                    |                                              |
| SNP_41221_A_18589750 | NC_021165.1    | Ca_Kabuli_Chr06 | 18589750                | CC                                     | TT                 | TT               | URR                           | 101504089          | uncharacterized LOC101504089                 |
| SNP_41222_A_18602624 | NC_021165.1    | Ca_Kabuli_Chr06 | 18602624                | GG                                     | AA                 | AA               | URR                           | 101504715          | uncharacterized LOC101504715                 |
| SNP_41223_A_18603043 | NC_021165.1    | Ca_Kabuli_Chr06 | 18603043                | AA                                     | GG                 | GG               | URR                           | 101504715          | uncharacterized LOC101504715                 |
| SNP_41224_A_18603079 | NC_021165.1    | Ca_Kabuli_Chr06 | 18603079                | AA                                     | GG                 | GG               | URR                           | 101504715          | uncharacterized LOC101504715                 |

| SNPs IDs             | Chromosome IDs | Chromosomes     | Physical positions (bp) | CDC Frontier genome (Reference genome) | (Pusa 1103 & HPNB) | (ILWC 46 & LPNB) | Sequence Components of genome | Gene accession IDs | Putative functions                         |
|----------------------|----------------|-----------------|-------------------------|----------------------------------------|--------------------|------------------|-------------------------------|--------------------|--------------------------------------------|
| SNP_41225_A_18603422 | NC_021165.1    | Ca_Kabuli_Chr06 | 18603422                | CC                                     | TT                 | TT               | URR                           | 101504715          | uncharacterized LOC101504715               |
| SNP_41226_A_18603461 | NC_021165.1    | Ca_Kabuli_Chr06 | 18603461                | TT                                     | CC                 | CC               | URR                           | 101504715          | uncharacterized LOC101504715               |
| SNP_41227_A_18617680 | NC_021165.1    | Ca_Kabuli_Chr06 | 18617680                | TT                                     | CC                 | CC               | INTERGENIC                    |                    |                                            |
| SNP_41228_A_18622249 | NC_021165.1    | Ca_Kabuli_Chr06 | 18622249                | GG                                     | AA                 | AA               | INTERGENIC                    |                    |                                            |
| SNP_41229_A_18622360 | NC_021165.1    | Ca_Kabuli_Chr06 | 18622360                | AA                                     | GG                 | GG               | INTERGENIC                    |                    |                                            |
| SNP_41230_A_18699485 | NC_021165.1    | Ca_Kabuli_Chr06 | 18699485                | AA                                     | GG                 | GG               | INTERGENIC                    |                    |                                            |
| SNP_41232_A_18739786 | NC_021165.1    | Ca_Kabuli_Chr06 | 18739786                | TT                                     | CC                 | CC               | INTERGENIC                    |                    |                                            |
| SNP_41233_A_18790726 | NC_021165.1    | Ca_Kabuli_Chr06 | 18790726                | AA                                     | GG                 | GG               | INTERGENIC                    |                    |                                            |
| SNP_41235_A_18795122 | NC_021165.1    | Ca_Kabuli_Chr06 | 18795122                | TT                                     | GG                 | GG               | INTERGENIC                    |                    |                                            |
| SNP_41236_A_18795123 | NC_021165.1    | Ca_Kabuli_Chr06 | 18795123                | TT                                     | CC                 | CC               | INTERGENIC                    |                    |                                            |
| SNP_41237_A_18859952 | NC_021165.1    | Ca_Kabuli_Chr06 | 18859952                | GG                                     | TT                 | TT               | INTERGENIC                    |                    |                                            |
| SNP_41238_A_18881565 | NC_021165.1    | Ca_Kabuli_Chr06 | 18881565                | TT                                     | CC                 | CC               | INTERGENIC                    |                    |                                            |
| SNP_41239_A_18897444 | NC_021165.1    | Ca_Kabuli_Chr06 | 18897444                | TT                                     | GG                 | GG               | INTERGENIC                    |                    |                                            |
| SNP_41240_A_18897446 | NC_021165.1    | Ca_Kabuli_Chr06 | 18897446                | TT                                     | CC                 | CC               | INTERGENIC                    |                    |                                            |
| SNP_41241_A_18931846 | NC_021165.1    | Ca_Kabuli_Chr06 | 18931846                | AA                                     | GG                 | GG               | URR                           | 101489326          | uncharacterized LOC101489326               |
| SNP_41243_A_19040488 | NC_021165.1    | Ca_Kabuli_Chr06 | 19040488                | GG                                     | AA                 | AA               | INTERGENIC                    |                    |                                            |
| SNP_41245_A_19193218 | NC_021165.1    | Ca_Kabuli_Chr06 | 19193218                | TT                                     | CC                 | CC               | URR                           | 101500673          | uncharacterized protein At4g19900          |
| SNP_41246_A_19225720 | NC_021165.1    | Ca_Kabuli_Chr06 | 19225720                | AA                                     | TT                 | TT               | INTRON                        | 101502261          | mitochondrial protein import protein ZIM17 |
| SNP_41248_A_19532770 | NC_021165.1    | Ca_Kabuli_Chr06 | 19532770                | AA                                     | CC                 | CC               | INTERGENIC                    |                    |                                            |
| SNP_41249_A_19582082 | NC_021165.1    | Ca_Kabuli_Chr06 | 19582082                | GG                                     | AA                 | AA               | INTERGENIC                    |                    |                                            |
| SNP_41251_A_19650398 | NC_021165.1    | Ca_Kabuli_Chr06 | 19650398                | AA                                     | GG                 | GG               | INTERGENIC                    |                    |                                            |
| SNP_41253_A_19721635 | NC_021165.1    | Ca_Kabuli_Chr06 | 19721635                | CC                                     | TT                 | TT               | DRR                           | 101493550          | uncharacterized protein At3g61260          |



| SNPs IDs             | Chromosome IDs | Chromosomes     | Physical positions (bp) | CDC Frontier genome (Reference genome) | (Pusa 1103 & HPNB) | (ILWC 46 & LPNB) | Sequence Components of genome | Gene accession IDs | Putative functions           |
|----------------------|----------------|-----------------|-------------------------|----------------------------------------|--------------------|------------------|-------------------------------|--------------------|------------------------------|
| SNP_41254_A_20493974 | NC_021165.1    | Ca_Kabuli_Chr06 | 20493974                | CC                                     | TT                 | TT               | INTERGENIC                    |                    |                              |
| SNP_41255_A_20494040 | NC_021165.1    | Ca_Kabuli_Chr06 | 20494040                | AA                                     | GG                 | GG               | INTERGENIC                    |                    |                              |
| SNP_41256_A_20494183 | NC_021165.1    | Ca_Kabuli_Chr06 | 20494183                | GG                                     | AA                 | AA               | INTERGENIC                    |                    |                              |
| SNP_41257_A_20494467 | NC_021165.1    | Ca_Kabuli_Chr06 | 20494467                | TT                                     | CC                 | CC               | INTERGENIC                    |                    |                              |
| SNP_41259_A_20779304 | NC_021165.1    | Ca_Kabuli_Chr06 | 20779304                | AA                                     | GG                 | GG               | DRR                           | 101502375          | uncharacterized LOC101502375 |
| SNP_41260_A_20779308 | NC_021165.1    | Ca_Kabuli_Chr06 | 20779308                | AA                                     | GG                 | GG               | DRR                           | 101502375          | uncharacterized LOC101502375 |
| SNP_41261_A_20826877 | NC_021165.1    | Ca_Kabuli_Chr06 | 20826877                | CC                                     | TT                 | TT               | INTERGENIC                    |                    |                              |
| SNP_41262_A_20851346 | NC_021165.1    | Ca_Kabuli_Chr06 | 20851346                | GG                                     | AA                 | AA               | INTERGENIC                    |                    |                              |
| SNP_41264_A_20851439 | NC_021165.1    | Ca_Kabuli_Chr06 | 20851439                | TT                                     | CC                 | CC               | INTERGENIC                    |                    |                              |
| SNP_41265_A_20851822 | NC_021165.1    | Ca_Kabuli_Chr06 | 20851822                | CC                                     | TT                 | TT               | INTERGENIC                    |                    |                              |
| SNP_41266_A_20851828 | NC_021165.1    | Ca_Kabuli_Chr06 | 20851828                | CC                                     | TT                 | TT               | INTERGENIC                    |                    |                              |
| SNP_41267_A_20851853 | NC_021165.1    | Ca_Kabuli_Chr06 | 20851853                | CC                                     | GG                 | GG               | INTERGENIC                    |                    |                              |
| SNP_41268_A_20851861 | NC_021165.1    | Ca_Kabuli_Chr06 | 20851861                | AA                                     | TT                 | TT               | INTERGENIC                    |                    |                              |
| SNP_41269_A_20851885 | NC_021165.1    | Ca_Kabuli_Chr06 | 20851885                | AA                                     | TT                 | TT               | INTERGENIC                    |                    |                              |
| SNP_41270_A_20852110 | NC_021165.1    | Ca_Kabuli_Chr06 | 20852110                | AA                                     | GG                 | GG               | INTERGENIC                    |                    |                              |
| SNP_41271_A_20852133 | NC_021165.1    | Ca_Kabuli_Chr06 | 20852133                | CC                                     | AA                 | AA               | INTERGENIC                    |                    |                              |
| SNP_41272_A_20852151 | NC_021165.1    | Ca_Kabuli_Chr06 | 20852151                | CC                                     | TT                 | TT               | INTERGENIC                    |                    |                              |
| SNP_41273_A_20852169 | NC_021165.1    | Ca_Kabuli_Chr06 | 20852169                | GG                                     | AA                 | AA               | INTERGENIC                    |                    |                              |
| SNP_41274_A_20852184 | NC_021165.1    | Ca_Kabuli_Chr06 | 20852184                | GG                                     | AA                 | AA               | INTERGENIC                    |                    |                              |
| SNP_41276_A_20852953 | NC_021165.1    | Ca_Kabuli_Chr06 | 20852953                | AA                                     | GG                 | GG               | INTERGENIC                    |                    |                              |
| SNP_41277_A_20852971 | NC_021165.1    | Ca_Kabuli_Chr06 | 20852971                | TT                                     | CC                 | CC               | INTERGENIC                    |                    |                              |
| SNP_41278_A_20853207 | NC_021165.1    | Ca_Kabuli_Chr06 | 20853207                | TT                                     | AA                 | AA               | INTERGENIC                    |                    |                              |

| SNPs IDs             | Chromosome IDs | Chromosomes     | Physical positions (bp) | CDC Frontier genome (Reference genome) | (Pusa 1103 & HPNB) | (ILWC 46 & LPNB) | Sequence Components of genome | Gene accession IDs | Putative functions              |
|----------------------|----------------|-----------------|-------------------------|----------------------------------------|--------------------|------------------|-------------------------------|--------------------|---------------------------------|
| SNP_41279_A_20853216 | NC_021165.1    | Ca_Kabuli_Chr06 | 20853216                | TT                                     | CC                 | CC               | INTERGENIC                    |                    |                                 |
| SNP_41280_A_20853232 | NC_021165.1    | Ca_Kabuli_Chr06 | 20853232                | GG                                     | AA                 | AA               | INTERGENIC                    |                    |                                 |
| SNP_41281_A_20853388 | NC_021165.1    | Ca_Kabuli_Chr06 | 20853388                | GG                                     | TT                 | TT               | INTERGENIC                    |                    |                                 |
| SNP_41282_A_20853447 | NC_021165.1    | Ca_Kabuli_Chr06 | 20853447                | CC                                     | TT                 | TT               | INTERGENIC                    |                    |                                 |
| SNP_41283_A_20853449 | NC_021165.1    | Ca_Kabuli_Chr06 | 20853449                | AA                                     | GG                 | GG               | INTERGENIC                    |                    |                                 |
| SNP_41284_A_20853620 | NC_021165.1    | Ca_Kabuli_Chr06 | 20853620                | CC                                     | TT                 | TT               | INTERGENIC                    |                    |                                 |
| SNP_41286_A_20854414 | NC_021165.1    | Ca_Kabuli_Chr06 | 20854414                | CC                                     | GG                 | GG               | INTERGENIC                    |                    |                                 |
| SNP_41287_A_20854415 | NC_021165.1    | Ca_Kabuli_Chr06 | 20854415                | GG                                     | TT                 | TT               | INTERGENIC                    |                    |                                 |
| SNP_41288_A_20854443 | NC_021165.1    | Ca_Kabuli_Chr06 | 20854443                | AA                                     | GG                 | GG               | INTERGENIC                    |                    |                                 |
| SNP_41289_A_20866647 | NC_021165.1    | Ca_Kabuli_Chr06 | 20866647                | TT                                     | CC                 | CC               | NON_SYNONYMOUS_CODING         | 101502679          | uncharacterized LOC101502679    |
| SNP_41290_A_20866847 | NC_021165.1    | Ca_Kabuli_Chr06 | 20866847                | AA                                     | GG                 | GG               | SYNONYMOUS_CODING             | 101502679          | uncharacterized LOC101502679    |
| SNP_41291_A_20867012 | NC_021165.1    | Ca_Kabuli_Chr06 | 20867012                | AA                                     | TT                 | TT               | SYNONYMOUS_CODING             | 101502679          | uncharacterized LOC101502679    |
| SNP_41292_A_20867251 | NC_021165.1    | Ca_Kabuli_Chr06 | 20867251                | CC                                     | GG                 | GG               | NON_SYNONYMOUS_CODING         | 101502679          | uncharacterized LOC101502679    |
| SNP_41293_A_20867836 | NC_021165.1    | Ca_Kabuli_Chr06 | 20867836                | CC                                     | AA                 | AA               | URR                           | 101502679          | uncharacterized LOC101502679    |
| SNP_41295_A_20989921 | NC_021165.1    | Ca_Kabuli_Chr06 | 20989921                | GG                                     | AA                 | AA               | INTERGENIC                    |                    |                                 |
| SNP_41296_A_20989971 | NC_021165.1    | Ca_Kabuli_Chr06 | 20989971                | AA                                     | GG                 | GG               | INTERGENIC                    |                    |                                 |
| SNP_41297_A_20990003 | NC_021165.1    | Ca_Kabuli_Chr06 | 20990003                | AA                                     | GG                 | GG               | INTERGENIC                    |                    |                                 |
| SNP_41299_A_21021700 | NC_021165.1    | Ca_Kabuli_Chr06 | 21021700                | AA                                     | TT                 | TT               | INTERGENIC                    |                    |                                 |
| SNP_41300_A_21021967 | NC_021165.1    | Ca_Kabuli_Chr06 | 21021967                | AA                                     | GG                 | GG               | INTERGENIC                    |                    |                                 |
| SNP_41301_A_21022036 | NC_021165.1    | Ca_Kabuli_Chr06 | 21022036                | TT                                     | CC                 | CC               | INTERGENIC                    |                    |                                 |
| SNP_41302_A_21035709 | NC_021165.1    | Ca_Kabuli_Chr06 | 21035709                | CC                                     | TT                 | TT               | URR                           | 101495900          | uncharacterized LOC101495900    |
| SNP_41303_A_21097132 | NC_021165.1    | Ca_Kabuli_Chr06 | 21097132                | GG                                     | AA                 | AA               | URR                           | 101498968          | ras-related protein Rab11D-like |

| SNPs IDs             | Chromosome IDs | Chromosomes     | Physical positions (bp) | CDC Frontier genome (Reference genome) | (Pusa 1103 & HPNB) | (ILWC 46 & LPNB) | Sequence Components of genome | Gene accession IDs | Putative functions                                       |
|----------------------|----------------|-----------------|-------------------------|----------------------------------------|--------------------|------------------|-------------------------------|--------------------|----------------------------------------------------------|
| SNP_41304_A_21122071 | NC_021165.1    | Ca_Kabuli_Chr06 | 21122071                | GG                                     | AA                 | AA               | INTERGENIC                    |                    |                                                          |
| SNP_41305_A_21138549 | NC_021165.1    | Ca_Kabuli_Chr06 | 21138549                | TT                                     | CC                 | CC               | URR                           | 101515688          | Unknown function                                         |
| SNP_41306_A_21139038 | NC_021165.1    | Ca_Kabuli_Chr06 | 21139038                | CC                                     | GG                 | GG               | URR                           | 101504397          | Unknown function                                         |
| SNP_41308_A_21141069 | NC_021165.1    | Ca_Kabuli_Chr06 | 21141069                | AA                                     | TT                 | TT               | URR                           | 101504716          | uncharacterized LOC101504716                             |
| SNP_41309_A_21141490 | NC_021165.1    | Ca_Kabuli_Chr06 | 21141490                | CC                                     | TT                 | TT               | URR                           | 101504716          | uncharacterized LOC101504716                             |
| SNP_41310_A_21141520 | NC_021165.1    | Ca_Kabuli_Chr06 | 21141520                | CC                                     | GG                 | GG               | URR                           | 101504716          | uncharacterized LOC101504716                             |
| SNP_41311_A_21141532 | NC_021165.1    | Ca_Kabuli_Chr06 | 21141532                | CC                                     | TT                 | TT               | URR                           | 101504716          | uncharacterized LOC101504716                             |
| SNP_41313_A_21141919 | NC_021165.1    | Ca_Kabuli_Chr06 | 21141919                | CC                                     | TT                 | TT               | INTERGENIC                    |                    |                                                          |
| SNP_41314_A_21146671 | NC_021165.1    | Ca_Kabuli_Chr06 | 21146671                | GG                                     | AA                 | AA               | INTERGENIC                    |                    |                                                          |
| SNP_41316_A_21147107 | NC_021165.1    | Ca_Kabuli_Chr06 | 21147107                | GG                                     | AA                 | AA               | INTERGENIC                    |                    |                                                          |
| SNP_41317_A_21147137 | NC_021165.1    | Ca_Kabuli_Chr06 | 21147137                | TT                                     | GG                 | GG               | INTERGENIC                    |                    |                                                          |
| SNP_41318_A_21147443 | NC_021165.1    | Ca_Kabuli_Chr06 | 21147443                | CC                                     | AA                 | AA               | INTERGENIC                    |                    |                                                          |
| SNP_41319_A_21154155 | NC_021165.1    | Ca_Kabuli_Chr06 | 21154155                | GG                                     | AA                 | AA               | INTERGENIC                    |                    |                                                          |
| SNP_41320_A_21154161 | NC_021165.1    | Ca_Kabuli_Chr06 | 21154161                | CC                                     | TT                 | TT               | INTERGENIC                    |                    |                                                          |
| SNP_41321_A_21154584 | NC_021165.1    | Ca_Kabuli_Chr06 | 21154584                | TT                                     | CC                 | CC               | INTERGENIC                    |                    |                                                          |
| SNP_41322_A_21154790 | NC_021165.1    | Ca_Kabuli_Chr06 | 21154790                | CC                                     | TT                 | TT               | INTERGENIC                    |                    |                                                          |
| SNP_41323_A_21259637 | NC_021165.1    | Ca_Kabuli_Chr06 | 21259637                | AA                                     | TT                 | TT               | URR                           | 101509104          | uncharacterized LOC101509104                             |
| SNP_41324_A_21260555 | NC_021165.1    | Ca_Kabuli_Chr06 | 21260555                | AA                                     | TT                 | TT               | URR                           | 101509104          | uncharacterized LOC101509104                             |
| SNP_41325_A_21317678 | NC_021165.1    | Ca_Kabuli_Chr06 | 21317678                | CC                                     | TT                 | TT               | INTERGENIC                    |                    |                                                          |
| SNP_41327_A_21353727 | NC_021165.1    | Ca_Kabuli_Chr06 | 21353727                | TT                                     | CC                 | CC               | NON_SYNONYMOUS_CODING         | 101489445          | serine/threonine-protein phosphatase 7 long form homolog |
| SNP_41328_A_21353758 | NC_021165.1    | Ca_Kabuli_Chr06 | 21353758                | AA                                     | GG                 | GG               | NON_SYNONYMOUS_CODING         | 101489445          | serine/threonine-protein phosphatase 7 long form homolog |
| SNP_41329_A_21384371 | NC_021165.1    | Ca_Kabuli_Chr06 | 21384371                | GG                                     | AA                 | AA               | INTERGENIC                    |                    |                                                          |

| SNPs IDs             | Chromosome IDs | Chromosomes     | Physical positions (bp) | CDC Frontier genome (Reference genome) | (Pusa 1103 & HPNB) | (ILWC 46 & LPNB) | Sequence Components of genome | Gene accession IDs | Putative functions           |
|----------------------|----------------|-----------------|-------------------------|----------------------------------------|--------------------|------------------|-------------------------------|--------------------|------------------------------|
| SNP_41330_A_21396475 | NC_021165.1    | Ca_Kabuli_Chr06 | 21396475                | AA                                     | TT                 | TT               | URR                           | 101513404          | uncharacterized LOC101513404 |
| SNP_41331_A_21396476 | NC_021165.1    | Ca_Kabuli_Chr06 | 21396476                | AA                                     | TT                 | TT               | URR                           | 101513404          | uncharacterized LOC101513404 |
| SNP_41332_A_21396477 | NC_021165.1    | Ca_Kabuli_Chr06 | 21396477                | CC                                     | TT                 | TT               | URR                           | 101513404          | uncharacterized LOC101513404 |
| SNP_41333_A_21397186 | NC_021165.1    | Ca_Kabuli_Chr06 | 21397186                | TT                                     | CC                 | CC               | URR                           | 101513404          | uncharacterized LOC101513404 |
| SNP_41334_A_21397201 | NC_021165.1    | Ca_Kabuli_Chr06 | 21397201                | CC                                     | TT                 | TT               | URR                           | 101513404          | uncharacterized LOC101513404 |
| SNP_41335_A_21397488 | NC_021165.1    | Ca_Kabuli_Chr06 | 21397488                | AA                                     | GG                 | GG               | URR                           | 101513404          | uncharacterized LOC101513404 |
| SNP_41336_A_21397493 | NC_021165.1    | Ca_Kabuli_Chr06 | 21397493                | AA                                     | GG                 | GG               | URR                           | 101513404          | uncharacterized LOC101513404 |
| SNP_41337_A_21397524 | NC_021165.1    | Ca_Kabuli_Chr06 | 21397524                | TT                                     | AA                 | AA               | URR                           | 101513404          | uncharacterized LOC101513404 |
| SNP_41338_A_21397589 | NC_021165.1    | Ca_Kabuli_Chr06 | 21397589                | AA                                     | TT                 | TT               | URR                           | 101513404          | uncharacterized LOC101513404 |
| SNP_41340_A_21399687 | NC_021165.1    | Ca_Kabuli_Chr06 | 21399687                | TT                                     | CC                 | CC               | INTERGENIC                    |                    |                              |
| SNP_41341_A_21400889 | NC_021165.1    | Ca_Kabuli_Chr06 | 21400889                | CC                                     | TT                 | TT               | INTERGENIC                    |                    |                              |
| SNP_41342_A_21400914 | NC_021165.1    | Ca_Kabuli_Chr06 | 21400914                | CC                                     | TT                 | TT               | INTERGENIC                    |                    |                              |
| SNP_41343_A_21401149 | NC_021165.1    | Ca_Kabuli_Chr06 | 21401149                | TT                                     | CC                 | CC               | INTERGENIC                    |                    |                              |
| SNP_41344_A_21401225 | NC_021165.1    | Ca_Kabuli_Chr06 | 21401225                | GG                                     | AA                 | AA               | INTERGENIC                    |                    |                              |
| SNP_41345_A_21401248 | NC_021165.1    | Ca_Kabuli_Chr06 | 21401248                | AA                                     | GG                 | GG               | INTERGENIC                    |                    |                              |
| SNP_41347_A_21401577 | NC_021165.1    | Ca_Kabuli_Chr06 | 21401577                | GG                                     | AA                 | AA               | INTERGENIC                    |                    |                              |
| SNP_41348_A_21401773 | NC_021165.1    | Ca_Kabuli_Chr06 | 21401773                | TT                                     | AA                 | AA               | INTERGENIC                    |                    |                              |
| SNP_41349_A_21401815 | NC_021165.1    | Ca_Kabuli_Chr06 | 21401815                | GG                                     | AA                 | AA               | INTERGENIC                    |                    |                              |
| SNP_41352_A_21409180 | NC_021165.1    | Ca_Kabuli_Chr06 | 21409180                | GG                                     | AA                 | AA               | URR                           | 101512863          | uncharacterized LOC101512863 |
| SNP_41353_A_21481389 | NC_021165.1    | Ca_Kabuli_Chr06 | 21481389                | GG                                     | TT                 | TT               | INTERGENIC                    |                    |                              |
| SNP_41354_A_21485207 | NC_021165.1    | Ca_Kabuli_Chr06 | 21485207                | CC                                     | TT                 | TT               | INTERGENIC                    |                    |                              |
| SNP_41355_A_21485249 | NC_021165.1    | Ca_Kabuli_Chr06 | 21485249                | CC                                     | AA                 | AA               | INTERGENIC                    |                    |                              |

| SNPs IDs             | Chromosome IDs | Chromosomes     | Physical positions (bp) | CDC Frontier genome (Reference genome) | (Pusa 1103 & HPNB) | (ILWC 46 & LPNB) | Sequence genome | Components of | Gene accession IDs | Putative functions |
|----------------------|----------------|-----------------|-------------------------|----------------------------------------|--------------------|------------------|-----------------|---------------|--------------------|--------------------|
| SNP_41356_A_21485363 | NC_021165.1    | Ca_Kabuli_Chr06 | 21485363                | GG                                     | AA                 | AA               | INTERGENIC      |               |                    |                    |
| SNP_41357_A_21485391 | NC_021165.1    | Ca_Kabuli_Chr06 | 21485391                | AA                                     | TT                 | TT               | INTERGENIC      |               |                    |                    |
| SNP_41358_A_21485487 | NC_021165.1    | Ca_Kabuli_Chr06 | 21485487                | CC                                     | TT                 | TT               | INTERGENIC      |               |                    |                    |
| SNP_41359_A_21485502 | NC_021165.1    | Ca_Kabuli_Chr06 | 21485502                | TT                                     | CC                 | CC               | INTERGENIC      |               |                    |                    |
| SNP_41360_A_21485530 | NC_021165.1    | Ca_Kabuli_Chr06 | 21485530                | AA                                     | TT                 | TT               | INTERGENIC      |               |                    |                    |
| SNP_41362_A_21485610 | NC_021165.1    | Ca_Kabuli_Chr06 | 21485610                | GG                                     | AA                 | AA               | INTERGENIC      |               |                    |                    |
| SNP_41363_A_21485656 | NC_021165.1    | Ca_Kabuli_Chr06 | 21485656                | TT                                     | GG                 | GG               | INTERGENIC      |               |                    |                    |
| SNP_41364_A_21522993 | NC_021165.1    | Ca_Kabuli_Chr06 | 21522993                | GG                                     | AA                 | AA               | INTERGENIC      |               |                    |                    |
| SNP_41365_A_21523277 | NC_021165.1    | Ca_Kabuli_Chr06 | 21523277                | GG                                     | AA                 | AA               | INTERGENIC      |               |                    |                    |
| SNP_41366_A_21523310 | NC_021165.1    | Ca_Kabuli_Chr06 | 21523310                | GG                                     | AA                 | AA               | INTERGENIC      |               |                    |                    |
| SNP_41367_A_21523337 | NC_021165.1    | Ca_Kabuli_Chr06 | 21523337                | GG                                     | AA                 | AA               | INTERGENIC      |               |                    |                    |
| SNP_41368_A_21523379 | NC_021165.1    | Ca_Kabuli_Chr06 | 21523379                | AA                                     | TT                 | TT               | INTERGENIC      |               |                    |                    |
| SNP_41369_A_21523409 | NC_021165.1    | Ca_Kabuli_Chr06 | 21523409                | TT                                     | CC                 | CC               | INTERGENIC      |               |                    |                    |
| SNP_41370_A_21523772 | NC_021165.1    | Ca_Kabuli_Chr06 | 21523772                | TT                                     | CC                 | CC               | INTERGENIC      |               |                    |                    |
| SNP_41371_A_21523784 | NC_021165.1    | Ca_Kabuli_Chr06 | 21523784                | TT                                     | CC                 | CC               | INTERGENIC      |               |                    |                    |
| SNP_41372_A_21523982 | NC_021165.1    | Ca_Kabuli_Chr06 | 21523982                | GG                                     | TT                 | TT               | INTERGENIC      |               |                    |                    |
| SNP_41373_A_21523984 | NC_021165.1    | Ca_Kabuli_Chr06 | 21523984                | GG                                     | AA                 | AA               | INTERGENIC      |               |                    |                    |
| SNP_41375_A_21524024 | NC_021165.1    | Ca_Kabuli_Chr06 | 21524024                | AA                                     | CC                 | CC               | INTERGENIC      |               |                    |                    |
| SNP_41376_A_21524058 | NC_021165.1    | Ca_Kabuli_Chr06 | 21524058                | AA                                     | GG                 | GG               | INTERGENIC      |               |                    |                    |
| SNP_41377_A_21524070 | NC_021165.1    | Ca_Kabuli_Chr06 | 21524070                | GG                                     | AA                 | AA               | INTERGENIC      |               |                    |                    |
| SNP_41378_A_21524108 | NC_021165.1    | Ca_Kabuli_Chr06 | 21524108                | TT                                     | AA                 | AA               | INTERGENIC      |               |                    |                    |
| SNP_41379_A_21524134 | NC_021165.1    | Ca_Kabuli_Chr06 | 21524134                | CC                                     | TT                 | TT               | INTERGENIC      |               |                    |                    |

| SNPs IDs             | Chromosome IDs | Chromosomes     | Physical positions (bp) | CDC Frontier (Reference genome) | (Pusa 1103 & HPNB) | (ILWC 46 & LPNB) | Sequence Components of genome | Gene accession IDs | Putative functions                              |
|----------------------|----------------|-----------------|-------------------------|---------------------------------|--------------------|------------------|-------------------------------|--------------------|-------------------------------------------------|
| SNP_41380_A_21524138 | NC_021165.1    | Ca_Kabuli_Chr06 | 21524138                | CC                              | TT                 | TT               | INTERGENIC                    |                    |                                                 |
| SNP_41381_A_21524184 | NC_021165.1    | Ca_Kabuli_Chr06 | 21524184                | AA                              | GG                 | GG               | INTERGENIC                    |                    |                                                 |
| SNP_41382_A_21524187 | NC_021165.1    | Ca_Kabuli_Chr06 | 21524187                | GG                              | AA                 | AA               | INTERGENIC                    |                    |                                                 |
| SNP_41383_A_21524201 | NC_021165.1    | Ca_Kabuli_Chr06 | 21524201                | AA                              | GG                 | GG               | INTERGENIC                    |                    |                                                 |
| SNP_41384_A_21530730 | NC_021165.1    | Ca_Kabuli_Chr06 | 21530730                | AA                              | CC                 | CC               | INTERGENIC                    |                    |                                                 |
| SNP_41385_A_21530732 | NC_021165.1    | Ca_Kabuli_Chr06 | 21530732                | CC                              | TT                 | TT               | INTERGENIC                    |                    |                                                 |
| SNP_41386_A_21530786 | NC_021165.1    | Ca_Kabuli_Chr06 | 21530786                | CC                              | TT                 | TT               | INTERGENIC                    |                    |                                                 |
| SNP_41387_A_21572638 | NC_021165.1    | Ca_Kabuli_Chr06 | 21572638                | CC                              | AA                 | AA               | INTRON                        | 101493552          | putative DEAD-box ATP-dependent RNA helicase 29 |
| SNP_41389_A_21666957 | NC_021165.1    | Ca_Kabuli_Chr06 | 21666957                | GG                              | TT                 | TT               | DRR                           | 101410606          | transfer RNA glycine (anticodon UCC)            |
| SNP_41390_A_21709487 | NC_021165.1    | Ca_Kabuli_Chr06 | 21709487                | GG                              | CC                 | CC               | INTERGENIC                    |                    |                                                 |
| SNP_41391_A_21822449 | NC_021165.1    | Ca_Kabuli_Chr06 | 21822449                | TT                              | CC                 | CC               | INTERGENIC                    |                    |                                                 |
| SNP_41392_A_21822458 | NC_021165.1    | Ca_Kabuli_Chr06 | 21822458                | TT                              | GG                 | GG               | INTERGENIC                    |                    |                                                 |
| SNP_41393_A_21822597 | NC_021165.1    | Ca_Kabuli_Chr06 | 21822597                | AA                              | GG                 | GG               | INTERGENIC                    |                    |                                                 |
| SNP_41394_A_21822824 | NC_021165.1    | Ca_Kabuli_Chr06 | 21822824                | GG                              | TT                 | TT               | INTERGENIC                    |                    |                                                 |
| SNP_41395_A_21822895 | NC_021165.1    | Ca_Kabuli_Chr06 | 21822895                | AA                              | GG                 | GG               | INTERGENIC                    |                    |                                                 |
| SNP_41396_A_21822935 | NC_021165.1    | Ca_Kabuli_Chr06 | 21822935                | TT                              | GG                 | GG               | INTERGENIC                    |                    |                                                 |
| SNP_41397_A_21822970 | NC_021165.1    | Ca_Kabuli_Chr06 | 21822970                | TT                              | GG                 | GG               | INTERGENIC                    |                    |                                                 |
| SNP_41398_A_21822978 | NC_021165.1    | Ca_Kabuli_Chr06 | 21822978                | AA                              | GG                 | GG               | INTERGENIC                    |                    |                                                 |
| SNP_41399_A_21822991 | NC_021165.1    | Ca_Kabuli_Chr06 | 21822991                | TT                              | CC                 | CC               | INTERGENIC                    |                    |                                                 |
| SNP_41400_A_21952603 | NC_021165.1    | Ca_Kabuli_Chr06 | 21952603                | TT                              | GG                 | GG               | INTERGENIC                    |                    |                                                 |
| SNP_41401_A_21952606 | NC_021165.1    | Ca_Kabuli_Chr06 | 21952606                | TT                              | GG                 | GG               | INTERGENIC                    |                    |                                                 |
| SNP_41402_A_21989714 | NC_021165.1    | Ca_Kabuli_Chr06 | 21989714                | CC                              | AA                 | AA               | INTERGENIC                    |                    |                                                 |

| SNPs IDs             | Chromosome IDs | Chromosomes     | Physical positions (bp) | CDC Frontier (Reference genome) | (Pusa 1103 & HPNB) | (ILWC 46 & LPNB) | Sequence Components of genome | Gene accession IDs | Putative functions             |
|----------------------|----------------|-----------------|-------------------------|---------------------------------|--------------------|------------------|-------------------------------|--------------------|--------------------------------|
| SNP_41403_A_22065882 | NC_021165.1    | Ca_Kabuli_Chr06 | 22065882                | AA                              | GG                 | GG               | URR                           | 101511362          | probable fructokinase-5        |
| SNP_41404_A_22067988 | NC_021165.1    | Ca_Kabuli_Chr06 | 22067988                | CC                              | AA                 | AA               | DRR                           | 101511690          | uncharacterized LOC101511690   |
| SNP_41405_A_22099385 | NC_021165.1    | Ca_Kabuli_Chr06 | 22099385                | TT                              | CC                 | CC               | INTERGENIC                    |                    |                                |
| SNP_41407_A_22099758 | NC_021165.1    | Ca_Kabuli_Chr06 | 22099758                | TT                              | CC                 | CC               | INTERGENIC                    |                    |                                |
| SNP_41408_A_22248763 | NC_021165.1    | Ca_Kabuli_Chr06 | 22248763                | TT                              | CC                 | CC               | DRR                           | 101491375          | scarecrow-like protein 4       |
| SNP_41409_A_22253430 | NC_021165.1    | Ca_Kabuli_Chr06 | 22253430                | GG                              | AA                 | AA               | URR                           | 101491375          | scarecrow-like protein 4       |
| SNP_41410_A_22320396 | NC_021165.1    | Ca_Kabuli_Chr06 | 22320396                | TT                              | CC                 | CC               | INTERGENIC                    |                    |                                |
| SNP_41411_A_22320417 | NC_021165.1    | Ca_Kabuli_Chr06 | 22320417                | CC                              | TT                 | TT               | INTERGENIC                    |                    |                                |
| SNP_41412_A_22320565 | NC_021165.1    | Ca_Kabuli_Chr06 | 22320565                | AA                              | TT                 | TT               | INTERGENIC                    |                    |                                |
| SNP_41413_A_22320802 | NC_021165.1    | Ca_Kabuli_Chr06 | 22320802                | AA                              | GG                 | GG               | INTERGENIC                    |                    |                                |
| SNP_41414_A_22320807 | NC_021165.1    | Ca_Kabuli_Chr06 | 22320807                | CC                              | TT                 | TT               | INTERGENIC                    |                    |                                |
| SNP_41415_A_22320823 | NC_021165.1    | Ca_Kabuli_Chr06 | 22320823                | AA                              | GG                 | GG               | INTERGENIC                    |                    |                                |
| SNP_41416_A_22322638 | NC_021165.1    | Ca_Kabuli_Chr06 | 22322638                | GG                              | AA                 | AA               | INTERGENIC                    |                    |                                |
| SNP_41417_A_22322954 | NC_021165.1    | Ca_Kabuli_Chr06 | 22322954                | TT                              | CC                 | CC               | INTERGENIC                    |                    |                                |
| SNP_41418_A_22391741 | NC_021165.1    | Ca_Kabuli_Chr06 | 22391741                | TT                              | AA                 | AA               | URR                           | 101495902          | isoflavone 2'-hydroxylase-like |
| SNP_41419_A_22419041 | NC_021165.1    | Ca_Kabuli_Chr06 | 22419041                | GG                              | AA                 | AA               | INTERGENIC                    |                    |                                |
| SNP_41420_A_22419073 | NC_021165.1    | Ca_Kabuli_Chr06 | 22419073                | AA                              | GG                 | GG               | INTERGENIC                    |                    |                                |
| SNP_41421_A_22419483 | NC_021165.1    | Ca_Kabuli_Chr06 | 22419483                | AA                              | GG                 | GG               | INTERGENIC                    |                    |                                |
| SNP_41422_A_22464326 | NC_021165.1    | Ca_Kabuli_Chr06 | 22464326                | CC                              | TT                 | TT               | INTERGENIC                    |                    |                                |
| SNP_41423_A_22464621 | NC_021165.1    | Ca_Kabuli_Chr06 | 22464621                | CC                              | TT                 | TT               | INTERGENIC                    |                    |                                |
| SNP_41424_A_22464661 | NC_021165.1    | Ca_Kabuli_Chr06 | 22464661                | CC                              | TT                 | TT               | INTERGENIC                    |                    |                                |
| SNP_41425_A_22465088 | NC_021165.1    | Ca_Kabuli_Chr06 | 22465088                | GG                              | AA                 | AA               | INTERGENIC                    |                    |                                |

| SNPs IDs             | Chromosome IDs | Chromosomes     | Physical positions (bp) | CDC Frontier genome (Reference genome) | (Pusa 1103 & HPNB) | (ILWC 46 & LPNB) | Sequence genome | Components of | Gene accession IDs                    | Putative functions |
|----------------------|----------------|-----------------|-------------------------|----------------------------------------|--------------------|------------------|-----------------|---------------|---------------------------------------|--------------------|
| SNP_41426_A_22465237 | NC_021165.1    | Ca_Kabuli_Chr06 | 22465237                | GG                                     | AA                 | AA               | INTERGENIC      |               |                                       |                    |
| SNP_41427_A_22487162 | NC_021165.1    | Ca_Kabuli_Chr06 | 22487162                | GG                                     | AA                 | AA               | INTERGENIC      |               |                                       |                    |
| SNP_41428_A_22859127 | NC_021165.1    | Ca_Kabuli_Chr06 | 22859127                | CC                                     | TT                 | TT               | INTERGENIC      |               |                                       |                    |
| SNP_41429_A_22859442 | NC_021165.1    | Ca_Kabuli_Chr06 | 22859442                | CC                                     | TT                 | TT               | INTERGENIC      |               |                                       |                    |
| SNP_41431_A_22956965 | NC_021165.1    | Ca_Kabuli_Chr06 | 22956965                | AA                                     | GG                 | GG               | INTERGENIC      |               |                                       |                    |
| SNP_41432_A_22956966 | NC_021165.1    | Ca_Kabuli_Chr06 | 22956966                | GG                                     | AA                 | AA               | INTERGENIC      |               |                                       |                    |
| SNP_41433_A_22992075 | NC_021165.1    | Ca_Kabuli_Chr06 | 22992075                | CC                                     | TT                 | TT               | INTERGENIC      |               |                                       |                    |
| SNP_41434_A_23039459 | NC_021165.1    | Ca_Kabuli_Chr06 | 23039459                | CC                                     | TT                 | TT               | INTERGENIC      |               |                                       |                    |
| SNP_41435_A_23039570 | NC_021165.1    | Ca_Kabuli_Chr06 | 23039570                | TT                                     | CC                 | CC               | INTERGENIC      |               |                                       |                    |
| SNP_41436_A_23039901 | NC_021165.1    | Ca_Kabuli_Chr06 | 23039901                | TT                                     | AA                 | AA               | INTERGENIC      |               |                                       |                    |
| SNP_41437_A_23039956 | NC_021165.1    | Ca_Kabuli_Chr06 | 23039956                | GG                                     | CC                 | CC               | INTERGENIC      |               |                                       |                    |
| SNP_41438_A_23040044 | NC_021165.1    | Ca_Kabuli_Chr06 | 23040044                | TT                                     | AA                 | AA               | INTERGENIC      |               |                                       |                    |
| SNP_41439_A_23040091 | NC_021165.1    | Ca_Kabuli_Chr06 | 23040091                | TT                                     | CC                 | CC               | INTERGENIC      |               |                                       |                    |
| SNP_41440_A_23040147 | NC_021165.1    | Ca_Kabuli_Chr06 | 23040147                | TT                                     | AA                 | AA               | INTERGENIC      |               |                                       |                    |
| SNP_41441_A_23040528 | NC_021165.1    | Ca_Kabuli_Chr06 | 23040528                | AA                                     | TT                 | TT               | INTERGENIC      |               |                                       |                    |
| SNP_41442_A_23040553 | NC_021165.1    | Ca_Kabuli_Chr06 | 23040553                | TT                                     | CC                 | CC               | INTERGENIC      |               |                                       |                    |
| SNP_41443_A_23042723 | NC_021165.1    | Ca_Kabuli_Chr06 | 23042723                | TT                                     | CC                 | CC               | URR             | 101498520     | glucan endo-1,3-beta-glucosidase-like |                    |
| SNP_41444_A_23042738 | NC_021165.1    | Ca_Kabuli_Chr06 | 23042738                | GG                                     | AA                 | AA               | URR             | 101498520     | glucan endo-1,3-beta-glucosidase-like |                    |
| SNP_41447_A_23042883 | NC_021165.1    | Ca_Kabuli_Chr06 | 23042883                | TT                                     | AA                 | AA               | URR             | 101498520     | glucan endo-1,3-beta-glucosidase-like |                    |
| SNP_41448_A_23042940 | NC_021165.1    | Ca_Kabuli_Chr06 | 23042940                | CC                                     | TT                 | TT               | URR             | 101498520     | glucan endo-1,3-beta-glucosidase-like |                    |
| SNP_41449_A_23042946 | NC_021165.1    | Ca_Kabuli_Chr06 | 23042946                | GG                                     | TT                 | TT               | URR             | 101498520     | glucan endo-1,3-beta-glucosidase-like |                    |
| SNP_41451_A_23064173 | NC_021165.1    | Ca_Kabuli_Chr06 | 23064173                | TT                                     | AA                 | AA               | INTERGENIC      |               |                                       |                    |



| SNPs IDs             | Chromosome IDs | Chromosomes     | Physical positions (bp) | CDC Frontier genome (Reference genome) | (Pusa 1103 & HPNB) | (ILWC 46 & LPNB) | Sequence Components of genome | Gene accession IDs | Putative functions                    |
|----------------------|----------------|-----------------|-------------------------|----------------------------------------|--------------------|------------------|-------------------------------|--------------------|---------------------------------------|
| SNP_41453_A_23064442 | NC_021165.1    | Ca_Kabuli_Chr06 | 23064442                | AA                                     | GG                 | GG               | INTERGENIC                    |                    |                                       |
| SNP_41454_A_23064629 | NC_021165.1    | Ca_Kabuli_Chr06 | 23064629                | AA                                     | GG                 | GG               | INTERGENIC                    |                    |                                       |
| SNP_41455_A_23064737 | NC_021165.1    | Ca_Kabuli_Chr06 | 23064737                | CC                                     | TT                 | TT               | INTERGENIC                    |                    |                                       |
| SNP_41457_A_23064793 | NC_021165.1    | Ca_Kabuli_Chr06 | 23064793                | GG                                     | AA                 | AA               | INTERGENIC                    |                    |                                       |
| SNP_41458_A_23064885 | NC_021165.1    | Ca_Kabuli_Chr06 | 23064885                | CC                                     | TT                 | TT               | INTERGENIC                    |                    |                                       |
| SNP_41459_A_23064975 | NC_021165.1    | Ca_Kabuli_Chr06 | 23064975                | GG                                     | AA                 | AA               | INTERGENIC                    |                    |                                       |
| SNP_41460_A_23065124 | NC_021165.1    | Ca_Kabuli_Chr06 | 23065124                | GG                                     | CC                 | CC               | INTERGENIC                    |                    |                                       |
| SNP_41461_A_23065568 | NC_021165.1    | Ca_Kabuli_Chr06 | 23065568                | GG                                     | TT                 | TT               | INTERGENIC                    |                    |                                       |
| SNP_41462_A_23065600 | NC_021165.1    | Ca_Kabuli_Chr06 | 23065600                | CC                                     | TT                 | TT               | INTERGENIC                    |                    |                                       |
| SNP_41463_A_23071023 | NC_021165.1    | Ca_Kabuli_Chr06 | 23071023                | TT                                     | AA                 | AA               | URR                           | 101499186          | glucan endo-1,3-beta-glucosidase-like |
| SNP_41464_A_23071095 | NC_021165.1    | Ca_Kabuli_Chr06 | 23071095                | AA                                     | GG                 | GG               | INTRON                        | 101499507          | glucan endo-1,3-beta-glucosidase-like |
| SNP_41465_A_23071162 | NC_021165.1    | Ca_Kabuli_Chr06 | 23071162                | AA                                     | GG                 | GG               | INTRON                        | 101499507          | glucan endo-1,3-beta-glucosidase-like |
| SNP_41466_A_23071228 | NC_021165.1    | Ca_Kabuli_Chr06 | 23071228                | GG                                     | AA                 | AA               | INTRON                        | 101499507          | glucan endo-1,3-beta-glucosidase-like |
| SNP_41467_A_23071245 | NC_021165.1    | Ca_Kabuli_Chr06 | 23071245                | TT                                     | AA                 | AA               | INTRON                        | 101499507          | glucan endo-1,3-beta-glucosidase-like |
| SNP_41468_A_23071397 | NC_021165.1    | Ca_Kabuli_Chr06 | 23071397                | CC                                     | TT                 | TT               | INTRON                        | 101499507          | glucan endo-1,3-beta-glucosidase-like |
| SNP_41469_A_23071621 | NC_021165.1    | Ca_Kabuli_Chr06 | 23071621                | TT                                     | AA                 | AA               | INTERGENIC                    |                    |                                       |
| SNP_41470_A_23071801 | NC_021165.1    | Ca_Kabuli_Chr06 | 23071801                | AA                                     | TT                 | TT               | INTERGENIC                    |                    |                                       |
| SNP_41471_A_23071808 | NC_021165.1    | Ca_Kabuli_Chr06 | 23071808                | GG                                     | TT                 | TT               | INTERGENIC                    |                    |                                       |
| SNP_41472_A_23071819 | NC_021165.1    | Ca_Kabuli_Chr06 | 23071819                | CC                                     | AA                 | AA               | INTERGENIC                    |                    |                                       |
| SNP_41473_A_23071863 | NC_021165.1    | Ca_Kabuli_Chr06 | 23071863                | AA                                     | GG                 | GG               | INTERGENIC                    |                    |                                       |
| SNP_41474_A_23072245 | NC_021165.1    | Ca_Kabuli_Chr06 | 23072245                | CC                                     | TT                 | TT               | INTERGENIC                    |                    |                                       |
| SNP_41475_A_23076895 | NC_021165.1    | Ca_Kabuli_Chr06 | 23076895                | GG                                     | AA                 | AA               | INTERGENIC                    |                    |                                       |

| SNPs IDs             | Chromosome IDs | Chromosomes     | Physical positions (bp) | CDC Frontier genome (Reference genome) | (Pusa 1103 & HPNB) | (ILWC 46 & LPNB) | Sequence Components of genome | Gene accession IDs | Putative functions                    |
|----------------------|----------------|-----------------|-------------------------|----------------------------------------|--------------------|------------------|-------------------------------|--------------------|---------------------------------------|
| SNP_41476_A_23076995 | NC_021165.1    | Ca_Kabuli_Chr06 | 23076995                | GG                                     | AA                 | AA               | INTERGENIC                    |                    |                                       |
| SNP_41477_A_23077170 | NC_021165.1    | Ca_Kabuli_Chr06 | 23077170                | GG                                     | AA                 | AA               | INTERGENIC                    |                    |                                       |
| SNP_41478_A_23077642 | NC_021165.1    | Ca_Kabuli_Chr06 | 23077642                | AA                                     | GG                 | GG               | INTERGENIC                    |                    |                                       |
| SNP_41479_A_23077684 | NC_021165.1    | Ca_Kabuli_Chr06 | 23077684                | AA                                     | GG                 | GG               | INTERGENIC                    |                    |                                       |
| SNP_41480_A_23077692 | NC_021165.1    | Ca_Kabuli_Chr06 | 23077692                | GG                                     | TT                 | TT               | INTERGENIC                    |                    |                                       |
| SNP_41481_A_23077713 | NC_021165.1    | Ca_Kabuli_Chr06 | 23077713                | TT                                     | CC                 | CC               | INTERGENIC                    |                    |                                       |
| SNP_41482_A_23077849 | NC_021165.1    | Ca_Kabuli_Chr06 | 23077849                | AA                                     | GG                 | GG               | INTERGENIC                    |                    |                                       |
| SNP_41483_A_23077867 | NC_021165.1    | Ca_Kabuli_Chr06 | 23077867                | CC                                     | TT                 | TT               | INTERGENIC                    |                    |                                       |
| SNP_41484_A_23078087 | NC_021165.1    | Ca_Kabuli_Chr06 | 23078087                | TT                                     | GG                 | GG               | INTERGENIC                    |                    |                                       |
| SNP_41485_A_23078377 | NC_021165.1    | Ca_Kabuli_Chr06 | 23078377                | CC                                     | TT                 | TT               | INTERGENIC                    |                    |                                       |
| SNP_41486_A_23078705 | NC_021165.1    | Ca_Kabuli_Chr06 | 23078705                | GG                                     | TT                 | TT               | URR                           | 101499808          | glucan endo-1,3-beta-glucosidase-like |
| SNP_41487_A_23078794 | NC_021165.1    | Ca_Kabuli_Chr06 | 23078794                | CC                                     | TT                 | TT               | URR                           | 101499808          | glucan endo-1,3-beta-glucosidase-like |
| SNP_41488_A_23078804 | NC_021165.1    | Ca_Kabuli_Chr06 | 23078804                | GG                                     | AA                 | AA               | URR                           | 101499808          | glucan endo-1,3-beta-glucosidase-like |
| SNP_41489_A_23078847 | NC_021165.1    | Ca_Kabuli_Chr06 | 23078847                | TT                                     | CC                 | CC               | URR                           | 101499808          | glucan endo-1,3-beta-glucosidase-like |
| SNP_41490_A_23078963 | NC_021165.1    | Ca_Kabuli_Chr06 | 23078963                | CC                                     | TT                 | TT               | URR                           | 101499808          | glucan endo-1,3-beta-glucosidase-like |
| SNP_41491_A_23078967 | NC_021165.1    | Ca_Kabuli_Chr06 | 23078967                | TT                                     | CC                 | CC               | URR                           | 101499808          | glucan endo-1,3-beta-glucosidase-like |
| SNP_41492_A_23098598 | NC_021165.1    | Ca_Kabuli_Chr06 | 23098598                | AA                                     | TT                 | TT               | URR                           | 101500460          | glucan endo-1,3-beta-glucosidase-like |
| SNP_41493_A_23107526 | NC_021165.1    | Ca_Kabuli_Chr06 | 23107526                | AA                                     | TT                 | TT               | INTERGENIC                    |                    |                                       |
| SNP_41495_A_23155135 | NC_021165.1    | Ca_Kabuli_Chr06 | 23155135                | TT                                     | CC                 | CC               | URR                           | 101511053          | ubiquitin-conjugating enzyme E2 20    |
| SNP_41496_A_23164107 | NC_021165.1    | Ca_Kabuli_Chr06 | 23164107                | TT                                     | CC                 | CC               | INTRON                        | 101501088          | uncharacterized LOC101501088          |
| SNP_41497_A_23164109 | NC_021165.1    | Ca_Kabuli_Chr06 | 23164109                | TT                                     | GG                 | GG               | INTRON                        | 101501088          | uncharacterized LOC101501088          |
| SNP_41500_A_23232239 | NC_021165.1    | Ca_Kabuli_Chr06 | 23232239                | GG                                     | AA                 | AA               | INTERGENIC                    |                    |                                       |

| SNPs IDs             | Chromosome IDs | Chromosomes     | Physical positions (bp) | CDC Frontier genome (Reference genome) | (Pusa 1103 & HPNB) | (ILWC 46 & LPNB) | Sequence genome | Components of | Gene accession IDs                  | Putative functions |
|----------------------|----------------|-----------------|-------------------------|----------------------------------------|--------------------|------------------|-----------------|---------------|-------------------------------------|--------------------|
| SNP_41502_A_23453761 | NC_021165.1    | Ca_Kabuli_Chr06 | 23453761                | TT                                     | AA                 | AA               | INTERGENIC      |               |                                     |                    |
| SNP_41503_A_23453768 | NC_021165.1    | Ca_Kabuli_Chr06 | 23453768                | TT                                     | CC                 | CC               | INTERGENIC      |               |                                     |                    |
| SNP_41504_A_23453774 | NC_021165.1    | Ca_Kabuli_Chr06 | 23453774                | CC                                     | AA                 | AA               | INTERGENIC      |               |                                     |                    |
| SNP_41505_A_23530559 | NC_021165.1    | Ca_Kabuli_Chr06 | 23530559                | CC                                     | TT                 | TT               | INTERGENIC      |               |                                     |                    |
| SNP_41507_A_23653074 | NC_021165.1    | Ca_Kabuli_Chr06 | 23653074                | GG                                     | TT                 | TT               | INTERGENIC      |               |                                     |                    |
| SNP_41508_A_23686972 | NC_021165.1    | Ca_Kabuli_Chr06 | 23686972                | AA                                     | CC                 | CC               | DRR             | 101502047     | nucleolin 2                         |                    |
| SNP_41509_A_23689664 | NC_021165.1    | Ca_Kabuli_Chr06 | 23689664                | TT                                     | AA                 | AA               | INTRON          | 101502047     | nucleolin 2                         |                    |
| SNP_41510_A_23719866 | NC_021165.1    | Ca_Kabuli_Chr06 | 23719866                | AA                                     | GG                 | GG               | INTRON          | 101502895     | MAP3K epsilon protein kinase 1-like |                    |
| SNP_41512_A_23755266 | NC_021165.1    | Ca_Kabuli_Chr06 | 23755266                | CC                                     | TT                 | TT               | INTERGENIC      |               |                                     |                    |
| SNP_41514_A_23755347 | NC_021165.1    | Ca_Kabuli_Chr06 | 23755347                | AA                                     | GG                 | GG               | INTERGENIC      |               |                                     |                    |
| SNP_41515_A_23755356 | NC_021165.1    | Ca_Kabuli_Chr06 | 23755356                | TT                                     | CC                 | CC               | INTERGENIC      |               |                                     |                    |
| SNP_41516_A_23755379 | NC_021165.1    | Ca_Kabuli_Chr06 | 23755379                | TT                                     | CC                 | CC               | INTERGENIC      |               |                                     |                    |
| SNP_41517_A_23755414 | NC_021165.1    | Ca_Kabuli_Chr06 | 23755414                | TT                                     | CC                 | CC               | INTERGENIC      |               |                                     |                    |
| SNP_41518_A_23755600 | NC_021165.1    | Ca_Kabuli_Chr06 | 23755600                | TT                                     | CC                 | CC               | INTERGENIC      |               |                                     |                    |
| SNP_41519_A_23815029 | NC_021165.1    | Ca_Kabuli_Chr06 | 23815029                | GG                                     | AA                 | AA               | URR             | 101504191     | alanine-tRNA ligase                 |                    |
| SNP_41521_A_23873973 | NC_021165.1    | Ca_Kabuli_Chr06 | 23873973                | GG                                     | AA                 | AA               | URR             | 101504620     | anamorsin homolog                   |                    |
| SNP_41522_A_23925026 | NC_021165.1    | Ca_Kabuli_Chr06 | 23925026                | AA                                     | GG                 | GG               | INTERGENIC      |               |                                     |                    |
| SNP_41523_A_23961178 | NC_021165.1    | Ca_Kabuli_Chr06 | 23961178                | CC                                     | TT                 | TT               | URR             | 101508891     | 60S ribosomal protein L7a-like      |                    |
| SNP_41524_A_24027303 | NC_021165.1    | Ca_Kabuli_Chr06 | 24027303                | GG                                     | AA                 | AA               | INTERGENIC      |               |                                     |                    |
| SNP_41526_A_24125893 | NC_021165.1    | Ca_Kabuli_Chr06 | 24125893                | GG                                     | AA                 | AA               | INTERGENIC      |               |                                     |                    |
| SNP_41528_A_24126356 | NC_021165.1    | Ca_Kabuli_Chr06 | 24126356                | GG                                     | TT                 | TT               | INTERGENIC      |               |                                     |                    |
| SNP_41529_A_24126395 | NC_021165.1    | Ca_Kabuli_Chr06 | 24126395                | GG                                     | AA                 | AA               | INTERGENIC      |               |                                     |                    |

| SNPs IDs             | Chromosome IDs | Chromosomes     | Physical positions (bp) | CDC Frontier genome (Reference genome) | (Pusa 1103 & HPNB) | (ILWC 46 & LPNB) | Sequence genome | Components of | Gene accession IDs       | Putative functions |
|----------------------|----------------|-----------------|-------------------------|----------------------------------------|--------------------|------------------|-----------------|---------------|--------------------------|--------------------|
| SNP_41530_A_24126951 | NC_021165.1    | Ca_Kabuli_Chr06 | 24126951                | CC                                     | AA                 | AA               | INTERGENIC      |               |                          |                    |
| SNP_41531_A_24127055 | NC_021165.1    | Ca_Kabuli_Chr06 | 24127055                | AA                                     | GG                 | GG               | INTERGENIC      |               |                          |                    |
| SNP_41532_A_24127058 | NC_021165.1    | Ca_Kabuli_Chr06 | 24127058                | AA                                     | GG                 | GG               | INTERGENIC      |               |                          |                    |
| SNP_41533_A_24127335 | NC_021165.1    | Ca_Kabuli_Chr06 | 24127335                | AA                                     | TT                 | TT               | INTERGENIC      |               |                          |                    |
| SNP_41534_A_24127824 | NC_021165.1    | Ca_Kabuli_Chr06 | 24127824                | TT                                     | CC                 | CC               | INTERGENIC      |               |                          |                    |
| SNP_41535_A_24136237 | NC_021165.1    | Ca_Kabuli_Chr06 | 24136237                | TT                                     | AA                 | AA               | INTERGENIC      |               |                          |                    |
| SNP_41536_A_24136245 | NC_021165.1    | Ca_Kabuli_Chr06 | 24136245                | TT                                     | CC                 | CC               | INTERGENIC      |               |                          |                    |
| SNP_41537_A_24145276 | NC_021165.1    | Ca_Kabuli_Chr06 | 24145276                | AA                                     | TT                 | TT               | INTERGENIC      |               |                          |                    |
| SNP_41538_A_24149380 | NC_021165.1    | Ca_Kabuli_Chr06 | 24149380                | GG                                     | AA                 | AA               | URR             | 101489327     | dirigent protein 23-like |                    |
| SNP_41539_A_24181645 | NC_021165.1    | Ca_Kabuli_Chr06 | 24181645                | GG                                     | AA                 | AA               | INTERGENIC      |               |                          |                    |
| SNP_41541_A_24240719 | NC_021165.1    | Ca_Kabuli_Chr06 | 24240719                | TT                                     | CC                 | CC               | INTERGENIC      |               |                          |                    |
| SNP_41542_A_24240740 | NC_021165.1    | Ca_Kabuli_Chr06 | 24240740                | TT                                     | CC                 | CC               | INTERGENIC      |               |                          |                    |
| SNP_41543_A_24240764 | NC_021165.1    | Ca_Kabuli_Chr06 | 24240764                | AA                                     | GG                 | GG               | INTERGENIC      |               |                          |                    |
| SNP_41544_A_24240810 | NC_021165.1    | Ca_Kabuli_Chr06 | 24240810                | AA                                     | CC                 | CC               | INTERGENIC      |               |                          |                    |
| SNP_41545_A_24240841 | NC_021165.1    | Ca_Kabuli_Chr06 | 24240841                | GG                                     | AA                 | AA               | INTERGENIC      |               |                          |                    |
| SNP_41546_A_24240852 | NC_021165.1    | Ca_Kabuli_Chr06 | 24240852                | TT                                     | GG                 | GG               | INTERGENIC      |               |                          |                    |
| SNP_41547_A_24240863 | NC_021165.1    | Ca_Kabuli_Chr06 | 24240863                | AA                                     | GG                 | GG               | INTERGENIC      |               |                          |                    |
| SNP_41548_A_24241069 | NC_021165.1    | Ca_Kabuli_Chr06 | 24241069                | CC                                     | TT                 | TT               | INTERGENIC      |               |                          |                    |
| SNP_41549_A_24241166 | NC_021165.1    | Ca_Kabuli_Chr06 | 24241166                | AA                                     | TT                 | TT               | INTERGENIC      |               |                          |                    |
| SNP_41550_A_24241211 | NC_021165.1    | Ca_Kabuli_Chr06 | 24241211                | AA                                     | TT                 | TT               | INTERGENIC      |               |                          |                    |
| SNP_41551_A_24241463 | NC_021165.1    | Ca_Kabuli_Chr06 | 24241463                | CC                                     | AA                 | AA               | INTERGENIC      |               |                          |                    |
| SNP_41552_A_24241493 | NC_021165.1    | Ca_Kabuli_Chr06 | 24241493                | AA                                     | GG                 | GG               | INTERGENIC      |               |                          |                    |

| SNPs IDs             | Chromosome IDs | Chromosomes     | Physical positions (bp) | CDC Frontier genome (Reference genome) | (Pusa 1103 & HPNB) | (ILWC 46 & LPNB) | Sequence genome | Components of | Gene accession IDs | Putative functions |
|----------------------|----------------|-----------------|-------------------------|----------------------------------------|--------------------|------------------|-----------------|---------------|--------------------|--------------------|
| SNP_41553_A_24241503 | NC_021165.1    | Ca_Kabuli_Chr06 | 24241503                | AA                                     | GG                 | GG               | INTERGENIC      |               |                    |                    |
| SNP_41554_A_24241780 | NC_021165.1    | Ca_Kabuli_Chr06 | 24241780                | GG                                     | AA                 | AA               | INTERGENIC      |               |                    |                    |
| SNP_41555_A_24242013 | NC_021165.1    | Ca_Kabuli_Chr06 | 24242013                | AA                                     | TT                 | TT               | INTERGENIC      |               |                    |                    |
| SNP_41557_A_24363322 | NC_021165.1    | Ca_Kabuli_Chr06 | 24363322                | CC                                     | TT                 | TT               | INTERGENIC      |               |                    |                    |
| SNP_41558_A_24394339 | NC_021165.1    | Ca_Kabuli_Chr06 | 24394339                | GG                                     | TT                 | TT               | INTERGENIC      |               |                    |                    |
| SNP_41560_A_24542042 | NC_021165.1    | Ca_Kabuli_Chr06 | 24542042                | GG                                     | AA                 | AA               | INTERGENIC      |               |                    |                    |
| SNP_41563_A_24673212 | NC_021165.1    | Ca_Kabuli_Chr06 | 24673212                | GG                                     | AA                 | AA               | INTERGENIC      |               |                    |                    |
| SNP_41565_A_24744265 | NC_021165.1    | Ca_Kabuli_Chr06 | 24744265                | TT                                     | CC                 | CC               | INTERGENIC      |               |                    |                    |
| SNP_41566_A_24770482 | NC_021165.1    | Ca_Kabuli_Chr06 | 24770482                | AA                                     | GG                 | GG               | INTERGENIC      |               |                    |                    |
| SNP_41567_A_24770484 | NC_021165.1    | Ca_Kabuli_Chr06 | 24770484                | GG                                     | AA                 | AA               | INTERGENIC      |               |                    |                    |
| SNP_41568_A_24770513 | NC_021165.1    | Ca_Kabuli_Chr06 | 24770513                | CC                                     | TT                 | TT               | INTERGENIC      |               |                    |                    |
| SNP_41569_A_24770543 | NC_021165.1    | Ca_Kabuli_Chr06 | 24770543                | TT                                     | CC                 | CC               | INTERGENIC      |               |                    |                    |
| SNP_41570_A_24770587 | NC_021165.1    | Ca_Kabuli_Chr06 | 24770587                | TT                                     | CC                 | CC               | INTERGENIC      |               |                    |                    |
| SNP_41571_A_24770598 | NC_021165.1    | Ca_Kabuli_Chr06 | 24770598                | GG                                     | AA                 | AA               | INTERGENIC      |               |                    |                    |
| SNP_41572_A_24770755 | NC_021165.1    | Ca_Kabuli_Chr06 | 24770755                | TT                                     | CC                 | CC               | INTERGENIC      |               |                    |                    |
| SNP_41573_A_24770883 | NC_021165.1    | Ca_Kabuli_Chr06 | 24770883                | AA                                     | GG                 | GG               | INTERGENIC      |               |                    |                    |
| SNP_41574_A_24770911 | NC_021165.1    | Ca_Kabuli_Chr06 | 24770911                | TT                                     | AA                 | AA               | INTERGENIC      |               |                    |                    |
| SNP_41575_A_24783300 | NC_021165.1    | Ca_Kabuli_Chr06 | 24783300                | TT                                     | CC                 | CC               | INTERGENIC      |               |                    |                    |
| SNP_41576_A_24811001 | NC_021165.1    | Ca_Kabuli_Chr06 | 24811001                | TT                                     | AA                 | AA               | INTERGENIC      |               |                    |                    |
| SNP_41577_A_24856065 | NC_021165.1    | Ca_Kabuli_Chr06 | 24856065                | GG                                     | TT                 | TT               | INTERGENIC      |               |                    |                    |
| SNP_41578_A_24856083 | NC_021165.1    | Ca_Kabuli_Chr06 | 24856083                | AA                                     | TT                 | TT               | INTERGENIC      |               |                    |                    |
| SNP_41579_A_24857343 | NC_021165.1    | Ca_Kabuli_Chr06 | 24857343                | CC                                     | AA                 | AA               | INTERGENIC      |               |                    |                    |

| SNPs IDs             | Chromosome IDs | Chromosomes     | Physical positions (bp) | CDC Frontier (Reference genome) | (Pusa 1103 & HPNB) | (ILWC 46 & LPNB) | Sequence Components of genome | Gene accession IDs | Putative functions                  |
|----------------------|----------------|-----------------|-------------------------|---------------------------------|--------------------|------------------|-------------------------------|--------------------|-------------------------------------|
| SNP_41580_A_24857925 | NC_021165.1    | Ca_Kabuli_Chr06 | 24857925                | TT                              | GG                 | GG               | INTERGENIC                    |                    |                                     |
| SNP_41581_A_24857980 | NC_021165.1    | Ca_Kabuli_Chr06 | 24857980                | GG                              | AA                 | AA               | INTERGENIC                    |                    |                                     |
| SNP_41582_A_24903405 | NC_021165.1    | Ca_Kabuli_Chr06 | 24903405                | TT                              | AA                 | AA               | INTERGENIC                    |                    |                                     |
| SNP_41583_A_24904311 | NC_021165.1    | Ca_Kabuli_Chr06 | 24904311                | AA                              | GG                 | GG               | INTERGENIC                    |                    |                                     |
| SNP_41584_A_24904803 | NC_021165.1    | Ca_Kabuli_Chr06 | 24904803                | CC                              | TT                 | TT               | INTERGENIC                    |                    |                                     |
| SNP_41585_A_24904806 | NC_021165.1    | Ca_Kabuli_Chr06 | 24904806                | AA                              | GG                 | GG               | INTERGENIC                    |                    |                                     |
| SNP_41586_A_24905521 | NC_021165.1    | Ca_Kabuli_Chr06 | 24905521                | TT                              | CC                 | CC               | INTERGENIC                    |                    |                                     |
| SNP_41587_A_24918980 | NC_021165.1    | Ca_Kabuli_Chr06 | 24918980                | AA                              | GG                 | GG               | INTERGENIC                    |                    |                                     |
| SNP_41588_A_24948287 | NC_021165.1    | Ca_Kabuli_Chr06 | 24948287                | GG                              | AA                 | AA               | URR                           | 101515357          | Unknown function                    |
| SNP_41589_A_24948288 | NC_021165.1    | Ca_Kabuli_Chr06 | 24948288                | TT                              | AA                 | AA               | URR                           | 101515357          | Unknown function                    |
| SNP_41590_A_24958945 | NC_021165.1    | Ca_Kabuli_Chr06 | 24958945                | CC                              | TT                 | TT               | URR                           | 101488449          | Unknown function                    |
| SNP_41591_A_24962230 | NC_021165.1    | Ca_Kabuli_Chr06 | 24962230                | TT                              | CC                 | CC               | INTRON                        | 101488784          | zinc finger MYM-type protein 1-like |
| SNP_41592_A_24981240 | NC_021165.1    | Ca_Kabuli_Chr06 | 24981240                | TT                              | CC                 | CC               | URR                           | 101489112          | uncharacterized LOC101489112        |
| SNP_41593_A_24981309 | NC_021165.1    | Ca_Kabuli_Chr06 | 24981309                | GG                              | TT                 | TT               | URR                           | 101489112          | uncharacterized LOC101489112        |
| SNP_41594_A_24989058 | NC_021165.1    | Ca_Kabuli_Chr06 | 24989058                | GG                              | AA                 | AA               | INTERGENIC                    |                    |                                     |
| SNP_41595_A_24997390 | NC_021165.1    | Ca_Kabuli_Chr06 | 24997390                | GG                              | AA                 | AA               | INTERGENIC                    |                    |                                     |
| SNP_41597_A_25004963 | NC_021165.1    | Ca_Kabuli_Chr06 | 25004963                | TT                              | GG                 | GG               | INTERGENIC                    |                    |                                     |
| SNP_41598_A_25014259 | NC_021165.1    | Ca_Kabuli_Chr06 | 25014259                | GG                              | AA                 | AA               | INTERGENIC                    |                    |                                     |
| SNP_41599_A_25066984 | NC_021165.1    | Ca_Kabuli_Chr06 | 25066984                | TT                              | CC                 | CC               | INTERGENIC                    |                    |                                     |
| SNP_41600_A_25069187 | NC_021165.1    | Ca_Kabuli_Chr06 | 25069187                | TT                              | CC                 | CC               | INTERGENIC                    |                    |                                     |
| SNP_41601_A_25069583 | NC_021165.1    | Ca_Kabuli_Chr06 | 25069583                | AA                              | CC                 | CC               | INTERGENIC                    |                    |                                     |
| SNP_41602_A_25131149 | NC_021165.1    | Ca_Kabuli_Chr06 | 25131149                | AA                              | CC                 | CC               | INTERGENIC                    |                    |                                     |

| SNPs IDs             | Chromosome IDs | Chromosomes     | Physical positions (bp) | CDC Frontier genome (Reference genome) | (Pusa 1103 & HPNB) | (ILWC 46 & LPNB) | Sequence Components of genome | Gene accession IDs | Putative functions |
|----------------------|----------------|-----------------|-------------------------|----------------------------------------|--------------------|------------------|-------------------------------|--------------------|--------------------|
| SNP_41603_A_25162778 | NC_021165.1    | Ca_Kabuli_Chr06 | 25162778                | CC                                     | TT                 | TT               | INTERGENIC                    |                    |                    |
| SNP_41604_A_25162792 | NC_021165.1    | Ca_Kabuli_Chr06 | 25162792                | TT                                     | CC                 | CC               | INTERGENIC                    |                    |                    |
| SNP_41605_A_25248786 | NC_021165.1    | Ca_Kabuli_Chr06 | 25248786                | CC                                     | TT                 | TT               | URR                           | 101492005          | Unknown function   |
| SNP_41606_A_25272033 | NC_021165.1    | Ca_Kabuli_Chr06 | 25272033                | AA                                     | GG                 | GG               | INTERGENIC                    |                    |                    |
| SNP_41607_A_25297977 | NC_021165.1    | Ca_Kabuli_Chr06 | 25297977                | AA                                     | GG                 | GG               | INTERGENIC                    |                    |                    |
| SNP_41608_A_25299693 | NC_021165.1    | Ca_Kabuli_Chr06 | 25299693                | CC                                     | TT                 | TT               | INTERGENIC                    |                    |                    |
| SNP_41609_A_25300226 | NC_021165.1    | Ca_Kabuli_Chr06 | 25300226                | TT                                     | AA                 | AA               | INTERGENIC                    |                    |                    |
| SNP_41610_A_25300230 | NC_021165.1    | Ca_Kabuli_Chr06 | 25300230                | TT                                     | CC                 | CC               | INTERGENIC                    |                    |                    |
| SNP_41611_A_25300272 | NC_021165.1    | Ca_Kabuli_Chr06 | 25300272                | TT                                     | CC                 | CC               | INTERGENIC                    |                    |                    |
| SNP_41612_A_25300288 | NC_021165.1    | Ca_Kabuli_Chr06 | 25300288                | TT                                     | GG                 | GG               | INTERGENIC                    |                    |                    |
| SNP_41613_A_25300327 | NC_021165.1    | Ca_Kabuli_Chr06 | 25300327                | CC                                     | TT                 | TT               | INTERGENIC                    |                    |                    |
| SNP_41614_A_25300549 | NC_021165.1    | Ca_Kabuli_Chr06 | 25300549                | AA                                     | TT                 | TT               | INTERGENIC                    |                    |                    |
| SNP_41615_A_25300574 | NC_021165.1    | Ca_Kabuli_Chr06 | 25300574                | AA                                     | GG                 | GG               | INTERGENIC                    |                    |                    |
| SNP_41616_A_25302573 | NC_021165.1    | Ca_Kabuli_Chr06 | 25302573                | TT                                     | CC                 | CC               | INTERGENIC                    |                    |                    |
| SNP_41617_A_25302574 | NC_021165.1    | Ca_Kabuli_Chr06 | 25302574                | GG                                     | AA                 | AA               | INTERGENIC                    |                    |                    |
| SNP_41618_A_25302605 | NC_021165.1    | Ca_Kabuli_Chr06 | 25302605                | AA                                     | GG                 | GG               | INTERGENIC                    |                    |                    |
| SNP_41619_A_25302619 | NC_021165.1    | Ca_Kabuli_Chr06 | 25302619                | AA                                     | CC                 | CC               | INTERGENIC                    |                    |                    |
| SNP_41620_A_25302625 | NC_021165.1    | Ca_Kabuli_Chr06 | 25302625                | AA                                     | GG                 | GG               | INTERGENIC                    |                    |                    |
| SNP_41621_A_25314476 | NC_021165.1    | Ca_Kabuli_Chr06 | 25314476                | GG                                     | AA                 | AA               | INTERGENIC                    |                    |                    |
| SNP_41622_A_25314551 | NC_021165.1    | Ca_Kabuli_Chr06 | 25314551                | GG                                     | TT                 | TT               | INTERGENIC                    |                    |                    |
| SNP_41623_A_25314572 | NC_021165.1    | Ca_Kabuli_Chr06 | 25314572                | GG                                     | TT                 | TT               | INTERGENIC                    |                    |                    |
| SNP_41624_A_25314762 | NC_021165.1    | Ca_Kabuli_Chr06 | 25314762                | AA                                     | GG                 | GG               | INTERGENIC                    |                    |                    |

| SNPs IDs             | Chromosome IDs | Chromosomes     | Physical positions (bp) | CDC Frontier genome (Reference genome) | (Pusa 1103 & HPNB) | (ILWC 46 & LPNB) | Sequence genome | Components of | Gene accession IDs | Putative functions |
|----------------------|----------------|-----------------|-------------------------|----------------------------------------|--------------------|------------------|-----------------|---------------|--------------------|--------------------|
| SNP_41625_A_25314874 | NC_021165.1    | Ca_Kabuli_Chr06 | 25314874                | AA                                     | TT                 | TT               | INTERGENIC      |               |                    |                    |
| SNP_41626_A_25314890 | NC_021165.1    | Ca_Kabuli_Chr06 | 25314890                | AA                                     | GG                 | GG               | INTERGENIC      |               |                    |                    |
| SNP_41627_A_25314926 | NC_021165.1    | Ca_Kabuli_Chr06 | 25314926                | GG                                     | AA                 | AA               | INTERGENIC      |               |                    |                    |
| SNP_41628_A_25314931 | NC_021165.1    | Ca_Kabuli_Chr06 | 25314931                | TT                                     | GG                 | GG               | INTERGENIC      |               |                    |                    |
| SNP_41629_A_25314937 | NC_021165.1    | Ca_Kabuli_Chr06 | 25314937                | GG                                     | AA                 | AA               | INTERGENIC      |               |                    |                    |
| SNP_41630_A_25314957 | NC_021165.1    | Ca_Kabuli_Chr06 | 25314957                | CC                                     | AA                 | AA               | INTERGENIC      |               |                    |                    |
| SNP_41631_A_25314959 | NC_021165.1    | Ca_Kabuli_Chr06 | 25314959                | AA                                     | GG                 | GG               | INTERGENIC      |               |                    |                    |
| SNP_41632_A_25316940 | NC_021165.1    | Ca_Kabuli_Chr06 | 25316940                | CC                                     | TT                 | TT               | INTERGENIC      |               |                    |                    |
| SNP_41633_A_25321177 | NC_021165.1    | Ca_Kabuli_Chr06 | 25321177                | GG                                     | TT                 | TT               | INTERGENIC      |               |                    |                    |
| SNP_41634_A_25324584 | NC_021165.1    | Ca_Kabuli_Chr06 | 25324584                | CC                                     | AA                 | AA               | INTERGENIC      |               |                    |                    |
| SNP_41635_A_25324979 | NC_021165.1    | Ca_Kabuli_Chr06 | 25324979                | TT                                     | GG                 | GG               | INTERGENIC      |               |                    |                    |
| SNP_41636_A_25325329 | NC_021165.1    | Ca_Kabuli_Chr06 | 25325329                | TT                                     | CC                 | CC               | INTERGENIC      |               |                    |                    |
| SNP_41637_A_25325367 | NC_021165.1    | Ca_Kabuli_Chr06 | 25325367                | AA                                     | TT                 | TT               | INTERGENIC      |               |                    |                    |
| SNP_41638_A_25325410 | NC_021165.1    | Ca_Kabuli_Chr06 | 25325410                | TT                                     | CC                 | CC               | INTERGENIC      |               |                    |                    |
| SNP_41639_A_25325418 | NC_021165.1    | Ca_Kabuli_Chr06 | 25325418                | TT                                     | CC                 | CC               | INTERGENIC      |               |                    |                    |
| SNP_41641_A_25338074 | NC_021165.1    | Ca_Kabuli_Chr06 | 25338074                | AA                                     | GG                 | GG               | INTERGENIC      |               |                    |                    |
| SNP_41642_A_25352576 | NC_021165.1    | Ca_Kabuli_Chr06 | 25352576                | TT                                     | AA                 | AA               | INTERGENIC      |               |                    |                    |
| SNP_41643_A_25356064 | NC_021165.1    | Ca_Kabuli_Chr06 | 25356064                | TT                                     | CC                 | CC               | INTERGENIC      |               |                    |                    |
| SNP_41644_A_25356080 | NC_021165.1    | Ca_Kabuli_Chr06 | 25356080                | CC                                     | AA                 | AA               | INTERGENIC      |               |                    |                    |
| SNP_41645_A_25356096 | NC_021165.1    | Ca_Kabuli_Chr06 | 25356096                | TT                                     | CC                 | CC               | INTERGENIC      |               |                    |                    |
| SNP_41646_A_25440571 | NC_021165.1    | Ca_Kabuli_Chr06 | 25440571                | CC                                     | TT                 | TT               | INTERGENIC      |               |                    |                    |
| SNP_41647_A_25440575 | NC_021165.1    | Ca_Kabuli_Chr06 | 25440575                | CC                                     | GG                 | GG               | INTERGENIC      |               |                    |                    |



| SNPs IDs             | Chromosome IDs | Chromosomes     | Physical positions (bp) | CDC Frontier genome (Reference genome) | (Pusa 1103 & HPNB) | (ILWC 46 & LPNB) | Sequence genome | Components of | Gene accession IDs | Putative functions |
|----------------------|----------------|-----------------|-------------------------|----------------------------------------|--------------------|------------------|-----------------|---------------|--------------------|--------------------|
| SNP_41648_A_25440627 | NC_021165.1    | Ca_Kabuli_Chr06 | 25440627                | TT                                     | GG                 | GG               | INTERGENIC      |               |                    |                    |
| SNP_41649_A_25440651 | NC_021165.1    | Ca_Kabuli_Chr06 | 25440651                | GG                                     | TT                 | TT               | INTERGENIC      |               |                    |                    |
| SNP_41650_A_25448664 | NC_021165.1    | Ca_Kabuli_Chr06 | 25448664                | AA                                     | CC                 | CC               | INTERGENIC      |               |                    |                    |
| SNP_41651_A_25518629 | NC_021165.1    | Ca_Kabuli_Chr06 | 25518629                | GG                                     | AA                 | AA               | INTERGENIC      |               |                    |                    |
| SNP_41652_A_25534711 | NC_021165.1    | Ca_Kabuli_Chr06 | 25534711                | TT                                     | GG                 | GG               | INTERGENIC      |               |                    |                    |
| SNP_41653_A_25536027 | NC_021165.1    | Ca_Kabuli_Chr06 | 25536027                | TT                                     | GG                 | GG               | INTERGENIC      |               |                    |                    |
| SNP_41654_A_25545553 | NC_021165.1    | Ca_Kabuli_Chr06 | 25545553                | TT                                     | CC                 | CC               | INTERGENIC      |               |                    |                    |
| SNP_41655_A_25545991 | NC_021165.1    | Ca_Kabuli_Chr06 | 25545991                | AA                                     | GG                 | GG               | INTERGENIC      |               |                    |                    |
| SNP_41656_A_25548722 | NC_021165.1    | Ca_Kabuli_Chr06 | 25548722                | GG                                     | AA                 | AA               | INTERGENIC      |               |                    |                    |
| SNP_41657_A_25549592 | NC_021165.1    | Ca_Kabuli_Chr06 | 25549592                | CC                                     | TT                 | TT               | INTERGENIC      |               |                    |                    |
| SNP_41658_A_25549600 | NC_021165.1    | Ca_Kabuli_Chr06 | 25549600                | AA                                     | GG                 | GG               | INTERGENIC      |               |                    |                    |
| SNP_41659_A_25549602 | NC_021165.1    | Ca_Kabuli_Chr06 | 25549602                | TT                                     | CC                 | CC               | INTERGENIC      |               |                    |                    |
| SNP_41660_A_25549620 | NC_021165.1    | Ca_Kabuli_Chr06 | 25549620                | GG                                     | TT                 | TT               | INTERGENIC      |               |                    |                    |
| SNP_41661_A_25549639 | NC_021165.1    | Ca_Kabuli_Chr06 | 25549639                | TT                                     | CC                 | CC               | INTERGENIC      |               |                    |                    |
| SNP_41662_A_25549648 | NC_021165.1    | Ca_Kabuli_Chr06 | 25549648                | TT                                     | CC                 | CC               | INTERGENIC      |               |                    |                    |
| SNP_41663_A_25549666 | NC_021165.1    | Ca_Kabuli_Chr06 | 25549666                | TT                                     | CC                 | CC               | INTERGENIC      |               |                    |                    |
| SNP_41664_A_25549678 | NC_021165.1    | Ca_Kabuli_Chr06 | 25549678                | TT                                     | AA                 | AA               | INTERGENIC      |               |                    |                    |
| SNP_41665_A_25549696 | NC_021165.1    | Ca_Kabuli_Chr06 | 25549696                | TT                                     | CC                 | CC               | INTERGENIC      |               |                    |                    |
| SNP_41666_A_25549712 | NC_021165.1    | Ca_Kabuli_Chr06 | 25549712                | TT                                     | CC                 | CC               | INTERGENIC      |               |                    |                    |
| SNP_41667_A_25549801 | NC_021165.1    | Ca_Kabuli_Chr06 | 25549801                | TT                                     | GG                 | GG               | INTERGENIC      |               |                    |                    |
| SNP_41668_A_25549807 | NC_021165.1    | Ca_Kabuli_Chr06 | 25549807                | GG                                     | AA                 | AA               | INTERGENIC      |               |                    |                    |
| SNP_41669_A_25549825 | NC_021165.1    | Ca_Kabuli_Chr06 | 25549825                | AA                                     | GG                 | GG               | INTERGENIC      |               |                    |                    |

| SNPs IDs             | Chromosome IDs | Chromosomes     | Physical positions (bp) | CDC Frontier genome (Reference genome) | (Pusa 1103 & HPNB) | (ILWC 46 & LPNB) | Sequence genome | Components of | Gene accession IDs | Putative functions |
|----------------------|----------------|-----------------|-------------------------|----------------------------------------|--------------------|------------------|-----------------|---------------|--------------------|--------------------|
| SNP_41670_A_25549831 | NC_021165.1    | Ca_Kabuli_Chr06 | 25549831                | CC                                     | TT                 | TT               | INTERGENIC      |               |                    |                    |
| SNP_41671_A_25549834 | NC_021165.1    | Ca_Kabuli_Chr06 | 25549834                | GG                                     | AA                 | AA               | INTERGENIC      |               |                    |                    |
| SNP_41672_A_25549837 | NC_021165.1    | Ca_Kabuli_Chr06 | 25549837                | AA                                     | GG                 | GG               | INTERGENIC      |               |                    |                    |
| SNP_41673_A_25549867 | NC_021165.1    | Ca_Kabuli_Chr06 | 25549867                | TT                                     | AA                 | AA               | INTERGENIC      |               |                    |                    |
| SNP_41674_A_25549970 | NC_021165.1    | Ca_Kabuli_Chr06 | 25549970                | GG                                     | AA                 | AA               | INTERGENIC      |               |                    |                    |
| SNP_41675_A_25550043 | NC_021165.1    | Ca_Kabuli_Chr06 | 25550043                | CC                                     | AA                 | AA               | INTERGENIC      |               |                    |                    |
| SNP_41677_A_25559001 | NC_021165.1    | Ca_Kabuli_Chr06 | 25559001                | AA                                     | CC                 | CC               | INTERGENIC      |               |                    |                    |
| SNP_41678_A_25559005 | NC_021165.1    | Ca_Kabuli_Chr06 | 25559005                | AA                                     | GG                 | GG               | INTERGENIC      |               |                    |                    |
| SNP_41679_A_25559023 | NC_021165.1    | Ca_Kabuli_Chr06 | 25559023                | GG                                     | AA                 | AA               | INTERGENIC      |               |                    |                    |
| SNP_41680_A_25569011 | NC_021165.1    | Ca_Kabuli_Chr06 | 25569011                | GG                                     | AA                 | AA               | INTERGENIC      |               |                    |                    |
| SNP_41681_A_25570033 | NC_021165.1    | Ca_Kabuli_Chr06 | 25570033                | AA                                     | GG                 | GG               | INTERGENIC      |               |                    |                    |
| SNP_41682_A_25570179 | NC_021165.1    | Ca_Kabuli_Chr06 | 25570179                | TT                                     | CC                 | CC               | INTERGENIC      |               |                    |                    |
| SNP_41683_A_25573599 | NC_021165.1    | Ca_Kabuli_Chr06 | 25573599                | CC                                     | AA                 | AA               | INTERGENIC      |               |                    |                    |
| SNP_41684_A_25581446 | NC_021165.1    | Ca_Kabuli_Chr06 | 25581446                | GG                                     | TT                 | TT               | INTERGENIC      |               |                    |                    |
| SNP_41685_A_25581473 | NC_021165.1    | Ca_Kabuli_Chr06 | 25581473                | GG                                     | AA                 | AA               | INTERGENIC      |               |                    |                    |
| SNP_41686_A_25581475 | NC_021165.1    | Ca_Kabuli_Chr06 | 25581475                | TT                                     | CC                 | CC               | INTERGENIC      |               |                    |                    |
| SNP_41687_A_25586866 | NC_021165.1    | Ca_Kabuli_Chr06 | 25586866                | GG                                     | TT                 | TT               | INTERGENIC      |               |                    |                    |
| SNP_41689_A_25595905 | NC_021165.1    | Ca_Kabuli_Chr06 | 25595905                | TT                                     | CC                 | CC               | INTERGENIC      |               |                    |                    |
| SNP_41690_A_25608897 | NC_021165.1    | Ca_Kabuli_Chr06 | 25608897                | GG                                     | TT                 | TT               | INTERGENIC      |               |                    |                    |
| SNP_41692_A_25613214 | NC_021165.1    | Ca_Kabuli_Chr06 | 25613214                | GG                                     | AA                 | AA               | INTERGENIC      |               |                    |                    |
| SNP_41693_A_25613503 | NC_021165.1    | Ca_Kabuli_Chr06 | 25613503                | AA                                     | GG                 | GG               | INTERGENIC      |               |                    |                    |
| SNP_41694_A_25624867 | NC_021165.1    | Ca_Kabuli_Chr06 | 25624867                | CC                                     | TT                 | TT               | INTERGENIC      |               |                    |                    |

| SNPs IDs             | Chromosome IDs | Chromosomes     | Physical positions (bp) | CDC Frontier (Reference genome) | (Pusa 1103 & HPNB) | (ILWC 46 & LPNB) | Sequence Components of genome | Gene accession IDs | Putative functions                       |
|----------------------|----------------|-----------------|-------------------------|---------------------------------|--------------------|------------------|-------------------------------|--------------------|------------------------------------------|
| SNP_41695_A_25626097 | NC_021165.1    | Ca_Kabuli_Chr06 | 25626097                | GG                              | AA                 | AA               | INTERGENIC                    |                    |                                          |
| SNP_41696_A_25638387 | NC_021165.1    | Ca_Kabuli_Chr06 | 25638387                | TT                              | CC                 | CC               | INTRON                        | 101493662          | protein FAR-RED IMPAIRED RESPONSE 1-like |
| SNP_41697_A_25638459 | NC_021165.1    | Ca_Kabuli_Chr06 | 25638459                | CC                              | TT                 | TT               | INTRON                        | 101493662          | protein FAR-RED IMPAIRED RESPONSE 1-like |
| SNP_41698_A_25638748 | NC_021165.1    | Ca_Kabuli_Chr06 | 25638748                | TT                              | GG                 | GG               | INTRON                        | 101493662          | protein FAR-RED IMPAIRED RESPONSE 1-like |
| SNP_41699_A_25638757 | NC_021165.1    | Ca_Kabuli_Chr06 | 25638757                | TT                              | AA                 | AA               | INTRON                        | 101493662          | protein FAR-RED IMPAIRED RESPONSE 1-like |
| SNP_41700_A_25652511 | NC_021165.1    | Ca_Kabuli_Chr06 | 25652511                | CC                              | AA                 | AA               | INTRON                        | 101493977          | protein ALWAYS EARLY 2-like              |
| SNP_41701_A_25671405 | NC_021165.1    | Ca_Kabuli_Chr06 | 25671405                | TT                              | AA                 | AA               | INTERGENIC                    |                    |                                          |
| SNP_41702_A_25671453 | NC_021165.1    | Ca_Kabuli_Chr06 | 25671453                | AA                              | GG                 | GG               | INTERGENIC                    |                    |                                          |
| SNP_41703_A_25671783 | NC_021165.1    | Ca_Kabuli_Chr06 | 25671783                | AA                              | TT                 | TT               | INTERGENIC                    |                    |                                          |
| SNP_41704_A_25671912 | NC_021165.1    | Ca_Kabuli_Chr06 | 25671912                | TT                              | GG                 | GG               | INTERGENIC                    |                    |                                          |
| SNP_41705_A_25672063 | NC_021165.1    | Ca_Kabuli_Chr06 | 25672063                | AA                              | TT                 | TT               | INTERGENIC                    |                    |                                          |
| SNP_41707_A_25690429 | NC_021165.1    | Ca_Kabuli_Chr06 | 25690429                | AA                              | TT                 | TT               | INTERGENIC                    |                    |                                          |
| SNP_41708_A_25690430 | NC_021165.1    | Ca_Kabuli_Chr06 | 25690430                | TT                              | AA                 | AA               | INTERGENIC                    |                    |                                          |
| SNP_41709_A_25696751 | NC_021165.1    | Ca_Kabuli_Chr06 | 25696751                | TT                              | GG                 | GG               | INTERGENIC                    |                    |                                          |
| SNP_41710_A_25697192 | NC_021165.1    | Ca_Kabuli_Chr06 | 25697192                | TT                              | CC                 | CC               | INTERGENIC                    |                    |                                          |
| SNP_41711_A_25726708 | NC_021165.1    | Ca_Kabuli_Chr06 | 25726708                | TT                              | AA                 | AA               | INTERGENIC                    |                    |                                          |
| SNP_41712_A_25727213 | NC_021165.1    | Ca_Kabuli_Chr06 | 25727213                | AA                              | GG                 | GG               | INTERGENIC                    |                    |                                          |
| SNP_41713_A_25727225 | NC_021165.1    | Ca_Kabuli_Chr06 | 25727225                | GG                              | CC                 | CC               | INTERGENIC                    |                    |                                          |
| SNP_41714_A_25733362 | NC_021165.1    | Ca_Kabuli_Chr06 | 25733362                | GG                              | AA                 | AA               | INTERGENIC                    |                    |                                          |
| SNP_41715_A_25733620 | NC_021165.1    | Ca_Kabuli_Chr06 | 25733620                | CC                              | TT                 | TT               | INTERGENIC                    |                    |                                          |
| SNP_41717_A_25733729 | NC_021165.1    | Ca_Kabuli_Chr06 | 25733729                | CC                              | TT                 | TT               | INTERGENIC                    |                    |                                          |
| SNP_41718_A_25733743 | NC_021165.1    | Ca_Kabuli_Chr06 | 25733743                | AA                              | GG                 | GG               | INTERGENIC                    |                    |                                          |

| SNPs IDs             | Chromosome IDs | Chromosomes     | Physical positions (bp) | CDC Frontier genome (Reference genome) | (Pusa 1103 & HPNB) | (ILWC 46 & LPNB) | Sequence genome | Components of | Gene accession IDs | Putative functions |
|----------------------|----------------|-----------------|-------------------------|----------------------------------------|--------------------|------------------|-----------------|---------------|--------------------|--------------------|
| SNP_41719_A_25733745 | NC_021165.1    | Ca_Kabuli_Chr06 | 25733745                | GG                                     | AA                 | AA               | INTERGENIC      |               |                    |                    |
| SNP_41720_A_25751760 | NC_021165.1    | Ca_Kabuli_Chr06 | 25751760                | AA                                     | CC                 | CC               | INTERGENIC      |               |                    |                    |
| SNP_41721_A_25751821 | NC_021165.1    | Ca_Kabuli_Chr06 | 25751821                | TT                                     | CC                 | CC               | INTERGENIC      |               |                    |                    |
| SNP_41722_A_25752006 | NC_021165.1    | Ca_Kabuli_Chr06 | 25752006                | GG                                     | AA                 | AA               | INTERGENIC      |               |                    |                    |
| SNP_41723_A_25756878 | NC_021165.1    | Ca_Kabuli_Chr06 | 25756878                | CC                                     | TT                 | TT               | INTERGENIC      |               |                    |                    |
| SNP_41724_A_25757855 | NC_021165.1    | Ca_Kabuli_Chr06 | 25757855                | GG                                     | AA                 | AA               | INTERGENIC      |               |                    |                    |
| SNP_41725_A_25758105 | NC_021165.1    | Ca_Kabuli_Chr06 | 25758105                | GG                                     | AA                 | AA               | INTERGENIC      |               |                    |                    |
| SNP_41727_A_25773506 | NC_021165.1    | Ca_Kabuli_Chr06 | 25773506                | AA                                     | GG                 | GG               | INTERGENIC      |               |                    |                    |
| SNP_41728_A_25789400 | NC_021165.1    | Ca_Kabuli_Chr06 | 25789400                | CC                                     | TT                 | TT               | INTERGENIC      |               |                    |                    |
| SNP_41729_A_25789415 | NC_021165.1    | Ca_Kabuli_Chr06 | 25789415                | AA                                     | GG                 | GG               | INTERGENIC      |               |                    |                    |
| SNP_41730_A_25821823 | NC_021165.1    | Ca_Kabuli_Chr06 | 25821823                | GG                                     | TT                 | TT               | INTERGENIC      |               |                    |                    |
| SNP_41731_A_25834242 | NC_021165.1    | Ca_Kabuli_Chr06 | 25834242                | GG                                     | AA                 | AA               | INTERGENIC      |               |                    |                    |
| SNP_41732_A_25867554 | NC_021165.1    | Ca_Kabuli_Chr06 | 25867554                | TT                                     | GG                 | AA               | INTERGENIC      |               |                    |                    |
| SNP_41733_A_25867611 | NC_021165.1    | Ca_Kabuli_Chr06 | 25867611                | AA                                     | GG                 | GG               | INTERGENIC      |               |                    |                    |
| SNP_41734_A_25867647 | NC_021165.1    | Ca_Kabuli_Chr06 | 25867647                | GG                                     | AA                 | AA               | INTERGENIC      |               |                    |                    |
| SNP_41735_A_25867650 | NC_021165.1    | Ca_Kabuli_Chr06 | 25867650                | AA                                     | GG                 | GG               | INTERGENIC      |               |                    |                    |
| SNP_41736_A_25867658 | NC_021165.1    | Ca_Kabuli_Chr06 | 25867658                | TT                                     | CC                 | CC               | INTERGENIC      |               |                    |                    |
| SNP_41737_A_25867665 | NC_021165.1    | Ca_Kabuli_Chr06 | 25867665                | TT                                     | CC                 | CC               | INTERGENIC      |               |                    |                    |
| SNP_41738_A_25867709 | NC_021165.1    | Ca_Kabuli_Chr06 | 25867709                | TT                                     | GG                 | GG               | INTERGENIC      |               |                    |                    |
| SNP_41739_A_25868100 | NC_021165.1    | Ca_Kabuli_Chr06 | 25868100                | TT                                     | AA                 | AA               | INTERGENIC      |               |                    |                    |
| SNP_41740_A_25869062 | NC_021165.1    | Ca_Kabuli_Chr06 | 25869062                | TT                                     | GG                 | GG               | INTERGENIC      |               |                    |                    |
| SNP_41741_A_25869104 | NC_021165.1    | Ca_Kabuli_Chr06 | 25869104                | GG                                     | AA                 | AA               | INTERGENIC      |               |                    |                    |

| SNPs IDs             | Chromosome IDs | Chromosomes     | Physical positions (bp) | CDC Frontier (Reference genome) | (Pusa 1103 & HPNB) | (ILWC 46 & LPNB) | Sequence genome | Components of | Gene accession IDs | Putative functions |
|----------------------|----------------|-----------------|-------------------------|---------------------------------|--------------------|------------------|-----------------|---------------|--------------------|--------------------|
| SNP_41742_A_25869140 | NC_021165.1    | Ca_Kabuli_Chr06 | 25869140                | AA                              | CC                 | CC               | INTERGENIC      |               |                    |                    |
| SNP_41743_A_25869181 | NC_021165.1    | Ca_Kabuli_Chr06 | 25869181                | TT                              | CC                 | CC               | INTERGENIC      |               |                    |                    |
| SNP_41744_A_25869254 | NC_021165.1    | Ca_Kabuli_Chr06 | 25869254                | AA                              | GG                 | GG               | INTERGENIC      |               |                    |                    |
| SNP_41745_A_25869411 | NC_021165.1    | Ca_Kabuli_Chr06 | 25869411                | TT                              | GG                 | GG               | INTERGENIC      |               |                    |                    |
| SNP_41746_A_25869437 | NC_021165.1    | Ca_Kabuli_Chr06 | 25869437                | CC                              | GG                 | GG               | INTERGENIC      |               |                    |                    |
| SNP_41747_A_25869441 | NC_021165.1    | Ca_Kabuli_Chr06 | 25869441                | TT                              | GG                 | GG               | INTERGENIC      |               |                    |                    |
| SNP_41748_A_25869497 | NC_021165.1    | Ca_Kabuli_Chr06 | 25869497                | CC                              | TT                 | TT               | INTERGENIC      |               |                    |                    |
| SNP_41749_A_25892592 | NC_021165.1    | Ca_Kabuli_Chr06 | 25892592                | AA                              | GG                 | GG               | INTERGENIC      |               |                    |                    |
| SNP_41750_A_25892608 | NC_021165.1    | Ca_Kabuli_Chr06 | 25892608                | AA                              | CC                 | CC               | INTERGENIC      |               |                    |                    |
| SNP_41751_A_25894571 | NC_021165.1    | Ca_Kabuli_Chr06 | 25894571                | AA                              | GG                 | GG               | INTERGENIC      |               |                    |                    |
| SNP_41752_A_25900117 | NC_021165.1    | Ca_Kabuli_Chr06 | 25900117                | AA                              | GG                 | GG               | INTERGENIC      |               |                    |                    |
| SNP_41753_A_25916484 | NC_021165.1    | Ca_Kabuli_Chr06 | 25916484                | CC                              | TT                 | TT               | INTERGENIC      |               |                    |                    |
| SNP_41754_A_25916486 | NC_021165.1    | Ca_Kabuli_Chr06 | 25916486                | AA                              | GG                 | GG               | INTERGENIC      |               |                    |                    |
| SNP_41755_A_25916489 | NC_021165.1    | Ca_Kabuli_Chr06 | 25916489                | TT                              | GG                 | AA               | INTERGENIC      |               |                    |                    |
| SNP_41756_A_25916500 | NC_021165.1    | Ca_Kabuli_Chr06 | 25916500                | AA                              | GG                 | GG               | INTERGENIC      |               |                    |                    |
| SNP_41757_A_25916600 | NC_021165.1    | Ca_Kabuli_Chr06 | 25916600                | GG                              | AA                 | AA               | INTERGENIC      |               |                    |                    |
| SNP_41759_A_25916630 | NC_021165.1    | Ca_Kabuli_Chr06 | 25916630                | CC                              | TT                 | TT               | INTERGENIC      |               |                    |                    |
| SNP_41761_A_25916663 | NC_021165.1    | Ca_Kabuli_Chr06 | 25916663                | TT                              | CC                 | CC               | INTERGENIC      |               |                    |                    |
| SNP_41762_A_25916702 | NC_021165.1    | Ca_Kabuli_Chr06 | 25916702                | TT                              | CC                 | CC               | INTERGENIC      |               |                    |                    |
| SNP_41763_A_25916902 | NC_021165.1    | Ca_Kabuli_Chr06 | 25916902                | AA                              | GG                 | GG               | INTERGENIC      |               |                    |                    |
| SNP_41764_A_25916935 | NC_021165.1    | Ca_Kabuli_Chr06 | 25916935                | CC                              | AA                 | AA               | INTERGENIC      |               |                    |                    |
| SNP_41765_A_25917007 | NC_021165.1    | Ca_Kabuli_Chr06 | 25917007                | GG                              | AA                 | AA               | INTERGENIC      |               |                    |                    |

| SNPs IDs             | Chromosome IDs | Chromosomes     | Physical positions (bp) | CDC Frontier genome (Reference genome) | (Pusa 1103 & HPNB) | (ILWC 46 & LPNB) | Sequence Components of genome | Gene accession IDs | Putative functions                        |
|----------------------|----------------|-----------------|-------------------------|----------------------------------------|--------------------|------------------|-------------------------------|--------------------|-------------------------------------------|
| SNP_41766_A_25917055 | NC_021165.1    | Ca_Kabuli_Chr06 | 25917055                | GG                                     | AA                 | AA               | INTERGENIC                    |                    |                                           |
| SNP_41767_A_25941060 | NC_021165.1    | Ca_Kabuli_Chr06 | 25941060                | AA                                     | CC                 | CC               | INTERGENIC                    |                    |                                           |
| SNP_41769_A_25967483 | NC_021165.1    | Ca_Kabuli_Chr06 | 25967483                | AA                                     | GG                 | GG               | INTERGENIC                    |                    |                                           |
| SNP_41770_A_25978111 | NC_021165.1    | Ca_Kabuli_Chr06 | 25978111                | AA                                     | GG                 | GG               | INTERGENIC                    |                    |                                           |
| SNP_41771_A_25978701 | NC_021165.1    | Ca_Kabuli_Chr06 | 25978701                | CC                                     | TT                 | TT               | INTERGENIC                    |                    |                                           |
| SNP_41772_A_26007381 | NC_021165.1    | Ca_Kabuli_Chr06 | 26007381                | AA                                     | TT                 | TT               | INTERGENIC                    |                    |                                           |
| SNP_41773_A_26023113 | NC_021165.1    | Ca_Kabuli_Chr06 | 26023113                | AA                                     | GG                 | GG               | INTERGENIC                    |                    |                                           |
| SNP_41775_A_26027576 | NC_021165.1    | Ca_Kabuli_Chr06 | 26027576                | AA                                     | GG                 | GG               | INTERGENIC                    |                    |                                           |
| SNP_41776_A_26027628 | NC_021165.1    | Ca_Kabuli_Chr06 | 26027628                | AA                                     | GG                 | GG               | INTERGENIC                    |                    |                                           |
| SNP_41777_A_26061037 | NC_021165.1    | Ca_Kabuli_Chr06 | 26061037                | GG                                     | AA                 | AA               | INTRON                        | 101494297          | 7-deoxyloganetin glucosyltransferase-like |
| SNP_41778_A_26065926 | NC_021165.1    | Ca_Kabuli_Chr06 | 26065926                | TT                                     | GG                 | GG               | INTRON                        | 101494297          | 7-deoxyloganetin glucosyltransferase-like |
| SNP_41779_A_26066080 | NC_021165.1    | Ca_Kabuli_Chr06 | 26066080                | TT                                     | CC                 | CC               | INTRON                        | 101494297          | 7-deoxyloganetin glucosyltransferase-like |
| SNP_41780_A_26066116 | NC_021165.1    | Ca_Kabuli_Chr06 | 26066116                | TT                                     | CC                 | CC               | INTRON                        | 101494297          | 7-deoxyloganetin glucosyltransferase-like |
| SNP_41782_A_26092906 | NC_021165.1    | Ca_Kabuli_Chr06 | 26092906                | AA                                     | CC                 | CC               | INTRON                        | 101494920          | protein TRANSPARENT TESTA 1-like          |
| SNP_41783_A_26131781 | NC_021165.1    | Ca_Kabuli_Chr06 | 26131781                | CC                                     | TT                 | TT               | INTERGENIC                    |                    |                                           |
| SNP_41784_A_26132045 | NC_021165.1    | Ca_Kabuli_Chr06 | 26132045                | TT                                     | AA                 | AA               | INTERGENIC                    |                    |                                           |
| SNP_41785_A_26132073 | NC_021165.1    | Ca_Kabuli_Chr06 | 26132073                | AA                                     | GG                 | GG               | INTERGENIC                    |                    |                                           |
| SNP_41786_A_26132085 | NC_021165.1    | Ca_Kabuli_Chr06 | 26132085                | CC                                     | GG                 | GG               | INTERGENIC                    |                    |                                           |
| SNP_41787_A_26132093 | NC_021165.1    | Ca_Kabuli_Chr06 | 26132093                | AA                                     | GG                 | GG               | INTERGENIC                    |                    |                                           |
| SNP_41788_A_26152533 | NC_021165.1    | Ca_Kabuli_Chr06 | 26152533                | CC                                     | TT                 | TT               | INTERGENIC                    |                    |                                           |
| SNP_41789_A_26152823 | NC_021165.1    | Ca_Kabuli_Chr06 | 26152823                | AA                                     | GG                 | GG               | INTERGENIC                    |                    |                                           |
| SNP_41790_A_26152861 | NC_021165.1    | Ca_Kabuli_Chr06 | 26152861                | AA                                     | GG                 | GG               | INTERGENIC                    |                    |                                           |

| SNPs IDs             | Chromosome IDs | Chromosomes     | Physical positions (bp) | CDC Frontier genome (Reference genome) | (Pusa 1103 & HPNB) | (ILWC 46 & LPNB) | Sequence genome | Components of | Gene accession IDs | Putative functions |
|----------------------|----------------|-----------------|-------------------------|----------------------------------------|--------------------|------------------|-----------------|---------------|--------------------|--------------------|
| SNP_41791_A_26152919 | NC_021165.1    | Ca_Kabuli_Chr06 | 26152919                | AA                                     | GG                 | GG               | INTERGENIC      |               |                    |                    |
| SNP_41792_A_26159928 | NC_021165.1    | Ca_Kabuli_Chr06 | 26159928                | CC                                     | GG                 | GG               | INTERGENIC      |               |                    |                    |
| SNP_41793_A_26159931 | NC_021165.1    | Ca_Kabuli_Chr06 | 26159931                | GG                                     | AA                 | AA               | INTERGENIC      |               |                    |                    |
| SNP_41794_A_26170587 | NC_021165.1    | Ca_Kabuli_Chr06 | 26170587                | GG                                     | TT                 | TT               | INTERGENIC      |               |                    |                    |
| SNP_41795_A_26213125 | NC_021165.1    | Ca_Kabuli_Chr06 | 26213125                | TT                                     | CC                 | CC               | INTERGENIC      |               |                    |                    |
| SNP_41796_A_26240562 | NC_021165.1    | Ca_Kabuli_Chr06 | 26240562                | TT                                     | CC                 | CC               | INTERGENIC      |               |                    |                    |
| SNP_41797_A_26244243 | NC_021165.1    | Ca_Kabuli_Chr06 | 26244243                | TT                                     | CC                 | CC               | INTERGENIC      |               |                    |                    |
| SNP_41798_A_26244267 | NC_021165.1    | Ca_Kabuli_Chr06 | 26244267                | GG                                     | AA                 | AA               | INTERGENIC      |               |                    |                    |
| SNP_41799_A_26244282 | NC_021165.1    | Ca_Kabuli_Chr06 | 26244282                | TT                                     | CC                 | CC               | INTERGENIC      |               |                    |                    |
| SNP_41800_A_26244306 | NC_021165.1    | Ca_Kabuli_Chr06 | 26244306                | CC                                     | TT                 | TT               | INTERGENIC      |               |                    |                    |
| SNP_41801_A_26244308 | NC_021165.1    | Ca_Kabuli_Chr06 | 26244308                | GG                                     | AA                 | AA               | INTERGENIC      |               |                    |                    |
| SNP_41802_A_26247969 | NC_021165.1    | Ca_Kabuli_Chr06 | 26247969                | CC                                     | TT                 | TT               | INTERGENIC      |               |                    |                    |
| SNP_41803_A_26247987 | NC_021165.1    | Ca_Kabuli_Chr06 | 26247987                | CC                                     | TT                 | TT               | INTERGENIC      |               |                    |                    |
| SNP_41804_A_26248015 | NC_021165.1    | Ca_Kabuli_Chr06 | 26248015                | AA                                     | TT                 | TT               | INTERGENIC      |               |                    |                    |
| SNP_41805_A_26248026 | NC_021165.1    | Ca_Kabuli_Chr06 | 26248026                | TT                                     | CC                 | CC               | INTERGENIC      |               |                    |                    |
| SNP_41806_A_26248041 | NC_021165.1    | Ca_Kabuli_Chr06 | 26248041                | TT                                     | GG                 | GG               | INTERGENIC      |               |                    |                    |
| SNP_41807_A_26248237 | NC_021165.1    | Ca_Kabuli_Chr06 | 26248237                | GG                                     | TT                 | TT               | INTERGENIC      |               |                    |                    |
| SNP_41808_A_26254738 | NC_021165.1    | Ca_Kabuli_Chr06 | 26254738                | AA                                     | TT                 | TT               | INTERGENIC      |               |                    |                    |
| SNP_41809_A_26254752 | NC_021165.1    | Ca_Kabuli_Chr06 | 26254752                | AA                                     | GG                 | GG               | INTERGENIC      |               |                    |                    |
| SNP_41810_A_26257056 | NC_021165.1    | Ca_Kabuli_Chr06 | 26257056                | TT                                     | CC                 | CC               | INTERGENIC      |               |                    |                    |
| SNP_41811_A_26257059 | NC_021165.1    | Ca_Kabuli_Chr06 | 26257059                | AA                                     | GG                 | GG               | INTERGENIC      |               |                    |                    |
| SNP_41812_A_26267748 | NC_021165.1    | Ca_Kabuli_Chr06 | 26267748                | TT                                     | GG                 | GG               | INTERGENIC      |               |                    |                    |

| SNPs IDs             | Chromosome IDs | Chromosomes     | Physical positions (bp) | CDC Frontier genome (Reference genome) | (Pusa 1103 & HPNB) | (ILWC 46 & LPNB) | Sequence genome | Components of | Gene accession IDs | Putative functions |
|----------------------|----------------|-----------------|-------------------------|----------------------------------------|--------------------|------------------|-----------------|---------------|--------------------|--------------------|
| SNP_41813_A_26277598 | NC_021165.1    | Ca_Kabuli_Chr06 | 26277598                | CC                                     | TT                 | TT               | INTERGENIC      |               |                    |                    |
| SNP_41815_A_26277848 | NC_021165.1    | Ca_Kabuli_Chr06 | 26277848                | AA                                     | TT                 | TT               | INTERGENIC      |               |                    |                    |
| SNP_41816_A_26278038 | NC_021165.1    | Ca_Kabuli_Chr06 | 26278038                | TT                                     | GG                 | GG               | INTERGENIC      |               |                    |                    |
| SNP_41817_A_26278114 | NC_021165.1    | Ca_Kabuli_Chr06 | 26278114                | AA                                     | GG                 | GG               | INTERGENIC      |               |                    |                    |
| SNP_41818_A_26278230 | NC_021165.1    | Ca_Kabuli_Chr06 | 26278230                | AA                                     | GG                 | GG               | INTERGENIC      |               |                    |                    |
| SNP_41819_A_26278238 | NC_021165.1    | Ca_Kabuli_Chr06 | 26278238                | TT                                     | CC                 | CC               | INTERGENIC      |               |                    |                    |
| SNP_41820_A_26278239 | NC_021165.1    | Ca_Kabuli_Chr06 | 26278239                | AA                                     | GG                 | GG               | INTERGENIC      |               |                    |                    |
| SNP_41821_A_26278254 | NC_021165.1    | Ca_Kabuli_Chr06 | 26278254                | CC                                     | TT                 | TT               | INTERGENIC      |               |                    |                    |
| SNP_41822_A_26278271 | NC_021165.1    | Ca_Kabuli_Chr06 | 26278271                | AA                                     | GG                 | GG               | INTERGENIC      |               |                    |                    |
| SNP_41823_A_26278309 | NC_021165.1    | Ca_Kabuli_Chr06 | 26278309                | TT                                     | GG                 | GG               | INTERGENIC      |               |                    |                    |
| SNP_41824_A_26283784 | NC_021165.1    | Ca_Kabuli_Chr06 | 26283784                | AA                                     | GG                 | GG               | INTERGENIC      |               |                    |                    |
| SNP_41825_A_26286460 | NC_021165.1    | Ca_Kabuli_Chr06 | 26286460                | AA                                     | GG                 | GG               | INTERGENIC      |               |                    |                    |
| SNP_41826_A_26298259 | NC_021165.1    | Ca_Kabuli_Chr06 | 26298259                | AA                                     | GG                 | GG               | INTERGENIC      |               |                    |                    |
| SNP_41827_A_26309641 | NC_021165.1    | Ca_Kabuli_Chr06 | 26309641                | TT                                     | CC                 | CC               | INTERGENIC      |               |                    |                    |
| SNP_41828_A_26309669 | NC_021165.1    | Ca_Kabuli_Chr06 | 26309669                | TT                                     | GG                 | GG               | INTERGENIC      |               |                    |                    |
| SNP_41829_A_26309979 | NC_021165.1    | Ca_Kabuli_Chr06 | 26309979                | CC                                     | AA                 | AA               | INTERGENIC      |               |                    |                    |
| SNP_41830_A_26310022 | NC_021165.1    | Ca_Kabuli_Chr06 | 26310022                | AA                                     | CC                 | CC               | INTERGENIC      |               |                    |                    |
| SNP_41831_A_26310042 | NC_021165.1    | Ca_Kabuli_Chr06 | 26310042                | AA                                     | GG                 | GG               | INTERGENIC      |               |                    |                    |
| SNP_41832_A_26310050 | NC_021165.1    | Ca_Kabuli_Chr06 | 26310050                | TT                                     | CC                 | CC               | INTERGENIC      |               |                    |                    |
| SNP_41833_A_26310052 | NC_021165.1    | Ca_Kabuli_Chr06 | 26310052                | TT                                     | GG                 | GG               | INTERGENIC      |               |                    |                    |
| SNP_41834_A_26310056 | NC_021165.1    | Ca_Kabuli_Chr06 | 26310056                | AA                                     | GG                 | GG               | INTERGENIC      |               |                    |                    |
| SNP_41835_A_26310067 | NC_021165.1    | Ca_Kabuli_Chr06 | 26310067                | GG                                     | TT                 | TT               | INTERGENIC      |               |                    |                    |



| SNPs IDs             | Chromosome IDs | Chromosomes     | Physical positions (bp) | CDC Frontier genome (Reference genome) | (Pusa 1103 & HPNB) | (ILWC 46 & LPNB) | Sequence Components of genome | Gene accession IDs | Putative functions                |
|----------------------|----------------|-----------------|-------------------------|----------------------------------------|--------------------|------------------|-------------------------------|--------------------|-----------------------------------|
| SNP_41836_A_26310073 | NC_021165.1    | Ca_Kabuli_Chr06 | 26310073                | TT                                     | AA                 | AA               | INTERGENIC                    |                    |                                   |
| SNP_41837_A_26438823 | NC_021165.1    | Ca_Kabuli_Chr06 | 26438823                | GG                                     | TT                 | TT               | INTERGENIC                    |                    |                                   |
| SNP_41838_A_26454234 | NC_021165.1    | Ca_Kabuli_Chr06 | 26454234                | CC                                     | TT                 | TT               | URR                           | 101499809          | probable protein phosphatase 2C 4 |
| SNP_41839_A_26479701 | NC_021165.1    | Ca_Kabuli_Chr06 | 26479701                | GG                                     | AA                 | AA               | INTERGENIC                    |                    |                                   |
| SNP_41840_A_26507527 | NC_021165.1    | Ca_Kabuli_Chr06 | 26507527                | GG                                     | AA                 | AA               | INTERGENIC                    |                    |                                   |
| SNP_41841_A_26545277 | NC_021165.1    | Ca_Kabuli_Chr06 | 26545277                | AA                                     | GG                 | GG               | INTERGENIC                    |                    |                                   |
| SNP_41843_A_26604882 | NC_021165.1    | Ca_Kabuli_Chr06 | 26604882                | AA                                     | CC                 | CC               | INTERGENIC                    |                    |                                   |
| SNP_41844_A_26645562 | NC_021165.1    | Ca_Kabuli_Chr06 | 26645562                | TT                                     | AA                 | AA               | INTERGENIC                    |                    |                                   |
| SNP_41845_A_26648195 | NC_021165.1    | Ca_Kabuli_Chr06 | 26648195                | TT                                     | AA                 | AA               | INTERGENIC                    |                    |                                   |
| SNP_41846_A_26685959 | NC_021165.1    | Ca_Kabuli_Chr06 | 26685959                | GG                                     | CC                 | CC               | URR                           | 101503972          | uncharacterized LOC101503972      |
| SNP_41847_A_26686289 | NC_021165.1    | Ca_Kabuli_Chr06 | 26686289                | TT                                     | AA                 | AA               | URR                           | 101503972          | uncharacterized LOC101503972      |
| SNP_41848_A_26686587 | NC_021165.1    | Ca_Kabuli_Chr06 | 26686587                | CC                                     | TT                 | TT               | URR                           | 101503972          | uncharacterized LOC101503972      |
| SNP_41849_A_26721504 | NC_021165.1    | Ca_Kabuli_Chr06 | 26721504                | TT                                     | CC                 | CC               | URR                           | 101505149          | uncharacterized LOC101505149      |
| SNP_41850_A_26721786 | NC_021165.1    | Ca_Kabuli_Chr06 | 26721786                | GG                                     | TT                 | TT               | URR                           | 101505149          | uncharacterized LOC101505149      |
| SNP_41852_A_26828982 | NC_021165.1    | Ca_Kabuli_Chr06 | 26828982                | CC                                     | AA                 | AA               | URR                           | 101508258          | uncharacterized LOC101508258      |
| SNP_41854_A_26922806 | NC_021165.1    | Ca_Kabuli_Chr06 | 26922806                | TT                                     | CC                 | CC               | INTERGENIC                    |                    |                                   |
| SNP_41855_A_26922839 | NC_021165.1    | Ca_Kabuli_Chr06 | 26922839                | CC                                     | TT                 | TT               | INTERGENIC                    |                    |                                   |
| SNP_41856_A_26923260 | NC_021165.1    | Ca_Kabuli_Chr06 | 26923260                | AA                                     | TT                 | TT               | DRR                           | 101512559          | 60S ribosomal protein L35         |
| SNP_41857_A_26948219 | NC_021165.1    | Ca_Kabuli_Chr06 | 26948219                | TT                                     | AA                 | AA               | INTERGENIC                    |                    |                                   |
| SNP_41858_A_26948222 | NC_021165.1    | Ca_Kabuli_Chr06 | 26948222                | TT                                     | GG                 | GG               | INTERGENIC                    |                    |                                   |
| SNP_41859_A_26949946 | NC_021165.1    | Ca_Kabuli_Chr06 | 26949946                | GG                                     | CC                 | CC               | INTERGENIC                    |                    |                                   |
| SNP_41860_A_26950010 | NC_021165.1    | Ca_Kabuli_Chr06 | 26950010                | CC                                     | TT                 | TT               | INTERGENIC                    |                    |                                   |

| SNPs IDs             | Chromosome IDs | Chromosomes     | Physical positions (bp) | CDC Frontier genome (Reference genome) | (Pusa 1103 & HPNB) | (ILWC 46 & LPNB) | Sequence Components of genome | Gene accession IDs | Putative functions                               |
|----------------------|----------------|-----------------|-------------------------|----------------------------------------|--------------------|------------------|-------------------------------|--------------------|--------------------------------------------------|
| SNP_41861_A_26954303 | NC_021165.1    | Ca_Kabuli_Chr06 | 26954303                | AA                                     | TT                 | TT               | INTERGENIC                    |                    |                                                  |
| SNP_41862_A_26954691 | NC_021165.1    | Ca_Kabuli_Chr06 | 26954691                | CC                                     | TT                 | TT               | INTERGENIC                    |                    |                                                  |
| SNP_41863_A_26977096 | NC_021165.1    | Ca_Kabuli_Chr06 | 26977096                | TT                                     | CC                 | CC               | INTERGENIC                    |                    |                                                  |
| SNP_41864_A_27008100 | NC_021165.1    | Ca_Kabuli_Chr06 | 27008100                | GG                                     | AA                 | AA               | INTERGENIC                    |                    |                                                  |
| SNP_41865_A_27008119 | NC_021165.1    | Ca_Kabuli_Chr06 | 27008119                | AA                                     | GG                 | GG               | INTERGENIC                    |                    |                                                  |
| SNP_41866_A_27021813 | NC_021165.1    | Ca_Kabuli_Chr06 | 27021813                | GG                                     | AA                 | AA               | INTERGENIC                    |                    |                                                  |
| SNP_41867_A_27039047 | NC_021165.1    | Ca_Kabuli_Chr06 | 27039047                | CC                                     | TT                 | TT               | INTERGENIC                    |                    |                                                  |
| SNP_41868_A_27039074 | NC_021165.1    | Ca_Kabuli_Chr06 | 27039074                | AA                                     | GG                 | GG               | INTERGENIC                    |                    |                                                  |
| SNP_41869_A_27039091 | NC_021165.1    | Ca_Kabuli_Chr06 | 27039091                | CC                                     | AA                 | AA               | INTERGENIC                    |                    |                                                  |
| SNP_41870_A_27039094 | NC_021165.1    | Ca_Kabuli_Chr06 | 27039094                | CC                                     | TT                 | TT               | INTERGENIC                    |                    |                                                  |
| SNP_41871_A_27039232 | NC_021165.1    | Ca_Kabuli_Chr06 | 27039232                | CC                                     | TT                 | TT               | INTERGENIC                    |                    |                                                  |
| SNP_41872_A_27039348 | NC_021165.1    | Ca_Kabuli_Chr06 | 27039348                | AA                                     | TT                 | TT               | INTERGENIC                    |                    |                                                  |
| SNP_41873_A_27039409 | NC_021165.1    | Ca_Kabuli_Chr06 | 27039409                | TT                                     | GG                 | GG               | INTERGENIC                    |                    |                                                  |
| SNP_41874_A_27067743 | NC_021165.1    | Ca_Kabuli_Chr06 | 27067743                | GG                                     | AA                 | AA               | URR                           | 101490085          | E3 UFM1-protein ligase 1 homolog                 |
| SNP_41875_A_27067792 | NC_021165.1    | Ca_Kabuli_Chr06 | 27067792                | CC                                     | TT                 | TT               | URR                           | 101490085          | E3 UFM1-protein ligase 1 homolog                 |
| SNP_41876_A_27075424 | NC_021165.1    | Ca_Kabuli_Chr06 | 27075424                | TT                                     | AA                 | AA               | INTERGENIC                    |                    |                                                  |
| SNP_41877_A_27083870 | NC_021165.1    | Ca_Kabuli_Chr06 | 27083870                | GG                                     | AA                 | AA               | INTERGENIC                    |                    |                                                  |
| SNP_41878_A_27108197 | NC_021165.1    | Ca_Kabuli_Chr06 | 27108197                | TT                                     | GG                 | GG               | DRR                           | 101488892          | uncharacterized LOC101488892                     |
| SNP_41879_A_27108240 | NC_021165.1    | Ca_Kabuli_Chr06 | 27108240                | TT                                     | AA                 | AA               | DRR                           | 101488892          | uncharacterized LOC101488892                     |
| SNP_41880_A_27208662 | NC_021165.1    | Ca_Kabuli_Chr06 | 27208662                | AA                                     | TT                 | TT               | INTRON                        | 101492784          | phototropin-1-like                               |
| SNP_41881_A_27223933 | NC_021165.1    | Ca_Kabuli_Chr06 | 27223933                | AA                                     | TT                 | TT               | DRR                           | 101494202          | probable serine/threonine-protein kinase RLCKVII |
| SNP_41882_A_27258135 | NC_021165.1    | Ca_Kabuli_Chr06 | 27258135                | GG                                     | TT                 | TT               | INTERGENIC                    |                    |                                                  |

| SNPs IDs             | Chromosome IDs | Chromosomes     | Physical positions (bp) | CDC Frontier genome (Reference genome) | (Pusa 1103 & HPNB) | (ILWC 46 & LPNB) | Sequence Components of genome | Gene accession IDs | Putative functions                         |
|----------------------|----------------|-----------------|-------------------------|----------------------------------------|--------------------|------------------|-------------------------------|--------------------|--------------------------------------------|
| SNP_41883_A_27258795 | NC_021165.1    | Ca_Kabuli_Chr06 | 27258795                | GG                                     | AA                 | AA               | INTERGENIC                    |                    |                                            |
| SNP_41885_A_27289118 | NC_021165.1    | Ca_Kabuli_Chr06 | 27289118                | CC                                     | GG                 | GG               | INTERGENIC                    |                    |                                            |
| SNP_41886_A_27297486 | NC_021165.1    | Ca_Kabuli_Chr06 | 27297486                | TT                                     | AA                 | AA               | INTERGENIC                    |                    |                                            |
| SNP_41888_A_27479441 | NC_021165.1    | Ca_Kabuli_Chr06 | 27479441                | TT                                     | CC                 | CC               | INTRON                        | 101500135          | interactor of constitutive active ROPs 3   |
| SNP_41889_A_27479445 | NC_021165.1    | Ca_Kabuli_Chr06 | 27479445                | TT                                     | CC                 | CC               | INTRON                        | 101500135          | interactor of constitutive active ROPs 3   |
| SNP_41890_A_27485639 | NC_021165.1    | Ca_Kabuli_Chr06 | 27485639                | AA                                     | GG                 | GG               | URR                           | 101500135          | interactor of constitutive active ROPs 3   |
| SNP_41891_A_27500711 | NC_021165.1    | Ca_Kabuli_Chr06 | 27500711                | CC                                     | AA                 | AA               | INTERGENIC                    |                    |                                            |
| SNP_41892_A_27503690 | NC_021165.1    | Ca_Kabuli_Chr06 | 27503690                | TT                                     | CC                 | CC               | INTERGENIC                    |                    |                                            |
| SNP_41893_A_27503818 | NC_021165.1    | Ca_Kabuli_Chr06 | 27503818                | TT                                     | CC                 | CC               | INTERGENIC                    |                    |                                            |
| SNP_41894_A_27612327 | NC_021165.1    | Ca_Kabuli_Chr06 | 27612327                | CC                                     | TT                 | TT               | INTERGENIC                    |                    |                                            |
| SNP_41896_A_27640955 | NC_021165.1    | Ca_Kabuli_Chr06 | 27640955                | GG                                     | AA                 | AA               | INTERGENIC                    |                    |                                            |
| SNP_41897_A_27640961 | NC_021165.1    | Ca_Kabuli_Chr06 | 27640961                | AA                                     | GG                 | GG               | INTERGENIC                    |                    |                                            |
| SNP_41899_A_27738654 | NC_021165.1    | Ca_Kabuli_Chr06 | 27738654                | AA                                     | GG                 | GG               | INTERGENIC                    |                    |                                            |
| SNP_41900_A_27738671 | NC_021165.1    | Ca_Kabuli_Chr06 | 27738671                | CC                                     | TT                 | TT               | INTERGENIC                    |                    |                                            |
| SNP_41901_A_27740338 | NC_021165.1    | Ca_Kabuli_Chr06 | 27740338                | GG                                     | AA                 | AA               | INTERGENIC                    |                    |                                            |
| SNP_41902_A_27777082 | NC_021165.1    | Ca_Kabuli_Chr06 | 27777082                | GG                                     | AA                 | AA               | INTERGENIC                    |                    |                                            |
| SNP_41903_A_27777083 | NC_021165.1    | Ca_Kabuli_Chr06 | 27777083                | CC                                     | TT                 | TT               | INTERGENIC                    |                    |                                            |
| SNP_41904_A_27777329 | NC_021165.1    | Ca_Kabuli_Chr06 | 27777329                | CC                                     | TT                 | TT               | INTERGENIC                    |                    |                                            |
| SNP_41905_A_27777350 | NC_021165.1    | Ca_Kabuli_Chr06 | 27777350                | TT                                     | CC                 | CC               | INTERGENIC                    |                    |                                            |
| SNP_41907_A_27854462 | NC_021165.1    | Ca_Kabuli_Chr06 | 27854462                | CC                                     | AA                 | AA               | INTRON                        | 101510830          | serine/threonine-protein kinase GRIK2-like |
| SNP_41908_A_27902221 | NC_021165.1    | Ca_Kabuli_Chr06 | 27902221                | TT                                     | CC                 | CC               | INTERGENIC                    |                    |                                            |
| SNP_41909_A_27902602 | NC_021165.1    | Ca_Kabuli_Chr06 | 27902602                | CC                                     | TT                 | TT               | INTERGENIC                    |                    |                                            |

| SNPs IDs             | Chromosome IDs | Chromosomes     | Physical positions (bp) | CDC Frontier genome (Reference genome) | (Pusa 1103 & HPNB) | (ILWC 46 & LPNB) | Sequence Components of genome | Gene accession IDs | Putative functions                                                 |
|----------------------|----------------|-----------------|-------------------------|----------------------------------------|--------------------|------------------|-------------------------------|--------------------|--------------------------------------------------------------------|
| SNP_41910_A_27910476 | NC_021165.1    | Ca_Kabuli_Chr06 | 27910476                | GG                                     | TT                 | TT               | INTERGENIC                    |                    |                                                                    |
| SNP_41911_A_27910486 | NC_021165.1    | Ca_Kabuli_Chr06 | 27910486                | TT                                     | CC                 | CC               | INTERGENIC                    |                    |                                                                    |
| SNP_41912_A_27910524 | NC_021165.1    | Ca_Kabuli_Chr06 | 27910524                | AA                                     | CC                 | CC               | INTERGENIC                    |                    |                                                                    |
| SNP_41913_A_27910529 | NC_021165.1    | Ca_Kabuli_Chr06 | 27910529                | GG                                     | TT                 | TT               | INTERGENIC                    |                    |                                                                    |
| SNP_41914_A_27910552 | NC_021165.1    | Ca_Kabuli_Chr06 | 27910552                | AA                                     | TT                 | TT               | INTERGENIC                    |                    |                                                                    |
| SNP_41915_A_27910558 | NC_021165.1    | Ca_Kabuli_Chr06 | 27910558                | AA                                     | GG                 | GG               | INTERGENIC                    |                    |                                                                    |
| SNP_41916_A_27910573 | NC_021165.1    | Ca_Kabuli_Chr06 | 27910573                | TT                                     | CC                 | CC               | INTERGENIC                    |                    |                                                                    |
| SNP_41917_A_27910577 | NC_021165.1    | Ca_Kabuli_Chr06 | 27910577                | AA                                     | TT                 | TT               | INTERGENIC                    |                    |                                                                    |
| SNP_41918_A_27910582 | NC_021165.1    | Ca_Kabuli_Chr06 | 27910582                | TT                                     | CC                 | CC               | INTERGENIC                    |                    |                                                                    |
| SNP_41920_A_27970250 | NC_021165.1    | Ca_Kabuli_Chr06 | 27970250                | GG                                     | AA                 | AA               | INTERGENIC                    |                    |                                                                    |
| SNP_41921_A_27988914 | NC_021165.1    | Ca_Kabuli_Chr06 | 27988914                | GG                                     | AA                 | AA               | URR                           | 101513949          | 60S ribosomal protein L12-3-like                                   |
| SNP_41922_A_28004803 | NC_021165.1    | Ca_Kabuli_Chr06 | 28004803                | TT                                     | CC                 | CC               | INTERGENIC                    |                    |                                                                    |
| SNP_41923_A_28018489 | NC_021165.1    | Ca_Kabuli_Chr06 | 28018489                | GG                                     | AA                 | AA               | INTERGENIC                    |                    |                                                                    |
| SNP_41925_A_28082992 | NC_021165.1    | Ca_Kabuli_Chr06 | 28082992                | AA                                     | TT                 | TT               | INTERGENIC                    |                    |                                                                    |
| SNP_41928_A_28119941 | NC_021165.1    | Ca_Kabuli_Chr06 | 28119941                | AA                                     | CC                 | CC               | INTERGENIC                    |                    |                                                                    |
| SNP_41929_A_28139262 | NC_021165.1    | Ca_Kabuli_Chr06 | 28139262                | TT                                     | CC                 | CC               | INTERGENIC                    |                    |                                                                    |
| SNP_41930_A_28139279 | NC_021165.1    | Ca_Kabuli_Chr06 | 28139279                | AA                                     | GG                 | GG               | INTERGENIC                    |                    |                                                                    |
| SNP_41931_A_28159260 | NC_021165.1    | Ca_Kabuli_Chr06 | 28159260                | AA                                     | GG                 | GG               | DRR                           | 101492111          | serine/threonine-protein phosphatase 6 regulatory subunit 3-B like |
| SNP_41933_A_28189242 | NC_021165.1    | Ca_Kabuli_Chr06 | 28189242                | CC                                     | AA                 | AA               | INTERGENIC                    |                    |                                                                    |
| SNP_41934_A_28190159 | NC_021165.1    | Ca_Kabuli_Chr06 | 28190159                | AA                                     | TT                 | TT               | INTERGENIC                    |                    |                                                                    |
| SNP_41937_A_28190987 | NC_021165.1    | Ca_Kabuli_Chr06 | 28190987                | TT                                     | AA                 | AA               | INTERGENIC                    |                    |                                                                    |
| SNP_41938_A_28191009 | NC_021165.1    | Ca_Kabuli_Chr06 | 28191009                | TT                                     | AA                 | AA               | INTERGENIC                    |                    |                                                                    |

| SNPs IDs             | Chromosome IDs | Chromosomes     | Physical positions (bp) | CDC Frontier genome (Reference genome) | (Pusa 1103 & HPNB) | (ILWC 46 & LPNB) | Sequence genome | Components of | Gene accession IDs                | Putative functions |
|----------------------|----------------|-----------------|-------------------------|----------------------------------------|--------------------|------------------|-----------------|---------------|-----------------------------------|--------------------|
| SNP_41939_A_28191044 | NC_021165.1    | Ca_Kabuli_Chr06 | 28191044                | CC                                     | AA                 | AA               | INTERGENIC      |               |                                   |                    |
| SNP_41940_A_28191069 | NC_021165.1    | Ca_Kabuli_Chr06 | 28191069                | AA                                     | TT                 | TT               | INTERGENIC      |               |                                   |                    |
| SNP_41941_A_28191552 | NC_021165.1    | Ca_Kabuli_Chr06 | 28191552                | CC                                     | GG                 | GG               | INTERGENIC      |               |                                   |                    |
| SNP_41942_A_28191672 | NC_021165.1    | Ca_Kabuli_Chr06 | 28191672                | CC                                     | TT                 | TT               | INTERGENIC      |               |                                   |                    |
| SNP_41943_A_28192424 | NC_021165.1    | Ca_Kabuli_Chr06 | 28192424                | GG                                     | AA                 | AA               | INTERGENIC      |               |                                   |                    |
| SNP_41944_A_28192527 | NC_021165.1    | Ca_Kabuli_Chr06 | 28192527                | AA                                     | CC                 | CC               | INTERGENIC      |               |                                   |                    |
| SNP_41945_A_28192544 | NC_021165.1    | Ca_Kabuli_Chr06 | 28192544                | CC                                     | TT                 | TT               | INTERGENIC      |               |                                   |                    |
| SNP_41946_A_28192873 | NC_021165.1    | Ca_Kabuli_Chr06 | 28192873                | TT                                     | GG                 | GG               | INTERGENIC      |               |                                   |                    |
| SNP_41947_A_28192875 | NC_021165.1    | Ca_Kabuli_Chr06 | 28192875                | CC                                     | GG                 | GG               | INTERGENIC      |               |                                   |                    |
| SNP_41949_A_28221781 | NC_021165.1    | Ca_Kabuli_Chr06 | 28221781                | AA                                     | GG                 | GG               | INTERGENIC      |               |                                   |                    |
| SNP_41950_A_28255801 | NC_021165.1    | Ca_Kabuli_Chr06 | 28255801                | AA                                     | GG                 | GG               | DRR             | 101493115     | protein-tyrosine sulfotransferase |                    |
| SNP_41951_A_28275055 | NC_021165.1    | Ca_Kabuli_Chr06 | 28275055                | GG                                     | TT                 | TT               | INTERGENIC      |               |                                   |                    |
| SNP_41952_A_28275993 | NC_021165.1    | Ca_Kabuli_Chr06 | 28275993                | TT                                     | CC                 | CC               | INTERGENIC      |               |                                   |                    |
| SNP_41953_A_28276241 | NC_021165.1    | Ca_Kabuli_Chr06 | 28276241                | TT                                     | CC                 | CC               | INTERGENIC      |               |                                   |                    |
| SNP_41954_A_28283779 | NC_021165.1    | Ca_Kabuli_Chr06 | 28283779                | GG                                     | CC                 | CC               | INTERGENIC      |               |                                   |                    |
| SNP_41955_A_28300895 | NC_021165.1    | Ca_Kabuli_Chr06 | 28300895                | AA                                     | GG                 | GG               | INTERGENIC      |               |                                   |                    |
| SNP_41956_A_28300897 | NC_021165.1    | Ca_Kabuli_Chr06 | 28300897                | CC                                     | TT                 | TT               | INTERGENIC      |               |                                   |                    |
| SNP_41957_A_28301377 | NC_021165.1    | Ca_Kabuli_Chr06 | 28301377                | AA                                     | GG                 | GG               | INTERGENIC      |               |                                   |                    |
| SNP_41959_A_28305434 | NC_021165.1    | Ca_Kabuli_Chr06 | 28305434                | GG                                     | CC                 | CC               | INTERGENIC      |               |                                   |                    |
| SNP_41961_A_28305498 | NC_021165.1    | Ca_Kabuli_Chr06 | 28305498                | GG                                     | AA                 | AA               | INTERGENIC      |               |                                   |                    |
| SNP_41962_A_28305516 | NC_021165.1    | Ca_Kabuli_Chr06 | 28305516                | TT                                     | AA                 | AA               | INTERGENIC      |               |                                   |                    |
| SNP_41963_A_28308301 | NC_021165.1    | Ca_Kabuli_Chr06 | 28308301                | CC                                     | AA                 | AA               | INTERGENIC      |               |                                   |                    |

| SNPs IDs             | Chromosome IDs | Chromosomes     | Physical positions (bp) | CDC Frontier (Reference genome) | (Pusa 1103 & HPNB) | (ILWC 46 & LPNB) | Sequence Components of genome | Gene accession IDs | Putative functions                            |
|----------------------|----------------|-----------------|-------------------------|---------------------------------|--------------------|------------------|-------------------------------|--------------------|-----------------------------------------------|
| SNP_41964_A_28308320 | NC_021165.1    | Ca_Kabuli_Chr06 | 28308320                | TT                              | AA                 | AA               | INTERGENIC                    |                    |                                               |
| SNP_41965_A_28323082 | NC_021165.1    | Ca_Kabuli_Chr06 | 28323082                | AA                              | TT                 | TT               | INTERGENIC                    |                    |                                               |
| SNP_41966_A_28323143 | NC_021165.1    | Ca_Kabuli_Chr06 | 28323143                | CC                              | TT                 | TT               | INTERGENIC                    |                    |                                               |
| SNP_41967_A_28323750 | NC_021165.1    | Ca_Kabuli_Chr06 | 28323750                | GG                              | TT                 | TT               | INTERGENIC                    |                    |                                               |
| SNP_41968_A_28323869 | NC_021165.1    | Ca_Kabuli_Chr06 | 28323869                | CC                              | GG                 | GG               | INTERGENIC                    |                    |                                               |
| SNP_41969_A_28323948 | NC_021165.1    | Ca_Kabuli_Chr06 | 28323948                | CC                              | TT                 | TT               | INTERGENIC                    |                    |                                               |
| SNP_41970_A_28323949 | NC_021165.1    | Ca_Kabuli_Chr06 | 28323949                | GG                              | TT                 | TT               | INTERGENIC                    |                    |                                               |
| SNP_41971_A_28324162 | NC_021165.1    | Ca_Kabuli_Chr06 | 28324162                | TT                              | CC                 | CC               | INTERGENIC                    |                    |                                               |
| SNP_41972_A_28324623 | NC_021165.1    | Ca_Kabuli_Chr06 | 28324623                | CC                              | TT                 | TT               | DRR                           | 101495153          | ribonuclease S-F11-like                       |
| SNP_41973_A_28324811 | NC_021165.1    | Ca_Kabuli_Chr06 | 28324811                | TT                              | GG                 | GG               | DRR                           | 101495153          | ribonuclease S-F11-like                       |
| SNP_41974_A_28326153 | NC_021165.1    | Ca_Kabuli_Chr06 | 28326153                | AA                              | GG                 | GG               | URR                           | 101495153          | ribonuclease S-F11-like                       |
| SNP_41976_A_28327235 | NC_021165.1    | Ca_Kabuli_Chr06 | 28327235                | GG                              | AA                 | AA               | URR                           | 101495153          | ribonuclease S-F11-like                       |
| SNP_41978_A_28328440 | NC_021165.1    | Ca_Kabuli_Chr06 | 28328440                | CC                              | AA                 | AA               | INTERGENIC                    |                    |                                               |
| SNP_41979_A_28328449 | NC_021165.1    | Ca_Kabuli_Chr06 | 28328449                | GG                              | TT                 | TT               | INTERGENIC                    |                    |                                               |
| SNP_41980_A_28330901 | NC_021165.1    | Ca_Kabuli_Chr06 | 28330901                | TT                              | AA                 | AA               | INTERGENIC                    |                    |                                               |
| SNP_41981_A_28330934 | NC_021165.1    | Ca_Kabuli_Chr06 | 28330934                | AA                              | GG                 | GG               | INTERGENIC                    |                    |                                               |
| SNP_41982_A_28331101 | NC_021165.1    | Ca_Kabuli_Chr06 | 28331101                | TT                              | CC                 | CC               | INTERGENIC                    |                    |                                               |
| SNP_41983_A_28331109 | NC_021165.1    | Ca_Kabuli_Chr06 | 28331109                | CC                              | TT                 | TT               | INTERGENIC                    |                    |                                               |
| SNP_41984_A_28331116 | NC_021165.1    | Ca_Kabuli_Chr06 | 28331116                | AA                              | TT                 | TT               | INTERGENIC                    |                    |                                               |
| SNP_41985_A_28331136 | NC_021165.1    | Ca_Kabuli_Chr06 | 28331136                | TT                              | CC                 | CC               | INTERGENIC                    |                    |                                               |
| SNP_41986_A_28332044 | NC_021165.1    | Ca_Kabuli_Chr06 | 28332044                | CC                              | AA                 | AA               | INTRON                        | 101495477          | delta-1-pyrroline-5-carboxylate synthase-like |
| SNP_41987_A_28332074 | NC_021165.1    | Ca_Kabuli_Chr06 | 28332074                | AA                              | GG                 | GG               | INTRON                        | 101495477          | delta-1-pyrroline-5-carboxylate synthase-like |

| SNPs IDs             | Chromosome IDs | Chromosomes     | Physical positions (bp) | CDC Frontier genome (Reference genome) | (Pusa 1103 & HPNB) | (ILWC 46 & LPNB) | Sequence genome | Components of | Gene accession IDs | Putative functions                            |
|----------------------|----------------|-----------------|-------------------------|----------------------------------------|--------------------|------------------|-----------------|---------------|--------------------|-----------------------------------------------|
| SNP_41988_A_28332107 | NC_021165.1    | Ca_Kabuli_Chr06 | 28332107                | TT                                     | GG                 | GG               | INTRON          |               | 101495477          | delta-1-pyrroline-5-carboxylate synthase-like |
| SNP_41989_A_28332112 | NC_021165.1    | Ca_Kabuli_Chr06 | 28332112                | CC                                     | AA                 | AA               | INTRON          |               | 101495477          | delta-1-pyrroline-5-carboxylate synthase-like |
| SNP_41990_A_28332163 | NC_021165.1    | Ca_Kabuli_Chr06 | 28332163                | CC                                     | TT                 | TT               | INTRON          |               | 101495477          | delta-1-pyrroline-5-carboxylate synthase-like |
| SNP_41991_A_28332259 | NC_021165.1    | Ca_Kabuli_Chr06 | 28332259                | TT                                     | GG                 | GG               | INTRON          |               | 101495477          | delta-1-pyrroline-5-carboxylate synthase-like |
| SNP_41992_A_28332269 | NC_021165.1    | Ca_Kabuli_Chr06 | 28332269                | AA                                     | TT                 | TT               | INTRON          |               | 101495477          | delta-1-pyrroline-5-carboxylate synthase-like |
| SNP_41994_A_28332367 | NC_021165.1    | Ca_Kabuli_Chr06 | 28332367                | AA                                     | CC                 | CC               | INTRON          |               | 101495477          | delta-1-pyrroline-5-carboxylate synthase-like |
| SNP_41995_A_28332422 | NC_021165.1    | Ca_Kabuli_Chr06 | 28332422                | TT                                     | CC                 | CC               | INTRON          |               | 101495477          | delta-1-pyrroline-5-carboxylate synthase-like |
| SNP_41996_A_28332424 | NC_021165.1    | Ca_Kabuli_Chr06 | 28332424                | GG                                     | AA                 | AA               | INTRON          |               | 101495477          | delta-1-pyrroline-5-carboxylate synthase-like |
| SNP_41997_A_28332550 | NC_021165.1    | Ca_Kabuli_Chr06 | 28332550                | AA                                     | GG                 | GG               | INTRON          |               | 101495477          | delta-1-pyrroline-5-carboxylate synthase-like |
| SNP_41998_A_28332561 | NC_021165.1    | Ca_Kabuli_Chr06 | 28332561                | TT                                     | GG                 | GG               | INTRON          |               | 101495477          | delta-1-pyrroline-5-carboxylate synthase-like |
| SNP_42000_A_28332621 | NC_021165.1    | Ca_Kabuli_Chr06 | 28332621                | TT                                     | AA                 | AA               | INTRON          |               | 101495477          | delta-1-pyrroline-5-carboxylate synthase-like |
| SNP_42001_A_28332630 | NC_021165.1    | Ca_Kabuli_Chr06 | 28332630                | TT                                     | GG                 | GG               | INTRON          |               | 101495477          | delta-1-pyrroline-5-carboxylate synthase-like |
| SNP_42002_A_28332647 | NC_021165.1    | Ca_Kabuli_Chr06 | 28332647                | CC                                     | GG                 | GG               | INTRON          |               | 101495477          | delta-1-pyrroline-5-carboxylate synthase-like |
| SNP_42004_A_28332660 | NC_021165.1    | Ca_Kabuli_Chr06 | 28332660                | AA                                     | GG                 | GG               | INTRON          |               | 101495477          | delta-1-pyrroline-5-carboxylate synthase-like |
| SNP_42005_A_28332705 | NC_021165.1    | Ca_Kabuli_Chr06 | 28332705                | TT                                     | CC                 | CC               | INTRON          |               | 101495477          | delta-1-pyrroline-5-carboxylate synthase-like |
| SNP_42006_A_28332722 | NC_021165.1    | Ca_Kabuli_Chr06 | 28332722                | TT                                     | CC                 | CC               | INTRON          |               | 101495477          | delta-1-pyrroline-5-carboxylate synthase-like |
| SNP_42007_A_28332726 | NC_021165.1    | Ca_Kabuli_Chr06 | 28332726                | TT                                     | GG                 | GG               | INTRON          |               | 101495477          | delta-1-pyrroline-5-carboxylate synthase-like |
| SNP_42009_A_28332774 | NC_021165.1    | Ca_Kabuli_Chr06 | 28332774                | CC                                     | TT                 | TT               | INTRON          |               | 101495477          | delta-1-pyrroline-5-carboxylate synthase-like |
| SNP_42010_A_28332786 | NC_021165.1    | Ca_Kabuli_Chr06 | 28332786                | GG                                     | AA                 | AA               | INTRON          |               | 101495477          | delta-1-pyrroline-5-carboxylate synthase-like |
| SNP_42012_A_28332883 | NC_021165.1    | Ca_Kabuli_Chr06 | 28332883                | TT                                     | CC                 | CC               | INTRON          |               | 101495477          | delta-1-pyrroline-5-carboxylate synthase-like |
| SNP_42013_A_28332935 | NC_021165.1    | Ca_Kabuli_Chr06 | 28332935                | GG                                     | AA                 | AA               | INTRON          |               | 101495477          | delta-1-pyrroline-5-carboxylate synthase-like |
| SNP_42015_A_28333063 | NC_021165.1    | Ca_Kabuli_Chr06 | 28333063                | AA                                     | GG                 | GG               | INTRON          |               | 101495477          | delta-1-pyrroline-5-carboxylate synthase-like |

| SNPs IDs             | Chromosome IDs | Chromosomes     | Physical positions (bp) | CDC Frontier genome (Reference genome) | (Pusa 1103 & HPNB) | (ILWC 46 & LPNB) | Sequence Components of genome | Gene accession IDs | Putative functions                            |
|----------------------|----------------|-----------------|-------------------------|----------------------------------------|--------------------|------------------|-------------------------------|--------------------|-----------------------------------------------|
| SNP_42016_A_28333177 | NC_021165.1    | Ca_Kabuli_Chr06 | 28333177                | AA                                     | GG                 | GG               | INTRON                        | 101495477          | delta-1-pyrroline-5-carboxylate synthase-like |
| SNP_42017_A_28333220 | NC_021165.1    | Ca_Kabuli_Chr06 | 28333220                | CC                                     | TT                 | TT               | INTRON                        | 101495477          | delta-1-pyrroline-5-carboxylate synthase-like |
| SNP_42018_A_28333671 | NC_021165.1    | Ca_Kabuli_Chr06 | 28333671                | GG                                     | AA                 | AA               | INTRON                        | 101495477          | delta-1-pyrroline-5-carboxylate synthase-like |
| SNP_42019_A_28334226 | NC_021165.1    | Ca_Kabuli_Chr06 | 28334226                | TT                                     | CC                 | CC               | INTRON                        | 101495477          | delta-1-pyrroline-5-carboxylate synthase-like |
| SNP_42020_A_28335846 | NC_021165.1    | Ca_Kabuli_Chr06 | 28335846                | GG                                     | AA                 | AA               | INTRON                        | 101495477          | delta-1-pyrroline-5-carboxylate synthase-like |
| SNP_42022_A_28336720 | NC_021165.1    | Ca_Kabuli_Chr06 | 28336720                | TT                                     | CC                 | CC               | INTRON                        | 101495477          | delta-1-pyrroline-5-carboxylate synthase-like |
| SNP_42023_A_28336773 | NC_021165.1    | Ca_Kabuli_Chr06 | 28336773                | CC                                     | TT                 | TT               | INTRON                        | 101495477          | delta-1-pyrroline-5-carboxylate synthase-like |
| SNP_42024_A_28336795 | NC_021165.1    | Ca_Kabuli_Chr06 | 28336795                | GG                                     | TT                 | TT               | INTRON                        | 101495477          | delta-1-pyrroline-5-carboxylate synthase-like |
| SNP_42025_A_28336872 | NC_021165.1    | Ca_Kabuli_Chr06 | 28336872                | AA                                     | CC                 | CC               | INTRON                        | 101495477          | delta-1-pyrroline-5-carboxylate synthase-like |
| SNP_42026_A_28336893 | NC_021165.1    | Ca_Kabuli_Chr06 | 28336893                | TT                                     | AA                 | AA               | INTRON                        | 101495477          | delta-1-pyrroline-5-carboxylate synthase-like |
| SNP_42027_A_28336896 | NC_021165.1    | Ca_Kabuli_Chr06 | 28336896                | TT                                     | AA                 | AA               | INTRON                        | 101495477          | delta-1-pyrroline-5-carboxylate synthase-like |
| SNP_42028_A_28336902 | NC_021165.1    | Ca_Kabuli_Chr06 | 28336902                | GG                                     | AA                 | AA               | INTRON                        | 101495477          | delta-1-pyrroline-5-carboxylate synthase-like |
| SNP_42029_A_28336938 | NC_021165.1    | Ca_Kabuli_Chr06 | 28336938                | TT                                     | GG                 | GG               | INTRON                        | 101495477          | delta-1-pyrroline-5-carboxylate synthase-like |
| SNP_42030_A_28336951 | NC_021165.1    | Ca_Kabuli_Chr06 | 28336951                | CC                                     | TT                 | TT               | INTRON                        | 101495477          | delta-1-pyrroline-5-carboxylate synthase-like |
| SNP_42031_A_28336967 | NC_021165.1    | Ca_Kabuli_Chr06 | 28336967                | TT                                     | CC                 | CC               | INTRON                        | 101495477          | delta-1-pyrroline-5-carboxylate synthase-like |
| SNP_42032_A_28336971 | NC_021165.1    | Ca_Kabuli_Chr06 | 28336971                | TT                                     | CC                 | CC               | INTRON                        | 101495477          | delta-1-pyrroline-5-carboxylate synthase-like |
| SNP_42033_A_28336980 | NC_021165.1    | Ca_Kabuli_Chr06 | 28336980                | TT                                     | AA                 | AA               | INTRON                        | 101495477          | delta-1-pyrroline-5-carboxylate synthase-like |
| SNP_42034_A_28337031 | NC_021165.1    | Ca_Kabuli_Chr06 | 28337031                | GG                                     | AA                 | AA               | INTRON                        | 101495477          | delta-1-pyrroline-5-carboxylate synthase-like |
| SNP_42035_A_28337049 | NC_021165.1    | Ca_Kabuli_Chr06 | 28337049                | CC                                     | AA                 | AA               | INTRON                        | 101495477          | delta-1-pyrroline-5-carboxylate synthase-like |
| SNP_42036_A_28337130 | NC_021165.1    | Ca_Kabuli_Chr06 | 28337130                | CC                                     | AA                 | AA               | INTRON                        | 101495477          | delta-1-pyrroline-5-carboxylate synthase-like |
| SNP_42037_A_28337162 | NC_021165.1    | Ca_Kabuli_Chr06 | 28337162                | GG                                     | TT                 | TT               | INTRON                        | 101495477          | delta-1-pyrroline-5-carboxylate synthase-like |
| SNP_42038_A_28337170 | NC_021165.1    | Ca_Kabuli_Chr06 | 28337170                | CC                                     | GG                 | GG               | INTRON                        | 101495477          | delta-1-pyrroline-5-carboxylate synthase-like |



| SNPs IDs             | Chromosome IDs | Chromosomes     | Physical positions (bp) | CDC Frontier genome (Reference genome) | (Pusa 1103 & HPNB) | (ILWC 46 & LPNB) | Sequence Components of genome | Gene accession IDs | Putative functions                            |
|----------------------|----------------|-----------------|-------------------------|----------------------------------------|--------------------|------------------|-------------------------------|--------------------|-----------------------------------------------|
| SNP_42039_A_28337205 | NC_021165.1    | Ca_Kabuli_Chr06 | 28337205                | TT                                     | CC                 | CC               | INTRON                        | 101495477          | delta-1-pyrroline-5-carboxylate synthase-like |
| SNP_42040_A_28337230 | NC_021165.1    | Ca_Kabuli_Chr06 | 28337230                | GG                                     | AA                 | AA               | INTRON                        | 101495477          | delta-1-pyrroline-5-carboxylate synthase-like |
| SNP_42041_A_28337239 | NC_021165.1    | Ca_Kabuli_Chr06 | 28337239                | AA                                     | GG                 | GG               | INTRON                        | 101495477          | delta-1-pyrroline-5-carboxylate synthase-like |
| SNP_42042_A_28337254 | NC_021165.1    | Ca_Kabuli_Chr06 | 28337254                | GG                                     | TT                 | TT               | INTRON                        | 101495477          | delta-1-pyrroline-5-carboxylate synthase-like |
| SNP_42043_A_28337297 | NC_021165.1    | Ca_Kabuli_Chr06 | 28337297                | TT                                     | GG                 | GG               | INTRON                        | 101495477          | delta-1-pyrroline-5-carboxylate synthase-like |
| SNP_42044_A_28337316 | NC_021165.1    | Ca_Kabuli_Chr06 | 28337316                | GG                                     | AA                 | AA               | INTRON                        | 101495477          | delta-1-pyrroline-5-carboxylate synthase-like |
| SNP_42045_A_28337362 | NC_021165.1    | Ca_Kabuli_Chr06 | 28337362                | GG                                     | TT                 | TT               | INTRON                        | 101495477          | delta-1-pyrroline-5-carboxylate synthase-like |
| SNP_42046_A_28337375 | NC_021165.1    | Ca_Kabuli_Chr06 | 28337375                | TT                                     | AA                 | AA               | INTRON                        | 101495477          | delta-1-pyrroline-5-carboxylate synthase-like |
| SNP_42047_A_28337466 | NC_021165.1    | Ca_Kabuli_Chr06 | 28337466                | GG                                     | AA                 | AA               | INTRON                        | 101495477          | delta-1-pyrroline-5-carboxylate synthase-like |
| SNP_42048_A_28337480 | NC_021165.1    | Ca_Kabuli_Chr06 | 28337480                | CC                                     | TT                 | TT               | INTRON                        | 101495477          | delta-1-pyrroline-5-carboxylate synthase-like |
| SNP_42049_A_28339616 | NC_021165.1    | Ca_Kabuli_Chr06 | 28339616                | TT                                     | GG                 | GG               | INTRON                        | 101495477          | delta-1-pyrroline-5-carboxylate synthase-like |
| SNP_42050_A_28350715 | NC_021165.1    | Ca_Kabuli_Chr06 | 28350715                | GG                                     | AA                 | AA               | INTRON                        | 101495477          | delta-1-pyrroline-5-carboxylate synthase-like |
| SNP_42051_A_28350872 | NC_021165.1    | Ca_Kabuli_Chr06 | 28350872                | TT                                     | CC                 | CC               | INTRON                        | 101495477          | delta-1-pyrroline-5-carboxylate synthase-like |
| SNP_42052_A_28350958 | NC_021165.1    | Ca_Kabuli_Chr06 | 28350958                | TT                                     | CC                 | CC               | INTRON                        | 101495477          | delta-1-pyrroline-5-carboxylate synthase-like |
| SNP_42053_A_28350993 | NC_021165.1    | Ca_Kabuli_Chr06 | 28350993                | AA                                     | GG                 | GG               | INTRON                        | 101495477          | delta-1-pyrroline-5-carboxylate synthase-like |
| SNP_42054_A_28351061 | NC_021165.1    | Ca_Kabuli_Chr06 | 28351061                | CC                                     | AA                 | AA               | INTRON                        | 101495477          | delta-1-pyrroline-5-carboxylate synthase-like |
| SNP_42055_A_28351228 | NC_021165.1    | Ca_Kabuli_Chr06 | 28351228                | GG                                     | AA                 | AA               | INTRON                        | 101495477          | delta-1-pyrroline-5-carboxylate synthase-like |
| SNP_42056_A_28351378 | NC_021165.1    | Ca_Kabuli_Chr06 | 28351378                | CC                                     | TT                 | TT               | INTRON                        | 101495477          | delta-1-pyrroline-5-carboxylate synthase-like |
| SNP_42057_A_28353434 | NC_021165.1    | Ca_Kabuli_Chr06 | 28353434                | AA                                     | TT                 | TT               | INTRON                        | 101495477          | delta-1-pyrroline-5-carboxylate synthase-like |
| SNP_42058_A_28353709 | NC_021165.1    | Ca_Kabuli_Chr06 | 28353709                | AA                                     | GG                 | GG               | INTRON                        | 101495477          | delta-1-pyrroline-5-carboxylate synthase-like |
| SNP_42059_A_28354240 | NC_021165.1    | Ca_Kabuli_Chr06 | 28354240                | CC                                     | AA                 | AA               | INTRON                        | 101495477          | delta-1-pyrroline-5-carboxylate synthase-like |
| SNP_42060_A_28354495 | NC_021165.1    | Ca_Kabuli_Chr06 | 28354495                | GG                                     | TT                 | TT               | INTRON                        | 101495477          | delta-1-pyrroline-5-carboxylate synthase-like |

| SNPs IDs             | Chromosome IDs | Chromosomes     | Physical positions (bp) | CDC Frontier genome (Reference genome) | (Pusa 1103 & HPNB) | (ILWC 46 & LPNB) | Sequence Components of genome | Gene accession IDs | Putative functions                            |
|----------------------|----------------|-----------------|-------------------------|----------------------------------------|--------------------|------------------|-------------------------------|--------------------|-----------------------------------------------|
| SNP_42061_A_28354622 | NC_021165.1    | Ca_Kabuli_Chr06 | 28354622                | GG                                     | AA                 | AA               | INTRON                        | 101495477          | delta-1-pyrroline-5-carboxylate synthase-like |
| SNP_42062_A_28354828 | NC_021165.1    | Ca_Kabuli_Chr06 | 28354828                | TT                                     | CC                 | CC               | INTRON                        | 101495477          | delta-1-pyrroline-5-carboxylate synthase-like |
| SNP_42063_A_28355011 | NC_021165.1    | Ca_Kabuli_Chr06 | 28355011                | TT                                     | CC                 | CC               | INTRON                        | 101495477          | delta-1-pyrroline-5-carboxylate synthase-like |
| SNP_42064_A_28355195 | NC_021165.1    | Ca_Kabuli_Chr06 | 28355195                | GG                                     | TT                 | TT               | INTRON                        | 101495477          | delta-1-pyrroline-5-carboxylate synthase-like |
| SNP_42065_A_28355225 | NC_021165.1    | Ca_Kabuli_Chr06 | 28355225                | TT                                     | AA                 | AA               | INTRON                        | 101495477          | delta-1-pyrroline-5-carboxylate synthase-like |
| SNP_42066_A_28355507 | NC_021165.1    | Ca_Kabuli_Chr06 | 28355507                | GG                                     | AA                 | AA               | INTRON                        | 101495477          | delta-1-pyrroline-5-carboxylate synthase-like |
| SNP_42067_A_28355844 | NC_021165.1    | Ca_Kabuli_Chr06 | 28355844                | CC                                     | TT                 | TT               | INTRON                        | 101495477          | delta-1-pyrroline-5-carboxylate synthase-like |
| SNP_42068_A_28356046 | NC_021165.1    | Ca_Kabuli_Chr06 | 28356046                | AA                                     | GG                 | GG               | INTRON                        | 101495477          | delta-1-pyrroline-5-carboxylate synthase-like |
| SNP_42069_A_28356412 | NC_021165.1    | Ca_Kabuli_Chr06 | 28356412                | GG                                     | AA                 | AA               | INTRON                        | 101495477          | delta-1-pyrroline-5-carboxylate synthase-like |
| SNP_42070_A_28374004 | NC_021165.1    | Ca_Kabuli_Chr06 | 28374004                | AA                                     | GG                 | GG               | URR                           | 101495477          | delta-1-pyrroline-5-carboxylate synthase-like |
| SNP_42071_A_28388227 | NC_021165.1    | Ca_Kabuli_Chr06 | 28388227                | CC                                     | TT                 | TT               | INTERGENIC                    |                    |                                               |
| SNP_42072_A_28388247 | NC_021165.1    | Ca_Kabuli_Chr06 | 28388247                | TT                                     | CC                 | CC               | INTERGENIC                    |                    |                                               |
| SNP_42073_A_28388249 | NC_021165.1    | Ca_Kabuli_Chr06 | 28388249                | TT                                     | CC                 | CC               | INTERGENIC                    |                    |                                               |
| SNP_42074_A_28394270 | NC_021165.1    | Ca_Kabuli_Chr06 | 28394270                | TT                                     | CC                 | CC               | INTERGENIC                    |                    |                                               |
| SNP_42075_A_28394639 | NC_021165.1    | Ca_Kabuli_Chr06 | 28394639                | TT                                     | GG                 | GG               | INTERGENIC                    |                    |                                               |
| SNP_42076_A_28431056 | NC_021165.1    | Ca_Kabuli_Chr06 | 28431056                | GG                                     | TT                 | TT               | INTERGENIC                    |                    |                                               |
| SNP_42077_A_28433491 | NC_021165.1    | Ca_Kabuli_Chr06 | 28433491                | AA                                     | GG                 | GG               | DRR                           | 101495805          | F-box/kelch-repeat protein At3g06240-like     |
| SNP_42078_A_28434990 | NC_021165.1    | Ca_Kabuli_Chr06 | 28434990                | AA                                     | GG                 | GG               | URR                           | 101495805          | F-box/kelch-repeat protein At3g06240-like     |
| SNP_42079_A_28440058 | NC_021165.1    | Ca_Kabuli_Chr06 | 28440058                | TT                                     | CC                 | CC               | INTERGENIC                    |                    |                                               |
| SNP_42080_A_28442088 | NC_021165.1    | Ca_Kabuli_Chr06 | 28442088                | TT                                     | CC                 | CC               | INTERGENIC                    |                    |                                               |
| SNP_42081_A_28442150 | NC_021165.1    | Ca_Kabuli_Chr06 | 28442150                | CC                                     | TT                 | TT               | INTERGENIC                    |                    |                                               |
| SNP_42082_A_28442157 | NC_021165.1    | Ca_Kabuli_Chr06 | 28442157                | CC                                     | TT                 | TT               | INTERGENIC                    |                    |                                               |

| SNPs IDs             | Chromosome IDs | Chromosomes     | Physical positions (bp) | CDC Frontier genome (Reference genome) | (Pusa 1103 & HPNB) | (ILWC 46 & LPNB) | Sequence genome | Components of | Gene accession IDs | Putative functions |
|----------------------|----------------|-----------------|-------------------------|----------------------------------------|--------------------|------------------|-----------------|---------------|--------------------|--------------------|
| SNP_42083_A_28442161 | NC_021165.1    | Ca_Kabuli_Chr06 | 28442161                | GG                                     | AA                 | AA               | INTERGENIC      |               |                    |                    |
| SNP_42084_A_28442162 | NC_021165.1    | Ca_Kabuli_Chr06 | 28442162                | AA                                     | GG                 | GG               | INTERGENIC      |               |                    |                    |
| SNP_42085_A_28442301 | NC_021165.1    | Ca_Kabuli_Chr06 | 28442301                | AA                                     | CC                 | CC               | INTERGENIC      |               |                    |                    |
| SNP_42086_A_28442360 | NC_021165.1    | Ca_Kabuli_Chr06 | 28442360                | AA                                     | GG                 | GG               | INTERGENIC      |               |                    |                    |
| SNP_42087_A_28443167 | NC_021165.1    | Ca_Kabuli_Chr06 | 28443167                | TT                                     | AA                 | AA               | INTERGENIC      |               |                    |                    |
| SNP_42088_A_28443279 | NC_021165.1    | Ca_Kabuli_Chr06 | 28443279                | CC                                     | TT                 | TT               | INTERGENIC      |               |                    |                    |
| SNP_42089_A_28443368 | NC_021165.1    | Ca_Kabuli_Chr06 | 28443368                | GG                                     | TT                 | TT               | INTERGENIC      |               |                    |                    |
| SNP_42091_A_28443714 | NC_021165.1    | Ca_Kabuli_Chr06 | 28443714                | TT                                     | CC                 | CC               | INTERGENIC      |               |                    |                    |
| SNP_42092_A_28443740 | NC_021165.1    | Ca_Kabuli_Chr06 | 28443740                | AA                                     | CC                 | CC               | INTERGENIC      |               |                    |                    |
| SNP_42093_A_28443861 | NC_021165.1    | Ca_Kabuli_Chr06 | 28443861                | CC                                     | TT                 | TT               | INTERGENIC      |               |                    |                    |
| SNP_42094_A_28443917 | NC_021165.1    | Ca_Kabuli_Chr06 | 28443917                | AA                                     | TT                 | TT               | INTERGENIC      |               |                    |                    |
| SNP_42095_A_28443918 | NC_021165.1    | Ca_Kabuli_Chr06 | 28443918                | TT                                     | AA                 | AA               | INTERGENIC      |               |                    |                    |
| SNP_42096_A_28444079 | NC_021165.1    | Ca_Kabuli_Chr06 | 28444079                | CC                                     | GG                 | GG               | INTERGENIC      |               |                    |                    |
| SNP_42097_A_28444153 | NC_021165.1    | Ca_Kabuli_Chr06 | 28444153                | CC                                     | TT                 | TT               | INTERGENIC      |               |                    |                    |
| SNP_42098_A_28444181 | NC_021165.1    | Ca_Kabuli_Chr06 | 28444181                | GG                                     | CC                 | CC               | INTERGENIC      |               |                    |                    |
| SNP_42099_A_28444404 | NC_021165.1    | Ca_Kabuli_Chr06 | 28444404                | GG                                     | AA                 | AA               | INTERGENIC      |               |                    |                    |
| SNP_42100_A_28444509 | NC_021165.1    | Ca_Kabuli_Chr06 | 28444509                | AA                                     | GG                 | GG               | INTERGENIC      |               |                    |                    |
| SNP_42101_A_28444517 | NC_021165.1    | Ca_Kabuli_Chr06 | 28444517                | CC                                     | TT                 | TT               | INTERGENIC      |               |                    |                    |
| SNP_42102_A_28444553 | NC_021165.1    | Ca_Kabuli_Chr06 | 28444553                | AA                                     | GG                 | GG               | INTERGENIC      |               |                    |                    |
| SNP_42103_A_28444562 | NC_021165.1    | Ca_Kabuli_Chr06 | 28444562                | AA                                     | CC                 | CC               | INTERGENIC      |               |                    |                    |
| SNP_42104_A_28444565 | NC_021165.1    | Ca_Kabuli_Chr06 | 28444565                | CC                                     | TT                 | TT               | INTERGENIC      |               |                    |                    |
| SNP_42106_A_28444771 | NC_021165.1    | Ca_Kabuli_Chr06 | 28444771                | GG                                     | AA                 | AA               | INTERGENIC      |               |                    |                    |

| SNPs IDs             | Chromosome IDs | Chromosomes     | Physical positions (bp) | CDC Frontier genome (Reference genome) | (Pusa 1103 & HPNB) | (ILWC 46 & LPNB) | Sequence Components of genome | Gene accession IDs | Putative functions                        |
|----------------------|----------------|-----------------|-------------------------|----------------------------------------|--------------------|------------------|-------------------------------|--------------------|-------------------------------------------|
| SNP_42107_A_28444985 | NC_021165.1    | Ca_Kabuli_Chr06 | 28444985                | GG                                     | AA                 | AA               | INTERGENIC                    |                    |                                           |
| SNP_42108_A_28445089 | NC_021165.1    | Ca_Kabuli_Chr06 | 28445089                | GG                                     | TT                 | TT               | INTERGENIC                    |                    |                                           |
| SNP_42109_A_28451493 | NC_021165.1    | Ca_Kabuli_Chr06 | 28451493                | TT                                     | AA                 | AA               | DRR                           | 101494608          | F-box/kelch-repeat protein At3g06240-like |
| SNP_42110_A_28495983 | NC_021165.1    | Ca_Kabuli_Chr06 | 28495983                | TT                                     | CC                 | CC               | INTRON                        | 101496455          | cysteine synthase-like                    |
| SNP_42111_A_28495997 | NC_021165.1    | Ca_Kabuli_Chr06 | 28495997                | CC                                     | TT                 | TT               | INTRON                        | 101496455          | cysteine synthase-like                    |
| SNP_42112_A_28503449 | NC_021165.1    | Ca_Kabuli_Chr06 | 28503449                | AA                                     | GG                 | GG               | URR                           | 101496455          | cysteine synthase-like                    |
| SNP_42114_A_28503574 | NC_021165.1    | Ca_Kabuli_Chr06 | 28503574                | GG                                     | AA                 | AA               | URR                           | 101496455          | cysteine synthase-like                    |
| SNP_42115_A_28503750 | NC_021165.1    | Ca_Kabuli_Chr06 | 28503750                | AA                                     | GG                 | GG               | URR                           | 101496455          | cysteine synthase-like                    |
| SNP_42116_A_28509462 | NC_021165.1    | Ca_Kabuli_Chr06 | 28509462                | TT                                     | GG                 | GG               | INTERGENIC                    |                    |                                           |
| SNP_42117_A_28511308 | NC_021165.1    | Ca_Kabuli_Chr06 | 28511308                | TT                                     | GG                 | GG               | INTERGENIC                    |                    |                                           |
| SNP_42118_A_28511348 | NC_021165.1    | Ca_Kabuli_Chr06 | 28511348                | TT                                     | AA                 | AA               | INTERGENIC                    |                    |                                           |
| SNP_42119_A_28511349 | NC_021165.1    | Ca_Kabuli_Chr06 | 28511349                | GG                                     | TT                 | TT               | INTERGENIC                    |                    |                                           |
| SNP_42120_A_28511406 | NC_021165.1    | Ca_Kabuli_Chr06 | 28511406                | GG                                     | AA                 | AA               | INTERGENIC                    |                    |                                           |
| SNP_42121_A_28511416 | NC_021165.1    | Ca_Kabuli_Chr06 | 28511416                | CC                                     | TT                 | TT               | INTERGENIC                    |                    |                                           |
| SNP_42122_A_28511437 | NC_021165.1    | Ca_Kabuli_Chr06 | 28511437                | TT                                     | CC                 | CC               | INTERGENIC                    |                    |                                           |
| SNP_42123_A_28511442 | NC_021165.1    | Ca_Kabuli_Chr06 | 28511442                | TT                                     | CC                 | CC               | INTERGENIC                    |                    |                                           |
| SNP_42124_A_28511443 | NC_021165.1    | Ca_Kabuli_Chr06 | 28511443                | AA                                     | GG                 | GG               | INTERGENIC                    |                    |                                           |
| SNP_42125_A_28511465 | NC_021165.1    | Ca_Kabuli_Chr06 | 28511465                | GG                                     | AA                 | AA               | INTERGENIC                    |                    |                                           |
| SNP_42127_A_28513487 | NC_021165.1    | Ca_Kabuli_Chr06 | 28513487                | GG                                     | TT                 | TT               | INTERGENIC                    |                    |                                           |
| SNP_42128_A_28513491 | NC_021165.1    | Ca_Kabuli_Chr06 | 28513491                | TT                                     | CC                 | CC               | INTERGENIC                    |                    |                                           |
| SNP_42129_A_28513522 | NC_021165.1    | Ca_Kabuli_Chr06 | 28513522                | CC                                     | AA                 | AA               | INTERGENIC                    |                    |                                           |
| SNP_42132_A_28518347 | NC_021165.1    | Ca_Kabuli_Chr06 | 28518347                | GG                                     | AA                 | AA               | INTERGENIC                    |                    |                                           |

| SNPs IDs             | Chromosome IDs | Chromosomes     | Physical positions (bp) | CDC Frontier genome (Reference genome) | (Pusa 1103 & HPNB) | (ILWC 46 & LPNB) | Sequence Components of genome | Gene accession IDs | Putative functions              |
|----------------------|----------------|-----------------|-------------------------|----------------------------------------|--------------------|------------------|-------------------------------|--------------------|---------------------------------|
| SNP_42133_A_28520904 | NC_021165.1    | Ca_Kabuli_Chr06 | 28520904                | TT                                     | CC                 | CC               | INTERGENIC                    |                    |                                 |
| SNP_42136_A_28521046 | NC_021165.1    | Ca_Kabuli_Chr06 | 28521046                | CC                                     | TT                 | TT               | INTERGENIC                    |                    |                                 |
| SNP_42138_A_28521101 | NC_021165.1    | Ca_Kabuli_Chr06 | 28521101                | TT                                     | CC                 | CC               | INTERGENIC                    |                    |                                 |
| SNP_42139_A_28521107 | NC_021165.1    | Ca_Kabuli_Chr06 | 28521107                | TT                                     | CC                 | CC               | INTERGENIC                    |                    |                                 |
| SNP_42140_A_28521115 | NC_021165.1    | Ca_Kabuli_Chr06 | 28521115                | GG                                     | AA                 | AA               | INTERGENIC                    |                    |                                 |
| SNP_42141_A_28521123 | NC_021165.1    | Ca_Kabuli_Chr06 | 28521123                | CC                                     | TT                 | TT               | INTERGENIC                    |                    |                                 |
| SNP_42142_A_28521312 | NC_021165.1    | Ca_Kabuli_Chr06 | 28521312                | GG                                     | AA                 | AA               | INTERGENIC                    |                    |                                 |
| SNP_42143_A_28521382 | NC_021165.1    | Ca_Kabuli_Chr06 | 28521382                | AA                                     | GG                 | GG               | INTERGENIC                    |                    |                                 |
| SNP_42144_A_28521788 | NC_021165.1    | Ca_Kabuli_Chr06 | 28521788                | AA                                     | GG                 | GG               | INTERGENIC                    |                    |                                 |
| SNP_42145_A_28537120 | NC_021165.1    | Ca_Kabuli_Chr06 | 28537120                | CC                                     | GG                 | GG               | INTERGENIC                    |                    |                                 |
| SNP_42146_A_28537166 | NC_021165.1    | Ca_Kabuli_Chr06 | 28537166                | AA                                     | CC                 | CC               | INTERGENIC                    |                    |                                 |
| SNP_42148_A_28546529 | NC_021165.1    | Ca_Kabuli_Chr06 | 28546529                | CC                                     | GG                 | GG               | SYNONYMOUS_CODING             | 101488450          | ribonuclease Ddl-like           |
| SNP_42150_A_28637653 | NC_021165.1    | Ca_Kabuli_Chr06 | 28637653                | CC                                     | TT                 | TT               | URR                           | 101501089          | alpha carbonic anhydrase 7-like |
| SNP_42151_A_28642366 | NC_021165.1    | Ca_Kabuli_Chr06 | 28642366                | CC                                     | TT                 | TT               | INTERGENIC                    |                    |                                 |
| SNP_42152_A_28644615 | NC_021165.1    | Ca_Kabuli_Chr06 | 28644615                | AA                                     | GG                 | GG               | INTERGENIC                    |                    |                                 |
| SNP_42153_A_28644671 | NC_021165.1    | Ca_Kabuli_Chr06 | 28644671                | AA                                     | TT                 | TT               | INTERGENIC                    |                    |                                 |
| SNP_42154_A_28644675 | NC_021165.1    | Ca_Kabuli_Chr06 | 28644675                | AA                                     | TT                 | TT               | INTERGENIC                    |                    |                                 |
| SNP_42155_A_28644764 | NC_021165.1    | Ca_Kabuli_Chr06 | 28644764                | CC                                     | GG                 | GG               | INTERGENIC                    |                    |                                 |
| SNP_42156_A_28644775 | NC_021165.1    | Ca_Kabuli_Chr06 | 28644775                | AA                                     | GG                 | GG               | INTERGENIC                    |                    |                                 |
| SNP_42157_A_28644912 | NC_021165.1    | Ca_Kabuli_Chr06 | 28644912                | CC                                     | TT                 | TT               | INTERGENIC                    |                    |                                 |
| SNP_42158_A_28644977 | NC_021165.1    | Ca_Kabuli_Chr06 | 28644977                | AA                                     | TT                 | TT               | INTERGENIC                    |                    |                                 |
| SNP_42159_A_28796614 | NC_021165.1    | Ca_Kabuli_Chr06 | 28796614                | TT                                     | CC                 | CC               | INTERGENIC                    |                    |                                 |

| SNPs IDs             | Chromosome IDs | Chromosomes     | Physical positions (bp) | CDC Frontier (Reference genome) | (Pusa 1103 & HPNB) | (ILWC 46 & LPNB) | Sequence Components of genome | Gene accession IDs | Putative functions                          |
|----------------------|----------------|-----------------|-------------------------|---------------------------------|--------------------|------------------|-------------------------------|--------------------|---------------------------------------------|
| SNP_42160_A_28802541 | NC_021165.1    | Ca_Kabuli_Chr06 | 28802541                | AA                              | GG                 | GG               | INTERGENIC                    |                    |                                             |
| SNP_42161_A_28821565 | NC_021165.1    | Ca_Kabuli_Chr06 | 28821565                | CC                              | TT                 | TT               | INTERGENIC                    |                    |                                             |
| SNP_42162_A_28821608 | NC_021165.1    | Ca_Kabuli_Chr06 | 28821608                | TT                              | AA                 | AA               | INTERGENIC                    |                    |                                             |
| SNP_42163_A_28821723 | NC_021165.1    | Ca_Kabuli_Chr06 | 28821723                | TT                              | CC                 | CC               | INTERGENIC                    |                    |                                             |
| SNP_42164_A_28821765 | NC_021165.1    | Ca_Kabuli_Chr06 | 28821765                | TT                              | CC                 | CC               | INTERGENIC                    |                    |                                             |
| SNP_42165_A_28821825 | NC_021165.1    | Ca_Kabuli_Chr06 | 28821825                | TT                              | CC                 | CC               | INTERGENIC                    |                    |                                             |
| SNP_42166_A_28821961 | NC_021165.1    | Ca_Kabuli_Chr06 | 28821961                | GG                              | AA                 | AA               | INTERGENIC                    |                    |                                             |
| SNP_42167_A_28821968 | NC_021165.1    | Ca_Kabuli_Chr06 | 28821968                | TT                              | CC                 | CC               | INTERGENIC                    |                    |                                             |
| SNP_42168_A_28821974 | NC_021165.1    | Ca_Kabuli_Chr06 | 28821974                | CC                              | TT                 | TT               | INTERGENIC                    |                    |                                             |
| SNP_42169_A_28821985 | NC_021165.1    | Ca_Kabuli_Chr06 | 28821985                | CC                              | TT                 | TT               | INTERGENIC                    |                    |                                             |
| SNP_42170_A_28821986 | NC_021165.1    | Ca_Kabuli_Chr06 | 28821986                | AA                              | GG                 | GG               | INTERGENIC                    |                    |                                             |
| SNP_42171_A_28822021 | NC_021165.1    | Ca_Kabuli_Chr06 | 28822021                | TT                              | GG                 | GG               | INTERGENIC                    |                    |                                             |
| SNP_42172_A_28822090 | NC_021165.1    | Ca_Kabuli_Chr06 | 28822090                | AA                              | GG                 | GG               | INTERGENIC                    |                    |                                             |
| SNP_42173_A_28822093 | NC_021165.1    | Ca_Kabuli_Chr06 | 28822093                | AA                              | GG                 | GG               | INTERGENIC                    |                    |                                             |
| SNP_42174_A_28822113 | NC_021165.1    | Ca_Kabuli_Chr06 | 28822113                | GG                              | AA                 | AA               | INTERGENIC                    |                    |                                             |
| SNP_42175_A_28822172 | NC_021165.1    | Ca_Kabuli_Chr06 | 28822172                | TT                              | GG                 | GG               | INTERGENIC                    |                    |                                             |
| SNP_42176_A_28822184 | NC_021165.1    | Ca_Kabuli_Chr06 | 28822184                | AA                              | GG                 | GG               | INTERGENIC                    |                    |                                             |
| SNP_42177_A_28822193 | NC_021165.1    | Ca_Kabuli_Chr06 | 28822193                | AA                              | GG                 | GG               | INTERGENIC                    |                    |                                             |
| SNP_42178_A_28822194 | NC_021165.1    | Ca_Kabuli_Chr06 | 28822194                | TT                              | CC                 | CC               | INTERGENIC                    |                    |                                             |
| SNP_42179_A_28825491 | NC_021165.1    | Ca_Kabuli_Chr06 | 28825491                | TT                              | AA                 | AA               | INTERGENIC                    |                    |                                             |
| SNP_42181_A_28878917 | NC_021165.1    | Ca_Kabuli_Chr06 | 28878917                | TT                              | CC                 | CC               | INTERGENIC                    |                    |                                             |
| SNP_42183_A_28996619 | NC_021165.1    | Ca_Kabuli_Chr06 | 28996619                | AA                              | GG                 | GG               | URR                           | 101506550          | protein N-lysine methyltransferase METTL21A |

| SNPs IDs             | Chromosome IDs | Chromosomes     | Physical positions (bp) | CDC Frontier genome (Reference genome) | (Pusa 1103 & HPNB) | (ILWC 46 & LPNB) | Sequence genome | Components of | Gene accession IDs                                       | Putative functions |
|----------------------|----------------|-----------------|-------------------------|----------------------------------------|--------------------|------------------|-----------------|---------------|----------------------------------------------------------|--------------------|
| SNP_42184_A_29001375 | NC_021165.1    | Ca_Kabuli_Chr06 | 29001375                | CC                                     | TT                 | TT               | INTERGENIC      |               |                                                          |                    |
| SNP_42185_A_29011331 | NC_021165.1    | Ca_Kabuli_Chr06 | 29011331                | GG                                     | TT                 | TT               | INTERGENIC      |               |                                                          |                    |
| SNP_42186_A_29011381 | NC_021165.1    | Ca_Kabuli_Chr06 | 29011381                | TT                                     | CC                 | CC               | INTERGENIC      |               |                                                          |                    |
| SNP_42187_A_29063216 | NC_021165.1    | Ca_Kabuli_Chr06 | 29063216                | TT                                     | CC                 | CC               | INTERGENIC      |               |                                                          |                    |
| SNP_42188_A_29063220 | NC_021165.1    | Ca_Kabuli_Chr06 | 29063220                | TT                                     | CC                 | CC               | INTERGENIC      |               |                                                          |                    |
| SNP_42189_A_29063269 | NC_021165.1    | Ca_Kabuli_Chr06 | 29063269                | AA                                     | GG                 | GG               | INTERGENIC      |               |                                                          |                    |
| SNP_42190_A_29063418 | NC_021165.1    | Ca_Kabuli_Chr06 | 29063418                | CC                                     | AA                 | AA               | INTERGENIC      |               |                                                          |                    |
| SNP_42191_A_29063428 | NC_021165.1    | Ca_Kabuli_Chr06 | 29063428                | AA                                     | GG                 | GG               | INTERGENIC      |               |                                                          |                    |
| SNP_42192_A_29063581 | NC_021165.1    | Ca_Kabuli_Chr06 | 29063581                | GG                                     | AA                 | AA               | INTERGENIC      |               |                                                          |                    |
| SNP_42193_A_29063583 | NC_021165.1    | Ca_Kabuli_Chr06 | 29063583                | TT                                     | CC                 | CC               | INTERGENIC      |               |                                                          |                    |
| SNP_42194_A_29063807 | NC_021165.1    | Ca_Kabuli_Chr06 | 29063807                | TT                                     | CC                 | CC               | INTERGENIC      |               |                                                          |                    |
| SNP_42195_A_29070943 | NC_021165.1    | Ca_Kabuli_Chr06 | 29070943                | GG                                     | AA                 | AA               | INTERGENIC      |               |                                                          |                    |
| SNP_42196_A_29070944 | NC_021165.1    | Ca_Kabuli_Chr06 | 29070944                | CC                                     | TT                 | TT               | INTERGENIC      |               |                                                          |                    |
| SNP_42197_A_29096597 | NC_021165.1    | Ca_Kabuli_Chr06 | 29096597                | GG                                     | AA                 | AA               | URR             | 101507844     | vacuolar protein sorting-associated protein 24 homolog 1 |                    |
| SNP_42199_A_29151009 | NC_021165.1    | Ca_Kabuli_Chr06 | 29151009                | AA                                     | GG                 | GG               | INTERGENIC      |               |                                                          |                    |
| SNP_42200_A_29164509 | NC_021165.1    | Ca_Kabuli_Chr06 | 29164509                | AA                                     | CC                 | CC               | INTERGENIC      |               |                                                          |                    |
| SNP_42202_A_29177617 | NC_021165.1    | Ca_Kabuli_Chr06 | 29177617                | AA                                     | CC                 | CC               | INTERGENIC      |               |                                                          |                    |
| SNP_42203_A_29177662 | NC_021165.1    | Ca_Kabuli_Chr06 | 29177662                | AA                                     | GG                 | GG               | INTERGENIC      |               |                                                          |                    |
| SNP_42204_A_29177666 | NC_021165.1    | Ca_Kabuli_Chr06 | 29177666                | AA                                     | GG                 | GG               | INTERGENIC      |               |                                                          |                    |
| SNP_42205_A_29177708 | NC_021165.1    | Ca_Kabuli_Chr06 | 29177708                | AA                                     | GG                 | GG               | INTERGENIC      |               |                                                          |                    |
| SNP_42206_A_29177726 | NC_021165.1    | Ca_Kabuli_Chr06 | 29177726                | AA                                     | TT                 | GG               | INTERGENIC      |               |                                                          |                    |
| SNP_42207_A_29177749 | NC_021165.1    | Ca_Kabuli_Chr06 | 29177749                | GG                                     | AA                 | AA               | INTERGENIC      |               |                                                          |                    |

| SNPs IDs             | Chromosome IDs | Chromosomes     | Physical positions (bp) | CDC Frontier genome (Reference genome) | (Pusa 1103 & HPNB) | (ILWC 46 & LPNB) | Sequence genome | Components of | Gene accession IDs  | Putative functions |
|----------------------|----------------|-----------------|-------------------------|----------------------------------------|--------------------|------------------|-----------------|---------------|---------------------|--------------------|
| SNP_42208_A_29177772 | NC_021165.1    | Ca_Kabuli_Chr06 | 29177772                | TT                                     | CC                 | CC               | INTERGENIC      |               |                     |                    |
| SNP_42209_A_29184943 | NC_021165.1    | Ca_Kabuli_Chr06 | 29184943                | TT                                     | CC                 | CC               | INTERGENIC      |               |                     |                    |
| SNP_42210_A_29185102 | NC_021165.1    | Ca_Kabuli_Chr06 | 29185102                | GG                                     | AA                 | AA               | INTERGENIC      |               |                     |                    |
| SNP_42211_A_29185197 | NC_021165.1    | Ca_Kabuli_Chr06 | 29185197                | AA                                     | TT                 | TT               | INTERGENIC      |               |                     |                    |
| SNP_42212_A_29185203 | NC_021165.1    | Ca_Kabuli_Chr06 | 29185203                | TT                                     | CC                 | CC               | INTERGENIC      |               |                     |                    |
| SNP_42213_A_29185206 | NC_021165.1    | Ca_Kabuli_Chr06 | 29185206                | GG                                     | AA                 | AA               | INTERGENIC      |               |                     |                    |
| SNP_42214_A_29185209 | NC_021165.1    | Ca_Kabuli_Chr06 | 29185209                | AA                                     | GG                 | GG               | INTERGENIC      |               |                     |                    |
| SNP_42215_A_29185224 | NC_021165.1    | Ca_Kabuli_Chr06 | 29185224                | TT                                     | AA                 | AA               | INTERGENIC      |               |                     |                    |
| SNP_42216_A_29185239 | NC_021165.1    | Ca_Kabuli_Chr06 | 29185239                | CC                                     | TT                 | TT               | INTERGENIC      |               |                     |                    |
| SNP_42217_A_29185240 | NC_021165.1    | Ca_Kabuli_Chr06 | 29185240                | CC                                     | TT                 | TT               | INTERGENIC      |               |                     |                    |
| SNP_42218_A_29185241 | NC_021165.1    | Ca_Kabuli_Chr06 | 29185241                | AA                                     | TT                 | TT               | INTERGENIC      |               |                     |                    |
| SNP_42219_A_29185257 | NC_021165.1    | Ca_Kabuli_Chr06 | 29185257                | TT                                     | AA                 | AA               | INTERGENIC      |               |                     |                    |
| SNP_42220_A_29185291 | NC_021165.1    | Ca_Kabuli_Chr06 | 29185291                | GG                                     | CC                 | CC               | INTERGENIC      |               |                     |                    |
| SNP_42221_A_29185292 | NC_021165.1    | Ca_Kabuli_Chr06 | 29185292                | CC                                     | TT                 | TT               | INTERGENIC      |               |                     |                    |
| SNP_42222_A_29185318 | NC_021165.1    | Ca_Kabuli_Chr06 | 29185318                | AA                                     | GG                 | GG               | INTERGENIC      |               |                     |                    |
| SNP_42223_A_29185479 | NC_021165.1    | Ca_Kabuli_Chr06 | 29185479                | AA                                     | CC                 | CC               | INTERGENIC      |               |                     |                    |
| SNP_42224_A_29190960 | NC_021165.1    | Ca_Kabuli_Chr06 | 29190960                | TT                                     | GG                 | GG               | INTERGENIC      |               |                     |                    |
| SNP_42225_A_29194241 | NC_021165.1    | Ca_Kabuli_Chr06 | 29194241                | AA                                     | TT                 | TT               | INTERGENIC      |               |                     |                    |
| SNP_42226_A_29194244 | NC_021165.1    | Ca_Kabuli_Chr06 | 29194244                | TT                                     | GG                 | GG               | INTERGENIC      |               |                     |                    |
| SNP_42228_A_29292996 | NC_021165.1    | Ca_Kabuli_Chr06 | 29292996                | CC                                     | GG                 | GG               | INTERGENIC      |               |                     |                    |
| SNP_42229_A_29296010 | NC_021165.1    | Ca_Kabuli_Chr06 | 29296010                | AA                                     | GG                 | GG               | INTERGENIC      |               |                     |                    |
| SNP_42230_A_29306404 | NC_021165.1    | Ca_Kabuli_Chr06 | 29306404                | TT                                     | GG                 | GG               | INTRON          | 101513622     | protein argonaute 5 |                    |



| SNPs IDs             | Chromosome IDs | Chromosomes     | Physical positions (bp) | CDC Frontier genome (Reference genome) | (Pusa 1103 & HPNB) | (ILWC 46 & LPNB) | Sequence genome | Components of | Gene accession IDs | Putative functions |
|----------------------|----------------|-----------------|-------------------------|----------------------------------------|--------------------|------------------|-----------------|---------------|--------------------|--------------------|
| SNP_42231_A_29411333 | NC_021165.1    | Ca_Kabuli_Chr06 | 29411333                | GG                                     | AA                 | AA               | INTERGENIC      |               |                    |                    |
| SNP_42232_A_29488522 | NC_021165.1    | Ca_Kabuli_Chr06 | 29488522                | TT                                     | GG                 | GG               | INTERGENIC      |               |                    |                    |
| SNP_42233_A_29488569 | NC_021165.1    | Ca_Kabuli_Chr06 | 29488569                | CC                                     | AA                 | AA               | INTERGENIC      |               |                    |                    |
| SNP_42234_A_29488581 | NC_021165.1    | Ca_Kabuli_Chr06 | 29488581                | GG                                     | AA                 | AA               | INTERGENIC      |               |                    |                    |
| SNP_42235_A_29488620 | NC_021165.1    | Ca_Kabuli_Chr06 | 29488620                | AA                                     | CC                 | CC               | INTERGENIC      |               |                    |                    |
| SNP_42236_A_29488782 | NC_021165.1    | Ca_Kabuli_Chr06 | 29488782                | TT                                     | CC                 | CC               | INTERGENIC      |               |                    |                    |
| SNP_42237_A_29492078 | NC_021165.1    | Ca_Kabuli_Chr06 | 29492078                | AA                                     | GG                 | GG               | INTERGENIC      |               |                    |                    |
| SNP_42238_A_29500141 | NC_021165.1    | Ca_Kabuli_Chr06 | 29500141                | AA                                     | GG                 | GG               | INTERGENIC      |               |                    |                    |
| SNP_42239_A_29500162 | NC_021165.1    | Ca_Kabuli_Chr06 | 29500162                | TT                                     | CC                 | CC               | INTERGENIC      |               |                    |                    |
| SNP_42240_A_29500192 | NC_021165.1    | Ca_Kabuli_Chr06 | 29500192                | TT                                     | CC                 | CC               | INTERGENIC      |               |                    |                    |
| SNP_42241_A_29500787 | NC_021165.1    | Ca_Kabuli_Chr06 | 29500787                | GG                                     | AA                 | AA               | INTERGENIC      |               |                    |                    |
| SNP_42242_A_29500802 | NC_021165.1    | Ca_Kabuli_Chr06 | 29500802                | AA                                     | GG                 | GG               | INTERGENIC      |               |                    |                    |
| SNP_42243_A_29523568 | NC_021165.1    | Ca_Kabuli_Chr06 | 29523568                | GG                                     | AA                 | AA               | INTERGENIC      |               |                    |                    |
| SNP_42244_A_29523593 | NC_021165.1    | Ca_Kabuli_Chr06 | 29523593                | TT                                     | GG                 | GG               | INTERGENIC      |               |                    |                    |
| SNP_42245_A_29523595 | NC_021165.1    | Ca_Kabuli_Chr06 | 29523595                | AA                                     | GG                 | GG               | INTERGENIC      |               |                    |                    |
| SNP_42246_A_29523596 | NC_021165.1    | Ca_Kabuli_Chr06 | 29523596                | GG                                     | AA                 | AA               | INTERGENIC      |               |                    |                    |
| SNP_42247_A_29536077 | NC_021165.1    | Ca_Kabuli_Chr06 | 29536077                | AA                                     | GG                 | GG               | INTERGENIC      |               |                    |                    |
| SNP_42248_A_29536096 | NC_021165.1    | Ca_Kabuli_Chr06 | 29536096                | CC                                     | TT                 | TT               | INTERGENIC      |               |                    |                    |
| SNP_42249_A_29536193 | NC_021165.1    | Ca_Kabuli_Chr06 | 29536193                | CC                                     | TT                 | TT               | INTERGENIC      |               |                    |                    |
| SNP_42250_A_29536251 | NC_021165.1    | Ca_Kabuli_Chr06 | 29536251                | CC                                     | TT                 | TT               | INTERGENIC      |               |                    |                    |
| SNP_42251_A_29536603 | NC_021165.1    | Ca_Kabuli_Chr06 | 29536603                | TT                                     | CC                 | CC               | INTERGENIC      |               |                    |                    |
| SNP_42252_A_29557490 | NC_021165.1    | Ca_Kabuli_Chr06 | 29557490                | TT                                     | GG                 | GG               | INTERGENIC      |               |                    |                    |

| SNPs IDs             | Chromosome IDs | Chromosomes     | Physical positions (bp) | CDC Frontier (Reference genome) | (Pusa 1103 & HPNB) | (ILWC 46 & LPNB) | Sequence genome | Components of | Gene accession IDs | Putative functions |
|----------------------|----------------|-----------------|-------------------------|---------------------------------|--------------------|------------------|-----------------|---------------|--------------------|--------------------|
| SNP_42253_A_29594300 | NC_021165.1    | Ca_Kabuli_Chr06 | 29594300                | TT                              | GG                 | GG               | INTERGENIC      |               |                    |                    |
| SNP_42254_A_29599556 | NC_021165.1    | Ca_Kabuli_Chr06 | 29599556                | TT                              | CC                 | CC               | INTERGENIC      |               |                    |                    |
| SNP_42255_A_29599601 | NC_021165.1    | Ca_Kabuli_Chr06 | 29599601                | AA                              | CC                 | CC               | INTERGENIC      |               |                    |                    |
| SNP_42256_A_29629207 | NC_021165.1    | Ca_Kabuli_Chr06 | 29629207                | TT                              | CC                 | CC               | INTERGENIC      |               |                    |                    |
| SNP_42257_A_29629390 | NC_021165.1    | Ca_Kabuli_Chr06 | 29629390                | GG                              | CC                 | CC               | INTERGENIC      |               |                    |                    |
| SNP_42258_A_29629413 | NC_021165.1    | Ca_Kabuli_Chr06 | 29629413                | TT                              | CC                 | CC               | INTERGENIC      |               |                    |                    |
| SNP_42259_A_29629697 | NC_021165.1    | Ca_Kabuli_Chr06 | 29629697                | GG                              | TT                 | TT               | INTERGENIC      |               |                    |                    |
| SNP_42260_A_29629702 | NC_021165.1    | Ca_Kabuli_Chr06 | 29629702                | CC                              | AA                 | AA               | INTERGENIC      |               |                    |                    |
| SNP_42263_A_29669062 | NC_021165.1    | Ca_Kabuli_Chr06 | 29669062                | CC                              | TT                 | TT               | INTERGENIC      |               |                    |                    |
| SNP_42264_A_29669096 | NC_021165.1    | Ca_Kabuli_Chr06 | 29669096                | GG                              | AA                 | AA               | INTERGENIC      |               |                    |                    |
| SNP_42265_A_29669192 | NC_021165.1    | Ca_Kabuli_Chr06 | 29669192                | GG                              | AA                 | AA               | INTERGENIC      |               |                    |                    |
| SNP_42266_A_29669216 | NC_021165.1    | Ca_Kabuli_Chr06 | 29669216                | CC                              | AA                 | AA               | INTERGENIC      |               |                    |                    |
| SNP_42267_A_29686117 | NC_021165.1    | Ca_Kabuli_Chr06 | 29686117                | AA                              | GG                 | GG               | INTERGENIC      |               |                    |                    |
| SNP_42268_A_29686168 | NC_021165.1    | Ca_Kabuli_Chr06 | 29686168                | AA                              | GG                 | GG               | INTERGENIC      |               |                    |                    |
| SNP_42269_A_29686449 | NC_021165.1    | Ca_Kabuli_Chr06 | 29686449                | TT                              | CC                 | CC               | INTERGENIC      |               |                    |                    |
| SNP_42270_A_29686562 | NC_021165.1    | Ca_Kabuli_Chr06 | 29686562                | TT                              | CC                 | CC               | INTERGENIC      |               |                    |                    |
| SNP_42271_A_29686595 | NC_021165.1    | Ca_Kabuli_Chr06 | 29686595                | AA                              | CC                 | CC               | INTERGENIC      |               |                    |                    |
| SNP_42272_A_29687529 | NC_021165.1    | Ca_Kabuli_Chr06 | 29687529                | AA                              | GG                 | GG               | INTERGENIC      |               |                    |                    |
| SNP_42273_A_29710989 | NC_021165.1    | Ca_Kabuli_Chr06 | 29710989                | AA                              | GG                 | GG               | INTERGENIC      |               |                    |                    |
| SNP_42274_A_29711060 | NC_021165.1    | Ca_Kabuli_Chr06 | 29711060                | AA                              | CC                 | CC               | INTERGENIC      |               |                    |                    |
| SNP_42275_A_29711320 | NC_021165.1    | Ca_Kabuli_Chr06 | 29711320                | AA                              | GG                 | GG               | INTERGENIC      |               |                    |                    |
| SNP_42276_A_29711452 | NC_021165.1    | Ca_Kabuli_Chr06 | 29711452                | CC                              | TT                 | TT               | INTERGENIC      |               |                    |                    |

| SNPs IDs             | Chromosome IDs | Chromosomes     | Physical positions (bp) | CDC Frontier genome (Reference genome) | (Pusa 1103 & HPNB) | (ILWC 46 & LPNB) | Sequence genome | Components of | Gene accession IDs | Putative functions |
|----------------------|----------------|-----------------|-------------------------|----------------------------------------|--------------------|------------------|-----------------|---------------|--------------------|--------------------|
| SNP_42277_A_29712995 | NC_021165.1    | Ca_Kabuli_Chr06 | 29712995                | CC                                     | GG                 | GG               | INTERGENIC      |               |                    |                    |
| SNP_42278_A_29713692 | NC_021165.1    | Ca_Kabuli_Chr06 | 29713692                | CC                                     | TT                 | TT               | INTERGENIC      |               |                    |                    |
| SNP_42279_A_29713776 | NC_021165.1    | Ca_Kabuli_Chr06 | 29713776                | TT                                     | GG                 | GG               | INTERGENIC      |               |                    |                    |
| SNP_42280_A_29713894 | NC_021165.1    | Ca_Kabuli_Chr06 | 29713894                | AA                                     | GG                 | GG               | INTERGENIC      |               |                    |                    |
| SNP_42281_A_29715995 | NC_021165.1    | Ca_Kabuli_Chr06 | 29715995                | AA                                     | CC                 | CC               | INTERGENIC      |               |                    |                    |
| SNP_42282_A_29716293 | NC_021165.1    | Ca_Kabuli_Chr06 | 29716293                | TT                                     | GG                 | GG               | INTERGENIC      |               |                    |                    |
| SNP_42283_A_29716436 | NC_021165.1    | Ca_Kabuli_Chr06 | 29716436                | TT                                     | CC                 | CC               | INTERGENIC      |               |                    |                    |
| SNP_42284_A_29724632 | NC_021165.1    | Ca_Kabuli_Chr06 | 29724632                | CC                                     | GG                 | GG               | INTERGENIC      |               |                    |                    |
| SNP_42285_A_29724819 | NC_021165.1    | Ca_Kabuli_Chr06 | 29724819                | AA                                     | GG                 | GG               | INTERGENIC      |               |                    |                    |
| SNP_42286_A_29724838 | NC_021165.1    | Ca_Kabuli_Chr06 | 29724838                | TT                                     | CC                 | CC               | INTERGENIC      |               |                    |                    |
| SNP_42287_A_29724840 | NC_021165.1    | Ca_Kabuli_Chr06 | 29724840                | GG                                     | AA                 | AA               | INTERGENIC      |               |                    |                    |
| SNP_42288_A_29724848 | NC_021165.1    | Ca_Kabuli_Chr06 | 29724848                | CC                                     | TT                 | TT               | INTERGENIC      |               |                    |                    |
| SNP_42289_A_29724909 | NC_021165.1    | Ca_Kabuli_Chr06 | 29724909                | AA                                     | TT                 | TT               | INTERGENIC      |               |                    |                    |
| SNP_42290_A_29731905 | NC_021165.1    | Ca_Kabuli_Chr06 | 29731905                | AA                                     | TT                 | TT               | INTERGENIC      |               |                    |                    |
| SNP_42291_A_29769572 | NC_021165.1    | Ca_Kabuli_Chr06 | 29769572                | TT                                     | AA                 | AA               | INTERGENIC      |               |                    |                    |
| SNP_42292_A_29784871 | NC_021165.1    | Ca_Kabuli_Chr06 | 29784871                | GG                                     | TT                 | TT               | INTERGENIC      |               |                    |                    |
| SNP_42293_A_29785043 | NC_021165.1    | Ca_Kabuli_Chr06 | 29785043                | AA                                     | TT                 | TT               | INTERGENIC      |               |                    |                    |
| SNP_42294_A_29785057 | NC_021165.1    | Ca_Kabuli_Chr06 | 29785057                | TT                                     | GG                 | GG               | INTERGENIC      |               |                    |                    |
| SNP_42295_A_29785080 | NC_021165.1    | Ca_Kabuli_Chr06 | 29785080                | CC                                     | TT                 | TT               | INTERGENIC      |               |                    |                    |
| SNP_42296_A_29785141 | NC_021165.1    | Ca_Kabuli_Chr06 | 29785141                | TT                                     | GG                 | GG               | INTERGENIC      |               |                    |                    |
| SNP_42297_A_29785156 | NC_021165.1    | Ca_Kabuli_Chr06 | 29785156                | AA                                     | TT                 | TT               | INTERGENIC      |               |                    |                    |
| SNP_42298_A_29785193 | NC_021165.1    | Ca_Kabuli_Chr06 | 29785193                | TT                                     | AA                 | AA               | INTERGENIC      |               |                    |                    |

| SNPs IDs             | Chromosome IDs | Chromosomes     | Physical positions (bp) | CDC Frontier genome (Reference genome) | (Pusa 1103 & HPNB) | (ILWC 46 & LPNB) | Sequence genome | Components of | Gene accession IDs                         | Putative functions |
|----------------------|----------------|-----------------|-------------------------|----------------------------------------|--------------------|------------------|-----------------|---------------|--------------------------------------------|--------------------|
| SNP_42299_A_29785200 | NC_021165.1    | Ca_Kabuli_Chr06 | 29785200                | GG                                     | AA                 | AA               | INTERGENIC      |               |                                            |                    |
| SNP_42300_A_29785214 | NC_021165.1    | Ca_Kabuli_Chr06 | 29785214                | TT                                     | AA                 | AA               | INTERGENIC      |               |                                            |                    |
| SNP_42301_A_29785216 | NC_021165.1    | Ca_Kabuli_Chr06 | 29785216                | AA                                     | CC                 | CC               | INTERGENIC      |               |                                            |                    |
| SNP_42302_A_29833269 | NC_021165.1    | Ca_Kabuli_Chr06 | 29833269                | GG                                     | TT                 | TT               | INTERGENIC      |               |                                            |                    |
| SNP_42304_A_29886808 | NC_021165.1    | Ca_Kabuli_Chr06 | 29886808                | GG                                     | TT                 | TT               | INTERGENIC      |               |                                            |                    |
| SNP_42305_A_29889106 | NC_021165.1    | Ca_Kabuli_Chr06 | 29889106                | TT                                     | CC                 | CC               | INTERGENIC      |               |                                            |                    |
| SNP_42306_A_29909325 | NC_021165.1    | Ca_Kabuli_Chr06 | 29909325                | GG                                     | TT                 | TT               | INTERGENIC      |               |                                            |                    |
| SNP_42307_A_29909535 | NC_021165.1    | Ca_Kabuli_Chr06 | 29909535                | TT                                     | CC                 | CC               | INTERGENIC      |               |                                            |                    |
| SNP_42308_A_29982269 | NC_021165.1    | Ca_Kabuli_Chr06 | 29982269                | AA                                     | GG                 | GG               | URR             | 101499092     | recQ-mediated genome instability protein 2 |                    |
| SNP_42309_A_30041035 | NC_021165.1    | Ca_Kabuli_Chr06 | 30041035                | GG                                     | AA                 | AA               | INTERGENIC      |               |                                            |                    |
| SNP_42311_A_30129370 | NC_021165.1    | Ca_Kabuli_Chr06 | 30129370                | TT                                     | GG                 | GG               | INTERGENIC      |               |                                            |                    |
| SNP_42312_A_30155732 | NC_021165.1    | Ca_Kabuli_Chr06 | 30155732                | CC                                     | TT                 | TT               | INTERGENIC      |               |                                            |                    |
| SNP_42313_A_30155934 | NC_021165.1    | Ca_Kabuli_Chr06 | 30155934                | GG                                     | AA                 | AA               | INTERGENIC      |               |                                            |                    |
| SNP_42314_A_30165903 | NC_021165.1    | Ca_Kabuli_Chr06 | 30165903                | TT                                     | CC                 | CC               | INTERGENIC      |               |                                            |                    |
| SNP_42315_A_30165916 | NC_021165.1    | Ca_Kabuli_Chr06 | 30165916                | CC                                     | TT                 | TT               | INTERGENIC      |               |                                            |                    |
| SNP_42316_A_30165925 | NC_021165.1    | Ca_Kabuli_Chr06 | 30165925                | TT                                     | CC                 | CC               | INTERGENIC      |               |                                            |                    |
| SNP_42317_A_30165937 | NC_021165.1    | Ca_Kabuli_Chr06 | 30165937                | GG                                     | AA                 | AA               | INTERGENIC      |               |                                            |                    |
| SNP_42318_A_30166250 | NC_021165.1    | Ca_Kabuli_Chr06 | 30166250                | GG                                     | AA                 | AA               | INTERGENIC      |               |                                            |                    |
| SNP_42319_A_30166255 | NC_021165.1    | Ca_Kabuli_Chr06 | 30166255                | AA                                     | GG                 | GG               | INTERGENIC      |               |                                            |                    |
| SNP_42320_A_30166256 | NC_021165.1    | Ca_Kabuli_Chr06 | 30166256                | AA                                     | GG                 | GG               | INTERGENIC      |               |                                            |                    |
| SNP_42321_A_30167312 | NC_021165.1    | Ca_Kabuli_Chr06 | 30167312                | AA                                     | GG                 | GG               | INTERGENIC      |               |                                            |                    |
| SNP_42322_A_30167315 | NC_021165.1    | Ca_Kabuli_Chr06 | 30167315                | AA                                     | CC                 | CC               | INTERGENIC      |               |                                            |                    |

| SNPs IDs             | Chromosome IDs | Chromosomes     | Physical positions (bp) | CDC Frontier genome (Reference genome) | (Pusa 1103 & HPNB) | (ILWC 46 & LPNB) | Sequence genome | Components of | Gene accession IDs | Putative functions              |
|----------------------|----------------|-----------------|-------------------------|----------------------------------------|--------------------|------------------|-----------------|---------------|--------------------|---------------------------------|
| SNP_42323_A_30167328 | NC_021165.1    | Ca_Kabuli_Chr06 | 30167328                | TT                                     | CC                 | CC               | INTERGENIC      |               |                    |                                 |
| SNP_42324_A_30167346 | NC_021165.1    | Ca_Kabuli_Chr06 | 30167346                | GG                                     | AA                 | AA               | INTERGENIC      |               |                    |                                 |
| SNP_42325_A_30167349 | NC_021165.1    | Ca_Kabuli_Chr06 | 30167349                | TT                                     | CC                 | CC               | INTERGENIC      |               |                    |                                 |
| SNP_42326_A_30167394 | NC_021165.1    | Ca_Kabuli_Chr06 | 30167394                | TT                                     | CC                 | CC               | INTERGENIC      |               |                    |                                 |
| SNP_42327_A_30256821 | NC_021165.1    | Ca_Kabuli_Chr06 | 30256821                | GG                                     | CC                 | CC               | INTERGENIC      |               |                    |                                 |
| SNP_42328_A_30264982 | NC_021165.1    | Ca_Kabuli_Chr06 | 30264982                | AA                                     | CC                 | CC               | INTERGENIC      |               |                    |                                 |
| SNP_42329_A_30265027 | NC_021165.1    | Ca_Kabuli_Chr06 | 30265027                | CC                                     | TT                 | TT               | INTERGENIC      |               |                    |                                 |
| SNP_42330_A_30265326 | NC_021165.1    | Ca_Kabuli_Chr06 | 30265326                | AA                                     | TT                 | TT               | INTERGENIC      |               |                    |                                 |
| SNP_42331_A_30290728 | NC_021165.1    | Ca_Kabuli_Chr06 | 30290728                | GG                                     | AA                 | AA               | INTERGENIC      |               |                    |                                 |
| SNP_42332_A_30307939 | NC_021165.1    | Ca_Kabuli_Chr06 | 30307939                | CC                                     | TT                 | TT               | INTERGENIC      |               |                    |                                 |
| SNP_42333_A_30367717 | NC_021165.1    | Ca_Kabuli_Chr06 | 30367717                | GG                                     | CC                 | CC               | INTERGENIC      |               |                    |                                 |
| SNP_42334_A_30383144 | NC_021165.1    | Ca_Kabuli_Chr06 | 30383144                | GG                                     | AA                 | AA               | URR             | 101494924     |                    | uncharacterized LOC101494924    |
| SNP_42335_A_30425177 | NC_021165.1    | Ca_Kabuli_Chr06 | 30425177                | AA                                     | GG                 | GG               | INTERGENIC      |               |                    |                                 |
| SNP_42336_A_30432142 | NC_021165.1    | Ca_Kabuli_Chr06 | 30432142                | GG                                     | AA                 | AA               | INTERGENIC      |               |                    |                                 |
| SNP_42338_A_30480933 | NC_021165.1    | Ca_Kabuli_Chr06 | 30480933                | TT                                     | AA                 | AA               | INTERGENIC      |               |                    |                                 |
| SNP_42339_A_30501639 | NC_021165.1    | Ca_Kabuli_Chr06 | 30501639                | CC                                     | TT                 | TT               | INTERGENIC      |               |                    |                                 |
| SNP_42340_A_30525094 | NC_021165.1    | Ca_Kabuli_Chr06 | 30525094                | TT                                     | CC                 | CC               | DRR             | 101495258     |                    | Unknown function                |
| SNP_42341_A_30540030 | NC_021165.1    | Ca_Kabuli_Chr06 | 30540030                | TT                                     | CC                 | CC               | DRR             | 101507212     |                    | tRNA dimethylallyltransferase 2 |
| SNP_42342_A_30586756 | NC_021165.1    | Ca_Kabuli_Chr06 | 30586756                | AA                                     | GG                 | GG               | INTERGENIC      |               |                    |                                 |
| SNP_42343_A_30587869 | NC_021165.1    | Ca_Kabuli_Chr06 | 30587869                | AA                                     | GG                 | GG               | INTERGENIC      |               |                    |                                 |
| SNP_42344_A_30587873 | NC_021165.1    | Ca_Kabuli_Chr06 | 30587873                | GG                                     | CC                 | CC               | INTERGENIC      |               |                    |                                 |
| SNP_42345_A_30587874 | NC_021165.1    | Ca_Kabuli_Chr06 | 30587874                | CC                                     | TT                 | TT               | INTERGENIC      |               |                    |                                 |

| SNPs IDs             | Chromosome IDs | Chromosomes     | Physical positions (bp) | CDC Frontier (Reference genome) | (Pusa 1103 & HPNB) | (ILWC 46 & LPNB) | Sequence Components of genome | Gene accession IDs | Putative functions       |
|----------------------|----------------|-----------------|-------------------------|---------------------------------|--------------------|------------------|-------------------------------|--------------------|--------------------------|
| SNP_42347_A_30678707 | NC_021165.1    | Ca_Kabuli_Chr06 | 30678707                | AA                              | GG                 | GG               | URR                           | 101509758          | elongation factor 2-like |
| SNP_42348_A_30678756 | NC_021165.1    | Ca_Kabuli_Chr06 | 30678756                | CC                              | TT                 | TT               | URR                           | 101509758          | elongation factor 2-like |
| SNP_42351_A_30678878 | NC_021165.1    | Ca_Kabuli_Chr06 | 30678878                | TT                              | GG                 | GG               | URR                           | 101509758          | elongation factor 2-like |
| SNP_42352_A_30678891 | NC_021165.1    | Ca_Kabuli_Chr06 | 30678891                | TT                              | GG                 | GG               | URR                           | 101509758          | elongation factor 2-like |
| SNP_42353_A_30678902 | NC_021165.1    | Ca_Kabuli_Chr06 | 30678902                | AA                              | GG                 | GG               | URR                           | 101509758          | elongation factor 2-like |
| SNP_42354_A_30678990 | NC_021165.1    | Ca_Kabuli_Chr06 | 30678990                | AA                              | TT                 | TT               | URR                           | 101509758          | elongation factor 2-like |
| SNP_42355_A_30691160 | NC_021165.1    | Ca_Kabuli_Chr06 | 30691160                | TT                              | CC                 | CC               | INTERGENIC                    |                    |                          |
| SNP_42356_A_30691319 | NC_021165.1    | Ca_Kabuli_Chr06 | 30691319                | CC                              | AA                 | AA               | INTERGENIC                    |                    |                          |
| SNP_42357_A_30752297 | NC_021165.1    | Ca_Kabuli_Chr06 | 30752297                | AA                              | GG                 | GG               | INTERGENIC                    |                    |                          |
| SNP_42358_A_30752474 | NC_021165.1    | Ca_Kabuli_Chr06 | 30752474                | AA                              | TT                 | TT               | INTERGENIC                    |                    |                          |
| SNP_42359_A_30752477 | NC_021165.1    | Ca_Kabuli_Chr06 | 30752477                | TT                              | AA                 | AA               | INTERGENIC                    |                    |                          |
| SNP_42360_A_30752633 | NC_021165.1    | Ca_Kabuli_Chr06 | 30752633                | AA                              | CC                 | CC               | INTERGENIC                    |                    |                          |
| SNP_42361_A_30752647 | NC_021165.1    | Ca_Kabuli_Chr06 | 30752647                | AA                              | TT                 | TT               | INTERGENIC                    |                    |                          |
| SNP_42362_A_30752670 | NC_021165.1    | Ca_Kabuli_Chr06 | 30752670                | AA                              | CC                 | CC               | INTERGENIC                    |                    |                          |
| SNP_42363_A_30752677 | NC_021165.1    | Ca_Kabuli_Chr06 | 30752677                | AA                              | CC                 | CC               | INTERGENIC                    |                    |                          |
| SNP_42364_A_30752685 | NC_021165.1    | Ca_Kabuli_Chr06 | 30752685                | AA                              | GG                 | GG               | INTERGENIC                    |                    |                          |
| SNP_42365_A_30752704 | NC_021165.1    | Ca_Kabuli_Chr06 | 30752704                | AA                              | GG                 | GG               | INTERGENIC                    |                    |                          |
| SNP_42366_A_30752746 | NC_021165.1    | Ca_Kabuli_Chr06 | 30752746                | GG                              | AA                 | AA               | INTERGENIC                    |                    |                          |
| SNP_42367_A_30753040 | NC_021165.1    | Ca_Kabuli_Chr06 | 30753040                | CC                              | AA                 | AA               | INTERGENIC                    |                    |                          |
| SNP_42368_A_30753098 | NC_021165.1    | Ca_Kabuli_Chr06 | 30753098                | TT                              | CC                 | CC               | INTERGENIC                    |                    |                          |
| SNP_42369_A_30753103 | NC_021165.1    | Ca_Kabuli_Chr06 | 30753103                | AA                              | GG                 | GG               | INTERGENIC                    |                    |                          |
| SNP_42370_A_30779389 | NC_021165.1    | Ca_Kabuli_Chr06 | 30779389                | AA                              | GG                 | GG               | INTERGENIC                    |                    |                          |

| SNPs IDs             | Chromosome IDs | Chromosomes     | Physical positions (bp) | CDC Frontier genome (Reference genome) | (Pusa 1103 & HPNB) | (ILWC 46 & LPNB) | Sequence genome | Components of | Gene accession IDs | Putative functions              |
|----------------------|----------------|-----------------|-------------------------|----------------------------------------|--------------------|------------------|-----------------|---------------|--------------------|---------------------------------|
| SNP_42371_A_30779809 | NC_021165.1    | Ca_Kabuli_Chr06 | 30779809                | GG                                     | AA                 | AA               | INTERGENIC      |               |                    |                                 |
| SNP_42372_A_30803262 | NC_021165.1    | Ca_Kabuli_Chr06 | 30803262                | TT                                     | CC                 | CC               | INTERGENIC      |               |                    |                                 |
| SNP_42374_A_30900446 | NC_021165.1    | Ca_Kabuli_Chr06 | 30900446                | AA                                     | TT                 | TT               | INTERGENIC      |               |                    |                                 |
| SNP_42376_A_30933743 | NC_021165.1    | Ca_Kabuli_Chr06 | 30933743                | TT                                     | CC                 | CC               | INTERGENIC      |               |                    |                                 |
| SNP_42377_A_30988884 | NC_021165.1    | Ca_Kabuli_Chr06 | 30988884                | CC                                     | TT                 | TT               | INTERGENIC      |               |                    |                                 |
| SNP_42378_A_31033780 | NC_021165.1    | Ca_Kabuli_Chr06 | 31033780                | TT                                     | CC                 | CC               | INTRON          | 101492575     |                    | rho GTPase-activating protein 1 |
| SNP_42379_A_31096873 | NC_021165.1    | Ca_Kabuli_Chr06 | 31096873                | AA                                     | GG                 | GG               | INTERGENIC      |               |                    |                                 |
| SNP_42380_A_31097018 | NC_021165.1    | Ca_Kabuli_Chr06 | 31097018                | CC                                     | TT                 | TT               | INTERGENIC      |               |                    |                                 |
| SNP_42381_A_31097043 | NC_021165.1    | Ca_Kabuli_Chr06 | 31097043                | TT                                     | CC                 | CC               | INTERGENIC      |               |                    |                                 |
| SNP_42382_A_31097088 | NC_021165.1    | Ca_Kabuli_Chr06 | 31097088                | GG                                     | TT                 | TT               | INTERGENIC      |               |                    |                                 |
| SNP_42383_A_31097110 | NC_021165.1    | Ca_Kabuli_Chr06 | 31097110                | GG                                     | TT                 | TT               | INTERGENIC      |               |                    |                                 |
| SNP_42385_A_31097195 | NC_021165.1    | Ca_Kabuli_Chr06 | 31097195                | CC                                     | GG                 | GG               | INTERGENIC      |               |                    |                                 |
| SNP_42386_A_31097321 | NC_021165.1    | Ca_Kabuli_Chr06 | 31097321                | GG                                     | AA                 | AA               | INTERGENIC      |               |                    |                                 |
| SNP_42387_A_31097352 | NC_021165.1    | Ca_Kabuli_Chr06 | 31097352                | GG                                     | AA                 | AA               | INTERGENIC      |               |                    |                                 |
| SNP_42388_A_31097404 | NC_021165.1    | Ca_Kabuli_Chr06 | 31097404                | TT                                     | AA                 | AA               | INTERGENIC      |               |                    |                                 |
| SNP_42389_A_31097425 | NC_021165.1    | Ca_Kabuli_Chr06 | 31097425                | AA                                     | GG                 | GG               | INTERGENIC      |               |                    |                                 |
| SNP_42390_A_31097492 | NC_021165.1    | Ca_Kabuli_Chr06 | 31097492                | TT                                     | CC                 | CC               | INTERGENIC      |               |                    |                                 |
| SNP_42391_A_31097583 | NC_021165.1    | Ca_Kabuli_Chr06 | 31097583                | GG                                     | CC                 | CC               | INTERGENIC      |               |                    |                                 |
| SNP_42392_A_31097617 | NC_021165.1    | Ca_Kabuli_Chr06 | 31097617                | CC                                     | TT                 | TT               | INTERGENIC      |               |                    |                                 |
| SNP_42393_A_31097688 | NC_021165.1    | Ca_Kabuli_Chr06 | 31097688                | TT                                     | GG                 | GG               | INTERGENIC      |               |                    |                                 |
| SNP_42395_A_31099641 | NC_021165.1    | Ca_Kabuli_Chr06 | 31099641                | TT                                     | CC                 | CC               | INTERGENIC      |               |                    |                                 |
| SNP_42396_A_31121996 | NC_021165.1    | Ca_Kabuli_Chr06 | 31121996                | AA                                     | GG                 | GG               | INTERGENIC      |               |                    |                                 |

| SNPs IDs             | Chromosome IDs | Chromosomes     | Physical positions (bp) | CDC Frontier (Reference genome) | (Pusa 1103 & HPNB) | (ILWC 46 & LPNB) | Sequence Components of genome | Gene accession IDs | Putative functions           |
|----------------------|----------------|-----------------|-------------------------|---------------------------------|--------------------|------------------|-------------------------------|--------------------|------------------------------|
| SNP_42397_A_31123575 | NC_021165.1    | Ca_Kabuli_Chr06 | 31123575                | TT                              | CC                 | CC               | INTERGENIC                    |                    |                              |
| SNP_42398_A_31131495 | NC_021165.1    | Ca_Kabuli_Chr06 | 31131495                | GG                              | AA                 | AA               | INTERGENIC                    |                    |                              |
| SNP_42400_A_31132481 | NC_021165.1    | Ca_Kabuli_Chr06 | 31132481                | TT                              | CC                 | CC               | INTERGENIC                    |                    |                              |
| SNP_42401_A_31162916 | NC_021165.1    | Ca_Kabuli_Chr06 | 31162916                | GG                              | AA                 | AA               | INTERGENIC                    |                    |                              |
| SNP_42402_A_31163108 | NC_021165.1    | Ca_Kabuli_Chr06 | 31163108                | AA                              | GG                 | GG               | INTERGENIC                    |                    |                              |
| SNP_42403_A_31163158 | NC_021165.1    | Ca_Kabuli_Chr06 | 31163158                | CC                              | AA                 | AA               | INTERGENIC                    |                    |                              |
| SNP_42404_A_31163699 | NC_021165.1    | Ca_Kabuli_Chr06 | 31163699                | AA                              | GG                 | GG               | INTERGENIC                    |                    |                              |
| SNP_42405_A_31163855 | NC_021165.1    | Ca_Kabuli_Chr06 | 31163855                | TT                              | GG                 | GG               | INTERGENIC                    |                    |                              |
| SNP_42406_A_31168606 | NC_021165.1    | Ca_Kabuli_Chr06 | 31168606                | GG                              | TT                 | TT               | DRR                           | 101490089          | uncharacterized LOC101490089 |
| SNP_42407_A_31168649 | NC_021165.1    | Ca_Kabuli_Chr06 | 31168649                | TT                              | GG                 | GG               | DRR                           | 101490089          | uncharacterized LOC101490089 |
| SNP_42408_A_31168674 | NC_021165.1    | Ca_Kabuli_Chr06 | 31168674                | TT                              | CC                 | CC               | DRR                           | 101490089          | uncharacterized LOC101490089 |
| SNP_42409_A_31168835 | NC_021165.1    | Ca_Kabuli_Chr06 | 31168835                | TT                              | CC                 | CC               | DRR                           | 101490089          | uncharacterized LOC101490089 |
| SNP_42410_A_31168838 | NC_021165.1    | Ca_Kabuli_Chr06 | 31168838                | TT                              | AA                 | AA               | DRR                           | 101490089          | uncharacterized LOC101490089 |
| SNP_42411_A_31168875 | NC_021165.1    | Ca_Kabuli_Chr06 | 31168875                | CC                              | AA                 | AA               | DRR                           | 101490089          | uncharacterized LOC101490089 |
| SNP_42412_A_31168902 | NC_021165.1    | Ca_Kabuli_Chr06 | 31168902                | TT                              | AA                 | AA               | NON_SYNONYMOUS_CODING         | 101490089          | uncharacterized LOC101490089 |
| SNP_42413_A_31168932 | NC_021165.1    | Ca_Kabuli_Chr06 | 31168932                | GG                              | AA                 | AA               | NON_SYNONYMOUS_CODING         | 101490089          | uncharacterized LOC101490089 |
| SNP_42414_A_31169006 | NC_021165.1    | Ca_Kabuli_Chr06 | 31169006                | CC                              | AA                 | AA               | SYNONYMOUS_CODING             | 101490089          | uncharacterized LOC101490089 |
| SNP_42415_A_31169044 | NC_021165.1    | Ca_Kabuli_Chr06 | 31169044                | AA                              | CC                 | CC               | NON_SYNONYMOUS_CODING         | 101490089          | uncharacterized LOC101490089 |
| SNP_42416_A_31169150 | NC_021165.1    | Ca_Kabuli_Chr06 | 31169150                | TT                              | CC                 | CC               | INTRON                        | 101490089          | uncharacterized LOC101490089 |
| SNP_42417_A_31169161 | NC_021165.1    | Ca_Kabuli_Chr06 | 31169161                | AA                              | GG                 | GG               | INTRON                        | 101490089          | uncharacterized LOC101490089 |
| SNP_42418_A_31184208 | NC_021165.1    | Ca_Kabuli_Chr06 | 31184208                | CC                              | GG                 | GG               | INTERGENIC                    |                    |                              |
| SNP_42419_A_31184218 | NC_021165.1    | Ca_Kabuli_Chr06 | 31184218                | AA                              | GG                 | GG               | INTERGENIC                    |                    |                              |



| SNPs IDs             | Chromosome IDs | Chromosomes     | Physical positions (bp) | CDC Frontier genome (Reference genome) | (Pusa 1103 & HPNB) | (ILWC 46 & LPNB) | Sequence genome | Components of | Gene accession IDs               | Putative functions |
|----------------------|----------------|-----------------|-------------------------|----------------------------------------|--------------------|------------------|-----------------|---------------|----------------------------------|--------------------|
| SNP_42420_A_31184278 | NC_021165.1    | Ca_Kabuli_Chr06 | 31184278                | AA                                     | GG                 | GG               | INTERGENIC      |               |                                  |                    |
| SNP_42421_A_31187319 | NC_021165.1    | Ca_Kabuli_Chr06 | 31187319                | TT                                     | CC                 | CC               | INTERGENIC      |               |                                  |                    |
| SNP_42422_A_31187320 | NC_021165.1    | Ca_Kabuli_Chr06 | 31187320                | GG                                     | AA                 | AA               | INTERGENIC      |               |                                  |                    |
| SNP_42423_A_31187332 | NC_021165.1    | Ca_Kabuli_Chr06 | 31187332                | GG                                     | AA                 | AA               | INTERGENIC      |               |                                  |                    |
| SNP_42424_A_31187337 | NC_021165.1    | Ca_Kabuli_Chr06 | 31187337                | CC                                     | TT                 | TT               | INTERGENIC      |               |                                  |                    |
| SNP_42425_A_31187362 | NC_021165.1    | Ca_Kabuli_Chr06 | 31187362                | GG                                     | TT                 | TT               | INTERGENIC      |               |                                  |                    |
| SNP_42426_A_31187367 | NC_021165.1    | Ca_Kabuli_Chr06 | 31187367                | TT                                     | AA                 | AA               | INTERGENIC      |               |                                  |                    |
| SNP_42427_A_31187391 | NC_021165.1    | Ca_Kabuli_Chr06 | 31187391                | GG                                     | AA                 | AA               | INTERGENIC      |               |                                  |                    |
| SNP_42428_A_31187409 | NC_021165.1    | Ca_Kabuli_Chr06 | 31187409                | AA                                     | GG                 | GG               | INTERGENIC      |               |                                  |                    |
| SNP_42429_A_31187434 | NC_021165.1    | Ca_Kabuli_Chr06 | 31187434                | AA                                     | CC                 | CC               | INTERGENIC      |               |                                  |                    |
| SNP_42430_A_31187470 | NC_021165.1    | Ca_Kabuli_Chr06 | 31187470                | CC                                     | GG                 | GG               | INTERGENIC      |               |                                  |                    |
| SNP_42431_A_31187507 | NC_021165.1    | Ca_Kabuli_Chr06 | 31187507                | TT                                     | CC                 | CC               | INTERGENIC      |               |                                  |                    |
| SNP_42432_A_31187584 | NC_021165.1    | Ca_Kabuli_Chr06 | 31187584                | AA                                     | TT                 | TT               | INTERGENIC      |               |                                  |                    |
| SNP_42433_A_31187773 | NC_021165.1    | Ca_Kabuli_Chr06 | 31187773                | TT                                     | CC                 | CC               | INTERGENIC      |               |                                  |                    |
| SNP_42434_A_31187801 | NC_021165.1    | Ca_Kabuli_Chr06 | 31187801                | GG                                     | TT                 | TT               | INTERGENIC      |               |                                  |                    |
| SNP_42435_A_31187822 | NC_021165.1    | Ca_Kabuli_Chr06 | 31187822                | CC                                     | TT                 | TT               | INTERGENIC      |               |                                  |                    |
| SNP_42436_A_31187860 | NC_021165.1    | Ca_Kabuli_Chr06 | 31187860                | CC                                     | TT                 | TT               | INTERGENIC      |               |                                  |                    |
| SNP_42437_A_31187880 | NC_021165.1    | Ca_Kabuli_Chr06 | 31187880                | GG                                     | AA                 | AA               | INTERGENIC      |               |                                  |                    |
| SNP_42438_A_31220205 | NC_021165.1    | Ca_Kabuli_Chr06 | 31220205                | CC                                     | TT                 | TT               | URR             | 101497878     | NAC domain-containing protein 90 |                    |
| SNP_42439_A_31292823 | NC_021165.1    | Ca_Kabuli_Chr06 | 31292823                | TT                                     | AA                 | AA               | INTERGENIC      |               |                                  |                    |
| SNP_42440_A_31293638 | NC_021165.1    | Ca_Kabuli_Chr06 | 31293638                | CC                                     | TT                 | TT               | INTERGENIC      |               |                                  |                    |
| SNP_42441_A_31293947 | NC_021165.1    | Ca_Kabuli_Chr06 | 31293947                | GG                                     | AA                 | AA               | INTERGENIC      |               |                                  |                    |

| SNPs IDs             | Chromosome IDs | Chromosomes     | Physical positions (bp) | CDC Frontier genome (Reference genome) | (Pusa 1103 & HPNB) | (ILWC 46 & LPNB) | Sequence Components of genome | Gene accession IDs | Putative functions           |
|----------------------|----------------|-----------------|-------------------------|----------------------------------------|--------------------|------------------|-------------------------------|--------------------|------------------------------|
| SNP_42442_A_31293959 | NC_021165.1    | Ca_Kabuli_Chr06 | 31293959                | GG                                     | AA                 | AA               | INTERGENIC                    |                    |                              |
| SNP_42443_A_31324730 | NC_021165.1    | Ca_Kabuli_Chr06 | 31324730                | CC                                     | TT                 | TT               | INTRON                        | id145063           | Unknown function             |
| SNP_42444_A_31334725 | NC_021165.1    | Ca_Kabuli_Chr06 | 31334725                | TT                                     | AA                 | AA               | INTERGENIC                    |                    |                              |
| SNP_42446_A_31370847 | NC_021165.1    | Ca_Kabuli_Chr06 | 31370847                | TT                                     | AA                 | AA               | INTERGENIC                    |                    |                              |
| SNP_42447_A_31371502 | NC_021165.1    | Ca_Kabuli_Chr06 | 31371502                | GG                                     | AA                 | AA               | INTERGENIC                    |                    |                              |
| SNP_42448_A_31371504 | NC_021165.1    | Ca_Kabuli_Chr06 | 31371504                | AA                                     | GG                 | GG               | INTERGENIC                    |                    |                              |
| SNP_42449_A_31371891 | NC_021165.1    | Ca_Kabuli_Chr06 | 31371891                | CC                                     | TT                 | TT               | INTERGENIC                    |                    |                              |
| SNP_42450_A_31371897 | NC_021165.1    | Ca_Kabuli_Chr06 | 31371897                | TT                                     | GG                 | GG               | INTERGENIC                    |                    |                              |
| SNP_42451_A_31372243 | NC_021165.1    | Ca_Kabuli_Chr06 | 31372243                | TT                                     | CC                 | CC               | INTERGENIC                    |                    |                              |
| SNP_42452_A_31372244 | NC_021165.1    | Ca_Kabuli_Chr06 | 31372244                | AA                                     | GG                 | GG               | INTERGENIC                    |                    |                              |
| SNP_42453_A_31372266 | NC_021165.1    | Ca_Kabuli_Chr06 | 31372266                | TT                                     | CC                 | CC               | INTERGENIC                    |                    |                              |
| SNP_42454_A_31372269 | NC_021165.1    | Ca_Kabuli_Chr06 | 31372269                | AA                                     | GG                 | GG               | INTERGENIC                    |                    |                              |
| SNP_42455_A_31372328 | NC_021165.1    | Ca_Kabuli_Chr06 | 31372328                | AA                                     | CC                 | CC               | INTERGENIC                    |                    |                              |
| SNP_42456_A_31372339 | NC_021165.1    | Ca_Kabuli_Chr06 | 31372339                | CC                                     | TT                 | TT               | INTERGENIC                    |                    |                              |
| SNP_42457_A_31372348 | NC_021165.1    | Ca_Kabuli_Chr06 | 31372348                | AA                                     | GG                 | GG               | INTERGENIC                    |                    |                              |
| SNP_42458_A_31372378 | NC_021165.1    | Ca_Kabuli_Chr06 | 31372378                | CC                                     | TT                 | TT               | INTERGENIC                    |                    |                              |
| SNP_42459_A_31372398 | NC_021165.1    | Ca_Kabuli_Chr06 | 31372398                | AA                                     | GG                 | GG               | INTERGENIC                    |                    |                              |
| SNP_42461_A_31429151 | NC_021165.1    | Ca_Kabuli_Chr06 | 31429151                | GG                                     | AA                 | AA               | INTERGENIC                    |                    |                              |
| SNP_42462_A_31430929 | NC_021165.1    | Ca_Kabuli_Chr06 | 31430929                | GG                                     | CC                 | CC               | NON_SYNONYMOUS_CODING         | 101491376          | uncharacterized LOC101491376 |
| SNP_42463_A_31431154 | NC_021165.1    | Ca_Kabuli_Chr06 | 31431154                | AA                                     | GG                 | GG               | NON_SYNONYMOUS_CODING         | 101491376          | uncharacterized LOC101491376 |
| SNP_42464_A_31431219 | NC_021165.1    | Ca_Kabuli_Chr06 | 31431219                | GG                                     | AA                 | AA               | INTRON                        | 101491376          | uncharacterized LOC101491376 |
| SNP_42465_A_31431602 | NC_021165.1    | Ca_Kabuli_Chr06 | 31431602                | GG                                     | AA                 | AA               | URR                           | 101491376          | uncharacterized LOC101491376 |

| SNPs IDs             | Chromosome IDs | Chromosomes     | Physical positions (bp) | CDC Frontier genome (Reference genome) | (Pusa 1103 & HPNB) | (ILWC 46 & LPNB) | Sequence genome | Components of | Gene accession IDs | Putative functions |
|----------------------|----------------|-----------------|-------------------------|----------------------------------------|--------------------|------------------|-----------------|---------------|--------------------|--------------------|
| SNP_42466_A_31472543 | NC_021165.1    | Ca_Kabuli_Chr06 | 31472543                | TT                                     | CC                 | CC               | INTERGENIC      |               |                    |                    |
| SNP_42467_A_31489091 | NC_021165.1    | Ca_Kabuli_Chr06 | 31489091                | AA                                     | CC                 | CC               | INTERGENIC      |               |                    |                    |
| SNP_42468_A_31502632 | NC_021165.1    | Ca_Kabuli_Chr06 | 31502632                | TT                                     | CC                 | CC               | INTERGENIC      |               |                    |                    |
| SNP_42469_A_31502644 | NC_021165.1    | Ca_Kabuli_Chr06 | 31502644                | CC                                     | TT                 | TT               | INTERGENIC      |               |                    |                    |
| SNP_42470_A_31535826 | NC_021165.1    | Ca_Kabuli_Chr06 | 31535826                | CC                                     | TT                 | TT               | INTERGENIC      |               |                    |                    |
| SNP_42471_A_31545838 | NC_021165.1    | Ca_Kabuli_Chr06 | 31545838                | AA                                     | GG                 | GG               | INTERGENIC      |               |                    |                    |
| SNP_42472_A_31585254 | NC_021165.1    | Ca_Kabuli_Chr06 | 31585254                | CC                                     | AA                 | AA               | INTERGENIC      |               |                    |                    |
| SNP_42473_A_31604832 | NC_021165.1    | Ca_Kabuli_Chr06 | 31604832                | GG                                     | AA                 | AA               | INTERGENIC      |               |                    |                    |
| SNP_42474_A_31604842 | NC_021165.1    | Ca_Kabuli_Chr06 | 31604842                | TT                                     | AA                 | AA               | INTERGENIC      |               |                    |                    |
| SNP_42475_A_31604851 | NC_021165.1    | Ca_Kabuli_Chr06 | 31604851                | AA                                     | GG                 | GG               | INTERGENIC      |               |                    |                    |
| SNP_42476_A_31604889 | NC_021165.1    | Ca_Kabuli_Chr06 | 31604889                | AA                                     | GG                 | GG               | INTERGENIC      |               |                    |                    |
| SNP_42477_A_31608175 | NC_021165.1    | Ca_Kabuli_Chr06 | 31608175                | AA                                     | TT                 | TT               | INTERGENIC      |               |                    |                    |
| SNP_42478_A_31608176 | NC_021165.1    | Ca_Kabuli_Chr06 | 31608176                | TT                                     | CC                 | CC               | INTERGENIC      |               |                    |                    |
| SNP_42479_A_31641833 | NC_021165.1    | Ca_Kabuli_Chr06 | 31641833                | TT                                     | CC                 | CC               | INTERGENIC      |               |                    |                    |
| SNP_42480_A_31659595 | NC_021165.1    | Ca_Kabuli_Chr06 | 31659595                | AA                                     | GG                 | GG               | INTERGENIC      |               |                    |                    |
| SNP_42481_A_31659603 | NC_021165.1    | Ca_Kabuli_Chr06 | 31659603                | AA                                     | TT                 | TT               | INTERGENIC      |               |                    |                    |
| SNP_42482_A_31659612 | NC_021165.1    | Ca_Kabuli_Chr06 | 31659612                | TT                                     | GG                 | GG               | INTERGENIC      |               |                    |                    |
| SNP_42483_A_31685453 | NC_021165.1    | Ca_Kabuli_Chr06 | 31685453                | AA                                     | TT                 | TT               | INTERGENIC      |               |                    |                    |
| SNP_42484_A_31689363 | NC_021165.1    | Ca_Kabuli_Chr06 | 31689363                | AA                                     | TT                 | TT               | INTERGENIC      |               |                    |                    |
| SNP_42485_A_31707464 | NC_021165.1    | Ca_Kabuli_Chr06 | 31707464                | TT                                     | AA                 | AA               | INTERGENIC      |               |                    |                    |
| SNP_42486_A_31712089 | NC_021165.1    | Ca_Kabuli_Chr06 | 31712089                | CC                                     | TT                 | TT               | INTERGENIC      |               |                    |                    |
| SNP_42487_A_31712184 | NC_021165.1    | Ca_Kabuli_Chr06 | 31712184                | CC                                     | TT                 | TT               | INTERGENIC      |               |                    |                    |

| SNPs IDs             | Chromosome IDs | Chromosomes     | Physical positions (bp) | CDC Frontier genome (Reference genome) | (Pusa 1103 & HPNB) | (ILWC 46 & LPNB) | Sequence Components of genome | Gene accession IDs | Putative functions           |
|----------------------|----------------|-----------------|-------------------------|----------------------------------------|--------------------|------------------|-------------------------------|--------------------|------------------------------|
| SNP_42488_A_31717440 | NC_021165.1    | Ca_Kabuli_Chr06 | 31717440                | TT                                     | CC                 | CC               | INTERGENIC                    |                    |                              |
| SNP_42489_A_31717467 | NC_021165.1    | Ca_Kabuli_Chr06 | 31717467                | GG                                     | AA                 | AA               | INTERGENIC                    |                    |                              |
| SNP_42490_A_31717770 | NC_021165.1    | Ca_Kabuli_Chr06 | 31717770                | TT                                     | CC                 | CC               | INTERGENIC                    |                    |                              |
| SNP_42491_A_31744925 | NC_021165.1    | Ca_Kabuli_Chr06 | 31744925                | CC                                     | AA                 | AA               | INTERGENIC                    |                    |                              |
| SNP_42493_A_31750755 | NC_021165.1    | Ca_Kabuli_Chr06 | 31750755                | AA                                     | CC                 | CC               | INTERGENIC                    |                    |                              |
| SNP_42494_A_31753798 | NC_021165.1    | Ca_Kabuli_Chr06 | 31753798                | AA                                     | GG                 | GG               | DRR                           | 101493346          | uncharacterized LOC101493346 |
| SNP_42495_A_31753804 | NC_021165.1    | Ca_Kabuli_Chr06 | 31753804                | TT                                     | CC                 | CC               | DRR                           | 101493346          | uncharacterized LOC101493346 |
| SNP_42496_A_31753834 | NC_021165.1    | Ca_Kabuli_Chr06 | 31753834                | TT                                     | CC                 | CC               | DRR                           | 101493346          | uncharacterized LOC101493346 |
| SNP_42497_A_31753875 | NC_021165.1    | Ca_Kabuli_Chr06 | 31753875                | TT                                     | GG                 | GG               | DRR                           | 101493346          | uncharacterized LOC101493346 |
| SNP_42498_A_31753881 | NC_021165.1    | Ca_Kabuli_Chr06 | 31753881                | AA                                     | GG                 | GG               | DRR                           | 101493346          | uncharacterized LOC101493346 |
| SNP_42499_A_31754248 | NC_021165.1    | Ca_Kabuli_Chr06 | 31754248                | AA                                     | GG                 | GG               | DRR                           | 101493346          | uncharacterized LOC101493346 |
| SNP_42500_A_31769439 | NC_021165.1    | Ca_Kabuli_Chr06 | 31769439                | GG                                     | TT                 | TT               | INTERGENIC                    |                    |                              |
| SNP_42502_A_31835514 | NC_021165.1    | Ca_Kabuli_Chr06 | 31835514                | TT                                     | CC                 | CC               | INTERGENIC                    |                    |                              |
| SNP_42503_A_31835596 | NC_021165.1    | Ca_Kabuli_Chr06 | 31835596                | TT                                     | CC                 | CC               | INTERGENIC                    |                    |                              |
| SNP_42504_A_31915034 | NC_021165.1    | Ca_Kabuli_Chr06 | 31915034                | TT                                     | GG                 | GG               | INTERGENIC                    |                    |                              |
| SNP_42505_A_31923499 | NC_021165.1    | Ca_Kabuli_Chr06 | 31923499                | TT                                     | CC                 | CC               | INTERGENIC                    |                    |                              |
| SNP_42506_A_31939418 | NC_021165.1    | Ca_Kabuli_Chr06 | 31939418                | GG                                     | AA                 | AA               | INTERGENIC                    |                    |                              |
| SNP_42507_A_31939442 | NC_021165.1    | Ca_Kabuli_Chr06 | 31939442                | CC                                     | AA                 | AA               | INTERGENIC                    |                    |                              |
| SNP_42508_A_31939447 | NC_021165.1    | Ca_Kabuli_Chr06 | 31939447                | CC                                     | TT                 | TT               | INTERGENIC                    |                    |                              |
| SNP_42509_A_31939456 | NC_021165.1    | Ca_Kabuli_Chr06 | 31939456                | TT                                     | CC                 | CC               | INTERGENIC                    |                    |                              |
| SNP_42510_A_31939465 | NC_021165.1    | Ca_Kabuli_Chr06 | 31939465                | GG                                     | AA                 | AA               | INTERGENIC                    |                    |                              |
| SNP_42511_A_31939480 | NC_021165.1    | Ca_Kabuli_Chr06 | 31939480                | AA                                     | GG                 | GG               | INTERGENIC                    |                    |                              |

| SNPs IDs             | Chromosome IDs | Chromosomes     | Physical positions (bp) | CDC Frontier genome (Reference genome) | (Pusa 1103 & HPNB) | (ILWC 46 & LPNB) | Sequence genome | Components of | Gene accession IDs | Putative functions |
|----------------------|----------------|-----------------|-------------------------|----------------------------------------|--------------------|------------------|-----------------|---------------|--------------------|--------------------|
| SNP_42512_A_31939496 | NC_021165.1    | Ca_Kabuli_Chr06 | 31939496                | TT                                     | CC                 | CC               | INTERGENIC      |               |                    |                    |
| SNP_42513_A_31939513 | NC_021165.1    | Ca_Kabuli_Chr06 | 31939513                | GG                                     | AA                 | AA               | INTERGENIC      |               |                    |                    |
| SNP_42514_A_31939549 | NC_021165.1    | Ca_Kabuli_Chr06 | 31939549                | CC                                     | TT                 | TT               | INTERGENIC      |               |                    |                    |
| SNP_42515_A_31939574 | NC_021165.1    | Ca_Kabuli_Chr06 | 31939574                | AA                                     | GG                 | GG               | INTERGENIC      |               |                    |                    |
| SNP_42516_A_31939594 | NC_021165.1    | Ca_Kabuli_Chr06 | 31939594                | GG                                     | AA                 | AA               | INTERGENIC      |               |                    |                    |
| SNP_42517_A_31939599 | NC_021165.1    | Ca_Kabuli_Chr06 | 31939599                | CC                                     | AA                 | AA               | INTERGENIC      |               |                    |                    |
| SNP_42518_A_31939626 | NC_021165.1    | Ca_Kabuli_Chr06 | 31939626                | AA                                     | GG                 | GG               | INTERGENIC      |               |                    |                    |
| SNP_42519_A_31939920 | NC_021165.1    | Ca_Kabuli_Chr06 | 31939920                | AA                                     | GG                 | GG               | INTERGENIC      |               |                    |                    |
| SNP_42520_A_31939935 | NC_021165.1    | Ca_Kabuli_Chr06 | 31939935                | TT                                     | CC                 | CC               | INTERGENIC      |               |                    |                    |
| SNP_42521_A_31944714 | NC_021165.1    | Ca_Kabuli_Chr06 | 31944714                | GG                                     | AA                 | AA               | INTERGENIC      |               |                    |                    |
| SNP_42522_A_31947358 | NC_021165.1    | Ca_Kabuli_Chr06 | 31947358                | TT                                     | AA                 | AA               | INTERGENIC      |               |                    |                    |
| SNP_42523_A_31947423 | NC_021165.1    | Ca_Kabuli_Chr06 | 31947423                | CC                                     | TT                 | TT               | INTERGENIC      |               |                    |                    |
| SNP_42524_A_31947449 | NC_021165.1    | Ca_Kabuli_Chr06 | 31947449                | TT                                     | CC                 | CC               | INTERGENIC      |               |                    |                    |
| SNP_42525_A_31947452 | NC_021165.1    | Ca_Kabuli_Chr06 | 31947452                | TT                                     | CC                 | CC               | INTERGENIC      |               |                    |                    |
| SNP_42526_A_31947460 | NC_021165.1    | Ca_Kabuli_Chr06 | 31947460                | AA                                     | GG                 | GG               | INTERGENIC      |               |                    |                    |
| SNP_42527_A_31947617 | NC_021165.1    | Ca_Kabuli_Chr06 | 31947617                | TT                                     | CC                 | CC               | INTERGENIC      |               |                    |                    |
| SNP_42529_A_31978099 | NC_021165.1    | Ca_Kabuli_Chr06 | 31978099                | CC                                     | TT                 | TT               | INTERGENIC      |               |                    |                    |
| SNP_42530_A_31998524 | NC_021165.1    | Ca_Kabuli_Chr06 | 31998524                | TT                                     | GG                 | GG               | INTERGENIC      |               |                    |                    |
| SNP_42531_A_31998525 | NC_021165.1    | Ca_Kabuli_Chr06 | 31998525                | TT                                     | GG                 | GG               | INTERGENIC      |               |                    |                    |
| SNP_42532_A_32059447 | NC_021165.1    | Ca_Kabuli_Chr06 | 32059447                | AA                                     | CC                 | CC               | INTERGENIC      |               |                    |                    |
| SNP_42533_A_32059540 | NC_021165.1    | Ca_Kabuli_Chr06 | 32059540                | GG                                     | AA                 | AA               | INTERGENIC      |               |                    |                    |
| SNP_42534_A_32059572 | NC_021165.1    | Ca_Kabuli_Chr06 | 32059572                | AA                                     | TT                 | TT               | INTERGENIC      |               |                    |                    |

| SNPs IDs             | Chromosome IDs | Chromosomes     | Physical positions (bp) | CDC Frontier genome (Reference genome) | (Pusa 1103 & HPNB) | (ILWC 46 & LPNB) | Sequence genome | Components of | Gene accession IDs | Putative functions           |
|----------------------|----------------|-----------------|-------------------------|----------------------------------------|--------------------|------------------|-----------------|---------------|--------------------|------------------------------|
| SNP_42535_A_32059690 | NC_021165.1    | Ca_Kabuli_Chr06 | 32059690                | CC                                     | AA                 | AA               | INTERGENIC      |               |                    |                              |
| SNP_42536_A_32093795 | NC_021165.1    | Ca_Kabuli_Chr06 | 32093795                | TT                                     | AA                 | AA               | INTERGENIC      |               |                    |                              |
| SNP_42537_A_32124066 | NC_021165.1    | Ca_Kabuli_Chr06 | 32124066                | GG                                     | AA                 | AA               | INTERGENIC      |               |                    |                              |
| SNP_42538_A_32124110 | NC_021165.1    | Ca_Kabuli_Chr06 | 32124110                | GG                                     | AA                 | AA               | INTERGENIC      |               |                    |                              |
| SNP_42539_A_32124290 | NC_021165.1    | Ca_Kabuli_Chr06 | 32124290                | TT                                     | CC                 | CC               | INTERGENIC      |               |                    |                              |
| SNP_42540_A_32129795 | NC_021165.1    | Ca_Kabuli_Chr06 | 32129795                | TT                                     | CC                 | CC               | URR             | 101494613     |                    | uncharacterized LOC101494613 |
| SNP_42541_A_32164199 | NC_021165.1    | Ca_Kabuli_Chr06 | 32164199                | AA                                     | CC                 | CC               | INTERGENIC      |               |                    |                              |
| SNP_42542_A_32187428 | NC_021165.1    | Ca_Kabuli_Chr06 | 32187428                | TT                                     | GG                 | GG               | INTERGENIC      |               |                    |                              |
| SNP_42543_A_32194299 | NC_021165.1    | Ca_Kabuli_Chr06 | 32194299                | GG                                     | AA                 | AA               | INTERGENIC      |               |                    |                              |
| SNP_42544_A_32194571 | NC_021165.1    | Ca_Kabuli_Chr06 | 32194571                | CC                                     | AA                 | AA               | INTERGENIC      |               |                    |                              |
| SNP_42545_A_32194631 | NC_021165.1    | Ca_Kabuli_Chr06 | 32194631                | AA                                     | GG                 | GG               | INTERGENIC      |               |                    |                              |
| SNP_42546_A_32194640 | NC_021165.1    | Ca_Kabuli_Chr06 | 32194640                | TT                                     | CC                 | CC               | INTERGENIC      |               |                    |                              |
| SNP_42547_A_32194655 | NC_021165.1    | Ca_Kabuli_Chr06 | 32194655                | TT                                     | AA                 | AA               | INTERGENIC      |               |                    |                              |
| SNP_42548_A_32194675 | NC_021165.1    | Ca_Kabuli_Chr06 | 32194675                | TT                                     | CC                 | CC               | INTERGENIC      |               |                    |                              |
| SNP_42549_A_32194692 | NC_021165.1    | Ca_Kabuli_Chr06 | 32194692                | AA                                     | GG                 | GG               | INTERGENIC      |               |                    |                              |
| SNP_42550_A_32194705 | NC_021165.1    | Ca_Kabuli_Chr06 | 32194705                | AA                                     | TT                 | TT               | INTERGENIC      |               |                    |                              |
| SNP_42551_A_32194719 | NC_021165.1    | Ca_Kabuli_Chr06 | 32194719                | AA                                     | TT                 | TT               | INTERGENIC      |               |                    |                              |
| SNP_42552_A_32194740 | NC_021165.1    | Ca_Kabuli_Chr06 | 32194740                | AA                                     | GG                 | GG               | INTERGENIC      |               |                    |                              |
| SNP_42553_A_32194749 | NC_021165.1    | Ca_Kabuli_Chr06 | 32194749                | GG                                     | AA                 | AA               | INTERGENIC      |               |                    |                              |
| SNP_42554_A_32194767 | NC_021165.1    | Ca_Kabuli_Chr06 | 32194767                | GG                                     | AA                 | AA               | INTERGENIC      |               |                    |                              |
| SNP_42555_A_32194778 | NC_021165.1    | Ca_Kabuli_Chr06 | 32194778                | AA                                     | GG                 | GG               | INTERGENIC      |               |                    |                              |
| SNP_42556_A_32195192 | NC_021165.1    | Ca_Kabuli_Chr06 | 32195192                | TT                                     | CC                 | CC               | INTERGENIC      |               |                    |                              |

| SNPs IDs             | Chromosome IDs | Chromosomes     | Physical positions (bp) | CDC Frontier genome (Reference genome) | (Pusa 1103 & HPNB) | (ILWC 46 & LPNB) | Sequence Components of genome | Gene accession IDs | Putative functions              |
|----------------------|----------------|-----------------|-------------------------|----------------------------------------|--------------------|------------------|-------------------------------|--------------------|---------------------------------|
| SNP_42557_A_32195222 | NC_021165.1    | Ca_Kabuli_Chr06 | 32195222                | TT                                     | CC                 | CC               | INTERGENIC                    |                    |                                 |
| SNP_42558_A_32216917 | NC_021165.1    | Ca_Kabuli_Chr06 | 32216917                | CC                                     | AA                 | AA               | INTERGENIC                    |                    |                                 |
| SNP_42559_A_32217010 | NC_021165.1    | Ca_Kabuli_Chr06 | 32217010                | TT                                     | CC                 | CC               | INTERGENIC                    |                    |                                 |
| SNP_42560_A_32335214 | NC_021165.1    | Ca_Kabuli_Chr06 | 32335214                | GG                                     | AA                 | AA               | INTERGENIC                    |                    |                                 |
| SNP_42561_A_32357239 | NC_021165.1    | Ca_Kabuli_Chr06 | 32357239                | GG                                     | TT                 | TT               | INTERGENIC                    |                    |                                 |
| SNP_42562_A_32370463 | NC_021165.1    | Ca_Kabuli_Chr06 | 32370463                | GG                                     | AA                 | AA               | NON_SYNONYMOUS_CODING         | 101496889          | S-type anion channel SLAH1-like |
| SNP_42563_A_32371234 | NC_021165.1    | Ca_Kabuli_Chr06 | 32371234                | TT                                     | CC                 | CC               | URR                           | 101496889          | S-type anion channel SLAH1-like |
| SNP_42564_A_32371320 | NC_021165.1    | Ca_Kabuli_Chr06 | 32371320                | AA                                     | TT                 | TT               | URR                           | 101496889          | S-type anion channel SLAH1-like |
| SNP_42565_A_32371595 | NC_021165.1    | Ca_Kabuli_Chr06 | 32371595                | AA                                     | CC                 | CC               | URR                           | 101496889          | S-type anion channel SLAH1-like |
| SNP_42566_A_32372478 | NC_021165.1    | Ca_Kabuli_Chr06 | 32372478                | GG                                     | AA                 | AA               | URR                           | 101496889          | S-type anion channel SLAH1-like |
| SNP_42567_A_32372700 | NC_021165.1    | Ca_Kabuli_Chr06 | 32372700                | TT                                     | CC                 | CC               | URR                           | 101496889          | S-type anion channel SLAH1-like |
| SNP_42568_A_32372821 | NC_021165.1    | Ca_Kabuli_Chr06 | 32372821                | GG                                     | AA                 | AA               | URR                           | 101496889          | S-type anion channel SLAH1-like |
| SNP_42570_A_32372844 | NC_021165.1    | Ca_Kabuli_Chr06 | 32372844                | AA                                     | GG                 | GG               | URR                           | 101496889          | S-type anion channel SLAH1-like |
| SNP_42571_A_32372970 | NC_021165.1    | Ca_Kabuli_Chr06 | 32372970                | GG                                     | AA                 | AA               | URR                           | 101496889          | S-type anion channel SLAH1-like |
| SNP_42572_A_32373112 | NC_021165.1    | Ca_Kabuli_Chr06 | 32373112                | TT                                     | CC                 | CC               | INTERGENIC                    |                    |                                 |
| SNP_42573_A_32373182 | NC_021165.1    | Ca_Kabuli_Chr06 | 32373182                | GG                                     | TT                 | TT               | INTERGENIC                    |                    |                                 |
| SNP_42574_A_32373281 | NC_021165.1    | Ca_Kabuli_Chr06 | 32373281                | CC                                     | TT                 | TT               | INTERGENIC                    |                    |                                 |
| SNP_42575_A_32373285 | NC_021165.1    | Ca_Kabuli_Chr06 | 32373285                | TT                                     | CC                 | CC               | INTERGENIC                    |                    |                                 |
| SNP_42576_A_32373304 | NC_021165.1    | Ca_Kabuli_Chr06 | 32373304                | TT                                     | GG                 | GG               | INTERGENIC                    |                    |                                 |
| SNP_42577_A_32373319 | NC_021165.1    | Ca_Kabuli_Chr06 | 32373319                | TT                                     | GG                 | GG               | INTERGENIC                    |                    |                                 |
| SNP_42578_A_32373387 | NC_021165.1    | Ca_Kabuli_Chr06 | 32373387                | GG                                     | AA                 | AA               | INTERGENIC                    |                    |                                 |
| SNP_42579_A_32373413 | NC_021165.1    | Ca_Kabuli_Chr06 | 32373413                | CC                                     | TT                 | TT               | INTERGENIC                    |                    |                                 |

| SNPs IDs             | Chromosome IDs | Chromosomes     | Physical positions (bp) | CDC Frontier genome (Reference genome) | (Pusa 1103 & HPNB) | (ILWC 46 & LPNB) | Sequence genome | Components of | Gene accession IDs                    | Putative functions |
|----------------------|----------------|-----------------|-------------------------|----------------------------------------|--------------------|------------------|-----------------|---------------|---------------------------------------|--------------------|
| SNP_42580_A_32373427 | NC_021165.1    | Ca_Kabuli_Chr06 | 32373427                | GG                                     | AA                 | AA               | INTERGENIC      |               |                                       |                    |
| SNP_42581_A_32373438 | NC_021165.1    | Ca_Kabuli_Chr06 | 32373438                | TT                                     | AA                 | AA               | INTERGENIC      |               |                                       |                    |
| SNP_42582_A_32373447 | NC_021165.1    | Ca_Kabuli_Chr06 | 32373447                | CC                                     | TT                 | TT               | INTERGENIC      |               |                                       |                    |
| SNP_42583_A_32373652 | NC_021165.1    | Ca_Kabuli_Chr06 | 32373652                | AA                                     | TT                 | TT               | INTERGENIC      |               |                                       |                    |
| SNP_42584_A_32373793 | NC_021165.1    | Ca_Kabuli_Chr06 | 32373793                | AA                                     | TT                 | TT               | INTERGENIC      |               |                                       |                    |
| SNP_42585_A_32390642 | NC_021165.1    | Ca_Kabuli_Chr06 | 32390642                | GG                                     | AA                 | AA               | INTERGENIC      |               |                                       |                    |
| SNP_42586_A_32390646 | NC_021165.1    | Ca_Kabuli_Chr06 | 32390646                | AA                                     | GG                 | GG               | INTERGENIC      |               |                                       |                    |
| SNP_42587_A_32391606 | NC_021165.1    | Ca_Kabuli_Chr06 | 32391606                | CC                                     | TT                 | TT               | INTERGENIC      |               |                                       |                    |
| SNP_42589_A_32391875 | NC_021165.1    | Ca_Kabuli_Chr06 | 32391875                | AA                                     | TT                 | TT               | INTERGENIC      |               |                                       |                    |
| SNP_42590_A_32391929 | NC_021165.1    | Ca_Kabuli_Chr06 | 32391929                | GG                                     | AA                 | AA               | INTERGENIC      |               |                                       |                    |
| SNP_42591_A_32391942 | NC_021165.1    | Ca_Kabuli_Chr06 | 32391942                | TT                                     | CC                 | CC               | INTERGENIC      |               |                                       |                    |
| SNP_42592_A_32392125 | NC_021165.1    | Ca_Kabuli_Chr06 | 32392125                | AA                                     | TT                 | TT               | INTERGENIC      |               |                                       |                    |
| SNP_42593_A_32392127 | NC_021165.1    | Ca_Kabuli_Chr06 | 32392127                | AA                                     | GG                 | GG               | INTERGENIC      |               |                                       |                    |
| SNP_42594_A_32392161 | NC_021165.1    | Ca_Kabuli_Chr06 | 32392161                | TT                                     | GG                 | GG               | INTERGENIC      |               |                                       |                    |
| SNP_42595_A_32392685 | NC_021165.1    | Ca_Kabuli_Chr06 | 32392685                | TT                                     | CC                 | CC               | INTERGENIC      |               |                                       |                    |
| SNP_42596_A_32393787 | NC_021165.1    | Ca_Kabuli_Chr06 | 32393787                | GG                                     | CC                 | CC               | DRR             | 101498869     | L-ascorbate oxidase homolog           |                    |
| SNP_42597_A_32407021 | NC_021165.1    | Ca_Kabuli_Chr06 | 32407021                | CC                                     | TT                 | TT               | INTERGENIC      |               |                                       |                    |
| SNP_42598_A_32407046 | NC_021165.1    | Ca_Kabuli_Chr06 | 32407046                | AA                                     | GG                 | GG               | INTERGENIC      |               |                                       |                    |
| SNP_42599_A_32407073 | NC_021165.1    | Ca_Kabuli_Chr06 | 32407073                | GG                                     | AA                 | AA               | INTERGENIC      |               |                                       |                    |
| SNP_42600_A_32429391 | NC_021165.1    | Ca_Kabuli_Chr06 | 32429391                | AA                                     | GG                 | GG               | INTERGENIC      |               |                                       |                    |
| SNP_42601_A_32435386 | NC_021165.1    | Ca_Kabuli_Chr06 | 32435386                | TT                                     | AA                 | AA               | URR             | 101498526     | B-cell receptor-associated protein 31 |                    |
| SNP_42602_A_32450150 | NC_021165.1    | Ca_Kabuli_Chr06 | 32450150                | TT                                     | CC                 | CC               | DRR             | 101499512     | fatty acyl-CoA reductase 3-like       |                    |



| SNPs IDs             | Chromosome IDs | Chromosomes     | Physical positions (bp) | CDC Frontier genome (Reference genome) | (Pusa 1103 & HPNB) | (ILWC 46 & LPNB) | Sequence genome | Components of | Gene accession IDs | Putative functions |
|----------------------|----------------|-----------------|-------------------------|----------------------------------------|--------------------|------------------|-----------------|---------------|--------------------|--------------------|
| SNP_42603_A_32508606 | NC_021165.1    | Ca_Kabuli_Chr06 | 32508606                | GG                                     | AA                 | AA               | INTERGENIC      |               |                    |                    |
| SNP_42604_A_32508630 | NC_021165.1    | Ca_Kabuli_Chr06 | 32508630                | GG                                     | AA                 | AA               | INTERGENIC      |               |                    |                    |
| SNP_42605_A_32512707 | NC_021165.1    | Ca_Kabuli_Chr06 | 32512707                | GG                                     | AA                 | AA               | INTERGENIC      |               |                    |                    |
| SNP_42606_A_32513609 | NC_021165.1    | Ca_Kabuli_Chr06 | 32513609                | GG                                     | AA                 | AA               | INTERGENIC      |               |                    |                    |
| SNP_42607_A_32513671 | NC_021165.1    | Ca_Kabuli_Chr06 | 32513671                | GG                                     | AA                 | AA               | INTERGENIC      |               |                    |                    |
| SNP_42608_A_32513673 | NC_021165.1    | Ca_Kabuli_Chr06 | 32513673                | GG                                     | AA                 | AA               | INTERGENIC      |               |                    |                    |
| SNP_42609_A_32513852 | NC_021165.1    | Ca_Kabuli_Chr06 | 32513852                | CC                                     | TT                 | TT               | INTERGENIC      |               |                    |                    |
| SNP_42610_A_32513943 | NC_021165.1    | Ca_Kabuli_Chr06 | 32513943                | AA                                     | CC                 | CC               | INTERGENIC      |               |                    |                    |
| SNP_42611_A_32519566 | NC_021165.1    | Ca_Kabuli_Chr06 | 32519566                | GG                                     | AA                 | AA               | INTERGENIC      |               |                    |                    |
| SNP_42613_A_32519699 | NC_021165.1    | Ca_Kabuli_Chr06 | 32519699                | GG                                     | AA                 | AA               | INTERGENIC      |               |                    |                    |
| SNP_42614_A_32519847 | NC_021165.1    | Ca_Kabuli_Chr06 | 32519847                | GG                                     | AA                 | AA               | INTERGENIC      |               |                    |                    |
| SNP_42615_A_32520026 | NC_021165.1    | Ca_Kabuli_Chr06 | 32520026                | GG                                     | CC                 | CC               | INTERGENIC      |               |                    |                    |
| SNP_42616_A_32520066 | NC_021165.1    | Ca_Kabuli_Chr06 | 32520066                | TT                                     | CC                 | CC               | INTERGENIC      |               |                    |                    |
| SNP_42617_A_32520244 | NC_021165.1    | Ca_Kabuli_Chr06 | 32520244                | GG                                     | AA                 | AA               | INTERGENIC      |               |                    |                    |
| SNP_42618_A_32520392 | NC_021165.1    | Ca_Kabuli_Chr06 | 32520392                | TT                                     | CC                 | CC               | INTERGENIC      |               |                    |                    |
| SNP_42619_A_32520460 | NC_021165.1    | Ca_Kabuli_Chr06 | 32520460                | TT                                     | AA                 | AA               | INTERGENIC      |               |                    |                    |
| SNP_42620_A_32520495 | NC_021165.1    | Ca_Kabuli_Chr06 | 32520495                | AA                                     | CC                 | CC               | INTERGENIC      |               |                    |                    |
| SNP_42621_A_32520504 | NC_021165.1    | Ca_Kabuli_Chr06 | 32520504                | GG                                     | AA                 | AA               | INTERGENIC      |               |                    |                    |
| SNP_42622_A_32520612 | NC_021165.1    | Ca_Kabuli_Chr06 | 32520612                | CC                                     | GG                 | GG               | INTERGENIC      |               |                    |                    |
| SNP_42623_A_32520661 | NC_021165.1    | Ca_Kabuli_Chr06 | 32520661                | AA                                     | TT                 | TT               | INTERGENIC      |               |                    |                    |
| SNP_42624_A_32520778 | NC_021165.1    | Ca_Kabuli_Chr06 | 32520778                | CC                                     | TT                 | TT               | INTERGENIC      |               |                    |                    |
| SNP_42625_A_32521173 | NC_021165.1    | Ca_Kabuli_Chr06 | 32521173                | CC                                     | TT                 | TT               | INTERGENIC      |               |                    |                    |

| SNPs IDs             | Chromosome IDs | Chromosomes     | Physical positions (bp) | CDC Frontier genome (Reference genome) | (Pusa 1103 & HPNB) | (ILWC 46 & LPNB) | Sequence Components of genome | Gene accession IDs | Putative functions          |
|----------------------|----------------|-----------------|-------------------------|----------------------------------------|--------------------|------------------|-------------------------------|--------------------|-----------------------------|
| SNP_42627_A_32521631 | NC_021165.1    | Ca_Kabuli_Chr06 | 32521631                | TT                                     | AA                 | AA               | INTERGENIC                    |                    |                             |
| SNP_42628_A_32521698 | NC_021165.1    | Ca_Kabuli_Chr06 | 32521698                | CC                                     | AA                 | AA               | INTERGENIC                    |                    |                             |
| SNP_42629_A_32521765 | NC_021165.1    | Ca_Kabuli_Chr06 | 32521765                | GG                                     | AA                 | AA               | INTERGENIC                    |                    |                             |
| SNP_42631_A_32522005 | NC_021165.1    | Ca_Kabuli_Chr06 | 32522005                | TT                                     | CC                 | CC               | INTERGENIC                    |                    |                             |
| SNP_42633_A_32522363 | NC_021165.1    | Ca_Kabuli_Chr06 | 32522363                | GG                                     | TT                 | TT               | INTERGENIC                    |                    |                             |
| SNP_42634_A_32522392 | NC_021165.1    | Ca_Kabuli_Chr06 | 32522392                | CC                                     | TT                 | TT               | INTERGENIC                    |                    |                             |
| SNP_42635_A_32538970 | NC_021165.1    | Ca_Kabuli_Chr06 | 32538970                | TT                                     | CC                 | CC               | URR                           | 101500462          | L-ascorbate oxidase homolog |
| SNP_42636_A_32539335 | NC_021165.1    | Ca_Kabuli_Chr06 | 32539335                | TT                                     | AA                 | AA               | URR                           | 101500462          | L-ascorbate oxidase homolog |
| SNP_42637_A_32539690 | NC_021165.1    | Ca_Kabuli_Chr06 | 32539690                | TT                                     | AA                 | AA               | URR                           | 101500462          | L-ascorbate oxidase homolog |
| SNP_42638_A_32539977 | NC_021165.1    | Ca_Kabuli_Chr06 | 32539977                | AA                                     | TT                 | TT               | INTERGENIC                    |                    |                             |
| SNP_42639_A_32540048 | NC_021165.1    | Ca_Kabuli_Chr06 | 32540048                | TT                                     | GG                 | GG               | INTERGENIC                    |                    |                             |
| SNP_42640_A_32540055 | NC_021165.1    | Ca_Kabuli_Chr06 | 32540055                | GG                                     | TT                 | TT               | INTERGENIC                    |                    |                             |
| SNP_42641_A_32540109 | NC_021165.1    | Ca_Kabuli_Chr06 | 32540109                | GG                                     | AA                 | AA               | INTERGENIC                    |                    |                             |
| SNP_42644_A_32540298 | NC_021165.1    | Ca_Kabuli_Chr06 | 32540298                | AA                                     | GG                 | GG               | INTERGENIC                    |                    |                             |
| SNP_42645_A_32540301 | NC_021165.1    | Ca_Kabuli_Chr06 | 32540301                | TT                                     | CC                 | CC               | INTERGENIC                    |                    |                             |
| SNP_42646_A_32540313 | NC_021165.1    | Ca_Kabuli_Chr06 | 32540313                | TT                                     | CC                 | CC               | INTERGENIC                    |                    |                             |
| SNP_42647_A_32540339 | NC_021165.1    | Ca_Kabuli_Chr06 | 32540339                | GG                                     | CC                 | CC               | INTERGENIC                    |                    |                             |
| SNP_42648_A_32540372 | NC_021165.1    | Ca_Kabuli_Chr06 | 32540372                | CC                                     | TT                 | TT               | INTERGENIC                    |                    |                             |
| SNP_42650_A_32540525 | NC_021165.1    | Ca_Kabuli_Chr06 | 32540525                | AA                                     | TT                 | TT               | INTERGENIC                    |                    |                             |
| SNP_42651_A_32540634 | NC_021165.1    | Ca_Kabuli_Chr06 | 32540634                | GG                                     | CC                 | CC               | INTERGENIC                    |                    |                             |
| SNP_42652_A_32540649 | NC_021165.1    | Ca_Kabuli_Chr06 | 32540649                | TT                                     | CC                 | CC               | INTERGENIC                    |                    |                             |
| SNP_42654_A_32540769 | NC_021165.1    | Ca_Kabuli_Chr06 | 32540769                | AA                                     | TT                 | TT               | INTERGENIC                    |                    |                             |

| SNPs IDs             | Chromosome IDs | Chromosomes     | Physical positions (bp) | CDC Frontier genome (Reference genome) | (Pusa 1103 & HPNB) | (ILWC 46 & LPNB) | Sequence genome | Components of | Gene accession IDs | Putative functions |
|----------------------|----------------|-----------------|-------------------------|----------------------------------------|--------------------|------------------|-----------------|---------------|--------------------|--------------------|
| SNP_42655_A_32552390 | NC_021165.1    | Ca_Kabuli_Chr06 | 32552390                | TT                                     | CC                 | CC               | INTERGENIC      |               |                    |                    |
| SNP_42656_A_32552896 | NC_021165.1    | Ca_Kabuli_Chr06 | 32552896                | GG                                     | AA                 | AA               | INTERGENIC      |               |                    |                    |
| SNP_42657_A_32553275 | NC_021165.1    | Ca_Kabuli_Chr06 | 32553275                | GG                                     | AA                 | AA               | INTERGENIC      |               |                    |                    |
| SNP_42658_A_32556437 | NC_021165.1    | Ca_Kabuli_Chr06 | 32556437                | CC                                     | TT                 | TT               | INTERGENIC      |               |                    |                    |
| SNP_42659_A_32572028 | NC_021165.1    | Ca_Kabuli_Chr06 | 32572028                | AA                                     | TT                 | TT               | INTERGENIC      |               |                    |                    |
| SNP_42660_A_32592079 | NC_021165.1    | Ca_Kabuli_Chr06 | 32592079                | AA                                     | GG                 | GG               | INTERGENIC      |               |                    |                    |
| SNP_42661_A_32592081 | NC_021165.1    | Ca_Kabuli_Chr06 | 32592081                | CC                                     | TT                 | TT               | INTERGENIC      |               |                    |                    |
| SNP_42662_A_32609216 | NC_021165.1    | Ca_Kabuli_Chr06 | 32609216                | TT                                     | GG                 | GG               | INTERGENIC      |               |                    |                    |
| SNP_42663_A_32609283 | NC_021165.1    | Ca_Kabuli_Chr06 | 32609283                | AA                                     | TT                 | TT               | INTERGENIC      |               |                    |                    |
| SNP_42664_A_32609299 | NC_021165.1    | Ca_Kabuli_Chr06 | 32609299                | GG                                     | AA                 | AA               | INTERGENIC      |               |                    |                    |
| SNP_42665_A_32609448 | NC_021165.1    | Ca_Kabuli_Chr06 | 32609448                | TT                                     | CC                 | CC               | INTERGENIC      |               |                    |                    |
| SNP_42666_A_32609589 | NC_021165.1    | Ca_Kabuli_Chr06 | 32609589                | CC                                     | GG                 | GG               | INTERGENIC      |               |                    |                    |
| SNP_42667_A_32609753 | NC_021165.1    | Ca_Kabuli_Chr06 | 32609753                | AA                                     | GG                 | GG               | INTERGENIC      |               |                    |                    |
| SNP_42668_A_32609793 | NC_021165.1    | Ca_Kabuli_Chr06 | 32609793                | AA                                     | GG                 | GG               | INTERGENIC      |               |                    |                    |
| SNP_42669_A_32611021 | NC_021165.1    | Ca_Kabuli_Chr06 | 32611021                | CC                                     | AA                 | AA               | INTERGENIC      |               |                    |                    |
| SNP_42670_A_32611024 | NC_021165.1    | Ca_Kabuli_Chr06 | 32611024                | AA                                     | GG                 | GG               | INTERGENIC      |               |                    |                    |
| SNP_42671_A_32614291 | NC_021165.1    | Ca_Kabuli_Chr06 | 32614291                | CC                                     | TT                 | TT               | INTERGENIC      |               |                    |                    |
| SNP_42672_A_32615361 | NC_021165.1    | Ca_Kabuli_Chr06 | 32615361                | GG                                     | AA                 | AA               | INTERGENIC      |               |                    |                    |
| SNP_42673_A_32615475 | NC_021165.1    | Ca_Kabuli_Chr06 | 32615475                | TT                                     | CC                 | CC               | INTERGENIC      |               |                    |                    |
| SNP_42674_A_32615486 | NC_021165.1    | Ca_Kabuli_Chr06 | 32615486                | TT                                     | CC                 | CC               | INTERGENIC      |               |                    |                    |
| SNP_42675_A_32615513 | NC_021165.1    | Ca_Kabuli_Chr06 | 32615513                | AA                                     | GG                 | GG               | INTERGENIC      |               |                    |                    |
| SNP_42676_A_32615711 | NC_021165.1    | Ca_Kabuli_Chr06 | 32615711                | AA                                     | TT                 | TT               | INTERGENIC      |               |                    |                    |

| SNPs IDs             | Chromosome IDs | Chromosomes     | Physical positions (bp) | CDC Frontier genome (Reference genome) | (Pusa 1103 & HPNB) | (ILWC 46 & LPNB) | Sequence genome | Components of | Gene accession IDs                          | Putative functions |
|----------------------|----------------|-----------------|-------------------------|----------------------------------------|--------------------|------------------|-----------------|---------------|---------------------------------------------|--------------------|
| SNP_42677_A_32615730 | NC_021165.1    | Ca_Kabuli_Chr06 | 32615730                | TT                                     | CC                 | CC               | INTERGENIC      |               |                                             |                    |
| SNP_42678_A_32615734 | NC_021165.1    | Ca_Kabuli_Chr06 | 32615734                | CC                                     | TT                 | TT               | INTERGENIC      |               |                                             |                    |
| SNP_42680_A_32627891 | NC_021165.1    | Ca_Kabuli_Chr06 | 32627891                | GG                                     | AA                 | AA               | INTERGENIC      |               |                                             |                    |
| SNP_42682_A_32630168 | NC_021165.1    | Ca_Kabuli_Chr06 | 32630168                | CC                                     | TT                 | TT               | INTERGENIC      |               |                                             |                    |
| SNP_42683_A_32630177 | NC_021165.1    | Ca_Kabuli_Chr06 | 32630177                | TT                                     | CC                 | CC               | INTERGENIC      |               |                                             |                    |
| SNP_42684_A_32630194 | NC_021165.1    | Ca_Kabuli_Chr06 | 32630194                | CC                                     | TT                 | TT               | INTERGENIC      |               |                                             |                    |
| SNP_42685_A_32630353 | NC_021165.1    | Ca_Kabuli_Chr06 | 32630353                | AA                                     | GG                 | GG               | INTERGENIC      |               |                                             |                    |
| SNP_42686_A_32630367 | NC_021165.1    | Ca_Kabuli_Chr06 | 32630367                | TT                                     | CC                 | CC               | INTERGENIC      |               |                                             |                    |
| SNP_42687_A_32630610 | NC_021165.1    | Ca_Kabuli_Chr06 | 32630610                | CC                                     | GG                 | GG               | INTERGENIC      |               |                                             |                    |
| SNP_42688_A_32630707 | NC_021165.1    | Ca_Kabuli_Chr06 | 32630707                | AA                                     | GG                 | GG               | INTERGENIC      |               |                                             |                    |
| SNP_42689_A_32637964 | NC_021165.1    | Ca_Kabuli_Chr06 | 32637964                | TT                                     | CC                 | CC               | INTERGENIC      |               |                                             |                    |
| SNP_42690_A_32691031 | NC_021165.1    | Ca_Kabuli_Chr06 | 32691031                | GG                                     | AA                 | AA               | INTERGENIC      |               |                                             |                    |
| SNP_42691_A_32730277 | NC_021165.1    | Ca_Kabuli_Chr06 | 32730277                | GG                                     | AA                 | AA               | INTERGENIC      |               |                                             |                    |
| SNP_42693_A_32767431 | NC_021165.1    | Ca_Kabuli_Chr06 | 32767431                | TT                                     | CC                 | CC               | INTERGENIC      |               |                                             |                    |
| SNP_42694_A_32839383 | NC_021165.1    | Ca_Kabuli_Chr06 | 32839383                | TT                                     | CC                 | CC               | INTERGENIC      |               |                                             |                    |
| SNP_42696_A_32931936 | NC_021165.1    | Ca_Kabuli_Chr06 | 32931936                | TT                                     | CC                 | CC               | URR             | 101510291     | 13-hydroxylupanine O-ligoyltransferase-like |                    |
| SNP_42698_A_32949650 | NC_021165.1    | Ca_Kabuli_Chr06 | 32949650                | CC                                     | AA                 | AA               | INTERGENIC      |               |                                             |                    |
| SNP_42701_A_33020118 | NC_021165.1    | Ca_Kabuli_Chr06 | 33020118                | AA                                     | GG                 | GG               | INTERGENIC      |               |                                             |                    |
| SNP_42702_A_33039578 | NC_021165.1    | Ca_Kabuli_Chr06 | 33039578                | CC                                     | TT                 | TT               | INTERGENIC      |               |                                             |                    |
| SNP_42703_A_33039694 | NC_021165.1    | Ca_Kabuli_Chr06 | 33039694                | GG                                     | AA                 | AA               | INTERGENIC      |               |                                             |                    |
| SNP_42704_A_33039774 | NC_021165.1    | Ca_Kabuli_Chr06 | 33039774                | TT                                     | CC                 | CC               | INTERGENIC      |               |                                             |                    |
| SNP_42705_A_33039866 | NC_021165.1    | Ca_Kabuli_Chr06 | 33039866                | AA                                     | GG                 | GG               | INTERGENIC      |               |                                             |                    |

| SNPs IDs             | Chromosome IDs | Chromosomes     | Physical positions (bp) | CDC Frontier genome (Reference genome) | (Pusa 1103 & HPNB) | (ILWC 46 & LPNB) | Sequence genome | Components of | Gene accession IDs | Putative functions |
|----------------------|----------------|-----------------|-------------------------|----------------------------------------|--------------------|------------------|-----------------|---------------|--------------------|--------------------|
| SNP_42706_A_33039919 | NC_021165.1    | Ca_Kabuli_Chr06 | 33039919                | CC                                     | TT                 | TT               | INTERGENIC      |               |                    |                    |
| SNP_42707_A_33039946 | NC_021165.1    | Ca_Kabuli_Chr06 | 33039946                | AA                                     | GG                 | GG               | INTERGENIC      |               |                    |                    |
| SNP_42708_A_33040033 | NC_021165.1    | Ca_Kabuli_Chr06 | 33040033                | GG                                     | TT                 | TT               | INTERGENIC      |               |                    |                    |
| SNP_42709_A_33055211 | NC_021165.1    | Ca_Kabuli_Chr06 | 33055211                | GG                                     | AA                 | AA               | INTERGENIC      |               |                    |                    |
| SNP_42710_A_33055378 | NC_021165.1    | Ca_Kabuli_Chr06 | 33055378                | TT                                     | AA                 | AA               | INTERGENIC      |               |                    |                    |
| SNP_42712_A_33055492 | NC_021165.1    | Ca_Kabuli_Chr06 | 33055492                | AA                                     | CC                 | CC               | INTERGENIC      |               |                    |                    |
| SNP_42713_A_33066872 | NC_021165.1    | Ca_Kabuli_Chr06 | 33066872                | GG                                     | TT                 | TT               | INTERGENIC      |               |                    |                    |
| SNP_42714_A_33094201 | NC_021165.1    | Ca_Kabuli_Chr06 | 33094201                | CC                                     | TT                 | TT               | INTERGENIC      |               |                    |                    |
| SNP_42715_A_33094227 | NC_021165.1    | Ca_Kabuli_Chr06 | 33094227                | GG                                     | CC                 | CC               | INTERGENIC      |               |                    |                    |
| SNP_42716_A_33094241 | NC_021165.1    | Ca_Kabuli_Chr06 | 33094241                | CC                                     | TT                 | TT               | INTERGENIC      |               |                    |                    |
| SNP_42717_A_33094249 | NC_021165.1    | Ca_Kabuli_Chr06 | 33094249                | TT                                     | CC                 | CC               | INTERGENIC      |               |                    |                    |
| SNP_42718_A_33094269 | NC_021165.1    | Ca_Kabuli_Chr06 | 33094269                | AA                                     | GG                 | GG               | INTERGENIC      |               |                    |                    |
| SNP_42719_A_33094293 | NC_021165.1    | Ca_Kabuli_Chr06 | 33094293                | CC                                     | TT                 | TT               | INTERGENIC      |               |                    |                    |
| SNP_42720_A_33094309 | NC_021165.1    | Ca_Kabuli_Chr06 | 33094309                | GG                                     | AA                 | AA               | INTERGENIC      |               |                    |                    |
| SNP_42721_A_33094315 | NC_021165.1    | Ca_Kabuli_Chr06 | 33094315                | AA                                     | TT                 | TT               | INTERGENIC      |               |                    |                    |
| SNP_42722_A_33094337 | NC_021165.1    | Ca_Kabuli_Chr06 | 33094337                | CC                                     | TT                 | TT               | INTERGENIC      |               |                    |                    |
| SNP_42723_A_33094358 | NC_021165.1    | Ca_Kabuli_Chr06 | 33094358                | GG                                     | AA                 | AA               | INTERGENIC      |               |                    |                    |
| SNP_42724_A_33094384 | NC_021165.1    | Ca_Kabuli_Chr06 | 33094384                | TT                                     | CC                 | CC               | INTERGENIC      |               |                    |                    |
| SNP_42725_A_33094404 | NC_021165.1    | Ca_Kabuli_Chr06 | 33094404                | CC                                     | TT                 | TT               | INTERGENIC      |               |                    |                    |
| SNP_42726_A_33094436 | NC_021165.1    | Ca_Kabuli_Chr06 | 33094436                | AA                                     | TT                 | TT               | INTERGENIC      |               |                    |                    |
| SNP_42727_A_33094502 | NC_021165.1    | Ca_Kabuli_Chr06 | 33094502                | TT                                     | CC                 | CC               | INTERGENIC      |               |                    |                    |
| SNP_42728_A_33094548 | NC_021165.1    | Ca_Kabuli_Chr06 | 33094548                | AA                                     | CC                 | CC               | INTERGENIC      |               |                    |                    |

| SNPs IDs             | Chromosome IDs | Chromosomes     | Physical positions (bp) | CDC Frontier (Reference genome) | (Pusa 1103 & HPNB) | (ILWC 46 & LPNB) | Sequence Components of genome | Gene accession IDs | Putative functions           |
|----------------------|----------------|-----------------|-------------------------|---------------------------------|--------------------|------------------|-------------------------------|--------------------|------------------------------|
| SNP_42729_A_33094583 | NC_021165.1    | Ca_Kabuli_Chr06 | 33094583                | AA                              | CC                 | CC               | INTERGENIC                    |                    |                              |
| SNP_42730_A_33094590 | NC_021165.1    | Ca_Kabuli_Chr06 | 33094590                | CC                              | TT                 | TT               | INTERGENIC                    |                    |                              |
| SNP_42732_A_33094656 | NC_021165.1    | Ca_Kabuli_Chr06 | 33094656                | TT                              | CC                 | CC               | INTERGENIC                    |                    |                              |
| SNP_42734_A_33094876 | NC_021165.1    | Ca_Kabuli_Chr06 | 33094876                | GG                              | AA                 | AA               | INTERGENIC                    |                    |                              |
| SNP_42735_A_33094905 | NC_021165.1    | Ca_Kabuli_Chr06 | 33094905                | GG                              | AA                 | AA               | INTERGENIC                    |                    |                              |
| SNP_42736_A_33105130 | NC_021165.1    | Ca_Kabuli_Chr06 | 33105130                | TT                              | CC                 | CC               | URR                           | 101513196          | uncharacterized LOC101513196 |
| SNP_42737_A_33105230 | NC_021165.1    | Ca_Kabuli_Chr06 | 33105230                | CC                              | TT                 | TT               | URR                           | 101513196          | uncharacterized LOC101513196 |
| SNP_42738_A_33105340 | NC_021165.1    | Ca_Kabuli_Chr06 | 33105340                | TT                              | CC                 | CC               | URR                           | 101513196          | uncharacterized LOC101513196 |
| SNP_42739_A_33105372 | NC_021165.1    | Ca_Kabuli_Chr06 | 33105372                | GG                              | AA                 | AA               | URR                           | 101513196          | uncharacterized LOC101513196 |
| SNP_42740_A_33105496 | NC_021165.1    | Ca_Kabuli_Chr06 | 33105496                | GG                              | AA                 | AA               | URR                           | 101513196          | uncharacterized LOC101513196 |
| SNP_42741_A_33105498 | NC_021165.1    | Ca_Kabuli_Chr06 | 33105498                | CC                              | TT                 | TT               | URR                           | 101513196          | uncharacterized LOC101513196 |
| SNP_42742_A_33105506 | NC_021165.1    | Ca_Kabuli_Chr06 | 33105506                | GG                              | TT                 | TT               | URR                           | 101513196          | uncharacterized LOC101513196 |
| SNP_42743_A_33106397 | NC_021165.1    | Ca_Kabuli_Chr06 | 33106397                | GG                              | AA                 | AA               | URR                           | 101513196          | uncharacterized LOC101513196 |
| SNP_42744_A_33106430 | NC_021165.1    | Ca_Kabuli_Chr06 | 33106430                | AA                              | GG                 | GG               | URR                           | 101513196          | uncharacterized LOC101513196 |
| SNP_42745_A_33176504 | NC_021165.1    | Ca_Kabuli_Chr06 | 33176504                | TT                              | AA                 | AA               | NON_SYNONYMOUS_CODING         | 101513519          | Unknown function             |
| SNP_42746_A_33176508 | NC_021165.1    | Ca_Kabuli_Chr06 | 33176508                | CC                              | TT                 | TT               | SYNONYMOUS_CODING             | 101513519          | Unknown function             |
| SNP_42747_A_33177545 | NC_021165.1    | Ca_Kabuli_Chr06 | 33177545                | TT                              | CC                 | CC               | INTRON                        | 101513519          | Unknown function             |
| SNP_42748_A_33177655 | NC_021165.1    | Ca_Kabuli_Chr06 | 33177655                | AA                              | GG                 | GG               | INTRON                        | 101513519          | Unknown function             |
| SNP_42750_A_33177703 | NC_021165.1    | Ca_Kabuli_Chr06 | 33177703                | CC                              | GG                 | GG               | INTRON                        | 101513519          | Unknown function             |
| SNP_42751_A_33177704 | NC_021165.1    | Ca_Kabuli_Chr06 | 33177704                | TT                              | AA                 | AA               | INTRON                        | 101513519          | Unknown function             |
| SNP_42752_A_33177705 | NC_021165.1    | Ca_Kabuli_Chr06 | 33177705                | CC                              | AA                 | AA               | INTRON                        | 101513519          | Unknown function             |
| SNP_42753_A_33177708 | NC_021165.1    | Ca_Kabuli_Chr06 | 33177708                | CC                              | GG                 | GG               | INTRON                        | 101513519          | Unknown function             |

| SNPs IDs             | Chromosome IDs | Chromosomes     | Physical positions (bp) | CDC Frontier genome (Reference genome) | (Pusa 1103 & HPNB) | (ILWC 46 & LPNB) | Sequence Components of genome | Gene accession IDs | Putative functions       |
|----------------------|----------------|-----------------|-------------------------|----------------------------------------|--------------------|------------------|-------------------------------|--------------------|--------------------------|
| SNP_42754_A_33177868 | NC_021165.1    | Ca_Kabuli_Chr06 | 33177868                | TT                                     | CC                 | CC               | STOP_LOST                     | 101513519          | Unknown function         |
| SNP_42755_A_33177902 | NC_021165.1    | Ca_Kabuli_Chr06 | 33177902                | TT                                     | CC                 | CC               | NON_SYNONYMOUS_CODING         | 101513519          | Unknown function         |
| SNP_42756_A_33177931 | NC_021165.1    | Ca_Kabuli_Chr06 | 33177931                | AA                                     | GG                 | GG               | SYNONYMOUS_CODING             | 101513519          | Unknown function         |
| SNP_42757_A_33177970 | NC_021165.1    | Ca_Kabuli_Chr06 | 33177970                | TT                                     | GG                 | GG               | SYNONYMOUS_CODING             | 101513519          | Unknown function         |
| SNP_42758_A_33180280 | NC_021165.1    | Ca_Kabuli_Chr06 | 33180280                | CC                                     | TT                 | TT               | SYNONYMOUS_CODING             | 101513519          | Unknown function         |
| SNP_42759_A_33210434 | NC_021165.1    | Ca_Kabuli_Chr06 | 33210434                | TT                                     | CC                 | CC               | INTERGENIC                    |                    |                          |
| SNP_42760_A_33210467 | NC_021165.1    | Ca_Kabuli_Chr06 | 33210467                | CC                                     | AA                 | AA               | INTERGENIC                    |                    |                          |
| SNP_42761_A_33210473 | NC_021165.1    | Ca_Kabuli_Chr06 | 33210473                | GG                                     | CC                 | CC               | INTERGENIC                    |                    |                          |
| SNP_42762_A_33210480 | NC_021165.1    | Ca_Kabuli_Chr06 | 33210480                | AA                                     | CC                 | CC               | INTERGENIC                    |                    |                          |
| SNP_42763_A_33210548 | NC_021165.1    | Ca_Kabuli_Chr06 | 33210548                | AA                                     | TT                 | TT               | INTERGENIC                    |                    |                          |
| SNP_42764_A_33219704 | NC_021165.1    | Ca_Kabuli_Chr06 | 33219704                | AA                                     | TT                 | TT               | URR                           | 101514497          | F-box protein CPR30-like |
| SNP_42765_A_33228473 | NC_021165.1    | Ca_Kabuli_Chr06 | 33228473                | GG                                     | AA                 | AA               | INTERGENIC                    |                    |                          |
| SNP_42766_A_33228498 | NC_021165.1    | Ca_Kabuli_Chr06 | 33228498                | AA                                     | GG                 | GG               | INTERGENIC                    |                    |                          |
| SNP_42767_A_33228503 | NC_021165.1    | Ca_Kabuli_Chr06 | 33228503                | CC                                     | TT                 | TT               | INTERGENIC                    |                    |                          |
| SNP_42768_A_33228509 | NC_021165.1    | Ca_Kabuli_Chr06 | 33228509                | GG                                     | AA                 | AA               | INTERGENIC                    |                    |                          |
| SNP_42769_A_33228525 | NC_021165.1    | Ca_Kabuli_Chr06 | 33228525                | GG                                     | AA                 | AA               | INTERGENIC                    |                    |                          |
| SNP_42770_A_33228569 | NC_021165.1    | Ca_Kabuli_Chr06 | 33228569                | AA                                     | CC                 | CC               | INTERGENIC                    |                    |                          |
| SNP_42771_A_33228598 | NC_021165.1    | Ca_Kabuli_Chr06 | 33228598                | TT                                     | AA                 | AA               | INTERGENIC                    |                    |                          |
| SNP_42772_A_33228667 | NC_021165.1    | Ca_Kabuli_Chr06 | 33228667                | TT                                     | AA                 | AA               | INTERGENIC                    |                    |                          |
| SNP_42773_A_33228688 | NC_021165.1    | Ca_Kabuli_Chr06 | 33228688                | CC                                     | TT                 | TT               | INTERGENIC                    |                    |                          |
| SNP_42774_A_33228923 | NC_021165.1    | Ca_Kabuli_Chr06 | 33228923                | TT                                     | GG                 | GG               | INTERGENIC                    |                    |                          |
| SNP_42778_A_33229305 | NC_021165.1    | Ca_Kabuli_Chr06 | 33229305                | TT                                     | AA                 | AA               | INTERGENIC                    |                    |                          |

| SNPs IDs             | Chromosome IDs | Chromosomes     | Physical positions (bp) | CDC Frontier genome (Reference genome) | (Pusa 1103 & HPNB) | (ILWC 46 & LPNB) | Sequence genome | Components of | Gene accession IDs | Putative functions |
|----------------------|----------------|-----------------|-------------------------|----------------------------------------|--------------------|------------------|-----------------|---------------|--------------------|--------------------|
| SNP_42780_A_33229398 | NC_021165.1    | Ca_Kabuli_Chr06 | 33229398                | AA                                     | CC                 | CC               | INTERGENIC      |               |                    |                    |
| SNP_42782_A_33229560 | NC_021165.1    | Ca_Kabuli_Chr06 | 33229560                | CC                                     | TT                 | TT               | INTERGENIC      |               |                    |                    |
| SNP_42783_A_33229652 | NC_021165.1    | Ca_Kabuli_Chr06 | 33229652                | TT                                     | AA                 | AA               | INTERGENIC      |               |                    |                    |
| SNP_42784_A_33229713 | NC_021165.1    | Ca_Kabuli_Chr06 | 33229713                | TT                                     | CC                 | CC               | INTERGENIC      |               |                    |                    |
| SNP_42785_A_33229723 | NC_021165.1    | Ca_Kabuli_Chr06 | 33229723                | TT                                     | CC                 | CC               | INTERGENIC      |               |                    |                    |
| SNP_42786_A_33229744 | NC_021165.1    | Ca_Kabuli_Chr06 | 33229744                | AA                                     | GG                 | GG               | INTERGENIC      |               |                    |                    |
| SNP_42787_A_33229776 | NC_021165.1    | Ca_Kabuli_Chr06 | 33229776                | AA                                     | GG                 | GG               | INTERGENIC      |               |                    |                    |
| SNP_42789_A_33229821 | NC_021165.1    | Ca_Kabuli_Chr06 | 33229821                | TT                                     | GG                 | GG               | INTERGENIC      |               |                    |                    |
| SNP_42790_A_33229887 | NC_021165.1    | Ca_Kabuli_Chr06 | 33229887                | GG                                     | AA                 | AA               | INTERGENIC      |               |                    |                    |
| SNP_42791_A_33229889 | NC_021165.1    | Ca_Kabuli_Chr06 | 33229889                | TT                                     | CC                 | CC               | INTERGENIC      |               |                    |                    |
| SNP_42792_A_33229924 | NC_021165.1    | Ca_Kabuli_Chr06 | 33229924                | TT                                     | GG                 | GG               | INTERGENIC      |               |                    |                    |
| SNP_42793_A_33229930 | NC_021165.1    | Ca_Kabuli_Chr06 | 33229930                | TT                                     | AA                 | AA               | INTERGENIC      |               |                    |                    |
| SNP_42794_A_33229987 | NC_021165.1    | Ca_Kabuli_Chr06 | 33229987                | AA                                     | TT                 | TT               | INTERGENIC      |               |                    |                    |
| SNP_42796_A_33230014 | NC_021165.1    | Ca_Kabuli_Chr06 | 33230014                | AA                                     | TT                 | TT               | INTERGENIC      |               |                    |                    |
| SNP_42797_A_33230084 | NC_021165.1    | Ca_Kabuli_Chr06 | 33230084                | GG                                     | AA                 | AA               | INTERGENIC      |               |                    |                    |
| SNP_42798_A_33230304 | NC_021165.1    | Ca_Kabuli_Chr06 | 33230304                | CC                                     | TT                 | TT               | INTERGENIC      |               |                    |                    |
| SNP_42799_A_33230328 | NC_021165.1    | Ca_Kabuli_Chr06 | 33230328                | TT                                     | CC                 | CC               | INTERGENIC      |               |                    |                    |
| SNP_42800_A_33230334 | NC_021165.1    | Ca_Kabuli_Chr06 | 33230334                | AA                                     | GG                 | GG               | INTERGENIC      |               |                    |                    |
| SNP_42801_A_33230335 | NC_021165.1    | Ca_Kabuli_Chr06 | 33230335                | GG                                     | AA                 | AA               | INTERGENIC      |               |                    |                    |
| SNP_42802_A_33230346 | NC_021165.1    | Ca_Kabuli_Chr06 | 33230346                | CC                                     | GG                 | GG               | INTERGENIC      |               |                    |                    |
| SNP_42803_A_33230493 | NC_021165.1    | Ca_Kabuli_Chr06 | 33230493                | CC                                     | TT                 | TT               | INTERGENIC      |               |                    |                    |
| SNP_42804_A_33230526 | NC_021165.1    | Ca_Kabuli_Chr06 | 33230526                | TT                                     | GG                 | GG               | INTERGENIC      |               |                    |                    |



| SNPs IDs             | Chromosome IDs | Chromosomes     | Physical positions (bp) | CDC Frontier genome (Reference genome) | (Pusa 1103 & HPNB) | (ILWC 46 & LPNB) | Sequence genome | Components of | Gene accession IDs | Putative functions |
|----------------------|----------------|-----------------|-------------------------|----------------------------------------|--------------------|------------------|-----------------|---------------|--------------------|--------------------|
| SNP_42805_A_33230578 | NC_021165.1    | Ca_Kabuli_Chr06 | 33230578                | CC                                     | TT                 | TT               | INTERGENIC      |               |                    |                    |
| SNP_42808_A_33233710 | NC_021165.1    | Ca_Kabuli_Chr06 | 33233710                | CC                                     | TT                 | TT               | INTERGENIC      |               |                    |                    |
| SNP_42809_A_33233716 | NC_021165.1    | Ca_Kabuli_Chr06 | 33233716                | TT                                     | CC                 | CC               | INTERGENIC      |               |                    |                    |
| SNP_42810_A_33233728 | NC_021165.1    | Ca_Kabuli_Chr06 | 33233728                | GG                                     | AA                 | AA               | INTERGENIC      |               |                    |                    |
| SNP_42811_A_33233768 | NC_021165.1    | Ca_Kabuli_Chr06 | 33233768                | CC                                     | TT                 | TT               | INTERGENIC      |               |                    |                    |
| SNP_42812_A_33233791 | NC_021165.1    | Ca_Kabuli_Chr06 | 33233791                | AA                                     | GG                 | GG               | INTERGENIC      |               |                    |                    |
| SNP_42813_A_33233859 | NC_021165.1    | Ca_Kabuli_Chr06 | 33233859                | TT                                     | GG                 | GG               | INTERGENIC      |               |                    |                    |
| SNP_42814_A_33234076 | NC_021165.1    | Ca_Kabuli_Chr06 | 33234076                | AA                                     | TT                 | TT               | INTERGENIC      |               |                    |                    |
| SNP_42815_A_33234428 | NC_021165.1    | Ca_Kabuli_Chr06 | 33234428                | TT                                     | AA                 | AA               | INTERGENIC      |               |                    |                    |
| SNP_42816_A_33234444 | NC_021165.1    | Ca_Kabuli_Chr06 | 33234444                | TT                                     | CC                 | CC               | INTERGENIC      |               |                    |                    |
| SNP_42817_A_33234543 | NC_021165.1    | Ca_Kabuli_Chr06 | 33234543                | TT                                     | AA                 | AA               | INTERGENIC      |               |                    |                    |
| SNP_42818_A_33236611 | NC_021165.1    | Ca_Kabuli_Chr06 | 33236611                | AA                                     | GG                 | GG               | INTERGENIC      |               |                    |                    |
| SNP_42819_A_33236612 | NC_021165.1    | Ca_Kabuli_Chr06 | 33236612                | AA                                     | TT                 | TT               | INTERGENIC      |               |                    |                    |
| SNP_42820_A_33240127 | NC_021165.1    | Ca_Kabuli_Chr06 | 33240127                | TT                                     | GG                 | GG               | INTERGENIC      |               |                    |                    |
| SNP_42821_A_33240198 | NC_021165.1    | Ca_Kabuli_Chr06 | 33240198                | CC                                     | GG                 | GG               | INTERGENIC      |               |                    |                    |
| SNP_42823_A_33240324 | NC_021165.1    | Ca_Kabuli_Chr06 | 33240324                | TT                                     | CC                 | CC               | INTERGENIC      |               |                    |                    |
| SNP_42824_A_33240364 | NC_021165.1    | Ca_Kabuli_Chr06 | 33240364                | CC                                     | TT                 | TT               | INTERGENIC      |               |                    |                    |
| SNP_42826_A_33240405 | NC_021165.1    | Ca_Kabuli_Chr06 | 33240405                | TT                                     | GG                 | GG               | INTERGENIC      |               |                    |                    |
| SNP_42827_A_33240416 | NC_021165.1    | Ca_Kabuli_Chr06 | 33240416                | GG                                     | TT                 | TT               | INTERGENIC      |               |                    |                    |
| SNP_42828_A_33240535 | NC_021165.1    | Ca_Kabuli_Chr06 | 33240535                | AA                                     | CC                 | CC               | INTERGENIC      |               |                    |                    |
| SNP_42829_A_33240538 | NC_021165.1    | Ca_Kabuli_Chr06 | 33240538                | TT                                     | AA                 | AA               | INTERGENIC      |               |                    |                    |
| SNP_42830_A_33240550 | NC_021165.1    | Ca_Kabuli_Chr06 | 33240550                | TT                                     | CC                 | CC               | INTERGENIC      |               |                    |                    |

| SNPs IDs             | Chromosome IDs | Chromosomes     | Physical positions (bp) | CDC Frontier genome (Reference genome) | (Pusa 1103 & HPNB) | (ILWC 46 & LPNB) | Sequence genome | Components of | Gene accession IDs | Putative functions |
|----------------------|----------------|-----------------|-------------------------|----------------------------------------|--------------------|------------------|-----------------|---------------|--------------------|--------------------|
| SNP_42831_A_33240564 | NC_021165.1    | Ca_Kabuli_Chr06 | 33240564                | TT                                     | AA                 | AA               | INTERGENIC      |               |                    |                    |
| SNP_42832_A_33240617 | NC_021165.1    | Ca_Kabuli_Chr06 | 33240617                | AA                                     | GG                 | GG               | INTERGENIC      |               |                    |                    |
| SNP_42833_A_33240651 | NC_021165.1    | Ca_Kabuli_Chr06 | 33240651                | GG                                     | AA                 | AA               | INTERGENIC      |               |                    |                    |
| SNP_42834_A_33240685 | NC_021165.1    | Ca_Kabuli_Chr06 | 33240685                | CC                                     | TT                 | TT               | INTERGENIC      |               |                    |                    |
| SNP_42836_A_33240811 | NC_021165.1    | Ca_Kabuli_Chr06 | 33240811                | GG                                     | CC                 | CC               | INTERGENIC      |               |                    |                    |
| SNP_42837_A_33240844 | NC_021165.1    | Ca_Kabuli_Chr06 | 33240844                | TT                                     | CC                 | CC               | INTERGENIC      |               |                    |                    |
| SNP_42838_A_33240911 | NC_021165.1    | Ca_Kabuli_Chr06 | 33240911                | AA                                     | GG                 | GG               | INTERGENIC      |               |                    |                    |
| SNP_42839_A_33240966 | NC_021165.1    | Ca_Kabuli_Chr06 | 33240966                | AA                                     | GG                 | GG               | INTERGENIC      |               |                    |                    |
| SNP_42840_A_33241158 | NC_021165.1    | Ca_Kabuli_Chr06 | 33241158                | AA                                     | GG                 | GG               | INTERGENIC      |               |                    |                    |
| SNP_42841_A_33241203 | NC_021165.1    | Ca_Kabuli_Chr06 | 33241203                | TT                                     | AA                 | AA               | INTERGENIC      |               |                    |                    |
| SNP_42842_A_33241211 | NC_021165.1    | Ca_Kabuli_Chr06 | 33241211                | GG                                     | AA                 | AA               | INTERGENIC      |               |                    |                    |
| SNP_42843_A_33241236 | NC_021165.1    | Ca_Kabuli_Chr06 | 33241236                | CC                                     | AA                 | AA               | INTERGENIC      |               |                    |                    |
| SNP_42844_A_33241247 | NC_021165.1    | Ca_Kabuli_Chr06 | 33241247                | CC                                     | TT                 | TT               | INTERGENIC      |               |                    |                    |
| SNP_42845_A_33241264 | NC_021165.1    | Ca_Kabuli_Chr06 | 33241264                | CC                                     | TT                 | TT               | INTERGENIC      |               |                    |                    |
| SNP_42846_A_33241304 | NC_021165.1    | Ca_Kabuli_Chr06 | 33241304                | CC                                     | AA                 | AA               | INTERGENIC      |               |                    |                    |
| SNP_42847_A_33241307 | NC_021165.1    | Ca_Kabuli_Chr06 | 33241307                | AA                                     | CC                 | CC               | INTERGENIC      |               |                    |                    |
| SNP_42848_A_33241487 | NC_021165.1    | Ca_Kabuli_Chr06 | 33241487                | GG                                     | TT                 | TT               | INTERGENIC      |               |                    |                    |
| SNP_42850_A_33265837 | NC_021165.1    | Ca_Kabuli_Chr06 | 33265837                | AA                                     | GG                 | GG               | INTERGENIC      |               |                    |                    |
| SNP_42851_A_33282973 | NC_021165.1    | Ca_Kabuli_Chr06 | 33282973                | TT                                     | CC                 | CC               | INTERGENIC      |               |                    |                    |
| SNP_42852_A_33283032 | NC_021165.1    | Ca_Kabuli_Chr06 | 33283032                | AA                                     | TT                 | TT               | INTERGENIC      |               |                    |                    |
| SNP_42853_A_33283038 | NC_021165.1    | Ca_Kabuli_Chr06 | 33283038                | GG                                     | TT                 | TT               | INTERGENIC      |               |                    |                    |
| SNP_42854_A_33283053 | NC_021165.1    | Ca_Kabuli_Chr06 | 33283053                | CC                                     | AA                 | AA               | INTERGENIC      |               |                    |                    |

| SNPs IDs             | Chromosome IDs | Chromosomes     | Physical positions (bp) | CDC Frontier (Reference genome) | (Pusa 1103 & HPNB) | (ILWC 46 & LPNB) | Sequence genome | Components of | Gene accession IDs | Putative functions |
|----------------------|----------------|-----------------|-------------------------|---------------------------------|--------------------|------------------|-----------------|---------------|--------------------|--------------------|
| SNP_42855_A_33283076 | NC_021165.1    | Ca_Kabuli_Chr06 | 33283076                | TT                              | CC                 | CC               | INTERGENIC      |               |                    |                    |
| SNP_42856_A_33283094 | NC_021165.1    | Ca_Kabuli_Chr06 | 33283094                | CC                              | TT                 | TT               | INTERGENIC      |               |                    |                    |
| SNP_42857_A_33283115 | NC_021165.1    | Ca_Kabuli_Chr06 | 33283115                | AA                              | TT                 | TT               | INTERGENIC      |               |                    |                    |
| SNP_42858_A_33283123 | NC_021165.1    | Ca_Kabuli_Chr06 | 33283123                | AA                              | GG                 | GG               | INTERGENIC      |               |                    |                    |
| SNP_42859_A_33283129 | NC_021165.1    | Ca_Kabuli_Chr06 | 33283129                | GG                              | AA                 | AA               | INTERGENIC      |               |                    |                    |
| SNP_42860_A_33283149 | NC_021165.1    | Ca_Kabuli_Chr06 | 33283149                | GG                              | TT                 | TT               | INTERGENIC      |               |                    |                    |
| SNP_42861_A_33283326 | NC_021165.1    | Ca_Kabuli_Chr06 | 33283326                | CC                              | GG                 | GG               | INTERGENIC      |               |                    |                    |
| SNP_42862_A_33283365 | NC_021165.1    | Ca_Kabuli_Chr06 | 33283365                | CC                              | TT                 | TT               | INTERGENIC      |               |                    |                    |
| SNP_42863_A_33283381 | NC_021165.1    | Ca_Kabuli_Chr06 | 33283381                | TT                              | GG                 | GG               | INTERGENIC      |               |                    |                    |
| SNP_42864_A_33283440 | NC_021165.1    | Ca_Kabuli_Chr06 | 33283440                | CC                              | TT                 | TT               | INTERGENIC      |               |                    |                    |
| SNP_42865_A_33283529 | NC_021165.1    | Ca_Kabuli_Chr06 | 33283529                | TT                              | AA                 | AA               | INTERGENIC      |               |                    |                    |
| SNP_42866_A_33293477 | NC_021165.1    | Ca_Kabuli_Chr06 | 33293477                | AA                              | TT                 | TT               | INTERGENIC      |               |                    |                    |
| SNP_42867_A_33293521 | NC_021165.1    | Ca_Kabuli_Chr06 | 33293521                | GG                              | AA                 | AA               | INTERGENIC      |               |                    |                    |
| SNP_42868_A_33293535 | NC_021165.1    | Ca_Kabuli_Chr06 | 33293535                | CC                              | TT                 | TT               | INTERGENIC      |               |                    |                    |
| SNP_42869_A_33293560 | NC_021165.1    | Ca_Kabuli_Chr06 | 33293560                | CC                              | TT                 | TT               | INTERGENIC      |               |                    |                    |
| SNP_42870_A_33293697 | NC_021165.1    | Ca_Kabuli_Chr06 | 33293697                | AA                              | GG                 | GG               | INTERGENIC      |               |                    |                    |
| SNP_42871_A_33293738 | NC_021165.1    | Ca_Kabuli_Chr06 | 33293738                | AA                              | TT                 | GG               | INTERGENIC      |               |                    |                    |
| SNP_42872_A_33293792 | NC_021165.1    | Ca_Kabuli_Chr06 | 33293792                | AA                              | GG                 | GG               | INTERGENIC      |               |                    |                    |
| SNP_42873_A_33293861 | NC_021165.1    | Ca_Kabuli_Chr06 | 33293861                | TT                              | AA                 | AA               | INTERGENIC      |               |                    |                    |
| SNP_42874_A_33293862 | NC_021165.1    | Ca_Kabuli_Chr06 | 33293862                | TT                              | GG                 | GG               | INTERGENIC      |               |                    |                    |
| SNP_42875_A_33295156 | NC_021165.1    | Ca_Kabuli_Chr06 | 33295156                | CC                              | TT                 | TT               | INTERGENIC      |               |                    |                    |
| SNP_42876_A_33295248 | NC_021165.1    | Ca_Kabuli_Chr06 | 33295248                | GG                              | TT                 | TT               | INTERGENIC      |               |                    |                    |

| SNPs IDs             | Chromosome IDs | Chromosomes     | Physical positions (bp) | CDC Frontier genome (Reference genome) | (Pusa 1103 & HPNB) | (ILWC 46 & LPNB) | Sequence genome | Components of | Gene accession IDs | Putative functions |
|----------------------|----------------|-----------------|-------------------------|----------------------------------------|--------------------|------------------|-----------------|---------------|--------------------|--------------------|
| SNP_42877_A_33295284 | NC_021165.1    | Ca_Kabuli_Chr06 | 33295284                | TT                                     | CC                 | CC               | INTERGENIC      |               |                    |                    |
| SNP_42878_A_33295296 | NC_021165.1    | Ca_Kabuli_Chr06 | 33295296                | AA                                     | GG                 | GG               | INTERGENIC      |               |                    |                    |
| SNP_42879_A_33295478 | NC_021165.1    | Ca_Kabuli_Chr06 | 33295478                | TT                                     | AA                 | AA               | INTERGENIC      |               |                    |                    |
| SNP_42880_A_33295749 | NC_021165.1    | Ca_Kabuli_Chr06 | 33295749                | GG                                     | CC                 | CC               | INTERGENIC      |               |                    |                    |
| SNP_42881_A_33295779 | NC_021165.1    | Ca_Kabuli_Chr06 | 33295779                | GG                                     | CC                 | CC               | INTERGENIC      |               |                    |                    |
| SNP_42882_A_33295852 | NC_021165.1    | Ca_Kabuli_Chr06 | 33295852                | AA                                     | CC                 | CC               | INTERGENIC      |               |                    |                    |
| SNP_42883_A_33295936 | NC_021165.1    | Ca_Kabuli_Chr06 | 33295936                | CC                                     | TT                 | TT               | INTERGENIC      |               |                    |                    |
| SNP_42884_A_33295985 | NC_021165.1    | Ca_Kabuli_Chr06 | 33295985                | TT                                     | CC                 | CC               | INTERGENIC      |               |                    |                    |
| SNP_42885_A_33295998 | NC_021165.1    | Ca_Kabuli_Chr06 | 33295998                | TT                                     | CC                 | CC               | INTERGENIC      |               |                    |                    |
| SNP_42886_A_33296060 | NC_021165.1    | Ca_Kabuli_Chr06 | 33296060                | AA                                     | GG                 | GG               | INTERGENIC      |               |                    |                    |
| SNP_42887_A_33296147 | NC_021165.1    | Ca_Kabuli_Chr06 | 33296147                | GG                                     | CC                 | CC               | INTERGENIC      |               |                    |                    |
| SNP_42888_A_33296174 | NC_021165.1    | Ca_Kabuli_Chr06 | 33296174                | GG                                     | CC                 | CC               | INTERGENIC      |               |                    |                    |
| SNP_42889_A_33296181 | NC_021165.1    | Ca_Kabuli_Chr06 | 33296181                | AA                                     | CC                 | CC               | INTERGENIC      |               |                    |                    |
| SNP_42890_A_33296248 | NC_021165.1    | Ca_Kabuli_Chr06 | 33296248                | AA                                     | CC                 | CC               | INTERGENIC      |               |                    |                    |
| SNP_42892_A_33296423 | NC_021165.1    | Ca_Kabuli_Chr06 | 33296423                | TT                                     | CC                 | CC               | INTERGENIC      |               |                    |                    |
| SNP_42893_A_33296474 | NC_021165.1    | Ca_Kabuli_Chr06 | 33296474                | CC                                     | TT                 | TT               | INTERGENIC      |               |                    |                    |
| SNP_42894_A_33296570 | NC_021165.1    | Ca_Kabuli_Chr06 | 33296570                | TT                                     | CC                 | CC               | INTERGENIC      |               |                    |                    |
| SNP_42895_A_33296606 | NC_021165.1    | Ca_Kabuli_Chr06 | 33296606                | AA                                     | TT                 | TT               | INTERGENIC      |               |                    |                    |
| SNP_42896_A_33296649 | NC_021165.1    | Ca_Kabuli_Chr06 | 33296649                | CC                                     | TT                 | TT               | INTERGENIC      |               |                    |                    |
| SNP_42897_A_33296672 | NC_021165.1    | Ca_Kabuli_Chr06 | 33296672                | CC                                     | AA                 | AA               | INTERGENIC      |               |                    |                    |
| SNP_42898_A_33296692 | NC_021165.1    | Ca_Kabuli_Chr06 | 33296692                | AA                                     | GG                 | GG               | INTERGENIC      |               |                    |                    |
| SNP_42899_A_33296728 | NC_021165.1    | Ca_Kabuli_Chr06 | 33296728                | GG                                     | AA                 | AA               | INTERGENIC      |               |                    |                    |

| SNPs IDs             | Chromosome IDs | Chromosomes     | Physical positions (bp) | CDC Frontier genome (Reference genome) | (Pusa 1103 & HPNB) | (ILWC 46 & LPNB) | Sequence genome | Components of | Gene accession IDs | Putative functions |
|----------------------|----------------|-----------------|-------------------------|----------------------------------------|--------------------|------------------|-----------------|---------------|--------------------|--------------------|
| SNP_42900_A_33296836 | NC_021165.1    | Ca_Kabuli_Chr06 | 33296836                | GG                                     | AA                 | AA               | INTERGENIC      |               |                    |                    |
| SNP_42901_A_33296895 | NC_021165.1    | Ca_Kabuli_Chr06 | 33296895                | AA                                     | GG                 | GG               | INTERGENIC      |               |                    |                    |
| SNP_42902_A_33296929 | NC_021165.1    | Ca_Kabuli_Chr06 | 33296929                | GG                                     | AA                 | AA               | INTERGENIC      |               |                    |                    |
| SNP_42903_A_33296936 | NC_021165.1    | Ca_Kabuli_Chr06 | 33296936                | GG                                     | AA                 | AA               | INTERGENIC      |               |                    |                    |
| SNP_42904_A_33296952 | NC_021165.1    | Ca_Kabuli_Chr06 | 33296952                | AA                                     | GG                 | GG               | INTERGENIC      |               |                    |                    |
| SNP_42905_A_33297091 | NC_021165.1    | Ca_Kabuli_Chr06 | 33297091                | AA                                     | CC                 | CC               | INTERGENIC      |               |                    |                    |
| SNP_42906_A_33297132 | NC_021165.1    | Ca_Kabuli_Chr06 | 33297132                | TT                                     | CC                 | CC               | INTERGENIC      |               |                    |                    |
| SNP_42907_A_33297152 | NC_021165.1    | Ca_Kabuli_Chr06 | 33297152                | TT                                     | GG                 | GG               | INTERGENIC      |               |                    |                    |
| SNP_42908_A_33297159 | NC_021165.1    | Ca_Kabuli_Chr06 | 33297159                | AA                                     | GG                 | GG               | INTERGENIC      |               |                    |                    |
| SNP_42909_A_33297204 | NC_021165.1    | Ca_Kabuli_Chr06 | 33297204                | CC                                     | TT                 | TT               | INTERGENIC      |               |                    |                    |
| SNP_42910_A_33297272 | NC_021165.1    | Ca_Kabuli_Chr06 | 33297272                | GG                                     | AA                 | AA               | INTERGENIC      |               |                    |                    |
| SNP_42911_A_33298964 | NC_021165.1    | Ca_Kabuli_Chr06 | 33298964                | AA                                     | CC                 | CC               | INTERGENIC      |               |                    |                    |
| SNP_42912_A_33299787 | NC_021165.1    | Ca_Kabuli_Chr06 | 33299787                | TT                                     | CC                 | CC               | INTERGENIC      |               |                    |                    |
| SNP_42913_A_33299852 | NC_021165.1    | Ca_Kabuli_Chr06 | 33299852                | AA                                     | TT                 | TT               | INTERGENIC      |               |                    |                    |
| SNP_42914_A_33299899 | NC_021165.1    | Ca_Kabuli_Chr06 | 33299899                | TT                                     | GG                 | GG               | INTERGENIC      |               |                    |                    |
| SNP_42915_A_33299966 | NC_021165.1    | Ca_Kabuli_Chr06 | 33299966                | CC                                     | GG                 | GG               | INTERGENIC      |               |                    |                    |
| SNP_42916_A_33300027 | NC_021165.1    | Ca_Kabuli_Chr06 | 33300027                | AA                                     | CC                 | CC               | INTERGENIC      |               |                    |                    |
| SNP_42917_A_33300070 | NC_021165.1    | Ca_Kabuli_Chr06 | 33300070                | GG                                     | TT                 | TT               | INTERGENIC      |               |                    |                    |
| SNP_42918_A_33300080 | NC_021165.1    | Ca_Kabuli_Chr06 | 33300080                | GG                                     | AA                 | AA               | INTERGENIC      |               |                    |                    |
| SNP_42919_A_33300123 | NC_021165.1    | Ca_Kabuli_Chr06 | 33300123                | AA                                     | TT                 | TT               | INTERGENIC      |               |                    |                    |
| SNP_42920_A_33300188 | NC_021165.1    | Ca_Kabuli_Chr06 | 33300188                | AA                                     | GG                 | GG               | INTERGENIC      |               |                    |                    |
| SNP_42921_A_33310241 | NC_021165.1    | Ca_Kabuli_Chr06 | 33310241                | AA                                     | GG                 | GG               | INTERGENIC      |               |                    |                    |

| SNPs IDs             | Chromosome IDs | Chromosomes     | Physical positions (bp) | CDC Frontier (Reference genome) | (Pusa 1103 & HPNB) | (ILWC 46 & LPNB) | Sequence Components of genome | Gene accession IDs | Putative functions |
|----------------------|----------------|-----------------|-------------------------|---------------------------------|--------------------|------------------|-------------------------------|--------------------|--------------------|
| SNP_42922_A_33310242 | NC_021165.1    | Ca_Kabuli_Chr06 | 33310242                | CC                              | AA                 | AA               | INTERGENIC                    |                    |                    |
| SNP_42923_A_33314023 | NC_021165.1    | Ca_Kabuli_Chr06 | 33314023                | AA                              | TT                 | TT               | INTERGENIC                    |                    |                    |
| SNP_42924_A_33314049 | NC_021165.1    | Ca_Kabuli_Chr06 | 33314049                | TT                              | AA                 | AA               | INTERGENIC                    |                    |                    |
| SNP_42925_A_33314063 | NC_021165.1    | Ca_Kabuli_Chr06 | 33314063                | GG                              | AA                 | AA               | INTERGENIC                    |                    |                    |
| SNP_42926_A_33314086 | NC_021165.1    | Ca_Kabuli_Chr06 | 33314086                | AA                              | TT                 | TT               | INTERGENIC                    |                    |                    |
| SNP_42928_A_33340581 | NC_021165.1    | Ca_Kabuli_Chr06 | 33340581                | CC                              | TT                 | TT               | DRR                           | 101515460          | Unknown function   |
| SNP_42929_A_33340584 | NC_021165.1    | Ca_Kabuli_Chr06 | 33340584                | AA                              | CC                 | CC               | DRR                           | 101515460          | Unknown function   |
| SNP_42930_A_33340590 | NC_021165.1    | Ca_Kabuli_Chr06 | 33340590                | AA                              | TT                 | TT               | DRR                           | 101515460          | Unknown function   |
| SNP_42931_A_33340746 | NC_021165.1    | Ca_Kabuli_Chr06 | 33340746                | GG                              | AA                 | AA               | DRR                           | 101515460          | Unknown function   |
| SNP_42932_A_33340775 | NC_021165.1    | Ca_Kabuli_Chr06 | 33340775                | GG                              | TT                 | TT               | DRR                           | 101515460          | Unknown function   |
| SNP_42934_A_33340878 | NC_021165.1    | Ca_Kabuli_Chr06 | 33340878                | CC                              | AA                 | AA               | DRR                           | 101515460          | Unknown function   |
| SNP_42935_A_33340891 | NC_021165.1    | Ca_Kabuli_Chr06 | 33340891                | CC                              | TT                 | TT               | DRR                           | 101515460          | Unknown function   |
| SNP_42936_A_33340909 | NC_021165.1    | Ca_Kabuli_Chr06 | 33340909                | TT                              | CC                 | CC               | DRR                           | 101515460          | Unknown function   |
| SNP_42937_A_33340911 | NC_021165.1    | Ca_Kabuli_Chr06 | 33340911                | GG                              | AA                 | AA               | DRR                           | 101515460          | Unknown function   |
| SNP_42938_A_33340994 | NC_021165.1    | Ca_Kabuli_Chr06 | 33340994                | AA                              | GG                 | GG               | DRR                           | 101515460          | Unknown function   |
| SNP_42939_A_33341001 | NC_021165.1    | Ca_Kabuli_Chr06 | 33341001                | AA                              | GG                 | GG               | DRR                           | 101515460          | Unknown function   |
| SNP_42940_A_33341024 | NC_021165.1    | Ca_Kabuli_Chr06 | 33341024                | TT                              | CC                 | CC               | DRR                           | 101515460          | Unknown function   |
| SNP_42941_A_33341074 | NC_021165.1    | Ca_Kabuli_Chr06 | 33341074                | CC                              | TT                 | TT               | DRR                           | 101515460          | Unknown function   |
| SNP_42942_A_33341077 | NC_021165.1    | Ca_Kabuli_Chr06 | 33341077                | TT                              | CC                 | CC               | DRR                           | 101515460          | Unknown function   |
| SNP_42943_A_33341154 | NC_021165.1    | Ca_Kabuli_Chr06 | 33341154                | GG                              | AA                 | AA               | DRR                           | 101515460          | Unknown function   |
| SNP_42944_A_33341161 | NC_021165.1    | Ca_Kabuli_Chr06 | 33341161                | CC                              | AA                 | AA               | DRR                           | 101515460          | Unknown function   |
| SNP_42945_A_33341241 | NC_021165.1    | Ca_Kabuli_Chr06 | 33341241                | TT                              | CC                 | CC               | NON_SYNONYMOUS_CODING         | 101515460          | Unknown function   |

| SNPs IDs             | Chromosome IDs | Chromosomes     | Physical positions (bp) | CDC Frontier genome (Reference genome) | (Pusa 1103 & HPNB) | (ILWC 46 & LPNB) | Sequence Components of genome | Gene accession IDs | Putative functions |
|----------------------|----------------|-----------------|-------------------------|----------------------------------------|--------------------|------------------|-------------------------------|--------------------|--------------------|
| SNP_42946_A_33341336 | NC_021165.1    | Ca_Kabuli_Chr06 | 33341336                | GG                                     | TT                 | TT               | STOP_GAINED                   | 101515460          | Unknown function   |
| SNP_42947_A_33341349 | NC_021165.1    | Ca_Kabuli_Chr06 | 33341349                | TT                                     | CC                 | CC               | NON_SYNONYMOUS_CODING         | 101515460          | Unknown function   |
| SNP_42948_A_33341363 | NC_021165.1    | Ca_Kabuli_Chr06 | 33341363                | GG                                     | AA                 | AA               | NON_SYNONYMOUS_CODING         | 101515460          | Unknown function   |
| SNP_42949_A_33341480 | NC_021165.1    | Ca_Kabuli_Chr06 | 33341480                | TT                                     | CC                 | CC               | STOP_LOST                     | 101515460          | Unknown function   |
| SNP_42950_A_33341634 | NC_021165.1    | Ca_Kabuli_Chr06 | 33341634                | TT                                     | GG                 | GG               | URR                           | 101515460          | Unknown function   |
| SNP_42951_A_33341723 | NC_021165.1    | Ca_Kabuli_Chr06 | 33341723                | TT                                     | AA                 | AA               | URR                           | 101515460          | Unknown function   |
| SNP_42952_A_33350430 | NC_021165.1    | Ca_Kabuli_Chr06 | 33350430                | CC                                     | TT                 | TT               | INTERGENIC                    |                    |                    |
| SNP_42953_A_33358386 | NC_021165.1    | Ca_Kabuli_Chr06 | 33358386                | GG                                     | AA                 | AA               | INTERGENIC                    |                    |                    |
| SNP_42954_A_33361669 | NC_021165.1    | Ca_Kabuli_Chr06 | 33361669                | TT                                     | CC                 | CC               | INTERGENIC                    |                    |                    |
| SNP_42955_A_33408278 | NC_021165.1    | Ca_Kabuli_Chr06 | 33408278                | CC                                     | AA                 | AA               | INTERGENIC                    |                    |                    |
| SNP_42956_A_33423333 | NC_021165.1    | Ca_Kabuli_Chr06 | 33423333                | GG                                     | TT                 | TT               | INTERGENIC                    |                    |                    |
| SNP_42957_A_33428210 | NC_021165.1    | Ca_Kabuli_Chr06 | 33428210                | CC                                     | TT                 | TT               | INTERGENIC                    |                    |                    |
| SNP_42958_A_33428615 | NC_021165.1    | Ca_Kabuli_Chr06 | 33428615                | CC                                     | AA                 | AA               | INTERGENIC                    |                    |                    |
| SNP_42959_A_33444855 | NC_021165.1    | Ca_Kabuli_Chr06 | 33444855                | CC                                     | TT                 | TT               | INTERGENIC                    |                    |                    |
| SNP_42960_A_33458072 | NC_021165.1    | Ca_Kabuli_Chr06 | 33458072                | CC                                     | TT                 | TT               | INTERGENIC                    |                    |                    |
| SNP_42961_A_33466055 | NC_021165.1    | Ca_Kabuli_Chr06 | 33466055                | TT                                     | CC                 | CC               | INTERGENIC                    |                    |                    |
| SNP_42962_A_33467907 | NC_021165.1    | Ca_Kabuli_Chr06 | 33467907                | AA                                     | GG                 | GG               | INTERGENIC                    |                    |                    |
| SNP_42964_A_33575309 | NC_021165.1    | Ca_Kabuli_Chr06 | 33575309                | AA                                     | TT                 | TT               | INTERGENIC                    |                    |                    |
| SNP_42965_A_33589864 | NC_021165.1    | Ca_Kabuli_Chr06 | 33589864                | TT                                     | AA                 | AA               | INTERGENIC                    |                    |                    |
| SNP_42966_A_33612205 | NC_021165.1    | Ca_Kabuli_Chr06 | 33612205                | GG                                     | AA                 | AA               | INTERGENIC                    |                    |                    |
| SNP_42967_A_33612211 | NC_021165.1    | Ca_Kabuli_Chr06 | 33612211                | TT                                     | CC                 | CC               | INTERGENIC                    |                    |                    |
| SNP_42968_A_33633062 | NC_021165.1    | Ca_Kabuli_Chr06 | 33633062                | TT                                     | CC                 | CC               | INTERGENIC                    |                    |                    |

| SNPs IDs             | Chromosome IDs | Chromosomes     | Physical positions (bp) | CDC Frontier genome (Reference genome) | (Pusa 1103 & HPNB) | (ILWC 46 & LPNB) | Sequence genome       | Components of | Gene accession IDs | Putative functions                                                   |
|----------------------|----------------|-----------------|-------------------------|----------------------------------------|--------------------|------------------|-----------------------|---------------|--------------------|----------------------------------------------------------------------|
| SNP_42969_A_33633083 | NC_021165.1    | Ca_Kabuli_Chr06 | 33633083                | AA                                     | GG                 | GG               | INTERGENIC            |               |                    |                                                                      |
| SNP_42970_A_33650878 | NC_021165.1    | Ca_Kabuli_Chr06 | 33650878                | GG                                     | AA                 | AA               | INTERGENIC            |               |                    |                                                                      |
| SNP_42971_A_33651239 | NC_021165.1    | Ca_Kabuli_Chr06 | 33651239                | AA                                     | GG                 | GG               | INTERGENIC            |               |                    |                                                                      |
| SNP_42972_A_33651311 | NC_021165.1    | Ca_Kabuli_Chr06 | 33651311                | TT                                     | CC                 | CC               | INTERGENIC            |               |                    |                                                                      |
| SNP_42973_A_33651326 | NC_021165.1    | Ca_Kabuli_Chr06 | 33651326                | GG                                     | AA                 | AA               | INTERGENIC            |               |                    |                                                                      |
| SNP_42974_A_33651375 | NC_021165.1    | Ca_Kabuli_Chr06 | 33651375                | TT                                     | CC                 | CC               | INTERGENIC            |               |                    |                                                                      |
| SNP_42975_A_33651394 | NC_021165.1    | Ca_Kabuli_Chr06 | 33651394                | GG                                     | AA                 | AA               | INTERGENIC            |               |                    |                                                                      |
| SNP_42976_A_33651527 | NC_021165.1    | Ca_Kabuli_Chr06 | 33651527                | TT                                     | CC                 | CC               | INTERGENIC            |               |                    |                                                                      |
| SNP_42977_A_33654988 | NC_021165.1    | Ca_Kabuli_Chr06 | 33654988                | AA                                     | CC                 | CC               | INTERGENIC            |               |                    |                                                                      |
| SNP_42978_A_33655992 | NC_021165.1    | Ca_Kabuli_Chr06 | 33655992                | GG                                     | AA                 | AA               | INTERGENIC            |               |                    |                                                                      |
| SNP_42979_A_33705006 | NC_021165.1    | Ca_Kabuli_Chr06 | 33705006                | GG                                     | TT                 | TT               | NON_SYNONYMOUS_CODING |               | 101494087          | Unknown function                                                     |
| SNP_42980_A_33736550 | NC_021165.1    | Ca_Kabuli_Chr06 | 33736550                | GG                                     | AA                 | AA               | URR                   |               | 101490739          | mediator of RNA polymerase II transcription subunit 12-like          |
| SNP_42982_A_33797059 | NC_021165.1    | Ca_Kabuli_Chr06 | 33797059                | CC                                     | GG                 | GG               | INTERGENIC            |               |                    |                                                                      |
| SNP_42983_A_33820530 | NC_021165.1    | Ca_Kabuli_Chr06 | 33820530                | CC                                     | TT                 | TT               | INTERGENIC            |               |                    |                                                                      |
| SNP_42984_A_33870496 | NC_021165.1    | Ca_Kabuli_Chr06 | 33870496                | GG                                     | AA                 | AA               | URR                   |               | 101492678          | probable LRR receptor-like serine/threonine-protein kinase At4g08850 |
| SNP_42985_A_33877896 | NC_021165.1    | Ca_Kabuli_Chr06 | 33877896                | GG                                     | AA                 | AA               | INTERGENIC            |               |                    |                                                                      |
| SNP_42986_A_33886236 | NC_021165.1    | Ca_Kabuli_Chr06 | 33886236                | AA                                     | CC                 | CC               | INTERGENIC            |               |                    |                                                                      |
| SNP_42987_A_33886581 | NC_021165.1    | Ca_Kabuli_Chr06 | 33886581                | CC                                     | AA                 | AA               | INTERGENIC            |               |                    |                                                                      |
| SNP_42988_A_33919866 | NC_021165.1    | Ca_Kabuli_Chr06 | 33919866                | GG                                     | AA                 | AA               | INTERGENIC            |               |                    |                                                                      |
| SNP_42989_A_33941866 | NC_021165.1    | Ca_Kabuli_Chr06 | 33941866                | CC                                     | TT                 | TT               | INTERGENIC            |               |                    |                                                                      |
| SNP_42990_A_33942074 | NC_021165.1    | Ca_Kabuli_Chr06 | 33942074                | AA                                     | GG                 | GG               | INTERGENIC            |               |                    |                                                                      |
| SNP_42991_A_33974241 | NC_021165.1    | Ca_Kabuli_Chr06 | 33974241                | AA                                     | TT                 | TT               | INTERGENIC            |               |                    |                                                                      |



| SNPs IDs             | Chromosome IDs | Chromosomes     | Physical positions (bp) | CDC Frontier genome (Reference genome) | (Pusa 1103 & HPNB) | (ILWC 46 & LPNB) | Sequence Components of genome | Gene accession IDs | Putative functions |
|----------------------|----------------|-----------------|-------------------------|----------------------------------------|--------------------|------------------|-------------------------------|--------------------|--------------------|
| SNP_42992_A_33974244 | NC_021165.1    | Ca_Kabuli_Chr06 | 33974244                | CC                                     | AA                 | AA               | INTERGENIC                    |                    |                    |
| SNP_42994_A_33988794 | NC_021165.1    | Ca_Kabuli_Chr06 | 33988794                | GG                                     | AA                 | AA               | INTERGENIC                    |                    |                    |
| SNP_42995_A_33988987 | NC_021165.1    | Ca_Kabuli_Chr06 | 33988987                | TT                                     | AA                 | AA               | INTERGENIC                    |                    |                    |
| SNP_42996_A_33989015 | NC_021165.1    | Ca_Kabuli_Chr06 | 33989015                | GG                                     | AA                 | AA               | INTERGENIC                    |                    |                    |
| SNP_42997_A_33989067 | NC_021165.1    | Ca_Kabuli_Chr06 | 33989067                | CC                                     | AA                 | AA               | INTERGENIC                    |                    |                    |
| SNP_42998_A_33989076 | NC_021165.1    | Ca_Kabuli_Chr06 | 33989076                | CC                                     | GG                 | GG               | INTERGENIC                    |                    |                    |
| SNP_42999_A_33989115 | NC_021165.1    | Ca_Kabuli_Chr06 | 33989115                | CC                                     | TT                 | TT               | INTERGENIC                    |                    |                    |
| SNP_43000_A_33995851 | NC_021165.1    | Ca_Kabuli_Chr06 | 33995851                | AA                                     | GG                 | GG               | INTERGENIC                    |                    |                    |
| SNP_43001_A_33995852 | NC_021165.1    | Ca_Kabuli_Chr06 | 33995852                | TT                                     | CC                 | CC               | INTERGENIC                    |                    |                    |
| SNP_43002_A_33995854 | NC_021165.1    | Ca_Kabuli_Chr06 | 33995854                | TT                                     | CC                 | CC               | INTERGENIC                    |                    |                    |
| SNP_43003_A_33999090 | NC_021165.1    | Ca_Kabuli_Chr06 | 33999090                | CC                                     | AA                 | AA               | DRR                           | 101493446          | Unknown function   |
| SNP_43004_A_34029738 | NC_021165.1    | Ca_Kabuli_Chr06 | 34029738                | CC                                     | AA                 | AA               | INTRON                        | 101496015          | Unknown function   |
| SNP_43005_A_34029746 | NC_021165.1    | Ca_Kabuli_Chr06 | 34029746                | TT                                     | AA                 | AA               | INTRON                        | 101496015          | Unknown function   |
| SNP_43006_A_34029895 | NC_021165.1    | Ca_Kabuli_Chr06 | 34029895                | AA                                     | TT                 | TT               | INTRON                        | 101496015          | Unknown function   |
| SNP_43007_A_34029906 | NC_021165.1    | Ca_Kabuli_Chr06 | 34029906                | AA                                     | GG                 | GG               | INTRON                        | 101496015          | Unknown function   |
| SNP_43008_A_34043830 | NC_021165.1    | Ca_Kabuli_Chr06 | 34043830                | GG                                     | TT                 | TT               | INTERGENIC                    |                    |                    |
| SNP_43009_A_34052328 | NC_021165.1    | Ca_Kabuli_Chr06 | 34052328                | CC                                     | GG                 | GG               | INTERGENIC                    |                    |                    |
| SNP_43010_A_34058321 | NC_021165.1    | Ca_Kabuli_Chr06 | 34058321                | TT                                     | CC                 | CC               | INTERGENIC                    |                    |                    |
| SNP_43011_A_34058695 | NC_021165.1    | Ca_Kabuli_Chr06 | 34058695                | TT                                     | CC                 | CC               | INTERGENIC                    |                    |                    |
| SNP_43012_A_34062645 | NC_021165.1    | Ca_Kabuli_Chr06 | 34062645                | AA                                     | GG                 | GG               | INTERGENIC                    |                    |                    |
| SNP_43013_A_34065190 | NC_021165.1    | Ca_Kabuli_Chr06 | 34065190                | CC                                     | TT                 | TT               | INTERGENIC                    |                    |                    |
| SNP_43014_A_34065508 | NC_021165.1    | Ca_Kabuli_Chr06 | 34065508                | TT                                     | AA                 | AA               | INTERGENIC                    |                    |                    |

| SNPs IDs             | Chromosome IDs | Chromosomes     | Physical positions (bp) | CDC Frontier genome (Reference genome) | (Pusa 1103 & HPNB) | (ILWC 46 & LPNB) | Sequence genome | Components of | Gene accession IDs | Putative functions |
|----------------------|----------------|-----------------|-------------------------|----------------------------------------|--------------------|------------------|-----------------|---------------|--------------------|--------------------|
| SNP_43015_A_34076633 | NC_021165.1    | Ca_Kabuli_Chr06 | 34076633                | GG                                     | AA                 | AA               | INTERGENIC      |               |                    |                    |
| SNP_43016_A_34117710 | NC_021165.1    | Ca_Kabuli_Chr06 | 34117710                | AA                                     | TT                 | TT               | INTERGENIC      |               |                    |                    |
| SNP_43017_A_34118061 | NC_021165.1    | Ca_Kabuli_Chr06 | 34118061                | CC                                     | AA                 | AA               | INTERGENIC      |               |                    |                    |
| SNP_43018_A_34125283 | NC_021165.1    | Ca_Kabuli_Chr06 | 34125283                | GG                                     | CC                 | CC               | INTERGENIC      |               |                    |                    |
| SNP_43019_A_34135502 | NC_021165.1    | Ca_Kabuli_Chr06 | 34135502                | TT                                     | GG                 | GG               | INTERGENIC      |               |                    |                    |
| SNP_43020_A_34144528 | NC_021165.1    | Ca_Kabuli_Chr06 | 34144528                | TT                                     | GG                 | GG               | INTERGENIC      |               |                    |                    |
| SNP_43021_A_34144550 | NC_021165.1    | Ca_Kabuli_Chr06 | 34144550                | GG                                     | AA                 | AA               | INTERGENIC      |               |                    |                    |
| SNP_43022_A_34144576 | NC_021165.1    | Ca_Kabuli_Chr06 | 34144576                | GG                                     | CC                 | CC               | INTERGENIC      |               |                    |                    |
| SNP_43023_A_34144590 | NC_021165.1    | Ca_Kabuli_Chr06 | 34144590                | AA                                     | TT                 | TT               | INTERGENIC      |               |                    |                    |
| SNP_43024_A_34144594 | NC_021165.1    | Ca_Kabuli_Chr06 | 34144594                | CC                                     | TT                 | TT               | INTERGENIC      |               |                    |                    |
| SNP_43025_A_34144606 | NC_021165.1    | Ca_Kabuli_Chr06 | 34144606                | AA                                     | GG                 | GG               | INTERGENIC      |               |                    |                    |
| SNP_43026_A_34144620 | NC_021165.1    | Ca_Kabuli_Chr06 | 34144620                | AA                                     | CC                 | CC               | INTERGENIC      |               |                    |                    |
| SNP_43027_A_34144653 | NC_021165.1    | Ca_Kabuli_Chr06 | 34144653                | AA                                     | TT                 | TT               | INTERGENIC      |               |                    |                    |
| SNP_43028_A_34144654 | NC_021165.1    | Ca_Kabuli_Chr06 | 34144654                | TT                                     | AA                 | AA               | INTERGENIC      |               |                    |                    |
| SNP_43029_A_34144669 | NC_021165.1    | Ca_Kabuli_Chr06 | 34144669                | CC                                     | GG                 | GG               | INTERGENIC      |               |                    |                    |
| SNP_43030_A_34144962 | NC_021165.1    | Ca_Kabuli_Chr06 | 34144962                | TT                                     | AA                 | AA               | INTERGENIC      |               |                    |                    |
| SNP_43031_A_34144975 | NC_021165.1    | Ca_Kabuli_Chr06 | 34144975                | AA                                     | GG                 | GG               | INTERGENIC      |               |                    |                    |
| SNP_43032_A_34145005 | NC_021165.1    | Ca_Kabuli_Chr06 | 34145005                | TT                                     | GG                 | GG               | INTERGENIC      |               |                    |                    |
| SNP_43033_A_34145096 | NC_021165.1    | Ca_Kabuli_Chr06 | 34145096                | AA                                     | TT                 | TT               | INTERGENIC      |               |                    |                    |
| SNP_43034_A_34162115 | NC_021165.1    | Ca_Kabuli_Chr06 | 34162115                | AA                                     | GG                 | GG               | INTERGENIC      |               |                    |                    |
| SNP_43035_A_34162270 | NC_021165.1    | Ca_Kabuli_Chr06 | 34162270                | TT                                     | AA                 | AA               | INTERGENIC      |               |                    |                    |
| SNP_43036_A_34162299 | NC_021165.1    | Ca_Kabuli_Chr06 | 34162299                | GG                                     | TT                 | TT               | INTERGENIC      |               |                    |                    |

| SNPs IDs             | Chromosome IDs | Chromosomes     | Physical positions (bp) | CDC Frontier genome (Reference genome) | (Pusa 1103 & HPNB) | (ILWC 46 & LPNB) | Sequence genome | Components of | Gene accession IDs | Putative functions |
|----------------------|----------------|-----------------|-------------------------|----------------------------------------|--------------------|------------------|-----------------|---------------|--------------------|--------------------|
| SNP_43037_A_34162372 | NC_021165.1    | Ca_Kabuli_Chr06 | 34162372                | AA                                     | CC                 | CC               | INTERGENIC      |               |                    |                    |
| SNP_43038_A_34164271 | NC_021165.1    | Ca_Kabuli_Chr06 | 34164271                | CC                                     | TT                 | TT               | INTERGENIC      |               |                    |                    |
| SNP_43039_A_34164326 | NC_021165.1    | Ca_Kabuli_Chr06 | 34164326                | TT                                     | CC                 | CC               | INTERGENIC      |               |                    |                    |
| SNP_43040_A_34164358 | NC_021165.1    | Ca_Kabuli_Chr06 | 34164358                | TT                                     | AA                 | AA               | INTERGENIC      |               |                    |                    |
| SNP_43041_A_34164361 | NC_021165.1    | Ca_Kabuli_Chr06 | 34164361                | CC                                     | TT                 | TT               | INTERGENIC      |               |                    |                    |
| SNP_43042_A_34164374 | NC_021165.1    | Ca_Kabuli_Chr06 | 34164374                | TT                                     | AA                 | AA               | INTERGENIC      |               |                    |                    |
| SNP_43043_A_34164382 | NC_021165.1    | Ca_Kabuli_Chr06 | 34164382                | AA                                     | TT                 | TT               | INTERGENIC      |               |                    |                    |
| SNP_43044_A_34164405 | NC_021165.1    | Ca_Kabuli_Chr06 | 34164405                | GG                                     | AA                 | AA               | INTERGENIC      |               |                    |                    |
| SNP_43045_A_34164406 | NC_021165.1    | Ca_Kabuli_Chr06 | 34164406                | TT                                     | CC                 | CC               | INTERGENIC      |               |                    |                    |
| SNP_43046_A_34164428 | NC_021165.1    | Ca_Kabuli_Chr06 | 34164428                | AA                                     | TT                 | TT               | INTERGENIC      |               |                    |                    |
| SNP_43047_A_34164493 | NC_021165.1    | Ca_Kabuli_Chr06 | 34164493                | AA                                     | GG                 | GG               | INTERGENIC      |               |                    |                    |
| SNP_43048_A_34164500 | NC_021165.1    | Ca_Kabuli_Chr06 | 34164500                | CC                                     | AA                 | AA               | INTERGENIC      |               |                    |                    |
| SNP_43049_A_34164529 | NC_021165.1    | Ca_Kabuli_Chr06 | 34164529                | GG                                     | AA                 | AA               | INTERGENIC      |               |                    |                    |
| SNP_43050_A_34164542 | NC_021165.1    | Ca_Kabuli_Chr06 | 34164542                | TT                                     | AA                 | AA               | INTERGENIC      |               |                    |                    |
| SNP_43051_A_34164567 | NC_021165.1    | Ca_Kabuli_Chr06 | 34164567                | CC                                     | AA                 | AA               | INTERGENIC      |               |                    |                    |
| SNP_43052_A_34164568 | NC_021165.1    | Ca_Kabuli_Chr06 | 34164568                | CC                                     | AA                 | AA               | INTERGENIC      |               |                    |                    |
| SNP_43053_A_34164641 | NC_021165.1    | Ca_Kabuli_Chr06 | 34164641                | TT                                     | GG                 | GG               | INTERGENIC      |               |                    |                    |
| SNP_43054_A_34164677 | NC_021165.1    | Ca_Kabuli_Chr06 | 34164677                | GG                                     | AA                 | AA               | INTERGENIC      |               |                    |                    |
| SNP_43055_A_34164748 | NC_021165.1    | Ca_Kabuli_Chr06 | 34164748                | TT                                     | CC                 | CC               | INTERGENIC      |               |                    |                    |
| SNP_43056_A_34164785 | NC_021165.1    | Ca_Kabuli_Chr06 | 34164785                | TT                                     | GG                 | GG               | INTERGENIC      |               |                    |                    |
| SNP_43057_A_34164787 | NC_021165.1    | Ca_Kabuli_Chr06 | 34164787                | AA                                     | GG                 | GG               | INTERGENIC      |               |                    |                    |
| SNP_43058_A_34164824 | NC_021165.1    | Ca_Kabuli_Chr06 | 34164824                | CC                                     | TT                 | TT               | INTERGENIC      |               |                    |                    |

| SNPs IDs             | Chromosome IDs | Chromosomes     | Physical positions (bp) | CDC Frontier genome (Reference genome) | (Pusa 1103 & HPNB) | (ILWC 46 & LPNB) | Sequence genome | Components of | Gene accession IDs                          | Putative functions |
|----------------------|----------------|-----------------|-------------------------|----------------------------------------|--------------------|------------------|-----------------|---------------|---------------------------------------------|--------------------|
| SNP_43059_A_34164836 | NC_021165.1    | Ca_Kabuli_Chr06 | 34164836                | CC                                     | AA                 | AA               | INTERGENIC      |               |                                             |                    |
| SNP_43060_A_34164845 | NC_021165.1    | Ca_Kabuli_Chr06 | 34164845                | TT                                     | CC                 | CC               | INTERGENIC      |               |                                             |                    |
| SNP_43061_A_34164856 | NC_021165.1    | Ca_Kabuli_Chr06 | 34164856                | TT                                     | AA                 | AA               | INTERGENIC      |               |                                             |                    |
| SNP_43062_A_34164875 | NC_021165.1    | Ca_Kabuli_Chr06 | 34164875                | GG                                     | AA                 | AA               | INTERGENIC      |               |                                             |                    |
| SNP_43063_A_34164899 | NC_021165.1    | Ca_Kabuli_Chr06 | 34164899                | TT                                     | AA                 | AA               | INTERGENIC      |               |                                             |                    |
| SNP_43064_A_34164922 | NC_021165.1    | Ca_Kabuli_Chr06 | 34164922                | CC                                     | AA                 | AA               | INTERGENIC      |               |                                             |                    |
| SNP_43065_A_34164940 | NC_021165.1    | Ca_Kabuli_Chr06 | 34164940                | CC                                     | TT                 | TT               | INTERGENIC      |               |                                             |                    |
| SNP_43066_A_34164985 | NC_021165.1    | Ca_Kabuli_Chr06 | 34164985                | TT                                     | CC                 | CC               | INTERGENIC      |               |                                             |                    |
| SNP_43067_A_34165392 | NC_021165.1    | Ca_Kabuli_Chr06 | 34165392                | AA                                     | GG                 | GG               | INTERGENIC      |               |                                             |                    |
| SNP_43068_A_34169550 | NC_021165.1    | Ca_Kabuli_Chr06 | 34169550                | GG                                     | AA                 | AA               | INTERGENIC      |               |                                             |                    |
| SNP_43070_A_34288172 | NC_021165.1    | Ca_Kabuli_Chr06 | 34288172                | CC                                     | TT                 | TT               | INTRON          | 101513080     | Unknown function                            |                    |
| SNP_43071_A_34288873 | NC_021165.1    | Ca_Kabuli_Chr06 | 34288873                | GG                                     | TT                 | TT               | INTRON          | 101513080     | Unknown function                            |                    |
| SNP_43072_A_34288884 | NC_021165.1    | Ca_Kabuli_Chr06 | 34288884                | TT                                     | CC                 | CC               | INTRON          | 101513080     | Unknown function                            |                    |
| SNP_43073_A_34292494 | NC_021165.1    | Ca_Kabuli_Chr06 | 34292494                | TT                                     | CC                 | CC               | INTERGENIC      |               |                                             |                    |
| SNP_43074_A_34337927 | NC_021165.1    | Ca_Kabuli_Chr06 | 34337927                | GG                                     | AA                 | AA               | INTERGENIC      |               |                                             |                    |
| SNP_43075_A_34469248 | NC_021165.1    | Ca_Kabuli_Chr06 | 34469248                | TT                                     | CC                 | CC               | INTERGENIC      |               |                                             |                    |
| SNP_43076_A_34511102 | NC_021165.1    | Ca_Kabuli_Chr06 | 34511102                | GG                                     | AA                 | AA               | INTERGENIC      |               |                                             |                    |
| SNP_43077_A_34513886 | NC_021165.1    | Ca_Kabuli_Chr06 | 34513886                | CC                                     | TT                 | TT               | INTERGENIC      |               |                                             |                    |
| SNP_43078_A_34553892 | NC_021165.1    | Ca_Kabuli_Chr06 | 34553892                | AA                                     | GG                 | GG               | URR             | 101514712     | putative glycerol-3-phosphate transporter 1 |                    |
| SNP_43079_A_34564408 | NC_021165.1    | Ca_Kabuli_Chr06 | 34564408                | TT                                     | AA                 | AA               | INTERGENIC      |               |                                             |                    |
| SNP_43080_A_34564409 | NC_021165.1    | Ca_Kabuli_Chr06 | 34564409                | AA                                     | TT                 | TT               | INTERGENIC      |               |                                             |                    |
| SNP_43081_A_34564592 | NC_021165.1    | Ca_Kabuli_Chr06 | 34564592                | AA                                     | GG                 | GG               | INTERGENIC      |               |                                             |                    |

| SNPs IDs             | Chromosome IDs | Chromosomes     | Physical positions (bp) | CDC Frontier genome (Reference genome) | (Pusa 1103 & HPNB) | (ILWC 46 & LPNB) | Sequence genome | Components of | Gene accession IDs                               | Putative functions |
|----------------------|----------------|-----------------|-------------------------|----------------------------------------|--------------------|------------------|-----------------|---------------|--------------------------------------------------|--------------------|
| SNP_43083_A_34567840 | NC_021165.1    | Ca_Kabuli_Chr06 | 34567840                | AA                                     | TT                 | TT               | INTERGENIC      |               |                                                  |                    |
| SNP_43084_A_34567868 | NC_021165.1    | Ca_Kabuli_Chr06 | 34567868                | AA                                     | GG                 | GG               | INTERGENIC      |               |                                                  |                    |
| SNP_43085_A_34567915 | NC_021165.1    | Ca_Kabuli_Chr06 | 34567915                | TT                                     | AA                 | AA               | INTERGENIC      |               |                                                  |                    |
| SNP_43086_A_34569991 | NC_021165.1    | Ca_Kabuli_Chr06 | 34569991                | TT                                     | AA                 | AA               | INTERGENIC      |               |                                                  |                    |
| SNP_43087_A_34570076 | NC_021165.1    | Ca_Kabuli_Chr06 | 34570076                | TT                                     | CC                 | CC               | INTERGENIC      |               |                                                  |                    |
| SNP_43089_A_34570354 | NC_021165.1    | Ca_Kabuli_Chr06 | 34570354                | GG                                     | AA                 | AA               | INTERGENIC      |               |                                                  |                    |
| SNP_43090_A_34606260 | NC_021165.1    | Ca_Kabuli_Chr06 | 34606260                | TT                                     | CC                 | CC               | INTERGENIC      |               |                                                  |                    |
| SNP_43091_A_34614916 | NC_021165.1    | Ca_Kabuli_Chr06 | 34614916                | TT                                     | CC                 | CC               | INTERGENIC      |               |                                                  |                    |
| SNP_43092_A_34662202 | NC_021165.1    | Ca_Kabuli_Chr06 | 34662202                | GG                                     | AA                 | AA               | INTERGENIC      |               |                                                  |                    |
| SNP_43093_A_34662207 | NC_021165.1    | Ca_Kabuli_Chr06 | 34662207                | AA                                     | TT                 | TT               | INTERGENIC      |               |                                                  |                    |
| SNP_43094_A_34684202 | NC_021165.1    | Ca_Kabuli_Chr06 | 34684202                | GG                                     | AA                 | AA               | INTERGENIC      |               |                                                  |                    |
| SNP_43095_A_34684384 | NC_021165.1    | Ca_Kabuli_Chr06 | 34684384                | TT                                     | CC                 | CC               | INTERGENIC      |               |                                                  |                    |
| SNP_43096_A_34684473 | NC_021165.1    | Ca_Kabuli_Chr06 | 34684473                | TT                                     | CC                 | CC               | INTERGENIC      |               |                                                  |                    |
| SNP_43097_A_34684675 | NC_021165.1    | Ca_Kabuli_Chr06 | 34684675                | AA                                     | CC                 | CC               | INTERGENIC      |               |                                                  |                    |
| SNP_43098_A_34684676 | NC_021165.1    | Ca_Kabuli_Chr06 | 34684676                | AA                                     | TT                 | TT               | INTERGENIC      |               |                                                  |                    |
| SNP_43099_A_34684677 | NC_021165.1    | Ca_Kabuli_Chr06 | 34684677                | CC                                     | TT                 | TT               | INTERGENIC      |               |                                                  |                    |
| SNP_43100_A_34684679 | NC_021165.1    | Ca_Kabuli_Chr06 | 34684679                | TT                                     | GG                 | GG               | INTERGENIC      |               |                                                  |                    |
| SNP_43101_A_34684722 | NC_021165.1    | Ca_Kabuli_Chr06 | 34684722                | TT                                     | AA                 | AA               | INTERGENIC      |               |                                                  |                    |
| SNP_43102_A_34724464 | NC_021165.1    | Ca_Kabuli_Chr06 | 34724464                | TT                                     | CC                 | CC               | INTRON          | 101501407     | zinc finger CCH domain-containing protein 6-like |                    |
| SNP_43105_A_34799564 | NC_021165.1    | Ca_Kabuli_Chr06 | 34799564                | AA                                     | GG                 | GG               | INTERGENIC      |               |                                                  |                    |
| SNP_43106_A_34799938 | NC_021165.1    | Ca_Kabuli_Chr06 | 34799938                | AA                                     | GG                 | GG               | INTERGENIC      |               |                                                  |                    |
| SNP_43107_A_34799954 | NC_021165.1    | Ca_Kabuli_Chr06 | 34799954                | GG                                     | AA                 | AA               | INTERGENIC      |               |                                                  |                    |

| SNPs IDs             | Chromosome IDs | Chromosomes     | Physical positions (bp) | CDC Frontier genome (Reference genome) | (Pusa 1103 & HPNB) | (ILWC 46 & LPNB) | Sequence Components of genome | Gene accession IDs | Putative functions                                       |
|----------------------|----------------|-----------------|-------------------------|----------------------------------------|--------------------|------------------|-------------------------------|--------------------|----------------------------------------------------------|
| SNP_43108_A_34809850 | NC_021165.1    | Ca_Kabuli_Chr06 | 34809850                | CC                                     | TT                 | TT               | INTERGENIC                    |                    |                                                          |
| SNP_43109_A_34810092 | NC_021165.1    | Ca_Kabuli_Chr06 | 34810092                | GG                                     | CC                 | CC               | INTERGENIC                    |                    |                                                          |
| SNP_43110_A_34810098 | NC_021165.1    | Ca_Kabuli_Chr06 | 34810098                | TT                                     | CC                 | CC               | INTERGENIC                    |                    |                                                          |
| SNP_43111_A_34810125 | NC_021165.1    | Ca_Kabuli_Chr06 | 34810125                | GG                                     | TT                 | TT               | INTERGENIC                    |                    |                                                          |
| SNP_43112_A_34810217 | NC_021165.1    | Ca_Kabuli_Chr06 | 34810217                | GG                                     | CC                 | CC               | INTERGENIC                    |                    |                                                          |
| SNP_43113_A_34810227 | NC_021165.1    | Ca_Kabuli_Chr06 | 34810227                | CC                                     | AA                 | AA               | INTERGENIC                    |                    |                                                          |
| SNP_43114_A_34814204 | NC_021165.1    | Ca_Kabuli_Chr06 | 34814204                | GG                                     | CC                 | CC               | INTERGENIC                    |                    |                                                          |
| SNP_43115_A_34814562 | NC_021165.1    | Ca_Kabuli_Chr06 | 34814562                | TT                                     | CC                 | CC               | INTERGENIC                    |                    |                                                          |
| SNP_43116_A_34814656 | NC_021165.1    | Ca_Kabuli_Chr06 | 34814656                | AA                                     | GG                 | GG               | INTERGENIC                    |                    |                                                          |
| SNP_43117_A_34814693 | NC_021165.1    | Ca_Kabuli_Chr06 | 34814693                | TT                                     | CC                 | CC               | INTERGENIC                    |                    |                                                          |
| SNP_43118_A_34814718 | NC_021165.1    | Ca_Kabuli_Chr06 | 34814718                | GG                                     | AA                 | AA               | INTERGENIC                    |                    |                                                          |
| SNP_43119_A_34816146 | NC_021165.1    | Ca_Kabuli_Chr06 | 34816146                | GG                                     | AA                 | AA               | INTERGENIC                    |                    |                                                          |
| SNP_43120_A_34819287 | NC_021165.1    | Ca_Kabuli_Chr06 | 34819287                | TT                                     | AA                 | AA               | DRR                           | 101503232          | polygalacturonase-like                                   |
| SNP_43121_A_34843624 | NC_021165.1    | Ca_Kabuli_Chr06 | 34843624                | CC                                     | TT                 | TT               | INTERGENIC                    |                    |                                                          |
| SNP_43123_A_34862527 | NC_021165.1    | Ca_Kabuli_Chr06 | 34862527                | GG                                     | TT                 | TT               | INTERGENIC                    |                    |                                                          |
| SNP_43124_A_34866357 | NC_021165.1    | Ca_Kabuli_Chr06 | 34866357                | TT                                     | AA                 | AA               | INTERGENIC                    |                    |                                                          |
| SNP_43125_A_34871227 | NC_021165.1    | Ca_Kabuli_Chr06 | 34871227                | GG                                     | TT                 | TT               | INTERGENIC                    |                    |                                                          |
| SNP_43126_A_34874329 | NC_021165.1    | Ca_Kabuli_Chr06 | 34874329                | CC                                     | TT                 | TT               | INTERGENIC                    |                    |                                                          |
| SNP_43127_A_34874846 | NC_021165.1    | Ca_Kabuli_Chr06 | 34874846                | TT                                     | AA                 | AA               | INTERGENIC                    |                    |                                                          |
| SNP_43128_A_34924243 | NC_021165.1    | Ca_Kabuli_Chr06 | 34924243                | CC                                     | TT                 | TT               | INTRON                        | 101488452          | serine/threonine-protein phosphatase 7 long form homolog |
| SNP_43130_A_34956521 | NC_021165.1    | Ca_Kabuli_Chr06 | 34956521                | CC                                     | GG                 | GG               | INTERGENIC                    |                    |                                                          |
| SNP_43131_A_34956888 | NC_021165.1    | Ca_Kabuli_Chr06 | 34956888                | AA                                     | GG                 | GG               | INTERGENIC                    |                    |                                                          |

| SNPs IDs             | Chromosome IDs | Chromosomes     | Physical positions (bp) | CDC Frontier (Reference genome) | (Pusa 1103 & HPNB) | (ILWC 46 & LPNB) | Sequence Components of genome | Gene accession IDs | Putative functions                                   |
|----------------------|----------------|-----------------|-------------------------|---------------------------------|--------------------|------------------|-------------------------------|--------------------|------------------------------------------------------|
| SNP_43132_A_34981114 | NC_021165.1    | Ca_Kabuli_Chr06 | 34981114                | AA                              | GG                 | GG               | URR                           | 101504402          | ubiquitin carboxyl-terminal hydrolase 24             |
| SNP_43133_A_35116750 | NC_021165.1    | Ca_Kabuli_Chr06 | 35116750                | CC                              | TT                 | TT               | INTERGENIC                    |                    |                                                      |
| SNP_43134_A_35161346 | NC_021165.1    | Ca_Kabuli_Chr06 | 35161346                | GG                              | AA                 | AA               | INTERGENIC                    |                    |                                                      |
| SNP_43135_A_35161466 | NC_021165.1    | Ca_Kabuli_Chr06 | 35161466                | AA                              | GG                 | GG               | INTERGENIC                    |                    |                                                      |
| SNP_43136_A_35161598 | NC_021165.1    | Ca_Kabuli_Chr06 | 35161598                | AA                              | CC                 | CC               | INTERGENIC                    |                    |                                                      |
| SNP_43137_A_35161619 | NC_021165.1    | Ca_Kabuli_Chr06 | 35161619                | AA                              | GG                 | GG               | INTERGENIC                    |                    |                                                      |
| SNP_43138_A_35161771 | NC_021165.1    | Ca_Kabuli_Chr06 | 35161771                | TT                              | CC                 | CC               | INTERGENIC                    |                    |                                                      |
| SNP_43139_A_35161784 | NC_021165.1    | Ca_Kabuli_Chr06 | 35161784                | CC                              | TT                 | TT               | INTERGENIC                    |                    |                                                      |
| SNP_43140_A_35161789 | NC_021165.1    | Ca_Kabuli_Chr06 | 35161789                | AA                              | GG                 | GG               | INTERGENIC                    |                    |                                                      |
| SNP_43142_A_35161839 | NC_021165.1    | Ca_Kabuli_Chr06 | 35161839                | GG                              | AA                 | AA               | INTERGENIC                    |                    |                                                      |
| SNP_43143_A_35161860 | NC_021165.1    | Ca_Kabuli_Chr06 | 35161860                | TT                              | AA                 | AA               | INTERGENIC                    |                    |                                                      |
| SNP_43144_A_35161871 | NC_021165.1    | Ca_Kabuli_Chr06 | 35161871                | GG                              | AA                 | AA               | INTERGENIC                    |                    |                                                      |
| SNP_43145_A_35161888 | NC_021165.1    | Ca_Kabuli_Chr06 | 35161888                | CC                              | TT                 | TT               | INTERGENIC                    |                    |                                                      |
| SNP_43146_A_35161891 | NC_021165.1    | Ca_Kabuli_Chr06 | 35161891                | TT                              | CC                 | CC               | INTERGENIC                    |                    |                                                      |
| SNP_43147_A_35167598 | NC_021165.1    | Ca_Kabuli_Chr06 | 35167598                | AA                              | GG                 | GG               | INTERGENIC                    |                    |                                                      |
| SNP_43148_A_35168288 | NC_021165.1    | Ca_Kabuli_Chr06 | 35168288                | TT                              | CC                 | CC               | INTERGENIC                    |                    |                                                      |
| SNP_43149_A_35168290 | NC_021165.1    | Ca_Kabuli_Chr06 | 35168290                | AA                              | GG                 | GG               | INTERGENIC                    |                    |                                                      |
| SNP_43150_A_35168347 | NC_021165.1    | Ca_Kabuli_Chr06 | 35168347                | AA                              | TT                 | TT               | INTERGENIC                    |                    |                                                      |
| SNP_43151_A_35185517 | NC_021165.1    | Ca_Kabuli_Chr06 | 35185517                | AA                              | GG                 | GG               | INTRON                        | 101506450          | probable beta-1,3-galactosyltransferase 8            |
| SNP_43152_A_35206687 | NC_021165.1    | Ca_Kabuli_Chr06 | 35206687                | TT                              | GG                 | GG               | INTERGENIC                    |                    |                                                      |
| SNP_43153_A_35228506 | NC_021165.1    | Ca_Kabuli_Chr06 | 35228506                | AA                              | TT                 | TT               | INTERGENIC                    |                    |                                                      |
| SNP_43154_A_35254752 | NC_021165.1    | Ca_Kabuli_Chr06 | 35254752                | TT                              | CC                 | CC               | INTRON                        | 101489451          | ethylene-responsive transcription factor ERF043-like |

| SNPs IDs             | Chromosome IDs | Chromosomes     | Physical positions (bp) | CDC Frontier (Reference genome) | (Pusa 1103 & HPNB) | (ILWC 46 & LPNB) | Sequence Components of genome | Gene accession IDs | Putative functions                                   |
|----------------------|----------------|-----------------|-------------------------|---------------------------------|--------------------|------------------|-------------------------------|--------------------|------------------------------------------------------|
| SNP_43155_A_35255101 | NC_021165.1    | Ca_Kabuli_Chr06 | 35255101                | GG                              | AA                 | AA               | INTRON                        | 101489451          | ethylene-responsive transcription factor ERF043-like |
| SNP_43156_A_35264581 | NC_021165.1    | Ca_Kabuli_Chr06 | 35264581                | CC                              | TT                 | TT               | INTRON                        | 101489451          | ethylene-responsive transcription factor ERF043-like |
| SNP_43157_A_35312939 | NC_021165.1    | Ca_Kabuli_Chr06 | 35312939                | AA                              | TT                 | TT               | INTERGENIC                    |                    |                                                      |
| SNP_43158_A_35316983 | NC_021165.1    | Ca_Kabuli_Chr06 | 35316983                | GG                              | AA                 | AA               | INTERGENIC                    |                    |                                                      |
| SNP_43159_A_35316991 | NC_021165.1    | Ca_Kabuli_Chr06 | 35316991                | AA                              | TT                 | TT               | INTERGENIC                    |                    |                                                      |
| SNP_43160_A_35357598 | NC_021165.1    | Ca_Kabuli_Chr06 | 35357598                | TT                              | CC                 | CC               | INTERGENIC                    |                    |                                                      |
| SNP_43161_A_35357614 | NC_021165.1    | Ca_Kabuli_Chr06 | 35357614                | CC                              | TT                 | TT               | INTERGENIC                    |                    |                                                      |
| SNP_43162_A_35363637 | NC_021165.1    | Ca_Kabuli_Chr06 | 35363637                | AA                              | GG                 | GG               | INTERGENIC                    |                    |                                                      |
| SNP_43163_A_35363652 | NC_021165.1    | Ca_Kabuli_Chr06 | 35363652                | CC                              | TT                 | TT               | INTERGENIC                    |                    |                                                      |
| SNP_43164_A_35363698 | NC_021165.1    | Ca_Kabuli_Chr06 | 35363698                | CC                              | TT                 | TT               | INTERGENIC                    |                    |                                                      |
| SNP_43165_A_35367038 | NC_021165.1    | Ca_Kabuli_Chr06 | 35367038                | GG                              | TT                 | TT               | INTERGENIC                    |                    |                                                      |
| SNP_43166_A_35367039 | NC_021165.1    | Ca_Kabuli_Chr06 | 35367039                | AA                              | TT                 | TT               | INTERGENIC                    |                    |                                                      |
| SNP_43167_A_35375554 | NC_021165.1    | Ca_Kabuli_Chr06 | 35375554                | TT                              | GG                 | GG               | INTERGENIC                    |                    |                                                      |
| SNP_43168_A_35375561 | NC_021165.1    | Ca_Kabuli_Chr06 | 35375561                | GG                              | AA                 | AA               | INTERGENIC                    |                    |                                                      |
| SNP_43170_A_35419704 | NC_021165.1    | Ca_Kabuli_Chr06 | 35419704                | AA                              | GG                 | GG               | INTERGENIC                    |                    |                                                      |
| SNP_43171_A_35419729 | NC_021165.1    | Ca_Kabuli_Chr06 | 35419729                | CC                              | TT                 | TT               | INTERGENIC                    |                    |                                                      |
| SNP_43172_A_35444233 | NC_021165.1    | Ca_Kabuli_Chr06 | 35444233                | TT                              | CC                 | CC               | INTERGENIC                    |                    |                                                      |
| SNP_43173_A_35461767 | NC_021165.1    | Ca_Kabuli_Chr06 | 35461767                | TT                              | GG                 | GG               | INTERGENIC                    |                    |                                                      |
| SNP_43174_A_35461773 | NC_021165.1    | Ca_Kabuli_Chr06 | 35461773                | AA                              | TT                 | TT               | INTERGENIC                    |                    |                                                      |
| SNP_43176_A_35541928 | NC_021165.1    | Ca_Kabuli_Chr06 | 35541928                | GG                              | AA                 | AA               | INTERGENIC                    |                    |                                                      |
| SNP_43177_A_35573611 | NC_021165.1    | Ca_Kabuli_Chr06 | 35573611                | AA                              | GG                 | GG               | INTERGENIC                    |                    |                                                      |
| SNP_43178_A_35596078 | NC_021165.1    | Ca_Kabuli_Chr06 | 35596078                | TT                              | AA                 | AA               | INTERGENIC                    |                    |                                                      |



| SNPs IDs             | Chromosome IDs | Chromosomes     | Physical positions (bp) | CDC Frontier genome (Reference genome) | (Pusa 1103 & HPNB) | (ILWC 46 & LPNB) | Sequence Components of genome | Gene accession IDs | Putative functions |
|----------------------|----------------|-----------------|-------------------------|----------------------------------------|--------------------|------------------|-------------------------------|--------------------|--------------------|
| SNP_43179_A_35596131 | NC_021165.1    | Ca_Kabuli_Chr06 | 35596131                | AA                                     | CC                 | CC               | INTERGENIC                    |                    |                    |
| SNP_43180_A_35608863 | NC_021165.1    | Ca_Kabuli_Chr06 | 35608863                | CC                                     | GG                 | GG               | INTERGENIC                    |                    |                    |
| SNP_43182_A_35704894 | NC_021165.1    | Ca_Kabuli_Chr06 | 35704894                | AA                                     | GG                 | GG               | URR                           | 101491378          | Unknown function   |
| SNP_43183_A_35704921 | NC_021165.1    | Ca_Kabuli_Chr06 | 35704921                | TT                                     | CC                 | CC               | URR                           | 101491378          | Unknown function   |
| SNP_43184_A_35704942 | NC_021165.1    | Ca_Kabuli_Chr06 | 35704942                | AA                                     | GG                 | GG               | URR                           | 101491378          | Unknown function   |
| SNP_43185_A_35704957 | NC_021165.1    | Ca_Kabuli_Chr06 | 35704957                | AA                                     | GG                 | GG               | URR                           | 101491378          | Unknown function   |
| SNP_43186_A_35704979 | NC_021165.1    | Ca_Kabuli_Chr06 | 35704979                | TT                                     | CC                 | CC               | URR                           | 101491378          | Unknown function   |
| SNP_43187_A_35704980 | NC_021165.1    | Ca_Kabuli_Chr06 | 35704980                | GG                                     | CC                 | CC               | URR                           | 101491378          | Unknown function   |
| SNP_43188_A_35705011 | NC_021165.1    | Ca_Kabuli_Chr06 | 35705011                | CC                                     | TT                 | TT               | URR                           | 101491378          | Unknown function   |
| SNP_43189_A_35705036 | NC_021165.1    | Ca_Kabuli_Chr06 | 35705036                | GG                                     | TT                 | TT               | URR                           | 101491378          | Unknown function   |
| SNP_43190_A_35705047 | NC_021165.1    | Ca_Kabuli_Chr06 | 35705047                | TT                                     | CC                 | CC               | URR                           | 101491378          | Unknown function   |
| SNP_43191_A_35705068 | NC_021165.1    | Ca_Kabuli_Chr06 | 35705068                | AA                                     | GG                 | GG               | URR                           | 101491378          | Unknown function   |
| SNP_43192_A_35705072 | NC_021165.1    | Ca_Kabuli_Chr06 | 35705072                | TT                                     | GG                 | GG               | URR                           | 101491378          | Unknown function   |
| SNP_43193_A_35705099 | NC_021165.1    | Ca_Kabuli_Chr06 | 35705099                | TT                                     | CC                 | CC               | URR                           | 101491378          | Unknown function   |
| SNP_43194_A_35705128 | NC_021165.1    | Ca_Kabuli_Chr06 | 35705128                | TT                                     | GG                 | GG               | URR                           | 101491378          | Unknown function   |
| SNP_43195_A_35705207 | NC_021165.1    | Ca_Kabuli_Chr06 | 35705207                | TT                                     | GG                 | GG               | URR                           | 101491378          | Unknown function   |
| SNP_43196_A_35705237 | NC_021165.1    | Ca_Kabuli_Chr06 | 35705237                | GG                                     | TT                 | TT               | URR                           | 101491378          | Unknown function   |
| SNP_43197_A_35705241 | NC_021165.1    | Ca_Kabuli_Chr06 | 35705241                | TT                                     | CC                 | CC               | URR                           | 101491378          | Unknown function   |
| SNP_43198_A_35705258 | NC_021165.1    | Ca_Kabuli_Chr06 | 35705258                | TT                                     | GG                 | GG               | URR                           | 101491378          | Unknown function   |
| SNP_43199_A_35705278 | NC_021165.1    | Ca_Kabuli_Chr06 | 35705278                | AA                                     | CC                 | CC               | URR                           | 101491378          | Unknown function   |
| SNP_43200_A_35705301 | NC_021165.1    | Ca_Kabuli_Chr06 | 35705301                | TT                                     | CC                 | CC               | URR                           | 101491378          | Unknown function   |
| SNP_43201_A_35705491 | NC_021165.1    | Ca_Kabuli_Chr06 | 35705491                | TT                                     | CC                 | CC               | URR                           | 101491378          | Unknown function   |

| SNPs IDs             | Chromosome IDs | Chromosomes     | Physical positions (bp) | CDC Frontier genome (Reference genome) | (Pusa 1103 & HPNB) | (ILWC 46 & LPNB) | Sequence Components of genome | Gene accession IDs | Putative functions                  |
|----------------------|----------------|-----------------|-------------------------|----------------------------------------|--------------------|------------------|-------------------------------|--------------------|-------------------------------------|
| SNP_43202_A_35705621 | NC_021165.1    | Ca_Kabuli_Chr06 | 35705621                | AA                                     | GG                 | GG               | URR                           | 101491378          | Unknown function                    |
| SNP_43203_A_35705842 | NC_021165.1    | Ca_Kabuli_Chr06 | 35705842                | AA                                     | TT                 | TT               | URR                           | 101491378          | Unknown function                    |
| SNP_43204_A_35705843 | NC_021165.1    | Ca_Kabuli_Chr06 | 35705843                | TT                                     | AA                 | AA               | URR                           | 101491378          | Unknown function                    |
| SNP_43206_A_35765621 | NC_021165.1    | Ca_Kabuli_Chr06 | 35765621                | CC                                     | TT                 | TT               | URR                           | 101509859          | phospholipase SGR2                  |
| SNP_43208_A_35771466 | NC_021165.1    | Ca_Kabuli_Chr06 | 35771466                | GG                                     | CC                 | CC               | INTERGENIC                    |                    |                                     |
| SNP_43209_A_35771717 | NC_021165.1    | Ca_Kabuli_Chr06 | 35771717                | GG                                     | AA                 | AA               | INTERGENIC                    |                    |                                     |
| SNP_43210_A_35771851 | NC_021165.1    | Ca_Kabuli_Chr06 | 35771851                | AA                                     | GG                 | GG               | INTERGENIC                    |                    |                                     |
| SNP_43212_A_35802500 | NC_021165.1    | Ca_Kabuli_Chr06 | 35802500                | TT                                     | CC                 | CC               | URR                           | 101510832          | uncharacterized LOC101510832        |
| SNP_43213_A_35802502 | NC_021165.1    | Ca_Kabuli_Chr06 | 35802502                | GG                                     | AA                 | AA               | URR                           | 101510832          | uncharacterized LOC101510832        |
| SNP_43215_A_35803368 | NC_021165.1    | Ca_Kabuli_Chr06 | 35803368                | GG                                     | AA                 | AA               | INTERGENIC                    |                    |                                     |
| SNP_43216_A_35805862 | NC_021165.1    | Ca_Kabuli_Chr06 | 35805862                | TT                                     | CC                 | CC               | INTERGENIC                    |                    |                                     |
| SNP_43217_A_35806888 | NC_021165.1    | Ca_Kabuli_Chr06 | 35806888                | AA                                     | GG                 | GG               | DRR                           | 101492679          | zinc finger MYM-type protein 1-like |
| SNP_43218_A_35809324 | NC_021165.1    | Ca_Kabuli_Chr06 | 35809324                | AA                                     | GG                 | GG               | NON_SYNONYMOUS_CODING         | 101492679          | zinc finger MYM-type protein 1-like |
| SNP_43219_A_35809448 | NC_021165.1    | Ca_Kabuli_Chr06 | 35809448                | TT                                     | AA                 | AA               | SYNONYMOUS_CODING             | 101492679          | zinc finger MYM-type protein 1-like |
| SNP_43220_A_35809507 | NC_021165.1    | Ca_Kabuli_Chr06 | 35809507                | CC                                     | TT                 | TT               | NON_SYNONYMOUS_CODING         | 101492679          | zinc finger MYM-type protein 1-like |
| SNP_43222_A_35810795 | NC_021165.1    | Ca_Kabuli_Chr06 | 35810795                | TT                                     | CC                 | CC               | INTRON                        | 101492679          | zinc finger MYM-type protein 1-like |
| SNP_43223_A_35811042 | NC_021165.1    | Ca_Kabuli_Chr06 | 35811042                | TT                                     | CC                 | CC               | SYNONYMOUS_CODING             | 101492679          | zinc finger MYM-type protein 1-like |
| SNP_43224_A_35811506 | NC_021165.1    | Ca_Kabuli_Chr06 | 35811506                | TT                                     | GG                 | GG               | STOP_GAINED                   | 101492679          | zinc finger MYM-type protein 1-like |
| SNP_43225_A_35811645 | NC_021165.1    | Ca_Kabuli_Chr06 | 35811645                | AA                                     | CC                 | CC               | NON_SYNONYMOUS_CODING         | 101492679          | zinc finger MYM-type protein 1-like |
| SNP_43226_A_35811859 | NC_021165.1    | Ca_Kabuli_Chr06 | 35811859                | CC                                     | TT                 | TT               | URR                           | 101492679          | zinc finger MYM-type protein 1-like |
| SNP_43227_A_35812913 | NC_021165.1    | Ca_Kabuli_Chr06 | 35812913                | GG                                     | TT                 | TT               | URR                           | 101492679          | zinc finger MYM-type protein 1-like |
| SNP_43228_A_35812959 | NC_021165.1    | Ca_Kabuli_Chr06 | 35812959                | AA                                     | GG                 | GG               | URR                           | 101492679          | zinc finger MYM-type protein 1-like |

| SNPs IDs             | Chromosome IDs | Chromosomes     | Physical positions (bp) | CDC Frontier (Reference genome) | (Pusa 1103 & HPNB) | (ILWC 46 & LPNB) | Sequence Components of genome | Gene accession IDs | Putative functions                  |
|----------------------|----------------|-----------------|-------------------------|---------------------------------|--------------------|------------------|-------------------------------|--------------------|-------------------------------------|
| SNP_43229_A_35813310 | NC_021165.1    | Ca_Kabuli_Chr06 | 35813310                | GG                              | AA                 | AA               | URR                           | 101492679          | zinc finger MYM-type protein 1-like |
| SNP_43230_A_35817077 | NC_021165.1    | Ca_Kabuli_Chr06 | 35817077                | AA                              | CC                 | CC               | INTERGENIC                    |                    |                                     |
| SNP_43231_A_35818704 | NC_021165.1    | Ca_Kabuli_Chr06 | 35818704                | AA                              | TT                 | TT               | INTERGENIC                    |                    |                                     |
| SNP_43232_A_35818709 | NC_021165.1    | Ca_Kabuli_Chr06 | 35818709                | AA                              | GG                 | GG               | INTERGENIC                    |                    |                                     |
| SNP_43233_A_35820727 | NC_021165.1    | Ca_Kabuli_Chr06 | 35820727                | AA                              | GG                 | GG               | INTERGENIC                    |                    |                                     |
| SNP_43234_A_35821704 | NC_021165.1    | Ca_Kabuli_Chr06 | 35821704                | CC                              | TT                 | TT               | INTERGENIC                    |                    |                                     |
| SNP_43235_A_35831590 | NC_021165.1    | Ca_Kabuli_Chr06 | 35831590                | AA                              | CC                 | CC               | INTERGENIC                    |                    |                                     |
| SNP_43236_A_35831885 | NC_021165.1    | Ca_Kabuli_Chr06 | 35831885                | GG                              | AA                 | AA               | INTERGENIC                    |                    |                                     |
| SNP_43237_A_35831916 | NC_021165.1    | Ca_Kabuli_Chr06 | 35831916                | GG                              | CC                 | CC               | INTERGENIC                    |                    |                                     |
| SNP_43238_A_35831924 | NC_021165.1    | Ca_Kabuli_Chr06 | 35831924                | AA                              | TT                 | TT               | INTERGENIC                    |                    |                                     |
| SNP_43239_A_35832075 | NC_021165.1    | Ca_Kabuli_Chr06 | 35832075                | AA                              | GG                 | GG               | INTERGENIC                    |                    |                                     |
| SNP_43240_A_35832154 | NC_021165.1    | Ca_Kabuli_Chr06 | 35832154                | CC                              | GG                 | GG               | INTERGENIC                    |                    |                                     |
| SNP_43241_A_35922038 | NC_021165.1    | Ca_Kabuli_Chr06 | 35922038                | AA                              | GG                 | GG               | INTERGENIC                    |                    |                                     |
| SNP_43242_A_35922262 | NC_021165.1    | Ca_Kabuli_Chr06 | 35922262                | AA                              | GG                 | GG               | INTERGENIC                    |                    |                                     |
| SNP_43243_A_35922290 | NC_021165.1    | Ca_Kabuli_Chr06 | 35922290                | TT                              | CC                 | CC               | INTERGENIC                    |                    |                                     |
| SNP_43244_A_35922310 | NC_021165.1    | Ca_Kabuli_Chr06 | 35922310                | TT                              | GG                 | GG               | INTERGENIC                    |                    |                                     |
| SNP_43245_A_35922311 | NC_021165.1    | Ca_Kabuli_Chr06 | 35922311                | TT                              | CC                 | CC               | INTERGENIC                    |                    |                                     |
| SNP_43246_A_35922358 | NC_021165.1    | Ca_Kabuli_Chr06 | 35922358                | AA                              | CC                 | CC               | INTERGENIC                    |                    |                                     |
| SNP_43247_A_35971132 | NC_021165.1    | Ca_Kabuli_Chr06 | 35971132                | GG                              | AA                 | AA               | INTRON                        | 101511789          | protein NRT1/ PTR FAMILY 5.10-like  |
| SNP_43248_A_35998757 | NC_021165.1    | Ca_Kabuli_Chr06 | 35998757                | CC                              | AA                 | AA               | INTERGENIC                    |                    |                                     |
| SNP_43249_A_35999053 | NC_021165.1    | Ca_Kabuli_Chr06 | 35999053                | GG                              | CC                 | CC               | INTERGENIC                    |                    |                                     |
| SNP_43250_A_36000241 | NC_021165.1    | Ca_Kabuli_Chr06 | 36000241                | TT                              | AA                 | AA               | INTERGENIC                    |                    |                                     |

| SNPs IDs             | Chromosome IDs | Chromosomes     | Physical positions (bp) | CDC Frontier genome (Reference genome) | (Pusa 1103 & HPNB) | (ILWC 46 & LPNB) | Sequence genome | Components of | Gene accession IDs | Putative functions           |
|----------------------|----------------|-----------------|-------------------------|----------------------------------------|--------------------|------------------|-----------------|---------------|--------------------|------------------------------|
| SNP_43251_A_36000783 | NC_021165.1    | Ca_Kabuli_Chr06 | 36000783                | GG                                     | AA                 | AA               | INTERGENIC      |               |                    |                              |
| SNP_43252_A_36000791 | NC_021165.1    | Ca_Kabuli_Chr06 | 36000791                | GG                                     | TT                 | TT               | INTERGENIC      |               |                    |                              |
| SNP_43253_A_36000807 | NC_021165.1    | Ca_Kabuli_Chr06 | 36000807                | AA                                     | GG                 | GG               | INTERGENIC      |               |                    |                              |
| SNP_43254_A_36028000 | NC_021165.1    | Ca_Kabuli_Chr06 | 36028000                | GG                                     | AA                 | AA               | INTERGENIC      |               |                    |                              |
| SNP_43255_A_36029339 | NC_021165.1    | Ca_Kabuli_Chr06 | 36029339                | TT                                     | GG                 | GG               | INTERGENIC      |               |                    |                              |
| SNP_43256_A_36029575 | NC_021165.1    | Ca_Kabuli_Chr06 | 36029575                | CC                                     | TT                 | TT               | INTERGENIC      |               |                    |                              |
| SNP_43259_A_36039680 | NC_021165.1    | Ca_Kabuli_Chr06 | 36039680                | AA                                     | CC                 | CC               | INTERGENIC      |               |                    |                              |
| SNP_43260_A_36039777 | NC_021165.1    | Ca_Kabuli_Chr06 | 36039777                | AA                                     | TT                 | TT               | INTERGENIC      |               |                    |                              |
| SNP_43261_A_36062149 | NC_021165.1    | Ca_Kabuli_Chr06 | 36062149                | TT                                     | CC                 | CC               | INTERGENIC      |               |                    |                              |
| SNP_43262_A_36067557 | NC_021165.1    | Ca_Kabuli_Chr06 | 36067557                | CC                                     | TT                 | TT               | INTERGENIC      |               |                    |                              |
| SNP_43263_A_36067565 | NC_021165.1    | Ca_Kabuli_Chr06 | 36067565                | AA                                     | GG                 | GG               | INTERGENIC      |               |                    |                              |
| SNP_43264_A_36070365 | NC_021165.1    | Ca_Kabuli_Chr06 | 36070365                | AA                                     | GG                 | GG               | INTERGENIC      |               |                    |                              |
| SNP_43265_A_36070372 | NC_021165.1    | Ca_Kabuli_Chr06 | 36070372                | TT                                     | CC                 | CC               | INTERGENIC      |               |                    |                              |
| SNP_43266_A_36070949 | NC_021165.1    | Ca_Kabuli_Chr06 | 36070949                | AA                                     | GG                 | GG               | INTERGENIC      |               |                    |                              |
| SNP_43267_A_36083697 | NC_021165.1    | Ca_Kabuli_Chr06 | 36083697                | TT                                     | CC                 | CC               | INTERGENIC      |               |                    |                              |
| SNP_43268_A_36083781 | NC_021165.1    | Ca_Kabuli_Chr06 | 36083781                | TT                                     | CC                 | CC               | INTERGENIC      |               |                    |                              |
| SNP_43269_A_36083811 | NC_021165.1    | Ca_Kabuli_Chr06 | 36083811                | GG                                     | AA                 | AA               | INTERGENIC      |               |                    |                              |
| SNP_43270_A_36083851 | NC_021165.1    | Ca_Kabuli_Chr06 | 36083851                | TT                                     | GG                 | GG               | INTERGENIC      |               |                    |                              |
| SNP_43271_A_36083870 | NC_021165.1    | Ca_Kabuli_Chr06 | 36083870                | TT                                     | CC                 | CC               | INTERGENIC      |               |                    |                              |
| SNP_43272_A_36083872 | NC_021165.1    | Ca_Kabuli_Chr06 | 36083872                | AA                                     | GG                 | GG               | INTERGENIC      |               |                    |                              |
| SNP_43274_A_36246471 | NC_021165.1    | Ca_Kabuli_Chr06 | 36246471                | TT                                     | GG                 | GG               | URR             |               | 101499094          | uncharacterized LOC101499094 |
| SNP_43275_A_36246507 | NC_021165.1    | Ca_Kabuli_Chr06 | 36246507                | GG                                     | AA                 | AA               | URR             |               | 101499094          | uncharacterized LOC101499094 |

| SNPs IDs             | Chromosome IDs | Chromosomes     | Physical positions (bp) | CDC Frontier (Reference genome) | (Pusa 1103 & HPNB) | (ILWC 46 & LPNB) | Sequence Components of genome | Gene accession IDs | Putative functions           |
|----------------------|----------------|-----------------|-------------------------|---------------------------------|--------------------|------------------|-------------------------------|--------------------|------------------------------|
| SNP_43276_A_36246516 | NC_021165.1    | Ca_Kabuli_Chr06 | 36246516                | AA                              | GG                 | GG               | URR                           | 101499094          | uncharacterized LOC101499094 |
| SNP_43277_A_36272361 | NC_021165.1    | Ca_Kabuli_Chr06 | 36272361                | GG                              | AA                 | AA               | URR                           | 101499716          | uncharacterized LOC101499716 |
| SNP_43279_A_36287151 | NC_021165.1    | Ca_Kabuli_Chr06 | 36287151                | GG                              | AA                 | AA               | INTERGENIC                    |                    |                              |
| SNP_43280_A_36339307 | NC_021165.1    | Ca_Kabuli_Chr06 | 36339307                | AA                              | GG                 | GG               | INTERGENIC                    |                    |                              |
| SNP_43281_A_36346232 | NC_021165.1    | Ca_Kabuli_Chr06 | 36346232                | CC                              | TT                 | TT               | INTERGENIC                    |                    |                              |
| SNP_43282_A_36346924 | NC_021165.1    | Ca_Kabuli_Chr06 | 36346924                | TT                              | CC                 | CC               | INTERGENIC                    |                    |                              |
| SNP_43283_A_36389233 | NC_021165.1    | Ca_Kabuli_Chr06 | 36389233                | GG                              | AA                 | AA               | INTERGENIC                    |                    |                              |
| SNP_43284_A_36389247 | NC_021165.1    | Ca_Kabuli_Chr06 | 36389247                | CC                              | TT                 | TT               | INTERGENIC                    |                    |                              |
| SNP_43285_A_36406262 | NC_021165.1    | Ca_Kabuli_Chr06 | 36406262                | CC                              | TT                 | TT               | INTERGENIC                    |                    |                              |
| SNP_43286_A_36406275 | NC_021165.1    | Ca_Kabuli_Chr06 | 36406275                | AA                              | GG                 | GG               | INTERGENIC                    |                    |                              |
| SNP_43287_A_36412118 | NC_021165.1    | Ca_Kabuli_Chr06 | 36412118                | TT                              | CC                 | CC               | INTERGENIC                    |                    |                              |
| SNP_43288_A_36412545 | NC_021165.1    | Ca_Kabuli_Chr06 | 36412545                | CC                              | TT                 | TT               | INTERGENIC                    |                    |                              |
| SNP_43289_A_36412623 | NC_021165.1    | Ca_Kabuli_Chr06 | 36412623                | AA                              | GG                 | GG               | INTERGENIC                    |                    |                              |
| SNP_43290_A_36412956 | NC_021165.1    | Ca_Kabuli_Chr06 | 36412956                | CC                              | TT                 | TT               | INTERGENIC                    |                    |                              |
| SNP_43291_A_36450470 | NC_021165.1    | Ca_Kabuli_Chr06 | 36450470                | TT                              | CC                 | CC               | INTERGENIC                    |                    |                              |
| SNP_43292_A_36450508 | NC_021165.1    | Ca_Kabuli_Chr06 | 36450508                | GG                              | AA                 | AA               | INTERGENIC                    |                    |                              |
| SNP_43293_A_36450683 | NC_021165.1    | Ca_Kabuli_Chr06 | 36450683                | AA                              | CC                 | CC               | INTERGENIC                    |                    |                              |
| SNP_43294_A_36450821 | NC_021165.1    | Ca_Kabuli_Chr06 | 36450821                | AA                              | GG                 | GG               | INTERGENIC                    |                    |                              |
| SNP_43296_A_36487675 | NC_021165.1    | Ca_Kabuli_Chr06 | 36487675                | AA                              | GG                 | GG               | INTERGENIC                    |                    |                              |
| SNP_43297_A_36487708 | NC_021165.1    | Ca_Kabuli_Chr06 | 36487708                | CC                              | TT                 | TT               | INTERGENIC                    |                    |                              |
| SNP_43298_A_36488015 | NC_021165.1    | Ca_Kabuli_Chr06 | 36488015                | AA                              | CC                 | CC               | INTERGENIC                    |                    |                              |
| SNP_43299_A_36488091 | NC_021165.1    | Ca_Kabuli_Chr06 | 36488091                | CC                              | TT                 | TT               | INTERGENIC                    |                    |                              |

| SNPs IDs             | Chromosome IDs | Chromosomes     | Physical positions (bp) | CDC Frontier genome (Reference genome) | (Pusa 1103 & HPNB) | (ILWC 46 & LPNB) | Sequence genome | Components of | Gene accession IDs           | Putative functions |
|----------------------|----------------|-----------------|-------------------------|----------------------------------------|--------------------|------------------|-----------------|---------------|------------------------------|--------------------|
| SNP_43300_A_36488097 | NC_021165.1    | Ca_Kabuli_Chr06 | 36488097                | AA                                     | GG                 | GG               | INTERGENIC      |               |                              |                    |
| SNP_43301_A_36488115 | NC_021165.1    | Ca_Kabuli_Chr06 | 36488115                | GG                                     | AA                 | AA               | INTERGENIC      |               |                              |                    |
| SNP_43302_A_36490737 | NC_021165.1    | Ca_Kabuli_Chr06 | 36490737                | CC                                     | TT                 | TT               | INTERGENIC      |               |                              |                    |
| SNP_43304_A_36491192 | NC_021165.1    | Ca_Kabuli_Chr06 | 36491192                | TT                                     | CC                 | CC               | INTERGENIC      |               |                              |                    |
| SNP_43305_A_36491272 | NC_021165.1    | Ca_Kabuli_Chr06 | 36491272                | TT                                     | CC                 | CC               | INTERGENIC      |               |                              |                    |
| SNP_43306_A_36491288 | NC_021165.1    | Ca_Kabuli_Chr06 | 36491288                | TT                                     | CC                 | CC               | INTERGENIC      |               |                              |                    |
| SNP_43307_A_36491314 | NC_021165.1    | Ca_Kabuli_Chr06 | 36491314                | CC                                     | TT                 | TT               | INTERGENIC      |               |                              |                    |
| SNP_43308_A_36491329 | NC_021165.1    | Ca_Kabuli_Chr06 | 36491329                | CC                                     | GG                 | GG               | INTERGENIC      |               |                              |                    |
| SNP_43309_A_36497964 | NC_021165.1    | Ca_Kabuli_Chr06 | 36497964                | AA                                     | GG                 | GG               | INTERGENIC      |               |                              |                    |
| SNP_43310_A_36497965 | NC_021165.1    | Ca_Kabuli_Chr06 | 36497965                | CC                                     | TT                 | TT               | INTERGENIC      |               |                              |                    |
| SNP_43311_A_36497974 | NC_021165.1    | Ca_Kabuli_Chr06 | 36497974                | AA                                     | TT                 | TT               | INTERGENIC      |               |                              |                    |
| SNP_43312_A_36497997 | NC_021165.1    | Ca_Kabuli_Chr06 | 36497997                | TT                                     | CC                 | CC               | INTERGENIC      |               |                              |                    |
| SNP_43313_A_36518148 | NC_021165.1    | Ca_Kabuli_Chr06 | 36518148                | CC                                     | AA                 | AA               | INTERGENIC      |               |                              |                    |
| SNP_43314_A_36518463 | NC_021165.1    | Ca_Kabuli_Chr06 | 36518463                | TT                                     | CC                 | CC               | INTERGENIC      |               |                              |                    |
| SNP_43315_A_36518519 | NC_021165.1    | Ca_Kabuli_Chr06 | 36518519                | TT                                     | CC                 | CC               | INTERGENIC      |               |                              |                    |
| SNP_43316_A_36518544 | NC_021165.1    | Ca_Kabuli_Chr06 | 36518544                | TT                                     | CC                 | CC               | INTERGENIC      |               |                              |                    |
| SNP_43317_A_36520424 | NC_021165.1    | Ca_Kabuli_Chr06 | 36520424                | GG                                     | TT                 | TT               | INTERGENIC      |               |                              |                    |
| SNP_43318_A_36555464 | NC_021165.1    | Ca_Kabuli_Chr06 | 36555464                | TT                                     | CC                 | CC               | URR             | 101510179     | Unknown function             |                    |
| SNP_43319_A_36559548 | NC_021165.1    | Ca_Kabuli_Chr06 | 36559548                | CC                                     | AA                 | AA               | INTERGENIC      |               |                              |                    |
| SNP_43320_A_36559557 | NC_021165.1    | Ca_Kabuli_Chr06 | 36559557                | TT                                     | AA                 | AA               | INTERGENIC      |               |                              |                    |
| SNP_43321_A_36597870 | NC_021165.1    | Ca_Kabuli_Chr06 | 36597870                | CC                                     | TT                 | TT               | DRR             | 101501935     | uncharacterized LOC101501935 |                    |
| SNP_43322_A_36619765 | NC_021165.1    | Ca_Kabuli_Chr06 | 36619765                | CC                                     | TT                 | TT               | INTERGENIC      |               |                              |                    |

| SNPs IDs             | Chromosome IDs | Chromosomes     | Physical positions (bp) | CDC Frontier genome (Reference genome) | (Pusa 1103 & HPNB) | (ILWC 46 & LPNB) | Sequence genome | Components of | Gene accession IDs | Putative functions |
|----------------------|----------------|-----------------|-------------------------|----------------------------------------|--------------------|------------------|-----------------|---------------|--------------------|--------------------|
| SNP_43323_A_36642628 | NC_021165.1    | Ca_Kabuli_Chr06 | 36642628                | TT                                     | GG                 | GG               | INTERGENIC      |               |                    |                    |
| SNP_43324_A_36651991 | NC_021165.1    | Ca_Kabuli_Chr06 | 36651991                | CC                                     | AA                 | AA               | INTERGENIC      |               |                    |                    |
| SNP_43325_A_36671413 | NC_021165.1    | Ca_Kabuli_Chr06 | 36671413                | TT                                     | AA                 | AA               | INTERGENIC      |               |                    |                    |
| SNP_43326_A_36716619 | NC_021165.1    | Ca_Kabuli_Chr06 | 36716619                | TT                                     | AA                 | AA               | INTERGENIC      |               |                    |                    |
| SNP_43327_A_36716620 | NC_021165.1    | Ca_Kabuli_Chr06 | 36716620                | TT                                     | AA                 | AA               | INTERGENIC      |               |                    |                    |
| SNP_43328_A_36721206 | NC_021165.1    | Ca_Kabuli_Chr06 | 36721206                | CC                                     | TT                 | TT               | INTERGENIC      |               |                    |                    |
| SNP_43329_A_36722301 | NC_021165.1    | Ca_Kabuli_Chr06 | 36722301                | GG                                     | AA                 | AA               | INTERGENIC      |               |                    |                    |
| SNP_43332_A_36722678 | NC_021165.1    | Ca_Kabuli_Chr06 | 36722678                | AA                                     | TT                 | TT               | INTERGENIC      |               |                    |                    |
| SNP_43333_A_36723493 | NC_021165.1    | Ca_Kabuli_Chr06 | 36723493                | CC                                     | TT                 | TT               | INTERGENIC      |               |                    |                    |
| SNP_43334_A_36773762 | NC_021165.1    | Ca_Kabuli_Chr06 | 36773762                | AA                                     | GG                 | GG               | INTERGENIC      |               |                    |                    |
| SNP_43335_A_36773782 | NC_021165.1    | Ca_Kabuli_Chr06 | 36773782                | AA                                     | GG                 | GG               | INTERGENIC      |               |                    |                    |
| SNP_43336_A_36773804 | NC_021165.1    | Ca_Kabuli_Chr06 | 36773804                | TT                                     | GG                 | GG               | INTERGENIC      |               |                    |                    |
| SNP_43337_A_36774113 | NC_021165.1    | Ca_Kabuli_Chr06 | 36774113                | AA                                     | GG                 | GG               | INTERGENIC      |               |                    |                    |
| SNP_43338_A_36783745 | NC_021165.1    | Ca_Kabuli_Chr06 | 36783745                | AA                                     | GG                 | GG               | INTERGENIC      |               |                    |                    |
| SNP_43339_A_36783746 | NC_021165.1    | Ca_Kabuli_Chr06 | 36783746                | TT                                     | CC                 | CC               | INTERGENIC      |               |                    |                    |
| SNP_43340_A_36783751 | NC_021165.1    | Ca_Kabuli_Chr06 | 36783751                | AA                                     | TT                 | TT               | INTERGENIC      |               |                    |                    |
| SNP_43341_A_36783758 | NC_021165.1    | Ca_Kabuli_Chr06 | 36783758                | CC                                     | TT                 | TT               | INTERGENIC      |               |                    |                    |
| SNP_43342_A_36783783 | NC_021165.1    | Ca_Kabuli_Chr06 | 36783783                | TT                                     | CC                 | CC               | INTERGENIC      |               |                    |                    |
| SNP_43343_A_36784116 | NC_021165.1    | Ca_Kabuli_Chr06 | 36784116                | CC                                     | TT                 | TT               | INTERGENIC      |               |                    |                    |
| SNP_43344_A_36784119 | NC_021165.1    | Ca_Kabuli_Chr06 | 36784119                | AA                                     | CC                 | CC               | INTERGENIC      |               |                    |                    |
| SNP_43345_A_36784137 | NC_021165.1    | Ca_Kabuli_Chr06 | 36784137                | AA                                     | GG                 | GG               | INTERGENIC      |               |                    |                    |
| SNP_43346_A_36786160 | NC_021165.1    | Ca_Kabuli_Chr06 | 36786160                | TT                                     | CC                 | CC               | INTERGENIC      |               |                    |                    |

| SNPs IDs             | Chromosome IDs | Chromosomes     | Physical positions (bp) | CDC Frontier genome (Reference genome) | (Pusa 1103 & HPNB) | (ILWC 46 & LPNB) | Sequence genome | Components of | Gene accession IDs | Putative functions |
|----------------------|----------------|-----------------|-------------------------|----------------------------------------|--------------------|------------------|-----------------|---------------|--------------------|--------------------|
| SNP_43347_A_36786225 | NC_021165.1    | Ca_Kabuli_Chr06 | 36786225                | TT                                     | CC                 | CC               | INTERGENIC      |               |                    |                    |
| SNP_43348_A_36786263 | NC_021165.1    | Ca_Kabuli_Chr06 | 36786263                | CC                                     | GG                 | GG               | INTERGENIC      |               |                    |                    |
| SNP_43349_A_36786318 | NC_021165.1    | Ca_Kabuli_Chr06 | 36786318                | TT                                     | CC                 | CC               | INTERGENIC      |               |                    |                    |
| SNP_43350_A_36786325 | NC_021165.1    | Ca_Kabuli_Chr06 | 36786325                | CC                                     | TT                 | TT               | INTERGENIC      |               |                    |                    |
| SNP_43351_A_36786409 | NC_021165.1    | Ca_Kabuli_Chr06 | 36786409                | CC                                     | TT                 | TT               | INTERGENIC      |               |                    |                    |
| SNP_43352_A_36789462 | NC_021165.1    | Ca_Kabuli_Chr06 | 36789462                | AA                                     | GG                 | GG               | INTERGENIC      |               |                    |                    |
| SNP_43353_A_36789502 | NC_021165.1    | Ca_Kabuli_Chr06 | 36789502                | CC                                     | GG                 | GG               | INTERGENIC      |               |                    |                    |
| SNP_43354_A_36789577 | NC_021165.1    | Ca_Kabuli_Chr06 | 36789577                | AA                                     | GG                 | GG               | INTERGENIC      |               |                    |                    |
| SNP_43355_A_36800068 | NC_021165.1    | Ca_Kabuli_Chr06 | 36800068                | AA                                     | CC                 | CC               | INTERGENIC      |               |                    |                    |
| SNP_43356_A_36845477 | NC_021165.1    | Ca_Kabuli_Chr06 | 36845477                | TT                                     | CC                 | CC               | INTERGENIC      |               |                    |                    |
| SNP_43357_A_36869231 | NC_021165.1    | Ca_Kabuli_Chr06 | 36869231                | AA                                     | CC                 | CC               | INTERGENIC      |               |                    |                    |
| SNP_43359_A_36890961 | NC_021165.1    | Ca_Kabuli_Chr06 | 36890961                | TT                                     | CC                 | CC               | INTERGENIC      |               |                    |                    |
| SNP_43360_A_36893091 | NC_021165.1    | Ca_Kabuli_Chr06 | 36893091                | GG                                     | AA                 | AA               | INTERGENIC      |               |                    |                    |
| SNP_43361_A_36893113 | NC_021165.1    | Ca_Kabuli_Chr06 | 36893113                | CC                                     | AA                 | AA               | INTERGENIC      |               |                    |                    |
| SNP_43362_A_36893140 | NC_021165.1    | Ca_Kabuli_Chr06 | 36893140                | CC                                     | AA                 | AA               | INTERGENIC      |               |                    |                    |
| SNP_43363_A_36893148 | NC_021165.1    | Ca_Kabuli_Chr06 | 36893148                | TT                                     | AA                 | AA               | INTERGENIC      |               |                    |                    |
| SNP_43364_A_36893205 | NC_021165.1    | Ca_Kabuli_Chr06 | 36893205                | CC                                     | AA                 | AA               | INTERGENIC      |               |                    |                    |
| SNP_43365_A_36893210 | NC_021165.1    | Ca_Kabuli_Chr06 | 36893210                | TT                                     | CC                 | CC               | INTERGENIC      |               |                    |                    |
| SNP_43366_A_36893273 | NC_021165.1    | Ca_Kabuli_Chr06 | 36893273                | GG                                     | AA                 | AA               | INTERGENIC      |               |                    |                    |
| SNP_43367_A_36893286 | NC_021165.1    | Ca_Kabuli_Chr06 | 36893286                | TT                                     | AA                 | AA               | INTERGENIC      |               |                    |                    |
| SNP_43368_A_36893293 | NC_021165.1    | Ca_Kabuli_Chr06 | 36893293                | CC                                     | AA                 | AA               | INTERGENIC      |               |                    |                    |
| SNP_43369_A_36893297 | NC_021165.1    | Ca_Kabuli_Chr06 | 36893297                | GG                                     | AA                 | AA               | INTERGENIC      |               |                    |                    |



| SNPs IDs             | Chromosome IDs | Chromosomes     | Physical positions (bp) | CDC Frontier genome (Reference genome) | (Pusa 1103 & HPNB) | (ILWC 46 & LPNB) | Sequence genome | Components of | Gene accession IDs | Putative functions |
|----------------------|----------------|-----------------|-------------------------|----------------------------------------|--------------------|------------------|-----------------|---------------|--------------------|--------------------|
| SNP_43372_A_37001398 | NC_021165.1    | Ca_Kabuli_Chr06 | 37001398                | CC                                     | AA                 | AA               | INTERGENIC      |               |                    |                    |
| SNP_43373_A_37009741 | NC_021165.1    | Ca_Kabuli_Chr06 | 37009741                | TT                                     | CC                 | CC               | INTERGENIC      |               |                    |                    |
| SNP_43374_A_37046488 | NC_021165.1    | Ca_Kabuli_Chr06 | 37046488                | AA                                     | GG                 | GG               | INTERGENIC      |               |                    |                    |
| SNP_43375_A_37101321 | NC_021165.1    | Ca_Kabuli_Chr06 | 37101321                | AA                                     | CC                 | CC               | INTERGENIC      |               |                    |                    |
| SNP_43376_A_37101329 | NC_021165.1    | Ca_Kabuli_Chr06 | 37101329                | AA                                     | TT                 | TT               | INTERGENIC      |               |                    |                    |
| SNP_43377_A_37101397 | NC_021165.1    | Ca_Kabuli_Chr06 | 37101397                | AA                                     | GG                 | GG               | INTERGENIC      |               |                    |                    |
| SNP_43378_A_37197708 | NC_021165.1    | Ca_Kabuli_Chr06 | 37197708                | CC                                     | TT                 | TT               | INTERGENIC      |               |                    |                    |
| SNP_43379_A_37197719 | NC_021165.1    | Ca_Kabuli_Chr06 | 37197719                | AA                                     | GG                 | GG               | INTERGENIC      |               |                    |                    |
| SNP_43380_A_37201297 | NC_021165.1    | Ca_Kabuli_Chr06 | 37201297                | TT                                     | AA                 | AA               | INTERGENIC      |               |                    |                    |
| SNP_43381_A_37201333 | NC_021165.1    | Ca_Kabuli_Chr06 | 37201333                | CC                                     | GG                 | GG               | INTERGENIC      |               |                    |                    |
| SNP_43382_A_37221783 | NC_021165.1    | Ca_Kabuli_Chr06 | 37221783                | TT                                     | CC                 | CC               | INTERGENIC      |               |                    |                    |
| SNP_43383_A_37221816 | NC_021165.1    | Ca_Kabuli_Chr06 | 37221816                | TT                                     | CC                 | CC               | INTERGENIC      |               |                    |                    |
| SNP_43384_A_37221830 | NC_021165.1    | Ca_Kabuli_Chr06 | 37221830                | TT                                     | CC                 | CC               | INTERGENIC      |               |                    |                    |
| SNP_43385_A_37221833 | NC_021165.1    | Ca_Kabuli_Chr06 | 37221833                | AA                                     | GG                 | GG               | INTERGENIC      |               |                    |                    |
| SNP_43386_A_37221845 | NC_021165.1    | Ca_Kabuli_Chr06 | 37221845                | AA                                     | GG                 | GG               | INTERGENIC      |               |                    |                    |
| SNP_43387_A_37221862 | NC_021165.1    | Ca_Kabuli_Chr06 | 37221862                | TT                                     | CC                 | CC               | INTERGENIC      |               |                    |                    |
| SNP_43388_A_37221880 | NC_021165.1    | Ca_Kabuli_Chr06 | 37221880                | AA                                     | GG                 | GG               | INTERGENIC      |               |                    |                    |
| SNP_43389_A_37221984 | NC_021165.1    | Ca_Kabuli_Chr06 | 37221984                | TT                                     | GG                 | GG               | INTERGENIC      |               |                    |                    |
| SNP_43390_A_37221995 | NC_021165.1    | Ca_Kabuli_Chr06 | 37221995                | AA                                     | GG                 | GG               | INTERGENIC      |               |                    |                    |
| SNP_43391_A_37222026 | NC_021165.1    | Ca_Kabuli_Chr06 | 37222026                | TT                                     | CC                 | CC               | INTERGENIC      |               |                    |                    |
| SNP_43392_A_37222171 | NC_021165.1    | Ca_Kabuli_Chr06 | 37222171                | TT                                     | GG                 | GG               | INTERGENIC      |               |                    |                    |
| SNP_43393_A_37229747 | NC_021165.1    | Ca_Kabuli_Chr06 | 37229747                | TT                                     | AA                 | AA               | INTERGENIC      |               |                    |                    |

| SNPs IDs             | Chromosome IDs | Chromosomes     | Physical positions (bp) | CDC Frontier genome (Reference genome) | (Pusa 1103 & HPNB) | (ILWC 46 & LPNB) | Sequence Components of genome | Gene accession IDs | Putative functions |
|----------------------|----------------|-----------------|-------------------------|----------------------------------------|--------------------|------------------|-------------------------------|--------------------|--------------------|
| SNP_43394_A_37230431 | NC_021165.1    | Ca_Kabuli_Chr06 | 37230431                | CC                                     | TT                 | TT               | INTERGENIC                    |                    |                    |
| SNP_43395_A_37277007 | NC_021165.1    | Ca_Kabuli_Chr06 | 37277007                | AA                                     | GG                 | GG               | INTERGENIC                    |                    |                    |
| SNP_43396_A_37284152 | NC_021165.1    | Ca_Kabuli_Chr06 | 37284152                | GG                                     | AA                 | AA               | INTERGENIC                    |                    |                    |
| SNP_43397_A_37295904 | NC_021165.1    | Ca_Kabuli_Chr06 | 37295904                | AA                                     | GG                 | GG               | INTRON                        | 101512105          | Unknown function   |
| SNP_43398_A_37295911 | NC_021165.1    | Ca_Kabuli_Chr06 | 37295911                | TT                                     | CC                 | CC               | INTRON                        | 101512105          | Unknown function   |
| SNP_43399_A_37295927 | NC_021165.1    | Ca_Kabuli_Chr06 | 37295927                | AA                                     | GG                 | GG               | INTRON                        | 101512105          | Unknown function   |
| SNP_43400_A_37295935 | NC_021165.1    | Ca_Kabuli_Chr06 | 37295935                | AA                                     | GG                 | GG               | INTRON                        | 101512105          | Unknown function   |
| SNP_43401_A_37360211 | NC_021165.1    | Ca_Kabuli_Chr06 | 37360211                | CC                                     | TT                 | TT               | INTERGENIC                    |                    |                    |
| SNP_43402_A_37368274 | NC_021165.1    | Ca_Kabuli_Chr06 | 37368274                | GG                                     | TT                 | TT               | INTERGENIC                    |                    |                    |
| SNP_43403_A_37403550 | NC_021165.1    | Ca_Kabuli_Chr06 | 37403550                | AA                                     | GG                 | GG               | INTERGENIC                    |                    |                    |
| SNP_43404_A_37418728 | NC_021165.1    | Ca_Kabuli_Chr06 | 37418728                | CC                                     | TT                 | TT               | INTERGENIC                    |                    |                    |
| SNP_43405_A_37451308 | NC_021165.1    | Ca_Kabuli_Chr06 | 37451308                | GG                                     | CC                 | CC               | INTERGENIC                    |                    |                    |
| SNP_43406_A_37452986 | NC_021165.1    | Ca_Kabuli_Chr06 | 37452986                | GG                                     | TT                 | TT               | INTERGENIC                    |                    |                    |
| SNP_43407_A_37453305 | NC_021165.1    | Ca_Kabuli_Chr06 | 37453305                | AA                                     | GG                 | GG               | INTERGENIC                    |                    |                    |
| SNP_43408_A_37453340 | NC_021165.1    | Ca_Kabuli_Chr06 | 37453340                | TT                                     | GG                 | GG               | INTERGENIC                    |                    |                    |
| SNP_43409_A_37453405 | NC_021165.1    | Ca_Kabuli_Chr06 | 37453405                | TT                                     | CC                 | CC               | INTERGENIC                    |                    |                    |
| SNP_43410_A_37453436 | NC_021165.1    | Ca_Kabuli_Chr06 | 37453436                | TT                                     | CC                 | CC               | INTERGENIC                    |                    |                    |
| SNP_43411_A_37453464 | NC_021165.1    | Ca_Kabuli_Chr06 | 37453464                | AA                                     | TT                 | TT               | INTERGENIC                    |                    |                    |
| SNP_43412_A_37453472 | NC_021165.1    | Ca_Kabuli_Chr06 | 37453472                | TT                                     | CC                 | CC               | INTERGENIC                    |                    |                    |
| SNP_43413_A_37453481 | NC_021165.1    | Ca_Kabuli_Chr06 | 37453481                | TT                                     | GG                 | GG               | INTERGENIC                    |                    |                    |
| SNP_43414_A_37453492 | NC_021165.1    | Ca_Kabuli_Chr06 | 37453492                | CC                                     | AA                 | AA               | INTERGENIC                    |                    |                    |
| SNP_43415_A_37453518 | NC_021165.1    | Ca_Kabuli_Chr06 | 37453518                | TT                                     | CC                 | CC               | INTERGENIC                    |                    |                    |

| SNPs IDs             | Chromosome IDs | Chromosomes     | Physical positions (bp) | CDC Frontier (Reference genome) | (Pusa 1103 & HPNB) | (ILWC 46 & LPNB) | Sequence genome | Components of | Gene accession IDs | Putative functions |
|----------------------|----------------|-----------------|-------------------------|---------------------------------|--------------------|------------------|-----------------|---------------|--------------------|--------------------|
| SNP_43416_A_37453665 | NC_021165.1    | Ca_Kabuli_Chr06 | 37453665                | CC                              | GG                 | GG               | INTERGENIC      |               |                    |                    |
| SNP_43417_A_37453667 | NC_021165.1    | Ca_Kabuli_Chr06 | 37453667                | TT                              | AA                 | GG               | INTERGENIC      |               |                    |                    |
| SNP_43418_A_37453704 | NC_021165.1    | Ca_Kabuli_Chr06 | 37453704                | AA                              | CC                 | CC               | INTERGENIC      |               |                    |                    |
| SNP_43419_A_37453797 | NC_021165.1    | Ca_Kabuli_Chr06 | 37453797                | AA                              | GG                 | GG               | INTERGENIC      |               |                    |                    |
| SNP_43420_A_37453827 | NC_021165.1    | Ca_Kabuli_Chr06 | 37453827                | AA                              | GG                 | GG               | INTERGENIC      |               |                    |                    |
| SNP_43421_A_37453871 | NC_021165.1    | Ca_Kabuli_Chr06 | 37453871                | AA                              | GG                 | GG               | INTERGENIC      |               |                    |                    |
| SNP_43422_A_37538193 | NC_021165.1    | Ca_Kabuli_Chr06 | 37538193                | GG                              | AA                 | AA               | INTERGENIC      |               |                    |                    |
| SNP_43423_A_37571381 | NC_021165.1    | Ca_Kabuli_Chr06 | 37571381                | GG                              | AA                 | AA               | INTERGENIC      |               |                    |                    |
| SNP_43424_A_37609759 | NC_021165.1    | Ca_Kabuli_Chr06 | 37609759                | AA                              | TT                 | TT               | INTERGENIC      |               |                    |                    |
| SNP_43425_A_37611075 | NC_021165.1    | Ca_Kabuli_Chr06 | 37611075                | CC                              | TT                 | TT               | INTERGENIC      |               |                    |                    |
| SNP_43426_A_37611146 | NC_021165.1    | Ca_Kabuli_Chr06 | 37611146                | GG                              | AA                 | AA               | INTERGENIC      |               |                    |                    |
| SNP_43427_A_37613194 | NC_021165.1    | Ca_Kabuli_Chr06 | 37613194                | AA                              | CC                 | CC               | INTERGENIC      |               |                    |                    |
| SNP_43428_A_37613195 | NC_021165.1    | Ca_Kabuli_Chr06 | 37613195                | AA                              | GG                 | GG               | INTERGENIC      |               |                    |                    |
| SNP_43429_A_37613207 | NC_021165.1    | Ca_Kabuli_Chr06 | 37613207                | GG                              | AA                 | AA               | INTERGENIC      |               |                    |                    |
| SNP_43430_A_37613214 | NC_021165.1    | Ca_Kabuli_Chr06 | 37613214                | GG                              | AA                 | AA               | INTERGENIC      |               |                    |                    |
| SNP_43431_A_37617171 | NC_021165.1    | Ca_Kabuli_Chr06 | 37617171                | TT                              | CC                 | CC               | INTERGENIC      |               |                    |                    |
| SNP_43432_A_37617358 | NC_021165.1    | Ca_Kabuli_Chr06 | 37617358                | GG                              | AA                 | AA               | INTERGENIC      |               |                    |                    |
| SNP_43433_A_37621052 | NC_021165.1    | Ca_Kabuli_Chr06 | 37621052                | CC                              | TT                 | TT               | INTERGENIC      |               |                    |                    |
| SNP_43434_A_37628447 | NC_021165.1    | Ca_Kabuli_Chr06 | 37628447                | TT                              | CC                 | CC               | URR             | 101508260     | prosaposin         |                    |
| SNP_43435_A_37638631 | NC_021165.1    | Ca_Kabuli_Chr06 | 37638631                | GG                              | AA                 | AA               | INTERGENIC      |               |                    |                    |
| SNP_43436_A_37639019 | NC_021165.1    | Ca_Kabuli_Chr06 | 37639019                | CC                              | TT                 | TT               | INTERGENIC      |               |                    |                    |
| SNP_43437_A_37639095 | NC_021165.1    | Ca_Kabuli_Chr06 | 37639095                | AA                              | CC                 | CC               | INTERGENIC      |               |                    |                    |

| SNPs IDs             | Chromosome IDs | Chromosomes     | Physical positions (bp) | CDC Frontier (Reference genome) | (Pusa 1103 & HPNB) | (ILWC 46 & LPNB) | Sequence genome | Components of | Gene accession IDs | Putative functions |
|----------------------|----------------|-----------------|-------------------------|---------------------------------|--------------------|------------------|-----------------|---------------|--------------------|--------------------|
| SNP_43438_A_37639174 | NC_021165.1    | Ca_Kabuli_Chr06 | 37639174                | CC                              | GG                 | GG               | INTERGENIC      |               |                    |                    |
| SNP_43439_A_37639379 | NC_021165.1    | Ca_Kabuli_Chr06 | 37639379                | GG                              | AA                 | AA               | INTERGENIC      |               |                    |                    |
| SNP_43440_A_37639415 | NC_021165.1    | Ca_Kabuli_Chr06 | 37639415                | GG                              | TT                 | TT               | INTERGENIC      |               |                    |                    |
| SNP_43441_A_37639435 | NC_021165.1    | Ca_Kabuli_Chr06 | 37639435                | TT                              | CC                 | CC               | INTERGENIC      |               |                    |                    |
| SNP_43442_A_37639549 | NC_021165.1    | Ca_Kabuli_Chr06 | 37639549                | AA                              | GG                 | GG               | INTERGENIC      |               |                    |                    |
| SNP_43444_A_37657156 | NC_021165.1    | Ca_Kabuli_Chr06 | 37657156                | AA                              | GG                 | GG               | INTERGENIC      |               |                    |                    |
| SNP_43445_A_37672648 | NC_021165.1    | Ca_Kabuli_Chr06 | 37672648                | CC                              | GG                 | GG               | INTERGENIC      |               |                    |                    |
| SNP_43446_A_37673504 | NC_021165.1    | Ca_Kabuli_Chr06 | 37673504                | TT                              | GG                 | GG               | INTERGENIC      |               |                    |                    |
| SNP_43448_A_37762213 | NC_021165.1    | Ca_Kabuli_Chr06 | 37762213                | TT                              | AA                 | AA               | INTERGENIC      |               |                    |                    |
| SNP_43449_A_37762281 | NC_021165.1    | Ca_Kabuli_Chr06 | 37762281                | AA                              | GG                 | GG               | INTERGENIC      |               |                    |                    |
| SNP_43450_A_37763848 | NC_021165.1    | Ca_Kabuli_Chr06 | 37763848                | TT                              | AA                 | AA               | INTERGENIC      |               |                    |                    |
| SNP_43451_A_37763850 | NC_021165.1    | Ca_Kabuli_Chr06 | 37763850                | AA                              | GG                 | GG               | INTERGENIC      |               |                    |                    |
| SNP_43453_A_37834682 | NC_021165.1    | Ca_Kabuli_Chr06 | 37834682                | CC                              | TT                 | TT               | INTERGENIC      |               |                    |                    |
| SNP_43454_A_37835316 | NC_021165.1    | Ca_Kabuli_Chr06 | 37835316                | TT                              | CC                 | CC               | INTERGENIC      |               |                    |                    |
| SNP_43455_A_37835332 | NC_021165.1    | Ca_Kabuli_Chr06 | 37835332                | AA                              | GG                 | GG               | INTERGENIC      |               |                    |                    |
| SNP_43456_A_37836482 | NC_021165.1    | Ca_Kabuli_Chr06 | 37836482                | TT                              | CC                 | CC               | INTERGENIC      |               |                    |                    |
| SNP_43457_A_37836524 | NC_021165.1    | Ca_Kabuli_Chr06 | 37836524                | AA                              | TT                 | TT               | INTERGENIC      |               |                    |                    |
| SNP_43458_A_37836943 | NC_021165.1    | Ca_Kabuli_Chr06 | 37836943                | AA                              | GG                 | GG               | INTERGENIC      |               |                    |                    |
| SNP_43460_A_37849802 | NC_021165.1    | Ca_Kabuli_Chr06 | 37849802                | AA                              | GG                 | GG               | INTERGENIC      |               |                    |                    |
| SNP_43461_A_37850345 | NC_021165.1    | Ca_Kabuli_Chr06 | 37850345                | GG                              | AA                 | AA               | INTERGENIC      |               |                    |                    |
| SNP_43462_A_37854537 | NC_021165.1    | Ca_Kabuli_Chr06 | 37854537                | TT                              | AA                 | AA               | INTERGENIC      |               |                    |                    |
| SNP_43464_A_37893614 | NC_021165.1    | Ca_Kabuli_Chr06 | 37893614                | TT                              | AA                 | AA               | INTERGENIC      |               |                    |                    |

| SNPs IDs             | Chromosome IDs | Chromosomes     | Physical positions (bp) | CDC Frontier genome (Reference genome) | (Pusa 1103 & HPNB) | (ILWC 46 & LPNB) | Sequence genome | Components of | Gene accession IDs | Putative functions |
|----------------------|----------------|-----------------|-------------------------|----------------------------------------|--------------------|------------------|-----------------|---------------|--------------------|--------------------|
| SNP_43465_A_37893650 | NC_021165.1    | Ca_Kabuli_Chr06 | 37893650                | AA                                     | CC                 | CC               | INTERGENIC      |               |                    |                    |
| SNP_43466_A_37894142 | NC_021165.1    | Ca_Kabuli_Chr06 | 37894142                | GG                                     | AA                 | AA               | INTERGENIC      |               |                    |                    |
| SNP_43467_A_37894148 | NC_021165.1    | Ca_Kabuli_Chr06 | 37894148                | TT                                     | CC                 | CC               | INTERGENIC      |               |                    |                    |
| SNP_43468_A_37901728 | NC_021165.1    | Ca_Kabuli_Chr06 | 37901728                | GG                                     | AA                 | AA               | INTERGENIC      |               |                    |                    |
| SNP_43469_A_37901800 | NC_021165.1    | Ca_Kabuli_Chr06 | 37901800                | TT                                     | CC                 | CC               | INTERGENIC      |               |                    |                    |
| SNP_43470_A_37901801 | NC_021165.1    | Ca_Kabuli_Chr06 | 37901801                | GG                                     | AA                 | AA               | INTERGENIC      |               |                    |                    |
| SNP_43471_A_37901811 | NC_021165.1    | Ca_Kabuli_Chr06 | 37901811                | GG                                     | TT                 | TT               | INTERGENIC      |               |                    |                    |
| SNP_43472_A_37901841 | NC_021165.1    | Ca_Kabuli_Chr06 | 37901841                | AA                                     | GG                 | GG               | INTERGENIC      |               |                    |                    |
| SNP_43474_A_37902283 | NC_021165.1    | Ca_Kabuli_Chr06 | 37902283                | TT                                     | CC                 | CC               | INTERGENIC      |               |                    |                    |
| SNP_43475_A_37902301 | NC_021165.1    | Ca_Kabuli_Chr06 | 37902301                | GG                                     | AA                 | AA               | INTERGENIC      |               |                    |                    |
| SNP_43476_A_37934715 | NC_021165.1    | Ca_Kabuli_Chr06 | 37934715                | TT                                     | AA                 | AA               | INTERGENIC      |               |                    |                    |
| SNP_43477_A_37934779 | NC_021165.1    | Ca_Kabuli_Chr06 | 37934779                | AA                                     | TT                 | TT               | INTERGENIC      |               |                    |                    |
| SNP_43478_A_37934797 | NC_021165.1    | Ca_Kabuli_Chr06 | 37934797                | TT                                     | GG                 | GG               | INTERGENIC      |               |                    |                    |
| SNP_43479_A_37934811 | NC_021165.1    | Ca_Kabuli_Chr06 | 37934811                | TT                                     | AA                 | AA               | INTERGENIC      |               |                    |                    |
| SNP_43480_A_37934824 | NC_021165.1    | Ca_Kabuli_Chr06 | 37934824                | AA                                     | CC                 | CC               | INTERGENIC      |               |                    |                    |
| SNP_43481_A_37935183 | NC_021165.1    | Ca_Kabuli_Chr06 | 37935183                | CC                                     | AA                 | AA               | INTERGENIC      |               |                    |                    |
| SNP_43482_A_37935201 | NC_021165.1    | Ca_Kabuli_Chr06 | 37935201                | CC                                     | AA                 | AA               | INTERGENIC      |               |                    |                    |
| SNP_43483_A_37935235 | NC_021165.1    | Ca_Kabuli_Chr06 | 37935235                | CC                                     | TT                 | TT               | INTERGENIC      |               |                    |                    |
| SNP_43484_A_37935242 | NC_021165.1    | Ca_Kabuli_Chr06 | 37935242                | GG                                     | AA                 | AA               | INTERGENIC      |               |                    |                    |
| SNP_43485_A_37947698 | NC_021165.1    | Ca_Kabuli_Chr06 | 37947698                | AA                                     | CC                 | CC               | INTERGENIC      |               |                    |                    |
| SNP_43486_A_37975721 | NC_021165.1    | Ca_Kabuli_Chr06 | 37975721                | CC                                     | TT                 | TT               | INTERGENIC      |               |                    |                    |
| SNP_43487_A_37975781 | NC_021165.1    | Ca_Kabuli_Chr06 | 37975781                | TT                                     | AA                 | AA               | INTERGENIC      |               |                    |                    |

| SNPs IDs             | Chromosome IDs | Chromosomes     | Physical positions (bp) | CDC Frontier genome (Reference genome) | (Pusa 1103 & HPNB) | (ILWC 46 & LPNB) | Sequence Components of genome | Gene accession IDs | Putative functions           |
|----------------------|----------------|-----------------|-------------------------|----------------------------------------|--------------------|------------------|-------------------------------|--------------------|------------------------------|
| SNP_43488_A_37975813 | NC_021165.1    | Ca_Kabuli_Chr06 | 37975813                | TT                                     | CC                 | CC               | URR                           | 101488217          | Unknown function             |
| SNP_43489_A_37975858 | NC_021165.1    | Ca_Kabuli_Chr06 | 37975858                | TT                                     | AA                 | AA               | URR                           | 101488217          | Unknown function             |
| SNP_43490_A_37975966 | NC_021165.1    | Ca_Kabuli_Chr06 | 37975966                | CC                                     | AA                 | AA               | URR                           | 101488217          | Unknown function             |
| SNP_43491_A_37975984 | NC_021165.1    | Ca_Kabuli_Chr06 | 37975984                | GG                                     | AA                 | AA               | URR                           | 101488217          | Unknown function             |
| SNP_43492_A_37975985 | NC_021165.1    | Ca_Kabuli_Chr06 | 37975985                | CC                                     | TT                 | TT               | URR                           | 101488217          | Unknown function             |
| SNP_43493_A_37976046 | NC_021165.1    | Ca_Kabuli_Chr06 | 37976046                | TT                                     | GG                 | GG               | URR                           | 101488217          | Unknown function             |
| SNP_43494_A_37976126 | NC_021165.1    | Ca_Kabuli_Chr06 | 37976126                | GG                                     | AA                 | AA               | URR                           | 101488217          | Unknown function             |
| SNP_43495_A_37976137 | NC_021165.1    | Ca_Kabuli_Chr06 | 37976137                | TT                                     | AA                 | AA               | URR                           | 101488217          | Unknown function             |
| SNP_43496_A_37976160 | NC_021165.1    | Ca_Kabuli_Chr06 | 37976160                | CC                                     | TT                 | TT               | URR                           | 101488217          | Unknown function             |
| SNP_43497_A_37976164 | NC_021165.1    | Ca_Kabuli_Chr06 | 37976164                | CC                                     | TT                 | TT               | URR                           | 101488217          | Unknown function             |
| SNP_43498_A_37976294 | NC_021165.1    | Ca_Kabuli_Chr06 | 37976294                | AA                                     | TT                 | TT               | URR                           | 101488217          | Unknown function             |
| SNP_43499_A_37980750 | NC_021165.1    | Ca_Kabuli_Chr06 | 37980750                | GG                                     | AA                 | AA               | URR                           | 101492240          | uncharacterized LOC101492240 |
| SNP_43500_A_37981131 | NC_021165.1    | Ca_Kabuli_Chr06 | 37981131                | GG                                     | CC                 | CC               | URR                           | 101492240          | uncharacterized LOC101492240 |
| SNP_43501_A_37981144 | NC_021165.1    | Ca_Kabuli_Chr06 | 37981144                | GG                                     | TT                 | TT               | URR                           | 101492240          | uncharacterized LOC101492240 |
| SNP_43502_A_37981252 | NC_021165.1    | Ca_Kabuli_Chr06 | 37981252                | AA                                     | CC                 | CC               | URR                           | 101492240          | uncharacterized LOC101492240 |
| SNP_43503_A_37981480 | NC_021165.1    | Ca_Kabuli_Chr06 | 37981480                | GG                                     | AA                 | AA               | URR                           | 101492240          | uncharacterized LOC101492240 |
| SNP_43504_A_37981519 | NC_021165.1    | Ca_Kabuli_Chr06 | 37981519                | AA                                     | GG                 | GG               | URR                           | 101492240          | uncharacterized LOC101492240 |
| SNP_43505_A_37981593 | NC_021165.1    | Ca_Kabuli_Chr06 | 37981593                | AA                                     | GG                 | GG               | URR                           | 101492240          | uncharacterized LOC101492240 |
| SNP_43506_A_37981676 | NC_021165.1    | Ca_Kabuli_Chr06 | 37981676                | GG                                     | AA                 | AA               | INTRON                        | 101492577          | Unknown function             |
| SNP_43507_A_37981699 | NC_021165.1    | Ca_Kabuli_Chr06 | 37981699                | TT                                     | CC                 | CC               | INTRON                        | 101492577          | Unknown function             |
| SNP_43508_A_37981708 | NC_021165.1    | Ca_Kabuli_Chr06 | 37981708                | CC                                     | TT                 | TT               | INTRON                        | 101492577          | Unknown function             |
| SNP_43509_A_37981786 | NC_021165.1    | Ca_Kabuli_Chr06 | 37981786                | CC                                     | TT                 | TT               | INTRON                        | 101492577          | Unknown function             |

| SNPs IDs             | Chromosome IDs | Chromosomes     | Physical positions (bp) | CDC Frontier genome (Reference genome) | (Pusa 1103 & HPNB) | (ILWC 46 & LPNB) | Sequence Components of genome | Gene accession IDs | Putative functions                                       |
|----------------------|----------------|-----------------|-------------------------|----------------------------------------|--------------------|------------------|-------------------------------|--------------------|----------------------------------------------------------|
| SNP_43511_A_37981881 | NC_021165.1    | Ca_Kabuli_Chr06 | 37981881                | GG                                     | AA                 | AA               | INTRON                        | 101492577          | Unknown function                                         |
| SNP_43512_A_37982008 | NC_021165.1    | Ca_Kabuli_Chr06 | 37982008                | AA                                     | CC                 | CC               | INTRON                        | 101492577          | Unknown function                                         |
| SNP_43513_A_37982062 | NC_021165.1    | Ca_Kabuli_Chr06 | 37982062                | TT                                     | GG                 | GG               | INTRON                        | 101492577          | Unknown function                                         |
| SNP_43515_A_37982188 | NC_021165.1    | Ca_Kabuli_Chr06 | 37982188                | CC                                     | AA                 | AA               | INTRON                        | 101492577          | Unknown function                                         |
| SNP_43516_A_37986140 | NC_021165.1    | Ca_Kabuli_Chr06 | 37986140                | AA                                     | GG                 | GG               | INTERGENIC                    |                    |                                                          |
| SNP_43517_A_37986141 | NC_021165.1    | Ca_Kabuli_Chr06 | 37986141                | AA                                     | TT                 | TT               | INTERGENIC                    |                    |                                                          |
| SNP_43518_A_38054614 | NC_021165.1    | Ca_Kabuli_Chr06 | 38054614                | AA                                     | GG                 | GG               | INTERGENIC                    |                    |                                                          |
| SNP_43519_A_38112615 | NC_021165.1    | Ca_Kabuli_Chr06 | 38112615                | GG                                     | AA                 | AA               | INTERGENIC                    |                    |                                                          |
| SNP_43520_A_38112838 | NC_021165.1    | Ca_Kabuli_Chr06 | 38112838                | AA                                     | GG                 | GG               | INTERGENIC                    |                    |                                                          |
| SNP_43521_A_38112887 | NC_021165.1    | Ca_Kabuli_Chr06 | 38112887                | AA                                     | CC                 | CC               | INTERGENIC                    |                    |                                                          |
| SNP_43522_A_38114778 | NC_021165.1    | Ca_Kabuli_Chr06 | 38114778                | TT                                     | CC                 | CC               | INTERGENIC                    |                    |                                                          |
| SNP_43523_A_38124341 | NC_021165.1    | Ca_Kabuli_Chr06 | 38124341                | AA                                     | GG                 | GG               | INTERGENIC                    |                    |                                                          |
| SNP_43524_A_38124568 | NC_021165.1    | Ca_Kabuli_Chr06 | 38124568                | TT                                     | CC                 | CC               | INTERGENIC                    |                    |                                                          |
| SNP_43525_A_38124580 | NC_021165.1    | Ca_Kabuli_Chr06 | 38124580                | AA                                     | GG                 | GG               | INTERGENIC                    |                    |                                                          |
| SNP_43526_A_38124602 | NC_021165.1    | Ca_Kabuli_Chr06 | 38124602                | AA                                     | GG                 | GG               | INTERGENIC                    |                    |                                                          |
| SNP_43527_A_38124620 | NC_021165.1    | Ca_Kabuli_Chr06 | 38124620                | AA                                     | GG                 | GG               | INTERGENIC                    |                    |                                                          |
| SNP_43528_A_38124653 | NC_021165.1    | Ca_Kabuli_Chr06 | 38124653                | AA                                     | GG                 | GG               | INTERGENIC                    |                    |                                                          |
| SNP_43529_A_38124660 | NC_021165.1    | Ca_Kabuli_Chr06 | 38124660                | AA                                     | GG                 | GG               | INTERGENIC                    |                    |                                                          |
| SNP_43530_A_38135203 | NC_021165.1    | Ca_Kabuli_Chr06 | 38135203                | AA                                     | GG                 | GG               | URR                           | 101494827          | serine/threonine-protein phosphatase 7 long form homolog |
| SNP_43531_A_38135229 | NC_021165.1    | Ca_Kabuli_Chr06 | 38135229                | TT                                     | CC                 | CC               | URR                           | 101494827          | serine/threonine-protein phosphatase 7 long form homolog |
| SNP_43532_A_38135341 | NC_021165.1    | Ca_Kabuli_Chr06 | 38135341                | AA                                     | GG                 | GG               | URR                           | 101494827          | serine/threonine-protein phosphatase 7 long form homolog |
| SNP_43533_A_38135351 | NC_021165.1    | Ca_Kabuli_Chr06 | 38135351                | TT                                     | CC                 | CC               | URR                           | 101494827          | serine/threonine-protein phosphatase 7 long form homolog |

| SNPs IDs             | Chromosome IDs | Chromosomes     | Physical positions (bp) | CDC Frontier genome (Reference genome) | (Pusa 1103 & HPNB) | (ILWC 46 & LPNB) | Sequence Components of genome | Gene accession IDs | Putative functions                                       |
|----------------------|----------------|-----------------|-------------------------|----------------------------------------|--------------------|------------------|-------------------------------|--------------------|----------------------------------------------------------|
| SNP_43534_A_38135383 | NC_021165.1    | Ca_Kabuli_Chr06 | 38135383                | TT                                     | AA                 | AA               | URR                           | 101494827          | serine/threonine-protein phosphatase 7 long form homolog |
| SNP_43535_A_38135404 | NC_021165.1    | Ca_Kabuli_Chr06 | 38135404                | GG                                     | AA                 | AA               | URR                           | 101494827          | serine/threonine-protein phosphatase 7 long form homolog |
| SNP_43536_A_38135421 | NC_021165.1    | Ca_Kabuli_Chr06 | 38135421                | CC                                     | AA                 | AA               | URR                           | 101494827          | serine/threonine-protein phosphatase 7 long form homolog |
| SNP_43537_A_38135422 | NC_021165.1    | Ca_Kabuli_Chr06 | 38135422                | TT                                     | AA                 | AA               | URR                           | 101494827          | serine/threonine-protein phosphatase 7 long form homolog |
| SNP_43538_A_38135425 | NC_021165.1    | Ca_Kabuli_Chr06 | 38135425                | AA                                     | GG                 | GG               | URR                           | 101494827          | serine/threonine-protein phosphatase 7 long form homolog |
| SNP_43539_A_38135467 | NC_021165.1    | Ca_Kabuli_Chr06 | 38135467                | TT                                     | CC                 | CC               | URR                           | 101494827          | serine/threonine-protein phosphatase 7 long form homolog |
| SNP_43540_A_38135483 | NC_021165.1    | Ca_Kabuli_Chr06 | 38135483                | TT                                     | CC                 | CC               | URR                           | 101494827          | serine/threonine-protein phosphatase 7 long form homolog |
| SNP_43541_A_38135490 | NC_021165.1    | Ca_Kabuli_Chr06 | 38135490                | AA                                     | GG                 | GG               | URR                           | 101494827          | serine/threonine-protein phosphatase 7 long form homolog |
| SNP_43542_A_38135506 | NC_021165.1    | Ca_Kabuli_Chr06 | 38135506                | AA                                     | GG                 | GG               | URR                           | 101494827          | serine/threonine-protein phosphatase 7 long form homolog |
| SNP_43543_A_38135527 | NC_021165.1    | Ca_Kabuli_Chr06 | 38135527                | CC                                     | TT                 | TT               | URR                           | 101494827          | serine/threonine-protein phosphatase 7 long form homolog |
| SNP_43544_A_38173334 | NC_021165.1    | Ca_Kabuli_Chr06 | 38173334                | TT                                     | AA                 | AA               | INTERGENIC                    |                    |                                                          |
| SNP_43545_A_38182224 | NC_021165.1    | Ca_Kabuli_Chr06 | 38182224                | AA                                     | CC                 | CC               | INTERGENIC                    |                    |                                                          |
| SNP_43546_A_38196165 | NC_021165.1    | Ca_Kabuli_Chr06 | 38196165                | AA                                     | CC                 | CC               | INTERGENIC                    |                    |                                                          |
| SNP_43547_A_38196208 | NC_021165.1    | Ca_Kabuli_Chr06 | 38196208                | AA                                     | TT                 | TT               | INTERGENIC                    |                    |                                                          |
| SNP_43548_A_38196244 | NC_021165.1    | Ca_Kabuli_Chr06 | 38196244                | CC                                     | TT                 | TT               | INTERGENIC                    |                    |                                                          |
| SNP_43549_A_38196435 | NC_021165.1    | Ca_Kabuli_Chr06 | 38196435                | AA                                     | TT                 | TT               | INTERGENIC                    |                    |                                                          |
| SNP_43550_A_38196474 | NC_021165.1    | Ca_Kabuli_Chr06 | 38196474                | TT                                     | CC                 | CC               | INTERGENIC                    |                    |                                                          |
| SNP_43551_A_38196524 | NC_021165.1    | Ca_Kabuli_Chr06 | 38196524                | AA                                     | CC                 | CC               | INTERGENIC                    |                    |                                                          |
| SNP_43552_A_38196541 | NC_021165.1    | Ca_Kabuli_Chr06 | 38196541                | AA                                     | GG                 | GG               | INTERGENIC                    |                    |                                                          |
| SNP_43553_A_38196556 | NC_021165.1    | Ca_Kabuli_Chr06 | 38196556                | AA                                     | GG                 | GG               | INTERGENIC                    |                    |                                                          |
| SNP_43554_A_38197457 | NC_021165.1    | Ca_Kabuli_Chr06 | 38197457                | TT                                     | AA                 | AA               | INTERGENIC                    |                    |                                                          |
| SNP_43556_A_38202188 | NC_021165.1    | Ca_Kabuli_Chr06 | 38202188                | AA                                     | GG                 | GG               | INTERGENIC                    |                    |                                                          |



| SNPs IDs             | Chromosome IDs | Chromosomes     | Physical positions (bp) | CDC Frontier genome (Reference genome) | (Pusa 1103 & HPNB) | (ILWC 46 & LPNB) | Sequence Components of genome | Gene accession IDs | Putative functions            |
|----------------------|----------------|-----------------|-------------------------|----------------------------------------|--------------------|------------------|-------------------------------|--------------------|-------------------------------|
| SNP_43557_A_38202245 | NC_021165.1    | Ca_Kabuli_Chr06 | 38202245                | AA                                     | GG                 | GG               | INTERGENIC                    |                    |                               |
| SNP_43558_A_38232366 | NC_021165.1    | Ca_Kabuli_Chr06 | 38232366                | GG                                     | TT                 | TT               | INTERGENIC                    |                    |                               |
| SNP_43559_A_38232380 | NC_021165.1    | Ca_Kabuli_Chr06 | 38232380                | CC                                     | AA                 | AA               | INTERGENIC                    |                    |                               |
| SNP_43560_A_38238007 | NC_021165.1    | Ca_Kabuli_Chr06 | 38238007                | AA                                     | CC                 | CC               | INTERGENIC                    |                    |                               |
| SNP_43561_A_38253840 | NC_021165.1    | Ca_Kabuli_Chr06 | 38253840                | GG                                     | AA                 | AA               | INTERGENIC                    |                    |                               |
| SNP_43562_A_38262278 | NC_021165.1    | Ca_Kabuli_Chr06 | 38262278                | TT                                     | CC                 | CC               | INTERGENIC                    |                    |                               |
| SNP_43564_A_38358810 | NC_021165.1    | Ca_Kabuli_Chr06 | 38358810                | TT                                     | AA                 | AA               | INTRON                        | 101491274          | molybdenum cofactor sulfurase |
| SNP_43565_A_38365356 | NC_021165.1    | Ca_Kabuli_Chr06 | 38365356                | GG                                     | AA                 | AA               | INTRON                        | 101491274          | molybdenum cofactor sulfurase |
| SNP_43566_A_38374403 | NC_021165.1    | Ca_Kabuli_Chr06 | 38374403                | AA                                     | GG                 | GG               | URR                           | 101491274          | molybdenum cofactor sulfurase |
| SNP_43567_A_38382095 | NC_021165.1    | Ca_Kabuli_Chr06 | 38382095                | AA                                     | GG                 | GG               | INTERGENIC                    |                    |                               |
| SNP_43568_A_38448557 | NC_021165.1    | Ca_Kabuli_Chr06 | 38448557                | AA                                     | CC                 | CC               | INTERGENIC                    |                    |                               |
| SNP_43569_A_38448572 | NC_021165.1    | Ca_Kabuli_Chr06 | 38448572                | AA                                     | GG                 | GG               | INTERGENIC                    |                    |                               |
| SNP_43570_A_38473041 | NC_021165.1    | Ca_Kabuli_Chr06 | 38473041                | CC                                     | TT                 | TT               | INTERGENIC                    |                    |                               |
| SNP_43571_A_38473180 | NC_021165.1    | Ca_Kabuli_Chr06 | 38473180                | GG                                     | AA                 | AA               | INTERGENIC                    |                    |                               |
| SNP_43572_A_38473191 | NC_021165.1    | Ca_Kabuli_Chr06 | 38473191                | GG                                     | AA                 | AA               | INTERGENIC                    |                    |                               |
| SNP_43573_A_38473401 | NC_021165.1    | Ca_Kabuli_Chr06 | 38473401                | TT                                     | CC                 | CC               | INTERGENIC                    |                    |                               |
| SNP_43574_A_38575455 | NC_021165.1    | Ca_Kabuli_Chr06 | 38575455                | GG                                     | AA                 | AA               | INTERGENIC                    |                    |                               |
| SNP_43575_A_38575646 | NC_021165.1    | Ca_Kabuli_Chr06 | 38575646                | TT                                     | CC                 | CC               | INTERGENIC                    |                    |                               |
| SNP_43576_A_38575673 | NC_021165.1    | Ca_Kabuli_Chr06 | 38575673                | GG                                     | AA                 | AA               | INTERGENIC                    |                    |                               |
| SNP_43577_A_38575679 | NC_021165.1    | Ca_Kabuli_Chr06 | 38575679                | AA                                     | GG                 | GG               | INTERGENIC                    |                    |                               |
| SNP_43578_A_38575745 | NC_021165.1    | Ca_Kabuli_Chr06 | 38575745                | GG                                     | TT                 | TT               | INTERGENIC                    |                    |                               |
| SNP_43579_A_38575763 | NC_021165.1    | Ca_Kabuli_Chr06 | 38575763                | TT                                     | AA                 | AA               | INTERGENIC                    |                    |                               |

| SNPs IDs             | Chromosome IDs | Chromosomes     | Physical positions (bp) | CDC Frontier (Reference genome) | (Pusa 1103 & HPNB) | (ILWC 46 & LPNB) | Sequence genome | Components of | Gene accession IDs | Putative functions |
|----------------------|----------------|-----------------|-------------------------|---------------------------------|--------------------|------------------|-----------------|---------------|--------------------|--------------------|
| SNP_43580_A_38577918 | NC_021165.1    | Ca_Kabuli_Chr06 | 38577918                | AA                              | GG                 | GG               | INTERGENIC      |               |                    |                    |
| SNP_43581_A_38577930 | NC_021165.1    | Ca_Kabuli_Chr06 | 38577930                | CC                              | TT                 | TT               | INTERGENIC      |               |                    |                    |
| SNP_43582_A_38613900 | NC_021165.1    | Ca_Kabuli_Chr06 | 38613900                | GG                              | AA                 | AA               | INTERGENIC      |               |                    |                    |
| SNP_43583_A_38614340 | NC_021165.1    | Ca_Kabuli_Chr06 | 38614340                | GG                              | TT                 | TT               | DRR             | 101509762     | Unknown function   |                    |
| SNP_43585_A_38669325 | NC_021165.1    | Ca_Kabuli_Chr06 | 38669325                | TT                              | AA                 | AA               | INTERGENIC      |               |                    |                    |
| SNP_43586_A_38669590 | NC_021165.1    | Ca_Kabuli_Chr06 | 38669590                | TT                              | AA                 | AA               | INTERGENIC      |               |                    |                    |
| SNP_43587_A_38701971 | NC_021165.1    | Ca_Kabuli_Chr06 | 38701971                | GG                              | CC                 | CC               | INTERGENIC      |               |                    |                    |
| SNP_43588_A_38717685 | NC_021165.1    | Ca_Kabuli_Chr06 | 38717685                | AA                              | GG                 | GG               | INTERGENIC      |               |                    |                    |
| SNP_43589_A_38717985 | NC_021165.1    | Ca_Kabuli_Chr06 | 38717985                | GG                              | TT                 | TT               | INTERGENIC      |               |                    |                    |
| SNP_43590_A_38746552 | NC_021165.1    | Ca_Kabuli_Chr06 | 38746552                | CC                              | TT                 | TT               | INTERGENIC      |               |                    |                    |
| SNP_43591_A_38810458 | NC_021165.1    | Ca_Kabuli_Chr06 | 38810458                | TT                              | CC                 | CC               | INTERGENIC      |               |                    |                    |
| SNP_43593_A_38829993 | NC_021165.1    | Ca_Kabuli_Chr06 | 38829993                | TT                              | AA                 | AA               | INTERGENIC      |               |                    |                    |
| SNP_43594_A_38844764 | NC_021165.1    | Ca_Kabuli_Chr06 | 38844764                | CC                              | GG                 | GG               | INTERGENIC      |               |                    |                    |
| SNP_43595_A_38863472 | NC_021165.1    | Ca_Kabuli_Chr06 | 38863472                | TT                              | AA                 | AA               | INTERGENIC      |               |                    |                    |
| SNP_43596_A_38863489 | NC_021165.1    | Ca_Kabuli_Chr06 | 38863489                | AA                              | GG                 | GG               | INTERGENIC      |               |                    |                    |
| SNP_43597_A_38863508 | NC_021165.1    | Ca_Kabuli_Chr06 | 38863508                | TT                              | CC                 | CC               | INTERGENIC      |               |                    |                    |
| SNP_43598_A_38863512 | NC_021165.1    | Ca_Kabuli_Chr06 | 38863512                | TT                              | CC                 | CC               | INTERGENIC      |               |                    |                    |
| SNP_43599_A_38863531 | NC_021165.1    | Ca_Kabuli_Chr06 | 38863531                | CC                              | TT                 | TT               | INTERGENIC      |               |                    |                    |
| SNP_43600_A_38863556 | NC_021165.1    | Ca_Kabuli_Chr06 | 38863556                | TT                              | CC                 | CC               | INTERGENIC      |               |                    |                    |
| SNP_43602_A_38863869 | NC_021165.1    | Ca_Kabuli_Chr06 | 38863869                | CC                              | TT                 | TT               | INTERGENIC      |               |                    |                    |
| SNP_43603_A_38863941 | NC_021165.1    | Ca_Kabuli_Chr06 | 38863941                | CC                              | TT                 | TT               | INTERGENIC      |               |                    |                    |
| SNP_43604_A_38863998 | NC_021165.1    | Ca_Kabuli_Chr06 | 38863998                | TT                              | CC                 | CC               | INTERGENIC      |               |                    |                    |

| SNPs IDs             | Chromosome IDs | Chromosomes     | Physical positions (bp) | CDC Frontier genome (Reference genome) | (Pusa 1103 & HPNB) | (ILWC 46 & LPNB) | Sequence Components of genome | Gene accession IDs | Putative functions |
|----------------------|----------------|-----------------|-------------------------|----------------------------------------|--------------------|------------------|-------------------------------|--------------------|--------------------|
| SNP_43605_A_38864023 | NC_021165.1    | Ca_Kabuli_Chr06 | 38864023                | GG                                     | AA                 | AA               | INTERGENIC                    |                    |                    |
| SNP_43606_A_38864028 | NC_021165.1    | Ca_Kabuli_Chr06 | 38864028                | TT                                     | AA                 | AA               | INTERGENIC                    |                    |                    |
| SNP_43607_A_38864043 | NC_021165.1    | Ca_Kabuli_Chr06 | 38864043                | CC                                     | TT                 | TT               | INTERGENIC                    |                    |                    |
| SNP_43608_A_38871608 | NC_021165.1    | Ca_Kabuli_Chr06 | 38871608                | AA                                     | TT                 | TT               | INTERGENIC                    |                    |                    |
| SNP_43609_A_39031880 | NC_021165.1    | Ca_Kabuli_Chr06 | 39031880                | TT                                     | AA                 | AA               | INTERGENIC                    |                    |                    |
| SNP_43610_A_39044299 | NC_021165.1    | Ca_Kabuli_Chr06 | 39044299                | GG                                     | AA                 | AA               | INTERGENIC                    |                    |                    |
| SNP_43611_A_39049308 | NC_021165.1    | Ca_Kabuli_Chr06 | 39049308                | GG                                     | AA                 | AA               | INTERGENIC                    |                    |                    |
| SNP_43612_A_39049320 | NC_021165.1    | Ca_Kabuli_Chr06 | 39049320                | CC                                     | TT                 | TT               | INTERGENIC                    |                    |                    |
| SNP_43613_A_39049360 | NC_021165.1    | Ca_Kabuli_Chr06 | 39049360                | TT                                     | CC                 | CC               | INTERGENIC                    |                    |                    |
| SNP_43614_A_39049391 | NC_021165.1    | Ca_Kabuli_Chr06 | 39049391                | CC                                     | TT                 | TT               | INTERGENIC                    |                    |                    |
| SNP_43615_A_39049418 | NC_021165.1    | Ca_Kabuli_Chr06 | 39049418                | AA                                     | GG                 | GG               | INTERGENIC                    |                    |                    |
| SNP_43616_A_39049425 | NC_021165.1    | Ca_Kabuli_Chr06 | 39049425                | CC                                     | TT                 | TT               | INTERGENIC                    |                    |                    |
| SNP_43617_A_39049702 | NC_021165.1    | Ca_Kabuli_Chr06 | 39049702                | CC                                     | AA                 | AA               | INTERGENIC                    |                    |                    |
| SNP_43618_A_39049720 | NC_021165.1    | Ca_Kabuli_Chr06 | 39049720                | GG                                     | AA                 | AA               | INTERGENIC                    |                    |                    |
| SNP_43619_A_39051379 | NC_021165.1    | Ca_Kabuli_Chr06 | 39051379                | TT                                     | CC                 | CC               | INTRON                        | 101512013          | Unknown function   |
| SNP_43620_A_39053213 | NC_021165.1    | Ca_Kabuli_Chr06 | 39053213                | CC                                     | TT                 | TT               | NON_SYNONYMOUS_CODING         | 101512013          | Unknown function   |
| SNP_43621_A_39053214 | NC_021165.1    | Ca_Kabuli_Chr06 | 39053214                | GG                                     | AA                 | AA               | SYNONYMOUS_CODING             | 101512013          | Unknown function   |
| SNP_43622_A_39055568 | NC_021165.1    | Ca_Kabuli_Chr06 | 39055568                | TT                                     | GG                 | GG               | INTRON                        | 101512013          | Unknown function   |
| SNP_43623_A_39055974 | NC_021165.1    | Ca_Kabuli_Chr06 | 39055974                | AA                                     | GG                 | GG               | INTRON                        | 101512013          | Unknown function   |
| SNP_43624_A_39055998 | NC_021165.1    | Ca_Kabuli_Chr06 | 39055998                | TT                                     | CC                 | CC               | INTRON                        | 101512013          | Unknown function   |
| SNP_43625_A_39056047 | NC_021165.1    | Ca_Kabuli_Chr06 | 39056047                | GG                                     | AA                 | AA               | INTRON                        | 101512013          | Unknown function   |
| SNP_43626_A_39062178 | NC_021165.1    | Ca_Kabuli_Chr06 | 39062178                | CC                                     | TT                 | TT               | INTRON                        | 101512013          | Unknown function   |

| SNPs IDs             | Chromosome IDs | Chromosomes     | Physical positions (bp) | CDC Frontier genome (Reference genome) | (Pusa 1103 & HPNB) | (ILWC 46 & LPNB) | Sequence genome | Components of | Gene accession IDs | Putative functions |
|----------------------|----------------|-----------------|-------------------------|----------------------------------------|--------------------|------------------|-----------------|---------------|--------------------|--------------------|
| SNP_43627_A_39078513 | NC_021165.1    | Ca_Kabuli_Chr06 | 39078513                | AA                                     | CC                 | CC               | INTERGENIC      |               |                    |                    |
| SNP_43628_A_39137779 | NC_021165.1    | Ca_Kabuli_Chr06 | 39137779                | TT                                     | CC                 | CC               | INTERGENIC      |               |                    |                    |
| SNP_43629_A_39175913 | NC_021165.1    | Ca_Kabuli_Chr06 | 39175913                | AA                                     | GG                 | GG               | INTERGENIC      |               |                    |                    |
| SNP_43631_A_39249985 | NC_021165.1    | Ca_Kabuli_Chr06 | 39249985                | AA                                     | GG                 | GG               | INTERGENIC      |               |                    |                    |
| SNP_43632_A_39283809 | NC_021165.1    | Ca_Kabuli_Chr06 | 39283809                | AA                                     | GG                 | GG               | INTERGENIC      |               |                    |                    |
| SNP_43633_A_39283936 | NC_021165.1    | Ca_Kabuli_Chr06 | 39283936                | CC                                     | TT                 | TT               | INTERGENIC      |               |                    |                    |
| SNP_43634_A_39284149 | NC_021165.1    | Ca_Kabuli_Chr06 | 39284149                | AA                                     | GG                 | GG               | INTERGENIC      |               |                    |                    |
| SNP_43635_A_39284154 | NC_021165.1    | Ca_Kabuli_Chr06 | 39284154                | CC                                     | TT                 | TT               | INTERGENIC      |               |                    |                    |
| SNP_43636_A_39284246 | NC_021165.1    | Ca_Kabuli_Chr06 | 39284246                | AA                                     | GG                 | GG               | INTERGENIC      |               |                    |                    |
| SNP_43637_A_39316401 | NC_021165.1    | Ca_Kabuli_Chr06 | 39316401                | AA                                     | TT                 | TT               | INTERGENIC      |               |                    |                    |
| SNP_43638_A_39483141 | NC_021165.1    | Ca_Kabuli_Chr06 | 39483141                | AA                                     | GG                 | GG               | INTERGENIC      |               |                    |                    |
| SNP_43639_A_39499994 | NC_021165.1    | Ca_Kabuli_Chr06 | 39499994                | AA                                     | GG                 | GG               | INTERGENIC      |               |                    |                    |
| SNP_43640_A_39500110 | NC_021165.1    | Ca_Kabuli_Chr06 | 39500110                | TT                                     | AA                 | AA               | INTERGENIC      |               |                    |                    |
| SNP_43641_A_39500189 | NC_021165.1    | Ca_Kabuli_Chr06 | 39500189                | TT                                     | CC                 | CC               | INTERGENIC      |               |                    |                    |
| SNP_43642_A_39500343 | NC_021165.1    | Ca_Kabuli_Chr06 | 39500343                | TT                                     | CC                 | CC               | INTERGENIC      |               |                    |                    |
| SNP_43643_A_39527637 | NC_021165.1    | Ca_Kabuli_Chr06 | 39527637                | TT                                     | CC                 | CC               | INTERGENIC      |               |                    |                    |
| SNP_43644_A_39527639 | NC_021165.1    | Ca_Kabuli_Chr06 | 39527639                | TT                                     | AA                 | AA               | INTERGENIC      |               |                    |                    |
| SNP_43645_A_39585086 | NC_021165.1    | Ca_Kabuli_Chr06 | 39585086                | TT                                     | AA                 | AA               | INTRON          | 101488665     | Unknown function   |                    |
| SNP_43646_A_39585087 | NC_021165.1    | Ca_Kabuli_Chr06 | 39585087                | GG                                     | TT                 | TT               | INTRON          | 101488665     | Unknown function   |                    |
| SNP_43647_A_39620639 | NC_021165.1    | Ca_Kabuli_Chr06 | 39620639                | CC                                     | AA                 | AA               | INTRON          | 101488665     | Unknown function   |                    |
| SNP_43648_A_39724016 | NC_021165.1    | Ca_Kabuli_Chr06 | 39724016                | AA                                     | CC                 | CC               | INTERGENIC      |               |                    |                    |
| SNP_43649_A_39724022 | NC_021165.1    | Ca_Kabuli_Chr06 | 39724022                | AA                                     | GG                 | GG               | INTERGENIC      |               |                    |                    |

| SNPs IDs             | Chromosome IDs | Chromosomes     | Physical positions (bp) | CDC Frontier genome (Reference genome) | (Pusa 1103 & HPNB) | (ILWC 46 & LPNB) | Sequence Components of genome | Gene accession IDs | Putative functions                           |
|----------------------|----------------|-----------------|-------------------------|----------------------------------------|--------------------|------------------|-------------------------------|--------------------|----------------------------------------------|
| SNP_43650_A_39762017 | NC_021165.1    | Ca_Kabuli_Chr06 | 39762017                | GG                                     | AA                 | AA               | INTERGENIC                    |                    |                                              |
| SNP_43651_A_39765444 | NC_021165.1    | Ca_Kabuli_Chr06 | 39765444                | TT                                     | CC                 | CC               | INTERGENIC                    |                    |                                              |
| SNP_43654_A_39834602 | NC_021165.1    | Ca_Kabuli_Chr06 | 39834602                | AA                                     | GG                 | GG               | INTRON                        | 101490963          | uncharacterized LOC101490963                 |
| SNP_43655_A_39862964 | NC_021165.1    | Ca_Kabuli_Chr06 | 39862964                | TT                                     | CC                 | CC               | INTERGENIC                    |                    |                                              |
| SNP_43656_A_39862965 | NC_021165.1    | Ca_Kabuli_Chr06 | 39862965                | GG                                     | AA                 | AA               | INTERGENIC                    |                    |                                              |
| SNP_43657_A_39863002 | NC_021165.1    | Ca_Kabuli_Chr06 | 39863002                | AA                                     | CC                 | CC               | INTERGENIC                    |                    |                                              |
| SNP_43659_A_39879852 | NC_021165.1    | Ca_Kabuli_Chr06 | 39879852                | AA                                     | TT                 | TT               | NON_SYNONYMOUS_CODING         | 101491276          | Unknown function                             |
| SNP_43660_A_39880218 | NC_021165.1    | Ca_Kabuli_Chr06 | 39880218                | AA                                     | GG                 | GG               | SYNONYMOUS_CODING             | 101491276          | Unknown function                             |
| SNP_43661_A_39917422 | NC_021165.1    | Ca_Kabuli_Chr06 | 39917422                | GG                                     | AA                 | AA               | URR                           | 101491598          | uncharacterized LOC101491598                 |
| SNP_43662_A_40036466 | NC_021165.1    | Ca_Kabuli_Chr06 | 40036466                | TT                                     | GG                 | GG               | INTERGENIC                    |                    |                                              |
| SNP_43663_A_40036483 | NC_021165.1    | Ca_Kabuli_Chr06 | 40036483                | TT                                     | AA                 | AA               | INTERGENIC                    |                    |                                              |
| SNP_43664_A_40036546 | NC_021165.1    | Ca_Kabuli_Chr06 | 40036546                | GG                                     | TT                 | TT               | INTERGENIC                    |                    |                                              |
| SNP_43665_A_40036554 | NC_021165.1    | Ca_Kabuli_Chr06 | 40036554                | TT                                     | AA                 | AA               | INTERGENIC                    |                    |                                              |
| SNP_43666_A_40037039 | NC_021165.1    | Ca_Kabuli_Chr06 | 40037039                | AA                                     | CC                 | CC               | INTERGENIC                    |                    |                                              |
| SNP_43667_A_40060139 | NC_021165.1    | Ca_Kabuli_Chr06 | 40060139                | CC                                     | TT                 | TT               | INTRON                        | 101504293          | chaperone protein dnaJ 1, mitochondrial-like |
| SNP_43669_A_40119395 | NC_021165.1    | Ca_Kabuli_Chr06 | 40119395                | CC                                     | TT                 | TT               | INTERGENIC                    |                    |                                              |
| SNP_43670_A_40119656 | NC_021165.1    | Ca_Kabuli_Chr06 | 40119656                | TT                                     | CC                 | CC               | INTERGENIC                    |                    |                                              |
| SNP_43671_A_40119712 | NC_021165.1    | Ca_Kabuli_Chr06 | 40119712                | TT                                     | GG                 | GG               | INTERGENIC                    |                    |                                              |
| SNP_43672_A_40119715 | NC_021165.1    | Ca_Kabuli_Chr06 | 40119715                | AA                                     | GG                 | GG               | INTERGENIC                    |                    |                                              |
| SNP_43673_A_40131929 | NC_021165.1    | Ca_Kabuli_Chr06 | 40131929                | GG                                     | AA                 | AA               | INTRON                        | 101505156          | tRNA 2'-phosphotransferase 1-like            |
| SNP_43674_A_40132179 | NC_021165.1    | Ca_Kabuli_Chr06 | 40132179                | TT                                     | CC                 | CC               | INTRON                        | 101505156          | tRNA 2'-phosphotransferase 1-like            |
| SNP_43675_A_40162771 | NC_021165.1    | Ca_Kabuli_Chr06 | 40162771                | GG                                     | AA                 | AA               | INTERGENIC                    |                    |                                              |

| SNPs IDs             | Chromosome IDs | Chromosomes     | Physical positions (bp) | CDC Frontier genome (Reference genome) | (Pusa 1103 & HPNB) | (ILWC 46 & LPNB) | Sequence Components of genome | Gene accession IDs | Putative functions                     |
|----------------------|----------------|-----------------|-------------------------|----------------------------------------|--------------------|------------------|-------------------------------|--------------------|----------------------------------------|
| SNP_43676_A_40164454 | NC_021165.1    | Ca_Kabuli_Chr06 | 40164454                | AA                                     | CC                 | CC               | INTERGENIC                    |                    |                                        |
| SNP_43677_A_40181249 | NC_021165.1    | Ca_Kabuli_Chr06 | 40181249                | TT                                     | CC                 | CC               | INTERGENIC                    |                    |                                        |
| SNP_43678_A_40188290 | NC_021165.1    | Ca_Kabuli_Chr06 | 40188290                | TT                                     | CC                 | CC               | INTERGENIC                    |                    |                                        |
| SNP_43679_A_40188342 | NC_021165.1    | Ca_Kabuli_Chr06 | 40188342                | CC                                     | TT                 | TT               | INTERGENIC                    |                    |                                        |
| SNP_43680_A_40188542 | NC_021165.1    | Ca_Kabuli_Chr06 | 40188542                | TT                                     | AA                 | AA               | INTERGENIC                    |                    |                                        |
| SNP_43681_A_40221027 | NC_021165.1    | Ca_Kabuli_Chr06 | 40221027                | AA                                     | GG                 | GG               | INTRON                        | 101507320          | protein transport Sec1a-like           |
| SNP_43682_A_40249035 | NC_021165.1    | Ca_Kabuli_Chr06 | 40249035                | GG                                     | AA                 | AA               | INTRON                        | 101495156          | Unknown function                       |
| SNP_43683_A_40361082 | NC_021165.1    | Ca_Kabuli_Chr06 | 40361082                | TT                                     | CC                 | CC               | URR                           | 101508791          | uncharacterized protein At1g04910-like |
| SNP_43684_A_40361196 | NC_021165.1    | Ca_Kabuli_Chr06 | 40361196                | GG                                     | AA                 | AA               | URR                           | 101508791          | uncharacterized protein At1g04910-like |
| SNP_43685_A_40427971 | NC_021165.1    | Ca_Kabuli_Chr06 | 40427971                | GG                                     | AA                 | AA               | DRR                           | 101496131          | sugar transport protein 11-like        |
| SNP_43686_A_40429248 | NC_021165.1    | Ca_Kabuli_Chr06 | 40429248                | AA                                     | TT                 | TT               | INTRON                        | 101496131          | sugar transport protein 11-like        |
| SNP_43687_A_40429551 | NC_021165.1    | Ca_Kabuli_Chr06 | 40429551                | CC                                     | TT                 | TT               | SYNONYMOUS_CODING             | 101496131          | sugar transport protein 11-like        |
| SNP_43688_A_40445464 | NC_021165.1    | Ca_Kabuli_Chr06 | 40445464                | GG                                     | AA                 | AA               | INTERGENIC                    |                    |                                        |
| SNP_43690_A_40522759 | NC_021165.1    | Ca_Kabuli_Chr06 | 40522759                | GG                                     | AA                 | AA               | INTERGENIC                    |                    |                                        |
| SNP_43691_A_40523106 | NC_021165.1    | Ca_Kabuli_Chr06 | 40523106                | GG                                     | AA                 | AA               | INTERGENIC                    |                    |                                        |
| SNP_43692_A_40536271 | NC_021165.1    | Ca_Kabuli_Chr06 | 40536271                | GG                                     | TT                 | TT               | INTERGENIC                    |                    |                                        |
| SNP_43693_A_40536554 | NC_021165.1    | Ca_Kabuli_Chr06 | 40536554                | AA                                     | GG                 | GG               | INTERGENIC                    |                    |                                        |
| SNP_43694_A_40536577 | NC_021165.1    | Ca_Kabuli_Chr06 | 40536577                | CC                                     | TT                 | TT               | INTERGENIC                    |                    |                                        |
| SNP_43695_A_40536640 | NC_021165.1    | Ca_Kabuli_Chr06 | 40536640                | CC                                     | TT                 | TT               | INTERGENIC                    |                    |                                        |
| SNP_43696_A_40536800 | NC_021165.1    | Ca_Kabuli_Chr06 | 40536800                | GG                                     | AA                 | AA               | INTERGENIC                    |                    |                                        |
| SNP_43697_A_40536843 | NC_021165.1    | Ca_Kabuli_Chr06 | 40536843                | GG                                     | TT                 | TT               | INTERGENIC                    |                    |                                        |
| SNP_43698_A_40536893 | NC_021165.1    | Ca_Kabuli_Chr06 | 40536893                | AA                                     | TT                 | TT               | INTERGENIC                    |                    |                                        |

| SNPs IDs             | Chromosome IDs | Chromosomes     | Physical positions (bp) | CDC Frontier genome (Reference genome) | (Pusa 1103 & HPNB) | (ILWC 46 & LPNB) | Sequence Components of genome | Gene accession IDs | Putative functions                             |
|----------------------|----------------|-----------------|-------------------------|----------------------------------------|--------------------|------------------|-------------------------------|--------------------|------------------------------------------------|
| SNP_43699_A_40536903 | NC_021165.1    | Ca_Kabuli_Chr06 | 40536903                | TT                                     | AA                 | AA               | INTERGENIC                    |                    |                                                |
| SNP_43700_A_40542334 | NC_021165.1    | Ca_Kabuli_Chr06 | 40542334                | TT                                     | GG                 | GG               | INTERGENIC                    |                    |                                                |
| SNP_43701_A_40820848 | NC_021165.1    | Ca_Kabuli_Chr06 | 40820848                | GG                                     | AA                 | AA               | INTRON                        | 101500139          | transketolase, chloroplastic                   |
| SNP_43702_A_40845396 | NC_021165.1    | Ca_Kabuli_Chr06 | 40845396                | TT                                     | CC                 | CC               | INTRON                        | 101500464          | 3-phosphoshikimate 1-carboxyvinyltransferase 2 |
| SNP_43703_A_40854819 | NC_021165.1    | Ca_Kabuli_Chr06 | 40854819                | AA                                     | GG                 | GG               | INTERGENIC                    |                    |                                                |
| SNP_43704_A_40860051 | NC_021165.1    | Ca_Kabuli_Chr06 | 40860051                | AA                                     | GG                 | GG               | INTERGENIC                    |                    |                                                |
| SNP_43705_A_40860319 | NC_021165.1    | Ca_Kabuli_Chr06 | 40860319                | CC                                     | TT                 | TT               | INTERGENIC                    |                    |                                                |
| SNP_43706_A_40860320 | NC_021165.1    | Ca_Kabuli_Chr06 | 40860320                | TT                                     | CC                 | CC               | INTERGENIC                    |                    |                                                |
| SNP_43707_A_40860341 | NC_021165.1    | Ca_Kabuli_Chr06 | 40860341                | TT                                     | CC                 | CC               | INTERGENIC                    |                    |                                                |
| SNP_43708_A_40860466 | NC_021165.1    | Ca_Kabuli_Chr06 | 40860466                | CC                                     | TT                 | TT               | INTERGENIC                    |                    |                                                |
| SNP_43709_A_40860539 | NC_021165.1    | Ca_Kabuli_Chr06 | 40860539                | GG                                     | AA                 | AA               | INTERGENIC                    |                    |                                                |
| SNP_43710_A_40907622 | NC_021165.1    | Ca_Kabuli_Chr06 | 40907622                | AA                                     | CC                 | CC               | INTERGENIC                    |                    |                                                |
| SNP_43711_A_40907633 | NC_021165.1    | Ca_Kabuli_Chr06 | 40907633                | CC                                     | TT                 | TT               | INTERGENIC                    |                    |                                                |
| SNP_43712_A_40908318 | NC_021165.1    | Ca_Kabuli_Chr06 | 40908318                | CC                                     | TT                 | TT               | INTERGENIC                    |                    |                                                |
| SNP_43713_A_40955355 | NC_021165.1    | Ca_Kabuli_Chr06 | 40955355                | CC                                     | TT                 | TT               | INTERGENIC                    |                    |                                                |
| SNP_43714_A_40955711 | NC_021165.1    | Ca_Kabuli_Chr06 | 40955711                | AA                                     | TT                 | TT               | INTERGENIC                    |                    |                                                |
| SNP_43715_A_40956838 | NC_021165.1    | Ca_Kabuli_Chr06 | 40956838                | CC                                     | TT                 | TT               | INTERGENIC                    |                    |                                                |
| SNP_43716_A_41001193 | NC_021165.1    | Ca_Kabuli_Chr06 | 41001193                | GG                                     | AA                 | AA               | INTERGENIC                    |                    |                                                |
| SNP_43717_A_41001279 | NC_021165.1    | Ca_Kabuli_Chr06 | 41001279                | CC                                     | TT                 | TT               | INTERGENIC                    |                    |                                                |
| SNP_43718_A_41001832 | NC_021165.1    | Ca_Kabuli_Chr06 | 41001832                | TT                                     | CC                 | CC               | INTERGENIC                    |                    |                                                |
| SNP_43719_A_41001882 | NC_021165.1    | Ca_Kabuli_Chr06 | 41001882                | AA                                     | CC                 | CC               | INTERGENIC                    |                    |                                                |
| SNP_43720_A_41001883 | NC_021165.1    | Ca_Kabuli_Chr06 | 41001883                | AA                                     | TT                 | TT               | INTERGENIC                    |                    |                                                |

| SNPs IDs             | Chromosome IDs | Chromosomes     | Physical positions (bp) | CDC Frontier genome (Reference genome) | (Pusa 1103 & HPNB) | (ILWC 46 & LPNB) | Sequence Components of genome | Gene accession IDs | Putative functions                           |
|----------------------|----------------|-----------------|-------------------------|----------------------------------------|--------------------|------------------|-------------------------------|--------------------|----------------------------------------------|
| SNP_43721_A_41001885 | NC_021165.1    | Ca_Kabuli_Chr06 | 41001885                | CC                                     | TT                 | TT               | INTERGENIC                    |                    |                                              |
| SNP_43722_A_41059959 | NC_021165.1    | Ca_Kabuli_Chr06 | 41059959                | TT                                     | CC                 | CC               | INTERGENIC                    |                    |                                              |
| SNP_43723_A_41075650 | NC_021165.1    | Ca_Kabuli_Chr06 | 41075650                | TT                                     | CC                 | CC               | INTERGENIC                    |                    |                                              |
| SNP_43724_A_41118032 | NC_021165.1    | Ca_Kabuli_Chr06 | 41118032                | CC                                     | AA                 | AA               | INTERGENIC                    |                    |                                              |
| SNP_43725_A_41118330 | NC_021165.1    | Ca_Kabuli_Chr06 | 41118330                | AA                                     | GG                 | GG               | INTERGENIC                    |                    |                                              |
| SNP_43726_A_41118618 | NC_021165.1    | Ca_Kabuli_Chr06 | 41118618                | AA                                     | TT                 | TT               | INTERGENIC                    |                    |                                              |
| SNP_43727_A_41118624 | NC_021165.1    | Ca_Kabuli_Chr06 | 41118624                | AA                                     | TT                 | TT               | INTERGENIC                    |                    |                                              |
| SNP_43728_A_41119058 | NC_021165.1    | Ca_Kabuli_Chr06 | 41119058                | TT                                     | CC                 | CC               | INTERGENIC                    |                    |                                              |
| SNP_43729_A_41128534 | NC_021165.1    | Ca_Kabuli_Chr06 | 41128534                | AA                                     | GG                 | GG               | DRR                           | 101509975          | PLASMODESMATA CALLOSE-BINDING PROTEIN 3-like |
| SNP_43730_A_41128688 | NC_021165.1    | Ca_Kabuli_Chr06 | 41128688                | CC                                     | TT                 | TT               | NON_SYNONYMOUS_CODING         | 101509975          | PLASMODESMATA CALLOSE-BINDING PROTEIN 3-like |
| SNP_43731_A_41128693 | NC_021165.1    | Ca_Kabuli_Chr06 | 41128693                | AA                                     | GG                 | GG               | NON_SYNONYMOUS_CODING         | 101509975          | PLASMODESMATA CALLOSE-BINDING PROTEIN 3-like |
| SNP_43732_A_41128699 | NC_021165.1    | Ca_Kabuli_Chr06 | 41128699                | CC                                     | TT                 | TT               | NON_SYNONYMOUS_CODING         | 101509975          | PLASMODESMATA CALLOSE-BINDING PROTEIN 3-like |
| SNP_43733_A_41128701 | NC_021165.1    | Ca_Kabuli_Chr06 | 41128701                | GG                                     | AA                 | AA               | SYNONYMOUS_CODING             | 101509975          | PLASMODESMATA CALLOSE-BINDING PROTEIN 3-like |
| SNP_43734_A_41128726 | NC_021165.1    | Ca_Kabuli_Chr06 | 41128726                | TT                                     | CC                 | CC               | NON_SYNONYMOUS_CODING         | 101509975          | PLASMODESMATA CALLOSE-BINDING PROTEIN 3-like |
| SNP_43735_A_41128736 | NC_021165.1    | Ca_Kabuli_Chr06 | 41128736                | CC                                     | TT                 | TT               | NON_SYNONYMOUS_CODING         | 101509975          | PLASMODESMATA CALLOSE-BINDING PROTEIN 3-like |
| SNP_43736_A_41128786 | NC_021165.1    | Ca_Kabuli_Chr06 | 41128786                | GG                                     | TT                 | TT               | NON_SYNONYMOUS_CODING         | 101509975          | PLASMODESMATA CALLOSE-BINDING PROTEIN 3-like |
| SNP_43737_A_41128847 | NC_021165.1    | Ca_Kabuli_Chr06 | 41128847                | CC                                     | TT                 | TT               | NON_SYNONYMOUS_CODING         | 101509975          | PLASMODESMATA CALLOSE-BINDING PROTEIN 3-like |
| SNP_43738_A_41129358 | NC_021165.1    | Ca_Kabuli_Chr06 | 41129358                | CC                                     | TT                 | TT               | URR                           | 101509975          | PLASMODESMATA CALLOSE-BINDING PROTEIN 3-like |
| SNP_43739_A_41131983 | NC_021165.1    | Ca_Kabuli_Chr06 | 41131983                | CC                                     | TT                 | TT               | INTERGENIC                    |                    |                                              |
| SNP_43740_A_41132467 | NC_021165.1    | Ca_Kabuli_Chr06 | 41132467                | AA                                     | TT                 | TT               | INTERGENIC                    |                    |                                              |
| SNP_43741_A_41132488 | NC_021165.1    | Ca_Kabuli_Chr06 | 41132488                | AA                                     | GG                 | GG               | INTERGENIC                    |                    |                                              |
| SNP_43742_A_41135198 | NC_021165.1    | Ca_Kabuli_Chr06 | 41135198                | CC                                     | AA                 | AA               | INTERGENIC                    |                    |                                              |



| SNPs IDs             | Chromosome IDs | Chromosomes     | Physical positions (bp) | CDC Frontier genome (Reference genome) | (Pusa 1103 & HPNB) | (ILWC 46 & LPNB) | Sequence Components of genome | Gene accession IDs | Putative functions |
|----------------------|----------------|-----------------|-------------------------|----------------------------------------|--------------------|------------------|-------------------------------|--------------------|--------------------|
| SNP_43744_A_41179833 | NC_021165.1    | Ca_Kabuli_Chr06 | 41179833                | GG                                     | AA                 | AA               | URR                           | 101510292          | Unknown function   |
| SNP_43745_A_41179906 | NC_021165.1    | Ca_Kabuli_Chr06 | 41179906                | CC                                     | AA                 | AA               | URR                           | 101510292          | Unknown function   |
| SNP_43746_A_41180127 | NC_021165.1    | Ca_Kabuli_Chr06 | 41180127                | AA                                     | TT                 | TT               | URR                           | 101510292          | Unknown function   |
| SNP_43747_A_41180141 | NC_021165.1    | Ca_Kabuli_Chr06 | 41180141                | AA                                     | TT                 | TT               | URR                           | 101510292          | Unknown function   |
| SNP_43748_A_41180142 | NC_021165.1    | Ca_Kabuli_Chr06 | 41180142                | GG                                     | TT                 | TT               | URR                           | 101510292          | Unknown function   |
| SNP_43749_A_41180155 | NC_021165.1    | Ca_Kabuli_Chr06 | 41180155                | AA                                     | TT                 | TT               | URR                           | 101510292          | Unknown function   |
| SNP_43750_A_41180172 | NC_021165.1    | Ca_Kabuli_Chr06 | 41180172                | TT                                     | AA                 | AA               | URR                           | 101510292          | Unknown function   |
| SNP_43751_A_41180207 | NC_021165.1    | Ca_Kabuli_Chr06 | 41180207                | AA                                     | TT                 | TT               | URR                           | 101510292          | Unknown function   |
| SNP_43752_A_41230156 | NC_021165.1    | Ca_Kabuli_Chr06 | 41230156                | CC                                     | TT                 | TT               | INTERGENIC                    |                    |                    |
| SNP_43753_A_41230463 | NC_021165.1    | Ca_Kabuli_Chr06 | 41230463                | AA                                     | GG                 | GG               | INTERGENIC                    |                    |                    |
| SNP_43754_A_41230486 | NC_021165.1    | Ca_Kabuli_Chr06 | 41230486                | GG                                     | TT                 | TT               | INTERGENIC                    |                    |                    |
| SNP_43755_A_41230489 | NC_021165.1    | Ca_Kabuli_Chr06 | 41230489                | GG                                     | AA                 | AA               | INTERGENIC                    |                    |                    |
| SNP_43756_A_41286099 | NC_021165.1    | Ca_Kabuli_Chr06 | 41286099                | TT                                     | CC                 | CC               | INTERGENIC                    |                    |                    |
| SNP_43757_A_41315378 | NC_021165.1    | Ca_Kabuli_Chr06 | 41315378                | GG                                     | AA                 | AA               | INTERGENIC                    |                    |                    |
| SNP_43758_A_41315382 | NC_021165.1    | Ca_Kabuli_Chr06 | 41315382                | TT                                     | AA                 | AA               | INTERGENIC                    |                    |                    |
| SNP_43759_A_41315386 | NC_021165.1    | Ca_Kabuli_Chr06 | 41315386                | CC                                     | AA                 | AA               | INTERGENIC                    |                    |                    |
| SNP_43760_A_41322373 | NC_021165.1    | Ca_Kabuli_Chr06 | 41322373                | CC                                     | TT                 | TT               | INTERGENIC                    |                    |                    |
| SNP_43761_A_41322820 | NC_021165.1    | Ca_Kabuli_Chr06 | 41322820                | TT                                     | AA                 | AA               | INTERGENIC                    |                    |                    |
| SNP_43762_A_41322822 | NC_021165.1    | Ca_Kabuli_Chr06 | 41322822                | CC                                     | GG                 | GG               | INTERGENIC                    |                    |                    |
| SNP_43763_A_41360694 | NC_021165.1    | Ca_Kabuli_Chr06 | 41360694                | CC                                     | TT                 | TT               | URR                           | 101511578          | Unknown function   |
| SNP_43765_A_41437714 | NC_021165.1    | Ca_Kabuli_Chr06 | 41437714                | CC                                     | TT                 | TT               | INTERGENIC                    |                    |                    |
| SNP_43766_A_41464139 | NC_021165.1    | Ca_Kabuli_Chr06 | 41464139                | TT                                     | CC                 | CC               | INTERGENIC                    |                    |                    |

| SNPs IDs             | Chromosome IDs | Chromosomes     | Physical positions (bp) | CDC Frontier (Reference genome) | (Pusa 1103 & HPNB) | (ILWC 46 & LPNB) | Sequence Components of genome | Gene accession IDs | Putative functions           |
|----------------------|----------------|-----------------|-------------------------|---------------------------------|--------------------|------------------|-------------------------------|--------------------|------------------------------|
| SNP_43767_A_41464177 | NC_021165.1    | Ca_Kabuli_Chr06 | 41464177                | AA                              | GG                 | GG               | INTERGENIC                    |                    |                              |
| SNP_43768_A_41464256 | NC_021165.1    | Ca_Kabuli_Chr06 | 41464256                | AA                              | GG                 | GG               | INTERGENIC                    |                    |                              |
| SNP_43769_A_41464303 | NC_021165.1    | Ca_Kabuli_Chr06 | 41464303                | TT                              | CC                 | CC               | INTERGENIC                    |                    |                              |
| SNP_43770_A_41464335 | NC_021165.1    | Ca_Kabuli_Chr06 | 41464335                | CC                              | TT                 | TT               | INTERGENIC                    |                    |                              |
| SNP_43771_A_41464338 | NC_021165.1    | Ca_Kabuli_Chr06 | 41464338                | GG                              | TT                 | TT               | INTERGENIC                    |                    |                              |
| SNP_43772_A_41464372 | NC_021165.1    | Ca_Kabuli_Chr06 | 41464372                | TT                              | CC                 | CC               | INTERGENIC                    |                    |                              |
| SNP_43773_A_41464374 | NC_021165.1    | Ca_Kabuli_Chr06 | 41464374                | AA                              | GG                 | GG               | INTERGENIC                    |                    |                              |
| SNP_43774_A_41465919 | NC_021165.1    | Ca_Kabuli_Chr06 | 41465919                | CC                              | AA                 | AA               | INTERGENIC                    |                    |                              |
| SNP_43776_A_41508436 | NC_021165.1    | Ca_Kabuli_Chr06 | 41508436                | GG                              | AA                 | AA               | INTERGENIC                    |                    |                              |
| SNP_43778_A_41573792 | NC_021165.1    | Ca_Kabuli_Chr06 | 41573792                | GG                              | AA                 | AA               | INTRON                        | 101509648          | uncharacterized LOC101509648 |
| SNP_43779_A_41573798 | NC_021165.1    | Ca_Kabuli_Chr06 | 41573798                | AA                              | GG                 | GG               | INTRON                        | 101509648          | uncharacterized LOC101509648 |
| SNP_43780_A_41573808 | NC_021165.1    | Ca_Kabuli_Chr06 | 41573808                | AA                              | TT                 | TT               | INTRON                        | 101509648          | uncharacterized LOC101509648 |
| SNP_43781_A_41574185 | NC_021165.1    | Ca_Kabuli_Chr06 | 41574185                | TT                              | AA                 | AA               | INTRON                        | 101509648          | uncharacterized LOC101509648 |
| SNP_43784_A_41574457 | NC_021165.1    | Ca_Kabuli_Chr06 | 41574457                | TT                              | CC                 | CC               | INTRON                        | 101509648          | uncharacterized LOC101509648 |
| SNP_43785_A_41574589 | NC_021165.1    | Ca_Kabuli_Chr06 | 41574589                | AA                              | TT                 | TT               | INTRON                        | 101509648          | uncharacterized LOC101509648 |
| SNP_43786_A_41589713 | NC_021165.1    | Ca_Kabuli_Chr06 | 41589713                | TT                              | AA                 | AA               | INTERGENIC                    |                    |                              |
| SNP_43787_A_41603679 | NC_021165.1    | Ca_Kabuli_Chr06 | 41603679                | AA                              | GG                 | GG               | INTERGENIC                    |                    |                              |
| SNP_43788_A_41603680 | NC_021165.1    | Ca_Kabuli_Chr06 | 41603680                | AA                              | GG                 | GG               | INTERGENIC                    |                    |                              |
| SNP_43789_A_41654050 | NC_021165.1    | Ca_Kabuli_Chr06 | 41654050                | CC                              | TT                 | TT               | INTERGENIC                    |                    |                              |
| SNP_43790_A_41654361 | NC_021165.1    | Ca_Kabuli_Chr06 | 41654361                | AA                              | GG                 | GG               | INTERGENIC                    |                    |                              |
| SNP_43792_A_41654678 | NC_021165.1    | Ca_Kabuli_Chr06 | 41654678                | TT                              | AA                 | AA               | INTERGENIC                    |                    |                              |
| SNP_43793_A_41654699 | NC_021165.1    | Ca_Kabuli_Chr06 | 41654699                | AA                              | TT                 | TT               | INTERGENIC                    |                    |                              |

| SNPs IDs             | Chromosome IDs | Chromosomes     | Physical positions (bp) | CDC Frontier genome (Reference genome) | (Pusa 1103 & HPNB) | (ILWC 46 & LPNB) | Sequence Components of genome | Gene accession IDs | Putative functions                           |
|----------------------|----------------|-----------------|-------------------------|----------------------------------------|--------------------|------------------|-------------------------------|--------------------|----------------------------------------------|
| SNP_43794_A_41654781 | NC_021165.1    | Ca_Kabuli_Chr06 | 41654781                | AA                                     | GG                 | GG               | INTERGENIC                    |                    |                                              |
| SNP_43795_A_41655587 | NC_021165.1    | Ca_Kabuli_Chr06 | 41655587                | TT                                     | AA                 | AA               | INTERGENIC                    |                    |                                              |
| SNP_43796_A_41656240 | NC_021165.1    | Ca_Kabuli_Chr06 | 41656240                | CC                                     | TT                 | TT               | INTERGENIC                    |                    |                                              |
| SNP_43797_A_41656963 | NC_021165.1    | Ca_Kabuli_Chr06 | 41656963                | TT                                     | GG                 | GG               | INTERGENIC                    |                    |                                              |
| SNP_43798_A_41658087 | NC_021165.1    | Ca_Kabuli_Chr06 | 41658087                | AA                                     | GG                 | GG               | INTERGENIC                    |                    |                                              |
| SNP_43799_A_41658962 | NC_021165.1    | Ca_Kabuli_Chr06 | 41658962                | AA                                     | CC                 | CC               | INTERGENIC                    |                    |                                              |
| SNP_43800_A_41659251 | NC_021165.1    | Ca_Kabuli_Chr06 | 41659251                | GG                                     | AA                 | AA               | INTERGENIC                    |                    |                                              |
| SNP_43801_A_41659380 | NC_021165.1    | Ca_Kabuli_Chr06 | 41659380                | TT                                     | CC                 | CC               | INTERGENIC                    |                    |                                              |
| SNP_43803_A_41659773 | NC_021165.1    | Ca_Kabuli_Chr06 | 41659773                | AA                                     | GG                 | GG               | INTERGENIC                    |                    |                                              |
| SNP_43804_A_41660675 | NC_021165.1    | Ca_Kabuli_Chr06 | 41660675                | GG                                     | AA                 | AA               | INTERGENIC                    |                    |                                              |
| SNP_43805_A_41660679 | NC_021165.1    | Ca_Kabuli_Chr06 | 41660679                | AA                                     | TT                 | TT               | INTERGENIC                    |                    |                                              |
| SNP_43806_A_41660936 | NC_021165.1    | Ca_Kabuli_Chr06 | 41660936                | CC                                     | TT                 | TT               | INTERGENIC                    |                    |                                              |
| SNP_43807_A_41661628 | NC_021165.1    | Ca_Kabuli_Chr06 | 41661628                | GG                                     | TT                 | TT               | INTERGENIC                    |                    |                                              |
| SNP_43808_A_41661653 | NC_021165.1    | Ca_Kabuli_Chr06 | 41661653                | CC                                     | TT                 | TT               | INTERGENIC                    |                    |                                              |
| SNP_43810_A_41674184 | NC_021165.1    | Ca_Kabuli_Chr06 | 41674184                | AA                                     | GG                 | GG               | INTERGENIC                    |                    |                                              |
| SNP_43811_A_41674185 | NC_021165.1    | Ca_Kabuli_Chr06 | 41674185                | TT                                     | AA                 | AA               | INTERGENIC                    |                    |                                              |
| SNP_43812_A_41681360 | NC_021165.1    | Ca_Kabuli_Chr06 | 41681360                | TT                                     | CC                 | CC               | INTERGENIC                    |                    |                                              |
| SNP_43813_A_41693501 | NC_021165.1    | Ca_Kabuli_Chr06 | 41693501                | AA                                     | GG                 | GG               | INTRON                        | 101491599          | ribonuclease II, chloroplastic/mitochondrial |
| SNP_43814_A_41693514 | NC_021165.1    | Ca_Kabuli_Chr06 | 41693514                | CC                                     | GG                 | GG               | INTRON                        | 101491599          | ribonuclease II, chloroplastic/mitochondrial |
| SNP_43815_A_41694033 | NC_021165.1    | Ca_Kabuli_Chr06 | 41694033                | TT                                     | CC                 | CC               | INTRON                        | 101491599          | ribonuclease II, chloroplastic/mitochondrial |
| SNP_43816_A_41706510 | NC_021165.1    | Ca_Kabuli_Chr06 | 41706510                | GG                                     | AA                 | AA               | DRR                           | 101513520          | uncharacterized LOC101513520                 |
| SNP_43817_A_41706640 | NC_021165.1    | Ca_Kabuli_Chr06 | 41706640                | TT                                     | AA                 | AA               | DRR                           | 101513520          | uncharacterized LOC101513520                 |

| SNPs IDs             | Chromosome IDs | Chromosomes     | Physical positions (bp) | CDC Frontier (Reference genome) | (Pusa 1103 & HPNB) | (ILWC 46 & LPNB) | Sequence genome | Components of | Gene accession IDs | Putative functions |
|----------------------|----------------|-----------------|-------------------------|---------------------------------|--------------------|------------------|-----------------|---------------|--------------------|--------------------|
| SNP_43818_A_41726147 | NC_021165.1    | Ca_Kabuli_Chr06 | 41726147                | AA                              | GG                 | GG               | INTERGENIC      |               |                    |                    |
| SNP_43819_A_41726431 | NC_021165.1    | Ca_Kabuli_Chr06 | 41726431                | TT                              | GG                 | GG               | INTERGENIC      |               |                    |                    |
| SNP_43820_A_41743388 | NC_021165.1    | Ca_Kabuli_Chr06 | 41743388                | AA                              | GG                 | GG               | INTERGENIC      |               |                    |                    |
| SNP_43821_A_41743574 | NC_021165.1    | Ca_Kabuli_Chr06 | 41743574                | TT                              | CC                 | CC               | INTERGENIC      |               |                    |                    |
| SNP_43822_A_41743678 | NC_021165.1    | Ca_Kabuli_Chr06 | 41743678                | AA                              | CC                 | CC               | INTERGENIC      |               |                    |                    |
| SNP_43823_A_41743714 | NC_021165.1    | Ca_Kabuli_Chr06 | 41743714                | CC                              | TT                 | TT               | INTERGENIC      |               |                    |                    |
| SNP_43824_A_41743723 | NC_021165.1    | Ca_Kabuli_Chr06 | 41743723                | AA                              | GG                 | GG               | INTERGENIC      |               |                    |                    |
| SNP_43825_A_41743744 | NC_021165.1    | Ca_Kabuli_Chr06 | 41743744                | TT                              | CC                 | CC               | INTERGENIC      |               |                    |                    |
| SNP_43826_A_41743815 | NC_021165.1    | Ca_Kabuli_Chr06 | 41743815                | GG                              | AA                 | AA               | INTERGENIC      |               |                    |                    |
| SNP_43827_A_41743817 | NC_021165.1    | Ca_Kabuli_Chr06 | 41743817                | TT                              | AA                 | AA               | INTERGENIC      |               |                    |                    |
| SNP_43828_A_41787539 | NC_021165.1    | Ca_Kabuli_Chr06 | 41787539                | CC                              | TT                 | TT               | INTERGENIC      |               |                    |                    |
| SNP_43829_A_41836402 | NC_021165.1    | Ca_Kabuli_Chr06 | 41836402                | TT                              | AA                 | AA               | INTERGENIC      |               |                    |                    |
| SNP_43830_A_41856348 | NC_021165.1    | Ca_Kabuli_Chr06 | 41856348                | CC                              | TT                 | TT               | INTERGENIC      |               |                    |                    |
| SNP_43831_A_41856350 | NC_021165.1    | Ca_Kabuli_Chr06 | 41856350                | AA                              | TT                 | TT               | INTERGENIC      |               |                    |                    |
| SNP_43832_A_41856360 | NC_021165.1    | Ca_Kabuli_Chr06 | 41856360                | AA                              | TT                 | TT               | INTERGENIC      |               |                    |                    |
| SNP_43833_A_41856366 | NC_021165.1    | Ca_Kabuli_Chr06 | 41856366                | TT                              | AA                 | AA               | INTERGENIC      |               |                    |                    |
| SNP_43834_A_41856421 | NC_021165.1    | Ca_Kabuli_Chr06 | 41856421                | CC                              | TT                 | TT               | INTERGENIC      |               |                    |                    |
| SNP_43835_A_41856465 | NC_021165.1    | Ca_Kabuli_Chr06 | 41856465                | AA                              | GG                 | GG               | INTERGENIC      |               |                    |                    |
| SNP_43837_A_41856698 | NC_021165.1    | Ca_Kabuli_Chr06 | 41856698                | TT                              | CC                 | CC               | INTERGENIC      |               |                    |                    |
| SNP_43838_A_41856911 | NC_021165.1    | Ca_Kabuli_Chr06 | 41856911                | GG                              | AA                 | AA               | INTERGENIC      |               |                    |                    |
| SNP_43839_A_41860519 | NC_021165.1    | Ca_Kabuli_Chr06 | 41860519                | TT                              | CC                 | CC               | INTERGENIC      |               |                    |                    |
| SNP_43840_A_41864726 | NC_021165.1    | Ca_Kabuli_Chr06 | 41864726                | GG                              | AA                 | AA               | INTERGENIC      |               |                    |                    |

| SNPs IDs             | Chromosome IDs | Chromosomes     | Physical positions (bp) | CDC Frontier genome (Reference genome) | (Pusa 1103 & HPNB) | (ILWC 46 & LPNB) | Sequence Components of genome | Gene accession IDs | Putative functions              |
|----------------------|----------------|-----------------|-------------------------|----------------------------------------|--------------------|------------------|-------------------------------|--------------------|---------------------------------|
| SNP_43841_A_41871770 | NC_021165.1    | Ca_Kabuli_Chr06 | 41871770                | TT                                     | CC                 | CC               | INTRON                        | 101492241          | Unknown function                |
| SNP_43842_A_41873990 | NC_021165.1    | Ca_Kabuli_Chr06 | 41873990                | TT                                     | AA                 | AA               | INTRON                        | 101492241          | Unknown function                |
| SNP_43843_A_41874497 | NC_021165.1    | Ca_Kabuli_Chr06 | 41874497                | AA                                     | GG                 | GG               | INTRON                        | 101492241          | Unknown function                |
| SNP_43845_A_41919572 | NC_021165.1    | Ca_Kabuli_Chr06 | 41919572                | TT                                     | CC                 | CC               | INTERGENIC                    |                    |                                 |
| SNP_43846_A_41921057 | NC_021165.1    | Ca_Kabuli_Chr06 | 41921057                | GG                                     | AA                 | AA               | INTERGENIC                    |                    |                                 |
| SNP_43848_A_42016665 | NC_021165.1    | Ca_Kabuli_Chr06 | 42016665                | TT                                     | CC                 | CC               | INTRON                        | 101489330          | serine carboxypeptidase-like 11 |
| SNP_43849_A_42016667 | NC_021165.1    | Ca_Kabuli_Chr06 | 42016667                | AA                                     | CC                 | CC               | INTRON                        | 101489330          | serine carboxypeptidase-like 11 |
| SNP_43850_A_42016669 | NC_021165.1    | Ca_Kabuli_Chr06 | 42016669                | CC                                     | AA                 | AA               | INTRON                        | 101489330          | serine carboxypeptidase-like 11 |
| SNP_43851_A_42017447 | NC_021165.1    | Ca_Kabuli_Chr06 | 42017447                | CC                                     | TT                 | TT               | INTRON                        | 101489330          | serine carboxypeptidase-like 11 |
| SNP_43852_A_42020022 | NC_021165.1    | Ca_Kabuli_Chr06 | 42020022                | TT                                     | AA                 | AA               | INTRON                        | 101489330          | serine carboxypeptidase-like 11 |
| SNP_43853_A_42020083 | NC_021165.1    | Ca_Kabuli_Chr06 | 42020083                | CC                                     | TT                 | TT               | INTRON                        | 101489330          | serine carboxypeptidase-like 11 |
| SNP_43854_A_42020091 | NC_021165.1    | Ca_Kabuli_Chr06 | 42020091                | AA                                     | GG                 | GG               | INTRON                        | 101489330          | serine carboxypeptidase-like 11 |
| SNP_43855_A_42020463 | NC_021165.1    | Ca_Kabuli_Chr06 | 42020463                | AA                                     | GG                 | GG               | INTRON                        | 101489330          | serine carboxypeptidase-like 11 |
| SNP_43856_A_42020494 | NC_021165.1    | Ca_Kabuli_Chr06 | 42020494                | CC                                     | GG                 | GG               | INTRON                        | 101489330          | serine carboxypeptidase-like 11 |
| SNP_43857_A_42020503 | NC_021165.1    | Ca_Kabuli_Chr06 | 42020503                | TT                                     | GG                 | GG               | INTRON                        | 101489330          | serine carboxypeptidase-like 11 |
| SNP_43858_A_42032525 | NC_021165.1    | Ca_Kabuli_Chr06 | 42032525                | GG                                     | CC                 | CC               | INTRON                        | 101489330          | serine carboxypeptidase-like 11 |
| SNP_43859_A_42032535 | NC_021165.1    | Ca_Kabuli_Chr06 | 42032535                | GG                                     | AA                 | AA               | INTRON                        | 101489330          | serine carboxypeptidase-like 11 |
| SNP_43860_A_42086763 | NC_021165.1    | Ca_Kabuli_Chr06 | 42086763                | CC                                     | AA                 | AA               | INTRON                        | 101489330          | serine carboxypeptidase-like 11 |
| SNP_43861_A_42109014 | NC_021165.1    | Ca_Kabuli_Chr06 | 42109014                | TT                                     | CC                 | CC               | INTRON                        | 101489330          | serine carboxypeptidase-like 11 |
| SNP_43862_A_42109015 | NC_021165.1    | Ca_Kabuli_Chr06 | 42109015                | GG                                     | AA                 | AA               | INTRON                        | 101489330          | serine carboxypeptidase-like 11 |
| SNP_43863_A_42109027 | NC_021165.1    | Ca_Kabuli_Chr06 | 42109027                | CC                                     | AA                 | AA               | INTRON                        | 101489330          | serine carboxypeptidase-like 11 |
| SNP_43864_A_42146136 | NC_021165.1    | Ca_Kabuli_Chr06 | 42146136                | TT                                     | CC                 | CC               | INTERGENIC                    |                    |                                 |

| SNPs IDs             | Chromosome IDs | Chromosomes     | Physical positions (bp) | CDC Frontier (Reference genome) | (Pusa 1103 & HPNB) | (ILWC 46 & LPNB) | Sequence Components of genome | Gene accession IDs | Putative functions                         |
|----------------------|----------------|-----------------|-------------------------|---------------------------------|--------------------|------------------|-------------------------------|--------------------|--------------------------------------------|
| SNP_43865_A_42172933 | NC_021165.1    | Ca_Kabuli_Chr06 | 42172933                | AA                              | GG                 | GG               | INTRON                        | 101489005          | serine carboxypeptidase-like 11            |
| SNP_43866_A_42208659 | NC_021165.1    | Ca_Kabuli_Chr06 | 42208659                | AA                              | GG                 | GG               | INTRON                        | 101489005          | serine carboxypeptidase-like 11            |
| SNP_43867_A_42208667 | NC_021165.1    | Ca_Kabuli_Chr06 | 42208667                | CC                              | TT                 | TT               | INTRON                        | 101489005          | serine carboxypeptidase-like 11            |
| SNP_43868_A_42208684 | NC_021165.1    | Ca_Kabuli_Chr06 | 42208684                | GG                              | AA                 | AA               | INTRON                        | 101489005          | serine carboxypeptidase-like 11            |
| SNP_43869_A_42208688 | NC_021165.1    | Ca_Kabuli_Chr06 | 42208688                | GG                              | AA                 | AA               | INTRON                        | 101489005          | serine carboxypeptidase-like 11            |
| SNP_43870_A_42208691 | NC_021165.1    | Ca_Kabuli_Chr06 | 42208691                | TT                              | CC                 | CC               | INTRON                        | 101489005          | serine carboxypeptidase-like 11            |
| SNP_43871_A_42208694 | NC_021165.1    | Ca_Kabuli_Chr06 | 42208694                | AA                              | CC                 | CC               | INTRON                        | 101489005          | serine carboxypeptidase-like 11            |
| SNP_43872_A_42208712 | NC_021165.1    | Ca_Kabuli_Chr06 | 42208712                | GG                              | AA                 | AA               | INTRON                        | 101489005          | serine carboxypeptidase-like 11            |
| SNP_43873_A_42208739 | NC_021165.1    | Ca_Kabuli_Chr06 | 42208739                | AA                              | GG                 | GG               | INTRON                        | 101489005          | serine carboxypeptidase-like 11            |
| SNP_43874_A_42208775 | NC_021165.1    | Ca_Kabuli_Chr06 | 42208775                | CC                              | TT                 | TT               | INTRON                        | 101489005          | serine carboxypeptidase-like 11            |
| SNP_43876_A_42342719 | NC_021165.1    | Ca_Kabuli_Chr06 | 42342719                | GG                              | TT                 | TT               | INTERGENIC                    |                    |                                            |
| SNP_43877_A_42355522 | NC_021165.1    | Ca_Kabuli_Chr06 | 42355522                | AA                              | GG                 | GG               | INTERGENIC                    |                    |                                            |
| SNP_43879_A_42365667 | NC_021165.1    | Ca_Kabuli_Chr06 | 42365667                | AA                              | GG                 | GG               | INTERGENIC                    |                    |                                            |
| SNP_43880_A_42392289 | NC_021165.1    | Ca_Kabuli_Chr06 | 42392289                | TT                              | AA                 | AA               | INTERGENIC                    |                    |                                            |
| SNP_43881_A_42396672 | NC_021165.1    | Ca_Kabuli_Chr06 | 42396672                | GG                              | AA                 | AA               | URR                           | 101489983          | non-specific lipid-transfer protein A-like |
| SNP_43882_A_42396734 | NC_021165.1    | Ca_Kabuli_Chr06 | 42396734                | TT                              | GG                 | GG               | INTERGENIC                    |                    |                                            |
| SNP_43883_A_42396782 | NC_021165.1    | Ca_Kabuli_Chr06 | 42396782                | TT                              | AA                 | AA               | INTERGENIC                    |                    |                                            |
| SNP_43884_A_42397053 | NC_021165.1    | Ca_Kabuli_Chr06 | 42397053                | TT                              | AA                 | AA               | INTERGENIC                    |                    |                                            |
| SNP_43885_A_42397080 | NC_021165.1    | Ca_Kabuli_Chr06 | 42397080                | TT                              | AA                 | AA               | INTERGENIC                    |                    |                                            |
| SNP_43886_A_42397157 | NC_021165.1    | Ca_Kabuli_Chr06 | 42397157                | CC                              | AA                 | AA               | INTERGENIC                    |                    |                                            |
| SNP_43887_A_42397299 | NC_021165.1    | Ca_Kabuli_Chr06 | 42397299                | TT                              | CC                 | CC               | INTERGENIC                    |                    |                                            |
| SNP_43888_A_42398670 | NC_021165.1    | Ca_Kabuli_Chr06 | 42398670                | AA                              | TT                 | TT               | INTERGENIC                    |                    |                                            |

| SNPs IDs             | Chromosome IDs | Chromosomes     | Physical positions (bp) | CDC Frontier genome (Reference genome) | (Pusa 1103 & HPNB) | (ILWC 46 & LPNB) | Sequence Components of genome | Gene accession IDs | Putative functions                         |
|----------------------|----------------|-----------------|-------------------------|----------------------------------------|--------------------|------------------|-------------------------------|--------------------|--------------------------------------------|
| SNP_43890_A_42398689 | NC_021165.1    | Ca_Kabuli_Chr06 | 42398689                | CC                                     | TT                 | TT               | INTERGENIC                    |                    |                                            |
| SNP_43891_A_42398690 | NC_021165.1    | Ca_Kabuli_Chr06 | 42398690                | AA                                     | GG                 | GG               | INTERGENIC                    |                    |                                            |
| SNP_43892_A_42402390 | NC_021165.1    | Ca_Kabuli_Chr06 | 42402390                | AA                                     | CC                 | CC               | INTERGENIC                    |                    |                                            |
| SNP_43893_A_42405600 | NC_021165.1    | Ca_Kabuli_Chr06 | 42405600                | CC                                     | AA                 | AA               | INTERGENIC                    |                    |                                            |
| SNP_43894_A_42461278 | NC_021165.1    | Ca_Kabuli_Chr06 | 42461278                | AA                                     | GG                 | GG               | INTERGENIC                    |                    |                                            |
| SNP_43895_A_42464604 | NC_021165.1    | Ca_Kabuli_Chr06 | 42464604                | CC                                     | TT                 | TT               | DRR                           | 101490637          | non-specific lipid-transfer protein A-like |
| SNP_43896_A_42464623 | NC_021165.1    | Ca_Kabuli_Chr06 | 42464623                | AA                                     | TT                 | TT               | DRR                           | 101490637          | non-specific lipid-transfer protein A-like |
| SNP_43897_A_42464626 | NC_021165.1    | Ca_Kabuli_Chr06 | 42464626                | CC                                     | TT                 | TT               | DRR                           | 101490637          | non-specific lipid-transfer protein A-like |
| SNP_43898_A_42464634 | NC_021165.1    | Ca_Kabuli_Chr06 | 42464634                | CC                                     | GG                 | GG               | DRR                           | 101490637          | non-specific lipid-transfer protein A-like |
| SNP_43899_A_42464643 | NC_021165.1    | Ca_Kabuli_Chr06 | 42464643                | AA                                     | GG                 | GG               | DRR                           | 101490637          | non-specific lipid-transfer protein A-like |
| SNP_43900_A_42464702 | NC_021165.1    | Ca_Kabuli_Chr06 | 42464702                | AA                                     | GG                 | GG               | DRR                           | 101490637          | non-specific lipid-transfer protein A-like |
| SNP_43901_A_42464710 | NC_021165.1    | Ca_Kabuli_Chr06 | 42464710                | GG                                     | AA                 | AA               | DRR                           | 101490637          | non-specific lipid-transfer protein A-like |
| SNP_43902_A_42464717 | NC_021165.1    | Ca_Kabuli_Chr06 | 42464717                | GG                                     | AA                 | AA               | DRR                           | 101490637          | non-specific lipid-transfer protein A-like |
| SNP_43903_A_42464888 | NC_021165.1    | Ca_Kabuli_Chr06 | 42464888                | GG                                     | AA                 | AA               | DRR                           | 101490637          | non-specific lipid-transfer protein A-like |
| SNP_43904_A_42464911 | NC_021165.1    | Ca_Kabuli_Chr06 | 42464911                | TT                                     | AA                 | AA               | DRR                           | 101490637          | non-specific lipid-transfer protein A-like |
| SNP_43905_A_42464941 | NC_021165.1    | Ca_Kabuli_Chr06 | 42464941                | AA                                     | CC                 | CC               | DRR                           | 101490637          | non-specific lipid-transfer protein A-like |
| SNP_43906_A_42470626 | NC_021165.1    | Ca_Kabuli_Chr06 | 42470626                | AA                                     | CC                 | CC               | INTERGENIC                    |                    |                                            |
| SNP_43907_A_42473217 | NC_021165.1    | Ca_Kabuli_Chr06 | 42473217                | AA                                     | CC                 | CC               | INTERGENIC                    |                    |                                            |
| SNP_43908_A_42473226 | NC_021165.1    | Ca_Kabuli_Chr06 | 42473226                | CC                                     | TT                 | TT               | INTERGENIC                    |                    |                                            |
| SNP_43909_A_42473763 | NC_021165.1    | Ca_Kabuli_Chr06 | 42473763                | AA                                     | TT                 | TT               | INTERGENIC                    |                    |                                            |
| SNP_43910_A_42473804 | NC_021165.1    | Ca_Kabuli_Chr06 | 42473804                | GG                                     | AA                 | AA               | INTERGENIC                    |                    |                                            |
| SNP_43911_A_42473817 | NC_021165.1    | Ca_Kabuli_Chr06 | 42473817                | CC                                     | TT                 | TT               | INTERGENIC                    |                    |                                            |

| SNPs IDs             | Chromosome IDs | Chromosomes     | Physical positions (bp) | CDC Frontier genome (Reference genome) | (Pusa 1103 & HPNB) | (ILWC 46 & LPNB) | Sequence genome | Components of | Gene accession IDs | Putative functions                            |
|----------------------|----------------|-----------------|-------------------------|----------------------------------------|--------------------|------------------|-----------------|---------------|--------------------|-----------------------------------------------|
| SNP_43912_A_42473978 | NC_021165.1    | Ca_Kabuli_Chr06 | 42473978                | GG                                     | TT                 | TT               | INTERGENIC      |               |                    |                                               |
| SNP_43913_A_42474148 | NC_021165.1    | Ca_Kabuli_Chr06 | 42474148                | AA                                     | GG                 | GG               | INTERGENIC      |               |                    |                                               |
| SNP_43914_A_42474207 | NC_021165.1    | Ca_Kabuli_Chr06 | 42474207                | CC                                     | AA                 | AA               | INTERGENIC      |               |                    |                                               |
| SNP_43915_A_42476347 | NC_021165.1    | Ca_Kabuli_Chr06 | 42476347                | AA                                     | GG                 | GG               | URR             |               | 101490965          | non-specific lipid-transfer protein A-like    |
| SNP_43916_A_42481206 | NC_021165.1    | Ca_Kabuli_Chr06 | 42481206                | TT                                     | CC                 | CC               | URR             |               | 101491277          | non-specific lipid-transfer protein AP10-like |
| SNP_43917_A_42535300 | NC_021165.1    | Ca_Kabuli_Chr06 | 42535300                | AA                                     | TT                 | TT               | INTERGENIC      |               |                    |                                               |
| SNP_43918_A_42601551 | NC_021165.1    | Ca_Kabuli_Chr06 | 42601551                | TT                                     | CC                 | CC               | INTERGENIC      |               |                    |                                               |
| SNP_43919_A_42602042 | NC_021165.1    | Ca_Kabuli_Chr06 | 42602042                | GG                                     | TT                 | TT               | INTERGENIC      |               |                    |                                               |
| SNP_43920_A_42618900 | NC_021165.1    | Ca_Kabuli_Chr06 | 42618900                | AA                                     | GG                 | GG               | INTERGENIC      |               |                    |                                               |
| SNP_43921_A_42619166 | NC_021165.1    | Ca_Kabuli_Chr06 | 42619166                | GG                                     | AA                 | AA               | INTERGENIC      |               |                    |                                               |
| SNP_43922_A_42619172 | NC_021165.1    | Ca_Kabuli_Chr06 | 42619172                | GG                                     | AA                 | AA               | INTERGENIC      |               |                    |                                               |
| SNP_43923_A_42619212 | NC_021165.1    | Ca_Kabuli_Chr06 | 42619212                | TT                                     | CC                 | CC               | INTERGENIC      |               |                    |                                               |
| SNP_43924_A_42625250 | NC_021165.1    | Ca_Kabuli_Chr06 | 42625250                | CC                                     | TT                 | TT               | INTERGENIC      |               |                    |                                               |
| SNP_43925_A_42625323 | NC_021165.1    | Ca_Kabuli_Chr06 | 42625323                | TT                                     | AA                 | AA               | INTERGENIC      |               |                    |                                               |
| SNP_43926_A_42625501 | NC_021165.1    | Ca_Kabuli_Chr06 | 42625501                | AA                                     | GG                 | GG               | INTERGENIC      |               |                    |                                               |
| SNP_43927_A_42625524 | NC_021165.1    | Ca_Kabuli_Chr06 | 42625524                | GG                                     | TT                 | TT               | INTERGENIC      |               |                    |                                               |
| SNP_43928_A_42627676 | NC_021165.1    | Ca_Kabuli_Chr06 | 42627676                | GG                                     | AA                 | AA               | INTERGENIC      |               |                    |                                               |
| SNP_43929_A_42769388 | NC_021165.1    | Ca_Kabuli_Chr06 | 42769388                | AA                                     | GG                 | GG               | URR             |               | 101497646          | F-box/kelch-repeat protein SKIP11-like        |
| SNP_43930_A_42816634 | NC_021165.1    | Ca_Kabuli_Chr06 | 42816634                | AA                                     | TT                 | TT               | URR             |               | 101495810          | E3 ubiquitin-protein ligase PRT1-like         |
| SNP_43931_A_42823592 | NC_021165.1    | Ca_Kabuli_Chr06 | 42823592                | AA                                     | GG                 | GG               | INTERGENIC      |               |                    |                                               |
| SNP_43932_A_42859737 | NC_021165.1    | Ca_Kabuli_Chr06 | 42859737                | GG                                     | AA                 | AA               | INTERGENIC      |               |                    |                                               |
| SNP_43933_A_42859876 | NC_021165.1    | Ca_Kabuli_Chr06 | 42859876                | AA                                     | TT                 | TT               | INTERGENIC      |               |                    |                                               |



| SNPs IDs             | Chromosome IDs | Chromosomes     | Physical positions (bp) | CDC Frontier genome (Reference genome) | (Pusa 1103 & HPNB) | (ILWC 46 & LPNB) | Sequence Components of genome | Gene accession IDs | Putative functions                  |
|----------------------|----------------|-----------------|-------------------------|----------------------------------------|--------------------|------------------|-------------------------------|--------------------|-------------------------------------|
| SNP_43934_A_42859900 | NC_021165.1    | Ca_Kabuli_Chr06 | 42859900                | GG                                     | CC                 | CC               | INTERGENIC                    |                    |                                     |
| SNP_43935_A_42864941 | NC_021165.1    | Ca_Kabuli_Chr06 | 42864941                | AA                                     | CC                 | CC               | INTERGENIC                    |                    |                                     |
| SNP_43937_A_42896098 | NC_021165.1    | Ca_Kabuli_Chr06 | 42896098                | GG                                     | CC                 | CC               | INTRON                        | 101498975          | zinc finger MYM-type protein 1-like |
| SNP_43938_A_42896100 | NC_021165.1    | Ca_Kabuli_Chr06 | 42896100                | GG                                     | AA                 | AA               | INTRON                        | 101498975          | zinc finger MYM-type protein 1-like |
| SNP_43940_A_42907378 | NC_021165.1    | Ca_Kabuli_Chr06 | 42907378                | CC                                     | AA                 | AA               | INTERGENIC                    |                    |                                     |
| SNP_43942_A_42937542 | NC_021165.1    | Ca_Kabuli_Chr06 | 42937542                | CC                                     | AA                 | AA               | INTERGENIC                    |                    |                                     |
| SNP_43943_A_42937544 | NC_021165.1    | Ca_Kabuli_Chr06 | 42937544                | CC                                     | TT                 | TT               | INTERGENIC                    |                    |                                     |
| SNP_43944_A_42937631 | NC_021165.1    | Ca_Kabuli_Chr06 | 42937631                | CC                                     | TT                 | TT               | INTERGENIC                    |                    |                                     |
| SNP_43945_A_42939266 | NC_021165.1    | Ca_Kabuli_Chr06 | 42939266                | TT                                     | GG                 | GG               | INTERGENIC                    |                    |                                     |
| SNP_43946_A_42940065 | NC_021165.1    | Ca_Kabuli_Chr06 | 42940065                | AA                                     | CC                 | CC               | INTERGENIC                    |                    |                                     |
| SNP_43947_A_42940114 | NC_021165.1    | Ca_Kabuli_Chr06 | 42940114                | TT                                     | CC                 | CC               | INTERGENIC                    |                    |                                     |
| SNP_43948_A_42940134 | NC_021165.1    | Ca_Kabuli_Chr06 | 42940134                | GG                                     | CC                 | CC               | INTERGENIC                    |                    |                                     |
| SNP_43949_A_42940144 | NC_021165.1    | Ca_Kabuli_Chr06 | 42940144                | TT                                     | AA                 | AA               | INTERGENIC                    |                    |                                     |
| SNP_43950_A_42940501 | NC_021165.1    | Ca_Kabuli_Chr06 | 42940501                | GG                                     | AA                 | AA               | INTERGENIC                    |                    |                                     |
| SNP_43951_A_42946717 | NC_021165.1    | Ca_Kabuli_Chr06 | 42946717                | CC                                     | AA                 | AA               | INTERGENIC                    |                    |                                     |
| SNP_43952_A_42980677 | NC_021165.1    | Ca_Kabuli_Chr06 | 42980677                | CC                                     | TT                 | TT               | INTERGENIC                    |                    |                                     |
| SNP_43953_A_42993882 | NC_021165.1    | Ca_Kabuli_Chr06 | 42993882                | AA                                     | GG                 | GG               | INTERGENIC                    |                    |                                     |
| SNP_43954_A_42999797 | NC_021165.1    | Ca_Kabuli_Chr06 | 42999797                | TT                                     | GG                 | GG               | INTERGENIC                    |                    |                                     |
| SNP_43955_A_42999809 | NC_021165.1    | Ca_Kabuli_Chr06 | 42999809                | CC                                     | TT                 | TT               | INTERGENIC                    |                    |                                     |
| SNP_43956_A_43010930 | NC_021165.1    | Ca_Kabuli_Chr06 | 43010930                | TT                                     | AA                 | AA               | INTERGENIC                    |                    |                                     |
| SNP_43957_A_43011198 | NC_021165.1    | Ca_Kabuli_Chr06 | 43011198                | TT                                     | AA                 | AA               | INTERGENIC                    |                    |                                     |
| SNP_43958_A_43012021 | NC_021165.1    | Ca_Kabuli_Chr06 | 43012021                | AA                                     | TT                 | TT               | INTERGENIC                    |                    |                                     |

| SNPs IDs             | Chromosome IDs | Chromosomes     | Physical positions (bp) | CDC Frontier genome (Reference genome) | (Pusa 1103 & HPNB) | (ILWC 46 & LPNB) | Sequence Components of genome | Gene accession IDs | Putative functions           |
|----------------------|----------------|-----------------|-------------------------|----------------------------------------|--------------------|------------------|-------------------------------|--------------------|------------------------------|
| SNP_43959_A_43017614 | NC_021165.1    | Ca_Kabuli_Chr06 | 43017614                | AA                                     | TT                 | TT               | INTERGENIC                    |                    |                              |
| SNP_43961_A_43017670 | NC_021165.1    | Ca_Kabuli_Chr06 | 43017670                | AA                                     | CC                 | CC               | INTERGENIC                    |                    |                              |
| SNP_43962_A_43017691 | NC_021165.1    | Ca_Kabuli_Chr06 | 43017691                | TT                                     | CC                 | CC               | INTERGENIC                    |                    |                              |
| SNP_43963_A_43022097 | NC_021165.1    | Ca_Kabuli_Chr06 | 43022097                | CC                                     | GG                 | GG               | INTERGENIC                    |                    |                              |
| SNP_43964_A_43043060 | NC_021165.1    | Ca_Kabuli_Chr06 | 43043060                | AA                                     | GG                 | GG               | URR                           | 101497441          | uncharacterized LOC101497441 |
| SNP_43966_A_43043160 | NC_021165.1    | Ca_Kabuli_Chr06 | 43043160                | AA                                     | GG                 | GG               | URR                           | 101497441          | uncharacterized LOC101497441 |
| SNP_43967_A_43043349 | NC_021165.1    | Ca_Kabuli_Chr06 | 43043349                | AA                                     | TT                 | TT               | URR                           | 101497441          | uncharacterized LOC101497441 |
| SNP_43968_A_43045713 | NC_021165.1    | Ca_Kabuli_Chr06 | 43045713                | CC                                     | TT                 | TT               | INTERGENIC                    |                    |                              |
| SNP_43970_A_43045823 | NC_021165.1    | Ca_Kabuli_Chr06 | 43045823                | GG                                     | CC                 | CC               | INTERGENIC                    |                    |                              |
| SNP_43971_A_43045827 | NC_021165.1    | Ca_Kabuli_Chr06 | 43045827                | CC                                     | AA                 | AA               | INTERGENIC                    |                    |                              |
| SNP_43972_A_43045847 | NC_021165.1    | Ca_Kabuli_Chr06 | 43045847                | AA                                     | GG                 | GG               | INTERGENIC                    |                    |                              |
| SNP_43973_A_43045958 | NC_021165.1    | Ca_Kabuli_Chr06 | 43045958                | TT                                     | GG                 | GG               | INTERGENIC                    |                    |                              |
| SNP_43974_A_43045968 | NC_021165.1    | Ca_Kabuli_Chr06 | 43045968                | CC                                     | TT                 | TT               | INTERGENIC                    |                    |                              |
| SNP_43976_A_43050245 | NC_021165.1    | Ca_Kabuli_Chr06 | 43050245                | GG                                     | AA                 | AA               | INTERGENIC                    |                    |                              |
| SNP_43977_A_43053166 | NC_021165.1    | Ca_Kabuli_Chr06 | 43053166                | AA                                     | GG                 | GG               | INTERGENIC                    |                    |                              |
| SNP_43978_A_43058419 | NC_021165.1    | Ca_Kabuli_Chr06 | 43058419                | AA                                     | TT                 | TT               | INTERGENIC                    |                    |                              |
| SNP_43979_A_43059011 | NC_021165.1    | Ca_Kabuli_Chr06 | 43059011                | AA                                     | GG                 | GG               | INTERGENIC                    |                    |                              |
| SNP_43980_A_43059239 | NC_021165.1    | Ca_Kabuli_Chr06 | 43059239                | TT                                     | AA                 | AA               | INTERGENIC                    |                    |                              |
| SNP_43981_A_43060372 | NC_021165.1    | Ca_Kabuli_Chr06 | 43060372                | CC                                     | TT                 | TT               | INTERGENIC                    |                    |                              |
| SNP_43982_A_43060690 | NC_021165.1    | Ca_Kabuli_Chr06 | 43060690                | CC                                     | TT                 | TT               | INTERGENIC                    |                    |                              |
| SNP_43983_A_43060709 | NC_021165.1    | Ca_Kabuli_Chr06 | 43060709                | CC                                     | GG                 | GG               | INTERGENIC                    |                    |                              |
| SNP_43984_A_43061251 | NC_021165.1    | Ca_Kabuli_Chr06 | 43061251                | CC                                     | TT                 | TT               | INTERGENIC                    |                    |                              |

| SNPs IDs             | Chromosome IDs | Chromosomes     | Physical positions (bp) | CDC Frontier genome (Reference genome) | (Pusa 1103 & HPNB) | (ILWC 46 & LPNB) | Sequence Components of genome | Gene accession IDs | Putative functions             |
|----------------------|----------------|-----------------|-------------------------|----------------------------------------|--------------------|------------------|-------------------------------|--------------------|--------------------------------|
| SNP_43985_A_43062195 | NC_021165.1    | Ca_Kabuli_Chr06 | 43062195                | TT                                     | CC                 | CC               | INTERGENIC                    |                    |                                |
| SNP_43986_A_43062263 | NC_021165.1    | Ca_Kabuli_Chr06 | 43062263                | GG                                     | TT                 | TT               | INTERGENIC                    |                    |                                |
| SNP_43987_A_43064245 | NC_021165.1    | Ca_Kabuli_Chr06 | 43064245                | TT                                     | AA                 | AA               | INTERGENIC                    |                    |                                |
| SNP_43988_A_43064263 | NC_021165.1    | Ca_Kabuli_Chr06 | 43064263                | GG                                     | AA                 | AA               | INTERGENIC                    |                    |                                |
| SNP_43990_A_43064373 | NC_021165.1    | Ca_Kabuli_Chr06 | 43064373                | CC                                     | AA                 | AA               | INTERGENIC                    |                    |                                |
| SNP_43991_A_43064385 | NC_021165.1    | Ca_Kabuli_Chr06 | 43064385                | AA                                     | GG                 | GG               | INTERGENIC                    |                    |                                |
| SNP_43992_A_43064386 | NC_021165.1    | Ca_Kabuli_Chr06 | 43064386                | CC                                     | AA                 | AA               | INTERGENIC                    |                    |                                |
| SNP_43993_A_43064401 | NC_021165.1    | Ca_Kabuli_Chr06 | 43064401                | AA                                     | TT                 | TT               | INTERGENIC                    |                    |                                |
| SNP_43994_A_43066540 | NC_021165.1    | Ca_Kabuli_Chr06 | 43066540                | AA                                     | CC                 | CC               | INTERGENIC                    |                    |                                |
| SNP_43995_A_43070528 | NC_021165.1    | Ca_Kabuli_Chr06 | 43070528                | TT                                     | AA                 | AA               | INTERGENIC                    |                    |                                |
| SNP_43996_A_43070529 | NC_021165.1    | Ca_Kabuli_Chr06 | 43070529                | GG                                     | TT                 | TT               | INTERGENIC                    |                    |                                |
| SNP_43997_A_43070578 | NC_021165.1    | Ca_Kabuli_Chr06 | 43070578                | TT                                     | CC                 | CC               | INTERGENIC                    |                    |                                |
| SNP_43998_A_43076929 | NC_021165.1    | Ca_Kabuli_Chr06 | 43076929                | AA                                     | GG                 | GG               | INTERGENIC                    |                    |                                |
| SNP_43999_A_43077738 | NC_021165.1    | Ca_Kabuli_Chr06 | 43077738                | GG                                     | AA                 | AA               | INTERGENIC                    |                    |                                |
| SNP_44000_A_43101184 | NC_021165.1    | Ca_Kabuli_Chr06 | 43101184                | GG                                     | CC                 | CC               | INTERGENIC                    |                    |                                |
| SNP_44001_A_43101353 | NC_021165.1    | Ca_Kabuli_Chr06 | 43101353                | AA                                     | TT                 | TT               | INTERGENIC                    |                    |                                |
| SNP_44002_A_43101358 | NC_021165.1    | Ca_Kabuli_Chr06 | 43101358                | CC                                     | TT                 | TT               | INTERGENIC                    |                    |                                |
| SNP_44004_A_43138283 | NC_021165.1    | Ca_Kabuli_Chr06 | 43138283                | GG                                     | TT                 | TT               | INTERGENIC                    |                    |                                |
| SNP_44007_A_43144582 | NC_021165.1    | Ca_Kabuli_Chr06 | 43144582                | CC                                     | AA                 | AA               | INTRON                        | 101501210          | transcription factor GTE8-like |
| SNP_44009_A_43154162 | NC_021165.1    | Ca_Kabuli_Chr06 | 43154162                | CC                                     | TT                 | TT               | INTERGENIC                    |                    |                                |
| SNP_44010_A_43154435 | NC_021165.1    | Ca_Kabuli_Chr06 | 43154435                | CC                                     | TT                 | TT               | INTERGENIC                    |                    |                                |
| SNP_44011_A_43165721 | NC_021165.1    | Ca_Kabuli_Chr06 | 43165721                | AA                                     | CC                 | CC               | INTERGENIC                    |                    |                                |

| SNPs IDs             | Chromosome IDs | Chromosomes     | Physical positions (bp) | CDC Frontier genome (Reference genome) | (Pusa 1103 & HPNB) | (ILWC 46 & LPNB) | Sequence genome | Components of | Gene accession IDs | Putative functions |
|----------------------|----------------|-----------------|-------------------------|----------------------------------------|--------------------|------------------|-----------------|---------------|--------------------|--------------------|
| SNP_44012_A_43165962 | NC_021165.1    | Ca_Kabuli_Chr06 | 43165962                | AA                                     | CC                 | CC               | INTERGENIC      |               |                    |                    |
| SNP_44013_A_43166369 | NC_021165.1    | Ca_Kabuli_Chr06 | 43166369                | CC                                     | TT                 | TT               | INTERGENIC      |               |                    |                    |
| SNP_44014_A_43166391 | NC_021165.1    | Ca_Kabuli_Chr06 | 43166391                | AA                                     | GG                 | GG               | INTERGENIC      |               |                    |                    |
| SNP_44015_A_43166413 | NC_021165.1    | Ca_Kabuli_Chr06 | 43166413                | AA                                     | CC                 | CC               | INTERGENIC      |               |                    |                    |
| SNP_44016_A_43166488 | NC_021165.1    | Ca_Kabuli_Chr06 | 43166488                | TT                                     | CC                 | CC               | INTERGENIC      |               |                    |                    |
| SNP_44017_A_43166561 | NC_021165.1    | Ca_Kabuli_Chr06 | 43166561                | CC                                     | TT                 | TT               | INTERGENIC      |               |                    |                    |
| SNP_44018_A_43166568 | NC_021165.1    | Ca_Kabuli_Chr06 | 43166568                | TT                                     | AA                 | AA               | INTERGENIC      |               |                    |                    |
| SNP_44019_A_43166604 | NC_021165.1    | Ca_Kabuli_Chr06 | 43166604                | AA                                     | GG                 | GG               | INTERGENIC      |               |                    |                    |
| SNP_44020_A_43166627 | NC_021165.1    | Ca_Kabuli_Chr06 | 43166627                | TT                                     | CC                 | CC               | INTERGENIC      |               |                    |                    |
| SNP_44022_A_43166635 | NC_021165.1    | Ca_Kabuli_Chr06 | 43166635                | AA                                     | TT                 | TT               | INTERGENIC      |               |                    |                    |
| SNP_44023_A_43166657 | NC_021165.1    | Ca_Kabuli_Chr06 | 43166657                | AA                                     | TT                 | TT               | INTERGENIC      |               |                    |                    |
| SNP_44024_A_43166752 | NC_021165.1    | Ca_Kabuli_Chr06 | 43166752                | TT                                     | GG                 | GG               | INTERGENIC      |               |                    |                    |
| SNP_44025_A_43166760 | NC_021165.1    | Ca_Kabuli_Chr06 | 43166760                | CC                                     | AA                 | AA               | INTERGENIC      |               |                    |                    |
| SNP_44026_A_43166827 | NC_021165.1    | Ca_Kabuli_Chr06 | 43166827                | GG                                     | CC                 | CC               | INTERGENIC      |               |                    |                    |
| SNP_44027_A_43167104 | NC_021165.1    | Ca_Kabuli_Chr06 | 43167104                | AA                                     | CC                 | CC               | INTERGENIC      |               |                    |                    |
| SNP_44028_A_43167283 | NC_021165.1    | Ca_Kabuli_Chr06 | 43167283                | TT                                     | CC                 | CC               | INTERGENIC      |               |                    |                    |
| SNP_44029_A_43167304 | NC_021165.1    | Ca_Kabuli_Chr06 | 43167304                | CC                                     | GG                 | GG               | INTERGENIC      |               |                    |                    |
| SNP_44030_A_43167434 | NC_021165.1    | Ca_Kabuli_Chr06 | 43167434                | AA                                     | TT                 | TT               | INTERGENIC      |               |                    |                    |
| SNP_44031_A_43167504 | NC_021165.1    | Ca_Kabuli_Chr06 | 43167504                | TT                                     | CC                 | CC               | INTERGENIC      |               |                    |                    |
| SNP_44032_A_43167534 | NC_021165.1    | Ca_Kabuli_Chr06 | 43167534                | TT                                     | GG                 | GG               | INTERGENIC      |               |                    |                    |
| SNP_44033_A_43167663 | NC_021165.1    | Ca_Kabuli_Chr06 | 43167663                | GG                                     | CC                 | CC               | INTERGENIC      |               |                    |                    |
| SNP_44034_A_43167688 | NC_021165.1    | Ca_Kabuli_Chr06 | 43167688                | TT                                     | AA                 | AA               | INTERGENIC      |               |                    |                    |

| SNPs IDs             | Chromosome IDs | Chromosomes     | Physical positions (bp) | CDC Frontier genome (Reference genome) | (Pusa 1103 & HPNB) | (ILWC 46 & LPNB) | Sequence genome | Components of | Gene accession IDs | Putative functions |
|----------------------|----------------|-----------------|-------------------------|----------------------------------------|--------------------|------------------|-----------------|---------------|--------------------|--------------------|
| SNP_44035_A_43167741 | NC_021165.1    | Ca_Kabuli_Chr06 | 43167741                | TT                                     | AA                 | AA               | INTERGENIC      |               |                    |                    |
| SNP_44036_A_43167752 | NC_021165.1    | Ca_Kabuli_Chr06 | 43167752                | CC                                     | TT                 | TT               | INTERGENIC      |               |                    |                    |
| SNP_44037_A_43168704 | NC_021165.1    | Ca_Kabuli_Chr06 | 43168704                | CC                                     | TT                 | TT               | INTERGENIC      |               |                    |                    |
| SNP_44038_A_43168716 | NC_021165.1    | Ca_Kabuli_Chr06 | 43168716                | GG                                     | CC                 | CC               | INTERGENIC      |               |                    |                    |
| SNP_44039_A_43168762 | NC_021165.1    | Ca_Kabuli_Chr06 | 43168762                | TT                                     | CC                 | CC               | INTERGENIC      |               |                    |                    |
| SNP_44040_A_43168763 | NC_021165.1    | Ca_Kabuli_Chr06 | 43168763                | TT                                     | AA                 | AA               | INTERGENIC      |               |                    |                    |
| SNP_44041_A_43168806 | NC_021165.1    | Ca_Kabuli_Chr06 | 43168806                | AA                                     | TT                 | TT               | INTERGENIC      |               |                    |                    |
| SNP_44042_A_43168832 | NC_021165.1    | Ca_Kabuli_Chr06 | 43168832                | GG                                     | AA                 | AA               | INTERGENIC      |               |                    |                    |
| SNP_44043_A_43168835 | NC_021165.1    | Ca_Kabuli_Chr06 | 43168835                | CC                                     | GG                 | GG               | INTERGENIC      |               |                    |                    |
| SNP_44044_A_43168901 | NC_021165.1    | Ca_Kabuli_Chr06 | 43168901                | AA                                     | GG                 | GG               | INTERGENIC      |               |                    |                    |
| SNP_44045_A_43168955 | NC_021165.1    | Ca_Kabuli_Chr06 | 43168955                | CC                                     | TT                 | TT               | INTERGENIC      |               |                    |                    |
| SNP_44046_A_43168971 | NC_021165.1    | Ca_Kabuli_Chr06 | 43168971                | TT                                     | GG                 | GG               | INTERGENIC      |               |                    |                    |
| SNP_44047_A_43168979 | NC_021165.1    | Ca_Kabuli_Chr06 | 43168979                | AA                                     | GG                 | GG               | INTERGENIC      |               |                    |                    |
| SNP_44048_A_43169168 | NC_021165.1    | Ca_Kabuli_Chr06 | 43169168                | CC                                     | TT                 | TT               | INTERGENIC      |               |                    |                    |
| SNP_44049_A_43169184 | NC_021165.1    | Ca_Kabuli_Chr06 | 43169184                | TT                                     | CC                 | CC               | INTERGENIC      |               |                    |                    |
| SNP_44050_A_43169245 | NC_021165.1    | Ca_Kabuli_Chr06 | 43169245                | AA                                     | GG                 | GG               | INTERGENIC      |               |                    |                    |
| SNP_44051_A_43169249 | NC_021165.1    | Ca_Kabuli_Chr06 | 43169249                | GG                                     | CC                 | CC               | INTERGENIC      |               |                    |                    |
| SNP_44052_A_43169366 | NC_021165.1    | Ca_Kabuli_Chr06 | 43169366                | AA                                     | CC                 | CC               | INTERGENIC      |               |                    |                    |
| SNP_44053_A_43169394 | NC_021165.1    | Ca_Kabuli_Chr06 | 43169394                | TT                                     | CC                 | CC               | INTERGENIC      |               |                    |                    |
| SNP_44054_A_43176146 | NC_021165.1    | Ca_Kabuli_Chr06 | 43176146                | TT                                     | CC                 | CC               | INTERGENIC      |               |                    |                    |
| SNP_44055_A_43176175 | NC_021165.1    | Ca_Kabuli_Chr06 | 43176175                | GG                                     | AA                 | AA               | INTERGENIC      |               |                    |                    |
| SNP_44056_A_43176244 | NC_021165.1    | Ca_Kabuli_Chr06 | 43176244                | GG                                     | AA                 | AA               | INTERGENIC      |               |                    |                    |

| SNPs IDs             | Chromosome IDs | Chromosomes     | Physical positions (bp) | CDC Frontier genome (Reference genome) | (Pusa 1103 & HPNB) | (ILWC 46 & LPNB) | Sequence genome | Components of | Gene accession IDs                       | Putative functions |
|----------------------|----------------|-----------------|-------------------------|----------------------------------------|--------------------|------------------|-----------------|---------------|------------------------------------------|--------------------|
| SNP_44057_A_43178233 | NC_021165.1    | Ca_Kabuli_Chr06 | 43178233                | GG                                     | AA                 | AA               | INTERGENIC      |               |                                          |                    |
| SNP_44058_A_43659945 | NC_021165.1    | Ca_Kabuli_Chr06 | 43659945                | TT                                     | AA                 | AA               | INTERGENIC      |               |                                          |                    |
| SNP_44059_A_43673792 | NC_021165.1    | Ca_Kabuli_Chr06 | 43673792                | CC                                     | TT                 | TT               | INTERGENIC      |               |                                          |                    |
| SNP_44060_A_43707456 | NC_021165.1    | Ca_Kabuli_Chr06 | 43707456                | TT                                     | CC                 | CC               | INTERGENIC      |               |                                          |                    |
| SNP_44061_A_43707760 | NC_021165.1    | Ca_Kabuli_Chr06 | 43707760                | TT                                     | CC                 | CC               | INTERGENIC      |               |                                          |                    |
| SNP_44062_A_43707814 | NC_021165.1    | Ca_Kabuli_Chr06 | 43707814                | GG                                     | AA                 | AA               | INTERGENIC      |               |                                          |                    |
| SNP_44063_A_43707827 | NC_021165.1    | Ca_Kabuli_Chr06 | 43707827                | TT                                     | CC                 | CC               | INTERGENIC      |               |                                          |                    |
| SNP_44064_A_43770276 | NC_021165.1    | Ca_Kabuli_Chr06 | 43770276                | AA                                     | TT                 | TT               | INTERGENIC      |               |                                          |                    |
| SNP_44065_A_43770287 | NC_021165.1    | Ca_Kabuli_Chr06 | 43770287                | AA                                     | CC                 | CC               | INTERGENIC      |               |                                          |                    |
| SNP_44066_A_43770289 | NC_021165.1    | Ca_Kabuli_Chr06 | 43770289                | GG                                     | AA                 | AA               | INTERGENIC      |               |                                          |                    |
| SNP_44067_A_43770297 | NC_021165.1    | Ca_Kabuli_Chr06 | 43770297                | TT                                     | CC                 | CC               | INTERGENIC      |               |                                          |                    |
| SNP_44068_A_43808412 | NC_021165.1    | Ca_Kabuli_Chr06 | 43808412                | CC                                     | TT                 | TT               | DRR             | 101506994     | Unknown function                         |                    |
| SNP_44069_A_43842916 | NC_021165.1    | Ca_Kabuli_Chr06 | 43842916                | CC                                     | TT                 | TT               | INTERGENIC      |               |                                          |                    |
| SNP_44071_A_43847768 | NC_021165.1    | Ca_Kabuli_Chr06 | 43847768                | TT                                     | AA                 | AA               | INTERGENIC      |               |                                          |                    |
| SNP_44072_A_43881022 | NC_021165.1    | Ca_Kabuli_Chr06 | 43881022                | AA                                     | GG                 | GG               | INTERGENIC      |               |                                          |                    |
| SNP_44073_A_43885916 | NC_021165.1    | Ca_Kabuli_Chr06 | 43885916                | TT                                     | CC                 | CC               | DRR             | 101507947     | protein FAR-RED IMPAIRED RESPONSE 1-like |                    |
| SNP_44074_A_43889896 | NC_021165.1    | Ca_Kabuli_Chr06 | 43889896                | TT                                     | CC                 | CC               | URR             | 101507947     | protein FAR-RED IMPAIRED RESPONSE 1-like |                    |
| SNP_44075_A_43890506 | NC_021165.1    | Ca_Kabuli_Chr06 | 43890506                | GG                                     | AA                 | AA               | URR             | 101507947     | protein FAR-RED IMPAIRED RESPONSE 1-like |                    |
| SNP_44077_A_43909153 | NC_021165.1    | Ca_Kabuli_Chr06 | 43909153                | TT                                     | GG                 | GG               | INTERGENIC      |               |                                          |                    |
| SNP_44079_A_43909347 | NC_021165.1    | Ca_Kabuli_Chr06 | 43909347                | TT                                     | GG                 | GG               | INTERGENIC      |               |                                          |                    |
| SNP_44080_A_43909404 | NC_021165.1    | Ca_Kabuli_Chr06 | 43909404                | AA                                     | TT                 | TT               | INTERGENIC      |               |                                          |                    |
| SNP_44081_A_43909405 | NC_021165.1    | Ca_Kabuli_Chr06 | 43909405                | AA                                     | CC                 | CC               | INTERGENIC      |               |                                          |                    |

| SNPs IDs             | Chromosome IDs | Chromosomes     | Physical positions (bp) | CDC Frontier genome (Reference genome) | (Pusa 1103 & HPNB) | (ILWC 46 & LPNB) | Sequence Components of genome | Gene accession IDs | Putative functions           |
|----------------------|----------------|-----------------|-------------------------|----------------------------------------|--------------------|------------------|-------------------------------|--------------------|------------------------------|
| SNP_44082_A_43909406 | NC_021165.1    | Ca_Kabuli_Chr06 | 43909406                | CC                                     | TT                 | TT               | INTERGENIC                    |                    |                              |
| SNP_44083_A_43909407 | NC_021165.1    | Ca_Kabuli_Chr06 | 43909407                | TT                                     | GG                 | GG               | INTERGENIC                    |                    |                              |
| SNP_44084_A_43909413 | NC_021165.1    | Ca_Kabuli_Chr06 | 43909413                | GG                                     | AA                 | AA               | INTERGENIC                    |                    |                              |
| SNP_44085_A_43920010 | NC_021165.1    | Ca_Kabuli_Chr06 | 43920010                | GG                                     | AA                 | AA               | URR                           | 101508581          | uncharacterized LOC101508581 |
| SNP_44086_A_43920043 | NC_021165.1    | Ca_Kabuli_Chr06 | 43920043                | GG                                     | AA                 | AA               | URR                           | 101508581          | uncharacterized LOC101508581 |
| SNP_44087_A_43920046 | NC_021165.1    | Ca_Kabuli_Chr06 | 43920046                | TT                                     | CC                 | CC               | URR                           | 101508581          | uncharacterized LOC101508581 |
| SNP_44088_A_43929581 | NC_021165.1    | Ca_Kabuli_Chr06 | 43929581                | CC                                     | AA                 | AA               | INTERGENIC                    |                    |                              |
| SNP_44089_A_44044807 | NC_021165.1    | Ca_Kabuli_Chr06 | 44044807                | TT                                     | GG                 | GG               | INTERGENIC                    |                    |                              |
| SNP_44091_A_44117407 | NC_021165.1    | Ca_Kabuli_Chr06 | 44117407                | GG                                     | AA                 | AA               | INTERGENIC                    |                    |                              |
| SNP_44092_A_44152088 | NC_021165.1    | Ca_Kabuli_Chr06 | 44152088                | AA                                     | GG                 | GG               | INTERGENIC                    |                    |                              |
| SNP_44093_A_44160570 | NC_021165.1    | Ca_Kabuli_Chr06 | 44160570                | GG                                     | AA                 | AA               | INTERGENIC                    |                    |                              |
| SNP_44094_A_44160779 | NC_021165.1    | Ca_Kabuli_Chr06 | 44160779                | TT                                     | AA                 | AA               | INTERGENIC                    |                    |                              |
| SNP_44095_A_44160827 | NC_021165.1    | Ca_Kabuli_Chr06 | 44160827                | TT                                     | CC                 | CC               | INTERGENIC                    |                    |                              |
| SNP_44096_A_44160889 | NC_021165.1    | Ca_Kabuli_Chr06 | 44160889                | AA                                     | GG                 | GG               | INTERGENIC                    |                    |                              |
| SNP_44097_A_44160929 | NC_021165.1    | Ca_Kabuli_Chr06 | 44160929                | CC                                     | AA                 | AA               | INTERGENIC                    |                    |                              |
| SNP_44098_A_44160983 | NC_021165.1    | Ca_Kabuli_Chr06 | 44160983                | AA                                     | GG                 | GG               | INTERGENIC                    |                    |                              |
| SNP_44099_A_44160993 | NC_021165.1    | Ca_Kabuli_Chr06 | 44160993                | GG                                     | AA                 | AA               | INTERGENIC                    |                    |                              |
| SNP_44100_A_44161040 | NC_021165.1    | Ca_Kabuli_Chr06 | 44161040                | TT                                     | AA                 | AA               | INTERGENIC                    |                    |                              |
| SNP_44101_A_44161042 | NC_021165.1    | Ca_Kabuli_Chr06 | 44161042                | GG                                     | CC                 | CC               | INTERGENIC                    |                    |                              |
| SNP_44102_A_44179988 | NC_021165.1    | Ca_Kabuli_Chr06 | 44179988                | CC                                     | TT                 | TT               | INTERGENIC                    |                    |                              |
| SNP_44103_A_44180436 | NC_021165.1    | Ca_Kabuli_Chr06 | 44180436                | AA                                     | GG                 | GG               | INTERGENIC                    |                    |                              |
| SNP_44104_A_44235850 | NC_021165.1    | Ca_Kabuli_Chr06 | 44235850                | TT                                     | CC                 | CC               | INTERGENIC                    |                    |                              |

| SNPs IDs             | Chromosome IDs | Chromosomes     | Physical positions (bp) | CDC Frontier genome (Reference genome) | (Pusa 1103 & HPNB) | (ILWC 46 & LPNB) | Sequence genome | Components of | Gene accession IDs | Putative functions |
|----------------------|----------------|-----------------|-------------------------|----------------------------------------|--------------------|------------------|-----------------|---------------|--------------------|--------------------|
| SNP_44105_A_44265437 | NC_021165.1    | Ca_Kabuli_Chr06 | 44265437                | CC                                     | AA                 | AA               | INTERGENIC      |               |                    |                    |
| SNP_44106_A_44265449 | NC_021165.1    | Ca_Kabuli_Chr06 | 44265449                | GG                                     | AA                 | AA               | INTERGENIC      |               |                    |                    |
| SNP_44107_A_44265487 | NC_021165.1    | Ca_Kabuli_Chr06 | 44265487                | TT                                     | CC                 | CC               | INTERGENIC      |               |                    |                    |
| SNP_44109_A_44282189 | NC_021165.1    | Ca_Kabuli_Chr06 | 44282189                | TT                                     | CC                 | CC               | INTERGENIC      |               |                    |                    |
| SNP_44110_A_44293796 | NC_021165.1    | Ca_Kabuli_Chr06 | 44293796                | AA                                     | GG                 | GG               | INTERGENIC      |               |                    |                    |
| SNP_44111_A_44293974 | NC_021165.1    | Ca_Kabuli_Chr06 | 44293974                | AA                                     | GG                 | GG               | INTERGENIC      |               |                    |                    |
| SNP_44112_A_44294199 | NC_021165.1    | Ca_Kabuli_Chr06 | 44294199                | TT                                     | CC                 | CC               | INTERGENIC      |               |                    |                    |
| SNP_44113_A_44294318 | NC_021165.1    | Ca_Kabuli_Chr06 | 44294318                | CC                                     | TT                 | TT               | INTERGENIC      |               |                    |                    |
| SNP_44114_A_44294329 | NC_021165.1    | Ca_Kabuli_Chr06 | 44294329                | GG                                     | AA                 | AA               | INTERGENIC      |               |                    |                    |
| SNP_44115_A_44294338 | NC_021165.1    | Ca_Kabuli_Chr06 | 44294338                | GG                                     | AA                 | AA               | INTERGENIC      |               |                    |                    |
| SNP_44116_A_44294342 | NC_021165.1    | Ca_Kabuli_Chr06 | 44294342                | AA                                     | GG                 | GG               | INTERGENIC      |               |                    |                    |
| SNP_44117_A_44302036 | NC_021165.1    | Ca_Kabuli_Chr06 | 44302036                | TT                                     | CC                 | CC               | INTERGENIC      |               |                    |                    |
| SNP_44118_A_44302075 | NC_021165.1    | Ca_Kabuli_Chr06 | 44302075                | GG                                     | AA                 | AA               | INTERGENIC      |               |                    |                    |
| SNP_44119_A_44302091 | NC_021165.1    | Ca_Kabuli_Chr06 | 44302091                | CC                                     | TT                 | TT               | INTERGENIC      |               |                    |                    |
| SNP_44120_A_44302114 | NC_021165.1    | Ca_Kabuli_Chr06 | 44302114                | CC                                     | GG                 | GG               | INTERGENIC      |               |                    |                    |
| SNP_44121_A_44302462 | NC_021165.1    | Ca_Kabuli_Chr06 | 44302462                | AA                                     | CC                 | CC               | INTERGENIC      |               |                    |                    |
| SNP_44122_A_44302518 | NC_021165.1    | Ca_Kabuli_Chr06 | 44302518                | CC                                     | TT                 | TT               | INTERGENIC      |               |                    |                    |
| SNP_44123_A_44302575 | NC_021165.1    | Ca_Kabuli_Chr06 | 44302575                | AA                                     | TT                 | TT               | INTERGENIC      |               |                    |                    |
| SNP_44124_A_44302576 | NC_021165.1    | Ca_Kabuli_Chr06 | 44302576                | AA                                     | GG                 | GG               | INTERGENIC      |               |                    |                    |
| SNP_44125_A_44303247 | NC_021165.1    | Ca_Kabuli_Chr06 | 44303247                | TT                                     | CC                 | CC               | INTERGENIC      |               |                    |                    |
| SNP_44126_A_44303279 | NC_021165.1    | Ca_Kabuli_Chr06 | 44303279                | CC                                     | TT                 | TT               | INTERGENIC      |               |                    |                    |
| SNP_44127_A_44330792 | NC_021165.1    | Ca_Kabuli_Chr06 | 44330792                | AA                                     | TT                 | TT               | INTERGENIC      |               |                    |                    |



| SNPs IDs             | Chromosome IDs | Chromosomes     | Physical positions (bp) | CDC Frontier (Reference genome) | (Pusa 1103 & HPNB) | (ILWC 46 & LPNB) | Sequence Components of genome | Gene accession IDs | Putative functions           |
|----------------------|----------------|-----------------|-------------------------|---------------------------------|--------------------|------------------|-------------------------------|--------------------|------------------------------|
| SNP_44130_A_44424559 | NC_021165.1    | Ca_Kabuli_Chr06 | 44424559                | AA                              | GG                 | GG               | INTRON                        | 101511908          | uncharacterized LOC101511908 |
| SNP_44131_A_44432334 | NC_021165.1    | Ca_Kabuli_Chr06 | 44432334                | CC                              | TT                 | TT               | INTRON                        | 101511908          | uncharacterized LOC101511908 |
| SNP_44132_A_44438975 | NC_021165.1    | Ca_Kabuli_Chr06 | 44438975                | CC                              | TT                 | TT               | INTRON                        | 101511908          | uncharacterized LOC101511908 |
| SNP_44133_A_44439297 | NC_021165.1    | Ca_Kabuli_Chr06 | 44439297                | CC                              | GG                 | GG               | INTRON                        | 101511908          | uncharacterized LOC101511908 |
| SNP_44134_A_44495104 | NC_021165.1    | Ca_Kabuli_Chr06 | 44495104                | GG                              | AA                 | AA               | INTERGENIC                    |                    |                              |
| SNP_44135_A_44516407 | NC_021165.1    | Ca_Kabuli_Chr06 | 44516407                | AA                              | TT                 | TT               | INTERGENIC                    |                    |                              |
| SNP_44136_A_44516593 | NC_021165.1    | Ca_Kabuli_Chr06 | 44516593                | GG                              | AA                 | AA               | INTERGENIC                    |                    |                              |
| SNP_44137_A_44516672 | NC_021165.1    | Ca_Kabuli_Chr06 | 44516672                | GG                              | TT                 | TT               | INTERGENIC                    |                    |                              |
| SNP_44138_A_44516673 | NC_021165.1    | Ca_Kabuli_Chr06 | 44516673                | TT                              | GG                 | GG               | INTERGENIC                    |                    |                              |
| SNP_44139_A_44516751 | NC_021165.1    | Ca_Kabuli_Chr06 | 44516751                | CC                              | TT                 | TT               | INTERGENIC                    |                    |                              |
| SNP_44140_A_44582937 | NC_021165.1    | Ca_Kabuli_Chr06 | 44582937                | AA                              | GG                 | GG               | INTERGENIC                    |                    |                              |
| SNP_44141_A_44626534 | NC_021165.1    | Ca_Kabuli_Chr06 | 44626534                | AA                              | CC                 | CC               | INTERGENIC                    |                    |                              |
| SNP_44142_A_44626892 | NC_021165.1    | Ca_Kabuli_Chr06 | 44626892                | GG                              | TT                 | TT               | INTERGENIC                    |                    |                              |
| SNP_44143_A_44626948 | NC_021165.1    | Ca_Kabuli_Chr06 | 44626948                | CC                              | GG                 | GG               | INTERGENIC                    |                    |                              |
| SNP_44144_A_44626950 | NC_021165.1    | Ca_Kabuli_Chr06 | 44626950                | AA                              | GG                 | GG               | INTERGENIC                    |                    |                              |
| SNP_44145_A_44627076 | NC_021165.1    | Ca_Kabuli_Chr06 | 44627076                | AA                              | GG                 | GG               | INTERGENIC                    |                    |                              |
| SNP_44146_A_44627084 | NC_021165.1    | Ca_Kabuli_Chr06 | 44627084                | TT                              | CC                 | CC               | INTERGENIC                    |                    |                              |
| SNP_44147_A_44627106 | NC_021165.1    | Ca_Kabuli_Chr06 | 44627106                | AA                              | GG                 | GG               | INTERGENIC                    |                    |                              |
| SNP_44148_A_44648772 | NC_021165.1    | Ca_Kabuli_Chr06 | 44648772                | CC                              | AA                 | AA               | URR                           | 101513410          | uncharacterized LOC101513410 |
| SNP_44149_A_44650806 | NC_021165.1    | Ca_Kabuli_Chr06 | 44650806                | TT                              | CC                 | CC               | INTERGENIC                    |                    |                              |
| SNP_44150_A_44652532 | NC_021165.1    | Ca_Kabuli_Chr06 | 44652532                | TT                              | GG                 | GG               | INTERGENIC                    |                    |                              |
| SNP_44151_A_44652573 | NC_021165.1    | Ca_Kabuli_Chr06 | 44652573                | GG                              | AA                 | AA               | INTERGENIC                    |                    |                              |

| SNPs IDs             | Chromosome IDs | Chromosomes     | Physical positions (bp) | CDC Frontier genome (Reference genome) | (Pusa 1103 & HPNB) | (ILWC 46 & LPNB) | Sequence genome   | Components of | Gene accession IDs | Putative functions                  |
|----------------------|----------------|-----------------|-------------------------|----------------------------------------|--------------------|------------------|-------------------|---------------|--------------------|-------------------------------------|
| SNP_44152_A_44652811 | NC_021165.1    | Ca_Kabuli_Chr06 | 44652811                | AA                                     | GG                 | GG               | INTERGENIC        |               |                    |                                     |
| SNP_44153_A_44653483 | NC_021165.1    | Ca_Kabuli_Chr06 | 44653483                | TT                                     | CC                 | CC               | INTERGENIC        |               |                    |                                     |
| SNP_44154_A_44653584 | NC_021165.1    | Ca_Kabuli_Chr06 | 44653584                | TT                                     | AA                 | AA               | INTERGENIC        |               |                    |                                     |
| SNP_44155_A_44653850 | NC_021165.1    | Ca_Kabuli_Chr06 | 44653850                | TT                                     | CC                 | CC               | INTERGENIC        |               |                    |                                     |
| SNP_44156_A_44653872 | NC_021165.1    | Ca_Kabuli_Chr06 | 44653872                | GG                                     | AA                 | AA               | INTERGENIC        |               |                    |                                     |
| SNP_44157_A_44654059 | NC_021165.1    | Ca_Kabuli_Chr06 | 44654059                | AA                                     | TT                 | TT               | INTERGENIC        |               |                    |                                     |
| SNP_44158_A_44654510 | NC_021165.1    | Ca_Kabuli_Chr06 | 44654510                | TT                                     | CC                 | CC               | INTERGENIC        |               |                    |                                     |
| SNP_44159_A_44654696 | NC_021165.1    | Ca_Kabuli_Chr06 | 44654696                | CC                                     | TT                 | TT               | INTERGENIC        |               |                    |                                     |
| SNP_44160_A_44678169 | NC_021165.1    | Ca_Kabuli_Chr06 | 44678169                | GG                                     | TT                 | TT               | INTERGENIC        |               |                    |                                     |
| SNP_44161_A_44678281 | NC_021165.1    | Ca_Kabuli_Chr06 | 44678281                | AA                                     | TT                 | TT               | INTERGENIC        |               |                    |                                     |
| SNP_44162_A_44678318 | NC_021165.1    | Ca_Kabuli_Chr06 | 44678318                | TT                                     | GG                 | GG               | INTERGENIC        |               |                    |                                     |
| SNP_44163_A_44680132 | NC_021165.1    | Ca_Kabuli_Chr06 | 44680132                | CC                                     | TT                 | TT               | SYNONYMOUS_CODING | Gene_ma22496  |                    | Unknown function                    |
| SNP_44164_A_44680156 | NC_021165.1    | Ca_Kabuli_Chr06 | 44680156                | CC                                     | TT                 | TT               | URR               | 101410588     |                    | transfer RNA lysine (anticodon CUU) |
| SNP_44165_A_44680162 | NC_021165.1    | Ca_Kabuli_Chr06 | 44680162                | CC                                     | TT                 | TT               | URR               | 101410588     |                    | transfer RNA lysine (anticodon CUU) |
| SNP_44166_A_44680506 | NC_021165.1    | Ca_Kabuli_Chr06 | 44680506                | CC                                     | TT                 | TT               | URR               | 101410588     |                    | transfer RNA lysine (anticodon CUU) |
| SNP_44167_A_44681644 | NC_021165.1    | Ca_Kabuli_Chr06 | 44681644                | GG                                     | AA                 | AA               | URR               | 101410588     |                    | transfer RNA lysine (anticodon CUU) |
| SNP_44168_A_44681983 | NC_021165.1    | Ca_Kabuli_Chr06 | 44681983                | TT                                     | CC                 | CC               | URR               | 101410588     |                    | transfer RNA lysine (anticodon CUU) |
| SNP_44169_A_44682605 | NC_021165.1    | Ca_Kabuli_Chr06 | 44682605                | AA                                     | GG                 | GG               | INTERGENIC        |               |                    |                                     |
| SNP_44170_A_44682608 | NC_021165.1    | Ca_Kabuli_Chr06 | 44682608                | GG                                     | AA                 | AA               | INTERGENIC        |               |                    |                                     |
| SNP_44171_A_44682821 | NC_021165.1    | Ca_Kabuli_Chr06 | 44682821                | AA                                     | TT                 | TT               | INTERGENIC        |               |                    |                                     |
| SNP_44172_A_44682923 | NC_021165.1    | Ca_Kabuli_Chr06 | 44682923                | AA                                     | GG                 | GG               | INTERGENIC        |               |                    |                                     |
| SNP_44173_A_44682958 | NC_021165.1    | Ca_Kabuli_Chr06 | 44682958                | AA                                     | GG                 | GG               | INTERGENIC        |               |                    |                                     |

| SNPs IDs             | Chromosome IDs | Chromosomes     | Physical positions (bp) | CDC Frontier (Reference genome) | (Pusa 1103 & HPNB) | (ILWC 46 & LPNB) | Sequence Components of genome | Gene accession IDs | Putative functions           |
|----------------------|----------------|-----------------|-------------------------|---------------------------------|--------------------|------------------|-------------------------------|--------------------|------------------------------|
| SNP_44174_A_44683107 | NC_021165.1    | Ca_Kabuli_Chr06 | 44683107                | TT                              | CC                 | CC               | INTERGENIC                    |                    |                              |
| SNP_44175_A_44700012 | NC_021165.1    | Ca_Kabuli_Chr06 | 44700012                | AA                              | GG                 | GG               | INTERGENIC                    |                    |                              |
| SNP_44176_A_44700112 | NC_021165.1    | Ca_Kabuli_Chr06 | 44700112                | GG                              | TT                 | TT               | INTERGENIC                    |                    |                              |
| SNP_44177_A_44700127 | NC_021165.1    | Ca_Kabuli_Chr06 | 44700127                | CC                              | TT                 | TT               | INTERGENIC                    |                    |                              |
| SNP_44178_A_44707046 | NC_021165.1    | Ca_Kabuli_Chr06 | 44707046                | GG                              | CC                 | CC               | INTERGENIC                    |                    |                              |
| SNP_44179_A_44707058 | NC_021165.1    | Ca_Kabuli_Chr06 | 44707058                | GG                              | AA                 | AA               | INTERGENIC                    |                    |                              |
| SNP_44180_A_44707308 | NC_021165.1    | Ca_Kabuli_Chr06 | 44707308                | CC                              | TT                 | TT               | INTERGENIC                    |                    |                              |
| SNP_44181_A_44709054 | NC_021165.1    | Ca_Kabuli_Chr06 | 44709054                | GG                              | CC                 | CC               | DRR                           | 101508065          | uncharacterized LOC101508065 |
| SNP_44182_A_44709079 | NC_021165.1    | Ca_Kabuli_Chr06 | 44709079                | CC                              | TT                 | TT               | DRR                           | 101508065          | uncharacterized LOC101508065 |
| SNP_44183_A_44709081 | NC_021165.1    | Ca_Kabuli_Chr06 | 44709081                | AA                              | CC                 | CC               | DRR                           | 101508065          | uncharacterized LOC101508065 |
| SNP_44184_A_44709123 | NC_021165.1    | Ca_Kabuli_Chr06 | 44709123                | CC                              | TT                 | TT               | SYNONYMOUS_CODING             | 101508065          | uncharacterized LOC101508065 |
| SNP_44185_A_44709126 | NC_021165.1    | Ca_Kabuli_Chr06 | 44709126                | AA                              | GG                 | GG               | SYNONYMOUS_CODING             | 101508065          | uncharacterized LOC101508065 |
| SNP_44186_A_44709425 | NC_021165.1    | Ca_Kabuli_Chr06 | 44709425                | GG                              | AA                 | AA               | STOP_GAINED                   | 101508065          | uncharacterized LOC101508065 |
| SNP_44187_A_44709811 | NC_021165.1    | Ca_Kabuli_Chr06 | 44709811                | AA                              | CC                 | CC               | NON_SYNONYMOUS_CODING         | 101508065          | uncharacterized LOC101508065 |
| SNP_44188_A_44709823 | NC_021165.1    | Ca_Kabuli_Chr06 | 44709823                | TT                              | CC                 | CC               | NON_SYNONYMOUS_CODING         | 101508065          | uncharacterized LOC101508065 |
| SNP_44189_A_44713012 | NC_021165.1    | Ca_Kabuli_Chr06 | 44713012                | TT                              | CC                 | CC               | URR                           | 101508065          | uncharacterized LOC101508065 |
| SNP_44190_A_44724314 | NC_021165.1    | Ca_Kabuli_Chr06 | 44724314                | AA                              | GG                 | GG               | INTERGENIC                    |                    |                              |
| SNP_44191_A_44726760 | NC_021165.1    | Ca_Kabuli_Chr06 | 44726760                | CC                              | GG                 | GG               | INTERGENIC                    |                    |                              |
| SNP_44192_A_44727178 | NC_021165.1    | Ca_Kabuli_Chr06 | 44727178                | AA                              | GG                 | GG               | INTERGENIC                    |                    |                              |
| SNP_44193_A_44727471 | NC_021165.1    | Ca_Kabuli_Chr06 | 44727471                | AA                              | CC                 | CC               | INTERGENIC                    |                    |                              |
| SNP_44194_A_44737973 | NC_021165.1    | Ca_Kabuli_Chr06 | 44737973                | CC                              | TT                 | TT               | INTERGENIC                    |                    |                              |
| SNP_44195_A_44738091 | NC_021165.1    | Ca_Kabuli_Chr06 | 44738091                | AA                              | GG                 | GG               | INTERGENIC                    |                    |                              |

| SNPs IDs             | Chromosome IDs | Chromosomes     | Physical positions (bp) | CDC Frontier genome (Reference genome) | (Pusa 1103 & HPNB) | (ILWC 46 & LPNB) | Sequence Components of genome | Gene accession IDs | Putative functions |
|----------------------|----------------|-----------------|-------------------------|----------------------------------------|--------------------|------------------|-------------------------------|--------------------|--------------------|
| SNP_44196_A_44738422 | NC_021165.1    | Ca_Kabuli_Chr06 | 44738422                | TT                                     | CC                 | CC               | INTERGENIC                    |                    |                    |
| SNP_44197_A_44758440 | NC_021165.1    | Ca_Kabuli_Chr06 | 44758440                | AA                                     | GG                 | GG               | INTERGENIC                    |                    |                    |
| SNP_44198_A_44776401 | NC_021165.1    | Ca_Kabuli_Chr06 | 44776401                | GG                                     | AA                 | AA               | INTERGENIC                    |                    |                    |
| SNP_44199_A_44776760 | NC_021165.1    | Ca_Kabuli_Chr06 | 44776760                | AA                                     | CC                 | CC               | INTERGENIC                    |                    |                    |
| SNP_44200_A_44820616 | NC_021165.1    | Ca_Kabuli_Chr06 | 44820616                | TT                                     | CC                 | CC               | INTERGENIC                    |                    |                    |
| SNP_44201_A_44888005 | NC_021165.1    | Ca_Kabuli_Chr06 | 44888005                | GG                                     | TT                 | TT               | INTERGENIC                    |                    |                    |
| SNP_44202_A_44950524 | NC_021165.1    | Ca_Kabuli_Chr06 | 44950524                | AA                                     | CC                 | CC               | INTERGENIC                    |                    |                    |
| SNP_44203_A_44953637 | NC_021165.1    | Ca_Kabuli_Chr06 | 44953637                | TT                                     | CC                 | CC               | INTERGENIC                    |                    |                    |
| SNP_44204_A_44954110 | NC_021165.1    | Ca_Kabuli_Chr06 | 44954110                | AA                                     | CC                 | CC               | DRR                           | 101511260          | Unknown function   |
| SNP_44205_A_44954224 | NC_021165.1    | Ca_Kabuli_Chr06 | 44954224                | GG                                     | AA                 | AA               | DRR                           | 101511260          | Unknown function   |
| SNP_44206_A_44954265 | NC_021165.1    | Ca_Kabuli_Chr06 | 44954265                | GG                                     | AA                 | AA               | DRR                           | 101511260          | Unknown function   |
| SNP_44207_A_44954270 | NC_021165.1    | Ca_Kabuli_Chr06 | 44954270                | TT                                     | CC                 | CC               | DRR                           | 101511260          | Unknown function   |
| SNP_44208_A_44954273 | NC_021165.1    | Ca_Kabuli_Chr06 | 44954273                | CC                                     | TT                 | TT               | DRR                           | 101511260          | Unknown function   |
| SNP_44209_A_44954276 | NC_021165.1    | Ca_Kabuli_Chr06 | 44954276                | GG                                     | AA                 | AA               | DRR                           | 101511260          | Unknown function   |
| SNP_44210_A_44954615 | NC_021165.1    | Ca_Kabuli_Chr06 | 44954615                | GG                                     | AA                 | AA               | DRR                           | 101511260          | Unknown function   |
| SNP_44211_A_44956319 | NC_021165.1    | Ca_Kabuli_Chr06 | 44956319                | TT                                     | CC                 | CC               | INTRON                        | 101511260          | Unknown function   |
| SNP_44212_A_44960315 | NC_021165.1    | Ca_Kabuli_Chr06 | 44960315                | AA                                     | GG                 | GG               | INTERGENIC                    |                    |                    |
| SNP_44213_A_44960372 | NC_021165.1    | Ca_Kabuli_Chr06 | 44960372                | AA                                     | TT                 | TT               | INTERGENIC                    |                    |                    |
| SNP_44214_A_44960537 | NC_021165.1    | Ca_Kabuli_Chr06 | 44960537                | AA                                     | GG                 | GG               | INTERGENIC                    |                    |                    |
| SNP_44215_A_44960546 | NC_021165.1    | Ca_Kabuli_Chr06 | 44960546                | TT                                     | AA                 | AA               | INTERGENIC                    |                    |                    |
| SNP_44216_A_44960554 | NC_021165.1    | Ca_Kabuli_Chr06 | 44960554                | GG                                     | AA                 | AA               | INTERGENIC                    |                    |                    |
| SNP_44217_A_44960677 | NC_021165.1    | Ca_Kabuli_Chr06 | 44960677                | GG                                     | AA                 | AA               | INTERGENIC                    |                    |                    |

| SNPs IDs             | Chromosome IDs | Chromosomes     | Physical positions (bp) | CDC Frontier (Reference genome) | (Pusa 1103 & HPNB) | (ILWC 46 & LPNB) | Sequence Components of genome | Gene accession IDs | Putative functions                      |
|----------------------|----------------|-----------------|-------------------------|---------------------------------|--------------------|------------------|-------------------------------|--------------------|-----------------------------------------|
| SNP_44218_A_44960686 | NC_021165.1    | Ca_Kabuli_Chr06 | 44960686                | GG                              | AA                 | AA               | INTERGENIC                    |                    |                                         |
| SNP_44219_A_44960692 | NC_021165.1    | Ca_Kabuli_Chr06 | 44960692                | GG                              | AA                 | AA               | INTERGENIC                    |                    |                                         |
| SNP_44220_A_44960704 | NC_021165.1    | Ca_Kabuli_Chr06 | 44960704                | CC                              | TT                 | TT               | INTERGENIC                    |                    |                                         |
| SNP_44221_A_44977012 | NC_021165.1    | Ca_Kabuli_Chr06 | 44977012                | TT                              | CC                 | CC               | INTERGENIC                    |                    |                                         |
| SNP_44222_A_44996613 | NC_021165.1    | Ca_Kabuli_Chr06 | 44996613                | CC                              | TT                 | TT               | INTERGENIC                    |                    |                                         |
| SNP_44223_A_44996739 | NC_021165.1    | Ca_Kabuli_Chr06 | 44996739                | GG                              | AA                 | AA               | INTERGENIC                    |                    |                                         |
| SNP_44225_A_45018832 | NC_021165.1    | Ca_Kabuli_Chr06 | 45018832                | CC                              | AA                 | AA               | INTERGENIC                    |                    |                                         |
| SNP_44226_A_45064580 | NC_021165.1    | Ca_Kabuli_Chr06 | 45064580                | GG                              | AA                 | AA               | DRR                           | 101513201          | uncharacterized LOC101513201            |
| SNP_44227_A_45067623 | NC_021165.1    | Ca_Kabuli_Chr06 | 45067623                | TT                              | CC                 | CC               | INTERGENIC                    |                    |                                         |
| SNP_44228_A_45135131 | NC_021165.1    | Ca_Kabuli_Chr06 | 45135131                | AA                              | GG                 | GG               | INTERGENIC                    |                    |                                         |
| SNP_44229_A_45135153 | NC_021165.1    | Ca_Kabuli_Chr06 | 45135153                | GG                              | TT                 | TT               | INTERGENIC                    |                    |                                         |
| SNP_44230_A_45144047 | NC_021165.1    | Ca_Kabuli_Chr06 | 45144047                | TT                              | CC                 | CC               | URR                           | 101410586          | transfer RNA asparagine (anticodon GUU) |
| SNP_44231_A_45164348 | NC_021165.1    | Ca_Kabuli_Chr06 | 45164348                | AA                              | CC                 | CC               | INTERGENIC                    |                    |                                         |
| SNP_44232_A_45164418 | NC_021165.1    | Ca_Kabuli_Chr06 | 45164418                | AA                              | CC                 | CC               | INTERGENIC                    |                    |                                         |
| SNP_44233_A_45164684 | NC_021165.1    | Ca_Kabuli_Chr06 | 45164684                | CC                              | TT                 | TT               | INTERGENIC                    |                    |                                         |
| SNP_44234_A_45200883 | NC_021165.1    | Ca_Kabuli_Chr06 | 45200883                | AA                              | CC                 | CC               | DRR                           | 101514500          | uncharacterized LOC101514500            |
| SNP_44235_A_45274614 | NC_021165.1    | Ca_Kabuli_Chr06 | 45274614                | CC                              | TT                 | TT               | INTERGENIC                    |                    |                                         |
| SNP_44236_A_45274623 | NC_021165.1    | Ca_Kabuli_Chr06 | 45274623                | TT                              | CC                 | CC               | INTERGENIC                    |                    |                                         |
| SNP_44237_A_45274641 | NC_021165.1    | Ca_Kabuli_Chr06 | 45274641                | AA                              | TT                 | TT               | INTERGENIC                    |                    |                                         |
| SNP_44238_A_45274661 | NC_021165.1    | Ca_Kabuli_Chr06 | 45274661                | TT                              | AA                 | AA               | INTERGENIC                    |                    |                                         |
| SNP_44239_A_45274669 | NC_021165.1    | Ca_Kabuli_Chr06 | 45274669                | CC                              | AA                 | AA               | INTERGENIC                    |                    |                                         |
| SNP_44240_A_45274704 | NC_021165.1    | Ca_Kabuli_Chr06 | 45274704                | AA                              | GG                 | GG               | INTERGENIC                    |                    |                                         |

| SNPs IDs             | Chromosome IDs | Chromosomes     | Physical positions (bp) | CDC Frontier genome (Reference genome) | (Pusa 1103 & HPNB) | (ILWC 46 & LPNB) | Sequence genome | Components of | Gene accession IDs           | Putative functions |
|----------------------|----------------|-----------------|-------------------------|----------------------------------------|--------------------|------------------|-----------------|---------------|------------------------------|--------------------|
| SNP_44241_A_45274710 | NC_021165.1    | Ca_Kabuli_Chr06 | 45274710                | TT                                     | GG                 | GG               | INTERGENIC      |               |                              |                    |
| SNP_44242_A_45274842 | NC_021165.1    | Ca_Kabuli_Chr06 | 45274842                | AA                                     | GG                 | GG               | INTERGENIC      |               |                              |                    |
| SNP_44243_A_45274884 | NC_021165.1    | Ca_Kabuli_Chr06 | 45274884                | CC                                     | TT                 | TT               | INTERGENIC      |               |                              |                    |
| SNP_44244_A_45274894 | NC_021165.1    | Ca_Kabuli_Chr06 | 45274894                | AA                                     | GG                 | GG               | INTERGENIC      |               |                              |                    |
| SNP_44245_A_45274902 | NC_021165.1    | Ca_Kabuli_Chr06 | 45274902                | TT                                     | CC                 | CC               | INTERGENIC      |               |                              |                    |
| SNP_44246_A_45274932 | NC_021165.1    | Ca_Kabuli_Chr06 | 45274932                | TT                                     | AA                 | AA               | INTERGENIC      |               |                              |                    |
| SNP_44247_A_45274935 | NC_021165.1    | Ca_Kabuli_Chr06 | 45274935                | TT                                     | CC                 | CC               | INTERGENIC      |               |                              |                    |
| SNP_44248_A_45274947 | NC_021165.1    | Ca_Kabuli_Chr06 | 45274947                | GG                                     | AA                 | AA               | INTERGENIC      |               |                              |                    |
| SNP_44249_A_45275303 | NC_021165.1    | Ca_Kabuli_Chr06 | 45275303                | TT                                     | CC                 | CC               | INTERGENIC      |               |                              |                    |
| SNP_44250_A_45277882 | NC_021165.1    | Ca_Kabuli_Chr06 | 45277882                | AA                                     | GG                 | GG               | INTERGENIC      |               |                              |                    |
| SNP_44251_A_45277885 | NC_021165.1    | Ca_Kabuli_Chr06 | 45277885                | TT                                     | AA                 | AA               | INTERGENIC      |               |                              |                    |
| SNP_44252_A_45277888 | NC_021165.1    | Ca_Kabuli_Chr06 | 45277888                | CC                                     | TT                 | TT               | INTERGENIC      |               |                              |                    |
| SNP_44253_A_45277908 | NC_021165.1    | Ca_Kabuli_Chr06 | 45277908                | TT                                     | GG                 | GG               | INTERGENIC      |               |                              |                    |
| SNP_44254_A_45277909 | NC_021165.1    | Ca_Kabuli_Chr06 | 45277909                | TT                                     | GG                 | GG               | INTERGENIC      |               |                              |                    |
| SNP_44255_A_45289616 | NC_021165.1    | Ca_Kabuli_Chr06 | 45289616                | CC                                     | TT                 | TT               | INTERGENIC      |               |                              |                    |
| SNP_44256_A_45290210 | NC_021165.1    | Ca_Kabuli_Chr06 | 45290210                | AA                                     | GG                 | GG               | INTERGENIC      |               |                              |                    |
| SNP_44257_A_45290265 | NC_021165.1    | Ca_Kabuli_Chr06 | 45290265                | AA                                     | GG                 | GG               | INTERGENIC      |               |                              |                    |
| SNP_44258_A_45290473 | NC_021165.1    | Ca_Kabuli_Chr06 | 45290473                | AA                                     | TT                 | TT               | INTERGENIC      |               |                              |                    |
| SNP_44259_A_45290475 | NC_021165.1    | Ca_Kabuli_Chr06 | 45290475                | AA                                     | TT                 | TT               | INTERGENIC      |               |                              |                    |
| SNP_44260_A_45304966 | NC_021165.1    | Ca_Kabuli_Chr06 | 45304966                | AA                                     | CC                 | CC               | URR             | 101514820     | uncharacterized LOC101514820 |                    |
| SNP_44262_A_45329327 | NC_021165.1    | Ca_Kabuli_Chr06 | 45329327                | CC                                     | TT                 | TT               | INTERGENIC      |               |                              |                    |
| SNP_44263_A_45329473 | NC_021165.1    | Ca_Kabuli_Chr06 | 45329473                | GG                                     | TT                 | TT               | INTERGENIC      |               |                              |                    |

| SNPs IDs             | Chromosome IDs | Chromosomes     | Physical positions (bp) | CDC Frontier genome (Reference genome) | (Pusa 1103 & HPNB) | (ILWC 46 & LPNB) | Sequence genome | Components of | Gene accession IDs           | Putative functions |
|----------------------|----------------|-----------------|-------------------------|----------------------------------------|--------------------|------------------|-----------------|---------------|------------------------------|--------------------|
| SNP_44264_A_45329567 | NC_021165.1    | Ca_Kabuli_Chr06 | 45329567                | TT                                     | CC                 | CC               | INTERGENIC      |               |                              |                    |
| SNP_44265_A_45365754 | NC_021165.1    | Ca_Kabuli_Chr06 | 45365754                | GG                                     | AA                 | AA               | INTERGENIC      |               |                              |                    |
| SNP_44266_A_45375376 | NC_021165.1    | Ca_Kabuli_Chr06 | 45375376                | TT                                     | AA                 | AA               | INTERGENIC      |               |                              |                    |
| SNP_44267_A_45392324 | NC_021165.1    | Ca_Kabuli_Chr06 | 45392324                | CC                                     | AA                 | AA               | INTERGENIC      |               |                              |                    |
| SNP_44268_A_45392691 | NC_021165.1    | Ca_Kabuli_Chr06 | 45392691                | AA                                     | GG                 | GG               | INTERGENIC      |               |                              |                    |
| SNP_44269_A_45405853 | NC_021165.1    | Ca_Kabuli_Chr06 | 45405853                | AA                                     | TT                 | TT               | INTERGENIC      |               |                              |                    |
| SNP_44270_A_45405969 | NC_021165.1    | Ca_Kabuli_Chr06 | 45405969                | AA                                     | TT                 | TT               | INTERGENIC      |               |                              |                    |
| SNP_44271_A_45405995 | NC_021165.1    | Ca_Kabuli_Chr06 | 45405995                | TT                                     | GG                 | GG               | INTERGENIC      |               |                              |                    |
| SNP_44272_A_45469568 | NC_021165.1    | Ca_Kabuli_Chr06 | 45469568                | GG                                     | CC                 | CC               | INTERGENIC      |               |                              |                    |
| SNP_44273_A_45469625 | NC_021165.1    | Ca_Kabuli_Chr06 | 45469625                | TT                                     | CC                 | CC               | INTERGENIC      |               |                              |                    |
| SNP_44274_A_45469954 | NC_021165.1    | Ca_Kabuli_Chr06 | 45469954                | TT                                     | CC                 | CC               | INTERGENIC      |               |                              |                    |
| SNP_44276_A_45473358 | NC_021165.1    | Ca_Kabuli_Chr06 | 45473358                | CC                                     | TT                 | TT               | INTERGENIC      |               |                              |                    |
| SNP_44277_A_45473384 | NC_021165.1    | Ca_Kabuli_Chr06 | 45473384                | AA                                     | GG                 | GG               | INTERGENIC      |               |                              |                    |
| SNP_44278_A_45473407 | NC_021165.1    | Ca_Kabuli_Chr06 | 45473407                | TT                                     | CC                 | CC               | INTERGENIC      |               |                              |                    |
| SNP_44279_A_45473729 | NC_021165.1    | Ca_Kabuli_Chr06 | 45473729                | CC                                     | TT                 | TT               | INTERGENIC      |               |                              |                    |
| SNP_44280_A_45473848 | NC_021165.1    | Ca_Kabuli_Chr06 | 45473848                | AA                                     | GG                 | GG               | INTERGENIC      |               |                              |                    |
| SNP_44282_A_45502335 | NC_021165.1    | Ca_Kabuli_Chr06 | 45502335                | TT                                     | CC                 | CC               | INTRON          | 101497776     | uncharacterized LOC101497776 |                    |
| SNP_44283_A_45564482 | NC_021165.1    | Ca_Kabuli_Chr06 | 45564482                | GG                                     | TT                 | TT               | INTERGENIC      |               |                              |                    |
| SNP_44284_A_45567817 | NC_021165.1    | Ca_Kabuli_Chr06 | 45567817                | TT                                     | GG                 | GG               | INTERGENIC      |               |                              |                    |
| SNP_44285_A_45585452 | NC_021165.1    | Ca_Kabuli_Chr06 | 45585452                | AA                                     | TT                 | TT               | INTERGENIC      |               |                              |                    |
| SNP_44286_A_45585577 | NC_021165.1    | Ca_Kabuli_Chr06 | 45585577                | CC                                     | TT                 | TT               | INTERGENIC      |               |                              |                    |
| SNP_44287_A_45585668 | NC_021165.1    | Ca_Kabuli_Chr06 | 45585668                | TT                                     | CC                 | CC               | INTERGENIC      |               |                              |                    |

| SNPs IDs             | Chromosome IDs | Chromosomes     | Physical positions (bp) | CDC Frontier genome (Reference genome) | (Pusa 1103 & HPNB) | (ILWC 46 & LPNB) | Sequence Components of genome | Gene accession IDs | Putative functions         |
|----------------------|----------------|-----------------|-------------------------|----------------------------------------|--------------------|------------------|-------------------------------|--------------------|----------------------------|
| SNP_44288_A_45585669 | NC_021165.1    | Ca_Kabuli_Chr06 | 45585669                | AA                                     | GG                 | GG               | INTERGENIC                    |                    |                            |
| SNP_44289_A_45598335 | NC_021165.1    | Ca_Kabuli_Chr06 | 45598335                | AA                                     | GG                 | GG               | INTERGENIC                    |                    |                            |
| SNP_44290_A_45642861 | NC_021165.1    | Ca_Kabuli_Chr06 | 45642861                | AA                                     | GG                 | GG               | INTERGENIC                    |                    |                            |
| SNP_44291_A_45642876 | NC_021165.1    | Ca_Kabuli_Chr06 | 45642876                | TT                                     | GG                 | GG               | INTERGENIC                    |                    |                            |
| SNP_44292_A_45643318 | NC_021165.1    | Ca_Kabuli_Chr06 | 45643318                | CC                                     | TT                 | TT               | INTERGENIC                    |                    |                            |
| SNP_44293_A_45643364 | NC_021165.1    | Ca_Kabuli_Chr06 | 45643364                | AA                                     | GG                 | GG               | INTERGENIC                    |                    |                            |
| SNP_44294_A_45851028 | NC_021165.1    | Ca_Kabuli_Chr06 | 45851028                | TT                                     | AA                 | AA               | INTERGENIC                    |                    |                            |
| SNP_44295_A_45851383 | NC_021165.1    | Ca_Kabuli_Chr06 | 45851383                | TT                                     | CC                 | CC               | INTERGENIC                    |                    |                            |
| SNP_44296_A_45851857 | NC_021165.1    | Ca_Kabuli_Chr06 | 45851857                | TT                                     | CC                 | CC               | INTERGENIC                    |                    |                            |
| SNP_44297_A_45872643 | NC_021165.1    | Ca_Kabuli_Chr06 | 45872643                | AA                                     | GG                 | GG               | INTERGENIC                    |                    |                            |
| SNP_44298_A_45872645 | NC_021165.1    | Ca_Kabuli_Chr06 | 45872645                | GG                                     | AA                 | AA               | INTERGENIC                    |                    |                            |
| SNP_44299_A_45896358 | NC_021165.1    | Ca_Kabuli_Chr06 | 45896358                | GG                                     | CC                 | CC               | INTERGENIC                    |                    |                            |
| SNP_44300_A_45896360 | NC_021165.1    | Ca_Kabuli_Chr06 | 45896360                | AA                                     | CC                 | CC               | INTERGENIC                    |                    |                            |
| SNP_44301_A_45896661 | NC_021165.1    | Ca_Kabuli_Chr06 | 45896661                | AA                                     | GG                 | GG               | INTERGENIC                    |                    |                            |
| SNP_44302_A_45912971 | NC_021165.1    | Ca_Kabuli_Chr06 | 45912971                | AA                                     | GG                 | GG               | NON_SYNONYMOUS_CODING         | 101504626          | cytochrome P450 71D9-like  |
| SNP_44304_A_45924974 | NC_021165.1    | Ca_Kabuli_Chr06 | 45924974                | AA                                     | GG                 | GG               | INTERGENIC                    |                    |                            |
| SNP_44305_A_45925368 | NC_021165.1    | Ca_Kabuli_Chr06 | 45925368                | TT                                     | CC                 | CC               | INTERGENIC                    |                    |                            |
| SNP_44306_A_45960452 | NC_021165.1    | Ca_Kabuli_Chr06 | 45960452                | TT                                     | AA                 | AA               | INTERGENIC                    |                    |                            |
| SNP_44307_A_45960454 | NC_021165.1    | Ca_Kabuli_Chr06 | 45960454                | TT                                     | CC                 | CC               | INTERGENIC                    |                    |                            |
| SNP_44308_A_45999374 | NC_021165.1    | Ca_Kabuli_Chr06 | 45999374                | TT                                     | CC                 | CC               | INTRON                        | 101505255          | cytochrome P450 71D11-like |
| SNP_44309_A_45999631 | NC_021165.1    | Ca_Kabuli_Chr06 | 45999631                | AA                                     | GG                 | GG               | INTRON                        | 101505255          | cytochrome P450 71D11-like |
| SNP_44310_A_45999636 | NC_021165.1    | Ca_Kabuli_Chr06 | 45999636                | AA                                     | GG                 | GG               | INTRON                        | 101505255          | cytochrome P450 71D11-like |



| SNPs IDs             | Chromosome IDs | Chromosomes     | Physical positions (bp) | CDC Frontier genome (Reference genome) | (Pusa 1103 & HPNB) | (ILWC 46 & LPNB) | Sequence Components of genome | Gene accession IDs | Putative functions                                       |
|----------------------|----------------|-----------------|-------------------------|----------------------------------------|--------------------|------------------|-------------------------------|--------------------|----------------------------------------------------------|
| SNP_44311_A_45999690 | NC_021165.1    | Ca_Kabuli_Chr06 | 45999690                | AA                                     | CC                 | CC               | INTRON                        | 101505255          | cytochrome P450 71D11-like                               |
| SNP_44312_A_46006543 | NC_021165.1    | Ca_Kabuli_Chr06 | 46006543                | CC                                     | TT                 | TT               | INTERGENIC                    |                    |                                                          |
| SNP_44313_A_46006545 | NC_021165.1    | Ca_Kabuli_Chr06 | 46006545                | TT                                     | AA                 | AA               | INTERGENIC                    |                    |                                                          |
| SNP_44314_A_46009450 | NC_021165.1    | Ca_Kabuli_Chr06 | 46009450                | AA                                     | TT                 | TT               | INTRON                        | 101494400          | serine/threonine-protein phosphatase 7 long form homolog |
| SNP_44315_A_46009481 | NC_021165.1    | Ca_Kabuli_Chr06 | 46009481                | AA                                     | GG                 | GG               | INTRON                        | 101494400          | serine/threonine-protein phosphatase 7 long form homolog |
| SNP_44316_A_46009493 | NC_021165.1    | Ca_Kabuli_Chr06 | 46009493                | AA                                     | TT                 | TT               | INTRON                        | 101494400          | serine/threonine-protein phosphatase 7 long form homolog |
| SNP_44317_A_46029211 | NC_021165.1    | Ca_Kabuli_Chr06 | 46029211                | AA                                     | CC                 | CC               | INTERGENIC                    |                    |                                                          |
| SNP_44319_A_46031182 | NC_021165.1    | Ca_Kabuli_Chr06 | 46031182                | GG                                     | AA                 | AA               | INTERGENIC                    |                    |                                                          |
| SNP_44321_A_46035724 | NC_021165.1    | Ca_Kabuli_Chr06 | 46035724                | AA                                     | GG                 | GG               | INTERGENIC                    |                    |                                                          |
| SNP_44322_A_46036150 | NC_021165.1    | Ca_Kabuli_Chr06 | 46036150                | GG                                     | AA                 | AA               | INTERGENIC                    |                    |                                                          |
| SNP_44323_A_46036175 | NC_021165.1    | Ca_Kabuli_Chr06 | 46036175                | CC                                     | TT                 | TT               | INTERGENIC                    |                    |                                                          |
| SNP_44324_A_46036212 | NC_021165.1    | Ca_Kabuli_Chr06 | 46036212                | GG                                     | AA                 | AA               | INTERGENIC                    |                    |                                                          |
| SNP_44325_A_46112923 | NC_021165.1    | Ca_Kabuli_Chr06 | 46112923                | GG                                     | AA                 | AA               | INTERGENIC                    |                    |                                                          |
| SNP_44326_A_46116863 | NC_021165.1    | Ca_Kabuli_Chr06 | 46116863                | TT                                     | CC                 | CC               | INTERGENIC                    |                    |                                                          |
| SNP_44327_A_46116957 | NC_021165.1    | Ca_Kabuli_Chr06 | 46116957                | AA                                     | GG                 | GG               | INTERGENIC                    |                    |                                                          |
| SNP_44328_A_46118987 | NC_021165.1    | Ca_Kabuli_Chr06 | 46118987                | TT                                     | CC                 | CC               | INTERGENIC                    |                    |                                                          |
| SNP_44330_A_46152445 | NC_021165.1    | Ca_Kabuli_Chr06 | 46152445                | AA                                     | TT                 | TT               | DOWNSTREAM                    | LARS               | Unknown function                                         |
| SNP_44331_A_46163499 | NC_021165.1    | Ca_Kabuli_Chr06 | 46163499                | AA                                     | CC                 | CC               | URR                           | 101506554          | leucine-tRNA ligase, cytoplasmic                         |
| SNP_44332_A_46163512 | NC_021165.1    | Ca_Kabuli_Chr06 | 46163512                | GG                                     | CC                 | CC               | URR                           | 101506554          | leucine-tRNA ligase, cytoplasmic                         |
| SNP_44334_A_46164533 | NC_021165.1    | Ca_Kabuli_Chr06 | 46164533                | GG                                     | TT                 | TT               | INTERGENIC                    |                    |                                                          |
| SNP_44335_A_46164743 | NC_021165.1    | Ca_Kabuli_Chr06 | 46164743                | TT                                     | CC                 | CC               | INTERGENIC                    |                    |                                                          |
| SNP_44336_A_46164755 | NC_021165.1    | Ca_Kabuli_Chr06 | 46164755                | GG                                     | TT                 | TT               | INTERGENIC                    |                    |                                                          |

| SNPs IDs             | Chromosome IDs | Chromosomes     | Physical positions (bp) | CDC Frontier genome (Reference genome) | (Pusa 1103 & HPNB) | (ILWC 46 & LPNB) | Sequence genome | Components of | Gene accession IDs | Putative functions |
|----------------------|----------------|-----------------|-------------------------|----------------------------------------|--------------------|------------------|-----------------|---------------|--------------------|--------------------|
| SNP_44337_A_46164775 | NC_021165.1    | Ca_Kabuli_Chr06 | 46164775                | AA                                     | CC                 | CC               | INTERGENIC      |               |                    |                    |
| SNP_44338_A_46164790 | NC_021165.1    | Ca_Kabuli_Chr06 | 46164790                | GG                                     | CC                 | CC               | INTERGENIC      |               |                    |                    |
| SNP_44339_A_46180724 | NC_021165.1    | Ca_Kabuli_Chr06 | 46180724                | TT                                     | CC                 | CC               | INTERGENIC      |               |                    |                    |
| SNP_44340_A_46180738 | NC_021165.1    | Ca_Kabuli_Chr06 | 46180738                | TT                                     | CC                 | CC               | INTERGENIC      |               |                    |                    |
| SNP_44341_A_46180766 | NC_021165.1    | Ca_Kabuli_Chr06 | 46180766                | TT                                     | CC                 | CC               | INTERGENIC      |               |                    |                    |
| SNP_44342_A_46181062 | NC_021165.1    | Ca_Kabuli_Chr06 | 46181062                | CC                                     | TT                 | TT               | INTERGENIC      |               |                    |                    |
| SNP_44343_A_46181102 | NC_021165.1    | Ca_Kabuli_Chr06 | 46181102                | GG                                     | TT                 | TT               | INTERGENIC      |               |                    |                    |
| SNP_44344_A_46186996 | NC_021165.1    | Ca_Kabuli_Chr06 | 46186996                | AA                                     | GG                 | GG               | INTERGENIC      |               |                    |                    |
| SNP_44345_A_46187032 | NC_021165.1    | Ca_Kabuli_Chr06 | 46187032                | AA                                     | GG                 | GG               | INTERGENIC      |               |                    |                    |
| SNP_44346_A_46187057 | NC_021165.1    | Ca_Kabuli_Chr06 | 46187057                | GG                                     | CC                 | CC               | INTERGENIC      |               |                    |                    |
| SNP_44348_A_46203199 | NC_021165.1    | Ca_Kabuli_Chr06 | 46203199                | AA                                     | GG                 | GG               | INTERGENIC      |               |                    |                    |
| SNP_44349_A_46210371 | NC_021165.1    | Ca_Kabuli_Chr06 | 46210371                | AA                                     | GG                 | GG               | INTERGENIC      |               |                    |                    |
| SNP_44350_A_46346520 | NC_021165.1    | Ca_Kabuli_Chr06 | 46346520                | GG                                     | AA                 | AA               | INTERGENIC      |               |                    |                    |
| SNP_44351_A_46346543 | NC_021165.1    | Ca_Kabuli_Chr06 | 46346543                | GG                                     | AA                 | AA               | INTERGENIC      |               |                    |                    |
| SNP_44352_A_46346636 | NC_021165.1    | Ca_Kabuli_Chr06 | 46346636                | AA                                     | GG                 | GG               | INTERGENIC      |               |                    |                    |
| SNP_44353_A_46346689 | NC_021165.1    | Ca_Kabuli_Chr06 | 46346689                | TT                                     | CC                 | CC               | INTERGENIC      |               |                    |                    |
| SNP_44354_A_46346854 | NC_021165.1    | Ca_Kabuli_Chr06 | 46346854                | TT                                     | CC                 | CC               | INTERGENIC      |               |                    |                    |
| SNP_44355_A_46351999 | NC_021165.1    | Ca_Kabuli_Chr06 | 46351999                | GG                                     | AA                 | AA               | INTERGENIC      |               |                    |                    |
| SNP_44356_A_46352003 | NC_021165.1    | Ca_Kabuli_Chr06 | 46352003                | AA                                     | GG                 | GG               | INTERGENIC      |               |                    |                    |
| SNP_44357_A_46354332 | NC_021165.1    | Ca_Kabuli_Chr06 | 46354332                | AA                                     | GG                 | GG               | INTERGENIC      |               |                    |                    |
| SNP_44358_A_46354397 | NC_021165.1    | Ca_Kabuli_Chr06 | 46354397                | AA                                     | GG                 | GG               | INTERGENIC      |               |                    |                    |
| SNP_44359_A_46354673 | NC_021165.1    | Ca_Kabuli_Chr06 | 46354673                | GG                                     | AA                 | AA               | INTERGENIC      |               |                    |                    |

| SNPs IDs             | Chromosome IDs | Chromosomes     | Physical positions (bp) | CDC Frontier genome (Reference genome) | (Pusa 1103 & HPNB) | (ILWC 46 & LPNB) | Sequence Components of genome | Gene accession IDs | Putative functions           |
|----------------------|----------------|-----------------|-------------------------|----------------------------------------|--------------------|------------------|-------------------------------|--------------------|------------------------------|
| SNP_44360_A_46354700 | NC_021165.1    | Ca_Kabuli_Chr06 | 46354700                | AA                                     | GG                 | GG               | INTERGENIC                    |                    |                              |
| SNP_44361_A_46354886 | NC_021165.1    | Ca_Kabuli_Chr06 | 46354886                | TT                                     | AA                 | AA               | INTERGENIC                    |                    |                              |
| SNP_44362_A_46354906 | NC_021165.1    | Ca_Kabuli_Chr06 | 46354906                | CC                                     | TT                 | TT               | INTERGENIC                    |                    |                              |
| SNP_44363_A_46354937 | NC_021165.1    | Ca_Kabuli_Chr06 | 46354937                | TT                                     | AA                 | AA               | INTERGENIC                    |                    |                              |
| SNP_44364_A_46365987 | NC_021165.1    | Ca_Kabuli_Chr06 | 46365987                | TT                                     | CC                 | CC               | DRR                           | 101508485          | uncharacterized LOC101508485 |
| SNP_44365_A_46366337 | NC_021165.1    | Ca_Kabuli_Chr06 | 46366337                | GG                                     | AA                 | AA               | DRR                           | 101508485          | uncharacterized LOC101508485 |
| SNP_44366_A_46368078 | NC_021165.1    | Ca_Kabuli_Chr06 | 46368078                | TT                                     | CC                 | CC               | NON_SYNONYMOUS_CODING         | 101508485          | uncharacterized LOC101508485 |
| SNP_44367_A_46368873 | NC_021165.1    | Ca_Kabuli_Chr06 | 46368873                | AA                                     | GG                 | GG               | NON_SYNONYMOUS_CODING         | 101508485          | uncharacterized LOC101508485 |
| SNP_44368_A_46368965 | NC_021165.1    | Ca_Kabuli_Chr06 | 46368965                | GG                                     | AA                 | AA               | SYNONYMOUS_CODING             | 101508485          | uncharacterized LOC101508485 |
| SNP_44369_A_46369159 | NC_021165.1    | Ca_Kabuli_Chr06 | 46369159                | GG                                     | CC                 | CC               | NON_SYNONYMOUS_CODING         | 101508485          | uncharacterized LOC101508485 |
| SNP_44370_A_46369221 | NC_021165.1    | Ca_Kabuli_Chr06 | 46369221                | AA                                     | CC                 | CC               | NON_SYNONYMOUS_CODING         | 101508485          | uncharacterized LOC101508485 |
| SNP_44371_A_46369314 | NC_021165.1    | Ca_Kabuli_Chr06 | 46369314                | TT                                     | CC                 | CC               | URR                           | 101508485          | uncharacterized LOC101508485 |
| SNP_44372_A_46369442 | NC_021165.1    | Ca_Kabuli_Chr06 | 46369442                | AA                                     | GG                 | GG               | URR                           | 101508485          | uncharacterized LOC101508485 |
| SNP_44373_A_46369509 | NC_021165.1    | Ca_Kabuli_Chr06 | 46369509                | AA                                     | GG                 | GG               | URR                           | 101508485          | uncharacterized LOC101508485 |
| SNP_44374_A_46369548 | NC_021165.1    | Ca_Kabuli_Chr06 | 46369548                | TT                                     | CC                 | CC               | URR                           | 101508485          | uncharacterized LOC101508485 |
| SNP_44375_A_46369584 | NC_021165.1    | Ca_Kabuli_Chr06 | 46369584                | AA                                     | CC                 | CC               | URR                           | 101508485          | uncharacterized LOC101508485 |
| SNP_44376_A_46369801 | NC_021165.1    | Ca_Kabuli_Chr06 | 46369801                | AA                                     | GG                 | GG               | URR                           | 101508485          | uncharacterized LOC101508485 |
| SNP_44377_A_46385492 | NC_021165.1    | Ca_Kabuli_Chr06 | 46385492                | CC                                     | AA                 | AA               | INTRON                        | 101508794          | uncharacterized LOC101508794 |
| SNP_44378_A_46385816 | NC_021165.1    | Ca_Kabuli_Chr06 | 46385816                | CC                                     | TT                 | TT               | INTRON                        | 101508794          | uncharacterized LOC101508794 |
| SNP_44379_A_46385918 | NC_021165.1    | Ca_Kabuli_Chr06 | 46385918                | AA                                     | TT                 | TT               | INTRON                        | 101508794          | uncharacterized LOC101508794 |
| SNP_44380_A_46385934 | NC_021165.1    | Ca_Kabuli_Chr06 | 46385934                | GG                                     | CC                 | CC               | INTRON                        | 101508794          | uncharacterized LOC101508794 |
| SNP_44382_A_46388400 | NC_021165.1    | Ca_Kabuli_Chr06 | 46388400                | TT                                     | AA                 | AA               | INTRON                        | 101508794          | uncharacterized LOC101508794 |

| SNPs IDs             | Chromosome IDs | Chromosomes     | Physical positions (bp) | CDC Frontier genome (Reference genome) | (Pusa 1103 & HPNB) | (ILWC 46 & LPNB) | Sequence Components of genome | Gene accession IDs | Putative functions           |
|----------------------|----------------|-----------------|-------------------------|----------------------------------------|--------------------|------------------|-------------------------------|--------------------|------------------------------|
| SNP_44383_A_46388446 | NC_021165.1    | Ca_Kabuli_Chr06 | 46388446                | AA                                     | TT                 | TT               | INTRON                        | 101508794          | uncharacterized LOC101508794 |
| SNP_44384_A_46388462 | NC_021165.1    | Ca_Kabuli_Chr06 | 46388462                | AA                                     | CC                 | CC               | INTRON                        | 101508794          | uncharacterized LOC101508794 |
| SNP_44385_A_46388464 | NC_021165.1    | Ca_Kabuli_Chr06 | 46388464                | GG                                     | AA                 | AA               | INTRON                        | 101508794          | uncharacterized LOC101508794 |
| SNP_44386_A_46390954 | NC_021165.1    | Ca_Kabuli_Chr06 | 46390954                | TT                                     | GG                 | GG               | INTRON                        | 101508794          | uncharacterized LOC101508794 |
| SNP_44387_A_46391031 | NC_021165.1    | Ca_Kabuli_Chr06 | 46391031                | TT                                     | AA                 | AA               | INTRON                        | 101508794          | uncharacterized LOC101508794 |
| SNP_44388_A_46391033 | NC_021165.1    | Ca_Kabuli_Chr06 | 46391033                | GG                                     | AA                 | AA               | INTRON                        | 101508794          | uncharacterized LOC101508794 |
| SNP_44389_A_46391073 | NC_021165.1    | Ca_Kabuli_Chr06 | 46391073                | AA                                     | CC                 | CC               | INTRON                        | 101508794          | uncharacterized LOC101508794 |
| SNP_44390_A_46391202 | NC_021165.1    | Ca_Kabuli_Chr06 | 46391202                | GG                                     | TT                 | TT               | INTRON                        | 101508794          | uncharacterized LOC101508794 |
| SNP_44391_A_46391222 | NC_021165.1    | Ca_Kabuli_Chr06 | 46391222                | CC                                     | TT                 | TT               | INTRON                        | 101508794          | uncharacterized LOC101508794 |
| SNP_44392_A_46391249 | NC_021165.1    | Ca_Kabuli_Chr06 | 46391249                | AA                                     | TT                 | TT               | INTRON                        | 101508794          | uncharacterized LOC101508794 |
| SNP_44393_A_46391259 | NC_021165.1    | Ca_Kabuli_Chr06 | 46391259                | TT                                     | AA                 | AA               | INTRON                        | 101508794          | uncharacterized LOC101508794 |
| SNP_44394_A_46391359 | NC_021165.1    | Ca_Kabuli_Chr06 | 46391359                | GG                                     | AA                 | AA               | NON_SYNONYMOUS_CODING         | 101508794          | uncharacterized LOC101508794 |
| SNP_44395_A_46391361 | NC_021165.1    | Ca_Kabuli_Chr06 | 46391361                | TT                                     | CC                 | CC               | SYNONYMOUS_CODING             | 101508794          | uncharacterized LOC101508794 |
| SNP_44396_A_46391429 | NC_021165.1    | Ca_Kabuli_Chr06 | 46391429                | AA                                     | GG                 | GG               | SYNONYMOUS_CODING             | 101508794          | uncharacterized LOC101508794 |
| SNP_44397_A_46391435 | NC_021165.1    | Ca_Kabuli_Chr06 | 46391435                | AA                                     | TT                 | TT               | NON_SYNONYMOUS_CODING         | 101508794          | uncharacterized LOC101508794 |
| SNP_44398_A_46391436 | NC_021165.1    | Ca_Kabuli_Chr06 | 46391436                | TT                                     | CC                 | CC               | SYNONYMOUS_CODING             | 101508794          | uncharacterized LOC101508794 |
| SNP_44399_A_46391483 | NC_021165.1    | Ca_Kabuli_Chr06 | 46391483                | TT                                     | CC                 | CC               | INTRON                        | 101508794          | uncharacterized LOC101508794 |
| SNP_44401_A_46391568 | NC_021165.1    | Ca_Kabuli_Chr06 | 46391568                | AA                                     | GG                 | GG               | INTRON                        | 101508794          | uncharacterized LOC101508794 |
| SNP_44402_A_46391573 | NC_021165.1    | Ca_Kabuli_Chr06 | 46391573                | TT                                     | CC                 | CC               | INTRON                        | 101508794          | uncharacterized LOC101508794 |
| SNP_44403_A_46391602 | NC_021165.1    | Ca_Kabuli_Chr06 | 46391602                | AA                                     | GG                 | GG               | INTRON                        | 101508794          | uncharacterized LOC101508794 |
| SNP_44404_A_46391638 | NC_021165.1    | Ca_Kabuli_Chr06 | 46391638                | TT                                     | CC                 | CC               | INTRON                        | 101508794          | uncharacterized LOC101508794 |
| SNP_44405_A_46391691 | NC_021165.1    | Ca_Kabuli_Chr06 | 46391691                | GG                                     | AA                 | AA               | INTRON                        | 101508794          | uncharacterized LOC101508794 |

| SNPs IDs             | Chromosome IDs | Chromosomes     | Physical positions (bp) | CDC Frontier (Reference genome) | (Pusa 1103 & HPNB) | (ILWC 46 & LPNB) | Sequence Components of genome | Gene accession IDs | Putative functions           |
|----------------------|----------------|-----------------|-------------------------|---------------------------------|--------------------|------------------|-------------------------------|--------------------|------------------------------|
| SNP_44406_A_46391720 | NC_021165.1    | Ca_Kabuli_Chr06 | 46391720                | TT                              | AA                 | AA               | INTRON                        | 101508794          | uncharacterized LOC101508794 |
| SNP_44407_A_46391852 | NC_021165.1    | Ca_Kabuli_Chr06 | 46391852                | TT                              | CC                 | CC               | SYNONYMOUS_CODING             | 101508794          | uncharacterized LOC101508794 |
| SNP_44408_A_46391868 | NC_021165.1    | Ca_Kabuli_Chr06 | 46391868                | TT                              | GG                 | GG               | NON_SYNONYMOUS_CODING         | 101508794          | uncharacterized LOC101508794 |
| SNP_44409_A_46399691 | NC_021165.1    | Ca_Kabuli_Chr06 | 46399691                | TT                              | CC                 | CC               | INTERGENIC                    |                    |                              |
| SNP_44410_A_46399701 | NC_021165.1    | Ca_Kabuli_Chr06 | 46399701                | TT                              | CC                 | CC               | INTERGENIC                    |                    |                              |
| SNP_44411_A_46399725 | NC_021165.1    | Ca_Kabuli_Chr06 | 46399725                | AA                              | GG                 | GG               | INTERGENIC                    |                    |                              |
| SNP_44412_A_46399871 | NC_021165.1    | Ca_Kabuli_Chr06 | 46399871                | AA                              | GG                 | GG               | INTERGENIC                    |                    |                              |
| SNP_44413_A_46399888 | NC_021165.1    | Ca_Kabuli_Chr06 | 46399888                | TT                              | CC                 | CC               | INTERGENIC                    |                    |                              |
| SNP_44414_A_46399925 | NC_021165.1    | Ca_Kabuli_Chr06 | 46399925                | CC                              | TT                 | TT               | INTERGENIC                    |                    |                              |
| SNP_44415_A_46399935 | NC_021165.1    | Ca_Kabuli_Chr06 | 46399935                | GG                              | AA                 | AA               | INTERGENIC                    |                    |                              |
| SNP_44416_A_46400146 | NC_021165.1    | Ca_Kabuli_Chr06 | 46400146                | AA                              | GG                 | GG               | INTERGENIC                    |                    |                              |
| SNP_44417_A_46411241 | NC_021165.1    | Ca_Kabuli_Chr06 | 46411241                | AA                              | GG                 | GG               | INTERGENIC                    |                    |                              |
| SNP_44418_A_46449768 | NC_021165.1    | Ca_Kabuli_Chr06 | 46449768                | CC                              | TT                 | TT               | INTERGENIC                    |                    |                              |
| SNP_44419_A_46449820 | NC_021165.1    | Ca_Kabuli_Chr06 | 46449820                | AA                              | GG                 | GG               | INTERGENIC                    |                    |                              |
| SNP_44420_A_46506768 | NC_021165.1    | Ca_Kabuli_Chr06 | 46506768                | TT                              | CC                 | CC               | INTERGENIC                    |                    |                              |
| SNP_44421_A_46506780 | NC_021165.1    | Ca_Kabuli_Chr06 | 46506780                | AA                              | GG                 | GG               | INTERGENIC                    |                    |                              |
| SNP_44422_A_46508774 | NC_021165.1    | Ca_Kabuli_Chr06 | 46508774                | CC                              | AA                 | AA               | INTERGENIC                    |                    |                              |
| SNP_44423_A_46509056 | NC_021165.1    | Ca_Kabuli_Chr06 | 46509056                | TT                              | CC                 | CC               | INTERGENIC                    |                    |                              |
| SNP_44424_A_46509358 | NC_021165.1    | Ca_Kabuli_Chr06 | 46509358                | GG                              | AA                 | AA               | INTERGENIC                    |                    |                              |
| SNP_44425_A_46509361 | NC_021165.1    | Ca_Kabuli_Chr06 | 46509361                | TT                              | CC                 | CC               | INTERGENIC                    |                    |                              |
| SNP_44426_A_46509362 | NC_021165.1    | Ca_Kabuli_Chr06 | 46509362                | CC                              | AA                 | AA               | INTERGENIC                    |                    |                              |
| SNP_44427_A_46509367 | NC_021165.1    | Ca_Kabuli_Chr06 | 46509367                | AA                              | CC                 | CC               | INTERGENIC                    |                    |                              |

| SNPs IDs             | Chromosome IDs | Chromosomes     | Physical positions (bp) | CDC Frontier genome (Reference genome) | (Pusa 1103 & HPNB) | (ILWC 46 & LPNB) | Sequence genome | Components of | Gene accession IDs | Putative functions |
|----------------------|----------------|-----------------|-------------------------|----------------------------------------|--------------------|------------------|-----------------|---------------|--------------------|--------------------|
| SNP_44429_A_46535472 | NC_021165.1    | Ca_Kabuli_Chr06 | 46535472                | TT                                     | AA                 | AA               | INTERGENIC      |               |                    |                    |
| SNP_44430_A_46634589 | NC_021165.1    | Ca_Kabuli_Chr06 | 46634589                | TT                                     | AA                 | AA               | INTERGENIC      |               |                    |                    |
| SNP_44431_A_46634590 | NC_021165.1    | Ca_Kabuli_Chr06 | 46634590                | TT                                     | CC                 | CC               | INTERGENIC      |               |                    |                    |
| SNP_44432_A_46673218 | NC_021165.1    | Ca_Kabuli_Chr06 | 46673218                | TT                                     | AA                 | AA               | INTERGENIC      |               |                    |                    |
| SNP_44433_A_46683969 | NC_021165.1    | Ca_Kabuli_Chr06 | 46683969                | GG                                     | AA                 | AA               | INTERGENIC      |               |                    |                    |
| SNP_44434_A_46689973 | NC_021165.1    | Ca_Kabuli_Chr06 | 46689973                | CC                                     | TT                 | TT               | INTERGENIC      |               |                    |                    |
| SNP_44435_A_46689990 | NC_021165.1    | Ca_Kabuli_Chr06 | 46689990                | TT                                     | AA                 | AA               | INTERGENIC      |               |                    |                    |
| SNP_44436_A_46690048 | NC_021165.1    | Ca_Kabuli_Chr06 | 46690048                | GG                                     | AA                 | AA               | INTERGENIC      |               |                    |                    |
| SNP_44437_A_46690053 | NC_021165.1    | Ca_Kabuli_Chr06 | 46690053                | CC                                     | GG                 | GG               | INTERGENIC      |               |                    |                    |
| SNP_44438_A_46690069 | NC_021165.1    | Ca_Kabuli_Chr06 | 46690069                | GG                                     | AA                 | AA               | INTERGENIC      |               |                    |                    |
| SNP_44439_A_46690086 | NC_021165.1    | Ca_Kabuli_Chr06 | 46690086                | CC                                     | TT                 | TT               | INTERGENIC      |               |                    |                    |
| SNP_44440_A_46690182 | NC_021165.1    | Ca_Kabuli_Chr06 | 46690182                | AA                                     | GG                 | GG               | INTERGENIC      |               |                    |                    |
| SNP_44441_A_46690258 | NC_021165.1    | Ca_Kabuli_Chr06 | 46690258                | TT                                     | GG                 | GG               | INTERGENIC      |               |                    |                    |
| SNP_44442_A_46690333 | NC_021165.1    | Ca_Kabuli_Chr06 | 46690333                | AA                                     | GG                 | GG               | INTERGENIC      |               |                    |                    |
| SNP_44443_A_46690335 | NC_021165.1    | Ca_Kabuli_Chr06 | 46690335                | AA                                     | GG                 | GG               | INTERGENIC      |               |                    |                    |
| SNP_44444_A_46690341 | NC_021165.1    | Ca_Kabuli_Chr06 | 46690341                | GG                                     | AA                 | AA               | INTERGENIC      |               |                    |                    |
| SNP_44445_A_46690353 | NC_021165.1    | Ca_Kabuli_Chr06 | 46690353                | TT                                     | CC                 | CC               | INTERGENIC      |               |                    |                    |
| SNP_44446_A_46690429 | NC_021165.1    | Ca_Kabuli_Chr06 | 46690429                | TT                                     | CC                 | CC               | INTERGENIC      |               |                    |                    |
| SNP_44447_A_46690432 | NC_021165.1    | Ca_Kabuli_Chr06 | 46690432                | AA                                     | GG                 | GG               | INTERGENIC      |               |                    |                    |
| SNP_44448_A_46690449 | NC_021165.1    | Ca_Kabuli_Chr06 | 46690449                | AA                                     | GG                 | GG               | INTERGENIC      |               |                    |                    |
| SNP_44449_A_46690502 | NC_021165.1    | Ca_Kabuli_Chr06 | 46690502                | TT                                     | CC                 | CC               | INTERGENIC      |               |                    |                    |
| SNP_44450_A_46707007 | NC_021165.1    | Ca_Kabuli_Chr06 | 46707007                | GG                                     | AA                 | AA               | INTERGENIC      |               |                    |                    |

| SNPs IDs             | Chromosome IDs | Chromosomes     | Physical positions (bp) | CDC Frontier genome (Reference genome) | (Pusa 1103 & HPNB) | (ILWC 46 & LPNB) | Sequence genome | Components of | Gene accession IDs | Putative functions |
|----------------------|----------------|-----------------|-------------------------|----------------------------------------|--------------------|------------------|-----------------|---------------|--------------------|--------------------|
| SNP_44451_A_46749110 | NC_021165.1    | Ca_Kabuli_Chr06 | 46749110                | TT                                     | CC                 | CC               | INTERGENIC      |               |                    |                    |
| SNP_44452_A_46772284 | NC_021165.1    | Ca_Kabuli_Chr06 | 46772284                | GG                                     | AA                 | AA               | INTERGENIC      |               |                    |                    |
| SNP_44453_A_46772304 | NC_021165.1    | Ca_Kabuli_Chr06 | 46772304                | TT                                     | GG                 | GG               | INTERGENIC      |               |                    |                    |
| SNP_44454_A_46772308 | NC_021165.1    | Ca_Kabuli_Chr06 | 46772308                | TT                                     | CC                 | CC               | INTERGENIC      |               |                    |                    |
| SNP_44455_A_46772325 | NC_021165.1    | Ca_Kabuli_Chr06 | 46772325                | TT                                     | GG                 | GG               | INTERGENIC      |               |                    |                    |
| SNP_44456_A_46772329 | NC_021165.1    | Ca_Kabuli_Chr06 | 46772329                | CC                                     | AA                 | AA               | INTERGENIC      |               |                    |                    |
| SNP_44457_A_46772333 | NC_021165.1    | Ca_Kabuli_Chr06 | 46772333                | AA                                     | GG                 | GG               | INTERGENIC      |               |                    |                    |
| SNP_44458_A_46772733 | NC_021165.1    | Ca_Kabuli_Chr06 | 46772733                | TT                                     | GG                 | GG               | INTERGENIC      |               |                    |                    |
| SNP_44459_A_46772917 | NC_021165.1    | Ca_Kabuli_Chr06 | 46772917                | CC                                     | TT                 | TT               | INTERGENIC      |               |                    |                    |
| SNP_44461_A_46789806 | NC_021165.1    | Ca_Kabuli_Chr06 | 46789806                | CC                                     | TT                 | TT               | INTERGENIC      |               |                    |                    |
| SNP_44463_A_46817622 | NC_021165.1    | Ca_Kabuli_Chr06 | 46817622                | CC                                     | AA                 | AA               | INTERGENIC      |               |                    |                    |
| SNP_44466_A_46896666 | NC_021165.1    | Ca_Kabuli_Chr06 | 46896666                | TT                                     | GG                 | GG               | INTERGENIC      |               |                    |                    |
| SNP_44467_A_46896889 | NC_021165.1    | Ca_Kabuli_Chr06 | 46896889                | CC                                     | TT                 | TT               | INTERGENIC      |               |                    |                    |
| SNP_44468_A_46896903 | NC_021165.1    | Ca_Kabuli_Chr06 | 46896903                | CC                                     | TT                 | TT               | INTERGENIC      |               |                    |                    |
| SNP_44469_A_46896934 | NC_021165.1    | Ca_Kabuli_Chr06 | 46896934                | CC                                     | GG                 | GG               | INTERGENIC      |               |                    |                    |
| SNP_44470_A_46896938 | NC_021165.1    | Ca_Kabuli_Chr06 | 46896938                | GG                                     | CC                 | CC               | INTERGENIC      |               |                    |                    |
| SNP_44471_A_46897044 | NC_021165.1    | Ca_Kabuli_Chr06 | 46897044                | CC                                     | GG                 | GG               | INTERGENIC      |               |                    |                    |
| SNP_44472_A_46898640 | NC_021165.1    | Ca_Kabuli_Chr06 | 46898640                | CC                                     | GG                 | GG               | INTERGENIC      |               |                    |                    |
| SNP_44473_A_46898828 | NC_021165.1    | Ca_Kabuli_Chr06 | 46898828                | CC                                     | TT                 | TT               | INTERGENIC      |               |                    |                    |
| SNP_44474_A_46899229 | NC_021165.1    | Ca_Kabuli_Chr06 | 46899229                | GG                                     | AA                 | AA               | INTERGENIC      |               |                    |                    |
| SNP_44475_A_46899450 | NC_021165.1    | Ca_Kabuli_Chr06 | 46899450                | TT                                     | CC                 | CC               | INTERGENIC      |               |                    |                    |
| SNP_44476_A_46899454 | NC_021165.1    | Ca_Kabuli_Chr06 | 46899454                | CC                                     | TT                 | TT               | INTERGENIC      |               |                    |                    |

| SNPs IDs             | Chromosome IDs | Chromosomes     | Physical positions (bp) | CDC Frontier (Reference genome) | (Pusa 1103 & HPNB) | (ILWC 46 & LPNB) | Sequence Components of genome | Gene accession IDs | Putative functions                                     |
|----------------------|----------------|-----------------|-------------------------|---------------------------------|--------------------|------------------|-------------------------------|--------------------|--------------------------------------------------------|
| SNP_44477_A_46899767 | NC_021165.1    | Ca_Kabuli_Chr06 | 46899767                | AA                              | GG                 | GG               | INTERGENIC                    |                    |                                                        |
| SNP_44478_A_46997169 | NC_021165.1    | Ca_Kabuli_Chr06 | 46997169                | TT                              | CC                 | CC               | INTERGENIC                    |                    |                                                        |
| SNP_44479_A_47000936 | NC_021165.1    | Ca_Kabuli_Chr06 | 47000936                | AA                              | GG                 | GG               | INTERGENIC                    |                    |                                                        |
| SNP_44481_A_47001105 | NC_021165.1    | Ca_Kabuli_Chr06 | 47001105                | TT                              | CC                 | CC               | INTERGENIC                    |                    |                                                        |
| SNP_44482_A_47001120 | NC_021165.1    | Ca_Kabuli_Chr06 | 47001120                | CC                              | TT                 | TT               | INTERGENIC                    |                    |                                                        |
| SNP_44483_A_47001167 | NC_021165.1    | Ca_Kabuli_Chr06 | 47001167                | CC                              | GG                 | GG               | INTERGENIC                    |                    |                                                        |
| SNP_44484_A_47002237 | NC_021165.1    | Ca_Kabuli_Chr06 | 47002237                | CC                              | TT                 | TT               | INTERGENIC                    |                    |                                                        |
| SNP_44486_A_47093709 | NC_021165.1    | Ca_Kabuli_Chr06 | 47093709                | GG                              | AA                 | AA               | INTRON                        | 101512664          | LRR receptor-like serine/threonine-protein kinase FLS2 |
| SNP_44487_A_47148751 | NC_021165.1    | Ca_Kabuli_Chr06 | 47148751                | AA                              | CC                 | CC               | INTRON                        | 101503235          | vacuolar cation/proton exchanger 3-like                |
| SNP_44488_A_47149056 | NC_021165.1    | Ca_Kabuli_Chr06 | 47149056                | AA                              | CC                 | CC               | INTRON                        | 101503235          | vacuolar cation/proton exchanger 3-like                |
| SNP_44489_A_47149086 | NC_021165.1    | Ca_Kabuli_Chr06 | 47149086                | AA                              | GG                 | GG               | INTRON                        | 101503235          | vacuolar cation/proton exchanger 3-like                |
| SNP_44490_A_47149096 | NC_021165.1    | Ca_Kabuli_Chr06 | 47149096                | AA                              | CC                 | CC               | INTRON                        | 101503235          | vacuolar cation/proton exchanger 3-like                |
| SNP_44491_A_47149099 | NC_021165.1    | Ca_Kabuli_Chr06 | 47149099                | GG                              | CC                 | CC               | INTRON                        | 101503235          | vacuolar cation/proton exchanger 3-like                |
| SNP_44493_A_47149161 | NC_021165.1    | Ca_Kabuli_Chr06 | 47149161                | TT                              | CC                 | CC               | INTRON                        | 101503235          | vacuolar cation/proton exchanger 3-like                |
| SNP_44494_A_47149205 | NC_021165.1    | Ca_Kabuli_Chr06 | 47149205                | CC                              | AA                 | AA               | INTRON                        | 101503235          | vacuolar cation/proton exchanger 3-like                |
| SNP_44495_A_47149224 | NC_021165.1    | Ca_Kabuli_Chr06 | 47149224                | TT                              | CC                 | CC               | INTRON                        | 101503235          | vacuolar cation/proton exchanger 3-like                |
| SNP_44496_A_47149237 | NC_021165.1    | Ca_Kabuli_Chr06 | 47149237                | TT                              | AA                 | AA               | INTRON                        | 101503235          | vacuolar cation/proton exchanger 3-like                |
| SNP_44497_A_47151270 | NC_021165.1    | Ca_Kabuli_Chr06 | 47151270                | AA                              | CC                 | CC               | INTRON                        | 101503235          | vacuolar cation/proton exchanger 3-like                |
| SNP_44498_A_47151284 | NC_021165.1    | Ca_Kabuli_Chr06 | 47151284                | AA                              | GG                 | GG               | INTRON                        | 101503235          | vacuolar cation/proton exchanger 3-like                |
| SNP_44499_A_47151331 | NC_021165.1    | Ca_Kabuli_Chr06 | 47151331                | GG                              | AA                 | AA               | INTRON                        | 101503235          | vacuolar cation/proton exchanger 3-like                |
| SNP_44500_A_47151334 | NC_021165.1    | Ca_Kabuli_Chr06 | 47151334                | AA                              | GG                 | GG               | INTRON                        | 101503235          | vacuolar cation/proton exchanger 3-like                |
| SNP_44501_A_47151353 | NC_021165.1    | Ca_Kabuli_Chr06 | 47151353                | TT                              | GG                 | GG               | INTRON                        | 101503235          | vacuolar cation/proton exchanger 3-like                |



| SNPs IDs             | Chromosome IDs | Chromosomes     | Physical positions (bp) | CDC Frontier (Reference genome) | (Pusa 1103 & HPNB) | (ILWC 46 & LPNB) | Sequence Components of genome | Gene accession IDs | Putative functions                                       |
|----------------------|----------------|-----------------|-------------------------|---------------------------------|--------------------|------------------|-------------------------------|--------------------|----------------------------------------------------------|
| SNP_44502_A_47151595 | NC_021165.1    | Ca_Kabuli_Chr06 | 47151595                | AA                              | GG                 | GG               | INTRON                        | 101503235          | vacuolar cation/proton exchanger 3-like                  |
| SNP_44503_A_47151738 | NC_021165.1    | Ca_Kabuli_Chr06 | 47151738                | AA                              | GG                 | GG               | INTRON                        | 101503235          | vacuolar cation/proton exchanger 3-like                  |
| SNP_44504_A_47209713 | NC_021165.1    | Ca_Kabuli_Chr06 | 47209713                | GG                              | TT                 | TT               | URR                           | 101512976          | serine/threonine-protein phosphatase 7 long form homolog |
| SNP_44505_A_47209888 | NC_021165.1    | Ca_Kabuli_Chr06 | 47209888                | TT                              | CC                 | CC               | URR                           | 101513303          | uncharacterized LOC101513303                             |
| SNP_44506_A_47209910 | NC_021165.1    | Ca_Kabuli_Chr06 | 47209910                | TT                              | GG                 | GG               | URR                           | 101513303          | uncharacterized LOC101513303                             |
| SNP_44507_A_47209986 | NC_021165.1    | Ca_Kabuli_Chr06 | 47209986                | CC                              | TT                 | TT               | URR                           | 101513303          | uncharacterized LOC101513303                             |
| SNP_44508_A_47210005 | NC_021165.1    | Ca_Kabuli_Chr06 | 47210005                | CC                              | TT                 | TT               | URR                           | 101513303          | uncharacterized LOC101513303                             |
| SNP_44509_A_47210028 | NC_021165.1    | Ca_Kabuli_Chr06 | 47210028                | AA                              | GG                 | GG               | URR                           | 101513303          | uncharacterized LOC101513303                             |
| SNP_44510_A_47258545 | NC_021165.1    | Ca_Kabuli_Chr06 | 47258545                | CC                              | AA                 | AA               | DRR                           | 101513627          | uncharacterized LOC101513627                             |
| SNP_44511_A_47260201 | NC_021165.1    | Ca_Kabuli_Chr06 | 47260201                | AA                              | GG                 | GG               | INTRON                        | 101513627          | uncharacterized LOC101513627                             |
| SNP_44512_A_47260222 | NC_021165.1    | Ca_Kabuli_Chr06 | 47260222                | GG                              | AA                 | AA               | NON_SYNONYMOUS_CODING         | 101513627          | uncharacterized LOC101513627                             |
| SNP_44513_A_47268177 | NC_021165.1    | Ca_Kabuli_Chr06 | 47268177                | TT                              | AA                 | AA               | INTERGENIC                    |                    |                                                          |
| SNP_44514_A_47268179 | NC_021165.1    | Ca_Kabuli_Chr06 | 47268179                | AA                              | CC                 | CC               | INTERGENIC                    |                    |                                                          |
| SNP_44515_A_47268216 | NC_021165.1    | Ca_Kabuli_Chr06 | 47268216                | TT                              | GG                 | GG               | INTERGENIC                    |                    |                                                          |
| SNP_44516_A_47312017 | NC_021165.1    | Ca_Kabuli_Chr06 | 47312017                | TT                              | CC                 | CC               | INTERGENIC                    |                    |                                                          |
| SNP_44517_A_47312020 | NC_021165.1    | Ca_Kabuli_Chr06 | 47312020                | AA                              | GG                 | GG               | INTERGENIC                    |                    |                                                          |
| SNP_44518_A_47312042 | NC_021165.1    | Ca_Kabuli_Chr06 | 47312042                | CC                              | AA                 | AA               | INTERGENIC                    |                    |                                                          |
| SNP_44519_A_47312267 | NC_021165.1    | Ca_Kabuli_Chr06 | 47312267                | AA                              | GG                 | GG               | INTERGENIC                    |                    |                                                          |
| SNP_44520_A_47312295 | NC_021165.1    | Ca_Kabuli_Chr06 | 47312295                | TT                              | CC                 | CC               | INTERGENIC                    |                    |                                                          |
| SNP_44522_A_47312527 | NC_021165.1    | Ca_Kabuli_Chr06 | 47312527                | AA                              | TT                 | TT               | INTERGENIC                    |                    |                                                          |
| SNP_44523_A_47312562 | NC_021165.1    | Ca_Kabuli_Chr06 | 47312562                | AA                              | GG                 | GG               | INTERGENIC                    |                    |                                                          |
| SNP_44524_A_47312580 | NC_021165.1    | Ca_Kabuli_Chr06 | 47312580                | CC                              | TT                 | TT               | INTERGENIC                    |                    |                                                          |

| SNPs IDs             | Chromosome IDs | Chromosomes     | Physical positions (bp) | CDC Frontier genome (Reference genome) | (Pusa 1103 & HPNB) | (ILWC 46 & LPNB) | Sequence genome | Components of | Gene accession IDs                  | Putative functions |
|----------------------|----------------|-----------------|-------------------------|----------------------------------------|--------------------|------------------|-----------------|---------------|-------------------------------------|--------------------|
| SNP_44525_A_47312595 | NC_021165.1    | Ca_Kabuli_Chr06 | 47312595                | CC                                     | TT                 | TT               | INTERGENIC      |               |                                     |                    |
| SNP_44526_A_47382727 | NC_021165.1    | Ca_Kabuli_Chr06 | 47382727                | TT                                     | CC                 | CC               | URR             | 101506340     | symplekin                           |                    |
| SNP_44528_A_47395099 | NC_021165.1    | Ca_Kabuli_Chr06 | 47395099                | AA                                     | TT                 | TT               | INTERGENIC      |               |                                     |                    |
| SNP_44529_A_47461283 | NC_021165.1    | Ca_Kabuli_Chr06 | 47461283                | GG                                     | AA                 | AA               | INTERGENIC      |               |                                     |                    |
| SNP_44530_A_47504908 | NC_021165.1    | Ca_Kabuli_Chr06 | 47504908                | CC                                     | TT                 | TT               | INTERGENIC      |               |                                     |                    |
| SNP_44531_A_47504911 | NC_021165.1    | Ca_Kabuli_Chr06 | 47504911                | GG                                     | TT                 | TT               | INTERGENIC      |               |                                     |                    |
| SNP_44532_A_47558546 | NC_021165.1    | Ca_Kabuli_Chr06 | 47558546                | TT                                     | CC                 | CC               | INTERGENIC      |               |                                     |                    |
| SNP_44533_A_47563102 | NC_021165.1    | Ca_Kabuli_Chr06 | 47563102                | AA                                     | TT                 | TT               | INTERGENIC      |               |                                     |                    |
| SNP_44534_A_47571056 | NC_021165.1    | Ca_Kabuli_Chr06 | 47571056                | CC                                     | AA                 | AA               | INTERGENIC      |               |                                     |                    |
| SNP_44535_A_47580946 | NC_021165.1    | Ca_Kabuli_Chr06 | 47580946                | CC                                     | TT                 | TT               | URR             | 101507846     | trihelix transcription factor GT-3b |                    |
| SNP_44536_A_47616872 | NC_021165.1    | Ca_Kabuli_Chr06 | 47616872                | AA                                     | GG                 | GG               | INTERGENIC      |               |                                     |                    |
| SNP_44537_A_47621979 | NC_021165.1    | Ca_Kabuli_Chr06 | 47621979                | GG                                     | AA                 | AA               | INTERGENIC      |               |                                     |                    |
| SNP_44538_A_47622022 | NC_021165.1    | Ca_Kabuli_Chr06 | 47622022                | GG                                     | AA                 | AA               | INTERGENIC      |               |                                     |                    |
| SNP_44539_A_47622244 | NC_021165.1    | Ca_Kabuli_Chr06 | 47622244                | CC                                     | GG                 | GG               | INTERGENIC      |               |                                     |                    |
| SNP_44540_A_47622264 | NC_021165.1    | Ca_Kabuli_Chr06 | 47622264                | AA                                     | GG                 | GG               | INTERGENIC      |               |                                     |                    |
| SNP_44541_A_47622282 | NC_021165.1    | Ca_Kabuli_Chr06 | 47622282                | AA                                     | GG                 | GG               | INTERGENIC      |               |                                     |                    |
| SNP_44542_A_47622384 | NC_021165.1    | Ca_Kabuli_Chr06 | 47622384                | TT                                     | GG                 | GG               | INTERGENIC      |               |                                     |                    |
| SNP_44543_A_47634825 | NC_021165.1    | Ca_Kabuli_Chr06 | 47634825                | TT                                     | CC                 | CC               | INTERGENIC      |               |                                     |                    |
| SNP_44544_A_47646294 | NC_021165.1    | Ca_Kabuli_Chr06 | 47646294                | GG                                     | AA                 | AA               | INTERGENIC      |               |                                     |                    |
| SNP_44545_A_47647483 | NC_021165.1    | Ca_Kabuli_Chr06 | 47647483                | TT                                     | AA                 | AA               | INTERGENIC      |               |                                     |                    |
| SNP_44546_A_47657141 | NC_021165.1    | Ca_Kabuli_Chr06 | 47657141                | GG                                     | TT                 | TT               | INTERGENIC      |               |                                     |                    |
| SNP_44547_A_47657147 | NC_021165.1    | Ca_Kabuli_Chr06 | 47657147                | AA                                     | CC                 | CC               | INTERGENIC      |               |                                     |                    |

| SNPs IDs             | Chromosome IDs | Chromosomes     | Physical positions (bp) | CDC Frontier (Reference genome) | (Pusa 1103 & HPNB) | (ILWC 46 & LPNB) | Sequence genome | Components of | Gene accession IDs | Putative functions |
|----------------------|----------------|-----------------|-------------------------|---------------------------------|--------------------|------------------|-----------------|---------------|--------------------|--------------------|
| SNP_44548_A_47675696 | NC_021165.1    | Ca_Kabuli_Chr06 | 47675696                | TT                              | GG                 | GG               | INTERGENIC      |               |                    |                    |
| SNP_44549_A_47675732 | NC_021165.1    | Ca_Kabuli_Chr06 | 47675732                | TT                              | CC                 | CC               | INTERGENIC      |               |                    |                    |
| SNP_44550_A_47675737 | NC_021165.1    | Ca_Kabuli_Chr06 | 47675737                | CC                              | TT                 | TT               | INTERGENIC      |               |                    |                    |
| SNP_44551_A_47697851 | NC_021165.1    | Ca_Kabuli_Chr06 | 47697851                | CC                              | GG                 | GG               | INTERGENIC      |               |                    |                    |
| SNP_44552_A_47697924 | NC_021165.1    | Ca_Kabuli_Chr06 | 47697924                | AA                              | CC                 | CC               | INTERGENIC      |               |                    |                    |
| SNP_44554_A_47698044 | NC_021165.1    | Ca_Kabuli_Chr06 | 47698044                | GG                              | CC                 | CC               | INTERGENIC      |               |                    |                    |
| SNP_44555_A_47698052 | NC_021165.1    | Ca_Kabuli_Chr06 | 47698052                | AA                              | GG                 | GG               | INTERGENIC      |               |                    |                    |
| SNP_44556_A_47698083 | NC_021165.1    | Ca_Kabuli_Chr06 | 47698083                | AA                              | CC                 | CC               | INTERGENIC      |               |                    |                    |
| SNP_44557_A_47699206 | NC_021165.1    | Ca_Kabuli_Chr06 | 47699206                | AA                              | GG                 | GG               | INTERGENIC      |               |                    |                    |
| SNP_44558_A_47699545 | NC_021165.1    | Ca_Kabuli_Chr06 | 47699545                | AA                              | GG                 | GG               | INTERGENIC      |               |                    |                    |
| SNP_44559_A_47699567 | NC_021165.1    | Ca_Kabuli_Chr06 | 47699567                | TT                              | AA                 | AA               | INTERGENIC      |               |                    |                    |
| SNP_44560_A_47707527 | NC_021165.1    | Ca_Kabuli_Chr06 | 47707527                | GG                              | TT                 | TT               | INTERGENIC      |               |                    |                    |
| SNP_44561_A_47716666 | NC_021165.1    | Ca_Kabuli_Chr06 | 47716666                | TT                              | CC                 | CC               | INTERGENIC      |               |                    |                    |
| SNP_44562_A_47716746 | NC_021165.1    | Ca_Kabuli_Chr06 | 47716746                | GG                              | AA                 | AA               | INTERGENIC      |               |                    |                    |
| SNP_44563_A_47716896 | NC_021165.1    | Ca_Kabuli_Chr06 | 47716896                | CC                              | TT                 | TT               | INTERGENIC      |               |                    |                    |
| SNP_44564_A_47716924 | NC_021165.1    | Ca_Kabuli_Chr06 | 47716924                | CC                              | TT                 | TT               | INTERGENIC      |               |                    |                    |
| SNP_44565_A_47717039 | NC_021165.1    | Ca_Kabuli_Chr06 | 47717039                | CC                              | GG                 | GG               | INTERGENIC      |               |                    |                    |
| SNP_44566_A_47717056 | NC_021165.1    | Ca_Kabuli_Chr06 | 47717056                | TT                              | GG                 | GG               | INTERGENIC      |               |                    |                    |
| SNP_44567_A_47717190 | NC_021165.1    | Ca_Kabuli_Chr06 | 47717190                | GG                              | AA                 | AA               | INTERGENIC      |               |                    |                    |
| SNP_44568_A_47722930 | NC_021165.1    | Ca_Kabuli_Chr06 | 47722930                | AA                              | GG                 | GG               | INTERGENIC      |               |                    |                    |
| SNP_44569_A_47723050 | NC_021165.1    | Ca_Kabuli_Chr06 | 47723050                | TT                              | CC                 | CC               | INTERGENIC      |               |                    |                    |
| SNP_44570_A_47723065 | NC_021165.1    | Ca_Kabuli_Chr06 | 47723065                | AA                              | GG                 | GG               | INTERGENIC      |               |                    |                    |

| SNPs IDs             | Chromosome IDs | Chromosomes     | Physical positions (bp) | CDC Frontier (Reference genome) | (Pusa 1103 & HPNB) | (ILWC 46 & LPNB) | Sequence genome | Components of | Gene accession IDs                                   | Putative functions |
|----------------------|----------------|-----------------|-------------------------|---------------------------------|--------------------|------------------|-----------------|---------------|------------------------------------------------------|--------------------|
| SNP_44571_A_47723077 | NC_021165.1    | Ca_Kabuli_Chr06 | 47723077                | TT                              | AA                 | AA               | INTERGENIC      |               |                                                      |                    |
| SNP_44572_A_47723368 | NC_021165.1    | Ca_Kabuli_Chr06 | 47723368                | TT                              | GG                 | GG               | INTERGENIC      |               |                                                      |                    |
| SNP_44573_A_47729525 | NC_021165.1    | Ca_Kabuli_Chr06 | 47729525                | AA                              | GG                 | GG               | INTERGENIC      |               |                                                      |                    |
| SNP_44575_A_47753623 | NC_021165.1    | Ca_Kabuli_Chr06 | 47753623                | TT                              | CC                 | CC               | INTERGENIC      |               |                                                      |                    |
| SNP_44576_A_47753658 | NC_021165.1    | Ca_Kabuli_Chr06 | 47753658                | AA                              | GG                 | GG               | INTERGENIC      |               |                                                      |                    |
| SNP_44577_A_47753728 | NC_021165.1    | Ca_Kabuli_Chr06 | 47753728                | TT                              | GG                 | GG               | INTERGENIC      |               |                                                      |                    |
| SNP_44578_A_47754029 | NC_021165.1    | Ca_Kabuli_Chr06 | 47754029                | CC                              | TT                 | TT               | INTERGENIC      |               |                                                      |                    |
| SNP_44579_A_47758812 | NC_021165.1    | Ca_Kabuli_Chr06 | 47758812                | AA                              | GG                 | GG               | INTERGENIC      |               |                                                      |                    |
| SNP_44580_A_47758837 | NC_021165.1    | Ca_Kabuli_Chr06 | 47758837                | AA                              | GG                 | GG               | INTERGENIC      |               |                                                      |                    |
| SNP_44581_A_47758874 | NC_021165.1    | Ca_Kabuli_Chr06 | 47758874                | AA                              | GG                 | GG               | INTERGENIC      |               |                                                      |                    |
| SNP_44582_A_47758925 | NC_021165.1    | Ca_Kabuli_Chr06 | 47758925                | GG                              | AA                 | AA               | INTERGENIC      |               |                                                      |                    |
| SNP_44583_A_47760741 | NC_021165.1    | Ca_Kabuli_Chr06 | 47760741                | GG                              | AA                 | AA               | INTERGENIC      |               |                                                      |                    |
| SNP_44584_A_47761044 | NC_021165.1    | Ca_Kabuli_Chr06 | 47761044                | CC                              | GG                 | GG               | INTERGENIC      |               |                                                      |                    |
| SNP_44585_A_47761064 | NC_021165.1    | Ca_Kabuli_Chr06 | 47761064                | CC                              | AA                 | AA               | INTERGENIC      |               |                                                      |                    |
| SNP_44586_A_47779071 | NC_021165.1    | Ca_Kabuli_Chr06 | 47779071                | GG                              | CC                 | CC               | INTERGENIC      |               |                                                      |                    |
| SNP_44587_A_47779178 | NC_021165.1    | Ca_Kabuli_Chr06 | 47779178                | TT                              | GG                 | GG               | INTERGENIC      |               |                                                      |                    |
| SNP_44588_A_47779197 | NC_021165.1    | Ca_Kabuli_Chr06 | 47779197                | TT                              | GG                 | GG               | INTERGENIC      |               |                                                      |                    |
| SNP_44589_A_47779290 | NC_021165.1    | Ca_Kabuli_Chr06 | 47779290                | CC                              | TT                 | TT               | INTERGENIC      |               |                                                      |                    |
| SNP_44591_A_47830601 | NC_021165.1    | Ca_Kabuli_Chr06 | 47830601                | GG                              | AA                 | AA               | INTERGENIC      |               |                                                      |                    |
| SNP_44592_A_47839836 | NC_021165.1    | Ca_Kabuli_Chr06 | 47839836                | TT                              | CC                 | CC               | DRR             | 101488341     | RING finger protein 141-like                         |                    |
| SNP_44593_A_47854752 | NC_021165.1    | Ca_Kabuli_Chr06 | 47854752                | CC                              | TT                 | TT               | URR             | 101488897     | probable pyridoxal 5-phosphate synthase subunit PDX2 |                    |
| SNP_44594_A_47865001 | NC_021165.1    | Ca_Kabuli_Chr06 | 47865001                | AA                              | CC                 | CC               | INTERGENIC      |               |                                                      |                    |

| SNPs IDs             | Chromosome IDs | Chromosomes     | Physical positions (bp) | CDC Frontier genome (Reference genome) | (Pusa 1103 & HPNB) | (ILWC 46 & LPNB) | Sequence genome | Components of | Gene accession IDs | Putative functions |
|----------------------|----------------|-----------------|-------------------------|----------------------------------------|--------------------|------------------|-----------------|---------------|--------------------|--------------------|
| SNP_44595_A_47905387 | NC_021165.1    | Ca_Kabuli_Chr06 | 47905387                | TT                                     | AA                 | AA               | INTERGENIC      |               |                    |                    |
| SNP_44596_A_47906100 | NC_021165.1    | Ca_Kabuli_Chr06 | 47906100                | AA                                     | GG                 | GG               | INTERGENIC      |               |                    |                    |
| SNP_44597_A_47906227 | NC_021165.1    | Ca_Kabuli_Chr06 | 47906227                | AA                                     | CC                 | CC               | INTERGENIC      |               |                    |                    |
| SNP_44598_A_47906243 | NC_021165.1    | Ca_Kabuli_Chr06 | 47906243                | AA                                     | CC                 | CC               | INTERGENIC      |               |                    |                    |
| SNP_44599_A_47906294 | NC_021165.1    | Ca_Kabuli_Chr06 | 47906294                | AA                                     | TT                 | TT               | INTERGENIC      |               |                    |                    |
| SNP_44600_A_47906312 | NC_021165.1    | Ca_Kabuli_Chr06 | 47906312                | TT                                     | CC                 | CC               | INTERGENIC      |               |                    |                    |
| SNP_44601_A_47910514 | NC_021165.1    | Ca_Kabuli_Chr06 | 47910514                | GG                                     | AA                 | AA               | INTERGENIC      |               |                    |                    |
| SNP_44602_A_47910517 | NC_021165.1    | Ca_Kabuli_Chr06 | 47910517                | CC                                     | TT                 | TT               | INTERGENIC      |               |                    |                    |
| SNP_44603_A_47910568 | NC_021165.1    | Ca_Kabuli_Chr06 | 47910568                | GG                                     | AA                 | AA               | INTERGENIC      |               |                    |                    |
| SNP_44604_A_47910631 | NC_021165.1    | Ca_Kabuli_Chr06 | 47910631                | GG                                     | TT                 | TT               | INTERGENIC      |               |                    |                    |
| SNP_44605_A_47910647 | NC_021165.1    | Ca_Kabuli_Chr06 | 47910647                | AA                                     | GG                 | GG               | INTERGENIC      |               |                    |                    |
| SNP_44606_A_47947792 | NC_021165.1    | Ca_Kabuli_Chr06 | 47947792                | TT                                     | CC                 | CC               | INTERGENIC      |               |                    |                    |
| SNP_44607_A_47947816 | NC_021165.1    | Ca_Kabuli_Chr06 | 47947816                | AA                                     | GG                 | GG               | INTERGENIC      |               |                    |                    |
| SNP_44608_A_47947846 | NC_021165.1    | Ca_Kabuli_Chr06 | 47947846                | TT                                     | CC                 | CC               | INTERGENIC      |               |                    |                    |
| SNP_44609_A_47947860 | NC_021165.1    | Ca_Kabuli_Chr06 | 47947860                | TT                                     | GG                 | GG               | INTERGENIC      |               |                    |                    |
| SNP_44610_A_47947866 | NC_021165.1    | Ca_Kabuli_Chr06 | 47947866                | AA                                     | GG                 | GG               | INTERGENIC      |               |                    |                    |
| SNP_44611_A_47947879 | NC_021165.1    | Ca_Kabuli_Chr06 | 47947879                | CC                                     | TT                 | TT               | INTERGENIC      |               |                    |                    |
| SNP_44612_A_47947942 | NC_021165.1    | Ca_Kabuli_Chr06 | 47947942                | GG                                     | AA                 | AA               | INTERGENIC      |               |                    |                    |
| SNP_44613_A_47947951 | NC_021165.1    | Ca_Kabuli_Chr06 | 47947951                | TT                                     | CC                 | CC               | INTERGENIC      |               |                    |                    |
| SNP_44614_A_47947954 | NC_021165.1    | Ca_Kabuli_Chr06 | 47947954                | TT                                     | GG                 | GG               | INTERGENIC      |               |                    |                    |
| SNP_44615_A_47947972 | NC_021165.1    | Ca_Kabuli_Chr06 | 47947972                | CC                                     | AA                 | AA               | INTERGENIC      |               |                    |                    |
| SNP_44616_A_47948278 | NC_021165.1    | Ca_Kabuli_Chr06 | 47948278                | CC                                     | TT                 | TT               | INTERGENIC      |               |                    |                    |

| SNPs IDs             | Chromosome IDs | Chromosomes     | Physical positions (bp) | CDC Frontier genome (Reference genome) | (Pusa 1103 & HPNB) | (ILWC 46 & LPNB) | Sequence genome | Components of | Gene accession IDs | Putative functions                   |
|----------------------|----------------|-----------------|-------------------------|----------------------------------------|--------------------|------------------|-----------------|---------------|--------------------|--------------------------------------|
| SNP_44618_A_48036690 | NC_021165.1    | Ca_Kabuli_Chr06 | 48036690                | TT                                     | CC                 | CC               | DRR             |               | 101491912          | UPF0481 protein At3g47200-like       |
| SNP_44619_A_48051447 | NC_021165.1    | Ca_Kabuli_Chr06 | 48051447                | AA                                     | GG                 | GG               | INTERGENIC      |               |                    |                                      |
| SNP_44620_A_48051454 | NC_021165.1    | Ca_Kabuli_Chr06 | 48051454                | CC                                     | AA                 | AA               | INTERGENIC      |               |                    |                                      |
| SNP_44621_A_48053989 | NC_021165.1    | Ca_Kabuli_Chr06 | 48053989                | GG                                     | AA                 | AA               | DRR             |               | 101492245          | Unknown function                     |
| SNP_44622_A_48053996 | NC_021165.1    | Ca_Kabuli_Chr06 | 48053996                | TT                                     | CC                 | CC               | DRR             |               | 101492245          | Unknown function                     |
| SNP_44623_A_48063809 | NC_021165.1    | Ca_Kabuli_Chr06 | 48063809                | TT                                     | CC                 | CC               | INTERGENIC      |               |                    |                                      |
| SNP_44624_A_48063837 | NC_021165.1    | Ca_Kabuli_Chr06 | 48063837                | TT                                     | CC                 | CC               | INTERGENIC      |               |                    |                                      |
| SNP_44625_A_48064128 | NC_021165.1    | Ca_Kabuli_Chr06 | 48064128                | AA                                     | TT                 | TT               | INTERGENIC      |               |                    |                                      |
| SNP_44626_A_48064210 | NC_021165.1    | Ca_Kabuli_Chr06 | 48064210                | TT                                     | CC                 | CC               | INTERGENIC      |               |                    |                                      |
| SNP_44627_A_48064237 | NC_021165.1    | Ca_Kabuli_Chr06 | 48064237                | AA                                     | GG                 | GG               | INTERGENIC      |               |                    |                                      |
| SNP_44628_A_48064253 | NC_021165.1    | Ca_Kabuli_Chr06 | 48064253                | TT                                     | CC                 | CC               | INTERGENIC      |               |                    |                                      |
| SNP_44629_A_48109439 | NC_021165.1    | Ca_Kabuli_Chr06 | 48109439                | TT                                     | CC                 | CC               | URR             |               | 101492791          | sulfoquinovosyl transferase SQD2     |
| SNP_44630_A_48111349 | NC_021165.1    | Ca_Kabuli_Chr06 | 48111349                | GG                                     | CC                 | CC               | INTERGENIC      |               |                    |                                      |
| SNP_44631_A_48216115 | NC_021165.1    | Ca_Kabuli_Chr06 | 48216115                | AA                                     | GG                 | GG               | INTERGENIC      |               |                    |                                      |
| SNP_44632_A_48247312 | NC_021165.1    | Ca_Kabuli_Chr06 | 48247312                | TT                                     | AA                 | AA               | INTRON          |               | 101493451          | queuine tRNA-ribosyltransferase-like |
| SNP_44633_A_48247437 | NC_021165.1    | Ca_Kabuli_Chr06 | 48247437                | GG                                     | AA                 | AA               | INTRON          |               | 101493451          | queuine tRNA-ribosyltransferase-like |
| SNP_44634_A_48253755 | NC_021165.1    | Ca_Kabuli_Chr06 | 48253755                | CC                                     | TT                 | TT               | INTRON          |               | 101493451          | queuine tRNA-ribosyltransferase-like |
| SNP_44635_A_48253805 | NC_021165.1    | Ca_Kabuli_Chr06 | 48253805                | GG                                     | AA                 | AA               | INTRON          |               | 101493451          | queuine tRNA-ribosyltransferase-like |
| SNP_44636_A_48253885 | NC_021165.1    | Ca_Kabuli_Chr06 | 48253885                | CC                                     | TT                 | TT               | INTRON          |               | 101493451          | queuine tRNA-ribosyltransferase-like |
| SNP_44637_A_48253949 | NC_021165.1    | Ca_Kabuli_Chr06 | 48253949                | GG                                     | AA                 | AA               | INTRON          |               | 101493451          | queuine tRNA-ribosyltransferase-like |
| SNP_44638_A_48253974 | NC_021165.1    | Ca_Kabuli_Chr06 | 48253974                | GG                                     | AA                 | AA               | INTRON          |               | 101493451          | queuine tRNA-ribosyltransferase-like |
| SNP_44639_A_48254067 | NC_021165.1    | Ca_Kabuli_Chr06 | 48254067                | GG                                     | CC                 | CC               | INTRON          |               | 101493451          | queuine tRNA-ribosyltransferase-like |

| SNPs IDs             | Chromosome IDs | Chromosomes     | Physical positions (bp) | CDC Frontier (Reference genome) | (Pusa 1103 & HPNB) | (ILWC 46 & LPNB) | Sequence Components of genome | Gene accession IDs | Putative functions                   |
|----------------------|----------------|-----------------|-------------------------|---------------------------------|--------------------|------------------|-------------------------------|--------------------|--------------------------------------|
| SNP_44640_A_48254099 | NC_021165.1    | Ca_Kabuli_Chr06 | 48254099                | TT                              | CC                 | CC               | INTRON                        | 101493451          | queuine tRNA-ribosyltransferase-like |
| SNP_44642_A_48261153 | NC_021165.1    | Ca_Kabuli_Chr06 | 48261153                | TT                              | GG                 | GG               | INTERGENIC                    |                    |                                      |
| SNP_44643_A_48262122 | NC_021165.1    | Ca_Kabuli_Chr06 | 48262122                | TT                              | CC                 | CC               | INTERGENIC                    |                    |                                      |
| SNP_44644_A_48262155 | NC_021165.1    | Ca_Kabuli_Chr06 | 48262155                | TT                              | AA                 | AA               | INTERGENIC                    |                    |                                      |
| SNP_44645_A_48262333 | NC_021165.1    | Ca_Kabuli_Chr06 | 48262333                | TT                              | CC                 | CC               | INTERGENIC                    |                    |                                      |
| SNP_44646_A_48266972 | NC_021165.1    | Ca_Kabuli_Chr06 | 48266972                | AA                              | GG                 | GG               | INTERGENIC                    |                    |                                      |
| SNP_44647_A_48267213 | NC_021165.1    | Ca_Kabuli_Chr06 | 48267213                | TT                              | CC                 | CC               | INTERGENIC                    |                    |                                      |
| SNP_44648_A_48269483 | NC_021165.1    | Ca_Kabuli_Chr06 | 48269483                | AA                              | TT                 | TT               | INTERGENIC                    |                    |                                      |
| SNP_44649_A_48269706 | NC_021165.1    | Ca_Kabuli_Chr06 | 48269706                | TT                              | CC                 | CC               | INTERGENIC                    |                    |                                      |
| SNP_44650_A_48270262 | NC_021165.1    | Ca_Kabuli_Chr06 | 48270262                | CC                              | TT                 | TT               | INTERGENIC                    |                    |                                      |
| SNP_44651_A_48270267 | NC_021165.1    | Ca_Kabuli_Chr06 | 48270267                | GG                              | AA                 | AA               | INTERGENIC                    |                    |                                      |
| SNP_44652_A_48270627 | NC_021165.1    | Ca_Kabuli_Chr06 | 48270627                | AA                              | GG                 | GG               | INTERGENIC                    |                    |                                      |
| SNP_44653_A_48270752 | NC_021165.1    | Ca_Kabuli_Chr06 | 48270752                | AA                              | TT                 | TT               | INTERGENIC                    |                    |                                      |
| SNP_44654_A_48270772 | NC_021165.1    | Ca_Kabuli_Chr06 | 48270772                | AA                              | GG                 | GG               | INTERGENIC                    |                    |                                      |
| SNP_44655_A_48270807 | NC_021165.1    | Ca_Kabuli_Chr06 | 48270807                | CC                              | TT                 | TT               | INTERGENIC                    |                    |                                      |
| SNP_44656_A_48270839 | NC_021165.1    | Ca_Kabuli_Chr06 | 48270839                | AA                              | CC                 | CC               | INTERGENIC                    |                    |                                      |
| SNP_44657_A_48270866 | NC_021165.1    | Ca_Kabuli_Chr06 | 48270866                | AA                              | GG                 | GG               | INTERGENIC                    |                    |                                      |
| SNP_44658_A_48270905 | NC_021165.1    | Ca_Kabuli_Chr06 | 48270905                | GG                              | AA                 | AA               | INTERGENIC                    |                    |                                      |
| SNP_44659_A_48270940 | NC_021165.1    | Ca_Kabuli_Chr06 | 48270940                | GG                              | TT                 | TT               | INTERGENIC                    |                    |                                      |
| SNP_44660_A_48270965 | NC_021165.1    | Ca_Kabuli_Chr06 | 48270965                | AA                              | GG                 | GG               | INTERGENIC                    |                    |                                      |
| SNP_44661_A_48270973 | NC_021165.1    | Ca_Kabuli_Chr06 | 48270973                | GG                              | AA                 | AA               | INTERGENIC                    |                    |                                      |
| SNP_44662_A_48270977 | NC_021165.1    | Ca_Kabuli_Chr06 | 48270977                | TT                              | CC                 | CC               | INTERGENIC                    |                    |                                      |

| SNPs IDs             | Chromosome IDs | Chromosomes     | Physical positions (bp) | CDC Frontier genome (Reference genome) | (Pusa 1103 & HPNB) | (ILWC 46 & LPNB) | Sequence Components of genome | Gene accession IDs | Putative functions                   |
|----------------------|----------------|-----------------|-------------------------|----------------------------------------|--------------------|------------------|-------------------------------|--------------------|--------------------------------------|
| SNP_44663_A_48271058 | NC_021165.1    | Ca_Kabuli_Chr06 | 48271058                | TT                                     | CC                 | CC               | INTERGENIC                    |                    |                                      |
| SNP_44664_A_48271128 | NC_021165.1    | Ca_Kabuli_Chr06 | 48271128                | CC                                     | GG                 | GG               | INTERGENIC                    |                    |                                      |
| SNP_44665_A_48271129 | NC_021165.1    | Ca_Kabuli_Chr06 | 48271129                | AA                                     | GG                 | GG               | INTERGENIC                    |                    |                                      |
| SNP_44666_A_48271177 | NC_021165.1    | Ca_Kabuli_Chr06 | 48271177                | CC                                     | TT                 | TT               | INTERGENIC                    |                    |                                      |
| SNP_44667_A_48271205 | NC_021165.1    | Ca_Kabuli_Chr06 | 48271205                | TT                                     | CC                 | CC               | DRR                           | 101493773          | queuine tRNA-ribosyltransferase-like |
| SNP_44669_A_48271522 | NC_021165.1    | Ca_Kabuli_Chr06 | 48271522                | CC                                     | TT                 | TT               | DRR                           | 101493773          | queuine tRNA-ribosyltransferase-like |
| SNP_44670_A_48271548 | NC_021165.1    | Ca_Kabuli_Chr06 | 48271548                | GG                                     | AA                 | AA               | DRR                           | 101493773          | queuine tRNA-ribosyltransferase-like |
| SNP_44671_A_48271562 | NC_021165.1    | Ca_Kabuli_Chr06 | 48271562                | GG                                     | AA                 | AA               | DRR                           | 101493773          | queuine tRNA-ribosyltransferase-like |
| SNP_44674_A_48276041 | NC_021165.1    | Ca_Kabuli_Chr06 | 48276041                | TT                                     | CC                 | CC               | INTRON                        | 101493773          | queuine tRNA-ribosyltransferase-like |
| SNP_44675_A_48276516 | NC_021165.1    | Ca_Kabuli_Chr06 | 48276516                | AA                                     | CC                 | CC               | INTRON                        | 101493773          | queuine tRNA-ribosyltransferase-like |
| SNP_44676_A_48276591 | NC_021165.1    | Ca_Kabuli_Chr06 | 48276591                | TT                                     | CC                 | CC               | INTRON                        | 101493773          | queuine tRNA-ribosyltransferase-like |
| SNP_44677_A_48277375 | NC_021165.1    | Ca_Kabuli_Chr06 | 48277375                | TT                                     | CC                 | CC               | INTERGENIC                    |                    |                                      |
| SNP_44678_A_48277676 | NC_021165.1    | Ca_Kabuli_Chr06 | 48277676                | GG                                     | AA                 | AA               | URR                           | 101493773          | queuine tRNA-ribosyltransferase-like |
| SNP_44679_A_48277780 | NC_021165.1    | Ca_Kabuli_Chr06 | 48277780                | AA                                     | TT                 | TT               | URR                           | 101493773          | queuine tRNA-ribosyltransferase-like |
| SNP_44680_A_48278273 | NC_021165.1    | Ca_Kabuli_Chr06 | 48278273                | AA                                     | GG                 | GG               | URR                           | 101493773          | queuine tRNA-ribosyltransferase-like |
| SNP_44681_A_48278920 | NC_021165.1    | Ca_Kabuli_Chr06 | 48278920                | GG                                     | TT                 | TT               | URR                           | 101493773          | queuine tRNA-ribosyltransferase-like |
| SNP_44682_A_48278999 | NC_021165.1    | Ca_Kabuli_Chr06 | 48278999                | AA                                     | CC                 | CC               | URR                           | 101493773          | queuine tRNA-ribosyltransferase-like |
| SNP_44683_A_48279066 | NC_021165.1    | Ca_Kabuli_Chr06 | 48279066                | CC                                     | GG                 | GG               | URR                           | 101493773          | queuine tRNA-ribosyltransferase-like |
| SNP_44684_A_48279068 | NC_021165.1    | Ca_Kabuli_Chr06 | 48279068                | GG                                     | TT                 | TT               | URR                           | 101493773          | queuine tRNA-ribosyltransferase-like |
| SNP_44685_A_48279072 | NC_021165.1    | Ca_Kabuli_Chr06 | 48279072                | TT                                     | AA                 | AA               | URR                           | 101493773          | queuine tRNA-ribosyltransferase-like |
| SNP_44686_A_48279076 | NC_021165.1    | Ca_Kabuli_Chr06 | 48279076                | TT                                     | CC                 | CC               | URR                           | 101493773          | queuine tRNA-ribosyltransferase-like |
| SNP_44688_A_48279231 | NC_021165.1    | Ca_Kabuli_Chr06 | 48279231                | TT                                     | CC                 | CC               | URR                           | 101493773          | queuine tRNA-ribosyltransferase-like |



| SNPs IDs             | Chromosome IDs | Chromosomes     | Physical positions (bp) | CDC Frontier (Reference genome) | (Pusa 1103 & HPNB) | (ILWC 46 & LPNB) | Sequence Components of genome | Gene accession IDs | Putative functions                   |
|----------------------|----------------|-----------------|-------------------------|---------------------------------|--------------------|------------------|-------------------------------|--------------------|--------------------------------------|
| SNP_44689_A_48279240 | NC_021165.1    | Ca_Kabuli_Chr06 | 48279240                | GG                              | TT                 | TT               | URR                           | 101493773          | queuine tRNA-ribosyltransferase-like |
| SNP_44690_A_48279263 | NC_021165.1    | Ca_Kabuli_Chr06 | 48279263                | CC                              | GG                 | GG               | URR                           | 101493773          | queuine tRNA-ribosyltransferase-like |
| SNP_44691_A_48279275 | NC_021165.1    | Ca_Kabuli_Chr06 | 48279275                | TT                              | CC                 | CC               | URR                           | 101493773          | queuine tRNA-ribosyltransferase-like |
| SNP_44692_A_48279283 | NC_021165.1    | Ca_Kabuli_Chr06 | 48279283                | CC                              | TT                 | TT               | URR                           | 101493773          | queuine tRNA-ribosyltransferase-like |
| SNP_44693_A_48279331 | NC_021165.1    | Ca_Kabuli_Chr06 | 48279331                | TT                              | GG                 | GG               | URR                           | 101493773          | queuine tRNA-ribosyltransferase-like |
| SNP_44694_A_48279381 | NC_021165.1    | Ca_Kabuli_Chr06 | 48279381                | AA                              | CC                 | CC               | URR                           | 101493773          | queuine tRNA-ribosyltransferase-like |
| SNP_44695_A_48279493 | NC_021165.1    | Ca_Kabuli_Chr06 | 48279493                | TT                              | CC                 | CC               | INTERGENIC                    |                    |                                      |
| SNP_44696_A_48279555 | NC_021165.1    | Ca_Kabuli_Chr06 | 48279555                | CC                              | TT                 | TT               | INTERGENIC                    |                    |                                      |
| SNP_44698_A_48279794 | NC_021165.1    | Ca_Kabuli_Chr06 | 48279794                | TT                              | CC                 | CC               | INTERGENIC                    |                    |                                      |
| SNP_44699_A_48279888 | NC_021165.1    | Ca_Kabuli_Chr06 | 48279888                | GG                              | CC                 | CC               | INTERGENIC                    |                    |                                      |
| SNP_44700_A_48279935 | NC_021165.1    | Ca_Kabuli_Chr06 | 48279935                | AA                              | GG                 | GG               | INTERGENIC                    |                    |                                      |
| SNP_44701_A_48279981 | NC_021165.1    | Ca_Kabuli_Chr06 | 48279981                | GG                              | AA                 | AA               | INTERGENIC                    |                    |                                      |
| SNP_44702_A_48279983 | NC_021165.1    | Ca_Kabuli_Chr06 | 48279983                | GG                              | AA                 | AA               | INTERGENIC                    |                    |                                      |
| SNP_44703_A_48280047 | NC_021165.1    | Ca_Kabuli_Chr06 | 48280047                | TT                              | AA                 | AA               | INTERGENIC                    |                    |                                      |
| SNP_44704_A_48280053 | NC_021165.1    | Ca_Kabuli_Chr06 | 48280053                | AA                              | TT                 | TT               | INTERGENIC                    |                    |                                      |
| SNP_44706_A_48280117 | NC_021165.1    | Ca_Kabuli_Chr06 | 48280117                | CC                              | GG                 | GG               | INTERGENIC                    |                    |                                      |
| SNP_44707_A_48280165 | NC_021165.1    | Ca_Kabuli_Chr06 | 48280165                | TT                              | CC                 | CC               | INTERGENIC                    |                    |                                      |
| SNP_44708_A_48280182 | NC_021165.1    | Ca_Kabuli_Chr06 | 48280182                | CC                              | AA                 | AA               | INTERGENIC                    |                    |                                      |
| SNP_44710_A_48280249 | NC_021165.1    | Ca_Kabuli_Chr06 | 48280249                | CC                              | TT                 | TT               | INTERGENIC                    |                    |                                      |
| SNP_44712_A_48280329 | NC_021165.1    | Ca_Kabuli_Chr06 | 48280329                | GG                              | AA                 | AA               | INTERGENIC                    |                    |                                      |
| SNP_44713_A_48280362 | NC_021165.1    | Ca_Kabuli_Chr06 | 48280362                | GG                              | AA                 | AA               | INTERGENIC                    |                    |                                      |
| SNP_44714_A_48280368 | NC_021165.1    | Ca_Kabuli_Chr06 | 48280368                | TT                              | CC                 | CC               | INTERGENIC                    |                    |                                      |

| SNPs IDs             | Chromosome IDs | Chromosomes     | Physical positions (bp) | CDC Frontier genome (Reference genome) | (Pusa 1103 & HPNB) | (ILWC 46 & LPNB) | Sequence genome | Components of | Gene accession IDs | Putative functions |
|----------------------|----------------|-----------------|-------------------------|----------------------------------------|--------------------|------------------|-----------------|---------------|--------------------|--------------------|
| SNP_44715_A_48280373 | NC_021165.1    | Ca_Kabuli_Chr06 | 48280373                | AA                                     | CC                 | CC               | INTERGENIC      |               |                    |                    |
| SNP_44716_A_48280417 | NC_021165.1    | Ca_Kabuli_Chr06 | 48280417                | AA                                     | GG                 | GG               | INTERGENIC      |               |                    |                    |
| SNP_44717_A_48280424 | NC_021165.1    | Ca_Kabuli_Chr06 | 48280424                | GG                                     | AA                 | AA               | INTERGENIC      |               |                    |                    |
| SNP_44718_A_48280445 | NC_021165.1    | Ca_Kabuli_Chr06 | 48280445                | AA                                     | GG                 | GG               | INTERGENIC      |               |                    |                    |
| SNP_44719_A_48280500 | NC_021165.1    | Ca_Kabuli_Chr06 | 48280500                | GG                                     | AA                 | AA               | INTERGENIC      |               |                    |                    |
| SNP_44720_A_48280595 | NC_021165.1    | Ca_Kabuli_Chr06 | 48280595                | AA                                     | GG                 | GG               | INTERGENIC      |               |                    |                    |
| SNP_44721_A_48280597 | NC_021165.1    | Ca_Kabuli_Chr06 | 48280597                | AA                                     | CC                 | CC               | INTERGENIC      |               |                    |                    |
| SNP_44722_A_48280612 | NC_021165.1    | Ca_Kabuli_Chr06 | 48280612                | AA                                     | GG                 | GG               | INTERGENIC      |               |                    |                    |
| SNP_44723_A_48280622 | NC_021165.1    | Ca_Kabuli_Chr06 | 48280622                | AA                                     | GG                 | GG               | INTERGENIC      |               |                    |                    |
| SNP_44724_A_48280713 | NC_021165.1    | Ca_Kabuli_Chr06 | 48280713                | AA                                     | TT                 | TT               | INTERGENIC      |               |                    |                    |
| SNP_44725_A_48280762 | NC_021165.1    | Ca_Kabuli_Chr06 | 48280762                | AA                                     | TT                 | TT               | INTERGENIC      |               |                    |                    |
| SNP_44727_A_48280837 | NC_021165.1    | Ca_Kabuli_Chr06 | 48280837                | AA                                     | CC                 | CC               | INTERGENIC      |               |                    |                    |
| SNP_44728_A_48281097 | NC_021165.1    | Ca_Kabuli_Chr06 | 48281097                | AA                                     | GG                 | GG               | INTERGENIC      |               |                    |                    |
| SNP_44729_A_48281321 | NC_021165.1    | Ca_Kabuli_Chr06 | 48281321                | GG                                     | AA                 | AA               | INTERGENIC      |               |                    |                    |
| SNP_44730_A_48281357 | NC_021165.1    | Ca_Kabuli_Chr06 | 48281357                | TT                                     | CC                 | CC               | INTERGENIC      |               |                    |                    |
| SNP_44731_A_48281359 | NC_021165.1    | Ca_Kabuli_Chr06 | 48281359                | AA                                     | CC                 | CC               | INTERGENIC      |               |                    |                    |
| SNP_44732_A_48281360 | NC_021165.1    | Ca_Kabuli_Chr06 | 48281360                | TT                                     | AA                 | AA               | INTERGENIC      |               |                    |                    |
| SNP_44734_A_48281410 | NC_021165.1    | Ca_Kabuli_Chr06 | 48281410                | CC                                     | AA                 | AA               | INTERGENIC      |               |                    |                    |
| SNP_44736_A_48281665 | NC_021165.1    | Ca_Kabuli_Chr06 | 48281665                | GG                                     | CC                 | CC               | INTERGENIC      |               |                    |                    |
| SNP_44737_A_48281668 | NC_021165.1    | Ca_Kabuli_Chr06 | 48281668                | CC                                     | AA                 | AA               | INTERGENIC      |               |                    |                    |
| SNP_44738_A_48281688 | NC_021165.1    | Ca_Kabuli_Chr06 | 48281688                | TT                                     | CC                 | CC               | INTERGENIC      |               |                    |                    |
| SNP_44739_A_48281893 | NC_021165.1    | Ca_Kabuli_Chr06 | 48281893                | GG                                     | AA                 | AA               | INTERGENIC      |               |                    |                    |

| SNPs IDs             | Chromosome IDs | Chromosomes     | Physical positions (bp) | CDC Frontier genome (Reference genome) | (Pusa 1103 & HPNB) | (ILWC 46 & LPNB) | Sequence genome | Components of | Gene accession IDs                                        | Putative functions |
|----------------------|----------------|-----------------|-------------------------|----------------------------------------|--------------------|------------------|-----------------|---------------|-----------------------------------------------------------|--------------------|
| SNP_44740_A_48281894 | NC_021165.1    | Ca_Kabuli_Chr06 | 48281894                | AA                                     | GG                 | GG               | INTERGENIC      |               |                                                           |                    |
| SNP_44741_A_48281951 | NC_021165.1    | Ca_Kabuli_Chr06 | 48281951                | AA                                     | GG                 | GG               | INTERGENIC      |               |                                                           |                    |
| SNP_44742_A_48302337 | NC_021165.1    | Ca_Kabuli_Chr06 | 48302337                | CC                                     | TT                 | TT               | URR             | 101494305     | transcription factor DIVARICATA-like                      |                    |
| SNP_44743_A_48311730 | NC_021165.1    | Ca_Kabuli_Chr06 | 48311730                | CC                                     | TT                 | TT               | DRR             | 101496791     | Unknown function                                          |                    |
| SNP_44745_A_48361917 | NC_021165.1    | Ca_Kabuli_Chr06 | 48361917                | AA                                     | GG                 | GG               | INTERGENIC      |               |                                                           |                    |
| SNP_44746_A_48386281 | NC_021165.1    | Ca_Kabuli_Chr06 | 48386281                | TT                                     | AA                 | AA               | INTRON          | 101495691     | TMV resistance protein N-like                             |                    |
| SNP_44747_A_48699060 | NC_021165.1    | Ca_Kabuli_Chr06 | 48699060                | CC                                     | TT                 | TT               | URR             | 101505257     | uncharacterized LOC101505257                              |                    |
| SNP_44748_A_48708067 | NC_021165.1    | Ca_Kabuli_Chr06 | 48708067                | CC                                     | TT                 | TT               | INTERGENIC      |               |                                                           |                    |
| SNP_44749_A_48710281 | NC_021165.1    | Ca_Kabuli_Chr06 | 48710281                | TT                                     | CC                 | CC               | INTERGENIC      |               |                                                           |                    |
| SNP_44750_A_48710318 | NC_021165.1    | Ca_Kabuli_Chr06 | 48710318                | AA                                     | GG                 | GG               | INTERGENIC      |               |                                                           |                    |
| SNP_44751_A_48710846 | NC_021165.1    | Ca_Kabuli_Chr06 | 48710846                | AA                                     | GG                 | GG               | INTERGENIC      |               |                                                           |                    |
| SNP_44752_A_48710903 | NC_021165.1    | Ca_Kabuli_Chr06 | 48710903                | AA                                     | GG                 | GG               | INTERGENIC      |               |                                                           |                    |
| SNP_44753_A_48710932 | NC_021165.1    | Ca_Kabuli_Chr06 | 48710932                | CC                                     | TT                 | TT               | INTERGENIC      |               |                                                           |                    |
| SNP_44754_A_48730300 | NC_021165.1    | Ca_Kabuli_Chr06 | 48730300                | TT                                     | CC                 | CC               | INTERGENIC      |               |                                                           |                    |
| SNP_44755_A_48767867 | NC_021165.1    | Ca_Kabuli_Chr06 | 48767867                | AA                                     | GG                 | GG               | URR             | 101497778     | gamma-interferon-inducible lysosomal thiol reductase-like |                    |
| SNP_44756_A_48769820 | NC_021165.1    | Ca_Kabuli_Chr06 | 48769820                | CC                                     | TT                 | TT               | INTERGENIC      |               |                                                           |                    |
| SNP_44757_A_48788468 | NC_021165.1    | Ca_Kabuli_Chr06 | 48788468                | TT                                     | CC                 | CC               | INTERGENIC      |               |                                                           |                    |
| SNP_44758_A_48788552 | NC_021165.1    | Ca_Kabuli_Chr06 | 48788552                | GG                                     | AA                 | AA               | INTERGENIC      |               |                                                           |                    |
| SNP_44760_A_48788638 | NC_021165.1    | Ca_Kabuli_Chr06 | 48788638                | AA                                     | GG                 | GG               | INTERGENIC      |               |                                                           |                    |
| SNP_44761_A_48788645 | NC_021165.1    | Ca_Kabuli_Chr06 | 48788645                | GG                                     | AA                 | AA               | INTERGENIC      |               |                                                           |                    |
| SNP_44762_A_48792599 | NC_021165.1    | Ca_Kabuli_Chr06 | 48792599                | TT                                     | CC                 | CC               | INTERGENIC      |               |                                                           |                    |
| SNP_44763_A_48826774 | NC_021165.1    | Ca_Kabuli_Chr06 | 48826774                | AA                                     | GG                 | GG               | INTERGENIC      |               |                                                           |                    |

| SNPs IDs             | Chromosome IDs | Chromosomes     | Physical positions (bp) | CDC Frontier (Reference genome) | (Pusa 1103 & HPNB) | (ILWC 46 & LPNB) | Sequence Components of genome | Gene accession IDs | Putative functions           |
|----------------------|----------------|-----------------|-------------------------|---------------------------------|--------------------|------------------|-------------------------------|--------------------|------------------------------|
| SNP_44764_A_48887281 | NC_021165.1    | Ca_Kabuli_Chr06 | 48887281                | AA                              | GG                 | GG               | INTERGENIC                    |                    |                              |
| SNP_44766_A_48908184 | NC_021165.1    | Ca_Kabuli_Chr06 | 48908184                | AA                              | GG                 | GG               | INTERGENIC                    |                    |                              |
| SNP_44767_A_48908194 | NC_021165.1    | Ca_Kabuli_Chr06 | 48908194                | GG                              | AA                 | AA               | INTERGENIC                    |                    |                              |
| SNP_44768_A_48925418 | NC_021165.1    | Ca_Kabuli_Chr06 | 48925418                | AA                              | GG                 | GG               | INTERGENIC                    |                    |                              |
| SNP_44769_A_48956060 | NC_021165.1    | Ca_Kabuli_Chr06 | 48956060                | TT                              | AA                 | AA               | DRR                           | 101500572          | uncharacterized LOC101500572 |
| SNP_44770_A_48962227 | NC_021165.1    | Ca_Kabuli_Chr06 | 48962227                | GG                              | TT                 | TT               | INTERGENIC                    |                    |                              |
| SNP_44771_A_48998489 | NC_021165.1    | Ca_Kabuli_Chr06 | 48998489                | TT                              | CC                 | CC               | DRR                           | 101501213          | uncharacterized LOC101501213 |
| SNP_44772_A_49010747 | NC_021165.1    | Ca_Kabuli_Chr06 | 49010747                | AA                              | TT                 | TT               | INTERGENIC                    |                    |                              |
| SNP_44773_A_49016356 | NC_021165.1    | Ca_Kabuli_Chr06 | 49016356                | TT                              | CC                 | CC               | STOP_LOST                     | 101507847          | uncharacterized LOC101507847 |
| SNP_44774_A_49016395 | NC_021165.1    | Ca_Kabuli_Chr06 | 49016395                | AA                              | GG                 | GG               | NON_SYNONYMOUS_CODING         | 101507847          | uncharacterized LOC101507847 |
| SNP_44775_A_49016472 | NC_021165.1    | Ca_Kabuli_Chr06 | 49016472                | TT                              | GG                 | GG               | SYNONYMOUS_CODING             | 101507847          | uncharacterized LOC101507847 |
| SNP_44776_A_49016757 | NC_021165.1    | Ca_Kabuli_Chr06 | 49016757                | AA                              | GG                 | GG               | SPLICE_SITE_REGION            | 101507847          | uncharacterized LOC101507847 |
| SNP_44777_A_49018444 | NC_021165.1    | Ca_Kabuli_Chr06 | 49018444                | AA                              | GG                 | GG               | NON_SYNONYMOUS_CODING         | 101507847          | uncharacterized LOC101507847 |
| SNP_44778_A_49018454 | NC_021165.1    | Ca_Kabuli_Chr06 | 49018454                | GG                              | AA                 | AA               | STOP_GAINED                   | 101507847          | uncharacterized LOC101507847 |
| SNP_44779_A_49018457 | NC_021165.1    | Ca_Kabuli_Chr06 | 49018457                | AA                              | CC                 | CC               | NON_SYNONYMOUS_CODING         | 101507847          | uncharacterized LOC101507847 |
| SNP_44780_A_49022777 | NC_021165.1    | Ca_Kabuli_Chr06 | 49022777                | AA                              | TT                 | TT               | INTRON                        | 101507847          | uncharacterized LOC101507847 |
| SNP_44781_A_49026331 | NC_021165.1    | Ca_Kabuli_Chr06 | 49026331                | AA                              | TT                 | CC               | INTRON                        | 101507847          | uncharacterized LOC101507847 |
| SNP_44782_A_49035398 | NC_021165.1    | Ca_Kabuli_Chr06 | 49035398                | TT                              | GG                 | GG               | INTERGENIC                    |                    |                              |
| SNP_44783_A_49056513 | NC_021165.1    | Ca_Kabuli_Chr06 | 49056513                | TT                              | CC                 | CC               | INTERGENIC                    |                    |                              |
| SNP_44784_A_49058653 | NC_021165.1    | Ca_Kabuli_Chr06 | 49058653                | AA                              | GG                 | GG               | INTERGENIC                    |                    |                              |
| SNP_44785_A_49058655 | NC_021165.1    | Ca_Kabuli_Chr06 | 49058655                | TT                              | CC                 | CC               | INTERGENIC                    |                    |                              |
| SNP_44786_A_49109327 | NC_021165.1    | Ca_Kabuli_Chr06 | 49109327                | AA                              | GG                 | GG               | INTERGENIC                    |                    |                              |

| SNPs IDs             | Chromosome IDs | Chromosomes     | Physical positions (bp) | CDC Frontier genome (Reference genome) | (Pusa 1103 & HPNB) | (ILWC 46 & LPNB) | Sequence Components of genome | Gene accession IDs | Putative functions           |
|----------------------|----------------|-----------------|-------------------------|----------------------------------------|--------------------|------------------|-------------------------------|--------------------|------------------------------|
| SNP_44787_A_49110099 | NC_021165.1    | Ca_Kabuli_Chr06 | 49110099                | TT                                     | GG                 | GG               | INTERGENIC                    |                    |                              |
| SNP_44788_A_49149795 | NC_021165.1    | Ca_Kabuli_Chr06 | 49149795                | TT                                     | CC                 | CC               | INTERGENIC                    |                    |                              |
| SNP_44789_A_49149813 | NC_021165.1    | Ca_Kabuli_Chr06 | 49149813                | TT                                     | CC                 | CC               | INTERGENIC                    |                    |                              |
| SNP_44790_A_49149851 | NC_021165.1    | Ca_Kabuli_Chr06 | 49149851                | CC                                     | TT                 | TT               | INTERGENIC                    |                    |                              |
| SNP_44791_A_49149877 | NC_021165.1    | Ca_Kabuli_Chr06 | 49149877                | TT                                     | GG                 | GG               | INTERGENIC                    |                    |                              |
| SNP_44792_A_49150200 | NC_021165.1    | Ca_Kabuli_Chr06 | 49150200                | AA                                     | GG                 | GG               | INTERGENIC                    |                    |                              |
| SNP_44794_A_49218844 | NC_021165.1    | Ca_Kabuli_Chr06 | 49218844                | TT                                     | GG                 | GG               | NON_SYNONYMOUS_CODING         | id149053           | Unknown function             |
| SNP_44795_A_49218851 | NC_021165.1    | Ca_Kabuli_Chr06 | 49218851                | CC                                     | TT                 | TT               | SYNONYMOUS_CODING             | id149053           | Unknown function             |
| SNP_44796_A_49218854 | NC_021165.1    | Ca_Kabuli_Chr06 | 49218854                | CC                                     | AA                 | AA               | NON_SYNONYMOUS_CODING         | id149053           | Unknown function             |
| SNP_44797_A_49218873 | NC_021165.1    | Ca_Kabuli_Chr06 | 49218873                | CC                                     | GG                 | GG               | NON_SYNONYMOUS_CODING         | id149053           | Unknown function             |
| SNP_44798_A_49218874 | NC_021165.1    | Ca_Kabuli_Chr06 | 49218874                | AA                                     | TT                 | TT               | NON_SYNONYMOUS_CODING         | id149053           | Unknown function             |
| SNP_44800_A_49219163 | NC_021165.1    | Ca_Kabuli_Chr06 | 49219163                | GG                                     | AA                 | AA               | URR                           | 101504406          | uncharacterized LOC101504406 |
| SNP_44801_A_49219299 | NC_021165.1    | Ca_Kabuli_Chr06 | 49219299                | AA                                     | TT                 | TT               | URR                           | 101504406          | uncharacterized LOC101504406 |
| SNP_44802_A_49219300 | NC_021165.1    | Ca_Kabuli_Chr06 | 49219300                | CC                                     | AA                 | AA               | URR                           | 101504406          | uncharacterized LOC101504406 |
| SNP_44803_A_49219423 | NC_021165.1    | Ca_Kabuli_Chr06 | 49219423                | AA                                     | CC                 | CC               | URR                           | 101504406          | uncharacterized LOC101504406 |
| SNP_44804_A_49219430 | NC_021165.1    | Ca_Kabuli_Chr06 | 49219430                | AA                                     | CC                 | CC               | URR                           | 101504406          | uncharacterized LOC101504406 |
| SNP_44805_A_49219557 | NC_021165.1    | Ca_Kabuli_Chr06 | 49219557                | GG                                     | AA                 | AA               | URR                           | 101504406          | uncharacterized LOC101504406 |
| SNP_44806_A_49221067 | NC_021165.1    | Ca_Kabuli_Chr06 | 49221067                | AA                                     | GG                 | GG               | URR                           | 101504406          | uncharacterized LOC101504406 |
| SNP_44807_A_49221075 | NC_021165.1    | Ca_Kabuli_Chr06 | 49221075                | CC                                     | TT                 | TT               | URR                           | 101504406          | uncharacterized LOC101504406 |
| SNP_44808_A_49221814 | NC_021165.1    | Ca_Kabuli_Chr06 | 49221814                | TT                                     | CC                 | CC               | INTERGENIC                    |                    |                              |
| SNP_44809_A_49222089 | NC_021165.1    | Ca_Kabuli_Chr06 | 49222089                | AA                                     | TT                 | TT               | INTERGENIC                    |                    |                              |
| SNP_44810_A_49223069 | NC_021165.1    | Ca_Kabuli_Chr06 | 49223069                | CC                                     | TT                 | TT               | INTERGENIC                    |                    |                              |

| SNPs IDs             | Chromosome IDs | Chromosomes     | Physical positions (bp) | CDC Frontier genome (Reference genome) | (Pusa 1103 & HPNB) | (ILWC 46 & LPNB) | Sequence genome | Components of | Gene accession IDs                        | Putative functions |
|----------------------|----------------|-----------------|-------------------------|----------------------------------------|--------------------|------------------|-----------------|---------------|-------------------------------------------|--------------------|
| SNP_44811_A_49261919 | NC_021165.1    | Ca_Kabuli_Chr06 | 49261919                | CC                                     | TT                 | TT               | INTERGENIC      |               |                                           |                    |
| SNP_44813_A_49262267 | NC_021165.1    | Ca_Kabuli_Chr06 | 49262267                | TT                                     | CC                 | CC               | INTERGENIC      |               |                                           |                    |
| SNP_44814_A_49262327 | NC_021165.1    | Ca_Kabuli_Chr06 | 49262327                | TT                                     | GG                 | GG               | INTERGENIC      |               |                                           |                    |
| SNP_44815_A_49262359 | NC_021165.1    | Ca_Kabuli_Chr06 | 49262359                | GG                                     | AA                 | AA               | INTERGENIC      |               |                                           |                    |
| SNP_44816_A_49302596 | NC_021165.1    | Ca_Kabuli_Chr06 | 49302596                | GG                                     | AA                 | AA               | INTERGENIC      |               |                                           |                    |
| SNP_44817_A_49318116 | NC_021165.1    | Ca_Kabuli_Chr06 | 49318116                | AA                                     | GG                 | GG               | INTERGENIC      |               |                                           |                    |
| SNP_44818_A_49318258 | NC_021165.1    | Ca_Kabuli_Chr06 | 49318258                | CC                                     | TT                 | TT               | INTERGENIC      |               |                                           |                    |
| SNP_44819_A_49318652 | NC_021165.1    | Ca_Kabuli_Chr06 | 49318652                | GG                                     | AA                 | AA               | INTERGENIC      |               |                                           |                    |
| SNP_44820_A_49318702 | NC_021165.1    | Ca_Kabuli_Chr06 | 49318702                | GG                                     | AA                 | AA               | INTERGENIC      |               |                                           |                    |
| SNP_44821_A_49319205 | NC_021165.1    | Ca_Kabuli_Chr06 | 49319205                | CC                                     | TT                 | TT               | INTERGENIC      |               |                                           |                    |
| SNP_44822_A_49323078 | NC_021165.1    | Ca_Kabuli_Chr06 | 49323078                | AA                                     | GG                 | GG               | INTERGENIC      |               |                                           |                    |
| SNP_44823_A_49325612 | NC_021165.1    | Ca_Kabuli_Chr06 | 49325612                | CC                                     | TT                 | TT               | INTERGENIC      |               |                                           |                    |
| SNP_44824_A_49335756 | NC_021165.1    | Ca_Kabuli_Chr06 | 49335756                | AA                                     | GG                 | GG               | INTERGENIC      |               |                                           |                    |
| SNP_44825_A_49438381 | NC_021165.1    | Ca_Kabuli_Chr06 | 49438381                | AA                                     | GG                 | GG               | INTRON          | 101510086     | Unknown function                          |                    |
| SNP_44826_A_49523109 | NC_021165.1    | Ca_Kabuli_Chr06 | 49523109                | TT                                     | AA                 | AA               | DRR             | 101513628     | uncharacterized LOC101513628              |                    |
| SNP_44827_A_49572551 | NC_021165.1    | Ca_Kabuli_Chr06 | 49572551                | AA                                     | TT                 | TT               | DRR             | 101515365     | probable ATP-dependent RNA helicase DDX11 |                    |
| SNP_44828_A_49583926 | NC_021165.1    | Ca_Kabuli_Chr06 | 49583926                | TT                                     | CC                 | CC               | URR             | 101515365     | probable ATP-dependent RNA helicase DDX11 |                    |
| SNP_44829_A_49628921 | NC_021165.1    | Ca_Kabuli_Chr06 | 49628921                | TT                                     | CC                 | CC               | INTERGENIC      |               |                                           |                    |
| SNP_44830_A_49629118 | NC_021165.1    | Ca_Kabuli_Chr06 | 49629118                | AA                                     | CC                 | CC               | INTERGENIC      |               |                                           |                    |
| SNP_44831_A_49629599 | NC_021165.1    | Ca_Kabuli_Chr06 | 49629599                | TT                                     | AA                 | AA               | INTERGENIC      |               |                                           |                    |
| SNP_44832_A_49629674 | NC_021165.1    | Ca_Kabuli_Chr06 | 49629674                | AA                                     | GG                 | GG               | INTERGENIC      |               |                                           |                    |
| SNP_44833_A_49655704 | NC_021165.1    | Ca_Kabuli_Chr06 | 49655704                | TT                                     | AA                 | AA               | INTRON          | 101512015     | uncharacterized LOC101512015              |                    |

| SNPs IDs             | Chromosome IDs | Chromosomes     | Physical positions (bp) | CDC Frontier genome (Reference genome) | (Pusa 1103 & HPNB) | (ILWC 46 & LPNB) | Sequence genome | Components of | Gene accession IDs | Putative functions |
|----------------------|----------------|-----------------|-------------------------|----------------------------------------|--------------------|------------------|-----------------|---------------|--------------------|--------------------|
| SNP_44834_A_49707175 | NC_021165.1    | Ca_Kabuli_Chr06 | 49707175                | GG                                     | AA                 | AA               | INTERGENIC      |               |                    |                    |
| SNP_44835_A_49727353 | NC_021165.1    | Ca_Kabuli_Chr06 | 49727353                | GG                                     | CC                 | CC               | INTERGENIC      |               |                    |                    |
| SNP_44836_A_49727380 | NC_021165.1    | Ca_Kabuli_Chr06 | 49727380                | TT                                     | GG                 | GG               | INTERGENIC      |               |                    |                    |
| SNP_44837_A_49727392 | NC_021165.1    | Ca_Kabuli_Chr06 | 49727392                | TT                                     | AA                 | AA               | INTERGENIC      |               |                    |                    |
| SNP_44838_A_49727397 | NC_021165.1    | Ca_Kabuli_Chr06 | 49727397                | GG                                     | AA                 | AA               | INTERGENIC      |               |                    |                    |
| SNP_44839_A_49727412 | NC_021165.1    | Ca_Kabuli_Chr06 | 49727412                | GG                                     | AA                 | AA               | INTERGENIC      |               |                    |                    |
| SNP_44840_A_49727427 | NC_021165.1    | Ca_Kabuli_Chr06 | 49727427                | AA                                     | GG                 | GG               | INTERGENIC      |               |                    |                    |
| SNP_44841_A_49727442 | NC_021165.1    | Ca_Kabuli_Chr06 | 49727442                | TT                                     | CC                 | CC               | INTERGENIC      |               |                    |                    |
| SNP_44842_A_49727444 | NC_021165.1    | Ca_Kabuli_Chr06 | 49727444                | TT                                     | AA                 | AA               | INTERGENIC      |               |                    |                    |
| SNP_44843_A_49727445 | NC_021165.1    | Ca_Kabuli_Chr06 | 49727445                | AA                                     | TT                 | TT               | INTERGENIC      |               |                    |                    |
| SNP_44844_A_49727448 | NC_021165.1    | Ca_Kabuli_Chr06 | 49727448                | AA                                     | GG                 | GG               | INTERGENIC      |               |                    |                    |
| SNP_44845_A_49727452 | NC_021165.1    | Ca_Kabuli_Chr06 | 49727452                | TT                                     | CC                 | CC               | INTERGENIC      |               |                    |                    |
| SNP_44846_A_49727460 | NC_021165.1    | Ca_Kabuli_Chr06 | 49727460                | AA                                     | CC                 | CC               | INTERGENIC      |               |                    |                    |
| SNP_44847_A_49727551 | NC_021165.1    | Ca_Kabuli_Chr06 | 49727551                | TT                                     | CC                 | CC               | INTERGENIC      |               |                    |                    |
| SNP_44848_A_49727806 | NC_021165.1    | Ca_Kabuli_Chr06 | 49727806                | TT                                     | GG                 | GG               | INTERGENIC      |               |                    |                    |
| SNP_44849_A_49727809 | NC_021165.1    | Ca_Kabuli_Chr06 | 49727809                | TT                                     | GG                 | GG               | INTERGENIC      |               |                    |                    |
| SNP_44850_A_49727821 | NC_021165.1    | Ca_Kabuli_Chr06 | 49727821                | AA                                     | GG                 | GG               | INTERGENIC      |               |                    |                    |
| SNP_44851_A_49727857 | NC_021165.1    | Ca_Kabuli_Chr06 | 49727857                | CC                                     | AA                 | AA               | INTERGENIC      |               |                    |                    |
| SNP_44852_A_49727913 | NC_021165.1    | Ca_Kabuli_Chr06 | 49727913                | GG                                     | TT                 | TT               | INTERGENIC      |               |                    |                    |
| SNP_44853_A_49727920 | NC_021165.1    | Ca_Kabuli_Chr06 | 49727920                | AA                                     | TT                 | TT               | INTERGENIC      |               |                    |                    |
| SNP_44854_A_49727922 | NC_021165.1    | Ca_Kabuli_Chr06 | 49727922                | GG                                     | CC                 | CC               | INTERGENIC      |               |                    |                    |
| SNP_44855_A_49727928 | NC_021165.1    | Ca_Kabuli_Chr06 | 49727928                | AA                                     | GG                 | GG               | INTERGENIC      |               |                    |                    |

| SNPs IDs             | Chromosome IDs | Chromosomes     | Physical positions (bp) | CDC Frontier (Reference genome) | (Pusa 1103 & HPNB) | (ILWC 46 & LPNB) | Sequence Components of genome | Gene accession IDs | Putative functions                                             |
|----------------------|----------------|-----------------|-------------------------|---------------------------------|--------------------|------------------|-------------------------------|--------------------|----------------------------------------------------------------|
| SNP_44856_A_49727950 | NC_021165.1    | Ca_Kabuli_Chr06 | 49727950                | TT                              | CC                 | CC               | INTERGENIC                    |                    |                                                                |
| SNP_44857_A_49727962 | NC_021165.1    | Ca_Kabuli_Chr06 | 49727962                | GG                              | TT                 | TT               | INTERGENIC                    |                    |                                                                |
| SNP_44858_A_49727963 | NC_021165.1    | Ca_Kabuli_Chr06 | 49727963                | GG                              | TT                 | TT               | INTERGENIC                    |                    |                                                                |
| SNP_44859_A_49727968 | NC_021165.1    | Ca_Kabuli_Chr06 | 49727968                | AA                              | GG                 | GG               | INTERGENIC                    |                    |                                                                |
| SNP_44860_A_49727979 | NC_021165.1    | Ca_Kabuli_Chr06 | 49727979                | TT                              | GG                 | GG               | INTERGENIC                    |                    |                                                                |
| SNP_44861_A_49728150 | NC_021165.1    | Ca_Kabuli_Chr06 | 49728150                | AA                              | GG                 | GG               | INTERGENIC                    |                    |                                                                |
| SNP_44862_A_49728480 | NC_021165.1    | Ca_Kabuli_Chr06 | 49728480                | CC                              | TT                 | TT               | INTERGENIC                    |                    |                                                                |
| SNP_44863_A_49728496 | NC_021165.1    | Ca_Kabuli_Chr06 | 49728496                | GG                              | AA                 | AA               | INTERGENIC                    |                    |                                                                |
| SNP_44865_A_49767972 | NC_021165.1    | Ca_Kabuli_Chr06 | 49767972                | GG                              | TT                 | TT               | INTERGENIC                    |                    |                                                                |
| SNP_44866_A_49790163 | NC_021165.1    | Ca_Kabuli_Chr06 | 49790163                | GG                              | AA                 | AA               | DRR                           | 101514944          | uncharacterized LOC101514944                                   |
| SNP_44867_A_49807769 | NC_021165.1    | Ca_Kabuli_Chr06 | 49807769                | GG                              | TT                 | TT               | INTERGENIC                    |                    |                                                                |
| SNP_44868_A_49848847 | NC_021165.1    | Ca_Kabuli_Chr06 | 49848847                | TT                              | AA                 | AA               | URR                           | 101491162          | heat shock 70 kDa protein 15-like                              |
| SNP_44869_A_49891321 | NC_021165.1    | Ca_Kabuli_Chr06 | 49891321                | TT                              | CC                 | CC               | INTERGENIC                    |                    |                                                                |
| SNP_44870_A_49894459 | NC_021165.1    | Ca_Kabuli_Chr06 | 49894459                | CC                              | TT                 | TT               | INTERGENIC                    |                    |                                                                |
| SNP_44871_A_49954030 | NC_021165.1    | Ca_Kabuli_Chr06 | 49954030                | AA                              | GG                 | GG               | INTRON                        | 101488343          | putative pentatricopeptide repeat-containing protein At3g47840 |
| SNP_44872_A_50052991 | NC_021165.1    | Ca_Kabuli_Chr06 | 50052991                | TT                              | CC                 | CC               | INTERGENIC                    |                    |                                                                |
| SNP_44873_A_50133863 | NC_021165.1    | Ca_Kabuli_Chr06 | 50133863                | GG                              | TT                 | TT               | INTERGENIC                    |                    |                                                                |
| SNP_44874_A_50145929 | NC_021165.1    | Ca_Kabuli_Chr06 | 50145929                | CC                              | TT                 | TT               | INTRON                        | 101489332          | uncharacterized LOC101489332                                   |
| SNP_44875_A_50147276 | NC_021165.1    | Ca_Kabuli_Chr06 | 50147276                | CC                              | AA                 | AA               | INTRON                        | 101489332          | uncharacterized LOC101489332                                   |
| SNP_44876_A_50148683 | NC_021165.1    | Ca_Kabuli_Chr06 | 50148683                | AA                              | GG                 | GG               | INTRON                        | 101489332          | uncharacterized LOC101489332                                   |
| SNP_44877_A_50148692 | NC_021165.1    | Ca_Kabuli_Chr06 | 50148692                | TT                              | CC                 | CC               | INTRON                        | 101489332          | uncharacterized LOC101489332                                   |
| SNP_44878_A_50148698 | NC_021165.1    | Ca_Kabuli_Chr06 | 50148698                | AA                              | GG                 | GG               | INTRON                        | 101489332          | uncharacterized LOC101489332                                   |



| SNPs IDs             | Chromosome IDs | Chromosomes     | Physical positions (bp) | CDC Frontier genome (Reference genome) | (Pusa 1103 & HPNB) | (ILWC 46 & LPNB) | Sequence Components of genome | Gene accession IDs | Putative functions |
|----------------------|----------------|-----------------|-------------------------|----------------------------------------|--------------------|------------------|-------------------------------|--------------------|--------------------|
| SNP_44879_A_50162493 | NC_021165.1    | Ca_Kabuli_Chr06 | 50162493                | TT                                     | AA                 | AA               | INTERGENIC                    |                    |                    |
| SNP_44880_A_50162501 | NC_021165.1    | Ca_Kabuli_Chr06 | 50162501                | CC                                     | TT                 | TT               | INTERGENIC                    |                    |                    |
| SNP_44881_A_50162804 | NC_021165.1    | Ca_Kabuli_Chr06 | 50162804                | AA                                     | TT                 | TT               | INTERGENIC                    |                    |                    |
| SNP_44882_A_50162878 | NC_021165.1    | Ca_Kabuli_Chr06 | 50162878                | GG                                     | AA                 | AA               | INTERGENIC                    |                    |                    |
| SNP_44883_A_50162918 | NC_021165.1    | Ca_Kabuli_Chr06 | 50162918                | CC                                     | TT                 | TT               | INTERGENIC                    |                    |                    |
| SNP_44884_A_50162981 | NC_021165.1    | Ca_Kabuli_Chr06 | 50162981                | TT                                     | CC                 | CC               | INTERGENIC                    |                    |                    |
| SNP_44885_A_50185148 | NC_021165.1    | Ca_Kabuli_Chr06 | 50185148                | TT                                     | GG                 | GG               | INTERGENIC                    |                    |                    |
| SNP_44886_A_50185229 | NC_021165.1    | Ca_Kabuli_Chr06 | 50185229                | AA                                     | TT                 | TT               | INTERGENIC                    |                    |                    |
| SNP_44887_A_50191944 | NC_021165.1    | Ca_Kabuli_Chr06 | 50191944                | AA                                     | GG                 | GG               | INTERGENIC                    |                    |                    |
| SNP_44888_A_50191990 | NC_021165.1    | Ca_Kabuli_Chr06 | 50191990                | TT                                     | CC                 | CC               | INTERGENIC                    |                    |                    |
| SNP_44889_A_50237642 | NC_021165.1    | Ca_Kabuli_Chr06 | 50237642                | TT                                     | CC                 | CC               | INTERGENIC                    |                    |                    |
| SNP_44890_A_50244197 | NC_021165.1    | Ca_Kabuli_Chr06 | 50244197                | AA                                     | GG                 | GG               | INTERGENIC                    |                    |                    |
| SNP_44891_A_50295739 | NC_021165.1    | Ca_Kabuli_Chr06 | 50295739                | GG                                     | AA                 | AA               | INTERGENIC                    |                    |                    |
| SNP_44892_A_50300829 | NC_021165.1    | Ca_Kabuli_Chr06 | 50300829                | GG                                     | AA                 | AA               | INTERGENIC                    |                    |                    |
| SNP_44893_A_50300836 | NC_021165.1    | Ca_Kabuli_Chr06 | 50300836                | GG                                     | AA                 | AA               | INTERGENIC                    |                    |                    |
| SNP_44894_A_50300877 | NC_021165.1    | Ca_Kabuli_Chr06 | 50300877                | AA                                     | GG                 | GG               | INTERGENIC                    |                    |                    |
| SNP_44895_A_50301166 | NC_021165.1    | Ca_Kabuli_Chr06 | 50301166                | TT                                     | CC                 | CC               | INTERGENIC                    |                    |                    |
| SNP_44896_A_50301173 | NC_021165.1    | Ca_Kabuli_Chr06 | 50301173                | GG                                     | AA                 | AA               | INTERGENIC                    |                    |                    |
| SNP_44897_A_50301382 | NC_021165.1    | Ca_Kabuli_Chr06 | 50301382                | GG                                     | AA                 | AA               | INTERGENIC                    |                    |                    |
| SNP_44898_A_50301410 | NC_021165.1    | Ca_Kabuli_Chr06 | 50301410                | TT                                     | AA                 | AA               | INTERGENIC                    |                    |                    |
| SNP_44899_A_50348386 | NC_021165.1    | Ca_Kabuli_Chr06 | 50348386                | CC                                     | AA                 | AA               | INTERGENIC                    |                    |                    |
| SNP_44900_A_50407468 | NC_021165.1    | Ca_Kabuli_Chr06 | 50407468                | GG                                     | AA                 | AA               | INTRON                        | id149665           | Unknown function   |

| SNPs IDs             | Chromosome IDs | Chromosomes     | Physical positions (bp) | CDC Frontier genome (Reference genome) | (Pusa 1103 & HPNB) | (ILWC 46 & LPNB) | Sequence genome | Components of | Gene accession IDs                          | Putative functions |
|----------------------|----------------|-----------------|-------------------------|----------------------------------------|--------------------|------------------|-----------------|---------------|---------------------------------------------|--------------------|
| SNP_44901_A_50491997 | NC_021165.1    | Ca_Kabuli_Chr06 | 50491997                | GG                                     | AA                 | AA               | INTERGENIC      |               |                                             |                    |
| SNP_44902_A_50681175 | NC_021165.1    | Ca_Kabuli_Chr06 | 50681175                | AA                                     | TT                 | TT               | INTERGENIC      |               |                                             |                    |
| SNP_44903_A_50681179 | NC_021165.1    | Ca_Kabuli_Chr06 | 50681179                | AA                                     | TT                 | TT               | INTERGENIC      |               |                                             |                    |
| SNP_44904_A_50760995 | NC_021165.1    | Ca_Kabuli_Chr06 | 50760995                | GG                                     | AA                 | AA               | INTERGENIC      |               |                                             |                    |
| SNP_44905_A_50788096 | NC_021165.1    | Ca_Kabuli_Chr06 | 50788096                | AA                                     | TT                 | TT               | INTERGENIC      |               |                                             |                    |
| SNP_44906_A_50792765 | NC_021165.1    | Ca_Kabuli_Chr06 | 50792765                | CC                                     | GG                 | GG               | INTRON          | 101509115     | two-component response regulator ARR10-like |                    |
| SNP_44907_A_50796883 | NC_021165.1    | Ca_Kabuli_Chr06 | 50796883                | TT                                     | CC                 | CC               | INTERGENIC      |               |                                             |                    |
| SNP_44908_A_50797048 | NC_021165.1    | Ca_Kabuli_Chr06 | 50797048                | AA                                     | GG                 | GG               | INTERGENIC      |               |                                             |                    |
| SNP_44909_A_50797051 | NC_021165.1    | Ca_Kabuli_Chr06 | 50797051                | TT                                     | GG                 | GG               | INTERGENIC      |               |                                             |                    |
| SNP_44910_A_50797117 | NC_021165.1    | Ca_Kabuli_Chr06 | 50797117                | CC                                     | TT                 | TT               | INTERGENIC      |               |                                             |                    |
| SNP_44911_A_50797170 | NC_021165.1    | Ca_Kabuli_Chr06 | 50797170                | CC                                     | TT                 | TT               | INTERGENIC      |               |                                             |                    |
| SNP_44912_A_50797176 | NC_021165.1    | Ca_Kabuli_Chr06 | 50797176                | TT                                     | CC                 | CC               | INTERGENIC      |               |                                             |                    |
| SNP_44913_A_50797191 | NC_021165.1    | Ca_Kabuli_Chr06 | 50797191                | TT                                     | GG                 | GG               | INTERGENIC      |               |                                             |                    |
| SNP_44914_A_50797326 | NC_021165.1    | Ca_Kabuli_Chr06 | 50797326                | GG                                     | AA                 | AA               | INTERGENIC      |               |                                             |                    |
| SNP_44915_A_50797365 | NC_021165.1    | Ca_Kabuli_Chr06 | 50797365                | AA                                     | GG                 | GG               | INTERGENIC      |               |                                             |                    |
| SNP_44916_A_50797480 | NC_021165.1    | Ca_Kabuli_Chr06 | 50797480                | GG                                     | AA                 | AA               | INTERGENIC      |               |                                             |                    |
| SNP_44917_A_50797481 | NC_021165.1    | Ca_Kabuli_Chr06 | 50797481                | GG                                     | AA                 | AA               | INTERGENIC      |               |                                             |                    |
| SNP_44918_A_50797504 | NC_021165.1    | Ca_Kabuli_Chr06 | 50797504                | TT                                     | AA                 | AA               | INTERGENIC      |               |                                             |                    |
| SNP_44919_A_50797525 | NC_021165.1    | Ca_Kabuli_Chr06 | 50797525                | GG                                     | AA                 | AA               | INTERGENIC      |               |                                             |                    |
| SNP_44920_A_50797531 | NC_021165.1    | Ca_Kabuli_Chr06 | 50797531                | CC                                     | GG                 | GG               | INTERGENIC      |               |                                             |                    |
| SNP_44921_A_50797536 | NC_021165.1    | Ca_Kabuli_Chr06 | 50797536                | CC                                     | AA                 | AA               | INTERGENIC      |               |                                             |                    |
| SNP_44922_A_50797616 | NC_021165.1    | Ca_Kabuli_Chr06 | 50797616                | CC                                     | AA                 | AA               | INTERGENIC      |               |                                             |                    |

| SNPs IDs             | Chromosome IDs | Chromosomes     | Physical positions (bp) | CDC Frontier genome (Reference genome) | (Pusa 1103 & HPNB) | (ILWC 46 & LPNB) | Sequence genome | Components of | Gene accession IDs | Putative functions |
|----------------------|----------------|-----------------|-------------------------|----------------------------------------|--------------------|------------------|-----------------|---------------|--------------------|--------------------|
| SNP_44923_A_50797674 | NC_021165.1    | Ca_Kabuli_Chr06 | 50797674                | CC                                     | AA                 | AA               | INTERGENIC      |               |                    |                    |
| SNP_44924_A_50797872 | NC_021165.1    | Ca_Kabuli_Chr06 | 50797872                | TT                                     | CC                 | CC               | INTERGENIC      |               |                    |                    |
| SNP_44925_A_50797873 | NC_021165.1    | Ca_Kabuli_Chr06 | 50797873                | GG                                     | TT                 | TT               | INTERGENIC      |               |                    |                    |
| SNP_44926_A_50797903 | NC_021165.1    | Ca_Kabuli_Chr06 | 50797903                | TT                                     | AA                 | AA               | INTERGENIC      |               |                    |                    |
| SNP_44927_A_50797991 | NC_021165.1    | Ca_Kabuli_Chr06 | 50797991                | TT                                     | AA                 | AA               | INTERGENIC      |               |                    |                    |
| SNP_44928_A_50798090 | NC_021165.1    | Ca_Kabuli_Chr06 | 50798090                | GG                                     | CC                 | CC               | INTERGENIC      |               |                    |                    |
| SNP_44929_A_50798119 | NC_021165.1    | Ca_Kabuli_Chr06 | 50798119                | CC                                     | TT                 | TT               | INTERGENIC      |               |                    |                    |
| SNP_44930_A_50798158 | NC_021165.1    | Ca_Kabuli_Chr06 | 50798158                | CC                                     | AA                 | AA               | INTERGENIC      |               |                    |                    |
| SNP_44931_A_50798168 | NC_021165.1    | Ca_Kabuli_Chr06 | 50798168                | AA                                     | GG                 | GG               | INTERGENIC      |               |                    |                    |
| SNP_44932_A_50798253 | NC_021165.1    | Ca_Kabuli_Chr06 | 50798253                | TT                                     | CC                 | CC               | INTERGENIC      |               |                    |                    |
| SNP_44933_A_50798260 | NC_021165.1    | Ca_Kabuli_Chr06 | 50798260                | AA                                     | GG                 | GG               | INTERGENIC      |               |                    |                    |
| SNP_44934_A_50798261 | NC_021165.1    | Ca_Kabuli_Chr06 | 50798261                | AA                                     | GG                 | GG               | INTERGENIC      |               |                    |                    |
| SNP_44935_A_50798364 | NC_021165.1    | Ca_Kabuli_Chr06 | 50798364                | CC                                     | TT                 | TT               | INTERGENIC      |               |                    |                    |
| SNP_44936_A_50798668 | NC_021165.1    | Ca_Kabuli_Chr06 | 50798668                | CC                                     | GG                 | GG               | INTERGENIC      |               |                    |                    |
| SNP_44937_A_50798723 | NC_021165.1    | Ca_Kabuli_Chr06 | 50798723                | GG                                     | TT                 | TT               | INTERGENIC      |               |                    |                    |
| SNP_44938_A_50799625 | NC_021165.1    | Ca_Kabuli_Chr06 | 50799625                | AA                                     | TT                 | TT               | INTERGENIC      |               |                    |                    |
| SNP_44939_A_50799645 | NC_021165.1    | Ca_Kabuli_Chr06 | 50799645                | CC                                     | AA                 | AA               | INTERGENIC      |               |                    |                    |
| SNP_44940_A_50799822 | NC_021165.1    | Ca_Kabuli_Chr06 | 50799822                | GG                                     | AA                 | AA               | INTERGENIC      |               |                    |                    |
| SNP_44941_A_50818104 | NC_021165.1    | Ca_Kabuli_Chr06 | 50818104                | AA                                     | GG                 | GG               | INTERGENIC      |               |                    |                    |
| SNP_44943_A_50829342 | NC_021165.1    | Ca_Kabuli_Chr06 | 50829342                | AA                                     | TT                 | TT               | INTERGENIC      |               |                    |                    |
| SNP_44944_A_50829351 | NC_021165.1    | Ca_Kabuli_Chr06 | 50829351                | TT                                     | AA                 | AA               | INTERGENIC      |               |                    |                    |
| SNP_44945_A_50830553 | NC_021165.1    | Ca_Kabuli_Chr06 | 50830553                | CC                                     | TT                 | TT               | INTERGENIC      |               |                    |                    |

| SNPs IDs             | Chromosome IDs | Chromosomes     | Physical positions (bp) | CDC Frontier genome (Reference genome) | (Pusa 1103 & HPNB) | (ILWC 46 & LPNB) | Sequence Components of genome | Gene accession IDs | Putative functions                                              |
|----------------------|----------------|-----------------|-------------------------|----------------------------------------|--------------------|------------------|-------------------------------|--------------------|-----------------------------------------------------------------|
| SNP_44946_A_50861513 | NC_021165.1    | Ca_Kabuli_Chr06 | 50861513                | AA                                     | TT                 | TT               | INTERGENIC                    |                    |                                                                 |
| SNP_44947_A_50875450 | NC_021165.1    | Ca_Kabuli_Chr06 | 50875450                | CC                                     | TT                 | TT               | INTERGENIC                    |                    |                                                                 |
| SNP_44948_A_50933846 | NC_021165.1    | Ca_Kabuli_Chr06 | 50933846                | CC                                     | TT                 | TT               | INTERGENIC                    |                    |                                                                 |
| SNP_44949_A_50966865 | NC_021165.1    | Ca_Kabuli_Chr06 | 50966865                | CC                                     | AA                 | AA               | INTERGENIC                    |                    |                                                                 |
| SNP_44950_A_50975920 | NC_021165.1    | Ca_Kabuli_Chr06 | 50975920                | GG                                     | CC                 | CC               | DRR                           | 101502904          | uncharacterized LOC101502904                                    |
| SNP_44951_A_50977086 | NC_021165.1    | Ca_Kabuli_Chr06 | 50977086                | CC                                     | TT                 | TT               | URR                           | 101502587          | Unknown function                                                |
| SNP_44952_A_50977168 | NC_021165.1    | Ca_Kabuli_Chr06 | 50977168                | TT                                     | AA                 | AA               | URR                           | 101502587          | Unknown function                                                |
| SNP_44953_A_50977340 | NC_021165.1    | Ca_Kabuli_Chr06 | 50977340                | CC                                     | TT                 | TT               | URR                           | 101502587          | Unknown function                                                |
| SNP_44954_A_50977467 | NC_021165.1    | Ca_Kabuli_Chr06 | 50977467                | AA                                     | GG                 | GG               | URR                           | 101502587          | Unknown function                                                |
| SNP_44955_A_50977580 | NC_021165.1    | Ca_Kabuli_Chr06 | 50977580                | GG                                     | TT                 | TT               | URR                           | 101502587          | Unknown function                                                |
| SNP_44957_A_51027782 | NC_021165.1    | Ca_Kabuli_Chr06 | 51027782                | AA                                     | GG                 | GG               | SYNONYMOUS_CODING             | 101504199          | uncharacterized LOC101504199                                    |
| SNP_44958_A_51073823 | NC_021165.1    | Ca_Kabuli_Chr06 | 51073823                | TT                                     | CC                 | CC               | INTERGENIC                    |                    |                                                                 |
| SNP_44959_A_51075513 | NC_021165.1    | Ca_Kabuli_Chr06 | 51075513                | GG                                     | CC                 | CC               | INTERGENIC                    |                    |                                                                 |
| SNP_44960_A_51219779 | NC_021165.1    | Ca_Kabuli_Chr06 | 51219779                | AA                                     | GG                 | GG               | INTERGENIC                    |                    |                                                                 |
| SNP_44961_A_51220334 | NC_021165.1    | Ca_Kabuli_Chr06 | 51220334                | AA                                     | GG                 | GG               | INTERGENIC                    |                    |                                                                 |
| SNP_44962_A_51256721 | NC_021165.1    | Ca_Kabuli_Chr06 | 51256721                | CC                                     | TT                 | TT               | INTERGENIC                    |                    |                                                                 |
| SNP_44963_A_51299469 | NC_021165.1    | Ca_Kabuli_Chr06 | 51299469                | GG                                     | CC                 | CC               | URR                           | 101497648          | LRR receptor-like serine/threonine-protein kinase GSO1          |
| SNP_44965_A_51350136 | NC_021165.1    | Ca_Kabuli_Chr06 | 51350136                | AA                                     | TT                 | TT               | INTERGENIC                    |                    |                                                                 |
| SNP_44966_A_51394432 | NC_021165.1    | Ca_Kabuli_Chr06 | 51394432                | AA                                     | CC                 | CC               | INTRON                        | 101499517          | 2-methoxy-6-polyprenyl-1,4-benzoquinol methylase, mitochondrial |
| SNP_44967_A_51398852 | NC_021165.1    | Ca_Kabuli_Chr06 | 51398852                | GG                                     | AA                 | AA               | DRR                           | 101499815          | F-box/LRR-repeat protein 20-like                                |
| SNP_44968_A_51411309 | NC_021165.1    | Ca_Kabuli_Chr06 | 51411309                | AA                                     | TT                 | TT               | INTERGENIC                    |                    |                                                                 |
| SNP_44969_A_51420081 | NC_021165.1    | Ca_Kabuli_Chr06 | 51420081                | GG                                     | AA                 | AA               | NON_SYNONYMOUS_CODING         | 101500368          | topless-related protein 1-like                                  |

| SNPs IDs             | Chromosome IDs | Chromosomes     | Physical positions (bp) | CDC Frontier genome (Reference genome) | (Pusa 1103 & HPNB) | (ILWC 46 & LPNB) | Sequence Components of genome | Gene accession IDs | Putative functions                                           |
|----------------------|----------------|-----------------|-------------------------|----------------------------------------|--------------------|------------------|-------------------------------|--------------------|--------------------------------------------------------------|
| SNP_44971_A_51444381 | NC_021165.1    | Ca_Kabuli_Chr06 | 51444381                | AA                                     | GG                 | GG               | INTERGENIC                    |                    |                                                              |
| SNP_44973_A_51444434 | NC_021165.1    | Ca_Kabuli_Chr06 | 51444434                | AA                                     | GG                 | GG               | INTERGENIC                    |                    |                                                              |
| SNP_44974_A_51473493 | NC_021165.1    | Ca_Kabuli_Chr06 | 51473493                | AA                                     | CC                 | CC               | INTRON                        | 101506124          | mediator of RNA polymerase II transcription subunit 15a-like |
| SNP_44975_A_51473495 | NC_021165.1    | Ca_Kabuli_Chr06 | 51473495                | AA                                     | TT                 | TT               | INTRON                        | 101506124          | mediator of RNA polymerase II transcription subunit 15a-like |
| SNP_44977_A_51482593 | NC_021165.1    | Ca_Kabuli_Chr06 | 51482593                | CC                                     | TT                 | TT               | INTRON                        | 101506124          | mediator of RNA polymerase II transcription subunit 15a-like |
| SNP_44978_A_51504461 | NC_021165.1    | Ca_Kabuli_Chr06 | 51504461                | TT                                     | CC                 | CC               | INTRON                        | 101506124          | mediator of RNA polymerase II transcription subunit 15a-like |
| SNP_44979_A_51504559 | NC_021165.1    | Ca_Kabuli_Chr06 | 51504559                | CC                                     | TT                 | TT               | INTRON                        | 101506124          | mediator of RNA polymerase II transcription subunit 15a-like |
| SNP_44980_A_51504970 | NC_021165.1    | Ca_Kabuli_Chr06 | 51504970                | AA                                     | TT                 | TT               | INTRON                        | 101506124          | mediator of RNA polymerase II transcription subunit 15a-like |
| SNP_44981_A_51506743 | NC_021165.1    | Ca_Kabuli_Chr06 | 51506743                | CC                                     | AA                 | AA               | INTRON                        | 101506124          | mediator of RNA polymerase II transcription subunit 15a-like |
| SNP_44982_A_51506777 | NC_021165.1    | Ca_Kabuli_Chr06 | 51506777                | TT                                     | AA                 | AA               | INTRON                        | 101506124          | mediator of RNA polymerase II transcription subunit 15a-like |
| SNP_44983_A_51506858 | NC_021165.1    | Ca_Kabuli_Chr06 | 51506858                | AA                                     | GG                 | GG               | INTRON                        | 101506124          | mediator of RNA polymerase II transcription subunit 15a-like |
| SNP_44984_A_51521917 | NC_021165.1    | Ca_Kabuli_Chr06 | 51521917                | AA                                     | TT                 | TT               | INTERGENIC                    |                    |                                                              |
| SNP_44985_A_51537111 | NC_021165.1    | Ca_Kabuli_Chr06 | 51537111                | GG                                     | AA                 | AA               | INTERGENIC                    |                    |                                                              |
| SNP_44986_A_51617449 | NC_021165.1    | Ca_Kabuli_Chr06 | 51617449                | TT                                     | CC                 | CC               | INTERGENIC                    |                    |                                                              |
| SNP_44987_A_51620145 | NC_021165.1    | Ca_Kabuli_Chr06 | 51620145                | CC                                     | AA                 | AA               | DRR                           | 101507116          | uncharacterized LOC101507116                                 |
| SNP_44988_A_51649690 | NC_021165.1    | Ca_Kabuli_Chr06 | 51649690                | TT                                     | GG                 | GG               | INTERGENIC                    |                    |                                                              |
| SNP_44989_A_51672042 | NC_021165.1    | Ca_Kabuli_Chr06 | 51672042                | CC                                     | TT                 | TT               | INTERGENIC                    |                    |                                                              |
| SNP_44990_A_51672074 | NC_021165.1    | Ca_Kabuli_Chr06 | 51672074                | AA                                     | CC                 | CC               | INTERGENIC                    |                    |                                                              |
| SNP_44992_A_51672951 | NC_021165.1    | Ca_Kabuli_Chr06 | 51672951                | CC                                     | AA                 | AA               | INTERGENIC                    |                    |                                                              |
| SNP_44993_A_51675181 | NC_021165.1    | Ca_Kabuli_Chr06 | 51675181                | TT                                     | CC                 | CC               | INTERGENIC                    |                    |                                                              |
| SNP_44994_A_51675231 | NC_021165.1    | Ca_Kabuli_Chr06 | 51675231                | CC                                     | TT                 | TT               | INTERGENIC                    |                    |                                                              |
| SNP_44995_A_51675262 | NC_021165.1    | Ca_Kabuli_Chr06 | 51675262                | GG                                     | AA                 | AA               | INTERGENIC                    |                    |                                                              |

| SNPs IDs             | Chromosome IDs | Chromosomes     | Physical positions (bp) | CDC Frontier genome (Reference genome) | (Pusa 1103 & HPNB) | (ILWC 46 & LPNB) | Sequence genome | Components of | Gene accession IDs | Putative functions                           |
|----------------------|----------------|-----------------|-------------------------|----------------------------------------|--------------------|------------------|-----------------|---------------|--------------------|----------------------------------------------|
| SNP_44996_A_51675264 | NC_021165.1    | Ca_Kabuli_Chr06 | 51675264                | GG                                     | AA                 | AA               | INTERGENIC      |               |                    |                                              |
| SNP_44997_A_51675466 | NC_021165.1    | Ca_Kabuli_Chr06 | 51675466                | CC                                     | GG                 | GG               | INTERGENIC      |               |                    |                                              |
| SNP_44998_A_51675476 | NC_021165.1    | Ca_Kabuli_Chr06 | 51675476                | CC                                     | TT                 | TT               | INTERGENIC      |               |                    |                                              |
| SNP_45000_A_51675562 | NC_021165.1    | Ca_Kabuli_Chr06 | 51675562                | TT                                     | CC                 | CC               | INTERGENIC      |               |                    |                                              |
| SNP_45001_A_51675577 | NC_021165.1    | Ca_Kabuli_Chr06 | 51675577                | GG                                     | AA                 | AA               | INTERGENIC      |               |                    |                                              |
| SNP_45002_A_51675595 | NC_021165.1    | Ca_Kabuli_Chr06 | 51675595                | AA                                     | GG                 | GG               | INTERGENIC      |               |                    |                                              |
| SNP_45003_A_51678031 | NC_021165.1    | Ca_Kabuli_Chr06 | 51678031                | TT                                     | CC                 | CC               | INTERGENIC      |               |                    |                                              |
| SNP_45004_A_51685183 | NC_021165.1    | Ca_Kabuli_Chr06 | 51685183                | TT                                     | AA                 | AA               | URR             | 101508067     |                    | probable CCR4-associated factor 1 homolog 11 |
| SNP_45005_A_51725386 | NC_021165.1    | Ca_Kabuli_Chr06 | 51725386                | CC                                     | TT                 | TT               | INTRON          | 101508693     |                    | glucan endo-1,3-beta-glucosidase-like        |
| SNP_45006_A_51725706 | NC_021165.1    | Ca_Kabuli_Chr06 | 51725706                | TT                                     | CC                 | CC               | INTRON          | 101508693     |                    | glucan endo-1,3-beta-glucosidase-like        |
| SNP_45007_A_51767671 | NC_021165.1    | Ca_Kabuli_Chr06 | 51767671                | CC                                     | TT                 | TT               | INTERGENIC      |               |                    |                                              |
| SNP_45008_A_51767889 | NC_021165.1    | Ca_Kabuli_Chr06 | 51767889                | AA                                     | GG                 | GG               | INTERGENIC      |               |                    |                                              |
| SNP_45009_A_51767902 | NC_021165.1    | Ca_Kabuli_Chr06 | 51767902                | AA                                     | CC                 | CC               | INTERGENIC      |               |                    |                                              |
| SNP_45010_A_51768028 | NC_021165.1    | Ca_Kabuli_Chr06 | 51768028                | GG                                     | AA                 | AA               | INTERGENIC      |               |                    |                                              |
| SNP_45011_A_51768069 | NC_021165.1    | Ca_Kabuli_Chr06 | 51768069                | TT                                     | GG                 | GG               | INTERGENIC      |               |                    |                                              |
| SNP_45012_A_51770292 | NC_021165.1    | Ca_Kabuli_Chr06 | 51770292                | CC                                     | TT                 | TT               | INTERGENIC      |               |                    |                                              |
| SNP_45013_A_51770311 | NC_021165.1    | Ca_Kabuli_Chr06 | 51770311                | TT                                     | CC                 | CC               | INTERGENIC      |               |                    |                                              |
| SNP_45014_A_51770358 | NC_021165.1    | Ca_Kabuli_Chr06 | 51770358                | AA                                     | CC                 | CC               | INTERGENIC      |               |                    |                                              |
| SNP_45015_A_51770385 | NC_021165.1    | Ca_Kabuli_Chr06 | 51770385                | CC                                     | TT                 | TT               | INTERGENIC      |               |                    |                                              |
| SNP_45016_A_51771391 | NC_021165.1    | Ca_Kabuli_Chr06 | 51771391                | CC                                     | TT                 | TT               | INTERGENIC      |               |                    |                                              |
| SNP_45018_A_51771534 | NC_021165.1    | Ca_Kabuli_Chr06 | 51771534                | AA                                     | CC                 | CC               | INTERGENIC      |               |                    |                                              |
| SNP_45019_A_51771762 | NC_021165.1    | Ca_Kabuli_Chr06 | 51771762                | GG                                     | AA                 | AA               | INTERGENIC      |               |                    |                                              |

| SNPs IDs             | Chromosome IDs | Chromosomes     | Physical positions (bp) | CDC Frontier genome (Reference genome) | (Pusa 1103 & HPNB) | (ILWC 46 & LPNB) | Sequence Components of genome | Gene accession IDs | Putative functions |
|----------------------|----------------|-----------------|-------------------------|----------------------------------------|--------------------|------------------|-------------------------------|--------------------|--------------------|
| SNP_45020_A_51772820 | NC_021165.1    | Ca_Kabuli_Chr06 | 51772820                | AA                                     | GG                 | GG               | INTERGENIC                    |                    |                    |
| SNP_45021_A_51772898 | NC_021165.1    | Ca_Kabuli_Chr06 | 51772898                | AA                                     | TT                 | TT               | INTERGENIC                    |                    |                    |
| SNP_45022_A_51773107 | NC_021165.1    | Ca_Kabuli_Chr06 | 51773107                | TT                                     | CC                 | CC               | INTERGENIC                    |                    |                    |
| SNP_45023_A_51773194 | NC_021165.1    | Ca_Kabuli_Chr06 | 51773194                | AA                                     | GG                 | GG               | INTERGENIC                    |                    |                    |
| SNP_45024_A_51775941 | NC_021165.1    | Ca_Kabuli_Chr06 | 51775941                | TT                                     | CC                 | CC               | INTERGENIC                    |                    |                    |
| SNP_45025_A_51776063 | NC_021165.1    | Ca_Kabuli_Chr06 | 51776063                | AA                                     | TT                 | TT               | INTERGENIC                    |                    |                    |
| SNP_45027_A_51806370 | NC_021165.1    | Ca_Kabuli_Chr06 | 51806370                | AA                                     | TT                 | TT               | INTRON                        | 101509650          | Unknown function   |
| SNP_45029_A_51829013 | NC_021165.1    | Ca_Kabuli_Chr06 | 51829013                | AA                                     | GG                 | GG               | INTERGENIC                    |                    |                    |
| SNP_45030_A_51829299 | NC_021165.1    | Ca_Kabuli_Chr06 | 51829299                | CC                                     | TT                 | TT               | INTERGENIC                    |                    |                    |
| SNP_45031_A_51829305 | NC_021165.1    | Ca_Kabuli_Chr06 | 51829305                | AA                                     | GG                 | GG               | INTERGENIC                    |                    |                    |
| SNP_45032_A_51829343 | NC_021165.1    | Ca_Kabuli_Chr06 | 51829343                | TT                                     | CC                 | CC               | INTERGENIC                    |                    |                    |
| SNP_45033_A_51830284 | NC_021165.1    | Ca_Kabuli_Chr06 | 51830284                | CC                                     | AA                 | AA               | INTERGENIC                    |                    |                    |
| SNP_45034_A_51830304 | NC_021165.1    | Ca_Kabuli_Chr06 | 51830304                | AA                                     | GG                 | GG               | INTERGENIC                    |                    |                    |
| SNP_45035_A_51831173 | NC_021165.1    | Ca_Kabuli_Chr06 | 51831173                | AA                                     | GG                 | GG               | INTERGENIC                    |                    |                    |
| SNP_45036_A_51831190 | NC_021165.1    | Ca_Kabuli_Chr06 | 51831190                | GG                                     | AA                 | AA               | INTERGENIC                    |                    |                    |
| SNP_45037_A_51885965 | NC_021165.1    | Ca_Kabuli_Chr06 | 51885965                | TT                                     | CC                 | CC               | INTERGENIC                    |                    |                    |
| SNP_45038_A_51914203 | NC_021165.1    | Ca_Kabuli_Chr06 | 51914203                | CC                                     | AA                 | AA               | INTERGENIC                    |                    |                    |
| SNP_45039_A_51923293 | NC_021165.1    | Ca_Kabuli_Chr06 | 51923293                | TT                                     | CC                 | CC               | INTERGENIC                    |                    |                    |
| SNP_45041_A_51959521 | NC_021165.1    | Ca_Kabuli_Chr06 | 51959521                | CC                                     | AA                 | AA               | INTERGENIC                    |                    |                    |
| SNP_45042_A_51959746 | NC_021165.1    | Ca_Kabuli_Chr06 | 51959746                | AA                                     | GG                 | GG               | INTERGENIC                    |                    |                    |
| SNP_45043_A_51959760 | NC_021165.1    | Ca_Kabuli_Chr06 | 51959760                | TT                                     | CC                 | CC               | INTERGENIC                    |                    |                    |
| SNP_45044_A_51983287 | NC_021165.1    | Ca_Kabuli_Chr06 | 51983287                | TT                                     | CC                 | CC               | INTERGENIC                    |                    |                    |

| SNPs IDs             | Chromosome IDs | Chromosomes     | Physical positions (bp) | CDC Frontier (Reference genome) | (Pusa 1103 & HPNB) | (ILWC 46 & LPNB) | Sequence Components of genome | Gene accession IDs | Putative functions                                       |
|----------------------|----------------|-----------------|-------------------------|---------------------------------|--------------------|------------------|-------------------------------|--------------------|----------------------------------------------------------|
| SNP_45045_A_52003768 | NC_021165.1    | Ca_Kabuli_Chr06 | 52003768                | TT                              | AA                 | AA               | INTERGENIC                    |                    |                                                          |
| SNP_45047_A_52075027 | NC_021165.1    | Ca_Kabuli_Chr06 | 52075027                | TT                              | AA                 | AA               | URR                           | 101506125          | serine/threonine-protein phosphatase 7 long form homolog |
| SNP_45048_A_52075034 | NC_021165.1    | Ca_Kabuli_Chr06 | 52075034                | TT                              | GG                 | GG               | URR                           | 101506125          | serine/threonine-protein phosphatase 7 long form homolog |
| SNP_45050_A_52075165 | NC_021165.1    | Ca_Kabuli_Chr06 | 52075165                | TT                              | CC                 | CC               | URR                           | 101506125          | serine/threonine-protein phosphatase 7 long form homolog |
| SNP_45051_A_52086792 | NC_021165.1    | Ca_Kabuli_Chr06 | 52086792                | GG                              | AA                 | AA               | INTERGENIC                    |                    |                                                          |
| SNP_45052_A_52086819 | NC_021165.1    | Ca_Kabuli_Chr06 | 52086819                | CC                              | AA                 | AA               | INTERGENIC                    |                    |                                                          |
| SNP_45053_A_52087910 | NC_021165.1    | Ca_Kabuli_Chr06 | 52087910                | CC                              | GG                 | GG               | START_GAINED                  | 101491067          | ribonuclease S-7-like                                    |
| SNP_45054_A_52088095 | NC_021165.1    | Ca_Kabuli_Chr06 | 52088095                | GG                              | CC                 | CC               | INTRON                        | 101491067          | ribonuclease S-7-like                                    |
| SNP_45055_A_52088185 | NC_021165.1    | Ca_Kabuli_Chr06 | 52088185                | AA                              | CC                 | CC               | INTRON                        | 101491067          | ribonuclease S-7-like                                    |
| SNP_45056_A_52088350 | NC_021165.1    | Ca_Kabuli_Chr06 | 52088350                | TT                              | CC                 | CC               | INTRON                        | 101491067          | ribonuclease S-7-like                                    |
| SNP_45057_A_52088388 | NC_021165.1    | Ca_Kabuli_Chr06 | 52088388                | AA                              | TT                 | TT               | INTRON                        | 101491067          | ribonuclease S-7-like                                    |
| SNP_45058_A_52088720 | NC_021165.1    | Ca_Kabuli_Chr06 | 52088720                | TT                              | GG                 | GG               | INTRON                        | 101491067          | ribonuclease S-7-like                                    |
| SNP_45059_A_52088832 | NC_021165.1    | Ca_Kabuli_Chr06 | 52088832                | AA                              | GG                 | GG               | NON_SYNONYMOUS_CODING         | 101491067          | ribonuclease S-7-like                                    |
| SNP_45060_A_52088834 | NC_021165.1    | Ca_Kabuli_Chr06 | 52088834                | CC                              | GG                 | GG               | NON_SYNONYMOUS_CODING         | 101491067          | ribonuclease S-7-like                                    |
| SNP_45061_A_52088933 | NC_021165.1    | Ca_Kabuli_Chr06 | 52088933                | GG                              | TT                 | TT               | NON_SYNONYMOUS_CODING         | 101491067          | ribonuclease S-7-like                                    |
| SNP_45062_A_52088934 | NC_021165.1    | Ca_Kabuli_Chr06 | 52088934                | GG                              | TT                 | TT               | NON_SYNONYMOUS_CODING         | 101491067          | ribonuclease S-7-like                                    |
| SNP_45063_A_52088939 | NC_021165.1    | Ca_Kabuli_Chr06 | 52088939                | AA                              | CC                 | CC               | SYNONYMOUS_CODING             | 101491067          | ribonuclease S-7-like                                    |
| SNP_45064_A_52088940 | NC_021165.1    | Ca_Kabuli_Chr06 | 52088940                | GG                              | AA                 | AA               | NON_SYNONYMOUS_CODING         | 101491067          | ribonuclease S-7-like                                    |
| SNP_45065_A_52088943 | NC_021165.1    | Ca_Kabuli_Chr06 | 52088943                | GG                              | CC                 | CC               | NON_SYNONYMOUS_CODING         | 101491067          | ribonuclease S-7-like                                    |
| SNP_45066_A_52088948 | NC_021165.1    | Ca_Kabuli_Chr06 | 52088948                | TT                              | AA                 | AA               | NON_SYNONYMOUS_CODING         | 101491067          | ribonuclease S-7-like                                    |
| SNP_45067_A_52088949 | NC_021165.1    | Ca_Kabuli_Chr06 | 52088949                | TT                              | GG                 | GG               | STOP_GAINED                   | 101491067          | ribonuclease S-7-like                                    |
| SNP_45068_A_52088952 | NC_021165.1    | Ca_Kabuli_Chr06 | 52088952                | AA                              | GG                 | GG               | NON_SYNONYMOUS_CODING         | 101491067          | ribonuclease S-7-like                                    |



| SNPs IDs             | Chromosome IDs | Chromosomes     | Physical positions (bp) | CDC Frontier genome (Reference genome) | (Pusa 1103 & HPNB) | (ILWC 46 & LPNB) | Sequence Components of genome | Gene accession IDs | Putative functions    |
|----------------------|----------------|-----------------|-------------------------|----------------------------------------|--------------------|------------------|-------------------------------|--------------------|-----------------------|
| SNP_45069_A_52089955 | NC_021165.1    | Ca_Kabuli_Chr06 | 52089955                | GG                                     | CC                 | CC               | NON_SYNONYMOUS_CODING         | 101491067          | ribonuclease S-7-like |
| SNP_45070_A_52089071 | NC_021165.1    | Ca_Kabuli_Chr06 | 52089071                | TT                                     | AA                 | AA               | NON_SYNONYMOUS_CODING         | 101491067          | ribonuclease S-7-like |
| SNP_45071_A_52089097 | NC_021165.1    | Ca_Kabuli_Chr06 | 52089097                | CC                                     | GG                 | GG               | NON_SYNONYMOUS_CODING         | 101491067          | ribonuclease S-7-like |
| SNP_45072_A_52089098 | NC_021165.1    | Ca_Kabuli_Chr06 | 52089098                | AA                                     | GG                 | GG               | NON_SYNONYMOUS_CODING         | 101491067          | ribonuclease S-7-like |
| SNP_45073_A_52089100 | NC_021165.1    | Ca_Kabuli_Chr06 | 52089100                | AA                                     | CC                 | CC               | NON_SYNONYMOUS_CODING         | 101491067          | ribonuclease S-7-like |
| SNP_45074_A_52089109 | NC_021165.1    | Ca_Kabuli_Chr06 | 52089109                | GG                                     | AA                 | AA               | NON_SYNONYMOUS_CODING         | 101491067          | ribonuclease S-7-like |
| SNP_45075_A_52089111 | NC_021165.1    | Ca_Kabuli_Chr06 | 52089111                | TT                                     | GG                 | GG               | NON_SYNONYMOUS_CODING         | 101491067          | ribonuclease S-7-like |
| SNP_45076_A_52089152 | NC_021165.1    | Ca_Kabuli_Chr06 | 52089152                | TT                                     | AA                 | AA               | NON_SYNONYMOUS_CODING         | 101491067          | ribonuclease S-7-like |
| SNP_45077_A_52089273 | NC_021165.1    | Ca_Kabuli_Chr06 | 52089273                | AA                                     | CC                 | CC               | SYNONYMOUS_CODING             | 101491067          | ribonuclease S-7-like |
| SNP_45078_A_52089316 | NC_021165.1    | Ca_Kabuli_Chr06 | 52089316                | AA                                     | GG                 | GG               | NON_SYNONYMOUS_CODING         | 101491067          | ribonuclease S-7-like |
| SNP_45079_A_52089339 | NC_021165.1    | Ca_Kabuli_Chr06 | 52089339                | CC                                     | GG                 | GG               | SYNONYMOUS_CODING             | 101491067          | ribonuclease S-7-like |
| SNP_45080_A_52089344 | NC_021165.1    | Ca_Kabuli_Chr06 | 52089344                | CC                                     | TT                 | TT               | NON_SYNONYMOUS_CODING         | 101491067          | ribonuclease S-7-like |
| SNP_45081_A_52089428 | NC_021165.1    | Ca_Kabuli_Chr06 | 52089428                | GG                                     | AA                 | AA               | NON_SYNONYMOUS_CODING         | 101491067          | ribonuclease S-7-like |
| SNP_45082_A_52089448 | NC_021165.1    | Ca_Kabuli_Chr06 | 52089448                | TT                                     | CC                 | CC               | NON_SYNONYMOUS_CODING         | 101491067          | ribonuclease S-7-like |
| SNP_45083_A_52089474 | NC_021165.1    | Ca_Kabuli_Chr06 | 52089474                | GG                                     | TT                 | TT               | DRR                           | 101491067          | ribonuclease S-7-like |
| SNP_45084_A_52089605 | NC_021165.1    | Ca_Kabuli_Chr06 | 52089605                | AA                                     | TT                 | TT               | URR                           | 101491067          | ribonuclease S-7-like |
| SNP_45085_A_52089619 | NC_021165.1    | Ca_Kabuli_Chr06 | 52089619                | TT                                     | AA                 | AA               | URR                           | 101491067          | ribonuclease S-7-like |
| SNP_45086_A_52089647 | NC_021165.1    | Ca_Kabuli_Chr06 | 52089647                | AA                                     | TT                 | TT               | URR                           | 101491067          | ribonuclease S-7-like |
| SNP_45087_A_52089653 | NC_021165.1    | Ca_Kabuli_Chr06 | 52089653                | AA                                     | GG                 | GG               | URR                           | 101491067          | ribonuclease S-7-like |
| SNP_45088_A_52089711 | NC_021165.1    | Ca_Kabuli_Chr06 | 52089711                | TT                                     | CC                 | CC               | URR                           | 101491067          | ribonuclease S-7-like |
| SNP_45089_A_52089739 | NC_021165.1    | Ca_Kabuli_Chr06 | 52089739                | CC                                     | TT                 | TT               | URR                           | 101491067          | ribonuclease S-7-like |
| SNP_45090_A_52089757 | NC_021165.1    | Ca_Kabuli_Chr06 | 52089757                | TT                                     | AA                 | AA               | URR                           | 101491067          | ribonuclease S-7-like |

| SNPs IDs             | Chromosome IDs | Chromosomes     | Physical positions (bp) | CDC Frontier genome (Reference genome) | (Pusa 1103 & HPNB) | (ILWC 46 & LPNB) | Sequence Components of genome | Gene accession IDs | Putative functions                                  |
|----------------------|----------------|-----------------|-------------------------|----------------------------------------|--------------------|------------------|-------------------------------|--------------------|-----------------------------------------------------|
| SNP_45092_A_52107516 | NC_021165.1    | Ca_Kabuli_Chr06 | 52107516                | GG                                     | CC                 | CC               | INTERGENIC                    |                    |                                                     |
| SNP_45093_A_52124742 | NC_021165.1    | Ca_Kabuli_Chr06 | 52124742                | CC                                     | TT                 | TT               | INTERGENIC                    |                    |                                                     |
| SNP_45094_A_52124760 | NC_021165.1    | Ca_Kabuli_Chr06 | 52124760                | GG                                     | AA                 | AA               | INTERGENIC                    |                    |                                                     |
| SNP_45095_A_52124783 | NC_021165.1    | Ca_Kabuli_Chr06 | 52124783                | TT                                     | GG                 | GG               | INTERGENIC                    |                    |                                                     |
| SNP_45096_A_52124940 | NC_021165.1    | Ca_Kabuli_Chr06 | 52124940                | GG                                     | TT                 | TT               | INTERGENIC                    |                    |                                                     |
| SNP_45097_A_52125066 | NC_021165.1    | Ca_Kabuli_Chr06 | 52125066                | GG                                     | AA                 | AA               | INTERGENIC                    |                    |                                                     |
| SNP_45098_A_52125120 | NC_021165.1    | Ca_Kabuli_Chr06 | 52125120                | GG                                     | AA                 | AA               | INTERGENIC                    |                    |                                                     |
| SNP_45099_A_52125392 | NC_021165.1    | Ca_Kabuli_Chr06 | 52125392                | TT                                     | CC                 | CC               | INTERGENIC                    |                    |                                                     |
| SNP_45100_A_52125614 | NC_021165.1    | Ca_Kabuli_Chr06 | 52125614                | CC                                     | TT                 | TT               | INTERGENIC                    |                    |                                                     |
| SNP_45101_A_52126344 | NC_021165.1    | Ca_Kabuli_Chr06 | 52126344                | TT                                     | CC                 | CC               | INTERGENIC                    |                    |                                                     |
| SNP_45102_A_52126667 | NC_021165.1    | Ca_Kabuli_Chr06 | 52126667                | TT                                     | GG                 | GG               | INTERGENIC                    |                    |                                                     |
| SNP_45103_A_52138762 | NC_021165.1    | Ca_Kabuli_Chr06 | 52138762                | AA                                     | GG                 | GG               | INTERGENIC                    |                    |                                                     |
| SNP_45104_A_52163932 | NC_021165.1    | Ca_Kabuli_Chr06 | 52163932                | CC                                     | GG                 | GG               | INTRON                        | 101492347          | calcium-transporting ATPase 9, plasma membrane-type |
| SNP_45105_A_52243506 | NC_021165.1    | Ca_Kabuli_Chr06 | 52243506                | GG                                     | AA                 | AA               | INTERGENIC                    |                    |                                                     |
| SNP_45106_A_52251192 | NC_021165.1    | Ca_Kabuli_Chr06 | 52251192                | AA                                     | CC                 | CC               | INTERGENIC                    |                    |                                                     |
| SNP_45107_A_52251202 | NC_021165.1    | Ca_Kabuli_Chr06 | 52251202                | AA                                     | GG                 | GG               | INTERGENIC                    |                    |                                                     |
| SNP_45108_A_52251296 | NC_021165.1    | Ca_Kabuli_Chr06 | 52251296                | GG                                     | AA                 | AA               | INTERGENIC                    |                    |                                                     |
| SNP_45109_A_52259747 | NC_021165.1    | Ca_Kabuli_Chr06 | 52259747                | AA                                     | GG                 | GG               | INTRON                        | 101495264          | xylosyltransferase 1-like                           |
| SNP_45110_A_52267676 | NC_021165.1    | Ca_Kabuli_Chr06 | 52267676                | AA                                     | GG                 | GG               | INTERGENIC                    |                    |                                                     |
| SNP_45111_A_52267711 | NC_021165.1    | Ca_Kabuli_Chr06 | 52267711                | TT                                     | CC                 | CC               | INTERGENIC                    |                    |                                                     |
| SNP_45112_A_52267790 | NC_021165.1    | Ca_Kabuli_Chr06 | 52267790                | AA                                     | GG                 | GG               | INTERGENIC                    |                    |                                                     |
| SNP_45113_A_52268005 | NC_021165.1    | Ca_Kabuli_Chr06 | 52268005                | AA                                     | TT                 | CC               | INTERGENIC                    |                    |                                                     |

| SNPs IDs             | Chromosome IDs | Chromosomes     | Physical positions (bp) | CDC Frontier (Reference genome) | (Pusa 1103 & HPNB) | (ILWC 46 & LPNB) | Sequence Components of genome | Gene accession IDs | Putative functions                        |
|----------------------|----------------|-----------------|-------------------------|---------------------------------|--------------------|------------------|-------------------------------|--------------------|-------------------------------------------|
| SNP_45114_A_52268099 | NC_021165.1    | Ca_Kabuli_Chr06 | 52268099                | AA                              | GG                 | GG               | INTERGENIC                    |                    |                                           |
| SNP_45115_A_52290301 | NC_021165.1    | Ca_Kabuli_Chr06 | 52290301                | AA                              | TT                 | TT               | URR                           | 101496243          | kelch repeat-containing protein At3g27220 |
| SNP_45116_A_52290303 | NC_021165.1    | Ca_Kabuli_Chr06 | 52290303                | CC                              | TT                 | TT               | URR                           | 101496243          | kelch repeat-containing protein At3g27220 |
| SNP_45117_A_52321837 | NC_021165.1    | Ca_Kabuli_Chr06 | 52321837                | GG                              | AA                 | AA               | INTERGENIC                    |                    |                                           |
| SNP_45118_A_52349739 | NC_021165.1    | Ca_Kabuli_Chr06 | 52349739                | TT                              | GG                 | GG               | INTRON                        | 101497985          | uncharacterized LOC101497985              |
| SNP_45119_A_52412045 | NC_021165.1    | Ca_Kabuli_Chr06 | 52412045                | TT                              | CC                 | CC               | INTERGENIC                    |                    |                                           |
| SNP_45121_A_52486155 | NC_021165.1    | Ca_Kabuli_Chr06 | 52486155                | AA                              | GG                 | GG               | INTERGENIC                    |                    |                                           |
| SNP_45122_A_52486171 | NC_021165.1    | Ca_Kabuli_Chr06 | 52486171                | TT                              | CC                 | CC               | INTERGENIC                    |                    |                                           |
| SNP_45123_A_52486236 | NC_021165.1    | Ca_Kabuli_Chr06 | 52486236                | CC                              | TT                 | TT               | INTERGENIC                    |                    |                                           |
| SNP_45124_A_52486284 | NC_021165.1    | Ca_Kabuli_Chr06 | 52486284                | AA                              | GG                 | GG               | INTERGENIC                    |                    |                                           |
| SNP_45125_A_52486300 | NC_021165.1    | Ca_Kabuli_Chr06 | 52486300                | TT                              | CC                 | CC               | INTERGENIC                    |                    |                                           |
| SNP_45126_A_52486358 | NC_021165.1    | Ca_Kabuli_Chr06 | 52486358                | TT                              | CC                 | CC               | INTERGENIC                    |                    |                                           |
| SNP_45127_A_52486378 | NC_021165.1    | Ca_Kabuli_Chr06 | 52486378                | GG                              | TT                 | TT               | INTERGENIC                    |                    |                                           |
| SNP_45130_A_52517671 | NC_021165.1    | Ca_Kabuli_Chr06 | 52517671                | AA                              | CC                 | CC               | INTERGENIC                    |                    |                                           |
| SNP_45131_A_52517676 | NC_021165.1    | Ca_Kabuli_Chr06 | 52517676                | TT                              | CC                 | CC               | INTERGENIC                    |                    |                                           |
| SNP_45134_A_52529805 | NC_021165.1    | Ca_Kabuli_Chr06 | 52529805                | AA                              | GG                 | GG               | INTERGENIC                    |                    |                                           |
| SNP_45135_A_52530007 | NC_021165.1    | Ca_Kabuli_Chr06 | 52530007                | AA                              | GG                 | GG               | INTERGENIC                    |                    |                                           |
| SNP_45136_A_52532294 | NC_021165.1    | Ca_Kabuli_Chr06 | 52532294                | GG                              | AA                 | AA               | INTERGENIC                    |                    |                                           |
| SNP_45137_A_52532309 | NC_021165.1    | Ca_Kabuli_Chr06 | 52532309                | TT                              | CC                 | CC               | INTERGENIC                    |                    |                                           |
| SNP_45138_A_52532315 | NC_021165.1    | Ca_Kabuli_Chr06 | 52532315                | CC                              | TT                 | TT               | INTERGENIC                    |                    |                                           |
| SNP_45139_A_52532330 | NC_021165.1    | Ca_Kabuli_Chr06 | 52532330                | CC                              | TT                 | TT               | INTERGENIC                    |                    |                                           |
| SNP_45140_A_52532340 | NC_021165.1    | Ca_Kabuli_Chr06 | 52532340                | TT                              | CC                 | CC               | INTERGENIC                    |                    |                                           |

| SNPs IDs             | Chromosome IDs | Chromosomes     | Physical positions (bp) | CDC Frontier genome (Reference genome) | (Pusa 1103 & HPNB) | (ILWC 46 & LPNB) | Sequence Components of genome | Gene accession IDs | Putative functions                           |
|----------------------|----------------|-----------------|-------------------------|----------------------------------------|--------------------|------------------|-------------------------------|--------------------|----------------------------------------------|
| SNP_45141_A_52537063 | NC_021165.1    | Ca_Kabuli_Chr06 | 52537063                | GG                                     | CC                 | CC               | INTERGENIC                    |                    |                                              |
| SNP_45142_A_52552823 | NC_021165.1    | Ca_Kabuli_Chr06 | 52552823                | AA                                     | TT                 | CC               | INTERGENIC                    |                    |                                              |
| SNP_45143_A_52570579 | NC_021165.1    | Ca_Kabuli_Chr06 | 52570579                | AA                                     | GG                 | GG               | INTRON                        | 101502383          | shikimate O-hydroxycinnamoyltransferase-like |
| SNP_45146_A_52696832 | NC_021165.1    | Ca_Kabuli_Chr06 | 52696832                | GG                                     | CC                 | CC               | DRR                           | 101508068          | Unknown function                             |
| SNP_45147_A_52696838 | NC_021165.1    | Ca_Kabuli_Chr06 | 52696838                | TT                                     | CC                 | CC               | DRR                           | 101508068          | Unknown function                             |
| SNP_45148_A_52697071 | NC_021165.1    | Ca_Kabuli_Chr06 | 52697071                | AA                                     | GG                 | GG               | DRR                           | 101508068          | Unknown function                             |
| SNP_45149_A_52697144 | NC_021165.1    | Ca_Kabuli_Chr06 | 52697144                | AA                                     | GG                 | GG               | STOP_LOST                     | 101508068          | Unknown function                             |
| SNP_45150_A_52702688 | NC_021165.1    | Ca_Kabuli_Chr06 | 52702688                | AA                                     | GG                 | GG               | INTRON                        | 101508068          | Unknown function                             |
| SNP_45151_A_52703012 | NC_021165.1    | Ca_Kabuli_Chr06 | 52703012                | TT                                     | CC                 | CC               | INTRON                        | 101508068          | Unknown function                             |
| SNP_45152_A_52703130 | NC_021165.1    | Ca_Kabuli_Chr06 | 52703130                | TT                                     | CC                 | CC               | INTRON                        | 101508068          | Unknown function                             |
| SNP_45153_A_52726478 | NC_021165.1    | Ca_Kabuli_Chr06 | 52726478                | AA                                     | CC                 | CC               | INTERGENIC                    |                    |                                              |
| SNP_45154_A_52759011 | NC_021165.1    | Ca_Kabuli_Chr06 | 52759011                | GG                                     | AA                 | AA               | INTERGENIC                    |                    |                                              |
| SNP_45155_A_52759013 | NC_021165.1    | Ca_Kabuli_Chr06 | 52759013                | CC                                     | TT                 | TT               | INTERGENIC                    |                    |                                              |
| SNP_45156_A_52762526 | NC_021165.1    | Ca_Kabuli_Chr06 | 52762526                | AA                                     | GG                 | GG               | INTERGENIC                    |                    |                                              |
| SNP_45157_A_52787838 | NC_021165.1    | Ca_Kabuli_Chr06 | 52787838                | GG                                     | CC                 | CC               | INTERGENIC                    |                    |                                              |
| SNP_45159_A_52839232 | NC_021165.1    | Ca_Kabuli_Chr06 | 52839232                | AA                                     | CC                 | CC               | INTERGENIC                    |                    |                                              |
| SNP_45160_A_52841606 | NC_021165.1    | Ca_Kabuli_Chr06 | 52841606                | CC                                     | AA                 | AA               | INTERGENIC                    |                    |                                              |
| SNP_45161_A_52841810 | NC_021165.1    | Ca_Kabuli_Chr06 | 52841810                | CC                                     | AA                 | AA               | INTERGENIC                    |                    |                                              |
| SNP_45163_A_52849183 | NC_021165.1    | Ca_Kabuli_Chr06 | 52849183                | TT                                     | CC                 | CC               | INTERGENIC                    |                    |                                              |
| SNP_45166_A_52854185 | NC_021165.1    | Ca_Kabuli_Chr06 | 52854185                | GG                                     | AA                 | AA               | INTRON                        | 101488344          | probable fucosyltransferase 7                |
| SNP_45167_A_52854317 | NC_021165.1    | Ca_Kabuli_Chr06 | 52854317                | AA                                     | GG                 | GG               | INTRON                        | 101488344          | probable fucosyltransferase 7                |
| SNP_45168_A_52854599 | NC_021165.1    | Ca_Kabuli_Chr06 | 52854599                | TT                                     | GG                 | GG               | INTRON                        | 101488344          | probable fucosyltransferase 7                |

| SNPs IDs             | Chromosome IDs | Chromosomes     | Physical positions (bp) | CDC Frontier genome (Reference genome) | (Pusa 1103 & HPNB) | (ILWC 46 & LPNB) | Sequence genome       | Components of | Gene accession IDs | Putative functions            |
|----------------------|----------------|-----------------|-------------------------|----------------------------------------|--------------------|------------------|-----------------------|---------------|--------------------|-------------------------------|
| SNP_45169_A_52855604 | NC_021165.1    | Ca_Kabuli_Chr06 | 52855604                | TT                                     | CC                 | CC               | INTRON                |               | 101488344          | probable fucosyltransferase 7 |
| SNP_45170_A_52855684 | NC_021165.1    | Ca_Kabuli_Chr06 | 52855684                | GG                                     | AA                 | AA               | INTRON                |               | 101488344          | probable fucosyltransferase 7 |
| SNP_45171_A_52855852 | NC_021165.1    | Ca_Kabuli_Chr06 | 52855852                | TT                                     | AA                 | AA               | INTRON                |               | 101488344          | probable fucosyltransferase 7 |
| SNP_45172_A_52855949 | NC_021165.1    | Ca_Kabuli_Chr06 | 52855949                | TT                                     | CC                 | CC               | INTRON                |               | 101488344          | probable fucosyltransferase 7 |
| SNP_45173_A_52856034 | NC_021165.1    | Ca_Kabuli_Chr06 | 52856034                | GG                                     | TT                 | TT               | INTRON                |               | 101488344          | probable fucosyltransferase 7 |
| SNP_45174_A_52856048 | NC_021165.1    | Ca_Kabuli_Chr06 | 52856048                | GG                                     | AA                 | AA               | INTRON                |               | 101488344          | probable fucosyltransferase 7 |
| SNP_45175_A_52857929 | NC_021165.1    | Ca_Kabuli_Chr06 | 52857929                | TT                                     | CC                 | CC               | INTRON                |               | 101488344          | probable fucosyltransferase 7 |
| SNP_45176_A_52858012 | NC_021165.1    | Ca_Kabuli_Chr06 | 52858012                | CC                                     | TT                 | TT               | INTRON                |               | 101488344          | probable fucosyltransferase 7 |
| SNP_45177_A_52858159 | NC_021165.1    | Ca_Kabuli_Chr06 | 52858159                | AA                                     | CC                 | CC               | INTRON                |               | 101488344          | probable fucosyltransferase 7 |
| SNP_45178_A_52858224 | NC_021165.1    | Ca_Kabuli_Chr06 | 52858224                | CC                                     | TT                 | TT               | INTRON                |               | 101488344          | probable fucosyltransferase 7 |
| SNP_45179_A_52858227 | NC_021165.1    | Ca_Kabuli_Chr06 | 52858227                | AA                                     | CC                 | CC               | INTRON                |               | 101488344          | probable fucosyltransferase 7 |
| SNP_45180_A_52858229 | NC_021165.1    | Ca_Kabuli_Chr06 | 52858229                | AA                                     | CC                 | CC               | INTRON                |               | 101488344          | probable fucosyltransferase 7 |
| SNP_45181_A_52858256 | NC_021165.1    | Ca_Kabuli_Chr06 | 52858256                | TT                                     | CC                 | CC               | INTRON                |               | 101488344          | probable fucosyltransferase 7 |
| SNP_45182_A_52858263 | NC_021165.1    | Ca_Kabuli_Chr06 | 52858263                | TT                                     | AA                 | AA               | INTRON                |               | 101488344          | probable fucosyltransferase 7 |
| SNP_45183_A_52858359 | NC_021165.1    | Ca_Kabuli_Chr06 | 52858359                | AA                                     | GG                 | GG               | INTRON                |               | 101488344          | probable fucosyltransferase 7 |
| SNP_45184_A_52858687 | NC_021165.1    | Ca_Kabuli_Chr06 | 52858687                | AA                                     | GG                 | GG               | INTRON                |               | 101488344          | probable fucosyltransferase 7 |
| SNP_45185_A_52858706 | NC_021165.1    | Ca_Kabuli_Chr06 | 52858706                | CC                                     | TT                 | TT               | INTRON                |               | 101488344          | probable fucosyltransferase 7 |
| SNP_45186_A_52858987 | NC_021165.1    | Ca_Kabuli_Chr06 | 52858987                | TT                                     | CC                 | CC               | INTRON                |               | 101488344          | probable fucosyltransferase 7 |
| SNP_45188_A_52862751 | NC_021165.1    | Ca_Kabuli_Chr06 | 52862751                | GG                                     | TT                 | TT               | NON_SYNONYMOUS_CODING |               | 101488344          | probable fucosyltransferase 7 |
| SNP_45189_A_52863062 | NC_021165.1    | Ca_Kabuli_Chr06 | 52863062                | AA                                     | TT                 | TT               | URR                   |               | 101488344          | probable fucosyltransferase 7 |
| SNP_45190_A_52863083 | NC_021165.1    | Ca_Kabuli_Chr06 | 52863083                | TT                                     | CC                 | CC               | URR                   |               | 101488344          | probable fucosyltransferase 7 |
| SNP_45191_A_52863208 | NC_021165.1    | Ca_Kabuli_Chr06 | 52863208                | TT                                     | CC                 | CC               | URR                   |               | 101488344          | probable fucosyltransferase 7 |

| SNPs IDs             | Chromosome IDs | Chromosomes     | Physical positions (bp) | CDC Frontier genome (Reference genome) | (Pusa 1103 & HPNB) | (ILWC 46 & LPNB) | Sequence Components of genome | Gene accession IDs | Putative functions            |
|----------------------|----------------|-----------------|-------------------------|----------------------------------------|--------------------|------------------|-------------------------------|--------------------|-------------------------------|
| SNP_45192_A_52863253 | NC_021165.1    | Ca_Kabuli_Chr06 | 52863253                | TT                                     | GG                 | GG               | URR                           | 101488344          | probable fucosyltransferase 7 |
| SNP_45193_A_52868927 | NC_021165.1    | Ca_Kabuli_Chr06 | 52868927                | TT                                     | AA                 | AA               | INTERGENIC                    |                    |                               |
| SNP_45194_A_52868948 | NC_021165.1    | Ca_Kabuli_Chr06 | 52868948                | AA                                     | TT                 | TT               | INTERGENIC                    |                    |                               |
| SNP_45195_A_52868968 | NC_021165.1    | Ca_Kabuli_Chr06 | 52868968                | GG                                     | AA                 | AA               | INTERGENIC                    |                    |                               |
| SNP_45196_A_52868997 | NC_021165.1    | Ca_Kabuli_Chr06 | 52868997                | AA                                     | CC                 | CC               | INTERGENIC                    |                    |                               |
| SNP_45197_A_52869002 | NC_021165.1    | Ca_Kabuli_Chr06 | 52869002                | TT                                     | AA                 | AA               | INTERGENIC                    |                    |                               |
| SNP_45198_A_52869190 | NC_021165.1    | Ca_Kabuli_Chr06 | 52869190                | CC                                     | TT                 | TT               | INTERGENIC                    |                    |                               |
| SNP_45199_A_52869229 | NC_021165.1    | Ca_Kabuli_Chr06 | 52869229                | AA                                     | CC                 | CC               | INTERGENIC                    |                    |                               |
| SNP_45200_A_52869305 | NC_021165.1    | Ca_Kabuli_Chr06 | 52869305                | CC                                     | AA                 | AA               | INTERGENIC                    |                    |                               |
| SNP_45201_A_52869414 | NC_021165.1    | Ca_Kabuli_Chr06 | 52869414                | CC                                     | AA                 | AA               | INTERGENIC                    |                    |                               |
| SNP_45202_A_52869658 | NC_021165.1    | Ca_Kabuli_Chr06 | 52869658                | CC                                     | TT                 | TT               | INTERGENIC                    |                    |                               |
| SNP_45203_A_52869672 | NC_021165.1    | Ca_Kabuli_Chr06 | 52869672                | GG                                     | TT                 | TT               | INTERGENIC                    |                    |                               |
| SNP_45204_A_52869685 | NC_021165.1    | Ca_Kabuli_Chr06 | 52869685                | TT                                     | CC                 | CC               | INTERGENIC                    |                    |                               |
| SNP_45205_A_52874445 | NC_021165.1    | Ca_Kabuli_Chr06 | 52874445                | AA                                     | GG                 | GG               | INTERGENIC                    |                    |                               |
| SNP_45206_A_52874448 | NC_021165.1    | Ca_Kabuli_Chr06 | 52874448                | TT                                     | CC                 | CC               | INTERGENIC                    |                    |                               |
| SNP_45207_A_52879695 | NC_021165.1    | Ca_Kabuli_Chr06 | 52879695                | AA                                     | CC                 | CC               | INTERGENIC                    |                    |                               |
| SNP_45208_A_52885576 | NC_021165.1    | Ca_Kabuli_Chr06 | 52885576                | TT                                     | AA                 | AA               | INTERGENIC                    |                    |                               |
| SNP_45209_A_52885657 | NC_021165.1    | Ca_Kabuli_Chr06 | 52885657                | AA                                     | GG                 | GG               | INTERGENIC                    |                    |                               |
| SNP_45210_A_52885916 | NC_021165.1    | Ca_Kabuli_Chr06 | 52885916                | TT                                     | GG                 | GG               | INTERGENIC                    |                    |                               |
| SNP_45211_A_52888060 | NC_021165.1    | Ca_Kabuli_Chr06 | 52888060                | TT                                     | CC                 | CC               | INTERGENIC                    |                    |                               |
| SNP_45212_A_52889842 | NC_021165.1    | Ca_Kabuli_Chr06 | 52889842                | CC                                     | GG                 | GG               | INTERGENIC                    |                    |                               |
| SNP_45214_A_52889942 | NC_021165.1    | Ca_Kabuli_Chr06 | 52889942                | CC                                     | GG                 | GG               | INTERGENIC                    |                    |                               |

| SNPs IDs             | Chromosome IDs | Chromosomes     | Physical positions (bp) | CDC Frontier (Reference genome) | (Pusa 1103 & HPNB) | (ILWC 46 & LPNB) | Sequence genome | Components of | Gene accession IDs | Putative functions |
|----------------------|----------------|-----------------|-------------------------|---------------------------------|--------------------|------------------|-----------------|---------------|--------------------|--------------------|
| SNP_45215_A_52890010 | NC_021165.1    | Ca_Kabuli_Chr06 | 52890010                | TT                              | AA                 | AA               | INTERGENIC      |               |                    |                    |
| SNP_45216_A_52890054 | NC_021165.1    | Ca_Kabuli_Chr06 | 52890054                | TT                              | CC                 | CC               | INTERGENIC      |               |                    |                    |
| SNP_45218_A_52893122 | NC_021165.1    | Ca_Kabuli_Chr06 | 52893122                | AA                              | CC                 | CC               | INTERGENIC      |               |                    |                    |
| SNP_45219_A_52895926 | NC_021165.1    | Ca_Kabuli_Chr06 | 52895926                | TT                              | CC                 | CC               | INTERGENIC      |               |                    |                    |
| SNP_45220_A_52919347 | NC_021165.1    | Ca_Kabuli_Chr06 | 52919347                | CC                              | TT                 | TT               | INTERGENIC      |               |                    |                    |
| SNP_45221_A_52933791 | NC_021165.1    | Ca_Kabuli_Chr06 | 52933791                | GG                              | TT                 | TT               | INTERGENIC      |               |                    |                    |
| SNP_45222_A_52934152 | NC_021165.1    | Ca_Kabuli_Chr06 | 52934152                | GG                              | AA                 | AA               | INTERGENIC      |               |                    |                    |
| SNP_45223_A_52934159 | NC_021165.1    | Ca_Kabuli_Chr06 | 52934159                | GG                              | AA                 | AA               | INTERGENIC      |               |                    |                    |
| SNP_45224_A_52958944 | NC_021165.1    | Ca_Kabuli_Chr06 | 52958944                | AA                              | CC                 | CC               | INTERGENIC      |               |                    |                    |
| SNP_45225_A_52960877 | NC_021165.1    | Ca_Kabuli_Chr06 | 52960877                | GG                              | TT                 | TT               | INTERGENIC      |               |                    |                    |
| SNP_45226_A_52960879 | NC_021165.1    | Ca_Kabuli_Chr06 | 52960879                | AA                              | GG                 | GG               | INTERGENIC      |               |                    |                    |
| SNP_45227_A_53002424 | NC_021165.1    | Ca_Kabuli_Chr06 | 53002424                | GG                              | AA                 | AA               | INTERGENIC      |               |                    |                    |
| SNP_45228_A_53005538 | NC_021165.1    | Ca_Kabuli_Chr06 | 53005538                | GG                              | TT                 | TT               | INTERGENIC      |               |                    |                    |
| SNP_45229_A_53010148 | NC_021165.1    | Ca_Kabuli_Chr06 | 53010148                | AA                              | GG                 | GG               | INTERGENIC      |               |                    |                    |
| SNP_45230_A_53010332 | NC_021165.1    | Ca_Kabuli_Chr06 | 53010332                | TT                              | CC                 | CC               | INTERGENIC      |               |                    |                    |
| SNP_45231_A_53010335 | NC_021165.1    | Ca_Kabuli_Chr06 | 53010335                | GG                              | AA                 | AA               | INTERGENIC      |               |                    |                    |
| SNP_45232_A_53010450 | NC_021165.1    | Ca_Kabuli_Chr06 | 53010450                | GG                              | AA                 | AA               | INTERGENIC      |               |                    |                    |
| SNP_45233_A_53010526 | NC_021165.1    | Ca_Kabuli_Chr06 | 53010526                | AA                              | TT                 | TT               | INTERGENIC      |               |                    |                    |
| SNP_45234_A_53010541 | NC_021165.1    | Ca_Kabuli_Chr06 | 53010541                | CC                              | AA                 | AA               | INTERGENIC      |               |                    |                    |
| SNP_45235_A_53011073 | NC_021165.1    | Ca_Kabuli_Chr06 | 53011073                | CC                              | TT                 | TT               | INTERGENIC      |               |                    |                    |
| SNP_45236_A_53030785 | NC_021165.1    | Ca_Kabuli_Chr06 | 53030785                | AA                              | GG                 | GG               | INTERGENIC      |               |                    |                    |
| SNP_45237_A_53039308 | NC_021165.1    | Ca_Kabuli_Chr06 | 53039308                | AA                              | CC                 | CC               | INTERGENIC      |               |                    |                    |

| SNPs IDs             | Chromosome IDs | Chromosomes     | Physical positions (bp) | CDC Frontier genome (Reference genome) | (Pusa 1103 & HPNB) | (ILWC 46 & LPNB) | Sequence Components of genome | Gene accession IDs | Putative functions                             |
|----------------------|----------------|-----------------|-------------------------|----------------------------------------|--------------------|------------------|-------------------------------|--------------------|------------------------------------------------|
| SNP_45238_A_53045372 | NC_021165.1    | Ca_Kabuli_Chr06 | 53045372                | CC                                     | TT                 | TT               | INTERGENIC                    |                    |                                                |
| SNP_45239_A_53045374 | NC_021165.1    | Ca_Kabuli_Chr06 | 53045374                | CC                                     | GG                 | GG               | INTERGENIC                    |                    |                                                |
| SNP_45240_A_53045382 | NC_021165.1    | Ca_Kabuli_Chr06 | 53045382                | TT                                     | GG                 | GG               | INTERGENIC                    |                    |                                                |
| SNP_45241_A_53045397 | NC_021165.1    | Ca_Kabuli_Chr06 | 53045397                | TT                                     | CC                 | CC               | INTERGENIC                    |                    |                                                |
| SNP_45242_A_53057676 | NC_021165.1    | Ca_Kabuli_Chr06 | 53057676                | AA                                     | GG                 | GG               | SYNONYMOUS_CODING             | 101489010          | probable fucosyltransferase 7                  |
| SNP_45243_A_53057829 | NC_021165.1    | Ca_Kabuli_Chr06 | 53057829                | GG                                     | AA                 | AA               | SYNONYMOUS_CODING             | 101489010          | probable fucosyltransferase 7                  |
| SNP_45244_A_53057913 | NC_021165.1    | Ca_Kabuli_Chr06 | 53057913                | TT                                     | CC                 | CC               | SYNONYMOUS_CODING             | 101489010          | probable fucosyltransferase 7                  |
| SNP_45245_A_53057951 | NC_021165.1    | Ca_Kabuli_Chr06 | 53057951                | TT                                     | CC                 | CC               | URR                           | 101489010          | probable fucosyltransferase 7                  |
| SNP_45246_A_53057972 | NC_021165.1    | Ca_Kabuli_Chr06 | 53057972                | AA                                     | GG                 | GG               | URR                           | 101489010          | probable fucosyltransferase 7                  |
| SNP_45247_A_53057973 | NC_021165.1    | Ca_Kabuli_Chr06 | 53057973                | GG                                     | AA                 | AA               | URR                           | 101489010          | probable fucosyltransferase 7                  |
| SNP_45248_A_53058040 | NC_021165.1    | Ca_Kabuli_Chr06 | 53058040                | GG                                     | CC                 | CC               | URR                           | 101489010          | probable fucosyltransferase 7                  |
| SNP_45249_A_53058053 | NC_021165.1    | Ca_Kabuli_Chr06 | 53058053                | CC                                     | AA                 | AA               | URR                           | 101489010          | probable fucosyltransferase 7                  |
| SNP_45250_A_53058085 | NC_021165.1    | Ca_Kabuli_Chr06 | 53058085                | GG                                     | TT                 | TT               | URR                           | 101489010          | probable fucosyltransferase 7                  |
| SNP_45251_A_53058096 | NC_021165.1    | Ca_Kabuli_Chr06 | 53058096                | AA                                     | GG                 | GG               | URR                           | 101489010          | probable fucosyltransferase 7                  |
| SNP_45252_A_53072481 | NC_021165.1    | Ca_Kabuli_Chr06 | 53072481                | TT                                     | CC                 | CC               | INTERGENIC                    |                    |                                                |
| SNP_45253_A_53072991 | NC_021165.1    | Ca_Kabuli_Chr06 | 53072991                | TT                                     | CC                 | CC               | INTERGENIC                    |                    |                                                |
| SNP_45254_A_53072995 | NC_021165.1    | Ca_Kabuli_Chr06 | 53072995                | CC                                     | TT                 | TT               | INTERGENIC                    |                    |                                                |
| SNP_45255_A_53099277 | NC_021165.1    | Ca_Kabuli_Chr06 | 53099277                | AA                                     | TT                 | TT               | URR                           | 101509116          | putative cyclic nucleotide-gated ion channel 8 |
| SNP_45256_A_53177612 | NC_021165.1    | Ca_Kabuli_Chr06 | 53177612                | GG                                     | TT                 | TT               | INTERGENIC                    |                    |                                                |
| SNP_45257_A_53177614 | NC_021165.1    | Ca_Kabuli_Chr06 | 53177614                | AA                                     | TT                 | TT               | INTERGENIC                    |                    |                                                |
| SNP_45258_A_53191536 | NC_021165.1    | Ca_Kabuli_Chr06 | 53191536                | GG                                     | TT                 | TT               | URR                           | 101513204          | V-type proton ATPase subunit D                 |
| SNP_45259_A_53214840 | NC_021165.1    | Ca_Kabuli_Chr06 | 53214840                | AA                                     | CC                 | CC               | INTERGENIC                    |                    |                                                |



| SNPs IDs             | Chromosome IDs | Chromosomes     | Physical positions (bp) | CDC Frontier genome (Reference genome) | (Pusa 1103 & HPNB) | (ILWC 46 & LPNB) | Sequence Components of genome | Gene accession IDs | Putative functions    |
|----------------------|----------------|-----------------|-------------------------|----------------------------------------|--------------------|------------------|-------------------------------|--------------------|-----------------------|
| SNP_45260_A_53303257 | NC_021165.1    | Ca_Kabuli_Chr06 | 53303257                | GG                                     | AA                 | AA               | INTRON                        | 101515041          | aquaporin NIP6-1-like |
| SNP_45261_A_53304750 | NC_021165.1    | Ca_Kabuli_Chr06 | 53304750                | CC                                     | TT                 | TT               | INTRON                        | 101515041          | aquaporin NIP6-1-like |
| SNP_45262_A_53304760 | NC_021165.1    | Ca_Kabuli_Chr06 | 53304760                | TT                                     | CC                 | CC               | INTRON                        | 101515041          | aquaporin NIP6-1-like |
| SNP_45263_A_53304761 | NC_021165.1    | Ca_Kabuli_Chr06 | 53304761                | CC                                     | TT                 | TT               | INTRON                        | 101515041          | aquaporin NIP6-1-like |
| SNP_45264_A_53304803 | NC_021165.1    | Ca_Kabuli_Chr06 | 53304803                | AA                                     | TT                 | TT               | INTRON                        | 101515041          | aquaporin NIP6-1-like |
| SNP_45265_A_53304830 | NC_021165.1    | Ca_Kabuli_Chr06 | 53304830                | GG                                     | TT                 | TT               | INTRON                        | 101515041          | aquaporin NIP6-1-like |
| SNP_45266_A_53304900 | NC_021165.1    | Ca_Kabuli_Chr06 | 53304900                | CC                                     | TT                 | TT               | INTRON                        | 101515041          | aquaporin NIP6-1-like |
| SNP_45267_A_53304910 | NC_021165.1    | Ca_Kabuli_Chr06 | 53304910                | GG                                     | CC                 | CC               | INTRON                        | 101515041          | aquaporin NIP6-1-like |
| SNP_45268_A_53304942 | NC_021165.1    | Ca_Kabuli_Chr06 | 53304942                | TT                                     | CC                 | CC               | INTRON                        | 101515041          | aquaporin NIP6-1-like |
| SNP_45269_A_53304969 | NC_021165.1    | Ca_Kabuli_Chr06 | 53304969                | TT                                     | CC                 | CC               | INTRON                        | 101515041          | aquaporin NIP6-1-like |
| SNP_45270_A_53305040 | NC_021165.1    | Ca_Kabuli_Chr06 | 53305040                | AA                                     | CC                 | CC               | INTRON                        | 101515041          | aquaporin NIP6-1-like |
| SNP_45271_A_53305059 | NC_021165.1    | Ca_Kabuli_Chr06 | 53305059                | GG                                     | AA                 | AA               | INTRON                        | 101515041          | aquaporin NIP6-1-like |
| SNP_45272_A_53305064 | NC_021165.1    | Ca_Kabuli_Chr06 | 53305064                | CC                                     | TT                 | TT               | INTRON                        | 101515041          | aquaporin NIP6-1-like |
| SNP_45273_A_53305083 | NC_021165.1    | Ca_Kabuli_Chr06 | 53305083                | TT                                     | AA                 | AA               | INTRON                        | 101515041          | aquaporin NIP6-1-like |
| SNP_45274_A_53305092 | NC_021165.1    | Ca_Kabuli_Chr06 | 53305092                | AA                                     | TT                 | TT               | INTRON                        | 101515041          | aquaporin NIP6-1-like |
| SNP_45275_A_53305120 | NC_021165.1    | Ca_Kabuli_Chr06 | 53305120                | GG                                     | CC                 | CC               | INTRON                        | 101515041          | aquaporin NIP6-1-like |
| SNP_45276_A_53305256 | NC_021165.1    | Ca_Kabuli_Chr06 | 53305256                | GG                                     | TT                 | TT               | INTRON                        | 101515041          | aquaporin NIP6-1-like |
| SNP_45277_A_53305293 | NC_021165.1    | Ca_Kabuli_Chr06 | 53305293                | TT                                     | CC                 | CC               | INTRON                        | 101515041          | aquaporin NIP6-1-like |
| SNP_45278_A_53305304 | NC_021165.1    | Ca_Kabuli_Chr06 | 53305304                | GG                                     | AA                 | AA               | INTRON                        | 101515041          | aquaporin NIP6-1-like |
| SNP_45280_A_53305581 | NC_021165.1    | Ca_Kabuli_Chr06 | 53305581                | CC                                     | TT                 | TT               | INTRON                        | 101515041          | aquaporin NIP6-1-like |
| SNP_45281_A_53309094 | NC_021165.1    | Ca_Kabuli_Chr06 | 53309094                | AA                                     | TT                 | TT               | URR                           | 101515041          | aquaporin NIP6-1-like |
| SNP_45282_A_53310289 | NC_021165.1    | Ca_Kabuli_Chr06 | 53310289                | TT                                     | GG                 | GG               | INTERGENIC                    |                    |                       |

| SNPs IDs             | Chromosome IDs | Chromosomes     | Physical positions (bp) | CDC Frontier genome (Reference genome) | (Pusa 1103 & HPNB) | (ILWC 46 & LPNB) | Sequence Components of genome | Gene accession IDs | Putative functions |
|----------------------|----------------|-----------------|-------------------------|----------------------------------------|--------------------|------------------|-------------------------------|--------------------|--------------------|
| SNP_45283_A_53310315 | NC_021165.1    | Ca_Kabuli_Chr06 | 53310315                | AA                                     | TT                 | TT               | INTERGENIC                    |                    |                    |
| SNP_45284_A_53310392 | NC_021165.1    | Ca_Kabuli_Chr06 | 53310392                | GG                                     | AA                 | AA               | INTERGENIC                    |                    |                    |
| SNP_45285_A_53310411 | NC_021165.1    | Ca_Kabuli_Chr06 | 53310411                | CC                                     | GG                 | GG               | INTERGENIC                    |                    |                    |
| SNP_45286_A_53310491 | NC_021165.1    | Ca_Kabuli_Chr06 | 53310491                | GG                                     | AA                 | AA               | INTERGENIC                    |                    |                    |
| SNP_45287_A_53310648 | NC_021165.1    | Ca_Kabuli_Chr06 | 53310648                | TT                                     | GG                 | GG               | INTERGENIC                    |                    |                    |
| SNP_45288_A_53311167 | NC_021165.1    | Ca_Kabuli_Chr06 | 53311167                | GG                                     | AA                 | AA               | INTERGENIC                    |                    |                    |
| SNP_45289_A_53311208 | NC_021165.1    | Ca_Kabuli_Chr06 | 53311208                | AA                                     | TT                 | TT               | INTERGENIC                    |                    |                    |
| SNP_45291_A_53312050 | NC_021165.1    | Ca_Kabuli_Chr06 | 53312050                | GG                                     | AA                 | AA               | DRR                           | 101490321          | Unknown function   |
| SNP_45292_A_53312174 | NC_021165.1    | Ca_Kabuli_Chr06 | 53312174                | GG                                     | CC                 | CC               | DRR                           | 101490321          | Unknown function   |
| SNP_45294_A_53312388 | NC_021165.1    | Ca_Kabuli_Chr06 | 53312388                | TT                                     | CC                 | CC               | DRR                           | 101490321          | Unknown function   |
| SNP_45295_A_53312435 | NC_021165.1    | Ca_Kabuli_Chr06 | 53312435                | GG                                     | CC                 | CC               | DRR                           | 101490321          | Unknown function   |
| SNP_45296_A_53312476 | NC_021165.1    | Ca_Kabuli_Chr06 | 53312476                | TT                                     | AA                 | AA               | DRR                           | 101490321          | Unknown function   |
| SNP_45297_A_53312547 | NC_021165.1    | Ca_Kabuli_Chr06 | 53312547                | AA                                     | CC                 | CC               | DRR                           | 101490321          | Unknown function   |
| SNP_45298_A_53312551 | NC_021165.1    | Ca_Kabuli_Chr06 | 53312551                | TT                                     | AA                 | AA               | DRR                           | 101490321          | Unknown function   |
| SNP_45299_A_53312614 | NC_021165.1    | Ca_Kabuli_Chr06 | 53312614                | AA                                     | CC                 | CC               | DRR                           | 101490321          | Unknown function   |
| SNP_45300_A_53312841 | NC_021165.1    | Ca_Kabuli_Chr06 | 53312841                | CC                                     | AA                 | AA               | DRR                           | 101490321          | Unknown function   |
| SNP_45301_A_53312868 | NC_021165.1    | Ca_Kabuli_Chr06 | 53312868                | TT                                     | AA                 | AA               | DRR                           | 101490321          | Unknown function   |
| SNP_45302_A_53312908 | NC_021165.1    | Ca_Kabuli_Chr06 | 53312908                | GG                                     | AA                 | AA               | DRR                           | 101490321          | Unknown function   |
| SNP_45303_A_53312951 | NC_021165.1    | Ca_Kabuli_Chr06 | 53312951                | CC                                     | GG                 | GG               | INTERGENIC                    |                    |                    |
| SNP_45304_A_53312994 | NC_021165.1    | Ca_Kabuli_Chr06 | 53312994                | GG                                     | CC                 | CC               | INTERGENIC                    |                    |                    |
| SNP_45305_A_53313124 | NC_021165.1    | Ca_Kabuli_Chr06 | 53313124                | TT                                     | CC                 | CC               | SYNONYMOUS_CODING             | 101490321          | Unknown function   |
| SNP_45306_A_53313174 | NC_021165.1    | Ca_Kabuli_Chr06 | 53313174                | TT                                     | AA                 | AA               | INTRON                        | 101490321          | Unknown function   |

| SNPs IDs             | Chromosome IDs | Chromosomes     | Physical positions (bp) | CDC Frontier genome (Reference genome) | (Pusa 1103 & HPNB) | (ILWC 46 & LPNB) | Sequence Components of genome | Gene accession IDs | Putative functions                             |
|----------------------|----------------|-----------------|-------------------------|----------------------------------------|--------------------|------------------|-------------------------------|--------------------|------------------------------------------------|
| SNP_45307_A_53313180 | NC_021165.1    | Ca_Kabuli_Chr06 | 53313180                | CC                                     | TT                 | TT               | INTRON                        | 101490321          | Unknown function                               |
| SNP_45308_A_53337765 | NC_021165.1    | Ca_Kabuli_Chr06 | 53337765                | GG                                     | AA                 | AA               | INTERGENIC                    |                    |                                                |
| SNP_45309_A_53344248 | NC_021165.1    | Ca_Kabuli_Chr06 | 53344248                | CC                                     | TT                 | TT               | INTERGENIC                    |                    |                                                |
| SNP_45310_A_53363334 | NC_021165.1    | Ca_Kabuli_Chr06 | 53363334                | GG                                     | TT                 | TT               | DRR                           | 101490969          | transcription factor MYB46                     |
| SNP_45311_A_53372395 | NC_021165.1    | Ca_Kabuli_Chr06 | 53372395                | TT                                     | GG                 | GG               | INTERGENIC                    |                    |                                                |
| SNP_45312_A_53372396 | NC_021165.1    | Ca_Kabuli_Chr06 | 53372396                | TT                                     | CC                 | CC               | INTERGENIC                    |                    |                                                |
| SNP_45313_A_53411546 | NC_021165.1    | Ca_Kabuli_Chr06 | 53411546                | GG                                     | TT                 | TT               | INTERGENIC                    |                    |                                                |
| SNP_45315_A_53414073 | NC_021165.1    | Ca_Kabuli_Chr06 | 53414073                | TT                                     | GG                 | GG               | INTERGENIC                    |                    |                                                |
| SNP_45316_A_53419959 | NC_021165.1    | Ca_Kabuli_Chr06 | 53419959                | AA                                     | TT                 | TT               | INTRON                        | 101491914          | aldehyde dehydrogenase family 3 member F1-like |
| SNP_45317_A_53487314 | NC_021165.1    | Ca_Kabuli_Chr06 | 53487314                | GG                                     | AA                 | AA               | URR                           | 101493244          | E3 ubiquitin ligase BIG BROTHER-like           |
| SNP_45318_A_53493580 | NC_021165.1    | Ca_Kabuli_Chr06 | 53493580                | AA                                     | CC                 | CC               | INTERGENIC                    |                    |                                                |
| SNP_45319_A_53493733 | NC_021165.1    | Ca_Kabuli_Chr06 | 53493733                | AA                                     | CC                 | CC               | INTERGENIC                    |                    |                                                |
| SNP_45320_A_53512000 | NC_021165.1    | Ca_Kabuli_Chr06 | 53512000                | CC                                     | AA                 | AA               | INTRON                        | 101504726          | probable copper-transporting ATPase HMA5       |
| SNP_45321_A_53547845 | NC_021165.1    | Ca_Kabuli_Chr06 | 53547845                | TT                                     | CC                 | CC               | URR                           | 101494307          | zinc transporter ZTP29-like                    |
| SNP_45322_A_53627751 | NC_021165.1    | Ca_Kabuli_Chr06 | 53627751                | TT                                     | CC                 | CC               | INTERGENIC                    |                    |                                                |
| SNP_45323_A_53648977 | NC_021165.1    | Ca_Kabuli_Chr06 | 53648977                | GG                                     | AA                 | AA               | INTERGENIC                    |                    |                                                |
| SNP_45324_A_53649283 | NC_021165.1    | Ca_Kabuli_Chr06 | 53649283                | AA                                     | GG                 | GG               | INTERGENIC                    |                    |                                                |
| SNP_45325_A_53664495 | NC_021165.1    | Ca_Kabuli_Chr06 | 53664495                | TT                                     | AA                 | AA               | INTRON                        | 101497986          | uncharacterized LOC101497986                   |
| SNP_45327_A_53723223 | NC_021165.1    | Ca_Kabuli_Chr06 | 53723223                | AA                                     | GG                 | GG               | INTERGENIC                    |                    |                                                |
| SNP_45328_A_53761180 | NC_021165.1    | Ca_Kabuli_Chr06 | 53761180                | AA                                     | TT                 | TT               | URR                           | 101505370          | Unknown function                               |
| SNP_45329_A_53761184 | NC_021165.1    | Ca_Kabuli_Chr06 | 53761184                | GG                                     | TT                 | TT               | URR                           | 101505370          | Unknown function                               |
| SNP_45331_A_53797876 | NC_021165.1    | Ca_Kabuli_Chr06 | 53797876                | CC                                     | GG                 | GG               | INTERGENIC                    |                    |                                                |

| SNPs IDs             | Chromosome IDs | Chromosomes     | Physical positions (bp) | CDC Frontier (Reference genome) | (Pusa 1103 & HPNB) | (ILWC 46 & LPNB) | Sequence Components of genome | Gene accession IDs | Putative functions       |
|----------------------|----------------|-----------------|-------------------------|---------------------------------|--------------------|------------------|-------------------------------|--------------------|--------------------------|
| SNP_45332_A_53797942 | NC_021165.1    | Ca_Kabuli_Chr06 | 53797942                | AA                              | TT                 | TT               | INTERGENIC                    |                    |                          |
| SNP_45334_A_53815025 | NC_021165.1    | Ca_Kabuli_Chr06 | 53815025                | AA                              | GG                 | GG               | INTERGENIC                    |                    |                          |
| SNP_45335_A_53815108 | NC_021165.1    | Ca_Kabuli_Chr06 | 53815108                | CC                              | TT                 | TT               | INTERGENIC                    |                    |                          |
| SNP_45336_A_53837401 | NC_021165.1    | Ca_Kabuli_Chr06 | 53837401                | CC                              | TT                 | TT               | INTERGENIC                    |                    |                          |
| SNP_45337_A_53842817 | NC_021165.1    | Ca_Kabuli_Chr06 | 53842817                | AA                              | GG                 | GG               | INTRON                        | 101506664          | beta-glucosidase 12-like |
| SNP_45338_A_53861524 | NC_021165.1    | Ca_Kabuli_Chr06 | 53861524                | TT                              | CC                 | CC               | INTERGENIC                    |                    |                          |
| SNP_45339_A_53936509 | NC_021165.1    | Ca_Kabuli_Chr06 | 53936509                | GG                              | AA                 | AA               | INTERGENIC                    |                    |                          |
| SNP_45340_A_53975705 | NC_021165.1    | Ca_Kabuli_Chr06 | 53975705                | TT                              | GG                 | GG               | INTERGENIC                    |                    |                          |
| SNP_45341_A_53987118 | NC_021165.1    | Ca_Kabuli_Chr06 | 53987118                | GG                              | AA                 | AA               | INTERGENIC                    |                    |                          |
| SNP_45342_A_53998707 | NC_021165.1    | Ca_Kabuli_Chr06 | 53998707                | AA                              | TT                 | TT               | INTERGENIC                    |                    |                          |
| SNP_45343_A_54028721 | NC_021165.1    | Ca_Kabuli_Chr06 | 54028721                | GG                              | AA                 | AA               | INTERGENIC                    |                    |                          |
| SNP_45344_A_54028739 | NC_021165.1    | Ca_Kabuli_Chr06 | 54028739                | CC                              | AA                 | AA               | INTERGENIC                    |                    |                          |
| SNP_45345_A_54028884 | NC_021165.1    | Ca_Kabuli_Chr06 | 54028884                | AA                              | CC                 | CC               | INTERGENIC                    |                    |                          |
| SNP_45346_A_54028885 | NC_021165.1    | Ca_Kabuli_Chr06 | 54028885                | AA                              | GG                 | GG               | INTERGENIC                    |                    |                          |
| SNP_45348_A_54067208 | NC_021165.1    | Ca_Kabuli_Chr06 | 54067208                | AA                              | CC                 | CC               | INTERGENIC                    |                    |                          |
| SNP_45349_A_54067251 | NC_021165.1    | Ca_Kabuli_Chr06 | 54067251                | CC                              | GG                 | GG               | INTERGENIC                    |                    |                          |
| SNP_45351_A_54068770 | NC_021165.1    | Ca_Kabuli_Chr06 | 54068770                | GG                              | TT                 | TT               | INTERGENIC                    |                    |                          |
| SNP_45352_A_54068841 | NC_021165.1    | Ca_Kabuli_Chr06 | 54068841                | GG                              | TT                 | TT               | INTERGENIC                    |                    |                          |
| SNP_45355_A_54069012 | NC_021165.1    | Ca_Kabuli_Chr06 | 54069012                | TT                              | CC                 | CC               | INTERGENIC                    |                    |                          |
| SNP_45356_A_54069087 | NC_021165.1    | Ca_Kabuli_Chr06 | 54069087                | GG                              | TT                 | TT               | INTERGENIC                    |                    |                          |
| SNP_45358_A_54069773 | NC_021165.1    | Ca_Kabuli_Chr06 | 54069773                | GG                              | AA                 | AA               | INTERGENIC                    |                    |                          |
| SNP_45359_A_54069784 | NC_021165.1    | Ca_Kabuli_Chr06 | 54069784                | AA                              | CC                 | CC               | INTERGENIC                    |                    |                          |

| SNPs IDs             | Chromosome IDs | Chromosomes     | Physical positions (bp) | CDC Frontier (Reference genome) | (Pusa 1103 & HPNB) | (ILWC 46 & LPNB) | Sequence Components of genome | Gene accession IDs | Putative functions                                    |
|----------------------|----------------|-----------------|-------------------------|---------------------------------|--------------------|------------------|-------------------------------|--------------------|-------------------------------------------------------|
| SNP_45360_A_54069846 | NC_021165.1    | Ca_Kabuli_Chr06 | 54069846                | TT                              | CC                 | CC               | INTERGENIC                    |                    |                                                       |
| SNP_45361_A_54069883 | NC_021165.1    | Ca_Kabuli_Chr06 | 54069883                | TT                              | AA                 | AA               | INTERGENIC                    |                    |                                                       |
| SNP_45362_A_54069995 | NC_021165.1    | Ca_Kabuli_Chr06 | 54069995                | CC                              | TT                 | TT               | INTERGENIC                    |                    |                                                       |
| SNP_45363_A_54070050 | NC_021165.1    | Ca_Kabuli_Chr06 | 54070050                | TT                              | GG                 | GG               | INTERGENIC                    |                    |                                                       |
| SNP_45364_A_54070066 | NC_021165.1    | Ca_Kabuli_Chr06 | 54070066                | TT                              | AA                 | AA               | INTERGENIC                    |                    |                                                       |
| SNP_45366_A_54070176 | NC_021165.1    | Ca_Kabuli_Chr06 | 54070176                | CC                              | GG                 | GG               | INTERGENIC                    |                    |                                                       |
| SNP_45367_A_54070215 | NC_021165.1    | Ca_Kabuli_Chr06 | 54070215                | CC                              | TT                 | TT               | INTERGENIC                    |                    |                                                       |
| SNP_45368_A_54070231 | NC_021165.1    | Ca_Kabuli_Chr06 | 54070231                | GG                              | AA                 | AA               | INTERGENIC                    |                    |                                                       |
| SNP_45370_A_54070274 | NC_021165.1    | Ca_Kabuli_Chr06 | 54070274                | CC                              | TT                 | TT               | INTERGENIC                    |                    |                                                       |
| SNP_45371_A_54070277 | NC_021165.1    | Ca_Kabuli_Chr06 | 54070277                | AA                              | CC                 | CC               | INTERGENIC                    |                    |                                                       |
| SNP_45372_A_54070287 | NC_021165.1    | Ca_Kabuli_Chr06 | 54070287                | CC                              | TT                 | TT               | INTERGENIC                    |                    |                                                       |
| SNP_45374_A_54143409 | NC_021165.1    | Ca_Kabuli_Chr06 | 54143409                | GG                              | AA                 | AA               | URR                           | 101510297          | uncharacterized LOC101510297                          |
| SNP_45375_A_54143425 | NC_021165.1    | Ca_Kabuli_Chr06 | 54143425                | AA                              | TT                 | TT               | URR                           | 101510297          | uncharacterized LOC101510297                          |
| SNP_45376_A_54143589 | NC_021165.1    | Ca_Kabuli_Chr06 | 54143589                | TT                              | CC                 | CC               | URR                           | 101510297          | uncharacterized LOC101510297                          |
| SNP_45378_A_54145747 | NC_021165.1    | Ca_Kabuli_Chr06 | 54145747                | GG                              | AA                 | AA               | INTERGENIC                    |                    |                                                       |
| SNP_45379_A_54145753 | NC_021165.1    | Ca_Kabuli_Chr06 | 54145753                | CC                              | TT                 | TT               | INTERGENIC                    |                    |                                                       |
| SNP_45380_A_54146087 | NC_021165.1    | Ca_Kabuli_Chr06 | 54146087                | TT                              | AA                 | AA               | INTERGENIC                    |                    |                                                       |
| SNP_45381_A_54149706 | NC_021165.1    | Ca_Kabuli_Chr06 | 54149706                | CC                              | TT                 | TT               | DRR                           | 101410590          | transfer RNA aspartic acid (anticodon GUC)            |
| SNP_45382_A_54151685 | NC_021165.1    | Ca_Kabuli_Chr06 | 54151685                | CC                              | TT                 | TT               | DRR                           | 101511161          | pentatricopeptide repeat-containing protein At3g46870 |
| SNP_45385_A_54160935 | NC_021165.1    | Ca_Kabuli_Chr06 | 54160935                | CC                              | TT                 | TT               | INTERGENIC                    |                    |                                                       |
| SNP_45387_A_54161054 | NC_021165.1    | Ca_Kabuli_Chr06 | 54161054                | GG                              | TT                 | TT               | INTERGENIC                    |                    |                                                       |
| SNP_45388_A_54161110 | NC_021165.1    | Ca_Kabuli_Chr06 | 54161110                | GG                              | AA                 | AA               | INTERGENIC                    |                    |                                                       |

| SNPs IDs             | Chromosome IDs | Chromosomes     | Physical positions (bp) | CDC Frontier genome (Reference genome) | (Pusa 1103 & HPNB) | (ILWC 46 & LPNB) | Sequence Components of genome | Gene accession IDs | Putative functions                                             |
|----------------------|----------------|-----------------|-------------------------|----------------------------------------|--------------------|------------------|-------------------------------|--------------------|----------------------------------------------------------------|
| SNP_45389_A_54161387 | NC_021165.1    | Ca_Kabuli_Chr06 | 54161387                | GG                                     | AA                 | AA               | INTERGENIC                    |                    |                                                                |
| SNP_45390_A_54161388 | NC_021165.1    | Ca_Kabuli_Chr06 | 54161388                | GG                                     | AA                 | AA               | INTERGENIC                    |                    |                                                                |
| SNP_45391_A_54161410 | NC_021165.1    | Ca_Kabuli_Chr06 | 54161410                | TT                                     | CC                 | CC               | INTERGENIC                    |                    |                                                                |
| SNP_45392_A_54161427 | NC_021165.1    | Ca_Kabuli_Chr06 | 54161427                | CC                                     | TT                 | TT               | INTERGENIC                    |                    |                                                                |
| SNP_45393_A_54162056 | NC_021165.1    | Ca_Kabuli_Chr06 | 54162056                | AA                                     | GG                 | GG               | INTERGENIC                    |                    |                                                                |
| SNP_45394_A_54163140 | NC_021165.1    | Ca_Kabuli_Chr06 | 54163140                | CC                                     | AA                 | AA               | INTERGENIC                    |                    |                                                                |
| SNP_45395_A_54174287 | NC_021165.1    | Ca_Kabuli_Chr06 | 54174287                | TT                                     | CC                 | CC               | INTERGENIC                    |                    |                                                                |
| SNP_45396_A_54180058 | NC_021165.1    | Ca_Kabuli_Chr06 | 54180058                | AA                                     | TT                 | TT               | INTERGENIC                    |                    |                                                                |
| SNP_45397_A_54180260 | NC_021165.1    | Ca_Kabuli_Chr06 | 54180260                | TT                                     | CC                 | CC               | INTERGENIC                    |                    |                                                                |
| SNP_45399_A_54255636 | NC_021165.1    | Ca_Kabuli_Chr06 | 54255636                | TT                                     | CC                 | CC               | INTERGENIC                    |                    |                                                                |
| SNP_45400_A_54259449 | NC_021165.1    | Ca_Kabuli_Chr06 | 54259449                | TT                                     | CC                 | CC               | INTERGENIC                    |                    |                                                                |
| SNP_45401_A_54304815 | NC_021165.1    | Ca_Kabuli_Chr06 | 54304815                | TT                                     | CC                 | CC               | INTERGENIC                    |                    |                                                                |
| SNP_45402_A_54304822 | NC_021165.1    | Ca_Kabuli_Chr06 | 54304822                | AA                                     | TT                 | TT               | INTERGENIC                    |                    |                                                                |
| SNP_45403_A_54315075 | NC_021165.1    | Ca_Kabuli_Chr06 | 54315075                | CC                                     | TT                 | TT               | INTERGENIC                    |                    |                                                                |
| SNP_45405_A_54321612 | NC_021165.1    | Ca_Kabuli_Chr06 | 54321612                | AA                                     | GG                 | GG               | INTERGENIC                    |                    |                                                                |
| SNP_45406_A_54321621 | NC_021165.1    | Ca_Kabuli_Chr06 | 54321621                | GG                                     | TT                 | TT               | INTERGENIC                    |                    |                                                                |
| SNP_45407_A_54324130 | NC_021165.1    | Ca_Kabuli_Chr06 | 54324130                | TT                                     | CC                 | CC               | INTERGENIC                    |                    |                                                                |
| SNP_45408_A_54338661 | NC_021165.1    | Ca_Kabuli_Chr06 | 54338661                | GG                                     | AA                 | AA               | URR                           | 101490522          | ATP-dependent zinc metalloprotease FTSH 10, mitochondrial-like |
| SNP_45411_A_54339867 | NC_021165.1    | Ca_Kabuli_Chr06 | 54339867                | CC                                     | TT                 | TT               | URR                           | 101490522          | ATP-dependent zinc metalloprotease FTSH 10, mitochondrial-like |
| SNP_45413_A_54340047 | NC_021165.1    | Ca_Kabuli_Chr06 | 54340047                | CC                                     | TT                 | TT               | URR                           | 101490522          | ATP-dependent zinc metalloprotease FTSH 10, mitochondrial-like |
| SNP_45414_A_54340108 | NC_021165.1    | Ca_Kabuli_Chr06 | 54340108                | TT                                     | CC                 | CC               | URR                           | 101490522          | ATP-dependent zinc metalloprotease FTSH 10, mitochondrial-like |
| SNP_45415_A_54340621 | NC_021165.1    | Ca_Kabuli_Chr06 | 54340621                | CC                                     | TT                 | TT               | INTERGENIC                    |                    |                                                                |

| SNPs IDs             | Chromosome IDs | Chromosomes     | Physical positions (bp) | CDC Frontier genome (Reference genome) | (Pusa 1103 & HPNB) | (ILWC 46 & LPNB) | Sequence genome | Components of | Gene accession IDs | Putative functions                     |
|----------------------|----------------|-----------------|-------------------------|----------------------------------------|--------------------|------------------|-----------------|---------------|--------------------|----------------------------------------|
| SNP_45416_A_54340641 | NC_021165.1    | Ca_Kabuli_Chr06 | 54340641                | GG                                     | AA                 | AA               | INTERGENIC      |               |                    |                                        |
| SNP_45417_A_54341482 | NC_021165.1    | Ca_Kabuli_Chr06 | 54341482                | CC                                     | GG                 | GG               | INTERGENIC      |               |                    |                                        |
| SNP_45419_A_54342499 | NC_021165.1    | Ca_Kabuli_Chr06 | 54342499                | TT                                     | CC                 | CC               | INTERGENIC      |               |                    |                                        |
| SNP_45420_A_54342738 | NC_021165.1    | Ca_Kabuli_Chr06 | 54342738                | TT                                     | AA                 | AA               | INTERGENIC      |               |                    |                                        |
| SNP_45421_A_54342772 | NC_021165.1    | Ca_Kabuli_Chr06 | 54342772                | AA                                     | TT                 | TT               | INTERGENIC      |               |                    |                                        |
| SNP_45422_A_54343711 | NC_021165.1    | Ca_Kabuli_Chr06 | 54343711                | GG                                     | AA                 | AA               | DRR             | 101490970     |                    | uncharacterized protein C24B11.05-like |
| SNP_45423_A_54343834 | NC_021165.1    | Ca_Kabuli_Chr06 | 54343834                | TT                                     | AA                 | AA               | INTERGENIC      |               |                    |                                        |
| SNP_45425_A_54644217 | NC_021165.1    | Ca_Kabuli_Chr06 | 54644217                | TT                                     | CC                 | CC               | INTERGENIC      |               |                    |                                        |
| SNP_45426_A_54679400 | NC_021165.1    | Ca_Kabuli_Chr06 | 54679400                | TT                                     | CC                 | CC               | INTERGENIC      |               |                    |                                        |
| SNP_45427_A_54680812 | NC_021165.1    | Ca_Kabuli_Chr06 | 54680812                | CC                                     | TT                 | TT               | INTERGENIC      |               |                    |                                        |
| SNP_45428_A_54680822 | NC_021165.1    | Ca_Kabuli_Chr06 | 54680822                | TT                                     | CC                 | CC               | INTERGENIC      |               |                    |                                        |
| SNP_45429_A_54681111 | NC_021165.1    | Ca_Kabuli_Chr06 | 54681111                | TT                                     | GG                 | GG               | INTERGENIC      |               |                    |                                        |
| SNP_45430_A_54682456 | NC_021165.1    | Ca_Kabuli_Chr06 | 54682456                | CC                                     | TT                 | TT               | INTERGENIC      |               |                    |                                        |
| SNP_45432_A_54715992 | NC_021165.1    | Ca_Kabuli_Chr06 | 54715992                | AA                                     | GG                 | GG               | URR             | 101495041     |                    | uncharacterized LOC101495041           |
| SNP_45433_A_54715996 | NC_021165.1    | Ca_Kabuli_Chr06 | 54715996                | AA                                     | GG                 | GG               | URR             | 101495041     |                    | uncharacterized LOC101495041           |
| SNP_45434_A_54720790 | NC_021165.1    | Ca_Kabuli_Chr06 | 54720790                | TT                                     | CC                 | CC               | INTERGENIC      |               |                    |                                        |
| SNP_45435_A_54720860 | NC_021165.1    | Ca_Kabuli_Chr06 | 54720860                | GG                                     | TT                 | TT               | INTERGENIC      |               |                    |                                        |
| SNP_45436_A_54720866 | NC_021165.1    | Ca_Kabuli_Chr06 | 54720866                | AA                                     | GG                 | GG               | INTERGENIC      |               |                    |                                        |
| SNP_45437_A_54754815 | NC_021165.1    | Ca_Kabuli_Chr06 | 54754815                | TT                                     | AA                 | AA               | INTERGENIC      |               |                    |                                        |
| SNP_45438_A_54754859 | NC_021165.1    | Ca_Kabuli_Chr06 | 54754859                | AA                                     | GG                 | GG               | INTERGENIC      |               |                    |                                        |
| SNP_45439_A_54754890 | NC_021165.1    | Ca_Kabuli_Chr06 | 54754890                | AA                                     | CC                 | CC               | INTERGENIC      |               |                    |                                        |
| SNP_45440_A_54756776 | NC_021165.1    | Ca_Kabuli_Chr06 | 54756776                | CC                                     | TT                 | TT               | INTERGENIC      |               |                    |                                        |

| SNPs IDs             | Chromosome IDs | Chromosomes     | Physical positions (bp) | CDC Frontier (Reference genome) | (Pusa 1103 & HPNB) | (ILWC 46 & LPNB) | Sequence genome | Components of | Gene accession IDs | Putative functions |
|----------------------|----------------|-----------------|-------------------------|---------------------------------|--------------------|------------------|-----------------|---------------|--------------------|--------------------|
| SNP_45441_A_54792784 | NC_021165.1    | Ca_Kabuli_Chr06 | 54792784                | TT                              | AA                 | AA               | INTERGENIC      |               |                    |                    |
| SNP_45442_A_54792817 | NC_021165.1    | Ca_Kabuli_Chr06 | 54792817                | CC                              | GG                 | GG               | INTERGENIC      |               |                    |                    |
| SNP_45443_A_54792821 | NC_021165.1    | Ca_Kabuli_Chr06 | 54792821                | GG                              | TT                 | TT               | INTERGENIC      |               |                    |                    |
| SNP_45444_A_54868923 | NC_021165.1    | Ca_Kabuli_Chr06 | 54868923                | AA                              | GG                 | GG               | INTERGENIC      |               |                    |                    |
| SNP_45445_A_54869157 | NC_021165.1    | Ca_Kabuli_Chr06 | 54869157                | TT                              | GG                 | GG               | INTERGENIC      |               |                    |                    |
| SNP_45446_A_54869264 | NC_021165.1    | Ca_Kabuli_Chr06 | 54869264                | CC                              | TT                 | TT               | INTERGENIC      |               |                    |                    |
| SNP_45447_A_54886623 | NC_021165.1    | Ca_Kabuli_Chr06 | 54886623                | CC                              | TT                 | TT               | INTERGENIC      |               |                    |                    |
| SNP_45448_A_54886648 | NC_021165.1    | Ca_Kabuli_Chr06 | 54886648                | AA                              | GG                 | GG               | INTERGENIC      |               |                    |                    |
| SNP_45449_A_54886693 | NC_021165.1    | Ca_Kabuli_Chr06 | 54886693                | TT                              | CC                 | CC               | INTERGENIC      |               |                    |                    |
| SNP_45450_A_54886705 | NC_021165.1    | Ca_Kabuli_Chr06 | 54886705                | AA                              | GG                 | GG               | INTERGENIC      |               |                    |                    |
| SNP_45451_A_54886733 | NC_021165.1    | Ca_Kabuli_Chr06 | 54886733                | AA                              | GG                 | GG               | INTERGENIC      |               |                    |                    |
| SNP_45452_A_54886832 | NC_021165.1    | Ca_Kabuli_Chr06 | 54886832                | GG                              | AA                 | AA               | INTERGENIC      |               |                    |                    |
| SNP_45453_A_54886877 | NC_021165.1    | Ca_Kabuli_Chr06 | 54886877                | GG                              | AA                 | AA               | INTERGENIC      |               |                    |                    |
| SNP_45454_A_54887103 | NC_021165.1    | Ca_Kabuli_Chr06 | 54887103                | TT                              | CC                 | CC               | INTERGENIC      |               |                    |                    |
| SNP_45455_A_54887202 | NC_021165.1    | Ca_Kabuli_Chr06 | 54887202                | CC                              | TT                 | TT               | INTERGENIC      |               |                    |                    |
| SNP_45456_A_54908188 | NC_021165.1    | Ca_Kabuli_Chr06 | 54908188                | CC                              | TT                 | TT               | INTERGENIC      |               |                    |                    |
| SNP_45459_A_54933189 | NC_021165.1    | Ca_Kabuli_Chr06 | 54933189                | CC                              | TT                 | TT               | INTERGENIC      |               |                    |                    |
| SNP_45460_A_54933290 | NC_021165.1    | Ca_Kabuli_Chr06 | 54933290                | CC                              | TT                 | TT               | INTERGENIC      |               |                    |                    |
| SNP_45461_A_54933291 | NC_021165.1    | Ca_Kabuli_Chr06 | 54933291                | CC                              | AA                 | AA               | INTERGENIC      |               |                    |                    |
| SNP_45462_A_54933294 | NC_021165.1    | Ca_Kabuli_Chr06 | 54933294                | TT                              | CC                 | CC               | INTERGENIC      |               |                    |                    |
| SNP_45463_A_54933513 | NC_021165.1    | Ca_Kabuli_Chr06 | 54933513                | GG                              | TT                 | TT               | INTERGENIC      |               |                    |                    |
| SNP_45464_A_54933514 | NC_021165.1    | Ca_Kabuli_Chr06 | 54933514                | GG                              | TT                 | TT               | INTERGENIC      |               |                    |                    |



| SNPs IDs             | Chromosome IDs | Chromosomes     | Physical positions (bp) | CDC Frontier genome (Reference genome) | (Pusa 1103 & HPNB) | (ILWC 46 & LPNB) | Sequence genome | Components of | Gene accession IDs | Putative functions |
|----------------------|----------------|-----------------|-------------------------|----------------------------------------|--------------------|------------------|-----------------|---------------|--------------------|--------------------|
| SNP_45465_A_54933522 | NC_021165.1    | Ca_Kabuli_Chr06 | 54933522                | GG                                     | TT                 | TT               | INTERGENIC      |               |                    |                    |
| SNP_45466_A_54933559 | NC_021165.1    | Ca_Kabuli_Chr06 | 54933559                | GG                                     | AA                 | AA               | INTERGENIC      |               |                    |                    |
| SNP_45468_A_54934216 | NC_021165.1    | Ca_Kabuli_Chr06 | 54934216                | TT                                     | CC                 | CC               | INTERGENIC      |               |                    |                    |
| SNP_45469_A_54934535 | NC_021165.1    | Ca_Kabuli_Chr06 | 54934535                | AA                                     | GG                 | GG               | INTERGENIC      |               |                    |                    |
| SNP_45470_A_54934624 | NC_021165.1    | Ca_Kabuli_Chr06 | 54934624                | CC                                     | TT                 | TT               | INTERGENIC      |               |                    |                    |
| SNP_45471_A_54934667 | NC_021165.1    | Ca_Kabuli_Chr06 | 54934667                | GG                                     | CC                 | CC               | INTERGENIC      |               |                    |                    |
| SNP_45472_A_54938304 | NC_021165.1    | Ca_Kabuli_Chr06 | 54938304                | TT                                     | CC                 | CC               | INTERGENIC      |               |                    |                    |
| SNP_45474_A_54962651 | NC_021165.1    | Ca_Kabuli_Chr06 | 54962651                | CC                                     | TT                 | TT               | INTERGENIC      |               |                    |                    |
| SNP_45475_A_54976772 | NC_021165.1    | Ca_Kabuli_Chr06 | 54976772                | CC                                     | TT                 | TT               | INTERGENIC      |               |                    |                    |
| SNP_45476_A_55004068 | NC_021165.1    | Ca_Kabuli_Chr06 | 55004068                | CC                                     | TT                 | TT               | INTERGENIC      |               |                    |                    |
| SNP_45477_A_55004069 | NC_021165.1    | Ca_Kabuli_Chr06 | 55004069                | AA                                     | GG                 | GG               | INTERGENIC      |               |                    |                    |
| SNP_45478_A_55004072 | NC_021165.1    | Ca_Kabuli_Chr06 | 55004072                | AA                                     | GG                 | GG               | INTERGENIC      |               |                    |                    |
| SNP_45479_A_55113130 | NC_021165.1    | Ca_Kabuli_Chr06 | 55113130                | AA                                     | GG                 | GG               | INTERGENIC      |               |                    |                    |
| SNP_45480_A_55113269 | NC_021165.1    | Ca_Kabuli_Chr06 | 55113269                | AA                                     | GG                 | GG               | INTERGENIC      |               |                    |                    |
| SNP_45481_A_55113412 | NC_021165.1    | Ca_Kabuli_Chr06 | 55113412                | GG                                     | AA                 | AA               | INTERGENIC      |               |                    |                    |
| SNP_45483_A_55156113 | NC_021165.1    | Ca_Kabuli_Chr06 | 55156113                | GG                                     | AA                 | AA               | INTERGENIC      |               |                    |                    |
| SNP_45484_A_55156117 | NC_021165.1    | Ca_Kabuli_Chr06 | 55156117                | GG                                     | AA                 | AA               | INTERGENIC      |               |                    |                    |
| SNP_45485_A_55345396 | NC_021165.1    | Ca_Kabuli_Chr06 | 55345396                | TT                                     | GG                 | GG               | INTERGENIC      |               |                    |                    |
| SNP_45486_A_55345421 | NC_021165.1    | Ca_Kabuli_Chr06 | 55345421                | TT                                     | CC                 | CC               | INTERGENIC      |               |                    |                    |
| SNP_45487_A_55345450 | NC_021165.1    | Ca_Kabuli_Chr06 | 55345450                | AA                                     | GG                 | GG               | INTERGENIC      |               |                    |                    |
| SNP_45488_A_55345458 | NC_021165.1    | Ca_Kabuli_Chr06 | 55345458                | CC                                     | GG                 | GG               | INTERGENIC      |               |                    |                    |
| SNP_45489_A_55345578 | NC_021165.1    | Ca_Kabuli_Chr06 | 55345578                | AA                                     | GG                 | GG               | INTERGENIC      |               |                    |                    |

| SNPs IDs             | Chromosome IDs | Chromosomes     | Physical positions (bp) | CDC Frontier (Reference genome) | (Pusa 1103 & HPNB) | (ILWC 46 & LPNB) | Sequence Components of genome | Gene accession IDs | Putative functions                                       |
|----------------------|----------------|-----------------|-------------------------|---------------------------------|--------------------|------------------|-------------------------------|--------------------|----------------------------------------------------------|
| SNP_45490_A_55345693 | NC_021165.1    | Ca_Kabuli_Chr06 | 55345693                | CC                              | TT                 | TT               | INTERGENIC                    |                    |                                                          |
| SNP_45491_A_55345670 | NC_021165.1    | Ca_Kabuli_Chr06 | 55345670                | AA                              | GG                 | GG               | INTERGENIC                    |                    |                                                          |
| SNP_45492_A_55356692 | NC_021165.1    | Ca_Kabuli_Chr06 | 55356692                | GG                              | CC                 | CC               | INTERGENIC                    |                    |                                                          |
| SNP_45493_A_55373818 | NC_021165.1    | Ca_Kabuli_Chr06 | 55373818                | GG                              | AA                 | AA               | INTERGENIC                    |                    |                                                          |
| SNP_45494_A_55399737 | NC_021165.1    | Ca_Kabuli_Chr06 | 55399737                | TT                              | AA                 | AA               | DRR                           | 101512759          | uncharacterized LOC101512759                             |
| SNP_45495_A_55399764 | NC_021165.1    | Ca_Kabuli_Chr06 | 55399764                | CC                              | TT                 | TT               | DRR                           | 101512759          | uncharacterized LOC101512759                             |
| SNP_45496_A_55399783 | NC_021165.1    | Ca_Kabuli_Chr06 | 55399783                | TT                              | AA                 | AA               | DRR                           | 101512759          | uncharacterized LOC101512759                             |
| SNP_45497_A_55399785 | NC_021165.1    | Ca_Kabuli_Chr06 | 55399785                | TT                              | AA                 | AA               | DRR                           | 101512759          | uncharacterized LOC101512759                             |
| SNP_45498_A_55399918 | NC_021165.1    | Ca_Kabuli_Chr06 | 55399918                | CC                              | TT                 | TT               | DRR                           | 101512759          | uncharacterized LOC101512759                             |
| SNP_45499_A_55399955 | NC_021165.1    | Ca_Kabuli_Chr06 | 55399955                | GG                              | AA                 | AA               | DRR                           | 101512759          | uncharacterized LOC101512759                             |
| SNP_45500_A_55400070 | NC_021165.1    | Ca_Kabuli_Chr06 | 55400070                | AA                              | TT                 | TT               | DRR                           | 101512759          | uncharacterized LOC101512759                             |
| SNP_45501_A_55400220 | NC_021165.1    | Ca_Kabuli_Chr06 | 55400220                | CC                              | AA                 | AA               | DRR                           | 101512759          | uncharacterized LOC101512759                             |
| SNP_45502_A_55431177 | NC_021165.1    | Ca_Kabuli_Chr06 | 55431177                | AA                              | CC                 | CC               | INTRON                        | 101503109          | xyloglucan endotransglucosylase/hydrolase protein 9-like |
| SNP_45503_A_55431679 | NC_021165.1    | Ca_Kabuli_Chr06 | 55431679                | TT                              | CC                 | CC               | INTRON                        | 101503109          | xyloglucan endotransglucosylase/hydrolase protein 9-like |
| SNP_45504_A_55437239 | NC_021165.1    | Ca_Kabuli_Chr06 | 55437239                | AA                              | GG                 | GG               | URR                           | 101503109          | xyloglucan endotransglucosylase/hydrolase protein 9-like |
| SNP_45505_A_55445551 | NC_021165.1    | Ca_Kabuli_Chr06 | 55445551                | GG                              | TT                 | TT               | INTERGENIC                    |                    |                                                          |
| SNP_45507_A_55445679 | NC_021165.1    | Ca_Kabuli_Chr06 | 55445679                | TT                              | AA                 | AA               | INTERGENIC                    |                    |                                                          |
| SNP_45508_A_55445695 | NC_021165.1    | Ca_Kabuli_Chr06 | 55445695                | TT                              | GG                 | GG               | INTERGENIC                    |                    |                                                          |
| SNP_45509_A_55445768 | NC_021165.1    | Ca_Kabuli_Chr06 | 55445768                | TT                              | GG                 | GG               | INTERGENIC                    |                    |                                                          |
| SNP_45510_A_55446198 | NC_021165.1    | Ca_Kabuli_Chr06 | 55446198                | TT                              | CC                 | CC               | INTERGENIC                    |                    |                                                          |
| SNP_45511_A_55446331 | NC_021165.1    | Ca_Kabuli_Chr06 | 55446331                | CC                              | GG                 | GG               | INTERGENIC                    |                    |                                                          |
| SNP_45512_A_55446339 | NC_021165.1    | Ca_Kabuli_Chr06 | 55446339                | GG                              | AA                 | AA               | INTERGENIC                    |                    |                                                          |

| SNPs IDs             | Chromosome IDs | Chromosomes     | Physical positions (bp) | CDC Frontier genome (Reference genome) | (Pusa 1103 & HPNB) | (ILWC 46 & LPNB) | Sequence Components of genome | Gene accession IDs | Putative functions                                         |
|----------------------|----------------|-----------------|-------------------------|----------------------------------------|--------------------|------------------|-------------------------------|--------------------|------------------------------------------------------------|
| SNP_45513_A_55446365 | NC_021165.1    | Ca_Kabuli_Chr06 | 55446365                | AA                                     | GG                 | GG               | INTERGENIC                    |                    |                                                            |
| SNP_45514_A_55446366 | NC_021165.1    | Ca_Kabuli_Chr06 | 55446366                | GG                                     | AA                 | AA               | INTERGENIC                    |                    |                                                            |
| SNP_45515_A_55455857 | NC_021165.1    | Ca_Kabuli_Chr06 | 55455857                | AA                                     | TT                 | TT               | INTRON                        | 101513415          | Unknown function                                           |
| SNP_45516_A_55455904 | NC_021165.1    | Ca_Kabuli_Chr06 | 55455904                | CC                                     | TT                 | TT               | INTRON                        | 101513415          | Unknown function                                           |
| SNP_45517_A_55455905 | NC_021165.1    | Ca_Kabuli_Chr06 | 55455905                | GG                                     | TT                 | TT               | INTRON                        | 101513415          | Unknown function                                           |
| SNP_45520_A_55557010 | NC_021165.1    | Ca_Kabuli_Chr06 | 55557010                | CC                                     | TT                 | TT               | INTERGENIC                    |                    |                                                            |
| SNP_45521_A_55607439 | NC_021165.1    | Ca_Kabuli_Chr06 | 55607439                | TT                                     | GG                 | GG               | INTERGENIC                    |                    |                                                            |
| SNP_45522_A_55607862 | NC_021165.1    | Ca_Kabuli_Chr06 | 55607862                | TT                                     | AA                 | AA               | INTERGENIC                    |                    |                                                            |
| SNP_45523_A_55607866 | NC_021165.1    | Ca_Kabuli_Chr06 | 55607866                | TT                                     | GG                 | GG               | INTERGENIC                    |                    |                                                            |
| SNP_45524_A_55609276 | NC_021165.1    | Ca_Kabuli_Chr06 | 55609276                | CC                                     | TT                 | TT               | INTERGENIC                    |                    |                                                            |
| SNP_45525_A_55609551 | NC_021165.1    | Ca_Kabuli_Chr06 | 55609551                | AA                                     | GG                 | GG               | INTERGENIC                    |                    |                                                            |
| SNP_45526_A_55617841 | NC_021165.1    | Ca_Kabuli_Chr06 | 55617841                | CC                                     | TT                 | TT               | INTRON                        | 101504097          | H/ACA ribonucleoprotein complex non-core subunit NAF1-like |
| SNP_45527_A_55684802 | NC_021165.1    | Ca_Kabuli_Chr06 | 55684802                | GG                                     | CC                 | CC               | INTERGENIC                    |                    |                                                            |
| SNP_45528_A_55684810 | NC_021165.1    | Ca_Kabuli_Chr06 | 55684810                | GG                                     | AA                 | AA               | INTERGENIC                    |                    |                                                            |
| SNP_45529_A_55684819 | NC_021165.1    | Ca_Kabuli_Chr06 | 55684819                | AA                                     | GG                 | GG               | INTERGENIC                    |                    |                                                            |
| SNP_45531_A_55684871 | NC_021165.1    | Ca_Kabuli_Chr06 | 55684871                | TT                                     | AA                 | AA               | INTERGENIC                    |                    |                                                            |
| SNP_45532_A_55727926 | NC_021165.1    | Ca_Kabuli_Chr06 | 55727926                | GG                                     | CC                 | CC               | INTERGENIC                    |                    |                                                            |
| SNP_45534_A_55771091 | NC_021165.1    | Ca_Kabuli_Chr06 | 55771091                | AA                                     | GG                 | GG               | INTERGENIC                    |                    |                                                            |
| SNP_45537_A_55771600 | NC_021165.1    | Ca_Kabuli_Chr06 | 55771600                | AA                                     | GG                 | GG               | INTERGENIC                    |                    |                                                            |
| SNP_45539_A_55807363 | NC_021165.1    | Ca_Kabuli_Chr06 | 55807363                | GG                                     | TT                 | TT               | INTERGENIC                    |                    |                                                            |
| SNP_45540_A_55826329 | NC_021165.1    | Ca_Kabuli_Chr06 | 55826329                | TT                                     | AA                 | AA               | INTERGENIC                    |                    |                                                            |
| SNP_45541_A_55826392 | NC_021165.1    | Ca_Kabuli_Chr06 | 55826392                | TT                                     | CC                 | CC               | INTERGENIC                    |                    |                                                            |

| SNPs IDs             | Chromosome IDs | Chromosomes     | Physical positions (bp) | CDC Frontier genome (Reference genome) | (Pusa 1103 & HPNB) | (ILWC 46 & LPNB) | Sequence Components of genome | Gene accession IDs | Putative functions                        |
|----------------------|----------------|-----------------|-------------------------|----------------------------------------|--------------------|------------------|-------------------------------|--------------------|-------------------------------------------|
| SNP_45542_A_55826428 | NC_021165.1    | Ca_Kabuli_Chr06 | 55826428                | CC                                     | TT                 | TT               | INTERGENIC                    |                    |                                           |
| SNP_45543_A_55826779 | NC_021165.1    | Ca_Kabuli_Chr06 | 55826779                | TT                                     | AA                 | AA               | INTERGENIC                    |                    |                                           |
| SNP_45544_A_55826832 | NC_021165.1    | Ca_Kabuli_Chr06 | 55826832                | GG                                     | AA                 | AA               | INTERGENIC                    |                    |                                           |
| SNP_45545_A_55826845 | NC_021165.1    | Ca_Kabuli_Chr06 | 55826845                | GG                                     | TT                 | TT               | INTERGENIC                    |                    |                                           |
| SNP_45547_A_55826902 | NC_021165.1    | Ca_Kabuli_Chr06 | 55826902                | CC                                     | TT                 | TT               | INTERGENIC                    |                    |                                           |
| SNP_45548_A_55847708 | NC_021165.1    | Ca_Kabuli_Chr06 | 55847708                | GG                                     | AA                 | AA               | INTERGENIC                    |                    |                                           |
| SNP_45550_A_55890229 | NC_021165.1    | Ca_Kabuli_Chr06 | 55890229                | TT                                     | GG                 | GG               | INTERGENIC                    |                    |                                           |
| SNP_45551_A_55944030 | NC_021165.1    | Ca_Kabuli_Chr06 | 55944030                | CC                                     | TT                 | TT               | URR                           | 101488798          | probable E3 ubiquitin-protein ligase HIP1 |
| SNP_45552_A_55944043 | NC_021165.1    | Ca_Kabuli_Chr06 | 55944043                | TT                                     | CC                 | CC               | URR                           | 101488798          | probable E3 ubiquitin-protein ligase HIP1 |
| SNP_45553_A_55972890 | NC_021165.1    | Ca_Kabuli_Chr06 | 55972890                | AA                                     | TT                 | TT               | INTERGENIC                    |                    |                                           |
| SNP_45554_A_55991796 | NC_021165.1    | Ca_Kabuli_Chr06 | 55991796                | TT                                     | AA                 | AA               | INTERGENIC                    |                    |                                           |
| SNP_45555_A_55991798 | NC_021165.1    | Ca_Kabuli_Chr06 | 55991798                | GG                                     | AA                 | AA               | INTERGENIC                    |                    |                                           |
| SNP_45556_A_56003026 | NC_021165.1    | Ca_Kabuli_Chr06 | 56003026                | AA                                     | GG                 | GG               | INTERGENIC                    |                    |                                           |
| SNP_45557_A_56047227 | NC_021165.1    | Ca_Kabuli_Chr06 | 56047227                | AA                                     | GG                 | GG               | INTERGENIC                    |                    |                                           |
| SNP_45558_A_56051663 | NC_021165.1    | Ca_Kabuli_Chr06 | 56051663                | AA                                     | GG                 | GG               | INTERGENIC                    |                    |                                           |
| SNP_45559_A_56056706 | NC_021165.1    | Ca_Kabuli_Chr06 | 56056706                | AA                                     | TT                 | TT               | INTERGENIC                    |                    |                                           |
| SNP_45560_A_56082017 | NC_021165.1    | Ca_Kabuli_Chr06 | 56082017                | AA                                     | GG                 | GG               | INTERGENIC                    |                    |                                           |
| SNP_45561_A_56082029 | NC_021165.1    | Ca_Kabuli_Chr06 | 56082029                | AA                                     | TT                 | TT               | INTERGENIC                    |                    |                                           |
| SNP_45562_A_56087431 | NC_021165.1    | Ca_Kabuli_Chr06 | 56087431                | GG                                     | AA                 | AA               | INTERGENIC                    |                    |                                           |
| SNP_45563_A_56087473 | NC_021165.1    | Ca_Kabuli_Chr06 | 56087473                | GG                                     | TT                 | TT               | INTERGENIC                    |                    |                                           |
| SNP_45565_A_56087743 | NC_021165.1    | Ca_Kabuli_Chr06 | 56087743                | TT                                     | AA                 | AA               | INTERGENIC                    |                    |                                           |
| SNP_45566_A_56087747 | NC_021165.1    | Ca_Kabuli_Chr06 | 56087747                | CC                                     | TT                 | TT               | INTERGENIC                    |                    |                                           |

| SNPs IDs             | Chromosome IDs | Chromosomes     | Physical positions (bp) | CDC Frontier genome (Reference genome) | (Pusa 1103 & HPNB) | (ILWC 46 & LPNB) | Sequence genome | Components of | Gene accession IDs | Putative functions |
|----------------------|----------------|-----------------|-------------------------|----------------------------------------|--------------------|------------------|-----------------|---------------|--------------------|--------------------|
| SNP_45567_A_56091954 | NC_021165.1    | Ca_Kabuli_Chr06 | 56091954                | GG                                     | TT                 | TT               | INTERGENIC      |               |                    |                    |
| SNP_45568_A_56138213 | NC_021165.1    | Ca_Kabuli_Chr06 | 56138213                | CC                                     | TT                 | TT               | INTERGENIC      |               |                    |                    |
| SNP_45569_A_56138593 | NC_021165.1    | Ca_Kabuli_Chr06 | 56138593                | GG                                     | AA                 | AA               | INTERGENIC      |               |                    |                    |
| SNP_45570_A_56138641 | NC_021165.1    | Ca_Kabuli_Chr06 | 56138641                | CC                                     | TT                 | TT               | INTERGENIC      |               |                    |                    |
| SNP_45571_A_56138924 | NC_021165.1    | Ca_Kabuli_Chr06 | 56138924                | GG                                     | AA                 | AA               | INTERGENIC      |               |                    |                    |
| SNP_45572_A_56139045 | NC_021165.1    | Ca_Kabuli_Chr06 | 56139045                | AA                                     | GG                 | GG               | INTERGENIC      |               |                    |                    |
| SNP_45573_A_56139152 | NC_021165.1    | Ca_Kabuli_Chr06 | 56139152                | AA                                     | GG                 | GG               | INTERGENIC      |               |                    |                    |
| SNP_45574_A_56139180 | NC_021165.1    | Ca_Kabuli_Chr06 | 56139180                | TT                                     | CC                 | CC               | INTERGENIC      |               |                    |                    |
| SNP_45575_A_56139211 | NC_021165.1    | Ca_Kabuli_Chr06 | 56139211                | TT                                     | CC                 | CC               | INTERGENIC      |               |                    |                    |
| SNP_45576_A_56139233 | NC_021165.1    | Ca_Kabuli_Chr06 | 56139233                | TT                                     | CC                 | CC               | INTERGENIC      |               |                    |                    |
| SNP_45577_A_56139303 | NC_021165.1    | Ca_Kabuli_Chr06 | 56139303                | AA                                     | TT                 | TT               | INTERGENIC      |               |                    |                    |
| SNP_45578_A_56139310 | NC_021165.1    | Ca_Kabuli_Chr06 | 56139310                | AA                                     | GG                 | GG               | INTERGENIC      |               |                    |                    |
| SNP_45579_A_56139342 | NC_021165.1    | Ca_Kabuli_Chr06 | 56139342                | TT                                     | AA                 | AA               | INTERGENIC      |               |                    |                    |
| SNP_45580_A_56139349 | NC_021165.1    | Ca_Kabuli_Chr06 | 56139349                | CC                                     | GG                 | GG               | INTERGENIC      |               |                    |                    |
| SNP_45581_A_56139456 | NC_021165.1    | Ca_Kabuli_Chr06 | 56139456                | AA                                     | GG                 | GG               | INTERGENIC      |               |                    |                    |
| SNP_45582_A_56139457 | NC_021165.1    | Ca_Kabuli_Chr06 | 56139457                | TT                                     | GG                 | GG               | INTERGENIC      |               |                    |                    |
| SNP_45583_A_56139459 | NC_021165.1    | Ca_Kabuli_Chr06 | 56139459                | TT                                     | GG                 | GG               | INTERGENIC      |               |                    |                    |
| SNP_45584_A_56191111 | NC_021165.1    | Ca_Kabuli_Chr06 | 56191111                | AA                                     | CC                 | CC               | INTERGENIC      |               |                    |                    |
| SNP_45586_A_56191348 | NC_021165.1    | Ca_Kabuli_Chr06 | 56191348                | CC                                     | TT                 | TT               | INTERGENIC      |               |                    |                    |
| SNP_45587_A_56193416 | NC_021165.1    | Ca_Kabuli_Chr06 | 56193416                | TT                                     | CC                 | CC               | INTERGENIC      |               |                    |                    |
| SNP_45588_A_56193443 | NC_021165.1    | Ca_Kabuli_Chr06 | 56193443                | AA                                     | TT                 | TT               | INTERGENIC      |               |                    |                    |
| SNP_45589_A_56229389 | NC_021165.1    | Ca_Kabuli_Chr06 | 56229389                | GG                                     | CC                 | CC               | INTERGENIC      |               |                    |                    |

| SNPs IDs             | Chromosome IDs | Chromosomes     | Physical positions (bp) | CDC Frontier genome (Reference genome) | (Pusa 1103 & HPNB) | (ILWC 46 & LPNB) | Sequence Components of genome | Gene accession IDs | Putative functions |
|----------------------|----------------|-----------------|-------------------------|----------------------------------------|--------------------|------------------|-------------------------------|--------------------|--------------------|
| SNP_45590_A_56232066 | NC_021165.1    | Ca_Kabuli_Chr06 | 56232066                | AA                                     | GG                 | GG               | INTERGENIC                    |                    |                    |
| SNP_45591_A_56245312 | NC_021165.1    | Ca_Kabuli_Chr06 | 56245312                | GG                                     | AA                 | AA               | INTERGENIC                    |                    |                    |
| SNP_45592_A_56245362 | NC_021165.1    | Ca_Kabuli_Chr06 | 56245362                | AA                                     | TT                 | TT               | INTERGENIC                    |                    |                    |
| SNP_45593_A_56245374 | NC_021165.1    | Ca_Kabuli_Chr06 | 56245374                | AA                                     | GG                 | GG               | INTERGENIC                    |                    |                    |
| SNP_45594_A_56245656 | NC_021165.1    | Ca_Kabuli_Chr06 | 56245656                | TT                                     | AA                 | AA               | INTERGENIC                    |                    |                    |
| SNP_45595_A_56293091 | NC_021165.1    | Ca_Kabuli_Chr06 | 56293091                | CC                                     | TT                 | TT               | INTERGENIC                    |                    |                    |
| SNP_45596_A_56303103 | NC_021165.1    | Ca_Kabuli_Chr06 | 56303103                | CC                                     | GG                 | GG               | INTERGENIC                    |                    |                    |
| SNP_45597_A_56303638 | NC_021165.1    | Ca_Kabuli_Chr06 | 56303638                | GG                                     | AA                 | AA               | INTERGENIC                    |                    |                    |
| SNP_45598_A_56304046 | NC_021165.1    | Ca_Kabuli_Chr06 | 56304046                | TT                                     | CC                 | CC               | INTERGENIC                    |                    |                    |
| SNP_45599_A_56304210 | NC_021165.1    | Ca_Kabuli_Chr06 | 56304210                | AA                                     | TT                 | TT               | INTERGENIC                    |                    |                    |
| SNP_45600_A_56304463 | NC_021165.1    | Ca_Kabuli_Chr06 | 56304463                | CC                                     | TT                 | TT               | INTERGENIC                    |                    |                    |
| SNP_45601_A_56304474 | NC_021165.1    | Ca_Kabuli_Chr06 | 56304474                | GG                                     | AA                 | AA               | INTERGENIC                    |                    |                    |
| SNP_45602_A_56304475 | NC_021165.1    | Ca_Kabuli_Chr06 | 56304475                | TT                                     | AA                 | AA               | INTERGENIC                    |                    |                    |
| SNP_45603_A_56304482 | NC_021165.1    | Ca_Kabuli_Chr06 | 56304482                | AA                                     | TT                 | TT               | INTERGENIC                    |                    |                    |
| SNP_45604_A_56304500 | NC_021165.1    | Ca_Kabuli_Chr06 | 56304500                | GG                                     | AA                 | AA               | INTERGENIC                    |                    |                    |
| SNP_45605_A_56304506 | NC_021165.1    | Ca_Kabuli_Chr06 | 56304506                | GG                                     | AA                 | AA               | INTERGENIC                    |                    |                    |
| SNP_45606_A_56304780 | NC_021165.1    | Ca_Kabuli_Chr06 | 56304780                | CC                                     | GG                 | GG               | INTERGENIC                    |                    |                    |
| SNP_45607_A_56304804 | NC_021165.1    | Ca_Kabuli_Chr06 | 56304804                | TT                                     | CC                 | CC               | INTERGENIC                    |                    |                    |
| SNP_45608_A_56304851 | NC_021165.1    | Ca_Kabuli_Chr06 | 56304851                | AA                                     | CC                 | CC               | INTERGENIC                    |                    |                    |
| SNP_45609_A_56304916 | NC_021165.1    | Ca_Kabuli_Chr06 | 56304916                | GG                                     | AA                 | AA               | INTERGENIC                    |                    |                    |
| SNP_45610_A_56325287 | NC_021165.1    | Ca_Kabuli_Chr06 | 56325287                | GG                                     | AA                 | AA               | INTERGENIC                    |                    |                    |
| SNP_45611_A_56397942 | NC_021165.1    | Ca_Kabuli_Chr06 | 56397942                | TT                                     | CC                 | CC               | INTRON                        | 101494099          | MLO-like protein 1 |

| SNPs IDs             | Chromosome IDs | Chromosomes     | Physical positions (bp) | CDC Frontier genome (Reference genome) | (Pusa 1103 & HPNB) | (ILWC 46 & LPNB) | Sequence Components of genome | Gene accession IDs | Putative functions |
|----------------------|----------------|-----------------|-------------------------|----------------------------------------|--------------------|------------------|-------------------------------|--------------------|--------------------|
| SNP_45612_A_56397986 | NC_021165.1    | Ca_Kabuli_Chr06 | 56397986                | TT                                     | CC                 | CC               | INTRON                        | 101494099          | MLO-like protein 1 |
| SNP_45613_A_56397993 | NC_021165.1    | Ca_Kabuli_Chr06 | 56397993                | AA                                     | GG                 | GG               | INTRON                        | 101494099          | MLO-like protein 1 |
| SNP_45614_A_56410754 | NC_021165.1    | Ca_Kabuli_Chr06 | 56410754                | AA                                     | GG                 | GG               | INTRON                        | 101494099          | MLO-like protein 1 |
| SNP_45615_A_56411945 | NC_021165.1    | Ca_Kabuli_Chr06 | 56411945                | CC                                     | AA                 | AA               | INTRON                        | 101494099          | MLO-like protein 1 |
| SNP_45616_A_56423147 | NC_021165.1    | Ca_Kabuli_Chr06 | 56423147                | AA                                     | CC                 | CC               | INTRON                        | 101494099          | MLO-like protein 1 |
| SNP_45617_A_56423148 | NC_021165.1    | Ca_Kabuli_Chr06 | 56423148                | AA                                     | CC                 | CC               | INTRON                        | 101494099          | MLO-like protein 1 |
| SNP_45618_A_56423463 | NC_021165.1    | Ca_Kabuli_Chr06 | 56423463                | AA                                     | GG                 | GG               | INTRON                        | 101494099          | MLO-like protein 1 |
| SNP_45619_A_56461578 | NC_021165.1    | Ca_Kabuli_Chr06 | 56461578                | GG                                     | AA                 | AA               | INTERGENIC                    |                    |                    |
| SNP_45620_A_56464718 | NC_021165.1    | Ca_Kabuli_Chr06 | 56464718                | CC                                     | TT                 | TT               | INTERGENIC                    |                    |                    |
| SNP_45621_A_56464722 | NC_021165.1    | Ca_Kabuli_Chr06 | 56464722                | CC                                     | GG                 | GG               | INTERGENIC                    |                    |                    |
| SNP_45622_A_56464769 | NC_021165.1    | Ca_Kabuli_Chr06 | 56464769                | CC                                     | TT                 | TT               | INTERGENIC                    |                    |                    |
| SNP_45623_A_56502583 | NC_021165.1    | Ca_Kabuli_Chr06 | 56502583                | AA                                     | TT                 | TT               | INTERGENIC                    |                    |                    |
| SNP_45624_A_56502686 | NC_021165.1    | Ca_Kabuli_Chr06 | 56502686                | CC                                     | AA                 | AA               | INTERGENIC                    |                    |                    |
| SNP_45625_A_56502736 | NC_021165.1    | Ca_Kabuli_Chr06 | 56502736                | TT                                     | CC                 | CC               | INTERGENIC                    |                    |                    |
| SNP_45626_A_56503529 | NC_021165.1    | Ca_Kabuli_Chr06 | 56503529                | CC                                     | TT                 | TT               | INTERGENIC                    |                    |                    |
| SNP_45627_A_56503530 | NC_021165.1    | Ca_Kabuli_Chr06 | 56503530                | GG                                     | AA                 | AA               | INTERGENIC                    |                    |                    |
| SNP_45628_A_56503557 | NC_021165.1    | Ca_Kabuli_Chr06 | 56503557                | GG                                     | CC                 | CC               | INTERGENIC                    |                    |                    |
| SNP_45629_A_56503561 | NC_021165.1    | Ca_Kabuli_Chr06 | 56503561                | AA                                     | TT                 | TT               | INTERGENIC                    |                    |                    |
| SNP_45630_A_56503597 | NC_021165.1    | Ca_Kabuli_Chr06 | 56503597                | AA                                     | TT                 | TT               | INTERGENIC                    |                    |                    |
| SNP_45631_A_56503611 | NC_021165.1    | Ca_Kabuli_Chr06 | 56503611                | AA                                     | GG                 | GG               | INTERGENIC                    |                    |                    |
| SNP_45632_A_56503616 | NC_021165.1    | Ca_Kabuli_Chr06 | 56503616                | GG                                     | AA                 | AA               | INTERGENIC                    |                    |                    |
| SNP_45633_A_56503617 | NC_021165.1    | Ca_Kabuli_Chr06 | 56503617                | CC                                     | GG                 | GG               | INTERGENIC                    |                    |                    |

| SNPs IDs             | Chromosome IDs | Chromosomes     | Physical positions (bp) | CDC Frontier genome (Reference genome) | (Pusa 1103 & HPNB) | (ILWC 46 & LPNB) | Sequence genome | Components of | Gene accession IDs | Putative functions |
|----------------------|----------------|-----------------|-------------------------|----------------------------------------|--------------------|------------------|-----------------|---------------|--------------------|--------------------|
| SNP_45634_A_56503657 | NC_021165.1    | Ca_Kabuli_Chr06 | 56503657                | CC                                     | TT                 | TT               | INTERGENIC      |               |                    |                    |
| SNP_45635_A_56503665 | NC_021165.1    | Ca_Kabuli_Chr06 | 56503665                | CC                                     | TT                 | TT               | INTERGENIC      |               |                    |                    |
| SNP_45636_A_56503683 | NC_021165.1    | Ca_Kabuli_Chr06 | 56503683                | CC                                     | TT                 | TT               | INTERGENIC      |               |                    |                    |
| SNP_45637_A_56503687 | NC_021165.1    | Ca_Kabuli_Chr06 | 56503687                | TT                                     | CC                 | CC               | INTERGENIC      |               |                    |                    |
| SNP_45638_A_56503716 | NC_021165.1    | Ca_Kabuli_Chr06 | 56503716                | CC                                     | AA                 | AA               | INTERGENIC      |               |                    |                    |
| SNP_45639_A_56503720 | NC_021165.1    | Ca_Kabuli_Chr06 | 56503720                | TT                                     | GG                 | GG               | INTERGENIC      |               |                    |                    |
| SNP_45640_A_56503750 | NC_021165.1    | Ca_Kabuli_Chr06 | 56503750                | GG                                     | AA                 | AA               | INTERGENIC      |               |                    |                    |
| SNP_45641_A_56503874 | NC_021165.1    | Ca_Kabuli_Chr06 | 56503874                | TT                                     | AA                 | AA               | INTERGENIC      |               |                    |                    |
| SNP_45642_A_56503880 | NC_021165.1    | Ca_Kabuli_Chr06 | 56503880                | CC                                     | AA                 | AA               | INTERGENIC      |               |                    |                    |
| SNP_45643_A_56503888 | NC_021165.1    | Ca_Kabuli_Chr06 | 56503888                | AA                                     | CC                 | CC               | INTERGENIC      |               |                    |                    |
| SNP_45644_A_56503913 | NC_021165.1    | Ca_Kabuli_Chr06 | 56503913                | TT                                     | CC                 | CC               | INTERGENIC      |               |                    |                    |
| SNP_45645_A_56503916 | NC_021165.1    | Ca_Kabuli_Chr06 | 56503916                | CC                                     | TT                 | TT               | INTERGENIC      |               |                    |                    |
| SNP_45646_A_56503941 | NC_021165.1    | Ca_Kabuli_Chr06 | 56503941                | GG                                     | AA                 | AA               | INTERGENIC      |               |                    |                    |
| SNP_45648_A_56504050 | NC_021165.1    | Ca_Kabuli_Chr06 | 56504050                | AA                                     | GG                 | GG               | INTERGENIC      |               |                    |                    |
| SNP_45649_A_56504070 | NC_021165.1    | Ca_Kabuli_Chr06 | 56504070                | AA                                     | GG                 | GG               | INTERGENIC      |               |                    |                    |
| SNP_45650_A_56504092 | NC_021165.1    | Ca_Kabuli_Chr06 | 56504092                | TT                                     | AA                 | AA               | INTERGENIC      |               |                    |                    |
| SNP_45652_A_56504316 | NC_021165.1    | Ca_Kabuli_Chr06 | 56504316                | AA                                     | GG                 | GG               | INTERGENIC      |               |                    |                    |
| SNP_45653_A_56504334 | NC_021165.1    | Ca_Kabuli_Chr06 | 56504334                | TT                                     | AA                 | GG               | INTERGENIC      |               |                    |                    |
| SNP_45654_A_56504541 | NC_021165.1    | Ca_Kabuli_Chr06 | 56504541                | CC                                     | GG                 | GG               | INTERGENIC      |               |                    |                    |
| SNP_45655_A_56504611 | NC_021165.1    | Ca_Kabuli_Chr06 | 56504611                | TT                                     | AA                 | AA               | INTERGENIC      |               |                    |                    |
| SNP_45656_A_56504620 | NC_021165.1    | Ca_Kabuli_Chr06 | 56504620                | AA                                     | CC                 | CC               | INTERGENIC      |               |                    |                    |
| SNP_45657_A_56504633 | NC_021165.1    | Ca_Kabuli_Chr06 | 56504633                | GG                                     | AA                 | AA               | INTERGENIC      |               |                    |                    |



| SNPs IDs             | Chromosome IDs | Chromosomes     | Physical positions (bp) | CDC Frontier genome (Reference genome) | (Pusa 1103 & HPNB) | (ILWC 46 & LPNB) | Sequence genome | Components of | Gene accession IDs | Putative functions |
|----------------------|----------------|-----------------|-------------------------|----------------------------------------|--------------------|------------------|-----------------|---------------|--------------------|--------------------|
| SNP_45659_A_56504785 | NC_021165.1    | Ca_Kabuli_Chr06 | 56504785                | TT                                     | AA                 | AA               | INTERGENIC      |               |                    |                    |
| SNP_45660_A_56505062 | NC_021165.1    | Ca_Kabuli_Chr06 | 56505062                | TT                                     | GG                 | GG               | INTERGENIC      |               |                    |                    |
| SNP_45661_A_56505167 | NC_021165.1    | Ca_Kabuli_Chr06 | 56505167                | CC                                     | TT                 | TT               | INTERGENIC      |               |                    |                    |
| SNP_45662_A_56505248 | NC_021165.1    | Ca_Kabuli_Chr06 | 56505248                | AA                                     | GG                 | GG               | INTERGENIC      |               |                    |                    |
| SNP_45663_A_56505253 | NC_021165.1    | Ca_Kabuli_Chr06 | 56505253                | AA                                     | GG                 | GG               | INTERGENIC      |               |                    |                    |
| SNP_45664_A_56505317 | NC_021165.1    | Ca_Kabuli_Chr06 | 56505317                | CC                                     | TT                 | TT               | INTERGENIC      |               |                    |                    |
| SNP_45665_A_56505321 | NC_021165.1    | Ca_Kabuli_Chr06 | 56505321                | TT                                     | CC                 | CC               | INTERGENIC      |               |                    |                    |
| SNP_45666_A_56505327 | NC_021165.1    | Ca_Kabuli_Chr06 | 56505327                | CC                                     | AA                 | AA               | INTERGENIC      |               |                    |                    |
| SNP_45667_A_56505389 | NC_021165.1    | Ca_Kabuli_Chr06 | 56505389                | TT                                     | CC                 | CC               | INTERGENIC      |               |                    |                    |
| SNP_45668_A_56505400 | NC_021165.1    | Ca_Kabuli_Chr06 | 56505400                | TT                                     | AA                 | AA               | INTERGENIC      |               |                    |                    |
| SNP_45669_A_56505409 | NC_021165.1    | Ca_Kabuli_Chr06 | 56505409                | AA                                     | GG                 | GG               | INTERGENIC      |               |                    |                    |
| SNP_45670_A_56505420 | NC_021165.1    | Ca_Kabuli_Chr06 | 56505420                | GG                                     | CC                 | CC               | INTERGENIC      |               |                    |                    |
| SNP_45671_A_56505540 | NC_021165.1    | Ca_Kabuli_Chr06 | 56505540                | CC                                     | TT                 | TT               | INTERGENIC      |               |                    |                    |
| SNP_45672_A_56505548 | NC_021165.1    | Ca_Kabuli_Chr06 | 56505548                | TT                                     | CC                 | CC               | INTERGENIC      |               |                    |                    |
| SNP_45673_A_56505563 | NC_021165.1    | Ca_Kabuli_Chr06 | 56505563                | TT                                     | CC                 | CC               | INTERGENIC      |               |                    |                    |
| SNP_45675_A_56505622 | NC_021165.1    | Ca_Kabuli_Chr06 | 56505622                | AA                                     | CC                 | CC               | INTERGENIC      |               |                    |                    |
| SNP_45676_A_56505656 | NC_021165.1    | Ca_Kabuli_Chr06 | 56505656                | TT                                     | GG                 | GG               | INTERGENIC      |               |                    |                    |
| SNP_45677_A_56506744 | NC_021165.1    | Ca_Kabuli_Chr06 | 56506744                | AA                                     | GG                 | GG               | INTERGENIC      |               |                    |                    |
| SNP_45678_A_56506806 | NC_021165.1    | Ca_Kabuli_Chr06 | 56506806                | GG                                     | AA                 | AA               | INTERGENIC      |               |                    |                    |
| SNP_45679_A_56506953 | NC_021165.1    | Ca_Kabuli_Chr06 | 56506953                | CC                                     | TT                 | TT               | INTERGENIC      |               |                    |                    |
| SNP_45680_A_56506985 | NC_021165.1    | Ca_Kabuli_Chr06 | 56506985                | TT                                     | CC                 | CC               | INTERGENIC      |               |                    |                    |
| SNP_45681_A_56507132 | NC_021165.1    | Ca_Kabuli_Chr06 | 56507132                | TT                                     | CC                 | CC               | INTERGENIC      |               |                    |                    |

| SNPs IDs             | Chromosome IDs | Chromosomes     | Physical positions (bp) | CDC Frontier (Reference genome) | (Pusa 1103 & HPNB) | (ILWC 46 & LPNB) | Sequence genome | Components of | Gene accession IDs                                       | Putative functions |
|----------------------|----------------|-----------------|-------------------------|---------------------------------|--------------------|------------------|-----------------|---------------|----------------------------------------------------------|--------------------|
| SNP_45682_A_56507160 | NC_021165.1    | Ca_Kabuli_Chr06 | 56507160                | AA                              | GG                 | GG               | INTERGENIC      |               |                                                          |                    |
| SNP_45683_A_56507352 | NC_021165.1    | Ca_Kabuli_Chr06 | 56507352                | CC                              | TT                 | TT               | INTERGENIC      |               |                                                          |                    |
| SNP_45684_A_56507373 | NC_021165.1    | Ca_Kabuli_Chr06 | 56507373                | CC                              | AA                 | AA               | INTERGENIC      |               |                                                          |                    |
| SNP_45685_A_56507394 | NC_021165.1    | Ca_Kabuli_Chr06 | 56507394                | TT                              | AA                 | AA               | INTERGENIC      |               |                                                          |                    |
| SNP_45687_A_56507463 | NC_021165.1    | Ca_Kabuli_Chr06 | 56507463                | CC                              | AA                 | AA               | INTERGENIC      |               |                                                          |                    |
| SNP_45688_A_56507466 | NC_021165.1    | Ca_Kabuli_Chr06 | 56507466                | GG                              | AA                 | AA               | INTERGENIC      |               |                                                          |                    |
| SNP_45689_A_56507487 | NC_021165.1    | Ca_Kabuli_Chr06 | 56507487                | TT                              | AA                 | AA               | INTERGENIC      |               |                                                          |                    |
| SNP_45690_A_56507715 | NC_021165.1    | Ca_Kabuli_Chr06 | 56507715                | TT                              | CC                 | CC               | INTERGENIC      |               |                                                          |                    |
| SNP_45692_A_56507746 | NC_021165.1    | Ca_Kabuli_Chr06 | 56507746                | TT                              | AA                 | AA               | INTERGENIC      |               |                                                          |                    |
| SNP_45693_A_56507791 | NC_021165.1    | Ca_Kabuli_Chr06 | 56507791                | CC                              | TT                 | TT               | INTERGENIC      |               |                                                          |                    |
| SNP_45695_A_56507803 | NC_021165.1    | Ca_Kabuli_Chr06 | 56507803                | GG                              | AA                 | AA               | INTERGENIC      |               |                                                          |                    |
| SNP_45696_A_56508135 | NC_021165.1    | Ca_Kabuli_Chr06 | 56508135                | GG                              | AA                 | AA               | INTERGENIC      |               |                                                          |                    |
| SNP_45697_A_56508190 | NC_021165.1    | Ca_Kabuli_Chr06 | 56508190                | AA                              | TT                 | TT               | INTERGENIC      |               |                                                          |                    |
| SNP_45698_A_56528011 | NC_021165.1    | Ca_Kabuli_Chr06 | 56528011                | TT                              | CC                 | CC               | INTERGENIC      |               |                                                          |                    |
| SNP_45699_A_56560731 | NC_021165.1    | Ca_Kabuli_Chr06 | 56560731                | AA                              | GG                 | GG               | URR             | 101495914     | cell division cycle protein 27 homolog B-like            |                    |
| SNP_45700_A_56578993 | NC_021165.1    | Ca_Kabuli_Chr06 | 56578993                | TT                              | CC                 | CC               | INTERGENIC      |               |                                                          |                    |
| SNP_45701_A_56621648 | NC_021165.1    | Ca_Kabuli_Chr06 | 56621648                | CC                              | GG                 | GG               | INTERGENIC      |               |                                                          |                    |
| SNP_45702_A_56626920 | NC_021165.1    | Ca_Kabuli_Chr06 | 56626920                | TT                              | CC                 | CC               | INTRON          | 101498535     | proline dehydrogenase 2, mitochondrial-like              |                    |
| SNP_45703_A_56635705 | NC_021165.1    | Ca_Kabuli_Chr06 | 56635705                | TT                              | AA                 | AA               | INTRON          | 101515269     | serine/threonine-protein phosphatase 7 long form homolog |                    |
| SNP_45704_A_56655711 | NC_021165.1    | Ca_Kabuli_Chr06 | 56655711                | CC                              | AA                 | AA               | INTERGENIC      |               |                                                          |                    |
| SNP_45705_A_56669388 | NC_021165.1    | Ca_Kabuli_Chr06 | 56669388                | AA                              | GG                 | GG               | DRR             | 101498206     | ATP-dependent RNA helicase SUV3L, mitochondrial-like     |                    |
| SNP_45706_A_56687825 | NC_021165.1    | Ca_Kabuli_Chr06 | 56687825                | TT                              | AA                 | AA               | INTERGENIC      |               |                                                          |                    |

| SNPs IDs             | Chromosome IDs | Chromosomes     | Physical positions (bp) | CDC Frontier (Reference genome) | (Pusa 1103 & HPNB) | (ILWC 46 & LPNB) | Sequence Components of genome | Gene accession IDs | Putative functions                                       |
|----------------------|----------------|-----------------|-------------------------|---------------------------------|--------------------|------------------|-------------------------------|--------------------|----------------------------------------------------------|
| SNP_45707_A_56713252 | NC_021165.1    | Ca_Kabuli_Chr06 | 56713252                | CC                              | GG                 | GG               | INTRON                        | 101488670          | uncharacterized LOC101488670                             |
| SNP_45708_A_56713316 | NC_021165.1    | Ca_Kabuli_Chr06 | 56713316                | TT                              | CC                 | CC               | INTRON                        | 101488670          | uncharacterized LOC101488670                             |
| SNP_45709_A_56713374 | NC_021165.1    | Ca_Kabuli_Chr06 | 56713374                | CC                              | TT                 | TT               | INTRON                        | 101488670          | uncharacterized LOC101488670                             |
| SNP_45710_A_56720417 | NC_021165.1    | Ca_Kabuli_Chr06 | 56720417                | GG                              | AA                 | AA               | URR                           | 101500578          | stress-induced protein KIN2-like                         |
| SNP_45712_A_56728535 | NC_021165.1    | Ca_Kabuli_Chr06 | 56728535                | TT                              | AA                 | AA               | INTERGENIC                    |                    |                                                          |
| SNP_45713_A_56728595 | NC_021165.1    | Ca_Kabuli_Chr06 | 56728595                | AA                              | GG                 | GG               | INTERGENIC                    |                    |                                                          |
| SNP_45715_A_56728926 | NC_021165.1    | Ca_Kabuli_Chr06 | 56728926                | TT                              | CC                 | CC               | INTERGENIC                    |                    |                                                          |
| SNP_45716_A_56769549 | NC_021165.1    | Ca_Kabuli_Chr06 | 56769549                | GG                              | AA                 | AA               | INTERGENIC                    |                    |                                                          |
| SNP_45718_A_56812676 | NC_021165.1    | Ca_Kabuli_Chr06 | 56812676                | TT                              | AA                 | AA               | DRR                           | 101503435          | probable sodium-coupled neutral amino acid transporter 6 |
| SNP_45719_A_56859370 | NC_021165.1    | Ca_Kabuli_Chr06 | 56859370                | CC                              | TT                 | TT               | INTRON                        | 101504728          | uncharacterized LOC101504728                             |
| SNP_45720_A_56883484 | NC_021165.1    | Ca_Kabuli_Chr06 | 56883484                | TT                              | CC                 | CC               | INTERGENIC                    |                    |                                                          |
| SNP_45721_A_56964182 | NC_021165.1    | Ca_Kabuli_Chr06 | 56964182                | CC                              | GG                 | GG               | INTERGENIC                    |                    |                                                          |
| SNP_45722_A_56982318 | NC_021165.1    | Ca_Kabuli_Chr06 | 56982318                | AA                              | CC                 | CC               | URR                           | 101507218          | uncharacterized protein At1g04910                        |
| SNP_45725_A_57093050 | NC_021165.1    | Ca_Kabuli_Chr06 | 57093050                | GG                              | AA                 | AA               | INTERGENIC                    |                    |                                                          |
| SNP_45726_A_57114156 | NC_021165.1    | Ca_Kabuli_Chr06 | 57114156                | AA                              | GG                 | GG               | INTRON                        | 101510842          | probable tRNA (guanine(26)-N(2))-dimethyltransferase 1   |
| SNP_45728_A_57136152 | NC_021165.1    | Ca_Kabuli_Chr06 | 57136152                | AA                              | GG                 | GG               | INTERGENIC                    |                    |                                                          |
| SNP_45729_A_57136153 | NC_021165.1    | Ca_Kabuli_Chr06 | 57136153                | AA                              | CC                 | CC               | INTERGENIC                    |                    |                                                          |
| SNP_45730_A_57138536 | NC_021165.1    | Ca_Kabuli_Chr06 | 57138536                | TT                              | CC                 | CC               | INTERGENIC                    |                    |                                                          |
| SNP_45731_A_57138577 | NC_021165.1    | Ca_Kabuli_Chr06 | 57138577                | GG                              | AA                 | AA               | INTERGENIC                    |                    |                                                          |
| SNP_45732_A_57144221 | NC_021165.1    | Ca_Kabuli_Chr06 | 57144221                | TT                              | CC                 | CC               | INTERGENIC                    |                    |                                                          |
| SNP_45733_A_57144243 | NC_021165.1    | Ca_Kabuli_Chr06 | 57144243                | TT                              | CC                 | CC               | INTERGENIC                    |                    |                                                          |
| SNP_45734_A_57144255 | NC_021165.1    | Ca_Kabuli_Chr06 | 57144255                | AA                              | GG                 | GG               | INTERGENIC                    |                    |                                                          |

| SNPs IDs             | Chromosome IDs | Chromosomes     | Physical positions (bp) | CDC Frontier (Reference genome) | (Pusa 1103 & HPNB) | (ILWC 46 & LPNB) | Sequence Components of genome | Gene accession IDs | Putative functions                           |
|----------------------|----------------|-----------------|-------------------------|---------------------------------|--------------------|------------------|-------------------------------|--------------------|----------------------------------------------|
| SNP_45735_A_57160887 | NC_021165.1    | Ca_Kabuli_Chr06 | 57160887                | TT                              | CC                 | CC               | INTERGENIC                    |                    |                                              |
| SNP_45736_A_57160889 | NC_021165.1    | Ca_Kabuli_Chr06 | 57160889                | TT                              | CC                 | CC               | INTERGENIC                    |                    |                                              |
| SNP_45737_A_57172921 | NC_021165.1    | Ca_Kabuli_Chr06 | 57172921                | CC                              | TT                 | TT               | NON_SYNONYMOUS_CODING         | 101513417          | phenolic glucoside malonyltransferase 1-like |
| SNP_45738_A_57173063 | NC_021165.1    | Ca_Kabuli_Chr06 | 57173063                | TT                              | CC                 | CC               | NON_SYNONYMOUS_CODING         | 101513417          | phenolic glucoside malonyltransferase 1-like |
| SNP_45739_A_57173072 | NC_021165.1    | Ca_Kabuli_Chr06 | 57173072                | GG                              | AA                 | AA               | NON_SYNONYMOUS_CODING         | 101513417          | phenolic glucoside malonyltransferase 1-like |
| SNP_45740_A_57173082 | NC_021165.1    | Ca_Kabuli_Chr06 | 57173082                | AA                              | TT                 | TT               | NON_SYNONYMOUS_CODING         | 101513417          | phenolic glucoside malonyltransferase 1-like |
| SNP_45741_A_57173435 | NC_021165.1    | Ca_Kabuli_Chr06 | 57173435                | GG                              | AA                 | AA               | SYNONYMOUS_CODING             | 101513417          | phenolic glucoside malonyltransferase 1-like |
| SNP_45742_A_57173513 | NC_021165.1    | Ca_Kabuli_Chr06 | 57173513                | CC                              | TT                 | TT               | NON_SYNONYMOUS_CODING         | 101513417          | phenolic glucoside malonyltransferase 1-like |
| SNP_45743_A_57173517 | NC_021165.1    | Ca_Kabuli_Chr06 | 57173517                | TT                              | AA                 | AA               | NON_SYNONYMOUS_CODING         | 101513417          | phenolic glucoside malonyltransferase 1-like |
| SNP_45744_A_57173520 | NC_021165.1    | Ca_Kabuli_Chr06 | 57173520                | CC                              | AA                 | AA               | NON_SYNONYMOUS_CODING         | 101513417          | phenolic glucoside malonyltransferase 1-like |
| SNP_45745_A_57173530 | NC_021165.1    | Ca_Kabuli_Chr06 | 57173530                | GG                              | CC                 | CC               | NON_SYNONYMOUS_CODING         | 101513417          | phenolic glucoside malonyltransferase 1-like |
| SNP_45746_A_57173535 | NC_021165.1    | Ca_Kabuli_Chr06 | 57173535                | CC                              | TT                 | TT               | SYNONYMOUS_CODING             | 101513417          | phenolic glucoside malonyltransferase 1-like |
| SNP_45747_A_57173536 | NC_021165.1    | Ca_Kabuli_Chr06 | 57173536                | AA                              | GG                 | GG               | NON_SYNONYMOUS_CODING         | 101513417          | phenolic glucoside malonyltransferase 1-like |
| SNP_45748_A_57173556 | NC_021165.1    | Ca_Kabuli_Chr06 | 57173556                | GG                              | AA                 | AA               | SYNONYMOUS_CODING             | 101513417          | phenolic glucoside malonyltransferase 1-like |
| SNP_45749_A_57173638 | NC_021165.1    | Ca_Kabuli_Chr06 | 57173638                | AA                              | CC                 | CC               | NON_SYNONYMOUS_CODING         | 101513417          | phenolic glucoside malonyltransferase 1-like |
| SNP_45750_A_57173648 | NC_021165.1    | Ca_Kabuli_Chr06 | 57173648                | CC                              | TT                 | TT               | NON_SYNONYMOUS_CODING         | 101513417          | phenolic glucoside malonyltransferase 1-like |
| SNP_45751_A_57173652 | NC_021165.1    | Ca_Kabuli_Chr06 | 57173652                | AA                              | CC                 | CC               | NON_SYNONYMOUS_CODING         | 101513417          | phenolic glucoside malonyltransferase 1-like |
| SNP_45752_A_57173657 | NC_021165.1    | Ca_Kabuli_Chr06 | 57173657                | AA                              | GG                 | GG               | NON_SYNONYMOUS_CODING         | 101513417          | phenolic glucoside malonyltransferase 1-like |
| SNP_45753_A_57173671 | NC_021165.1    | Ca_Kabuli_Chr06 | 57173671                | AA                              | GG                 | GG               | NON_SYNONYMOUS_CODING         | 101513417          | phenolic glucoside malonyltransferase 1-like |
| SNP_45754_A_57173684 | NC_021165.1    | Ca_Kabuli_Chr06 | 57173684                | AA                              | GG                 | GG               | NON_SYNONYMOUS_CODING         | 101513417          | phenolic glucoside malonyltransferase 1-like |
| SNP_45755_A_57173688 | NC_021165.1    | Ca_Kabuli_Chr06 | 57173688                | AA                              | CC                 | CC               | SYNONYMOUS_CODING             | 101513417          | phenolic glucoside malonyltransferase 1-like |
| SNP_45756_A_57173695 | NC_021165.1    | Ca_Kabuli_Chr06 | 57173695                | AA                              | GG                 | GG               | NON_SYNONYMOUS_CODING         | 101513417          | phenolic glucoside malonyltransferase 1-like |

| SNPs IDs             | Chromosome IDs | Chromosomes     | Physical positions (bp) | CDC Frontier (Reference genome) | (Pusa 1103 & HPNB) | (ILWC 46 & LPNB) | Sequence Components of genome | Gene accession IDs | Putative functions                           |
|----------------------|----------------|-----------------|-------------------------|---------------------------------|--------------------|------------------|-------------------------------|--------------------|----------------------------------------------|
| SNP_45757_A_57173882 | NC_021165.1    | Ca_Kabuli_Chr06 | 57173882                | CC                              | GG                 | GG               | NON_SYNONYMOUS_CODING         | 101513417          | phenolic glucoside malonyltransferase 1-like |
| SNP_45758_A_57184385 | NC_021165.1    | Ca_Kabuli_Chr06 | 57184385                | AA                              | TT                 | TT               | DRR                           | 101513730          | receptor-like protein kinase FERONIA         |
| SNP_45759_A_57252809 | NC_021165.1    | Ca_Kabuli_Chr06 | 57252809                | GG                              | AA                 | AA               | INTERGENIC                    |                    |                                              |
| SNP_45760_A_57402865 | NC_021165.1    | Ca_Kabuli_Chr06 | 57402865                | CC                              | TT                 | TT               | DRR                           | 101495043          | endonuclease III homolog 1, chloroplastic    |
| SNP_45761_A_57425772 | NC_021165.1    | Ca_Kabuli_Chr06 | 57425772                | AA                              | CC                 | CC               | INTRON                        | 101495369          | uncharacterized LOC101495369                 |
| SNP_45762_A_57483795 | NC_021165.1    | Ca_Kabuli_Chr06 | 57483795                | TT                              | GG                 | GG               | INTERGENIC                    |                    |                                              |
| SNP_45763_A_57488358 | NC_021165.1    | Ca_Kabuli_Chr06 | 57488358                | TT                              | GG                 | GG               | INTERGENIC                    |                    |                                              |
| SNP_45764_A_57488564 | NC_021165.1    | Ca_Kabuli_Chr06 | 57488564                | AA                              | CC                 | CC               | INTERGENIC                    |                    |                                              |
| SNP_45765_A_57488978 | NC_021165.1    | Ca_Kabuli_Chr06 | 57488978                | TT                              | CC                 | CC               | INTERGENIC                    |                    |                                              |
| SNP_45766_A_57528249 | NC_021165.1    | Ca_Kabuli_Chr06 | 57528249                | AA                              | GG                 | GG               | DRR                           | 101498102          | calmodulin-like protein 3                    |
| SNP_45767_A_57528252 | NC_021165.1    | Ca_Kabuli_Chr06 | 57528252                | AA                              | CC                 | CC               | DRR                           | 101498102          | calmodulin-like protein 3                    |
| SNP_45768_A_57554123 | NC_021165.1    | Ca_Kabuli_Chr06 | 57554123                | CC                              | TT                 | TT               | URR                           | 101499101          | B-box zinc finger protein 24                 |
| SNP_45769_A_57608251 | NC_021165.1    | Ca_Kabuli_Chr06 | 57608251                | GG                              | CC                 | CC               | INTERGENIC                    |                    |                                              |
| SNP_45770_A_57608265 | NC_021165.1    | Ca_Kabuli_Chr06 | 57608265                | GG                              | AA                 | AA               | INTERGENIC                    |                    |                                              |
| SNP_45771_A_57628013 | NC_021165.1    | Ca_Kabuli_Chr06 | 57628013                | GG                              | AA                 | AA               | URR                           | 101501628          | calreticulin-3                               |
| SNP_45772_A_57679342 | NC_021165.1    | Ca_Kabuli_Chr06 | 57679342                | TT                              | GG                 | GG               | DRR                           | 101504949          | GTPase-activating protein GYP1-like          |
| SNP_45773_A_57679343 | NC_021165.1    | Ca_Kabuli_Chr06 | 57679343                | GG                              | TT                 | TT               | DRR                           | 101504949          | GTPase-activating protein GYP1-like          |
| SNP_45774_A_57744902 | NC_021165.1    | Ca_Kabuli_Chr06 | 57744902                | TT                              | AA                 | AA               | DRR                           | 101509219          | serine/threonine-protein kinase SMG1-like    |
| SNP_45775_A_57744903 | NC_021165.1    | Ca_Kabuli_Chr06 | 57744903                | CC                              | TT                 | TT               | DRR                           | 101509219          | serine/threonine-protein kinase SMG1-like    |
| SNP_45776_A_57953619 | NC_021165.1    | Ca_Kabuli_Chr06 | 57953619                | GG                              | CC                 | CC               | INTERGENIC                    |                    |                                              |
| SNP_45777_A_58017545 | NC_021165.1    | Ca_Kabuli_Chr06 | 58017545                | GG                              | TT                 | TT               | INTERGENIC                    |                    |                                              |
| SNP_45779_A_58095253 | NC_021165.1    | Ca_Kabuli_Chr06 | 58095253                | TT                              | CC                 | CC               | INTERGENIC                    |                    |                                              |

| SNPs IDs             | Chromosome IDs | Chromosomes     | Physical positions (bp) | CDC Frontier (Reference genome) | (Pusa 1103 & HPNB) | (ILWC 46 & LPNB) | Sequence Components of genome | Gene accession IDs | Putative functions                                             |
|----------------------|----------------|-----------------|-------------------------|---------------------------------|--------------------|------------------|-------------------------------|--------------------|----------------------------------------------------------------|
| SNP_45780_A_58129099 | NC_021165.1    | Ca_Kabuli_Chr06 | 58129099                | GG                              | TT                 | TT               | SPLICE_SITE_REGION            | 101501727          | uncharacterized protein PB18E9.04c-like                        |
| SNP_45781_A_58253859 | NC_021165.1    | Ca_Kabuli_Chr06 | 58253859                | AA                              | CC                 | CC               | DRR                           | 101506557          | glycine-rich RNA-binding, abscisic acid-inducible protein-like |
| SNP_45782_A_58332855 | NC_021165.1    | Ca_Kabuli_Chr06 | 58332855                | TT                              | CC                 | CC               | INTERGENIC                    |                    |                                                                |
| SNP_45783_A_58342972 | NC_021165.1    | Ca_Kabuli_Chr06 | 58342972                | AA                              | GG                 | GG               | INTERGENIC                    |                    |                                                                |
| SNP_45784_A_58372173 | NC_021165.1    | Ca_Kabuli_Chr06 | 58372173                | AA                              | GG                 | GG               | URR                           | 101508382          | isoflavone reductase-like protein                              |
| SNP_45785_A_58372181 | NC_021165.1    | Ca_Kabuli_Chr06 | 58372181                | AA                              | CC                 | CC               | URR                           | 101508382          | isoflavone reductase-like protein                              |
| SNP_45787_A_58405031 | NC_021165.1    | Ca_Kabuli_Chr06 | 58405031                | TT                              | CC                 | CC               | NON_SYNONYMOUS_CODING         | 101500035          | protein FAR-RED ELONGATED HYPOCOTYL 3-like                     |
| SNP_45790_A_58678049 | NC_021165.1    | Ca_Kabuli_Chr06 | 58678049                | GG                              | AA                 | AA               | INTERGENIC                    |                    |                                                                |
| SNP_45791_A_58682755 | NC_021165.1    | Ca_Kabuli_Chr06 | 58682755                | AA                              | GG                 | GG               | INTRON                        | 101492352          | kinesin-related protein 11                                     |
| SNP_45792_A_58695085 | NC_021165.1    | Ca_Kabuli_Chr06 | 58695085                | GG                              | TT                 | TT               | INTERGENIC                    |                    |                                                                |
| SNP_45793_A_58716139 | NC_021165.1    | Ca_Kabuli_Chr06 | 58716139                | GG                              | AA                 | AA               | INTERGENIC                    |                    |                                                                |
| SNP_45794_A_58739789 | NC_021165.1    | Ca_Kabuli_Chr06 | 58739789                | GG                              | TT                 | TT               | INTERGENIC                    |                    |                                                                |
| SNP_45795_A_58781276 | NC_021165.1    | Ca_Kabuli_Chr06 | 58781276                | GG                              | AA                 | AA               | URR                           | 101495269          | nostrin-like                                                   |
| SNP_45796_A_58781581 | NC_021165.1    | Ca_Kabuli_Chr06 | 58781581                | GG                              | AA                 | AA               | URR                           | 101495269          | nostrin-like                                                   |
| SNP_45797_A_58781646 | NC_021165.1    | Ca_Kabuli_Chr06 | 58781646                | GG                              | AA                 | AA               | URR                           | 101495269          | nostrin-like                                                   |
| SNP_45798_A_58782767 | NC_021165.1    | Ca_Kabuli_Chr06 | 58782767                | GG                              | AA                 | AA               | URR                           | 101495269          | nostrin-like                                                   |
| SNP_45799_A_58783420 | NC_021165.1    | Ca_Kabuli_Chr06 | 58783420                | AA                              | TT                 | TT               | INTERGENIC                    |                    |                                                                |
| SNP_45800_A_58783421 | NC_021165.1    | Ca_Kabuli_Chr06 | 58783421                | AA                              | TT                 | TT               | INTERGENIC                    |                    |                                                                |
| SNP_45801_A_58784122 | NC_021165.1    | Ca_Kabuli_Chr06 | 58784122                | TT                              | AA                 | AA               | INTERGENIC                    |                    |                                                                |
| SNP_45802_A_58784133 | NC_021165.1    | Ca_Kabuli_Chr06 | 58784133                | GG                              | TT                 | TT               | INTERGENIC                    |                    |                                                                |
| SNP_45803_A_58784616 | NC_021165.1    | Ca_Kabuli_Chr06 | 58784616                | TT                              | AA                 | AA               | INTERGENIC                    |                    |                                                                |
| SNP_45804_A_58784917 | NC_021165.1    | Ca_Kabuli_Chr06 | 58784917                | TT                              | CC                 | CC               | INTERGENIC                    |                    |                                                                |

| SNPs IDs             | Chromosome IDs | Chromosomes     | Physical positions (bp) | CDC Frontier genome (Reference genome) | (Pusa 1103 & HPNB) | (ILWC 46 & LPNB) | Sequence Components of genome | Gene accession IDs | Putative functions               |
|----------------------|----------------|-----------------|-------------------------|----------------------------------------|--------------------|------------------|-------------------------------|--------------------|----------------------------------|
| SNP_45805_A_58785463 | NC_021165.1    | Ca_Kabuli_Chr06 | 58785463                | TT                                     | CC                 | CC               | INTERGENIC                    |                    |                                  |
| SNP_45806_A_58786348 | NC_021165.1    | Ca_Kabuli_Chr06 | 58786348                | TT                                     | GG                 | GG               | DRR                           | 101502589          | myb-like protein M               |
| SNP_45807_A_58786353 | NC_021165.1    | Ca_Kabuli_Chr06 | 58786353                | TT                                     | CC                 | CC               | DRR                           | 101502589          | myb-like protein M               |
| SNP_45808_A_58787940 | NC_021165.1    | Ca_Kabuli_Chr06 | 58787940                | GG                                     | AA                 | AA               | SYNONYMOUS_CODING             | 101502589          | myb-like protein M               |
| SNP_45809_A_58787944 | NC_021165.1    | Ca_Kabuli_Chr06 | 58787944                | CC                                     | GG                 | GG               | NON_SYNONYMOUS_CODING         | 101502589          | myb-like protein M               |
| SNP_45810_A_58788005 | NC_021165.1    | Ca_Kabuli_Chr06 | 58788005                | GG                                     | AA                 | AA               | NON_SYNONYMOUS_CODING         | 101502589          | myb-like protein M               |
| SNP_45811_A_58789675 | NC_021165.1    | Ca_Kabuli_Chr06 | 58789675                | GG                                     | AA                 | AA               | URR                           | 101502589          | myb-like protein M               |
| SNP_45812_A_58790175 | NC_021165.1    | Ca_Kabuli_Chr06 | 58790175                | AA                                     | GG                 | GG               | URR                           | 101502589          | myb-like protein M               |
| SNP_45813_A_58790179 | NC_021165.1    | Ca_Kabuli_Chr06 | 58790179                | CC                                     | TT                 | TT               | URR                           | 101502589          | myb-like protein M               |
| SNP_45814_A_58792374 | NC_021165.1    | Ca_Kabuli_Chr06 | 58792374                | TT                                     | CC                 | CC               | INTERGENIC                    |                    |                                  |
| SNP_45815_A_58792375 | NC_021165.1    | Ca_Kabuli_Chr06 | 58792375                | TT                                     | CC                 | CC               | INTERGENIC                    |                    |                                  |
| SNP_45816_A_58792435 | NC_021165.1    | Ca_Kabuli_Chr06 | 58792435                | TT                                     | CC                 | CC               | INTERGENIC                    |                    |                                  |
| SNP_45817_A_58792437 | NC_021165.1    | Ca_Kabuli_Chr06 | 58792437                | GG                                     | AA                 | AA               | INTERGENIC                    |                    |                                  |
| SNP_45818_A_58792729 | NC_021165.1    | Ca_Kabuli_Chr06 | 58792729                | GG                                     | AA                 | AA               | INTERGENIC                    |                    |                                  |
| SNP_45819_A_58794250 | NC_021165.1    | Ca_Kabuli_Chr06 | 58794250                | TT                                     | AA                 | AA               | INTERGENIC                    |                    |                                  |
| SNP_45820_A_58794377 | NC_021165.1    | Ca_Kabuli_Chr06 | 58794377                | GG                                     | AA                 | AA               | INTERGENIC                    |                    |                                  |
| SNP_45821_A_58799662 | NC_021165.1    | Ca_Kabuli_Chr06 | 58799662                | GG                                     | AA                 | AA               | INTERGENIC                    |                    |                                  |
| SNP_45822_A_58800991 | NC_021165.1    | Ca_Kabuli_Chr06 | 58800991                | CC                                     | TT                 | TT               | INTERGENIC                    |                    |                                  |
| SNP_45823_A_58800992 | NC_021165.1    | Ca_Kabuli_Chr06 | 58800992                | TT                                     | CC                 | CC               | INTERGENIC                    |                    |                                  |
| SNP_45824_A_58802424 | NC_021165.1    | Ca_Kabuli_Chr06 | 58802424                | TT                                     | CC                 | CC               | INTERGENIC                    |                    |                                  |
| SNP_45825_A_58802777 | NC_021165.1    | Ca_Kabuli_Chr06 | 58802777                | TT                                     | CC                 | CC               | INTERGENIC                    |                    |                                  |
| SNP_45826_A_58811499 | NC_021165.1    | Ca_Kabuli_Chr06 | 58811499                | AA                                     | GG                 | GG               | URR                           | 101496024          | GATA transcription factor 7-like |

| SNPs IDs             | Chromosome IDs | Chromosomes     | Physical positions (bp) | CDC Frontier (Reference genome) | (Pusa 1103 & HPNB) | (ILWC 46 & LPNB) | Sequence Components of genome | Gene accession IDs | Putative functions                              |
|----------------------|----------------|-----------------|-------------------------|---------------------------------|--------------------|------------------|-------------------------------|--------------------|-------------------------------------------------|
| SNP_45827_A_58820063 | NC_021165.1    | Ca_Kabuli_Chr06 | 58820063                | TT                              | CC                 | CC               | INTERGENIC                    |                    |                                                 |
| SNP_45828_A_58821587 | NC_021165.1    | Ca_Kabuli_Chr06 | 58821587                | AA                              | GG                 | GG               | INTERGENIC                    |                    |                                                 |
| SNP_45829_A_58821660 | NC_021165.1    | Ca_Kabuli_Chr06 | 58821660                | CC                              | AA                 | AA               | INTERGENIC                    |                    |                                                 |
| SNP_45830_A_58829022 | NC_021165.1    | Ca_Kabuli_Chr06 | 58829022                | AA                              | TT                 | TT               | DRR                           | 101497227          | fructose-bisphosphate aldolase 1, chloroplastic |
| SNP_45832_A_58854303 | NC_021165.1    | Ca_Kabuli_Chr06 | 58854303                | AA                              | GG                 | GG               | INTERGENIC                    |                    |                                                 |
| SNP_45833_A_58897252 | NC_021165.1    | Ca_Kabuli_Chr06 | 58897252                | CC                              | TT                 | TT               | SYNONYMOUS_CODING             | 101498538          | V-type proton ATPase 16 kDa proteolipid subunit |
| SNP_45834_A_58914916 | NC_021165.1    | Ca_Kabuli_Chr06 | 58914916                | GG                              | AA                 | AA               | URR                           | 101499200          | polyprenol reductase 2                          |
| SNP_45835_A_58922664 | NC_021165.1    | Ca_Kabuli_Chr06 | 58922664                | CC                              | GG                 | GG               | INTERGENIC                    |                    |                                                 |
| SNP_45836_A_58922667 | NC_021165.1    | Ca_Kabuli_Chr06 | 58922667                | AA                              | GG                 | GG               | INTERGENIC                    |                    |                                                 |
| SNP_45838_A_59058564 | NC_021165.1    | Ca_Kabuli_Chr06 | 59058564                | AA                              | TT                 | TT               | INTERGENIC                    |                    |                                                 |
| SNP_45839_A_59058643 | NC_021165.1    | Ca_Kabuli_Chr06 | 59058643                | GG                              | AA                 | AA               | INTERGENIC                    |                    |                                                 |
| SNP_45840_A_59059841 | NC_021165.1    | Ca_Kabuli_Chr06 | 59059841                | TT                              | CC                 | CC               | INTERGENIC                    |                    |                                                 |
| SNP_45841_A_59059905 | NC_021165.1    | Ca_Kabuli_Chr06 | 59059905                | TT                              | CC                 | CC               | INTERGENIC                    |                    |                                                 |
| SNP_45842_A_59059944 | NC_021165.1    | Ca_Kabuli_Chr06 | 59059944                | CC                              | AA                 | AA               | INTERGENIC                    |                    |                                                 |
| SNP_45844_A_59060216 | NC_021165.1    | Ca_Kabuli_Chr06 | 59060216                | CC                              | TT                 | TT               | INTERGENIC                    |                    |                                                 |
| SNP_45845_A_59062020 | NC_021165.1    | Ca_Kabuli_Chr06 | 59062020                | CC                              | AA                 | AA               | DRR                           | 101506558          | ATP synthase subunit epsilon, mitochondrial     |
| SNP_45847_A_59100409 | NC_021165.1    | Ca_Kabuli_Chr06 | 59100409                | CC                              | TT                 | TT               | INTERGENIC                    |                    |                                                 |
| SNP_45848_A_59133132 | NC_021165.1    | Ca_Kabuli_Chr06 | 59133132                | AA                              | GG                 | GG               | INTERGENIC                    |                    |                                                 |
| SNP_45849_A_59141216 | NC_021165.1    | Ca_Kabuli_Chr06 | 59141216                | TT                              | AA                 | AA               | INTERGENIC                    |                    |                                                 |
| SNP_45850_A_59170585 | NC_021165.1    | Ca_Kabuli_Chr06 | 59170585                | TT                              | GG                 | GG               | URR                           | 101509868          | serine/threonine-protein kinase BLUS1           |
| SNP_45853_A_59209042 | NC_021165.1    | Ca_Kabuli_Chr06 | 59209042                | CC                              | TT                 | TT               | INTRON                        | 101512763          | 7-dehydrocholesterol reductase                  |
| SNP_45854_A_59265767 | NC_021165.1    | Ca_Kabuli_Chr06 | 59265767                | CC                              | TT                 | TT               | INTERGENIC                    |                    |                                                 |



| SNPs IDs             | Chromosome IDs | Chromosomes     | Physical positions (bp) | CDC Frontier genome (Reference genome) | (Pusa 1103 & HPNB) | (ILWC 46 & LPNB) | Sequence Components of genome | Gene accession IDs | Putative functions                       |
|----------------------|----------------|-----------------|-------------------------|----------------------------------------|--------------------|------------------|-------------------------------|--------------------|------------------------------------------|
| SNP_45857_A_59277491 | NC_021165.1    | Ca_Kabuli_Chr06 | 59277491                | GG                                     | AA                 | AA               | INTERGENIC                    |                    |                                          |
| SNP_45859_A_59355599 | NC_021165.1    | Ca_Kabuli_Chr06 | 59355599                | AA                                     | GG                 | GG               | INTERGENIC                    |                    |                                          |
| SNP_45860_A_59381422 | NC_021165.1    | Ca_Kabuli_Chr06 | 59381422                | TT                                     | CC                 | CC               | DRR                           | 101488799          | auxin-induced protein 6B                 |
| SNP_45862_A_59424858 | NC_021165.1    | Ca_Kabuli_Chr06 | 59424858                | GG                                     | AA                 | AA               | INTERGENIC                    |                    |                                          |
| SNP_45863_A_59434642 | NC_021165.1    | Ca_Kabuli_Chr06 | 59434642                | GG                                     | AA                 | AA               | INTERGENIC                    |                    |                                          |
| SNP_45864_A_59443499 | NC_021165.1    | Ca_Kabuli_Chr06 | 59443499                | TT                                     | GG                 | GG               | INTERGENIC                    |                    |                                          |
| SNP_45865_A_59443512 | NC_021165.1    | Ca_Kabuli_Chr06 | 59443512                | AA                                     | GG                 | GG               | INTERGENIC                    |                    |                                          |
| SNP_45866_A_59443549 | NC_021165.1    | Ca_Kabuli_Chr06 | 59443549                | GG                                     | AA                 | AA               | INTERGENIC                    |                    |                                          |
| SNP_45867_A_59443572 | NC_021165.1    | Ca_Kabuli_Chr06 | 59443572                | CC                                     | TT                 | TT               | INTERGENIC                    |                    |                                          |
| SNP_45868_A_59443578 | NC_021165.1    | Ca_Kabuli_Chr06 | 59443578                | TT                                     | GG                 | GG               | INTERGENIC                    |                    |                                          |
| SNP_45869_A_59443865 | NC_021165.1    | Ca_Kabuli_Chr06 | 59443865                | TT                                     | AA                 | AA               | INTERGENIC                    |                    |                                          |
| SNP_45870_A_59443931 | NC_021165.1    | Ca_Kabuli_Chr06 | 59443931                | CC                                     | TT                 | TT               | INTERGENIC                    |                    |                                          |
| SNP_45871_A_59444298 | NC_021165.1    | Ca_Kabuli_Chr06 | 59444298                | GG                                     | CC                 | CC               | INTERGENIC                    |                    |                                          |
| SNP_45872_A_59444321 | NC_021165.1    | Ca_Kabuli_Chr06 | 59444321                | CC                                     | TT                 | TT               | INTERGENIC                    |                    |                                          |
| SNP_45873_A_59444324 | NC_021165.1    | Ca_Kabuli_Chr06 | 59444324                | TT                                     | CC                 | CC               | INTERGENIC                    |                    |                                          |
| SNP_45874_A_59444340 | NC_021165.1    | Ca_Kabuli_Chr06 | 59444340                | TT                                     | CC                 | CC               | INTERGENIC                    |                    |                                          |
| SNP_45875_A_59450271 | NC_021165.1    | Ca_Kabuli_Chr06 | 59450271                | AA                                     | CC                 | CC               | INTERGENIC                    |                    |                                          |
| SNP_45876_A_70169    | NC_021166.1    | Ca_Kabuli_Chr07 | 70169                   | AA                                     | TT                 | TT               | INTERGENIC                    |                    |                                          |
| SNP_45877_A_165596   | NC_021166.1    | Ca_Kabuli_Chr07 | 165596                  | CC                                     | TT                 | TT               | INTRON                        | 101503883          | glucan endo-1,3-beta-glucosidase 12-like |
| SNP_45879_A_180470   | NC_021166.1    | Ca_Kabuli_Chr07 | 180470                  | TT                                     | AA                 | AA               | INTERGENIC                    |                    |                                          |
| SNP_45880_A_180542   | NC_021166.1    | Ca_Kabuli_Chr07 | 180542                  | CC                                     | TT                 | TT               | INTERGENIC                    |                    |                                          |
| SNP_45881_A_180806   | NC_021166.1    | Ca_Kabuli_Chr07 | 180806                  | AA                                     | GG                 | GG               | INTERGENIC                    |                    |                                          |

| SNPs IDs           | Chromosome IDs | Chromosomes     | Physical positions (bp) | CDC Frontier (Reference genome) | (Pusa 1103 & HPNB) | (ILWC 46 & LPNB) | Sequence Components of genome | Gene accession IDs | Putative functions                      |
|--------------------|----------------|-----------------|-------------------------|---------------------------------|--------------------|------------------|-------------------------------|--------------------|-----------------------------------------|
| SNP_45882_A_180910 | NC_021166.1    | Ca_Kabuli_Chr07 | 180910                  | AA                              | GG                 | GG               | INTERGENIC                    |                    |                                         |
| SNP_45883_A_193416 | NC_021166.1    | Ca_Kabuli_Chr07 | 193416                  | AA                              | GG                 | GG               | INTRON                        | 101504537          | glucan endo-1,3-beta-glucosidase 4-like |
| SNP_45884_A_193418 | NC_021166.1    | Ca_Kabuli_Chr07 | 193418                  | CC                              | TT                 | TT               | INTRON                        | 101504537          | glucan endo-1,3-beta-glucosidase 4-like |
| SNP_45885_A_193533 | NC_021166.1    | Ca_Kabuli_Chr07 | 193533                  | TT                              | AA                 | AA               | INTRON                        | 101504537          | glucan endo-1,3-beta-glucosidase 4-like |
| SNP_45886_A_193945 | NC_021166.1    | Ca_Kabuli_Chr07 | 193945                  | TT                              | CC                 | CC               | INTRON                        | 101504537          | glucan endo-1,3-beta-glucosidase 4-like |
| SNP_45887_A_193947 | NC_021166.1    | Ca_Kabuli_Chr07 | 193947                  | TT                              | AA                 | AA               | INTRON                        | 101504537          | glucan endo-1,3-beta-glucosidase 4-like |
| SNP_45888_A_197831 | NC_021166.1    | Ca_Kabuli_Chr07 | 197831                  | GG                              | TT                 | TT               | INTRON                        | 101504537          | glucan endo-1,3-beta-glucosidase 4-like |
| SNP_45889_A_222179 | NC_021166.1    | Ca_Kabuli_Chr07 | 222179                  | GG                              | AA                 | AA               | URR                           | 101501630          | scarecrow-like protein 13               |
| SNP_45890_A_226092 | NC_021166.1    | Ca_Kabuli_Chr07 | 226092                  | AA                              | GG                 | GG               | URR                           | 101410554          | transfer RNA leucine (anticodon CAG)    |
| SNP_45891_A_256459 | NC_021166.1    | Ca_Kabuli_Chr07 | 256459                  | AA                              | GG                 | GG               | INTERGENIC                    |                    |                                         |
| SNP_45892_A_283933 | NC_021166.1    | Ca_Kabuli_Chr07 | 283933                  | TT                              | CC                 | CC               | INTERGENIC                    |                    |                                         |
| SNP_45893_A_283935 | NC_021166.1    | Ca_Kabuli_Chr07 | 283935                  | TT                              | CC                 | CC               | INTERGENIC                    |                    |                                         |
| SNP_45894_A_284823 | NC_021166.1    | Ca_Kabuli_Chr07 | 284823                  | GG                              | TT                 | TT               | INTERGENIC                    |                    |                                         |
| SNP_45895_A_324377 | NC_021166.1    | Ca_Kabuli_Chr07 | 324377                  | GG                              | TT                 | TT               | INTERGENIC                    |                    |                                         |
| SNP_45896_A_329132 | NC_021166.1    | Ca_Kabuli_Chr07 | 329132                  | CC                              | TT                 | TT               | INTERGENIC                    |                    |                                         |
| SNP_45899_A_357551 | NC_021166.1    | Ca_Kabuli_Chr07 | 357551                  | GG                              | AA                 | AA               | INTERGENIC                    |                    |                                         |
| SNP_45900_A_357556 | NC_021166.1    | Ca_Kabuli_Chr07 | 357556                  | TT                              | CC                 | CC               | INTERGENIC                    |                    |                                         |
| SNP_45901_A_357667 | NC_021166.1    | Ca_Kabuli_Chr07 | 357667                  | TT                              | CC                 | CC               | INTERGENIC                    |                    |                                         |
| SNP_45902_A_357678 | NC_021166.1    | Ca_Kabuli_Chr07 | 357678                  | TT                              | CC                 | CC               | INTERGENIC                    |                    |                                         |
| SNP_45903_A_357690 | NC_021166.1    | Ca_Kabuli_Chr07 | 357690                  | GG                              | AA                 | AA               | INTERGENIC                    |                    |                                         |
| SNP_45904_A_357764 | NC_021166.1    | Ca_Kabuli_Chr07 | 357764                  | TT                              | GG                 | GG               | INTERGENIC                    |                    |                                         |
| SNP_45905_A_357813 | NC_021166.1    | Ca_Kabuli_Chr07 | 357813                  | CC                              | TT                 | TT               | INTERGENIC                    |                    |                                         |

| SNPs IDs           | Chromosome IDs | Chromosomes     | Physical positions (bp) | CDC Frontier genome (Reference genome) | (Pusa 1103 & HPNB) | (ILWC 46 & LPNB) | Sequence genome | Components of | Gene accession IDs | Putative functions |
|--------------------|----------------|-----------------|-------------------------|----------------------------------------|--------------------|------------------|-----------------|---------------|--------------------|--------------------|
| SNP_45906_A_357840 | NC_021166.1    | Ca_Kabuli_Chr07 | 357840                  | AA                                     | TT                 | TT               | INTERGENIC      |               |                    |                    |
| SNP_45907_A_357940 | NC_021166.1    | Ca_Kabuli_Chr07 | 357940                  | AA                                     | GG                 | GG               | INTERGENIC      |               |                    |                    |
| SNP_45908_A_357949 | NC_021166.1    | Ca_Kabuli_Chr07 | 357949                  | TT                                     | CC                 | CC               | INTERGENIC      |               |                    |                    |
| SNP_45909_A_434582 | NC_021166.1    | Ca_Kabuli_Chr07 | 434582                  | GG                                     | AA                 | AA               | INTERGENIC      |               |                    |                    |
| SNP_45910_A_434585 | NC_021166.1    | Ca_Kabuli_Chr07 | 434585                  | GG                                     | AA                 | AA               | INTERGENIC      |               |                    |                    |
| SNP_45911_A_450223 | NC_021166.1    | Ca_Kabuli_Chr07 | 450223                  | AA                                     | GG                 | GG               | INTERGENIC      |               |                    |                    |
| SNP_45912_A_457805 | NC_021166.1    | Ca_Kabuli_Chr07 | 457805                  | TT                                     | AA                 | AA               | INTERGENIC      |               |                    |                    |
| SNP_45913_A_457813 | NC_021166.1    | Ca_Kabuli_Chr07 | 457813                  | TT                                     | CC                 | CC               | INTERGENIC      |               |                    |                    |
| SNP_45914_A_479815 | NC_021166.1    | Ca_Kabuli_Chr07 | 479815                  | AA                                     | GG                 | GG               | INTERGENIC      |               |                    |                    |
| SNP_45915_A_479820 | NC_021166.1    | Ca_Kabuli_Chr07 | 479820                  | GG                                     | AA                 | AA               | INTERGENIC      |               |                    |                    |
| SNP_45916_A_496615 | NC_021166.1    | Ca_Kabuli_Chr07 | 496615                  | AA                                     | TT                 | TT               | INTERGENIC      |               |                    |                    |
| SNP_45917_A_496864 | NC_021166.1    | Ca_Kabuli_Chr07 | 496864                  | CC                                     | AA                 | AA               | INTERGENIC      |               |                    |                    |
| SNP_45918_A_496944 | NC_021166.1    | Ca_Kabuli_Chr07 | 496944                  | AA                                     | TT                 | TT               | INTERGENIC      |               |                    |                    |
| SNP_45919_A_503257 | NC_021166.1    | Ca_Kabuli_Chr07 | 503257                  | CC                                     | TT                 | TT               | INTERGENIC      |               |                    |                    |
| SNP_45920_A_503277 | NC_021166.1    | Ca_Kabuli_Chr07 | 503277                  | CC                                     | AA                 | AA               | INTERGENIC      |               |                    |                    |
| SNP_45922_A_510394 | NC_021166.1    | Ca_Kabuli_Chr07 | 510394                  | CC                                     | TT                 | TT               | INTERGENIC      |               |                    |                    |
| SNP_45923_A_521278 | NC_021166.1    | Ca_Kabuli_Chr07 | 521278                  | AA                                     | GG                 | GG               | INTERGENIC      |               |                    |                    |
| SNP_45925_A_542577 | NC_021166.1    | Ca_Kabuli_Chr07 | 542577                  | CC                                     | AA                 | AA               | INTERGENIC      |               |                    |                    |
| SNP_45926_A_563789 | NC_021166.1    | Ca_Kabuli_Chr07 | 563789                  | GG                                     | AA                 | AA               | INTERGENIC      |               |                    |                    |
| SNP_45927_A_570669 | NC_021166.1    | Ca_Kabuli_Chr07 | 570669                  | AA                                     | TT                 | TT               | INTERGENIC      |               |                    |                    |
| SNP_45928_A_570748 | NC_021166.1    | Ca_Kabuli_Chr07 | 570748                  | AA                                     | TT                 | TT               | INTERGENIC      |               |                    |                    |
| SNP_45929_A_570802 | NC_021166.1    | Ca_Kabuli_Chr07 | 570802                  | GG                                     | AA                 | AA               | INTERGENIC      |               |                    |                    |

| SNPs IDs           | Chromosome IDs | Chromosomes     | Physical positions (bp) | CDC Frontier (Reference genome) | (Pusa 1103 & HPNB) | (ILWC 46 & LPNB) | Sequence genome | Components of | Gene accession IDs         | Putative functions |
|--------------------|----------------|-----------------|-------------------------|---------------------------------|--------------------|------------------|-----------------|---------------|----------------------------|--------------------|
| SNP_45931_A_585465 | NC_021166.1    | Ca_Kabuli_Chr07 | 585465                  | GG                              | TT                 | TT               | INTERGENIC      |               |                            |                    |
| SNP_45932_A_585483 | NC_021166.1    | Ca_Kabuli_Chr07 | 585483                  | AA                              | GG                 | GG               | INTERGENIC      |               |                            |                    |
| SNP_45933_A_585491 | NC_021166.1    | Ca_Kabuli_Chr07 | 585491                  | TT                              | GG                 | GG               | INTERGENIC      |               |                            |                    |
| SNP_45934_A_585500 | NC_021166.1    | Ca_Kabuli_Chr07 | 585500                  | CC                              | TT                 | TT               | INTERGENIC      |               |                            |                    |
| SNP_45935_A_585517 | NC_021166.1    | Ca_Kabuli_Chr07 | 585517                  | TT                              | CC                 | CC               | INTERGENIC      |               |                            |                    |
| SNP_45936_A_586900 | NC_021166.1    | Ca_Kabuli_Chr07 | 586900                  | TT                              | GG                 | GG               | INTERGENIC      |               |                            |                    |
| SNP_45937_A_586925 | NC_021166.1    | Ca_Kabuli_Chr07 | 586925                  | AA                              | GG                 | GG               | INTERGENIC      |               |                            |                    |
| SNP_45938_A_586963 | NC_021166.1    | Ca_Kabuli_Chr07 | 586963                  | CC                              | TT                 | TT               | INTERGENIC      |               |                            |                    |
| SNP_45940_A_599200 | NC_021166.1    | Ca_Kabuli_Chr07 | 599200                  | GG                              | AA                 | AA               | INTERGENIC      |               |                            |                    |
| SNP_45941_A_599240 | NC_021166.1    | Ca_Kabuli_Chr07 | 599240                  | AA                              | GG                 | GG               | INTERGENIC      |               |                            |                    |
| SNP_45942_A_599378 | NC_021166.1    | Ca_Kabuli_Chr07 | 599378                  | TT                              | CC                 | CC               | INTERGENIC      |               |                            |                    |
| SNP_45943_A_599426 | NC_021166.1    | Ca_Kabuli_Chr07 | 599426                  | AA                              | TT                 | TT               | INTERGENIC      |               |                            |                    |
| SNP_45944_A_599513 | NC_021166.1    | Ca_Kabuli_Chr07 | 599513                  | AA                              | GG                 | GG               | INTERGENIC      |               |                            |                    |
| SNP_45945_A_599531 | NC_021166.1    | Ca_Kabuli_Chr07 | 599531                  | GG                              | AA                 | AA               | INTERGENIC      |               |                            |                    |
| SNP_45946_A_599600 | NC_021166.1    | Ca_Kabuli_Chr07 | 599600                  | CC                              | TT                 | TT               | INTERGENIC      |               |                            |                    |
| SNP_45947_A_606598 | NC_021166.1    | Ca_Kabuli_Chr07 | 606598                  | GG                              | AA                 | AA               | INTERGENIC      |               |                            |                    |
| SNP_45948_A_639500 | NC_021166.1    | Ca_Kabuli_Chr07 | 639500                  | AA                              | CC                 | CC               | INTERGENIC      |               |                            |                    |
| SNP_45949_A_639592 | NC_021166.1    | Ca_Kabuli_Chr07 | 639592                  | AA                              | CC                 | CC               | INTERGENIC      |               |                            |                    |
| SNP_45950_A_639607 | NC_021166.1    | Ca_Kabuli_Chr07 | 639607                  | AA                              | GG                 | GG               | INTERGENIC      |               |                            |                    |
| SNP_45951_A_660874 | NC_021166.1    | Ca_Kabuli_Chr07 | 660874                  | TT                              | CC                 | CC               | DRR             | 101508905     | F-box protein CPR30-like   |                    |
| SNP_45952_A_687094 | NC_021166.1    | Ca_Kabuli_Chr07 | 687094                  | GG                              | AA                 | AA               | INTERGENIC      |               |                            |                    |
| SNP_45953_A_760433 | NC_021166.1    | Ca_Kabuli_Chr07 | 760433                  | TT                              | CC                 | CC               | DRR             | 101488800     | tropinone reductase-like 3 |                    |

| SNPs IDs           | Chromosome IDs | Chromosomes     | Physical positions (bp) | CDC Frontier (Reference genome) | (Pusa 1103 & HPNB) | (ILWC 46 & LPNB) | Sequence Components of genome | Gene accession IDs | Putative functions                |
|--------------------|----------------|-----------------|-------------------------|---------------------------------|--------------------|------------------|-------------------------------|--------------------|-----------------------------------|
| SNP_45954_A_760480 | NC_021166.1    | Ca_Kabuli_Chr07 | 760480                  | GG                              | AA                 | AA               | DRR                           | 101488800          | tropinone reductase-like 3        |
| SNP_45955_A_760488 | NC_021166.1    | Ca_Kabuli_Chr07 | 760488                  | TT                              | CC                 | CC               | DRR                           | 101488800          | tropinone reductase-like 3        |
| SNP_45956_A_760503 | NC_021166.1    | Ca_Kabuli_Chr07 | 760503                  | CC                              | AA                 | AA               | DRR                           | 101488800          | tropinone reductase-like 3        |
| SNP_45958_A_760533 | NC_021166.1    | Ca_Kabuli_Chr07 | 760533                  | CC                              | AA                 | AA               | DRR                           | 101488800          | tropinone reductase-like 3        |
| SNP_45959_A_760557 | NC_021166.1    | Ca_Kabuli_Chr07 | 760557                  | CC                              | TT                 | TT               | DRR                           | 101488800          | tropinone reductase-like 3        |
| SNP_45960_A_760568 | NC_021166.1    | Ca_Kabuli_Chr07 | 760568                  | GG                              | TT                 | TT               | DRR                           | 101488800          | tropinone reductase-like 3        |
| SNP_45961_A_760705 | NC_021166.1    | Ca_Kabuli_Chr07 | 760705                  | CC                              | GG                 | GG               | DRR                           | 101488800          | tropinone reductase-like 3        |
| SNP_45963_A_791856 | NC_021166.1    | Ca_Kabuli_Chr07 | 791856                  | GG                              | AA                 | AA               | URR                           | 101490848          | E3 ubiquitin-protein ligase RFWD2 |
| SNP_45964_A_818977 | NC_021166.1    | Ca_Kabuli_Chr07 | 818977                  | CC                              | TT                 | TT               | INTERGENIC                    |                    |                                   |
| SNP_45965_A_819041 | NC_021166.1    | Ca_Kabuli_Chr07 | 819041                  | GG                              | AA                 | AA               | INTERGENIC                    |                    |                                   |
| SNP_45966_A_819044 | NC_021166.1    | Ca_Kabuli_Chr07 | 819044                  | CC                              | TT                 | TT               | INTERGENIC                    |                    |                                   |
| SNP_45967_A_819068 | NC_021166.1    | Ca_Kabuli_Chr07 | 819068                  | TT                              | CC                 | CC               | INTERGENIC                    |                    |                                   |
| SNP_45968_A_819073 | NC_021166.1    | Ca_Kabuli_Chr07 | 819073                  | TT                              | CC                 | CC               | INTERGENIC                    |                    |                                   |
| SNP_45969_A_819100 | NC_021166.1    | Ca_Kabuli_Chr07 | 819100                  | AA                              | TT                 | TT               | INTERGENIC                    |                    |                                   |
| SNP_45970_A_819130 | NC_021166.1    | Ca_Kabuli_Chr07 | 819130                  | TT                              | CC                 | CC               | INTERGENIC                    |                    |                                   |
| SNP_45971_A_819220 | NC_021166.1    | Ca_Kabuli_Chr07 | 819220                  | AA                              | CC                 | CC               | INTERGENIC                    |                    |                                   |
| SNP_45972_A_819261 | NC_021166.1    | Ca_Kabuli_Chr07 | 819261                  | GG                              | AA                 | AA               | INTERGENIC                    |                    |                                   |
| SNP_45973_A_819270 | NC_021166.1    | Ca_Kabuli_Chr07 | 819270                  | TT                              | CC                 | CC               | INTERGENIC                    |                    |                                   |
| SNP_45974_A_819310 | NC_021166.1    | Ca_Kabuli_Chr07 | 819310                  | AA                              | GG                 | GG               | INTERGENIC                    |                    |                                   |
| SNP_45975_A_819319 | NC_021166.1    | Ca_Kabuli_Chr07 | 819319                  | AA                              | TT                 | TT               | INTERGENIC                    |                    |                                   |
| SNP_45976_A_819325 | NC_021166.1    | Ca_Kabuli_Chr07 | 819325                  | AA                              | CC                 | CC               | INTERGENIC                    |                    |                                   |
| SNP_45977_A_819332 | NC_021166.1    | Ca_Kabuli_Chr07 | 819332                  | CC                              | TT                 | TT               | INTERGENIC                    |                    |                                   |

| SNPs IDs            | Chromosome IDs | Chromosomes     | Physical positions (bp) | CDC Frontier (Reference genome) | (Pusa 1103 & HPNB) | (ILWC 46 & LPNB) | Sequence Components of genome | Gene accession IDs | Putative functions                 |
|---------------------|----------------|-----------------|-------------------------|---------------------------------|--------------------|------------------|-------------------------------|--------------------|------------------------------------|
| SNP_45978_A_819333  | NC_021166.1    | Ca_Kabuli_Chr07 | 819333                  | TT                              | AA                 | AA               | INTERGENIC                    |                    |                                    |
| SNP_45979_A_819352  | NC_021166.1    | Ca_Kabuli_Chr07 | 819352                  | AA                              | GG                 | GG               | INTERGENIC                    |                    |                                    |
| SNP_45980_A_819367  | NC_021166.1    | Ca_Kabuli_Chr07 | 819367                  | GG                              | AA                 | AA               | INTERGENIC                    |                    |                                    |
| SNP_45982_A_819513  | NC_021166.1    | Ca_Kabuli_Chr07 | 819513                  | TT                              | CC                 | CC               | INTERGENIC                    |                    |                                    |
| SNP_45983_A_819663  | NC_021166.1    | Ca_Kabuli_Chr07 | 819663                  | AA                              | GG                 | GG               | INTERGENIC                    |                    |                                    |
| SNP_45984_A_836079  | NC_021166.1    | Ca_Kabuli_Chr07 | 836079                  | AA                              | GG                 | GG               | URR                           | 101491793          | uncharacterized protein At1g04910  |
| SNP_45985_A_885183  | NC_021166.1    | Ca_Kabuli_Chr07 | 885183                  | CC                              | TT                 | TT               | INTERGENIC                    |                    |                                    |
| SNP_45986_A_905517  | NC_021166.1    | Ca_Kabuli_Chr07 | 905517                  | GG                              | TT                 | TT               | INTERGENIC                    |                    |                                    |
| SNP_45987_A_940627  | NC_021166.1    | Ca_Kabuli_Chr07 | 940627                  | TT                              | AA                 | AA               | INTERGENIC                    |                    |                                    |
| SNP_45988_A_954137  | NC_021166.1    | Ca_Kabuli_Chr07 | 954137                  | AA                              | TT                 | TT               | DRR                           | 101496027          | uncharacterized LOC101496027       |
| SNP_45989_A_978516  | NC_021166.1    | Ca_Kabuli_Chr07 | 978516                  | TT                              | CC                 | CC               | DRR                           | 101497452          | glucan endo-1,3-beta-glucosidase 1 |
| SNP_45990_A_1003420 | NC_021166.1    | Ca_Kabuli_Chr07 | 1003420                 | CC                              | TT                 | TT               | INTERGENIC                    |                    |                                    |
| SNP_45991_A_1018531 | NC_021166.1    | Ca_Kabuli_Chr07 | 1018531                 | TT                              | CC                 | CC               | URR                           | 101499729          | uncharacterized LOC101499729       |
| SNP_45992_A_1018540 | NC_021166.1    | Ca_Kabuli_Chr07 | 1018540                 | TT                              | CC                 | CC               | URR                           | 101499729          | uncharacterized LOC101499729       |
| SNP_45993_A_1018557 | NC_021166.1    | Ca_Kabuli_Chr07 | 1018557                 | AA                              | TT                 | TT               | URR                           | 101499729          | uncharacterized LOC101499729       |
| SNP_45994_A_1018676 | NC_021166.1    | Ca_Kabuli_Chr07 | 1018676                 | AA                              | GG                 | GG               | INTERGENIC                    |                    |                                    |
| SNP_45996_A_1018756 | NC_021166.1    | Ca_Kabuli_Chr07 | 1018756                 | GG                              | AA                 | AA               | INTERGENIC                    |                    |                                    |
| SNP_45998_A_1018840 | NC_021166.1    | Ca_Kabuli_Chr07 | 1018840                 | CC                              | AA                 | AA               | INTERGENIC                    |                    |                                    |
| SNP_45999_A_1019099 | NC_021166.1    | Ca_Kabuli_Chr07 | 1019099                 | TT                              | AA                 | AA               | INTERGENIC                    |                    |                                    |
| SNP_46000_A_1019156 | NC_021166.1    | Ca_Kabuli_Chr07 | 1019156                 | AA                              | GG                 | GG               | INTERGENIC                    |                    |                                    |
| SNP_46001_A_1019410 | NC_021166.1    | Ca_Kabuli_Chr07 | 1019410                 | AA                              | GG                 | GG               | INTERGENIC                    |                    |                                    |
| SNP_46002_A_1019455 | NC_021166.1    | Ca_Kabuli_Chr07 | 1019455                 | AA                              | GG                 | GG               | INTERGENIC                    |                    |                                    |

| SNPs IDs            | Chromosome IDs | Chromosomes     | Physical positions (bp) | CDC Frontier (Reference genome) | (Pusa 1103 & HPNB) | (ILWC 46 & LPNB) | Sequence genome | Components of | Gene accession IDs | Putative functions                                     |
|---------------------|----------------|-----------------|-------------------------|---------------------------------|--------------------|------------------|-----------------|---------------|--------------------|--------------------------------------------------------|
| SNP_46003_A_1019477 | NC_021166.1    | Ca_Kabuli_Chr07 | 1019477                 | TT                              | CC                 | CC               | INTERGENIC      |               |                    |                                                        |
| SNP_46004_A_1019510 | NC_021166.1    | Ca_Kabuli_Chr07 | 1019510                 | AA                              | GG                 | GG               | INTERGENIC      |               |                    |                                                        |
| SNP_46005_A_1019698 | NC_021166.1    | Ca_Kabuli_Chr07 | 1019698                 | AA                              | GG                 | GG               | INTERGENIC      |               |                    |                                                        |
| SNP_46006_A_1019724 | NC_021166.1    | Ca_Kabuli_Chr07 | 1019724                 | AA                              | TT                 | TT               | INTERGENIC      |               |                    |                                                        |
| SNP_46007_A_1019764 | NC_021166.1    | Ca_Kabuli_Chr07 | 1019764                 | GG                              | AA                 | AA               | INTERGENIC      |               |                    |                                                        |
| SNP_46008_A_1019768 | NC_021166.1    | Ca_Kabuli_Chr07 | 1019768                 | GG                              | CC                 | CC               | INTERGENIC      |               |                    |                                                        |
| SNP_46009_A_1019770 | NC_021166.1    | Ca_Kabuli_Chr07 | 1019770                 | AA                              | TT                 | TT               | INTERGENIC      |               |                    |                                                        |
| SNP_46010_A_1019788 | NC_021166.1    | Ca_Kabuli_Chr07 | 1019788                 | CC                              | AA                 | AA               | INTERGENIC      |               |                    |                                                        |
| SNP_46011_A_1019808 | NC_021166.1    | Ca_Kabuli_Chr07 | 1019808                 | CC                              | TT                 | TT               | INTERGENIC      |               |                    |                                                        |
| SNP_46013_A_1042316 | NC_021166.1    | Ca_Kabuli_Chr07 | 1042316                 | CC                              | TT                 | TT               | URR             |               | 101500893          | peroxidase 42-like                                     |
| SNP_46014_A_1069131 | NC_021166.1    | Ca_Kabuli_Chr07 | 1069131                 | AA                              | CC                 | CC               | INTERGENIC      |               |                    |                                                        |
| SNP_46015_A_1176364 | NC_021166.1    | Ca_Kabuli_Chr07 | 1176364                 | CC                              | TT                 | TT               | URR             |               | 101505054          | DEAD-box ATP-dependent RNA helicase 58, chloroplastic  |
| SNP_46018_A_1244387 | NC_021166.1    | Ca_Kabuli_Chr07 | 1244387                 | TT                              | CC                 | CC               | INTERGENIC      |               |                    |                                                        |
| SNP_46019_A_1244943 | NC_021166.1    | Ca_Kabuli_Chr07 | 1244943                 | AA                              | GG                 | GG               | INTERGENIC      |               |                    |                                                        |
| SNP_46021_A_1256389 | NC_021166.1    | Ca_Kabuli_Chr07 | 1256389                 | TT                              | CC                 | CC               | URR             |               | 101510516          | protein RTF2 homolog                                   |
| SNP_46022_A_1268068 | NC_021166.1    | Ca_Kabuli_Chr07 | 1268068                 | GG                              | AA                 | AA               | INTERGENIC      |               |                    |                                                        |
| SNP_46023_A_1303792 | NC_021166.1    | Ca_Kabuli_Chr07 | 1303792                 | GG                              | AA                 | AA               | INTRON          |               | 101512019          | RNA polymerase II C-terminal domain phosphatase-like 4 |
| SNP_46025_A_1307928 | NC_021166.1    | Ca_Kabuli_Chr07 | 1307928                 | GG                              | AA                 | AA               | URR             |               | 101512019          | RNA polymerase II C-terminal domain phosphatase-like 4 |
| SNP_46026_A_1307930 | NC_021166.1    | Ca_Kabuli_Chr07 | 1307930                 | GG                              | TT                 | TT               | URR             |               | 101512019          | RNA polymerase II C-terminal domain phosphatase-like 4 |
| SNP_46027_A_1367452 | NC_021166.1    | Ca_Kabuli_Chr07 | 1367452                 | TT                              | AA                 | AA               | URR             |               | 101514618          | eukaryotic translation initiation factor 5A-2          |
| SNP_46028_A_1385168 | NC_021166.1    | Ca_Kabuli_Chr07 | 1385168                 | TT                              | CC                 | CC               | INTERGENIC      |               |                    |                                                        |
| SNP_46029_A_1418771 | NC_021166.1    | Ca_Kabuli_Chr07 | 1418771                 | AA                              | TT                 | TT               | INTERGENIC      |               |                    |                                                        |

| SNPs IDs            | Chromosome IDs | Chromosomes     | Physical positions (bp) | CDC Frontier genome (Reference genome) | (Pusa 1103 & HPNB) | (ILWC 46 & LPNB) | Sequence Components of genome | Gene accession IDs | Putative functions                                                                               |
|---------------------|----------------|-----------------|-------------------------|----------------------------------------|--------------------|------------------|-------------------------------|--------------------|--------------------------------------------------------------------------------------------------|
| SNP_46030_A_1419207 | NC_021166.1    | Ca_Kabuli_Chr07 | 1419207                 | AA                                     | GG                 | GG               | INTERGENIC                    |                    |                                                                                                  |
| SNP_46031_A_1465830 | NC_021166.1    | Ca_Kabuli_Chr07 | 1465830                 | CC                                     | TT                 | TT               | DRR                           | 101492018          | F-box protein SKIP1                                                                              |
| SNP_46032_A_1525930 | NC_021166.1    | Ca_Kabuli_Chr07 | 1525930                 | CC                                     | AA                 | AA               | INTERGENIC                    |                    |                                                                                                  |
| SNP_46033_A_1617991 | NC_021166.1    | Ca_Kabuli_Chr07 | 1617991                 | TT                                     | CC                 | CC               | DRR                           | 101410575          | transfer RNA alanine (anticodon AGC)                                                             |
| SNP_46034_A_1696007 | NC_021166.1    | Ca_Kabuli_Chr07 | 1696007                 | TT                                     | CC                 | CC               | URR                           | 101501415          | ATP synthase subunit gamma, mitochondrial                                                        |
| SNP_46038_A_2093688 | NC_021166.1    | Ca_Kabuli_Chr07 | 2093688                 | TT                                     | CC                 | CC               | INTRON                        | 101488228          | bifunctional dethiobiotin synthetase/7,8-diamino-pelargonic acid aminotransferase, mitochondrial |
| SNP_46040_A_2113660 | NC_021166.1    | Ca_Kabuli_Chr07 | 2113660                 | CC                                     | TT                 | TT               | URR                           | 101490102          | probable xyloglucan endotransglucosylase/hydrolase protein 23                                    |
| SNP_46041_A_2139056 | NC_021166.1    | Ca_Kabuli_Chr07 | 2139056                 | AA                                     | CC                 | CC               | DRR                           | 101504854          | Zinc finger protein 2                                                                            |
| SNP_46043_A_2168252 | NC_021166.1    | Ca_Kabuli_Chr07 | 2168252                 | AA                                     | CC                 | CC               | INTRON                        | 101492799          | mitochondrial outer membrane protein porin 6                                                     |
| SNP_46044_A_2168319 | NC_021166.1    | Ca_Kabuli_Chr07 | 2168319                 | AA                                     | CC                 | CC               | INTRON                        | 101492799          | mitochondrial outer membrane protein porin 6                                                     |
| SNP_46045_A_2168338 | NC_021166.1    | Ca_Kabuli_Chr07 | 2168338                 | TT                                     | CC                 | CC               | INTRON                        | 101492799          | mitochondrial outer membrane protein porin 6                                                     |
| SNP_46046_A_2168507 | NC_021166.1    | Ca_Kabuli_Chr07 | 2168507                 | GG                                     | AA                 | AA               | INTRON                        | 101492799          | mitochondrial outer membrane protein porin 6                                                     |
| SNP_46047_A_2168538 | NC_021166.1    | Ca_Kabuli_Chr07 | 2168538                 | CC                                     | TT                 | TT               | INTRON                        | 101492799          | mitochondrial outer membrane protein porin 6                                                     |
| SNP_46048_A_2169661 | NC_021166.1    | Ca_Kabuli_Chr07 | 2169661                 | AA                                     | CC                 | CC               | INTRON                        | 101492799          | mitochondrial outer membrane protein porin 6                                                     |
| SNP_46050_A_2169860 | NC_021166.1    | Ca_Kabuli_Chr07 | 2169860                 | CC                                     | TT                 | TT               | INTRON                        | 101492799          | mitochondrial outer membrane protein porin 6                                                     |
| SNP_46052_A_2169907 | NC_021166.1    | Ca_Kabuli_Chr07 | 2169907                 | GG                                     | CC                 | CC               | INTRON                        | 101492799          | mitochondrial outer membrane protein porin 6                                                     |
| SNP_46053_A_2169981 | NC_021166.1    | Ca_Kabuli_Chr07 | 2169981                 | AA                                     | CC                 | CC               | INTRON                        | 101492799          | mitochondrial outer membrane protein porin 6                                                     |
| SNP_46054_A_2170031 | NC_021166.1    | Ca_Kabuli_Chr07 | 2170031                 | CC                                     | TT                 | TT               | INTRON                        | 101492799          | mitochondrial outer membrane protein porin 6                                                     |
| SNP_46055_A_2193216 | NC_021166.1    | Ca_Kabuli_Chr07 | 2193216                 | CC                                     | GG                 | GG               | NON_SYNONYMOUS_CODING         | 101493673          | probable mitochondrial chaperone BCS1-B                                                          |
| SNP_46056_A_2327126 | NC_021166.1    | Ca_Kabuli_Chr07 | 2327126                 | CC                                     | TT                 | TT               | INTERGENIC                    |                    |                                                                                                  |
| SNP_46059_A_2443292 | NC_021166.1    | Ca_Kabuli_Chr07 | 2443292                 | TT                                     | AA                 | AA               | INTERGENIC                    |                    |                                                                                                  |
| SNP_46061_A_2635726 | NC_021166.1    | Ca_Kabuli_Chr07 | 2635726                 | CC                                     | AA                 | AA               | INTERGENIC                    |                    |                                                                                                  |



| SNPs IDs            | Chromosome IDs | Chromosomes     | Physical positions (bp) | CDC Frontier (Reference genome) | (Pusa 1103 & HPNB) | (ILWC 46 & LPNB) | Sequence Components of genome | Gene accession IDs | Putative functions                      |
|---------------------|----------------|-----------------|-------------------------|---------------------------------|--------------------|------------------|-------------------------------|--------------------|-----------------------------------------|
| SNP_46063_A_2642358 | NC_021166.1    | Ca_Kabuli_Chr07 | 2642358                 | TT                              | GG                 | GG               | NON_SYNONYMOUS_CODING         | 101510302          | uncharacterized LOC101510302            |
| SNP_46064_A_2716581 | NC_021166.1    | Ca_Kabuli_Chr07 | 2716581                 | TT                              | AA                 | AA               | INTERGENIC                    |                    |                                         |
| SNP_46065_A_2765174 | NC_021166.1    | Ca_Kabuli_Chr07 | 2765174                 | AA                              | GG                 | GG               | INTERGENIC                    |                    |                                         |
| SNP_46066_A_2801369 | NC_021166.1    | Ca_Kabuli_Chr07 | 2801369                 | AA                              | GG                 | GG               | INTERGENIC                    |                    |                                         |
| SNP_46067_A_2804016 | NC_021166.1    | Ca_Kabuli_Chr07 | 2804016                 | GG                              | AA                 | AA               | INTERGENIC                    |                    |                                         |
| SNP_46068_A_2821086 | NC_021166.1    | Ca_Kabuli_Chr07 | 2821086                 | AA                              | GG                 | GG               | INTERGENIC                    |                    |                                         |
| SNP_46069_A_2884577 | NC_021166.1    | Ca_Kabuli_Chr07 | 2884577                 | GG                              | CC                 | CC               | URR                           | 101493024          | cytokinin dehydrogenase 3-like          |
| SNP_46070_A_2887413 | NC_021166.1    | Ca_Kabuli_Chr07 | 2887413                 | GG                              | CC                 | CC               | INTERGENIC                    |                    |                                         |
| SNP_46072_A_2965062 | NC_021166.1    | Ca_Kabuli_Chr07 | 2965062                 | TT                              | CC                 | CC               | URR                           | 101497785          | diacylglycerol O-acyltransferase 1-like |
| SNP_46074_A_2988039 | NC_021166.1    | Ca_Kabuli_Chr07 | 2988039                 | AA                              | TT                 | TT               | DRR                           | 101499732          | U-box domain-containing protein 34      |
| SNP_46075_A_3083622 | NC_021166.1    | Ca_Kabuli_Chr07 | 3083622                 | CC                              | GG                 | GG               | DRR                           | 101503438          | myosin-17                               |
| SNP_46076_A_3152607 | NC_021166.1    | Ca_Kabuli_Chr07 | 3152607                 | TT                              | CC                 | CC               | INTERGENIC                    |                    |                                         |
| SNP_46077_A_3230149 | NC_021166.1    | Ca_Kabuli_Chr07 | 3230149                 | TT                              | CC                 | CC               | URR                           | 101510518          | thiol protease aleurain-like            |
| SNP_46079_A_3248303 | NC_021166.1    | Ca_Kabuli_Chr07 | 3248303                 | TT                              | CC                 | CC               | INTERGENIC                    |                    |                                         |
| SNP_46080_A_3248343 | NC_021166.1    | Ca_Kabuli_Chr07 | 3248343                 | GG                              | TT                 | TT               | INTERGENIC                    |                    |                                         |
| SNP_46081_A_3248387 | NC_021166.1    | Ca_Kabuli_Chr07 | 3248387                 | CC                              | TT                 | TT               | INTERGENIC                    |                    |                                         |
| SNP_46083_A_3288546 | NC_021166.1    | Ca_Kabuli_Chr07 | 3288546                 | TT                              | AA                 | AA               | INTERGENIC                    |                    |                                         |
| SNP_46085_A_3332277 | NC_021166.1    | Ca_Kabuli_Chr07 | 3332277                 | TT                              | CC                 | CC               | DRR                           | 101488674          | oligouridylate-binding protein 1-like   |
| SNP_46086_A_3332280 | NC_021166.1    | Ca_Kabuli_Chr07 | 3332280                 | TT                              | CC                 | CC               | DRR                           | 101488674          | oligouridylate-binding protein 1-like   |
| SNP_46087_A_3360940 | NC_021166.1    | Ca_Kabuli_Chr07 | 3360940                 | AA                              | TT                 | TT               | URR                           | 101489666          | auxin response factor 19                |
| SNP_46088_A_3365016 | NC_021166.1    | Ca_Kabuli_Chr07 | 3365016                 | AA                              | CC                 | CC               | INTERGENIC                    |                    |                                         |
| SNP_46089_A_3366627 | NC_021166.1    | Ca_Kabuli_Chr07 | 3366627                 | GG                              | TT                 | TT               | INTERGENIC                    |                    |                                         |

| SNPs IDs            | Chromosome IDs | Chromosomes     | Physical positions (bp) | CDC Frontier genome (Reference genome) | (Pusa 1103 & HPNB) | (ILWC 46 & LPNB) | Sequence Components of genome | Gene accession IDs | Putative functions                                   |
|---------------------|----------------|-----------------|-------------------------|----------------------------------------|--------------------|------------------|-------------------------------|--------------------|------------------------------------------------------|
| SNP_46090_A_3377747 | NC_021166.1    | Ca_Kabuli_Chr07 | 3377747                 | CC                                     | TT                 | TT               | INTERGENIC                    |                    |                                                      |
| SNP_46091_A_3404164 | NC_021166.1    | Ca_Kabuli_Chr07 | 3404164                 | GG                                     | TT                 | TT               | URR                           | 101492021          | 21 kDa protein-like                                  |
| SNP_46092_A_3409827 | NC_021166.1    | Ca_Kabuli_Chr07 | 3409827                 | AA                                     | GG                 | GG               | INTRON                        | 101509018          | probable flavin-containing monooxygenase 1           |
| SNP_46093_A_3427995 | NC_021166.1    | Ca_Kabuli_Chr07 | 3427995                 | AA                                     | CC                 | CC               | DRR                           | 101492690          | uncharacterized LOC101492690                         |
| SNP_46094_A_3427996 | NC_021166.1    | Ca_Kabuli_Chr07 | 3427996                 | AA                                     | CC                 | CC               | DRR                           | 101492690          | uncharacterized LOC101492690                         |
| SNP_46095_A_3440476 | NC_021166.1    | Ca_Kabuli_Chr07 | 3440476                 | TT                                     | CC                 | CC               | INTERGENIC                    |                    |                                                      |
| SNP_46096_A_3448446 | NC_021166.1    | Ca_Kabuli_Chr07 | 3448446                 | GG                                     | CC                 | CC               | INTERGENIC                    |                    |                                                      |
| SNP_46097_A_3502923 | NC_021166.1    | Ca_Kabuli_Chr07 | 3502923                 | TT                                     | CC                 | CC               | INTERGENIC                    |                    |                                                      |
| SNP_46098_A_3503743 | NC_021166.1    | Ca_Kabuli_Chr07 | 3503743                 | CC                                     | TT                 | TT               | DRR                           | 101495046          | kinesin-like protein NACK2                           |
| SNP_46099_A_3503802 | NC_021166.1    | Ca_Kabuli_Chr07 | 3503802                 | TT                                     | CC                 | CC               | DRR                           | 101495046          | kinesin-like protein NACK2                           |
| SNP_46100_A_3503976 | NC_021166.1    | Ca_Kabuli_Chr07 | 3503976                 | CC                                     | AA                 | AA               | DRR                           | 101495046          | kinesin-like protein NACK2                           |
| SNP_46101_A_3506580 | NC_021166.1    | Ca_Kabuli_Chr07 | 3506580                 | GG                                     | TT                 | TT               | INTRON                        | 101495046          | kinesin-like protein NACK2                           |
| SNP_46102_A_3511613 | NC_021166.1    | Ca_Kabuli_Chr07 | 3511613                 | CC                                     | TT                 | TT               | DRR                           | 101495592          | eukaryotic translation initiation factor 3 subunit K |
| SNP_46103_A_3511847 | NC_021166.1    | Ca_Kabuli_Chr07 | 3511847                 | AA                                     | GG                 | GG               | DRR                           | 101495592          | eukaryotic translation initiation factor 3 subunit K |
| SNP_46104_A_3511980 | NC_021166.1    | Ca_Kabuli_Chr07 | 3511980                 | TT                                     | AA                 | AA               | DRR                           | 101495592          | eukaryotic translation initiation factor 3 subunit K |
| SNP_46105_A_3511995 | NC_021166.1    | Ca_Kabuli_Chr07 | 3511995                 | GG                                     | AA                 | AA               | DRR                           | 101495592          | eukaryotic translation initiation factor 3 subunit K |
| SNP_46106_A_3512153 | NC_021166.1    | Ca_Kabuli_Chr07 | 3512153                 | CC                                     | TT                 | TT               | DRR                           | 101495592          | eukaryotic translation initiation factor 3 subunit K |
| SNP_46107_A_3519471 | NC_021166.1    | Ca_Kabuli_Chr07 | 3519471                 | AA                                     | TT                 | TT               | INTERGENIC                    |                    |                                                      |
| SNP_46108_A_3520234 | NC_021166.1    | Ca_Kabuli_Chr07 | 3520234                 | GG                                     | CC                 | CC               | INTRON                        | 101495920          | phosphoinositide phosphatase SAC3                    |
| SNP_46109_A_3521744 | NC_021166.1    | Ca_Kabuli_Chr07 | 3521744                 | GG                                     | AA                 | AA               | INTRON                        | 101495920          | phosphoinositide phosphatase SAC3                    |
| SNP_46111_A_3523887 | NC_021166.1    | Ca_Kabuli_Chr07 | 3523887                 | AA                                     | GG                 | GG               | INTRON                        | 101495920          | phosphoinositide phosphatase SAC3                    |
| SNP_46112_A_3524044 | NC_021166.1    | Ca_Kabuli_Chr07 | 3524044                 | TT                                     | CC                 | CC               | SYNONYMOUS_CODING             | 101495920          | phosphoinositide phosphatase SAC3                    |

| SNPs IDs            | Chromosome IDs | Chromosomes     | Physical positions (bp) | CDC Frontier genome (Reference genome) | (Pusa 1103 & HPNB) | (ILWC 46 & LPNB) | Sequence Components of genome | Gene accession IDs | Putative functions                |
|---------------------|----------------|-----------------|-------------------------|----------------------------------------|--------------------|------------------|-------------------------------|--------------------|-----------------------------------|
| SNP_46113_A_3524349 | NC_021166.1    | Ca_Kabuli_Chr07 | 3524349                 | GG                                     | AA                 | AA               | INTRON                        | 101495920          | phosphoinositide phosphatase SAC3 |
| SNP_46115_A_3528676 | NC_021166.1    | Ca_Kabuli_Chr07 | 3528676                 | CC                                     | TT                 | TT               | URR                           | 101495920          | phosphoinositide phosphatase SAC3 |
| SNP_46116_A_3528679 | NC_021166.1    | Ca_Kabuli_Chr07 | 3528679                 | TT                                     | CC                 | CC               | URR                           | 101495920          | phosphoinositide phosphatase SAC3 |
| SNP_46117_A_3528709 | NC_021166.1    | Ca_Kabuli_Chr07 | 3528709                 | CC                                     | TT                 | TT               | URR                           | 101495920          | phosphoinositide phosphatase SAC3 |
| SNP_46118_A_3528860 | NC_021166.1    | Ca_Kabuli_Chr07 | 3528860                 | TT                                     | CC                 | CC               | URR                           | 101495920          | phosphoinositide phosphatase SAC3 |
| SNP_46119_A_3529166 | NC_021166.1    | Ca_Kabuli_Chr07 | 3529166                 | AA                                     | GG                 | GG               | INTERGENIC                    |                    |                                   |
| SNP_46120_A_3529177 | NC_021166.1    | Ca_Kabuli_Chr07 | 3529177                 | GG                                     | CC                 | CC               | INTERGENIC                    |                    |                                   |
| SNP_46121_A_3531081 | NC_021166.1    | Ca_Kabuli_Chr07 | 3531081                 | AA                                     | GG                 | GG               | INTERGENIC                    |                    |                                   |
| SNP_46122_A_3532060 | NC_021166.1    | Ca_Kabuli_Chr07 | 3532060                 | AA                                     | GG                 | GG               | INTERGENIC                    |                    |                                   |
| SNP_46123_A_3532234 | NC_021166.1    | Ca_Kabuli_Chr07 | 3532234                 | GG                                     | CC                 | CC               | INTERGENIC                    |                    |                                   |
| SNP_46124_A_3532274 | NC_021166.1    | Ca_Kabuli_Chr07 | 3532274                 | AA                                     | GG                 | GG               | INTERGENIC                    |                    |                                   |
| SNP_46125_A_3532288 | NC_021166.1    | Ca_Kabuli_Chr07 | 3532288                 | GG                                     | AA                 | AA               | INTERGENIC                    |                    |                                   |
| SNP_46126_A_3532296 | NC_021166.1    | Ca_Kabuli_Chr07 | 3532296                 | TT                                     | CC                 | CC               | INTERGENIC                    |                    |                                   |
| SNP_46127_A_3532549 | NC_021166.1    | Ca_Kabuli_Chr07 | 3532549                 | CC                                     | TT                 | TT               | INTERGENIC                    |                    |                                   |
| SNP_46128_A_3539644 | NC_021166.1    | Ca_Kabuli_Chr07 | 3539644                 | CC                                     | AA                 | AA               | DRR                           | 101496798          | uncharacterized LOC101496798      |
| SNP_46130_A_3540242 | NC_021166.1    | Ca_Kabuli_Chr07 | 3540242                 | CC                                     | AA                 | AA               | DRR                           | 101496798          | uncharacterized LOC101496798      |
| SNP_46131_A_3540255 | NC_021166.1    | Ca_Kabuli_Chr07 | 3540255                 | TT                                     | CC                 | CC               | DRR                           | 101496798          | uncharacterized LOC101496798      |
| SNP_46132_A_3544511 | NC_021166.1    | Ca_Kabuli_Chr07 | 3544511                 | CC                                     | GG                 | GG               | URR                           | 101496798          | uncharacterized LOC101496798      |
| SNP_46133_A_3548514 | NC_021166.1    | Ca_Kabuli_Chr07 | 3548514                 | CC                                     | TT                 | TT               | INTERGENIC                    |                    |                                   |
| SNP_46134_A_3548567 | NC_021166.1    | Ca_Kabuli_Chr07 | 3548567                 | GG                                     | AA                 | AA               | INTERGENIC                    |                    |                                   |
| SNP_46136_A_3552361 | NC_021166.1    | Ca_Kabuli_Chr07 | 3552361                 | GG                                     | AA                 | AA               | INTERGENIC                    |                    |                                   |
| SNP_46137_A_3552504 | NC_021166.1    | Ca_Kabuli_Chr07 | 3552504                 | GG                                     | AA                 | AA               | INTERGENIC                    |                    |                                   |

| SNPs IDs            | Chromosome IDs | Chromosomes     | Physical positions (bp) | CDC Frontier genome (Reference genome) | (Pusa 1103 & HPNB) | (ILWC 46 & LPNB) | Sequence Components of genome | Gene accession IDs | Putative functions                                  |
|---------------------|----------------|-----------------|-------------------------|----------------------------------------|--------------------|------------------|-------------------------------|--------------------|-----------------------------------------------------|
| SNP_46138_A_3557377 | NC_021166.1    | Ca_Kabuli_Chr07 | 3557377                 | CC                                     | TT                 | TT               | INTRON                        | 101497117          | 1-phosphatidylinositol-3-phosphate 5-kinase FAB1A   |
| SNP_46139_A_3557446 | NC_021166.1    | Ca_Kabuli_Chr07 | 3557446                 | GG                                     | AA                 | AA               | INTRON                        | 101497117          | 1-phosphatidylinositol-3-phosphate 5-kinase FAB1A   |
| SNP_46140_A_3567427 | NC_021166.1    | Ca_Kabuli_Chr07 | 3567427                 | GG                                     | AA                 | AA               | URR                           | 101498317          | Unknown function                                    |
| SNP_46141_A_3567474 | NC_021166.1    | Ca_Kabuli_Chr07 | 3567474                 | CC                                     | TT                 | TT               | URR                           | 101498317          | Unknown function                                    |
| SNP_46142_A_3567866 | NC_021166.1    | Ca_Kabuli_Chr07 | 3567866                 | TT                                     | CC                 | CC               | URR                           | 101498317          | Unknown function                                    |
| SNP_46143_A_3567911 | NC_021166.1    | Ca_Kabuli_Chr07 | 3567911                 | CC                                     | TT                 | TT               | URR                           | 101498317          | Unknown function                                    |
| SNP_46144_A_3568756 | NC_021166.1    | Ca_Kabuli_Chr07 | 3568756                 | AA                                     | GG                 | GG               | DRR                           | 101498656          | conserved oligomeric Golgi complex subunit 3        |
| SNP_46145_A_3572439 | NC_021166.1    | Ca_Kabuli_Chr07 | 3572439                 | AA                                     | GG                 | GG               | INTRON                        | 101498656          | conserved oligomeric Golgi complex subunit 3        |
| SNP_46146_A_3573794 | NC_021166.1    | Ca_Kabuli_Chr07 | 3573794                 | TT                                     | AA                 | AA               | INTRON                        | 101498656          | conserved oligomeric Golgi complex subunit 3        |
| SNP_46147_A_3575574 | NC_021166.1    | Ca_Kabuli_Chr07 | 3575574                 | GG                                     | TT                 | TT               | INTRON                        | 101498656          | conserved oligomeric Golgi complex subunit 3        |
| SNP_46148_A_3577144 | NC_021166.1    | Ca_Kabuli_Chr07 | 3577144                 | CC                                     | GG                 | GG               | INTRON                        | 101498656          | conserved oligomeric Golgi complex subunit 3        |
| SNP_46149_A_3577482 | NC_021166.1    | Ca_Kabuli_Chr07 | 3577482                 | GG                                     | AA                 | AA               | INTRON                        | 101498656          | conserved oligomeric Golgi complex subunit 3        |
| SNP_46150_A_3580487 | NC_021166.1    | Ca_Kabuli_Chr07 | 3580487                 | TT                                     | CC                 | CC               | INTRON                        | 101498656          | conserved oligomeric Golgi complex subunit 3        |
| SNP_46151_A_3588119 | NC_021166.1    | Ca_Kabuli_Chr07 | 3588119                 | CC                                     | TT                 | TT               | DRR                           | 101509658          | uncharacterized LOC101509658                        |
| SNP_46152_A_3590196 | NC_021166.1    | Ca_Kabuli_Chr07 | 3590196                 | TT                                     | GG                 | GG               | DRR                           | 101498982          | DNA repair protein RAD51 homolog 1                  |
| SNP_46153_A_3594581 | NC_021166.1    | Ca_Kabuli_Chr07 | 3594581                 | AA                                     | TT                 | TT               | URR                           | 101498982          | DNA repair protein RAD51 homolog 1                  |
| SNP_46154_A_3594585 | NC_021166.1    | Ca_Kabuli_Chr07 | 3594585                 | AA                                     | GG                 | GG               | URR                           | 101498982          | DNA repair protein RAD51 homolog 1                  |
| SNP_46155_A_3594671 | NC_021166.1    | Ca_Kabuli_Chr07 | 3594671                 | AA                                     | GG                 | GG               | URR                           | 101498982          | DNA repair protein RAD51 homolog 1                  |
| SNP_46156_A_3595165 | NC_021166.1    | Ca_Kabuli_Chr07 | 3595165                 | TT                                     | CC                 | CC               | DRR                           | 101499304          | putative pectinesterase/pectinesterase inhibitor 45 |
| SNP_46157_A_3595169 | NC_021166.1    | Ca_Kabuli_Chr07 | 3595169                 | GG                                     | AA                 | AA               | DRR                           | 101499304          | putative pectinesterase/pectinesterase inhibitor 45 |
| SNP_46158_A_3597172 | NC_021166.1    | Ca_Kabuli_Chr07 | 3597172                 | CC                                     | TT                 | TT               | INTERGENIC                    |                    |                                                     |
| SNP_46159_A_3597359 | NC_021166.1    | Ca_Kabuli_Chr07 | 3597359                 | GG                                     | AA                 | AA               | INTERGENIC                    |                    |                                                     |

| SNPs IDs            | Chromosome IDs | Chromosomes     | Physical positions (bp) | CDC Frontier (Reference genome) | (Pusa 1103 & HPNB) | (ILWC 46 & LPNB) | Sequence Components of genome | Gene accession IDs | Putative functions                                  |
|---------------------|----------------|-----------------|-------------------------|---------------------------------|--------------------|------------------|-------------------------------|--------------------|-----------------------------------------------------|
| SNP_46160_A_3599352 | NC_021166.1    | Ca_Kabuli_Chr07 | 3599352                 | CC                              | TT                 | TT               | URR                           | 101499304          | putative pectinesterase/pectinesterase inhibitor 45 |
| SNP_46161_A_3599379 | NC_021166.1    | Ca_Kabuli_Chr07 | 3599379                 | TT                              | CC                 | CC               | URR                           | 101499304          | putative pectinesterase/pectinesterase inhibitor 45 |
| SNP_46162_A_3601804 | NC_021166.1    | Ca_Kabuli_Chr07 | 3601804                 | GG                              | AA                 | AA               | URR                           | 101499619          | probable pectinesterase/pectinesterase inhibitor 12 |
| SNP_46163_A_3601818 | NC_021166.1    | Ca_Kabuli_Chr07 | 3601818                 | GG                              | AA                 | AA               | URR                           | 101499619          | probable pectinesterase/pectinesterase inhibitor 12 |
| SNP_46164_A_3601870 | NC_021166.1    | Ca_Kabuli_Chr07 | 3601870                 | TT                              | AA                 | AA               | URR                           | 101499619          | probable pectinesterase/pectinesterase inhibitor 12 |
| SNP_46165_A_3604018 | NC_021166.1    | Ca_Kabuli_Chr07 | 3604018                 | TT                              | CC                 | CC               | DRR                           | 101499927          | pectinesterase/pectinesterase inhibitor PPE8B       |
| SNP_46166_A_3609509 | NC_021166.1    | Ca_Kabuli_Chr07 | 3609509                 | CC                              | AA                 | AA               | INTERGENIC                    |                    |                                                     |
| SNP_46167_A_3612532 | NC_021166.1    | Ca_Kabuli_Chr07 | 3612532                 | CC                              | TT                 | TT               | INTERGENIC                    |                    |                                                     |
| SNP_46168_A_3612825 | NC_021166.1    | Ca_Kabuli_Chr07 | 3612825                 | AA                              | TT                 | TT               | INTERGENIC                    |                    |                                                     |
| SNP_46169_A_3612954 | NC_021166.1    | Ca_Kabuli_Chr07 | 3612954                 | AA                              | GG                 | GG               | INTERGENIC                    |                    |                                                     |
| SNP_46170_A_3613014 | NC_021166.1    | Ca_Kabuli_Chr07 | 3613014                 | GG                              | CC                 | CC               | INTERGENIC                    |                    |                                                     |
| SNP_46171_A_3613228 | NC_021166.1    | Ca_Kabuli_Chr07 | 3613228                 | TT                              | GG                 | GG               | INTERGENIC                    |                    |                                                     |
| SNP_46172_A_3613300 | NC_021166.1    | Ca_Kabuli_Chr07 | 3613300                 | TT                              | AA                 | AA               | INTERGENIC                    |                    |                                                     |
| SNP_46173_A_3613399 | NC_021166.1    | Ca_Kabuli_Chr07 | 3613399                 | AA                              | GG                 | GG               | INTERGENIC                    |                    |                                                     |
| SNP_46174_A_3613455 | NC_021166.1    | Ca_Kabuli_Chr07 | 3613455                 | GG                              | AA                 | AA               | INTERGENIC                    |                    |                                                     |
| SNP_46175_A_3613471 | NC_021166.1    | Ca_Kabuli_Chr07 | 3613471                 | TT                              | GG                 | GG               | INTERGENIC                    |                    |                                                     |
| SNP_46177_A_3615240 | NC_021166.1    | Ca_Kabuli_Chr07 | 3615240                 | AA                              | GG                 | GG               | INTERGENIC                    |                    |                                                     |
| SNP_46178_A_3615304 | NC_021166.1    | Ca_Kabuli_Chr07 | 3615304                 | AA                              | CC                 | CC               | INTERGENIC                    |                    |                                                     |
| SNP_46179_A_3615642 | NC_021166.1    | Ca_Kabuli_Chr07 | 3615642                 | TT                              | CC                 | CC               | INTERGENIC                    |                    |                                                     |
| SNP_46180_A_3616597 | NC_021166.1    | Ca_Kabuli_Chr07 | 3616597                 | AA                              | CC                 | CC               | INTERGENIC                    |                    |                                                     |
| SNP_46181_A_3617367 | NC_021166.1    | Ca_Kabuli_Chr07 | 3617367                 | AA                              | TT                 | TT               | INTERGENIC                    |                    |                                                     |
| SNP_46183_A_3618166 | NC_021166.1    | Ca_Kabuli_Chr07 | 3618166                 | TT                              | CC                 | CC               | INTERGENIC                    |                    |                                                     |

| SNPs IDs            | Chromosome IDs | Chromosomes     | Physical positions (bp) | CDC Frontier genome (Reference genome) | (Pusa 1103 & HPNB) | (ILWC 46 & LPNB) | Sequence Components of genome | Gene accession IDs | Putative functions                                          |
|---------------------|----------------|-----------------|-------------------------|----------------------------------------|--------------------|------------------|-------------------------------|--------------------|-------------------------------------------------------------|
| SNP_46184_A_3618170 | NC_021166.1    | Ca_Kabuli_Chr07 | 3618170                 | GG                                     | AA                 | AA               | INTERGENIC                    |                    |                                                             |
| SNP_46185_A_3618702 | NC_021166.1    | Ca_Kabuli_Chr07 | 3618702                 | TT                                     | CC                 | CC               | INTERGENIC                    |                    |                                                             |
| SNP_46186_A_3619792 | NC_021166.1    | Ca_Kabuli_Chr07 | 3619792                 | TT                                     | GG                 | GG               | INTERGENIC                    |                    |                                                             |
| SNP_46187_A_3622346 | NC_021166.1    | Ca_Kabuli_Chr07 | 3622346                 | TT                                     | CC                 | CC               | INTERGENIC                    |                    |                                                             |
| SNP_46188_A_3624928 | NC_021166.1    | Ca_Kabuli_Chr07 | 3624928                 | TT                                     | AA                 | AA               | INTRON                        | 101500267          | alpha-aminoadipic semialdehyde synthase                     |
| SNP_46189_A_3625099 | NC_021166.1    | Ca_Kabuli_Chr07 | 3625099                 | CC                                     | TT                 | TT               | INTRON                        | 101500267          | alpha-aminoadipic semialdehyde synthase                     |
| SNP_46190_A_3629633 | NC_021166.1    | Ca_Kabuli_Chr07 | 3629633                 | TT                                     | AA                 | AA               | INTRON                        | 101500267          | alpha-aminoadipic semialdehyde synthase                     |
| SNP_46192_A_3630067 | NC_021166.1    | Ca_Kabuli_Chr07 | 3630067                 | AA                                     | TT                 | TT               | INTRON                        | 101500267          | alpha-aminoadipic semialdehyde synthase                     |
| SNP_46193_A_3633555 | NC_021166.1    | Ca_Kabuli_Chr07 | 3633555                 | GG                                     | TT                 | TT               | INTRON                        | 101500267          | alpha-aminoadipic semialdehyde synthase                     |
| SNP_46194_A_3635713 | NC_021166.1    | Ca_Kabuli_Chr07 | 3635713                 | GG                                     | TT                 | TT               | INTERGENIC                    |                    |                                                             |
| SNP_46195_A_3638803 | NC_021166.1    | Ca_Kabuli_Chr07 | 3638803                 | GG                                     | TT                 | TT               | DRR                           | 101500584          | uncharacterized LOC101500584                                |
| SNP_46196_A_3641713 | NC_021166.1    | Ca_Kabuli_Chr07 | 3641713                 | TT                                     | CC                 | CC               | INTERGENIC                    |                    |                                                             |
| SNP_46197_A_3645063 | NC_021166.1    | Ca_Kabuli_Chr07 | 3645063                 | TT                                     | CC                 | CC               | URR                           | 101500584          | uncharacterized LOC101500584                                |
| SNP_46198_A_3645342 | NC_021166.1    | Ca_Kabuli_Chr07 | 3645342                 | AA                                     | GG                 | GG               | INTERGENIC                    |                    |                                                             |
| SNP_46199_A_3645358 | NC_021166.1    | Ca_Kabuli_Chr07 | 3645358                 | TT                                     | CC                 | CC               | INTERGENIC                    |                    |                                                             |
| SNP_46200_A_3646298 | NC_021166.1    | Ca_Kabuli_Chr07 | 3646298                 | CC                                     | TT                 | TT               | URR                           | 101500896          | glucan endo-1,3-beta-glucosidase 5                          |
| SNP_46201_A_3646520 | NC_021166.1    | Ca_Kabuli_Chr07 | 3646520                 | AA                                     | GG                 | GG               | URR                           | 101500896          | glucan endo-1,3-beta-glucosidase 5                          |
| SNP_46202_A_3648194 | NC_021166.1    | Ca_Kabuli_Chr07 | 3648194                 | AA                                     | GG                 | GG               | DRR                           | 101501224          | brefeldin A-inhibited guanine nucleotide-exchange protein 5 |
| SNP_46203_A_3650540 | NC_021166.1    | Ca_Kabuli_Chr07 | 3650540                 | TT                                     | GG                 | GG               | SYNONYMOUS_CODING             | 101501224          | brefeldin A-inhibited guanine nucleotide-exchange protein 5 |
| SNP_46204_A_3650612 | NC_021166.1    | Ca_Kabuli_Chr07 | 3650612                 | TT                                     | CC                 | CC               | INTRON                        | 101501224          | brefeldin A-inhibited guanine nucleotide-exchange protein 5 |
| SNP_46205_A_3651683 | NC_021166.1    | Ca_Kabuli_Chr07 | 3651683                 | CC                                     | AA                 | AA               | INTRON                        | 101501224          | brefeldin A-inhibited guanine nucleotide-exchange protein 5 |
| SNP_46206_A_3652918 | NC_021166.1    | Ca_Kabuli_Chr07 | 3652918                 | CC                                     | TT                 | TT               | INTRON                        | 101501224          | brefeldin A-inhibited guanine nucleotide-exchange protein 5 |

| SNPs IDs            | Chromosome IDs | Chromosomes     | Physical positions (bp) | CDC Frontier genome (Reference genome) | (Pusa 1103 & HPNB) | (ILWC 46 & LPNB) | Sequence Components of genome | Gene accession IDs | Putative functions                                           |
|---------------------|----------------|-----------------|-------------------------|----------------------------------------|--------------------|------------------|-------------------------------|--------------------|--------------------------------------------------------------|
| SNP_46207_A_3653694 | NC_021166.1    | Ca_Kabuli_Chr07 | 3653694                 | AA                                     | GG                 | GG               | SYNONYMOUS_CODING             | 101501224          | brefeldin A-inhibited guanine nucleotide-exchange protein 5  |
| SNP_46208_A_3654046 | NC_021166.1    | Ca_Kabuli_Chr07 | 3654046                 | GG                                     | TT                 | TT               | INTRON                        | 101501224          | brefeldin A-inhibited guanine nucleotide-exchange protein 5  |
| SNP_46209_A_3654254 | NC_021166.1    | Ca_Kabuli_Chr07 | 3654254                 | GG                                     | AA                 | AA               | INTRON                        | 101501224          | brefeldin A-inhibited guanine nucleotide-exchange protein 5  |
| SNP_46210_A_3661188 | NC_021166.1    | Ca_Kabuli_Chr07 | 3661188                 | GG                                     | AA                 | AA               | INTRON                        | 101501224          | brefeldin A-inhibited guanine nucleotide-exchange protein 5  |
| SNP_46211_A_3661353 | NC_021166.1    | Ca_Kabuli_Chr07 | 3661353                 | CC                                     | AA                 | AA               | SYNONYMOUS_CODING             | 101501224          | brefeldin A-inhibited guanine nucleotide-exchange protein 5  |
| SNP_46212_A_3664374 | NC_021166.1    | Ca_Kabuli_Chr07 | 3664374                 | GG                                     | TT                 | TT               | INTRON                        | 101501224          | brefeldin A-inhibited guanine nucleotide-exchange protein 5  |
| SNP_46213_A_3667924 | NC_021166.1    | Ca_Kabuli_Chr07 | 3667924                 | AA                                     | GG                 | GG               | URR                           | 101501224          | brefeldin A-inhibited guanine nucleotide-exchange protein 5  |
| SNP_46215_A_3670600 | NC_021166.1    | Ca_Kabuli_Chr07 | 3670600                 | TT                                     | CC                 | CC               | URR                           | 101501536          | RING-H2 zinc finger protein RHA4a                            |
| SNP_46216_A_3670627 | NC_021166.1    | Ca_Kabuli_Chr07 | 3670627                 | TT                                     | CC                 | CC               | URR                           | 101501536          | RING-H2 zinc finger protein RHA4a                            |
| SNP_46218_A_3674075 | NC_021166.1    | Ca_Kabuli_Chr07 | 3674075                 | AA                                     | GG                 | GG               | INTRON                        | 101501853          | hepatocyte growth factor-regulated tyrosine kinase substrate |
| SNP_46219_A_3674154 | NC_021166.1    | Ca_Kabuli_Chr07 | 3674154                 | CC                                     | AA                 | AA               | INTRON                        | 101501853          | hepatocyte growth factor-regulated tyrosine kinase substrate |
| SNP_46220_A_3674396 | NC_021166.1    | Ca_Kabuli_Chr07 | 3674396                 | TT                                     | GG                 | GG               | INTRON                        | 101501853          | hepatocyte growth factor-regulated tyrosine kinase substrate |
| SNP_46221_A_3675615 | NC_021166.1    | Ca_Kabuli_Chr07 | 3675615                 | GG                                     | AA                 | AA               | INTRON                        | 101501853          | hepatocyte growth factor-regulated tyrosine kinase substrate |
| SNP_46222_A_3675668 | NC_021166.1    | Ca_Kabuli_Chr07 | 3675668                 | CC                                     | AA                 | AA               | INTRON                        | 101501853          | hepatocyte growth factor-regulated tyrosine kinase substrate |
| SNP_46224_A_3677067 | NC_021166.1    | Ca_Kabuli_Chr07 | 3677067                 | CC                                     | TT                 | TT               | URR                           | 101501853          | hepatocyte growth factor-regulated tyrosine kinase substrate |
| SNP_46225_A_3683423 | NC_021166.1    | Ca_Kabuli_Chr07 | 3683423                 | AA                                     | TT                 | TT               | URR                           | 101502388          | protein TIFY 3B                                              |
| SNP_46226_A_3683683 | NC_021166.1    | Ca_Kabuli_Chr07 | 3683683                 | TT                                     | CC                 | CC               | URR                           | 101502388          | protein TIFY 3B                                              |
| SNP_46228_A_3687484 | NC_021166.1    | Ca_Kabuli_Chr07 | 3687484                 | TT                                     | CC                 | CC               | INTERGENIC                    |                    |                                                              |
| SNP_46229_A_3689581 | NC_021166.1    | Ca_Kabuli_Chr07 | 3689581                 | CC                                     | AA                 | AA               | DRR                           | 101502693          | protein FATTY ACID EXPORT 2, chloroplast                     |
| SNP_46230_A_3689590 | NC_021166.1    | Ca_Kabuli_Chr07 | 3689590                 | GG                                     | AA                 | AA               | DRR                           | 101502693          | protein FATTY ACID EXPORT 2, chloroplast                     |
| SNP_46232_A_3690098 | NC_021166.1    | Ca_Kabuli_Chr07 | 3690098                 | CC                                     | AA                 | AA               | DRR                           | 101502693          | protein FATTY ACID EXPORT 2, chloroplast                     |
| SNP_46233_A_3690813 | NC_021166.1    | Ca_Kabuli_Chr07 | 3690813                 | TT                                     | CC                 | CC               | INTRON                        | 101502693          | protein FATTY ACID EXPORT 2, chloroplast                     |

| SNPs IDs            | Chromosome IDs | Chromosomes     | Physical positions (bp) | CDC Frontier genome (Reference genome) | (Pusa 1103 & HPNB) | (ILWC 46 & LPNB) | Sequence genome | Components of | Gene accession IDs | Putative functions                                         |
|---------------------|----------------|-----------------|-------------------------|----------------------------------------|--------------------|------------------|-----------------|---------------|--------------------|------------------------------------------------------------|
| SNP_46234_A_3690814 | NC_021166.1    | Ca_Kabuli_Chr07 | 3690814                 | GG                                     | AA                 | AA               | INTRON          |               | 101502693          | protein FATTY ACID EXPORT 2, chloroplastic                 |
| SNP_46236_A_3691382 | NC_021166.1    | Ca_Kabuli_Chr07 | 3691382                 | GG                                     | TT                 | TT               | INTERGENIC      |               |                    |                                                            |
| SNP_46237_A_3721492 | NC_021166.1    | Ca_Kabuli_Chr07 | 3721492                 | TT                                     | CC                 | CC               | URR             |               | 101503657          | cyprosin-like                                              |
| SNP_46238_A_3860673 | NC_021166.1    | Ca_Kabuli_Chr07 | 3860673                 | TT                                     | CC                 | CC               | DRR             |               | 101509870          | uncharacterized LOC101509870                               |
| SNP_46239_A_3896298 | NC_021166.1    | Ca_Kabuli_Chr07 | 3896298                 | GG                                     | AA                 | AA               | URR             |               | 101511170          | probable sugar phosphate/phosphate translocator At3g17430  |
| SNP_46243_A_4012081 | NC_021166.1    | Ca_Kabuli_Chr07 | 4012081                 | GG                                     | CC                 | CC               | DRR             |               | 101488675          | uncharacterized LOC101488675                               |
| SNP_46244_A_4041976 | NC_021166.1    | Ca_Kabuli_Chr07 | 4041976                 | TT                                     | CC                 | CC               | INTRON          |               | 101488675          | uncharacterized LOC101488675                               |
| SNP_46245_A_4091955 | NC_021166.1    | Ca_Kabuli_Chr07 | 4091955                 | TT                                     | CC                 | CC               | INTERGENIC      |               |                    |                                                            |
| SNP_46246_A_4092122 | NC_021166.1    | Ca_Kabuli_Chr07 | 4092122                 | GG                                     | CC                 | CC               | INTERGENIC      |               |                    |                                                            |
| SNP_46247_A_4092146 | NC_021166.1    | Ca_Kabuli_Chr07 | 4092146                 | AA                                     | CC                 | CC               | INTERGENIC      |               |                    |                                                            |
| SNP_46248_A_4108791 | NC_021166.1    | Ca_Kabuli_Chr07 | 4108791                 | TT                                     | AA                 | AA               | URR             |               | 101489551          | probable protein phosphatase 2C 13                         |
| SNP_46249_A_4108794 | NC_021166.1    | Ca_Kabuli_Chr07 | 4108794                 | TT                                     | AA                 | AA               | URR             |               | 101489551          | probable protein phosphatase 2C 13                         |
| SNP_46250_A_4162136 | NC_021166.1    | Ca_Kabuli_Chr07 | 4162136                 | TT                                     | CC                 | CC               | DRR             |               | 101492467          | beta-glucosidase-like SFR2, chloroplastic                  |
| SNP_46251_A_4228743 | NC_021166.1    | Ca_Kabuli_Chr07 | 4228743                 | AA                                     | GG                 | GG               | DRR             |               | 101496253          | cell wall / vacuolar inhibitor of fructosidase 1-like      |
| SNP_46253_A_4258284 | NC_021166.1    | Ca_Kabuli_Chr07 | 4258284                 | GG                                     | CC                 | CC               | URR             |               | 101497559          | pentatricopeptide repeat-containing protein At1g60770-like |
| SNP_46254_A_4258809 | NC_021166.1    | Ca_Kabuli_Chr07 | 4258809                 | TT                                     | AA                 | AA               | URR             |               | 101497559          | pentatricopeptide repeat-containing protein At1g60770-like |
| SNP_46255_A_4262537 | NC_021166.1    | Ca_Kabuli_Chr07 | 4262537                 | AA                                     | GG                 | GG               | INTERGENIC      |               |                    |                                                            |
| SNP_46256_A_4314479 | NC_021166.1    | Ca_Kabuli_Chr07 | 4314479                 | TT                                     | AA                 | AA               | INTERGENIC      |               |                    |                                                            |
| SNP_46257_A_4314483 | NC_021166.1    | Ca_Kabuli_Chr07 | 4314483                 | AA                                     | GG                 | GG               | INTERGENIC      |               |                    |                                                            |
| SNP_46260_A_4365694 | NC_021166.1    | Ca_Kabuli_Chr07 | 4365694                 | AA                                     | TT                 | TT               | URR             |               | 101501315          | uncharacterized LOC101501315                               |
| SNP_46263_A_4413703 | NC_021166.1    | Ca_Kabuli_Chr07 | 4413703                 | AA                                     | GG                 | GG               | INTERGENIC      |               |                    |                                                            |
| SNP_46264_A_4417809 | NC_021166.1    | Ca_Kabuli_Chr07 | 4417809                 | AA                                     | GG                 | GG               | INTERGENIC      |               |                    |                                                            |



| SNPs IDs            | Chromosome IDs | Chromosomes     | Physical positions (bp) | CDC Frontier genome (Reference genome) | (Pusa 1103 & HPNB) | (ILWC 46 & LPNB) | Sequence genome | Components of | Gene accession IDs | Putative functions                                |
|---------------------|----------------|-----------------|-------------------------|----------------------------------------|--------------------|------------------|-----------------|---------------|--------------------|---------------------------------------------------|
| SNP_46265_A_4417815 | NC_021166.1    | Ca_Kabuli_Chr07 | 4417815                 | CC                                     | GG                 | GG               | INTERGENIC      |               |                    |                                                   |
| SNP_46266_A_4417819 | NC_021166.1    | Ca_Kabuli_Chr07 | 4417819                 | AA                                     | GG                 | GG               | INTERGENIC      |               |                    |                                                   |
| SNP_46267_A_4417932 | NC_021166.1    | Ca_Kabuli_Chr07 | 4417932                 | GG                                     | CC                 | CC               | INTERGENIC      |               |                    |                                                   |
| SNP_46268_A_4417940 | NC_021166.1    | Ca_Kabuli_Chr07 | 4417940                 | CC                                     | TT                 | TT               | INTERGENIC      |               |                    |                                                   |
| SNP_46269_A_4418072 | NC_021166.1    | Ca_Kabuli_Chr07 | 4418072                 | AA                                     | GG                 | GG               | INTERGENIC      |               |                    |                                                   |
| SNP_46270_A_4418083 | NC_021166.1    | Ca_Kabuli_Chr07 | 4418083                 | TT                                     | AA                 | AA               | INTERGENIC      |               |                    |                                                   |
| SNP_46271_A_4418090 | NC_021166.1    | Ca_Kabuli_Chr07 | 4418090                 | AA                                     | GG                 | GG               | INTERGENIC      |               |                    |                                                   |
| SNP_46272_A_4418103 | NC_021166.1    | Ca_Kabuli_Chr07 | 4418103                 | AA                                     | CC                 | CC               | INTERGENIC      |               |                    |                                                   |
| SNP_46274_A_4450309 | NC_021166.1    | Ca_Kabuli_Chr07 | 4450309                 | GG                                     | TT                 | TT               | INTERGENIC      |               |                    |                                                   |
| SNP_46275_A_4487187 | NC_021166.1    | Ca_Kabuli_Chr07 | 4487187                 | AA                                     | GG                 | GG               | INTERGENIC      |               |                    |                                                   |
| SNP_46276_A_4537746 | NC_021166.1    | Ca_Kabuli_Chr07 | 4537746                 | GG                                     | TT                 | TT               | URR             |               | 101488231          | Unknown function                                  |
| SNP_46277_A_4547125 | NC_021166.1    | Ca_Kabuli_Chr07 | 4547125                 | TT                                     | CC                 | CC               | DRR             |               | 101507750          | GTP-binding protein SAR1A-like                    |
| SNP_46278_A_4550993 | NC_021166.1    | Ca_Kabuli_Chr07 | 4550993                 | AA                                     | GG                 | GG               | DRR             |               | 101508075          | calmodulin-binding transcription activator 5-like |
| SNP_46279_A_4552677 | NC_021166.1    | Ca_Kabuli_Chr07 | 4552677                 | GG                                     | AA                 | AA               | INTERGENIC      |               |                    |                                                   |
| SNP_46280_A_4552684 | NC_021166.1    | Ca_Kabuli_Chr07 | 4552684                 | AA                                     | GG                 | GG               | INTERGENIC      |               |                    |                                                   |
| SNP_46281_A_4552705 | NC_021166.1    | Ca_Kabuli_Chr07 | 4552705                 | AA                                     | GG                 | GG               | INTERGENIC      |               |                    |                                                   |
| SNP_46282_A_4552783 | NC_021166.1    | Ca_Kabuli_Chr07 | 4552783                 | TT                                     | CC                 | CC               | INTERGENIC      |               |                    |                                                   |
| SNP_46283_A_4552813 | NC_021166.1    | Ca_Kabuli_Chr07 | 4552813                 | AA                                     | TT                 | TT               | INTERGENIC      |               |                    |                                                   |
| SNP_46284_A_4552834 | NC_021166.1    | Ca_Kabuli_Chr07 | 4552834                 | TT                                     | CC                 | CC               | INTERGENIC      |               |                    |                                                   |
| SNP_46285_A_4552911 | NC_021166.1    | Ca_Kabuli_Chr07 | 4552911                 | CC                                     | TT                 | TT               | INTERGENIC      |               |                    |                                                   |
| SNP_46286_A_4552925 | NC_021166.1    | Ca_Kabuli_Chr07 | 4552925                 | GG                                     | TT                 | TT               | INTERGENIC      |               |                    |                                                   |
| SNP_46287_A_4629363 | NC_021166.1    | Ca_Kabuli_Chr07 | 4629363                 | GG                                     | AA                 | AA               | URR             |               | 101510188          | two-component response regulator ARR2             |

| SNPs IDs            | Chromosome IDs | Chromosomes     | Physical positions (bp) | CDC Frontier (Reference genome) | (Pusa 1103 & HPNB) | (ILWC 46 & LPNB) | Sequence Components of genome | Gene accession IDs | Putative functions                                       |
|---------------------|----------------|-----------------|-------------------------|---------------------------------|--------------------|------------------|-------------------------------|--------------------|----------------------------------------------------------|
| SNP_46288_A_4660745 | NC_021166.1    | Ca_Kabuli_Chr07 | 4660745                 | AA                              | GG                 | GG               | DRR                           | 101511589          | ABA-responsive protein ABR18-like                        |
| SNP_46289_A_4661365 | NC_021166.1    | Ca_Kabuli_Chr07 | 4661365                 | CC                              | TT                 | TT               | DRR                           | 101511589          | ABA-responsive protein ABR18-like                        |
| SNP_46291_A_4764441 | NC_021166.1    | Ca_Kabuli_Chr07 | 4764441                 | CC                              | TT                 | TT               | SYNONYMOUS_CODING             | 101489553          | serine/threonine-protein phosphatase 7 long form homolog |
| SNP_46293_A_4824547 | NC_021166.1    | Ca_Kabuli_Chr07 | 4824547                 | TT                              | CC                 | CC               | INTERGENIC                    |                    |                                                          |
| SNP_46295_A_4867511 | NC_021166.1    | Ca_Kabuli_Chr07 | 4867511                 | TT                              | CC                 | CC               | URR                           | 101494627          | ubiquitin-like-specific protease ESD4                    |
| SNP_46296_A_4886992 | NC_021166.1    | Ca_Kabuli_Chr07 | 4886992                 | GG                              | AA                 | AA               | URR                           | 101489872          | histone acetyltransferase KAT6B-like                     |
| SNP_46297_A_4915338 | NC_021166.1    | Ca_Kabuli_Chr07 | 4915338                 | GG                              | AA                 | AA               | INTERGENIC                    |                    |                                                          |
| SNP_46298_A_4915802 | NC_021166.1    | Ca_Kabuli_Chr07 | 4915802                 | AA                              | TT                 | TT               | INTERGENIC                    |                    |                                                          |
| SNP_46299_A_4921000 | NC_021166.1    | Ca_Kabuli_Chr07 | 4921000                 | TT                              | GG                 | GG               | URR                           | 101497457          | F-box protein At5g50450-like                             |
| SNP_46300_A_4928825 | NC_021166.1    | Ca_Kabuli_Chr07 | 4928825                 | AA                              | GG                 | GG               | URR                           | 101497788          | putative F-box protein At1g67623                         |
| SNP_46301_A_4928854 | NC_021166.1    | Ca_Kabuli_Chr07 | 4928854                 | CC                              | AA                 | AA               | URR                           | 101497788          | putative F-box protein At1g67623                         |
| SNP_46302_A_4933630 | NC_021166.1    | Ca_Kabuli_Chr07 | 4933630                 | AA                              | TT                 | TT               | INTERGENIC                    |                    |                                                          |
| SNP_46303_A_4933631 | NC_021166.1    | Ca_Kabuli_Chr07 | 4933631                 | CC                              | GG                 | GG               | INTERGENIC                    |                    |                                                          |
| SNP_46304_A_4969265 | NC_021166.1    | Ca_Kabuli_Chr07 | 4969265                 | CC                              | AA                 | AA               | INTERGENIC                    |                    |                                                          |
| SNP_46305_A_4969274 | NC_021166.1    | Ca_Kabuli_Chr07 | 4969274                 | TT                              | GG                 | GG               | INTERGENIC                    |                    |                                                          |
| SNP_46306_A_4970009 | NC_021166.1    | Ca_Kabuli_Chr07 | 4970009                 | AA                              | TT                 | TT               | INTERGENIC                    |                    |                                                          |
| SNP_46307_A_4975365 | NC_021166.1    | Ca_Kabuli_Chr07 | 4975365                 | AA                              | GG                 | GG               | INTERGENIC                    |                    |                                                          |
| SNP_46308_A_4976008 | NC_021166.1    | Ca_Kabuli_Chr07 | 4976008                 | CC                              | TT                 | TT               | INTERGENIC                    |                    |                                                          |
| SNP_46309_A_4983531 | NC_021166.1    | Ca_Kabuli_Chr07 | 4983531                 | AA                              | TT                 | TT               | DRR                           | 101490649          | Unknown function                                         |
| SNP_46310_A_4984193 | NC_021166.1    | Ca_Kabuli_Chr07 | 4984193                 | AA                              | GG                 | GG               | INTRON                        | 101490649          | Unknown function                                         |
| SNP_46312_A_5005108 | NC_021166.1    | Ca_Kabuli_Chr07 | 5005108                 | TT                              | CC                 | CC               | INTRON                        | 101493130          | uncharacterized LOC101493130                             |
| SNP_46313_A_5008442 | NC_021166.1    | Ca_Kabuli_Chr07 | 5008442                 | CC                              | AA                 | AA               | URR                           | 101493130          | uncharacterized LOC101493130                             |

| SNPs IDs            | Chromosome IDs | Chromosomes     | Physical positions (bp) | CDC Frontier genome (Reference genome) | (Pusa 1103 & HPNB) | (ILWC 46 & LPNB) | Sequence genome | Components of | Gene accession IDs           | Putative functions |
|---------------------|----------------|-----------------|-------------------------|----------------------------------------|--------------------|------------------|-----------------|---------------|------------------------------|--------------------|
| SNP_46314_A_5010658 | NC_021166.1    | Ca_Kabuli_Chr07 | 5010658                 | GG                                     | TT                 | TT               | INTERGENIC      |               |                              |                    |
| SNP_46315_A_5010936 | NC_021166.1    | Ca_Kabuli_Chr07 | 5010936                 | TT                                     | GG                 | GG               | INTERGENIC      |               |                              |                    |
| SNP_46317_A_5015649 | NC_021166.1    | Ca_Kabuli_Chr07 | 5015649                 | TT                                     | CC                 | CC               | INTERGENIC      |               |                              |                    |
| SNP_46318_A_5016588 | NC_021166.1    | Ca_Kabuli_Chr07 | 5016588                 | GG                                     | AA                 | AA               | INTERGENIC      |               |                              |                    |
| SNP_46319_A_5021173 | NC_021166.1    | Ca_Kabuli_Chr07 | 5021173                 | AA                                     | GG                 | GG               | INTERGENIC      |               |                              |                    |
| SNP_46320_A_5021534 | NC_021166.1    | Ca_Kabuli_Chr07 | 5021534                 | AA                                     | GG                 | GG               | INTERGENIC      |               |                              |                    |
| SNP_46321_A_5023005 | NC_021166.1    | Ca_Kabuli_Chr07 | 5023005                 | TT                                     | CC                 | CC               | INTERGENIC      |               |                              |                    |
| SNP_46322_A_5023033 | NC_021166.1    | Ca_Kabuli_Chr07 | 5023033                 | TT                                     | CC                 | CC               | INTERGENIC      |               |                              |                    |
| SNP_46324_A_5027046 | NC_021166.1    | Ca_Kabuli_Chr07 | 5027046                 | CC                                     | TT                 | TT               | INTERGENIC      |               |                              |                    |
| SNP_46325_A_5028892 | NC_021166.1    | Ca_Kabuli_Chr07 | 5028892                 | TT                                     | AA                 | AA               | INTERGENIC      |               |                              |                    |
| SNP_46326_A_5031310 | NC_021166.1    | Ca_Kabuli_Chr07 | 5031310                 | CC                                     | AA                 | AA               | INTERGENIC      |               |                              |                    |
| SNP_46328_A_5034011 | NC_021166.1    | Ca_Kabuli_Chr07 | 5034011                 | CC                                     | TT                 | TT               | INTERGENIC      |               |                              |                    |
| SNP_46330_A_5040460 | NC_021166.1    | Ca_Kabuli_Chr07 | 5040460                 | AA                                     | GG                 | GG               | INTERGENIC      |               |                              |                    |
| SNP_46331_A_5047998 | NC_021166.1    | Ca_Kabuli_Chr07 | 5047998                 | CC                                     | AA                 | AA               | INTERGENIC      |               |                              |                    |
| SNP_46332_A_5051530 | NC_021166.1    | Ca_Kabuli_Chr07 | 5051530                 | TT                                     | CC                 | CC               | INTERGENIC      |               |                              |                    |
| SNP_46333_A_5069569 | NC_021166.1    | Ca_Kabuli_Chr07 | 5069569                 | TT                                     | AA                 | AA               | INTERGENIC      |               |                              |                    |
| SNP_46334_A_5072130 | NC_021166.1    | Ca_Kabuli_Chr07 | 5072130                 | TT                                     | CC                 | CC               | INTERGENIC      |               |                              |                    |
| SNP_46335_A_5076962 | NC_021166.1    | Ca_Kabuli_Chr07 | 5076962                 | AA                                     | GG                 | GG               | INTERGENIC      |               |                              |                    |
| SNP_46336_A_5082445 | NC_021166.1    | Ca_Kabuli_Chr07 | 5082445                 | CC                                     | TT                 | TT               | URR             | 101493459     | uncharacterized LOC101493459 |                    |
| SNP_46337_A_5091918 | NC_021166.1    | Ca_Kabuli_Chr07 | 5091918                 | TT                                     | CC                 | CC               | INTERGENIC      |               |                              |                    |
| SNP_46338_A_5093248 | NC_021166.1    | Ca_Kabuli_Chr07 | 5093248                 | AA                                     | GG                 | GG               | INTERGENIC      |               |                              |                    |
| SNP_46339_A_5104853 | NC_021166.1    | Ca_Kabuli_Chr07 | 5104853                 | AA                                     | GG                 | GG               | INTRON          | 101493781     | uncharacterized LOC101493781 |                    |

| SNPs IDs            | Chromosome IDs | Chromosomes     | Physical positions (bp) | CDC Frontier (Reference genome) | (Pusa 1103 & HPNB) | (ILWC 46 & LPNB) | Sequence genome | Components of | Gene accession IDs | Putative functions |
|---------------------|----------------|-----------------|-------------------------|---------------------------------|--------------------|------------------|-----------------|---------------|--------------------|--------------------|
| SNP_46340_A_5118909 | NC_021166.1    | Ca_Kabuli_Chr07 | 5118909                 | AA                              | CC                 | CC               | INTERGENIC      |               |                    |                    |
| SNP_46341_A_5127699 | NC_021166.1    | Ca_Kabuli_Chr07 | 5127699                 | GG                              | AA                 | AA               | INTERGENIC      |               |                    |                    |
| SNP_46342_A_5132923 | NC_021166.1    | Ca_Kabuli_Chr07 | 5132923                 | CC                              | AA                 | AA               | INTERGENIC      |               |                    |                    |
| SNP_46343_A_5140331 | NC_021166.1    | Ca_Kabuli_Chr07 | 5140331                 | CC                              | TT                 | TT               | INTERGENIC      |               |                    |                    |
| SNP_46345_A_5143656 | NC_021166.1    | Ca_Kabuli_Chr07 | 5143656                 | CC                              | TT                 | TT               | INTERGENIC      |               |                    |                    |
| SNP_46346_A_5145803 | NC_021166.1    | Ca_Kabuli_Chr07 | 5145803                 | GG                              | TT                 | TT               | INTERGENIC      |               |                    |                    |
| SNP_46347_A_5147203 | NC_021166.1    | Ca_Kabuli_Chr07 | 5147203                 | GG                              | TT                 | TT               | INTERGENIC      |               |                    |                    |
| SNP_46348_A_5153457 | NC_021166.1    | Ca_Kabuli_Chr07 | 5153457                 | CC                              | TT                 | TT               | INTERGENIC      |               |                    |                    |
| SNP_46349_A_5178127 | NC_021166.1    | Ca_Kabuli_Chr07 | 5178127                 | GG                              | AA                 | AA               | INTERGENIC      |               |                    |                    |
| SNP_46350_A_5178560 | NC_021166.1    | Ca_Kabuli_Chr07 | 5178560                 | GG                              | CC                 | CC               | INTERGENIC      |               |                    |                    |
| SNP_46351_A_5179500 | NC_021166.1    | Ca_Kabuli_Chr07 | 5179500                 | GG                              | AA                 | AA               | INTERGENIC      |               |                    |                    |
| SNP_46352_A_5181285 | NC_021166.1    | Ca_Kabuli_Chr07 | 5181285                 | GG                              | AA                 | AA               | INTERGENIC      |               |                    |                    |
| SNP_46353_A_5181458 | NC_021166.1    | Ca_Kabuli_Chr07 | 5181458                 | CC                              | TT                 | TT               | INTERGENIC      |               |                    |                    |
| SNP_46354_A_5185109 | NC_021166.1    | Ca_Kabuli_Chr07 | 5185109                 | GG                              | TT                 | TT               | INTERGENIC      |               |                    |                    |
| SNP_46355_A_5185173 | NC_021166.1    | Ca_Kabuli_Chr07 | 5185173                 | TT                              | CC                 | CC               | INTERGENIC      |               |                    |                    |
| SNP_46356_A_5189856 | NC_021166.1    | Ca_Kabuli_Chr07 | 5189856                 | GG                              | AA                 | AA               | INTERGENIC      |               |                    |                    |
| SNP_46357_A_5191513 | NC_021166.1    | Ca_Kabuli_Chr07 | 5191513                 | CC                              | TT                 | TT               | INTERGENIC      |               |                    |                    |
| SNP_46358_A_5193465 | NC_021166.1    | Ca_Kabuli_Chr07 | 5193465                 | AA                              | CC                 | CC               | INTERGENIC      |               |                    |                    |
| SNP_46359_A_5193472 | NC_021166.1    | Ca_Kabuli_Chr07 | 5193472                 | AA                              | CC                 | CC               | INTERGENIC      |               |                    |                    |
| SNP_46360_A_5193491 | NC_021166.1    | Ca_Kabuli_Chr07 | 5193491                 | TT                              | AA                 | AA               | INTERGENIC      |               |                    |                    |
| SNP_46361_A_5193498 | NC_021166.1    | Ca_Kabuli_Chr07 | 5193498                 | AA                              | GG                 | GG               | INTERGENIC      |               |                    |                    |
| SNP_46362_A_5193508 | NC_021166.1    | Ca_Kabuli_Chr07 | 5193508                 | AA                              | GG                 | GG               | INTERGENIC      |               |                    |                    |

| SNPs IDs            | Chromosome IDs | Chromosomes     | Physical positions (bp) | CDC Frontier (Reference genome) | (Pusa 1103 & HPNB) | (ILWC 46 & LPNB) | Sequence Components of genome | Gene accession IDs | Putative functions                                                                  |
|---------------------|----------------|-----------------|-------------------------|---------------------------------|--------------------|------------------|-------------------------------|--------------------|-------------------------------------------------------------------------------------|
| SNP_46363_A_5193533 | NC_021166.1    | Ca_Kabuli_Chr07 | 5193533                 | CC                              | TT                 | TT               | INTERGENIC                    |                    |                                                                                     |
| SNP_46364_A_5193570 | NC_021166.1    | Ca_Kabuli_Chr07 | 5193570                 | AA                              | GG                 | GG               | INTERGENIC                    |                    |                                                                                     |
| SNP_46365_A_5193713 | NC_021166.1    | Ca_Kabuli_Chr07 | 5193713                 | CC                              | TT                 | TT               | INTERGENIC                    |                    |                                                                                     |
| SNP_46366_A_5198766 | NC_021166.1    | Ca_Kabuli_Chr07 | 5198766                 | TT                              | CC                 | CC               | INTERGENIC                    |                    |                                                                                     |
| SNP_46367_A_5262132 | NC_021166.1    | Ca_Kabuli_Chr07 | 5262132                 | TT                              | AA                 | AA               | INTRON                        | 101496029          | uncharacterized LOC101496029                                                        |
| SNP_46368_A_5265319 | NC_021166.1    | Ca_Kabuli_Chr07 | 5265319                 | GG                              | AA                 | AA               | INTERGENIC                    |                    |                                                                                     |
| SNP_46369_A_5284899 | NC_021166.1    | Ca_Kabuli_Chr07 | 5284899                 | TT                              | AA                 | AA               | INTERGENIC                    |                    |                                                                                     |
| SNP_46370_A_5297775 | NC_021166.1    | Ca_Kabuli_Chr07 | 5297775                 | GG                              | TT                 | TT               | INTERGENIC                    |                    |                                                                                     |
| SNP_46373_A_5374691 | NC_021166.1    | Ca_Kabuli_Chr07 | 5374691                 | TT                              | CC                 | CC               | INTRON                        | 101500784          | probable serine/threonine-protein phosphatase 2A regulatory subunit B" subunit TON2 |
| SNP_46374_A_5375166 | NC_021166.1    | Ca_Kabuli_Chr07 | 5375166                 | CC                              | TT                 | TT               | INTRON                        | 101500784          | probable serine/threonine-protein phosphatase 2A regulatory subunit B" subunit TON2 |
| SNP_46375_A_5378775 | NC_021166.1    | Ca_Kabuli_Chr07 | 5378775                 | AA                              | GG                 | GG               | INTRON                        | 101500784          | probable serine/threonine-protein phosphatase 2A regulatory subunit B" subunit TON2 |
| SNP_46376_A_5382063 | NC_021166.1    | Ca_Kabuli_Chr07 | 5382063                 | AA                              | GG                 | GG               | INTERGENIC                    |                    |                                                                                     |
| SNP_46377_A_5382693 | NC_021166.1    | Ca_Kabuli_Chr07 | 5382693                 | AA                              | GG                 | GG               | INTERGENIC                    |                    |                                                                                     |
| SNP_46378_A_5382696 | NC_021166.1    | Ca_Kabuli_Chr07 | 5382696                 | GG                              | CC                 | CC               | INTERGENIC                    |                    |                                                                                     |
| SNP_46379_A_5386620 | NC_021166.1    | Ca_Kabuli_Chr07 | 5386620                 | GG                              | AA                 | AA               | URR                           | 101501419          | pentatricopeptide repeat-containing protein At4g22760                               |
| SNP_46380_A_5386725 | NC_021166.1    | Ca_Kabuli_Chr07 | 5386725                 | AA                              | GG                 | GG               | URR                           | 101501419          | pentatricopeptide repeat-containing protein At4g22760                               |
| SNP_46381_A_5398592 | NC_021166.1    | Ca_Kabuli_Chr07 | 5398592                 | CC                              | TT                 | TT               | INTERGENIC                    |                    |                                                                                     |
| SNP_46384_A_5402247 | NC_021166.1    | Ca_Kabuli_Chr07 | 5402247                 | TT                              | AA                 | AA               | URR                           | 101502063          | acyl-CoA-binding domain-containing protein 4-like                                   |
| SNP_46386_A_5405356 | NC_021166.1    | Ca_Kabuli_Chr07 | 5405356                 | AA                              | CC                 | CC               | URR                           | 101503006          | monothiol glutaredoxin-S2-like                                                      |
| SNP_46387_A_5406794 | NC_021166.1    | Ca_Kabuli_Chr07 | 5406794                 | CC                              | AA                 | AA               | URR                           | 101503006          | monothiol glutaredoxin-S2-like                                                      |
| SNP_46388_A_5407089 | NC_021166.1    | Ca_Kabuli_Chr07 | 5407089                 | CC                              | AA                 | AA               | INTERGENIC                    |                    |                                                                                     |
| SNP_46389_A_5407336 | NC_021166.1    | Ca_Kabuli_Chr07 | 5407336                 | TT                              | AA                 | AA               | INTERGENIC                    |                    |                                                                                     |

| SNPs IDs            | Chromosome IDs | Chromosomes     | Physical positions (bp) | CDC Frontier genome (Reference genome) | (Pusa 1103 & HPNB) | (ILWC 46 & LPNB) | Sequence Components of genome | Gene accession IDs | Putative functions                                 |
|---------------------|----------------|-----------------|-------------------------|----------------------------------------|--------------------|------------------|-------------------------------|--------------------|----------------------------------------------------|
| SNP_46390_A_5407411 | NC_021166.1    | Ca_Kabuli_Chr07 | 5407411                 | GG                                     | AA                 | AA               | INTERGENIC                    |                    |                                                    |
| SNP_46391_A_5410015 | NC_021166.1    | Ca_Kabuli_Chr07 | 5410015                 | GG                                     | AA                 | AA               | DRR                           | 101503330          | monothiol glutaredoxin-S2-like                     |
| SNP_46392_A_5410115 | NC_021166.1    | Ca_Kabuli_Chr07 | 5410115                 | TT                                     | CC                 | CC               | DRR                           | 101503330          | monothiol glutaredoxin-S2-like                     |
| SNP_46393_A_5411467 | NC_021166.1    | Ca_Kabuli_Chr07 | 5411467                 | GG                                     | CC                 | CC               | INTERGENIC                    |                    |                                                    |
| SNP_46394_A_5411482 | NC_021166.1    | Ca_Kabuli_Chr07 | 5411482                 | CC                                     | TT                 | TT               | INTERGENIC                    |                    |                                                    |
| SNP_46395_A_5411522 | NC_021166.1    | Ca_Kabuli_Chr07 | 5411522                 | TT                                     | CC                 | CC               | INTERGENIC                    |                    |                                                    |
| SNP_46396_A_5412082 | NC_021166.1    | Ca_Kabuli_Chr07 | 5412082                 | GG                                     | AA                 | AA               | URR                           | 101503330          | monothiol glutaredoxin-S2-like                     |
| SNP_46397_A_5414587 | NC_021166.1    | Ca_Kabuli_Chr07 | 5414587                 | TT                                     | CC                 | CC               | INTERGENIC                    |                    |                                                    |
| SNP_46398_A_5415211 | NC_021166.1    | Ca_Kabuli_Chr07 | 5415211                 | AA                                     | GG                 | GG               | INTERGENIC                    |                    |                                                    |
| SNP_46399_A_5415539 | NC_021166.1    | Ca_Kabuli_Chr07 | 5415539                 | CC                                     | TT                 | TT               | INTERGENIC                    |                    |                                                    |
| SNP_46400_A_5416144 | NC_021166.1    | Ca_Kabuli_Chr07 | 5416144                 | CC                                     | TT                 | TT               | INTERGENIC                    |                    |                                                    |
| SNP_46401_A_5416187 | NC_021166.1    | Ca_Kabuli_Chr07 | 5416187                 | GG                                     | AA                 | AA               | INTERGENIC                    |                    |                                                    |
| SNP_46402_A_5417414 | NC_021166.1    | Ca_Kabuli_Chr07 | 5417414                 | CC                                     | TT                 | TT               | DRR                           | 101504208          | putative chromatin-remodeling complex ATPase chain |
| SNP_46403_A_5417421 | NC_021166.1    | Ca_Kabuli_Chr07 | 5417421                 | CC                                     | TT                 | TT               | DRR                           | 101504208          | putative chromatin-remodeling complex ATPase chain |
| SNP_46404_A_5417427 | NC_021166.1    | Ca_Kabuli_Chr07 | 5417427                 | AA                                     | GG                 | GG               | DRR                           | 101504208          | putative chromatin-remodeling complex ATPase chain |
| SNP_46405_A_5417428 | NC_021166.1    | Ca_Kabuli_Chr07 | 5417428                 | CC                                     | AA                 | AA               | DRR                           | 101504208          | putative chromatin-remodeling complex ATPase chain |
| SNP_46406_A_5417495 | NC_021166.1    | Ca_Kabuli_Chr07 | 5417495                 | TT                                     | CC                 | CC               | DRR                           | 101504208          | putative chromatin-remodeling complex ATPase chain |
| SNP_46407_A_5419203 | NC_021166.1    | Ca_Kabuli_Chr07 | 5419203                 | AA                                     | TT                 | TT               | INTERGENIC                    |                    |                                                    |
| SNP_46408_A_5419811 | NC_021166.1    | Ca_Kabuli_Chr07 | 5419811                 | CC                                     | TT                 | TT               | INTERGENIC                    |                    |                                                    |
| SNP_46409_A_5426548 | NC_021166.1    | Ca_Kabuli_Chr07 | 5426548                 | AA                                     | TT                 | TT               | INTRON                        | 101504208          | putative chromatin-remodeling complex ATPase chain |
| SNP_46410_A_5429443 | NC_021166.1    | Ca_Kabuli_Chr07 | 5429443                 | CC                                     | GG                 | GG               | URR                           | 101504208          | putative chromatin-remodeling complex ATPase chain |
| SNP_46411_A_5429503 | NC_021166.1    | Ca_Kabuli_Chr07 | 5429503                 | GG                                     | CC                 | CC               | URR                           | 101504208          | putative chromatin-remodeling complex ATPase chain |

| SNPs IDs            | Chromosome IDs | Chromosomes     | Physical positions (bp) | CDC Frontier genome (Reference genome) | (Pusa 1103 & HPNB) | (ILWC 46 & LPNB) | Sequence Components of genome | Gene accession IDs | Putative functions               |
|---------------------|----------------|-----------------|-------------------------|----------------------------------------|--------------------|------------------|-------------------------------|--------------------|----------------------------------|
| SNP_46413_A_5434164 | NC_021166.1    | Ca_Kabuli_Chr07 | 5434164                 | AA                                     | TT                 | TT               | INTERGENIC                    |                    |                                  |
| SNP_46416_A_5434764 | NC_021166.1    | Ca_Kabuli_Chr07 | 5434764                 | CC                                     | TT                 | TT               | INTERGENIC                    |                    |                                  |
| SNP_46418_A_5435254 | NC_021166.1    | Ca_Kabuli_Chr07 | 5435254                 | CC                                     | AA                 | AA               | DRR                           | 101504955          | uncharacterized LOC101504955     |
| SNP_46420_A_5437937 | NC_021166.1    | Ca_Kabuli_Chr07 | 5437937                 | CC                                     | TT                 | TT               | URR                           | 101504955          | uncharacterized LOC101504955     |
| SNP_46421_A_5438232 | NC_021166.1    | Ca_Kabuli_Chr07 | 5438232                 | AA                                     | GG                 | GG               | URR                           | 101504955          | uncharacterized LOC101504955     |
| SNP_46422_A_5441716 | NC_021166.1    | Ca_Kabuli_Chr07 | 5441716                 | TT                                     | CC                 | CC               | INTERGENIC                    |                    |                                  |
| SNP_46424_A_5443854 | NC_021166.1    | Ca_Kabuli_Chr07 | 5443854                 | CC                                     | AA                 | AA               | INTERGENIC                    |                    |                                  |
| SNP_46426_A_5445438 | NC_021166.1    | Ca_Kabuli_Chr07 | 5445438                 | TT                                     | GG                 | GG               | DRR                           | 101505266          | uncharacterized LOC101505266     |
| SNP_46427_A_5445572 | NC_021166.1    | Ca_Kabuli_Chr07 | 5445572                 | CC                                     | GG                 | GG               | DRR                           | 101505266          | uncharacterized LOC101505266     |
| SNP_46428_A_5445590 | NC_021166.1    | Ca_Kabuli_Chr07 | 5445590                 | CC                                     | TT                 | TT               | DRR                           | 101505266          | uncharacterized LOC101505266     |
| SNP_46429_A_5445661 | NC_021166.1    | Ca_Kabuli_Chr07 | 5445661                 | AA                                     | GG                 | GG               | DRR                           | 101505266          | uncharacterized LOC101505266     |
| SNP_46431_A_5451360 | NC_021166.1    | Ca_Kabuli_Chr07 | 5451360                 | TT                                     | GG                 | GG               | DRR                           | 101491921          | transcription factor bHLH13-like |
| SNP_46432_A_5452161 | NC_021166.1    | Ca_Kabuli_Chr07 | 5452161                 | TT                                     | CC                 | CC               | URR                           | 101505266          | uncharacterized LOC101505266     |
| SNP_46433_A_5454790 | NC_021166.1    | Ca_Kabuli_Chr07 | 5454790                 | CC                                     | TT                 | TT               | INTERGENIC                    |                    |                                  |
| SNP_46434_A_5455565 | NC_021166.1    | Ca_Kabuli_Chr07 | 5455565                 | AA                                     | GG                 | GG               | INTRON                        | 101492256          | CASP-like protein 1E1            |
| SNP_46435_A_5459145 | NC_021166.1    | Ca_Kabuli_Chr07 | 5459145                 | CC                                     | AA                 | AA               | URR                           | 101492256          | CASP-like protein 1E1            |
| SNP_46438_A_5466665 | NC_021166.1    | Ca_Kabuli_Chr07 | 5466665                 | AA                                     | CC                 | CC               | URR                           | 101505592          | CASP-like protein 1D2            |
| SNP_46439_A_5466964 | NC_021166.1    | Ca_Kabuli_Chr07 | 5466964                 | GG                                     | AA                 | AA               | URR                           | 101505592          | CASP-like protein 1D2            |
| SNP_46440_A_5467860 | NC_021166.1    | Ca_Kabuli_Chr07 | 5467860                 | AA                                     | GG                 | GG               | INTERGENIC                    |                    |                                  |
| SNP_46441_A_5468089 | NC_021166.1    | Ca_Kabuli_Chr07 | 5468089                 | CC                                     | GG                 | GG               | INTERGENIC                    |                    |                                  |
| SNP_46442_A_5469949 | NC_021166.1    | Ca_Kabuli_Chr07 | 5469949                 | TT                                     | CC                 | CC               | URR                           | 101505918          | uncharacterized LOC101505918     |
| SNP_46443_A_5469954 | NC_021166.1    | Ca_Kabuli_Chr07 | 5469954                 | TT                                     | AA                 | AA               | URR                           | 101505918          | uncharacterized LOC101505918     |

| SNPs IDs            | Chromosome IDs | Chromosomes     | Physical positions (bp) | CDC Frontier genome (Reference genome) | (Pusa 1103 & HPNB) | (ILWC 46 & LPNB) | Sequence Components of genome | Gene accession IDs | Putative functions                                                   |
|---------------------|----------------|-----------------|-------------------------|----------------------------------------|--------------------|------------------|-------------------------------|--------------------|----------------------------------------------------------------------|
| SNP_46445_A_5474583 | NC_021166.1    | Ca_Kabuli_Chr07 | 5474583                 | GG                                     | AA                 | AA               | INTERGENIC                    |                    |                                                                      |
| SNP_46446_A_5474633 | NC_021166.1    | Ca_Kabuli_Chr07 | 5474633                 | CC                                     | AA                 | AA               | INTERGENIC                    |                    |                                                                      |
| SNP_46447_A_5478939 | NC_021166.1    | Ca_Kabuli_Chr07 | 5478939                 | AA                                     | CC                 | CC               | URR                           | 101506561          | sodium/hydrogen exchanger 2-like                                     |
| SNP_46448_A_5478949 | NC_021166.1    | Ca_Kabuli_Chr07 | 5478949                 | GG                                     | TT                 | TT               | INTERGENIC                    |                    |                                                                      |
| SNP_46449_A_5478951 | NC_021166.1    | Ca_Kabuli_Chr07 | 5478951                 | GG                                     | AA                 | AA               | INTERGENIC                    |                    |                                                                      |
| SNP_46450_A_5481986 | NC_021166.1    | Ca_Kabuli_Chr07 | 5481986                 | AA                                     | TT                 | TT               | INTERGENIC                    |                    |                                                                      |
| SNP_46452_A_5482597 | NC_021166.1    | Ca_Kabuli_Chr07 | 5482597                 | GG                                     | AA                 | AA               | INTERGENIC                    |                    |                                                                      |
| SNP_46455_A_5482749 | NC_021166.1    | Ca_Kabuli_Chr07 | 5482749                 | TT                                     | AA                 | AA               | INTERGENIC                    |                    |                                                                      |
| SNP_46456_A_5483752 | NC_021166.1    | Ca_Kabuli_Chr07 | 5483752                 | GG                                     | AA                 | AA               | INTERGENIC                    |                    |                                                                      |
| SNP_46457_A_5483767 | NC_021166.1    | Ca_Kabuli_Chr07 | 5483767                 | AA                                     | TT                 | TT               | INTERGENIC                    |                    |                                                                      |
| SNP_46458_A_5485502 | NC_021166.1    | Ca_Kabuli_Chr07 | 5485502                 | GG                                     | AA                 | AA               | INTERGENIC                    |                    |                                                                      |
| SNP_46459_A_5488484 | NC_021166.1    | Ca_Kabuli_Chr07 | 5488484                 | GG                                     | AA                 | AA               | INTRON                        | id159557           | Unknown function                                                     |
| SNP_46460_A_5488578 | NC_021166.1    | Ca_Kabuli_Chr07 | 5488578                 | GG                                     | AA                 | AA               | INTRON                        | id159557           | Unknown function                                                     |
| SNP_46461_A_5488590 | NC_021166.1    | Ca_Kabuli_Chr07 | 5488590                 | AA                                     | GG                 | GG               | INTRON                        | id159557           | Unknown function                                                     |
| SNP_46462_A_5488863 | NC_021166.1    | Ca_Kabuli_Chr07 | 5488863                 | GG                                     | CC                 | CC               | INTRON                        | id159557           | Unknown function                                                     |
| SNP_46463_A_5492573 | NC_021166.1    | Ca_Kabuli_Chr07 | 5492573                 | GG                                     | AA                 | AA               | INTERGENIC                    |                    |                                                                      |
| SNP_46464_A_5506116 | NC_021166.1    | Ca_Kabuli_Chr07 | 5506116                 | CC                                     | TT                 | TT               | INTRON                        | 101507449          | chromatin structure-remodeling complex protein SYD                   |
| SNP_46465_A_5509021 | NC_021166.1    | Ca_Kabuli_Chr07 | 5509021                 | CC                                     | TT                 | TT               | NON_SYNONYMOUS_CODING         | 101507449          | chromatin structure-remodeling complex protein SYD                   |
| SNP_46466_A_5511690 | NC_021166.1    | Ca_Kabuli_Chr07 | 5511690                 | AA                                     | GG                 | GG               | SYNONYMOUS_CODING             | 101507449          | chromatin structure-remodeling complex protein SYD                   |
| SNP_46467_A_5514418 | NC_021166.1    | Ca_Kabuli_Chr07 | 5514418                 | TT                                     | CC                 | CC               | DRR                           | 101507959          | pentatricopeptide repeat-containing protein At2g36980, mitochondrial |
| SNP_46468_A_5518473 | NC_021166.1    | Ca_Kabuli_Chr07 | 5518473                 | AA                                     | TT                 | TT               | DRR                           | 101508493          | uncharacterized LOC101508493                                         |
| SNP_46469_A_5523812 | NC_021166.1    | Ca_Kabuli_Chr07 | 5523812                 | AA                                     | CC                 | CC               | INTERGENIC                    |                    |                                                                      |



| SNPs IDs            | Chromosome IDs | Chromosomes     | Physical positions (bp) | CDC Frontier (Reference genome) | (Pusa 1103 & HPNB) | (ILWC 46 & LPNB) | Sequence Components of genome | Gene accession IDs | Putative functions                   |
|---------------------|----------------|-----------------|-------------------------|---------------------------------|--------------------|------------------|-------------------------------|--------------------|--------------------------------------|
| SNP_46470_A_5524559 | NC_021166.1    | Ca_Kabuli_Chr07 | 5524559                 | GG                              | TT                 | TT               | DRR                           | 101410569          | transfer RNA proline (anticodon UGG) |
| SNP_46472_A_5529844 | NC_021166.1    | Ca_Kabuli_Chr07 | 5529844                 | CC                              | AA                 | AA               | INTERGENIC                    |                    |                                      |
| SNP_46473_A_5540674 | NC_021166.1    | Ca_Kabuli_Chr07 | 5540674                 | AA                              | TT                 | TT               | DRR                           | 101510416          | sugar transporter ERD6-like 16       |
| SNP_46474_A_5540679 | NC_021166.1    | Ca_Kabuli_Chr07 | 5540679                 | AA                              | GG                 | GG               | DRR                           | 101510416          | sugar transporter ERD6-like 16       |
| SNP_46475_A_5540707 | NC_021166.1    | Ca_Kabuli_Chr07 | 5540707                 | GG                              | TT                 | TT               | DRR                           | 101510416          | sugar transporter ERD6-like 16       |
| SNP_46478_A_5541009 | NC_021166.1    | Ca_Kabuli_Chr07 | 5541009                 | GG                              | TT                 | TT               | DRR                           | 101510416          | sugar transporter ERD6-like 16       |
| SNP_46479_A_5541469 | NC_021166.1    | Ca_Kabuli_Chr07 | 5541469                 | GG                              | AA                 | AA               | DRR                           | 101510416          | sugar transporter ERD6-like 16       |
| SNP_46480_A_5541474 | NC_021166.1    | Ca_Kabuli_Chr07 | 5541474                 | TT                              | CC                 | CC               | DRR                           | 101510416          | sugar transporter ERD6-like 16       |
| SNP_46481_A_5544636 | NC_021166.1    | Ca_Kabuli_Chr07 | 5544636                 | TT                              | CC                 | CC               | NON_SYNONYMOUS_CODING         | 101510416          | sugar transporter ERD6-like 16       |
| SNP_46482_A_5546142 | NC_021166.1    | Ca_Kabuli_Chr07 | 5546142                 | GG                              | CC                 | CC               | URR                           | 101510416          | sugar transporter ERD6-like 16       |
| SNP_46483_A_5547248 | NC_021166.1    | Ca_Kabuli_Chr07 | 5547248                 | TT                              | GG                 | GG               | DRR                           | 101510745          | uncharacterized LOC101510745         |
| SNP_46484_A_5556643 | NC_021166.1    | Ca_Kabuli_Chr07 | 5556643                 | CC                              | TT                 | TT               | INTRON                        | 101511066          | uncharacterized LOC101511066         |
| SNP_46485_A_5556682 | NC_021166.1    | Ca_Kabuli_Chr07 | 5556682                 | GG                              | AA                 | AA               | INTRON                        | 101511066          | uncharacterized LOC101511066         |
| SNP_46486_A_5556841 | NC_021166.1    | Ca_Kabuli_Chr07 | 5556841                 | GG                              | TT                 | TT               | INTRON                        | 101511066          | uncharacterized LOC101511066         |
| SNP_46487_A_5556842 | NC_021166.1    | Ca_Kabuli_Chr07 | 5556842                 | AA                              | TT                 | TT               | INTRON                        | 101511066          | uncharacterized LOC101511066         |
| SNP_46488_A_5556885 | NC_021166.1    | Ca_Kabuli_Chr07 | 5556885                 | CC                              | TT                 | TT               | INTRON                        | 101511066          | uncharacterized LOC101511066         |
| SNP_46489_A_5558978 | NC_021166.1    | Ca_Kabuli_Chr07 | 5558978                 | TT                              | AA                 | AA               | INTERGENIC                    |                    |                                      |
| SNP_46490_A_5559269 | NC_021166.1    | Ca_Kabuli_Chr07 | 5559269                 | CC                              | TT                 | TT               | INTERGENIC                    |                    |                                      |
| SNP_46491_A_5559289 | NC_021166.1    | Ca_Kabuli_Chr07 | 5559289                 | GG                              | AA                 | AA               | INTERGENIC                    |                    |                                      |
| SNP_46492_A_5559353 | NC_021166.1    | Ca_Kabuli_Chr07 | 5559353                 | CC                              | TT                 | TT               | INTERGENIC                    |                    |                                      |
| SNP_46493_A_5563821 | NC_021166.1    | Ca_Kabuli_Chr07 | 5563821                 | GG                              | AA                 | AA               | URR                           | 101511066          | uncharacterized LOC101511066         |
| SNP_46494_A_5567558 | NC_021166.1    | Ca_Kabuli_Chr07 | 5567558                 | GG                              | AA                 | AA               | URR                           | 101511375          | probable prolyl 4-hydroxylase 4      |

| SNPs IDs            | Chromosome IDs | Chromosomes     | Physical positions (bp) | CDC Frontier (Reference genome) | (Pusa 1103 & HPNB) | (ILWC 46 & LPNB) | Sequence Components of genome | Gene accession IDs | Putative functions                       |
|---------------------|----------------|-----------------|-------------------------|---------------------------------|--------------------|------------------|-------------------------------|--------------------|------------------------------------------|
| SNP_46495_A_5572415 | NC_021166.1    | Ca_Kabuli_Chr07 | 5572415                 | TT                              | GG                 | GG               | URR                           | 101511706          | uncharacterized protein At4g15545-like   |
| SNP_46496_A_5572439 | NC_021166.1    | Ca_Kabuli_Chr07 | 5572439                 | TT                              | CC                 | CC               | URR                           | 101511706          | uncharacterized protein At4g15545-like   |
| SNP_46497_A_5572599 | NC_021166.1    | Ca_Kabuli_Chr07 | 5572599                 | AA                              | TT                 | TT               | URR                           | 101511706          | uncharacterized protein At4g15545-like   |
| SNP_46498_A_5572600 | NC_021166.1    | Ca_Kabuli_Chr07 | 5572600                 | AA                              | TT                 | TT               | URR                           | 101511706          | uncharacterized protein At4g15545-like   |
| SNP_46500_A_5572667 | NC_021166.1    | Ca_Kabuli_Chr07 | 5572667                 | GG                              | CC                 | CC               | URR                           | 101511706          | uncharacterized protein At4g15545-like   |
| SNP_46502_A_5572798 | NC_021166.1    | Ca_Kabuli_Chr07 | 5572798                 | AA                              | GG                 | GG               | URR                           | 101511706          | uncharacterized protein At4g15545-like   |
| SNP_46503_A_5574274 | NC_021166.1    | Ca_Kabuli_Chr07 | 5574274                 | AA                              | GG                 | GG               | INTERGENIC                    |                    |                                          |
| SNP_46506_A_5578638 | NC_021166.1    | Ca_Kabuli_Chr07 | 5578638                 | AA                              | TT                 | TT               | URR                           | 101512024          | uncharacterized LOC101512024             |
| SNP_46507_A_5578640 | NC_021166.1    | Ca_Kabuli_Chr07 | 5578640                 | GG                              | AA                 | AA               | URR                           | 101512024          | uncharacterized LOC101512024             |
| SNP_46508_A_5578784 | NC_021166.1    | Ca_Kabuli_Chr07 | 5578784                 | AA                              | GG                 | GG               | URR                           | 101512024          | uncharacterized LOC101512024             |
| SNP_46509_A_5579652 | NC_021166.1    | Ca_Kabuli_Chr07 | 5579652                 | AA                              | GG                 | GG               | DRR                           | 101512348          | uncharacterized LOC101512348             |
| SNP_46510_A_5581968 | NC_021166.1    | Ca_Kabuli_Chr07 | 5581968                 | GG                              | CC                 | CC               | URR                           | 101512348          | uncharacterized LOC101512348             |
| SNP_46513_A_5585868 | NC_021166.1    | Ca_Kabuli_Chr07 | 5585868                 | TT                              | CC                 | CC               | URR                           | 101512577          | uncharacterized LOC101512577             |
| SNP_46514_A_5625059 | NC_021166.1    | Ca_Kabuli_Chr07 | 5625059                 | CC                              | TT                 | TT               | INTRON                        | 101515477          | AP-5 complex subunit mu                  |
| SNP_46515_A_5630226 | NC_021166.1    | Ca_Kabuli_Chr07 | 5630226                 | TT                              | CC                 | CC               | INTERGENIC                    |                    |                                          |
| SNP_46516_A_5631455 | NC_021166.1    | Ca_Kabuli_Chr07 | 5631455                 | TT                              | CC                 | CC               | URR                           | 101488806          | scopoletin glucosyltransferase           |
| SNP_46517_A_5631890 | NC_021166.1    | Ca_Kabuli_Chr07 | 5631890                 | GG                              | AA                 | AA               | URR                           | 101488806          | scopoletin glucosyltransferase           |
| SNP_46518_A_5631907 | NC_021166.1    | Ca_Kabuli_Chr07 | 5631907                 | TT                              | AA                 | AA               | URR                           | 101488806          | scopoletin glucosyltransferase           |
| SNP_46519_A_5633053 | NC_021166.1    | Ca_Kabuli_Chr07 | 5633053                 | AA                              | GG                 | GG               | DRR                           | 101489132          | trihelix transcription factor ASIL1-like |
| SNP_46522_A_5649267 | NC_021166.1    | Ca_Kabuli_Chr07 | 5649267                 | TT                              | CC                 | CC               | INTERGENIC                    |                    |                                          |
| SNP_46523_A_5649562 | NC_021166.1    | Ca_Kabuli_Chr07 | 5649562                 | TT                              | CC                 | CC               | INTERGENIC                    |                    |                                          |
| SNP_46525_A_5649934 | NC_021166.1    | Ca_Kabuli_Chr07 | 5649934                 | CC                              | AA                 | AA               | INTERGENIC                    |                    |                                          |

| SNPs IDs            | Chromosome IDs | Chromosomes     | Physical positions (bp) | CDC Frontier genome (Reference genome) | (Pusa 1103 & HPNB) | (ILWC 46 & LPNB) | Sequence Components of genome | Gene accession IDs | Putative functions                                                  |
|---------------------|----------------|-----------------|-------------------------|----------------------------------------|--------------------|------------------|-------------------------------|--------------------|---------------------------------------------------------------------|
| SNP_46527_A_5655143 | NC_021166.1    | Ca_Kabuli_Chr07 | 5655143                 | GG                                     | AA                 | AA               | URR                           | 101490104          | UDP-glucose flavonoid 3-O-glucosyltransferase 7-like                |
| SNP_46528_A_5655145 | NC_021166.1    | Ca_Kabuli_Chr07 | 5655145                 | GG                                     | TT                 | TT               | URR                           | 101490104          | UDP-glucose flavonoid 3-O-glucosyltransferase 7-like                |
| SNP_46529_A_5659433 | NC_021166.1    | Ca_Kabuli_Chr07 | 5659433                 | TT                                     | AA                 | AA               | URR                           | 101489782          | scopoletin glucosyltransferase                                      |
| SNP_46530_A_5659447 | NC_021166.1    | Ca_Kabuli_Chr07 | 5659447                 | AA                                     | GG                 | GG               | URR                           | 101489782          | scopoletin glucosyltransferase                                      |
| SNP_46531_A_5666894 | NC_021166.1    | Ca_Kabuli_Chr07 | 5666894                 | GG                                     | AA                 | AA               | URR                           | 101489464          | UDP-glucose flavonoid 3-O-glucosyltransferase 7                     |
| SNP_46533_A_5671807 | NC_021166.1    | Ca_Kabuli_Chr07 | 5671807                 | TT                                     | CC                 | CC               | INTERGENIC                    |                    |                                                                     |
| SNP_46534_A_5672729 | NC_021166.1    | Ca_Kabuli_Chr07 | 5672729                 | TT                                     | GG                 | GG               | DRR                           | 101490428          | F-box/kelch-repeat protein At3g23880-like                           |
| SNP_46535_A_5672770 | NC_021166.1    | Ca_Kabuli_Chr07 | 5672770                 | CC                                     | TT                 | TT               | DRR                           | 101490428          | F-box/kelch-repeat protein At3g23880-like                           |
| SNP_46536_A_5672782 | NC_021166.1    | Ca_Kabuli_Chr07 | 5672782                 | CC                                     | GG                 | GG               | DRR                           | 101490428          | F-box/kelch-repeat protein At3g23880-like                           |
| SNP_46537_A_5672923 | NC_021166.1    | Ca_Kabuli_Chr07 | 5672923                 | GG                                     | TT                 | TT               | DRR                           | 101490428          | F-box/kelch-repeat protein At3g23880-like                           |
| SNP_46538_A_5673134 | NC_021166.1    | Ca_Kabuli_Chr07 | 5673134                 | CC                                     | TT                 | TT               | DRR                           | 101490428          | F-box/kelch-repeat protein At3g23880-like                           |
| SNP_46539_A_5675638 | NC_021166.1    | Ca_Kabuli_Chr07 | 5675638                 | TT                                     | AA                 | AA               | URR                           | 101490428          | F-box/kelch-repeat protein At3g23880-like                           |
| SNP_46540_A_5675670 | NC_021166.1    | Ca_Kabuli_Chr07 | 5675670                 | AA                                     | CC                 | CC               | URR                           | 101490428          | F-box/kelch-repeat protein At3g23880-like                           |
| SNP_46541_A_5675672 | NC_021166.1    | Ca_Kabuli_Chr07 | 5675672                 | AA                                     | CC                 | CC               | URR                           | 101490428          | F-box/kelch-repeat protein At3g23880-like                           |
| SNP_46542_A_5675675 | NC_021166.1    | Ca_Kabuli_Chr07 | 5675675                 | GG                                     | TT                 | TT               | URR                           | 101490428          | F-box/kelch-repeat protein At3g23880-like                           |
| SNP_46543_A_5675703 | NC_021166.1    | Ca_Kabuli_Chr07 | 5675703                 | GG                                     | TT                 | TT               | URR                           | 101490428          | F-box/kelch-repeat protein At3g23880-like                           |
| SNP_46544_A_5678992 | NC_021166.1    | Ca_Kabuli_Chr07 | 5678992                 | TT                                     | CC                 | CC               | INTRON                        | 101490748          | RNA polymerase I-specific transcription initiation factor RRN3-like |
| SNP_46545_A_5681490 | NC_021166.1    | Ca_Kabuli_Chr07 | 5681490                 | TT                                     | CC                 | CC               | INTERGENIC                    |                    |                                                                     |
| SNP_46546_A_5681516 | NC_021166.1    | Ca_Kabuli_Chr07 | 5681516                 | AA                                     | GG                 | GG               | INTERGENIC                    |                    |                                                                     |
| SNP_46547_A_5681542 | NC_021166.1    | Ca_Kabuli_Chr07 | 5681542                 | TT                                     | CC                 | CC               | INTERGENIC                    |                    |                                                                     |
| SNP_46549_A_5689280 | NC_021166.1    | Ca_Kabuli_Chr07 | 5689280                 | TT                                     | CC                 | CC               | URR                           | 101491487          | primary amine oxidase-like                                          |
| SNP_46550_A_5689391 | NC_021166.1    | Ca_Kabuli_Chr07 | 5689391                 | CC                                     | TT                 | TT               | URR                           | 101491487          | primary amine oxidase-like                                          |

| SNPs IDs            | Chromosome IDs | Chromosomes     | Physical positions (bp) | CDC Frontier genome (Reference genome) | (Pusa 1103 & HPNB) | (ILWC 46 & LPNB) | Sequence Components of genome | Gene accession IDs | Putative functions           |
|---------------------|----------------|-----------------|-------------------------|----------------------------------------|--------------------|------------------|-------------------------------|--------------------|------------------------------|
| SNP_46551_A_5689417 | NC_021166.1    | Ca_Kabuli_Chr07 | 5689417                 | CC                                     | TT                 | TT               | URR                           | 101491487          | primary amine oxidase-like   |
| SNP_46554_A_5699781 | NC_021166.1    | Ca_Kabuli_Chr07 | 5699781                 | TT                                     | CC                 | CC               | INTERGENIC                    |                    |                              |
| SNP_46555_A_5699855 | NC_021166.1    | Ca_Kabuli_Chr07 | 5699855                 | AA                                     | TT                 | TT               | INTERGENIC                    |                    |                              |
| SNP_46557_A_5704648 | NC_021166.1    | Ca_Kabuli_Chr07 | 5704648                 | GG                                     | AA                 | AA               | INTERGENIC                    |                    |                              |
| SNP_46558_A_5712604 | NC_021166.1    | Ca_Kabuli_Chr07 | 5712604                 | CC                                     | TT                 | TT               | DRR                           | 101492128          | uncharacterized LOC101492128 |
| SNP_46559_A_5713388 | NC_021166.1    | Ca_Kabuli_Chr07 | 5713388                 | GG                                     | AA                 | AA               | URR                           | 101491799          | primary amine oxidase-like   |
| SNP_46560_A_5714715 | NC_021166.1    | Ca_Kabuli_Chr07 | 5714715                 | CC                                     | TT                 | TT               | URR                           | 101491799          | primary amine oxidase-like   |
| SNP_46561_A_5718368 | NC_021166.1    | Ca_Kabuli_Chr07 | 5718368                 | AA                                     | GG                 | GG               | INTERGENIC                    |                    |                              |
| SNP_46562_A_5719140 | NC_021166.1    | Ca_Kabuli_Chr07 | 5719140                 | GG                                     | CC                 | CC               | DRR                           | 101492469          | uncharacterized LOC101492469 |
| SNP_46563_A_5719640 | NC_021166.1    | Ca_Kabuli_Chr07 | 5719640                 | AA                                     | CC                 | CC               | START_GAINED                  | 101492469          | uncharacterized LOC101492469 |
| SNP_46564_A_5720058 | NC_021166.1    | Ca_Kabuli_Chr07 | 5720058                 | TT                                     | CC                 | CC               | INTRON                        | 101492469          | uncharacterized LOC101492469 |
| SNP_46565_A_5721247 | NC_021166.1    | Ca_Kabuli_Chr07 | 5721247                 | CC                                     | TT                 | TT               | INTRON                        | 101492469          | uncharacterized LOC101492469 |
| SNP_46566_A_5723107 | NC_021166.1    | Ca_Kabuli_Chr07 | 5723107                 | CC                                     | TT                 | TT               | INTRON                        | 101492469          | uncharacterized LOC101492469 |
| SNP_46567_A_5725797 | NC_021166.1    | Ca_Kabuli_Chr07 | 5725797                 | AA                                     | GG                 | GG               | INTERGENIC                    |                    |                              |
| SNP_46568_A_5728003 | NC_021166.1    | Ca_Kabuli_Chr07 | 5728003                 | TT                                     | CC                 | CC               | INTERGENIC                    |                    |                              |
| SNP_46569_A_5728897 | NC_021166.1    | Ca_Kabuli_Chr07 | 5728897                 | AA                                     | GG                 | GG               | DRR                           | 101492593          | uncharacterized LOC101492593 |
| SNP_46570_A_5745152 | NC_021166.1    | Ca_Kabuli_Chr07 | 5745152                 | AA                                     | GG                 | GG               | INTERGENIC                    |                    |                              |
| SNP_46571_A_5745158 | NC_021166.1    | Ca_Kabuli_Chr07 | 5745158                 | GG                                     | AA                 | AA               | INTERGENIC                    |                    |                              |
| SNP_46572_A_5745451 | NC_021166.1    | Ca_Kabuli_Chr07 | 5745451                 | GG                                     | AA                 | AA               | INTERGENIC                    |                    |                              |
| SNP_46573_A_5745481 | NC_021166.1    | Ca_Kabuli_Chr07 | 5745481                 | GG                                     | TT                 | TT               | INTERGENIC                    |                    |                              |
| SNP_46574_A_5745538 | NC_021166.1    | Ca_Kabuli_Chr07 | 5745538                 | AA                                     | GG                 | GG               | INTERGENIC                    |                    |                              |
| SNP_46575_A_5745569 | NC_021166.1    | Ca_Kabuli_Chr07 | 5745569                 | CC                                     | TT                 | TT               | INTERGENIC                    |                    |                              |

| SNPs IDs            | Chromosome IDs | Chromosomes     | Physical positions (bp) | CDC Frontier genome (Reference genome) | (Pusa 1103 & HPNB) | (ILWC 46 & LPNB) | Sequence Components of genome | Gene accession IDs | Putative functions                                 |
|---------------------|----------------|-----------------|-------------------------|----------------------------------------|--------------------|------------------|-------------------------------|--------------------|----------------------------------------------------|
| SNP_46577_A_5745587 | NC_021166.1    | Ca_Kabuli_Chr07 | 5745587                 | TT                                     | CC                 | CC               | INTERGENIC                    |                    |                                                    |
| SNP_46578_A_5745589 | NC_021166.1    | Ca_Kabuli_Chr07 | 5745589                 | GG                                     | AA                 | AA               | INTERGENIC                    |                    |                                                    |
| SNP_46579_A_5745610 | NC_021166.1    | Ca_Kabuli_Chr07 | 5745610                 | GG                                     | TT                 | TT               | INTERGENIC                    |                    |                                                    |
| SNP_46580_A_5769567 | NC_021166.1    | Ca_Kabuli_Chr07 | 5769567                 | TT                                     | CC                 | CC               | INTERGENIC                    |                    |                                                    |
| SNP_46581_A_5769569 | NC_021166.1    | Ca_Kabuli_Chr07 | 5769569                 | GG                                     | AA                 | AA               | INTERGENIC                    |                    |                                                    |
| SNP_46582_A_5770688 | NC_021166.1    | Ca_Kabuli_Chr07 | 5770688                 | CC                                     | AA                 | AA               | INTERGENIC                    |                    |                                                    |
| SNP_46583_A_5770944 | NC_021166.1    | Ca_Kabuli_Chr07 | 5770944                 | TT                                     | CC                 | CC               | INTERGENIC                    |                    |                                                    |
| SNP_46584_A_5773012 | NC_021166.1    | Ca_Kabuli_Chr07 | 5773012                 | AA                                     | GG                 | GG               | SYNONYMOUS_CODING             | 101495167          | endo-1,3;1,4-beta-D-glucanase-like                 |
| SNP_46585_A_5774491 | NC_021166.1    | Ca_Kabuli_Chr07 | 5774491                 | GG                                     | AA                 | AA               | INTRON                        | 101495167          | endo-1,3;1,4-beta-D-glucanase-like                 |
| SNP_46586_A_5778042 | NC_021166.1    | Ca_Kabuli_Chr07 | 5778042                 | CC                                     | TT                 | TT               | DRR                           | 101495492          | ribonucleoside-diphosphate reductase small chain A |
| SNP_46587_A_5778243 | NC_021166.1    | Ca_Kabuli_Chr07 | 5778243                 | TT                                     | CC                 | CC               | DRR                           | 101495492          | ribonucleoside-diphosphate reductase small chain A |
| SNP_46589_A_5778374 | NC_021166.1    | Ca_Kabuli_Chr07 | 5778374                 | AA                                     | GG                 | GG               | DRR                           | 101495492          | ribonucleoside-diphosphate reductase small chain A |
| SNP_46591_A_5779321 | NC_021166.1    | Ca_Kabuli_Chr07 | 5779321                 | GG                                     | TT                 | TT               | INTRON                        | 101495492          | ribonucleoside-diphosphate reductase small chain A |
| SNP_46592_A_5780405 | NC_021166.1    | Ca_Kabuli_Chr07 | 5780405                 | GG                                     | TT                 | TT               | INTRON                        | 101495492          | ribonucleoside-diphosphate reductase small chain A |
| SNP_46593_A_5780954 | NC_021166.1    | Ca_Kabuli_Chr07 | 5780954                 | AA                                     | GG                 | GG               | INTRON                        | 101495492          | ribonucleoside-diphosphate reductase small chain A |
| SNP_46594_A_5782032 | NC_021166.1    | Ca_Kabuli_Chr07 | 5782032                 | TT                                     | CC                 | CC               | INTRON                        | 101495492          | ribonucleoside-diphosphate reductase small chain A |
| SNP_46595_A_5782051 | NC_021166.1    | Ca_Kabuli_Chr07 | 5782051                 | CC                                     | TT                 | TT               | INTRON                        | 101495492          | ribonucleoside-diphosphate reductase small chain A |
| SNP_46596_A_5783718 | NC_021166.1    | Ca_Kabuli_Chr07 | 5783718                 | CC                                     | AA                 | AA               | URR                           | 101495492          | ribonucleoside-diphosphate reductase small chain A |
| SNP_46597_A_5783764 | NC_021166.1    | Ca_Kabuli_Chr07 | 5783764                 | CC                                     | TT                 | TT               | URR                           | 101495492          | ribonucleoside-diphosphate reductase small chain A |
| SNP_46598_A_5783991 | NC_021166.1    | Ca_Kabuli_Chr07 | 5783991                 | GG                                     | AA                 | AA               | URR                           | 101495492          | ribonucleoside-diphosphate reductase small chain A |
| SNP_46599_A_5784630 | NC_021166.1    | Ca_Kabuli_Chr07 | 5784630                 | CC                                     | TT                 | TT               | URR                           | 101495492          | ribonucleoside-diphosphate reductase small chain A |
| SNP_46600_A_5784805 | NC_021166.1    | Ca_Kabuli_Chr07 | 5784805                 | AA                                     | GG                 | GG               | URR                           | 101495492          | ribonucleoside-diphosphate reductase small chain A |

| SNPs IDs            | Chromosome IDs | Chromosomes     | Physical positions (bp) | CDC Frontier (Reference genome) | (Pusa 1103 & HPNB) | (ILWC 46 & LPNB) | Sequence Components of genome | Gene accession IDs | Putative functions                                 |
|---------------------|----------------|-----------------|-------------------------|---------------------------------|--------------------|------------------|-------------------------------|--------------------|----------------------------------------------------|
| SNP_46601_A_5784842 | NC_021166.1    | Ca_Kabuli_Chr07 | 5784842                 | GG                              | AA                 | AA               | URR                           | 101495492          | ribonucleoside-diphosphate reductase small chain A |
| SNP_46603_A_5785403 | NC_021166.1    | Ca_Kabuli_Chr07 | 5785403                 | CC                              | AA                 | AA               | INTERGENIC                    |                    |                                                    |
| SNP_46605_A_5786326 | NC_021166.1    | Ca_Kabuli_Chr07 | 5786326                 | AA                              | TT                 | TT               | INTERGENIC                    |                    |                                                    |
| SNP_46606_A_5786356 | NC_021166.1    | Ca_Kabuli_Chr07 | 5786356                 | AA                              | TT                 | TT               | INTERGENIC                    |                    |                                                    |
| SNP_46607_A_5787900 | NC_021166.1    | Ca_Kabuli_Chr07 | 5787900                 | CC                              | AA                 | AA               | INTERGENIC                    |                    |                                                    |
| SNP_46608_A_5787965 | NC_021166.1    | Ca_Kabuli_Chr07 | 5787965                 | TT                              | AA                 | AA               | INTERGENIC                    |                    |                                                    |
| SNP_46609_A_5792513 | NC_021166.1    | Ca_Kabuli_Chr07 | 5792513                 | TT                              | CC                 | CC               | INTERGENIC                    |                    |                                                    |
| SNP_46610_A_5794165 | NC_021166.1    | Ca_Kabuli_Chr07 | 5794165                 | TT                              | CC                 | CC               | SYNONYMOUS_CODING             | 101495819          | DUF21 domain-containing protein At4g14240-like     |
| SNP_46611_A_5794903 | NC_021166.1    | Ca_Kabuli_Chr07 | 5794903                 | AA                              | GG                 | GG               | SYNONYMOUS_CODING             | 101495819          | DUF21 domain-containing protein At4g14240-like     |
| SNP_46613_A_5800463 | NC_021166.1    | Ca_Kabuli_Chr07 | 5800463                 | TT                              | CC                 | CC               | INTERGENIC                    |                    |                                                    |
| SNP_46614_A_5800747 | NC_021166.1    | Ca_Kabuli_Chr07 | 5800747                 | CC                              | TT                 | TT               | INTERGENIC                    |                    |                                                    |
| SNP_46616_A_5801810 | NC_021166.1    | Ca_Kabuli_Chr07 | 5801810                 | AA                              | TT                 | TT               | SYNONYMOUS_CODING             | 101496584          | glycine-rich RNA-binding protein 4, mitochondrial  |
| SNP_46617_A_5801822 | NC_021166.1    | Ca_Kabuli_Chr07 | 5801822                 | GG                              | TT                 | TT               | SYNONYMOUS_CODING             | 101496584          | glycine-rich RNA-binding protein 4, mitochondrial  |
| SNP_46618_A_5807297 | NC_021166.1    | Ca_Kabuli_Chr07 | 5807297                 | TT                              | AA                 | AA               | INTERGENIC                    |                    |                                                    |
| SNP_46619_A_5810222 | NC_021166.1    | Ca_Kabuli_Chr07 | 5810222                 | GG                              | CC                 | CC               | INTERGENIC                    |                    |                                                    |
| SNP_46620_A_5811097 | NC_021166.1    | Ca_Kabuli_Chr07 | 5811097                 | AA                              | GG                 | GG               | DRR                           | 101496908          | adenylate isopentenyltransferase 5, chloroplastic  |
| SNP_46621_A_5811143 | NC_021166.1    | Ca_Kabuli_Chr07 | 5811143                 | GG                              | TT                 | TT               | DRR                           | 101496908          | adenylate isopentenyltransferase 5, chloroplastic  |
| SNP_46622_A_5811165 | NC_021166.1    | Ca_Kabuli_Chr07 | 5811165                 | AA                              | CC                 | CC               | DRR                           | 101496908          | adenylate isopentenyltransferase 5, chloroplastic  |
| SNP_46623_A_5813885 | NC_021166.1    | Ca_Kabuli_Chr07 | 5813885                 | TT                              | CC                 | CC               | URR                           | 101496908          | adenylate isopentenyltransferase 5, chloroplastic  |
| SNP_46624_A_5817354 | NC_021166.1    | Ca_Kabuli_Chr07 | 5817354                 | CC                              | AA                 | AA               | INTERGENIC                    |                    |                                                    |
| SNP_46625_A_5819129 | NC_021166.1    | Ca_Kabuli_Chr07 | 5819129                 | GG                              | AA                 | AA               | INTERGENIC                    |                    |                                                    |
| SNP_46626_A_5820281 | NC_021166.1    | Ca_Kabuli_Chr07 | 5820281                 | GG                              | AA                 | AA               | INTERGENIC                    |                    |                                                    |

| SNPs IDs            | Chromosome IDs | Chromosomes     | Physical positions (bp) | CDC Frontier genome (Reference genome) | (Pusa 1103 & HPNB) | (ILWC 46 & LPNB) | Sequence Components of genome | Gene accession IDs | Putative functions           |
|---------------------|----------------|-----------------|-------------------------|----------------------------------------|--------------------|------------------|-------------------------------|--------------------|------------------------------|
| SNP_46627_A_5820738 | NC_021166.1    | Ca_Kabuli_Chr07 | 5820738                 | GG                                     | CC                 | CC               | INTERGENIC                    |                    |                              |
| SNP_46628_A_5821923 | NC_021166.1    | Ca_Kabuli_Chr07 | 5821923                 | AA                                     | CC                 | CC               | INTERGENIC                    |                    |                              |
| SNP_46629_A_5824849 | NC_021166.1    | Ca_Kabuli_Chr07 | 5824849                 | GG                                     | AA                 | AA               | INTERGENIC                    |                    |                              |
| SNP_46630_A_5825151 | NC_021166.1    | Ca_Kabuli_Chr07 | 5825151                 | TT                                     | CC                 | CC               | INTERGENIC                    |                    |                              |
| SNP_46631_A_5826814 | NC_021166.1    | Ca_Kabuli_Chr07 | 5826814                 | AA                                     | TT                 | TT               | INTERGENIC                    |                    |                              |
| SNP_46632_A_5827780 | NC_021166.1    | Ca_Kabuli_Chr07 | 5827780                 | AA                                     | GG                 | GG               | INTERGENIC                    |                    |                              |
| SNP_46633_A_5827967 | NC_021166.1    | Ca_Kabuli_Chr07 | 5827967                 | TT                                     | CC                 | CC               | INTERGENIC                    |                    |                              |
| SNP_46634_A_5828025 | NC_021166.1    | Ca_Kabuli_Chr07 | 5828025                 | CC                                     | TT                 | TT               | INTERGENIC                    |                    |                              |
| SNP_46635_A_5828027 | NC_021166.1    | Ca_Kabuli_Chr07 | 5828027                 | AA                                     | TT                 | TT               | INTERGENIC                    |                    |                              |
| SNP_46636_A_5828040 | NC_021166.1    | Ca_Kabuli_Chr07 | 5828040                 | TT                                     | CC                 | CC               | INTERGENIC                    |                    |                              |
| SNP_46637_A_5828045 | NC_021166.1    | Ca_Kabuli_Chr07 | 5828045                 | CC                                     | TT                 | TT               | INTERGENIC                    |                    |                              |
| SNP_46638_A_5828324 | NC_021166.1    | Ca_Kabuli_Chr07 | 5828324                 | CC                                     | TT                 | TT               | INTERGENIC                    |                    |                              |
| SNP_46639_A_5828413 | NC_021166.1    | Ca_Kabuli_Chr07 | 5828413                 | GG                                     | AA                 | AA               | INTERGENIC                    |                    |                              |
| SNP_46640_A_5830342 | NC_021166.1    | Ca_Kabuli_Chr07 | 5830342                 | CC                                     | TT                 | TT               | NON_SYNONYMOUS_CODING         | id160123           | Unknown function             |
| SNP_46641_A_5830865 | NC_021166.1    | Ca_Kabuli_Chr07 | 5830865                 | CC                                     | TT                 | TT               | INTRON                        | 101497232          | UPF0613 protein PB24D3.06c   |
| SNP_46642_A_5833033 | NC_021166.1    | Ca_Kabuli_Chr07 | 5833033                 | CC                                     | TT                 | TT               | INTRON                        | 101497232          | UPF0613 protein PB24D3.06c   |
| SNP_46643_A_5834238 | NC_021166.1    | Ca_Kabuli_Chr07 | 5834238                 | CC                                     | GG                 | GG               | INTRON                        | 101497232          | UPF0613 protein PB24D3.06c   |
| SNP_46644_A_5838207 | NC_021166.1    | Ca_Kabuli_Chr07 | 5838207                 | AA                                     | GG                 | GG               | URR                           | 101497232          | UPF0613 protein PB24D3.06c   |
| SNP_46645_A_5838531 | NC_021166.1    | Ca_Kabuli_Chr07 | 5838531                 | AA                                     | GG                 | GG               | DRR                           | 101497658          | uncharacterized LOC101497658 |
| SNP_46646_A_5838532 | NC_021166.1    | Ca_Kabuli_Chr07 | 5838532                 | GG                                     | AA                 | AA               | DRR                           | 101497658          | uncharacterized LOC101497658 |
| SNP_46647_A_5838773 | NC_021166.1    | Ca_Kabuli_Chr07 | 5838773                 | AA                                     | CC                 | CC               | DRR                           | 101497658          | uncharacterized LOC101497658 |
| SNP_46648_A_5838783 | NC_021166.1    | Ca_Kabuli_Chr07 | 5838783                 | GG                                     | TT                 | TT               | DRR                           | 101497658          | uncharacterized LOC101497658 |

| SNPs IDs            | Chromosome IDs | Chromosomes     | Physical positions (bp) | CDC Frontier (Reference genome) | (Pusa 1103 & HPNB) | (ILWC 46 & LPNB) | Sequence Components of genome | Gene accession IDs | Putative functions           |
|---------------------|----------------|-----------------|-------------------------|---------------------------------|--------------------|------------------|-------------------------------|--------------------|------------------------------|
| SNP_46649_A_5838793 | NC_021166.1    | Ca_Kabuli_Chr07 | 5838793                 | AA                              | TT                 | TT               | DRR                           | 101497658          | uncharacterized LOC101497658 |
| SNP_46650_A_5838969 | NC_021166.1    | Ca_Kabuli_Chr07 | 5838969                 | GG                              | AA                 | AA               | DRR                           | 101497658          | uncharacterized LOC101497658 |
| SNP_46651_A_5839950 | NC_021166.1    | Ca_Kabuli_Chr07 | 5839950                 | AA                              | CC                 | CC               | INTERGENIC                    |                    |                              |
| SNP_46652_A_5841207 | NC_021166.1    | Ca_Kabuli_Chr07 | 5841207                 | CC                              | TT                 | TT               | INTERGENIC                    |                    |                              |
| SNP_46655_A_5843664 | NC_021166.1    | Ca_Kabuli_Chr07 | 5843664                 | TT                              | AA                 | AA               | DRR                           | 101497990          | transmembrane protein 64     |
| SNP_46656_A_5843911 | NC_021166.1    | Ca_Kabuli_Chr07 | 5843911                 | TT                              | AA                 | AA               | DRR                           | 101497990          | transmembrane protein 64     |
| SNP_46657_A_5843932 | NC_021166.1    | Ca_Kabuli_Chr07 | 5843932                 | GG                              | AA                 | AA               | DRR                           | 101497990          | transmembrane protein 64     |
| SNP_46658_A_5846477 | NC_021166.1    | Ca_Kabuli_Chr07 | 5846477                 | AA                              | GG                 | GG               | INTERGENIC                    |                    |                              |
| SNP_46659_A_5848823 | NC_021166.1    | Ca_Kabuli_Chr07 | 5848823                 | CC                              | TT                 | TT               | DRR                           | 101498543          | uncharacterized LOC101498543 |
| SNP_46660_A_5850383 | NC_021166.1    | Ca_Kabuli_Chr07 | 5850383                 | GG                              | TT                 | TT               | URR                           | 101497990          | transmembrane protein 64     |
| SNP_46661_A_5850504 | NC_021166.1    | Ca_Kabuli_Chr07 | 5850504                 | CC                              | TT                 | TT               | URR                           | 101497990          | transmembrane protein 64     |
| SNP_46662_A_5850658 | NC_021166.1    | Ca_Kabuli_Chr07 | 5850658                 | AA                              | GG                 | GG               | URR                           | 101498543          | uncharacterized LOC101498543 |
| SNP_46663_A_5856954 | NC_021166.1    | Ca_Kabuli_Chr07 | 5856954                 | AA                              | GG                 | GG               | URR                           | 101498881          | protein BUD31 homolog 2-like |
| SNP_46664_A_5858601 | NC_021166.1    | Ca_Kabuli_Chr07 | 5858601                 | TT                              | CC                 | CC               | INTERGENIC                    |                    |                              |
| SNP_46666_A_5858844 | NC_021166.1    | Ca_Kabuli_Chr07 | 5858844                 | AA                              | TT                 | TT               | INTERGENIC                    |                    |                              |
| SNP_46667_A_5859725 | NC_021166.1    | Ca_Kabuli_Chr07 | 5859725                 | AA                              | CC                 | CC               | INTERGENIC                    |                    |                              |
| SNP_46668_A_5861237 | NC_021166.1    | Ca_Kabuli_Chr07 | 5861237                 | CC                              | TT                 | TT               | INTERGENIC                    |                    |                              |
| SNP_46669_A_5870867 | NC_021166.1    | Ca_Kabuli_Chr07 | 5870867                 | GG                              | CC                 | CC               | INTERGENIC                    |                    |                              |
| SNP_46670_A_5870876 | NC_021166.1    | Ca_Kabuli_Chr07 | 5870876                 | TT                              | AA                 | AA               | INTERGENIC                    |                    |                              |
| SNP_46672_A_5871597 | NC_021166.1    | Ca_Kabuli_Chr07 | 5871597                 | GG                              | AA                 | AA               | INTERGENIC                    |                    |                              |
| SNP_46673_A_5871659 | NC_021166.1    | Ca_Kabuli_Chr07 | 5871659                 | TT                              | CC                 | CC               | INTERGENIC                    |                    |                              |
| SNP_46674_A_5871660 | NC_021166.1    | Ca_Kabuli_Chr07 | 5871660                 | GG                              | AA                 | AA               | INTERGENIC                    |                    |                              |



| SNPs IDs            | Chromosome IDs | Chromosomes     | Physical positions (bp) | CDC Frontier genome (Reference genome) | (Pusa 1103 & HPNB) | (ILWC 46 & LPNB) | Sequence genome       | Components of | Gene accession IDs | Putative functions                     |
|---------------------|----------------|-----------------|-------------------------|----------------------------------------|--------------------|------------------|-----------------------|---------------|--------------------|----------------------------------------|
| SNP_46677_A_5872241 | NC_021166.1    | Ca_Kabuli_Chr07 | 5872241                 | AA                                     | GG                 | GG               | INTERGENIC            |               |                    |                                        |
| SNP_46678_A_5872272 | NC_021166.1    | Ca_Kabuli_Chr07 | 5872272                 | AA                                     | GG                 | GG               | INTERGENIC            |               |                    |                                        |
| SNP_46679_A_5872788 | NC_021166.1    | Ca_Kabuli_Chr07 | 5872788                 | TT                                     | CC                 | CC               | INTERGENIC            |               |                    |                                        |
| SNP_46680_A_5872806 | NC_021166.1    | Ca_Kabuli_Chr07 | 5872806                 | TT                                     | AA                 | AA               | INTERGENIC            |               |                    |                                        |
| SNP_46681_A_5874389 | NC_021166.1    | Ca_Kabuli_Chr07 | 5874389                 | AA                                     | TT                 | TT               | INTERGENIC            |               |                    |                                        |
| SNP_46682_A_5874403 | NC_021166.1    | Ca_Kabuli_Chr07 | 5874403                 | CC                                     | AA                 | AA               | INTERGENIC            |               |                    |                                        |
| SNP_46683_A_5874408 | NC_021166.1    | Ca_Kabuli_Chr07 | 5874408                 | CC                                     | TT                 | TT               | INTERGENIC            |               |                    |                                        |
| SNP_46684_A_5874610 | NC_021166.1    | Ca_Kabuli_Chr07 | 5874610                 | TT                                     | CC                 | CC               | INTERGENIC            |               |                    |                                        |
| SNP_46685_A_5874622 | NC_021166.1    | Ca_Kabuli_Chr07 | 5874622                 | CC                                     | TT                 | TT               | INTERGENIC            |               |                    |                                        |
| SNP_46686_A_5874638 | NC_021166.1    | Ca_Kabuli_Chr07 | 5874638                 | GG                                     | TT                 | TT               | INTERGENIC            |               |                    |                                        |
| SNP_46688_A_5876025 | NC_021166.1    | Ca_Kabuli_Chr07 | 5876025                 | GG                                     | TT                 | TT               | INTERGENIC            |               |                    |                                        |
| SNP_46689_A_5877837 | NC_021166.1    | Ca_Kabuli_Chr07 | 5877837                 | TT                                     | AA                 | AA               | INTERGENIC            |               |                    |                                        |
| SNP_46690_A_5881512 | NC_021166.1    | Ca_Kabuli_Chr07 | 5881512                 | AA                                     | GG                 | GG               | INTRON                | 101499521     |                    | dual specificity protein phosphatase 1 |
| SNP_46691_A_5881942 | NC_021166.1    | Ca_Kabuli_Chr07 | 5881942                 | AA                                     | GG                 | GG               | INTRON                | 101499521     |                    | dual specificity protein phosphatase 1 |
| SNP_46692_A_5881951 | NC_021166.1    | Ca_Kabuli_Chr07 | 5881951                 | TT                                     | CC                 | CC               | INTRON                | 101499521     |                    | dual specificity protein phosphatase 1 |
| SNP_46693_A_5881959 | NC_021166.1    | Ca_Kabuli_Chr07 | 5881959                 | AA                                     | GG                 | GG               | INTRON                | 101499521     |                    | dual specificity protein phosphatase 1 |
| SNP_46695_A_5884725 | NC_021166.1    | Ca_Kabuli_Chr07 | 5884725                 | AA                                     | GG                 | GG               | URR                   | 101499521     |                    | dual specificity protein phosphatase 1 |
| SNP_46696_A_5887541 | NC_021166.1    | Ca_Kabuli_Chr07 | 5887541                 | TT                                     | AA                 | AA               | DRR                   | 101500045     |                    | basic 7S globulin-like                 |
| SNP_46697_A_5888757 | NC_021166.1    | Ca_Kabuli_Chr07 | 5888757                 | AA                                     | CC                 | CC               | NON_SYNONYMOUS_CODING | 101500045     |                    | basic 7S globulin-like                 |
| SNP_46699_A_5889257 | NC_021166.1    | Ca_Kabuli_Chr07 | 5889257                 | AA                                     | GG                 | GG               | URR                   | 101500045     |                    | basic 7S globulin-like                 |
| SNP_46700_A_5889405 | NC_021166.1    | Ca_Kabuli_Chr07 | 5889405                 | TT                                     | GG                 | GG               | URR                   | 101500045     |                    | basic 7S globulin-like                 |
| SNP_46701_A_5889426 | NC_021166.1    | Ca_Kabuli_Chr07 | 5889426                 | TT                                     | CC                 | CC               | URR                   | 101500045     |                    | basic 7S globulin-like                 |

| SNPs IDs            | Chromosome IDs | Chromosomes     | Physical positions (bp) | CDC Frontier genome (Reference genome) | (Pusa 1103 & HPNB) | (ILWC 46 & LPNB) | Sequence Components of genome | Gene accession IDs | Putative functions                            |
|---------------------|----------------|-----------------|-------------------------|----------------------------------------|--------------------|------------------|-------------------------------|--------------------|-----------------------------------------------|
| SNP_46702_A_5889887 | NC_021166.1    | Ca_Kabuli_Chr07 | 5889887                 | AA                                     | TT                 | TT               | URR                           | 101500045          | basic 7S globulin-like                        |
| SNP_46703_A_5889934 | NC_021166.1    | Ca_Kabuli_Chr07 | 5889934                 | AA                                     | CC                 | CC               | URR                           | 101500045          | basic 7S globulin-like                        |
| SNP_46704_A_5889955 | NC_021166.1    | Ca_Kabuli_Chr07 | 5889955                 | GG                                     | AA                 | AA               | URR                           | 101500045          | basic 7S globulin-like                        |
| SNP_46705_A_5890074 | NC_021166.1    | Ca_Kabuli_Chr07 | 5890074                 | TT                                     | AA                 | AA               | URR                           | 101500045          | basic 7S globulin-like                        |
| SNP_46707_A_5890611 | NC_021166.1    | Ca_Kabuli_Chr07 | 5890611                 | TT                                     | AA                 | AA               | URR                           | 101500045          | basic 7S globulin-like                        |
| SNP_46708_A_5891468 | NC_021166.1    | Ca_Kabuli_Chr07 | 5891468                 | TT                                     | AA                 | AA               | INTERGENIC                    |                    |                                               |
| SNP_46709_A_5891850 | NC_021166.1    | Ca_Kabuli_Chr07 | 5891850                 | GG                                     | TT                 | TT               | INTERGENIC                    |                    |                                               |
| SNP_46712_A_5894767 | NC_021166.1    | Ca_Kabuli_Chr07 | 5894767                 | TT                                     | CC                 | CC               | INTERGENIC                    |                    |                                               |
| SNP_46714_A_5894993 | NC_021166.1    | Ca_Kabuli_Chr07 | 5894993                 | TT                                     | CC                 | CC               | INTERGENIC                    |                    |                                               |
| SNP_46716_A_5899978 | NC_021166.1    | Ca_Kabuli_Chr07 | 5899978                 | AA                                     | GG                 | GG               | INTERGENIC                    |                    |                                               |
| SNP_46717_A_5899982 | NC_021166.1    | Ca_Kabuli_Chr07 | 5899982                 | AA                                     | GG                 | GG               | INTERGENIC                    |                    |                                               |
| SNP_46718_A_5900306 | NC_021166.1    | Ca_Kabuli_Chr07 | 5900306                 | CC                                     | TT                 | TT               | INTERGENIC                    |                    |                                               |
| SNP_46719_A_5901083 | NC_021166.1    | Ca_Kabuli_Chr07 | 5901083                 | GG                                     | AA                 | AA               | INTERGENIC                    |                    |                                               |
| SNP_46720_A_5901919 | NC_021166.1    | Ca_Kabuli_Chr07 | 5901919                 | GG                                     | AA                 | AA               | INTERGENIC                    |                    |                                               |
| SNP_46721_A_5904061 | NC_021166.1    | Ca_Kabuli_Chr07 | 5904061                 | AA                                     | GG                 | GG               | INTERGENIC                    |                    |                                               |
| SNP_46722_A_5904276 | NC_021166.1    | Ca_Kabuli_Chr07 | 5904276                 | GG                                     | TT                 | TT               | DRR                           | 101500379          | stem-specific protein TSJT1                   |
| SNP_46723_A_5904280 | NC_021166.1    | Ca_Kabuli_Chr07 | 5904280                 | GG                                     | AA                 | AA               | DRR                           | 101500379          | stem-specific protein TSJT1                   |
| SNP_46724_A_5906849 | NC_021166.1    | Ca_Kabuli_Chr07 | 5906849                 | TT                                     | CC                 | CC               | INTRON                        | 101500379          | stem-specific protein TSJT1                   |
| SNP_46725_A_5907578 | NC_021166.1    | Ca_Kabuli_Chr07 | 5907578                 | CC                                     | GG                 | GG               | INTRON                        | 101500379          | stem-specific protein TSJT1                   |
| SNP_46726_A_5914248 | NC_021166.1    | Ca_Kabuli_Chr07 | 5914248                 | CC                                     | TT                 | TT               | INTRON                        | 101500690          | cysteine-rich receptor-like protein kinase 25 |
| SNP_46727_A_5914266 | NC_021166.1    | Ca_Kabuli_Chr07 | 5914266                 | CC                                     | TT                 | TT               | INTRON                        | 101500690          | cysteine-rich receptor-like protein kinase 25 |
| SNP_46728_A_5914274 | NC_021166.1    | Ca_Kabuli_Chr07 | 5914274                 | AA                                     | CC                 | CC               | INTRON                        | 101500690          | cysteine-rich receptor-like protein kinase 25 |

| SNPs IDs            | Chromosome IDs | Chromosomes     | Physical positions (bp) | CDC Frontier (Reference genome) | (Pusa 1103 & HPNB) | (ILWC 46 & LPNB) | Sequence Components of genome | Gene accession IDs | Putative functions                            |
|---------------------|----------------|-----------------|-------------------------|---------------------------------|--------------------|------------------|-------------------------------|--------------------|-----------------------------------------------|
| SNP_46729_A_5914283 | NC_021166.1    | Ca_Kabuli_Chr07 | 5914283                 | AA                              | GG                 | GG               | INTRON                        | 101500690          | cysteine-rich receptor-like protein kinase 25 |
| SNP_46731_A_5918429 | NC_021166.1    | Ca_Kabuli_Chr07 | 5918429                 | GG                              | AA                 | AA               | INTERGENIC                    |                    |                                               |
| SNP_46732_A_5920252 | NC_021166.1    | Ca_Kabuli_Chr07 | 5920252                 | CC                              | TT                 | TT               | DRR                           | 101501854          | DCN1-like protein 5                           |
| SNP_46733_A_5932415 | NC_021166.1    | Ca_Kabuli_Chr07 | 5932415                 | CC                              | TT                 | TT               | SYNONYMOUS_CODING             | 101501318          | ATPase 8, plasma membrane-type-like           |
| SNP_46735_A_5935839 | NC_021166.1    | Ca_Kabuli_Chr07 | 5935839                 | CC                              | TT                 | TT               | INTERGENIC                    |                    |                                               |
| SNP_46736_A_5935998 | NC_021166.1    | Ca_Kabuli_Chr07 | 5935998                 | AA                              | GG                 | GG               | INTERGENIC                    |                    |                                               |
| SNP_46737_A_5936000 | NC_021166.1    | Ca_Kabuli_Chr07 | 5936000                 | GG                              | TT                 | TT               | INTERGENIC                    |                    |                                               |
| SNP_46738_A_5936189 | NC_021166.1    | Ca_Kabuli_Chr07 | 5936189                 | TT                              | CC                 | CC               | INTERGENIC                    |                    |                                               |
| SNP_46739_A_5936195 | NC_021166.1    | Ca_Kabuli_Chr07 | 5936195                 | AA                              | GG                 | GG               | INTERGENIC                    |                    |                                               |
| SNP_46740_A_5936936 | NC_021166.1    | Ca_Kabuli_Chr07 | 5936936                 | AA                              | TT                 | TT               | INTERGENIC                    |                    |                                               |
| SNP_46741_A_5936939 | NC_021166.1    | Ca_Kabuli_Chr07 | 5936939                 | GG                              | AA                 | AA               | INTERGENIC                    |                    |                                               |
| SNP_46742_A_5936978 | NC_021166.1    | Ca_Kabuli_Chr07 | 5936978                 | GG                              | AA                 | AA               | INTERGENIC                    |                    |                                               |
| SNP_46743_A_5937314 | NC_021166.1    | Ca_Kabuli_Chr07 | 5937314                 | AA                              | GG                 | GG               | INTERGENIC                    |                    |                                               |
| SNP_46744_A_5937336 | NC_021166.1    | Ca_Kabuli_Chr07 | 5937336                 | TT                              | AA                 | AA               | INTERGENIC                    |                    |                                               |
| SNP_46745_A_5937595 | NC_021166.1    | Ca_Kabuli_Chr07 | 5937595                 | CC                              | TT                 | TT               | INTERGENIC                    |                    |                                               |
| SNP_46746_A_5937758 | NC_021166.1    | Ca_Kabuli_Chr07 | 5937758                 | CC                              | AA                 | AA               | INTERGENIC                    |                    |                                               |
| SNP_46747_A_5937761 | NC_021166.1    | Ca_Kabuli_Chr07 | 5937761                 | TT                              | CC                 | CC               | INTERGENIC                    |                    |                                               |
| SNP_46748_A_5937769 | NC_021166.1    | Ca_Kabuli_Chr07 | 5937769                 | GG                              | AA                 | AA               | INTERGENIC                    |                    |                                               |
| SNP_46749_A_5937773 | NC_021166.1    | Ca_Kabuli_Chr07 | 5937773                 | CC                              | AA                 | AA               | INTERGENIC                    |                    |                                               |
| SNP_46750_A_5937972 | NC_021166.1    | Ca_Kabuli_Chr07 | 5937972                 | AA                              | GG                 | GG               | INTERGENIC                    |                    |                                               |
| SNP_46751_A_5940324 | NC_021166.1    | Ca_Kabuli_Chr07 | 5940324                 | CC                              | TT                 | TT               | DRR                           | 101502177          | WD repeat-containing protein 76               |
| SNP_46752_A_5944125 | NC_021166.1    | Ca_Kabuli_Chr07 | 5944125                 | GG                              | TT                 | TT               | URR                           | 101502177          | WD repeat-containing protein 76               |

| SNPs IDs            | Chromosome IDs | Chromosomes     | Physical positions (bp) | CDC Frontier genome (Reference genome) | (Pusa 1103 & HPNB) | (ILWC 46 & LPNB) | Sequence genome | Components of | Gene accession IDs | Putative functions                    |
|---------------------|----------------|-----------------|-------------------------|----------------------------------------|--------------------|------------------|-----------------|---------------|--------------------|---------------------------------------|
| SNP_46753_A_5945024 | NC_021166.1    | Ca_Kabuli_Chr07 | 5945024                 | TT                                     | GG                 | GG               | DRR             |               | 101502490          | DNA replication licensing factor MCM5 |
| SNP_46754_A_5951922 | NC_021166.1    | Ca_Kabuli_Chr07 | 5951922                 | TT                                     | CC                 | CC               | URR             |               | 101502490          | DNA replication licensing factor MCM5 |
| SNP_46755_A_5951949 | NC_021166.1    | Ca_Kabuli_Chr07 | 5951949                 | GG                                     | AA                 | AA               | URR             |               | 101502490          | DNA replication licensing factor MCM5 |
| SNP_46756_A_5951972 | NC_021166.1    | Ca_Kabuli_Chr07 | 5951972                 | TT                                     | GG                 | GG               | URR             |               | 101502490          | DNA replication licensing factor MCM5 |
| SNP_46757_A_5952436 | NC_021166.1    | Ca_Kabuli_Chr07 | 5952436                 | AA                                     | GG                 | GG               | DRR             |               | 101502793          | dicer-like protein 4                  |
| SNP_46758_A_5952445 | NC_021166.1    | Ca_Kabuli_Chr07 | 5952445                 | TT                                     | GG                 | GG               | DRR             |               | 101502793          | dicer-like protein 4                  |
| SNP_46759_A_5952456 | NC_021166.1    | Ca_Kabuli_Chr07 | 5952456                 | TT                                     | CC                 | CC               | DRR             |               | 101502793          | dicer-like protein 4                  |
| SNP_46760_A_5952474 | NC_021166.1    | Ca_Kabuli_Chr07 | 5952474                 | CC                                     | TT                 | TT               | DRR             |               | 101502793          | dicer-like protein 4                  |
| SNP_46761_A_5952482 | NC_021166.1    | Ca_Kabuli_Chr07 | 5952482                 | GG                                     | CC                 | CC               | DRR             |               | 101502793          | dicer-like protein 4                  |
| SNP_46762_A_5952484 | NC_021166.1    | Ca_Kabuli_Chr07 | 5952484                 | AA                                     | GG                 | GG               | DRR             |               | 101502793          | dicer-like protein 4                  |
| SNP_46764_A_5954831 | NC_021166.1    | Ca_Kabuli_Chr07 | 5954831                 | TT                                     | GG                 | GG               | INTRON          |               | 101502793          | dicer-like protein 4                  |
| SNP_46765_A_5955414 | NC_021166.1    | Ca_Kabuli_Chr07 | 5955414                 | GG                                     | AA                 | AA               | INTRON          |               | 101502793          | dicer-like protein 4                  |
| SNP_46767_A_5958745 | NC_021166.1    | Ca_Kabuli_Chr07 | 5958745                 | AA                                     | GG                 | GG               | INTRON          |               | 101502793          | dicer-like protein 4                  |
| SNP_46768_A_5959832 | NC_021166.1    | Ca_Kabuli_Chr07 | 5959832                 | AA                                     | GG                 | GG               | INTRON          |               | 101502793          | dicer-like protein 4                  |
| SNP_46769_A_5960144 | NC_021166.1    | Ca_Kabuli_Chr07 | 5960144                 | GG                                     | CC                 | CC               | INTRON          |               | 101502793          | dicer-like protein 4                  |
| SNP_46770_A_5960152 | NC_021166.1    | Ca_Kabuli_Chr07 | 5960152                 | TT                                     | CC                 | CC               | INTRON          |               | 101502793          | dicer-like protein 4                  |
| SNP_46771_A_5960334 | NC_021166.1    | Ca_Kabuli_Chr07 | 5960334                 | AA                                     | GG                 | GG               | INTRON          |               | 101502793          | dicer-like protein 4                  |
| SNP_46772_A_5960368 | NC_021166.1    | Ca_Kabuli_Chr07 | 5960368                 | CC                                     | TT                 | TT               | INTRON          |               | 101502793          | dicer-like protein 4                  |
| SNP_46774_A_5975441 | NC_021166.1    | Ca_Kabuli_Chr07 | 5975441                 | GG                                     | AA                 | AA               | URR             |               | 101502793          | dicer-like protein 4                  |
| SNP_46775_A_5975492 | NC_021166.1    | Ca_Kabuli_Chr07 | 5975492                 | GG                                     | AA                 | AA               | URR             |               | 101502793          | dicer-like protein 4                  |
| SNP_46776_A_5975817 | NC_021166.1    | Ca_Kabuli_Chr07 | 5975817                 | AA                                     | GG                 | GG               | URR             |               | 101502793          | dicer-like protein 4                  |
| SNP_46777_A_5976069 | NC_021166.1    | Ca_Kabuli_Chr07 | 5976069                 | CC                                     | TT                 | TT               | URR             |               | 101502793          | dicer-like protein 4                  |

| SNPs IDs            | Chromosome IDs | Chromosomes     | Physical positions (bp) | CDC Frontier (Reference genome) | (Pusa 1103 & HPNB) | (ILWC 46 & LPNB) | Sequence Components of genome | Gene accession IDs | Putative functions                    |
|---------------------|----------------|-----------------|-------------------------|---------------------------------|--------------------|------------------|-------------------------------|--------------------|---------------------------------------|
| SNP_46778_A_5976087 | NC_021166.1    | Ca_Kabuli_Chr07 | 5976087                 | AA                              | TT                 | TT               | URR                           | 101502793          | dicer-like protein 4                  |
| SNP_46780_A_5978889 | NC_021166.1    | Ca_Kabuli_Chr07 | 5978889                 | TT                              | GG                 | GG               | DRR                           | 101503113          | protein ENHANCED DISEASE RESISTANCE 2 |
| SNP_46782_A_5983905 | NC_021166.1    | Ca_Kabuli_Chr07 | 5983905                 | TT                              | CC                 | CC               | INTRON                        | 101503113          | protein ENHANCED DISEASE RESISTANCE 2 |
| SNP_46783_A_5984537 | NC_021166.1    | Ca_Kabuli_Chr07 | 5984537                 | TT                              | AA                 | AA               | INTRON                        | 101503113          | protein ENHANCED DISEASE RESISTANCE 2 |
| SNP_46784_A_5988875 | NC_021166.1    | Ca_Kabuli_Chr07 | 5988875                 | GG                              | CC                 | CC               | INTRON                        | 101503113          | protein ENHANCED DISEASE RESISTANCE 2 |
| SNP_46785_A_5989143 | NC_021166.1    | Ca_Kabuli_Chr07 | 5989143                 | CC                              | TT                 | TT               | INTRON                        | 101503113          | protein ENHANCED DISEASE RESISTANCE 2 |
| SNP_46787_A_5989816 | NC_021166.1    | Ca_Kabuli_Chr07 | 5989816                 | CC                              | TT                 | TT               | INTRON                        | 101503113          | protein ENHANCED DISEASE RESISTANCE 2 |
| SNP_46788_A_5990995 | NC_021166.1    | Ca_Kabuli_Chr07 | 5990995                 | CC                              | TT                 | TT               | INTRON                        | 101503113          | protein ENHANCED DISEASE RESISTANCE 2 |
| SNP_46789_A_5991353 | NC_021166.1    | Ca_Kabuli_Chr07 | 5991353                 | AA                              | CC                 | CC               | INTRON                        | 101503113          | protein ENHANCED DISEASE RESISTANCE 2 |
| SNP_46792_A_5996051 | NC_021166.1    | Ca_Kabuli_Chr07 | 5996051                 | CC                              | TT                 | TT               | URR                           | 101503113          | protein ENHANCED DISEASE RESISTANCE 2 |
| SNP_46793_A_5996156 | NC_021166.1    | Ca_Kabuli_Chr07 | 5996156                 | CC                              | TT                 | TT               | URR                           | 101503113          | protein ENHANCED DISEASE RESISTANCE 2 |
| SNP_46794_A_5997023 | NC_021166.1    | Ca_Kabuli_Chr07 | 5997023                 | GG                              | TT                 | TT               | URR                           | 101503113          | protein ENHANCED DISEASE RESISTANCE 2 |
| SNP_46795_A_5997237 | NC_021166.1    | Ca_Kabuli_Chr07 | 5997237                 | CC                              | AA                 | AA               | URR                           | 101503113          | protein ENHANCED DISEASE RESISTANCE 2 |
| SNP_46796_A_5997298 | NC_021166.1    | Ca_Kabuli_Chr07 | 5997298                 | TT                              | CC                 | CC               | INTERGENIC                    |                    |                                       |
| SNP_46797_A_5997478 | NC_021166.1    | Ca_Kabuli_Chr07 | 5997478                 | AA                              | GG                 | GG               | INTERGENIC                    |                    |                                       |
| SNP_46798_A_5999940 | NC_021166.1    | Ca_Kabuli_Chr07 | 5999940                 | CC                              | TT                 | TT               | NON_SYNONYMOUS_CODING         | 101492921          | uncharacterized LOC101492921          |
| SNP_46800_A_6000960 | NC_021166.1    | Ca_Kabuli_Chr07 | 6000960                 | AA                              | TT                 | TT               | URR                           | 101492921          | uncharacterized LOC101492921          |
| SNP_46801_A_6004143 | NC_021166.1    | Ca_Kabuli_Chr07 | 6004143                 | GG                              | CC                 | CC               | INTERGENIC                    |                    |                                       |
| SNP_46802_A_6005909 | NC_021166.1    | Ca_Kabuli_Chr07 | 6005909                 | GG                              | AA                 | AA               | INTERGENIC                    |                    |                                       |
| SNP_46803_A_6007315 | NC_021166.1    | Ca_Kabuli_Chr07 | 6007315                 | GG                              | TT                 | TT               | DRR                           | 101503439          | uncharacterized LOC101503439          |
| SNP_46805_A_6010578 | NC_021166.1    | Ca_Kabuli_Chr07 | 6010578                 | TT                              | AA                 | AA               | URR                           | 101503439          | uncharacterized LOC101503439          |
| SNP_46806_A_6015214 | NC_021166.1    | Ca_Kabuli_Chr07 | 6015214                 | GG                              | AA                 | AA               | URR                           | 101503779          | sugar transport protein 7-like        |

| SNPs IDs            | Chromosome IDs | Chromosomes     | Physical positions (bp) | CDC Frontier genome (Reference genome) | (Pusa 1103 & HPNB) | (ILWC 46 & LPNB) | Sequence Components of genome | Gene accession IDs | Putative functions                    |
|---------------------|----------------|-----------------|-------------------------|----------------------------------------|--------------------|------------------|-------------------------------|--------------------|---------------------------------------|
| SNP_46807_A_6015281 | NC_021166.1    | Ca_Kabuli_Chr07 | 6015281                 | CC                                     | TT                 | TT               | URR                           | 101503779          | sugar transport protein 7-like        |
| SNP_46808_A_6015859 | NC_021166.1    | Ca_Kabuli_Chr07 | 6015859                 | AA                                     | TT                 | TT               | URR                           | 101503779          | sugar transport protein 7-like        |
| SNP_46810_A_6016733 | NC_021166.1    | Ca_Kabuli_Chr07 | 6016733                 | TT                                     | GG                 | GG               | URR                           | 101503779          | sugar transport protein 7-like        |
| SNP_46811_A_6016737 | NC_021166.1    | Ca_Kabuli_Chr07 | 6016737                 | AA                                     | TT                 | TT               | URR                           | 101503779          | sugar transport protein 7-like        |
| SNP_46812_A_6016738 | NC_021166.1    | Ca_Kabuli_Chr07 | 6016738                 | AA                                     | TT                 | TT               | URR                           | 101503779          | sugar transport protein 7-like        |
| SNP_46813_A_6016908 | NC_021166.1    | Ca_Kabuli_Chr07 | 6016908                 | TT                                     | AA                 | AA               | URR                           | 101503779          | sugar transport protein 7-like        |
| SNP_46814_A_6016909 | NC_021166.1    | Ca_Kabuli_Chr07 | 6016909                 | GG                                     | AA                 | AA               | URR                           | 101503779          | sugar transport protein 7-like        |
| SNP_46815_A_6017216 | NC_021166.1    | Ca_Kabuli_Chr07 | 6017216                 | AA                                     | CC                 | CC               | INTERGENIC                    |                    |                                       |
| SNP_46816_A_6018225 | NC_021166.1    | Ca_Kabuli_Chr07 | 6018225                 | GG                                     | TT                 | TT               | INTERGENIC                    |                    |                                       |
| SNP_46818_A_6018283 | NC_021166.1    | Ca_Kabuli_Chr07 | 6018283                 | AA                                     | GG                 | GG               | INTERGENIC                    |                    |                                       |
| SNP_46821_A_6021483 | NC_021166.1    | Ca_Kabuli_Chr07 | 6021483                 | TT                                     | CC                 | CC               | DRR                           | 101504310          | sugar transport protein 7-like        |
| SNP_46825_A_6021928 | NC_021166.1    | Ca_Kabuli_Chr07 | 6021928                 | AA                                     | CC                 | CC               | DRR                           | 101504310          | sugar transport protein 7-like        |
| SNP_46826_A_6021929 | NC_021166.1    | Ca_Kabuli_Chr07 | 6021929                 | CC                                     | TT                 | TT               | DRR                           | 101504310          | sugar transport protein 7-like        |
| SNP_46827_A_6021949 | NC_021166.1    | Ca_Kabuli_Chr07 | 6021949                 | TT                                     | AA                 | AA               | DRR                           | 101504310          | sugar transport protein 7-like        |
| SNP_46828_A_6023782 | NC_021166.1    | Ca_Kabuli_Chr07 | 6023782                 | AA                                     | GG                 | GG               | INTRON                        | 101504310          | sugar transport protein 7-like        |
| SNP_46829_A_6024772 | NC_021166.1    | Ca_Kabuli_Chr07 | 6024772                 | AA                                     | TT                 | TT               | INTERGENIC                    |                    |                                       |
| SNP_46831_A_6025936 | NC_021166.1    | Ca_Kabuli_Chr07 | 6025936                 | GG                                     | TT                 | TT               | URR                           | 101504310          | sugar transport protein 7-like        |
| SNP_46832_A_6025937 | NC_021166.1    | Ca_Kabuli_Chr07 | 6025937                 | GG                                     | AA                 | AA               | URR                           | 101504310          | sugar transport protein 7-like        |
| SNP_46833_A_6028640 | NC_021166.1    | Ca_Kabuli_Chr07 | 6028640                 | CC                                     | AA                 | AA               | DRR                           | 101504856          | transmembrane 9 superfamily member 11 |
| SNP_46834_A_6028962 | NC_021166.1    | Ca_Kabuli_Chr07 | 6028962                 | TT                                     | GG                 | GG               | INTERGENIC                    |                    |                                       |
| SNP_46835_A_6032038 | NC_021166.1    | Ca_Kabuli_Chr07 | 6032038                 | GG                                     | AA                 | AA               | URR                           | 101504856          | transmembrane 9 superfamily member 11 |
| SNP_46836_A_6032341 | NC_021166.1    | Ca_Kabuli_Chr07 | 6032341                 | GG                                     | AA                 | AA               | URR                           | 101504856          | transmembrane 9 superfamily member 11 |

| SNPs IDs            | Chromosome IDs | Chromosomes     | Physical positions (bp) | CDC Frontier genome (Reference genome) | (Pusa 1103 & HPNB) | (ILWC 46 & LPNB) | Sequence Components of genome | Gene accession IDs | Putative functions                    |
|---------------------|----------------|-----------------|-------------------------|----------------------------------------|--------------------|------------------|-------------------------------|--------------------|---------------------------------------|
| SNP_46837_A_6032354 | NC_021166.1    | Ca_Kabuli_Chr07 | 6032354                 | TT                                     | AA                 | AA               | URR                           | 101504856          | transmembrane 9 superfamily member 11 |
| SNP_46838_A_6032678 | NC_021166.1    | Ca_Kabuli_Chr07 | 6032678                 | TT                                     | AA                 | AA               | URR                           | 101504856          | transmembrane 9 superfamily member 11 |
| SNP_46841_A_6034177 | NC_021166.1    | Ca_Kabuli_Chr07 | 6034177                 | AA                                     | GG                 | GG               | DRR                           | 101505169          | dentin sialophosphoprotein            |
| SNP_46842_A_6035174 | NC_021166.1    | Ca_Kabuli_Chr07 | 6035174                 | CC                                     | GG                 | GG               | INTERGENIC                    |                    |                                       |
| SNP_46843_A_6037478 | NC_021166.1    | Ca_Kabuli_Chr07 | 6037478                 | AA                                     | GG                 | GG               | INTRON                        | 101505169          | dentin sialophosphoprotein            |
| SNP_46844_A_6037488 | NC_021166.1    | Ca_Kabuli_Chr07 | 6037488                 | CC                                     | TT                 | TT               | INTRON                        | 101505169          | dentin sialophosphoprotein            |
| SNP_46845_A_6040910 | NC_021166.1    | Ca_Kabuli_Chr07 | 6040910                 | GG                                     | AA                 | AA               | INTRON                        | 101505169          | dentin sialophosphoprotein            |
| SNP_46846_A_6040924 | NC_021166.1    | Ca_Kabuli_Chr07 | 6040924                 | GG                                     | AA                 | AA               | INTRON                        | 101505169          | dentin sialophosphoprotein            |
| SNP_46847_A_6040981 | NC_021166.1    | Ca_Kabuli_Chr07 | 6040981                 | TT                                     | CC                 | CC               | INTRON                        | 101505169          | dentin sialophosphoprotein            |
| SNP_46848_A_6043937 | NC_021166.1    | Ca_Kabuli_Chr07 | 6043937                 | GG                                     | AA                 | AA               | INTERGENIC                    |                    |                                       |
| SNP_46849_A_6044026 | NC_021166.1    | Ca_Kabuli_Chr07 | 6044026                 | TT                                     | CC                 | CC               | INTERGENIC                    |                    |                                       |
| SNP_46850_A_6044285 | NC_021166.1    | Ca_Kabuli_Chr07 | 6044285                 | GG                                     | AA                 | AA               | INTERGENIC                    |                    |                                       |
| SNP_46851_A_6044292 | NC_021166.1    | Ca_Kabuli_Chr07 | 6044292                 | TT                                     | GG                 | GG               | INTERGENIC                    |                    |                                       |
| SNP_46852_A_6044296 | NC_021166.1    | Ca_Kabuli_Chr07 | 6044296                 | CC                                     | TT                 | TT               | INTERGENIC                    |                    |                                       |
| SNP_46854_A_6044341 | NC_021166.1    | Ca_Kabuli_Chr07 | 6044341                 | GG                                     | AA                 | AA               | INTERGENIC                    |                    |                                       |
| SNP_46855_A_6044377 | NC_021166.1    | Ca_Kabuli_Chr07 | 6044377                 | AA                                     | GG                 | GG               | INTERGENIC                    |                    |                                       |
| SNP_46856_A_6044413 | NC_021166.1    | Ca_Kabuli_Chr07 | 6044413                 | GG                                     | TT                 | TT               | INTERGENIC                    |                    |                                       |
| SNP_46857_A_6044555 | NC_021166.1    | Ca_Kabuli_Chr07 | 6044555                 | CC                                     | TT                 | TT               | INTERGENIC                    |                    |                                       |
| SNP_46858_A_6044564 | NC_021166.1    | Ca_Kabuli_Chr07 | 6044564                 | GG                                     | AA                 | AA               | INTERGENIC                    |                    |                                       |
| SNP_46859_A_6044578 | NC_021166.1    | Ca_Kabuli_Chr07 | 6044578                 | GG                                     | AA                 | AA               | INTERGENIC                    |                    |                                       |
| SNP_46860_A_6044581 | NC_021166.1    | Ca_Kabuli_Chr07 | 6044581                 | GG                                     | AA                 | AA               | INTERGENIC                    |                    |                                       |
| SNP_46861_A_6046976 | NC_021166.1    | Ca_Kabuli_Chr07 | 6046976                 | CC                                     | GG                 | GG               | DRR                           | 101505483          | Unknown function                      |

| SNPs IDs            | Chromosome IDs | Chromosomes     | Physical positions (bp) | CDC Frontier (Reference genome) | (Pusa 1103 & HPNB) | (ILWC 46 & LPNB) | Sequence Components of genome | Gene accession IDs | Putative functions                |
|---------------------|----------------|-----------------|-------------------------|---------------------------------|--------------------|------------------|-------------------------------|--------------------|-----------------------------------|
| SNP_46862_A_6046986 | NC_021166.1    | Ca_Kabuli_Chr07 | 6046986                 | TT                              | CC                 | CC               | DRR                           | 101505483          | Unknown function                  |
| SNP_46863_A_6048790 | NC_021166.1    | Ca_Kabuli_Chr07 | 6048790                 | CC                              | AA                 | AA               | URR                           | 101505483          | Unknown function                  |
| SNP_46864_A_6049732 | NC_021166.1    | Ca_Kabuli_Chr07 | 6049732                 | TT                              | GG                 | GG               | URR                           | 101505483          | Unknown function                  |
| SNP_46865_A_6049734 | NC_021166.1    | Ca_Kabuli_Chr07 | 6049734                 | AA                              | GG                 | GG               | URR                           | 101505483          | Unknown function                  |
| SNP_46866_A_6055455 | NC_021166.1    | Ca_Kabuli_Chr07 | 6055455                 | TT                              | CC                 | CC               | INTERGENIC                    |                    |                                   |
| SNP_46867_A_6055472 | NC_021166.1    | Ca_Kabuli_Chr07 | 6055472                 | AA                              | CC                 | CC               | INTERGENIC                    |                    |                                   |
| SNP_46870_A_6056403 | NC_021166.1    | Ca_Kabuli_Chr07 | 6056403                 | GG                              | TT                 | TT               | INTERGENIC                    |                    |                                   |
| SNP_46871_A_6058510 | NC_021166.1    | Ca_Kabuli_Chr07 | 6058510                 | CC                              | AA                 | AA               | INTRON                        | 101493571          | homeobox protein knotted-1-like 4 |
| SNP_46872_A_6058539 | NC_021166.1    | Ca_Kabuli_Chr07 | 6058539                 | AA                              | GG                 | GG               | INTRON                        | 101493571          | homeobox protein knotted-1-like 4 |
| SNP_46873_A_6058577 | NC_021166.1    | Ca_Kabuli_Chr07 | 6058577                 | AA                              | TT                 | TT               | INTRON                        | 101493571          | homeobox protein knotted-1-like 4 |
| SNP_46874_A_6058970 | NC_021166.1    | Ca_Kabuli_Chr07 | 6058970                 | GG                              | TT                 | TT               | INTRON                        | 101493571          | homeobox protein knotted-1-like 4 |
| SNP_46875_A_6058973 | NC_021166.1    | Ca_Kabuli_Chr07 | 6058973                 | GG                              | AA                 | AA               | INTRON                        | 101493571          | homeobox protein knotted-1-like 4 |
| SNP_46876_A_6059002 | NC_021166.1    | Ca_Kabuli_Chr07 | 6059002                 | CC                              | GG                 | GG               | INTRON                        | 101493571          | homeobox protein knotted-1-like 4 |
| SNP_46879_A_6060905 | NC_021166.1    | Ca_Kabuli_Chr07 | 6060905                 | AA                              | CC                 | CC               | INTERGENIC                    |                    |                                   |
| SNP_46880_A_6060961 | NC_021166.1    | Ca_Kabuli_Chr07 | 6060961                 | AA                              | GG                 | GG               | INTERGENIC                    |                    |                                   |
| SNP_46881_A_6060963 | NC_021166.1    | Ca_Kabuli_Chr07 | 6060963                 | TT                              | CC                 | CC               | INTERGENIC                    |                    |                                   |
| SNP_46882_A_6061068 | NC_021166.1    | Ca_Kabuli_Chr07 | 6061068                 | GG                              | AA                 | AA               | INTERGENIC                    |                    |                                   |
| SNP_46883_A_6061115 | NC_021166.1    | Ca_Kabuli_Chr07 | 6061115                 | AA                              | TT                 | TT               | INTERGENIC                    |                    |                                   |
| SNP_46884_A_6061126 | NC_021166.1    | Ca_Kabuli_Chr07 | 6061126                 | TT                              | CC                 | CC               | INTERGENIC                    |                    |                                   |
| SNP_46886_A_6065915 | NC_021166.1    | Ca_Kabuli_Chr07 | 6065915                 | TT                              | CC                 | CC               | DRR                           | 101506133          | uncharacterized LOC101506133      |
| SNP_46887_A_6065924 | NC_021166.1    | Ca_Kabuli_Chr07 | 6065924                 | GG                              | AA                 | AA               | DRR                           | 101506133          | uncharacterized LOC101506133      |
| SNP_46888_A_6078557 | NC_021166.1    | Ca_Kabuli_Chr07 | 6078557                 | GG                              | AA                 | AA               | INTERGENIC                    |                    |                                   |



| SNPs IDs            | Chromosome IDs | Chromosomes     | Physical positions (bp) | CDC Frontier (Reference genome) | (Pusa 1103 & HPNB) | (ILWC 46 & LPNB) | Sequence Components of genome | Gene accession IDs | Putative functions           |
|---------------------|----------------|-----------------|-------------------------|---------------------------------|--------------------|------------------|-------------------------------|--------------------|------------------------------|
| SNP_46889_A_6079444 | NC_021166.1    | Ca_Kabuli_Chr07 | 6079444                 | GG                              | AA                 | AA               | INTERGENIC                    |                    |                              |
| SNP_46890_A_6080946 | NC_021166.1    | Ca_Kabuli_Chr07 | 6080946                 | TT                              | AA                 | AA               | INTERGENIC                    |                    |                              |
| SNP_46892_A_6082116 | NC_021166.1    | Ca_Kabuli_Chr07 | 6082116                 | TT                              | CC                 | CC               | INTERGENIC                    |                    |                              |
| SNP_46893_A_6082118 | NC_021166.1    | Ca_Kabuli_Chr07 | 6082118                 | CC                              | AA                 | AA               | INTERGENIC                    |                    |                              |
| SNP_46894_A_6082129 | NC_021166.1    | Ca_Kabuli_Chr07 | 6082129                 | GG                              | AA                 | AA               | INTERGENIC                    |                    |                              |
| SNP_46895_A_6082138 | NC_021166.1    | Ca_Kabuli_Chr07 | 6082138                 | CC                              | GG                 | GG               | INTERGENIC                    |                    |                              |
| SNP_46896_A_6082139 | NC_021166.1    | Ca_Kabuli_Chr07 | 6082139                 | CC                              | TT                 | TT               | INTERGENIC                    |                    |                              |
| SNP_46897_A_6082468 | NC_021166.1    | Ca_Kabuli_Chr07 | 6082468                 | TT                              | CC                 | CC               | INTERGENIC                    |                    |                              |
| SNP_46899_A_6083912 | NC_021166.1    | Ca_Kabuli_Chr07 | 6083912                 | TT                              | GG                 | GG               | INTERGENIC                    |                    |                              |
| SNP_46900_A_6091125 | NC_021166.1    | Ca_Kabuli_Chr07 | 6091125                 | AA                              | GG                 | GG               | URR                           | 101506464          | uncharacterized LOC101506464 |
| SNP_46901_A_6091156 | NC_021166.1    | Ca_Kabuli_Chr07 | 6091156                 | GG                              | AA                 | AA               | URR                           | 101506464          | uncharacterized LOC101506464 |
| SNP_46902_A_6091159 | NC_021166.1    | Ca_Kabuli_Chr07 | 6091159                 | GG                              | AA                 | AA               | URR                           | 101506464          | uncharacterized LOC101506464 |
| SNP_46903_A_6091174 | NC_021166.1    | Ca_Kabuli_Chr07 | 6091174                 | CC                              | TT                 | TT               | URR                           | 101506464          | uncharacterized LOC101506464 |
| SNP_46904_A_6091578 | NC_021166.1    | Ca_Kabuli_Chr07 | 6091578                 | GG                              | TT                 | TT               | URR                           | 101506464          | uncharacterized LOC101506464 |
| SNP_46905_A_6091701 | NC_021166.1    | Ca_Kabuli_Chr07 | 6091701                 | GG                              | AA                 | AA               | URR                           | 101506464          | uncharacterized LOC101506464 |
| SNP_46906_A_6091824 | NC_021166.1    | Ca_Kabuli_Chr07 | 6091824                 | TT                              | CC                 | CC               | URR                           | 101506464          | uncharacterized LOC101506464 |
| SNP_46907_A_6092030 | NC_021166.1    | Ca_Kabuli_Chr07 | 6092030                 | TT                              | GG                 | GG               | INTERGENIC                    |                    |                              |
| SNP_46908_A_6094060 | NC_021166.1    | Ca_Kabuli_Chr07 | 6094060                 | AA                              | GG                 | GG               | INTERGENIC                    |                    |                              |
| SNP_46910_A_6094075 | NC_021166.1    | Ca_Kabuli_Chr07 | 6094075                 | TT                              | GG                 | GG               | INTERGENIC                    |                    |                              |
| SNP_46911_A_6094080 | NC_021166.1    | Ca_Kabuli_Chr07 | 6094080                 | TT                              | CC                 | CC               | INTERGENIC                    |                    |                              |
| SNP_46913_A_6100736 | NC_021166.1    | Ca_Kabuli_Chr07 | 6100736                 | GG                              | AA                 | AA               | INTERGENIC                    |                    |                              |
| SNP_46914_A_6100748 | NC_021166.1    | Ca_Kabuli_Chr07 | 6100748                 | TT                              | AA                 | AA               | INTERGENIC                    |                    |                              |

| SNPs IDs            | Chromosome IDs | Chromosomes     | Physical positions (bp) | CDC Frontier (Reference genome) | (Pusa 1103 & HPNB) | (ILWC 46 & LPNB) | Sequence Components of genome | Gene accession IDs | Putative functions           |
|---------------------|----------------|-----------------|-------------------------|---------------------------------|--------------------|------------------|-------------------------------|--------------------|------------------------------|
| SNP_46915_A_6100790 | NC_021166.1    | Ca_Kabuli_Chr07 | 6100790                 | GG                              | CC                 | CC               | INTERGENIC                    |                    |                              |
| SNP_46916_A_6100928 | NC_021166.1    | Ca_Kabuli_Chr07 | 6100928                 | TT                              | CC                 | CC               | INTERGENIC                    |                    |                              |
| SNP_46917_A_6100931 | NC_021166.1    | Ca_Kabuli_Chr07 | 6100931                 | TT                              | CC                 | CC               | INTERGENIC                    |                    |                              |
| SNP_46918_A_6100946 | NC_021166.1    | Ca_Kabuli_Chr07 | 6100946                 | TT                              | CC                 | CC               | INTERGENIC                    |                    |                              |
| SNP_46920_A_6102124 | NC_021166.1    | Ca_Kabuli_Chr07 | 6102124                 | GG                              | AA                 | AA               | URR                           | 101493889          | uncharacterized LOC101493889 |
| SNP_46921_A_6102134 | NC_021166.1    | Ca_Kabuli_Chr07 | 6102134                 | TT                              | CC                 | CC               | URR                           | 101493889          | uncharacterized LOC101493889 |
| SNP_46922_A_6102140 | NC_021166.1    | Ca_Kabuli_Chr07 | 6102140                 | AA                              | TT                 | TT               | URR                           | 101493889          | uncharacterized LOC101493889 |
| SNP_46923_A_6102142 | NC_021166.1    | Ca_Kabuli_Chr07 | 6102142                 | CC                              | TT                 | TT               | URR                           | 101493889          | uncharacterized LOC101493889 |
| SNP_46924_A_6102143 | NC_021166.1    | Ca_Kabuli_Chr07 | 6102143                 | GG                              | CC                 | CC               | URR                           | 101493889          | uncharacterized LOC101493889 |
| SNP_46925_A_6102160 | NC_021166.1    | Ca_Kabuli_Chr07 | 6102160                 | CC                              | TT                 | TT               | URR                           | 101493889          | uncharacterized LOC101493889 |
| SNP_46926_A_6102168 | NC_021166.1    | Ca_Kabuli_Chr07 | 6102168                 | TT                              | GG                 | GG               | URR                           | 101493889          | uncharacterized LOC101493889 |
| SNP_46927_A_6102437 | NC_021166.1    | Ca_Kabuli_Chr07 | 6102437                 | TT                              | CC                 | CC               | URR                           | 101493889          | uncharacterized LOC101493889 |
| SNP_46928_A_6102872 | NC_021166.1    | Ca_Kabuli_Chr07 | 6102872                 | TT                              | CC                 | CC               | URR                           | 101493889          | uncharacterized LOC101493889 |
| SNP_46929_A_6103154 | NC_021166.1    | Ca_Kabuli_Chr07 | 6103154                 | TT                              | AA                 | AA               | URR                           | 101493889          | uncharacterized LOC101493889 |
| SNP_46930_A_6103158 | NC_021166.1    | Ca_Kabuli_Chr07 | 6103158                 | AA                              | TT                 | TT               | URR                           | 101493889          | uncharacterized LOC101493889 |
| SNP_46931_A_6103159 | NC_021166.1    | Ca_Kabuli_Chr07 | 6103159                 | AA                              | TT                 | TT               | URR                           | 101493889          | uncharacterized LOC101493889 |
| SNP_46932_A_6103160 | NC_021166.1    | Ca_Kabuli_Chr07 | 6103160                 | AA                              | TT                 | TT               | URR                           | 101493889          | uncharacterized LOC101493889 |
| SNP_46933_A_6103161 | NC_021166.1    | Ca_Kabuli_Chr07 | 6103161                 | AA                              | TT                 | TT               | URR                           | 101493889          | uncharacterized LOC101493889 |
| SNP_46935_A_6104908 | NC_021166.1    | Ca_Kabuli_Chr07 | 6104908                 | AA                              | GG                 | GG               | INTERGENIC                    |                    |                              |
| SNP_46936_A_6104918 | NC_021166.1    | Ca_Kabuli_Chr07 | 6104918                 | CC                              | TT                 | TT               | INTERGENIC                    |                    |                              |
| SNP_46937_A_6105426 | NC_021166.1    | Ca_Kabuli_Chr07 | 6105426                 | AA                              | TT                 | TT               | INTERGENIC                    |                    |                              |
| SNP_46938_A_6106263 | NC_021166.1    | Ca_Kabuli_Chr07 | 6106263                 | GG                              | TT                 | TT               | INTERGENIC                    |                    |                              |

| SNPs IDs            | Chromosome IDs | Chromosomes     | Physical positions (bp) | CDC Frontier genome (Reference genome) | (Pusa 1103 & HPNB) | (ILWC 46 & LPNB) | Sequence Components of genome | Gene accession IDs | Putative functions                                   |
|---------------------|----------------|-----------------|-------------------------|----------------------------------------|--------------------|------------------|-------------------------------|--------------------|------------------------------------------------------|
| SNP_46940_A_6106981 | NC_021166.1    | Ca_Kabuli_Chr07 | 6106981                 | AA                                     | CC                 | CC               | INTERGENIC                    |                    |                                                      |
| SNP_46941_A_6106987 | NC_021166.1    | Ca_Kabuli_Chr07 | 6106987                 | AA                                     | CC                 | CC               | INTERGENIC                    |                    |                                                      |
| SNP_46942_A_6106999 | NC_021166.1    | Ca_Kabuli_Chr07 | 6106999                 | CC                                     | AA                 | AA               | DRR                           | 101507129          | 116 kDa U5 small nuclear ribonucleoprotein component |
| SNP_46943_A_6107049 | NC_021166.1    | Ca_Kabuli_Chr07 | 6107049                 | GG                                     | TT                 | TT               | DRR                           | 101507129          | 116 kDa U5 small nuclear ribonucleoprotein component |
| SNP_46944_A_6107066 | NC_021166.1    | Ca_Kabuli_Chr07 | 6107066                 | GG                                     | AA                 | AA               | DRR                           | 101507129          | 116 kDa U5 small nuclear ribonucleoprotein component |
| SNP_46945_A_6107080 | NC_021166.1    | Ca_Kabuli_Chr07 | 6107080                 | AA                                     | GG                 | GG               | DRR                           | 101507129          | 116 kDa U5 small nuclear ribonucleoprotein component |
| SNP_46946_A_6107082 | NC_021166.1    | Ca_Kabuli_Chr07 | 6107082                 | CC                                     | TT                 | TT               | DRR                           | 101507129          | 116 kDa U5 small nuclear ribonucleoprotein component |
| SNP_46947_A_6107103 | NC_021166.1    | Ca_Kabuli_Chr07 | 6107103                 | CC                                     | TT                 | TT               | DRR                           | 101507129          | 116 kDa U5 small nuclear ribonucleoprotein component |
| SNP_46948_A_6107163 | NC_021166.1    | Ca_Kabuli_Chr07 | 6107163                 | CC                                     | TT                 | TT               | DRR                           | 101507129          | 116 kDa U5 small nuclear ribonucleoprotein component |
| SNP_46951_A_6107664 | NC_021166.1    | Ca_Kabuli_Chr07 | 6107664                 | TT                                     | CC                 | CC               | DRR                           | 101507129          | 116 kDa U5 small nuclear ribonucleoprotein component |
| SNP_46952_A_6107665 | NC_021166.1    | Ca_Kabuli_Chr07 | 6107665                 | CC                                     | TT                 | TT               | DRR                           | 101507129          | 116 kDa U5 small nuclear ribonucleoprotein component |
| SNP_46953_A_6107704 | NC_021166.1    | Ca_Kabuli_Chr07 | 6107704                 | GG                                     | AA                 | AA               | DRR                           | 101507129          | 116 kDa U5 small nuclear ribonucleoprotein component |
| SNP_46954_A_6112929 | NC_021166.1    | Ca_Kabuli_Chr07 | 6112929                 | AA                                     | GG                 | GG               | DRR                           | 101507450          | probable protein phosphatase 2C 27                   |
| SNP_46955_A_6114858 | NC_021166.1    | Ca_Kabuli_Chr07 | 6114858                 | TT                                     | GG                 | GG               | URR                           | 101507129          | 116 kDa U5 small nuclear ribonucleoprotein component |
| SNP_46956_A_6116668 | NC_021166.1    | Ca_Kabuli_Chr07 | 6116668                 | TT                                     | CC                 | CC               | DOWNSTREAM                    | EFTUD2             | Unknown function                                     |
| SNP_46957_A_6118995 | NC_021166.1    | Ca_Kabuli_Chr07 | 6118995                 | TT                                     | GG                 | GG               | INTERGENIC                    |                    |                                                      |
| SNP_46959_A_6120602 | NC_021166.1    | Ca_Kabuli_Chr07 | 6120602                 | AA                                     | GG                 | GG               | INTERGENIC                    |                    |                                                      |
| SNP_46961_A_6125221 | NC_021166.1    | Ca_Kabuli_Chr07 | 6125221                 | GG                                     | AA                 | AA               | URR                           | 101507753          | 40S ribosomal protein S11                            |
| SNP_46965_A_6126843 | NC_021166.1    | Ca_Kabuli_Chr07 | 6126843                 | TT                                     | AA                 | AA               | DRR                           | 101508078          | large proline-rich protein bag6-A                    |
| SNP_46966_A_6131558 | NC_021166.1    | Ca_Kabuli_Chr07 | 6131558                 | TT                                     | AA                 | AA               | INTRON                        | id160373           | Unknown function                                     |
| SNP_46967_A_6135379 | NC_021166.1    | Ca_Kabuli_Chr07 | 6135379                 | CC                                     | AA                 | AA               | INTRON                        | id160373           | Unknown function                                     |
| SNP_46968_A_6135594 | NC_021166.1    | Ca_Kabuli_Chr07 | 6135594                 | TT                                     | AA                 | AA               | INTRON                        | id160373           | Unknown function                                     |

| SNPs IDs            | Chromosome IDs | Chromosomes     | Physical positions (bp) | CDC Frontier (Reference genome) | (Pusa 1103 & HPNB) | (ILWC 46 & LPNB) | Sequence Components of genome | Gene accession IDs | Putative functions                          |
|---------------------|----------------|-----------------|-------------------------|---------------------------------|--------------------|------------------|-------------------------------|--------------------|---------------------------------------------|
| SNP_46969_A_6141640 | NC_021166.1    | Ca_Kabuli_Chr07 | 6141640                 | TT                              | CC                 | CC               | URR                           | 101508078          | large proline-rich protein bag6-A           |
| SNP_46970_A_6141702 | NC_021166.1    | Ca_Kabuli_Chr07 | 6141702                 | AA                              | TT                 | TT               | URR                           | 101508078          | large proline-rich protein bag6-A           |
| SNP_46971_A_6142218 | NC_021166.1    | Ca_Kabuli_Chr07 | 6142218                 | CC                              | AA                 | AA               | URR                           | 101508078          | large proline-rich protein bag6-A           |
| SNP_46972_A_6142269 | NC_021166.1    | Ca_Kabuli_Chr07 | 6142269                 | CC                              | TT                 | TT               | URR                           | 101508078          | large proline-rich protein bag6-A           |
| SNP_46973_A_6143400 | NC_021166.1    | Ca_Kabuli_Chr07 | 6143400                 | AA                              | GG                 | GG               | INTERGENIC                    |                    |                                             |
| SNP_46974_A_6144928 | NC_021166.1    | Ca_Kabuli_Chr07 | 6144928                 | TT                              | CC                 | CC               | INTERGENIC                    |                    |                                             |
| SNP_46975_A_6153897 | NC_021166.1    | Ca_Kabuli_Chr07 | 6153897                 | GG                              | AA                 | AA               | INTERGENIC                    |                    |                                             |
| SNP_46976_A_6157168 | NC_021166.1    | Ca_Kabuli_Chr07 | 6157168                 | CC                              | AA                 | AA               | URR                           | 101508703          | uncharacterized LOC101508703                |
| SNP_46977_A_6157333 | NC_021166.1    | Ca_Kabuli_Chr07 | 6157333                 | TT                              | GG                 | GG               | URR                           | 101508703          | uncharacterized LOC101508703                |
| SNP_46978_A_6157335 | NC_021166.1    | Ca_Kabuli_Chr07 | 6157335                 | GG                              | AA                 | AA               | URR                           | 101508703          | uncharacterized LOC101508703                |
| SNP_46979_A_6157371 | NC_021166.1    | Ca_Kabuli_Chr07 | 6157371                 | GG                              | AA                 | AA               | URR                           | 101508703          | uncharacterized LOC101508703                |
| SNP_46980_A_6157378 | NC_021166.1    | Ca_Kabuli_Chr07 | 6157378                 | GG                              | TT                 | TT               | URR                           | 101508703          | uncharacterized LOC101508703                |
| SNP_46981_A_6160438 | NC_021166.1    | Ca_Kabuli_Chr07 | 6160438                 | TT                              | AA                 | AA               | INTERGENIC                    |                    |                                             |
| SNP_46982_A_6162790 | NC_021166.1    | Ca_Kabuli_Chr07 | 6162790                 | AA                              | TT                 | TT               | INTERGENIC                    |                    |                                             |
| SNP_46983_A_6162943 | NC_021166.1    | Ca_Kabuli_Chr07 | 6162943                 | TT                              | AA                 | AA               | INTERGENIC                    |                    |                                             |
| SNP_46985_A_6165447 | NC_021166.1    | Ca_Kabuli_Chr07 | 6165447                 | GG                              | AA                 | AA               | DRR                           | 101509020          | uncharacterized LOC101509020                |
| SNP_46987_A_6220220 | NC_021166.1    | Ca_Kabuli_Chr07 | 6220220                 | AA                              | CC                 | CC               | INTRON                        | 101510637          | uncharacterized LOC101510637                |
| SNP_46988_A_6313528 | NC_021166.1    | Ca_Kabuli_Chr07 | 6313528                 | TT                              | CC                 | CC               | INTERGENIC                    |                    |                                             |
| SNP_46989_A_6313850 | NC_021166.1    | Ca_Kabuli_Chr07 | 6313850                 | TT                              | AA                 | AA               | INTERGENIC                    |                    |                                             |
| SNP_46991_A_6339958 | NC_021166.1    | Ca_Kabuli_Chr07 | 6339958                 | TT                              | AA                 | AA               | DRR                           | 101489230          | actin-related protein 2/3 complex subunit 3 |
| SNP_46993_A_6434182 | NC_021166.1    | Ca_Kabuli_Chr07 | 6434182                 | TT                              | CC                 | CC               | URR                           | 101493995          | probable sucrose-phosphate synthase         |
| SNP_46995_A_6610050 | NC_021166.1    | Ca_Kabuli_Chr07 | 6610050                 | GG                              | TT                 | TT               | INTERGENIC                    |                    |                                             |

| SNPs IDs            | Chromosome IDs | Chromosomes     | Physical positions (bp) | CDC Frontier (Reference genome) | (Pusa 1103 & HPNB) | (ILWC 46 & LPNB) | Sequence Components of genome | Gene accession IDs | Putative functions                                 |
|---------------------|----------------|-----------------|-------------------------|---------------------------------|--------------------|------------------|-------------------------------|--------------------|----------------------------------------------------|
| SNP_46996_A_6629117 | NC_021166.1    | Ca_Kabuli_Chr07 | 6629117                 | TT                              | CC                 | CC               | INTERGENIC                    |                    |                                                    |
| SNP_46997_A_6659707 | NC_021166.1    | Ca_Kabuli_Chr07 | 6659707                 | AA                              | CC                 | CC               | INTERGENIC                    |                    |                                                    |
| SNP_46999_A_6703235 | NC_021166.1    | Ca_Kabuli_Chr07 | 6703235                 | TT                              | CC                 | CC               | SYNONYMOUS_CODING             | 101501950          | topless-related protein 4-like                     |
| SNP_47000_A_6719148 | NC_021166.1    | Ca_Kabuli_Chr07 | 6719148                 | TT                              | CC                 | CC               | DRR                           | 101502794          | putative clathrin assembly protein At2g25430       |
| SNP_47001_A_6832606 | NC_021166.1    | Ca_Kabuli_Chr07 | 6832606                 | GG                              | AA                 | AA               | INTERGENIC                    |                    |                                                    |
| SNP_47004_A_6855448 | NC_021166.1    | Ca_Kabuli_Chr07 | 6855448                 | AA                              | GG                 | GG               | NON_SYNONYMOUS_CODING         | 101507330          | CBL-interacting serine/threonine-protein kinase 24 |
| SNP_47005_A_6906490 | NC_021166.1    | Ca_Kabuli_Chr07 | 6906490                 | AA                              | GG                 | GG               | URR                           | 101508273          | uncharacterized LOC101508273                       |
| SNP_47007_A_6918299 | NC_021166.1    | Ca_Kabuli_Chr07 | 6918299                 | TT                              | AA                 | AA               | URR                           | 101509021          | uncharacterized LOC101509021                       |
| SNP_47008_A_7009387 | NC_021166.1    | Ca_Kabuli_Chr07 | 7009387                 | AA                              | CC                 | CC               | INTRON                        | 101513969          | protein NRT1/ PTR FAMILY 6.2                       |
| SNP_47009_A_7051010 | NC_021166.1    | Ca_Kabuli_Chr07 | 7051010                 | GG                              | AA                 | AA               | INTERGENIC                    |                    |                                                    |
| SNP_47010_A_7078820 | NC_021166.1    | Ca_Kabuli_Chr07 | 7078820                 | AA                              | GG                 | GG               | DRR                           | 101496804          | uncharacterized protein At1g15400-like             |
| SNP_47011_A_7135917 | NC_021166.1    | Ca_Kabuli_Chr07 | 7135917                 | TT                              | CC                 | CC               | INTERGENIC                    |                    |                                                    |
| SNP_47012_A_7184712 | NC_021166.1    | Ca_Kabuli_Chr07 | 7184712                 | AA                              | CC                 | CC               | INTERGENIC                    |                    |                                                    |
| SNP_47013_A_7208803 | NC_021166.1    | Ca_Kabuli_Chr07 | 7208803                 | AA                              | TT                 | TT               | INTERGENIC                    |                    |                                                    |
| SNP_47014_A_7209131 | NC_021166.1    | Ca_Kabuli_Chr07 | 7209131                 | CC                              | GG                 | GG               | INTERGENIC                    |                    |                                                    |
| SNP_47015_A_7224378 | NC_021166.1    | Ca_Kabuli_Chr07 | 7224378                 | TT                              | CC                 | CC               | DRR                           | 101495050          | uncharacterized LOC101495050                       |
| SNP_47016_A_7232216 | NC_021166.1    | Ca_Kabuli_Chr07 | 7232216                 | GG                              | AA                 | AA               | INTERGENIC                    |                    |                                                    |
| SNP_47017_A_7241785 | NC_021166.1    | Ca_Kabuli_Chr07 | 7241785                 | TT                              | CC                 | CC               | INTERGENIC                    |                    |                                                    |
| SNP_47019_A_7269663 | NC_021166.1    | Ca_Kabuli_Chr07 | 7269663                 | TT                              | CC                 | CC               | URR                           | 101496257          | uncharacterized LOC101496257                       |
| SNP_47021_A_7298884 | NC_021166.1    | Ca_Kabuli_Chr07 | 7298884                 | TT                              | AA                 | AA               | DRR                           | 101499305          | nipped-B-like protein B                            |
| SNP_47022_A_7331797 | NC_021166.1    | Ca_Kabuli_Chr07 | 7331797                 | GG                              | AA                 | AA               | URR                           | 101500693          | probable inactive receptor kinase At2g26730        |
| SNP_47023_A_7331798 | NC_021166.1    | Ca_Kabuli_Chr07 | 7331798                 | AA                              | GG                 | GG               | URR                           | 101500693          | probable inactive receptor kinase At2g26730        |

| SNPs IDs            | Chromosome IDs | Chromosomes     | Physical positions (bp) | CDC Frontier (Reference genome) | (Pusa 1103 & HPNB) | (ILWC 46 & LPNB) | Sequence Components of genome | Gene accession IDs | Putative functions                                                                     |
|---------------------|----------------|-----------------|-------------------------|---------------------------------|--------------------|------------------|-------------------------------|--------------------|----------------------------------------------------------------------------------------|
| SNP_47024_A_7332037 | NC_021166.1    | Ca_Kabuli_Chr07 | 7332037                 | GG                              | AA                 | AA               | URR                           | 101500693          | probable inactive receptor kinase At2g26730                                            |
| SNP_47027_A_7332270 | NC_021166.1    | Ca_Kabuli_Chr07 | 7332270                 | AA                              | GG                 | GG               | URR                           | 101500693          | probable inactive receptor kinase At2g26730                                            |
| SNP_47028_A_7333297 | NC_021166.1    | Ca_Kabuli_Chr07 | 7333297                 | GG                              | AA                 | AA               | INTERGENIC                    |                    |                                                                                        |
| SNP_47030_A_7339331 | NC_021166.1    | Ca_Kabuli_Chr07 | 7339331                 | AA                              | CC                 | CC               | INTERGENIC                    |                    |                                                                                        |
| SNP_47031_A_7340606 | NC_021166.1    | Ca_Kabuli_Chr07 | 7340606                 | TT                              | AA                 | AA               | DRR                           | 101501005          | sodium/pyruvate cotransporter BASS2, chloroplastic                                     |
| SNP_47032_A_7341497 | NC_021166.1    | Ca_Kabuli_Chr07 | 7341497                 | GG                              | AA                 | AA               | INTRON                        | 101501005          | sodium/pyruvate cotransporter BASS2, chloroplastic                                     |
| SNP_47033_A_7341516 | NC_021166.1    | Ca_Kabuli_Chr07 | 7341516                 | GG                              | AA                 | AA               | INTRON                        | 101501005          | sodium/pyruvate cotransporter BASS2, chloroplastic                                     |
| SNP_47034_A_7341527 | NC_021166.1    | Ca_Kabuli_Chr07 | 7341527                 | CC                              | TT                 | TT               | INTRON                        | 101501005          | sodium/pyruvate cotransporter BASS2, chloroplastic                                     |
| SNP_47035_A_7366467 | NC_021166.1    | Ca_Kabuli_Chr07 | 7366467                 | TT                              | GG                 | GG               | URR                           | 101501640          | uncharacterized LOC101501640                                                           |
| SNP_47036_A_7367329 | NC_021166.1    | Ca_Kabuli_Chr07 | 7367329                 | GG                              | AA                 | AA               | URR                           | 101501640          | uncharacterized LOC101501640                                                           |
| SNP_47037_A_7368594 | NC_021166.1    | Ca_Kabuli_Chr07 | 7368594                 | AA                              | GG                 | GG               | INTERGENIC                    |                    |                                                                                        |
| SNP_47038_A_7378500 | NC_021166.1    | Ca_Kabuli_Chr07 | 7378500                 | AA                              | GG                 | GG               | URR                           | 101501855          | ABC transporter G family member 32                                                     |
| SNP_47039_A_7378769 | NC_021166.1    | Ca_Kabuli_Chr07 | 7378769                 | GG                              | AA                 | AA               | URR                           | 101501855          | ABC transporter G family member 32                                                     |
| SNP_47041_A_7383564 | NC_021166.1    | Ca_Kabuli_Chr07 | 7383564                 | GG                              | AA                 | AA               | DRR                           | 101502178          | transmembrane protein 19                                                               |
| SNP_47042_A_7383816 | NC_021166.1    | Ca_Kabuli_Chr07 | 7383816                 | TT                              | CC                 | CC               | DRR                           | 101502178          | transmembrane protein 19                                                               |
| SNP_47043_A_7384994 | NC_021166.1    | Ca_Kabuli_Chr07 | 7384994                 | AA                              | GG                 | GG               | INTERGENIC                    |                    |                                                                                        |
| SNP_47045_A_7390206 | NC_021166.1    | Ca_Kabuli_Chr07 | 7390206                 | GG                              | CC                 | CC               | DRR                           | 101502492          | serine/threonine protein phosphatase 2A 57 kDa regulatory subunit B' iota isoform-like |
| SNP_47046_A_7390210 | NC_021166.1    | Ca_Kabuli_Chr07 | 7390210                 | AA                              | TT                 | TT               | DRR                           | 101502492          | serine/threonine protein phosphatase 2A 57 kDa regulatory subunit B' iota isoform-like |
| SNP_47047_A_7391003 | NC_021166.1    | Ca_Kabuli_Chr07 | 7391003                 | TT                              | CC                 | CC               | URR                           | 101497460          | Unknown function                                                                       |
| SNP_47048_A_7395026 | NC_021166.1    | Ca_Kabuli_Chr07 | 7395026                 | CC                              | AA                 | AA               | URR                           | 101502492          | serine/threonine protein phosphatase 2A 57 kDa regulatory subunit B' iota isoform-like |
| SNP_47049_A_7395366 | NC_021166.1    | Ca_Kabuli_Chr07 | 7395366                 | GG                              | AA                 | AA               | URR                           | 101502492          | serine/threonine protein phosphatase 2A 57 kDa regulatory subunit B' iota isoform-like |
| SNP_47050_A_7399808 | NC_021166.1    | Ca_Kabuli_Chr07 | 7399808                 | CC                              | GG                 | GG               | INTERGENIC                    |                    |                                                                                        |

| SNPs IDs            | Chromosome IDs | Chromosomes     | Physical positions (bp) | CDC Frontier genome (Reference genome) | (Pusa 1103 & HPNB) | (ILWC 46 & LPNB) | Sequence Components of genome | Gene accession IDs | Putative functions                                              |
|---------------------|----------------|-----------------|-------------------------|----------------------------------------|--------------------|------------------|-------------------------------|--------------------|-----------------------------------------------------------------|
| SNP_47052_A_7404753 | NC_021166.1    | Ca_Kabuli_Chr07 | 7404753                 | CC                                     | AA                 | AA               | DRR                           | 101502796          | palmitoyl-acyl carrier protein thioesterase, chloroplastic-like |
| SNP_47054_A_7411627 | NC_021166.1    | Ca_Kabuli_Chr07 | 7411627                 | CC                                     | AA                 | AA               | URR                           | 101502796          | palmitoyl-acyl carrier protein thioesterase, chloroplastic-like |
| SNP_47056_A_7411644 | NC_021166.1    | Ca_Kabuli_Chr07 | 7411644                 | GG                                     | AA                 | AA               | URR                           | 101502796          | palmitoyl-acyl carrier protein thioesterase, chloroplastic-like |
| SNP_47057_A_7411713 | NC_021166.1    | Ca_Kabuli_Chr07 | 7411713                 | GG                                     | AA                 | AA               | URR                           | 101502796          | palmitoyl-acyl carrier protein thioesterase, chloroplastic-like |
| SNP_47059_A_7411943 | NC_021166.1    | Ca_Kabuli_Chr07 | 7411943                 | CC                                     | AA                 | AA               | INTERGENIC                    |                    |                                                                 |
| SNP_47060_A_7412032 | NC_021166.1    | Ca_Kabuli_Chr07 | 7412032                 | CC                                     | TT                 | TT               | INTERGENIC                    |                    |                                                                 |
| SNP_47061_A_7412099 | NC_021166.1    | Ca_Kabuli_Chr07 | 7412099                 | TT                                     | AA                 | AA               | INTERGENIC                    |                    |                                                                 |
| SNP_47062_A_7417485 | NC_021166.1    | Ca_Kabuli_Chr07 | 7417485                 | GG                                     | TT                 | TT               | INTERGENIC                    |                    |                                                                 |
| SNP_47063_A_7420203 | NC_021166.1    | Ca_Kabuli_Chr07 | 7420203                 | TT                                     | AA                 | AA               | DRR                           | 101503781          | dnaJ homolog subfamily C GRV2                                   |
| SNP_47064_A_7428253 | NC_021166.1    | Ca_Kabuli_Chr07 | 7428253                 | CC                                     | TT                 | TT               | SYNONYMOUS_CODING             | 101503781          | dnaJ homolog subfamily C GRV2                                   |
| SNP_47065_A_7429106 | NC_021166.1    | Ca_Kabuli_Chr07 | 7429106                 | AA                                     | GG                 | GG               | INTRON                        | 101503781          | dnaJ homolog subfamily C GRV2                                   |
| SNP_47066_A_7440665 | NC_021166.1    | Ca_Kabuli_Chr07 | 7440665                 | TT                                     | CC                 | CC               | INTERGENIC                    |                    |                                                                 |
| SNP_47068_A_7442404 | NC_021166.1    | Ca_Kabuli_Chr07 | 7442404                 | AA                                     | GG                 | GG               | INTERGENIC                    |                    |                                                                 |
| SNP_47069_A_7444891 | NC_021166.1    | Ca_Kabuli_Chr07 | 7444891                 | GG                                     | AA                 | AA               | DRR                           | 101503116          | glucan endo-1,3-beta-glucosidase 8-like                         |
| SNP_47070_A_7444894 | NC_021166.1    | Ca_Kabuli_Chr07 | 7444894                 | GG                                     | AA                 | AA               | DRR                           | 101503116          | glucan endo-1,3-beta-glucosidase 8-like                         |
| SNP_47071_A_7446753 | NC_021166.1    | Ca_Kabuli_Chr07 | 7446753                 | GG                                     | AA                 | AA               | INTERGENIC                    |                    |                                                                 |
| SNP_47072_A_7447140 | NC_021166.1    | Ca_Kabuli_Chr07 | 7447140                 | CC                                     | AA                 | AA               | INTERGENIC                    |                    |                                                                 |
| SNP_47073_A_7447141 | NC_021166.1    | Ca_Kabuli_Chr07 | 7447141                 | CC                                     | TT                 | TT               | INTERGENIC                    |                    |                                                                 |
| SNP_47074_A_7449038 | NC_021166.1    | Ca_Kabuli_Chr07 | 7449038                 | TT                                     | AA                 | AA               | URR                           | 101503116          | glucan endo-1,3-beta-glucosidase 8-like                         |
| SNP_47075_A_7455703 | NC_021166.1    | Ca_Kabuli_Chr07 | 7455703                 | GG                                     | AA                 | AA               | INTRON                        | 101504544          | tRNA (guanine(37)-N1)-methyltransferase 2                       |
| SNP_47077_A_7458767 | NC_021166.1    | Ca_Kabuli_Chr07 | 7458767                 | TT                                     | GG                 | GG               | INTERGENIC                    |                    |                                                                 |
| SNP_47080_A_7464962 | NC_021166.1    | Ca_Kabuli_Chr07 | 7464962                 | GG                                     | AA                 | AA               | INTRON                        | 101504857          | histone deacetylase 15                                          |

| SNPs IDs            | Chromosome IDs | Chromosomes     | Physical positions (bp) | CDC Frontier genome (Reference genome) | (Pusa 1103 & HPNB) | (ILWC 46 & LPNB) | Sequence Components of genome | Gene accession IDs | Putative functions               |
|---------------------|----------------|-----------------|-------------------------|----------------------------------------|--------------------|------------------|-------------------------------|--------------------|----------------------------------|
| SNP_47081_A_7468193 | NC_021166.1    | Ca_Kabuli_Chr07 | 7468193                 | GG                                     | CC                 | CC               | INTRON                        | 101504857          | histone deacetylase 15           |
| SNP_47082_A_7476346 | NC_021166.1    | Ca_Kabuli_Chr07 | 7476346                 | AA                                     | GG                 | GG               | URR                           | 101505171          | transcription factor DIVARICATA  |
| SNP_47083_A_7476603 | NC_021166.1    | Ca_Kabuli_Chr07 | 7476603                 | GG                                     | AA                 | AA               | URR                           | 101505171          | transcription factor DIVARICATA  |
| SNP_47084_A_7476634 | NC_021166.1    | Ca_Kabuli_Chr07 | 7476634                 | AA                                     | GG                 | GG               | URR                           | 101505171          | transcription factor DIVARICATA  |
| SNP_47085_A_7476664 | NC_021166.1    | Ca_Kabuli_Chr07 | 7476664                 | GG                                     | AA                 | AA               | URR                           | 101505171          | transcription factor DIVARICATA  |
| SNP_47086_A_7476694 | NC_021166.1    | Ca_Kabuli_Chr07 | 7476694                 | CC                                     | TT                 | TT               | URR                           | 101505171          | transcription factor DIVARICATA  |
| SNP_47087_A_7478376 | NC_021166.1    | Ca_Kabuli_Chr07 | 7478376                 | AA                                     | TT                 | TT               | INTERGENIC                    |                    |                                  |
| SNP_47088_A_7478921 | NC_021166.1    | Ca_Kabuli_Chr07 | 7478921                 | AA                                     | TT                 | TT               | INTERGENIC                    |                    |                                  |
| SNP_47089_A_7481031 | NC_021166.1    | Ca_Kabuli_Chr07 | 7481031                 | TT                                     | CC                 | CC               | DRR                           | 101505485          | uncharacterized LOC101505485     |
| SNP_47090_A_7489186 | NC_021166.1    | Ca_Kabuli_Chr07 | 7489186                 | CC                                     | TT                 | TT               | URR                           | 101505485          | uncharacterized LOC101505485     |
| SNP_47092_A_7496340 | NC_021166.1    | Ca_Kabuli_Chr07 | 7496340                 | TT                                     | CC                 | CC               | NON_SYNONYMOUS_CODING         | 101505823          | DNA mismatch repair protein MSH2 |
| SNP_47093_A_7498325 | NC_021166.1    | Ca_Kabuli_Chr07 | 7498325                 | AA                                     | GG                 | GG               | INTRON                        | 101505823          | DNA mismatch repair protein MSH2 |
| SNP_47094_A_7500736 | NC_021166.1    | Ca_Kabuli_Chr07 | 7500736                 | GG                                     | AA                 | AA               | INTRON                        | 101505823          | DNA mismatch repair protein MSH2 |
| SNP_47095_A_7500763 | NC_021166.1    | Ca_Kabuli_Chr07 | 7500763                 | CC                                     | TT                 | TT               | INTRON                        | 101505823          | DNA mismatch repair protein MSH2 |
| SNP_47096_A_7501427 | NC_021166.1    | Ca_Kabuli_Chr07 | 7501427                 | TT                                     | GG                 | GG               | URR                           | 101505823          | DNA mismatch repair protein MSH2 |
| SNP_47097_A_7501653 | NC_021166.1    | Ca_Kabuli_Chr07 | 7501653                 | CC                                     | TT                 | TT               | URR                           | 101505823          | DNA mismatch repair protein MSH2 |
| SNP_47098_A_7501655 | NC_021166.1    | Ca_Kabuli_Chr07 | 7501655                 | GG                                     | TT                 | TT               | URR                           | 101505823          | DNA mismatch repair protein MSH2 |
| SNP_47099_A_7502465 | NC_021166.1    | Ca_Kabuli_Chr07 | 7502465                 | TT                                     | CC                 | CC               | URR                           | 101505823          | DNA mismatch repair protein MSH2 |
| SNP_47100_A_7504476 | NC_021166.1    | Ca_Kabuli_Chr07 | 7504476                 | CC                                     | TT                 | TT               | INTERGENIC                    |                    |                                  |
| SNP_47101_A_7504487 | NC_021166.1    | Ca_Kabuli_Chr07 | 7504487                 | CC                                     | AA                 | AA               | INTERGENIC                    |                    |                                  |
| SNP_47102_A_7504538 | NC_021166.1    | Ca_Kabuli_Chr07 | 7504538                 | CC                                     | AA                 | AA               | INTERGENIC                    |                    |                                  |
| SNP_47103_A_7504562 | NC_021166.1    | Ca_Kabuli_Chr07 | 7504562                 | TT                                     | AA                 | AA               | INTERGENIC                    |                    |                                  |



| SNPs IDs            | Chromosome IDs | Chromosomes     | Physical positions (bp) | CDC Frontier genome (Reference genome) | (Pusa 1103 & HPNB) | (ILWC 46 & LPNB) | Sequence Components of genome | Gene accession IDs | Putative functions                                     |
|---------------------|----------------|-----------------|-------------------------|----------------------------------------|--------------------|------------------|-------------------------------|--------------------|--------------------------------------------------------|
| SNP_47104_A_7504566 | NC_021166.1    | Ca_Kabuli_Chr07 | 7504566                 | AA                                     | GG                 | GG               | INTERGENIC                    |                    |                                                        |
| SNP_47105_A_7506281 | NC_021166.1    | Ca_Kabuli_Chr07 | 7506281                 | TT                                     | CC                 | CC               | INTERGENIC                    |                    |                                                        |
| SNP_47107_A_7510997 | NC_021166.1    | Ca_Kabuli_Chr07 | 7510997                 | CC                                     | TT                 | TT               | URR                           | 101506134          | transcription factor TCP12                             |
| SNP_47108_A_7511216 | NC_021166.1    | Ca_Kabuli_Chr07 | 7511216                 | TT                                     | CC                 | CC               | URR                           | 101506134          | transcription factor TCP12                             |
| SNP_47109_A_7511227 | NC_021166.1    | Ca_Kabuli_Chr07 | 7511227                 | AA                                     | GG                 | GG               | URR                           | 101506134          | transcription factor TCP12                             |
| SNP_47110_A_7511625 | NC_021166.1    | Ca_Kabuli_Chr07 | 7511625                 | AA                                     | GG                 | GG               | URR                           | 101506134          | transcription factor TCP12                             |
| SNP_47111_A_7511632 | NC_021166.1    | Ca_Kabuli_Chr07 | 7511632                 | TT                                     | GG                 | GG               | URR                           | 101506134          | transcription factor TCP12                             |
| SNP_47112_A_7511787 | NC_021166.1    | Ca_Kabuli_Chr07 | 7511787                 | CC                                     | TT                 | TT               | URR                           | 101506134          | transcription factor TCP12                             |
| SNP_47113_A_7512071 | NC_021166.1    | Ca_Kabuli_Chr07 | 7512071                 | TT                                     | CC                 | CC               | URR                           | 101506134          | transcription factor TCP12                             |
| SNP_47114_A_7512078 | NC_021166.1    | Ca_Kabuli_Chr07 | 7512078                 | TT                                     | CC                 | CC               | URR                           | 101506134          | transcription factor TCP12                             |
| SNP_47115_A_7514493 | NC_021166.1    | Ca_Kabuli_Chr07 | 7514493                 | AA                                     | GG                 | GG               | INTERGENIC                    |                    |                                                        |
| SNP_47116_A_7514494 | NC_021166.1    | Ca_Kabuli_Chr07 | 7514494                 | GG                                     | AA                 | AA               | INTERGENIC                    |                    |                                                        |
| SNP_47117_A_7514501 | NC_021166.1    | Ca_Kabuli_Chr07 | 7514501                 | CC                                     | TT                 | TT               | INTERGENIC                    |                    |                                                        |
| SNP_47118_A_7515238 | NC_021166.1    | Ca_Kabuli_Chr07 | 7515238                 | GG                                     | AA                 | AA               | INTERGENIC                    |                    |                                                        |
| SNP_47119_A_7520773 | NC_021166.1    | Ca_Kabuli_Chr07 | 7520773                 | TT                                     | CC                 | CC               | INTRON                        | 101506465          | transcription initiation factor TFIID subunit 2        |
| SNP_47120_A_7532406 | NC_021166.1    | Ca_Kabuli_Chr07 | 7532406                 | CC                                     | TT                 | TT               | URR                           | 101506465          | transcription initiation factor TFIID subunit 2        |
| SNP_47121_A_7535810 | NC_021166.1    | Ca_Kabuli_Chr07 | 7535810                 | CC                                     | TT                 | TT               | INTERGENIC                    |                    |                                                        |
| SNP_47122_A_7536095 | NC_021166.1    | Ca_Kabuli_Chr07 | 7536095                 | TT                                     | CC                 | CC               | INTERGENIC                    |                    |                                                        |
| SNP_47123_A_7536104 | NC_021166.1    | Ca_Kabuli_Chr07 | 7536104                 | GG                                     | AA                 | AA               | INTERGENIC                    |                    |                                                        |
| SNP_47124_A_7536307 | NC_021166.1    | Ca_Kabuli_Chr07 | 7536307                 | AA                                     | TT                 | TT               | INTERGENIC                    |                    |                                                        |
| SNP_47125_A_7536316 | NC_021166.1    | Ca_Kabuli_Chr07 | 7536316                 | TT                                     | AA                 | AA               | INTERGENIC                    |                    |                                                        |
| SNP_47126_A_7539293 | NC_021166.1    | Ca_Kabuli_Chr07 | 7539293                 | TT                                     | CC                 | CC               | INTRON                        | 101507007          | transcription initiation factor IIE subunit alpha-like |

| SNPs IDs            | Chromosome IDs | Chromosomes     | Physical positions (bp) | CDC Frontier (Reference genome) | (Pusa 1103 & HPNB) | (ILWC 46 & LPNB) | Sequence Components of genome | Gene accession IDs | Putative functions                                     |
|---------------------|----------------|-----------------|-------------------------|---------------------------------|--------------------|------------------|-------------------------------|--------------------|--------------------------------------------------------|
| SNP_47127_A_7540144 | NC_021166.1    | Ca_Kabuli_Chr07 | 7540144                 | TT                              | CC                 | CC               | INTRON                        | 101507007          | transcription initiation factor IIE subunit alpha-like |
| SNP_47128_A_7541006 | NC_021166.1    | Ca_Kabuli_Chr07 | 7541006                 | GG                              | AA                 | AA               | INTRON                        | 101507007          | transcription initiation factor IIE subunit alpha-like |
| SNP_47130_A_7544103 | NC_021166.1    | Ca_Kabuli_Chr07 | 7544103                 | TT                              | CC                 | CC               | INTRON                        | 101507007          | transcription initiation factor IIE subunit alpha-like |
| SNP_47131_A_7545884 | NC_021166.1    | Ca_Kabuli_Chr07 | 7545884                 | CC                              | AA                 | AA               | INTRON                        | 101507007          | transcription initiation factor IIE subunit alpha-like |
| SNP_47134_A_7550878 | NC_021166.1    | Ca_Kabuli_Chr07 | 7550878                 | AA                              | TT                 | TT               | URR                           | 101507331          | Unknown function                                       |
| SNP_47135_A_7554302 | NC_021166.1    | Ca_Kabuli_Chr07 | 7554302                 | AA                              | CC                 | CC               | INTERGENIC                    |                    |                                                        |
| SNP_47136_A_7554344 | NC_021166.1    | Ca_Kabuli_Chr07 | 7554344                 | CC                              | TT                 | TT               | INTERGENIC                    |                    |                                                        |
| SNP_47137_A_7554346 | NC_021166.1    | Ca_Kabuli_Chr07 | 7554346                 | AA                              | GG                 | GG               | INTERGENIC                    |                    |                                                        |
| SNP_47138_A_7558736 | NC_021166.1    | Ca_Kabuli_Chr07 | 7558736                 | GG                              | TT                 | TT               | DRR                           | 101507638          | uncharacterized LOC101507638                           |
| SNP_47139_A_7561276 | NC_021166.1    | Ca_Kabuli_Chr07 | 7561276                 | CC                              | AA                 | AA               | URR                           | 101507638          | uncharacterized LOC101507638                           |
| SNP_47140_A_7561284 | NC_021166.1    | Ca_Kabuli_Chr07 | 7561284                 | AA                              | GG                 | GG               | URR                           | 101507638          | uncharacterized LOC101507638                           |
| SNP_47141_A_7564298 | NC_021166.1    | Ca_Kabuli_Chr07 | 7564298                 | AA                              | CC                 | CC               | INTERGENIC                    |                    |                                                        |
| SNP_47142_A_7568633 | NC_021166.1    | Ca_Kabuli_Chr07 | 7568633                 | TT                              | CC                 | CC               | INTERGENIC                    |                    |                                                        |
| SNP_47143_A_7570839 | NC_021166.1    | Ca_Kabuli_Chr07 | 7570839                 | CC                              | TT                 | TT               | URR                           | 101507962          | WD repeat-containing protein 55 homolog                |
| SNP_47144_A_7572456 | NC_021166.1    | Ca_Kabuli_Chr07 | 7572456                 | GG                              | AA                 | AA               | INTERGENIC                    |                    |                                                        |
| SNP_47145_A_7577118 | NC_021166.1    | Ca_Kabuli_Chr07 | 7577118                 | TT                              | CC                 | CC               | INTERGENIC                    |                    |                                                        |
| SNP_47146_A_7577409 | NC_021166.1    | Ca_Kabuli_Chr07 | 7577409                 | AA                              | GG                 | GG               | INTERGENIC                    |                    |                                                        |
| SNP_47147_A_7577430 | NC_021166.1    | Ca_Kabuli_Chr07 | 7577430                 | TT                              | CC                 | CC               | INTERGENIC                    |                    |                                                        |
| SNP_47148_A_7577431 | NC_021166.1    | Ca_Kabuli_Chr07 | 7577431                 | GG                              | CC                 | CC               | INTERGENIC                    |                    |                                                        |
| SNP_47149_A_7577435 | NC_021166.1    | Ca_Kabuli_Chr07 | 7577435                 | CC                              | AA                 | AA               | INTERGENIC                    |                    |                                                        |
| SNP_47150_A_7577466 | NC_021166.1    | Ca_Kabuli_Chr07 | 7577466                 | AA                              | GG                 | GG               | INTERGENIC                    |                    |                                                        |
| SNP_47151_A_7578823 | NC_021166.1    | Ca_Kabuli_Chr07 | 7578823                 | GG                              | CC                 | CC               | INTERGENIC                    |                    |                                                        |

| SNPs IDs            | Chromosome IDs | Chromosomes     | Physical positions (bp) | CDC Frontier genome (Reference genome) | (Pusa 1103 & HPNB) | (ILWC 46 & LPNB) | Sequence Components of genome | Gene accession IDs | Putative functions                                         |
|---------------------|----------------|-----------------|-------------------------|----------------------------------------|--------------------|------------------|-------------------------------|--------------------|------------------------------------------------------------|
| SNP_47152_A_7580680 | NC_021166.1    | Ca_Kabuli_Chr07 | 7580680                 | AA                                     | GG                 | GG               | INTERGENIC                    |                    |                                                            |
| SNP_47153_A_7580775 | NC_021166.1    | Ca_Kabuli_Chr07 | 7580775                 | GG                                     | TT                 | TT               | INTERGENIC                    |                    |                                                            |
| SNP_47154_A_7584125 | NC_021166.1    | Ca_Kabuli_Chr07 | 7584125                 | CC                                     | AA                 | AA               | INTERGENIC                    |                    |                                                            |
| SNP_47155_A_7585322 | NC_021166.1    | Ca_Kabuli_Chr07 | 7585322                 | TT                                     | AA                 | AA               | DRR                           | 101509777          | peptidyl-prolyl cis-trans isomerase CYP26-2, chloroplastic |
| SNP_47156_A_7585739 | NC_021166.1    | Ca_Kabuli_Chr07 | 7585739                 | CC                                     | TT                 | TT               | DRR                           | 101509777          | peptidyl-prolyl cis-trans isomerase CYP26-2, chloroplastic |
| SNP_47157_A_7588011 | NC_021166.1    | Ca_Kabuli_Chr07 | 7588011                 | TT                                     | AA                 | AA               | URR                           | 101509777          | peptidyl-prolyl cis-trans isomerase CYP26-2, chloroplastic |
| SNP_47158_A_7590690 | NC_021166.1    | Ca_Kabuli_Chr07 | 7590690                 | GG                                     | TT                 | TT               | INTERGENIC                    |                    |                                                            |
| SNP_47159_A_7593398 | NC_021166.1    | Ca_Kabuli_Chr07 | 7593398                 | TT                                     | CC                 | CC               | URR                           | 101510093          | uncharacterized LOC101510093                               |
| SNP_47160_A_7593408 | NC_021166.1    | Ca_Kabuli_Chr07 | 7593408                 | AA                                     | TT                 | TT               | URR                           | 101510093          | uncharacterized LOC101510093                               |
| SNP_47161_A_7593420 | NC_021166.1    | Ca_Kabuli_Chr07 | 7593420                 | AA                                     | GG                 | GG               | URR                           | 101510093          | uncharacterized LOC101510093                               |
| SNP_47162_A_7594284 | NC_021166.1    | Ca_Kabuli_Chr07 | 7594284                 | AA                                     | GG                 | GG               | INTERGENIC                    |                    |                                                            |
| SNP_47163_A_7594316 | NC_021166.1    | Ca_Kabuli_Chr07 | 7594316                 | AA                                     | GG                 | GG               | INTERGENIC                    |                    |                                                            |
| SNP_47164_A_7596161 | NC_021166.1    | Ca_Kabuli_Chr07 | 7596161                 | CC                                     | TT                 | TT               | INTERGENIC                    |                    |                                                            |
| SNP_47165_A_7597410 | NC_021166.1    | Ca_Kabuli_Chr07 | 7597410                 | AA                                     | TT                 | TT               | DRR                           | 101510961          | DEAD-box ATP-dependent RNA helicase 51-like                |
| SNP_47167_A_7598934 | NC_021166.1    | Ca_Kabuli_Chr07 | 7598934                 | AA                                     | GG                 | GG               | URR                           | 101510639          | mavicyanin                                                 |
| SNP_47168_A_7599068 | NC_021166.1    | Ca_Kabuli_Chr07 | 7599068                 | CC                                     | TT                 | TT               | URR                           | 101510639          | mavicyanin                                                 |
| SNP_47169_A_7599085 | NC_021166.1    | Ca_Kabuli_Chr07 | 7599085                 | GG                                     | TT                 | TT               | URR                           | 101510639          | mavicyanin                                                 |
| SNP_47170_A_7599183 | NC_021166.1    | Ca_Kabuli_Chr07 | 7599183                 | GG                                     | AA                 | AA               | URR                           | 101510639          | mavicyanin                                                 |
| SNP_47171_A_7602423 | NC_021166.1    | Ca_Kabuli_Chr07 | 7602423                 | TT                                     | GG                 | GG               | INTRON                        | 101510961          | DEAD-box ATP-dependent RNA helicase 51-like                |
| SNP_47172_A_7606858 | NC_021166.1    | Ca_Kabuli_Chr07 | 7606858                 | TT                                     | CC                 | CC               | INTERGENIC                    |                    |                                                            |
| SNP_47173_A_7608007 | NC_021166.1    | Ca_Kabuli_Chr07 | 7608007                 | TT                                     | GG                 | GG               | URR                           | 101510961          | DEAD-box ATP-dependent RNA helicase 51-like                |
| SNP_47174_A_7608268 | NC_021166.1    | Ca_Kabuli_Chr07 | 7608268                 | CC                                     | TT                 | TT               | URR                           | 101510961          | DEAD-box ATP-dependent RNA helicase 51-like                |

| SNPs IDs            | Chromosome IDs | Chromosomes     | Physical positions (bp) | CDC Frontier (Reference genome) | (Pusa 1103 & HPNB) | (ILWC 46 & LPNB) | Sequence Components of genome | Gene accession IDs | Putative functions                          |
|---------------------|----------------|-----------------|-------------------------|---------------------------------|--------------------|------------------|-------------------------------|--------------------|---------------------------------------------|
| SNP_47175_A_7608269 | NC_021166.1    | Ca_Kabuli_Chr07 | 7608269                 | AA                              | GG                 | GG               | URR                           | 101510961          | DEAD-box ATP-dependent RNA helicase 51-like |
| SNP_47176_A_7608517 | NC_021166.1    | Ca_Kabuli_Chr07 | 7608517                 | AA                              | GG                 | GG               | DRR                           | 101511485          | deoxyhypusine hydroxylase                   |
| SNP_47177_A_7608534 | NC_021166.1    | Ca_Kabuli_Chr07 | 7608534                 | AA                              | TT                 | TT               | DRR                           | 101511485          | deoxyhypusine hydroxylase                   |
| SNP_47178_A_7612810 | NC_021166.1    | Ca_Kabuli_Chr07 | 7612810                 | CC                              | TT                 | TT               | NON_SYNONYMOUS_CODING         | 101511485          | deoxyhypusine hydroxylase                   |
| SNP_47179_A_7613935 | NC_021166.1    | Ca_Kabuli_Chr07 | 7613935                 | AA                              | TT                 | TT               | URR                           | 101511485          | deoxyhypusine hydroxylase                   |
| SNP_47180_A_7613948 | NC_021166.1    | Ca_Kabuli_Chr07 | 7613948                 | CC                              | AA                 | AA               | URR                           | 101511485          | deoxyhypusine hydroxylase                   |
| SNP_47181_A_7613989 | NC_021166.1    | Ca_Kabuli_Chr07 | 7613989                 | CC                              | TT                 | TT               | URR                           | 101511485          | deoxyhypusine hydroxylase                   |
| SNP_47182_A_7615484 | NC_021166.1    | Ca_Kabuli_Chr07 | 7615484                 | GG                              | AA                 | AA               | INTERGENIC                    |                    |                                             |
| SNP_47183_A_7616755 | NC_021166.1    | Ca_Kabuli_Chr07 | 7616755                 | GG                              | TT                 | TT               | INTERGENIC                    |                    |                                             |
| SNP_47184_A_7616810 | NC_021166.1    | Ca_Kabuli_Chr07 | 7616810                 | AA                              | GG                 | GG               | INTERGENIC                    |                    |                                             |
| SNP_47185_A_7618713 | NC_021166.1    | Ca_Kabuli_Chr07 | 7618713                 | AA                              | GG                 | GG               | INTERGENIC                    |                    |                                             |
| SNP_47186_A_7618747 | NC_021166.1    | Ca_Kabuli_Chr07 | 7618747                 | CC                              | TT                 | TT               | INTERGENIC                    |                    |                                             |
| SNP_47187_A_7618776 | NC_021166.1    | Ca_Kabuli_Chr07 | 7618776                 | GG                              | AA                 | AA               | INTERGENIC                    |                    |                                             |
| SNP_47188_A_7619356 | NC_021166.1    | Ca_Kabuli_Chr07 | 7619356                 | CC                              | TT                 | TT               | INTERGENIC                    |                    |                                             |
| SNP_47189_A_7624594 | NC_021166.1    | Ca_Kabuli_Chr07 | 7624594                 | GG                              | TT                 | TT               | NON_SYNONYMOUS_CODING         | 101511811          | kinesin-like protein KIF19                  |
| SNP_47191_A_7626610 | NC_021166.1    | Ca_Kabuli_Chr07 | 7626610                 | GG                              | TT                 | TT               | URR                           | 101511811          | kinesin-like protein KIF19                  |
| SNP_47192_A_7626630 | NC_021166.1    | Ca_Kabuli_Chr07 | 7626630                 | CC                              | TT                 | TT               | URR                           | 101511811          | kinesin-like protein KIF19                  |
| SNP_47193_A_7627341 | NC_021166.1    | Ca_Kabuli_Chr07 | 7627341                 | AA                              | GG                 | GG               | URR                           | 101511811          | kinesin-like protein KIF19                  |
| SNP_47194_A_7627383 | NC_021166.1    | Ca_Kabuli_Chr07 | 7627383                 | AA                              | GG                 | GG               | URR                           | 101511811          | kinesin-like protein KIF19                  |
| SNP_47195_A_7627404 | NC_021166.1    | Ca_Kabuli_Chr07 | 7627404                 | TT                              | CC                 | CC               | URR                           | 101511811          | kinesin-like protein KIF19                  |
| SNP_47196_A_7627407 | NC_021166.1    | Ca_Kabuli_Chr07 | 7627407                 | GG                              | AA                 | AA               | URR                           | 101511811          | kinesin-like protein KIF19                  |
| SNP_47197_A_7629350 | NC_021166.1    | Ca_Kabuli_Chr07 | 7629350                 | GG                              | AA                 | AA               | DRR                           | 101512123          | protein MIZU-KUSSEI 1                       |

| SNPs IDs            | Chromosome IDs | Chromosomes     | Physical positions (bp) | CDC Frontier genome (Reference genome) | (Pusa 1103 & HPNB) | (ILWC 46 & LPNB) | Sequence Components of genome | Gene accession IDs | Putative functions                                 |
|---------------------|----------------|-----------------|-------------------------|----------------------------------------|--------------------|------------------|-------------------------------|--------------------|----------------------------------------------------|
| SNP_47198_A_7634618 | NC_021166.1    | Ca_Kabuli_Chr07 | 7634618                 | GG                                     | TT                 | TT               | INTRON                        | 101512449          | protein Dr1 homolog                                |
| SNP_47199_A_7637088 | NC_021166.1    | Ca_Kabuli_Chr07 | 7637088                 | CC                                     | TT                 | TT               | URR                           | 101512449          | protein Dr1 homolog                                |
| SNP_47200_A_7637131 | NC_021166.1    | Ca_Kabuli_Chr07 | 7637131                 | AA                                     | CC                 | CC               | URR                           | 101512449          | protein Dr1 homolog                                |
| SNP_47201_A_7637160 | NC_021166.1    | Ca_Kabuli_Chr07 | 7637160                 | CC                                     | TT                 | TT               | URR                           | 101512449          | protein Dr1 homolog                                |
| SNP_47202_A_7637903 | NC_021166.1    | Ca_Kabuli_Chr07 | 7637903                 | AA                                     | GG                 | GG               | URR                           | 101512449          | protein Dr1 homolog                                |
| SNP_47203_A_7637918 | NC_021166.1    | Ca_Kabuli_Chr07 | 7637918                 | TT                                     | CC                 | CC               | URR                           | 101512449          | protein Dr1 homolog                                |
| SNP_47204_A_7642178 | NC_021166.1    | Ca_Kabuli_Chr07 | 7642178                 | TT                                     | GG                 | GG               | INTERGENIC                    |                    |                                                    |
| SNP_47205_A_7642186 | NC_021166.1    | Ca_Kabuli_Chr07 | 7642186                 | AA                                     | GG                 | GG               | INTERGENIC                    |                    |                                                    |
| SNP_47206_A_7642777 | NC_021166.1    | Ca_Kabuli_Chr07 | 7642777                 | CC                                     | TT                 | TT               | DRR                           | 101512990          | G patch domain-containing protein TGH              |
| SNP_47207_A_7653188 | NC_021166.1    | Ca_Kabuli_Chr07 | 7653188                 | TT                                     | AA                 | AA               | DRR                           | 101512990          | G patch domain-containing protein TGH              |
| SNP_47208_A_7657655 | NC_021166.1    | Ca_Kabuli_Chr07 | 7657655                 | TT                                     | CC                 | CC               | INTERGENIC                    |                    |                                                    |
| SNP_47209_A_7661630 | NC_021166.1    | Ca_Kabuli_Chr07 | 7661630                 | TT                                     | GG                 | GG               | INTRON                        | 101513316          | putative phospholipid-transporting ATPase 9        |
| SNP_47210_A_7663564 | NC_021166.1    | Ca_Kabuli_Chr07 | 7663564                 | AA                                     | GG                 | GG               | SYNONYMOUS_CODING             | 101513316          | putative phospholipid-transporting ATPase 9        |
| SNP_47211_A_7666027 | NC_021166.1    | Ca_Kabuli_Chr07 | 7666027                 | TT                                     | CC                 | CC               | SYNONYMOUS_CODING             | 101513316          | putative phospholipid-transporting ATPase 9        |
| SNP_47212_A_7668643 | NC_021166.1    | Ca_Kabuli_Chr07 | 7668643                 | CC                                     | TT                 | TT               | URR                           | 101513316          | putative phospholipid-transporting ATPase 9        |
| SNP_47214_A_7668722 | NC_021166.1    | Ca_Kabuli_Chr07 | 7668722                 | GG                                     | AA                 | AA               | URR                           | 101513316          | putative phospholipid-transporting ATPase 9        |
| SNP_47215_A_7669393 | NC_021166.1    | Ca_Kabuli_Chr07 | 7669393                 | CC                                     | GG                 | GG               | INTERGENIC                    |                    |                                                    |
| SNP_47216_A_7669394 | NC_021166.1    | Ca_Kabuli_Chr07 | 7669394                 | AA                                     | GG                 | GG               | INTERGENIC                    |                    |                                                    |
| SNP_47217_A_7669398 | NC_021166.1    | Ca_Kabuli_Chr07 | 7669398                 | AA                                     | GG                 | GG               | INTERGENIC                    |                    |                                                    |
| SNP_47218_A_7669675 | NC_021166.1    | Ca_Kabuli_Chr07 | 7669675                 | CC                                     | TT                 | TT               | DRR                           | 101513844          | eukaryotic translation initiation factor 5A-4-like |
| SNP_47219_A_7669719 | NC_021166.1    | Ca_Kabuli_Chr07 | 7669719                 | TT                                     | CC                 | CC               | DRR                           | 101513844          | eukaryotic translation initiation factor 5A-4-like |
| SNP_47220_A_7669908 | NC_021166.1    | Ca_Kabuli_Chr07 | 7669908                 | TT                                     | CC                 | CC               | DRR                           | 101513844          | eukaryotic translation initiation factor 5A-4-like |

| SNPs IDs            | Chromosome IDs | Chromosomes     | Physical positions (bp) | CDC Frontier (Reference genome) | (Pusa 1103 & HPNB) | (ILWC 46 & LPNB) | Sequence Components of genome | Gene accession IDs | Putative functions                                 |
|---------------------|----------------|-----------------|-------------------------|---------------------------------|--------------------|------------------|-------------------------------|--------------------|----------------------------------------------------|
| SNP_47221_A_7671727 | NC_021166.1    | Ca_Kabuli_Chr07 | 7671727                 | TT                              | CC                 | CC               | URR                           | 101513844          | eukaryotic translation initiation factor 5A-4-like |
| SNP_47222_A_7671736 | NC_021166.1    | Ca_Kabuli_Chr07 | 7671736                 | CC                              | TT                 | TT               | URR                           | 101513844          | eukaryotic translation initiation factor 5A-4-like |
| SNP_47224_A_7672082 | NC_021166.1    | Ca_Kabuli_Chr07 | 7672082                 | GG                              | AA                 | AA               | URR                           | 101513844          | eukaryotic translation initiation factor 5A-4-like |
| SNP_47225_A_7673285 | NC_021166.1    | Ca_Kabuli_Chr07 | 7673285                 | AA                              | CC                 | CC               | URR                           | 101513844          | eukaryotic translation initiation factor 5A-4-like |
| SNP_47226_A_7680694 | NC_021166.1    | Ca_Kabuli_Chr07 | 7680694                 | AA                              | GG                 | GG               | INTERGENIC                    |                    |                                                    |
| SNP_47227_A_7681059 | NC_021166.1    | Ca_Kabuli_Chr07 | 7681059                 | TT                              | CC                 | CC               | INTERGENIC                    |                    |                                                    |
| SNP_47228_A_7681061 | NC_021166.1    | Ca_Kabuli_Chr07 | 7681061                 | AA                              | TT                 | TT               | INTERGENIC                    |                    |                                                    |
| SNP_47229_A_7681822 | NC_021166.1    | Ca_Kabuli_Chr07 | 7681822                 | CC                              | GG                 | GG               | INTERGENIC                    |                    |                                                    |
| SNP_47230_A_7681832 | NC_021166.1    | Ca_Kabuli_Chr07 | 7681832                 | GG                              | AA                 | AA               | INTERGENIC                    |                    |                                                    |
| SNP_47231_A_7681922 | NC_021166.1    | Ca_Kabuli_Chr07 | 7681922                 | TT                              | AA                 | AA               | INTERGENIC                    |                    |                                                    |
| SNP_47232_A_7682001 | NC_021166.1    | Ca_Kabuli_Chr07 | 7682001                 | TT                              | CC                 | CC               | INTERGENIC                    |                    |                                                    |
| SNP_47233_A_7682054 | NC_021166.1    | Ca_Kabuli_Chr07 | 7682054                 | GG                              | AA                 | AA               | INTERGENIC                    |                    |                                                    |
| SNP_47234_A_7682056 | NC_021166.1    | Ca_Kabuli_Chr07 | 7682056                 | AA                              | GG                 | GG               | INTERGENIC                    |                    |                                                    |
| SNP_47235_A_7683066 | NC_021166.1    | Ca_Kabuli_Chr07 | 7683066                 | AA                              | TT                 | TT               | DRR                           | 101514831          | 60S ribosomal protein L36-3-like                   |
| SNP_47236_A_7683088 | NC_021166.1    | Ca_Kabuli_Chr07 | 7683088                 | GG                              | AA                 | AA               | DRR                           | 101514831          | 60S ribosomal protein L36-3-like                   |
| SNP_47237_A_7683094 | NC_021166.1    | Ca_Kabuli_Chr07 | 7683094                 | AA                              | GG                 | GG               | DRR                           | 101514831          | 60S ribosomal protein L36-3-like                   |
| SNP_47239_A_7683863 | NC_021166.1    | Ca_Kabuli_Chr07 | 7683863                 | GG                              | AA                 | AA               | INTRON                        | 101514831          | 60S ribosomal protein L36-3-like                   |
| SNP_47240_A_7685049 | NC_021166.1    | Ca_Kabuli_Chr07 | 7685049                 | AA                              | TT                 | TT               | URR                           | 101514831          | 60S ribosomal protein L36-3-like                   |
| SNP_47241_A_7685264 | NC_021166.1    | Ca_Kabuli_Chr07 | 7685264                 | TT                              | CC                 | CC               | URR                           | 101514831          | 60S ribosomal protein L36-3-like                   |
| SNP_47242_A_7685335 | NC_021166.1    | Ca_Kabuli_Chr07 | 7685335                 | AA                              | TT                 | TT               | URR                           | 101514831          | 60S ribosomal protein L36-3-like                   |
| SNP_47244_A_7689100 | NC_021166.1    | Ca_Kabuli_Chr07 | 7689100                 | CC                              | TT                 | TT               | INTERGENIC                    |                    |                                                    |
| SNP_47245_A_7689120 | NC_021166.1    | Ca_Kabuli_Chr07 | 7689120                 | CC                              | GG                 | GG               | INTERGENIC                    |                    |                                                    |

| SNPs IDs            | Chromosome IDs | Chromosomes     | Physical positions (bp) | CDC Frontier (Reference genome) | (Pusa 1103 & HPNB) | (ILWC 46 & LPNB) | Sequence Components of genome | Gene accession IDs | Putative functions                                    |
|---------------------|----------------|-----------------|-------------------------|---------------------------------|--------------------|------------------|-------------------------------|--------------------|-------------------------------------------------------|
| SNP_47246_A_7689122 | NC_021166.1    | Ca_Kabuli_Chr07 | 7689122                 | TT                              | CC                 | CC               | INTERGENIC                    |                    |                                                       |
| SNP_47247_A_7689231 | NC_021166.1    | Ca_Kabuli_Chr07 | 7689231                 | AA                              | GG                 | GG               | INTERGENIC                    |                    |                                                       |
| SNP_47248_A_7689233 | NC_021166.1    | Ca_Kabuli_Chr07 | 7689233                 | GG                              | AA                 | AA               | INTERGENIC                    |                    |                                                       |
| SNP_47249_A_7689237 | NC_021166.1    | Ca_Kabuli_Chr07 | 7689237                 | AA                              | CC                 | CC               | INTERGENIC                    |                    |                                                       |
| SNP_47250_A_7689394 | NC_021166.1    | Ca_Kabuli_Chr07 | 7689394                 | AA                              | GG                 | GG               | INTERGENIC                    |                    |                                                       |
| SNP_47251_A_7689415 | NC_021166.1    | Ca_Kabuli_Chr07 | 7689415                 | TT                              | CC                 | CC               | INTERGENIC                    |                    |                                                       |
| SNP_47252_A_7689680 | NC_021166.1    | Ca_Kabuli_Chr07 | 7689680                 | AA                              | TT                 | TT               | INTERGENIC                    |                    |                                                       |
| SNP_47254_A_7691225 | NC_021166.1    | Ca_Kabuli_Chr07 | 7691225                 | GG                              | AA                 | AA               | DRR                           | 101498111          | ethylene-responsive transcription factor RAP2-9-like  |
| SNP_47255_A_7691518 | NC_021166.1    | Ca_Kabuli_Chr07 | 7691518                 | CC                              | TT                 | TT               | DRR                           | 101498111          | ethylene-responsive transcription factor RAP2-9-like  |
| SNP_47256_A_7691637 | NC_021166.1    | Ca_Kabuli_Chr07 | 7691637                 | GG                              | AA                 | AA               | DRR                           | 101498111          | ethylene-responsive transcription factor RAP2-9-like  |
| SNP_47257_A_7692050 | NC_021166.1    | Ca_Kabuli_Chr07 | 7692050                 | CC                              | TT                 | TT               | SYNONYMOUS_CODING             | 101498111          | ethylene-responsive transcription factor RAP2-9-like  |
| SNP_47258_A_7693034 | NC_021166.1    | Ca_Kabuli_Chr07 | 7693034                 | TT                              | CC                 | CC               | URR                           | 101498111          | ethylene-responsive transcription factor RAP2-9-like  |
| SNP_47259_A_7694500 | NC_021166.1    | Ca_Kabuli_Chr07 | 7694500                 | GG                              | AA                 | AA               | URR                           | 101498111          | ethylene-responsive transcription factor RAP2-9-like  |
| SNP_47261_A_7701437 | NC_021166.1    | Ca_Kabuli_Chr07 | 7701437                 | TT                              | CC                 | CC               | DRR                           | 101515706          | protein CHAPERONE-LIKE PROTEIN OF POR1, chloroplastic |
| SNP_47262_A_7701557 | NC_021166.1    | Ca_Kabuli_Chr07 | 7701557                 | AA                              | GG                 | GG               | DRR                           | 101515706          | protein CHAPERONE-LIKE PROTEIN OF POR1, chloroplastic |
| SNP_47265_A_7707512 | NC_021166.1    | Ca_Kabuli_Chr07 | 7707512                 | TT                              | AA                 | AA               | URR                           | 101515706          | protein CHAPERONE-LIKE PROTEIN OF POR1, chloroplastic |
| SNP_47266_A_7708794 | NC_021166.1    | Ca_Kabuli_Chr07 | 7708794                 | AA                              | CC                 | CC               | URR                           | 101488467          | tetraspanin-11                                        |
| SNP_47267_A_7708801 | NC_021166.1    | Ca_Kabuli_Chr07 | 7708801                 | CC                              | GG                 | GG               | URR                           | 101488467          | tetraspanin-11                                        |
| SNP_47268_A_7712081 | NC_021166.1    | Ca_Kabuli_Chr07 | 7712081                 | CC                              | TT                 | TT               | SYNONYMOUS_CODING             | 101498446          | putative F-box protein At1g67623                      |
| SNP_47269_A_7720700 | NC_021166.1    | Ca_Kabuli_Chr07 | 7720700                 | CC                              | TT                 | TT               | URR                           | 101489344          | protein STRICTOSIDINE SYNTHASE-LIKE 12-like           |
| SNP_47270_A_7720762 | NC_021166.1    | Ca_Kabuli_Chr07 | 7720762                 | TT                              | AA                 | AA               | URR                           | 101489344          | protein STRICTOSIDINE SYNTHASE-LIKE 12-like           |
| SNP_47271_A_7722295 | NC_021166.1    | Ca_Kabuli_Chr07 | 7722295                 | TT                              | CC                 | CC               | INTERGENIC                    |                    |                                                       |

| SNPs IDs            | Chromosome IDs | Chromosomes     | Physical positions (bp) | CDC Frontier genome (Reference genome) | (Pusa 1103 & HPNB) | (ILWC 46 & LPNB) | Sequence genome | Components of | Gene accession IDs | Putative functions |
|---------------------|----------------|-----------------|-------------------------|----------------------------------------|--------------------|------------------|-----------------|---------------|--------------------|--------------------|
| SNP_47272_A_7723262 | NC_021166.1    | Ca_Kabuli_Chr07 | 7723262                 | GG                                     | TT                 | TT               | INTERGENIC      |               |                    |                    |
| SNP_47274_A_7737855 | NC_021166.1    | Ca_Kabuli_Chr07 | 7737855                 | TT                                     | CC                 | CC               | URR             | 101498787     | Unknown function   |                    |
| SNP_47275_A_7737942 | NC_021166.1    | Ca_Kabuli_Chr07 | 7737942                 | AA                                     | TT                 | TT               | URR             | 101498787     | Unknown function   |                    |
| SNP_47276_A_7737963 | NC_021166.1    | Ca_Kabuli_Chr07 | 7737963                 | TT                                     | GG                 | GG               | URR             | 101498787     | Unknown function   |                    |
| SNP_47277_A_7737970 | NC_021166.1    | Ca_Kabuli_Chr07 | 7737970                 | TT                                     | GG                 | GG               | URR             | 101498787     | Unknown function   |                    |
| SNP_47278_A_7737997 | NC_021166.1    | Ca_Kabuli_Chr07 | 7737997                 | TT                                     | CC                 | CC               | URR             | 101498787     | Unknown function   |                    |
| SNP_47280_A_7738089 | NC_021166.1    | Ca_Kabuli_Chr07 | 7738089                 | GG                                     | AA                 | AA               | URR             | 101498787     | Unknown function   |                    |
| SNP_47281_A_7738128 | NC_021166.1    | Ca_Kabuli_Chr07 | 7738128                 | TT                                     | GG                 | GG               | URR             | 101498787     | Unknown function   |                    |
| SNP_47282_A_7738138 | NC_021166.1    | Ca_Kabuli_Chr07 | 7738138                 | AA                                     | GG                 | GG               | URR             | 101498787     | Unknown function   |                    |
| SNP_47283_A_7738245 | NC_021166.1    | Ca_Kabuli_Chr07 | 7738245                 | AA                                     | GG                 | GG               | URR             | 101498787     | Unknown function   |                    |
| SNP_47284_A_7738483 | NC_021166.1    | Ca_Kabuli_Chr07 | 7738483                 | AA                                     | GG                 | GG               | URR             | 101498787     | Unknown function   |                    |
| SNP_47285_A_7738508 | NC_021166.1    | Ca_Kabuli_Chr07 | 7738508                 | AA                                     | GG                 | GG               | URR             | 101498787     | Unknown function   |                    |
| SNP_47287_A_7738695 | NC_021166.1    | Ca_Kabuli_Chr07 | 7738695                 | TT                                     | GG                 | GG               | URR             | 101498787     | Unknown function   |                    |
| SNP_47288_A_7738708 | NC_021166.1    | Ca_Kabuli_Chr07 | 7738708                 | AA                                     | GG                 | GG               | URR             | 101498787     | Unknown function   |                    |
| SNP_47289_A_7738854 | NC_021166.1    | Ca_Kabuli_Chr07 | 7738854                 | GG                                     | AA                 | AA               | URR             | 101498787     | Unknown function   |                    |
| SNP_47290_A_7738920 | NC_021166.1    | Ca_Kabuli_Chr07 | 7738920                 | AA                                     | GG                 | GG               | URR             | 101498787     | Unknown function   |                    |
| SNP_47291_A_7738930 | NC_021166.1    | Ca_Kabuli_Chr07 | 7738930                 | TT                                     | CC                 | CC               | URR             | 101498787     | Unknown function   |                    |
| SNP_47292_A_7738943 | NC_021166.1    | Ca_Kabuli_Chr07 | 7738943                 | AA                                     | GG                 | GG               | URR             | 101498787     | Unknown function   |                    |
| SNP_47293_A_7738965 | NC_021166.1    | Ca_Kabuli_Chr07 | 7738965                 | TT                                     | CC                 | CC               | URR             | 101498787     | Unknown function   |                    |
| SNP_47294_A_7738984 | NC_021166.1    | Ca_Kabuli_Chr07 | 7738984                 | CC                                     | TT                 | TT               | URR             | 101498787     | Unknown function   |                    |
| SNP_47295_A_7738985 | NC_021166.1    | Ca_Kabuli_Chr07 | 7738985                 | AA                                     | GG                 | GG               | URR             | 101498787     | Unknown function   |                    |
| SNP_47296_A_7738991 | NC_021166.1    | Ca_Kabuli_Chr07 | 7738991                 | TT                                     | CC                 | CC               | URR             | 101498787     | Unknown function   |                    |



| SNPs IDs            | Chromosome IDs | Chromosomes     | Physical positions (bp) | CDC Frontier genome (Reference genome) | (Pusa 1103 & HPNB) | (ILWC 46 & LPNB) | Sequence Components of genome | Gene accession IDs | Putative functions                                            |
|---------------------|----------------|-----------------|-------------------------|----------------------------------------|--------------------|------------------|-------------------------------|--------------------|---------------------------------------------------------------|
| SNP_47297_A_7738998 | NC_021166.1    | Ca_Kabuli_Chr07 | 7738998                 | GG                                     | TT                 | TT               | URR                           | 101498787          | Unknown function                                              |
| SNP_47298_A_7739000 | NC_021166.1    | Ca_Kabuli_Chr07 | 7739000                 | CC                                     | TT                 | TT               | URR                           | 101498787          | Unknown function                                              |
| SNP_47299_A_7739021 | NC_021166.1    | Ca_Kabuli_Chr07 | 7739021                 | TT                                     | CC                 | CC               | URR                           | 101498787          | Unknown function                                              |
| SNP_47300_A_7739056 | NC_021166.1    | Ca_Kabuli_Chr07 | 7739056                 | CC                                     | TT                 | TT               | URR                           | 101498787          | Unknown function                                              |
| SNP_47301_A_7739157 | NC_021166.1    | Ca_Kabuli_Chr07 | 7739157                 | TT                                     | CC                 | CC               | URR                           | 101498787          | Unknown function                                              |
| SNP_47302_A_7739201 | NC_021166.1    | Ca_Kabuli_Chr07 | 7739201                 | CC                                     | TT                 | TT               | URR                           | 101498787          | Unknown function                                              |
| SNP_47303_A_7739222 | NC_021166.1    | Ca_Kabuli_Chr07 | 7739222                 | TT                                     | AA                 | AA               | URR                           | 101498787          | Unknown function                                              |
| SNP_47304_A_7739223 | NC_021166.1    | Ca_Kabuli_Chr07 | 7739223                 | TT                                     | CC                 | CC               | URR                           | 101498787          | Unknown function                                              |
| SNP_47305_A_7751749 | NC_021166.1    | Ca_Kabuli_Chr07 | 7751749                 | AA                                     | TT                 | TT               | DRR                           | 101505594          | protein CHROMATIN REMODELING 24-like                          |
| SNP_47306_A_7751791 | NC_021166.1    | Ca_Kabuli_Chr07 | 7751791                 | TT                                     | CC                 | CC               | DRR                           | 101505594          | protein CHROMATIN REMODELING 24-like                          |
| SNP_47308_A_7756455 | NC_021166.1    | Ca_Kabuli_Chr07 | 7756455                 | CC                                     | TT                 | TT               | NON_SYNONYMOUS_CODING         | 101505594          | protein CHROMATIN REMODELING 24-like                          |
| SNP_47309_A_7763975 | NC_021166.1    | Ca_Kabuli_Chr07 | 7763975                 | CC                                     | TT                 | TT               | INTERGENIC                    |                    |                                                               |
| SNP_47310_A_7769482 | NC_021166.1    | Ca_Kabuli_Chr07 | 7769482                 | AA                                     | CC                 | CC               | INTRON                        | 101501006          | uridine-cytidine kinase C-like                                |
| SNP_47311_A_7770155 | NC_021166.1    | Ca_Kabuli_Chr07 | 7770155                 | GG                                     | AA                 | AA               | URR                           | 101501006          | uridine-cytidine kinase C-like                                |
| SNP_47312_A_7776671 | NC_021166.1    | Ca_Kabuli_Chr07 | 7776671                 | AA                                     | GG                 | GG               | URR                           | 101505920          | Unknown function                                              |
| SNP_47313_A_7795407 | NC_021166.1    | Ca_Kabuli_Chr07 | 7795407                 | GG                                     | TT                 | TT               | INTERGENIC                    |                    |                                                               |
| SNP_47314_A_7795786 | NC_021166.1    | Ca_Kabuli_Chr07 | 7795786                 | AA                                     | GG                 | GG               | INTERGENIC                    |                    |                                                               |
| SNP_47315_A_7797298 | NC_021166.1    | Ca_Kabuli_Chr07 | 7797298                 | GG                                     | AA                 | AA               | DRR                           | 101503332          | acidic leucine-rich nuclear phosphoprotein 32 family member E |
| SNP_47316_A_7799731 | NC_021166.1    | Ca_Kabuli_Chr07 | 7799731                 | AA                                     | GG                 | GG               | URR                           | 101503332          | acidic leucine-rich nuclear phosphoprotein 32 family member E |
| SNP_47317_A_7799773 | NC_021166.1    | Ca_Kabuli_Chr07 | 7799773                 | TT                                     | CC                 | CC               | URR                           | 101503332          | acidic leucine-rich nuclear phosphoprotein 32 family member E |
| SNP_47318_A_7801235 | NC_021166.1    | Ca_Kabuli_Chr07 | 7801235                 | GG                                     | AA                 | AA               | DRR                           | 101503662          | serine protease SPPA, chloroplastic-like                      |
| SNP_47319_A_7814775 | NC_021166.1    | Ca_Kabuli_Chr07 | 7814775                 | CC                                     | TT                 | TT               | INTERGENIC                    |                    |                                                               |

| SNPs IDs            | Chromosome IDs | Chromosomes     | Physical positions (bp) | CDC Frontier (Reference genome) | (Pusa 1103 & HPNB) | (ILWC 46 & LPNB) | Sequence Components of genome | Gene accession IDs | Putative functions           |
|---------------------|----------------|-----------------|-------------------------|---------------------------------|--------------------|------------------|-------------------------------|--------------------|------------------------------|
| SNP_47320_A_7818260 | NC_021166.1    | Ca_Kabuli_Chr07 | 7818260                 | GG                              | AA                 | AA               | INTERGENIC                    |                    |                              |
| SNP_47321_A_7819639 | NC_021166.1    | Ca_Kabuli_Chr07 | 7819639                 | TT                              | GG                 | GG               | INTERGENIC                    |                    |                              |
| SNP_47322_A_7840439 | NC_021166.1    | Ca_Kabuli_Chr07 | 7840439                 | CC                              | TT                 | TT               | URR                           | 101504311          | uncharacterized LOC101504311 |
| SNP_47323_A_7842810 | NC_021166.1    | Ca_Kabuli_Chr07 | 7842810                 | GG                              | TT                 | TT               | INTERGENIC                    |                    |                              |
| SNP_47324_A_7844692 | NC_021166.1    | Ca_Kabuli_Chr07 | 7844692                 | AA                              | CC                 | CC               | INTERGENIC                    |                    |                              |
| SNP_47325_A_7847213 | NC_021166.1    | Ca_Kabuli_Chr07 | 7847213                 | TT                              | CC                 | CC               | INTERGENIC                    |                    |                              |
| SNP_47326_A_7847216 | NC_021166.1    | Ca_Kabuli_Chr07 | 7847216                 | GG                              | AA                 | AA               | INTERGENIC                    |                    |                              |
| SNP_47327_A_7848267 | NC_021166.1    | Ca_Kabuli_Chr07 | 7848267                 | AA                              | GG                 | GG               | INTERGENIC                    |                    |                              |
| SNP_47328_A_7848296 | NC_021166.1    | Ca_Kabuli_Chr07 | 7848296                 | TT                              | GG                 | GG               | INTERGENIC                    |                    |                              |
| SNP_47329_A_7848298 | NC_021166.1    | Ca_Kabuli_Chr07 | 7848298                 | TT                              | CC                 | CC               | INTERGENIC                    |                    |                              |
| SNP_47330_A_7848310 | NC_021166.1    | Ca_Kabuli_Chr07 | 7848310                 | AA                              | GG                 | GG               | INTERGENIC                    |                    |                              |
| SNP_47331_A_7850218 | NC_021166.1    | Ca_Kabuli_Chr07 | 7850218                 | TT                              | CC                 | CC               | INTERGENIC                    |                    |                              |
| SNP_47332_A_7850219 | NC_021166.1    | Ca_Kabuli_Chr07 | 7850219                 | CC                              | TT                 | TT               | INTERGENIC                    |                    |                              |
| SNP_47333_A_7850420 | NC_021166.1    | Ca_Kabuli_Chr07 | 7850420                 | CC                              | AA                 | AA               | INTERGENIC                    |                    |                              |
| SNP_47335_A_7851468 | NC_021166.1    | Ca_Kabuli_Chr07 | 7851468                 | AA                              | TT                 | TT               | INTERGENIC                    |                    |                              |
| SNP_47336_A_7855125 | NC_021166.1    | Ca_Kabuli_Chr07 | 7855125                 | CC                              | TT                 | TT               | INTERGENIC                    |                    |                              |
| SNP_47337_A_7856552 | NC_021166.1    | Ca_Kabuli_Chr07 | 7856552                 | TT                              | CC                 | CC               | INTERGENIC                    |                    |                              |
| SNP_47338_A_7856857 | NC_021166.1    | Ca_Kabuli_Chr07 | 7856857                 | AA                              | GG                 | GG               | INTERGENIC                    |                    |                              |
| SNP_47339_A_7857474 | NC_021166.1    | Ca_Kabuli_Chr07 | 7857474                 | GG                              | AA                 | AA               | INTERGENIC                    |                    |                              |
| SNP_47340_A_7859334 | NC_021166.1    | Ca_Kabuli_Chr07 | 7859334                 | AA                              | CC                 | CC               | INTERGENIC                    |                    |                              |
| SNP_47341_A_7861057 | NC_021166.1    | Ca_Kabuli_Chr07 | 7861057                 | TT                              | AA                 | AA               | INTERGENIC                    |                    |                              |
| SNP_47342_A_7861095 | NC_021166.1    | Ca_Kabuli_Chr07 | 7861095                 | CC                              | TT                 | TT               | INTERGENIC                    |                    |                              |

| SNPs IDs            | Chromosome IDs | Chromosomes     | Physical positions (bp) | CDC Frontier genome (Reference genome) | (Pusa 1103 & HPNB) | (ILWC 46 & LPNB) | Sequence Components of genome | Gene accession IDs | Putative functions           |
|---------------------|----------------|-----------------|-------------------------|----------------------------------------|--------------------|------------------|-------------------------------|--------------------|------------------------------|
| SNP_47343_A_7861694 | NC_021166.1    | Ca_Kabuli_Chr07 | 7861694                 | CC                                     | TT                 | TT               | INTERGENIC                    |                    |                              |
| SNP_47345_A_7862000 | NC_021166.1    | Ca_Kabuli_Chr07 | 7862000                 | AA                                     | GG                 | GG               | DRR                           | 101504639          | transcription factor BIM1    |
| SNP_47346_A_7865687 | NC_021166.1    | Ca_Kabuli_Chr07 | 7865687                 | CC                                     | TT                 | TT               | INTRON                        | 101504639          | transcription factor BIM1    |
| SNP_47347_A_7865802 | NC_021166.1    | Ca_Kabuli_Chr07 | 7865802                 | TT                                     | CC                 | CC               | INTRON                        | 101504639          | transcription factor BIM1    |
| SNP_47348_A_7870792 | NC_021166.1    | Ca_Kabuli_Chr07 | 7870792                 | GG                                     | CC                 | CC               | INTERGENIC                    |                    |                              |
| SNP_47352_A_7881531 | NC_021166.1    | Ca_Kabuli_Chr07 | 7881531                 | CC                                     | TT                 | TT               | INTERGENIC                    |                    |                              |
| SNP_47353_A_7881535 | NC_021166.1    | Ca_Kabuli_Chr07 | 7881535                 | CC                                     | TT                 | TT               | INTERGENIC                    |                    |                              |
| SNP_47354_A_7881789 | NC_021166.1    | Ca_Kabuli_Chr07 | 7881789                 | GG                                     | AA                 | AA               | INTERGENIC                    |                    |                              |
| SNP_47355_A_7886409 | NC_021166.1    | Ca_Kabuli_Chr07 | 7886409                 | GG                                     | AA                 | AA               | INTERGENIC                    |                    |                              |
| SNP_47356_A_7886410 | NC_021166.1    | Ca_Kabuli_Chr07 | 7886410                 | AA                                     | TT                 | TT               | INTERGENIC                    |                    |                              |
| SNP_47357_A_7886436 | NC_021166.1    | Ca_Kabuli_Chr07 | 7886436                 | GG                                     | TT                 | TT               | INTERGENIC                    |                    |                              |
| SNP_47358_A_7886793 | NC_021166.1    | Ca_Kabuli_Chr07 | 7886793                 | GG                                     | AA                 | AA               | INTERGENIC                    |                    |                              |
| SNP_47359_A_7887690 | NC_021166.1    | Ca_Kabuli_Chr07 | 7887690                 | AA                                     | TT                 | TT               | INTERGENIC                    |                    |                              |
| SNP_47360_A_7887867 | NC_021166.1    | Ca_Kabuli_Chr07 | 7887867                 | GG                                     | AA                 | AA               | DRR                           | 101505486          | uncharacterized LOC101505486 |
| SNP_47361_A_7887951 | NC_021166.1    | Ca_Kabuli_Chr07 | 7887951                 | AA                                     | GG                 | GG               | DRR                           | 101505486          | uncharacterized LOC101505486 |
| SNP_47362_A_7888032 | NC_021166.1    | Ca_Kabuli_Chr07 | 7888032                 | GG                                     | CC                 | CC               | DRR                           | 101505486          | uncharacterized LOC101505486 |
| SNP_47364_A_7888073 | NC_021166.1    | Ca_Kabuli_Chr07 | 7888073                 | CC                                     | TT                 | TT               | DRR                           | 101505486          | uncharacterized LOC101505486 |
| SNP_47365_A_7888074 | NC_021166.1    | Ca_Kabuli_Chr07 | 7888074                 | TT                                     | GG                 | GG               | DRR                           | 101505486          | uncharacterized LOC101505486 |
| SNP_47366_A_7894258 | NC_021166.1    | Ca_Kabuli_Chr07 | 7894258                 | CC                                     | TT                 | TT               | URR                           | 101505486          | uncharacterized LOC101505486 |
| SNP_47367_A_7899175 | NC_021166.1    | Ca_Kabuli_Chr07 | 7899175                 | CC                                     | GG                 | GG               | INTERGENIC                    |                    |                              |
| SNP_47368_A_7899964 | NC_021166.1    | Ca_Kabuli_Chr07 | 7899964                 | AA                                     | CC                 | CC               | INTERGENIC                    |                    |                              |
| SNP_47369_A_7899970 | NC_021166.1    | Ca_Kabuli_Chr07 | 7899970                 | AA                                     | GG                 | GG               | INTERGENIC                    |                    |                              |

| SNPs IDs            | Chromosome IDs | Chromosomes     | Physical positions (bp) | CDC Frontier (Reference genome) | (Pusa 1103 & HPNB) | (ILWC 46 & LPNB) | Sequence Components of genome | Gene accession IDs | Putative functions                                    |
|---------------------|----------------|-----------------|-------------------------|---------------------------------|--------------------|------------------|-------------------------------|--------------------|-------------------------------------------------------|
| SNP_47370_A_7902049 | NC_021166.1    | Ca_Kabuli_Chr07 | 7902049                 | TT                              | AA                 | AA               | INTERGENIC                    |                    |                                                       |
| SNP_47371_A_7903083 | NC_021166.1    | Ca_Kabuli_Chr07 | 7903083                 | GG                              | AA                 | AA               | INTERGENIC                    |                    |                                                       |
| SNP_47372_A_7903086 | NC_021166.1    | Ca_Kabuli_Chr07 | 7903086                 | GG                              | AA                 | AA               | INTERGENIC                    |                    |                                                       |
| SNP_47373_A_7903107 | NC_021166.1    | Ca_Kabuli_Chr07 | 7903107                 | GG                              | AA                 | AA               | INTERGENIC                    |                    |                                                       |
| SNP_47374_A_7903343 | NC_021166.1    | Ca_Kabuli_Chr07 | 7903343                 | AA                              | TT                 | TT               | INTERGENIC                    |                    |                                                       |
| SNP_47375_A_7903375 | NC_021166.1    | Ca_Kabuli_Chr07 | 7903375                 | AA                              | GG                 | GG               | INTERGENIC                    |                    |                                                       |
| SNP_47376_A_7909700 | NC_021166.1    | Ca_Kabuli_Chr07 | 7909700                 | AA                              | GG                 | GG               | INTERGENIC                    |                    |                                                       |
| SNP_47378_A_7910942 | NC_021166.1    | Ca_Kabuli_Chr07 | 7910942                 | TT                              | GG                 | GG               | INTERGENIC                    |                    |                                                       |
| SNP_47379_A_7911261 | NC_021166.1    | Ca_Kabuli_Chr07 | 7911261                 | GG                              | AA                 | AA               | INTERGENIC                    |                    |                                                       |
| SNP_47380_A_7913085 | NC_021166.1    | Ca_Kabuli_Chr07 | 7913085                 | CC                              | TT                 | TT               | INTERGENIC                    |                    |                                                       |
| SNP_47381_A_7917433 | NC_021166.1    | Ca_Kabuli_Chr07 | 7917433                 | TT                              | CC                 | CC               | URR                           | 101506353          | dof zinc finger protein DOF5.4                        |
| SNP_47382_A_7917631 | NC_021166.1    | Ca_Kabuli_Chr07 | 7917631                 | GG                              | AA                 | AA               | URR                           | 101506353          | dof zinc finger protein DOF5.4                        |
| SNP_47383_A_7922263 | NC_021166.1    | Ca_Kabuli_Chr07 | 7922263                 | AA                              | GG                 | GG               | INTERGENIC                    |                    |                                                       |
| SNP_47384_A_7924079 | NC_021166.1    | Ca_Kabuli_Chr07 | 7924079                 | AA                              | GG                 | GG               | DRR                           | 101506674          | uncharacterized LOC101506674                          |
| SNP_47385_A_7928257 | NC_021166.1    | Ca_Kabuli_Chr07 | 7928257                 | CC                              | TT                 | TT               | DRR                           | 101506898          | protein BREAKING OF ASYMMETRY IN THE STOMATAL LINEAGE |
| SNP_47386_A_7931677 | NC_021166.1    | Ca_Kabuli_Chr07 | 7931677                 | AA                              | GG                 | GG               | INTERGENIC                    |                    |                                                       |
| SNP_47387_A_7934723 | NC_021166.1    | Ca_Kabuli_Chr07 | 7934723                 | CC                              | TT                 | TT               | INTERGENIC                    |                    |                                                       |
| SNP_47388_A_7938097 | NC_021166.1    | Ca_Kabuli_Chr07 | 7938097                 | TT                              | CC                 | CC               | INTERGENIC                    |                    |                                                       |
| SNP_47389_A_7942318 | NC_021166.1    | Ca_Kabuli_Chr07 | 7942318                 | TT                              | GG                 | GG               | URR                           | 101507332          | probable galacturonosyltransferase 11                 |
| SNP_47390_A_7942319 | NC_021166.1    | Ca_Kabuli_Chr07 | 7942319                 | AA                              | GG                 | GG               | URR                           | 101507332          | probable galacturonosyltransferase 11                 |
| SNP_47391_A_7942345 | NC_021166.1    | Ca_Kabuli_Chr07 | 7942345                 | AA                              | GG                 | GG               | URR                           | 101507332          | probable galacturonosyltransferase 11                 |
| SNP_47392_A_7942781 | NC_021166.1    | Ca_Kabuli_Chr07 | 7942781                 | GG                              | AA                 | AA               | DRR                           | 101508168          | uncharacterized LOC101508168                          |

| SNPs IDs            | Chromosome IDs | Chromosomes     | Physical positions (bp) | CDC Frontier genome (Reference genome) | (Pusa 1103 & HPNB) | (ILWC 46 & LPNB) | Sequence Components of genome | Gene accession IDs | Putative functions                           |
|---------------------|----------------|-----------------|-------------------------|----------------------------------------|--------------------|------------------|-------------------------------|--------------------|----------------------------------------------|
| SNP_47393_A_7944322 | NC_021166.1    | Ca_Kabuli_Chr07 | 7944322                 | AA                                     | CC                 | CC               | INTERGENIC                    |                    |                                              |
| SNP_47394_A_7944500 | NC_021166.1    | Ca_Kabuli_Chr07 | 7944500                 | AA                                     | TT                 | TT               | DRR                           | 101507855          | truncated transcription factor CAULIFLOWER A |
| SNP_47396_A_7945838 | NC_021166.1    | Ca_Kabuli_Chr07 | 7945838                 | CC                                     | GG                 | GG               | URR                           | 101508168          | uncharacterized LOC101508168                 |
| SNP_47397_A_7947008 | NC_021166.1    | Ca_Kabuli_Chr07 | 7947008                 | TT                                     | CC                 | CC               | INTRON                        | 101507855          | truncated transcription factor CAULIFLOWER A |
| SNP_47398_A_7948806 | NC_021166.1    | Ca_Kabuli_Chr07 | 7948806                 | GG                                     | AA                 | AA               | INTRON                        | 101507855          | truncated transcription factor CAULIFLOWER A |
| SNP_47399_A_7948885 | NC_021166.1    | Ca_Kabuli_Chr07 | 7948885                 | GG                                     | AA                 | AA               | INTRON                        | 101507855          | truncated transcription factor CAULIFLOWER A |
| SNP_47400_A_7949231 | NC_021166.1    | Ca_Kabuli_Chr07 | 7949231                 | GG                                     | AA                 | AA               | INTRON                        | 101507855          | truncated transcription factor CAULIFLOWER A |
| SNP_47401_A_7949290 | NC_021166.1    | Ca_Kabuli_Chr07 | 7949290                 | GG                                     | CC                 | CC               | INTRON                        | 101507855          | truncated transcription factor CAULIFLOWER A |
| SNP_47404_A_7953881 | NC_021166.1    | Ca_Kabuli_Chr07 | 7953881                 | CC                                     | TT                 | TT               | INTERGENIC                    |                    |                                              |
| SNP_47405_A_7954408 | NC_021166.1    | Ca_Kabuli_Chr07 | 7954408                 | CC                                     | TT                 | TT               | INTERGENIC                    |                    |                                              |
| SNP_47407_A_7958036 | NC_021166.1    | Ca_Kabuli_Chr07 | 7958036                 | AA                                     | GG                 | GG               | INTERGENIC                    |                    |                                              |
| SNP_47409_A_7959516 | NC_021166.1    | Ca_Kabuli_Chr07 | 7959516                 | GG                                     | AA                 | AA               | INTERGENIC                    |                    |                                              |
| SNP_47410_A_7959528 | NC_021166.1    | Ca_Kabuli_Chr07 | 7959528                 | CC                                     | TT                 | TT               | INTERGENIC                    |                    |                                              |
| SNP_47411_A_7959785 | NC_021166.1    | Ca_Kabuli_Chr07 | 7959785                 | TT                                     | CC                 | CC               | INTERGENIC                    |                    |                                              |
| SNP_47414_A_7963128 | NC_021166.1    | Ca_Kabuli_Chr07 | 7963128                 | CC                                     | AA                 | AA               | INTERGENIC                    |                    |                                              |
| SNP_47415_A_7968986 | NC_021166.1    | Ca_Kabuli_Chr07 | 7968986                 | TT                                     | GG                 | GG               | INTRON                        | 101508495          | MADS-box protein CMB1-like                   |
| SNP_47416_A_7969123 | NC_021166.1    | Ca_Kabuli_Chr07 | 7969123                 | AA                                     | TT                 | TT               | INTRON                        | 101508495          | MADS-box protein CMB1-like                   |
| SNP_47417_A_7969135 | NC_021166.1    | Ca_Kabuli_Chr07 | 7969135                 | AA                                     | GG                 | GG               | INTRON                        | 101508495          | MADS-box protein CMB1-like                   |
| SNP_47418_A_7969141 | NC_021166.1    | Ca_Kabuli_Chr07 | 7969141                 | CC                                     | AA                 | AA               | INTRON                        | 101508495          | MADS-box protein CMB1-like                   |
| SNP_47419_A_7969160 | NC_021166.1    | Ca_Kabuli_Chr07 | 7969160                 | AA                                     | GG                 | GG               | INTRON                        | 101508495          | MADS-box protein CMB1-like                   |
| SNP_47420_A_7969173 | NC_021166.1    | Ca_Kabuli_Chr07 | 7969173                 | AA                                     | GG                 | GG               | INTRON                        | 101508495          | MADS-box protein CMB1-like                   |
| SNP_47421_A_7969196 | NC_021166.1    | Ca_Kabuli_Chr07 | 7969196                 | AA                                     | TT                 | TT               | INTRON                        | 101508495          | MADS-box protein CMB1-like                   |

| SNPs IDs            | Chromosome IDs | Chromosomes     | Physical positions (bp) | CDC Frontier (Reference genome) | (Pusa 1103 & HPNB) | (ILWC 46 & LPNB) | Sequence Components of genome | Gene accession IDs | Putative functions                     |
|---------------------|----------------|-----------------|-------------------------|---------------------------------|--------------------|------------------|-------------------------------|--------------------|----------------------------------------|
| SNP_47422_A_7969215 | NC_021166.1    | Ca_Kabuli_Chr07 | 7969215                 | GG                              | AA                 | AA               | INTRON                        | 101508495          | MADS-box protein CMB1-like             |
| SNP_47423_A_7970595 | NC_021166.1    | Ca_Kabuli_Chr07 | 7970595                 | AA                              | TT                 | TT               | SYNONYMOUS_CODING             | 101508495          | MADS-box protein CMB1-like             |
| SNP_47424_A_7970709 | NC_021166.1    | Ca_Kabuli_Chr07 | 7970709                 | CC                              | GG                 | GG               | NON_SYNONYMOUS_CODING         | 101508495          | MADS-box protein CMB1-like             |
| SNP_47425_A_7970711 | NC_021166.1    | Ca_Kabuli_Chr07 | 7970711                 | GG                              | CC                 | CC               | NON_SYNONYMOUS_CODING         | 101508495          | MADS-box protein CMB1-like             |
| SNP_47426_A_7977713 | NC_021166.1    | Ca_Kabuli_Chr07 | 7977713                 | GG                              | AA                 | AA               | INTERGENIC                    |                    |                                        |
| SNP_47427_A_7979539 | NC_021166.1    | Ca_Kabuli_Chr07 | 7979539                 | CC                              | AA                 | AA               | INTERGENIC                    |                    |                                        |
| SNP_47428_A_7979613 | NC_021166.1    | Ca_Kabuli_Chr07 | 7979613                 | TT                              | CC                 | CC               | INTERGENIC                    |                    |                                        |
| SNP_47429_A_7981881 | NC_021166.1    | Ca_Kabuli_Chr07 | 7981881                 | CC                              | TT                 | TT               | DRR                           | 101508803          | ABC transporter B family member 25     |
| SNP_47430_A_7981900 | NC_021166.1    | Ca_Kabuli_Chr07 | 7981900                 | CC                              | AA                 | AA               | DRR                           | 101508803          | ABC transporter B family member 25     |
| SNP_47431_A_7982163 | NC_021166.1    | Ca_Kabuli_Chr07 | 7982163                 | CC                              | TT                 | TT               | INTRON                        | 101508803          | ABC transporter B family member 25     |
| SNP_47432_A_7988091 | NC_021166.1    | Ca_Kabuli_Chr07 | 7988091                 | TT                              | AA                 | AA               | DRR                           | 101509342          | uncharacterized protein C13E7.11       |
| SNP_47433_A_7988231 | NC_021166.1    | Ca_Kabuli_Chr07 | 7988231                 | AA                              | CC                 | CC               | DRR                           | 101509342          | uncharacterized protein C13E7.11       |
| SNP_47434_A_7988411 | NC_021166.1    | Ca_Kabuli_Chr07 | 7988411                 | TT                              | CC                 | CC               | DRR                           | 101509342          | uncharacterized protein C13E7.11       |
| SNP_47435_A_7995654 | NC_021166.1    | Ca_Kabuli_Chr07 | 7995654                 | TT                              | CC                 | CC               | URR                           | 101509342          | uncharacterized protein C13E7.11       |
| SNP_47436_A_7995703 | NC_021166.1    | Ca_Kabuli_Chr07 | 7995703                 | GG                              | AA                 | AA               | URR                           | 101509342          | uncharacterized protein C13E7.11       |
| SNP_47437_A_7998692 | NC_021166.1    | Ca_Kabuli_Chr07 | 7998692                 | AA                              | GG                 | GG               | INTERGENIC                    |                    |                                        |
| SNP_47438_A_7998701 | NC_021166.1    | Ca_Kabuli_Chr07 | 7998701                 | GG                              | AA                 | AA               | INTERGENIC                    |                    |                                        |
| SNP_47439_A_8002782 | NC_021166.1    | Ca_Kabuli_Chr07 | 8002782                 | CC                              | TT                 | TT               | DRR                           | 101509662          | tip elongation aberrant protein 1      |
| SNP_47440_A_8002816 | NC_021166.1    | Ca_Kabuli_Chr07 | 8002816                 | GG                              | AA                 | AA               | DRR                           | 101509662          | tip elongation aberrant protein 1      |
| SNP_47441_A_8002833 | NC_021166.1    | Ca_Kabuli_Chr07 | 8002833                 | TT                              | AA                 | AA               | DRR                           | 101509662          | tip elongation aberrant protein 1      |
| SNP_47442_A_8005460 | NC_021166.1    | Ca_Kabuli_Chr07 | 8005460                 | TT                              | CC                 | CC               | INTRON                        | 101509662          | tip elongation aberrant protein 1      |
| SNP_47443_A_8010687 | NC_021166.1    | Ca_Kabuli_Chr07 | 8010687                 | TT                              | GG                 | GG               | DRR                           | 101410574          | transfer RNA threonine (anticodon CGU) |

| SNPs IDs            | Chromosome IDs | Chromosomes     | Physical positions (bp) | CDC Frontier genome (Reference genome) | (Pusa 1103 & HPNB) | (ILWC 46 & LPNB) | Sequence Components of genome | Gene accession IDs | Putative functions                              |
|---------------------|----------------|-----------------|-------------------------|----------------------------------------|--------------------|------------------|-------------------------------|--------------------|-------------------------------------------------|
| SNP_47445_A_8010977 | NC_021166.1    | Ca_Kabuli_Chr07 | 8010977                 | AA                                     | TT                 | TT               | DRR                           | 101410574          | transfer RNA threonine (anticodon CGU)          |
| SNP_47446_A_8010994 | NC_021166.1    | Ca_Kabuli_Chr07 | 8010994                 | CC                                     | TT                 | TT               | DRR                           | 101410574          | transfer RNA threonine (anticodon CGU)          |
| SNP_47447_A_8011010 | NC_021166.1    | Ca_Kabuli_Chr07 | 8011010                 | GG                                     | TT                 | TT               | DRR                           | 101410574          | transfer RNA threonine (anticodon CGU)          |
| SNP_47448_A_8011842 | NC_021166.1    | Ca_Kabuli_Chr07 | 8011842                 | TT                                     | CC                 | CC               | URR                           | 101509662          | tip elongation aberrant protein 1               |
| SNP_47450_A_8017471 | NC_021166.1    | Ca_Kabuli_Chr07 | 8017471                 | GG                                     | AA                 | AA               | URR                           | 101510192          | transcription factor TCP17                      |
| SNP_47451_A_8017518 | NC_021166.1    | Ca_Kabuli_Chr07 | 8017518                 | CC                                     | TT                 | TT               | URR                           | 101510192          | transcription factor TCP17                      |
| SNP_47452_A_8017642 | NC_021166.1    | Ca_Kabuli_Chr07 | 8017642                 | GG                                     | AA                 | AA               | URR                           | 101510192          | transcription factor TCP17                      |
| SNP_47454_A_8021061 | NC_021166.1    | Ca_Kabuli_Chr07 | 8021061                 | CC                                     | TT                 | TT               | INTERGENIC                    |                    |                                                 |
| SNP_47455_A_8022320 | NC_021166.1    | Ca_Kabuli_Chr07 | 8022320                 | AA                                     | CC                 | CC               | INTERGENIC                    |                    |                                                 |
| SNP_47456_A_8022344 | NC_021166.1    | Ca_Kabuli_Chr07 | 8022344                 | GG                                     | AA                 | AA               | INTERGENIC                    |                    |                                                 |
| SNP_47459_A_8030124 | NC_021166.1    | Ca_Kabuli_Chr07 | 8030124                 | TT                                     | GG                 | GG               | URR                           | 101510524          | uncharacterized LOC101510524                    |
| SNP_47460_A_8031201 | NC_021166.1    | Ca_Kabuli_Chr07 | 8031201                 | CC                                     | TT                 | TT               | DRR                           | 101510849          | ras GTPase-activating protein-binding protein 1 |
| SNP_47461_A_8031267 | NC_021166.1    | Ca_Kabuli_Chr07 | 8031267                 | CC                                     | TT                 | TT               | DRR                           | 101510849          | ras GTPase-activating protein-binding protein 1 |
| SNP_47462_A_8031275 | NC_021166.1    | Ca_Kabuli_Chr07 | 8031275                 | CC                                     | TT                 | TT               | DRR                           | 101510849          | ras GTPase-activating protein-binding protein 1 |
| SNP_47463_A_8031299 | NC_021166.1    | Ca_Kabuli_Chr07 | 8031299                 | AA                                     | GG                 | GG               | DRR                           | 101510849          | ras GTPase-activating protein-binding protein 1 |
| SNP_47464_A_8031654 | NC_021166.1    | Ca_Kabuli_Chr07 | 8031654                 | TT                                     | CC                 | CC               | DRR                           | 101510849          | ras GTPase-activating protein-binding protein 1 |
| SNP_47465_A_8031664 | NC_021166.1    | Ca_Kabuli_Chr07 | 8031664                 | TT                                     | GG                 | GG               | DRR                           | 101510849          | ras GTPase-activating protein-binding protein 1 |
| SNP_47466_A_8031989 | NC_021166.1    | Ca_Kabuli_Chr07 | 8031989                 | TT                                     | GG                 | GG               | DRR                           | 101510849          | ras GTPase-activating protein-binding protein 1 |
| SNP_47467_A_8031996 | NC_021166.1    | Ca_Kabuli_Chr07 | 8031996                 | CC                                     | TT                 | TT               | DRR                           | 101510849          | ras GTPase-activating protein-binding protein 1 |
| SNP_47469_A_8034202 | NC_021166.1    | Ca_Kabuli_Chr07 | 8034202                 | CC                                     | AA                 | AA               | INTRON                        | 101510849          | ras GTPase-activating protein-binding protein 1 |
| SNP_47470_A_8037346 | NC_021166.1    | Ca_Kabuli_Chr07 | 8037346                 | TT                                     | AA                 | AA               | INTRON                        | 101510849          | ras GTPase-activating protein-binding protein 1 |
| SNP_47471_A_8037357 | NC_021166.1    | Ca_Kabuli_Chr07 | 8037357                 | TT                                     | AA                 | AA               | INTRON                        | 101510849          | ras GTPase-activating protein-binding protein 1 |

| SNPs IDs            | Chromosome IDs | Chromosomes     | Physical positions (bp) | CDC Frontier genome (Reference genome) | (Pusa 1103 & HPNB) | (ILWC 46 & LPNB) | Sequence Components of genome | Gene accession IDs | Putative functions                                 |
|---------------------|----------------|-----------------|-------------------------|----------------------------------------|--------------------|------------------|-------------------------------|--------------------|----------------------------------------------------|
| SNP_47472_A_8039633 | NC_021166.1    | Ca_Kabuli_Chr07 | 8039633                 | AA                                     | TT                 | TT               | DRR                           | 101511174          | mitochondrial import receptor subunit TOM5 homolog |
| SNP_47473_A_8039658 | NC_021166.1    | Ca_Kabuli_Chr07 | 8039658                 | TT                                     | CC                 | CC               | DRR                           | 101511174          | mitochondrial import receptor subunit TOM5 homolog |
| SNP_47474_A_8040771 | NC_021166.1    | Ca_Kabuli_Chr07 | 8040771                 | GG                                     | AA                 | AA               | INTERGENIC                    |                    |                                                    |
| SNP_47475_A_8044652 | NC_021166.1    | Ca_Kabuli_Chr07 | 8044652                 | GG                                     | AA                 | AA               | DRR                           | 101511486          | glycerophosphodiester phosphodiesterase GDPD6      |
| SNP_47476_A_8049593 | NC_021166.1    | Ca_Kabuli_Chr07 | 8049593                 | CC                                     | AA                 | AA               | DRR                           | 101512349          | uncharacterized LOC101512349                       |
| SNP_47477_A_8056100 | NC_021166.1    | Ca_Kabuli_Chr07 | 8056100                 | CC                                     | TT                 | TT               | INTERGENIC                    |                    |                                                    |
| SNP_47478_A_8057415 | NC_021166.1    | Ca_Kabuli_Chr07 | 8057415                 | CC                                     | GG                 | GG               | URR                           | 101511812          | uncharacterized LOC101511812                       |
| SNP_47479_A_8057420 | NC_021166.1    | Ca_Kabuli_Chr07 | 8057420                 | TT                                     | GG                 | GG               | URR                           | 101511812          | uncharacterized LOC101511812                       |
| SNP_47480_A_8057896 | NC_021166.1    | Ca_Kabuli_Chr07 | 8057896                 | CC                                     | AA                 | AA               | URR                           | 101511812          | uncharacterized LOC101511812                       |
| SNP_47481_A_8057897 | NC_021166.1    | Ca_Kabuli_Chr07 | 8057897                 | AA                                     | TT                 | TT               | URR                           | 101511812          | uncharacterized LOC101511812                       |
| SNP_47482_A_8057900 | NC_021166.1    | Ca_Kabuli_Chr07 | 8057900                 | GG                                     | CC                 | CC               | URR                           | 101511812          | uncharacterized LOC101511812                       |
| SNP_47483_A_8057901 | NC_021166.1    | Ca_Kabuli_Chr07 | 8057901                 | TT                                     | GG                 | GG               | URR                           | 101511812          | uncharacterized LOC101511812                       |
| SNP_47484_A_8057905 | NC_021166.1    | Ca_Kabuli_Chr07 | 8057905                 | CC                                     | TT                 | TT               | URR                           | 101511812          | uncharacterized LOC101511812                       |
| SNP_47485_A_8057917 | NC_021166.1    | Ca_Kabuli_Chr07 | 8057917                 | CC                                     | TT                 | TT               | URR                           | 101511812          | uncharacterized LOC101511812                       |
| SNP_47486_A_8057954 | NC_021166.1    | Ca_Kabuli_Chr07 | 8057954                 | CC                                     | AA                 | AA               | URR                           | 101511812          | uncharacterized LOC101511812                       |
| SNP_47487_A_8058209 | NC_021166.1    | Ca_Kabuli_Chr07 | 8058209                 | AA                                     | GG                 | GG               | URR                           | 101511812          | uncharacterized LOC101511812                       |
| SNP_47488_A_8058234 | NC_021166.1    | Ca_Kabuli_Chr07 | 8058234                 | TT                                     | AA                 | AA               | URR                           | 101511812          | uncharacterized LOC101511812                       |
| SNP_47489_A_8058236 | NC_021166.1    | Ca_Kabuli_Chr07 | 8058236                 | GG                                     | CC                 | CC               | URR                           | 101511812          | uncharacterized LOC101511812                       |
| SNP_47490_A_8059286 | NC_021166.1    | Ca_Kabuli_Chr07 | 8059286                 | GG                                     | AA                 | AA               | INTERGENIC                    |                    |                                                    |
| SNP_47491_A_8059299 | NC_021166.1    | Ca_Kabuli_Chr07 | 8059299                 | GG                                     | AA                 | AA               | INTERGENIC                    |                    |                                                    |
| SNP_47492_A_8063770 | NC_021166.1    | Ca_Kabuli_Chr07 | 8063770                 | GG                                     | TT                 | TT               | INTERGENIC                    |                    |                                                    |
| SNP_47493_A_8067082 | NC_021166.1    | Ca_Kabuli_Chr07 | 8067082                 | AA                                     | GG                 | GG               | DRR                           | 101512991          | uncharacterized LOC101512991                       |



| SNPs IDs            | Chromosome IDs | Chromosomes     | Physical positions (bp) | CDC Frontier genome (Reference genome) | (Pusa 1103 & HPNB) | (ILWC 46 & LPNB) | Sequence Components of genome | Gene accession IDs | Putative functions                                       |
|---------------------|----------------|-----------------|-------------------------|----------------------------------------|--------------------|------------------|-------------------------------|--------------------|----------------------------------------------------------|
| SNP_47494_A_8067090 | NC_021166.1    | Ca_Kabuli_Chr07 | 8067090                 | GG                                     | TT                 | TT               | DRR                           | 101512991          | uncharacterized LOC101512991                             |
| SNP_47495_A_8067101 | NC_021166.1    | Ca_Kabuli_Chr07 | 8067101                 | TT                                     | CC                 | CC               | DRR                           | 101512991          | uncharacterized LOC101512991                             |
| SNP_47496_A_8067240 | NC_021166.1    | Ca_Kabuli_Chr07 | 8067240                 | CC                                     | TT                 | TT               | DRR                           | 101512991          | uncharacterized LOC101512991                             |
| SNP_47497_A_8067274 | NC_021166.1    | Ca_Kabuli_Chr07 | 8067274                 | GG                                     | AA                 | AA               | DRR                           | 101512991          | uncharacterized LOC101512991                             |
| SNP_47498_A_8067317 | NC_021166.1    | Ca_Kabuli_Chr07 | 8067317                 | GG                                     | AA                 | AA               | DRR                           | 101512991          | uncharacterized LOC101512991                             |
| SNP_47499_A_8067352 | NC_021166.1    | Ca_Kabuli_Chr07 | 8067352                 | TT                                     | CC                 | CC               | DRR                           | 101512991          | uncharacterized LOC101512991                             |
| SNP_47500_A_8069149 | NC_021166.1    | Ca_Kabuli_Chr07 | 8069149                 | AA                                     | CC                 | CC               | INTERGENIC                    |                    |                                                          |
| SNP_47501_A_8081550 | NC_021166.1    | Ca_Kabuli_Chr07 | 8081550                 | GG                                     | AA                 | AA               | INTERGENIC                    |                    |                                                          |
| SNP_47502_A_8081906 | NC_021166.1    | Ca_Kabuli_Chr07 | 8081906                 | TT                                     | CC                 | CC               | INTERGENIC                    |                    |                                                          |
| SNP_47503_A_8082161 | NC_021166.1    | Ca_Kabuli_Chr07 | 8082161                 | TT                                     | GG                 | GG               | INTERGENIC                    |                    |                                                          |
| SNP_47505_A_8096885 | NC_021166.1    | Ca_Kabuli_Chr07 | 8096885                 | CC                                     | TT                 | TT               | URR                           | 101513642          | DNA topoisomerase 1-like                                 |
| SNP_47506_A_8097022 | NC_021166.1    | Ca_Kabuli_Chr07 | 8097022                 | TT                                     | CC                 | CC               | URR                           | 101513642          | DNA topoisomerase 1-like                                 |
| SNP_47507_A_8097149 | NC_021166.1    | Ca_Kabuli_Chr07 | 8097149                 | CC                                     | TT                 | TT               | URR                           | 101513642          | DNA topoisomerase 1-like                                 |
| SNP_47508_A_8100998 | NC_021166.1    | Ca_Kabuli_Chr07 | 8100998                 | TT                                     | GG                 | GG               | URR                           | 101507227          | serine/threonine-protein phosphatase 7 long form homolog |
| SNP_47509_A_8107709 | NC_021166.1    | Ca_Kabuli_Chr07 | 8107709                 | AA                                     | GG                 | GG               | INTERGENIC                    |                    |                                                          |
| SNP_47511_A_8109856 | NC_021166.1    | Ca_Kabuli_Chr07 | 8109856                 | AA                                     | GG                 | GG               | INTERGENIC                    |                    |                                                          |
| SNP_47512_A_8109896 | NC_021166.1    | Ca_Kabuli_Chr07 | 8109896                 | GG                                     | TT                 | TT               | INTERGENIC                    |                    |                                                          |
| SNP_47513_A_8109902 | NC_021166.1    | Ca_Kabuli_Chr07 | 8109902                 | TT                                     | CC                 | CC               | INTERGENIC                    |                    |                                                          |
| SNP_47514_A_8117698 | NC_021166.1    | Ca_Kabuli_Chr07 | 8117698                 | GG                                     | AA                 | AA               | INTERGENIC                    |                    |                                                          |
| SNP_47515_A_8122431 | NC_021166.1    | Ca_Kabuli_Chr07 | 8122431                 | AA                                     | GG                 | GG               | DRR                           | 101515052          | respiratory burst oxidase homolog protein A-like         |
| SNP_47516_A_8124729 | NC_021166.1    | Ca_Kabuli_Chr07 | 8124729                 | AA                                     | GG                 | GG               | INTERGENIC                    |                    |                                                          |
| SNP_47517_A_8125065 | NC_021166.1    | Ca_Kabuli_Chr07 | 8125065                 | AA                                     | GG                 | GG               | INTERGENIC                    |                    |                                                          |

| SNPs IDs            | Chromosome IDs | Chromosomes     | Physical positions (bp) | CDC Frontier genome (Reference genome) | (Pusa 1103 & HPNB) | (ILWC 46 & LPNB) | Sequence Components of genome | Gene accession IDs | Putative functions                                   |
|---------------------|----------------|-----------------|-------------------------|----------------------------------------|--------------------|------------------|-------------------------------|--------------------|------------------------------------------------------|
| SNP_47518_A_8146702 | NC_021166.1    | Ca_Kabuli_Chr07 | 8146702                 | TT                                     | AA                 | AA               | URR                           | 101488469          | histone deacetylase 5-like                           |
| SNP_47519_A_8146706 | NC_021166.1    | Ca_Kabuli_Chr07 | 8146706                 | AA                                     | TT                 | TT               | URR                           | 101488469          | histone deacetylase 5-like                           |
| SNP_47520_A_8146727 | NC_021166.1    | Ca_Kabuli_Chr07 | 8146727                 | CC                                     | TT                 | TT               | URR                           | 101488469          | histone deacetylase 5-like                           |
| SNP_47521_A_8147803 | NC_021166.1    | Ca_Kabuli_Chr07 | 8147803                 | TT                                     | CC                 | CC               | URR                           | 101488469          | histone deacetylase 5-like                           |
| SNP_47522_A_8147813 | NC_021166.1    | Ca_Kabuli_Chr07 | 8147813                 | GG                                     | CC                 | CC               | URR                           | 101488469          | histone deacetylase 5-like                           |
| SNP_47524_A_8152046 | NC_021166.1    | Ca_Kabuli_Chr07 | 8152046                 | TT                                     | AA                 | AA               | INTERGENIC                    |                    |                                                      |
| SNP_47525_A_8152103 | NC_021166.1    | Ca_Kabuli_Chr07 | 8152103                 | AA                                     | CC                 | CC               | INTERGENIC                    |                    |                                                      |
| SNP_47526_A_8152289 | NC_021166.1    | Ca_Kabuli_Chr07 | 8152289                 | GG                                     | AA                 | AA               | INTERGENIC                    |                    |                                                      |
| SNP_47527_A_8153850 | NC_021166.1    | Ca_Kabuli_Chr07 | 8153850                 | TT                                     | GG                 | GG               | INTERGENIC                    |                    |                                                      |
| SNP_47528_A_8157792 | NC_021166.1    | Ca_Kabuli_Chr07 | 8157792                 | GG                                     | AA                 | AA               | INTERGENIC                    |                    |                                                      |
| SNP_47531_A_8166389 | NC_021166.1    | Ca_Kabuli_Chr07 | 8166389                 | CC                                     | TT                 | TT               | INTERGENIC                    |                    |                                                      |
| SNP_47532_A_8167494 | NC_021166.1    | Ca_Kabuli_Chr07 | 8167494                 | CC                                     | TT                 | TT               | INTERGENIC                    |                    |                                                      |
| SNP_47533_A_8167577 | NC_021166.1    | Ca_Kabuli_Chr07 | 8167577                 | TT                                     | GG                 | GG               | INTERGENIC                    |                    |                                                      |
| SNP_47535_A_8172501 | NC_021166.1    | Ca_Kabuli_Chr07 | 8172501                 | GG                                     | AA                 | AA               | URR                           | 101489134          | transmembrane protein adipocyte-associated 1 homolog |
| SNP_47536_A_8175765 | NC_021166.1    | Ca_Kabuli_Chr07 | 8175765                 | CC                                     | TT                 | TT               | INTRON                        | 101507543          | flavonoid 3'-monooxygenase                           |
| SNP_47537_A_8177501 | NC_021166.1    | Ca_Kabuli_Chr07 | 8177501                 | CC                                     | TT                 | TT               | INTRON                        | 101507543          | flavonoid 3'-monooxygenase                           |
| SNP_47538_A_8177607 | NC_021166.1    | Ca_Kabuli_Chr07 | 8177607                 | TT                                     | GG                 | GG               | INTRON                        | 101507543          | flavonoid 3'-monooxygenase                           |
| SNP_47539_A_8178750 | NC_021166.1    | Ca_Kabuli_Chr07 | 8178750                 | GG                                     | AA                 | AA               | INTRON                        | 101507543          | flavonoid 3'-monooxygenase                           |
| SNP_47540_A_8181404 | NC_021166.1    | Ca_Kabuli_Chr07 | 8181404                 | TT                                     | AA                 | AA               | URR                           | 101507543          | flavonoid 3'-monooxygenase                           |
| SNP_47541_A_8183374 | NC_021166.1    | Ca_Kabuli_Chr07 | 8183374                 | AA                                     | GG                 | GG               | INTERGENIC                    |                    |                                                      |
| SNP_47542_A_8187396 | NC_021166.1    | Ca_Kabuli_Chr07 | 8187396                 | CC                                     | AA                 | AA               | INTRON                        | 101489671          | chaperone protein ClpB1                              |
| SNP_47543_A_8190093 | NC_021166.1    | Ca_Kabuli_Chr07 | 8190093                 | GG                                     | AA                 | AA               | URR                           | 101489671          | chaperone protein ClpB1                              |

| SNPs IDs            | Chromosome IDs | Chromosomes     | Physical positions (bp) | CDC Frontier genome (Reference genome) | (Pusa 1103 & HPNB) | (ILWC 46 & LPNB) | Sequence Components of genome | Gene accession IDs | Putative functions           |
|---------------------|----------------|-----------------|-------------------------|----------------------------------------|--------------------|------------------|-------------------------------|--------------------|------------------------------|
| SNP_47544_A_8190679 | NC_021166.1    | Ca_Kabuli_Chr07 | 8190679                 | GG                                     | AA                 | AA               | URR                           | 101489671          | chaperone protein ClpB1      |
| SNP_47545_A_8190841 | NC_021166.1    | Ca_Kabuli_Chr07 | 8190841                 | GG                                     | TT                 | TT               | URR                           | 101489671          | chaperone protein ClpB1      |
| SNP_47546_A_8191209 | NC_021166.1    | Ca_Kabuli_Chr07 | 8191209                 | GG                                     | CC                 | CC               | URR                           | 101489671          | chaperone protein ClpB1      |
| SNP_47547_A_8193470 | NC_021166.1    | Ca_Kabuli_Chr07 | 8193470                 | GG                                     | CC                 | CC               | INTERGENIC                    |                    |                              |
| SNP_47548_A_8193525 | NC_021166.1    | Ca_Kabuli_Chr07 | 8193525                 | TT                                     | CC                 | CC               | INTERGENIC                    |                    |                              |
| SNP_47549_A_8207369 | NC_021166.1    | Ca_Kabuli_Chr07 | 8207369                 | AA                                     | GG                 | GG               | NON_SYNONYMOUS_CODING         | 101489994          | uncharacterized LOC101489994 |
| SNP_47552_A_8218104 | NC_021166.1    | Ca_Kabuli_Chr07 | 8218104                 | GG                                     | AA                 | AA               | INTERGENIC                    |                    |                              |
| SNP_47553_A_8221768 | NC_021166.1    | Ca_Kabuli_Chr07 | 8221768                 | GG                                     | AA                 | AA               | URR                           | 101490978          | uncharacterized LOC101490978 |
| SNP_47554_A_8222263 | NC_021166.1    | Ca_Kabuli_Chr07 | 8222263                 | GG                                     | AA                 | AA               | URR                           | 101490978          | uncharacterized LOC101490978 |
| SNP_47555_A_8222552 | NC_021166.1    | Ca_Kabuli_Chr07 | 8222552                 | AA                                     | GG                 | GG               | URR                           | 101490978          | uncharacterized LOC101490978 |
| SNP_47556_A_8224802 | NC_021166.1    | Ca_Kabuli_Chr07 | 8224802                 | AA                                     | GG                 | GG               | INTERGENIC                    |                    |                              |
| SNP_47557_A_8225503 | NC_021166.1    | Ca_Kabuli_Chr07 | 8225503                 | TT                                     | CC                 | CC               | INTERGENIC                    |                    |                              |
| SNP_47558_A_8225548 | NC_021166.1    | Ca_Kabuli_Chr07 | 8225548                 | TT                                     | CC                 | CC               | INTERGENIC                    |                    |                              |
| SNP_47559_A_8227109 | NC_021166.1    | Ca_Kabuli_Chr07 | 8227109                 | AA                                     | GG                 | GG               | INTRON                        | 101491290          | diacylglycerol kinase 1      |
| SNP_47560_A_8227135 | NC_021166.1    | Ca_Kabuli_Chr07 | 8227135                 | GG                                     | AA                 | AA               | URR                           | 101491290          | diacylglycerol kinase 1      |
| SNP_47561_A_8232363 | NC_021166.1    | Ca_Kabuli_Chr07 | 8232363                 | CC                                     | AA                 | AA               | INTRON                        | 101491290          | diacylglycerol kinase 1      |
| SNP_47562_A_8233776 | NC_021166.1    | Ca_Kabuli_Chr07 | 8233776                 | GG                                     | AA                 | AA               | URR                           | 101491290          | diacylglycerol kinase 1      |
| SNP_47563_A_8234889 | NC_021166.1    | Ca_Kabuli_Chr07 | 8234889                 | TT                                     | AA                 | AA               | URR                           | 101491290          | diacylglycerol kinase 1      |
| SNP_47564_A_8234940 | NC_021166.1    | Ca_Kabuli_Chr07 | 8234940                 | GG                                     | AA                 | AA               | INTERGENIC                    |                    |                              |
| SNP_47565_A_8234945 | NC_021166.1    | Ca_Kabuli_Chr07 | 8234945                 | CC                                     | TT                 | TT               | INTERGENIC                    |                    |                              |
| SNP_47566_A_8236125 | NC_021166.1    | Ca_Kabuli_Chr07 | 8236125                 | CC                                     | TT                 | TT               | INTERGENIC                    |                    |                              |
| SNP_47567_A_8239663 | NC_021166.1    | Ca_Kabuli_Chr07 | 8239663                 | GG                                     | CC                 | CC               | INTERGENIC                    |                    |                              |

| SNPs IDs            | Chromosome IDs | Chromosomes     | Physical positions (bp) | CDC Frontier genome (Reference genome) | (Pusa 1103 & HPNB) | (ILWC 46 & LPNB) | Sequence Components of genome | Gene accession IDs | Putative functions                           |
|---------------------|----------------|-----------------|-------------------------|----------------------------------------|--------------------|------------------|-------------------------------|--------------------|----------------------------------------------|
| SNP_47569_A_8241887 | NC_021166.1    | Ca_Kabuli_Chr07 | 8241887                 | GG                                     | AA                 | AA               | INTERGENIC                    |                    |                                              |
| SNP_47570_A_8243899 | NC_021166.1    | Ca_Kabuli_Chr07 | 8243899                 | TT                                     | AA                 | AA               | INTERGENIC                    |                    |                                              |
| SNP_47571_A_8245245 | NC_021166.1    | Ca_Kabuli_Chr07 | 8245245                 | AA                                     | CC                 | CC               | INTERGENIC                    |                    |                                              |
| SNP_47572_A_8245258 | NC_021166.1    | Ca_Kabuli_Chr07 | 8245258                 | CC                                     | TT                 | TT               | INTERGENIC                    |                    |                                              |
| SNP_47574_A_8246527 | NC_021166.1    | Ca_Kabuli_Chr07 | 8246527                 | AA                                     | GG                 | GG               | INTERGENIC                    |                    |                                              |
| SNP_47575_A_8246695 | NC_021166.1    | Ca_Kabuli_Chr07 | 8246695                 | GG                                     | AA                 | AA               | INTERGENIC                    |                    |                                              |
| SNP_47576_A_8246706 | NC_021166.1    | Ca_Kabuli_Chr07 | 8246706                 | GG                                     | TT                 | TT               | INTERGENIC                    |                    |                                              |
| SNP_47577_A_8249728 | NC_021166.1    | Ca_Kabuli_Chr07 | 8249728                 | TT                                     | CC                 | CC               | NON_SYNONYMOUS_CODING         | 101491614          | uncharacterized LOC101491614                 |
| SNP_47579_A_8251550 | NC_021166.1    | Ca_Kabuli_Chr07 | 8251550                 | AA                                     | GG                 | GG               | URR                           | 101491614          | uncharacterized LOC101491614                 |
| SNP_47580_A_8252168 | NC_021166.1    | Ca_Kabuli_Chr07 | 8252168                 | CC                                     | GG                 | GG               | INTERGENIC                    |                    |                                              |
| SNP_47581_A_8254113 | NC_021166.1    | Ca_Kabuli_Chr07 | 8254113                 | TT                                     | CC                 | CC               | DRR                           | 101492257          | synaptonemal complex protein 1               |
| SNP_47582_A_8254129 | NC_021166.1    | Ca_Kabuli_Chr07 | 8254129                 | GG                                     | AA                 | AA               | DRR                           | 101492257          | synaptonemal complex protein 1               |
| SNP_47583_A_8254513 | NC_021166.1    | Ca_Kabuli_Chr07 | 8254513                 | TT                                     | GG                 | GG               | DRR                           | 101492257          | synaptonemal complex protein 1               |
| SNP_47584_A_8254527 | NC_021166.1    | Ca_Kabuli_Chr07 | 8254527                 | AA                                     | GG                 | GG               | DRR                           | 101492257          | synaptonemal complex protein 1               |
| SNP_47585_A_8254529 | NC_021166.1    | Ca_Kabuli_Chr07 | 8254529                 | GG                                     | AA                 | AA               | DRR                           | 101492257          | synaptonemal complex protein 1               |
| SNP_47586_A_8254543 | NC_021166.1    | Ca_Kabuli_Chr07 | 8254543                 | GG                                     | AA                 | AA               | DRR                           | 101492257          | synaptonemal complex protein 1               |
| SNP_47587_A_8254594 | NC_021166.1    | Ca_Kabuli_Chr07 | 8254594                 | CC                                     | TT                 | TT               | DRR                           | 101492257          | synaptonemal complex protein 1               |
| SNP_47588_A_8262006 | NC_021166.1    | Ca_Kabuli_Chr07 | 8262006                 | TT                                     | CC                 | CC               | URR                           | 101491922          | 2-alkenal reductase (NADP(+)-dependent)-like |
| SNP_47589_A_8262183 | NC_021166.1    | Ca_Kabuli_Chr07 | 8262183                 | CC                                     | TT                 | TT               | URR                           | 101491922          | 2-alkenal reductase (NADP(+)-dependent)-like |
| SNP_47590_A_8265361 | NC_021166.1    | Ca_Kabuli_Chr07 | 8265361                 | CC                                     | TT                 | TT               | INTERGENIC                    |                    |                                              |
| SNP_47591_A_8266657 | NC_021166.1    | Ca_Kabuli_Chr07 | 8266657                 | GG                                     | AA                 | AA               | INTERGENIC                    |                    |                                              |
| SNP_47592_A_8266691 | NC_021166.1    | Ca_Kabuli_Chr07 | 8266691                 | CC                                     | TT                 | TT               | INTERGENIC                    |                    |                                              |

| SNPs IDs            | Chromosome IDs | Chromosomes     | Physical positions (bp) | CDC Frontier genome | (Reference genome) | (Pusa 1103 & HPNB) | (ILWC 46 & LPNB) | Sequence Components of genome | Gene accession IDs | Putative functions                                                   |
|---------------------|----------------|-----------------|-------------------------|---------------------|--------------------|--------------------|------------------|-------------------------------|--------------------|----------------------------------------------------------------------|
| SNP_47593_A_8267085 | NC_021166.1    | Ca_Kabuli_Chr07 | 8267085                 | CC                  | TT                 | TT                 |                  | DRR                           | 101493679          | heparanase-like protein 1                                            |
| SNP_47594_A_8267467 | NC_021166.1    | Ca_Kabuli_Chr07 | 8267467                 | TT                  | CC                 | CC                 |                  | DRR                           | 101493679          | heparanase-like protein 1                                            |
| SNP_47595_A_8267793 | NC_021166.1    | Ca_Kabuli_Chr07 | 8267793                 | TT                  | CC                 | CC                 |                  | URR                           | 101493133          | SNAP25 homologous protein SNAP33                                     |
| SNP_47596_A_8271471 | NC_021166.1    | Ca_Kabuli_Chr07 | 8271471                 | AA                  | TT                 | TT                 |                  | INTERGENIC                    |                    |                                                                      |
| SNP_47597_A_8271499 | NC_021166.1    | Ca_Kabuli_Chr07 | 8271499                 | TT                  | AA                 | AA                 |                  | INTERGENIC                    |                    |                                                                      |
| SNP_47598_A_8271516 | NC_021166.1    | Ca_Kabuli_Chr07 | 8271516                 | AA                  | CC                 | CC                 |                  | INTERGENIC                    |                    |                                                                      |
| SNP_47599_A_8271521 | NC_021166.1    | Ca_Kabuli_Chr07 | 8271521                 | AA                  | TT                 | TT                 |                  | INTERGENIC                    |                    |                                                                      |
| SNP_47600_A_8271954 | NC_021166.1    | Ca_Kabuli_Chr07 | 8271954                 | TT                  | CC                 | CC                 |                  | INTERGENIC                    |                    |                                                                      |
| SNP_47601_A_8277314 | NC_021166.1    | Ca_Kabuli_Chr07 | 8277314                 | GG                  | AA                 | AA                 |                  | DRR                           | 101495052          | calponin homology domain-containing protein DDB_G0272472-like        |
| SNP_47602_A_8277395 | NC_021166.1    | Ca_Kabuli_Chr07 | 8277395                 | TT                  | GG                 | GG                 |                  | DRR                           | 101495052          | calponin homology domain-containing protein DDB_G0272472-like        |
| SNP_47603_A_8277711 | NC_021166.1    | Ca_Kabuli_Chr07 | 8277711                 | AA                  | TT                 | TT                 |                  | DRR                           | 101495052          | calponin homology domain-containing protein DDB_G0272472-like        |
| SNP_47604_A_8278056 | NC_021166.1    | Ca_Kabuli_Chr07 | 8278056                 | GG                  | CC                 | CC                 |                  | DRR                           | 101495052          | calponin homology domain-containing protein DDB_G0272472-like        |
| SNP_47605_A_8292243 | NC_021166.1    | Ca_Kabuli_Chr07 | 8292243                 | AA                  | CC                 | CC                 |                  | INTERGENIC                    |                    |                                                                      |
| SNP_47606_A_8292249 | NC_021166.1    | Ca_Kabuli_Chr07 | 8292249                 | GG                  | AA                 | AA                 |                  | INTERGENIC                    |                    |                                                                      |
| SNP_47607_A_8292605 | NC_021166.1    | Ca_Kabuli_Chr07 | 8292605                 | AA                  | TT                 | TT                 |                  | INTERGENIC                    |                    |                                                                      |
| SNP_47608_A_8293303 | NC_021166.1    | Ca_Kabuli_Chr07 | 8293303                 | AA                  | GG                 | GG                 |                  | URR                           | 101495381          | uncharacterized LOC101495381                                         |
| SNP_47609_A_8293380 | NC_021166.1    | Ca_Kabuli_Chr07 | 8293380                 | TT                  | AA                 | AA                 |                  | URR                           | 101495381          | uncharacterized LOC101495381                                         |
| SNP_47610_A_8293674 | NC_021166.1    | Ca_Kabuli_Chr07 | 8293674                 | TT                  | CC                 | CC                 |                  | DRR                           | 101495925          | uncharacterized LOC101495925                                         |
| SNP_47611_A_8302089 | NC_021166.1    | Ca_Kabuli_Chr07 | 8302089                 | CC                  | TT                 | TT                 |                  | INTERGENIC                    |                    |                                                                      |
| SNP_47612_A_8302975 | NC_021166.1    | Ca_Kabuli_Chr07 | 8302975                 | TT                  | CC                 | CC                 |                  | INTERGENIC                    |                    |                                                                      |
| SNP_47613_A_8303015 | NC_021166.1    | Ca_Kabuli_Chr07 | 8303015                 | AA                  | GG                 | GG                 |                  | INTERGENIC                    |                    |                                                                      |
| SNP_47615_A_8304078 | NC_021166.1    | Ca_Kabuli_Chr07 | 8304078                 | CC                  | TT                 | TT                 |                  | DRR                           | 101496260          | probable LRR receptor-like serine/threonine-protein kinase At1g74360 |

| SNPs IDs            | Chromosome IDs | Chromosomes     | Physical positions (bp) | CDC Frontier (Reference genome) | (Pusa 1103 & HPNB) | (ILWC 46 & LPNB) | Sequence Components of genome | Gene accession IDs | Putative functions                                                   |
|---------------------|----------------|-----------------|-------------------------|---------------------------------|--------------------|------------------|-------------------------------|--------------------|----------------------------------------------------------------------|
| SNP_47616_A_8309769 | NC_021166.1    | Ca_Kabuli_Chr07 | 8309769                 | GG                              | TT                 | TT               | URR                           | 101496260          | probable LRR receptor-like serine/threonine-protein kinase At1g74360 |
| SNP_47617_A_8309788 | NC_021166.1    | Ca_Kabuli_Chr07 | 8309788                 | TT                              | GG                 | GG               | URR                           | 101496260          | probable LRR receptor-like serine/threonine-protein kinase At1g74360 |
| SNP_47618_A_8310070 | NC_021166.1    | Ca_Kabuli_Chr07 | 8310070                 | CC                              | TT                 | TT               | URR                           | 101496260          | probable LRR receptor-like serine/threonine-protein kinase At1g74360 |
| SNP_47619_A_8310078 | NC_021166.1    | Ca_Kabuli_Chr07 | 8310078                 | TT                              | CC                 | CC               | URR                           | 101496260          | probable LRR receptor-like serine/threonine-protein kinase At1g74360 |
| SNP_47620_A_8310535 | NC_021166.1    | Ca_Kabuli_Chr07 | 8310535                 | TT                              | CC                 | CC               | URR                           | 101496260          | probable LRR receptor-like serine/threonine-protein kinase At1g74360 |
| SNP_47621_A_8310544 | NC_021166.1    | Ca_Kabuli_Chr07 | 8310544                 | AA                              | GG                 | GG               | URR                           | 101496260          | probable LRR receptor-like serine/threonine-protein kinase At1g74360 |
| SNP_47622_A_8310553 | NC_021166.1    | Ca_Kabuli_Chr07 | 8310553                 | GG                              | TT                 | TT               | URR                           | 101496260          | probable LRR receptor-like serine/threonine-protein kinase At1g74360 |
| SNP_47623_A_8310583 | NC_021166.1    | Ca_Kabuli_Chr07 | 8310583                 | AA                              | TT                 | TT               | URR                           | 101496260          | probable LRR receptor-like serine/threonine-protein kinase At1g74360 |
| SNP_47627_A_8342965 | NC_021166.1    | Ca_Kabuli_Chr07 | 8342965                 | TT                              | GG                 | GG               | INTERGENIC                    |                    |                                                                      |
| SNP_47628_A_8342977 | NC_021166.1    | Ca_Kabuli_Chr07 | 8342977                 | TT                              | GG                 | GG               | INTERGENIC                    |                    |                                                                      |
| SNP_47629_A_8343865 | NC_021166.1    | Ca_Kabuli_Chr07 | 8343865                 | GG                              | AA                 | AA               | URR                           | 101498113          | eukaryotic translation initiation factor 5A-2                        |
| SNP_47630_A_8344582 | NC_021166.1    | Ca_Kabuli_Chr07 | 8344582                 | GG                              | AA                 | AA               | URR                           | 101498113          | eukaryotic translation initiation factor 5A-2                        |
| SNP_47631_A_8347422 | NC_021166.1    | Ca_Kabuli_Chr07 | 8347422                 | AA                              | GG                 | GG               | INTERGENIC                    |                    |                                                                      |
| SNP_47632_A_8348235 | NC_021166.1    | Ca_Kabuli_Chr07 | 8348235                 | TT                              | AA                 | AA               | INTERGENIC                    |                    |                                                                      |
| SNP_47633_A_8348236 | NC_021166.1    | Ca_Kabuli_Chr07 | 8348236                 | TT                              | AA                 | AA               | INTERGENIC                    |                    |                                                                      |
| SNP_47634_A_8348267 | NC_021166.1    | Ca_Kabuli_Chr07 | 8348267                 | AA                              | GG                 | GG               | INTERGENIC                    |                    |                                                                      |
| SNP_47635_A_8348490 | NC_021166.1    | Ca_Kabuli_Chr07 | 8348490                 | AA                              | TT                 | TT               | INTERGENIC                    |                    |                                                                      |
| SNP_47636_A_8348636 | NC_021166.1    | Ca_Kabuli_Chr07 | 8348636                 | TT                              | AA                 | AA               | INTERGENIC                    |                    |                                                                      |
| SNP_47637_A_8348637 | NC_021166.1    | Ca_Kabuli_Chr07 | 8348637                 | TT                              | AA                 | AA               | INTERGENIC                    |                    |                                                                      |
| SNP_47638_A_8350788 | NC_021166.1    | Ca_Kabuli_Chr07 | 8350788                 | TT                              | CC                 | CC               | INTERGENIC                    |                    |                                                                      |
| SNP_47639_A_8353766 | NC_021166.1    | Ca_Kabuli_Chr07 | 8353766                 | CC                              | TT                 | TT               | DRR                           | 101498788          | probable serine/threonine-protein kinase At1g54610                   |
| SNP_47640_A_8356161 | NC_021166.1    | Ca_Kabuli_Chr07 | 8356161                 | CC                              | AA                 | AA               | INTERGENIC                    |                    |                                                                      |

| SNPs IDs            | Chromosome IDs | Chromosomes     | Physical positions (bp) | CDC Frontier (Reference genome) | (Pusa 1103 & HPNB) | (ILWC 46 & LPNB) | Sequence Components of genome | Gene accession IDs | Putative functions                                                   |
|---------------------|----------------|-----------------|-------------------------|---------------------------------|--------------------|------------------|-------------------------------|--------------------|----------------------------------------------------------------------|
| SNP_47641_A_8358840 | NC_021166.1    | Ca_Kabuli_Chr07 | 8358840                 | TT                              | CC                 | CC               | URR                           | 101498788          | probable serine/threonine-protein kinase At1g54610                   |
| SNP_47642_A_8359453 | NC_021166.1    | Ca_Kabuli_Chr07 | 8359453                 | CC                              | GG                 | GG               | URR                           | 101498788          | probable serine/threonine-protein kinase At1g54610                   |
| SNP_47643_A_8362472 | NC_021166.1    | Ca_Kabuli_Chr07 | 8362472                 | GG                              | TT                 | TT               | INTERGENIC                    |                    |                                                                      |
| SNP_47644_A_8362594 | NC_021166.1    | Ca_Kabuli_Chr07 | 8362594                 | AA                              | CC                 | CC               | INTERGENIC                    |                    |                                                                      |
| SNP_47646_A_8363925 | NC_021166.1    | Ca_Kabuli_Chr07 | 8363925                 | TT                              | CC                 | CC               | INTERGENIC                    |                    |                                                                      |
| SNP_47647_A_8366575 | NC_021166.1    | Ca_Kabuli_Chr07 | 8366575                 | TT                              | CC                 | CC               | INTERGENIC                    |                    |                                                                      |
| SNP_47648_A_8366577 | NC_021166.1    | Ca_Kabuli_Chr07 | 8366577                 | CC                              | AA                 | AA               | INTERGENIC                    |                    |                                                                      |
| SNP_47650_A_8366886 | NC_021166.1    | Ca_Kabuli_Chr07 | 8366886                 | CC                              | GG                 | GG               | INTERGENIC                    |                    |                                                                      |
| SNP_47651_A_8366887 | NC_021166.1    | Ca_Kabuli_Chr07 | 8366887                 | CC                              | TT                 | TT               | INTERGENIC                    |                    |                                                                      |
| SNP_47652_A_8367638 | NC_021166.1    | Ca_Kabuli_Chr07 | 8367638                 | GG                              | AA                 | AA               | INTERGENIC                    |                    |                                                                      |
| SNP_47653_A_8367647 | NC_021166.1    | Ca_Kabuli_Chr07 | 8367647                 | TT                              | AA                 | AA               | INTERGENIC                    |                    |                                                                      |
| SNP_47654_A_8367650 | NC_021166.1    | Ca_Kabuli_Chr07 | 8367650                 | TT                              | AA                 | AA               | INTERGENIC                    |                    |                                                                      |
| SNP_47656_A_8389867 | NC_021166.1    | Ca_Kabuli_Chr07 | 8389867                 | TT                              | AA                 | AA               | URR                           | 101499112          | uncharacterized LOC101499112                                         |
| SNP_47657_A_8398942 | NC_021166.1    | Ca_Kabuli_Chr07 | 8398942                 | CC                              | TT                 | TT               | DRR                           | 101499430          | uncharacterized LOC101499430                                         |
| SNP_47658_A_8401571 | NC_021166.1    | Ca_Kabuli_Chr07 | 8401571                 | AA                              | GG                 | GG               | INTERGENIC                    |                    |                                                                      |
| SNP_47659_A_8406593 | NC_021166.1    | Ca_Kabuli_Chr07 | 8406593                 | CC                              | TT                 | TT               | DRR                           | 101508497          | pentatricopeptide repeat-containing protein At5g61370, mitochondrial |
| SNP_47661_A_8410056 | NC_021166.1    | Ca_Kabuli_Chr07 | 8410056                 | TT                              | CC                 | CC               | INTERGENIC                    |                    |                                                                      |
| SNP_47662_A_8412483 | NC_021166.1    | Ca_Kabuli_Chr07 | 8412483                 | TT                              | AA                 | AA               | DRR                           | 101500048          | pentatricopeptide repeat-containing protein At5g66520-like           |
| SNP_47663_A_8413704 | NC_021166.1    | Ca_Kabuli_Chr07 | 8413704                 | AA                              | TT                 | TT               | URR                           | 101500048          | pentatricopeptide repeat-containing protein At5g66520-like           |
| SNP_47664_A_8416984 | NC_021166.1    | Ca_Kabuli_Chr07 | 8416984                 | GG                              | AA                 | AA               | URR                           | 101508497          | pentatricopeptide repeat-containing protein At5g61370, mitochondrial |
| SNP_47665_A_8417184 | NC_021166.1    | Ca_Kabuli_Chr07 | 8417184                 | AA                              | GG                 | GG               | URR                           | 101508497          | pentatricopeptide repeat-containing protein At5g61370, mitochondrial |
| SNP_47666_A_8417200 | NC_021166.1    | Ca_Kabuli_Chr07 | 8417200                 | GG                              | TT                 | TT               | URR                           | 101508497          | pentatricopeptide repeat-containing protein At5g61370, mitochondrial |

| SNPs IDs            | Chromosome IDs | Chromosomes     | Physical positions (bp) | CDC Frontier (Reference genome) | (Pusa 1103 & HPNB) | (ILWC 46 & LPNB) | Sequence Components of genome | Gene accession IDs | Putative functions                                                   |
|---------------------|----------------|-----------------|-------------------------|---------------------------------|--------------------|------------------|-------------------------------|--------------------|----------------------------------------------------------------------|
| SNP_47667_A_8417658 | NC_021166.1    | Ca_Kabuli_Chr07 | 8417658                 | AA                              | GG                 | GG               | URR                           | 101508497          | pentatricopeptide repeat-containing protein At5g61370, mitochondrial |
| SNP_47668_A_8417747 | NC_021166.1    | Ca_Kabuli_Chr07 | 8417747                 | AA                              | TT                 | TT               | DRR                           | 101500788          | two-component response regulator-like APRR1                          |
| SNP_47669_A_8421911 | NC_021166.1    | Ca_Kabuli_Chr07 | 8421911                 | AA                              | TT                 | TT               | INTERGENIC                    |                    |                                                                      |
| SNP_47670_A_8431784 | NC_021166.1    | Ca_Kabuli_Chr07 | 8431784                 | TT                              | GG                 | GG               | INTERGENIC                    |                    |                                                                      |
| SNP_47671_A_8433066 | NC_021166.1    | Ca_Kabuli_Chr07 | 8433066                 | CC                              | TT                 | TT               | INTERGENIC                    |                    |                                                                      |
| SNP_47674_A_8439927 | NC_021166.1    | Ca_Kabuli_Chr07 | 8439927                 | TT                              | AA                 | AA               | INTERGENIC                    |                    |                                                                      |
| SNP_47676_A_8441673 | NC_021166.1    | Ca_Kabuli_Chr07 | 8441673                 | CC                              | TT                 | TT               | INTERGENIC                    |                    |                                                                      |
| SNP_47677_A_8441996 | NC_021166.1    | Ca_Kabuli_Chr07 | 8441996                 | AA                              | TT                 | TT               | INTERGENIC                    |                    |                                                                      |
| SNP_47679_A_8442063 | NC_021166.1    | Ca_Kabuli_Chr07 | 8442063                 | CC                              | AA                 | AA               | INTERGENIC                    |                    |                                                                      |
| SNP_47680_A_8443998 | NC_021166.1    | Ca_Kabuli_Chr07 | 8443998                 | CC                              | TT                 | TT               | URR                           | 101501537          | ribulose-phosphate 3-epimerase, chloroplastic                        |
| SNP_47681_A_8444801 | NC_021166.1    | Ca_Kabuli_Chr07 | 8444801                 | GG                              | CC                 | CC               | INTERGENIC                    |                    |                                                                      |
| SNP_47682_A_8445043 | NC_021166.1    | Ca_Kabuli_Chr07 | 8445043                 | GG                              | AA                 | AA               | INTERGENIC                    |                    |                                                                      |
| SNP_47683_A_8445096 | NC_021166.1    | Ca_Kabuli_Chr07 | 8445096                 | TT                              | AA                 | AA               | INTERGENIC                    |                    |                                                                      |
| SNP_47685_A_8445772 | NC_021166.1    | Ca_Kabuli_Chr07 | 8445772                 | GG                              | AA                 | AA               | INTERGENIC                    |                    |                                                                      |
| SNP_47686_A_8445902 | NC_021166.1    | Ca_Kabuli_Chr07 | 8445902                 | AA                              | GG                 | GG               | INTERGENIC                    |                    |                                                                      |
| SNP_47687_A_8447979 | NC_021166.1    | Ca_Kabuli_Chr07 | 8447979                 | TT                              | AA                 | AA               | DRR                           | 101502065          | galactoside 2-alpha-L-fucosyltransferase                             |
| SNP_47688_A_8447981 | NC_021166.1    | Ca_Kabuli_Chr07 | 8447981                 | CC                              | TT                 | TT               | DRR                           | 101502065          | galactoside 2-alpha-L-fucosyltransferase                             |
| SNP_47689_A_8448013 | NC_021166.1    | Ca_Kabuli_Chr07 | 8448013                 | TT                              | CC                 | CC               | DRR                           | 101502065          | galactoside 2-alpha-L-fucosyltransferase                             |
| SNP_47690_A_8448036 | NC_021166.1    | Ca_Kabuli_Chr07 | 8448036                 | TT                              | AA                 | AA               | DRR                           | 101502065          | galactoside 2-alpha-L-fucosyltransferase                             |
| SNP_47691_A_8453046 | NC_021166.1    | Ca_Kabuli_Chr07 | 8453046                 | GG                              | AA                 | AA               | URR                           | 101502065          | galactoside 2-alpha-L-fucosyltransferase                             |
| SNP_47692_A_8453248 | NC_021166.1    | Ca_Kabuli_Chr07 | 8453248                 | GG                              | TT                 | TT               | URR                           | 101502065          | galactoside 2-alpha-L-fucosyltransferase                             |
| SNP_47693_A_8454700 | NC_021166.1    | Ca_Kabuli_Chr07 | 8454700                 | AA                              | GG                 | GG               | INTERGENIC                    |                    |                                                                      |



| SNPs IDs            | Chromosome IDs | Chromosomes     | Physical positions (bp) | CDC Frontier genome (Reference genome) | (Pusa 1103 & HPNB) | (ILWC 46 & LPNB) | Sequence Components of genome | Gene accession IDs | Putative functions                |
|---------------------|----------------|-----------------|-------------------------|----------------------------------------|--------------------|------------------|-------------------------------|--------------------|-----------------------------------|
| SNP_47694_A_8454869 | NC_021166.1    | Ca_Kabuli_Chr07 | 8454869                 | GG                                     | CC                 | CC               | INTERGENIC                    |                    |                                   |
| SNP_47695_A_8458487 | NC_021166.1    | Ca_Kabuli_Chr07 | 8458487                 | AA                                     | GG                 | GG               | INTERGENIC                    |                    |                                   |
| SNP_47696_A_8458536 | NC_021166.1    | Ca_Kabuli_Chr07 | 8458536                 | TT                                     | CC                 | CC               | INTERGENIC                    |                    |                                   |
| SNP_47697_A_8458550 | NC_021166.1    | Ca_Kabuli_Chr07 | 8458550                 | AA                                     | GG                 | GG               | INTERGENIC                    |                    |                                   |
| SNP_47698_A_8458551 | NC_021166.1    | Ca_Kabuli_Chr07 | 8458551                 | TT                                     | AA                 | AA               | INTERGENIC                    |                    |                                   |
| SNP_47699_A_8462513 | NC_021166.1    | Ca_Kabuli_Chr07 | 8462513                 | GG                                     | AA                 | AA               | DRR                           | 101502392          | NAC domain-containing protein 100 |
| SNP_47700_A_8465859 | NC_021166.1    | Ca_Kabuli_Chr07 | 8465859                 | GG                                     | TT                 | TT               | URR                           | 101502392          | NAC domain-containing protein 100 |
| SNP_47701_A_8465920 | NC_021166.1    | Ca_Kabuli_Chr07 | 8465920                 | CC                                     | TT                 | TT               | URR                           | 101502392          | NAC domain-containing protein 100 |
| SNP_47702_A_8465939 | NC_021166.1    | Ca_Kabuli_Chr07 | 8465939                 | CC                                     | TT                 | TT               | URR                           | 101502392          | NAC domain-containing protein 100 |
| SNP_47703_A_8466207 | NC_021166.1    | Ca_Kabuli_Chr07 | 8466207                 | CC                                     | TT                 | TT               | URR                           | 101502392          | NAC domain-containing protein 100 |
| SNP_47704_A_8466368 | NC_021166.1    | Ca_Kabuli_Chr07 | 8466368                 | TT                                     | CC                 | CC               | URR                           | 101502392          | NAC domain-containing protein 100 |
| SNP_47705_A_8466759 | NC_021166.1    | Ca_Kabuli_Chr07 | 8466759                 | GG                                     | TT                 | TT               | URR                           | 101502392          | NAC domain-containing protein 100 |
| SNP_47708_A_8467702 | NC_021166.1    | Ca_Kabuli_Chr07 | 8467702                 | TT                                     | AA                 | AA               | INTERGENIC                    |                    |                                   |
| SNP_47709_A_8469655 | NC_021166.1    | Ca_Kabuli_Chr07 | 8469655                 | AA                                     | CC                 | CC               | INTERGENIC                    |                    |                                   |
| SNP_47710_A_8472642 | NC_021166.1    | Ca_Kabuli_Chr07 | 8472642                 | AA                                     | TT                 | TT               | INTERGENIC                    |                    |                                   |
| SNP_47711_A_8473069 | NC_021166.1    | Ca_Kabuli_Chr07 | 8473069                 | CC                                     | AA                 | AA               | INTERGENIC                    |                    |                                   |
| SNP_47712_A_8473246 | NC_021166.1    | Ca_Kabuli_Chr07 | 8473246                 | TT                                     | CC                 | CC               | INTERGENIC                    |                    |                                   |
| SNP_47714_A_8476135 | NC_021166.1    | Ca_Kabuli_Chr07 | 8476135                 | TT                                     | AA                 | AA               | INTERGENIC                    |                    |                                   |
| SNP_47715_A_8477310 | NC_021166.1    | Ca_Kabuli_Chr07 | 8477310                 | CC                                     | TT                 | TT               | INTERGENIC                    |                    |                                   |
| SNP_47717_A_8478311 | NC_021166.1    | Ca_Kabuli_Chr07 | 8478311                 | GG                                     | TT                 | TT               | INTERGENIC                    |                    |                                   |
| SNP_47718_A_8478572 | NC_021166.1    | Ca_Kabuli_Chr07 | 8478572                 | AA                                     | GG                 | GG               | INTERGENIC                    |                    |                                   |
| SNP_47719_A_8478573 | NC_021166.1    | Ca_Kabuli_Chr07 | 8478573                 | AA                                     | GG                 | GG               | INTERGENIC                    |                    |                                   |

| SNPs IDs            | Chromosome IDs | Chromosomes     | Physical positions (bp) | CDC Frontier (Reference genome) | (Pusa 1103 & HPNB) | (ILWC 46 & LPNB) | Sequence Components of genome | Gene accession IDs | Putative functions                      |
|---------------------|----------------|-----------------|-------------------------|---------------------------------|--------------------|------------------|-------------------------------|--------------------|-----------------------------------------|
| SNP_47720_A_8483976 | NC_021166.1    | Ca_Kabuli_Chr07 | 8483976                 | AA                              | GG                 | GG               | INTRON                        | 101502697          | MADS-box protein FLOWERING LOCUS C-like |
| SNP_47721_A_8483981 | NC_021166.1    | Ca_Kabuli_Chr07 | 8483981                 | CC                              | TT                 | TT               | INTRON                        | 101502697          | MADS-box protein FLOWERING LOCUS C-like |
| SNP_47722_A_8484928 | NC_021166.1    | Ca_Kabuli_Chr07 | 8484928                 | AA                              | GG                 | GG               | INTRON                        | 101502697          | MADS-box protein FLOWERING LOCUS C-like |
| SNP_47723_A_8484936 | NC_021166.1    | Ca_Kabuli_Chr07 | 8484936                 | AA                              | CC                 | CC               | INTRON                        | 101502697          | MADS-box protein FLOWERING LOCUS C-like |
| SNP_47724_A_8484937 | NC_021166.1    | Ca_Kabuli_Chr07 | 8484937                 | AA                              | GG                 | GG               | INTRON                        | 101502697          | MADS-box protein FLOWERING LOCUS C-like |
| SNP_47725_A_8485351 | NC_021166.1    | Ca_Kabuli_Chr07 | 8485351                 | TT                              | CC                 | CC               | INTERGENIC                    |                    |                                         |
| SNP_47726_A_8486395 | NC_021166.1    | Ca_Kabuli_Chr07 | 8486395                 | CC                              | AA                 | AA               | URR                           | 101502697          | MADS-box protein FLOWERING LOCUS C-like |
| SNP_47727_A_8486398 | NC_021166.1    | Ca_Kabuli_Chr07 | 8486398                 | TT                              | CC                 | CC               | URR                           | 101502697          | MADS-box protein FLOWERING LOCUS C-like |
| SNP_47728_A_8486403 | NC_021166.1    | Ca_Kabuli_Chr07 | 8486403                 | GG                              | TT                 | TT               | URR                           | 101502697          | MADS-box protein FLOWERING LOCUS C-like |
| SNP_47729_A_8486415 | NC_021166.1    | Ca_Kabuli_Chr07 | 8486415                 | TT                              | AA                 | AA               | URR                           | 101502697          | MADS-box protein FLOWERING LOCUS C-like |
| SNP_47730_A_8488160 | NC_021166.1    | Ca_Kabuli_Chr07 | 8488160                 | TT                              | AA                 | AA               | INTERGENIC                    |                    |                                         |
| SNP_47731_A_8488634 | NC_021166.1    | Ca_Kabuli_Chr07 | 8488634                 | CC                              | TT                 | TT               | INTERGENIC                    |                    |                                         |
| SNP_47732_A_8489180 | NC_021166.1    | Ca_Kabuli_Chr07 | 8489180                 | AA                              | GG                 | GG               | INTERGENIC                    |                    |                                         |
| SNP_47734_A_8492796 | NC_021166.1    | Ca_Kabuli_Chr07 | 8492796                 | TT                              | AA                 | AA               | URR                           | 101503333          | cyclic dof factor 3                     |
| SNP_47735_A_8492811 | NC_021166.1    | Ca_Kabuli_Chr07 | 8492811                 | TT                              | AA                 | AA               | URR                           | 101503333          | cyclic dof factor 3                     |
| SNP_47736_A_8492855 | NC_021166.1    | Ca_Kabuli_Chr07 | 8492855                 | GG                              | AA                 | AA               | URR                           | 101503333          | cyclic dof factor 3                     |
| SNP_47737_A_8492884 | NC_021166.1    | Ca_Kabuli_Chr07 | 8492884                 | TT                              | GG                 | GG               | URR                           | 101503333          | cyclic dof factor 3                     |
| SNP_47739_A_8493702 | NC_021166.1    | Ca_Kabuli_Chr07 | 8493702                 | TT                              | CC                 | CC               | URR                           | 101503333          | cyclic dof factor 3                     |
| SNP_47740_A_8494742 | NC_021166.1    | Ca_Kabuli_Chr07 | 8494742                 | AA                              | GG                 | GG               | INTERGENIC                    |                    |                                         |
| SNP_47741_A_8494743 | NC_021166.1    | Ca_Kabuli_Chr07 | 8494743                 | GG                              | AA                 | AA               | INTERGENIC                    |                    |                                         |
| SNP_47742_A_8494798 | NC_021166.1    | Ca_Kabuli_Chr07 | 8494798                 | GG                              | TT                 | TT               | INTERGENIC                    |                    |                                         |
| SNP_47743_A_8494966 | NC_021166.1    | Ca_Kabuli_Chr07 | 8494966                 | TT                              | GG                 | GG               | INTERGENIC                    |                    |                                         |

| SNPs IDs            | Chromosome IDs | Chromosomes     | Physical positions (bp) | CDC Frontier genome (Reference genome) | (Pusa 1103 & HPNB) | (ILWC 46 & LPNB) | Sequence Components of genome | Gene accession IDs | Putative functions                                  |
|---------------------|----------------|-----------------|-------------------------|----------------------------------------|--------------------|------------------|-------------------------------|--------------------|-----------------------------------------------------|
| SNP_47744_A_8494999 | NC_021166.1    | Ca_Kabuli_Chr07 | 8494999                 | TT                                     | CC                 | CC               | INTERGENIC                    |                    |                                                     |
| SNP_47745_A_8495025 | NC_021166.1    | Ca_Kabuli_Chr07 | 8495025                 | AA                                     | CC                 | CC               | INTERGENIC                    |                    |                                                     |
| SNP_47746_A_8495042 | NC_021166.1    | Ca_Kabuli_Chr07 | 8495042                 | AA                                     | GG                 | GG               | INTERGENIC                    |                    |                                                     |
| SNP_47747_A_8495053 | NC_021166.1    | Ca_Kabuli_Chr07 | 8495053                 | TT                                     | CC                 | CC               | INTERGENIC                    |                    |                                                     |
| SNP_47748_A_8496093 | NC_021166.1    | Ca_Kabuli_Chr07 | 8496093                 | CC                                     | TT                 | TT               | DRR                           | 101503663          | uncharacterized LOC101503663                        |
| SNP_47749_A_8496118 | NC_021166.1    | Ca_Kabuli_Chr07 | 8496118                 | CC                                     | TT                 | TT               | DRR                           | 101503663          | uncharacterized LOC101503663                        |
| SNP_47750_A_8501053 | NC_021166.1    | Ca_Kabuli_Chr07 | 8501053                 | CC                                     | TT                 | TT               | URR                           | 101503992          | GDSL esterase/lipase At1g74460-like                 |
| SNP_47751_A_8501056 | NC_021166.1    | Ca_Kabuli_Chr07 | 8501056                 | CC                                     | GG                 | GG               | URR                           | 101503992          | GDSL esterase/lipase At1g74460-like                 |
| SNP_47752_A_8502093 | NC_021166.1    | Ca_Kabuli_Chr07 | 8502093                 | AA                                     | CC                 | CC               | URR                           | 101503992          | GDSL esterase/lipase At1g74460-like                 |
| SNP_47753_A_8502406 | NC_021166.1    | Ca_Kabuli_Chr07 | 8502406                 | TT                                     | CC                 | CC               | URR                           | 101503992          | GDSL esterase/lipase At1g74460-like                 |
| SNP_47754_A_8510162 | NC_021166.1    | Ca_Kabuli_Chr07 | 8510162                 | TT                                     | CC                 | CC               | INTRON                        | 101504312          | geranylgeranyl diphosphate reductase, chloroplastic |
| SNP_47755_A_8511702 | NC_021166.1    | Ca_Kabuli_Chr07 | 8511702                 | CC                                     | AA                 | AA               | INTERGENIC                    |                    |                                                     |
| SNP_47756_A_8512350 | NC_021166.1    | Ca_Kabuli_Chr07 | 8512350                 | GG                                     | TT                 | TT               | URR                           | 101504312          | geranylgeranyl diphosphate reductase, chloroplastic |
| SNP_47757_A_8513061 | NC_021166.1    | Ca_Kabuli_Chr07 | 8513061                 | AA                                     | GG                 | GG               | URR                           | 101504312          | geranylgeranyl diphosphate reductase, chloroplastic |
| SNP_47758_A_8513366 | NC_021166.1    | Ca_Kabuli_Chr07 | 8513366                 | TT                                     | CC                 | CC               | DRR                           | 101504640          | malate dehydrogenase, chloroplastic                 |
| SNP_47759_A_8513369 | NC_021166.1    | Ca_Kabuli_Chr07 | 8513369                 | GG                                     | AA                 | AA               | DRR                           | 101504640          | malate dehydrogenase, chloroplastic                 |
| SNP_47760_A_8514570 | NC_021166.1    | Ca_Kabuli_Chr07 | 8514570                 | GG                                     | TT                 | TT               | INTERGENIC                    |                    |                                                     |
| SNP_47762_A_8523663 | NC_021166.1    | Ca_Kabuli_Chr07 | 8523663                 | GG                                     | AA                 | AA               | INTERGENIC                    |                    |                                                     |
| SNP_47763_A_8523704 | NC_021166.1    | Ca_Kabuli_Chr07 | 8523704                 | TT                                     | CC                 | CC               | INTERGENIC                    |                    |                                                     |
| SNP_47764_A_8525446 | NC_021166.1    | Ca_Kabuli_Chr07 | 8525446                 | AA                                     | TT                 | TT               | INTERGENIC                    |                    |                                                     |
| SNP_47765_A_8525506 | NC_021166.1    | Ca_Kabuli_Chr07 | 8525506                 | CC                                     | AA                 | AA               | INTERGENIC                    |                    |                                                     |
| SNP_47766_A_8526391 | NC_021166.1    | Ca_Kabuli_Chr07 | 8526391                 | AA                                     | TT                 | TT               | URR                           | 101509125          | protein RKD1                                        |

| SNPs IDs            | Chromosome IDs | Chromosomes     | Physical positions (bp) | CDC Frontier genome (Reference genome) | (Pusa 1103 & HPNB) | (ILWC 46 & LPNB) | Sequence Components of genome | Gene accession IDs | Putative functions                                             |
|---------------------|----------------|-----------------|-------------------------|----------------------------------------|--------------------|------------------|-------------------------------|--------------------|----------------------------------------------------------------|
| SNP_47767_A_8526463 | NC_021166.1    | Ca_Kabuli_Chr07 | 8526463                 | GG                                     | AA                 | AA               | URR                           | 101509125          | protein RKD1                                                   |
| SNP_47768_A_8528306 | NC_021166.1    | Ca_Kabuli_Chr07 | 8528306                 | AA                                     | TT                 | TT               | INTERGENIC                    |                    |                                                                |
| SNP_47769_A_8529096 | NC_021166.1    | Ca_Kabuli_Chr07 | 8529096                 | AA                                     | GG                 | GG               | DRR                           | 101505269          | protein DCL, chloroplastic-like                                |
| SNP_47771_A_8529569 | NC_021166.1    | Ca_Kabuli_Chr07 | 8529569                 | AA                                     | GG                 | GG               | DRR                           | 101505269          | protein DCL, chloroplastic-like                                |
| SNP_47773_A_8532083 | NC_021166.1    | Ca_Kabuli_Chr07 | 8532083                 | GG                                     | AA                 | AA               | URR                           | 101505269          | protein DCL, chloroplastic-like                                |
| SNP_47774_A_8540019 | NC_021166.1    | Ca_Kabuli_Chr07 | 8540019                 | AA                                     | CC                 | CC               | INTERGENIC                    |                    |                                                                |
| SNP_47775_A_8557651 | NC_021166.1    | Ca_Kabuli_Chr07 | 8557651                 | CC                                     | TT                 | TT               | INTERGENIC                    |                    |                                                                |
| SNP_47776_A_8557654 | NC_021166.1    | Ca_Kabuli_Chr07 | 8557654                 | TT                                     | AA                 | AA               | INTERGENIC                    |                    |                                                                |
| SNP_47777_A_8560588 | NC_021166.1    | Ca_Kabuli_Chr07 | 8560588                 | AA                                     | GG                 | GG               | INTERGENIC                    |                    |                                                                |
| SNP_47778_A_8574821 | NC_021166.1    | Ca_Kabuli_Chr07 | 8574821                 | TT                                     | CC                 | CC               | NON_SYNONYMOUS_CODING         | 101510746          | putative pentatricopeptide repeat-containing protein At1g74580 |
| SNP_47779_A_8577009 | NC_021166.1    | Ca_Kabuli_Chr07 | 8577009                 | GG                                     | TT                 | TT               | URR                           | 101510746          | putative pentatricopeptide repeat-containing protein At1g74580 |
| SNP_47780_A_8583206 | NC_021166.1    | Ca_Kabuli_Chr07 | 8583206                 | GG                                     | TT                 | TT               | INTRON                        | 101511068          | activating signal cointegrator 1                               |
| SNP_47781_A_8587395 | NC_021166.1    | Ca_Kabuli_Chr07 | 8587395                 | GG                                     | AA                 | AA               | DRR                           | 101511377          | NAP1-related protein 2-like                                    |
| SNP_47782_A_8592074 | NC_021166.1    | Ca_Kabuli_Chr07 | 8592074                 | CC                                     | AA                 | AA               | INTRON                        | 101511377          | NAP1-related protein 2-like                                    |
| SNP_47783_A_8594863 | NC_021166.1    | Ca_Kabuli_Chr07 | 8594863                 | GG                                     | AA                 | AA               | URR                           | 101511377          | NAP1-related protein 2-like                                    |
| SNP_47784_A_8594884 | NC_021166.1    | Ca_Kabuli_Chr07 | 8594884                 | AA                                     | GG                 | GG               | URR                           | 101511377          | NAP1-related protein 2-like                                    |
| SNP_47785_A_8595305 | NC_021166.1    | Ca_Kabuli_Chr07 | 8595305                 | GG                                     | AA                 | AA               | INTERGENIC                    |                    |                                                                |
| SNP_47787_A_8597419 | NC_021166.1    | Ca_Kabuli_Chr07 | 8597419                 | TT                                     | CC                 | CC               | INTERGENIC                    |                    |                                                                |
| SNP_47788_A_8600528 | NC_021166.1    | Ca_Kabuli_Chr07 | 8600528                 | TT                                     | AA                 | AA               | INTERGENIC                    |                    |                                                                |
| SNP_47790_A_8603089 | NC_021166.1    | Ca_Kabuli_Chr07 | 8603089                 | AA                                     | GG                 | GG               | INTERGENIC                    |                    |                                                                |
| SNP_47791_A_8603392 | NC_021166.1    | Ca_Kabuli_Chr07 | 8603392                 | AA                                     | GG                 | GG               | INTERGENIC                    |                    |                                                                |
| SNP_47792_A_8603480 | NC_021166.1    | Ca_Kabuli_Chr07 | 8603480                 | CC                                     | TT                 | TT               | INTERGENIC                    |                    |                                                                |

| SNPs IDs            | Chromosome IDs | Chromosomes     | Physical positions (bp) | CDC Frontier genome (Reference genome) | (Pusa 1103 & HPNB) | (ILWC 46 & LPNB) | Sequence Components of genome | Gene accession IDs | Putative functions          |
|---------------------|----------------|-----------------|-------------------------|----------------------------------------|--------------------|------------------|-------------------------------|--------------------|-----------------------------|
| SNP_47793_A_8603493 | NC_021166.1    | Ca_Kabuli_Chr07 | 8603493                 | CC                                     | GG                 | GG               | INTERGENIC                    |                    |                             |
| SNP_47794_A_8607066 | NC_021166.1    | Ca_Kabuli_Chr07 | 8607066                 | TT                                     | CC                 | CC               | INTERGENIC                    |                    |                             |
| SNP_47795_A_8613332 | NC_021166.1    | Ca_Kabuli_Chr07 | 8613332                 | GG                                     | AA                 | AA               | DRR                           | 101512124          | transcription factor TCP14  |
| SNP_47796_A_8618277 | NC_021166.1    | Ca_Kabuli_Chr07 | 8618277                 | CC                                     | TT                 | TT               | INTERGENIC                    |                    |                             |
| SNP_47797_A_8618286 | NC_021166.1    | Ca_Kabuli_Chr07 | 8618286                 | TT                                     | AA                 | AA               | INTERGENIC                    |                    |                             |
| SNP_47798_A_8618340 | NC_021166.1    | Ca_Kabuli_Chr07 | 8618340                 | CC                                     | TT                 | TT               | INTERGENIC                    |                    |                             |
| SNP_47799_A_8618354 | NC_021166.1    | Ca_Kabuli_Chr07 | 8618354                 | AA                                     | TT                 | TT               | INTERGENIC                    |                    |                             |
| SNP_47801_A_8621174 | NC_021166.1    | Ca_Kabuli_Chr07 | 8621174                 | AA                                     | TT                 | TT               | INTERGENIC                    |                    |                             |
| SNP_47802_A_8621176 | NC_021166.1    | Ca_Kabuli_Chr07 | 8621176                 | TT                                     | AA                 | AA               | INTERGENIC                    |                    |                             |
| SNP_47803_A_8621180 | NC_021166.1    | Ca_Kabuli_Chr07 | 8621180                 | AA                                     | TT                 | TT               | INTERGENIC                    |                    |                             |
| SNP_47804_A_8622373 | NC_021166.1    | Ca_Kabuli_Chr07 | 8622373                 | AA                                     | GG                 | GG               | INTERGENIC                    |                    |                             |
| SNP_47805_A_8622888 | NC_021166.1    | Ca_Kabuli_Chr07 | 8622888                 | GG                                     | TT                 | TT               | INTERGENIC                    |                    |                             |
| SNP_47806_A_8622972 | NC_021166.1    | Ca_Kabuli_Chr07 | 8622972                 | CC                                     | AA                 | AA               | INTERGENIC                    |                    |                             |
| SNP_47807_A_8623056 | NC_021166.1    | Ca_Kabuli_Chr07 | 8623056                 | TT                                     | GG                 | GG               | INTERGENIC                    |                    |                             |
| SNP_47808_A_8623136 | NC_021166.1    | Ca_Kabuli_Chr07 | 8623136                 | CC                                     | AA                 | AA               | INTERGENIC                    |                    |                             |
| SNP_47809_A_8624270 | NC_021166.1    | Ca_Kabuli_Chr07 | 8624270                 | CC                                     | TT                 | TT               | DRR                           | 101512450          | transcription factor bHLH47 |
| SNP_47810_A_8624597 | NC_021166.1    | Ca_Kabuli_Chr07 | 8624597                 | AA                                     | GG                 | GG               | DRR                           | 101512450          | transcription factor bHLH47 |
| SNP_47811_A_8624606 | NC_021166.1    | Ca_Kabuli_Chr07 | 8624606                 | TT                                     | CC                 | CC               | DRR                           | 101512450          | transcription factor bHLH47 |
| SNP_47812_A_8627639 | NC_021166.1    | Ca_Kabuli_Chr07 | 8627639                 | GG                                     | AA                 | AA               | URR                           | 101512450          | transcription factor bHLH47 |
| SNP_47813_A_8628199 | NC_021166.1    | Ca_Kabuli_Chr07 | 8628199                 | TT                                     | CC                 | CC               | URR                           | 101512450          | transcription factor bHLH47 |
| SNP_47814_A_8628619 | NC_021166.1    | Ca_Kabuli_Chr07 | 8628619                 | AA                                     | TT                 | TT               | URR                           | 101512450          | transcription factor bHLH47 |
| SNP_47815_A_8629119 | NC_021166.1    | Ca_Kabuli_Chr07 | 8629119                 | CC                                     | TT                 | TT               | DRR                           | 101512771          | HVA22-like protein a        |

| SNPs IDs            | Chromosome IDs | Chromosomes     | Physical positions (bp) | CDC Frontier (Reference genome) | (Pusa 1103 & HPNB) | (ILWC 46 & LPNB) | Sequence Components of genome | Gene accession IDs | Putative functions                                    |
|---------------------|----------------|-----------------|-------------------------|---------------------------------|--------------------|------------------|-------------------------------|--------------------|-------------------------------------------------------|
| SNP_47816_A_8629147 | NC_021166.1    | Ca_Kabuli_Chr07 | 8629147                 | AA                              | TT                 | TT               | DRR                           | 101512771          | HVA22-like protein a                                  |
| SNP_47817_A_8629514 | NC_021166.1    | Ca_Kabuli_Chr07 | 8629514                 | GG                              | AA                 | AA               | DRR                           | 101512771          | HVA22-like protein a                                  |
| SNP_47818_A_8629521 | NC_021166.1    | Ca_Kabuli_Chr07 | 8629521                 | AA                              | TT                 | TT               | DRR                           | 101512771          | HVA22-like protein a                                  |
| SNP_47819_A_8632936 | NC_021166.1    | Ca_Kabuli_Chr07 | 8632936                 | TT                              | CC                 | CC               | URR                           | 101512771          | HVA22-like protein a                                  |
| SNP_47821_A_8634809 | NC_021166.1    | Ca_Kabuli_Chr07 | 8634809                 | CC                              | TT                 | TT               | DRR                           | 101513096          | microtubule-associated protein RP/EB family member 1A |
| SNP_47823_A_8637837 | NC_021166.1    | Ca_Kabuli_Chr07 | 8637837                 | GG                              | AA                 | AA               | INTRON                        | 101513096          | microtubule-associated protein RP/EB family member 1A |
| SNP_47824_A_8640363 | NC_021166.1    | Ca_Kabuli_Chr07 | 8640363                 | AA                              | CC                 | CC               | URR                           | 101513096          | microtubule-associated protein RP/EB family member 1A |
| SNP_47825_A_8641095 | NC_021166.1    | Ca_Kabuli_Chr07 | 8641095                 | AA                              | GG                 | GG               | INTERGENIC                    |                    |                                                       |
| SNP_47826_A_8646626 | NC_021166.1    | Ca_Kabuli_Chr07 | 8646626                 | TT                              | CC                 | CC               | DRR                           | 101513421          | 40S ribosomal protein S9-2-like                       |
| SNP_47827_A_8646724 | NC_021166.1    | Ca_Kabuli_Chr07 | 8646724                 | CC                              | AA                 | AA               | DRR                           | 101513421          | 40S ribosomal protein S9-2-like                       |
| SNP_47828_A_8649674 | NC_021166.1    | Ca_Kabuli_Chr07 | 8649674                 | CC                              | TT                 | TT               | URR                           | 101513421          | 40S ribosomal protein S9-2-like                       |
| SNP_47829_A_8649678 | NC_021166.1    | Ca_Kabuli_Chr07 | 8649678                 | CC                              | TT                 | TT               | URR                           | 101513421          | 40S ribosomal protein S9-2-like                       |
| SNP_47830_A_8651506 | NC_021166.1    | Ca_Kabuli_Chr07 | 8651506                 | TT                              | CC                 | CC               | DRR                           | 101513734          | F-box/kelch-repeat protein At1g74510                  |
| SNP_47831_A_8652654 | NC_021166.1    | Ca_Kabuli_Chr07 | 8652654                 | TT                              | GG                 | GG               | INTERGENIC                    |                    |                                                       |
| SNP_47832_A_8653327 | NC_021166.1    | Ca_Kabuli_Chr07 | 8653327                 | AA                              | GG                 | GG               | URR                           | 101513734          | F-box/kelch-repeat protein At1g74510                  |
| SNP_47833_A_8653587 | NC_021166.1    | Ca_Kabuli_Chr07 | 8653587                 | CC                              | AA                 | AA               | URR                           | 101513734          | F-box/kelch-repeat protein At1g74510                  |
| SNP_47834_A_8653602 | NC_021166.1    | Ca_Kabuli_Chr07 | 8653602                 | CC                              | TT                 | TT               | URR                           | 101513734          | F-box/kelch-repeat protein At1g74510                  |
| SNP_47835_A_8653603 | NC_021166.1    | Ca_Kabuli_Chr07 | 8653603                 | CC                              | GG                 | GG               | URR                           | 101513734          | F-box/kelch-repeat protein At1g74510                  |
| SNP_47836_A_8653659 | NC_021166.1    | Ca_Kabuli_Chr07 | 8653659                 | CC                              | TT                 | TT               | URR                           | 101513734          | F-box/kelch-repeat protein At1g74510                  |
| SNP_47837_A_8653660 | NC_021166.1    | Ca_Kabuli_Chr07 | 8653660                 | TT                              | CC                 | CC               | URR                           | 101513734          | F-box/kelch-repeat protein At1g74510                  |
| SNP_47838_A_8654615 | NC_021166.1    | Ca_Kabuli_Chr07 | 8654615                 | CC                              | TT                 | TT               | URR                           | 101513734          | F-box/kelch-repeat protein At1g74510                  |
| SNP_47839_A_8654659 | NC_021166.1    | Ca_Kabuli_Chr07 | 8654659                 | CC                              | TT                 | TT               | URR                           | 101513734          | F-box/kelch-repeat protein At1g74510                  |

| SNPs IDs            | Chromosome IDs | Chromosomes     | Physical positions (bp) | CDC Frontier genome (Reference genome) | (Pusa 1103 & HPNB) | (ILWC 46 & LPNB) | Sequence Components of genome | Gene accession IDs | Putative functions                     |
|---------------------|----------------|-----------------|-------------------------|----------------------------------------|--------------------|------------------|-------------------------------|--------------------|----------------------------------------|
| SNP_47840_A_8654817 | NC_021166.1    | Ca_Kabuli_Chr07 | 8654817                 | TT                                     | AA                 | AA               | INTERGENIC                    |                    |                                        |
| SNP_47841_A_8655844 | NC_021166.1    | Ca_Kabuli_Chr07 | 8655844                 | AA                                     | GG                 | GG               | INTERGENIC                    |                    |                                        |
| SNP_47842_A_8659813 | NC_021166.1    | Ca_Kabuli_Chr07 | 8659813                 | CC                                     | TT                 | TT               | INTERGENIC                    |                    |                                        |
| SNP_47843_A_8659820 | NC_021166.1    | Ca_Kabuli_Chr07 | 8659820                 | AA                                     | CC                 | CC               | INTERGENIC                    |                    |                                        |
| SNP_47844_A_8659838 | NC_021166.1    | Ca_Kabuli_Chr07 | 8659838                 | AA                                     | GG                 | GG               | INTERGENIC                    |                    |                                        |
| SNP_47846_A_8662293 | NC_021166.1    | Ca_Kabuli_Chr07 | 8662293                 | GG                                     | TT                 | TT               | URR                           | 101514072          | 40S ribosomal protein S9-2-like        |
| SNP_47847_A_8662336 | NC_021166.1    | Ca_Kabuli_Chr07 | 8662336                 | GG                                     | CC                 | CC               | URR                           | 101514072          | 40S ribosomal protein S9-2-like        |
| SNP_47848_A_8662566 | NC_021166.1    | Ca_Kabuli_Chr07 | 8662566                 | TT                                     | AA                 | AA               | URR                           | 101514072          | 40S ribosomal protein S9-2-like        |
| SNP_47850_A_8663592 | NC_021166.1    | Ca_Kabuli_Chr07 | 8663592                 | CC                                     | TT                 | TT               | DRR                           | 101508171          | F-box/kelch-repeat protein SKIP11-like |
| SNP_47852_A_8667166 | NC_021166.1    | Ca_Kabuli_Chr07 | 8667166                 | AA                                     | GG                 | GG               | INTERGENIC                    |                    |                                        |
| SNP_47853_A_8667183 | NC_021166.1    | Ca_Kabuli_Chr07 | 8667183                 | AA                                     | GG                 | GG               | INTERGENIC                    |                    |                                        |
| SNP_47854_A_8667193 | NC_021166.1    | Ca_Kabuli_Chr07 | 8667193                 | AA                                     | GG                 | GG               | INTERGENIC                    |                    |                                        |
| SNP_47855_A_8669645 | NC_021166.1    | Ca_Kabuli_Chr07 | 8669645                 | GG                                     | AA                 | AA               | INTERGENIC                    |                    |                                        |
| SNP_47856_A_8669654 | NC_021166.1    | Ca_Kabuli_Chr07 | 8669654                 | TT                                     | CC                 | CC               | INTERGENIC                    |                    |                                        |
| SNP_47858_A_8672907 | NC_021166.1    | Ca_Kabuli_Chr07 | 8672907                 | CC                                     | TT                 | TT               | INTERGENIC                    |                    |                                        |
| SNP_47859_A_8672909 | NC_021166.1    | Ca_Kabuli_Chr07 | 8672909                 | GG                                     | AA                 | AA               | INTERGENIC                    |                    |                                        |
| SNP_47860_A_8673263 | NC_021166.1    | Ca_Kabuli_Chr07 | 8673263                 | GG                                     | AA                 | AA               | INTERGENIC                    |                    |                                        |
| SNP_47862_A_8677340 | NC_021166.1    | Ca_Kabuli_Chr07 | 8677340                 | GG                                     | AA                 | AA               | DRR                           | 101508498          | protein kinase 2B, chloroplastic-like  |
| SNP_47864_A_8678429 | NC_021166.1    | Ca_Kabuli_Chr07 | 8678429                 | GG                                     | TT                 | TT               | INTERGENIC                    |                    |                                        |
| SNP_47866_A_8683006 | NC_021166.1    | Ca_Kabuli_Chr07 | 8683006                 | GG                                     | TT                 | TT               | INTERGENIC                    |                    |                                        |
| SNP_47867_A_8685291 | NC_021166.1    | Ca_Kabuli_Chr07 | 8685291                 | CC                                     | AA                 | AA               | DRR                           | 101514956          | ABC transporter A family member 7-like |
| SNP_47868_A_8687398 | NC_021166.1    | Ca_Kabuli_Chr07 | 8687398                 | GG                                     | CC                 | CC               | INTRON                        | 101514956          | ABC transporter A family member 7-like |

| SNPs IDs            | Chromosome IDs | Chromosomes     | Physical positions (bp) | CDC Frontier genome (Reference genome) | (Pusa 1103 & HPNB) | (ILWC 46 & LPNB) | Sequence Components of genome | Gene accession IDs | Putative functions                                                |
|---------------------|----------------|-----------------|-------------------------|----------------------------------------|--------------------|------------------|-------------------------------|--------------------|-------------------------------------------------------------------|
| SNP_47870_A_8710255 | NC_021166.1    | Ca_Kabuli_Chr07 | 8710255                 | GG                                     | AA                 | AA               | INTERGENIC                    |                    |                                                                   |
| SNP_47871_A_8710618 | NC_021166.1    | Ca_Kabuli_Chr07 | 8710618                 | GG                                     | AA                 | AA               | DRR                           | 101489135          | uncharacterized LOC101489135                                      |
| SNP_47872_A_8710667 | NC_021166.1    | Ca_Kabuli_Chr07 | 8710667                 | CC                                     | TT                 | TT               | DRR                           | 101489135          | uncharacterized LOC101489135                                      |
| SNP_47873_A_8710780 | NC_021166.1    | Ca_Kabuli_Chr07 | 8710780                 | CC                                     | TT                 | TT               | DRR                           | 101489135          | uncharacterized LOC101489135                                      |
| SNP_47874_A_8711152 | NC_021166.1    | Ca_Kabuli_Chr07 | 8711152                 | AA                                     | GG                 | GG               | DRR                           | 101489135          | uncharacterized LOC101489135                                      |
| SNP_47875_A_8711450 | NC_021166.1    | Ca_Kabuli_Chr07 | 8711450                 | AA                                     | CC                 | CC               | SYNONYMOUS_CODING             | 101489135          | uncharacterized LOC101489135                                      |
| SNP_47876_A_8716412 | NC_021166.1    | Ca_Kabuli_Chr07 | 8716412                 | TT                                     | CC                 | CC               | INTERGENIC                    |                    |                                                                   |
| SNP_47877_A_8716652 | NC_021166.1    | Ca_Kabuli_Chr07 | 8716652                 | GG                                     | AA                 | AA               | INTERGENIC                    |                    |                                                                   |
| SNP_47878_A_8716657 | NC_021166.1    | Ca_Kabuli_Chr07 | 8716657                 | TT                                     | CC                 | CC               | INTERGENIC                    |                    |                                                                   |
| SNP_47879_A_8716689 | NC_021166.1    | Ca_Kabuli_Chr07 | 8716689                 | GG                                     | AA                 | AA               | INTERGENIC                    |                    |                                                                   |
| SNP_47880_A_8716731 | NC_021166.1    | Ca_Kabuli_Chr07 | 8716731                 | TT                                     | CC                 | CC               | INTERGENIC                    |                    |                                                                   |
| SNP_47881_A_8722979 | NC_021166.1    | Ca_Kabuli_Chr07 | 8722979                 | AA                                     | GG                 | GG               | DRR                           | 101489784          | probable WRKY transcription factor 72                             |
| SNP_47882_A_8723297 | NC_021166.1    | Ca_Kabuli_Chr07 | 8723297                 | TT                                     | CC                 | CC               | DRR                           | 101489784          | probable WRKY transcription factor 72                             |
| SNP_47883_A_8727541 | NC_021166.1    | Ca_Kabuli_Chr07 | 8727541                 | GG                                     | AA                 | AA               | INTRON                        | 101489784          | probable WRKY transcription factor 72                             |
| SNP_47884_A_8727549 | NC_021166.1    | Ca_Kabuli_Chr07 | 8727549                 | TT                                     | AA                 | AA               | INTRON                        | 101489784          | probable WRKY transcription factor 72                             |
| SNP_47885_A_8727577 | NC_021166.1    | Ca_Kabuli_Chr07 | 8727577                 | TT                                     | GG                 | GG               | INTRON                        | 101489784          | probable WRKY transcription factor 72                             |
| SNP_47886_A_8728808 | NC_021166.1    | Ca_Kabuli_Chr07 | 8728808                 | TT                                     | CC                 | CC               | URR                           | 101489784          | probable WRKY transcription factor 72                             |
| SNP_47887_A_8728828 | NC_021166.1    | Ca_Kabuli_Chr07 | 8728828                 | GG                                     | AA                 | AA               | URR                           | 101489784          | probable WRKY transcription factor 72                             |
| SNP_47888_A_8730204 | NC_021166.1    | Ca_Kabuli_Chr07 | 8730204                 | TT                                     | GG                 | GG               | INTERGENIC                    |                    |                                                                   |
| SNP_47890_A_8740030 | NC_021166.1    | Ca_Kabuli_Chr07 | 8740030                 | GG                                     | TT                 | TT               | INTRON                        | 101490107          | delta-1-pyrroline-5-carboxylate dehydrogenase 12A1, mitochondrial |
| SNP_47891_A_8750054 | NC_021166.1    | Ca_Kabuli_Chr07 | 8750054                 | GG                                     | TT                 | TT               | INTRON                        | 101508806          | YLP motif-containing protein 1                                    |
| SNP_47892_A_8750094 | NC_021166.1    | Ca_Kabuli_Chr07 | 8750094                 | GG                                     | CC                 | CC               | INTRON                        | 101508806          | YLP motif-containing protein 1                                    |



| SNPs IDs            | Chromosome IDs | Chromosomes     | Physical positions (bp) | CDC Frontier (Reference genome) | (Pusa 1103 & HPNB) | (ILWC 46 & LPNB) | Sequence Components of genome | Gene accession IDs | Putative functions                              |
|---------------------|----------------|-----------------|-------------------------|---------------------------------|--------------------|------------------|-------------------------------|--------------------|-------------------------------------------------|
| SNP_47893_A_8750318 | NC_021166.1    | Ca_Kabuli_Chr07 | 8750318                 | TT                              | GG                 | GG               | INTRON                        | 101508806          | YLP motif-containing protein 1                  |
| SNP_47894_A_8753104 | NC_021166.1    | Ca_Kabuli_Chr07 | 8753104                 | GG                              | TT                 | TT               | INTRON                        | 101508806          | YLP motif-containing protein 1                  |
| SNP_47895_A_8753105 | NC_021166.1    | Ca_Kabuli_Chr07 | 8753105                 | TT                              | AA                 | AA               | INTRON                        | 101508806          | YLP motif-containing protein 1                  |
| SNP_47896_A_8758713 | NC_021166.1    | Ca_Kabuli_Chr07 | 8758713                 | CC                              | AA                 | AA               | DRR                           | 101490432          | probable pectate lyase P59                      |
| SNP_47899_A_8762308 | NC_021166.1    | Ca_Kabuli_Chr07 | 8762308                 | TT                              | AA                 | AA               | URR                           | 101490432          | probable pectate lyase P59                      |
| SNP_47900_A_8762358 | NC_021166.1    | Ca_Kabuli_Chr07 | 8762358                 | CC                              | GG                 | GG               | URR                           | 101490432          | probable pectate lyase P59                      |
| SNP_47901_A_8762378 | NC_021166.1    | Ca_Kabuli_Chr07 | 8762378                 | AA                              | GG                 | GG               | URR                           | 101490432          | probable pectate lyase P59                      |
| SNP_47902_A_8762705 | NC_021166.1    | Ca_Kabuli_Chr07 | 8762705                 | TT                              | CC                 | CC               | URR                           | 101490432          | probable pectate lyase P59                      |
| SNP_47903_A_8762716 | NC_021166.1    | Ca_Kabuli_Chr07 | 8762716                 | GG                              | AA                 | AA               | URR                           | 101490432          | probable pectate lyase P59                      |
| SNP_47904_A_8765341 | NC_021166.1    | Ca_Kabuli_Chr07 | 8765341                 | GG                              | AA                 | AA               | URR                           | 101491080          | inactive protein RESTRICTED TEV MOVEMENT 2-like |
| SNP_47905_A_8765376 | NC_021166.1    | Ca_Kabuli_Chr07 | 8765376                 | GG                              | TT                 | TT               | URR                           | 101491080          | inactive protein RESTRICTED TEV MOVEMENT 2-like |
| SNP_47906_A_8766058 | NC_021166.1    | Ca_Kabuli_Chr07 | 8766058                 | TT                              | CC                 | CC               | URR                           | 101491080          | inactive protein RESTRICTED TEV MOVEMENT 2-like |
| SNP_47907_A_8773673 | NC_021166.1    | Ca_Kabuli_Chr07 | 8773673                 | CC                              | TT                 | TT               | URR                           | 101490754          | protein QUIRKY                                  |
| SNP_47908_A_8775170 | NC_021166.1    | Ca_Kabuli_Chr07 | 8775170                 | AA                              | GG                 | GG               | INTERGENIC                    |                    |                                                 |
| SNP_47909_A_8782986 | NC_021166.1    | Ca_Kabuli_Chr07 | 8782986                 | GG                              | TT                 | TT               | DRR                           | 101492027          | protein NRT1/ PTR FAMILY 4.6                    |
| SNP_47910_A_8783416 | NC_021166.1    | Ca_Kabuli_Chr07 | 8783416                 | CC                              | GG                 | GG               | NON_SYNONYMOUS_CODING         | 101492027          | protein NRT1/ PTR FAMILY 4.6                    |
| SNP_47911_A_8785678 | NC_021166.1    | Ca_Kabuli_Chr07 | 8785678                 | AA                              | GG                 | GG               | INTRON                        | 101492027          | protein NRT1/ PTR FAMILY 4.6                    |
| SNP_47912_A_8787435 | NC_021166.1    | Ca_Kabuli_Chr07 | 8787435                 | AA                              | TT                 | TT               | URR                           | 101492027          | protein NRT1/ PTR FAMILY 4.6                    |
| SNP_47913_A_8787824 | NC_021166.1    | Ca_Kabuli_Chr07 | 8787824                 | GG                              | AA                 | AA               | URR                           | 101492027          | protein NRT1/ PTR FAMILY 4.6                    |
| SNP_47914_A_8789164 | NC_021166.1    | Ca_Kabuli_Chr07 | 8789164                 | TT                              | GG                 | GG               | INTERGENIC                    |                    |                                                 |
| SNP_47915_A_8791762 | NC_021166.1    | Ca_Kabuli_Chr07 | 8791762                 | GG                              | AA                 | AA               | INTERGENIC                    |                    |                                                 |
| SNP_47917_A_8792419 | NC_021166.1    | Ca_Kabuli_Chr07 | 8792419                 | CC                              | AA                 | AA               | INTERGENIC                    |                    |                                                 |

| SNPs IDs            | Chromosome IDs | Chromosomes     | Physical positions (bp) | CDC Frontier (Reference genome) | (Pusa 1103 & HPNB) | (ILWC 46 & LPNB) | Sequence Components of genome | Gene accession IDs | Putative functions                                      |
|---------------------|----------------|-----------------|-------------------------|---------------------------------|--------------------|------------------|-------------------------------|--------------------|---------------------------------------------------------|
| SNP_47918_A_8793834 | NC_021166.1    | Ca_Kabuli_Chr07 | 8793834                 | TT                              | CC                 | CC               | DRR                           | 101492365          | homeobox-leucine zipper protein ATHB-16-like            |
| SNP_47920_A_8794019 | NC_021166.1    | Ca_Kabuli_Chr07 | 8794019                 | AA                              | GG                 | GG               | DRR                           | 101492365          | homeobox-leucine zipper protein ATHB-16-like            |
| SNP_47921_A_8796694 | NC_021166.1    | Ca_Kabuli_Chr07 | 8796694                 | GG                              | TT                 | TT               | URR                           | 101492365          | homeobox-leucine zipper protein ATHB-16-like            |
| SNP_47922_A_8797945 | NC_021166.1    | Ca_Kabuli_Chr07 | 8797945                 | GG                              | AA                 | AA               | URR                           | 101492365          | homeobox-leucine zipper protein ATHB-16-like            |
| SNP_47923_A_8799217 | NC_021166.1    | Ca_Kabuli_Chr07 | 8799217                 | AA                              | TT                 | TT               | INTERGENIC                    |                    |                                                         |
| SNP_47924_A_8799591 | NC_021166.1    | Ca_Kabuli_Chr07 | 8799591                 | CC                              | AA                 | AA               | INTERGENIC                    |                    |                                                         |
| SNP_47925_A_8799785 | NC_021166.1    | Ca_Kabuli_Chr07 | 8799785                 | CC                              | TT                 | TT               | INTERGENIC                    |                    |                                                         |
| SNP_47926_A_8800395 | NC_021166.1    | Ca_Kabuli_Chr07 | 8800395                 | GG                              | AA                 | AA               | INTERGENIC                    |                    |                                                         |
| SNP_47927_A_8800408 | NC_021166.1    | Ca_Kabuli_Chr07 | 8800408                 | CC                              | TT                 | TT               | INTERGENIC                    |                    |                                                         |
| SNP_47928_A_8800931 | NC_021166.1    | Ca_Kabuli_Chr07 | 8800931                 | CC                              | TT                 | TT               | DRR                           | 101492695          | uncharacterized LOC101492695                            |
| SNP_47929_A_8805990 | NC_021166.1    | Ca_Kabuli_Chr07 | 8805990                 | TT                              | GG                 | GG               | URR                           | 101492695          | uncharacterized LOC101492695                            |
| SNP_47930_A_8806223 | NC_021166.1    | Ca_Kabuli_Chr07 | 8806223                 | AA                              | CC                 | CC               | URR                           | 101492695          | uncharacterized LOC101492695                            |
| SNP_47931_A_8809324 | NC_021166.1    | Ca_Kabuli_Chr07 | 8809324                 | CC                              | TT                 | GG               | INTRON                        | 101493032          | LRR receptor-like serine/threonine-protein kinase FEI 1 |
| SNP_47932_A_8812902 | NC_021166.1    | Ca_Kabuli_Chr07 | 8812902                 | GG                              | TT                 | TT               | INTERGENIC                    |                    |                                                         |
| SNP_47933_A_8812904 | NC_021166.1    | Ca_Kabuli_Chr07 | 8812904                 | GG                              | CC                 | CC               | INTERGENIC                    |                    |                                                         |
| SNP_47934_A_8814442 | NC_021166.1    | Ca_Kabuli_Chr07 | 8814442                 | AA                              | TT                 | TT               | INTRON                        | 101493572          | protein NRT1/ PTR FAMILY 2.8                            |
| SNP_47935_A_8817972 | NC_021166.1    | Ca_Kabuli_Chr07 | 8817972                 | AA                              | GG                 | GG               | URR                           | 101493572          | protein NRT1/ PTR FAMILY 2.8                            |
| SNP_47936_A_8818420 | NC_021166.1    | Ca_Kabuli_Chr07 | 8818420                 | AA                              | GG                 | GG               | URR                           | 101493572          | protein NRT1/ PTR FAMILY 2.8                            |
| SNP_47937_A_8818430 | NC_021166.1    | Ca_Kabuli_Chr07 | 8818430                 | TT                              | CC                 | CC               | URR                           | 101493572          | protein NRT1/ PTR FAMILY 2.8                            |
| SNP_47938_A_8822178 | NC_021166.1    | Ca_Kabuli_Chr07 | 8822178                 | TT                              | AA                 | AA               | DRR                           | 101493890          | protein NRT1/ PTR FAMILY 2.9-like                       |
| SNP_47939_A_8824278 | NC_021166.1    | Ca_Kabuli_Chr07 | 8824278                 | CC                              | TT                 | TT               | INTRON                        | 101493890          | protein NRT1/ PTR FAMILY 2.9-like                       |
| SNP_47940_A_8825607 | NC_021166.1    | Ca_Kabuli_Chr07 | 8825607                 | AA                              | CC                 | CC               | URR                           | 101493890          | protein NRT1/ PTR FAMILY 2.9-like                       |

| SNPs IDs            | Chromosome IDs | Chromosomes     | Physical positions (bp) | CDC Frontier (Reference genome) | (Pusa 1103 & HPNB) | (ILWC 46 & LPNB) | Sequence Components of genome | Gene accession IDs | Putative functions                  |
|---------------------|----------------|-----------------|-------------------------|---------------------------------|--------------------|------------------|-------------------------------|--------------------|-------------------------------------|
| SNP_47941_A_8826158 | NC_021166.1    | Ca_Kabuli_Chr07 | 8826158                 | AA                              | GG                 | GG               | URR                           | 101493890          | protein NRT1/ PTR FAMILY 2.9-like   |
| SNP_47942_A_8826960 | NC_021166.1    | Ca_Kabuli_Chr07 | 8826960                 | TT                              | AA                 | AA               | DRR                           | 101494629          | protein NRT1/ PTR FAMILY 2.11-like  |
| SNP_47943_A_8826970 | NC_021166.1    | Ca_Kabuli_Chr07 | 8826970                 | GG                              | AA                 | AA               | DRR                           | 101494629          | protein NRT1/ PTR FAMILY 2.11-like  |
| SNP_47944_A_8827031 | NC_021166.1    | Ca_Kabuli_Chr07 | 8827031                 | TT                              | GG                 | GG               | DRR                           | 101494629          | protein NRT1/ PTR FAMILY 2.11-like  |
| SNP_47945_A_8827032 | NC_021166.1    | Ca_Kabuli_Chr07 | 8827032                 | GG                              | AA                 | AA               | DRR                           | 101494629          | protein NRT1/ PTR FAMILY 2.11-like  |
| SNP_47946_A_8835053 | NC_021166.1    | Ca_Kabuli_Chr07 | 8835053                 | GG                              | CC                 | CC               | INTERGENIC                    |                    |                                     |
| SNP_47947_A_8835074 | NC_021166.1    | Ca_Kabuli_Chr07 | 8835074                 | AA                              | GG                 | GG               | INTERGENIC                    |                    |                                     |
| SNP_47948_A_8835783 | NC_021166.1    | Ca_Kabuli_Chr07 | 8835783                 | CC                              | TT                 | TT               | INTERGENIC                    |                    |                                     |
| SNP_47950_A_8839665 | NC_021166.1    | Ca_Kabuli_Chr07 | 8839665                 | TT                              | GG                 | GG               | URR                           | 101495170          | protein NRT1/ PTR FAMILY 2.9-like   |
| SNP_47951_A_8839685 | NC_021166.1    | Ca_Kabuli_Chr07 | 8839685                 | GG                              | CC                 | CC               | URR                           | 101495170          | protein NRT1/ PTR FAMILY 2.9-like   |
| SNP_47953_A_8842123 | NC_021166.1    | Ca_Kabuli_Chr07 | 8842123                 | TT                              | AA                 | AA               | INTERGENIC                    |                    |                                     |
| SNP_47954_A_8856403 | NC_021166.1    | Ca_Kabuli_Chr07 | 8856403                 | TT                              | CC                 | CC               | INTERGENIC                    |                    |                                     |
| SNP_47955_A_8856796 | NC_021166.1    | Ca_Kabuli_Chr07 | 8856796                 | TT                              | CC                 | CC               | INTERGENIC                    |                    |                                     |
| SNP_47956_A_8856814 | NC_021166.1    | Ca_Kabuli_Chr07 | 8856814                 | GG                              | TT                 | TT               | INTERGENIC                    |                    |                                     |
| SNP_47957_A_8856866 | NC_021166.1    | Ca_Kabuli_Chr07 | 8856866                 | TT                              | CC                 | CC               | INTERGENIC                    |                    |                                     |
| SNP_47959_A_8859308 | NC_021166.1    | Ca_Kabuli_Chr07 | 8859308                 | TT                              | AA                 | AA               | INTERGENIC                    |                    |                                     |
| SNP_47960_A_8861879 | NC_021166.1    | Ca_Kabuli_Chr07 | 8861879                 | TT                              | AA                 | AA               | INTERGENIC                    |                    |                                     |
| SNP_47961_A_8861880 | NC_021166.1    | Ca_Kabuli_Chr07 | 8861880                 | AA                              | CC                 | CC               | INTERGENIC                    |                    |                                     |
| SNP_47962_A_8874929 | NC_021166.1    | Ca_Kabuli_Chr07 | 8874929                 | CC                              | TT                 | TT               | URR                           | 101496261          | calcium-dependent protein kinase 10 |
| SNP_47964_A_8875790 | NC_021166.1    | Ca_Kabuli_Chr07 | 8875790                 | CC                              | TT                 | TT               | INTERGENIC                    |                    |                                     |
| SNP_47965_A_8875794 | NC_021166.1    | Ca_Kabuli_Chr07 | 8875794                 | TT                              | CC                 | CC               | INTERGENIC                    |                    |                                     |
| SNP_47966_A_8875798 | NC_021166.1    | Ca_Kabuli_Chr07 | 8875798                 | CC                              | TT                 | TT               | INTERGENIC                    |                    |                                     |

| SNPs IDs            | Chromosome IDs | Chromosomes     | Physical positions (bp) | CDC Frontier genome (Reference genome) | (Pusa 1103 & HPNB) | (ILWC 46 & LPNB) | Sequence Components of genome | Gene accession IDs | Putative functions               |
|---------------------|----------------|-----------------|-------------------------|----------------------------------------|--------------------|------------------|-------------------------------|--------------------|----------------------------------|
| SNP_47967_A_8878662 | NC_021166.1    | Ca_Kabuli_Chr07 | 8878662                 | GG                                     | TT                 | TT               | INTERGENIC                    |                    |                                  |
| SNP_47968_A_8878941 | NC_021166.1    | Ca_Kabuli_Chr07 | 8878941                 | CC                                     | GG                 | GG               | INTERGENIC                    |                    |                                  |
| SNP_47969_A_8879712 | NC_021166.1    | Ca_Kabuli_Chr07 | 8879712                 | CC                                     | TT                 | TT               | INTERGENIC                    |                    |                                  |
| SNP_47970_A_8885518 | NC_021166.1    | Ca_Kabuli_Chr07 | 8885518                 | GG                                     | AA                 | AA               | INTERGENIC                    |                    |                                  |
| SNP_47971_A_8885755 | NC_021166.1    | Ca_Kabuli_Chr07 | 8885755                 | CC                                     | GG                 | GG               | INTERGENIC                    |                    |                                  |
| SNP_47972_A_8889404 | NC_021166.1    | Ca_Kabuli_Chr07 | 8889404                 | CC                                     | TT                 | TT               | INTERGENIC                    |                    |                                  |
| SNP_47973_A_8889413 | NC_021166.1    | Ca_Kabuli_Chr07 | 8889413                 | GG                                     | AA                 | AA               | INTERGENIC                    |                    |                                  |
| SNP_47974_A_8893054 | NC_021166.1    | Ca_Kabuli_Chr07 | 8893054                 | GG                                     | AA                 | AA               | DRR                           | 101496590          | uncharacterized LOC101496590     |
| SNP_47975_A_8893059 | NC_021166.1    | Ca_Kabuli_Chr07 | 8893059                 | TT                                     | CC                 | CC               | DRR                           | 101496590          | uncharacterized LOC101496590     |
| SNP_47976_A_8898432 | NC_021166.1    | Ca_Kabuli_Chr07 | 8898432                 | TT                                     | CC                 | CC               | INTRON                        | 101496590          | uncharacterized LOC101496590     |
| SNP_47977_A_8898458 | NC_021166.1    | Ca_Kabuli_Chr07 | 8898458                 | TT                                     | AA                 | AA               | INTRON                        | 101496590          | uncharacterized LOC101496590     |
| SNP_47978_A_8898475 | NC_021166.1    | Ca_Kabuli_Chr07 | 8898475                 | AA                                     | CC                 | CC               | INTRON                        | 101496590          | uncharacterized LOC101496590     |
| SNP_47980_A_8898832 | NC_021166.1    | Ca_Kabuli_Chr07 | 8898832                 | AA                                     | GG                 | GG               | INTRON                        | 101496590          | uncharacterized LOC101496590     |
| SNP_47981_A_8902051 | NC_021166.1    | Ca_Kabuli_Chr07 | 8902051                 | AA                                     | TT                 | TT               | SYNONYMOUS_CODING             | 101496590          | uncharacterized LOC101496590     |
| SNP_47982_A_8902388 | NC_021166.1    | Ca_Kabuli_Chr07 | 8902388                 | AA                                     | TT                 | TT               | SYNONYMOUS_CODING             | 101496590          | uncharacterized LOC101496590     |
| SNP_47983_A_8906459 | NC_021166.1    | Ca_Kabuli_Chr07 | 8906459                 | AA                                     | GG                 | GG               | URR                           | 101496590          | uncharacterized LOC101496590     |
| SNP_47984_A_8906463 | NC_021166.1    | Ca_Kabuli_Chr07 | 8906463                 | CC                                     | AA                 | AA               | URR                           | 101496590          | uncharacterized LOC101496590     |
| SNP_47985_A_8907658 | NC_021166.1    | Ca_Kabuli_Chr07 | 8907658                 | CC                                     | TT                 | TT               | DRR                           | 101497462          | LOB domain-containing protein 27 |
| SNP_47987_A_8908007 | NC_021166.1    | Ca_Kabuli_Chr07 | 8908007                 | CC                                     | GG                 | GG               | DRR                           | 101497462          | LOB domain-containing protein 27 |
| SNP_47988_A_8908034 | NC_021166.1    | Ca_Kabuli_Chr07 | 8908034                 | TT                                     | CC                 | CC               | DRR                           | 101497462          | LOB domain-containing protein 27 |
| SNP_47989_A_8910159 | NC_021166.1    | Ca_Kabuli_Chr07 | 8910159                 | GG                                     | AA                 | AA               | INTERGENIC                    |                    |                                  |
| SNP_47990_A_8913092 | NC_021166.1    | Ca_Kabuli_Chr07 | 8913092                 | CC                                     | GG                 | GG               | URR                           | 101497462          | LOB domain-containing protein 27 |

| SNPs IDs            | Chromosome IDs | Chromosomes     | Physical positions (bp) | CDC Frontier (Reference genome) | (Pusa 1103 & HPNB) | (ILWC 46 & LPNB) | Sequence Components of genome | Gene accession IDs | Putative functions                              |
|---------------------|----------------|-----------------|-------------------------|---------------------------------|--------------------|------------------|-------------------------------|--------------------|-------------------------------------------------|
| SNP_47991_A_8922630 | NC_021166.1    | Ca_Kabuli_Chr07 | 8922630                 | CC                              | TT                 | TT               | URR                           | 101497125          | uncharacterized LOC101497125                    |
| SNP_47992_A_8922828 | NC_021166.1    | Ca_Kabuli_Chr07 | 8922828                 | AA                              | TT                 | TT               | URR                           | 101497125          | uncharacterized LOC101497125                    |
| SNP_47993_A_8926883 | NC_021166.1    | Ca_Kabuli_Chr07 | 8926883                 | TT                              | CC                 | CC               | INTERGENIC                    |                    |                                                 |
| SNP_47994_A_8927773 | NC_021166.1    | Ca_Kabuli_Chr07 | 8927773                 | TT                              | AA                 | AA               | INTERGENIC                    |                    |                                                 |
| SNP_47995_A_8927951 | NC_021166.1    | Ca_Kabuli_Chr07 | 8927951                 | GG                              | AA                 | AA               | INTERGENIC                    |                    |                                                 |
| SNP_47996_A_8931993 | NC_021166.1    | Ca_Kabuli_Chr07 | 8931993                 | TT                              | CC                 | CC               | INTRON                        | 101497894          | basic proline-rich protein                      |
| SNP_47997_A_8932225 | NC_021166.1    | Ca_Kabuli_Chr07 | 8932225                 | TT                              | AA                 | AA               | INTRON                        | 101497894          | basic proline-rich protein                      |
| SNP_47998_A_8932695 | NC_021166.1    | Ca_Kabuli_Chr07 | 8932695                 | GG                              | TT                 | TT               | INTRON                        | 101497894          | basic proline-rich protein                      |
| SNP_47999_A_8932706 | NC_021166.1    | Ca_Kabuli_Chr07 | 8932706                 | TT                              | AA                 | AA               | INTRON                        | 101497894          | basic proline-rich protein                      |
| SNP_48000_A_8944823 | NC_021166.1    | Ca_Kabuli_Chr07 | 8944823                 | AA                              | GG                 | GG               | INTERGENIC                    |                    |                                                 |
| SNP_48001_A_8946055 | NC_021166.1    | Ca_Kabuli_Chr07 | 8946055                 | TT                              | CC                 | CC               | INTERGENIC                    |                    |                                                 |
| SNP_48002_A_8946265 | NC_021166.1    | Ca_Kabuli_Chr07 | 8946265                 | CC                              | TT                 | TT               | INTERGENIC                    |                    |                                                 |
| SNP_48003_A_8948666 | NC_021166.1    | Ca_Kabuli_Chr07 | 8948666                 | CC                              | TT                 | TT               | URR                           | 101498215          | HIPL1 protein-like                              |
| SNP_48004_A_8949327 | NC_021166.1    | Ca_Kabuli_Chr07 | 8949327                 | TT                              | GG                 | GG               | URR                           | 101498215          | HIPL1 protein-like                              |
| SNP_48005_A_8951428 | NC_021166.1    | Ca_Kabuli_Chr07 | 8951428                 | TT                              | CC                 | CC               | DRR                           | 101499113          | MATH and LRR domain-containing protein PFE0570w |
| SNP_48006_A_8952984 | NC_021166.1    | Ca_Kabuli_Chr07 | 8952984                 | GG                              | TT                 | TT               | INTERGENIC                    |                    |                                                 |
| SNP_48007_A_8955836 | NC_021166.1    | Ca_Kabuli_Chr07 | 8955836                 | AA                              | CC                 | CC               | INTERGENIC                    |                    |                                                 |
| SNP_48009_A_8963931 | NC_021166.1    | Ca_Kabuli_Chr07 | 8963931                 | CC                              | TT                 | TT               | URR                           | 101498790          | probable mitochondrial chaperone BCS1-B         |
| SNP_48010_A_8964365 | NC_021166.1    | Ca_Kabuli_Chr07 | 8964365                 | AA                              | GG                 | GG               | URR                           | 101498790          | probable mitochondrial chaperone BCS1-B         |
| SNP_48011_A_8965756 | NC_021166.1    | Ca_Kabuli_Chr07 | 8965756                 | TT                              | CC                 | CC               | INTERGENIC                    |                    |                                                 |
| SNP_48012_A_8965956 | NC_021166.1    | Ca_Kabuli_Chr07 | 8965956                 | AA                              | TT                 | TT               | INTERGENIC                    |                    |                                                 |
| SNP_48013_A_8965988 | NC_021166.1    | Ca_Kabuli_Chr07 | 8965988                 | GG                              | AA                 | AA               | INTERGENIC                    |                    |                                                 |

| SNPs IDs            | Chromosome IDs | Chromosomes     | Physical positions (bp) | CDC Frontier genome (Reference genome) | (Pusa 1103 & HPNB) | (ILWC 46 & LPNB) | Sequence Components of genome | Gene accession IDs | Putative functions                         |
|---------------------|----------------|-----------------|-------------------------|----------------------------------------|--------------------|------------------|-------------------------------|--------------------|--------------------------------------------|
| SNP_48015_A_8968019 | NC_021166.1    | Ca_Kabuli_Chr07 | 8968019                 | AA                                     | GG                 | GG               | INTERGENIC                    |                    |                                            |
| SNP_48016_A_8968031 | NC_021166.1    | Ca_Kabuli_Chr07 | 8968031                 | AA                                     | GG                 | GG               | INTERGENIC                    |                    |                                            |
| SNP_48017_A_8968081 | NC_021166.1    | Ca_Kabuli_Chr07 | 8968081                 | TT                                     | CC                 | CC               | DRR                           | 101499432          | probable beta-1,3-galactosyltransferase 19 |
| SNP_48018_A_8968112 | NC_021166.1    | Ca_Kabuli_Chr07 | 8968112                 | AA                                     | GG                 | GG               | DRR                           | 101499432          | probable beta-1,3-galactosyltransferase 19 |
| SNP_48019_A_8968209 | NC_021166.1    | Ca_Kabuli_Chr07 | 8968209                 | GG                                     | AA                 | AA               | DRR                           | 101499432          | probable beta-1,3-galactosyltransferase 19 |
| SNP_48020_A_8968214 | NC_021166.1    | Ca_Kabuli_Chr07 | 8968214                 | TT                                     | AA                 | AA               | DRR                           | 101499432          | probable beta-1,3-galactosyltransferase 19 |
| SNP_48021_A_8970707 | NC_021166.1    | Ca_Kabuli_Chr07 | 8970707                 | GG                                     | AA                 | AA               | SYNONYMOUS_CODING             | 101499432          | probable beta-1,3-galactosyltransferase 19 |
| SNP_48023_A_8974713 | NC_021166.1    | Ca_Kabuli_Chr07 | 8974713                 | CC                                     | GG                 | GG               | INTERGENIC                    |                    |                                            |
| SNP_48025_A_8975073 | NC_021166.1    | Ca_Kabuli_Chr07 | 8975073                 | CC                                     | TT                 | TT               | INTERGENIC                    |                    |                                            |
| SNP_48026_A_8975098 | NC_021166.1    | Ca_Kabuli_Chr07 | 8975098                 | GG                                     | AA                 | AA               | INTERGENIC                    |                    |                                            |
| SNP_48027_A_8975302 | NC_021166.1    | Ca_Kabuli_Chr07 | 8975302                 | GG                                     | CC                 | CC               | INTERGENIC                    |                    |                                            |
| SNP_48028_A_8976484 | NC_021166.1    | Ca_Kabuli_Chr07 | 8976484                 | AA                                     | GG                 | GG               | DRR                           | 101499740          | uncharacterized LOC101499740               |
| SNP_48029_A_8978728 | NC_021166.1    | Ca_Kabuli_Chr07 | 8978728                 | TT                                     | CC                 | CC               | INTRON                        | 101499740          | uncharacterized LOC101499740               |
| SNP_48030_A_8979523 | NC_021166.1    | Ca_Kabuli_Chr07 | 8979523                 | GG                                     | AA                 | AA               | DRR                           | 101499740          | uncharacterized LOC101499740               |
| SNP_48031_A_8979544 | NC_021166.1    | Ca_Kabuli_Chr07 | 8979544                 | GG                                     | TT                 | TT               | DRR                           | 101499740          | uncharacterized LOC101499740               |
| SNP_48032_A_8981454 | NC_021166.1    | Ca_Kabuli_Chr07 | 8981454                 | CC                                     | TT                 | TT               | URR                           | 101499740          | uncharacterized LOC101499740               |
| SNP_48033_A_8983513 | NC_021166.1    | Ca_Kabuli_Chr07 | 8983513                 | GG                                     | TT                 | TT               | INTERGENIC                    |                    |                                            |
| SNP_48034_A_8983843 | NC_021166.1    | Ca_Kabuli_Chr07 | 8983843                 | AA                                     | GG                 | GG               | INTERGENIC                    |                    |                                            |
| SNP_48035_A_8983859 | NC_021166.1    | Ca_Kabuli_Chr07 | 8983859                 | TT                                     | CC                 | CC               | INTERGENIC                    |                    |                                            |
| SNP_48036_A_8984263 | NC_021166.1    | Ca_Kabuli_Chr07 | 8984263                 | GG                                     | TT                 | TT               | INTERGENIC                    |                    |                                            |
| SNP_48037_A_8984273 | NC_021166.1    | Ca_Kabuli_Chr07 | 8984273                 | AA                                     | TT                 | TT               | INTERGENIC                    |                    |                                            |
| SNP_48038_A_8988094 | NC_021166.1    | Ca_Kabuli_Chr07 | 8988094                 | CC                                     | GG                 | GG               | INTERGENIC                    |                    |                                            |

| SNPs IDs            | Chromosome IDs | Chromosomes     | Physical positions (bp) | CDC Frontier (Reference genome) | (Pusa 1103 & HPNB) | (ILWC 46 & LPNB) | Sequence Components of genome | Gene accession IDs | Putative functions          |
|---------------------|----------------|-----------------|-------------------------|---------------------------------|--------------------|------------------|-------------------------------|--------------------|-----------------------------|
| SNP_48039_A_8988134 | NC_021166.1    | Ca_Kabuli_Chr07 | 8988134                 | AA                              | GG                 | GG               | INTERGENIC                    |                    |                             |
| SNP_48040_A_8988137 | NC_021166.1    | Ca_Kabuli_Chr07 | 8988137                 | TT                              | CC                 | CC               | INTERGENIC                    |                    |                             |
| SNP_48041_A_8989943 | NC_021166.1    | Ca_Kabuli_Chr07 | 8989943                 | TT                              | CC                 | CC               | INTERGENIC                    |                    |                             |
| SNP_48042_A_8990596 | NC_021166.1    | Ca_Kabuli_Chr07 | 8990596                 | AA                              | TT                 | TT               | INTERGENIC                    |                    |                             |
| SNP_48043_A_8990624 | NC_021166.1    | Ca_Kabuli_Chr07 | 8990624                 | GG                              | AA                 | AA               | INTERGENIC                    |                    |                             |
| SNP_48044_A_8991081 | NC_021166.1    | Ca_Kabuli_Chr07 | 8991081                 | TT                              | CC                 | CC               | INTERGENIC                    |                    |                             |
| SNP_48045_A_8994052 | NC_021166.1    | Ca_Kabuli_Chr07 | 8994052                 | TT                              | CC                 | CC               | INTERGENIC                    |                    |                             |
| SNP_48046_A_8994333 | NC_021166.1    | Ca_Kabuli_Chr07 | 8994333                 | AA                              | GG                 | GG               | INTERGENIC                    |                    |                             |
| SNP_48048_A_8997385 | NC_021166.1    | Ca_Kabuli_Chr07 | 8997385                 | AA                              | GG                 | GG               | NON_SYNONYMOUS_CODING         | 101500049          | transcription factor bHLH79 |
| SNP_48049_A_8997390 | NC_021166.1    | Ca_Kabuli_Chr07 | 8997390                 | AA                              | GG                 | GG               | NON_SYNONYMOUS_CODING         | 101500049          | transcription factor bHLH79 |
| SNP_48050_A_8998123 | NC_021166.1    | Ca_Kabuli_Chr07 | 8998123                 | CC                              | TT                 | TT               | INTRON                        | 101500049          | transcription factor bHLH79 |
| SNP_48051_A_8998558 | NC_021166.1    | Ca_Kabuli_Chr07 | 8998558                 | CC                              | TT                 | TT               | INTRON                        | 101500049          | transcription factor bHLH79 |
| SNP_48052_A_9009843 | NC_021166.1    | Ca_Kabuli_Chr07 | 9009843                 | TT                              | CC                 | CC               | INTERGENIC                    |                    |                             |
| SNP_48053_A_9012098 | NC_021166.1    | Ca_Kabuli_Chr07 | 9012098                 | GG                              | CC                 | CC               | INTERGENIC                    |                    |                             |
| SNP_48054_A_9014263 | NC_021166.1    | Ca_Kabuli_Chr07 | 9014263                 | AA                              | GG                 | GG               | DRR                           | 101500897          | transportin-3               |
| SNP_48055_A_9015537 | NC_021166.1    | Ca_Kabuli_Chr07 | 9015537                 | GG                              | AA                 | AA               | INTRON                        | 101500897          | transportin-3               |
| SNP_48057_A_9021131 | NC_021166.1    | Ca_Kabuli_Chr07 | 9021131                 | AA                              | GG                 | GG               | INTRON                        | 101500897          | transportin-3               |
| SNP_48058_A_9022508 | NC_021166.1    | Ca_Kabuli_Chr07 | 9022508                 | TT                              | CC                 | CC               | INTRON                        | 101500897          | transportin-3               |
| SNP_48059_A_9022546 | NC_021166.1    | Ca_Kabuli_Chr07 | 9022546                 | GG                              | AA                 | AA               | INTRON                        | 101500897          | transportin-3               |
| SNP_48061_A_9024212 | NC_021166.1    | Ca_Kabuli_Chr07 | 9024212                 | CC                              | TT                 | TT               | INTRON                        | 101500897          | transportin-3               |
| SNP_48062_A_9026774 | NC_021166.1    | Ca_Kabuli_Chr07 | 9026774                 | AA                              | GG                 | GG               | INTRON                        | 101500897          | transportin-3               |
| SNP_48063_A_9030071 | NC_021166.1    | Ca_Kabuli_Chr07 | 9030071                 | GG                              | AA                 | AA               | DRR                           | 101501226          | tubby-like F-box protein 5  |

| SNPs IDs            | Chromosome IDs | Chromosomes     | Physical positions (bp) | CDC Frontier genome (Reference genome) | (Pusa 1103 & HPNB) | (ILWC 46 & LPNB) | Sequence Components of genome | Gene accession IDs | Putative functions                                |
|---------------------|----------------|-----------------|-------------------------|----------------------------------------|--------------------|------------------|-------------------------------|--------------------|---------------------------------------------------|
| SNP_48065_A_9030289 | NC_021166.1    | Ca_Kabuli_Chr07 | 9030289                 | AA                                     | GG                 | GG               | DRR                           | 101501226          | tubby-like F-box protein 5                        |
| SNP_48066_A_9030291 | NC_021166.1    | Ca_Kabuli_Chr07 | 9030291                 | TT                                     | CC                 | CC               | DRR                           | 101501226          | tubby-like F-box protein 5                        |
| SNP_48067_A_9030316 | NC_021166.1    | Ca_Kabuli_Chr07 | 9030316                 | GG                                     | CC                 | CC               | DRR                           | 101501226          | tubby-like F-box protein 5                        |
| SNP_48068_A_9030322 | NC_021166.1    | Ca_Kabuli_Chr07 | 9030322                 | AA                                     | TT                 | TT               | DRR                           | 101501226          | tubby-like F-box protein 5                        |
| SNP_48069_A_9030581 | NC_021166.1    | Ca_Kabuli_Chr07 | 9030581                 | AA                                     | GG                 | GG               | DRR                           | 101501226          | tubby-like F-box protein 5                        |
| SNP_48073_A_9037355 | NC_021166.1    | Ca_Kabuli_Chr07 | 9037355                 | GG                                     | AA                 | AA               | INTERGENIC                    |                    |                                                   |
| SNP_48075_A_9037426 | NC_021166.1    | Ca_Kabuli_Chr07 | 9037426                 | TT                                     | GG                 | GG               | INTERGENIC                    |                    |                                                   |
| SNP_48076_A_9037782 | NC_021166.1    | Ca_Kabuli_Chr07 | 9037782                 | CC                                     | TT                 | TT               | URR                           | 101501952          | serine/threonine-protein kinase AtPK2/AtPK19-like |
| SNP_48077_A_9037805 | NC_021166.1    | Ca_Kabuli_Chr07 | 9037805                 | AA                                     | CC                 | CC               | URR                           | 101501952          | serine/threonine-protein kinase AtPK2/AtPK19-like |
| SNP_48078_A_9043292 | NC_021166.1    | Ca_Kabuli_Chr07 | 9043292                 | CC                                     | TT                 | TT               | INTERGENIC                    |                    |                                                   |
| SNP_48079_A_9043328 | NC_021166.1    | Ca_Kabuli_Chr07 | 9043328                 | CC                                     | TT                 | TT               | INTERGENIC                    |                    |                                                   |
| SNP_48080_A_9043630 | NC_021166.1    | Ca_Kabuli_Chr07 | 9043630                 | GG                                     | AA                 | AA               | INTERGENIC                    |                    |                                                   |
| SNP_48081_A_9043664 | NC_021166.1    | Ca_Kabuli_Chr07 | 9043664                 | TT                                     | CC                 | CC               | INTERGENIC                    |                    |                                                   |
| SNP_48083_A_9045933 | NC_021166.1    | Ca_Kabuli_Chr07 | 9045933                 | TT                                     | CC                 | CC               | INTERGENIC                    |                    |                                                   |
| SNP_48084_A_9045939 | NC_021166.1    | Ca_Kabuli_Chr07 | 9045939                 | CC                                     | GG                 | GG               | INTERGENIC                    |                    |                                                   |
| SNP_48085_A_9046094 | NC_021166.1    | Ca_Kabuli_Chr07 | 9046094                 | CC                                     | AA                 | AA               | INTERGENIC                    |                    |                                                   |
| SNP_48086_A_9046462 | NC_021166.1    | Ca_Kabuli_Chr07 | 9046462                 | TT                                     | GG                 | GG               | INTERGENIC                    |                    |                                                   |
| SNP_48087_A_9046776 | NC_021166.1    | Ca_Kabuli_Chr07 | 9046776                 | CC                                     | TT                 | TT               | INTERGENIC                    |                    |                                                   |
| SNP_48088_A_9046780 | NC_021166.1    | Ca_Kabuli_Chr07 | 9046780                 | TT                                     | CC                 | CC               | INTERGENIC                    |                    |                                                   |
| SNP_48089_A_9046791 | NC_021166.1    | Ca_Kabuli_Chr07 | 9046791                 | CC                                     | GG                 | GG               | INTERGENIC                    |                    |                                                   |
| SNP_48090_A_9047129 | NC_021166.1    | Ca_Kabuli_Chr07 | 9047129                 | TT                                     | CC                 | CC               | INTERGENIC                    |                    |                                                   |
| SNP_48091_A_9050802 | NC_021166.1    | Ca_Kabuli_Chr07 | 9050802                 | TT                                     | CC                 | CC               | URR                           | 101502286          | transcription factor MYB1R1                       |



| SNPs IDs            | Chromosome IDs | Chromosomes     | Physical positions (bp) | CDC Frontier (Reference genome) | (Pusa 1103 & HPNB) | (ILWC 46 & LPNB) | Sequence Components of genome | Gene accession IDs | Putative functions          |
|---------------------|----------------|-----------------|-------------------------|---------------------------------|--------------------|------------------|-------------------------------|--------------------|-----------------------------|
| SNP_48092_A_9050860 | NC_021166.1    | Ca_Kabuli_Chr07 | 9050860                 | AA                              | TT                 | TT               | URR                           | 101502286          | transcription factor MYB1R1 |
| SNP_48094_A_9051640 | NC_021166.1    | Ca_Kabuli_Chr07 | 9051640                 | GG                              | TT                 | TT               | URR                           | 101502286          | transcription factor MYB1R1 |
| SNP_48095_A_9051657 | NC_021166.1    | Ca_Kabuli_Chr07 | 9051657                 | CC                              | TT                 | TT               | URR                           | 101502286          | transcription factor MYB1R1 |
| SNP_48096_A_9052635 | NC_021166.1    | Ca_Kabuli_Chr07 | 9052635                 | AA                              | GG                 | GG               | INTERGENIC                    |                    |                             |
| SNP_48097_A_9052690 | NC_021166.1    | Ca_Kabuli_Chr07 | 9052690                 | CC                              | AA                 | AA               | INTERGENIC                    |                    |                             |
| SNP_48098_A_9052774 | NC_021166.1    | Ca_Kabuli_Chr07 | 9052774                 | TT                              | CC                 | CC               | INTERGENIC                    |                    |                             |
| SNP_48099_A_9052776 | NC_021166.1    | Ca_Kabuli_Chr07 | 9052776                 | CC                              | AA                 | AA               | INTERGENIC                    |                    |                             |
| SNP_48100_A_9052907 | NC_021166.1    | Ca_Kabuli_Chr07 | 9052907                 | AA                              | GG                 | GG               | INTERGENIC                    |                    |                             |
| SNP_48101_A_9057401 | NC_021166.1    | Ca_Kabuli_Chr07 | 9057401                 | TT                              | GG                 | GG               | INTERGENIC                    |                    |                             |
| SNP_48102_A_9057496 | NC_021166.1    | Ca_Kabuli_Chr07 | 9057496                 | CC                              | TT                 | TT               | INTERGENIC                    |                    |                             |
| SNP_48103_A_9057554 | NC_021166.1    | Ca_Kabuli_Chr07 | 9057554                 | GG                              | AA                 | AA               | INTERGENIC                    |                    |                             |
| SNP_48104_A_9057919 | NC_021166.1    | Ca_Kabuli_Chr07 | 9057919                 | TT                              | GG                 | GG               | INTERGENIC                    |                    |                             |
| SNP_48105_A_9057962 | NC_021166.1    | Ca_Kabuli_Chr07 | 9057962                 | CC                              | TT                 | TT               | INTERGENIC                    |                    |                             |
| SNP_48106_A_9059767 | NC_021166.1    | Ca_Kabuli_Chr07 | 9059767                 | TT                              | AA                 | AA               | INTERGENIC                    |                    |                             |
| SNP_48107_A_9060024 | NC_021166.1    | Ca_Kabuli_Chr07 | 9060024                 | GG                              | AA                 | AA               | INTERGENIC                    |                    |                             |
| SNP_48108_A_9063289 | NC_021166.1    | Ca_Kabuli_Chr07 | 9063289                 | AA                              | CC                 | CC               | INTERGENIC                    |                    |                             |
| SNP_48109_A_9063526 | NC_021166.1    | Ca_Kabuli_Chr07 | 9063526                 | TT                              | CC                 | CC               | INTERGENIC                    |                    |                             |
| SNP_48110_A_9063542 | NC_021166.1    | Ca_Kabuli_Chr07 | 9063542                 | TT                              | CC                 | CC               | INTERGENIC                    |                    |                             |
| SNP_48111_A_9063585 | NC_021166.1    | Ca_Kabuli_Chr07 | 9063585                 | CC                              | TT                 | TT               | INTERGENIC                    |                    |                             |
| SNP_48112_A_9063598 | NC_021166.1    | Ca_Kabuli_Chr07 | 9063598                 | CC                              | TT                 | TT               | INTERGENIC                    |                    |                             |
| SNP_48113_A_9063648 | NC_021166.1    | Ca_Kabuli_Chr07 | 9063648                 | TT                              | AA                 | AA               | INTERGENIC                    |                    |                             |
| SNP_48114_A_9064471 | NC_021166.1    | Ca_Kabuli_Chr07 | 9064471                 | CC                              | TT                 | TT               | INTERGENIC                    |                    |                             |

| SNPs IDs            | Chromosome IDs | Chromosomes     | Physical positions (bp) | CDC Frontier (Reference genome) | (Pusa 1103 & HPNB) | (ILWC 46 & LPNB) | Sequence Components of genome | Gene accession IDs | Putative functions                                                   |
|---------------------|----------------|-----------------|-------------------------|---------------------------------|--------------------|------------------|-------------------------------|--------------------|----------------------------------------------------------------------|
| SNP_48115_A_9064791 | NC_021166.1    | Ca_Kabuli_Chr07 | 9064791                 | TT                              | AA                 | AA               | INTERGENIC                    |                    |                                                                      |
| SNP_48117_A_9065069 | NC_021166.1    | Ca_Kabuli_Chr07 | 9065069                 | GG                              | CC                 | CC               | INTERGENIC                    |                    |                                                                      |
| SNP_48118_A_9066014 | NC_021166.1    | Ca_Kabuli_Chr07 | 9066014                 | AA                              | GG                 | GG               | DRR                           | 101502599          | pentatricopeptide repeat-containing protein At1g74850, chloroplastic |
| SNP_48119_A_9072426 | NC_021166.1    | Ca_Kabuli_Chr07 | 9072426                 | AA                              | GG                 | GG               | URR                           | 101502599          | pentatricopeptide repeat-containing protein At1g74850, chloroplastic |
| SNP_48120_A_9073390 | NC_021166.1    | Ca_Kabuli_Chr07 | 9073390                 | AA                              | GG                 | GG               | INTERGENIC                    |                    |                                                                      |
| SNP_48121_A_9073702 | NC_021166.1    | Ca_Kabuli_Chr07 | 9073702                 | TT                              | AA                 | AA               | INTERGENIC                    |                    |                                                                      |
| SNP_48122_A_9073708 | NC_021166.1    | Ca_Kabuli_Chr07 | 9073708                 | AA                              | GG                 | GG               | INTERGENIC                    |                    |                                                                      |
| SNP_48124_A_9075351 | NC_021166.1    | Ca_Kabuli_Chr07 | 9075351                 | CC                              | TT                 | TT               | INTERGENIC                    |                    |                                                                      |
| SNP_48125_A_9076284 | NC_021166.1    | Ca_Kabuli_Chr07 | 9076284                 | GG                              | AA                 | AA               | DRR                           | 101502916          | uncharacterized LOC101502916                                         |
| SNP_48126_A_9076324 | NC_021166.1    | Ca_Kabuli_Chr07 | 9076324                 | GG                              | CC                 | CC               | DRR                           | 101502916          | uncharacterized LOC101502916                                         |
| SNP_48127_A_9077415 | NC_021166.1    | Ca_Kabuli_Chr07 | 9077415                 | TT                              | GG                 | GG               | INTRON                        | 101502916          | uncharacterized LOC101502916                                         |
| SNP_48128_A_9080694 | NC_021166.1    | Ca_Kabuli_Chr07 | 9080694                 | CC                              | TT                 | TT               | INTERGENIC                    |                    |                                                                      |
| SNP_48129_A_9082739 | NC_021166.1    | Ca_Kabuli_Chr07 | 9082739                 | GG                              | AA                 | AA               | DRR                           | 101509127          | uncharacterized LOC101509127                                         |
| SNP_48130_A_9084705 | NC_021166.1    | Ca_Kabuli_Chr07 | 9084705                 | GG                              | CC                 | CC               | URR                           | 101509127          | uncharacterized LOC101509127                                         |
| SNP_48132_A_9089133 | NC_021166.1    | Ca_Kabuli_Chr07 | 9089133                 | GG                              | TT                 | TT               | INTERGENIC                    |                    |                                                                      |
| SNP_48133_A_9092809 | NC_021166.1    | Ca_Kabuli_Chr07 | 9092809                 | TT                              | GG                 | GG               | INTERGENIC                    |                    |                                                                      |
| SNP_48134_A_9094586 | NC_021166.1    | Ca_Kabuli_Chr07 | 9094586                 | TT                              | AA                 | AA               | URR                           | 101503665          | Unknown function                                                     |
| SNP_48135_A_9097045 | NC_021166.1    | Ca_Kabuli_Chr07 | 9097045                 | AA                              | TT                 | TT               | DRR                           | 101503994          | microtubule-associated protein TORTIFOLIA1                           |
| SNP_48136_A_9097697 | NC_021166.1    | Ca_Kabuli_Chr07 | 9097697                 | TT                              | CC                 | CC               | INTERGENIC                    |                    |                                                                      |
| SNP_48137_A_9101777 | NC_021166.1    | Ca_Kabuli_Chr07 | 9101777                 | TT                              | CC                 | CC               | URR                           | 101503994          | microtubule-associated protein TORTIFOLIA1                           |
| SNP_48139_A_9103113 | NC_021166.1    | Ca_Kabuli_Chr07 | 9103113                 | TT                              | CC                 | CC               | INTERGENIC                    |                    |                                                                      |
| SNP_48140_A_9103121 | NC_021166.1    | Ca_Kabuli_Chr07 | 9103121                 | TT                              | CC                 | CC               | INTERGENIC                    |                    |                                                                      |

| SNPs IDs            | Chromosome IDs | Chromosomes     | Physical positions (bp) | CDC Frontier (Reference genome) | (Pusa 1103 & HPNB) | (ILWC 46 & LPNB) | Sequence Components of genome | Gene accession IDs | Putative functions                              |
|---------------------|----------------|-----------------|-------------------------|---------------------------------|--------------------|------------------|-------------------------------|--------------------|-------------------------------------------------|
| SNP_48141_A_9103157 | NC_021166.1    | Ca_Kabuli_Chr07 | 9103157                 | AA                              | GG                 | GG               | INTERGENIC                    |                    |                                                 |
| SNP_48142_A_9103180 | NC_021166.1    | Ca_Kabuli_Chr07 | 9103180                 | CC                              | TT                 | TT               | INTERGENIC                    |                    |                                                 |
| SNP_48143_A_9103362 | NC_021166.1    | Ca_Kabuli_Chr07 | 9103362                 | CC                              | TT                 | TT               | INTERGENIC                    |                    |                                                 |
| SNP_48144_A_9103864 | NC_021166.1    | Ca_Kabuli_Chr07 | 9103864                 | AA                              | TT                 | TT               | INTERGENIC                    |                    |                                                 |
| SNP_48146_A_9109135 | NC_021166.1    | Ca_Kabuli_Chr07 | 9109135                 | AA                              | CC                 | CC               | INTERGENIC                    |                    |                                                 |
| SNP_48147_A_9109281 | NC_021166.1    | Ca_Kabuli_Chr07 | 9109281                 | TT                              | CC                 | CC               | INTERGENIC                    |                    |                                                 |
| SNP_48148_A_9109309 | NC_021166.1    | Ca_Kabuli_Chr07 | 9109309                 | TT                              | CC                 | CC               | INTERGENIC                    |                    |                                                 |
| SNP_48149_A_9120257 | NC_021166.1    | Ca_Kabuli_Chr07 | 9120257                 | AA                              | CC                 | CC               | INTERGENIC                    |                    |                                                 |
| SNP_48150_A_9120844 | NC_021166.1    | Ca_Kabuli_Chr07 | 9120844                 | GG                              | AA                 | AA               | INTERGENIC                    |                    |                                                 |
| SNP_48151_A_9128812 | NC_021166.1    | Ca_Kabuli_Chr07 | 9128812                 | TT                              | CC                 | CC               | DRR                           | 101504314          | two-component response regulator ARR5-like      |
| SNP_48152_A_9128821 | NC_021166.1    | Ca_Kabuli_Chr07 | 9128821                 | GG                              | AA                 | AA               | DRR                           | 101504314          | two-component response regulator ARR5-like      |
| SNP_48153_A_9129152 | NC_021166.1    | Ca_Kabuli_Chr07 | 9129152                 | AA                              | GG                 | GG               | DRR                           | 101504314          | two-component response regulator ARR5-like      |
| SNP_48156_A_9138439 | NC_021166.1    | Ca_Kabuli_Chr07 | 9138439                 | GG                              | AA                 | AA               | DRR                           | 101505059          | serine/Arginine-related protein 53              |
| SNP_48157_A_9144081 | NC_021166.1    | Ca_Kabuli_Chr07 | 9144081                 | GG                              | AA                 | AA               | INTERGENIC                    |                    |                                                 |
| SNP_48158_A_9144370 | NC_021166.1    | Ca_Kabuli_Chr07 | 9144370                 | GG                              | TT                 | TT               | INTERGENIC                    |                    |                                                 |
| SNP_48159_A_9149035 | NC_021166.1    | Ca_Kabuli_Chr07 | 9149035                 | GG                              | AA                 | AA               | URR                           | 101505596          | E2F transcription factor-like E2FE              |
| SNP_48160_A_9149243 | NC_021166.1    | Ca_Kabuli_Chr07 | 9149243                 | CC                              | GG                 | GG               | URR                           | 101505596          | E2F transcription factor-like E2FE              |
| SNP_48161_A_9149366 | NC_021166.1    | Ca_Kabuli_Chr07 | 9149366                 | CC                              | GG                 | GG               | URR                           | 101505596          | E2F transcription factor-like E2FE              |
| SNP_48162_A_9149430 | NC_021166.1    | Ca_Kabuli_Chr07 | 9149430                 | CC                              | TT                 | TT               | URR                           | 101505596          | E2F transcription factor-like E2FE              |
| SNP_48163_A_9154838 | NC_021166.1    | Ca_Kabuli_Chr07 | 9154838                 | TT                              | CC                 | CC               | INTERGENIC                    |                    |                                                 |
| SNP_48164_A_9155295 | NC_021166.1    | Ca_Kabuli_Chr07 | 9155295                 | GG                              | TT                 | TT               | URR                           | 101506136          | betaine aldehyde dehydrogenase 1, chloroplastic |
| SNP_48165_A_9155685 | NC_021166.1    | Ca_Kabuli_Chr07 | 9155685                 | AA                              | GG                 | GG               | DRR                           | 101506467          | uncharacterized LOC101506467                    |

| SNPs IDs            | Chromosome IDs | Chromosomes     | Physical positions (bp) | CDC Frontier (Reference genome) | (Pusa 1103 & HPNB) | (ILWC 46 & LPNB) | Sequence Components of genome | Gene accession IDs | Putative functions                                     |
|---------------------|----------------|-----------------|-------------------------|---------------------------------|--------------------|------------------|-------------------------------|--------------------|--------------------------------------------------------|
| SNP_48166_A_9160910 | NC_021166.1    | Ca_Kabuli_Chr07 | 9160910                 | TT                              | AA                 | AA               | INTERGENIC                    |                    |                                                        |
| SNP_48167_A_9161001 | NC_021166.1    | Ca_Kabuli_Chr07 | 9161001                 | GG                              | AA                 | AA               | INTERGENIC                    |                    |                                                        |
| SNP_48168_A_9165174 | NC_021166.1    | Ca_Kabuli_Chr07 | 9165174                 | TT                              | GG                 | GG               | DRR                           | 101506794          | probable E3 ubiquitin ligase complex SCF subunit sconB |
| SNP_48169_A_9165197 | NC_021166.1    | Ca_Kabuli_Chr07 | 9165197                 | CC                              | AA                 | AA               | DRR                           | 101506794          | probable E3 ubiquitin ligase complex SCF subunit sconB |
| SNP_48170_A_9165257 | NC_021166.1    | Ca_Kabuli_Chr07 | 9165257                 | GG                              | AA                 | AA               | DRR                           | 101506794          | probable E3 ubiquitin ligase complex SCF subunit sconB |
| SNP_48171_A_9165383 | NC_021166.1    | Ca_Kabuli_Chr07 | 9165383                 | AA                              | TT                 | TT               | DRR                           | 101506794          | probable E3 ubiquitin ligase complex SCF subunit sconB |
| SNP_48172_A_9165388 | NC_021166.1    | Ca_Kabuli_Chr07 | 9165388                 | TT                              | CC                 | CC               | DRR                           | 101506794          | probable E3 ubiquitin ligase complex SCF subunit sconB |
| SNP_48173_A_9168955 | NC_021166.1    | Ca_Kabuli_Chr07 | 9168955                 | GG                              | AA                 | AA               | URR                           | 101506794          | probable E3 ubiquitin ligase complex SCF subunit sconB |
| SNP_48174_A_9180688 | NC_021166.1    | Ca_Kabuli_Chr07 | 9180688                 | TT                              | CC                 | CC               | SYNONYMOUS_CODING             | 101509451          | separase-like                                          |
| SNP_48175_A_9180839 | NC_021166.1    | Ca_Kabuli_Chr07 | 9180839                 | GG                              | AA                 | AA               | NON_SYNONYMOUS_CODING         | 101509451          | separase-like                                          |
| SNP_48178_A_9181428 | NC_021166.1    | Ca_Kabuli_Chr07 | 9181428                 | GG                              | TT                 | TT               | INTRON                        | 101509451          | separase-like                                          |
| SNP_48179_A_9181566 | NC_021166.1    | Ca_Kabuli_Chr07 | 9181566                 | CC                              | TT                 | TT               | SYNONYMOUS_CODING             | 101509451          | separase-like                                          |
| SNP_48180_A_9181704 | NC_021166.1    | Ca_Kabuli_Chr07 | 9181704                 | GG                              | AA                 | AA               | NON_SYNONYMOUS_CODING         | 101509451          | separase-like                                          |
| SNP_48182_A_9181880 | NC_021166.1    | Ca_Kabuli_Chr07 | 9181880                 | AA                              | TT                 | TT               | INTRON                        | 101509451          | separase-like                                          |
| SNP_48183_A_9182505 | NC_021166.1    | Ca_Kabuli_Chr07 | 9182505                 | GG                              | CC                 | CC               | INTERGENIC                    |                    |                                                        |
| SNP_48184_A_9182567 | NC_021166.1    | Ca_Kabuli_Chr07 | 9182567                 | GG                              | TT                 | TT               | INTERGENIC                    |                    |                                                        |
| SNP_48185_A_9182881 | NC_021166.1    | Ca_Kabuli_Chr07 | 9182881                 | AA                              | GG                 | GG               | INTERGENIC                    |                    |                                                        |
| SNP_48186_A_9182913 | NC_021166.1    | Ca_Kabuli_Chr07 | 9182913                 | GG                              | AA                 | AA               | INTERGENIC                    |                    |                                                        |
| SNP_48187_A_9183160 | NC_021166.1    | Ca_Kabuli_Chr07 | 9183160                 | AA                              | GG                 | GG               | INTERGENIC                    |                    |                                                        |
| SNP_48188_A_9183167 | NC_021166.1    | Ca_Kabuli_Chr07 | 9183167                 | TT                              | GG                 | GG               | INTERGENIC                    |                    |                                                        |
| SNP_48190_A_9203466 | NC_021166.1    | Ca_Kabuli_Chr07 | 9203466                 | TT                              | GG                 | GG               | INTERGENIC                    |                    |                                                        |
| SNP_48192_A_9211810 | NC_021166.1    | Ca_Kabuli_Chr07 | 9211810                 | CC                              | AA                 | AA               | INTERGENIC                    |                    |                                                        |

| SNPs IDs            | Chromosome IDs | Chromosomes     | Physical positions (bp) | CDC Frontier genome (Reference genome) | (Pusa 1103 & HPNB) | (ILWC 46 & LPNB) | Sequence Components of genome | Gene accession IDs | Putative functions             |
|---------------------|----------------|-----------------|-------------------------|----------------------------------------|--------------------|------------------|-------------------------------|--------------------|--------------------------------|
| SNP_48193_A_9211832 | NC_021166.1    | Ca_Kabuli_Chr07 | 9211832                 | TT                                     | CC                 | CC               | INTERGENIC                    |                    |                                |
| SNP_48194_A_9212023 | NC_021166.1    | Ca_Kabuli_Chr07 | 9212023                 | CC                                     | TT                 | TT               | INTERGENIC                    |                    |                                |
| SNP_48195_A_9212293 | NC_021166.1    | Ca_Kabuli_Chr07 | 9212293                 | GG                                     | AA                 | AA               | INTERGENIC                    |                    |                                |
| SNP_48196_A_9212566 | NC_021166.1    | Ca_Kabuli_Chr07 | 9212566                 | AA                                     | TT                 | TT               | INTERGENIC                    |                    |                                |
| SNP_48197_A_9216158 | NC_021166.1    | Ca_Kabuli_Chr07 | 9216158                 | GG                                     | AA                 | AA               | NON_SYNONYMOUS_CODING         | 101503009          | metal tolerance protein 4-like |
| SNP_48198_A_9217376 | NC_021166.1    | Ca_Kabuli_Chr07 | 9217376                 | CC                                     | TT                 | TT               | INTRON                        | 101503009          | metal tolerance protein 4-like |
| SNP_48199_A_9217660 | NC_021166.1    | Ca_Kabuli_Chr07 | 9217660                 | CC                                     | TT                 | TT               | INTRON                        | 101503009          | metal tolerance protein 4-like |
| SNP_48200_A_9218615 | NC_021166.1    | Ca_Kabuli_Chr07 | 9218615                 | CC                                     | TT                 | TT               | URR                           | 101503009          | metal tolerance protein 4-like |
| SNP_48201_A_9219059 | NC_021166.1    | Ca_Kabuli_Chr07 | 9219059                 | GG                                     | AA                 | AA               | URR                           | 101503009          | metal tolerance protein 4-like |
| SNP_48202_A_9219240 | NC_021166.1    | Ca_Kabuli_Chr07 | 9219240                 | CC                                     | TT                 | TT               | URR                           | 101503009          | metal tolerance protein 4-like |
| SNP_48203_A_9219241 | NC_021166.1    | Ca_Kabuli_Chr07 | 9219241                 | CC                                     | TT                 | TT               | URR                           | 101503009          | metal tolerance protein 4-like |
| SNP_48204_A_9219357 | NC_021166.1    | Ca_Kabuli_Chr07 | 9219357                 | CC                                     | AA                 | AA               | URR                           | 101503009          | metal tolerance protein 4-like |
| SNP_48205_A_9224542 | NC_021166.1    | Ca_Kabuli_Chr07 | 9224542                 | CC                                     | TT                 | TT               | INTERGENIC                    |                    |                                |
| SNP_48206_A_9225118 | NC_021166.1    | Ca_Kabuli_Chr07 | 9225118                 | CC                                     | GG                 | GG               | INTERGENIC                    |                    |                                |
| SNP_48207_A_9228351 | NC_021166.1    | Ca_Kabuli_Chr07 | 9228351                 | GG                                     | AA                 | AA               | INTRON                        | 101510193          | uncharacterized LOC101510193   |
| SNP_48208_A_9228739 | NC_021166.1    | Ca_Kabuli_Chr07 | 9228739                 | TT                                     | CC                 | CC               | INTRON                        | 101510193          | uncharacterized LOC101510193   |
| SNP_48209_A_9232147 | NC_021166.1    | Ca_Kabuli_Chr07 | 9232147                 | AA                                     | GG                 | GG               | URR                           | 101510193          | uncharacterized LOC101510193   |
| SNP_48211_A_9255116 | NC_021166.1    | Ca_Kabuli_Chr07 | 9255116                 | GG                                     | CC                 | CC               | INTERGENIC                    |                    |                                |
| SNP_48212_A_9255117 | NC_021166.1    | Ca_Kabuli_Chr07 | 9255117                 | TT                                     | AA                 | AA               | INTERGENIC                    |                    |                                |
| SNP_48214_A_9259389 | NC_021166.1    | Ca_Kabuli_Chr07 | 9259389                 | GG                                     | AA                 | AA               | INTRON                        | 101504315          | uncharacterized LOC101504315   |
| SNP_48215_A_9259507 | NC_021166.1    | Ca_Kabuli_Chr07 | 9259507                 | AA                                     | GG                 | GG               | INTRON                        | 101504315          | uncharacterized LOC101504315   |
| SNP_48217_A_9260498 | NC_021166.1    | Ca_Kabuli_Chr07 | 9260498                 | CC                                     | TT                 | TT               | INTRON                        | 101504315          | uncharacterized LOC101504315   |

| SNPs IDs            | Chromosome IDs | Chromosomes     | Physical positions (bp) | CDC Frontier (Reference genome) | (Pusa 1103 & HPNB) | (ILWC 46 & LPNB) | Sequence Components of genome | Gene accession IDs | Putative functions                                             |
|---------------------|----------------|-----------------|-------------------------|---------------------------------|--------------------|------------------|-------------------------------|--------------------|----------------------------------------------------------------|
| SNP_48219_A_9269785 | NC_021166.1    | Ca_Kabuli_Chr07 | 9269785                 | CC                              | AA                 | AA               | INTRON                        | 101504643          | tRNA (cytosine(34)-C(5))-methyltransferase-like                |
| SNP_48220_A_9269959 | NC_021166.1    | Ca_Kabuli_Chr07 | 9269959                 | GG                              | TT                 | TT               | INTRON                        | 101504643          | tRNA (cytosine(34)-C(5))-methyltransferase-like                |
| SNP_48222_A_9277876 | NC_021166.1    | Ca_Kabuli_Chr07 | 9277876                 | TT                              | CC                 | CC               | URR                           | 101504643          | tRNA (cytosine(34)-C(5))-methyltransferase-like                |
| SNP_48223_A_9295204 | NC_021166.1    | Ca_Kabuli_Chr07 | 9295204                 | GG                              | CC                 | CC               | INTRON                        | 101510850          | uncharacterized LOC101510850                                   |
| SNP_48224_A_9296980 | NC_021166.1    | Ca_Kabuli_Chr07 | 9296980                 | TT                              | CC                 | CC               | INTRON                        | 101510850          | uncharacterized LOC101510850                                   |
| SNP_48225_A_9304017 | NC_021166.1    | Ca_Kabuli_Chr07 | 9304017                 | AA                              | GG                 | GG               | URR                           | 101510850          | uncharacterized LOC101510850                                   |
| SNP_48226_A_9304127 | NC_021166.1    | Ca_Kabuli_Chr07 | 9304127                 | TT                              | CC                 | CC               | URR                           | 101510850          | uncharacterized LOC101510850                                   |
| SNP_48227_A_9305310 | NC_021166.1    | Ca_Kabuli_Chr07 | 9305310                 | TT                              | CC                 | CC               | DRR                           | 101511814          | uncharacterized LOC101511814                                   |
| SNP_48228_A_9305331 | NC_021166.1    | Ca_Kabuli_Chr07 | 9305331                 | GG                              | AA                 | AA               | DRR                           | 101511814          | uncharacterized LOC101511814                                   |
| SNP_48229_A_9305591 | NC_021166.1    | Ca_Kabuli_Chr07 | 9305591                 | TT                              | CC                 | CC               | DRR                           | 101511814          | uncharacterized LOC101511814                                   |
| SNP_48230_A_9306527 | NC_021166.1    | Ca_Kabuli_Chr07 | 9306527                 | TT                              | CC                 | CC               | INTERGENIC                    |                    |                                                                |
| SNP_48231_A_9306868 | NC_021166.1    | Ca_Kabuli_Chr07 | 9306868                 | AA                              | CC                 | CC               | URR                           | 101511814          | uncharacterized LOC101511814                                   |
| SNP_48232_A_9306883 | NC_021166.1    | Ca_Kabuli_Chr07 | 9306883                 | CC                              | TT                 | TT               | URR                           | 101511814          | uncharacterized LOC101511814                                   |
| SNP_48233_A_9307182 | NC_021166.1    | Ca_Kabuli_Chr07 | 9307182                 | GG                              | AA                 | AA               | URR                           | 101511814          | uncharacterized LOC101511814                                   |
| SNP_48234_A_9312577 | NC_021166.1    | Ca_Kabuli_Chr07 | 9312577                 | TT                              | AA                 | AA               | URR                           | 101512126          | putative DNA glycosylase At3g47830                             |
| SNP_48236_A_9312849 | NC_021166.1    | Ca_Kabuli_Chr07 | 9312849                 | TT                              | CC                 | CC               | URR                           | 101512126          | putative DNA glycosylase At3g47830                             |
| SNP_48237_A_9322226 | NC_021166.1    | Ca_Kabuli_Chr07 | 9322226                 | AA                              | GG                 | GG               | INTRON                        | 101505271          | glyoxylate/succinic semialdehyde reductase 2, chloroplast-like |
| SNP_48238_A_9330650 | NC_021166.1    | Ca_Kabuli_Chr07 | 9330650                 | AA                              | GG                 | GG               | NON_SYNONYMOUS_CODING         | 101505271          | glyoxylate/succinic semialdehyde reductase 2, chloroplast-like |
| SNP_48239_A_9330660 | NC_021166.1    | Ca_Kabuli_Chr07 | 9330660                 | GG                              | AA                 | AA               | SYNONYMOUS_CODING             | 101505271          | glyoxylate/succinic semialdehyde reductase 2, chloroplast-like |
| SNP_48240_A_9330669 | NC_021166.1    | Ca_Kabuli_Chr07 | 9330669                 | GG                              | AA                 | AA               | SYNONYMOUS_CODING             | 101505271          | glyoxylate/succinic semialdehyde reductase 2, chloroplast-like |
| SNP_48241_A_9330681 | NC_021166.1    | Ca_Kabuli_Chr07 | 9330681                 | GG                              | AA                 | AA               | SYNONYMOUS_CODING             | 101505271          | glyoxylate/succinic semialdehyde reductase 2, chloroplast-like |
| SNP_48242_A_9331470 | NC_021166.1    | Ca_Kabuli_Chr07 | 9331470                 | CC                              | TT                 | TT               | URR                           | 101505271          | glyoxylate/succinic semialdehyde reductase 2, chloroplast-like |

| SNPs IDs            | Chromosome IDs | Chromosomes     | Physical positions (bp) | CDC Frontier genome (Reference genome) | (Pusa 1103 & HPNB) | (ILWC 46 & LPNB) | Sequence Components of genome | Gene accession IDs | Putative functions                 |
|---------------------|----------------|-----------------|-------------------------|----------------------------------------|--------------------|------------------|-------------------------------|--------------------|------------------------------------|
| SNP_48243_A_9333488 | NC_021166.1    | Ca_Kabuli_Chr07 | 9333488                 | GG                                     | CC                 | CC               | INTERGENIC                    |                    |                                    |
| SNP_48244_A_9333602 | NC_021166.1    | Ca_Kabuli_Chr07 | 9333602                 | AA                                     | GG                 | GG               | INTERGENIC                    |                    |                                    |
| SNP_48245_A_9334030 | NC_021166.1    | Ca_Kabuli_Chr07 | 9334030                 | AA                                     | GG                 | GG               | INTERGENIC                    |                    |                                    |
| SNP_48246_A_9334916 | NC_021166.1    | Ca_Kabuli_Chr07 | 9334916                 | TT                                     | CC                 | CC               | INTERGENIC                    |                    |                                    |
| SNP_48247_A_9339945 | NC_021166.1    | Ca_Kabuli_Chr07 | 9339945                 | GG                                     | AA                 | AA               | INTERGENIC                    |                    |                                    |
| SNP_48248_A_9340085 | NC_021166.1    | Ca_Kabuli_Chr07 | 9340085                 | CC                                     | TT                 | TT               | INTERGENIC                    |                    |                                    |
| SNP_48249_A_9340130 | NC_021166.1    | Ca_Kabuli_Chr07 | 9340130                 | AA                                     | GG                 | GG               | INTERGENIC                    |                    |                                    |
| SNP_48250_A_9340323 | NC_021166.1    | Ca_Kabuli_Chr07 | 9340323                 | TT                                     | AA                 | AA               | INTERGENIC                    |                    |                                    |
| SNP_48251_A_9340357 | NC_021166.1    | Ca_Kabuli_Chr07 | 9340357                 | AA                                     | CC                 | CC               | INTERGENIC                    |                    |                                    |
| SNP_48252_A_9340450 | NC_021166.1    | Ca_Kabuli_Chr07 | 9340450                 | AA                                     | CC                 | CC               | INTERGENIC                    |                    |                                    |
| SNP_48253_A_9340642 | NC_021166.1    | Ca_Kabuli_Chr07 | 9340642                 | GG                                     | AA                 | AA               | INTERGENIC                    |                    |                                    |
| SNP_48254_A_9340653 | NC_021166.1    | Ca_Kabuli_Chr07 | 9340653                 | TT                                     | AA                 | AA               | INTERGENIC                    |                    |                                    |
| SNP_48255_A_9341389 | NC_021166.1    | Ca_Kabuli_Chr07 | 9341389                 | GG                                     | AA                 | AA               | INTERGENIC                    |                    |                                    |
| SNP_48256_A_9342847 | NC_021166.1    | Ca_Kabuli_Chr07 | 9342847                 | TT                                     | CC                 | CC               | DRR                           | 101512452          | putative DNA glycosylase At3g47830 |
| SNP_48257_A_9347148 | NC_021166.1    | Ca_Kabuli_Chr07 | 9347148                 | AA                                     | GG                 | GG               | DRR                           | 101512773          | probable alpha-mannosidase I MNS5  |
| SNP_48258_A_9347681 | NC_021166.1    | Ca_Kabuli_Chr07 | 9347681                 | AA                                     | TT                 | TT               | URR                           | 101512452          | putative DNA glycosylase At3g47830 |
| SNP_48259_A_9347745 | NC_021166.1    | Ca_Kabuli_Chr07 | 9347745                 | AA                                     | CC                 | CC               | URR                           | 101512452          | putative DNA glycosylase At3g47830 |
| SNP_48260_A_9347752 | NC_021166.1    | Ca_Kabuli_Chr07 | 9347752                 | GG                                     | AA                 | AA               | URR                           | 101512452          | putative DNA glycosylase At3g47830 |
| SNP_48261_A_9347808 | NC_021166.1    | Ca_Kabuli_Chr07 | 9347808                 | AA                                     | GG                 | GG               | URR                           | 101512452          | putative DNA glycosylase At3g47830 |
| SNP_48262_A_9348281 | NC_021166.1    | Ca_Kabuli_Chr07 | 9348281                 | TT                                     | CC                 | CC               | INTERGENIC                    |                    |                                    |
| SNP_48263_A_9351475 | NC_021166.1    | Ca_Kabuli_Chr07 | 9351475                 | TT                                     | CC                 | CC               | SYNONYMOUS_CODING             | 101512773          | probable alpha-mannosidase I MNS5  |
| SNP_48264_A_9354475 | NC_021166.1    | Ca_Kabuli_Chr07 | 9354475                 | GG                                     | AA                 | AA               | INTRON                        | 101512773          | probable alpha-mannosidase I MNS5  |

| SNPs IDs            | Chromosome IDs | Chromosomes     | Physical positions (bp) | CDC Frontier genome (Reference genome) | (Pusa 1103 & HPNB) | (ILWC 46 & LPNB) | Sequence Components of genome | Gene accession IDs | Putative functions                       |
|---------------------|----------------|-----------------|-------------------------|----------------------------------------|--------------------|------------------|-------------------------------|--------------------|------------------------------------------|
| SNP_48265_A_9358027 | NC_021166.1    | Ca_Kabuli_Chr07 | 9358027                 | AA                                     | GG                 | GG               | INTERGENIC                    |                    |                                          |
| SNP_48267_A_9370199 | NC_021166.1    | Ca_Kabuli_Chr07 | 9370199                 | TT                                     | CC                 | CC               | INTERGENIC                    |                    |                                          |
| SNP_48268_A_9370207 | NC_021166.1    | Ca_Kabuli_Chr07 | 9370207                 | GG                                     | TT                 | TT               | INTERGENIC                    |                    |                                          |
| SNP_48269_A_9370231 | NC_021166.1    | Ca_Kabuli_Chr07 | 9370231                 | GG                                     | TT                 | TT               | INTERGENIC                    |                    |                                          |
| SNP_48270_A_9373031 | NC_021166.1    | Ca_Kabuli_Chr07 | 9373031                 | TT                                     | CC                 | CC               | INTERGENIC                    |                    |                                          |
| SNP_48271_A_9373440 | NC_021166.1    | Ca_Kabuli_Chr07 | 9373440                 | AA                                     | GG                 | GG               | DRR                           | 101513422          | uncharacterized LOC101513422             |
| SNP_48272_A_9373649 | NC_021166.1    | Ca_Kabuli_Chr07 | 9373649                 | GG                                     | TT                 | TT               | DRR                           | 101513422          | uncharacterized LOC101513422             |
| SNP_48273_A_9373689 | NC_021166.1    | Ca_Kabuli_Chr07 | 9373689                 | AA                                     | GG                 | GG               | DRR                           | 101513422          | uncharacterized LOC101513422             |
| SNP_48274_A_9373853 | NC_021166.1    | Ca_Kabuli_Chr07 | 9373853                 | CC                                     | AA                 | AA               | DRR                           | 101513422          | uncharacterized LOC101513422             |
| SNP_48275_A_9384354 | NC_021166.1    | Ca_Kabuli_Chr07 | 9384354                 | TT                                     | GG                 | GG               | URR                           | 101513735          | LIM domain-containing protein WLIM1-like |
| SNP_48276_A_9384448 | NC_021166.1    | Ca_Kabuli_Chr07 | 9384448                 | CC                                     | TT                 | TT               | URR                           | 101513735          | LIM domain-containing protein WLIM1-like |
| SNP_48277_A_9384452 | NC_021166.1    | Ca_Kabuli_Chr07 | 9384452                 | AA                                     | TT                 | TT               | URR                           | 101513735          | LIM domain-containing protein WLIM1-like |
| SNP_48278_A_9385561 | NC_021166.1    | Ca_Kabuli_Chr07 | 9385561                 | TT                                     | CC                 | CC               | URR                           | 101513735          | LIM domain-containing protein WLIM1-like |
| SNP_48279_A_9385625 | NC_021166.1    | Ca_Kabuli_Chr07 | 9385625                 | GG                                     | AA                 | AA               | URR                           | 101513735          | LIM domain-containing protein WLIM1-like |
| SNP_48280_A_9385628 | NC_021166.1    | Ca_Kabuli_Chr07 | 9385628                 | TT                                     | AA                 | AA               | URR                           | 101513735          | LIM domain-containing protein WLIM1-like |
| SNP_48281_A_9385638 | NC_021166.1    | Ca_Kabuli_Chr07 | 9385638                 | AA                                     | GG                 | GG               | URR                           | 101513735          | LIM domain-containing protein WLIM1-like |
| SNP_48282_A_9385953 | NC_021166.1    | Ca_Kabuli_Chr07 | 9385953                 | AA                                     | GG                 | GG               | INTERGENIC                    |                    |                                          |
| SNP_48284_A_9387764 | NC_021166.1    | Ca_Kabuli_Chr07 | 9387764                 | TT                                     | CC                 | CC               | INTERGENIC                    |                    |                                          |
| SNP_48285_A_9390507 | NC_021166.1    | Ca_Kabuli_Chr07 | 9390507                 | TT                                     | AA                 | AA               | URR                           | 101514073          | uncharacterized LOC101514073             |
| SNP_48286_A_9390520 | NC_021166.1    | Ca_Kabuli_Chr07 | 9390520                 | TT                                     | AA                 | AA               | URR                           | 101514073          | uncharacterized LOC101514073             |
| SNP_48287_A_9392601 | NC_021166.1    | Ca_Kabuli_Chr07 | 9392601                 | TT                                     | CC                 | CC               | DRR                           | 101514626          | nucleobase-ascorbate transporter 6-like  |
| SNP_48288_A_9396601 | NC_021166.1    | Ca_Kabuli_Chr07 | 9396601                 | GG                                     | TT                 | TT               | INTRON                        | 101514626          | nucleobase-ascorbate transporter 6-like  |



| SNPs IDs            | Chromosome IDs | Chromosomes     | Physical positions (bp) | CDC Frontier (Reference genome) | (Pusa 1103 & HPNB) | (ILWC 46 & LPNB) | Sequence Components of genome | Gene accession IDs | Putative functions                      |
|---------------------|----------------|-----------------|-------------------------|---------------------------------|--------------------|------------------|-------------------------------|--------------------|-----------------------------------------|
| SNP_48289_A_9396602 | NC_021166.1    | Ca_Kabuli_Chr07 | 9396602                 | AA                              | GG                 | GG               | INTRON                        | 101514626          | nucleobase-ascorbate transporter 6-like |
| SNP_48290_A_9396811 | NC_021166.1    | Ca_Kabuli_Chr07 | 9396811                 | GG                              | CC                 | CC               | INTRON                        | 101514626          | nucleobase-ascorbate transporter 6-like |
| SNP_48291_A_9397611 | NC_021166.1    | Ca_Kabuli_Chr07 | 9397611                 | CC                              | GG                 | GG               | INTRON                        | 101514626          | nucleobase-ascorbate transporter 6-like |
| SNP_48292_A_9397617 | NC_021166.1    | Ca_Kabuli_Chr07 | 9397617                 | GG                              | AA                 | AA               | INTRON                        | 101514626          | nucleobase-ascorbate transporter 6-like |
| SNP_48293_A_9397646 | NC_021166.1    | Ca_Kabuli_Chr07 | 9397646                 | AA                              | CC                 | CC               | INTRON                        | 101514626          | nucleobase-ascorbate transporter 6-like |
| SNP_48294_A_9397649 | NC_021166.1    | Ca_Kabuli_Chr07 | 9397649                 | CC                              | TT                 | TT               | INTRON                        | 101514626          | nucleobase-ascorbate transporter 6-like |
| SNP_48295_A_9397675 | NC_021166.1    | Ca_Kabuli_Chr07 | 9397675                 | AA                              | GG                 | GG               | INTRON                        | 101514626          | nucleobase-ascorbate transporter 6-like |
| SNP_48297_A_9402621 | NC_021166.1    | Ca_Kabuli_Chr07 | 9402621                 | AA                              | GG                 | GG               | INTERGENIC                    |                    |                                         |
| SNP_48298_A_9404308 | NC_021166.1    | Ca_Kabuli_Chr07 | 9404308                 | TT                              | GG                 | GG               | INTERGENIC                    |                    |                                         |
| SNP_48299_A_9404592 | NC_021166.1    | Ca_Kabuli_Chr07 | 9404592                 | CC                              | TT                 | TT               | INTERGENIC                    |                    |                                         |
| SNP_48301_A_9406681 | NC_021166.1    | Ca_Kabuli_Chr07 | 9406681                 | GG                              | TT                 | TT               | INTERGENIC                    |                    |                                         |
| SNP_48302_A_9409709 | NC_021166.1    | Ca_Kabuli_Chr07 | 9409709                 | AA                              | GG                 | GG               | INTERGENIC                    |                    |                                         |
| SNP_48303_A_9410081 | NC_021166.1    | Ca_Kabuli_Chr07 | 9410081                 | CC                              | TT                 | TT               | DRR                           | 101515482          | protease Do-like 9                      |
| SNP_48304_A_9411711 | NC_021166.1    | Ca_Kabuli_Chr07 | 9411711                 | TT                              | GG                 | GG               | INTRON                        | 101515482          | protease Do-like 9                      |
| SNP_48305_A_9412048 | NC_021166.1    | Ca_Kabuli_Chr07 | 9412048                 | GG                              | AA                 | AA               | INTRON                        | 101515482          | protease Do-like 9                      |
| SNP_48306_A_9412297 | NC_021166.1    | Ca_Kabuli_Chr07 | 9412297                 | AA                              | GG                 | GG               | INTRON                        | 101515482          | protease Do-like 9                      |
| SNP_48307_A_9412372 | NC_021166.1    | Ca_Kabuli_Chr07 | 9412372                 | TT                              | CC                 | CC               | INTRON                        | 101515482          | protease Do-like 9                      |
| SNP_48308_A_9412389 | NC_021166.1    | Ca_Kabuli_Chr07 | 9412389                 | AA                              | GG                 | GG               | INTRON                        | 101515482          | protease Do-like 9                      |
| SNP_48309_A_9412538 | NC_021166.1    | Ca_Kabuli_Chr07 | 9412538                 | GG                              | AA                 | AA               | INTRON                        | 101515482          | protease Do-like 9                      |
| SNP_48310_A_9412604 | NC_021166.1    | Ca_Kabuli_Chr07 | 9412604                 | GG                              | CC                 | CC               | INTRON                        | 101515482          | protease Do-like 9                      |
| SNP_48311_A_9412630 | NC_021166.1    | Ca_Kabuli_Chr07 | 9412630                 | CC                              | TT                 | TT               | INTRON                        | 101515482          | protease Do-like 9                      |
| SNP_48312_A_9413880 | NC_021166.1    | Ca_Kabuli_Chr07 | 9413880                 | TT                              | CC                 | CC               | INTERGENIC                    |                    |                                         |

| SNPs IDs            | Chromosome IDs | Chromosomes     | Physical positions (bp) | CDC Frontier genome (Reference genome) | (Pusa 1103 & HPNB) | (ILWC 46 & LPNB) | Sequence Components of genome | Gene accession IDs | Putative functions                          |
|---------------------|----------------|-----------------|-------------------------|----------------------------------------|--------------------|------------------|-------------------------------|--------------------|---------------------------------------------|
| SNP_48313_A_9415050 | NC_021166.1    | Ca_Kabuli_Chr07 | 9415050                 | TT                                     | AA                 | AA               | INTERGENIC                    |                    |                                             |
| SNP_48314_A_9415572 | NC_021166.1    | Ca_Kabuli_Chr07 | 9415572                 | AA                                     | GG                 | GG               | INTERGENIC                    |                    |                                             |
| SNP_48315_A_9419959 | NC_021166.1    | Ca_Kabuli_Chr07 | 9419959                 | TT                                     | CC                 | CC               | URR                           | 101515482          | protease Do-like 9                          |
| SNP_48316_A_9420638 | NC_021166.1    | Ca_Kabuli_Chr07 | 9420638                 | AA                                     | GG                 | GG               | URR                           | 101515159          | WAT1-related protein At5g40240-like         |
| SNP_48317_A_9420669 | NC_021166.1    | Ca_Kabuli_Chr07 | 9420669                 | GG                                     | AA                 | AA               | URR                           | 101515159          | WAT1-related protein At5g40240-like         |
| SNP_48318_A_9421120 | NC_021166.1    | Ca_Kabuli_Chr07 | 9421120                 | CC                                     | GG                 | GG               | DRR                           | 101488236          | RING-H2 finger protein ATL48                |
| SNP_48320_A_9421403 | NC_021166.1    | Ca_Kabuli_Chr07 | 9421403                 | AA                                     | CC                 | CC               | DRR                           | 101488236          | RING-H2 finger protein ATL48                |
| SNP_48321_A_9421569 | NC_021166.1    | Ca_Kabuli_Chr07 | 9421569                 | GG                                     | AA                 | AA               | DRR                           | 101488236          | RING-H2 finger protein ATL48                |
| SNP_48322_A_9421587 | NC_021166.1    | Ca_Kabuli_Chr07 | 9421587                 | TT                                     | AA                 | AA               | DRR                           | 101488236          | RING-H2 finger protein ATL48                |
| SNP_48324_A_9422001 | NC_021166.1    | Ca_Kabuli_Chr07 | 9422001                 | TT                                     | AA                 | AA               | DRR                           | 101488236          | RING-H2 finger protein ATL48                |
| SNP_48326_A_9424351 | NC_021166.1    | Ca_Kabuli_Chr07 | 9424351                 | AA                                     | CC                 | CC               | URR                           | 101488236          | RING-H2 finger protein ATL48                |
| SNP_48327_A_9424539 | NC_021166.1    | Ca_Kabuli_Chr07 | 9424539                 | GG                                     | AA                 | AA               | URR                           | 101488236          | RING-H2 finger protein ATL48                |
| SNP_48328_A_9425781 | NC_021166.1    | Ca_Kabuli_Chr07 | 9425781                 | AA                                     | GG                 | GG               | URR                           | 101488236          | RING-H2 finger protein ATL48                |
| SNP_48329_A_9425830 | NC_021166.1    | Ca_Kabuli_Chr07 | 9425830                 | GG                                     | CC                 | CC               | URR                           | 101488236          | RING-H2 finger protein ATL48                |
| SNP_48330_A_9427388 | NC_021166.1    | Ca_Kabuli_Chr07 | 9427388                 | GG                                     | AA                 | AA               | INTERGENIC                    |                    |                                             |
| SNP_48331_A_9431847 | NC_021166.1    | Ca_Kabuli_Chr07 | 9431847                 | CC                                     | TT                 | TT               | DRR                           | 101488565          | ubiquitin-conjugating enzyme E2-23 kDa-like |
| SNP_48332_A_9432881 | NC_021166.1    | Ca_Kabuli_Chr07 | 9432881                 | AA                                     | GG                 | GG               | INTRON                        | 101488565          | ubiquitin-conjugating enzyme E2-23 kDa-like |
| SNP_48333_A_9434501 | NC_021166.1    | Ca_Kabuli_Chr07 | 9434501                 | AA                                     | GG                 | GG               | INTRON                        | 101488565          | ubiquitin-conjugating enzyme E2-23 kDa-like |
| SNP_48335_A_9441071 | NC_021166.1    | Ca_Kabuli_Chr07 | 9441071                 | TT                                     | GG                 | GG               | URR                           | 101488909          | RING-H2 finger protein ATL47-like           |
| SNP_48336_A_9441079 | NC_021166.1    | Ca_Kabuli_Chr07 | 9441079                 | CC                                     | TT                 | TT               | URR                           | 101488909          | RING-H2 finger protein ATL47-like           |
| SNP_48337_A_9441162 | NC_021166.1    | Ca_Kabuli_Chr07 | 9441162                 | CC                                     | TT                 | TT               | URR                           | 101488909          | RING-H2 finger protein ATL47-like           |
| SNP_48338_A_9441163 | NC_021166.1    | Ca_Kabuli_Chr07 | 9441163                 | AA                                     | TT                 | TT               | URR                           | 101488909          | RING-H2 finger protein ATL47-like           |

| SNPs IDs            | Chromosome IDs | Chromosomes     | Physical positions (bp) | CDC Frontier genome (Reference genome) | (Pusa 1103 & HPNB) | (ILWC 46 & LPNB) | Sequence Components of genome | Gene accession IDs | Putative functions                                       |
|---------------------|----------------|-----------------|-------------------------|----------------------------------------|--------------------|------------------|-------------------------------|--------------------|----------------------------------------------------------|
| SNP_48339_A_9444624 | NC_021166.1    | Ca_Kabuli_Chr07 | 9444624                 | CC                                     | TT                 | TT               | INTERGENIC                    |                    |                                                          |
| SNP_48340_A_9444704 | NC_021166.1    | Ca_Kabuli_Chr07 | 9444704                 | CC                                     | GG                 | GG               | INTERGENIC                    |                    |                                                          |
| SNP_48341_A_9448957 | NC_021166.1    | Ca_Kabuli_Chr07 | 9448957                 | AA                                     | GG                 | GG               | URR                           | 101489558          | uncharacterized LOC101489558                             |
| SNP_48342_A_9449213 | NC_021166.1    | Ca_Kabuli_Chr07 | 9449213                 | GG                                     | AA                 | AA               | DRR                           | 101489876          | protein NUCLEAR FUSION DEFECTIVE 2                       |
| SNP_48343_A_9449830 | NC_021166.1    | Ca_Kabuli_Chr07 | 9449830                 | AA                                     | GG                 | GG               | DRR                           | 101489876          | protein NUCLEAR FUSION DEFECTIVE 2                       |
| SNP_48345_A_9454941 | NC_021166.1    | Ca_Kabuli_Chr07 | 9454941                 | GG                                     | AA                 | AA               | INTERGENIC                    |                    |                                                          |
| SNP_48346_A_9454990 | NC_021166.1    | Ca_Kabuli_Chr07 | 9454990                 | GG                                     | TT                 | TT               | INTERGENIC                    |                    |                                                          |
| SNP_48347_A_9455005 | NC_021166.1    | Ca_Kabuli_Chr07 | 9455005                 | AA                                     | GG                 | GG               | INTERGENIC                    |                    |                                                          |
| SNP_48348_A_9455332 | NC_021166.1    | Ca_Kabuli_Chr07 | 9455332                 | TT                                     | CC                 | CC               | DRR                           | 101490212          | uncharacterized LOC101490212                             |
| SNP_48349_A_9457582 | NC_021166.1    | Ca_Kabuli_Chr07 | 9457582                 | TT                                     | GG                 | GG               | INTRON                        | 101490212          | uncharacterized LOC101490212                             |
| SNP_48350_A_9457601 | NC_021166.1    | Ca_Kabuli_Chr07 | 9457601                 | TT                                     | AA                 | AA               | INTRON                        | 101490212          | uncharacterized LOC101490212                             |
| SNP_48351_A_9457637 | NC_021166.1    | Ca_Kabuli_Chr07 | 9457637                 | TT                                     | CC                 | CC               | INTRON                        | 101490212          | uncharacterized LOC101490212                             |
| SNP_48353_A_9460774 | NC_021166.1    | Ca_Kabuli_Chr07 | 9460774                 | AA                                     | CC                 | CC               | INTERGENIC                    |                    |                                                          |
| SNP_48354_A_9460817 | NC_021166.1    | Ca_Kabuli_Chr07 | 9460817                 | AA                                     | GG                 | GG               | INTERGENIC                    |                    |                                                          |
| SNP_48355_A_9461058 | NC_021166.1    | Ca_Kabuli_Chr07 | 9461058                 | CC                                     | TT                 | TT               | INTERGENIC                    |                    |                                                          |
| SNP_48356_A_9464383 | NC_021166.1    | Ca_Kabuli_Chr07 | 9464383                 | TT                                     | GG                 | GG               | INTRON                        | 101490532          | aldehyde dehydrogenase family 2 member B7, mitochondrial |
| SNP_48358_A_9465107 | NC_021166.1    | Ca_Kabuli_Chr07 | 9465107                 | AA                                     | TT                 | TT               | URR                           | 101490532          | aldehyde dehydrogenase family 2 member B7, mitochondrial |
| SNP_48359_A_9466089 | NC_021166.1    | Ca_Kabuli_Chr07 | 9466089                 | GG                                     | TT                 | TT               | URR                           | 101490532          | aldehyde dehydrogenase family 2 member B7, mitochondrial |
| SNP_48360_A_9466263 | NC_021166.1    | Ca_Kabuli_Chr07 | 9466263                 | GG                                     | AA                 | AA               | URR                           | 101490532          | aldehyde dehydrogenase family 2 member B7, mitochondrial |
| SNP_48361_A_9466269 | NC_021166.1    | Ca_Kabuli_Chr07 | 9466269                 | TT                                     | CC                 | CC               | URR                           | 101490532          | aldehyde dehydrogenase family 2 member B7, mitochondrial |
| SNP_48362_A_9466285 | NC_021166.1    | Ca_Kabuli_Chr07 | 9466285                 | CC                                     | TT                 | TT               | URR                           | 101490532          | aldehyde dehydrogenase family 2 member B7, mitochondrial |
| SNP_48363_A_9466294 | NC_021166.1    | Ca_Kabuli_Chr07 | 9466294                 | AA                                     | GG                 | GG               | URR                           | 101490532          | aldehyde dehydrogenase family 2 member B7, mitochondrial |

| SNPs IDs            | Chromosome IDs | Chromosomes     | Physical positions (bp) | CDC Frontier (Reference genome) | (Pusa 1103 & HPNB) | (ILWC 46 & LPNB) | Sequence Components of genome | Gene accession IDs | Putative functions                       |
|---------------------|----------------|-----------------|-------------------------|---------------------------------|--------------------|------------------|-------------------------------|--------------------|------------------------------------------|
| SNP_48364_A_9468213 | NC_021166.1    | Ca_Kabuli_Chr07 | 9468213                 | AA                              | TT                 | TT               | DRR                           | 101491081          | U-box domain-containing protein 19-like  |
| SNP_48365_A_9468321 | NC_021166.1    | Ca_Kabuli_Chr07 | 9468321                 | TT                              | CC                 | CC               | DRR                           | 101491081          | U-box domain-containing protein 19-like  |
| SNP_48367_A_9468540 | NC_021166.1    | Ca_Kabuli_Chr07 | 9468540                 | AA                              | GG                 | GG               | DRR                           | 101491081          | U-box domain-containing protein 19-like  |
| SNP_48368_A_9480232 | NC_021166.1    | Ca_Kabuli_Chr07 | 9480232                 | GG                              | AA                 | AA               | URR                           | 101491924          | serine/threonine-protein kinase HT1-like |
| SNP_48369_A_9480244 | NC_021166.1    | Ca_Kabuli_Chr07 | 9480244                 | AA                              | TT                 | TT               | URR                           | 101491924          | serine/threonine-protein kinase HT1-like |
| SNP_48370_A_9480931 | NC_021166.1    | Ca_Kabuli_Chr07 | 9480931                 | TT                              | GG                 | GG               | URR                           | 101491924          | serine/threonine-protein kinase HT1-like |
| SNP_48371_A_9482175 | NC_021166.1    | Ca_Kabuli_Chr07 | 9482175                 | TT                              | CC                 | CC               | INTERGENIC                    |                    |                                          |
| SNP_48372_A_9482182 | NC_021166.1    | Ca_Kabuli_Chr07 | 9482182                 | CC                              | TT                 | TT               | INTERGENIC                    |                    |                                          |
| SNP_48373_A_9484697 | NC_021166.1    | Ca_Kabuli_Chr07 | 9484697                 | GG                              | TT                 | TT               | INTERGENIC                    |                    |                                          |
| SNP_48374_A_9484701 | NC_021166.1    | Ca_Kabuli_Chr07 | 9484701                 | TT                              | GG                 | GG               | INTERGENIC                    |                    |                                          |
| SNP_48375_A_9485951 | NC_021166.1    | Ca_Kabuli_Chr07 | 9485951                 | TT                              | CC                 | CC               | INTERGENIC                    |                    |                                          |
| SNP_48376_A_9493315 | NC_021166.1    | Ca_Kabuli_Chr07 | 9493315                 | AA                              | TT                 | TT               | INTERGENIC                    |                    |                                          |
| SNP_48377_A_9493936 | NC_021166.1    | Ca_Kabuli_Chr07 | 9493936                 | TT                              | GG                 | GG               | INTERGENIC                    |                    |                                          |
| SNP_48378_A_9493985 | NC_021166.1    | Ca_Kabuli_Chr07 | 9493985                 | AA                              | GG                 | GG               | INTERGENIC                    |                    |                                          |
| SNP_48380_A_9494243 | NC_021166.1    | Ca_Kabuli_Chr07 | 9494243                 | CC                              | TT                 | TT               | INTERGENIC                    |                    |                                          |
| SNP_48381_A_9494255 | NC_021166.1    | Ca_Kabuli_Chr07 | 9494255                 | AA                              | CC                 | CC               | INTERGENIC                    |                    |                                          |
| SNP_48382_A_9494505 | NC_021166.1    | Ca_Kabuli_Chr07 | 9494505                 | GG                              | AA                 | AA               | INTERGENIC                    |                    |                                          |
| SNP_48383_A_9494556 | NC_021166.1    | Ca_Kabuli_Chr07 | 9494556                 | AA                              | TT                 | TT               | INTERGENIC                    |                    |                                          |
| SNP_48384_A_9494561 | NC_021166.1    | Ca_Kabuli_Chr07 | 9494561                 | GG                              | AA                 | AA               | INTERGENIC                    |                    |                                          |
| SNP_48386_A_9496092 | NC_021166.1    | Ca_Kabuli_Chr07 | 9496092                 | AA                              | GG                 | GG               | INTRON                        | 101492805          | E3 ubiquitin-protein ligase SIS3         |
| SNP_48387_A_9500030 | NC_021166.1    | Ca_Kabuli_Chr07 | 9500030                 | CC                              | TT                 | TT               | URR                           | 101492805          | E3 ubiquitin-protein ligase SIS3         |
| SNP_48388_A_9501230 | NC_021166.1    | Ca_Kabuli_Chr07 | 9501230                 | AA                              | CC                 | CC               | INTERGENIC                    |                    |                                          |

| SNPs IDs            | Chromosome IDs | Chromosomes     | Physical positions (bp) | CDC Frontier genome (Reference genome) | (Pusa 1103 & HPNB) | (ILWC 46 & LPNB) | Sequence Components of genome | Gene accession IDs | Putative functions                                  |
|---------------------|----------------|-----------------|-------------------------|----------------------------------------|--------------------|------------------|-------------------------------|--------------------|-----------------------------------------------------|
| SNP_48389_A_9501265 | NC_021166.1    | Ca_Kabuli_Chr07 | 9501265                 | AA                                     | GG                 | GG               | INTERGENIC                    |                    |                                                     |
| SNP_48390_A_9501581 | NC_021166.1    | Ca_Kabuli_Chr07 | 9501581                 | GG                                     | AA                 | AA               | INTERGENIC                    |                    |                                                     |
| SNP_48391_A_9501629 | NC_021166.1    | Ca_Kabuli_Chr07 | 9501629                 | CC                                     | TT                 | TT               | INTERGENIC                    |                    |                                                     |
| SNP_48392_A_9507211 | NC_021166.1    | Ca_Kabuli_Chr07 | 9507211                 | TT                                     | CC                 | CC               | INTRON                        | 101505597          | protein EXECUTER 2, chloroplastic-like              |
| SNP_48393_A_9510220 | NC_021166.1    | Ca_Kabuli_Chr07 | 9510220                 | TT                                     | GG                 | GG               | URR                           | 101505597          | protein EXECUTER 2, chloroplastic-like              |
| SNP_48394_A_9510535 | NC_021166.1    | Ca_Kabuli_Chr07 | 9510535                 | CC                                     | GG                 | GG               | URR                           | 101505597          | protein EXECUTER 2, chloroplastic-like              |
| SNP_48395_A_9521285 | NC_021166.1    | Ca_Kabuli_Chr07 | 9521285                 | TT                                     | CC                 | CC               | DRR                           | 101493463          | serine/threonine-protein kinase HT1-like            |
| SNP_48396_A_9525503 | NC_021166.1    | Ca_Kabuli_Chr07 | 9525503                 | CC                                     | AA                 | AA               | DRR                           | 101410553          | transfer RNA leucine (anticodon UAG)                |
| SNP_48397_A_9541645 | NC_021166.1    | Ca_Kabuli_Chr07 | 9541645                 | TT                                     | GG                 | GG               | INTERGENIC                    |                    |                                                     |
| SNP_48399_A_9543060 | NC_021166.1    | Ca_Kabuli_Chr07 | 9543060                 | CC                                     | TT                 | TT               | INTERGENIC                    |                    |                                                     |
| SNP_48400_A_9546157 | NC_021166.1    | Ca_Kabuli_Chr07 | 9546157                 | TT                                     | CC                 | CC               | INTRON                        | id163603           | Unknown function                                    |
| SNP_48401_A_9549668 | NC_021166.1    | Ca_Kabuli_Chr07 | 9549668                 | GG                                     | TT                 | TT               | INTRON                        | id163603           | Unknown function                                    |
| SNP_48402_A_9549995 | NC_021166.1    | Ca_Kabuli_Chr07 | 9549995                 | AA                                     | GG                 | GG               | INTERGENIC                    |                    |                                                     |
| SNP_48403_A_9556464 | NC_021166.1    | Ca_Kabuli_Chr07 | 9556464                 | CC                                     | TT                 | TT               | URR                           | 101494945          | uncharacterized LOC101494945                        |
| SNP_48404_A_9557594 | NC_021166.1    | Ca_Kabuli_Chr07 | 9557594                 | CC                                     | TT                 | TT               | URR                           | 101494945          | uncharacterized LOC101494945                        |
| SNP_48405_A_9558661 | NC_021166.1    | Ca_Kabuli_Chr07 | 9558661                 | CC                                     | TT                 | TT               | INTERGENIC                    |                    |                                                     |
| SNP_48406_A_9558663 | NC_021166.1    | Ca_Kabuli_Chr07 | 9558663                 | GG                                     | AA                 | AA               | INTERGENIC                    |                    |                                                     |
| SNP_48408_A_9559741 | NC_021166.1    | Ca_Kabuli_Chr07 | 9559741                 | GG                                     | AA                 | AA               | INTERGENIC                    |                    |                                                     |
| SNP_48409_A_9560540 | NC_021166.1    | Ca_Kabuli_Chr07 | 9560540                 | AA                                     | GG                 | GG               | INTERGENIC                    |                    |                                                     |
| SNP_48410_A_9563521 | NC_021166.1    | Ca_Kabuli_Chr07 | 9563521                 | CC                                     | TT                 | TT               | INTRON                        | 101495274          | probable inactive poly [ADP-ribose] polymerase SRO5 |
| SNP_48411_A_9563758 | NC_021166.1    | Ca_Kabuli_Chr07 | 9563758                 | TT                                     | CC                 | CC               | SYNONYMOUS_CODING             | 101495274          | probable inactive poly [ADP-ribose] polymerase SRO5 |
| SNP_48412_A_9566499 | NC_021166.1    | Ca_Kabuli_Chr07 | 9566499                 | GG                                     | AA                 | AA               | URR                           | 101495274          | probable inactive poly [ADP-ribose] polymerase SRO5 |

| SNPs IDs            | Chromosome IDs | Chromosomes     | Physical positions (bp) | CDC Frontier genome (Reference genome) | (Pusa 1103 & HPNB) | (ILWC 46 & LPNB) | Sequence Components of genome | Gene accession IDs | Putative functions                                  |
|---------------------|----------------|-----------------|-------------------------|----------------------------------------|--------------------|------------------|-------------------------------|--------------------|-----------------------------------------------------|
| SNP_48413_A_9566529 | NC_021166.1    | Ca_Kabuli_Chr07 | 9566529                 | AA                                     | GG                 | GG               | URR                           | 101495274          | probable inactive poly [ADP-ribose] polymerase SRO5 |
| SNP_48414_A_9573169 | NC_021166.1    | Ca_Kabuli_Chr07 | 9573169                 | GG                                     | CC                 | CC               | INTRON                        | 101495596          | transducin beta-like protein 3                      |
| SNP_48415_A_9573489 | NC_021166.1    | Ca_Kabuli_Chr07 | 9573489                 | AA                                     | CC                 | CC               | INTRON                        | 101495596          | transducin beta-like protein 3                      |
| SNP_48416_A_9579702 | NC_021166.1    | Ca_Kabuli_Chr07 | 9579702                 | TT                                     | CC                 | CC               | INTERGENIC                    |                    |                                                     |
| SNP_48417_A_9579705 | NC_021166.1    | Ca_Kabuli_Chr07 | 9579705                 | GG                                     | AA                 | AA               | INTERGENIC                    |                    |                                                     |
| SNP_48418_A_9580341 | NC_021166.1    | Ca_Kabuli_Chr07 | 9580341                 | CC                                     | TT                 | TT               | INTERGENIC                    |                    |                                                     |
| SNP_48419_A_9580382 | NC_021166.1    | Ca_Kabuli_Chr07 | 9580382                 | TT                                     | GG                 | GG               | INTERGENIC                    |                    |                                                     |
| SNP_48420_A_9580392 | NC_021166.1    | Ca_Kabuli_Chr07 | 9580392                 | GG                                     | AA                 | AA               | INTERGENIC                    |                    |                                                     |
| SNP_48421_A_9582090 | NC_021166.1    | Ca_Kabuli_Chr07 | 9582090                 | GG                                     | AA                 | AA               | INTERGENIC                    |                    |                                                     |
| SNP_48422_A_9584210 | NC_021166.1    | Ca_Kabuli_Chr07 | 9584210                 | CC                                     | AA                 | AA               | INTERGENIC                    |                    |                                                     |
| SNP_48424_A_9588841 | NC_021166.1    | Ca_Kabuli_Chr07 | 9588841                 | CC                                     | AA                 | AA               | INTERGENIC                    |                    |                                                     |
| SNP_48425_A_9589266 | NC_021166.1    | Ca_Kabuli_Chr07 | 9589266                 | TT                                     | CC                 | CC               | INTERGENIC                    |                    |                                                     |
| SNP_48426_A_9589913 | NC_021166.1    | Ca_Kabuli_Chr07 | 9589913                 | CC                                     | TT                 | TT               | INTERGENIC                    |                    |                                                     |
| SNP_48427_A_9589944 | NC_021166.1    | Ca_Kabuli_Chr07 | 9589944                 | TT                                     | CC                 | CC               | INTERGENIC                    |                    |                                                     |
| SNP_48428_A_9590733 | NC_021166.1    | Ca_Kabuli_Chr07 | 9590733                 | CC                                     | TT                 | TT               | INTERGENIC                    |                    |                                                     |
| SNP_48430_A_9604447 | NC_021166.1    | Ca_Kabuli_Chr07 | 9604447                 | AA                                     | GG                 | GG               | URR                           | 101496144          | inositol-tetrakisphosphate 1-kinase 1               |
| SNP_48431_A_9604685 | NC_021166.1    | Ca_Kabuli_Chr07 | 9604685                 | CC                                     | AA                 | AA               | URR                           | 101496144          | inositol-tetrakisphosphate 1-kinase 1               |
| SNP_48432_A_9604694 | NC_021166.1    | Ca_Kabuli_Chr07 | 9604694                 | TT                                     | AA                 | AA               | URR                           | 101496144          | inositol-tetrakisphosphate 1-kinase 1               |
| SNP_48433_A_9605396 | NC_021166.1    | Ca_Kabuli_Chr07 | 9605396                 | CC                                     | TT                 | TT               | URR                           | 101496144          | inositol-tetrakisphosphate 1-kinase 1               |
| SNP_48434_A_9606348 | NC_021166.1    | Ca_Kabuli_Chr07 | 9606348                 | AA                                     | GG                 | GG               | DRR                           | 101496470          | GDSL esterase/lipase At5g62930                      |
| SNP_48435_A_9606515 | NC_021166.1    | Ca_Kabuli_Chr07 | 9606515                 | GG                                     | AA                 | AA               | DRR                           | 101496470          | GDSL esterase/lipase At5g62930                      |
| SNP_48436_A_9606794 | NC_021166.1    | Ca_Kabuli_Chr07 | 9606794                 | TT                                     | AA                 | AA               | INTERGENIC                    |                    |                                                     |

| SNPs IDs            | Chromosome IDs | Chromosomes     | Physical positions (bp) | CDC Frontier (Reference genome) | (Pusa 1103 & HPNB) | (ILWC 46 & LPNB) | Sequence Components of genome | Gene accession IDs | Putative functions                                                             |
|---------------------|----------------|-----------------|-------------------------|---------------------------------|--------------------|------------------|-------------------------------|--------------------|--------------------------------------------------------------------------------|
| SNP_48437_A_9612024 | NC_021166.1    | Ca_Kabuli_Chr07 | 9612024                 | TT                              | CC                 | CC               | INTERGENIC                    |                    |                                                                                |
| SNP_48438_A_9620123 | NC_021166.1    | Ca_Kabuli_Chr07 | 9620123                 | GG                              | AA                 | AA               | URR                           | 101496806          | triose phosphate/phosphate translocator, non-green plastid, chloroplastic-like |
| SNP_48439_A_9624446 | NC_021166.1    | Ca_Kabuli_Chr07 | 9624446                 | TT                              | GG                 | GG               | INTRON                        | 101497126          | uncharacterized LOC101497126                                                   |
| SNP_48441_A_9626271 | NC_021166.1    | Ca_Kabuli_Chr07 | 9626271                 | TT                              | CC                 | CC               | URR                           | 101497126          | uncharacterized LOC101497126                                                   |
| SNP_48442_A_9626326 | NC_021166.1    | Ca_Kabuli_Chr07 | 9626326                 | CC                              | AA                 | AA               | URR                           | 101497126          | uncharacterized LOC101497126                                                   |
| SNP_48444_A_9641821 | NC_021166.1    | Ca_Kabuli_Chr07 | 9641821                 | CC                              | GG                 | GG               | URR                           | 101497992          | U3 small nucleolar ribonucleoprotein protein MPP10                             |
| SNP_48445_A_9644387 | NC_021166.1    | Ca_Kabuli_Chr07 | 9644387                 | CC                              | AA                 | AA               | INTERGENIC                    |                    |                                                                                |
| SNP_48446_A_9646836 | NC_021166.1    | Ca_Kabuli_Chr07 | 9646836                 | CC                              | TT                 | TT               | URR                           | 101498321          | uncharacterized LOC101498321                                                   |
| SNP_48447_A_9646846 | NC_021166.1    | Ca_Kabuli_Chr07 | 9646846                 | AA                              | GG                 | GG               | URR                           | 101498321          | uncharacterized LOC101498321                                                   |
| SNP_48448_A_9647874 | NC_021166.1    | Ca_Kabuli_Chr07 | 9647874                 | AA                              | GG                 | GG               | INTERGENIC                    |                    |                                                                                |
| SNP_48450_A_9648551 | NC_021166.1    | Ca_Kabuli_Chr07 | 9648551                 | TT                              | CC                 | CC               | INTERGENIC                    |                    |                                                                                |
| SNP_48451_A_9649050 | NC_021166.1    | Ca_Kabuli_Chr07 | 9649050                 | AA                              | GG                 | GG               | INTERGENIC                    |                    |                                                                                |
| SNP_48452_A_9649293 | NC_021166.1    | Ca_Kabuli_Chr07 | 9649293                 | TT                              | GG                 | GG               | INTERGENIC                    |                    |                                                                                |
| SNP_48453_A_9649436 | NC_021166.1    | Ca_Kabuli_Chr07 | 9649436                 | AA                              | GG                 | GG               | INTERGENIC                    |                    |                                                                                |
| SNP_48454_A_9652074 | NC_021166.1    | Ca_Kabuli_Chr07 | 9652074                 | AA                              | GG                 | GG               | SYNONYMOUS_CODING             | 101498661          | uncharacterized LOC101498661                                                   |
| SNP_48456_A_9658037 | NC_021166.1    | Ca_Kabuli_Chr07 | 9658037                 | TT                              | AA                 | AA               | URR                           | 101498985          | cysteine-rich receptor-like protein kinase 1                                   |
| SNP_48457_A_9659319 | NC_021166.1    | Ca_Kabuli_Chr07 | 9659319                 | CC                              | TT                 | TT               | URR                           | 101498985          | cysteine-rich receptor-like protein kinase 1                                   |
| SNP_48458_A_9661791 | NC_021166.1    | Ca_Kabuli_Chr07 | 9661791                 | TT                              | CC                 | CC               | INTERGENIC                    |                    |                                                                                |
| SNP_48459_A_9661807 | NC_021166.1    | Ca_Kabuli_Chr07 | 9661807                 | CC                              | AA                 | AA               | INTERGENIC                    |                    |                                                                                |
| SNP_48460_A_9662792 | NC_021166.1    | Ca_Kabuli_Chr07 | 9662792                 | AA                              | TT                 | TT               | INTRON                        | 101506234          | MORC family CW-type zinc finger protein 3-like                                 |
| SNP_48461_A_9665666 | NC_021166.1    | Ca_Kabuli_Chr07 | 9665666                 | CC                              | TT                 | TT               | INTERGENIC                    |                    |                                                                                |
| SNP_48463_A_9666688 | NC_021166.1    | Ca_Kabuli_Chr07 | 9666688                 | CC                              | TT                 | TT               | INTERGENIC                    |                    |                                                                                |

| SNPs IDs            | Chromosome IDs | Chromosomes     | Physical positions (bp) | CDC Frontier genome (Reference genome) | (Pusa 1103 & HPNB) | (ILWC 46 & LPNB) | Sequence Components of genome | Gene accession IDs | Putative functions                                     |
|---------------------|----------------|-----------------|-------------------------|----------------------------------------|--------------------|------------------|-------------------------------|--------------------|--------------------------------------------------------|
| SNP_48464_A_9667570 | NC_021166.1    | Ca_Kabuli_Chr07 | 9667570                 | CC                                     | TT                 | TT               | INTERGENIC                    |                    |                                                        |
| SNP_48465_A_9668224 | NC_021166.1    | Ca_Kabuli_Chr07 | 9668224                 | AA                                     | TT                 | TT               | DRR                           | 101499307          | LRR receptor-like serine/threonine-protein kinase GSO1 |
| SNP_48467_A_9672492 | NC_021166.1    | Ca_Kabuli_Chr07 | 9672492                 | TT                                     | CC                 | CC               | URR                           | 101499307          | LRR receptor-like serine/threonine-protein kinase GSO1 |
| SNP_48468_A_9672795 | NC_021166.1    | Ca_Kabuli_Chr07 | 9672795                 | AA                                     | TT                 | TT               | URR                           | 101499307          | LRR receptor-like serine/threonine-protein kinase GSO1 |
| SNP_48469_A_9673040 | NC_021166.1    | Ca_Kabuli_Chr07 | 9673040                 | GG                                     | TT                 | TT               | URR                           | 101499307          | LRR receptor-like serine/threonine-protein kinase GSO1 |
| SNP_48470_A_9676332 | NC_021166.1    | Ca_Kabuli_Chr07 | 9676332                 | CC                                     | TT                 | TT               | INTERGENIC                    |                    |                                                        |
| SNP_48471_A_9676368 | NC_021166.1    | Ca_Kabuli_Chr07 | 9676368                 | TT                                     | GG                 | GG               | INTERGENIC                    |                    |                                                        |
| SNP_48473_A_9677768 | NC_021166.1    | Ca_Kabuli_Chr07 | 9677768                 | GG                                     | CC                 | CC               | DRR                           | 101499621          | uncharacterized LOC101499621                           |
| SNP_48474_A_9679543 | NC_021166.1    | Ca_Kabuli_Chr07 | 9679543                 | CC                                     | TT                 | TT               | INTERGENIC                    |                    |                                                        |
| SNP_48475_A_9680846 | NC_021166.1    | Ca_Kabuli_Chr07 | 9680846                 | AA                                     | CC                 | CC               | INTERGENIC                    |                    |                                                        |
| SNP_48476_A_9682328 | NC_021166.1    | Ca_Kabuli_Chr07 | 9682328                 | TT                                     | AA                 | AA               | URR                           | 101499621          | uncharacterized LOC101499621                           |
| SNP_48477_A_9682778 | NC_021166.1    | Ca_Kabuli_Chr07 | 9682778                 | CC                                     | TT                 | TT               | URR                           | 101499621          | uncharacterized LOC101499621                           |
| SNP_48478_A_9686252 | NC_021166.1    | Ca_Kabuli_Chr07 | 9686252                 | AA                                     | GG                 | GG               | URR                           | 101506565          | Unknown function                                       |
| SNP_48479_A_9686971 | NC_021166.1    | Ca_Kabuli_Chr07 | 9686971                 | TT                                     | AA                 | AA               | INTRON                        | 101500385          | VAMP-like protein YKT61                                |
| SNP_48480_A_9687254 | NC_021166.1    | Ca_Kabuli_Chr07 | 9687254                 | AA                                     | GG                 | GG               | INTRON                        | 101500385          | VAMP-like protein YKT61                                |
| SNP_48481_A_9687328 | NC_021166.1    | Ca_Kabuli_Chr07 | 9687328                 | AA                                     | GG                 | GG               | INTRON                        | 101500385          | VAMP-like protein YKT61                                |
| SNP_48482_A_9693712 | NC_021166.1    | Ca_Kabuli_Chr07 | 9693712                 | CC                                     | TT                 | TT               | INTERGENIC                    |                    |                                                        |
| SNP_48483_A_9693745 | NC_021166.1    | Ca_Kabuli_Chr07 | 9693745                 | AA                                     | GG                 | GG               | INTERGENIC                    |                    |                                                        |
| SNP_48484_A_9694053 | NC_021166.1    | Ca_Kabuli_Chr07 | 9694053                 | GG                                     | TT                 | TT               | DRR                           | 101501227          | heme-binding protein 2-like                            |
| SNP_48485_A_9694458 | NC_021166.1    | Ca_Kabuli_Chr07 | 9694458                 | TT                                     | CC                 | CC               | DRR                           | 101501227          | heme-binding protein 2-like                            |
| SNP_48486_A_9697056 | NC_021166.1    | Ca_Kabuli_Chr07 | 9697056                 | CC                                     | TT                 | TT               | URR                           | 101501227          | heme-binding protein 2-like                            |
| SNP_48487_A_9699568 | NC_021166.1    | Ca_Kabuli_Chr07 | 9699568                 | TT                                     | CC                 | CC               | SYNONYMOUS_CODING             | 101501538          | phosphatidylinositol transfer protein CSR1             |



| SNPs IDs            | Chromosome IDs | Chromosomes     | Physical positions (bp) | CDC Frontier (Reference genome) | (Pusa 1103 & HPNB) | (ILWC 46 & LPNB) | Sequence Components of genome | Gene accession IDs | Putative functions                         |
|---------------------|----------------|-----------------|-------------------------|---------------------------------|--------------------|------------------|-------------------------------|--------------------|--------------------------------------------|
| SNP_48488_A_9699875 | NC_021166.1    | Ca_Kabuli_Chr07 | 9699875                 | AA                              | TT                 | TT               | URR                           | 101501538          | phosphatidylinositol transfer protein CSR1 |
| SNP_48490_A_9699911 | NC_021166.1    | Ca_Kabuli_Chr07 | 9699911                 | AA                              | GG                 | GG               | URR                           | 101501538          | phosphatidylinositol transfer protein CSR1 |
| SNP_48491_A_9699941 | NC_021166.1    | Ca_Kabuli_Chr07 | 9699941                 | TT                              | CC                 | CC               | URR                           | 101501538          | phosphatidylinositol transfer protein CSR1 |
| SNP_48492_A_9700346 | NC_021166.1    | Ca_Kabuli_Chr07 | 9700346                 | TT                              | CC                 | CC               | URR                           | 101501538          | phosphatidylinositol transfer protein CSR1 |
| SNP_48493_A_9701011 | NC_021166.1    | Ca_Kabuli_Chr07 | 9701011                 | AA                              | TT                 | TT               | URR                           | 101501538          | phosphatidylinositol transfer protein CSR1 |
| SNP_48494_A_9701087 | NC_021166.1    | Ca_Kabuli_Chr07 | 9701087                 | CC                              | TT                 | TT               | URR                           | 101501538          | phosphatidylinositol transfer protein CSR1 |
| SNP_48495_A_9701101 | NC_021166.1    | Ca_Kabuli_Chr07 | 9701101                 | TT                              | GG                 | GG               | URR                           | 101501538          | phosphatidylinositol transfer protein CSR1 |
| SNP_48496_A_9701102 | NC_021166.1    | Ca_Kabuli_Chr07 | 9701102                 | GG                              | AA                 | AA               | URR                           | 101501538          | phosphatidylinositol transfer protein CSR1 |
| SNP_48497_A_9701103 | NC_021166.1    | Ca_Kabuli_Chr07 | 9701103                 | TT                              | CC                 | CC               | URR                           | 101501538          | phosphatidylinositol transfer protein CSR1 |
| SNP_48498_A_9701104 | NC_021166.1    | Ca_Kabuli_Chr07 | 9701104                 | GG                              | AA                 | AA               | URR                           | 101501538          | phosphatidylinositol transfer protein CSR1 |
| SNP_48499_A_9701132 | NC_021166.1    | Ca_Kabuli_Chr07 | 9701132                 | AA                              | GG                 | GG               | URR                           | 101501538          | phosphatidylinositol transfer protein CSR1 |
| SNP_48501_A_9701192 | NC_021166.1    | Ca_Kabuli_Chr07 | 9701192                 | TT                              | CC                 | CC               | URR                           | 101501538          | phosphatidylinositol transfer protein CSR1 |
| SNP_48502_A_9701201 | NC_021166.1    | Ca_Kabuli_Chr07 | 9701201                 | GG                              | AA                 | AA               | URR                           | 101501538          | phosphatidylinositol transfer protein CSR1 |
| SNP_48503_A_9701355 | NC_021166.1    | Ca_Kabuli_Chr07 | 9701355                 | AA                              | GG                 | GG               | URR                           | 101501538          | phosphatidylinositol transfer protein CSR1 |
| SNP_48504_A_9701371 | NC_021166.1    | Ca_Kabuli_Chr07 | 9701371                 | GG                              | AA                 | AA               | URR                           | 101501538          | phosphatidylinositol transfer protein CSR1 |
| SNP_48505_A_9701384 | NC_021166.1    | Ca_Kabuli_Chr07 | 9701384                 | TT                              | CC                 | CC               | URR                           | 101501538          | phosphatidylinositol transfer protein CSR1 |
| SNP_48506_A_9705184 | NC_021166.1    | Ca_Kabuli_Chr07 | 9705184                 | AA                              | CC                 | CC               | INTERGENIC                    |                    |                                            |
| SNP_48508_A_9705577 | NC_021166.1    | Ca_Kabuli_Chr07 | 9705577                 | CC                              | TT                 | TT               | INTERGENIC                    |                    |                                            |
| SNP_48509_A_9705592 | NC_021166.1    | Ca_Kabuli_Chr07 | 9705592                 | CC                              | TT                 | TT               | INTERGENIC                    |                    |                                            |
| SNP_48510_A_9705617 | NC_021166.1    | Ca_Kabuli_Chr07 | 9705617                 | CC                              | GG                 | GG               | INTERGENIC                    |                    |                                            |
| SNP_48511_A_9707153 | NC_021166.1    | Ca_Kabuli_Chr07 | 9707153                 | AA                              | GG                 | GG               | INTERGENIC                    |                    |                                            |
| SNP_48512_A_9708719 | NC_021166.1    | Ca_Kabuli_Chr07 | 9708719                 | AA                              | GG                 | GG               | INTERGENIC                    |                    |                                            |

| SNPs IDs            | Chromosome IDs | Chromosomes     | Physical positions (bp) | CDC Frontier genome (Reference genome) | (Pusa 1103 & HPNB) | (ILWC 46 & LPNB) | Sequence Components of genome | Gene accession IDs | Putative functions           |
|---------------------|----------------|-----------------|-------------------------|----------------------------------------|--------------------|------------------|-------------------------------|--------------------|------------------------------|
| SNP_48513_A_9708722 | NC_021166.1    | Ca_Kabuli_Chr07 | 9708722                 | CC                                     | TT                 | TT               | INTERGENIC                    |                    |                              |
| SNP_48514_A_9708914 | NC_021166.1    | Ca_Kabuli_Chr07 | 9708914                 | TT                                     | AA                 | AA               | INTERGENIC                    |                    |                              |
| SNP_48515_A_9709090 | NC_021166.1    | Ca_Kabuli_Chr07 | 9709090                 | AA                                     | GG                 | GG               | INTERGENIC                    |                    |                              |
| SNP_48516_A_9710533 | NC_021166.1    | Ca_Kabuli_Chr07 | 9710533                 | TT                                     | CC                 | CC               | INTERGENIC                    |                    |                              |
| SNP_48517_A_9710579 | NC_021166.1    | Ca_Kabuli_Chr07 | 9710579                 | GG                                     | AA                 | AA               | INTERGENIC                    |                    |                              |
| SNP_48518_A_9710791 | NC_021166.1    | Ca_Kabuli_Chr07 | 9710791                 | GG                                     | AA                 | AA               | INTERGENIC                    |                    |                              |
| SNP_48521_A_9711138 | NC_021166.1    | Ca_Kabuli_Chr07 | 9711138                 | AA                                     | GG                 | GG               | INTERGENIC                    |                    |                              |
| SNP_48522_A_9711194 | NC_021166.1    | Ca_Kabuli_Chr07 | 9711194                 | CC                                     | TT                 | TT               | INTERGENIC                    |                    |                              |
| SNP_48523_A_9713992 | NC_021166.1    | Ca_Kabuli_Chr07 | 9713992                 | GG                                     | AA                 | AA               | INTERGENIC                    |                    |                              |
| SNP_48524_A_9713998 | NC_021166.1    | Ca_Kabuli_Chr07 | 9713998                 | GG                                     | TT                 | TT               | INTERGENIC                    |                    |                              |
| SNP_48525_A_9714036 | NC_021166.1    | Ca_Kabuli_Chr07 | 9714036                 | CC                                     | TT                 | TT               | INTERGENIC                    |                    |                              |
| SNP_48526_A_9714152 | NC_021166.1    | Ca_Kabuli_Chr07 | 9714152                 | GG                                     | AA                 | AA               | INTERGENIC                    |                    |                              |
| SNP_48527_A_9716470 | NC_021166.1    | Ca_Kabuli_Chr07 | 9716470                 | TT                                     | GG                 | GG               | INTERGENIC                    |                    |                              |
| SNP_48528_A_9716474 | NC_021166.1    | Ca_Kabuli_Chr07 | 9716474                 | AA                                     | GG                 | GG               | INTERGENIC                    |                    |                              |
| SNP_48529_A_9719720 | NC_021166.1    | Ca_Kabuli_Chr07 | 9719720                 | GG                                     | AA                 | AA               | DRR                           | 101501856          | uncharacterized LOC101501856 |
| SNP_48530_A_9722004 | NC_021166.1    | Ca_Kabuli_Chr07 | 9722004                 | AA                                     | GG                 | GG               | INTRON                        | 101501856          | uncharacterized LOC101501856 |
| SNP_48531_A_9725452 | NC_021166.1    | Ca_Kabuli_Chr07 | 9725452                 | TT                                     | GG                 | GG               | INTERGENIC                    |                    |                              |
| SNP_48532_A_9725524 | NC_021166.1    | Ca_Kabuli_Chr07 | 9725524                 | TT                                     | AA                 | AA               | INTERGENIC                    |                    |                              |
| SNP_48533_A_9725536 | NC_021166.1    | Ca_Kabuli_Chr07 | 9725536                 | GG                                     | AA                 | AA               | INTERGENIC                    |                    |                              |
| SNP_48534_A_9725580 | NC_021166.1    | Ca_Kabuli_Chr07 | 9725580                 | AA                                     | GG                 | GG               | INTERGENIC                    |                    |                              |
| SNP_48535_A_9725839 | NC_021166.1    | Ca_Kabuli_Chr07 | 9725839                 | AA                                     | TT                 | TT               | INTERGENIC                    |                    |                              |
| SNP_48536_A_9725852 | NC_021166.1    | Ca_Kabuli_Chr07 | 9725852                 | GG                                     | AA                 | AA               | INTERGENIC                    |                    |                              |

| SNPs IDs            | Chromosome IDs | Chromosomes     | Physical positions (bp) | CDC Frontier genome (Reference genome) | (Pusa 1103 & HPNB) | (ILWC 46 & LPNB) | Sequence Components of genome | Gene accession IDs | Putative functions                                                   |
|---------------------|----------------|-----------------|-------------------------|----------------------------------------|--------------------|------------------|-------------------------------|--------------------|----------------------------------------------------------------------|
| SNP_48537_A_9725863 | NC_021166.1    | Ca_Kabuli_Chr07 | 9725863                 | GG                                     | TT                 | TT               | INTERGENIC                    |                    |                                                                      |
| SNP_48538_A_9726892 | NC_021166.1    | Ca_Kabuli_Chr07 | 9726892                 | CC                                     | GG                 | GG               | INTERGENIC                    |                    |                                                                      |
| SNP_48539_A_9728592 | NC_021166.1    | Ca_Kabuli_Chr07 | 9728592                 | TT                                     | CC                 | CC               | INTERGENIC                    |                    |                                                                      |
| SNP_48540_A_9728779 | NC_021166.1    | Ca_Kabuli_Chr07 | 9728779                 | GG                                     | AA                 | AA               | INTERGENIC                    |                    |                                                                      |
| SNP_48541_A_9733697 | NC_021166.1    | Ca_Kabuli_Chr07 | 9733697                 | GG                                     | AA                 | AA               | INTERGENIC                    |                    |                                                                      |
| SNP_48542_A_9733711 | NC_021166.1    | Ca_Kabuli_Chr07 | 9733711                 | CC                                     | GG                 | GG               | INTERGENIC                    |                    |                                                                      |
| SNP_48543_A_9738367 | NC_021166.1    | Ca_Kabuli_Chr07 | 9738367                 | TT                                     | CC                 | CC               | DRR                           | 101502179          | probable LRR receptor-like serine/threonine-protein kinase At4g26540 |
| SNP_48544_A_9739332 | NC_021166.1    | Ca_Kabuli_Chr07 | 9739332                 | CC                                     | TT                 | TT               | INTERGENIC                    |                    |                                                                      |
| SNP_48545_A_9742376 | NC_021166.1    | Ca_Kabuli_Chr07 | 9742376                 | AA                                     | TT                 | TT               | URR                           | 101502179          | probable LRR receptor-like serine/threonine-protein kinase At4g26540 |
| SNP_48546_A_9745019 | NC_021166.1    | Ca_Kabuli_Chr07 | 9745019                 | AA                                     | GG                 | GG               | URR                           | 101506899          | Unknown function                                                     |
| SNP_48547_A_9745046 | NC_021166.1    | Ca_Kabuli_Chr07 | 9745046                 | TT                                     | AA                 | AA               | URR                           | 101506899          | Unknown function                                                     |
| SNP_48548_A_9745578 | NC_021166.1    | Ca_Kabuli_Chr07 | 9745578                 | AA                                     | GG                 | GG               | INTERGENIC                    |                    |                                                                      |
| SNP_48549_A_9750598 | NC_021166.1    | Ca_Kabuli_Chr07 | 9750598                 | TT                                     | AA                 | AA               | INTERGENIC                    |                    |                                                                      |
| SNP_48550_A_9751050 | NC_021166.1    | Ca_Kabuli_Chr07 | 9751050                 | CC                                     | AA                 | AA               | INTERGENIC                    |                    |                                                                      |
| SNP_48551_A_9751430 | NC_021166.1    | Ca_Kabuli_Chr07 | 9751430                 | CC                                     | TT                 | TT               | INTERGENIC                    |                    |                                                                      |
| SNP_48552_A_9751452 | NC_021166.1    | Ca_Kabuli_Chr07 | 9751452                 | AA                                     | TT                 | TT               | INTERGENIC                    |                    |                                                                      |
| SNP_48553_A_9751824 | NC_021166.1    | Ca_Kabuli_Chr07 | 9751824                 | GG                                     | TT                 | TT               | INTERGENIC                    |                    |                                                                      |
| SNP_48554_A_9752096 | NC_021166.1    | Ca_Kabuli_Chr07 | 9752096                 | AA                                     | TT                 | TT               | INTERGENIC                    |                    |                                                                      |
| SNP_48555_A_9754291 | NC_021166.1    | Ca_Kabuli_Chr07 | 9754291                 | AA                                     | GG                 | GG               | INTERGENIC                    |                    |                                                                      |
| SNP_48556_A_9756525 | NC_021166.1    | Ca_Kabuli_Chr07 | 9756525                 | GG                                     | CC                 | CC               | INTERGENIC                    |                    |                                                                      |
| SNP_48557_A_9756529 | NC_021166.1    | Ca_Kabuli_Chr07 | 9756529                 | GG                                     | AA                 | AA               | INTERGENIC                    |                    |                                                                      |
| SNP_48558_A_9757175 | NC_021166.1    | Ca_Kabuli_Chr07 | 9757175                 | GG                                     | TT                 | TT               | DRR                           | 101502493          | suppressor of mec-8 and unc-52 protein homolog 1                     |

| SNPs IDs            | Chromosome IDs | Chromosomes     | Physical positions (bp) | CDC Frontier (Reference genome) | (Pusa 1103 & HPNB) | (ILWC 46 & LPNB) | Sequence Components of genome | Gene accession IDs | Putative functions                               |
|---------------------|----------------|-----------------|-------------------------|---------------------------------|--------------------|------------------|-------------------------------|--------------------|--------------------------------------------------|
| SNP_48559_A_9757403 | NC_021166.1    | Ca_Kabuli_Chr07 | 9757403                 | AA                              | GG                 | GG               | DRR                           | 101502493          | suppressor of mec-8 and unc-52 protein homolog 1 |
| SNP_48560_A_9763855 | NC_021166.1    | Ca_Kabuli_Chr07 | 9763855                 | GG                              | AA                 | AA               | INTRON                        | 101502493          | suppressor of mec-8 and unc-52 protein homolog 1 |
| SNP_48561_A_9763885 | NC_021166.1    | Ca_Kabuli_Chr07 | 9763885                 | CC                              | TT                 | TT               | INTRON                        | 101502493          | suppressor of mec-8 and unc-52 protein homolog 1 |
| SNP_48562_A_9764252 | NC_021166.1    | Ca_Kabuli_Chr07 | 9764252                 | GG                              | AA                 | AA               | INTRON                        | 101502493          | suppressor of mec-8 and unc-52 protein homolog 1 |
| SNP_48563_A_9764265 | NC_021166.1    | Ca_Kabuli_Chr07 | 9764265                 | AA                              | GG                 | GG               | INTRON                        | 101502493          | suppressor of mec-8 and unc-52 protein homolog 1 |
| SNP_48564_A_9768828 | NC_021166.1    | Ca_Kabuli_Chr07 | 9768828                 | CC                              | TT                 | TT               | INTRON                        | 101502493          | suppressor of mec-8 and unc-52 protein homolog 1 |
| SNP_48565_A_9770857 | NC_021166.1    | Ca_Kabuli_Chr07 | 9770857                 | CC                              | TT                 | TT               | INTRON                        | 101502493          | suppressor of mec-8 and unc-52 protein homolog 1 |
| SNP_48566_A_9774219 | NC_021166.1    | Ca_Kabuli_Chr07 | 9774219                 | TT                              | CC                 | CC               | INTERGENIC                    |                    |                                                  |
| SNP_48568_A_9774689 | NC_021166.1    | Ca_Kabuli_Chr07 | 9774689                 | CC                              | TT                 | TT               | INTERGENIC                    |                    |                                                  |
| SNP_48569_A_9798706 | NC_021166.1    | Ca_Kabuli_Chr07 | 9798706                 | CC                              | AA                 | AA               | INTERGENIC                    |                    |                                                  |
| SNP_48570_A_9799093 | NC_021166.1    | Ca_Kabuli_Chr07 | 9799093                 | GG                              | AA                 | AA               | INTERGENIC                    |                    |                                                  |
| SNP_48571_A_9799181 | NC_021166.1    | Ca_Kabuli_Chr07 | 9799181                 | TT                              | CC                 | CC               | INTERGENIC                    |                    |                                                  |
| SNP_48572_A_9799186 | NC_021166.1    | Ca_Kabuli_Chr07 | 9799186                 | GG                              | AA                 | AA               | INTERGENIC                    |                    |                                                  |
| SNP_48573_A_9800647 | NC_021166.1    | Ca_Kabuli_Chr07 | 9800647                 | TT                              | CC                 | CC               | INTERGENIC                    |                    |                                                  |
| SNP_48574_A_9801974 | NC_021166.1    | Ca_Kabuli_Chr07 | 9801974                 | GG                              | TT                 | TT               | INTERGENIC                    |                    |                                                  |
| SNP_48575_A_9802791 | NC_021166.1    | Ca_Kabuli_Chr07 | 9802791                 | TT                              | CC                 | CC               | INTERGENIC                    |                    |                                                  |
| SNP_48576_A_9802803 | NC_021166.1    | Ca_Kabuli_Chr07 | 9802803                 | GG                              | AA                 | AA               | INTERGENIC                    |                    |                                                  |
| SNP_48577_A_9802849 | NC_021166.1    | Ca_Kabuli_Chr07 | 9802849                 | TT                              | GG                 | GG               | INTERGENIC                    |                    |                                                  |
| SNP_48578_A_9809832 | NC_021166.1    | Ca_Kabuli_Chr07 | 9809832                 | CC                              | GG                 | GG               | INTERGENIC                    |                    |                                                  |
| SNP_48579_A_9812015 | NC_021166.1    | Ca_Kabuli_Chr07 | 9812015                 | AA                              | CC                 | CC               | INTERGENIC                    |                    |                                                  |
| SNP_48580_A_9812073 | NC_021166.1    | Ca_Kabuli_Chr07 | 9812073                 | TT                              | GG                 | GG               | INTERGENIC                    |                    |                                                  |
| SNP_48581_A_9813895 | NC_021166.1    | Ca_Kabuli_Chr07 | 9813895                 | AA                              | GG                 | GG               | URR                           | 101507757          | protein CWC15 homolog                            |

| SNPs IDs            | Chromosome IDs | Chromosomes     | Physical positions (bp) | CDC Frontier genome (Reference genome) | (Pusa 1103 & HPNB) | (ILWC 46 & LPNB) | Sequence Components of genome | Gene accession IDs | Putative functions                                   |
|---------------------|----------------|-----------------|-------------------------|----------------------------------------|--------------------|------------------|-------------------------------|--------------------|------------------------------------------------------|
| SNP_48582_A_9814152 | NC_021166.1    | Ca_Kabuli_Chr07 | 9814152                 | GG                                     | AA                 | AA               | URR                           | 101507757          | protein CWC15 homolog                                |
| SNP_48583_A_9814278 | NC_021166.1    | Ca_Kabuli_Chr07 | 9814278                 | TT                                     | GG                 | GG               | URR                           | 101507757          | protein CWC15 homolog                                |
| SNP_48585_A_9814578 | NC_021166.1    | Ca_Kabuli_Chr07 | 9814578                 | AA                                     | GG                 | GG               | URR                           | 101507757          | protein CWC15 homolog                                |
| SNP_48586_A_9814636 | NC_021166.1    | Ca_Kabuli_Chr07 | 9814636                 | CC                                     | TT                 | TT               | URR                           | 101507757          | protein CWC15 homolog                                |
| SNP_48588_A_9815772 | NC_021166.1    | Ca_Kabuli_Chr07 | 9815772                 | CC                                     | AA                 | AA               | INTERGENIC                    |                    |                                                      |
| SNP_48589_A_9815921 | NC_021166.1    | Ca_Kabuli_Chr07 | 9815921                 | CC                                     | GG                 | GG               | INTERGENIC                    |                    |                                                      |
| SNP_48590_A_9815937 | NC_021166.1    | Ca_Kabuli_Chr07 | 9815937                 | AA                                     | CC                 | CC               | INTERGENIC                    |                    |                                                      |
| SNP_48591_A_9815941 | NC_021166.1    | Ca_Kabuli_Chr07 | 9815941                 | AA                                     | GG                 | GG               | INTERGENIC                    |                    |                                                      |
| SNP_48592_A_9821385 | NC_021166.1    | Ca_Kabuli_Chr07 | 9821385                 | CC                                     | TT                 | TT               | INTRON                        | 101508081          | putative glucuronosyltransferase PGSIIP8             |
| SNP_48594_A_9826139 | NC_021166.1    | Ca_Kabuli_Chr07 | 9826139                 | CC                                     | TT                 | TT               | INTERGENIC                    |                    |                                                      |
| SNP_48595_A_9826450 | NC_021166.1    | Ca_Kabuli_Chr07 | 9826450                 | CC                                     | TT                 | TT               | INTERGENIC                    |                    |                                                      |
| SNP_48596_A_9833743 | NC_021166.1    | Ca_Kabuli_Chr07 | 9833743                 | GG                                     | AA                 | AA               | DRR                           | 101508705          | asparagine--tRNA ligase, chloroplastic/mitochondrial |
| SNP_48597_A_9843359 | NC_021166.1    | Ca_Kabuli_Chr07 | 9843359                 | GG                                     | AA                 | AA               | URR                           | 101508705          | asparagine--tRNA ligase, chloroplastic/mitochondrial |
| SNP_48598_A_9843378 | NC_021166.1    | Ca_Kabuli_Chr07 | 9843378                 | GG                                     | AA                 | AA               | URR                           | 101508705          | asparagine--tRNA ligase, chloroplastic/mitochondrial |
| SNP_48600_A_9843776 | NC_021166.1    | Ca_Kabuli_Chr07 | 9843776                 | GG                                     | AA                 | AA               | INTERGENIC                    |                    |                                                      |
| SNP_48603_A_9843909 | NC_021166.1    | Ca_Kabuli_Chr07 | 9843909                 | TT                                     | AA                 | AA               | INTERGENIC                    |                    |                                                      |
| SNP_48605_A_9844194 | NC_021166.1    | Ca_Kabuli_Chr07 | 9844194                 | CC                                     | TT                 | TT               | INTERGENIC                    |                    |                                                      |
| SNP_48606_A_9844561 | NC_021166.1    | Ca_Kabuli_Chr07 | 9844561                 | TT                                     | CC                 | CC               | INTERGENIC                    |                    |                                                      |
| SNP_48608_A_9844880 | NC_021166.1    | Ca_Kabuli_Chr07 | 9844880                 | GG                                     | AA                 | AA               | INTERGENIC                    |                    |                                                      |
| SNP_48609_A_9845369 | NC_021166.1    | Ca_Kabuli_Chr07 | 9845369                 | TT                                     | GG                 | GG               | DRR                           | 101509022          | 40S ribosomal protein S30                            |
| SNP_48610_A_9845471 | NC_021166.1    | Ca_Kabuli_Chr07 | 9845471                 | AA                                     | TT                 | TT               | DRR                           | 101509022          | 40S ribosomal protein S30                            |
| SNP_48611_A_9847658 | NC_021166.1    | Ca_Kabuli_Chr07 | 9847658                 | AA                                     | GG                 | GG               | DRR                           | 101509344          | protein transport protein SEC16B homolog             |

| SNPs IDs            | Chromosome IDs | Chromosomes     | Physical positions (bp) | CDC Frontier genome (Reference genome) | (Pusa 1103 & HPNB) | (ILWC 46 & LPNB) | Sequence Components of genome | Gene accession IDs | Putative functions                       |
|---------------------|----------------|-----------------|-------------------------|----------------------------------------|--------------------|------------------|-------------------------------|--------------------|------------------------------------------|
| SNP_48612_A_9849513 | NC_021166.1    | Ca_Kabuli_Chr07 | 9849513                 | GG                                     | AA                 | AA               | INTRON                        | 101509344          | protein transport protein SEC16B homolog |
| SNP_48613_A_9849514 | NC_021166.1    | Ca_Kabuli_Chr07 | 9849514                 | TT                                     | CC                 | CC               | INTRON                        | 101509344          | protein transport protein SEC16B homolog |
| SNP_48614_A_9858486 | NC_021166.1    | Ca_Kabuli_Chr07 | 9858486                 | TT                                     | CC                 | CC               | URR                           | 101509344          | protein transport protein SEC16B homolog |
| SNP_48615_A_9863929 | NC_021166.1    | Ca_Kabuli_Chr07 | 9863929                 | GG                                     | AA                 | AA               | INTERGENIC                    |                    |                                          |
| SNP_48616_A_9863930 | NC_021166.1    | Ca_Kabuli_Chr07 | 9863930                 | AA                                     | TT                 | TT               | INTERGENIC                    |                    |                                          |
| SNP_48617_A_9863957 | NC_021166.1    | Ca_Kabuli_Chr07 | 9863957                 | GG                                     | AA                 | AA               | INTERGENIC                    |                    |                                          |
| SNP_48618_A_9863962 | NC_021166.1    | Ca_Kabuli_Chr07 | 9863962                 | AA                                     | GG                 | GG               | INTERGENIC                    |                    |                                          |
| SNP_48619_A_9864985 | NC_021166.1    | Ca_Kabuli_Chr07 | 9864985                 | TT                                     | GG                 | GG               | INTERGENIC                    |                    |                                          |
| SNP_48620_A_9865006 | NC_021166.1    | Ca_Kabuli_Chr07 | 9865006                 | AA                                     | GG                 | GG               | INTERGENIC                    |                    |                                          |
| SNP_48621_A_9865161 | NC_021166.1    | Ca_Kabuli_Chr07 | 9865161                 | CC                                     | TT                 | TT               | INTERGENIC                    |                    |                                          |
| SNP_48623_A_9868392 | NC_021166.1    | Ca_Kabuli_Chr07 | 9868392                 | AA                                     | GG                 | GG               | URR                           | 101509664          | zinc finger protein ZAT9-like            |
| SNP_48624_A_9869705 | NC_021166.1    | Ca_Kabuli_Chr07 | 9869705                 | GG                                     | AA                 | AA               | URR                           | 101509664          | zinc finger protein ZAT9-like            |
| SNP_48625_A_9869713 | NC_021166.1    | Ca_Kabuli_Chr07 | 9869713                 | GG                                     | AA                 | AA               | URR                           | 101509664          | zinc finger protein ZAT9-like            |
| SNP_48626_A_9869718 | NC_021166.1    | Ca_Kabuli_Chr07 | 9869718                 | GG                                     | AA                 | AA               | URR                           | 101509664          | zinc finger protein ZAT9-like            |
| SNP_48627_A_9869723 | NC_021166.1    | Ca_Kabuli_Chr07 | 9869723                 | CC                                     | AA                 | AA               | URR                           | 101509664          | zinc finger protein ZAT9-like            |
| SNP_48628_A_9871092 | NC_021166.1    | Ca_Kabuli_Chr07 | 9871092                 | TT                                     | CC                 | CC               | INTERGENIC                    |                    |                                          |
| SNP_48629_A_9879857 | NC_021166.1    | Ca_Kabuli_Chr07 | 9879857                 | AA                                     | CC                 | CC               | DRR                           | 101512454          | WAT1-related protein At5g47470-like      |
| SNP_48630_A_9879863 | NC_021166.1    | Ca_Kabuli_Chr07 | 9879863                 | AA                                     | GG                 | GG               | DRR                           | 101512454          | WAT1-related protein At5g47470-like      |
| SNP_48631_A_9880707 | NC_021166.1    | Ca_Kabuli_Chr07 | 9880707                 | TT                                     | CC                 | CC               | INTERGENIC                    |                    |                                          |
| SNP_48632_A_9880729 | NC_021166.1    | Ca_Kabuli_Chr07 | 9880729                 | CC                                     | TT                 | TT               | INTERGENIC                    |                    |                                          |
| SNP_48633_A_9880733 | NC_021166.1    | Ca_Kabuli_Chr07 | 9880733                 | TT                                     | CC                 | CC               | INTERGENIC                    |                    |                                          |
| SNP_48634_A_9880745 | NC_021166.1    | Ca_Kabuli_Chr07 | 9880745                 | GG                                     | TT                 | TT               | INTERGENIC                    |                    |                                          |

| SNPs IDs            | Chromosome IDs | Chromosomes     | Physical positions (bp) | CDC Frontier genome (Reference genome) | (Pusa 1103 & HPNB) | (ILWC 46 & LPNB) | Sequence Components of genome             | Gene accession IDs | Putative functions                                                   |
|---------------------|----------------|-----------------|-------------------------|----------------------------------------|--------------------|------------------|-------------------------------------------|--------------------|----------------------------------------------------------------------|
| SNP_48635_A_9880767 | NC_021166.1    | Ca_Kabuli_Chr07 | 9880767                 | TT                                     | CC                 | CC               | INTERGENIC                                |                    |                                                                      |
| SNP_48636_A_9889378 | NC_021166.1    | Ca_Kabuli_Chr07 | 9889378                 | GG                                     | TT                 | TT               | DRR                                       | 101514833          | uncharacterized protein At1g04910-like                               |
| SNP_48637_A_9889772 | NC_021166.1    | Ca_Kabuli_Chr07 | 9889772                 | CC                                     | TT                 | TT               | URR                                       | 101509988          | protein NUCLEAR FUSION DEFECTIVE 6, chloroplastic/mitochondrial-like |
| SNP_48638_A_9890046 | NC_021166.1    | Ca_Kabuli_Chr07 | 9890046                 | TT                                     | AA                 | AA               | URR                                       | 101509988          | protein NUCLEAR FUSION DEFECTIVE 6, chloroplastic/mitochondrial-like |
| SNP_48639_A_9892267 | NC_021166.1    | Ca_Kabuli_Chr07 | 9892267                 | TT                                     | CC                 | CC               | INTERGENICWARNING_TRANS CRIP1_INCOMPLETE) | 0                  | Unknown function                                                     |
| SNP_48640_A_9898425 | NC_021166.1    | Ca_Kabuli_Chr07 | 9898425                 | GG                                     | TT                 | TT               | INTERGENIC                                |                    |                                                                      |
| SNP_48641_A_9904504 | NC_021166.1    | Ca_Kabuli_Chr07 | 9904504                 | CC                                     | TT                 | TT               | SYNONYMOUS_CODING                         | 101512775          | uncharacterized LOC101512775                                         |
| SNP_48642_A_9905354 | NC_021166.1    | Ca_Kabuli_Chr07 | 9905354                 | GG                                     | AA                 | AA               | INTRON                                    | 101512775          | uncharacterized LOC101512775                                         |
| SNP_48643_A_9908383 | NC_021166.1    | Ca_Kabuli_Chr07 | 9908383                 | TT                                     | CC                 | CC               | URR                                       | 101512775          | uncharacterized LOC101512775                                         |
| SNP_48644_A_9908384 | NC_021166.1    | Ca_Kabuli_Chr07 | 9908384                 | GG                                     | AA                 | AA               | URR                                       | 101512775          | uncharacterized LOC101512775                                         |
| SNP_48645_A_9908394 | NC_021166.1    | Ca_Kabuli_Chr07 | 9908394                 | GG                                     | AA                 | AA               | URR                                       | 101512775          | uncharacterized LOC101512775                                         |
| SNP_48646_A_9908399 | NC_021166.1    | Ca_Kabuli_Chr07 | 9908399                 | CC                                     | AA                 | AA               | URR                                       | 101512775          | uncharacterized LOC101512775                                         |
| SNP_48647_A_9908415 | NC_021166.1    | Ca_Kabuli_Chr07 | 9908415                 | GG                                     | AA                 | AA               | URR                                       | 101512775          | uncharacterized LOC101512775                                         |
| SNP_48648_A_9908419 | NC_021166.1    | Ca_Kabuli_Chr07 | 9908419                 | CC                                     | TT                 | TT               | URR                                       | 101512775          | uncharacterized LOC101512775                                         |
| SNP_48649_A_9908439 | NC_021166.1    | Ca_Kabuli_Chr07 | 9908439                 | AA                                     | GG                 | GG               | URR                                       | 101512775          | uncharacterized LOC101512775                                         |
| SNP_48650_A_9915898 | NC_021166.1    | Ca_Kabuli_Chr07 | 9915898                 | TT                                     | CC                 | CC               | INTERGENIC                                |                    |                                                                      |
| SNP_48651_A_9915972 | NC_021166.1    | Ca_Kabuli_Chr07 | 9915972                 | TT                                     | CC                 | CC               | INTERGENIC                                |                    |                                                                      |
| SNP_48652_A_9916185 | NC_021166.1    | Ca_Kabuli_Chr07 | 9916185                 | CC                                     | TT                 | TT               | INTERGENIC                                |                    |                                                                      |
| SNP_48653_A_9916187 | NC_021166.1    | Ca_Kabuli_Chr07 | 9916187                 | TT                                     | GG                 | GG               | INTERGENIC                                |                    |                                                                      |
| SNP_48654_A_9916201 | NC_021166.1    | Ca_Kabuli_Chr07 | 9916201                 | CC                                     | AA                 | AA               | INTERGENIC                                |                    |                                                                      |
| SNP_48655_A_9916463 | NC_021166.1    | Ca_Kabuli_Chr07 | 9916463                 | TT                                     | GG                 | GG               | INTERGENIC                                |                    |                                                                      |
| SNP_48656_A_9916980 | NC_021166.1    | Ca_Kabuli_Chr07 | 9916980                 | TT                                     | CC                 | CC               | INTERGENIC                                |                    |                                                                      |

| SNPs IDs            | Chromosome IDs | Chromosomes     | Physical positions (bp) | CDC Frontier genome (Reference genome) | (Pusa 1103 & HPNB) | (ILWC 46 & LPNB) | Sequence Components of genome | Gene accession IDs | Putative functions           |
|---------------------|----------------|-----------------|-------------------------|----------------------------------------|--------------------|------------------|-------------------------------|--------------------|------------------------------|
| SNP_48657_A_9917052 | NC_021166.1    | Ca_Kabuli_Chr07 | 9917052                 | GG                                     | CC                 | CC               | INTERGENIC                    |                    |                              |
| SNP_48658_A_9917057 | NC_021166.1    | Ca_Kabuli_Chr07 | 9917057                 | AA                                     | GG                 | GG               | INTERGENIC                    |                    |                              |
| SNP_48659_A_9917061 | NC_021166.1    | Ca_Kabuli_Chr07 | 9917061                 | TT                                     | CC                 | CC               | INTERGENIC                    |                    |                              |
| SNP_48660_A_9917117 | NC_021166.1    | Ca_Kabuli_Chr07 | 9917117                 | CC                                     | TT                 | TT               | INTERGENIC                    |                    |                              |
| SNP_48661_A_9917388 | NC_021166.1    | Ca_Kabuli_Chr07 | 9917388                 | GG                                     | AA                 | AA               | INTERGENIC                    |                    |                              |
| SNP_48662_A_9918810 | NC_021166.1    | Ca_Kabuli_Chr07 | 9918810                 | TT                                     | GG                 | GG               | INTERGENIC                    |                    |                              |
| SNP_48663_A_9918847 | NC_021166.1    | Ca_Kabuli_Chr07 | 9918847                 | AA                                     | GG                 | GG               | INTERGENIC                    |                    |                              |
| SNP_48664_A_9919005 | NC_021166.1    | Ca_Kabuli_Chr07 | 9919005                 | TT                                     | CC                 | CC               | INTERGENIC                    |                    |                              |
| SNP_48665_A_9919018 | NC_021166.1    | Ca_Kabuli_Chr07 | 9919018                 | TT                                     | CC                 | CC               | INTERGENIC                    |                    |                              |
| SNP_48666_A_9919128 | NC_021166.1    | Ca_Kabuli_Chr07 | 9919128                 | TT                                     | CC                 | CC               | INTERGENIC                    |                    |                              |
| SNP_48667_A_9919135 | NC_021166.1    | Ca_Kabuli_Chr07 | 9919135                 | GG                                     | AA                 | AA               | INTERGENIC                    |                    |                              |
| SNP_48668_A_9919399 | NC_021166.1    | Ca_Kabuli_Chr07 | 9919399                 | AA                                     | CC                 | CC               | INTERGENIC                    |                    |                              |
| SNP_48669_A_9919476 | NC_021166.1    | Ca_Kabuli_Chr07 | 9919476                 | CC                                     | TT                 | TT               | INTERGENIC                    |                    |                              |
| SNP_48670_A_9919559 | NC_021166.1    | Ca_Kabuli_Chr07 | 9919559                 | CC                                     | AA                 | AA               | INTERGENIC                    |                    |                              |
| SNP_48671_A_9919744 | NC_021166.1    | Ca_Kabuli_Chr07 | 9919744                 | AA                                     | GG                 | GG               | INTERGENIC                    |                    |                              |
| SNP_48672_A_9919818 | NC_021166.1    | Ca_Kabuli_Chr07 | 9919818                 | TT                                     | CC                 | CC               | INTERGENIC                    |                    |                              |
| SNP_48673_A_9920676 | NC_021166.1    | Ca_Kabuli_Chr07 | 9920676                 | CC                                     | AA                 | AA               | INTERGENIC                    |                    |                              |
| SNP_48674_A_9921329 | NC_021166.1    | Ca_Kabuli_Chr07 | 9921329                 | CC                                     | TT                 | TT               | INTERGENIC                    |                    |                              |
| SNP_48675_A_9925819 | NC_021166.1    | Ca_Kabuli_Chr07 | 9925819                 | CC                                     | AA                 | AA               | URR                           | 101515374          | uncharacterized LOC101515374 |
| SNP_48677_A_9929388 | NC_021166.1    | Ca_Kabuli_Chr07 | 9929388                 | CC                                     | TT                 | TT               | INTERGENIC                    |                    |                              |
| SNP_48679_A_9942026 | NC_021166.1    | Ca_Kabuli_Chr07 | 9942026                 | TT                                     | CC                 | CC               | URR                           | 101489018          | uncharacterized LOC101489018 |
| SNP_48680_A_9942035 | NC_021166.1    | Ca_Kabuli_Chr07 | 9942035                 | TT                                     | AA                 | AA               | URR                           | 101489018          | uncharacterized LOC101489018 |



| SNPs IDs            | Chromosome IDs | Chromosomes     | Physical positions (bp) | CDC Frontier (Reference genome) | (Pusa 1103 & HPNB) | (ILWC 46 & LPNB) | Sequence Components of genome | Gene accession IDs | Putative functions                     |
|---------------------|----------------|-----------------|-------------------------|---------------------------------|--------------------|------------------|-------------------------------|--------------------|----------------------------------------|
| SNP_48681_A_9942736 | NC_021166.1    | Ca_Kabuli_Chr07 | 9942736                 | TT                              | CC                 | CC               | URR                           | 101489018          | uncharacterized LOC101489018           |
| SNP_48682_A_9943296 | NC_021166.1    | Ca_Kabuli_Chr07 | 9943296                 | CC                              | AA                 | AA               | URR                           | 101489018          | uncharacterized LOC101489018           |
| SNP_48683_A_9943719 | NC_021166.1    | Ca_Kabuli_Chr07 | 9943719                 | CC                              | TT                 | TT               | DRR                           | 101489346          | uncharacterized LOC101489346           |
| SNP_48684_A_9946037 | NC_021166.1    | Ca_Kabuli_Chr07 | 9946037                 | TT                              | CC                 | CC               | INTRON                        | 101489346          | uncharacterized LOC101489346           |
| SNP_48685_A_9947405 | NC_021166.1    | Ca_Kabuli_Chr07 | 9947405                 | AA                              | GG                 | GG               | INTRON                        | 101489346          | uncharacterized LOC101489346           |
| SNP_48686_A_9951007 | NC_021166.1    | Ca_Kabuli_Chr07 | 9951007                 | AA                              | CC                 | CC               | URR                           | 101489346          | uncharacterized LOC101489346           |
| SNP_48687_A_9951016 | NC_021166.1    | Ca_Kabuli_Chr07 | 9951016                 | AA                              | GG                 | GG               | URR                           | 101489346          | uncharacterized LOC101489346           |
| SNP_48688_A_9951178 | NC_021166.1    | Ca_Kabuli_Chr07 | 9951178                 | GG                              | TT                 | TT               | URR                           | 101489346          | uncharacterized LOC101489346           |
| SNP_48690_A_9954074 | NC_021166.1    | Ca_Kabuli_Chr07 | 9954074                 | TT                              | CC                 | CC               | INTERGENIC                    |                    |                                        |
| SNP_48691_A_9954481 | NC_021166.1    | Ca_Kabuli_Chr07 | 9954481                 | GG                              | CC                 | CC               | INTERGENIC                    |                    |                                        |
| SNP_48692_A_9954535 | NC_021166.1    | Ca_Kabuli_Chr07 | 9954535                 | GG                              | AA                 | AA               | INTERGENIC                    |                    |                                        |
| SNP_48693_A_9954551 | NC_021166.1    | Ca_Kabuli_Chr07 | 9954551                 | AA                              | TT                 | TT               | INTERGENIC                    |                    |                                        |
| SNP_48694_A_9954566 | NC_021166.1    | Ca_Kabuli_Chr07 | 9954566                 | AA                              | GG                 | GG               | INTERGENIC                    |                    |                                        |
| SNP_48695_A_9954621 | NC_021166.1    | Ca_Kabuli_Chr07 | 9954621                 | CC                              | TT                 | TT               | INTERGENIC                    |                    |                                        |
| SNP_48696_A_9954633 | NC_021166.1    | Ca_Kabuli_Chr07 | 9954633                 | TT                              | GG                 | GG               | INTERGENIC                    |                    |                                        |
| SNP_48697_A_9954642 | NC_021166.1    | Ca_Kabuli_Chr07 | 9954642                 | AA                              | GG                 | GG               | INTERGENIC                    |                    |                                        |
| SNP_48698_A_9954670 | NC_021166.1    | Ca_Kabuli_Chr07 | 9954670                 | CC                              | TT                 | TT               | INTERGENIC                    |                    |                                        |
| SNP_48699_A_9954824 | NC_021166.1    | Ca_Kabuli_Chr07 | 9954824                 | CC                              | TT                 | TT               | INTERGENIC                    |                    |                                        |
| SNP_48700_A_9955821 | NC_021166.1    | Ca_Kabuli_Chr07 | 9955821                 | TT                              | CC                 | CC               | INTERGENIC                    |                    |                                        |
| SNP_48701_A_9959293 | NC_021166.1    | Ca_Kabuli_Chr07 | 9959293                 | CC                              | TT                 | TT               | INTERGENIC                    |                    |                                        |
| SNP_48702_A_9959343 | NC_021166.1    | Ca_Kabuli_Chr07 | 9959343                 | CC                              | AA                 | AA               | INTERGENIC                    |                    |                                        |
| SNP_48704_A_9964992 | NC_021166.1    | Ca_Kabuli_Chr07 | 9964992                 | GG                              | TT                 | TT               | URR                           | 101489673          | probable glycosyltransferase At5g03795 |

| SNPs IDs            | Chromosome IDs | Chromosomes     | Physical positions (bp) | CDC Frontier (Reference genome) | (Pusa 1103 & HPNB) | (ILWC 46 & LPNB) | Sequence Components of genome | Gene accession IDs | Putative functions                              |
|---------------------|----------------|-----------------|-------------------------|---------------------------------|--------------------|------------------|-------------------------------|--------------------|-------------------------------------------------|
| SNP_48705_A_9965014 | NC_021166.1    | Ca_Kabuli_Chr07 | 9965014                 | AA                              | GG                 | GG               | URR                           | 101489673          | probable glycosyltransferase At5g03795          |
| SNP_48706_A_9965284 | NC_021166.1    | Ca_Kabuli_Chr07 | 9965284                 | CC                              | AA                 | AA               | URR                           | 101489673          | probable glycosyltransferase At5g03795          |
| SNP_48707_A_9965289 | NC_021166.1    | Ca_Kabuli_Chr07 | 9965289                 | CC                              | TT                 | TT               | URR                           | 101489673          | probable glycosyltransferase At5g03795          |
| SNP_48708_A_9966991 | NC_021166.1    | Ca_Kabuli_Chr07 | 9966991                 | GG                              | AA                 | AA               | URR                           | 101490434          | transcription factor MYB114-like                |
| SNP_48711_A_9974629 | NC_021166.1    | Ca_Kabuli_Chr07 | 9974629                 | TT                              | CC                 | CC               | URR                           | 101490756          | uncharacterized LOC101490756                    |
| SNP_48713_A_9977513 | NC_021166.1    | Ca_Kabuli_Chr07 | 9977513                 | AA                              | CC                 | CC               | INTERGENIC                    |                    |                                                 |
| SNP_48714_A_9977557 | NC_021166.1    | Ca_Kabuli_Chr07 | 9977557                 | CC                              | TT                 | TT               | INTERGENIC                    |                    |                                                 |
| SNP_48715_A_9977606 | NC_021166.1    | Ca_Kabuli_Chr07 | 9977606                 | AA                              | TT                 | TT               | INTERGENIC                    |                    |                                                 |
| SNP_48716_A_9978658 | NC_021166.1    | Ca_Kabuli_Chr07 | 9978658                 | CC                              | GG                 | GG               | DRR                           | 101491714          | protein NRT1/ PTR FAMILY 5.2-like               |
| SNP_48717_A_9978686 | NC_021166.1    | Ca_Kabuli_Chr07 | 9978686                 | CC                              | TT                 | TT               | DRR                           | 101491714          | protein NRT1/ PTR FAMILY 5.2-like               |
| SNP_48718_A_9984378 | NC_021166.1    | Ca_Kabuli_Chr07 | 9984378                 | CC                              | TT                 | TT               | INTERGENIC                    |                    |                                                 |
| SNP_48719_A_9984683 | NC_021166.1    | Ca_Kabuli_Chr07 | 9984683                 | GG                              | AA                 | AA               | INTERGENIC                    |                    |                                                 |
| SNP_48720_A_9989730 | NC_021166.1    | Ca_Kabuli_Chr07 | 9989730                 | TT                              | AA                 | AA               | DRR                           | 101491082          | ethylene-responsive transcription factor ERF039 |
| SNP_48721_A_9990722 | NC_021166.1    | Ca_Kabuli_Chr07 | 9990722                 | CC                              | TT                 | TT               | URR                           | 101491082          | ethylene-responsive transcription factor ERF039 |
| SNP_48722_A_9990743 | NC_021166.1    | Ca_Kabuli_Chr07 | 9990743                 | AA                              | GG                 | GG               | URR                           | 101491082          | ethylene-responsive transcription factor ERF039 |
| SNP_48723_A_9992605 | NC_021166.1    | Ca_Kabuli_Chr07 | 9992605                 | CC                              | AA                 | AA               | URR                           | 101491082          | ethylene-responsive transcription factor ERF039 |
| SNP_48724_A_9992673 | NC_021166.1    | Ca_Kabuli_Chr07 | 9992673                 | GG                              | AA                 | AA               | INTERGENIC                    |                    |                                                 |
| SNP_48726_A_9993003 | NC_021166.1    | Ca_Kabuli_Chr07 | 9993003                 | TT                              | CC                 | CC               | INTERGENIC                    |                    |                                                 |
| SNP_48727_A_9993537 | NC_021166.1    | Ca_Kabuli_Chr07 | 9993537                 | CC                              | TT                 | TT               | INTERGENIC                    |                    |                                                 |
| SNP_48728_A_9994094 | NC_021166.1    | Ca_Kabuli_Chr07 | 9994094                 | AA                              | GG                 | GG               | INTERGENIC                    |                    |                                                 |
| SNP_48729_A_9994845 | NC_021166.1    | Ca_Kabuli_Chr07 | 9994845                 | CC                              | TT                 | TT               | INTERGENIC                    |                    |                                                 |
| SNP_48730_A_9997503 | NC_021166.1    | Ca_Kabuli_Chr07 | 9997503                 | CC                              | TT                 | TT               | INTERGENIC                    |                    |                                                 |

| SNPs IDs             | Chromosome IDs | Chromosomes     | Physical positions (bp) | CDC Frontier (Reference genome) | (Pusa 1103 & HPNB) | (ILWC 46 & LPNB) | Sequence Components of genome | Gene accession IDs | Putative functions                         |
|----------------------|----------------|-----------------|-------------------------|---------------------------------|--------------------|------------------|-------------------------------|--------------------|--------------------------------------------|
| SNP_48731_A_10003287 | NC_021166.1    | Ca_Kabuli_Chr07 | 10003287                | GG                              | AA                 | AA               | SYNONYMOUS_CODING             | 101491397          | peroxisomal acyl-coenzyme A oxidase 1-like |
| SNP_48732_A_10007054 | NC_021166.1    | Ca_Kabuli_Chr07 | 10007054                | AA                              | CC                 | CC               | URR                           | 101491397          | peroxisomal acyl-coenzyme A oxidase 1-like |
| SNP_48733_A_10007060 | NC_021166.1    | Ca_Kabuli_Chr07 | 10007060                | GG                              | AA                 | AA               | URR                           | 101491397          | peroxisomal acyl-coenzyme A oxidase 1-like |
| SNP_48734_A_10007072 | NC_021166.1    | Ca_Kabuli_Chr07 | 10007072                | TT                              | AA                 | AA               | URR                           | 101491397          | peroxisomal acyl-coenzyme A oxidase 1-like |
| SNP_48735_A_10007073 | NC_021166.1    | Ca_Kabuli_Chr07 | 10007073                | GG                              | AA                 | AA               | URR                           | 101491397          | peroxisomal acyl-coenzyme A oxidase 1-like |
| SNP_48736_A_10007091 | NC_021166.1    | Ca_Kabuli_Chr07 | 10007091                | AA                              | GG                 | GG               | URR                           | 101491397          | peroxisomal acyl-coenzyme A oxidase 1-like |
| SNP_48737_A_10007102 | NC_021166.1    | Ca_Kabuli_Chr07 | 10007102                | GG                              | AA                 | AA               | URR                           | 101491397          | peroxisomal acyl-coenzyme A oxidase 1-like |
| SNP_48738_A_10007119 | NC_021166.1    | Ca_Kabuli_Chr07 | 10007119                | TT                              | CC                 | CC               | URR                           | 101491397          | peroxisomal acyl-coenzyme A oxidase 1-like |
| SNP_48739_A_10007121 | NC_021166.1    | Ca_Kabuli_Chr07 | 10007121                | TT                              | CC                 | CC               | URR                           | 101491397          | peroxisomal acyl-coenzyme A oxidase 1-like |
| SNP_48740_A_10007122 | NC_021166.1    | Ca_Kabuli_Chr07 | 10007122                | TT                              | CC                 | CC               | URR                           | 101491397          | peroxisomal acyl-coenzyme A oxidase 1-like |
| SNP_48742_A_10008368 | NC_021166.1    | Ca_Kabuli_Chr07 | 10008368                | TT                              | CC                 | CC               | URR                           | 101491397          | peroxisomal acyl-coenzyme A oxidase 1-like |
| SNP_48743_A_10008377 | NC_021166.1    | Ca_Kabuli_Chr07 | 10008377                | TT                              | CC                 | CC               | URR                           | 101491397          | peroxisomal acyl-coenzyme A oxidase 1-like |
| SNP_48744_A_10009313 | NC_021166.1    | Ca_Kabuli_Chr07 | 10009313                | GG                              | AA                 | AA               | INTERGENIC                    |                    |                                            |
| SNP_48745_A_10011422 | NC_021166.1    | Ca_Kabuli_Chr07 | 10011422                | GG                              | AA                 | AA               | DRR                           | 101492699          | Unknown function                           |
| SNP_48746_A_10011462 | NC_021166.1    | Ca_Kabuli_Chr07 | 10011462                | CC                              | AA                 | AA               | DRR                           | 101492699          | Unknown function                           |
| SNP_48747_A_10011623 | NC_021166.1    | Ca_Kabuli_Chr07 | 10011623                | TT                              | CC                 | CC               | DRR                           | 101492699          | Unknown function                           |
| SNP_48748_A_10011694 | NC_021166.1    | Ca_Kabuli_Chr07 | 10011694                | GG                              | AA                 | AA               | DRR                           | 101492699          | Unknown function                           |
| SNP_48749_A_10011727 | NC_021166.1    | Ca_Kabuli_Chr07 | 10011727                | GG                              | AA                 | AA               | DRR                           | 101492699          | Unknown function                           |
| SNP_48750_A_10013529 | NC_021166.1    | Ca_Kabuli_Chr07 | 10013529                | TT                              | CC                 | CC               | URR                           | 101492699          | Unknown function                           |
| SNP_48751_A_10013906 | NC_021166.1    | Ca_Kabuli_Chr07 | 10013906                | TT                              | CC                 | CC               | URR                           | 101492699          | Unknown function                           |
| SNP_48753_A_10021356 | NC_021166.1    | Ca_Kabuli_Chr07 | 10021356                | TT                              | AA                 | AA               | URR                           | 101491712          | transcription factor MYB1R1                |
| SNP_48754_A_10021427 | NC_021166.1    | Ca_Kabuli_Chr07 | 10021427                | AA                              | GG                 | GG               | URR                           | 101491712          | transcription factor MYB1R1                |

| SNPs IDs             | Chromosome IDs | Chromosomes     | Physical positions (bp) | CDC Frontier genome (Reference genome) | (Pusa 1103 & HPNB) | (ILWC 46 & LPNB) | Sequence Components of genome | Gene accession IDs | Putative functions                             |
|----------------------|----------------|-----------------|-------------------------|----------------------------------------|--------------------|------------------|-------------------------------|--------------------|------------------------------------------------|
| SNP_48755_A_10021623 | NC_021166.1    | Ca_Kabuli_Chr07 | 10021623                | AA                                     | GG                 | GG               | URR                           | 101491712          | transcription factor MYB1R1                    |
| SNP_48756_A_10022612 | NC_021166.1    | Ca_Kabuli_Chr07 | 10022612                | GG                                     | AA                 | AA               | INTERGENIC                    |                    |                                                |
| SNP_48757_A_10023413 | NC_021166.1    | Ca_Kabuli_Chr07 | 10023413                | AA                                     | GG                 | GG               | INTERGENIC                    |                    |                                                |
| SNP_48758_A_10029370 | NC_021166.1    | Ca_Kabuli_Chr07 | 10029370                | GG                                     | AA                 | AA               | INTRON                        | 101493034          | 1-aminocyclopropane-1-carboxylate oxidase-like |
| SNP_48759_A_10029373 | NC_021166.1    | Ca_Kabuli_Chr07 | 10029373                | GG                                     | AA                 | AA               | INTRON                        | 101493034          | 1-aminocyclopropane-1-carboxylate oxidase-like |
| SNP_48760_A_10029832 | NC_021166.1    | Ca_Kabuli_Chr07 | 10029832                | GG                                     | AA                 | AA               | INTRON                        | 101493034          | 1-aminocyclopropane-1-carboxylate oxidase-like |
| SNP_48761_A_10029841 | NC_021166.1    | Ca_Kabuli_Chr07 | 10029841                | CC                                     | TT                 | TT               | INTRON                        | 101493034          | 1-aminocyclopropane-1-carboxylate oxidase-like |
| SNP_48762_A_10033050 | NC_021166.1    | Ca_Kabuli_Chr07 | 10033050                | AA                                     | CC                 | CC               | INTRON                        | 101493034          | 1-aminocyclopropane-1-carboxylate oxidase-like |
| SNP_48763_A_10046112 | NC_021166.1    | Ca_Kabuli_Chr07 | 10046112                | TT                                     | CC                 | CC               | DRR                           | 101492028          | uncharacterized LOC101492028                   |
| SNP_48764_A_10046133 | NC_021166.1    | Ca_Kabuli_Chr07 | 10046133                | CC                                     | GG                 | GG               | DRR                           | 101492028          | uncharacterized LOC101492028                   |
| SNP_48765_A_10046197 | NC_021166.1    | Ca_Kabuli_Chr07 | 10046197                | TT                                     | CC                 | CC               | DRR                           | 101492028          | uncharacterized LOC101492028                   |
| SNP_48766_A_10046440 | NC_021166.1    | Ca_Kabuli_Chr07 | 10046440                | AA                                     | TT                 | TT               | DRR                           | 101492028          | uncharacterized LOC101492028                   |
| SNP_48767_A_10046461 | NC_021166.1    | Ca_Kabuli_Chr07 | 10046461                | CC                                     | AA                 | AA               | DRR                           | 101492028          | uncharacterized LOC101492028                   |
| SNP_48768_A_10046465 | NC_021166.1    | Ca_Kabuli_Chr07 | 10046465                | TT                                     | CC                 | CC               | DRR                           | 101492028          | uncharacterized LOC101492028                   |
| SNP_48769_A_10048821 | NC_021166.1    | Ca_Kabuli_Chr07 | 10048821                | GG                                     | TT                 | TT               | URR                           | 101492028          | uncharacterized LOC101492028                   |
| SNP_48770_A_10048978 | NC_021166.1    | Ca_Kabuli_Chr07 | 10048978                | TT                                     | AA                 | AA               | URR                           | 101492028          | uncharacterized LOC101492028                   |
| SNP_48771_A_10054528 | NC_021166.1    | Ca_Kabuli_Chr07 | 10054528                | CC                                     | TT                 | TT               | INTERGENIC                    |                    |                                                |
| SNP_48772_A_10054793 | NC_021166.1    | Ca_Kabuli_Chr07 | 10054793                | AA                                     | GG                 | GG               | INTERGENIC                    |                    |                                                |
| SNP_48773_A_10055017 | NC_021166.1    | Ca_Kabuli_Chr07 | 10055017                | CC                                     | TT                 | TT               | INTERGENIC                    |                    |                                                |
| SNP_48774_A_10056095 | NC_021166.1    | Ca_Kabuli_Chr07 | 10056095                | AA                                     | TT                 | TT               | INTERGENIC                    |                    |                                                |
| SNP_48775_A_10056162 | NC_021166.1    | Ca_Kabuli_Chr07 | 10056162                | CC                                     | TT                 | TT               | INTERGENIC                    |                    |                                                |
| SNP_48776_A_10056231 | NC_021166.1    | Ca_Kabuli_Chr07 | 10056231                | GG                                     | AA                 | AA               | INTERGENIC                    |                    |                                                |

| SNPs IDs             | Chromosome IDs | Chromosomes     | Physical positions (bp) | CDC Frontier genome (Reference genome) | (Pusa 1103 & HPNB) | (ILWC 46 & LPNB) | Sequence Components of genome | Gene accession IDs | Putative functions                                 |
|----------------------|----------------|-----------------|-------------------------|----------------------------------------|--------------------|------------------|-------------------------------|--------------------|----------------------------------------------------|
| SNP_48777_A_10056431 | NC_021166.1    | Ca_Kabuli_Chr07 | 10056431                | GG                                     | TT                 | TT               | INTERGENIC                    |                    |                                                    |
| SNP_48778_A_10056450 | NC_021166.1    | Ca_Kabuli_Chr07 | 10056450                | GG                                     | AA                 | AA               | INTERGENIC                    |                    |                                                    |
| SNP_48779_A_10056491 | NC_021166.1    | Ca_Kabuli_Chr07 | 10056491                | TT                                     | AA                 | AA               | INTERGENIC                    |                    |                                                    |
| SNP_48780_A_10056492 | NC_021166.1    | Ca_Kabuli_Chr07 | 10056492                | TT                                     | CC                 | CC               | INTERGENIC                    |                    |                                                    |
| SNP_48781_A_10056682 | NC_021166.1    | Ca_Kabuli_Chr07 | 10056682                | GG                                     | CC                 | CC               | INTERGENIC                    |                    |                                                    |
| SNP_48783_A_10060560 | NC_021166.1    | Ca_Kabuli_Chr07 | 10060560                | AA                                     | GG                 | GG               | INTERGENIC                    |                    |                                                    |
| SNP_48784_A_10060561 | NC_021166.1    | Ca_Kabuli_Chr07 | 10060561                | AA                                     | TT                 | TT               | INTERGENIC                    |                    |                                                    |
| SNP_48785_A_10060569 | NC_021166.1    | Ca_Kabuli_Chr07 | 10060569                | CC                                     | TT                 | TT               | INTERGENIC                    |                    |                                                    |
| SNP_48786_A_10060571 | NC_021166.1    | Ca_Kabuli_Chr07 | 10060571                | TT                                     | CC                 | CC               | INTERGENIC                    |                    |                                                    |
| SNP_48787_A_10060927 | NC_021166.1    | Ca_Kabuli_Chr07 | 10060927                | AA                                     | GG                 | GG               | INTERGENIC                    |                    |                                                    |
| SNP_48788_A_10060934 | NC_021166.1    | Ca_Kabuli_Chr07 | 10060934                | GG                                     | AA                 | AA               | INTERGENIC                    |                    |                                                    |
| SNP_48789_A_10062576 | NC_021166.1    | Ca_Kabuli_Chr07 | 10062576                | TT                                     | AA                 | AA               | INTERGENIC                    |                    |                                                    |
| SNP_48790_A_10064098 | NC_021166.1    | Ca_Kabuli_Chr07 | 10064098                | AA                                     | GG                 | GG               | INTERGENIC                    |                    |                                                    |
| SNP_48791_A_10064239 | NC_021166.1    | Ca_Kabuli_Chr07 | 10064239                | GG                                     | TT                 | TT               | INTERGENIC                    |                    |                                                    |
| SNP_48792_A_10079393 | NC_021166.1    | Ca_Kabuli_Chr07 | 10079393                | CC                                     | TT                 | TT               | SYNONYMOUS_CODING             | 101492697          | glutamic acid-rich protein                         |
| SNP_48793_A_10079961 | NC_021166.1    | Ca_Kabuli_Chr07 | 10079961                | AA                                     | GG                 | GG               | NON_SYNONYMOUS_CODING         | 101492697          | glutamic acid-rich protein                         |
| SNP_48794_A_10081330 | NC_021166.1    | Ca_Kabuli_Chr07 | 10081330                | AA                                     | GG                 | GG               | URR                           | 101492697          | glutamic acid-rich protein                         |
| SNP_48796_A_10081358 | NC_021166.1    | Ca_Kabuli_Chr07 | 10081358                | AA                                     | GG                 | GG               | URR                           | 101492697          | glutamic acid-rich protein                         |
| SNP_48797_A_10081604 | NC_021166.1    | Ca_Kabuli_Chr07 | 10081604                | AA                                     | TT                 | TT               | URR                           | 101492697          | glutamic acid-rich protein                         |
| SNP_48798_A_10085299 | NC_021166.1    | Ca_Kabuli_Chr07 | 10085299                | CC                                     | TT                 | TT               | URR                           | 101493033          | putative dual specificity protein phosphatase DSP8 |
| SNP_48799_A_10085311 | NC_021166.1    | Ca_Kabuli_Chr07 | 10085311                | TT                                     | CC                 | CC               | URR                           | 101493033          | putative dual specificity protein phosphatase DSP8 |
| SNP_48800_A_10085517 | NC_021166.1    | Ca_Kabuli_Chr07 | 10085517                | TT                                     | AA                 | AA               | URR                           | 101493033          | putative dual specificity protein phosphatase DSP8 |

| SNPs IDs             | Chromosome IDs | Chromosomes     | Physical positions (bp) | CDC Frontier genome (Reference genome) | (Pusa 1103 & HPNB) | (ILWC 46 & LPNB) | Sequence Components of genome | Gene accession IDs | Putative functions          |
|----------------------|----------------|-----------------|-------------------------|----------------------------------------|--------------------|------------------|-------------------------------|--------------------|-----------------------------|
| SNP_48801_A_10086282 | NC_021166.1    | Ca_Kabuli_Chr07 | 10086282                | GG                                     | AA                 | AA               | INTERGENIC                    |                    |                             |
| SNP_48802_A_10087229 | NC_021166.1    | Ca_Kabuli_Chr07 | 10087229                | TT                                     | CC                 | CC               | INTERGENIC                    |                    |                             |
| SNP_48803_A_10087577 | NC_021166.1    | Ca_Kabuli_Chr07 | 10087577                | AA                                     | GG                 | GG               | INTERGENIC                    |                    |                             |
| SNP_48804_A_10087606 | NC_021166.1    | Ca_Kabuli_Chr07 | 10087606                | CC                                     | TT                 | TT               | INTERGENIC                    |                    |                             |
| SNP_48805_A_10094055 | NC_021166.1    | Ca_Kabuli_Chr07 | 10094055                | CC                                     | TT                 | TT               | INTERGENIC                    |                    |                             |
| SNP_48806_A_10095171 | NC_021166.1    | Ca_Kabuli_Chr07 | 10095171                | CC                                     | TT                 | TT               | DRR                           | 101493680          | nudix hydrolase 8           |
| SNP_48807_A_10095204 | NC_021166.1    | Ca_Kabuli_Chr07 | 10095204                | AA                                     | TT                 | TT               | URR                           | 101493359          | deSI-like protein At4g17486 |
| SNP_48808_A_10095247 | NC_021166.1    | Ca_Kabuli_Chr07 | 10095247                | TT                                     | CC                 | CC               | URR                           | 101493359          | deSI-like protein At4g17486 |
| SNP_48809_A_10097250 | NC_021166.1    | Ca_Kabuli_Chr07 | 10097250                | TT                                     | CC                 | CC               | INTRON                        | 101493680          | nudix hydrolase 8           |
| SNP_48810_A_10098279 | NC_021166.1    | Ca_Kabuli_Chr07 | 10098279                | CC                                     | TT                 | TT               | INTERGENIC                    |                    |                             |
| SNP_48811_A_10099387 | NC_021166.1    | Ca_Kabuli_Chr07 | 10099387                | GG                                     | TT                 | TT               | URR                           | 101493680          | nudix hydrolase 8           |
| SNP_48812_A_10099854 | NC_021166.1    | Ca_Kabuli_Chr07 | 10099854                | TT                                     | AA                 | AA               | URR                           | 101493680          | nudix hydrolase 8           |
| SNP_48813_A_10099878 | NC_021166.1    | Ca_Kabuli_Chr07 | 10099878                | AA                                     | GG                 | GG               | URR                           | 101493680          | nudix hydrolase 8           |
| SNP_48814_A_10102147 | NC_021166.1    | Ca_Kabuli_Chr07 | 10102147                | TT                                     | CC                 | CC               | INTERGENIC                    |                    |                             |
| SNP_48815_A_10102453 | NC_021166.1    | Ca_Kabuli_Chr07 | 10102453                | AA                                     | GG                 | GG               | INTERGENIC                    |                    |                             |
| SNP_48816_A_10103070 | NC_021166.1    | Ca_Kabuli_Chr07 | 10103070                | TT                                     | AA                 | AA               | INTERGENIC                    |                    |                             |
| SNP_48817_A_10104174 | NC_021166.1    | Ca_Kabuli_Chr07 | 10104174                | GG                                     | CC                 | CC               | INTERGENIC                    |                    |                             |
| SNP_48818_A_10104495 | NC_021166.1    | Ca_Kabuli_Chr07 | 10104495                | TT                                     | CC                 | CC               | INTERGENIC                    |                    |                             |
| SNP_48819_A_10104504 | NC_021166.1    | Ca_Kabuli_Chr07 | 10104504                | TT                                     | AA                 | AA               | INTERGENIC                    |                    |                             |
| SNP_48820_A_10104505 | NC_021166.1    | Ca_Kabuli_Chr07 | 10104505                | AA                                     | TT                 | TT               | INTERGENIC                    |                    |                             |
| SNP_48821_A_10104515 | NC_021166.1    | Ca_Kabuli_Chr07 | 10104515                | GG                                     | TT                 | TT               | INTERGENIC                    |                    |                             |
| SNP_48822_A_10106688 | NC_021166.1    | Ca_Kabuli_Chr07 | 10106688                | CC                                     | TT                 | TT               | INTERGENIC                    |                    |                             |

| SNPs IDs             | Chromosome IDs | Chromosomes     | Physical positions (bp) | CDC Frontier genome (Reference genome) | (Pusa 1103 & HPNB) | (ILWC 46 & LPNB) | Sequence Components of genome | Gene accession IDs | Putative functions                              |
|----------------------|----------------|-----------------|-------------------------|----------------------------------------|--------------------|------------------|-------------------------------|--------------------|-------------------------------------------------|
| SNP_48823_A_10106916 | NC_021166.1    | Ca_Kabuli_Chr07 | 10106916                | CC                                     | TT                 | TT               | INTERGENIC                    |                    |                                                 |
| SNP_48824_A_10109379 | NC_021166.1    | Ca_Kabuli_Chr07 | 10109379                | CC                                     | AA                 | AA               | INTERGENIC                    |                    |                                                 |
| SNP_48827_A_10113993 | NC_021166.1    | Ca_Kabuli_Chr07 | 10113993                | CC                                     | TT                 | TT               | DRR                           | 101494217          | ethylene-responsive transcription factor 5-like |
| SNP_48828_A_10115618 | NC_021166.1    | Ca_Kabuli_Chr07 | 10115618                | TT                                     | GG                 | GG               | NON_SYNONYMOUS_CODING         | 101494217          | ethylene-responsive transcription factor 5-like |
| SNP_48829_A_10115908 | NC_021166.1    | Ca_Kabuli_Chr07 | 10115908                | CC                                     | AA                 | AA               | URR                           | 101494217          | ethylene-responsive transcription factor 5-like |
| SNP_48830_A_10118761 | NC_021166.1    | Ca_Kabuli_Chr07 | 10118761                | GG                                     | AA                 | AA               | INTERGENIC                    |                    |                                                 |
| SNP_48831_A_10118806 | NC_021166.1    | Ca_Kabuli_Chr07 | 10118806                | TT                                     | GG                 | GG               | INTERGENIC                    |                    |                                                 |
| SNP_48833_A_10119025 | NC_021166.1    | Ca_Kabuli_Chr07 | 10119025                | TT                                     | GG                 | GG               | INTERGENIC                    |                    |                                                 |
| SNP_48834_A_10121232 | NC_021166.1    | Ca_Kabuli_Chr07 | 10121232                | GG                                     | AA                 | AA               | INTERGENIC                    |                    |                                                 |
| SNP_48835_A_10121257 | NC_021166.1    | Ca_Kabuli_Chr07 | 10121257                | AA                                     | CC                 | CC               | INTERGENIC                    |                    |                                                 |
| SNP_48836_A_10123479 | NC_021166.1    | Ca_Kabuli_Chr07 | 10123479                | AA                                     | TT                 | TT               | INTERGENIC                    |                    |                                                 |
| SNP_48837_A_10127704 | NC_021166.1    | Ca_Kabuli_Chr07 | 10127704                | CC                                     | TT                 | TT               | INTERGENIC                    |                    |                                                 |
| SNP_48838_A_10127718 | NC_021166.1    | Ca_Kabuli_Chr07 | 10127718                | AA                                     | GG                 | GG               | INTERGENIC                    |                    |                                                 |
| SNP_48839_A_10127743 | NC_021166.1    | Ca_Kabuli_Chr07 | 10127743                | AA                                     | TT                 | TT               | INTERGENIC                    |                    |                                                 |
| SNP_48840_A_10127768 | NC_021166.1    | Ca_Kabuli_Chr07 | 10127768                | AA                                     | GG                 | GG               | INTERGENIC                    |                    |                                                 |
| SNP_48841_A_10129710 | NC_021166.1    | Ca_Kabuli_Chr07 | 10129710                | TT                                     | AA                 | AA               | INTERGENIC                    |                    |                                                 |
| SNP_48843_A_10130452 | NC_021166.1    | Ca_Kabuli_Chr07 | 10130452                | GG                                     | AA                 | AA               | INTERGENIC                    |                    |                                                 |
| SNP_48844_A_10130479 | NC_021166.1    | Ca_Kabuli_Chr07 | 10130479                | GG                                     | AA                 | AA               | INTERGENIC                    |                    |                                                 |
| SNP_48845_A_10134299 | NC_021166.1    | Ca_Kabuli_Chr07 | 10134299                | CC                                     | AA                 | AA               | INTERGENIC                    |                    |                                                 |
| SNP_48846_A_10134321 | NC_021166.1    | Ca_Kabuli_Chr07 | 10134321                | TT                                     | CC                 | CC               | INTERGENIC                    |                    |                                                 |
| SNP_48848_A_10140972 | NC_021166.1    | Ca_Kabuli_Chr07 | 10140972                | GG                                     | AA                 | AA               | INTERGENIC                    |                    |                                                 |
| SNP_48849_A_10140998 | NC_021166.1    | Ca_Kabuli_Chr07 | 10140998                | CC                                     | GG                 | GG               | INTERGENIC                    |                    |                                                 |

| SNPs IDs             | Chromosome IDs | Chromosomes     | Physical positions (bp) | CDC Frontier genome (Reference genome) | (Pusa 1103 & HPNB) | (ILWC 46 & LPNB) | Sequence Components of genome | Gene accession IDs | Putative functions                               |
|----------------------|----------------|-----------------|-------------------------|----------------------------------------|--------------------|------------------|-------------------------------|--------------------|--------------------------------------------------|
| SNP_48850_A_10142680 | NC_021166.1    | Ca_Kabuli_Chr07 | 10142680                | CC                                     | TT                 | TT               | INTERGENIC                    |                    |                                                  |
| SNP_48851_A_10144061 | NC_021166.1    | Ca_Kabuli_Chr07 | 10144061                | TT                                     | GG                 | GG               | INTERGENIC                    |                    |                                                  |
| SNP_48852_A_10144232 | NC_021166.1    | Ca_Kabuli_Chr07 | 10144232                | GG                                     | TT                 | TT               | INTERGENIC                    |                    |                                                  |
| SNP_48853_A_10144256 | NC_021166.1    | Ca_Kabuli_Chr07 | 10144256                | CC                                     | TT                 | TT               | INTERGENIC                    |                    |                                                  |
| SNP_48854_A_10144313 | NC_021166.1    | Ca_Kabuli_Chr07 | 10144313                | TT                                     | GG                 | GG               | INTERGENIC                    |                    |                                                  |
| SNP_48855_A_10144396 | NC_021166.1    | Ca_Kabuli_Chr07 | 10144396                | TT                                     | GG                 | GG               | INTERGENIC                    |                    |                                                  |
| SNP_48856_A_10145391 | NC_021166.1    | Ca_Kabuli_Chr07 | 10145391                | CC                                     | TT                 | TT               | INTERGENIC                    |                    |                                                  |
| SNP_48857_A_10145444 | NC_021166.1    | Ca_Kabuli_Chr07 | 10145444                | AA                                     | GG                 | GG               | INTERGENIC                    |                    |                                                  |
| SNP_48858_A_10145452 | NC_021166.1    | Ca_Kabuli_Chr07 | 10145452                | TT                                     | AA                 | AA               | INTERGENIC                    |                    |                                                  |
| SNP_48859_A_10146081 | NC_021166.1    | Ca_Kabuli_Chr07 | 10146081                | CC                                     | AA                 | AA               | INTERGENIC                    |                    |                                                  |
| SNP_48860_A_10146098 | NC_021166.1    | Ca_Kabuli_Chr07 | 10146098                | TT                                     | AA                 | AA               | INTERGENIC                    |                    |                                                  |
| SNP_48861_A_10146141 | NC_021166.1    | Ca_Kabuli_Chr07 | 10146141                | AA                                     | GG                 | GG               | INTERGENIC                    |                    |                                                  |
| SNP_48862_A_10146380 | NC_021166.1    | Ca_Kabuli_Chr07 | 10146380                | GG                                     | AA                 | AA               | INTERGENIC                    |                    |                                                  |
| SNP_48863_A_10146404 | NC_021166.1    | Ca_Kabuli_Chr07 | 10146404                | TT                                     | AA                 | AA               | INTERGENIC                    |                    |                                                  |
| SNP_48864_A_10146438 | NC_021166.1    | Ca_Kabuli_Chr07 | 10146438                | CC                                     | TT                 | TT               | INTERGENIC                    |                    |                                                  |
| SNP_48865_A_10153048 | NC_021166.1    | Ca_Kabuli_Chr07 | 10153048                | CC                                     | TT                 | TT               | URR                           | 101494843          | ubiquitin carboxyl-terminal hydrolase isozyme L3 |
| SNP_48866_A_10156606 | NC_021166.1    | Ca_Kabuli_Chr07 | 10156606                | AA                                     | GG                 | GG               | INTRON                        | 101495172          | methylglutaconyl-CoA hydratase, mitochondrial    |
| SNP_48867_A_10158547 | NC_021166.1    | Ca_Kabuli_Chr07 | 10158547                | AA                                     | GG                 | GG               | URR                           | 101495172          | methylglutaconyl-CoA hydratase, mitochondrial    |
| SNP_48868_A_10158744 | NC_021166.1    | Ca_Kabuli_Chr07 | 10158744                | TT                                     | CC                 | CC               | URR                           | 101495172          | methylglutaconyl-CoA hydratase, mitochondrial    |
| SNP_48869_A_10158745 | NC_021166.1    | Ca_Kabuli_Chr07 | 10158745                | GG                                     | AA                 | AA               | URR                           | 101495172          | methylglutaconyl-CoA hydratase, mitochondrial    |
| SNP_48870_A_10158903 | NC_021166.1    | Ca_Kabuli_Chr07 | 10158903                | TT                                     | AA                 | AA               | URR                           | 101495172          | methylglutaconyl-CoA hydratase, mitochondrial    |
| SNP_48871_A_10158959 | NC_021166.1    | Ca_Kabuli_Chr07 | 10158959                | CC                                     | AA                 | AA               | URR                           | 101495172          | methylglutaconyl-CoA hydratase, mitochondrial    |



| SNPs IDs             | Chromosome IDs | Chromosomes     | Physical positions (bp) | CDC Frontier genome (Reference genome) | (Pusa 1103 & HPNB) | (ILWC 46 & LPNB) | Sequence Components of genome | Gene accession IDs | Putative functions                            |
|----------------------|----------------|-----------------|-------------------------|----------------------------------------|--------------------|------------------|-------------------------------|--------------------|-----------------------------------------------|
| SNP_48872_A_10159079 | NC_021166.1    | Ca_Kabuli_Chr07 | 10159079                | CC                                     | AA                 | AA               | URR                           | 101495172          | methylglutaconyl-CoA hydratase, mitochondrial |
| SNP_48873_A_10159095 | NC_021166.1    | Ca_Kabuli_Chr07 | 10159095                | AA                                     | GG                 | GG               | URR                           | 101495172          | methylglutaconyl-CoA hydratase, mitochondrial |
| SNP_48874_A_10159096 | NC_021166.1    | Ca_Kabuli_Chr07 | 10159096                | TT                                     | AA                 | AA               | URR                           | 101495172          | methylglutaconyl-CoA hydratase, mitochondrial |
| SNP_48875_A_10159214 | NC_021166.1    | Ca_Kabuli_Chr07 | 10159214                | TT                                     | CC                 | CC               | URR                           | 101495172          | methylglutaconyl-CoA hydratase, mitochondrial |
| SNP_48876_A_10159399 | NC_021166.1    | Ca_Kabuli_Chr07 | 10159399                | TT                                     | CC                 | CC               | URR                           | 101495172          | methylglutaconyl-CoA hydratase, mitochondrial |
| SNP_48877_A_10161119 | NC_021166.1    | Ca_Kabuli_Chr07 | 10161119                | AA                                     | CC                 | CC               | INTERGENIC                    |                    |                                               |
| SNP_48878_A_10161130 | NC_021166.1    | Ca_Kabuli_Chr07 | 10161130                | GG                                     | AA                 | AA               | INTERGENIC                    |                    |                                               |
| SNP_48879_A_10161142 | NC_021166.1    | Ca_Kabuli_Chr07 | 10161142                | TT                                     | CC                 | CC               | INTERGENIC                    |                    |                                               |
| SNP_48880_A_10173432 | NC_021166.1    | Ca_Kabuli_Chr07 | 10173432                | TT                                     | GG                 | GG               | INTERGENIC                    |                    |                                               |
| SNP_48881_A_10186162 | NC_021166.1    | Ca_Kabuli_Chr07 | 10186162                | CC                                     | TT                 | TT               | INTERGENIC                    |                    |                                               |
| SNP_48882_A_10189629 | NC_021166.1    | Ca_Kabuli_Chr07 | 10189629                | TT                                     | CC                 | CC               | INTERGENIC                    |                    |                                               |
| SNP_48883_A_10189694 | NC_021166.1    | Ca_Kabuli_Chr07 | 10189694                | CC                                     | TT                 | TT               | INTERGENIC                    |                    |                                               |
| SNP_48885_A_10192784 | NC_021166.1    | Ca_Kabuli_Chr07 | 10192784                | GG                                     | AA                 | AA               | INTERGENIC                    |                    |                                               |
| SNP_48886_A_10192788 | NC_021166.1    | Ca_Kabuli_Chr07 | 10192788                | CC                                     | TT                 | TT               | INTERGENIC                    |                    |                                               |
| SNP_48887_A_10193706 | NC_021166.1    | Ca_Kabuli_Chr07 | 10193706                | CC                                     | TT                 | TT               | INTERGENIC                    |                    |                                               |
| SNP_48888_A_10193717 | NC_021166.1    | Ca_Kabuli_Chr07 | 10193717                | CC                                     | TT                 | TT               | INTERGENIC                    |                    |                                               |
| SNP_48889_A_10193730 | NC_021166.1    | Ca_Kabuli_Chr07 | 10193730                | CC                                     | TT                 | TT               | INTERGENIC                    |                    |                                               |
| SNP_48890_A_10193993 | NC_021166.1    | Ca_Kabuli_Chr07 | 10193993                | AA                                     | GG                 | GG               | INTERGENIC                    |                    |                                               |
| SNP_48892_A_10194021 | NC_021166.1    | Ca_Kabuli_Chr07 | 10194021                | CC                                     | TT                 | TT               | INTERGENIC                    |                    |                                               |
| SNP_48893_A_10200912 | NC_021166.1    | Ca_Kabuli_Chr07 | 10200912                | TT                                     | CC                 | CC               | URR                           | 101495709          | phospholipase A1-1beta2, chloroplastic-like   |
| SNP_48894_A_10200966 | NC_021166.1    | Ca_Kabuli_Chr07 | 10200966                | GG                                     | AA                 | AA               | URR                           | 101495709          | phospholipase A1-1beta2, chloroplastic-like   |
| SNP_48895_A_10201438 | NC_021166.1    | Ca_Kabuli_Chr07 | 10201438                | GG                                     | AA                 | AA               | URR                           | 101495709          | phospholipase A1-1beta2, chloroplastic-like   |

| SNPs IDs             | Chromosome IDs | Chromosomes     | Physical positions (bp) | CDC Frontier genome (Reference genome) | (Pusa 1103 & HPNB) | (ILWC 46 & LPNB) | Sequence Components of genome | Gene accession IDs | Putative functions                                                   |
|----------------------|----------------|-----------------|-------------------------|----------------------------------------|--------------------|------------------|-------------------------------|--------------------|----------------------------------------------------------------------|
| SNP_48897_A_10204305 | NC_021166.1    | Ca_Kabuli_Chr07 | 10204305                | TT                                     | AA                 | AA               | INTERGENIC                    |                    |                                                                      |
| SNP_48898_A_10204322 | NC_021166.1    | Ca_Kabuli_Chr07 | 10204322                | TT                                     | AA                 | AA               | INTERGENIC                    |                    |                                                                      |
| SNP_48899_A_10207546 | NC_021166.1    | Ca_Kabuli_Chr07 | 10207546                | AA                                     | GG                 | GG               | INTERGENIC                    |                    |                                                                      |
| SNP_48901_A_10209834 | NC_021166.1    | Ca_Kabuli_Chr07 | 10209834                | AA                                     | TT                 | TT               | URR                           | 101496032          | pentatricopeptide repeat-containing protein At4g16835, mitochondrial |
| SNP_48902_A_10211323 | NC_021166.1    | Ca_Kabuli_Chr07 | 10211323                | GG                                     | AA                 | AA               | INTERGENIC                    |                    |                                                                      |
| SNP_48905_A_10214436 | NC_021166.1    | Ca_Kabuli_Chr07 | 10214436                | GG                                     | AA                 | AA               | URR                           | 101496365          | ras-related protein RABD2c-like                                      |
| SNP_48906_A_10214443 | NC_021166.1    | Ca_Kabuli_Chr07 | 10214443                | TT                                     | CC                 | CC               | URR                           | 101496365          | ras-related protein RABD2c-like                                      |
| SNP_48907_A_10214461 | NC_021166.1    | Ca_Kabuli_Chr07 | 10214461                | AA                                     | CC                 | CC               | URR                           | 101496365          | ras-related protein RABD2c-like                                      |
| SNP_48908_A_10214462 | NC_021166.1    | Ca_Kabuli_Chr07 | 10214462                | AA                                     | GG                 | GG               | URR                           | 101496365          | ras-related protein RABD2c-like                                      |
| SNP_48909_A_10214492 | NC_021166.1    | Ca_Kabuli_Chr07 | 10214492                | TT                                     | CC                 | CC               | URR                           | 101496365          | ras-related protein RABD2c-like                                      |
| SNP_48910_A_10214512 | NC_021166.1    | Ca_Kabuli_Chr07 | 10214512                | GG                                     | AA                 | AA               | URR                           | 101496365          | ras-related protein RABD2c-like                                      |
| SNP_48911_A_10214691 | NC_021166.1    | Ca_Kabuli_Chr07 | 10214691                | GG                                     | AA                 | AA               | URR                           | 101496365          | ras-related protein RABD2c-like                                      |
| SNP_48912_A_10218314 | NC_021166.1    | Ca_Kabuli_Chr07 | 10218314                | CC                                     | TT                 | TT               | INTRON                        | 101496696          | putative glycerol-3-phosphate transporter 4                          |
| SNP_48913_A_10218319 | NC_021166.1    | Ca_Kabuli_Chr07 | 10218319                | TT                                     | GG                 | GG               | INTRON                        | 101496696          | putative glycerol-3-phosphate transporter 4                          |
| SNP_48914_A_10218676 | NC_021166.1    | Ca_Kabuli_Chr07 | 10218676                | CC                                     | TT                 | TT               | INTRON                        | 101496696          | putative glycerol-3-phosphate transporter 4                          |
| SNP_48915_A_10220327 | NC_021166.1    | Ca_Kabuli_Chr07 | 10220327                | AA                                     | CC                 | CC               | URR                           | 101496696          | putative glycerol-3-phosphate transporter 4                          |
| SNP_48916_A_10220408 | NC_021166.1    | Ca_Kabuli_Chr07 | 10220408                | TT                                     | CC                 | CC               | URR                           | 101496696          | putative glycerol-3-phosphate transporter 4                          |
| SNP_48917_A_10220410 | NC_021166.1    | Ca_Kabuli_Chr07 | 10220410                | TT                                     | CC                 | CC               | URR                           | 101496696          | putative glycerol-3-phosphate transporter 4                          |
| SNP_48918_A_10220754 | NC_021166.1    | Ca_Kabuli_Chr07 | 10220754                | AA                                     | GG                 | GG               | URR                           | 101496696          | putative glycerol-3-phosphate transporter 4                          |
| SNP_48919_A_10220799 | NC_021166.1    | Ca_Kabuli_Chr07 | 10220799                | AA                                     | GG                 | GG               | URR                           | 101496696          | putative glycerol-3-phosphate transporter 4                          |
| SNP_48920_A_10221994 | NC_021166.1    | Ca_Kabuli_Chr07 | 10221994                | GG                                     | AA                 | AA               | INTERGENIC                    |                    |                                                                      |
| SNP_48921_A_10222393 | NC_021166.1    | Ca_Kabuli_Chr07 | 10222393                | TT                                     | CC                 | CC               | DRR                           | 101497009          | vesicle-associated protein 2-1-like                                  |

| SNPs IDs             | Chromosome IDs | Chromosomes     | Physical positions (bp) | CDC Frontier genome (Reference genome) | (Pusa 1103 & HPNB) | (ILWC 46 & LPNB) | Sequence Components of genome | Gene accession IDs | Putative functions                  |
|----------------------|----------------|-----------------|-------------------------|----------------------------------------|--------------------|------------------|-------------------------------|--------------------|-------------------------------------|
| SNP_48922_A_10222543 | NC_021166.1    | Ca_Kabuli_Chr07 | 10222543                | TT                                     | CC                 | CC               | DRR                           | 101497009          | vesicle-associated protein 2-1-like |
| SNP_48923_A_10224256 | NC_021166.1    | Ca_Kabuli_Chr07 | 10224256                | GG                                     | AA                 | AA               | INTRON                        | 101497009          | vesicle-associated protein 2-1-like |
| SNP_48925_A_10226259 | NC_021166.1    | Ca_Kabuli_Chr07 | 10226259                | CC                                     | TT                 | TT               | INTRON                        | 101497009          | vesicle-associated protein 2-1-like |
| SNP_48926_A_10227292 | NC_021166.1    | Ca_Kabuli_Chr07 | 10227292                | TT                                     | CC                 | CC               | INTRON                        | 101497009          | vesicle-associated protein 2-1-like |
| SNP_48927_A_10229759 | NC_021166.1    | Ca_Kabuli_Chr07 | 10229759                | GG                                     | AA                 | AA               | DRR                           | 101493682          | bax inhibitor 1-like                |
| SNP_48928_A_10229910 | NC_021166.1    | Ca_Kabuli_Chr07 | 10229910                | GG                                     | AA                 | AA               | DRR                           | 101493682          | bax inhibitor 1-like                |
| SNP_48929_A_10229930 | NC_021166.1    | Ca_Kabuli_Chr07 | 10229930                | TT                                     | CC                 | CC               | DRR                           | 101493682          | bax inhibitor 1-like                |
| SNP_48930_A_10230029 | NC_021166.1    | Ca_Kabuli_Chr07 | 10230029                | CC                                     | TT                 | TT               | DRR                           | 101493682          | bax inhibitor 1-like                |
| SNP_48931_A_10230083 | NC_021166.1    | Ca_Kabuli_Chr07 | 10230083                | AA                                     | CC                 | CC               | DRR                           | 101493682          | bax inhibitor 1-like                |
| SNP_48932_A_10230099 | NC_021166.1    | Ca_Kabuli_Chr07 | 10230099                | GG                                     | AA                 | AA               | DRR                           | 101493682          | bax inhibitor 1-like                |
| SNP_48933_A_10230194 | NC_021166.1    | Ca_Kabuli_Chr07 | 10230194                | AA                                     | GG                 | GG               | DRR                           | 101493682          | bax inhibitor 1-like                |
| SNP_48934_A_10232520 | NC_021166.1    | Ca_Kabuli_Chr07 | 10232520                | GG                                     | AA                 | AA               | INTERGENIC                    |                    |                                     |
| SNP_48935_A_10233678 | NC_021166.1    | Ca_Kabuli_Chr07 | 10233678                | CC                                     | TT                 | TT               | URR                           | 101493682          | bax inhibitor 1-like                |
| SNP_48936_A_10233692 | NC_021166.1    | Ca_Kabuli_Chr07 | 10233692                | GG                                     | AA                 | AA               | URR                           | 101493682          | bax inhibitor 1-like                |
| SNP_48937_A_10233759 | NC_021166.1    | Ca_Kabuli_Chr07 | 10233759                | CC                                     | TT                 | TT               | URR                           | 101493682          | bax inhibitor 1-like                |
| SNP_48938_A_10238806 | NC_021166.1    | Ca_Kabuli_Chr07 | 10238806                | CC                                     | AA                 | AA               | INTERGENIC                    |                    |                                     |
| SNP_48939_A_10239073 | NC_021166.1    | Ca_Kabuli_Chr07 | 10239073                | CC                                     | TT                 | TT               | INTERGENIC                    |                    |                                     |
| SNP_48940_A_10240989 | NC_021166.1    | Ca_Kabuli_Chr07 | 10240989                | TT                                     | CC                 | CC               | INTERGENIC                    |                    |                                     |
| SNP_48941_A_10243400 | NC_021166.1    | Ca_Kabuli_Chr07 | 10243400                | AA                                     | GG                 | GG               | INTERGENIC                    |                    |                                     |
| SNP_48942_A_10243420 | NC_021166.1    | Ca_Kabuli_Chr07 | 10243420                | CC                                     | TT                 | TT               | INTERGENIC                    |                    |                                     |
| SNP_48943_A_10247414 | NC_021166.1    | Ca_Kabuli_Chr07 | 10247414                | AA                                     | GG                 | GG               | INTERGENIC                    |                    |                                     |
| SNP_48945_A_10248323 | NC_021166.1    | Ca_Kabuli_Chr07 | 10248323                | TT                                     | CC                 | CC               | DRR                           | 101497335          | GATA transcription factor 26-like   |

| SNPs IDs             | Chromosome IDs | Chromosomes     | Physical positions (bp) | CDC Frontier genome (Reference genome) | (Pusa 1103 & HPNB) | (ILWC 46 & LPNB) | Sequence Components of genome | Gene accession IDs | Putative functions                |
|----------------------|----------------|-----------------|-------------------------|----------------------------------------|--------------------|------------------|-------------------------------|--------------------|-----------------------------------|
| SNP_48946_A_10249237 | NC_021166.1    | Ca_Kabuli_Chr07 | 10249237                | AA                                     | TT                 | TT               | URR                           | 101497335          | GATA transcription factor 26-like |
| SNP_48947_A_10251101 | NC_021166.1    | Ca_Kabuli_Chr07 | 10251101                | AA                                     | TT                 | TT               | INTRON                        | 101497335          | GATA transcription factor 26-like |
| SNP_48948_A_10252890 | NC_021166.1    | Ca_Kabuli_Chr07 | 10252890                | CC                                     | TT                 | TT               | INTRON                        | 101497335          | GATA transcription factor 26-like |
| SNP_48949_A_10256571 | NC_021166.1    | Ca_Kabuli_Chr07 | 10256571                | CC                                     | TT                 | TT               | URR                           | 101497335          | GATA transcription factor 26-like |
| SNP_48950_A_10258494 | NC_021166.1    | Ca_Kabuli_Chr07 | 10258494                | CC                                     | TT                 | TT               | INTERGENIC                    |                    |                                   |
| SNP_48951_A_10258523 | NC_021166.1    | Ca_Kabuli_Chr07 | 10258523                | TT                                     | AA                 | AA               | INTERGENIC                    |                    |                                   |
| SNP_48952_A_10258753 | NC_021166.1    | Ca_Kabuli_Chr07 | 10258753                | AA                                     | CC                 | CC               | INTERGENIC                    |                    |                                   |
| SNP_48953_A_10258933 | NC_021166.1    | Ca_Kabuli_Chr07 | 10258933                | GG                                     | TT                 | TT               | INTERGENIC                    |                    |                                   |
| SNP_48954_A_10258951 | NC_021166.1    | Ca_Kabuli_Chr07 | 10258951                | TT                                     | GG                 | GG               | INTERGENIC                    |                    |                                   |
| SNP_48955_A_10259525 | NC_021166.1    | Ca_Kabuli_Chr07 | 10259525                | AA                                     | GG                 | GG               | INTERGENIC                    |                    |                                   |
| SNP_48956_A_10260152 | NC_021166.1    | Ca_Kabuli_Chr07 | 10260152                | TT                                     | AA                 | AA               | INTERGENIC                    |                    |                                   |
| SNP_48958_A_10260595 | NC_021166.1    | Ca_Kabuli_Chr07 | 10260595                | CC                                     | TT                 | TT               | INTERGENIC                    |                    |                                   |
| SNP_48959_A_10274121 | NC_021166.1    | Ca_Kabuli_Chr07 | 10274121                | GG                                     | AA                 | AA               | INTERGENIC                    |                    |                                   |
| SNP_48960_A_10289888 | NC_021166.1    | Ca_Kabuli_Chr07 | 10289888                | GG                                     | AA                 | AA               | DRR                           | 101498323          | uncharacterized LOC101498323      |
| SNP_48961_A_10289893 | NC_021166.1    | Ca_Kabuli_Chr07 | 10289893                | CC                                     | AA                 | AA               | DRR                           | 101498323          | uncharacterized LOC101498323      |
| SNP_48962_A_10289901 | NC_021166.1    | Ca_Kabuli_Chr07 | 10289901                | GG                                     | AA                 | AA               | DRR                           | 101498323          | uncharacterized LOC101498323      |
| SNP_48964_A_10297547 | NC_021166.1    | Ca_Kabuli_Chr07 | 10297547                | CC                                     | TT                 | TT               | URR                           | 101498663          | glutamate dehydrogenase A-like    |
| SNP_48965_A_10297550 | NC_021166.1    | Ca_Kabuli_Chr07 | 10297550                | TT                                     | GG                 | GG               | URR                           | 101498663          | glutamate dehydrogenase A-like    |
| SNP_48966_A_10297748 | NC_021166.1    | Ca_Kabuli_Chr07 | 10297748                | GG                                     | AA                 | AA               | URR                           | 101498663          | glutamate dehydrogenase A-like    |
| SNP_48967_A_10297768 | NC_021166.1    | Ca_Kabuli_Chr07 | 10297768                | AA                                     | GG                 | GG               | URR                           | 101498663          | glutamate dehydrogenase A-like    |
| SNP_48968_A_10298640 | NC_021166.1    | Ca_Kabuli_Chr07 | 10298640                | CC                                     | TT                 | TT               | URR                           | 101498663          | glutamate dehydrogenase A-like    |
| SNP_48969_A_10298644 | NC_021166.1    | Ca_Kabuli_Chr07 | 10298644                | GG                                     | AA                 | AA               | URR                           | 101498663          | glutamate dehydrogenase A-like    |

| SNPs IDs             | Chromosome IDs | Chromosomes     | Physical positions (bp) | CDC Frontier genome (Reference genome) | (Pusa 1103 & HPNB) | (ILWC 46 & LPNB) | Sequence Components of genome | Gene accession IDs | Putative functions                                    |
|----------------------|----------------|-----------------|-------------------------|----------------------------------------|--------------------|------------------|-------------------------------|--------------------|-------------------------------------------------------|
| SNP_48970_A_10298726 | NC_021166.1    | Ca_Kabuli_Chr07 | 10298726                | CC                                     | TT                 | TT               | URR                           | 101498663          | glutamate dehydrogenase A-like                        |
| SNP_48971_A_10298735 | NC_021166.1    | Ca_Kabuli_Chr07 | 10298735                | AA                                     | CC                 | CC               | URR                           | 101498663          | glutamate dehydrogenase A-like                        |
| SNP_48972_A_10302256 | NC_021166.1    | Ca_Kabuli_Chr07 | 10302256                | TT                                     | GG                 | GG               | INTERGENIC                    |                    |                                                       |
| SNP_48973_A_10308022 | NC_021166.1    | Ca_Kabuli_Chr07 | 10308022                | CC                                     | TT                 | TT               | DRR                           | 101498987          | uncharacterized LOC101498987                          |
| SNP_48974_A_10313186 | NC_021166.1    | Ca_Kabuli_Chr07 | 10313186                | TT                                     | CC                 | CC               | INTRON                        | 101498987          | uncharacterized LOC101498987                          |
| SNP_48976_A_10317447 | NC_021166.1    | Ca_Kabuli_Chr07 | 10317447                | GG                                     | AA                 | AA               | INTRON                        | 101498987          | uncharacterized LOC101498987                          |
| SNP_48977_A_10324764 | NC_021166.1    | Ca_Kabuli_Chr07 | 10324764                | GG                                     | AA                 | AA               | INTRON                        | 101498987          | uncharacterized LOC101498987                          |
| SNP_48978_A_10325896 | NC_021166.1    | Ca_Kabuli_Chr07 | 10325896                | GG                                     | CC                 | CC               | INTRON                        | 101498987          | uncharacterized LOC101498987                          |
| SNP_48979_A_10326759 | NC_021166.1    | Ca_Kabuli_Chr07 | 10326759                | AA                                     | GG                 | GG               | INTRON                        | 101498987          | uncharacterized LOC101498987                          |
| SNP_48981_A_10340265 | NC_021166.1    | Ca_Kabuli_Chr07 | 10340265                | AA                                     | GG                 | GG               | URR                           | 101498987          | uncharacterized LOC101498987                          |
| SNP_48982_A_10340305 | NC_021166.1    | Ca_Kabuli_Chr07 | 10340305                | GG                                     | AA                 | AA               | URR                           | 101498987          | uncharacterized LOC101498987                          |
| SNP_48984_A_10346852 | NC_021166.1    | Ca_Kabuli_Chr07 | 10346852                | CC                                     | TT                 | TT               | INTRON                        | 101499522          | (S)-ureidoglycine aminohydrolase                      |
| SNP_48986_A_10355815 | NC_021166.1    | Ca_Kabuli_Chr07 | 10355815                | TT                                     | AA                 | AA               | INTERGENIC                    |                    |                                                       |
| SNP_48987_A_10361670 | NC_021166.1    | Ca_Kabuli_Chr07 | 10361670                | CC                                     | TT                 | TT               | SYNONYMOUS_CODING             | 101499822          | cationic amino acid transporter 6, chloroplastic-like |
| SNP_48988_A_10365341 | NC_021166.1    | Ca_Kabuli_Chr07 | 10365341                | AA                                     | GG                 | GG               | URR                           | 101499822          | cationic amino acid transporter 6, chloroplastic-like |
| SNP_48989_A_10365410 | NC_021166.1    | Ca_Kabuli_Chr07 | 10365410                | TT                                     | GG                 | GG               | URR                           | 101499822          | cationic amino acid transporter 6, chloroplastic-like |
| SNP_48990_A_10365427 | NC_021166.1    | Ca_Kabuli_Chr07 | 10365427                | AA                                     | GG                 | GG               | URR                           | 101499822          | cationic amino acid transporter 6, chloroplastic-like |
| SNP_48991_A_10365799 | NC_021166.1    | Ca_Kabuli_Chr07 | 10365799                | AA                                     | CC                 | CC               | URR                           | 101499822          | cationic amino acid transporter 6, chloroplastic-like |
| SNP_48992_A_10367953 | NC_021166.1    | Ca_Kabuli_Chr07 | 10367953                | TT                                     | AA                 | AA               | INTERGENIC                    |                    |                                                       |
| SNP_48993_A_10368626 | NC_021166.1    | Ca_Kabuli_Chr07 | 10368626                | AA                                     | TT                 | TT               | INTERGENIC                    |                    |                                                       |
| SNP_48994_A_10369025 | NC_021166.1    | Ca_Kabuli_Chr07 | 10369025                | CC                                     | TT                 | TT               | INTERGENIC                    |                    |                                                       |
| SNP_48996_A_10389367 | NC_021166.1    | Ca_Kabuli_Chr07 | 10389367                | AA                                     | GG                 | GG               | DRR                           | 101500472          | serine/threonine-protein kinase SAPK3-like            |

| SNPs IDs             | Chromosome IDs | Chromosomes     | Physical positions (bp) | CDC Frontier genome (Reference genome) | (Pusa 1103 & HPNB) | (ILWC 46 & LPNB) | Sequence Components of genome | Gene accession IDs | Putative functions                         |
|----------------------|----------------|-----------------|-------------------------|----------------------------------------|--------------------|------------------|-------------------------------|--------------------|--------------------------------------------|
| SNP_48997_A_10389450 | NC_021166.1    | Ca_Kabuli_Chr07 | 10389450                | AA                                     | GG                 | GG               | DRR                           | 101500472          | serine/threonine-protein kinase SAPK3-like |
| SNP_48998_A_10389478 | NC_021166.1    | Ca_Kabuli_Chr07 | 10389478                | TT                                     | GG                 | GG               | DRR                           | 101500472          | serine/threonine-protein kinase SAPK3-like |
| SNP_48999_A_10391691 | NC_021166.1    | Ca_Kabuli_Chr07 | 10391691                | GG                                     | AA                 | AA               | INTERGENIC                    |                    |                                            |
| SNP_49000_A_10391706 | NC_021166.1    | Ca_Kabuli_Chr07 | 10391706                | CC                                     | TT                 | TT               | INTERGENIC                    |                    |                                            |
| SNP_49001_A_10391899 | NC_021166.1    | Ca_Kabuli_Chr07 | 10391899                | GG                                     | AA                 | AA               | INTERGENIC                    |                    |                                            |
| SNP_49002_A_10393029 | NC_021166.1    | Ca_Kabuli_Chr07 | 10393029                | GG                                     | CC                 | CC               | INTERGENIC                    |                    |                                            |
| SNP_49004_A_10393482 | NC_021166.1    | Ca_Kabuli_Chr07 | 10393482                | GG                                     | CC                 | CC               | URR                           | 101500472          | serine/threonine-protein kinase SAPK3-like |
| SNP_49005_A_10393810 | NC_021166.1    | Ca_Kabuli_Chr07 | 10393810                | CC                                     | TT                 | TT               | URR                           | 101500472          | serine/threonine-protein kinase SAPK3-like |
| SNP_49006_A_10393851 | NC_021166.1    | Ca_Kabuli_Chr07 | 10393851                | CC                                     | TT                 | TT               | URR                           | 101500472          | serine/threonine-protein kinase SAPK3-like |
| SNP_49007_A_10393870 | NC_021166.1    | Ca_Kabuli_Chr07 | 10393870                | TT                                     | CC                 | CC               | URR                           | 101500472          | serine/threonine-protein kinase SAPK3-like |
| SNP_49008_A_10393874 | NC_021166.1    | Ca_Kabuli_Chr07 | 10393874                | CC                                     | TT                 | TT               | URR                           | 101500472          | serine/threonine-protein kinase SAPK3-like |
| SNP_49009_A_10394778 | NC_021166.1    | Ca_Kabuli_Chr07 | 10394778                | TT                                     | CC                 | CC               | URR                           | 101500472          | serine/threonine-protein kinase SAPK3-like |
| SNP_49010_A_10394779 | NC_021166.1    | Ca_Kabuli_Chr07 | 10394779                | GG                                     | AA                 | AA               | URR                           | 101500472          | serine/threonine-protein kinase SAPK3-like |
| SNP_49011_A_10395095 | NC_021166.1    | Ca_Kabuli_Chr07 | 10395095                | GG                                     | AA                 | AA               | INTERGENIC                    |                    |                                            |
| SNP_49012_A_10395532 | NC_021166.1    | Ca_Kabuli_Chr07 | 10395532                | CC                                     | AA                 | AA               | INTERGENIC                    |                    |                                            |
| SNP_49014_A_10395637 | NC_021166.1    | Ca_Kabuli_Chr07 | 10395637                | TT                                     | GG                 | GG               | INTERGENIC                    |                    |                                            |
| SNP_49016_A_10396700 | NC_021166.1    | Ca_Kabuli_Chr07 | 10396700                | GG                                     | CC                 | CC               | INTERGENIC                    |                    |                                            |
| SNP_49017_A_10399889 | NC_021166.1    | Ca_Kabuli_Chr07 | 10399889                | CC                                     | GG                 | GG               | INTERGENIC                    |                    |                                            |
| SNP_49018_A_10402958 | NC_021166.1    | Ca_Kabuli_Chr07 | 10402958                | TT                                     | GG                 | GG               | INTERGENIC                    |                    |                                            |
| SNP_49019_A_10404160 | NC_021166.1    | Ca_Kabuli_Chr07 | 10404160                | GG                                     | TT                 | TT               | DRR                           | 101500790          | calcineurin B-like protein 1               |
| SNP_49021_A_10408838 | NC_021166.1    | Ca_Kabuli_Chr07 | 10408838                | TT                                     | CC                 | CC               | URR                           | 101500790          | calcineurin B-like protein 1               |
| SNP_49022_A_10409297 | NC_021166.1    | Ca_Kabuli_Chr07 | 10409297                | GG                                     | AA                 | AA               | DRR                           | 101501109          | coiled-coil domain-containing protein 97   |

| SNPs IDs             | Chromosome IDs | Chromosomes     | Physical positions (bp) | CDC Frontier genome | (Reference genome) | (Pusa 1103 & HPNB) | (ILWC 46 & LPNB) | Sequence Components of genome | Gene accession IDs | Putative functions                                    |
|----------------------|----------------|-----------------|-------------------------|---------------------|--------------------|--------------------|------------------|-------------------------------|--------------------|-------------------------------------------------------|
| SNP_49023_A_10411338 | NC_021166.1    | Ca_Kabuli_Chr07 | 10411338                | GG                  |                    | TT                 | TT               | INTERGENIC                    |                    |                                                       |
| SNP_49024_A_10413327 | NC_021166.1    | Ca_Kabuli_Chr07 | 10413327                | GG                  |                    | TT                 | TT               | INTRON                        | 101501109          | coiled-coil domain-containing protein 97              |
| SNP_49026_A_10416277 | NC_021166.1    | Ca_Kabuli_Chr07 | 10416277                | GG                  |                    | AA                 | AA               | INTERGENIC                    |                    |                                                       |
| SNP_49027_A_10416300 | NC_021166.1    | Ca_Kabuli_Chr07 | 10416300                | GG                  |                    | AA                 | AA               | INTERGENIC                    |                    |                                                       |
| SNP_49028_A_10420796 | NC_021166.1    | Ca_Kabuli_Chr07 | 10420796                | TT                  |                    | CC                 | CC               | SYNONYMOUS_CODING             | 101501642          | pentatricopeptide repeat-containing protein At4g17616 |
| SNP_49029_A_10421133 | NC_021166.1    | Ca_Kabuli_Chr07 | 10421133                | AA                  |                    | GG                 | GG               | INTRON                        | 101501642          | pentatricopeptide repeat-containing protein At4g17616 |
| SNP_49030_A_10423901 | NC_021166.1    | Ca_Kabuli_Chr07 | 10423901                | TT                  |                    | GG                 | GG               | URR                           | 101501642          | pentatricopeptide repeat-containing protein At4g17616 |
| SNP_49031_A_10423908 | NC_021166.1    | Ca_Kabuli_Chr07 | 10423908                | AA                  |                    | CC                 | CC               | URR                           | 101501642          | pentatricopeptide repeat-containing protein At4g17616 |
| SNP_49032_A_10423919 | NC_021166.1    | Ca_Kabuli_Chr07 | 10423919                | AA                  |                    | TT                 | TT               | URR                           | 101501642          | pentatricopeptide repeat-containing protein At4g17616 |
| SNP_49034_A_10424215 | NC_021166.1    | Ca_Kabuli_Chr07 | 10424215                | TT                  |                    | CC                 | CC               | URR                           | 101501642          | pentatricopeptide repeat-containing protein At4g17616 |
| SNP_49035_A_10432943 | NC_021166.1    | Ca_Kabuli_Chr07 | 10432943                | TT                  |                    | GG                 | GG               | INTERGENIC                    |                    |                                                       |
| SNP_49036_A_10432960 | NC_021166.1    | Ca_Kabuli_Chr07 | 10432960                | TT                  |                    | AA                 | AA               | INTERGENIC                    |                    |                                                       |
| SNP_49037_A_10433500 | NC_021166.1    | Ca_Kabuli_Chr07 | 10433500                | CC                  |                    | TT                 | TT               | DRR                           | 101501953          | casein kinase II subunit beta-like                    |
| SNP_49038_A_10433501 | NC_021166.1    | Ca_Kabuli_Chr07 | 10433501                | TT                  |                    | CC                 | CC               | DRR                           | 101501953          | casein kinase II subunit beta-like                    |
| SNP_49039_A_10433916 | NC_021166.1    | Ca_Kabuli_Chr07 | 10433916                | CC                  |                    | GG                 | GG               | DRR                           | 101501953          | casein kinase II subunit beta-like                    |
| SNP_49040_A_10433942 | NC_021166.1    | Ca_Kabuli_Chr07 | 10433942                | TT                  |                    | CC                 | CC               | DRR                           | 101501953          | casein kinase II subunit beta-like                    |
| SNP_49041_A_10433970 | NC_021166.1    | Ca_Kabuli_Chr07 | 10433970                | CC                  |                    | AA                 | AA               | DRR                           | 101501953          | casein kinase II subunit beta-like                    |
| SNP_49042_A_10434031 | NC_021166.1    | Ca_Kabuli_Chr07 | 10434031                | CC                  |                    | TT                 | TT               | DRR                           | 101501953          | casein kinase II subunit beta-like                    |
| SNP_49043_A_10434058 | NC_021166.1    | Ca_Kabuli_Chr07 | 10434058                | CC                  |                    | TT                 | TT               | DRR                           | 101501953          | casein kinase II subunit beta-like                    |
| SNP_49044_A_10434059 | NC_021166.1    | Ca_Kabuli_Chr07 | 10434059                | CC                  |                    | GG                 | GG               | DRR                           | 101501953          | casein kinase II subunit beta-like                    |
| SNP_49046_A_10441535 | NC_021166.1    | Ca_Kabuli_Chr07 | 10441535                | GG                  |                    | TT                 | TT               | INTERGENIC                    |                    |                                                       |
| SNP_49047_A_10441536 | NC_021166.1    | Ca_Kabuli_Chr07 | 10441536                | CC                  |                    | AA                 | AA               | INTERGENIC                    |                    |                                                       |

| SNPs IDs             | Chromosome IDs | Chromosomes     | Physical positions (bp) | CDC Frontier genome (Reference genome) | (Pusa 1103 & HPNB) | (ILWC 46 & LPNB) | Sequence Components of genome | Gene accession IDs | Putative functions           |
|----------------------|----------------|-----------------|-------------------------|----------------------------------------|--------------------|------------------|-------------------------------|--------------------|------------------------------|
| SNP_49048_A_10443051 | NC_021166.1    | Ca_Kabuli_Chr07 | 10443051                | CC                                     | AA                 | AA               | URR                           | 101502798          | 60S ribosomal protein L37a   |
| SNP_49049_A_10443064 | NC_021166.1    | Ca_Kabuli_Chr07 | 10443064                | TT                                     | CC                 | CC               | URR                           | 101502798          | 60S ribosomal protein L37a   |
| SNP_49050_A_10443194 | NC_021166.1    | Ca_Kabuli_Chr07 | 10443194                | AA                                     | TT                 | TT               | URR                           | 101502798          | 60S ribosomal protein L37a   |
| SNP_49051_A_10443214 | NC_021166.1    | Ca_Kabuli_Chr07 | 10443214                | AA                                     | CC                 | CC               | URR                           | 101502798          | 60S ribosomal protein L37a   |
| SNP_49052_A_10443747 | NC_021166.1    | Ca_Kabuli_Chr07 | 10443747                | GG                                     | AA                 | AA               | URR                           | 101502798          | 60S ribosomal protein L37a   |
| SNP_49053_A_10444172 | NC_021166.1    | Ca_Kabuli_Chr07 | 10444172                | GG                                     | AA                 | AA               | INTERGENIC                    |                    |                              |
| SNP_49054_A_10446292 | NC_021166.1    | Ca_Kabuli_Chr07 | 10446292                | CC                                     | AA                 | AA               | INTERGENIC                    |                    |                              |
| SNP_49055_A_10446775 | NC_021166.1    | Ca_Kabuli_Chr07 | 10446775                | AA                                     | CC                 | CC               | DRR                           | 101503335          | uncharacterized LOC101503335 |
| SNP_49056_A_10446808 | NC_021166.1    | Ca_Kabuli_Chr07 | 10446808                | AA                                     | CC                 | CC               | DRR                           | 101503335          | uncharacterized LOC101503335 |
| SNP_49057_A_10446821 | NC_021166.1    | Ca_Kabuli_Chr07 | 10446821                | CC                                     | TT                 | TT               | DRR                           | 101503335          | uncharacterized LOC101503335 |
| SNP_49058_A_10446826 | NC_021166.1    | Ca_Kabuli_Chr07 | 10446826                | AA                                     | CC                 | CC               | DRR                           | 101503335          | uncharacterized LOC101503335 |
| SNP_49059_A_10446830 | NC_021166.1    | Ca_Kabuli_Chr07 | 10446830                | GG                                     | AA                 | AA               | DRR                           | 101503335          | uncharacterized LOC101503335 |
| SNP_49061_A_10448360 | NC_021166.1    | Ca_Kabuli_Chr07 | 10448360                | TT                                     | AA                 | AA               | URR                           | 101503335          | uncharacterized LOC101503335 |
| SNP_49062_A_10448587 | NC_021166.1    | Ca_Kabuli_Chr07 | 10448587                | AA                                     | CC                 | CC               | URR                           | 101503335          | uncharacterized LOC101503335 |
| SNP_49063_A_10448616 | NC_021166.1    | Ca_Kabuli_Chr07 | 10448616                | AA                                     | GG                 | GG               | URR                           | 101503335          | uncharacterized LOC101503335 |
| SNP_49064_A_10448859 | NC_021166.1    | Ca_Kabuli_Chr07 | 10448859                | CC                                     | TT                 | TT               | URR                           | 101503335          | uncharacterized LOC101503335 |
| SNP_49065_A_10449083 | NC_021166.1    | Ca_Kabuli_Chr07 | 10449083                | TT                                     | CC                 | CC               | URR                           | 101503335          | uncharacterized LOC101503335 |
| SNP_49066_A_10449702 | NC_021166.1    | Ca_Kabuli_Chr07 | 10449702                | GG                                     | AA                 | AA               | DRR                           | 101503667          | novel plant SNARE 11         |
| SNP_49067_A_10449821 | NC_021166.1    | Ca_Kabuli_Chr07 | 10449821                | AA                                     | CC                 | CC               | DRR                           | 101503667          | novel plant SNARE 11         |
| SNP_49068_A_10449844 | NC_021166.1    | Ca_Kabuli_Chr07 | 10449844                | CC                                     | TT                 | TT               | DRR                           | 101503667          | novel plant SNARE 11         |
| SNP_49069_A_10449877 | NC_021166.1    | Ca_Kabuli_Chr07 | 10449877                | CC                                     | TT                 | TT               | DRR                           | 101503667          | novel plant SNARE 11         |
| SNP_49070_A_10449920 | NC_021166.1    | Ca_Kabuli_Chr07 | 10449920                | CC                                     | TT                 | TT               | DRR                           | 101503667          | novel plant SNARE 11         |



| SNPs IDs             | Chromosome IDs | Chromosomes     | Physical positions (bp) | CDC Frontier genome (Reference genome) | (Pusa 1103 & HPNB) | (ILWC 46 & LPNB) | Sequence Components of genome | Gene accession IDs | Putative functions                              |
|----------------------|----------------|-----------------|-------------------------|----------------------------------------|--------------------|------------------|-------------------------------|--------------------|-------------------------------------------------|
| SNP_49072_A_10449956 | NC_021166.1    | Ca_Kabuli_Chr07 | 10449956                | TT                                     | CC                 | CC               | DRR                           | 101503667          | novel plant SNARE 11                            |
| SNP_49073_A_10450008 | NC_021166.1    | Ca_Kabuli_Chr07 | 10450008                | AA                                     | GG                 | GG               | DRR                           | 101503667          | novel plant SNARE 11                            |
| SNP_49074_A_10451411 | NC_021166.1    | Ca_Kabuli_Chr07 | 10451411                | AA                                     | TT                 | TT               | INTERGENIC                    |                    |                                                 |
| SNP_49075_A_10451450 | NC_021166.1    | Ca_Kabuli_Chr07 | 10451450                | TT                                     | CC                 | CC               | INTERGENIC                    |                    |                                                 |
| SNP_49076_A_10451453 | NC_021166.1    | Ca_Kabuli_Chr07 | 10451453                | GG                                     | CC                 | CC               | INTERGENIC                    |                    |                                                 |
| SNP_49077_A_10451459 | NC_021166.1    | Ca_Kabuli_Chr07 | 10451459                | GG                                     | TT                 | TT               | INTERGENIC                    |                    |                                                 |
| SNP_49078_A_10453360 | NC_021166.1    | Ca_Kabuli_Chr07 | 10453360                | CC                                     | AA                 | AA               | INTRON                        | 101503667          | novel plant SNARE 11                            |
| SNP_49079_A_10454751 | NC_021166.1    | Ca_Kabuli_Chr07 | 10454751                | GG                                     | TT                 | TT               | INTRON                        | 101503667          | novel plant SNARE 11                            |
| SNP_49080_A_10454797 | NC_021166.1    | Ca_Kabuli_Chr07 | 10454797                | GG                                     | AA                 | AA               | INTRON                        | 101503667          | novel plant SNARE 11                            |
| SNP_49081_A_10455902 | NC_021166.1    | Ca_Kabuli_Chr07 | 10455902                | TT                                     | CC                 | CC               | DRR                           | 101503996          | probable receptor-like protein kinase At5g47070 |
| SNP_49082_A_10457445 | NC_021166.1    | Ca_Kabuli_Chr07 | 10457445                | CC                                     | TT                 | TT               | INTERGENIC                    |                    |                                                 |
| SNP_49083_A_10458502 | NC_021166.1    | Ca_Kabuli_Chr07 | 10458502                | CC                                     | TT                 | TT               | INTERGENIC                    |                    |                                                 |
| SNP_49084_A_10459556 | NC_021166.1    | Ca_Kabuli_Chr07 | 10459556                | GG                                     | AA                 | AA               | INTERGENIC                    |                    |                                                 |
| SNP_49086_A_10460801 | NC_021166.1    | Ca_Kabuli_Chr07 | 10460801                | AA                                     | GG                 | GG               | URR                           | 101503996          | probable receptor-like protein kinase At5g47070 |
| SNP_49087_A_10461084 | NC_021166.1    | Ca_Kabuli_Chr07 | 10461084                | CC                                     | TT                 | TT               | URR                           | 101503996          | probable receptor-like protein kinase At5g47070 |
| SNP_49088_A_10464516 | NC_021166.1    | Ca_Kabuli_Chr07 | 10464516                | AA                                     | GG                 | GG               | DRR                           | 101504547          | beta-amylase 3, chloroplastic-like              |
| SNP_49090_A_10465387 | NC_021166.1    | Ca_Kabuli_Chr07 | 10465387                | AA                                     | TT                 | TT               | URR                           | 101504316          | uncharacterized LOC101504316                    |
| SNP_49091_A_10467106 | NC_021166.1    | Ca_Kabuli_Chr07 | 10467106                | TT                                     | AA                 | AA               | INTERGENIC                    |                    |                                                 |
| SNP_49092_A_10467107 | NC_021166.1    | Ca_Kabuli_Chr07 | 10467107                | TT                                     | AA                 | AA               | INTERGENIC                    |                    |                                                 |
| SNP_49094_A_10473022 | NC_021166.1    | Ca_Kabuli_Chr07 | 10473022                | AA                                     | GG                 | GG               | DRR                           | 101494319          | poly(U)-specific endoribonuclease-B             |
| SNP_49095_A_10473024 | NC_021166.1    | Ca_Kabuli_Chr07 | 10473024                | TT                                     | CC                 | CC               | DRR                           | 101494319          | poly(U)-specific endoribonuclease-B             |
| SNP_49096_A_10473034 | NC_021166.1    | Ca_Kabuli_Chr07 | 10473034                | CC                                     | TT                 | TT               | DRR                           | 101494319          | poly(U)-specific endoribonuclease-B             |

| SNPs IDs             | Chromosome IDs | Chromosomes     | Physical positions (bp) | CDC Frontier genome (Reference genome) | (Pusa 1103 & HPNB) | (ILWC 46 & LPNB) | Sequence Components of genome | Gene accession IDs | Putative functions                  |
|----------------------|----------------|-----------------|-------------------------|----------------------------------------|--------------------|------------------|-------------------------------|--------------------|-------------------------------------|
| SNP_49097_A_10473129 | NC_021166.1    | Ca_Kabuli_Chr07 | 10473129                | GG                                     | TT                 | TT               | DRR                           | 101494319          | poly(U)-specific endoribonuclease-B |
| SNP_49098_A_10473131 | NC_021166.1    | Ca_Kabuli_Chr07 | 10473131                | AA                                     | TT                 | TT               | DRR                           | 101494319          | poly(U)-specific endoribonuclease-B |
| SNP_49099_A_10473136 | NC_021166.1    | Ca_Kabuli_Chr07 | 10473136                | GG                                     | CC                 | CC               | DRR                           | 101494319          | poly(U)-specific endoribonuclease-B |
| SNP_49101_A_10477254 | NC_021166.1    | Ca_Kabuli_Chr07 | 10477254                | GG                                     | CC                 | CC               | INTRON                        | 101494319          | poly(U)-specific endoribonuclease-B |
| SNP_49102_A_10478320 | NC_021166.1    | Ca_Kabuli_Chr07 | 10478320                | TT                                     | CC                 | CC               | DRR                           | 101504860          | uncharacterized LOC101504860        |
| SNP_49103_A_10478756 | NC_021166.1    | Ca_Kabuli_Chr07 | 10478756                | TT                                     | CC                 | CC               | DRR                           | 101504860          | uncharacterized LOC101504860        |
| SNP_49104_A_10481015 | NC_021166.1    | Ca_Kabuli_Chr07 | 10481015                | CC                                     | TT                 | TT               | INTRON                        | 101504860          | uncharacterized LOC101504860        |
| SNP_49105_A_10481568 | NC_021166.1    | Ca_Kabuli_Chr07 | 10481568                | GG                                     | CC                 | CC               | INTRON                        | 101504860          | uncharacterized LOC101504860        |
| SNP_49106_A_10481961 | NC_021166.1    | Ca_Kabuli_Chr07 | 10481961                | AA                                     | GG                 | GG               | INTRON                        | 101504860          | uncharacterized LOC101504860        |
| SNP_49108_A_10482142 | NC_021166.1    | Ca_Kabuli_Chr07 | 10482142                | TT                                     | CC                 | CC               | INTRON                        | 101504860          | uncharacterized LOC101504860        |
| SNP_49109_A_10482162 | NC_021166.1    | Ca_Kabuli_Chr07 | 10482162                | CC                                     | TT                 | TT               | INTRON                        | 101504860          | uncharacterized LOC101504860        |
| SNP_49110_A_10486875 | NC_021166.1    | Ca_Kabuli_Chr07 | 10486875                | CC                                     | GG                 | GG               | URR                           | 101504860          | uncharacterized LOC101504860        |
| SNP_49111_A_10489010 | NC_021166.1    | Ca_Kabuli_Chr07 | 10489010                | AA                                     | GG                 | GG               | INTERGENIC                    |                    |                                     |
| SNP_49112_A_10489694 | NC_021166.1    | Ca_Kabuli_Chr07 | 10489694                | TT                                     | AA                 | AA               | INTERGENIC                    |                    |                                     |
| SNP_49113_A_10489710 | NC_021166.1    | Ca_Kabuli_Chr07 | 10489710                | GG                                     | AA                 | AA               | INTERGENIC                    |                    |                                     |
| SNP_49114_A_10489738 | NC_021166.1    | Ca_Kabuli_Chr07 | 10489738                | AA                                     | GG                 | GG               | INTERGENIC                    |                    |                                     |
| SNP_49115_A_10489900 | NC_021166.1    | Ca_Kabuli_Chr07 | 10489900                | GG                                     | AA                 | AA               | INTERGENIC                    |                    |                                     |
| SNP_49116_A_10489947 | NC_021166.1    | Ca_Kabuli_Chr07 | 10489947                | TT                                     | AA                 | AA               | INTERGENIC                    |                    |                                     |
| SNP_49118_A_10490495 | NC_021166.1    | Ca_Kabuli_Chr07 | 10490495                | TT                                     | AA                 | AA               | INTERGENIC                    |                    |                                     |
| SNP_49119_A_10494428 | NC_021166.1    | Ca_Kabuli_Chr07 | 10494428                | CC                                     | TT                 | TT               | INTERGENIC                    |                    |                                     |
| SNP_49120_A_10494434 | NC_021166.1    | Ca_Kabuli_Chr07 | 10494434                | TT                                     | AA                 | AA               | INTERGENIC                    |                    |                                     |
| SNP_49121_A_10494547 | NC_021166.1    | Ca_Kabuli_Chr07 | 10494547                | GG                                     | TT                 | TT               | INTERGENIC                    |                    |                                     |

| SNPs IDs             | Chromosome IDs | Chromosomes     | Physical positions (bp) | CDC Frontier genome (Reference genome) | (Pusa 1103 & HPNB) | (ILWC 46 & LPNB) | Sequence genome | Components of | Gene accession IDs                                 | Putative functions |
|----------------------|----------------|-----------------|-------------------------|----------------------------------------|--------------------|------------------|-----------------|---------------|----------------------------------------------------|--------------------|
| SNP_49122_A_10494555 | NC_021166.1    | Ca_Kabuli_Chr07 | 10494555                | GG                                     | AA                 | AA               | INTERGENIC      |               |                                                    |                    |
| SNP_49123_A_10494566 | NC_021166.1    | Ca_Kabuli_Chr07 | 10494566                | GG                                     | AA                 | AA               | INTERGENIC      |               |                                                    |                    |
| SNP_49124_A_10508239 | NC_021166.1    | Ca_Kabuli_Chr07 | 10508239                | TT                                     | CC                 | CC               | INTERGENIC      |               |                                                    |                    |
| SNP_49125_A_10508313 | NC_021166.1    | Ca_Kabuli_Chr07 | 10508313                | GG                                     | AA                 | AA               | INTERGENIC      |               |                                                    |                    |
| SNP_49126_A_10510028 | NC_021166.1    | Ca_Kabuli_Chr07 | 10510028                | TT                                     | CC                 | CC               | INTERGENIC      |               |                                                    |                    |
| SNP_49127_A_10510174 | NC_021166.1    | Ca_Kabuli_Chr07 | 10510174                | AA                                     | TT                 | TT               | INTERGENIC      |               |                                                    |                    |
| SNP_49128_A_10514930 | NC_021166.1    | Ca_Kabuli_Chr07 | 10514930                | TT                                     | CC                 | CC               | INTERGENIC      |               |                                                    |                    |
| SNP_49130_A_10515227 | NC_021166.1    | Ca_Kabuli_Chr07 | 10515227                | TT                                     | CC                 | CC               | INTERGENIC      |               |                                                    |                    |
| SNP_49131_A_10515413 | NC_021166.1    | Ca_Kabuli_Chr07 | 10515413                | GG                                     | AA                 | AA               | INTERGENIC      |               |                                                    |                    |
| SNP_49132_A_10517719 | NC_021166.1    | Ca_Kabuli_Chr07 | 10517719                | AA                                     | GG                 | GG               | INTERGENIC      |               |                                                    |                    |
| SNP_49133_A_10517856 | NC_021166.1    | Ca_Kabuli_Chr07 | 10517856                | AA                                     | CC                 | CC               | INTERGENIC      |               |                                                    |                    |
| SNP_49134_A_10517917 | NC_021166.1    | Ca_Kabuli_Chr07 | 10517917                | GG                                     | CC                 | CC               | INTERGENIC      |               |                                                    |                    |
| SNP_49135_A_10517936 | NC_021166.1    | Ca_Kabuli_Chr07 | 10517936                | CC                                     | TT                 | TT               | INTERGENIC      |               |                                                    |                    |
| SNP_49137_A_10522438 | NC_021166.1    | Ca_Kabuli_Chr07 | 10522438                | TT                                     | CC                 | CC               | URR             | 101505382     | probable BOI-related E3 ubiquitin-protein ligase 2 |                    |
| SNP_49138_A_10523222 | NC_021166.1    | Ca_Kabuli_Chr07 | 10523222                | TT                                     | CC                 | CC               | URR             | 101505382     | probable BOI-related E3 ubiquitin-protein ligase 2 |                    |
| SNP_49139_A_10524243 | NC_021166.1    | Ca_Kabuli_Chr07 | 10524243                | CC                                     | TT                 | TT               | INTERGENIC      |               |                                                    |                    |
| SNP_49140_A_10529603 | NC_021166.1    | Ca_Kabuli_Chr07 | 10529603                | GG                                     | TT                 | TT               | INTERGENIC      |               |                                                    |                    |
| SNP_49141_A_10529643 | NC_021166.1    | Ca_Kabuli_Chr07 | 10529643                | AA                                     | TT                 | TT               | INTERGENIC      |               |                                                    |                    |
| SNP_49142_A_10530216 | NC_021166.1    | Ca_Kabuli_Chr07 | 10530216                | GG                                     | AA                 | AA               | INTERGENIC      |               |                                                    |                    |
| SNP_49143_A_10535721 | NC_021166.1    | Ca_Kabuli_Chr07 | 10535721                | AA                                     | GG                 | GG               | INTRON          | 101494632     | lon protease homolog 2, peroxisomal-like           |                    |
| SNP_49144_A_10535725 | NC_021166.1    | Ca_Kabuli_Chr07 | 10535725                | TT                                     | CC                 | CC               | INTRON          | 101494632     | lon protease homolog 2, peroxisomal-like           |                    |
| SNP_49145_A_10535728 | NC_021166.1    | Ca_Kabuli_Chr07 | 10535728                | GG                                     | AA                 | AA               | INTRON          | 101494632     | lon protease homolog 2, peroxisomal-like           |                    |

| SNPs IDs             | Chromosome IDs | Chromosomes     | Physical positions (bp) | CDC Frontier (Reference genome) | (Pusa 1103 & HPNB) | (ILWC 46 & LPNB) | Sequence Components of genome | Gene accession IDs | Putative functions                       |
|----------------------|----------------|-----------------|-------------------------|---------------------------------|--------------------|------------------|-------------------------------|--------------------|------------------------------------------|
| SNP_49146_A_10535788 | NC_021166.1    | Ca_Kabuli_Chr07 | 10535788                | AA                              | GG                 | GG               | INTRON                        | 101494632          | Ion protease homolog 2, peroxisomal-like |
| SNP_49147_A_10535805 | NC_021166.1    | Ca_Kabuli_Chr07 | 10535805                | GG                              | AA                 | AA               | INTRON                        | 101494632          | Ion protease homolog 2, peroxisomal-like |
| SNP_49148_A_10535813 | NC_021166.1    | Ca_Kabuli_Chr07 | 10535813                | TT                              | AA                 | AA               | INTRON                        | 101494632          | Ion protease homolog 2, peroxisomal-like |
| SNP_49149_A_10536192 | NC_021166.1    | Ca_Kabuli_Chr07 | 10536192                | CC                              | TT                 | TT               | INTRON                        | 101494632          | Ion protease homolog 2, peroxisomal-like |
| SNP_49150_A_10542900 | NC_021166.1    | Ca_Kabuli_Chr07 | 10542900                | TT                              | CC                 | CC               | INTRON                        | 101494632          | Ion protease homolog 2, peroxisomal-like |
| SNP_49151_A_10543245 | NC_021166.1    | Ca_Kabuli_Chr07 | 10543245                | TT                              | GG                 | GG               | INTRON                        | 101494632          | Ion protease homolog 2, peroxisomal-like |
| SNP_49153_A_10554647 | NC_021166.1    | Ca_Kabuli_Chr07 | 10554647                | TT                              | AA                 | AA               | INTRON                        | 101494632          | Ion protease homolog 2, peroxisomal-like |
| SNP_49154_A_10555956 | NC_021166.1    | Ca_Kabuli_Chr07 | 10555956                | TT                              | GG                 | GG               | INTRON                        | 101494632          | Ion protease homolog 2, peroxisomal-like |
| SNP_49155_A_10556018 | NC_021166.1    | Ca_Kabuli_Chr07 | 10556018                | TT                              | CC                 | CC               | INTRON                        | 101494632          | Ion protease homolog 2, peroxisomal-like |
| SNP_49156_A_10557484 | NC_021166.1    | Ca_Kabuli_Chr07 | 10557484                | GG                              | AA                 | AA               | INTRON                        | 101494632          | Ion protease homolog 2, peroxisomal-like |
| SNP_49157_A_10557506 | NC_021166.1    | Ca_Kabuli_Chr07 | 10557506                | GG                              | AA                 | AA               | INTRON                        | 101494632          | Ion protease homolog 2, peroxisomal-like |
| SNP_49158_A_10557689 | NC_021166.1    | Ca_Kabuli_Chr07 | 10557689                | CC                              | AA                 | AA               | INTRON                        | 101494632          | Ion protease homolog 2, peroxisomal-like |
| SNP_49159_A_10557813 | NC_021166.1    | Ca_Kabuli_Chr07 | 10557813                | GG                              | TT                 | TT               | INTRON                        | 101494632          | Ion protease homolog 2, peroxisomal-like |
| SNP_49160_A_10557824 | NC_021166.1    | Ca_Kabuli_Chr07 | 10557824                | GG                              | TT                 | TT               | INTRON                        | 101494632          | Ion protease homolog 2, peroxisomal-like |
| SNP_49161_A_10557973 | NC_021166.1    | Ca_Kabuli_Chr07 | 10557973                | CC                              | AA                 | AA               | STOP_GAINED                   | 101494632          | Ion protease homolog 2, peroxisomal-like |
| SNP_49163_A_10558219 | NC_021166.1    | Ca_Kabuli_Chr07 | 10558219                | GG                              | AA                 | AA               | URR                           | 101494632          | Ion protease homolog 2, peroxisomal-like |
| SNP_49164_A_10563256 | NC_021166.1    | Ca_Kabuli_Chr07 | 10563256                | AA                              | GG                 | GG               | INTERGENIC                    |                    |                                          |
| SNP_49166_A_10571435 | NC_021166.1    | Ca_Kabuli_Chr07 | 10571435                | CC                              | TT                 | TT               | INTERGENIC                    |                    |                                          |
| SNP_49168_A_10572800 | NC_021166.1    | Ca_Kabuli_Chr07 | 10572800                | TT                              | AA                 | AA               | INTERGENIC                    |                    |                                          |
| SNP_49169_A_10572843 | NC_021166.1    | Ca_Kabuli_Chr07 | 10572843                | AA                              | CC                 | CC               | INTERGENIC                    |                    |                                          |
| SNP_49170_A_10574447 | NC_021166.1    | Ca_Kabuli_Chr07 | 10574447                | TT                              | CC                 | CC               | INTERGENIC                    |                    |                                          |
| SNP_49171_A_10574526 | NC_021166.1    | Ca_Kabuli_Chr07 | 10574526                | CC                              | TT                 | TT               | INTERGENIC                    |                    |                                          |

| SNPs IDs             | Chromosome IDs | Chromosomes     | Physical positions (bp) | CDC Frontier genome (Reference genome) | (Pusa 1103 & HPNB) | (ILWC 46 & LPNB) | Sequence genome | Components of | Gene accession IDs           | Putative functions |
|----------------------|----------------|-----------------|-------------------------|----------------------------------------|--------------------|------------------|-----------------|---------------|------------------------------|--------------------|
| SNP_49172_A_10575516 | NC_021166.1    | Ca_Kabuli_Chr07 | 10575516                | TT                                     | AA                 | AA               | INTERGENIC      |               |                              |                    |
| SNP_49173_A_10575528 | NC_021166.1    | Ca_Kabuli_Chr07 | 10575528                | GG                                     | AA                 | AA               | INTERGENIC      |               |                              |                    |
| SNP_49174_A_10575533 | NC_021166.1    | Ca_Kabuli_Chr07 | 10575533                | TT                                     | AA                 | AA               | INTERGENIC      |               |                              |                    |
| SNP_49175_A_10575544 | NC_021166.1    | Ca_Kabuli_Chr07 | 10575544                | CC                                     | TT                 | TT               | INTERGENIC      |               |                              |                    |
| SNP_49176_A_10575873 | NC_021166.1    | Ca_Kabuli_Chr07 | 10575873                | AA                                     | TT                 | TT               | INTERGENIC      |               |                              |                    |
| SNP_49177_A_10575886 | NC_021166.1    | Ca_Kabuli_Chr07 | 10575886                | AA                                     | GG                 | GG               | INTERGENIC      |               |                              |                    |
| SNP_49178_A_10575893 | NC_021166.1    | Ca_Kabuli_Chr07 | 10575893                | AA                                     | GG                 | GG               | INTERGENIC      |               |                              |                    |
| SNP_49179_A_10575956 | NC_021166.1    | Ca_Kabuli_Chr07 | 10575956                | GG                                     | AA                 | AA               | INTERGENIC      |               |                              |                    |
| SNP_49180_A_10577301 | NC_021166.1    | Ca_Kabuli_Chr07 | 10577301                | TT                                     | CC                 | CC               | INTERGENIC      |               |                              |                    |
| SNP_49181_A_10577563 | NC_021166.1    | Ca_Kabuli_Chr07 | 10577563                | CC                                     | AA                 | AA               | INTERGENIC      |               |                              |                    |
| SNP_49183_A_10580746 | NC_021166.1    | Ca_Kabuli_Chr07 | 10580746                | TT                                     | CC                 | CC               | INTERGENIC      |               |                              |                    |
| SNP_49184_A_10580798 | NC_021166.1    | Ca_Kabuli_Chr07 | 10580798                | TT                                     | CC                 | CC               | INTERGENIC      |               |                              |                    |
| SNP_49185_A_10584456 | NC_021166.1    | Ca_Kabuli_Chr07 | 10584456                | GG                                     | AA                 | AA               | INTERGENIC      |               |                              |                    |
| SNP_49186_A_10586225 | NC_021166.1    | Ca_Kabuli_Chr07 | 10586225                | TT                                     | AA                 | AA               | INTERGENIC      |               |                              |                    |
| SNP_49187_A_10586411 | NC_021166.1    | Ca_Kabuli_Chr07 | 10586411                | AA                                     | TT                 | TT               | INTERGENIC      |               |                              |                    |
| SNP_49188_A_10590225 | NC_021166.1    | Ca_Kabuli_Chr07 | 10590225                | AA                                     | TT                 | TT               | INTERGENIC      |               |                              |                    |
| SNP_49189_A_10590226 | NC_021166.1    | Ca_Kabuli_Chr07 | 10590226                | TT                                     | CC                 | CC               | INTERGENIC      |               |                              |                    |
| SNP_49191_A_10596468 | NC_021166.1    | Ca_Kabuli_Chr07 | 10596468                | TT                                     | AA                 | AA               | URR             | 101505923     | uncharacterized LOC101505923 |                    |
| SNP_49192_A_10596500 | NC_021166.1    | Ca_Kabuli_Chr07 | 10596500                | TT                                     | CC                 | CC               | URR             | 101505923     | uncharacterized LOC101505923 |                    |
| SNP_49193_A_10596511 | NC_021166.1    | Ca_Kabuli_Chr07 | 10596511                | CC                                     | TT                 | TT               | URR             | 101505923     | uncharacterized LOC101505923 |                    |
| SNP_49194_A_10596580 | NC_021166.1    | Ca_Kabuli_Chr07 | 10596580                | TT                                     | AA                 | AA               | URR             | 101505923     | uncharacterized LOC101505923 |                    |
| SNP_49195_A_10596582 | NC_021166.1    | Ca_Kabuli_Chr07 | 10596582                | GG                                     | TT                 | TT               | URR             | 101505923     | uncharacterized LOC101505923 |                    |

| SNPs IDs             | Chromosome IDs | Chromosomes     | Physical positions (bp) | CDC Frontier (Reference genome) | (Pusa 1103 & HPNB) | (ILWC 46 & LPNB) | Sequence Components of genome | Gene accession IDs | Putative functions                       |
|----------------------|----------------|-----------------|-------------------------|---------------------------------|--------------------|------------------|-------------------------------|--------------------|------------------------------------------|
| SNP_49196_A_10596633 | NC_021166.1    | Ca_Kabuli_Chr07 | 10596633                | AA                              | CC                 | CC               | URR                           | 101505923          | uncharacterized LOC101505923             |
| SNP_49197_A_10596643 | NC_021166.1    | Ca_Kabuli_Chr07 | 10596643                | TT                              | CC                 | CC               | URR                           | 101505923          | uncharacterized LOC101505923             |
| SNP_49198_A_10596785 | NC_021166.1    | Ca_Kabuli_Chr07 | 10596785                | TT                              | CC                 | CC               | URR                           | 101505923          | uncharacterized LOC101505923             |
| SNP_49199_A_10596953 | NC_021166.1    | Ca_Kabuli_Chr07 | 10596953                | CC                              | TT                 | TT               | URR                           | 101505923          | uncharacterized LOC101505923             |
| SNP_49200_A_10600932 | NC_021166.1    | Ca_Kabuli_Chr07 | 10600932                | TT                              | CC                 | CC               | INTERGENIC                    |                    |                                          |
| SNP_49201_A_10607008 | NC_021166.1    | Ca_Kabuli_Chr07 | 10607008                | TT                              | GG                 | GG               | INTRON                        | 101506566          | lon protease homolog 2, peroxisomal-like |
| SNP_49202_A_10607013 | NC_021166.1    | Ca_Kabuli_Chr07 | 10607013                | TT                              | CC                 | CC               | INTRON                        | 101506566          | lon protease homolog 2, peroxisomal-like |
| SNP_49203_A_10607016 | NC_021166.1    | Ca_Kabuli_Chr07 | 10607016                | AA                              | GG                 | GG               | INTRON                        | 101506566          | lon protease homolog 2, peroxisomal-like |
| SNP_49204_A_10607040 | NC_021166.1    | Ca_Kabuli_Chr07 | 10607040                | GG                              | AA                 | AA               | INTRON                        | 101506566          | lon protease homolog 2, peroxisomal-like |
| SNP_49205_A_10607059 | NC_021166.1    | Ca_Kabuli_Chr07 | 10607059                | CC                              | TT                 | TT               | INTRON                        | 101506566          | lon protease homolog 2, peroxisomal-like |
| SNP_49206_A_10607079 | NC_021166.1    | Ca_Kabuli_Chr07 | 10607079                | CC                              | TT                 | TT               | INTRON                        | 101506566          | lon protease homolog 2, peroxisomal-like |
| SNP_49207_A_10607331 | NC_021166.1    | Ca_Kabuli_Chr07 | 10607331                | TT                              | CC                 | CC               | INTRON                        | 101506566          | lon protease homolog 2, peroxisomal-like |
| SNP_49208_A_10607375 | NC_021166.1    | Ca_Kabuli_Chr07 | 10607375                | AA                              | GG                 | GG               | INTRON                        | 101506566          | lon protease homolog 2, peroxisomal-like |
| SNP_49210_A_10607613 | NC_021166.1    | Ca_Kabuli_Chr07 | 10607613                | TT                              | GG                 | GG               | NON_SYNONYMOUS_CODING         | 101506566          | lon protease homolog 2, peroxisomal-like |
| SNP_49211_A_10607639 | NC_021166.1    | Ca_Kabuli_Chr07 | 10607639                | AA                              | GG                 | GG               | NON_SYNONYMOUS_CODING         | 101506566          | lon protease homolog 2, peroxisomal-like |
| SNP_49212_A_10607676 | NC_021166.1    | Ca_Kabuli_Chr07 | 10607676                | GG                              | AA                 | AA               | INTRON                        | 101506566          | lon protease homolog 2, peroxisomal-like |
| SNP_49213_A_10607693 | NC_021166.1    | Ca_Kabuli_Chr07 | 10607693                | TT                              | AA                 | AA               | INTRON                        | 101506566          | lon protease homolog 2, peroxisomal-like |
| SNP_49214_A_10607728 | NC_021166.1    | Ca_Kabuli_Chr07 | 10607728                | AA                              | GG                 | GG               | INTRON                        | 101506566          | lon protease homolog 2, peroxisomal-like |
| SNP_49215_A_10607907 | NC_021166.1    | Ca_Kabuli_Chr07 | 10607907                | CC                              | TT                 | TT               | INTRON                        | 101506566          | lon protease homolog 2, peroxisomal-like |
| SNP_49216_A_10608010 | NC_021166.1    | Ca_Kabuli_Chr07 | 10608010                | TT                              | CC                 | CC               | INTRON                        | 101506566          | lon protease homolog 2, peroxisomal-like |
| SNP_49217_A_10608032 | NC_021166.1    | Ca_Kabuli_Chr07 | 10608032                | GG                              | AA                 | AA               | NON_SYNONYMOUS_CODING         | 101506566          | lon protease homolog 2, peroxisomal-like |
| SNP_49218_A_10608063 | NC_021166.1    | Ca_Kabuli_Chr07 | 10608063                | TT                              | CC                 | CC               | NON_SYNONYMOUS_CODING         | 101506566          | lon protease homolog 2, peroxisomal-like |

| SNPs IDs             | Chromosome IDs | Chromosomes     | Physical positions (bp) | CDC Frontier genome (Reference genome) | (Pusa 1103 & HPNB) | (ILWC 46 & LPNB) | Sequence Components of genome | Gene accession IDs | Putative functions                       |
|----------------------|----------------|-----------------|-------------------------|----------------------------------------|--------------------|------------------|-------------------------------|--------------------|------------------------------------------|
| SNP_49219_A_10613094 | NC_021166.1    | Ca_Kabuli_Chr07 | 10613094                | GG                                     | AA                 | AA               | INTRON                        | 101506566          | lon protease homolog 2, peroxisomal-like |
| SNP_49220_A_10613106 | NC_021166.1    | Ca_Kabuli_Chr07 | 10613106                | TT                                     | AA                 | AA               | INTRON                        | 101506566          | lon protease homolog 2, peroxisomal-like |
| SNP_49221_A_10613149 | NC_021166.1    | Ca_Kabuli_Chr07 | 10613149                | AA                                     | TT                 | TT               | INTRON                        | 101506566          | lon protease homolog 2, peroxisomal-like |
| SNP_49223_A_10614337 | NC_021166.1    | Ca_Kabuli_Chr07 | 10614337                | AA                                     | TT                 | TT               | INTRON                        | 101506566          | lon protease homolog 2, peroxisomal-like |
| SNP_49224_A_10614343 | NC_021166.1    | Ca_Kabuli_Chr07 | 10614343                | TT                                     | CC                 | CC               | INTRON                        | 101506566          | lon protease homolog 2, peroxisomal-like |
| SNP_49225_A_10615624 | NC_021166.1    | Ca_Kabuli_Chr07 | 10615624                | AA                                     | TT                 | TT               | INTRON                        | 101506566          | lon protease homolog 2, peroxisomal-like |
| SNP_49226_A_10615633 | NC_021166.1    | Ca_Kabuli_Chr07 | 10615633                | TT                                     | CC                 | CC               | INTRON                        | 101506566          | lon protease homolog 2, peroxisomal-like |
| SNP_49227_A_10616186 | NC_021166.1    | Ca_Kabuli_Chr07 | 10616186                | GG                                     | AA                 | AA               | INTRON                        | 101506566          | lon protease homolog 2, peroxisomal-like |
| SNP_49228_A_10616198 | NC_021166.1    | Ca_Kabuli_Chr07 | 10616198                | CC                                     | TT                 | TT               | INTRON                        | 101506566          | lon protease homolog 2, peroxisomal-like |
| SNP_49229_A_10616229 | NC_021166.1    | Ca_Kabuli_Chr07 | 10616229                | AA                                     | GG                 | GG               | INTRON                        | 101506566          | lon protease homolog 2, peroxisomal-like |
| SNP_49230_A_10616921 | NC_021166.1    | Ca_Kabuli_Chr07 | 10616921                | TT                                     | CC                 | CC               | INTRON                        | 101506566          | lon protease homolog 2, peroxisomal-like |
| SNP_49232_A_10621184 | NC_021166.1    | Ca_Kabuli_Chr07 | 10621184                | CC                                     | TT                 | TT               | URR                           | 101506566          | lon protease homolog 2, peroxisomal-like |
| SNP_49233_A_10621301 | NC_021166.1    | Ca_Kabuli_Chr07 | 10621301                | AA                                     | GG                 | GG               | URR                           | 101506566          | lon protease homolog 2, peroxisomal-like |
| SNP_49234_A_10624558 | NC_021166.1    | Ca_Kabuli_Chr07 | 10624558                | GG                                     | AA                 | AA               | URR                           | 101506235          | putative invertase inhibitor             |
| SNP_49235_A_10624647 | NC_021166.1    | Ca_Kabuli_Chr07 | 10624647                | AA                                     | CC                 | CC               | URR                           | 101506235          | putative invertase inhibitor             |
| SNP_49236_A_10624684 | NC_021166.1    | Ca_Kabuli_Chr07 | 10624684                | GG                                     | AA                 | AA               | URR                           | 101506235          | putative invertase inhibitor             |
| SNP_49237_A_10625752 | NC_021166.1    | Ca_Kabuli_Chr07 | 10625752                | AA                                     | GG                 | GG               | DRR                           | 101507228          | ras-related protein RABH1b-like          |
| SNP_49238_A_10625776 | NC_021166.1    | Ca_Kabuli_Chr07 | 10625776                | GG                                     | AA                 | AA               | DRR                           | 101507228          | ras-related protein RABH1b-like          |
| SNP_49239_A_10626743 | NC_021166.1    | Ca_Kabuli_Chr07 | 10626743                | AA                                     | TT                 | TT               | DRR                           | 101506900          | pectinesterase inhibitor 2               |
| SNP_49241_A_10632802 | NC_021166.1    | Ca_Kabuli_Chr07 | 10632802                | GG                                     | AA                 | AA               | URR                           | 101507228          | ras-related protein RABH1b-like          |
| SNP_49242_A_10632985 | NC_021166.1    | Ca_Kabuli_Chr07 | 10632985                | AA                                     | GG                 | GG               | URR                           | 101507228          | ras-related protein RABH1b-like          |
| SNP_49243_A_10633060 | NC_021166.1    | Ca_Kabuli_Chr07 | 10633060                | CC                                     | AA                 | AA               | URR                           | 101507228          | ras-related protein RABH1b-like          |

| SNPs IDs             | Chromosome IDs | Chromosomes     | Physical positions (bp) | CDC Frontier genome (Reference genome) | (Pusa 1103 & HPNB) | (ILWC 46 & LPNB) | Sequence Components of genome | Gene accession IDs | Putative functions                          |
|----------------------|----------------|-----------------|-------------------------|----------------------------------------|--------------------|------------------|-------------------------------|--------------------|---------------------------------------------|
| SNP_49244_A_10633247 | NC_021166.1    | Ca_Kabuli_Chr07 | 10633247                | AA                                     | CC                 | CC               | URR                           | 101507228          | ras-related protein RABH1b-like             |
| SNP_49245_A_10633267 | NC_021166.1    | Ca_Kabuli_Chr07 | 10633267                | GG                                     | AA                 | AA               | URR                           | 101507228          | ras-related protein RABH1b-like             |
| SNP_49246_A_10633396 | NC_021166.1    | Ca_Kabuli_Chr07 | 10633396                | AA                                     | TT                 | TT               | URR                           | 101507228          | ras-related protein RABH1b-like             |
| SNP_49247_A_10646866 | NC_021166.1    | Ca_Kabuli_Chr07 | 10646866                | AA                                     | GG                 | GG               | DRR                           | 101507858          | dynammin-related protein 1E-like            |
| SNP_49248_A_10646916 | NC_021166.1    | Ca_Kabuli_Chr07 | 10646916                | CC                                     | GG                 | GG               | DRR                           | 101507858          | dynammin-related protein 1E-like            |
| SNP_49249_A_10657101 | NC_021166.1    | Ca_Kabuli_Chr07 | 10657101                | TT                                     | CC                 | CC               | INTERGENIC                    |                    |                                             |
| SNP_49253_A_10680497 | NC_021166.1    | Ca_Kabuli_Chr07 | 10680497                | CC                                     | TT                 | TT               | INTERGENIC                    |                    |                                             |
| SNP_49255_A_10680942 | NC_021166.1    | Ca_Kabuli_Chr07 | 10680942                | CC                                     | AA                 | AA               | INTERGENIC                    |                    |                                             |
| SNP_49257_A_10684830 | NC_021166.1    | Ca_Kabuli_Chr07 | 10684830                | AA                                     | TT                 | TT               | INTRON                        | 101509989          | two-component response regulator-like APRR2 |
| SNP_49258_A_10684833 | NC_021166.1    | Ca_Kabuli_Chr07 | 10684833                | GG                                     | TT                 | TT               | INTRON                        | 101509989          | two-component response regulator-like APRR2 |
| SNP_49259_A_10687451 | NC_021166.1    | Ca_Kabuli_Chr07 | 10687451                | CC                                     | TT                 | TT               | INTRON                        | 101509989          | two-component response regulator-like APRR2 |
| SNP_49260_A_10691990 | NC_021166.1    | Ca_Kabuli_Chr07 | 10691990                | TT                                     | CC                 | CC               | INTERGENIC                    |                    |                                             |
| SNP_49261_A_10693728 | NC_021166.1    | Ca_Kabuli_Chr07 | 10693728                | GG                                     | AA                 | AA               | INTERGENIC                    |                    |                                             |
| SNP_49262_A_10693770 | NC_021166.1    | Ca_Kabuli_Chr07 | 10693770                | AA                                     | GG                 | GG               | INTERGENIC                    |                    |                                             |
| SNP_49264_A_10694601 | NC_021166.1    | Ca_Kabuli_Chr07 | 10694601                | CC                                     | TT                 | TT               | INTERGENIC                    |                    |                                             |
| SNP_49265_A_10697894 | NC_021166.1    | Ca_Kabuli_Chr07 | 10697894                | CC                                     | GG                 | GG               | NON_SYNONYMOUS_CODING         | 101495598          | transcription factor GAMYB-like             |
| SNP_49266_A_10701522 | NC_021166.1    | Ca_Kabuli_Chr07 | 10701522                | AA                                     | TT                 | TT               | INTERGENIC                    |                    |                                             |
| SNP_49267_A_10714426 | NC_021166.1    | Ca_Kabuli_Chr07 | 10714426                | TT                                     | GG                 | GG               | INTERGENIC                    |                    |                                             |
| SNP_49268_A_10715117 | NC_021166.1    | Ca_Kabuli_Chr07 | 10715117                | TT                                     | CC                 | CC               | DRR                           | 101510525          | tobamovirus multiplication protein 2A-like  |
| SNP_49270_A_10719603 | NC_021166.1    | Ca_Kabuli_Chr07 | 10719603                | AA                                     | GG                 | GG               | INTRON                        | 101510525          | tobamovirus multiplication protein 2A-like  |
| SNP_49271_A_10719661 | NC_021166.1    | Ca_Kabuli_Chr07 | 10719661                | AA                                     | GG                 | GG               | INTRON                        | 101510525          | tobamovirus multiplication protein 2A-like  |
| SNP_49272_A_10720644 | NC_021166.1    | Ca_Kabuli_Chr07 | 10720644                | CC                                     | GG                 | GG               | INTRON                        | 101510525          | tobamovirus multiplication protein 2A-like  |



| SNPs IDs             | Chromosome IDs | Chromosomes     | Physical positions (bp) | CDC Frontier genome (Reference genome) | (Pusa 1103 & HPNB) | (ILWC 46 & LPNB) | Sequence Components of genome | Gene accession IDs | Putative functions                                       |
|----------------------|----------------|-----------------|-------------------------|----------------------------------------|--------------------|------------------|-------------------------------|--------------------|----------------------------------------------------------|
| SNP_49273_A_10720662 | NC_021166.1    | Ca_Kabuli_Chr07 | 10720662                | GG                                     | TT                 | TT               | INTRON                        | 101510525          | tobamovirus multiplication protein 2A-like               |
| SNP_49274_A_10724051 | NC_021166.1    | Ca_Kabuli_Chr07 | 10724051                | CC                                     | TT                 | TT               | INTERGENIC                    |                    |                                                          |
| SNP_49275_A_10724089 | NC_021166.1    | Ca_Kabuli_Chr07 | 10724089                | GG                                     | CC                 | CC               | INTERGENIC                    |                    |                                                          |
| SNP_49276_A_10725175 | NC_021166.1    | Ca_Kabuli_Chr07 | 10725175                | AA                                     | GG                 | GG               | DRR                           | 101511070          | type I inositol 1,4,5-trisphosphate 5-phosphatase 2-like |
| SNP_49277_A_10727877 | NC_021166.1    | Ca_Kabuli_Chr07 | 10727877                | TT                                     | AA                 | AA               | INTRON                        | 101511070          | type I inositol 1,4,5-trisphosphate 5-phosphatase 2-like |
| SNP_49278_A_10731500 | NC_021166.1    | Ca_Kabuli_Chr07 | 10731500                | CC                                     | TT                 | TT               | URR                           | 101511070          | type I inositol 1,4,5-trisphosphate 5-phosphatase 2-like |
| SNP_49280_A_10731640 | NC_021166.1    | Ca_Kabuli_Chr07 | 10731640                | AA                                     | TT                 | TT               | URR                           | 101511070          | type I inositol 1,4,5-trisphosphate 5-phosphatase 2-like |
| SNP_49281_A_10731978 | NC_021166.1    | Ca_Kabuli_Chr07 | 10731978                | TT                                     | AA                 | AA               | URR                           | 101511070          | type I inositol 1,4,5-trisphosphate 5-phosphatase 2-like |
| SNP_49282_A_10731981 | NC_021166.1    | Ca_Kabuli_Chr07 | 10731981                | CC                                     | TT                 | TT               | URR                           | 101511070          | type I inositol 1,4,5-trisphosphate 5-phosphatase 2-like |
| SNP_49283_A_10731993 | NC_021166.1    | Ca_Kabuli_Chr07 | 10731993                | AA                                     | GG                 | GG               | URR                           | 101511070          | type I inositol 1,4,5-trisphosphate 5-phosphatase 2-like |
| SNP_49284_A_10732080 | NC_021166.1    | Ca_Kabuli_Chr07 | 10732080                | CC                                     | GG                 | GG               | URR                           | 101511070          | type I inositol 1,4,5-trisphosphate 5-phosphatase 2-like |
| SNP_49285_A_10732089 | NC_021166.1    | Ca_Kabuli_Chr07 | 10732089                | AA                                     | GG                 | GG               | URR                           | 101511070          | type I inositol 1,4,5-trisphosphate 5-phosphatase 2-like |
| SNP_49286_A_10732101 | NC_021166.1    | Ca_Kabuli_Chr07 | 10732101                | CC                                     | TT                 | TT               | URR                           | 101511070          | type I inositol 1,4,5-trisphosphate 5-phosphatase 2-like |
| SNP_49287_A_10732116 | NC_021166.1    | Ca_Kabuli_Chr07 | 10732116                | CC                                     | TT                 | TT               | URR                           | 101511070          | type I inositol 1,4,5-trisphosphate 5-phosphatase 2-like |
| SNP_49289_A_10733835 | NC_021166.1    | Ca_Kabuli_Chr07 | 10733835                | AA                                     | GG                 | GG               | INTERGENIC                    |                    |                                                          |
| SNP_49290_A_10733870 | NC_021166.1    | Ca_Kabuli_Chr07 | 10733870                | AA                                     | GG                 | GG               | INTERGENIC                    |                    |                                                          |
| SNP_49291_A_10735407 | NC_021166.1    | Ca_Kabuli_Chr07 | 10735407                | CC                                     | AA                 | AA               | INTERGENIC                    |                    |                                                          |
| SNP_49292_A_10735409 | NC_021166.1    | Ca_Kabuli_Chr07 | 10735409                | CC                                     | TT                 | TT               | INTERGENIC                    |                    |                                                          |
| SNP_49293_A_10735419 | NC_021166.1    | Ca_Kabuli_Chr07 | 10735419                | AA                                     | GG                 | GG               | INTERGENIC                    |                    |                                                          |
| SNP_49294_A_10735446 | NC_021166.1    | Ca_Kabuli_Chr07 | 10735446                | AA                                     | GG                 | GG               | INTERGENIC                    |                    |                                                          |
| SNP_49295_A_10735650 | NC_021166.1    | Ca_Kabuli_Chr07 | 10735650                | AA                                     | GG                 | GG               | INTERGENIC                    |                    |                                                          |
| SNP_49296_A_10735697 | NC_021166.1    | Ca_Kabuli_Chr07 | 10735697                | GG                                     | AA                 | AA               | INTERGENIC                    |                    |                                                          |

| SNPs IDs             | Chromosome IDs | Chromosomes     | Physical positions (bp) | CDC Frontier genome (Reference genome) | (Pusa 1103 & HPNB) | (ILWC 46 & LPNB) | Sequence Components of genome | Gene accession IDs | Putative functions                   |
|----------------------|----------------|-----------------|-------------------------|----------------------------------------|--------------------|------------------|-------------------------------|--------------------|--------------------------------------|
| SNP_49297_A_10735804 | NC_021166.1    | Ca_Kabuli_Chr07 | 10735804                | CC                                     | TT                 | TT               | INTERGENIC                    |                    |                                      |
| SNP_49298_A_10735973 | NC_021166.1    | Ca_Kabuli_Chr07 | 10735973                | CC                                     | TT                 | TT               | INTERGENIC                    |                    |                                      |
| SNP_49299_A_10736049 | NC_021166.1    | Ca_Kabuli_Chr07 | 10736049                | CC                                     | AA                 | AA               | INTERGENIC                    |                    |                                      |
| SNP_49300_A_10740785 | NC_021166.1    | Ca_Kabuli_Chr07 | 10740785                | AA                                     | TT                 | TT               | INTERGENIC                    |                    |                                      |
| SNP_49302_A_10742951 | NC_021166.1    | Ca_Kabuli_Chr07 | 10742951                | AA                                     | GG                 | GG               | DRR                           | 101511593          | ribose-phosphate pyrophosphokinase 1 |
| SNP_49303_A_10743261 | NC_021166.1    | Ca_Kabuli_Chr07 | 10743261                | CC                                     | TT                 | TT               | DRR                           | 101511593          | ribose-phosphate pyrophosphokinase 1 |
| SNP_49304_A_10744085 | NC_021166.1    | Ca_Kabuli_Chr07 | 10744085                | CC                                     | AA                 | AA               | INTRON                        | 101511593          | ribose-phosphate pyrophosphokinase 1 |
| SNP_49305_A_10749577 | NC_021166.1    | Ca_Kabuli_Chr07 | 10749577                | TT                                     | CC                 | CC               | URR                           | 101511593          | ribose-phosphate pyrophosphokinase 1 |
| SNP_49306_A_10749579 | NC_021166.1    | Ca_Kabuli_Chr07 | 10749579                | TT                                     | CC                 | CC               | URR                           | 101511593          | ribose-phosphate pyrophosphokinase 1 |
| SNP_49307_A_10751028 | NC_021166.1    | Ca_Kabuli_Chr07 | 10751028                | AA                                     | GG                 | GG               | INTERGENIC                    |                    |                                      |
| SNP_49308_A_10761632 | NC_021166.1    | Ca_Kabuli_Chr07 | 10761632                | AA                                     | GG                 | GG               | INTERGENIC                    |                    |                                      |
| SNP_49309_A_10763982 | NC_021166.1    | Ca_Kabuli_Chr07 | 10763982                | CC                                     | GG                 | GG               | INTERGENIC                    |                    |                                      |
| SNP_49310_A_10764653 | NC_021166.1    | Ca_Kabuli_Chr07 | 10764653                | TT                                     | AA                 | AA               | INTERGENIC                    |                    |                                      |
| SNP_49311_A_10767084 | NC_021166.1    | Ca_Kabuli_Chr07 | 10767084                | AA                                     | GG                 | GG               | INTERGENIC                    |                    |                                      |
| SNP_49312_A_10767178 | NC_021166.1    | Ca_Kabuli_Chr07 | 10767178                | CC                                     | TT                 | TT               | INTERGENIC                    |                    |                                      |
| SNP_49313_A_10767317 | NC_021166.1    | Ca_Kabuli_Chr07 | 10767317                | GG                                     | AA                 | AA               | INTERGENIC                    |                    |                                      |
| SNP_49314_A_10767342 | NC_021166.1    | Ca_Kabuli_Chr07 | 10767342                | CC                                     | TT                 | TT               | INTERGENIC                    |                    |                                      |
| SNP_49315_A_10767354 | NC_021166.1    | Ca_Kabuli_Chr07 | 10767354                | AA                                     | GG                 | GG               | INTERGENIC                    |                    |                                      |
| SNP_49316_A_10767372 | NC_021166.1    | Ca_Kabuli_Chr07 | 10767372                | TT                                     | CC                 | CC               | INTERGENIC                    |                    |                                      |
| SNP_49317_A_10767382 | NC_021166.1    | Ca_Kabuli_Chr07 | 10767382                | CC                                     | TT                 | TT               | INTERGENIC                    |                    |                                      |
| SNP_49318_A_10769038 | NC_021166.1    | Ca_Kabuli_Chr07 | 10769038                | GG                                     | AA                 | AA               | INTERGENIC                    |                    |                                      |
| SNP_49319_A_10769291 | NC_021166.1    | Ca_Kabuli_Chr07 | 10769291                | CC                                     | TT                 | TT               | INTERGENIC                    |                    |                                      |

| SNPs IDs             | Chromosome IDs | Chromosomes     | Physical positions (bp) | CDC Frontier genome (Reference genome) | (Pusa 1103 & HPNB) | (ILWC 46 & LPNB) | Sequence Components of genome | Gene accession IDs | Putative functions                                                   |
|----------------------|----------------|-----------------|-------------------------|----------------------------------------|--------------------|------------------|-------------------------------|--------------------|----------------------------------------------------------------------|
| SNP_49320_A_10770723 | NC_021166.1    | Ca_Kabuli_Chr07 | 10770723                | TT                                     | GG                 | GG               | INTERGENIC                    |                    |                                                                      |
| SNP_49321_A_10770759 | NC_021166.1    | Ca_Kabuli_Chr07 | 10770759                | TT                                     | AA                 | AA               | INTERGENIC                    |                    |                                                                      |
| SNP_49322_A_10770798 | NC_021166.1    | Ca_Kabuli_Chr07 | 10770798                | AA                                     | TT                 | TT               | INTERGENIC                    |                    |                                                                      |
| SNP_49323_A_10770809 | NC_021166.1    | Ca_Kabuli_Chr07 | 10770809                | GG                                     | AA                 | AA               | INTERGENIC                    |                    |                                                                      |
| SNP_49324_A_10784196 | NC_021166.1    | Ca_Kabuli_Chr07 | 10784196                | GG                                     | TT                 | TT               | INTERGENIC                    |                    |                                                                      |
| SNP_49325_A_10784311 | NC_021166.1    | Ca_Kabuli_Chr07 | 10784311                | AA                                     | GG                 | GG               | INTERGENIC                    |                    |                                                                      |
| SNP_49326_A_10784634 | NC_021166.1    | Ca_Kabuli_Chr07 | 10784634                | AA                                     | GG                 | GG               | INTERGENIC                    |                    |                                                                      |
| SNP_49327_A_10784673 | NC_021166.1    | Ca_Kabuli_Chr07 | 10784673                | GG                                     | TT                 | TT               | INTERGENIC                    |                    |                                                                      |
| SNP_49328_A_10792091 | NC_021166.1    | Ca_Kabuli_Chr07 | 10792091                | TT                                     | CC                 | CC               | INTERGENIC                    |                    |                                                                      |
| SNP_49329_A_10792094 | NC_021166.1    | Ca_Kabuli_Chr07 | 10792094                | GG                                     | CC                 | CC               | INTERGENIC                    |                    |                                                                      |
| SNP_49330_A_10793749 | NC_021166.1    | Ca_Kabuli_Chr07 | 10793749                | CC                                     | TT                 | TT               | INTERGENIC                    |                    |                                                                      |
| SNP_49331_A_10794195 | NC_021166.1    | Ca_Kabuli_Chr07 | 10794195                | AA                                     | GG                 | GG               | INTERGENIC                    |                    |                                                                      |
| SNP_49332_A_10794196 | NC_021166.1    | Ca_Kabuli_Chr07 | 10794196                | GG                                     | AA                 | AA               | INTERGENIC                    |                    |                                                                      |
| SNP_49333_A_10802133 | NC_021166.1    | Ca_Kabuli_Chr07 | 10802133                | AA                                     | CC                 | CC               | URR                           | 101511919          | probable serine/threonine-protein kinase At4g35230                   |
| SNP_49334_A_10802170 | NC_021166.1    | Ca_Kabuli_Chr07 | 10802170                | AA                                     | GG                 | GG               | URR                           | 101511919          | probable serine/threonine-protein kinase At4g35230                   |
| SNP_49335_A_10802428 | NC_021166.1    | Ca_Kabuli_Chr07 | 10802428                | AA                                     | TT                 | TT               | URR                           | 101511919          | probable serine/threonine-protein kinase At4g35230                   |
| SNP_49336_A_10802430 | NC_021166.1    | Ca_Kabuli_Chr07 | 10802430                | TT                                     | GG                 | GG               | URR                           | 101511919          | probable serine/threonine-protein kinase At4g35230                   |
| SNP_49337_A_10802512 | NC_021166.1    | Ca_Kabuli_Chr07 | 10802512                | AA                                     | TT                 | TT               | URR                           | 101511919          | probable serine/threonine-protein kinase At4g35230                   |
| SNP_49338_A_10802616 | NC_021166.1    | Ca_Kabuli_Chr07 | 10802616                | TT                                     | CC                 | CC               | URR                           | 101511919          | probable serine/threonine-protein kinase At4g35230                   |
| SNP_49339_A_10802629 | NC_021166.1    | Ca_Kabuli_Chr07 | 10802629                | AA                                     | GG                 | GG               | URR                           | 101511919          | probable serine/threonine-protein kinase At4g35230                   |
| SNP_49340_A_10807475 | NC_021166.1    | Ca_Kabuli_Chr07 | 10807475                | GG                                     | AA                 | AA               | INTRON                        | 101513425          | uncharacterized LOC101513425                                         |
| SNP_49341_A_10809534 | NC_021166.1    | Ca_Kabuli_Chr07 | 10809534                | GG                                     | AA                 | AA               | DRR                           | 101513100          | pentatricopeptide repeat-containing protein At5g46580, chloroplastic |

| SNPs IDs             | Chromosome IDs | Chromosomes     | Physical positions (bp) | CDC Frontier genome (Reference genome) | (Pusa 1103 & HPNB) | (ILWC 46 & LPNB) | Sequence Components of genome | Gene accession IDs | Putative functions                                                   |
|----------------------|----------------|-----------------|-------------------------|----------------------------------------|--------------------|------------------|-------------------------------|--------------------|----------------------------------------------------------------------|
| SNP_49342_A_10809569 | NC_021166.1    | Ca_Kabuli_Chr07 | 10809569                | AA                                     | CC                 | CC               | DRR                           | 101513100          | pentatricopeptide repeat-containing protein At5g46580, chloroplastic |
| SNP_49343_A_10810383 | NC_021166.1    | Ca_Kabuli_Chr07 | 10810383                | AA                                     | TT                 | TT               | DRR                           | 101513100          | pentatricopeptide repeat-containing protein At5g46580, chloroplastic |
| SNP_49344_A_10813507 | NC_021166.1    | Ca_Kabuli_Chr07 | 10813507                | CC                                     | GG                 | GG               | DRR                           | 101512455          | protein phosphatase 2C 29                                            |
| SNP_49345_A_10816113 | NC_021166.1    | Ca_Kabuli_Chr07 | 10816113                | CC                                     | TT                 | TT               | INTERGENIC                    |                    |                                                                      |
| SNP_49346_A_10818088 | NC_021166.1    | Ca_Kabuli_Chr07 | 10818088                | CC                                     | GG                 | GG               | NON_SYNONYMOUS_CODING         | id164673           | Unknown function                                                     |
| SNP_49347_A_10820224 | NC_021166.1    | Ca_Kabuli_Chr07 | 10820224                | AA                                     | GG                 | GG               | URR                           | 101512455          | protein phosphatase 2C 29                                            |
| SNP_49348_A_10820227 | NC_021166.1    | Ca_Kabuli_Chr07 | 10820227                | AA                                     | CC                 | CC               | URR                           | 101512455          | protein phosphatase 2C 29                                            |
| SNP_49349_A_10820247 | NC_021166.1    | Ca_Kabuli_Chr07 | 10820247                | TT                                     | AA                 | AA               | URR                           | 101512455          | protein phosphatase 2C 29                                            |
| SNP_49350_A_10822720 | NC_021166.1    | Ca_Kabuli_Chr07 | 10822720                | GG                                     | AA                 | AA               | INTERGENIC                    |                    |                                                                      |
| SNP_49351_A_10822837 | NC_021166.1    | Ca_Kabuli_Chr07 | 10822837                | AA                                     | TT                 | TT               | INTERGENIC                    |                    |                                                                      |
| SNP_49352_A_10825850 | NC_021166.1    | Ca_Kabuli_Chr07 | 10825850                | AA                                     | CC                 | CC               | INTERGENIC                    |                    |                                                                      |
| SNP_49353_A_10825879 | NC_021166.1    | Ca_Kabuli_Chr07 | 10825879                | AA                                     | GG                 | GG               | INTERGENIC                    |                    |                                                                      |
| SNP_49354_A_10825887 | NC_021166.1    | Ca_Kabuli_Chr07 | 10825887                | GG                                     | AA                 | AA               | INTERGENIC                    |                    |                                                                      |
| SNP_49355_A_10826904 | NC_021166.1    | Ca_Kabuli_Chr07 | 10826904                | CC                                     | TT                 | TT               | INTERGENIC                    |                    |                                                                      |
| SNP_49356_A_10827024 | NC_021166.1    | Ca_Kabuli_Chr07 | 10827024                | GG                                     | TT                 | TT               | INTERGENIC                    |                    |                                                                      |
| SNP_49357_A_10827034 | NC_021166.1    | Ca_Kabuli_Chr07 | 10827034                | TT                                     | CC                 | CC               | INTERGENIC                    |                    |                                                                      |
| SNP_49358_A_10827036 | NC_021166.1    | Ca_Kabuli_Chr07 | 10827036                | CC                                     | TT                 | TT               | INTERGENIC                    |                    |                                                                      |
| SNP_49359_A_10827057 | NC_021166.1    | Ca_Kabuli_Chr07 | 10827057                | CC                                     | TT                 | TT               | INTERGENIC                    |                    |                                                                      |
| SNP_49360_A_10827139 | NC_021166.1    | Ca_Kabuli_Chr07 | 10827139                | AA                                     | GG                 | GG               | INTERGENIC                    |                    |                                                                      |
| SNP_49361_A_10834231 | NC_021166.1    | Ca_Kabuli_Chr07 | 10834231                | CC                                     | TT                 | TT               | INTRON                        | 101513738          | uncharacterized LOC101513738                                         |
| SNP_49362_A_10838544 | NC_021166.1    | Ca_Kabuli_Chr07 | 10838544                | GG                                     | AA                 | AA               | URR                           | 101513738          | uncharacterized LOC101513738                                         |
| SNP_49363_A_10838581 | NC_021166.1    | Ca_Kabuli_Chr07 | 10838581                | AA                                     | GG                 | GG               | URR                           | 101513738          | uncharacterized LOC101513738                                         |

| SNPs IDs             | Chromosome IDs | Chromosomes     | Physical positions (bp) | CDC Frontier genome (Reference genome) | (Pusa 1103 & HPNB) | (ILWC 46 & LPNB) | Sequence Components of genome | Gene accession IDs | Putative functions                            |
|----------------------|----------------|-----------------|-------------------------|----------------------------------------|--------------------|------------------|-------------------------------|--------------------|-----------------------------------------------|
| SNP_49365_A_10838625 | NC_021166.1    | Ca_Kabuli_Chr07 | 10838625                | TT                                     | GG                 | GG               | URR                           | 101513738          | uncharacterized LOC101513738                  |
| SNP_49366_A_10839075 | NC_021166.1    | Ca_Kabuli_Chr07 | 10839075                | TT                                     | CC                 | CC               | URR                           | 101513738          | uncharacterized LOC101513738                  |
| SNP_49367_A_10839281 | NC_021166.1    | Ca_Kabuli_Chr07 | 10839281                | AA                                     | GG                 | GG               | URR                           | 101513738          | uncharacterized LOC101513738                  |
| SNP_49368_A_10839287 | NC_021166.1    | Ca_Kabuli_Chr07 | 10839287                | GG                                     | CC                 | CC               | URR                           | 101513738          | uncharacterized LOC101513738                  |
| SNP_49369_A_10839329 | NC_021166.1    | Ca_Kabuli_Chr07 | 10839329                | GG                                     | AA                 | AA               | URR                           | 101513738          | uncharacterized LOC101513738                  |
| SNP_49370_A_10839780 | NC_021166.1    | Ca_Kabuli_Chr07 | 10839780                | TT                                     | CC                 | CC               | INTERGENIC                    |                    |                                               |
| SNP_49372_A_10846227 | NC_021166.1    | Ca_Kabuli_Chr07 | 10846227                | TT                                     | CC                 | CC               | INTERGENIC                    |                    |                                               |
| SNP_49373_A_10847604 | NC_021166.1    | Ca_Kabuli_Chr07 | 10847604                | TT                                     | CC                 | CC               | DRR                           | 101514627          | uncharacterized LOC101514627                  |
| SNP_49374_A_10848874 | NC_021166.1    | Ca_Kabuli_Chr07 | 10848874                | CC                                     | TT                 | TT               | URR                           | 101514305          | NAC domain-containing protein 72-like         |
| SNP_49375_A_10848928 | NC_021166.1    | Ca_Kabuli_Chr07 | 10848928                | CC                                     | GG                 | GG               | URR                           | 101514305          | NAC domain-containing protein 72-like         |
| SNP_49376_A_10852304 | NC_021166.1    | Ca_Kabuli_Chr07 | 10852304                | AA                                     | GG                 | GG               | INTERGENIC                    |                    |                                               |
| SNP_49377_A_10852307 | NC_021166.1    | Ca_Kabuli_Chr07 | 10852307                | AA                                     | GG                 | GG               | INTERGENIC                    |                    |                                               |
| SNP_49378_A_10853838 | NC_021166.1    | Ca_Kabuli_Chr07 | 10853838                | AA                                     | GG                 | GG               | INTRON                        | 101515278          | aluminum-activated malate transporter 12-like |
| SNP_49379_A_10853912 | NC_021166.1    | Ca_Kabuli_Chr07 | 10853912                | AA                                     | GG                 | GG               | INTRON                        | 101515278          | aluminum-activated malate transporter 12-like |
| SNP_49380_A_10853919 | NC_021166.1    | Ca_Kabuli_Chr07 | 10853919                | GG                                     | CC                 | CC               | INTRON                        | 101515278          | aluminum-activated malate transporter 12-like |
| SNP_49381_A_10854521 | NC_021166.1    | Ca_Kabuli_Chr07 | 10854521                | GG                                     | AA                 | AA               | INTERGENIC                    |                    |                                               |
| SNP_49382_A_10855161 | NC_021166.1    | Ca_Kabuli_Chr07 | 10855161                | AA                                     | GG                 | GG               | INTERGENIC                    |                    |                                               |
| SNP_49383_A_10855196 | NC_021166.1    | Ca_Kabuli_Chr07 | 10855196                | GG                                     | AA                 | AA               | INTERGENIC                    |                    |                                               |
| SNP_49384_A_10857594 | NC_021166.1    | Ca_Kabuli_Chr07 | 10857594                | TT                                     | CC                 | CC               | INTERGENIC                    |                    |                                               |
| SNP_49385_A_10860600 | NC_021166.1    | Ca_Kabuli_Chr07 | 10860600                | TT                                     | CC                 | CC               | INTRON                        | 101514958          | MND1-interacting protein 1                    |
| SNP_49386_A_10860612 | NC_021166.1    | Ca_Kabuli_Chr07 | 10860612                | TT                                     | AA                 | AA               | INTRON                        | 101514958          | MND1-interacting protein 1                    |
| SNP_49387_A_10871945 | NC_021166.1    | Ca_Kabuli_Chr07 | 10871945                | AA                                     | GG                 | GG               | INTERGENIC                    |                    |                                               |

| SNPs IDs             | Chromosome IDs | Chromosomes     | Physical positions (bp) | CDC Frontier genome (Reference genome) | (Pusa 1103 & HPNB) | (ILWC 46 & LPNB) | Sequence Components of genome | Gene accession IDs | Putative functions                                       |
|----------------------|----------------|-----------------|-------------------------|----------------------------------------|--------------------|------------------|-------------------------------|--------------------|----------------------------------------------------------|
| SNP_49388_A_10872135 | NC_021166.1    | Ca_Kabuli_Chr07 | 10872135                | GG                                     | AA                 | AA               | INTERGENIC                    |                    |                                                          |
| SNP_49389_A_10872310 | NC_021166.1    | Ca_Kabuli_Chr07 | 10872310                | TT                                     | CC                 | CC               | INTERGENIC                    |                    |                                                          |
| SNP_49390_A_10872323 | NC_021166.1    | Ca_Kabuli_Chr07 | 10872323                | GG                                     | AA                 | AA               | INTERGENIC                    |                    |                                                          |
| SNP_49391_A_10872406 | NC_021166.1    | Ca_Kabuli_Chr07 | 10872406                | TT                                     | CC                 | CC               | INTERGENIC                    |                    |                                                          |
| SNP_49392_A_10876107 | NC_021166.1    | Ca_Kabuli_Chr07 | 10876107                | TT                                     | AA                 | AA               | INTRON                        | 101515603          | plant intracellular Ras-group-related LRR protein 5-like |
| SNP_49393_A_10876564 | NC_021166.1    | Ca_Kabuli_Chr07 | 10876564                | CC                                     | TT                 | TT               | URR                           | 101515603          | plant intracellular Ras-group-related LRR protein 5-like |
| SNP_49394_A_10876704 | NC_021166.1    | Ca_Kabuli_Chr07 | 10876704                | GG                                     | AA                 | AA               | URR                           | 101515603          | plant intracellular Ras-group-related LRR protein 5-like |
| SNP_49395_A_10876795 | NC_021166.1    | Ca_Kabuli_Chr07 | 10876795                | GG                                     | AA                 | AA               | URR                           | 101515603          | plant intracellular Ras-group-related LRR protein 5-like |
| SNP_49396_A_10876830 | NC_021166.1    | Ca_Kabuli_Chr07 | 10876830                | GG                                     | AA                 | AA               | URR                           | 101515603          | plant intracellular Ras-group-related LRR protein 5-like |
| SNP_49397_A_10877801 | NC_021166.1    | Ca_Kabuli_Chr07 | 10877801                | TT                                     | GG                 | GG               | DRR                           | 101488356          | eyes absent homolog 2                                    |
| SNP_49398_A_10879902 | NC_021166.1    | Ca_Kabuli_Chr07 | 10879902                | TT                                     | CC                 | CC               | INTERGENIC                    |                    |                                                          |
| SNP_49399_A_10888742 | NC_021166.1    | Ca_Kabuli_Chr07 | 10888742                | CC                                     | TT                 | TT               | INTERGENIC                    |                    |                                                          |
| SNP_49400_A_10890111 | NC_021166.1    | Ca_Kabuli_Chr07 | 10890111                | GG                                     | AA                 | AA               | INTERGENIC                    |                    |                                                          |
| SNP_49401_A_10891104 | NC_021166.1    | Ca_Kabuli_Chr07 | 10891104                | AA                                     | GG                 | GG               | INTERGENIC                    |                    |                                                          |
| SNP_49402_A_10891172 | NC_021166.1    | Ca_Kabuli_Chr07 | 10891172                | AA                                     | CC                 | CC               | INTERGENIC                    |                    |                                                          |
| SNP_49403_A_10891382 | NC_021166.1    | Ca_Kabuli_Chr07 | 10891382                | AA                                     | GG                 | GG               | INTERGENIC                    |                    |                                                          |
| SNP_49404_A_10894309 | NC_021166.1    | Ca_Kabuli_Chr07 | 10894309                | GG                                     | CC                 | CC               | INTERGENIC                    |                    |                                                          |
| SNP_49405_A_10894318 | NC_021166.1    | Ca_Kabuli_Chr07 | 10894318                | TT                                     | CC                 | CC               | INTERGENIC                    |                    |                                                          |
| SNP_49406_A_10896005 | NC_021166.1    | Ca_Kabuli_Chr07 | 10896005                | TT                                     | AA                 | AA               | INTERGENIC                    |                    |                                                          |
| SNP_49407_A_10896191 | NC_021166.1    | Ca_Kabuli_Chr07 | 10896191                | GG                                     | AA                 | AA               | INTERGENIC                    |                    |                                                          |
| SNP_49409_A_10896907 | NC_021166.1    | Ca_Kabuli_Chr07 | 10896907                | GG                                     | AA                 | AA               | INTERGENIC                    |                    |                                                          |
| SNP_49410_A_10896915 | NC_021166.1    | Ca_Kabuli_Chr07 | 10896915                | AA                                     | GG                 | GG               | INTERGENIC                    |                    |                                                          |

| SNPs IDs             | Chromosome IDs | Chromosomes     | Physical positions (bp) | CDC Frontier genome (Reference genome) | (Pusa 1103 & HPNB) | (ILWC 46 & LPNB) | Sequence Components of genome | Gene accession IDs | Putative functions                             |
|----------------------|----------------|-----------------|-------------------------|----------------------------------------|--------------------|------------------|-------------------------------|--------------------|------------------------------------------------|
| SNP_49411_A_10898755 | NC_021166.1    | Ca_Kabuli_Chr07 | 10898755                | CC                                     | TT                 | TT               | DRR                           | 101488680          | protein LOL1                                   |
| SNP_49412_A_10899239 | NC_021166.1    | Ca_Kabuli_Chr07 | 10899239                | TT                                     | GG                 | GG               | DRR                           | 101488680          | protein LOL1                                   |
| SNP_49413_A_10899260 | NC_021166.1    | Ca_Kabuli_Chr07 | 10899260                | TT                                     | CC                 | CC               | DRR                           | 101488680          | protein LOL1                                   |
| SNP_49415_A_10901505 | NC_021166.1    | Ca_Kabuli_Chr07 | 10901505                | TT                                     | CC                 | CC               | INTERGENIC                    |                    |                                                |
| SNP_49418_A_10908263 | NC_021166.1    | Ca_Kabuli_Chr07 | 10908263                | GG                                     | AA                 | AA               | INTRON                        | 101489877          | ferredoxin-A                                   |
| SNP_49419_A_10909277 | NC_021166.1    | Ca_Kabuli_Chr07 | 10909277                | AA                                     | TT                 | TT               | URR                           | 101489877          | ferredoxin-A                                   |
| SNP_49420_A_10909562 | NC_021166.1    | Ca_Kabuli_Chr07 | 10909562                | AA                                     | GG                 | GG               | URR                           | 101489877          | ferredoxin-A                                   |
| SNP_49421_A_10909789 | NC_021166.1    | Ca_Kabuli_Chr07 | 10909789                | TT                                     | AA                 | AA               | URR                           | 101489877          | ferredoxin-A                                   |
| SNP_49422_A_10909963 | NC_021166.1    | Ca_Kabuli_Chr07 | 10909963                | CC                                     | TT                 | TT               | URR                           | 101489877          | ferredoxin-A                                   |
| SNP_49424_A_10914988 | NC_021166.1    | Ca_Kabuli_Chr07 | 10914988                | CC                                     | TT                 | TT               | INTERGENIC                    |                    |                                                |
| SNP_49425_A_10915738 | NC_021166.1    | Ca_Kabuli_Chr07 | 10915738                | TT                                     | CC                 | CC               | INTERGENIC                    |                    |                                                |
| SNP_49426_A_10915754 | NC_021166.1    | Ca_Kabuli_Chr07 | 10915754                | AA                                     | TT                 | TT               | INTERGENIC                    |                    |                                                |
| SNP_49427_A_10916494 | NC_021166.1    | Ca_Kabuli_Chr07 | 10916494                | TT                                     | CC                 | CC               | INTERGENIC                    |                    |                                                |
| SNP_49428_A_10924957 | NC_021166.1    | Ca_Kabuli_Chr07 | 10924957                | CC                                     | TT                 | TT               | URR                           | 101490533          | AT-hook motif nuclear-localized protein 8-like |
| SNP_49429_A_10925211 | NC_021166.1    | Ca_Kabuli_Chr07 | 10925211                | TT                                     | GG                 | GG               | URR                           | 101490533          | AT-hook motif nuclear-localized protein 8-like |
| SNP_49430_A_10925466 | NC_021166.1    | Ca_Kabuli_Chr07 | 10925466                | AA                                     | GG                 | GG               | INTERGENIC                    |                    |                                                |
| SNP_49432_A_10927110 | NC_021166.1    | Ca_Kabuli_Chr07 | 10927110                | AA                                     | GG                 | GG               | INTERGENIC                    |                    |                                                |
| SNP_49433_A_10927772 | NC_021166.1    | Ca_Kabuli_Chr07 | 10927772                | AA                                     | GG                 | GG               | INTERGENIC                    |                    |                                                |
| SNP_49434_A_10927862 | NC_021166.1    | Ca_Kabuli_Chr07 | 10927862                | CC                                     | GG                 | GG               | INTERGENIC                    |                    |                                                |
| SNP_49435_A_10927916 | NC_021166.1    | Ca_Kabuli_Chr07 | 10927916                | AA                                     | CC                 | CC               | INTERGENIC                    |                    |                                                |
| SNP_49436_A_10932091 | NC_021166.1    | Ca_Kabuli_Chr07 | 10932091                | CC                                     | AA                 | AA               | URR                           | 101490855          | AT-hook motif nuclear-localized protein 23     |
| SNP_49437_A_10936409 | NC_021166.1    | Ca_Kabuli_Chr07 | 10936409                | CC                                     | GG                 | GG               | INTERGENIC                    |                    |                                                |

| SNPs IDs             | Chromosome IDs | Chromosomes     | Physical positions (bp) | CDC Frontier genome (Reference genome) | (Pusa 1103 & HPNB) | (ILWC 46 & LPNB) | Sequence genome | Components of | Gene accession IDs | Putative functions |
|----------------------|----------------|-----------------|-------------------------|----------------------------------------|--------------------|------------------|-----------------|---------------|--------------------|--------------------|
| SNP_49440_A_10939538 | NC_021166.1    | Ca_Kabuli_Chr07 | 10939538                | TT                                     | CC                 | CC               | INTERGENIC      |               |                    |                    |
| SNP_49441_A_10940713 | NC_021166.1    | Ca_Kabuli_Chr07 | 10940713                | TT                                     | AA                 | AA               | INTERGENIC      |               |                    |                    |
| SNP_49442_A_10940716 | NC_021166.1    | Ca_Kabuli_Chr07 | 10940716                | GG                                     | AA                 | AA               | INTERGENIC      |               |                    |                    |
| SNP_49443_A_10940776 | NC_021166.1    | Ca_Kabuli_Chr07 | 10940776                | AA                                     | GG                 | GG               | INTERGENIC      |               |                    |                    |
| SNP_49444_A_10941233 | NC_021166.1    | Ca_Kabuli_Chr07 | 10941233                | CC                                     | TT                 | TT               | INTERGENIC      |               |                    |                    |
| SNP_49445_A_10942913 | NC_021166.1    | Ca_Kabuli_Chr07 | 10942913                | GG                                     | TT                 | TT               | INTERGENIC      |               |                    |                    |
| SNP_49446_A_10942958 | NC_021166.1    | Ca_Kabuli_Chr07 | 10942958                | TT                                     | CC                 | CC               | INTERGENIC      |               |                    |                    |
| SNP_49447_A_10942984 | NC_021166.1    | Ca_Kabuli_Chr07 | 10942984                | TT                                     | CC                 | CC               | INTERGENIC      |               |                    |                    |
| SNP_49448_A_10943272 | NC_021166.1    | Ca_Kabuli_Chr07 | 10943272                | TT                                     | GG                 | GG               | INTERGENIC      |               |                    |                    |
| SNP_49449_A_10943990 | NC_021166.1    | Ca_Kabuli_Chr07 | 10943990                | AA                                     | TT                 | TT               | INTERGENIC      |               |                    |                    |
| SNP_49450_A_10944006 | NC_021166.1    | Ca_Kabuli_Chr07 | 10944006                | AA                                     | GG                 | GG               | INTERGENIC      |               |                    |                    |
| SNP_49451_A_10944022 | NC_021166.1    | Ca_Kabuli_Chr07 | 10944022                | GG                                     | CC                 | CC               | INTERGENIC      |               |                    |                    |
| SNP_49452_A_10961345 | NC_021166.1    | Ca_Kabuli_Chr07 | 10961345                | TT                                     | CC                 | CC               | INTERGENIC      |               |                    |                    |
| SNP_49453_A_10961399 | NC_021166.1    | Ca_Kabuli_Chr07 | 10961399                | GG                                     | AA                 | AA               | INTERGENIC      |               |                    |                    |
| SNP_49454_A_10961510 | NC_021166.1    | Ca_Kabuli_Chr07 | 10961510                | TT                                     | CC                 | CC               | INTERGENIC      |               |                    |                    |
| SNP_49455_A_10961546 | NC_021166.1    | Ca_Kabuli_Chr07 | 10961546                | GG                                     | AA                 | AA               | INTERGENIC      |               |                    |                    |
| SNP_49456_A_10961551 | NC_021166.1    | Ca_Kabuli_Chr07 | 10961551                | AA                                     | GG                 | GG               | INTERGENIC      |               |                    |                    |
| SNP_49457_A_10961570 | NC_021166.1    | Ca_Kabuli_Chr07 | 10961570                | TT                                     | CC                 | CC               | INTERGENIC      |               |                    |                    |
| SNP_49458_A_10961602 | NC_021166.1    | Ca_Kabuli_Chr07 | 10961602                | CC                                     | TT                 | TT               | INTERGENIC      |               |                    |                    |
| SNP_49459_A_11025404 | NC_021166.1    | Ca_Kabuli_Chr07 | 11025404                | AA                                     | CC                 | CC               | INTERGENIC      |               |                    |                    |
| SNP_49460_A_11030629 | NC_021166.1    | Ca_Kabuli_Chr07 | 11030629                | AA                                     | CC                 | CC               | INTERGENIC      |               |                    |                    |
| SNP_49461_A_11031986 | NC_021166.1    | Ca_Kabuli_Chr07 | 11031986                | CC                                     | AA                 | AA               | INTERGENIC      |               |                    |                    |



| SNPs IDs             | Chromosome IDs | Chromosomes     | Physical positions (bp) | CDC Frontier genome (Reference genome) | (Pusa 1103 & HPNB) | (ILWC 46 & LPNB) | Sequence genome | Components of | Gene accession IDs | Putative functions |
|----------------------|----------------|-----------------|-------------------------|----------------------------------------|--------------------|------------------|-----------------|---------------|--------------------|--------------------|
| SNP_49463_A_11035255 | NC_021166.1    | Ca_Kabuli_Chr07 | 11035255                | CC                                     | TT                 | TT               | INTERGENIC      |               |                    |                    |
| SNP_49464_A_11035626 | NC_021166.1    | Ca_Kabuli_Chr07 | 11035626                | AA                                     | TT                 | TT               | INTERGENIC      |               |                    |                    |
| SNP_49465_A_11035973 | NC_021166.1    | Ca_Kabuli_Chr07 | 11035973                | TT                                     | CC                 | CC               | INTERGENIC      |               |                    |                    |
| SNP_49466_A_11036038 | NC_021166.1    | Ca_Kabuli_Chr07 | 11036038                | GG                                     | AA                 | AA               | INTERGENIC      |               |                    |                    |
| SNP_49467_A_11036088 | NC_021166.1    | Ca_Kabuli_Chr07 | 11036088                | AA                                     | GG                 | GG               | INTERGENIC      |               |                    |                    |
| SNP_49468_A_11036092 | NC_021166.1    | Ca_Kabuli_Chr07 | 11036092                | AA                                     | GG                 | GG               | INTERGENIC      |               |                    |                    |
| SNP_49469_A_11036343 | NC_021166.1    | Ca_Kabuli_Chr07 | 11036343                | TT                                     | CC                 | CC               | INTERGENIC      |               |                    |                    |
| SNP_49470_A_11037033 | NC_021166.1    | Ca_Kabuli_Chr07 | 11037033                | CC                                     | AA                 | AA               | INTERGENIC      |               |                    |                    |
| SNP_49471_A_11037049 | NC_021166.1    | Ca_Kabuli_Chr07 | 11037049                | TT                                     | AA                 | AA               | INTERGENIC      |               |                    |                    |
| SNP_49472_A_11037059 | NC_021166.1    | Ca_Kabuli_Chr07 | 11037059                | AA                                     | GG                 | GG               | INTERGENIC      |               |                    |                    |
| SNP_49473_A_11039186 | NC_021166.1    | Ca_Kabuli_Chr07 | 11039186                | CC                                     | AA                 | AA               | INTERGENIC      |               |                    |                    |
| SNP_49474_A_11056656 | NC_021166.1    | Ca_Kabuli_Chr07 | 11056656                | CC                                     | TT                 | TT               | INTERGENIC      |               |                    |                    |
| SNP_49475_A_11056662 | NC_021166.1    | Ca_Kabuli_Chr07 | 11056662                | AA                                     | GG                 | GG               | INTERGENIC      |               |                    |                    |
| SNP_49476_A_11057708 | NC_021166.1    | Ca_Kabuli_Chr07 | 11057708                | TT                                     | CC                 | CC               | INTERGENIC      |               |                    |                    |
| SNP_49477_A_11057783 | NC_021166.1    | Ca_Kabuli_Chr07 | 11057783                | CC                                     | TT                 | TT               | INTERGENIC      |               |                    |                    |
| SNP_49478_A_11058812 | NC_021166.1    | Ca_Kabuli_Chr07 | 11058812                | GG                                     | AA                 | AA               | INTERGENIC      |               |                    |                    |
| SNP_49479_A_11058892 | NC_021166.1    | Ca_Kabuli_Chr07 | 11058892                | AA                                     | GG                 | GG               | INTERGENIC      |               |                    |                    |
| SNP_49480_A_11059055 | NC_021166.1    | Ca_Kabuli_Chr07 | 11059055                | GG                                     | AA                 | AA               | INTERGENIC      |               |                    |                    |
| SNP_49481_A_11059065 | NC_021166.1    | Ca_Kabuli_Chr07 | 11059065                | GG                                     | AA                 | AA               | INTERGENIC      |               |                    |                    |
| SNP_49482_A_11059075 | NC_021166.1    | Ca_Kabuli_Chr07 | 11059075                | TT                                     | GG                 | GG               | INTERGENIC      |               |                    |                    |
| SNP_49483_A_11059087 | NC_021166.1    | Ca_Kabuli_Chr07 | 11059087                | AA                                     | GG                 | GG               | INTERGENIC      |               |                    |                    |
| SNP_49484_A_11059096 | NC_021166.1    | Ca_Kabuli_Chr07 | 11059096                | GG                                     | AA                 | AA               | INTERGENIC      |               |                    |                    |

| SNPs IDs             | Chromosome IDs | Chromosomes     | Physical positions (bp) | CDC Frontier genome (Reference genome) | (Pusa 1103 & HPNB) | (ILWC 46 & LPNB) | Sequence Components of genome | Gene accession IDs | Putative functions               |
|----------------------|----------------|-----------------|-------------------------|----------------------------------------|--------------------|------------------|-------------------------------|--------------------|----------------------------------|
| SNP_49485_A_11063147 | NC_021166.1    | Ca_Kabuli_Chr07 | 11063147                | AA                                     | TT                 | TT               | INTERGENIC                    |                    |                                  |
| SNP_49486_A_11063180 | NC_021166.1    | Ca_Kabuli_Chr07 | 11063180                | TT                                     | AA                 | AA               | INTERGENIC                    |                    |                                  |
| SNP_49487_A_11063201 | NC_021166.1    | Ca_Kabuli_Chr07 | 11063201                | TT                                     | GG                 | GG               | INTERGENIC                    |                    |                                  |
| SNP_49488_A_11065508 | NC_021166.1    | Ca_Kabuli_Chr07 | 11065508                | AA                                     | TT                 | TT               | DRR                           | 101497336          | transcription factor NAI1-like   |
| SNP_49490_A_11066520 | NC_021166.1    | Ca_Kabuli_Chr07 | 11066520                | CC                                     | TT                 | TT               | INTRON                        | 101497336          | transcription factor NAI1-like   |
| SNP_49491_A_11068236 | NC_021166.1    | Ca_Kabuli_Chr07 | 11068236                | GG                                     | AA                 | AA               | INTRON                        | 101497336          | transcription factor NAI1-like   |
| SNP_49492_A_11070415 | NC_021166.1    | Ca_Kabuli_Chr07 | 11070415                | AA                                     | TT                 | TT               | URR                           | 101497336          | transcription factor NAI1-like   |
| SNP_49494_A_11071130 | NC_021166.1    | Ca_Kabuli_Chr07 | 11071130                | CC                                     | TT                 | TT               | INTERGENIC                    |                    |                                  |
| SNP_49495_A_11071142 | NC_021166.1    | Ca_Kabuli_Chr07 | 11071142                | TT                                     | CC                 | CC               | INTERGENIC                    |                    |                                  |
| SNP_49496_A_11074238 | NC_021166.1    | Ca_Kabuli_Chr07 | 11074238                | TT                                     | AA                 | AA               | INTRON                        | 101494527          | transcription factor bHLH18-like |
| SNP_49497_A_11074281 | NC_021166.1    | Ca_Kabuli_Chr07 | 11074281                | TT                                     | CC                 | CC               | INTRON                        | 101494527          | transcription factor bHLH18-like |
| SNP_49499_A_11075024 | NC_021166.1    | Ca_Kabuli_Chr07 | 11075024                | TT                                     | CC                 | CC               | INTRON                        | 101494527          | transcription factor bHLH18-like |
| SNP_49500_A_11075392 | NC_021166.1    | Ca_Kabuli_Chr07 | 11075392                | CC                                     | GG                 | GG               | INTRON                        | 101494527          | transcription factor bHLH18-like |
| SNP_49501_A_11075767 | NC_021166.1    | Ca_Kabuli_Chr07 | 11075767                | CC                                     | GG                 | GG               | INTRON                        | 101494527          | transcription factor bHLH18-like |
| SNP_49503_A_11076499 | NC_021166.1    | Ca_Kabuli_Chr07 | 11076499                | AA                                     | GG                 | GG               | NON_SYNONYMOUS_CODING         | 101494527          | transcription factor bHLH18-like |
| SNP_49504_A_11077673 | NC_021166.1    | Ca_Kabuli_Chr07 | 11077673                | AA                                     | GG                 | GG               | INTRON                        | 101494527          | transcription factor bHLH18-like |
| SNP_49505_A_11077982 | NC_021166.1    | Ca_Kabuli_Chr07 | 11077982                | AA                                     | GG                 | GG               | INTRON                        | 101494527          | transcription factor bHLH18-like |
| SNP_49506_A_11077989 | NC_021166.1    | Ca_Kabuli_Chr07 | 11077989                | CC                                     | AA                 | AA               | INTRON                        | 101494527          | transcription factor bHLH18-like |
| SNP_49508_A_11081029 | NC_021166.1    | Ca_Kabuli_Chr07 | 11081029                | GG                                     | AA                 | AA               | URR                           | 101494527          | transcription factor bHLH18-like |
| SNP_49509_A_11081099 | NC_021166.1    | Ca_Kabuli_Chr07 | 11081099                | TT                                     | CC                 | CC               | URR                           | 101494527          | transcription factor bHLH18-like |
| SNP_49510_A_11082673 | NC_021166.1    | Ca_Kabuli_Chr07 | 11082673                | GG                                     | TT                 | TT               | INTERGENIC                    |                    |                                  |
| SNP_49511_A_11083049 | NC_021166.1    | Ca_Kabuli_Chr07 | 11083049                | GG                                     | AA                 | AA               | INTERGENIC                    |                    |                                  |

| SNPs IDs             | Chromosome IDs | Chromosomes     | Physical positions (bp) | CDC Frontier genome (Reference genome) | (Pusa 1103 & HPNB) | (ILWC 46 & LPNB) | Sequence Components of genome | Gene accession IDs | Putative functions                 |
|----------------------|----------------|-----------------|-------------------------|----------------------------------------|--------------------|------------------|-------------------------------|--------------------|------------------------------------|
| SNP_49512_A_11083069 | NC_021166.1    | Ca_Kabuli_Chr07 | 11083069                | CC                                     | GG                 | GG               | INTERGENIC                    |                    |                                    |
| SNP_49513_A_11083389 | NC_021166.1    | Ca_Kabuli_Chr07 | 11083389                | CC                                     | GG                 | GG               | INTERGENIC                    |                    |                                    |
| SNP_49514_A_11084802 | NC_021166.1    | Ca_Kabuli_Chr07 | 11084802                | CC                                     | GG                 | GG               | INTERGENIC                    |                    |                                    |
| SNP_49515_A_11088169 | NC_021166.1    | Ca_Kabuli_Chr07 | 11088169                | TT                                     | CC                 | CC               | URR                           | 101497663          | transcription factor bHLH19        |
| SNP_49516_A_11088705 | NC_021166.1    | Ca_Kabuli_Chr07 | 11088705                | GG                                     | CC                 | CC               | INTERGENIC                    |                    |                                    |
| SNP_49517_A_11088709 | NC_021166.1    | Ca_Kabuli_Chr07 | 11088709                | AA                                     | CC                 | CC               | INTERGENIC                    |                    |                                    |
| SNP_49518_A_11088710 | NC_021166.1    | Ca_Kabuli_Chr07 | 11088710                | AA                                     | GG                 | GG               | INTERGENIC                    |                    |                                    |
| SNP_49519_A_11090576 | NC_021166.1    | Ca_Kabuli_Chr07 | 11090576                | AA                                     | CC                 | CC               | INTERGENIC                    |                    |                                    |
| SNP_49520_A_11091293 | NC_021166.1    | Ca_Kabuli_Chr07 | 11091293                | CC                                     | TT                 | TT               | INTERGENIC                    |                    |                                    |
| SNP_49521_A_11091317 | NC_021166.1    | Ca_Kabuli_Chr07 | 11091317                | AA                                     | GG                 | GG               | INTERGENIC                    |                    |                                    |
| SNP_49523_A_11093377 | NC_021166.1    | Ca_Kabuli_Chr07 | 11093377                | AA                                     | GG                 | GG               | INTERGENIC                    |                    |                                    |
| SNP_49524_A_11093388 | NC_021166.1    | Ca_Kabuli_Chr07 | 11093388                | CC                                     | GG                 | GG               | INTERGENIC                    |                    |                                    |
| SNP_49525_A_11094257 | NC_021166.1    | Ca_Kabuli_Chr07 | 11094257                | AA                                     | GG                 | GG               | INTERGENIC                    |                    |                                    |
| SNP_49526_A_11096468 | NC_021166.1    | Ca_Kabuli_Chr07 | 11096468                | CC                                     | TT                 | TT               | INTERGENIC                    |                    |                                    |
| SNP_49527_A_11096974 | NC_021166.1    | Ca_Kabuli_Chr07 | 11096974                | GG                                     | TT                 | TT               | INTERGENIC                    |                    |                                    |
| SNP_49528_A_11099784 | NC_021166.1    | Ca_Kabuli_Chr07 | 11099784                | CC                                     | AA                 | AA               | INTERGENIC                    |                    |                                    |
| SNP_49529_A_11100016 | NC_021166.1    | Ca_Kabuli_Chr07 | 11100016                | TT                                     | AA                 | AA               | INTERGENIC                    |                    |                                    |
| SNP_49530_A_11100038 | NC_021166.1    | Ca_Kabuli_Chr07 | 11100038                | CC                                     | TT                 | TT               | INTERGENIC                    |                    |                                    |
| SNP_49531_A_11100149 | NC_021166.1    | Ca_Kabuli_Chr07 | 11100149                | TT                                     | CC                 | CC               | INTERGENIC                    |                    |                                    |
| SNP_49532_A_11100899 | NC_021166.1    | Ca_Kabuli_Chr07 | 11100899                | CC                                     | AA                 | AA               | DRR                           | 101494846          | probable hexokinase-like 2 protein |
| SNP_49533_A_11101079 | NC_021166.1    | Ca_Kabuli_Chr07 | 11101079                | TT                                     | CC                 | CC               | DRR                           | 101494846          | probable hexokinase-like 2 protein |
| SNP_49534_A_11102177 | NC_021166.1    | Ca_Kabuli_Chr07 | 11102177                | TT                                     | GG                 | GG               | INTRON                        | 101494846          | probable hexokinase-like 2 protein |

| SNPs IDs             | Chromosome IDs | Chromosomes     | Physical positions (bp) | CDC Frontier (Reference genome) | (Pusa 1103 & HPNB) | (ILWC 46 & LPNB) | Sequence Components of genome | Gene accession IDs | Putative functions                                                     |
|----------------------|----------------|-----------------|-------------------------|---------------------------------|--------------------|------------------|-------------------------------|--------------------|------------------------------------------------------------------------|
| SNP_49535_A_11103244 | NC_021166.1    | Ca_Kabuli_Chr07 | 11103244                | AA                              | CC                 | CC               | INTRON                        | 101494846          | probable hexokinase-like 2 protein                                     |
| SNP_49536_A_11103245 | NC_021166.1    | Ca_Kabuli_Chr07 | 11103245                | TT                              | AA                 | AA               | INTRON                        | 101494846          | probable hexokinase-like 2 protein                                     |
| SNP_49537_A_11103613 | NC_021166.1    | Ca_Kabuli_Chr07 | 11103613                | CC                              | AA                 | AA               | SYNONYMOUS_CODING             | 101494846          | probable hexokinase-like 2 protein                                     |
| SNP_49538_A_11113999 | NC_021166.1    | Ca_Kabuli_Chr07 | 11113999                | TT                              | GG                 | GG               | SYNONYMOUS_CODING             | 101497995          | leucine-rich repeat receptor-like serine/threonine-protein kinase BAM1 |
| SNP_49539_A_11114258 | NC_021166.1    | Ca_Kabuli_Chr07 | 11114258                | TT                              | CC                 | CC               | SYNONYMOUS_CODING             | 101497995          | leucine-rich repeat receptor-like serine/threonine-protein kinase BAM1 |
| SNP_49540_A_11118446 | NC_021166.1    | Ca_Kabuli_Chr07 | 11118446                | AA                              | CC                 | CC               | URR                           | 101497995          | leucine-rich repeat receptor-like serine/threonine-protein kinase BAM1 |
| SNP_49542_A_11119633 | NC_021166.1    | Ca_Kabuli_Chr07 | 11119633                | TT                              | GG                 | GG               | INTERGENIC                    |                    |                                                                        |
| SNP_49544_A_11122260 | NC_021166.1    | Ca_Kabuli_Chr07 | 11122260                | GG                              | TT                 | TT               | INTERGENIC                    |                    |                                                                        |
| SNP_49546_A_11122570 | NC_021166.1    | Ca_Kabuli_Chr07 | 11122570                | TT                              | CC                 | CC               | INTERGENIC                    |                    |                                                                        |
| SNP_49547_A_11122577 | NC_021166.1    | Ca_Kabuli_Chr07 | 11122577                | CC                              | GG                 | GG               | INTERGENIC                    |                    |                                                                        |
| SNP_49548_A_11128417 | NC_021166.1    | Ca_Kabuli_Chr07 | 11128417                | AA                              | CC                 | CC               | INTERGENIC                    |                    |                                                                        |
| SNP_49549_A_11128435 | NC_021166.1    | Ca_Kabuli_Chr07 | 11128435                | GG                              | AA                 | AA               | INTERGENIC                    |                    |                                                                        |
| SNP_49550_A_11128444 | NC_021166.1    | Ca_Kabuli_Chr07 | 11128444                | TT                              | CC                 | CC               | INTERGENIC                    |                    |                                                                        |
| SNP_49551_A_11132764 | NC_021166.1    | Ca_Kabuli_Chr07 | 11132764                | CC                              | TT                 | TT               | INTERGENIC                    |                    |                                                                        |
| SNP_49552_A_11133051 | NC_021166.1    | Ca_Kabuli_Chr07 | 11133051                | TT                              | CC                 | CC               | INTERGENIC                    |                    |                                                                        |
| SNP_49553_A_11133083 | NC_021166.1    | Ca_Kabuli_Chr07 | 11133083                | CC                              | TT                 | TT               | INTERGENIC                    |                    |                                                                        |
| SNP_49554_A_11133340 | NC_021166.1    | Ca_Kabuli_Chr07 | 11133340                | TT                              | CC                 | CC               | INTERGENIC                    |                    |                                                                        |
| SNP_49555_A_11139751 | NC_021166.1    | Ca_Kabuli_Chr07 | 11139751                | GG                              | AA                 | AA               | DRR                           | 101498664          | dentin sialophosphoprotein                                             |
| SNP_49556_A_11146036 | NC_021166.1    | Ca_Kabuli_Chr07 | 11146036                | TT                              | AA                 | AA               | URR                           | 101498664          | dentin sialophosphoprotein                                             |
| SNP_49557_A_11147429 | NC_021166.1    | Ca_Kabuli_Chr07 | 11147429                | GG                              | AA                 | AA               | INTERGENIC                    |                    |                                                                        |
| SNP_49558_A_11147453 | NC_021166.1    | Ca_Kabuli_Chr07 | 11147453                | CC                              | AA                 | AA               | INTERGENIC                    |                    |                                                                        |
| SNP_49559_A_11147482 | NC_021166.1    | Ca_Kabuli_Chr07 | 11147482                | AA                              | CC                 | CC               | INTERGENIC                    |                    |                                                                        |

| SNPs IDs             | Chromosome IDs | Chromosomes     | Physical positions (bp) | CDC Frontier genome | (Reference genome) | (Pusa 1103 & HPNB) | (ILWC 46 & LPNB) | Sequence genome | Components of | Gene accession IDs | Putative functions                         |
|----------------------|----------------|-----------------|-------------------------|---------------------|--------------------|--------------------|------------------|-----------------|---------------|--------------------|--------------------------------------------|
| SNP_49560_A_11151329 | NC_021166.1    | Ca_Kabuli_Chr07 | 11151329                | GG                  |                    | AA                 | AA               | INTERGENIC      |               |                    |                                            |
| SNP_49561_A_11151331 | NC_021166.1    | Ca_Kabuli_Chr07 | 11151331                | GG                  |                    | AA                 | AA               | INTERGENIC      |               |                    |                                            |
| SNP_49562_A_11154348 | NC_021166.1    | Ca_Kabuli_Chr07 | 11154348                | CC                  |                    | GG                 | GG               | INTERGENIC      |               |                    |                                            |
| SNP_49564_A_11154482 | NC_021166.1    | Ca_Kabuli_Chr07 | 11154482                | GG                  |                    | AA                 | AA               | INTERGENIC      |               |                    |                                            |
| SNP_49565_A_11154624 | NC_021166.1    | Ca_Kabuli_Chr07 | 11154624                | CC                  |                    | TT                 | TT               | INTERGENIC      |               |                    |                                            |
| SNP_49566_A_11154813 | NC_021166.1    | Ca_Kabuli_Chr07 | 11154813                | GG                  |                    | AA                 | AA               | INTERGENIC      |               |                    |                                            |
| SNP_49567_A_11154837 | NC_021166.1    | Ca_Kabuli_Chr07 | 11154837                | TT                  |                    | CC                 | CC               | INTERGENIC      |               |                    |                                            |
| SNP_49568_A_11160249 | NC_021166.1    | Ca_Kabuli_Chr07 | 11160249                | TT                  |                    | CC                 | CC               | INTERGENIC      |               |                    |                                            |
| SNP_49569_A_11160610 | NC_021166.1    | Ca_Kabuli_Chr07 | 11160610                | AA                  |                    | GG                 | GG               | INTERGENIC      |               |                    |                                            |
| SNP_49570_A_11163443 | NC_021166.1    | Ca_Kabuli_Chr07 | 11163443                | TT                  |                    | CC                 | CC               | INTERGENIC      |               |                    |                                            |
| SNP_49571_A_11164370 | NC_021166.1    | Ca_Kabuli_Chr07 | 11164370                | GG                  |                    | AA                 | AA               | INTERGENIC      |               |                    |                                            |
| SNP_49572_A_11164691 | NC_021166.1    | Ca_Kabuli_Chr07 | 11164691                | GG                  |                    | AA                 | AA               | INTERGENIC      |               |                    |                                            |
| SNP_49573_A_11165410 | NC_021166.1    | Ca_Kabuli_Chr07 | 11165410                | CC                  |                    | GG                 | GG               | INTERGENIC      |               |                    |                                            |
| SNP_49574_A_11165801 | NC_021166.1    | Ca_Kabuli_Chr07 | 11165801                | AA                  |                    | TT                 | TT               | INTERGENIC      |               |                    |                                            |
| SNP_49575_A_11166070 | NC_021166.1    | Ca_Kabuli_Chr07 | 11166070                | TT                  |                    | GG                 | GG               | DRR             |               | 101498988          | EPIDERMAL PATTERNING FACTOR-like protein 2 |
| SNP_49576_A_11166138 | NC_021166.1    | Ca_Kabuli_Chr07 | 11166138                | CC                  |                    | TT                 | TT               | DRR             |               | 101498988          | EPIDERMAL PATTERNING FACTOR-like protein 2 |
| SNP_49578_A_11166410 | NC_021166.1    | Ca_Kabuli_Chr07 | 11166410                | AA                  |                    | CC                 | CC               | DRR             |               | 101498988          | EPIDERMAL PATTERNING FACTOR-like protein 2 |
| SNP_49579_A_11166573 | NC_021166.1    | Ca_Kabuli_Chr07 | 11166573                | CC                  |                    | GG                 | GG               | DRR             |               | 101498988          | EPIDERMAL PATTERNING FACTOR-like protein 2 |
| SNP_49580_A_11170731 | NC_021166.1    | Ca_Kabuli_Chr07 | 11170731                | GG                  |                    | CC                 | CC               | INTERGENIC      |               |                    |                                            |
| SNP_49581_A_11171630 | NC_021166.1    | Ca_Kabuli_Chr07 | 11171630                | AA                  |                    | GG                 | GG               | INTERGENIC      |               |                    |                                            |
| SNP_49582_A_11171632 | NC_021166.1    | Ca_Kabuli_Chr07 | 11171632                | AA                  |                    | CC                 | CC               | INTERGENIC      |               |                    |                                            |
| SNP_49583_A_11171633 | NC_021166.1    | Ca_Kabuli_Chr07 | 11171633                | AA                  |                    | GG                 | GG               | INTERGENIC      |               |                    |                                            |

| SNPs IDs             | Chromosome IDs | Chromosomes     | Physical positions (bp) | CDC Frontier genome (Reference genome) | (Pusa 1103 & HPNB) | (ILWC 46 & LPNB) | Sequence Components of genome | Gene accession IDs | Putative functions                                           |
|----------------------|----------------|-----------------|-------------------------|----------------------------------------|--------------------|------------------|-------------------------------|--------------------|--------------------------------------------------------------|
| SNP_49584_A_11173232 | NC_021166.1    | Ca_Kabuli_Chr07 | 11173232                | AA                                     | GG                 | GG               | INTERGENIC                    |                    |                                                              |
| SNP_49585_A_11180678 | NC_021166.1    | Ca_Kabuli_Chr07 | 11180678                | CC                                     | TT                 | TT               | INTERGENIC                    |                    |                                                              |
| SNP_49586_A_11180684 | NC_021166.1    | Ca_Kabuli_Chr07 | 11180684                | TT                                     | GG                 | GG               | INTERGENIC                    |                    |                                                              |
| SNP_49587_A_11180715 | NC_021166.1    | Ca_Kabuli_Chr07 | 11180715                | CC                                     | AA                 | AA               | INTERGENIC                    |                    |                                                              |
| SNP_49589_A_11181110 | NC_021166.1    | Ca_Kabuli_Chr07 | 11181110                | TT                                     | CC                 | CC               | DRR                           | 101499308          | probable xyloglucan endotransglucosylase/hydrolase protein 6 |
| SNP_49590_A_11182431 | NC_021166.1    | Ca_Kabuli_Chr07 | 11182431                | AA                                     | CC                 | CC               | INTRON                        | 101499308          | probable xyloglucan endotransglucosylase/hydrolase protein 6 |
| SNP_49591_A_11182697 | NC_021166.1    | Ca_Kabuli_Chr07 | 11182697                | TT                                     | GG                 | GG               | SYNONYMOUS_CODING             | 101499308          | probable xyloglucan endotransglucosylase/hydrolase protein 6 |
| SNP_49592_A_11182817 | NC_021166.1    | Ca_Kabuli_Chr07 | 11182817                | AA                                     | TT                 | TT               | SYNONYMOUS_CODING             | 101499308          | probable xyloglucan endotransglucosylase/hydrolase protein 6 |
| SNP_49593_A_11188082 | NC_021166.1    | Ca_Kabuli_Chr07 | 11188082                | CC                                     | TT                 | TT               | INTERGENIC                    |                    |                                                              |
| SNP_49594_A_11188130 | NC_021166.1    | Ca_Kabuli_Chr07 | 11188130                | CC                                     | TT                 | TT               | INTERGENIC                    |                    |                                                              |
| SNP_49595_A_11188135 | NC_021166.1    | Ca_Kabuli_Chr07 | 11188135                | GG                                     | CC                 | CC               | INTERGENIC                    |                    |                                                              |
| SNP_49596_A_11188160 | NC_021166.1    | Ca_Kabuli_Chr07 | 11188160                | GG                                     | TT                 | TT               | INTERGENIC                    |                    |                                                              |
| SNP_49597_A_11188275 | NC_021166.1    | Ca_Kabuli_Chr07 | 11188275                | AA                                     | GG                 | GG               | INTERGENIC                    |                    |                                                              |
| SNP_49598_A_11188850 | NC_021166.1    | Ca_Kabuli_Chr07 | 11188850                | AA                                     | GG                 | GG               | INTERGENIC                    |                    |                                                              |
| SNP_49599_A_11189005 | NC_021166.1    | Ca_Kabuli_Chr07 | 11189005                | GG                                     | TT                 | TT               | INTERGENIC                    |                    |                                                              |
| SNP_49600_A_11189148 | NC_021166.1    | Ca_Kabuli_Chr07 | 11189148                | AA                                     | CC                 | CC               | INTERGENIC                    |                    |                                                              |
| SNP_49601_A_11189160 | NC_021166.1    | Ca_Kabuli_Chr07 | 11189160                | GG                                     | AA                 | AA               | INTERGENIC                    |                    |                                                              |
| SNP_49602_A_11189161 | NC_021166.1    | Ca_Kabuli_Chr07 | 11189161                | GG                                     | CC                 | CC               | INTERGENIC                    |                    |                                                              |
| SNP_49603_A_11189196 | NC_021166.1    | Ca_Kabuli_Chr07 | 11189196                | TT                                     | CC                 | CC               | INTERGENIC                    |                    |                                                              |
| SNP_49604_A_11194350 | NC_021166.1    | Ca_Kabuli_Chr07 | 11194350                | AA                                     | TT                 | TT               | URR                           | 101499622          | homeobox-leucine zipper protein HAT22                        |
| SNP_49605_A_11195245 | NC_021166.1    | Ca_Kabuli_Chr07 | 11195245                | CC                                     | TT                 | TT               | URR                           | 101499622          | homeobox-leucine zipper protein HAT22                        |
| SNP_49606_A_11195603 | NC_021166.1    | Ca_Kabuli_Chr07 | 11195603                | TT                                     | AA                 | AA               | URR                           | 101499622          | homeobox-leucine zipper protein HAT22                        |

| SNPs IDs             | Chromosome IDs | Chromosomes     | Physical positions (bp) | CDC Frontier genome (Reference genome) | (Pusa 1103 & HPNB) | (ILWC 46 & LPNB) | Sequence genome | Components of | Gene accession IDs | Putative functions |
|----------------------|----------------|-----------------|-------------------------|----------------------------------------|--------------------|------------------|-----------------|---------------|--------------------|--------------------|
| SNP_49607_A_11195959 | NC_021166.1    | Ca_Kabuli_Chr07 | 11195959                | TT                                     | GG                 | GG               | INTERGENIC      |               |                    |                    |
| SNP_49608_A_11195973 | NC_021166.1    | Ca_Kabuli_Chr07 | 11195973                | CC                                     | TT                 | TT               | INTERGENIC      |               |                    |                    |
| SNP_49609_A_11197331 | NC_021166.1    | Ca_Kabuli_Chr07 | 11197331                | TT                                     | CC                 | CC               | INTERGENIC      |               |                    |                    |
| SNP_49610_A_11197559 | NC_021166.1    | Ca_Kabuli_Chr07 | 11197559                | GG                                     | TT                 | TT               | INTERGENIC      |               |                    |                    |
| SNP_49611_A_11197562 | NC_021166.1    | Ca_Kabuli_Chr07 | 11197562                | AA                                     | GG                 | GG               | INTERGENIC      |               |                    |                    |
| SNP_49612_A_11198388 | NC_021166.1    | Ca_Kabuli_Chr07 | 11198388                | CC                                     | AA                 | AA               | INTERGENIC      |               |                    |                    |
| SNP_49613_A_11199372 | NC_021166.1    | Ca_Kabuli_Chr07 | 11199372                | CC                                     | TT                 | TT               | INTERGENIC      |               |                    |                    |
| SNP_49614_A_11203432 | NC_021166.1    | Ca_Kabuli_Chr07 | 11203432                | CC                                     | TT                 | TT               | INTERGENIC      |               |                    |                    |
| SNP_49615_A_11203435 | NC_021166.1    | Ca_Kabuli_Chr07 | 11203435                | GG                                     | AA                 | AA               | INTERGENIC      |               |                    |                    |
| SNP_49617_A_11205878 | NC_021166.1    | Ca_Kabuli_Chr07 | 11205878                | AA                                     | CC                 | CC               | INTERGENIC      |               |                    |                    |
| SNP_49618_A_11207674 | NC_021166.1    | Ca_Kabuli_Chr07 | 11207674                | AA                                     | GG                 | GG               | INTERGENIC      |               |                    |                    |
| SNP_49619_A_11207927 | NC_021166.1    | Ca_Kabuli_Chr07 | 11207927                | GG                                     | CC                 | CC               | INTERGENIC      |               |                    |                    |
| SNP_49620_A_11207944 | NC_021166.1    | Ca_Kabuli_Chr07 | 11207944                | CC                                     | TT                 | TT               | INTERGENIC      |               |                    |                    |
| SNP_49621_A_11207946 | NC_021166.1    | Ca_Kabuli_Chr07 | 11207946                | CC                                     | TT                 | TT               | INTERGENIC      |               |                    |                    |
| SNP_49622_A_11207947 | NC_021166.1    | Ca_Kabuli_Chr07 | 11207947                | TT                                     | GG                 | GG               | INTERGENIC      |               |                    |                    |
| SNP_49623_A_11207956 | NC_021166.1    | Ca_Kabuli_Chr07 | 11207956                | CC                                     | TT                 | TT               | INTERGENIC      |               |                    |                    |
| SNP_49624_A_11207959 | NC_021166.1    | Ca_Kabuli_Chr07 | 11207959                | TT                                     | CC                 | CC               | INTERGENIC      |               |                    |                    |
| SNP_49625_A_11207963 | NC_021166.1    | Ca_Kabuli_Chr07 | 11207963                | AA                                     | GG                 | GG               | INTERGENIC      |               |                    |                    |
| SNP_49626_A_11207972 | NC_021166.1    | Ca_Kabuli_Chr07 | 11207972                | AA                                     | TT                 | TT               | INTERGENIC      |               |                    |                    |
| SNP_49627_A_11207977 | NC_021166.1    | Ca_Kabuli_Chr07 | 11207977                | CC                                     | TT                 | TT               | INTERGENIC      |               |                    |                    |
| SNP_49628_A_11208785 | NC_021166.1    | Ca_Kabuli_Chr07 | 11208785                | AA                                     | GG                 | GG               | INTERGENIC      |               |                    |                    |
| SNP_49629_A_11209077 | NC_021166.1    | Ca_Kabuli_Chr07 | 11209077                | TT                                     | CC                 | CC               | INTERGENIC      |               |                    |                    |

| SNPs IDs             | Chromosome IDs | Chromosomes     | Physical positions (bp) | CDC Frontier genome (Reference genome) | (Pusa 1103 & HPNB) | (ILWC 46 & LPNB) | Sequence Components of genome | Gene accession IDs | Putative functions               |
|----------------------|----------------|-----------------|-------------------------|----------------------------------------|--------------------|------------------|-------------------------------|--------------------|----------------------------------|
| SNP_49630_A_11209323 | NC_021166.1    | Ca_Kabuli_Chr07 | 11209323                | GG                                     | AA                 | AA               | INTERGENIC                    |                    |                                  |
| SNP_49631_A_11209389 | NC_021166.1    | Ca_Kabuli_Chr07 | 11209389                | GG                                     | AA                 | AA               | INTERGENIC                    |                    |                                  |
| SNP_49632_A_11209563 | NC_021166.1    | Ca_Kabuli_Chr07 | 11209563                | TT                                     | CC                 | CC               | INTERGENIC                    |                    |                                  |
| SNP_49633_A_11209670 | NC_021166.1    | Ca_Kabuli_Chr07 | 11209670                | GG                                     | AA                 | AA               | INTERGENIC                    |                    |                                  |
| SNP_49634_A_11209821 | NC_021166.1    | Ca_Kabuli_Chr07 | 11209821                | GG                                     | AA                 | AA               | INTERGENIC                    |                    |                                  |
| SNP_49635_A_11215305 | NC_021166.1    | Ca_Kabuli_Chr07 | 11215305                | TT                                     | CC                 | CC               | INTRON                        | 101499929          | lysosomal Pro-X carboxypeptidase |
| SNP_49636_A_11215783 | NC_021166.1    | Ca_Kabuli_Chr07 | 11215783                | GG                                     | AA                 | AA               | INTRON                        | 101499929          | lysosomal Pro-X carboxypeptidase |
| SNP_49637_A_11218055 | NC_021166.1    | Ca_Kabuli_Chr07 | 11218055                | AA                                     | TT                 | TT               | INTRON                        | 101499929          | lysosomal Pro-X carboxypeptidase |
| SNP_49638_A_11218424 | NC_021166.1    | Ca_Kabuli_Chr07 | 11218424                | AA                                     | GG                 | GG               | URR                           | 101499929          | lysosomal Pro-X carboxypeptidase |
| SNP_49639_A_11218427 | NC_021166.1    | Ca_Kabuli_Chr07 | 11218427                | AA                                     | GG                 | GG               | URR                           | 101499929          | lysosomal Pro-X carboxypeptidase |
| SNP_49640_A_11218429 | NC_021166.1    | Ca_Kabuli_Chr07 | 11218429                | AA                                     | TT                 | TT               | URR                           | 101499929          | lysosomal Pro-X carboxypeptidase |
| SNP_49641_A_11218569 | NC_021166.1    | Ca_Kabuli_Chr07 | 11218569                | GG                                     | AA                 | AA               | URR                           | 101499929          | lysosomal Pro-X carboxypeptidase |
| SNP_49642_A_11218892 | NC_021166.1    | Ca_Kabuli_Chr07 | 11218892                | TT                                     | CC                 | CC               | URR                           | 101499929          | lysosomal Pro-X carboxypeptidase |
| SNP_49643_A_11219217 | NC_021166.1    | Ca_Kabuli_Chr07 | 11219217                | AA                                     | GG                 | GG               | URR                           | 101499929          | lysosomal Pro-X carboxypeptidase |
| SNP_49644_A_11220102 | NC_021166.1    | Ca_Kabuli_Chr07 | 11220102                | AA                                     | GG                 | GG               | URR                           | 101499929          | lysosomal Pro-X carboxypeptidase |
| SNP_49645_A_11221231 | NC_021166.1    | Ca_Kabuli_Chr07 | 11221231                | AA                                     | GG                 | GG               | INTERGENIC                    |                    |                                  |
| SNP_49646_A_11221255 | NC_021166.1    | Ca_Kabuli_Chr07 | 11221255                | AA                                     | GG                 | GG               | INTERGENIC                    |                    |                                  |
| SNP_49647_A_11221293 | NC_021166.1    | Ca_Kabuli_Chr07 | 11221293                | CC                                     | TT                 | TT               | INTERGENIC                    |                    |                                  |
| SNP_49648_A_11223972 | NC_021166.1    | Ca_Kabuli_Chr07 | 11223972                | TT                                     | CC                 | CC               | INTRON                        | 101500271          | protein CROWDED NUCLEI 4-like    |
| SNP_49651_A_11230369 | NC_021166.1    | Ca_Kabuli_Chr07 | 11230369                | CC                                     | GG                 | GG               | DRR                           | 101500586          | transcription factor RAX3        |
| SNP_49653_A_11231519 | NC_021166.1    | Ca_Kabuli_Chr07 | 11231519                | TT                                     | CC                 | CC               | INTERGENIC                    |                    |                                  |
| SNP_49654_A_11231620 | NC_021166.1    | Ca_Kabuli_Chr07 | 11231620                | GG                                     | AA                 | AA               | INTERGENIC                    |                    |                                  |



| SNPs IDs             | Chromosome IDs | Chromosomes     | Physical positions (bp) | CDC Frontier genome (Reference genome) | (Pusa 1103 & HPNB) | (ILWC 46 & LPNB) | Sequence genome | Components of | Gene accession IDs                                | Putative functions |
|----------------------|----------------|-----------------|-------------------------|----------------------------------------|--------------------|------------------|-----------------|---------------|---------------------------------------------------|--------------------|
| SNP_49655_A_11231835 | NC_021166.1    | Ca_Kabuli_Chr07 | 11231835                | AA                                     | GG                 | GG               | INTERGENIC      |               |                                                   |                    |
| SNP_49656_A_11231940 | NC_021166.1    | Ca_Kabuli_Chr07 | 11231940                | AA                                     | TT                 | TT               | INTERGENIC      |               |                                                   |                    |
| SNP_49657_A_11238669 | NC_021166.1    | Ca_Kabuli_Chr07 | 11238669                | TT                                     | AA                 | AA               | INTERGENIC      |               |                                                   |                    |
| SNP_49658_A_11238682 | NC_021166.1    | Ca_Kabuli_Chr07 | 11238682                | TT                                     | CC                 | CC               | INTERGENIC      |               |                                                   |                    |
| SNP_49659_A_11238714 | NC_021166.1    | Ca_Kabuli_Chr07 | 11238714                | CC                                     | TT                 | TT               | INTERGENIC      |               |                                                   |                    |
| SNP_49660_A_11239961 | NC_021166.1    | Ca_Kabuli_Chr07 | 11239961                | CC                                     | TT                 | TT               | INTERGENIC      |               |                                                   |                    |
| SNP_49661_A_11239969 | NC_021166.1    | Ca_Kabuli_Chr07 | 11239969                | TT                                     | CC                 | CC               | INTERGENIC      |               |                                                   |                    |
| SNP_49662_A_11240013 | NC_021166.1    | Ca_Kabuli_Chr07 | 11240013                | TT                                     | CC                 | CC               | INTERGENIC      |               |                                                   |                    |
| SNP_49663_A_11246166 | NC_021166.1    | Ca_Kabuli_Chr07 | 11246166                | CC                                     | GG                 | GG               | INTERGENIC      |               |                                                   |                    |
| SNP_49664_A_11246214 | NC_021166.1    | Ca_Kabuli_Chr07 | 11246214                | GG                                     | AA                 | AA               | INTERGENIC      |               |                                                   |                    |
| SNP_49665_A_11246427 | NC_021166.1    | Ca_Kabuli_Chr07 | 11246427                | CC                                     | TT                 | TT               | INTERGENIC      |               |                                                   |                    |
| SNP_49666_A_11246637 | NC_021166.1    | Ca_Kabuli_Chr07 | 11246637                | AA                                     | TT                 | TT               | INTERGENIC      |               |                                                   |                    |
| SNP_49667_A_11246742 | NC_021166.1    | Ca_Kabuli_Chr07 | 11246742                | TT                                     | CC                 | CC               | INTERGENIC      |               |                                                   |                    |
| SNP_49668_A_11246743 | NC_021166.1    | Ca_Kabuli_Chr07 | 11246743                | GG                                     | AA                 | AA               | INTERGENIC      |               |                                                   |                    |
| SNP_49670_A_11247359 | NC_021166.1    | Ca_Kabuli_Chr07 | 11247359                | GG                                     | TT                 | TT               | INTERGENIC      |               |                                                   |                    |
| SNP_49671_A_11251652 | NC_021166.1    | Ca_Kabuli_Chr07 | 11251652                | TT                                     | GG                 | GG               | INTERGENIC      |               |                                                   |                    |
| SNP_49672_A_11251881 | NC_021166.1    | Ca_Kabuli_Chr07 | 11251881                | CC                                     | GG                 | GG               | INTERGENIC      |               |                                                   |                    |
| SNP_49673_A_11260321 | NC_021166.1    | Ca_Kabuli_Chr07 | 11260321                | AA                                     | TT                 | TT               | URR             | 101501111     | 1-aminocyclopropane-1-carboxylate synthase 3-like |                    |
| SNP_49674_A_11260409 | NC_021166.1    | Ca_Kabuli_Chr07 | 11260409                | CC                                     | TT                 | TT               | URR             | 101501111     | 1-aminocyclopropane-1-carboxylate synthase 3-like |                    |
| SNP_49675_A_11261138 | NC_021166.1    | Ca_Kabuli_Chr07 | 11261138                | AA                                     | GG                 | GG               | INTERGENIC      |               |                                                   |                    |
| SNP_49676_A_11263945 | NC_021166.1    | Ca_Kabuli_Chr07 | 11263945                | CC                                     | TT                 | TT               | INTERGENIC      |               |                                                   |                    |
| SNP_49677_A_11265433 | NC_021166.1    | Ca_Kabuli_Chr07 | 11265433                | GG                                     | AA                 | AA               | INTERGENIC      |               |                                                   |                    |

| SNPs IDs             | Chromosome IDs | Chromosomes     | Physical positions (bp) | CDC Frontier genome (Reference genome) | (Pusa 1103 & HPNB) | (ILWC 46 & LPNB) | Sequence Components of genome | Gene accession IDs | Putative functions                                    |
|----------------------|----------------|-----------------|-------------------------|----------------------------------------|--------------------|------------------|-------------------------------|--------------------|-------------------------------------------------------|
| SNP_49678_A_11265879 | NC_021166.1    | Ca_Kabuli_Chr07 | 11265879                | CC                                     | AA                 | AA               | INTERGENIC                    |                    |                                                       |
| SNP_49679_A_11267998 | NC_021166.1    | Ca_Kabuli_Chr07 | 11267998                | GG                                     | AA                 | AA               | INTERGENIC                    |                    |                                                       |
| SNP_49681_A_11268585 | NC_021166.1    | Ca_Kabuli_Chr07 | 11268585                | AA                                     | GG                 | GG               | DRR                           | 101501424          | uncharacterized protein At3g49720                     |
| SNP_49683_A_11274008 | NC_021166.1    | Ca_Kabuli_Chr07 | 11274008                | GG                                     | AA                 | AA               | URR                           | 101501424          | uncharacterized protein At3g49720                     |
| SNP_49684_A_11274159 | NC_021166.1    | Ca_Kabuli_Chr07 | 11274159                | GG                                     | AA                 | AA               | URR                           | 101501424          | uncharacterized protein At3g49720                     |
| SNP_49685_A_11274162 | NC_021166.1    | Ca_Kabuli_Chr07 | 11274162                | TT                                     | CC                 | CC               | URR                           | 101501424          | uncharacterized protein At3g49720                     |
| SNP_49686_A_11274179 | NC_021166.1    | Ca_Kabuli_Chr07 | 11274179                | CC                                     | GG                 | GG               | URR                           | 101501424          | uncharacterized protein At3g49720                     |
| SNP_49687_A_11274185 | NC_021166.1    | Ca_Kabuli_Chr07 | 11274185                | CC                                     | TT                 | TT               | URR                           | 101501424          | uncharacterized protein At3g49720                     |
| SNP_49688_A_11274388 | NC_021166.1    | Ca_Kabuli_Chr07 | 11274388                | CC                                     | TT                 | TT               | URR                           | 101501424          | uncharacterized protein At3g49720                     |
| SNP_49689_A_11274480 | NC_021166.1    | Ca_Kabuli_Chr07 | 11274480                | TT                                     | AA                 | AA               | URR                           | 101501424          | uncharacterized protein At3g49720                     |
| SNP_49690_A_11274505 | NC_021166.1    | Ca_Kabuli_Chr07 | 11274505                | TT                                     | AA                 | AA               | URR                           | 101501424          | uncharacterized protein At3g49720                     |
| SNP_49691_A_11274807 | NC_021166.1    | Ca_Kabuli_Chr07 | 11274807                | GG                                     | AA                 | AA               | URR                           | 101501424          | uncharacterized protein At3g49720                     |
| SNP_49692_A_11274816 | NC_021166.1    | Ca_Kabuli_Chr07 | 11274816                | GG                                     | AA                 | AA               | URR                           | 101501424          | uncharacterized protein At3g49720                     |
| SNP_49693_A_11275500 | NC_021166.1    | Ca_Kabuli_Chr07 | 11275500                | GG                                     | AA                 | AA               | INTERGENIC                    |                    |                                                       |
| SNP_49694_A_11284152 | NC_021166.1    | Ca_Kabuli_Chr07 | 11284152                | AA                                     | GG                 | GG               | DRR                           | 101501954          | AP2-like ethylene-responsive transcription factor ANT |
| SNP_49695_A_11284161 | NC_021166.1    | Ca_Kabuli_Chr07 | 11284161                | TT                                     | CC                 | CC               | DRR                           | 101501954          | AP2-like ethylene-responsive transcription factor ANT |
| SNP_49696_A_11284164 | NC_021166.1    | Ca_Kabuli_Chr07 | 11284164                | CC                                     | TT                 | TT               | DRR                           | 101501954          | AP2-like ethylene-responsive transcription factor ANT |
| SNP_49698_A_11289263 | NC_021166.1    | Ca_Kabuli_Chr07 | 11289263                | AA                                     | GG                 | GG               | URR                           | 101501954          | AP2-like ethylene-responsive transcription factor ANT |
| SNP_49699_A_11289703 | NC_021166.1    | Ca_Kabuli_Chr07 | 11289703                | TT                                     | CC                 | CC               | URR                           | 101501954          | AP2-like ethylene-responsive transcription factor ANT |
| SNP_49700_A_11299745 | NC_021166.1    | Ca_Kabuli_Chr07 | 11299745                | GG                                     | TT                 | TT               | URR                           | 101502495          | prostamide/prostaglandin F synthase                   |
| SNP_49701_A_11300825 | NC_021166.1    | Ca_Kabuli_Chr07 | 11300825                | TT                                     | CC                 | CC               | URR                           | 101502495          | prostamide/prostaglandin F synthase                   |
| SNP_49702_A_11302474 | NC_021166.1    | Ca_Kabuli_Chr07 | 11302474                | TT                                     | CC                 | CC               | INTERGENIC                    |                    |                                                       |

| SNPs IDs             | Chromosome IDs | Chromosomes     | Physical positions (bp) | CDC Frontier genome (Reference genome) | (Pusa 1103 & HPNB) | (ILWC 46 & LPNB) | Sequence genome | Components of | Gene accession IDs           | Putative functions |
|----------------------|----------------|-----------------|-------------------------|----------------------------------------|--------------------|------------------|-----------------|---------------|------------------------------|--------------------|
| SNP_49703_A_11306422 | NC_021166.1    | Ca_Kabuli_Chr07 | 11306422                | TT                                     | CC                 | CC               | INTERGENIC      |               |                              |                    |
| SNP_49704_A_11307509 | NC_021166.1    | Ca_Kabuli_Chr07 | 11307509                | AA                                     | CC                 | CC               | INTERGENIC      |               |                              |                    |
| SNP_49705_A_11308599 | NC_021166.1    | Ca_Kabuli_Chr07 | 11308599                | AA                                     | CC                 | CC               | INTERGENIC      |               |                              |                    |
| SNP_49706_A_11308601 | NC_021166.1    | Ca_Kabuli_Chr07 | 11308601                | GG                                     | TT                 | TT               | INTERGENIC      |               |                              |                    |
| SNP_49707_A_11308700 | NC_021166.1    | Ca_Kabuli_Chr07 | 11308700                | AA                                     | TT                 | TT               | INTERGENIC      |               |                              |                    |
| SNP_49708_A_11313493 | NC_021166.1    | Ca_Kabuli_Chr07 | 11313493                | AA                                     | GG                 | GG               | INTERGENIC      |               |                              |                    |
| SNP_49710_A_11313535 | NC_021166.1    | Ca_Kabuli_Chr07 | 11313535                | GG                                     | AA                 | AA               | INTERGENIC      |               |                              |                    |
| SNP_49711_A_11313574 | NC_021166.1    | Ca_Kabuli_Chr07 | 11313574                | GG                                     | AA                 | AA               | INTERGENIC      |               |                              |                    |
| SNP_49712_A_11313847 | NC_021166.1    | Ca_Kabuli_Chr07 | 11313847                | TT                                     | CC                 | CC               | INTERGENIC      |               |                              |                    |
| SNP_49713_A_11313856 | NC_021166.1    | Ca_Kabuli_Chr07 | 11313856                | AA                                     | GG                 | GG               | INTERGENIC      |               |                              |                    |
| SNP_49714_A_11321402 | NC_021166.1    | Ca_Kabuli_Chr07 | 11321402                | GG                                     | AA                 | AA               | INTERGENIC      |               |                              |                    |
| SNP_49715_A_11321422 | NC_021166.1    | Ca_Kabuli_Chr07 | 11321422                | TT                                     | CC                 | CC               | INTERGENIC      |               |                              |                    |
| SNP_49716_A_11321682 | NC_021166.1    | Ca_Kabuli_Chr07 | 11321682                | GG                                     | AA                 | AA               | INTERGENIC      |               |                              |                    |
| SNP_49717_A_11321707 | NC_021166.1    | Ca_Kabuli_Chr07 | 11321707                | CC                                     | AA                 | AA               | INTERGENIC      |               |                              |                    |
| SNP_49718_A_11321977 | NC_021166.1    | Ca_Kabuli_Chr07 | 11321977                | CC                                     | TT                 | TT               | INTERGENIC      |               |                              |                    |
| SNP_49719_A_11322310 | NC_021166.1    | Ca_Kabuli_Chr07 | 11322310                | AA                                     | GG                 | GG               | INTERGENIC      |               |                              |                    |
| SNP_49720_A_11322357 | NC_021166.1    | Ca_Kabuli_Chr07 | 11322357                | CC                                     | TT                 | TT               | INTERGENIC      |               |                              |                    |
| SNP_49721_A_11322500 | NC_021166.1    | Ca_Kabuli_Chr07 | 11322500                | GG                                     | AA                 | AA               | INTERGENIC      |               |                              |                    |
| SNP_49722_A_11326020 | NC_021166.1    | Ca_Kabuli_Chr07 | 11326020                | AA                                     | TT                 | TT               | URR             | 101502799     | basic leucine zipper 43-like |                    |
| SNP_49723_A_11326386 | NC_021166.1    | Ca_Kabuli_Chr07 | 11326386                | AA                                     | TT                 | TT               | URR             | 101502799     | basic leucine zipper 43-like |                    |
| SNP_49724_A_11332990 | NC_021166.1    | Ca_Kabuli_Chr07 | 11332990                | TT                                     | AA                 | AA               | INTERGENIC      |               |                              |                    |
| SNP_49725_A_11333060 | NC_021166.1    | Ca_Kabuli_Chr07 | 11333060                | GG                                     | AA                 | AA               | INTERGENIC      |               |                              |                    |

| SNPs IDs             | Chromosome IDs | Chromosomes     | Physical positions (bp) | CDC Frontier genome (Reference genome) | (Pusa 1103 & HPNB) | (ILWC 46 & LPNB) | Sequence genome | Components of | Gene accession IDs           | Putative functions |
|----------------------|----------------|-----------------|-------------------------|----------------------------------------|--------------------|------------------|-----------------|---------------|------------------------------|--------------------|
| SNP_49726_A_11333340 | NC_021166.1    | Ca_Kabuli_Chr07 | 11333340                | AA                                     | GG                 | GG               | INTERGENIC      |               |                              |                    |
| SNP_49727_A_11333692 | NC_021166.1    | Ca_Kabuli_Chr07 | 11333692                | CC                                     | AA                 | AA               | INTERGENIC      |               |                              |                    |
| SNP_49728_A_11333694 | NC_021166.1    | Ca_Kabuli_Chr07 | 11333694                | CC                                     | AA                 | AA               | INTERGENIC      |               |                              |                    |
| SNP_49729_A_11333702 | NC_021166.1    | Ca_Kabuli_Chr07 | 11333702                | GG                                     | TT                 | TT               | INTERGENIC      |               |                              |                    |
| SNP_49730_A_11333957 | NC_021166.1    | Ca_Kabuli_Chr07 | 11333957                | TT                                     | CC                 | CC               | INTERGENIC      |               |                              |                    |
| SNP_49731_A_11334004 | NC_021166.1    | Ca_Kabuli_Chr07 | 11334004                | GG                                     | AA                 | AA               | INTERGENIC      |               |                              |                    |
| SNP_49732_A_11334024 | NC_021166.1    | Ca_Kabuli_Chr07 | 11334024                | CC                                     | TT                 | TT               | INTERGENIC      |               |                              |                    |
| SNP_49733_A_11334362 | NC_021166.1    | Ca_Kabuli_Chr07 | 11334362                | GG                                     | CC                 | CC               | INTERGENIC      |               |                              |                    |
| SNP_49734_A_11334374 | NC_021166.1    | Ca_Kabuli_Chr07 | 11334374                | AA                                     | CC                 | CC               | INTERGENIC      |               |                              |                    |
| SNP_49735_A_11334765 | NC_021166.1    | Ca_Kabuli_Chr07 | 11334765                | AA                                     | CC                 | CC               | INTERGENIC      |               |                              |                    |
| SNP_49736_A_11338951 | NC_021166.1    | Ca_Kabuli_Chr07 | 11338951                | TT                                     | GG                 | GG               | INTERGENIC      |               |                              |                    |
| SNP_49737_A_11339142 | NC_021166.1    | Ca_Kabuli_Chr07 | 11339142                | TT                                     | CC                 | CC               | INTERGENIC      |               |                              |                    |
| SNP_49738_A_11339146 | NC_021166.1    | Ca_Kabuli_Chr07 | 11339146                | TT                                     | GG                 | GG               | INTERGENIC      |               |                              |                    |
| SNP_49739_A_11340229 | NC_021166.1    | Ca_Kabuli_Chr07 | 11340229                | CC                                     | GG                 | GG               | DRR             | 101503119     | Unknown function             |                    |
| SNP_49740_A_11341820 | NC_021166.1    | Ca_Kabuli_Chr07 | 11341820                | CC                                     | GG                 | GG               | URR             | 101503119     | Unknown function             |                    |
| SNP_49741_A_11342512 | NC_021166.1    | Ca_Kabuli_Chr07 | 11342512                | TT                                     | CC                 | CC               | URR             | 101503119     | Unknown function             |                    |
| SNP_49742_A_11342513 | NC_021166.1    | Ca_Kabuli_Chr07 | 11342513                | AA                                     | TT                 | TT               | URR             | 101503119     | Unknown function             |                    |
| SNP_49743_A_11343486 | NC_021166.1    | Ca_Kabuli_Chr07 | 11343486                | GG                                     | AA                 | AA               | URR             | 101503119     | Unknown function             |                    |
| SNP_49745_A_11343818 | NC_021166.1    | Ca_Kabuli_Chr07 | 11343818                | TT                                     | AA                 | AA               | INTERGENIC      |               |                              |                    |
| SNP_49746_A_11344040 | NC_021166.1    | Ca_Kabuli_Chr07 | 11344040                | CC                                     | TT                 | TT               | DRR             | 101503444     | uncharacterized LOC101503444 |                    |
| SNP_49748_A_11347811 | NC_021166.1    | Ca_Kabuli_Chr07 | 11347811                | CC                                     | TT                 | TT               | INTERGENIC      |               |                              |                    |
| SNP_49749_A_11349915 | NC_021166.1    | Ca_Kabuli_Chr07 | 11349915                | AA                                     | CC                 | CC               | INTERGENIC      |               |                              |                    |

| SNPs IDs             | Chromosome IDs | Chromosomes     | Physical positions (bp) | CDC Frontier genome (Reference genome) | (Pusa 1103 & HPNB) | (ILWC 46 & LPNB) | Sequence Components of genome | Gene accession IDs | Putative functions                                                   |
|----------------------|----------------|-----------------|-------------------------|----------------------------------------|--------------------|------------------|-------------------------------|--------------------|----------------------------------------------------------------------|
| SNP_49750_A_11350606 | NC_021166.1    | Ca_Kabuli_Chr07 | 11350606                | AA                                     | TT                 | TT               | INTERGENIC                    |                    |                                                                      |
| SNP_49751_A_11355284 | NC_021166.1    | Ca_Kabuli_Chr07 | 11355284                | AA                                     | CC                 | CC               | INTERGENIC                    |                    |                                                                      |
| SNP_49752_A_11357802 | NC_021166.1    | Ca_Kabuli_Chr07 | 11357802                | CC                                     | TT                 | TT               | INTERGENIC                    |                    |                                                                      |
| SNP_49753_A_11357889 | NC_021166.1    | Ca_Kabuli_Chr07 | 11357889                | TT                                     | CC                 | CC               | INTERGENIC                    |                    |                                                                      |
| SNP_49754_A_11358025 | NC_021166.1    | Ca_Kabuli_Chr07 | 11358025                | TT                                     | CC                 | CC               | INTERGENIC                    |                    |                                                                      |
| SNP_49755_A_11358033 | NC_021166.1    | Ca_Kabuli_Chr07 | 11358033                | CC                                     | TT                 | TT               | INTERGENIC                    |                    |                                                                      |
| SNP_49756_A_11358058 | NC_021166.1    | Ca_Kabuli_Chr07 | 11358058                | TT                                     | CC                 | CC               | INTERGENIC                    |                    |                                                                      |
| SNP_49757_A_11358062 | NC_021166.1    | Ca_Kabuli_Chr07 | 11358062                | AA                                     | GG                 | GG               | INTERGENIC                    |                    |                                                                      |
| SNP_49758_A_11359534 | NC_021166.1    | Ca_Kabuli_Chr07 | 11359534                | CC                                     | GG                 | GG               | INTERGENIC                    |                    |                                                                      |
| SNP_49759_A_11373701 | NC_021166.1    | Ca_Kabuli_Chr07 | 11373701                | CC                                     | TT                 | TT               | INTERGENIC                    |                    |                                                                      |
| SNP_49760_A_11373702 | NC_021166.1    | Ca_Kabuli_Chr07 | 11373702                | TT                                     | CC                 | CC               | INTERGENIC                    |                    |                                                                      |
| SNP_49761_A_11374129 | NC_021166.1    | Ca_Kabuli_Chr07 | 11374129                | CC                                     | GG                 | GG               | INTERGENIC                    |                    |                                                                      |
| SNP_49763_A_11377124 | NC_021166.1    | Ca_Kabuli_Chr07 | 11377124                | CC                                     | TT                 | TT               | DRR                           | 101503782          | uncharacterized LOC101503782                                         |
| SNP_49764_A_11377662 | NC_021166.1    | Ca_Kabuli_Chr07 | 11377662                | TT                                     | GG                 | GG               | DRR                           | 101503782          | uncharacterized LOC101503782                                         |
| SNP_49765_A_11380591 | NC_021166.1    | Ca_Kabuli_Chr07 | 11380591                | CC                                     | TT                 | TT               | URR                           | 101503782          | uncharacterized LOC101503782                                         |
| SNP_49766_A_11382353 | NC_021166.1    | Ca_Kabuli_Chr07 | 11382353                | TT                                     | CC                 | CC               | DRR                           | 101504105          | uncharacterized LOC101504105                                         |
| SNP_49767_A_11382366 | NC_021166.1    | Ca_Kabuli_Chr07 | 11382366                | CC                                     | TT                 | TT               | DRR                           | 101504105          | uncharacterized LOC101504105                                         |
| SNP_49768_A_11395961 | NC_021166.1    | Ca_Kabuli_Chr07 | 11395961                | GG                                     | AA                 | AA               | URR                           | 101504416          | histone H3.3                                                         |
| SNP_49770_A_11397587 | NC_021166.1    | Ca_Kabuli_Chr07 | 11397587                | GG                                     | CC                 | CC               | DRR                           | 101504736          | NADH dehydrogenase [ubiquinone] iron-sulfur protein 4, mitochondrial |
| SNP_49771_A_11403285 | NC_021166.1    | Ca_Kabuli_Chr07 | 11403285                | AA                                     | TT                 | TT               | URR                           | 101504736          | NADH dehydrogenase [ubiquinone] iron-sulfur protein 4, mitochondrial |
| SNP_49772_A_11404505 | NC_021166.1    | Ca_Kabuli_Chr07 | 11404505                | GG                                     | TT                 | TT               | INTERGENIC                    |                    |                                                                      |
| SNP_49773_A_11405407 | NC_021166.1    | Ca_Kabuli_Chr07 | 11405407                | GG                                     | AA                 | AA               | INTERGENIC                    |                    |                                                                      |

| SNPs IDs             | Chromosome IDs | Chromosomes     | Physical positions (bp) | CDC Frontier genome (Reference genome) | (Pusa 1103 & HPNB) | (ILWC 46 & LPNB) | Sequence Components of genome | Gene accession IDs | Putative functions               |
|----------------------|----------------|-----------------|-------------------------|----------------------------------------|--------------------|------------------|-------------------------------|--------------------|----------------------------------|
| SNP_49774_A_11406156 | NC_021166.1    | Ca_Kabuli_Chr07 | 11406156                | CC                                     | TT                 | TT               | INTERGENIC                    |                    |                                  |
| SNP_49775_A_11406257 | NC_021166.1    | Ca_Kabuli_Chr07 | 11406257                | CC                                     | TT                 | TT               | INTERGENIC                    |                    |                                  |
| SNP_49776_A_11406480 | NC_021166.1    | Ca_Kabuli_Chr07 | 11406480                | GG                                     | TT                 | TT               | INTERGENIC                    |                    |                                  |
| SNP_49777_A_11406502 | NC_021166.1    | Ca_Kabuli_Chr07 | 11406502                | TT                                     | GG                 | GG               | INTERGENIC                    |                    |                                  |
| SNP_49778_A_11408050 | NC_021166.1    | Ca_Kabuli_Chr07 | 11408050                | GG                                     | CC                 | CC               | INTERGENIC                    |                    |                                  |
| SNP_49779_A_11411269 | NC_021166.1    | Ca_Kabuli_Chr07 | 11411269                | CC                                     | TT                 | TT               | INTERGENIC                    |                    |                                  |
| SNP_49780_A_11411270 | NC_021166.1    | Ca_Kabuli_Chr07 | 11411270                | TT                                     | AA                 | AA               | INTERGENIC                    |                    |                                  |
| SNP_49781_A_11411287 | NC_021166.1    | Ca_Kabuli_Chr07 | 11411287                | GG                                     | AA                 | AA               | INTERGENIC                    |                    |                                  |
| SNP_49782_A_11411574 | NC_021166.1    | Ca_Kabuli_Chr07 | 11411574                | AA                                     | TT                 | TT               | INTERGENIC                    |                    |                                  |
| SNP_49784_A_11413876 | NC_021166.1    | Ca_Kabuli_Chr07 | 11413876                | CC                                     | AA                 | AA               | URR                           | 101505061          | telomere repeat-binding factor 2 |
| SNP_49785_A_11415632 | NC_021166.1    | Ca_Kabuli_Chr07 | 11415632                | TT                                     | CC                 | CC               | INTERGENIC                    |                    |                                  |
| SNP_49786_A_11421214 | NC_021166.1    | Ca_Kabuli_Chr07 | 11421214                | GG                                     | AA                 | AA               | INTRON                        | 101505714          | uncharacterized LOC101505714     |
| SNP_49787_A_11421219 | NC_021166.1    | Ca_Kabuli_Chr07 | 11421219                | GG                                     | AA                 | AA               | INTRON                        | 101505714          | uncharacterized LOC101505714     |
| SNP_49788_A_11421512 | NC_021166.1    | Ca_Kabuli_Chr07 | 11421512                | AA                                     | GG                 | GG               | INTRON                        | 101505714          | uncharacterized LOC101505714     |
| SNP_49789_A_11422673 | NC_021166.1    | Ca_Kabuli_Chr07 | 11422673                | AA                                     | GG                 | GG               | SYNONYMOUS_CODING             | 101505714          | uncharacterized LOC101505714     |
| SNP_49792_A_11430892 | NC_021166.1    | Ca_Kabuli_Chr07 | 11430892                | CC                                     | GG                 | GG               | URR                           | 101506038          | protein SHORT-ROOT-like          |
| SNP_49793_A_11433207 | NC_021166.1    | Ca_Kabuli_Chr07 | 11433207                | TT                                     | AA                 | AA               | INTERGENIC                    |                    |                                  |
| SNP_49794_A_11433226 | NC_021166.1    | Ca_Kabuli_Chr07 | 11433226                | AA                                     | GG                 | GG               | INTERGENIC                    |                    |                                  |
| SNP_49795_A_11433253 | NC_021166.1    | Ca_Kabuli_Chr07 | 11433253                | AA                                     | GG                 | GG               | INTERGENIC                    |                    |                                  |
| SNP_49796_A_11433394 | NC_021166.1    | Ca_Kabuli_Chr07 | 11433394                | GG                                     | CC                 | CC               | INTERGENIC                    |                    |                                  |
| SNP_49797_A_11433428 | NC_021166.1    | Ca_Kabuli_Chr07 | 11433428                | AA                                     | TT                 | TT               | INTERGENIC                    |                    |                                  |
| SNP_49798_A_11433444 | NC_021166.1    | Ca_Kabuli_Chr07 | 11433444                | AA                                     | GG                 | GG               | INTERGENIC                    |                    |                                  |

| SNPs IDs             | Chromosome IDs | Chromosomes     | Physical positions (bp) | CDC Frontier genome (Reference genome) | (Pusa 1103 & HPNB) | (ILWC 46 & LPNB) | Sequence Components of genome | Gene accession IDs | Putative functions                     |
|----------------------|----------------|-----------------|-------------------------|----------------------------------------|--------------------|------------------|-------------------------------|--------------------|----------------------------------------|
| SNP_49799_A_11433454 | NC_021166.1    | Ca_Kabuli_Chr07 | 11433454                | TT                                     | AA                 | AA               | INTERGENIC                    |                    |                                        |
| SNP_49800_A_11433513 | NC_021166.1    | Ca_Kabuli_Chr07 | 11433513                | TT                                     | CC                 | CC               | INTERGENIC                    |                    |                                        |
| SNP_49801_A_11433681 | NC_021166.1    | Ca_Kabuli_Chr07 | 11433681                | AA                                     | GG                 | GG               | INTERGENIC                    |                    |                                        |
| SNP_49802_A_11433684 | NC_021166.1    | Ca_Kabuli_Chr07 | 11433684                | GG                                     | TT                 | TT               | INTERGENIC                    |                    |                                        |
| SNP_49803_A_11433711 | NC_021166.1    | Ca_Kabuli_Chr07 | 11433711                | TT                                     | AA                 | AA               | INTERGENIC                    |                    |                                        |
| SNP_49804_A_11433775 | NC_021166.1    | Ca_Kabuli_Chr07 | 11433775                | GG                                     | AA                 | AA               | INTERGENIC                    |                    |                                        |
| SNP_49805_A_11434290 | NC_021166.1    | Ca_Kabuli_Chr07 | 11434290                | TT                                     | CC                 | CC               | INTERGENIC                    |                    |                                        |
| SNP_49806_A_11434291 | NC_021166.1    | Ca_Kabuli_Chr07 | 11434291                | CC                                     | TT                 | TT               | INTERGENIC                    |                    |                                        |
| SNP_49807_A_11434292 | NC_021166.1    | Ca_Kabuli_Chr07 | 11434292                | TT                                     | CC                 | CC               | INTERGENIC                    |                    |                                        |
| SNP_49808_A_11437672 | NC_021166.1    | Ca_Kabuli_Chr07 | 11437672                | GG                                     | CC                 | CC               | INTERGENIC                    |                    |                                        |
| SNP_49810_A_11438427 | NC_021166.1    | Ca_Kabuli_Chr07 | 11438427                | TT                                     | GG                 | GG               | INTERGENIC                    |                    |                                        |
| SNP_49811_A_11438527 | NC_021166.1    | Ca_Kabuli_Chr07 | 11438527                | TT                                     | AA                 | AA               | INTERGENIC                    |                    |                                        |
| SNP_49812_A_11439372 | NC_021166.1    | Ca_Kabuli_Chr07 | 11439372                | TT                                     | CC                 | CC               | INTERGENIC                    |                    |                                        |
| SNP_49813_A_11439431 | NC_021166.1    | Ca_Kabuli_Chr07 | 11439431                | TT                                     | CC                 | CC               | INTERGENIC                    |                    |                                        |
| SNP_49814_A_11439452 | NC_021166.1    | Ca_Kabuli_Chr07 | 11439452                | TT                                     | AA                 | AA               | INTERGENIC                    |                    |                                        |
| SNP_49815_A_11439705 | NC_021166.1    | Ca_Kabuli_Chr07 | 11439705                | CC                                     | AA                 | AA               | INTERGENIC                    |                    |                                        |
| SNP_49816_A_11440164 | NC_021166.1    | Ca_Kabuli_Chr07 | 11440164                | AA                                     | GG                 | GG               | INTERGENIC                    |                    |                                        |
| SNP_49818_A_11443115 | NC_021166.1    | Ca_Kabuli_Chr07 | 11443115                | GG                                     | TT                 | TT               | INTRON                        | 101506354          | uncharacterized LOC101506354           |
| SNP_49819_A_11443234 | NC_021166.1    | Ca_Kabuli_Chr07 | 11443234                | CC                                     | GG                 | GG               | NON_SYNONYMOUS_CODING         | 101506354          | uncharacterized LOC101506354           |
| SNP_49820_A_11446255 | NC_021166.1    | Ca_Kabuli_Chr07 | 11446255                | AA                                     | GG                 | GG               | URR                           | 101506354          | uncharacterized LOC101506354           |
| SNP_49821_A_11453953 | NC_021166.1    | Ca_Kabuli_Chr07 | 11453953                | CC                                     | AA                 | AA               | URR                           | 101506675          | adenylyl-sulfate kinase, chloroplastic |
| SNP_49822_A_11453954 | NC_021166.1    | Ca_Kabuli_Chr07 | 11453954                | AA                                     | GG                 | GG               | URR                           | 101506675          | adenylyl-sulfate kinase, chloroplastic |

| SNPs IDs             | Chromosome IDs | Chromosomes     | Physical positions (bp) | CDC Frontier genome (Reference genome) | (Pusa 1103 & HPNB) | (ILWC 46 & LPNB) | Sequence Components of genome | Gene accession IDs | Putative functions                                       |
|----------------------|----------------|-----------------|-------------------------|----------------------------------------|--------------------|------------------|-------------------------------|--------------------|----------------------------------------------------------|
| SNP_49823_A_11453962 | NC_021166.1    | Ca_Kabuli_Chr07 | 11453962                | AA                                     | TT                 | TT               | URR                           | 101506675          | adenylyl-sulfate kinase, chloroplastic                   |
| SNP_49824_A_11453973 | NC_021166.1    | Ca_Kabuli_Chr07 | 11453973                | TT                                     | CC                 | CC               | URR                           | 101506675          | adenylyl-sulfate kinase, chloroplastic                   |
| SNP_49825_A_11454086 | NC_021166.1    | Ca_Kabuli_Chr07 | 11454086                | TT                                     | GG                 | GG               | URR                           | 101506675          | adenylyl-sulfate kinase, chloroplastic                   |
| SNP_49826_A_11454090 | NC_021166.1    | Ca_Kabuli_Chr07 | 11454090                | TT                                     | CC                 | CC               | URR                           | 101506675          | adenylyl-sulfate kinase, chloroplastic                   |
| SNP_49827_A_11454454 | NC_021166.1    | Ca_Kabuli_Chr07 | 11454454                | AA                                     | GG                 | GG               | URR                           | 101506675          | adenylyl-sulfate kinase, chloroplastic                   |
| SNP_49828_A_11454807 | NC_021166.1    | Ca_Kabuli_Chr07 | 11454807                | CC                                     | AA                 | AA               | URR                           | 101506675          | adenylyl-sulfate kinase, chloroplastic                   |
| SNP_49829_A_11457549 | NC_021166.1    | Ca_Kabuli_Chr07 | 11457549                | TT                                     | CC                 | CC               | INTERGENIC                    |                    |                                                          |
| SNP_49830_A_11458735 | NC_021166.1    | Ca_Kabuli_Chr07 | 11458735                | AA                                     | GG                 | GG               | INTERGENIC                    |                    |                                                          |
| SNP_49831_A_11459138 | NC_021166.1    | Ca_Kabuli_Chr07 | 11459138                | AA                                     | TT                 | TT               | INTERGENIC                    |                    |                                                          |
| SNP_49832_A_11459180 | NC_021166.1    | Ca_Kabuli_Chr07 | 11459180                | GG                                     | CC                 | CC               | INTERGENIC                    |                    |                                                          |
| SNP_49833_A_11459183 | NC_021166.1    | Ca_Kabuli_Chr07 | 11459183                | AA                                     | TT                 | TT               | INTERGENIC                    |                    |                                                          |
| SNP_49834_A_11467319 | NC_021166.1    | Ca_Kabuli_Chr07 | 11467319                | GG                                     | AA                 | AA               | DRR                           | 101507009          | cyclin-D1-1-like                                         |
| SNP_49835_A_11467790 | NC_021166.1    | Ca_Kabuli_Chr07 | 11467790                | TT                                     | CC                 | CC               | URR                           | 101507334          | calcium-transporting ATPase 2, plasma membrane-type-like |
| SNP_49836_A_11469400 | NC_021166.1    | Ca_Kabuli_Chr07 | 11469400                | AA                                     | GG                 | GG               | URR                           | 101507334          | calcium-transporting ATPase 2, plasma membrane-type-like |
| SNP_49837_A_11469415 | NC_021166.1    | Ca_Kabuli_Chr07 | 11469415                | GG                                     | AA                 | AA               | URR                           | 101507334          | calcium-transporting ATPase 2, plasma membrane-type-like |
| SNP_49838_A_11469433 | NC_021166.1    | Ca_Kabuli_Chr07 | 11469433                | TT                                     | CC                 | CC               | URR                           | 101507334          | calcium-transporting ATPase 2, plasma membrane-type-like |
| SNP_49839_A_11469454 | NC_021166.1    | Ca_Kabuli_Chr07 | 11469454                | TT                                     | CC                 | CC               | URR                           | 101507334          | calcium-transporting ATPase 2, plasma membrane-type-like |
| SNP_49840_A_11469455 | NC_021166.1    | Ca_Kabuli_Chr07 | 11469455                | GG                                     | CC                 | CC               | URR                           | 101507334          | calcium-transporting ATPase 2, plasma membrane-type-like |
| SNP_49841_A_11473993 | NC_021166.1    | Ca_Kabuli_Chr07 | 11473993                | AA                                     | GG                 | GG               | INTRON                        | 101507641          | formin-like protein 6                                    |
| SNP_49842_A_11477629 | NC_021166.1    | Ca_Kabuli_Chr07 | 11477629                | TT                                     | CC                 | CC               | URR                           | 101507641          | formin-like protein 6                                    |
| SNP_49843_A_11477641 | NC_021166.1    | Ca_Kabuli_Chr07 | 11477641                | GG                                     | AA                 | AA               | URR                           | 101507641          | formin-like protein 6                                    |
| SNP_49844_A_11478415 | NC_021166.1    | Ca_Kabuli_Chr07 | 11478415                | AA                                     | GG                 | GG               | INTERGENIC                    |                    |                                                          |



| SNPs IDs             | Chromosome IDs | Chromosomes     | Physical positions (bp) | CDC Frontier genome (Reference genome) | (Pusa 1103 & HPNB) | (ILWC 46 & LPNB) | Sequence Components of genome | Gene accession IDs | Putative functions                      |
|----------------------|----------------|-----------------|-------------------------|----------------------------------------|--------------------|------------------|-------------------------------|--------------------|-----------------------------------------|
| SNP_49845_A_11479429 | NC_021166.1    | Ca_Kabuli_Chr07 | 11479429                | AA                                     | TT                 | TT               | INTERGENIC                    |                    |                                         |
| SNP_49846_A_11479557 | NC_021166.1    | Ca_Kabuli_Chr07 | 11479557                | GG                                     | AA                 | AA               | DRR                           | 101410558          | transfer RNA methionine (anticodon CAU) |
| SNP_49847_A_11481227 | NC_021166.1    | Ca_Kabuli_Chr07 | 11481227                | GG                                     | CC                 | CC               | URR                           | 101410558          | transfer RNA methionine (anticodon CAU) |
| SNP_49848_A_11481236 | NC_021166.1    | Ca_Kabuli_Chr07 | 11481236                | CC                                     | GG                 | GG               | URR                           | 101410558          | transfer RNA methionine (anticodon CAU) |
| SNP_49849_A_11481251 | NC_021166.1    | Ca_Kabuli_Chr07 | 11481251                | CC                                     | TT                 | TT               | URR                           | 101410558          | transfer RNA methionine (anticodon CAU) |
| SNP_49850_A_11481978 | NC_021166.1    | Ca_Kabuli_Chr07 | 11481978                | AA                                     | TT                 | TT               | URR                           | 101410558          | transfer RNA methionine (anticodon CAU) |
| SNP_49852_A_11485678 | NC_021166.1    | Ca_Kabuli_Chr07 | 11485678                | CC                                     | TT                 | TT               | INTERGENIC                    |                    |                                         |
| SNP_49854_A_11487990 | NC_021166.1    | Ca_Kabuli_Chr07 | 11487990                | TT                                     | CC                 | CC               | INTERGENIC                    |                    |                                         |
| SNP_49855_A_11488598 | NC_021166.1    | Ca_Kabuli_Chr07 | 11488598                | CC                                     | TT                 | TT               | INTERGENIC                    |                    |                                         |
| SNP_49856_A_11488614 | NC_021166.1    | Ca_Kabuli_Chr07 | 11488614                | AA                                     | GG                 | GG               | INTERGENIC                    |                    |                                         |
| SNP_49857_A_11489874 | NC_021166.1    | Ca_Kabuli_Chr07 | 11489874                | CC                                     | GG                 | GG               | INTERGENIC                    |                    |                                         |
| SNP_49858_A_11490220 | NC_021166.1    | Ca_Kabuli_Chr07 | 11490220                | AA                                     | CC                 | CC               | INTERGENIC                    |                    |                                         |
| SNP_49859_A_11490259 | NC_021166.1    | Ca_Kabuli_Chr07 | 11490259                | GG                                     | AA                 | AA               | INTERGENIC                    |                    |                                         |
| SNP_49860_A_11490318 | NC_021166.1    | Ca_Kabuli_Chr07 | 11490318                | CC                                     | TT                 | TT               | INTERGENIC                    |                    |                                         |
| SNP_49861_A_11492326 | NC_021166.1    | Ca_Kabuli_Chr07 | 11492326                | AA                                     | GG                 | GG               | INTERGENIC                    |                    |                                         |
| SNP_49862_A_11492700 | NC_021166.1    | Ca_Kabuli_Chr07 | 11492700                | CC                                     | TT                 | TT               | INTERGENIC                    |                    |                                         |
| SNP_49863_A_11494090 | NC_021166.1    | Ca_Kabuli_Chr07 | 11494090                | GG                                     | AA                 | AA               | INTERGENIC                    |                    |                                         |
| SNP_49865_A_11494918 | NC_021166.1    | Ca_Kabuli_Chr07 | 11494918                | TT                                     | AA                 | AA               | DRR                           | 101507964          | probable N-acetyltransferase HLS1       |
| SNP_49867_A_11512163 | NC_021166.1    | Ca_Kabuli_Chr07 | 11512163                | TT                                     | AA                 | AA               | INTERGENIC                    |                    |                                         |
| SNP_49868_A_11512956 | NC_021166.1    | Ca_Kabuli_Chr07 | 11512956                | AA                                     | TT                 | TT               | INTERGENIC                    |                    |                                         |
| SNP_49869_A_11512958 | NC_021166.1    | Ca_Kabuli_Chr07 | 11512958                | AA                                     | TT                 | TT               | INTERGENIC                    |                    |                                         |
| SNP_49870_A_11516928 | NC_021166.1    | Ca_Kabuli_Chr07 | 11516928                | GG                                     | AA                 | AA               | INTERGENIC                    |                    |                                         |

| SNPs IDs             | Chromosome IDs | Chromosomes     | Physical positions (bp) | CDC Frontier genome (Reference genome) | (Pusa 1103 & HPNB) | (ILWC 46 & LPNB) | Sequence Components of genome | Gene accession IDs | Putative functions                            |
|----------------------|----------------|-----------------|-------------------------|----------------------------------------|--------------------|------------------|-------------------------------|--------------------|-----------------------------------------------|
| SNP_49871_A_11516931 | NC_021166.1    | Ca_Kabuli_Chr07 | 11516931                | AA                                     | TT                 | TT               | INTERGENIC                    |                    |                                               |
| SNP_49874_A_11518630 | NC_021166.1    | Ca_Kabuli_Chr07 | 11518630                | AA                                     | CC                 | CC               | INTERGENIC                    |                    |                                               |
| SNP_49875_A_11523432 | NC_021166.1    | Ca_Kabuli_Chr07 | 11523432                | AA                                     | GG                 | GG               | INTRON                        | 101508276          | casein kinase II subunit alpha, chloroplastic |
| SNP_49876_A_11528690 | NC_021166.1    | Ca_Kabuli_Chr07 | 11528690                | TT                                     | CC                 | CC               | URR                           | 101508276          | casein kinase II subunit alpha, chloroplastic |
| SNP_49877_A_11530383 | NC_021166.1    | Ca_Kabuli_Chr07 | 11530383                | AA                                     | GG                 | GG               | DRR                           | 101508598          | putative formamidase C869.04                  |
| SNP_49878_A_11531042 | NC_021166.1    | Ca_Kabuli_Chr07 | 11531042                | CC                                     | AA                 | AA               | INTERGENIC                    |                    |                                               |
| SNP_49879_A_11531055 | NC_021166.1    | Ca_Kabuli_Chr07 | 11531055                | CC                                     | TT                 | TT               | INTERGENIC                    |                    |                                               |
| SNP_49880_A_11531545 | NC_021166.1    | Ca_Kabuli_Chr07 | 11531545                | CC                                     | TT                 | TT               | SYNONYMOUS_CODING             | 101508598          | putative formamidase C869.04                  |
| SNP_49881_A_11531612 | NC_021166.1    | Ca_Kabuli_Chr07 | 11531612                | AA                                     | TT                 | TT               | INTRON                        | 101508598          | putative formamidase C869.04                  |
| SNP_49882_A_11537733 | NC_021166.1    | Ca_Kabuli_Chr07 | 11537733                | AA                                     | GG                 | GG               | INTRON                        | 101508598          | putative formamidase C869.04                  |
| SNP_49883_A_11537740 | NC_021166.1    | Ca_Kabuli_Chr07 | 11537740                | TT                                     | CC                 | CC               | INTRON                        | 101508598          | putative formamidase C869.04                  |
| SNP_49884_A_11537764 | NC_021166.1    | Ca_Kabuli_Chr07 | 11537764                | TT                                     | CC                 | CC               | INTRON                        | 101508598          | putative formamidase C869.04                  |
| SNP_49885_A_11537828 | NC_021166.1    | Ca_Kabuli_Chr07 | 11537828                | TT                                     | AA                 | AA               | INTRON                        | 101508598          | putative formamidase C869.04                  |
| SNP_49886_A_11538196 | NC_021166.1    | Ca_Kabuli_Chr07 | 11538196                | GG                                     | AA                 | AA               | SYNONYMOUS_CODING             | 101508598          | putative formamidase C869.04                  |
| SNP_49887_A_11540417 | NC_021166.1    | Ca_Kabuli_Chr07 | 11540417                | AA                                     | TT                 | TT               | URR                           | 101508598          | putative formamidase C869.04                  |
| SNP_49888_A_11540707 | NC_021166.1    | Ca_Kabuli_Chr07 | 11540707                | CC                                     | TT                 | TT               | INTERGENIC                    |                    |                                               |
| SNP_49889_A_11540999 | NC_021166.1    | Ca_Kabuli_Chr07 | 11540999                | GG                                     | AA                 | AA               | INTERGENIC                    |                    |                                               |
| SNP_49890_A_11541028 | NC_021166.1    | Ca_Kabuli_Chr07 | 11541028                | GG                                     | AA                 | AA               | INTERGENIC                    |                    |                                               |
| SNP_49891_A_11542008 | NC_021166.1    | Ca_Kabuli_Chr07 | 11542008                | TT                                     | CC                 | CC               | INTERGENIC                    |                    |                                               |
| SNP_49892_A_11542010 | NC_021166.1    | Ca_Kabuli_Chr07 | 11542010                | TT                                     | CC                 | CC               | INTERGENIC                    |                    |                                               |
| SNP_49894_A_11542695 | NC_021166.1    | Ca_Kabuli_Chr07 | 11542695                | AA                                     | GG                 | GG               | INTERGENIC                    |                    |                                               |
| SNP_49895_A_11542716 | NC_021166.1    | Ca_Kabuli_Chr07 | 11542716                | GG                                     | TT                 | TT               | INTERGENIC                    |                    |                                               |

| SNPs IDs             | Chromosome IDs | Chromosomes     | Physical positions (bp) | CDC Frontier genome (Reference genome) | (Pusa 1103 & HPNB) | (ILWC 46 & LPNB) | Sequence genome | Components of | Gene accession IDs        | Putative functions |
|----------------------|----------------|-----------------|-------------------------|----------------------------------------|--------------------|------------------|-----------------|---------------|---------------------------|--------------------|
| SNP_49897_A_11543264 | NC_021166.1    | Ca_Kabuli_Chr07 | 11543264                | GG                                     | AA                 | AA               | INTERGENIC      |               |                           |                    |
| SNP_49899_A_11549540 | NC_021166.1    | Ca_Kabuli_Chr07 | 11549540                | CC                                     | TT                 | TT               | INTERGENIC      |               |                           |                    |
| SNP_49900_A_11555426 | NC_021166.1    | Ca_Kabuli_Chr07 | 11555426                | TT                                     | CC                 | CC               | INTERGENIC      |               |                           |                    |
| SNP_49901_A_11555436 | NC_021166.1    | Ca_Kabuli_Chr07 | 11555436                | TT                                     | CC                 | CC               | INTERGENIC      |               |                           |                    |
| SNP_49902_A_11566414 | NC_021166.1    | Ca_Kabuli_Chr07 | 11566414                | CC                                     | TT                 | TT               | INTERGENIC      |               |                           |                    |
| SNP_49903_A_11566420 | NC_021166.1    | Ca_Kabuli_Chr07 | 11566420                | AA                                     | GG                 | GG               | INTERGENIC      |               |                           |                    |
| SNP_49904_A_11566425 | NC_021166.1    | Ca_Kabuli_Chr07 | 11566425                | CC                                     | TT                 | TT               | INTERGENIC      |               |                           |                    |
| SNP_49905_A_11566475 | NC_021166.1    | Ca_Kabuli_Chr07 | 11566475                | CC                                     | TT                 | TT               | INTERGENIC      |               |                           |                    |
| SNP_49906_A_11566479 | NC_021166.1    | Ca_Kabuli_Chr07 | 11566479                | CC                                     | TT                 | TT               | INTERGENIC      |               |                           |                    |
| SNP_49907_A_11570752 | NC_021166.1    | Ca_Kabuli_Chr07 | 11570752                | GG                                     | AA                 | AA               | INTERGENIC      |               |                           |                    |
| SNP_49908_A_11571165 | NC_021166.1    | Ca_Kabuli_Chr07 | 11571165                | AA                                     | TT                 | TT               | INTERGENIC      |               |                           |                    |
| SNP_49909_A_11571527 | NC_021166.1    | Ca_Kabuli_Chr07 | 11571527                | GG                                     | AA                 | AA               | INTERGENIC      |               |                           |                    |
| SNP_49910_A_11572085 | NC_021166.1    | Ca_Kabuli_Chr07 | 11572085                | CC                                     | TT                 | TT               | INTERGENIC      |               |                           |                    |
| SNP_49911_A_11572118 | NC_021166.1    | Ca_Kabuli_Chr07 | 11572118                | TT                                     | CC                 | CC               | INTERGENIC      |               |                           |                    |
| SNP_49912_A_11576678 | NC_021166.1    | Ca_Kabuli_Chr07 | 11576678                | GG                                     | CC                 | CC               | URR             | 101509453     | scarecrow-like protein 32 |                    |
| SNP_49913_A_11576702 | NC_021166.1    | Ca_Kabuli_Chr07 | 11576702                | CC                                     | TT                 | TT               | URR             | 101509453     | scarecrow-like protein 32 |                    |
| SNP_49914_A_11576732 | NC_021166.1    | Ca_Kabuli_Chr07 | 11576732                | CC                                     | AA                 | AA               | URR             | 101509453     | scarecrow-like protein 32 |                    |
| SNP_49915_A_11576766 | NC_021166.1    | Ca_Kabuli_Chr07 | 11576766                | AA                                     | TT                 | TT               | URR             | 101509453     | scarecrow-like protein 32 |                    |
| SNP_49916_A_11577253 | NC_021166.1    | Ca_Kabuli_Chr07 | 11577253                | AA                                     | GG                 | GG               | URR             | 101509453     | scarecrow-like protein 32 |                    |
| SNP_49917_A_11580791 | NC_021166.1    | Ca_Kabuli_Chr07 | 11580791                | AA                                     | TT                 | TT               | INTERGENIC      |               |                           |                    |
| SNP_49918_A_11580793 | NC_021166.1    | Ca_Kabuli_Chr07 | 11580793                | GG                                     | AA                 | AA               | INTERGENIC      |               |                           |                    |
| SNP_49919_A_11580805 | NC_021166.1    | Ca_Kabuli_Chr07 | 11580805                | TT                                     | AA                 | AA               | INTERGENIC      |               |                           |                    |

| SNPs IDs             | Chromosome IDs | Chromosomes     | Physical positions (bp) | CDC Frontier genome (Reference genome) | (Pusa 1103 & HPNB) | (ILWC 46 & LPNB) | Sequence Components of genome | Gene accession IDs | Putative functions           |
|----------------------|----------------|-----------------|-------------------------|----------------------------------------|--------------------|------------------|-------------------------------|--------------------|------------------------------|
| SNP_49921_A_11585494 | NC_021166.1    | Ca_Kabuli_Chr07 | 11585494                | CC                                     | TT                 | TT               | DRR                           | 101509779          | uncharacterized LOC101509779 |
| SNP_49923_A_11592902 | NC_021166.1    | Ca_Kabuli_Chr07 | 11592902                | AA                                     | GG                 | GG               | URR                           | 101510308          | peroxidase 73-like           |
| SNP_49924_A_11592952 | NC_021166.1    | Ca_Kabuli_Chr07 | 11592952                | TT                                     | GG                 | GG               | URR                           | 101510308          | peroxidase 73-like           |
| SNP_49925_A_11592975 | NC_021166.1    | Ca_Kabuli_Chr07 | 11592975                | AA                                     | CC                 | CC               | URR                           | 101510308          | peroxidase 73-like           |
| SNP_49926_A_11593171 | NC_021166.1    | Ca_Kabuli_Chr07 | 11593171                | AA                                     | TT                 | TT               | URR                           | 101510308          | peroxidase 73-like           |
| SNP_49927_A_11593324 | NC_021166.1    | Ca_Kabuli_Chr07 | 11593324                | TT                                     | CC                 | CC               | URR                           | 101510308          | peroxidase 73-like           |
| SNP_49928_A_11593550 | NC_021166.1    | Ca_Kabuli_Chr07 | 11593550                | GG                                     | CC                 | CC               | URR                           | 101510308          | peroxidase 73-like           |
| SNP_49929_A_11594178 | NC_021166.1    | Ca_Kabuli_Chr07 | 11594178                | GG                                     | TT                 | TT               | INTERGENIC                    |                    |                              |
| SNP_49930_A_11596132 | NC_021166.1    | Ca_Kabuli_Chr07 | 11596132                | TT                                     | CC                 | CC               | INTERGENIC                    |                    |                              |
| SNP_49931_A_11600727 | NC_021166.1    | Ca_Kabuli_Chr07 | 11600727                | GG                                     | TT                 | TT               | INTERGENIC                    |                    |                              |
| SNP_49933_A_11601229 | NC_021166.1    | Ca_Kabuli_Chr07 | 11601229                | TT                                     | CC                 | CC               | INTERGENIC                    |                    |                              |
| SNP_49934_A_11601251 | NC_021166.1    | Ca_Kabuli_Chr07 | 11601251                | TT                                     | AA                 | AA               | INTERGENIC                    |                    |                              |
| SNP_49935_A_11602189 | NC_021166.1    | Ca_Kabuli_Chr07 | 11602189                | AA                                     | GG                 | GG               | INTERGENIC                    |                    |                              |
| SNP_49936_A_11602224 | NC_021166.1    | Ca_Kabuli_Chr07 | 11602224                | AA                                     | GG                 | GG               | INTERGENIC                    |                    |                              |
| SNP_49937_A_11608364 | NC_021166.1    | Ca_Kabuli_Chr07 | 11608364                | GG                                     | AA                 | AA               | INTERGENIC                    |                    |                              |
| SNP_49938_A_11608369 | NC_021166.1    | Ca_Kabuli_Chr07 | 11608369                | CC                                     | TT                 | TT               | INTERGENIC                    |                    |                              |
| SNP_49939_A_11608870 | NC_021166.1    | Ca_Kabuli_Chr07 | 11608870                | TT                                     | AA                 | AA               | INTERGENIC                    |                    |                              |
| SNP_49940_A_11613250 | NC_021166.1    | Ca_Kabuli_Chr07 | 11613250                | TT                                     | AA                 | AA               | URR                           | 101510644          | uncharacterized LOC101510644 |
| SNP_49941_A_11613700 | NC_021166.1    | Ca_Kabuli_Chr07 | 11613700                | CC                                     | TT                 | TT               | INTRON                        | 101510644          | uncharacterized LOC101510644 |
| SNP_49942_A_11615652 | NC_021166.1    | Ca_Kabuli_Chr07 | 11615652                | TT                                     | CC                 | CC               | URR                           | 101510644          | uncharacterized LOC101510644 |
| SNP_49943_A_11616579 | NC_021166.1    | Ca_Kabuli_Chr07 | 11616579                | CC                                     | AA                 | AA               | URR                           | 101510644          | uncharacterized LOC101510644 |
| SNP_49944_A_11616760 | NC_021166.1    | Ca_Kabuli_Chr07 | 11616760                | GG                                     | CC                 | CC               | URR                           | 101510644          | uncharacterized LOC101510644 |

| SNPs IDs             | Chromosome IDs | Chromosomes     | Physical positions (bp) | CDC Frontier genome (Reference genome) | (Pusa 1103 & HPNB) | (ILWC 46 & LPNB) | Sequence Components of genome | Gene accession IDs | Putative functions           |
|----------------------|----------------|-----------------|-------------------------|----------------------------------------|--------------------|------------------|-------------------------------|--------------------|------------------------------|
| SNP_49945_A_11616908 | NC_021166.1    | Ca_Kabuli_Chr07 | 11616908                | CC                                     | TT                 | TT               | URR                           | 101510644          | uncharacterized LOC101510644 |
| SNP_49946_A_11617449 | NC_021166.1    | Ca_Kabuli_Chr07 | 11617449                | GG                                     | AA                 | AA               | URR                           | 101510644          | uncharacterized LOC101510644 |
| SNP_49947_A_11617512 | NC_021166.1    | Ca_Kabuli_Chr07 | 11617512                | CC                                     | AA                 | AA               | INTERGENIC                    |                    |                              |
| SNP_49948_A_11617516 | NC_021166.1    | Ca_Kabuli_Chr07 | 11617516                | CC                                     | AA                 | AA               | INTERGENIC                    |                    |                              |
| SNP_49949_A_11617518 | NC_021166.1    | Ca_Kabuli_Chr07 | 11617518                | TT                                     | CC                 | CC               | INTERGENIC                    |                    |                              |
| SNP_49950_A_11617601 | NC_021166.1    | Ca_Kabuli_Chr07 | 11617601                | AA                                     | GG                 | GG               | INTERGENIC                    |                    |                              |
| SNP_49951_A_11617729 | NC_021166.1    | Ca_Kabuli_Chr07 | 11617729                | GG                                     | AA                 | AA               | INTERGENIC                    |                    |                              |
| SNP_49952_A_11618040 | NC_021166.1    | Ca_Kabuli_Chr07 | 11618040                | AA                                     | TT                 | TT               | INTERGENIC                    |                    |                              |
| SNP_49953_A_11618044 | NC_021166.1    | Ca_Kabuli_Chr07 | 11618044                | CC                                     | TT                 | TT               | INTERGENIC                    |                    |                              |
| SNP_49954_A_11618052 | NC_021166.1    | Ca_Kabuli_Chr07 | 11618052                | GG                                     | AA                 | AA               | INTERGENIC                    |                    |                              |
| SNP_49955_A_11618233 | NC_021166.1    | Ca_Kabuli_Chr07 | 11618233                | AA                                     | TT                 | TT               | INTERGENIC                    |                    |                              |
| SNP_49956_A_11623679 | NC_021166.1    | Ca_Kabuli_Chr07 | 11623679                | TT                                     | AA                 | AA               | INTERGENIC                    |                    |                              |
| SNP_49957_A_11623984 | NC_021166.1    | Ca_Kabuli_Chr07 | 11623984                | TT                                     | AA                 | AA               | INTERGENIC                    |                    |                              |
| SNP_49958_A_11624202 | NC_021166.1    | Ca_Kabuli_Chr07 | 11624202                | AA                                     | GG                 | GG               | INTERGENIC                    |                    |                              |
| SNP_49959_A_11624257 | NC_021166.1    | Ca_Kabuli_Chr07 | 11624257                | GG                                     | AA                 | AA               | INTERGENIC                    |                    |                              |
| SNP_49960_A_11624370 | NC_021166.1    | Ca_Kabuli_Chr07 | 11624370                | TT                                     | CC                 | CC               | INTERGENIC                    |                    |                              |
| SNP_49961_A_11624401 | NC_021166.1    | Ca_Kabuli_Chr07 | 11624401                | AA                                     | GG                 | GG               | INTERGENIC                    |                    |                              |
| SNP_49962_A_11624421 | NC_021166.1    | Ca_Kabuli_Chr07 | 11624421                | AA                                     | GG                 | GG               | INTERGENIC                    |                    |                              |
| SNP_49964_A_11624623 | NC_021166.1    | Ca_Kabuli_Chr07 | 11624623                | AA                                     | GG                 | GG               | INTERGENIC                    |                    |                              |
| SNP_49965_A_11625577 | NC_021166.1    | Ca_Kabuli_Chr07 | 11625577                | AA                                     | GG                 | GG               | INTERGENIC                    |                    |                              |
| SNP_49966_A_11626109 | NC_021166.1    | Ca_Kabuli_Chr07 | 11626109                | GG                                     | AA                 | AA               | INTERGENIC                    |                    |                              |
| SNP_49967_A_11627021 | NC_021166.1    | Ca_Kabuli_Chr07 | 11627021                | CC                                     | TT                 | TT               | INTERGENIC                    |                    |                              |

| SNPs IDs             | Chromosome IDs | Chromosomes     | Physical positions (bp) | CDC Frontier genome (Reference genome) | (Pusa 1103 & HPNB) | (ILWC 46 & LPNB) | Sequence Components of genome | Gene accession IDs | Putative functions              |
|----------------------|----------------|-----------------|-------------------------|----------------------------------------|--------------------|------------------|-------------------------------|--------------------|---------------------------------|
| SNP_49968_A_11645199 | NC_021166.1    | Ca_Kabuli_Chr07 | 11645199                | TT                                     | GG                 | GG               | INTRON                        | 101511488          | uncharacterized LOC101511488    |
| SNP_49969_A_11645200 | NC_021166.1    | Ca_Kabuli_Chr07 | 11645200                | AA                                     | TT                 | TT               | INTRON                        | 101511488          | uncharacterized LOC101511488    |
| SNP_49970_A_11647559 | NC_021166.1    | Ca_Kabuli_Chr07 | 11647559                | TT                                     | CC                 | CC               | DRR                           | 101511815          | casein kinase II subunit alpha  |
| SNP_49971_A_11651889 | NC_021166.1    | Ca_Kabuli_Chr07 | 11651889                | CC                                     | AA                 | AA               | INTRON                        | 101511815          | casein kinase II subunit alpha  |
| SNP_49972_A_11656445 | NC_021166.1    | Ca_Kabuli_Chr07 | 11656445                | GG                                     | AA                 | AA               | URR                           | 101511815          | casein kinase II subunit alpha  |
| SNP_49973_A_11657882 | NC_021166.1    | Ca_Kabuli_Chr07 | 11657882                | TT                                     | CC                 | CC               | INTERGENIC                    |                    |                                 |
| SNP_49974_A_11657884 | NC_021166.1    | Ca_Kabuli_Chr07 | 11657884                | GG                                     | AA                 | AA               | INTERGENIC                    |                    |                                 |
| SNP_49975_A_11658890 | NC_021166.1    | Ca_Kabuli_Chr07 | 11658890                | CC                                     | AA                 | AA               | INTERGENIC                    |                    |                                 |
| SNP_49976_A_11660767 | NC_021166.1    | Ca_Kabuli_Chr07 | 11660767                | AA                                     | CC                 | CC               | INTERGENIC                    |                    |                                 |
| SNP_49977_A_11662041 | NC_021166.1    | Ca_Kabuli_Chr07 | 11662041                | TT                                     | AA                 | AA               | INTERGENIC                    |                    |                                 |
| SNP_49978_A_11670422 | NC_021166.1    | Ca_Kabuli_Chr07 | 11670422                | TT                                     | CC                 | CC               | INTERGENIC                    |                    |                                 |
| SNP_49979_A_11675295 | NC_021166.1    | Ca_Kabuli_Chr07 | 11675295                | GG                                     | CC                 | CC               | INTRON                        | 101512678          | probable prolyl 4-hydroxylase 9 |
| SNP_49980_A_11676982 | NC_021166.1    | Ca_Kabuli_Chr07 | 11676982                | AA                                     | TT                 | TT               | INTRON                        | 101512678          | probable prolyl 4-hydroxylase 9 |
| SNP_49981_A_11678377 | NC_021166.1    | Ca_Kabuli_Chr07 | 11678377                | TT                                     | CC                 | CC               | URR                           | 101512678          | probable prolyl 4-hydroxylase 9 |
| SNP_49982_A_11678688 | NC_021166.1    | Ca_Kabuli_Chr07 | 11678688                | CC                                     | TT                 | TT               | URR                           | 101512678          | probable prolyl 4-hydroxylase 9 |
| SNP_49983_A_11678956 | NC_021166.1    | Ca_Kabuli_Chr07 | 11678956                | CC                                     | TT                 | TT               | URR                           | 101512678          | probable prolyl 4-hydroxylase 9 |
| SNP_49985_A_11679097 | NC_021166.1    | Ca_Kabuli_Chr07 | 11679097                | TT                                     | CC                 | CC               | URR                           | 101512678          | probable prolyl 4-hydroxylase 9 |
| SNP_49986_A_11679316 | NC_021166.1    | Ca_Kabuli_Chr07 | 11679316                | GG                                     | AA                 | AA               | URR                           | 101512678          | probable prolyl 4-hydroxylase 9 |
| SNP_49987_A_11679353 | NC_021166.1    | Ca_Kabuli_Chr07 | 11679353                | AA                                     | TT                 | TT               | URR                           | 101512678          | probable prolyl 4-hydroxylase 9 |
| SNP_49988_A_11680954 | NC_021166.1    | Ca_Kabuli_Chr07 | 11680954                | GG                                     | AA                 | AA               | INTERGENIC                    |                    |                                 |
| SNP_49989_A_11680989 | NC_021166.1    | Ca_Kabuli_Chr07 | 11680989                | TT                                     | CC                 | CC               | INTERGENIC                    |                    |                                 |
| SNP_49990_A_11681009 | NC_021166.1    | Ca_Kabuli_Chr07 | 11681009                | CC                                     | GG                 | GG               | INTERGENIC                    |                    |                                 |

| SNPs IDs             | Chromosome IDs | Chromosomes     | Physical positions (bp) | CDC Frontier genome (Reference genome) | (Pusa 1103 & HPNB) | (ILWC 46 & LPNB) | Sequence Components of genome | Gene accession IDs | Putative functions                   |
|----------------------|----------------|-----------------|-------------------------|----------------------------------------|--------------------|------------------|-------------------------------|--------------------|--------------------------------------|
| SNP_49991_A_11681178 | NC_021166.1    | Ca_Kabuli_Chr07 | 11681178                | AA                                     | GG                 | GG               | INTERGENIC                    |                    |                                      |
| SNP_49992_A_11681956 | NC_021166.1    | Ca_Kabuli_Chr07 | 11681956                | GG                                     | TT                 | TT               | INTERGENIC                    |                    |                                      |
| SNP_49993_A_11682686 | NC_021166.1    | Ca_Kabuli_Chr07 | 11682686                | AA                                     | GG                 | GG               | INTERGENIC                    |                    |                                      |
| SNP_49994_A_11682865 | NC_021166.1    | Ca_Kabuli_Chr07 | 11682865                | AA                                     | TT                 | TT               | INTERGENIC                    |                    |                                      |
| SNP_49995_A_11683161 | NC_021166.1    | Ca_Kabuli_Chr07 | 11683161                | AA                                     | CC                 | CC               | DRR                           | 101512994          | subtilisin-like protease SBT1.7      |
| SNP_49996_A_11683195 | NC_021166.1    | Ca_Kabuli_Chr07 | 11683195                | TT                                     | AA                 | AA               | DRR                           | 101512994          | subtilisin-like protease SBT1.7      |
| SNP_49997_A_11683957 | NC_021166.1    | Ca_Kabuli_Chr07 | 11683957                | AA                                     | TT                 | TT               | DRR                           | 101512994          | subtilisin-like protease SBT1.7      |
| SNP_49999_A_11691939 | NC_021166.1    | Ca_Kabuli_Chr07 | 11691939                | AA                                     | TT                 | TT               | INTERGENIC                    |                    |                                      |
| SNP_50001_A_11693740 | NC_021166.1    | Ca_Kabuli_Chr07 | 11693740                | GG                                     | AA                 | AA               | URR                           | 101513321          | uncharacterized LOC101513321         |
| SNP_50002_A_11697451 | NC_021166.1    | Ca_Kabuli_Chr07 | 11697451                | GG                                     | TT                 | TT               | INTERGENIC                    |                    |                                      |
| SNP_50003_A_11697602 | NC_021166.1    | Ca_Kabuli_Chr07 | 11697602                | AA                                     | CC                 | CC               | INTERGENIC                    |                    |                                      |
| SNP_50004_A_11706657 | NC_021166.1    | Ca_Kabuli_Chr07 | 11706657                | GG                                     | AA                 | AA               | URR                           | 101513645          | uncharacterized protein DDB_G0271670 |
| SNP_50005_A_11707029 | NC_021166.1    | Ca_Kabuli_Chr07 | 11707029                | CC                                     | TT                 | TT               | INTERGENIC                    |                    |                                      |
| SNP_50006_A_11707086 | NC_021166.1    | Ca_Kabuli_Chr07 | 11707086                | AA                                     | GG                 | GG               | INTERGENIC                    |                    |                                      |
| SNP_50007_A_11708387 | NC_021166.1    | Ca_Kabuli_Chr07 | 11708387                | GG                                     | AA                 | AA               | DRR                           | 101513972          | probable esterase D14L               |
| SNP_50008_A_11710906 | NC_021166.1    | Ca_Kabuli_Chr07 | 11710906                | CC                                     | TT                 | TT               | URR                           | 101513972          | probable esterase D14L               |
| SNP_50009_A_11712396 | NC_021166.1    | Ca_Kabuli_Chr07 | 11712396                | AA                                     | GG                 | GG               | INTERGENIC                    |                    |                                      |
| SNP_50010_A_11712405 | NC_021166.1    | Ca_Kabuli_Chr07 | 11712405                | GG                                     | AA                 | AA               | INTERGENIC                    |                    |                                      |
| SNP_50011_A_11712409 | NC_021166.1    | Ca_Kabuli_Chr07 | 11712409                | CC                                     | TT                 | TT               | INTERGENIC                    |                    |                                      |
| SNP_50012_A_11712420 | NC_021166.1    | Ca_Kabuli_Chr07 | 11712420                | TT                                     | CC                 | CC               | INTERGENIC                    |                    |                                      |
| SNP_50013_A_11712431 | NC_021166.1    | Ca_Kabuli_Chr07 | 11712431                | TT                                     | AA                 | AA               | INTERGENIC                    |                    |                                      |
| SNP_50014_A_11712478 | NC_021166.1    | Ca_Kabuli_Chr07 | 11712478                | TT                                     | CC                 | CC               | INTERGENIC                    |                    |                                      |

| SNPs IDs             | Chromosome IDs | Chromosomes     | Physical positions (bp) | CDC Frontier genome (Reference genome) | (Pusa 1103 & HPNB) | (ILWC 46 & LPNB) | Sequence Components of genome | Gene accession IDs | Putative functions                          |
|----------------------|----------------|-----------------|-------------------------|----------------------------------------|--------------------|------------------|-------------------------------|--------------------|---------------------------------------------|
| SNP_50015_A_11713758 | NC_021166.1    | Ca_Kabuli_Chr07 | 11713758                | AA                                     | TT                 | TT               | DRR                           | 101495824          | Unknown function                            |
| SNP_50016_A_11714363 | NC_021166.1    | Ca_Kabuli_Chr07 | 11714363                | GG                                     | TT                 | TT               | INTERGENIC                    |                    |                                             |
| SNP_50018_A_11714530 | NC_021166.1    | Ca_Kabuli_Chr07 | 11714530                | TT                                     | CC                 | CC               | INTERGENIC                    |                    |                                             |
| SNP_50019_A_11717556 | NC_021166.1    | Ca_Kabuli_Chr07 | 11717556                | AA                                     | GG                 | GG               | INTRON                        | 101495824          | Unknown function                            |
| SNP_50020_A_11717560 | NC_021166.1    | Ca_Kabuli_Chr07 | 11717560                | GG                                     | AA                 | AA               | INTRON                        | 101495824          | Unknown function                            |
| SNP_50021_A_11717561 | NC_021166.1    | Ca_Kabuli_Chr07 | 11717561                | GG                                     | AA                 | AA               | INTRON                        | 101495824          | Unknown function                            |
| SNP_50022_A_11717621 | NC_021166.1    | Ca_Kabuli_Chr07 | 11717621                | TT                                     | GG                 | GG               | INTRON                        | 101495824          | Unknown function                            |
| SNP_50023_A_11717637 | NC_021166.1    | Ca_Kabuli_Chr07 | 11717637                | GG                                     | AA                 | AA               | INTRON                        | 101495824          | Unknown function                            |
| SNP_50024_A_11718147 | NC_021166.1    | Ca_Kabuli_Chr07 | 11718147                | CC                                     | AA                 | AA               | INTRON                        | 101495824          | Unknown function                            |
| SNP_50025_A_11718331 | NC_021166.1    | Ca_Kabuli_Chr07 | 11718331                | CC                                     | TT                 | TT               | NON_SYNONYMOUS_CODING         | 101495824          | Unknown function                            |
| SNP_50026_A_11719248 | NC_021166.1    | Ca_Kabuli_Chr07 | 11719248                | GG                                     | AA                 | AA               | INTRON                        | 101495824          | Unknown function                            |
| SNP_50027_A_11719493 | NC_021166.1    | Ca_Kabuli_Chr07 | 11719493                | CC                                     | TT                 | TT               | INTRON                        | 101495824          | Unknown function                            |
| SNP_50028_A_11719503 | NC_021166.1    | Ca_Kabuli_Chr07 | 11719503                | TT                                     | AA                 | AA               | INTRON                        | 101495824          | Unknown function                            |
| SNP_50029_A_11719828 | NC_021166.1    | Ca_Kabuli_Chr07 | 11719828                | CC                                     | TT                 | TT               | INTRON                        | 101495824          | Unknown function                            |
| SNP_50030_A_11723373 | NC_021166.1    | Ca_Kabuli_Chr07 | 11723373                | AA                                     | TT                 | TT               | INTERGENIC                    |                    |                                             |
| SNP_50031_A_11725655 | NC_021166.1    | Ca_Kabuli_Chr07 | 11725655                | GG                                     | AA                 | AA               | URR                           | 101514307          | lysine-rich arabinogalactan protein 18-like |
| SNP_50032_A_11725760 | NC_021166.1    | Ca_Kabuli_Chr07 | 11725760                | GG                                     | AA                 | AA               | URR                           | 101514307          | lysine-rich arabinogalactan protein 18-like |
| SNP_50033_A_11726758 | NC_021166.1    | Ca_Kabuli_Chr07 | 11726758                | TT                                     | CC                 | CC               | INTERGENIC                    |                    |                                             |
| SNP_50034_A_11727049 | NC_021166.1    | Ca_Kabuli_Chr07 | 11727049                | GG                                     | TT                 | TT               | INTERGENIC                    |                    |                                             |
| SNP_50035_A_11729672 | NC_021166.1    | Ca_Kabuli_Chr07 | 11729672                | AA                                     | TT                 | TT               | INTERGENIC                    |                    |                                             |
| SNP_50038_A_11732899 | NC_021166.1    | Ca_Kabuli_Chr07 | 11732899                | CC                                     | GG                 | GG               | DRR                           | 101514960          | FRIGIDA-like protein 3                      |
| SNP_50039_A_11732929 | NC_021166.1    | Ca_Kabuli_Chr07 | 11732929                | CC                                     | AA                 | AA               | DRR                           | 101514960          | FRIGIDA-like protein 3                      |



| SNPs IDs             | Chromosome IDs | Chromosomes     | Physical positions (bp) | CDC Frontier (Reference genome) | (Pusa 1103 & HPNB) | (ILWC 46 & LPNB) | Sequence Components of genome | Gene accession IDs | Putative functions            |
|----------------------|----------------|-----------------|-------------------------|---------------------------------|--------------------|------------------|-------------------------------|--------------------|-------------------------------|
| SNP_50040_A_11735857 | NC_021166.1    | Ca_Kabuli_Chr07 | 11735857                | TT                              | CC                 | CC               | INTERGENIC                    |                    |                               |
| SNP_50041_A_11737691 | NC_021166.1    | Ca_Kabuli_Chr07 | 11737691                | GG                              | AA                 | AA               | URR                           | 101514960          | FRIGIDA-like protein 3        |
| SNP_50042_A_11738534 | NC_021166.1    | Ca_Kabuli_Chr07 | 11738534                | GG                              | CC                 | CC               | INTERGENIC                    |                    |                               |
| SNP_50043_A_11738784 | NC_021166.1    | Ca_Kabuli_Chr07 | 11738784                | TT                              | CC                 | CC               | DRR                           | 101515280          | metal transporter Nramp3-like |
| SNP_50044_A_11738919 | NC_021166.1    | Ca_Kabuli_Chr07 | 11738919                | AA                              | TT                 | TT               | DRR                           | 101515280          | metal transporter Nramp3-like |
| SNP_50045_A_11738943 | NC_021166.1    | Ca_Kabuli_Chr07 | 11738943                | CC                              | GG                 | GG               | DRR                           | 101515280          | metal transporter Nramp3-like |
| SNP_50046_A_11743602 | NC_021166.1    | Ca_Kabuli_Chr07 | 11743602                | GG                              | AA                 | AA               | URR                           | 101515280          | metal transporter Nramp3-like |
| SNP_50047_A_11743614 | NC_021166.1    | Ca_Kabuli_Chr07 | 11743614                | GG                              | AA                 | AA               | URR                           | 101515280          | metal transporter Nramp3-like |
| SNP_50048_A_11745150 | NC_021166.1    | Ca_Kabuli_Chr07 | 11745150                | TT                              | AA                 | AA               | URR                           | 101515280          | metal transporter Nramp3-like |
| SNP_50049_A_11745169 | NC_021166.1    | Ca_Kabuli_Chr07 | 11745169                | AA                              | GG                 | GG               | URR                           | 101515280          | metal transporter Nramp3-like |
| SNP_50050_A_11745196 | NC_021166.1    | Ca_Kabuli_Chr07 | 11745196                | AA                              | GG                 | GG               | URR                           | 101515280          | metal transporter Nramp3-like |
| SNP_50051_A_11745337 | NC_021166.1    | Ca_Kabuli_Chr07 | 11745337                | AA                              | GG                 | GG               | INTERGENIC                    |                    |                               |
| SNP_50052_A_11745579 | NC_021166.1    | Ca_Kabuli_Chr07 | 11745579                | AA                              | GG                 | GG               | INTERGENIC                    |                    |                               |
| SNP_50053_A_11751063 | NC_021166.1    | Ca_Kabuli_Chr07 | 11751063                | AA                              | GG                 | GG               | DRR                           | 101515605          | zinc finger protein 7-like    |
| SNP_50054_A_11751176 | NC_021166.1    | Ca_Kabuli_Chr07 | 11751176                | TT                              | CC                 | CC               | DRR                           | 101515605          | zinc finger protein 7-like    |
| SNP_50055_A_11751622 | NC_021166.1    | Ca_Kabuli_Chr07 | 11751622                | TT                              | CC                 | CC               | INTRON                        | 101515605          | zinc finger protein 7-like    |
| SNP_50057_A_11751819 | NC_021166.1    | Ca_Kabuli_Chr07 | 11751819                | TT                              | CC                 | CC               | INTRON                        | 101515605          | zinc finger protein 7-like    |
| SNP_50058_A_11752054 | NC_021166.1    | Ca_Kabuli_Chr07 | 11752054                | GG                              | AA                 | AA               | INTRON                        | 101515605          | zinc finger protein 7-like    |
| SNP_50059_A_11752055 | NC_021166.1    | Ca_Kabuli_Chr07 | 11752055                | TT                              | CC                 | CC               | INTRON                        | 101515605          | zinc finger protein 7-like    |
| SNP_50060_A_11753073 | NC_021166.1    | Ca_Kabuli_Chr07 | 11753073                | CC                              | TT                 | TT               | NON_SYNONYMOUS_CODING         | 101515605          | zinc finger protein 7-like    |
| SNP_50064_A_11758303 | NC_021166.1    | Ca_Kabuli_Chr07 | 11758303                | TT                              | CC                 | CC               | INTERGENIC                    |                    |                               |
| SNP_50065_A_11759267 | NC_021166.1    | Ca_Kabuli_Chr07 | 11759267                | CC                              | AA                 | AA               | INTERGENIC                    |                    |                               |

| SNPs IDs             | Chromosome IDs | Chromosomes     | Physical positions (bp) | CDC Frontier genome (Reference genome) | (Pusa 1103 & HPNB) | (ILWC 46 & LPNB) | Sequence Components of genome | Gene accession IDs | Putative functions                                                 |
|----------------------|----------------|-----------------|-------------------------|----------------------------------------|--------------------|------------------|-------------------------------|--------------------|--------------------------------------------------------------------|
| SNP_50066_A_11759277 | NC_021166.1    | Ca_Kabuli_Chr07 | 11759277                | AA                                     | GG                 | GG               | INTERGENIC                    |                    |                                                                    |
| SNP_50067_A_11759323 | NC_021166.1    | Ca_Kabuli_Chr07 | 11759323                | AA                                     | CC                 | CC               | INTERGENIC                    |                    |                                                                    |
| SNP_50068_A_11759923 | NC_021166.1    | Ca_Kabuli_Chr07 | 11759923                | CC                                     | TT                 | TT               | INTERGENIC                    |                    |                                                                    |
| SNP_50069_A_11760244 | NC_021166.1    | Ca_Kabuli_Chr07 | 11760244                | GG                                     | AA                 | AA               | INTERGENIC                    |                    |                                                                    |
| SNP_50070_A_11760490 | NC_021166.1    | Ca_Kabuli_Chr07 | 11760490                | GG                                     | AA                 | AA               | INTERGENIC                    |                    |                                                                    |
| SNP_50071_A_11768414 | NC_021166.1    | Ca_Kabuli_Chr07 | 11768414                | TT                                     | CC                 | CC               | INTERGENIC                    |                    |                                                                    |
| SNP_50072_A_11770323 | NC_021166.1    | Ca_Kabuli_Chr07 | 11770323                | CC                                     | TT                 | TT               | INTRON                        | 101488682          | F-box-like/WD repeat-containing protein TBL1XR1                    |
| SNP_50073_A_11770336 | NC_021166.1    | Ca_Kabuli_Chr07 | 11770336                | TT                                     | CC                 | CC               | INTRON                        | 101488682          | F-box-like/WD repeat-containing protein TBL1XR1                    |
| SNP_50074_A_11770845 | NC_021166.1    | Ca_Kabuli_Chr07 | 11770845                | AA                                     | GG                 | GG               | INTRON                        | 101488682          | F-box-like/WD repeat-containing protein TBL1XR1                    |
| SNP_50075_A_11771781 | NC_021166.1    | Ca_Kabuli_Chr07 | 11771781                | CC                                     | AA                 | AA               | INTRON                        | 101488682          | F-box-like/WD repeat-containing protein TBL1XR1                    |
| SNP_50076_A_11772043 | NC_021166.1    | Ca_Kabuli_Chr07 | 11772043                | CC                                     | TT                 | TT               | INTRON                        | 101488682          | F-box-like/WD repeat-containing protein TBL1XR1                    |
| SNP_50077_A_11772666 | NC_021166.1    | Ca_Kabuli_Chr07 | 11772666                | AA                                     | GG                 | GG               | INTRON                        | 101488682          | F-box-like/WD repeat-containing protein TBL1XR1                    |
| SNP_50078_A_11775872 | NC_021166.1    | Ca_Kabuli_Chr07 | 11775872                | CC                                     | TT                 | TT               | URR                           | 101488682          | F-box-like/WD repeat-containing protein TBL1XR1                    |
| SNP_50079_A_11775927 | NC_021166.1    | Ca_Kabuli_Chr07 | 11775927                | TT                                     | AA                 | AA               | URR                           | 101488682          | F-box-like/WD repeat-containing protein TBL1XR1                    |
| SNP_50080_A_11775935 | NC_021166.1    | Ca_Kabuli_Chr07 | 11775935                | CC                                     | TT                 | TT               | URR                           | 101488682          | F-box-like/WD repeat-containing protein TBL1XR1                    |
| SNP_50081_A_11776038 | NC_021166.1    | Ca_Kabuli_Chr07 | 11776038                | AA                                     | GG                 | GG               | URR                           | 101488682          | F-box-like/WD repeat-containing protein TBL1XR1                    |
| SNP_50082_A_11776227 | NC_021166.1    | Ca_Kabuli_Chr07 | 11776227                | GG                                     | AA                 | AA               | URR                           | 101488682          | F-box-like/WD repeat-containing protein TBL1XR1                    |
| SNP_50083_A_11785872 | NC_021166.1    | Ca_Kabuli_Chr07 | 11785872                | CC                                     | TT                 | TT               | URR                           | 101489348          | solanesyl diphosphate synthase 3, chloroplastic/mitochondrial like |
| SNP_50084_A_11785881 | NC_021166.1    | Ca_Kabuli_Chr07 | 11785881                | CC                                     | AA                 | AA               | URR                           | 101489348          | solanesyl diphosphate synthase 3, chloroplastic/mitochondrial like |
| SNP_50085_A_11787359 | NC_021166.1    | Ca_Kabuli_Chr07 | 11787359                | CC                                     | TT                 | TT               | INTERGENIC                    |                    |                                                                    |
| SNP_50086_A_11788611 | NC_021166.1    | Ca_Kabuli_Chr07 | 11788611                | TT                                     | AA                 | AA               | INTERGENIC                    |                    |                                                                    |
| SNP_50087_A_11789006 | NC_021166.1    | Ca_Kabuli_Chr07 | 11789006                | AA                                     | GG                 | GG               | URR                           | 101489020          | cytochrome P450 81E8-like                                          |

| SNPs IDs             | Chromosome IDs | Chromosomes     | Physical positions (bp) | CDC Frontier genome | (Reference genome) | (Pusa 1103 & HPNB) | (ILWC 46 & LPNB) | Sequence Components of genome | Gene accession IDs | Putative functions                              |
|----------------------|----------------|-----------------|-------------------------|---------------------|--------------------|--------------------|------------------|-------------------------------|--------------------|-------------------------------------------------|
| SNP_50088_A_11789009 | NC_021166.1    | Ca_Kabuli_Chr07 | 11789009                | TT                  |                    | CC                 | CC               | URR                           | 101489020          | cytochrome P450 81E8-like                       |
| SNP_50089_A_11789090 | NC_021166.1    | Ca_Kabuli_Chr07 | 11789090                | GG                  |                    | AA                 | AA               | URR                           | 101489020          | cytochrome P450 81E8-like                       |
| SNP_50090_A_11798980 | NC_021166.1    | Ca_Kabuli_Chr07 | 11798980                | CC                  |                    | TT                 | TT               | INTERGENIC                    |                    |                                                 |
| SNP_50091_A_11799286 | NC_021166.1    | Ca_Kabuli_Chr07 | 11799286                | AA                  |                    | TT                 | TT               | DRR                           | 101489675          | probable receptor-like protein kinase At2g23200 |
| SNP_50092_A_11799288 | NC_021166.1    | Ca_Kabuli_Chr07 | 11799288                | TT                  |                    | GG                 | GG               | DRR                           | 101489675          | probable receptor-like protein kinase At2g23200 |
| SNP_50093_A_11799290 | NC_021166.1    | Ca_Kabuli_Chr07 | 11799290                | TT                  |                    | CC                 | CC               | DRR                           | 101489675          | probable receptor-like protein kinase At2g23200 |
| SNP_50094_A_11799305 | NC_021166.1    | Ca_Kabuli_Chr07 | 11799305                | AA                  |                    | TT                 | TT               | DRR                           | 101489675          | probable receptor-like protein kinase At2g23200 |
| SNP_50095_A_11799319 | NC_021166.1    | Ca_Kabuli_Chr07 | 11799319                | CC                  |                    | TT                 | TT               | DRR                           | 101489675          | probable receptor-like protein kinase At2g23200 |
| SNP_50096_A_11799642 | NC_021166.1    | Ca_Kabuli_Chr07 | 11799642                | AA                  |                    | CC                 | CC               | DRR                           | 101489675          | probable receptor-like protein kinase At2g23200 |
| SNP_50097_A_11799645 | NC_021166.1    | Ca_Kabuli_Chr07 | 11799645                | TT                  |                    | GG                 | GG               | DRR                           | 101489675          | probable receptor-like protein kinase At2g23200 |
| SNP_50098_A_11799699 | NC_021166.1    | Ca_Kabuli_Chr07 | 11799699                | GG                  |                    | TT                 | TT               | DRR                           | 101489675          | probable receptor-like protein kinase At2g23200 |
| SNP_50099_A_11801109 | NC_021166.1    | Ca_Kabuli_Chr07 | 11801109                | TT                  |                    | AA                 | AA               | NON_SYNONYMOUS_CODING         | 101489675          | probable receptor-like protein kinase At2g23200 |
| SNP_50100_A_11803540 | NC_021166.1    | Ca_Kabuli_Chr07 | 11803540                | TT                  |                    | CC                 | CC               | URR                           | 101489675          | probable receptor-like protein kinase At2g23200 |
| SNP_50101_A_11808154 | NC_021166.1    | Ca_Kabuli_Chr07 | 11808154                | TT                  |                    | CC                 | CC               | INTERGENIC                    |                    |                                                 |
| SNP_50102_A_11808161 | NC_021166.1    | Ca_Kabuli_Chr07 | 11808161                | TT                  |                    | CC                 | CC               | INTERGENIC                    |                    |                                                 |
| SNP_50103_A_11808834 | NC_021166.1    | Ca_Kabuli_Chr07 | 11808834                | AA                  |                    | TT                 | TT               | INTERGENIC                    |                    |                                                 |
| SNP_50104_A_11809148 | NC_021166.1    | Ca_Kabuli_Chr07 | 11809148                | AA                  |                    | TT                 | TT               | INTERGENIC                    |                    |                                                 |
| SNP_50105_A_11809876 | NC_021166.1    | Ca_Kabuli_Chr07 | 11809876                | TT                  |                    | CC                 | CC               | INTERGENIC                    |                    |                                                 |
| SNP_50106_A_11832544 | NC_021166.1    | Ca_Kabuli_Chr07 | 11832544                | CC                  |                    | AA                 | AA               | INTERGENIC                    |                    |                                                 |
| SNP_50107_A_11833326 | NC_021166.1    | Ca_Kabuli_Chr07 | 11833326                | CC                  |                    | TT                 | TT               | INTERGENIC                    |                    |                                                 |
| SNP_50108_A_11833866 | NC_021166.1    | Ca_Kabuli_Chr07 | 11833866                | AA                  |                    | GG                 | GG               | INTERGENIC                    |                    |                                                 |
| SNP_50109_A_11833900 | NC_021166.1    | Ca_Kabuli_Chr07 | 11833900                | TT                  |                    | CC                 | CC               | INTERGENIC                    |                    |                                                 |

| SNPs IDs             | Chromosome IDs | Chromosomes     | Physical positions (bp) | CDC Frontier genome (Reference genome) | (Pusa 1103 & HPNB) | (ILWC 46 & LPNB) | Sequence Components of genome | Gene accession IDs | Putative functions                |
|----------------------|----------------|-----------------|-------------------------|----------------------------------------|--------------------|------------------|-------------------------------|--------------------|-----------------------------------|
| SNP_50110_A_11833911 | NC_021166.1    | Ca_Kabuli_Chr07 | 11833911                | GG                                     | TT                 | TT               | INTERGENIC                    |                    |                                   |
| SNP_50111_A_11833921 | NC_021166.1    | Ca_Kabuli_Chr07 | 11833921                | GG                                     | CC                 | CC               | INTERGENIC                    |                    |                                   |
| SNP_50113_A_11834393 | NC_021166.1    | Ca_Kabuli_Chr07 | 11834393                | CC                                     | GG                 | GG               | INTERGENIC                    |                    |                                   |
| SNP_50114_A_11835218 | NC_021166.1    | Ca_Kabuli_Chr07 | 11835218                | TT                                     | GG                 | GG               | INTERGENIC                    |                    |                                   |
| SNP_50115_A_11835228 | NC_021166.1    | Ca_Kabuli_Chr07 | 11835228                | AA                                     | GG                 | GG               | INTERGENIC                    |                    |                                   |
| SNP_50116_A_11841031 | NC_021166.1    | Ca_Kabuli_Chr07 | 11841031                | CC                                     | AA                 | AA               | URR                           | 101496472          | UDP-glycosyltransferase 84B2-like |
| SNP_50117_A_11841296 | NC_021166.1    | Ca_Kabuli_Chr07 | 11841296                | TT                                     | GG                 | GG               | URR                           | 101496472          | UDP-glycosyltransferase 84B2-like |
| SNP_50118_A_11849286 | NC_021166.1    | Ca_Kabuli_Chr07 | 11849286                | TT                                     | GG                 | GG               | URR                           | 101489997          | uncharacterized LOC101489997      |
| SNP_50119_A_11851075 | NC_021166.1    | Ca_Kabuli_Chr07 | 11851075                | TT                                     | CC                 | CC               | URR                           | 101489997          | uncharacterized LOC101489997      |
| SNP_50120_A_11851143 | NC_021166.1    | Ca_Kabuli_Chr07 | 11851143                | CC                                     | AA                 | AA               | URR                           | 101489997          | uncharacterized LOC101489997      |
| SNP_50121_A_11851169 | NC_021166.1    | Ca_Kabuli_Chr07 | 11851169                | AA                                     | GG                 | GG               | URR                           | 101489997          | uncharacterized LOC101489997      |
| SNP_50122_A_11851313 | NC_021166.1    | Ca_Kabuli_Chr07 | 11851313                | GG                                     | AA                 | AA               | INTERGENIC                    |                    |                                   |
| SNP_50123_A_11851619 | NC_021166.1    | Ca_Kabuli_Chr07 | 11851619                | TT                                     | CC                 | CC               | INTERGENIC                    |                    |                                   |
| SNP_50124_A_11851708 | NC_021166.1    | Ca_Kabuli_Chr07 | 11851708                | TT                                     | CC                 | CC               | INTERGENIC                    |                    |                                   |
| SNP_50125_A_11851881 | NC_021166.1    | Ca_Kabuli_Chr07 | 11851881                | AA                                     | GG                 | GG               | INTERGENIC                    |                    |                                   |
| SNP_50126_A_11851965 | NC_021166.1    | Ca_Kabuli_Chr07 | 11851965                | TT                                     | CC                 | CC               | INTERGENIC                    |                    |                                   |
| SNP_50127_A_11851982 | NC_021166.1    | Ca_Kabuli_Chr07 | 11851982                | TT                                     | CC                 | CC               | INTERGENIC                    |                    |                                   |
| SNP_50128_A_11851986 | NC_021166.1    | Ca_Kabuli_Chr07 | 11851986                | AA                                     | GG                 | GG               | INTERGENIC                    |                    |                                   |
| SNP_50129_A_11853125 | NC_021166.1    | Ca_Kabuli_Chr07 | 11853125                | AA                                     | GG                 | GG               | INTERGENIC                    |                    |                                   |
| SNP_50130_A_11853374 | NC_021166.1    | Ca_Kabuli_Chr07 | 11853374                | TT                                     | CC                 | CC               | INTERGENIC                    |                    |                                   |
| SNP_50131_A_11853422 | NC_021166.1    | Ca_Kabuli_Chr07 | 11853422                | TT                                     | CC                 | CC               | INTERGENIC                    |                    |                                   |
| SNP_50132_A_11854034 | NC_021166.1    | Ca_Kabuli_Chr07 | 11854034                | GG                                     | TT                 | TT               | INTERGENIC                    |                    |                                   |

| SNPs IDs             | Chromosome IDs | Chromosomes     | Physical positions (bp) | CDC Frontier genome | (Reference genome) | (Pusa 1103 & HPNB) | (ILWC 46 & LPNB) | Sequence Components of genome | Gene accession IDs | Putative functions                                            |
|----------------------|----------------|-----------------|-------------------------|---------------------|--------------------|--------------------|------------------|-------------------------------|--------------------|---------------------------------------------------------------|
| SNP_50133_A_11854042 | NC_021166.1    | Ca_Kabuli_Chr07 | 11854042                | CC                  | TT                 | TT                 |                  | INTERGENIC                    |                    |                                                               |
| SNP_50134_A_11854093 | NC_021166.1    | Ca_Kabuli_Chr07 | 11854093                | CC                  | TT                 | TT                 |                  | DRR                           | 101490333          | protein MRG1                                                  |
| SNP_50135_A_11855807 | NC_021166.1    | Ca_Kabuli_Chr07 | 11855807                | AA                  | GG                 | GG                 |                  | INTRON                        | 101490333          | protein MRG1                                                  |
| SNP_50136_A_11870668 | NC_021166.1    | Ca_Kabuli_Chr07 | 11870668                | CC                  | TT                 | TT                 |                  | INTRON                        | 101490333          | protein MRG1                                                  |
| SNP_50137_A_11871785 | NC_021166.1    | Ca_Kabuli_Chr07 | 11871785                | CC                  | AA                 | AA                 |                  | INTRON                        | 101490333          | protein MRG1                                                  |
| SNP_50138_A_11873764 | NC_021166.1    | Ca_Kabuli_Chr07 | 11873764                | TT                  | GG                 | GG                 |                  | URR                           | 101490333          | protein MRG1                                                  |
| SNP_50139_A_11880170 | NC_021166.1    | Ca_Kabuli_Chr07 | 11880170                | CC                  | AA                 | AA                 |                  | INTRON                        | 101490857          | probable cadmium/zinc-transporting ATPase HMA1, chloroplastic |
| SNP_50140_A_11880171 | NC_021166.1    | Ca_Kabuli_Chr07 | 11880171                | CC                  | TT                 | TT                 |                  | INTRON                        | 101490857          | probable cadmium/zinc-transporting ATPase HMA1, chloroplastic |
| SNP_50141_A_11880172 | NC_021166.1    | Ca_Kabuli_Chr07 | 11880172                | CC                  | TT                 | TT                 |                  | INTRON                        | 101490857          | probable cadmium/zinc-transporting ATPase HMA1, chloroplastic |
| SNP_50142_A_11882768 | NC_021166.1    | Ca_Kabuli_Chr07 | 11882768                | AA                  | GG                 | GG                 |                  | INTRON                        | 101490857          | probable cadmium/zinc-transporting ATPase HMA1, chloroplastic |
| SNP_50143_A_11882810 | NC_021166.1    | Ca_Kabuli_Chr07 | 11882810                | TT                  | CC                 | CC                 |                  | INTRON                        | 101490857          | probable cadmium/zinc-transporting ATPase HMA1, chloroplastic |
| SNP_50144_A_11882933 | NC_021166.1    | Ca_Kabuli_Chr07 | 11882933                | AA                  | GG                 | GG                 |                  | INTRON                        | 101490857          | probable cadmium/zinc-transporting ATPase HMA1, chloroplastic |
| SNP_50145_A_11884166 | NC_021166.1    | Ca_Kabuli_Chr07 | 11884166                | TT                  | CC                 | CC                 |                  | SYNONYMOUS_CODING             | 101490857          | probable cadmium/zinc-transporting ATPase HMA1, chloroplastic |
| SNP_50146_A_11884513 | NC_021166.1    | Ca_Kabuli_Chr07 | 11884513                | TT                  | CC                 | CC                 |                  | INTRON                        | 101490857          | probable cadmium/zinc-transporting ATPase HMA1, chloroplastic |
| SNP_50148_A_11889743 | NC_021166.1    | Ca_Kabuli_Chr07 | 11889743                | CC                  | AA                 | AA                 |                  | DRR                           | 101491174          | transcription factor MYB44-like                               |
| SNP_50149_A_11889755 | NC_021166.1    | Ca_Kabuli_Chr07 | 11889755                | AA                  | CC                 | CC                 |                  | DRR                           | 101491174          | transcription factor MYB44-like                               |
| SNP_50151_A_11893514 | NC_021166.1    | Ca_Kabuli_Chr07 | 11893514                | GG                  | AA                 | AA                 |                  | URR                           | 101491174          | transcription factor MYB44-like                               |
| SNP_50152_A_11893808 | NC_021166.1    | Ca_Kabuli_Chr07 | 11893808                | AA                  | TT                 | TT                 |                  | INTERGENIC                    |                    |                                                               |
| SNP_50153_A_11893857 | NC_021166.1    | Ca_Kabuli_Chr07 | 11893857                | CC                  | TT                 | TT                 |                  | INTERGENIC                    |                    |                                                               |
| SNP_50154_A_11893897 | NC_021166.1    | Ca_Kabuli_Chr07 | 11893897                | TT                  | CC                 | CC                 |                  | INTERGENIC                    |                    |                                                               |
| SNP_50155_A_11894257 | NC_021166.1    | Ca_Kabuli_Chr07 | 11894257                | GG                  | TT                 | TT                 |                  | INTERGENIC                    |                    |                                                               |
| SNP_50156_A_11899697 | NC_021166.1    | Ca_Kabuli_Chr07 | 11899697                | AA                  | GG                 | GG                 |                  | INTERGENIC                    |                    |                                                               |

| SNPs IDs             | Chromosome IDs | Chromosomes     | Physical positions (bp) | CDC Frontier genome (Reference genome) | (Pusa 1103 & HPNB) | (ILWC 46 & LPNB) | Sequence Components of genome | Gene accession IDs | Putative functions                                                   |
|----------------------|----------------|-----------------|-------------------------|----------------------------------------|--------------------|------------------|-------------------------------|--------------------|----------------------------------------------------------------------|
| SNP_50157_A_11900043 | NC_021166.1    | Ca_Kabuli_Chr07 | 11900043                | AA                                     | GG                 | GG               | INTERGENIC                    |                    |                                                                      |
| SNP_50158_A_11902020 | NC_021166.1    | Ca_Kabuli_Chr07 | 11902020                | GG                                     | TT                 | TT               | INTERGENIC                    |                    |                                                                      |
| SNP_50159_A_11902142 | NC_021166.1    | Ca_Kabuli_Chr07 | 11902142                | CC                                     | AA                 | AA               | INTERGENIC                    |                    |                                                                      |
| SNP_50160_A_11902358 | NC_021166.1    | Ca_Kabuli_Chr07 | 11902358                | GG                                     | AA                 | AA               | INTERGENIC                    |                    |                                                                      |
| SNP_50162_A_11902621 | NC_021166.1    | Ca_Kabuli_Chr07 | 11902621                | CC                                     | AA                 | AA               | INTERGENIC                    |                    |                                                                      |
| SNP_50163_A_11902633 | NC_021166.1    | Ca_Kabuli_Chr07 | 11902633                | GG                                     | AA                 | AA               | INTERGENIC                    |                    |                                                                      |
| SNP_50164_A_11902644 | NC_021166.1    | Ca_Kabuli_Chr07 | 11902644                | TT                                     | CC                 | CC               | INTERGENIC                    |                    |                                                                      |
| SNP_50165_A_11902655 | NC_021166.1    | Ca_Kabuli_Chr07 | 11902655                | TT                                     | GG                 | GG               | INTERGENIC                    |                    |                                                                      |
| SNP_50166_A_11905717 | NC_021166.1    | Ca_Kabuli_Chr07 | 11905717                | AA                                     | CC                 | CC               | INTERGENIC                    |                    |                                                                      |
| SNP_50167_A_11911145 | NC_021166.1    | Ca_Kabuli_Chr07 | 11911145                | TT                                     | CC                 | CC               | INTERGENIC                    |                    |                                                                      |
| SNP_50169_A_11913776 | NC_021166.1    | Ca_Kabuli_Chr07 | 11913776                | TT                                     | GG                 | GG               | INTERGENIC                    |                    |                                                                      |
| SNP_50170_A_11913831 | NC_021166.1    | Ca_Kabuli_Chr07 | 11913831                | GG                                     | AA                 | AA               | INTERGENIC                    |                    |                                                                      |
| SNP_50171_A_11926967 | NC_021166.1    | Ca_Kabuli_Chr07 | 11926967                | AA                                     | TT                 | TT               | INTERGENIC                    |                    |                                                                      |
| SNP_50172_A_11928653 | NC_021166.1    | Ca_Kabuli_Chr07 | 11928653                | GG                                     | CC                 | CC               | INTERGENIC                    |                    |                                                                      |
| SNP_50173_A_11933071 | NC_021166.1    | Ca_Kabuli_Chr07 | 11933071                | TT                                     | CC                 | CC               | SYNONYMOUS_CODING             | 101491489          | probable LRR receptor-like serine/threonine-protein kinase At4g37250 |
| SNP_50174_A_11936552 | NC_021166.1    | Ca_Kabuli_Chr07 | 11936552                | AA                                     | GG                 | GG               | URR                           | 101491489          | probable LRR receptor-like serine/threonine-protein kinase At4g37250 |
| SNP_50175_A_11937888 | NC_021166.1    | Ca_Kabuli_Chr07 | 11937888                | AA                                     | GG                 | GG               | INTERGENIC                    |                    |                                                                      |
| SNP_50176_A_11940393 | NC_021166.1    | Ca_Kabuli_Chr07 | 11940393                | CC                                     | TT                 | TT               | INTERGENIC                    |                    |                                                                      |
| SNP_50177_A_11940400 | NC_021166.1    | Ca_Kabuli_Chr07 | 11940400                | GG                                     | TT                 | TT               | INTERGENIC                    |                    |                                                                      |
| SNP_50178_A_11940404 | NC_021166.1    | Ca_Kabuli_Chr07 | 11940404                | CC                                     | TT                 | TT               | INTERGENIC                    |                    |                                                                      |
| SNP_50179_A_11940635 | NC_021166.1    | Ca_Kabuli_Chr07 | 11940635                | TT                                     | CC                 | CC               | INTERGENIC                    |                    |                                                                      |
| SNP_50180_A_11940662 | NC_021166.1    | Ca_Kabuli_Chr07 | 11940662                | AA                                     | CC                 | CC               | INTERGENIC                    |                    |                                                                      |

| SNPs IDs             | Chromosome IDs | Chromosomes     | Physical positions (bp) | CDC Frontier (Reference genome) | (Pusa 1103 & HPNB) | (ILWC 46 & LPNB) | Sequence genome | Components of | Gene accession IDs | Putative functions |
|----------------------|----------------|-----------------|-------------------------|---------------------------------|--------------------|------------------|-----------------|---------------|--------------------|--------------------|
| SNP_50181_A_11940663 | NC_021166.1    | Ca_Kabuli_Chr07 | 11940663                | GG                              | TT                 | TT               | INTERGENIC      |               |                    |                    |
| SNP_50182_A_11940671 | NC_021166.1    | Ca_Kabuli_Chr07 | 11940671                | TT                              | CC                 | CC               | INTERGENIC      |               |                    |                    |
| SNP_50183_A_11940723 | NC_021166.1    | Ca_Kabuli_Chr07 | 11940723                | CC                              | TT                 | TT               | INTERGENIC      |               |                    |                    |
| SNP_50184_A_11940902 | NC_021166.1    | Ca_Kabuli_Chr07 | 11940902                | TT                              | GG                 | GG               | INTERGENIC      |               |                    |                    |
| SNP_50185_A_11940999 | NC_021166.1    | Ca_Kabuli_Chr07 | 11940999                | TT                              | AA                 | AA               | INTERGENIC      |               |                    |                    |
| SNP_50186_A_11941010 | NC_021166.1    | Ca_Kabuli_Chr07 | 11941010                | CC                              | TT                 | TT               | INTERGENIC      |               |                    |                    |
| SNP_50187_A_11948778 | NC_021166.1    | Ca_Kabuli_Chr07 | 11948778                | GG                              | AA                 | AA               | URR             |               | 101491802          | cyclin-D3-3        |
| SNP_50188_A_11954216 | NC_021166.1    | Ca_Kabuli_Chr07 | 11954216                | TT                              | GG                 | GG               | INTERGENIC      |               |                    |                    |
| SNP_50189_A_11956358 | NC_021166.1    | Ca_Kabuli_Chr07 | 11956358                | GG                              | AA                 | AA               | INTERGENIC      |               |                    |                    |
| SNP_50190_A_11956385 | NC_021166.1    | Ca_Kabuli_Chr07 | 11956385                | AA                              | GG                 | GG               | INTERGENIC      |               |                    |                    |
| SNP_50191_A_11957131 | NC_021166.1    | Ca_Kabuli_Chr07 | 11957131                | TT                              | CC                 | CC               | INTERGENIC      |               |                    |                    |
| SNP_50192_A_11957779 | NC_021166.1    | Ca_Kabuli_Chr07 | 11957779                | CC                              | TT                 | TT               | INTERGENIC      |               |                    |                    |
| SNP_50193_A_11957783 | NC_021166.1    | Ca_Kabuli_Chr07 | 11957783                | TT                              | AA                 | AA               | INTERGENIC      |               |                    |                    |
| SNP_50194_A_11960263 | NC_021166.1    | Ca_Kabuli_Chr07 | 11960263                | TT                              | CC                 | CC               | INTERGENIC      |               |                    |                    |
| SNP_50197_A_11961298 | NC_021166.1    | Ca_Kabuli_Chr07 | 11961298                | AA                              | CC                 | CC               | INTERGENIC      |               |                    |                    |
| SNP_50198_A_11962763 | NC_021166.1    | Ca_Kabuli_Chr07 | 11962763                | GG                              | AA                 | AA               | INTERGENIC      |               |                    |                    |
| SNP_50199_A_11963467 | NC_021166.1    | Ca_Kabuli_Chr07 | 11963467                | CC                              | GG                 | GG               | INTERGENIC      |               |                    |                    |
| SNP_50200_A_11969177 | NC_021166.1    | Ca_Kabuli_Chr07 | 11969177                | TT                              | AA                 | AA               | DRR             |               | 101492131          | protein RER1A-like |
| SNP_50201_A_11969185 | NC_021166.1    | Ca_Kabuli_Chr07 | 11969185                | AA                              | TT                 | TT               | DRR             |               | 101492131          | protein RER1A-like |
| SNP_50202_A_11969254 | NC_021166.1    | Ca_Kabuli_Chr07 | 11969254                | CC                              | TT                 | TT               | DRR             |               | 101492131          | protein RER1A-like |
| SNP_50203_A_11969256 | NC_021166.1    | Ca_Kabuli_Chr07 | 11969256                | AA                              | TT                 | TT               | DRR             |               | 101492131          | protein RER1A-like |
| SNP_50204_A_11969384 | NC_021166.1    | Ca_Kabuli_Chr07 | 11969384                | TT                              | CC                 | CC               | DRR             |               | 101492131          | protein RER1A-like |

| SNPs IDs             | Chromosome IDs | Chromosomes     | Physical positions (bp) | CDC Frontier genome (Reference genome) | (Pusa 1103 & HPNB) | (ILWC 46 & LPNB) | Sequence Components of genome | Gene accession IDs | Putative functions                          |
|----------------------|----------------|-----------------|-------------------------|----------------------------------------|--------------------|------------------|-------------------------------|--------------------|---------------------------------------------|
| SNP_50205_A_11969431 | NC_021166.1    | Ca_Kabuli_Chr07 | 11969431                | AA                                     | GG                 | GG               | DRR                           | 101492131          | protein RER1A-like                          |
| SNP_50206_A_11971210 | NC_021166.1    | Ca_Kabuli_Chr07 | 11971210                | CC                                     | AA                 | AA               | INTERGENIC                    |                    |                                             |
| SNP_50207_A_11973352 | NC_021166.1    | Ca_Kabuli_Chr07 | 11973352                | AA                                     | TT                 | TT               | DRR                           | 101492472          | cysteine proteinase RD21a-like              |
| SNP_50208_A_11974792 | NC_021166.1    | Ca_Kabuli_Chr07 | 11974792                | TT                                     | AA                 | AA               | URR                           | 101492131          | protein RER1A-like                          |
| SNP_50209_A_11975003 | NC_021166.1    | Ca_Kabuli_Chr07 | 11975003                | CC                                     | AA                 | AA               | INTERGENIC                    |                    |                                             |
| SNP_50210_A_11975240 | NC_021166.1    | Ca_Kabuli_Chr07 | 11975240                | CC                                     | TT                 | TT               | INTERGENIC                    |                    |                                             |
| SNP_50211_A_11976369 | NC_021166.1    | Ca_Kabuli_Chr07 | 11976369                | AA                                     | CC                 | CC               | INTERGENIC                    |                    |                                             |
| SNP_50213_A_11984983 | NC_021166.1    | Ca_Kabuli_Chr07 | 11984983                | CC                                     | AA                 | AA               | INTRON                        | 101492806          | probable beta-1,4-xylosyltransferase IRX14H |
| SNP_50214_A_11988351 | NC_021166.1    | Ca_Kabuli_Chr07 | 11988351                | CC                                     | TT                 | TT               | URR                           | 101492806          | probable beta-1,4-xylosyltransferase IRX14H |
| SNP_50215_A_11988371 | NC_021166.1    | Ca_Kabuli_Chr07 | 11988371                | GG                                     | AA                 | AA               | URR                           | 101492806          | probable beta-1,4-xylosyltransferase IRX14H |
| SNP_50218_A_11991361 | NC_021166.1    | Ca_Kabuli_Chr07 | 11991361                | GG                                     | AA                 | AA               | INTERGENIC                    |                    |                                             |
| SNP_50219_A_12002843 | NC_021166.1    | Ca_Kabuli_Chr07 | 12002843                | CC                                     | TT                 | TT               | INTERGENIC                    |                    |                                             |
| SNP_50220_A_12002857 | NC_021166.1    | Ca_Kabuli_Chr07 | 12002857                | CC                                     | TT                 | TT               | INTERGENIC                    |                    |                                             |
| SNP_50221_A_12004138 | NC_021166.1    | Ca_Kabuli_Chr07 | 12004138                | TT                                     | CC                 | CC               | INTERGENIC                    |                    |                                             |
| SNP_50222_A_12006673 | NC_021166.1    | Ca_Kabuli_Chr07 | 12006673                | AA                                     | TT                 | TT               | INTERGENIC                    |                    |                                             |
| SNP_50224_A_12009417 | NC_021166.1    | Ca_Kabuli_Chr07 | 12009417                | AA                                     | GG                 | GG               | INTERGENIC                    |                    |                                             |
| SNP_50225_A_12009434 | NC_021166.1    | Ca_Kabuli_Chr07 | 12009434                | TT                                     | CC                 | CC               | INTERGENIC                    |                    |                                             |
| SNP_50226_A_12009453 | NC_021166.1    | Ca_Kabuli_Chr07 | 12009453                | TT                                     | CC                 | CC               | INTERGENIC                    |                    |                                             |
| SNP_50227_A_12024260 | NC_021166.1    | Ca_Kabuli_Chr07 | 12024260                | TT                                     | CC                 | CC               | URR                           | 101493135          | probable WRKY transcription factor 15       |
| SNP_50230_A_12025551 | NC_021166.1    | Ca_Kabuli_Chr07 | 12025551                | TT                                     | AA                 | AA               | URR                           | 101493135          | probable WRKY transcription factor 15       |
| SNP_50231_A_12025903 | NC_021166.1    | Ca_Kabuli_Chr07 | 12025903                | CC                                     | TT                 | TT               | INTERGENIC                    |                    |                                             |
| SNP_50232_A_12026759 | NC_021166.1    | Ca_Kabuli_Chr07 | 12026759                | TT                                     | CC                 | CC               | INTERGENIC                    |                    |                                             |



| SNPs IDs             | Chromosome IDs | Chromosomes     | Physical positions (bp) | CDC Frontier (Reference genome) | (Pusa 1103 & HPNB) | (ILWC 46 & LPNB) | Sequence Components of genome | Gene accession IDs | Putative functions                                   |
|----------------------|----------------|-----------------|-------------------------|---------------------------------|--------------------|------------------|-------------------------------|--------------------|------------------------------------------------------|
| SNP_50233_A_12027090 | NC_021166.1    | Ca_Kabuli_Chr07 | 12027090                | AA                              | CC                 | CC               | INTERGENIC                    |                    |                                                      |
| SNP_50234_A_12027159 | NC_021166.1    | Ca_Kabuli_Chr07 | 12027159                | GG                              | AA                 | AA               | INTERGENIC                    |                    |                                                      |
| SNP_50235_A_12027209 | NC_021166.1    | Ca_Kabuli_Chr07 | 12027209                | GG                              | TT                 | TT               | INTERGENIC                    |                    |                                                      |
| SNP_50236_A_12033623 | NC_021166.1    | Ca_Kabuli_Chr07 | 12033623                | AA                              | TT                 | TT               | URR                           | 101493683          | tRNA-dihydrouridine(16/17) synthase [NAD(P)(+)]-like |
| SNP_50237_A_12033913 | NC_021166.1    | Ca_Kabuli_Chr07 | 12033913                | GG                              | CC                 | CC               | URR                           | 101493683          | tRNA-dihydrouridine(16/17) synthase [NAD(P)(+)]-like |
| SNP_50238_A_12034342 | NC_021166.1    | Ca_Kabuli_Chr07 | 12034342                | TT                              | CC                 | CC               | URR                           | 101493683          | tRNA-dihydrouridine(16/17) synthase [NAD(P)(+)]-like |
| SNP_50239_A_12035016 | NC_021166.1    | Ca_Kabuli_Chr07 | 12035016                | AA                              | GG                 | GG               | INTERGENIC                    |                    |                                                      |
| SNP_50240_A_12042924 | NC_021166.1    | Ca_Kabuli_Chr07 | 12042924                | AA                              | GG                 | GG               | INTERGENIC                    |                    |                                                      |
| SNP_50241_A_12044416 | NC_021166.1    | Ca_Kabuli_Chr07 | 12044416                | GG                              | CC                 | CC               | INTERGENIC                    |                    |                                                      |
| SNP_50242_A_12044643 | NC_021166.1    | Ca_Kabuli_Chr07 | 12044643                | GG                              | CC                 | CC               | INTERGENIC                    |                    |                                                      |
| SNP_50243_A_12044696 | NC_021166.1    | Ca_Kabuli_Chr07 | 12044696                | TT                              | CC                 | CC               | INTERGENIC                    |                    |                                                      |
| SNP_50244_A_12046564 | NC_021166.1    | Ca_Kabuli_Chr07 | 12046564                | TT                              | CC                 | CC               | URR                           | 101494526          | protein IRX15-LIKE                                   |
| SNP_50245_A_12047379 | NC_021166.1    | Ca_Kabuli_Chr07 | 12047379                | AA                              | GG                 | GG               | URR                           | 101494526          | protein IRX15-LIKE                                   |
| SNP_50246_A_12047972 | NC_021166.1    | Ca_Kabuli_Chr07 | 12047972                | GG                              | AA                 | AA               | INTERGENIC                    |                    |                                                      |
| SNP_50247_A_12048986 | NC_021166.1    | Ca_Kabuli_Chr07 | 12048986                | AA                              | TT                 | TT               | INTERGENIC                    |                    |                                                      |
| SNP_50248_A_12050287 | NC_021166.1    | Ca_Kabuli_Chr07 | 12050287                | GG                              | CC                 | CC               | INTERGENIC                    |                    |                                                      |
| SNP_50249_A_12050643 | NC_021166.1    | Ca_Kabuli_Chr07 | 12050643                | AA                              | GG                 | GG               | INTERGENIC                    |                    |                                                      |
| SNP_50250_A_12059221 | NC_021166.1    | Ca_Kabuli_Chr07 | 12059221                | CC                              | TT                 | TT               | INTERGENIC                    |                    |                                                      |
| SNP_50251_A_12059704 | NC_021166.1    | Ca_Kabuli_Chr07 | 12059704                | GG                              | AA                 | AA               | INTERGENIC                    |                    |                                                      |
| SNP_50252_A_12060084 | NC_021166.1    | Ca_Kabuli_Chr07 | 12060084                | AA                              | GG                 | GG               | INTERGENIC                    |                    |                                                      |
| SNP_50253_A_12064128 | NC_021166.1    | Ca_Kabuli_Chr07 | 12064128                | TT                              | GG                 | GG               | DRR                           | 101494845          | probable inactive receptor kinase At5g67200          |
| SNP_50254_A_12074467 | NC_021166.1    | Ca_Kabuli_Chr07 | 12074467                | AA                              | CC                 | CC               | INTRON                        | 101495174          | kinesin-like protein FRA1                            |

| SNPs IDs             | Chromosome IDs | Chromosomes     | Physical positions (bp) | CDC Frontier (Reference genome) | (Pusa 1103 & HPNB) | (ILWC 46 & LPNB) | Sequence Components of genome | Gene accession IDs | Putative functions                |
|----------------------|----------------|-----------------|-------------------------|---------------------------------|--------------------|------------------|-------------------------------|--------------------|-----------------------------------|
| SNP_50255_A_12080179 | NC_021166.1    | Ca_Kabuli_Chr07 | 12080179                | CC                              | AA                 | AA               | INTRON                        | 101495174          | kinesin-like protein FRA1         |
| SNP_50256_A_12082115 | NC_021166.1    | Ca_Kabuli_Chr07 | 12082115                | CC                              | GG                 | GG               | URR                           | 101495174          | kinesin-like protein FRA1         |
| SNP_50257_A_12082474 | NC_021166.1    | Ca_Kabuli_Chr07 | 12082474                | CC                              | GG                 | GG               | URR                           | 101495174          | kinesin-like protein FRA1         |
| SNP_50258_A_12083361 | NC_021166.1    | Ca_Kabuli_Chr07 | 12083361                | CC                              | TT                 | TT               | URR                           | 101495174          | kinesin-like protein FRA1         |
| SNP_50259_A_12083369 | NC_021166.1    | Ca_Kabuli_Chr07 | 12083369                | CC                              | TT                 | TT               | URR                           | 101495174          | kinesin-like protein FRA1         |
| SNP_50260_A_12083583 | NC_021166.1    | Ca_Kabuli_Chr07 | 12083583                | AA                              | GG                 | GG               | URR                           | 101495174          | kinesin-like protein FRA1         |
| SNP_50261_A_12083590 | NC_021166.1    | Ca_Kabuli_Chr07 | 12083590                | AA                              | GG                 | GG               | URR                           | 101495174          | kinesin-like protein FRA1         |
| SNP_50262_A_12085646 | NC_021166.1    | Ca_Kabuli_Chr07 | 12085646                | TT                              | AA                 | AA               | INTERGENIC                    |                    |                                   |
| SNP_50263_A_12085901 | NC_021166.1    | Ca_Kabuli_Chr07 | 12085901                | CC                              | GG                 | GG               | INTERGENIC                    |                    |                                   |
| SNP_50264_A_12089251 | NC_021166.1    | Ca_Kabuli_Chr07 | 12089251                | GG                              | AA                 | AA               | INTERGENIC                    |                    |                                   |
| SNP_50265_A_12091155 | NC_021166.1    | Ca_Kabuli_Chr07 | 12091155                | TT                              | CC                 | CC               | INTERGENIC                    |                    |                                   |
| SNP_50266_A_12092536 | NC_021166.1    | Ca_Kabuli_Chr07 | 12092536                | TT                              | CC                 | CC               | INTERGENIC                    |                    |                                   |
| SNP_50268_A_12093538 | NC_021166.1    | Ca_Kabuli_Chr07 | 12093538                | TT                              | AA                 | AA               | INTERGENIC                    |                    |                                   |
| SNP_50269_A_12094876 | NC_021166.1    | Ca_Kabuli_Chr07 | 12094876                | TT                              | AA                 | AA               | INTERGENIC                    |                    |                                   |
| SNP_50270_A_12094908 | NC_021166.1    | Ca_Kabuli_Chr07 | 12094908                | AA                              | GG                 | GG               | INTERGENIC                    |                    |                                   |
| SNP_50271_A_12094917 | NC_021166.1    | Ca_Kabuli_Chr07 | 12094917                | GG                              | CC                 | CC               | INTERGENIC                    |                    |                                   |
| SNP_50272_A_12095117 | NC_021166.1    | Ca_Kabuli_Chr07 | 12095117                | GG                              | AA                 | AA               | INTERGENIC                    |                    |                                   |
| SNP_50273_A_12095476 | NC_021166.1    | Ca_Kabuli_Chr07 | 12095476                | CC                              | AA                 | AA               | INTERGENIC                    |                    |                                   |
| SNP_50274_A_12097026 | NC_021166.1    | Ca_Kabuli_Chr07 | 12097026                | CC                              | AA                 | AA               | DRR                           | 101495599          | SUMO-conjugating enzyme SCE1-like |
| SNP_50275_A_12099314 | NC_021166.1    | Ca_Kabuli_Chr07 | 12099314                | CC                              | AA                 | AA               | INTRON                        | 101495599          | SUMO-conjugating enzyme SCE1-like |
| SNP_50276_A_12100175 | NC_021166.1    | Ca_Kabuli_Chr07 | 12100175                | CC                              | AA                 | AA               | INTRON                        | 101495599          | SUMO-conjugating enzyme SCE1-like |
| SNP_50277_A_12100176 | NC_021166.1    | Ca_Kabuli_Chr07 | 12100176                | AA                              | GG                 | GG               | INTRON                        | 101495599          | SUMO-conjugating enzyme SCE1-like |

| SNPs IDs             | Chromosome IDs | Chromosomes     | Physical positions (bp) | CDC Frontier (Reference genome) | (Pusa 1103 & HPNB) | (ILWC 46 & LPNB) | Sequence Components of genome | Gene accession IDs | Putative functions                     |
|----------------------|----------------|-----------------|-------------------------|---------------------------------|--------------------|------------------|-------------------------------|--------------------|----------------------------------------|
| SNP_50278_A_12100490 | NC_021166.1    | Ca_Kabuli_Chr07 | 12100490                | TT                              | CC                 | CC               | INTRON                        | 101495599          | SUMO-conjugating enzyme SCE1-like      |
| SNP_50279_A_12100570 | NC_021166.1    | Ca_Kabuli_Chr07 | 12100570                | CC                              | AA                 | AA               | INTRON                        | 101495599          | SUMO-conjugating enzyme SCE1-like      |
| SNP_50280_A_12103954 | NC_021166.1    | Ca_Kabuli_Chr07 | 12103954                | CC                              | TT                 | TT               | URR                           | 101495599          | SUMO-conjugating enzyme SCE1-like      |
| SNP_50281_A_12103956 | NC_021166.1    | Ca_Kabuli_Chr07 | 12103956                | GG                              | AA                 | AA               | URR                           | 101495599          | SUMO-conjugating enzyme SCE1-like      |
| SNP_50282_A_12103962 | NC_021166.1    | Ca_Kabuli_Chr07 | 12103962                | CC                              | TT                 | TT               | URR                           | 101495599          | SUMO-conjugating enzyme SCE1-like      |
| SNP_50283_A_12105540 | NC_021166.1    | Ca_Kabuli_Chr07 | 12105540                | CC                              | TT                 | TT               | INTERGENIC                    |                    |                                        |
| SNP_50284_A_12105541 | NC_021166.1    | Ca_Kabuli_Chr07 | 12105541                | AA                              | CC                 | CC               | INTERGENIC                    |                    |                                        |
| SNP_50285_A_12105542 | NC_021166.1    | Ca_Kabuli_Chr07 | 12105542                | AA                              | GG                 | GG               | INTERGENIC                    |                    |                                        |
| SNP_50286_A_12105583 | NC_021166.1    | Ca_Kabuli_Chr07 | 12105583                | TT                              | AA                 | AA               | INTERGENIC                    |                    |                                        |
| SNP_50287_A_12105902 | NC_021166.1    | Ca_Kabuli_Chr07 | 12105902                | TT                              | AA                 | AA               | INTERGENIC                    |                    |                                        |
| SNP_50288_A_12105903 | NC_021166.1    | Ca_Kabuli_Chr07 | 12105903                | CC                              | TT                 | TT               | INTERGENIC                    |                    |                                        |
| SNP_50289_A_12105913 | NC_021166.1    | Ca_Kabuli_Chr07 | 12105913                | CC                              | TT                 | TT               | INTERGENIC                    |                    |                                        |
| SNP_50290_A_12105916 | NC_021166.1    | Ca_Kabuli_Chr07 | 12105916                | TT                              | AA                 | AA               | INTERGENIC                    |                    |                                        |
| SNP_50291_A_12105971 | NC_021166.1    | Ca_Kabuli_Chr07 | 12105971                | TT                              | AA                 | AA               | INTERGENIC                    |                    |                                        |
| SNP_50292_A_12106619 | NC_021166.1    | Ca_Kabuli_Chr07 | 12106619                | CC                              | GG                 | GG               | INTERGENIC                    |                    |                                        |
| SNP_50293_A_12106800 | NC_021166.1    | Ca_Kabuli_Chr07 | 12106800                | TT                              | CC                 | CC               | INTERGENIC                    |                    |                                        |
| SNP_50295_A_12108290 | NC_021166.1    | Ca_Kabuli_Chr07 | 12108290                | TT                              | AA                 | AA               | INTERGENIC                    |                    |                                        |
| SNP_50296_A_12111795 | NC_021166.1    | Ca_Kabuli_Chr07 | 12111795                | CC                              | TT                 | TT               | INTERGENIC                    |                    |                                        |
| SNP_50297_A_12111849 | NC_021166.1    | Ca_Kabuli_Chr07 | 12111849                | TT                              | GG                 | GG               | INTERGENIC                    |                    |                                        |
| SNP_50298_A_12117865 | NC_021166.1    | Ca_Kabuli_Chr07 | 12117865                | CC                              | AA                 | AA               | INTERGENIC                    |                    |                                        |
| SNP_50299_A_12119600 | NC_021166.1    | Ca_Kabuli_Chr07 | 12119600                | GG                              | AA                 | AA               | INTERGENIC                    |                    |                                        |
| SNP_50300_A_12124805 | NC_021166.1    | Ca_Kabuli_Chr07 | 12124805                | AA                              | CC                 | CC               | URR                           | 101495928          | floral homeotic protein APETALA 2-like |

| SNPs IDs             | Chromosome IDs | Chromosomes     | Physical positions (bp) | CDC Frontier genome (Reference genome) | (Pusa 1103 & HPNB) | (ILWC 46 & LPNB) | Sequence genome | Components of | Gene accession IDs | Putative functions |
|----------------------|----------------|-----------------|-------------------------|----------------------------------------|--------------------|------------------|-----------------|---------------|--------------------|--------------------|
| SNP_50302_A_12129529 | NC_021166.1    | Ca_Kabuli_Chr07 | 12129529                | GG                                     | AA                 | AA               | INTERGENIC      |               |                    |                    |
| SNP_50303_A_12129530 | NC_021166.1    | Ca_Kabuli_Chr07 | 12129530                | CC                                     | GG                 | GG               | INTERGENIC      |               |                    |                    |
| SNP_50304_A_12129818 | NC_021166.1    | Ca_Kabuli_Chr07 | 12129818                | TT                                     | GG                 | GG               | INTERGENIC      |               |                    |                    |
| SNP_50305_A_12130321 | NC_021166.1    | Ca_Kabuli_Chr07 | 12130321                | GG                                     | CC                 | CC               | INTERGENIC      |               |                    |                    |
| SNP_50306_A_12130350 | NC_021166.1    | Ca_Kabuli_Chr07 | 12130350                | TT                                     | CC                 | CC               | INTERGENIC      |               |                    |                    |
| SNP_50307_A_12130554 | NC_021166.1    | Ca_Kabuli_Chr07 | 12130554                | GG                                     | AA                 | AA               | INTERGENIC      |               |                    |                    |
| SNP_50308_A_12130878 | NC_021166.1    | Ca_Kabuli_Chr07 | 12130878                | AA                                     | TT                 | TT               | INTERGENIC      |               |                    |                    |
| SNP_50309_A_12133844 | NC_021166.1    | Ca_Kabuli_Chr07 | 12133844                | AA                                     | TT                 | TT               | INTERGENIC      |               |                    |                    |
| SNP_50310_A_12135105 | NC_021166.1    | Ca_Kabuli_Chr07 | 12135105                | GG                                     | CC                 | CC               | INTERGENIC      |               |                    |                    |
| SNP_50311_A_12135106 | NC_021166.1    | Ca_Kabuli_Chr07 | 12135106                | AA                                     | GG                 | GG               | INTERGENIC      |               |                    |                    |
| SNP_50312_A_12135447 | NC_021166.1    | Ca_Kabuli_Chr07 | 12135447                | TT                                     | CC                 | CC               | INTERGENIC      |               |                    |                    |
| SNP_50313_A_12138009 | NC_021166.1    | Ca_Kabuli_Chr07 | 12138009                | CC                                     | TT                 | TT               | INTERGENIC      |               |                    |                    |
| SNP_50314_A_12138323 | NC_021166.1    | Ca_Kabuli_Chr07 | 12138323                | CC                                     | TT                 | TT               | INTERGENIC      |               |                    |                    |
| SNP_50315_A_12138355 | NC_021166.1    | Ca_Kabuli_Chr07 | 12138355                | GG                                     | AA                 | AA               | INTERGENIC      |               |                    |                    |
| SNP_50316_A_12138523 | NC_021166.1    | Ca_Kabuli_Chr07 | 12138523                | TT                                     | CC                 | CC               | INTERGENIC      |               |                    |                    |
| SNP_50318_A_12138564 | NC_021166.1    | Ca_Kabuli_Chr07 | 12138564                | AA                                     | TT                 | TT               | INTERGENIC      |               |                    |                    |
| SNP_50319_A_12141060 | NC_021166.1    | Ca_Kabuli_Chr07 | 12141060                | TT                                     | GG                 | GG               | INTERGENIC      |               |                    |                    |
| SNP_50320_A_12141272 | NC_021166.1    | Ca_Kabuli_Chr07 | 12141272                | CC                                     | TT                 | TT               | INTERGENIC      |               |                    |                    |
| SNP_50321_A_12141840 | NC_021166.1    | Ca_Kabuli_Chr07 | 12141840                | GG                                     | AA                 | AA               | INTERGENIC      |               |                    |                    |
| SNP_50322_A_12142450 | NC_021166.1    | Ca_Kabuli_Chr07 | 12142450                | CC                                     | TT                 | TT               | INTERGENIC      |               |                    |                    |
| SNP_50323_A_12142508 | NC_021166.1    | Ca_Kabuli_Chr07 | 12142508                | GG                                     | AA                 | AA               | INTERGENIC      |               |                    |                    |
| SNP_50324_A_12142513 | NC_021166.1    | Ca_Kabuli_Chr07 | 12142513                | TT                                     | CC                 | CC               | INTERGENIC      |               |                    |                    |

| SNPs IDs             | Chromosome IDs | Chromosomes     | Physical positions (bp) | CDC Frontier genome (Reference genome) | (Pusa 1103 & HPNB) | (ILWC 46 & LPNB) | Sequence Components of genome | Gene accession IDs | Putative functions                               |
|----------------------|----------------|-----------------|-------------------------|----------------------------------------|--------------------|------------------|-------------------------------|--------------------|--------------------------------------------------|
| SNP_50325_A_12143225 | NC_021166.1    | Ca_Kabuli_Chr07 | 12143225                | GG                                     | TT                 | TT               | INTERGENIC                    |                    |                                                  |
| SNP_50327_A_12143773 | NC_021166.1    | Ca_Kabuli_Chr07 | 12143773                | AA                                     | TT                 | TT               | INTERGENIC                    |                    |                                                  |
| SNP_50328_A_12143808 | NC_021166.1    | Ca_Kabuli_Chr07 | 12143808                | CC                                     | TT                 | TT               | INTERGENIC                    |                    |                                                  |
| SNP_50329_A_12144178 | NC_021166.1    | Ca_Kabuli_Chr07 | 12144178                | AA                                     | TT                 | TT               | INTERGENIC                    |                    |                                                  |
| SNP_50330_A_12144292 | NC_021166.1    | Ca_Kabuli_Chr07 | 12144292                | AA                                     | TT                 | TT               | INTERGENIC                    |                    |                                                  |
| SNP_50332_A_12146380 | NC_021166.1    | Ca_Kabuli_Chr07 | 12146380                | TT                                     | AA                 | AA               | INTERGENIC                    |                    |                                                  |
| SNP_50333_A_12148444 | NC_021166.1    | Ca_Kabuli_Chr07 | 12148444                | TT                                     | CC                 | CC               | INTRON                        | 101496262          | OTU domain-containing protein 3                  |
| SNP_50334_A_12148501 | NC_021166.1    | Ca_Kabuli_Chr07 | 12148501                | AA                                     | CC                 | CC               | INTRON                        | 101496262          | OTU domain-containing protein 3                  |
| SNP_50335_A_12149338 | NC_021166.1    | Ca_Kabuli_Chr07 | 12149338                | TT                                     | GG                 | GG               | INTRON                        | 101496262          | OTU domain-containing protein 3                  |
| SNP_50336_A_12154740 | NC_021166.1    | Ca_Kabuli_Chr07 | 12154740                | TT                                     | CC                 | CC               | URR                           | 101496262          | OTU domain-containing protein 3                  |
| SNP_50337_A_12155168 | NC_021166.1    | Ca_Kabuli_Chr07 | 12155168                | TT                                     | AA                 | AA               | URR                           | 101496262          | OTU domain-containing protein 3                  |
| SNP_50338_A_12156478 | NC_021166.1    | Ca_Kabuli_Chr07 | 12156478                | GG                                     | AA                 | AA               | DRR                           | 101497896          | filament-like plant protein 7                    |
| SNP_50339_A_12156536 | NC_021166.1    | Ca_Kabuli_Chr07 | 12156536                | TT                                     | CC                 | CC               | DRR                           | 101497896          | filament-like plant protein 7                    |
| SNP_50340_A_12167490 | NC_021166.1    | Ca_Kabuli_Chr07 | 12167490                | GG                                     | CC                 | CC               | DRR                           | 101498451          | uncharacterized acetyltransferase At3g50280-like |
| SNP_50341_A_12167574 | NC_021166.1    | Ca_Kabuli_Chr07 | 12167574                | TT                                     | GG                 | GG               | DRR                           | 101498451          | uncharacterized acetyltransferase At3g50280-like |
| SNP_50342_A_12168008 | NC_021166.1    | Ca_Kabuli_Chr07 | 12168008                | GG                                     | AA                 | AA               | INTERGENIC                    |                    |                                                  |
| SNP_50343_A_12168045 | NC_021166.1    | Ca_Kabuli_Chr07 | 12168045                | GG                                     | CC                 | CC               | INTERGENIC                    |                    |                                                  |
| SNP_50344_A_12169268 | NC_021166.1    | Ca_Kabuli_Chr07 | 12169268                | TT                                     | GG                 | GG               | URR                           | 101498451          | uncharacterized acetyltransferase At3g50280-like |
| SNP_50345_A_12169276 | NC_021166.1    | Ca_Kabuli_Chr07 | 12169276                | GG                                     | CC                 | CC               | URR                           | 101498451          | uncharacterized acetyltransferase At3g50280-like |
| SNP_50346_A_12169285 | NC_021166.1    | Ca_Kabuli_Chr07 | 12169285                | AA                                     | GG                 | GG               | URR                           | 101498451          | uncharacterized acetyltransferase At3g50280-like |
| SNP_50347_A_12173083 | NC_021166.1    | Ca_Kabuli_Chr07 | 12173083                | CC                                     | TT                 | TT               | INTERGENIC                    |                    |                                                  |
| SNP_50348_A_12175125 | NC_021166.1    | Ca_Kabuli_Chr07 | 12175125                | TT                                     | CC                 | CC               | DRR                           | 101498793          | uncharacterized acetyltransferase At3g50280-like |

| SNPs IDs             | Chromosome IDs | Chromosomes     | Physical positions (bp) | CDC Frontier genome (Reference genome) | (Pusa 1103 & HPNB) | (ILWC 46 & LPNB) | Sequence Components of genome | Gene accession IDs | Putative functions                                |
|----------------------|----------------|-----------------|-------------------------|----------------------------------------|--------------------|------------------|-------------------------------|--------------------|---------------------------------------------------|
| SNP_50349_A_12186426 | NC_021166.1    | Ca_Kabuli_Chr07 | 12186426                | TT                                     | CC                 | CC               | URR                           | 101499114          | uncharacterized LOC101499114                      |
| SNP_50350_A_12192064 | NC_021166.1    | Ca_Kabuli_Chr07 | 12192064                | TT                                     | AA                 | AA               | INTERGENIC                    |                    |                                                   |
| SNP_50351_A_12192953 | NC_021166.1    | Ca_Kabuli_Chr07 | 12192953                | GG                                     | TT                 | TT               | URR                           | 101499931          | PI-PLC X domain-containing protein At5g67130-like |
| SNP_50352_A_12192976 | NC_021166.1    | Ca_Kabuli_Chr07 | 12192976                | CC                                     | TT                 | TT               | URR                           | 101499931          | PI-PLC X domain-containing protein At5g67130-like |
| SNP_50353_A_12193040 | NC_021166.1    | Ca_Kabuli_Chr07 | 12193040                | CC                                     | TT                 | TT               | URR                           | 101499931          | PI-PLC X domain-containing protein At5g67130-like |
| SNP_50354_A_12193051 | NC_021166.1    | Ca_Kabuli_Chr07 | 12193051                | TT                                     | CC                 | CC               | URR                           | 101499931          | PI-PLC X domain-containing protein At5g67130-like |
| SNP_50355_A_12193714 | NC_021166.1    | Ca_Kabuli_Chr07 | 12193714                | GG                                     | AA                 | AA               | URR                           | 101499931          | PI-PLC X domain-containing protein At5g67130-like |
| SNP_50356_A_12194633 | NC_021166.1    | Ca_Kabuli_Chr07 | 12194633                | CC                                     | TT                 | TT               | URR                           | 101499931          | PI-PLC X domain-containing protein At5g67130-like |
| SNP_50357_A_12195453 | NC_021166.1    | Ca_Kabuli_Chr07 | 12195453                | AA                                     | TT                 | TT               | INTERGENIC                    |                    |                                                   |
| SNP_50358_A_12196622 | NC_021166.1    | Ca_Kabuli_Chr07 | 12196622                | TT                                     | CC                 | CC               | INTERGENIC                    |                    |                                                   |
| SNP_50359_A_12196657 | NC_021166.1    | Ca_Kabuli_Chr07 | 12196657                | CC                                     | TT                 | TT               | INTERGENIC                    |                    |                                                   |
| SNP_50360_A_12196669 | NC_021166.1    | Ca_Kabuli_Chr07 | 12196669                | TT                                     | GG                 | GG               | INTERGENIC                    |                    |                                                   |
| SNP_50361_A_12198383 | NC_021166.1    | Ca_Kabuli_Chr07 | 12198383                | GG                                     | AA                 | AA               | INTERGENIC                    |                    |                                                   |
| SNP_50362_A_12204101 | NC_021166.1    | Ca_Kabuli_Chr07 | 12204101                | TT                                     | CC                 | CC               | URR                           | 101497128          | isoaspartyl peptidase/L-asparaginase-like         |
| SNP_50363_A_12204733 | NC_021166.1    | Ca_Kabuli_Chr07 | 12204733                | AA                                     | GG                 | GG               | URR                           | 101497128          | isoaspartyl peptidase/L-asparaginase-like         |
| SNP_50364_A_12204738 | NC_021166.1    | Ca_Kabuli_Chr07 | 12204738                | TT                                     | CC                 | CC               | URR                           | 101497128          | isoaspartyl peptidase/L-asparaginase-like         |
| SNP_50365_A_12204751 | NC_021166.1    | Ca_Kabuli_Chr07 | 12204751                | TT                                     | GG                 | GG               | URR                           | 101497128          | isoaspartyl peptidase/L-asparaginase-like         |
| SNP_50366_A_12204754 | NC_021166.1    | Ca_Kabuli_Chr07 | 12204754                | CC                                     | TT                 | TT               | URR                           | 101497128          | isoaspartyl peptidase/L-asparaginase-like         |
| SNP_50367_A_12204776 | NC_021166.1    | Ca_Kabuli_Chr07 | 12204776                | AA                                     | GG                 | GG               | URR                           | 101497128          | isoaspartyl peptidase/L-asparaginase-like         |
| SNP_50368_A_12207386 | NC_021166.1    | Ca_Kabuli_Chr07 | 12207386                | GG                                     | AA                 | AA               | DRR                           | 101500474          | caffeoyl-CoA O-methyltransferase 5-like           |
| SNP_50369_A_12207775 | NC_021166.1    | Ca_Kabuli_Chr07 | 12207775                | GG                                     | AA                 | AA               | NON_SYNONYMOUS_CODING         | id165406           | Unknown function                                  |
| SNP_50370_A_12210145 | NC_021166.1    | Ca_Kabuli_Chr07 | 12210145                | CC                                     | GG                 | GG               | INTRON                        | id165406           | Unknown function                                  |

| SNPs IDs             | Chromosome IDs | Chromosomes     | Physical positions (bp) | CDC Frontier genome (Reference genome) | (Pusa 1103 & HPNB) | (ILWC 46 & LPNB) | Sequence Components of genome | Gene accession IDs | Putative functions                          |
|----------------------|----------------|-----------------|-------------------------|----------------------------------------|--------------------|------------------|-------------------------------|--------------------|---------------------------------------------|
| SNP_50372_A_12210740 | NC_021166.1    | Ca_Kabuli_Chr07 | 12210740                | AA                                     | CC                 | CC               | NON_SYNONYMOUS_CODING         | id165406           | Unknown function                            |
| SNP_50373_A_12211327 | NC_021166.1    | Ca_Kabuli_Chr07 | 12211327                | AA                                     | GG                 | GG               | URR                           | 101500474          | caffeoyl-CoA O-methyltransferase 5-like     |
| SNP_50374_A_12211360 | NC_021166.1    | Ca_Kabuli_Chr07 | 12211360                | TT                                     | CC                 | CC               | URR                           | 101500474          | caffeoyl-CoA O-methyltransferase 5-like     |
| SNP_50375_A_12211465 | NC_021166.1    | Ca_Kabuli_Chr07 | 12211465                | AA                                     | TT                 | TT               | URR                           | 101500474          | caffeoyl-CoA O-methyltransferase 5-like     |
| SNP_50376_A_12211485 | NC_021166.1    | Ca_Kabuli_Chr07 | 12211485                | TT                                     | GG                 | GG               | URR                           | 101500474          | caffeoyl-CoA O-methyltransferase 5-like     |
| SNP_50377_A_12211507 | NC_021166.1    | Ca_Kabuli_Chr07 | 12211507                | TT                                     | CC                 | CC               | URR                           | 101500474          | caffeoyl-CoA O-methyltransferase 5-like     |
| SNP_50379_A_12212940 | NC_021166.1    | Ca_Kabuli_Chr07 | 12212940                | TT                                     | CC                 | CC               | INTERGENIC                    |                    |                                             |
| SNP_50381_A_12214612 | NC_021166.1    | Ca_Kabuli_Chr07 | 12214612                | AA                                     | GG                 | GG               | INTERGENIC                    |                    |                                             |
| SNP_50382_A_12224441 | NC_021166.1    | Ca_Kabuli_Chr07 | 12224441                | GG                                     | AA                 | AA               | INTERGENIC                    |                    |                                             |
| SNP_50383_A_12227658 | NC_021166.1    | Ca_Kabuli_Chr07 | 12227658                | GG                                     | TT                 | TT               | INTERGENIC                    |                    |                                             |
| SNP_50385_A_12234117 | NC_021166.1    | Ca_Kabuli_Chr07 | 12234117                | CC                                     | TT                 | TT               | INTERGENIC                    |                    |                                             |
| SNP_50387_A_12236777 | NC_021166.1    | Ca_Kabuli_Chr07 | 12236777                | CC                                     | TT                 | TT               | INTERGENIC                    |                    |                                             |
| SNP_50388_A_12239322 | NC_021166.1    | Ca_Kabuli_Chr07 | 12239322                | CC                                     | TT                 | TT               | INTERGENIC                    |                    |                                             |
| SNP_50389_A_12239329 | NC_021166.1    | Ca_Kabuli_Chr07 | 12239329                | AA                                     | TT                 | TT               | INTERGENIC                    |                    |                                             |
| SNP_50390_A_12241110 | NC_021166.1    | Ca_Kabuli_Chr07 | 12241110                | AA                                     | GG                 | GG               | INTERGENIC                    |                    |                                             |
| SNP_50391_A_12241461 | NC_021166.1    | Ca_Kabuli_Chr07 | 12241461                | CC                                     | TT                 | TT               | INTERGENIC                    |                    |                                             |
| SNP_50392_A_12249667 | NC_021166.1    | Ca_Kabuli_Chr07 | 12249667                | AA                                     | GG                 | GG               | INTRON                        | 101500792          | nicotinate phosphoribosyltransferase 2-like |
| SNP_50393_A_12251734 | NC_021166.1    | Ca_Kabuli_Chr07 | 12251734                | TT                                     | AA                 | AA               | INTRON                        | 101500792          | nicotinate phosphoribosyltransferase 2-like |
| SNP_50394_A_12253229 | NC_021166.1    | Ca_Kabuli_Chr07 | 12253229                | AA                                     | CC                 | CC               | DRR                           | 101501112          | uncharacterized LOC101501112                |
| SNP_50395_A_12258573 | NC_021166.1    | Ca_Kabuli_Chr07 | 12258573                | GG                                     | AA                 | AA               | INTERGENIC                    |                    |                                             |
| SNP_50396_A_12258582 | NC_021166.1    | Ca_Kabuli_Chr07 | 12258582                | GG                                     | AA                 | AA               | INTERGENIC                    |                    |                                             |
| SNP_50397_A_12258592 | NC_021166.1    | Ca_Kabuli_Chr07 | 12258592                | GG                                     | AA                 | AA               | INTERGENIC                    |                    |                                             |

| SNPs IDs             | Chromosome IDs | Chromosomes     | Physical positions (bp) | CDC Frontier genome (Reference genome) | (Pusa 1103 & HPNB) | (ILWC 46 & LPNB) | Sequence Components of genome | Gene accession IDs | Putative functions                                    |
|----------------------|----------------|-----------------|-------------------------|----------------------------------------|--------------------|------------------|-------------------------------|--------------------|-------------------------------------------------------|
| SNP_50398_A_12259079 | NC_021166.1    | Ca_Kabuli_Chr07 | 12259079                | CC                                     | TT                 | TT               | INTERGENIC                    |                    |                                                       |
| SNP_50399_A_12262878 | NC_021166.1    | Ca_Kabuli_Chr07 | 12262878                | TT                                     | AA                 | AA               | INTERGENIC                    |                    |                                                       |
| SNP_50400_A_12264913 | NC_021166.1    | Ca_Kabuli_Chr07 | 12264913                | CC                                     | AA                 | AA               | DRR                           | 101501425          | mitogen-activated protein kinase kinase kinase 3-like |
| SNP_50401_A_12265294 | NC_021166.1    | Ca_Kabuli_Chr07 | 12265294                | GG                                     | AA                 | AA               | SYNONYMOUS_CODING             | 101501425          | mitogen-activated protein kinase kinase kinase 3-like |
| SNP_50403_A_12268381 | NC_021166.1    | Ca_Kabuli_Chr07 | 12268381                | AA                                     | GG                 | GG               | URR                           | 101501425          | mitogen-activated protein kinase kinase kinase 3-like |
| SNP_50404_A_12269619 | NC_021166.1    | Ca_Kabuli_Chr07 | 12269619                | TT                                     | GG                 | GG               | INTERGENIC                    |                    |                                                       |
| SNP_50405_A_12269636 | NC_021166.1    | Ca_Kabuli_Chr07 | 12269636                | GG                                     | AA                 | AA               | INTERGENIC                    |                    |                                                       |
| SNP_50406_A_12269860 | NC_021166.1    | Ca_Kabuli_Chr07 | 12269860                | CC                                     | AA                 | AA               | INTERGENIC                    |                    |                                                       |
| SNP_50407_A_12269892 | NC_021166.1    | Ca_Kabuli_Chr07 | 12269892                | GG                                     | TT                 | TT               | INTERGENIC                    |                    |                                                       |
| SNP_50408_A_12270820 | NC_021166.1    | Ca_Kabuli_Chr07 | 12270820                | TT                                     | AA                 | AA               | INTERGENIC                    |                    |                                                       |
| SNP_50409_A_12270838 | NC_021166.1    | Ca_Kabuli_Chr07 | 12270838                | AA                                     | TT                 | TT               | INTERGENIC                    |                    |                                                       |
| SNP_50410_A_12271713 | NC_021166.1    | Ca_Kabuli_Chr07 | 12271713                | CC                                     | AA                 | AA               | INTERGENIC                    |                    |                                                       |
| SNP_50411_A_12272163 | NC_021166.1    | Ca_Kabuli_Chr07 | 12272163                | GG                                     | AA                 | AA               | INTERGENIC                    |                    |                                                       |
| SNP_50413_A_12280290 | NC_021166.1    | Ca_Kabuli_Chr07 | 12280290                | AA                                     | TT                 | TT               | INTERGENIC                    |                    |                                                       |
| SNP_50414_A_12280336 | NC_021166.1    | Ca_Kabuli_Chr07 | 12280336                | TT                                     | AA                 | AA               | INTERGENIC                    |                    |                                                       |
| SNP_50415_A_12283364 | NC_021166.1    | Ca_Kabuli_Chr07 | 12283364                | GG                                     | AA                 | AA               | INTERGENIC                    |                    |                                                       |
| SNP_50417_A_12284814 | NC_021166.1    | Ca_Kabuli_Chr07 | 12284814                | CC                                     | TT                 | TT               | INTERGENIC                    |                    |                                                       |
| SNP_50418_A_12285025 | NC_021166.1    | Ca_Kabuli_Chr07 | 12285025                | CC                                     | TT                 | TT               | INTERGENIC                    |                    |                                                       |
| SNP_50419_A_12285030 | NC_021166.1    | Ca_Kabuli_Chr07 | 12285030                | GG                                     | AA                 | AA               | INTERGENIC                    |                    |                                                       |
| SNP_50420_A_12285548 | NC_021166.1    | Ca_Kabuli_Chr07 | 12285548                | AA                                     | TT                 | TT               | INTERGENIC                    |                    |                                                       |
| SNP_50421_A_12285595 | NC_021166.1    | Ca_Kabuli_Chr07 | 12285595                | AA                                     | GG                 | GG               | INTERGENIC                    |                    |                                                       |
| SNP_50422_A_12285598 | NC_021166.1    | Ca_Kabuli_Chr07 | 12285598                | AA                                     | GG                 | GG               | INTERGENIC                    |                    |                                                       |



| SNPs IDs             | Chromosome IDs | Chromosomes     | Physical positions (bp) | CDC Frontier genome | (Reference genome) | (Pusa 1103 & HPNB) | (ILWC 46 & LPNB) | Sequence Components of genome | Gene accession IDs | Putative functions        |
|----------------------|----------------|-----------------|-------------------------|---------------------|--------------------|--------------------|------------------|-------------------------------|--------------------|---------------------------|
| SNP_50424_A_12286441 | NC_021166.1    | Ca_Kabuli_Chr07 | 12286441                | TT                  |                    | GG                 | GG               | INTERGENIC                    |                    |                           |
| SNP_50425_A_12286564 | NC_021166.1    | Ca_Kabuli_Chr07 | 12286564                | GG                  |                    | AA                 | AA               | INTERGENIC                    |                    |                           |
| SNP_50426_A_12286580 | NC_021166.1    | Ca_Kabuli_Chr07 | 12286580                | AA                  |                    | GG                 | GG               | INTERGENIC                    |                    |                           |
| SNP_50427_A_12286600 | NC_021166.1    | Ca_Kabuli_Chr07 | 12286600                | GG                  |                    | TT                 | TT               | INTERGENIC                    |                    |                           |
| SNP_50428_A_12286870 | NC_021166.1    | Ca_Kabuli_Chr07 | 12286870                | CC                  |                    | AA                 | AA               | INTERGENIC                    |                    |                           |
| SNP_50429_A_12288533 | NC_021166.1    | Ca_Kabuli_Chr07 | 12288533                | AA                  |                    | CC                 | CC               | INTERGENIC                    |                    |                           |
| SNP_50430_A_12290386 | NC_021166.1    | Ca_Kabuli_Chr07 | 12290386                | CC                  |                    | TT                 | TT               | INTERGENIC                    |                    |                           |
| SNP_50431_A_12290445 | NC_021166.1    | Ca_Kabuli_Chr07 | 12290445                | CC                  |                    | TT                 | TT               | INTERGENIC                    |                    |                           |
| SNP_50432_A_12290869 | NC_021166.1    | Ca_Kabuli_Chr07 | 12290869                | GG                  |                    | AA                 | AA               | INTERGENIC                    |                    |                           |
| SNP_50434_A_12291414 | NC_021166.1    | Ca_Kabuli_Chr07 | 12291414                | TT                  |                    | CC                 | CC               | INTERGENIC                    |                    |                           |
| SNP_50435_A_12291438 | NC_021166.1    | Ca_Kabuli_Chr07 | 12291438                | CC                  |                    | TT                 | TT               | INTERGENIC                    |                    |                           |
| SNP_50436_A_12291443 | NC_021166.1    | Ca_Kabuli_Chr07 | 12291443                | TT                  |                    | AA                 | AA               | INTERGENIC                    |                    |                           |
| SNP_50437_A_12291469 | NC_021166.1    | Ca_Kabuli_Chr07 | 12291469                | TT                  |                    | GG                 | GG               | INTERGENIC                    |                    |                           |
| SNP_50438_A_12291482 | NC_021166.1    | Ca_Kabuli_Chr07 | 12291482                | AA                  |                    | TT                 | TT               | INTERGENIC                    |                    |                           |
| SNP_50439_A_12292340 | NC_021166.1    | Ca_Kabuli_Chr07 | 12292340                | GG                  |                    | AA                 | AA               | INTERGENIC                    |                    |                           |
| SNP_50440_A_12292441 | NC_021166.1    | Ca_Kabuli_Chr07 | 12292441                | AA                  |                    | TT                 | TT               | INTERGENIC                    |                    |                           |
| SNP_50441_A_12293450 | NC_021166.1    | Ca_Kabuli_Chr07 | 12293450                | GG                  |                    | AA                 | AA               | INTERGENIC                    |                    |                           |
| SNP_50442_A_12293481 | NC_021166.1    | Ca_Kabuli_Chr07 | 12293481                | GG                  |                    | TT                 | TT               | INTERGENIC                    |                    |                           |
| SNP_50443_A_12298245 | NC_021166.1    | Ca_Kabuli_Chr07 | 12298245                | TT                  |                    | AA                 | AA               | DRR                           | 101501740          | transcription factor HEC1 |
| SNP_50445_A_12300526 | NC_021166.1    | Ca_Kabuli_Chr07 | 12300526                | AA                  |                    | GG                 | GG               | INTRON                        | 101501740          | transcription factor HEC1 |
| SNP_50446_A_12300531 | NC_021166.1    | Ca_Kabuli_Chr07 | 12300531                | GG                  |                    | AA                 | AA               | INTRON                        | 101501740          | transcription factor HEC1 |
| SNP_50447_A_12301966 | NC_021166.1    | Ca_Kabuli_Chr07 | 12301966                | CC                  |                    | AA                 | AA               | URR                           | 101501740          | transcription factor HEC1 |

| SNPs IDs             | Chromosome IDs | Chromosomes     | Physical positions (bp) | CDC Frontier (Reference genome) | (Pusa 1103 & HPNB) | (ILWC 46 & LPNB) | Sequence Components of genome | Gene accession IDs | Putative functions        |
|----------------------|----------------|-----------------|-------------------------|---------------------------------|--------------------|------------------|-------------------------------|--------------------|---------------------------|
| SNP_50448_A_12303190 | NC_021166.1    | Ca_Kabuli_Chr07 | 12303190                | TT                              | CC                 | CC               | URR                           | 101501740          | transcription factor HEC1 |
| SNP_50449_A_12304987 | NC_021166.1    | Ca_Kabuli_Chr07 | 12304987                | AA                              | GG                 | GG               | INTERGENIC                    |                    |                           |
| SNP_50450_A_12307194 | NC_021166.1    | Ca_Kabuli_Chr07 | 12307194                | TT                              | CC                 | CC               | INTERGENIC                    |                    |                           |
| SNP_50451_A_12307199 | NC_021166.1    | Ca_Kabuli_Chr07 | 12307199                | AA                              | TT                 | TT               | INTERGENIC                    |                    |                           |
| SNP_50452_A_12307201 | NC_021166.1    | Ca_Kabuli_Chr07 | 12307201                | AA                              | TT                 | TT               | INTERGENIC                    |                    |                           |
| SNP_50453_A_12308376 | NC_021166.1    | Ca_Kabuli_Chr07 | 12308376                | TT                              | CC                 | CC               | INTERGENIC                    |                    |                           |
| SNP_50454_A_12308589 | NC_021166.1    | Ca_Kabuli_Chr07 | 12308589                | AA                              | GG                 | GG               | INTERGENIC                    |                    |                           |
| SNP_50455_A_12308936 | NC_021166.1    | Ca_Kabuli_Chr07 | 12308936                | AA                              | TT                 | TT               | INTERGENIC                    |                    |                           |
| SNP_50456_A_12308943 | NC_021166.1    | Ca_Kabuli_Chr07 | 12308943                | CC                              | TT                 | TT               | INTERGENIC                    |                    |                           |
| SNP_50457_A_12311315 | NC_021166.1    | Ca_Kabuli_Chr07 | 12311315                | GG                              | AA                 | AA               | INTERGENIC                    |                    |                           |
| SNP_50458_A_12311317 | NC_021166.1    | Ca_Kabuli_Chr07 | 12311317                | CC                              | AA                 | AA               | INTERGENIC                    |                    |                           |
| SNP_50459_A_12311492 | NC_021166.1    | Ca_Kabuli_Chr07 | 12311492                | GG                              | AA                 | AA               | INTERGENIC                    |                    |                           |
| SNP_50460_A_12311493 | NC_021166.1    | Ca_Kabuli_Chr07 | 12311493                | AA                              | TT                 | TT               | INTERGENIC                    |                    |                           |
| SNP_50461_A_12311533 | NC_021166.1    | Ca_Kabuli_Chr07 | 12311533                | GG                              | AA                 | AA               | INTERGENIC                    |                    |                           |
| SNP_50462_A_12311549 | NC_021166.1    | Ca_Kabuli_Chr07 | 12311549                | CC                              | TT                 | TT               | INTERGENIC                    |                    |                           |
| SNP_50463_A_12311557 | NC_021166.1    | Ca_Kabuli_Chr07 | 12311557                | AA                              | TT                 | TT               | INTERGENIC                    |                    |                           |
| SNP_50464_A_12311810 | NC_021166.1    | Ca_Kabuli_Chr07 | 12311810                | AA                              | CC                 | CC               | INTERGENIC                    |                    |                           |
| SNP_50465_A_12312030 | NC_021166.1    | Ca_Kabuli_Chr07 | 12312030                | GG                              | AA                 | AA               | INTERGENIC                    |                    |                           |
| SNP_50466_A_12312085 | NC_021166.1    | Ca_Kabuli_Chr07 | 12312085                | CC                              | TT                 | TT               | INTERGENIC                    |                    |                           |
| SNP_50467_A_12320740 | NC_021166.1    | Ca_Kabuli_Chr07 | 12320740                | GG                              | AA                 | AA               | INTERGENIC                    |                    |                           |
| SNP_50468_A_12320849 | NC_021166.1    | Ca_Kabuli_Chr07 | 12320849                | GG                              | TT                 | TT               | INTERGENIC                    |                    |                           |
| SNP_50469_A_12320884 | NC_021166.1    | Ca_Kabuli_Chr07 | 12320884                | AA                              | TT                 | TT               | INTERGENIC                    |                    |                           |

| SNPs IDs             | Chromosome IDs | Chromosomes     | Physical positions (bp) | CDC Frontier genome (Reference genome) | (Pusa 1103 & HPNB) | (ILWC 46 & LPNB) | Sequence Components of genome | Gene accession IDs | Putative functions                         |
|----------------------|----------------|-----------------|-------------------------|----------------------------------------|--------------------|------------------|-------------------------------|--------------------|--------------------------------------------|
| SNP_50470_A_12321022 | NC_021166.1    | Ca_Kabuli_Chr07 | 12321022                | TT                                     | CC                 | CC               | INTERGENIC                    |                    |                                            |
| SNP_50472_A_12324750 | NC_021166.1    | Ca_Kabuli_Chr07 | 12324750                | GG                                     | AA                 | AA               | URR                           | 101502287          | RNA-binding protein Musashi homolog 2-like |
| SNP_50473_A_12324760 | NC_021166.1    | Ca_Kabuli_Chr07 | 12324760                | TT                                     | AA                 | AA               | URR                           | 101502287          | RNA-binding protein Musashi homolog 2-like |
| SNP_50474_A_12328290 | NC_021166.1    | Ca_Kabuli_Chr07 | 12328290                | GG                                     | AA                 | AA               | URR                           | 101503251          | uncharacterized LOC101503251               |
| SNP_50475_A_12328563 | NC_021166.1    | Ca_Kabuli_Chr07 | 12328563                | AA                                     | GG                 | GG               | URR                           | 101503251          | uncharacterized LOC101503251               |
| SNP_50476_A_12328717 | NC_021166.1    | Ca_Kabuli_Chr07 | 12328717                | GG                                     | CC                 | CC               | INTERGENIC                    |                    |                                            |
| SNP_50477_A_12328833 | NC_021166.1    | Ca_Kabuli_Chr07 | 12328833                | CC                                     | TT                 | TT               | INTERGENIC                    |                    |                                            |
| SNP_50478_A_12328919 | NC_021166.1    | Ca_Kabuli_Chr07 | 12328919                | AA                                     | GG                 | GG               | INTERGENIC                    |                    |                                            |
| SNP_50479_A_12328922 | NC_021166.1    | Ca_Kabuli_Chr07 | 12328922                | TT                                     | CC                 | CC               | INTERGENIC                    |                    |                                            |
| SNP_50480_A_12328946 | NC_021166.1    | Ca_Kabuli_Chr07 | 12328946                | TT                                     | AA                 | AA               | INTERGENIC                    |                    |                                            |
| SNP_50481_A_12328969 | NC_021166.1    | Ca_Kabuli_Chr07 | 12328969                | CC                                     | AA                 | AA               | INTERGENIC                    |                    |                                            |
| SNP_50482_A_12328990 | NC_021166.1    | Ca_Kabuli_Chr07 | 12328990                | AA                                     | GG                 | GG               | INTERGENIC                    |                    |                                            |
| SNP_50483_A_12329031 | NC_021166.1    | Ca_Kabuli_Chr07 | 12329031                | AA                                     | GG                 | GG               | INTERGENIC                    |                    |                                            |
| SNP_50484_A_12329413 | NC_021166.1    | Ca_Kabuli_Chr07 | 12329413                | AA                                     | GG                 | GG               | INTERGENIC                    |                    |                                            |
| SNP_50485_A_12331454 | NC_021166.1    | Ca_Kabuli_Chr07 | 12331454                | AA                                     | GG                 | GG               | INTERGENIC                    |                    |                                            |
| SNP_50486_A_12331458 | NC_021166.1    | Ca_Kabuli_Chr07 | 12331458                | AA                                     | GG                 | GG               | INTERGENIC                    |                    |                                            |
| SNP_50488_A_12335596 | NC_021166.1    | Ca_Kabuli_Chr07 | 12335596                | TT                                     | GG                 | GG               | INTRON                        | 101503567          | zeaxanthin epoxidase, chloroplastic-like   |
| SNP_50490_A_12343942 | NC_021166.1    | Ca_Kabuli_Chr07 | 12343942                | GG                                     | AA                 | AA               | URR                           | 101503893          | uncharacterized LOC101503893               |
| SNP_50491_A_12344560 | NC_021166.1    | Ca_Kabuli_Chr07 | 12344560                | GG                                     | AA                 | AA               | URR                           | 101503893          | uncharacterized LOC101503893               |
| SNP_50492_A_12345319 | NC_021166.1    | Ca_Kabuli_Chr07 | 12345319                | AA                                     | CC                 | CC               | INTERGENIC                    |                    |                                            |
| SNP_50494_A_12347990 | NC_021166.1    | Ca_Kabuli_Chr07 | 12347990                | CC                                     | GG                 | GG               | INTERGENIC                    |                    |                                            |
| SNP_50496_A_12348678 | NC_021166.1    | Ca_Kabuli_Chr07 | 12348678                | GG                                     | AA                 | AA               | INTERGENIC                    |                    |                                            |

| SNPs IDs             | Chromosome IDs | Chromosomes     | Physical positions (bp) | CDC Frontier genome (Reference genome) | (Pusa 1103 & HPNB) | (ILWC 46 & LPNB) | Sequence genome | Components of | Gene accession IDs                                   | Putative functions |
|----------------------|----------------|-----------------|-------------------------|----------------------------------------|--------------------|------------------|-----------------|---------------|------------------------------------------------------|--------------------|
| SNP_50497_A_12360301 | NC_021166.1    | Ca_Kabuli_Chr07 | 12360301                | AA                                     | TT                 | TT               | INTERGENIC      |               |                                                      |                    |
| SNP_50498_A_12361345 | NC_021166.1    | Ca_Kabuli_Chr07 | 12361345                | CC                                     | AA                 | AA               | DRR             | 101504213     | heat shock factor protein HSF24-like                 |                    |
| SNP_50499_A_12361499 | NC_021166.1    | Ca_Kabuli_Chr07 | 12361499                | TT                                     | AA                 | AA               | DRR             | 101504213     | heat shock factor protein HSF24-like                 |                    |
| SNP_50501_A_12362812 | NC_021166.1    | Ca_Kabuli_Chr07 | 12362812                | AA                                     | TT                 | TT               | URR             | 101504549     | Unknown function                                     |                    |
| SNP_50502_A_12364932 | NC_021166.1    | Ca_Kabuli_Chr07 | 12364932                | TT                                     | AA                 | AA               | INTERGENIC      |               |                                                      |                    |
| SNP_50503_A_12364935 | NC_021166.1    | Ca_Kabuli_Chr07 | 12364935                | TT                                     | AA                 | AA               | INTERGENIC      |               |                                                      |                    |
| SNP_50504_A_12364945 | NC_021166.1    | Ca_Kabuli_Chr07 | 12364945                | AA                                     | GG                 | GG               | INTERGENIC      |               |                                                      |                    |
| SNP_50505_A_12365033 | NC_021166.1    | Ca_Kabuli_Chr07 | 12365033                | TT                                     | AA                 | AA               | INTERGENIC      |               |                                                      |                    |
| SNP_50506_A_12365137 | NC_021166.1    | Ca_Kabuli_Chr07 | 12365137                | CC                                     | AA                 | AA               | INTERGENIC      |               |                                                      |                    |
| SNP_50507_A_12366172 | NC_021166.1    | Ca_Kabuli_Chr07 | 12366172                | CC                                     | AA                 | AA               | INTERGENIC      |               |                                                      |                    |
| SNP_50508_A_12366430 | NC_021166.1    | Ca_Kabuli_Chr07 | 12366430                | AA                                     | GG                 | GG               | INTERGENIC      |               |                                                      |                    |
| SNP_50509_A_12366434 | NC_021166.1    | Ca_Kabuli_Chr07 | 12366434                | GG                                     | AA                 | AA               | INTERGENIC      |               |                                                      |                    |
| SNP_50510_A_12368469 | NC_021166.1    | Ca_Kabuli_Chr07 | 12368469                | TT                                     | CC                 | CC               | URR             | 101504213     | heat shock factor protein HSF24-like                 |                    |
| SNP_50511_A_12368475 | NC_021166.1    | Ca_Kabuli_Chr07 | 12368475                | TT                                     | AA                 | AA               | URR             | 101504213     | heat shock factor protein HSF24-like                 |                    |
| SNP_50512_A_12368642 | NC_021166.1    | Ca_Kabuli_Chr07 | 12368642                | GG                                     | CC                 | CC               | URR             | 101504213     | heat shock factor protein HSF24-like                 |                    |
| SNP_50513_A_12368796 | NC_021166.1    | Ca_Kabuli_Chr07 | 12368796                | GG                                     | AA                 | AA               | URR             | 101504213     | heat shock factor protein HSF24-like                 |                    |
| SNP_50514_A_12369236 | NC_021166.1    | Ca_Kabuli_Chr07 | 12369236                | GG                                     | AA                 | AA               | URR             | 101504213     | heat shock factor protein HSF24-like                 |                    |
| SNP_50515_A_12381040 | NC_021166.1    | Ca_Kabuli_Chr07 | 12381040                | TT                                     | CC                 | CC               | DRR             | 101497463     | ethylene-responsive transcription factor ERF109-like |                    |
| SNP_50516_A_12381043 | NC_021166.1    | Ca_Kabuli_Chr07 | 12381043                | AA                                     | TT                 | TT               | DRR             | 101497463     | ethylene-responsive transcription factor ERF109-like |                    |
| SNP_50517_A_12400975 | NC_021166.1    | Ca_Kabuli_Chr07 | 12400975                | GG                                     | AA                 | AA               | INTERGENIC      |               |                                                      |                    |
| SNP_50518_A_12402925 | NC_021166.1    | Ca_Kabuli_Chr07 | 12402925                | CC                                     | AA                 | AA               | INTERGENIC      |               |                                                      |                    |
| SNP_50519_A_12410835 | NC_021166.1    | Ca_Kabuli_Chr07 | 12410835                | TT                                     | CC                 | CC               | INTERGENIC      |               |                                                      |                    |

| SNPs IDs             | Chromosome IDs | Chromosomes     | Physical positions (bp) | CDC Frontier genome (Reference genome) | (Pusa 1103 & HPNB) | (ILWC 46 & LPNB) | Sequence Components of genome | Gene accession IDs | Putative functions                             |
|----------------------|----------------|-----------------|-------------------------|----------------------------------------|--------------------|------------------|-------------------------------|--------------------|------------------------------------------------|
| SNP_50520_A_12411231 | NC_021166.1    | Ca_Kabuli_Chr07 | 12411231                | CC                                     | AA                 | AA               | INTERGENIC                    |                    |                                                |
| SNP_50521_A_12412046 | NC_021166.1    | Ca_Kabuli_Chr07 | 12412046                | TT                                     | CC                 | CC               | INTERGENIC                    |                    |                                                |
| SNP_50522_A_12412047 | NC_021166.1    | Ca_Kabuli_Chr07 | 12412047                | TT                                     | AA                 | AA               | INTERGENIC                    |                    |                                                |
| SNP_50523_A_12412063 | NC_021166.1    | Ca_Kabuli_Chr07 | 12412063                | TT                                     | CC                 | CC               | INTERGENIC                    |                    |                                                |
| SNP_50524_A_12412280 | NC_021166.1    | Ca_Kabuli_Chr07 | 12412280                | TT                                     | CC                 | CC               | INTERGENIC                    |                    |                                                |
| SNP_50525_A_12412289 | NC_021166.1    | Ca_Kabuli_Chr07 | 12412289                | AA                                     | GG                 | GG               | INTERGENIC                    |                    |                                                |
| SNP_50526_A_12422404 | NC_021166.1    | Ca_Kabuli_Chr07 | 12422404                | TT                                     | CC                 | CC               | URR                           | 101505174          | B3 domain-containing protein Os01g0234100-like |
| SNP_50528_A_12423564 | NC_021166.1    | Ca_Kabuli_Chr07 | 12423564                | TT                                     | AA                 | AA               | URR                           | 101505174          | B3 domain-containing protein Os01g0234100-like |
| SNP_50529_A_12426727 | NC_021166.1    | Ca_Kabuli_Chr07 | 12426727                | AA                                     | TT                 | TT               | INTERGENIC                    |                    |                                                |
| SNP_50530_A_12426732 | NC_021166.1    | Ca_Kabuli_Chr07 | 12426732                | GG                                     | AA                 | AA               | INTERGENIC                    |                    |                                                |
| SNP_50531_A_12426736 | NC_021166.1    | Ca_Kabuli_Chr07 | 12426736                | CC                                     | TT                 | TT               | INTERGENIC                    |                    |                                                |
| SNP_50532_A_12427373 | NC_021166.1    | Ca_Kabuli_Chr07 | 12427373                | CC                                     | TT                 | TT               | INTERGENIC                    |                    |                                                |
| SNP_50533_A_12427659 | NC_021166.1    | Ca_Kabuli_Chr07 | 12427659                | TT                                     | GG                 | GG               | INTERGENIC                    |                    |                                                |
| SNP_50534_A_12430211 | NC_021166.1    | Ca_Kabuli_Chr07 | 12430211                | TT                                     | CC                 | CC               | INTRON                        | 101505715          | uncharacterized membrane protein At3g27390     |
| SNP_50535_A_12431651 | NC_021166.1    | Ca_Kabuli_Chr07 | 12431651                | CC                                     | TT                 | TT               | INTRON                        | 101505715          | uncharacterized membrane protein At3g27390     |
| SNP_50536_A_12431657 | NC_021166.1    | Ca_Kabuli_Chr07 | 12431657                | AA                                     | CC                 | CC               | INTRON                        | 101505715          | uncharacterized membrane protein At3g27390     |
| SNP_50538_A_12432576 | NC_021166.1    | Ca_Kabuli_Chr07 | 12432576                | AA                                     | GG                 | GG               | INTRON                        | 101505715          | uncharacterized membrane protein At3g27390     |
| SNP_50539_A_12434523 | NC_021166.1    | Ca_Kabuli_Chr07 | 12434523                | AA                                     | TT                 | TT               | URR                           | 101505715          | uncharacterized membrane protein At3g27390     |
| SNP_50540_A_12434548 | NC_021166.1    | Ca_Kabuli_Chr07 | 12434548                | AA                                     | CC                 | CC               | URR                           | 101505715          | uncharacterized membrane protein At3g27390     |
| SNP_50541_A_12434582 | NC_021166.1    | Ca_Kabuli_Chr07 | 12434582                | TT                                     | CC                 | CC               | URR                           | 101505715          | uncharacterized membrane protein At3g27390     |
| SNP_50542_A_12434610 | NC_021166.1    | Ca_Kabuli_Chr07 | 12434610                | TT                                     | AA                 | AA               | URR                           | 101505715          | uncharacterized membrane protein At3g27390     |
| SNP_50543_A_12434619 | NC_021166.1    | Ca_Kabuli_Chr07 | 12434619                | GG                                     | AA                 | AA               | URR                           | 101505715          | uncharacterized membrane protein At3g27390     |

| SNPs IDs             | Chromosome IDs | Chromosomes     | Physical positions (bp) | CDC Frontier (Reference genome) | (Pusa 1103 & HPNB) | (ILWC 46 & LPNB) | Sequence Components of genome | Gene accession IDs | Putative functions                         |
|----------------------|----------------|-----------------|-------------------------|---------------------------------|--------------------|------------------|-------------------------------|--------------------|--------------------------------------------|
| SNP_50544_A_12434725 | NC_021166.1    | Ca_Kabuli_Chr07 | 12434725                | AA                              | GG                 | GG               | URR                           | 101505715          | uncharacterized membrane protein At3g27390 |
| SNP_50545_A_12435065 | NC_021166.1    | Ca_Kabuli_Chr07 | 12435065                | CC                              | AA                 | AA               | URR                           | 101505715          | uncharacterized membrane protein At3g27390 |
| SNP_50546_A_12438936 | NC_021166.1    | Ca_Kabuli_Chr07 | 12438936                | TT                              | GG                 | GG               | INTERGENIC                    |                    |                                            |
| SNP_50547_A_12439232 | NC_021166.1    | Ca_Kabuli_Chr07 | 12439232                | GG                              | AA                 | AA               | INTERGENIC                    |                    |                                            |
| SNP_50548_A_12439622 | NC_021166.1    | Ca_Kabuli_Chr07 | 12439622                | TT                              | AA                 | AA               | INTERGENIC                    |                    |                                            |
| SNP_50549_A_12441798 | NC_021166.1    | Ca_Kabuli_Chr07 | 12441798                | TT                              | GG                 | GG               | INTERGENIC                    |                    |                                            |
| SNP_50550_A_12442401 | NC_021166.1    | Ca_Kabuli_Chr07 | 12442401                | CC                              | TT                 | TT               | INTERGENIC                    |                    |                                            |
| SNP_50551_A_12442474 | NC_021166.1    | Ca_Kabuli_Chr07 | 12442474                | AA                              | CC                 | CC               | INTERGENIC                    |                    |                                            |
| SNP_50552_A_12443773 | NC_021166.1    | Ca_Kabuli_Chr07 | 12443773                | GG                              | TT                 | TT               | DRR                           | 101506039          | cyclin-dependent kinase inhibitor 7-like   |
| SNP_50553_A_12444161 | NC_021166.1    | Ca_Kabuli_Chr07 | 12444161                | CC                              | AA                 | AA               | INTRON                        | 101506039          | cyclin-dependent kinase inhibitor 7-like   |
| SNP_50554_A_12444234 | NC_021166.1    | Ca_Kabuli_Chr07 | 12444234                | AA                              | TT                 | TT               | INTRON                        | 101506039          | cyclin-dependent kinase inhibitor 7-like   |
| SNP_50555_A_12446327 | NC_021166.1    | Ca_Kabuli_Chr07 | 12446327                | GG                              | AA                 | AA               | URR                           | 101506039          | cyclin-dependent kinase inhibitor 7-like   |
| SNP_50556_A_12447050 | NC_021166.1    | Ca_Kabuli_Chr07 | 12447050                | TT                              | CC                 | CC               | URR                           | 101506039          | cyclin-dependent kinase inhibitor 7-like   |
| SNP_50557_A_12449610 | NC_021166.1    | Ca_Kabuli_Chr07 | 12449610                | TT                              | CC                 | CC               | INTERGENIC                    |                    |                                            |
| SNP_50558_A_12449613 | NC_021166.1    | Ca_Kabuli_Chr07 | 12449613                | TT                              | CC                 | CC               | INTERGENIC                    |                    |                                            |
| SNP_50559_A_12453614 | NC_021166.1    | Ca_Kabuli_Chr07 | 12453614                | AA                              | TT                 | TT               | INTERGENIC                    |                    |                                            |
| SNP_50560_A_12458037 | NC_021166.1    | Ca_Kabuli_Chr07 | 12458037                | CC                              | GG                 | GG               | INTERGENIC                    |                    |                                            |
| SNP_50561_A_12459443 | NC_021166.1    | Ca_Kabuli_Chr07 | 12459443                | GG                              | TT                 | TT               | INTERGENIC                    |                    |                                            |
| SNP_50562_A_12459452 | NC_021166.1    | Ca_Kabuli_Chr07 | 12459452                | AA                              | TT                 | TT               | INTERGENIC                    |                    |                                            |
| SNP_50563_A_12459472 | NC_021166.1    | Ca_Kabuli_Chr07 | 12459472                | GG                              | TT                 | TT               | INTERGENIC                    |                    |                                            |
| SNP_50564_A_12464725 | NC_021166.1    | Ca_Kabuli_Chr07 | 12464725                | GG                              | AA                 | AA               | URR                           | 101506355          | uncharacterized LOC101506355               |
| SNP_50565_A_12466255 | NC_021166.1    | Ca_Kabuli_Chr07 | 12466255                | GG                              | AA                 | AA               | URR                           | 101506355          | uncharacterized LOC101506355               |

| SNPs IDs             | Chromosome IDs | Chromosomes     | Physical positions (bp) | CDC Frontier genome (Reference genome) | (Pusa 1103 & HPNB) | (ILWC 46 & LPNB) | Sequence Components of genome | Gene accession IDs | Putative functions                                         |
|----------------------|----------------|-----------------|-------------------------|----------------------------------------|--------------------|------------------|-------------------------------|--------------------|------------------------------------------------------------|
| SNP_50566_A_12466258 | NC_021166.1    | Ca_Kabuli_Chr07 | 12466258                | GG                                     | AA                 | AA               | URR                           | 101506355          | uncharacterized LOC101506355                               |
| SNP_50567_A_12467181 | NC_021166.1    | Ca_Kabuli_Chr07 | 12467181                | TT                                     | CC                 | CC               | DRR                           | 101506676          | uncharacterized LOC101506676                               |
| SNP_50568_A_12468327 | NC_021166.1    | Ca_Kabuli_Chr07 | 12468327                | TT                                     | CC                 | CC               | INTERGENIC                    |                    |                                                            |
| SNP_50569_A_12471327 | NC_021166.1    | Ca_Kabuli_Chr07 | 12471327                | TT                                     | CC                 | CC               | INTRON                        | 101506676          | uncharacterized LOC101506676                               |
| SNP_50570_A_12473382 | NC_021166.1    | Ca_Kabuli_Chr07 | 12473382                | AA                                     | GG                 | GG               | INTRON                        | 101506676          | uncharacterized LOC101506676                               |
| SNP_50571_A_12473642 | NC_021166.1    | Ca_Kabuli_Chr07 | 12473642                | TT                                     | CC                 | CC               | INTRON                        | 101506676          | uncharacterized LOC101506676                               |
| SNP_50572_A_12473647 | NC_021166.1    | Ca_Kabuli_Chr07 | 12473647                | TT                                     | CC                 | CC               | INTRON                        | 101506676          | uncharacterized LOC101506676                               |
| SNP_50573_A_12473903 | NC_021166.1    | Ca_Kabuli_Chr07 | 12473903                | AA                                     | GG                 | GG               | INTRON                        | 101506676          | uncharacterized LOC101506676                               |
| SNP_50574_A_12473904 | NC_021166.1    | Ca_Kabuli_Chr07 | 12473904                | TT                                     | AA                 | AA               | INTRON                        | 101506676          | uncharacterized LOC101506676                               |
| SNP_50575_A_12474203 | NC_021166.1    | Ca_Kabuli_Chr07 | 12474203                | AA                                     | GG                 | GG               | INTRON                        | 101506676          | uncharacterized LOC101506676                               |
| SNP_50576_A_12474556 | NC_021166.1    | Ca_Kabuli_Chr07 | 12474556                | GG                                     | AA                 | AA               | INTRON                        | 101506676          | uncharacterized LOC101506676                               |
| SNP_50577_A_12475031 | NC_021166.1    | Ca_Kabuli_Chr07 | 12475031                | AA                                     | GG                 | GG               | INTRON                        | 101506676          | uncharacterized LOC101506676                               |
| SNP_50578_A_12475113 | NC_021166.1    | Ca_Kabuli_Chr07 | 12475113                | GG                                     | AA                 | AA               | INTRON                        | 101506676          | uncharacterized LOC101506676                               |
| SNP_50579_A_12476756 | NC_021166.1    | Ca_Kabuli_Chr07 | 12476756                | GG                                     | CC                 | CC               | SYNONYMOUS_CODING             | 101506676          | uncharacterized LOC101506676                               |
| SNP_50582_A_12483270 | NC_021166.1    | Ca_Kabuli_Chr07 | 12483270                | TT                                     | CC                 | CC               | URR                           | 101498116          | pentatricopeptide repeat-containing protein At3g16610-like |
| SNP_50583_A_12483290 | NC_021166.1    | Ca_Kabuli_Chr07 | 12483290                | AA                                     | CC                 | CC               | URR                           | 101498116          | pentatricopeptide repeat-containing protein At3g16610-like |
| SNP_50584_A_12483399 | NC_021166.1    | Ca_Kabuli_Chr07 | 12483399                | GG                                     | TT                 | TT               | URR                           | 101498116          | pentatricopeptide repeat-containing protein At3g16610-like |
| SNP_50585_A_12483449 | NC_021166.1    | Ca_Kabuli_Chr07 | 12483449                | CC                                     | TT                 | TT               | URR                           | 101498116          | pentatricopeptide repeat-containing protein At3g16610-like |
| SNP_50586_A_12484325 | NC_021166.1    | Ca_Kabuli_Chr07 | 12484325                | CC                                     | GG                 | GG               | URR                           | 101498116          | pentatricopeptide repeat-containing protein At3g16610-like |
| SNP_50587_A_12485778 | NC_021166.1    | Ca_Kabuli_Chr07 | 12485778                | GG                                     | AA                 | AA               | INTERGENIC                    |                    |                                                            |
| SNP_50588_A_12486174 | NC_021166.1    | Ca_Kabuli_Chr07 | 12486174                | GG                                     | AA                 | AA               | INTERGENIC                    |                    |                                                            |
| SNP_50589_A_12486342 | NC_021166.1    | Ca_Kabuli_Chr07 | 12486342                | CC                                     | GG                 | GG               | INTERGENIC                    |                    |                                                            |

| SNPs IDs             | Chromosome IDs | Chromosomes     | Physical positions (bp) | CDC Frontier genome (Reference genome) | (Pusa 1103 & HPNB) | (ILWC 46 & LPNB) | Sequence Components of genome | Gene accession IDs | Putative functions           |
|----------------------|----------------|-----------------|-------------------------|----------------------------------------|--------------------|------------------|-------------------------------|--------------------|------------------------------|
| SNP_50590_A_12487565 | NC_021166.1    | Ca_Kabuli_Chr07 | 12487565                | CC                                     | AA                 | AA               | INTERGENIC                    |                    |                              |
| SNP_50591_A_12487921 | NC_021166.1    | Ca_Kabuli_Chr07 | 12487921                | CC                                     | TT                 | TT               | INTERGENIC                    |                    |                              |
| SNP_50593_A_12492232 | NC_021166.1    | Ca_Kabuli_Chr07 | 12492232                | CC                                     | TT                 | TT               | INTRON                        | 101507230          | uncharacterized LOC101507230 |
| SNP_50594_A_12492633 | NC_021166.1    | Ca_Kabuli_Chr07 | 12492633                | GG                                     | AA                 | AA               | SPLICE_SITE_REGION            | 101507230          | uncharacterized LOC101507230 |
| SNP_50595_A_12492672 | NC_021166.1    | Ca_Kabuli_Chr07 | 12492672                | AA                                     | GG                 | GG               | NON_SYNONYMOUS_CODING         | 101507230          | uncharacterized LOC101507230 |
| SNP_50596_A_12492706 | NC_021166.1    | Ca_Kabuli_Chr07 | 12492706                | GG                                     | CC                 | CC               | NON_SYNONYMOUS_CODING         | 101507230          | uncharacterized LOC101507230 |
| SNP_50598_A_12496416 | NC_021166.1    | Ca_Kabuli_Chr07 | 12496416                | AA                                     | CC                 | CC               | DRR                           | 101498452          | Unknown function             |
| SNP_50599_A_12496527 | NC_021166.1    | Ca_Kabuli_Chr07 | 12496527                | AA                                     | GG                 | GG               | INTERGENIC                    |                    |                              |
| SNP_50600_A_12496588 | NC_021166.1    | Ca_Kabuli_Chr07 | 12496588                | TT                                     | AA                 | AA               | INTERGENIC                    |                    |                              |
| SNP_50601_A_12496670 | NC_021166.1    | Ca_Kabuli_Chr07 | 12496670                | TT                                     | AA                 | AA               | INTERGENIC                    |                    |                              |
| SNP_50602_A_12497446 | NC_021166.1    | Ca_Kabuli_Chr07 | 12497446                | TT                                     | GG                 | GG               | URR                           | 101498452          | Unknown function             |
| SNP_50603_A_12497858 | NC_021166.1    | Ca_Kabuli_Chr07 | 12497858                | CC                                     | TT                 | TT               | URR                           | 101498452          | Unknown function             |
| SNP_50604_A_12497880 | NC_021166.1    | Ca_Kabuli_Chr07 | 12497880                | GG                                     | TT                 | TT               | URR                           | 101498452          | Unknown function             |
| SNP_50605_A_12497902 | NC_021166.1    | Ca_Kabuli_Chr07 | 12497902                | AA                                     | GG                 | GG               | URR                           | 101498452          | Unknown function             |
| SNP_50606_A_12497927 | NC_021166.1    | Ca_Kabuli_Chr07 | 12497927                | AA                                     | GG                 | GG               | URR                           | 101498452          | Unknown function             |
| SNP_50607_A_12497938 | NC_021166.1    | Ca_Kabuli_Chr07 | 12497938                | TT                                     | CC                 | CC               | URR                           | 101498452          | Unknown function             |
| SNP_50608_A_12502434 | NC_021166.1    | Ca_Kabuli_Chr07 | 12502434                | TT                                     | AA                 | AA               | INTERGENIC                    |                    |                              |
| SNP_50609_A_12502436 | NC_021166.1    | Ca_Kabuli_Chr07 | 12502436                | TT                                     | AA                 | AA               | INTERGENIC                    |                    |                              |
| SNP_50610_A_12502437 | NC_021166.1    | Ca_Kabuli_Chr07 | 12502437                | AA                                     | GG                 | GG               | INTERGENIC                    |                    |                              |
| SNP_50611_A_12503269 | NC_021166.1    | Ca_Kabuli_Chr07 | 12503269                | TT                                     | AA                 | AA               | INTERGENIC                    |                    |                              |
| SNP_50612_A_12503270 | NC_021166.1    | Ca_Kabuli_Chr07 | 12503270                | GG                                     | TT                 | TT               | INTERGENIC                    |                    |                              |
| SNP_50614_A_12509102 | NC_021166.1    | Ca_Kabuli_Chr07 | 12509102                | GG                                     | AA                 | AA               | URR                           | 101498794          | uncharacterized LOC101498794 |



| SNPs IDs             | Chromosome IDs | Chromosomes     | Physical positions (bp) | CDC Frontier genome (Reference genome) | (Pusa 1103 & HPNB) | (ILWC 46 & LPNB) | Sequence genome | Components of | Gene accession IDs | Putative functions |
|----------------------|----------------|-----------------|-------------------------|----------------------------------------|--------------------|------------------|-----------------|---------------|--------------------|--------------------|
| SNP_50615_A_12509421 | NC_021166.1    | Ca_Kabuli_Chr07 | 12509421                | AA                                     | GG                 | GG               | INTERGENIC      |               |                    |                    |
| SNP_50616_A_12509468 | NC_021166.1    | Ca_Kabuli_Chr07 | 12509468                | AA                                     | GG                 | GG               | INTERGENIC      |               |                    |                    |
| SNP_50617_A_12509510 | NC_021166.1    | Ca_Kabuli_Chr07 | 12509510                | GG                                     | AA                 | AA               | INTERGENIC      |               |                    |                    |
| SNP_50618_A_12509561 | NC_021166.1    | Ca_Kabuli_Chr07 | 12509561                | AA                                     | CC                 | CC               | INTERGENIC      |               |                    |                    |
| SNP_50619_A_12510431 | NC_021166.1    | Ca_Kabuli_Chr07 | 12510431                | CC                                     | TT                 | TT               | INTERGENIC      |               |                    |                    |
| SNP_50620_A_12510475 | NC_021166.1    | Ca_Kabuli_Chr07 | 12510475                | GG                                     | AA                 | AA               | INTERGENIC      |               |                    |                    |
| SNP_50621_A_12512402 | NC_021166.1    | Ca_Kabuli_Chr07 | 12512402                | GG                                     | AA                 | AA               | INTERGENIC      |               |                    |                    |
| SNP_50622_A_12512428 | NC_021166.1    | Ca_Kabuli_Chr07 | 12512428                | CC                                     | TT                 | TT               | INTERGENIC      |               |                    |                    |
| SNP_50623_A_12513407 | NC_021166.1    | Ca_Kabuli_Chr07 | 12513407                | TT                                     | GG                 | GG               | INTERGENIC      |               |                    |                    |
| SNP_50624_A_12517228 | NC_021166.1    | Ca_Kabuli_Chr07 | 12517228                | GG                                     | TT                 | TT               | INTERGENIC      |               |                    |                    |
| SNP_50625_A_12517238 | NC_021166.1    | Ca_Kabuli_Chr07 | 12517238                | GG                                     | AA                 | AA               | INTERGENIC      |               |                    |                    |
| SNP_50626_A_12517254 | NC_021166.1    | Ca_Kabuli_Chr07 | 12517254                | AA                                     | TT                 | TT               | INTERGENIC      |               |                    |                    |
| SNP_50627_A_12520813 | NC_021166.1    | Ca_Kabuli_Chr07 | 12520813                | TT                                     | CC                 | CC               | URR             | 101499115     | Unknown function   |                    |
| SNP_50629_A_12521008 | NC_021166.1    | Ca_Kabuli_Chr07 | 12521008                | CC                                     | AA                 | AA               | URR             | 101499115     | Unknown function   |                    |
| SNP_50630_A_12521198 | NC_021166.1    | Ca_Kabuli_Chr07 | 12521198                | GG                                     | TT                 | TT               | URR             | 101499115     | Unknown function   |                    |
| SNP_50631_A_12521410 | NC_021166.1    | Ca_Kabuli_Chr07 | 12521410                | GG                                     | AA                 | AA               | URR             | 101499115     | Unknown function   |                    |
| SNP_50632_A_12521415 | NC_021166.1    | Ca_Kabuli_Chr07 | 12521415                | GG                                     | TT                 | TT               | URR             | 101499115     | Unknown function   |                    |
| SNP_50633_A_12523056 | NC_021166.1    | Ca_Kabuli_Chr07 | 12523056                | CC                                     | TT                 | TT               | INTERGENIC      |               |                    |                    |
| SNP_50634_A_12523350 | NC_021166.1    | Ca_Kabuli_Chr07 | 12523350                | TT                                     | CC                 | CC               | INTERGENIC      |               |                    |                    |
| SNP_50636_A_12524112 | NC_021166.1    | Ca_Kabuli_Chr07 | 12524112                | CC                                     | TT                 | TT               | DRR             | 101499434     | Unknown function   |                    |
| SNP_50637_A_12524149 | NC_021166.1    | Ca_Kabuli_Chr07 | 12524149                | CC                                     | TT                 | TT               | DRR             | 101499434     | Unknown function   |                    |
| SNP_50638_A_12524371 | NC_021166.1    | Ca_Kabuli_Chr07 | 12524371                | TT                                     | CC                 | CC               | DRR             | 101499434     | Unknown function   |                    |

| SNPs IDs             | Chromosome IDs | Chromosomes     | Physical positions (bp) | CDC Frontier genome (Reference genome) | (Pusa 1103 & HPNB) | (ILWC 46 & LPNB) | Sequence Components of genome | Gene accession IDs | Putative functions |
|----------------------|----------------|-----------------|-------------------------|----------------------------------------|--------------------|------------------|-------------------------------|--------------------|--------------------|
| SNP_50639_A_12527519 | NC_021166.1    | Ca_Kabuli_Chr07 | 12527519                | CC                                     | TT                 | TT               | INTRON                        | 101499434          | Unknown function   |
| SNP_50640_A_12532238 | NC_021166.1    | Ca_Kabuli_Chr07 | 12532238                | AA                                     | TT                 | TT               | INTRON                        | 101499434          | Unknown function   |
| SNP_50641_A_12535045 | NC_021166.1    | Ca_Kabuli_Chr07 | 12535045                | GG                                     | AA                 | AA               | INTRON                        | 101499434          | Unknown function   |
| SNP_50642_A_12539968 | NC_021166.1    | Ca_Kabuli_Chr07 | 12539968                | TT                                     | CC                 | CC               | INTRON                        | 101499434          | Unknown function   |
| SNP_50644_A_12551692 | NC_021166.1    | Ca_Kabuli_Chr07 | 12551692                | AA                                     | GG                 | GG               | URR                           | 101507546          | Unknown function   |
| SNP_50645_A_12551701 | NC_021166.1    | Ca_Kabuli_Chr07 | 12551701                | TT                                     | GG                 | GG               | URR                           | 101507546          | Unknown function   |
| SNP_50646_A_12557418 | NC_021166.1    | Ca_Kabuli_Chr07 | 12557418                | GG                                     | AA                 | AA               | INTRON                        | 101499434          | Unknown function   |
| SNP_50647_A_12560127 | NC_021166.1    | Ca_Kabuli_Chr07 | 12560127                | TT                                     | AA                 | AA               | INTRON                        | 101499434          | Unknown function   |
| SNP_50648_A_12561434 | NC_021166.1    | Ca_Kabuli_Chr07 | 12561434                | GG                                     | AA                 | AA               | URR                           | 101499434          | Unknown function   |
| SNP_50649_A_12564521 | NC_021166.1    | Ca_Kabuli_Chr07 | 12564521                | TT                                     | AA                 | AA               | INTERGENIC                    |                    |                    |
| SNP_50650_A_12564802 | NC_021166.1    | Ca_Kabuli_Chr07 | 12564802                | CC                                     | TT                 | TT               | INTERGENIC                    |                    |                    |
| SNP_50651_A_12564822 | NC_021166.1    | Ca_Kabuli_Chr07 | 12564822                | AA                                     | GG                 | GG               | INTERGENIC                    |                    |                    |
| SNP_50652_A_12564827 | NC_021166.1    | Ca_Kabuli_Chr07 | 12564827                | CC                                     | TT                 | TT               | INTERGENIC                    |                    |                    |
| SNP_50653_A_12564849 | NC_021166.1    | Ca_Kabuli_Chr07 | 12564849                | AA                                     | TT                 | TT               | INTERGENIC                    |                    |                    |
| SNP_50654_A_12564855 | NC_021166.1    | Ca_Kabuli_Chr07 | 12564855                | AA                                     | TT                 | TT               | INTERGENIC                    |                    |                    |
| SNP_50655_A_12565785 | NC_021166.1    | Ca_Kabuli_Chr07 | 12565785                | TT                                     | GG                 | GG               | INTERGENIC                    |                    |                    |
| SNP_50656_A_12565830 | NC_021166.1    | Ca_Kabuli_Chr07 | 12565830                | TT                                     | CC                 | CC               | INTERGENIC                    |                    |                    |
| SNP_50657_A_12565979 | NC_021166.1    | Ca_Kabuli_Chr07 | 12565979                | CC                                     | TT                 | TT               | INTERGENIC                    |                    |                    |
| SNP_50658_A_12566008 | NC_021166.1    | Ca_Kabuli_Chr07 | 12566008                | AA                                     | TT                 | TT               | INTERGENIC                    |                    |                    |
| SNP_50659_A_12567091 | NC_021166.1    | Ca_Kabuli_Chr07 | 12567091                | TT                                     | CC                 | CC               | INTERGENIC                    |                    |                    |
| SNP_50660_A_12567116 | NC_021166.1    | Ca_Kabuli_Chr07 | 12567116                | CC                                     | TT                 | TT               | INTERGENIC                    |                    |                    |
| SNP_50661_A_12567125 | NC_021166.1    | Ca_Kabuli_Chr07 | 12567125                | CC                                     | TT                 | TT               | INTERGENIC                    |                    |                    |

| SNPs IDs             | Chromosome IDs | Chromosomes     | Physical positions (bp) | CDC Frontier genome (Reference genome) | (Pusa 1103 & HPNB) | (ILWC 46 & LPNB) | Sequence genome       | Components of | Gene accession IDs | Putative functions           |
|----------------------|----------------|-----------------|-------------------------|----------------------------------------|--------------------|------------------|-----------------------|---------------|--------------------|------------------------------|
| SNP_50662_A_12567447 | NC_021166.1    | Ca_Kabuli_Chr07 | 12567447                | GG                                     | TT                 | TT               | INTERGENIC            |               |                    |                              |
| SNP_50663_A_12567512 | NC_021166.1    | Ca_Kabuli_Chr07 | 12567512                | GG                                     | AA                 | AA               | INTERGENIC            |               |                    |                              |
| SNP_50664_A_12567542 | NC_021166.1    | Ca_Kabuli_Chr07 | 12567542                | CC                                     | AA                 | AA               | INTERGENIC            |               |                    |                              |
| SNP_50665_A_12568821 | NC_021166.1    | Ca_Kabuli_Chr07 | 12568821                | TT                                     | CC                 | CC               | INTERGENIC            |               |                    |                              |
| SNP_50666_A_12570686 | NC_021166.1    | Ca_Kabuli_Chr07 | 12570686                | CC                                     | AA                 | AA               | INTERGENIC            |               |                    |                              |
| SNP_50667_A_12570699 | NC_021166.1    | Ca_Kabuli_Chr07 | 12570699                | AA                                     | CC                 | CC               | INTERGENIC            |               |                    |                              |
| SNP_50668_A_12571529 | NC_021166.1    | Ca_Kabuli_Chr07 | 12571529                | TT                                     | GG                 | GG               | INTERGENIC            |               |                    |                              |
| SNP_50669_A_12571903 | NC_021166.1    | Ca_Kabuli_Chr07 | 12571903                | TT                                     | CC                 | CC               | INTERGENIC            |               |                    |                              |
| SNP_50670_A_12572323 | NC_021166.1    | Ca_Kabuli_Chr07 | 12572323                | CC                                     | TT                 | TT               | INTERGENIC            |               |                    |                              |
| SNP_50671_A_12572640 | NC_021166.1    | Ca_Kabuli_Chr07 | 12572640                | AA                                     | CC                 | CC               | INTERGENIC            |               |                    |                              |
| SNP_50672_A_12572687 | NC_021166.1    | Ca_Kabuli_Chr07 | 12572687                | TT                                     | CC                 | CC               | INTERGENIC            |               |                    |                              |
| SNP_50673_A_12572854 | NC_021166.1    | Ca_Kabuli_Chr07 | 12572854                | TT                                     | CC                 | CC               | INTERGENIC            |               |                    |                              |
| SNP_50674_A_12573654 | NC_021166.1    | Ca_Kabuli_Chr07 | 12573654                | GG                                     | CC                 | CC               | INTERGENIC            |               |                    |                              |
| SNP_50675_A_12575345 | NC_021166.1    | Ca_Kabuli_Chr07 | 12575345                | CC                                     | TT                 | TT               | INTERGENIC            |               |                    |                              |
| SNP_50676_A_12578035 | NC_021166.1    | Ca_Kabuli_Chr07 | 12578035                | CC                                     | TT                 | TT               | INTERGENIC            |               |                    |                              |
| SNP_50677_A_12581108 | NC_021166.1    | Ca_Kabuli_Chr07 | 12581108                | TT                                     | AA                 | AA               | INTERGENIC            |               |                    |                              |
| SNP_50678_A_12581154 | NC_021166.1    | Ca_Kabuli_Chr07 | 12581154                | AA                                     | GG                 | GG               | INTERGENIC            |               |                    |                              |
| SNP_50681_A_12589378 | NC_021166.1    | Ca_Kabuli_Chr07 | 12589378                | TT                                     | CC                 | CC               | NON_SYNONYMOUS_CODING | 101507859     |                    | uncharacterized LOC101507859 |
| SNP_50682_A_12591668 | NC_021166.1    | Ca_Kabuli_Chr07 | 12591668                | CC                                     | TT                 | TT               | URR                   | 101507859     |                    | uncharacterized LOC101507859 |
| SNP_50683_A_12595186 | NC_021166.1    | Ca_Kabuli_Chr07 | 12595186                | GG                                     | AA                 | AA               | INTERGENIC            |               |                    |                              |
| SNP_50684_A_12595218 | NC_021166.1    | Ca_Kabuli_Chr07 | 12595218                | GG                                     | AA                 | AA               | INTERGENIC            |               |                    |                              |
| SNP_50685_A_12595918 | NC_021166.1    | Ca_Kabuli_Chr07 | 12595918                | GG                                     | AA                 | AA               | INTERGENIC            |               |                    |                              |

| SNPs IDs             | Chromosome IDs | Chromosomes     | Physical positions (bp) | CDC Frontier genome (Reference genome) | (Pusa 1103 & HPNB) | (ILWC 46 & LPNB) | Sequence Components of genome | Gene accession IDs | Putative functions           |
|----------------------|----------------|-----------------|-------------------------|----------------------------------------|--------------------|------------------|-------------------------------|--------------------|------------------------------|
| SNP_50686_A_12598540 | NC_021166.1    | Ca_Kabuli_Chr07 | 12598540                | CC                                     | GG                 | GG               | INTERGENIC                    |                    |                              |
| SNP_50687_A_12598557 | NC_021166.1    | Ca_Kabuli_Chr07 | 12598557                | TT                                     | GG                 | GG               | INTERGENIC                    |                    |                              |
| SNP_50688_A_12598574 | NC_021166.1    | Ca_Kabuli_Chr07 | 12598574                | CC                                     | TT                 | TT               | INTERGENIC                    |                    |                              |
| SNP_50689_A_12598577 | NC_021166.1    | Ca_Kabuli_Chr07 | 12598577                | TT                                     | CC                 | CC               | INTERGENIC                    |                    |                              |
| SNP_50690_A_12598588 | NC_021166.1    | Ca_Kabuli_Chr07 | 12598588                | GG                                     | AA                 | AA               | INTERGENIC                    |                    |                              |
| SNP_50691_A_12598631 | NC_021166.1    | Ca_Kabuli_Chr07 | 12598631                | AA                                     | GG                 | GG               | INTERGENIC                    |                    |                              |
| SNP_50692_A_12601275 | NC_021166.1    | Ca_Kabuli_Chr07 | 12601275                | CC                                     | TT                 | TT               | INTERGENIC                    |                    |                              |
| SNP_50693_A_12602089 | NC_021166.1    | Ca_Kabuli_Chr07 | 12602089                | GG                                     | CC                 | CC               | INTERGENIC                    |                    |                              |
| SNP_50694_A_12606821 | NC_021166.1    | Ca_Kabuli_Chr07 | 12606821                | AA                                     | TT                 | TT               | INTRON                        | 101508173          | uncharacterized LOC101508173 |
| SNP_50695_A_12607675 | NC_021166.1    | Ca_Kabuli_Chr07 | 12607675                | GG                                     | AA                 | AA               | INTERGENIC                    |                    |                              |
| SNP_50696_A_12607756 | NC_021166.1    | Ca_Kabuli_Chr07 | 12607756                | GG                                     | AA                 | AA               | INTERGENIC                    |                    |                              |
| SNP_50697_A_12607997 | NC_021166.1    | Ca_Kabuli_Chr07 | 12607997                | AA                                     | TT                 | TT               | INTERGENIC                    |                    |                              |
| SNP_50699_A_12608688 | NC_021166.1    | Ca_Kabuli_Chr07 | 12608688                | CC                                     | TT                 | TT               | URR                           | 101508173          | uncharacterized LOC101508173 |
| SNP_50701_A_12609038 | NC_021166.1    | Ca_Kabuli_Chr07 | 12609038                | TT                                     | AA                 | AA               | URR                           | 101508173          | uncharacterized LOC101508173 |
| SNP_50702_A_12609041 | NC_021166.1    | Ca_Kabuli_Chr07 | 12609041                | GG                                     | TT                 | TT               | URR                           | 101508173          | uncharacterized LOC101508173 |
| SNP_50703_A_12609996 | NC_021166.1    | Ca_Kabuli_Chr07 | 12609996                | GG                                     | AA                 | AA               | URR                           | 101508173          | uncharacterized LOC101508173 |
| SNP_50704_A_12610027 | NC_021166.1    | Ca_Kabuli_Chr07 | 12610027                | GG                                     | CC                 | CC               | URR                           | 101508173          | uncharacterized LOC101508173 |
| SNP_50705_A_12613487 | NC_021166.1    | Ca_Kabuli_Chr07 | 12613487                | TT                                     | CC                 | CC               | INTERGENIC                    |                    |                              |
| SNP_50706_A_12629132 | NC_021166.1    | Ca_Kabuli_Chr07 | 12629132                | CC                                     | TT                 | TT               | INTRON                        | 101508500          | uncharacterized LOC101508500 |
| SNP_50707_A_12629142 | NC_021166.1    | Ca_Kabuli_Chr07 | 12629142                | AA                                     | CC                 | CC               | INTRON                        | 101508500          | uncharacterized LOC101508500 |
| SNP_50708_A_12633643 | NC_021166.1    | Ca_Kabuli_Chr07 | 12633643                | AA                                     | TT                 | TT               | INTRON                        | 101508500          | uncharacterized LOC101508500 |
| SNP_50709_A_12634664 | NC_021166.1    | Ca_Kabuli_Chr07 | 12634664                | TT                                     | CC                 | CC               | INTRON                        | 101508500          | uncharacterized LOC101508500 |

| SNPs IDs             | Chromosome IDs | Chromosomes     | Physical positions (bp) | CDC Frontier genome | (Reference genome) | (Pusa 1103 & HPNB) | (ILWC 46 & LPNB) | Sequence Components of genome | Gene accession IDs | Putative functions                      |
|----------------------|----------------|-----------------|-------------------------|---------------------|--------------------|--------------------|------------------|-------------------------------|--------------------|-----------------------------------------|
| SNP_50710_A_12636442 | NC_021166.1    | Ca_Kabuli_Chr07 | 12636442                | GG                  | AA                 | AA                 | AA               | INTRON                        | 101508500          | uncharacterized LOC101508500            |
| SNP_50711_A_12637313 | NC_021166.1    | Ca_Kabuli_Chr07 | 12637313                | AA                  | TT                 | TT                 | TT               | INTRON                        | 101508500          | uncharacterized LOC101508500            |
| SNP_50712_A_12640300 | NC_021166.1    | Ca_Kabuli_Chr07 | 12640300                | TT                  | GG                 | GG                 | GG               | INTRON                        | 101508500          | uncharacterized LOC101508500            |
| SNP_50713_A_12643246 | NC_021166.1    | Ca_Kabuli_Chr07 | 12643246                | TT                  | GG                 | GG                 | GG               | NON_SYNONYMOUS_CODING         | 101499741          | uncharacterized LOC101499741            |
| SNP_50714_A_12643921 | NC_021166.1    | Ca_Kabuli_Chr07 | 12643921                | GG                  | AA                 | AA                 | AA               | URR                           | 101499741          | uncharacterized LOC101499741            |
| SNP_50715_A_12643932 | NC_021166.1    | Ca_Kabuli_Chr07 | 12643932                | CC                  | AA                 | AA                 | AA               | URR                           | 101499741          | uncharacterized LOC101499741            |
| SNP_50716_A_12644885 | NC_021166.1    | Ca_Kabuli_Chr07 | 12644885                | GG                  | CC                 | CC                 | CC               | URR                           | 101499741          | uncharacterized LOC101499741            |
| SNP_50717_A_12645294 | NC_021166.1    | Ca_Kabuli_Chr07 | 12645294                | AA                  | TT                 | TT                 | TT               | URR                           | 101499741          | uncharacterized LOC101499741            |
| SNP_50718_A_12645307 | NC_021166.1    | Ca_Kabuli_Chr07 | 12645307                | GG                  | CC                 | CC                 | CC               | URR                           | 101499741          | uncharacterized LOC101499741            |
| SNP_50719_A_12645311 | NC_021166.1    | Ca_Kabuli_Chr07 | 12645311                | GG                  | TT                 | TT                 | TT               | URR                           | 101499741          | uncharacterized LOC101499741            |
| SNP_50721_A_12645604 | NC_021166.1    | Ca_Kabuli_Chr07 | 12645604                | CC                  | TT                 | TT                 | TT               | INTERGENIC                    |                    |                                         |
| SNP_50722_A_12650161 | NC_021166.1    | Ca_Kabuli_Chr07 | 12650161                | CC                  | AA                 | AA                 | AA               | URR                           | 101509025          | very-long-chain 3-oxoacyl-CoA reductase |
| SNP_50723_A_12650193 | NC_021166.1    | Ca_Kabuli_Chr07 | 12650193                | CC                  | TT                 | TT                 | TT               | URR                           | 101509025          | very-long-chain 3-oxoacyl-CoA reductase |
| SNP_50724_A_12650201 | NC_021166.1    | Ca_Kabuli_Chr07 | 12650201                | GG                  | TT                 | TT                 | TT               | URR                           | 101509025          | very-long-chain 3-oxoacyl-CoA reductase |
| SNP_50725_A_12650215 | NC_021166.1    | Ca_Kabuli_Chr07 | 12650215                | GG                  | TT                 | TT                 | TT               | URR                           | 101509025          | very-long-chain 3-oxoacyl-CoA reductase |
| SNP_50726_A_12653503 | NC_021166.1    | Ca_Kabuli_Chr07 | 12653503                | AA                  | GG                 | GG                 | GG               | INTERGENIC                    |                    |                                         |
| SNP_50727_A_12653664 | NC_021166.1    | Ca_Kabuli_Chr07 | 12653664                | GG                  | AA                 | AA                 | AA               | INTERGENIC                    |                    |                                         |
| SNP_50729_A_12653999 | NC_021166.1    | Ca_Kabuli_Chr07 | 12653999                | GG                  | CC                 | CC                 | CC               | INTERGENIC                    |                    |                                         |
| SNP_50730_A_12656705 | NC_021166.1    | Ca_Kabuli_Chr07 | 12656705                | TT                  | GG                 | GG                 | GG               | INTERGENIC                    |                    |                                         |
| SNP_50731_A_12656710 | NC_021166.1    | Ca_Kabuli_Chr07 | 12656710                | TT                  | CC                 | CC                 | CC               | INTERGENIC                    |                    |                                         |
| SNP_50732_A_12656719 | NC_021166.1    | Ca_Kabuli_Chr07 | 12656719                | GG                  | AA                 | AA                 | AA               | INTERGENIC                    |                    |                                         |
| SNP_50733_A_12656726 | NC_021166.1    | Ca_Kabuli_Chr07 | 12656726                | AA                  | CC                 | CC                 | CC               | INTERGENIC                    |                    |                                         |

| SNPs IDs             | Chromosome IDs | Chromosomes     | Physical positions (bp) | CDC Frontier genome (Reference genome) | (Pusa 1103 & HPNB) | (ILWC 46 & LPNB) | Sequence Components of genome | Gene accession IDs | Putative functions                     |
|----------------------|----------------|-----------------|-------------------------|----------------------------------------|--------------------|------------------|-------------------------------|--------------------|----------------------------------------|
| SNP_50734_A_12657389 | NC_021166.1    | Ca_Kabuli_Chr07 | 12657389                | AA                                     | CC                 | CC               | INTERGENIC                    |                    |                                        |
| SNP_50735_A_12661467 | NC_021166.1    | Ca_Kabuli_Chr07 | 12661467                | GG                                     | AA                 | AA               | INTERGENIC                    |                    |                                        |
| SNP_50736_A_12661650 | NC_021166.1    | Ca_Kabuli_Chr07 | 12661650                | CC                                     | TT                 | TT               | INTERGENIC                    |                    |                                        |
| SNP_50737_A_12663105 | NC_021166.1    | Ca_Kabuli_Chr07 | 12663105                | GG                                     | TT                 | TT               | DRR                           | 101509346          | CDPK-related protein kinase            |
| SNP_50739_A_12663542 | NC_021166.1    | Ca_Kabuli_Chr07 | 12663542                | CC                                     | TT                 | TT               | DRR                           | 101509346          | CDPK-related protein kinase            |
| SNP_50740_A_12665283 | NC_021166.1    | Ca_Kabuli_Chr07 | 12665283                | GG                                     | AA                 | AA               | INTRON                        | 101509346          | CDPK-related protein kinase            |
| SNP_50741_A_12668407 | NC_021166.1    | Ca_Kabuli_Chr07 | 12668407                | GG                                     | AA                 | AA               | URR                           | 101509346          | CDPK-related protein kinase            |
| SNP_50742_A_12668417 | NC_021166.1    | Ca_Kabuli_Chr07 | 12668417                | GG                                     | AA                 | AA               | URR                           | 101509346          | CDPK-related protein kinase            |
| SNP_50743_A_12676323 | NC_021166.1    | Ca_Kabuli_Chr07 | 12676323                | CC                                     | GG                 | GG               | INTRON                        | 101509667          | phosphoglycerate mutase-like protein 4 |
| SNP_50744_A_12677133 | NC_021166.1    | Ca_Kabuli_Chr07 | 12677133                | CC                                     | AA                 | AA               | INTRON                        | 101509667          | phosphoglycerate mutase-like protein 4 |
| SNP_50745_A_12677237 | NC_021166.1    | Ca_Kabuli_Chr07 | 12677237                | TT                                     | AA                 | AA               | INTRON                        | 101509667          | phosphoglycerate mutase-like protein 4 |
| SNP_50746_A_12677865 | NC_021166.1    | Ca_Kabuli_Chr07 | 12677865                | CC                                     | GG                 | GG               | INTRON                        | 101509667          | phosphoglycerate mutase-like protein 4 |
| SNP_50747_A_12679417 | NC_021166.1    | Ca_Kabuli_Chr07 | 12679417                | AA                                     | TT                 | TT               | URR                           | 101509667          | phosphoglycerate mutase-like protein 4 |
| SNP_50748_A_12679440 | NC_021166.1    | Ca_Kabuli_Chr07 | 12679440                | TT                                     | AA                 | AA               | URR                           | 101509667          | phosphoglycerate mutase-like protein 4 |
| SNP_50749_A_12679615 | NC_021166.1    | Ca_Kabuli_Chr07 | 12679615                | GG                                     | AA                 | AA               | URR                           | 101509667          | phosphoglycerate mutase-like protein 4 |
| SNP_50750_A_12680201 | NC_021166.1    | Ca_Kabuli_Chr07 | 12680201                | CC                                     | TT                 | TT               | URR                           | 101509667          | phosphoglycerate mutase-like protein 4 |
| SNP_50751_A_12680211 | NC_021166.1    | Ca_Kabuli_Chr07 | 12680211                | CC                                     | TT                 | TT               | URR                           | 101509667          | phosphoglycerate mutase-like protein 4 |
| SNP_50752_A_12685651 | NC_021166.1    | Ca_Kabuli_Chr07 | 12685651                | CC                                     | TT                 | TT               | INTRON                        | 101509990          | phosphoglycerate mutase-like protein 4 |
| SNP_50753_A_12685880 | NC_021166.1    | Ca_Kabuli_Chr07 | 12685880                | AA                                     | GG                 | GG               | INTRON                        | 101509990          | phosphoglycerate mutase-like protein 4 |
| SNP_50754_A_12685963 | NC_021166.1    | Ca_Kabuli_Chr07 | 12685963                | TT                                     | CC                 | CC               | INTRON                        | 101509990          | phosphoglycerate mutase-like protein 4 |
| SNP_50755_A_12686141 | NC_021166.1    | Ca_Kabuli_Chr07 | 12686141                | GG                                     | AA                 | AA               | INTRON                        | 101509990          | phosphoglycerate mutase-like protein 4 |
| SNP_50756_A_12686611 | NC_021166.1    | Ca_Kabuli_Chr07 | 12686611                | CC                                     | TT                 | TT               | INTRON                        | 101509990          | phosphoglycerate mutase-like protein 4 |

| SNPs IDs             | Chromosome IDs | Chromosomes     | Physical positions (bp) | CDC Frontier genome (Reference genome) | (Pusa 1103 & HPNB) | (ILWC 46 & LPNB) | Sequence Components of genome | Gene accession IDs | Putative functions                                   |
|----------------------|----------------|-----------------|-------------------------|----------------------------------------|--------------------|------------------|-------------------------------|--------------------|------------------------------------------------------|
| SNP_50757_A_12687284 | NC_021166.1    | Ca_Kabuli_Chr07 | 12687284                | TT                                     | CC                 | CC               | INTRON                        | 101509990          | phosphoglycerate mutase-like protein 4               |
| SNP_50758_A_12687303 | NC_021166.1    | Ca_Kabuli_Chr07 | 12687303                | TT                                     | AA                 | AA               | INTRON                        | 101509990          | phosphoglycerate mutase-like protein 4               |
| SNP_50759_A_12687359 | NC_021166.1    | Ca_Kabuli_Chr07 | 12687359                | GG                                     | CC                 | CC               | INTRON                        | 101509990          | phosphoglycerate mutase-like protein 4               |
| SNP_50761_A_12692983 | NC_021166.1    | Ca_Kabuli_Chr07 | 12692983                | CC                                     | AA                 | AA               | DRR                           | 101510309          | peptidyl-prolyl cis-trans isomerase CYP40-like       |
| SNP_50762_A_12693877 | NC_021166.1    | Ca_Kabuli_Chr07 | 12693877                | AA                                     | TT                 | TT               | URR                           | 101500050          | Unknown function                                     |
| SNP_50763_A_12696683 | NC_021166.1    | Ca_Kabuli_Chr07 | 12696683                | GG                                     | AA                 | AA               | INTERGENIC                    |                    |                                                      |
| SNP_50764_A_12697398 | NC_021166.1    | Ca_Kabuli_Chr07 | 12697398                | CC                                     | GG                 | GG               | INTERGENIC                    |                    |                                                      |
| SNP_50765_A_12704222 | NC_021166.1    | Ca_Kabuli_Chr07 | 12704222                | GG                                     | TT                 | TT               | DRR                           | 101510645          | DNA-directed RNA polymerases II, IV and V subunit 11 |
| SNP_50766_A_12709885 | NC_021166.1    | Ca_Kabuli_Chr07 | 12709885                | GG                                     | AA                 | AA               | INTERGENIC                    |                    |                                                      |
| SNP_50767_A_12712890 | NC_021166.1    | Ca_Kabuli_Chr07 | 12712890                | TT                                     | CC                 | CC               | URR                           | 101511175          | uncharacterized LOC101511175                         |
| SNP_50769_A_12715125 | NC_021166.1    | Ca_Kabuli_Chr07 | 12715125                | GG                                     | AA                 | AA               | INTERGENIC                    |                    |                                                      |
| SNP_50771_A_12727374 | NC_021166.1    | Ca_Kabuli_Chr07 | 12727374                | TT                                     | CC                 | CC               | URR                           | 101500386          | LOB domain-containing protein 15-like                |
| SNP_50772_A_12727446 | NC_021166.1    | Ca_Kabuli_Chr07 | 12727446                | AA                                     | TT                 | TT               | URR                           | 101500386          | LOB domain-containing protein 15-like                |
| SNP_50773_A_12727508 | NC_021166.1    | Ca_Kabuli_Chr07 | 12727508                | AA                                     | GG                 | GG               | URR                           | 101500386          | LOB domain-containing protein 15-like                |
| SNP_50774_A_12727532 | NC_021166.1    | Ca_Kabuli_Chr07 | 12727532                | TT                                     | CC                 | CC               | URR                           | 101500386          | LOB domain-containing protein 15-like                |
| SNP_50775_A_12729938 | NC_021166.1    | Ca_Kabuli_Chr07 | 12729938                | TT                                     | GG                 | GG               | INTERGENIC                    |                    |                                                      |
| SNP_50776_A_12729939 | NC_021166.1    | Ca_Kabuli_Chr07 | 12729939                | CC                                     | TT                 | TT               | INTERGENIC                    |                    |                                                      |
| SNP_50777_A_12729972 | NC_021166.1    | Ca_Kabuli_Chr07 | 12729972                | GG                                     | CC                 | CC               | INTERGENIC                    |                    |                                                      |
| SNP_50778_A_12729984 | NC_021166.1    | Ca_Kabuli_Chr07 | 12729984                | TT                                     | GG                 | GG               | INTERGENIC                    |                    |                                                      |
| SNP_50779_A_12730022 | NC_021166.1    | Ca_Kabuli_Chr07 | 12730022                | CC                                     | TT                 | TT               | INTERGENIC                    |                    |                                                      |
| SNP_50780_A_12730141 | NC_021166.1    | Ca_Kabuli_Chr07 | 12730141                | CC                                     | AA                 | AA               | INTERGENIC                    |                    |                                                      |
| SNP_50782_A_12733852 | NC_021166.1    | Ca_Kabuli_Chr07 | 12733852                | GG                                     | TT                 | TT               | INTERGENIC                    |                    |                                                      |

| SNPs IDs             | Chromosome IDs | Chromosomes     | Physical positions (bp) | CDC Frontier genome (Reference genome) | (Pusa 1103 & HPNB) | (ILWC 46 & LPNB) | Sequence Components of genome | Gene accession IDs | Putative functions                            |
|----------------------|----------------|-----------------|-------------------------|----------------------------------------|--------------------|------------------|-------------------------------|--------------------|-----------------------------------------------|
| SNP_50783_A_12733855 | NC_021166.1    | Ca_Kabuli_Chr07 | 12733855                | GG                                     | AA                 | AA               | INTERGENIC                    |                    |                                               |
| SNP_50784_A_12733944 | NC_021166.1    | Ca_Kabuli_Chr07 | 12733944                | CC                                     | TT                 | TT               | INTERGENIC                    |                    |                                               |
| SNP_50785_A_12734166 | NC_021166.1    | Ca_Kabuli_Chr07 | 12734166                | GG                                     | CC                 | CC               | INTERGENIC                    |                    |                                               |
| SNP_50786_A_12738315 | NC_021166.1    | Ca_Kabuli_Chr07 | 12738315                | CC                                     | GG                 | GG               | URR                           | 101500696          | Unknown function                              |
| SNP_50787_A_12738326 | NC_021166.1    | Ca_Kabuli_Chr07 | 12738326                | AA                                     | CC                 | CC               | URR                           | 101500696          | Unknown function                              |
| SNP_50788_A_12742867 | NC_021166.1    | Ca_Kabuli_Chr07 | 12742867                | GG                                     | CC                 | CC               | URR                           | 101511817          | uncharacterized LOC101511817                  |
| SNP_50789_A_12742907 | NC_021166.1    | Ca_Kabuli_Chr07 | 12742907                | GG                                     | CC                 | CC               | URR                           | 101511817          | uncharacterized LOC101511817                  |
| SNP_50790_A_12744203 | NC_021166.1    | Ca_Kabuli_Chr07 | 12744203                | CC                                     | GG                 | GG               | URR                           | 101511817          | uncharacterized LOC101511817                  |
| SNP_50791_A_12744216 | NC_021166.1    | Ca_Kabuli_Chr07 | 12744216                | TT                                     | AA                 | AA               | URR                           | 101511817          | uncharacterized LOC101511817                  |
| SNP_50792_A_12744285 | NC_021166.1    | Ca_Kabuli_Chr07 | 12744285                | CC                                     | TT                 | TT               | URR                           | 101511817          | uncharacterized LOC101511817                  |
| SNP_50794_A_12745212 | NC_021166.1    | Ca_Kabuli_Chr07 | 12745212                | TT                                     | CC                 | CC               | DRR                           | 101512129          | serine/threonine-protein kinase SRK2I-like    |
| SNP_50795_A_12747035 | NC_021166.1    | Ca_Kabuli_Chr07 | 12747035                | TT                                     | CC                 | CC               | INTRON                        | 101512129          | serine/threonine-protein kinase SRK2I-like    |
| SNP_50796_A_12747048 | NC_021166.1    | Ca_Kabuli_Chr07 | 12747048                | CC                                     | TT                 | TT               | INTRON                        | 101512129          | serine/threonine-protein kinase SRK2I-like    |
| SNP_50797_A_12747851 | NC_021166.1    | Ca_Kabuli_Chr07 | 12747851                | TT                                     | AA                 | AA               | SYNONYMOUS_CODING             | 101512129          | serine/threonine-protein kinase SRK2I-like    |
| SNP_50798_A_12748803 | NC_021166.1    | Ca_Kabuli_Chr07 | 12748803                | AA                                     | TT                 | TT               | INTRON                        | 101512129          | serine/threonine-protein kinase SRK2I-like    |
| SNP_50799_A_12748815 | NC_021166.1    | Ca_Kabuli_Chr07 | 12748815                | TT                                     | GG                 | GG               | INTRON                        | 101512129          | serine/threonine-protein kinase SRK2I-like    |
| SNP_50800_A_12752256 | NC_021166.1    | Ca_Kabuli_Chr07 | 12752256                | GG                                     | AA                 | AA               | URR                           | 101512129          | serine/threonine-protein kinase SRK2I-like    |
| SNP_50801_A_12753128 | NC_021166.1    | Ca_Kabuli_Chr07 | 12753128                | GG                                     | AA                 | AA               | INTERGENIC                    |                    |                                               |
| SNP_50802_A_12762316 | NC_021166.1    | Ca_Kabuli_Chr07 | 12762316                | GG                                     | CC                 | CC               | INTERGENIC                    |                    |                                               |
| SNP_50804_A_12763038 | NC_021166.1    | Ca_Kabuli_Chr07 | 12763038                | GG                                     | AA                 | AA               | DRR                           | 101512457          | uroporphyrinogen-III C-methyltransferase      |
| SNP_50805_A_12766266 | NC_021166.1    | Ca_Kabuli_Chr07 | 12766266                | AA                                     | GG                 | GG               | INTERGENIC                    |                    |                                               |
| SNP_50806_A_12768801 | NC_021166.1    | Ca_Kabuli_Chr07 | 12768801                | AA                                     | GG                 | GG               | DRR                           | 101512995          | probable disease resistance protein At5g68900 |



| SNPs IDs             | Chromosome IDs | Chromosomes     | Physical positions (bp) | CDC Frontier (Reference genome) | (Pusa 1103 & HPNB) | (ILWC 46 & LPNB) | Sequence Components of genome | Gene accession IDs | Putative functions                            |
|----------------------|----------------|-----------------|-------------------------|---------------------------------|--------------------|------------------|-------------------------------|--------------------|-----------------------------------------------|
| SNP_50807_A_12768810 | NC_021166.1    | Ca_Kabuli_Chr07 | 12768810                | CC                              | TT                 | TT               | DRR                           | 101512995          | probable disease resistance protein At5g66900 |
| SNP_50808_A_12768818 | NC_021166.1    | Ca_Kabuli_Chr07 | 12768818                | GG                              | AA                 | AA               | DRR                           | 101512995          | probable disease resistance protein At5g66900 |
| SNP_50809_A_12773402 | NC_021166.1    | Ca_Kabuli_Chr07 | 12773402                | AA                              | GG                 | GG               | INTRON                        | 101512995          | probable disease resistance protein At5g66900 |
| SNP_50811_A_12773794 | NC_021166.1    | Ca_Kabuli_Chr07 | 12773794                | GG                              | TT                 | TT               | NON_SYNONYMOUS_CODING         | 101512995          | probable disease resistance protein At5g66900 |
| SNP_50812_A_12775202 | NC_021166.1    | Ca_Kabuli_Chr07 | 12775202                | GG                              | AA                 | AA               | URR                           | 101512995          | probable disease resistance protein At5g66900 |
| SNP_50813_A_12776018 | NC_021166.1    | Ca_Kabuli_Chr07 | 12776018                | TT                              | AA                 | AA               | URR                           | 101512995          | probable disease resistance protein At5g66900 |
| SNP_50814_A_12776307 | NC_021166.1    | Ca_Kabuli_Chr07 | 12776307                | TT                              | AA                 | AA               | URR                           | 101512995          | probable disease resistance protein At5g66900 |
| SNP_50815_A_12776308 | NC_021166.1    | Ca_Kabuli_Chr07 | 12776308                | AA                              | TT                 | TT               | URR                           | 101512995          | probable disease resistance protein At5g66900 |
| SNP_50816_A_12777411 | NC_021166.1    | Ca_Kabuli_Chr07 | 12777411                | GG                              | TT                 | TT               | INTERGENIC                    |                    |                                               |
| SNP_50817_A_12777438 | NC_021166.1    | Ca_Kabuli_Chr07 | 12777438                | TT                              | GG                 | GG               | INTERGENIC                    |                    |                                               |
| SNP_50818_A_12778850 | NC_021166.1    | Ca_Kabuli_Chr07 | 12778850                | TT                              | CC                 | CC               | INTERGENIC                    |                    |                                               |
| SNP_50819_A_12784869 | NC_021166.1    | Ca_Kabuli_Chr07 | 12784869                | TT                              | CC                 | CC               | INTERGENIC                    |                    |                                               |
| SNP_50820_A_12785229 | NC_021166.1    | Ca_Kabuli_Chr07 | 12785229                | AA                              | GG                 | GG               | INTERGENIC                    |                    |                                               |
| SNP_50821_A_12789086 | NC_021166.1    | Ca_Kabuli_Chr07 | 12789086                | TT                              | CC                 | CC               | URR                           | 101410595          | transfer RNA tryptophan (anticodon CCA)       |
| SNP_50822_A_12795564 | NC_021166.1    | Ca_Kabuli_Chr07 | 12795564                | CC                              | TT                 | TT               | URR                           | 101513322          | L-ascorbate oxidase homolog                   |
| SNP_50823_A_12795577 | NC_021166.1    | Ca_Kabuli_Chr07 | 12795577                | GG                              | TT                 | TT               | URR                           | 101513322          | L-ascorbate oxidase homolog                   |
| SNP_50824_A_12795659 | NC_021166.1    | Ca_Kabuli_Chr07 | 12795659                | GG                              | TT                 | TT               | URR                           | 101513322          | L-ascorbate oxidase homolog                   |
| SNP_50825_A_12795887 | NC_021166.1    | Ca_Kabuli_Chr07 | 12795887                | GG                              | TT                 | TT               | URR                           | 101513322          | L-ascorbate oxidase homolog                   |
| SNP_50826_A_12799789 | NC_021166.1    | Ca_Kabuli_Chr07 | 12799789                | GG                              | AA                 | AA               | INTERGENIC                    |                    |                                               |
| SNP_50827_A_12803855 | NC_021166.1    | Ca_Kabuli_Chr07 | 12803855                | CC                              | TT                 | TT               | INTRON                        | 101514400          | L-ascorbate oxidase homolog                   |
| SNP_50828_A_12803877 | NC_021166.1    | Ca_Kabuli_Chr07 | 12803877                | AA                              | TT                 | TT               | INTRON                        | 101514400          | L-ascorbate oxidase homolog                   |
| SNP_50829_A_12803879 | NC_021166.1    | Ca_Kabuli_Chr07 | 12803879                | AA                              | TT                 | TT               | INTRON                        | 101514400          | L-ascorbate oxidase homolog                   |

| SNPs IDs             | Chromosome IDs | Chromosomes     | Physical positions (bp) | CDC Frontier genome | (Reference genome) | (Pusa 1103 & HPNB) | (ILWC 46 & LPNB) | Sequence Components of genome | Gene accession IDs | Putative functions                  |
|----------------------|----------------|-----------------|-------------------------|---------------------|--------------------|--------------------|------------------|-------------------------------|--------------------|-------------------------------------|
| SNP_50830_A_12803880 | NC_021166.1    | Ca_Kabuli_Chr07 | 12803880                | AA                  | TT                 | TT                 | TT               | INTRON                        | 101514400          | L-ascorbate oxidase homolog         |
| SNP_50831_A_12803881 | NC_021166.1    | Ca_Kabuli_Chr07 | 12803881                | AA                  | TT                 | TT                 | TT               | INTRON                        | 101514400          | L-ascorbate oxidase homolog         |
| SNP_50832_A_12803918 | NC_021166.1    | Ca_Kabuli_Chr07 | 12803918                | CC                  | TT                 | TT                 | TT               | INTRON                        | 101514400          | L-ascorbate oxidase homolog         |
| SNP_50833_A_12806516 | NC_021166.1    | Ca_Kabuli_Chr07 | 12806516                | AA                  | TT                 | TT                 | TT               | INTERGENIC                    |                    |                                     |
| SNP_50834_A_12808741 | NC_021166.1    | Ca_Kabuli_Chr07 | 12808741                | AA                  | TT                 | TT                 | TT               | URR                           | 101514400          | L-ascorbate oxidase homolog         |
| SNP_50835_A_12808756 | NC_021166.1    | Ca_Kabuli_Chr07 | 12808756                | AA                  | GG                 | GG                 | GG               | URR                           | 101514400          | L-ascorbate oxidase homolog         |
| SNP_50836_A_12808760 | NC_021166.1    | Ca_Kabuli_Chr07 | 12808760                | AA                  | TT                 | TT                 | TT               | URR                           | 101514400          | L-ascorbate oxidase homolog         |
| SNP_50838_A_12809730 | NC_021166.1    | Ca_Kabuli_Chr07 | 12809730                | CC                  | TT                 | TT                 | TT               | INTERGENIC                    |                    |                                     |
| SNP_50839_A_12809734 | NC_021166.1    | Ca_Kabuli_Chr07 | 12809734                | AA                  | GG                 | GG                 | GG               | INTERGENIC                    |                    |                                     |
| SNP_50840_A_12809769 | NC_021166.1    | Ca_Kabuli_Chr07 | 12809769                | GG                  | TT                 | TT                 | TT               | INTERGENIC                    |                    |                                     |
| SNP_50842_A_12810471 | NC_021166.1    | Ca_Kabuli_Chr07 | 12810471                | AA                  | TT                 | TT                 | TT               | INTERGENIC                    |                    |                                     |
| SNP_50844_A_12811028 | NC_021166.1    | Ca_Kabuli_Chr07 | 12811028                | AA                  | CC                 | CC                 | CC               | DRR                           | 101514728          | dof zinc finger protein DOF5.3-like |
| SNP_50845_A_12811382 | NC_021166.1    | Ca_Kabuli_Chr07 | 12811382                | GG                  | TT                 | TT                 | TT               | DRR                           | 101514728          | dof zinc finger protein DOF5.3-like |
| SNP_50846_A_12811474 | NC_021166.1    | Ca_Kabuli_Chr07 | 12811474                | TT                  | AA                 | AA                 | AA               | DRR                           | 101514728          | dof zinc finger protein DOF5.3-like |
| SNP_50847_A_12811674 | NC_021166.1    | Ca_Kabuli_Chr07 | 12811674                | GG                  | AA                 | AA                 | AA               | INTERGENIC                    |                    |                                     |
| SNP_50848_A_12813220 | NC_021166.1    | Ca_Kabuli_Chr07 | 12813220                | CC                  | GG                 | GG                 | GG               | URR                           | 101514728          | dof zinc finger protein DOF5.3-like |
| SNP_50849_A_12813850 | NC_021166.1    | Ca_Kabuli_Chr07 | 12813850                | TT                  | AA                 | AA                 | AA               | URR                           | 101514728          | dof zinc finger protein DOF5.3-like |
| SNP_50850_A_12813858 | NC_021166.1    | Ca_Kabuli_Chr07 | 12813858                | AA                  | CC                 | CC                 | CC               | URR                           | 101514728          | dof zinc finger protein DOF5.3-like |
| SNP_50851_A_12813933 | NC_021166.1    | Ca_Kabuli_Chr07 | 12813933                | AA                  | TT                 | TT                 | TT               | URR                           | 101514728          | dof zinc finger protein DOF5.3-like |
| SNP_50852_A_12815615 | NC_021166.1    | Ca_Kabuli_Chr07 | 12815615                | CC                  | GG                 | GG                 | GG               | INTERGENIC                    |                    |                                     |
| SNP_50853_A_12819555 | NC_021166.1    | Ca_Kabuli_Chr07 | 12819555                | GG                  | TT                 | TT                 | TT               | INTERGENIC                    |                    |                                     |
| SNP_50854_A_12819848 | NC_021166.1    | Ca_Kabuli_Chr07 | 12819848                | CC                  | TT                 | TT                 | TT               | INTERGENIC                    |                    |                                     |

| SNPs IDs             | Chromosome IDs | Chromosomes     | Physical positions (bp) | CDC Frontier (Reference genome) | (Pusa 1103 & HPNB) | (ILWC 46 & LPNB) | Sequence genome | Components of | Gene accession IDs | Putative functions    |
|----------------------|----------------|-----------------|-------------------------|---------------------------------|--------------------|------------------|-----------------|---------------|--------------------|-----------------------|
| SNP_50855_A_12835857 | NC_021166.1    | Ca_Kabuli_Chr07 | 12835857                | AA                              | GG                 | GG               | INTERGENIC      |               |                    |                       |
| SNP_50856_A_12836120 | NC_021166.1    | Ca_Kabuli_Chr07 | 12836120                | TT                              | CC                 | CC               | INTERGENIC      |               |                    |                       |
| SNP_50857_A_12836263 | NC_021166.1    | Ca_Kabuli_Chr07 | 12836263                | TT                              | CC                 | CC               | INTERGENIC      |               |                    |                       |
| SNP_50858_A_12839448 | NC_021166.1    | Ca_Kabuli_Chr07 | 12839448                | AA                              | GG                 | GG               | INTERGENIC      |               |                    |                       |
| SNP_50859_A_12839458 | NC_021166.1    | Ca_Kabuli_Chr07 | 12839458                | TT                              | CC                 | CC               | INTERGENIC      |               |                    |                       |
| SNP_50860_A_12840210 | NC_021166.1    | Ca_Kabuli_Chr07 | 12840210                | AA                              | TT                 | TT               | INTERGENIC      |               |                    |                       |
| SNP_50861_A_12840645 | NC_021166.1    | Ca_Kabuli_Chr07 | 12840645                | GG                              | AA                 | AA               | INTERGENIC      |               |                    |                       |
| SNP_50862_A_12840646 | NC_021166.1    | Ca_Kabuli_Chr07 | 12840646                | TT                              | CC                 | CC               | INTERGENIC      |               |                    |                       |
| SNP_50863_A_12841327 | NC_021166.1    | Ca_Kabuli_Chr07 | 12841327                | AA                              | TT                 | TT               | INTERGENIC      |               |                    |                       |
| SNP_50864_A_12844519 | NC_021166.1    | Ca_Kabuli_Chr07 | 12844519                | GG                              | AA                 | AA               | INTERGENIC      |               |                    |                       |
| SNP_50866_A_12846447 | NC_021166.1    | Ca_Kabuli_Chr07 | 12846447                | GG                              | AA                 | AA               | INTERGENIC      |               |                    |                       |
| SNP_50867_A_12846461 | NC_021166.1    | Ca_Kabuli_Chr07 | 12846461                | CC                              | TT                 | TT               | INTERGENIC      |               |                    |                       |
| SNP_50868_A_12846467 | NC_021166.1    | Ca_Kabuli_Chr07 | 12846467                | AA                              | GG                 | GG               | INTERGENIC      |               |                    |                       |
| SNP_50869_A_12847961 | NC_021166.1    | Ca_Kabuli_Chr07 | 12847961                | TT                              | CC                 | CC               | URR             | 101488360     |                    | methylesterase 1-like |
| SNP_50870_A_12848345 | NC_021166.1    | Ca_Kabuli_Chr07 | 12848345                | AA                              | TT                 | TT               | URR             | 101488360     |                    | methylesterase 1-like |
| SNP_50872_A_12848441 | NC_021166.1    | Ca_Kabuli_Chr07 | 12848441                | CC                              | GG                 | GG               | URR             | 101488360     |                    | methylesterase 1-like |
| SNP_50874_A_12851577 | NC_021166.1    | Ca_Kabuli_Chr07 | 12851577                | AA                              | GG                 | GG               | INTERGENIC      |               |                    |                       |
| SNP_50876_A_12856542 | NC_021166.1    | Ca_Kabuli_Chr07 | 12856542                | CC                              | AA                 | AA               | INTERGENIC      |               |                    |                       |
| SNP_50877_A_12856797 | NC_021166.1    | Ca_Kabuli_Chr07 | 12856797                | AA                              | GG                 | GG               | INTERGENIC      |               |                    |                       |
| SNP_50878_A_12858374 | NC_021166.1    | Ca_Kabuli_Chr07 | 12858374                | CC                              | TT                 | TT               | INTERGENIC      |               |                    |                       |
| SNP_50879_A_12858375 | NC_021166.1    | Ca_Kabuli_Chr07 | 12858375                | GG                              | AA                 | AA               | INTERGENIC      |               |                    |                       |
| SNP_50880_A_12858432 | NC_021166.1    | Ca_Kabuli_Chr07 | 12858432                | GG                              | AA                 | AA               | INTERGENIC      |               |                    |                       |

| SNPs IDs             | Chromosome IDs | Chromosomes     | Physical positions (bp) | CDC Frontier (Reference genome) | (Pusa 1103 & HPNB) | (ILWC 46 & LPNB) | Sequence Components of genome | Gene accession IDs | Putative functions                  |
|----------------------|----------------|-----------------|-------------------------|---------------------------------|--------------------|------------------|-------------------------------|--------------------|-------------------------------------|
| SNP_50882_A_12859023 | NC_021166.1    | Ca_Kabuli_Chr07 | 12859023                | AA                              | TT                 | TT               | DRR                           | 101488684          | dof zinc finger protein DOF3.4-like |
| SNP_50883_A_12859068 | NC_021166.1    | Ca_Kabuli_Chr07 | 12859068                | CC                              | AA                 | AA               | DRR                           | 101488684          | dof zinc finger protein DOF3.4-like |
| SNP_50884_A_12864675 | NC_021166.1    | Ca_Kabuli_Chr07 | 12864675                | TT                              | CC                 | CC               | INTERGENIC                    |                    |                                     |
| SNP_50885_A_12864715 | NC_021166.1    | Ca_Kabuli_Chr07 | 12864715                | AA                              | GG                 | GG               | INTERGENIC                    |                    |                                     |
| SNP_50886_A_12864752 | NC_021166.1    | Ca_Kabuli_Chr07 | 12864752                | CC                              | TT                 | TT               | INTERGENIC                    |                    |                                     |
| SNP_50887_A_12864760 | NC_021166.1    | Ca_Kabuli_Chr07 | 12864760                | TT                              | CC                 | CC               | INTERGENIC                    |                    |                                     |
| SNP_50888_A_12865255 | NC_021166.1    | Ca_Kabuli_Chr07 | 12865255                | AA                              | GG                 | GG               | INTERGENIC                    |                    |                                     |
| SNP_50890_A_12867167 | NC_021166.1    | Ca_Kabuli_Chr07 | 12867167                | GG                              | AA                 | AA               | INTERGENIC                    |                    |                                     |
| SNP_50891_A_12867498 | NC_021166.1    | Ca_Kabuli_Chr07 | 12867498                | GG                              | AA                 | AA               | INTERGENIC                    |                    |                                     |
| SNP_50892_A_12869000 | NC_021166.1    | Ca_Kabuli_Chr07 | 12869000                | TT                              | CC                 | CC               | INTERGENIC                    |                    |                                     |
| SNP_50893_A_12869054 | NC_021166.1    | Ca_Kabuli_Chr07 | 12869054                | AA                              | GG                 | GG               | INTERGENIC                    |                    |                                     |
| SNP_50894_A_12869566 | NC_021166.1    | Ca_Kabuli_Chr07 | 12869566                | TT                              | AA                 | AA               | INTERGENIC                    |                    |                                     |
| SNP_50895_A_12871069 | NC_021166.1    | Ca_Kabuli_Chr07 | 12871069                | TT                              | CC                 | CC               | INTERGENIC                    |                    |                                     |
| SNP_50896_A_12875822 | NC_021166.1    | Ca_Kabuli_Chr07 | 12875822                | CC                              | GG                 | GG               | URR                           | 101489022          | dof zinc finger protein DOF3.4-like |
| SNP_50897_A_12878648 | NC_021166.1    | Ca_Kabuli_Chr07 | 12878648                | TT                              | CC                 | CC               | INTERGENIC                    |                    |                                     |
| SNP_50898_A_12878654 | NC_021166.1    | Ca_Kabuli_Chr07 | 12878654                | CC                              | AA                 | AA               | INTERGENIC                    |                    |                                     |
| SNP_50899_A_12879699 | NC_021166.1    | Ca_Kabuli_Chr07 | 12879699                | AA                              | GG                 | GG               | INTERGENIC                    |                    |                                     |
| SNP_50900_A_12884049 | NC_021166.1    | Ca_Kabuli_Chr07 | 12884049                | GG                              | AA                 | AA               | INTERGENIC                    |                    |                                     |
| SNP_50901_A_12884063 | NC_021166.1    | Ca_Kabuli_Chr07 | 12884063                | GG                              | AA                 | AA               | INTERGENIC                    |                    |                                     |
| SNP_50902_A_12884100 | NC_021166.1    | Ca_Kabuli_Chr07 | 12884100                | AA                              | CC                 | CC               | INTERGENIC                    |                    |                                     |
| SNP_50903_A_12884133 | NC_021166.1    | Ca_Kabuli_Chr07 | 12884133                | AA                              | GG                 | GG               | INTERGENIC                    |                    |                                     |
| SNP_50904_A_12885844 | NC_021166.1    | Ca_Kabuli_Chr07 | 12885844                | TT                              | GG                 | GG               | INTERGENIC                    |                    |                                     |

| SNPs IDs             | Chromosome IDs | Chromosomes     | Physical positions (bp) | CDC Frontier (Reference genome) | (Pusa 1103 & HPNB) | (ILWC 46 & LPNB) | Sequence Components of genome | Gene accession IDs | Putative functions        |
|----------------------|----------------|-----------------|-------------------------|---------------------------------|--------------------|------------------|-------------------------------|--------------------|---------------------------|
| SNP_50905_A_12886487 | NC_021166.1    | Ca_Kabuli_Chr07 | 12886487                | TT                              | AA                 | AA               | INTERGENIC                    |                    |                           |
| SNP_50906_A_12886505 | NC_021166.1    | Ca_Kabuli_Chr07 | 12886505                | CC                              | AA                 | AA               | INTERGENIC                    |                    |                           |
| SNP_50907_A_12886508 | NC_021166.1    | Ca_Kabuli_Chr07 | 12886508                | GG                              | TT                 | TT               | INTERGENIC                    |                    |                           |
| SNP_50908_A_12886537 | NC_021166.1    | Ca_Kabuli_Chr07 | 12886537                | CC                              | AA                 | AA               | INTERGENIC                    |                    |                           |
| SNP_50909_A_12889134 | NC_021166.1    | Ca_Kabuli_Chr07 | 12889134                | CC                              | TT                 | TT               | INTERGENIC                    |                    |                           |
| SNP_50910_A_12890426 | NC_021166.1    | Ca_Kabuli_Chr07 | 12890426                | AA                              | GG                 | GG               | INTERGENIC                    |                    |                           |
| SNP_50911_A_12891433 | NC_021166.1    | Ca_Kabuli_Chr07 | 12891433                | CC                              | TT                 | TT               | INTERGENIC                    |                    |                           |
| SNP_50912_A_12893312 | NC_021166.1    | Ca_Kabuli_Chr07 | 12893312                | CC                              | TT                 | TT               | INTERGENIC                    |                    |                           |
| SNP_50914_A_12898709 | NC_021166.1    | Ca_Kabuli_Chr07 | 12898709                | TT                              | AA                 | AA               | INTERGENIC                    |                    |                           |
| SNP_50915_A_12901458 | NC_021166.1    | Ca_Kabuli_Chr07 | 12901458                | TT                              | CC                 | CC               | INTERGENIC                    |                    |                           |
| SNP_50916_A_12901605 | NC_021166.1    | Ca_Kabuli_Chr07 | 12901605                | CC                              | TT                 | TT               | INTERGENIC                    |                    |                           |
| SNP_50917_A_12902104 | NC_021166.1    | Ca_Kabuli_Chr07 | 12902104                | TT                              | CC                 | CC               | SYNONYMOUS_CODING             | 101490215          | prolyl endopeptidase-like |
| SNP_50918_A_12902604 | NC_021166.1    | Ca_Kabuli_Chr07 | 12902604                | CC                              | AA                 | AA               | INTRON                        | 101490215          | prolyl endopeptidase-like |
| SNP_50919_A_12904738 | NC_021166.1    | Ca_Kabuli_Chr07 | 12904738                | TT                              | AA                 | AA               | URR                           | 101490215          | prolyl endopeptidase-like |
| SNP_50920_A_12904753 | NC_021166.1    | Ca_Kabuli_Chr07 | 12904753                | TT                              | AA                 | AA               | URR                           | 101490215          | prolyl endopeptidase-like |
| SNP_50921_A_12904778 | NC_021166.1    | Ca_Kabuli_Chr07 | 12904778                | TT                              | CC                 | CC               | URR                           | 101490215          | prolyl endopeptidase-like |
| SNP_50922_A_12905216 | NC_021166.1    | Ca_Kabuli_Chr07 | 12905216                | AA                              | GG                 | GG               | URR                           | 101490215          | prolyl endopeptidase-like |
| SNP_50923_A_12905965 | NC_021166.1    | Ca_Kabuli_Chr07 | 12905965                | GG                              | AA                 | AA               | INTERGENIC                    |                    |                           |
| SNP_50924_A_12906217 | NC_021166.1    | Ca_Kabuli_Chr07 | 12906217                | AA                              | GG                 | GG               | INTERGENIC                    |                    |                           |
| SNP_50925_A_12906244 | NC_021166.1    | Ca_Kabuli_Chr07 | 12906244                | AA                              | CC                 | CC               | INTERGENIC                    |                    |                           |
| SNP_50926_A_12906246 | NC_021166.1    | Ca_Kabuli_Chr07 | 12906246                | GG                              | AA                 | AA               | INTERGENIC                    |                    |                           |
| SNP_50927_A_12906515 | NC_021166.1    | Ca_Kabuli_Chr07 | 12906515                | GG                              | AA                 | AA               | INTERGENIC                    |                    |                           |

| SNPs IDs             | Chromosome IDs | Chromosomes     | Physical positions (bp) | CDC Frontier genome (Reference genome) | (Pusa 1103 & HPNB) | (ILWC 46 & LPNB) | Sequence Components of genome | Gene accession IDs | Putative functions           |
|----------------------|----------------|-----------------|-------------------------|----------------------------------------|--------------------|------------------|-------------------------------|--------------------|------------------------------|
| SNP_50928_A_12906519 | NC_021166.1    | Ca_Kabuli_Chr07 | 12906519                | CC                                     | TT                 | TT               | INTERGENIC                    |                    |                              |
| SNP_50929_A_12906534 | NC_021166.1    | Ca_Kabuli_Chr07 | 12906534                | GG                                     | AA                 | AA               | INTERGENIC                    |                    |                              |
| SNP_50930_A_12906760 | NC_021166.1    | Ca_Kabuli_Chr07 | 12906760                | CC                                     | AA                 | AA               | INTERGENIC                    |                    |                              |
| SNP_50931_A_12907009 | NC_021166.1    | Ca_Kabuli_Chr07 | 12907009                | AA                                     | GG                 | GG               | INTERGENIC                    |                    |                              |
| SNP_50932_A_12907371 | NC_021166.1    | Ca_Kabuli_Chr07 | 12907371                | GG                                     | AA                 | AA               | INTERGENIC                    |                    |                              |
| SNP_50933_A_12907391 | NC_021166.1    | Ca_Kabuli_Chr07 | 12907391                | GG                                     | AA                 | AA               | INTERGENIC                    |                    |                              |
| SNP_50934_A_12907425 | NC_021166.1    | Ca_Kabuli_Chr07 | 12907425                | CC                                     | TT                 | TT               | INTERGENIC                    |                    |                              |
| SNP_50935_A_12907593 | NC_021166.1    | Ca_Kabuli_Chr07 | 12907593                | TT                                     | CC                 | CC               | INTERGENIC                    |                    |                              |
| SNP_50936_A_12907608 | NC_021166.1    | Ca_Kabuli_Chr07 | 12907608                | CC                                     | TT                 | TT               | INTERGENIC                    |                    |                              |
| SNP_50937_A_12907613 | NC_021166.1    | Ca_Kabuli_Chr07 | 12907613                | CC                                     | AA                 | AA               | INTERGENIC                    |                    |                              |
| SNP_50938_A_12907717 | NC_021166.1    | Ca_Kabuli_Chr07 | 12907717                | AA                                     | GG                 | GG               | INTERGENIC                    |                    |                              |
| SNP_50939_A_12907751 | NC_021166.1    | Ca_Kabuli_Chr07 | 12907751                | CC                                     | TT                 | TT               | INTERGENIC                    |                    |                              |
| SNP_50940_A_12907814 | NC_021166.1    | Ca_Kabuli_Chr07 | 12907814                | CC                                     | TT                 | TT               | INTERGENIC                    |                    |                              |
| SNP_50941_A_12907845 | NC_021166.1    | Ca_Kabuli_Chr07 | 12907845                | GG                                     | TT                 | TT               | INTERGENIC                    |                    |                              |
| SNP_50942_A_12907847 | NC_021166.1    | Ca_Kabuli_Chr07 | 12907847                | TT                                     | AA                 | AA               | INTERGENIC                    |                    |                              |
| SNP_50943_A_12907871 | NC_021166.1    | Ca_Kabuli_Chr07 | 12907871                | TT                                     | AA                 | AA               | INTERGENIC                    |                    |                              |
| SNP_50944_A_12907889 | NC_021166.1    | Ca_Kabuli_Chr07 | 12907889                | AA                                     | GG                 | GG               | INTERGENIC                    |                    |                              |
| SNP_50945_A_12909569 | NC_021166.1    | Ca_Kabuli_Chr07 | 12909569                | CC                                     | TT                 | TT               | DRR                           | 101490535          | uncharacterized LOC101490535 |
| SNP_50946_A_12909693 | NC_021166.1    | Ca_Kabuli_Chr07 | 12909693                | AA                                     | CC                 | CC               | DRR                           | 101490535          | uncharacterized LOC101490535 |
| SNP_50947_A_12909911 | NC_021166.1    | Ca_Kabuli_Chr07 | 12909911                | TT                                     | AA                 | AA               | DRR                           | 101490535          | uncharacterized LOC101490535 |
| SNP_50948_A_12917031 | NC_021166.1    | Ca_Kabuli_Chr07 | 12917031                | TT                                     | CC                 | CC               | INTERGENIC                    |                    |                              |
| SNP_50949_A_12918261 | NC_021166.1    | Ca_Kabuli_Chr07 | 12918261                | TT                                     | CC                 | CC               | INTERGENIC                    |                    |                              |

| SNPs IDs             | Chromosome IDs | Chromosomes     | Physical positions (bp) | CDC Frontier genome (Reference genome) | (Pusa 1103 & HPNB) | (ILWC 46 & LPNB) | Sequence Components of genome | Gene accession IDs | Putative functions           |
|----------------------|----------------|-----------------|-------------------------|----------------------------------------|--------------------|------------------|-------------------------------|--------------------|------------------------------|
| SNP_50950_A_12919226 | NC_021166.1    | Ca_Kabuli_Chr07 | 12919226                | CC                                     | TT                 | TT               | INTERGENIC                    |                    |                              |
| SNP_50951_A_12920650 | NC_021166.1    | Ca_Kabuli_Chr07 | 12920650                | TT                                     | CC                 | CC               | INTERGENIC                    |                    |                              |
| SNP_50952_A_12921068 | NC_021166.1    | Ca_Kabuli_Chr07 | 12921068                | AA                                     | GG                 | GG               | INTERGENIC                    |                    |                              |
| SNP_50954_A_12921473 | NC_021166.1    | Ca_Kabuli_Chr07 | 12921473                | AA                                     | TT                 | TT               | INTERGENIC                    |                    |                              |
| SNP_50955_A_12923745 | NC_021166.1    | Ca_Kabuli_Chr07 | 12923745                | GG                                     | AA                 | AA               | INTERGENIC                    |                    |                              |
| SNP_50957_A_12924179 | NC_021166.1    | Ca_Kabuli_Chr07 | 12924179                | TT                                     | AA                 | AA               | INTERGENIC                    |                    |                              |
| SNP_50958_A_12924182 | NC_021166.1    | Ca_Kabuli_Chr07 | 12924182                | CC                                     | TT                 | TT               | INTERGENIC                    |                    |                              |
| SNP_50959_A_12924377 | NC_021166.1    | Ca_Kabuli_Chr07 | 12924377                | AA                                     | TT                 | TT               | INTERGENIC                    |                    |                              |
| SNP_50960_A_12924697 | NC_021166.1    | Ca_Kabuli_Chr07 | 12924697                | TT                                     | CC                 | CC               | INTERGENIC                    |                    |                              |
| SNP_50961_A_12928636 | NC_021166.1    | Ca_Kabuli_Chr07 | 12928636                | CC                                     | AA                 | AA               | DRR                           | 101491490          | uncharacterized LOC101491490 |
| SNP_50962_A_12928640 | NC_021166.1    | Ca_Kabuli_Chr07 | 12928640                | AA                                     | GG                 | GG               | DRR                           | 101491490          | uncharacterized LOC101491490 |
| SNP_50963_A_12928753 | NC_021166.1    | Ca_Kabuli_Chr07 | 12928753                | AA                                     | GG                 | GG               | DRR                           | 101491490          | uncharacterized LOC101491490 |
| SNP_50964_A_12928760 | NC_021166.1    | Ca_Kabuli_Chr07 | 12928760                | GG                                     | AA                 | AA               | DRR                           | 101491490          | uncharacterized LOC101491490 |
| SNP_50965_A_12928799 | NC_021166.1    | Ca_Kabuli_Chr07 | 12928799                | AA                                     | GG                 | GG               | DRR                           | 101491490          | uncharacterized LOC101491490 |
| SNP_50966_A_12928809 | NC_021166.1    | Ca_Kabuli_Chr07 | 12928809                | AA                                     | GG                 | GG               | DRR                           | 101491490          | uncharacterized LOC101491490 |
| SNP_50967_A_12928832 | NC_021166.1    | Ca_Kabuli_Chr07 | 12928832                | CC                                     | TT                 | TT               | DRR                           | 101491490          | uncharacterized LOC101491490 |
| SNP_50968_A_12928835 | NC_021166.1    | Ca_Kabuli_Chr07 | 12928835                | AA                                     | GG                 | GG               | DRR                           | 101491490          | uncharacterized LOC101491490 |
| SNP_50969_A_12931711 | NC_021166.1    | Ca_Kabuli_Chr07 | 12931711                | TT                                     | CC                 | CC               | STOP_LOST                     | id165854           | Unknown function             |
| SNP_50970_A_12933133 | NC_021166.1    | Ca_Kabuli_Chr07 | 12933133                | TT                                     | CC                 | CC               | URR                           | 101491490          | uncharacterized LOC101491490 |
| SNP_50971_A_12933139 | NC_021166.1    | Ca_Kabuli_Chr07 | 12933139                | CC                                     | TT                 | TT               | URR                           | 101491490          | uncharacterized LOC101491490 |
| SNP_50972_A_12933243 | NC_021166.1    | Ca_Kabuli_Chr07 | 12933243                | GG                                     | AA                 | AA               | URR                           | 101491490          | uncharacterized LOC101491490 |
| SNP_50973_A_12933491 | NC_021166.1    | Ca_Kabuli_Chr07 | 12933491                | GG                                     | AA                 | AA               | URR                           | 101491490          | uncharacterized LOC101491490 |

| SNPs IDs             | Chromosome IDs | Chromosomes     | Physical positions (bp) | CDC Frontier genome (Reference genome) | (Pusa 1103 & HPNB) | (ILWC 46 & LPNB) | Sequence Components of genome | Gene accession IDs | Putative functions                                    |
|----------------------|----------------|-----------------|-------------------------|----------------------------------------|--------------------|------------------|-------------------------------|--------------------|-------------------------------------------------------|
| SNP_50974_A_12933497 | NC_021166.1    | Ca_Kabuli_Chr07 | 12933497                | TT                                     | CC                 | CC               | URR                           | 101491490          | uncharacterized LOC101491490                          |
| SNP_50975_A_12934815 | NC_021166.1    | Ca_Kabuli_Chr07 | 12934815                | TT                                     | GG                 | GG               | DRR                           | 101491715          | uncharacterized LOC101491715                          |
| SNP_50976_A_12934817 | NC_021166.1    | Ca_Kabuli_Chr07 | 12934817                | CC                                     | TT                 | TT               | DRR                           | 101491715          | uncharacterized LOC101491715                          |
| SNP_50977_A_12934991 | NC_021166.1    | Ca_Kabuli_Chr07 | 12934991                | TT                                     | CC                 | CC               | DRR                           | 101491715          | uncharacterized LOC101491715                          |
| SNP_50978_A_12935013 | NC_021166.1    | Ca_Kabuli_Chr07 | 12935013                | GG                                     | AA                 | AA               | DRR                           | 101491715          | uncharacterized LOC101491715                          |
| SNP_50979_A_12935103 | NC_021166.1    | Ca_Kabuli_Chr07 | 12935103                | CC                                     | TT                 | TT               | DRR                           | 101491715          | uncharacterized LOC101491715                          |
| SNP_50980_A_12940993 | NC_021166.1    | Ca_Kabuli_Chr07 | 12940993                | CC                                     | TT                 | TT               | URR                           | 101491715          | uncharacterized LOC101491715                          |
| SNP_50981_A_12941359 | NC_021166.1    | Ca_Kabuli_Chr07 | 12941359                | AA                                     | GG                 | GG               | URR                           | 101491715          | uncharacterized LOC101491715                          |
| SNP_50982_A_12945328 | NC_021166.1    | Ca_Kabuli_Chr07 | 12945328                | CC                                     | AA                 | AA               | INTERGENIC                    |                    |                                                       |
| SNP_50983_A_12947973 | NC_021166.1    | Ca_Kabuli_Chr07 | 12947973                | AA                                     | TT                 | TT               | INTRON                        | 101492032          | extra-large guanine nucleotide-binding protein 1-like |
| SNP_50984_A_12948467 | NC_021166.1    | Ca_Kabuli_Chr07 | 12948467                | CC                                     | TT                 | TT               | INTRON                        | 101492032          | extra-large guanine nucleotide-binding protein 1-like |
| SNP_50985_A_12953816 | NC_021166.1    | Ca_Kabuli_Chr07 | 12953816                | AA                                     | GG                 | GG               | URR                           | 101492032          | extra-large guanine nucleotide-binding protein 1-like |
| SNP_50986_A_12953835 | NC_021166.1    | Ca_Kabuli_Chr07 | 12953835                | AA                                     | CC                 | CC               | URR                           | 101492032          | extra-large guanine nucleotide-binding protein 1-like |
| SNP_50987_A_12953894 | NC_021166.1    | Ca_Kabuli_Chr07 | 12953894                | TT                                     | AA                 | AA               | URR                           | 101492032          | extra-large guanine nucleotide-binding protein 1-like |
| SNP_50988_A_12953926 | NC_021166.1    | Ca_Kabuli_Chr07 | 12953926                | AA                                     | GG                 | GG               | URR                           | 101492032          | extra-large guanine nucleotide-binding protein 1-like |
| SNP_50989_A_12954022 | NC_021166.1    | Ca_Kabuli_Chr07 | 12954022                | TT                                     | CC                 | CC               | INTERGENIC                    |                    |                                                       |
| SNP_50990_A_12960892 | NC_021166.1    | Ca_Kabuli_Chr07 | 12960892                | CC                                     | TT                 | TT               | INTRON                        | 101492923          | uncharacterized LOC101492923                          |
| SNP_50991_A_12976817 | NC_021166.1    | Ca_Kabuli_Chr07 | 12976817                | AA                                     | GG                 | GG               | INTRON                        | 101492923          | uncharacterized LOC101492923                          |
| SNP_50992_A_12978811 | NC_021166.1    | Ca_Kabuli_Chr07 | 12978811                | AA                                     | CC                 | CC               | INTRON                        | 101492923          | uncharacterized LOC101492923                          |
| SNP_50993_A_13018898 | NC_021166.1    | Ca_Kabuli_Chr07 | 13018898                | CC                                     | TT                 | TT               | INTRON                        | 101492923          | uncharacterized LOC101492923                          |
| SNP_50994_A_13028339 | NC_021166.1    | Ca_Kabuli_Chr07 | 13028339                | TT                                     | CC                 | CC               | DRR                           | 101493255          | uncharacterized LOC101493255                          |
| SNP_50995_A_13028905 | NC_021166.1    | Ca_Kabuli_Chr07 | 13028905                | CC                                     | TT                 | TT               | DRR                           | 101493255          | uncharacterized LOC101493255                          |



| SNPs IDs             | Chromosome IDs | Chromosomes     | Physical positions (bp) | CDC Frontier genome (Reference genome) | (Pusa 1103 & HPNB) | (ILWC 46 & LPNB) | Sequence Components of genome | Gene accession IDs | Putative functions                               |
|----------------------|----------------|-----------------|-------------------------|----------------------------------------|--------------------|------------------|-------------------------------|--------------------|--------------------------------------------------|
| SNP_50996_A_13029858 | NC_021166.1    | Ca_Kabuli_Chr07 | 13029858                | GG                                     | TT                 | TT               | URR                           | 101492923          | uncharacterized LOC101492923                     |
| SNP_51000_A_13033971 | NC_021166.1    | Ca_Kabuli_Chr07 | 13033971                | AA                                     | GG                 | GG               | INTERGENIC                    |                    |                                                  |
| SNP_51001_A_13034022 | NC_021166.1    | Ca_Kabuli_Chr07 | 13034022                | GG                                     | AA                 | AA               | INTERGENIC                    |                    |                                                  |
| SNP_51002_A_13034133 | NC_021166.1    | Ca_Kabuli_Chr07 | 13034133                | GG                                     | TT                 | TT               | INTERGENIC                    |                    |                                                  |
| SNP_51003_A_13036786 | NC_021166.1    | Ca_Kabuli_Chr07 | 13036786                | CC                                     | AA                 | AA               | INTERGENIC                    |                    |                                                  |
| SNP_51004_A_13036823 | NC_021166.1    | Ca_Kabuli_Chr07 | 13036823                | GG                                     | AA                 | AA               | INTERGENIC                    |                    |                                                  |
| SNP_51006_A_13037743 | NC_021166.1    | Ca_Kabuli_Chr07 | 13037743                | TT                                     | CC                 | CC               | INTERGENIC                    |                    |                                                  |
| SNP_51007_A_13039965 | NC_021166.1    | Ca_Kabuli_Chr07 | 13039965                | TT                                     | GG                 | GG               | INTERGENIC                    |                    |                                                  |
| SNP_51008_A_13039969 | NC_021166.1    | Ca_Kabuli_Chr07 | 13039969                | AA                                     | GG                 | GG               | INTERGENIC                    |                    |                                                  |
| SNP_51009_A_13040669 | NC_021166.1    | Ca_Kabuli_Chr07 | 13040669                | CC                                     | TT                 | TT               | INTERGENIC                    |                    |                                                  |
| SNP_51010_A_13040945 | NC_021166.1    | Ca_Kabuli_Chr07 | 13040945                | TT                                     | CC                 | CC               | INTERGENIC                    |                    |                                                  |
| SNP_51011_A_13046532 | NC_021166.1    | Ca_Kabuli_Chr07 | 13046532                | GG                                     | AA                 | AA               | INTRON                        | 101493575          | wall-associated receptor kinase-like 14          |
| SNP_51012_A_13050042 | NC_021166.1    | Ca_Kabuli_Chr07 | 13050042                | TT                                     | CC                 | CC               | URR                           | 101493575          | wall-associated receptor kinase-like 14          |
| SNP_51013_A_13050182 | NC_021166.1    | Ca_Kabuli_Chr07 | 13050182                | CC                                     | AA                 | AA               | URR                           | 101493575          | wall-associated receptor kinase-like 14          |
| SNP_51014_A_13051062 | NC_021166.1    | Ca_Kabuli_Chr07 | 13051062                | TT                                     | CC                 | CC               | INTERGENIC                    |                    |                                                  |
| SNP_51015_A_13055350 | NC_021166.1    | Ca_Kabuli_Chr07 | 13055350                | AA                                     | GG                 | GG               | INTERGENIC                    |                    |                                                  |
| SNP_51016_A_13056472 | NC_021166.1    | Ca_Kabuli_Chr07 | 13056472                | CC                                     | TT                 | TT               | DRR                           | 101493893          | BTB/POZ domain-containing protein At5g66560-like |
| SNP_51017_A_13056480 | NC_021166.1    | Ca_Kabuli_Chr07 | 13056480                | CC                                     | TT                 | TT               | DRR                           | 101493893          | BTB/POZ domain-containing protein At5g66560-like |
| SNP_51018_A_13056484 | NC_021166.1    | Ca_Kabuli_Chr07 | 13056484                | TT                                     | CC                 | CC               | DRR                           | 101493893          | BTB/POZ domain-containing protein At5g66560-like |
| SNP_51019_A_13056510 | NC_021166.1    | Ca_Kabuli_Chr07 | 13056510                | CC                                     | TT                 | TT               | DRR                           | 101493893          | BTB/POZ domain-containing protein At5g66560-like |
| SNP_51020_A_13060544 | NC_021166.1    | Ca_Kabuli_Chr07 | 13060544                | GG                                     | TT                 | TT               | URR                           | 101493893          | BTB/POZ domain-containing protein At5g66560-like |
| SNP_51022_A_13061362 | NC_021166.1    | Ca_Kabuli_Chr07 | 13061362                | CC                                     | TT                 | TT               | URR                           | 101493893          | BTB/POZ domain-containing protein At5g66560-like |

| SNPs IDs             | Chromosome IDs | Chromosomes     | Physical positions (bp) | CDC Frontier (Reference genome) | (Pusa 1103 & HPNB) | (ILWC 46 & LPNB) | Sequence Components of genome | Gene accession IDs | Putative functions                               |
|----------------------|----------------|-----------------|-------------------------|---------------------------------|--------------------|------------------|-------------------------------|--------------------|--------------------------------------------------|
| SNP_51023_A_13061376 | NC_021166.1    | Ca_Kabuli_Chr07 | 13061376                | AA                              | CC                 | CC               | URR                           | 101493893          | BTB/POZ domain-containing protein At5g66560-like |
| SNP_51024_A_13061593 | NC_021166.1    | Ca_Kabuli_Chr07 | 13061593                | TT                              | CC                 | CC               | URR                           | 101493893          | BTB/POZ domain-containing protein At5g66560-like |
| SNP_51025_A_13062687 | NC_021166.1    | Ca_Kabuli_Chr07 | 13062687                | AA                              | GG                 | GG               | INTERGENIC                    |                    |                                                  |
| SNP_51026_A_13066275 | NC_021166.1    | Ca_Kabuli_Chr07 | 13066275                | GG                              | AA                 | AA               | INTERGENIC                    |                    |                                                  |
| SNP_51027_A_13066324 | NC_021166.1    | Ca_Kabuli_Chr07 | 13066324                | TT                              | GG                 | GG               | INTERGENIC                    |                    |                                                  |
| SNP_51029_A_13066818 | NC_021166.1    | Ca_Kabuli_Chr07 | 13066818                | GG                              | AA                 | AA               | INTERGENIC                    |                    |                                                  |
| SNP_51030_A_13067036 | NC_021166.1    | Ca_Kabuli_Chr07 | 13067036                | CC                              | TT                 | TT               | INTERGENIC                    |                    |                                                  |
| SNP_51031_A_13067089 | NC_021166.1    | Ca_Kabuli_Chr07 | 13067089                | TT                              | AA                 | AA               | INTERGENIC                    |                    |                                                  |
| SNP_51032_A_13067097 | NC_021166.1    | Ca_Kabuli_Chr07 | 13067097                | TT                              | CC                 | CC               | INTERGENIC                    |                    |                                                  |
| SNP_51033_A_13067940 | NC_021166.1    | Ca_Kabuli_Chr07 | 13067940                | AA                              | GG                 | GG               | INTERGENIC                    |                    |                                                  |
| SNP_51034_A_13068287 | NC_021166.1    | Ca_Kabuli_Chr07 | 13068287                | AA                              | TT                 | TT               | INTERGENIC                    |                    |                                                  |
| SNP_51035_A_13069306 | NC_021166.1    | Ca_Kabuli_Chr07 | 13069306                | TT                              | GG                 | GG               | DRR                           | 101494218          | cold-regulated 413 plasma membrane protein 2     |
| SNP_51036_A_13070714 | NC_021166.1    | Ca_Kabuli_Chr07 | 13070714                | AA                              | GG                 | GG               | INTERGENIC                    |                    |                                                  |
| SNP_51038_A_13071674 | NC_021166.1    | Ca_Kabuli_Chr07 | 13071674                | TT                              | AA                 | AA               | INTERGENIC                    |                    |                                                  |
| SNP_51039_A_13075194 | NC_021166.1    | Ca_Kabuli_Chr07 | 13075194                | GG                              | TT                 | TT               | DRR                           | 101501009          | Unknown function                                 |
| SNP_51040_A_13075211 | NC_021166.1    | Ca_Kabuli_Chr07 | 13075211                | TT                              | AA                 | AA               | DRR                           | 101501009          | Unknown function                                 |
| SNP_51041_A_13089820 | NC_021166.1    | Ca_Kabuli_Chr07 | 13089820                | AA                              | GG                 | GG               | INTERGENIC                    |                    |                                                  |
| SNP_51042_A_13096748 | NC_021166.1    | Ca_Kabuli_Chr07 | 13096748                | TT                              | GG                 | GG               | INTERGENIC                    |                    |                                                  |
| SNP_51043_A_13102484 | NC_021166.1    | Ca_Kabuli_Chr07 | 13102484                | CC                              | TT                 | TT               | INTERGENIC                    |                    |                                                  |
| SNP_51044_A_13104320 | NC_021166.1    | Ca_Kabuli_Chr07 | 13104320                | TT                              | GG                 | GG               | INTERGENIC                    |                    |                                                  |
| SNP_51045_A_13104324 | NC_021166.1    | Ca_Kabuli_Chr07 | 13104324                | GG                              | TT                 | TT               | INTERGENIC                    |                    |                                                  |
| SNP_51046_A_13106082 | NC_021166.1    | Ca_Kabuli_Chr07 | 13106082                | AA                              | GG                 | GG               | INTERGENIC                    |                    |                                                  |

| SNPs IDs             | Chromosome IDs | Chromosomes     | Physical positions (bp) | CDC Frontier genome (Reference genome) | (Pusa 1103 & HPNB) | (ILWC 46 & LPNB) | Sequence genome | Components of | Gene accession IDs           | Putative functions |
|----------------------|----------------|-----------------|-------------------------|----------------------------------------|--------------------|------------------|-----------------|---------------|------------------------------|--------------------|
| SNP_51047_A_13106165 | NC_021166.1    | Ca_Kabuli_Chr07 | 13106165                | AA                                     | TT                 | TT               | INTERGENIC      |               |                              |                    |
| SNP_51048_A_13116391 | NC_021166.1    | Ca_Kabuli_Chr07 | 13116391                | AA                                     | CC                 | CC               | INTERGENIC      |               |                              |                    |
| SNP_51049_A_13131864 | NC_021166.1    | Ca_Kabuli_Chr07 | 13131864                | TT                                     | CC                 | CC               | INTERGENIC      |               |                              |                    |
| SNP_51050_A_13140354 | NC_021166.1    | Ca_Kabuli_Chr07 | 13140354                | CC                                     | AA                 | AA               | INTERGENIC      |               |                              |                    |
| SNP_51051_A_13140482 | NC_021166.1    | Ca_Kabuli_Chr07 | 13140482                | CC                                     | AA                 | AA               | INTERGENIC      |               |                              |                    |
| SNP_51052_A_13141127 | NC_021166.1    | Ca_Kabuli_Chr07 | 13141127                | AA                                     | TT                 | TT               | INTERGENIC      |               |                              |                    |
| SNP_51053_A_13141128 | NC_021166.1    | Ca_Kabuli_Chr07 | 13141128                | TT                                     | CC                 | CC               | INTERGENIC      |               |                              |                    |
| SNP_51054_A_13141206 | NC_021166.1    | Ca_Kabuli_Chr07 | 13141206                | CC                                     | GG                 | GG               | INTERGENIC      |               |                              |                    |
| SNP_51055_A_13141330 | NC_021166.1    | Ca_Kabuli_Chr07 | 13141330                | GG                                     | AA                 | AA               | INTERGENIC      |               |                              |                    |
| SNP_51056_A_13155777 | NC_021166.1    | Ca_Kabuli_Chr07 | 13155777                | AA                                     | TT                 | TT               | INTERGENIC      |               |                              |                    |
| SNP_51057_A_13157281 | NC_021166.1    | Ca_Kabuli_Chr07 | 13157281                | TT                                     | CC                 | CC               | INTERGENIC      |               |                              |                    |
| SNP_51058_A_13159075 | NC_021166.1    | Ca_Kabuli_Chr07 | 13159075                | TT                                     | AA                 | AA               | INTERGENIC      |               |                              |                    |
| SNP_51059_A_13159670 | NC_021166.1    | Ca_Kabuli_Chr07 | 13159670                | TT                                     | AA                 | AA               | INTERGENIC      |               |                              |                    |
| SNP_51060_A_13159686 | NC_021166.1    | Ca_Kabuli_Chr07 | 13159686                | AA                                     | GG                 | GG               | INTERGENIC      |               |                              |                    |
| SNP_51061_A_13159895 | NC_021166.1    | Ca_Kabuli_Chr07 | 13159895                | TT                                     | CC                 | CC               | INTERGENIC      |               |                              |                    |
| SNP_51062_A_13160077 | NC_021166.1    | Ca_Kabuli_Chr07 | 13160077                | GG                                     | AA                 | AA               | INTERGENIC      |               |                              |                    |
| SNP_51063_A_13169140 | NC_021166.1    | Ca_Kabuli_Chr07 | 13169140                | CC                                     | TT                 | TT               | URR             | 101501955     | uncharacterized LOC101501955 |                    |
| SNP_51064_A_13170624 | NC_021166.1    | Ca_Kabuli_Chr07 | 13170624                | CC                                     | TT                 | TT               | INTERGENIC      |               |                              |                    |
| SNP_51065_A_13170641 | NC_021166.1    | Ca_Kabuli_Chr07 | 13170641                | AA                                     | TT                 | TT               | INTERGENIC      |               |                              |                    |
| SNP_51066_A_13171913 | NC_021166.1    | Ca_Kabuli_Chr07 | 13171913                | GG                                     | AA                 | AA               | INTERGENIC      |               |                              |                    |
| SNP_51067_A_13172339 | NC_021166.1    | Ca_Kabuli_Chr07 | 13172339                | AA                                     | GG                 | GG               | INTERGENIC      |               |                              |                    |
| SNP_51068_A_13172726 | NC_021166.1    | Ca_Kabuli_Chr07 | 13172726                | CC                                     | TT                 | TT               | INTERGENIC      |               |                              |                    |

| SNPs IDs             | Chromosome IDs | Chromosomes     | Physical positions (bp) | CDC Frontier genome (Reference genome) | (Pusa 1103 & HPNB) | (ILWC 46 & LPNB) | Sequence Components of genome | Gene accession IDs | Putative functions                                |
|----------------------|----------------|-----------------|-------------------------|----------------------------------------|--------------------|------------------|-------------------------------|--------------------|---------------------------------------------------|
| SNP_51069_A_13176492 | NC_021166.1    | Ca_Kabuli_Chr07 | 13176492                | GG                                     | AA                 | AA               | URR                           | 101502182          | oxygen-evolving enhancer protein 1, chloroplastic |
| SNP_51070_A_13176536 | NC_021166.1    | Ca_Kabuli_Chr07 | 13176536                | TT                                     | CC                 | CC               | URR                           | 101502182          | oxygen-evolving enhancer protein 1, chloroplastic |
| SNP_51071_A_13176542 | NC_021166.1    | Ca_Kabuli_Chr07 | 13176542                | AA                                     | GG                 | GG               | URR                           | 101502182          | oxygen-evolving enhancer protein 1, chloroplastic |
| SNP_51072_A_13176739 | NC_021166.1    | Ca_Kabuli_Chr07 | 13176739                | TT                                     | CC                 | CC               | URR                           | 101502182          | oxygen-evolving enhancer protein 1, chloroplastic |
| SNP_51073_A_13176747 | NC_021166.1    | Ca_Kabuli_Chr07 | 13176747                | AA                                     | GG                 | GG               | URR                           | 101502182          | oxygen-evolving enhancer protein 1, chloroplastic |
| SNP_51074_A_13176772 | NC_021166.1    | Ca_Kabuli_Chr07 | 13176772                | TT                                     | AA                 | AA               | URR                           | 101502182          | oxygen-evolving enhancer protein 1, chloroplastic |
| SNP_51075_A_13176789 | NC_021166.1    | Ca_Kabuli_Chr07 | 13176789                | TT                                     | GG                 | GG               | URR                           | 101502182          | oxygen-evolving enhancer protein 1, chloroplastic |
| SNP_51076_A_13176811 | NC_021166.1    | Ca_Kabuli_Chr07 | 13176811                | AA                                     | GG                 | GG               | URR                           | 101502182          | oxygen-evolving enhancer protein 1, chloroplastic |
| SNP_51077_A_13176828 | NC_021166.1    | Ca_Kabuli_Chr07 | 13176828                | CC                                     | TT                 | TT               | URR                           | 101502182          | oxygen-evolving enhancer protein 1, chloroplastic |
| SNP_51079_A_13179668 | NC_021166.1    | Ca_Kabuli_Chr07 | 13179668                | AA                                     | TT                 | TT               | INTERGENIC                    |                    |                                                   |
| SNP_51080_A_13183976 | NC_021166.1    | Ca_Kabuli_Chr07 | 13183976                | TT                                     | AA                 | AA               | INTERGENIC                    |                    |                                                   |
| SNP_51081_A_13184277 | NC_021166.1    | Ca_Kabuli_Chr07 | 13184277                | CC                                     | AA                 | AA               | INTERGENIC                    |                    |                                                   |
| SNP_51082_A_13186735 | NC_021166.1    | Ca_Kabuli_Chr07 | 13186735                | TT                                     | AA                 | AA               | INTERGENIC                    |                    |                                                   |
| SNP_51083_A_13186738 | NC_021166.1    | Ca_Kabuli_Chr07 | 13186738                | CC                                     | TT                 | TT               | INTERGENIC                    |                    |                                                   |
| SNP_51084_A_13186739 | NC_021166.1    | Ca_Kabuli_Chr07 | 13186739                | GG                                     | AA                 | AA               | INTERGENIC                    |                    |                                                   |
| SNP_51085_A_13186757 | NC_021166.1    | Ca_Kabuli_Chr07 | 13186757                | TT                                     | CC                 | CC               | INTERGENIC                    |                    |                                                   |
| SNP_51086_A_13187029 | NC_021166.1    | Ca_Kabuli_Chr07 | 13187029                | TT                                     | CC                 | CC               | INTERGENIC                    |                    |                                                   |
| SNP_51087_A_13187499 | NC_021166.1    | Ca_Kabuli_Chr07 | 13187499                | AA                                     | TT                 | TT               | INTERGENIC                    |                    |                                                   |
| SNP_51088_A_13188112 | NC_021166.1    | Ca_Kabuli_Chr07 | 13188112                | CC                                     | TT                 | TT               | DRR                           | 101502801          | uncharacterized LOC101502801                      |
| SNP_51090_A_13193011 | NC_021166.1    | Ca_Kabuli_Chr07 | 13193011                | TT                                     | CC                 | CC               | URR                           | 101503121          | uncharacterized LOC101503121                      |
| SNP_51091_A_13193805 | NC_021166.1    | Ca_Kabuli_Chr07 | 13193805                | TT                                     | CC                 | CC               | INTERGENIC                    |                    |                                                   |
| SNP_51092_A_13193868 | NC_021166.1    | Ca_Kabuli_Chr07 | 13193868                | GG                                     | AA                 | AA               | INTERGENIC                    |                    |                                                   |

| SNPs IDs             | Chromosome IDs | Chromosomes     | Physical positions (bp) | CDC Frontier genome (Reference genome) | (Pusa 1103 & HPNB) | (ILWC 46 & LPNB) | Sequence genome | Components of | Gene accession IDs           | Putative functions |
|----------------------|----------------|-----------------|-------------------------|----------------------------------------|--------------------|------------------|-----------------|---------------|------------------------------|--------------------|
| SNP_51094_A_13193931 | NC_021166.1    | Ca_Kabuli_Chr07 | 13193931                | GG                                     | AA                 | AA               | INTERGENIC      |               |                              |                    |
| SNP_51095_A_13195666 | NC_021166.1    | Ca_Kabuli_Chr07 | 13195666                | TT                                     | CC                 | CC               | INTERGENIC      |               |                              |                    |
| SNP_51096_A_13195675 | NC_021166.1    | Ca_Kabuli_Chr07 | 13195675                | GG                                     | AA                 | AA               | INTERGENIC      |               |                              |                    |
| SNP_51097_A_13196279 | NC_021166.1    | Ca_Kabuli_Chr07 | 13196279                | GG                                     | AA                 | AA               | INTERGENIC      |               |                              |                    |
| SNP_51098_A_13196794 | NC_021166.1    | Ca_Kabuli_Chr07 | 13196794                | AA                                     | GG                 | GG               | INTERGENIC      |               |                              |                    |
| SNP_51099_A_13201055 | NC_021166.1    | Ca_Kabuli_Chr07 | 13201055                | TT                                     | CC                 | CC               | INTERGENIC      |               |                              |                    |
| SNP_51100_A_13204521 | NC_021166.1    | Ca_Kabuli_Chr07 | 13204521                | AA                                     | TT                 | TT               | INTERGENIC      |               |                              |                    |
| SNP_51101_A_13204551 | NC_021166.1    | Ca_Kabuli_Chr07 | 13204551                | GG                                     | TT                 | TT               | INTERGENIC      |               |                              |                    |
| SNP_51102_A_13205464 | NC_021166.1    | Ca_Kabuli_Chr07 | 13205464                | GG                                     | TT                 | TT               | INTERGENIC      |               |                              |                    |
| SNP_51103_A_13205545 | NC_021166.1    | Ca_Kabuli_Chr07 | 13205545                | TT                                     | CC                 | CC               | INTERGENIC      |               |                              |                    |
| SNP_51104_A_13205804 | NC_021166.1    | Ca_Kabuli_Chr07 | 13205804                | TT                                     | CC                 | CC               | INTERGENIC      |               |                              |                    |
| SNP_51105_A_13206334 | NC_021166.1    | Ca_Kabuli_Chr07 | 13206334                | TT                                     | CC                 | CC               | INTERGENIC      |               |                              |                    |
| SNP_51106_A_13207792 | NC_021166.1    | Ca_Kabuli_Chr07 | 13207792                | CC                                     | TT                 | TT               | INTERGENIC      |               |                              |                    |
| SNP_51107_A_13208888 | NC_021166.1    | Ca_Kabuli_Chr07 | 13208888                | AA                                     | CC                 | CC               | INTERGENIC      |               |                              |                    |
| SNP_51108_A_13208903 | NC_021166.1    | Ca_Kabuli_Chr07 | 13208903                | GG                                     | CC                 | CC               | INTERGENIC      |               |                              |                    |
| SNP_51109_A_13208978 | NC_021166.1    | Ca_Kabuli_Chr07 | 13208978                | TT                                     | CC                 | CC               | INTERGENIC      |               |                              |                    |
| SNP_51110_A_13209160 | NC_021166.1    | Ca_Kabuli_Chr07 | 13209160                | TT                                     | AA                 | AA               | INTERGENIC      |               |                              |                    |
| SNP_51111_A_13211447 | NC_021166.1    | Ca_Kabuli_Chr07 | 13211447                | TT                                     | CC                 | CC               | DRR             | 101503446     | STS14 protein-like           |                    |
| SNP_51112_A_13211466 | NC_021166.1    | Ca_Kabuli_Chr07 | 13211466                | TT                                     | CC                 | CC               | DRR             | 101503446     | STS14 protein-like           |                    |
| SNP_51113_A_13212047 | NC_021166.1    | Ca_Kabuli_Chr07 | 13212047                | GG                                     | CC                 | CC               | DRR             | 101503446     | STS14 protein-like           |                    |
| SNP_51114_A_13213358 | NC_021166.1    | Ca_Kabuli_Chr07 | 13213358                | GG                                     | TT                 | TT               | URR             | 101503446     | STS14 protein-like           |                    |
| SNP_51115_A_13216539 | NC_021166.1    | Ca_Kabuli_Chr07 | 13216539                | GG                                     | AA                 | AA               | DRR             | 101503784     | uncharacterized LOC101503784 |                    |

| SNPs IDs             | Chromosome IDs | Chromosomes     | Physical positions (bp) | CDC Frontier genome (Reference genome) | (Pusa 1103 & HPNB) | (ILWC 46 & LPNB) | Sequence Components of genome | Gene accession IDs | Putative functions                           |
|----------------------|----------------|-----------------|-------------------------|----------------------------------------|--------------------|------------------|-------------------------------|--------------------|----------------------------------------------|
| SNP_51116_A_13222497 | NC_021166.1    | Ca_Kabuli_Chr07 | 13222497                | GG                                     | CC                 | CC               | URR                           | 101503784          | uncharacterized LOC101503784                 |
| SNP_51117_A_13222695 | NC_021166.1    | Ca_Kabuli_Chr07 | 13222695                | TT                                     | CC                 | CC               | URR                           | 101503784          | uncharacterized LOC101503784                 |
| SNP_51118_A_13222716 | NC_021166.1    | Ca_Kabuli_Chr07 | 13222716                | GG                                     | CC                 | CC               | URR                           | 101503784          | uncharacterized LOC101503784                 |
| SNP_51119_A_13223199 | NC_021166.1    | Ca_Kabuli_Chr07 | 13223199                | CC                                     | TT                 | TT               | URR                           | 101503784          | uncharacterized LOC101503784                 |
| SNP_51120_A_13223244 | NC_021166.1    | Ca_Kabuli_Chr07 | 13223244                | TT                                     | CC                 | CC               | URR                           | 101503784          | uncharacterized LOC101503784                 |
| SNP_51121_A_13226081 | NC_021166.1    | Ca_Kabuli_Chr07 | 13226081                | CC                                     | AA                 | AA               | INTERGENIC                    |                    |                                              |
| SNP_51122_A_13226107 | NC_021166.1    | Ca_Kabuli_Chr07 | 13226107                | CC                                     | TT                 | TT               | INTERGENIC                    |                    |                                              |
| SNP_51123_A_13226118 | NC_021166.1    | Ca_Kabuli_Chr07 | 13226118                | AA                                     | CC                 | CC               | INTERGENIC                    |                    |                                              |
| SNP_51124_A_13226188 | NC_021166.1    | Ca_Kabuli_Chr07 | 13226188                | TT                                     | CC                 | CC               | INTERGENIC                    |                    |                                              |
| SNP_51125_A_13226267 | NC_021166.1    | Ca_Kabuli_Chr07 | 13226267                | TT                                     | CC                 | CC               | INTERGENIC                    |                    |                                              |
| SNP_51126_A_13226271 | NC_021166.1    | Ca_Kabuli_Chr07 | 13226271                | GG                                     | AA                 | AA               | INTERGENIC                    |                    |                                              |
| SNP_51127_A_13239499 | NC_021166.1    | Ca_Kabuli_Chr07 | 13239499                | CC                                     | TT                 | TT               | INTRON                        | 101497564          | uncharacterized LOC101497564                 |
| SNP_51128_A_13248460 | NC_021166.1    | Ca_Kabuli_Chr07 | 13248460                | TT                                     | CC                 | CC               | INTERGENIC                    |                    |                                              |
| SNP_51129_A_13248659 | NC_021166.1    | Ca_Kabuli_Chr07 | 13248659                | GG                                     | TT                 | TT               | INTERGENIC                    |                    |                                              |
| SNP_51130_A_13248868 | NC_021166.1    | Ca_Kabuli_Chr07 | 13248868                | GG                                     | AA                 | AA               | INTERGENIC                    |                    |                                              |
| SNP_51131_A_13250138 | NC_021166.1    | Ca_Kabuli_Chr07 | 13250138                | TT                                     | CC                 | CC               | INTERGENIC                    |                    |                                              |
| SNP_51132_A_13255733 | NC_021166.1    | Ca_Kabuli_Chr07 | 13255733                | AA                                     | GG                 | GG               | INTRON                        | 101497897          | histone-lysine N-methyltransferase SUV5-like |
| SNP_51133_A_13256072 | NC_021166.1    | Ca_Kabuli_Chr07 | 13256072                | AA                                     | TT                 | TT               | INTRON                        | 101497897          | histone-lysine N-methyltransferase SUV5-like |
| SNP_51134_A_13258909 | NC_021166.1    | Ca_Kabuli_Chr07 | 13258909                | CC                                     | TT                 | TT               | INTRON                        | 101497897          | histone-lysine N-methyltransferase SUV5-like |
| SNP_51135_A_13263188 | NC_021166.1    | Ca_Kabuli_Chr07 | 13263188                | GG                                     | TT                 | TT               | INTERGENIC                    |                    |                                              |
| SNP_51136_A_13263264 | NC_021166.1    | Ca_Kabuli_Chr07 | 13263264                | TT                                     | GG                 | GG               | INTERGENIC                    |                    |                                              |
| SNP_51137_A_13264910 | NC_021166.1    | Ca_Kabuli_Chr07 | 13264910                | AA                                     | GG                 | GG               | INTERGENIC                    |                    |                                              |

| SNPs IDs             | Chromosome IDs | Chromosomes     | Physical positions (bp) | CDC Frontier genome (Reference genome) | (Pusa 1103 & HPNB) | (ILWC 46 & LPNB) | Sequence Components of genome | Gene accession IDs | Putative functions                           |
|----------------------|----------------|-----------------|-------------------------|----------------------------------------|--------------------|------------------|-------------------------------|--------------------|----------------------------------------------|
| SNP_51138_A_13266137 | NC_021166.1    | Ca_Kabuli_Chr07 | 13266137                | TT                                     | CC                 | CC               | URR                           | 101497897          | histone-lysine N-methyltransferase SUV5-like |
| SNP_51139_A_13266261 | NC_021166.1    | Ca_Kabuli_Chr07 | 13266261                | AA                                     | GG                 | GG               | URR                           | 101497897          | histone-lysine N-methyltransferase SUV5-like |
| SNP_51140_A_13283380 | NC_021166.1    | Ca_Kabuli_Chr07 | 13283380                | GG                                     | AA                 | AA               | INTERGENIC                    |                    |                                              |
| SNP_51142_A_13283681 | NC_021166.1    | Ca_Kabuli_Chr07 | 13283681                | AA                                     | CC                 | CC               | INTERGENIC                    |                    |                                              |
| SNP_51143_A_13283699 | NC_021166.1    | Ca_Kabuli_Chr07 | 13283699                | TT                                     | CC                 | CC               | INTERGENIC                    |                    |                                              |
| SNP_51144_A_13284368 | NC_021166.1    | Ca_Kabuli_Chr07 | 13284368                | CC                                     | AA                 | AA               | INTERGENIC                    |                    |                                              |
| SNP_51146_A_13295719 | NC_021166.1    | Ca_Kabuli_Chr07 | 13295719                | GG                                     | TT                 | TT               | INTERGENIC                    |                    |                                              |
| SNP_51147_A_13299272 | NC_021166.1    | Ca_Kabuli_Chr07 | 13299272                | TT                                     | GG                 | GG               | DRR                           | 101504644          | Unknown function                             |
| SNP_51148_A_13299310 | NC_021166.1    | Ca_Kabuli_Chr07 | 13299310                | AA                                     | TT                 | TT               | DRR                           | 101504644          | Unknown function                             |
| SNP_51149_A_13299347 | NC_021166.1    | Ca_Kabuli_Chr07 | 13299347                | CC                                     | AA                 | AA               | DRR                           | 101504644          | Unknown function                             |
| SNP_51150_A_13299433 | NC_021166.1    | Ca_Kabuli_Chr07 | 13299433                | TT                                     | GG                 | GG               | NON_SYNONYMOUS_CODING         | 101504644          | Unknown function                             |
| SNP_51151_A_13299449 | NC_021166.1    | Ca_Kabuli_Chr07 | 13299449                | GG                                     | AA                 | AA               | NON_SYNONYMOUS_CODING         | 101504644          | Unknown function                             |
| SNP_51152_A_13299616 | NC_021166.1    | Ca_Kabuli_Chr07 | 13299616                | TT                                     | CC                 | CC               | NON_SYNONYMOUS_CODING         | 101504644          | Unknown function                             |
| SNP_51153_A_13299970 | NC_021166.1    | Ca_Kabuli_Chr07 | 13299970                | TT                                     | CC                 | CC               | URR                           | 101504644          | Unknown function                             |
| SNP_51154_A_13299979 | NC_021166.1    | Ca_Kabuli_Chr07 | 13299979                | CC                                     | TT                 | TT               | URR                           | 101504644          | Unknown function                             |
| SNP_51156_A_13300050 | NC_021166.1    | Ca_Kabuli_Chr07 | 13300050                | AA                                     | GG                 | GG               | URR                           | 101504644          | Unknown function                             |
| SNP_51157_A_13300533 | NC_021166.1    | Ca_Kabuli_Chr07 | 13300533                | GG                                     | AA                 | AA               | URR                           | 101504644          | Unknown function                             |
| SNP_51158_A_13300697 | NC_021166.1    | Ca_Kabuli_Chr07 | 13300697                | GG                                     | AA                 | AA               | URR                           | 101504644          | Unknown function                             |
| SNP_51159_A_13300709 | NC_021166.1    | Ca_Kabuli_Chr07 | 13300709                | GG                                     | AA                 | AA               | URR                           | 101504644          | Unknown function                             |
| SNP_51160_A_13301126 | NC_021166.1    | Ca_Kabuli_Chr07 | 13301126                | GG                                     | AA                 | AA               | URR                           | 101504644          | Unknown function                             |
| SNP_51161_A_13301137 | NC_021166.1    | Ca_Kabuli_Chr07 | 13301137                | GG                                     | CC                 | CC               | URR                           | 101504644          | Unknown function                             |
| SNP_51162_A_13301202 | NC_021166.1    | Ca_Kabuli_Chr07 | 13301202                | CC                                     | TT                 | TT               | URR                           | 101504644          | Unknown function                             |

| SNPs IDs             | Chromosome IDs | Chromosomes     | Physical positions (bp) | CDC Frontier genome (Reference genome) | (Pusa 1103 & HPNB) | (ILWC 46 & LPNB) | Sequence Components of genome | Gene accession IDs | Putative functions              |
|----------------------|----------------|-----------------|-------------------------|----------------------------------------|--------------------|------------------|-------------------------------|--------------------|---------------------------------|
| SNP_51163_A_13301560 | NC_021166.1    | Ca_Kabuli_Chr07 | 13301560                | TT                                     | CC                 | CC               | URR                           | 101504644          | Unknown function                |
| SNP_51164_A_13302567 | NC_021166.1    | Ca_Kabuli_Chr07 | 13302567                | GG                                     | TT                 | TT               | INTERGENIC                    |                    |                                 |
| SNP_51165_A_13302830 | NC_021166.1    | Ca_Kabuli_Chr07 | 13302830                | TT                                     | AA                 | AA               | INTERGENIC                    |                    |                                 |
| SNP_51166_A_13303559 | NC_021166.1    | Ca_Kabuli_Chr07 | 13303559                | AA                                     | GG                 | GG               | INTERGENIC                    |                    |                                 |
| SNP_51167_A_13303641 | NC_021166.1    | Ca_Kabuli_Chr07 | 13303641                | GG                                     | CC                 | CC               | INTERGENIC                    |                    |                                 |
| SNP_51168_A_13303763 | NC_021166.1    | Ca_Kabuli_Chr07 | 13303763                | CC                                     | TT                 | TT               | INTERGENIC                    |                    |                                 |
| SNP_51169_A_13303790 | NC_021166.1    | Ca_Kabuli_Chr07 | 13303790                | TT                                     | CC                 | CC               | INTERGENIC                    |                    |                                 |
| SNP_51170_A_13303838 | NC_021166.1    | Ca_Kabuli_Chr07 | 13303838                | TT                                     | AA                 | AA               | INTERGENIC                    |                    |                                 |
| SNP_51171_A_13303877 | NC_021166.1    | Ca_Kabuli_Chr07 | 13303877                | GG                                     | AA                 | AA               | INTERGENIC                    |                    |                                 |
| SNP_51172_A_13303915 | NC_021166.1    | Ca_Kabuli_Chr07 | 13303915                | TT                                     | CC                 | CC               | INTERGENIC                    |                    |                                 |
| SNP_51173_A_13304115 | NC_021166.1    | Ca_Kabuli_Chr07 | 13304115                | TT                                     | CC                 | CC               | INTERGENIC                    |                    |                                 |
| SNP_51174_A_13304341 | NC_021166.1    | Ca_Kabuli_Chr07 | 13304341                | AA                                     | TT                 | TT               | INTERGENIC                    |                    |                                 |
| SNP_51175_A_13306189 | NC_021166.1    | Ca_Kabuli_Chr07 | 13306189                | TT                                     | CC                 | CC               | INTERGENIC                    |                    |                                 |
| SNP_51176_A_13306216 | NC_021166.1    | Ca_Kabuli_Chr07 | 13306216                | AA                                     | GG                 | GG               | INTERGENIC                    |                    |                                 |
| SNP_51177_A_13306246 | NC_021166.1    | Ca_Kabuli_Chr07 | 13306246                | GG                                     | AA                 | AA               | INTERGENIC                    |                    |                                 |
| SNP_51179_A_13306759 | NC_021166.1    | Ca_Kabuli_Chr07 | 13306759                | GG                                     | AA                 | AA               | INTERGENIC                    |                    |                                 |
| SNP_51180_A_13306948 | NC_021166.1    | Ca_Kabuli_Chr07 | 13306948                | AA                                     | GG                 | GG               | INTERGENIC                    |                    |                                 |
| SNP_51181_A_13306949 | NC_021166.1    | Ca_Kabuli_Chr07 | 13306949                | TT                                     | GG                 | GG               | INTERGENIC                    |                    |                                 |
| SNP_51182_A_13307926 | NC_021166.1    | Ca_Kabuli_Chr07 | 13307926                | CC                                     | TT                 | TT               | INTERGENIC                    |                    |                                 |
| SNP_51183_A_13310498 | NC_021166.1    | Ca_Kabuli_Chr07 | 13310498                | CC                                     | TT                 | TT               | INTERGENIC                    |                    |                                 |
| SNP_51184_A_13311798 | NC_021166.1    | Ca_Kabuli_Chr07 | 13311798                | GG                                     | AA                 | AA               | DRR                           | 101504960          | BEL1-like homeodomain protein 4 |
| SNP_51186_A_13314028 | NC_021166.1    | Ca_Kabuli_Chr07 | 13314028                | GG                                     | CC                 | CC               | INTRON                        | 101504960          | BEL1-like homeodomain protein 4 |



| SNPs IDs             | Chromosome IDs | Chromosomes     | Physical positions (bp) | CDC Frontier genome (Reference genome) | (Pusa 1103 & HPNB) | (ILWC 46 & LPNB) | Sequence Components of genome | Gene accession IDs | Putative functions              |
|----------------------|----------------|-----------------|-------------------------|----------------------------------------|--------------------|------------------|-------------------------------|--------------------|---------------------------------|
| SNP_51187_A_13314210 | NC_021166.1    | Ca_Kabuli_Chr07 | 13314210                | CC                                     | TT                 | TT               | INTRON                        | 101504960          | BEL1-like homeodomain protein 4 |
| SNP_51188_A_13314266 | NC_021166.1    | Ca_Kabuli_Chr07 | 13314266                | GG                                     | AA                 | AA               | INTRON                        | 101504960          | BEL1-like homeodomain protein 4 |
| SNP_51189_A_13314841 | NC_021166.1    | Ca_Kabuli_Chr07 | 13314841                | TT                                     | AA                 | AA               | INTRON                        | 101504960          | BEL1-like homeodomain protein 4 |
| SNP_51190_A_13315225 | NC_021166.1    | Ca_Kabuli_Chr07 | 13315225                | TT                                     | CC                 | CC               | INTRON                        | 101504960          | BEL1-like homeodomain protein 4 |
| SNP_51191_A_13321902 | NC_021166.1    | Ca_Kabuli_Chr07 | 13321902                | AA                                     | GG                 | GG               | URR                           | 101504960          | BEL1-like homeodomain protein 4 |
| SNP_51193_A_13321963 | NC_021166.1    | Ca_Kabuli_Chr07 | 13321963                | CC                                     | TT                 | TT               | URR                           | 101504960          | BEL1-like homeodomain protein 4 |
| SNP_51194_A_13325485 | NC_021166.1    | Ca_Kabuli_Chr07 | 13325485                | AA                                     | GG                 | GG               | INTERGENIC                    |                    |                                 |
| SNP_51195_A_13325625 | NC_021166.1    | Ca_Kabuli_Chr07 | 13325625                | TT                                     | GG                 | GG               | INTERGENIC                    |                    |                                 |
| SNP_51196_A_13330687 | NC_021166.1    | Ca_Kabuli_Chr07 | 13330687                | AA                                     | TT                 | TT               | INTERGENIC                    |                    |                                 |
| SNP_51197_A_13331008 | NC_021166.1    | Ca_Kabuli_Chr07 | 13331008                | TT                                     | AA                 | AA               | INTERGENIC                    |                    |                                 |
| SNP_51198_A_13331013 | NC_021166.1    | Ca_Kabuli_Chr07 | 13331013                | CC                                     | AA                 | AA               | INTERGENIC                    |                    |                                 |
| SNP_51199_A_13331021 | NC_021166.1    | Ca_Kabuli_Chr07 | 13331021                | TT                                     | AA                 | AA               | INTERGENIC                    |                    |                                 |
| SNP_51200_A_13331025 | NC_021166.1    | Ca_Kabuli_Chr07 | 13331025                | TT                                     | GG                 | GG               | INTERGENIC                    |                    |                                 |
| SNP_51201_A_13333613 | NC_021166.1    | Ca_Kabuli_Chr07 | 13333613                | AA                                     | GG                 | GG               | INTERGENIC                    |                    |                                 |
| SNP_51202_A_13334017 | NC_021166.1    | Ca_Kabuli_Chr07 | 13334017                | AA                                     | GG                 | GG               | INTERGENIC                    |                    |                                 |
| SNP_51203_A_13338143 | NC_021166.1    | Ca_Kabuli_Chr07 | 13338143                | CC                                     | AA                 | AA               | INTERGENIC                    |                    |                                 |
| SNP_51204_A_13341425 | NC_021166.1    | Ca_Kabuli_Chr07 | 13341425                | TT                                     | AA                 | AA               | INTERGENIC                    |                    |                                 |
| SNP_51205_A_13341426 | NC_021166.1    | Ca_Kabuli_Chr07 | 13341426                | GG                                     | TT                 | TT               | INTERGENIC                    |                    |                                 |
| SNP_51206_A_13341905 | NC_021166.1    | Ca_Kabuli_Chr07 | 13341905                | GG                                     | AA                 | AA               | INTERGENIC                    |                    |                                 |
| SNP_51207_A_13342005 | NC_021166.1    | Ca_Kabuli_Chr07 | 13342005                | AA                                     | TT                 | TT               | INTERGENIC                    |                    |                                 |
| SNP_51208_A_13342085 | NC_021166.1    | Ca_Kabuli_Chr07 | 13342085                | GG                                     | AA                 | AA               | INTERGENIC                    |                    |                                 |
| SNP_51209_A_13343276 | NC_021166.1    | Ca_Kabuli_Chr07 | 13343276                | CC                                     | TT                 | TT               | INTERGENIC                    |                    |                                 |

| SNPs IDs             | Chromosome IDs | Chromosomes     | Physical positions (bp) | CDC Frontier genome | (Reference genome) | (Pusa 1103 & HPNB) | (ILWC 46 & LPNB) | Sequence Components of genome | Gene accession IDs | Putative functions             |
|----------------------|----------------|-----------------|-------------------------|---------------------|--------------------|--------------------|------------------|-------------------------------|--------------------|--------------------------------|
| SNP_51210_A_13348566 | NC_021166.1    | Ca_Kabuli_Chr07 | 13348566                | CC                  |                    | TT                 | TT               | INTERGENIC                    |                    |                                |
| SNP_51211_A_13348596 | NC_021166.1    | Ca_Kabuli_Chr07 | 13348596                | TT                  |                    | AA                 | AA               | INTERGENIC                    |                    |                                |
| SNP_51212_A_13359263 | NC_021166.1    | Ca_Kabuli_Chr07 | 13359263                | TT                  |                    | GG                 | GG               | INTERGENIC                    |                    |                                |
| SNP_51213_A_13359270 | NC_021166.1    | Ca_Kabuli_Chr07 | 13359270                | GG                  |                    | AA                 | AA               | INTERGENIC                    |                    |                                |
| SNP_51214_A_13359796 | NC_021166.1    | Ca_Kabuli_Chr07 | 13359796                | TT                  |                    | CC                 | CC               | INTERGENIC                    |                    |                                |
| SNP_51215_A_13365291 | NC_021166.1    | Ca_Kabuli_Chr07 | 13365291                | CC                  |                    | TT                 | TT               | INTRON                        | 101505272          | protein DA1-related 1-like     |
| SNP_51216_A_13368099 | NC_021166.1    | Ca_Kabuli_Chr07 | 13368099                | AA                  |                    | GG                 | GG               | URR                           | 101505272          | protein DA1-related 1-like     |
| SNP_51217_A_13368434 | NC_021166.1    | Ca_Kabuli_Chr07 | 13368434                | CC                  |                    | TT                 | TT               | URR                           | 101505272          | protein DA1-related 1-like     |
| SNP_51218_A_13368800 | NC_021166.1    | Ca_Kabuli_Chr07 | 13368800                | AA                  |                    | GG                 | GG               | URR                           | 101505272          | protein DA1-related 1-like     |
| SNP_51219_A_13369231 | NC_021166.1    | Ca_Kabuli_Chr07 | 13369231                | TT                  |                    | CC                 | CC               | URR                           | 101505272          | protein DA1-related 1-like     |
| SNP_51220_A_13369247 | NC_021166.1    | Ca_Kabuli_Chr07 | 13369247                | GG                  |                    | AA                 | AA               | URR                           | 101505272          | protein DA1-related 1-like     |
| SNP_51221_A_13370824 | NC_021166.1    | Ca_Kabuli_Chr07 | 13370824                | GG                  |                    | TT                 | TT               | DRR                           | 101505826          | V-type proton ATPase subunit H |
| SNP_51222_A_13371186 | NC_021166.1    | Ca_Kabuli_Chr07 | 13371186                | GG                  |                    | AA                 | AA               | DRR                           | 101505826          | V-type proton ATPase subunit H |
| SNP_51223_A_13371418 | NC_021166.1    | Ca_Kabuli_Chr07 | 13371418                | CC                  |                    | GG                 | GG               | DRR                           | 101505826          | V-type proton ATPase subunit H |
| SNP_51225_A_13373322 | NC_021166.1    | Ca_Kabuli_Chr07 | 13373322                | TT                  |                    | CC                 | CC               | INTRON                        | 101505826          | V-type proton ATPase subunit H |
| SNP_51226_A_13373690 | NC_021166.1    | Ca_Kabuli_Chr07 | 13373690                | TT                  |                    | AA                 | AA               | INTRON                        | 101505826          | V-type proton ATPase subunit H |
| SNP_51227_A_13376976 | NC_021166.1    | Ca_Kabuli_Chr07 | 13376976                | GG                  |                    | AA                 | AA               | INTRON                        | 101505826          | V-type proton ATPase subunit H |
| SNP_51228_A_13378763 | NC_021166.1    | Ca_Kabuli_Chr07 | 13378763                | CC                  |                    | TT                 | TT               | DRR                           | 101506677          | protein LYK5                   |
| SNP_51229_A_13378789 | NC_021166.1    | Ca_Kabuli_Chr07 | 13378789                | TT                  |                    | AA                 | AA               | DRR                           | 101506677          | protein LYK5                   |
| SNP_51231_A_13382286 | NC_021166.1    | Ca_Kabuli_Chr07 | 13382286                | GG                  |                    | AA                 | AA               | DRR                           | 101506356          | pectate lyase 1-like           |
| SNP_51232_A_13385197 | NC_021166.1    | Ca_Kabuli_Chr07 | 13385197                | TT                  |                    | CC                 | CC               | URR                           | 101506356          | pectate lyase 1-like           |
| SNP_51233_A_13387206 | NC_021166.1    | Ca_Kabuli_Chr07 | 13387206                | TT                  |                    | CC                 | CC               | INTRON                        | 101507010          | probable pectate lyase 16      |

| SNPs IDs             | Chromosome IDs | Chromosomes     | Physical positions (bp) | CDC Frontier genome (Reference genome) | (Pusa 1103 & HPNB) | (ILWC 46 & LPNB) | Sequence Components of genome | Gene accession IDs | Putative functions                     |
|----------------------|----------------|-----------------|-------------------------|----------------------------------------|--------------------|------------------|-------------------------------|--------------------|----------------------------------------|
| SNP_51234_A_13387237 | NC_021166.1    | Ca_Kabuli_Chr07 | 13387237                | AA                                     | GG                 | GG               | INTRON                        | 101507010          | probable pectate lyase 16              |
| SNP_51235_A_13387537 | NC_021166.1    | Ca_Kabuli_Chr07 | 13387537                | AA                                     | GG                 | GG               | SYNONYMOUS_CODING             | 101507010          | probable pectate lyase 16              |
| SNP_51236_A_13389609 | NC_021166.1    | Ca_Kabuli_Chr07 | 13389609                | TT                                     | GG                 | GG               | URR                           | 101507010          | probable pectate lyase 16              |
| SNP_51237_A_13389619 | NC_021166.1    | Ca_Kabuli_Chr07 | 13389619                | GG                                     | AA                 | AA               | URR                           | 101507010          | probable pectate lyase 16              |
| SNP_51238_A_13391977 | NC_021166.1    | Ca_Kabuli_Chr07 | 13391977                | TT                                     | CC                 | CC               | INTERGENIC                    |                    |                                        |
| SNP_51239_A_13391989 | NC_021166.1    | Ca_Kabuli_Chr07 | 13391989                | TT                                     | GG                 | GG               | INTERGENIC                    |                    |                                        |
| SNP_51240_A_13391995 | NC_021166.1    | Ca_Kabuli_Chr07 | 13391995                | CC                                     | TT                 | TT               | INTERGENIC                    |                    |                                        |
| SNP_51241_A_13392305 | NC_021166.1    | Ca_Kabuli_Chr07 | 13392305                | TT                                     | CC                 | CC               | INTERGENIC                    |                    |                                        |
| SNP_51242_A_13392338 | NC_021166.1    | Ca_Kabuli_Chr07 | 13392338                | CC                                     | TT                 | TT               | INTERGENIC                    |                    |                                        |
| SNP_51243_A_13394234 | NC_021166.1    | Ca_Kabuli_Chr07 | 13394234                | CC                                     | TT                 | TT               | DRR                           | 101507335          | probable calcium-binding protein CML41 |
| SNP_51244_A_13397418 | NC_021166.1    | Ca_Kabuli_Chr07 | 13397418                | AA                                     | TT                 | TT               | INTERGENIC                    |                    |                                        |
| SNP_51245_A_13398240 | NC_021166.1    | Ca_Kabuli_Chr07 | 13398240                | GG                                     | CC                 | CC               | INTERGENIC                    |                    |                                        |
| SNP_51246_A_13398246 | NC_021166.1    | Ca_Kabuli_Chr07 | 13398246                | TT                                     | CC                 | CC               | INTERGENIC                    |                    |                                        |
| SNP_51247_A_13398305 | NC_021166.1    | Ca_Kabuli_Chr07 | 13398305                | TT                                     | GG                 | GG               | INTERGENIC                    |                    |                                        |
| SNP_51248_A_13398319 | NC_021166.1    | Ca_Kabuli_Chr07 | 13398319                | GG                                     | TT                 | TT               | INTERGENIC                    |                    |                                        |
| SNP_51249_A_13398368 | NC_021166.1    | Ca_Kabuli_Chr07 | 13398368                | CC                                     | TT                 | TT               | INTERGENIC                    |                    |                                        |
| SNP_51250_A_13398395 | NC_021166.1    | Ca_Kabuli_Chr07 | 13398395                | CC                                     | TT                 | TT               | INTERGENIC                    |                    |                                        |
| SNP_51251_A_13399504 | NC_021166.1    | Ca_Kabuli_Chr07 | 13399504                | GG                                     | CC                 | CC               | INTERGENIC                    |                    |                                        |
| SNP_51252_A_13399764 | NC_021166.1    | Ca_Kabuli_Chr07 | 13399764                | TT                                     | GG                 | GG               | INTERGENIC                    |                    |                                        |
| SNP_51253_A_13400181 | NC_021166.1    | Ca_Kabuli_Chr07 | 13400181                | CC                                     | TT                 | TT               | INTERGENIC                    |                    |                                        |
| SNP_51254_A_13400186 | NC_021166.1    | Ca_Kabuli_Chr07 | 13400186                | TT                                     | CC                 | CC               | INTERGENIC                    |                    |                                        |
| SNP_51255_A_13400463 | NC_021166.1    | Ca_Kabuli_Chr07 | 13400463                | TT                                     | CC                 | CC               | INTERGENIC                    |                    |                                        |

| SNPs IDs             | Chromosome IDs | Chromosomes     | Physical positions (bp) | CDC Frontier (Reference genome) | (Pusa 1103 & HPNB) | (ILWC 46 & LPNB) | Sequence Components of genome | Gene accession IDs | Putative functions                        |
|----------------------|----------------|-----------------|-------------------------|---------------------------------|--------------------|------------------|-------------------------------|--------------------|-------------------------------------------|
| SNP_51256_A_13400464 | NC_021166.1    | Ca_Kabuli_Chr07 | 13400464                | GG                              | AA                 | AA               | INTERGENIC                    |                    |                                           |
| SNP_51257_A_13408064 | NC_021166.1    | Ca_Kabuli_Chr07 | 13408064                | CC                              | GG                 | GG               | URR                           | 101507642          | probable galacturonosyltransferase-like 1 |
| SNP_51258_A_13408097 | NC_021166.1    | Ca_Kabuli_Chr07 | 13408097                | TT                              | CC                 | CC               | URR                           | 101507642          | probable galacturonosyltransferase-like 1 |
| SNP_51259_A_13408474 | NC_021166.1    | Ca_Kabuli_Chr07 | 13408474                | AA                              | GG                 | GG               | URR                           | 101507642          | probable galacturonosyltransferase-like 1 |
| SNP_51260_A_13408751 | NC_021166.1    | Ca_Kabuli_Chr07 | 13408751                | AA                              | CC                 | CC               | INTERGENIC                    |                    |                                           |
| SNP_51261_A_13410658 | NC_021166.1    | Ca_Kabuli_Chr07 | 13410658                | CC                              | TT                 | TT               | INTERGENIC                    |                    |                                           |
| SNP_51262_A_13410806 | NC_021166.1    | Ca_Kabuli_Chr07 | 13410806                | CC                              | TT                 | TT               | INTERGENIC                    |                    |                                           |
| SNP_51263_A_13412925 | NC_021166.1    | Ca_Kabuli_Chr07 | 13412925                | CC                              | TT                 | TT               | INTERGENIC                    |                    |                                           |
| SNP_51264_A_13413324 | NC_021166.1    | Ca_Kabuli_Chr07 | 13413324                | TT                              | CC                 | CC               | INTERGENIC                    |                    |                                           |
| SNP_51265_A_13414515 | NC_021166.1    | Ca_Kabuli_Chr07 | 13414515                | TT                              | GG                 | GG               | INTERGENIC                    |                    |                                           |
| SNP_51266_A_13414766 | NC_021166.1    | Ca_Kabuli_Chr07 | 13414766                | GG                              | TT                 | TT               | INTERGENIC                    |                    |                                           |
| SNP_51267_A_13415666 | NC_021166.1    | Ca_Kabuli_Chr07 | 13415666                | TT                              | CC                 | CC               | INTERGENIC                    |                    |                                           |
| SNP_51268_A_13415692 | NC_021166.1    | Ca_Kabuli_Chr07 | 13415692                | CC                              | TT                 | TT               | INTERGENIC                    |                    |                                           |
| SNP_51269_A_13416019 | NC_021166.1    | Ca_Kabuli_Chr07 | 13416019                | AA                              | GG                 | GG               | INTERGENIC                    |                    |                                           |
| SNP_51270_A_13439587 | NC_021166.1    | Ca_Kabuli_Chr07 | 13439587                | GG                              | AA                 | AA               | INTERGENIC                    |                    |                                           |
| SNP_51271_A_13439588 | NC_021166.1    | Ca_Kabuli_Chr07 | 13439588                | AA                              | GG                 | GG               | INTERGENIC                    |                    |                                           |
| SNP_51272_A_13442107 | NC_021166.1    | Ca_Kabuli_Chr07 | 13442107                | GG                              | AA                 | AA               | INTERGENIC                    |                    |                                           |
| SNP_51273_A_13442233 | NC_021166.1    | Ca_Kabuli_Chr07 | 13442233                | CC                              | TT                 | TT               | INTERGENIC                    |                    |                                           |
| SNP_51274_A_13443303 | NC_021166.1    | Ca_Kabuli_Chr07 | 13443303                | AA                              | TT                 | TT               | INTERGENIC                    |                    |                                           |
| SNP_51275_A_13443313 | NC_021166.1    | Ca_Kabuli_Chr07 | 13443313                | AA                              | GG                 | GG               | INTERGENIC                    |                    |                                           |
| SNP_51276_A_13443433 | NC_021166.1    | Ca_Kabuli_Chr07 | 13443433                | CC                              | TT                 | TT               | INTERGENIC                    |                    |                                           |
| SNP_51277_A_13444467 | NC_021166.1    | Ca_Kabuli_Chr07 | 13444467                | GG                              | AA                 | AA               | INTERGENIC                    |                    |                                           |

| SNPs IDs             | Chromosome IDs | Chromosomes     | Physical positions (bp) | CDC Frontier genome (Reference genome) | (Pusa 1103 & HPNB) | (ILWC 46 & LPNB) | Sequence Components of genome | Gene accession IDs | Putative functions                       |
|----------------------|----------------|-----------------|-------------------------|----------------------------------------|--------------------|------------------|-------------------------------|--------------------|------------------------------------------|
| SNP_51278_A_13444475 | NC_021166.1    | Ca_Kabuli_Chr07 | 13444475                | GG                                     | AA                 | AA               | INTERGENIC                    |                    |                                          |
| SNP_51279_A_13445096 | NC_021166.1    | Ca_Kabuli_Chr07 | 13445096                | AA                                     | GG                 | GG               | INTERGENIC                    |                    |                                          |
| SNP_51280_A_13445335 | NC_021166.1    | Ca_Kabuli_Chr07 | 13445335                | AA                                     | GG                 | GG               | INTERGENIC                    |                    |                                          |
| SNP_51281_A_13446840 | NC_021166.1    | Ca_Kabuli_Chr07 | 13446840                | CC                                     | TT                 | TT               | INTERGENIC                    |                    |                                          |
| SNP_51282_A_13446961 | NC_021166.1    | Ca_Kabuli_Chr07 | 13446961                | CC                                     | TT                 | TT               | INTERGENIC                    |                    |                                          |
| SNP_51283_A_13452665 | NC_021166.1    | Ca_Kabuli_Chr07 | 13452665                | CC                                     | TT                 | TT               | UPSTREAM                      | Gene_ma25248       | Unknown function                         |
| SNP_51285_A_13456929 | NC_021166.1    | Ca_Kabuli_Chr07 | 13456929                | GG                                     | AA                 | AA               | INTERGENIC                    |                    |                                          |
| SNP_51286_A_13456984 | NC_021166.1    | Ca_Kabuli_Chr07 | 13456984                | CC                                     | TT                 | TT               | INTERGENIC                    |                    |                                          |
| SNP_51287_A_13457059 | NC_021166.1    | Ca_Kabuli_Chr07 | 13457059                | GG                                     | AA                 | AA               | INTERGENIC                    |                    |                                          |
| SNP_51288_A_13457082 | NC_021166.1    | Ca_Kabuli_Chr07 | 13457082                | GG                                     | AA                 | AA               | INTERGENIC                    |                    |                                          |
| SNP_51289_A_13457443 | NC_021166.1    | Ca_Kabuli_Chr07 | 13457443                | AA                                     | GG                 | GG               | INTERGENIC                    |                    |                                          |
| SNP_51290_A_13461018 | NC_021166.1    | Ca_Kabuli_Chr07 | 13461018                | CC                                     | TT                 | TT               | INTERGENIC                    |                    |                                          |
| SNP_51291_A_13461175 | NC_021166.1    | Ca_Kabuli_Chr07 | 13461175                | TT                                     | CC                 | CC               | INTERGENIC                    |                    |                                          |
| SNP_51292_A_13467740 | NC_021166.1    | Ca_Kabuli_Chr07 | 13467740                | CC                                     | TT                 | TT               | URR                           | 101508277          | elongation of fatty acids protein 3-like |
| SNP_51295_A_13468639 | NC_021166.1    | Ca_Kabuli_Chr07 | 13468639                | CC                                     | AA                 | AA               | URR                           | 101508277          | elongation of fatty acids protein 3-like |
| SNP_51296_A_13468640 | NC_021166.1    | Ca_Kabuli_Chr07 | 13468640                | TT                                     | AA                 | AA               | URR                           | 101508277          | elongation of fatty acids protein 3-like |
| SNP_51297_A_13468936 | NC_021166.1    | Ca_Kabuli_Chr07 | 13468936                | AA                                     | GG                 | GG               | INTERGENIC                    |                    |                                          |
| SNP_51298_A_13468940 | NC_021166.1    | Ca_Kabuli_Chr07 | 13468940                | TT                                     | CC                 | CC               | INTERGENIC                    |                    |                                          |
| SNP_51299_A_13468967 | NC_021166.1    | Ca_Kabuli_Chr07 | 13468967                | CC                                     | TT                 | TT               | INTERGENIC                    |                    |                                          |
| SNP_51300_A_13469021 | NC_021166.1    | Ca_Kabuli_Chr07 | 13469021                | GG                                     | AA                 | AA               | INTERGENIC                    |                    |                                          |
| SNP_51301_A_13469289 | NC_021166.1    | Ca_Kabuli_Chr07 | 13469289                | AA                                     | TT                 | TT               | INTERGENIC                    |                    |                                          |
| SNP_51302_A_13476725 | NC_021166.1    | Ca_Kabuli_Chr07 | 13476725                | AA                                     | GG                 | GG               | INTERGENIC                    |                    |                                          |

| SNPs IDs             | Chromosome IDs | Chromosomes     | Physical positions (bp) | CDC Frontier (Reference genome) | (Pusa 1103 & HPNB) | (ILWC 46 & LPNB) | Sequence Components of genome | Gene accession IDs | Putative functions                         |
|----------------------|----------------|-----------------|-------------------------|---------------------------------|--------------------|------------------|-------------------------------|--------------------|--------------------------------------------|
| SNP_51303_A_13477453 | NC_021166.1    | Ca_Kabuli_Chr07 | 13477453                | CC                              | GG                 | GG               | INTERGENIC                    |                    |                                            |
| SNP_51304_A_13478433 | NC_021166.1    | Ca_Kabuli_Chr07 | 13478433                | AA                              | TT                 | TT               | DRR                           | 101498547          | uncharacterized LOC101498547               |
| SNP_51305_A_13479058 | NC_021166.1    | Ca_Kabuli_Chr07 | 13479058                | GG                              | AA                 | AA               | INTERGENIC                    |                    |                                            |
| SNP_51306_A_13479075 | NC_021166.1    | Ca_Kabuli_Chr07 | 13479075                | TT                              | CC                 | CC               | INTERGENIC                    |                    |                                            |
| SNP_51307_A_13479137 | NC_021166.1    | Ca_Kabuli_Chr07 | 13479137                | CC                              | TT                 | TT               | INTERGENIC                    |                    |                                            |
| SNP_51308_A_13479243 | NC_021166.1    | Ca_Kabuli_Chr07 | 13479243                | AA                              | CC                 | CC               | INTERGENIC                    |                    |                                            |
| SNP_51310_A_13479961 | NC_021166.1    | Ca_Kabuli_Chr07 | 13479961                | AA                              | CC                 | CC               | INTERGENIC                    |                    |                                            |
| SNP_51311_A_13479982 | NC_021166.1    | Ca_Kabuli_Chr07 | 13479982                | AA                              | GG                 | GG               | INTERGENIC                    |                    |                                            |
| SNP_51312_A_13480005 | NC_021166.1    | Ca_Kabuli_Chr07 | 13480005                | TT                              | GG                 | GG               | INTERGENIC                    |                    |                                            |
| SNP_51313_A_13481324 | NC_021166.1    | Ca_Kabuli_Chr07 | 13481324                | GG                              | CC                 | CC               | DRR                           | 101508599          | calcium uniporter protein 2, mitochondrial |
| SNP_51314_A_13484613 | NC_021166.1    | Ca_Kabuli_Chr07 | 13484613                | GG                              | TT                 | TT               | INTRON                        | 101508599          | calcium uniporter protein 2, mitochondrial |
| SNP_51315_A_13487446 | NC_021166.1    | Ca_Kabuli_Chr07 | 13487446                | AA                              | TT                 | TT               | INTERGENIC                    |                    |                                            |
| SNP_51316_A_13492728 | NC_021166.1    | Ca_Kabuli_Chr07 | 13492728                | AA                              | GG                 | GG               | INTERGENIC                    |                    |                                            |
| SNP_51317_A_13493220 | NC_021166.1    | Ca_Kabuli_Chr07 | 13493220                | GG                              | TT                 | TT               | INTERGENIC                    |                    |                                            |
| SNP_51318_A_13493697 | NC_021166.1    | Ca_Kabuli_Chr07 | 13493697                | TT                              | CC                 | CC               | INTERGENIC                    |                    |                                            |
| SNP_51319_A_13494586 | NC_021166.1    | Ca_Kabuli_Chr07 | 13494586                | CC                              | TT                 | TT               | INTERGENIC                    |                    |                                            |
| SNP_51322_A_13498236 | NC_021166.1    | Ca_Kabuli_Chr07 | 13498236                | CC                              | GG                 | GG               | INTERGENIC                    |                    |                                            |
| SNP_51323_A_13499866 | NC_021166.1    | Ca_Kabuli_Chr07 | 13499866                | TT                              | CC                 | CC               | INTERGENIC                    |                    |                                            |
| SNP_51324_A_13500412 | NC_021166.1    | Ca_Kabuli_Chr07 | 13500412                | GG                              | TT                 | TT               | INTERGENIC                    |                    |                                            |
| SNP_51325_A_13500420 | NC_021166.1    | Ca_Kabuli_Chr07 | 13500420                | CC                              | AA                 | AA               | INTERGENIC                    |                    |                                            |
| SNP_51327_A_13500485 | NC_021166.1    | Ca_Kabuli_Chr07 | 13500485                | AA                              | TT                 | TT               | INTERGENIC                    |                    |                                            |
| SNP_51328_A_13500557 | NC_021166.1    | Ca_Kabuli_Chr07 | 13500557                | AA                              | CC                 | CC               | INTERGENIC                    |                    |                                            |

| SNPs IDs             | Chromosome IDs | Chromosomes     | Physical positions (bp) | CDC Frontier genome (Reference genome) | (Pusa 1103 & HPNB) | (ILWC 46 & LPNB) | Sequence Components of genome | Gene accession IDs | Putative functions             |
|----------------------|----------------|-----------------|-------------------------|----------------------------------------|--------------------|------------------|-------------------------------|--------------------|--------------------------------|
| SNP_51329_A_13501447 | NC_021166.1    | Ca_Kabuli_Chr07 | 13501447                | AA                                     | CC                 | CC               | INTERGENIC                    |                    |                                |
| SNP_51330_A_13504367 | NC_021166.1    | Ca_Kabuli_Chr07 | 13504367                | TT                                     | CC                 | CC               | INTERGENIC                    |                    |                                |
| SNP_51331_A_13506856 | NC_021166.1    | Ca_Kabuli_Chr07 | 13506856                | TT                                     | CC                 | CC               | INTERGENIC                    |                    |                                |
| SNP_51332_A_13506857 | NC_021166.1    | Ca_Kabuli_Chr07 | 13506857                | CC                                     | TT                 | TT               | INTERGENIC                    |                    |                                |
| SNP_51333_A_13506878 | NC_021166.1    | Ca_Kabuli_Chr07 | 13506878                | GG                                     | AA                 | AA               | INTERGENIC                    |                    |                                |
| SNP_51334_A_13506882 | NC_021166.1    | Ca_Kabuli_Chr07 | 13506882                | CC                                     | TT                 | TT               | INTERGENIC                    |                    |                                |
| SNP_51335_A_13507138 | NC_021166.1    | Ca_Kabuli_Chr07 | 13507138                | TT                                     | CC                 | CC               | INTERGENIC                    |                    |                                |
| SNP_51336_A_13507169 | NC_021166.1    | Ca_Kabuli_Chr07 | 13507169                | GG                                     | AA                 | AA               | INTERGENIC                    |                    |                                |
| SNP_51337_A_13507201 | NC_021166.1    | Ca_Kabuli_Chr07 | 13507201                | AA                                     | TT                 | TT               | INTERGENIC                    |                    |                                |
| SNP_51338_A_13511877 | NC_021166.1    | Ca_Kabuli_Chr07 | 13511877                | TT                                     | CC                 | CC               | INTERGENIC                    |                    |                                |
| SNP_51339_A_13511926 | NC_021166.1    | Ca_Kabuli_Chr07 | 13511926                | AA                                     | GG                 | GG               | INTERGENIC                    |                    |                                |
| SNP_51340_A_13511932 | NC_021166.1    | Ca_Kabuli_Chr07 | 13511932                | CC                                     | TT                 | TT               | INTERGENIC                    |                    |                                |
| SNP_51341_A_13512019 | NC_021166.1    | Ca_Kabuli_Chr07 | 13512019                | TT                                     | AA                 | AA               | INTERGENIC                    |                    |                                |
| SNP_51342_A_13512024 | NC_021166.1    | Ca_Kabuli_Chr07 | 13512024                | CC                                     | TT                 | TT               | INTERGENIC                    |                    |                                |
| SNP_51343_A_13512143 | NC_021166.1    | Ca_Kabuli_Chr07 | 13512143                | AA                                     | GG                 | GG               | INTERGENIC                    |                    |                                |
| SNP_51344_A_13512148 | NC_021166.1    | Ca_Kabuli_Chr07 | 13512148                | AA                                     | TT                 | TT               | INTERGENIC                    |                    |                                |
| SNP_51345_A_13512152 | NC_021166.1    | Ca_Kabuli_Chr07 | 13512152                | TT                                     | CC                 | CC               | INTERGENIC                    |                    |                                |
| SNP_51346_A_13512187 | NC_021166.1    | Ca_Kabuli_Chr07 | 13512187                | GG                                     | AA                 | AA               | INTERGENIC                    |                    |                                |
| SNP_51347_A_13512371 | NC_021166.1    | Ca_Kabuli_Chr07 | 13512371                | GG                                     | CC                 | CC               | INTERGENIC                    |                    |                                |
| SNP_51348_A_13515064 | NC_021166.1    | Ca_Kabuli_Chr07 | 13515064                | GG                                     | AA                 | AA               | INTRON                        | 101508912          | UPF0496 protein At2g18630-like |
| SNP_51349_A_13516558 | NC_021166.1    | Ca_Kabuli_Chr07 | 13516558                | GG                                     | TT                 | TT               | URR                           | 101508912          | UPF0496 protein At2g18630-like |
| SNP_51350_A_13516648 | NC_021166.1    | Ca_Kabuli_Chr07 | 13516648                | AA                                     | GG                 | GG               | URR                           | 101508912          | UPF0496 protein At2g18630-like |

| SNPs IDs             | Chromosome IDs | Chromosomes     | Physical positions (bp) | CDC Frontier (Reference genome) | (Pusa 1103 & HPNB) | (ILWC 46 & LPNB) | Sequence Components of genome | Gene accession IDs | Putative functions                       |
|----------------------|----------------|-----------------|-------------------------|---------------------------------|--------------------|------------------|-------------------------------|--------------------|------------------------------------------|
| SNP_51351_A_13516921 | NC_021166.1    | Ca_Kabuli_Chr07 | 13516921                | AA                              | GG                 | GG               | URR                           | 101508912          | UPF0496 protein At2g18630-like           |
| SNP_51352_A_13516924 | NC_021166.1    | Ca_Kabuli_Chr07 | 13516924                | AA                              | GG                 | GG               | URR                           | 101508912          | UPF0496 protein At2g18630-like           |
| SNP_51353_A_13516944 | NC_021166.1    | Ca_Kabuli_Chr07 | 13516944                | TT                              | CC                 | CC               | URR                           | 101508912          | UPF0496 protein At2g18630-like           |
| SNP_51355_A_13525149 | NC_021166.1    | Ca_Kabuli_Chr07 | 13525149                | TT                              | AA                 | AA               | INTERGENIC                    |                    |                                          |
| SNP_51356_A_13527015 | NC_021166.1    | Ca_Kabuli_Chr07 | 13527015                | CC                              | TT                 | TT               | INTERGENIC                    |                    |                                          |
| SNP_51357_A_13530426 | NC_021166.1    | Ca_Kabuli_Chr07 | 13530426                | TT                              | CC                 | CC               | INTERGENIC                    |                    |                                          |
| SNP_51358_A_13530429 | NC_021166.1    | Ca_Kabuli_Chr07 | 13530429                | TT                              | CC                 | CC               | INTERGENIC                    |                    |                                          |
| SNP_51359_A_13530944 | NC_021166.1    | Ca_Kabuli_Chr07 | 13530944                | CC                              | TT                 | TT               | INTERGENIC                    |                    |                                          |
| SNP_51360_A_13540991 | NC_021166.1    | Ca_Kabuli_Chr07 | 13540991                | TT                              | CC                 | CC               | INTERGENIC                    |                    |                                          |
| SNP_51361_A_13545046 | NC_021166.1    | Ca_Kabuli_Chr07 | 13545046                | TT                              | CC                 | CC               | INTRON                        | 101498884          | serine/threonine-protein kinase HT1-like |
| SNP_51362_A_13545052 | NC_021166.1    | Ca_Kabuli_Chr07 | 13545052                | AA                              | CC                 | CC               | INTRON                        | 101498884          | serine/threonine-protein kinase HT1-like |
| SNP_51363_A_13545054 | NC_021166.1    | Ca_Kabuli_Chr07 | 13545054                | AA                              | TT                 | TT               | INTRON                        | 101498884          | serine/threonine-protein kinase HT1-like |
| SNP_51364_A_13545065 | NC_021166.1    | Ca_Kabuli_Chr07 | 13545065                | AA                              | GG                 | GG               | INTRON                        | 101498884          | serine/threonine-protein kinase HT1-like |
| SNP_51365_A_13545076 | NC_021166.1    | Ca_Kabuli_Chr07 | 13545076                | CC                              | TT                 | TT               | INTRON                        | 101498884          | serine/threonine-protein kinase HT1-like |
| SNP_51366_A_13545101 | NC_021166.1    | Ca_Kabuli_Chr07 | 13545101                | CC                              | TT                 | TT               | INTRON                        | 101498884          | serine/threonine-protein kinase HT1-like |
| SNP_51367_A_13545109 | NC_021166.1    | Ca_Kabuli_Chr07 | 13545109                | TT                              | CC                 | CC               | INTRON                        | 101498884          | serine/threonine-protein kinase HT1-like |
| SNP_51368_A_13546019 | NC_021166.1    | Ca_Kabuli_Chr07 | 13546019                | CC                              | TT                 | TT               | INTRON                        | 101498884          | serine/threonine-protein kinase HT1-like |
| SNP_51369_A_13548899 | NC_021166.1    | Ca_Kabuli_Chr07 | 13548899                | GG                              | AA                 | AA               | DRR                           | 101509554          | G-box-binding factor 1                   |
| SNP_51370_A_13548901 | NC_021166.1    | Ca_Kabuli_Chr07 | 13548901                | TT                              | CC                 | CC               | DRR                           | 101509554          | G-box-binding factor 1                   |
| SNP_51371_A_13549172 | NC_021166.1    | Ca_Kabuli_Chr07 | 13549172                | GG                              | CC                 | CC               | DRR                           | 101509554          | G-box-binding factor 1                   |
| SNP_51372_A_13556146 | NC_021166.1    | Ca_Kabuli_Chr07 | 13556146                | GG                              | AA                 | AA               | URR                           | 101509554          | G-box-binding factor 1                   |
| SNP_51373_A_13566897 | NC_021166.1    | Ca_Kabuli_Chr07 | 13566897                | AA                              | GG                 | GG               | URR                           | 101499525          | RNA-binding protein 48-like              |



| SNPs IDs             | Chromosome IDs | Chromosomes     | Physical positions (bp) | CDC Frontier (Reference genome) | (Pusa 1103 & HPNB) | (ILWC 46 & LPNB) | Sequence Components of genome | Gene accession IDs | Putative functions                                 |
|----------------------|----------------|-----------------|-------------------------|---------------------------------|--------------------|------------------|-------------------------------|--------------------|----------------------------------------------------|
| SNP_51374_A_13572910 | NC_021166.1    | Ca_Kabuli_Chr07 | 13572910                | CC                              | GG                 | GG               | INTRON                        | 101510095          | tRNA threonylcarbamoyladenosine dehydratase 2-like |
| SNP_51375_A_13573126 | NC_021166.1    | Ca_Kabuli_Chr07 | 13573126                | AA                              | GG                 | GG               | INTRON                        | 101510095          | tRNA threonylcarbamoyladenosine dehydratase 2-like |
| SNP_51376_A_13583991 | NC_021166.1    | Ca_Kabuli_Chr07 | 13583991                | AA                              | TT                 | TT               | URR                           | 101510420          | scarecrow-like protein 15                          |
| SNP_51377_A_13587192 | NC_021166.1    | Ca_Kabuli_Chr07 | 13587192                | CC                              | AA                 | AA               | INTERGENIC                    |                    |                                                    |
| SNP_51378_A_13587693 | NC_021166.1    | Ca_Kabuli_Chr07 | 13587693                | CC                              | TT                 | TT               | INTERGENIC                    |                    |                                                    |
| SNP_51379_A_13588041 | NC_021166.1    | Ca_Kabuli_Chr07 | 13588041                | TT                              | CC                 | CC               | INTERGENIC                    |                    |                                                    |
| SNP_51380_A_13592258 | NC_021166.1    | Ca_Kabuli_Chr07 | 13592258                | AA                              | GG                 | GG               | INTERGENIC                    |                    |                                                    |
| SNP_51381_A_13592629 | NC_021166.1    | Ca_Kabuli_Chr07 | 13592629                | AA                              | CC                 | CC               | INTERGENIC                    |                    |                                                    |
| SNP_51382_A_13594228 | NC_021166.1    | Ca_Kabuli_Chr07 | 13594228                | CC                              | TT                 | TT               | INTERGENIC                    |                    |                                                    |
| SNP_51383_A_13595212 | NC_021166.1    | Ca_Kabuli_Chr07 | 13595212                | CC                              | TT                 | TT               | INTERGENIC                    |                    |                                                    |
| SNP_51384_A_13595213 | NC_021166.1    | Ca_Kabuli_Chr07 | 13595213                | GG                              | AA                 | AA               | INTERGENIC                    |                    |                                                    |
| SNP_51385_A_13597018 | NC_021166.1    | Ca_Kabuli_Chr07 | 13597018                | AA                              | GG                 | GG               | INTERGENIC                    |                    |                                                    |
| SNP_51387_A_13599634 | NC_021166.1    | Ca_Kabuli_Chr07 | 13599634                | CC                              | AA                 | AA               | INTERGENIC                    |                    |                                                    |
| SNP_51388_A_13601877 | NC_021166.1    | Ca_Kabuli_Chr07 | 13601877                | AA                              | CC                 | CC               | INTERGENIC                    |                    |                                                    |
| SNP_51389_A_13606818 | NC_021166.1    | Ca_Kabuli_Chr07 | 13606818                | AA                              | CC                 | CC               | INTRON                        | 101510748          | protein indeterminate-domain 1                     |
| SNP_51390_A_13612103 | NC_021166.1    | Ca_Kabuli_Chr07 | 13612103                | GG                              | TT                 | TT               | INTERGENIC                    |                    |                                                    |
| SNP_51391_A_13612435 | NC_021166.1    | Ca_Kabuli_Chr07 | 13612435                | TT                              | GG                 | GG               | INTERGENIC                    |                    |                                                    |
| SNP_51392_A_13613774 | NC_021166.1    | Ca_Kabuli_Chr07 | 13613774                | TT                              | AA                 | AA               | INTERGENIC                    |                    |                                                    |
| SNP_51393_A_13617846 | NC_021166.1    | Ca_Kabuli_Chr07 | 13617846                | TT                              | CC                 | CC               | INTERGENIC                    |                    |                                                    |
| SNP_51394_A_13618612 | NC_021166.1    | Ca_Kabuli_Chr07 | 13618612                | GG                              | AA                 | AA               | INTERGENIC                    |                    |                                                    |
| SNP_51395_A_13620058 | NC_021166.1    | Ca_Kabuli_Chr07 | 13620058                | GG                              | AA                 | AA               | INTERGENIC                    |                    |                                                    |
| SNP_51396_A_13620059 | NC_021166.1    | Ca_Kabuli_Chr07 | 13620059                | CC                              | TT                 | TT               | INTERGENIC                    |                    |                                                    |

| SNPs IDs             | Chromosome IDs | Chromosomes     | Physical positions (bp) | CDC Frontier genome (Reference genome) | (Pusa 1103 & HPNB) | (ILWC 46 & LPNB) | Sequence Components of genome | Gene accession IDs | Putative functions                                            |
|----------------------|----------------|-----------------|-------------------------|----------------------------------------|--------------------|------------------|-------------------------------|--------------------|---------------------------------------------------------------|
| SNP_51397_A_13620091 | NC_021166.1    | Ca_Kabuli_Chr07 | 13620091                | TT                                     | GG                 | GG               | INTERGENIC                    |                    |                                                               |
| SNP_51398_A_13620093 | NC_021166.1    | Ca_Kabuli_Chr07 | 13620093                | AA                                     | GG                 | GG               | INTERGENIC                    |                    |                                                               |
| SNP_51399_A_13621939 | NC_021166.1    | Ca_Kabuli_Chr07 | 13621939                | GG                                     | CC                 | CC               | INTERGENIC                    |                    |                                                               |
| SNP_51401_A_13623912 | NC_021166.1    | Ca_Kabuli_Chr07 | 13623912                | GG                                     | AA                 | AA               | INTRON                        | 101499825          | probable polyol transporter 6                                 |
| SNP_51402_A_13631028 | NC_021166.1    | Ca_Kabuli_Chr07 | 13631028                | TT                                     | CC                 | CC               | INTERGENIC                    |                    |                                                               |
| SNP_51403_A_13631099 | NC_021166.1    | Ca_Kabuli_Chr07 | 13631099                | TT                                     | CC                 | CC               | INTERGENIC                    |                    |                                                               |
| SNP_51404_A_13644994 | NC_021166.1    | Ca_Kabuli_Chr07 | 13644994                | TT                                     | CC                 | CC               | INTERGENIC                    |                    |                                                               |
| SNP_51405_A_13648939 | NC_021166.1    | Ca_Kabuli_Chr07 | 13648939                | AA                                     | TT                 | TT               | INTERGENIC                    |                    |                                                               |
| SNP_51406_A_13648946 | NC_021166.1    | Ca_Kabuli_Chr07 | 13648946                | AA                                     | TT                 | TT               | INTERGENIC                    |                    |                                                               |
| SNP_51407_A_13652555 | NC_021166.1    | Ca_Kabuli_Chr07 | 13652555                | AA                                     | GG                 | GG               | INTRON                        | 101511818          | acidic leucine-rich nuclear phosphoprotein 32-related protein |
| SNP_51408_A_13652621 | NC_021166.1    | Ca_Kabuli_Chr07 | 13652621                | GG                                     | TT                 | TT               | INTRON                        | 101511818          | acidic leucine-rich nuclear phosphoprotein 32-related protein |
| SNP_51411_A_13657792 | NC_021166.1    | Ca_Kabuli_Chr07 | 13657792                | AA                                     | GG                 | GG               | INTERGENIC                    |                    |                                                               |
| SNP_51412_A_13659153 | NC_021166.1    | Ca_Kabuli_Chr07 | 13659153                | TT                                     | AA                 | AA               | INTERGENIC                    |                    |                                                               |
| SNP_51413_A_13663932 | NC_021166.1    | Ca_Kabuli_Chr07 | 13663932                | GG                                     | AA                 | AA               | INTERGENIC                    |                    |                                                               |
| SNP_51414_A_13664484 | NC_021166.1    | Ca_Kabuli_Chr07 | 13664484                | GG                                     | TT                 | TT               | INTERGENIC                    |                    |                                                               |
| SNP_51415_A_13664485 | NC_021166.1    | Ca_Kabuli_Chr07 | 13664485                | TT                                     | GG                 | GG               | INTERGENIC                    |                    |                                                               |
| SNP_51416_A_13667103 | NC_021166.1    | Ca_Kabuli_Chr07 | 13667103                | TT                                     | GG                 | GG               | INTRON                        | 101512251          | U1 small nuclear ribonucleoprotein 70 kDa                     |
| SNP_51417_A_13667676 | NC_021166.1    | Ca_Kabuli_Chr07 | 13667676                | AA                                     | TT                 | TT               | INTRON                        | 101512251          | U1 small nuclear ribonucleoprotein 70 kDa                     |
| SNP_51418_A_13671455 | NC_021166.1    | Ca_Kabuli_Chr07 | 13671455                | AA                                     | GG                 | GG               | INTERGENIC                    |                    |                                                               |
| SNP_51419_A_13672668 | NC_021166.1    | Ca_Kabuli_Chr07 | 13672668                | TT                                     | CC                 | CC               | DRR                           | 101512581          | uncharacterized LOC101512581                                  |
| SNP_51420_A_13673461 | NC_021166.1    | Ca_Kabuli_Chr07 | 13673461                | AA                                     | CC                 | CC               | DRR                           | 101512581          | uncharacterized LOC101512581                                  |
| SNP_51421_A_13674703 | NC_021166.1    | Ca_Kabuli_Chr07 | 13674703                | AA                                     | GG                 | GG               | INTERGENIC                    |                    |                                                               |

| SNPs IDs             | Chromosome IDs | Chromosomes     | Physical positions (bp) | CDC Frontier genome (Reference genome) | (Pusa 1103 & HPNB) | (ILWC 46 & LPNB) | Sequence Components of genome | Gene accession IDs | Putative functions           |
|----------------------|----------------|-----------------|-------------------------|----------------------------------------|--------------------|------------------|-------------------------------|--------------------|------------------------------|
| SNP_51422_A_13674773 | NC_021166.1    | Ca_Kabuli_Chr07 | 13674773                | GG                                     | AA                 | AA               | INTERGENIC                    |                    |                              |
| SNP_51423_A_13675010 | NC_021166.1    | Ca_Kabuli_Chr07 | 13675010                | AA                                     | GG                 | GG               | INTERGENIC                    |                    |                              |
| SNP_51425_A_13680337 | NC_021166.1    | Ca_Kabuli_Chr07 | 13680337                | GG                                     | AA                 | AA               | INTERGENIC                    |                    |                              |
| SNP_51426_A_13684199 | NC_021166.1    | Ca_Kabuli_Chr07 | 13684199                | AA                                     | GG                 | GG               | URR                           | 101512887          | uncharacterized LOC101512887 |
| SNP_51428_A_13684405 | NC_021166.1    | Ca_Kabuli_Chr07 | 13684405                | CC                                     | GG                 | GG               | URR                           | 101512887          | uncharacterized LOC101512887 |
| SNP_51430_A_13684603 | NC_021166.1    | Ca_Kabuli_Chr07 | 13684603                | CC                                     | AA                 | AA               | URR                           | 101512887          | uncharacterized LOC101512887 |
| SNP_51431_A_13686215 | NC_021166.1    | Ca_Kabuli_Chr07 | 13686215                | TT                                     | CC                 | CC               | INTERGENIC                    |                    |                              |
| SNP_51432_A_13686546 | NC_021166.1    | Ca_Kabuli_Chr07 | 13686546                | CC                                     | TT                 | TT               | INTERGENIC                    |                    |                              |
| SNP_51434_A_13687390 | NC_021166.1    | Ca_Kabuli_Chr07 | 13687390                | AA                                     | GG                 | GG               | INTERGENIC                    |                    |                              |
| SNP_51435_A_13689006 | NC_021166.1    | Ca_Kabuli_Chr07 | 13689006                | CC                                     | TT                 | TT               | INTERGENIC                    |                    |                              |
| SNP_51436_A_13689018 | NC_021166.1    | Ca_Kabuli_Chr07 | 13689018                | GG                                     | AA                 | AA               | INTERGENIC                    |                    |                              |
| SNP_51437_A_13690527 | NC_021166.1    | Ca_Kabuli_Chr07 | 13690527                | GG                                     | AA                 | AA               | INTERGENIC                    |                    |                              |
| SNP_51439_A_13690626 | NC_021166.1    | Ca_Kabuli_Chr07 | 13690626                | AA                                     | GG                 | GG               | INTERGENIC                    |                    |                              |
| SNP_51440_A_13693370 | NC_021166.1    | Ca_Kabuli_Chr07 | 13693370                | CC                                     | TT                 | TT               | INTERGENIC                    |                    |                              |
| SNP_51441_A_13693385 | NC_021166.1    | Ca_Kabuli_Chr07 | 13693385                | AA                                     | GG                 | GG               | INTERGENIC                    |                    |                              |
| SNP_51442_A_13693560 | NC_021166.1    | Ca_Kabuli_Chr07 | 13693560                | TT                                     | CC                 | CC               | INTERGENIC                    |                    |                              |
| SNP_51443_A_13693584 | NC_021166.1    | Ca_Kabuli_Chr07 | 13693584                | AA                                     | GG                 | GG               | INTERGENIC                    |                    |                              |
| SNP_51444_A_13696404 | NC_021166.1    | Ca_Kabuli_Chr07 | 13696404                | GG                                     | AA                 | AA               | INTERGENIC                    |                    |                              |
| SNP_51445_A_13696406 | NC_021166.1    | Ca_Kabuli_Chr07 | 13696406                | TT                                     | CC                 | CC               | INTERGENIC                    |                    |                              |
| SNP_51446_A_13700952 | NC_021166.1    | Ca_Kabuli_Chr07 | 13700952                | TT                                     | AA                 | AA               | INTERGENIC                    |                    |                              |
| SNP_51447_A_13701079 | NC_021166.1    | Ca_Kabuli_Chr07 | 13701079                | GG                                     | AA                 | AA               | INTERGENIC                    |                    |                              |
| SNP_51448_A_13701512 | NC_021166.1    | Ca_Kabuli_Chr07 | 13701512                | TT                                     | CC                 | CC               | INTERGENIC                    |                    |                              |

| SNPs IDs             | Chromosome IDs | Chromosomes     | Physical positions (bp) | CDC Frontier (Reference genome) | (Pusa 1103 & HPNB) | (ILWC 46 & LPNB) | Sequence Components of genome | Gene accession IDs | Putative functions                                                         |
|----------------------|----------------|-----------------|-------------------------|---------------------------------|--------------------|------------------|-------------------------------|--------------------|----------------------------------------------------------------------------|
| SNP_51449_A_13706141 | NC_021166.1    | Ca_Kabuli_Chr07 | 13706141                | TT                              | CC                 | CC               | INTERGENIC                    |                    |                                                                            |
| SNP_51450_A_13706145 | NC_021166.1    | Ca_Kabuli_Chr07 | 13706145                | AA                              | GG                 | GG               | INTERGENIC                    |                    |                                                                            |
| SNP_51451_A_13708061 | NC_021166.1    | Ca_Kabuli_Chr07 | 13708061                | TT                              | AA                 | AA               | INTERGENIC                    |                    |                                                                            |
| SNP_51452_A_13709829 | NC_021166.1    | Ca_Kabuli_Chr07 | 13709829                | AA                              | GG                 | GG               | INTERGENIC                    |                    |                                                                            |
| SNP_51453_A_13710739 | NC_021166.1    | Ca_Kabuli_Chr07 | 13710739                | CC                              | AA                 | AA               | INTERGENIC                    |                    |                                                                            |
| SNP_51454_A_13710899 | NC_021166.1    | Ca_Kabuli_Chr07 | 13710899                | GG                              | TT                 | TT               | INTERGENIC                    |                    |                                                                            |
| SNP_51455_A_13710970 | NC_021166.1    | Ca_Kabuli_Chr07 | 13710970                | GG                              | AA                 | AA               | INTERGENIC                    |                    |                                                                            |
| SNP_51456_A_13711479 | NC_021166.1    | Ca_Kabuli_Chr07 | 13711479                | AA                              | CC                 | CC               | INTERGENIC                    |                    |                                                                            |
| SNP_51457_A_13717827 | NC_021166.1    | Ca_Kabuli_Chr07 | 13717827                | TT                              | AA                 | AA               | INTRON                        | 101500152          | cytochrome P450 90B1-like                                                  |
| SNP_51458_A_13717886 | NC_021166.1    | Ca_Kabuli_Chr07 | 13717886                | TT                              | AA                 | AA               | INTRON                        | 101500152          | cytochrome P450 90B1-like                                                  |
| SNP_51459_A_13717997 | NC_021166.1    | Ca_Kabuli_Chr07 | 13717997                | CC                              | TT                 | TT               | INTRON                        | 101500152          | cytochrome P450 90B1-like                                                  |
| SNP_51460_A_13718629 | NC_021166.1    | Ca_Kabuli_Chr07 | 13718629                | CC                              | TT                 | TT               | INTRON                        | 101500152          | cytochrome P450 90B1-like                                                  |
| SNP_51461_A_13719009 | NC_021166.1    | Ca_Kabuli_Chr07 | 13719009                | TT                              | CC                 | CC               | INTRON                        | 101500152          | cytochrome P450 90B1-like                                                  |
| SNP_51462_A_13719047 | NC_021166.1    | Ca_Kabuli_Chr07 | 13719047                | TT                              | CC                 | CC               | INTRON                        | 101500152          | cytochrome P450 90B1-like                                                  |
| SNP_51463_A_13719063 | NC_021166.1    | Ca_Kabuli_Chr07 | 13719063                | AA                              | TT                 | TT               | INTRON                        | 101500152          | cytochrome P450 90B1-like                                                  |
| SNP_51464_A_13719066 | NC_021166.1    | Ca_Kabuli_Chr07 | 13719066                | TT                              | AA                 | AA               | INTRON                        | 101500152          | cytochrome P450 90B1-like                                                  |
| SNP_51465_A_13722071 | NC_021166.1    | Ca_Kabuli_Chr07 | 13722071                | TT                              | CC                 | CC               | URR                           | 101500152          | cytochrome P450 90B1-like                                                  |
| SNP_51466_A_13722080 | NC_021166.1    | Ca_Kabuli_Chr07 | 13722080                | AA                              | TT                 | TT               | URR                           | 101500152          | cytochrome P450 90B1-like                                                  |
| SNP_51467_A_13728022 | NC_021166.1    | Ca_Kabuli_Chr07 | 13728022                | CC                              | AA                 | AA               | INTRON                        | 101513215          | succinate dehydrogenase [ubiquinone] flavoprotein subunit 1, mitochondrial |
| SNP_51468_A_13730027 | NC_021166.1    | Ca_Kabuli_Chr07 | 13730027                | CC                              | GG                 | GG               | INTRON                        | 101513215          | succinate dehydrogenase [ubiquinone] flavoprotein subunit 1, mitochondrial |
| SNP_51469_A_13735388 | NC_021166.1    | Ca_Kabuli_Chr07 | 13735388                | TT                              | CC                 | CC               | INTERGENIC                    |                    |                                                                            |
| SNP_51470_A_13735389 | NC_021166.1    | Ca_Kabuli_Chr07 | 13735389                | TT                              | GG                 | GG               | INTERGENIC                    |                    |                                                                            |

| SNPs IDs             | Chromosome IDs | Chromosomes     | Physical positions (bp) | CDC Frontier (Reference genome) | (Pusa 1103 & HPNB) | (ILWC 46 & LPNB) | Sequence Components of genome | Gene accession IDs | Putative functions                                                       |
|----------------------|----------------|-----------------|-------------------------|---------------------------------|--------------------|------------------|-------------------------------|--------------------|--------------------------------------------------------------------------|
| SNP_51471_A_13735392 | NC_021166.1    | Ca_Kabuli_Chr07 | 13735392                | TT                              | CC                 | CC               | INTERGENIC                    |                    |                                                                          |
| SNP_51472_A_13749296 | NC_021166.1    | Ca_Kabuli_Chr07 | 13749296                | TT                              | AA                 | AA               | DRR                           | 101514515          | vam6/Vps39-like protein                                                  |
| SNP_51473_A_13751965 | NC_021166.1    | Ca_Kabuli_Chr07 | 13751965                | AA                              | CC                 | CC               | INTRON                        | 101514515          | vam6/Vps39-like protein                                                  |
| SNP_51474_A_13759341 | NC_021166.1    | Ca_Kabuli_Chr07 | 13759341                | CC                              | GG                 | GG               | DRR                           | 101515054          | protein N-lysine methyltransferase METTL21A-like                         |
| SNP_51475_A_13761295 | NC_021166.1    | Ca_Kabuli_Chr07 | 13761295                | GG                              | CC                 | CC               | URR                           | 101514515          | vam6/Vps39-like protein                                                  |
| SNP_51476_A_13763095 | NC_021166.1    | Ca_Kabuli_Chr07 | 13763095                | GG                              | AA                 | AA               | DRR                           | 101515376          | AP-3 complex subunit sigma                                               |
| SNP_51477_A_13763113 | NC_021166.1    | Ca_Kabuli_Chr07 | 13763113                | AA                              | GG                 | GG               | DRR                           | 101515376          | AP-3 complex subunit sigma                                               |
| SNP_51478_A_13763627 | NC_021166.1    | Ca_Kabuli_Chr07 | 13763627                | AA                              | GG                 | GG               | DRR                           | 101515376          | AP-3 complex subunit sigma                                               |
| SNP_51479_A_13763628 | NC_021166.1    | Ca_Kabuli_Chr07 | 13763628                | AA                              | TT                 | TT               | DRR                           | 101515376          | AP-3 complex subunit sigma                                               |
| SNP_51480_A_13763629 | NC_021166.1    | Ca_Kabuli_Chr07 | 13763629                | CC                              | TT                 | TT               | DRR                           | 101515376          | AP-3 complex subunit sigma                                               |
| SNP_51481_A_13763630 | NC_021166.1    | Ca_Kabuli_Chr07 | 13763630                | TT                              | CC                 | CC               | DRR                           | 101515376          | AP-3 complex subunit sigma                                               |
| SNP_51482_A_13763631 | NC_021166.1    | Ca_Kabuli_Chr07 | 13763631                | TT                              | AA                 | AA               | DRR                           | 101515376          | AP-3 complex subunit sigma                                               |
| SNP_51483_A_13765947 | NC_021166.1    | Ca_Kabuli_Chr07 | 13765947                | GG                              | AA                 | AA               | INTERGENIC                    |                    |                                                                          |
| SNP_51484_A_13768067 | NC_021166.1    | Ca_Kabuli_Chr07 | 13768067                | GG                              | AA                 | AA               | INTERGENIC                    |                    |                                                                          |
| SNP_51485_A_13768452 | NC_021166.1    | Ca_Kabuli_Chr07 | 13768452                | TT                              | CC                 | CC               | URR                           | 101515376          | AP-3 complex subunit sigma                                               |
| SNP_51486_A_13768466 | NC_021166.1    | Ca_Kabuli_Chr07 | 13768466                | CC                              | AA                 | AA               | URR                           | 101515376          | AP-3 complex subunit sigma                                               |
| SNP_51487_A_13769142 | NC_021166.1    | Ca_Kabuli_Chr07 | 13769142                | TT                              | CC                 | CC               | DRR                           | 101515711          | pyridine nucleotide-disulfide oxidoreductase domain-containing protein 2 |
| SNP_51488_A_13769169 | NC_021166.1    | Ca_Kabuli_Chr07 | 13769169                | CC                              | GG                 | GG               | DRR                           | 101515711          | pyridine nucleotide-disulfide oxidoreductase domain-containing protein 2 |
| SNP_51489_A_13770562 | NC_021166.1    | Ca_Kabuli_Chr07 | 13770562                | CC                              | TT                 | TT               | INTERGENIC                    |                    |                                                                          |
| SNP_51490_A_13772016 | NC_021166.1    | Ca_Kabuli_Chr07 | 13772016                | GG                              | TT                 | TT               | INTERGENIC                    |                    |                                                                          |
| SNP_51491_A_13775394 | NC_021166.1    | Ca_Kabuli_Chr07 | 13775394                | CC                              | TT                 | TT               | INTRON                        | 101515711          | pyridine nucleotide-disulfide oxidoreductase domain-containing protein 2 |
| SNP_51492_A_13775420 | NC_021166.1    | Ca_Kabuli_Chr07 | 13775420                | AA                              | GG                 | GG               | INTRON                        | 101515711          | pyridine nucleotide-disulfide oxidoreductase domain-containing protein 2 |

| SNPs IDs             | Chromosome IDs | Chromosomes     | Physical positions (bp) | CDC Frontier genome (Reference genome) | (Pusa 1103 & HPNB) | (ILWC 46 & LPNB) | Sequence Components of genome | Gene accession IDs | Putative functions                                                       |
|----------------------|----------------|-----------------|-------------------------|----------------------------------------|--------------------|------------------|-------------------------------|--------------------|--------------------------------------------------------------------------|
| SNP_51493_A_13777684 | NC_021166.1    | Ca_Kabuli_Chr07 | 13777684                | AA                                     | GG                 | GG               | URR                           | 101515711          | pyridine nucleotide-disulfide oxidoreductase domain-containing protein 2 |
| SNP_51494_A_13779925 | NC_021166.1    | Ca_Kabuli_Chr07 | 13779925                | CC                                     | AA                 | AA               | INTERGENIC                    |                    |                                                                          |
| SNP_51495_A_13790830 | NC_021166.1    | Ca_Kabuli_Chr07 | 13790830                | TT                                     | CC                 | CC               | INTERGENIC                    |                    |                                                                          |
| SNP_51497_A_13848200 | NC_021166.1    | Ca_Kabuli_Chr07 | 13848200                | GG                                     | TT                 | TT               | INTERGENIC                    |                    |                                                                          |
| SNP_51498_A_13864245 | NC_021166.1    | Ca_Kabuli_Chr07 | 13864245                | AA                                     | CC                 | CC               | URR                           | 101490979          | late embryogenesis abundant protein D-29                                 |
| SNP_51500_A_13937142 | NC_021166.1    | Ca_Kabuli_Chr07 | 13937142                | AA                                     | TT                 | TT               | INTERGENIC                    |                    |                                                                          |
| SNP_51501_A_14000648 | NC_021166.1    | Ca_Kabuli_Chr07 | 14000648                | GG                                     | TT                 | TT               | INTERGENIC                    |                    |                                                                          |
| SNP_51502_A_14016177 | NC_021166.1    | Ca_Kabuli_Chr07 | 14016177                | TT                                     | AA                 | AA               | INTERGENIC                    |                    |                                                                          |
| SNP_51503_A_14020860 | NC_021166.1    | Ca_Kabuli_Chr07 | 14020860                | AA                                     | GG                 | GG               | INTERGENIC                    |                    |                                                                          |
| SNP_51504_A_14022362 | NC_021166.1    | Ca_Kabuli_Chr07 | 14022362                | TT                                     | CC                 | CC               | INTERGENIC                    |                    |                                                                          |
| SNP_51505_A_14026845 | NC_021166.1    | Ca_Kabuli_Chr07 | 14026845                | TT                                     | GG                 | GG               | INTERGENIC                    |                    |                                                                          |
| SNP_51507_A_14066075 | NC_021166.1    | Ca_Kabuli_Chr07 | 14066075                | GG                                     | AA                 | AA               | INTRON                        | 101496913          | salicylate carboxymethyltransferase-like                                 |
| SNP_51508_A_14066079 | NC_021166.1    | Ca_Kabuli_Chr07 | 14066079                | CC                                     | TT                 | TT               | INTRON                        | 101496913          | salicylate carboxymethyltransferase-like                                 |
| SNP_51509_A_14066111 | NC_021166.1    | Ca_Kabuli_Chr07 | 14066111                | TT                                     | AA                 | AA               | INTRON                        | 101496913          | salicylate carboxymethyltransferase-like                                 |
| SNP_51511_A_14071991 | NC_021166.1    | Ca_Kabuli_Chr07 | 14071991                | CC                                     | TT                 | TT               | INTERGENIC                    |                    |                                                                          |
| SNP_51512_A_14072742 | NC_021166.1    | Ca_Kabuli_Chr07 | 14072742                | AA                                     | GG                 | GG               | INTERGENIC                    |                    |                                                                          |
| SNP_51513_A_14073197 | NC_021166.1    | Ca_Kabuli_Chr07 | 14073197                | TT                                     | GG                 | GG               | INTERGENIC                    |                    |                                                                          |
| SNP_51515_A_14081225 | NC_021166.1    | Ca_Kabuli_Chr07 | 14081225                | CC                                     | TT                 | TT               | INTERGENIC                    |                    |                                                                          |
| SNP_51516_A_14081273 | NC_021166.1    | Ca_Kabuli_Chr07 | 14081273                | AA                                     | GG                 | GG               | INTERGENIC                    |                    |                                                                          |
| SNP_51517_A_14083307 | NC_021166.1    | Ca_Kabuli_Chr07 | 14083307                | CC                                     | TT                 | TT               | DRR                           | 101497237          | salicylate carboxymethyltransferase-like                                 |
| SNP_51518_A_14083319 | NC_021166.1    | Ca_Kabuli_Chr07 | 14083319                | TT                                     | CC                 | CC               | DRR                           | 101497237          | salicylate carboxymethyltransferase-like                                 |
| SNP_51519_A_14083369 | NC_021166.1    | Ca_Kabuli_Chr07 | 14083369                | TT                                     | CC                 | CC               | DRR                           | 101497237          | salicylate carboxymethyltransferase-like                                 |

| SNPs IDs             | Chromosome IDs | Chromosomes     | Physical positions (bp) | CDC Frontier genome (Reference genome) | (Pusa 1103 & HPNB) | (ILWC 46 & LPNB) | Sequence genome | Components of | Gene accession IDs | Putative functions                              |
|----------------------|----------------|-----------------|-------------------------|----------------------------------------|--------------------|------------------|-----------------|---------------|--------------------|-------------------------------------------------|
| SNP_51520_A_14083444 | NC_021166.1    | Ca_Kabuli_Chr07 | 14083444                | AA                                     | TT                 | TT               | DRR             |               | 101497237          | salicylate carboxymethyltransferase-like        |
| SNP_51521_A_14083843 | NC_021166.1    | Ca_Kabuli_Chr07 | 14083843                | AA                                     | GG                 | GG               | DRR             |               | 101497237          | salicylate carboxymethyltransferase-like        |
| SNP_51522_A_14088870 | NC_021166.1    | Ca_Kabuli_Chr07 | 14088870                | GG                                     | TT                 | TT               | INTERGENIC      |               |                    |                                                 |
| SNP_51523_A_14091349 | NC_021166.1    | Ca_Kabuli_Chr07 | 14091349                | CC                                     | TT                 | TT               | INTERGENIC      |               |                    |                                                 |
| SNP_51524_A_14091426 | NC_021166.1    | Ca_Kabuli_Chr07 | 14091426                | AA                                     | CC                 | CC               | INTERGENIC      |               |                    |                                                 |
| SNP_51525_A_14091733 | NC_021166.1    | Ca_Kabuli_Chr07 | 14091733                | GG                                     | AA                 | AA               | INTERGENIC      |               |                    |                                                 |
| SNP_51526_A_14108503 | NC_021166.1    | Ca_Kabuli_Chr07 | 14108503                | GG                                     | AA                 | AA               | INTERGENIC      |               |                    |                                                 |
| SNP_51527_A_14121170 | NC_021166.1    | Ca_Kabuli_Chr07 | 14121170                | CC                                     | TT                 | TT               | INTERGENIC      |               |                    |                                                 |
| SNP_51528_A_14140631 | NC_021166.1    | Ca_Kabuli_Chr07 | 14140631                | TT                                     | CC                 | CC               | INTERGENIC      |               |                    |                                                 |
| SNP_51530_A_14270911 | NC_021166.1    | Ca_Kabuli_Chr07 | 14270911                | GG                                     | AA                 | AA               | INTERGENIC      |               |                    |                                                 |
| SNP_51531_A_14301809 | NC_021166.1    | Ca_Kabuli_Chr07 | 14301809                | CC                                     | TT                 | TT               | INTERGENIC      |               |                    |                                                 |
| SNP_51534_A_14370003 | NC_021166.1    | Ca_Kabuli_Chr07 | 14370003                | TT                                     | CC                 | CC               | INTERGENIC      |               |                    |                                                 |
| SNP_51535_A_14370038 | NC_021166.1    | Ca_Kabuli_Chr07 | 14370038                | CC                                     | TT                 | TT               | INTERGENIC      |               |                    |                                                 |
| SNP_51536_A_14371418 | NC_021166.1    | Ca_Kabuli_Chr07 | 14371418                | TT                                     | AA                 | AA               | INTERGENIC      |               |                    |                                                 |
| SNP_51537_A_14371419 | NC_021166.1    | Ca_Kabuli_Chr07 | 14371419                | TT                                     | AA                 | AA               | INTERGENIC      |               |                    |                                                 |
| SNP_51539_A_14483058 | NC_021166.1    | Ca_Kabuli_Chr07 | 14483058                | TT                                     | CC                 | CC               | INTERGENIC      |               |                    |                                                 |
| SNP_51540_A_14483512 | NC_021166.1    | Ca_Kabuli_Chr07 | 14483512                | AA                                     | GG                 | GG               | DRR             |               | 101512459          | GATA transcription factor 5-like                |
| SNP_51541_A_14483513 | NC_021166.1    | Ca_Kabuli_Chr07 | 14483513                | TT                                     | CC                 | CC               | DRR             |               | 101512459          | GATA transcription factor 5-like                |
| SNP_51542_A_14490120 | NC_021166.1    | Ca_Kabuli_Chr07 | 14490120                | AA                                     | GG                 | GG               | INTERGENIC      |               |                    |                                                 |
| SNP_51543_A_14498900 | NC_021166.1    | Ca_Kabuli_Chr07 | 14498900                | GG                                     | AA                 | AA               | INTRON          |               | 101508175          | zinc finger MYM-type protein 1-like             |
| SNP_51544_A_14514783 | NC_021166.1    | Ca_Kabuli_Chr07 | 14514783                | TT                                     | AA                 | AA               | INTERGENIC      |               |                    |                                                 |
| SNP_51545_A_14603555 | NC_021166.1    | Ca_Kabuli_Chr07 | 14603555                | GG                                     | AA                 | AA               | URR             |               | 101488361          | V-type proton ATPase 16 kDa proteolipid subunit |

| SNPs IDs             | Chromosome IDs | Chromosomes     | Physical positions (bp) | CDC Frontier genome (Reference genome) | (Pusa 1103 & HPNB) | (ILWC 46 & LPNB) | Sequence Components of genome | Gene accession IDs | Putative functions                                              |
|----------------------|----------------|-----------------|-------------------------|----------------------------------------|--------------------|------------------|-------------------------------|--------------------|-----------------------------------------------------------------|
| SNP_51546_A_14724501 | NC_021166.1    | Ca_Kabuli_Chr07 | 14724501                | TT                                     | AA                 | AA               | INTERGENIC                    |                    |                                                                 |
| SNP_51547_A_14766717 | NC_021166.1    | Ca_Kabuli_Chr07 | 14766717                | GG                                     | AA                 | AA               | DRR                           | 101493577          | DNA-(apurinic or apyrimidinic site) lyase 2                     |
| SNP_51548_A_14778008 | NC_021166.1    | Ca_Kabuli_Chr07 | 14778008                | AA                                     | GG                 | GG               | URR                           | 101493894          | mediator of RNA polymerase II transcription subunit 4-like      |
| SNP_51549_A_14780895 | NC_021166.1    | Ca_Kabuli_Chr07 | 14780895                | CC                                     | GG                 | GG               | INTERGENIC                    |                    |                                                                 |
| SNP_51552_A_14806758 | NC_021166.1    | Ca_Kabuli_Chr07 | 14806758                | AA                                     | GG                 | GG               | INTERGENIC                    |                    |                                                                 |
| SNP_51553_A_14806767 | NC_021166.1    | Ca_Kabuli_Chr07 | 14806767                | CC                                     | TT                 | TT               | INTERGENIC                    |                    |                                                                 |
| SNP_51554_A_14806792 | NC_021166.1    | Ca_Kabuli_Chr07 | 14806792                | GG                                     | TT                 | TT               | INTERGENIC                    |                    |                                                                 |
| SNP_51555_A_14811699 | NC_021166.1    | Ca_Kabuli_Chr07 | 14811699                | AA                                     | GG                 | GG               | INTERGENIC                    |                    |                                                                 |
| SNP_51556_A_14811732 | NC_021166.1    | Ca_Kabuli_Chr07 | 14811732                | TT                                     | CC                 | CC               | INTERGENIC                    |                    |                                                                 |
| SNP_51557_A_14813851 | NC_021166.1    | Ca_Kabuli_Chr07 | 14813851                | GG                                     | AA                 | AA               | INTERGENIC                    |                    |                                                                 |
| SNP_51558_A_14821267 | NC_021166.1    | Ca_Kabuli_Chr07 | 14821267                | CC                                     | TT                 | TT               | INTERGENIC                    |                    |                                                                 |
| SNP_51560_A_14858045 | NC_021166.1    | Ca_Kabuli_Chr07 | 14858045                | AA                                     | TT                 | TT               | INTERGENIC                    |                    |                                                                 |
| SNP_51561_A_14858046 | NC_021166.1    | Ca_Kabuli_Chr07 | 14858046                | TT                                     | CC                 | CC               | INTERGENIC                    |                    |                                                                 |
| SNP_51562_A_14872189 | NC_021166.1    | Ca_Kabuli_Chr07 | 14872189                | CC                                     | AA                 | AA               | URR                           | 101495712          | calmodulin-lysine N-methyltransferase                           |
| SNP_51563_A_14879919 | NC_021166.1    | Ca_Kabuli_Chr07 | 14879919                | TT                                     | GG                 | GG               | URR                           | 101496035          | multisite-specific tRNA:(cytosine-C(5))-methyltransferase trm4b |
| SNP_51564_A_14882085 | NC_021166.1    | Ca_Kabuli_Chr07 | 14882085                | CC                                     | TT                 | TT               | INTERGENIC                    |                    |                                                                 |
| SNP_51566_A_14956181 | NC_021166.1    | Ca_Kabuli_Chr07 | 14956181                | CC                                     | TT                 | TT               | INTERGENIC                    |                    |                                                                 |
| SNP_51567_A_14980843 | NC_021166.1    | Ca_Kabuli_Chr07 | 14980843                | GG                                     | AA                 | AA               | DRR                           | 101498990          | uncharacterized LOC101498990                                    |
| SNP_51569_A_15019062 | NC_021166.1    | Ca_Kabuli_Chr07 | 15019062                | CC                                     | TT                 | TT               | DRR                           | 101499932          | cell cycle checkpoint protein RAD17                             |
| SNP_51570_A_15031527 | NC_021166.1    | Ca_Kabuli_Chr07 | 15031527                | AA                                     | TT                 | TT               | URR                           | 101500273          | rac-like GTP-binding protein RHO1                               |
| SNP_51571_A_15037796 | NC_021166.1    | Ca_Kabuli_Chr07 | 15037796                | AA                                     | CC                 | CC               | INTERGENIC                    |                    |                                                                 |
| SNP_51572_A_15037814 | NC_021166.1    | Ca_Kabuli_Chr07 | 15037814                | AA                                     | GG                 | GG               | INTERGENIC                    |                    |                                                                 |



| SNPs IDs             | Chromosome IDs | Chromosomes     | Physical positions (bp) | CDC Frontier genome (Reference genome) | (Pusa 1103 & HPNB) | (ILWC 46 & LPNB) | Sequence Components of genome | Gene accession IDs | Putative functions                         |
|----------------------|----------------|-----------------|-------------------------|----------------------------------------|--------------------|------------------|-------------------------------|--------------------|--------------------------------------------|
| SNP_51573_A_15037821 | NC_021166.1    | Ca_Kabuli_Chr07 | 15037821                | CC                                     | TT                 | TT               | INTERGENIC                    |                    |                                            |
| SNP_51574_A_15071515 | NC_021166.1    | Ca_Kabuli_Chr07 | 15071515                | AA                                     | GG                 | GG               | URR                           | 101503338          | protein MID1-COMPLEMENTING ACTIVITY 1-like |
| SNP_51575_A_15071533 | NC_021166.1    | Ca_Kabuli_Chr07 | 15071533                | AA                                     | GG                 | GG               | URR                           | 101503338          | protein MID1-COMPLEMENTING ACTIVITY 1-like |
| SNP_51576_A_15071730 | NC_021166.1    | Ca_Kabuli_Chr07 | 15071730                | TT                                     | GG                 | GG               | URR                           | 101503338          | protein MID1-COMPLEMENTING ACTIVITY 1-like |
| SNP_51577_A_15071751 | NC_021166.1    | Ca_Kabuli_Chr07 | 15071751                | CC                                     | TT                 | TT               | URR                           | 101503338          | protein MID1-COMPLEMENTING ACTIVITY 1-like |
| SNP_51578_A_15088720 | NC_021166.1    | Ca_Kabuli_Chr07 | 15088720                | CC                                     | TT                 | TT               | INTERGENIC                    |                    |                                            |
| SNP_51582_A_15269516 | NC_021166.1    | Ca_Kabuli_Chr07 | 15269516                | AA                                     | GG                 | GG               | INTERGENIC                    |                    |                                            |
| SNP_51583_A_15278316 | NC_021166.1    | Ca_Kabuli_Chr07 | 15278316                | GG                                     | AA                 | AA               | INTERGENIC                    |                    |                                            |
| SNP_51584_A_15278334 | NC_021166.1    | Ca_Kabuli_Chr07 | 15278334                | CC                                     | TT                 | TT               | INTERGENIC                    |                    |                                            |
| SNP_51585_A_15278355 | NC_021166.1    | Ca_Kabuli_Chr07 | 15278355                | AA                                     | GG                 | GG               | INTERGENIC                    |                    |                                            |
| SNP_51586_A_15278397 | NC_021166.1    | Ca_Kabuli_Chr07 | 15278397                | AA                                     | GG                 | GG               | INTERGENIC                    |                    |                                            |
| SNP_51587_A_15278407 | NC_021166.1    | Ca_Kabuli_Chr07 | 15278407                | GG                                     | TT                 | TT               | INTERGENIC                    |                    |                                            |
| SNP_51589_A_15303037 | NC_021166.1    | Ca_Kabuli_Chr07 | 15303037                | TT                                     | CC                 | CC               | INTERGENIC                    |                    |                                            |
| SNP_51590_A_15303058 | NC_021166.1    | Ca_Kabuli_Chr07 | 15303058                | TT                                     | CC                 | CC               | INTERGENIC                    |                    |                                            |
| SNP_51591_A_15303078 | NC_021166.1    | Ca_Kabuli_Chr07 | 15303078                | AA                                     | GG                 | GG               | INTERGENIC                    |                    |                                            |
| SNP_51592_A_15303485 | NC_021166.1    | Ca_Kabuli_Chr07 | 15303485                | GG                                     | AA                 | AA               | INTERGENIC                    |                    |                                            |
| SNP_51593_A_15304957 | NC_021166.1    | Ca_Kabuli_Chr07 | 15304957                | AA                                     | GG                 | GG               | INTERGENIC                    |                    |                                            |
| SNP_51594_A_15305188 | NC_021166.1    | Ca_Kabuli_Chr07 | 15305188                | CC                                     | TT                 | TT               | INTERGENIC                    |                    |                                            |
| SNP_51595_A_15305213 | NC_021166.1    | Ca_Kabuli_Chr07 | 15305213                | CC                                     | AA                 | AA               | INTERGENIC                    |                    |                                            |
| SNP_51596_A_15316602 | NC_021166.1    | Ca_Kabuli_Chr07 | 15316602                | CC                                     | TT                 | TT               | INTRON                        | 101513650          | Unknown function                           |
| SNP_51597_A_15325858 | NC_021166.1    | Ca_Kabuli_Chr07 | 15325858                | GG                                     | AA                 | AA               | INTRON                        | 101513650          | Unknown function                           |
| SNP_51599_A_15325894 | NC_021166.1    | Ca_Kabuli_Chr07 | 15325894                | AA                                     | GG                 | GG               | INTRON                        | 101513650          | Unknown function                           |

| SNPs IDs             | Chromosome IDs | Chromosomes     | Physical positions (bp) | CDC Frontier genome (Reference genome) | (Pusa 1103 & HPNB) | (ILWC 46 & LPNB) | Sequence Components of genome | Gene accession IDs | Putative functions                             |
|----------------------|----------------|-----------------|-------------------------|----------------------------------------|--------------------|------------------|-------------------------------|--------------------|------------------------------------------------|
| SNP_51600_A_15325907 | NC_021166.1    | Ca_Kabuli_Chr07 | 15325907                | CC                                     | TT                 | TT               | INTRON                        | 101513650          | Unknown function                               |
| SNP_51601_A_15325909 | NC_021166.1    | Ca_Kabuli_Chr07 | 15325909                | TT                                     | GG                 | GG               | INTRON                        | 101513650          | Unknown function                               |
| SNP_51602_A_15325913 | NC_021166.1    | Ca_Kabuli_Chr07 | 15325913                | AA                                     | GG                 | GG               | INTRON                        | 101513650          | Unknown function                               |
| SNP_51603_A_15325918 | NC_021166.1    | Ca_Kabuli_Chr07 | 15325918                | AA                                     | GG                 | GG               | INTRON                        | 101513650          | Unknown function                               |
| SNP_51604_A_15325921 | NC_021166.1    | Ca_Kabuli_Chr07 | 15325921                | AA                                     | GG                 | GG               | INTRON                        | 101513650          | Unknown function                               |
| SNP_51605_A_15372164 | NC_021166.1    | Ca_Kabuli_Chr07 | 15372164                | GG                                     | AA                 | AA               | DRR                           | 101510421          | uncharacterized LOC101510421                   |
| SNP_51606_A_15385013 | NC_021166.1    | Ca_Kabuli_Chr07 | 15385013                | CC                                     | TT                 | TT               | INTERGENIC                    |                    |                                                |
| SNP_51610_A_15434686 | NC_021166.1    | Ca_Kabuli_Chr07 | 15434686                | CC                                     | TT                 | TT               | INTERGENIC                    |                    |                                                |
| SNP_51612_A_15488426 | NC_021166.1    | Ca_Kabuli_Chr07 | 15488426                | CC                                     | TT                 | TT               | INTERGENIC                    |                    |                                                |
| SNP_51613_A_15488445 | NC_021166.1    | Ca_Kabuli_Chr07 | 15488445                | GG                                     | AA                 | AA               | INTERGENIC                    |                    |                                                |
| SNP_51615_A_15518760 | NC_021166.1    | Ca_Kabuli_Chr07 | 15518760                | AA                                     | GG                 | GG               | INTERGENIC                    |                    |                                                |
| SNP_51616_A_15520942 | NC_021166.1    | Ca_Kabuli_Chr07 | 15520942                | TT                                     | CC                 | CC               | INTERGENIC                    |                    |                                                |
| SNP_51617_A_15521137 | NC_021166.1    | Ca_Kabuli_Chr07 | 15521137                | CC                                     | TT                 | TT               | INTERGENIC                    |                    |                                                |
| SNP_51618_A_15521155 | NC_021166.1    | Ca_Kabuli_Chr07 | 15521155                | TT                                     | CC                 | CC               | INTERGENIC                    |                    |                                                |
| SNP_51619_A_15521191 | NC_021166.1    | Ca_Kabuli_Chr07 | 15521191                | TT                                     | CC                 | CC               | INTERGENIC                    |                    |                                                |
| SNP_51620_A_15521198 | NC_021166.1    | Ca_Kabuli_Chr07 | 15521198                | GG                                     | CC                 | CC               | INTERGENIC                    |                    |                                                |
| SNP_51621_A_15521208 | NC_021166.1    | Ca_Kabuli_Chr07 | 15521208                | TT                                     | CC                 | CC               | INTERGENIC                    |                    |                                                |
| SNP_51622_A_15528388 | NC_021166.1    | Ca_Kabuli_Chr07 | 15528388                | GG                                     | TT                 | TT               | DRR                           | 101512996          | probable acyl-activating enzyme 2              |
| SNP_51623_A_15580193 | NC_021166.1    | Ca_Kabuli_Chr07 | 15580193                | TT                                     | CC                 | CC               | INTERGENIC                    |                    |                                                |
| SNP_51625_A_15626861 | NC_021166.1    | Ca_Kabuli_Chr07 | 15626861                | CC                                     | TT                 | TT               | URR                           | 101515162          | ubiquitin domain-containing protein DSK2b-like |
| SNP_51626_A_15646058 | NC_021166.1    | Ca_Kabuli_Chr07 | 15646058                | CC                                     | AA                 | AA               | INTERGENIC                    |                    |                                                |
| SNP_51627_A_15646067 | NC_021166.1    | Ca_Kabuli_Chr07 | 15646067                | AA                                     | GG                 | GG               | INTERGENIC                    |                    |                                                |

| SNPs IDs             | Chromosome IDs | Chromosomes     | Physical positions (bp) | CDC Frontier genome (Reference genome) | (Pusa 1103 & HPNB) | (ILWC 46 & LPNB) | Sequence Components of genome | Gene accession IDs | Putative functions                        |
|----------------------|----------------|-----------------|-------------------------|----------------------------------------|--------------------|------------------|-------------------------------|--------------------|-------------------------------------------|
| SNP_51628_A_15646092 | NC_021166.1    | Ca_Kabuli_Chr07 | 15646092                | CC                                     | TT                 | TT               | INTERGENIC                    |                    |                                           |
| SNP_51630_A_15653308 | NC_021166.1    | Ca_Kabuli_Chr07 | 15653308                | GG                                     | CC                 | CC               | INTERGENIC                    |                    |                                           |
| SNP_51632_A_15676621 | NC_021166.1    | Ca_Kabuli_Chr07 | 15676621                | TT                                     | GG                 | GG               | INTERGENIC                    |                    |                                           |
| SNP_51633_A_15687987 | NC_021166.1    | Ca_Kabuli_Chr07 | 15687987                | AA                                     | CC                 | CC               | INTERGENIC                    |                    |                                           |
| SNP_51635_A_15709771 | NC_021166.1    | Ca_Kabuli_Chr07 | 15709771                | GG                                     | AA                 | AA               | INTERGENIC                    |                    |                                           |
| SNP_51636_A_15734925 | NC_021166.1    | Ca_Kabuli_Chr07 | 15734925                | CC                                     | TT                 | TT               | URR                           | 101490335          | heterogeneous nuclear ribonucleoprotein F |
| SNP_51637_A_15734930 | NC_021166.1    | Ca_Kabuli_Chr07 | 15734930                | CC                                     | TT                 | TT               | URR                           | 101490335          | heterogeneous nuclear ribonucleoprotein F |
| SNP_51638_A_15770698 | NC_021166.1    | Ca_Kabuli_Chr07 | 15770698                | AA                                     | TT                 | TT               | INTERGENIC                    |                    |                                           |
| SNP_51639_A_15773299 | NC_021166.1    | Ca_Kabuli_Chr07 | 15773299                | CC                                     | TT                 | TT               | INTERGENIC                    |                    |                                           |
| SNP_51640_A_15821503 | NC_021166.1    | Ca_Kabuli_Chr07 | 15821503                | TT                                     | CC                 | CC               | INTERGENIC                    |                    |                                           |
| SNP_51641_A_15825373 | NC_021166.1    | Ca_Kabuli_Chr07 | 15825373                | CC                                     | GG                 | GG               | DRR                           | 101494413          | PCTP-like protein                         |
| SNP_51642_A_15825383 | NC_021166.1    | Ca_Kabuli_Chr07 | 15825383                | CC                                     | GG                 | GG               | DRR                           | 101494413          | PCTP-like protein                         |
| SNP_51643_A_15825409 | NC_021166.1    | Ca_Kabuli_Chr07 | 15825409                | GG                                     | TT                 | TT               | DRR                           | 101494413          | PCTP-like protein                         |
| SNP_51644_A_15828080 | NC_021166.1    | Ca_Kabuli_Chr07 | 15828080                | AA                                     | CC                 | CC               | DRR                           | 101515608          | uncharacterized LOC101515608              |
| SNP_51645_A_15841195 | NC_021166.1    | Ca_Kabuli_Chr07 | 15841195                | CC                                     | GG                 | GG               | INTERGENIC                    |                    |                                           |
| SNP_51646_A_15841293 | NC_021166.1    | Ca_Kabuli_Chr07 | 15841293                | TT                                     | CC                 | CC               | INTERGENIC                    |                    |                                           |
| SNP_51648_A_15841396 | NC_021166.1    | Ca_Kabuli_Chr07 | 15841396                | TT                                     | GG                 | GG               | INTERGENIC                    |                    |                                           |
| SNP_51649_A_15841442 | NC_021166.1    | Ca_Kabuli_Chr07 | 15841442                | TT                                     | AA                 | AA               | INTERGENIC                    |                    |                                           |
| SNP_51650_A_15861841 | NC_021166.1    | Ca_Kabuli_Chr07 | 15861841                | GG                                     | AA                 | AA               | URR                           | 101495056          | glutamate receptor 3.6-like               |
| SNP_51651_A_15877130 | NC_021166.1    | Ca_Kabuli_Chr07 | 15877130                | CC                                     | TT                 | TT               | INTERGENIC                    |                    |                                           |
| SNP_51652_A_15896962 | NC_021166.1    | Ca_Kabuli_Chr07 | 15896962                | AA                                     | TT                 | TT               | DOWNSTREAM                    | DIS3               | Unknown function                          |
| SNP_51653_A_15896977 | NC_021166.1    | Ca_Kabuli_Chr07 | 15896977                | TT                                     | AA                 | AA               | DOWNSTREAM                    | DIS3               | Unknown function                          |

| SNPs IDs             | Chromosome IDs | Chromosomes     | Physical positions (bp) | CDC Frontier (Reference genome) | (Pusa 1103 & HPNB) | (ILWC 46 & LPNB) | Sequence Components of genome | Gene accession IDs | Putative functions |
|----------------------|----------------|-----------------|-------------------------|---------------------------------|--------------------|------------------|-------------------------------|--------------------|--------------------|
| SNP_51655_A_15969831 | NC_021166.1    | Ca_Kabuli_Chr07 | 15969831                | TT                              | CC                 | CC               | INTERGENIC                    |                    |                    |
| SNP_51656_A_15969867 | NC_021166.1    | Ca_Kabuli_Chr07 | 15969867                | TT                              | CC                 | CC               | INTERGENIC                    |                    |                    |
| SNP_51658_A_16026836 | NC_021166.1    | Ca_Kabuli_Chr07 | 16026836                | GG                              | AA                 | AA               | INTERGENIC                    |                    |                    |
| SNP_51660_A_16080874 | NC_021166.1    | Ca_Kabuli_Chr07 | 16080874                | GG                              | TT                 | TT               | INTERGENIC                    |                    |                    |
| SNP_51661_A_16082044 | NC_021166.1    | Ca_Kabuli_Chr07 | 16082044                | AA                              | GG                 | GG               | INTRON                        | 101489680          | Unknown function   |
| SNP_51662_A_16082159 | NC_021166.1    | Ca_Kabuli_Chr07 | 16082159                | AA                              | GG                 | GG               | INTRON                        | 101489680          | Unknown function   |
| SNP_51663_A_16082201 | NC_021166.1    | Ca_Kabuli_Chr07 | 16082201                | CC                              | GG                 | GG               | INTRON                        | 101489680          | Unknown function   |
| SNP_51664_A_16082243 | NC_021166.1    | Ca_Kabuli_Chr07 | 16082243                | AA                              | GG                 | GG               | INTRON                        | 101489680          | Unknown function   |
| SNP_51665_A_16082251 | NC_021166.1    | Ca_Kabuli_Chr07 | 16082251                | TT                              | CC                 | CC               | SYNONYMOUS_CODING             | 101489680          | Unknown function   |
| SNP_51666_A_16082331 | NC_021166.1    | Ca_Kabuli_Chr07 | 16082331                | TT                              | GG                 | GG               | NON_SYNONYMOUS_CODING         | 101489680          | Unknown function   |
| SNP_51667_A_16082332 | NC_021166.1    | Ca_Kabuli_Chr07 | 16082332                | GG                              | AA                 | AA               | SYNONYMOUS_CODING             | 101489680          | Unknown function   |
| SNP_51668_A_16082345 | NC_021166.1    | Ca_Kabuli_Chr07 | 16082345                | GG                              | AA                 | AA               | NON_SYNONYMOUS_CODING         | 101489680          | Unknown function   |
| SNP_51669_A_16082355 | NC_021166.1    | Ca_Kabuli_Chr07 | 16082355                | AA                              | GG                 | GG               | SYNONYMOUS_CODING             | 101489680          | Unknown function   |
| SNP_51670_A_16082356 | NC_021166.1    | Ca_Kabuli_Chr07 | 16082356                | TT                              | CC                 | CC               | SYNONYMOUS_CODING             | 101489680          | Unknown function   |
| SNP_51671_A_16099663 | NC_021166.1    | Ca_Kabuli_Chr07 | 16099663                | AA                              | GG                 | GG               | INTERGENIC                    |                    |                    |
| SNP_51672_A_16099885 | NC_021166.1    | Ca_Kabuli_Chr07 | 16099885                | TT                              | AA                 | AA               | INTERGENIC                    |                    |                    |
| SNP_51673_A_16099931 | NC_021166.1    | Ca_Kabuli_Chr07 | 16099931                | CC                              | TT                 | TT               | INTERGENIC                    |                    |                    |
| SNP_51674_A_16099952 | NC_021166.1    | Ca_Kabuli_Chr07 | 16099952                | CC                              | AA                 | AA               | INTERGENIC                    |                    |                    |
| SNP_51675_A_16099958 | NC_021166.1    | Ca_Kabuli_Chr07 | 16099958                | AA                              | TT                 | TT               | INTERGENIC                    |                    |                    |
| SNP_51677_A_16162070 | NC_021166.1    | Ca_Kabuli_Chr07 | 16162070                | GG                              | AA                 | AA               | INTERGENIC                    |                    |                    |
| SNP_51678_A_16185612 | NC_021166.1    | Ca_Kabuli_Chr07 | 16185612                | CC                              | TT                 | TT               | INTERGENIC                    |                    |                    |
| SNP_51679_A_16186768 | NC_021166.1    | Ca_Kabuli_Chr07 | 16186768                | TT                              | CC                 | CC               | INTERGENIC                    |                    |                    |

| SNPs IDs             | Chromosome IDs | Chromosomes     | Physical positions (bp) | CDC Frontier genome (Reference genome) | (Pusa 1103 & HPNB) | (ILWC 46 & LPNB) | Sequence Components of genome | Gene accession IDs | Putative functions                                                        |
|----------------------|----------------|-----------------|-------------------------|----------------------------------------|--------------------|------------------|-------------------------------|--------------------|---------------------------------------------------------------------------|
| SNP_51680_A_16186775 | NC_021166.1    | Ca_Kabuli_Chr07 | 16186775                | CC                                     | TT                 | TT               | INTERGENIC                    |                    |                                                                           |
| SNP_51682_A_16252229 | NC_021166.1    | Ca_Kabuli_Chr07 | 16252229                | CC                                     | TT                 | TT               | INTERGENIC                    |                    |                                                                           |
| SNP_51683_A_16283311 | NC_021166.1    | Ca_Kabuli_Chr07 | 16283311                | AA                                     | GG                 | GG               | INTERGENIC                    |                    |                                                                           |
| SNP_51684_A_16306601 | NC_021166.1    | Ca_Kabuli_Chr07 | 16306601                | TT                                     | CC                 | CC               | URR                           | 101504109          | DNA-directed RNA polymerase II subunit 4                                  |
| SNP_51686_A_16372241 | NC_021166.1    | Ca_Kabuli_Chr07 | 16372241                | TT                                     | GG                 | GG               | INTRON                        | 101505927          | abscisic acid 8'-hydroxylase 1-like                                       |
| SNP_51687_A_16375751 | NC_021166.1    | Ca_Kabuli_Chr07 | 16375751                | GG                                     | TT                 | TT               | URR                           | 101505927          | abscisic acid 8'-hydroxylase 1-like                                       |
| SNP_51691_A_16456849 | NC_021166.1    | Ca_Kabuli_Chr07 | 16456849                | CC                                     | TT                 | TT               | DRR                           | 101507233          | pentatricopeptide repeat-containing protein At1g77360, mitochondrial-like |
| SNP_51692_A_16475464 | NC_021166.1    | Ca_Kabuli_Chr07 | 16475464                | AA                                     | TT                 | TT               | INTERGENIC                    |                    |                                                                           |
| SNP_51693_A_16475465 | NC_021166.1    | Ca_Kabuli_Chr07 | 16475465                | AA                                     | GG                 | GG               | INTERGENIC                    |                    |                                                                           |
| SNP_51695_A_16475604 | NC_021166.1    | Ca_Kabuli_Chr07 | 16475604                | AA                                     | GG                 | GG               | INTERGENIC                    |                    |                                                                           |
| SNP_51696_A_16503335 | NC_021166.1    | Ca_Kabuli_Chr07 | 16503335                | AA                                     | CC                 | CC               | URR                           | 101490655          | inositol transporter 1-like                                               |
| SNP_51697_A_16523916 | NC_021166.1    | Ca_Kabuli_Chr07 | 16523916                | AA                                     | GG                 | GG               | INTERGENIC                    |                    |                                                                           |
| SNP_51698_A_16524080 | NC_021166.1    | Ca_Kabuli_Chr07 | 16524080                | CC                                     | TT                 | TT               | INTERGENIC                    |                    |                                                                           |
| SNP_51699_A_16524160 | NC_021166.1    | Ca_Kabuli_Chr07 | 16524160                | CC                                     | TT                 | TT               | INTERGENIC                    |                    |                                                                           |
| SNP_51700_A_16524165 | NC_021166.1    | Ca_Kabuli_Chr07 | 16524165                | AA                                     | GG                 | GG               | INTERGENIC                    |                    |                                                                           |
| SNP_51701_A_16524254 | NC_021166.1    | Ca_Kabuli_Chr07 | 16524254                | GG                                     | TT                 | TT               | INTERGENIC                    |                    |                                                                           |
| SNP_51702_A_16524383 | NC_021166.1    | Ca_Kabuli_Chr07 | 16524383                | AA                                     | GG                 | GG               | INTERGENIC                    |                    |                                                                           |
| SNP_51703_A_16524388 | NC_021166.1    | Ca_Kabuli_Chr07 | 16524388                | TT                                     | GG                 | GG               | INTERGENIC                    |                    |                                                                           |
| SNP_51704_A_16524489 | NC_021166.1    | Ca_Kabuli_Chr07 | 16524489                | GG                                     | AA                 | AA               | INTERGENIC                    |                    |                                                                           |
| SNP_51705_A_16543826 | NC_021166.1    | Ca_Kabuli_Chr07 | 16543826                | GG                                     | AA                 | AA               | INTERGENIC                    |                    |                                                                           |
| SNP_51706_A_16544119 | NC_021166.1    | Ca_Kabuli_Chr07 | 16544119                | CC                                     | TT                 | TT               | INTERGENIC                    |                    |                                                                           |
| SNP_51707_A_16544245 | NC_021166.1    | Ca_Kabuli_Chr07 | 16544245                | TT                                     | CC                 | CC               | INTERGENIC                    |                    |                                                                           |

| SNPs IDs             | Chromosome IDs | Chromosomes     | Physical positions (bp) | CDC Frontier genome (Reference genome) | (Pusa 1103 & HPNB) | (ILWC 46 & LPNB) | Sequence Components of genome | Gene accession IDs | Putative functions                                                              |
|----------------------|----------------|-----------------|-------------------------|----------------------------------------|--------------------|------------------|-------------------------------|--------------------|---------------------------------------------------------------------------------|
| SNP_51708_A_16544264 | NC_021166.1    | Ca_Kabuli_Chr07 | 16544264                | GG                                     | AA                 | AA               | INTERGENIC                    |                    |                                                                                 |
| SNP_51709_A_16544269 | NC_021166.1    | Ca_Kabuli_Chr07 | 16544269                | TT                                     | CC                 | CC               | INTERGENIC                    |                    |                                                                                 |
| SNP_51710_A_16548652 | NC_021166.1    | Ca_Kabuli_Chr07 | 16548652                | CC                                     | AA                 | AA               | DRR                           | 101503012          | inositol transporter 1-like                                                     |
| SNP_51712_A_16548696 | NC_021166.1    | Ca_Kabuli_Chr07 | 16548696                | GG                                     | AA                 | AA               | DRR                           | 101503012          | inositol transporter 1-like                                                     |
| SNP_51713_A_16548726 | NC_021166.1    | Ca_Kabuli_Chr07 | 16548726                | CC                                     | AA                 | AA               | DRR                           | 101503012          | inositol transporter 1-like                                                     |
| SNP_51714_A_16548766 | NC_021166.1    | Ca_Kabuli_Chr07 | 16548766                | GG                                     | AA                 | AA               | DRR                           | 101503012          | inositol transporter 1-like                                                     |
| SNP_51715_A_16548768 | NC_021166.1    | Ca_Kabuli_Chr07 | 16548768                | AA                                     | GG                 | GG               | DRR                           | 101503012          | inositol transporter 1-like                                                     |
| SNP_51716_A_16548780 | NC_021166.1    | Ca_Kabuli_Chr07 | 16548780                | AA                                     | GG                 | GG               | DRR                           | 101503012          | inositol transporter 1-like                                                     |
| SNP_51717_A_16548783 | NC_021166.1    | Ca_Kabuli_Chr07 | 16548783                | GG                                     | AA                 | AA               | DRR                           | 101503012          | inositol transporter 1-like                                                     |
| SNP_51718_A_16560929 | NC_021166.1    | Ca_Kabuli_Chr07 | 16560929                | CC                                     | TT                 | TT               | DRR                           | 101491804          | inositol hexakisphosphate and diphosphoinositol-pentakisphosphate kinase 2-like |
| SNP_51719_A_16568650 | NC_021166.1    | Ca_Kabuli_Chr07 | 16568650                | TT                                     | CC                 | CC               | INTERGENIC                    |                    |                                                                                 |
| SNP_51720_A_16597803 | NC_021166.1    | Ca_Kabuli_Chr07 | 16597803                | GG                                     | AA                 | AA               | URR                           | 101493258          | pectin acetyltransferase 8-like                                                 |
| SNP_51722_A_16612516 | NC_021166.1    | Ca_Kabuli_Chr07 | 16612516                | AA                                     | TT                 | TT               | INTERGENIC                    |                    |                                                                                 |
| SNP_51723_A_16615940 | NC_021166.1    | Ca_Kabuli_Chr07 | 16615940                | GG                                     | AA                 | AA               | INTERGENIC                    |                    |                                                                                 |
| SNP_51724_A_16630785 | NC_021166.1    | Ca_Kabuli_Chr07 | 16630785                | TT                                     | CC                 | CC               | URR                           | 101496265          | uncharacterized LOC101496265                                                    |
| SNP_51725_A_16650363 | NC_021166.1    | Ca_Kabuli_Chr07 | 16650363                | AA                                     | TT                 | TT               | URR                           | 101496915          | 60S ribosomal protein L13-1-like                                                |
| SNP_51726_A_16650364 | NC_021166.1    | Ca_Kabuli_Chr07 | 16650364                | GG                                     | AA                 | AA               | URR                           | 101496915          | 60S ribosomal protein L13-1-like                                                |
| SNP_51727_A_16651401 | NC_021166.1    | Ca_Kabuli_Chr07 | 16651401                | AA                                     | CC                 | CC               | INTERGENIC                    |                    |                                                                                 |
| SNP_51728_A_16652122 | NC_021166.1    | Ca_Kabuli_Chr07 | 16652122                | TT                                     | AA                 | AA               | INTERGENIC                    |                    |                                                                                 |
| SNP_51729_A_16652445 | NC_021166.1    | Ca_Kabuli_Chr07 | 16652445                | TT                                     | CC                 | CC               | INTERGENIC                    |                    |                                                                                 |
| SNP_51730_A_16654598 | NC_021166.1    | Ca_Kabuli_Chr07 | 16654598                | TT                                     | AA                 | AA               | INTERGENIC                    |                    |                                                                                 |
| SNP_51731_A_16700006 | NC_021166.1    | Ca_Kabuli_Chr07 | 16700006                | TT                                     | CC                 | CC               | INTERGENIC                    |                    |                                                                                 |

| SNPs IDs             | Chromosome IDs | Chromosomes     | Physical positions (bp) | CDC Frontier genome (Reference genome) | (Pusa 1103 & HPNB) | (ILWC 46 & LPNB) | Sequence Components of genome | Gene accession IDs | Putative functions                         |
|----------------------|----------------|-----------------|-------------------------|----------------------------------------|--------------------|------------------|-------------------------------|--------------------|--------------------------------------------|
| SNP_51732_A_16718654 | NC_021166.1    | Ca_Kabuli_Chr07 | 16718654                | GG                                     | AA                 | AA               | URR                           | 101504646          | Unknown function                           |
| SNP_51733_A_16743456 | NC_021166.1    | Ca_Kabuli_Chr07 | 16743456                | CC                                     | TT                 | TT               | INTERGENIC                    |                    |                                            |
| SNP_51734_A_16753114 | NC_021166.1    | Ca_Kabuli_Chr07 | 16753114                | TT                                     | CC                 | CC               | INTERGENIC                    |                    |                                            |
| SNP_51735_A_16879767 | NC_021166.1    | Ca_Kabuli_Chr07 | 16879767                | CC                                     | TT                 | TT               | INTERGENIC                    |                    |                                            |
| SNP_51736_A_16895464 | NC_021166.1    | Ca_Kabuli_Chr07 | 16895464                | CC                                     | TT                 | TT               | INTRON                        | 101500275          | uncharacterized LOC101500275               |
| SNP_51737_A_16895522 | NC_021166.1    | Ca_Kabuli_Chr07 | 16895522                | TT                                     | CC                 | CC               | INTRON                        | 101500275          | uncharacterized LOC101500275               |
| SNP_51738_A_16895523 | NC_021166.1    | Ca_Kabuli_Chr07 | 16895523                | AA                                     | GG                 | GG               | INTRON                        | 101500275          | uncharacterized LOC101500275               |
| SNP_51739_A_16895528 | NC_021166.1    | Ca_Kabuli_Chr07 | 16895528                | GG                                     | CC                 | CC               | INTRON                        | 101500275          | uncharacterized LOC101500275               |
| SNP_51740_A_16895539 | NC_021166.1    | Ca_Kabuli_Chr07 | 16895539                | AA                                     | GG                 | GG               | INTRON                        | 101500275          | uncharacterized LOC101500275               |
| SNP_51741_A_16895914 | NC_021166.1    | Ca_Kabuli_Chr07 | 16895914                | TT                                     | CC                 | CC               | URR                           | 101500275          | uncharacterized LOC101500275               |
| SNP_51742_A_16895961 | NC_021166.1    | Ca_Kabuli_Chr07 | 16895961                | AA                                     | GG                 | GG               | URR                           | 101500275          | uncharacterized LOC101500275               |
| SNP_51743_A_16917607 | NC_021166.1    | Ca_Kabuli_Chr07 | 16917607                | AA                                     | CC                 | CC               | INTRON                        | 101506240          | alpha-glucan water dikinase, chloroplastic |
| SNP_51744_A_16939881 | NC_021166.1    | Ca_Kabuli_Chr07 | 16939881                | GG                                     | AA                 | AA               | INTERGENIC                    |                    |                                            |
| SNP_51746_A_16941733 | NC_021166.1    | Ca_Kabuli_Chr07 | 16941733                | AA                                     | GG                 | GG               | INTERGENIC                    |                    |                                            |
| SNP_51747_A_16941742 | NC_021166.1    | Ca_Kabuli_Chr07 | 16941742                | TT                                     | GG                 | GG               | INTERGENIC                    |                    |                                            |
| SNP_51748_A_16951500 | NC_021166.1    | Ca_Kabuli_Chr07 | 16951500                | TT                                     | AA                 | AA               | INTRON                        | 101506906          | high affinity nitrate transporter 2.5      |
| SNP_51749_A_16972812 | NC_021166.1    | Ca_Kabuli_Chr07 | 16972812                | TT                                     | CC                 | CC               | INTERGENIC                    |                    |                                            |
| SNP_51750_A_16988923 | NC_021166.1    | Ca_Kabuli_Chr07 | 16988923                | CC                                     | TT                 | TT               | URR                           | 101500591          | Unknown function                           |
| SNP_51751_A_16994093 | NC_021166.1    | Ca_Kabuli_Chr07 | 16994093                | CC                                     | GG                 | GG               | INTERGENIC                    |                    |                                            |
| SNP_51752_A_17006032 | NC_021166.1    | Ca_Kabuli_Chr07 | 17006032                | AA                                     | GG                 | GG               | INTERGENIC                    |                    |                                            |
| SNP_51753_A_17007001 | NC_021166.1    | Ca_Kabuli_Chr07 | 17007001                | CC                                     | TT                 | TT               | INTERGENIC                    |                    |                                            |
| SNP_51754_A_17097814 | NC_021166.1    | Ca_Kabuli_Chr07 | 17097814                | GG                                     | TT                 | TT               | INTRON                        | 101508711          | protein PHYLO, chloroplastic               |

| SNPs IDs             | Chromosome IDs | Chromosomes     | Physical positions (bp) | CDC Frontier (Reference genome) | (Pusa 1103 & HPNB) | (ILWC 46 & LPNB) | Sequence Components of genome | Gene accession IDs | Putative functions           |
|----------------------|----------------|-----------------|-------------------------|---------------------------------|--------------------|------------------|-------------------------------|--------------------|------------------------------|
| SNP_51755_A_17117805 | NC_021166.1    | Ca_Kabuli_Chr07 | 17117805                | GG                              | AA                 | AA               | INTERGENIC                    |                    |                              |
| SNP_51756_A_17130341 | NC_021166.1    | Ca_Kabuli_Chr07 | 17130341                | CC                              | TT                 | TT               | INTERGENIC                    |                    |                              |
| SNP_51757_A_17133012 | NC_021166.1    | Ca_Kabuli_Chr07 | 17133012                | AA                              | TT                 | TT               | INTERGENIC                    |                    |                              |
| SNP_51761_A_17173582 | NC_021166.1    | Ca_Kabuli_Chr07 | 17173582                | GG                              | AA                 | AA               | URR                           | 101501231          | uncharacterized LOC101501231 |
| SNP_51762_A_17203637 | NC_021166.1    | Ca_Kabuli_Chr07 | 17203637                | TT                              | CC                 | CC               | INTERGENIC                    |                    |                              |
| SNP_51763_A_17203647 | NC_021166.1    | Ca_Kabuli_Chr07 | 17203647                | AA                              | CC                 | CC               | INTERGENIC                    |                    |                              |
| SNP_51764_A_17203774 | NC_021166.1    | Ca_Kabuli_Chr07 | 17203774                | GG                              | CC                 | CC               | INTERGENIC                    |                    |                              |
| SNP_51765_A_17207120 | NC_021166.1    | Ca_Kabuli_Chr07 | 17207120                | CC                              | AA                 | AA               | INTERGENIC                    |                    |                              |
| SNP_51766_A_17207154 | NC_021166.1    | Ca_Kabuli_Chr07 | 17207154                | TT                              | CC                 | CC               | INTERGENIC                    |                    |                              |
| SNP_51767_A_17207232 | NC_021166.1    | Ca_Kabuli_Chr07 | 17207232                | TT                              | GG                 | GG               | INTERGENIC                    |                    |                              |
| SNP_51768_A_17207258 | NC_021166.1    | Ca_Kabuli_Chr07 | 17207258                | TT                              | GG                 | GG               | INTERGENIC                    |                    |                              |
| SNP_51769_A_17207268 | NC_021166.1    | Ca_Kabuli_Chr07 | 17207268                | AA                              | GG                 | GG               | INTERGENIC                    |                    |                              |
| SNP_51770_A_17213279 | NC_021166.1    | Ca_Kabuli_Chr07 | 17213279                | AA                              | TT                 | TT               | INTERGENIC                    |                    |                              |
| SNP_51771_A_17216643 | NC_021166.1    | Ca_Kabuli_Chr07 | 17216643                | AA                              | TT                 | TT               | INTERGENIC                    |                    |                              |
| SNP_51772_A_17218240 | NC_021166.1    | Ca_Kabuli_Chr07 | 17218240                | TT                              | CC                 | CC               | INTERGENIC                    |                    |                              |
| SNP_51773_A_17219458 | NC_021166.1    | Ca_Kabuli_Chr07 | 17219458                | TT                              | AA                 | AA               | INTERGENIC                    |                    |                              |
| SNP_51774_A_17219460 | NC_021166.1    | Ca_Kabuli_Chr07 | 17219460                | TT                              | AA                 | AA               | INTERGENIC                    |                    |                              |
| SNP_51775_A_17219468 | NC_021166.1    | Ca_Kabuli_Chr07 | 17219468                | TT                              | CC                 | CC               | INTERGENIC                    |                    |                              |
| SNP_51776_A_17244927 | NC_021166.1    | Ca_Kabuli_Chr07 | 17244927                | CC                              | AA                 | AA               | INTERGENIC                    |                    |                              |
| SNP_51777_A_17269256 | NC_021166.1    | Ca_Kabuli_Chr07 | 17269256                | TT                              | CC                 | CC               | INTERGENIC                    |                    |                              |
| SNP_51778_A_17269265 | NC_021166.1    | Ca_Kabuli_Chr07 | 17269265                | CC                              | TT                 | TT               | INTERGENIC                    |                    |                              |
| SNP_51779_A_17269528 | NC_021166.1    | Ca_Kabuli_Chr07 | 17269528                | GG                              | AA                 | AA               | INTERGENIC                    |                    |                              |



| SNPs IDs             | Chromosome IDs | Chromosomes     | Physical positions (bp) | CDC Frontier genome (Reference genome) | (Pusa 1103 & HPNB) | (ILWC 46 & LPNB) | Sequence genome | Components of | Gene accession IDs    | Putative functions |
|----------------------|----------------|-----------------|-------------------------|----------------------------------------|--------------------|------------------|-----------------|---------------|-----------------------|--------------------|
| SNP_51780_A_17275403 | NC_021166.1    | Ca_Kabuli_Chr07 | 17275403                | GG                                     | AA                 | AA               | INTERGENIC      |               |                       |                    |
| SNP_51781_A_17285609 | NC_021166.1    | Ca_Kabuli_Chr07 | 17285609                | CC                                     | AA                 | AA               | INTERGENIC      |               |                       |                    |
| SNP_51782_A_17344436 | NC_021166.1    | Ca_Kabuli_Chr07 | 17344436                | GG                                     | AA                 | AA               | INTERGENIC      |               |                       |                    |
| SNP_51783_A_17372032 | NC_021166.1    | Ca_Kabuli_Chr07 | 17372032                | CC                                     | AA                 | AA               | INTERGENIC      |               |                       |                    |
| SNP_51784_A_17372125 | NC_021166.1    | Ca_Kabuli_Chr07 | 17372125                | TT                                     | AA                 | AA               | INTERGENIC      |               |                       |                    |
| SNP_51785_A_17372144 | NC_021166.1    | Ca_Kabuli_Chr07 | 17372144                | GG                                     | AA                 | AA               | INTERGENIC      |               |                       |                    |
| SNP_51786_A_17372147 | NC_021166.1    | Ca_Kabuli_Chr07 | 17372147                | TT                                     | CC                 | CC               | INTERGENIC      |               |                       |                    |
| SNP_51787_A_17374519 | NC_021166.1    | Ca_Kabuli_Chr07 | 17374519                | CC                                     | TT                 | TT               | INTERGENIC      |               |                       |                    |
| SNP_51788_A_17374585 | NC_021166.1    | Ca_Kabuli_Chr07 | 17374585                | CC                                     | AA                 | AA               | INTERGENIC      |               |                       |                    |
| SNP_51790_A_17375211 | NC_021166.1    | Ca_Kabuli_Chr07 | 17375211                | AA                                     | CC                 | CC               | INTERGENIC      |               |                       |                    |
| SNP_51791_A_17379370 | NC_021166.1    | Ca_Kabuli_Chr07 | 17379370                | TT                                     | CC                 | CC               | DRR             | 101502184     | defensin-like protein |                    |
| SNP_51792_A_17395669 | NC_021166.1    | Ca_Kabuli_Chr07 | 17395669                | GG                                     | TT                 | TT               | INTERGENIC      |               |                       |                    |
| SNP_51793_A_17395746 | NC_021166.1    | Ca_Kabuli_Chr07 | 17395746                | CC                                     | TT                 | TT               | INTERGENIC      |               |                       |                    |
| SNP_51794_A_17410738 | NC_021166.1    | Ca_Kabuli_Chr07 | 17410738                | AA                                     | CC                 | CC               | INTERGENIC      |               |                       |                    |
| SNP_51795_A_17418411 | NC_021166.1    | Ca_Kabuli_Chr07 | 17418411                | CC                                     | TT                 | TT               | INTERGENIC      |               |                       |                    |
| SNP_51796_A_17451461 | NC_021166.1    | Ca_Kabuli_Chr07 | 17451461                | GG                                     | AA                 | AA               | INTERGENIC      |               |                       |                    |
| SNP_51797_A_17451464 | NC_021166.1    | Ca_Kabuli_Chr07 | 17451464                | TT                                     | CC                 | CC               | INTERGENIC      |               |                       |                    |
| SNP_51798_A_17460328 | NC_021166.1    | Ca_Kabuli_Chr07 | 17460328                | CC                                     | AA                 | AA               | INTERGENIC      |               |                       |                    |
| SNP_51799_A_17472970 | NC_021166.1    | Ca_Kabuli_Chr07 | 17472970                | AA                                     | GG                 | GG               | INTERGENIC      |               |                       |                    |
| SNP_51800_A_17508081 | NC_021166.1    | Ca_Kabuli_Chr07 | 17508081                | TT                                     | CC                 | CC               | INTERGENIC      |               |                       |                    |
| SNP_51801_A_17662755 | NC_021166.1    | Ca_Kabuli_Chr07 | 17662755                | TT                                     | GG                 | GG               | INTERGENIC      |               |                       |                    |
| SNP_51802_A_17841610 | NC_021166.1    | Ca_Kabuli_Chr07 | 17841610                | CC                                     | TT                 | TT               | INTERGENIC      |               |                       |                    |

| SNPs IDs             | Chromosome IDs | Chromosomes     | Physical positions (bp) | CDC Frontier (Reference genome) | (Pusa 1103 & HPNB) | (ILWC 46 & LPNB) | Sequence Components of genome | Gene accession IDs | Putative functions                                                  |
|----------------------|----------------|-----------------|-------------------------|---------------------------------|--------------------|------------------|-------------------------------|--------------------|---------------------------------------------------------------------|
| SNP_51803_A_17858807 | NC_021166.1    | Ca_Kabuli_Chr07 | 17858807                | GG                              | AA                 | AA               | NON_SYNONYMOUS_CODING         | 101505067          | Unknown function                                                    |
| SNP_51804_A_17869145 | NC_021166.1    | Ca_Kabuli_Chr07 | 17869145                | CC                              | TT                 | TT               | DRR                           | 101498120          | uncharacterized LOC101498120                                        |
| SNP_51805_A_17869189 | NC_021166.1    | Ca_Kabuli_Chr07 | 17869189                | TT                              | CC                 | CC               | DRR                           | 101498120          | uncharacterized LOC101498120                                        |
| SNP_51806_A_17869299 | NC_021166.1    | Ca_Kabuli_Chr07 | 17869299                | TT                              | CC                 | CC               | DRR                           | 101498120          | uncharacterized LOC101498120                                        |
| SNP_51807_A_17869631 | NC_021166.1    | Ca_Kabuli_Chr07 | 17869631                | AA                              | TT                 | TT               | DRR                           | 101498120          | uncharacterized LOC101498120                                        |
| SNP_51808_A_17869634 | NC_021166.1    | Ca_Kabuli_Chr07 | 17869634                | TT                              | CC                 | CC               | DRR                           | 101498120          | uncharacterized LOC101498120                                        |
| SNP_51809_A_17874951 | NC_021166.1    | Ca_Kabuli_Chr07 | 17874951                | GG                              | TT                 | TT               | URR                           | 101498120          | uncharacterized LOC101498120                                        |
| SNP_51810_A_17875009 | NC_021166.1    | Ca_Kabuli_Chr07 | 17875009                | TT                              | CC                 | CC               | URR                           | 101498120          | uncharacterized LOC101498120                                        |
| SNP_51811_A_17875325 | NC_021166.1    | Ca_Kabuli_Chr07 | 17875325                | AA                              | GG                 | GG               | URR                           | 101498120          | uncharacterized LOC101498120                                        |
| SNP_51812_A_17875331 | NC_021166.1    | Ca_Kabuli_Chr07 | 17875331                | AA                              | GG                 | GG               | URR                           | 101498120          | uncharacterized LOC101498120                                        |
| SNP_51813_A_17879955 | NC_021166.1    | Ca_Kabuli_Chr07 | 17879955                | AA                              | TT                 | TT               | INTERGENIC                    |                    |                                                                     |
| SNP_51814_A_17879998 | NC_021166.1    | Ca_Kabuli_Chr07 | 17879998                | AA                              | GG                 | GG               | INTERGENIC                    |                    |                                                                     |
| SNP_51815_A_17880234 | NC_021166.1    | Ca_Kabuli_Chr07 | 17880234                | TT                              | CC                 | CC               | INTERGENIC                    |                    |                                                                     |
| SNP_51816_A_17880237 | NC_021166.1    | Ca_Kabuli_Chr07 | 17880237                | GG                              | AA                 | AA               | INTERGENIC                    |                    |                                                                     |
| SNP_51817_A_17898460 | NC_021166.1    | Ca_Kabuli_Chr07 | 17898460                | AA                              | CC                 | CC               | INTERGENIC                    |                    |                                                                     |
| SNP_51818_A_17902038 | NC_021166.1    | Ca_Kabuli_Chr07 | 17902038                | AA                              | GG                 | GG               | INTERGENIC                    |                    |                                                                     |
| SNP_51819_A_17902047 | NC_021166.1    | Ca_Kabuli_Chr07 | 17902047                | GG                              | TT                 | TT               | INTERGENIC                    |                    |                                                                     |
| SNP_51820_A_17902057 | NC_021166.1    | Ca_Kabuli_Chr07 | 17902057                | GG                              | AA                 | AA               | INTERGENIC                    |                    |                                                                     |
| SNP_51821_A_17922296 | NC_021166.1    | Ca_Kabuli_Chr07 | 17922296                | AA                              | GG                 | CC               | URR                           | 101506042          | probable leucine-rich repeat receptor-like protein kinase At5g49770 |
| SNP_51823_A_17987221 | NC_021166.1    | Ca_Kabuli_Chr07 | 17987221                | TT                              | AA                 | AA               | INTERGENIC                    |                    |                                                                     |
| SNP_51824_A_17997471 | NC_021166.1    | Ca_Kabuli_Chr07 | 17997471                | GG                              | AA                 | AA               | INTRON                        | 101498992          | probable leucine-rich repeat receptor-like protein kinase At5g49770 |
| SNP_51825_A_18007004 | NC_021166.1    | Ca_Kabuli_Chr07 | 18007004                | AA                              | TT                 | TT               | INTERGENIC                    |                    |                                                                     |

| SNPs IDs             | Chromosome IDs | Chromosomes     | Physical positions (bp) | CDC Frontier genome (Reference genome) | (Pusa 1103 & HPNB) | (ILWC 46 & LPNB) | Sequence genome | Components of | Gene accession IDs | Putative functions |
|----------------------|----------------|-----------------|-------------------------|----------------------------------------|--------------------|------------------|-----------------|---------------|--------------------|--------------------|
| SNP_51826_A_18007184 | NC_021166.1    | Ca_Kabuli_Chr07 | 18007184                | GG                                     | TT                 | TT               | INTERGENIC      |               |                    |                    |
| SNP_51827_A_18007302 | NC_021166.1    | Ca_Kabuli_Chr07 | 18007302                | AA                                     | GG                 | GG               | INTERGENIC      |               |                    |                    |
| SNP_51828_A_18007376 | NC_021166.1    | Ca_Kabuli_Chr07 | 18007376                | CC                                     | TT                 | TT               | INTERGENIC      |               |                    |                    |
| SNP_51829_A_18007484 | NC_021166.1    | Ca_Kabuli_Chr07 | 18007484                | AA                                     | GG                 | GG               | INTERGENIC      |               |                    |                    |
| SNP_51830_A_18007509 | NC_021166.1    | Ca_Kabuli_Chr07 | 18007509                | GG                                     | AA                 | AA               | INTERGENIC      |               |                    |                    |
| SNP_51831_A_18007525 | NC_021166.1    | Ca_Kabuli_Chr07 | 18007525                | TT                                     | CC                 | CC               | INTERGENIC      |               |                    |                    |
| SNP_51832_A_18007537 | NC_021166.1    | Ca_Kabuli_Chr07 | 18007537                | TT                                     | CC                 | CC               | INTERGENIC      |               |                    |                    |
| SNP_51833_A_18007798 | NC_021166.1    | Ca_Kabuli_Chr07 | 18007798                | CC                                     | TT                 | TT               | INTERGENIC      |               |                    |                    |
| SNP_51834_A_18007900 | NC_021166.1    | Ca_Kabuli_Chr07 | 18007900                | AA                                     | GG                 | GG               | INTERGENIC      |               |                    |                    |
| SNP_51836_A_18007952 | NC_021166.1    | Ca_Kabuli_Chr07 | 18007952                | GG                                     | TT                 | TT               | INTERGENIC      |               |                    |                    |
| SNP_51837_A_18007965 | NC_021166.1    | Ca_Kabuli_Chr07 | 18007965                | CC                                     | TT                 | TT               | INTERGENIC      |               |                    |                    |
| SNP_51838_A_18024889 | NC_021166.1    | Ca_Kabuli_Chr07 | 18024889                | TT                                     | CC                 | CC               | INTERGENIC      |               |                    |                    |
| SNP_51839_A_18038540 | NC_021166.1    | Ca_Kabuli_Chr07 | 18038540                | GG                                     | TT                 | TT               | INTERGENIC      |               |                    |                    |
| SNP_51841_A_18038552 | NC_021166.1    | Ca_Kabuli_Chr07 | 18038552                | CC                                     | GG                 | GG               | INTERGENIC      |               |                    |                    |
| SNP_51842_A_18054078 | NC_021166.1    | Ca_Kabuli_Chr07 | 18054078                | CC                                     | TT                 | TT               | INTERGENIC      |               |                    |                    |
| SNP_51843_A_18070993 | NC_021166.1    | Ca_Kabuli_Chr07 | 18070993                | AA                                     | TT                 | TT               | INTERGENIC      |               |                    |                    |
| SNP_51844_A_18071005 | NC_021166.1    | Ca_Kabuli_Chr07 | 18071005                | GG                                     | TT                 | TT               | INTERGENIC      |               |                    |                    |
| SNP_51845_A_18071028 | NC_021166.1    | Ca_Kabuli_Chr07 | 18071028                | AA                                     | GG                 | GG               | INTERGENIC      |               |                    |                    |
| SNP_51846_A_18071121 | NC_021166.1    | Ca_Kabuli_Chr07 | 18071121                | TT                                     | GG                 | GG               | INTERGENIC      |               |                    |                    |
| SNP_51847_A_18071159 | NC_021166.1    | Ca_Kabuli_Chr07 | 18071159                | AA                                     | TT                 | TT               | INTERGENIC      |               |                    |                    |
| SNP_51848_A_18071165 | NC_021166.1    | Ca_Kabuli_Chr07 | 18071165                | GG                                     | CC                 | CC               | INTERGENIC      |               |                    |                    |
| SNP_51849_A_18071188 | NC_021166.1    | Ca_Kabuli_Chr07 | 18071188                | TT                                     | CC                 | CC               | INTERGENIC      |               |                    |                    |

| SNPs IDs             | Chromosome IDs | Chromosomes     | Physical positions (bp) | CDC Frontier genome (Reference genome) | (Pusa 1103 & HPNB) | (ILWC 46 & LPNB) | Sequence Components of genome | Gene accession IDs | Putative functions           |
|----------------------|----------------|-----------------|-------------------------|----------------------------------------|--------------------|------------------|-------------------------------|--------------------|------------------------------|
| SNP_51850_A_18071197 | NC_021166.1    | Ca_Kabuli_Chr07 | 18071197                | TT                                     | CC                 | CC               | INTERGENIC                    |                    |                              |
| SNP_51851_A_18071401 | NC_021166.1    | Ca_Kabuli_Chr07 | 18071401                | CC                                     | AA                 | AA               | INTERGENIC                    |                    |                              |
| SNP_51852_A_18084750 | NC_021166.1    | Ca_Kabuli_Chr07 | 18084750                | CC                                     | TT                 | TT               | INTERGENIC                    |                    |                              |
| SNP_51853_A_18088218 | NC_021166.1    | Ca_Kabuli_Chr07 | 18088218                | TT                                     | AA                 | AA               | INTERGENIC                    |                    |                              |
| SNP_51855_A_18125921 | NC_021166.1    | Ca_Kabuli_Chr07 | 18125921                | CC                                     | TT                 | TT               | INTERGENIC                    |                    |                              |
| SNP_51856_A_18136949 | NC_021166.1    | Ca_Kabuli_Chr07 | 18136949                | TT                                     | CC                 | CC               | INTERGENIC                    |                    |                              |
| SNP_51857_A_18151654 | NC_021166.1    | Ca_Kabuli_Chr07 | 18151654                | AA                                     | GG                 | GG               | NON_SYNONYMOUS_CODING         | 101513850          | uncharacterized LOC101513850 |
| SNP_51858_A_18188233 | NC_021166.1    | Ca_Kabuli_Chr07 | 18188233                | GG                                     | AA                 | AA               | INTERGENIC                    |                    |                              |
| SNP_51859_A_18188451 | NC_021166.1    | Ca_Kabuli_Chr07 | 18188451                | AA                                     | CC                 | CC               | INTERGENIC                    |                    |                              |
| SNP_51860_A_18198990 | NC_021166.1    | Ca_Kabuli_Chr07 | 18198990                | GG                                     | AA                 | AA               | DRR                           | 101514197          | uncharacterized LOC101514197 |
| SNP_51861_A_18198998 | NC_021166.1    | Ca_Kabuli_Chr07 | 18198998                | GG                                     | TT                 | TT               | DRR                           | 101514197          | uncharacterized LOC101514197 |
| SNP_51862_A_18199007 | NC_021166.1    | Ca_Kabuli_Chr07 | 18199007                | GG                                     | TT                 | TT               | DRR                           | 101514197          | uncharacterized LOC101514197 |
| SNP_51863_A_18199059 | NC_021166.1    | Ca_Kabuli_Chr07 | 18199059                | GG                                     | AA                 | AA               | SYNONYMOUS_CODING             | 101514197          | uncharacterized LOC101514197 |
| SNP_51864_A_18199084 | NC_021166.1    | Ca_Kabuli_Chr07 | 18199084                | TT                                     | CC                 | CC               | NON_SYNONYMOUS_CODING         | 101514197          | uncharacterized LOC101514197 |
| SNP_51865_A_18199086 | NC_021166.1    | Ca_Kabuli_Chr07 | 18199086                | AA                                     | TT                 | TT               | NON_SYNONYMOUS_CODING         | 101514197          | uncharacterized LOC101514197 |
| SNP_51866_A_18211303 | NC_021166.1    | Ca_Kabuli_Chr07 | 18211303                | GG                                     | AA                 | AA               | INTERGENIC                    |                    |                              |
| SNP_51867_A_18221628 | NC_021166.1    | Ca_Kabuli_Chr07 | 18221628                | GG                                     | AA                 | AA               | INTERGENIC                    |                    |                              |
| SNP_51868_A_18308123 | NC_021166.1    | Ca_Kabuli_Chr07 | 18308123                | AA                                     | TT                 | TT               | INTERGENIC                    |                    |                              |
| SNP_51869_A_18308174 | NC_021166.1    | Ca_Kabuli_Chr07 | 18308174                | AA                                     | GG                 | GG               | INTERGENIC                    |                    |                              |
| SNP_51870_A_18308196 | NC_021166.1    | Ca_Kabuli_Chr07 | 18308196                | TT                                     | CC                 | CC               | INTERGENIC                    |                    |                              |
| SNP_51871_A_18308363 | NC_021166.1    | Ca_Kabuli_Chr07 | 18308363                | AA                                     | GG                 | GG               | INTERGENIC                    |                    |                              |
| SNP_51872_A_18332774 | NC_021166.1    | Ca_Kabuli_Chr07 | 18332774                | AA                                     | GG                 | GG               | INTERGENIC                    |                    |                              |

| SNPs IDs             | Chromosome IDs | Chromosomes     | Physical positions (bp) | CDC Frontier genome (Reference genome) | (Pusa 1103 & HPNB) | (ILWC 46 & LPNB) | Sequence Components of genome | Gene accession IDs | Putative functions                                         |
|----------------------|----------------|-----------------|-------------------------|----------------------------------------|--------------------|------------------|-------------------------------|--------------------|------------------------------------------------------------|
| SNP_51873_A_18332778 | NC_021166.1    | Ca_Kabuli_Chr07 | 18332778                | CC                                     | TT                 | TT               | INTERGENIC                    |                    |                                                            |
| SNP_51874_A_18332792 | NC_021166.1    | Ca_Kabuli_Chr07 | 18332792                | CC                                     | AA                 | AA               | INTERGENIC                    |                    |                                                            |
| SNP_51875_A_18332822 | NC_021166.1    | Ca_Kabuli_Chr07 | 18332822                | CC                                     | TT                 | TT               | INTERGENIC                    |                    |                                                            |
| SNP_51876_A_18332825 | NC_021166.1    | Ca_Kabuli_Chr07 | 18332825                | CC                                     | TT                 | TT               | INTERGENIC                    |                    |                                                            |
| SNP_51878_A_18332831 | NC_021166.1    | Ca_Kabuli_Chr07 | 18332831                | TT                                     | CC                 | CC               | INTERGENIC                    |                    |                                                            |
| SNP_51879_A_18332872 | NC_021166.1    | Ca_Kabuli_Chr07 | 18332872                | GG                                     | AA                 | AA               | INTERGENIC                    |                    |                                                            |
| SNP_51880_A_18332915 | NC_021166.1    | Ca_Kabuli_Chr07 | 18332915                | GG                                     | AA                 | AA               | INTERGENIC                    |                    |                                                            |
| SNP_51881_A_18333209 | NC_021166.1    | Ca_Kabuli_Chr07 | 18333209                | CC                                     | TT                 | TT               | INTERGENIC                    |                    |                                                            |
| SNP_51882_A_18343950 | NC_021166.1    | Ca_Kabuli_Chr07 | 18343950                | CC                                     | TT                 | TT               | INTERGENIC                    |                    |                                                            |
| SNP_51883_A_18362444 | NC_021166.1    | Ca_Kabuli_Chr07 | 18362444                | TT                                     | CC                 | CC               | DRR                           | 101488240          | uncharacterized LOC101488240                               |
| SNP_51884_A_18362477 | NC_021166.1    | Ca_Kabuli_Chr07 | 18362477                | AA                                     | GG                 | GG               | DRR                           | 101488240          | uncharacterized LOC101488240                               |
| SNP_51885_A_18362523 | NC_021166.1    | Ca_Kabuli_Chr07 | 18362523                | TT                                     | AA                 | AA               | DRR                           | 101488240          | uncharacterized LOC101488240                               |
| SNP_51886_A_18362532 | NC_021166.1    | Ca_Kabuli_Chr07 | 18362532                | CC                                     | TT                 | TT               | DRR                           | 101488240          | uncharacterized LOC101488240                               |
| SNP_51887_A_18363240 | NC_021166.1    | Ca_Kabuli_Chr07 | 18363240                | AA                                     | GG                 | GG               | DRR                           | 101488240          | uncharacterized LOC101488240                               |
| SNP_51888_A_18363569 | NC_021166.1    | Ca_Kabuli_Chr07 | 18363569                | TT                                     | CC                 | CC               | NON_SYNONYMOUS_CODING         | 101488240          | uncharacterized LOC101488240                               |
| SNP_51889_A_18363622 | NC_021166.1    | Ca_Kabuli_Chr07 | 18363622                | AA                                     | GG                 | GG               | NON_SYNONYMOUS_CODING         | 101488240          | uncharacterized LOC101488240                               |
| SNP_51890_A_18387239 | NC_021166.1    | Ca_Kabuli_Chr07 | 18387239                | CC                                     | AA                 | AA               | DRR                           | 101510424          | pentatricopeptide repeat-containing protein At1g60770-like |
| SNP_51891_A_18409471 | NC_021166.1    | Ca_Kabuli_Chr07 | 18409471                | TT                                     | CC                 | CC               | SYNONYMOUS_CODING             | 101489237          | uncharacterized LOC101489237                               |
| SNP_51892_A_18409488 | NC_021166.1    | Ca_Kabuli_Chr07 | 18409488                | AA                                     | GG                 | GG               | NON_SYNONYMOUS_CODING         | 101489237          | uncharacterized LOC101489237                               |
| SNP_51893_A_18409517 | NC_021166.1    | Ca_Kabuli_Chr07 | 18409517                | AA                                     | GG                 | GG               | NON_SYNONYMOUS_CODING         | 101489237          | uncharacterized LOC101489237                               |
| SNP_51894_A_18409890 | NC_021166.1    | Ca_Kabuli_Chr07 | 18409890                | AA                                     | GG                 | GG               | INTRON                        | 101489237          | uncharacterized LOC101489237                               |
| SNP_51896_A_18436461 | NC_021166.1    | Ca_Kabuli_Chr07 | 18436461                | TT                                     | CC                 | CC               | INTERGENIC                    |                    |                                                            |

| SNPs IDs             | Chromosome IDs | Chromosomes     | Physical positions (bp) | CDC Frontier genome (Reference genome) | (Pusa 1103 & HPNB) | (ILWC 46 & LPNB) | Sequence Components of genome | Gene accession IDs | Putative functions           |
|----------------------|----------------|-----------------|-------------------------|----------------------------------------|--------------------|------------------|-------------------------------|--------------------|------------------------------|
| SNP_51897_A_18444207 | NC_021166.1    | Ca_Kabuli_Chr07 | 18444207                | CC                                     | AA                 | AA               | INTERGENIC                    |                    |                              |
| SNP_51898_A_18444217 | NC_021166.1    | Ca_Kabuli_Chr07 | 18444217                | TT                                     | CC                 | CC               | INTERGENIC                    |                    |                              |
| SNP_51899_A_18444223 | NC_021166.1    | Ca_Kabuli_Chr07 | 18444223                | TT                                     | GG                 | GG               | INTERGENIC                    |                    |                              |
| SNP_51900_A_18459289 | NC_021166.1    | Ca_Kabuli_Chr07 | 18459289                | TT                                     | GG                 | GG               | INTERGENIC                    |                    |                              |
| SNP_51901_A_18462115 | NC_021166.1    | Ca_Kabuli_Chr07 | 18462115                | GG                                     | CC                 | CC               | INTRON                        | 101511280          | uncharacterized LOC101511280 |
| SNP_51902_A_18526136 | NC_021166.1    | Ca_Kabuli_Chr07 | 18526136                | AA                                     | TT                 | TT               | DRR                           | 101512584          | protein TRANSPARENT TESTA 12 |
| SNP_51903_A_18539501 | NC_021166.1    | Ca_Kabuli_Chr07 | 18539501                | CC                                     | TT                 | TT               | INTERGENIC                    |                    |                              |
| SNP_51904_A_18539507 | NC_021166.1    | Ca_Kabuli_Chr07 | 18539507                | CC                                     | TT                 | TT               | INTERGENIC                    |                    |                              |
| SNP_51905_A_18539567 | NC_021166.1    | Ca_Kabuli_Chr07 | 18539567                | CC                                     | TT                 | TT               | INTERGENIC                    |                    |                              |
| SNP_51906_A_18539621 | NC_021166.1    | Ca_Kabuli_Chr07 | 18539621                | AA                                     | GG                 | GG               | INTERGENIC                    |                    |                              |
| SNP_51907_A_18539674 | NC_021166.1    | Ca_Kabuli_Chr07 | 18539674                | GG                                     | TT                 | TT               | INTERGENIC                    |                    |                              |
| SNP_51908_A_18539689 | NC_021166.1    | Ca_Kabuli_Chr07 | 18539689                | AA                                     | GG                 | GG               | INTERGENIC                    |                    |                              |
| SNP_51909_A_18539886 | NC_021166.1    | Ca_Kabuli_Chr07 | 18539886                | TT                                     | CC                 | CC               | INTERGENIC                    |                    |                              |
| SNP_51910_A_18541728 | NC_021166.1    | Ca_Kabuli_Chr07 | 18541728                | AA                                     | GG                 | GG               | INTERGENIC                    |                    |                              |
| SNP_51911_A_18574447 | NC_021166.1    | Ca_Kabuli_Chr07 | 18574447                | TT                                     | AA                 | AA               | INTERGENIC                    |                    |                              |
| SNP_51912_A_18587157 | NC_021166.1    | Ca_Kabuli_Chr07 | 18587157                | AA                                     | GG                 | GG               | INTERGENIC                    |                    |                              |
| SNP_51913_A_18587182 | NC_021166.1    | Ca_Kabuli_Chr07 | 18587182                | GG                                     | CC                 | CC               | INTERGENIC                    |                    |                              |
| SNP_51914_A_18587223 | NC_021166.1    | Ca_Kabuli_Chr07 | 18587223                | CC                                     | AA                 | AA               | INTERGENIC                    |                    |                              |
| SNP_51915_A_18587404 | NC_021166.1    | Ca_Kabuli_Chr07 | 18587404                | GG                                     | AA                 | AA               | INTERGENIC                    |                    |                              |
| SNP_51916_A_18587448 | NC_021166.1    | Ca_Kabuli_Chr07 | 18587448                | CC                                     | TT                 | TT               | INTERGENIC                    |                    |                              |
| SNP_51917_A_18587466 | NC_021166.1    | Ca_Kabuli_Chr07 | 18587466                | AA                                     | TT                 | TT               | INTERGENIC                    |                    |                              |
| SNP_51918_A_18587495 | NC_021166.1    | Ca_Kabuli_Chr07 | 18587495                | TT                                     | GG                 | GG               | INTERGENIC                    |                    |                              |

| SNPs IDs             | Chromosome IDs | Chromosomes     | Physical positions (bp) | CDC Frontier (Reference genome) | (Pusa 1103 & HPNB) | (ILWC 46 & LPNB) | Sequence genome | Components of | Gene accession IDs | Putative functions |
|----------------------|----------------|-----------------|-------------------------|---------------------------------|--------------------|------------------|-----------------|---------------|--------------------|--------------------|
| SNP_51919_A_18587510 | NC_021166.1    | Ca_Kabuli_Chr07 | 18587510                | TT                              | CC                 | CC               | INTERGENIC      |               |                    |                    |
| SNP_51920_A_18587524 | NC_021166.1    | Ca_Kabuli_Chr07 | 18587524                | CC                              | TT                 | TT               | INTERGENIC      |               |                    |                    |
| SNP_51921_A_18587533 | NC_021166.1    | Ca_Kabuli_Chr07 | 18587533                | TT                              | CC                 | CC               | INTERGENIC      |               |                    |                    |
| SNP_51922_A_18587546 | NC_021166.1    | Ca_Kabuli_Chr07 | 18587546                | AA                              | TT                 | TT               | INTERGENIC      |               |                    |                    |
| SNP_51923_A_18587563 | NC_021166.1    | Ca_Kabuli_Chr07 | 18587563                | TT                              | CC                 | CC               | INTERGENIC      |               |                    |                    |
| SNP_51924_A_18587603 | NC_021166.1    | Ca_Kabuli_Chr07 | 18587603                | CC                              | TT                 | TT               | INTERGENIC      |               |                    |                    |
| SNP_51925_A_18587607 | NC_021166.1    | Ca_Kabuli_Chr07 | 18587607                | CC                              | TT                 | TT               | INTERGENIC      |               |                    |                    |
| SNP_51927_A_18587706 | NC_021166.1    | Ca_Kabuli_Chr07 | 18587706                | GG                              | AA                 | AA               | INTERGENIC      |               |                    |                    |
| SNP_51928_A_18587760 | NC_021166.1    | Ca_Kabuli_Chr07 | 18587760                | AA                              | GG                 | GG               | INTERGENIC      |               |                    |                    |
| SNP_51929_A_18587763 | NC_021166.1    | Ca_Kabuli_Chr07 | 18587763                | TT                              | CC                 | CC               | INTERGENIC      |               |                    |                    |
| SNP_51930_A_18587764 | NC_021166.1    | Ca_Kabuli_Chr07 | 18587764                | GG                              | CC                 | CC               | INTERGENIC      |               |                    |                    |
| SNP_51931_A_18587772 | NC_021166.1    | Ca_Kabuli_Chr07 | 18587772                | AA                              | GG                 | GG               | INTERGENIC      |               |                    |                    |
| SNP_51933_A_18588046 | NC_021166.1    | Ca_Kabuli_Chr07 | 18588046                | GG                              | TT                 | TT               | INTERGENIC      |               |                    |                    |
| SNP_51934_A_18588184 | NC_021166.1    | Ca_Kabuli_Chr07 | 18588184                | AA                              | TT                 | TT               | INTERGENIC      |               |                    |                    |
| SNP_51935_A_18588221 | NC_021166.1    | Ca_Kabuli_Chr07 | 18588221                | AA                              | TT                 | TT               | INTERGENIC      |               |                    |                    |
| SNP_51936_A_18588341 | NC_021166.1    | Ca_Kabuli_Chr07 | 18588341                | TT                              | AA                 | AA               | INTERGENIC      |               |                    |                    |
| SNP_51937_A_18588411 | NC_021166.1    | Ca_Kabuli_Chr07 | 18588411                | TT                              | AA                 | AA               | INTERGENIC      |               |                    |                    |
| SNP_51938_A_18588443 | NC_021166.1    | Ca_Kabuli_Chr07 | 18588443                | CC                              | AA                 | AA               | INTERGENIC      |               |                    |                    |
| SNP_51939_A_18588451 | NC_021166.1    | Ca_Kabuli_Chr07 | 18588451                | TT                              | CC                 | CC               | INTERGENIC      |               |                    |                    |
| SNP_51940_A_18588488 | NC_021166.1    | Ca_Kabuli_Chr07 | 18588488                | AA                              | CC                 | CC               | INTERGENIC      |               |                    |                    |
| SNP_51941_A_18588599 | NC_021166.1    | Ca_Kabuli_Chr07 | 18588599                | TT                              | CC                 | CC               | INTERGENIC      |               |                    |                    |
| SNP_51942_A_18588642 | NC_021166.1    | Ca_Kabuli_Chr07 | 18588642                | TT                              | CC                 | CC               | INTERGENIC      |               |                    |                    |

| SNPs IDs             | Chromosome IDs | Chromosomes     | Physical positions (bp) | CDC Frontier genome (Reference genome) | (Pusa 1103 & HPNB) | (ILWC 46 & LPNB) | Sequence genome | Components of | Gene accession IDs | Putative functions |
|----------------------|----------------|-----------------|-------------------------|----------------------------------------|--------------------|------------------|-----------------|---------------|--------------------|--------------------|
| SNP_51944_A_18588743 | NC_021166.1    | Ca_Kabuli_Chr07 | 18588743                | CC                                     | TT                 | TT               | INTERGENIC      |               |                    |                    |
| SNP_51945_A_18588753 | NC_021166.1    | Ca_Kabuli_Chr07 | 18588753                | TT                                     | CC                 | CC               | INTERGENIC      |               |                    |                    |
| SNP_51946_A_18588761 | NC_021166.1    | Ca_Kabuli_Chr07 | 18588761                | TT                                     | CC                 | CC               | INTERGENIC      |               |                    |                    |
| SNP_51947_A_18588812 | NC_021166.1    | Ca_Kabuli_Chr07 | 18588812                | CC                                     | AA                 | AA               | INTERGENIC      |               |                    |                    |
| SNP_51949_A_18589037 | NC_021166.1    | Ca_Kabuli_Chr07 | 18589037                | AA                                     | CC                 | CC               | INTERGENIC      |               |                    |                    |
| SNP_51950_A_18589252 | NC_021166.1    | Ca_Kabuli_Chr07 | 18589252                | CC                                     | TT                 | TT               | INTERGENIC      |               |                    |                    |
| SNP_51951_A_18589688 | NC_021166.1    | Ca_Kabuli_Chr07 | 18589688                | TT                                     | AA                 | AA               | INTERGENIC      |               |                    |                    |
| SNP_51952_A_18589701 | NC_021166.1    | Ca_Kabuli_Chr07 | 18589701                | GG                                     | AA                 | AA               | INTERGENIC      |               |                    |                    |
| SNP_51953_A_18589743 | NC_021166.1    | Ca_Kabuli_Chr07 | 18589743                | GG                                     | AA                 | AA               | INTERGENIC      |               |                    |                    |
| SNP_51954_A_18589762 | NC_021166.1    | Ca_Kabuli_Chr07 | 18589762                | AA                                     | GG                 | GG               | INTERGENIC      |               |                    |                    |
| SNP_51955_A_18589764 | NC_021166.1    | Ca_Kabuli_Chr07 | 18589764                | GG                                     | AA                 | AA               | INTERGENIC      |               |                    |                    |
| SNP_51956_A_18589787 | NC_021166.1    | Ca_Kabuli_Chr07 | 18589787                | TT                                     | CC                 | CC               | INTERGENIC      |               |                    |                    |
| SNP_51957_A_18589809 | NC_021166.1    | Ca_Kabuli_Chr07 | 18589809                | AA                                     | TT                 | TT               | INTERGENIC      |               |                    |                    |
| SNP_51958_A_18589838 | NC_021166.1    | Ca_Kabuli_Chr07 | 18589838                | GG                                     | AA                 | AA               | INTERGENIC      |               |                    |                    |
| SNP_51959_A_18589912 | NC_021166.1    | Ca_Kabuli_Chr07 | 18589912                | AA                                     | GG                 | GG               | INTERGENIC      |               |                    |                    |
| SNP_51960_A_18590050 | NC_021166.1    | Ca_Kabuli_Chr07 | 18590050                | AA                                     | TT                 | TT               | INTERGENIC      |               |                    |                    |
| SNP_51961_A_18590096 | NC_021166.1    | Ca_Kabuli_Chr07 | 18590096                | TT                                     | GG                 | GG               | INTERGENIC      |               |                    |                    |
| SNP_51962_A_18590133 | NC_021166.1    | Ca_Kabuli_Chr07 | 18590133                | AA                                     | GG                 | GG               | INTERGENIC      |               |                    |                    |
| SNP_51963_A_18590166 | NC_021166.1    | Ca_Kabuli_Chr07 | 18590166                | TT                                     | CC                 | CC               | INTERGENIC      |               |                    |                    |
| SNP_51964_A_18622104 | NC_021166.1    | Ca_Kabuli_Chr07 | 18622104                | CC                                     | TT                 | TT               | INTERGENIC      |               |                    |                    |
| SNP_51965_A_18653754 | NC_021166.1    | Ca_Kabuli_Chr07 | 18653754                | AA                                     | TT                 | TT               | INTERGENIC      |               |                    |                    |
| SNP_51966_A_18666367 | NC_021166.1    | Ca_Kabuli_Chr07 | 18666367                | TT                                     | AA                 | AA               | INTERGENIC      |               |                    |                    |



| SNPs IDs             | Chromosome IDs | Chromosomes     | Physical positions (bp) | CDC Frontier genome (Reference genome) | (Pusa 1103 & HPNB) | (ILWC 46 & LPNB) | Sequence Components of genome | Gene accession IDs | Putative functions                |
|----------------------|----------------|-----------------|-------------------------|----------------------------------------|--------------------|------------------|-------------------------------|--------------------|-----------------------------------|
| SNP_51967_A_18681465 | NC_021166.1    | Ca_Kabuli_Chr07 | 18681465                | CC                                     | TT                 | TT               | INTERGENIC                    |                    |                                   |
| SNP_51968_A_18701118 | NC_021166.1    | Ca_Kabuli_Chr07 | 18701118                | AA                                     | TT                 | TT               | INTERGENIC                    |                    |                                   |
| SNP_51969_A_18702880 | NC_021166.1    | Ca_Kabuli_Chr07 | 18702880                | AA                                     | TT                 | TT               | INTERGENIC                    |                    |                                   |
| SNP_51970_A_18730203 | NC_021166.1    | Ca_Kabuli_Chr07 | 18730203                | AA                                     | TT                 | TT               | INTRON                        | 101491806          | GLABRA2 expression modulator-like |
| SNP_51971_A_18739595 | NC_021166.1    | Ca_Kabuli_Chr07 | 18739595                | GG                                     | AA                 | AA               | INTERGENIC                    |                    |                                   |
| SNP_51972_A_18739713 | NC_021166.1    | Ca_Kabuli_Chr07 | 18739713                | TT                                     | CC                 | CC               | INTERGENIC                    |                    |                                   |
| SNP_51973_A_18739723 | NC_021166.1    | Ca_Kabuli_Chr07 | 18739723                | AA                                     | TT                 | TT               | INTERGENIC                    |                    |                                   |
| SNP_51975_A_18740453 | NC_021166.1    | Ca_Kabuli_Chr07 | 18740453                | TT                                     | CC                 | CC               | INTERGENIC                    |                    |                                   |
| SNP_51976_A_18852410 | NC_021166.1    | Ca_Kabuli_Chr07 | 18852410                | GG                                     | AA                 | AA               | INTERGENIC                    |                    |                                   |
| SNP_51977_A_18899138 | NC_021166.1    | Ca_Kabuli_Chr07 | 18899138                | TT                                     | CC                 | CC               | INTERGENIC                    |                    |                                   |
| SNP_51978_A_18899163 | NC_021166.1    | Ca_Kabuli_Chr07 | 18899163                | TT                                     | GG                 | GG               | INTERGENIC                    |                    |                                   |
| SNP_51979_A_18904699 | NC_021166.1    | Ca_Kabuli_Chr07 | 18904699                | GG                                     | AA                 | AA               | INTERGENIC                    |                    |                                   |
| SNP_51980_A_18904858 | NC_021166.1    | Ca_Kabuli_Chr07 | 18904858                | TT                                     | AA                 | AA               | INTERGENIC                    |                    |                                   |
| SNP_51981_A_18917831 | NC_021166.1    | Ca_Kabuli_Chr07 | 18917831                | TT                                     | GG                 | GG               | INTERGENIC                    |                    |                                   |
| SNP_51982_A_18918110 | NC_021166.1    | Ca_Kabuli_Chr07 | 18918110                | GG                                     | AA                 | AA               | INTERGENIC                    |                    |                                   |
| SNP_51984_A_18918187 | NC_021166.1    | Ca_Kabuli_Chr07 | 18918187                | GG                                     | AA                 | AA               | INTERGENIC                    |                    |                                   |
| SNP_51985_A_18918206 | NC_021166.1    | Ca_Kabuli_Chr07 | 18918206                | AA                                     | CC                 | CC               | INTERGENIC                    |                    |                                   |
| SNP_51987_A_18923208 | NC_021166.1    | Ca_Kabuli_Chr07 | 18923208                | GG                                     | TT                 | TT               | INTERGENIC                    |                    |                                   |
| SNP_51989_A_18930931 | NC_021166.1    | Ca_Kabuli_Chr07 | 18930931                | AA                                     | GG                 | GG               | INTERGENIC                    |                    |                                   |
| SNP_51990_A_18933094 | NC_021166.1    | Ca_Kabuli_Chr07 | 18933094                | GG                                     | AA                 | AA               | INTERGENIC                    |                    |                                   |
| SNP_51991_A_18933240 | NC_021166.1    | Ca_Kabuli_Chr07 | 18933240                | TT                                     | CC                 | CC               | INTERGENIC                    |                    |                                   |
| SNP_51992_A_18935333 | NC_021166.1    | Ca_Kabuli_Chr07 | 18935333                | TT                                     | AA                 | AA               | INTERGENIC                    |                    |                                   |

| SNPs IDs             | Chromosome IDs | Chromosomes     | Physical positions (bp) | CDC Frontier genome (Reference genome) | (Pusa 1103 & HPNB) | (ILWC 46 & LPNB) | Sequence Components of genome | Gene accession IDs | Putative functions                      |
|----------------------|----------------|-----------------|-------------------------|----------------------------------------|--------------------|------------------|-------------------------------|--------------------|-----------------------------------------|
| SNP_51993_A_18935363 | NC_021166.1    | Ca_Kabuli_Chr07 | 18935363                | GG                                     | AA                 | AA               | INTERGENIC                    |                    |                                         |
| SNP_51994_A_18935480 | NC_021166.1    | Ca_Kabuli_Chr07 | 18935480                | AA                                     | TT                 | TT               | INTERGENIC                    |                    |                                         |
| SNP_51995_A_18935486 | NC_021166.1    | Ca_Kabuli_Chr07 | 18935486                | TT                                     | AA                 | AA               | INTERGENIC                    |                    |                                         |
| SNP_51996_A_18935507 | NC_021166.1    | Ca_Kabuli_Chr07 | 18935507                | TT                                     | CC                 | CC               | INTERGENIC                    |                    |                                         |
| SNP_51997_A_18938170 | NC_021166.1    | Ca_Kabuli_Chr07 | 18938170                | AA                                     | TT                 | TT               | INTERGENIC                    |                    |                                         |
| SNP_51998_A_18967441 | NC_021166.1    | Ca_Kabuli_Chr07 | 18967441                | AA                                     | GG                 | GG               | DRR                           | 101410603          | transfer RNA serine (anticodon GCU)     |
| SNP_51999_A_18975081 | NC_021166.1    | Ca_Kabuli_Chr07 | 18975081                | AA                                     | TT                 | TT               | INTERGENIC                    |                    |                                         |
| SNP_52000_A_18982274 | NC_021166.1    | Ca_Kabuli_Chr07 | 18982274                | GG                                     | AA                 | AA               | INTERGENIC                    |                    |                                         |
| SNP_52001_A_18982279 | NC_021166.1    | Ca_Kabuli_Chr07 | 18982279                | TT                                     | CC                 | CC               | INTERGENIC                    |                    |                                         |
| SNP_52002_A_18984450 | NC_021166.1    | Ca_Kabuli_Chr07 | 18984450                | AA                                     | GG                 | GG               | INTERGENIC                    |                    |                                         |
| SNP_52003_A_18985978 | NC_021166.1    | Ca_Kabuli_Chr07 | 18985978                | GG                                     | AA                 | AA               | INTERGENIC                    |                    |                                         |
| SNP_52004_A_19014572 | NC_021166.1    | Ca_Kabuli_Chr07 | 19014572                | AA                                     | CC                 | CC               | NON_SYNONYMOUS_CODING         | 101494415          | kinesin-like protein KCA2               |
| SNP_52005_A_19025071 | NC_021166.1    | Ca_Kabuli_Chr07 | 19025071                | GG                                     | CC                 | CC               | INTRON                        | 101494415          | kinesin-like protein KCA2               |
| SNP_52006_A_19084126 | NC_021166.1    | Ca_Kabuli_Chr07 | 19084126                | TT                                     | CC                 | CC               | INTERGENIC                    |                    |                                         |
| SNP_52007_A_19116980 | NC_021166.1    | Ca_Kabuli_Chr07 | 19116980                | GG                                     | AA                 | AA               | INTERGENIC                    |                    |                                         |
| SNP_52008_A_19126833 | NC_021166.1    | Ca_Kabuli_Chr07 | 19126833                | TT                                     | CC                 | CC               | INTERGENIC                    |                    |                                         |
| SNP_52009_A_19149854 | NC_021166.1    | Ca_Kabuli_Chr07 | 19149854                | TT                                     | CC                 | CC               | INTERGENIC                    |                    |                                         |
| SNP_52010_A_19167959 | NC_021166.1    | Ca_Kabuli_Chr07 | 19167959                | TT                                     | AA                 | AA               | INTERGENIC                    |                    |                                         |
| SNP_52011_A_19179057 | NC_021166.1    | Ca_Kabuli_Chr07 | 19179057                | AA                                     | GG                 | GG               | INTRON                        | 101499314          | caffeic acid 3-O-methyltransferase-like |
| SNP_52012_A_19185027 | NC_021166.1    | Ca_Kabuli_Chr07 | 19185027                | CC                                     | AA                 | AA               | INTERGENIC                    |                    |                                         |
| SNP_52013_A_19263839 | NC_021166.1    | Ca_Kabuli_Chr07 | 19263839                | AA                                     | GG                 | GG               | INTERGENIC                    |                    |                                         |
| SNP_52014_A_19268046 | NC_021166.1    | Ca_Kabuli_Chr07 | 19268046                | CC                                     | TT                 | TT               | INTERGENIC                    |                    |                                         |

| SNPs IDs             | Chromosome IDs | Chromosomes     | Physical positions (bp) | CDC Frontier genome (Reference genome) | (Pusa 1103 & HPNB) | (ILWC 46 & LPNB) | Sequence Components of genome | Gene accession IDs | Putative functions                              |
|----------------------|----------------|-----------------|-------------------------|----------------------------------------|--------------------|------------------|-------------------------------|--------------------|-------------------------------------------------|
| SNP_52016_A_19296559 | NC_021166.1    | Ca_Kabuli_Chr07 | 19296559                | CC                                     | GG                 | GG               | DRR                           | 101502500          | uncharacterized LOC101502500                    |
| SNP_52017_A_19296571 | NC_021166.1    | Ca_Kabuli_Chr07 | 19296571                | GG                                     | AA                 | AA               | DRR                           | 101502500          | uncharacterized LOC101502500                    |
| SNP_52019_A_19359983 | NC_021166.1    | Ca_Kabuli_Chr07 | 19359983                | TT                                     | CC                 | CC               | URR                           | 101502399          | uncharacterized LOC101502399                    |
| SNP_52020_A_19360020 | NC_021166.1    | Ca_Kabuli_Chr07 | 19360020                | AA                                     | GG                 | GG               | URR                           | 101502399          | uncharacterized LOC101502399                    |
| SNP_52021_A_19360291 | NC_021166.1    | Ca_Kabuli_Chr07 | 19360291                | AA                                     | GG                 | GG               | URR                           | 101502399          | uncharacterized LOC101502399                    |
| SNP_52022_A_19360296 | NC_021166.1    | Ca_Kabuli_Chr07 | 19360296                | GG                                     | AA                 | AA               | URR                           | 101502399          | uncharacterized LOC101502399                    |
| SNP_52023_A_19360339 | NC_021166.1    | Ca_Kabuli_Chr07 | 19360339                | AA                                     | CC                 | CC               | URR                           | 101502399          | uncharacterized LOC101502399                    |
| SNP_52024_A_19360608 | NC_021166.1    | Ca_Kabuli_Chr07 | 19360608                | TT                                     | AA                 | AA               | URR                           | 101502399          | uncharacterized LOC101502399                    |
| SNP_52026_A_19440256 | NC_021166.1    | Ca_Kabuli_Chr07 | 19440256                | CC                                     | TT                 | TT               | INTERGENIC                    |                    |                                                 |
| SNP_52027_A_19440575 | NC_021166.1    | Ca_Kabuli_Chr07 | 19440575                | CC                                     | TT                 | TT               | INTERGENIC                    |                    |                                                 |
| SNP_52028_A_19461412 | NC_021166.1    | Ca_Kabuli_Chr07 | 19461412                | AA                                     | CC                 | CC               | INTERGENIC                    |                    |                                                 |
| SNP_52029_A_19463384 | NC_021166.1    | Ca_Kabuli_Chr07 | 19463384                | TT                                     | CC                 | CC               | INTERGENIC                    |                    |                                                 |
| SNP_52030_A_19505591 | NC_021166.1    | Ca_Kabuli_Chr07 | 19505591                | CC                                     | AA                 | AA               | INTERGENIC                    |                    |                                                 |
| SNP_52031_A_19510905 | NC_021166.1    | Ca_Kabuli_Chr07 | 19510905                | AA                                     | CC                 | CC               | INTERGENIC                    |                    |                                                 |
| SNP_52032_A_19510966 | NC_021166.1    | Ca_Kabuli_Chr07 | 19510966                | TT                                     | GG                 | GG               | INTERGENIC                    |                    |                                                 |
| SNP_52033_A_19510980 | NC_021166.1    | Ca_Kabuli_Chr07 | 19510980                | TT                                     | AA                 | AA               | INTERGENIC                    |                    |                                                 |
| SNP_52034_A_19511327 | NC_021166.1    | Ca_Kabuli_Chr07 | 19511327                | TT                                     | CC                 | CC               | INTERGENIC                    |                    |                                                 |
| SNP_52035_A_19511334 | NC_021166.1    | Ca_Kabuli_Chr07 | 19511334                | AA                                     | CC                 | CC               | INTERGENIC                    |                    |                                                 |
| SNP_52036_A_19517105 | NC_021166.1    | Ca_Kabuli_Chr07 | 19517105                | CC                                     | AA                 | AA               | INTERGENIC                    |                    |                                                 |
| SNP_52037_A_19529352 | NC_021166.1    | Ca_Kabuli_Chr07 | 19529352                | AA                                     | GG                 | GG               | URR                           | 101505275          | tRNA-dihydrouridine(20) synthase [NAD(P)+]-like |
| SNP_52038_A_19584564 | NC_021166.1    | Ca_Kabuli_Chr07 | 19584564                | CC                                     | TT                 | TT               | INTERGENIC                    |                    |                                                 |
| SNP_52039_A_19584566 | NC_021166.1    | Ca_Kabuli_Chr07 | 19584566                | CC                                     | TT                 | TT               | INTERGENIC                    |                    |                                                 |

| SNPs IDs             | Chromosome IDs | Chromosomes     | Physical positions (bp) | CDC Frontier (Reference genome) | (Pusa 1103 & HPNB) | (ILWC 46 & LPNB) | Sequence Components of genome | Gene accession IDs | Putative functions             |
|----------------------|----------------|-----------------|-------------------------|---------------------------------|--------------------|------------------|-------------------------------|--------------------|--------------------------------|
| SNP_52040_A_19584595 | NC_021166.1    | Ca_Kabuli_Chr07 | 19584595                | TT                              | AA                 | AA               | INTERGENIC                    |                    |                                |
| SNP_52041_A_19584596 | NC_021166.1    | Ca_Kabuli_Chr07 | 19584596                | TT                              | CC                 | CC               | INTERGENIC                    |                    |                                |
| SNP_52042_A_19584726 | NC_021166.1    | Ca_Kabuli_Chr07 | 19584726                | AA                              | TT                 | TT               | INTERGENIC                    |                    |                                |
| SNP_52043_A_19584747 | NC_021166.1    | Ca_Kabuli_Chr07 | 19584747                | AA                              | TT                 | TT               | INTERGENIC                    |                    |                                |
| SNP_52044_A_19584786 | NC_021166.1    | Ca_Kabuli_Chr07 | 19584786                | TT                              | GG                 | GG               | INTERGENIC                    |                    |                                |
| SNP_52045_A_19584790 | NC_021166.1    | Ca_Kabuli_Chr07 | 19584790                | CC                              | TT                 | TT               | INTERGENIC                    |                    |                                |
| SNP_52048_A_19622474 | NC_021166.1    | Ca_Kabuli_Chr07 | 19622474                | GG                              | AA                 | AA               | URR                           | 101507137          | transcription factor MYC2-like |
| SNP_52050_A_19646854 | NC_021166.1    | Ca_Kabuli_Chr07 | 19646854                | TT                              | GG                 | GG               | INTERGENIC                    |                    |                                |
| SNP_52051_A_19646955 | NC_021166.1    | Ca_Kabuli_Chr07 | 19646955                | TT                              | AA                 | AA               | INTERGENIC                    |                    |                                |
| SNP_52052_A_19647299 | NC_021166.1    | Ca_Kabuli_Chr07 | 19647299                | GG                              | AA                 | AA               | INTERGENIC                    |                    |                                |
| SNP_52053_A_19673710 | NC_021166.1    | Ca_Kabuli_Chr07 | 19673710                | TT                              | CC                 | CC               | INTERGENIC                    |                    |                                |
| SNP_52054_A_19705801 | NC_021166.1    | Ca_Kabuli_Chr07 | 19705801                | TT                              | CC                 | CC               | URR                           | 101505720          | Unknown function               |
| SNP_52055_A_19731438 | NC_021166.1    | Ca_Kabuli_Chr07 | 19731438                | TT                              | CC                 | CC               | DRR                           | 101506358          | uncharacterized LOC101506358   |
| SNP_52056_A_19731448 | NC_021166.1    | Ca_Kabuli_Chr07 | 19731448                | CC                              | TT                 | TT               | DRR                           | 101506358          | uncharacterized LOC101506358   |
| SNP_52058_A_19731801 | NC_021166.1    | Ca_Kabuli_Chr07 | 19731801                | CC                              | TT                 | TT               | DRR                           | 101506358          | uncharacterized LOC101506358   |
| SNP_52059_A_19731815 | NC_021166.1    | Ca_Kabuli_Chr07 | 19731815                | TT                              | CC                 | CC               | DRR                           | 101506358          | uncharacterized LOC101506358   |
| SNP_52060_A_19731846 | NC_021166.1    | Ca_Kabuli_Chr07 | 19731846                | TT                              | CC                 | CC               | DRR                           | 101506358          | uncharacterized LOC101506358   |
| SNP_52061_A_19731860 | NC_021166.1    | Ca_Kabuli_Chr07 | 19731860                | CC                              | AA                 | AA               | DRR                           | 101506358          | uncharacterized LOC101506358   |
| SNP_52062_A_19732025 | NC_021166.1    | Ca_Kabuli_Chr07 | 19732025                | GG                              | AA                 | AA               | DRR                           | 101506358          | uncharacterized LOC101506358   |
| SNP_52063_A_19732045 | NC_021166.1    | Ca_Kabuli_Chr07 | 19732045                | CC                              | GG                 | GG               | DRR                           | 101506358          | uncharacterized LOC101506358   |
| SNP_52064_A_19732089 | NC_021166.1    | Ca_Kabuli_Chr07 | 19732089                | TT                              | CC                 | CC               | SYNONYMOUS_CODING             | 101506358          | uncharacterized LOC101506358   |
| SNP_52065_A_19732117 | NC_021166.1    | Ca_Kabuli_Chr07 | 19732117                | TT                              | CC                 | CC               | NON_SYNONYMOUS_CODING         | 101506358          | uncharacterized LOC101506358   |

| SNPs IDs             | Chromosome IDs | Chromosomes     | Physical positions (bp) | CDC Frontier genome (Reference genome) | (Pusa 1103 & HPNB) | (ILWC 46 & LPNB) | Sequence Components of genome | Gene accession IDs | Putative functions           |
|----------------------|----------------|-----------------|-------------------------|----------------------------------------|--------------------|------------------|-------------------------------|--------------------|------------------------------|
| SNP_52066_A_19732168 | NC_021166.1    | Ca_Kabuli_Chr07 | 19732168                | GG                                     | AA                 | AA               | NON_SYNONYMOUS_CODING         | 101506358          | uncharacterized LOC101506358 |
| SNP_52067_A_19732182 | NC_021166.1    | Ca_Kabuli_Chr07 | 19732182                | CC                                     | TT                 | TT               | SYNONYMOUS_CODING             | 101506358          | uncharacterized LOC101506358 |
| SNP_52068_A_19732228 | NC_021166.1    | Ca_Kabuli_Chr07 | 19732228                | AA                                     | GG                 | GG               | NON_SYNONYMOUS_CODING         | 101506358          | uncharacterized LOC101506358 |
| SNP_52069_A_19786413 | NC_021166.1    | Ca_Kabuli_Chr07 | 19786413                | AA                                     | GG                 | GG               | INTERGENIC                    |                    |                              |
| SNP_52070_A_19786603 | NC_021166.1    | Ca_Kabuli_Chr07 | 19786603                | CC                                     | AA                 | AA               | INTERGENIC                    |                    |                              |
| SNP_52071_A_19786609 | NC_021166.1    | Ca_Kabuli_Chr07 | 19786609                | AA                                     | TT                 | TT               | INTERGENIC                    |                    |                              |
| SNP_52072_A_19786645 | NC_021166.1    | Ca_Kabuli_Chr07 | 19786645                | CC                                     | AA                 | AA               | INTERGENIC                    |                    |                              |
| SNP_52073_A_19787318 | NC_021166.1    | Ca_Kabuli_Chr07 | 19787318                | TT                                     | GG                 | GG               | INTERGENIC                    |                    |                              |
| SNP_52074_A_19823250 | NC_021166.1    | Ca_Kabuli_Chr07 | 19823250                | TT                                     | CC                 | CC               | INTERGENIC                    |                    |                              |
| SNP_52075_A_19823562 | NC_021166.1    | Ca_Kabuli_Chr07 | 19823562                | GG                                     | TT                 | TT               | INTERGENIC                    |                    |                              |
| SNP_52076_A_19829662 | NC_021166.1    | Ca_Kabuli_Chr07 | 19829662                | GG                                     | AA                 | AA               | INTERGENIC                    |                    |                              |
| SNP_52079_A_19848478 | NC_021166.1    | Ca_Kabuli_Chr07 | 19848478                | CC                                     | TT                 | TT               | INTERGENIC                    |                    |                              |
| SNP_52081_A_19860233 | NC_021166.1    | Ca_Kabuli_Chr07 | 19860233                | CC                                     | TT                 | TT               | INTERGENIC                    |                    |                              |
| SNP_52082_A_19860285 | NC_021166.1    | Ca_Kabuli_Chr07 | 19860285                | TT                                     | GG                 | GG               | INTERGENIC                    |                    |                              |
| SNP_52084_A_19860604 | NC_021166.1    | Ca_Kabuli_Chr07 | 19860604                | TT                                     | AA                 | AA               | INTERGENIC                    |                    |                              |
| SNP_52085_A_19860641 | NC_021166.1    | Ca_Kabuli_Chr07 | 19860641                | GG                                     | CC                 | CC               | INTERGENIC                    |                    |                              |
| SNP_52086_A_19860852 | NC_021166.1    | Ca_Kabuli_Chr07 | 19860852                | TT                                     | CC                 | CC               | INTERGENIC                    |                    |                              |
| SNP_52087_A_19860885 | NC_021166.1    | Ca_Kabuli_Chr07 | 19860885                | CC                                     | AA                 | AA               | INTERGENIC                    |                    |                              |
| SNP_52088_A_19860886 | NC_021166.1    | Ca_Kabuli_Chr07 | 19860886                | GG                                     | AA                 | AA               | INTERGENIC                    |                    |                              |
| SNP_52090_A_19867305 | NC_021166.1    | Ca_Kabuli_Chr07 | 19867305                | TT                                     | CC                 | CC               | INTERGENIC                    |                    |                              |
| SNP_52091_A_19874294 | NC_021166.1    | Ca_Kabuli_Chr07 | 19874294                | TT                                     | GG                 | GG               | INTERGENIC                    |                    |                              |
| SNP_52092_A_19891103 | NC_021166.1    | Ca_Kabuli_Chr07 | 19891103                | CC                                     | GG                 | GG               | URR                           | 101509030          | protein TORNADO 2-like       |

| SNPs IDs             | Chromosome IDs | Chromosomes     | Physical positions (bp) | CDC Frontier (Reference genome) | (Pusa 1103 & HPNB) | (ILWC 46 & LPNB) | Sequence Components of genome | Gene accession IDs | Putative functions                           |
|----------------------|----------------|-----------------|-------------------------|---------------------------------|--------------------|------------------|-------------------------------|--------------------|----------------------------------------------|
| SNP_52093_A_19896172 | NC_021166.1    | Ca_Kabuli_Chr07 | 19896172                | AA                              | TT                 | TT               | INTERGENIC                    |                    |                                              |
| SNP_52094_A_19922459 | NC_021166.1    | Ca_Kabuli_Chr07 | 19922459                | AA                              | GG                 | GG               | DRR                           | 101507968          | RING-H2 finger protein ATL51                 |
| SNP_52095_A_19957465 | NC_021166.1    | Ca_Kabuli_Chr07 | 19957465                | GG                              | AA                 | AA               | INTERGENIC                    |                    |                                              |
| SNP_52096_A_19962365 | NC_021166.1    | Ca_Kabuli_Chr07 | 19962365                | AA                              | GG                 | GG               | INTERGENIC                    |                    |                                              |
| SNP_52099_A_19977319 | NC_021166.1    | Ca_Kabuli_Chr07 | 19977319                | AA                              | GG                 | GG               | INTERGENIC                    |                    |                                              |
| SNP_52100_A_19977357 | NC_021166.1    | Ca_Kabuli_Chr07 | 19977357                | TT                              | CC                 | CC               | INTERGENIC                    |                    |                                              |
| SNP_52101_A_19977516 | NC_021166.1    | Ca_Kabuli_Chr07 | 19977516                | AA                              | GG                 | GG               | INTERGENIC                    |                    |                                              |
| SNP_52102_A_19977803 | NC_021166.1    | Ca_Kabuli_Chr07 | 19977803                | AA                              | GG                 | GG               | INTERGENIC                    |                    |                                              |
| SNP_52104_A_19991983 | NC_021166.1    | Ca_Kabuli_Chr07 | 19991983                | TT                              | CC                 | CC               | URR                           | 101510313          | zinc finger CCH domain-containing protein 12 |
| SNP_52105_A_19993540 | NC_021166.1    | Ca_Kabuli_Chr07 | 19993540                | GG                              | AA                 | AA               | INTERGENIC                    |                    |                                              |
| SNP_52106_A_19995031 | NC_021166.1    | Ca_Kabuli_Chr07 | 19995031                | GG                              | AA                 | AA               | INTERGENIC                    |                    |                                              |
| SNP_52107_A_20033162 | NC_021166.1    | Ca_Kabuli_Chr07 | 20033162                | AA                              | GG                 | GG               | URR                           | 101511713          | sucrose transport protein SUC8-like          |
| SNP_52108_A_20035640 | NC_021166.1    | Ca_Kabuli_Chr07 | 20035640                | AA                              | GG                 | GG               | INTERGENIC                    |                    |                                              |
| SNP_52110_A_20036653 | NC_021166.1    | Ca_Kabuli_Chr07 | 20036653                | GG                              | CC                 | CC               | INTERGENIC                    |                    |                                              |
| SNP_52111_A_20036659 | NC_021166.1    | Ca_Kabuli_Chr07 | 20036659                | AA                              | GG                 | GG               | INTERGENIC                    |                    |                                              |
| SNP_52113_A_20050652 | NC_021166.1    | Ca_Kabuli_Chr07 | 20050652                | TT                              | AA                 | AA               | URR                           | 101512030          | probable calcium-binding protein CML11       |
| SNP_52114_A_20059894 | NC_021166.1    | Ca_Kabuli_Chr07 | 20059894                | GG                              | AA                 | AA               | INTERGENIC                    |                    |                                              |
| SNP_52115_A_20060126 | NC_021166.1    | Ca_Kabuli_Chr07 | 20060126                | AA                              | GG                 | GG               | INTERGENIC                    |                    |                                              |
| SNP_52116_A_20060227 | NC_021166.1    | Ca_Kabuli_Chr07 | 20060227                | CC                              | TT                 | TT               | INTERGENIC                    |                    |                                              |
| SNP_52118_A_20061081 | NC_021166.1    | Ca_Kabuli_Chr07 | 20061081                | TT                              | CC                 | CC               | INTERGENIC                    |                    |                                              |
| SNP_52119_A_20078378 | NC_021166.1    | Ca_Kabuli_Chr07 | 20078378                | TT                              | CC                 | CC               | INTERGENIC                    |                    |                                              |
| SNP_52120_A_20092564 | NC_021166.1    | Ca_Kabuli_Chr07 | 20092564                | CC                              | TT                 | TT               | INTERGENIC                    |                    |                                              |

| SNPs IDs             | Chromosome IDs | Chromosomes     | Physical positions (bp) | CDC Frontier genome (Reference genome) | (Pusa 1103 & HPNB) | (ILWC 46 & LPNB) | Sequence Components of genome | Gene accession IDs | Putative functions                                             |
|----------------------|----------------|-----------------|-------------------------|----------------------------------------|--------------------|------------------|-------------------------------|--------------------|----------------------------------------------------------------|
| SNP_52121_A_20121711 | NC_021166.1    | Ca_Kabuli_Chr07 | 20121711                | CC                                     | TT                 | TT               | INTRON                        | 101514841          | probable transcription factor KAN2                             |
| SNP_52122_A_20217434 | NC_021166.1    | Ca_Kabuli_Chr07 | 20217434                | TT                                     | AA                 | AA               | INTERGENIC                    |                    |                                                                |
| SNP_52123_A_20217491 | NC_021166.1    | Ca_Kabuli_Chr07 | 20217491                | AA                                     | GG                 | GG               | INTERGENIC                    |                    |                                                                |
| SNP_52124_A_20217532 | NC_021166.1    | Ca_Kabuli_Chr07 | 20217532                | CC                                     | GG                 | GG               | INTERGENIC                    |                    |                                                                |
| SNP_52126_A_20217901 | NC_021166.1    | Ca_Kabuli_Chr07 | 20217901                | TT                                     | CC                 | CC               | INTERGENIC                    |                    |                                                                |
| SNP_52127_A_20220232 | NC_021166.1    | Ca_Kabuli_Chr07 | 20220232                | AA                                     | GG                 | GG               | INTERGENIC                    |                    |                                                                |
| SNP_52130_A_20251949 | NC_021166.1    | Ca_Kabuli_Chr07 | 20251949                | AA                                     | GG                 | GG               | DRR                           | 101488914          | probable pre-mRNA-splicing factor ATP-dependent RNA helicase   |
| SNP_52131_A_20251950 | NC_021166.1    | Ca_Kabuli_Chr07 | 20251950                | TT                                     | GG                 | GG               | DRR                           | 101488914          | probable pre-mRNA-splicing factor ATP-dependent RNA helicase   |
| SNP_52132_A_20251970 | NC_021166.1    | Ca_Kabuli_Chr07 | 20251970                | GG                                     | AA                 | AA               | DRR                           | 101488914          | probable pre-mRNA-splicing factor ATP-dependent RNA helicase   |
| SNP_52133_A_20251982 | NC_021166.1    | Ca_Kabuli_Chr07 | 20251982                | TT                                     | AA                 | AA               | DRR                           | 101488914          | probable pre-mRNA-splicing factor ATP-dependent RNA helicase   |
| SNP_52134_A_20252334 | NC_021166.1    | Ca_Kabuli_Chr07 | 20252334                | TT                                     | AA                 | AA               | URR                           | 101489238          | uncharacterized LOC101489238                                   |
| SNP_52136_A_20252613 | NC_021166.1    | Ca_Kabuli_Chr07 | 20252613                | AA                                     | GG                 | GG               | URR                           | 101489238          | uncharacterized LOC101489238                                   |
| SNP_52137_A_20321678 | NC_021166.1    | Ca_Kabuli_Chr07 | 20321678                | CC                                     | AA                 | AA               | URR                           | 101490111          | polygalacturonase At1g48100-like                               |
| SNP_52138_A_20331829 | NC_021166.1    | Ca_Kabuli_Chr07 | 20331829                | CC                                     | AA                 | AA               | INTERGENIC                    |                    |                                                                |
| SNP_52139_A_20358954 | NC_021166.1    | Ca_Kabuli_Chr07 | 20358954                | TT                                     | CC                 | CC               | INTERGENIC                    |                    |                                                                |
| SNP_52140_A_20371532 | NC_021166.1    | Ca_Kabuli_Chr07 | 20371532                | CC                                     | AA                 | AA               | DRR                           | 101491807          | putative pentatricopeptide repeat-containing protein At1g68930 |
| SNP_52141_A_20441565 | NC_021166.1    | Ca_Kabuli_Chr07 | 20441565                | GG                                     | AA                 | AA               | INTERGENIC                    |                    |                                                                |
| SNP_52142_A_20443613 | NC_021166.1    | Ca_Kabuli_Chr07 | 20443613                | GG                                     | AA                 | AA               | INTRON                        | 101511821          | 7-deoxyloganic acid glucosyltransferase-like                   |
| SNP_52143_A_20443649 | NC_021166.1    | Ca_Kabuli_Chr07 | 20443649                | GG                                     | AA                 | AA               | INTRON                        | 101511821          | 7-deoxyloganic acid glucosyltransferase-like                   |
| SNP_52144_A_20450725 | NC_021166.1    | Ca_Kabuli_Chr07 | 20450725                | AA                                     | GG                 | GG               | DRR                           | 101493042          | receptor-like cytosolic serine/threonine-protein kinase RBK1   |
| SNP_52145_A_20450987 | NC_021166.1    | Ca_Kabuli_Chr07 | 20450987                | GG                                     | TT                 | TT               | DRR                           | 101493042          | receptor-like cytosolic serine/threonine-protein kinase RBK1   |
| SNP_52147_A_20451060 | NC_021166.1    | Ca_Kabuli_Chr07 | 20451060                | AA                                     | TT                 | TT               | DRR                           | 101493042          | receptor-like cytosolic serine/threonine-protein kinase RBK1   |

| SNPs IDs             | Chromosome IDs | Chromosomes     | Physical positions (bp) | CDC Frontier (Reference genome) | (Pusa 1103 & HPNB) | (ILWC 46 & LPNB) | Sequence Components of genome | Gene accession IDs | Putative functions                                           |
|----------------------|----------------|-----------------|-------------------------|---------------------------------|--------------------|------------------|-------------------------------|--------------------|--------------------------------------------------------------|
| SNP_52148_A_20452945 | NC_021166.1    | Ca_Kabuli_Chr07 | 20452945                | AA                              | GG                 | GG               | INTRON                        | 101493042          | receptor-like cytosolic serine/threonine-protein kinase RBK1 |
| SNP_52149_A_20457563 | NC_021166.1    | Ca_Kabuli_Chr07 | 20457563                | AA                              | TT                 | TT               | URR                           | 101493042          | receptor-like cytosolic serine/threonine-protein kinase RBK1 |
| SNP_52150_A_20458155 | NC_021166.1    | Ca_Kabuli_Chr07 | 20458155                | TT                              | CC                 | CC               | URR                           | 101493042          | receptor-like cytosolic serine/threonine-protein kinase RBK1 |
| SNP_52151_A_20458307 | NC_021166.1    | Ca_Kabuli_Chr07 | 20458307                | TT                              | CC                 | CC               | URR                           | 101493042          | receptor-like cytosolic serine/threonine-protein kinase RBK1 |
| SNP_52152_A_20463294 | NC_021166.1    | Ca_Kabuli_Chr07 | 20463294                | CC                              | TT                 | TT               | DRR                           | 101512133          | Unknown function                                             |
| SNP_52153_A_20463313 | NC_021166.1    | Ca_Kabuli_Chr07 | 20463313                | GG                              | TT                 | TT               | DRR                           | 101512133          | Unknown function                                             |
| SNP_52154_A_20463315 | NC_021166.1    | Ca_Kabuli_Chr07 | 20463315                | TT                              | CC                 | CC               | DRR                           | 101512133          | Unknown function                                             |
| SNP_52155_A_20463398 | NC_021166.1    | Ca_Kabuli_Chr07 | 20463398                | AA                              | GG                 | GG               | DRR                           | 101512133          | Unknown function                                             |
| SNP_52156_A_20463456 | NC_021166.1    | Ca_Kabuli_Chr07 | 20463456                | TT                              | GG                 | GG               | DRR                           | 101512133          | Unknown function                                             |
| SNP_52157_A_20463608 | NC_021166.1    | Ca_Kabuli_Chr07 | 20463608                | CC                              | GG                 | GG               | DRR                           | 101512133          | Unknown function                                             |
| SNP_52158_A_20463810 | NC_021166.1    | Ca_Kabuli_Chr07 | 20463810                | CC                              | TT                 | TT               | DRR                           | 101512133          | Unknown function                                             |
| SNP_52159_A_20463874 | NC_021166.1    | Ca_Kabuli_Chr07 | 20463874                | CC                              | TT                 | TT               | DRR                           | 101512133          | Unknown function                                             |
| SNP_52160_A_20463950 | NC_021166.1    | Ca_Kabuli_Chr07 | 20463950                | AA                              | GG                 | GG               | DRR                           | 101512133          | Unknown function                                             |
| SNP_52161_A_20464003 | NC_021166.1    | Ca_Kabuli_Chr07 | 20464003                | AA                              | CC                 | CC               | DRR                           | 101512133          | Unknown function                                             |
| SNP_52162_A_20464011 | NC_021166.1    | Ca_Kabuli_Chr07 | 20464011                | CC                              | TT                 | TT               | DRR                           | 101512133          | Unknown function                                             |
| SNP_52163_A_20464026 | NC_021166.1    | Ca_Kabuli_Chr07 | 20464026                | AA                              | GG                 | GG               | DRR                           | 101512133          | Unknown function                                             |
| SNP_52164_A_20464228 | NC_021166.1    | Ca_Kabuli_Chr07 | 20464228                | AA                              | TT                 | TT               | NON_SYNONYMOUS_CODING         | 101512133          | Unknown function                                             |
| SNP_52166_A_20480265 | NC_021166.1    | Ca_Kabuli_Chr07 | 20480265                | GG                              | TT                 | TT               | INTERGENIC                    |                    |                                                              |
| SNP_52167_A_20480901 | NC_021166.1    | Ca_Kabuli_Chr07 | 20480901                | GG                              | AA                 | AA               | INTERGENIC                    |                    |                                                              |
| SNP_52168_A_20482024 | NC_021166.1    | Ca_Kabuli_Chr07 | 20482024                | GG                              | TT                 | TT               | INTERGENIC                    |                    |                                                              |
| SNP_52169_A_20493285 | NC_021166.1    | Ca_Kabuli_Chr07 | 20493285                | CC                              | TT                 | TT               | INTERGENIC                    |                    |                                                              |
| SNP_52171_A_20495766 | NC_021166.1    | Ca_Kabuli_Chr07 | 20495766                | CC                              | TT                 | TT               | DRR                           | 101494323          | AP2-like ethylene-responsive transcription factor AIL6       |



| SNPs IDs             | Chromosome IDs | Chromosomes     | Physical positions (bp) | CDC Frontier genome (Reference genome) | (Pusa 1103 & HPNB) | (ILWC 46 & LPNB) | Sequence Components of genome | Gene accession IDs | Putative functions                                     |
|----------------------|----------------|-----------------|-------------------------|----------------------------------------|--------------------|------------------|-------------------------------|--------------------|--------------------------------------------------------|
| SNP_52172_A_20496693 | NC_021166.1    | Ca_Kabuli_Chr07 | 20496693                | AA                                     | GG                 | GG               | INTRON                        | 101494323          | AP2-like ethylene-responsive transcription factor AIL6 |
| SNP_52173_A_20496739 | NC_021166.1    | Ca_Kabuli_Chr07 | 20496739                | GG                                     | CC                 | CC               | INTRON                        | 101494323          | AP2-like ethylene-responsive transcription factor AIL6 |
| SNP_52174_A_20497039 | NC_021166.1    | Ca_Kabuli_Chr07 | 20497039                | AA                                     | CC                 | CC               | INTRON                        | 101494323          | AP2-like ethylene-responsive transcription factor AIL6 |
| SNP_52175_A_20500662 | NC_021166.1    | Ca_Kabuli_Chr07 | 20500662                | CC                                     | TT                 | TT               | URR                           | 101494323          | AP2-like ethylene-responsive transcription factor AIL6 |
| SNP_52176_A_20501364 | NC_021166.1    | Ca_Kabuli_Chr07 | 20501364                | GG                                     | TT                 | TT               | URR                           | 101494323          | AP2-like ethylene-responsive transcription factor AIL6 |
| SNP_52178_A_20501456 | NC_021166.1    | Ca_Kabuli_Chr07 | 20501456                | AA                                     | GG                 | GG               | URR                           | 101494323          | AP2-like ethylene-responsive transcription factor AIL6 |
| SNP_52184_A_20503667 | NC_021166.1    | Ca_Kabuli_Chr07 | 20503667                | TT                                     | AA                 | AA               | INTERGENIC                    |                    |                                                        |
| SNP_52186_A_20505796 | NC_021166.1    | Ca_Kabuli_Chr07 | 20505796                | AA                                     | CC                 | CC               | INTERGENIC                    |                    |                                                        |
| SNP_52188_A_20505874 | NC_021166.1    | Ca_Kabuli_Chr07 | 20505874                | AA                                     | GG                 | GG               | INTERGENIC                    |                    |                                                        |
| SNP_52190_A_20506476 | NC_021166.1    | Ca_Kabuli_Chr07 | 20506476                | TT                                     | AA                 | AA               | INTERGENIC                    |                    |                                                        |
| SNP_52192_A_20509135 | NC_021166.1    | Ca_Kabuli_Chr07 | 20509135                | CC                                     | TT                 | TT               | INTERGENIC                    |                    |                                                        |
| SNP_52193_A_20509143 | NC_021166.1    | Ca_Kabuli_Chr07 | 20509143                | GG                                     | CC                 | CC               | INTERGENIC                    |                    |                                                        |
| SNP_52194_A_20509156 | NC_021166.1    | Ca_Kabuli_Chr07 | 20509156                | GG                                     | AA                 | AA               | INTERGENIC                    |                    |                                                        |
| SNP_52195_A_20510103 | NC_021166.1    | Ca_Kabuli_Chr07 | 20510103                | CC                                     | GG                 | GG               | INTERGENIC                    |                    |                                                        |
| SNP_52198_A_20510837 | NC_021166.1    | Ca_Kabuli_Chr07 | 20510837                | GG                                     | TT                 | TT               | INTERGENIC                    |                    |                                                        |
| SNP_52200_A_20516084 | NC_021166.1    | Ca_Kabuli_Chr07 | 20516084                | GG                                     | AA                 | AA               | INTERGENIC                    |                    |                                                        |
| SNP_52201_A_20517119 | NC_021166.1    | Ca_Kabuli_Chr07 | 20517119                | TT                                     | CC                 | CC               | INTERGENIC                    |                    |                                                        |
| SNP_52204_A_20520770 | NC_021166.1    | Ca_Kabuli_Chr07 | 20520770                | AA                                     | GG                 | GG               | INTERGENIC                    |                    |                                                        |
| SNP_52205_A_20522303 | NC_021166.1    | Ca_Kabuli_Chr07 | 20522303                | AA                                     | GG                 | GG               | INTERGENIC                    |                    |                                                        |
| SNP_52206_A_20523000 | NC_021166.1    | Ca_Kabuli_Chr07 | 20523000                | TT                                     | CC                 | CC               | INTERGENIC                    |                    |                                                        |
| SNP_52207_A_20529196 | NC_021166.1    | Ca_Kabuli_Chr07 | 20529196                | CC                                     | AA                 | AA               | INTERGENIC                    |                    |                                                        |
| SNP_52209_A_20534365 | NC_021166.1    | Ca_Kabuli_Chr07 | 20534365                | TT                                     | CC                 | CC               | INTRON                        | 101494849          | putative U-box domain-containing protein 50            |

| SNPs IDs             | Chromosome IDs | Chromosomes     | Physical positions (bp) | CDC Frontier (Reference genome) | (Pusa 1103 & HPNB) | (ILWC 46 & LPNB) | Sequence Components of genome | Gene accession IDs | Putative functions                          |
|----------------------|----------------|-----------------|-------------------------|---------------------------------|--------------------|------------------|-------------------------------|--------------------|---------------------------------------------|
| SNP_52210_A_20534371 | NC_021166.1    | Ca_Kabuli_Chr07 | 20534371                | CC                              | TT                 | TT               | INTRON                        | 101494849          | putative U-box domain-containing protein 50 |
| SNP_52211_A_20534676 | NC_021166.1    | Ca_Kabuli_Chr07 | 20534676                | GG                              | AA                 | AA               | INTERGENIC                    |                    |                                             |
| SNP_52212_A_20534689 | NC_021166.1    | Ca_Kabuli_Chr07 | 20534689                | TT                              | GG                 | GG               | INTERGENIC                    |                    |                                             |
| SNP_52213_A_20534715 | NC_021166.1    | Ca_Kabuli_Chr07 | 20534715                | AA                              | GG                 | GG               | INTERGENIC                    |                    |                                             |
| SNP_52214_A_20534719 | NC_021166.1    | Ca_Kabuli_Chr07 | 20534719                | AA                              | GG                 | GG               | INTERGENIC                    |                    |                                             |
| SNP_52215_A_20534720 | NC_021166.1    | Ca_Kabuli_Chr07 | 20534720                | TT                              | CC                 | CC               | INTERGENIC                    |                    |                                             |
| SNP_52216_A_20536046 | NC_021166.1    | Ca_Kabuli_Chr07 | 20536046                | AA                              | GG                 | GG               | INTERGENIC                    |                    |                                             |
| SNP_52217_A_20536056 | NC_021166.1    | Ca_Kabuli_Chr07 | 20536056                | AA                              | GG                 | GG               | INTERGENIC                    |                    |                                             |
| SNP_52219_A_20536283 | NC_021166.1    | Ca_Kabuli_Chr07 | 20536283                | CC                              | TT                 | TT               | INTERGENIC                    |                    |                                             |
| SNP_52221_A_20538966 | NC_021166.1    | Ca_Kabuli_Chr07 | 20538966                | CC                              | TT                 | TT               | DRR                           | 101495176          | nucleobase-ascorbate transporter 11-like    |
| SNP_52222_A_20540111 | NC_021166.1    | Ca_Kabuli_Chr07 | 20540111                | AA                              | GG                 | GG               | URR                           | 101494849          | putative U-box domain-containing protein 50 |
| SNP_52223_A_20543694 | NC_021166.1    | Ca_Kabuli_Chr07 | 20543694                | GG                              | AA                 | AA               | INTERGENIC                    |                    |                                             |
| SNP_52224_A_20545134 | NC_021166.1    | Ca_Kabuli_Chr07 | 20545134                | TT                              | CC                 | CC               | NON_SYNONYMOUS_CODING         | 101495176          | nucleobase-ascorbate transporter 11-like    |
| SNP_52225_A_20545373 | NC_021166.1    | Ca_Kabuli_Chr07 | 20545373                | TT                              | GG                 | GG               | NON_SYNONYMOUS_CODING         | 101495176          | nucleobase-ascorbate transporter 11-like    |
| SNP_52226_A_20545520 | NC_021166.1    | Ca_Kabuli_Chr07 | 20545520                | GG                              | AA                 | AA               | INTERGENIC                    |                    |                                             |
| SNP_52227_A_20554056 | NC_021166.1    | Ca_Kabuli_Chr07 | 20554056                | AA                              | GG                 | GG               | INTERGENIC                    |                    |                                             |
| SNP_52229_A_20554471 | NC_021166.1    | Ca_Kabuli_Chr07 | 20554471                | AA                              | CC                 | CC               | INTERGENIC                    |                    |                                             |
| SNP_52230_A_20555372 | NC_021166.1    | Ca_Kabuli_Chr07 | 20555372                | CC                              | TT                 | TT               | INTERGENIC                    |                    |                                             |
| SNP_52232_A_20559775 | NC_021166.1    | Ca_Kabuli_Chr07 | 20559775                | TT                              | AA                 | AA               | INTERGENIC                    |                    |                                             |
| SNP_52234_A_20566843 | NC_021166.1    | Ca_Kabuli_Chr07 | 20566843                | GG                              | TT                 | TT               | URR                           | 101495826          | protein NETWORKED 2D-like                   |
| SNP_52235_A_20567192 | NC_021166.1    | Ca_Kabuli_Chr07 | 20567192                | AA                              | CC                 | CC               | URR                           | 101495826          | protein NETWORKED 2D-like                   |
| SNP_52237_A_20574691 | NC_021166.1    | Ca_Kabuli_Chr07 | 20574691                | GG                              | TT                 | TT               | UPSTREAM                      | Gene_ma25854       | Unknown function                            |

| SNPs IDs             | Chromosome IDs | Chromosomes     | Physical positions (bp) | CDC Frontier genome | (Reference genome) | (Pusa 1103 & HPNB) | (ILWC 46 & LPNB) | Sequence Components of genome | Gene accession IDs                | Putative functions |
|----------------------|----------------|-----------------|-------------------------|---------------------|--------------------|--------------------|------------------|-------------------------------|-----------------------------------|--------------------|
| SNP_52238_A_20575014 | NC_021166.1    | Ca_Kabuli_Chr07 | 20575014                | AA                  | TT                 | TT                 | URR              | 101496149                     | uncharacterized LOC101496149      |                    |
| SNP_52239_A_20575464 | NC_021166.1    | Ca_Kabuli_Chr07 | 20575464                | TT                  | GG                 | GG                 | URR              | 101496149                     | uncharacterized LOC101496149      |                    |
| SNP_52240_A_20575506 | NC_021166.1    | Ca_Kabuli_Chr07 | 20575506                | TT                  | CC                 | CC                 | URR              | 101496149                     | uncharacterized LOC101496149      |                    |
| SNP_52241_A_20578274 | NC_021166.1    | Ca_Kabuli_Chr07 | 20578274                | GG                  | AA                 | AA                 | INTERGENIC       |                               |                                   |                    |
| SNP_52242_A_20578293 | NC_021166.1    | Ca_Kabuli_Chr07 | 20578293                | GG                  | AA                 | AA                 | INTERGENIC       |                               |                                   |                    |
| SNP_52243_A_20578296 | NC_021166.1    | Ca_Kabuli_Chr07 | 20578296                | GG                  | CC                 | CC                 | INTERGENIC       |                               |                                   |                    |
| SNP_52244_A_20578299 | NC_021166.1    | Ca_Kabuli_Chr07 | 20578299                | GG                  | AA                 | AA                 | INTERGENIC       |                               |                                   |                    |
| SNP_52245_A_20578424 | NC_021166.1    | Ca_Kabuli_Chr07 | 20578424                | GG                  | AA                 | AA                 | INTERGENIC       |                               |                                   |                    |
| SNP_52246_A_20578476 | NC_021166.1    | Ca_Kabuli_Chr07 | 20578476                | CC                  | GG                 | GG                 | INTERGENIC       |                               |                                   |                    |
| SNP_52247_A_20593434 | NC_021166.1    | Ca_Kabuli_Chr07 | 20593434                | TT                  | CC                 | CC                 | INTERGENIC       |                               |                                   |                    |
| SNP_52248_A_20595053 | NC_021166.1    | Ca_Kabuli_Chr07 | 20595053                | CC                  | TT                 | TT                 | INTERGENIC       |                               |                                   |                    |
| SNP_52250_A_20603589 | NC_021166.1    | Ca_Kabuli_Chr07 | 20603589                | GG                  | TT                 | TT                 | INTERGENIC       |                               |                                   |                    |
| SNP_52251_A_20603591 | NC_021166.1    | Ca_Kabuli_Chr07 | 20603591                | CC                  | GG                 | GG                 | INTERGENIC       |                               |                                   |                    |
| SNP_52252_A_20604002 | NC_021166.1    | Ca_Kabuli_Chr07 | 20604002                | GG                  | AA                 | AA                 | INTERGENIC       |                               |                                   |                    |
| SNP_52254_A_20614696 | NC_021166.1    | Ca_Kabuli_Chr07 | 20614696                | CC                  | TT                 | TT                 | INTERGENIC       |                               |                                   |                    |
| SNP_52255_A_20614750 | NC_021166.1    | Ca_Kabuli_Chr07 | 20614750                | CC                  | TT                 | TT                 | INTERGENIC       |                               |                                   |                    |
| SNP_52256_A_20614943 | NC_021166.1    | Ca_Kabuli_Chr07 | 20614943                | AA                  | GG                 | GG                 | INTERGENIC       |                               |                                   |                    |
| SNP_52257_A_20617009 | NC_021166.1    | Ca_Kabuli_Chr07 | 20617009                | TT                  | AA                 | AA                 | URR              | 101496810                     | uncharacterized protein At1g04910 |                    |
| SNP_52258_A_20617446 | NC_021166.1    | Ca_Kabuli_Chr07 | 20617446                | CC                  | TT                 | TT                 | URR              | 101496810                     | uncharacterized protein At1g04910 |                    |
| SNP_52259_A_20617458 | NC_021166.1    | Ca_Kabuli_Chr07 | 20617458                | TT                  | CC                 | CC                 | URR              | 101496810                     | uncharacterized protein At1g04910 |                    |
| SNP_52260_A_20617460 | NC_021166.1    | Ca_Kabuli_Chr07 | 20617460                | TT                  | CC                 | CC                 | URR              | 101496810                     | uncharacterized protein At1g04910 |                    |
| SNP_52262_A_20620617 | NC_021166.1    | Ca_Kabuli_Chr07 | 20620617                | TT                  | CC                 | CC                 | INTERGENIC       |                               |                                   |                    |

| SNPs IDs             | Chromosome IDs | Chromosomes     | Physical positions (bp) | CDC Frontier genome (Reference genome) | (Pusa 1103 & HPNB) | (ILWC 46 & LPNB) | Sequence Components of genome | Gene accession IDs | Putative functions                                |
|----------------------|----------------|-----------------|-------------------------|----------------------------------------|--------------------|------------------|-------------------------------|--------------------|---------------------------------------------------|
| SNP_52263_A_20624998 | NC_021166.1    | Ca_Kabuli_Chr07 | 20624998                | CC                                     | TT                 | TT               | INTERGENIC                    |                    |                                                   |
| SNP_52264_A_20625442 | NC_021166.1    | Ca_Kabuli_Chr07 | 20625442                | CC                                     | TT                 | TT               | INTERGENIC                    |                    |                                                   |
| SNP_52265_A_20629158 | NC_021166.1    | Ca_Kabuli_Chr07 | 20629158                | AA                                     | TT                 | TT               | INTERGENIC                    |                    |                                                   |
| SNP_52266_A_20640858 | NC_021166.1    | Ca_Kabuli_Chr07 | 20640858                | TT                                     | GG                 | GG               | URR                           | 101497134          | translation initiation factor IF-2, mitochondrial |
| SNP_52267_A_20903418 | NC_021166.1    | Ca_Kabuli_Chr07 | 20903418                | TT                                     | CC                 | CC               | URR                           | 101514843          | uncharacterized LOC101514843                      |
| SNP_52268_A_20905188 | NC_021166.1    | Ca_Kabuli_Chr07 | 20905188                | TT                                     | CC                 | CC               | INTERGENIC                    |                    |                                                   |
| SNP_52269_A_20911132 | NC_021166.1    | Ca_Kabuli_Chr07 | 20911132                | CC                                     | TT                 | TT               | INTERGENIC                    |                    |                                                   |
| SNP_52270_A_20911341 | NC_021166.1    | Ca_Kabuli_Chr07 | 20911341                | GG                                     | AA                 | AA               | INTERGENIC                    |                    |                                                   |
| SNP_52271_A_20911355 | NC_021166.1    | Ca_Kabuli_Chr07 | 20911355                | AA                                     | CC                 | CC               | INTERGENIC                    |                    |                                                   |
| SNP_52272_A_20911365 | NC_021166.1    | Ca_Kabuli_Chr07 | 20911365                | TT                                     | CC                 | CC               | INTERGENIC                    |                    |                                                   |
| SNP_52273_A_20911372 | NC_021166.1    | Ca_Kabuli_Chr07 | 20911372                | TT                                     | CC                 | CC               | INTERGENIC                    |                    |                                                   |
| SNP_52274_A_20911391 | NC_021166.1    | Ca_Kabuli_Chr07 | 20911391                | CC                                     | TT                 | TT               | INTERGENIC                    |                    |                                                   |
| SNP_52275_A_20911420 | NC_021166.1    | Ca_Kabuli_Chr07 | 20911420                | CC                                     | TT                 | TT               | INTERGENIC                    |                    |                                                   |
| SNP_52276_A_20924080 | NC_021166.1    | Ca_Kabuli_Chr07 | 20924080                | TT                                     | CC                 | CC               | INTERGENIC                    |                    |                                                   |
| SNP_52277_A_20931898 | NC_021166.1    | Ca_Kabuli_Chr07 | 20931898                | AA                                     | GG                 | GG               | INTERGENIC                    |                    |                                                   |
| SNP_52279_A_20934900 | NC_021166.1    | Ca_Kabuli_Chr07 | 20934900                | TT                                     | CC                 | CC               | INTERGENIC                    |                    |                                                   |
| SNP_52280_A_20935186 | NC_021166.1    | Ca_Kabuli_Chr07 | 20935186                | TT                                     | AA                 | AA               | INTERGENIC                    |                    |                                                   |
| SNP_52281_A_20935245 | NC_021166.1    | Ca_Kabuli_Chr07 | 20935245                | TT                                     | GG                 | GG               | INTERGENIC                    |                    |                                                   |
| SNP_52282_A_20945676 | NC_021166.1    | Ca_Kabuli_Chr07 | 20945676                | GG                                     | AA                 | AA               | INTERGENIC                    |                    |                                                   |
| SNP_52283_A_20969199 | NC_021166.1    | Ca_Kabuli_Chr07 | 20969199                | TT                                     | CC                 | CC               | INTERGENIC                    |                    |                                                   |
| SNP_52284_A_20985359 | NC_021166.1    | Ca_Kabuli_Chr07 | 20985359                | TT                                     | CC                 | CC               | INTERGENIC                    |                    |                                                   |
| SNP_52285_A_20985389 | NC_021166.1    | Ca_Kabuli_Chr07 | 20985389                | GG                                     | CC                 | CC               | INTERGENIC                    |                    |                                                   |

| SNPs IDs             | Chromosome IDs | Chromosomes     | Physical positions (bp) | CDC Frontier genome (Reference genome) | (Pusa 1103 & HPNB) | (ILWC 46 & LPNB) | Sequence Components of genome | Gene accession IDs | Putative functions        |
|----------------------|----------------|-----------------|-------------------------|----------------------------------------|--------------------|------------------|-------------------------------|--------------------|---------------------------|
| SNP_52286_A_20985391 | NC_021166.1    | Ca_Kabuli_Chr07 | 20985391                | GG                                     | AA                 | AA               | INTERGENIC                    |                    |                           |
| SNP_52287_A_20985406 | NC_021166.1    | Ca_Kabuli_Chr07 | 20985406                | GG                                     | AA                 | AA               | INTERGENIC                    |                    |                           |
| SNP_52288_A_20985426 | NC_021166.1    | Ca_Kabuli_Chr07 | 20985426                | GG                                     | AA                 | AA               | INTERGENIC                    |                    |                           |
| SNP_52289_A_20985460 | NC_021166.1    | Ca_Kabuli_Chr07 | 20985460                | AA                                     | GG                 | GG               | INTERGENIC                    |                    |                           |
| SNP_52290_A_20985497 | NC_021166.1    | Ca_Kabuli_Chr07 | 20985497                | GG                                     | AA                 | AA               | INTERGENIC                    |                    |                           |
| SNP_52291_A_20985582 | NC_021166.1    | Ca_Kabuli_Chr07 | 20985582                | TT                                     | CC                 | CC               | INTERGENIC                    |                    |                           |
| SNP_52292_A_20985726 | NC_021166.1    | Ca_Kabuli_Chr07 | 20985726                | GG                                     | TT                 | TT               | INTERGENIC                    |                    |                           |
| SNP_52293_A_20985872 | NC_021166.1    | Ca_Kabuli_Chr07 | 20985872                | CC                                     | GG                 | GG               | INTERGENIC                    |                    |                           |
| SNP_52294_A_20985893 | NC_021166.1    | Ca_Kabuli_Chr07 | 20985893                | AA                                     | GG                 | GG               | INTERGENIC                    |                    |                           |
| SNP_52295_A_20985906 | NC_021166.1    | Ca_Kabuli_Chr07 | 20985906                | AA                                     | GG                 | GG               | INTERGENIC                    |                    |                           |
| SNP_52296_A_20985921 | NC_021166.1    | Ca_Kabuli_Chr07 | 20985921                | CC                                     | TT                 | TT               | INTERGENIC                    |                    |                           |
| SNP_52297_A_20987896 | NC_021166.1    | Ca_Kabuli_Chr07 | 20987896                | TT                                     | GG                 | GG               | INTERGENIC                    |                    |                           |
| SNP_52298_A_21000362 | NC_021166.1    | Ca_Kabuli_Chr07 | 21000362                | TT                                     | CC                 | CC               | INTERGENIC                    |                    |                           |
| SNP_52299_A_21000364 | NC_021166.1    | Ca_Kabuli_Chr07 | 21000364                | GG                                     | AA                 | AA               | INTERGENIC                    |                    |                           |
| SNP_52300_A_21000376 | NC_021166.1    | Ca_Kabuli_Chr07 | 21000376                | TT                                     | CC                 | CC               | INTERGENIC                    |                    |                           |
| SNP_52301_A_21000468 | NC_021166.1    | Ca_Kabuli_Chr07 | 21000468                | AA                                     | GG                 | GG               | INTERGENIC                    |                    |                           |
| SNP_52302_A_21000848 | NC_021166.1    | Ca_Kabuli_Chr07 | 21000848                | TT                                     | CC                 | CC               | INTERGENIC                    |                    |                           |
| SNP_52303_A_21006986 | NC_021166.1    | Ca_Kabuli_Chr07 | 21006986                | TT                                     | GG                 | GG               | INTERGENIC                    |                    |                           |
| SNP_52304_A_21012592 | NC_021166.1    | Ca_Kabuli_Chr07 | 21012592                | TT                                     | GG                 | GG               | INTERGENIC                    |                    |                           |
| SNP_52305_A_21012610 | NC_021166.1    | Ca_Kabuli_Chr07 | 21012610                | CC                                     | TT                 | TT               | INTERGENIC                    |                    |                           |
| SNP_52306_A_21020341 | NC_021166.1    | Ca_Kabuli_Chr07 | 21020341                | AA                                     | TT                 | TT               | INTERGENIC                    |                    |                           |
| SNP_52307_A_21042231 | NC_021166.1    | Ca_Kabuli_Chr07 | 21042231                | AA                                     | GG                 | GG               | INTRON                        | 101513326          | carbonic anhydrase 2-like |

| SNPs IDs             | Chromosome IDs | Chromosomes     | Physical positions (bp) | CDC Frontier genome (Reference genome) | (Pusa 1103 & HPNB) | (ILWC 46 & LPNB) | Sequence Components of genome | Gene accession IDs | Putative functions        |
|----------------------|----------------|-----------------|-------------------------|----------------------------------------|--------------------|------------------|-------------------------------|--------------------|---------------------------|
| SNP_52308_A_21043317 | NC_021166.1    | Ca_Kabuli_Chr07 | 21043317                | AA                                     | CC                 | CC               | INTRON                        | 101513326          | carbonic anhydrase 2-like |
| SNP_52309_A_21043318 | NC_021166.1    | Ca_Kabuli_Chr07 | 21043318                | TT                                     | CC                 | CC               | INTRON                        | 101513326          | carbonic anhydrase 2-like |
| SNP_52310_A_21049080 | NC_021166.1    | Ca_Kabuli_Chr07 | 21049080                | AA                                     | TT                 | TT               | INTRON                        | 101513326          | carbonic anhydrase 2-like |
| SNP_52311_A_21059752 | NC_021166.1    | Ca_Kabuli_Chr07 | 21059752                | GG                                     | AA                 | AA               | INTERGENIC                    |                    |                           |
| SNP_52312_A_21069627 | NC_021166.1    | Ca_Kabuli_Chr07 | 21069627                | AA                                     | TT                 | TT               | INTERGENIC                    |                    |                           |
| SNP_52313_A_21087703 | NC_021166.1    | Ca_Kabuli_Chr07 | 21087703                | GG                                     | CC                 | CC               | DRR                           | 101513978          | Unknown function          |
| SNP_52314_A_21099468 | NC_021166.1    | Ca_Kabuli_Chr07 | 21099468                | GG                                     | CC                 | CC               | INTERGENIC                    |                    |                           |
| SNP_52315_A_21099495 | NC_021166.1    | Ca_Kabuli_Chr07 | 21099495                | TT                                     | AA                 | AA               | INTERGENIC                    |                    |                           |
| SNP_52316_A_21099497 | NC_021166.1    | Ca_Kabuli_Chr07 | 21099497                | TT                                     | CC                 | CC               | INTERGENIC                    |                    |                           |
| SNP_52317_A_21099505 | NC_021166.1    | Ca_Kabuli_Chr07 | 21099505                | AA                                     | CC                 | CC               | INTERGENIC                    |                    |                           |
| SNP_52318_A_21099591 | NC_021166.1    | Ca_Kabuli_Chr07 | 21099591                | AA                                     | GG                 | GG               | INTERGENIC                    |                    |                           |
| SNP_52319_A_21099683 | NC_021166.1    | Ca_Kabuli_Chr07 | 21099683                | CC                                     | TT                 | TT               | INTERGENIC                    |                    |                           |
| SNP_52321_A_21099782 | NC_021166.1    | Ca_Kabuli_Chr07 | 21099782                | TT                                     | GG                 | GG               | INTERGENIC                    |                    |                           |
| SNP_52322_A_21099792 | NC_021166.1    | Ca_Kabuli_Chr07 | 21099792                | GG                                     | TT                 | TT               | INTERGENIC                    |                    |                           |
| SNP_52323_A_21103362 | NC_021166.1    | Ca_Kabuli_Chr07 | 21103362                | TT                                     | AA                 | AA               | INTERGENIC                    |                    |                           |
| SNP_52324_A_21103458 | NC_021166.1    | Ca_Kabuli_Chr07 | 21103458                | TT                                     | CC                 | CC               | INTERGENIC                    |                    |                           |
| SNP_52325_A_21115200 | NC_021166.1    | Ca_Kabuli_Chr07 | 21115200                | CC                                     | TT                 | TT               | INTERGENIC                    |                    |                           |
| SNP_52326_A_21115307 | NC_021166.1    | Ca_Kabuli_Chr07 | 21115307                | CC                                     | AA                 | AA               | INTERGENIC                    |                    |                           |
| SNP_52327_A_21115347 | NC_021166.1    | Ca_Kabuli_Chr07 | 21115347                | GG                                     | TT                 | TT               | INTERGENIC                    |                    |                           |
| SNP_52330_A_21143529 | NC_021166.1    | Ca_Kabuli_Chr07 | 21143529                | TT                                     | CC                 | CC               | INTERGENIC                    |                    |                           |
| SNP_52331_A_21168768 | NC_021166.1    | Ca_Kabuli_Chr07 | 21168768                | AA                                     | CC                 | CC               | INTERGENIC                    |                    |                           |
| SNP_52336_A_21251225 | NC_021166.1    | Ca_Kabuli_Chr07 | 21251225                | TT                                     | CC                 | CC               | INTERGENIC                    |                    |                           |

| SNPs IDs             | Chromosome IDs | Chromosomes     | Physical positions (bp) | CDC Frontier genome (Reference genome) | (Pusa 1103 & HPNB) | (ILWC 46 & LPNB) | Sequence Components of genome | Gene accession IDs | Putative functions           |
|----------------------|----------------|-----------------|-------------------------|----------------------------------------|--------------------|------------------|-------------------------------|--------------------|------------------------------|
| SNP_52337_A_21251235 | NC_021166.1    | Ca_Kabuli_Chr07 | 21251235                | GG                                     | TT                 | TT               | INTERGENIC                    |                    |                              |
| SNP_52338_A_21251236 | NC_021166.1    | Ca_Kabuli_Chr07 | 21251236                | CC                                     | GG                 | GG               | INTERGENIC                    |                    |                              |
| SNP_52339_A_21257262 | NC_021166.1    | Ca_Kabuli_Chr07 | 21257262                | AA                                     | CC                 | CC               | STOP_LOST                     | 101515284          | uncharacterized LOC101515284 |
| SNP_52340_A_21257398 | NC_021166.1    | Ca_Kabuli_Chr07 | 21257398                | TT                                     | AA                 | AA               | SYNONYMOUS_CODING             | 101515284          | uncharacterized LOC101515284 |
| SNP_52341_A_21257475 | NC_021166.1    | Ca_Kabuli_Chr07 | 21257475                | TT                                     | GG                 | GG               | NON_SYNONYMOUS_CODING         | 101515284          | uncharacterized LOC101515284 |
| SNP_52342_A_21257521 | NC_021166.1    | Ca_Kabuli_Chr07 | 21257521                | TT                                     | CC                 | CC               | SYNONYMOUS_CODING             | 101515284          | uncharacterized LOC101515284 |
| SNP_52343_A_21257723 | NC_021166.1    | Ca_Kabuli_Chr07 | 21257723                | AA                                     | GG                 | GG               | NON_SYNONYMOUS_CODING         | 101515284          | uncharacterized LOC101515284 |
| SNP_52344_A_21257853 | NC_021166.1    | Ca_Kabuli_Chr07 | 21257853                | AA                                     | GG                 | GG               | SYNONYMOUS_CODING             | 101515284          | uncharacterized LOC101515284 |
| SNP_52345_A_21299408 | NC_021166.1    | Ca_Kabuli_Chr07 | 21299408                | TT                                     | CC                 | CC               | INTERGENIC                    |                    |                              |
| SNP_52346_A_21336441 | NC_021166.1    | Ca_Kabuli_Chr07 | 21336441                | CC                                     | TT                 | TT               | INTERGENIC                    |                    |                              |
| SNP_52347_A_21336448 | NC_021166.1    | Ca_Kabuli_Chr07 | 21336448                | GG                                     | AA                 | AA               | INTERGENIC                    |                    |                              |
| SNP_52348_A_21359511 | NC_021166.1    | Ca_Kabuli_Chr07 | 21359511                | CC                                     | TT                 | TT               | INTERGENIC                    |                    |                              |
| SNP_52349_A_21441587 | NC_021166.1    | Ca_Kabuli_Chr07 | 21441587                | TT                                     | AA                 | AA               | INTERGENIC                    |                    |                              |
| SNP_52350_A_21473950 | NC_021166.1    | Ca_Kabuli_Chr07 | 21473950                | CC                                     | TT                 | TT               | INTERGENIC                    |                    |                              |
| SNP_52351_A_21529943 | NC_021166.1    | Ca_Kabuli_Chr07 | 21529943                | TT                                     | CC                 | CC               | INTERGENIC                    |                    |                              |
| SNP_52353_A_21559682 | NC_021166.1    | Ca_Kabuli_Chr07 | 21559682                | TT                                     | GG                 | GG               | INTERGENIC                    |                    |                              |
| SNP_52355_A_21666682 | NC_021166.1    | Ca_Kabuli_Chr07 | 21666682                | TT                                     | CC                 | CC               | INTERGENIC                    |                    |                              |
| SNP_52356_A_21666903 | NC_021166.1    | Ca_Kabuli_Chr07 | 21666903                | AA                                     | CC                 | CC               | INTERGENIC                    |                    |                              |
| SNP_52357_A_21666949 | NC_021166.1    | Ca_Kabuli_Chr07 | 21666949                | CC                                     | TT                 | TT               | INTERGENIC                    |                    |                              |
| SNP_52358_A_21670785 | NC_021166.1    | Ca_Kabuli_Chr07 | 21670785                | AA                                     | TT                 | TT               | INTERGENIC                    |                    |                              |
| SNP_52359_A_21670832 | NC_021166.1    | Ca_Kabuli_Chr07 | 21670832                | TT                                     | GG                 | GG               | INTERGENIC                    |                    |                              |
| SNP_52361_A_21674733 | NC_021166.1    | Ca_Kabuli_Chr07 | 21674733                | GG                                     | TT                 | TT               | INTERGENIC                    |                    |                              |

| SNPs IDs             | Chromosome IDs | Chromosomes     | Physical positions (bp) | CDC Frontier genome (Reference genome) | (Pusa 1103 & HPNB) | (ILWC 46 & LPNB) | Sequence genome | Components of | Gene accession IDs | Putative functions |
|----------------------|----------------|-----------------|-------------------------|----------------------------------------|--------------------|------------------|-----------------|---------------|--------------------|--------------------|
| SNP_52362_A_21674768 | NC_021166.1    | Ca_Kabuli_Chr07 | 21674768                | AA                                     | GG                 | GG               | INTERGENIC      |               |                    |                    |
| SNP_52363_A_21674821 | NC_021166.1    | Ca_Kabuli_Chr07 | 21674821                | TT                                     | AA                 | AA               | INTERGENIC      |               |                    |                    |
| SNP_52364_A_21674829 | NC_021166.1    | Ca_Kabuli_Chr07 | 21674829                | CC                                     | TT                 | TT               | INTERGENIC      |               |                    |                    |
| SNP_52365_A_21674884 | NC_021166.1    | Ca_Kabuli_Chr07 | 21674884                | GG                                     | AA                 | AA               | INTERGENIC      |               |                    |                    |
| SNP_52366_A_21675381 | NC_021166.1    | Ca_Kabuli_Chr07 | 21675381                | AA                                     | TT                 | TT               | INTERGENIC      |               |                    |                    |
| SNP_52368_A_21675491 | NC_021166.1    | Ca_Kabuli_Chr07 | 21675491                | TT                                     | CC                 | CC               | INTERGENIC      |               |                    |                    |
| SNP_52369_A_21677943 | NC_021166.1    | Ca_Kabuli_Chr07 | 21677943                | AA                                     | CC                 | CC               | INTERGENIC      |               |                    |                    |
| SNP_52370_A_21678098 | NC_021166.1    | Ca_Kabuli_Chr07 | 21678098                | TT                                     | AA                 | AA               | INTERGENIC      |               |                    |                    |
| SNP_52371_A_21678768 | NC_021166.1    | Ca_Kabuli_Chr07 | 21678768                | CC                                     | AA                 | AA               | INTERGENIC      |               |                    |                    |
| SNP_52372_A_21680123 | NC_021166.1    | Ca_Kabuli_Chr07 | 21680123                | CC                                     | TT                 | TT               | INTERGENIC      |               |                    |                    |
| SNP_52373_A_21680130 | NC_021166.1    | Ca_Kabuli_Chr07 | 21680130                | AA                                     | GG                 | GG               | INTERGENIC      |               |                    |                    |
| SNP_52374_A_21680289 | NC_021166.1    | Ca_Kabuli_Chr07 | 21680289                | GG                                     | AA                 | AA               | INTERGENIC      |               |                    |                    |
| SNP_52375_A_21681018 | NC_021166.1    | Ca_Kabuli_Chr07 | 21681018                | GG                                     | AA                 | AA               | INTERGENIC      |               |                    |                    |
| SNP_52376_A_21681195 | NC_021166.1    | Ca_Kabuli_Chr07 | 21681195                | GG                                     | AA                 | AA               | INTERGENIC      |               |                    |                    |
| SNP_52377_A_21681446 | NC_021166.1    | Ca_Kabuli_Chr07 | 21681446                | AA                                     | GG                 | GG               | INTERGENIC      |               |                    |                    |
| SNP_52378_A_21681466 | NC_021166.1    | Ca_Kabuli_Chr07 | 21681466                | TT                                     | CC                 | CC               | INTERGENIC      |               |                    |                    |
| SNP_52379_A_21681509 | NC_021166.1    | Ca_Kabuli_Chr07 | 21681509                | AA                                     | GG                 | GG               | INTERGENIC      |               |                    |                    |
| SNP_52380_A_21681544 | NC_021166.1    | Ca_Kabuli_Chr07 | 21681544                | CC                                     | TT                 | TT               | INTERGENIC      |               |                    |                    |
| SNP_52381_A_21681699 | NC_021166.1    | Ca_Kabuli_Chr07 | 21681699                | TT                                     | CC                 | CC               | INTERGENIC      |               |                    |                    |
| SNP_52382_A_21681726 | NC_021166.1    | Ca_Kabuli_Chr07 | 21681726                | CC                                     | TT                 | TT               | INTERGENIC      |               |                    |                    |
| SNP_52383_A_21681769 | NC_021166.1    | Ca_Kabuli_Chr07 | 21681769                | CC                                     | TT                 | TT               | INTERGENIC      |               |                    |                    |
| SNP_52384_A_21681779 | NC_021166.1    | Ca_Kabuli_Chr07 | 21681779                | GG                                     | AA                 | AA               | INTERGENIC      |               |                    |                    |



| SNPs IDs             | Chromosome IDs | Chromosomes     | Physical positions (bp) | CDC Frontier genome (Reference genome) | (Pusa 1103 & HPNB) | (ILWC 46 & LPNB) | Sequence genome | Components of | Gene accession IDs               | Putative functions |
|----------------------|----------------|-----------------|-------------------------|----------------------------------------|--------------------|------------------|-----------------|---------------|----------------------------------|--------------------|
| SNP_52385_A_21681782 | NC_021166.1    | Ca_Kabuli_Chr07 | 21681782                | GG                                     | AA                 | AA               | INTERGENIC      |               |                                  |                    |
| SNP_52386_A_21681937 | NC_021166.1    | Ca_Kabuli_Chr07 | 21681937                | GG                                     | AA                 | AA               | INTERGENIC      |               |                                  |                    |
| SNP_52387_A_21682297 | NC_021166.1    | Ca_Kabuli_Chr07 | 21682297                | AA                                     | GG                 | GG               | INTERGENIC      |               |                                  |                    |
| SNP_52388_A_21682646 | NC_021166.1    | Ca_Kabuli_Chr07 | 21682646                | GG                                     | TT                 | TT               | INTERGENIC      |               |                                  |                    |
| SNP_52389_A_21682888 | NC_021166.1    | Ca_Kabuli_Chr07 | 21682888                | GG                                     | AA                 | AA               | INTERGENIC      |               |                                  |                    |
| SNP_52390_A_21683620 | NC_021166.1    | Ca_Kabuli_Chr07 | 21683620                | GG                                     | TT                 | TT               | INTERGENIC      |               |                                  |                    |
| SNP_52391_A_21684632 | NC_021166.1    | Ca_Kabuli_Chr07 | 21684632                | CC                                     | TT                 | TT               | INTERGENIC      |               |                                  |                    |
| SNP_52392_A_21684701 | NC_021166.1    | Ca_Kabuli_Chr07 | 21684701                | TT                                     | CC                 | CC               | INTERGENIC      |               |                                  |                    |
| SNP_52393_A_21684966 | NC_021166.1    | Ca_Kabuli_Chr07 | 21684966                | CC                                     | AA                 | AA               | INTERGENIC      |               |                                  |                    |
| SNP_52394_A_21685053 | NC_021166.1    | Ca_Kabuli_Chr07 | 21685053                | GG                                     | CC                 | CC               | INTERGENIC      |               |                                  |                    |
| SNP_52396_A_21686729 | NC_021166.1    | Ca_Kabuli_Chr07 | 21686729                | GG                                     | AA                 | AA               | INTERGENIC      |               |                                  |                    |
| SNP_52397_A_21687270 | NC_021166.1    | Ca_Kabuli_Chr07 | 21687270                | GG                                     | AA                 | AA               | INTERGENIC      |               |                                  |                    |
| SNP_52398_A_21687286 | NC_021166.1    | Ca_Kabuli_Chr07 | 21687286                | GG                                     | AA                 | AA               | INTERGENIC      |               |                                  |                    |
| SNP_52399_A_21700881 | NC_021166.1    | Ca_Kabuli_Chr07 | 21700881                | CC                                     | TT                 | TT               | URR             | 101498122     | putative F-box protein At3g16210 |                    |
| SNP_52400_A_21726401 | NC_021166.1    | Ca_Kabuli_Chr07 | 21726401                | CC                                     | TT                 | TT               | INTERGENIC      |               |                                  |                    |
| SNP_52401_A_21728256 | NC_021166.1    | Ca_Kabuli_Chr07 | 21728256                | GG                                     | AA                 | AA               | INTERGENIC      |               |                                  |                    |
| SNP_52402_A_21728259 | NC_021166.1    | Ca_Kabuli_Chr07 | 21728259                | GG                                     | AA                 | AA               | INTERGENIC      |               |                                  |                    |
| SNP_52403_A_21728301 | NC_021166.1    | Ca_Kabuli_Chr07 | 21728301                | CC                                     | GG                 | GG               | INTERGENIC      |               |                                  |                    |
| SNP_52404_A_21728328 | NC_021166.1    | Ca_Kabuli_Chr07 | 21728328                | TT                                     | CC                 | CC               | INTERGENIC      |               |                                  |                    |
| SNP_52405_A_21728332 | NC_021166.1    | Ca_Kabuli_Chr07 | 21728332                | AA                                     | GG                 | GG               | INTERGENIC      |               |                                  |                    |
| SNP_52406_A_21728372 | NC_021166.1    | Ca_Kabuli_Chr07 | 21728372                | AA                                     | GG                 | GG               | INTERGENIC      |               |                                  |                    |
| SNP_52408_A_21728437 | NC_021166.1    | Ca_Kabuli_Chr07 | 21728437                | AA                                     | CC                 | CC               | INTERGENIC      |               |                                  |                    |

| SNPs IDs             | Chromosome IDs | Chromosomes     | Physical positions (bp) | CDC Frontier genome (Reference genome) | (Pusa 1103 & HPNB) | (ILWC 46 & LPNB) | Sequence genome | Components of | Gene accession IDs | Putative functions |
|----------------------|----------------|-----------------|-------------------------|----------------------------------------|--------------------|------------------|-----------------|---------------|--------------------|--------------------|
| SNP_52409_A_21728439 | NC_021166.1    | Ca_Kabuli_Chr07 | 21728439                | CC                                     | TT                 | TT               | INTERGENIC      |               |                    |                    |
| SNP_52410_A_21728485 | NC_021166.1    | Ca_Kabuli_Chr07 | 21728485                | TT                                     | CC                 | CC               | INTERGENIC      |               |                    |                    |
| SNP_52411_A_21728486 | NC_021166.1    | Ca_Kabuli_Chr07 | 21728486                | GG                                     | AA                 | AA               | INTERGENIC      |               |                    |                    |
| SNP_52412_A_21728570 | NC_021166.1    | Ca_Kabuli_Chr07 | 21728570                | TT                                     | GG                 | GG               | INTERGENIC      |               |                    |                    |
| SNP_52413_A_21728581 | NC_021166.1    | Ca_Kabuli_Chr07 | 21728581                | GG                                     | AA                 | AA               | INTERGENIC      |               |                    |                    |
| SNP_52414_A_21728613 | NC_021166.1    | Ca_Kabuli_Chr07 | 21728613                | GG                                     | TT                 | TT               | INTERGENIC      |               |                    |                    |
| SNP_52415_A_21728638 | NC_021166.1    | Ca_Kabuli_Chr07 | 21728638                | GG                                     | AA                 | AA               | INTERGENIC      |               |                    |                    |
| SNP_52416_A_21728728 | NC_021166.1    | Ca_Kabuli_Chr07 | 21728728                | TT                                     | CC                 | CC               | INTERGENIC      |               |                    |                    |
| SNP_52417_A_21728731 | NC_021166.1    | Ca_Kabuli_Chr07 | 21728731                | GG                                     | AA                 | AA               | INTERGENIC      |               |                    |                    |
| SNP_52418_A_21728821 | NC_021166.1    | Ca_Kabuli_Chr07 | 21728821                | AA                                     | CC                 | CC               | INTERGENIC      |               |                    |                    |
| SNP_52419_A_21728904 | NC_021166.1    | Ca_Kabuli_Chr07 | 21728904                | CC                                     | GG                 | GG               | INTERGENIC      |               |                    |                    |
| SNP_52420_A_21728928 | NC_021166.1    | Ca_Kabuli_Chr07 | 21728928                | CC                                     | TT                 | TT               | INTERGENIC      |               |                    |                    |
| SNP_52421_A_21728935 | NC_021166.1    | Ca_Kabuli_Chr07 | 21728935                | GG                                     | AA                 | AA               | INTERGENIC      |               |                    |                    |
| SNP_52422_A_21728966 | NC_021166.1    | Ca_Kabuli_Chr07 | 21728966                | TT                                     | CC                 | CC               | INTERGENIC      |               |                    |                    |
| SNP_52424_A_21729239 | NC_021166.1    | Ca_Kabuli_Chr07 | 21729239                | AA                                     | GG                 | GG               | INTERGENIC      |               |                    |                    |
| SNP_52426_A_21729493 | NC_021166.1    | Ca_Kabuli_Chr07 | 21729493                | TT                                     | AA                 | AA               | INTERGENIC      |               |                    |                    |
| SNP_52427_A_21729580 | NC_021166.1    | Ca_Kabuli_Chr07 | 21729580                | AA                                     | TT                 | TT               | INTERGENIC      |               |                    |                    |
| SNP_52428_A_21729657 | NC_021166.1    | Ca_Kabuli_Chr07 | 21729657                | TT                                     | AA                 | AA               | INTERGENIC      |               |                    |                    |
| SNP_52429_A_21729819 | NC_021166.1    | Ca_Kabuli_Chr07 | 21729819                | AA                                     | GG                 | GG               | INTERGENIC      |               |                    |                    |
| SNP_52430_A_21729872 | NC_021166.1    | Ca_Kabuli_Chr07 | 21729872                | AA                                     | CC                 | CC               | INTERGENIC      |               |                    |                    |
| SNP_52431_A_21729892 | NC_021166.1    | Ca_Kabuli_Chr07 | 21729892                | TT                                     | AA                 | AA               | INTERGENIC      |               |                    |                    |
| SNP_52432_A_21729893 | NC_021166.1    | Ca_Kabuli_Chr07 | 21729893                | GG                                     | AA                 | AA               | INTERGENIC      |               |                    |                    |

| SNPs IDs             | Chromosome IDs | Chromosomes     | Physical positions (bp) | CDC Frontier genome (Reference genome) | (Pusa 1103 & HPNB) | (ILWC 46 & LPNB) | Sequence genome | Components of | Gene accession IDs | Putative functions |
|----------------------|----------------|-----------------|-------------------------|----------------------------------------|--------------------|------------------|-----------------|---------------|--------------------|--------------------|
| SNP_52433_A_21730106 | NC_021166.1    | Ca_Kabuli_Chr07 | 21730106                | CC                                     | GG                 | GG               | INTERGENIC      |               |                    |                    |
| SNP_52434_A_21730144 | NC_021166.1    | Ca_Kabuli_Chr07 | 21730144                | CC                                     | TT                 | TT               | INTERGENIC      |               |                    |                    |
| SNP_52435_A_21730147 | NC_021166.1    | Ca_Kabuli_Chr07 | 21730147                | TT                                     | CC                 | CC               | INTERGENIC      |               |                    |                    |
| SNP_52436_A_21730302 | NC_021166.1    | Ca_Kabuli_Chr07 | 21730302                | AA                                     | TT                 | TT               | INTERGENIC      |               |                    |                    |
| SNP_52437_A_21730308 | NC_021166.1    | Ca_Kabuli_Chr07 | 21730308                | AA                                     | TT                 | TT               | INTERGENIC      |               |                    |                    |
| SNP_52438_A_21730497 | NC_021166.1    | Ca_Kabuli_Chr07 | 21730497                | CC                                     | TT                 | TT               | INTERGENIC      |               |                    |                    |
| SNP_52439_A_21730501 | NC_021166.1    | Ca_Kabuli_Chr07 | 21730501                | GG                                     | AA                 | AA               | INTERGENIC      |               |                    |                    |
| SNP_52440_A_21730540 | NC_021166.1    | Ca_Kabuli_Chr07 | 21730540                | GG                                     | TT                 | TT               | INTERGENIC      |               |                    |                    |
| SNP_52441_A_21730605 | NC_021166.1    | Ca_Kabuli_Chr07 | 21730605                | TT                                     | CC                 | CC               | INTERGENIC      |               |                    |                    |
| SNP_52442_A_21730608 | NC_021166.1    | Ca_Kabuli_Chr07 | 21730608                | CC                                     | GG                 | GG               | INTERGENIC      |               |                    |                    |
| SNP_52443_A_21730625 | NC_021166.1    | Ca_Kabuli_Chr07 | 21730625                | TT                                     | GG                 | GG               | INTERGENIC      |               |                    |                    |
| SNP_52444_A_21730669 | NC_021166.1    | Ca_Kabuli_Chr07 | 21730669                | TT                                     | CC                 | CC               | INTERGENIC      |               |                    |                    |
| SNP_52445_A_21730842 | NC_021166.1    | Ca_Kabuli_Chr07 | 21730842                | AA                                     | TT                 | TT               | INTERGENIC      |               |                    |                    |
| SNP_52446_A_21730845 | NC_021166.1    | Ca_Kabuli_Chr07 | 21730845                | AA                                     | TT                 | TT               | INTERGENIC      |               |                    |                    |
| SNP_52447_A_21730868 | NC_021166.1    | Ca_Kabuli_Chr07 | 21730868                | CC                                     | AA                 | AA               | INTERGENIC      |               |                    |                    |
| SNP_52448_A_21730900 | NC_021166.1    | Ca_Kabuli_Chr07 | 21730900                | CC                                     | TT                 | TT               | INTERGENIC      |               |                    |                    |
| SNP_52449_A_21730905 | NC_021166.1    | Ca_Kabuli_Chr07 | 21730905                | TT                                     | CC                 | CC               | INTERGENIC      |               |                    |                    |
| SNP_52450_A_21730915 | NC_021166.1    | Ca_Kabuli_Chr07 | 21730915                | GG                                     | AA                 | AA               | INTERGENIC      |               |                    |                    |
| SNP_52451_A_21731038 | NC_021166.1    | Ca_Kabuli_Chr07 | 21731038                | TT                                     | CC                 | CC               | INTERGENIC      |               |                    |                    |
| SNP_52452_A_21731046 | NC_021166.1    | Ca_Kabuli_Chr07 | 21731046                | AA                                     | GG                 | GG               | INTERGENIC      |               |                    |                    |
| SNP_52453_A_21731118 | NC_021166.1    | Ca_Kabuli_Chr07 | 21731118                | GG                                     | TT                 | TT               | INTERGENIC      |               |                    |                    |
| SNP_52454_A_21731149 | NC_021166.1    | Ca_Kabuli_Chr07 | 21731149                | AA                                     | CC                 | CC               | INTERGENIC      |               |                    |                    |

| SNPs IDs             | Chromosome IDs | Chromosomes     | Physical positions (bp) | CDC Frontier genome (Reference genome) | (Pusa 1103 & HPNB) | (ILWC 46 & LPNB) | Sequence genome | Components of | Gene accession IDs                   | Putative functions |
|----------------------|----------------|-----------------|-------------------------|----------------------------------------|--------------------|------------------|-----------------|---------------|--------------------------------------|--------------------|
| SNP_52455_A_21731240 | NC_021166.1    | Ca_Kabuli_Chr07 | 21731240                | AA                                     | TT                 | TT               | INTERGENIC      |               |                                      |                    |
| SNP_52456_A_21731338 | NC_021166.1    | Ca_Kabuli_Chr07 | 21731338                | TT                                     | CC                 | CC               | INTERGENIC      |               |                                      |                    |
| SNP_52457_A_21731395 | NC_021166.1    | Ca_Kabuli_Chr07 | 21731395                | TT                                     | CC                 | CC               | INTERGENIC      |               |                                      |                    |
| SNP_52458_A_21731428 | NC_021166.1    | Ca_Kabuli_Chr07 | 21731428                | TT                                     | AA                 | AA               | INTERGENIC      |               |                                      |                    |
| SNP_52459_A_21731511 | NC_021166.1    | Ca_Kabuli_Chr07 | 21731511                | GG                                     | AA                 | AA               | INTERGENIC      |               |                                      |                    |
| SNP_52460_A_21731518 | NC_021166.1    | Ca_Kabuli_Chr07 | 21731518                | GG                                     | AA                 | AA               | INTERGENIC      |               |                                      |                    |
| SNP_52461_A_21731527 | NC_021166.1    | Ca_Kabuli_Chr07 | 21731527                | TT                                     | AA                 | AA               | INTERGENIC      |               |                                      |                    |
| SNP_52462_A_21731531 | NC_021166.1    | Ca_Kabuli_Chr07 | 21731531                | GG                                     | AA                 | AA               | INTERGENIC      |               |                                      |                    |
| SNP_52463_A_21731558 | NC_021166.1    | Ca_Kabuli_Chr07 | 21731558                | CC                                     | TT                 | TT               | INTERGENIC      |               |                                      |                    |
| SNP_52464_A_21731750 | NC_021166.1    | Ca_Kabuli_Chr07 | 21731750                | TT                                     | CC                 | CC               | INTERGENIC      |               |                                      |                    |
| SNP_52465_A_21742351 | NC_021166.1    | Ca_Kabuli_Chr07 | 21742351                | TT                                     | CC                 | CC               | INTERGENIC      |               |                                      |                    |
| SNP_52466_A_21742359 | NC_021166.1    | Ca_Kabuli_Chr07 | 21742359                | CC                                     | TT                 | TT               | INTERGENIC      |               |                                      |                    |
| SNP_52467_A_21743011 | NC_021166.1    | Ca_Kabuli_Chr07 | 21743011                | CC                                     | TT                 | TT               | INTERGENIC      |               |                                      |                    |
| SNP_52469_A_21743385 | NC_021166.1    | Ca_Kabuli_Chr07 | 21743385                | TT                                     | AA                 | AA               | DRR             | 101499316     | transcription factor DIVARICATA-like |                    |
| SNP_52470_A_21743393 | NC_021166.1    | Ca_Kabuli_Chr07 | 21743393                | TT                                     | CC                 | CC               | DRR             | 101499316     | transcription factor DIVARICATA-like |                    |
| SNP_52471_A_21743528 | NC_021166.1    | Ca_Kabuli_Chr07 | 21743528                | TT                                     | GG                 | GG               | DRR             | 101499316     | transcription factor DIVARICATA-like |                    |
| SNP_52472_A_21743540 | NC_021166.1    | Ca_Kabuli_Chr07 | 21743540                | GG                                     | AA                 | AA               | DRR             | 101499316     | transcription factor DIVARICATA-like |                    |
| SNP_52473_A_21743592 | NC_021166.1    | Ca_Kabuli_Chr07 | 21743592                | TT                                     | GG                 | GG               | DRR             | 101499316     | transcription factor DIVARICATA-like |                    |
| SNP_52475_A_21743638 | NC_021166.1    | Ca_Kabuli_Chr07 | 21743638                | TT                                     | CC                 | CC               | DRR             | 101499316     | transcription factor DIVARICATA-like |                    |
| SNP_52476_A_21743676 | NC_021166.1    | Ca_Kabuli_Chr07 | 21743676                | GG                                     | AA                 | AA               | DRR             | 101499316     | transcription factor DIVARICATA-like |                    |
| SNP_52477_A_21743731 | NC_021166.1    | Ca_Kabuli_Chr07 | 21743731                | TT                                     | CC                 | CC               | DRR             | 101499316     | transcription factor DIVARICATA-like |                    |
| SNP_52478_A_21743739 | NC_021166.1    | Ca_Kabuli_Chr07 | 21743739                | TT                                     | CC                 | CC               | DRR             | 101499316     | transcription factor DIVARICATA-like |                    |

| SNPs IDs             | Chromosome IDs | Chromosomes     | Physical positions (bp) | CDC Frontier (Reference genome) | (Pusa 1103 & HPNB) | (ILWC 46 & LPNB) | Sequence Components of genome | Gene accession IDs | Putative functions                   |
|----------------------|----------------|-----------------|-------------------------|---------------------------------|--------------------|------------------|-------------------------------|--------------------|--------------------------------------|
| SNP_52479_A_21743840 | NC_021166.1    | Ca_Kabuli_Chr07 | 21743840                | CC                              | AA                 | AA               | DRR                           | 101499316          | transcription factor DIVARICATA-like |
| SNP_52480_A_21743841 | NC_021166.1    | Ca_Kabuli_Chr07 | 21743841                | TT                              | GG                 | GG               | DRR                           | 101499316          | transcription factor DIVARICATA-like |
| SNP_52481_A_21743843 | NC_021166.1    | Ca_Kabuli_Chr07 | 21743843                | GG                              | AA                 | AA               | DRR                           | 101499316          | transcription factor DIVARICATA-like |
| SNP_52482_A_21743845 | NC_021166.1    | Ca_Kabuli_Chr07 | 21743845                | TT                              | GG                 | GG               | DRR                           | 101499316          | transcription factor DIVARICATA-like |
| SNP_52483_A_21743929 | NC_021166.1    | Ca_Kabuli_Chr07 | 21743929                | AA                              | GG                 | GG               | DRR                           | 101499316          | transcription factor DIVARICATA-like |
| SNP_52485_A_21744003 | NC_021166.1    | Ca_Kabuli_Chr07 | 21744003                | AA                              | CC                 | CC               | DRR                           | 101499316          | transcription factor DIVARICATA-like |
| SNP_52486_A_21744355 | NC_021166.1    | Ca_Kabuli_Chr07 | 21744355                | GG                              | AA                 | AA               | NON_SYNONYMOUS_CODING         | 101499316          | transcription factor DIVARICATA-like |
| SNP_52487_A_21744514 | NC_021166.1    | Ca_Kabuli_Chr07 | 21744514                | TT                              | CC                 | CC               | NON_SYNONYMOUS_CODING         | 101499316          | transcription factor DIVARICATA-like |
| SNP_52488_A_21744821 | NC_021166.1    | Ca_Kabuli_Chr07 | 21744821                | AA                              | GG                 | GG               | INTRON                        | 101499316          | transcription factor DIVARICATA-like |
| SNP_52489_A_21744856 | NC_021166.1    | Ca_Kabuli_Chr07 | 21744856                | GG                              | AA                 | AA               | INTRON                        | 101499316          | transcription factor DIVARICATA-like |
| SNP_52490_A_21745382 | NC_021166.1    | Ca_Kabuli_Chr07 | 21745382                | CC                              | TT                 | TT               | INTRON                        | 101499316          | transcription factor DIVARICATA-like |
| SNP_52492_A_21746594 | NC_021166.1    | Ca_Kabuli_Chr07 | 21746594                | CC                              | TT                 | TT               | URR                           | 101499316          | transcription factor DIVARICATA-like |
| SNP_52493_A_21746643 | NC_021166.1    | Ca_Kabuli_Chr07 | 21746643                | CC                              | TT                 | TT               | URR                           | 101499316          | transcription factor DIVARICATA-like |
| SNP_52494_A_21746651 | NC_021166.1    | Ca_Kabuli_Chr07 | 21746651                | GG                              | AA                 | AA               | URR                           | 101499316          | transcription factor DIVARICATA-like |
| SNP_52495_A_21750525 | NC_021166.1    | Ca_Kabuli_Chr07 | 21750525                | GG                              | AA                 | AA               | INTERGENIC                    |                    |                                      |
| SNP_52496_A_21766124 | NC_021166.1    | Ca_Kabuli_Chr07 | 21766124                | CC                              | TT                 | TT               | INTERGENIC                    |                    |                                      |
| SNP_52497_A_21766368 | NC_021166.1    | Ca_Kabuli_Chr07 | 21766368                | AA                              | GG                 | GG               | INTERGENIC                    |                    |                                      |
| SNP_52498_A_21766436 | NC_021166.1    | Ca_Kabuli_Chr07 | 21766436                | TT                              | GG                 | GG               | INTERGENIC                    |                    |                                      |
| SNP_52499_A_21766439 | NC_021166.1    | Ca_Kabuli_Chr07 | 21766439                | CC                              | TT                 | TT               | INTERGENIC                    |                    |                                      |
| SNP_52500_A_21818410 | NC_021166.1    | Ca_Kabuli_Chr07 | 21818410                | TT                              | CC                 | CC               | INTERGENIC                    |                    |                                      |
| SNP_52502_A_21818653 | NC_021166.1    | Ca_Kabuli_Chr07 | 21818653                | AA                              | TT                 | TT               | INTERGENIC                    |                    |                                      |
| SNP_52503_A_21818654 | NC_021166.1    | Ca_Kabuli_Chr07 | 21818654                | TT                              | AA                 | AA               | INTERGENIC                    |                    |                                      |

| SNPs IDs             | Chromosome IDs | Chromosomes     | Physical positions (bp) | CDC Frontier genome (Reference genome) | (Pusa 1103 & HPNB) | (ILWC 46 & LPNB) | Sequence genome | Components of | Gene accession IDs | Putative functions |
|----------------------|----------------|-----------------|-------------------------|----------------------------------------|--------------------|------------------|-----------------|---------------|--------------------|--------------------|
| SNP_52504_A_21818794 | NC_021166.1    | Ca_Kabuli_Chr07 | 21818794                | CC                                     | TT                 | TT               | INTERGENIC      |               |                    |                    |
| SNP_52505_A_21818806 | NC_021166.1    | Ca_Kabuli_Chr07 | 21818806                | GG                                     | AA                 | AA               | INTERGENIC      |               |                    |                    |
| SNP_52506_A_21822870 | NC_021166.1    | Ca_Kabuli_Chr07 | 21822870                | GG                                     | AA                 | AA               | INTERGENIC      |               |                    |                    |
| SNP_52507_A_21831844 | NC_021166.1    | Ca_Kabuli_Chr07 | 21831844                | GG                                     | TT                 | TT               | INTERGENIC      |               |                    |                    |
| SNP_52508_A_21838157 | NC_021166.1    | Ca_Kabuli_Chr07 | 21838157                | CC                                     | TT                 | TT               | INTERGENIC      |               |                    |                    |
| SNP_52509_A_21838162 | NC_021166.1    | Ca_Kabuli_Chr07 | 21838162                | AA                                     | TT                 | TT               | INTERGENIC      |               |                    |                    |
| SNP_52511_A_21849810 | NC_021166.1    | Ca_Kabuli_Chr07 | 21849810                | TT                                     | GG                 | GG               | INTERGENIC      |               |                    |                    |
| SNP_52512_A_21856168 | NC_021166.1    | Ca_Kabuli_Chr07 | 21856168                | TT                                     | CC                 | CC               | INTERGENIC      |               |                    |                    |
| SNP_52513_A_21877330 | NC_021166.1    | Ca_Kabuli_Chr07 | 21877330                | TT                                     | AA                 | AA               | INTERGENIC      |               |                    |                    |
| SNP_52515_A_21986581 | NC_021166.1    | Ca_Kabuli_Chr07 | 21986581                | TT                                     | GG                 | GG               | INTERGENIC      |               |                    |                    |
| SNP_52516_A_21994249 | NC_021166.1    | Ca_Kabuli_Chr07 | 21994249                | AA                                     | GG                 | GG               | INTERGENIC      |               |                    |                    |
| SNP_52517_A_21994650 | NC_021166.1    | Ca_Kabuli_Chr07 | 21994650                | TT                                     | CC                 | CC               | INTERGENIC      |               |                    |                    |
| SNP_52519_A_22014568 | NC_021166.1    | Ca_Kabuli_Chr07 | 22014568                | AA                                     | GG                 | GG               | INTERGENIC      |               |                    |                    |
| SNP_52520_A_22014571 | NC_021166.1    | Ca_Kabuli_Chr07 | 22014571                | GG                                     | AA                 | AA               | INTERGENIC      |               |                    |                    |
| SNP_52521_A_22023665 | NC_021166.1    | Ca_Kabuli_Chr07 | 22023665                | AA                                     | CC                 | CC               | INTERGENIC      |               |                    |                    |
| SNP_52522_A_22027566 | NC_021166.1    | Ca_Kabuli_Chr07 | 22027566                | TT                                     | AA                 | AA               | INTERGENIC      |               |                    |                    |
| SNP_52523_A_22027615 | NC_021166.1    | Ca_Kabuli_Chr07 | 22027615                | TT                                     | CC                 | CC               | INTERGENIC      |               |                    |                    |
| SNP_52525_A_22034889 | NC_021166.1    | Ca_Kabuli_Chr07 | 22034889                | TT                                     | GG                 | GG               | INTERGENIC      |               |                    |                    |
| SNP_52526_A_22035553 | NC_021166.1    | Ca_Kabuli_Chr07 | 22035553                | AA                                     | GG                 | GG               | INTERGENIC      |               |                    |                    |
| SNP_52527_A_22035657 | NC_021166.1    | Ca_Kabuli_Chr07 | 22035657                | AA                                     | GG                 | GG               | INTERGENIC      |               |                    |                    |
| SNP_52528_A_22036213 | NC_021166.1    | Ca_Kabuli_Chr07 | 22036213                | GG                                     | AA                 | AA               | INTERGENIC      |               |                    |                    |
| SNP_52530_A_22036380 | NC_021166.1    | Ca_Kabuli_Chr07 | 22036380                | GG                                     | AA                 | AA               | INTERGENIC      |               |                    |                    |

| SNPs IDs             | Chromosome IDs | Chromosomes     | Physical positions (bp) | CDC Frontier genome (Reference genome) | (Pusa 1103 & HPNB) | (ILWC 46 & LPNB) | Sequence genome       | Components of | Gene accession IDs                                               | Putative functions |
|----------------------|----------------|-----------------|-------------------------|----------------------------------------|--------------------|------------------|-----------------------|---------------|------------------------------------------------------------------|--------------------|
| SNP_52532_A_22038167 | NC_021166.1    | Ca_Kabuli_Chr07 | 22038167                | AA                                     | CC                 | CC               | INTERGENIC            |               |                                                                  |                    |
| SNP_52533_A_22038776 | NC_021166.1    | Ca_Kabuli_Chr07 | 22038776                | AA                                     | GG                 | GG               | INTERGENIC            |               |                                                                  |                    |
| SNP_52534_A_22042181 | NC_021166.1    | Ca_Kabuli_Chr07 | 22042181                | TT                                     | GG                 | GG               | URR                   | 101492599     | transcription factor GTE12-like                                  |                    |
| SNP_52535_A_22042530 | NC_021166.1    | Ca_Kabuli_Chr07 | 22042530                | AA                                     | GG                 | GG               | URR                   | 101492599     | transcription factor GTE12-like                                  |                    |
| SNP_52536_A_22042916 | NC_021166.1    | Ca_Kabuli_Chr07 | 22042916                | CC                                     | AA                 | AA               | URR                   | 101492599     | transcription factor GTE12-like                                  |                    |
| SNP_52538_A_22044990 | NC_021166.1    | Ca_Kabuli_Chr07 | 22044990                | CC                                     | AA                 | AA               | INTERGENIC            |               |                                                                  |                    |
| SNP_52540_A_22046351 | NC_021166.1    | Ca_Kabuli_Chr07 | 22046351                | CC                                     | TT                 | TT               | INTERGENIC            |               |                                                                  |                    |
| SNP_52541_A_22046592 | NC_021166.1    | Ca_Kabuli_Chr07 | 22046592                | CC                                     | TT                 | TT               | INTERGENIC            |               |                                                                  |                    |
| SNP_52545_A_22047792 | NC_021166.1    | Ca_Kabuli_Chr07 | 22047792                | TT                                     | GG                 | GG               | INTERGENIC            |               |                                                                  |                    |
| SNP_52546_A_22048306 | NC_021166.1    | Ca_Kabuli_Chr07 | 22048306                | CC                                     | TT                 | TT               | INTERGENIC            |               |                                                                  |                    |
| SNP_52547_A_22048847 | NC_021166.1    | Ca_Kabuli_Chr07 | 22048847                | AA                                     | GG                 | GG               | INTERGENIC            |               |                                                                  |                    |
| SNP_52549_A_22049336 | NC_021166.1    | Ca_Kabuli_Chr07 | 22049336                | AA                                     | TT                 | TT               | INTERGENIC            |               |                                                                  |                    |
| SNP_52550_A_22049920 | NC_021166.1    | Ca_Kabuli_Chr07 | 22049920                | TT                                     | GG                 | GG               | INTERGENIC            |               |                                                                  |                    |
| SNP_52551_A_22053695 | NC_021166.1    | Ca_Kabuli_Chr07 | 22053695                | AA                                     | CC                 | CC               | INTERGENIC            |               |                                                                  |                    |
| SNP_52552_A_22068547 | NC_021166.1    | Ca_Kabuli_Chr07 | 22068547                | TT                                     | GG                 | GG               | DRR                   | 101503342     | uncharacterized LOC101503342                                     |                    |
| SNP_52553_A_22068570 | NC_021166.1    | Ca_Kabuli_Chr07 | 22068570                | GG                                     | AA                 | AA               | DRR                   | 101503342     | uncharacterized LOC101503342                                     |                    |
| SNP_52554_A_22069260 | NC_021166.1    | Ca_Kabuli_Chr07 | 22069260                | AA                                     | CC                 | CC               | INTRON                | 101503342     | uncharacterized LOC101503342                                     |                    |
| SNP_52555_A_22083088 | NC_021166.1    | Ca_Kabuli_Chr07 | 22083088                | AA                                     | GG                 | GG               | INTERGENIC            |               |                                                                  |                    |
| SNP_52556_A_22096383 | NC_021166.1    | Ca_Kabuli_Chr07 | 22096383                | AA                                     | TT                 | TT               | NON_SYNONYMOUS_CODING | 101492928     | putative F-box protein At3g16210                                 |                    |
| SNP_52557_A_22101671 | NC_021166.1    | Ca_Kabuli_Chr07 | 22101671                | GG                                     | AA                 | AA               | INTERGENIC            |               |                                                                  |                    |
| SNP_52558_A_22101683 | NC_021166.1    | Ca_Kabuli_Chr07 | 22101683                | CC                                     | TT                 | TT               | INTERGENIC            |               |                                                                  |                    |
| SNP_52559_A_22115081 | NC_021166.1    | Ca_Kabuli_Chr07 | 22115081                | GG                                     | AA                 | AA               | URR                   | 101504000     | phosphoribosylformylglycinamide chloroplastic/mitochondrial-like | cyclo-ligase,      |

| SNPs IDs             | Chromosome IDs | Chromosomes     | Physical positions (bp) | CDC Frontier genome (Reference genome) | (Pusa 1103 & HPNB) | (ILWC 46 & LPNB) | Sequence genome | Components of | Gene accession IDs                                    | Putative functions |
|----------------------|----------------|-----------------|-------------------------|----------------------------------------|--------------------|------------------|-----------------|---------------|-------------------------------------------------------|--------------------|
| SNP_52560_A_22125870 | NC_021166.1    | Ca_Kabuli_Chr07 | 22125870                | TT                                     | AA                 | AA               | INTERGENIC      |               |                                                       |                    |
| SNP_52561_A_22143216 | NC_021166.1    | Ca_Kabuli_Chr07 | 22143216                | GG                                     | TT                 | TT               | INTERGENIC      |               |                                                       |                    |
| SNP_52562_A_22146458 | NC_021166.1    | Ca_Kabuli_Chr07 | 22146458                | GG                                     | AA                 | AA               | INTERGENIC      |               |                                                       |                    |
| SNP_52563_A_22146596 | NC_021166.1    | Ca_Kabuli_Chr07 | 22146596                | TT                                     | CC                 | CC               | INTERGENIC      |               |                                                       |                    |
| SNP_52564_A_22146668 | NC_021166.1    | Ca_Kabuli_Chr07 | 22146668                | TT                                     | AA                 | AA               | INTERGENIC      |               |                                                       |                    |
| SNP_52565_A_22146698 | NC_021166.1    | Ca_Kabuli_Chr07 | 22146698                | CC                                     | TT                 | TT               | INTERGENIC      |               |                                                       |                    |
| SNP_52567_A_22146740 | NC_021166.1    | Ca_Kabuli_Chr07 | 22146740                | AA                                     | GG                 | GG               | INTERGENIC      |               |                                                       |                    |
| SNP_52568_A_22149216 | NC_021166.1    | Ca_Kabuli_Chr07 | 22149216                | TT                                     | GG                 | GG               | INTERGENIC      |               |                                                       |                    |
| SNP_52569_A_22174055 | NC_021166.1    | Ca_Kabuli_Chr07 | 22174055                | GG                                     | CC                 | CC               | INTERGENIC      |               |                                                       |                    |
| SNP_52570_A_22174122 | NC_021166.1    | Ca_Kabuli_Chr07 | 22174122                | GG                                     | AA                 | AA               | INTERGENIC      |               |                                                       |                    |
| SNP_52571_A_22206661 | NC_021166.1    | Ca_Kabuli_Chr07 | 22206661                | CC                                     | TT                 | TT               | INTERGENIC      |               |                                                       |                    |
| SNP_52572_A_22206672 | NC_021166.1    | Ca_Kabuli_Chr07 | 22206672                | CC                                     | TT                 | TT               | INTERGENIC      |               |                                                       |                    |
| SNP_52573_A_22297070 | NC_021166.1    | Ca_Kabuli_Chr07 | 22297070                | CC                                     | TT                 | TT               | URR             | 101410596     | transfer RNA arginine (anticodon ACG)                 |                    |
| SNP_52574_A_22330605 | NC_021166.1    | Ca_Kabuli_Chr07 | 22330605                | GG                                     | TT                 | TT               | INTRON          | 101507015     | transcription initiation factor TFIID subunit 4b-like |                    |
| SNP_52575_A_22330680 | NC_021166.1    | Ca_Kabuli_Chr07 | 22330680                | GG                                     | CC                 | CC               | INTRON          | 101507015     | transcription initiation factor TFIID subunit 4b-like |                    |
| SNP_52576_A_22330997 | NC_021166.1    | Ca_Kabuli_Chr07 | 22330997                | GG                                     | AA                 | AA               | INTRON          | 101507015     | transcription initiation factor TFIID subunit 4b-like |                    |
| SNP_52577_A_22331017 | NC_021166.1    | Ca_Kabuli_Chr07 | 22331017                | GG                                     | AA                 | AA               | INTRON          | 101507015     | transcription initiation factor TFIID subunit 4b-like |                    |
| SNP_52579_A_22339619 | NC_021166.1    | Ca_Kabuli_Chr07 | 22339619                | GG                                     | AA                 | AA               | INTERGENIC      |               |                                                       |                    |
| SNP_52580_A_22342233 | NC_021166.1    | Ca_Kabuli_Chr07 | 22342233                | CC                                     | TT                 | TT               | INTERGENIC      |               |                                                       |                    |
| SNP_52581_A_22350370 | NC_021166.1    | Ca_Kabuli_Chr07 | 22350370                | AA                                     | GG                 | GG               | INTERGENIC      |               |                                                       |                    |
| SNP_52585_A_22457151 | NC_021166.1    | Ca_Kabuli_Chr07 | 22457151                | CC                                     | TT                 | TT               | INTERGENIC      |               |                                                       |                    |
| SNP_52587_A_22527751 | NC_021166.1    | Ca_Kabuli_Chr07 | 22527751                | GG                                     | AA                 | AA               | INTERGENIC      |               |                                                       |                    |



| SNPs IDs             | Chromosome IDs | Chromosomes     | Physical positions (bp) | CDC Frontier genome (Reference genome) | (Pusa 1103 & HPNB) | (ILWC 46 & LPNB) | Sequence Components of genome | Gene accession IDs | Putative functions                      |
|----------------------|----------------|-----------------|-------------------------|----------------------------------------|--------------------|------------------|-------------------------------|--------------------|-----------------------------------------|
| SNP_52589_A_22598042 | NC_021166.1    | Ca_Kabuli_Chr07 | 22598042                | AA                                     | CC                 | CC               | INTERGENIC                    |                    |                                         |
| SNP_52590_A_22652043 | NC_021166.1    | Ca_Kabuli_Chr07 | 22652043                | AA                                     | TT                 | TT               | INTERGENIC                    |                    |                                         |
| SNP_52592_A_22664292 | NC_021166.1    | Ca_Kabuli_Chr07 | 22664292                | AA                                     | GG                 | GG               | INTRON                        | 101504426          | protein FAR1-RELATED SEQUENCE 5-like    |
| SNP_52593_A_22664298 | NC_021166.1    | Ca_Kabuli_Chr07 | 22664298                | AA                                     | GG                 | GG               | INTRON                        | 101504426          | protein FAR1-RELATED SEQUENCE 5-like    |
| SNP_52594_A_22664309 | NC_021166.1    | Ca_Kabuli_Chr07 | 22664309                | CC                                     | AA                 | AA               | INTRON                        | 101504426          | protein FAR1-RELATED SEQUENCE 5-like    |
| SNP_52596_A_22699750 | NC_021166.1    | Ca_Kabuli_Chr07 | 22699750                | AA                                     | CC                 | CC               | NON_SYNONYMOUS_CODING         | 101505724          | kinesin-like protein KIF19              |
| SNP_52597_A_22699759 | NC_021166.1    | Ca_Kabuli_Chr07 | 22699759                | GG                                     | TT                 | TT               | NON_SYNONYMOUS_CODING         | 101505724          | kinesin-like protein KIF19              |
| SNP_52598_A_22700457 | NC_021166.1    | Ca_Kabuli_Chr07 | 22700457                | AA                                     | GG                 | GG               | STOP_LOST                     | 101505724          | kinesin-like protein KIF19              |
| SNP_52599_A_22700880 | NC_021166.1    | Ca_Kabuli_Chr07 | 22700880                | GG                                     | AA                 | AA               | NON_SYNONYMOUS_CODING         | 101505724          | kinesin-like protein KIF19              |
| SNP_52600_A_22700892 | NC_021166.1    | Ca_Kabuli_Chr07 | 22700892                | AA                                     | CC                 | CC               | NON_SYNONYMOUS_CODING         | 101505724          | kinesin-like protein KIF19              |
| SNP_52601_A_22700896 | NC_021166.1    | Ca_Kabuli_Chr07 | 22700896                | AA                                     | GG                 | GG               | SYNONYMOUS_CODING             | 101505724          | kinesin-like protein KIF19              |
| SNP_52602_A_22700898 | NC_021166.1    | Ca_Kabuli_Chr07 | 22700898                | AA                                     | GG                 | GG               | NON_SYNONYMOUS_CODING         | 101505724          | kinesin-like protein KIF19              |
| SNP_52603_A_22700903 | NC_021166.1    | Ca_Kabuli_Chr07 | 22700903                | CC                                     | TT                 | TT               | NON_SYNONYMOUS_CODING         | 101505724          | kinesin-like protein KIF19              |
| SNP_52604_A_22700913 | NC_021166.1    | Ca_Kabuli_Chr07 | 22700913                | GG                                     | TT                 | TT               | NON_SYNONYMOUS_CODING         | 101505724          | kinesin-like protein KIF19              |
| SNP_52605_A_22700917 | NC_021166.1    | Ca_Kabuli_Chr07 | 22700917                | GG                                     | AA                 | AA               | SYNONYMOUS_CODING             | 101505724          | kinesin-like protein KIF19              |
| SNP_52606_A_22700918 | NC_021166.1    | Ca_Kabuli_Chr07 | 22700918                | AA                                     | GG                 | GG               | NON_SYNONYMOUS_CODING         | 101505724          | kinesin-like protein KIF19              |
| SNP_52608_A_22745142 | NC_021166.1    | Ca_Kabuli_Chr07 | 22745142                | TT                                     | AA                 | AA               | INTRON                        | 101506046          | phospholipid-transporting ATPase 3-like |
| SNP_52609_A_22803878 | NC_021166.1    | Ca_Kabuli_Chr07 | 22803878                | GG                                     | TT                 | TT               | INTERGENIC                    |                    |                                         |
| SNP_52610_A_22803913 | NC_021166.1    | Ca_Kabuli_Chr07 | 22803913                | AA                                     | GG                 | GG               | INTERGENIC                    |                    |                                         |
| SNP_52611_A_22810003 | NC_021166.1    | Ca_Kabuli_Chr07 | 22810003                | TT                                     | CC                 | CC               | INTERGENIC                    |                    |                                         |
| SNP_52612_A_22864273 | NC_021166.1    | Ca_Kabuli_Chr07 | 22864273                | TT                                     | CC                 | CC               | INTERGENIC                    |                    |                                         |
| SNP_52613_A_22864289 | NC_021166.1    | Ca_Kabuli_Chr07 | 22864289                | CC                                     | TT                 | TT               | INTERGENIC                    |                    |                                         |

| SNPs IDs             | Chromosome IDs | Chromosomes     | Physical positions (bp) | CDC Frontier genome (Reference genome) | (Pusa 1103 & HPNB) | (ILWC 46 & LPNB) | Sequence genome | Components of | Gene accession IDs | Putative functions |
|----------------------|----------------|-----------------|-------------------------|----------------------------------------|--------------------|------------------|-----------------|---------------|--------------------|--------------------|
| SNP_52614_A_22864330 | NC_021166.1    | Ca_Kabuli_Chr07 | 22864330                | GG                                     | AA                 | AA               | INTERGENIC      |               |                    |                    |
| SNP_52617_A_22911589 | NC_021166.1    | Ca_Kabuli_Chr07 | 22911589                | TT                                     | AA                 | AA               | INTERGENIC      |               |                    |                    |
| SNP_52618_A_22912885 | NC_021166.1    | Ca_Kabuli_Chr07 | 22912885                | CC                                     | TT                 | TT               | INTERGENIC      |               |                    |                    |
| SNP_52619_A_22921689 | NC_021166.1    | Ca_Kabuli_Chr07 | 22921689                | CC                                     | GG                 | GG               | INTERGENIC      |               |                    |                    |
| SNP_52620_A_22921952 | NC_021166.1    | Ca_Kabuli_Chr07 | 22921952                | AA                                     | CC                 | CC               | INTERGENIC      |               |                    |                    |
| SNP_52621_A_22922025 | NC_021166.1    | Ca_Kabuli_Chr07 | 22922025                | AA                                     | GG                 | GG               | INTERGENIC      |               |                    |                    |
| SNP_52622_A_22922128 | NC_021166.1    | Ca_Kabuli_Chr07 | 22922128                | GG                                     | TT                 | TT               | INTERGENIC      |               |                    |                    |
| SNP_52623_A_22927159 | NC_021166.1    | Ca_Kabuli_Chr07 | 22927159                | TT                                     | CC                 | CC               | INTERGENIC      |               |                    |                    |
| SNP_52624_A_22931923 | NC_021166.1    | Ca_Kabuli_Chr07 | 22931923                | CC                                     | AA                 | AA               | INTERGENIC      |               |                    |                    |
| SNP_52625_A_22941408 | NC_021166.1    | Ca_Kabuli_Chr07 | 22941408                | TT                                     | CC                 | CC               | INTERGENIC      |               |                    |                    |
| SNP_52627_A_22952381 | NC_021166.1    | Ca_Kabuli_Chr07 | 22952381                | CC                                     | TT                 | TT               | INTERGENIC      |               |                    |                    |
| SNP_52628_A_22962057 | NC_021166.1    | Ca_Kabuli_Chr07 | 22962057                | TT                                     | AA                 | AA               | INTERGENIC      |               |                    |                    |
| SNP_52629_A_22964630 | NC_021166.1    | Ca_Kabuli_Chr07 | 22964630                | AA                                     | TT                 | TT               | INTERGENIC      |               |                    |                    |
| SNP_52630_A_22969944 | NC_021166.1    | Ca_Kabuli_Chr07 | 22969944                | AA                                     | GG                 | GG               | INTERGENIC      |               |                    |                    |
| SNP_52631_A_22969968 | NC_021166.1    | Ca_Kabuli_Chr07 | 22969968                | TT                                     | CC                 | CC               | INTERGENIC      |               |                    |                    |
| SNP_52632_A_22977974 | NC_021166.1    | Ca_Kabuli_Chr07 | 22977974                | GG                                     | CC                 | CC               | INTERGENIC      |               |                    |                    |
| SNP_52633_A_22992416 | NC_021166.1    | Ca_Kabuli_Chr07 | 22992416                | AA                                     | CC                 | CC               | INTERGENIC      |               |                    |                    |
| SNP_52634_A_22992474 | NC_021166.1    | Ca_Kabuli_Chr07 | 22992474                | AA                                     | GG                 | GG               | INTERGENIC      |               |                    |                    |
| SNP_52635_A_22992492 | NC_021166.1    | Ca_Kabuli_Chr07 | 22992492                | GG                                     | AA                 | AA               | INTERGENIC      |               |                    |                    |
| SNP_52636_A_22992561 | NC_021166.1    | Ca_Kabuli_Chr07 | 22992561                | CC                                     | TT                 | TT               | INTERGENIC      |               |                    |                    |
| SNP_52637_A_22992570 | NC_021166.1    | Ca_Kabuli_Chr07 | 22992570                | TT                                     | GG                 | GG               | INTERGENIC      |               |                    |                    |
| SNP_52638_A_22992625 | NC_021166.1    | Ca_Kabuli_Chr07 | 22992625                | AA                                     | GG                 | GG               | INTERGENIC      |               |                    |                    |

| SNPs IDs             | Chromosome IDs | Chromosomes     | Physical positions (bp) | CDC Frontier genome (Reference genome) | (Pusa 1103 & HPNB) | (ILWC 46 & LPNB) | Sequence Components of genome | Gene accession IDs | Putative functions                                                   |
|----------------------|----------------|-----------------|-------------------------|----------------------------------------|--------------------|------------------|-------------------------------|--------------------|----------------------------------------------------------------------|
| SNP_52639_A_22992743 | NC_021166.1    | Ca_Kabuli_Chr07 | 22992743                | TT                                     | GG                 | GG               | INTERGENIC                    |                    |                                                                      |
| SNP_52640_A_22992765 | NC_021166.1    | Ca_Kabuli_Chr07 | 22992765                | CC                                     | TT                 | TT               | INTERGENIC                    |                    |                                                                      |
| SNP_52641_A_22992802 | NC_021166.1    | Ca_Kabuli_Chr07 | 22992802                | AA                                     | CC                 | CC               | INTERGENIC                    |                    |                                                                      |
| SNP_52642_A_22992867 | NC_021166.1    | Ca_Kabuli_Chr07 | 22992867                | TT                                     | CC                 | CC               | INTERGENIC                    |                    |                                                                      |
| SNP_52643_A_22992878 | NC_021166.1    | Ca_Kabuli_Chr07 | 22992878                | AA                                     | GG                 | GG               | INTERGENIC                    |                    |                                                                      |
| SNP_52644_A_22995814 | NC_021166.1    | Ca_Kabuli_Chr07 | 22995814                | CC                                     | TT                 | TT               | INTERGENIC                    |                    |                                                                      |
| SNP_52645_A_23037469 | NC_021166.1    | Ca_Kabuli_Chr07 | 23037469                | CC                                     | TT                 | TT               | INTERGENIC                    |                    |                                                                      |
| SNP_52646_A_23037800 | NC_021166.1    | Ca_Kabuli_Chr07 | 23037800                | GG                                     | AA                 | AA               | INTERGENIC                    |                    |                                                                      |
| SNP_52647_A_23038213 | NC_021166.1    | Ca_Kabuli_Chr07 | 23038213                | GG                                     | AA                 | AA               | INTERGENIC                    |                    |                                                                      |
| SNP_52649_A_23038537 | NC_021166.1    | Ca_Kabuli_Chr07 | 23038537                | AA                                     | TT                 | TT               | INTERGENIC                    |                    |                                                                      |
| SNP_52650_A_23146290 | NC_021166.1    | Ca_Kabuli_Chr07 | 23146290                | CC                                     | TT                 | TT               | URR                           | 101510533          | toll/interleukin-1 receptor-like protein                             |
| SNP_52651_A_23162239 | NC_021166.1    | Ca_Kabuli_Chr07 | 23162239                | GG                                     | TT                 | TT               | URR                           | 101510857          | TMV resistance protein N-like                                        |
| SNP_52652_A_23168674 | NC_021166.1    | Ca_Kabuli_Chr07 | 23168674                | AA                                     | GG                 | GG               | INTERGENIC                    |                    |                                                                      |
| SNP_52655_A_23178669 | NC_021166.1    | Ca_Kabuli_Chr07 | 23178669                | GG                                     | AA                 | AA               | STOP_GAINED                   | 101502807          | probable LRR receptor-like serine/threonine-protein kinase At3g47570 |
| SNP_52656_A_23193340 | NC_021166.1    | Ca_Kabuli_Chr07 | 23193340                | AA                                     | GG                 | GG               | INTERGENIC                    |                    |                                                                      |
| SNP_52657_A_23193557 | NC_021166.1    | Ca_Kabuli_Chr07 | 23193557                | CC                                     | TT                 | TT               | INTERGENIC                    |                    |                                                                      |
| SNP_52658_A_23193594 | NC_021166.1    | Ca_Kabuli_Chr07 | 23193594                | TT                                     | CC                 | CC               | INTERGENIC                    |                    |                                                                      |
| SNP_52659_A_23193706 | NC_021166.1    | Ca_Kabuli_Chr07 | 23193706                | AA                                     | GG                 | GG               | INTERGENIC                    |                    |                                                                      |
| SNP_52660_A_23230290 | NC_021166.1    | Ca_Kabuli_Chr07 | 23230290                | CC                                     | TT                 | TT               | INTERGENIC                    |                    |                                                                      |
| SNP_52661_A_23232689 | NC_021166.1    | Ca_Kabuli_Chr07 | 23232689                | AA                                     | TT                 | TT               | INTERGENIC                    |                    |                                                                      |
| SNP_52662_A_23241335 | NC_021166.1    | Ca_Kabuli_Chr07 | 23241335                | GG                                     | AA                 | AA               | INTERGENIC                    |                    |                                                                      |
| SNP_52663_A_23247163 | NC_021166.1    | Ca_Kabuli_Chr07 | 23247163                | GG                                     | AA                 | AA               | INTERGENIC                    |                    |                                                                      |

| SNPs IDs             | Chromosome IDs | Chromosomes     | Physical positions (bp) | CDC Frontier genome (Reference genome) | (Pusa 1103 & HPNB) | (ILWC 46 & LPNB) | Sequence genome | Components of | Gene accession IDs            | Putative functions |
|----------------------|----------------|-----------------|-------------------------|----------------------------------------|--------------------|------------------|-----------------|---------------|-------------------------------|--------------------|
| SNP_52664_A_23247180 | NC_021166.1    | Ca_Kabuli_Chr07 | 23247180                | CC                                     | TT                 | TT               | INTERGENIC      |               |                               |                    |
| SNP_52665_A_23247215 | NC_021166.1    | Ca_Kabuli_Chr07 | 23247215                | TT                                     | CC                 | CC               | INTERGENIC      |               |                               |                    |
| SNP_52666_A_23247380 | NC_021166.1    | Ca_Kabuli_Chr07 | 23247380                | GG                                     | AA                 | AA               | INTERGENIC      |               |                               |                    |
| SNP_52667_A_23294023 | NC_021166.1    | Ca_Kabuli_Chr07 | 23294023                | CC                                     | TT                 | TT               | INTERGENIC      |               |                               |                    |
| SNP_52668_A_23333086 | NC_021166.1    | Ca_Kabuli_Chr07 | 23333086                | TT                                     | AA                 | AA               | INTERGENIC      |               |                               |                    |
| SNP_52669_A_23361630 | NC_021166.1    | Ca_Kabuli_Chr07 | 23361630                | GG                                     | AA                 | AA               | INTERGENIC      |               |                               |                    |
| SNP_52670_A_23361706 | NC_021166.1    | Ca_Kabuli_Chr07 | 23361706                | CC                                     | GG                 | GG               | INTERGENIC      |               |                               |                    |
| SNP_52671_A_23468825 | NC_021166.1    | Ca_Kabuli_Chr07 | 23468825                | CC                                     | TT                 | TT               | INTERGENIC      |               |                               |                    |
| SNP_52672_A_23530085 | NC_021166.1    | Ca_Kabuli_Chr07 | 23530085                | AA                                     | CC                 | CC               | INTERGENIC      |               |                               |                    |
| SNP_52673_A_23530091 | NC_021166.1    | Ca_Kabuli_Chr07 | 23530091                | TT                                     | CC                 | CC               | INTERGENIC      |               |                               |                    |
| SNP_52674_A_23532222 | NC_021166.1    | Ca_Kabuli_Chr07 | 23532222                | TT                                     | CC                 | CC               | INTERGENIC      |               |                               |                    |
| SNP_52675_A_23552756 | NC_021166.1    | Ca_Kabuli_Chr07 | 23552756                | CC                                     | TT                 | TT               | INTERGENIC      |               |                               |                    |
| SNP_52676_A_23556192 | NC_021166.1    | Ca_Kabuli_Chr07 | 23556192                | CC                                     | TT                 | TT               | INTERGENIC      |               |                               |                    |
| SNP_52677_A_23565168 | NC_021166.1    | Ca_Kabuli_Chr07 | 23565168                | TT                                     | CC                 | CC               | DRR             | 101488571     | uncharacterized LOC101488571  |                    |
| SNP_52678_A_23603064 | NC_021166.1    | Ca_Kabuli_Chr07 | 23603064                | GG                                     | TT                 | TT               | URR             | 101489474     | D-aminoacyl-tRNA deacylase    |                    |
| SNP_52679_A_23613186 | NC_021166.1    | Ca_Kabuli_Chr07 | 23613186                | TT                                     | CC                 | CC               | DRR             | 101489789     | translin-associated protein X |                    |
| SNP_52680_A_23627127 | NC_021166.1    | Ca_Kabuli_Chr07 | 23627127                | AA                                     | GG                 | GG               | INTERGENIC      |               |                               |                    |
| SNP_52681_A_23627473 | NC_021166.1    | Ca_Kabuli_Chr07 | 23627473                | AA                                     | GG                 | GG               | INTERGENIC      |               |                               |                    |
| SNP_52682_A_23627488 | NC_021166.1    | Ca_Kabuli_Chr07 | 23627488                | AA                                     | CC                 | CC               | INTERGENIC      |               |                               |                    |
| SNP_52683_A_23644427 | NC_021166.1    | Ca_Kabuli_Chr07 | 23644427                | AA                                     | TT                 | TT               | INTERGENIC      |               |                               |                    |
| SNP_52684_A_23656788 | NC_021166.1    | Ca_Kabuli_Chr07 | 23656788                | TT                                     | CC                 | CC               | INTERGENIC      |               |                               |                    |
| SNP_52685_A_23658567 | NC_021166.1    | Ca_Kabuli_Chr07 | 23658567                | AA                                     | TT                 | TT               | INTERGENIC      |               |                               |                    |

| SNPs IDs             | Chromosome IDs | Chromosomes     | Physical positions (bp) | CDC Frontier (Reference genome) | (Pusa 1103 & HPNB) | (ILWC 46 & LPNB) | Sequence Components of genome | Gene accession IDs | Putative functions                                                                                                             |
|----------------------|----------------|-----------------|-------------------------|---------------------------------|--------------------|------------------|-------------------------------|--------------------|--------------------------------------------------------------------------------------------------------------------------------|
| SNP_52686_A_23661573 | NC_021166.1    | Ca_Kabuli_Chr07 | 23661573                | AA                              | CC                 | CC               | DRR                           | 101491089          | trifunctional UDP-glucose 4,6-dehydratase/UDP-4-keto-6-deoxy-D-glucose 3,5-epimerase/UDP-4-keto-L-rhamnose-reductase RHM1-like |
| SNP_52687_A_23661579 | NC_021166.1    | Ca_Kabuli_Chr07 | 23661579                | AA                              | GG                 | GG               | DRR                           | 101491089          | trifunctional UDP-glucose 4,6-dehydratase/UDP-4-keto-6-deoxy-D-glucose 3,5-epimerase/UDP-4-keto-L-rhamnose-reductase RHM1-like |
| SNP_52689_A_23667538 | NC_021166.1    | Ca_Kabuli_Chr07 | 23667538                | GG                              | CC                 | CC               | URR                           | 101491089          | trifunctional UDP-glucose 4,6-dehydratase/UDP-4-keto-6-deoxy-D-glucose 3,5-epimerase/UDP-4-keto-L-rhamnose-reductase RHM1-like |
| SNP_52690_A_23667863 | NC_021166.1    | Ca_Kabuli_Chr07 | 23667863                | CC                              | TT                 | TT               | INTERGENIC                    |                    |                                                                                                                                |
| SNP_52691_A_23667867 | NC_021166.1    | Ca_Kabuli_Chr07 | 23667867                | AA                              | GG                 | GG               | INTERGENIC                    |                    |                                                                                                                                |
| SNP_52692_A_23667882 | NC_021166.1    | Ca_Kabuli_Chr07 | 23667882                | CC                              | TT                 | TT               | INTERGENIC                    |                    |                                                                                                                                |
| SNP_52693_A_23667970 | NC_021166.1    | Ca_Kabuli_Chr07 | 23667970                | CC                              | AA                 | AA               | INTERGENIC                    |                    |                                                                                                                                |
| SNP_52695_A_23696042 | NC_021166.1    | Ca_Kabuli_Chr07 | 23696042                | GG                              | CC                 | CC               | INTERGENIC                    |                    |                                                                                                                                |
| SNP_52696_A_23766762 | NC_021166.1    | Ca_Kabuli_Chr07 | 23766762                | CC                              | TT                 | TT               | INTERGENIC                    |                    |                                                                                                                                |
| SNP_52698_A_23794764 | NC_021166.1    | Ca_Kabuli_Chr07 | 23794764                | TT                              | CC                 | CC               | INTERGENIC                    |                    |                                                                                                                                |
| SNP_52700_A_23798634 | NC_021166.1    | Ca_Kabuli_Chr07 | 23798634                | AA                              | TT                 | TT               | INTERGENIC                    |                    |                                                                                                                                |
| SNP_52701_A_23801471 | NC_021166.1    | Ca_Kabuli_Chr07 | 23801471                | CC                              | AA                 | AA               | INTERGENIC                    |                    |                                                                                                                                |
| SNP_52702_A_23804174 | NC_021166.1    | Ca_Kabuli_Chr07 | 23804174                | CC                              | TT                 | TT               | INTERGENIC                    |                    |                                                                                                                                |
| SNP_52703_A_23807168 | NC_021166.1    | Ca_Kabuli_Chr07 | 23807168                | AA                              | GG                 | GG               | INTERGENIC                    |                    |                                                                                                                                |
| SNP_52704_A_23807184 | NC_021166.1    | Ca_Kabuli_Chr07 | 23807184                | CC                              | TT                 | TT               | INTERGENIC                    |                    |                                                                                                                                |
| SNP_52705_A_23807208 | NC_021166.1    | Ca_Kabuli_Chr07 | 23807208                | TT                              | GG                 | GG               | INTERGENIC                    |                    |                                                                                                                                |
| SNP_52706_A_23807367 | NC_021166.1    | Ca_Kabuli_Chr07 | 23807367                | AA                              | TT                 | TT               | INTERGENIC                    |                    |                                                                                                                                |
| SNP_52707_A_23807396 | NC_021166.1    | Ca_Kabuli_Chr07 | 23807396                | AA                              | GG                 | GG               | INTERGENIC                    |                    |                                                                                                                                |
| SNP_52708_A_23807402 | NC_021166.1    | Ca_Kabuli_Chr07 | 23807402                | CC                              | TT                 | TT               | INTERGENIC                    |                    |                                                                                                                                |
| SNP_52709_A_23807410 | NC_021166.1    | Ca_Kabuli_Chr07 | 23807410                | AA                              | GG                 | GG               | INTERGENIC                    |                    |                                                                                                                                |
| SNP_52710_A_23807450 | NC_021166.1    | Ca_Kabuli_Chr07 | 23807450                | AA                              | TT                 | TT               | INTERGENIC                    |                    |                                                                                                                                |
| SNP_52711_A_23812206 | NC_021166.1    | Ca_Kabuli_Chr07 | 23812206                | AA                              | CC                 | CC               | INTERGENIC                    |                    |                                                                                                                                |

| SNPs IDs             | Chromosome IDs | Chromosomes     | Physical positions (bp) | CDC Frontier genome (Reference genome) | (Pusa 1103 & HPNB) | (ILWC 46 & LPNB) | Sequence genome | Components of | Gene accession IDs           | Putative functions |
|----------------------|----------------|-----------------|-------------------------|----------------------------------------|--------------------|------------------|-----------------|---------------|------------------------------|--------------------|
| SNP_52712_A_23815462 | NC_021166.1    | Ca_Kabuli_Chr07 | 23815462                | TT                                     | AA                 | AA               | INTERGENIC      |               |                              |                    |
| SNP_52713_A_23819658 | NC_021166.1    | Ca_Kabuli_Chr07 | 23819658                | GG                                     | AA                 | AA               | INTERGENIC      |               |                              |                    |
| SNP_52714_A_23819668 | NC_021166.1    | Ca_Kabuli_Chr07 | 23819668                | AA                                     | GG                 | GG               | INTERGENIC      |               |                              |                    |
| SNP_52715_A_23820032 | NC_021166.1    | Ca_Kabuli_Chr07 | 23820032                | TT                                     | AA                 | AA               | INTERGENIC      |               |                              |                    |
| SNP_52716_A_23824521 | NC_021166.1    | Ca_Kabuli_Chr07 | 23824521                | TT                                     | CC                 | CC               | INTERGENIC      |               |                              |                    |
| SNP_52717_A_23825835 | NC_021166.1    | Ca_Kabuli_Chr07 | 23825835                | AA                                     | GG                 | GG               | INTERGENIC      |               |                              |                    |
| SNP_52718_A_23879151 | NC_021166.1    | Ca_Kabuli_Chr07 | 23879151                | GG                                     | TT                 | TT               | INTERGENIC      |               |                              |                    |
| SNP_52719_A_23879436 | NC_021166.1    | Ca_Kabuli_Chr07 | 23879436                | CC                                     | AA                 | AA               | INTERGENIC      |               |                              |                    |
| SNP_52720_A_23879451 | NC_021166.1    | Ca_Kabuli_Chr07 | 23879451                | TT                                     | AA                 | AA               | INTERGENIC      |               |                              |                    |
| SNP_52721_A_23879455 | NC_021166.1    | Ca_Kabuli_Chr07 | 23879455                | TT                                     | CC                 | CC               | INTERGENIC      |               |                              |                    |
| SNP_52722_A_23879513 | NC_021166.1    | Ca_Kabuli_Chr07 | 23879513                | AA                                     | TT                 | TT               | INTERGENIC      |               |                              |                    |
| SNP_52723_A_23879531 | NC_021166.1    | Ca_Kabuli_Chr07 | 23879531                | CC                                     | AA                 | AA               | INTERGENIC      |               |                              |                    |
| SNP_52724_A_23879560 | NC_021166.1    | Ca_Kabuli_Chr07 | 23879560                | TT                                     | AA                 | AA               | INTERGENIC      |               |                              |                    |
| SNP_52725_A_23879576 | NC_021166.1    | Ca_Kabuli_Chr07 | 23879576                | GG                                     | CC                 | CC               | INTERGENIC      |               |                              |                    |
| SNP_52726_A_23879594 | NC_021166.1    | Ca_Kabuli_Chr07 | 23879594                | AA                                     | GG                 | GG               | INTERGENIC      |               |                              |                    |
| SNP_52727_A_23879615 | NC_021166.1    | Ca_Kabuli_Chr07 | 23879615                | TT                                     | CC                 | CC               | INTERGENIC      |               |                              |                    |
| SNP_52728_A_23894186 | NC_021166.1    | Ca_Kabuli_Chr07 | 23894186                | GG                                     | AA                 | AA               | INTERGENIC      |               |                              |                    |
| SNP_52729_A_23902427 | NC_021166.1    | Ca_Kabuli_Chr07 | 23902427                | AA                                     | GG                 | GG               | INTERGENIC      |               |                              |                    |
| SNP_52730_A_23905788 | NC_021166.1    | Ca_Kabuli_Chr07 | 23905788                | CC                                     | TT                 | TT               | INTERGENIC      |               |                              |                    |
| SNP_52732_A_23930939 | NC_021166.1    | Ca_Kabuli_Chr07 | 23930939                | TT                                     | CC                 | CC               | URR             | 101495282     | uncharacterized LOC101495282 |                    |
| SNP_52734_A_23985001 | NC_021166.1    | Ca_Kabuli_Chr07 | 23985001                | CC                                     | TT                 | TT               | INTERGENIC      |               |                              |                    |
| SNP_52735_A_24000784 | NC_021166.1    | Ca_Kabuli_Chr07 | 24000784                | CC                                     | AA                 | AA               | INTERGENIC      |               |                              |                    |

| SNPs IDs             | Chromosome IDs | Chromosomes     | Physical positions (bp) | CDC Frontier genome (Reference genome) | (Pusa 1103 & HPNB) | (ILWC 46 & LPNB) | Sequence genome | Components of | Gene accession IDs           | Putative functions |
|----------------------|----------------|-----------------|-------------------------|----------------------------------------|--------------------|------------------|-----------------|---------------|------------------------------|--------------------|
| SNP_52736_A_24001083 | NC_021166.1    | Ca_Kabuli_Chr07 | 24001083                | TT                                     | CC                 | CC               | INTERGENIC      |               |                              |                    |
| SNP_52737_A_24001315 | NC_021166.1    | Ca_Kabuli_Chr07 | 24001315                | AA                                     | GG                 | GG               | INTERGENIC      |               |                              |                    |
| SNP_52738_A_24001324 | NC_021166.1    | Ca_Kabuli_Chr07 | 24001324                | TT                                     | GG                 | GG               | INTERGENIC      |               |                              |                    |
| SNP_52739_A_24001338 | NC_021166.1    | Ca_Kabuli_Chr07 | 24001338                | CC                                     | TT                 | TT               | INTERGENIC      |               |                              |                    |
| SNP_52740_A_24001343 | NC_021166.1    | Ca_Kabuli_Chr07 | 24001343                | TT                                     | CC                 | CC               | INTERGENIC      |               |                              |                    |
| SNP_52741_A_24001346 | NC_021166.1    | Ca_Kabuli_Chr07 | 24001346                | TT                                     | CC                 | CC               | INTERGENIC      |               |                              |                    |
| SNP_52742_A_24002187 | NC_021166.1    | Ca_Kabuli_Chr07 | 24002187                | TT                                     | CC                 | CC               | INTERGENIC      |               |                              |                    |
| SNP_52743_A_24002208 | NC_021166.1    | Ca_Kabuli_Chr07 | 24002208                | TT                                     | CC                 | CC               | INTERGENIC      |               |                              |                    |
| SNP_52744_A_24002233 | NC_021166.1    | Ca_Kabuli_Chr07 | 24002233                | GG                                     | TT                 | TT               | INTERGENIC      |               |                              |                    |
| SNP_52745_A_24037098 | NC_021166.1    | Ca_Kabuli_Chr07 | 24037098                | TT                                     | CC                 | CC               | INTERGENIC      |               |                              |                    |
| SNP_52746_A_24037145 | NC_021166.1    | Ca_Kabuli_Chr07 | 24037145                | AA                                     | TT                 | TT               | INTERGENIC      |               |                              |                    |
| SNP_52747_A_24060145 | NC_021166.1    | Ca_Kabuli_Chr07 | 24060145                | TT                                     | CC                 | CC               | INTERGENIC      |               |                              |                    |
| SNP_52749_A_24098572 | NC_021166.1    | Ca_Kabuli_Chr07 | 24098572                | TT                                     | CC                 | CC               | INTERGENIC      |               |                              |                    |
| SNP_52750_A_24098669 | NC_021166.1    | Ca_Kabuli_Chr07 | 24098669                | AA                                     | GG                 | GG               | INTERGENIC      |               |                              |                    |
| SNP_52751_A_24100778 | NC_021166.1    | Ca_Kabuli_Chr07 | 24100778                | TT                                     | CC                 | CC               | INTERGENIC      |               |                              |                    |
| SNP_52752_A_24107949 | NC_021166.1    | Ca_Kabuli_Chr07 | 24107949                | TT                                     | GG                 | GG               | INTERGENIC      |               |                              |                    |
| SNP_52753_A_24108343 | NC_021166.1    | Ca_Kabuli_Chr07 | 24108343                | AA                                     | GG                 | GG               | INTERGENIC      |               |                              |                    |
| SNP_52754_A_24129128 | NC_021166.1    | Ca_Kabuli_Chr07 | 24129128                | TT                                     | AA                 | AA               | INTERGENIC      |               |                              |                    |
| SNP_52755_A_24199806 | NC_021166.1    | Ca_Kabuli_Chr07 | 24199806                | GG                                     | TT                 | TT               | INTERGENIC      |               |                              |                    |
| SNP_52756_A_24260137 | NC_021166.1    | Ca_Kabuli_Chr07 | 24260137                | TT                                     | GG                 | GG               | URR             | 101496812     | uncharacterized LOC101496812 |                    |
| SNP_52757_A_24260172 | NC_021166.1    | Ca_Kabuli_Chr07 | 24260172                | CC                                     | AA                 | AA               | URR             | 101496812     | uncharacterized LOC101496812 |                    |
| SNP_52760_A_24284079 | NC_021166.1    | Ca_Kabuli_Chr07 | 24284079                | TT                                     | AA                 | AA               | URR             | 101503255     | uncharacterized LOC101503255 |                    |

| SNPs IDs             | Chromosome IDs | Chromosomes     | Physical positions (bp) | CDC Frontier genome (Reference genome) | (Pusa 1103 & HPNB) | (ILWC 46 & LPNB) | Sequence genome | Components of | Gene accession IDs | Putative functions |
|----------------------|----------------|-----------------|-------------------------|----------------------------------------|--------------------|------------------|-----------------|---------------|--------------------|--------------------|
| SNP_52762_A_24284718 | NC_021166.1    | Ca_Kabuli_Chr07 | 24284718                | TT                                     | AA                 | AA               | INTERGENIC      |               |                    |                    |
| SNP_52763_A_24290906 | NC_021166.1    | Ca_Kabuli_Chr07 | 24290906                | CC                                     | TT                 | TT               | INTERGENIC      |               |                    |                    |
| SNP_52764_A_24290913 | NC_021166.1    | Ca_Kabuli_Chr07 | 24290913                | TT                                     | CC                 | CC               | INTERGENIC      |               |                    |                    |
| SNP_52765_A_24329192 | NC_021166.1    | Ca_Kabuli_Chr07 | 24329192                | AA                                     | CC                 | CC               | INTERGENIC      |               |                    |                    |
| SNP_52766_A_24329586 | NC_021166.1    | Ca_Kabuli_Chr07 | 24329586                | GG                                     | AA                 | AA               | INTERGENIC      |               |                    |                    |
| SNP_52767_A_24330486 | NC_021166.1    | Ca_Kabuli_Chr07 | 24330486                | GG                                     | AA                 | AA               | INTERGENIC      |               |                    |                    |
| SNP_52768_A_24335283 | NC_021166.1    | Ca_Kabuli_Chr07 | 24335283                | TT                                     | GG                 | GG               | INTERGENIC      |               |                    |                    |
| SNP_52769_A_24335312 | NC_021166.1    | Ca_Kabuli_Chr07 | 24335312                | TT                                     | GG                 | GG               | INTERGENIC      |               |                    |                    |
| SNP_52770_A_24344572 | NC_021166.1    | Ca_Kabuli_Chr07 | 24344572                | CC                                     | TT                 | TT               | INTERGENIC      |               |                    |                    |
| SNP_52772_A_24348021 | NC_021166.1    | Ca_Kabuli_Chr07 | 24348021                | CC                                     | TT                 | TT               | INTERGENIC      |               |                    |                    |
| SNP_52773_A_24348159 | NC_021166.1    | Ca_Kabuli_Chr07 | 24348159                | TT                                     | CC                 | CC               | INTERGENIC      |               |                    |                    |
| SNP_52774_A_24348315 | NC_021166.1    | Ca_Kabuli_Chr07 | 24348315                | CC                                     | TT                 | TT               | INTERGENIC      |               |                    |                    |
| SNP_52776_A_24348384 | NC_021166.1    | Ca_Kabuli_Chr07 | 24348384                | TT                                     | CC                 | CC               | INTERGENIC      |               |                    |                    |
| SNP_52777_A_24348439 | NC_021166.1    | Ca_Kabuli_Chr07 | 24348439                | AA                                     | GG                 | GG               | INTERGENIC      |               |                    |                    |
| SNP_52778_A_24348544 | NC_021166.1    | Ca_Kabuli_Chr07 | 24348544                | CC                                     | TT                 | TT               | INTERGENIC      |               |                    |                    |
| SNP_52779_A_24348562 | NC_021166.1    | Ca_Kabuli_Chr07 | 24348562                | TT                                     | CC                 | CC               | INTERGENIC      |               |                    |                    |
| SNP_52780_A_24348563 | NC_021166.1    | Ca_Kabuli_Chr07 | 24348563                | GG                                     | AA                 | AA               | INTERGENIC      |               |                    |                    |
| SNP_52781_A_24363947 | NC_021166.1    | Ca_Kabuli_Chr07 | 24363947                | CC                                     | AA                 | AA               | INTERGENIC      |               |                    |                    |
| SNP_52782_A_24365838 | NC_021166.1    | Ca_Kabuli_Chr07 | 24365838                | TT                                     | AA                 | AA               | INTERGENIC      |               |                    |                    |
| SNP_52783_A_24365851 | NC_021166.1    | Ca_Kabuli_Chr07 | 24365851                | GG                                     | AA                 | AA               | INTERGENIC      |               |                    |                    |
| SNP_52784_A_24365880 | NC_021166.1    | Ca_Kabuli_Chr07 | 24365880                | AA                                     | GG                 | GG               | INTERGENIC      |               |                    |                    |
| SNP_52785_A_24365906 | NC_021166.1    | Ca_Kabuli_Chr07 | 24365906                | CC                                     | TT                 | TT               | INTERGENIC      |               |                    |                    |



| SNPs IDs             | Chromosome IDs | Chromosomes     | Physical positions (bp) | CDC Frontier genome (Reference genome) | (Pusa 1103 & HPNB) | (ILWC 46 & LPNB) | Sequence Components of genome | Gene accession IDs | Putative functions                                           |
|----------------------|----------------|-----------------|-------------------------|----------------------------------------|--------------------|------------------|-------------------------------|--------------------|--------------------------------------------------------------|
| SNP_52786_A_24365969 | NC_021166.1    | Ca_Kabuli_Chr07 | 24365969                | TT                                     | GG                 | GG               | INTERGENIC                    |                    |                                                              |
| SNP_52787_A_24365970 | NC_021166.1    | Ca_Kabuli_Chr07 | 24365970                | TT                                     | GG                 | GG               | INTERGENIC                    |                    |                                                              |
| SNP_52788_A_24381956 | NC_021166.1    | Ca_Kabuli_Chr07 | 24381956                | AA                                     | GG                 | GG               | INTERGENIC                    |                    |                                                              |
| SNP_52789_A_24386790 | NC_021166.1    | Ca_Kabuli_Chr07 | 24386790                | AA                                     | GG                 | GG               | DRR                           | 101497667          | uncharacterized aarF domain-containing protein kinase 2-like |
| SNP_52790_A_24408991 | NC_021166.1    | Ca_Kabuli_Chr07 | 24408991                | TT                                     | CC                 | CC               | INTERGENIC                    |                    |                                                              |
| SNP_52793_A_24453864 | NC_021166.1    | Ca_Kabuli_Chr07 | 24453864                | AA                                     | GG                 | GG               | INTERGENIC                    |                    |                                                              |
| SNP_52794_A_24454901 | NC_021166.1    | Ca_Kabuli_Chr07 | 24454901                | GG                                     | AA                 | AA               | INTERGENIC                    |                    |                                                              |
| SNP_52795_A_24454999 | NC_021166.1    | Ca_Kabuli_Chr07 | 24454999                | TT                                     | GG                 | GG               | INTERGENIC                    |                    |                                                              |
| SNP_52796_A_24456728 | NC_021166.1    | Ca_Kabuli_Chr07 | 24456728                | GG                                     | CC                 | CC               | INTERGENIC                    |                    |                                                              |
| SNP_52797_A_24456758 | NC_021166.1    | Ca_Kabuli_Chr07 | 24456758                | AA                                     | CC                 | CC               | INTERGENIC                    |                    |                                                              |
| SNP_52798_A_24457095 | NC_021166.1    | Ca_Kabuli_Chr07 | 24457095                | TT                                     | CC                 | CC               | INTERGENIC                    |                    |                                                              |
| SNP_52799_A_24457164 | NC_021166.1    | Ca_Kabuli_Chr07 | 24457164                | AA                                     | CC                 | CC               | INTERGENIC                    |                    |                                                              |
| SNP_52800_A_24462471 | NC_021166.1    | Ca_Kabuli_Chr07 | 24462471                | GG                                     | AA                 | AA               | INTERGENIC                    |                    |                                                              |
| SNP_52801_A_24462676 | NC_021166.1    | Ca_Kabuli_Chr07 | 24462676                | AA                                     | GG                 | GG               | INTERGENIC                    |                    |                                                              |
| SNP_52802_A_24463055 | NC_021166.1    | Ca_Kabuli_Chr07 | 24463055                | GG                                     | TT                 | TT               | INTERGENIC                    |                    |                                                              |
| SNP_52803_A_24485195 | NC_021166.1    | Ca_Kabuli_Chr07 | 24485195                | TT                                     | CC                 | CC               | INTRON                        | 101498670          | uncharacterized LOC101498670                                 |
| SNP_52804_A_24485201 | NC_021166.1    | Ca_Kabuli_Chr07 | 24485201                | TT                                     | CC                 | CC               | INTRON                        | 101498670          | uncharacterized LOC101498670                                 |
| SNP_52805_A_24485232 | NC_021166.1    | Ca_Kabuli_Chr07 | 24485232                | AA                                     | TT                 | TT               | INTRON                        | 101498670          | uncharacterized LOC101498670                                 |
| SNP_52807_A_24485296 | NC_021166.1    | Ca_Kabuli_Chr07 | 24485296                | CC                                     | TT                 | TT               | INTRON                        | 101498670          | uncharacterized LOC101498670                                 |
| SNP_52808_A_24485448 | NC_021166.1    | Ca_Kabuli_Chr07 | 24485448                | CC                                     | AA                 | AA               | INTRON                        | 101498670          | uncharacterized LOC101498670                                 |
| SNP_52809_A_24485635 | NC_021166.1    | Ca_Kabuli_Chr07 | 24485635                | CC                                     | GG                 | GG               | INTRON                        | 101498670          | uncharacterized LOC101498670                                 |
| SNP_52810_A_24485737 | NC_021166.1    | Ca_Kabuli_Chr07 | 24485737                | CC                                     | AA                 | AA               | INTRON                        | 101498670          | uncharacterized LOC101498670                                 |

| SNPs IDs             | Chromosome IDs | Chromosomes     | Physical positions (bp) | CDC Frontier genome (Reference genome) | (Pusa 1103 & HPNB) | (ILWC 46 & LPNB) | Sequence Components of genome | Gene accession IDs | Putative functions           |
|----------------------|----------------|-----------------|-------------------------|----------------------------------------|--------------------|------------------|-------------------------------|--------------------|------------------------------|
| SNP_52811_A_24485766 | NC_021166.1    | Ca_Kabuli_Chr07 | 24485766                | GG                                     | CC                 | CC               | INTRON                        | 101498670          | uncharacterized LOC101498670 |
| SNP_52812_A_24485879 | NC_021166.1    | Ca_Kabuli_Chr07 | 24485879                | AA                                     | TT                 | TT               | STOP_GAINED                   | 101498670          | uncharacterized LOC101498670 |
| SNP_52813_A_24492789 | NC_021166.1    | Ca_Kabuli_Chr07 | 24492789                | GG                                     | AA                 | AA               | INTERGENIC                    |                    |                              |
| SNP_52814_A_24492833 | NC_021166.1    | Ca_Kabuli_Chr07 | 24492833                | GG                                     | CC                 | CC               | INTERGENIC                    |                    |                              |
| SNP_52815_A_24492979 | NC_021166.1    | Ca_Kabuli_Chr07 | 24492979                | AA                                     | GG                 | GG               | INTERGENIC                    |                    |                              |
| SNP_52816_A_24493091 | NC_021166.1    | Ca_Kabuli_Chr07 | 24493091                | TT                                     | AA                 | AA               | INTERGENIC                    |                    |                              |
| SNP_52817_A_24493421 | NC_021166.1    | Ca_Kabuli_Chr07 | 24493421                | AA                                     | TT                 | TT               | INTERGENIC                    |                    |                              |
| SNP_52818_A_24493437 | NC_021166.1    | Ca_Kabuli_Chr07 | 24493437                | GG                                     | CC                 | CC               | INTERGENIC                    |                    |                              |
| SNP_52819_A_24493460 | NC_021166.1    | Ca_Kabuli_Chr07 | 24493460                | AA                                     | TT                 | TT               | INTERGENIC                    |                    |                              |
| SNP_52820_A_24493576 | NC_021166.1    | Ca_Kabuli_Chr07 | 24493576                | CC                                     | AA                 | AA               | INTERGENIC                    |                    |                              |
| SNP_52821_A_24494137 | NC_021166.1    | Ca_Kabuli_Chr07 | 24494137                | CC                                     | TT                 | TT               | INTERGENIC                    |                    |                              |
| SNP_52822_A_24494331 | NC_021166.1    | Ca_Kabuli_Chr07 | 24494331                | AA                                     | CC                 | CC               | DRR                           | 101503572          | Unknown function             |
| SNP_52823_A_24494491 | NC_021166.1    | Ca_Kabuli_Chr07 | 24494491                | CC                                     | TT                 | TT               | DRR                           | 101503572          | Unknown function             |
| SNP_52824_A_24494498 | NC_021166.1    | Ca_Kabuli_Chr07 | 24494498                | AA                                     | CC                 | CC               | DRR                           | 101503572          | Unknown function             |
| SNP_52825_A_24494714 | NC_021166.1    | Ca_Kabuli_Chr07 | 24494714                | CC                                     | TT                 | TT               | DRR                           | 101503572          | Unknown function             |
| SNP_52826_A_24494715 | NC_021166.1    | Ca_Kabuli_Chr07 | 24494715                | TT                                     | CC                 | CC               | DRR                           | 101503572          | Unknown function             |
| SNP_52827_A_24494831 | NC_021166.1    | Ca_Kabuli_Chr07 | 24494831                | TT                                     | CC                 | CC               | DRR                           | 101503572          | Unknown function             |
| SNP_52829_A_24495121 | NC_021166.1    | Ca_Kabuli_Chr07 | 24495121                | AA                                     | CC                 | CC               | DRR                           | 101503572          | Unknown function             |
| SNP_52830_A_24495864 | NC_021166.1    | Ca_Kabuli_Chr07 | 24495864                | CC                                     | TT                 | TT               | INTRON                        | 101503572          | Unknown function             |
| SNP_52831_A_24496292 | NC_021166.1    | Ca_Kabuli_Chr07 | 24496292                | AA                                     | GG                 | GG               | INTRON                        | 101503572          | Unknown function             |
| SNP_52832_A_24496524 | NC_021166.1    | Ca_Kabuli_Chr07 | 24496524                | TT                                     | AA                 | AA               | INTRON                        | 101503572          | Unknown function             |
| SNP_52833_A_24496618 | NC_021166.1    | Ca_Kabuli_Chr07 | 24496618                | GG                                     | AA                 | AA               | INTRON                        | 101503572          | Unknown function             |

| SNPs IDs             | Chromosome IDs | Chromosomes     | Physical positions (bp) | CDC Frontier genome (Reference genome) | (Pusa 1103 & HPNB) | (ILWC 46 & LPNB) | Sequence Components of genome | Gene accession IDs | Putative functions                  |
|----------------------|----------------|-----------------|-------------------------|----------------------------------------|--------------------|------------------|-------------------------------|--------------------|-------------------------------------|
| SNP_52834_A_24496712 | NC_021166.1    | Ca_Kabuli_Chr07 | 24496712                | CC                                     | TT                 | TT               | INTRON                        | 101503572          | Unknown function                    |
| SNP_52835_A_24497096 | NC_021166.1    | Ca_Kabuli_Chr07 | 24497096                | CC                                     | TT                 | TT               | INTRON                        | 101503572          | Unknown function                    |
| SNP_52836_A_24501847 | NC_021166.1    | Ca_Kabuli_Chr07 | 24501847                | GG                                     | AA                 | AA               | INTERGENIC                    |                    |                                     |
| SNP_52837_A_24502190 | NC_021166.1    | Ca_Kabuli_Chr07 | 24502190                | CC                                     | TT                 | TT               | INTERGENIC                    |                    |                                     |
| SNP_52838_A_24502193 | NC_021166.1    | Ca_Kabuli_Chr07 | 24502193                | GG                                     | AA                 | AA               | INTERGENIC                    |                    |                                     |
| SNP_52839_A_24502298 | NC_021166.1    | Ca_Kabuli_Chr07 | 24502298                | CC                                     | AA                 | AA               | INTERGENIC                    |                    |                                     |
| SNP_52840_A_24503289 | NC_021166.1    | Ca_Kabuli_Chr07 | 24503289                | GG                                     | AA                 | AA               | INTERGENIC                    |                    |                                     |
| SNP_52841_A_24503296 | NC_021166.1    | Ca_Kabuli_Chr07 | 24503296                | CC                                     | TT                 | TT               | INTERGENIC                    |                    |                                     |
| SNP_52842_A_24503372 | NC_021166.1    | Ca_Kabuli_Chr07 | 24503372                | GG                                     | AA                 | AA               | INTERGENIC                    |                    |                                     |
| SNP_52843_A_24503945 | NC_021166.1    | Ca_Kabuli_Chr07 | 24503945                | TT                                     | CC                 | CC               | INTERGENIC                    |                    |                                     |
| SNP_52844_A_24504110 | NC_021166.1    | Ca_Kabuli_Chr07 | 24504110                | TT                                     | CC                 | CC               | INTERGENIC                    |                    |                                     |
| SNP_52845_A_24504212 | NC_021166.1    | Ca_Kabuli_Chr07 | 24504212                | GG                                     | CC                 | CC               | INTERGENIC                    |                    |                                     |
| SNP_52846_A_24504220 | NC_021166.1    | Ca_Kabuli_Chr07 | 24504220                | CC                                     | TT                 | TT               | INTERGENIC                    |                    |                                     |
| SNP_52847_A_24505226 | NC_021166.1    | Ca_Kabuli_Chr07 | 24505226                | TT                                     | CC                 | CC               | INTERGENIC                    |                    |                                     |
| SNP_52848_A_24525755 | NC_021166.1    | Ca_Kabuli_Chr07 | 24525755                | TT                                     | CC                 | CC               | INTERGENIC                    |                    |                                     |
| SNP_52849_A_24525956 | NC_021166.1    | Ca_Kabuli_Chr07 | 24525956                | CC                                     | TT                 | TT               | INTERGENIC                    |                    |                                     |
| SNP_52850_A_24526087 | NC_021166.1    | Ca_Kabuli_Chr07 | 24526087                | AA                                     | GG                 | GG               | INTERGENIC                    |                    |                                     |
| SNP_52852_A_24526145 | NC_021166.1    | Ca_Kabuli_Chr07 | 24526145                | AA                                     | GG                 | GG               | INTERGENIC                    |                    |                                     |
| SNP_52853_A_24534713 | NC_021166.1    | Ca_Kabuli_Chr07 | 24534713                | GG                                     | AA                 | AA               | URR                           | 101410563          | transfer RNA serine (anticodon AGA) |
| SNP_52854_A_24543270 | NC_021166.1    | Ca_Kabuli_Chr07 | 24543270                | TT                                     | AA                 | AA               | DRR                           | 101498996          | uncharacterized LOC101498996        |
| SNP_52855_A_24556525 | NC_021166.1    | Ca_Kabuli_Chr07 | 24556525                | AA                                     | TT                 | TT               | INTERGENIC                    |                    |                                     |
| SNP_52856_A_24556546 | NC_021166.1    | Ca_Kabuli_Chr07 | 24556546                | AA                                     | TT                 | TT               | INTERGENIC                    |                    |                                     |

| SNPs IDs             | Chromosome IDs | Chromosomes     | Physical positions (bp) | CDC Frontier genome (Reference genome) | (Pusa 1103 & HPNB) | (ILWC 46 & LPNB) | Sequence Components of genome | Gene accession IDs | Putative functions                                                      |
|----------------------|----------------|-----------------|-------------------------|----------------------------------------|--------------------|------------------|-------------------------------|--------------------|-------------------------------------------------------------------------|
| SNP_52857_A_24556593 | NC_021166.1    | Ca_Kabuli_Chr07 | 24556593                | GG                                     | AA                 | AA               | INTERGENIC                    |                    |                                                                         |
| SNP_52858_A_24601586 | NC_021166.1    | Ca_Kabuli_Chr07 | 24601586                | AA                                     | GG                 | GG               | URR                           | 101504866          | Unknown function                                                        |
| SNP_52859_A_24601910 | NC_021166.1    | Ca_Kabuli_Chr07 | 24601910                | AA                                     | GG                 | GG               | URR                           | 101504866          | Unknown function                                                        |
| SNP_52860_A_24601912 | NC_021166.1    | Ca_Kabuli_Chr07 | 24601912                | TT                                     | GG                 | GG               | URR                           | 101504866          | Unknown function                                                        |
| SNP_52861_A_24602193 | NC_021166.1    | Ca_Kabuli_Chr07 | 24602193                | AA                                     | CC                 | CC               | INTERGENIC                    |                    |                                                                         |
| SNP_52862_A_24607578 | NC_021166.1    | Ca_Kabuli_Chr07 | 24607578                | AA                                     | CC                 | CC               | INTERGENIC                    |                    |                                                                         |
| SNP_52863_A_24609798 | NC_021166.1    | Ca_Kabuli_Chr07 | 24609798                | CC                                     | TT                 | TT               | INTERGENIC                    |                    |                                                                         |
| SNP_52864_A_24627323 | NC_021166.1    | Ca_Kabuli_Chr07 | 24627323                | AA                                     | GG                 | GG               | INTERGENIC                    |                    |                                                                         |
| SNP_52865_A_24657819 | NC_021166.1    | Ca_Kabuli_Chr07 | 24657819                | AA                                     | GG                 | GG               | INTERGENIC                    |                    |                                                                         |
| SNP_52867_A_24691213 | NC_021166.1    | Ca_Kabuli_Chr07 | 24691213                | AA                                     | GG                 | GG               | INTRON                        | 101500278          | G-type lectin S-receptor-like serine/threonine-protein kinase At4g27290 |
| SNP_52868_A_24710120 | NC_021166.1    | Ca_Kabuli_Chr07 | 24710120                | GG                                     | TT                 | TT               | INTERGENIC                    |                    |                                                                         |
| SNP_52869_A_24710541 | NC_021166.1    | Ca_Kabuli_Chr07 | 24710541                | CC                                     | TT                 | TT               | INTERGENIC                    |                    |                                                                         |
| SNP_52870_A_24710585 | NC_021166.1    | Ca_Kabuli_Chr07 | 24710585                | AA                                     | GG                 | GG               | INTERGENIC                    |                    |                                                                         |
| SNP_52872_A_24750633 | NC_021166.1    | Ca_Kabuli_Chr07 | 24750633                | TT                                     | GG                 | GG               | URR                           | 101506143          | uncharacterized LOC101506143                                            |
| SNP_52873_A_24750635 | NC_021166.1    | Ca_Kabuli_Chr07 | 24750635                | TT                                     | CC                 | CC               | URR                           | 101506143          | uncharacterized LOC101506143                                            |
| SNP_52874_A_24750649 | NC_021166.1    | Ca_Kabuli_Chr07 | 24750649                | AA                                     | GG                 | GG               | URR                           | 101506143          | uncharacterized LOC101506143                                            |
| SNP_52875_A_24751381 | NC_021166.1    | Ca_Kabuli_Chr07 | 24751381                | TT                                     | CC                 | CC               | URR                           | 101506143          | uncharacterized LOC101506143                                            |
| SNP_52876_A_24774594 | NC_021166.1    | Ca_Kabuli_Chr07 | 24774594                | AA                                     | TT                 | TT               | INTERGENIC                    |                    |                                                                         |
| SNP_52877_A_24775282 | NC_021166.1    | Ca_Kabuli_Chr07 | 24775282                | GG                                     | TT                 | TT               | DRR                           | 101501436          | calcium-binding protein PBP1-like                                       |
| SNP_52878_A_24775283 | NC_021166.1    | Ca_Kabuli_Chr07 | 24775283                | AA                                     | TT                 | TT               | DRR                           | 101501436          | calcium-binding protein PBP1-like                                       |
| SNP_52879_A_24800507 | NC_021166.1    | Ca_Kabuli_Chr07 | 24800507                | TT                                     | AA                 | AA               | INTERGENIC                    |                    |                                                                         |
| SNP_52880_A_24850925 | NC_021166.1    | Ca_Kabuli_Chr07 | 24850925                | AA                                     | GG                 | GG               | INTERGENIC                    |                    |                                                                         |

| SNPs IDs             | Chromosome IDs | Chromosomes     | Physical positions (bp) | CDC Frontier genome (Reference genome) | (Pusa 1103 & HPNB) | (ILWC 46 & LPNB) | Sequence genome | Components of | Gene accession IDs | Putative functions |
|----------------------|----------------|-----------------|-------------------------|----------------------------------------|--------------------|------------------|-----------------|---------------|--------------------|--------------------|
| SNP_52881_A_24851322 | NC_021166.1    | Ca_Kabuli_Chr07 | 24851322                | TT                                     | CC                 | CC               | INTERGENIC      |               |                    |                    |
| SNP_52882_A_24856523 | NC_021166.1    | Ca_Kabuli_Chr07 | 24856523                | CC                                     | GG                 | GG               | INTERGENIC      |               |                    |                    |
| SNP_52883_A_24856530 | NC_021166.1    | Ca_Kabuli_Chr07 | 24856530                | TT                                     | GG                 | GG               | INTERGENIC      |               |                    |                    |
| SNP_52884_A_24856545 | NC_021166.1    | Ca_Kabuli_Chr07 | 24856545                | CC                                     | AA                 | AA               | INTERGENIC      |               |                    |                    |
| SNP_52885_A_24856896 | NC_021166.1    | Ca_Kabuli_Chr07 | 24856896                | AA                                     | GG                 | GG               | INTERGENIC      |               |                    |                    |
| SNP_52886_A_24856931 | NC_021166.1    | Ca_Kabuli_Chr07 | 24856931                | TT                                     | GG                 | GG               | INTERGENIC      |               |                    |                    |
| SNP_52887_A_24856932 | NC_021166.1    | Ca_Kabuli_Chr07 | 24856932                | CC                                     | AA                 | AA               | INTERGENIC      |               |                    |                    |
| SNP_52888_A_24863170 | NC_021166.1    | Ca_Kabuli_Chr07 | 24863170                | CC                                     | TT                 | TT               | INTERGENIC      |               |                    |                    |
| SNP_52889_A_24870102 | NC_021166.1    | Ca_Kabuli_Chr07 | 24870102                | AA                                     | GG                 | GG               | INTERGENIC      |               |                    |                    |
| SNP_52890_A_24870138 | NC_021166.1    | Ca_Kabuli_Chr07 | 24870138                | CC                                     | TT                 | TT               | INTERGENIC      |               |                    |                    |
| SNP_52892_A_24924913 | NC_021166.1    | Ca_Kabuli_Chr07 | 24924913                | AA                                     | CC                 | CC               | INTERGENIC      |               |                    |                    |
| SNP_52893_A_24924915 | NC_021166.1    | Ca_Kabuli_Chr07 | 24924915                | CC                                     | AA                 | AA               | INTERGENIC      |               |                    |                    |
| SNP_52894_A_24949904 | NC_021166.1    | Ca_Kabuli_Chr07 | 24949904                | AA                                     | GG                 | GG               | INTERGENIC      |               |                    |                    |
| SNP_52895_A_24992269 | NC_021166.1    | Ca_Kabuli_Chr07 | 24992269                | AA                                     | GG                 | GG               | INTERGENIC      |               |                    |                    |
| SNP_52896_A_24992277 | NC_021166.1    | Ca_Kabuli_Chr07 | 24992277                | AA                                     | GG                 | GG               | INTERGENIC      |               |                    |                    |
| SNP_52897_A_24992306 | NC_021166.1    | Ca_Kabuli_Chr07 | 24992306                | TT                                     | AA                 | AA               | INTERGENIC      |               |                    |                    |
| SNP_52898_A_24998748 | NC_021166.1    | Ca_Kabuli_Chr07 | 24998748                | GG                                     | AA                 | AA               | INTERGENIC      |               |                    |                    |
| SNP_52899_A_25030467 | NC_021166.1    | Ca_Kabuli_Chr07 | 25030467                | GG                                     | CC                 | CC               | INTERGENIC      |               |                    |                    |
| SNP_52900_A_25030545 | NC_021166.1    | Ca_Kabuli_Chr07 | 25030545                | CC                                     | TT                 | TT               | INTERGENIC      |               |                    |                    |
| SNP_52901_A_25030701 | NC_021166.1    | Ca_Kabuli_Chr07 | 25030701                | GG                                     | AA                 | AA               | INTERGENIC      |               |                    |                    |
| SNP_52902_A_25030818 | NC_021166.1    | Ca_Kabuli_Chr07 | 25030818                | TT                                     | GG                 | GG               | INTERGENIC      |               |                    |                    |
| SNP_52903_A_25031000 | NC_021166.1    | Ca_Kabuli_Chr07 | 25031000                | AA                                     | GG                 | GG               | INTERGENIC      |               |                    |                    |

| SNPs IDs             | Chromosome IDs | Chromosomes     | Physical positions (bp) | CDC Frontier genome (Reference genome) | (Pusa 1103 & HPNB) | (ILWC 46 & LPNB) | Sequence Components of genome | Gene accession IDs | Putative functions           |
|----------------------|----------------|-----------------|-------------------------|----------------------------------------|--------------------|------------------|-------------------------------|--------------------|------------------------------|
| SNP_52904_A_25031257 | NC_021166.1    | Ca_Kabuli_Chr07 | 25031257                | AA                                     | TT                 | TT               | INTERGENIC                    |                    |                              |
| SNP_52905_A_25031269 | NC_021166.1    | Ca_Kabuli_Chr07 | 25031269                | AA                                     | CC                 | CC               | INTERGENIC                    |                    |                              |
| SNP_52906_A_25031752 | NC_021166.1    | Ca_Kabuli_Chr07 | 25031752                | AA                                     | GG                 | GG               | INTERGENIC                    |                    |                              |
| SNP_52907_A_25057263 | NC_021166.1    | Ca_Kabuli_Chr07 | 25057263                | TT                                     | GG                 | GG               | INTERGENIC                    |                    |                              |
| SNP_52908_A_25069497 | NC_021166.1    | Ca_Kabuli_Chr07 | 25069497                | TT                                     | AA                 | AA               | INTRON                        | 101510858          | uncharacterized LOC101510858 |
| SNP_52909_A_25105060 | NC_021166.1    | Ca_Kabuli_Chr07 | 25105060                | AA                                     | GG                 | GG               | INTERGENIC                    |                    |                              |
| SNP_52910_A_25111088 | NC_021166.1    | Ca_Kabuli_Chr07 | 25111088                | GG                                     | AA                 | AA               | INTERGENIC                    |                    |                              |
| SNP_52912_A_25113354 | NC_021166.1    | Ca_Kabuli_Chr07 | 25113354                | CC                                     | AA                 | AA               | INTERGENIC                    |                    |                              |
| SNP_52913_A_25118828 | NC_021166.1    | Ca_Kabuli_Chr07 | 25118828                | TT                                     | CC                 | CC               | INTERGENIC                    |                    |                              |
| SNP_52914_A_25118841 | NC_021166.1    | Ca_Kabuli_Chr07 | 25118841                | TT                                     | CC                 | CC               | INTERGENIC                    |                    |                              |
| SNP_52915_A_25118861 | NC_021166.1    | Ca_Kabuli_Chr07 | 25118861                | AA                                     | GG                 | GG               | INTERGENIC                    |                    |                              |
| SNP_52916_A_25128350 | NC_021166.1    | Ca_Kabuli_Chr07 | 25128350                | TT                                     | GG                 | GG               | INTERGENIC                    |                    |                              |
| SNP_52917_A_25144616 | NC_021166.1    | Ca_Kabuli_Chr07 | 25144616                | TT                                     | CC                 | CC               | NON_SYNONYMOUS_CODING         | 101511496          | uncharacterized LOC101511496 |
| SNP_52918_A_25144620 | NC_021166.1    | Ca_Kabuli_Chr07 | 25144620                | TT                                     | CC                 | CC               | NON_SYNONYMOUS_CODING         | 101511496          | uncharacterized LOC101511496 |
| SNP_52919_A_25151338 | NC_021166.1    | Ca_Kabuli_Chr07 | 25151338                | TT                                     | AA                 | AA               | INTRON                        | 101511496          | uncharacterized LOC101511496 |
| SNP_52920_A_25151347 | NC_021166.1    | Ca_Kabuli_Chr07 | 25151347                | GG                                     | AA                 | AA               | INTRON                        | 101511496          | uncharacterized LOC101511496 |
| SNP_52921_A_25159783 | NC_021166.1    | Ca_Kabuli_Chr07 | 25159783                | AA                                     | CC                 | CC               | INTERGENIC                    |                    |                              |
| SNP_52922_A_25206093 | NC_021166.1    | Ca_Kabuli_Chr07 | 25206093                | AA                                     | GG                 | GG               | DRR                           | 101511824          | uncharacterized LOC101511824 |
| SNP_52923_A_25206440 | NC_021166.1    | Ca_Kabuli_Chr07 | 25206440                | AA                                     | GG                 | GG               | DRR                           | 101511824          | uncharacterized LOC101511824 |
| SNP_52924_A_25206666 | NC_021166.1    | Ca_Kabuli_Chr07 | 25206666                | TT                                     | CC                 | CC               | SYNONYMOUS_CODING             | 101511824          | uncharacterized LOC101511824 |
| SNP_52925_A_25219173 | NC_021166.1    | Ca_Kabuli_Chr07 | 25219173                | AA                                     | GG                 | GG               | INTERGENIC                    |                    |                              |
| SNP_52926_A_25219455 | NC_021166.1    | Ca_Kabuli_Chr07 | 25219455                | GG                                     | AA                 | AA               | INTERGENIC                    |                    |                              |

| SNPs IDs             | Chromosome IDs | Chromosomes     | Physical positions (bp) | CDC Frontier genome (Reference genome) | (Pusa 1103 & HPNB) | (ILWC 46 & LPNB) | Sequence genome   | Components of | Gene accession IDs                          | Putative functions |
|----------------------|----------------|-----------------|-------------------------|----------------------------------------|--------------------|------------------|-------------------|---------------|---------------------------------------------|--------------------|
| SNP_52927_A_25225797 | NC_021166.1    | Ca_Kabuli_Chr07 | 25225797                | TT                                     | CC                 | CC               | INTERGENIC        |               |                                             |                    |
| SNP_52929_A_25259290 | NC_021166.1    | Ca_Kabuli_Chr07 | 25259290                | AA                                     | TT                 | TT               | INTERGENIC        |               |                                             |                    |
| SNP_52930_A_25277896 | NC_021166.1    | Ca_Kabuli_Chr07 | 25277896                | TT                                     | CC                 | CC               | INTERGENIC        |               |                                             |                    |
| SNP_52931_A_25278074 | NC_021166.1    | Ca_Kabuli_Chr07 | 25278074                | TT                                     | CC                 | CC               | INTERGENIC        |               |                                             |                    |
| SNP_52932_A_25278182 | NC_021166.1    | Ca_Kabuli_Chr07 | 25278182                | TT                                     | GG                 | GG               | INTERGENIC        |               |                                             |                    |
| SNP_52933_A_25278207 | NC_021166.1    | Ca_Kabuli_Chr07 | 25278207                | GG                                     | TT                 | TT               | INTERGENIC        |               |                                             |                    |
| SNP_52934_A_25278216 | NC_021166.1    | Ca_Kabuli_Chr07 | 25278216                | CC                                     | AA                 | AA               | INTERGENIC        |               |                                             |                    |
| SNP_52935_A_25278437 | NC_021166.1    | Ca_Kabuli_Chr07 | 25278437                | AA                                     | GG                 | GG               | INTERGENIC        |               |                                             |                    |
| SNP_52936_A_25278440 | NC_021166.1    | Ca_Kabuli_Chr07 | 25278440                | TT                                     | AA                 | AA               | INTERGENIC        |               |                                             |                    |
| SNP_52937_A_25278446 | NC_021166.1    | Ca_Kabuli_Chr07 | 25278446                | TT                                     | GG                 | GG               | INTERGENIC        |               |                                             |                    |
| SNP_52938_A_25278492 | NC_021166.1    | Ca_Kabuli_Chr07 | 25278492                | CC                                     | AA                 | AA               | INTERGENIC        |               |                                             |                    |
| SNP_52939_A_25278517 | NC_021166.1    | Ca_Kabuli_Chr07 | 25278517                | CC                                     | TT                 | TT               | INTERGENIC        |               |                                             |                    |
| SNP_52940_A_25278567 | NC_021166.1    | Ca_Kabuli_Chr07 | 25278567                | CC                                     | TT                 | TT               | INTERGENIC        |               |                                             |                    |
| SNP_52941_A_25278668 | NC_021166.1    | Ca_Kabuli_Chr07 | 25278668                | TT                                     | AA                 | AA               | INTERGENIC        |               |                                             |                    |
| SNP_52942_A_25278914 | NC_021166.1    | Ca_Kabuli_Chr07 | 25278914                | AA                                     | CC                 | CC               | INTERGENIC        |               |                                             |                    |
| SNP_52943_A_25278915 | NC_021166.1    | Ca_Kabuli_Chr07 | 25278915                | AA                                     | GG                 | GG               | INTERGENIC        |               |                                             |                    |
| SNP_52944_A_25278918 | NC_021166.1    | Ca_Kabuli_Chr07 | 25278918                | TT                                     | AA                 | AA               | INTERGENIC        |               |                                             |                    |
| SNP_52945_A_25278951 | NC_021166.1    | Ca_Kabuli_Chr07 | 25278951                | AA                                     | TT                 | TT               | INTERGENIC        |               |                                             |                    |
| SNP_52946_A_25295783 | NC_021166.1    | Ca_Kabuli_Chr07 | 25295783                | AA                                     | GG                 | GG               | INTERGENIC        |               |                                             |                    |
| SNP_52947_A_25305399 | NC_021166.1    | Ca_Kabuli_Chr07 | 25305399                | AA                                     | CC                 | CC               | INTERGENIC        |               |                                             |                    |
| SNP_52948_A_25328594 | NC_021166.1    | Ca_Kabuli_Chr07 | 25328594                | GG                                     | AA                 | AA               | SYNONYMOUS_CODING | 101514732     | B3 domain-containing protein At3g25182-like |                    |
| SNP_52949_A_25346088 | NC_021166.1    | Ca_Kabuli_Chr07 | 25346088                | GG                                     | TT                 | TT               | INTERGENIC        |               |                                             |                    |

| SNPs IDs             | Chromosome IDs | Chromosomes     | Physical positions (bp) | CDC Frontier genome (Reference genome) | (Pusa 1103 & HPNB) | (ILWC 46 & LPNB) | Sequence genome | Components of | Gene accession IDs              | Putative functions |
|----------------------|----------------|-----------------|-------------------------|----------------------------------------|--------------------|------------------|-----------------|---------------|---------------------------------|--------------------|
| SNP_52950_A_25398479 | NC_021166.1    | Ca_Kabuli_Chr07 | 25398479                | CC                                     | GG                 | GG               | INTERGENIC      |               |                                 |                    |
| SNP_52951_A_25403097 | NC_021166.1    | Ca_Kabuli_Chr07 | 25403097                | TT                                     | CC                 | CC               | INTERGENIC      |               |                                 |                    |
| SNP_52952_A_25418271 | NC_021166.1    | Ca_Kabuli_Chr07 | 25418271                | AA                                     | GG                 | GG               | INTERGENIC      |               |                                 |                    |
| SNP_52953_A_25424008 | NC_021166.1    | Ca_Kabuli_Chr07 | 25424008                | TT                                     | CC                 | CC               | INTERGENIC      |               |                                 |                    |
| SNP_52954_A_25438058 | NC_021166.1    | Ca_Kabuli_Chr07 | 25438058                | GG                                     | AA                 | AA               | INTERGENIC      |               |                                 |                    |
| SNP_52955_A_25438352 | NC_021166.1    | Ca_Kabuli_Chr07 | 25438352                | GG                                     | AA                 | AA               | INTERGENIC      |               |                                 |                    |
| SNP_52956_A_25467303 | NC_021166.1    | Ca_Kabuli_Chr07 | 25467303                | AA                                     | CC                 | CC               | INTERGENIC      |               |                                 |                    |
| SNP_52957_A_25504850 | NC_021166.1    | Ca_Kabuli_Chr07 | 25504850                | TT                                     | GG                 | GG               | INTERGENIC      |               |                                 |                    |
| SNP_52958_A_25509175 | NC_021166.1    | Ca_Kabuli_Chr07 | 25509175                | TT                                     | CC                 | CC               | INTERGENIC      |               |                                 |                    |
| SNP_52959_A_25509802 | NC_021166.1    | Ca_Kabuli_Chr07 | 25509802                | AA                                     | CC                 | CC               | INTERGENIC      |               |                                 |                    |
| SNP_52960_A_25511590 | NC_021166.1    | Ca_Kabuli_Chr07 | 25511590                | AA                                     | GG                 | GG               | INTERGENIC      |               |                                 |                    |
| SNP_52961_A_25539595 | NC_021166.1    | Ca_Kabuli_Chr07 | 25539595                | GG                                     | TT                 | TT               | INTERGENIC      |               |                                 |                    |
| SNP_52962_A_25563179 | NC_021166.1    | Ca_Kabuli_Chr07 | 25563179                | GG                                     | AA                 | AA               | INTERGENIC      |               |                                 |                    |
| SNP_52963_A_25570144 | NC_021166.1    | Ca_Kabuli_Chr07 | 25570144                | CC                                     | TT                 | TT               | INTRON          | 101509353     | protein strawberry notch-like   |                    |
| SNP_52965_A_25617939 | NC_021166.1    | Ca_Kabuli_Chr07 | 25617939                | TT                                     | CC                 | CC               | INTERGENIC      |               |                                 |                    |
| SNP_52967_A_25626902 | NC_021166.1    | Ca_Kabuli_Chr07 | 25626902                | AA                                     | GG                 | GG               | INTERGENIC      |               |                                 |                    |
| SNP_52968_A_25640454 | NC_021166.1    | Ca_Kabuli_Chr07 | 25640454                | GG                                     | CC                 | CC               | INTRON          | 101490344     | Unknown function                |                    |
| SNP_52969_A_25640463 | NC_021166.1    | Ca_Kabuli_Chr07 | 25640463                | AA                                     | TT                 | TT               | INTRON          | 101490344     | Unknown function                |                    |
| SNP_52970_A_25665843 | NC_021166.1    | Ca_Kabuli_Chr07 | 25665843                | GG                                     | AA                 | AA               | INTRON          | 101488818     | WD repeat-containing protein 25 |                    |
| SNP_52971_A_25682363 | NC_021166.1    | Ca_Kabuli_Chr07 | 25682363                | CC                                     | TT                 | TT               | INTERGENIC      |               |                                 |                    |
| SNP_52972_A_25692450 | NC_021166.1    | Ca_Kabuli_Chr07 | 25692450                | GG                                     | AA                 | AA               | INTERGENIC      |               |                                 |                    |
| SNP_52973_A_25692452 | NC_021166.1    | Ca_Kabuli_Chr07 | 25692452                | TT                                     | CC                 | CC               | INTERGENIC      |               |                                 |                    |



| SNPs IDs             | Chromosome IDs | Chromosomes     | Physical positions (bp) | CDC Frontier genome (Reference genome) | (Pusa 1103 & HPNB) | (ILWC 46 & LPNB) | Sequence genome | Components of | Gene accession IDs | Putative functions |
|----------------------|----------------|-----------------|-------------------------|----------------------------------------|--------------------|------------------|-----------------|---------------|--------------------|--------------------|
| SNP_52974_A_25696693 | NC_021166.1    | Ca_Kabuli_Chr07 | 25696693                | CC                                     | AA                 | AA               | INTERGENIC      |               |                    |                    |
| SNP_52975_A_25706911 | NC_021166.1    | Ca_Kabuli_Chr07 | 25706911                | GG                                     | AA                 | AA               | INTERGENIC      |               |                    |                    |
| SNP_52976_A_25725323 | NC_021166.1    | Ca_Kabuli_Chr07 | 25725323                | AA                                     | GG                 | GG               | INTERGENIC      |               |                    |                    |
| SNP_52977_A_25732023 | NC_021166.1    | Ca_Kabuli_Chr07 | 25732023                | CC                                     | TT                 | TT               | INTERGENIC      |               |                    |                    |
| SNP_52978_A_25752130 | NC_021166.1    | Ca_Kabuli_Chr07 | 25752130                | CC                                     | AA                 | AA               | INTERGENIC      |               |                    |                    |
| SNP_52979_A_25774828 | NC_021166.1    | Ca_Kabuli_Chr07 | 25774828                | TT                                     | CC                 | CC               | INTERGENIC      |               |                    |                    |
| SNP_52980_A_25790446 | NC_021166.1    | Ca_Kabuli_Chr07 | 25790446                | GG                                     | AA                 | AA               | INTERGENIC      |               |                    |                    |
| SNP_52981_A_25816103 | NC_021166.1    | Ca_Kabuli_Chr07 | 25816103                | TT                                     | CC                 | CC               | INTERGENIC      |               |                    |                    |
| SNP_52982_A_25816172 | NC_021166.1    | Ca_Kabuli_Chr07 | 25816172                | CC                                     | TT                 | TT               | INTERGENIC      |               |                    |                    |
| SNP_52983_A_25833163 | NC_021166.1    | Ca_Kabuli_Chr07 | 25833163                | TT                                     | CC                 | CC               | INTERGENIC      |               |                    |                    |
| SNP_52984_A_25833182 | NC_021166.1    | Ca_Kabuli_Chr07 | 25833182                | TT                                     | CC                 | CC               | INTERGENIC      |               |                    |                    |
| SNP_52985_A_25833204 | NC_021166.1    | Ca_Kabuli_Chr07 | 25833204                | GG                                     | TT                 | TT               | INTERGENIC      |               |                    |                    |
| SNP_52986_A_25833222 | NC_021166.1    | Ca_Kabuli_Chr07 | 25833222                | TT                                     | CC                 | CC               | INTERGENIC      |               |                    |                    |
| SNP_52987_A_25833389 | NC_021166.1    | Ca_Kabuli_Chr07 | 25833389                | CC                                     | TT                 | TT               | INTERGENIC      |               |                    |                    |
| SNP_52988_A_25833393 | NC_021166.1    | Ca_Kabuli_Chr07 | 25833393                | CC                                     | AA                 | AA               | INTERGENIC      |               |                    |                    |
| SNP_52989_A_25833789 | NC_021166.1    | Ca_Kabuli_Chr07 | 25833789                | TT                                     | GG                 | GG               | INTERGENIC      |               |                    |                    |
| SNP_52991_A_25834027 | NC_021166.1    | Ca_Kabuli_Chr07 | 25834027                | GG                                     | AA                 | AA               | INTERGENIC      |               |                    |                    |
| SNP_52992_A_25834090 | NC_021166.1    | Ca_Kabuli_Chr07 | 25834090                | GG                                     | AA                 | AA               | INTERGENIC      |               |                    |                    |
| SNP_52993_A_25834199 | NC_021166.1    | Ca_Kabuli_Chr07 | 25834199                | CC                                     | TT                 | TT               | INTERGENIC      |               |                    |                    |
| SNP_52994_A_25862052 | NC_021166.1    | Ca_Kabuli_Chr07 | 25862052                | GG                                     | AA                 | AA               | INTERGENIC      |               |                    |                    |
| SNP_52995_A_25862117 | NC_021166.1    | Ca_Kabuli_Chr07 | 25862117                | TT                                     | CC                 | CC               | INTERGENIC      |               |                    |                    |
| SNP_52996_A_25862216 | NC_021166.1    | Ca_Kabuli_Chr07 | 25862216                | AA                                     | TT                 | TT               | INTERGENIC      |               |                    |                    |

| SNPs IDs             | Chromosome IDs | Chromosomes     | Physical positions (bp) | CDC Frontier genome (Reference genome) | (Pusa 1103 & HPNB) | (ILWC 46 & LPNB) | Sequence genome | Components of | Gene accession IDs | Putative functions |
|----------------------|----------------|-----------------|-------------------------|----------------------------------------|--------------------|------------------|-----------------|---------------|--------------------|--------------------|
| SNP_52997_A_25862312 | NC_021166.1    | Ca_Kabuli_Chr07 | 25862312                | TT                                     | AA                 | AA               | INTERGENIC      |               |                    |                    |
| SNP_52998_A_25862496 | NC_021166.1    | Ca_Kabuli_Chr07 | 25862496                | AA                                     | TT                 | TT               | INTERGENIC      |               |                    |                    |
| SNP_52999_A_25862531 | NC_021166.1    | Ca_Kabuli_Chr07 | 25862531                | AA                                     | GG                 | GG               | INTERGENIC      |               |                    |                    |
| SNP_53000_A_25862534 | NC_021166.1    | Ca_Kabuli_Chr07 | 25862534                | CC                                     | GG                 | GG               | INTERGENIC      |               |                    |                    |
| SNP_53001_A_25862577 | NC_021166.1    | Ca_Kabuli_Chr07 | 25862577                | TT                                     | GG                 | GG               | INTERGENIC      |               |                    |                    |
| SNP_53003_A_25863321 | NC_021166.1    | Ca_Kabuli_Chr07 | 25863321                | CC                                     | TT                 | TT               | INTERGENIC      |               |                    |                    |
| SNP_53004_A_25867556 | NC_021166.1    | Ca_Kabuli_Chr07 | 25867556                | CC                                     | TT                 | TT               | INTERGENIC      |               |                    |                    |
| SNP_53005_A_25871997 | NC_021166.1    | Ca_Kabuli_Chr07 | 25871997                | AA                                     | TT                 | TT               | INTERGENIC      |               |                    |                    |
| SNP_53006_A_25872279 | NC_021166.1    | Ca_Kabuli_Chr07 | 25872279                | GG                                     | AA                 | AA               | INTERGENIC      |               |                    |                    |
| SNP_53007_A_25899884 | NC_021166.1    | Ca_Kabuli_Chr07 | 25899884                | TT                                     | CC                 | CC               | INTERGENIC      |               |                    |                    |
| SNP_53008_A_25899922 | NC_021166.1    | Ca_Kabuli_Chr07 | 25899922                | AA                                     | CC                 | CC               | INTERGENIC      |               |                    |                    |
| SNP_53009_A_25899937 | NC_021166.1    | Ca_Kabuli_Chr07 | 25899937                | CC                                     | AA                 | AA               | INTERGENIC      |               |                    |                    |
| SNP_53010_A_25899980 | NC_021166.1    | Ca_Kabuli_Chr07 | 25899980                | CC                                     | TT                 | TT               | INTERGENIC      |               |                    |                    |
| SNP_53011_A_25911418 | NC_021166.1    | Ca_Kabuli_Chr07 | 25911418                | TT                                     | CC                 | CC               | INTERGENIC      |               |                    |                    |
| SNP_53012_A_25932432 | NC_021166.1    | Ca_Kabuli_Chr07 | 25932432                | CC                                     | TT                 | TT               | INTERGENIC      |               |                    |                    |
| SNP_53013_A_25934160 | NC_021166.1    | Ca_Kabuli_Chr07 | 25934160                | AA                                     | GG                 | GG               | INTERGENIC      |               |                    |                    |
| SNP_53014_A_25990379 | NC_021166.1    | Ca_Kabuli_Chr07 | 25990379                | TT                                     | CC                 | CC               | INTERGENIC      |               |                    |                    |
| SNP_53015_A_25990551 | NC_021166.1    | Ca_Kabuli_Chr07 | 25990551                | AA                                     | TT                 | TT               | INTERGENIC      |               |                    |                    |
| SNP_53017_A_26001890 | NC_021166.1    | Ca_Kabuli_Chr07 | 26001890                | CC                                     | GG                 | GG               | INTERGENIC      |               |                    |                    |
| SNP_53018_A_26001925 | NC_021166.1    | Ca_Kabuli_Chr07 | 26001925                | TT                                     | AA                 | AA               | INTERGENIC      |               |                    |                    |
| SNP_53019_A_26002012 | NC_021166.1    | Ca_Kabuli_Chr07 | 26002012                | CC                                     | GG                 | GG               | INTERGENIC      |               |                    |                    |
| SNP_53020_A_26011616 | NC_021166.1    | Ca_Kabuli_Chr07 | 26011616                | TT                                     | CC                 | CC               | INTERGENIC      |               |                    |                    |

| SNPs IDs             | Chromosome IDs | Chromosomes     | Physical positions (bp) | CDC Frontier genome (Reference genome) | (Pusa 1103 & HPNB) | (ILWC 46 & LPNB) | Sequence Components of genome | Gene accession IDs | Putative functions |
|----------------------|----------------|-----------------|-------------------------|----------------------------------------|--------------------|------------------|-------------------------------|--------------------|--------------------|
| SNP_53024_A_26128593 | NC_021166.1    | Ca_Kabuli_Chr07 | 26128593                | AA                                     | GG                 | GG               | INTERGENIC                    |                    |                    |
| SNP_53025_A_26154452 | NC_021166.1    | Ca_Kabuli_Chr07 | 26154452                | AA                                     | GG                 | GG               | URR                           | 101493262          | myosin-2-like      |
| SNP_53026_A_26155225 | NC_021166.1    | Ca_Kabuli_Chr07 | 26155225                | CC                                     | TT                 | TT               | INTERGENIC                    |                    |                    |
| SNP_53027_A_26155226 | NC_021166.1    | Ca_Kabuli_Chr07 | 26155226                | CC                                     | AA                 | AA               | INTERGENIC                    |                    |                    |
| SNP_53029_A_26160170 | NC_021166.1    | Ca_Kabuli_Chr07 | 26160170                | CC                                     | GG                 | GG               | INTERGENIC                    |                    |                    |
| SNP_53031_A_26160203 | NC_021166.1    | Ca_Kabuli_Chr07 | 26160203                | CC                                     | GG                 | GG               | INTERGENIC                    |                    |                    |
| SNP_53032_A_26160479 | NC_021166.1    | Ca_Kabuli_Chr07 | 26160479                | CC                                     | TT                 | TT               | INTERGENIC                    |                    |                    |
| SNP_53033_A_26160486 | NC_021166.1    | Ca_Kabuli_Chr07 | 26160486                | AA                                     | GG                 | GG               | INTERGENIC                    |                    |                    |
| SNP_53034_A_26160491 | NC_021166.1    | Ca_Kabuli_Chr07 | 26160491                | CC                                     | TT                 | TT               | INTERGENIC                    |                    |                    |
| SNP_53035_A_26160508 | NC_021166.1    | Ca_Kabuli_Chr07 | 26160508                | AA                                     | GG                 | GG               | INTERGENIC                    |                    |                    |
| SNP_53036_A_26160524 | NC_021166.1    | Ca_Kabuli_Chr07 | 26160524                | AA                                     | GG                 | GG               | INTERGENIC                    |                    |                    |
| SNP_53037_A_26160579 | NC_021166.1    | Ca_Kabuli_Chr07 | 26160579                | TT                                     | AA                 | AA               | INTERGENIC                    |                    |                    |
| SNP_53038_A_26162109 | NC_021166.1    | Ca_Kabuli_Chr07 | 26162109                | GG                                     | CC                 | CC               | INTERGENIC                    |                    |                    |
| SNP_53039_A_26168246 | NC_021166.1    | Ca_Kabuli_Chr07 | 26168246                | AA                                     | GG                 | GG               | INTRON                        | 101493583          | Unknown function   |
| SNP_53040_A_26168509 | NC_021166.1    | Ca_Kabuli_Chr07 | 26168509                | AA                                     | GG                 | GG               | NON_SYNONYMOUS_CODING         | 101493583          | Unknown function   |
| SNP_53041_A_26171161 | NC_021166.1    | Ca_Kabuli_Chr07 | 26171161                | CC                                     | TT                 | TT               | INTERGENIC                    |                    |                    |
| SNP_53042_A_26171215 | NC_021166.1    | Ca_Kabuli_Chr07 | 26171215                | GG                                     | TT                 | TT               | INTERGENIC                    |                    |                    |
| SNP_53043_A_26171439 | NC_021166.1    | Ca_Kabuli_Chr07 | 26171439                | CC                                     | GG                 | GG               | INTERGENIC                    |                    |                    |
| SNP_53044_A_26171594 | NC_021166.1    | Ca_Kabuli_Chr07 | 26171594                | AA                                     | CC                 | CC               | INTERGENIC                    |                    |                    |
| SNP_53045_A_26171676 | NC_021166.1    | Ca_Kabuli_Chr07 | 26171676                | TT                                     | AA                 | AA               | INTERGENIC                    |                    |                    |
| SNP_53046_A_26172006 | NC_021166.1    | Ca_Kabuli_Chr07 | 26172006                | AA                                     | GG                 | GG               | INTERGENIC                    |                    |                    |
| SNP_53047_A_26176884 | NC_021166.1    | Ca_Kabuli_Chr07 | 26176884                | TT                                     | GG                 | GG               | INTERGENIC                    |                    |                    |

| SNPs IDs             | Chromosome IDs | Chromosomes     | Physical positions (bp) | CDC Frontier genome (Reference genome) | (Pusa 1103 & HPNB) | (ILWC 46 & LPNB) | Sequence genome | Components of | Gene accession IDs | Putative functions |
|----------------------|----------------|-----------------|-------------------------|----------------------------------------|--------------------|------------------|-----------------|---------------|--------------------|--------------------|
| SNP_53048_A_26176902 | NC_021166.1    | Ca_Kabuli_Chr07 | 26176902                | AA                                     | CC                 | CC               | INTERGENIC      |               |                    |                    |
| SNP_53049_A_26176960 | NC_021166.1    | Ca_Kabuli_Chr07 | 26176960                | CC                                     | TT                 | TT               | INTERGENIC      |               |                    |                    |
| SNP_53050_A_26176961 | NC_021166.1    | Ca_Kabuli_Chr07 | 26176961                | TT                                     | AA                 | AA               | INTERGENIC      |               |                    |                    |
| SNP_53051_A_26177198 | NC_021166.1    | Ca_Kabuli_Chr07 | 26177198                | TT                                     | CC                 | CC               | INTERGENIC      |               |                    |                    |
| SNP_53052_A_26177359 | NC_021166.1    | Ca_Kabuli_Chr07 | 26177359                | TT                                     | CC                 | CC               | INTERGENIC      |               |                    |                    |
| SNP_53053_A_26177410 | NC_021166.1    | Ca_Kabuli_Chr07 | 26177410                | GG                                     | TT                 | TT               | INTERGENIC      |               |                    |                    |
| SNP_53054_A_26177478 | NC_021166.1    | Ca_Kabuli_Chr07 | 26177478                | CC                                     | TT                 | TT               | INTERGENIC      |               |                    |                    |
| SNP_53055_A_26177549 | NC_021166.1    | Ca_Kabuli_Chr07 | 26177549                | TT                                     | CC                 | CC               | INTERGENIC      |               |                    |                    |
| SNP_53056_A_26177802 | NC_021166.1    | Ca_Kabuli_Chr07 | 26177802                | AA                                     | GG                 | GG               | INTERGENIC      |               |                    |                    |
| SNP_53057_A_26177835 | NC_021166.1    | Ca_Kabuli_Chr07 | 26177835                | GG                                     | TT                 | TT               | INTERGENIC      |               |                    |                    |
| SNP_53058_A_26177841 | NC_021166.1    | Ca_Kabuli_Chr07 | 26177841                | GG                                     | AA                 | AA               | INTERGENIC      |               |                    |                    |
| SNP_53059_A_26177894 | NC_021166.1    | Ca_Kabuli_Chr07 | 26177894                | GG                                     | AA                 | AA               | INTERGENIC      |               |                    |                    |
| SNP_53060_A_26177896 | NC_021166.1    | Ca_Kabuli_Chr07 | 26177896                | AA                                     | GG                 | GG               | INTERGENIC      |               |                    |                    |
| SNP_53062_A_26191020 | NC_021166.1    | Ca_Kabuli_Chr07 | 26191020                | CC                                     | TT                 | TT               | INTERGENIC      |               |                    |                    |
| SNP_53063_A_26191158 | NC_021166.1    | Ca_Kabuli_Chr07 | 26191158                | TT                                     | CC                 | CC               | INTERGENIC      |               |                    |                    |
| SNP_53064_A_26218453 | NC_021166.1    | Ca_Kabuli_Chr07 | 26218453                | GG                                     | AA                 | AA               | INTERGENIC      |               |                    |                    |
| SNP_53065_A_26218527 | NC_021166.1    | Ca_Kabuli_Chr07 | 26218527                | CC                                     | TT                 | TT               | INTERGENIC      |               |                    |                    |
| SNP_53066_A_26218604 | NC_021166.1    | Ca_Kabuli_Chr07 | 26218604                | GG                                     | TT                 | TT               | INTERGENIC      |               |                    |                    |
| SNP_53067_A_26218731 | NC_021166.1    | Ca_Kabuli_Chr07 | 26218731                | CC                                     | AA                 | AA               | INTERGENIC      |               |                    |                    |
| SNP_53068_A_26218746 | NC_021166.1    | Ca_Kabuli_Chr07 | 26218746                | CC                                     | GG                 | GG               | INTERGENIC      |               |                    |                    |
| SNP_53069_A_26219927 | NC_021166.1    | Ca_Kabuli_Chr07 | 26219927                | AA                                     | CC                 | CC               | INTERGENIC      |               |                    |                    |
| SNP_53070_A_26220257 | NC_021166.1    | Ca_Kabuli_Chr07 | 26220257                | GG                                     | AA                 | AA               | INTERGENIC      |               |                    |                    |

| SNPs IDs             | Chromosome IDs | Chromosomes     | Physical positions (bp) | CDC Frontier genome (Reference genome) | (Pusa 1103 & HPNB) | (ILWC 46 & LPNB) | Sequence genome | Components of | Gene accession IDs | Putative functions |
|----------------------|----------------|-----------------|-------------------------|----------------------------------------|--------------------|------------------|-----------------|---------------|--------------------|--------------------|
| SNP_53071_A_26220552 | NC_021166.1    | Ca_Kabuli_Chr07 | 26220552                | TT                                     | CC                 | CC               | INTERGENIC      |               |                    |                    |
| SNP_53072_A_26220952 | NC_021166.1    | Ca_Kabuli_Chr07 | 26220952                | GG                                     | AA                 | AA               | INTERGENIC      |               |                    |                    |
| SNP_53073_A_26221444 | NC_021166.1    | Ca_Kabuli_Chr07 | 26221444                | AA                                     | CC                 | CC               | INTERGENIC      |               |                    |                    |
| SNP_53075_A_26221892 | NC_021166.1    | Ca_Kabuli_Chr07 | 26221892                | AA                                     | CC                 | CC               | INTERGENIC      |               |                    |                    |
| SNP_53076_A_26221901 | NC_021166.1    | Ca_Kabuli_Chr07 | 26221901                | CC                                     | AA                 | AA               | INTERGENIC      |               |                    |                    |
| SNP_53077_A_26222025 | NC_021166.1    | Ca_Kabuli_Chr07 | 26222025                | CC                                     | TT                 | TT               | INTERGENIC      |               |                    |                    |
| SNP_53078_A_26222145 | NC_021166.1    | Ca_Kabuli_Chr07 | 26222145                | AA                                     | GG                 | GG               | INTERGENIC      |               |                    |                    |
| SNP_53079_A_26223411 | NC_021166.1    | Ca_Kabuli_Chr07 | 26223411                | TT                                     | CC                 | CC               | INTERGENIC      |               |                    |                    |
| SNP_53080_A_26223479 | NC_021166.1    | Ca_Kabuli_Chr07 | 26223479                | AA                                     | GG                 | GG               | INTERGENIC      |               |                    |                    |
| SNP_53081_A_26223755 | NC_021166.1    | Ca_Kabuli_Chr07 | 26223755                | GG                                     | AA                 | AA               | INTERGENIC      |               |                    |                    |
| SNP_53082_A_26223931 | NC_021166.1    | Ca_Kabuli_Chr07 | 26223931                | AA                                     | CC                 | CC               | INTERGENIC      |               |                    |                    |
| SNP_53083_A_26224008 | NC_021166.1    | Ca_Kabuli_Chr07 | 26224008                | GG                                     | TT                 | TT               | INTERGENIC      |               |                    |                    |
| SNP_53084_A_26224061 | NC_021166.1    | Ca_Kabuli_Chr07 | 26224061                | CC                                     | TT                 | TT               | INTERGENIC      |               |                    |                    |
| SNP_53085_A_26224664 | NC_021166.1    | Ca_Kabuli_Chr07 | 26224664                | AA                                     | GG                 | GG               | INTERGENIC      |               |                    |                    |
| SNP_53086_A_26224815 | NC_021166.1    | Ca_Kabuli_Chr07 | 26224815                | AA                                     | TT                 | TT               | INTERGENIC      |               |                    |                    |
| SNP_53087_A_26225610 | NC_021166.1    | Ca_Kabuli_Chr07 | 26225610                | AA                                     | CC                 | CC               | INTERGENIC      |               |                    |                    |
| SNP_53088_A_26226146 | NC_021166.1    | Ca_Kabuli_Chr07 | 26226146                | GG                                     | CC                 | CC               | INTERGENIC      |               |                    |                    |
| SNP_53089_A_26226400 | NC_021166.1    | Ca_Kabuli_Chr07 | 26226400                | AA                                     | CC                 | CC               | INTERGENIC      |               |                    |                    |
| SNP_53090_A_26226779 | NC_021166.1    | Ca_Kabuli_Chr07 | 26226779                | CC                                     | TT                 | TT               | INTERGENIC      |               |                    |                    |
| SNP_53091_A_26227566 | NC_021166.1    | Ca_Kabuli_Chr07 | 26227566                | CC                                     | TT                 | TT               | INTERGENIC      |               |                    |                    |
| SNP_53092_A_26228010 | NC_021166.1    | Ca_Kabuli_Chr07 | 26228010                | AA                                     | CC                 | CC               | INTERGENIC      |               |                    |                    |
| SNP_53093_A_26228014 | NC_021166.1    | Ca_Kabuli_Chr07 | 26228014                | GG                                     | AA                 | AA               | INTERGENIC      |               |                    |                    |

| SNPs IDs             | Chromosome IDs | Chromosomes     | Physical positions (bp) | CDC Frontier genome (Reference genome) | (Pusa 1103 & HPNB) | (ILWC 46 & LPNB) | Sequence genome | Components of | Gene accession IDs | Putative functions |
|----------------------|----------------|-----------------|-------------------------|----------------------------------------|--------------------|------------------|-----------------|---------------|--------------------|--------------------|
| SNP_53095_A_26228664 | NC_021166.1    | Ca_Kabuli_Chr07 | 26228664                | CC                                     | TT                 | TT               | INTERGENIC      |               |                    |                    |
| SNP_53096_A_26228984 | NC_021166.1    | Ca_Kabuli_Chr07 | 26228984                | GG                                     | TT                 | TT               | INTERGENIC      |               |                    |                    |
| SNP_53097_A_26229150 | NC_021166.1    | Ca_Kabuli_Chr07 | 26229150                | GG                                     | TT                 | TT               | INTERGENIC      |               |                    |                    |
| SNP_53098_A_26229429 | NC_021166.1    | Ca_Kabuli_Chr07 | 26229429                | CC                                     | TT                 | TT               | INTERGENIC      |               |                    |                    |
| SNP_53099_A_26229459 | NC_021166.1    | Ca_Kabuli_Chr07 | 26229459                | TT                                     | GG                 | GG               | INTERGENIC      |               |                    |                    |
| SNP_53100_A_26229510 | NC_021166.1    | Ca_Kabuli_Chr07 | 26229510                | GG                                     | AA                 | AA               | INTERGENIC      |               |                    |                    |
| SNP_53101_A_26229614 | NC_021166.1    | Ca_Kabuli_Chr07 | 26229614                | GG                                     | AA                 | AA               | INTERGENIC      |               |                    |                    |
| SNP_53102_A_26229793 | NC_021166.1    | Ca_Kabuli_Chr07 | 26229793                | CC                                     | TT                 | TT               | INTERGENIC      |               |                    |                    |
| SNP_53103_A_26229799 | NC_021166.1    | Ca_Kabuli_Chr07 | 26229799                | AA                                     | GG                 | GG               | INTERGENIC      |               |                    |                    |
| SNP_53104_A_26229817 | NC_021166.1    | Ca_Kabuli_Chr07 | 26229817                | AA                                     | CC                 | CC               | INTERGENIC      |               |                    |                    |
| SNP_53105_A_26230403 | NC_021166.1    | Ca_Kabuli_Chr07 | 26230403                | CC                                     | TT                 | TT               | INTERGENIC      |               |                    |                    |
| SNP_53106_A_26230811 | NC_021166.1    | Ca_Kabuli_Chr07 | 26230811                | TT                                     | CC                 | CC               | INTERGENIC      |               |                    |                    |
| SNP_53107_A_26230922 | NC_021166.1    | Ca_Kabuli_Chr07 | 26230922                | GG                                     | AA                 | AA               | INTERGENIC      |               |                    |                    |
| SNP_53108_A_26231034 | NC_021166.1    | Ca_Kabuli_Chr07 | 26231034                | CC                                     | AA                 | AA               | INTERGENIC      |               |                    |                    |
| SNP_53109_A_26231717 | NC_021166.1    | Ca_Kabuli_Chr07 | 26231717                | CC                                     | TT                 | TT               | INTERGENIC      |               |                    |                    |
| SNP_53110_A_26232059 | NC_021166.1    | Ca_Kabuli_Chr07 | 26232059                | TT                                     | AA                 | AA               | INTERGENIC      |               |                    |                    |
| SNP_53111_A_26232248 | NC_021166.1    | Ca_Kabuli_Chr07 | 26232248                | TT                                     | AA                 | AA               | INTERGENIC      |               |                    |                    |
| SNP_53112_A_26232464 | NC_021166.1    | Ca_Kabuli_Chr07 | 26232464                | AA                                     | CC                 | CC               | INTERGENIC      |               |                    |                    |
| SNP_53113_A_26232640 | NC_021166.1    | Ca_Kabuli_Chr07 | 26232640                | AA                                     | GG                 | GG               | INTERGENIC      |               |                    |                    |
| SNP_53114_A_26232919 | NC_021166.1    | Ca_Kabuli_Chr07 | 26232919                | AA                                     | TT                 | TT               | INTERGENIC      |               |                    |                    |
| SNP_53116_A_26234078 | NC_021166.1    | Ca_Kabuli_Chr07 | 26234078                | GG                                     | TT                 | TT               | INTERGENIC      |               |                    |                    |
| SNP_53117_A_26234109 | NC_021166.1    | Ca_Kabuli_Chr07 | 26234109                | AA                                     | CC                 | CC               | INTERGENIC      |               |                    |                    |

| SNPs IDs             | Chromosome IDs | Chromosomes     | Physical positions (bp) | CDC Frontier genome (Reference genome) | (Pusa 1103 & HPNB) | (ILWC 46 & LPNB) | Sequence genome | Components of | Gene accession IDs                         | Putative functions |
|----------------------|----------------|-----------------|-------------------------|----------------------------------------|--------------------|------------------|-----------------|---------------|--------------------------------------------|--------------------|
| SNP_53118_A_26234682 | NC_021166.1    | Ca_Kabuli_Chr07 | 26234682                | CC                                     | TT                 | TT               | INTERGENIC      |               |                                            |                    |
| SNP_53119_A_26234774 | NC_021166.1    | Ca_Kabuli_Chr07 | 26234774                | CC                                     | TT                 | TT               | INTERGENIC      |               |                                            |                    |
| SNP_53120_A_26235069 | NC_021166.1    | Ca_Kabuli_Chr07 | 26235069                | TT                                     | CC                 | CC               | INTERGENIC      |               |                                            |                    |
| SNP_53122_A_26235896 | NC_021166.1    | Ca_Kabuli_Chr07 | 26235896                | AA                                     | GG                 | GG               | INTERGENIC      |               |                                            |                    |
| SNP_53123_A_26236327 | NC_021166.1    | Ca_Kabuli_Chr07 | 26236327                | GG                                     | AA                 | AA               | INTERGENIC      |               |                                            |                    |
| SNP_53124_A_26236362 | NC_021166.1    | Ca_Kabuli_Chr07 | 26236362                | TT                                     | AA                 | AA               | INTERGENIC      |               |                                            |                    |
| SNP_53125_A_26236447 | NC_021166.1    | Ca_Kabuli_Chr07 | 26236447                | AA                                     | CC                 | CC               | INTERGENIC      |               |                                            |                    |
| SNP_53126_A_26237245 | NC_021166.1    | Ca_Kabuli_Chr07 | 26237245                | CC                                     | TT                 | TT               | INTERGENIC      |               |                                            |                    |
| SNP_53127_A_26237262 | NC_021166.1    | Ca_Kabuli_Chr07 | 26237262                | GG                                     | AA                 | AA               | INTERGENIC      |               |                                            |                    |
| SNP_53128_A_26237312 | NC_021166.1    | Ca_Kabuli_Chr07 | 26237312                | GG                                     | TT                 | TT               | INTERGENIC      |               |                                            |                    |
| SNP_53129_A_26237567 | NC_021166.1    | Ca_Kabuli_Chr07 | 26237567                | CC                                     | AA                 | AA               | INTERGENIC      |               |                                            |                    |
| SNP_53130_A_26237697 | NC_021166.1    | Ca_Kabuli_Chr07 | 26237697                | TT                                     | AA                 | AA               | INTERGENIC      |               |                                            |                    |
| SNP_53131_A_26238151 | NC_021166.1    | Ca_Kabuli_Chr07 | 26238151                | CC                                     | TT                 | TT               | DRR             | 101493899     | homeobox-leucine zipper protein HDG12-like |                    |
| SNP_53132_A_26238516 | NC_021166.1    | Ca_Kabuli_Chr07 | 26238516                | TT                                     | CC                 | CC               | DRR             | 101493899     | homeobox-leucine zipper protein HDG12-like |                    |
| SNP_53133_A_26239860 | NC_021166.1    | Ca_Kabuli_Chr07 | 26239860                | GG                                     | AA                 | AA               | INTRON          | 101493899     | homeobox-leucine zipper protein HDG12-like |                    |
| SNP_53134_A_26240179 | NC_021166.1    | Ca_Kabuli_Chr07 | 26240179                | AA                                     | GG                 | GG               | INTRON          | 101493899     | homeobox-leucine zipper protein HDG12-like |                    |
| SNP_53136_A_26240587 | NC_021166.1    | Ca_Kabuli_Chr07 | 26240587                | TT                                     | CC                 | CC               | INTRON          | 101493899     | homeobox-leucine zipper protein HDG12-like |                    |
| SNP_53137_A_26240588 | NC_021166.1    | Ca_Kabuli_Chr07 | 26240588                | GG                                     | AA                 | AA               | INTRON          | 101493899     | homeobox-leucine zipper protein HDG12-like |                    |
| SNP_53138_A_26240589 | NC_021166.1    | Ca_Kabuli_Chr07 | 26240589                | AA                                     | TT                 | TT               | INTRON          | 101493899     | homeobox-leucine zipper protein HDG12-like |                    |
| SNP_53139_A_26240592 | NC_021166.1    | Ca_Kabuli_Chr07 | 26240592                | AA                                     | TT                 | TT               | INTRON          | 101493899     | homeobox-leucine zipper protein HDG12-like |                    |
| SNP_53140_A_26240695 | NC_021166.1    | Ca_Kabuli_Chr07 | 26240695                | TT                                     | AA                 | AA               | INTRON          | 101493899     | homeobox-leucine zipper protein HDG12-like |                    |
| SNP_53141_A_26245030 | NC_021166.1    | Ca_Kabuli_Chr07 | 26245030                | AA                                     | CC                 | CC               | INTRON          | 101493899     | homeobox-leucine zipper protein HDG12-like |                    |

| SNPs IDs             | Chromosome IDs | Chromosomes     | Physical positions (bp) | CDC Frontier genome (Reference genome) | (Pusa 1103 & HPNB) | (ILWC 46 & LPNB) | Sequence Components of genome | Gene accession IDs | Putative functions                         |
|----------------------|----------------|-----------------|-------------------------|----------------------------------------|--------------------|------------------|-------------------------------|--------------------|--------------------------------------------|
| SNP_53142_A_26245715 | NC_021166.1    | Ca_Kabuli_Chr07 | 26245715                | AA                                     | GG                 | GG               | SYNONYMOUS_CODING             | 101493899          | homeobox-leucine zipper protein HDG12-like |
| SNP_53143_A_26248225 | NC_021166.1    | Ca_Kabuli_Chr07 | 26248225                | GG                                     | AA                 | AA               | INTERGENIC                    |                    |                                            |
| SNP_53144_A_26258803 | NC_021166.1    | Ca_Kabuli_Chr07 | 26258803                | GG                                     | TT                 | TT               | INTERGENIC                    |                    |                                            |
| SNP_53145_A_26258812 | NC_021166.1    | Ca_Kabuli_Chr07 | 26258812                | CC                                     | TT                 | TT               | INTERGENIC                    |                    |                                            |
| SNP_53146_A_26259873 | NC_021166.1    | Ca_Kabuli_Chr07 | 26259873                | GG                                     | AA                 | AA               | INTERGENIC                    |                    |                                            |
| SNP_53147_A_26260112 | NC_021166.1    | Ca_Kabuli_Chr07 | 26260112                | GG                                     | AA                 | AA               | INTERGENIC                    |                    |                                            |
| SNP_53148_A_26260197 | NC_021166.1    | Ca_Kabuli_Chr07 | 26260197                | TT                                     | CC                 | CC               | INTERGENIC                    |                    |                                            |
| SNP_53149_A_26260372 | NC_021166.1    | Ca_Kabuli_Chr07 | 26260372                | CC                                     | TT                 | TT               | INTERGENIC                    |                    |                                            |
| SNP_53150_A_26260952 | NC_021166.1    | Ca_Kabuli_Chr07 | 26260952                | TT                                     | AA                 | AA               | INTERGENIC                    |                    |                                            |
| SNP_53151_A_26261404 | NC_021166.1    | Ca_Kabuli_Chr07 | 26261404                | GG                                     | AA                 | AA               | INTERGENIC                    |                    |                                            |
| SNP_53152_A_26263500 | NC_021166.1    | Ca_Kabuli_Chr07 | 26263500                | AA                                     | GG                 | GG               | DRR                           | 101494224          | Unknown function                           |
| SNP_53153_A_26263664 | NC_021166.1    | Ca_Kabuli_Chr07 | 26263664                | GG                                     | AA                 | AA               | DRR                           | 101494224          | Unknown function                           |
| SNP_53154_A_26264028 | NC_021166.1    | Ca_Kabuli_Chr07 | 26264028                | GG                                     | AA                 | AA               | INTRON                        | 101494224          | Unknown function                           |
| SNP_53155_A_26264104 | NC_021166.1    | Ca_Kabuli_Chr07 | 26264104                | GG                                     | TT                 | TT               | INTRON                        | 101494224          | Unknown function                           |
| SNP_53156_A_26264506 | NC_021166.1    | Ca_Kabuli_Chr07 | 26264506                | CC                                     | TT                 | TT               | INTRON                        | 101494224          | Unknown function                           |
| SNP_53157_A_26264697 | NC_021166.1    | Ca_Kabuli_Chr07 | 26264697                | GG                                     | TT                 | TT               | NON_SYNONYMOUS_CODING         | 101494224          | Unknown function                           |
| SNP_53158_A_26265483 | NC_021166.1    | Ca_Kabuli_Chr07 | 26265483                | GG                                     | AA                 | AA               | INTRON                        | 101494224          | Unknown function                           |
| SNP_53159_A_26266063 | NC_021166.1    | Ca_Kabuli_Chr07 | 26266063                | TT                                     | CC                 | CC               | INTRON                        | 101494224          | Unknown function                           |
| SNP_53160_A_26266678 | NC_021166.1    | Ca_Kabuli_Chr07 | 26266678                | TT                                     | CC                 | CC               | URR                           | 101494224          | Unknown function                           |
| SNP_53161_A_26267033 | NC_021166.1    | Ca_Kabuli_Chr07 | 26267033                | AA                                     | GG                 | GG               | URR                           | 101494224          | Unknown function                           |
| SNP_53162_A_26267387 | NC_021166.1    | Ca_Kabuli_Chr07 | 26267387                | AA                                     | GG                 | GG               | URR                           | 101494224          | Unknown function                           |
| SNP_53163_A_26268053 | NC_021166.1    | Ca_Kabuli_Chr07 | 26268053                | TT                                     | CC                 | CC               | URR                           | 101494224          | Unknown function                           |



| SNPs IDs             | Chromosome IDs | Chromosomes     | Physical positions (bp) | CDC Frontier genome (Reference genome) | (Pusa 1103 & HPNB) | (ILWC 46 & LPNB) | Sequence Components of genome | Gene accession IDs | Putative functions           |
|----------------------|----------------|-----------------|-------------------------|----------------------------------------|--------------------|------------------|-------------------------------|--------------------|------------------------------|
| SNP_53164_A_26268529 | NC_021166.1    | Ca_Kabuli_Chr07 | 26268529                | AA                                     | GG                 | GG               | INTERGENIC                    |                    |                              |
| SNP_53165_A_26271232 | NC_021166.1    | Ca_Kabuli_Chr07 | 26271232                | CC                                     | TT                 | TT               | INTERGENIC                    |                    |                              |
| SNP_53166_A_26271487 | NC_021166.1    | Ca_Kabuli_Chr07 | 26271487                | CC                                     | TT                 | TT               | INTERGENIC                    |                    |                              |
| SNP_53167_A_26271493 | NC_021166.1    | Ca_Kabuli_Chr07 | 26271493                | GG                                     | AA                 | AA               | INTERGENIC                    |                    |                              |
| SNP_53168_A_26271694 | NC_021166.1    | Ca_Kabuli_Chr07 | 26271694                | TT                                     | GG                 | GG               | INTERGENIC                    |                    |                              |
| SNP_53169_A_26273256 | NC_021166.1    | Ca_Kabuli_Chr07 | 26273256                | TT                                     | AA                 | AA               | INTERGENIC                    |                    |                              |
| SNP_53170_A_26273257 | NC_021166.1    | Ca_Kabuli_Chr07 | 26273257                | TT                                     | GG                 | GG               | INTERGENIC                    |                    |                              |
| SNP_53171_A_26277488 | NC_021166.1    | Ca_Kabuli_Chr07 | 26277488                | TT                                     | CC                 | CC               | INTERGENIC                    |                    |                              |
| SNP_53172_A_26277672 | NC_021166.1    | Ca_Kabuli_Chr07 | 26277672                | GG                                     | AA                 | AA               | INTERGENIC                    |                    |                              |
| SNP_53173_A_26311709 | NC_021166.1    | Ca_Kabuli_Chr07 | 26311709                | TT                                     | GG                 | GG               | INTRON                        | 101505278          | uncharacterized LOC101505278 |
| SNP_53174_A_26315481 | NC_021166.1    | Ca_Kabuli_Chr07 | 26315481                | TT                                     | CC                 | CC               | INTRON                        | 101505278          | uncharacterized LOC101505278 |
| SNP_53176_A_26353019 | NC_021166.1    | Ca_Kabuli_Chr07 | 26353019                | CC                                     | TT                 | TT               | INTRON                        | 101505931          | Unknown function             |
| SNP_53177_A_26375906 | NC_021166.1    | Ca_Kabuli_Chr07 | 26375906                | CC                                     | TT                 | TT               | INTERGENIC                    |                    |                              |
| SNP_53178_A_26376213 | NC_021166.1    | Ca_Kabuli_Chr07 | 26376213                | CC                                     | GG                 | GG               | INTERGENIC                    |                    |                              |
| SNP_53179_A_26399813 | NC_021166.1    | Ca_Kabuli_Chr07 | 26399813                | GG                                     | TT                 | TT               | INTERGENIC                    |                    |                              |
| SNP_53180_A_26437452 | NC_021166.1    | Ca_Kabuli_Chr07 | 26437452                | GG                                     | AA                 | AA               | INTERGENIC                    |                    |                              |
| SNP_53181_A_26437453 | NC_021166.1    | Ca_Kabuli_Chr07 | 26437453                | TT                                     | CC                 | CC               | INTERGENIC                    |                    |                              |
| SNP_53182_A_26450405 | NC_021166.1    | Ca_Kabuli_Chr07 | 26450405                | TT                                     | GG                 | GG               | INTERGENIC                    |                    |                              |
| SNP_53183_A_26450423 | NC_021166.1    | Ca_Kabuli_Chr07 | 26450423                | GG                                     | TT                 | TT               | INTERGENIC                    |                    |                              |
| SNP_53184_A_26450444 | NC_021166.1    | Ca_Kabuli_Chr07 | 26450444                | AA                                     | GG                 | GG               | INTERGENIC                    |                    |                              |
| SNP_53185_A_26450489 | NC_021166.1    | Ca_Kabuli_Chr07 | 26450489                | AA                                     | GG                 | GG               | INTERGENIC                    |                    |                              |
| SNP_53186_A_26450533 | NC_021166.1    | Ca_Kabuli_Chr07 | 26450533                | TT                                     | CC                 | CC               | INTERGENIC                    |                    |                              |

| SNPs IDs             | Chromosome IDs | Chromosomes     | Physical positions (bp) | CDC Frontier genome (Reference genome) | (Pusa 1103 & HPNB) | (ILWC 46 & LPNB) | Sequence genome   | Components of | Gene accession IDs           | Putative functions |
|----------------------|----------------|-----------------|-------------------------|----------------------------------------|--------------------|------------------|-------------------|---------------|------------------------------|--------------------|
| SNP_53187_A_26450608 | NC_021166.1    | Ca_Kabuli_Chr07 | 26450608                | GG                                     | AA                 | AA               | INTERGENIC        |               |                              |                    |
| SNP_53188_A_26450620 | NC_021166.1    | Ca_Kabuli_Chr07 | 26450620                | CC                                     | TT                 | TT               | INTERGENIC        |               |                              |                    |
| SNP_53189_A_26475565 | NC_021166.1    | Ca_Kabuli_Chr07 | 26475565                | CC                                     | TT                 | TT               | INTERGENIC        |               |                              |                    |
| SNP_53190_A_26550495 | NC_021166.1    | Ca_Kabuli_Chr07 | 26550495                | CC                                     | TT                 | TT               | INTERGENIC        |               |                              |                    |
| SNP_53191_A_26575175 | NC_021166.1    | Ca_Kabuli_Chr07 | 26575175                | TT                                     | CC                 | CC               | INTERGENIC        |               |                              |                    |
| SNP_53192_A_26598149 | NC_021166.1    | Ca_Kabuli_Chr07 | 26598149                | GG                                     | AA                 | AA               | INTERGENIC        |               |                              |                    |
| SNP_53193_A_26639494 | NC_021166.1    | Ca_Kabuli_Chr07 | 26639494                | AA                                     | CC                 | CC               | INTERGENIC        |               |                              |                    |
| SNP_53194_A_26639499 | NC_021166.1    | Ca_Kabuli_Chr07 | 26639499                | AA                                     | GG                 | GG               | INTERGENIC        |               |                              |                    |
| SNP_53195_A_26639514 | NC_021166.1    | Ca_Kabuli_Chr07 | 26639514                | GG                                     | AA                 | AA               | INTERGENIC        |               |                              |                    |
| SNP_53196_A_26639523 | NC_021166.1    | Ca_Kabuli_Chr07 | 26639523                | CC                                     | TT                 | TT               | INTERGENIC        |               |                              |                    |
| SNP_53197_A_26639524 | NC_021166.1    | Ca_Kabuli_Chr07 | 26639524                | AA                                     | GG                 | GG               | INTERGENIC        |               |                              |                    |
| SNP_53198_A_26639534 | NC_021166.1    | Ca_Kabuli_Chr07 | 26639534                | CC                                     | TT                 | TT               | INTERGENIC        |               |                              |                    |
| SNP_53199_A_26643361 | NC_021166.1    | Ca_Kabuli_Chr07 | 26643361                | AA                                     | TT                 | TT               | INTERGENIC        |               |                              |                    |
| SNP_53200_A_26643778 | NC_021166.1    | Ca_Kabuli_Chr07 | 26643778                | AA                                     | TT                 | TT               | INTERGENIC        |               |                              |                    |
| SNP_53201_A_26649724 | NC_021166.1    | Ca_Kabuli_Chr07 | 26649724                | AA                                     | CC                 | CC               | INTERGENIC        |               |                              |                    |
| SNP_53203_A_26672053 | NC_021166.1    | Ca_Kabuli_Chr07 | 26672053                | CC                                     | TT                 | TT               | INTRON            | 101496374     | uncharacterized LOC101496374 |                    |
| SNP_53204_A_26691926 | NC_021166.1    | Ca_Kabuli_Chr07 | 26691926                | CC                                     | TT                 | TT               | URR               | 101496374     | uncharacterized LOC101496374 |                    |
| SNP_53205_A_26694588 | NC_021166.1    | Ca_Kabuli_Chr07 | 26694588                | TT                                     | CC                 | CC               | DRR               | 101507236     | Unknown function             |                    |
| SNP_53207_A_26694825 | NC_021166.1    | Ca_Kabuli_Chr07 | 26694825                | CC                                     | AA                 | AA               | DRR               | 101507236     | Unknown function             |                    |
| SNP_53208_A_26694829 | NC_021166.1    | Ca_Kabuli_Chr07 | 26694829                | TT                                     | CC                 | CC               | DRR               | 101507236     | Unknown function             |                    |
| SNP_53209_A_26694863 | NC_021166.1    | Ca_Kabuli_Chr07 | 26694863                | AA                                     | CC                 | CC               | DRR               | 101507236     | Unknown function             |                    |
| SNP_53210_A_26695291 | NC_021166.1    | Ca_Kabuli_Chr07 | 26695291                | TT                                     | CC                 | CC               | SYNONYMOUS_CODING | 101507236     | Unknown function             |                    |

| SNPs IDs             | Chromosome IDs | Chromosomes     | Physical positions (bp) | CDC Frontier (Reference genome) | (Pusa 1103 & HPNB) | (ILWC 46 & LPNB) | Sequence Components of genome | Gene accession IDs | Putative functions |
|----------------------|----------------|-----------------|-------------------------|---------------------------------|--------------------|------------------|-------------------------------|--------------------|--------------------|
| SNP_53211_A_26698614 | NC_021166.1    | Ca_Kabuli_Chr07 | 26698614                | CC                              | AA                 | AA               | INTRON                        | 101507236          | Unknown function   |
| SNP_53212_A_26699275 | NC_021166.1    | Ca_Kabuli_Chr07 | 26699275                | AA                              | GG                 | GG               | INTRON                        | 101507236          | Unknown function   |
| SNP_53213_A_26699289 | NC_021166.1    | Ca_Kabuli_Chr07 | 26699289                | AA                              | GG                 | GG               | INTRON                        | 101507236          | Unknown function   |
| SNP_53214_A_26699344 | NC_021166.1    | Ca_Kabuli_Chr07 | 26699344                | CC                              | GG                 | GG               | INTRON                        | 101507236          | Unknown function   |
| SNP_53215_A_26699346 | NC_021166.1    | Ca_Kabuli_Chr07 | 26699346                | AA                              | GG                 | GG               | INTRON                        | 101507236          | Unknown function   |
| SNP_53216_A_26699366 | NC_021166.1    | Ca_Kabuli_Chr07 | 26699366                | AA                              | GG                 | GG               | INTRON                        | 101507236          | Unknown function   |
| SNP_53217_A_26699415 | NC_021166.1    | Ca_Kabuli_Chr07 | 26699415                | CC                              | TT                 | TT               | INTRON                        | 101507236          | Unknown function   |
| SNP_53218_A_26699765 | NC_021166.1    | Ca_Kabuli_Chr07 | 26699765                | TT                              | CC                 | CC               | INTRON                        | 101507236          | Unknown function   |
| SNP_53219_A_26699787 | NC_021166.1    | Ca_Kabuli_Chr07 | 26699787                | AA                              | GG                 | GG               | INTRON                        | 101507236          | Unknown function   |
| SNP_53220_A_26699890 | NC_021166.1    | Ca_Kabuli_Chr07 | 26699890                | TT                              | CC                 | CC               | NON_SYNONYMOUS_CODING         | 101507236          | Unknown function   |
| SNP_53221_A_26699899 | NC_021166.1    | Ca_Kabuli_Chr07 | 26699899                | TT                              | CC                 | CC               | NON_SYNONYMOUS_CODING         | 101507236          | Unknown function   |
| SNP_53223_A_26699943 | NC_021166.1    | Ca_Kabuli_Chr07 | 26699943                | AA                              | GG                 | GG               | NON_SYNONYMOUS_CODING         | 101507236          | Unknown function   |
| SNP_53224_A_26700038 | NC_021166.1    | Ca_Kabuli_Chr07 | 26700038                | TT                              | AA                 | AA               | NON_SYNONYMOUS_CODING         | 101507236          | Unknown function   |
| SNP_53225_A_26700316 | NC_021166.1    | Ca_Kabuli_Chr07 | 26700316                | AA                              | GG                 | GG               | NON_SYNONYMOUS_CODING         | 101507236          | Unknown function   |
| SNP_53226_A_26700368 | NC_021166.1    | Ca_Kabuli_Chr07 | 26700368                | CC                              | GG                 | GG               | NON_SYNONYMOUS_CODING         | 101507236          | Unknown function   |
| SNP_53227_A_26700373 | NC_021166.1    | Ca_Kabuli_Chr07 | 26700373                | TT                              | CC                 | CC               | NON_SYNONYMOUS_CODING         | 101507236          | Unknown function   |
| SNP_53228_A_26700382 | NC_021166.1    | Ca_Kabuli_Chr07 | 26700382                | TT                              | CC                 | CC               | NON_SYNONYMOUS_CODING         | 101507236          | Unknown function   |
| SNP_53229_A_26700395 | NC_021166.1    | Ca_Kabuli_Chr07 | 26700395                | AA                              | GG                 | GG               | SYNONYMOUS_CODING             | 101507236          | Unknown function   |
| SNP_53230_A_26700412 | NC_021166.1    | Ca_Kabuli_Chr07 | 26700412                | AA                              | GG                 | GG               | NON_SYNONYMOUS_CODING         | 101507236          | Unknown function   |
| SNP_53231_A_26700803 | NC_021166.1    | Ca_Kabuli_Chr07 | 26700803                | TT                              | GG                 | GG               | URR                           | 101507236          | Unknown function   |
| SNP_53232_A_26700879 | NC_021166.1    | Ca_Kabuli_Chr07 | 26700879                | TT                              | CC                 | CC               | URR                           | 101507236          | Unknown function   |
| SNP_53233_A_26700892 | NC_021166.1    | Ca_Kabuli_Chr07 | 26700892                | CC                              | GG                 | GG               | URR                           | 101507236          | Unknown function   |

| SNPs IDs             | Chromosome IDs | Chromosomes     | Physical positions (bp) | CDC Frontier genome (Reference genome) | (Pusa 1103 & HPNB) | (ILWC 46 & LPNB) | Sequence Components of genome | Gene accession IDs | Putative functions |
|----------------------|----------------|-----------------|-------------------------|----------------------------------------|--------------------|------------------|-------------------------------|--------------------|--------------------|
| SNP_53234_A_26700953 | NC_021166.1    | Ca_Kabuli_Chr07 | 26700953                | AA                                     | GG                 | GG               | URR                           | 101507236          | Unknown function   |
| SNP_53235_A_26700955 | NC_021166.1    | Ca_Kabuli_Chr07 | 26700955                | TT                                     | AA                 | AA               | URR                           | 101507236          | Unknown function   |
| SNP_53236_A_26700969 | NC_021166.1    | Ca_Kabuli_Chr07 | 26700969                | TT                                     | CC                 | CC               | URR                           | 101507236          | Unknown function   |
| SNP_53238_A_26701396 | NC_021166.1    | Ca_Kabuli_Chr07 | 26701396                | GG                                     | CC                 | CC               | DRR                           | 101507551          | Unknown function   |
| SNP_53239_A_26701489 | NC_021166.1    | Ca_Kabuli_Chr07 | 26701489                | CC                                     | AA                 | AA               | DRR                           | 101507551          | Unknown function   |
| SNP_53241_A_26701540 | NC_021166.1    | Ca_Kabuli_Chr07 | 26701540                | AA                                     | CC                 | CC               | DRR                           | 101507551          | Unknown function   |
| SNP_53242_A_26701579 | NC_021166.1    | Ca_Kabuli_Chr07 | 26701579                | GG                                     | CC                 | CC               | DRR                           | 101507551          | Unknown function   |
| SNP_53243_A_26701606 | NC_021166.1    | Ca_Kabuli_Chr07 | 26701606                | GG                                     | AA                 | AA               | DRR                           | 101507551          | Unknown function   |
| SNP_53244_A_26702198 | NC_021166.1    | Ca_Kabuli_Chr07 | 26702198                | TT                                     | CC                 | CC               | DRR                           | 101507865          | Unknown function   |
| SNP_53245_A_26702313 | NC_021166.1    | Ca_Kabuli_Chr07 | 26702313                | TT                                     | CC                 | CC               | DRR                           | 101507865          | Unknown function   |
| SNP_53246_A_26702829 | NC_021166.1    | Ca_Kabuli_Chr07 | 26702829                | CC                                     | TT                 | TT               | INTERGENIC                    |                    |                    |
| SNP_53247_A_26702861 | NC_021166.1    | Ca_Kabuli_Chr07 | 26702861                | AA                                     | GG                 | GG               | URR                           | 101507551          | Unknown function   |
| SNP_53248_A_26702914 | NC_021166.1    | Ca_Kabuli_Chr07 | 26702914                | AA                                     | CC                 | CC               | URR                           | 101507551          | Unknown function   |
| SNP_53249_A_26702922 | NC_021166.1    | Ca_Kabuli_Chr07 | 26702922                | AA                                     | CC                 | CC               | URR                           | 101507551          | Unknown function   |
| SNP_53250_A_26703209 | NC_021166.1    | Ca_Kabuli_Chr07 | 26703209                | AA                                     | GG                 | GG               | URR                           | 101507551          | Unknown function   |
| SNP_53251_A_26703222 | NC_021166.1    | Ca_Kabuli_Chr07 | 26703222                | AA                                     | GG                 | GG               | URR                           | 101507551          | Unknown function   |
| SNP_53252_A_26703238 | NC_021166.1    | Ca_Kabuli_Chr07 | 26703238                | GG                                     | CC                 | CC               | URR                           | 101507551          | Unknown function   |
| SNP_53253_A_26703250 | NC_021166.1    | Ca_Kabuli_Chr07 | 26703250                | TT                                     | GG                 | GG               | URR                           | 101507551          | Unknown function   |
| SNP_53254_A_26703290 | NC_021166.1    | Ca_Kabuli_Chr07 | 26703290                | AA                                     | GG                 | GG               | URR                           | 101507551          | Unknown function   |
| SNP_53255_A_26717813 | NC_021166.1    | Ca_Kabuli_Chr07 | 26717813                | CC                                     | TT                 | TT               | INTERGENIC                    |                    |                    |
| SNP_53256_A_26720899 | NC_021166.1    | Ca_Kabuli_Chr07 | 26720899                | AA                                     | TT                 | TT               | INTERGENIC                    |                    |                    |
| SNP_53257_A_26730534 | NC_021166.1    | Ca_Kabuli_Chr07 | 26730534                | AA                                     | GG                 | GG               | INTERGENIC                    |                    |                    |

| SNPs IDs             | Chromosome IDs | Chromosomes     | Physical positions (bp) | CDC Frontier genome (Reference genome) | (Pusa 1103 & HPNB) | (ILWC 46 & LPNB) | Sequence genome | Components of | Gene accession IDs | Putative functions |
|----------------------|----------------|-----------------|-------------------------|----------------------------------------|--------------------|------------------|-----------------|---------------|--------------------|--------------------|
| SNP_53258_A_26754795 | NC_021166.1    | Ca_Kabuli_Chr07 | 26754795                | TT                                     | CC                 | CC               | INTERGENIC      |               |                    |                    |
| SNP_53259_A_26754803 | NC_021166.1    | Ca_Kabuli_Chr07 | 26754803                | AA                                     | GG                 | GG               | INTERGENIC      |               |                    |                    |
| SNP_53260_A_26758043 | NC_021166.1    | Ca_Kabuli_Chr07 | 26758043                | CC                                     | AA                 | AA               | INTERGENIC      |               |                    |                    |
| SNP_53261_A_26758473 | NC_021166.1    | Ca_Kabuli_Chr07 | 26758473                | TT                                     | CC                 | CC               | INTERGENIC      |               |                    |                    |
| SNP_53262_A_26799087 | NC_021166.1    | Ca_Kabuli_Chr07 | 26799087                | GG                                     | TT                 | TT               | INTERGENIC      |               |                    |                    |
| SNP_53263_A_26799359 | NC_021166.1    | Ca_Kabuli_Chr07 | 26799359                | AA                                     | GG                 | GG               | INTERGENIC      |               |                    |                    |
| SNP_53264_A_26799370 | NC_021166.1    | Ca_Kabuli_Chr07 | 26799370                | CC                                     | TT                 | TT               | INTERGENIC      |               |                    |                    |
| SNP_53266_A_26799466 | NC_021166.1    | Ca_Kabuli_Chr07 | 26799466                | GG                                     | AA                 | AA               | INTERGENIC      |               |                    |                    |
| SNP_53267_A_26799468 | NC_021166.1    | Ca_Kabuli_Chr07 | 26799468                | AA                                     | CC                 | CC               | INTERGENIC      |               |                    |                    |
| SNP_53268_A_26828126 | NC_021166.1    | Ca_Kabuli_Chr07 | 26828126                | GG                                     | CC                 | CC               | INTERGENIC      |               |                    |                    |
| SNP_53269_A_26842428 | NC_021166.1    | Ca_Kabuli_Chr07 | 26842428                | CC                                     | TT                 | TT               | INTERGENIC      |               |                    |                    |
| SNP_53270_A_26868198 | NC_021166.1    | Ca_Kabuli_Chr07 | 26868198                | AA                                     | CC                 | CC               | INTERGENIC      |               |                    |                    |
| SNP_53271_A_26869900 | NC_021166.1    | Ca_Kabuli_Chr07 | 26869900                | GG                                     | AA                 | AA               | INTERGENIC      |               |                    |                    |
| SNP_53273_A_26981489 | NC_021166.1    | Ca_Kabuli_Chr07 | 26981489                | TT                                     | GG                 | GG               | INTERGENIC      |               |                    |                    |
| SNP_53274_A_26994485 | NC_021166.1    | Ca_Kabuli_Chr07 | 26994485                | AA                                     | TT                 | TT               | INTERGENIC      |               |                    |                    |
| SNP_53275_A_27009595 | NC_021166.1    | Ca_Kabuli_Chr07 | 27009595                | CC                                     | AA                 | AA               | INTERGENIC      |               |                    |                    |
| SNP_53276_A_27009615 | NC_021166.1    | Ca_Kabuli_Chr07 | 27009615                | CC                                     | TT                 | TT               | INTERGENIC      |               |                    |                    |
| SNP_53277_A_27009735 | NC_021166.1    | Ca_Kabuli_Chr07 | 27009735                | GG                                     | AA                 | AA               | INTERGENIC      |               |                    |                    |
| SNP_53278_A_27009743 | NC_021166.1    | Ca_Kabuli_Chr07 | 27009743                | TT                                     | CC                 | CC               | INTERGENIC      |               |                    |                    |
| SNP_53279_A_27018623 | NC_021166.1    | Ca_Kabuli_Chr07 | 27018623                | AA                                     | CC                 | CC               | INTERGENIC      |               |                    |                    |
| SNP_53280_A_27025245 | NC_021166.1    | Ca_Kabuli_Chr07 | 27025245                | CC                                     | TT                 | TT               | INTERGENIC      |               |                    |                    |
| SNP_53281_A_27034861 | NC_021166.1    | Ca_Kabuli_Chr07 | 27034861                | CC                                     | AA                 | AA               | INTERGENIC      |               |                    |                    |

| SNPs IDs             | Chromosome IDs | Chromosomes     | Physical positions (bp) | CDC Frontier genome (Reference genome) | (Pusa 1103 & HPNB) | (ILWC 46 & LPNB) | Sequence genome | Components of | Gene accession IDs | Putative functions |
|----------------------|----------------|-----------------|-------------------------|----------------------------------------|--------------------|------------------|-----------------|---------------|--------------------|--------------------|
| SNP_53282_A_27043293 | NC_021166.1    | Ca_Kabuli_Chr07 | 27043293                | CC                                     | AA                 | AA               | INTERGENIC      |               |                    |                    |
| SNP_53283_A_27043427 | NC_021166.1    | Ca_Kabuli_Chr07 | 27043427                | AA                                     | GG                 | GG               | INTERGENIC      |               |                    |                    |
| SNP_53284_A_27046102 | NC_021166.1    | Ca_Kabuli_Chr07 | 27046102                | CC                                     | TT                 | TT               | INTERGENIC      |               |                    |                    |
| SNP_53285_A_27070100 | NC_021166.1    | Ca_Kabuli_Chr07 | 27070100                | CC                                     | TT                 | TT               | INTERGENIC      |               |                    |                    |
| SNP_53286_A_27070162 | NC_021166.1    | Ca_Kabuli_Chr07 | 27070162                | GG                                     | AA                 | AA               | INTERGENIC      |               |                    |                    |
| SNP_53287_A_27070179 | NC_021166.1    | Ca_Kabuli_Chr07 | 27070179                | AA                                     | TT                 | TT               | INTERGENIC      |               |                    |                    |
| SNP_53288_A_27070190 | NC_021166.1    | Ca_Kabuli_Chr07 | 27070190                | GG                                     | TT                 | TT               | INTERGENIC      |               |                    |                    |
| SNP_53289_A_27077912 | NC_021166.1    | Ca_Kabuli_Chr07 | 27077912                | AA                                     | CC                 | CC               | INTERGENIC      |               |                    |                    |
| SNP_53290_A_27097401 | NC_021166.1    | Ca_Kabuli_Chr07 | 27097401                | GG                                     | AA                 | AA               | INTERGENIC      |               |                    |                    |
| SNP_53292_A_27126759 | NC_021166.1    | Ca_Kabuli_Chr07 | 27126759                | CC                                     | TT                 | TT               | INTERGENIC      |               |                    |                    |
| SNP_53293_A_27187294 | NC_021166.1    | Ca_Kabuli_Chr07 | 27187294                | CC                                     | AA                 | AA               | INTERGENIC      |               |                    |                    |
| SNP_53294_A_27187485 | NC_021166.1    | Ca_Kabuli_Chr07 | 27187485                | GG                                     | AA                 | AA               | INTERGENIC      |               |                    |                    |
| SNP_53295_A_27257429 | NC_021166.1    | Ca_Kabuli_Chr07 | 27257429                | AA                                     | GG                 | GG               | INTERGENIC      |               |                    |                    |
| SNP_53297_A_27332393 | NC_021166.1    | Ca_Kabuli_Chr07 | 27332393                | AA                                     | GG                 | GG               | INTERGENIC      |               |                    |                    |
| SNP_53298_A_27332425 | NC_021166.1    | Ca_Kabuli_Chr07 | 27332425                | AA                                     | GG                 | GG               | INTERGENIC      |               |                    |                    |
| SNP_53299_A_27336911 | NC_021166.1    | Ca_Kabuli_Chr07 | 27336911                | TT                                     | CC                 | CC               | INTERGENIC      |               |                    |                    |
| SNP_53300_A_27341222 | NC_021166.1    | Ca_Kabuli_Chr07 | 27341222                | AA                                     | GG                 | GG               | INTERGENIC      |               |                    |                    |
| SNP_53301_A_27341371 | NC_021166.1    | Ca_Kabuli_Chr07 | 27341371                | CC                                     | TT                 | TT               | INTERGENIC      |               |                    |                    |
| SNP_53302_A_27341388 | NC_021166.1    | Ca_Kabuli_Chr07 | 27341388                | AA                                     | GG                 | GG               | INTERGENIC      |               |                    |                    |
| SNP_53303_A_27341391 | NC_021166.1    | Ca_Kabuli_Chr07 | 27341391                | TT                                     | AA                 | AA               | INTERGENIC      |               |                    |                    |
| SNP_53304_A_27341636 | NC_021166.1    | Ca_Kabuli_Chr07 | 27341636                | TT                                     | CC                 | CC               | INTERGENIC      |               |                    |                    |
| SNP_53306_A_27348707 | NC_021166.1    | Ca_Kabuli_Chr07 | 27348707                | CC                                     | TT                 | TT               | INTERGENIC      |               |                    |                    |

| SNPs IDs             | Chromosome IDs | Chromosomes     | Physical positions (bp) | CDC Frontier genome (Reference genome) | (Pusa 1103 & HPNB) | (ILWC 46 & LPNB) | Sequence Components of genome | Gene accession IDs | Putative functions           |
|----------------------|----------------|-----------------|-------------------------|----------------------------------------|--------------------|------------------|-------------------------------|--------------------|------------------------------|
| SNP_53307_A_27353115 | NC_021166.1    | Ca_Kabuli_Chr07 | 27353115                | GG                                     | AA                 | AA               | INTERGENIC                    |                    |                              |
| SNP_53308_A_27357312 | NC_021166.1    | Ca_Kabuli_Chr07 | 27357312                | AA                                     | GG                 | GG               | INTERGENIC                    |                    |                              |
| SNP_53309_A_27361060 | NC_021166.1    | Ca_Kabuli_Chr07 | 27361060                | GG                                     | TT                 | TT               | NON_SYNONYMOUS_CODING         | 101512032          | uncharacterized LOC101512032 |
| SNP_53310_A_27386580 | NC_021166.1    | Ca_Kabuli_Chr07 | 27386580                | TT                                     | CC                 | CC               | INTERGENIC                    |                    |                              |
| SNP_53311_A_27390299 | NC_021166.1    | Ca_Kabuli_Chr07 | 27390299                | TT                                     | AA                 | AA               | DRR                           | 101500699          | peroxidase P7-like           |
| SNP_53312_A_27437577 | NC_021166.1    | Ca_Kabuli_Chr07 | 27437577                | GG                                     | AA                 | AA               | INTERGENIC                    |                    |                              |
| SNP_53313_A_27458629 | NC_021166.1    | Ca_Kabuli_Chr07 | 27458629                | AA                                     | CC                 | CC               | INTRON                        | 101513001          | Unknown function             |
| SNP_53314_A_27458631 | NC_021166.1    | Ca_Kabuli_Chr07 | 27458631                | TT                                     | AA                 | AA               | INTRON                        | 101513001          | Unknown function             |
| SNP_53315_A_27488019 | NC_021166.1    | Ca_Kabuli_Chr07 | 27488019                | AA                                     | GG                 | GG               | INTERGENIC                    |                    |                              |
| SNP_53316_A_27502458 | NC_021166.1    | Ca_Kabuli_Chr07 | 27502458                | GG                                     | AA                 | AA               | INTERGENIC                    |                    |                              |
| SNP_53317_A_27509734 | NC_021166.1    | Ca_Kabuli_Chr07 | 27509734                | TT                                     | CC                 | CC               | INTERGENIC                    |                    |                              |
| SNP_53318_A_27509735 | NC_021166.1    | Ca_Kabuli_Chr07 | 27509735                | TT                                     | CC                 | CC               | INTERGENIC                    |                    |                              |
| SNP_53320_A_27521186 | NC_021166.1    | Ca_Kabuli_Chr07 | 27521186                | TT                                     | AA                 | AA               | INTRON                        | id171761           | Unknown function             |
| SNP_53323_A_27528240 | NC_021166.1    | Ca_Kabuli_Chr07 | 27528240                | TT                                     | CC                 | CC               | INTERGENIC                    |                    |                              |
| SNP_53324_A_27594662 | NC_021166.1    | Ca_Kabuli_Chr07 | 27594662                | GG                                     | TT                 | TT               | NON_SYNONYMOUS_CODING         | 101514964          | Unknown function             |
| SNP_53325_A_27602571 | NC_021166.1    | Ca_Kabuli_Chr07 | 27602571                | CC                                     | TT                 | TT               | INTERGENIC                    |                    |                              |
| SNP_53326_A_27611374 | NC_021166.1    | Ca_Kabuli_Chr07 | 27611374                | CC                                     | AA                 | AA               | INTERGENIC                    |                    |                              |
| SNP_53327_A_27639721 | NC_021166.1    | Ca_Kabuli_Chr07 | 27639721                | GG                                     | AA                 | AA               | INTERGENIC                    |                    |                              |
| SNP_53328_A_27639727 | NC_021166.1    | Ca_Kabuli_Chr07 | 27639727                | GG                                     | AA                 | AA               | INTERGENIC                    |                    |                              |
| SNP_53329_A_27662402 | NC_021166.1    | Ca_Kabuli_Chr07 | 27662402                | CC                                     | TT                 | TT               | INTERGENIC                    |                    |                              |
| SNP_53330_A_27681752 | NC_021166.1    | Ca_Kabuli_Chr07 | 27681752                | TT                                     | AA                 | AA               | INTERGENIC                    |                    |                              |
| SNP_53331_A_27713269 | NC_021166.1    | Ca_Kabuli_Chr07 | 27713269                | TT                                     | GG                 | GG               | INTERGENIC                    |                    |                              |

| SNPs IDs             | Chromosome IDs | Chromosomes     | Physical positions (bp) | CDC Frontier (Reference genome) | (Pusa 1103 & HPNB) | (ILWC 46 & LPNB) | Sequence Components of genome | Gene accession IDs | Putative functions                       |
|----------------------|----------------|-----------------|-------------------------|---------------------------------|--------------------|------------------|-------------------------------|--------------------|------------------------------------------|
| SNP_53332_A_27775580 | NC_021166.1    | Ca_Kabuli_Chr07 | 27775580                | CC                              | TT                 | TT               | INTERGENIC                    |                    |                                          |
| SNP_53333_A_27775589 | NC_021166.1    | Ca_Kabuli_Chr07 | 27775589                | AA                              | GG                 | GG               | INTERGENIC                    |                    |                                          |
| SNP_53334_A_27822800 | NC_021166.1    | Ca_Kabuli_Chr07 | 27822800                | GG                              | CC                 | CC               | INTRON                        | 101489686          | Unknown function                         |
| SNP_53335_A_27829222 | NC_021166.1    | Ca_Kabuli_Chr07 | 27829222                | CC                              | TT                 | TT               | INTERGENIC                    |                    |                                          |
| SNP_53336_A_27874205 | NC_021166.1    | Ca_Kabuli_Chr07 | 27874205                | TT                              | AA                 | AA               | URR                           | 101504427          | uncharacterized LOC101504427             |
| SNP_53337_A_27913121 | NC_021166.1    | Ca_Kabuli_Chr07 | 27913121                | CC                              | TT                 | TT               | INTERGENIC                    |                    |                                          |
| SNP_53338_A_27935887 | NC_021166.1    | Ca_Kabuli_Chr07 | 27935887                | GG                              | AA                 | AA               | INTERGENIC                    |                    |                                          |
| SNP_53340_A_27937664 | NC_021166.1    | Ca_Kabuli_Chr07 | 27937664                | GG                              | AA                 | AA               | INTERGENIC                    |                    |                                          |
| SNP_53341_A_27939643 | NC_021166.1    | Ca_Kabuli_Chr07 | 27939643                | TT                              | CC                 | CC               | INTERGENIC                    |                    |                                          |
| SNP_53342_A_27939690 | NC_021166.1    | Ca_Kabuli_Chr07 | 27939690                | TT                              | CC                 | CC               | INTERGENIC                    |                    |                                          |
| SNP_53343_A_27939724 | NC_021166.1    | Ca_Kabuli_Chr07 | 27939724                | AA                              | GG                 | GG               | INTERGENIC                    |                    |                                          |
| SNP_53344_A_27939761 | NC_021166.1    | Ca_Kabuli_Chr07 | 27939761                | AA                              | GG                 | GG               | INTERGENIC                    |                    |                                          |
| SNP_53345_A_27939771 | NC_021166.1    | Ca_Kabuli_Chr07 | 27939771                | CC                              | TT                 | TT               | INTERGENIC                    |                    |                                          |
| SNP_53346_A_27940056 | NC_021166.1    | Ca_Kabuli_Chr07 | 27940056                | AA                              | GG                 | GG               | INTERGENIC                    |                    |                                          |
| SNP_53347_A_27943272 | NC_021166.1    | Ca_Kabuli_Chr07 | 27943272                | TT                              | GG                 | GG               | INTERGENIC                    |                    |                                          |
| SNP_53348_A_27978172 | NC_021166.1    | Ca_Kabuli_Chr07 | 27978172                | TT                              | AA                 | AA               | INTERGENIC                    |                    |                                          |
| SNP_53349_A_27978653 | NC_021166.1    | Ca_Kabuli_Chr07 | 27978653                | TT                              | GG                 | GG               | INTERGENIC                    |                    |                                          |
| SNP_53350_A_27979541 | NC_021166.1    | Ca_Kabuli_Chr07 | 27979541                | TT                              | GG                 | GG               | INTERGENIC                    |                    |                                          |
| SNP_53351_A_28011041 | NC_021166.1    | Ca_Kabuli_Chr07 | 28011041                | GG                              | AA                 | AA               | INTERGENIC                    |                    |                                          |
| SNP_53352_A_28048234 | NC_021166.1    | Ca_Kabuli_Chr07 | 28048234                | TT                              | CC                 | CC               | DRR                           | 101490346          | E3 ubiquitin-protein ligase RNF12-A-like |
| SNP_53353_A_28048241 | NC_021166.1    | Ca_Kabuli_Chr07 | 28048241                | GG                              | AA                 | AA               | DRR                           | 101490346          | E3 ubiquitin-protein ligase RNF12-A-like |
| SNP_53354_A_28048274 | NC_021166.1    | Ca_Kabuli_Chr07 | 28048274                | CC                              | TT                 | TT               | DRR                           | 101490346          | E3 ubiquitin-protein ligase RNF12-A-like |



| SNPs IDs             | Chromosome IDs | Chromosomes     | Physical positions (bp) | CDC Frontier genome (Reference genome) | (Pusa 1103 & HPNB) | (ILWC 46 & LPNB) | Sequence Components of genome | Gene accession IDs | Putative functions                       |
|----------------------|----------------|-----------------|-------------------------|----------------------------------------|--------------------|------------------|-------------------------------|--------------------|------------------------------------------|
| SNP_53355_A_28048304 | NC_021166.1    | Ca_Kabuli_Chr07 | 28048304                | GG                                     | CC                 | CC               | DRR                           | 101490346          | E3 ubiquitin-protein ligase RNF12-A-like |
| SNP_53357_A_28074925 | NC_021166.1    | Ca_Kabuli_Chr07 | 28074925                | TT                                     | CC                 | CC               | URR                           | 101490662          | Unknown function                         |
| SNP_53358_A_28075278 | NC_021166.1    | Ca_Kabuli_Chr07 | 28075278                | AA                                     | GG                 | GG               | URR                           | 101490662          | Unknown function                         |
| SNP_53359_A_28075293 | NC_021166.1    | Ca_Kabuli_Chr07 | 28075293                | CC                                     | TT                 | TT               | URR                           | 101490662          | Unknown function                         |
| SNP_53360_A_28075305 | NC_021166.1    | Ca_Kabuli_Chr07 | 28075305                | GG                                     | AA                 | AA               | URR                           | 101490662          | Unknown function                         |
| SNP_53361_A_28075328 | NC_021166.1    | Ca_Kabuli_Chr07 | 28075328                | AA                                     | GG                 | GG               | URR                           | 101490662          | Unknown function                         |
| SNP_53362_A_28075355 | NC_021166.1    | Ca_Kabuli_Chr07 | 28075355                | GG                                     | AA                 | AA               | URR                           | 101490662          | Unknown function                         |
| SNP_53363_A_28075368 | NC_021166.1    | Ca_Kabuli_Chr07 | 28075368                | TT                                     | CC                 | CC               | URR                           | 101490662          | Unknown function                         |
| SNP_53364_A_28075370 | NC_021166.1    | Ca_Kabuli_Chr07 | 28075370                | AA                                     | GG                 | GG               | URR                           | 101490662          | Unknown function                         |
| SNP_53365_A_28075382 | NC_021166.1    | Ca_Kabuli_Chr07 | 28075382                | AA                                     | GG                 | GG               | URR                           | 101490662          | Unknown function                         |
| SNP_53366_A_28076335 | NC_021166.1    | Ca_Kabuli_Chr07 | 28076335                | TT                                     | CC                 | CC               | URR                           | 101490662          | Unknown function                         |
| SNP_53367_A_28084916 | NC_021166.1    | Ca_Kabuli_Chr07 | 28084916                | GG                                     | AA                 | AA               | INTERGENIC                    |                    |                                          |
| SNP_53368_A_28093725 | NC_021166.1    | Ca_Kabuli_Chr07 | 28093725                | CC                                     | TT                 | TT               | INTERGENIC                    |                    |                                          |
| SNP_53369_A_28093755 | NC_021166.1    | Ca_Kabuli_Chr07 | 28093755                | CC                                     | TT                 | TT               | INTERGENIC                    |                    |                                          |
| SNP_53370_A_28094014 | NC_021166.1    | Ca_Kabuli_Chr07 | 28094014                | CC                                     | AA                 | AA               | INTERGENIC                    |                    |                                          |
| SNP_53371_A_28094158 | NC_021166.1    | Ca_Kabuli_Chr07 | 28094158                | GG                                     | TT                 | TT               | INTERGENIC                    |                    |                                          |
| SNP_53372_A_28094204 | NC_021166.1    | Ca_Kabuli_Chr07 | 28094204                | TT                                     | CC                 | CC               | INTERGENIC                    |                    |                                          |
| SNP_53373_A_28094213 | NC_021166.1    | Ca_Kabuli_Chr07 | 28094213                | GG                                     | AA                 | AA               | INTERGENIC                    |                    |                                          |
| SNP_53374_A_28094224 | NC_021166.1    | Ca_Kabuli_Chr07 | 28094224                | AA                                     | CC                 | CC               | INTERGENIC                    |                    |                                          |
| SNP_53375_A_28113248 | NC_021166.1    | Ca_Kabuli_Chr07 | 28113248                | CC                                     | AA                 | AA               | INTERGENIC                    |                    |                                          |
| SNP_53376_A_28113256 | NC_021166.1    | Ca_Kabuli_Chr07 | 28113256                | TT                                     | CC                 | CC               | INTERGENIC                    |                    |                                          |
| SNP_53377_A_28113262 | NC_021166.1    | Ca_Kabuli_Chr07 | 28113262                | CC                                     | AA                 | AA               | INTERGENIC                    |                    |                                          |

| SNPs IDs             | Chromosome IDs | Chromosomes     | Physical positions (bp) | CDC Frontier genome (Reference genome) | (Pusa 1103 & HPNB) | (ILWC 46 & LPNB) | Sequence Components of genome | Gene accession IDs | Putative functions                         |
|----------------------|----------------|-----------------|-------------------------|----------------------------------------|--------------------|------------------|-------------------------------|--------------------|--------------------------------------------|
| SNP_53378_A_28113301 | NC_021166.1    | Ca_Kabuli_Chr07 | 28113301                | GG                                     | AA                 | AA               | INTERGENIC                    |                    |                                            |
| SNP_53379_A_28119615 | NC_021166.1    | Ca_Kabuli_Chr07 | 28119615                | TT                                     | CC                 | CC               | INTERGENIC                    |                    |                                            |
| SNP_53380_A_28146839 | NC_021166.1    | Ca_Kabuli_Chr07 | 28146839                | AA                                     | CC                 | CC               | INTERGENIC                    |                    |                                            |
| SNP_53381_A_28163918 | NC_021166.1    | Ca_Kabuli_Chr07 | 28163918                | TT                                     | CC                 | CC               | INTERGENIC                    |                    |                                            |
| SNP_53382_A_28163922 | NC_021166.1    | Ca_Kabuli_Chr07 | 28163922                | AA                                     | TT                 | TT               | INTERGENIC                    |                    |                                            |
| SNP_53383_A_28163938 | NC_021166.1    | Ca_Kabuli_Chr07 | 28163938                | TT                                     | CC                 | CC               | INTERGENIC                    |                    |                                            |
| SNP_53384_A_28163945 | NC_021166.1    | Ca_Kabuli_Chr07 | 28163945                | TT                                     | AA                 | AA               | INTERGENIC                    |                    |                                            |
| SNP_53385_A_28164055 | NC_021166.1    | Ca_Kabuli_Chr07 | 28164055                | GG                                     | AA                 | AA               | INTERGENIC                    |                    |                                            |
| SNP_53386_A_28164092 | NC_021166.1    | Ca_Kabuli_Chr07 | 28164092                | AA                                     | TT                 | TT               | INTERGENIC                    |                    |                                            |
| SNP_53387_A_28186176 | NC_021166.1    | Ca_Kabuli_Chr07 | 28186176                | GG                                     | CC                 | CC               | INTERGENIC                    |                    |                                            |
| SNP_53389_A_28189913 | NC_021166.1    | Ca_Kabuli_Chr07 | 28189913                | TT                                     | GG                 | GG               | INTERGENIC                    |                    |                                            |
| SNP_53390_A_28190095 | NC_021166.1    | Ca_Kabuli_Chr07 | 28190095                | AA                                     | TT                 | TT               | INTERGENIC                    |                    |                                            |
| SNP_53391_A_28190186 | NC_021166.1    | Ca_Kabuli_Chr07 | 28190186                | AA                                     | CC                 | CC               | INTERGENIC                    |                    |                                            |
| SNP_53393_A_28190228 | NC_021166.1    | Ca_Kabuli_Chr07 | 28190228                | TT                                     | CC                 | CC               | INTERGENIC                    |                    |                                            |
| SNP_53394_A_28219636 | NC_021166.1    | Ca_Kabuli_Chr07 | 28219636                | GG                                     | AA                 | AA               | INTRON                        | 101491929          | cyclic nucleotide-gated ion channel 4-like |
| SNP_53395_A_28219639 | NC_021166.1    | Ca_Kabuli_Chr07 | 28219639                | GG                                     | AA                 | AA               | INTRON                        | 101491929          | cyclic nucleotide-gated ion channel 4-like |
| SNP_53396_A_28240484 | NC_021166.1    | Ca_Kabuli_Chr07 | 28240484                | AA                                     | CC                 | CC               | INTERGENIC                    |                    |                                            |
| SNP_53397_A_28240490 | NC_021166.1    | Ca_Kabuli_Chr07 | 28240490                | AA                                     | GG                 | GG               | INTERGENIC                    |                    |                                            |
| SNP_53398_A_28240501 | NC_021166.1    | Ca_Kabuli_Chr07 | 28240501                | GG                                     | TT                 | TT               | INTERGENIC                    |                    |                                            |
| SNP_53399_A_28240517 | NC_021166.1    | Ca_Kabuli_Chr07 | 28240517                | AA                                     | GG                 | GG               | INTERGENIC                    |                    |                                            |
| SNP_53400_A_28240540 | NC_021166.1    | Ca_Kabuli_Chr07 | 28240540                | TT                                     | AA                 | AA               | INTERGENIC                    |                    |                                            |
| SNP_53401_A_28240545 | NC_021166.1    | Ca_Kabuli_Chr07 | 28240545                | CC                                     | AA                 | AA               | INTERGENIC                    |                    |                                            |

| SNPs IDs             | Chromosome IDs | Chromosomes     | Physical positions (bp) | CDC Frontier genome (Reference genome) | (Pusa 1103 & HPNB) | (ILWC 46 & LPNB) | Sequence Components of genome | Gene accession IDs | Putative functions                       |
|----------------------|----------------|-----------------|-------------------------|----------------------------------------|--------------------|------------------|-------------------------------|--------------------|------------------------------------------|
| SNP_53402_A_28240603 | NC_021166.1    | Ca_Kabuli_Chr07 | 28240603                | GG                                     | TT                 | TT               | INTERGENIC                    |                    |                                          |
| SNP_53403_A_28240611 | NC_021166.1    | Ca_Kabuli_Chr07 | 28240611                | TT                                     | CC                 | CC               | INTERGENIC                    |                    |                                          |
| SNP_53404_A_28240810 | NC_021166.1    | Ca_Kabuli_Chr07 | 28240810                | TT                                     | GG                 | GG               | INTERGENIC                    |                    |                                          |
| SNP_53405_A_28240834 | NC_021166.1    | Ca_Kabuli_Chr07 | 28240834                | TT                                     | CC                 | CC               | INTERGENIC                    |                    |                                          |
| SNP_53406_A_28317214 | NC_021166.1    | Ca_Kabuli_Chr07 | 28317214                | CC                                     | TT                 | TT               | INTERGENIC                    |                    |                                          |
| SNP_53408_A_28352872 | NC_021166.1    | Ca_Kabuli_Chr07 | 28352872                | TT                                     | CC                 | CC               | INTERGENIC                    |                    |                                          |
| SNP_53411_A_28401444 | NC_021166.1    | Ca_Kabuli_Chr07 | 28401444                | CC                                     | TT                 | TT               | INTERGENIC                    |                    |                                          |
| SNP_53413_A_28486280 | NC_021166.1    | Ca_Kabuli_Chr07 | 28486280                | TT                                     | CC                 | CC               | INTRON                        | 101499438          | CCR4-NOT transcription complex subunit 1 |
| SNP_53414_A_28529866 | NC_021166.1    | Ca_Kabuli_Chr07 | 28529866                | AA                                     | CC                 | CC               | INTERGENIC                    |                    |                                          |
| SNP_53415_A_28556933 | NC_021166.1    | Ca_Kabuli_Chr07 | 28556933                | AA                                     | TT                 | TT               | DRR                           | 101506477          | uncharacterized LOC101506477             |
| SNP_53417_A_28557139 | NC_021166.1    | Ca_Kabuli_Chr07 | 28557139                | CC                                     | TT                 | TT               | DRR                           | 101506477          | uncharacterized LOC101506477             |
| SNP_53418_A_28557203 | NC_021166.1    | Ca_Kabuli_Chr07 | 28557203                | GG                                     | AA                 | AA               | INTRON                        | 101506477          | uncharacterized LOC101506477             |
| SNP_53419_A_28561207 | NC_021166.1    | Ca_Kabuli_Chr07 | 28561207                | TT                                     | CC                 | CC               | DRR                           | 101506803          | uncharacterized LOC101506803             |
| SNP_53420_A_28561217 | NC_021166.1    | Ca_Kabuli_Chr07 | 28561217                | GG                                     | TT                 | TT               | DRR                           | 101506803          | uncharacterized LOC101506803             |
| SNP_53421_A_28561226 | NC_021166.1    | Ca_Kabuli_Chr07 | 28561226                | TT                                     | AA                 | AA               | DRR                           | 101506803          | uncharacterized LOC101506803             |
| SNP_53422_A_28561271 | NC_021166.1    | Ca_Kabuli_Chr07 | 28561271                | TT                                     | CC                 | CC               | DRR                           | 101506803          | uncharacterized LOC101506803             |
| SNP_53423_A_28561376 | NC_021166.1    | Ca_Kabuli_Chr07 | 28561376                | GG                                     | CC                 | CC               | DRR                           | 101506803          | uncharacterized LOC101506803             |
| SNP_53424_A_28561399 | NC_021166.1    | Ca_Kabuli_Chr07 | 28561399                | GG                                     | AA                 | AA               | DRR                           | 101506803          | uncharacterized LOC101506803             |
| SNP_53425_A_28561428 | NC_021166.1    | Ca_Kabuli_Chr07 | 28561428                | TT                                     | CC                 | CC               | DRR                           | 101506803          | uncharacterized LOC101506803             |
| SNP_53426_A_28561445 | NC_021166.1    | Ca_Kabuli_Chr07 | 28561445                | AA                                     | GG                 | GG               | DRR                           | 101506803          | uncharacterized LOC101506803             |
| SNP_53428_A_28561549 | NC_021166.1    | Ca_Kabuli_Chr07 | 28561549                | TT                                     | CC                 | CC               | DRR                           | 101506803          | uncharacterized LOC101506803             |
| SNP_53429_A_28561600 | NC_021166.1    | Ca_Kabuli_Chr07 | 28561600                | AA                                     | TT                 | TT               | DRR                           | 101506803          | uncharacterized LOC101506803             |

| SNPs IDs             | Chromosome IDs | Chromosomes     | Physical positions (bp) | CDC Frontier (Reference genome) | (Pusa 1103 & HPNB) | (ILWC 46 & LPNB) | Sequence Components of genome | Gene accession IDs | Putative functions                                        |
|----------------------|----------------|-----------------|-------------------------|---------------------------------|--------------------|------------------|-------------------------------|--------------------|-----------------------------------------------------------|
| SNP_53430_A_28611873 | NC_021166.1    | Ca_Kabuli_Chr07 | 28611873                | AA                              | GG                 | GG               | INTERGENIC                    |                    |                                                           |
| SNP_53431_A_28619530 | NC_021166.1    | Ca_Kabuli_Chr07 | 28619530                | TT                              | GG                 | GG               | DRR                           | 101503256          | dnaJ protein homolog 2-like                               |
| SNP_53432_A_28619534 | NC_021166.1    | Ca_Kabuli_Chr07 | 28619534                | TT                              | CC                 | CC               | DRR                           | 101503256          | dnaJ protein homolog 2-like                               |
| SNP_53433_A_28652673 | NC_021166.1    | Ca_Kabuli_Chr07 | 28652673                | CC                              | TT                 | TT               | INTERGENIC                    |                    |                                                           |
| SNP_53434_A_28702153 | NC_021166.1    | Ca_Kabuli_Chr07 | 28702153                | GG                              | AA                 | AA               | DRR                           | 101509032          | actin-related protein 4-like                              |
| SNP_53435_A_28702322 | NC_021166.1    | Ca_Kabuli_Chr07 | 28702322                | TT                              | CC                 | CC               | DRR                           | 101509032          | actin-related protein 4-like                              |
| SNP_53436_A_28702492 | NC_021166.1    | Ca_Kabuli_Chr07 | 28702492                | CC                              | TT                 | TT               | DRR                           | 101509032          | actin-related protein 4-like                              |
| SNP_53437_A_28702561 | NC_021166.1    | Ca_Kabuli_Chr07 | 28702561                | AA                              | CC                 | CC               | DRR                           | 101509032          | actin-related protein 4-like                              |
| SNP_53438_A_28702615 | NC_021166.1    | Ca_Kabuli_Chr07 | 28702615                | TT                              | CC                 | CC               | DRR                           | 101509032          | actin-related protein 4-like                              |
| SNP_53440_A_28705945 | NC_021166.1    | Ca_Kabuli_Chr07 | 28705945                | TT                              | CC                 | CC               | INTRON                        | 101509032          | actin-related protein 4-like                              |
| SNP_53441_A_28707198 | NC_021166.1    | Ca_Kabuli_Chr07 | 28707198                | CC                              | AA                 | AA               | INTRON                        | 101509032          | actin-related protein 4-like                              |
| SNP_53443_A_28707268 | NC_021166.1    | Ca_Kabuli_Chr07 | 28707268                | GG                              | AA                 | AA               | INTRON                        | 101509032          | actin-related protein 4-like                              |
| SNP_53444_A_28707394 | NC_021166.1    | Ca_Kabuli_Chr07 | 28707394                | TT                              | CC                 | CC               | INTRON                        | 101509032          | actin-related protein 4-like                              |
| SNP_53446_A_28707467 | NC_021166.1    | Ca_Kabuli_Chr07 | 28707467                | AA                              | GG                 | GG               | INTRON                        | 101509032          | actin-related protein 4-like                              |
| SNP_53447_A_28707595 | NC_021166.1    | Ca_Kabuli_Chr07 | 28707595                | CC                              | TT                 | TT               | INTRON                        | 101509032          | actin-related protein 4-like                              |
| SNP_53449_A_28875900 | NC_021166.1    | Ca_Kabuli_Chr07 | 28875900                | TT                              | CC                 | CC               | INTERGENIC                    |                    |                                                           |
| SNP_53450_A_28876231 | NC_021166.1    | Ca_Kabuli_Chr07 | 28876231                | CC                              | AA                 | AA               | INTERGENIC                    |                    |                                                           |
| SNP_53451_A_28904772 | NC_021166.1    | Ca_Kabuli_Chr07 | 28904772                | TT                              | AA                 | AA               | INTERGENIC                    |                    |                                                           |
| SNP_53452_A_28907272 | NC_021166.1    | Ca_Kabuli_Chr07 | 28907272                | CC                              | GG                 | GG               | INTERGENIC                    |                    |                                                           |
| SNP_53453_A_28912618 | NC_021166.1    | Ca_Kabuli_Chr07 | 28912618                | TT                              | AA                 | AA               | INTERGENIC                    |                    |                                                           |
| SNP_53454_A_28912899 | NC_021166.1    | Ca_Kabuli_Chr07 | 28912899                | AA                              | GG                 | GG               | INTERGENIC                    |                    |                                                           |
| SNP_53455_A_28913527 | NC_021166.1    | Ca_Kabuli_Chr07 | 28913527                | TT                              | CC                 | CC               | URR                           | 101510104          | 1-aminocyclopropane-1-carboxylate oxidase homolog 12-like |

| SNPs IDs             | Chromosome IDs | Chromosomes     | Physical positions (bp) | CDC Frontier (Reference genome) | (Pusa 1103 & HPNB) | (ILWC 46 & LPNB) | Sequence genome | Components of | Gene accession IDs | Putative functions                                        |
|----------------------|----------------|-----------------|-------------------------|---------------------------------|--------------------|------------------|-----------------|---------------|--------------------|-----------------------------------------------------------|
| SNP_53456_A_28913905 | NC_021166.1    | Ca_Kabuli_Chr07 | 28913905                | TT                              | GG                 | GG               | URR             |               | 101510104          | 1-aminocyclopropane-1-carboxylate oxidase homolog 12-like |
| SNP_53458_A_28916647 | NC_021166.1    | Ca_Kabuli_Chr07 | 28916647                | TT                              | CC                 | CC               | DRR             |               | 101510429          | E3 ubiquitin-protein ligase ATL4-like                     |
| SNP_53459_A_28918641 | NC_021166.1    | Ca_Kabuli_Chr07 | 28918641                | CC                              | TT                 | TT               | URR             |               | 101510429          | E3 ubiquitin-protein ligase ATL4-like                     |
| SNP_53460_A_28918775 | NC_021166.1    | Ca_Kabuli_Chr07 | 28918775                | AA                              | CC                 | CC               | URR             |               | 101510429          | E3 ubiquitin-protein ligase ATL4-like                     |
| SNP_53461_A_28918902 | NC_021166.1    | Ca_Kabuli_Chr07 | 28918902                | GG                              | CC                 | CC               | URR             |               | 101510429          | E3 ubiquitin-protein ligase ATL4-like                     |
| SNP_53463_A_28918973 | NC_021166.1    | Ca_Kabuli_Chr07 | 28918973                | TT                              | CC                 | CC               | URR             |               | 101510429          | E3 ubiquitin-protein ligase ATL4-like                     |
| SNP_53464_A_28918993 | NC_021166.1    | Ca_Kabuli_Chr07 | 28918993                | GG                              | AA                 | AA               | URR             |               | 101510429          | E3 ubiquitin-protein ligase ATL4-like                     |
| SNP_53465_A_28923058 | NC_021166.1    | Ca_Kabuli_Chr07 | 28923058                | AA                              | TT                 | TT               | INTRON          |               | 101510755          | uncharacterized LOC101510755                              |
| SNP_53466_A_28923852 | NC_021166.1    | Ca_Kabuli_Chr07 | 28923852                | CC                              | GG                 | GG               | INTRON          |               | 101510755          | uncharacterized LOC101510755                              |
| SNP_53467_A_28924098 | NC_021166.1    | Ca_Kabuli_Chr07 | 28924098                | CC                              | TT                 | TT               | INTRON          |               | 101510755          | uncharacterized LOC101510755                              |
| SNP_53468_A_28924317 | NC_021166.1    | Ca_Kabuli_Chr07 | 28924317                | CC                              | AA                 | AA               | INTRON          |               | 101510755          | uncharacterized LOC101510755                              |
| SNP_53469_A_28924330 | NC_021166.1    | Ca_Kabuli_Chr07 | 28924330                | TT                              | AA                 | AA               | INTRON          |               | 101510755          | uncharacterized LOC101510755                              |
| SNP_53470_A_28924343 | NC_021166.1    | Ca_Kabuli_Chr07 | 28924343                | GG                              | AA                 | AA               | INTRON          |               | 101510755          | uncharacterized LOC101510755                              |
| SNP_53472_A_28926142 | NC_021166.1    | Ca_Kabuli_Chr07 | 28926142                | AA                              | CC                 | CC               | DRR             |               | 101511079          | 20 kDa chaperonin, chloroplastic-like                     |
| SNP_53473_A_28929081 | NC_021166.1    | Ca_Kabuli_Chr07 | 28929081                | AA                              | CC                 | CC               | URR             |               | 101511079          | 20 kDa chaperonin, chloroplastic-like                     |
| SNP_53474_A_28932814 | NC_021166.1    | Ca_Kabuli_Chr07 | 28932814                | AA                              | GG                 | GG               | INTERGENIC      |               |                    |                                                           |
| SNP_53476_A_28935937 | NC_021166.1    | Ca_Kabuli_Chr07 | 28935937                | TT                              | GG                 | GG               | INTERGENIC      |               |                    |                                                           |
| SNP_53478_A_28937138 | NC_021166.1    | Ca_Kabuli_Chr07 | 28937138                | AA                              | GG                 | GG               | INTERGENIC      |               |                    |                                                           |
| SNP_53480_A_28937399 | NC_021166.1    | Ca_Kabuli_Chr07 | 28937399                | GG                              | AA                 | AA               | INTERGENIC      |               |                    |                                                           |
| SNP_53483_A_28942575 | NC_021166.1    | Ca_Kabuli_Chr07 | 28942575                | CC                              | GG                 | GG               | URR             |               | 101511717          | putative invertase inhibitor                              |
| SNP_53484_A_28942800 | NC_021166.1    | Ca_Kabuli_Chr07 | 28942800                | CC                              | TT                 | TT               | URR             |               | 101511717          | putative invertase inhibitor                              |
| SNP_53485_A_28943087 | NC_021166.1    | Ca_Kabuli_Chr07 | 28943087                | CC                              | TT                 | TT               | INTERGENIC      |               |                    |                                                           |

| SNPs IDs             | Chromosome IDs | Chromosomes     | Physical positions (bp) | CDC Frontier genome (Reference genome) | (Pusa 1103 & HPNB) | (ILWC 46 & LPNB) | Sequence genome | Components of | Gene accession IDs           | Putative functions |
|----------------------|----------------|-----------------|-------------------------|----------------------------------------|--------------------|------------------|-----------------|---------------|------------------------------|--------------------|
| SNP_53486_A_28946048 | NC_021166.1    | Ca_Kabuli_Chr07 | 28946048                | TT                                     | AA                 | AA               | INTERGENIC      |               |                              |                    |
| SNP_53487_A_28947362 | NC_021166.1    | Ca_Kabuli_Chr07 | 28947362                | AA                                     | GG                 | GG               | INTERGENIC      |               |                              |                    |
| SNP_53488_A_28947631 | NC_021166.1    | Ca_Kabuli_Chr07 | 28947631                | CC                                     | TT                 | TT               | INTERGENIC      |               |                              |                    |
| SNP_53489_A_28948504 | NC_021166.1    | Ca_Kabuli_Chr07 | 28948504                | CC                                     | AA                 | AA               | INTERGENIC      |               |                              |                    |
| SNP_53490_A_28948570 | NC_021166.1    | Ca_Kabuli_Chr07 | 28948570                | AA                                     | CC                 | CC               | INTERGENIC      |               |                              |                    |
| SNP_53492_A_28949523 | NC_021166.1    | Ca_Kabuli_Chr07 | 28949523                | TT                                     | AA                 | AA               | INTERGENIC      |               |                              |                    |
| SNP_53493_A_28949525 | NC_021166.1    | Ca_Kabuli_Chr07 | 28949525                | AA                                     | GG                 | GG               | INTERGENIC      |               |                              |                    |
| SNP_53494_A_28950286 | NC_021166.1    | Ca_Kabuli_Chr07 | 28950286                | AA                                     | CC                 | CC               | INTERGENIC      |               |                              |                    |
| SNP_53495_A_28950337 | NC_021166.1    | Ca_Kabuli_Chr07 | 28950337                | CC                                     | TT                 | TT               | INTERGENIC      |               |                              |                    |
| SNP_53496_A_28951025 | NC_021166.1    | Ca_Kabuli_Chr07 | 28951025                | TT                                     | CC                 | CC               | INTERGENIC      |               |                              |                    |
| SNP_53497_A_28951027 | NC_021166.1    | Ca_Kabuli_Chr07 | 28951027                | GG                                     | AA                 | AA               | INTERGENIC      |               |                              |                    |
| SNP_53498_A_28953397 | NC_021166.1    | Ca_Kabuli_Chr07 | 28953397                | TT                                     | CC                 | CC               | INTERGENIC      |               |                              |                    |
| SNP_53499_A_28956573 | NC_021166.1    | Ca_Kabuli_Chr07 | 28956573                | CC                                     | GG                 | GG               | INTERGENIC      |               |                              |                    |
| SNP_53500_A_28956628 | NC_021166.1    | Ca_Kabuli_Chr07 | 28956628                | AA                                     | GG                 | GG               | INTERGENIC      |               |                              |                    |
| SNP_53501_A_28958757 | NC_021166.1    | Ca_Kabuli_Chr07 | 28958757                | TT                                     | CC                 | CC               | INTERGENIC      |               |                              |                    |
| SNP_53502_A_28962014 | NC_021166.1    | Ca_Kabuli_Chr07 | 28962014                | AA                                     | GG                 | GG               | URR             | 101512034     | uncharacterized LOC101512034 |                    |
| SNP_53503_A_28964503 | NC_021166.1    | Ca_Kabuli_Chr07 | 28964503                | CC                                     | GG                 | GG               | INTERGENIC      |               |                              |                    |
| SNP_53504_A_28964893 | NC_021166.1    | Ca_Kabuli_Chr07 | 28964893                | AA                                     | CC                 | CC               | INTERGENIC      |               |                              |                    |
| SNP_53505_A_28965121 | NC_021166.1    | Ca_Kabuli_Chr07 | 28965121                | AA                                     | TT                 | TT               | INTERGENIC      |               |                              |                    |
| SNP_53506_A_28965250 | NC_021166.1    | Ca_Kabuli_Chr07 | 28965250                | CC                                     | TT                 | TT               | INTERGENIC      |               |                              |                    |
| SNP_53507_A_28965277 | NC_021166.1    | Ca_Kabuli_Chr07 | 28965277                | GG                                     | AA                 | AA               | INTERGENIC      |               |                              |                    |
| SNP_53508_A_28965366 | NC_021166.1    | Ca_Kabuli_Chr07 | 28965366                | GG                                     | CC                 | CC               | INTERGENIC      |               |                              |                    |

| SNPs IDs             | Chromosome IDs | Chromosomes     | Physical positions (bp) | CDC Frontier genome (Reference genome) | (Pusa 1103 & HPNB) | (ILWC 46 & LPNB) | Sequence Components of genome | Gene accession IDs | Putative functions                                       |
|----------------------|----------------|-----------------|-------------------------|----------------------------------------|--------------------|------------------|-------------------------------|--------------------|----------------------------------------------------------|
| SNP_53509_A_28966614 | NC_021166.1    | Ca_Kabuli_Chr07 | 28966614                | TT                                     | GG                 | GG               | INTERGENIC                    |                    |                                                          |
| SNP_53510_A_28966630 | NC_021166.1    | Ca_Kabuli_Chr07 | 28966630                | GG                                     | AA                 | AA               | INTERGENIC                    |                    |                                                          |
| SNP_53511_A_28966850 | NC_021166.1    | Ca_Kabuli_Chr07 | 28966850                | AA                                     | GG                 | GG               | INTERGENIC                    |                    |                                                          |
| SNP_53512_A_28966894 | NC_021166.1    | Ca_Kabuli_Chr07 | 28966894                | GG                                     | AA                 | AA               | INTERGENIC                    |                    |                                                          |
| SNP_53513_A_28966897 | NC_021166.1    | Ca_Kabuli_Chr07 | 28966897                | GG                                     | TT                 | TT               | INTERGENIC                    |                    |                                                          |
| SNP_53514_A_28968944 | NC_021166.1    | Ca_Kabuli_Chr07 | 28968944                | CC                                     | TT                 | TT               | INTERGENIC                    |                    |                                                          |
| SNP_53515_A_28969021 | NC_021166.1    | Ca_Kabuli_Chr07 | 28969021                | GG                                     | AA                 | AA               | INTERGENIC                    |                    |                                                          |
| SNP_53517_A_28979330 | NC_021166.1    | Ca_Kabuli_Chr07 | 28979330                | TT                                     | CC                 | CC               | INTRON                        | 101512359          | NAD-dependent malic enzyme 62 kDa isoform, mitochondrial |
| SNP_53518_A_28988010 | NC_021166.1    | Ca_Kabuli_Chr07 | 28988010                | GG                                     | AA                 | AA               | INTRON                        | 101512359          | NAD-dependent malic enzyme 62 kDa isoform, mitochondrial |
| SNP_53520_A_28999155 | NC_021166.1    | Ca_Kabuli_Chr07 | 28999155                | TT                                     | CC                 | CC               | INTERGENIC                    |                    |                                                          |
| SNP_53521_A_28999171 | NC_021166.1    | Ca_Kabuli_Chr07 | 28999171                | GG                                     | TT                 | TT               | INTERGENIC                    |                    |                                                          |
| SNP_53522_A_28999173 | NC_021166.1    | Ca_Kabuli_Chr07 | 28999173                | TT                                     | AA                 | AA               | INTERGENIC                    |                    |                                                          |
| SNP_53523_A_28999484 | NC_021166.1    | Ca_Kabuli_Chr07 | 28999484                | TT                                     | AA                 | AA               | INTERGENIC                    |                    |                                                          |
| SNP_53524_A_28999514 | NC_021166.1    | Ca_Kabuli_Chr07 | 28999514                | AA                                     | TT                 | TT               | INTERGENIC                    |                    |                                                          |
| SNP_53525_A_29000615 | NC_021166.1    | Ca_Kabuli_Chr07 | 29000615                | TT                                     | CC                 | CC               | INTERGENIC                    |                    |                                                          |
| SNP_53526_A_29000617 | NC_021166.1    | Ca_Kabuli_Chr07 | 29000617                | GG                                     | AA                 | AA               | INTERGENIC                    |                    |                                                          |
| SNP_53527_A_29000809 | NC_021166.1    | Ca_Kabuli_Chr07 | 29000809                | TT                                     | AA                 | AA               | INTERGENIC                    |                    |                                                          |
| SNP_53528_A_29000834 | NC_021166.1    | Ca_Kabuli_Chr07 | 29000834                | AA                                     | GG                 | GG               | INTERGENIC                    |                    |                                                          |
| SNP_53530_A_29001524 | NC_021166.1    | Ca_Kabuli_Chr07 | 29001524                | AA                                     | CC                 | CC               | INTERGENIC                    |                    |                                                          |
| SNP_53531_A_29001527 | NC_021166.1    | Ca_Kabuli_Chr07 | 29001527                | CC                                     | AA                 | AA               | INTERGENIC                    |                    |                                                          |
| SNP_53533_A_29003187 | NC_021166.1    | Ca_Kabuli_Chr07 | 29003187                | CC                                     | TT                 | TT               | DRR                           | 101512684          | dynamamin-related protein 1E-like                        |
| SNP_53534_A_29003298 | NC_021166.1    | Ca_Kabuli_Chr07 | 29003298                | CC                                     | GG                 | GG               | DRR                           | 101512684          | dynamamin-related protein 1E-like                        |

| SNPs IDs             | Chromosome IDs | Chromosomes     | Physical positions (bp) | CDC Frontier genome (Reference genome) | (Pusa 1103 & HPNB) | (ILWC 46 & LPNB) | Sequence Components of genome | Gene accession IDs | Putative functions               |
|----------------------|----------------|-----------------|-------------------------|----------------------------------------|--------------------|------------------|-------------------------------|--------------------|----------------------------------|
| SNP_53535_A_29004068 | NC_021166.1    | Ca_Kabuli_Chr07 | 29004068                | AA                                     | GG                 | GG               | INTRON                        | 101512684          | dynammin-related protein 1E-like |
| SNP_53536_A_29004072 | NC_021166.1    | Ca_Kabuli_Chr07 | 29004072                | TT                                     | CC                 | CC               | INTRON                        | 101512684          | dynammin-related protein 1E-like |
| SNP_53539_A_29008518 | NC_021166.1    | Ca_Kabuli_Chr07 | 29008518                | CC                                     | TT                 | TT               | INTERGENIC                    |                    |                                  |
| SNP_53540_A_29009596 | NC_021166.1    | Ca_Kabuli_Chr07 | 29009596                | TT                                     | AA                 | AA               | DRR                           | 101513002          | UMP-CMP kinase 3-like            |
| SNP_53541_A_29009772 | NC_021166.1    | Ca_Kabuli_Chr07 | 29009772                | AA                                     | GG                 | GG               | DRR                           | 101513002          | UMP-CMP kinase 3-like            |
| SNP_53542_A_29010138 | NC_021166.1    | Ca_Kabuli_Chr07 | 29010138                | TT                                     | GG                 | GG               | DRR                           | 101513002          | UMP-CMP kinase 3-like            |
| SNP_53544_A_29011145 | NC_021166.1    | Ca_Kabuli_Chr07 | 29011145                | CC                                     | TT                 | TT               | URR                           | 101512684          | dynammin-related protein 1E-like |
| SNP_53545_A_29011228 | NC_021166.1    | Ca_Kabuli_Chr07 | 29011228                | TT                                     | CC                 | CC               | URR                           | 101512684          | dynammin-related protein 1E-like |
| SNP_53547_A_29012104 | NC_021166.1    | Ca_Kabuli_Chr07 | 29012104                | CC                                     | TT                 | TT               | INTERGENIC                    |                    |                                  |
| SNP_53548_A_29012481 | NC_021166.1    | Ca_Kabuli_Chr07 | 29012481                | CC                                     | GG                 | GG               | INTERGENIC                    |                    |                                  |
| SNP_53550_A_29014927 | NC_021166.1    | Ca_Kabuli_Chr07 | 29014927                | AA                                     | GG                 | GG               | INTRON                        | 101513002          | UMP-CMP kinase 3-like            |
| SNP_53551_A_29015144 | NC_021166.1    | Ca_Kabuli_Chr07 | 29015144                | TT                                     | CC                 | CC               | INTRON                        | 101513002          | UMP-CMP kinase 3-like            |
| SNP_53552_A_29015165 | NC_021166.1    | Ca_Kabuli_Chr07 | 29015165                | GG                                     | AA                 | AA               | INTRON                        | 101513002          | UMP-CMP kinase 3-like            |
| SNP_53553_A_29020197 | NC_021166.1    | Ca_Kabuli_Chr07 | 29020197                | GG                                     | AA                 | AA               | URR                           | 101513002          | UMP-CMP kinase 3-like            |
| SNP_53554_A_29020212 | NC_021166.1    | Ca_Kabuli_Chr07 | 29020212                | CC                                     | GG                 | GG               | URR                           | 101513002          | UMP-CMP kinase 3-like            |
| SNP_53555_A_29020413 | NC_021166.1    | Ca_Kabuli_Chr07 | 29020413                | AA                                     | GG                 | GG               | URR                           | 101513002          | UMP-CMP kinase 3-like            |
| SNP_53556_A_29020418 | NC_021166.1    | Ca_Kabuli_Chr07 | 29020418                | CC                                     | TT                 | TT               | URR                           | 101513002          | UMP-CMP kinase 3-like            |
| SNP_53557_A_29020462 | NC_021166.1    | Ca_Kabuli_Chr07 | 29020462                | GG                                     | TT                 | TT               | URR                           | 101513002          | UMP-CMP kinase 3-like            |
| SNP_53559_A_29020511 | NC_021166.1    | Ca_Kabuli_Chr07 | 29020511                | CC                                     | AA                 | AA               | URR                           | 101513002          | UMP-CMP kinase 3-like            |
| SNP_53560_A_29020708 | NC_021166.1    | Ca_Kabuli_Chr07 | 29020708                | CC                                     | AA                 | AA               | URR                           | 101513002          | UMP-CMP kinase 3-like            |
| SNP_53561_A_29020919 | NC_021166.1    | Ca_Kabuli_Chr07 | 29020919                | GG                                     | AA                 | AA               | URR                           | 101513002          | UMP-CMP kinase 3-like            |
| SNP_53564_A_29021315 | NC_021166.1    | Ca_Kabuli_Chr07 | 29021315                | AA                                     | TT                 | TT               | INTERGENIC                    |                    |                                  |



| SNPs IDs             | Chromosome IDs | Chromosomes     | Physical positions (bp) | CDC Frontier genome (Reference genome) | (Pusa 1103 & HPNB) | (ILWC 46 & LPNB) | Sequence Components of genome | Gene accession IDs | Putative functions           |
|----------------------|----------------|-----------------|-------------------------|----------------------------------------|--------------------|------------------|-------------------------------|--------------------|------------------------------|
| SNP_53566_A_29022040 | NC_021166.1    | Ca_Kabuli_Chr07 | 29022040                | TT                                     | GG                 | GG               | INTERGENIC                    |                    |                              |
| SNP_53566_A_29022062 | NC_021166.1    | Ca_Kabuli_Chr07 | 29022062                | GG                                     | AA                 | AA               | INTERGENIC                    |                    |                              |
| SNP_53567_A_29022067 | NC_021166.1    | Ca_Kabuli_Chr07 | 29022067                | CC                                     | TT                 | TT               | INTERGENIC                    |                    |                              |
| SNP_53568_A_29022279 | NC_021166.1    | Ca_Kabuli_Chr07 | 29022279                | AA                                     | TT                 | TT               | INTERGENIC                    |                    |                              |
| SNP_53570_A_29022476 | NC_021166.1    | Ca_Kabuli_Chr07 | 29022476                | AA                                     | GG                 | GG               | INTERGENIC                    |                    |                              |
| SNP_53571_A_29022494 | NC_021166.1    | Ca_Kabuli_Chr07 | 29022494                | AA                                     | TT                 | TT               | INTERGENIC                    |                    |                              |
| SNP_53572_A_29022574 | NC_021166.1    | Ca_Kabuli_Chr07 | 29022574                | TT                                     | AA                 | AA               | INTERGENIC                    |                    |                              |
| SNP_53573_A_29022589 | NC_021166.1    | Ca_Kabuli_Chr07 | 29022589                | AA                                     | CC                 | CC               | INTERGENIC                    |                    |                              |
| SNP_53575_A_29022925 | NC_021166.1    | Ca_Kabuli_Chr07 | 29022925                | CC                                     | AA                 | AA               | DRR                           | 101513544          | uncharacterized LOC101513544 |
| SNP_53577_A_29024222 | NC_021166.1    | Ca_Kabuli_Chr07 | 29024222                | AA                                     | CC                 | CC               | INTRON                        | 101513544          | uncharacterized LOC101513544 |
| SNP_53578_A_29024489 | NC_021166.1    | Ca_Kabuli_Chr07 | 29024489                | CC                                     | TT                 | TT               | INTRON                        | 101513544          | uncharacterized LOC101513544 |
| SNP_53579_A_29025997 | NC_021166.1    | Ca_Kabuli_Chr07 | 29025997                | CC                                     | GG                 | GG               | INTRON                        | 101513544          | uncharacterized LOC101513544 |
| SNP_53580_A_29035540 | NC_021166.1    | Ca_Kabuli_Chr07 | 29035540                | TT                                     | CC                 | CC               | INTERGENIC                    |                    |                              |
| SNP_53581_A_29035548 | NC_021166.1    | Ca_Kabuli_Chr07 | 29035548                | AA                                     | CC                 | CC               | INTERGENIC                    |                    |                              |
| SNP_53582_A_29041645 | NC_021166.1    | Ca_Kabuli_Chr07 | 29041645                | AA                                     | GG                 | GG               | URR                           | 101514081          | protein ECERIFERUM 1         |
| SNP_53583_A_29041656 | NC_021166.1    | Ca_Kabuli_Chr07 | 29041656                | GG                                     | TT                 | TT               | URR                           | 101514081          | protein ECERIFERUM 1         |
| SNP_53584_A_29042268 | NC_021166.1    | Ca_Kabuli_Chr07 | 29042268                | GG                                     | TT                 | TT               | URR                           | 101514081          | protein ECERIFERUM 1         |
| SNP_53585_A_29042269 | NC_021166.1    | Ca_Kabuli_Chr07 | 29042269                | TT                                     | CC                 | CC               | URR                           | 101514081          | protein ECERIFERUM 1         |
| SNP_53586_A_29044227 | NC_021166.1    | Ca_Kabuli_Chr07 | 29044227                | CC                                     | TT                 | TT               | INTERGENIC                    |                    |                              |
| SNP_53587_A_29044669 | NC_021166.1    | Ca_Kabuli_Chr07 | 29044669                | TT                                     | GG                 | GG               | INTERGENIC                    |                    |                              |
| SNP_53588_A_29063222 | NC_021166.1    | Ca_Kabuli_Chr07 | 29063222                | AA                                     | GG                 | GG               | INTERGENIC                    |                    |                              |
| SNP_53589_A_29064041 | NC_021166.1    | Ca_Kabuli_Chr07 | 29064041                | TT                                     | CC                 | CC               | INTERGENIC                    |                    |                              |

| SNPs IDs             | Chromosome IDs | Chromosomes     | Physical positions (bp) | CDC Frontier (Reference genome) | (Pusa 1103 & HPNB) | (ILWC 46 & LPNB) | Sequence Components of genome | Gene accession IDs | Putative functions        |
|----------------------|----------------|-----------------|-------------------------|---------------------------------|--------------------|------------------|-------------------------------|--------------------|---------------------------|
| SNP_53590_A_29064042 | NC_021166.1    | Ca_Kabuli_Chr07 | 29064042                | CC                              | AA                 | AA               | INTERGENIC                    |                    |                           |
| SNP_53591_A_29064104 | NC_021166.1    | Ca_Kabuli_Chr07 | 29064104                | TT                              | GG                 | GG               | INTERGENIC                    |                    |                           |
| SNP_53592_A_29066064 | NC_021166.1    | Ca_Kabuli_Chr07 | 29066064                | GG                              | AA                 | AA               | INTERGENIC                    |                    |                           |
| SNP_53593_A_29066082 | NC_021166.1    | Ca_Kabuli_Chr07 | 29066082                | AA                              | CC                 | CC               | INTERGENIC                    |                    |                           |
| SNP_53594_A_29066148 | NC_021166.1    | Ca_Kabuli_Chr07 | 29066148                | TT                              | CC                 | CC               | INTERGENIC                    |                    |                           |
| SNP_53595_A_29066174 | NC_021166.1    | Ca_Kabuli_Chr07 | 29066174                | AA                              | GG                 | GG               | INTERGENIC                    |                    |                           |
| SNP_53596_A_29066180 | NC_021166.1    | Ca_Kabuli_Chr07 | 29066180                | GG                              | AA                 | AA               | INTERGENIC                    |                    |                           |
| SNP_53598_A_29067601 | NC_021166.1    | Ca_Kabuli_Chr07 | 29067601                | CC                              | TT                 | TT               | INTERGENIC                    |                    |                           |
| SNP_53599_A_29067629 | NC_021166.1    | Ca_Kabuli_Chr07 | 29067629                | TT                              | CC                 | CC               | INTERGENIC                    |                    |                           |
| SNP_53600_A_29067755 | NC_021166.1    | Ca_Kabuli_Chr07 | 29067755                | AA                              | GG                 | GG               | INTERGENIC                    |                    |                           |
| SNP_53601_A_29067772 | NC_021166.1    | Ca_Kabuli_Chr07 | 29067772                | GG                              | AA                 | AA               | INTERGENIC                    |                    |                           |
| SNP_53602_A_29067814 | NC_021166.1    | Ca_Kabuli_Chr07 | 29067814                | AA                              | TT                 | TT               | INTERGENIC                    |                    |                           |
| SNP_53603_A_29067820 | NC_021166.1    | Ca_Kabuli_Chr07 | 29067820                | AA                              | GG                 | GG               | INTERGENIC                    |                    |                           |
| SNP_53604_A_29067822 | NC_021166.1    | Ca_Kabuli_Chr07 | 29067822                | TT                              | CC                 | CC               | INTERGENIC                    |                    |                           |
| SNP_53605_A_29067847 | NC_021166.1    | Ca_Kabuli_Chr07 | 29067847                | GG                              | AA                 | AA               | INTERGENIC                    |                    |                           |
| SNP_53606_A_29067918 | NC_021166.1    | Ca_Kabuli_Chr07 | 29067918                | GG                              | AA                 | AA               | INTERGENIC                    |                    |                           |
| SNP_53607_A_29068012 | NC_021166.1    | Ca_Kabuli_Chr07 | 29068012                | AA                              | GG                 | GG               | INTERGENIC                    |                    |                           |
| SNP_53608_A_29068023 | NC_021166.1    | Ca_Kabuli_Chr07 | 29068023                | TT                              | CC                 | CC               | INTERGENIC                    |                    |                           |
| SNP_53609_A_29069418 | NC_021166.1    | Ca_Kabuli_Chr07 | 29069418                | CC                              | TT                 | TT               | DRR                           | 101514846          | protein ECERIFERUM 1-like |
| SNP_53610_A_29069425 | NC_021166.1    | Ca_Kabuli_Chr07 | 29069425                | TT                              | CC                 | CC               | DRR                           | 101514846          | protein ECERIFERUM 1-like |
| SNP_53613_A_29070416 | NC_021166.1    | Ca_Kabuli_Chr07 | 29070416                | CC                              | TT                 | TT               | SYNONYMOUS_CODING             | 101514846          | protein ECERIFERUM 1-like |
| SNP_53614_A_29070492 | NC_021166.1    | Ca_Kabuli_Chr07 | 29070492                | GG                              | CC                 | CC               | INTRON                        | 101514846          | protein ECERIFERUM 1-like |

| SNPs IDs             | Chromosome IDs | Chromosomes     | Physical positions (bp) | CDC Frontier genome (Reference genome) | (Pusa 1103 & HPNB) | (ILWC 46 & LPNB) | Sequence Components of genome | Gene accession IDs | Putative functions        |
|----------------------|----------------|-----------------|-------------------------|----------------------------------------|--------------------|------------------|-------------------------------|--------------------|---------------------------|
| SNP_53616_A_29070565 | NC_021166.1    | Ca_Kabuli_Chr07 | 29070565                | GG                                     | TT                 | TT               | INTRON                        | 101514846          | protein ECERIFERUM 1-like |
| SNP_53617_A_29070787 | NC_021166.1    | Ca_Kabuli_Chr07 | 29070787                | GG                                     | AA                 | AA               | INTRON                        | 101514846          | protein ECERIFERUM 1-like |
| SNP_53618_A_29070788 | NC_021166.1    | Ca_Kabuli_Chr07 | 29070788                | AA                                     | CC                 | CC               | INTRON                        | 101514846          | protein ECERIFERUM 1-like |
| SNP_53619_A_29070797 | NC_021166.1    | Ca_Kabuli_Chr07 | 29070797                | AA                                     | GG                 | GG               | INTRON                        | 101514846          | protein ECERIFERUM 1-like |
| SNP_53620_A_29073545 | NC_021166.1    | Ca_Kabuli_Chr07 | 29073545                | TT                                     | CC                 | CC               | INTRON                        | 101514846          | protein ECERIFERUM 1-like |
| SNP_53621_A_29073984 | NC_021166.1    | Ca_Kabuli_Chr07 | 29073984                | GG                                     | AA                 | AA               | SYNONYMOUS_CODING             | 101514846          | protein ECERIFERUM 1-like |
| SNP_53622_A_29076393 | NC_021166.1    | Ca_Kabuli_Chr07 | 29076393                | TT                                     | CC                 | CC               | INTRON                        | 101514846          | protein ECERIFERUM 1-like |
| SNP_53623_A_29077032 | NC_021166.1    | Ca_Kabuli_Chr07 | 29077032                | CC                                     | TT                 | TT               | INTRON                        | 101514846          | protein ECERIFERUM 1-like |
| SNP_53624_A_29079415 | NC_021166.1    | Ca_Kabuli_Chr07 | 29079415                | GG                                     | CC                 | CC               | URR                           | 101514846          | protein ECERIFERUM 1-like |
| SNP_53625_A_29083157 | NC_021166.1    | Ca_Kabuli_Chr07 | 29083157                | TT                                     | GG                 | GG               | INTERGENIC                    |                    |                           |
| SNP_53626_A_29084807 | NC_021166.1    | Ca_Kabuli_Chr07 | 29084807                | TT                                     | CC                 | CC               | INTERGENIC                    |                    |                           |
| SNP_53627_A_29084933 | NC_021166.1    | Ca_Kabuli_Chr07 | 29084933                | GG                                     | AA                 | AA               | INTERGENIC                    |                    |                           |
| SNP_53628_A_29085579 | NC_021166.1    | Ca_Kabuli_Chr07 | 29085579                | GG                                     | AA                 | AA               | INTERGENIC                    |                    |                           |
| SNP_53629_A_29085636 | NC_021166.1    | Ca_Kabuli_Chr07 | 29085636                | CC                                     | AA                 | AA               | INTERGENIC                    |                    |                           |
| SNP_53631_A_29085889 | NC_021166.1    | Ca_Kabuli_Chr07 | 29085889                | CC                                     | AA                 | AA               | INTERGENIC                    |                    |                           |
| SNP_53632_A_29086107 | NC_021166.1    | Ca_Kabuli_Chr07 | 29086107                | AA                                     | GG                 | GG               | INTERGENIC                    |                    |                           |
| SNP_53633_A_29086133 | NC_021166.1    | Ca_Kabuli_Chr07 | 29086133                | AA                                     | GG                 | GG               | INTERGENIC                    |                    |                           |
| SNP_53634_A_29086150 | NC_021166.1    | Ca_Kabuli_Chr07 | 29086150                | TT                                     | CC                 | CC               | INTERGENIC                    |                    |                           |
| SNP_53635_A_29086948 | NC_021166.1    | Ca_Kabuli_Chr07 | 29086948                | TT                                     | CC                 | CC               | INTERGENIC                    |                    |                           |
| SNP_53636_A_29087083 | NC_021166.1    | Ca_Kabuli_Chr07 | 29087083                | TT                                     | CC                 | CC               | INTERGENIC                    |                    |                           |
| SNP_53638_A_29094129 | NC_021166.1    | Ca_Kabuli_Chr07 | 29094129                | CC                                     | TT                 | TT               | INTERGENIC                    |                    |                           |
| SNP_53639_A_29094168 | NC_021166.1    | Ca_Kabuli_Chr07 | 29094168                | GG                                     | CC                 | CC               | INTERGENIC                    |                    |                           |

| SNPs IDs             | Chromosome IDs | Chromosomes     | Physical positions (bp) | CDC Frontier genome (Reference genome) | (Pusa 1103 & HPNB) | (ILWC 46 & LPNB) | Sequence Components of genome | Gene accession IDs | Putative functions                          |
|----------------------|----------------|-----------------|-------------------------|----------------------------------------|--------------------|------------------|-------------------------------|--------------------|---------------------------------------------|
| SNP_53640_A_29094621 | NC_021166.1    | Ca_Kabuli_Chr07 | 29094621                | AA                                     | TT                 | TT               | INTERGENIC                    |                    |                                             |
| SNP_53641_A_29094975 | NC_021166.1    | Ca_Kabuli_Chr07 | 29094975                | AA                                     | TT                 | TT               | INTERGENIC                    |                    |                                             |
| SNP_53642_A_29095481 | NC_021166.1    | Ca_Kabuli_Chr07 | 29095481                | CC                                     | TT                 | TT               | DRR                           | 101515169          | putative ABC transporter C family member 15 |
| SNP_53643_A_29095760 | NC_021166.1    | Ca_Kabuli_Chr07 | 29095760                | GG                                     | AA                 | AA               | DRR                           | 101515169          | putative ABC transporter C family member 15 |
| SNP_53644_A_29095766 | NC_021166.1    | Ca_Kabuli_Chr07 | 29095766                | AA                                     | GG                 | GG               | DRR                           | 101515169          | putative ABC transporter C family member 15 |
| SNP_53646_A_29103875 | NC_021166.1    | Ca_Kabuli_Chr07 | 29103875                | TT                                     | CC                 | CC               | INTERGENIC                    |                    |                                             |
| SNP_53647_A_29103890 | NC_021166.1    | Ca_Kabuli_Chr07 | 29103890                | GG                                     | AA                 | AA               | INTERGENIC                    |                    |                                             |
| SNP_53648_A_29103962 | NC_021166.1    | Ca_Kabuli_Chr07 | 29103962                | TT                                     | CC                 | CC               | INTERGENIC                    |                    |                                             |
| SNP_53649_A_29103965 | NC_021166.1    | Ca_Kabuli_Chr07 | 29103965                | AA                                     | GG                 | GG               | INTERGENIC                    |                    |                                             |
| SNP_53650_A_29104009 | NC_021166.1    | Ca_Kabuli_Chr07 | 29104009                | CC                                     | AA                 | AA               | INTERGENIC                    |                    |                                             |
| SNP_53651_A_29104208 | NC_021166.1    | Ca_Kabuli_Chr07 | 29104208                | TT                                     | CC                 | CC               | INTERGENIC                    |                    |                                             |
| SNP_53653_A_29104299 | NC_021166.1    | Ca_Kabuli_Chr07 | 29104299                | GG                                     | TT                 | TT               | INTERGENIC                    |                    |                                             |
| SNP_53654_A_29104429 | NC_021166.1    | Ca_Kabuli_Chr07 | 29104429                | GG                                     | TT                 | TT               | INTERGENIC                    |                    |                                             |
| SNP_53655_A_29105068 | NC_021166.1    | Ca_Kabuli_Chr07 | 29105068                | AA                                     | GG                 | GG               | INTERGENIC                    |                    |                                             |
| SNP_53656_A_29105793 | NC_021166.1    | Ca_Kabuli_Chr07 | 29105793                | TT                                     | CC                 | CC               | INTERGENIC                    |                    |                                             |
| SNP_53657_A_29105815 | NC_021166.1    | Ca_Kabuli_Chr07 | 29105815                | AA                                     | GG                 | GG               | INTERGENIC                    |                    |                                             |
| SNP_53658_A_29106196 | NC_021166.1    | Ca_Kabuli_Chr07 | 29106196                | TT                                     | GG                 | GG               | INTERGENIC                    |                    |                                             |
| SNP_53659_A_29106197 | NC_021166.1    | Ca_Kabuli_Chr07 | 29106197                | AA                                     | CC                 | CC               | INTERGENIC                    |                    |                                             |
| SNP_53660_A_29106602 | NC_021166.1    | Ca_Kabuli_Chr07 | 29106602                | AA                                     | TT                 | TT               | INTERGENIC                    |                    |                                             |
| SNP_53661_A_29108206 | NC_021166.1    | Ca_Kabuli_Chr07 | 29108206                | TT                                     | CC                 | CC               | DRR                           | 101515718          | uncharacterized LOC101515718                |
| SNP_53662_A_29108252 | NC_021166.1    | Ca_Kabuli_Chr07 | 29108252                | CC                                     | TT                 | TT               | URR                           | 101515169          | putative ABC transporter C family member 15 |
| SNP_53663_A_29109628 | NC_021166.1    | Ca_Kabuli_Chr07 | 29109628                | GG                                     | AA                 | AA               | INTERGENIC                    |                    |                                             |

| SNPs IDs             | Chromosome IDs | Chromosomes     | Physical positions (bp) | CDC Frontier genome (Reference genome) | (Pusa 1103 & HPNB) | (ILWC 46 & LPNB) | Sequence Components of genome | Gene accession IDs | Putative functions                                                   |
|----------------------|----------------|-----------------|-------------------------|----------------------------------------|--------------------|------------------|-------------------------------|--------------------|----------------------------------------------------------------------|
| SNP_53664_A_29110091 | NC_021166.1    | Ca_Kabuli_Chr07 | 29110091                | AA                                     | TT                 | TT               | INTERGENIC                    |                    |                                                                      |
| SNP_53665_A_29110095 | NC_021166.1    | Ca_Kabuli_Chr07 | 29110095                | AA                                     | CC                 | CC               | INTERGENIC                    |                    |                                                                      |
| SNP_53666_A_29110159 | NC_021166.1    | Ca_Kabuli_Chr07 | 29110159                | TT                                     | AA                 | AA               | INTERGENIC                    |                    |                                                                      |
| SNP_53667_A_29110895 | NC_021166.1    | Ca_Kabuli_Chr07 | 29110895                | GG                                     | AA                 | AA               | DRR                           | 101488477          | ribose-phosphate pyrophosphokinase 1                                 |
| SNP_53668_A_29110906 | NC_021166.1    | Ca_Kabuli_Chr07 | 29110906                | GG                                     | CC                 | CC               | DRR                           | 101488477          | ribose-phosphate pyrophosphokinase 1                                 |
| SNP_53669_A_29111893 | NC_021166.1    | Ca_Kabuli_Chr07 | 29111893                | CC                                     | TT                 | TT               | URR                           | 101515718          | uncharacterized LOC101515718                                         |
| SNP_53671_A_29119069 | NC_021166.1    | Ca_Kabuli_Chr07 | 29119069                | TT                                     | AA                 | AA               | INTERGENIC                    |                    |                                                                      |
| SNP_53672_A_29120175 | NC_021166.1    | Ca_Kabuli_Chr07 | 29120175                | GG                                     | AA                 | AA               | URR                           | 101488477          | ribose-phosphate pyrophosphokinase 1                                 |
| SNP_53673_A_29121593 | NC_021166.1    | Ca_Kabuli_Chr07 | 29121593                | CC                                     | AA                 | AA               | URR                           | 101488477          | ribose-phosphate pyrophosphokinase 1                                 |
| SNP_53675_A_29122696 | NC_021166.1    | Ca_Kabuli_Chr07 | 29122696                | CC                                     | TT                 | TT               | INTRON                        | 101488819          | NADH dehydrogenase [ubiquinone] 1 alpha subcomplex assembly factor 3 |
| SNP_53676_A_29122715 | NC_021166.1    | Ca_Kabuli_Chr07 | 29122715                | TT                                     | CC                 | CC               | INTRON                        | 101488819          | NADH dehydrogenase [ubiquinone] 1 alpha subcomplex assembly factor 3 |
| SNP_53677_A_29123091 | NC_021166.1    | Ca_Kabuli_Chr07 | 29123091                | AA                                     | TT                 | TT               | INTRON                        | 101488819          | NADH dehydrogenase [ubiquinone] 1 alpha subcomplex assembly factor 3 |
| SNP_53678_A_29123249 | NC_021166.1    | Ca_Kabuli_Chr07 | 29123249                | AA                                     | GG                 | GG               | INTRON                        | 101488819          | NADH dehydrogenase [ubiquinone] 1 alpha subcomplex assembly factor 3 |
| SNP_53679_A_29123259 | NC_021166.1    | Ca_Kabuli_Chr07 | 29123259                | GG                                     | AA                 | AA               | INTRON                        | 101488819          | NADH dehydrogenase [ubiquinone] 1 alpha subcomplex assembly factor 3 |
| SNP_53680_A_29123271 | NC_021166.1    | Ca_Kabuli_Chr07 | 29123271                | CC                                     | AA                 | AA               | INTRON                        | 101488819          | NADH dehydrogenase [ubiquinone] 1 alpha subcomplex assembly factor 3 |
| SNP_53681_A_29125720 | NC_021166.1    | Ca_Kabuli_Chr07 | 29125720                | AA                                     | CC                 | CC               | URR                           | 101488819          | NADH dehydrogenase [ubiquinone] 1 alpha subcomplex assembly factor 3 |
| SNP_53682_A_29125724 | NC_021166.1    | Ca_Kabuli_Chr07 | 29125724                | GG                                     | AA                 | AA               | URR                           | 101488819          | NADH dehydrogenase [ubiquinone] 1 alpha subcomplex assembly factor 3 |
| SNP_53684_A_29128331 | NC_021166.1    | Ca_Kabuli_Chr07 | 29128331                | AA                                     | GG                 | GG               | DRR                           | 101489476          | annexin A7                                                           |
| SNP_53685_A_29128346 | NC_021166.1    | Ca_Kabuli_Chr07 | 29128346                | TT                                     | AA                 | AA               | DRR                           | 101489476          | annexin A7                                                           |
| SNP_53686_A_29128348 | NC_021166.1    | Ca_Kabuli_Chr07 | 29128348                | CC                                     | AA                 | AA               | DRR                           | 101489476          | annexin A7                                                           |
| SNP_53688_A_29131225 | NC_021166.1    | Ca_Kabuli_Chr07 | 29131225                | GG                                     | AA                 | AA               | INTERGENIC                    |                    |                                                                      |
| SNP_53689_A_29133106 | NC_021166.1    | Ca_Kabuli_Chr07 | 29133106                | GG                                     | CC                 | CC               | URR                           | 101489476          | annexin A7                                                           |

| SNPs IDs             | Chromosome IDs | Chromosomes     | Physical positions (bp) | CDC Frontier genome (Reference genome) | (Pusa 1103 & HPNB) | (ILWC 46 & LPNB) | Sequence Components of genome | Gene accession IDs | Putative functions           |
|----------------------|----------------|-----------------|-------------------------|----------------------------------------|--------------------|------------------|-------------------------------|--------------------|------------------------------|
| SNP_53691_A_29133192 | NC_021166.1    | Ca_Kabuli_Chr07 | 29133192                | CC                                     | TT                 | TT               | URR                           | 101489476          | annexin A7                   |
| SNP_53692_A_29133350 | NC_021166.1    | Ca_Kabuli_Chr07 | 29133350                | TT                                     | CC                 | CC               | URR                           | 101489476          | annexin A7                   |
| SNP_53693_A_29133355 | NC_021166.1    | Ca_Kabuli_Chr07 | 29133355                | TT                                     | CC                 | CC               | URR                           | 101489476          | annexin A7                   |
| SNP_53694_A_29133382 | NC_021166.1    | Ca_Kabuli_Chr07 | 29133382                | CC                                     | TT                 | TT               | URR                           | 101489476          | annexin A7                   |
| SNP_53695_A_29133385 | NC_021166.1    | Ca_Kabuli_Chr07 | 29133385                | CC                                     | TT                 | TT               | URR                           | 101489476          | annexin A7                   |
| SNP_53696_A_29133391 | NC_021166.1    | Ca_Kabuli_Chr07 | 29133391                | CC                                     | TT                 | TT               | URR                           | 101489476          | annexin A7                   |
| SNP_53697_A_29133420 | NC_021166.1    | Ca_Kabuli_Chr07 | 29133420                | TT                                     | CC                 | CC               | URR                           | 101489476          | annexin A7                   |
| SNP_53698_A_29133426 | NC_021166.1    | Ca_Kabuli_Chr07 | 29133426                | CC                                     | TT                 | TT               | URR                           | 101489476          | annexin A7                   |
| SNP_53699_A_29133708 | NC_021166.1    | Ca_Kabuli_Chr07 | 29133708                | GG                                     | AA                 | AA               | URR                           | 101489476          | annexin A7                   |
| SNP_53700_A_29134302 | NC_021166.1    | Ca_Kabuli_Chr07 | 29134302                | TT                                     | CC                 | CC               | INTERGENIC                    |                    |                              |
| SNP_53701_A_29134314 | NC_021166.1    | Ca_Kabuli_Chr07 | 29134314                | AA                                     | GG                 | GG               | INTERGENIC                    |                    |                              |
| SNP_53702_A_29134321 | NC_021166.1    | Ca_Kabuli_Chr07 | 29134321                | TT                                     | CC                 | CC               | INTERGENIC                    |                    |                              |
| SNP_53703_A_29134331 | NC_021166.1    | Ca_Kabuli_Chr07 | 29134331                | TT                                     | CC                 | CC               | INTERGENIC                    |                    |                              |
| SNP_53704_A_29134341 | NC_021166.1    | Ca_Kabuli_Chr07 | 29134341                | GG                                     | AA                 | AA               | INTERGENIC                    |                    |                              |
| SNP_53705_A_29134625 | NC_021166.1    | Ca_Kabuli_Chr07 | 29134625                | TT                                     | GG                 | GG               | INTERGENIC                    |                    |                              |
| SNP_53706_A_29135611 | NC_021166.1    | Ca_Kabuli_Chr07 | 29135611                | TT                                     | GG                 | GG               | DRR                           | 101490219          | uncharacterized LOC101490219 |
| SNP_53708_A_29136774 | NC_021166.1    | Ca_Kabuli_Chr07 | 29136774                | GG                                     | CC                 | CC               | INTERGENIC                    |                    |                              |
| SNP_53709_A_29137155 | NC_021166.1    | Ca_Kabuli_Chr07 | 29137155                | GG                                     | TT                 | TT               | INTERGENIC                    |                    |                              |
| SNP_53710_A_29138450 | NC_021166.1    | Ca_Kabuli_Chr07 | 29138450                | CC                                     | TT                 | TT               | INTERGENIC                    |                    |                              |
| SNP_53711_A_29138464 | NC_021166.1    | Ca_Kabuli_Chr07 | 29138464                | TT                                     | CC                 | CC               | INTERGENIC                    |                    |                              |
| SNP_53712_A_29140270 | NC_021166.1    | Ca_Kabuli_Chr07 | 29140270                | AA                                     | TT                 | TT               | URR                           | 101490219          | uncharacterized LOC101490219 |
| SNP_53713_A_29140287 | NC_021166.1    | Ca_Kabuli_Chr07 | 29140287                | CC                                     | TT                 | TT               | URR                           | 101490219          | uncharacterized LOC101490219 |

| SNPs IDs             | Chromosome IDs | Chromosomes     | Physical positions (bp) | CDC Frontier genome (Reference genome) | (Pusa 1103 & HPNB) | (ILWC 46 & LPNB) | Sequence Components of genome | Gene accession IDs | Putative functions                                                 |
|----------------------|----------------|-----------------|-------------------------|----------------------------------------|--------------------|------------------|-------------------------------|--------------------|--------------------------------------------------------------------|
| SNP_53714_A_29142943 | NC_021166.1    | Ca_Kabuli_Chr07 | 29142943                | TT                                     | AA                 | AA               | INTERGENIC                    |                    |                                                                    |
| SNP_53715_A_29142947 | NC_021166.1    | Ca_Kabuli_Chr07 | 29142947                | TT                                     | AA                 | AA               | INTERGENIC                    |                    |                                                                    |
| SNP_53716_A_29143751 | NC_021166.1    | Ca_Kabuli_Chr07 | 29143751                | AA                                     | GG                 | GG               | INTERGENIC                    |                    |                                                                    |
| SNP_53717_A_29145024 | NC_021166.1    | Ca_Kabuli_Chr07 | 29145024                | GG                                     | AA                 | AA               | INTRON                        | 101491622          | uncharacterized LOC101491622                                       |
| SNP_53718_A_29153091 | NC_021166.1    | Ca_Kabuli_Chr07 | 29153091                | AA                                     | GG                 | GG               | INTRON                        | 101491622          | uncharacterized LOC101491622                                       |
| SNP_53719_A_29163255 | NC_021166.1    | Ca_Kabuli_Chr07 | 29163255                | TT                                     | CC                 | CC               | INTERGENIC                    |                    |                                                                    |
| SNP_53720_A_29164623 | NC_021166.1    | Ca_Kabuli_Chr07 | 29164623                | AA                                     | TT                 | TT               | DRR                           | 101492381          | zinc finger protein 593-like                                       |
| SNP_53721_A_29164723 | NC_021166.1    | Ca_Kabuli_Chr07 | 29164723                | TT                                     | AA                 | AA               | DRR                           | 101492381          | zinc finger protein 593-like                                       |
| SNP_53723_A_29165905 | NC_021166.1    | Ca_Kabuli_Chr07 | 29165905                | CC                                     | TT                 | TT               | INTRON                        | 101492381          | zinc finger protein 593-like                                       |
| SNP_53724_A_29165917 | NC_021166.1    | Ca_Kabuli_Chr07 | 29165917                | GG                                     | AA                 | AA               | INTRON                        | 101492381          | zinc finger protein 593-like                                       |
| SNP_53725_A_29167218 | NC_021166.1    | Ca_Kabuli_Chr07 | 29167218                | TT                                     | CC                 | CC               | URR                           | 101492381          | zinc finger protein 593-like                                       |
| SNP_53726_A_29172135 | NC_021166.1    | Ca_Kabuli_Chr07 | 29172135                | TT                                     | CC                 | CC               | DRR                           | 101492713          | 2-alkenal reductase (NADP(+)-dependent)-like                       |
| SNP_53727_A_29172167 | NC_021166.1    | Ca_Kabuli_Chr07 | 29172167                | GG                                     | CC                 | CC               | DRR                           | 101492713          | 2-alkenal reductase (NADP(+)-dependent)-like                       |
| SNP_53729_A_29172546 | NC_021166.1    | Ca_Kabuli_Chr07 | 29172546                | CC                                     | AA                 | AA               | INTRON                        | 101492713          | 2-alkenal reductase (NADP(+)-dependent)-like                       |
| SNP_53730_A_29172724 | NC_021166.1    | Ca_Kabuli_Chr07 | 29172724                | GG                                     | CC                 | CC               | INTRON                        | 101492713          | 2-alkenal reductase (NADP(+)-dependent)-like                       |
| SNP_53731_A_29172725 | NC_021166.1    | Ca_Kabuli_Chr07 | 29172725                | GG                                     | TT                 | TT               | INTRON                        | 101492713          | 2-alkenal reductase (NADP(+)-dependent)-like                       |
| SNP_53732_A_29175133 | NC_021166.1    | Ca_Kabuli_Chr07 | 29175133                | TT                                     | AA                 | AA               | URR                           | 101492713          | 2-alkenal reductase (NADP(+)-dependent)-like                       |
| SNP_53733_A_29176663 | NC_021166.1    | Ca_Kabuli_Chr07 | 29176663                | AA                                     | GG                 | GG               | URR                           | 101492713          | 2-alkenal reductase (NADP(+)-dependent)-like                       |
| SNP_53736_A_29181975 | NC_021166.1    | Ca_Kabuli_Chr07 | 29181975                | TT                                     | CC                 | CC               | INTERGENIC                    |                    |                                                                    |
| SNP_53737_A_29184529 | NC_021166.1    | Ca_Kabuli_Chr07 | 29184529                | GG                                     | AA                 | AA               | URR                           | 101493370          | cytochrome b561 and DOMON domain-containing protein At2g04850-like |
| SNP_53738_A_29184773 | NC_021166.1    | Ca_Kabuli_Chr07 | 29184773                | GG                                     | AA                 | AA               | URR                           | 101493691          | uncharacterized LOC101493691                                       |
| SNP_53739_A_29186767 | NC_021166.1    | Ca_Kabuli_Chr07 | 29186767                | TT                                     | AA                 | AA               | INTERGENIC                    |                    |                                                                    |

| SNPs IDs             | Chromosome IDs | Chromosomes     | Physical positions (bp) | CDC Frontier genome (Reference genome) | (Pusa 1103 & HPNB) | (ILWC 46 & LPNB) | Sequence genome | Components of | Gene accession IDs | Putative functions                                                     |
|----------------------|----------------|-----------------|-------------------------|----------------------------------------|--------------------|------------------|-----------------|---------------|--------------------|------------------------------------------------------------------------|
| SNP_53740_A_29188050 | NC_021166.1    | Ca_Kabuli_Chr07 | 29188050                | TT                                     | CC                 | CC               | INTERGENIC      |               |                    |                                                                        |
| SNP_53741_A_29188098 | NC_021166.1    | Ca_Kabuli_Chr07 | 29188098                | GG                                     | AA                 | AA               | INTERGENIC      |               |                    |                                                                        |
| SNP_53742_A_29188107 | NC_021166.1    | Ca_Kabuli_Chr07 | 29188107                | GG                                     | AA                 | AA               | INTERGENIC      |               |                    |                                                                        |
| SNP_53745_A_29196598 | NC_021166.1    | Ca_Kabuli_Chr07 | 29196598                | GG                                     | AA                 | AA               | INTERGENIC      |               |                    |                                                                        |
| SNP_53746_A_29198689 | NC_021166.1    | Ca_Kabuli_Chr07 | 29198689                | GG                                     | AA                 | AA               | DRR             |               | 101498998          | NAC transcription factor 29-like                                       |
| SNP_53747_A_29198695 | NC_021166.1    | Ca_Kabuli_Chr07 | 29198695                | CC                                     | TT                 | TT               | DRR             |               | 101498998          | NAC transcription factor 29-like                                       |
| SNP_53748_A_29200929 | NC_021166.1    | Ca_Kabuli_Chr07 | 29200929                | CC                                     | AA                 | AA               | URR             |               | 101498998          | NAC transcription factor 29-like                                       |
| SNP_53749_A_29208166 | NC_021166.1    | Ca_Kabuli_Chr07 | 29208166                | AA                                     | GG                 | GG               | INTERGENIC      |               |                    |                                                                        |
| SNP_53751_A_29208235 | NC_021166.1    | Ca_Kabuli_Chr07 | 29208235                | CC                                     | AA                 | AA               | INTERGENIC      |               |                    |                                                                        |
| SNP_53752_A_29208243 | NC_021166.1    | Ca_Kabuli_Chr07 | 29208243                | AA                                     | GG                 | GG               | INTERGENIC      |               |                    |                                                                        |
| SNP_53753_A_29208244 | NC_021166.1    | Ca_Kabuli_Chr07 | 29208244                | TT                                     | AA                 | AA               | INTERGENIC      |               |                    |                                                                        |
| SNP_53754_A_29209655 | NC_021166.1    | Ca_Kabuli_Chr07 | 29209655                | TT                                     | CC                 | CC               | INTERGENIC      |               |                    |                                                                        |
| SNP_53755_A_29209688 | NC_021166.1    | Ca_Kabuli_Chr07 | 29209688                | GG                                     | TT                 | TT               | INTERGENIC      |               |                    |                                                                        |
| SNP_53756_A_29218670 | NC_021166.1    | Ca_Kabuli_Chr07 | 29218670                | AA                                     | TT                 | TT               | INTERGENIC      |               |                    |                                                                        |
| SNP_53758_A_29221730 | NC_021166.1    | Ca_Kabuli_Chr07 | 29221730                | AA                                     | GG                 | GG               | INTERGENIC      |               |                    |                                                                        |
| SNP_53760_A_29223440 | NC_021166.1    | Ca_Kabuli_Chr07 | 29223440                | TT                                     | GG                 | GG               | URR             |               | 101494326          | protein SCAI                                                           |
| SNP_53762_A_29224379 | NC_021166.1    | Ca_Kabuli_Chr07 | 29224379                | GG                                     | CC                 | CC               | INTRON          |               | 101494639          | probable NADH dehydrogenase [ubiquinone] 1 alpha subcomplex subunit 12 |
| SNP_53763_A_29224457 | NC_021166.1    | Ca_Kabuli_Chr07 | 29224457                | CC                                     | AA                 | AA               | INTRON          |               | 101494639          | probable NADH dehydrogenase [ubiquinone] 1 alpha subcomplex subunit 12 |
| SNP_53764_A_29224486 | NC_021166.1    | Ca_Kabuli_Chr07 | 29224486                | TT                                     | CC                 | CC               | INTRON          |               | 101494639          | probable NADH dehydrogenase [ubiquinone] 1 alpha subcomplex subunit 12 |
| SNP_53766_A_29230368 | NC_021166.1    | Ca_Kabuli_Chr07 | 29230368                | AA                                     | GG                 | GG               | INTERGENIC      |               |                    |                                                                        |
| SNP_53767_A_29232140 | NC_021166.1    | Ca_Kabuli_Chr07 | 29232140                | CC                                     | GG                 | GG               | URR             |               | 101494955          | splicing factor 3A subunit 2                                           |
| SNP_53768_A_29232146 | NC_021166.1    | Ca_Kabuli_Chr07 | 29232146                | AA                                     | GG                 | GG               | URR             |               | 101494955          | splicing factor 3A subunit 2                                           |



| SNPs IDs             | Chromosome IDs | Chromosomes     | Physical positions (bp) | CDC Frontier genome (Reference genome) | (Pusa 1103 & HPNB) | (ILWC 46 & LPNB) | Sequence Components of genome | Gene accession IDs | Putative functions                           |
|----------------------|----------------|-----------------|-------------------------|----------------------------------------|--------------------|------------------|-------------------------------|--------------------|----------------------------------------------|
| SNP_53769_A_29232169 | NC_021166.1    | Ca_Kabuli_Chr07 | 29232169                | TT                                     | CC                 | CC               | URR                           | 101494955          | splicing factor 3A subunit 2                 |
| SNP_53770_A_29232347 | NC_021166.1    | Ca_Kabuli_Chr07 | 29232347                | TT                                     | AA                 | AA               | URR                           | 101494955          | splicing factor 3A subunit 2                 |
| SNP_53771_A_29232376 | NC_021166.1    | Ca_Kabuli_Chr07 | 29232376                | TT                                     | CC                 | CC               | URR                           | 101494955          | splicing factor 3A subunit 2                 |
| SNP_53772_A_29232791 | NC_021166.1    | Ca_Kabuli_Chr07 | 29232791                | AA                                     | TT                 | TT               | URR                           | 101494955          | splicing factor 3A subunit 2                 |
| SNP_53773_A_29233471 | NC_021166.1    | Ca_Kabuli_Chr07 | 29233471                | TT                                     | AA                 | AA               | URR                           | 101494955          | splicing factor 3A subunit 2                 |
| SNP_53774_A_29233488 | NC_021166.1    | Ca_Kabuli_Chr07 | 29233488                | AA                                     | CC                 | CC               | URR                           | 101494955          | splicing factor 3A subunit 2                 |
| SNP_53775_A_29233491 | NC_021166.1    | Ca_Kabuli_Chr07 | 29233491                | GG                                     | AA                 | AA               | URR                           | 101494955          | splicing factor 3A subunit 2                 |
| SNP_53776_A_29234767 | NC_021166.1    | Ca_Kabuli_Chr07 | 29234767                | TT                                     | CC                 | CC               | DRR                           | 101495283          | 2-alkenal reductase (NADP(+)-dependent)-like |
| SNP_53777_A_29236493 | NC_021166.1    | Ca_Kabuli_Chr07 | 29236493                | TT                                     | CC                 | CC               | INTERGENIC                    |                    |                                              |
| SNP_53779_A_29240433 | NC_021166.1    | Ca_Kabuli_Chr07 | 29240433                | GG                                     | AA                 | AA               | URR                           | 101495283          | 2-alkenal reductase (NADP(+)-dependent)-like |
| SNP_53780_A_29242730 | NC_021166.1    | Ca_Kabuli_Chr07 | 29242730                | GG                                     | AA                 | AA               | INTERGENIC                    |                    |                                              |
| SNP_53781_A_29244583 | NC_021166.1    | Ca_Kabuli_Chr07 | 29244583                | AA                                     | GG                 | GG               | INTERGENIC                    |                    |                                              |
| SNP_53782_A_29245245 | NC_021166.1    | Ca_Kabuli_Chr07 | 29245245                | CC                                     | TT                 | TT               | INTERGENIC                    |                    |                                              |
| SNP_53783_A_29246482 | NC_021166.1    | Ca_Kabuli_Chr07 | 29246482                | TT                                     | CC                 | CC               | INTERGENIC                    |                    |                                              |
| SNP_53784_A_29246531 | NC_021166.1    | Ca_Kabuli_Chr07 | 29246531                | TT                                     | CC                 | CC               | INTERGENIC                    |                    |                                              |
| SNP_53785_A_29246595 | NC_021166.1    | Ca_Kabuli_Chr07 | 29246595                | CC                                     | AA                 | AA               | INTERGENIC                    |                    |                                              |
| SNP_53786_A_29246858 | NC_021166.1    | Ca_Kabuli_Chr07 | 29246858                | CC                                     | TT                 | TT               | INTERGENIC                    |                    |                                              |
| SNP_53787_A_29250345 | NC_021166.1    | Ca_Kabuli_Chr07 | 29250345                | TT                                     | CC                 | CC               | INTERGENIC                    |                    |                                              |
| SNP_53788_A_29250899 | NC_021166.1    | Ca_Kabuli_Chr07 | 29250899                | AA                                     | CC                 | CC               | INTERGENIC                    |                    |                                              |
| SNP_53789_A_29251216 | NC_021166.1    | Ca_Kabuli_Chr07 | 29251216                | AA                                     | GG                 | GG               | INTERGENIC                    |                    |                                              |
| SNP_53790_A_29251679 | NC_021166.1    | Ca_Kabuli_Chr07 | 29251679                | GG                                     | TT                 | TT               | INTERGENIC                    |                    |                                              |
| SNP_53791_A_29252698 | NC_021166.1    | Ca_Kabuli_Chr07 | 29252698                | AA                                     | GG                 | GG               | INTERGENIC                    |                    |                                              |

| SNPs IDs             | Chromosome IDs | Chromosomes     | Physical positions (bp) | CDC Frontier genome (Reference genome) | (Pusa 1103 & HPNB) | (ILWC 46 & LPNB) | Sequence Components of genome | Gene accession IDs | Putative functions                   |
|----------------------|----------------|-----------------|-------------------------|----------------------------------------|--------------------|------------------|-------------------------------|--------------------|--------------------------------------|
| SNP_53792_A_29253603 | NC_021166.1    | Ca_Kabuli_Chr07 | 29253603                | GG                                     | AA                 | AA               | INTERGENIC                    |                    |                                      |
| SNP_53793_A_29254022 | NC_021166.1    | Ca_Kabuli_Chr07 | 29254022                | TT                                     | AA                 | AA               | INTERGENIC                    |                    |                                      |
| SNP_53794_A_29258380 | NC_021166.1    | Ca_Kabuli_Chr07 | 29258380                | GG                                     | AA                 | AA               | INTERGENIC                    |                    |                                      |
| SNP_53795_A_29259839 | NC_021166.1    | Ca_Kabuli_Chr07 | 29259839                | AA                                     | GG                 | GG               | INTERGENIC                    |                    |                                      |
| SNP_53796_A_29260175 | NC_021166.1    | Ca_Kabuli_Chr07 | 29260175                | TT                                     | GG                 | GG               | INTERGENIC                    |                    |                                      |
| SNP_53797_A_29262185 | NC_021166.1    | Ca_Kabuli_Chr07 | 29262185                | CC                                     | TT                 | TT               | DRR                           | 101499319          | probable polygalacturonase At3g15720 |
| SNP_53799_A_29266587 | NC_021166.1    | Ca_Kabuli_Chr07 | 29266587                | GG                                     | TT                 | TT               | URR                           | 101499319          | probable polygalacturonase At3g15720 |
| SNP_53800_A_29266829 | NC_021166.1    | Ca_Kabuli_Chr07 | 29266829                | GG                                     | CC                 | CC               | URR                           | 101499319          | probable polygalacturonase At3g15720 |
| SNP_53801_A_29269168 | NC_021166.1    | Ca_Kabuli_Chr07 | 29269168                | AA                                     | GG                 | GG               | INTERGENIC                    |                    |                                      |
| SNP_53802_A_29270449 | NC_021166.1    | Ca_Kabuli_Chr07 | 29270449                | AA                                     | TT                 | TT               | INTERGENIC                    |                    |                                      |
| SNP_53803_A_29270491 | NC_021166.1    | Ca_Kabuli_Chr07 | 29270491                | AA                                     | GG                 | GG               | INTERGENIC                    |                    |                                      |
| SNP_53804_A_29270595 | NC_021166.1    | Ca_Kabuli_Chr07 | 29270595                | GG                                     | TT                 | TT               | INTERGENIC                    |                    |                                      |
| SNP_53806_A_29289979 | NC_021166.1    | Ca_Kabuli_Chr07 | 29289979                | CC                                     | TT                 | TT               | INTRON                        | 101499635          | probable polygalacturonase At3g15720 |
| SNP_53807_A_29291022 | NC_021166.1    | Ca_Kabuli_Chr07 | 29291022                | GG                                     | AA                 | AA               | INTRON                        | 101499635          | probable polygalacturonase At3g15720 |
| SNP_53808_A_29291419 | NC_021166.1    | Ca_Kabuli_Chr07 | 29291419                | TT                                     | CC                 | CC               | INTRON                        | 101499635          | probable polygalacturonase At3g15720 |
| SNP_53809_A_29291972 | NC_021166.1    | Ca_Kabuli_Chr07 | 29291972                | CC                                     | AA                 | AA               | URR                           | 101499635          | probable polygalacturonase At3g15720 |
| SNP_53810_A_29291974 | NC_021166.1    | Ca_Kabuli_Chr07 | 29291974                | TT                                     | CC                 | CC               | URR                           | 101499635          | probable polygalacturonase At3g15720 |
| SNP_53811_A_29294187 | NC_021166.1    | Ca_Kabuli_Chr07 | 29294187                | TT                                     | GG                 | GG               | INTERGENIC                    |                    |                                      |
| SNP_53812_A_29294193 | NC_021166.1    | Ca_Kabuli_Chr07 | 29294193                | TT                                     | CC                 | CC               | INTERGENIC                    |                    |                                      |
| SNP_53814_A_29300894 | NC_021166.1    | Ca_Kabuli_Chr07 | 29300894                | CC                                     | TT                 | TT               | INTRON                        | 101499939          | probable polygalacturonase At3g15720 |
| SNP_53815_A_29300932 | NC_021166.1    | Ca_Kabuli_Chr07 | 29300932                | AA                                     | GG                 | GG               | INTRON                        | 101499939          | probable polygalacturonase At3g15720 |
| SNP_53816_A_29301213 | NC_021166.1    | Ca_Kabuli_Chr07 | 29301213                | TT                                     | CC                 | CC               | INTRON                        | 101499939          | probable polygalacturonase At3g15720 |

| SNPs IDs             | Chromosome IDs | Chromosomes     | Physical positions (bp) | CDC Frontier genome (Reference genome) | (Pusa 1103 & HPNB) | (ILWC 46 & LPNB) | Sequence Components of genome | Gene accession IDs | Putative functions                   |
|----------------------|----------------|-----------------|-------------------------|----------------------------------------|--------------------|------------------|-------------------------------|--------------------|--------------------------------------|
| SNP_53817_A_29301214 | NC_021166.1    | Ca_Kabuli_Chr07 | 29301214                | GG                                     | AA                 | AA               | INTRON                        | 101499939          | probable polygalacturonase At3g15720 |
| SNP_53818_A_29301221 | NC_021166.1    | Ca_Kabuli_Chr07 | 29301221                | CC                                     | TT                 | TT               | INTRON                        | 101499939          | probable polygalacturonase At3g15720 |
| SNP_53819_A_29301226 | NC_021166.1    | Ca_Kabuli_Chr07 | 29301226                | TT                                     | CC                 | CC               | INTRON                        | 101499939          | probable polygalacturonase At3g15720 |
| SNP_53820_A_29306670 | NC_021166.1    | Ca_Kabuli_Chr07 | 29306670                | GG                                     | TT                 | TT               | INTRON                        | 101499939          | probable polygalacturonase At3g15720 |
| SNP_53821_A_29307050 | NC_021166.1    | Ca_Kabuli_Chr07 | 29307050                | GG                                     | TT                 | TT               | INTRON                        | 101499939          | probable polygalacturonase At3g15720 |
| SNP_53822_A_29307387 | NC_021166.1    | Ca_Kabuli_Chr07 | 29307387                | GG                                     | CC                 | CC               | INTRON                        | 101499939          | probable polygalacturonase At3g15720 |
| SNP_53823_A_29310933 | NC_021166.1    | Ca_Kabuli_Chr07 | 29310933                | TT                                     | CC                 | CC               | INTRON                        | 101499939          | probable polygalacturonase At3g15720 |
| SNP_53824_A_29310946 | NC_021166.1    | Ca_Kabuli_Chr07 | 29310946                | TT                                     | CC                 | CC               | INTRON                        | 101499939          | probable polygalacturonase At3g15720 |
| SNP_53825_A_29310960 | NC_021166.1    | Ca_Kabuli_Chr07 | 29310960                | AA                                     | GG                 | GG               | INTRON                        | 101499939          | probable polygalacturonase At3g15720 |
| SNP_53826_A_29310990 | NC_021166.1    | Ca_Kabuli_Chr07 | 29310990                | TT                                     | GG                 | GG               | INTRON                        | 101499939          | probable polygalacturonase At3g15720 |
| SNP_53827_A_29310991 | NC_021166.1    | Ca_Kabuli_Chr07 | 29310991                | CC                                     | TT                 | TT               | INTRON                        | 101499939          | probable polygalacturonase At3g15720 |
| SNP_53828_A_29311446 | NC_021166.1    | Ca_Kabuli_Chr07 | 29311446                | AA                                     | GG                 | GG               | INTRON                        | 101499939          | probable polygalacturonase At3g15720 |
| SNP_53829_A_29311739 | NC_021166.1    | Ca_Kabuli_Chr07 | 29311739                | GG                                     | TT                 | TT               | INTRON                        | 101499939          | probable polygalacturonase At3g15720 |
| SNP_53830_A_29317785 | NC_021166.1    | Ca_Kabuli_Chr07 | 29317785                | CC                                     | TT                 | TT               | INTERGENIC                    |                    |                                      |
| SNP_53831_A_29319896 | NC_021166.1    | Ca_Kabuli_Chr07 | 29319896                | AA                                     | GG                 | GG               | INTERGENIC                    |                    |                                      |
| SNP_53832_A_29319901 | NC_021166.1    | Ca_Kabuli_Chr07 | 29319901                | GG                                     | AA                 | AA               | INTERGENIC                    |                    |                                      |
| SNP_53833_A_29319963 | NC_021166.1    | Ca_Kabuli_Chr07 | 29319963                | GG                                     | AA                 | AA               | INTERGENIC                    |                    |                                      |
| SNP_53834_A_29320319 | NC_021166.1    | Ca_Kabuli_Chr07 | 29320319                | AA                                     | GG                 | GG               | INTERGENIC                    |                    |                                      |
| SNP_53835_A_29320612 | NC_021166.1    | Ca_Kabuli_Chr07 | 29320612                | AA                                     | GG                 | GG               | INTRON                        | 101495935          | probable polygalacturonase At3g15720 |
| SNP_53836_A_29321376 | NC_021166.1    | Ca_Kabuli_Chr07 | 29321376                | AA                                     | CC                 | CC               | NON_SYNONYMOUS_CODING         | 101495935          | probable polygalacturonase At3g15720 |
| SNP_53837_A_29321401 | NC_021166.1    | Ca_Kabuli_Chr07 | 29321401                | TT                                     | GG                 | GG               | NON_SYNONYMOUS_CODING         | 101495935          | probable polygalacturonase At3g15720 |
| SNP_53838_A_29321631 | NC_021166.1    | Ca_Kabuli_Chr07 | 29321631                | GG                                     | TT                 | TT               | INTRON                        | 101495935          | probable polygalacturonase At3g15720 |

| SNPs IDs             | Chromosome IDs | Chromosomes     | Physical positions (bp) | CDC Frontier genome (Reference genome) | (Pusa 1103 & HPNB) | (ILWC 46 & LPNB) | Sequence Components of genome | Gene accession IDs | Putative functions                   |
|----------------------|----------------|-----------------|-------------------------|----------------------------------------|--------------------|------------------|-------------------------------|--------------------|--------------------------------------|
| SNP_53839_A_29321660 | NC_021166.1    | Ca_Kabuli_Chr07 | 29321660                | TT                                     | GG                 | GG               | INTRON                        | 101495935          | probable polygalacturonase At3g15720 |
| SNP_53841_A_29322570 | NC_021166.1    | Ca_Kabuli_Chr07 | 29322570                | AA                                     | GG                 | GG               | INTRON                        | 101495935          | probable polygalacturonase At3g15720 |
| SNP_53842_A_29322609 | NC_021166.1    | Ca_Kabuli_Chr07 | 29322609                | GG                                     | TT                 | TT               | INTRON                        | 101495935          | probable polygalacturonase At3g15720 |
| SNP_53843_A_29322906 | NC_021166.1    | Ca_Kabuli_Chr07 | 29322906                | CC                                     | TT                 | TT               | INTRON                        | 101495935          | probable polygalacturonase At3g15720 |
| SNP_53844_A_29324266 | NC_021166.1    | Ca_Kabuli_Chr07 | 29324266                | TT                                     | GG                 | GG               | INTRON                        | 101495935          | probable polygalacturonase At3g15720 |
| SNP_53845_A_29324283 | NC_021166.1    | Ca_Kabuli_Chr07 | 29324283                | AA                                     | CC                 | CC               | INTRON                        | 101495935          | probable polygalacturonase At3g15720 |
| SNP_53846_A_29324330 | NC_021166.1    | Ca_Kabuli_Chr07 | 29324330                | AA                                     | GG                 | GG               | INTRON                        | 101495935          | probable polygalacturonase At3g15720 |
| SNP_53847_A_29324369 | NC_021166.1    | Ca_Kabuli_Chr07 | 29324369                | CC                                     | GG                 | GG               | NON_SYNONYMOUS_CODING         | 101495935          | probable polygalacturonase At3g15720 |
| SNP_53848_A_29324419 | NC_021166.1    | Ca_Kabuli_Chr07 | 29324419                | AA                                     | GG                 | GG               | SYNONYMOUS_CODING             | 101495935          | probable polygalacturonase At3g15720 |
| SNP_53849_A_29324628 | NC_021166.1    | Ca_Kabuli_Chr07 | 29324628                | TT                                     | CC                 | CC               | URR                           | 101495935          | probable polygalacturonase At3g15720 |
| SNP_53851_A_29324669 | NC_021166.1    | Ca_Kabuli_Chr07 | 29324669                | AA                                     | GG                 | GG               | URR                           | 101495935          | probable polygalacturonase At3g15720 |
| SNP_53852_A_29324970 | NC_021166.1    | Ca_Kabuli_Chr07 | 29324970                | AA                                     | TT                 | TT               | URR                           | 101495935          | probable polygalacturonase At3g15720 |
| SNP_53853_A_29324973 | NC_021166.1    | Ca_Kabuli_Chr07 | 29324973                | CC                                     | TT                 | TT               | URR                           | 101495935          | probable polygalacturonase At3g15720 |
| SNP_53854_A_29324984 | NC_021166.1    | Ca_Kabuli_Chr07 | 29324984                | AA                                     | TT                 | TT               | URR                           | 101495935          | probable polygalacturonase At3g15720 |
| SNP_53855_A_29324995 | NC_021166.1    | Ca_Kabuli_Chr07 | 29324995                | TT                                     | CC                 | CC               | URR                           | 101495935          | probable polygalacturonase At3g15720 |
| SNP_53856_A_29325052 | NC_021166.1    | Ca_Kabuli_Chr07 | 29325052                | GG                                     | TT                 | TT               | URR                           | 101495935          | probable polygalacturonase At3g15720 |
| SNP_53857_A_29325501 | NC_021166.1    | Ca_Kabuli_Chr07 | 29325501                | TT                                     | AA                 | AA               | URR                           | 101495935          | probable polygalacturonase At3g15720 |
| SNP_53859_A_29329829 | NC_021166.1    | Ca_Kabuli_Chr07 | 29329829                | GG                                     | TT                 | TT               | INTERGENIC                    |                    |                                      |
| SNP_53860_A_29329836 | NC_021166.1    | Ca_Kabuli_Chr07 | 29329836                | CC                                     | AA                 | AA               | INTERGENIC                    |                    |                                      |
| SNP_53861_A_29329847 | NC_021166.1    | Ca_Kabuli_Chr07 | 29329847                | AA                                     | GG                 | GG               | INTERGENIC                    |                    |                                      |
| SNP_53862_A_29329849 | NC_021166.1    | Ca_Kabuli_Chr07 | 29329849                | GG                                     | AA                 | AA               | INTERGENIC                    |                    |                                      |
| SNP_53864_A_29335609 | NC_021166.1    | Ca_Kabuli_Chr07 | 29335609                | CC                                     | TT                 | TT               | INTERGENIC                    |                    |                                      |

| SNPs IDs             | Chromosome IDs | Chromosomes     | Physical positions (bp) | CDC Frontier genome (Reference genome) | (Pusa 1103 & HPNB) | (ILWC 46 & LPNB) | Sequence Components of genome | Gene accession IDs | Putative functions                   |
|----------------------|----------------|-----------------|-------------------------|----------------------------------------|--------------------|------------------|-------------------------------|--------------------|--------------------------------------|
| SNP_53865_A_29335633 | NC_021166.1    | Ca_Kabuli_Chr07 | 29335633                | GG                                     | AA                 | AA               | INTERGENIC                    |                    |                                      |
| SNP_53866_A_29335943 | NC_021166.1    | Ca_Kabuli_Chr07 | 29335943                | TT                                     | CC                 | CC               | INTERGENIC                    |                    |                                      |
| SNP_53867_A_29335966 | NC_021166.1    | Ca_Kabuli_Chr07 | 29335966                | GG                                     | AA                 | AA               | INTERGENIC                    |                    |                                      |
| SNP_53868_A_29337175 | NC_021166.1    | Ca_Kabuli_Chr07 | 29337175                | AA                                     | TT                 | TT               | SYNONYMOUS_CODING             | 101496270          | probable polygalacturonase At3g15720 |
| SNP_53869_A_29341831 | NC_021166.1    | Ca_Kabuli_Chr07 | 29341831                | GG                                     | AA                 | AA               | URR                           | 101496270          | probable polygalacturonase At3g15720 |
| SNP_53870_A_29343743 | NC_021166.1    | Ca_Kabuli_Chr07 | 29343743                | AA                                     | GG                 | GG               | INTERGENIC                    |                    |                                      |
| SNP_53872_A_29344737 | NC_021166.1    | Ca_Kabuli_Chr07 | 29344737                | TT                                     | CC                 | CC               | INTERGENIC                    |                    |                                      |
| SNP_53873_A_29346112 | NC_021166.1    | Ca_Kabuli_Chr07 | 29346112                | GG                                     | AA                 | AA               | INTERGENIC                    |                    |                                      |
| SNP_53876_A_29348100 | NC_021166.1    | Ca_Kabuli_Chr07 | 29348100                | TT                                     | CC                 | CC               | INTERGENIC                    |                    |                                      |
| SNP_53877_A_29350582 | NC_021166.1    | Ca_Kabuli_Chr07 | 29350582                | GG                                     | CC                 | CC               | INTERGENIC                    |                    |                                      |
| SNP_53878_A_29353854 | NC_021166.1    | Ca_Kabuli_Chr07 | 29353854                | GG                                     | AA                 | AA               | INTERGENIC                    |                    |                                      |
| SNP_53879_A_29354582 | NC_021166.1    | Ca_Kabuli_Chr07 | 29354582                | AA                                     | GG                 | GG               | INTERGENIC                    |                    |                                      |
| SNP_53880_A_29355029 | NC_021166.1    | Ca_Kabuli_Chr07 | 29355029                | TT                                     | CC                 | CC               | INTERGENIC                    |                    |                                      |
| SNP_53882_A_29380845 | NC_021166.1    | Ca_Kabuli_Chr07 | 29380845                | TT                                     | CC                 | CC               | INTERGENIC                    |                    |                                      |
| SNP_53883_A_29382105 | NC_021166.1    | Ca_Kabuli_Chr07 | 29382105                | TT                                     | CC                 | CC               | INTERGENIC                    |                    |                                      |
| SNP_53884_A_29382182 | NC_021166.1    | Ca_Kabuli_Chr07 | 29382182                | GG                                     | AA                 | AA               | INTERGENIC                    |                    |                                      |
| SNP_53885_A_29385471 | NC_021166.1    | Ca_Kabuli_Chr07 | 29385471                | GG                                     | AA                 | AA               | INTERGENIC                    |                    |                                      |
| SNP_53886_A_29386384 | NC_021166.1    | Ca_Kabuli_Chr07 | 29386384                | CC                                     | TT                 | TT               | INTERGENIC                    |                    |                                      |
| SNP_53887_A_29386534 | NC_021166.1    | Ca_Kabuli_Chr07 | 29386534                | TT                                     | GG                 | GG               | INTERGENIC                    |                    |                                      |
| SNP_53888_A_29386616 | NC_021166.1    | Ca_Kabuli_Chr07 | 29386616                | GG                                     | TT                 | TT               | INTERGENIC                    |                    |                                      |
| SNP_53889_A_29386905 | NC_021166.1    | Ca_Kabuli_Chr07 | 29386905                | CC                                     | TT                 | TT               | INTERGENIC                    |                    |                                      |
| SNP_53890_A_29386979 | NC_021166.1    | Ca_Kabuli_Chr07 | 29386979                | TT                                     | AA                 | AA               | INTERGENIC                    |                    |                                      |

| SNPs IDs             | Chromosome IDs | Chromosomes     | Physical positions (bp) | CDC Frontier genome (Reference genome) | (Pusa 1103 & HPNB) | (ILWC 46 & LPNB) | Sequence genome | Components of | Gene accession IDs | Putative functions |
|----------------------|----------------|-----------------|-------------------------|----------------------------------------|--------------------|------------------|-----------------|---------------|--------------------|--------------------|
| SNP_53891_A_29387103 | NC_021166.1    | Ca_Kabuli_Chr07 | 29387103                | GG                                     | TT                 | TT               | INTERGENIC      |               |                    |                    |
| SNP_53892_A_29387259 | NC_021166.1    | Ca_Kabuli_Chr07 | 29387259                | TT                                     | AA                 | AA               | INTERGENIC      |               |                    |                    |
| SNP_53893_A_29387500 | NC_021166.1    | Ca_Kabuli_Chr07 | 29387500                | TT                                     | CC                 | CC               | INTERGENIC      |               |                    |                    |
| SNP_53894_A_29387544 | NC_021166.1    | Ca_Kabuli_Chr07 | 29387544                | TT                                     | AA                 | AA               | INTERGENIC      |               |                    |                    |
| SNP_53895_A_29387840 | NC_021166.1    | Ca_Kabuli_Chr07 | 29387840                | GG                                     | AA                 | AA               | INTERGENIC      |               |                    |                    |
| SNP_53896_A_29387868 | NC_021166.1    | Ca_Kabuli_Chr07 | 29387868                | GG                                     | TT                 | TT               | INTERGENIC      |               |                    |                    |
| SNP_53897_A_29388117 | NC_021166.1    | Ca_Kabuli_Chr07 | 29388117                | GG                                     | AA                 | AA               | INTERGENIC      |               |                    |                    |
| SNP_53898_A_29388128 | NC_021166.1    | Ca_Kabuli_Chr07 | 29388128                | TT                                     | AA                 | AA               | INTERGENIC      |               |                    |                    |
| SNP_53899_A_29388406 | NC_021166.1    | Ca_Kabuli_Chr07 | 29388406                | CC                                     | TT                 | TT               | INTERGENIC      |               |                    |                    |
| SNP_53900_A_29388411 | NC_021166.1    | Ca_Kabuli_Chr07 | 29388411                | AA                                     | GG                 | GG               | INTERGENIC      |               |                    |                    |
| SNP_53901_A_29388417 | NC_021166.1    | Ca_Kabuli_Chr07 | 29388417                | CC                                     | GG                 | GG               | INTERGENIC      |               |                    |                    |
| SNP_53902_A_29388492 | NC_021166.1    | Ca_Kabuli_Chr07 | 29388492                | AA                                     | TT                 | TT               | INTERGENIC      |               |                    |                    |
| SNP_53903_A_29388506 | NC_021166.1    | Ca_Kabuli_Chr07 | 29388506                | GG                                     | CC                 | CC               | INTERGENIC      |               |                    |                    |
| SNP_53904_A_29388508 | NC_021166.1    | Ca_Kabuli_Chr07 | 29388508                | GG                                     | AA                 | AA               | INTERGENIC      |               |                    |                    |
| SNP_53905_A_29388567 | NC_021166.1    | Ca_Kabuli_Chr07 | 29388567                | TT                                     | CC                 | CC               | INTERGENIC      |               |                    |                    |
| SNP_53906_A_29388574 | NC_021166.1    | Ca_Kabuli_Chr07 | 29388574                | CC                                     | TT                 | TT               | INTERGENIC      |               |                    |                    |
| SNP_53907_A_29388596 | NC_021166.1    | Ca_Kabuli_Chr07 | 29388596                | TT                                     | CC                 | CC               | INTERGENIC      |               |                    |                    |
| SNP_53909_A_29388858 | NC_021166.1    | Ca_Kabuli_Chr07 | 29388858                | CC                                     | AA                 | AA               | INTERGENIC      |               |                    |                    |
| SNP_53910_A_29392110 | NC_021166.1    | Ca_Kabuli_Chr07 | 29392110                | GG                                     | AA                 | AA               | INTERGENIC      |               |                    |                    |
| SNP_53912_A_29392209 | NC_021166.1    | Ca_Kabuli_Chr07 | 29392209                | CC                                     | GG                 | GG               | INTERGENIC      |               |                    |                    |
| SNP_53913_A_29392300 | NC_021166.1    | Ca_Kabuli_Chr07 | 29392300                | GG                                     | TT                 | TT               | INTERGENIC      |               |                    |                    |
| SNP_53914_A_29392309 | NC_021166.1    | Ca_Kabuli_Chr07 | 29392309                | GG                                     | AA                 | AA               | INTERGENIC      |               |                    |                    |

| SNPs IDs             | Chromosome IDs | Chromosomes     | Physical positions (bp) | CDC Frontier genome (Reference genome) | (Pusa 1103 & HPNB) | (ILWC 46 & LPNB) | Sequence Components of genome | Gene accession IDs | Putative functions                   |
|----------------------|----------------|-----------------|-------------------------|----------------------------------------|--------------------|------------------|-------------------------------|--------------------|--------------------------------------|
| SNP_53915_A_29404731 | NC_021166.1    | Ca_Kabuli_Chr07 | 29404731                | GG                                     | AA                 | AA               | INTERGENIC                    |                    |                                      |
| SNP_53916_A_29404839 | NC_021166.1    | Ca_Kabuli_Chr07 | 29404839                | CC                                     | TT                 | TT               | INTERGENIC                    |                    |                                      |
| SNP_53917_A_29405977 | NC_021166.1    | Ca_Kabuli_Chr07 | 29405977                | CC                                     | TT                 | TT               | DRR                           | 101496919          | probable polygalacturonase At3g15720 |
| SNP_53918_A_29410120 | NC_021166.1    | Ca_Kabuli_Chr07 | 29410120                | TT                                     | CC                 | CC               | INTRON                        | 101496919          | probable polygalacturonase At3g15720 |
| SNP_53921_A_29416673 | NC_021166.1    | Ca_Kabuli_Chr07 | 29416673                | GG                                     | AA                 | AA               | INTERGENIC                    |                    |                                      |
| SNP_53922_A_29417151 | NC_021166.1    | Ca_Kabuli_Chr07 | 29417151                | GG                                     | AA                 | AA               | INTERGENIC                    |                    |                                      |
| SNP_53923_A_29417242 | NC_021166.1    | Ca_Kabuli_Chr07 | 29417242                | TT                                     | AA                 | AA               | DRR                           | 101497246          | uncharacterized LOC101497246         |
| SNP_53924_A_29417586 | NC_021166.1    | Ca_Kabuli_Chr07 | 29417586                | TT                                     | AA                 | AA               | DRR                           | 101497246          | uncharacterized LOC101497246         |
| SNP_53925_A_29417970 | NC_021166.1    | Ca_Kabuli_Chr07 | 29417970                | GG                                     | AA                 | AA               | DRR                           | 101497246          | uncharacterized LOC101497246         |
| SNP_53926_A_29417985 | NC_021166.1    | Ca_Kabuli_Chr07 | 29417985                | AA                                     | GG                 | GG               | DRR                           | 101497246          | uncharacterized LOC101497246         |
| SNP_53927_A_29418050 | NC_021166.1    | Ca_Kabuli_Chr07 | 29418050                | GG                                     | AA                 | AA               | DRR                           | 101497246          | uncharacterized LOC101497246         |
| SNP_53928_A_29418065 | NC_021166.1    | Ca_Kabuli_Chr07 | 29418065                | CC                                     | TT                 | TT               | DRR                           | 101497246          | uncharacterized LOC101497246         |
| SNP_53929_A_29418067 | NC_021166.1    | Ca_Kabuli_Chr07 | 29418067                | AA                                     | GG                 | GG               | DRR                           | 101497246          | uncharacterized LOC101497246         |
| SNP_53931_A_29418285 | NC_021166.1    | Ca_Kabuli_Chr07 | 29418285                | CC                                     | TT                 | TT               | NON_SYNONYMOUS_CODING         | 101497246          | uncharacterized LOC101497246         |
| SNP_53932_A_29433295 | NC_021166.1    | Ca_Kabuli_Chr07 | 29433295                | CC                                     | AA                 | AA               | INTRON                        | id172707           | Unknown function                     |
| SNP_53933_A_29433354 | NC_021166.1    | Ca_Kabuli_Chr07 | 29433354                | TT                                     | CC                 | CC               | INTRON                        | id172707           | Unknown function                     |
| SNP_53934_A_29433372 | NC_021166.1    | Ca_Kabuli_Chr07 | 29433372                | CC                                     | TT                 | TT               | INTRON                        | id172707           | Unknown function                     |
| SNP_53935_A_29433448 | NC_021166.1    | Ca_Kabuli_Chr07 | 29433448                | TT                                     | AA                 | AA               | INTRON                        | id172707           | Unknown function                     |
| SNP_53936_A_29433627 | NC_021166.1    | Ca_Kabuli_Chr07 | 29433627                | CC                                     | TT                 | TT               | SYNONYMOUS_STOP               | id172707           | Unknown function                     |
| SNP_53937_A_29433631 | NC_021166.1    | Ca_Kabuli_Chr07 | 29433631                | TT                                     | CC                 | CC               | NON_SYNONYMOUS_CODING         | id172707           | Unknown function                     |
| SNP_53938_A_29433644 | NC_021166.1    | Ca_Kabuli_Chr07 | 29433644                | CC                                     | GG                 | GG               | NON_SYNONYMOUS_CODING         | id172707           | Unknown function                     |
| SNP_53939_A_29433667 | NC_021166.1    | Ca_Kabuli_Chr07 | 29433667                | AA                                     | TT                 | TT               | INTRON                        | id172707           | Unknown function                     |

| SNPs IDs             | Chromosome IDs | Chromosomes     | Physical positions (bp) | CDC Frontier genome (Reference genome) | (Pusa 1103 & HPNB) | (ILWC 46 & LPNB) | Sequence Components of genome | Gene accession IDs | Putative functions                |
|----------------------|----------------|-----------------|-------------------------|----------------------------------------|--------------------|------------------|-------------------------------|--------------------|-----------------------------------|
| SNP_53940_A_29433738 | NC_021166.1    | Ca_Kabuli_Chr07 | 29433738                | CC                                     | TT                 | TT               | INTRON                        | id172707           | Unknown function                  |
| SNP_53941_A_29437362 | NC_021166.1    | Ca_Kabuli_Chr07 | 29437362                | TT                                     | CC                 | CC               | INTRON                        | id172707           | Unknown function                  |
| SNP_53942_A_29443272 | NC_021166.1    | Ca_Kabuli_Chr07 | 29443272                | GG                                     | TT                 | TT               | INTERGENIC                    |                    |                                   |
| SNP_53943_A_29443274 | NC_021166.1    | Ca_Kabuli_Chr07 | 29443274                | TT                                     | GG                 | GG               | INTERGENIC                    |                    |                                   |
| SNP_53944_A_29443445 | NC_021166.1    | Ca_Kabuli_Chr07 | 29443445                | GG                                     | AA                 | AA               | INTERGENIC                    |                    |                                   |
| SNP_53945_A_29443522 | NC_021166.1    | Ca_Kabuli_Chr07 | 29443522                | CC                                     | TT                 | TT               | INTERGENIC                    |                    |                                   |
| SNP_53946_A_29443524 | NC_021166.1    | Ca_Kabuli_Chr07 | 29443524                | AA                                     | GG                 | GG               | INTERGENIC                    |                    |                                   |
| SNP_53947_A_29443531 | NC_021166.1    | Ca_Kabuli_Chr07 | 29443531                | AA                                     | GG                 | GG               | INTERGENIC                    |                    |                                   |
| SNP_53948_A_29443565 | NC_021166.1    | Ca_Kabuli_Chr07 | 29443565                | AA                                     | GG                 | GG               | INTERGENIC                    |                    |                                   |
| SNP_53949_A_29443685 | NC_021166.1    | Ca_Kabuli_Chr07 | 29443685                | GG                                     | AA                 | AA               | INTERGENIC                    |                    |                                   |
| SNP_53950_A_29443706 | NC_021166.1    | Ca_Kabuli_Chr07 | 29443706                | AA                                     | GG                 | GG               | INTERGENIC                    |                    |                                   |
| SNP_53951_A_29444491 | NC_021166.1    | Ca_Kabuli_Chr07 | 29444491                | GG                                     | TT                 | TT               | INTERGENIC                    |                    |                                   |
| SNP_53952_A_29444503 | NC_021166.1    | Ca_Kabuli_Chr07 | 29444503                | AA                                     | TT                 | TT               | INTERGENIC                    |                    |                                   |
| SNP_53953_A_29445332 | NC_021166.1    | Ca_Kabuli_Chr07 | 29445332                | GG                                     | AA                 | AA               | INTERGENIC                    |                    |                                   |
| SNP_53954_A_29445334 | NC_021166.1    | Ca_Kabuli_Chr07 | 29445334                | GG                                     | AA                 | AA               | INTERGENIC                    |                    |                                   |
| SNP_53955_A_29446053 | NC_021166.1    | Ca_Kabuli_Chr07 | 29446053                | TT                                     | CC                 | CC               | INTERGENIC                    |                    |                                   |
| SNP_53957_A_29446136 | NC_021166.1    | Ca_Kabuli_Chr07 | 29446136                | GG                                     | AA                 | AA               | DRR                           | 101497804          | uncharacterized hydrolase YNR064C |
| SNP_53959_A_29446259 | NC_021166.1    | Ca_Kabuli_Chr07 | 29446259                | CC                                     | AA                 | AA               | DRR                           | 101497804          | uncharacterized hydrolase YNR064C |
| SNP_53960_A_29447057 | NC_021166.1    | Ca_Kabuli_Chr07 | 29447057                | AA                                     | CC                 | CC               | DRR                           | 101497804          | uncharacterized hydrolase YNR064C |
| SNP_53961_A_29447355 | NC_021166.1    | Ca_Kabuli_Chr07 | 29447355                | CC                                     | TT                 | TT               | NON_SYNONYMOUS_CODING         | 101497804          | uncharacterized hydrolase YNR064C |
| SNP_53962_A_29449947 | NC_021166.1    | Ca_Kabuli_Chr07 | 29449947                | GG                                     | AA                 | AA               | INTRON                        | 101497804          | uncharacterized hydrolase YNR064C |
| SNP_53963_A_29450303 | NC_021166.1    | Ca_Kabuli_Chr07 | 29450303                | AA                                     | GG                 | GG               | INTRON                        | 101497804          | uncharacterized hydrolase YNR064C |



| SNPs IDs             | Chromosome IDs | Chromosomes     | Physical positions (bp) | CDC Frontier genome (Reference genome) | (Pusa 1103 & HPNB) | (ILWC 46 & LPNB) | Sequence Components of genome | Gene accession IDs | Putative functions                      |
|----------------------|----------------|-----------------|-------------------------|----------------------------------------|--------------------|------------------|-------------------------------|--------------------|-----------------------------------------|
| SNP_53964_A_29452550 | NC_021166.1    | Ca_Kabuli_Chr07 | 29452550                | TT                                     | GG                 | GG               | URR                           | 101497804          | uncharacterized hydrolase YNR064C       |
| SNP_53965_A_29452567 | NC_021166.1    | Ca_Kabuli_Chr07 | 29452567                | TT                                     | CC                 | CC               | URR                           | 101497804          | uncharacterized hydrolase YNR064C       |
| SNP_53966_A_29452803 | NC_021166.1    | Ca_Kabuli_Chr07 | 29452803                | TT                                     | CC                 | CC               | URR                           | 101497804          | uncharacterized hydrolase YNR064C       |
| SNP_53967_A_29455649 | NC_021166.1    | Ca_Kabuli_Chr07 | 29455649                | GG                                     | AA                 | AA               | INTERGENIC                    |                    |                                         |
| SNP_53968_A_29455671 | NC_021166.1    | Ca_Kabuli_Chr07 | 29455671                | AA                                     | GG                 | GG               | INTERGENIC                    |                    |                                         |
| SNP_53969_A_29456666 | NC_021166.1    | Ca_Kabuli_Chr07 | 29456666                | AA                                     | GG                 | GG               | DRR                           | 101498673          | ubiquitin-like-conjugating enzyme ATG10 |
| SNP_53970_A_29456733 | NC_021166.1    | Ca_Kabuli_Chr07 | 29456733                | AA                                     | TT                 | TT               | DRR                           | 101498673          | ubiquitin-like-conjugating enzyme ATG10 |
| SNP_53971_A_29457585 | NC_021166.1    | Ca_Kabuli_Chr07 | 29457585                | CC                                     | TT                 | TT               | URR                           | 101498329          | uncharacterized LOC101498329            |
| SNP_53972_A_29458440 | NC_021166.1    | Ca_Kabuli_Chr07 | 29458440                | GG                                     | AA                 | AA               | URR                           | 101498329          | uncharacterized LOC101498329            |
| SNP_53974_A_29460562 | NC_021166.1    | Ca_Kabuli_Chr07 | 29460562                | AA                                     | CC                 | CC               | INTERGENIC                    |                    |                                         |
| SNP_53975_A_29460565 | NC_021166.1    | Ca_Kabuli_Chr07 | 29460565                | TT                                     | AA                 | AA               | INTERGENIC                    |                    |                                         |
| SNP_53976_A_29460893 | NC_021166.1    | Ca_Kabuli_Chr07 | 29460893                | TT                                     | AA                 | AA               | INTERGENIC                    |                    |                                         |
| SNP_53977_A_29464170 | NC_021166.1    | Ca_Kabuli_Chr07 | 29464170                | GG                                     | TT                 | TT               | INTERGENIC                    |                    |                                         |
| SNP_53978_A_29464205 | NC_021166.1    | Ca_Kabuli_Chr07 | 29464205                | CC                                     | AA                 | AA               | INTERGENIC                    |                    |                                         |
| SNP_53980_A_29466385 | NC_021166.1    | Ca_Kabuli_Chr07 | 29466385                | AA                                     | CC                 | CC               | INTERGENIC                    |                    |                                         |
| SNP_53981_A_29468426 | NC_021166.1    | Ca_Kabuli_Chr07 | 29468426                | TT                                     | GG                 | GG               | INTERGENIC                    |                    |                                         |
| SNP_53982_A_29470288 | NC_021166.1    | Ca_Kabuli_Chr07 | 29470288                | TT                                     | CC                 | CC               | DRR                           | 101499533          | FRIGIDA-like protein 3                  |
| SNP_53983_A_29472046 | NC_021166.1    | Ca_Kabuli_Chr07 | 29472046                | GG                                     | CC                 | CC               | INTRON                        | 101499533          | FRIGIDA-like protein 3                  |
| SNP_53984_A_29472313 | NC_021166.1    | Ca_Kabuli_Chr07 | 29472313                | GG                                     | AA                 | AA               | INTRON                        | 101499533          | FRIGIDA-like protein 3                  |
| SNP_53985_A_29472348 | NC_021166.1    | Ca_Kabuli_Chr07 | 29472348                | GG                                     | AA                 | AA               | INTRON                        | 101499533          | FRIGIDA-like protein 3                  |
| SNP_53986_A_29472364 | NC_021166.1    | Ca_Kabuli_Chr07 | 29472364                | AA                                     | GG                 | GG               | INTRON                        | 101499533          | FRIGIDA-like protein 3                  |
| SNP_53987_A_29473575 | NC_021166.1    | Ca_Kabuli_Chr07 | 29473575                | CC                                     | TT                 | TT               | SYNONYMOUS_CODING             | 101499533          | FRIGIDA-like protein 3                  |

| SNPs IDs             | Chromosome IDs | Chromosomes     | Physical positions (bp) | CDC Frontier genome (Reference genome) | (Pusa 1103 & HPNB) | (ILWC 46 & LPNB) | Sequence Components of genome | Gene accession IDs | Putative functions                                                           |
|----------------------|----------------|-----------------|-------------------------|----------------------------------------|--------------------|------------------|-------------------------------|--------------------|------------------------------------------------------------------------------|
| SNP_53988_A_29473807 | NC_021166.1    | Ca_Kabuli_Chr07 | 29473807                | TT                                     | CC                 | CC               | NON_SYNONYMOUS_CODING         | 101499533          | FRIGIDA-like protein 3                                                       |
| SNP_53989_A_29475509 | NC_021166.1    | Ca_Kabuli_Chr07 | 29475509                | TT                                     | GG                 | GG               | URR                           | 101499533          | FRIGIDA-like protein 3                                                       |
| SNP_53990_A_29475776 | NC_021166.1    | Ca_Kabuli_Chr07 | 29475776                | AA                                     | GG                 | GG               | URR                           | 101499533          | FRIGIDA-like protein 3                                                       |
| SNP_53991_A_29479456 | NC_021166.1    | Ca_Kabuli_Chr07 | 29479456                | AA                                     | GG                 | GG               | DRR                           | 101499833          | probably inactive leucine-rich repeat receptor-like protein kinase At5g48380 |
| SNP_53992_A_29479463 | NC_021166.1    | Ca_Kabuli_Chr07 | 29479463                | AA                                     | GG                 | GG               | DRR                           | 101499833          | probably inactive leucine-rich repeat receptor-like protein kinase At5g48380 |
| SNP_53993_A_29479632 | NC_021166.1    | Ca_Kabuli_Chr07 | 29479632                | CC                                     | AA                 | AA               | DRR                           | 101499833          | probably inactive leucine-rich repeat receptor-like protein kinase At5g48380 |
| SNP_53994_A_29480242 | NC_021166.1    | Ca_Kabuli_Chr07 | 29480242                | GG                                     | CC                 | CC               | INTRON                        | 101499833          | probably inactive leucine-rich repeat receptor-like protein kinase At5g48380 |
| SNP_53995_A_29489068 | NC_021166.1    | Ca_Kabuli_Chr07 | 29489068                | TT                                     | CC                 | CC               | INTERGENIC                    |                    |                                                                              |
| SNP_53997_A_29491669 | NC_021166.1    | Ca_Kabuli_Chr07 | 29491669                | TT                                     | AA                 | AA               | INTERGENIC                    |                    |                                                                              |
| SNP_53998_A_29491733 | NC_021166.1    | Ca_Kabuli_Chr07 | 29491733                | GG                                     | AA                 | AA               | INTERGENIC                    |                    |                                                                              |
| SNP_53999_A_29491734 | NC_021166.1    | Ca_Kabuli_Chr07 | 29491734                | AA                                     | GG                 | GG               | INTERGENIC                    |                    |                                                                              |
| SNP_54000_A_29491803 | NC_021166.1    | Ca_Kabuli_Chr07 | 29491803                | TT                                     | AA                 | AA               | INTERGENIC                    |                    |                                                                              |
| SNP_54001_A_29491863 | NC_021166.1    | Ca_Kabuli_Chr07 | 29491863                | CC                                     | AA                 | AA               | INTERGENIC                    |                    |                                                                              |
| SNP_54002_A_29491886 | NC_021166.1    | Ca_Kabuli_Chr07 | 29491886                | AA                                     | GG                 | GG               | INTERGENIC                    |                    |                                                                              |
| SNP_54003_A_29491944 | NC_021166.1    | Ca_Kabuli_Chr07 | 29491944                | TT                                     | GG                 | GG               | INTERGENIC                    |                    |                                                                              |
| SNP_54004_A_29491965 | NC_021166.1    | Ca_Kabuli_Chr07 | 29491965                | GG                                     | AA                 | AA               | INTERGENIC                    |                    |                                                                              |
| SNP_54005_A_29493837 | NC_021166.1    | Ca_Kabuli_Chr07 | 29493837                | CC                                     | TT                 | TT               | INTERGENIC                    |                    |                                                                              |
| SNP_54006_A_29495352 | NC_021166.1    | Ca_Kabuli_Chr07 | 29495352                | CC                                     | TT                 | TT               | INTERGENIC                    |                    |                                                                              |
| SNP_54008_A_29496598 | NC_021166.1    | Ca_Kabuli_Chr07 | 29496598                | CC                                     | TT                 | TT               | INTERGENIC                    |                    |                                                                              |
| SNP_54009_A_29496634 | NC_021166.1    | Ca_Kabuli_Chr07 | 29496634                | AA                                     | CC                 | CC               | INTERGENIC                    |                    |                                                                              |
| SNP_54010_A_29499854 | NC_021166.1    | Ca_Kabuli_Chr07 | 29499854                | AA                                     | GG                 | GG               | INTERGENIC                    |                    |                                                                              |
| SNP_54011_A_29500255 | NC_021166.1    | Ca_Kabuli_Chr07 | 29500255                | CC                                     | TT                 | TT               | INTERGENIC                    |                    |                                                                              |

| SNPs IDs             | Chromosome IDs | Chromosomes     | Physical positions (bp) | CDC Frontier genome (Reference genome) | (Pusa 1103 & HPNB) | (ILWC 46 & LPNB) | Sequence Components of genome | Gene accession IDs | Putative functions           |
|----------------------|----------------|-----------------|-------------------------|----------------------------------------|--------------------|------------------|-------------------------------|--------------------|------------------------------|
| SNP_54012_A_29501257 | NC_021166.1    | Ca_Kabuli_Chr07 | 29501257                | CC                                     | TT                 | TT               | INTERGENIC                    |                    |                              |
| SNP_54013_A_29501449 | NC_021166.1    | Ca_Kabuli_Chr07 | 29501449                | TT                                     | GG                 | GG               | INTERGENIC                    |                    |                              |
| SNP_54014_A_29501928 | NC_021166.1    | Ca_Kabuli_Chr07 | 29501928                | GG                                     | AA                 | AA               | INTERGENIC                    |                    |                              |
| SNP_54015_A_29504889 | NC_021166.1    | Ca_Kabuli_Chr07 | 29504889                | TT                                     | AA                 | AA               | INTERGENIC                    |                    |                              |
| SNP_54016_A_29504966 | NC_021166.1    | Ca_Kabuli_Chr07 | 29504966                | CC                                     | GG                 | GG               | INTERGENIC                    |                    |                              |
| SNP_54017_A_29505293 | NC_021166.1    | Ca_Kabuli_Chr07 | 29505293                | AA                                     | GG                 | GG               | INTERGENIC                    |                    |                              |
| SNP_54018_A_29509930 | NC_021166.1    | Ca_Kabuli_Chr07 | 29509930                | CC                                     | TT                 | TT               | INTERGENIC                    |                    |                              |
| SNP_54019_A_29510224 | NC_021166.1    | Ca_Kabuli_Chr07 | 29510224                | CC                                     | AA                 | AA               | INTERGENIC                    |                    |                              |
| SNP_54020_A_29510227 | NC_021166.1    | Ca_Kabuli_Chr07 | 29510227                | TT                                     | CC                 | CC               | INTERGENIC                    |                    |                              |
| SNP_54021_A_29512132 | NC_021166.1    | Ca_Kabuli_Chr07 | 29512132                | CC                                     | GG                 | GG               | DRR                           | 101500804          | uncharacterized LOC101500804 |
| SNP_54022_A_29512156 | NC_021166.1    | Ca_Kabuli_Chr07 | 29512156                | AA                                     | CC                 | CC               | DRR                           | 101500804          | uncharacterized LOC101500804 |
| SNP_54023_A_29526542 | NC_021166.1    | Ca_Kabuli_Chr07 | 29526542                | GG                                     | AA                 | AA               | INTERGENIC                    |                    |                              |
| SNP_54024_A_29526591 | NC_021166.1    | Ca_Kabuli_Chr07 | 29526591                | TT                                     | AA                 | AA               | INTERGENIC                    |                    |                              |
| SNP_54025_A_29526592 | NC_021166.1    | Ca_Kabuli_Chr07 | 29526592                | AA                                     | GG                 | GG               | INTERGENIC                    |                    |                              |
| SNP_54026_A_29526723 | NC_021166.1    | Ca_Kabuli_Chr07 | 29526723                | GG                                     | AA                 | AA               | INTERGENIC                    |                    |                              |
| SNP_54027_A_29526961 | NC_021166.1    | Ca_Kabuli_Chr07 | 29526961                | AA                                     | CC                 | CC               | INTERGENIC                    |                    |                              |
| SNP_54028_A_29528399 | NC_021166.1    | Ca_Kabuli_Chr07 | 29528399                | AA                                     | TT                 | TT               | INTERGENIC                    |                    |                              |
| SNP_54029_A_29533519 | NC_021166.1    | Ca_Kabuli_Chr07 | 29533519                | TT                                     | CC                 | CC               | DRR                           | 101500595          | uncharacterized LOC101500595 |
| SNP_54030_A_29534539 | NC_021166.1    | Ca_Kabuli_Chr07 | 29534539                | TT                                     | CC                 | CC               | INTRON                        | 101500595          | uncharacterized LOC101500595 |
| SNP_54033_A_29537422 | NC_021166.1    | Ca_Kabuli_Chr07 | 29537422                | TT                                     | AA                 | AA               | INTRON                        | 101500595          | uncharacterized LOC101500595 |
| SNP_54034_A_29538646 | NC_021166.1    | Ca_Kabuli_Chr07 | 29538646                | CC                                     | TT                 | TT               | INTRON                        | 101500595          | uncharacterized LOC101500595 |
| SNP_54035_A_29540648 | NC_021166.1    | Ca_Kabuli_Chr07 | 29540648                | CC                                     | GG                 | GG               | INTRON                        | 101500595          | uncharacterized LOC101500595 |

| SNPs IDs             | Chromosome IDs | Chromosomes     | Physical positions (bp) | CDC Frontier (Reference genome) | (Pusa 1103 & HPNB) | (ILWC 46 & LPNB) | Sequence Components of genome | Gene accession IDs | Putative functions           |
|----------------------|----------------|-----------------|-------------------------|---------------------------------|--------------------|------------------|-------------------------------|--------------------|------------------------------|
| SNP_54036_A_29541201 | NC_021166.1    | Ca_Kabuli_Chr07 | 29541201                | GG                              | AA                 | AA               | INTRON                        | 101500595          | uncharacterized LOC101500595 |
| SNP_54037_A_29541209 | NC_021166.1    | Ca_Kabuli_Chr07 | 29541209                | TT                              | AA                 | AA               | INTRON                        | 101500595          | uncharacterized LOC101500595 |
| SNP_54038_A_29543338 | NC_021166.1    | Ca_Kabuli_Chr07 | 29543338                | CC                              | GG                 | GG               | INTRON                        | 101500595          | uncharacterized LOC101500595 |
| SNP_54041_A_29553033 | NC_021166.1    | Ca_Kabuli_Chr07 | 29553033                | TT                              | GG                 | GG               | INTERGENIC                    |                    |                              |
| SNP_54042_A_29553037 | NC_021166.1    | Ca_Kabuli_Chr07 | 29553037                | TT                              | GG                 | GG               | INTERGENIC                    |                    |                              |
| SNP_54043_A_29553040 | NC_021166.1    | Ca_Kabuli_Chr07 | 29553040                | CC                              | TT                 | TT               | INTERGENIC                    |                    |                              |
| SNP_54044_A_29553101 | NC_021166.1    | Ca_Kabuli_Chr07 | 29553101                | AA                              | GG                 | GG               | INTERGENIC                    |                    |                              |
| SNP_54045_A_29553359 | NC_021166.1    | Ca_Kabuli_Chr07 | 29553359                | TT                              | AA                 | AA               | INTERGENIC                    |                    |                              |
| SNP_54046_A_29553799 | NC_021166.1    | Ca_Kabuli_Chr07 | 29553799                | GG                              | AA                 | AA               | INTERGENIC                    |                    |                              |
| SNP_54047_A_29555290 | NC_021166.1    | Ca_Kabuli_Chr07 | 29555290                | TT                              | AA                 | AA               | DRR                           | 101500906          | uncharacterized LOC101500906 |
| SNP_54048_A_29558206 | NC_021166.1    | Ca_Kabuli_Chr07 | 29558206                | AA                              | GG                 | GG               | URR                           | 101500906          | uncharacterized LOC101500906 |
| SNP_54049_A_29558498 | NC_021166.1    | Ca_Kabuli_Chr07 | 29558498                | GG                              | CC                 | CC               | URR                           | 101500906          | uncharacterized LOC101500906 |
| SNP_54050_A_29560931 | NC_021166.1    | Ca_Kabuli_Chr07 | 29560931                | CC                              | AA                 | AA               | INTERGENIC                    |                    |                              |
| SNP_54051_A_29561285 | NC_021166.1    | Ca_Kabuli_Chr07 | 29561285                | AA                              | CC                 | CC               | INTERGENIC                    |                    |                              |
| SNP_54052_A_29561338 | NC_021166.1    | Ca_Kabuli_Chr07 | 29561338                | TT                              | GG                 | GG               | INTERGENIC                    |                    |                              |
| SNP_54053_A_29562467 | NC_021166.1    | Ca_Kabuli_Chr07 | 29562467                | TT                              | CC                 | CC               | INTERGENIC                    |                    |                              |
| SNP_54054_A_29565080 | NC_021166.1    | Ca_Kabuli_Chr07 | 29565080                | TT                              | CC                 | CC               | INTERGENIC                    |                    |                              |
| SNP_54055_A_29565910 | NC_021166.1    | Ca_Kabuli_Chr07 | 29565910                | GG                              | AA                 | AA               | INTERGENIC                    |                    |                              |
| SNP_54056_A_29567882 | NC_021166.1    | Ca_Kabuli_Chr07 | 29567882                | TT                              | AA                 | AA               | INTERGENIC                    |                    |                              |
| SNP_54057_A_29570171 | NC_021166.1    | Ca_Kabuli_Chr07 | 29570171                | TT                              | CC                 | CC               | INTERGENIC                    |                    |                              |
| SNP_54058_A_29570178 | NC_021166.1    | Ca_Kabuli_Chr07 | 29570178                | CC                              | AA                 | AA               | INTERGENIC                    |                    |                              |
| SNP_54060_A_29572430 | NC_021166.1    | Ca_Kabuli_Chr07 | 29572430                | AA                              | GG                 | GG               | INTERGENIC                    |                    |                              |

| SNPs IDs             | Chromosome IDs | Chromosomes     | Physical positions (bp) | CDC Frontier genome (Reference genome) | (Pusa 1103 & HPNB) | (ILWC 46 & LPNB) | Sequence genome | Components of | Gene accession IDs | Putative functions |
|----------------------|----------------|-----------------|-------------------------|----------------------------------------|--------------------|------------------|-----------------|---------------|--------------------|--------------------|
| SNP_54061_A_29572431 | NC_021166.1    | Ca_Kabuli_Chr07 | 29572431                | CC                                     | TT                 | TT               | INTERGENIC      |               |                    |                    |
| SNP_54062_A_29572908 | NC_021166.1    | Ca_Kabuli_Chr07 | 29572908                | GG                                     | AA                 | AA               | INTERGENIC      |               |                    |                    |
| SNP_54063_A_29576192 | NC_021166.1    | Ca_Kabuli_Chr07 | 29576192                | TT                                     | GG                 | GG               | INTERGENIC      |               |                    |                    |
| SNP_54064_A_29576200 | NC_021166.1    | Ca_Kabuli_Chr07 | 29576200                | AA                                     | GG                 | GG               | INTERGENIC      |               |                    |                    |
| SNP_54065_A_29576202 | NC_021166.1    | Ca_Kabuli_Chr07 | 29576202                | CC                                     | GG                 | GG               | INTERGENIC      |               |                    |                    |
| SNP_54066_A_29576683 | NC_021166.1    | Ca_Kabuli_Chr07 | 29576683                | CC                                     | TT                 | TT               | INTERGENIC      |               |                    |                    |
| SNP_54067_A_29576695 | NC_021166.1    | Ca_Kabuli_Chr07 | 29576695                | TT                                     | CC                 | CC               | INTERGENIC      |               |                    |                    |
| SNP_54068_A_29576707 | NC_021166.1    | Ca_Kabuli_Chr07 | 29576707                | AA                                     | GG                 | GG               | INTERGENIC      |               |                    |                    |
| SNP_54069_A_29576714 | NC_021166.1    | Ca_Kabuli_Chr07 | 29576714                | CC                                     | TT                 | TT               | INTERGENIC      |               |                    |                    |
| SNP_54070_A_29576878 | NC_021166.1    | Ca_Kabuli_Chr07 | 29576878                | AA                                     | TT                 | TT               | INTERGENIC      |               |                    |                    |
| SNP_54071_A_29576892 | NC_021166.1    | Ca_Kabuli_Chr07 | 29576892                | CC                                     | TT                 | TT               | INTERGENIC      |               |                    |                    |
| SNP_54072_A_29579898 | NC_021166.1    | Ca_Kabuli_Chr07 | 29579898                | CC                                     | AA                 | AA               | INTERGENIC      |               |                    |                    |
| SNP_54073_A_29580158 | NC_021166.1    | Ca_Kabuli_Chr07 | 29580158                | GG                                     | AA                 | AA               | INTERGENIC      |               |                    |                    |
| SNP_54075_A_29581607 | NC_021166.1    | Ca_Kabuli_Chr07 | 29581607                | GG                                     | AA                 | AA               | INTERGENIC      |               |                    |                    |
| SNP_54076_A_29581912 | NC_021166.1    | Ca_Kabuli_Chr07 | 29581912                | GG                                     | AA                 | AA               | INTERGENIC      |               |                    |                    |
| SNP_54077_A_29581926 | NC_021166.1    | Ca_Kabuli_Chr07 | 29581926                | CC                                     | TT                 | TT               | INTERGENIC      |               |                    |                    |
| SNP_54078_A_29581991 | NC_021166.1    | Ca_Kabuli_Chr07 | 29581991                | GG                                     | AA                 | AA               | INTERGENIC      |               |                    |                    |
| SNP_54080_A_29582042 | NC_021166.1    | Ca_Kabuli_Chr07 | 29582042                | CC                                     | TT                 | TT               | INTERGENIC      |               |                    |                    |
| SNP_54081_A_29582047 | NC_021166.1    | Ca_Kabuli_Chr07 | 29582047                | AA                                     | TT                 | TT               | INTERGENIC      |               |                    |                    |
| SNP_54082_A_29582189 | NC_021166.1    | Ca_Kabuli_Chr07 | 29582189                | GG                                     | AA                 | AA               | INTERGENIC      |               |                    |                    |
| SNP_54084_A_29584370 | NC_021166.1    | Ca_Kabuli_Chr07 | 29584370                | AA                                     | CC                 | CC               | INTERGENIC      |               |                    |                    |
| SNP_54086_A_29584963 | NC_021166.1    | Ca_Kabuli_Chr07 | 29584963                | AA                                     | GG                 | GG               | INTERGENIC      |               |                    |                    |

| SNPs IDs             | Chromosome IDs | Chromosomes     | Physical positions (bp) | CDC Frontier genome (Reference genome) | (Pusa 1103 & HPNB) | (ILWC 46 & LPNB) | Sequence Components of genome | Gene accession IDs | Putative functions |
|----------------------|----------------|-----------------|-------------------------|----------------------------------------|--------------------|------------------|-------------------------------|--------------------|--------------------|
| SNP_54087_A_29587180 | NC_021166.1    | Ca_Kabuli_Chr07 | 29587180                | TT                                     | AA                 | AA               | INTERGENIC                    |                    |                    |
| SNP_54088_A_29587247 | NC_021166.1    | Ca_Kabuli_Chr07 | 29587247                | CC                                     | TT                 | TT               | INTERGENIC                    |                    |                    |
| SNP_54089_A_29593840 | NC_021166.1    | Ca_Kabuli_Chr07 | 29593840                | AA                                     | TT                 | TT               | INTERGENIC                    |                    |                    |
| SNP_54091_A_29596070 | NC_021166.1    | Ca_Kabuli_Chr07 | 29596070                | CC                                     | TT                 | TT               | INTERGENIC                    |                    |                    |
| SNP_54092_A_29599671 | NC_021166.1    | Ca_Kabuli_Chr07 | 29599671                | AA                                     | GG                 | GG               | INTERGENIC                    |                    |                    |
| SNP_54093_A_29609773 | NC_021166.1    | Ca_Kabuli_Chr07 | 29609773                | TT                                     | CC                 | CC               | URR                           | 101501863          | Unknown function   |
| SNP_54095_A_29610046 | NC_021166.1    | Ca_Kabuli_Chr07 | 29610046                | AA                                     | GG                 | GG               | URR                           | 101501863          | Unknown function   |
| SNP_54097_A_29610159 | NC_021166.1    | Ca_Kabuli_Chr07 | 29610159                | TT                                     | CC                 | CC               | URR                           | 101501863          | Unknown function   |
| SNP_54098_A_29610180 | NC_021166.1    | Ca_Kabuli_Chr07 | 29610180                | CC                                     | TT                 | TT               | URR                           | 101501863          | Unknown function   |
| SNP_54099_A_29610208 | NC_021166.1    | Ca_Kabuli_Chr07 | 29610208                | TT                                     | AA                 | AA               | URR                           | 101501863          | Unknown function   |
| SNP_54100_A_29610298 | NC_021166.1    | Ca_Kabuli_Chr07 | 29610298                | TT                                     | CC                 | CC               | URR                           | 101501863          | Unknown function   |
| SNP_54101_A_29610384 | NC_021166.1    | Ca_Kabuli_Chr07 | 29610384                | TT                                     | GG                 | GG               | URR                           | 101501863          | Unknown function   |
| SNP_54102_A_29613177 | NC_021166.1    | Ca_Kabuli_Chr07 | 29613177                | TT                                     | GG                 | GG               | INTERGENIC                    |                    |                    |
| SNP_54103_A_29613361 | NC_021166.1    | Ca_Kabuli_Chr07 | 29613361                | CC                                     | AA                 | AA               | INTERGENIC                    |                    |                    |
| SNP_54104_A_29613768 | NC_021166.1    | Ca_Kabuli_Chr07 | 29613768                | TT                                     | CC                 | CC               | INTERGENIC                    |                    |                    |
| SNP_54105_A_29613918 | NC_021166.1    | Ca_Kabuli_Chr07 | 29613918                | CC                                     | GG                 | GG               | INTERGENIC                    |                    |                    |
| SNP_54106_A_29614407 | NC_021166.1    | Ca_Kabuli_Chr07 | 29614407                | AA                                     | CC                 | CC               | INTERGENIC                    |                    |                    |
| SNP_54107_A_29614854 | NC_021166.1    | Ca_Kabuli_Chr07 | 29614854                | CC                                     | AA                 | AA               | INTERGENIC                    |                    |                    |
| SNP_54108_A_29615086 | NC_021166.1    | Ca_Kabuli_Chr07 | 29615086                | GG                                     | AA                 | AA               | INTERGENIC                    |                    |                    |
| SNP_54109_A_29615155 | NC_021166.1    | Ca_Kabuli_Chr07 | 29615155                | TT                                     | GG                 | GG               | INTERGENIC                    |                    |                    |
| SNP_54112_A_29615489 | NC_021166.1    | Ca_Kabuli_Chr07 | 29615489                | CC                                     | AA                 | AA               | INTERGENIC                    |                    |                    |
| SNP_54113_A_29615491 | NC_021166.1    | Ca_Kabuli_Chr07 | 29615491                | TT                                     | CC                 | CC               | INTERGENIC                    |                    |                    |

| SNPs IDs             | Chromosome IDs | Chromosomes     | Physical positions (bp) | CDC Frontier genome (Reference genome) | (Pusa 1103 & HPNB) | (ILWC 46 & LPNB) | Sequence genome | Components of | Gene accession IDs | Putative functions |
|----------------------|----------------|-----------------|-------------------------|----------------------------------------|--------------------|------------------|-----------------|---------------|--------------------|--------------------|
| SNP_54114_A_29615550 | NC_021166.1    | Ca_Kabuli_Chr07 | 29615550                | GG                                     | TT                 | TT               | INTERGENIC      |               |                    |                    |
| SNP_54115_A_29615579 | NC_021166.1    | Ca_Kabuli_Chr07 | 29615579                | GG                                     | AA                 | AA               | INTERGENIC      |               |                    |                    |
| SNP_54116_A_29615601 | NC_021166.1    | Ca_Kabuli_Chr07 | 29615601                | GG                                     | CC                 | CC               | INTERGENIC      |               |                    |                    |
| SNP_54118_A_29615796 | NC_021166.1    | Ca_Kabuli_Chr07 | 29615796                | CC                                     | AA                 | AA               | INTERGENIC      |               |                    |                    |
| SNP_54119_A_29616197 | NC_021166.1    | Ca_Kabuli_Chr07 | 29616197                | AA                                     | CC                 | CC               | INTERGENIC      |               |                    |                    |
| SNP_54120_A_29616735 | NC_021166.1    | Ca_Kabuli_Chr07 | 29616735                | GG                                     | TT                 | TT               | INTERGENIC      |               |                    |                    |
| SNP_54122_A_29617008 | NC_021166.1    | Ca_Kabuli_Chr07 | 29617008                | GG                                     | AA                 | AA               | INTERGENIC      |               |                    |                    |
| SNP_54123_A_29617110 | NC_021166.1    | Ca_Kabuli_Chr07 | 29617110                | AA                                     | GG                 | GG               | INTERGENIC      |               |                    |                    |
| SNP_54125_A_29617348 | NC_021166.1    | Ca_Kabuli_Chr07 | 29617348                | AA                                     | GG                 | GG               | INTERGENIC      |               |                    |                    |
| SNP_54126_A_29617368 | NC_021166.1    | Ca_Kabuli_Chr07 | 29617368                | GG                                     | TT                 | TT               | INTERGENIC      |               |                    |                    |
| SNP_54127_A_29617440 | NC_021166.1    | Ca_Kabuli_Chr07 | 29617440                | CC                                     | GG                 | GG               | INTERGENIC      |               |                    |                    |
| SNP_54128_A_29617572 | NC_021166.1    | Ca_Kabuli_Chr07 | 29617572                | GG                                     | AA                 | AA               | INTERGENIC      |               |                    |                    |
| SNP_54129_A_29617654 | NC_021166.1    | Ca_Kabuli_Chr07 | 29617654                | AA                                     | GG                 | GG               | INTERGENIC      |               |                    |                    |
| SNP_54130_A_29617755 | NC_021166.1    | Ca_Kabuli_Chr07 | 29617755                | AA                                     | GG                 | GG               | INTERGENIC      |               |                    |                    |
| SNP_54131_A_29617819 | NC_021166.1    | Ca_Kabuli_Chr07 | 29617819                | CC                                     | AA                 | AA               | INTERGENIC      |               |                    |                    |
| SNP_54132_A_29617925 | NC_021166.1    | Ca_Kabuli_Chr07 | 29617925                | GG                                     | AA                 | AA               | INTERGENIC      |               |                    |                    |
| SNP_54133_A_29617967 | NC_021166.1    | Ca_Kabuli_Chr07 | 29617967                | AA                                     | GG                 | GG               | INTERGENIC      |               |                    |                    |
| SNP_54134_A_29618010 | NC_021166.1    | Ca_Kabuli_Chr07 | 29618010                | CC                                     | TT                 | TT               | INTERGENIC      |               |                    |                    |
| SNP_54135_A_29618111 | NC_021166.1    | Ca_Kabuli_Chr07 | 29618111                | AA                                     | TT                 | TT               | INTERGENIC      |               |                    |                    |
| SNP_54136_A_29618147 | NC_021166.1    | Ca_Kabuli_Chr07 | 29618147                | CC                                     | TT                 | TT               | INTERGENIC      |               |                    |                    |
| SNP_54137_A_29618228 | NC_021166.1    | Ca_Kabuli_Chr07 | 29618228                | CC                                     | TT                 | TT               | INTERGENIC      |               |                    |                    |
| SNP_54138_A_29618573 | NC_021166.1    | Ca_Kabuli_Chr07 | 29618573                | GG                                     | AA                 | AA               | INTERGENIC      |               |                    |                    |

| SNPs IDs             | Chromosome IDs | Chromosomes     | Physical positions (bp) | CDC Frontier genome (Reference genome) | (Pusa 1103 & HPNB) | (ILWC 46 & LPNB) | Sequence Components of genome | Gene accession IDs | Putative functions                         |
|----------------------|----------------|-----------------|-------------------------|----------------------------------------|--------------------|------------------|-------------------------------|--------------------|--------------------------------------------|
| SNP_54139_A_29631555 | NC_021166.1    | Ca_Kabuli_Chr07 | 29631555                | AA                                     | TT                 | TT               | DRR                           | 101501329          | uncharacterized LOC101501329               |
| SNP_54140_A_29631709 | NC_021166.1    | Ca_Kabuli_Chr07 | 29631709                | CC                                     | TT                 | TT               | DRR                           | 101501329          | uncharacterized LOC101501329               |
| SNP_54141_A_29644064 | NC_021166.1    | Ca_Kabuli_Chr07 | 29644064                | TT                                     | CC                 | CC               | INTERGENIC                    |                    |                                            |
| SNP_54142_A_29645381 | NC_021166.1    | Ca_Kabuli_Chr07 | 29645381                | GG                                     | AA                 | AA               | INTERGENIC                    |                    |                                            |
| SNP_54143_A_29645382 | NC_021166.1    | Ca_Kabuli_Chr07 | 29645382                | CC                                     | AA                 | AA               | INTERGENIC                    |                    |                                            |
| SNP_54144_A_29645412 | NC_021166.1    | Ca_Kabuli_Chr07 | 29645412                | AA                                     | GG                 | GG               | INTERGENIC                    |                    |                                            |
| SNP_54145_A_29645454 | NC_021166.1    | Ca_Kabuli_Chr07 | 29645454                | AA                                     | GG                 | GG               | INTERGENIC                    |                    |                                            |
| SNP_54146_A_29645457 | NC_021166.1    | Ca_Kabuli_Chr07 | 29645457                | CC                                     | TT                 | TT               | INTERGENIC                    |                    |                                            |
| SNP_54147_A_29645532 | NC_021166.1    | Ca_Kabuli_Chr07 | 29645532                | AA                                     | GG                 | GG               | INTERGENIC                    |                    |                                            |
| SNP_54150_A_29646350 | NC_021166.1    | Ca_Kabuli_Chr07 | 29646350                | CC                                     | TT                 | TT               | INTERGENIC                    |                    |                                            |
| SNP_54151_A_29646359 | NC_021166.1    | Ca_Kabuli_Chr07 | 29646359                | AA                                     | GG                 | GG               | INTERGENIC                    |                    |                                            |
| SNP_54152_A_29646390 | NC_021166.1    | Ca_Kabuli_Chr07 | 29646390                | GG                                     | AA                 | AA               | INTERGENIC                    |                    |                                            |
| SNP_54153_A_29646400 | NC_021166.1    | Ca_Kabuli_Chr07 | 29646400                | TT                                     | CC                 | CC               | INTERGENIC                    |                    |                                            |
| SNP_54154_A_29647704 | NC_021166.1    | Ca_Kabuli_Chr07 | 29647704                | TT                                     | CC                 | CC               | INTERGENIC                    |                    |                                            |
| SNP_54155_A_29649380 | NC_021166.1    | Ca_Kabuli_Chr07 | 29649380                | TT                                     | AA                 | AA               | INTRON                        | 101501646          | chromo domain-containing protein LHP1-like |
| SNP_54156_A_29667252 | NC_021166.1    | Ca_Kabuli_Chr07 | 29667252                | GG                                     | TT                 | TT               | INTRON                        | 101501959          | MLO-like protein 1                         |
| SNP_54157_A_29668051 | NC_021166.1    | Ca_Kabuli_Chr07 | 29668051                | AA                                     | GG                 | GG               | SYNONYMOUS_CODING             | 101501959          | MLO-like protein 1                         |
| SNP_54158_A_29672630 | NC_021166.1    | Ca_Kabuli_Chr07 | 29672630                | CC                                     | AA                 | AA               | DRR                           | 101502292          | uncharacterized LOC101502292               |
| SNP_54160_A_29673517 | NC_021166.1    | Ca_Kabuli_Chr07 | 29673517                | AA                                     | GG                 | GG               | DRR                           | 101502292          | uncharacterized LOC101502292               |
| SNP_54161_A_29673524 | NC_021166.1    | Ca_Kabuli_Chr07 | 29673524                | AA                                     | GG                 | GG               | DRR                           | 101502292          | uncharacterized LOC101502292               |
| SNP_54163_A_29674513 | NC_021166.1    | Ca_Kabuli_Chr07 | 29674513                | AA                                     | GG                 | GG               | INTERGENIC                    |                    |                                            |
| SNP_54164_A_29674532 | NC_021166.1    | Ca_Kabuli_Chr07 | 29674532                | AA                                     | GG                 | GG               | INTERGENIC                    |                    |                                            |



| SNPs IDs             | Chromosome IDs | Chromosomes     | Physical positions (bp) | CDC Frontier genome (Reference genome) | (Pusa 1103 & HPNB) | (ILWC 46 & LPNB) | Sequence Components of genome | Gene accession IDs | Putative functions                               |
|----------------------|----------------|-----------------|-------------------------|----------------------------------------|--------------------|------------------|-------------------------------|--------------------|--------------------------------------------------|
| SNP_54165_A_29675596 | NC_021166.1    | Ca_Kabuli_Chr07 | 29675596                | TT                                     | AA                 | AA               | URR                           | 101502292          | uncharacterized LOC101502292                     |
| SNP_54166_A_29690408 | NC_021166.1    | Ca_Kabuli_Chr07 | 29690408                | TT                                     | GG                 | GG               | DRR                           | 101503792          | uncharacterized protein At2g37660, chloroplastic |
| SNP_54167_A_29690840 | NC_021166.1    | Ca_Kabuli_Chr07 | 29690840                | AA                                     | CC                 | CC               | DRR                           | 101503792          | uncharacterized protein At2g37660, chloroplastic |
| SNP_54168_A_29693981 | NC_021166.1    | Ca_Kabuli_Chr07 | 29693981                | CC                                     | AA                 | AA               | INTRON                        | 101503792          | uncharacterized protein At2g37660, chloroplastic |
| SNP_54169_A_29694538 | NC_021166.1    | Ca_Kabuli_Chr07 | 29694538                | AA                                     | GG                 | GG               | INTRON                        | 101503792          | uncharacterized protein At2g37660, chloroplastic |
| SNP_54170_A_29694554 | NC_021166.1    | Ca_Kabuli_Chr07 | 29694554                | AA                                     | GG                 | GG               | INTRON                        | 101503792          | uncharacterized protein At2g37660, chloroplastic |
| SNP_54171_A_29702632 | NC_021166.1    | Ca_Kabuli_Chr07 | 29702632                | AA                                     | GG                 | GG               | URR                           | 101503454          | uncharacterized LOC101503454                     |
| SNP_54172_A_29703231 | NC_021166.1    | Ca_Kabuli_Chr07 | 29703231                | AA                                     | GG                 | GG               | SYNONYMOUS_CODING             | 101504115          | uncharacterized LOC101504115                     |
| SNP_54173_A_29704127 | NC_021166.1    | Ca_Kabuli_Chr07 | 29704127                | GG                                     | CC                 | CC               | NON_SYNONYMOUS_CODING         | 101504115          | uncharacterized LOC101504115                     |
| SNP_54174_A_29704130 | NC_021166.1    | Ca_Kabuli_Chr07 | 29704130                | AA                                     | CC                 | CC               | NON_SYNONYMOUS_CODING         | 101504115          | uncharacterized LOC101504115                     |
| SNP_54175_A_29704423 | NC_021166.1    | Ca_Kabuli_Chr07 | 29704423                | TT                                     | CC                 | CC               | NON_SYNONYMOUS_CODING         | 101504115          | uncharacterized LOC101504115                     |
| SNP_54176_A_29705987 | NC_021166.1    | Ca_Kabuli_Chr07 | 29705987                | TT                                     | CC                 | CC               | NON_SYNONYMOUS_CODING         | 101504115          | uncharacterized LOC101504115                     |
| SNP_54177_A_29706633 | NC_021166.1    | Ca_Kabuli_Chr07 | 29706633                | GG                                     | AA                 | AA               | SYNONYMOUS_CODING             | 101504115          | uncharacterized LOC101504115                     |
| SNP_54178_A_29711919 | NC_021166.1    | Ca_Kabuli_Chr07 | 29711919                | TT                                     | AA                 | AA               | INTRON                        | 101504115          | uncharacterized LOC101504115                     |
| SNP_54179_A_29713128 | NC_021166.1    | Ca_Kabuli_Chr07 | 29713128                | CC                                     | TT                 | TT               | URR                           | 101504115          | uncharacterized LOC101504115                     |
| SNP_54180_A_29713646 | NC_021166.1    | Ca_Kabuli_Chr07 | 29713646                | GG                                     | CC                 | CC               | URR                           | 101504115          | uncharacterized LOC101504115                     |
| SNP_54181_A_29713700 | NC_021166.1    | Ca_Kabuli_Chr07 | 29713700                | AA                                     | TT                 | TT               | URR                           | 101504115          | uncharacterized LOC101504115                     |
| SNP_54182_A_29716384 | NC_021166.1    | Ca_Kabuli_Chr07 | 29716384                | GG                                     | AA                 | AA               | INTERGENIC                    |                    |                                                  |
| SNP_54183_A_29719052 | NC_021166.1    | Ca_Kabuli_Chr07 | 29719052                | CC                                     | TT                 | TT               | INTERGENIC                    |                    |                                                  |
| SNP_54184_A_29734104 | NC_021166.1    | Ca_Kabuli_Chr07 | 29734104                | TT                                     | CC                 | CC               | NON_SYNONYMOUS_CODING         | 101502188          | uncharacterized LOC101502188                     |
| SNP_54185_A_29735273 | NC_021166.1    | Ca_Kabuli_Chr07 | 29735273                | AA                                     | GG                 | GG               | URR                           | 101502188          | uncharacterized LOC101502188                     |
| SNP_54187_A_29736938 | NC_021166.1    | Ca_Kabuli_Chr07 | 29736938                | TT                                     | AA                 | AA               | INTERGENIC                    |                    |                                                  |

| SNPs IDs             | Chromosome IDs | Chromosomes     | Physical positions (bp) | CDC Frontier genome (Reference genome) | (Pusa 1103 & HPNB) | (ILWC 46 & LPNB) | Sequence Components of genome | Gene accession IDs | Putative functions              |
|----------------------|----------------|-----------------|-------------------------|----------------------------------------|--------------------|------------------|-------------------------------|--------------------|---------------------------------|
| SNP_54188_A_29737000 | NC_021166.1    | Ca_Kabuli_Chr07 | 29737000                | CC                                     | TT                 | TT               | INTERGENIC                    |                    |                                 |
| SNP_54189_A_29737018 | NC_021166.1    | Ca_Kabuli_Chr07 | 29737018                | GG                                     | CC                 | CC               | INTERGENIC                    |                    |                                 |
| SNP_54190_A_29737276 | NC_021166.1    | Ca_Kabuli_Chr07 | 29737276                | TT                                     | CC                 | CC               | INTERGENIC                    |                    |                                 |
| SNP_54191_A_29741251 | NC_021166.1    | Ca_Kabuli_Chr07 | 29741251                | AA                                     | CC                 | CC               | INTERGENIC                    |                    |                                 |
| SNP_54192_A_29741474 | NC_021166.1    | Ca_Kabuli_Chr07 | 29741474                | AA                                     | TT                 | TT               | INTERGENIC                    |                    |                                 |
| SNP_54193_A_29742596 | NC_021166.1    | Ca_Kabuli_Chr07 | 29742596                | TT                                     | CC                 | CC               | INTERGENIC                    |                    |                                 |
| SNP_54194_A_29744119 | NC_021166.1    | Ca_Kabuli_Chr07 | 29744119                | AA                                     | TT                 | TT               | INTERGENIC                    |                    |                                 |
| SNP_54195_A_29744444 | NC_021166.1    | Ca_Kabuli_Chr07 | 29744444                | CC                                     | TT                 | TT               | INTERGENIC                    |                    |                                 |
| SNP_54196_A_29744453 | NC_021166.1    | Ca_Kabuli_Chr07 | 29744453                | AA                                     | GG                 | GG               | INTERGENIC                    |                    |                                 |
| SNP_54197_A_29744491 | NC_021166.1    | Ca_Kabuli_Chr07 | 29744491                | CC                                     | TT                 | TT               | INTERGENIC                    |                    |                                 |
| SNP_54198_A_29744514 | NC_021166.1    | Ca_Kabuli_Chr07 | 29744514                | CC                                     | TT                 | TT               | INTERGENIC                    |                    |                                 |
| SNP_54200_A_29755554 | NC_021166.1    | Ca_Kabuli_Chr07 | 29755554                | GG                                     | CC                 | CC               | INTRON                        | 101504968          | protein transport protein SEC23 |
| SNP_54202_A_29759152 | NC_021166.1    | Ca_Kabuli_Chr07 | 29759152                | TT                                     | AA                 | AA               | INTRON                        | 101504968          | protein transport protein SEC23 |
| SNP_54203_A_29759190 | NC_021166.1    | Ca_Kabuli_Chr07 | 29759190                | CC                                     | TT                 | TT               | INTRON                        | 101504968          | protein transport protein SEC23 |
| SNP_54204_A_29764386 | NC_021166.1    | Ca_Kabuli_Chr07 | 29764386                | GG                                     | AA                 | AA               | INTERGENIC                    |                    |                                 |
| SNP_54205_A_29764426 | NC_021166.1    | Ca_Kabuli_Chr07 | 29764426                | TT                                     | CC                 | CC               | INTERGENIC                    |                    |                                 |
| SNP_54206_A_29765042 | NC_021166.1    | Ca_Kabuli_Chr07 | 29765042                | GG                                     | TT                 | TT               | INTERGENIC                    |                    |                                 |
| SNP_54207_A_29765043 | NC_021166.1    | Ca_Kabuli_Chr07 | 29765043                | CC                                     | TT                 | TT               | INTERGENIC                    |                    |                                 |
| SNP_54208_A_29768722 | NC_021166.1    | Ca_Kabuli_Chr07 | 29768722                | CC                                     | TT                 | TT               | DRR                           | 101505607          | serine carboxypeptidase-like 20 |
| SNP_54209_A_29768727 | NC_021166.1    | Ca_Kabuli_Chr07 | 29768727                | CC                                     | TT                 | TT               | DRR                           | 101505607          | serine carboxypeptidase-like 20 |
| SNP_54210_A_29769280 | NC_021166.1    | Ca_Kabuli_Chr07 | 29769280                | AA                                     | CC                 | CC               | URR                           | 101505280          | linoleate 9S-lipoxygenase-like  |
| SNP_54211_A_29770711 | NC_021166.1    | Ca_Kabuli_Chr07 | 29770711                | CC                                     | AA                 | AA               | INTERGENIC                    |                    |                                 |

| SNPs IDs             | Chromosome IDs | Chromosomes     | Physical positions (bp) | CDC Frontier genome (Reference genome) | (Pusa 1103 & HPNB) | (ILWC 46 & LPNB) | Sequence Components of genome | Gene accession IDs | Putative functions              |
|----------------------|----------------|-----------------|-------------------------|----------------------------------------|--------------------|------------------|-------------------------------|--------------------|---------------------------------|
| SNP_54213_A_29772987 | NC_021166.1    | Ca_Kabuli_Chr07 | 29772987                | AA                                     | TT                 | TT               | INTERGENIC                    |                    |                                 |
| SNP_54215_A_29775505 | NC_021166.1    | Ca_Kabuli_Chr07 | 29775505                | AA                                     | GG                 | GG               | URR                           | 101505607          | serine carboxypeptidase-like 20 |
| SNP_54216_A_29775934 | NC_021166.1    | Ca_Kabuli_Chr07 | 29775934                | TT                                     | AA                 | AA               | URR                           | 101505607          | serine carboxypeptidase-like 20 |
| SNP_54217_A_29775948 | NC_021166.1    | Ca_Kabuli_Chr07 | 29775948                | CC                                     | TT                 | TT               | URR                           | 101505607          | serine carboxypeptidase-like 20 |
| SNP_54218_A_29775971 | NC_021166.1    | Ca_Kabuli_Chr07 | 29775971                | TT                                     | AA                 | AA               | URR                           | 101505607          | serine carboxypeptidase-like 20 |
| SNP_54219_A_29775999 | NC_021166.1    | Ca_Kabuli_Chr07 | 29775999                | GG                                     | AA                 | AA               | URR                           | 101505607          | serine carboxypeptidase-like 20 |
| SNP_54220_A_29776003 | NC_021166.1    | Ca_Kabuli_Chr07 | 29776003                | GG                                     | TT                 | TT               | URR                           | 101505607          | serine carboxypeptidase-like 20 |
| SNP_54221_A_29776023 | NC_021166.1    | Ca_Kabuli_Chr07 | 29776023                | CC                                     | TT                 | TT               | URR                           | 101505607          | serine carboxypeptidase-like 20 |
| SNP_54222_A_29776190 | NC_021166.1    | Ca_Kabuli_Chr07 | 29776190                | TT                                     | CC                 | CC               | URR                           | 101505607          | serine carboxypeptidase-like 20 |
| SNP_54223_A_29776201 | NC_021166.1    | Ca_Kabuli_Chr07 | 29776201                | AA                                     | GG                 | GG               | URR                           | 101505607          | serine carboxypeptidase-like 20 |
| SNP_54224_A_29777426 | NC_021166.1    | Ca_Kabuli_Chr07 | 29777426                | AA                                     | GG                 | GG               | INTERGENIC                    |                    |                                 |
| SNP_54225_A_29777428 | NC_021166.1    | Ca_Kabuli_Chr07 | 29777428                | CC                                     | AA                 | AA               | INTERGENIC                    |                    |                                 |
| SNP_54226_A_29779037 | NC_021166.1    | Ca_Kabuli_Chr07 | 29779037                | AA                                     | CC                 | CC               | INTERGENIC                    |                    |                                 |
| SNP_54227_A_29779371 | NC_021166.1    | Ca_Kabuli_Chr07 | 29779371                | AA                                     | GG                 | GG               | INTERGENIC                    |                    |                                 |
| SNP_54228_A_29780087 | NC_021166.1    | Ca_Kabuli_Chr07 | 29780087                | CC                                     | TT                 | TT               | INTERGENIC                    |                    |                                 |
| SNP_54229_A_29781428 | NC_021166.1    | Ca_Kabuli_Chr07 | 29781428                | CC                                     | TT                 | TT               | INTERGENIC                    |                    |                                 |
| SNP_54230_A_29781727 | NC_021166.1    | Ca_Kabuli_Chr07 | 29781727                | TT                                     | AA                 | AA               | INTERGENIC                    |                    |                                 |
| SNP_54231_A_29784006 | NC_021166.1    | Ca_Kabuli_Chr07 | 29784006                | AA                                     | CC                 | CC               | INTERGENIC                    |                    |                                 |
| SNP_54232_A_29784620 | NC_021166.1    | Ca_Kabuli_Chr07 | 29784620                | CC                                     | TT                 | TT               | INTERGENIC                    |                    |                                 |
| SNP_54233_A_29785066 | NC_021166.1    | Ca_Kabuli_Chr07 | 29785066                | AA                                     | GG                 | GG               | INTERGENIC                    |                    |                                 |
| SNP_54235_A_29789306 | NC_021166.1    | Ca_Kabuli_Chr07 | 29789306                | AA                                     | GG                 | GG               | INTERGENIC                    |                    |                                 |
| SNP_54236_A_29789601 | NC_021166.1    | Ca_Kabuli_Chr07 | 29789601                | CC                                     | GG                 | GG               | INTERGENIC                    |                    |                                 |

| SNPs IDs             | Chromosome IDs | Chromosomes     | Physical positions (bp) | CDC Frontier genome (Reference genome) | (Pusa 1103 & HPNB) | (ILWC 46 & LPNB) | Sequence Components of genome | Gene accession IDs | Putative functions                |
|----------------------|----------------|-----------------|-------------------------|----------------------------------------|--------------------|------------------|-------------------------------|--------------------|-----------------------------------|
| SNP_54237_A_29790158 | NC_021166.1    | Ca_Kabuli_Chr07 | 29790158                | AA                                     | GG                 | GG               | INTERGENIC                    |                    |                                   |
| SNP_54238_A_29790163 | NC_021166.1    | Ca_Kabuli_Chr07 | 29790163                | GG                                     | CC                 | CC               | INTERGENIC                    |                    |                                   |
| SNP_54239_A_29794396 | NC_021166.1    | Ca_Kabuli_Chr07 | 29794396                | AA                                     | TT                 | TT               | INTRON                        | 101505932          | gamma-tubulin complex component 2 |
| SNP_54241_A_29803184 | NC_021166.1    | Ca_Kabuli_Chr07 | 29803184                | GG                                     | AA                 | AA               | URR                           | 101505932          | gamma-tubulin complex component 2 |
| SNP_54242_A_29803257 | NC_021166.1    | Ca_Kabuli_Chr07 | 29803257                | TT                                     | CC                 | CC               | URR                           | 101505932          | gamma-tubulin complex component 2 |
| SNP_54243_A_29803275 | NC_021166.1    | Ca_Kabuli_Chr07 | 29803275                | TT                                     | AA                 | AA               | URR                           | 101505932          | gamma-tubulin complex component 2 |
| SNP_54244_A_29803608 | NC_021166.1    | Ca_Kabuli_Chr07 | 29803608                | AA                                     | TT                 | TT               | URR                           | 101505932          | gamma-tubulin complex component 2 |
| SNP_54245_A_29804395 | NC_021166.1    | Ca_Kabuli_Chr07 | 29804395                | AA                                     | TT                 | TT               | INTERGENIC                    |                    |                                   |
| SNP_54247_A_29805238 | NC_021166.1    | Ca_Kabuli_Chr07 | 29805238                | GG                                     | CC                 | CC               | INTERGENIC                    |                    |                                   |
| SNP_54248_A_29805239 | NC_021166.1    | Ca_Kabuli_Chr07 | 29805239                | TT                                     | GG                 | GG               | INTERGENIC                    |                    |                                   |
| SNP_54249_A_29805270 | NC_021166.1    | Ca_Kabuli_Chr07 | 29805270                | AA                                     | TT                 | TT               | INTERGENIC                    |                    |                                   |
| SNP_54251_A_29809219 | NC_021166.1    | Ca_Kabuli_Chr07 | 29809219                | TT                                     | CC                 | CC               | URR                           | 101506245          | fimbrin-2-like                    |
| SNP_54252_A_29809240 | NC_021166.1    | Ca_Kabuli_Chr07 | 29809240                | GG                                     | CC                 | CC               | URR                           | 101506245          | fimbrin-2-like                    |
| SNP_54253_A_29809254 | NC_021166.1    | Ca_Kabuli_Chr07 | 29809254                | TT                                     | CC                 | CC               | URR                           | 101506245          | fimbrin-2-like                    |
| SNP_54254_A_29810687 | NC_021166.1    | Ca_Kabuli_Chr07 | 29810687                | GG                                     | AA                 | AA               | INTERGENIC                    |                    |                                   |
| SNP_54255_A_29812186 | NC_021166.1    | Ca_Kabuli_Chr07 | 29812186                | GG                                     | AA                 | AA               | DRR                           | 101506574          | uncharacterized LOC101506574      |
| SNP_54256_A_29812207 | NC_021166.1    | Ca_Kabuli_Chr07 | 29812207                | GG                                     | AA                 | AA               | DRR                           | 101506574          | uncharacterized LOC101506574      |
| SNP_54258_A_29816808 | NC_021166.1    | Ca_Kabuli_Chr07 | 29816808                | TT                                     | AA                 | AA               | DRR                           | 101506911          | uncharacterized LOC101506911      |
| SNP_54259_A_29818875 | NC_021166.1    | Ca_Kabuli_Chr07 | 29818875                | GG                                     | AA                 | AA               | INTRON                        | 101506911          | uncharacterized LOC101506911      |
| SNP_54260_A_29818879 | NC_021166.1    | Ca_Kabuli_Chr07 | 29818879                | TT                                     | CC                 | CC               | INTRON                        | 101506911          | uncharacterized LOC101506911      |
| SNP_54261_A_29818890 | NC_021166.1    | Ca_Kabuli_Chr07 | 29818890                | AA                                     | GG                 | GG               | INTRON                        | 101506911          | uncharacterized LOC101506911      |
| SNP_54262_A_29822605 | NC_021166.1    | Ca_Kabuli_Chr07 | 29822605                | GG                                     | AA                 | AA               | URR                           | 101506911          | uncharacterized LOC101506911      |

| SNPs IDs             | Chromosome IDs | Chromosomes     | Physical positions (bp) | CDC Frontier genome (Reference genome) | (Pusa 1103 & HPNB) | (ILWC 46 & LPNB) | Sequence Components of genome | Gene accession IDs | Putative functions                         |
|----------------------|----------------|-----------------|-------------------------|----------------------------------------|--------------------|------------------|-------------------------------|--------------------|--------------------------------------------|
| SNP_54263_A_29822839 | NC_021166.1    | Ca_Kabuli_Chr07 | 29822839                | TT                                     | CC                 | CC               | URR                           | 101506911          | uncharacterized LOC101506911               |
| SNP_54264_A_29822862 | NC_021166.1    | Ca_Kabuli_Chr07 | 29822862                | CC                                     | AA                 | AA               | URR                           | 101506911          | uncharacterized LOC101506911               |
| SNP_54265_A_29822906 | NC_021166.1    | Ca_Kabuli_Chr07 | 29822906                | TT                                     | AA                 | AA               | URR                           | 101506911          | uncharacterized LOC101506911               |
| SNP_54266_A_29822913 | NC_021166.1    | Ca_Kabuli_Chr07 | 29822913                | AA                                     | CC                 | CC               | URR                           | 101506911          | uncharacterized LOC101506911               |
| SNP_54267_A_29822951 | NC_021166.1    | Ca_Kabuli_Chr07 | 29822951                | GG                                     | AA                 | AA               | URR                           | 101506911          | uncharacterized LOC101506911               |
| SNP_54268_A_29836635 | NC_021166.1    | Ca_Kabuli_Chr07 | 29836635                | TT                                     | CC                 | CC               | URR                           | 101508285          | EPIDERMAL PATTERNING FACTOR-like protein 9 |
| SNP_54269_A_29839580 | NC_021166.1    | Ca_Kabuli_Chr07 | 29839580                | TT                                     | AA                 | AA               | INTERGENIC                    |                    |                                            |
| SNP_54270_A_29839635 | NC_021166.1    | Ca_Kabuli_Chr07 | 29839635                | CC                                     | AA                 | AA               | INTERGENIC                    |                    |                                            |
| SNP_54271_A_29840055 | NC_021166.1    | Ca_Kabuli_Chr07 | 29840055                | TT                                     | AA                 | AA               | INTERGENIC                    |                    |                                            |
| SNP_54272_A_29841302 | NC_021166.1    | Ca_Kabuli_Chr07 | 29841302                | AA                                     | GG                 | GG               | DRR                           | 101508920          | uncharacterized LOC101508920               |
| SNP_54273_A_29842271 | NC_021166.1    | Ca_Kabuli_Chr07 | 29842271                | AA                                     | TT                 | TT               | URR                           | 101508605          | asparagine-tRNA ligase, cytoplasmic 2      |
| SNP_54274_A_29843267 | NC_021166.1    | Ca_Kabuli_Chr07 | 29843267                | GG                                     | AA                 | AA               | INTRON                        | 101508920          | uncharacterized LOC101508920               |
| SNP_54275_A_29843268 | NC_021166.1    | Ca_Kabuli_Chr07 | 29843268                | TT                                     | AA                 | AA               | INTRON                        | 101508920          | uncharacterized LOC101508920               |
| SNP_54277_A_29849679 | NC_021166.1    | Ca_Kabuli_Chr07 | 29849679                | AA                                     | CC                 | CC               | INTRON                        | 101508920          | uncharacterized LOC101508920               |
| SNP_54278_A_29849850 | NC_021166.1    | Ca_Kabuli_Chr07 | 29849850                | CC                                     | AA                 | AA               | INTRON                        | 101508920          | uncharacterized LOC101508920               |
| SNP_54279_A_29851245 | NC_021166.1    | Ca_Kabuli_Chr07 | 29851245                | CC                                     | TT                 | TT               | INTRON                        | 101508920          | uncharacterized LOC101508920               |
| SNP_54280_A_29852531 | NC_021166.1    | Ca_Kabuli_Chr07 | 29852531                | TT                                     | CC                 | CC               | URR                           | 101508920          | uncharacterized LOC101508920               |
| SNP_54282_A_29854099 | NC_021166.1    | Ca_Kabuli_Chr07 | 29854099                | GG                                     | CC                 | CC               | URR                           | 101508920          | uncharacterized LOC101508920               |
| SNP_54283_A_29854818 | NC_021166.1    | Ca_Kabuli_Chr07 | 29854818                | GG                                     | AA                 | AA               | INTERGENIC                    |                    |                                            |
| SNP_54285_A_29856416 | NC_021166.1    | Ca_Kabuli_Chr07 | 29856416                | GG                                     | AA                 | AA               | DRR                           | 101509464          | auxin-induced in root cultures protein 12  |
| SNP_54286_A_29856440 | NC_021166.1    | Ca_Kabuli_Chr07 | 29856440                | GG                                     | TT                 | TT               | DRR                           | 101509464          | auxin-induced in root cultures protein 12  |
| SNP_54287_A_29856446 | NC_021166.1    | Ca_Kabuli_Chr07 | 29856446                | AA                                     | TT                 | TT               | DRR                           | 101509464          | auxin-induced in root cultures protein 12  |

| SNPs IDs             | Chromosome IDs | Chromosomes     | Physical positions (bp) | CDC Frontier genome (Reference genome) | (Pusa 1103 & HPNB) | (ILWC 46 & LPNB) | Sequence Components of genome | Gene accession IDs | Putative functions                        |
|----------------------|----------------|-----------------|-------------------------|----------------------------------------|--------------------|------------------|-------------------------------|--------------------|-------------------------------------------|
| SNP_54288_A_29856479 | NC_021166.1    | Ca_Kabuli_Chr07 | 29856479                | TT                                     | GG                 | GG               | DRR                           | 101509464          | auxin-induced in root cultures protein 12 |
| SNP_54289_A_29859890 | NC_021166.1    | Ca_Kabuli_Chr07 | 29859890                | GG                                     | AA                 | AA               | URR                           | 101509464          | auxin-induced in root cultures protein 12 |
| SNP_54290_A_29863314 | NC_021166.1    | Ca_Kabuli_Chr07 | 29863314                | AA                                     | CC                 | CC               | INTERGENIC                    |                    |                                           |
| SNP_54291_A_29863317 | NC_021166.1    | Ca_Kabuli_Chr07 | 29863317                | CC                                     | TT                 | TT               | INTERGENIC                    |                    |                                           |
| SNP_54292_A_29863322 | NC_021166.1    | Ca_Kabuli_Chr07 | 29863322                | GG                                     | CC                 | CC               | INTERGENIC                    |                    |                                           |
| SNP_54293_A_29863907 | NC_021166.1    | Ca_Kabuli_Chr07 | 29863907                | CC                                     | GG                 | GG               | INTERGENIC                    |                    |                                           |
| SNP_54295_A_29865696 | NC_021166.1    | Ca_Kabuli_Chr07 | 29865696                | TT                                     | AA                 | AA               | INTERGENIC                    |                    |                                           |
| SNP_54296_A_29866468 | NC_021166.1    | Ca_Kabuli_Chr07 | 29866468                | TT                                     | CC                 | CC               | INTERGENIC                    |                    |                                           |
| SNP_54297_A_29866469 | NC_021166.1    | Ca_Kabuli_Chr07 | 29866469                | AA                                     | TT                 | TT               | INTERGENIC                    |                    |                                           |
| SNP_54298_A_29866771 | NC_021166.1    | Ca_Kabuli_Chr07 | 29866771                | AA                                     | GG                 | GG               | INTERGENIC                    |                    |                                           |
| SNP_54300_A_29866889 | NC_021166.1    | Ca_Kabuli_Chr07 | 29866889                | AA                                     | TT                 | TT               | INTERGENIC                    |                    |                                           |
| SNP_54301_A_29867927 | NC_021166.1    | Ca_Kabuli_Chr07 | 29867927                | CC                                     | TT                 | TT               | DRR                           | 101509786          | serine/threonine-protein kinase OX11-like |
| SNP_54302_A_29879231 | NC_021166.1    | Ca_Kabuli_Chr07 | 29879231                | TT                                     | CC                 | CC               | INTERGENIC                    |                    |                                           |
| SNP_54303_A_29882523 | NC_021166.1    | Ca_Kabuli_Chr07 | 29882523                | AA                                     | GG                 | GG               | INTRON                        | 101510105          | E3 ubiquitin-protein ligase CHIP          |
| SNP_54304_A_29890778 | NC_021166.1    | Ca_Kabuli_Chr07 | 29890778                | GG                                     | AA                 | AA               | INTERGENIC                    |                    |                                           |
| SNP_54305_A_29895112 | NC_021166.1    | Ca_Kabuli_Chr07 | 29895112                | CC                                     | TT                 | TT               | DRR                           | 101502809          | Unknown function                          |
| SNP_54306_A_29895121 | NC_021166.1    | Ca_Kabuli_Chr07 | 29895121                | TT                                     | AA                 | AA               | DRR                           | 101502809          | Unknown function                          |
| SNP_54307_A_29895142 | NC_021166.1    | Ca_Kabuli_Chr07 | 29895142                | AA                                     | GG                 | GG               | DRR                           | 101502809          | Unknown function                          |
| SNP_54308_A_29895143 | NC_021166.1    | Ca_Kabuli_Chr07 | 29895143                | GG                                     | TT                 | TT               | DRR                           | 101502809          | Unknown function                          |
| SNP_54309_A_29897444 | NC_021166.1    | Ca_Kabuli_Chr07 | 29897444                | TT                                     | CC                 | CC               | URR                           | 101502809          | Unknown function                          |
| SNP_54310_A_29897460 | NC_021166.1    | Ca_Kabuli_Chr07 | 29897460                | AA                                     | GG                 | GG               | URR                           | 101502809          | Unknown function                          |
| SNP_54311_A_29897465 | NC_021166.1    | Ca_Kabuli_Chr07 | 29897465                | AA                                     | GG                 | GG               | URR                           | 101502809          | Unknown function                          |

| SNPs IDs             | Chromosome IDs | Chromosomes     | Physical positions (bp) | CDC Frontier genome (Reference genome) | (Pusa 1103 & HPNB) | (ILWC 46 & LPNB) | Sequence Components of genome | Gene accession IDs | Putative functions                       |
|----------------------|----------------|-----------------|-------------------------|----------------------------------------|--------------------|------------------|-------------------------------|--------------------|------------------------------------------|
| SNP_54312_A_29904641 | NC_021166.1    | Ca_Kabuli_Chr07 | 29904641                | AA                                     | TT                 | TT               | INTERGENIC                    |                    |                                          |
| SNP_54313_A_29905705 | NC_021166.1    | Ca_Kabuli_Chr07 | 29905705                | GG                                     | TT                 | TT               | INTERGENIC                    |                    |                                          |
| SNP_54314_A_29905712 | NC_021166.1    | Ca_Kabuli_Chr07 | 29905712                | TT                                     | CC                 | CC               | INTERGENIC                    |                    |                                          |
| SNP_54315_A_29906026 | NC_021166.1    | Ca_Kabuli_Chr07 | 29906026                | GG                                     | AA                 | AA               | INTERGENIC                    |                    |                                          |
| SNP_54316_A_29906077 | NC_021166.1    | Ca_Kabuli_Chr07 | 29906077                | TT                                     | CC                 | CC               | INTERGENIC                    |                    |                                          |
| SNP_54317_A_29906520 | NC_021166.1    | Ca_Kabuli_Chr07 | 29906520                | GG                                     | AA                 | AA               | INTERGENIC                    |                    |                                          |
| SNP_54318_A_29921396 | NC_021166.1    | Ca_Kabuli_Chr07 | 29921396                | TT                                     | CC                 | CC               | NON_SYNONYMOUS_CODING         | 101503793          | putative disease resistance protein RGA3 |
| SNP_54319_A_29921474 | NC_021166.1    | Ca_Kabuli_Chr07 | 29921474                | AA                                     | CC                 | CC               | NON_SYNONYMOUS_CODING         | 101503793          | putative disease resistance protein RGA3 |
| SNP_54320_A_29921496 | NC_021166.1    | Ca_Kabuli_Chr07 | 29921496                | AA                                     | GG                 | GG               | NON_SYNONYMOUS_CODING         | 101503793          | putative disease resistance protein RGA3 |
| SNP_54321_A_29921786 | NC_021166.1    | Ca_Kabuli_Chr07 | 29921786                | GG                                     | TT                 | TT               | NON_SYNONYMOUS_CODING         | 101503793          | putative disease resistance protein RGA3 |
| SNP_54322_A_29922701 | NC_021166.1    | Ca_Kabuli_Chr07 | 29922701                | AA                                     | GG                 | GG               | NON_SYNONYMOUS_CODING         | 101503793          | putative disease resistance protein RGA3 |
| SNP_54323_A_29922734 | NC_021166.1    | Ca_Kabuli_Chr07 | 29922734                | AA                                     | GG                 | GG               | NON_SYNONYMOUS_CODING         | 101503793          | putative disease resistance protein RGA3 |
| SNP_54324_A_29922735 | NC_021166.1    | Ca_Kabuli_Chr07 | 29922735                | GG                                     | AA                 | AA               | NON_SYNONYMOUS_CODING         | 101503793          | putative disease resistance protein RGA3 |
| SNP_54325_A_29922745 | NC_021166.1    | Ca_Kabuli_Chr07 | 29922745                | GG                                     | TT                 | TT               | NON_SYNONYMOUS_CODING         | 101503793          | putative disease resistance protein RGA3 |
| SNP_54326_A_29923370 | NC_021166.1    | Ca_Kabuli_Chr07 | 29923370                | AA                                     | GG                 | GG               | URR                           | 101503793          | putative disease resistance protein RGA3 |
| SNP_54327_A_29923429 | NC_021166.1    | Ca_Kabuli_Chr07 | 29923429                | TT                                     | CC                 | CC               | URR                           | 101503793          | putative disease resistance protein RGA3 |
| SNP_54328_A_29923457 | NC_021166.1    | Ca_Kabuli_Chr07 | 29923457                | GG                                     | AA                 | AA               | URR                           | 101503793          | putative disease resistance protein RGA3 |
| SNP_54329_A_29929668 | NC_021166.1    | Ca_Kabuli_Chr07 | 29929668                | GG                                     | AA                 | AA               | URR                           | 101511080          | disease resistance protein RGA2-like     |
| SNP_54330_A_29929745 | NC_021166.1    | Ca_Kabuli_Chr07 | 29929745                | CC                                     | AA                 | AA               | URR                           | 101511080          | disease resistance protein RGA2-like     |
| SNP_54331_A_29935347 | NC_021166.1    | Ca_Kabuli_Chr07 | 29935347                | AA                                     | TT                 | TT               | INTERGENIC                    |                    |                                          |
| SNP_54332_A_29937536 | NC_021166.1    | Ca_Kabuli_Chr07 | 29937536                | AA                                     | TT                 | TT               | INTERGENIC                    |                    |                                          |
| SNP_54333_A_29939987 | NC_021166.1    | Ca_Kabuli_Chr07 | 29939987                | AA                                     | GG                 | GG               | INTERGENIC                    |                    |                                          |

| SNPs IDs             | Chromosome IDs | Chromosomes     | Physical positions (bp) | CDC Frontier genome (Reference genome) | (Pusa 1103 & HPNB) | (ILWC 46 & LPNB) | Sequence Components of genome | Gene accession IDs | Putative functions            |
|----------------------|----------------|-----------------|-------------------------|----------------------------------------|--------------------|------------------|-------------------------------|--------------------|-------------------------------|
| SNP_54334_A_29939996 | NC_021166.1    | Ca_Kabuli_Chr07 | 29939996                | AA                                     | GG                 | GG               | INTERGENIC                    |                    |                               |
| SNP_54335_A_29940031 | NC_021166.1    | Ca_Kabuli_Chr07 | 29940031                | AA                                     | GG                 | GG               | INTERGENIC                    |                    |                               |
| SNP_54336_A_29940032 | NC_021166.1    | Ca_Kabuli_Chr07 | 29940032                | AA                                     | GG                 | GG               | INTERGENIC                    |                    |                               |
| SNP_54337_A_29940040 | NC_021166.1    | Ca_Kabuli_Chr07 | 29940040                | GG                                     | AA                 | AA               | INTERGENIC                    |                    |                               |
| SNP_54338_A_29940053 | NC_021166.1    | Ca_Kabuli_Chr07 | 29940053                | GG                                     | TT                 | TT               | INTERGENIC                    |                    |                               |
| SNP_54339_A_29946693 | NC_021166.1    | Ca_Kabuli_Chr07 | 29946693                | TT                                     | CC                 | CC               | INTERGENIC                    |                    |                               |
| SNP_54340_A_29947080 | NC_021166.1    | Ca_Kabuli_Chr07 | 29947080                | AA                                     | GG                 | GG               | INTERGENIC                    |                    |                               |
| SNP_54341_A_29949477 | NC_021166.1    | Ca_Kabuli_Chr07 | 29949477                | CC                                     | TT                 | TT               | INTERGENIC                    |                    |                               |
| SNP_54342_A_29949485 | NC_021166.1    | Ca_Kabuli_Chr07 | 29949485                | TT                                     | GG                 | GG               | INTERGENIC                    |                    |                               |
| SNP_54343_A_29949488 | NC_021166.1    | Ca_Kabuli_Chr07 | 29949488                | GG                                     | AA                 | AA               | INTERGENIC                    |                    |                               |
| SNP_54344_A_29950011 | NC_021166.1    | Ca_Kabuli_Chr07 | 29950011                | GG                                     | AA                 | AA               | INTERGENIC                    |                    |                               |
| SNP_54345_A_29950422 | NC_021166.1    | Ca_Kabuli_Chr07 | 29950422                | TT                                     | CC                 | CC               | INTERGENIC                    |                    |                               |
| SNP_54346_A_29950438 | NC_021166.1    | Ca_Kabuli_Chr07 | 29950438                | AA                                     | GG                 | GG               | INTERGENIC                    |                    |                               |
| SNP_54347_A_29950533 | NC_021166.1    | Ca_Kabuli_Chr07 | 29950533                | TT                                     | GG                 | GG               | INTERGENIC                    |                    |                               |
| SNP_54348_A_29950792 | NC_021166.1    | Ca_Kabuli_Chr07 | 29950792                | GG                                     | CC                 | CC               | INTERGENIC                    |                    |                               |
| SNP_54349_A_29952849 | NC_021166.1    | Ca_Kabuli_Chr07 | 29952849                | CC                                     | TT                 | TT               | INTERGENIC                    |                    |                               |
| SNP_54350_A_29953355 | NC_021166.1    | Ca_Kabuli_Chr07 | 29953355                | TT                                     | CC                 | CC               | INTERGENIC                    |                    |                               |
| SNP_54351_A_29962024 | NC_021166.1    | Ca_Kabuli_Chr07 | 29962024                | GG                                     | AA                 | AA               | DRR                           | 101511388          | TMV resistance protein N-like |
| SNP_54353_A_29969311 | NC_021166.1    | Ca_Kabuli_Chr07 | 29969311                | AA                                     | TT                 | TT               | DRR                           | 101511718          | TMV resistance protein N-like |
| SNP_54356_A_29969772 | NC_021166.1    | Ca_Kabuli_Chr07 | 29969772                | CC                                     | AA                 | AA               | URR                           | 101511388          | TMV resistance protein N-like |
| SNP_54357_A_29972323 | NC_021166.1    | Ca_Kabuli_Chr07 | 29972323                | GG                                     | AA                 | AA               | SYNONYMOUS_CODING             | 101511718          | TMV resistance protein N-like |
| SNP_54359_A_29972972 | NC_021166.1    | Ca_Kabuli_Chr07 | 29972972                | AA                                     | TT                 | TT               | INTERGENIC                    |                    |                               |



| SNPs IDs             | Chromosome IDs | Chromosomes     | Physical positions (bp) | CDC Frontier (Reference genome) | (Pusa 1103 & HPNB) | (ILWC 46 & LPNB) | Sequence Components of genome | Gene accession IDs | Putative functions            |
|----------------------|----------------|-----------------|-------------------------|---------------------------------|--------------------|------------------|-------------------------------|--------------------|-------------------------------|
| SNP_54360_A_29974587 | NC_021166.1    | Ca_Kabuli_Chr07 | 29974587                | GG                              | AA                 | AA               | INTERGENIC                    |                    |                               |
| SNP_54361_A_29974602 | NC_021166.1    | Ca_Kabuli_Chr07 | 29974602                | TT                              | CC                 | CC               | INTERGENIC                    |                    |                               |
| SNP_54362_A_29976199 | NC_021166.1    | Ca_Kabuli_Chr07 | 29976199                | TT                              | GG                 | GG               | URR                           | 101511718          | TMV resistance protein N-like |
| SNP_54363_A_29976251 | NC_021166.1    | Ca_Kabuli_Chr07 | 29976251                | GG                              | TT                 | TT               | URR                           | 101511718          | TMV resistance protein N-like |
| SNP_54364_A_29976295 | NC_021166.1    | Ca_Kabuli_Chr07 | 29976295                | AA                              | GG                 | GG               | URR                           | 101511718          | TMV resistance protein N-like |
| SNP_54366_A_29976476 | NC_021166.1    | Ca_Kabuli_Chr07 | 29976476                | GG                              | AA                 | AA               | URR                           | 101511718          | TMV resistance protein N-like |
| SNP_54367_A_29976528 | NC_021166.1    | Ca_Kabuli_Chr07 | 29976528                | TT                              | CC                 | CC               | URR                           | 101511718          | TMV resistance protein N-like |
| SNP_54368_A_29976535 | NC_021166.1    | Ca_Kabuli_Chr07 | 29976535                | TT                              | AA                 | AA               | URR                           | 101511718          | TMV resistance protein N-like |
| SNP_54369_A_29976588 | NC_021166.1    | Ca_Kabuli_Chr07 | 29976588                | GG                              | AA                 | AA               | URR                           | 101511718          | TMV resistance protein N-like |
| SNP_54370_A_29976762 | NC_021166.1    | Ca_Kabuli_Chr07 | 29976762                | GG                              | TT                 | TT               | URR                           | 101511718          | TMV resistance protein N-like |
| SNP_54371_A_29976950 | NC_021166.1    | Ca_Kabuli_Chr07 | 29976950                | AA                              | GG                 | GG               | DRR                           | 101512780          | uncharacterized LOC101512780  |
| SNP_54372_A_29977151 | NC_021166.1    | Ca_Kabuli_Chr07 | 29977151                | GG                              | AA                 | AA               | DRR                           | 101512780          | uncharacterized LOC101512780  |
| SNP_54373_A_29977440 | NC_021166.1    | Ca_Kabuli_Chr07 | 29977440                | GG                              | AA                 | AA               | DRR                           | 101512780          | uncharacterized LOC101512780  |
| SNP_54374_A_29978949 | NC_021166.1    | Ca_Kabuli_Chr07 | 29978949                | CC                              | TT                 | TT               | INTERGENIC                    |                    |                               |
| SNP_54377_A_29979949 | NC_021166.1    | Ca_Kabuli_Chr07 | 29979949                | TT                              | CC                 | CC               | URR                           | 101512780          | uncharacterized LOC101512780  |
| SNP_54378_A_29980055 | NC_021166.1    | Ca_Kabuli_Chr07 | 29980055                | TT                              | GG                 | GG               | URR                           | 101512780          | uncharacterized LOC101512780  |
| SNP_54379_A_29980585 | NC_021166.1    | Ca_Kabuli_Chr07 | 29980585                | TT                              | AA                 | AA               | URR                           | 101512780          | uncharacterized LOC101512780  |
| SNP_54380_A_29980662 | NC_021166.1    | Ca_Kabuli_Chr07 | 29980662                | GG                              | AA                 | AA               | URR                           | 101512780          | uncharacterized LOC101512780  |
| SNP_54382_A_29980866 | NC_021166.1    | Ca_Kabuli_Chr07 | 29980866                | CC                              | AA                 | AA               | URR                           | 101512780          | uncharacterized LOC101512780  |
| SNP_54384_A_29980948 | NC_021166.1    | Ca_Kabuli_Chr07 | 29980948                | AA                              | CC                 | CC               | URR                           | 101512780          | uncharacterized LOC101512780  |
| SNP_54385_A_29981173 | NC_021166.1    | Ca_Kabuli_Chr07 | 29981173                | CC                              | TT                 | TT               | URR                           | 101512780          | uncharacterized LOC101512780  |
| SNP_54386_A_29981590 | NC_021166.1    | Ca_Kabuli_Chr07 | 29981590                | CC                              | TT                 | TT               | INTERGENIC                    |                    |                               |

| SNPs IDs             | Chromosome IDs | Chromosomes     | Physical positions (bp) | CDC Frontier genome (Reference genome) | (Pusa 1103 & HPNB) | (ILWC 46 & LPNB) | Sequence Components of genome | Gene accession IDs | Putative functions           |
|----------------------|----------------|-----------------|-------------------------|----------------------------------------|--------------------|------------------|-------------------------------|--------------------|------------------------------|
| SNP_54387_A_29981616 | NC_021166.1    | Ca_Kabuli_Chr07 | 29981616                | TT                                     | AA                 | AA               | INTERGENIC                    |                    |                              |
| SNP_54389_A_29982462 | NC_021166.1    | Ca_Kabuli_Chr07 | 29982462                | AA                                     | TT                 | TT               | INTERGENIC                    |                    |                              |
| SNP_54391_A_29985751 | NC_021166.1    | Ca_Kabuli_Chr07 | 29985751                | CC                                     | TT                 | TT               | URR                           | 101513106          | uncharacterized LOC101513106 |
| SNP_54392_A_29985778 | NC_021166.1    | Ca_Kabuli_Chr07 | 29985778                | TT                                     | CC                 | CC               | URR                           | 101513106          | uncharacterized LOC101513106 |
| SNP_54393_A_29986095 | NC_021166.1    | Ca_Kabuli_Chr07 | 29986095                | GG                                     | AA                 | AA               | URR                           | 101513106          | uncharacterized LOC101513106 |
| SNP_54395_A_29986283 | NC_021166.1    | Ca_Kabuli_Chr07 | 29986283                | CC                                     | TT                 | TT               | URR                           | 101513106          | uncharacterized LOC101513106 |
| SNP_54396_A_29986313 | NC_021166.1    | Ca_Kabuli_Chr07 | 29986313                | CC                                     | TT                 | TT               | URR                           | 101513106          | uncharacterized LOC101513106 |
| SNP_54397_A_29987886 | NC_021166.1    | Ca_Kabuli_Chr07 | 29987886                | AA                                     | TT                 | TT               | INTERGENIC                    |                    |                              |
| SNP_54398_A_29988455 | NC_021166.1    | Ca_Kabuli_Chr07 | 29988455                | GG                                     | AA                 | AA               | INTERGENIC                    |                    |                              |
| SNP_54399_A_29988508 | NC_021166.1    | Ca_Kabuli_Chr07 | 29988508                | CC                                     | AA                 | AA               | INTERGENIC                    |                    |                              |
| SNP_54400_A_29989965 | NC_021166.1    | Ca_Kabuli_Chr07 | 29989965                | AA                                     | GG                 | GG               | INTERGENIC                    |                    |                              |
| SNP_54401_A_29990839 | NC_021166.1    | Ca_Kabuli_Chr07 | 29990839                | AA                                     | GG                 | GG               | INTERGENIC                    |                    |                              |
| SNP_54402_A_29990881 | NC_021166.1    | Ca_Kabuli_Chr07 | 29990881                | AA                                     | GG                 | GG               | INTERGENIC                    |                    |                              |
| SNP_54403_A_29992871 | NC_021166.1    | Ca_Kabuli_Chr07 | 29992871                | CC                                     | TT                 | TT               | INTERGENIC                    |                    |                              |
| SNP_54404_A_29993628 | NC_021166.1    | Ca_Kabuli_Chr07 | 29993628                | AA                                     | GG                 | GG               | INTERGENIC                    |                    |                              |
| SNP_54406_A_29994652 | NC_021166.1    | Ca_Kabuli_Chr07 | 29994652                | TT                                     | CC                 | CC               | INTERGENIC                    |                    |                              |
| SNP_54407_A_29995436 | NC_021166.1    | Ca_Kabuli_Chr07 | 29995436                | CC                                     | AA                 | AA               | INTERGENIC                    |                    |                              |
| SNP_54408_A_29995760 | NC_021166.1    | Ca_Kabuli_Chr07 | 29995760                | TT                                     | CC                 | CC               | INTERGENIC                    |                    |                              |
| SNP_54409_A_29996629 | NC_021166.1    | Ca_Kabuli_Chr07 | 29996629                | AA                                     | GG                 | GG               | INTERGENIC                    |                    |                              |
| SNP_54410_A_29996899 | NC_021166.1    | Ca_Kabuli_Chr07 | 29996899                | AA                                     | TT                 | TT               | INTERGENIC                    |                    |                              |
| SNP_54411_A_29996906 | NC_021166.1    | Ca_Kabuli_Chr07 | 29996906                | AA                                     | GG                 | GG               | INTERGENIC                    |                    |                              |
| SNP_54412_A_29996908 | NC_021166.1    | Ca_Kabuli_Chr07 | 29996908                | TT                                     | CC                 | CC               | INTERGENIC                    |                    |                              |

| SNPs IDs             | Chromosome IDs | Chromosomes     | Physical positions (bp) | CDC Frontier genome (Reference genome) | (Pusa 1103 & HPNB) | (ILWC 46 & LPNB) | Sequence Components of genome | Gene accession IDs | Putative functions               |
|----------------------|----------------|-----------------|-------------------------|----------------------------------------|--------------------|------------------|-------------------------------|--------------------|----------------------------------|
| SNP_54413_A_29996914 | NC_021166.1    | Ca_Kabuli_Chr07 | 29996914                | CC                                     | TT                 | TT               | INTERGENIC                    |                    |                                  |
| SNP_54415_A_30002986 | NC_021166.1    | Ca_Kabuli_Chr07 | 30002986                | AA                                     | CC                 | CC               | INTERGENIC                    |                    |                                  |
| SNP_54416_A_30003027 | NC_021166.1    | Ca_Kabuli_Chr07 | 30003027                | TT                                     | AA                 | AA               | INTERGENIC                    |                    |                                  |
| SNP_54417_A_30003645 | NC_021166.1    | Ca_Kabuli_Chr07 | 30003645                | AA                                     | GG                 | GG               | INTERGENIC                    |                    |                                  |
| SNP_54418_A_30005301 | NC_021166.1    | Ca_Kabuli_Chr07 | 30005301                | TT                                     | CC                 | CC               | INTERGENIC                    |                    |                                  |
| SNP_54421_A_30008163 | NC_021166.1    | Ca_Kabuli_Chr07 | 30008163                | GG                                     | CC                 | CC               | NON_SYNONYMOUS_CODING         | 101513433          | transcription factor bHLH62-like |
| SNP_54422_A_30008197 | NC_021166.1    | Ca_Kabuli_Chr07 | 30008197                | TT                                     | CC                 | CC               | INTRON                        | 101513433          | transcription factor bHLH62-like |
| SNP_54423_A_30008205 | NC_021166.1    | Ca_Kabuli_Chr07 | 30008205                | AA                                     | GG                 | GG               | INTRON                        | 101513433          | transcription factor bHLH62-like |
| SNP_54424_A_30008206 | NC_021166.1    | Ca_Kabuli_Chr07 | 30008206                | CC                                     | TT                 | TT               | INTRON                        | 101513433          | transcription factor bHLH62-like |
| SNP_54425_A_30008207 | NC_021166.1    | Ca_Kabuli_Chr07 | 30008207                | GG                                     | AA                 | AA               | INTRON                        | 101513433          | transcription factor bHLH62-like |
| SNP_54426_A_30008470 | NC_021166.1    | Ca_Kabuli_Chr07 | 30008470                | GG                                     | TT                 | TT               | NON_SYNONYMOUS_CODING         | 101513433          | transcription factor bHLH62-like |
| SNP_54427_A_30008868 | NC_021166.1    | Ca_Kabuli_Chr07 | 30008868                | GG                                     | AA                 | AA               | INTRON                        | 101513433          | transcription factor bHLH62-like |
| SNP_54428_A_30008874 | NC_021166.1    | Ca_Kabuli_Chr07 | 30008874                | CC                                     | GG                 | GG               | INTRON                        | 101513433          | transcription factor bHLH62-like |
| SNP_54429_A_30008919 | NC_021166.1    | Ca_Kabuli_Chr07 | 30008919                | GG                                     | AA                 | AA               | INTRON                        | 101513433          | transcription factor bHLH62-like |
| SNP_54432_A_30009231 | NC_021166.1    | Ca_Kabuli_Chr07 | 30009231                | GG                                     | CC                 | CC               | INTRON                        | 101513433          | transcription factor bHLH62-like |
| SNP_54434_A_30009545 | NC_021166.1    | Ca_Kabuli_Chr07 | 30009545                | TT                                     | AA                 | AA               | INTRON                        | 101513433          | transcription factor bHLH62-like |
| SNP_54435_A_30011061 | NC_021166.1    | Ca_Kabuli_Chr07 | 30011061                | CC                                     | TT                 | TT               | URR                           | 101513433          | transcription factor bHLH62-like |
| SNP_54436_A_30011145 | NC_021166.1    | Ca_Kabuli_Chr07 | 30011145                | CC                                     | GG                 | GG               | URR                           | 101513433          | transcription factor bHLH62-like |
| SNP_54437_A_30011362 | NC_021166.1    | Ca_Kabuli_Chr07 | 30011362                | AA                                     | GG                 | GG               | URR                           | 101513433          | transcription factor bHLH62-like |
| SNP_54438_A_30011455 | NC_021166.1    | Ca_Kabuli_Chr07 | 30011455                | TT                                     | AA                 | AA               | URR                           | 101513433          | transcription factor bHLH62-like |
| SNP_54439_A_30011478 | NC_021166.1    | Ca_Kabuli_Chr07 | 30011478                | CC                                     | TT                 | TT               | URR                           | 101513433          | transcription factor bHLH62-like |
| SNP_54440_A_30011487 | NC_021166.1    | Ca_Kabuli_Chr07 | 30011487                | GG                                     | TT                 | TT               | URR                           | 101513433          | transcription factor bHLH62-like |

| SNPs IDs             | Chromosome IDs | Chromosomes     | Physical positions (bp) | CDC Frontier genome (Reference genome) | (Pusa 1103 & HPNB) | (ILWC 46 & LPNB) | Sequence Components of genome | Gene accession IDs | Putative functions                        |
|----------------------|----------------|-----------------|-------------------------|----------------------------------------|--------------------|------------------|-------------------------------|--------------------|-------------------------------------------|
| SNP_54441_A_30011534 | NC_021166.1    | Ca_Kabuli_Chr07 | 30011534                | TT                                     | GG                 | GG               | URR                           | 101513433          | transcription factor bHLH62-like          |
| SNP_54442_A_30013731 | NC_021166.1    | Ca_Kabuli_Chr07 | 30013731                | GG                                     | CC                 | CC               | INTERGENIC                    |                    |                                           |
| SNP_54443_A_30015306 | NC_021166.1    | Ca_Kabuli_Chr07 | 30015306                | TT                                     | AA                 | AA               | INTERGENIC                    |                    |                                           |
| SNP_54444_A_30015309 | NC_021166.1    | Ca_Kabuli_Chr07 | 30015309                | TT                                     | CC                 | CC               | INTERGENIC                    |                    |                                           |
| SNP_54446_A_30016441 | NC_021166.1    | Ca_Kabuli_Chr07 | 30016441                | AA                                     | CC                 | CC               | INTERGENIC                    |                    |                                           |
| SNP_54447_A_30016443 | NC_021166.1    | Ca_Kabuli_Chr07 | 30016443                | GG                                     | AA                 | AA               | INTERGENIC                    |                    |                                           |
| SNP_54448_A_30016445 | NC_021166.1    | Ca_Kabuli_Chr07 | 30016445                | GG                                     | TT                 | TT               | INTERGENIC                    |                    |                                           |
| SNP_54449_A_30016477 | NC_021166.1    | Ca_Kabuli_Chr07 | 30016477                | CC                                     | GG                 | GG               | INTERGENIC                    |                    |                                           |
| SNP_54450_A_30016739 | NC_021166.1    | Ca_Kabuli_Chr07 | 30016739                | TT                                     | CC                 | CC               | INTERGENIC                    |                    |                                           |
| SNP_54451_A_30017694 | NC_021166.1    | Ca_Kabuli_Chr07 | 30017694                | AA                                     | GG                 | GG               | INTERGENIC                    |                    |                                           |
| SNP_54452_A_30017709 | NC_021166.1    | Ca_Kabuli_Chr07 | 30017709                | TT                                     | CC                 | CC               | INTERGENIC                    |                    |                                           |
| SNP_54453_A_30021102 | NC_021166.1    | Ca_Kabuli_Chr07 | 30021102                | TT                                     | CC                 | CC               | DRR                           | 101513981          | probable xyloglucan glycosyltransferase 6 |
| SNP_54454_A_30024721 | NC_021166.1    | Ca_Kabuli_Chr07 | 30024721                | GG                                     | AA                 | AA               | INTERGENIC                    |                    |                                           |
| SNP_54455_A_30024853 | NC_021166.1    | Ca_Kabuli_Chr07 | 30024853                | GG                                     | AA                 | AA               | INTERGENIC                    |                    |                                           |
| SNP_54456_A_30024945 | NC_021166.1    | Ca_Kabuli_Chr07 | 30024945                | GG                                     | AA                 | AA               | INTERGENIC                    |                    |                                           |
| SNP_54457_A_30025039 | NC_021166.1    | Ca_Kabuli_Chr07 | 30025039                | TT                                     | AA                 | AA               | INTERGENIC                    |                    |                                           |
| SNP_54459_A_30028518 | NC_021166.1    | Ca_Kabuli_Chr07 | 30028518                | CC                                     | TT                 | TT               | DRR                           | 101514314          | 40S ribosomal protein S8                  |
| SNP_54460_A_30028731 | NC_021166.1    | Ca_Kabuli_Chr07 | 30028731                | TT                                     | CC                 | CC               | DRR                           | 101514314          | 40S ribosomal protein S8                  |
| SNP_54461_A_30030933 | NC_021166.1    | Ca_Kabuli_Chr07 | 30030933                | AA                                     | TT                 | TT               | INTERGENIC                    |                    |                                           |
| SNP_54462_A_30030974 | NC_021166.1    | Ca_Kabuli_Chr07 | 30030974                | AA                                     | CC                 | CC               | INTERGENIC                    |                    |                                           |
| SNP_54463_A_30034352 | NC_021166.1    | Ca_Kabuli_Chr07 | 30034352                | GG                                     | TT                 | TT               | INTERGENIC                    |                    |                                           |
| SNP_54464_A_30037176 | NC_021166.1    | Ca_Kabuli_Chr07 | 30037176                | GG                                     | AA                 | AA               | URR                           | 101514635          | class II metallothionein-like protein 1A  |

| SNPs IDs             | Chromosome IDs | Chromosomes     | Physical positions (bp) | CDC Frontier genome | (Reference genome) | (Pusa 1103 & HPNB) | (ILWC 46 & LPNB) | Sequence Components of genome | Gene accession IDs | Putative functions                              |
|----------------------|----------------|-----------------|-------------------------|---------------------|--------------------|--------------------|------------------|-------------------------------|--------------------|-------------------------------------------------|
| SNP_54465_A_30038184 | NC_021166.1    | Ca_Kabuli_Chr07 | 30038184                | CC                  |                    | TT                 | TT               | URR                           | 101514635          | class II metallothionein-like protein 1A        |
| SNP_54466_A_30038216 | NC_021166.1    | Ca_Kabuli_Chr07 | 30038216                | CC                  |                    | TT                 | TT               | URR                           | 101514635          | class II metallothionein-like protein 1A        |
| SNP_54468_A_30041719 | NC_021166.1    | Ca_Kabuli_Chr07 | 30041719                | AA                  |                    | TT                 | TT               | URR                           | 101514965          | peptidyl-prolyl cis-trans isomerase FKBP62-like |
| SNP_54469_A_30041810 | NC_021166.1    | Ca_Kabuli_Chr07 | 30041810                | TT                  |                    | GG                 | GG               | URR                           | 101514965          | peptidyl-prolyl cis-trans isomerase FKBP62-like |
| SNP_54470_A_30042001 | NC_021166.1    | Ca_Kabuli_Chr07 | 30042001                | TT                  |                    | CC                 | CC               | URR                           | 101514965          | peptidyl-prolyl cis-trans isomerase FKBP62-like |
| SNP_54471_A_30042012 | NC_021166.1    | Ca_Kabuli_Chr07 | 30042012                | AA                  |                    | TT                 | TT               | URR                           | 101514965          | peptidyl-prolyl cis-trans isomerase FKBP62-like |
| SNP_54472_A_30042121 | NC_021166.1    | Ca_Kabuli_Chr07 | 30042121                | TT                  |                    | CC                 | CC               | URR                           | 101514965          | peptidyl-prolyl cis-trans isomerase FKBP62-like |
| SNP_54473_A_30042133 | NC_021166.1    | Ca_Kabuli_Chr07 | 30042133                | AA                  |                    | GG                 | GG               | URR                           | 101514965          | peptidyl-prolyl cis-trans isomerase FKBP62-like |
| SNP_54474_A_30042150 | NC_021166.1    | Ca_Kabuli_Chr07 | 30042150                | TT                  |                    | CC                 | CC               | URR                           | 101514965          | peptidyl-prolyl cis-trans isomerase FKBP62-like |
| SNP_54475_A_30042445 | NC_021166.1    | Ca_Kabuli_Chr07 | 30042445                | GG                  |                    | AA                 | AA               | URR                           | 101514965          | peptidyl-prolyl cis-trans isomerase FKBP62-like |
| SNP_54477_A_30043363 | NC_021166.1    | Ca_Kabuli_Chr07 | 30043363                | CC                  |                    | AA                 | AA               | URR                           | 101514965          | peptidyl-prolyl cis-trans isomerase FKBP62-like |
| SNP_54478_A_30044757 | NC_021166.1    | Ca_Kabuli_Chr07 | 30044757                | GG                  |                    | AA                 | AA               | INTERGENIC                    |                    |                                                 |
| SNP_54479_A_30045667 | NC_021166.1    | Ca_Kabuli_Chr07 | 30045667                | TT                  |                    | CC                 | CC               | INTERGENIC                    |                    |                                                 |
| SNP_54480_A_30045687 | NC_021166.1    | Ca_Kabuli_Chr07 | 30045687                | CC                  |                    | TT                 | TT               | INTERGENIC                    |                    |                                                 |
| SNP_54481_A_30045713 | NC_021166.1    | Ca_Kabuli_Chr07 | 30045713                | TT                  |                    | CC                 | CC               | INTERGENIC                    |                    |                                                 |
| SNP_54482_A_30046469 | NC_021166.1    | Ca_Kabuli_Chr07 | 30046469                | AA                  |                    | GG                 | GG               | INTERGENIC                    |                    |                                                 |
| SNP_54483_A_30048428 | NC_021166.1    | Ca_Kabuli_Chr07 | 30048428                | CC                  |                    | TT                 | TT               | DRR                           | 101515288          | FK506-binding protein 2                         |
| SNP_54485_A_30048717 | NC_021166.1    | Ca_Kabuli_Chr07 | 30048717                | TT                  |                    | CC                 | CC               | DRR                           | 101515288          | FK506-binding protein 2                         |
| SNP_54486_A_30050139 | NC_021166.1    | Ca_Kabuli_Chr07 | 30050139                | CC                  |                    | GG                 | GG               | INTRON                        | 101515288          | FK506-binding protein 2                         |
| SNP_54487_A_30050169 | NC_021166.1    | Ca_Kabuli_Chr07 | 30050169                | TT                  |                    | CC                 | CC               | INTRON                        | 101515288          | FK506-binding protein 2                         |
| SNP_54489_A_30053170 | NC_021166.1    | Ca_Kabuli_Chr07 | 30053170                | TT                  |                    | AA                 | AA               | DRR                           | 101515614          | probable copper-transporting ATPase HMA5        |
| SNP_54490_A_30053188 | NC_021166.1    | Ca_Kabuli_Chr07 | 30053188                | TT                  |                    | AA                 | AA               | DRR                           | 101515614          | probable copper-transporting ATPase HMA5        |

| SNPs IDs             | Chromosome IDs | Chromosomes     | Physical positions (bp) | CDC Frontier genome (Reference genome) | (Pusa 1103 & HPNB) | (ILWC 46 & LPNB) | Sequence Components of genome | Gene accession IDs | Putative functions                       |
|----------------------|----------------|-----------------|-------------------------|----------------------------------------|--------------------|------------------|-------------------------------|--------------------|------------------------------------------|
| SNP_54492_A_30059136 | NC_021166.1    | Ca_Kabuli_Chr07 | 30059136                | TT                                     | AA                 | AA               | INTRON                        | 101515614          | probable copper-transporting ATPase HMA5 |
| SNP_54493_A_30059142 | NC_021166.1    | Ca_Kabuli_Chr07 | 30059142                | TT                                     | GG                 | GG               | INTRON                        | 101515614          | probable copper-transporting ATPase HMA5 |
| SNP_54494_A_30063550 | NC_021166.1    | Ca_Kabuli_Chr07 | 30063550                | AA                                     | GG                 | GG               | INTERGENIC                    |                    |                                          |
| SNP_54495_A_30067583 | NC_021166.1    | Ca_Kabuli_Chr07 | 30067583                | CC                                     | TT                 | TT               | INTERGENIC                    |                    |                                          |
| SNP_54496_A_30069549 | NC_021166.1    | Ca_Kabuli_Chr07 | 30069549                | AA                                     | GG                 | GG               | INTERGENIC                    |                    |                                          |
| SNP_54497_A_30069555 | NC_021166.1    | Ca_Kabuli_Chr07 | 30069555                | AA                                     | GG                 | GG               | INTERGENIC                    |                    |                                          |
| SNP_54498_A_30069590 | NC_021166.1    | Ca_Kabuli_Chr07 | 30069590                | AA                                     | GG                 | GG               | INTERGENIC                    |                    |                                          |
| SNP_54499_A_30070876 | NC_021166.1    | Ca_Kabuli_Chr07 | 30070876                | AA                                     | TT                 | TT               | URR                           | 101488370          | mediator-associated protein 2-like       |
| SNP_54500_A_30070880 | NC_021166.1    | Ca_Kabuli_Chr07 | 30070880                | GG                                     | TT                 | TT               | URR                           | 101488370          | mediator-associated protein 2-like       |
| SNP_54502_A_30073355 | NC_021166.1    | Ca_Kabuli_Chr07 | 30073355                | GG                                     | AA                 | AA               | DRR                           | 101488695          | uncharacterized LOC101488695             |
| SNP_54503_A_30073357 | NC_021166.1    | Ca_Kabuli_Chr07 | 30073357                | TT                                     | CC                 | CC               | DRR                           | 101488695          | uncharacterized LOC101488695             |
| SNP_54504_A_30073376 | NC_021166.1    | Ca_Kabuli_Chr07 | 30073376                | TT                                     | CC                 | CC               | DRR                           | 101488695          | uncharacterized LOC101488695             |
| SNP_54505_A_30073384 | NC_021166.1    | Ca_Kabuli_Chr07 | 30073384                | CC                                     | GG                 | GG               | DRR                           | 101488695          | uncharacterized LOC101488695             |
| SNP_54506_A_30073388 | NC_021166.1    | Ca_Kabuli_Chr07 | 30073388                | CC                                     | TT                 | TT               | DRR                           | 101488695          | uncharacterized LOC101488695             |
| SNP_54507_A_30073394 | NC_021166.1    | Ca_Kabuli_Chr07 | 30073394                | GG                                     | AA                 | AA               | DRR                           | 101488695          | uncharacterized LOC101488695             |
| SNP_54508_A_30073431 | NC_021166.1    | Ca_Kabuli_Chr07 | 30073431                | CC                                     | GG                 | GG               | DRR                           | 101488695          | uncharacterized LOC101488695             |
| SNP_54509_A_30073578 | NC_021166.1    | Ca_Kabuli_Chr07 | 30073578                | AA                                     | TT                 | TT               | DRR                           | 101488695          | uncharacterized LOC101488695             |
| SNP_54510_A_30073579 | NC_021166.1    | Ca_Kabuli_Chr07 | 30073579                | AA                                     | TT                 | TT               | DRR                           | 101488695          | uncharacterized LOC101488695             |
| SNP_54513_A_30074088 | NC_021166.1    | Ca_Kabuli_Chr07 | 30074088                | CC                                     | TT                 | TT               | DRR                           | 101488695          | uncharacterized LOC101488695             |
| SNP_54514_A_30074101 | NC_021166.1    | Ca_Kabuli_Chr07 | 30074101                | AA                                     | GG                 | GG               | DRR                           | 101488695          | uncharacterized LOC101488695             |
| SNP_54515_A_30074108 | NC_021166.1    | Ca_Kabuli_Chr07 | 30074108                | GG                                     | CC                 | CC               | DRR                           | 101488695          | uncharacterized LOC101488695             |
| SNP_54516_A_30075744 | NC_021166.1    | Ca_Kabuli_Chr07 | 30075744                | TT                                     | CC                 | CC               | URR                           | 101488695          | uncharacterized LOC101488695             |

| SNPs IDs             | Chromosome IDs | Chromosomes     | Physical positions (bp) | CDC Frontier genome | (Reference genome) | (Pusa 1103 & HPNB) | (ILWC 46 & LPNB) | Sequence Components of genome | Gene accession IDs | Putative functions               |
|----------------------|----------------|-----------------|-------------------------|---------------------|--------------------|--------------------|------------------|-------------------------------|--------------------|----------------------------------|
| SNP_54517_A_30075753 | NC_021166.1    | Ca_Kabuli_Chr07 | 30075753                | CC                  |                    | TT                 | TT               | URR                           | 101488695          | uncharacterized LOC101488695     |
| SNP_54518_A_30075754 | NC_021166.1    | Ca_Kabuli_Chr07 | 30075754                | GG                  |                    | AA                 | AA               | URR                           | 101488695          | uncharacterized LOC101488695     |
| SNP_54519_A_30075809 | NC_021166.1    | Ca_Kabuli_Chr07 | 30075809                | GG                  |                    | AA                 | AA               | URR                           | 101488695          | uncharacterized LOC101488695     |
| SNP_54520_A_30075812 | NC_021166.1    | Ca_Kabuli_Chr07 | 30075812                | CC                  |                    | AA                 | AA               | URR                           | 101488695          | uncharacterized LOC101488695     |
| SNP_54521_A_30075823 | NC_021166.1    | Ca_Kabuli_Chr07 | 30075823                | CC                  |                    | GG                 | GG               | URR                           | 101488695          | uncharacterized LOC101488695     |
| SNP_54522_A_30079495 | NC_021166.1    | Ca_Kabuli_Chr07 | 30079495                | GG                  |                    | AA                 | AA               | INTRON                        | 101504747          | factor of DNA methylation 1-like |
| SNP_54523_A_30081141 | NC_021166.1    | Ca_Kabuli_Chr07 | 30081141                | GG                  |                    | AA                 | AA               | URR                           | 101504747          | factor of DNA methylation 1-like |
| SNP_54524_A_30082188 | NC_021166.1    | Ca_Kabuli_Chr07 | 30082188                | TT                  |                    | CC                 | CC               | URR                           | 101504747          | factor of DNA methylation 1-like |
| SNP_54525_A_30082189 | NC_021166.1    | Ca_Kabuli_Chr07 | 30082189                | AA                  |                    | GG                 | GG               | URR                           | 101504747          | factor of DNA methylation 1-like |
| SNP_54526_A_30082210 | NC_021166.1    | Ca_Kabuli_Chr07 | 30082210                | CC                  |                    | TT                 | TT               | URR                           | 101504747          | factor of DNA methylation 1-like |
| SNP_54527_A_30082565 | NC_021166.1    | Ca_Kabuli_Chr07 | 30082565                | AA                  |                    | GG                 | GG               | URR                           | 101504747          | factor of DNA methylation 1-like |
| SNP_54528_A_30082643 | NC_021166.1    | Ca_Kabuli_Chr07 | 30082643                | CC                  |                    | AA                 | AA               | INTERGENIC                    |                    |                                  |
| SNP_54529_A_30082669 | NC_021166.1    | Ca_Kabuli_Chr07 | 30082669                | GG                  |                    | AA                 | AA               | INTERGENIC                    |                    |                                  |
| SNP_54530_A_30082833 | NC_021166.1    | Ca_Kabuli_Chr07 | 30082833                | TT                  |                    | CC                 | CC               | INTERGENIC                    |                    |                                  |
| SNP_54531_A_30082852 | NC_021166.1    | Ca_Kabuli_Chr07 | 30082852                | CC                  |                    | TT                 | TT               | INTERGENIC                    |                    |                                  |
| SNP_54532_A_30087497 | NC_021166.1    | Ca_Kabuli_Chr07 | 30087497                | TT                  |                    | CC                 | CC               | URR                           | 101488917          | uncharacterized LOC101488917     |
| SNP_54533_A_30089487 | NC_021166.1    | Ca_Kabuli_Chr07 | 30089487                | CC                  |                    | AA                 | AA               | INTERGENIC                    |                    |                                  |
| SNP_54534_A_30089676 | NC_021166.1    | Ca_Kabuli_Chr07 | 30089676                | GG                  |                    | AA                 | AA               | INTERGENIC                    |                    |                                  |
| SNP_54535_A_30089704 | NC_021166.1    | Ca_Kabuli_Chr07 | 30089704                | CC                  |                    | TT                 | TT               | INTERGENIC                    |                    |                                  |
| SNP_54536_A_30089706 | NC_021166.1    | Ca_Kabuli_Chr07 | 30089706                | GG                  |                    | AA                 | AA               | INTERGENIC                    |                    |                                  |
| SNP_54537_A_30089741 | NC_021166.1    | Ca_Kabuli_Chr07 | 30089741                | GG                  |                    | AA                 | AA               | INTERGENIC                    |                    |                                  |
| SNP_54538_A_30090849 | NC_021166.1    | Ca_Kabuli_Chr07 | 30090849                | CC                  |                    | GG                 | GG               | INTERGENIC                    |                    |                                  |

| SNPs IDs             | Chromosome IDs | Chromosomes     | Physical positions (bp) | CDC Frontier genome (Reference genome) | (Pusa 1103 & HPNB) | (ILWC 46 & LPNB) | Sequence Components of genome | Gene accession IDs | Putative functions                  |
|----------------------|----------------|-----------------|-------------------------|----------------------------------------|--------------------|------------------|-------------------------------|--------------------|-------------------------------------|
| SNP_54539_A_30090911 | NC_021166.1    | Ca_Kabuli_Chr07 | 30090911                | GG                                     | TT                 | TT               | INTERGENIC                    |                    |                                     |
| SNP_54540_A_30090918 | NC_021166.1    | Ca_Kabuli_Chr07 | 30090918                | TT                                     | CC                 | CC               | INTERGENIC                    |                    |                                     |
| SNP_54542_A_30091451 | NC_021166.1    | Ca_Kabuli_Chr07 | 30091451                | AA                                     | GG                 | GG               | INTERGENIC                    |                    |                                     |
| SNP_54543_A_30092318 | NC_021166.1    | Ca_Kabuli_Chr07 | 30092318                | TT                                     | GG                 | GG               | INTERGENIC                    |                    |                                     |
| SNP_54544_A_30092389 | NC_021166.1    | Ca_Kabuli_Chr07 | 30092389                | GG                                     | TT                 | TT               | INTERGENIC                    |                    |                                     |
| SNP_54545_A_30096725 | NC_021166.1    | Ca_Kabuli_Chr07 | 30096725                | AA                                     | GG                 | GG               | INTERGENIC                    |                    |                                     |
| SNP_54546_A_30096780 | NC_021166.1    | Ca_Kabuli_Chr07 | 30096780                | AA                                     | GG                 | GG               | INTERGENIC                    |                    |                                     |
| SNP_54547_A_30096808 | NC_021166.1    | Ca_Kabuli_Chr07 | 30096808                | GG                                     | AA                 | AA               | INTERGENIC                    |                    |                                     |
| SNP_54549_A_30098627 | NC_021166.1    | Ca_Kabuli_Chr07 | 30098627                | TT                                     | GG                 | GG               | INTERGENIC                    |                    |                                     |
| SNP_54551_A_30100183 | NC_021166.1    | Ca_Kabuli_Chr07 | 30100183                | CC                                     | TT                 | TT               | DRR                           | 101489146          | uncharacterized LOC101489146        |
| SNP_54552_A_30101904 | NC_021166.1    | Ca_Kabuli_Chr07 | 30101904                | CC                                     | AA                 | AA               | SYNONYMOUS_CODING             | 101489146          | uncharacterized LOC101489146        |
| SNP_54553_A_30101949 | NC_021166.1    | Ca_Kabuli_Chr07 | 30101949                | AA                                     | TT                 | TT               | SYNONYMOUS_CODING             | 101489146          | uncharacterized LOC101489146        |
| SNP_54554_A_30105801 | NC_021166.1    | Ca_Kabuli_Chr07 | 30105801                | CC                                     | AA                 | AA               | DRR                           | 101489477          | serine/threonine-protein kinase MHK |
| SNP_54555_A_30105805 | NC_021166.1    | Ca_Kabuli_Chr07 | 30105805                | AA                                     | GG                 | GG               | DRR                           | 101489477          | serine/threonine-protein kinase MHK |
| SNP_54557_A_30107923 | NC_021166.1    | Ca_Kabuli_Chr07 | 30107923                | GG                                     | TT                 | TT               | INTRON                        | 101489477          | serine/threonine-protein kinase MHK |
| SNP_54558_A_30112239 | NC_021166.1    | Ca_Kabuli_Chr07 | 30112239                | GG                                     | TT                 | TT               | INTRON                        | 101489477          | serine/threonine-protein kinase MHK |
| SNP_54559_A_30112245 | NC_021166.1    | Ca_Kabuli_Chr07 | 30112245                | AA                                     | GG                 | GG               | INTRON                        | 101489477          | serine/threonine-protein kinase MHK |
| SNP_54560_A_30112258 | NC_021166.1    | Ca_Kabuli_Chr07 | 30112258                | CC                                     | TT                 | TT               | INTRON                        | 101489477          | serine/threonine-protein kinase MHK |
| SNP_54561_A_30113060 | NC_021166.1    | Ca_Kabuli_Chr07 | 30113060                | CC                                     | TT                 | TT               | INTRON                        | 101489477          | serine/threonine-protein kinase MHK |
| SNP_54562_A_30113327 | NC_021166.1    | Ca_Kabuli_Chr07 | 30113327                | TT                                     | AA                 | AA               | INTRON                        | 101489477          | serine/threonine-protein kinase MHK |
| SNP_54563_A_30113486 | NC_021166.1    | Ca_Kabuli_Chr07 | 30113486                | TT                                     | GG                 | GG               | INTRON                        | 101489477          | serine/threonine-protein kinase MHK |
| SNP_54565_A_30130313 | NC_021166.1    | Ca_Kabuli_Chr07 | 30130313                | GG                                     | AA                 | AA               | DRR                           | 101490443          | Unknown function                    |



| SNPs IDs             | Chromosome IDs | Chromosomes     | Physical positions (bp) | CDC Frontier genome (Reference genome) | (Pusa 1103 & HPNB) | (ILWC 46 & LPNB) | Sequence Components of genome | Gene accession IDs | Putative functions                                                  |
|----------------------|----------------|-----------------|-------------------------|----------------------------------------|--------------------|------------------|-------------------------------|--------------------|---------------------------------------------------------------------|
| SNP_54566_A_30131597 | NC_021166.1    | Ca_Kabuli_Chr07 | 30131597                | TT                                     | AA                 | AA               | INTERGENIC                    |                    |                                                                     |
| SNP_54567_A_30133291 | NC_021166.1    | Ca_Kabuli_Chr07 | 30133291                | CC                                     | TT                 | TT               | INTRON                        | 101490762          | 1-deoxy-D-xylulose chloroplastic-like 5-phosphate reductoisomerase, |
| SNP_54568_A_30133498 | NC_021166.1    | Ca_Kabuli_Chr07 | 30133498                | TT                                     | CC                 | CC               | INTRON                        | 101490762          | 1-deoxy-D-xylulose chloroplastic-like 5-phosphate reductoisomerase, |
| SNP_54569_A_30133518 | NC_021166.1    | Ca_Kabuli_Chr07 | 30133518                | TT                                     | GG                 | GG               | INTRON                        | 101490762          | 1-deoxy-D-xylulose chloroplastic-like 5-phosphate reductoisomerase, |
| SNP_54570_A_30133537 | NC_021166.1    | Ca_Kabuli_Chr07 | 30133537                | CC                                     | AA                 | AA               | INTRON                        | 101490762          | 1-deoxy-D-xylulose chloroplastic-like 5-phosphate reductoisomerase, |
| SNP_54571_A_30133538 | NC_021166.1    | Ca_Kabuli_Chr07 | 30133538                | AA                                     | TT                 | TT               | INTRON                        | 101490762          | 1-deoxy-D-xylulose chloroplastic-like 5-phosphate reductoisomerase, |
| SNP_54574_A_30141000 | NC_021166.1    | Ca_Kabuli_Chr07 | 30141000                | TT                                     | AA                 | AA               | INTERGENIC                    |                    |                                                                     |
| SNP_54575_A_30145989 | NC_021166.1    | Ca_Kabuli_Chr07 | 30145989                | TT                                     | AA                 | AA               | INTERGENIC                    |                    |                                                                     |
| SNP_54576_A_30152632 | NC_021166.1    | Ca_Kabuli_Chr07 | 30152632                | CC                                     | AA                 | AA               | URR                           | 101491406          | uncharacterized LOC101491406                                        |
| SNP_54577_A_30154307 | NC_021166.1    | Ca_Kabuli_Chr07 | 30154307                | AA                                     | TT                 | TT               | INTERGENIC                    |                    |                                                                     |
| SNP_54578_A_30154312 | NC_021166.1    | Ca_Kabuli_Chr07 | 30154312                | TT                                     | GG                 | GG               | INTERGENIC                    |                    |                                                                     |
| SNP_54579_A_30154314 | NC_021166.1    | Ca_Kabuli_Chr07 | 30154314                | GG                                     | TT                 | TT               | INTERGENIC                    |                    |                                                                     |
| SNP_54581_A_30156876 | NC_021166.1    | Ca_Kabuli_Chr07 | 30156876                | TT                                     | CC                 | CC               | INTERGENIC                    |                    |                                                                     |
| SNP_54582_A_30157194 | NC_021166.1    | Ca_Kabuli_Chr07 | 30157194                | TT                                     | CC                 | CC               | INTERGENIC                    |                    |                                                                     |
| SNP_54583_A_30157703 | NC_021166.1    | Ca_Kabuli_Chr07 | 30157703                | TT                                     | CC                 | CC               | INTERGENIC                    |                    |                                                                     |
| SNP_54584_A_30157713 | NC_021166.1    | Ca_Kabuli_Chr07 | 30157713                | TT                                     | CC                 | CC               | INTERGENIC                    |                    |                                                                     |
| SNP_54587_A_30159225 | NC_021166.1    | Ca_Kabuli_Chr07 | 30159225                | GG                                     | AA                 | AA               | DRR                           | 101505071          | cytochrome P450 82C4-like                                           |
| SNP_54588_A_30160843 | NC_021166.1    | Ca_Kabuli_Chr07 | 30160843                | GG                                     | AA                 | AA               | INTRON                        | 101505071          | cytochrome P450 82C4-like                                           |
| SNP_54589_A_30160844 | NC_021166.1    | Ca_Kabuli_Chr07 | 30160844                | GG                                     | AA                 | AA               | INTRON                        | 101505071          | cytochrome P450 82C4-like                                           |
| SNP_54590_A_30160947 | NC_021166.1    | Ca_Kabuli_Chr07 | 30160947                | AA                                     | GG                 | GG               | INTRON                        | 101505071          | cytochrome P450 82C4-like                                           |
| SNP_54591_A_30166177 | NC_021166.1    | Ca_Kabuli_Chr07 | 30166177                | GG                                     | AA                 | AA               | DRR                           | 101491722          | putative ER lumen protein-retaining receptor C28H8.4                |
| SNP_54593_A_30166203 | NC_021166.1    | Ca_Kabuli_Chr07 | 30166203                | GG                                     | AA                 | AA               | DRR                           | 101491722          | putative ER lumen protein-retaining receptor C28H8.4                |

| SNPs IDs             | Chromosome IDs | Chromosomes     | Physical positions (bp) | CDC Frontier genome (Reference genome) | (Pusa 1103 & HPNB) | (ILWC 46 & LPNB) | Sequence Components of genome | Gene accession IDs | Putative functions                                   |
|----------------------|----------------|-----------------|-------------------------|----------------------------------------|--------------------|------------------|-------------------------------|--------------------|------------------------------------------------------|
| SNP_54594_A_30166290 | NC_021166.1    | Ca_Kabuli_Chr07 | 30166290                | TT                                     | CC                 | CC               | DRR                           | 101491722          | putative ER lumen protein-retaining receptor C28H8.4 |
| SNP_54595_A_30166357 | NC_021166.1    | Ca_Kabuli_Chr07 | 30166357                | AA                                     | TT                 | TT               | DRR                           | 101491722          | putative ER lumen protein-retaining receptor C28H8.4 |
| SNP_54596_A_30172743 | NC_021166.1    | Ca_Kabuli_Chr07 | 30172743                | AA                                     | GG                 | GG               | INTRON                        | 101492040          | ER lumen protein-retaining receptor-like             |
| SNP_54597_A_30172786 | NC_021166.1    | Ca_Kabuli_Chr07 | 30172786                | TT                                     | AA                 | AA               | INTRON                        | 101492040          | ER lumen protein-retaining receptor-like             |
| SNP_54598_A_30172983 | NC_021166.1    | Ca_Kabuli_Chr07 | 30172983                | GG                                     | TT                 | TT               | INTRON                        | 101492040          | ER lumen protein-retaining receptor-like             |
| SNP_54599_A_30173185 | NC_021166.1    | Ca_Kabuli_Chr07 | 30173185                | TT                                     | CC                 | CC               | INTRON                        | 101492040          | ER lumen protein-retaining receptor-like             |
| SNP_54600_A_30173186 | NC_021166.1    | Ca_Kabuli_Chr07 | 30173186                | TT                                     | CC                 | CC               | INTRON                        | 101492040          | ER lumen protein-retaining receptor-like             |
| SNP_54602_A_30174426 | NC_021166.1    | Ca_Kabuli_Chr07 | 30174426                | CC                                     | TT                 | TT               | INTRON                        | 101492040          | ER lumen protein-retaining receptor-like             |
| SNP_54603_A_30185289 | NC_021166.1    | Ca_Kabuli_Chr07 | 30185289                | AA                                     | CC                 | CC               | INTRON                        | 101492040          | ER lumen protein-retaining receptor-like             |
| SNP_54604_A_30185293 | NC_021166.1    | Ca_Kabuli_Chr07 | 30185293                | GG                                     | AA                 | AA               | INTRON                        | 101492040          | ER lumen protein-retaining receptor-like             |
| SNP_54606_A_30192425 | NC_021166.1    | Ca_Kabuli_Chr07 | 30192425                | TT                                     | CC                 | CC               | SYNONYMOUS_CODING             | 101505393          | ER lumen protein-retaining receptor 1-like           |
| SNP_54607_A_30192478 | NC_021166.1    | Ca_Kabuli_Chr07 | 30192478                | CC                                     | TT                 | TT               | INTRON                        | 101505393          | ER lumen protein-retaining receptor 1-like           |
| SNP_54609_A_30192692 | NC_021166.1    | Ca_Kabuli_Chr07 | 30192692                | CC                                     | TT                 | TT               | INTRON                        | 101505393          | ER lumen protein-retaining receptor 1-like           |
| SNP_54610_A_30193502 | NC_021166.1    | Ca_Kabuli_Chr07 | 30193502                | CC                                     | GG                 | GG               | INTRON                        | 101505393          | ER lumen protein-retaining receptor 1-like           |
| SNP_54611_A_30193541 | NC_021166.1    | Ca_Kabuli_Chr07 | 30193541                | CC                                     | AA                 | AA               | INTRON                        | 101505393          | ER lumen protein-retaining receptor 1-like           |
| SNP_54612_A_30193569 | NC_021166.1    | Ca_Kabuli_Chr07 | 30193569                | TT                                     | AA                 | AA               | INTRON                        | 101505393          | ER lumen protein-retaining receptor 1-like           |
| SNP_54613_A_30197094 | NC_021166.1    | Ca_Kabuli_Chr07 | 30197094                | TT                                     | CC                 | CC               | URR                           | 101492383          | ninja-family protein AFP2-like                       |
| SNP_54614_A_30197095 | NC_021166.1    | Ca_Kabuli_Chr07 | 30197095                | CC                                     | AA                 | AA               | URR                           | 101492383          | ninja-family protein AFP2-like                       |
| SNP_54615_A_30198262 | NC_021166.1    | Ca_Kabuli_Chr07 | 30198262                | AA                                     | GG                 | GG               | URR                           | 101492383          | ninja-family protein AFP2-like                       |
| SNP_54616_A_30207798 | NC_021166.1    | Ca_Kabuli_Chr07 | 30207798                | AA                                     | TT                 | TT               | INTERGENIC                    |                    |                                                      |
| SNP_54617_A_30207849 | NC_021166.1    | Ca_Kabuli_Chr07 | 30207849                | GG                                     | TT                 | TT               | INTERGENIC                    |                    |                                                      |
| SNP_54618_A_30207937 | NC_021166.1    | Ca_Kabuli_Chr07 | 30207937                | TT                                     | AA                 | AA               | INTERGENIC                    |                    |                                                      |

| SNPs IDs             | Chromosome IDs | Chromosomes     | Physical positions (bp) | CDC Frontier genome (Reference genome) | (Pusa 1103 & HPNB) | (ILWC 46 & LPNB) | Sequence genome | Components of | Gene accession IDs | Putative functions |
|----------------------|----------------|-----------------|-------------------------|----------------------------------------|--------------------|------------------|-----------------|---------------|--------------------|--------------------|
| SNP_54619_A_30207941 | NC_021166.1    | Ca_Kabuli_Chr07 | 30207941                | TT                                     | AA                 | AA               | INTERGENIC      |               |                    |                    |
| SNP_54620_A_30207961 | NC_021166.1    | Ca_Kabuli_Chr07 | 30207961                | GG                                     | AA                 | AA               | INTERGENIC      |               |                    |                    |
| SNP_54621_A_30207981 | NC_021166.1    | Ca_Kabuli_Chr07 | 30207981                | AA                                     | CC                 | CC               | INTERGENIC      |               |                    |                    |
| SNP_54622_A_30207992 | NC_021166.1    | Ca_Kabuli_Chr07 | 30207992                | GG                                     | CC                 | CC               | INTERGENIC      |               |                    |                    |
| SNP_54623_A_30208010 | NC_021166.1    | Ca_Kabuli_Chr07 | 30208010                | AA                                     | CC                 | CC               | INTERGENIC      |               |                    |                    |
| SNP_54624_A_30208018 | NC_021166.1    | Ca_Kabuli_Chr07 | 30208018                | TT                                     | CC                 | CC               | INTERGENIC      |               |                    |                    |
| SNP_54625_A_30208029 | NC_021166.1    | Ca_Kabuli_Chr07 | 30208029                | AA                                     | GG                 | GG               | INTERGENIC      |               |                    |                    |
| SNP_54626_A_30208075 | NC_021166.1    | Ca_Kabuli_Chr07 | 30208075                | CC                                     | TT                 | TT               | INTERGENIC      |               |                    |                    |
| SNP_54627_A_30208123 | NC_021166.1    | Ca_Kabuli_Chr07 | 30208123                | AA                                     | CC                 | CC               | INTERGENIC      |               |                    |                    |
| SNP_54628_A_30208132 | NC_021166.1    | Ca_Kabuli_Chr07 | 30208132                | AA                                     | GG                 | GG               | INTERGENIC      |               |                    |                    |
| SNP_54629_A_30208139 | NC_021166.1    | Ca_Kabuli_Chr07 | 30208139                | GG                                     | TT                 | TT               | INTERGENIC      |               |                    |                    |
| SNP_54632_A_30208185 | NC_021166.1    | Ca_Kabuli_Chr07 | 30208185                | GG                                     | CC                 | CC               | INTERGENIC      |               |                    |                    |
| SNP_54633_A_30208193 | NC_021166.1    | Ca_Kabuli_Chr07 | 30208193                | GG                                     | CC                 | CC               | INTERGENIC      |               |                    |                    |
| SNP_54634_A_30208204 | NC_021166.1    | Ca_Kabuli_Chr07 | 30208204                | TT                                     | AA                 | AA               | INTERGENIC      |               |                    |                    |
| SNP_54635_A_30208214 | NC_021166.1    | Ca_Kabuli_Chr07 | 30208214                | GG                                     | AA                 | AA               | INTERGENIC      |               |                    |                    |
| SNP_54636_A_30208223 | NC_021166.1    | Ca_Kabuli_Chr07 | 30208223                | AA                                     | GG                 | GG               | INTERGENIC      |               |                    |                    |
| SNP_54637_A_30208257 | NC_021166.1    | Ca_Kabuli_Chr07 | 30208257                | AA                                     | TT                 | TT               | INTERGENIC      |               |                    |                    |
| SNP_54638_A_30208272 | NC_021166.1    | Ca_Kabuli_Chr07 | 30208272                | AA                                     | CC                 | CC               | INTERGENIC      |               |                    |                    |
| SNP_54640_A_30208313 | NC_021166.1    | Ca_Kabuli_Chr07 | 30208313                | TT                                     | CC                 | CC               | INTERGENIC      |               |                    |                    |
| SNP_54641_A_30208318 | NC_021166.1    | Ca_Kabuli_Chr07 | 30208318                | AA                                     | GG                 | GG               | INTERGENIC      |               |                    |                    |
| SNP_54642_A_30208334 | NC_021166.1    | Ca_Kabuli_Chr07 | 30208334                | CC                                     | TT                 | TT               | INTERGENIC      |               |                    |                    |
| SNP_54643_A_30208429 | NC_021166.1    | Ca_Kabuli_Chr07 | 30208429                | TT                                     | GG                 | GG               | INTERGENIC      |               |                    |                    |

| SNPs IDs             | Chromosome IDs | Chromosomes     | Physical positions (bp) | CDC Frontier genome (Reference genome) | (Pusa 1103 & HPNB) | (ILWC 46 & LPNB) | Sequence Components of genome | Gene accession IDs | Putative functions           |
|----------------------|----------------|-----------------|-------------------------|----------------------------------------|--------------------|------------------|-------------------------------|--------------------|------------------------------|
| SNP_54644_A_30208448 | NC_021166.1    | Ca_Kabuli_Chr07 | 30208448                | AA                                     | GG                 | GG               | INTERGENIC                    |                    |                              |
| SNP_54645_A_30208695 | NC_021166.1    | Ca_Kabuli_Chr07 | 30208695                | TT                                     | CC                 | CC               | INTERGENIC                    |                    |                              |
| SNP_54646_A_30208747 | NC_021166.1    | Ca_Kabuli_Chr07 | 30208747                | TT                                     | GG                 | GG               | INTERGENIC                    |                    |                              |
| SNP_54648_A_30208827 | NC_021166.1    | Ca_Kabuli_Chr07 | 30208827                | TT                                     | CC                 | CC               | INTERGENIC                    |                    |                              |
| SNP_54649_A_30208889 | NC_021166.1    | Ca_Kabuli_Chr07 | 30208889                | AA                                     | GG                 | GG               | INTERGENIC                    |                    |                              |
| SNP_54650_A_30208944 | NC_021166.1    | Ca_Kabuli_Chr07 | 30208944                | AA                                     | TT                 | TT               | INTERGENIC                    |                    |                              |
| SNP_54651_A_30216562 | NC_021166.1    | Ca_Kabuli_Chr07 | 30216562                | TT                                     | CC                 | CC               | INTERGENIC                    |                    |                              |
| SNP_54652_A_30216601 | NC_021166.1    | Ca_Kabuli_Chr07 | 30216601                | TT                                     | CC                 | CC               | INTERGENIC                    |                    |                              |
| SNP_54653_A_30218326 | NC_021166.1    | Ca_Kabuli_Chr07 | 30218326                | AA                                     | GG                 | GG               | URR                           | 101493047          | uncharacterized LOC101493047 |
| SNP_54655_A_30225545 | NC_021166.1    | Ca_Kabuli_Chr07 | 30225545                | TT                                     | GG                 | GG               | INTERGENIC                    |                    |                              |
| SNP_54656_A_30226208 | NC_021166.1    | Ca_Kabuli_Chr07 | 30226208                | GG                                     | TT                 | TT               | INTERGENIC                    |                    |                              |
| SNP_54657_A_30226790 | NC_021166.1    | Ca_Kabuli_Chr07 | 30226790                | CC                                     | TT                 | TT               | INTERGENIC                    |                    |                              |
| SNP_54658_A_30226792 | NC_021166.1    | Ca_Kabuli_Chr07 | 30226792                | CC                                     | AA                 | AA               | INTERGENIC                    |                    |                              |
| SNP_54659_A_30226866 | NC_021166.1    | Ca_Kabuli_Chr07 | 30226866                | AA                                     | GG                 | GG               | INTERGENIC                    |                    |                              |
| SNP_54660_A_30226868 | NC_021166.1    | Ca_Kabuli_Chr07 | 30226868                | AA                                     | GG                 | GG               | INTERGENIC                    |                    |                              |
| SNP_54661_A_30227065 | NC_021166.1    | Ca_Kabuli_Chr07 | 30227065                | TT                                     | GG                 | GG               | INTERGENIC                    |                    |                              |
| SNP_54662_A_30227608 | NC_021166.1    | Ca_Kabuli_Chr07 | 30227608                | CC                                     | TT                 | TT               | INTERGENIC                    |                    |                              |
| SNP_54663_A_30228489 | NC_021166.1    | Ca_Kabuli_Chr07 | 30228489                | AA                                     | CC                 | CC               | INTERGENIC                    |                    |                              |
| SNP_54665_A_30228902 | NC_021166.1    | Ca_Kabuli_Chr07 | 30228902                | GG                                     | AA                 | AA               | INTERGENIC                    |                    |                              |
| SNP_54666_A_30229985 | NC_021166.1    | Ca_Kabuli_Chr07 | 30229985                | GG                                     | TT                 | TT               | INTERGENIC                    |                    |                              |
| SNP_54667_A_30231890 | NC_021166.1    | Ca_Kabuli_Chr07 | 30231890                | CC                                     | TT                 | TT               | INTERGENIC                    |                    |                              |
| SNP_54668_A_30231893 | NC_021166.1    | Ca_Kabuli_Chr07 | 30231893                | GG                                     | AA                 | AA               | INTERGENIC                    |                    |                              |

| SNPs IDs             | Chromosome IDs | Chromosomes     | Physical positions (bp) | CDC Frontier genome (Reference genome) | (Pusa 1103 & HPNB) | (ILWC 46 & LPNB) | Sequence Components of genome | Gene accession IDs | Putative functions                       |
|----------------------|----------------|-----------------|-------------------------|----------------------------------------|--------------------|------------------|-------------------------------|--------------------|------------------------------------------|
| SNP_54669_A_30232165 | NC_021166.1    | Ca_Kabuli_Chr07 | 30232165                | AA                                     | GG                 | GG               | INTERGENIC                    |                    |                                          |
| SNP_54671_A_30235254 | NC_021166.1    | Ca_Kabuli_Chr07 | 30235254                | GG                                     | AA                 | AA               | URR                           | 101493371          | hydroquinone glucosyltransferase-like    |
| SNP_54672_A_30236379 | NC_021166.1    | Ca_Kabuli_Chr07 | 30236379                | TT                                     | AA                 | AA               | URR                           | 101493371          | hydroquinone glucosyltransferase-like    |
| SNP_54673_A_30236383 | NC_021166.1    | Ca_Kabuli_Chr07 | 30236383                | AA                                     | TT                 | TT               | URR                           | 101493371          | hydroquinone glucosyltransferase-like    |
| SNP_54674_A_30237688 | NC_021166.1    | Ca_Kabuli_Chr07 | 30237688                | GG                                     | CC                 | CC               | INTERGENIC                    |                    |                                          |
| SNP_54675_A_30237899 | NC_021166.1    | Ca_Kabuli_Chr07 | 30237899                | AA                                     | GG                 | GG               | INTERGENIC                    |                    |                                          |
| SNP_54676_A_30237982 | NC_021166.1    | Ca_Kabuli_Chr07 | 30237982                | AA                                     | GG                 | GG               | DRR                           | 101493692          | defensin-like protein 19                 |
| SNP_54678_A_30241119 | NC_021166.1    | Ca_Kabuli_Chr07 | 30241119                | AA                                     | GG                 | GG               | URR                           | 101493692          | defensin-like protein 19                 |
| SNP_54679_A_30241156 | NC_021166.1    | Ca_Kabuli_Chr07 | 30241156                | AA                                     | GG                 | GG               | URR                           | 101493692          | defensin-like protein 19                 |
| SNP_54680_A_30241157 | NC_021166.1    | Ca_Kabuli_Chr07 | 30241157                | AA                                     | CC                 | CC               | URR                           | 101493692          | defensin-like protein 19                 |
| SNP_54681_A_30241163 | NC_021166.1    | Ca_Kabuli_Chr07 | 30241163                | AA                                     | GG                 | GG               | URR                           | 101493692          | defensin-like protein 19                 |
| SNP_54682_A_30242079 | NC_021166.1    | Ca_Kabuli_Chr07 | 30242079                | AA                                     | GG                 | GG               | INTERGENIC                    |                    |                                          |
| SNP_54683_A_30242101 | NC_021166.1    | Ca_Kabuli_Chr07 | 30242101                | CC                                     | AA                 | AA               | INTERGENIC                    |                    |                                          |
| SNP_54684_A_30243165 | NC_021166.1    | Ca_Kabuli_Chr07 | 30243165                | AA                                     | TT                 | TT               | INTERGENIC                    |                    |                                          |
| SNP_54685_A_30243510 | NC_021166.1    | Ca_Kabuli_Chr07 | 30243510                | CC                                     | GG                 | GG               | INTERGENIC                    |                    |                                          |
| SNP_54686_A_30243623 | NC_021166.1    | Ca_Kabuli_Chr07 | 30243623                | AA                                     | GG                 | GG               | INTERGENIC                    |                    |                                          |
| SNP_54687_A_30245260 | NC_021166.1    | Ca_Kabuli_Chr07 | 30245260                | AA                                     | CC                 | CC               | DRR                           | 101506049          | Unknown function                         |
| SNP_54688_A_30246250 | NC_021166.1    | Ca_Kabuli_Chr07 | 30246250                | CC                                     | TT                 | TT               | DRR                           | 101506365          | membrane protein of ER body-like protein |
| SNP_54689_A_30248972 | NC_021166.1    | Ca_Kabuli_Chr07 | 30248972                | AA                                     | GG                 | GG               | INTERGENIC                    |                    |                                          |
| SNP_54690_A_30261355 | NC_021166.1    | Ca_Kabuli_Chr07 | 30261355                | GG                                     | AA                 | AA               | INTERGENIC                    |                    |                                          |
| SNP_54691_A_30261607 | NC_021166.1    | Ca_Kabuli_Chr07 | 30261607                | AA                                     | TT                 | TT               | INTERGENIC                    |                    |                                          |
| SNP_54692_A_30261861 | NC_021166.1    | Ca_Kabuli_Chr07 | 30261861                | TT                                     | CC                 | CC               | INTERGENIC                    |                    |                                          |

| SNPs IDs             | Chromosome IDs | Chromosomes     | Physical positions (bp) | CDC Frontier genome (Reference genome) | (Pusa 1103 & HPNB) | (ILWC 46 & LPNB) | Sequence genome | Components of | Gene accession IDs | Putative functions |
|----------------------|----------------|-----------------|-------------------------|----------------------------------------|--------------------|------------------|-----------------|---------------|--------------------|--------------------|
| SNP_54693_A_30262983 | NC_021166.1    | Ca_Kabuli_Chr07 | 30262983                | GG                                     | TT                 | TT               | INTERGENIC      |               |                    |                    |
| SNP_54694_A_30262984 | NC_021166.1    | Ca_Kabuli_Chr07 | 30262984                | CC                                     | GG                 | GG               | INTERGENIC      |               |                    |                    |
| SNP_54695_A_30265972 | NC_021166.1    | Ca_Kabuli_Chr07 | 30265972                | TT                                     | CC                 | CC               | INTERGENIC      |               |                    |                    |
| SNP_54696_A_30267500 | NC_021166.1    | Ca_Kabuli_Chr07 | 30267500                | TT                                     | CC                 | CC               | INTERGENIC      |               |                    |                    |
| SNP_54697_A_30267633 | NC_021166.1    | Ca_Kabuli_Chr07 | 30267633                | TT                                     | AA                 | AA               | INTERGENIC      |               |                    |                    |
| SNP_54699_A_30269316 | NC_021166.1    | Ca_Kabuli_Chr07 | 30269316                | AA                                     | TT                 | TT               | INTERGENIC      |               |                    |                    |
| SNP_54700_A_30272810 | NC_021166.1    | Ca_Kabuli_Chr07 | 30272810                | AA                                     | GG                 | GG               | INTERGENIC      |               |                    |                    |
| SNP_54701_A_30272820 | NC_021166.1    | Ca_Kabuli_Chr07 | 30272820                | GG                                     | CC                 | CC               | INTERGENIC      |               |                    |                    |
| SNP_54702_A_30272978 | NC_021166.1    | Ca_Kabuli_Chr07 | 30272978                | CC                                     | AA                 | AA               | INTERGENIC      |               |                    |                    |
| SNP_54703_A_30272995 | NC_021166.1    | Ca_Kabuli_Chr07 | 30272995                | AA                                     | GG                 | GG               | INTERGENIC      |               |                    |                    |
| SNP_54704_A_30276083 | NC_021166.1    | Ca_Kabuli_Chr07 | 30276083                | AA                                     | CC                 | CC               | INTERGENIC      |               |                    |                    |
| SNP_54705_A_30276086 | NC_021166.1    | Ca_Kabuli_Chr07 | 30276086                | GG                                     | CC                 | CC               | INTERGENIC      |               |                    |                    |
| SNP_54706_A_30276253 | NC_021166.1    | Ca_Kabuli_Chr07 | 30276253                | AA                                     | TT                 | TT               | INTERGENIC      |               |                    |                    |
| SNP_54707_A_30276254 | NC_021166.1    | Ca_Kabuli_Chr07 | 30276254                | TT                                     | AA                 | AA               | INTERGENIC      |               |                    |                    |
| SNP_54708_A_30276277 | NC_021166.1    | Ca_Kabuli_Chr07 | 30276277                | TT                                     | AA                 | AA               | INTERGENIC      |               |                    |                    |
| SNP_54709_A_30276493 | NC_021166.1    | Ca_Kabuli_Chr07 | 30276493                | TT                                     | AA                 | AA               | INTERGENIC      |               |                    |                    |
| SNP_54711_A_30276525 | NC_021166.1    | Ca_Kabuli_Chr07 | 30276525                | GG                                     | AA                 | AA               | INTERGENIC      |               |                    |                    |
| SNP_54712_A_30276550 | NC_021166.1    | Ca_Kabuli_Chr07 | 30276550                | AA                                     | CC                 | CC               | INTERGENIC      |               |                    |                    |
| SNP_54713_A_30276551 | NC_021166.1    | Ca_Kabuli_Chr07 | 30276551                | GG                                     | TT                 | TT               | INTERGENIC      |               |                    |                    |
| SNP_54714_A_30276559 | NC_021166.1    | Ca_Kabuli_Chr07 | 30276559                | CC                                     | AA                 | AA               | INTERGENIC      |               |                    |                    |
| SNP_54715_A_30276578 | NC_021166.1    | Ca_Kabuli_Chr07 | 30276578                | GG                                     | AA                 | AA               | INTERGENIC      |               |                    |                    |
| SNP_54716_A_30276804 | NC_021166.1    | Ca_Kabuli_Chr07 | 30276804                | TT                                     | CC                 | CC               | INTERGENIC      |               |                    |                    |

| SNPs IDs             | Chromosome IDs | Chromosomes     | Physical positions (bp) | CDC Frontier genome (Reference genome) | (Pusa 1103 & HPNB) | (ILWC 46 & LPNB) | Sequence Components of genome | Gene accession IDs | Putative functions          |
|----------------------|----------------|-----------------|-------------------------|----------------------------------------|--------------------|------------------|-------------------------------|--------------------|-----------------------------|
| SNP_54719_A_30280160 | NC_021166.1    | Ca_Kabuli_Chr07 | 30280160                | AA                                     | CC                 | CC               | INTERGENIC                    |                    |                             |
| SNP_54721_A_30284702 | NC_021166.1    | Ca_Kabuli_Chr07 | 30284702                | CC                                     | GG                 | GG               | INTRON                        | 101494956          | RPM1-interacting protein 4  |
| SNP_54722_A_30285328 | NC_021166.1    | Ca_Kabuli_Chr07 | 30285328                | AA                                     | TT                 | TT               | INTRON                        | 101494956          | RPM1-interacting protein 4  |
| SNP_54723_A_30286118 | NC_021166.1    | Ca_Kabuli_Chr07 | 30286118                | TT                                     | CC                 | CC               | INTRON                        | 101494956          | RPM1-interacting protein 4  |
| SNP_54724_A_30287744 | NC_021166.1    | Ca_Kabuli_Chr07 | 30287744                | AA                                     | CC                 | CC               | URR                           | 101494956          | RPM1-interacting protein 4  |
| SNP_54725_A_30287784 | NC_021166.1    | Ca_Kabuli_Chr07 | 30287784                | TT                                     | CC                 | CC               | URR                           | 101494956          | RPM1-interacting protein 4  |
| SNP_54726_A_30292090 | NC_021166.1    | Ca_Kabuli_Chr07 | 30292090                | GG                                     | AA                 | AA               | INTERGENIC                    |                    |                             |
| SNP_54727_A_30293753 | NC_021166.1    | Ca_Kabuli_Chr07 | 30293753                | AA                                     | TT                 | TT               | DRR                           | 101495501          | beta-amyrin 11-oxidase-like |
| SNP_54728_A_30293786 | NC_021166.1    | Ca_Kabuli_Chr07 | 30293786                | TT                                     | CC                 | CC               | DRR                           | 101495501          | beta-amyrin 11-oxidase-like |
| SNP_54730_A_30298287 | NC_021166.1    | Ca_Kabuli_Chr07 | 30298287                | TT                                     | CC                 | CC               | INTRON                        | 101495501          | beta-amyrin 11-oxidase-like |
| SNP_54733_A_30300469 | NC_021166.1    | Ca_Kabuli_Chr07 | 30300469                | AA                                     | TT                 | TT               | URR                           | 101495501          | beta-amyrin 11-oxidase-like |
| SNP_54734_A_30300674 | NC_021166.1    | Ca_Kabuli_Chr07 | 30300674                | AA                                     | GG                 | GG               | URR                           | 101495501          | beta-amyrin 11-oxidase-like |
| SNP_54735_A_30300726 | NC_021166.1    | Ca_Kabuli_Chr07 | 30300726                | CC                                     | TT                 | TT               | URR                           | 101495501          | beta-amyrin 11-oxidase-like |
| SNP_54736_A_30300780 | NC_021166.1    | Ca_Kabuli_Chr07 | 30300780                | CC                                     | TT                 | TT               | URR                           | 101495501          | beta-amyrin 11-oxidase-like |
| SNP_54737_A_30300810 | NC_021166.1    | Ca_Kabuli_Chr07 | 30300810                | TT                                     | GG                 | GG               | URR                           | 101495501          | beta-amyrin 11-oxidase-like |
| SNP_54738_A_30302943 | NC_021166.1    | Ca_Kabuli_Chr07 | 30302943                | TT                                     | CC                 | CC               | INTERGENIC                    |                    |                             |
| SNP_54739_A_30303198 | NC_021166.1    | Ca_Kabuli_Chr07 | 30303198                | CC                                     | TT                 | TT               | INTERGENIC                    |                    |                             |
| SNP_54741_A_30303530 | NC_021166.1    | Ca_Kabuli_Chr07 | 30303530                | GG                                     | AA                 | AA               | INTERGENIC                    |                    |                             |
| SNP_54742_A_30303534 | NC_021166.1    | Ca_Kabuli_Chr07 | 30303534                | TT                                     | CC                 | CC               | INTERGENIC                    |                    |                             |
| SNP_54743_A_30303553 | NC_021166.1    | Ca_Kabuli_Chr07 | 30303553                | TT                                     | CC                 | CC               | INTERGENIC                    |                    |                             |
| SNP_54744_A_30303571 | NC_021166.1    | Ca_Kabuli_Chr07 | 30303571                | TT                                     | CC                 | CC               | INTERGENIC                    |                    |                             |
| SNP_54745_A_30303645 | NC_021166.1    | Ca_Kabuli_Chr07 | 30303645                | GG                                     | AA                 | AA               | INTERGENIC                    |                    |                             |

| SNPs IDs             | Chromosome IDs | Chromosomes     | Physical positions (bp) | CDC Frontier genome (Reference genome) | (Pusa 1103 & HPNB) | (ILWC 46 & LPNB) | Sequence Components of genome | Gene accession IDs | Putative functions          |
|----------------------|----------------|-----------------|-------------------------|----------------------------------------|--------------------|------------------|-------------------------------|--------------------|-----------------------------|
| SNP_54746_A_30303656 | NC_021166.1    | Ca_Kabuli_Chr07 | 30303656                | CC                                     | TT                 | TT               | INTERGENIC                    |                    |                             |
| SNP_54747_A_30303768 | NC_021166.1    | Ca_Kabuli_Chr07 | 30303768                | TT                                     | CC                 | CC               | INTERGENIC                    |                    |                             |
| SNP_54748_A_30303881 | NC_021166.1    | Ca_Kabuli_Chr07 | 30303881                | CC                                     | TT                 | TT               | INTERGENIC                    |                    |                             |
| SNP_54749_A_30303887 | NC_021166.1    | Ca_Kabuli_Chr07 | 30303887                | TT                                     | CC                 | CC               | INTERGENIC                    |                    |                             |
| SNP_54750_A_30303954 | NC_021166.1    | Ca_Kabuli_Chr07 | 30303954                | TT                                     | AA                 | AA               | INTERGENIC                    |                    |                             |
| SNP_54751_A_30303979 | NC_021166.1    | Ca_Kabuli_Chr07 | 30303979                | CC                                     | TT                 | TT               | INTERGENIC                    |                    |                             |
| SNP_54752_A_30303980 | NC_021166.1    | Ca_Kabuli_Chr07 | 30303980                | CC                                     | TT                 | TT               | INTERGENIC                    |                    |                             |
| SNP_54753_A_30306852 | NC_021166.1    | Ca_Kabuli_Chr07 | 30306852                | AA                                     | TT                 | TT               | NON_SYNONYMOUS_CODING         | 101495829          | beta-amyrin 11-oxidase-like |
| SNP_54754_A_30306853 | NC_021166.1    | Ca_Kabuli_Chr07 | 30306853                | AA                                     | GG                 | GG               | SYNONYMOUS_CODING             | 101495829          | beta-amyrin 11-oxidase-like |
| SNP_54755_A_30306957 | NC_021166.1    | Ca_Kabuli_Chr07 | 30306957                | TT                                     | CC                 | CC               | INTRON                        | 101495829          | beta-amyrin 11-oxidase-like |
| SNP_54756_A_30306973 | NC_021166.1    | Ca_Kabuli_Chr07 | 30306973                | TT                                     | CC                 | CC               | INTRON                        | 101495829          | beta-amyrin 11-oxidase-like |
| SNP_54759_A_30311466 | NC_021166.1    | Ca_Kabuli_Chr07 | 30311466                | GG                                     | CC                 | CC               | URR                           | 101495829          | beta-amyrin 11-oxidase-like |
| SNP_54760_A_30311629 | NC_021166.1    | Ca_Kabuli_Chr07 | 30311629                | CC                                     | TT                 | TT               | URR                           | 101495829          | beta-amyrin 11-oxidase-like |
| SNP_54761_A_30316384 | NC_021166.1    | Ca_Kabuli_Chr07 | 30316384                | AA                                     | GG                 | GG               | DRR                           | 101496150          | beta-amyrin 11-oxidase-like |
| SNP_54763_A_30319576 | NC_021166.1    | Ca_Kabuli_Chr07 | 30319576                | TT                                     | CC                 | CC               | INTERGENIC                    |                    |                             |
| SNP_54764_A_30320554 | NC_021166.1    | Ca_Kabuli_Chr07 | 30320554                | CC                                     | TT                 | TT               | INTERGENIC                    |                    |                             |
| SNP_54765_A_30321330 | NC_021166.1    | Ca_Kabuli_Chr07 | 30321330                | GG                                     | CC                 | CC               | INTERGENIC                    |                    |                             |
| SNP_54766_A_30321365 | NC_021166.1    | Ca_Kabuli_Chr07 | 30321365                | TT                                     | AA                 | AA               | INTERGENIC                    |                    |                             |
| SNP_54767_A_30321369 | NC_021166.1    | Ca_Kabuli_Chr07 | 30321369                | GG                                     | AA                 | AA               | INTERGENIC                    |                    |                             |
| SNP_54768_A_30321408 | NC_021166.1    | Ca_Kabuli_Chr07 | 30321408                | GG                                     | AA                 | AA               | INTERGENIC                    |                    |                             |
| SNP_54769_A_30321453 | NC_021166.1    | Ca_Kabuli_Chr07 | 30321453                | CC                                     | TT                 | TT               | INTERGENIC                    |                    |                             |
| SNP_54770_A_30321460 | NC_021166.1    | Ca_Kabuli_Chr07 | 30321460                | CC                                     | AA                 | AA               | INTERGENIC                    |                    |                             |



| SNPs IDs             | Chromosome IDs | Chromosomes     | Physical positions (bp) | CDC Frontier genome (Reference genome) | (Pusa 1103 & HPNB) | (ILWC 46 & LPNB) | Sequence Components of genome | Gene accession IDs | Putative functions                                 |
|----------------------|----------------|-----------------|-------------------------|----------------------------------------|--------------------|------------------|-------------------------------|--------------------|----------------------------------------------------|
| SNP_54771_A_30321502 | NC_021166.1    | Ca_Kabuli_Chr07 | 30321502                | AA                                     | GG                 | GG               | INTERGENIC                    |                    |                                                    |
| SNP_54772_A_30322645 | NC_021166.1    | Ca_Kabuli_Chr07 | 30322645                | CC                                     | GG                 | GG               | URR                           | 101496150          | beta-amyrin 11-oxidase-like                        |
| SNP_54773_A_30323524 | NC_021166.1    | Ca_Kabuli_Chr07 | 30323524                | CC                                     | TT                 | TT               | DRR                           | 101496479          | beta-amyrin 11-oxidase-like                        |
| SNP_54774_A_30325312 | NC_021166.1    | Ca_Kabuli_Chr07 | 30325312                | GG                                     | AA                 | AA               | INTRON                        | 101496479          | beta-amyrin 11-oxidase-like                        |
| SNP_54775_A_30325414 | NC_021166.1    | Ca_Kabuli_Chr07 | 30325414                | CC                                     | TT                 | TT               | INTRON                        | 101496479          | beta-amyrin 11-oxidase-like                        |
| SNP_54776_A_30325880 | NC_021166.1    | Ca_Kabuli_Chr07 | 30325880                | GG                                     | AA                 | AA               | INTRON                        | 101496479          | beta-amyrin 11-oxidase-like                        |
| SNP_54777_A_30325885 | NC_021166.1    | Ca_Kabuli_Chr07 | 30325885                | TT                                     | AA                 | AA               | INTRON                        | 101496479          | beta-amyrin 11-oxidase-like                        |
| SNP_54778_A_30330356 | NC_021166.1    | Ca_Kabuli_Chr07 | 30330356                | TT                                     | GG                 | GG               | URR                           | 101496479          | beta-amyrin 11-oxidase-like                        |
| SNP_54779_A_30346499 | NC_021166.1    | Ca_Kabuli_Chr07 | 30346499                | GG                                     | AA                 | AA               | INTERGENIC                    |                    |                                                    |
| SNP_54780_A_30346648 | NC_021166.1    | Ca_Kabuli_Chr07 | 30346648                | GG                                     | AA                 | AA               | INTERGENIC                    |                    |                                                    |
| SNP_54781_A_30346659 | NC_021166.1    | Ca_Kabuli_Chr07 | 30346659                | AA                                     | GG                 | GG               | INTERGENIC                    |                    |                                                    |
| SNP_54782_A_30347468 | NC_021166.1    | Ca_Kabuli_Chr07 | 30347468                | AA                                     | GG                 | GG               | INTERGENIC                    |                    |                                                    |
| SNP_54783_A_30347749 | NC_021166.1    | Ca_Kabuli_Chr07 | 30347749                | AA                                     | GG                 | GG               | INTERGENIC                    |                    |                                                    |
| SNP_54784_A_30348436 | NC_021166.1    | Ca_Kabuli_Chr07 | 30348436                | TT                                     | CC                 | CC               | INTERGENIC                    |                    |                                                    |
| SNP_54785_A_30351273 | NC_021166.1    | Ca_Kabuli_Chr07 | 30351273                | CC                                     | TT                 | TT               | INTERGENIC                    |                    |                                                    |
| SNP_54786_A_30351332 | NC_021166.1    | Ca_Kabuli_Chr07 | 30351332                | CC                                     | TT                 | TT               | INTERGENIC                    |                    |                                                    |
| SNP_54787_A_30355115 | NC_021166.1    | Ca_Kabuli_Chr07 | 30355115                | CC                                     | TT                 | TT               | INTRON                        | 101497137          | ankyrin repeat and SAM domain-containing protein 6 |
| SNP_54788_A_30356766 | NC_021166.1    | Ca_Kabuli_Chr07 | 30356766                | CC                                     | TT                 | TT               | INTERGENIC                    |                    |                                                    |
| SNP_54789_A_30356774 | NC_021166.1    | Ca_Kabuli_Chr07 | 30356774                | CC                                     | TT                 | TT               | INTERGENIC                    |                    |                                                    |
| SNP_54791_A_30365156 | NC_021166.1    | Ca_Kabuli_Chr07 | 30365156                | GG                                     | TT                 | TT               | INTRON                        | 101497469          | UBX domain-containing protein 1-like               |
| SNP_54793_A_30365430 | NC_021166.1    | Ca_Kabuli_Chr07 | 30365430                | TT                                     | CC                 | CC               | INTERGENIC                    |                    |                                                    |
| SNP_54794_A_30365433 | NC_021166.1    | Ca_Kabuli_Chr07 | 30365433                | AA                                     | TT                 | TT               | INTERGENIC                    |                    |                                                    |

| SNPs IDs             | Chromosome IDs | Chromosomes     | Physical positions (bp) | CDC Frontier genome (Reference genome) | (Pusa 1103 & HPNB) | (ILWC 46 & LPNB) | Sequence Components of genome | Gene accession IDs | Putative functions                                       |
|----------------------|----------------|-----------------|-------------------------|----------------------------------------|--------------------|------------------|-------------------------------|--------------------|----------------------------------------------------------|
| SNP_54795_A_30365458 | NC_021166.1    | Ca_Kabuli_Chr07 | 30365458                | TT                                     | AA                 | AA               | INTERGENIC                    |                    |                                                          |
| SNP_54797_A_30366367 | NC_021166.1    | Ca_Kabuli_Chr07 | 30366367                | AA                                     | GG                 | GG               | INTERGENIC                    |                    |                                                          |
| SNP_54798_A_30366448 | NC_021166.1    | Ca_Kabuli_Chr07 | 30366448                | AA                                     | TT                 | TT               | INTERGENIC                    |                    |                                                          |
| SNP_54800_A_30368620 | NC_021166.1    | Ca_Kabuli_Chr07 | 30368620                | GG                                     | CC                 | CC               | URR                           | 101497469          | UBX domain-containing protein 1-like                     |
| SNP_54801_A_30377101 | NC_021166.1    | Ca_Kabuli_Chr07 | 30377101                | GG                                     | CC                 | CC               | URR                           | 101498331          | GPI transamidase component PIG-T                         |
| SNP_54802_A_30393814 | NC_021166.1    | Ca_Kabuli_Chr07 | 30393814                | TT                                     | CC                 | CC               | INTRON                        | 101507020          | xyloglucan endotransglucosylase/hydrolase protein 2-like |
| SNP_54803_A_30393827 | NC_021166.1    | Ca_Kabuli_Chr07 | 30393827                | AA                                     | GG                 | GG               | INTRON                        | 101507020          | xyloglucan endotransglucosylase/hydrolase protein 2-like |
| SNP_54804_A_30394076 | NC_021166.1    | Ca_Kabuli_Chr07 | 30394076                | CC                                     | TT                 | TT               | INTRON                        | 101507020          | xyloglucan endotransglucosylase/hydrolase protein 2-like |
| SNP_54805_A_30394234 | NC_021166.1    | Ca_Kabuli_Chr07 | 30394234                | AA                                     | GG                 | GG               | INTRON                        | 101507020          | xyloglucan endotransglucosylase/hydrolase protein 2-like |
| SNP_54806_A_30394595 | NC_021166.1    | Ca_Kabuli_Chr07 | 30394595                | AA                                     | GG                 | GG               | INTRON                        | 101507020          | xyloglucan endotransglucosylase/hydrolase protein 2-like |
| SNP_54807_A_30394640 | NC_021166.1    | Ca_Kabuli_Chr07 | 30394640                | GG                                     | AA                 | AA               | INTRON                        | 101507020          | xyloglucan endotransglucosylase/hydrolase protein 2-like |
| SNP_54808_A_30394654 | NC_021166.1    | Ca_Kabuli_Chr07 | 30394654                | AA                                     | GG                 | GG               | INTRON                        | 101507020          | xyloglucan endotransglucosylase/hydrolase protein 2-like |
| SNP_54809_A_30394669 | NC_021166.1    | Ca_Kabuli_Chr07 | 30394669                | GG                                     | AA                 | AA               | INTRON                        | 101507020          | xyloglucan endotransglucosylase/hydrolase protein 2-like |
| SNP_54813_A_30395401 | NC_021166.1    | Ca_Kabuli_Chr07 | 30395401                | AA                                     | GG                 | GG               | INTRON                        | 101507020          | xyloglucan endotransglucosylase/hydrolase protein 2-like |
| SNP_54815_A_30396131 | NC_021166.1    | Ca_Kabuli_Chr07 | 30396131                | GG                                     | AA                 | AA               | INTRON                        | 101507020          | xyloglucan endotransglucosylase/hydrolase protein 2-like |
| SNP_54816_A_30396198 | NC_021166.1    | Ca_Kabuli_Chr07 | 30396198                | CC                                     | TT                 | TT               | URR                           | 101507020          | xyloglucan endotransglucosylase/hydrolase protein 2-like |
| SNP_54817_A_30396986 | NC_021166.1    | Ca_Kabuli_Chr07 | 30396986                | AA                                     | TT                 | TT               | URR                           | 101507020          | xyloglucan endotransglucosylase/hydrolase protein 2-like |
| SNP_54818_A_30411344 | NC_021166.1    | Ca_Kabuli_Chr07 | 30411344                | AA                                     | GG                 | GG               | INTERGENIC                    |                    |                                                          |
| SNP_54819_A_30412833 | NC_021166.1    | Ca_Kabuli_Chr07 | 30412833                | TT                                     | CC                 | CC               | DRR                           | 101507975          | xyloglucan endotransglucosylase/hydrolase protein 2-like |
| SNP_54820_A_30412951 | NC_021166.1    | Ca_Kabuli_Chr07 | 30412951                | AA                                     | GG                 | GG               | DRR                           | 101507975          | xyloglucan endotransglucosylase/hydrolase protein 2-like |
| SNP_54821_A_30412974 | NC_021166.1    | Ca_Kabuli_Chr07 | 30412974                | GG                                     | TT                 | TT               | DRR                           | 101507975          | xyloglucan endotransglucosylase/hydrolase protein 2-like |
| SNP_54822_A_30414086 | NC_021166.1    | Ca_Kabuli_Chr07 | 30414086                | AA                                     | CC                 | CC               | STOP_GAINED                   | 101507975          | xyloglucan endotransglucosylase/hydrolase protein 2-like |

| SNPs IDs             | Chromosome IDs | Chromosomes     | Physical positions (bp) | CDC Frontier (Reference genome) | (Pusa 1103 & HPNB) | (ILWC 46 & LPNB) | Sequence Components of genome | Gene accession IDs | Putative functions                                       |
|----------------------|----------------|-----------------|-------------------------|---------------------------------|--------------------|------------------|-------------------------------|--------------------|----------------------------------------------------------|
| SNP_54823_A_30414088 | NC_021166.1    | Ca_Kabuli_Chr07 | 30414088                | AA                              | GG                 | GG               | NON_SYNONYMOUS_CODING         | 101507975          | xyloglucan endotransglucosylase/hydrolase protein 2-like |
| SNP_54824_A_30414094 | NC_021166.1    | Ca_Kabuli_Chr07 | 30414094                | CC                              | TT                 | TT               | NON_SYNONYMOUS_CODING         | 101507975          | xyloglucan endotransglucosylase/hydrolase protein 2-like |
| SNP_54825_A_30414645 | NC_021166.1    | Ca_Kabuli_Chr07 | 30414645                | GG                              | AA                 | AA               | INTRON                        | 101507975          | xyloglucan endotransglucosylase/hydrolase protein 2-like |
| SNP_54826_A_30414863 | NC_021166.1    | Ca_Kabuli_Chr07 | 30414863                | AA                              | GG                 | GG               | INTRON                        | 101507975          | xyloglucan endotransglucosylase/hydrolase protein 2-like |
| SNP_54827_A_30414867 | NC_021166.1    | Ca_Kabuli_Chr07 | 30414867                | TT                              | CC                 | CC               | INTRON                        | 101507975          | xyloglucan endotransglucosylase/hydrolase protein 2-like |
| SNP_54828_A_30414886 | NC_021166.1    | Ca_Kabuli_Chr07 | 30414886                | AA                              | GG                 | GG               | INTRON                        | 101507975          | xyloglucan endotransglucosylase/hydrolase protein 2-like |
| SNP_54829_A_30414911 | NC_021166.1    | Ca_Kabuli_Chr07 | 30414911                | TT                              | CC                 | CC               | INTRON                        | 101507975          | xyloglucan endotransglucosylase/hydrolase protein 2-like |
| SNP_54831_A_30415187 | NC_021166.1    | Ca_Kabuli_Chr07 | 30415187                | TT                              | CC                 | CC               | INTRON                        | 101507975          | xyloglucan endotransglucosylase/hydrolase protein 2-like |
| SNP_54832_A_30415350 | NC_021166.1    | Ca_Kabuli_Chr07 | 30415350                | TT                              | AA                 | AA               | INTRON                        | 101507975          | xyloglucan endotransglucosylase/hydrolase protein 2-like |
| SNP_54834_A_30415408 | NC_021166.1    | Ca_Kabuli_Chr07 | 30415408                | TT                              | CC                 | CC               | INTRON                        | 101507975          | xyloglucan endotransglucosylase/hydrolase protein 2-like |
| SNP_54835_A_30416454 | NC_021166.1    | Ca_Kabuli_Chr07 | 30416454                | TT                              | CC                 | CC               | INTRON                        | 101507975          | xyloglucan endotransglucosylase/hydrolase protein 2-like |
| SNP_54837_A_30422780 | NC_021166.1    | Ca_Kabuli_Chr07 | 30422780                | CC                              | TT                 | TT               | URR                           | 101507975          | xyloglucan endotransglucosylase/hydrolase protein 2-like |
| SNP_54839_A_30424266 | NC_021166.1    | Ca_Kabuli_Chr07 | 30424266                | AA                              | TT                 | TT               | DRR                           | 101508607          | xyloglucan endotransglucosylase/hydrolase protein 2-like |
| SNP_54840_A_30424498 | NC_021166.1    | Ca_Kabuli_Chr07 | 30424498                | CC                              | TT                 | TT               | DRR                           | 101508607          | xyloglucan endotransglucosylase/hydrolase protein 2-like |
| SNP_54841_A_30424588 | NC_021166.1    | Ca_Kabuli_Chr07 | 30424588                | TT                              | GG                 | GG               | DRR                           | 101508607          | xyloglucan endotransglucosylase/hydrolase protein 2-like |
| SNP_54842_A_30426273 | NC_021166.1    | Ca_Kabuli_Chr07 | 30426273                | GG                              | TT                 | TT               | URR                           | 101508287          | xyloglucan endotransglucosylase/hydrolase protein 2-like |
| SNP_54843_A_30426821 | NC_021166.1    | Ca_Kabuli_Chr07 | 30426821                | CC                              | AA                 | AA               | URR                           | 101508607          | xyloglucan endotransglucosylase/hydrolase protein 2-like |
| SNP_54845_A_30617434 | NC_021166.1    | Ca_Kabuli_Chr07 | 30617434                | GG                              | AA                 | AA               | INTERGENIC                    |                    |                                                          |
| SNP_54846_A_30617439 | NC_021166.1    | Ca_Kabuli_Chr07 | 30617439                | AA                              | CC                 | CC               | INTERGENIC                    |                    |                                                          |
| SNP_54847_A_30617443 | NC_021166.1    | Ca_Kabuli_Chr07 | 30617443                | TT                              | CC                 | CC               | INTERGENIC                    |                    |                                                          |
| SNP_54848_A_30620858 | NC_021166.1    | Ca_Kabuli_Chr07 | 30620858                | CC                              | GG                 | GG               | DRR                           | 101508921          | cullin-1-like                                            |
| SNP_54849_A_30631228 | NC_021166.1    | Ca_Kabuli_Chr07 | 30631228                | GG                              | AA                 | AA               | INTERGENIC                    |                    |                                                          |

| SNPs IDs             | Chromosome IDs | Chromosomes     | Physical positions (bp) | CDC Frontier genome (Reference genome) | (Pusa 1103 & HPNB) | (ILWC 46 & LPNB) | Sequence genome | Components of | Gene accession IDs | Putative functions                                   |
|----------------------|----------------|-----------------|-------------------------|----------------------------------------|--------------------|------------------|-----------------|---------------|--------------------|------------------------------------------------------|
| SNP_54850_A_30639232 | NC_021166.1    | Ca_Kabuli_Chr07 | 30639232                | CC                                     | TT                 | TT               | INTERGENIC      |               |                    |                                                      |
| SNP_54851_A_30657587 | NC_021166.1    | Ca_Kabuli_Chr07 | 30657587                | TT                                     | CC                 | CC               | URR             | 101512897     |                    | uncharacterized LOC101512897                         |
| SNP_54852_A_30661557 | NC_021166.1    | Ca_Kabuli_Chr07 | 30661557                | GG                                     | AA                 | AA               | INTERGENIC      |               |                    |                                                      |
| SNP_54853_A_30661920 | NC_021166.1    | Ca_Kabuli_Chr07 | 30661920                | GG                                     | AA                 | AA               | INTERGENIC      |               |                    |                                                      |
| SNP_54854_A_30662387 | NC_021166.1    | Ca_Kabuli_Chr07 | 30662387                | TT                                     | CC                 | CC               | INTERGENIC      |               |                    |                                                      |
| SNP_54856_A_30666345 | NC_021166.1    | Ca_Kabuli_Chr07 | 30666345                | GG                                     | AA                 | AA               | INTERGENIC      |               |                    |                                                      |
| SNP_54857_A_30666367 | NC_021166.1    | Ca_Kabuli_Chr07 | 30666367                | CC                                     | GG                 | GG               | INTERGENIC      |               |                    |                                                      |
| SNP_54858_A_30666370 | NC_021166.1    | Ca_Kabuli_Chr07 | 30666370                | CC                                     | TT                 | TT               | INTERGENIC      |               |                    |                                                      |
| SNP_54860_A_30673511 | NC_021166.1    | Ca_Kabuli_Chr07 | 30673511                | GG                                     | AA                 | AA               | INTERGENIC      |               |                    |                                                      |
| SNP_54861_A_30678156 | NC_021166.1    | Ca_Kabuli_Chr07 | 30678156                | GG                                     | AA                 | AA               | INTERGENIC      |               |                    |                                                      |
| SNP_54862_A_30678598 | NC_021166.1    | Ca_Kabuli_Chr07 | 30678598                | GG                                     | CC                 | CC               | INTERGENIC      |               |                    |                                                      |
| SNP_54863_A_30681868 | NC_021166.1    | Ca_Kabuli_Chr07 | 30681868                | AA                                     | TT                 | TT               | INTERGENIC      |               |                    |                                                      |
| SNP_54864_A_30690286 | NC_021166.1    | Ca_Kabuli_Chr07 | 30690286                | CC                                     | GG                 | GG               | DRR             | 101509238     |                    | ethylene-responsive transcription factor ERF039-like |
| SNP_54865_A_30690878 | NC_021166.1    | Ca_Kabuli_Chr07 | 30690878                | GG                                     | TT                 | TT               | DRR             | 101509238     |                    | ethylene-responsive transcription factor ERF039-like |
| SNP_54866_A_30690906 | NC_021166.1    | Ca_Kabuli_Chr07 | 30690906                | GG                                     | AA                 | AA               | URR             | 101509238     |                    | ethylene-responsive transcription factor ERF039-like |
| SNP_54867_A_30692459 | NC_021166.1    | Ca_Kabuli_Chr07 | 30692459                | CC                                     | TT                 | TT               | URR             | 101509238     |                    | ethylene-responsive transcription factor ERF039-like |
| SNP_54868_A_30697364 | NC_021166.1    | Ca_Kabuli_Chr07 | 30697364                | AA                                     | CC                 | CC               | INTERGENIC      |               |                    |                                                      |
| SNP_54869_A_30697682 | NC_021166.1    | Ca_Kabuli_Chr07 | 30697682                | TT                                     | CC                 | CC               | DRR             | 101410600     |                    | transfer RNA arginine (anticodon UCU)                |
| SNP_54870_A_30697726 | NC_021166.1    | Ca_Kabuli_Chr07 | 30697726                | AA                                     | GG                 | GG               | DRR             | 101410600     |                    | transfer RNA arginine (anticodon UCU)                |
| SNP_54871_A_30699192 | NC_021166.1    | Ca_Kabuli_Chr07 | 30699192                | TT                                     | GG                 | GG               | URR             | 101410600     |                    | transfer RNA arginine (anticodon UCU)                |
| SNP_54872_A_30699207 | NC_021166.1    | Ca_Kabuli_Chr07 | 30699207                | AA                                     | TT                 | TT               | URR             | 101410600     |                    | transfer RNA arginine (anticodon UCU)                |
| SNP_54873_A_30699217 | NC_021166.1    | Ca_Kabuli_Chr07 | 30699217                | AA                                     | TT                 | TT               | URR             | 101410600     |                    | transfer RNA arginine (anticodon UCU)                |

| SNPs IDs             | Chromosome IDs | Chromosomes     | Physical positions (bp) | CDC Frontier genome (Reference genome) | (Pusa 1103 & HPNB) | (ILWC 46 & LPNB) | Sequence Components of genome | Gene accession IDs | Putative functions                    |
|----------------------|----------------|-----------------|-------------------------|----------------------------------------|--------------------|------------------|-------------------------------|--------------------|---------------------------------------|
| SNP_54874_A_30699788 | NC_021166.1    | Ca_Kabuli_Chr07 | 30699788                | AA                                     | GG                 | GG               | URR                           | 101410600          | transfer RNA arginine (anticodon UCU) |
| SNP_54875_A_30700423 | NC_021166.1    | Ca_Kabuli_Chr07 | 30700423                | AA                                     | TT                 | TT               | URR                           | 101410600          | transfer RNA arginine (anticodon UCU) |
| SNP_54876_A_30701809 | NC_021166.1    | Ca_Kabuli_Chr07 | 30701809                | AA                                     | TT                 | TT               | INTERGENIC                    |                    |                                       |
| SNP_54877_A_30701811 | NC_021166.1    | Ca_Kabuli_Chr07 | 30701811                | AA                                     | TT                 | TT               | INTERGENIC                    |                    |                                       |
| SNP_54878_A_30705136 | NC_021166.1    | Ca_Kabuli_Chr07 | 30705136                | AA                                     | CC                 | CC               | INTERGENIC                    |                    |                                       |
| SNP_54879_A_30708757 | NC_021166.1    | Ca_Kabuli_Chr07 | 30708757                | TT                                     | CC                 | CC               | INTRON                        | 101509882          | uncharacterized LOC101509882          |
| SNP_54881_A_30720852 | NC_021166.1    | Ca_Kabuli_Chr07 | 30720852                | TT                                     | CC                 | CC               | INTERGENIC                    |                    |                                       |
| SNP_54882_A_30720908 | NC_021166.1    | Ca_Kabuli_Chr07 | 30720908                | TT                                     | CC                 | CC               | INTERGENIC                    |                    |                                       |
| SNP_54883_A_30721008 | NC_021166.1    | Ca_Kabuli_Chr07 | 30721008                | GG                                     | AA                 | AA               | INTERGENIC                    |                    |                                       |
| SNP_54884_A_30721052 | NC_021166.1    | Ca_Kabuli_Chr07 | 30721052                | TT                                     | GG                 | GG               | INTERGENIC                    |                    |                                       |
| SNP_54885_A_30722856 | NC_021166.1    | Ca_Kabuli_Chr07 | 30722856                | TT                                     | AA                 | AA               | INTERGENIC                    |                    |                                       |
| SNP_54886_A_30723461 | NC_021166.1    | Ca_Kabuli_Chr07 | 30723461                | CC                                     | GG                 | GG               | INTERGENIC                    |                    |                                       |
| SNP_54887_A_30723464 | NC_021166.1    | Ca_Kabuli_Chr07 | 30723464                | TT                                     | CC                 | CC               | INTERGENIC                    |                    |                                       |
| SNP_54888_A_30726118 | NC_021166.1    | Ca_Kabuli_Chr07 | 30726118                | TT                                     | CC                 | CC               | INTERGENIC                    |                    |                                       |
| SNP_54889_A_30726122 | NC_021166.1    | Ca_Kabuli_Chr07 | 30726122                | CC                                     | TT                 | TT               | INTERGENIC                    |                    |                                       |
| SNP_54890_A_30726131 | NC_021166.1    | Ca_Kabuli_Chr07 | 30726131                | TT                                     | CC                 | CC               | INTERGENIC                    |                    |                                       |
| SNP_54891_A_30728927 | NC_021166.1    | Ca_Kabuli_Chr07 | 30728927                | AA                                     | TT                 | TT               | INTERGENIC                    |                    |                                       |
| SNP_54892_A_30734123 | NC_021166.1    | Ca_Kabuli_Chr07 | 30734123                | CC                                     | GG                 | GG               | DRR                           | 101510199          | GATA transcription factor 9-like      |
| SNP_54893_A_30737133 | NC_021166.1    | Ca_Kabuli_Chr07 | 30737133                | TT                                     | GG                 | GG               | URR                           | 101510199          | GATA transcription factor 9-like      |
| SNP_54894_A_30737134 | NC_021166.1    | Ca_Kabuli_Chr07 | 30737134                | AA                                     | GG                 | GG               | URR                           | 101510199          | GATA transcription factor 9-like      |
| SNP_54895_A_30739702 | NC_021166.1    | Ca_Kabuli_Chr07 | 30739702                | AA                                     | TT                 | TT               | INTERGENIC                    |                    |                                       |
| SNP_54896_A_30740734 | NC_021166.1    | Ca_Kabuli_Chr07 | 30740734                | TT                                     | CC                 | CC               | INTERGENIC                    |                    |                                       |

| SNPs IDs             | Chromosome IDs | Chromosomes     | Physical positions (bp) | CDC Frontier (Reference genome) | (Pusa 1103 & HPNB) | (ILWC 46 & LPNB) | Sequence genome | Components of | Gene accession IDs                           | Putative functions |
|----------------------|----------------|-----------------|-------------------------|---------------------------------|--------------------|------------------|-----------------|---------------|----------------------------------------------|--------------------|
| SNP_54897_A_30740775 | NC_021166.1    | Ca_Kabuli_Chr07 | 30740775                | CC                              | TT                 | TT               | INTERGENIC      |               |                                              |                    |
| SNP_54898_A_30741042 | NC_021166.1    | Ca_Kabuli_Chr07 | 30741042                | AA                              | TT                 | TT               | INTERGENIC      |               |                                              |                    |
| SNP_54899_A_30743335 | NC_021166.1    | Ca_Kabuli_Chr07 | 30743335                | AA                              | TT                 | TT               | INTERGENIC      |               |                                              |                    |
| SNP_54900_A_30743571 | NC_021166.1    | Ca_Kabuli_Chr07 | 30743571                | AA                              | TT                 | TT               | INTERGENIC      |               |                                              |                    |
| SNP_54902_A_30745390 | NC_021166.1    | Ca_Kabuli_Chr07 | 30745390                | GG                              | TT                 | TT               | INTERGENIC      |               |                                              |                    |
| SNP_54904_A_30746900 | NC_021166.1    | Ca_Kabuli_Chr07 | 30746900                | CC                              | TT                 | TT               | INTERGENIC      |               |                                              |                    |
| SNP_54905_A_30748467 | NC_021166.1    | Ca_Kabuli_Chr07 | 30748467                | GG                              | AA                 | AA               | INTERGENIC      |               |                                              |                    |
| SNP_54906_A_30751085 | NC_021166.1    | Ca_Kabuli_Chr07 | 30751085                | GG                              | CC                 | CC               | INTERGENIC      |               |                                              |                    |
| SNP_54907_A_30752208 | NC_021166.1    | Ca_Kabuli_Chr07 | 30752208                | GG                              | AA                 | AA               | INTERGENIC      |               |                                              |                    |
| SNP_54908_A_30752231 | NC_021166.1    | Ca_Kabuli_Chr07 | 30752231                | TT                              | GG                 | GG               | INTERGENIC      |               |                                              |                    |
| SNP_54909_A_30752240 | NC_021166.1    | Ca_Kabuli_Chr07 | 30752240                | CC                              | TT                 | TT               | INTERGENIC      |               |                                              |                    |
| SNP_54910_A_30752262 | NC_021166.1    | Ca_Kabuli_Chr07 | 30752262                | CC                              | TT                 | TT               | INTERGENIC      |               |                                              |                    |
| SNP_54911_A_30754132 | NC_021166.1    | Ca_Kabuli_Chr07 | 30754132                | AA                              | GG                 | GG               | INTERGENIC      |               |                                              |                    |
| SNP_54912_A_30754640 | NC_021166.1    | Ca_Kabuli_Chr07 | 30754640                | AA                              | GG                 | GG               | INTERGENIC      |               |                                              |                    |
| SNP_54913_A_30754704 | NC_021166.1    | Ca_Kabuli_Chr07 | 30754704                | GG                              | AA                 | AA               | INTERGENIC      |               |                                              |                    |
| SNP_54916_A_30763150 | NC_021166.1    | Ca_Kabuli_Chr07 | 30763150                | CC                              | AA                 | AA               | INTRON          | 101510535     | homeobox-leucine zipper protein ATHB-15-like |                    |
| SNP_54917_A_30768391 | NC_021166.1    | Ca_Kabuli_Chr07 | 30768391                | TT                              | GG                 | GG               | URR             | 101510535     | homeobox-leucine zipper protein ATHB-15-like |                    |
| SNP_54918_A_30768403 | NC_021166.1    | Ca_Kabuli_Chr07 | 30768403                | TT                              | CC                 | CC               | URR             | 101510535     | homeobox-leucine zipper protein ATHB-15-like |                    |
| SNP_54919_A_30768410 | NC_021166.1    | Ca_Kabuli_Chr07 | 30768410                | TT                              | GG                 | GG               | URR             | 101510535     | homeobox-leucine zipper protein ATHB-15-like |                    |
| SNP_54920_A_30768899 | NC_021166.1    | Ca_Kabuli_Chr07 | 30768899                | TT                              | CC                 | CC               | URR             | 101510535     | homeobox-leucine zipper protein ATHB-15-like |                    |
| SNP_54922_A_30770702 | NC_021166.1    | Ca_Kabuli_Chr07 | 30770702                | CC                              | GG                 | GG               | DRR             | 101511082     | uncharacterized LOC101511082                 |                    |
| SNP_54923_A_30773187 | NC_021166.1    | Ca_Kabuli_Chr07 | 30773187                | TT                              | CC                 | CC               | URR             | 101511082     | uncharacterized LOC101511082                 |                    |

| SNPs IDs             | Chromosome IDs | Chromosomes     | Physical positions (bp) | CDC Frontier genome (Reference genome) | (Pusa 1103 & HPNB) | (ILWC 46 & LPNB) | Sequence Components of genome | Gene accession IDs | Putative functions            |
|----------------------|----------------|-----------------|-------------------------|----------------------------------------|--------------------|------------------|-------------------------------|--------------------|-------------------------------|
| SNP_54924_A_30775093 | NC_021166.1    | Ca_Kabuli_Chr07 | 30775093                | GG                                     | AA                 | AA               | INTERGENIC                    |                    |                               |
| SNP_54925_A_30775136 | NC_021166.1    | Ca_Kabuli_Chr07 | 30775136                | CC                                     | TT                 | TT               | INTERGENIC                    |                    |                               |
| SNP_54926_A_30775278 | NC_021166.1    | Ca_Kabuli_Chr07 | 30775278                | CC                                     | TT                 | TT               | INTERGENIC                    |                    |                               |
| SNP_54927_A_30776091 | NC_021166.1    | Ca_Kabuli_Chr07 | 30776091                | GG                                     | AA                 | AA               | INTERGENIC                    |                    |                               |
| SNP_54928_A_30776108 | NC_021166.1    | Ca_Kabuli_Chr07 | 30776108                | TT                                     | GG                 | GG               | INTERGENIC                    |                    |                               |
| SNP_54929_A_30776370 | NC_021166.1    | Ca_Kabuli_Chr07 | 30776370                | TT                                     | AA                 | AA               | INTERGENIC                    |                    |                               |
| SNP_54930_A_30776472 | NC_021166.1    | Ca_Kabuli_Chr07 | 30776472                | GG                                     | TT                 | TT               | INTERGENIC                    |                    |                               |
| SNP_54931_A_30776499 | NC_021166.1    | Ca_Kabuli_Chr07 | 30776499                | AA                                     | CC                 | CC               | INTERGENIC                    |                    |                               |
| SNP_54933_A_30782813 | NC_021166.1    | Ca_Kabuli_Chr07 | 30782813                | GG                                     | AA                 | AA               | INTERGENIC                    |                    |                               |
| SNP_54934_A_30788122 | NC_021166.1    | Ca_Kabuli_Chr07 | 30788122                | TT                                     | CC                 | CC               | INTERGENIC                    |                    |                               |
| SNP_54935_A_30788143 | NC_021166.1    | Ca_Kabuli_Chr07 | 30788143                | AA                                     | GG                 | GG               | INTERGENIC                    |                    |                               |
| SNP_54936_A_30788173 | NC_021166.1    | Ca_Kabuli_Chr07 | 30788173                | AA                                     | GG                 | GG               | INTERGENIC                    |                    |                               |
| SNP_54937_A_30791891 | NC_021166.1    | Ca_Kabuli_Chr07 | 30791891                | GG                                     | AA                 | AA               | INTERGENIC                    |                    |                               |
| SNP_54938_A_30795598 | NC_021166.1    | Ca_Kabuli_Chr07 | 30795598                | TT                                     | GG                 | GG               | INTERGENIC                    |                    |                               |
| SNP_54940_A_30795934 | NC_021166.1    | Ca_Kabuli_Chr07 | 30795934                | AA                                     | TT                 | TT               | INTERGENIC                    |                    |                               |
| SNP_54941_A_30797708 | NC_021166.1    | Ca_Kabuli_Chr07 | 30797708                | CC                                     | TT                 | TT               | INTERGENIC                    |                    |                               |
| SNP_54942_A_30798300 | NC_021166.1    | Ca_Kabuli_Chr07 | 30798300                | CC                                     | TT                 | TT               | INTERGENIC                    |                    |                               |
| SNP_54943_A_30798655 | NC_021166.1    | Ca_Kabuli_Chr07 | 30798655                | GG                                     | AA                 | AA               | INTERGENIC                    |                    |                               |
| SNP_54944_A_30805755 | NC_021166.1    | Ca_Kabuli_Chr07 | 30805755                | GG                                     | AA                 | AA               | INTRON                        | 101513223          | insulin-degrading enzyme-like |
| SNP_54945_A_30805783 | NC_021166.1    | Ca_Kabuli_Chr07 | 30805783                | AA                                     | CC                 | CC               | INTRON                        | 101513223          | insulin-degrading enzyme-like |
| SNP_54946_A_30805794 | NC_021166.1    | Ca_Kabuli_Chr07 | 30805794                | AA                                     | GG                 | GG               | INTRON                        | 101513223          | insulin-degrading enzyme-like |
| SNP_54948_A_30806169 | NC_021166.1    | Ca_Kabuli_Chr07 | 30806169                | CC                                     | TT                 | TT               | INTRON                        | 101513223          | insulin-degrading enzyme-like |

| SNPs IDs             | Chromosome IDs | Chromosomes     | Physical positions (bp) | CDC Frontier genome (Reference genome) | (Pusa 1103 & HPNB) | (ILWC 46 & LPNB) | Sequence Components of genome | Gene accession IDs | Putative functions            |
|----------------------|----------------|-----------------|-------------------------|----------------------------------------|--------------------|------------------|-------------------------------|--------------------|-------------------------------|
| SNP_54950_A_30806901 | NC_021166.1    | Ca_Kabuli_Chr07 | 30806901                | AA                                     | GG                 | GG               | INTRON                        | 101513223          | insulin-degrading enzyme-like |
| SNP_54951_A_30806914 | NC_021166.1    | Ca_Kabuli_Chr07 | 30806914                | GG                                     | TT                 | TT               | INTRON                        | 101513223          | insulin-degrading enzyme-like |
| SNP_54953_A_30807734 | NC_021166.1    | Ca_Kabuli_Chr07 | 30807734                | TT                                     | CC                 | CC               | INTRON                        | 101513223          | insulin-degrading enzyme-like |
| SNP_54954_A_30807735 | NC_021166.1    | Ca_Kabuli_Chr07 | 30807735                | GG                                     | TT                 | TT               | INTRON                        | 101513223          | insulin-degrading enzyme-like |
| SNP_54955_A_30807737 | NC_021166.1    | Ca_Kabuli_Chr07 | 30807737                | AA                                     | TT                 | TT               | INTRON                        | 101513223          | insulin-degrading enzyme-like |
| SNP_54956_A_30807738 | NC_021166.1    | Ca_Kabuli_Chr07 | 30807738                | TT                                     | AA                 | AA               | INTRON                        | 101513223          | insulin-degrading enzyme-like |
| SNP_54957_A_30807772 | NC_021166.1    | Ca_Kabuli_Chr07 | 30807772                | CC                                     | TT                 | TT               | INTRON                        | 101513223          | insulin-degrading enzyme-like |
| SNP_54958_A_30807773 | NC_021166.1    | Ca_Kabuli_Chr07 | 30807773                | TT                                     | AA                 | AA               | INTRON                        | 101513223          | insulin-degrading enzyme-like |
| SNP_54959_A_30809910 | NC_021166.1    | Ca_Kabuli_Chr07 | 30809910                | CC                                     | AA                 | AA               | INTRON                        | 101513223          | insulin-degrading enzyme-like |
| SNP_54960_A_30812046 | NC_021166.1    | Ca_Kabuli_Chr07 | 30812046                | AA                                     | TT                 | TT               | NON_SYNONYMOUS_CODING         | 101513223          | insulin-degrading enzyme-like |
| SNP_54961_A_30812283 | NC_021166.1    | Ca_Kabuli_Chr07 | 30812283                | AA                                     | GG                 | GG               | INTRON                        | 101513223          | insulin-degrading enzyme-like |
| SNP_54962_A_30812527 | NC_021166.1    | Ca_Kabuli_Chr07 | 30812527                | CC                                     | TT                 | TT               | INTRON                        | 101513223          | insulin-degrading enzyme-like |
| SNP_54963_A_30812549 | NC_021166.1    | Ca_Kabuli_Chr07 | 30812549                | AA                                     | GG                 | GG               | INTRON                        | 101513223          | insulin-degrading enzyme-like |
| SNP_54964_A_30812831 | NC_021166.1    | Ca_Kabuli_Chr07 | 30812831                | TT                                     | CC                 | CC               | INTRON                        | 101513223          | insulin-degrading enzyme-like |
| SNP_54965_A_30814934 | NC_021166.1    | Ca_Kabuli_Chr07 | 30814934                | CC                                     | TT                 | TT               | DRR                           | 101513223          | insulin-degrading enzyme-like |
| SNP_54966_A_30817654 | NC_021166.1    | Ca_Kabuli_Chr07 | 30817654                | TT                                     | CC                 | CC               | INTERGENIC                    |                    |                               |
| SNP_54967_A_30819090 | NC_021166.1    | Ca_Kabuli_Chr07 | 30819090                | GG                                     | AA                 | AA               | INTERGENIC                    |                    |                               |
| SNP_54968_A_30819176 | NC_021166.1    | Ca_Kabuli_Chr07 | 30819176                | AA                                     | GG                 | GG               | INTERGENIC                    |                    |                               |
| SNP_54969_A_30821285 | NC_021166.1    | Ca_Kabuli_Chr07 | 30821285                | TT                                     | AA                 | AA               | INTERGENIC                    |                    |                               |
| SNP_54970_A_30821302 | NC_021166.1    | Ca_Kabuli_Chr07 | 30821302                | GG                                     | TT                 | TT               | INTERGENIC                    |                    |                               |
| SNP_54971_A_30821496 | NC_021166.1    | Ca_Kabuli_Chr07 | 30821496                | CC                                     | TT                 | TT               | INTERGENIC                    |                    |                               |
| SNP_54972_A_30821685 | NC_021166.1    | Ca_Kabuli_Chr07 | 30821685                | GG                                     | AA                 | AA               | INTERGENIC                    |                    |                               |



| SNPs IDs             | Chromosome IDs | Chromosomes     | Physical positions (bp) | CDC Frontier genome (Reference genome) | (Pusa 1103 & HPNB) | (ILWC 46 & LPNB) | Sequence genome | Components of | Gene accession IDs           | Putative functions |
|----------------------|----------------|-----------------|-------------------------|----------------------------------------|--------------------|------------------|-----------------|---------------|------------------------------|--------------------|
| SNP_54973_A_30821955 | NC_021166.1    | Ca_Kabuli_Chr07 | 30821955                | CC                                     | TT                 | TT               | INTERGENIC      |               |                              |                    |
| SNP_54974_A_30822368 | NC_021166.1    | Ca_Kabuli_Chr07 | 30822368                | TT                                     | GG                 | GG               | INTERGENIC      |               |                              |                    |
| SNP_54975_A_30822532 | NC_021166.1    | Ca_Kabuli_Chr07 | 30822532                | AA                                     | GG                 | GG               | INTERGENIC      |               |                              |                    |
| SNP_54976_A_30823676 | NC_021166.1    | Ca_Kabuli_Chr07 | 30823676                | TT                                     | CC                 | CC               | INTERGENIC      |               |                              |                    |
| SNP_54977_A_30823690 | NC_021166.1    | Ca_Kabuli_Chr07 | 30823690                | AA                                     | GG                 | GG               | INTERGENIC      |               |                              |                    |
| SNP_54978_A_30823915 | NC_021166.1    | Ca_Kabuli_Chr07 | 30823915                | TT                                     | CC                 | CC               | INTERGENIC      |               |                              |                    |
| SNP_54980_A_30825694 | NC_021166.1    | Ca_Kabuli_Chr07 | 30825694                | AA                                     | TT                 | TT               | INTERGENIC      |               |                              |                    |
| SNP_54981_A_30834646 | NC_021166.1    | Ca_Kabuli_Chr07 | 30834646                | GG                                     | TT                 | TT               | INTERGENIC      |               |                              |                    |
| SNP_54982_A_30835702 | NC_021166.1    | Ca_Kabuli_Chr07 | 30835702                | GG                                     | AA                 | AA               | INTERGENIC      |               |                              |                    |
| SNP_54983_A_30835767 | NC_021166.1    | Ca_Kabuli_Chr07 | 30835767                | GG                                     | CC                 | CC               | INTERGENIC      |               |                              |                    |
| SNP_54984_A_30835770 | NC_021166.1    | Ca_Kabuli_Chr07 | 30835770                | AA                                     | TT                 | TT               | INTERGENIC      |               |                              |                    |
| SNP_54985_A_30836016 | NC_021166.1    | Ca_Kabuli_Chr07 | 30836016                | GG                                     | AA                 | AA               | INTERGENIC      |               |                              |                    |
| SNP_54986_A_30839265 | NC_021166.1    | Ca_Kabuli_Chr07 | 30839265                | AA                                     | CC                 | CC               | URR             | 101511390     | uncharacterized LOC101511390 |                    |
| SNP_54987_A_30839326 | NC_021166.1    | Ca_Kabuli_Chr07 | 30839326                | TT                                     | AA                 | AA               | URR             | 101511390     | uncharacterized LOC101511390 |                    |
| SNP_54988_A_30839343 | NC_021166.1    | Ca_Kabuli_Chr07 | 30839343                | GG                                     | AA                 | AA               | URR             | 101511390     | uncharacterized LOC101511390 |                    |
| SNP_54989_A_30839344 | NC_021166.1    | Ca_Kabuli_Chr07 | 30839344                | GG                                     | AA                 | AA               | URR             | 101511390     | uncharacterized LOC101511390 |                    |
| SNP_54990_A_30839972 | NC_021166.1    | Ca_Kabuli_Chr07 | 30839972                | TT                                     | CC                 | CC               | URR             | 101511390     | uncharacterized LOC101511390 |                    |
| SNP_54991_A_30840247 | NC_021166.1    | Ca_Kabuli_Chr07 | 30840247                | AA                                     | GG                 | GG               | URR             | 101511390     | uncharacterized LOC101511390 |                    |
| SNP_54992_A_30840251 | NC_021166.1    | Ca_Kabuli_Chr07 | 30840251                | GG                                     | AA                 | AA               | URR             | 101511390     | uncharacterized LOC101511390 |                    |
| SNP_54993_A_30840288 | NC_021166.1    | Ca_Kabuli_Chr07 | 30840288                | AA                                     | CC                 | CC               | URR             | 101511390     | uncharacterized LOC101511390 |                    |
| SNP_54994_A_30840303 | NC_021166.1    | Ca_Kabuli_Chr07 | 30840303                | CC                                     | TT                 | TT               | URR             | 101511390     | uncharacterized LOC101511390 |                    |
| SNP_54995_A_30840311 | NC_021166.1    | Ca_Kabuli_Chr07 | 30840311                | TT                                     | CC                 | CC               | URR             | 101511390     | uncharacterized LOC101511390 |                    |

| SNPs IDs             | Chromosome IDs | Chromosomes     | Physical positions (bp) | CDC Frontier genome (Reference genome) | (Pusa 1103 & HPNB) | (ILWC 46 & LPNB) | Sequence Components of genome | Gene accession IDs | Putative functions                         |
|----------------------|----------------|-----------------|-------------------------|----------------------------------------|--------------------|------------------|-------------------------------|--------------------|--------------------------------------------|
| SNP_54996_A_30840345 | NC_021166.1    | Ca_Kabuli_Chr07 | 30840345                | TT                                     | CC                 | CC               | URR                           | 101511390          | uncharacterized LOC101511390               |
| SNP_54998_A_30840690 | NC_021166.1    | Ca_Kabuli_Chr07 | 30840690                | TT                                     | CC                 | CC               | URR                           | 101511390          | uncharacterized LOC101511390               |
| SNP_54999_A_30842223 | NC_021166.1    | Ca_Kabuli_Chr07 | 30842223                | GG                                     | CC                 | CC               | INTERGENIC                    |                    |                                            |
| SNP_55000_A_30842358 | NC_021166.1    | Ca_Kabuli_Chr07 | 30842358                | AA                                     | CC                 | CC               | INTERGENIC                    |                    |                                            |
| SNP_55001_A_30842476 | NC_021166.1    | Ca_Kabuli_Chr07 | 30842476                | AA                                     | CC                 | CC               | INTERGENIC                    |                    |                                            |
| SNP_55002_A_30842787 | NC_021166.1    | Ca_Kabuli_Chr07 | 30842787                | GG                                     | CC                 | CC               | INTERGENIC                    |                    |                                            |
| SNP_55003_A_30843037 | NC_021166.1    | Ca_Kabuli_Chr07 | 30843037                | TT                                     | CC                 | CC               | INTERGENIC                    |                    |                                            |
| SNP_55004_A_30843041 | NC_021166.1    | Ca_Kabuli_Chr07 | 30843041                | GG                                     | AA                 | AA               | INTERGENIC                    |                    |                                            |
| SNP_55005_A_30843080 | NC_021166.1    | Ca_Kabuli_Chr07 | 30843080                | CC                                     | TT                 | TT               | INTERGENIC                    |                    |                                            |
| SNP_55006_A_30844988 | NC_021166.1    | Ca_Kabuli_Chr07 | 30844988                | TT                                     | CC                 | CC               | INTERGENIC                    |                    |                                            |
| SNP_55007_A_30848463 | NC_021166.1    | Ca_Kabuli_Chr07 | 30848463                | CC                                     | TT                 | TT               | INTERGENIC                    |                    |                                            |
| SNP_55008_A_30858647 | NC_021166.1    | Ca_Kabuli_Chr07 | 30858647                | GG                                     | AA                 | AA               | URR                           | 101511720          | uncharacterized LOC101511720               |
| SNP_55010_A_30864050 | NC_021166.1    | Ca_Kabuli_Chr07 | 30864050                | CC                                     | TT                 | TT               | INTRON                        | 101512036          | protein SAWADEE HOMEODOMAIN HOMOLOG 1-like |
| SNP_55011_A_30864344 | NC_021166.1    | Ca_Kabuli_Chr07 | 30864344                | TT                                     | GG                 | GG               | INTRON                        | 101512036          | protein SAWADEE HOMEODOMAIN HOMOLOG 1-like |
| SNP_55012_A_30869593 | NC_021166.1    | Ca_Kabuli_Chr07 | 30869593                | AA                                     | GG                 | GG               | URR                           | 101512036          | protein SAWADEE HOMEODOMAIN HOMOLOG 1-like |
| SNP_55013_A_30869601 | NC_021166.1    | Ca_Kabuli_Chr07 | 30869601                | CC                                     | TT                 | TT               | URR                           | 101512036          | protein SAWADEE HOMEODOMAIN HOMOLOG 1-like |
| SNP_55015_A_30869755 | NC_021166.1    | Ca_Kabuli_Chr07 | 30869755                | AA                                     | GG                 | GG               | URR                           | 101512036          | protein SAWADEE HOMEODOMAIN HOMOLOG 1-like |
| SNP_55017_A_30871441 | NC_021166.1    | Ca_Kabuli_Chr07 | 30871441                | GG                                     | AA                 | AA               | INTERGENIC                    |                    |                                            |
| SNP_55018_A_30871487 | NC_021166.1    | Ca_Kabuli_Chr07 | 30871487                | CC                                     | TT                 | TT               | INTERGENIC                    |                    |                                            |
| SNP_55019_A_30872043 | NC_021166.1    | Ca_Kabuli_Chr07 | 30872043                | CC                                     | TT                 | TT               | INTERGENIC                    |                    |                                            |
| SNP_55020_A_30874265 | NC_021166.1    | Ca_Kabuli_Chr07 | 30874265                | GG                                     | AA                 | AA               | INTERGENIC                    |                    |                                            |
| SNP_55021_A_30874266 | NC_021166.1    | Ca_Kabuli_Chr07 | 30874266                | AA                                     | GG                 | GG               | INTERGENIC                    |                    |                                            |

| SNPs IDs             | Chromosome IDs | Chromosomes     | Physical positions (bp) | CDC Frontier genome (Reference genome) | (Pusa 1103 & HPNB) | (ILWC 46 & LPNB) | Sequence genome | Components of | Gene accession IDs | Putative functions |
|----------------------|----------------|-----------------|-------------------------|----------------------------------------|--------------------|------------------|-----------------|---------------|--------------------|--------------------|
| SNP_55023_A_30874335 | NC_021166.1    | Ca_Kabuli_Chr07 | 30874335                | GG                                     | AA                 | AA               | INTERGENIC      |               |                    |                    |
| SNP_55024_A_30874372 | NC_021166.1    | Ca_Kabuli_Chr07 | 30874372                | AA                                     | GG                 | GG               | INTERGENIC      |               |                    |                    |
| SNP_55025_A_30874646 | NC_021166.1    | Ca_Kabuli_Chr07 | 30874646                | TT                                     | CC                 | CC               | INTERGENIC      |               |                    |                    |
| SNP_55026_A_30874652 | NC_021166.1    | Ca_Kabuli_Chr07 | 30874652                | GG                                     | AA                 | AA               | INTERGENIC      |               |                    |                    |
| SNP_55027_A_30874725 | NC_021166.1    | Ca_Kabuli_Chr07 | 30874725                | GG                                     | AA                 | AA               | INTERGENIC      |               |                    |                    |
| SNP_55028_A_30874745 | NC_021166.1    | Ca_Kabuli_Chr07 | 30874745                | GG                                     | AA                 | AA               | INTERGENIC      |               |                    |                    |
| SNP_55029_A_30910389 | NC_021166.1    | Ca_Kabuli_Chr07 | 30910389                | AA                                     | TT                 | TT               | INTERGENIC      |               |                    |                    |
| SNP_55030_A_30910791 | NC_021166.1    | Ca_Kabuli_Chr07 | 30910791                | AA                                     | CC                 | CC               | INTERGENIC      |               |                    |                    |
| SNP_55031_A_30912533 | NC_021166.1    | Ca_Kabuli_Chr07 | 30912533                | GG                                     | AA                 | AA               | INTERGENIC      |               |                    |                    |
| SNP_55032_A_30913047 | NC_021166.1    | Ca_Kabuli_Chr07 | 30913047                | TT                                     | AA                 | AA               | INTERGENIC      |               |                    |                    |
| SNP_55033_A_30915651 | NC_021166.1    | Ca_Kabuli_Chr07 | 30915651                | CC                                     | TT                 | TT               | INTERGENIC      |               |                    |                    |
| SNP_55034_A_30921704 | NC_021166.1    | Ca_Kabuli_Chr07 | 30921704                | CC                                     | GG                 | GG               | INTERGENIC      |               |                    |                    |
| SNP_55035_A_30930561 | NC_021166.1    | Ca_Kabuli_Chr07 | 30930561                | TT                                     | AA                 | AA               | INTERGENIC      |               |                    |                    |
| SNP_55037_A_30930689 | NC_021166.1    | Ca_Kabuli_Chr07 | 30930689                | GG                                     | CC                 | CC               | INTERGENIC      |               |                    |                    |
| SNP_55038_A_30947265 | NC_021166.1    | Ca_Kabuli_Chr07 | 30947265                | TT                                     | GG                 | GG               | INTERGENIC      |               |                    |                    |
| SNP_55039_A_30948144 | NC_021166.1    | Ca_Kabuli_Chr07 | 30948144                | AA                                     | GG                 | GG               | INTERGENIC      |               |                    |                    |
| SNP_55040_A_30948155 | NC_021166.1    | Ca_Kabuli_Chr07 | 30948155                | GG                                     | AA                 | AA               | INTERGENIC      |               |                    |                    |
| SNP_55041_A_30964091 | NC_021166.1    | Ca_Kabuli_Chr07 | 30964091                | AA                                     | GG                 | GG               | INTERGENIC      |               |                    |                    |
| SNP_55042_A_30966130 | NC_021166.1    | Ca_Kabuli_Chr07 | 30966130                | AA                                     | GG                 | GG               | INTERGENIC      |               |                    |                    |
| SNP_55043_A_30966219 | NC_021166.1    | Ca_Kabuli_Chr07 | 30966219                | GG                                     | TT                 | TT               | INTERGENIC      |               |                    |                    |
| SNP_55044_A_30966513 | NC_021166.1    | Ca_Kabuli_Chr07 | 30966513                | GG                                     | AA                 | AA               | INTERGENIC      |               |                    |                    |
| SNP_55046_A_30976395 | NC_021166.1    | Ca_Kabuli_Chr07 | 30976395                | TT                                     | CC                 | CC               | INTERGENIC      |               |                    |                    |

| SNPs IDs             | Chromosome IDs | Chromosomes     | Physical positions (bp) | CDC Frontier genome (Reference genome) | (Pusa 1103 & HPNB) | (ILWC 46 & LPNB) | Sequence genome | Components of | Gene accession IDs | Putative functions |
|----------------------|----------------|-----------------|-------------------------|----------------------------------------|--------------------|------------------|-----------------|---------------|--------------------|--------------------|
| SNP_55047_A_30979507 | NC_021166.1    | Ca_Kabuli_Chr07 | 30979507                | GG                                     | AA                 | AA               | INTERGENIC      |               |                    |                    |
| SNP_55048_A_30981552 | NC_021166.1    | Ca_Kabuli_Chr07 | 30981552                | AA                                     | TT                 | TT               | INTERGENIC      |               |                    |                    |
| SNP_55049_A_30983230 | NC_021166.1    | Ca_Kabuli_Chr07 | 30983230                | GG                                     | TT                 | TT               | INTERGENIC      |               |                    |                    |
| SNP_55050_A_30983242 | NC_021166.1    | Ca_Kabuli_Chr07 | 30983242                | TT                                     | CC                 | CC               | INTERGENIC      |               |                    |                    |
| SNP_55051_A_30987856 | NC_021166.1    | Ca_Kabuli_Chr07 | 30987856                | CC                                     | GG                 | GG               | INTERGENIC      |               |                    |                    |
| SNP_55052_A_30987878 | NC_021166.1    | Ca_Kabuli_Chr07 | 30987878                | GG                                     | AA                 | AA               | INTERGENIC      |               |                    |                    |
| SNP_55053_A_30987902 | NC_021166.1    | Ca_Kabuli_Chr07 | 30987902                | GG                                     | AA                 | AA               | INTERGENIC      |               |                    |                    |
| SNP_55054_A_30991969 | NC_021166.1    | Ca_Kabuli_Chr07 | 30991969                | GG                                     | AA                 | AA               | INTERGENIC      |               |                    |                    |
| SNP_55055_A_30991980 | NC_021166.1    | Ca_Kabuli_Chr07 | 30991980                | AA                                     | CC                 | CC               | INTERGENIC      |               |                    |                    |
| SNP_55056_A_30993884 | NC_021166.1    | Ca_Kabuli_Chr07 | 30993884                | TT                                     | CC                 | CC               | INTERGENIC      |               |                    |                    |
| SNP_55057_A_30999279 | NC_021166.1    | Ca_Kabuli_Chr07 | 30999279                | GG                                     | AA                 | AA               | INTERGENIC      |               |                    |                    |
| SNP_55058_A_30999506 | NC_021166.1    | Ca_Kabuli_Chr07 | 30999506                | AA                                     | GG                 | GG               | INTERGENIC      |               |                    |                    |
| SNP_55059_A_30999565 | NC_021166.1    | Ca_Kabuli_Chr07 | 30999565                | GG                                     | CC                 | CC               | INTERGENIC      |               |                    |                    |
| SNP_55060_A_30999587 | NC_021166.1    | Ca_Kabuli_Chr07 | 30999587                | CC                                     | TT                 | TT               | INTERGENIC      |               |                    |                    |
| SNP_55061_A_31005628 | NC_021166.1    | Ca_Kabuli_Chr07 | 31005628                | TT                                     | CC                 | CC               | INTERGENIC      |               |                    |                    |
| SNP_55062_A_31047392 | NC_021166.1    | Ca_Kabuli_Chr07 | 31047392                | TT                                     | AA                 | AA               | INTERGENIC      |               |                    |                    |
| SNP_55063_A_31047483 | NC_021166.1    | Ca_Kabuli_Chr07 | 31047483                | TT                                     | CC                 | CC               | INTERGENIC      |               |                    |                    |
| SNP_55064_A_31047491 | NC_021166.1    | Ca_Kabuli_Chr07 | 31047491                | CC                                     | TT                 | TT               | INTERGENIC      |               |                    |                    |
| SNP_55065_A_31047675 | NC_021166.1    | Ca_Kabuli_Chr07 | 31047675                | CC                                     | TT                 | TT               | INTERGENIC      |               |                    |                    |
| SNP_55066_A_31047685 | NC_021166.1    | Ca_Kabuli_Chr07 | 31047685                | CC                                     | TT                 | TT               | INTERGENIC      |               |                    |                    |
| SNP_55067_A_31047862 | NC_021166.1    | Ca_Kabuli_Chr07 | 31047862                | CC                                     | TT                 | TT               | INTERGENIC      |               |                    |                    |
| SNP_55068_A_31047911 | NC_021166.1    | Ca_Kabuli_Chr07 | 31047911                | CC                                     | TT                 | TT               | INTERGENIC      |               |                    |                    |

| SNPs IDs             | Chromosome IDs | Chromosomes     | Physical positions (bp) | CDC Frontier (Reference genome) | (Pusa 1103 & HPNB) | (ILWC 46 & LPNB) | Sequence genome | Components of | Gene accession IDs | Putative functions |
|----------------------|----------------|-----------------|-------------------------|---------------------------------|--------------------|------------------|-----------------|---------------|--------------------|--------------------|
| SNP_55069_A_31048392 | NC_021166.1    | Ca_Kabuli_Chr07 | 31048392                | TT                              | GG                 | GG               | INTERGENIC      |               |                    |                    |
| SNP_55070_A_31048451 | NC_021166.1    | Ca_Kabuli_Chr07 | 31048451                | GG                              | AA                 | AA               | INTERGENIC      |               |                    |                    |
| SNP_55071_A_31048534 | NC_021166.1    | Ca_Kabuli_Chr07 | 31048534                | CC                              | AA                 | AA               | INTERGENIC      |               |                    |                    |
| SNP_55072_A_31062088 | NC_021166.1    | Ca_Kabuli_Chr07 | 31062088                | AA                              | GG                 | GG               | INTERGENIC      |               |                    |                    |
| SNP_55073_A_31064287 | NC_021166.1    | Ca_Kabuli_Chr07 | 31064287                | GG                              | AA                 | AA               | INTERGENIC      |               |                    |                    |
| SNP_55074_A_31070291 | NC_021166.1    | Ca_Kabuli_Chr07 | 31070291                | CC                              | TT                 | TT               | INTERGENIC      |               |                    |                    |
| SNP_55075_A_31070580 | NC_021166.1    | Ca_Kabuli_Chr07 | 31070580                | CC                              | TT                 | TT               | INTERGENIC      |               |                    |                    |
| SNP_55076_A_31070623 | NC_021166.1    | Ca_Kabuli_Chr07 | 31070623                | CC                              | TT                 | TT               | INTERGENIC      |               |                    |                    |
| SNP_55077_A_31072179 | NC_021166.1    | Ca_Kabuli_Chr07 | 31072179                | TT                              | CC                 | CC               | INTERGENIC      |               |                    |                    |
| SNP_55078_A_31073467 | NC_021166.1    | Ca_Kabuli_Chr07 | 31073467                | AA                              | CC                 | CC               | INTERGENIC      |               |                    |                    |
| SNP_55079_A_31073482 | NC_021166.1    | Ca_Kabuli_Chr07 | 31073482                | TT                              | CC                 | CC               | INTERGENIC      |               |                    |                    |
| SNP_55080_A_31073533 | NC_021166.1    | Ca_Kabuli_Chr07 | 31073533                | AA                              | TT                 | TT               | INTERGENIC      |               |                    |                    |
| SNP_55081_A_31074170 | NC_021166.1    | Ca_Kabuli_Chr07 | 31074170                | AA                              | GG                 | GG               | INTERGENIC      |               |                    |                    |
| SNP_55082_A_31074176 | NC_021166.1    | Ca_Kabuli_Chr07 | 31074176                | AA                              | GG                 | GG               | INTERGENIC      |               |                    |                    |
| SNP_55083_A_31074192 | NC_021166.1    | Ca_Kabuli_Chr07 | 31074192                | AA                              | CC                 | CC               | INTERGENIC      |               |                    |                    |
| SNP_55084_A_31074195 | NC_021166.1    | Ca_Kabuli_Chr07 | 31074195                | CC                              | TT                 | TT               | INTERGENIC      |               |                    |                    |
| SNP_55085_A_31074202 | NC_021166.1    | Ca_Kabuli_Chr07 | 31074202                | AA                              | GG                 | GG               | INTERGENIC      |               |                    |                    |
| SNP_55086_A_31074242 | NC_021166.1    | Ca_Kabuli_Chr07 | 31074242                | TT                              | CC                 | CC               | INTERGENIC      |               |                    |                    |
| SNP_55087_A_31074339 | NC_021166.1    | Ca_Kabuli_Chr07 | 31074339                | CC                              | TT                 | TT               | INTERGENIC      |               |                    |                    |
| SNP_55088_A_31074371 | NC_021166.1    | Ca_Kabuli_Chr07 | 31074371                | TT                              | CC                 | CC               | INTERGENIC      |               |                    |                    |
| SNP_55089_A_31074426 | NC_021166.1    | Ca_Kabuli_Chr07 | 31074426                | AA                              | GG                 | GG               | INTERGENIC      |               |                    |                    |
| SNP_55090_A_31074441 | NC_021166.1    | Ca_Kabuli_Chr07 | 31074441                | TT                              | CC                 | CC               | INTERGENIC      |               |                    |                    |

| SNPs IDs             | Chromosome IDs | Chromosomes     | Physical positions (bp) | CDC Frontier genome (Reference genome) | (Pusa 1103 & HPNB) | (ILWC 46 & LPNB) | Sequence genome | Components of | Gene accession IDs | Putative functions |
|----------------------|----------------|-----------------|-------------------------|----------------------------------------|--------------------|------------------|-----------------|---------------|--------------------|--------------------|
| SNP_55091_A_31074463 | NC_021166.1    | Ca_Kabuli_Chr07 | 31074463                | TT                                     | GG                 | GG               | INTERGENIC      |               |                    |                    |
| SNP_55092_A_31074495 | NC_021166.1    | Ca_Kabuli_Chr07 | 31074495                | TT                                     | CC                 | CC               | INTERGENIC      |               |                    |                    |
| SNP_55093_A_31074877 | NC_021166.1    | Ca_Kabuli_Chr07 | 31074877                | CC                                     | TT                 | TT               | INTERGENIC      |               |                    |                    |
| SNP_55094_A_31074889 | NC_021166.1    | Ca_Kabuli_Chr07 | 31074889                | TT                                     | CC                 | CC               | INTERGENIC      |               |                    |                    |
| SNP_55095_A_31074896 | NC_021166.1    | Ca_Kabuli_Chr07 | 31074896                | AA                                     | GG                 | GG               | INTERGENIC      |               |                    |                    |
| SNP_55096_A_31074936 | NC_021166.1    | Ca_Kabuli_Chr07 | 31074936                | TT                                     | AA                 | AA               | INTERGENIC      |               |                    |                    |
| SNP_55097_A_31075097 | NC_021166.1    | Ca_Kabuli_Chr07 | 31075097                | GG                                     | CC                 | CC               | INTERGENIC      |               |                    |                    |
| SNP_55098_A_31075140 | NC_021166.1    | Ca_Kabuli_Chr07 | 31075140                | CC                                     | TT                 | TT               | INTERGENIC      |               |                    |                    |
| SNP_55099_A_31078066 | NC_021166.1    | Ca_Kabuli_Chr07 | 31078066                | CC                                     | TT                 | TT               | INTERGENIC      |               |                    |                    |
| SNP_55100_A_31078316 | NC_021166.1    | Ca_Kabuli_Chr07 | 31078316                | AA                                     | GG                 | GG               | INTERGENIC      |               |                    |                    |
| SNP_55102_A_31088091 | NC_021166.1    | Ca_Kabuli_Chr07 | 31088091                | CC                                     | TT                 | TT               | INTERGENIC      |               |                    |                    |
| SNP_55103_A_31093251 | NC_021166.1    | Ca_Kabuli_Chr07 | 31093251                | TT                                     | AA                 | AA               | INTERGENIC      |               |                    |                    |
| SNP_55104_A_31093254 | NC_021166.1    | Ca_Kabuli_Chr07 | 31093254                | CC                                     | TT                 | TT               | INTERGENIC      |               |                    |                    |
| SNP_55105_A_31093255 | NC_021166.1    | Ca_Kabuli_Chr07 | 31093255                | AA                                     | CC                 | CC               | INTERGENIC      |               |                    |                    |
| SNP_55106_A_31094109 | NC_021166.1    | Ca_Kabuli_Chr07 | 31094109                | GG                                     | AA                 | AA               | INTERGENIC      |               |                    |                    |
| SNP_55107_A_31094796 | NC_021166.1    | Ca_Kabuli_Chr07 | 31094796                | AA                                     | GG                 | GG               | INTERGENIC      |               |                    |                    |
| SNP_55108_A_31098808 | NC_021166.1    | Ca_Kabuli_Chr07 | 31098808                | CC                                     | AA                 | AA               | INTERGENIC      |               |                    |                    |
| SNP_55109_A_31098817 | NC_021166.1    | Ca_Kabuli_Chr07 | 31098817                | AA                                     | GG                 | GG               | INTERGENIC      |               |                    |                    |
| SNP_55110_A_31098827 | NC_021166.1    | Ca_Kabuli_Chr07 | 31098827                | CC                                     | TT                 | TT               | INTERGENIC      |               |                    |                    |
| SNP_55111_A_31102807 | NC_021166.1    | Ca_Kabuli_Chr07 | 31102807                | AA                                     | TT                 | TT               | INTERGENIC      |               |                    |                    |
| SNP_55112_A_31107249 | NC_021166.1    | Ca_Kabuli_Chr07 | 31107249                | GG                                     | AA                 | AA               | INTERGENIC      |               |                    |                    |
| SNP_55113_A_31107454 | NC_021166.1    | Ca_Kabuli_Chr07 | 31107454                | AA                                     | GG                 | GG               | INTERGENIC      |               |                    |                    |

| SNPs IDs             | Chromosome IDs | Chromosomes     | Physical positions (bp) | CDC Frontier genome (Reference genome) | (Pusa 1103 & HPNB) | (ILWC 46 & LPNB) | Sequence genome | Components of | Gene accession IDs                          | Putative functions |
|----------------------|----------------|-----------------|-------------------------|----------------------------------------|--------------------|------------------|-----------------|---------------|---------------------------------------------|--------------------|
| SNP_55114_A_31108205 | NC_021166.1    | Ca_Kabuli_Chr07 | 31108205                | AA                                     | GG                 | GG               | INTERGENIC      |               |                                             |                    |
| SNP_55115_A_31108268 | NC_021166.1    | Ca_Kabuli_Chr07 | 31108268                | AA                                     | GG                 | GG               | INTERGENIC      |               |                                             |                    |
| SNP_55116_A_31109124 | NC_021166.1    | Ca_Kabuli_Chr07 | 31109124                | CC                                     | GG                 | GG               | INTERGENIC      |               |                                             |                    |
| SNP_55117_A_31111498 | NC_021166.1    | Ca_Kabuli_Chr07 | 31111498                | CC                                     | GG                 | GG               | INTERGENIC      |               |                                             |                    |
| SNP_55118_A_31111546 | NC_021166.1    | Ca_Kabuli_Chr07 | 31111546                | GG                                     | AA                 | AA               | INTERGENIC      |               |                                             |                    |
| SNP_55119_A_31111624 | NC_021166.1    | Ca_Kabuli_Chr07 | 31111624                | AA                                     | CC                 | CC               | INTERGENIC      |               |                                             |                    |
| SNP_55120_A_31111705 | NC_021166.1    | Ca_Kabuli_Chr07 | 31111705                | GG                                     | AA                 | AA               | INTERGENIC      |               |                                             |                    |
| SNP_55121_A_31111831 | NC_021166.1    | Ca_Kabuli_Chr07 | 31111831                | CC                                     | TT                 | TT               | INTERGENIC      |               |                                             |                    |
| SNP_55122_A_31111839 | NC_021166.1    | Ca_Kabuli_Chr07 | 31111839                | AA                                     | GG                 | GG               | INTERGENIC      |               |                                             |                    |
| SNP_55123_A_31111875 | NC_021166.1    | Ca_Kabuli_Chr07 | 31111875                | AA                                     | TT                 | TT               | INTERGENIC      |               |                                             |                    |
| SNP_55124_A_31111876 | NC_021166.1    | Ca_Kabuli_Chr07 | 31111876                | AA                                     | TT                 | TT               | INTERGENIC      |               |                                             |                    |
| SNP_55125_A_31111898 | NC_021166.1    | Ca_Kabuli_Chr07 | 31111898                | CC                                     | TT                 | TT               | INTERGENIC      |               |                                             |                    |
| SNP_55126_A_31111913 | NC_021166.1    | Ca_Kabuli_Chr07 | 31111913                | GG                                     | TT                 | TT               | INTERGENIC      |               |                                             |                    |
| SNP_55127_A_31111937 | NC_021166.1    | Ca_Kabuli_Chr07 | 31111937                | CC                                     | TT                 | TT               | INTERGENIC      |               |                                             |                    |
| SNP_55128_A_31112358 | NC_021166.1    | Ca_Kabuli_Chr07 | 31112358                | AA                                     | GG                 | GG               | INTERGENIC      |               |                                             |                    |
| SNP_55129_A_31112426 | NC_021166.1    | Ca_Kabuli_Chr07 | 31112426                | AA                                     | CC                 | CC               | INTERGENIC      |               |                                             |                    |
| SNP_55131_A_31112497 | NC_021166.1    | Ca_Kabuli_Chr07 | 31112497                | GG                                     | TT                 | TT               | INTERGENIC      |               |                                             |                    |
| SNP_55132_A_31113006 | NC_021166.1    | Ca_Kabuli_Chr07 | 31113006                | GG                                     | AA                 | AA               | INTERGENIC      |               |                                             |                    |
| SNP_55133_A_31131273 | NC_021166.1    | Ca_Kabuli_Chr07 | 31131273                | CC                                     | TT                 | TT               | INTERGENIC      |               |                                             |                    |
| SNP_55134_A_31131556 | NC_021166.1    | Ca_Kabuli_Chr07 | 31131556                | CC                                     | TT                 | TT               | INTERGENIC      |               |                                             |                    |
| SNP_55136_A_31133379 | NC_021166.1    | Ca_Kabuli_Chr07 | 31133379                | GG                                     | AA                 | AA               | URR             | 101514735     | 1-aminocyclopropane-1-carboxylate oxidase 3 |                    |
| SNP_55137_A_31134451 | NC_021166.1    | Ca_Kabuli_Chr07 | 31134451                | AA                                     | GG                 | GG               | URR             | 101514735     | 1-aminocyclopropane-1-carboxylate oxidase 3 |                    |

| SNPs IDs             | Chromosome IDs | Chromosomes     | Physical positions (bp) | CDC Frontier genome (Reference genome) | (Pusa 1103 & HPNB) | (ILWC 46 & LPNB) | Sequence genome   | Components of | Gene accession IDs | Putative functions                      |
|----------------------|----------------|-----------------|-------------------------|----------------------------------------|--------------------|------------------|-------------------|---------------|--------------------|-----------------------------------------|
| SNP_55139_A_31148053 | NC_021166.1    | Ca_Kabuli_Chr07 | 31148053                | GG                                     | AA                 | AA               | INTERGENIC        |               |                    |                                         |
| SNP_55140_A_31148767 | NC_021166.1    | Ca_Kabuli_Chr07 | 31148767                | AA                                     | TT                 | TT               | INTERGENIC        |               |                    |                                         |
| SNP_55141_A_31150103 | NC_021166.1    | Ca_Kabuli_Chr07 | 31150103                | TT                                     | CC                 | CC               | INTERGENIC        |               |                    |                                         |
| SNP_55142_A_31150105 | NC_021166.1    | Ca_Kabuli_Chr07 | 31150105                | GG                                     | AA                 | AA               | INTERGENIC        |               |                    |                                         |
| SNP_55143_A_31150124 | NC_021166.1    | Ca_Kabuli_Chr07 | 31150124                | TT                                     | CC                 | CC               | INTERGENIC        |               |                    |                                         |
| SNP_55144_A_31150320 | NC_021166.1    | Ca_Kabuli_Chr07 | 31150320                | CC                                     | TT                 | TT               | INTERGENIC        |               |                    |                                         |
| SNP_55145_A_31151222 | NC_021166.1    | Ca_Kabuli_Chr07 | 31151222                | TT                                     | CC                 | CC               | INTERGENIC        |               |                    |                                         |
| SNP_55146_A_31151223 | NC_021166.1    | Ca_Kabuli_Chr07 | 31151223                | CC                                     | TT                 | TT               | INTERGENIC        |               |                    |                                         |
| SNP_55147_A_31151228 | NC_021166.1    | Ca_Kabuli_Chr07 | 31151228                | CC                                     | TT                 | TT               | INTERGENIC        |               |                    |                                         |
| SNP_55148_A_31151240 | NC_021166.1    | Ca_Kabuli_Chr07 | 31151240                | AA                                     | GG                 | GG               | INTERGENIC        |               |                    |                                         |
| SNP_55149_A_31152193 | NC_021166.1    | Ca_Kabuli_Chr07 | 31152193                | TT                                     | GG                 | GG               | INTERGENIC        |               |                    |                                         |
| SNP_55150_A_31152531 | NC_021166.1    | Ca_Kabuli_Chr07 | 31152531                | CC                                     | TT                 | TT               | INTERGENIC        |               |                    |                                         |
| SNP_55152_A_31152646 | NC_021166.1    | Ca_Kabuli_Chr07 | 31152646                | AA                                     | GG                 | GG               | INTERGENIC        |               |                    |                                         |
| SNP_55153_A_31152651 | NC_021166.1    | Ca_Kabuli_Chr07 | 31152651                | TT                                     | CC                 | CC               | INTERGENIC        |               |                    |                                         |
| SNP_55154_A_31152655 | NC_021166.1    | Ca_Kabuli_Chr07 | 31152655                | AA                                     | GG                 | GG               | INTERGENIC        |               |                    |                                         |
| SNP_55155_A_31152700 | NC_021166.1    | Ca_Kabuli_Chr07 | 31152700                | CC                                     | TT                 | TT               | INTERGENIC        |               |                    |                                         |
| SNP_55156_A_31152708 | NC_021166.1    | Ca_Kabuli_Chr07 | 31152708                | CC                                     | TT                 | TT               | INTERGENIC        |               |                    |                                         |
| SNP_55157_A_31152713 | NC_021166.1    | Ca_Kabuli_Chr07 | 31152713                | TT                                     | GG                 | GG               | INTERGENIC        |               |                    |                                         |
| SNP_55158_A_31152727 | NC_021166.1    | Ca_Kabuli_Chr07 | 31152727                | AA                                     | GG                 | GG               | INTERGENIC        |               |                    |                                         |
| SNP_55159_A_31152967 | NC_021166.1    | Ca_Kabuli_Chr07 | 31152967                | TT                                     | CC                 | CC               | INTERGENIC        |               |                    |                                         |
| SNP_55161_A_31157541 | NC_021166.1    | Ca_Kabuli_Chr07 | 31157541                | GG                                     | AA                 | AA               | INTRON            |               | 101515061          | ABC transporter G family member 36-like |
| SNP_55162_A_31158868 | NC_021166.1    | Ca_Kabuli_Chr07 | 31158868                | TT                                     | AA                 | AA               | SYNONYMOUS_CODING |               | 101515061          | ABC transporter G family member 36-like |



| SNPs IDs             | Chromosome IDs | Chromosomes     | Physical positions (bp) | CDC Frontier genome (Reference genome) | (Pusa 1103 & HPNB) | (ILWC 46 & LPNB) | Sequence Components of genome | Gene accession IDs | Putative functions                                  |
|----------------------|----------------|-----------------|-------------------------|----------------------------------------|--------------------|------------------|-------------------------------|--------------------|-----------------------------------------------------|
| SNP_55163_A_31162155 | NC_021166.1    | Ca_Kabuli_Chr07 | 31162155                | TT                                     | AA                 | AA               | INTRON                        | 101515061          | ABC transporter G family member 36-like             |
| SNP_55164_A_31162160 | NC_021166.1    | Ca_Kabuli_Chr07 | 31162160                | GG                                     | CC                 | CC               | INTRON                        | 101515061          | ABC transporter G family member 36-like             |
| SNP_55165_A_31167749 | NC_021166.1    | Ca_Kabuli_Chr07 | 31167749                | TT                                     | GG                 | GG               | URR                           | 101515061          | ABC transporter G family member 36-like             |
| SNP_55167_A_31169428 | NC_021166.1    | Ca_Kabuli_Chr07 | 31169428                | AA                                     | GG                 | GG               | DRR                           | 101515384          | NADP-dependent malic enzyme-like                    |
| SNP_55168_A_31169715 | NC_021166.1    | Ca_Kabuli_Chr07 | 31169715                | TT                                     | GG                 | GG               | INTERGENIC                    |                    |                                                     |
| SNP_55169_A_31169750 | NC_021166.1    | Ca_Kabuli_Chr07 | 31169750                | TT                                     | GG                 | GG               | INTERGENIC                    |                    |                                                     |
| SNP_55170_A_31169904 | NC_021166.1    | Ca_Kabuli_Chr07 | 31169904                | AA                                     | GG                 | GG               | INTERGENIC                    |                    |                                                     |
| SNP_55172_A_31175806 | NC_021166.1    | Ca_Kabuli_Chr07 | 31175806                | CC                                     | TT                 | TT               | URR                           | 101515384          | NADP-dependent malic enzyme-like                    |
| SNP_55173_A_31175818 | NC_021166.1    | Ca_Kabuli_Chr07 | 31175818                | AA                                     | TT                 | TT               | URR                           | 101515384          | NADP-dependent malic enzyme-like                    |
| SNP_55174_A_31175834 | NC_021166.1    | Ca_Kabuli_Chr07 | 31175834                | AA                                     | GG                 | GG               | URR                           | 101515384          | NADP-dependent malic enzyme-like                    |
| SNP_55175_A_31176887 | NC_021166.1    | Ca_Kabuli_Chr07 | 31176887                | AA                                     | GG                 | GG               | URR                           | 101515384          | NADP-dependent malic enzyme-like                    |
| SNP_55176_A_31176894 | NC_021166.1    | Ca_Kabuli_Chr07 | 31176894                | TT                                     | CC                 | CC               | URR                           | 101515384          | NADP-dependent malic enzyme-like                    |
| SNP_55177_A_31177219 | NC_021166.1    | Ca_Kabuli_Chr07 | 31177219                | GG                                     | TT                 | TT               | URR                           | 101515384          | NADP-dependent malic enzyme-like                    |
| SNP_55178_A_31181707 | NC_021166.1    | Ca_Kabuli_Chr07 | 31181707                | GG                                     | AA                 | AA               | DRR                           | 101515720          | histidine-containing phosphotransfer protein 4-like |
| SNP_55180_A_31181949 | NC_021166.1    | Ca_Kabuli_Chr07 | 31181949                | AA                                     | GG                 | GG               | DRR                           | 101515720          | histidine-containing phosphotransfer protein 4-like |
| SNP_55181_A_31183550 | NC_021166.1    | Ca_Kabuli_Chr07 | 31183550                | GG                                     | AA                 | AA               | INTRON                        | 101515720          | histidine-containing phosphotransfer protein 4-like |
| SNP_55182_A_31184466 | NC_021166.1    | Ca_Kabuli_Chr07 | 31184466                | GG                                     | AA                 | AA               | INTRON                        | 101515720          | histidine-containing phosphotransfer protein 4-like |
| SNP_55183_A_31184523 | NC_021166.1    | Ca_Kabuli_Chr07 | 31184523                | AA                                     | CC                 | CC               | INTRON                        | 101515720          | histidine-containing phosphotransfer protein 4-like |
| SNP_55184_A_31184531 | NC_021166.1    | Ca_Kabuli_Chr07 | 31184531                | CC                                     | TT                 | TT               | INTRON                        | 101515720          | histidine-containing phosphotransfer protein 4-like |
| SNP_55185_A_31184650 | NC_021166.1    | Ca_Kabuli_Chr07 | 31184650                | AA                                     | GG                 | GG               | INTRON                        | 101515720          | histidine-containing phosphotransfer protein 4-like |
| SNP_55186_A_31185445 | NC_021166.1    | Ca_Kabuli_Chr07 | 31185445                | CC                                     | TT                 | TT               | URR                           | 101515720          | histidine-containing phosphotransfer protein 4-like |
| SNP_55187_A_31185901 | NC_021166.1    | Ca_Kabuli_Chr07 | 31185901                | TT                                     | CC                 | CC               | URR                           | 101515720          | histidine-containing phosphotransfer protein 4-like |

| SNPs IDs             | Chromosome IDs | Chromosomes     | Physical positions (bp) | CDC Frontier genome (Reference genome) | (Pusa 1103 & HPNB) | (ILWC 46 & LPNB) | Sequence Components of genome | Gene accession IDs | Putative functions                  |
|----------------------|----------------|-----------------|-------------------------|----------------------------------------|--------------------|------------------|-------------------------------|--------------------|-------------------------------------|
| SNP_55191_A_31196196 | NC_021166.1    | Ca_Kabuli_Chr07 | 31196196                | GG                                     | AA                 | AA               | URR                           | 101488479          | protein PAF1 homolog                |
| SNP_55192_A_31196280 | NC_021166.1    | Ca_Kabuli_Chr07 | 31196280                | TT                                     | CC                 | CC               | URR                           | 101488479          | protein PAF1 homolog                |
| SNP_55193_A_31197004 | NC_021166.1    | Ca_Kabuli_Chr07 | 31197004                | AA                                     | CC                 | CC               | DRR                           | 101488822          | uncharacterized LOC101488822        |
| SNP_55194_A_31197155 | NC_021166.1    | Ca_Kabuli_Chr07 | 31197155                | AA                                     | TT                 | TT               | DRR                           | 101488822          | uncharacterized LOC101488822        |
| SNP_55195_A_31197497 | NC_021166.1    | Ca_Kabuli_Chr07 | 31197497                | CC                                     | AA                 | AA               | DRR                           | 101488822          | uncharacterized LOC101488822        |
| SNP_55197_A_31200243 | NC_021166.1    | Ca_Kabuli_Chr07 | 31200243                | TT                                     | CC                 | CC               | DRR                           | 101489148          | lysM domain receptor-like kinase 3  |
| SNP_55198_A_31200244 | NC_021166.1    | Ca_Kabuli_Chr07 | 31200244                | GG                                     | AA                 | AA               | DRR                           | 101489148          | lysM domain receptor-like kinase 3  |
| SNP_55199_A_31200246 | NC_021166.1    | Ca_Kabuli_Chr07 | 31200246                | CC                                     | TT                 | TT               | DRR                           | 101489148          | lysM domain receptor-like kinase 3  |
| SNP_55202_A_31204293 | NC_021166.1    | Ca_Kabuli_Chr07 | 31204293                | AA                                     | TT                 | TT               | INTRON                        | 101489148          | lysM domain receptor-like kinase 3  |
| SNP_55203_A_31204314 | NC_021166.1    | Ca_Kabuli_Chr07 | 31204314                | GG                                     | TT                 | TT               | INTRON                        | 101489148          | lysM domain receptor-like kinase 3  |
| SNP_55205_A_31206006 | NC_021166.1    | Ca_Kabuli_Chr07 | 31206006                | CC                                     | GG                 | GG               | URR                           | 101489148          | lysM domain receptor-like kinase 3  |
| SNP_55206_A_31206541 | NC_021166.1    | Ca_Kabuli_Chr07 | 31206541                | GG                                     | AA                 | AA               | URR                           | 101489148          | lysM domain receptor-like kinase 3  |
| SNP_55207_A_31206602 | NC_021166.1    | Ca_Kabuli_Chr07 | 31206602                | GG                                     | AA                 | AA               | URR                           | 101489148          | lysM domain receptor-like kinase 3  |
| SNP_55208_A_31206935 | NC_021166.1    | Ca_Kabuli_Chr07 | 31206935                | TT                                     | GG                 | GG               | URR                           | 101489148          | lysM domain receptor-like kinase 3  |
| SNP_55209_A_31210704 | NC_021166.1    | Ca_Kabuli_Chr07 | 31210704                | CC                                     | TT                 | TT               | DRR                           | 101489478          | auxin-responsive protein IAA26-like |
| SNP_55211_A_31213560 | NC_021166.1    | Ca_Kabuli_Chr07 | 31213560                | TT                                     | GG                 | GG               | INTERGENIC                    |                    |                                     |
| SNP_55213_A_31215102 | NC_021166.1    | Ca_Kabuli_Chr07 | 31215102                | CC                                     | TT                 | TT               | DRR                           | 101489792          | hexokinase-1-like                   |
| SNP_55216_A_31215687 | NC_021166.1    | Ca_Kabuli_Chr07 | 31215687                | GG                                     | AA                 | AA               | DRR                           | 101489792          | hexokinase-1-like                   |
| SNP_55217_A_31218132 | NC_021166.1    | Ca_Kabuli_Chr07 | 31218132                | CC                                     | TT                 | TT               | INTERGENIC                    |                    |                                     |
| SNP_55218_A_31218357 | NC_021166.1    | Ca_Kabuli_Chr07 | 31218357                | CC                                     | AA                 | AA               | INTERGENIC                    |                    |                                     |
| SNP_55219_A_31218399 | NC_021166.1    | Ca_Kabuli_Chr07 | 31218399                | AA                                     | CC                 | CC               | INTERGENIC                    |                    |                                     |
| SNP_55220_A_31218482 | NC_021166.1    | Ca_Kabuli_Chr07 | 31218482                | GG                                     | CC                 | CC               | INTERGENIC                    |                    |                                     |

| SNPs IDs             | Chromosome IDs | Chromosomes     | Physical positions (bp) | CDC Frontier genome (Reference genome) | (Pusa 1103 & HPNB) | (ILWC 46 & LPNB) | Sequence Components of genome | Gene accession IDs | Putative functions                |
|----------------------|----------------|-----------------|-------------------------|----------------------------------------|--------------------|------------------|-------------------------------|--------------------|-----------------------------------|
| SNP_55221_A_31219543 | NC_021166.1    | Ca_Kabuli_Chr07 | 31219543                | AA                                     | TT                 | TT               | INTERGENIC                    |                    |                                   |
| SNP_55222_A_31219557 | NC_021166.1    | Ca_Kabuli_Chr07 | 31219557                | TT                                     | CC                 | CC               | INTERGENIC                    |                    |                                   |
| SNP_55223_A_31219562 | NC_021166.1    | Ca_Kabuli_Chr07 | 31219562                | AA                                     | TT                 | TT               | INTERGENIC                    |                    |                                   |
| SNP_55224_A_31224932 | NC_021166.1    | Ca_Kabuli_Chr07 | 31224932                | TT                                     | GG                 | GG               | INTRON                        | 101490116          | nuclear poly(A) polymerase 4-like |
| SNP_55225_A_31224962 | NC_021166.1    | Ca_Kabuli_Chr07 | 31224962                | AA                                     | GG                 | GG               | INTRON                        | 101490116          | nuclear poly(A) polymerase 4-like |
| SNP_55226_A_31225914 | NC_021166.1    | Ca_Kabuli_Chr07 | 31225914                | CC                                     | AA                 | AA               | INTRON                        | 101490116          | nuclear poly(A) polymerase 4-like |
| SNP_55227_A_31229003 | NC_021166.1    | Ca_Kabuli_Chr07 | 31229003                | GG                                     | TT                 | TT               | URR                           | 101490116          | nuclear poly(A) polymerase 4-like |
| SNP_55228_A_31229042 | NC_021166.1    | Ca_Kabuli_Chr07 | 31229042                | TT                                     | AA                 | AA               | URR                           | 101490116          | nuclear poly(A) polymerase 4-like |
| SNP_55229_A_31229109 | NC_021166.1    | Ca_Kabuli_Chr07 | 31229109                | CC                                     | TT                 | TT               | URR                           | 101490116          | nuclear poly(A) polymerase 4-like |
| SNP_55230_A_31229155 | NC_021166.1    | Ca_Kabuli_Chr07 | 31229155                | CC                                     | GG                 | GG               | URR                           | 101490116          | nuclear poly(A) polymerase 4-like |
| SNP_55231_A_31231061 | NC_021166.1    | Ca_Kabuli_Chr07 | 31231061                | GG                                     | TT                 | TT               | INTERGENIC                    |                    |                                   |
| SNP_55232_A_31231102 | NC_021166.1    | Ca_Kabuli_Chr07 | 31231102                | TT                                     | CC                 | CC               | INTERGENIC                    |                    |                                   |
| SNP_55233_A_31231372 | NC_021166.1    | Ca_Kabuli_Chr07 | 31231372                | AA                                     | GG                 | GG               | INTERGENIC                    |                    |                                   |
| SNP_55234_A_31231508 | NC_021166.1    | Ca_Kabuli_Chr07 | 31231508                | GG                                     | AA                 | AA               | INTERGENIC                    |                    |                                   |
| SNP_55235_A_31231701 | NC_021166.1    | Ca_Kabuli_Chr07 | 31231701                | TT                                     | CC                 | CC               | INTERGENIC                    |                    |                                   |
| SNP_55237_A_31234080 | NC_021166.1    | Ca_Kabuli_Chr07 | 31234080                | TT                                     | CC                 | CC               | INTERGENIC                    |                    |                                   |
| SNP_55238_A_31234722 | NC_021166.1    | Ca_Kabuli_Chr07 | 31234722                | AA                                     | GG                 | GG               | INTERGENIC                    |                    |                                   |
| SNP_55239_A_31234845 | NC_021166.1    | Ca_Kabuli_Chr07 | 31234845                | GG                                     | AA                 | AA               | INTERGENIC                    |                    |                                   |
| SNP_55240_A_31234934 | NC_021166.1    | Ca_Kabuli_Chr07 | 31234934                | TT                                     | AA                 | AA               | INTERGENIC                    |                    |                                   |
| SNP_55241_A_31235334 | NC_021166.1    | Ca_Kabuli_Chr07 | 31235334                | CC                                     | TT                 | TT               | INTERGENIC                    |                    |                                   |
| SNP_55242_A_31235352 | NC_021166.1    | Ca_Kabuli_Chr07 | 31235352                | TT                                     | CC                 | CC               | INTERGENIC                    |                    |                                   |
| SNP_55243_A_31237402 | NC_021166.1    | Ca_Kabuli_Chr07 | 31237402                | AA                                     | TT                 | TT               | INTERGENIC                    |                    |                                   |

| SNPs IDs             | Chromosome IDs | Chromosomes     | Physical positions (bp) | CDC Frontier genome (Reference genome) | (Pusa 1103 & HPNB) | (ILWC 46 & LPNB) | Sequence genome | Components of | Gene accession IDs   | Putative functions |
|----------------------|----------------|-----------------|-------------------------|----------------------------------------|--------------------|------------------|-----------------|---------------|----------------------|--------------------|
| SNP_55244_A_31237425 | NC_021166.1    | Ca_Kabuli_Chr07 | 31237425                | TT                                     | CC                 | CC               | INTERGENIC      |               |                      |                    |
| SNP_55245_A_31238193 | NC_021166.1    | Ca_Kabuli_Chr07 | 31238193                | AA                                     | GG                 | GG               | INTERGENIC      |               |                      |                    |
| SNP_55246_A_31246017 | NC_021166.1    | Ca_Kabuli_Chr07 | 31246017                | CC                                     | TT                 | TT               | INTERGENIC      |               |                      |                    |
| SNP_55247_A_31246068 | NC_021166.1    | Ca_Kabuli_Chr07 | 31246068                | AA                                     | CC                 | CC               | INTERGENIC      |               |                      |                    |
| SNP_55248_A_31248638 | NC_021166.1    | Ca_Kabuli_Chr07 | 31248638                | AA                                     | CC                 | CC               | INTERGENIC      |               |                      |                    |
| SNP_55249_A_31248808 | NC_021166.1    | Ca_Kabuli_Chr07 | 31248808                | CC                                     | TT                 | TT               | INTERGENIC      |               |                      |                    |
| SNP_55250_A_31248809 | NC_021166.1    | Ca_Kabuli_Chr07 | 31248809                | GG                                     | TT                 | TT               | INTERGENIC      |               |                      |                    |
| SNP_55251_A_31250712 | NC_021166.1    | Ca_Kabuli_Chr07 | 31250712                | GG                                     | AA                 | AA               | INTERGENIC      |               |                      |                    |
| SNP_55252_A_31250718 | NC_021166.1    | Ca_Kabuli_Chr07 | 31250718                | GG                                     | CC                 | CC               | INTERGENIC      |               |                      |                    |
| SNP_55253_A_31251147 | NC_021166.1    | Ca_Kabuli_Chr07 | 31251147                | CC                                     | TT                 | TT               | INTERGENIC      |               |                      |                    |
| SNP_55255_A_31255874 | NC_021166.1    | Ca_Kabuli_Chr07 | 31255874                | TT                                     | CC                 | CC               | DRR             | 101491092     | protein IQ-DOMAIN 14 |                    |
| SNP_55256_A_31255921 | NC_021166.1    | Ca_Kabuli_Chr07 | 31255921                | CC                                     | AA                 | AA               | DRR             | 101491092     | protein IQ-DOMAIN 14 |                    |
| SNP_55257_A_31255922 | NC_021166.1    | Ca_Kabuli_Chr07 | 31255922                | TT                                     | GG                 | GG               | DRR             | 101491092     | protein IQ-DOMAIN 14 |                    |
| SNP_55258_A_31255938 | NC_021166.1    | Ca_Kabuli_Chr07 | 31255938                | GG                                     | AA                 | AA               | DRR             | 101491092     | protein IQ-DOMAIN 14 |                    |
| SNP_55259_A_31257024 | NC_021166.1    | Ca_Kabuli_Chr07 | 31257024                | GG                                     | CC                 | CC               | URR             | 101491092     | protein IQ-DOMAIN 14 |                    |
| SNP_55261_A_31258677 | NC_021166.1    | Ca_Kabuli_Chr07 | 31258677                | CC                                     | TT                 | TT               | INTERGENIC      |               |                      |                    |
| SNP_55262_A_31258687 | NC_021166.1    | Ca_Kabuli_Chr07 | 31258687                | CC                                     | TT                 | TT               | INTERGENIC      |               |                      |                    |
| SNP_55263_A_31267740 | NC_021166.1    | Ca_Kabuli_Chr07 | 31267740                | TT                                     | CC                 | CC               | INTERGENIC      |               |                      |                    |
| SNP_55264_A_31268017 | NC_021166.1    | Ca_Kabuli_Chr07 | 31268017                | GG                                     | TT                 | TT               | INTERGENIC      |               |                      |                    |
| SNP_55265_A_31268380 | NC_021166.1    | Ca_Kabuli_Chr07 | 31268380                | AA                                     | TT                 | TT               | INTERGENIC      |               |                      |                    |
| SNP_55266_A_31268583 | NC_021166.1    | Ca_Kabuli_Chr07 | 31268583                | CC                                     | AA                 | AA               | INTERGENIC      |               |                      |                    |
| SNP_55268_A_31277390 | NC_021166.1    | Ca_Kabuli_Chr07 | 31277390                | CC                                     | GG                 | GG               | INTERGENIC      |               |                      |                    |

| SNPs IDs             | Chromosome IDs | Chromosomes     | Physical positions (bp) | CDC Frontier genome (Reference genome) | (Pusa 1103 & HPNB) | (ILWC 46 & LPNB) | Sequence Components of genome | Gene accession IDs | Putative functions                                    |
|----------------------|----------------|-----------------|-------------------------|----------------------------------------|--------------------|------------------|-------------------------------|--------------------|-------------------------------------------------------|
| SNP_55269_A_31277424 | NC_021166.1    | Ca_Kabuli_Chr07 | 31277424                | AA                                     | TT                 | TT               | INTERGENIC                    |                    |                                                       |
| SNP_55270_A_31277929 | NC_021166.1    | Ca_Kabuli_Chr07 | 31277929                | AA                                     | CC                 | CC               | INTERGENIC                    |                    |                                                       |
| SNP_55271_A_31283557 | NC_021166.1    | Ca_Kabuli_Chr07 | 31283557                | CC                                     | TT                 | TT               | DRR                           | 101491407          | stem 28 kDa glycoprotein-like                         |
| SNP_55272_A_31284503 | NC_021166.1    | Ca_Kabuli_Chr07 | 31284503                | CC                                     | GG                 | GG               | NON_SYNONYMOUS_CODING         | 101491407          | stem 28 kDa glycoprotein-like                         |
| SNP_55273_A_31287138 | NC_021166.1    | Ca_Kabuli_Chr07 | 31287138                | AA                                     | GG                 | GG               | URR                           | 101491407          | stem 28 kDa glycoprotein-like                         |
| SNP_55274_A_31287831 | NC_021166.1    | Ca_Kabuli_Chr07 | 31287831                | AA                                     | GG                 | GG               | URR                           | 101491407          | stem 28 kDa glycoprotein-like                         |
| SNP_55275_A_31289683 | NC_021166.1    | Ca_Kabuli_Chr07 | 31289683                | GG                                     | CC                 | CC               | INTERGENIC                    |                    |                                                       |
| SNP_55276_A_31294607 | NC_021166.1    | Ca_Kabuli_Chr07 | 31294607                | AA                                     | GG                 | GG               | DRR                           | 101491723          | mitochondrial-processing peptidase subunit alpha-like |
| SNP_55278_A_31294729 | NC_021166.1    | Ca_Kabuli_Chr07 | 31294729                | CC                                     | GG                 | GG               | DRR                           | 101491723          | mitochondrial-processing peptidase subunit alpha-like |
| SNP_55279_A_31296109 | NC_021166.1    | Ca_Kabuli_Chr07 | 31296109                | GG                                     | TT                 | TT               | INTERGENIC                    |                    |                                                       |
| SNP_55280_A_31296781 | NC_021166.1    | Ca_Kabuli_Chr07 | 31296781                | CC                                     | AA                 | AA               | INTERGENIC                    |                    |                                                       |
| SNP_55281_A_31298352 | NC_021166.1    | Ca_Kabuli_Chr07 | 31298352                | AA                                     | TT                 | TT               | INTERGENIC                    |                    |                                                       |
| SNP_55282_A_31300337 | NC_021166.1    | Ca_Kabuli_Chr07 | 31300337                | TT                                     | CC                 | CC               | DRR                           | 101492041          | uncharacterized LOC101492041                          |
| SNP_55283_A_31300361 | NC_021166.1    | Ca_Kabuli_Chr07 | 31300361                | AA                                     | GG                 | GG               | DRR                           | 101492041          | uncharacterized LOC101492041                          |
| SNP_55286_A_31303282 | NC_021166.1    | Ca_Kabuli_Chr07 | 31303282                | CC                                     | TT                 | TT               | INTRON                        | 101492041          | uncharacterized LOC101492041                          |
| SNP_55287_A_31304102 | NC_021166.1    | Ca_Kabuli_Chr07 | 31304102                | TT                                     | CC                 | CC               | INTRON                        | 101492041          | uncharacterized LOC101492041                          |
| SNP_55288_A_31304182 | NC_021166.1    | Ca_Kabuli_Chr07 | 31304182                | TT                                     | CC                 | CC               | SYNONYMOUS_CODING             | 101492041          | uncharacterized LOC101492041                          |
| SNP_55289_A_31305560 | NC_021166.1    | Ca_Kabuli_Chr07 | 31305560                | AA                                     | GG                 | GG               | INTRON                        | 101492041          | uncharacterized LOC101492041                          |
| SNP_55290_A_31305919 | NC_021166.1    | Ca_Kabuli_Chr07 | 31305919                | TT                                     | GG                 | GG               | INTRON                        | 101492041          | uncharacterized LOC101492041                          |
| SNP_55291_A_31307360 | NC_021166.1    | Ca_Kabuli_Chr07 | 31307360                | AA                                     | GG                 | GG               | URR                           | 101492041          | uncharacterized LOC101492041                          |
| SNP_55292_A_31309518 | NC_021166.1    | Ca_Kabuli_Chr07 | 31309518                | CC                                     | AA                 | AA               | INTERGENIC                    |                    |                                                       |
| SNP_55293_A_31309519 | NC_021166.1    | Ca_Kabuli_Chr07 | 31309519                | TT                                     | GG                 | GG               | INTERGENIC                    |                    |                                                       |

| SNPs IDs             | Chromosome IDs | Chromosomes     | Physical positions (bp) | CDC Frontier genome (Reference genome) | (Pusa 1103 & HPNB) | (ILWC 46 & LPNB) | Sequence Components of genome | Gene accession IDs | Putative functions           |
|----------------------|----------------|-----------------|-------------------------|----------------------------------------|--------------------|------------------|-------------------------------|--------------------|------------------------------|
| SNP_55294_A_31309882 | NC_021166.1    | Ca_Kabuli_Chr07 | 31309882                | GG                                     | CC                 | CC               | INTERGENIC                    |                    |                              |
| SNP_55295_A_31309929 | NC_021166.1    | Ca_Kabuli_Chr07 | 31309929                | TT                                     | AA                 | AA               | INTERGENIC                    |                    |                              |
| SNP_55296_A_31310940 | NC_021166.1    | Ca_Kabuli_Chr07 | 31310940                | TT                                     | CC                 | CC               | INTERGENIC                    |                    |                              |
| SNP_55297_A_31310943 | NC_021166.1    | Ca_Kabuli_Chr07 | 31310943                | TT                                     | CC                 | CC               | INTERGENIC                    |                    |                              |
| SNP_55298_A_31313046 | NC_021166.1    | Ca_Kabuli_Chr07 | 31313046                | AA                                     | CC                 | CC               | INTERGENIC                    |                    |                              |
| SNP_55300_A_31313717 | NC_021166.1    | Ca_Kabuli_Chr07 | 31313717                | GG                                     | AA                 | AA               | INTERGENIC                    |                    |                              |
| SNP_55301_A_31316868 | NC_021166.1    | Ca_Kabuli_Chr07 | 31316868                | CC                                     | TT                 | TT               | URR                           | 101492384          | protein CHUP1, chloroplastic |
| SNP_55302_A_31317486 | NC_021166.1    | Ca_Kabuli_Chr07 | 31317486                | AA                                     | GG                 | GG               | URR                           | 101492384          | protein CHUP1, chloroplastic |
| SNP_55303_A_31317823 | NC_021166.1    | Ca_Kabuli_Chr07 | 31317823                | CC                                     | GG                 | GG               | URR                           | 101492384          | protein CHUP1, chloroplastic |
| SNP_55304_A_31318579 | NC_021166.1    | Ca_Kabuli_Chr07 | 31318579                | GG                                     | TT                 | TT               | INTERGENIC                    |                    |                              |
| SNP_55305_A_31318698 | NC_021166.1    | Ca_Kabuli_Chr07 | 31318698                | TT                                     | CC                 | CC               | INTERGENIC                    |                    |                              |
| SNP_55306_A_31319018 | NC_021166.1    | Ca_Kabuli_Chr07 | 31319018                | AA                                     | CC                 | CC               | INTERGENIC                    |                    |                              |
| SNP_55307_A_31319426 | NC_021166.1    | Ca_Kabuli_Chr07 | 31319426                | CC                                     | TT                 | TT               | INTERGENIC                    |                    |                              |
| SNP_55308_A_31322169 | NC_021166.1    | Ca_Kabuli_Chr07 | 31322169                | AA                                     | GG                 | GG               | INTERGENIC                    |                    |                              |
| SNP_55309_A_31322182 | NC_021166.1    | Ca_Kabuli_Chr07 | 31322182                | CC                                     | TT                 | TT               | INTERGENIC                    |                    |                              |
| SNP_55310_A_31322239 | NC_021166.1    | Ca_Kabuli_Chr07 | 31322239                | CC                                     | TT                 | TT               | INTERGENIC                    |                    |                              |
| SNP_55311_A_31329775 | NC_021166.1    | Ca_Kabuli_Chr07 | 31329775                | AA                                     | GG                 | GG               | DRR                           | 101493267          | inositol oxygenase 1-like    |
| SNP_55312_A_31330217 | NC_021166.1    | Ca_Kabuli_Chr07 | 31330217                | TT                                     | GG                 | GG               | INTRON                        | 101493267          | inositol oxygenase 1-like    |
| SNP_55313_A_31330252 | NC_021166.1    | Ca_Kabuli_Chr07 | 31330252                | TT                                     | GG                 | GG               | INTRON                        | 101493267          | inositol oxygenase 1-like    |
| SNP_55314_A_31330267 | NC_021166.1    | Ca_Kabuli_Chr07 | 31330267                | AA                                     | GG                 | GG               | INTRON                        | 101493267          | inositol oxygenase 1-like    |
| SNP_55315_A_31330300 | NC_021166.1    | Ca_Kabuli_Chr07 | 31330300                | GG                                     | AA                 | AA               | INTRON                        | 101493267          | inositol oxygenase 1-like    |
| SNP_55317_A_31332209 | NC_021166.1    | Ca_Kabuli_Chr07 | 31332209                | TT                                     | AA                 | AA               | INTRON                        | 101493267          | inositol oxygenase 1-like    |

| SNPs IDs             | Chromosome IDs | Chromosomes     | Physical positions (bp) | CDC Frontier genome (Reference genome) | (Pusa 1103 & HPNB) | (ILWC 46 & LPNB) | Sequence Components of genome | Gene accession IDs | Putative functions                                                   |
|----------------------|----------------|-----------------|-------------------------|----------------------------------------|--------------------|------------------|-------------------------------|--------------------|----------------------------------------------------------------------|
| SNP_55318_A_31332354 | NC_021166.1    | Ca_Kabuli_Chr07 | 31332354                | TT                                     | AA                 | AA               | INTRON                        | 101493267          | inositol oxygenase 1-like                                            |
| SNP_55319_A_31332361 | NC_021166.1    | Ca_Kabuli_Chr07 | 31332361                | GG                                     | AA                 | AA               | INTRON                        | 101493267          | inositol oxygenase 1-like                                            |
| SNP_55320_A_31332362 | NC_021166.1    | Ca_Kabuli_Chr07 | 31332362                | CC                                     | TT                 | TT               | INTRON                        | 101493267          | inositol oxygenase 1-like                                            |
| SNP_55321_A_31333402 | NC_021166.1    | Ca_Kabuli_Chr07 | 31333402                | TT                                     | AA                 | AA               | INTRON                        | 101493267          | inositol oxygenase 1-like                                            |
| SNP_55322_A_31333502 | NC_021166.1    | Ca_Kabuli_Chr07 | 31333502                | TT                                     | GG                 | GG               | INTRON                        | 101493267          | inositol oxygenase 1-like                                            |
| SNP_55323_A_31333713 | NC_021166.1    | Ca_Kabuli_Chr07 | 31333713                | CC                                     | TT                 | TT               | INTRON                        | 101493267          | inositol oxygenase 1-like                                            |
| SNP_55324_A_31334326 | NC_021166.1    | Ca_Kabuli_Chr07 | 31334326                | TT                                     | CC                 | CC               | URR                           | 101493267          | inositol oxygenase 1-like                                            |
| SNP_55325_A_31334571 | NC_021166.1    | Ca_Kabuli_Chr07 | 31334571                | CC                                     | AA                 | AA               | URR                           | 101493267          | inositol oxygenase 1-like                                            |
| SNP_55327_A_31335548 | NC_021166.1    | Ca_Kabuli_Chr07 | 31335548                | CC                                     | TT                 | TT               | URR                           | 101493267          | inositol oxygenase 1-like                                            |
| SNP_55328_A_31335624 | NC_021166.1    | Ca_Kabuli_Chr07 | 31335624                | CC                                     | TT                 | TT               | URR                           | 101493267          | inositol oxygenase 1-like                                            |
| SNP_55329_A_31335688 | NC_021166.1    | Ca_Kabuli_Chr07 | 31335688                | GG                                     | AA                 | AA               | URR                           | 101493267          | inositol oxygenase 1-like                                            |
| SNP_55330_A_31335823 | NC_021166.1    | Ca_Kabuli_Chr07 | 31335823                | TT                                     | AA                 | AA               | URR                           | 101493267          | inositol oxygenase 1-like                                            |
| SNP_55331_A_31337821 | NC_021166.1    | Ca_Kabuli_Chr07 | 31337821                | AA                                     | TT                 | TT               | INTERGENIC                    |                    |                                                                      |
| SNP_55332_A_31337827 | NC_021166.1    | Ca_Kabuli_Chr07 | 31337827                | TT                                     | AA                 | AA               | INTERGENIC                    |                    |                                                                      |
| SNP_55333_A_31337864 | NC_021166.1    | Ca_Kabuli_Chr07 | 31337864                | GG                                     | AA                 | AA               | INTERGENIC                    |                    |                                                                      |
| SNP_55334_A_31340753 | NC_021166.1    | Ca_Kabuli_Chr07 | 31340753                | CC                                     | TT                 | TT               | INTERGENIC                    |                    |                                                                      |
| SNP_55335_A_31342532 | NC_021166.1    | Ca_Kabuli_Chr07 | 31342532                | TT                                     | AA                 | AA               | DRR                           | 101493587          | pentatricopeptide repeat-containing protein At4g26680, mitochondrial |
| SNP_55336_A_31343832 | NC_021166.1    | Ca_Kabuli_Chr07 | 31343832                | CC                                     | TT                 | TT               | URR                           | 101493904          | mediator of RNA polymerase II transcription subunit 6                |
| SNP_55337_A_31345329 | NC_021166.1    | Ca_Kabuli_Chr07 | 31345329                | AA                                     | GG                 | GG               | DRR                           | 101494735          | glucose-6-phosphate 1-dehydrogenase, chloroplastic                   |
| SNP_55338_A_31346031 | NC_021166.1    | Ca_Kabuli_Chr07 | 31346031                | CC                                     | TT                 | TT               | URR                           | 101493587          | pentatricopeptide repeat-containing protein At4g26680, mitochondrial |
| SNP_55339_A_31352182 | NC_021166.1    | Ca_Kabuli_Chr07 | 31352182                | TT                                     | CC                 | CC               | DRR                           | 101494417          | vacuolar protein sorting-associated protein 26B                      |
| SNP_55341_A_31352740 | NC_021166.1    | Ca_Kabuli_Chr07 | 31352740                | CC                                     | AA                 | AA               | URR                           | 101494735          | glucose-6-phosphate 1-dehydrogenase, chloroplastic                   |

| SNPs IDs             | Chromosome IDs | Chromosomes     | Physical positions (bp) | CDC Frontier genome (Reference genome) | (Pusa 1103 & HPNB) | (ILWC 46 & LPNB) | Sequence Components of genome | Gene accession IDs | Putative functions                              |
|----------------------|----------------|-----------------|-------------------------|----------------------------------------|--------------------|------------------|-------------------------------|--------------------|-------------------------------------------------|
| SNP_55342_A_31357140 | NC_021166.1    | Ca_Kabuli_Chr07 | 31357140                | AA                                     | TT                 | TT               | INTRON                        | 101494417          | vacuolar protein sorting-associated protein 26B |
| SNP_55344_A_31360298 | NC_021166.1    | Ca_Kabuli_Chr07 | 31360298                | GG                                     | AA                 | AA               | INTERGENIC                    |                    |                                                 |
| SNP_55345_A_31360676 | NC_021166.1    | Ca_Kabuli_Chr07 | 31360676                | CC                                     | TT                 | TT               | URR                           | 101494417          | vacuolar protein sorting-associated protein 26B |
| SNP_55346_A_31360678 | NC_021166.1    | Ca_Kabuli_Chr07 | 31360678                | AA                                     | TT                 | TT               | URR                           | 101494417          | vacuolar protein sorting-associated protein 26B |
| SNP_55347_A_31361490 | NC_021166.1    | Ca_Kabuli_Chr07 | 31361490                | CC                                     | AA                 | AA               | URR                           | 101494417          | vacuolar protein sorting-associated protein 26B |
| SNP_55348_A_31361713 | NC_021166.1    | Ca_Kabuli_Chr07 | 31361713                | CC                                     | TT                 | TT               | URR                           | 101494417          | vacuolar protein sorting-associated protein 26B |
| SNP_55350_A_31363142 | NC_021166.1    | Ca_Kabuli_Chr07 | 31363142                | CC                                     | TT                 | TT               | INTERGENIC                    |                    |                                                 |
| SNP_55351_A_31363168 | NC_021166.1    | Ca_Kabuli_Chr07 | 31363168                | GG                                     | TT                 | TT               | INTERGENIC                    |                    |                                                 |
| SNP_55352_A_31366089 | NC_021166.1    | Ca_Kabuli_Chr07 | 31366089                | CC                                     | TT                 | TT               | INTRON                        | 101495062          | transcription factor bHLH87-like                |
| SNP_55353_A_31366307 | NC_021166.1    | Ca_Kabuli_Chr07 | 31366307                | AA                                     | TT                 | TT               | INTRON                        | 101495062          | transcription factor bHLH87-like                |
| SNP_55354_A_31366340 | NC_021166.1    | Ca_Kabuli_Chr07 | 31366340                | TT                                     | CC                 | CC               | INTRON                        | 101495062          | transcription factor bHLH87-like                |
| SNP_55355_A_31367441 | NC_021166.1    | Ca_Kabuli_Chr07 | 31367441                | GG                                     | CC                 | CC               | URR                           | 101495062          | transcription factor bHLH87-like                |
| SNP_55356_A_31369307 | NC_021166.1    | Ca_Kabuli_Chr07 | 31369307                | CC                                     | AA                 | AA               | INTERGENIC                    |                    |                                                 |
| SNP_55357_A_31371977 | NC_021166.1    | Ca_Kabuli_Chr07 | 31371977                | TT                                     | CC                 | CC               | INTERGENIC                    |                    |                                                 |
| SNP_55358_A_31371981 | NC_021166.1    | Ca_Kabuli_Chr07 | 31371981                | GG                                     | AA                 | AA               | INTERGENIC                    |                    |                                                 |
| SNP_55359_A_31372839 | NC_021166.1    | Ca_Kabuli_Chr07 | 31372839                | CC                                     | TT                 | TT               | INTERGENIC                    |                    |                                                 |
| SNP_55360_A_31373123 | NC_021166.1    | Ca_Kabuli_Chr07 | 31373123                | TT                                     | AA                 | AA               | INTERGENIC                    |                    |                                                 |
| SNP_55361_A_31373132 | NC_021166.1    | Ca_Kabuli_Chr07 | 31373132                | TT                                     | AA                 | AA               | INTERGENIC                    |                    |                                                 |
| SNP_55362_A_31373214 | NC_021166.1    | Ca_Kabuli_Chr07 | 31373214                | TT                                     | AA                 | AA               | INTERGENIC                    |                    |                                                 |
| SNP_55363_A_31373669 | NC_021166.1    | Ca_Kabuli_Chr07 | 31373669                | CC                                     | GG                 | GG               | INTERGENIC                    |                    |                                                 |
| SNP_55364_A_31374102 | NC_021166.1    | Ca_Kabuli_Chr07 | 31374102                | GG                                     | TT                 | TT               | INTERGENIC                    |                    |                                                 |
| SNP_55365_A_31374120 | NC_021166.1    | Ca_Kabuli_Chr07 | 31374120                | AA                                     | GG                 | GG               | INTERGENIC                    |                    |                                                 |



| SNPs IDs             | Chromosome IDs | Chromosomes     | Physical positions (bp) | CDC Frontier genome (Reference genome) | (Pusa 1103 & HPNB) | (ILWC 46 & LPNB) | Sequence genome | Components of | Gene accession IDs                                 | Putative functions |
|----------------------|----------------|-----------------|-------------------------|----------------------------------------|--------------------|------------------|-----------------|---------------|----------------------------------------------------|--------------------|
| SNP_55367_A_31377344 | NC_021166.1    | Ca_Kabuli_Chr07 | 31377344                | AA                                     | CC                 | CC               | INTERGENIC      |               |                                                    |                    |
| SNP_55368_A_31378402 | NC_021166.1    | Ca_Kabuli_Chr07 | 31378402                | AA                                     | TT                 | TT               | INTERGENIC      |               |                                                    |                    |
| SNP_55369_A_31378840 | NC_021166.1    | Ca_Kabuli_Chr07 | 31378840                | CC                                     | TT                 | TT               | INTERGENIC      |               |                                                    |                    |
| SNP_55370_A_31384212 | NC_021166.1    | Ca_Kabuli_Chr07 | 31384212                | AA                                     | TT                 | TT               | INTERGENIC      |               |                                                    |                    |
| SNP_55371_A_31384415 | NC_021166.1    | Ca_Kabuli_Chr07 | 31384415                | TT                                     | GG                 | GG               | INTERGENIC      |               |                                                    |                    |
| SNP_55373_A_31384999 | NC_021166.1    | Ca_Kabuli_Chr07 | 31384999                | AA                                     | TT                 | TT               | INTERGENIC      |               |                                                    |                    |
| SNP_55374_A_31389929 | NC_021166.1    | Ca_Kabuli_Chr07 | 31389929                | GG                                     | AA                 | AA               | INTERGENIC      |               |                                                    |                    |
| SNP_55376_A_31399554 | NC_021166.1    | Ca_Kabuli_Chr07 | 31399554                | TT                                     | AA                 | AA               | DRR             | 101495393     | protein EARLY FLOWERING 3                          |                    |
| SNP_55377_A_31416938 | NC_021166.1    | Ca_Kabuli_Chr07 | 31416938                | AA                                     | GG                 | GG               | DRR             | 101496481     | IAA-amino acid hydrolase ILR1-like 4               |                    |
| SNP_55378_A_31416942 | NC_021166.1    | Ca_Kabuli_Chr07 | 31416942                | TT                                     | CC                 | CC               | DRR             | 101496481     | IAA-amino acid hydrolase ILR1-like 4               |                    |
| SNP_55379_A_31422132 | NC_021166.1    | Ca_Kabuli_Chr07 | 31422132                | AA                                     | TT                 | TT               | URR             | 101496481     | IAA-amino acid hydrolase ILR1-like 4               |                    |
| SNP_55380_A_31422143 | NC_021166.1    | Ca_Kabuli_Chr07 | 31422143                | AA                                     | TT                 | TT               | URR             | 101496481     | IAA-amino acid hydrolase ILR1-like 4               |                    |
| SNP_55381_A_31422145 | NC_021166.1    | Ca_Kabuli_Chr07 | 31422145                | AA                                     | CC                 | CC               | URR             | 101496481     | IAA-amino acid hydrolase ILR1-like 4               |                    |
| SNP_55382_A_31422150 | NC_021166.1    | Ca_Kabuli_Chr07 | 31422150                | CC                                     | AA                 | AA               | URR             | 101496481     | IAA-amino acid hydrolase ILR1-like 4               |                    |
| SNP_55383_A_31444308 | NC_021166.1    | Ca_Kabuli_Chr07 | 31444308                | AA                                     | GG                 | GG               | URR             | 101497471     | uncharacterized protein At1g51745                  |                    |
| SNP_55384_A_31500300 | NC_021166.1    | Ca_Kabuli_Chr07 | 31500300                | GG                                     | AA                 | AA               | DRR             | 101499834     | ubiquitin carboxyl-terminal hydrolase 6-like       |                    |
| SNP_55385_A_31520102 | NC_021166.1    | Ca_Kabuli_Chr07 | 31520102                | GG                                     | AA                 | AA               | INTERGENIC      |               |                                                    |                    |
| SNP_55386_A_31647472 | NC_021166.1    | Ca_Kabuli_Chr07 | 31647472                | TT                                     | CC                 | CC               | INTERGENIC      |               |                                                    |                    |
| SNP_55387_A_31652658 | NC_021166.1    | Ca_Kabuli_Chr07 | 31652658                | TT                                     | GG                 | GG               | INTERGENIC      |               |                                                    |                    |
| SNP_55388_A_31658194 | NC_021166.1    | Ca_Kabuli_Chr07 | 31658194                | CC                                     | TT                 | TT               | INTERGENIC      |               |                                                    |                    |
| SNP_55389_A_31728629 | NC_021166.1    | Ca_Kabuli_Chr07 | 31728629                | TT                                     | CC                 | CC               | URR             | 101505609     | 3-epi-6-deoxocathasterone 23-monooxygenase         |                    |
| SNP_55392_A_31824747 | NC_021166.1    | Ca_Kabuli_Chr07 | 31824747                | GG                                     | AA                 | AA               | DRR             | 101508179     | receptor-like serine/threonine-protein kinase ALE2 |                    |

| SNPs IDs             | Chromosome IDs | Chromosomes     | Physical positions (bp) | CDC Frontier (Reference genome) | (Pusa 1103 & HPNB) | (ILWC 46 & LPNB) | Sequence Components of genome | Gene accession IDs | Putative functions                            |
|----------------------|----------------|-----------------|-------------------------|---------------------------------|--------------------|------------------|-------------------------------|--------------------|-----------------------------------------------|
| SNP_55393_A_31838883 | NC_021166.1    | Ca_Kabuli_Chr07 | 31838883                | TT                              | AA                 | AA               | INTERGENIC                    |                    |                                               |
| SNP_55396_A_31968224 | NC_021166.1    | Ca_Kabuli_Chr07 | 31968224                | TT                              | GG                 | GG               | INTRON                        | 101488371          | uncharacterized LOC101488371                  |
| SNP_55397_A_31994961 | NC_021166.1    | Ca_Kabuli_Chr07 | 31994961                | TT                              | AA                 | AA               | URR                           | 101514848          | EPIDERMAL PATTERNING FACTOR-like protein 3    |
| SNP_55398_A_31998622 | NC_021166.1    | Ca_Kabuli_Chr07 | 31998622                | CC                              | AA                 | AA               | INTERGENIC                    |                    |                                               |
| SNP_55399_A_31999008 | NC_021166.1    | Ca_Kabuli_Chr07 | 31999008                | CC                              | TT                 | TT               | INTERGENIC                    |                    |                                               |
| SNP_55400_A_32017015 | NC_021166.1    | Ca_Kabuli_Chr07 | 32017015                | TT                              | CC                 | CC               | INTERGENIC                    |                    |                                               |
| SNP_55401_A_32022676 | NC_021166.1    | Ca_Kabuli_Chr07 | 32022676                | CC                              | GG                 | GG               | INTERGENIC                    |                    |                                               |
| SNP_55403_A_32173945 | NC_021166.1    | Ca_Kabuli_Chr07 | 32173945                | CC                              | TT                 | TT               | INTERGENIC                    |                    |                                               |
| SNP_55404_A_32267254 | NC_021166.1    | Ca_Kabuli_Chr07 | 32267254                | CC                              | TT                 | TT               | DRR                           | 101494011          | midasin                                       |
| SNP_55405_A_32357400 | NC_021166.1    | Ca_Kabuli_Chr07 | 32357400                | CC                              | TT                 | TT               | INTERGENIC                    |                    |                                               |
| SNP_55406_A_32357402 | NC_021166.1    | Ca_Kabuli_Chr07 | 32357402                | GG                              | CC                 | CC               | INTERGENIC                    |                    |                                               |
| SNP_55407_A_32357440 | NC_021166.1    | Ca_Kabuli_Chr07 | 32357440                | TT                              | CC                 | CC               | INTERGENIC                    |                    |                                               |
| SNP_55408_A_32357447 | NC_021166.1    | Ca_Kabuli_Chr07 | 32357447                | AA                              | GG                 | GG               | INTERGENIC                    |                    |                                               |
| SNP_55409_A_32357651 | NC_021166.1    | Ca_Kabuli_Chr07 | 32357651                | GG                              | AA                 | AA               | INTERGENIC                    |                    |                                               |
| SNP_55410_A_32357672 | NC_021166.1    | Ca_Kabuli_Chr07 | 32357672                | TT                              | GG                 | GG               | INTERGENIC                    |                    |                                               |
| SNP_55411_A_32357684 | NC_021166.1    | Ca_Kabuli_Chr07 | 32357684                | CC                              | AA                 | AA               | INTERGENIC                    |                    |                                               |
| SNP_55412_A_32357857 | NC_021166.1    | Ca_Kabuli_Chr07 | 32357857                | AA                              | GG                 | GG               | INTERGENIC                    |                    |                                               |
| SNP_55413_A_32358254 | NC_021166.1    | Ca_Kabuli_Chr07 | 32358254                | AA                              | GG                 | GG               | INTERGENIC                    |                    |                                               |
| SNP_55414_A_32358270 | NC_021166.1    | Ca_Kabuli_Chr07 | 32358270                | AA                              | GG                 | GG               | INTERGENIC                    |                    |                                               |
| SNP_55416_A_32490764 | NC_021166.1    | Ca_Kabuli_Chr07 | 32490764                | AA                              | CC                 | CC               | INTRON                        | 101499439          | putative disease resistance protein At4g11170 |
| SNP_55417_A_32513344 | NC_021166.1    | Ca_Kabuli_Chr07 | 32513344                | GG                              | AA                 | AA               | INTERGENIC                    |                    |                                               |
| SNP_55418_A_32529371 | NC_021166.1    | Ca_Kabuli_Chr07 | 32529371                | TT                              | CC                 | CC               | INTERGENIC                    |                    |                                               |

| SNPs IDs             | Chromosome IDs | Chromosomes     | Physical positions (bp) | CDC Frontier genome (Reference genome) | (Pusa 1103 & HPNB) | (ILWC 46 & LPNB) | Sequence Components of genome | Gene accession IDs | Putative functions                   |
|----------------------|----------------|-----------------|-------------------------|----------------------------------------|--------------------|------------------|-------------------------------|--------------------|--------------------------------------|
| SNP_55419_A_32567949 | NC_021166.1    | Ca_Kabuli_Chr07 | 32567949                | AA                                     | CC                 | CC               | SYNONYMOUS_CODING             | 101492604          | protein FAR1-RELATED SEQUENCE 5-like |
| SNP_55420_A_32578830 | NC_021166.1    | Ca_Kabuli_Chr07 | 32578830                | TT                                     | CC                 | CC               | INTERGENIC                    |                    |                                      |
| SNP_55421_A_32578844 | NC_021166.1    | Ca_Kabuli_Chr07 | 32578844                | CC                                     | GG                 | GG               | INTERGENIC                    |                    |                                      |
| SNP_55422_A_32601283 | NC_021166.1    | Ca_Kabuli_Chr07 | 32601283                | AA                                     | GG                 | GG               | INTRON                        | 101502504          | calumenin-B-like                     |
| SNP_55423_A_32601322 | NC_021166.1    | Ca_Kabuli_Chr07 | 32601322                | GG                                     | CC                 | CC               | INTRON                        | 101502504          | calumenin-B-like                     |
| SNP_55425_A_32601528 | NC_021166.1    | Ca_Kabuli_Chr07 | 32601528                | GG                                     | CC                 | CC               | INTRON                        | 101502504          | calumenin-B-like                     |
| SNP_55426_A_32601736 | NC_021166.1    | Ca_Kabuli_Chr07 | 32601736                | TT                                     | AA                 | AA               | INTRON                        | 101502504          | calumenin-B-like                     |
| SNP_55428_A_32614174 | NC_021166.1    | Ca_Kabuli_Chr07 | 32614174                | CC                                     | AA                 | AA               | DRR                           | 101493588          | Unknown function                     |
| SNP_55430_A_32614263 | NC_021166.1    | Ca_Kabuli_Chr07 | 32614263                | GG                                     | TT                 | TT               | DRR                           | 101493588          | Unknown function                     |
| SNP_55431_A_32628591 | NC_021166.1    | Ca_Kabuli_Chr07 | 32628591                | TT                                     | CC                 | CC               | INTERGENIC                    |                    |                                      |
| SNP_55432_A_32632415 | NC_021166.1    | Ca_Kabuli_Chr07 | 32632415                | GG                                     | AA                 | AA               | URR                           | 101493905          | mucin-2-like                         |
| SNP_55433_A_32632959 | NC_021166.1    | Ca_Kabuli_Chr07 | 32632959                | TT                                     | GG                 | GG               | URR                           | 101493905          | mucin-2-like                         |
| SNP_55434_A_32633865 | NC_021166.1    | Ca_Kabuli_Chr07 | 32633865                | GG                                     | CC                 | CC               | URR                           | 101493905          | mucin-2-like                         |
| SNP_55435_A_32635356 | NC_021166.1    | Ca_Kabuli_Chr07 | 32635356                | GG                                     | TT                 | TT               | INTERGENIC                    |                    |                                      |
| SNP_55436_A_32635829 | NC_021166.1    | Ca_Kabuli_Chr07 | 32635829                | AA                                     | CC                 | CC               | INTERGENIC                    |                    |                                      |
| SNP_55437_A_32635848 | NC_021166.1    | Ca_Kabuli_Chr07 | 32635848                | GG                                     | TT                 | TT               | INTERGENIC                    |                    |                                      |
| SNP_55438_A_32636988 | NC_021166.1    | Ca_Kabuli_Chr07 | 32636988                | CC                                     | AA                 | AA               | INTERGENIC                    |                    |                                      |
| SNP_55439_A_32638645 | NC_021166.1    | Ca_Kabuli_Chr07 | 32638645                | TT                                     | AA                 | AA               | INTERGENIC                    |                    |                                      |
| SNP_55440_A_32639461 | NC_021166.1    | Ca_Kabuli_Chr07 | 32639461                | CC                                     | GG                 | GG               | INTERGENIC                    |                    |                                      |
| SNP_55441_A_32639812 | NC_021166.1    | Ca_Kabuli_Chr07 | 32639812                | CC                                     | TT                 | TT               | INTERGENIC                    |                    |                                      |
| SNP_55442_A_32639845 | NC_021166.1    | Ca_Kabuli_Chr07 | 32639845                | AA                                     | TT                 | TT               | INTERGENIC                    |                    |                                      |
| SNP_55443_A_32639858 | NC_021166.1    | Ca_Kabuli_Chr07 | 32639858                | AA                                     | GG                 | GG               | INTERGENIC                    |                    |                                      |

| SNPs IDs             | Chromosome IDs | Chromosomes     | Physical positions (bp) | CDC Frontier genome (Reference genome) | (Pusa 1103 & HPNB) | (ILWC 46 & LPNB) | Sequence Components of genome | Gene accession IDs | Putative functions                                          |
|----------------------|----------------|-----------------|-------------------------|----------------------------------------|--------------------|------------------|-------------------------------|--------------------|-------------------------------------------------------------|
| SNP_55444_A_32639871 | NC_021166.1    | Ca_Kabuli_Chr07 | 32639871                | AA                                     | GG                 | GG               | INTERGENIC                    |                    |                                                             |
| SNP_55445_A_32649346 | NC_021166.1    | Ca_Kabuli_Chr07 | 32649346                | CC                                     | TT                 | TT               | INTRON                        | 101501961          | calumenin-like                                              |
| SNP_55447_A_32649733 | NC_021166.1    | Ca_Kabuli_Chr07 | 32649733                | GG                                     | AA                 | AA               | INTERGENIC                    |                    |                                                             |
| SNP_55449_A_32650629 | NC_021166.1    | Ca_Kabuli_Chr07 | 32650629                | GG                                     | AA                 | AA               | INTERGENIC                    |                    |                                                             |
| SNP_55450_A_32653143 | NC_021166.1    | Ca_Kabuli_Chr07 | 32653143                | AA                                     | GG                 | GG               | INTERGENIC                    |                    |                                                             |
| SNP_55451_A_32653178 | NC_021166.1    | Ca_Kabuli_Chr07 | 32653178                | CC                                     | TT                 | TT               | INTERGENIC                    |                    |                                                             |
| SNP_55453_A_32653204 | NC_021166.1    | Ca_Kabuli_Chr07 | 32653204                | GG                                     | AA                 | AA               | INTERGENIC                    |                    |                                                             |
| SNP_55454_A_32654139 | NC_021166.1    | Ca_Kabuli_Chr07 | 32654139                | AA                                     | CC                 | CC               | INTERGENIC                    |                    |                                                             |
| SNP_55455_A_32654357 | NC_021166.1    | Ca_Kabuli_Chr07 | 32654357                | AA                                     | TT                 | TT               | INTERGENIC                    |                    |                                                             |
| SNP_55459_A_32694518 | NC_021166.1    | Ca_Kabuli_Chr07 | 32694518                | TT                                     | CC                 | CC               | INTERGENIC                    |                    |                                                             |
| SNP_55460_A_32774517 | NC_021166.1    | Ca_Kabuli_Chr07 | 32774517                | TT                                     | AA                 | AA               | INTRON                        | 101505282          | transcription initiation factor TFIID subunit 12b           |
| SNP_55461_A_32814053 | NC_021166.1    | Ca_Kabuli_Chr07 | 32814053                | CC                                     | GG                 | GG               | INTERGENIC                    |                    |                                                             |
| SNP_55462_A_32814072 | NC_021166.1    | Ca_Kabuli_Chr07 | 32814072                | AA                                     | TT                 | TT               | INTERGENIC                    |                    |                                                             |
| SNP_55463_A_32820610 | NC_021166.1    | Ca_Kabuli_Chr07 | 32820610                | CC                                     | AA                 | AA               | INTERGENIC                    |                    |                                                             |
| SNP_55464_A_32838307 | NC_021166.1    | Ca_Kabuli_Chr07 | 32838307                | AA                                     | TT                 | TT               | DRR                           | 101506805          | pollen-specific leucine-rich repeat extensin-like protein 3 |
| SNP_55465_A_32974415 | NC_021166.1    | Ca_Kabuli_Chr07 | 32974415                | AA                                     | GG                 | GG               | INTERGENIC                    |                    |                                                             |
| SNP_55466_A_32974450 | NC_021166.1    | Ca_Kabuli_Chr07 | 32974450                | AA                                     | GG                 | GG               | INTERGENIC                    |                    |                                                             |
| SNP_55467_A_33003958 | NC_021166.1    | Ca_Kabuli_Chr07 | 33003958                | GG                                     | AA                 | AA               | DRR                           | 101511721          | flavonoid 3'-monooxygenase-like                             |
| SNP_55468_A_33049345 | NC_021166.1    | Ca_Kabuli_Chr07 | 33049345                | AA                                     | CC                 | CC               | INTERGENIC                    |                    |                                                             |
| SNP_55469_A_33050339 | NC_021166.1    | Ca_Kabuli_Chr07 | 33050339                | TT                                     | CC                 | CC               | INTERGENIC                    |                    |                                                             |
| SNP_55470_A_33054085 | NC_021166.1    | Ca_Kabuli_Chr07 | 33054085                | CC                                     | AA                 | AA               | INTERGENIC                    |                    |                                                             |
| SNP_55471_A_33054217 | NC_021166.1    | Ca_Kabuli_Chr07 | 33054217                | AA                                     | GG                 | GG               | INTERGENIC                    |                    |                                                             |

| SNPs IDs             | Chromosome IDs | Chromosomes     | Physical positions (bp) | CDC Frontier genome (Reference genome) | (Pusa 1103 & HPNB) | (ILWC 46 & LPNB) | Sequence genome | Components of | Gene accession IDs           | Putative functions |
|----------------------|----------------|-----------------|-------------------------|----------------------------------------|--------------------|------------------|-----------------|---------------|------------------------------|--------------------|
| SNP_55472_A_33054400 | NC_021166.1    | Ca_Kabuli_Chr07 | 33054400                | AA                                     | GG                 | GG               | INTERGENIC      |               |                              |                    |
| SNP_55473_A_33054609 | NC_021166.1    | Ca_Kabuli_Chr07 | 33054609                | CC                                     | AA                 | AA               | INTERGENIC      |               |                              |                    |
| SNP_55474_A_33054636 | NC_021166.1    | Ca_Kabuli_Chr07 | 33054636                | CC                                     | TT                 | TT               | INTERGENIC      |               |                              |                    |
| SNP_55475_A_33055476 | NC_021166.1    | Ca_Kabuli_Chr07 | 33055476                | AA                                     | TT                 | TT               | INTERGENIC      |               |                              |                    |
| SNP_55477_A_33055658 | NC_021166.1    | Ca_Kabuli_Chr07 | 33055658                | GG                                     | AA                 | AA               | INTERGENIC      |               |                              |                    |
| SNP_55478_A_33057894 | NC_021166.1    | Ca_Kabuli_Chr07 | 33057894                | GG                                     | AA                 | AA               | INTERGENIC      |               |                              |                    |
| SNP_55479_A_33058199 | NC_021166.1    | Ca_Kabuli_Chr07 | 33058199                | AA                                     | CC                 | CC               | INTERGENIC      |               |                              |                    |
| SNP_55480_A_33058477 | NC_021166.1    | Ca_Kabuli_Chr07 | 33058477                | TT                                     | AA                 | AA               | INTERGENIC      |               |                              |                    |
| SNP_55481_A_33058497 | NC_021166.1    | Ca_Kabuli_Chr07 | 33058497                | GG                                     | AA                 | AA               | INTERGENIC      |               |                              |                    |
| SNP_55482_A_33059260 | NC_021166.1    | Ca_Kabuli_Chr07 | 33059260                | GG                                     | TT                 | TT               | INTERGENIC      |               |                              |                    |
| SNP_55483_A_33059275 | NC_021166.1    | Ca_Kabuli_Chr07 | 33059275                | TT                                     | CC                 | CC               | INTERGENIC      |               |                              |                    |
| SNP_55484_A_33059322 | NC_021166.1    | Ca_Kabuli_Chr07 | 33059322                | TT                                     | AA                 | AA               | INTERGENIC      |               |                              |                    |
| SNP_55485_A_33059738 | NC_021166.1    | Ca_Kabuli_Chr07 | 33059738                | GG                                     | AA                 | AA               | INTERGENIC      |               |                              |                    |
| SNP_55486_A_33059768 | NC_021166.1    | Ca_Kabuli_Chr07 | 33059768                | AA                                     | CC                 | CC               | INTERGENIC      |               |                              |                    |
| SNP_55487_A_33061651 | NC_021166.1    | Ca_Kabuli_Chr07 | 33061651                | AA                                     | TT                 | TT               | URR             | 101512363     | uncharacterized LOC101512363 |                    |
| SNP_55488_A_33061912 | NC_021166.1    | Ca_Kabuli_Chr07 | 33061912                | CC                                     | AA                 | AA               | URR             | 101512363     | uncharacterized LOC101512363 |                    |
| SNP_55490_A_33062907 | NC_021166.1    | Ca_Kabuli_Chr07 | 33062907                | CC                                     | TT                 | TT               | URR             | 101512363     | uncharacterized LOC101512363 |                    |
| SNP_55491_A_33065414 | NC_021166.1    | Ca_Kabuli_Chr07 | 33065414                | AA                                     | TT                 | TT               | INTERGENIC      |               |                              |                    |
| SNP_55492_A_33065416 | NC_021166.1    | Ca_Kabuli_Chr07 | 33065416                | GG                                     | AA                 | AA               | INTERGENIC      |               |                              |                    |
| SNP_55493_A_33066532 | NC_021166.1    | Ca_Kabuli_Chr07 | 33066532                | AA                                     | CC                 | CC               | INTERGENIC      |               |                              |                    |
| SNP_55494_A_33066824 | NC_021166.1    | Ca_Kabuli_Chr07 | 33066824                | TT                                     | GG                 | GG               | INTERGENIC      |               |                              |                    |
| SNP_55495_A_33066831 | NC_021166.1    | Ca_Kabuli_Chr07 | 33066831                | AA                                     | GG                 | GG               | INTERGENIC      |               |                              |                    |

| SNPs IDs             | Chromosome IDs | Chromosomes     | Physical positions (bp) | CDC Frontier genome (Reference genome) | (Pusa 1103 & HPNB) | (ILWC 46 & LPNB) | Sequence genome | Components of | Gene accession IDs | Putative functions |
|----------------------|----------------|-----------------|-------------------------|----------------------------------------|--------------------|------------------|-----------------|---------------|--------------------|--------------------|
| SNP_55496_A_33066834 | NC_021166.1    | Ca_Kabuli_Chr07 | 33066834                | GG                                     | AA                 | AA               | INTERGENIC      |               |                    |                    |
| SNP_55497_A_33066861 | NC_021166.1    | Ca_Kabuli_Chr07 | 33066861                | GG                                     | AA                 | AA               | INTERGENIC      |               |                    |                    |
| SNP_55498_A_33067033 | NC_021166.1    | Ca_Kabuli_Chr07 | 33067033                | GG                                     | AA                 | AA               | INTERGENIC      |               |                    |                    |
| SNP_55499_A_33067399 | NC_021166.1    | Ca_Kabuli_Chr07 | 33067399                | AA                                     | GG                 | GG               | INTERGENIC      |               |                    |                    |
| SNP_55500_A_33067545 | NC_021166.1    | Ca_Kabuli_Chr07 | 33067545                | GG                                     | AA                 | AA               | INTERGENIC      |               |                    |                    |
| SNP_55502_A_33068236 | NC_021166.1    | Ca_Kabuli_Chr07 | 33068236                | AA                                     | GG                 | GG               | INTERGENIC      |               |                    |                    |
| SNP_55503_A_33068493 | NC_021166.1    | Ca_Kabuli_Chr07 | 33068493                | CC                                     | TT                 | TT               | INTERGENIC      |               |                    |                    |
| SNP_55505_A_33069181 | NC_021166.1    | Ca_Kabuli_Chr07 | 33069181                | CC                                     | TT                 | TT               | INTERGENIC      |               |                    |                    |
| SNP_55506_A_33070518 | NC_021166.1    | Ca_Kabuli_Chr07 | 33070518                | TT                                     | AA                 | AA               | INTERGENIC      |               |                    |                    |
| SNP_55507_A_33070970 | NC_021166.1    | Ca_Kabuli_Chr07 | 33070970                | GG                                     | CC                 | CC               | INTERGENIC      |               |                    |                    |
| SNP_55508_A_33070980 | NC_021166.1    | Ca_Kabuli_Chr07 | 33070980                | TT                                     | AA                 | AA               | INTERGENIC      |               |                    |                    |
| SNP_55509_A_33071297 | NC_021166.1    | Ca_Kabuli_Chr07 | 33071297                | CC                                     | AA                 | AA               | INTERGENIC      |               |                    |                    |
| SNP_55510_A_33073104 | NC_021166.1    | Ca_Kabuli_Chr07 | 33073104                | TT                                     | CC                 | CC               | INTERGENIC      |               |                    |                    |
| SNP_55511_A_33073177 | NC_021166.1    | Ca_Kabuli_Chr07 | 33073177                | CC                                     | TT                 | TT               | INTERGENIC      |               |                    |                    |
| SNP_55512_A_33073232 | NC_021166.1    | Ca_Kabuli_Chr07 | 33073232                | TT                                     | CC                 | CC               | INTERGENIC      |               |                    |                    |
| SNP_55513_A_33101347 | NC_021166.1    | Ca_Kabuli_Chr07 | 33101347                | TT                                     | CC                 | CC               | INTERGENIC      |               |                    |                    |
| SNP_55514_A_33101497 | NC_021166.1    | Ca_Kabuli_Chr07 | 33101497                | TT                                     | GG                 | GG               | INTERGENIC      |               |                    |                    |
| SNP_55516_A_33102909 | NC_021166.1    | Ca_Kabuli_Chr07 | 33102909                | TT                                     | CC                 | CC               | INTERGENIC      |               |                    |                    |
| SNP_55517_A_33102939 | NC_021166.1    | Ca_Kabuli_Chr07 | 33102939                | CC                                     | TT                 | TT               | INTERGENIC      |               |                    |                    |
| SNP_55518_A_33102950 | NC_021166.1    | Ca_Kabuli_Chr07 | 33102950                | TT                                     | CC                 | CC               | INTERGENIC      |               |                    |                    |
| SNP_55519_A_33107162 | NC_021166.1    | Ca_Kabuli_Chr07 | 33107162                | GG                                     | AA                 | AA               | INTERGENIC      |               |                    |                    |
| SNP_55520_A_33107333 | NC_021166.1    | Ca_Kabuli_Chr07 | 33107333                | CC                                     | TT                 | TT               | INTERGENIC      |               |                    |                    |

| SNPs IDs             | Chromosome IDs | Chromosomes     | Physical positions (bp) | CDC Frontier genome (Reference genome) | (Pusa 1103 & HPNB) | (ILWC 46 & LPNB) | Sequence Components of genome | Gene accession IDs | Putative functions                       |
|----------------------|----------------|-----------------|-------------------------|----------------------------------------|--------------------|------------------|-------------------------------|--------------------|------------------------------------------|
| SNP_55521_A_33107334 | NC_021166.1    | Ca_Kabuli_Chr07 | 33107334                | GG                                     | AA                 | AA               | INTERGENIC                    |                    |                                          |
| SNP_55522_A_33107355 | NC_021166.1    | Ca_Kabuli_Chr07 | 33107355                | AA                                     | TT                 | TT               | INTERGENIC                    |                    |                                          |
| SNP_55523_A_33113027 | NC_021166.1    | Ca_Kabuli_Chr07 | 33113027                | GG                                     | AA                 | AA               | INTRON                        | 101496482          | microtubule-associated protein 70-2-like |
| SNP_55524_A_33113031 | NC_021166.1    | Ca_Kabuli_Chr07 | 33113031                | AA                                     | CC                 | CC               | INTRON                        | 101496482          | microtubule-associated protein 70-2-like |
| SNP_55525_A_33116026 | NC_021166.1    | Ca_Kabuli_Chr07 | 33116026                | AA                                     | GG                 | GG               | INTERGENIC                    |                    |                                          |
| SNP_55526_A_33117179 | NC_021166.1    | Ca_Kabuli_Chr07 | 33117179                | TT                                     | GG                 | GG               | INTERGENIC                    |                    |                                          |
| SNP_55527_A_33117182 | NC_021166.1    | Ca_Kabuli_Chr07 | 33117182                | TT                                     | GG                 | GG               | INTERGENIC                    |                    |                                          |
| SNP_55528_A_33117191 | NC_021166.1    | Ca_Kabuli_Chr07 | 33117191                | AA                                     | TT                 | TT               | INTERGENIC                    |                    |                                          |
| SNP_55529_A_33117198 | NC_021166.1    | Ca_Kabuli_Chr07 | 33117198                | AA                                     | CC                 | CC               | INTERGENIC                    |                    |                                          |
| SNP_55530_A_33117833 | NC_021166.1    | Ca_Kabuli_Chr07 | 33117833                | GG                                     | AA                 | AA               | INTERGENIC                    |                    |                                          |
| SNP_55531_A_33120700 | NC_021166.1    | Ca_Kabuli_Chr07 | 33120700                | TT                                     | CC                 | CC               | URR                           | 101496482          | microtubule-associated protein 70-2-like |
| SNP_55532_A_33124163 | NC_021166.1    | Ca_Kabuli_Chr07 | 33124163                | AA                                     | CC                 | CC               | URR                           | 101496818          | subtilisin-like protease SBT1.7          |
| SNP_55533_A_33125714 | NC_021166.1    | Ca_Kabuli_Chr07 | 33125714                | AA                                     | GG                 | GG               | INTERGENIC                    |                    |                                          |
| SNP_55534_A_33127362 | NC_021166.1    | Ca_Kabuli_Chr07 | 33127362                | AA                                     | GG                 | GG               | INTERGENIC                    |                    |                                          |
| SNP_55535_A_33127462 | NC_021166.1    | Ca_Kabuli_Chr07 | 33127462                | AA                                     | GG                 | GG               | INTERGENIC                    |                    |                                          |
| SNP_55536_A_33127626 | NC_021166.1    | Ca_Kabuli_Chr07 | 33127626                | GG                                     | CC                 | CC               | INTERGENIC                    |                    |                                          |
| SNP_55537_A_33143611 | NC_021166.1    | Ca_Kabuli_Chr07 | 33143611                | TT                                     | CC                 | CC               | INTERGENIC                    |                    |                                          |
| SNP_55538_A_33144344 | NC_021166.1    | Ca_Kabuli_Chr07 | 33144344                | AA                                     | GG                 | GG               | INTERGENIC                    |                    |                                          |
| SNP_55539_A_33144374 | NC_021166.1    | Ca_Kabuli_Chr07 | 33144374                | AA                                     | GG                 | GG               | INTERGENIC                    |                    |                                          |
| SNP_55540_A_33144404 | NC_021166.1    | Ca_Kabuli_Chr07 | 33144404                | TT                                     | CC                 | CC               | INTERGENIC                    |                    |                                          |
| SNP_55541_A_33144410 | NC_021166.1    | Ca_Kabuli_Chr07 | 33144410                | AA                                     | GG                 | GG               | INTERGENIC                    |                    |                                          |
| SNP_55542_A_33144424 | NC_021166.1    | Ca_Kabuli_Chr07 | 33144424                | TT                                     | AA                 | AA               | INTERGENIC                    |                    |                                          |

| SNPs IDs             | Chromosome IDs | Chromosomes     | Physical positions (bp) | CDC Frontier genome (Reference genome) | (Pusa 1103 & HPNB) | (ILWC 46 & LPNB) | Sequence genome       | Components of | Gene accession IDs           | Putative functions |
|----------------------|----------------|-----------------|-------------------------|----------------------------------------|--------------------|------------------|-----------------------|---------------|------------------------------|--------------------|
| SNP_55543_A_33144760 | NC_021166.1    | Ca_Kabuli_Chr07 | 33144760                | AA                                     | GG                 | GG               | INTERGENIC            |               |                              |                    |
| SNP_55544_A_33146241 | NC_021166.1    | Ca_Kabuli_Chr07 | 33146241                | CC                                     | TT                 | TT               | INTERGENIC            |               |                              |                    |
| SNP_55545_A_33146284 | NC_021166.1    | Ca_Kabuli_Chr07 | 33146284                | AA                                     | GG                 | GG               | INTERGENIC            |               |                              |                    |
| SNP_55546_A_33146328 | NC_021166.1    | Ca_Kabuli_Chr07 | 33146328                | AA                                     | GG                 | GG               | INTERGENIC            |               |                              |                    |
| SNP_55547_A_33146336 | NC_021166.1    | Ca_Kabuli_Chr07 | 33146336                | TT                                     | CC                 | CC               | INTERGENIC            |               |                              |                    |
| SNP_55548_A_33146574 | NC_021166.1    | Ca_Kabuli_Chr07 | 33146574                | TT                                     | AA                 | AA               | INTERGENIC            |               |                              |                    |
| SNP_55549_A_33146592 | NC_021166.1    | Ca_Kabuli_Chr07 | 33146592                | AA                                     | GG                 | GG               | INTERGENIC            |               |                              |                    |
| SNP_55550_A_33147215 | NC_021166.1    | Ca_Kabuli_Chr07 | 33147215                | AA                                     | GG                 | GG               | INTERGENIC            |               |                              |                    |
| SNP_55551_A_33147361 | NC_021166.1    | Ca_Kabuli_Chr07 | 33147361                | AA                                     | CC                 | CC               | INTERGENIC            |               |                              |                    |
| SNP_55552_A_33147436 | NC_021166.1    | Ca_Kabuli_Chr07 | 33147436                | TT                                     | CC                 | CC               | INTERGENIC            |               |                              |                    |
| SNP_55553_A_33147682 | NC_021166.1    | Ca_Kabuli_Chr07 | 33147682                | TT                                     | CC                 | CC               | INTERGENIC            |               |                              |                    |
| SNP_55554_A_33149291 | NC_021166.1    | Ca_Kabuli_Chr07 | 33149291                | CC                                     | TT                 | TT               | INTERGENIC            |               |                              |                    |
| SNP_55555_A_33149613 | NC_021166.1    | Ca_Kabuli_Chr07 | 33149613                | GG                                     | AA                 | AA               | INTERGENIC            |               |                              |                    |
| SNP_55556_A_33156422 | NC_021166.1    | Ca_Kabuli_Chr07 | 33156422                | CC                                     | TT                 | TT               | INTERGENIC            |               |                              |                    |
| SNP_55557_A_33157550 | NC_021166.1    | Ca_Kabuli_Chr07 | 33157550                | AA                                     | GG                 | GG               | INTERGENIC            |               |                              |                    |
| SNP_55558_A_33157596 | NC_021166.1    | Ca_Kabuli_Chr07 | 33157596                | TT                                     | CC                 | CC               | INTERGENIC            |               |                              |                    |
| SNP_55559_A_33157623 | NC_021166.1    | Ca_Kabuli_Chr07 | 33157623                | GG                                     | AA                 | AA               | INTERGENIC            |               |                              |                    |
| SNP_55560_A_33157841 | NC_021166.1    | Ca_Kabuli_Chr07 | 33157841                | AA                                     | GG                 | GG               | INTERGENIC            |               |                              |                    |
| SNP_55561_A_33158097 | NC_021166.1    | Ca_Kabuli_Chr07 | 33158097                | GG                                     | CC                 | CC               | INTERGENIC            |               |                              |                    |
| SNP_55562_A_33160158 | NC_021166.1    | Ca_Kabuli_Chr07 | 33160158                | TT                                     | CC                 | CC               | DRR                   | 101498004     | uncharacterized LOC101498004 |                    |
| SNP_55563_A_33160245 | NC_021166.1    | Ca_Kabuli_Chr07 | 33160245                | CC                                     | AA                 | AA               | NON_SYNONYMOUS_CODING | 101498004     | uncharacterized LOC101498004 |                    |
| SNP_55564_A_33171949 | NC_021166.1    | Ca_Kabuli_Chr07 | 33171949                | CC                                     | TT                 | TT               | INTERGENIC            |               |                              |                    |



| SNPs IDs             | Chromosome IDs | Chromosomes     | Physical positions (bp) | CDC Frontier genome (Reference genome) | (Pusa 1103 & HPNB) | (ILWC 46 & LPNB) | Sequence Components of genome | Gene accession IDs | Putative functions           |
|----------------------|----------------|-----------------|-------------------------|----------------------------------------|--------------------|------------------|-------------------------------|--------------------|------------------------------|
| SNP_55566_A_33172505 | NC_021166.1    | Ca_Kabuli_Chr07 | 33172505                | TT                                     | CC                 | CC               | INTERGENIC                    |                    |                              |
| SNP_55566_A_33174178 | NC_021166.1    | Ca_Kabuli_Chr07 | 33174178                | CC                                     | TT                 | TT               | INTERGENIC                    |                    |                              |
| SNP_55567_A_33176504 | NC_021166.1    | Ca_Kabuli_Chr07 | 33176504                | AA                                     | GG                 | GG               | INTERGENIC                    |                    |                              |
| SNP_55568_A_33176510 | NC_021166.1    | Ca_Kabuli_Chr07 | 33176510                | CC                                     | TT                 | TT               | INTERGENIC                    |                    |                              |
| SNP_55569_A_33185925 | NC_021166.1    | Ca_Kabuli_Chr07 | 33185925                | TT                                     | CC                 | CC               | SYNONYMOUS_CODING             | 101498678          | uncharacterized LOC101498678 |
| SNP_55570_A_33188196 | NC_021166.1    | Ca_Kabuli_Chr07 | 33188196                | GG                                     | AA                 | AA               | URR                           | 101498678          | uncharacterized LOC101498678 |
| SNP_55571_A_33188243 | NC_021166.1    | Ca_Kabuli_Chr07 | 33188243                | CC                                     | TT                 | TT               | URR                           | 101498678          | uncharacterized LOC101498678 |
| SNP_55572_A_33188538 | NC_021166.1    | Ca_Kabuli_Chr07 | 33188538                | GG                                     | AA                 | AA               | URR                           | 101498678          | uncharacterized LOC101498678 |
| SNP_55573_A_33189893 | NC_021166.1    | Ca_Kabuli_Chr07 | 33189893                | GG                                     | AA                 | AA               | INTERGENIC                    |                    |                              |
| SNP_55574_A_33191973 | NC_021166.1    | Ca_Kabuli_Chr07 | 33191973                | CC                                     | AA                 | AA               | INTERGENIC                    |                    |                              |
| SNP_55575_A_33192833 | NC_021166.1    | Ca_Kabuli_Chr07 | 33192833                | GG                                     | AA                 | AA               | INTERGENIC                    |                    |                              |
| SNP_55576_A_33193057 | NC_021166.1    | Ca_Kabuli_Chr07 | 33193057                | CC                                     | TT                 | TT               | INTERGENIC                    |                    |                              |
| SNP_55577_A_33193063 | NC_021166.1    | Ca_Kabuli_Chr07 | 33193063                | GG                                     | AA                 | AA               | INTERGENIC                    |                    |                              |
| SNP_55578_A_33193954 | NC_021166.1    | Ca_Kabuli_Chr07 | 33193954                | GG                                     | AA                 | AA               | INTERGENIC                    |                    |                              |
| SNP_55579_A_33193962 | NC_021166.1    | Ca_Kabuli_Chr07 | 33193962                | CC                                     | TT                 | TT               | INTERGENIC                    |                    |                              |
| SNP_55580_A_33196851 | NC_021166.1    | Ca_Kabuli_Chr07 | 33196851                | CC                                     | TT                 | TT               | INTERGENIC                    |                    |                              |
| SNP_55581_A_33197000 | NC_021166.1    | Ca_Kabuli_Chr07 | 33197000                | CC                                     | TT                 | TT               | INTERGENIC                    |                    |                              |
| SNP_55582_A_33197165 | NC_021166.1    | Ca_Kabuli_Chr07 | 33197165                | CC                                     | GG                 | GG               | INTERGENIC                    |                    |                              |
| SNP_55583_A_33197183 | NC_021166.1    | Ca_Kabuli_Chr07 | 33197183                | TT                                     | CC                 | CC               | INTERGENIC                    |                    |                              |
| SNP_55584_A_33209235 | NC_021166.1    | Ca_Kabuli_Chr07 | 33209235                | TT                                     | AA                 | AA               | INTERGENIC                    |                    |                              |
| SNP_55585_A_33211030 | NC_021166.1    | Ca_Kabuli_Chr07 | 33211030                | GG                                     | CC                 | CC               | INTERGENIC                    |                    |                              |
| SNP_55586_A_33211033 | NC_021166.1    | Ca_Kabuli_Chr07 | 33211033                | AA                                     | GG                 | GG               | INTERGENIC                    |                    |                              |

| SNPs IDs             | Chromosome IDs | Chromosomes     | Physical positions (bp) | CDC Frontier genome (Reference genome) | (Pusa 1103 & HPNB) | (ILWC 46 & LPNB) | Sequence Components of genome | Gene accession IDs | Putative functions                       |
|----------------------|----------------|-----------------|-------------------------|----------------------------------------|--------------------|------------------|-------------------------------|--------------------|------------------------------------------|
| SNP_55588_A_33211105 | NC_021166.1    | Ca_Kabuli_Chr07 | 33211105                | GG                                     | AA                 | AA               | INTERGENIC                    |                    |                                          |
| SNP_55589_A_33211222 | NC_021166.1    | Ca_Kabuli_Chr07 | 33211222                | TT                                     | CC                 | CC               | INTERGENIC                    |                    |                                          |
| SNP_55590_A_33211232 | NC_021166.1    | Ca_Kabuli_Chr07 | 33211232                | CC                                     | TT                 | TT               | INTERGENIC                    |                    |                                          |
| SNP_55591_A_33211262 | NC_021166.1    | Ca_Kabuli_Chr07 | 33211262                | CC                                     | TT                 | TT               | INTERGENIC                    |                    |                                          |
| SNP_55592_A_33213619 | NC_021166.1    | Ca_Kabuli_Chr07 | 33213619                | AA                                     | TT                 | TT               | INTERGENIC                    |                    |                                          |
| SNP_55593_A_33216829 | NC_021166.1    | Ca_Kabuli_Chr07 | 33216829                | CC                                     | AA                 | AA               | INTERGENIC                    |                    |                                          |
| SNP_55594_A_33217943 | NC_021166.1    | Ca_Kabuli_Chr07 | 33217943                | CC                                     | GG                 | GG               | DRR                           | 101499440          | uncharacterized LOC101499440             |
| SNP_55595_A_33217946 | NC_021166.1    | Ca_Kabuli_Chr07 | 33217946                | AA                                     | CC                 | CC               | DRR                           | 101499440          | uncharacterized LOC101499440             |
| SNP_55596_A_33218955 | NC_021166.1    | Ca_Kabuli_Chr07 | 33218955                | TT                                     | CC                 | CC               | INTRON                        | 101499440          | uncharacterized LOC101499440             |
| SNP_55597_A_33218957 | NC_021166.1    | Ca_Kabuli_Chr07 | 33218957                | AA                                     | GG                 | GG               | INTRON                        | 101499440          | uncharacterized LOC101499440             |
| SNP_55598_A_33218974 | NC_021166.1    | Ca_Kabuli_Chr07 | 33218974                | CC                                     | TT                 | TT               | INTRON                        | 101499440          | uncharacterized LOC101499440             |
| SNP_55599_A_33220412 | NC_021166.1    | Ca_Kabuli_Chr07 | 33220412                | CC                                     | TT                 | TT               | INTRON                        | 101499440          | uncharacterized LOC101499440             |
| SNP_55600_A_33220811 | NC_021166.1    | Ca_Kabuli_Chr07 | 33220811                | GG                                     | AA                 | AA               | SYNONYMOUS_CODING             | 101499440          | uncharacterized LOC101499440             |
| SNP_55601_A_33221134 | NC_021166.1    | Ca_Kabuli_Chr07 | 33221134                | GG                                     | AA                 | AA               | SYNONYMOUS_CODING             | 101499440          | uncharacterized LOC101499440             |
| SNP_55602_A_33230907 | NC_021166.1    | Ca_Kabuli_Chr07 | 33230907                | GG                                     | AA                 | AA               | URR                           | 101499746          | probable nucleoside diphosphate kinase 5 |
| SNP_55603_A_33234746 | NC_021166.1    | Ca_Kabuli_Chr07 | 33234746                | TT                                     | CC                 | CC               | INTERGENIC                    |                    |                                          |
| SNP_55604_A_33234748 | NC_021166.1    | Ca_Kabuli_Chr07 | 33234748                | CC                                     | GG                 | GG               | INTERGENIC                    |                    |                                          |
| SNP_55605_A_33237300 | NC_021166.1    | Ca_Kabuli_Chr07 | 33237300                | CC                                     | TT                 | TT               | INTERGENIC                    |                    |                                          |
| SNP_55607_A_33238264 | NC_021166.1    | Ca_Kabuli_Chr07 | 33238264                | AA                                     | TT                 | TT               | INTERGENIC                    |                    |                                          |
| SNP_55608_A_33238299 | NC_021166.1    | Ca_Kabuli_Chr07 | 33238299                | AA                                     | GG                 | GG               | INTERGENIC                    |                    |                                          |
| SNP_55609_A_33238345 | NC_021166.1    | Ca_Kabuli_Chr07 | 33238345                | TT                                     | AA                 | AA               | INTERGENIC                    |                    |                                          |
| SNP_55610_A_33238492 | NC_021166.1    | Ca_Kabuli_Chr07 | 33238492                | GG                                     | AA                 | AA               | INTERGENIC                    |                    |                                          |

| SNPs IDs             | Chromosome IDs | Chromosomes     | Physical positions (bp) | CDC Frontier genome (Reference genome) | (Pusa 1103 & HPNB) | (ILWC 46 & LPNB) | Sequence Components of genome | Gene accession IDs | Putative functions                     |
|----------------------|----------------|-----------------|-------------------------|----------------------------------------|--------------------|------------------|-------------------------------|--------------------|----------------------------------------|
| SNP_55611_A_33239671 | NC_021166.1    | Ca_Kabuli_Chr07 | 33239671                | AA                                     | GG                 | GG               | INTERGENIC                    |                    |                                        |
| SNP_55612_A_33239915 | NC_021166.1    | Ca_Kabuli_Chr07 | 33239915                | GG                                     | AA                 | AA               | INTERGENIC                    |                    |                                        |
| SNP_55613_A_33242654 | NC_021166.1    | Ca_Kabuli_Chr07 | 33242654                | TT                                     | CC                 | CC               | INTRON                        | 101501332          | uncharacterized LOC101501332           |
| SNP_55614_A_33242748 | NC_021166.1    | Ca_Kabuli_Chr07 | 33242748                | CC                                     | AA                 | AA               | INTRON                        | 101501332          | uncharacterized LOC101501332           |
| SNP_55615_A_33243427 | NC_021166.1    | Ca_Kabuli_Chr07 | 33243427                | TT                                     | GG                 | GG               | INTRON                        | 101501332          | uncharacterized LOC101501332           |
| SNP_55616_A_33245793 | NC_021166.1    | Ca_Kabuli_Chr07 | 33245793                | AA                                     | GG                 | GG               | DRR                           | 101501650          | sm-like protein LSM1B                  |
| SNP_55617_A_33245942 | NC_021166.1    | Ca_Kabuli_Chr07 | 33245942                | GG                                     | TT                 | TT               | DRR                           | 101501650          | sm-like protein LSM1B                  |
| SNP_55618_A_33245954 | NC_021166.1    | Ca_Kabuli_Chr07 | 33245954                | GG                                     | TT                 | TT               | DRR                           | 101501650          | sm-like protein LSM1B                  |
| SNP_55620_A_33247972 | NC_021166.1    | Ca_Kabuli_Chr07 | 33247972                | TT                                     | CC                 | CC               | INTERGENIC                    |                    |                                        |
| SNP_55621_A_33249138 | NC_021166.1    | Ca_Kabuli_Chr07 | 33249138                | TT                                     | CC                 | CC               | INTRON                        | 101501650          | sm-like protein LSM1B                  |
| SNP_55623_A_33253457 | NC_021166.1    | Ca_Kabuli_Chr07 | 33253457                | GG                                     | AA                 | AA               | DRR                           | 101502191          | transmembrane protein 87A              |
| SNP_55624_A_33253814 | NC_021166.1    | Ca_Kabuli_Chr07 | 33253814                | CC                                     | TT                 | TT               | DRR                           | 101502191          | transmembrane protein 87A              |
| SNP_55625_A_33266440 | NC_021166.1    | Ca_Kabuli_Chr07 | 33266440                | AA                                     | GG                 | GG               | URR                           | 101502505          | exocyst complex component EXO70A1-like |
| SNP_55626_A_33266451 | NC_021166.1    | Ca_Kabuli_Chr07 | 33266451                | GG                                     | AA                 | AA               | URR                           | 101502505          | exocyst complex component EXO70A1-like |
| SNP_55627_A_33266949 | NC_021166.1    | Ca_Kabuli_Chr07 | 33266949                | AA                                     | GG                 | GG               | URR                           | 101502505          | exocyst complex component EXO70A1-like |
| SNP_55628_A_33272213 | NC_021166.1    | Ca_Kabuli_Chr07 | 33272213                | TT                                     | CC                 | CC               | INTERGENIC                    |                    |                                        |
| SNP_55629_A_33273063 | NC_021166.1    | Ca_Kabuli_Chr07 | 33273063                | TT                                     | CC                 | CC               | INTERGENIC                    |                    |                                        |
| SNP_55630_A_33273084 | NC_021166.1    | Ca_Kabuli_Chr07 | 33273084                | CC                                     | TT                 | TT               | INTERGENIC                    |                    |                                        |
| SNP_55631_A_33273308 | NC_021166.1    | Ca_Kabuli_Chr07 | 33273308                | TT                                     | CC                 | CC               | INTERGENIC                    |                    |                                        |
| SNP_55632_A_33273315 | NC_021166.1    | Ca_Kabuli_Chr07 | 33273315                | CC                                     | TT                 | TT               | INTERGENIC                    |                    |                                        |
| SNP_55634_A_33286045 | NC_021166.1    | Ca_Kabuli_Chr07 | 33286045                | CC                                     | TT                 | TT               | INTRON                        | 101503135          | F-box protein SKP2B-like               |
| SNP_55635_A_33286059 | NC_021166.1    | Ca_Kabuli_Chr07 | 33286059                | CC                                     | AA                 | AA               | INTRON                        | 101503135          | F-box protein SKP2B-like               |

| SNPs IDs             | Chromosome IDs | Chromosomes     | Physical positions (bp) | CDC Frontier genome (Reference genome) | (Pusa 1103 & HPNB) | (ILWC 46 & LPNB) | Sequence Components of genome | Gene accession IDs | Putative functions       |
|----------------------|----------------|-----------------|-------------------------|----------------------------------------|--------------------|------------------|-------------------------------|--------------------|--------------------------|
| SNP_55636_A_33286454 | NC_021166.1    | Ca_Kabuli_Chr07 | 33286454                | CC                                     | AA                 | AA               | INTRON                        | 101503135          | F-box protein SKP2B-like |
| SNP_55637_A_33286498 | NC_021166.1    | Ca_Kabuli_Chr07 | 33286498                | GG                                     | AA                 | AA               | INTRON                        | 101503135          | F-box protein SKP2B-like |
| SNP_55638_A_33286584 | NC_021166.1    | Ca_Kabuli_Chr07 | 33286584                | GG                                     | AA                 | AA               | INTRON                        | 101503135          | F-box protein SKP2B-like |
| SNP_55639_A_33286980 | NC_021166.1    | Ca_Kabuli_Chr07 | 33286980                | AA                                     | GG                 | GG               | INTRON                        | 101503135          | F-box protein SKP2B-like |
| SNP_55640_A_33286996 | NC_021166.1    | Ca_Kabuli_Chr07 | 33286996                | TT                                     | AA                 | AA               | INTRON                        | 101503135          | F-box protein SKP2B-like |
| SNP_55641_A_33287011 | NC_021166.1    | Ca_Kabuli_Chr07 | 33287011                | TT                                     | CC                 | CC               | INTRON                        | 101503135          | F-box protein SKP2B-like |
| SNP_55642_A_33287276 | NC_021166.1    | Ca_Kabuli_Chr07 | 33287276                | GG                                     | AA                 | AA               | INTRON                        | 101503135          | F-box protein SKP2B-like |
| SNP_55643_A_33287395 | NC_021166.1    | Ca_Kabuli_Chr07 | 33287395                | AA                                     | GG                 | GG               | INTRON                        | 101503135          | F-box protein SKP2B-like |
| SNP_55645_A_33288951 | NC_021166.1    | Ca_Kabuli_Chr07 | 33288951                | GG                                     | AA                 | AA               | URR                           | 101503135          | F-box protein SKP2B-like |
| SNP_55646_A_33290094 | NC_021166.1    | Ca_Kabuli_Chr07 | 33290094                | GG                                     | AA                 | AA               | INTERGENIC                    |                    |                          |
| SNP_55647_A_33290097 | NC_021166.1    | Ca_Kabuli_Chr07 | 33290097                | AA                                     | GG                 | GG               | INTERGENIC                    |                    |                          |
| SNP_55648_A_33290139 | NC_021166.1    | Ca_Kabuli_Chr07 | 33290139                | AA                                     | CC                 | CC               | INTERGENIC                    |                    |                          |
| SNP_55649_A_33290147 | NC_021166.1    | Ca_Kabuli_Chr07 | 33290147                | TT                                     | AA                 | AA               | INTERGENIC                    |                    |                          |
| SNP_55650_A_33290257 | NC_021166.1    | Ca_Kabuli_Chr07 | 33290257                | GG                                     | AA                 | AA               | INTERGENIC                    |                    |                          |
| SNP_55651_A_33290785 | NC_021166.1    | Ca_Kabuli_Chr07 | 33290785                | GG                                     | CC                 | CC               | INTERGENIC                    |                    |                          |
| SNP_55652_A_33290803 | NC_021166.1    | Ca_Kabuli_Chr07 | 33290803                | AA                                     | TT                 | TT               | INTERGENIC                    |                    |                          |
| SNP_55653_A_33293350 | NC_021166.1    | Ca_Kabuli_Chr07 | 33293350                | GG                                     | TT                 | TT               | INTERGENIC                    |                    |                          |
| SNP_55654_A_33293354 | NC_021166.1    | Ca_Kabuli_Chr07 | 33293354                | GG                                     | AA                 | AA               | INTERGENIC                    |                    |                          |
| SNP_55656_A_33296208 | NC_021166.1    | Ca_Kabuli_Chr07 | 33296208                | TT                                     | CC                 | CC               | INTERGENIC                    |                    |                          |
| SNP_55658_A_33299068 | NC_021166.1    | Ca_Kabuli_Chr07 | 33299068                | CC                                     | GG                 | GG               | INTRON                        | 101503456          | protein TIFY 11B         |
| SNP_55659_A_33303458 | NC_021166.1    | Ca_Kabuli_Chr07 | 33303458                | CC                                     | AA                 | AA               | INTERGENIC                    |                    |                          |
| SNP_55660_A_33307380 | NC_021166.1    | Ca_Kabuli_Chr07 | 33307380                | GG                                     | AA                 | AA               | INTERGENIC                    |                    |                          |

| SNPs IDs             | Chromosome IDs | Chromosomes     | Physical positions (bp) | CDC Frontier genome (Reference genome) | (Pusa 1103 & HPNB) | (ILWC 46 & LPNB) | Sequence genome | Components of | Gene accession IDs                               | Putative functions |
|----------------------|----------------|-----------------|-------------------------|----------------------------------------|--------------------|------------------|-----------------|---------------|--------------------------------------------------|--------------------|
| SNP_55661_A_33326499 | NC_021166.1    | Ca_Kabuli_Chr07 | 33326499                | TT                                     | CC                 | CC               | INTERGENIC      |               |                                                  |                    |
| SNP_55662_A_33328661 | NC_021166.1    | Ca_Kabuli_Chr07 | 33328661                | CC                                     | TT                 | TT               | INTERGENIC      |               |                                                  |                    |
| SNP_55663_A_33329144 | NC_021166.1    | Ca_Kabuli_Chr07 | 33329144                | TT                                     | CC                 | CC               | INTERGENIC      |               |                                                  |                    |
| SNP_55664_A_33329162 | NC_021166.1    | Ca_Kabuli_Chr07 | 33329162                | GG                                     | TT                 | TT               | INTERGENIC      |               |                                                  |                    |
| SNP_55665_A_33329172 | NC_021166.1    | Ca_Kabuli_Chr07 | 33329172                | GG                                     | AA                 | AA               | INTERGENIC      |               |                                                  |                    |
| SNP_55667_A_33329405 | NC_021166.1    | Ca_Kabuli_Chr07 | 33329405                | CC                                     | TT                 | TT               | INTERGENIC      |               |                                                  |                    |
| SNP_55668_A_33329408 | NC_021166.1    | Ca_Kabuli_Chr07 | 33329408                | AA                                     | GG                 | GG               | INTERGENIC      |               |                                                  |                    |
| SNP_55669_A_33329441 | NC_021166.1    | Ca_Kabuli_Chr07 | 33329441                | AA                                     | TT                 | TT               | INTERGENIC      |               |                                                  |                    |
| SNP_55670_A_33334743 | NC_021166.1    | Ca_Kabuli_Chr07 | 33334743                | GG                                     | CC                 | CC               | INTERGENIC      |               |                                                  |                    |
| SNP_55671_A_33335688 | NC_021166.1    | Ca_Kabuli_Chr07 | 33335688                | CC                                     | TT                 | TT               | INTERGENIC      |               |                                                  |                    |
| SNP_55672_A_33336996 | NC_021166.1    | Ca_Kabuli_Chr07 | 33336996                | CC                                     | TT                 | TT               | URR             | 101503795     | oligouridylate-binding protein 1B-like           |                    |
| SNP_55673_A_33338385 | NC_021166.1    | Ca_Kabuli_Chr07 | 33338385                | TT                                     | AA                 | AA               | DRR             | 101504116     | protein FLUORESCENT IN BLUE LIGHT, chloroplastic |                    |
| SNP_55674_A_33338390 | NC_021166.1    | Ca_Kabuli_Chr07 | 33338390                | CC                                     | GG                 | GG               | DRR             | 101504116     | protein FLUORESCENT IN BLUE LIGHT, chloroplastic |                    |
| SNP_55675_A_33338405 | NC_021166.1    | Ca_Kabuli_Chr07 | 33338405                | AA                                     | GG                 | GG               | DRR             | 101504116     | protein FLUORESCENT IN BLUE LIGHT, chloroplastic |                    |
| SNP_55676_A_33338406 | NC_021166.1    | Ca_Kabuli_Chr07 | 33338406                | CC                                     | TT                 | TT               | DRR             | 101504116     | protein FLUORESCENT IN BLUE LIGHT, chloroplastic |                    |
| SNP_55677_A_33338477 | NC_021166.1    | Ca_Kabuli_Chr07 | 33338477                | AA                                     | GG                 | GG               | INTERGENIC      |               |                                                  |                    |
| SNP_55678_A_33342246 | NC_021166.1    | Ca_Kabuli_Chr07 | 33342246                | GG                                     | AA                 | AA               | URR             | 101504116     | protein FLUORESCENT IN BLUE LIGHT, chloroplastic |                    |
| SNP_55680_A_33344836 | NC_021166.1    | Ca_Kabuli_Chr07 | 33344836                | GG                                     | AA                 | AA               | URR             | 101504655     | uncharacterized LOC101504655                     |                    |
| SNP_55681_A_33345895 | NC_021166.1    | Ca_Kabuli_Chr07 | 33345895                | CC                                     | GG                 | GG               | URR             | 101504655     | uncharacterized LOC101504655                     |                    |
| SNP_55682_A_33346008 | NC_021166.1    | Ca_Kabuli_Chr07 | 33346008                | CC                                     | AA                 | AA               | URR             | 101504655     | uncharacterized LOC101504655                     |                    |
| SNP_55683_A_33346053 | NC_021166.1    | Ca_Kabuli_Chr07 | 33346053                | TT                                     | AA                 | AA               | URR             | 101504655     | uncharacterized LOC101504655                     |                    |
| SNP_55684_A_33346133 | NC_021166.1    | Ca_Kabuli_Chr07 | 33346133                | CC                                     | TT                 | TT               | URR             | 101504655     | uncharacterized LOC101504655                     |                    |

| SNPs IDs             | Chromosome IDs | Chromosomes     | Physical positions (bp) | CDC Frontier (Reference genome) | (Pusa 1103 & HPNB) | (ILWC 46 & LPNB) | Sequence Components of genome | Gene accession IDs | Putative functions                  |
|----------------------|----------------|-----------------|-------------------------|---------------------------------|--------------------|------------------|-------------------------------|--------------------|-------------------------------------|
| SNP_55685_A_33348524 | NC_021166.1    | Ca_Kabuli_Chr07 | 33348524                | GG                              | AA                 | AA               | INTRON                        | 101504972          | nuclear pore complex protein NUP107 |
| SNP_55686_A_33349798 | NC_021166.1    | Ca_Kabuli_Chr07 | 33349798                | AA                              | GG                 | GG               | INTRON                        | 101504972          | nuclear pore complex protein NUP107 |
| SNP_55688_A_33355094 | NC_021166.1    | Ca_Kabuli_Chr07 | 33355094                | AA                              | GG                 | GG               | INTRON                        | 101504972          | nuclear pore complex protein NUP107 |
| SNP_55689_A_33356130 | NC_021166.1    | Ca_Kabuli_Chr07 | 33356130                | TT                              | CC                 | CC               | INTRON                        | 101504972          | nuclear pore complex protein NUP107 |
| SNP_55690_A_33356139 | NC_021166.1    | Ca_Kabuli_Chr07 | 33356139                | AA                              | GG                 | GG               | INTRON                        | 101504972          | nuclear pore complex protein NUP107 |
| SNP_55691_A_33356814 | NC_021166.1    | Ca_Kabuli_Chr07 | 33356814                | GG                              | TT                 | TT               | INTRON                        | 101504972          | nuclear pore complex protein NUP107 |
| SNP_55693_A_33359436 | NC_021166.1    | Ca_Kabuli_Chr07 | 33359436                | CC                              | TT                 | TT               | INTRON                        | 101504972          | nuclear pore complex protein NUP107 |
| SNP_55694_A_33361617 | NC_021166.1    | Ca_Kabuli_Chr07 | 33361617                | TT                              | AA                 | AA               | INTRON                        | 101504972          | nuclear pore complex protein NUP107 |
| SNP_55695_A_33364354 | NC_021166.1    | Ca_Kabuli_Chr07 | 33364354                | GG                              | AA                 | AA               | INTRON                        | 101504972          | nuclear pore complex protein NUP107 |
| SNP_55696_A_33364643 | NC_021166.1    | Ca_Kabuli_Chr07 | 33364643                | TT                              | GG                 | GG               | INTRON                        | 101504972          | nuclear pore complex protein NUP107 |
| SNP_55697_A_33364712 | NC_021166.1    | Ca_Kabuli_Chr07 | 33364712                | CC                              | TT                 | TT               | INTRON                        | 101504972          | nuclear pore complex protein NUP107 |
| SNP_55698_A_33364862 | NC_021166.1    | Ca_Kabuli_Chr07 | 33364862                | GG                              | AA                 | AA               | INTRON                        | 101504972          | nuclear pore complex protein NUP107 |
| SNP_55699_A_33365533 | NC_021166.1    | Ca_Kabuli_Chr07 | 33365533                | AA                              | GG                 | GG               | INTRON                        | 101504972          | nuclear pore complex protein NUP107 |
| SNP_55700_A_33367778 | NC_021166.1    | Ca_Kabuli_Chr07 | 33367778                | GG                              | TT                 | TT               | URR                           | 101504972          | nuclear pore complex protein NUP107 |
| SNP_55701_A_33368827 | NC_021166.1    | Ca_Kabuli_Chr07 | 33368827                | TT                              | CC                 | CC               | URR                           | 101504972          | nuclear pore complex protein NUP107 |
| SNP_55702_A_33369121 | NC_021166.1    | Ca_Kabuli_Chr07 | 33369121                | CC                              | TT                 | TT               | URR                           | 101504972          | nuclear pore complex protein NUP107 |
| SNP_55703_A_33370914 | NC_021166.1    | Ca_Kabuli_Chr07 | 33370914                | GG                              | AA                 | AA               | INTERGENIC                    |                    |                                     |
| SNP_55704_A_33370918 | NC_021166.1    | Ca_Kabuli_Chr07 | 33370918                | GG                              | AA                 | AA               | INTERGENIC                    |                    |                                     |
| SNP_55705_A_33381245 | NC_021166.1    | Ca_Kabuli_Chr07 | 33381245                | CC                              | TT                 | TT               | DRR                           | 101505495          | uncharacterized LOC101505495        |
| SNP_55706_A_33381739 | NC_021166.1    | Ca_Kabuli_Chr07 | 33381739                | AA                              | GG                 | GG               | URR                           | 101505495          | uncharacterized LOC101505495        |
| SNP_55707_A_33381742 | NC_021166.1    | Ca_Kabuli_Chr07 | 33381742                | TT                              | AA                 | AA               | URR                           | 101505495          | uncharacterized LOC101505495        |
| SNP_55708_A_33381749 | NC_021166.1    | Ca_Kabuli_Chr07 | 33381749                | TT                              | GG                 | GG               | URR                           | 101505495          | uncharacterized LOC101505495        |

| SNPs IDs             | Chromosome IDs | Chromosomes     | Physical positions (bp) | CDC Frontier (Reference genome) | (Pusa 1103 & HPNB) | (ILWC 46 & LPNB) | Sequence Components of genome | Gene accession IDs | Putative functions                 |
|----------------------|----------------|-----------------|-------------------------|---------------------------------|--------------------|------------------|-------------------------------|--------------------|------------------------------------|
| SNP_55709_A_33382992 | NC_021166.1    | Ca_Kabuli_Chr07 | 33382992                | TT                              | GG                 | GG               | URR                           | 101505495          | uncharacterized LOC101505495       |
| SNP_55710_A_33383240 | NC_021166.1    | Ca_Kabuli_Chr07 | 33383240                | TT                              | CC                 | CC               | URR                           | 101505495          | uncharacterized LOC101505495       |
| SNP_55711_A_33385285 | NC_021166.1    | Ca_Kabuli_Chr07 | 33385285                | TT                              | CC                 | CC               | INTERGENIC                    |                    |                                    |
| SNP_55712_A_33385452 | NC_021166.1    | Ca_Kabuli_Chr07 | 33385452                | AA                              | GG                 | GG               | INTERGENIC                    |                    |                                    |
| SNP_55713_A_33401809 | NC_021166.1    | Ca_Kabuli_Chr07 | 33401809                | AA                              | GG                 | GG               | INTERGENIC                    |                    |                                    |
| SNP_55714_A_33401811 | NC_021166.1    | Ca_Kabuli_Chr07 | 33401811                | CC                              | TT                 | TT               | INTERGENIC                    |                    |                                    |
| SNP_55717_A_33413632 | NC_021166.1    | Ca_Kabuli_Chr07 | 33413632                | CC                              | TT                 | TT               | INTERGENIC                    |                    |                                    |
| SNP_55718_A_33414673 | NC_021166.1    | Ca_Kabuli_Chr07 | 33414673                | CC                              | GG                 | GG               | INTERGENIC                    |                    |                                    |
| SNP_55719_A_33415783 | NC_021166.1    | Ca_Kabuli_Chr07 | 33415783                | AA                              | GG                 | GG               | DRR                           | 101506688          | 25.3 kDa vesicle transport protein |
| SNP_55720_A_33416195 | NC_021166.1    | Ca_Kabuli_Chr07 | 33416195                | TT                              | CC                 | CC               | DRR                           | 101506688          | 25.3 kDa vesicle transport protein |
| SNP_55721_A_33419008 | NC_021166.1    | Ca_Kabuli_Chr07 | 33419008                | TT                              | AA                 | AA               | INTERGENIC                    |                    |                                    |
| SNP_55722_A_33419287 | NC_021166.1    | Ca_Kabuli_Chr07 | 33419287                | GG                              | CC                 | CC               | INTERGENIC                    |                    |                                    |
| SNP_55723_A_33419942 | NC_021166.1    | Ca_Kabuli_Chr07 | 33419942                | TT                              | CC                 | CC               | INTERGENIC                    |                    |                                    |
| SNP_55724_A_33419962 | NC_021166.1    | Ca_Kabuli_Chr07 | 33419962                | CC                              | GG                 | GG               | INTERGENIC                    |                    |                                    |
| SNP_55725_A_33442943 | NC_021166.1    | Ca_Kabuli_Chr07 | 33442943                | GG                              | AA                 | AA               | INTERGENIC                    |                    |                                    |
| SNP_55726_A_33459158 | NC_021166.1    | Ca_Kabuli_Chr07 | 33459158                | GG                              | AA                 | AA               | INTERGENIC                    |                    |                                    |
| SNP_55727_A_33459992 | NC_021166.1    | Ca_Kabuli_Chr07 | 33459992                | CC                              | GG                 | GG               | INTERGENIC                    |                    |                                    |
| SNP_55728_A_33459993 | NC_021166.1    | Ca_Kabuli_Chr07 | 33459993                | TT                              | CC                 | CC               | INTERGENIC                    |                    |                                    |
| SNP_55729_A_33467926 | NC_021166.1    | Ca_Kabuli_Chr07 | 33467926                | GG                              | TT                 | TT               | INTRON                        | 101507554          | uncharacterized LOC101507554       |
| SNP_55730_A_33468732 | NC_021166.1    | Ca_Kabuli_Chr07 | 33468732                | AA                              | GG                 | GG               | INTRON                        | 101507554          | uncharacterized LOC101507554       |
| SNP_55731_A_33469548 | NC_021166.1    | Ca_Kabuli_Chr07 | 33469548                | GG                              | AA                 | AA               | INTRON                        | 101507554          | uncharacterized LOC101507554       |
| SNP_55732_A_33472258 | NC_021166.1    | Ca_Kabuli_Chr07 | 33472258                | TT                              | CC                 | CC               | URR                           | 101507554          | uncharacterized LOC101507554       |

| SNPs IDs             | Chromosome IDs | Chromosomes     | Physical positions (bp) | CDC Frontier (Reference genome) | (Pusa 1103 & HPNB) | (ILWC 46 & LPNB) | Sequence Components of genome | Gene accession IDs | Putative functions           |
|----------------------|----------------|-----------------|-------------------------|---------------------------------|--------------------|------------------|-------------------------------|--------------------|------------------------------|
| SNP_55733_A_33472260 | NC_021166.1    | Ca_Kabuli_Chr07 | 33472260                | TT                              | CC                 | CC               | URR                           | 101507554          | uncharacterized LOC101507554 |
| SNP_55734_A_33472305 | NC_021166.1    | Ca_Kabuli_Chr07 | 33472305                | GG                              | AA                 | AA               | URR                           | 101507554          | uncharacterized LOC101507554 |
| SNP_55735_A_33472506 | NC_021166.1    | Ca_Kabuli_Chr07 | 33472506                | AA                              | GG                 | GG               | URR                           | 101507554          | uncharacterized LOC101507554 |
| SNP_55736_A_33472525 | NC_021166.1    | Ca_Kabuli_Chr07 | 33472525                | TT                              | CC                 | CC               | URR                           | 101507554          | uncharacterized LOC101507554 |
| SNP_55738_A_33472626 | NC_021166.1    | Ca_Kabuli_Chr07 | 33472626                | AA                              | GG                 | GG               | URR                           | 101507554          | uncharacterized LOC101507554 |
| SNP_55739_A_33473266 | NC_021166.1    | Ca_Kabuli_Chr07 | 33473266                | CC                              | GG                 | GG               | URR                           | 101507554          | uncharacterized LOC101507554 |
| SNP_55740_A_33473291 | NC_021166.1    | Ca_Kabuli_Chr07 | 33473291                | AA                              | TT                 | TT               | URR                           | 101507554          | uncharacterized LOC101507554 |
| SNP_55743_A_33475001 | NC_021166.1    | Ca_Kabuli_Chr07 | 33475001                | CC                              | TT                 | TT               | INTERGENIC                    |                    |                              |
| SNP_55744_A_33475085 | NC_021166.1    | Ca_Kabuli_Chr07 | 33475085                | CC                              | TT                 | TT               | INTERGENIC                    |                    |                              |
| SNP_55745_A_33475097 | NC_021166.1    | Ca_Kabuli_Chr07 | 33475097                | CC                              | TT                 | TT               | INTERGENIC                    |                    |                              |
| SNP_55746_A_33477590 | NC_021166.1    | Ca_Kabuli_Chr07 | 33477590                | GG                              | AA                 | AA               | INTERGENIC                    |                    |                              |
| SNP_55747_A_33477599 | NC_021166.1    | Ca_Kabuli_Chr07 | 33477599                | TT                              | CC                 | CC               | INTERGENIC                    |                    |                              |
| SNP_55748_A_33477852 | NC_021166.1    | Ca_Kabuli_Chr07 | 33477852                | CC                              | TT                 | TT               | INTERGENIC                    |                    |                              |
| SNP_55749_A_33477863 | NC_021166.1    | Ca_Kabuli_Chr07 | 33477863                | GG                              | AA                 | AA               | INTERGENIC                    |                    |                              |
| SNP_55750_A_33477878 | NC_021166.1    | Ca_Kabuli_Chr07 | 33477878                | AA                              | GG                 | GG               | INTERGENIC                    |                    |                              |
| SNP_55751_A_33477900 | NC_021166.1    | Ca_Kabuli_Chr07 | 33477900                | AA                              | GG                 | GG               | INTERGENIC                    |                    |                              |
| SNP_55752_A_33477906 | NC_021166.1    | Ca_Kabuli_Chr07 | 33477906                | AA                              | CC                 | CC               | INTERGENIC                    |                    |                              |
| SNP_55753_A_33477941 | NC_021166.1    | Ca_Kabuli_Chr07 | 33477941                | AA                              | TT                 | TT               | INTERGENIC                    |                    |                              |
| SNP_55754_A_33477958 | NC_021166.1    | Ca_Kabuli_Chr07 | 33477958                | AA                              | GG                 | GG               | INTERGENIC                    |                    |                              |
| SNP_55755_A_33477969 | NC_021166.1    | Ca_Kabuli_Chr07 | 33477969                | CC                              | TT                 | TT               | INTERGENIC                    |                    |                              |
| SNP_55756_A_33477975 | NC_021166.1    | Ca_Kabuli_Chr07 | 33477975                | TT                              | CC                 | CC               | INTERGENIC                    |                    |                              |
| SNP_55757_A_33478027 | NC_021166.1    | Ca_Kabuli_Chr07 | 33478027                | TT                              | AA                 | AA               | INTERGENIC                    |                    |                              |



| SNPs IDs             | Chromosome IDs | Chromosomes     | Physical positions (bp) | CDC Frontier (Reference genome) | (Pusa 1103 & HPNB) | (ILWC 46 & LPNB) | Sequence Components of genome | Gene accession IDs | Putative functions                                    |
|----------------------|----------------|-----------------|-------------------------|---------------------------------|--------------------|------------------|-------------------------------|--------------------|-------------------------------------------------------|
| SNP_55758_A_33482383 | NC_021166.1    | Ca_Kabuli_Chr07 | 33482383                | AA                              | CC                 | CC               | URR                           | 101508093          | trihelix transcription factor ASIL2                   |
| SNP_55759_A_33486489 | NC_021166.1    | Ca_Kabuli_Chr07 | 33486489                | TT                              | CC                 | CC               | URR                           | 101508408          | auxin-repressed 12.5 kDa protein                      |
| SNP_55760_A_33489357 | NC_021166.1    | Ca_Kabuli_Chr07 | 33489357                | AA                              | GG                 | GG               | INTERGENIC                    |                    |                                                       |
| SNP_55761_A_33518078 | NC_021166.1    | Ca_Kabuli_Chr07 | 33518078                | AA                              | GG                 | GG               | INTERGENIC                    |                    |                                                       |
| SNP_55762_A_33519380 | NC_021166.1    | Ca_Kabuli_Chr07 | 33519380                | AA                              | TT                 | TT               | INTERGENIC                    |                    |                                                       |
| SNP_55764_A_33520488 | NC_021166.1    | Ca_Kabuli_Chr07 | 33520488                | AA                              | GG                 | GG               | INTERGENIC                    |                    |                                                       |
| SNP_55765_A_33520507 | NC_021166.1    | Ca_Kabuli_Chr07 | 33520507                | GG                              | AA                 | AA               | INTERGENIC                    |                    |                                                       |
| SNP_55766_A_33520522 | NC_021166.1    | Ca_Kabuli_Chr07 | 33520522                | CC                              | GG                 | GG               | INTERGENIC                    |                    |                                                       |
| SNP_55767_A_33520540 | NC_021166.1    | Ca_Kabuli_Chr07 | 33520540                | AA                              | CC                 | CC               | INTERGENIC                    |                    |                                                       |
| SNP_55768_A_33520541 | NC_021166.1    | Ca_Kabuli_Chr07 | 33520541                | CC                              | TT                 | TT               | INTERGENIC                    |                    |                                                       |
| SNP_55769_A_33521607 | NC_021166.1    | Ca_Kabuli_Chr07 | 33521607                | TT                              | CC                 | CC               | INTERGENIC                    |                    |                                                       |
| SNP_55770_A_33521669 | NC_021166.1    | Ca_Kabuli_Chr07 | 33521669                | TT                              | CC                 | CC               | INTERGENIC                    |                    |                                                       |
| SNP_55771_A_33521855 | NC_021166.1    | Ca_Kabuli_Chr07 | 33521855                | TT                              | CC                 | CC               | INTERGENIC                    |                    |                                                       |
| SNP_55772_A_33522028 | NC_021166.1    | Ca_Kabuli_Chr07 | 33522028                | CC                              | TT                 | TT               | INTERGENIC                    |                    |                                                       |
| SNP_55773_A_33523155 | NC_021166.1    | Ca_Kabuli_Chr07 | 33523155                | AA                              | CC                 | CC               | INTERGENIC                    |                    |                                                       |
| SNP_55774_A_33523353 | NC_021166.1    | Ca_Kabuli_Chr07 | 33523353                | TT                              | CC                 | CC               | INTERGENIC                    |                    |                                                       |
| SNP_55775_A_33523404 | NC_021166.1    | Ca_Kabuli_Chr07 | 33523404                | AA                              | TT                 | TT               | INTERGENIC                    |                    |                                                       |
| SNP_55776_A_33524733 | NC_021166.1    | Ca_Kabuli_Chr07 | 33524733                | AA                              | GG                 | GG               | SYNONYMOUS_CODING             | 101509790          | probable complex I intermediate-associated protein 30 |
| SNP_55778_A_33528024 | NC_021166.1    | Ca_Kabuli_Chr07 | 33528024                | TT                              | AA                 | AA               | URR                           | 101509790          | probable complex I intermediate-associated protein 30 |
| SNP_55779_A_33528034 | NC_021166.1    | Ca_Kabuli_Chr07 | 33528034                | CC                              | TT                 | TT               | URR                           | 101509790          | probable complex I intermediate-associated protein 30 |
| SNP_55780_A_33528145 | NC_021166.1    | Ca_Kabuli_Chr07 | 33528145                | AA                              | GG                 | GG               | URR                           | 101509790          | probable complex I intermediate-associated protein 30 |
| SNP_55782_A_33528406 | NC_021166.1    | Ca_Kabuli_Chr07 | 33528406                | AA                              | GG                 | GG               | URR                           | 101509790          | probable complex I intermediate-associated protein 30 |

| SNPs IDs             | Chromosome IDs | Chromosomes     | Physical positions (bp) | CDC Frontier genome (Reference genome) | (Pusa 1103 & HPNB) | (ILWC 46 & LPNB) | Sequence Components of genome | Gene accession IDs | Putative functions                                    |
|----------------------|----------------|-----------------|-------------------------|----------------------------------------|--------------------|------------------|-------------------------------|--------------------|-------------------------------------------------------|
| SNP_55783_A_33528566 | NC_021166.1    | Ca_Kabuli_Chr07 | 33528566                | AA                                     | CC                 | CC               | URR                           | 101509790          | probable complex I intermediate-associated protein 30 |
| SNP_55784_A_33531911 | NC_021166.1    | Ca_Kabuli_Chr07 | 33531911                | AA                                     | TT                 | TT               | URR                           | 101510110          | auxin-induced protein X10A-like                       |
| SNP_55785_A_33531919 | NC_021166.1    | Ca_Kabuli_Chr07 | 33531919                | GG                                     | CC                 | CC               | INTERGENIC                    |                    |                                                       |
| SNP_55786_A_33532013 | NC_021166.1    | Ca_Kabuli_Chr07 | 33532013                | TT                                     | AA                 | AA               | INTERGENIC                    |                    |                                                       |
| SNP_55787_A_33532034 | NC_021166.1    | Ca_Kabuli_Chr07 | 33532034                | GG                                     | AA                 | AA               | INTERGENIC                    |                    |                                                       |
| SNP_55789_A_33532766 | NC_021166.1    | Ca_Kabuli_Chr07 | 33532766                | GG                                     | CC                 | CC               | INTERGENIC                    |                    |                                                       |
| SNP_55790_A_33532768 | NC_021166.1    | Ca_Kabuli_Chr07 | 33532768                | GG                                     | AA                 | AA               | INTERGENIC                    |                    |                                                       |
| SNP_55792_A_33534327 | NC_021166.1    | Ca_Kabuli_Chr07 | 33534327                | AA                                     | GG                 | GG               | INTERGENIC                    |                    |                                                       |
| SNP_55793_A_33534785 | NC_021166.1    | Ca_Kabuli_Chr07 | 33534785                | TT                                     | CC                 | CC               | INTERGENIC                    |                    |                                                       |
| SNP_55794_A_33534795 | NC_021166.1    | Ca_Kabuli_Chr07 | 33534795                | CC                                     | TT                 | TT               | INTERGENIC                    |                    |                                                       |
| SNP_55795_A_33534802 | NC_021166.1    | Ca_Kabuli_Chr07 | 33534802                | CC                                     | TT                 | TT               | INTERGENIC                    |                    |                                                       |
| SNP_55796_A_33538991 | NC_021166.1    | Ca_Kabuli_Chr07 | 33538991                | TT                                     | AA                 | AA               | URR                           | 101510435          | uncharacterized LOC101510435                          |
| SNP_55797_A_33539202 | NC_021166.1    | Ca_Kabuli_Chr07 | 33539202                | TT                                     | CC                 | CC               | URR                           | 101510435          | uncharacterized LOC101510435                          |
| SNP_55798_A_33539234 | NC_021166.1    | Ca_Kabuli_Chr07 | 33539234                | TT                                     | AA                 | AA               | URR                           | 101510435          | uncharacterized LOC101510435                          |
| SNP_55800_A_33539804 | NC_021166.1    | Ca_Kabuli_Chr07 | 33539804                | GG                                     | CC                 | CC               | URR                           | 101510435          | uncharacterized LOC101510435                          |
| SNP_55801_A_33541241 | NC_021166.1    | Ca_Kabuli_Chr07 | 33541241                | AA                                     | TT                 | TT               | INTERGENIC                    |                    |                                                       |
| SNP_55802_A_33545414 | NC_021166.1    | Ca_Kabuli_Chr07 | 33545414                | AA                                     | GG                 | GG               | INTERGENIC                    |                    |                                                       |
| SNP_55803_A_33557273 | NC_021166.1    | Ca_Kabuli_Chr07 | 33557273                | GG                                     | AA                 | AA               | INTERGENIC                    |                    |                                                       |
| SNP_55804_A_33557326 | NC_021166.1    | Ca_Kabuli_Chr07 | 33557326                | TT                                     | AA                 | AA               | INTERGENIC                    |                    |                                                       |
| SNP_55805_A_33557896 | NC_021166.1    | Ca_Kabuli_Chr07 | 33557896                | AA                                     | GG                 | GG               | INTERGENIC                    |                    |                                                       |
| SNP_55808_A_33560849 | NC_021166.1    | Ca_Kabuli_Chr07 | 33560849                | CC                                     | TT                 | TT               | DRR                           | 101510760          | cytochrome P450 704B1                                 |
| SNP_55809_A_33561057 | NC_021166.1    | Ca_Kabuli_Chr07 | 33561057                | TT                                     | CC                 | CC               | INTERGENIC                    |                    |                                                       |

| SNPs IDs             | Chromosome IDs | Chromosomes     | Physical positions (bp) | CDC Frontier genome (Reference genome) | (Pusa 1103 & HPNB) | (ILWC 46 & LPNB) | Sequence Components of genome | Gene accession IDs | Putative functions                     |
|----------------------|----------------|-----------------|-------------------------|----------------------------------------|--------------------|------------------|-------------------------------|--------------------|----------------------------------------|
| SNP_55812_A_33561496 | NC_021166.1    | Ca_Kabuli_Chr07 | 33561496                | AA                                     | TT                 | TT               | INTRON                        | 101510760          | cytochrome P450 704B1                  |
| SNP_55813_A_33562451 | NC_021166.1    | Ca_Kabuli_Chr07 | 33562451                | TT                                     | AA                 | AA               | INTERGENIC                    |                    |                                        |
| SNP_55814_A_33563963 | NC_021166.1    | Ca_Kabuli_Chr07 | 33563963                | TT                                     | CC                 | CC               | INTERGENIC                    |                    |                                        |
| SNP_55815_A_33564852 | NC_021166.1    | Ca_Kabuli_Chr07 | 33564852                | GG                                     | AA                 | AA               | DRR                           | 101511085          | 17.4 kDa class III heat shock protein  |
| SNP_55816_A_33565013 | NC_021166.1    | Ca_Kabuli_Chr07 | 33565013                | AA                                     | TT                 | TT               | DRR                           | 101511085          | 17.4 kDa class III heat shock protein  |
| SNP_55817_A_33565384 | NC_021166.1    | Ca_Kabuli_Chr07 | 33565384                | GG                                     | TT                 | TT               | DRR                           | 101511085          | 17.4 kDa class III heat shock protein  |
| SNP_55818_A_33574530 | NC_021166.1    | Ca_Kabuli_Chr07 | 33574530                | TT                                     | AA                 | AA               | URR                           | 101511601          | CCAAT/enhancer-binding protein zeta    |
| SNP_55819_A_33575054 | NC_021166.1    | Ca_Kabuli_Chr07 | 33575054                | AA                                     | GG                 | GG               | DRR                           | 101511927          | phosphoinositide phosphatase SAC2-like |
| SNP_55820_A_33575858 | NC_021166.1    | Ca_Kabuli_Chr07 | 33575858                | GG                                     | AA                 | AA               | DRR                           | 101511927          | phosphoinositide phosphatase SAC2-like |
| SNP_55821_A_33575862 | NC_021166.1    | Ca_Kabuli_Chr07 | 33575862                | GG                                     | AA                 | AA               | DRR                           | 101511927          | phosphoinositide phosphatase SAC2-like |
| SNP_55822_A_33575875 | NC_021166.1    | Ca_Kabuli_Chr07 | 33575875                | CC                                     | TT                 | TT               | DRR                           | 101511927          | phosphoinositide phosphatase SAC2-like |
| SNP_55824_A_33579300 | NC_021166.1    | Ca_Kabuli_Chr07 | 33579300                | TT                                     | CC                 | CC               | INTRON                        | 101511927          | phosphoinositide phosphatase SAC2-like |
| SNP_55825_A_33579666 | NC_021166.1    | Ca_Kabuli_Chr07 | 33579666                | TT                                     | CC                 | CC               | INTRON                        | 101511927          | phosphoinositide phosphatase SAC2-like |
| SNP_55826_A_33585101 | NC_021166.1    | Ca_Kabuli_Chr07 | 33585101                | AA                                     | TT                 | TT               | INTRON                        | 101511927          | phosphoinositide phosphatase SAC2-like |
| SNP_55827_A_33585439 | NC_021166.1    | Ca_Kabuli_Chr07 | 33585439                | GG                                     | AA                 | AA               | INTRON                        | 101511927          | phosphoinositide phosphatase SAC2-like |
| SNP_55828_A_33587259 | NC_021166.1    | Ca_Kabuli_Chr07 | 33587259                | AA                                     | CC                 | CC               | START_GAINED                  | 101511927          | phosphoinositide phosphatase SAC2-like |
| SNP_55829_A_33592076 | NC_021166.1    | Ca_Kabuli_Chr07 | 33592076                | AA                                     | CC                 | CC               | INTERGENIC                    |                    |                                        |
| SNP_55830_A_33592497 | NC_021166.1    | Ca_Kabuli_Chr07 | 33592497                | AA                                     | GG                 | GG               | INTERGENIC                    |                    |                                        |
| SNP_55831_A_33594231 | NC_021166.1    | Ca_Kabuli_Chr07 | 33594231                | GG                                     | AA                 | AA               | INTERGENIC                    |                    |                                        |
| SNP_55834_A_33605646 | NC_021166.1    | Ca_Kabuli_Chr07 | 33605646                | AA                                     | TT                 | TT               | INTERGENIC                    |                    |                                        |
| SNP_55836_A_33605878 | NC_021166.1    | Ca_Kabuli_Chr07 | 33605878                | TT                                     | CC                 | CC               | INTERGENIC                    |                    |                                        |
| SNP_55837_A_33605881 | NC_021166.1    | Ca_Kabuli_Chr07 | 33605881                | TT                                     | GG                 | GG               | INTERGENIC                    |                    |                                        |

| SNPs IDs             | Chromosome IDs | Chromosomes     | Physical positions (bp) | CDC Frontier genome (Reference genome) | (Pusa 1103 & HPNB) | (ILWC 46 & LPNB) | Sequence Components of genome | Gene accession IDs | Putative functions          |
|----------------------|----------------|-----------------|-------------------------|----------------------------------------|--------------------|------------------|-------------------------------|--------------------|-----------------------------|
| SNP_55838_A_33605901 | NC_021166.1    | Ca_Kabuli_Chr07 | 33605901                | TT                                     | AA                 | AA               | INTERGENIC                    |                    |                             |
| SNP_55839_A_33606247 | NC_021166.1    | Ca_Kabuli_Chr07 | 33606247                | TT                                     | AA                 | AA               | INTERGENIC                    |                    |                             |
| SNP_55841_A_33612616 | NC_021166.1    | Ca_Kabuli_Chr07 | 33612616                | AA                                     | GG                 | GG               | INTERGENIC                    |                    |                             |
| SNP_55843_A_33625655 | NC_021166.1    | Ca_Kabuli_Chr07 | 33625655                | GG                                     | AA                 | AA               | INTRON                        | 101512592          | GDSL esterase/lipase 5-like |
| SNP_55844_A_33625656 | NC_021166.1    | Ca_Kabuli_Chr07 | 33625656                | AA                                     | TT                 | TT               | INTRON                        | 101512592          | GDSL esterase/lipase 5-like |
| SNP_55845_A_33625697 | NC_021166.1    | Ca_Kabuli_Chr07 | 33625697                | AA                                     | CC                 | CC               | INTRON                        | 101512592          | GDSL esterase/lipase 5-like |
| SNP_55846_A_33627699 | NC_021166.1    | Ca_Kabuli_Chr07 | 33627699                | GG                                     | AA                 | AA               | INTRON                        | 101512592          | GDSL esterase/lipase 5-like |
| SNP_55847_A_33630712 | NC_021166.1    | Ca_Kabuli_Chr07 | 33630712                | GG                                     | TT                 | TT               | INTRON                        | 101512592          | GDSL esterase/lipase 5-like |
| SNP_55848_A_33630739 | NC_021166.1    | Ca_Kabuli_Chr07 | 33630739                | CC                                     | TT                 | TT               | INTRON                        | 101512592          | GDSL esterase/lipase 5-like |
| SNP_55849_A_33631039 | NC_021166.1    | Ca_Kabuli_Chr07 | 33631039                | CC                                     | AA                 | AA               | INTRON                        | 101512592          | GDSL esterase/lipase 5-like |
| SNP_55850_A_33631045 | NC_021166.1    | Ca_Kabuli_Chr07 | 33631045                | GG                                     | TT                 | TT               | INTRON                        | 101512592          | GDSL esterase/lipase 5-like |
| SNP_55851_A_33631070 | NC_021166.1    | Ca_Kabuli_Chr07 | 33631070                | GG                                     | CC                 | CC               | INTRON                        | 101512592          | GDSL esterase/lipase 5-like |
| SNP_55852_A_33631075 | NC_021166.1    | Ca_Kabuli_Chr07 | 33631075                | GG                                     | AA                 | AA               | INTRON                        | 101512592          | GDSL esterase/lipase 5-like |
| SNP_55853_A_33631347 | NC_021166.1    | Ca_Kabuli_Chr07 | 33631347                | AA                                     | TT                 | TT               | INTRON                        | 101512592          | GDSL esterase/lipase 5-like |
| SNP_55854_A_33631398 | NC_021166.1    | Ca_Kabuli_Chr07 | 33631398                | TT                                     | AA                 | AA               | INTRON                        | 101512592          | GDSL esterase/lipase 5-like |
| SNP_55855_A_33631462 | NC_021166.1    | Ca_Kabuli_Chr07 | 33631462                | GG                                     | AA                 | AA               | INTRON                        | 101512592          | GDSL esterase/lipase 5-like |
| SNP_55856_A_33631498 | NC_021166.1    | Ca_Kabuli_Chr07 | 33631498                | CC                                     | TT                 | TT               | INTRON                        | 101512592          | GDSL esterase/lipase 5-like |
| SNP_55857_A_33631501 | NC_021166.1    | Ca_Kabuli_Chr07 | 33631501                | GG                                     | AA                 | AA               | INTRON                        | 101512592          | GDSL esterase/lipase 5-like |
| SNP_55859_A_33631719 | NC_021166.1    | Ca_Kabuli_Chr07 | 33631719                | GG                                     | TT                 | TT               | INTRON                        | 101512592          | GDSL esterase/lipase 5-like |
| SNP_55860_A_33631755 | NC_021166.1    | Ca_Kabuli_Chr07 | 33631755                | CC                                     | TT                 | TT               | INTRON                        | 101512592          | GDSL esterase/lipase 5-like |
| SNP_55862_A_33631773 | NC_021166.1    | Ca_Kabuli_Chr07 | 33631773                | TT                                     | GG                 | GG               | INTRON                        | 101512592          | GDSL esterase/lipase 5-like |
| SNP_55863_A_33631780 | NC_021166.1    | Ca_Kabuli_Chr07 | 33631780                | AA                                     | GG                 | GG               | INTRON                        | 101512592          | GDSL esterase/lipase 5-like |

| SNPs IDs             | Chromosome IDs | Chromosomes     | Physical positions (bp) | CDC Frontier genome (Reference genome) | (Pusa 1103 & HPNB) | (ILWC 46 & LPNB) | Sequence genome | Components of | Gene accession IDs                               | Putative functions |
|----------------------|----------------|-----------------|-------------------------|----------------------------------------|--------------------|------------------|-----------------|---------------|--------------------------------------------------|--------------------|
| SNP_55864_A_33636674 | NC_021166.1    | Ca_Kabuli_Chr07 | 33636674                | TT                                     | CC                 | CC               | INTERGENIC      |               |                                                  |                    |
| SNP_55865_A_33636700 | NC_021166.1    | Ca_Kabuli_Chr07 | 33636700                | AA                                     | GG                 | GG               | INTERGENIC      |               |                                                  |                    |
| SNP_55866_A_33637022 | NC_021166.1    | Ca_Kabuli_Chr07 | 33637022                | TT                                     | AA                 | AA               | INTERGENIC      |               |                                                  |                    |
| SNP_55867_A_33637989 | NC_021166.1    | Ca_Kabuli_Chr07 | 33637989                | GG                                     | AA                 | AA               | INTERGENIC      |               |                                                  |                    |
| SNP_55868_A_33638003 | NC_021166.1    | Ca_Kabuli_Chr07 | 33638003                | GG                                     | AA                 | AA               | INTERGENIC      |               |                                                  |                    |
| SNP_55869_A_33638015 | NC_021166.1    | Ca_Kabuli_Chr07 | 33638015                | GG                                     | CC                 | CC               | INTERGENIC      |               |                                                  |                    |
| SNP_55870_A_33638261 | NC_021166.1    | Ca_Kabuli_Chr07 | 33638261                | GG                                     | AA                 | AA               | INTERGENIC      |               |                                                  |                    |
| SNP_55871_A_33638344 | NC_021166.1    | Ca_Kabuli_Chr07 | 33638344                | TT                                     | AA                 | AA               | INTERGENIC      |               |                                                  |                    |
| SNP_55872_A_33638353 | NC_021166.1    | Ca_Kabuli_Chr07 | 33638353                | TT                                     | AA                 | AA               | INTERGENIC      |               |                                                  |                    |
| SNP_55873_A_33638541 | NC_021166.1    | Ca_Kabuli_Chr07 | 33638541                | AA                                     | TT                 | TT               | INTERGENIC      |               |                                                  |                    |
| SNP_55878_A_33640340 | NC_021166.1    | Ca_Kabuli_Chr07 | 33640340                | AA                                     | TT                 | TT               | DRR             | 101512899     | ethylene-responsive transcription factor RAP2-12 |                    |
| SNP_55879_A_33640397 | NC_021166.1    | Ca_Kabuli_Chr07 | 33640397                | TT                                     | CC                 | CC               | DRR             | 101512899     | ethylene-responsive transcription factor RAP2-12 |                    |
| SNP_55880_A_33640556 | NC_021166.1    | Ca_Kabuli_Chr07 | 33640556                | GG                                     | CC                 | CC               | DRR             | 101512899     | ethylene-responsive transcription factor RAP2-12 |                    |
| SNP_55881_A_33643734 | NC_021166.1    | Ca_Kabuli_Chr07 | 33643734                | TT                                     | GG                 | GG               | URR             | 101512899     | ethylene-responsive transcription factor RAP2-12 |                    |
| SNP_55884_A_33644693 | NC_021166.1    | Ca_Kabuli_Chr07 | 33644693                | GG                                     | CC                 | CC               | URR             | 101512899     | ethylene-responsive transcription factor RAP2-12 |                    |
| SNP_55885_A_33644697 | NC_021166.1    | Ca_Kabuli_Chr07 | 33644697                | CC                                     | TT                 | TT               | URR             | 101512899     | ethylene-responsive transcription factor RAP2-12 |                    |
| SNP_55887_A_33644967 | NC_021166.1    | Ca_Kabuli_Chr07 | 33644967                | AA                                     | GG                 | GG               | URR             | 101512899     | ethylene-responsive transcription factor RAP2-12 |                    |
| SNP_55888_A_33644974 | NC_021166.1    | Ca_Kabuli_Chr07 | 33644974                | TT                                     | CC                 | CC               | URR             | 101512899     | ethylene-responsive transcription factor RAP2-12 |                    |
| SNP_55889_A_33644984 | NC_021166.1    | Ca_Kabuli_Chr07 | 33644984                | GG                                     | AA                 | AA               | URR             | 101512899     | ethylene-responsive transcription factor RAP2-12 |                    |
| SNP_55890_A_33644989 | NC_021166.1    | Ca_Kabuli_Chr07 | 33644989                | CC                                     | AA                 | AA               | URR             | 101512899     | ethylene-responsive transcription factor RAP2-12 |                    |
| SNP_55891_A_33645034 | NC_021166.1    | Ca_Kabuli_Chr07 | 33645034                | CC                                     | TT                 | TT               | URR             | 101512899     | ethylene-responsive transcription factor RAP2-12 |                    |
| SNP_55892_A_33645047 | NC_021166.1    | Ca_Kabuli_Chr07 | 33645047                | CC                                     | TT                 | TT               | URR             | 101512899     | ethylene-responsive transcription factor RAP2-12 |                    |

| SNPs IDs             | Chromosome IDs | Chromosomes     | Physical positions (bp) | CDC Frontier genome (Reference genome) | (Pusa 1103 & HPNB) | (ILWC 46 & LPNB) | Sequence Components of genome | Gene accession IDs | Putative functions                               |
|----------------------|----------------|-----------------|-------------------------|----------------------------------------|--------------------|------------------|-------------------------------|--------------------|--------------------------------------------------|
| SNP_55894_A_33645386 | NC_021166.1    | Ca_Kabuli_Chr07 | 33645386                | AA                                     | GG                 | GG               | URR                           | 101512899          | ethylene-responsive transcription factor RAP2-12 |
| SNP_55895_A_33647939 | NC_021166.1    | Ca_Kabuli_Chr07 | 33647939                | GG                                     | TT                 | TT               | INTERGENIC                    |                    |                                                  |
| SNP_55896_A_33649813 | NC_021166.1    | Ca_Kabuli_Chr07 | 33649813                | TT                                     | CC                 | CC               | INTERGENIC                    |                    |                                                  |
| SNP_55897_A_33649818 | NC_021166.1    | Ca_Kabuli_Chr07 | 33649818                | TT                                     | CC                 | CC               | INTERGENIC                    |                    |                                                  |
| SNP_55898_A_33650134 | NC_021166.1    | Ca_Kabuli_Chr07 | 33650134                | CC                                     | TT                 | TT               | INTERGENIC                    |                    |                                                  |
| SNP_55899_A_33650404 | NC_021166.1    | Ca_Kabuli_Chr07 | 33650404                | GG                                     | AA                 | AA               | INTERGENIC                    |                    |                                                  |
| SNP_55900_A_33650508 | NC_021166.1    | Ca_Kabuli_Chr07 | 33650508                | AA                                     | GG                 | GG               | INTERGENIC                    |                    |                                                  |
| SNP_55901_A_33650843 | NC_021166.1    | Ca_Kabuli_Chr07 | 33650843                | AA                                     | GG                 | GG               | INTERGENIC                    |                    |                                                  |
| SNP_55902_A_33652028 | NC_021166.1    | Ca_Kabuli_Chr07 | 33652028                | CC                                     | TT                 | TT               | INTERGENIC                    |                    |                                                  |
| SNP_55903_A_33653665 | NC_021166.1    | Ca_Kabuli_Chr07 | 33653665                | AA                                     | GG                 | GG               | INTERGENIC                    |                    |                                                  |
| SNP_55904_A_33653676 | NC_021166.1    | Ca_Kabuli_Chr07 | 33653676                | GG                                     | AA                 | AA               | INTERGENIC                    |                    |                                                  |
| SNP_55905_A_33653941 | NC_021166.1    | Ca_Kabuli_Chr07 | 33653941                | TT                                     | GG                 | GG               | INTERGENIC                    |                    |                                                  |
| SNP_55906_A_33655992 | NC_021166.1    | Ca_Kabuli_Chr07 | 33655992                | CC                                     | TT                 | TT               | INTERGENIC                    |                    |                                                  |
| SNP_55907_A_33657854 | NC_021166.1    | Ca_Kabuli_Chr07 | 33657854                | AA                                     | TT                 | TT               | INTERGENIC                    |                    |                                                  |
| SNP_55908_A_33657859 | NC_021166.1    | Ca_Kabuli_Chr07 | 33657859                | GG                                     | AA                 | AA               | INTERGENIC                    |                    |                                                  |
| SNP_55909_A_33657897 | NC_021166.1    | Ca_Kabuli_Chr07 | 33657897                | CC                                     | AA                 | AA               | INTERGENIC                    |                    |                                                  |
| SNP_55910_A_33657935 | NC_021166.1    | Ca_Kabuli_Chr07 | 33657935                | GG                                     | AA                 | AA               | INTERGENIC                    |                    |                                                  |
| SNP_55911_A_33658901 | NC_021166.1    | Ca_Kabuli_Chr07 | 33658901                | GG                                     | AA                 | AA               | INTERGENIC                    |                    |                                                  |
| SNP_55912_A_33659224 | NC_021166.1    | Ca_Kabuli_Chr07 | 33659224                | TT                                     | CC                 | CC               | INTERGENIC                    |                    |                                                  |
| SNP_55913_A_33659261 | NC_021166.1    | Ca_Kabuli_Chr07 | 33659261                | TT                                     | CC                 | CC               | INTERGENIC                    |                    |                                                  |
| SNP_55914_A_33659270 | NC_021166.1    | Ca_Kabuli_Chr07 | 33659270                | GG                                     | AA                 | AA               | INTERGENIC                    |                    |                                                  |
| SNP_55915_A_33659284 | NC_021166.1    | Ca_Kabuli_Chr07 | 33659284                | CC                                     | TT                 | TT               | INTERGENIC                    |                    |                                                  |

| SNPs IDs             | Chromosome IDs | Chromosomes     | Physical positions (bp) | CDC Frontier genome (Reference genome) | (Pusa 1103 & HPNB) | (ILWC 46 & LPNB) | Sequence genome | Components of | Gene accession IDs              | Putative functions |
|----------------------|----------------|-----------------|-------------------------|----------------------------------------|--------------------|------------------|-----------------|---------------|---------------------------------|--------------------|
| SNP_55916_A_33659308 | NC_021166.1    | Ca_Kabuli_Chr07 | 33659308                | TT                                     | CC                 | CC               | INTERGENIC      |               |                                 |                    |
| SNP_55917_A_33659383 | NC_021166.1    | Ca_Kabuli_Chr07 | 33659383                | CC                                     | GG                 | GG               | INTERGENIC      |               |                                 |                    |
| SNP_55918_A_33659617 | NC_021166.1    | Ca_Kabuli_Chr07 | 33659617                | AA                                     | GG                 | GG               | INTERGENIC      |               |                                 |                    |
| SNP_55919_A_33659634 | NC_021166.1    | Ca_Kabuli_Chr07 | 33659634                | TT                                     | CC                 | CC               | INTERGENIC      |               |                                 |                    |
| SNP_55921_A_33662637 | NC_021166.1    | Ca_Kabuli_Chr07 | 33662637                | TT                                     | AA                 | AA               | INTERGENIC      |               |                                 |                    |
| SNP_55926_A_33663742 | NC_021166.1    | Ca_Kabuli_Chr07 | 33663742                | CC                                     | AA                 | AA               | INTERGENIC      |               |                                 |                    |
| SNP_55927_A_33665155 | NC_021166.1    | Ca_Kabuli_Chr07 | 33665155                | GG                                     | AA                 | AA               | INTERGENIC      |               |                                 |                    |
| SNP_55928_A_33666453 | NC_021166.1    | Ca_Kabuli_Chr07 | 33666453                | CC                                     | GG                 | GG               | INTERGENIC      |               |                                 |                    |
| SNP_55929_A_33670382 | NC_021166.1    | Ca_Kabuli_Chr07 | 33670382                | TT                                     | CC                 | CC               | INTERGENIC      |               |                                 |                    |
| SNP_55930_A_33670403 | NC_021166.1    | Ca_Kabuli_Chr07 | 33670403                | CC                                     | TT                 | TT               | INTERGENIC      |               |                                 |                    |
| SNP_55931_A_33671090 | NC_021166.1    | Ca_Kabuli_Chr07 | 33671090                | CC                                     | TT                 | TT               | INTERGENIC      |               |                                 |                    |
| SNP_55932_A_33671358 | NC_021166.1    | Ca_Kabuli_Chr07 | 33671358                | GG                                     | AA                 | AA               | INTERGENIC      |               |                                 |                    |
| SNP_55934_A_33672594 | NC_021166.1    | Ca_Kabuli_Chr07 | 33672594                | AA                                     | TT                 | TT               | DRR             | 101513435     | subtilisin-like protease SBT1.6 |                    |
| SNP_55935_A_33678499 | NC_021166.1    | Ca_Kabuli_Chr07 | 33678499                | AA                                     | TT                 | TT               | INTERGENIC      |               |                                 |                    |
| SNP_55936_A_33683176 | NC_021166.1    | Ca_Kabuli_Chr07 | 33683176                | TT                                     | AA                 | AA               | INTERGENIC      |               |                                 |                    |
| SNP_55938_A_33683226 | NC_021166.1    | Ca_Kabuli_Chr07 | 33683226                | AA                                     | CC                 | CC               | INTERGENIC      |               |                                 |                    |
| SNP_55939_A_33683312 | NC_021166.1    | Ca_Kabuli_Chr07 | 33683312                | AA                                     | GG                 | GG               | INTERGENIC      |               |                                 |                    |
| SNP_55940_A_33683323 | NC_021166.1    | Ca_Kabuli_Chr07 | 33683323                | AA                                     | CC                 | CC               | INTERGENIC      |               |                                 |                    |
| SNP_55941_A_33683334 | NC_021166.1    | Ca_Kabuli_Chr07 | 33683334                | TT                                     | GG                 | GG               | INTERGENIC      |               |                                 |                    |
| SNP_55942_A_33683885 | NC_021166.1    | Ca_Kabuli_Chr07 | 33683885                | GG                                     | AA                 | AA               | INTERGENIC      |               |                                 |                    |
| SNP_55943_A_33683890 | NC_021166.1    | Ca_Kabuli_Chr07 | 33683890                | AA                                     | TT                 | TT               | INTERGENIC      |               |                                 |                    |
| SNP_55944_A_33683947 | NC_021166.1    | Ca_Kabuli_Chr07 | 33683947                | CC                                     | AA                 | AA               | INTERGENIC      |               |                                 |                    |

| SNPs IDs             | Chromosome IDs | Chromosomes     | Physical positions (bp) | CDC Frontier genome (Reference genome) | (Pusa 1103 & HPNB) | (ILWC 46 & LPNB) | Sequence Components of genome | Gene accession IDs | Putative functions                  |
|----------------------|----------------|-----------------|-------------------------|----------------------------------------|--------------------|------------------|-------------------------------|--------------------|-------------------------------------|
| SNP_55945_A_33700331 | NC_021166.1    | Ca_Kabuli_Chr07 | 33700331                | AA                                     | GG                 | GG               | INTERGENIC                    |                    |                                     |
| SNP_55946_A_33700362 | NC_021166.1    | Ca_Kabuli_Chr07 | 33700362                | CC                                     | AA                 | AA               | INTERGENIC                    |                    |                                     |
| SNP_55947_A_33700387 | NC_021166.1    | Ca_Kabuli_Chr07 | 33700387                | CC                                     | TT                 | TT               | INTERGENIC                    |                    |                                     |
| SNP_55948_A_33700660 | NC_021166.1    | Ca_Kabuli_Chr07 | 33700660                | CC                                     | TT                 | TT               | INTERGENIC                    |                    |                                     |
| SNP_55949_A_33701350 | NC_021166.1    | Ca_Kabuli_Chr07 | 33701350                | AA                                     | GG                 | GG               | INTERGENIC                    |                    |                                     |
| SNP_55950_A_33704744 | NC_021166.1    | Ca_Kabuli_Chr07 | 33704744                | TT                                     | CC                 | CC               | INTERGENIC                    |                    |                                     |
| SNP_55951_A_33705918 | NC_021166.1    | Ca_Kabuli_Chr07 | 33705918                | TT                                     | AA                 | AA               | DRR                           | 101513746          | uncharacterized LOC101513746        |
| SNP_55952_A_33706124 | NC_021166.1    | Ca_Kabuli_Chr07 | 33706124                | CC                                     | GG                 | GG               | DRR                           | 101513746          | uncharacterized LOC101513746        |
| SNP_55953_A_33708161 | NC_021166.1    | Ca_Kabuli_Chr07 | 33708161                | AA                                     | GG                 | GG               | URR                           | 101513746          | uncharacterized LOC101513746        |
| SNP_55955_A_33719738 | NC_021166.1    | Ca_Kabuli_Chr07 | 33719738                | TT                                     | CC                 | CC               | INTERGENIC                    |                    |                                     |
| SNP_55956_A_33720124 | NC_021166.1    | Ca_Kabuli_Chr07 | 33720124                | CC                                     | AA                 | AA               | INTERGENIC                    |                    |                                     |
| SNP_55957_A_33720343 | NC_021166.1    | Ca_Kabuli_Chr07 | 33720343                | CC                                     | TT                 | TT               | INTERGENIC                    |                    |                                     |
| SNP_55958_A_33720387 | NC_021166.1    | Ca_Kabuli_Chr07 | 33720387                | GG                                     | AA                 | AA               | INTERGENIC                    |                    |                                     |
| SNP_55959_A_33720414 | NC_021166.1    | Ca_Kabuli_Chr07 | 33720414                | CC                                     | TT                 | TT               | INTERGENIC                    |                    |                                     |
| SNP_55960_A_33721854 | NC_021166.1    | Ca_Kabuli_Chr07 | 33721854                | AA                                     | GG                 | GG               | INTERGENIC                    |                    |                                     |
| SNP_55961_A_33722981 | NC_021166.1    | Ca_Kabuli_Chr07 | 33722981                | CC                                     | AA                 | AA               | INTERGENIC                    |                    |                                     |
| SNP_55962_A_33722986 | NC_021166.1    | Ca_Kabuli_Chr07 | 33722986                | GG                                     | CC                 | CC               | INTERGENIC                    |                    |                                     |
| SNP_55963_A_33725472 | NC_021166.1    | Ca_Kabuli_Chr07 | 33725472                | GG                                     | AA                 | AA               | DRR                           | 101493142          | agamous-like MADS-box protein AGL62 |
| SNP_55965_A_33727112 | NC_021166.1    | Ca_Kabuli_Chr07 | 33727112                | AA                                     | TT                 | TT               | URR                           | 101493142          | agamous-like MADS-box protein AGL62 |
| SNP_55966_A_33729675 | NC_021166.1    | Ca_Kabuli_Chr07 | 33729675                | CC                                     | TT                 | TT               | INTERGENIC                    |                    |                                     |
| SNP_55967_A_33732113 | NC_021166.1    | Ca_Kabuli_Chr07 | 33732113                | TT                                     | AA                 | AA               | INTERGENIC                    |                    |                                     |
| SNP_55968_A_33732504 | NC_021166.1    | Ca_Kabuli_Chr07 | 33732504                | TT                                     | CC                 | CC               | INTERGENIC                    |                    |                                     |



| SNPs IDs             | Chromosome IDs | Chromosomes     | Physical positions (bp) | CDC Frontier genome (Reference genome) | (Pusa 1103 & HPNB) | (ILWC 46 & LPNB) | Sequence Components of genome | Gene accession IDs | Putative functions                                      |
|----------------------|----------------|-----------------|-------------------------|----------------------------------------|--------------------|------------------|-------------------------------|--------------------|---------------------------------------------------------|
| SNP_55969_A_33732655 | NC_021166.1    | Ca_Kabuli_Chr07 | 33732655                | GG                                     | TT                 | TT               | INTERGENIC                    |                    |                                                         |
| SNP_55970_A_33739074 | NC_021166.1    | Ca_Kabuli_Chr07 | 33739074                | GG                                     | AA                 | AA               | INTRON                        | 101514085          | AT-rich interactive domain-containing protein 4-like    |
| SNP_55971_A_33741986 | NC_021166.1    | Ca_Kabuli_Chr07 | 33741986                | CC                                     | TT                 | TT               | INTRON                        | 101514085          | AT-rich interactive domain-containing protein 4-like    |
| SNP_55972_A_33743963 | NC_021166.1    | Ca_Kabuli_Chr07 | 33743963                | GG                                     | AA                 | AA               | INTRON                        | 101514085          | AT-rich interactive domain-containing protein 4-like    |
| SNP_55973_A_33744353 | NC_021166.1    | Ca_Kabuli_Chr07 | 33744353                | TT                                     | CC                 | CC               | INTRON                        | 101514085          | AT-rich interactive domain-containing protein 4-like    |
| SNP_55974_A_33747075 | NC_021166.1    | Ca_Kabuli_Chr07 | 33747075                | AA                                     | TT                 | TT               | URR                           | 101514085          | AT-rich interactive domain-containing protein 4-like    |
| SNP_55975_A_33747365 | NC_021166.1    | Ca_Kabuli_Chr07 | 33747365                | CC                                     | TT                 | TT               | URR                           | 101514085          | AT-rich interactive domain-containing protein 4-like    |
| SNP_55976_A_33756409 | NC_021166.1    | Ca_Kabuli_Chr07 | 33756409                | AA                                     | GG                 | GG               | URR                           | 101514410          | translation initiation factor eIF-2B subunit alpha-like |
| SNP_55977_A_33759645 | NC_021166.1    | Ca_Kabuli_Chr07 | 33759645                | CC                                     | TT                 | TT               | NON_SYNONYMOUS_CODING         | 101514737          | uncharacterized LOC101514737                            |
| SNP_55978_A_33759648 | NC_021166.1    | Ca_Kabuli_Chr07 | 33759648                | CC                                     | TT                 | TT               | NON_SYNONYMOUS_CODING         | 101514737          | uncharacterized LOC101514737                            |
| SNP_55979_A_33759675 | NC_021166.1    | Ca_Kabuli_Chr07 | 33759675                | CC                                     | TT                 | TT               | NON_SYNONYMOUS_CODING         | 101514737          | uncharacterized LOC101514737                            |
| SNP_55980_A_33763290 | NC_021166.1    | Ca_Kabuli_Chr07 | 33763290                | AA                                     | GG                 | GG               | URR                           | 101514737          | uncharacterized LOC101514737                            |
| SNP_55981_A_33763296 | NC_021166.1    | Ca_Kabuli_Chr07 | 33763296                | AA                                     | GG                 | GG               | URR                           | 101514737          | uncharacterized LOC101514737                            |
| SNP_55982_A_33763655 | NC_021166.1    | Ca_Kabuli_Chr07 | 33763655                | CC                                     | TT                 | TT               | URR                           | 101514737          | uncharacterized LOC101514737                            |
| SNP_55983_A_33763672 | NC_021166.1    | Ca_Kabuli_Chr07 | 33763672                | TT                                     | CC                 | CC               | URR                           | 101514737          | uncharacterized LOC101514737                            |
| SNP_55984_A_33765561 | NC_021166.1    | Ca_Kabuli_Chr07 | 33765561                | AA                                     | TT                 | TT               | DRR                           | 101515063          | protein LURP-one-related 11-like                        |
| SNP_55985_A_33765614 | NC_021166.1    | Ca_Kabuli_Chr07 | 33765614                | TT                                     | AA                 | AA               | DRR                           | 101515063          | protein LURP-one-related 11-like                        |
| SNP_55987_A_33766145 | NC_021166.1    | Ca_Kabuli_Chr07 | 33766145                | GG                                     | AA                 | AA               | INTRON                        | 101515063          | protein LURP-one-related 11-like                        |
| SNP_55988_A_33766152 | NC_021166.1    | Ca_Kabuli_Chr07 | 33766152                | AA                                     | GG                 | GG               | INTRON                        | 101515063          | protein LURP-one-related 11-like                        |
| SNP_55989_A_33766154 | NC_021166.1    | Ca_Kabuli_Chr07 | 33766154                | GG                                     | TT                 | TT               | INTRON                        | 101515063          | protein LURP-one-related 11-like                        |
| SNP_55990_A_33766324 | NC_021166.1    | Ca_Kabuli_Chr07 | 33766324                | CC                                     | GG                 | GG               | INTRON                        | 101515063          | protein LURP-one-related 11-like                        |
| SNP_55991_A_33768642 | NC_021166.1    | Ca_Kabuli_Chr07 | 33768642                | TT                                     | CC                 | CC               | URR                           | 101515063          | protein LURP-one-related 11-like                        |

| SNPs IDs             | Chromosome IDs | Chromosomes     | Physical positions (bp) | CDC Frontier genome (Reference genome) | (Pusa 1103 & HPNB) | (ILWC 46 & LPNB) | Sequence Components of genome | Gene accession IDs | Putative functions               |
|----------------------|----------------|-----------------|-------------------------|----------------------------------------|--------------------|------------------|-------------------------------|--------------------|----------------------------------|
| SNP_55992_A_33768652 | NC_021166.1    | Ca_Kabuli_Chr07 | 33768652                | CC                                     | TT                 | TT               | URR                           | 101515063          | protein LURP-one-related 11-like |
| SNP_55993_A_33768679 | NC_021166.1    | Ca_Kabuli_Chr07 | 33768679                | CC                                     | AA                 | AA               | URR                           | 101515063          | protein LURP-one-related 11-like |
| SNP_55995_A_33768934 | NC_021166.1    | Ca_Kabuli_Chr07 | 33768934                | AA                                     | CC                 | CC               | URR                           | 101515063          | protein LURP-one-related 11-like |
| SNP_55997_A_33770999 | NC_021166.1    | Ca_Kabuli_Chr07 | 33770999                | TT                                     | AA                 | AA               | INTERGENIC                    |                    |                                  |
| SNP_55998_A_33771000 | NC_021166.1    | Ca_Kabuli_Chr07 | 33771000                | GG                                     | AA                 | AA               | INTERGENIC                    |                    |                                  |
| SNP_55999_A_33771006 | NC_021166.1    | Ca_Kabuli_Chr07 | 33771006                | TT                                     | CC                 | CC               | INTERGENIC                    |                    |                                  |
| SNP_56000_A_33771209 | NC_021166.1    | Ca_Kabuli_Chr07 | 33771209                | AA                                     | GG                 | GG               | INTERGENIC                    |                    |                                  |
| SNP_56001_A_33771237 | NC_021166.1    | Ca_Kabuli_Chr07 | 33771237                | TT                                     | AA                 | AA               | INTERGENIC                    |                    |                                  |
| SNP_56002_A_33772165 | NC_021166.1    | Ca_Kabuli_Chr07 | 33772165                | TT                                     | CC                 | CC               | INTERGENIC                    |                    |                                  |
| SNP_56003_A_33772747 | NC_021166.1    | Ca_Kabuli_Chr07 | 33772747                | AA                                     | TT                 | TT               | INTERGENIC                    |                    |                                  |
| SNP_56005_A_33775645 | NC_021166.1    | Ca_Kabuli_Chr07 | 33775645                | GG                                     | CC                 | CC               | INTERGENIC                    |                    |                                  |
| SNP_56006_A_33775647 | NC_021166.1    | Ca_Kabuli_Chr07 | 33775647                | GG                                     | AA                 | AA               | INTERGENIC                    |                    |                                  |
| SNP_56007_A_33775671 | NC_021166.1    | Ca_Kabuli_Chr07 | 33775671                | GG                                     | AA                 | AA               | INTERGENIC                    |                    |                                  |
| SNP_56008_A_33776151 | NC_021166.1    | Ca_Kabuli_Chr07 | 33776151                | GG                                     | AA                 | AA               | INTERGENIC                    |                    |                                  |
| SNP_56009_A_33780130 | NC_021166.1    | Ca_Kabuli_Chr07 | 33780130                | AA                                     | TT                 | TT               | INTERGENIC                    |                    |                                  |
| SNP_56010_A_33780640 | NC_021166.1    | Ca_Kabuli_Chr07 | 33780640                | AA                                     | GG                 | GG               | INTERGENIC                    |                    |                                  |
| SNP_56011_A_33780666 | NC_021166.1    | Ca_Kabuli_Chr07 | 33780666                | GG                                     | AA                 | AA               | INTERGENIC                    |                    |                                  |
| SNP_56012_A_33780685 | NC_021166.1    | Ca_Kabuli_Chr07 | 33780685                | AA                                     | GG                 | GG               | INTERGENIC                    |                    |                                  |
| SNP_56013_A_33780814 | NC_021166.1    | Ca_Kabuli_Chr07 | 33780814                | AA                                     | GG                 | GG               | INTERGENIC                    |                    |                                  |
| SNP_56014_A_33780826 | NC_021166.1    | Ca_Kabuli_Chr07 | 33780826                | GG                                     | AA                 | AA               | INTERGENIC                    |                    |                                  |
| SNP_56015_A_33780912 | NC_021166.1    | Ca_Kabuli_Chr07 | 33780912                | TT                                     | CC                 | CC               | INTERGENIC                    |                    |                                  |
| SNP_56016_A_33780933 | NC_021166.1    | Ca_Kabuli_Chr07 | 33780933                | CC                                     | TT                 | TT               | INTERGENIC                    |                    |                                  |

| SNPs IDs             | Chromosome IDs | Chromosomes     | Physical positions (bp) | CDC Frontier genome (Reference genome) | (Pusa 1103 & HPNB) | (ILWC 46 & LPNB) | Sequence Components of genome | Gene accession IDs | Putative functions                                   |
|----------------------|----------------|-----------------|-------------------------|----------------------------------------|--------------------|------------------|-------------------------------|--------------------|------------------------------------------------------|
| SNP_56017_A_33780953 | NC_021166.1    | Ca_Kabuli_Chr07 | 33780953                | AA                                     | CC                 | CC               | INTERGENIC                    |                    |                                                      |
| SNP_56018_A_33781163 | NC_021166.1    | Ca_Kabuli_Chr07 | 33781163                | TT                                     | AA                 | AA               | INTERGENIC                    |                    |                                                      |
| SNP_56019_A_33781185 | NC_021166.1    | Ca_Kabuli_Chr07 | 33781185                | AA                                     | GG                 | GG               | INTERGENIC                    |                    |                                                      |
| SNP_56020_A_33781197 | NC_021166.1    | Ca_Kabuli_Chr07 | 33781197                | GG                                     | AA                 | AA               | INTERGENIC                    |                    |                                                      |
| SNP_56022_A_33781535 | NC_021166.1    | Ca_Kabuli_Chr07 | 33781535                | AA                                     | TT                 | TT               | DRR                           | 101515385          | 1-phosphatidylinositol-3-phosphate 5-kinase FAB1B    |
| SNP_56023_A_33781625 | NC_021166.1    | Ca_Kabuli_Chr07 | 33781625                | TT                                     | CC                 | CC               | DRR                           | 101515385          | 1-phosphatidylinositol-3-phosphate 5-kinase FAB1B    |
| SNP_56024_A_33781636 | NC_021166.1    | Ca_Kabuli_Chr07 | 33781636                | AA                                     | TT                 | TT               | DRR                           | 101515385          | 1-phosphatidylinositol-3-phosphate 5-kinase FAB1B    |
| SNP_56026_A_33781755 | NC_021166.1    | Ca_Kabuli_Chr07 | 33781755                | AA                                     | TT                 | TT               | DRR                           | 101515385          | 1-phosphatidylinositol-3-phosphate 5-kinase FAB1B    |
| SNP_56027_A_33781903 | NC_021166.1    | Ca_Kabuli_Chr07 | 33781903                | GG                                     | AA                 | AA               | DRR                           | 101515385          | 1-phosphatidylinositol-3-phosphate 5-kinase FAB1B    |
| SNP_56028_A_33781910 | NC_021166.1    | Ca_Kabuli_Chr07 | 33781910                | TT                                     | CC                 | CC               | DRR                           | 101515385          | 1-phosphatidylinositol-3-phosphate 5-kinase FAB1B    |
| SNP_56029_A_33781985 | NC_021166.1    | Ca_Kabuli_Chr07 | 33781985                | GG                                     | AA                 | AA               | DRR                           | 101515385          | 1-phosphatidylinositol-3-phosphate 5-kinase FAB1B    |
| SNP_56030_A_33783121 | NC_021166.1    | Ca_Kabuli_Chr07 | 33783121                | GG                                     | TT                 | TT               | URR                           | 101515385          | 1-phosphatidylinositol-3-phosphate 5-kinase FAB1B    |
| SNP_56031_A_33784776 | NC_021166.1    | Ca_Kabuli_Chr07 | 33784776                | GG                                     | AA                 | AA               | SYNONYMOUS_CODING             | 101515385          | 1-phosphatidylinositol-3-phosphate 5-kinase FAB1B    |
| SNP_56032_A_33785735 | NC_021166.1    | Ca_Kabuli_Chr07 | 33785735                | CC                                     | GG                 | GG               | INTRON                        | 101515385          | 1-phosphatidylinositol-3-phosphate 5-kinase FAB1B    |
| SNP_56033_A_33786946 | NC_021166.1    | Ca_Kabuli_Chr07 | 33786946                | TT                                     | CC                 | CC               | INTRON                        | 101515385          | 1-phosphatidylinositol-3-phosphate 5-kinase FAB1B    |
| SNP_56035_A_33789547 | NC_021166.1    | Ca_Kabuli_Chr07 | 33789547                | CC                                     | GG                 | GG               | INTRON                        | 101515385          | 1-phosphatidylinositol-3-phosphate 5-kinase FAB1B    |
| SNP_56037_A_33802162 | NC_021166.1    | Ca_Kabuli_Chr07 | 33802162                | CC                                     | TT                 | TT               | URR                           | 101493791          | putative WEB family protein At1g65010, chloroplastic |
| SNP_56038_A_33805052 | NC_021166.1    | Ca_Kabuli_Chr07 | 33805052                | TT                                     | GG                 | GG               | INTERGENIC                    |                    |                                                      |
| SNP_56039_A_33805060 | NC_021166.1    | Ca_Kabuli_Chr07 | 33805060                | TT                                     | AA                 | AA               | INTERGENIC                    |                    |                                                      |
| SNP_56040_A_33805068 | NC_021166.1    | Ca_Kabuli_Chr07 | 33805068                | AA                                     | TT                 | TT               | INTERGENIC                    |                    |                                                      |
| SNP_56042_A_33805551 | NC_021166.1    | Ca_Kabuli_Chr07 | 33805551                | AA                                     | CC                 | CC               | INTERGENIC                    |                    |                                                      |
| SNP_56043_A_33805552 | NC_021166.1    | Ca_Kabuli_Chr07 | 33805552                | AA                                     | GG                 | GG               | INTERGENIC                    |                    |                                                      |

| SNPs IDs             | Chromosome IDs | Chromosomes     | Physical positions (bp) | CDC Frontier genome (Reference genome) | (Pusa 1103 & HPNB) | (ILWC 46 & LPNB) | Sequence Components of genome | Gene accession IDs | Putative functions                            |
|----------------------|----------------|-----------------|-------------------------|----------------------------------------|--------------------|------------------|-------------------------------|--------------------|-----------------------------------------------|
| SNP_56044_A_33805669 | NC_021166.1    | Ca_Kabuli_Chr07 | 33805669                | CC                                     | TT                 | TT               | INTERGENIC                    |                    |                                               |
| SNP_56046_A_33807309 | NC_021166.1    | Ca_Kabuli_Chr07 | 33807309                | GG                                     | AA                 | AA               | DRR                           | 101488697          | putative uncharacterized protein DDB_G0279653 |
| SNP_56047_A_33808988 | NC_021166.1    | Ca_Kabuli_Chr07 | 33808988                | GG                                     | AA                 | AA               | INTRON                        | 101488697          | putative uncharacterized protein DDB_G0279653 |
| SNP_56048_A_33809055 | NC_021166.1    | Ca_Kabuli_Chr07 | 33809055                | AA                                     | TT                 | TT               | INTRON                        | 101488697          | putative uncharacterized protein DDB_G0279653 |
| SNP_56050_A_33810967 | NC_021166.1    | Ca_Kabuli_Chr07 | 33810967                | TT                                     | CC                 | CC               | INTRON                        | 101488697          | putative uncharacterized protein DDB_G0279653 |
| SNP_56051_A_33811214 | NC_021166.1    | Ca_Kabuli_Chr07 | 33811214                | GG                                     | AA                 | AA               | INTERGENIC                    |                    |                                               |
| SNP_56054_A_33813173 | NC_021166.1    | Ca_Kabuli_Chr07 | 33813173                | AA                                     | GG                 | GG               | INTERGENIC                    |                    |                                               |
| SNP_56055_A_33813400 | NC_021166.1    | Ca_Kabuli_Chr07 | 33813400                | TT                                     | AA                 | AA               | INTERGENIC                    |                    |                                               |
| SNP_56057_A_33815322 | NC_021166.1    | Ca_Kabuli_Chr07 | 33815322                | CC                                     | GG                 | GG               | DRR                           | 101489034          | alanine aminotransferase 2-like               |
| SNP_56058_A_33815324 | NC_021166.1    | Ca_Kabuli_Chr07 | 33815324                | CC                                     | TT                 | TT               | DRR                           | 101489034          | alanine aminotransferase 2-like               |
| SNP_56059_A_33815374 | NC_021166.1    | Ca_Kabuli_Chr07 | 33815374                | CC                                     | GG                 | GG               | DRR                           | 101489034          | alanine aminotransferase 2-like               |
| SNP_56061_A_33815731 | NC_021166.1    | Ca_Kabuli_Chr07 | 33815731                | GG                                     | TT                 | TT               | DRR                           | 101489034          | alanine aminotransferase 2-like               |
| SNP_56063_A_33817116 | NC_021166.1    | Ca_Kabuli_Chr07 | 33817116                | GG                                     | AA                 | AA               | INTERGENIC                    |                    |                                               |
| SNP_56064_A_33817419 | NC_021166.1    | Ca_Kabuli_Chr07 | 33817419                | CC                                     | TT                 | TT               | INTERGENIC                    |                    |                                               |
| SNP_56065_A_33821189 | NC_021166.1    | Ca_Kabuli_Chr07 | 33821189                | AA                                     | GG                 | GG               | INTRON                        | 101489034          | alanine aminotransferase 2-like               |
| SNP_56066_A_33821476 | NC_021166.1    | Ca_Kabuli_Chr07 | 33821476                | AA                                     | CC                 | CC               | INTRON                        | 101489034          | alanine aminotransferase 2-like               |
| SNP_56067_A_33821678 | NC_021166.1    | Ca_Kabuli_Chr07 | 33821678                | AA                                     | GG                 | GG               | INTRON                        | 101489034          | alanine aminotransferase 2-like               |
| SNP_56068_A_33821690 | NC_021166.1    | Ca_Kabuli_Chr07 | 33821690                | CC                                     | AA                 | AA               | INTRON                        | 101489034          | alanine aminotransferase 2-like               |
| SNP_56069_A_33821693 | NC_021166.1    | Ca_Kabuli_Chr07 | 33821693                | TT                                     | AA                 | AA               | INTRON                        | 101489034          | alanine aminotransferase 2-like               |
| SNP_56070_A_33823165 | NC_021166.1    | Ca_Kabuli_Chr07 | 33823165                | CC                                     | GG                 | GG               | URR                           | 101489034          | alanine aminotransferase 2-like               |
| SNP_56071_A_33824552 | NC_021166.1    | Ca_Kabuli_Chr07 | 33824552                | TT                                     | GG                 | GG               | URR                           | 101489034          | alanine aminotransferase 2-like               |
| SNP_56072_A_33824808 | NC_021166.1    | Ca_Kabuli_Chr07 | 33824808                | GG                                     | AA                 | AA               | URR                           | 101489034          | alanine aminotransferase 2-like               |

| SNPs IDs             | Chromosome IDs | Chromosomes     | Physical positions (bp) | CDC Frontier (Reference genome) | (Pusa 1103 & HPNB) | (ILWC 46 & LPNB) | Sequence Components of genome | Gene accession IDs | Putative functions              |
|----------------------|----------------|-----------------|-------------------------|---------------------------------|--------------------|------------------|-------------------------------|--------------------|---------------------------------|
| SNP_56073_A_33824975 | NC_021166.1    | Ca_Kabuli_Chr07 | 33824975                | TT                              | GG                 | GG               | URR                           | 101489034          | alanine aminotransferase 2-like |
| SNP_56074_A_33829068 | NC_021166.1    | Ca_Kabuli_Chr07 | 33829068                | AA                              | TT                 | TT               | INTERGENIC                    |                    |                                 |
| SNP_56075_A_33839324 | NC_021166.1    | Ca_Kabuli_Chr07 | 33839324                | AA                              | TT                 | TT               | URR                           | 101489363          | pectinesterase 3                |
| SNP_56076_A_33839340 | NC_021166.1    | Ca_Kabuli_Chr07 | 33839340                | CC                              | AA                 | AA               | URR                           | 101489363          | pectinesterase 3                |
| SNP_56078_A_33846893 | NC_021166.1    | Ca_Kabuli_Chr07 | 33846893                | TT                              | CC                 | CC               | INTRON                        | 101489689          | pectinesterase 3-like           |
| SNP_56079_A_33850992 | NC_021166.1    | Ca_Kabuli_Chr07 | 33850992                | AA                              | TT                 | TT               | URR                           | 101489689          | pectinesterase 3-like           |
| SNP_56080_A_33850998 | NC_021166.1    | Ca_Kabuli_Chr07 | 33850998                | AA                              | GG                 | GG               | URR                           | 101489689          | pectinesterase 3-like           |
| SNP_56081_A_33851033 | NC_021166.1    | Ca_Kabuli_Chr07 | 33851033                | TT                              | GG                 | GG               | URR                           | 101489689          | pectinesterase 3-like           |
| SNP_56082_A_33855167 | NC_021166.1    | Ca_Kabuli_Chr07 | 33855167                | GG                              | AA                 | AA               | INTERGENIC                    |                    |                                 |
| SNP_56083_A_33855170 | NC_021166.1    | Ca_Kabuli_Chr07 | 33855170                | TT                              | CC                 | CC               | INTERGENIC                    |                    |                                 |
| SNP_56084_A_33855261 | NC_021166.1    | Ca_Kabuli_Chr07 | 33855261                | GG                              | CC                 | CC               | INTERGENIC                    |                    |                                 |
| SNP_56086_A_33855314 | NC_021166.1    | Ca_Kabuli_Chr07 | 33855314                | TT                              | CC                 | CC               | INTERGENIC                    |                    |                                 |
| SNP_56090_A_33855756 | NC_021166.1    | Ca_Kabuli_Chr07 | 33855756                | AA                              | CC                 | CC               | INTERGENIC                    |                    |                                 |
| SNP_56091_A_33856749 | NC_021166.1    | Ca_Kabuli_Chr07 | 33856749                | AA                              | TT                 | TT               | INTERGENIC                    |                    |                                 |
| SNP_56093_A_33857643 | NC_021166.1    | Ca_Kabuli_Chr07 | 33857643                | AA                              | GG                 | GG               | INTERGENIC                    |                    |                                 |
| SNP_56094_A_33857757 | NC_021166.1    | Ca_Kabuli_Chr07 | 33857757                | CC                              | TT                 | TT               | INTERGENIC                    |                    |                                 |
| SNP_56095_A_33857981 | NC_021166.1    | Ca_Kabuli_Chr07 | 33857981                | CC                              | AA                 | AA               | INTERGENIC                    |                    |                                 |
| SNP_56096_A_33857985 | NC_021166.1    | Ca_Kabuli_Chr07 | 33857985                | GG                              | AA                 | AA               | INTERGENIC                    |                    |                                 |
| SNP_56097_A_33858054 | NC_021166.1    | Ca_Kabuli_Chr07 | 33858054                | TT                              | AA                 | AA               | INTERGENIC                    |                    |                                 |
| SNP_56098_A_33858072 | NC_021166.1    | Ca_Kabuli_Chr07 | 33858072                | TT                              | AA                 | AA               | INTERGENIC                    |                    |                                 |
| SNP_56099_A_33858116 | NC_021166.1    | Ca_Kabuli_Chr07 | 33858116                | CC                              | TT                 | TT               | INTERGENIC                    |                    |                                 |
| SNP_56100_A_33858492 | NC_021166.1    | Ca_Kabuli_Chr07 | 33858492                | TT                              | GG                 | GG               | INTERGENIC                    |                    |                                 |

| SNPs IDs             | Chromosome IDs | Chromosomes     | Physical positions (bp) | CDC Frontier genome (Reference genome) | (Pusa 1103 & HPNB) | (ILWC 46 & LPNB) | Sequence Components of genome | Gene accession IDs | Putative functions                      |
|----------------------|----------------|-----------------|-------------------------|----------------------------------------|--------------------|------------------|-------------------------------|--------------------|-----------------------------------------|
| SNP_56101_A_33858493 | NC_021166.1    | Ca_Kabuli_Chr07 | 33858493                | CC                                     | TT                 | TT               | INTERGENIC                    |                    |                                         |
| SNP_56102_A_33858503 | NC_021166.1    | Ca_Kabuli_Chr07 | 33858503                | CC                                     | TT                 | TT               | INTERGENIC                    |                    |                                         |
| SNP_56103_A_33859100 | NC_021166.1    | Ca_Kabuli_Chr07 | 33859100                | GG                                     | AA                 | AA               | INTERGENIC                    |                    |                                         |
| SNP_56105_A_33859467 | NC_021166.1    | Ca_Kabuli_Chr07 | 33859467                | AA                                     | TT                 | TT               | INTERGENIC                    |                    |                                         |
| SNP_56106_A_33859526 | NC_021166.1    | Ca_Kabuli_Chr07 | 33859526                | TT                                     | CC                 | CC               | INTERGENIC                    |                    |                                         |
| SNP_56107_A_33862502 | NC_021166.1    | Ca_Kabuli_Chr07 | 33862502                | TT                                     | CC                 | CC               | INTRON                        | 101490009          | exocyst complex component SEC10         |
| SNP_56108_A_33862519 | NC_021166.1    | Ca_Kabuli_Chr07 | 33862519                | CC                                     | AA                 | AA               | INTRON                        | 101490009          | exocyst complex component SEC10         |
| SNP_56109_A_33863242 | NC_021166.1    | Ca_Kabuli_Chr07 | 33863242                | GG                                     | AA                 | AA               | INTRON                        | 101490009          | exocyst complex component SEC10         |
| SNP_56110_A_33863359 | NC_021166.1    | Ca_Kabuli_Chr07 | 33863359                | GG                                     | AA                 | AA               | INTRON                        | 101490009          | exocyst complex component SEC10         |
| SNP_56111_A_33863578 | NC_021166.1    | Ca_Kabuli_Chr07 | 33863578                | GG                                     | AA                 | AA               | INTRON                        | 101490009          | exocyst complex component SEC10         |
| SNP_56112_A_33863854 | NC_021166.1    | Ca_Kabuli_Chr07 | 33863854                | GG                                     | AA                 | AA               | INTRON                        | 101490009          | exocyst complex component SEC10         |
| SNP_56113_A_33866743 | NC_021166.1    | Ca_Kabuli_Chr07 | 33866743                | AA                                     | GG                 | GG               | INTRON                        | 101490009          | exocyst complex component SEC10         |
| SNP_56114_A_33867334 | NC_021166.1    | Ca_Kabuli_Chr07 | 33867334                | TT                                     | CC                 | CC               | INTRON                        | 101490009          | exocyst complex component SEC10         |
| SNP_56115_A_33867674 | NC_021166.1    | Ca_Kabuli_Chr07 | 33867674                | TT                                     | CC                 | CC               | INTRON                        | 101490009          | exocyst complex component SEC10         |
| SNP_56116_A_33871165 | NC_021166.1    | Ca_Kabuli_Chr07 | 33871165                | AA                                     | GG                 | GG               | SYNONYMOUS_CODING             | 101490009          | exocyst complex component SEC10         |
| SNP_56117_A_33871696 | NC_021166.1    | Ca_Kabuli_Chr07 | 33871696                | GG                                     | AA                 | AA               | URR                           | 101490009          | exocyst complex component SEC10         |
| SNP_56118_A_33871846 | NC_021166.1    | Ca_Kabuli_Chr07 | 33871846                | TT                                     | CC                 | CC               | URR                           | 101490009          | exocyst complex component SEC10         |
| SNP_56120_A_33873480 | NC_021166.1    | Ca_Kabuli_Chr07 | 33873480                | TT                                     | GG                 | GG               | INTERGENIC                    |                    |                                         |
| SNP_56121_A_33873500 | NC_021166.1    | Ca_Kabuli_Chr07 | 33873500                | AA                                     | TT                 | TT               | INTERGENIC                    |                    |                                         |
| SNP_56122_A_33880526 | NC_021166.1    | Ca_Kabuli_Chr07 | 33880526                | GG                                     | TT                 | TT               | URR                           | 101490348          | ubiquitin-conjugating enzyme E2 34-like |
| SNP_56123_A_33880802 | NC_021166.1    | Ca_Kabuli_Chr07 | 33880802                | AA                                     | GG                 | GG               | URR                           | 101490348          | ubiquitin-conjugating enzyme E2 34-like |
| SNP_56124_A_33880898 | NC_021166.1    | Ca_Kabuli_Chr07 | 33880898                | GG                                     | AA                 | AA               | URR                           | 101490348          | ubiquitin-conjugating enzyme E2 34-like |

| SNPs IDs             | Chromosome IDs | Chromosomes     | Physical positions (bp) | CDC Frontier genome (Reference genome) | (Pusa 1103 & HPNB) | (ILWC 46 & LPNB) | Sequence Components of genome | Gene accession IDs | Putative functions          |
|----------------------|----------------|-----------------|-------------------------|----------------------------------------|--------------------|------------------|-------------------------------|--------------------|-----------------------------|
| SNP_56126_A_33891901 | NC_021166.1    | Ca_Kabuli_Chr07 | 33891901                | TT                                     | AA                 | AA               | INTERGENIC                    |                    |                             |
| SNP_56127_A_33892084 | NC_021166.1    | Ca_Kabuli_Chr07 | 33892084                | AA                                     | TT                 | TT               | INTERGENIC                    |                    |                             |
| SNP_56128_A_33900390 | NC_021166.1    | Ca_Kabuli_Chr07 | 33900390                | AA                                     | GG                 | GG               | INTERGENIC                    |                    |                             |
| SNP_56129_A_33900397 | NC_021166.1    | Ca_Kabuli_Chr07 | 33900397                | GG                                     | AA                 | AA               | INTERGENIC                    |                    |                             |
| SNP_56130_A_33900438 | NC_021166.1    | Ca_Kabuli_Chr07 | 33900438                | GG                                     | CC                 | CC               | INTERGENIC                    |                    |                             |
| SNP_56131_A_33905411 | NC_021166.1    | Ca_Kabuli_Chr07 | 33905411                | AA                                     | CC                 | CC               | INTRON                        | id175489           | Unknown function            |
| SNP_56132_A_33905577 | NC_021166.1    | Ca_Kabuli_Chr07 | 33905577                | GG                                     | AA                 | AA               | INTRON                        | id175489           | Unknown function            |
| SNP_56133_A_33905704 | NC_021166.1    | Ca_Kabuli_Chr07 | 33905704                | TT                                     | CC                 | CC               | NON_SYNONYMOUS_CODING         | id175489           | Unknown function            |
| SNP_56134_A_33905708 | NC_021166.1    | Ca_Kabuli_Chr07 | 33905708                | CC                                     | TT                 | TT               | NON_SYNONYMOUS_CODING         | id175489           | Unknown function            |
| SNP_56135_A_33905713 | NC_021166.1    | Ca_Kabuli_Chr07 | 33905713                | AA                                     | GG                 | GG               | NON_SYNONYMOUS_CODING         | id175489           | Unknown function            |
| SNP_56136_A_33905730 | NC_021166.1    | Ca_Kabuli_Chr07 | 33905730                | CC                                     | GG                 | GG               | NON_SYNONYMOUS_CODING         | id175489           | Unknown function            |
| SNP_56137_A_33905731 | NC_021166.1    | Ca_Kabuli_Chr07 | 33905731                | AA                                     | TT                 | TT               | NON_SYNONYMOUS_CODING         | id175489           | Unknown function            |
| SNP_56138_A_33937347 | NC_021166.1    | Ca_Kabuli_Chr07 | 33937347                | GG                                     | AA                 | AA               | INTERGENIC                    |                    |                             |
| SNP_56139_A_33987231 | NC_021166.1    | Ca_Kabuli_Chr07 | 33987231                | TT                                     | CC                 | CC               | INTRON                        | 101491935          | glutamate receptor 2.9-like |
| SNP_56140_A_34002768 | NC_021166.1    | Ca_Kabuli_Chr07 | 34002768                | TT                                     | CC                 | CC               | INTERGENIC                    |                    |                             |
| SNP_56141_A_34002775 | NC_021166.1    | Ca_Kabuli_Chr07 | 34002775                | GG                                     | AA                 | AA               | INTERGENIC                    |                    |                             |
| SNP_56142_A_34080943 | NC_021166.1    | Ca_Kabuli_Chr07 | 34080943                | TT                                     | CC                 | CC               | INTERGENIC                    |                    |                             |
| SNP_56143_A_34085289 | NC_021166.1    | Ca_Kabuli_Chr07 | 34085289                | CC                                     | TT                 | TT               | INTERGENIC                    |                    |                             |
| SNP_56144_A_34086986 | NC_021166.1    | Ca_Kabuli_Chr07 | 34086986                | CC                                     | TT                 | TT               | INTERGENIC                    |                    |                             |
| SNP_56145_A_34087575 | NC_021166.1    | Ca_Kabuli_Chr07 | 34087575                | CC                                     | GG                 | GG               | INTERGENIC                    |                    |                             |
| SNP_56146_A_34087768 | NC_021166.1    | Ca_Kabuli_Chr07 | 34087768                | TT                                     | CC                 | CC               | INTERGENIC                    |                    |                             |
| SNP_56147_A_34087796 | NC_021166.1    | Ca_Kabuli_Chr07 | 34087796                | TT                                     | GG                 | GG               | INTERGENIC                    |                    |                             |

| SNPs IDs             | Chromosome IDs | Chromosomes     | Physical positions (bp) | CDC Frontier genome (Reference genome) | (Pusa 1103 & HPNB) | (ILWC 46 & LPNB) | Sequence Components of genome | Gene accession IDs | Putative functions                           |
|----------------------|----------------|-----------------|-------------------------|----------------------------------------|--------------------|------------------|-------------------------------|--------------------|----------------------------------------------|
| SNP_56148_A_34108966 | NC_021166.1    | Ca_Kabuli_Chr07 | 34108966                | GG                                     | AA                 | AA               | INTERGENIC                    |                    |                                              |
| SNP_56149_A_34109007 | NC_021166.1    | Ca_Kabuli_Chr07 | 34109007                | CC                                     | TT                 | TT               | INTERGENIC                    |                    |                                              |
| SNP_56150_A_34109030 | NC_021166.1    | Ca_Kabuli_Chr07 | 34109030                | AA                                     | TT                 | TT               | INTERGENIC                    |                    |                                              |
| SNP_56152_A_34110721 | NC_021166.1    | Ca_Kabuli_Chr07 | 34110721                | TT                                     | CC                 | CC               | INTERGENIC                    |                    |                                              |
| SNP_56153_A_34112458 | NC_021166.1    | Ca_Kabuli_Chr07 | 34112458                | CC                                     | TT                 | TT               | URR                           | 101495833          | putative RING-H2 finger protein ATL53        |
| SNP_56154_A_34131804 | NC_021166.1    | Ca_Kabuli_Chr07 | 34131804                | CC                                     | TT                 | TT               | INTRON                        | 101496156          | DNA-directed RNA polymerase III subunit RPC2 |
| SNP_56155_A_34131810 | NC_021166.1    | Ca_Kabuli_Chr07 | 34131810                | TT                                     | GG                 | GG               | INTRON                        | 101496156          | DNA-directed RNA polymerase III subunit RPC2 |
| SNP_56156_A_34131818 | NC_021166.1    | Ca_Kabuli_Chr07 | 34131818                | TT                                     | CC                 | CC               | INTRON                        | 101496156          | DNA-directed RNA polymerase III subunit RPC2 |
| SNP_56157_A_34135103 | NC_021166.1    | Ca_Kabuli_Chr07 | 34135103                | TT                                     | CC                 | CC               | SYNONYMOUS_CODING             | 101496156          | DNA-directed RNA polymerase III subunit RPC2 |
| SNP_56159_A_34136786 | NC_021166.1    | Ca_Kabuli_Chr07 | 34136786                | TT                                     | GG                 | GG               | INTRON                        | 101496156          | DNA-directed RNA polymerase III subunit RPC2 |
| SNP_56161_A_34138326 | NC_021166.1    | Ca_Kabuli_Chr07 | 34138326                | TT                                     | AA                 | AA               | SYNONYMOUS_CODING             | 101496156          | DNA-directed RNA polymerase III subunit RPC2 |
| SNP_56162_A_34142924 | NC_021166.1    | Ca_Kabuli_Chr07 | 34142924                | CC                                     | GG                 | GG               | INTRON                        | 101496156          | DNA-directed RNA polymerase III subunit RPC2 |
| SNP_56163_A_34146566 | NC_021166.1    | Ca_Kabuli_Chr07 | 34146566                | AA                                     | TT                 | TT               | INTRON                        | 101496156          | DNA-directed RNA polymerase III subunit RPC2 |
| SNP_56164_A_34149775 | NC_021166.1    | Ca_Kabuli_Chr07 | 34149775                | GG                                     | AA                 | AA               | INTRON                        | 101496156          | DNA-directed RNA polymerase III subunit RPC2 |
| SNP_56166_A_34158175 | NC_021166.1    | Ca_Kabuli_Chr07 | 34158175                | TT                                     | CC                 | CC               | INTRON                        | 101496156          | DNA-directed RNA polymerase III subunit RPC2 |
| SNP_56167_A_34158391 | NC_021166.1    | Ca_Kabuli_Chr07 | 34158391                | TT                                     | CC                 | CC               | INTRON                        | 101496156          | DNA-directed RNA polymerase III subunit RPC2 |
| SNP_56168_A_34158412 | NC_021166.1    | Ca_Kabuli_Chr07 | 34158412                | TT                                     | CC                 | CC               | INTRON                        | 101496156          | DNA-directed RNA polymerase III subunit RPC2 |
| SNP_56169_A_34158434 | NC_021166.1    | Ca_Kabuli_Chr07 | 34158434                | AA                                     | CC                 | CC               | INTRON                        | 101496156          | DNA-directed RNA polymerase III subunit RPC2 |
| SNP_56170_A_34158467 | NC_021166.1    | Ca_Kabuli_Chr07 | 34158467                | AA                                     | GG                 | GG               | INTRON                        | 101496156          | DNA-directed RNA polymerase III subunit RPC2 |
| SNP_56171_A_34158520 | NC_021166.1    | Ca_Kabuli_Chr07 | 34158520                | AA                                     | GG                 | GG               | INTRON                        | 101496156          | DNA-directed RNA polymerase III subunit RPC2 |
| SNP_56172_A_34158521 | NC_021166.1    | Ca_Kabuli_Chr07 | 34158521                | AA                                     | CC                 | CC               | INTRON                        | 101496156          | DNA-directed RNA polymerase III subunit RPC2 |
| SNP_56173_A_34158663 | NC_021166.1    | Ca_Kabuli_Chr07 | 34158663                | TT                                     | CC                 | CC               | INTRON                        | 101496156          | DNA-directed RNA polymerase III subunit RPC2 |



| SNPs IDs             | Chromosome IDs | Chromosomes     | Physical positions (bp) | CDC Frontier genome (Reference genome) | (Pusa 1103 & HPNB) | (ILWC 46 & LPNB) | Sequence Components of genome | Gene accession IDs | Putative functions                           |
|----------------------|----------------|-----------------|-------------------------|----------------------------------------|--------------------|------------------|-------------------------------|--------------------|----------------------------------------------|
| SNP_56174_A_34158753 | NC_021166.1    | Ca_Kabuli_Chr07 | 34158753                | TT                                     | GG                 | GG               | INTRON                        | 101496156          | DNA-directed RNA polymerase III subunit RPC2 |
| SNP_56175_A_34158808 | NC_021166.1    | Ca_Kabuli_Chr07 | 34158808                | CC                                     | TT                 | TT               | INTRON                        | 101496156          | DNA-directed RNA polymerase III subunit RPC2 |
| SNP_56176_A_34158811 | NC_021166.1    | Ca_Kabuli_Chr07 | 34158811                | GG                                     | AA                 | AA               | INTRON                        | 101496156          | DNA-directed RNA polymerase III subunit RPC2 |
| SNP_56177_A_34158828 | NC_021166.1    | Ca_Kabuli_Chr07 | 34158828                | TT                                     | CC                 | CC               | INTRON                        | 101496156          | DNA-directed RNA polymerase III subunit RPC2 |
| SNP_56178_A_34158884 | NC_021166.1    | Ca_Kabuli_Chr07 | 34158884                | GG                                     | AA                 | AA               | INTRON                        | 101496156          | DNA-directed RNA polymerase III subunit RPC2 |
| SNP_56179_A_34158885 | NC_021166.1    | Ca_Kabuli_Chr07 | 34158885                | AA                                     | GG                 | GG               | INTRON                        | 101496156          | DNA-directed RNA polymerase III subunit RPC2 |
| SNP_56180_A_34158914 | NC_021166.1    | Ca_Kabuli_Chr07 | 34158914                | TT                                     | CC                 | CC               | INTRON                        | 101496156          | DNA-directed RNA polymerase III subunit RPC2 |
| SNP_56181_A_34159108 | NC_021166.1    | Ca_Kabuli_Chr07 | 34159108                | TT                                     | CC                 | CC               | INTRON                        | 101496156          | DNA-directed RNA polymerase III subunit RPC2 |
| SNP_56182_A_34159159 | NC_021166.1    | Ca_Kabuli_Chr07 | 34159159                | TT                                     | CC                 | CC               | INTRON                        | 101496156          | DNA-directed RNA polymerase III subunit RPC2 |
| SNP_56184_A_34159252 | NC_021166.1    | Ca_Kabuli_Chr07 | 34159252                | CC                                     | AA                 | AA               | INTRON                        | 101496156          | DNA-directed RNA polymerase III subunit RPC2 |
| SNP_56185_A_34160940 | NC_021166.1    | Ca_Kabuli_Chr07 | 34160940                | AA                                     | CC                 | CC               | INTRON                        | 101496156          | DNA-directed RNA polymerase III subunit RPC2 |
| SNP_56186_A_34160941 | NC_021166.1    | Ca_Kabuli_Chr07 | 34160941                | AA                                     | GG                 | GG               | INTRON                        | 101496156          | DNA-directed RNA polymerase III subunit RPC2 |
| SNP_56187_A_34161026 | NC_021166.1    | Ca_Kabuli_Chr07 | 34161026                | TT                                     | GG                 | GG               | INTRON                        | 101496156          | DNA-directed RNA polymerase III subunit RPC2 |
| SNP_56188_A_34161034 | NC_021166.1    | Ca_Kabuli_Chr07 | 34161034                | TT                                     | GG                 | GG               | INTRON                        | 101496156          | DNA-directed RNA polymerase III subunit RPC2 |
| SNP_56190_A_34161098 | NC_021166.1    | Ca_Kabuli_Chr07 | 34161098                | CC                                     | TT                 | TT               | INTRON                        | 101496156          | DNA-directed RNA polymerase III subunit RPC2 |
| SNP_56191_A_34161120 | NC_021166.1    | Ca_Kabuli_Chr07 | 34161120                | TT                                     | CC                 | CC               | INTRON                        | 101496156          | DNA-directed RNA polymerase III subunit RPC2 |
| SNP_56192_A_34161138 | NC_021166.1    | Ca_Kabuli_Chr07 | 34161138                | TT                                     | CC                 | CC               | INTRON                        | 101496156          | DNA-directed RNA polymerase III subunit RPC2 |
| SNP_56193_A_34161242 | NC_021166.1    | Ca_Kabuli_Chr07 | 34161242                | CC                                     | GG                 | GG               | INTRON                        | 101496156          | DNA-directed RNA polymerase III subunit RPC2 |
| SNP_56194_A_34161302 | NC_021166.1    | Ca_Kabuli_Chr07 | 34161302                | CC                                     | TT                 | TT               | INTRON                        | 101496156          | DNA-directed RNA polymerase III subunit RPC2 |
| SNP_56195_A_34161325 | NC_021166.1    | Ca_Kabuli_Chr07 | 34161325                | GG                                     | AA                 | AA               | INTRON                        | 101496156          | DNA-directed RNA polymerase III subunit RPC2 |
| SNP_56196_A_34162622 | NC_021166.1    | Ca_Kabuli_Chr07 | 34162622                | TT                                     | CC                 | CC               | INTRON                        | 101496156          | DNA-directed RNA polymerase III subunit RPC2 |
| SNP_56197_A_34165285 | NC_021166.1    | Ca_Kabuli_Chr07 | 34165285                | TT                                     | CC                 | CC               | INTRON                        | 101496156          | DNA-directed RNA polymerase III subunit RPC2 |

| SNPs IDs             | Chromosome IDs | Chromosomes     | Physical positions (bp) | CDC Frontier genome (Reference genome) | (Pusa 1103 & HPNB) | (ILWC 46 & LPNB) | Sequence Components of genome | Gene accession IDs | Putative functions                           |
|----------------------|----------------|-----------------|-------------------------|----------------------------------------|--------------------|------------------|-------------------------------|--------------------|----------------------------------------------|
| SNP_56198_A_34166663 | NC_021166.1    | Ca_Kabuli_Chr07 | 34166663                | GG                                     | TT                 | TT               | INTRON                        | 101496156          | DNA-directed RNA polymerase III subunit RPC2 |
| SNP_56199_A_34168487 | NC_021166.1    | Ca_Kabuli_Chr07 | 34168487                | CC                                     | TT                 | TT               | URR                           | 101496156          | DNA-directed RNA polymerase III subunit RPC2 |
| SNP_56200_A_34168790 | NC_021166.1    | Ca_Kabuli_Chr07 | 34168790                | GG                                     | AA                 | AA               | URR                           | 101496156          | DNA-directed RNA polymerase III subunit RPC2 |
| SNP_56201_A_34168811 | NC_021166.1    | Ca_Kabuli_Chr07 | 34168811                | TT                                     | CC                 | CC               | URR                           | 101496156          | DNA-directed RNA polymerase III subunit RPC2 |
| SNP_56202_A_34169404 | NC_021166.1    | Ca_Kabuli_Chr07 | 34169404                | CC                                     | TT                 | TT               | URR                           | 101496156          | DNA-directed RNA polymerase III subunit RPC2 |
| SNP_56203_A_34170370 | NC_021166.1    | Ca_Kabuli_Chr07 | 34170370                | TT                                     | GG                 | GG               | INTERGENIC                    |                    |                                              |
| SNP_56204_A_34170665 | NC_021166.1    | Ca_Kabuli_Chr07 | 34170665                | AA                                     | GG                 | GG               | INTERGENIC                    |                    |                                              |
| SNP_56205_A_34170827 | NC_021166.1    | Ca_Kabuli_Chr07 | 34170827                | CC                                     | TT                 | TT               | INTERGENIC                    |                    |                                              |
| SNP_56206_A_34170833 | NC_021166.1    | Ca_Kabuli_Chr07 | 34170833                | CC                                     | TT                 | TT               | INTERGENIC                    |                    |                                              |
| SNP_56207_A_34170867 | NC_021166.1    | Ca_Kabuli_Chr07 | 34170867                | CC                                     | TT                 | TT               | INTERGENIC                    |                    |                                              |
| SNP_56208_A_34171193 | NC_021166.1    | Ca_Kabuli_Chr07 | 34171193                | AA                                     | CC                 | CC               | INTERGENIC                    |                    |                                              |
| SNP_56209_A_34172767 | NC_021166.1    | Ca_Kabuli_Chr07 | 34172767                | GG                                     | AA                 | AA               | INTERGENIC                    |                    |                                              |
| SNP_56210_A_34172821 | NC_021166.1    | Ca_Kabuli_Chr07 | 34172821                | CC                                     | TT                 | TT               | INTERGENIC                    |                    |                                              |
| SNP_56211_A_34172844 | NC_021166.1    | Ca_Kabuli_Chr07 | 34172844                | AA                                     | GG                 | GG               | INTERGENIC                    |                    |                                              |
| SNP_56213_A_34173177 | NC_021166.1    | Ca_Kabuli_Chr07 | 34173177                | GG                                     | TT                 | TT               | INTERGENIC                    |                    |                                              |
| SNP_56214_A_34173184 | NC_021166.1    | Ca_Kabuli_Chr07 | 34173184                | CC                                     | TT                 | TT               | INTERGENIC                    |                    |                                              |
| SNP_56215_A_34173214 | NC_021166.1    | Ca_Kabuli_Chr07 | 34173214                | CC                                     | TT                 | TT               | INTERGENIC                    |                    |                                              |
| SNP_56217_A_34173561 | NC_021166.1    | Ca_Kabuli_Chr07 | 34173561                | CC                                     | AA                 | AA               | INTERGENIC                    |                    |                                              |
| SNP_56218_A_34173642 | NC_021166.1    | Ca_Kabuli_Chr07 | 34173642                | AA                                     | GG                 | GG               | INTERGENIC                    |                    |                                              |
| SNP_56219_A_34173807 | NC_021166.1    | Ca_Kabuli_Chr07 | 34173807                | CC                                     | TT                 | TT               | INTERGENIC                    |                    |                                              |
| SNP_56220_A_34173929 | NC_021166.1    | Ca_Kabuli_Chr07 | 34173929                | AA                                     | CC                 | CC               | INTERGENIC                    |                    |                                              |
| SNP_56222_A_34174120 | NC_021166.1    | Ca_Kabuli_Chr07 | 34174120                | TT                                     | CC                 | CC               | INTERGENIC                    |                    |                                              |

| SNPs IDs             | Chromosome IDs | Chromosomes     | Physical positions (bp) | CDC Frontier genome (Reference genome) | (Pusa 1103 & HPNB) | (ILWC 46 & LPNB) | Sequence genome | Components of | Gene accession IDs           | Putative functions |
|----------------------|----------------|-----------------|-------------------------|----------------------------------------|--------------------|------------------|-----------------|---------------|------------------------------|--------------------|
| SNP_56223_A_34174552 | NC_021166.1    | Ca_Kabuli_Chr07 | 34174552                | TT                                     | CC                 | CC               | INTERGENIC      |               |                              |                    |
| SNP_56224_A_34174573 | NC_021166.1    | Ca_Kabuli_Chr07 | 34174573                | TT                                     | AA                 | AA               | INTERGENIC      |               |                              |                    |
| SNP_56225_A_34176096 | NC_021166.1    | Ca_Kabuli_Chr07 | 34176096                | TT                                     | CC                 | CC               | INTERGENIC      |               |                              |                    |
| SNP_56226_A_34176684 | NC_021166.1    | Ca_Kabuli_Chr07 | 34176684                | AA                                     | GG                 | GG               | INTERGENIC      |               |                              |                    |
| SNP_56227_A_34176703 | NC_021166.1    | Ca_Kabuli_Chr07 | 34176703                | TT                                     | AA                 | AA               | INTERGENIC      |               |                              |                    |
| SNP_56229_A_34176794 | NC_021166.1    | Ca_Kabuli_Chr07 | 34176794                | GG                                     | TT                 | TT               | INTERGENIC      |               |                              |                    |
| SNP_56230_A_34176833 | NC_021166.1    | Ca_Kabuli_Chr07 | 34176833                | TT                                     | CC                 | CC               | INTERGENIC      |               |                              |                    |
| SNP_56231_A_34176875 | NC_021166.1    | Ca_Kabuli_Chr07 | 34176875                | AA                                     | GG                 | GG               | INTERGENIC      |               |                              |                    |
| SNP_56232_A_34176879 | NC_021166.1    | Ca_Kabuli_Chr07 | 34176879                | GG                                     | TT                 | TT               | INTERGENIC      |               |                              |                    |
| SNP_56233_A_34176889 | NC_021166.1    | Ca_Kabuli_Chr07 | 34176889                | GG                                     | AA                 | AA               | INTERGENIC      |               |                              |                    |
| SNP_56234_A_34176909 | NC_021166.1    | Ca_Kabuli_Chr07 | 34176909                | AA                                     | GG                 | GG               | INTERGENIC      |               |                              |                    |
| SNP_56235_A_34176917 | NC_021166.1    | Ca_Kabuli_Chr07 | 34176917                | AA                                     | GG                 | GG               | INTERGENIC      |               |                              |                    |
| SNP_56236_A_34176934 | NC_021166.1    | Ca_Kabuli_Chr07 | 34176934                | GG                                     | TT                 | TT               | INTERGENIC      |               |                              |                    |
| SNP_56237_A_34177125 | NC_021166.1    | Ca_Kabuli_Chr07 | 34177125                | AA                                     | GG                 | GG               | INTERGENIC      |               |                              |                    |
| SNP_56238_A_34177167 | NC_021166.1    | Ca_Kabuli_Chr07 | 34177167                | AA                                     | GG                 | GG               | INTERGENIC      |               |                              |                    |
| SNP_56239_A_34177183 | NC_021166.1    | Ca_Kabuli_Chr07 | 34177183                | GG                                     | AA                 | AA               | INTERGENIC      |               |                              |                    |
| SNP_56240_A_34177815 | NC_021166.1    | Ca_Kabuli_Chr07 | 34177815                | CC                                     | TT                 | TT               | DRR             | 101496484     | uncharacterized LOC101496484 |                    |
| SNP_56241_A_34177852 | NC_021166.1    | Ca_Kabuli_Chr07 | 34177852                | GG                                     | AA                 | AA               | DRR             | 101496484     | uncharacterized LOC101496484 |                    |
| SNP_56242_A_34177855 | NC_021166.1    | Ca_Kabuli_Chr07 | 34177855                | TT                                     | AA                 | AA               | DRR             | 101496484     | uncharacterized LOC101496484 |                    |
| SNP_56243_A_34178030 | NC_021166.1    | Ca_Kabuli_Chr07 | 34178030                | GG                                     | AA                 | AA               | DRR             | 101496484     | uncharacterized LOC101496484 |                    |
| SNP_56244_A_34178169 | NC_021166.1    | Ca_Kabuli_Chr07 | 34178169                | GG                                     | CC                 | CC               | DRR             | 101496484     | uncharacterized LOC101496484 |                    |
| SNP_56245_A_34178175 | NC_021166.1    | Ca_Kabuli_Chr07 | 34178175                | GG                                     | AA                 | AA               | DRR             | 101496484     | uncharacterized LOC101496484 |                    |

| SNPs IDs             | Chromosome IDs | Chromosomes     | Physical positions (bp) | CDC Frontier genome (Reference genome) | (Pusa 1103 & HPNB) | (ILWC 46 & LPNB) | Sequence Components of genome | Gene accession IDs | Putative functions                    |
|----------------------|----------------|-----------------|-------------------------|----------------------------------------|--------------------|------------------|-------------------------------|--------------------|---------------------------------------|
| SNP_56246_A_34178216 | NC_021166.1    | Ca_Kabuli_Chr07 | 34178216                | GG                                     | AA                 | AA               | DRR                           | 101496484          | uncharacterized LOC101496484          |
| SNP_56247_A_34178222 | NC_021166.1    | Ca_Kabuli_Chr07 | 34178222                | CC                                     | GG                 | GG               | DRR                           | 101496484          | uncharacterized LOC101496484          |
| SNP_56248_A_34180359 | NC_021166.1    | Ca_Kabuli_Chr07 | 34180359                | AA                                     | GG                 | GG               | INTRON                        | 101496484          | uncharacterized LOC101496484          |
| SNP_56250_A_34182514 | NC_021166.1    | Ca_Kabuli_Chr07 | 34182514                | AA                                     | TT                 | TT               | INTERGENIC                    |                    |                                       |
| SNP_56251_A_34182996 | NC_021166.1    | Ca_Kabuli_Chr07 | 34182996                | GG                                     | AA                 | AA               | URR                           | 101496484          | uncharacterized LOC101496484          |
| SNP_56252_A_34183011 | NC_021166.1    | Ca_Kabuli_Chr07 | 34183011                | TT                                     | CC                 | CC               | URR                           | 101496484          | uncharacterized LOC101496484          |
| SNP_56253_A_34183024 | NC_021166.1    | Ca_Kabuli_Chr07 | 34183024                | AA                                     | GG                 | GG               | URR                           | 101496484          | uncharacterized LOC101496484          |
| SNP_56254_A_34183047 | NC_021166.1    | Ca_Kabuli_Chr07 | 34183047                | TT                                     | CC                 | CC               | URR                           | 101496484          | uncharacterized LOC101496484          |
| SNP_56255_A_34183901 | NC_021166.1    | Ca_Kabuli_Chr07 | 34183901                | CC                                     | TT                 | TT               | URR                           | 101496484          | uncharacterized LOC101496484          |
| SNP_56257_A_34189566 | NC_021166.1    | Ca_Kabuli_Chr07 | 34189566                | TT                                     | AA                 | AA               | URR                           | 101496820          | uncharacterized protein C23H3.12c     |
| SNP_56259_A_34189894 | NC_021166.1    | Ca_Kabuli_Chr07 | 34189894                | TT                                     | CC                 | CC               | URR                           | 101496820          | uncharacterized protein C23H3.12c     |
| SNP_56260_A_34191646 | NC_021166.1    | Ca_Kabuli_Chr07 | 34191646                | CC                                     | TT                 | TT               | DRR                           | 101497140          | 26S protease regulatory subunit 7     |
| SNP_56261_A_34191798 | NC_021166.1    | Ca_Kabuli_Chr07 | 34191798                | GG                                     | TT                 | TT               | INTERGENIC                    |                    |                                       |
| SNP_56262_A_34196726 | NC_021166.1    | Ca_Kabuli_Chr07 | 34196726                | AA                                     | GG                 | GG               | URR                           | 101497140          | 26S protease regulatory subunit 7     |
| SNP_56263_A_34198836 | NC_021166.1    | Ca_Kabuli_Chr07 | 34198836                | CC                                     | AA                 | AA               | INTERGENIC                    |                    |                                       |
| SNP_56264_A_34200071 | NC_021166.1    | Ca_Kabuli_Chr07 | 34200071                | CC                                     | AA                 | AA               | INTERGENIC                    |                    |                                       |
| SNP_56265_A_34203577 | NC_021166.1    | Ca_Kabuli_Chr07 | 34203577                | GG                                     | TT                 | TT               | URR                           | 101497474          | protein STRUBBELIG-RECEPTOR FAMILY 6  |
| SNP_56266_A_34205488 | NC_021166.1    | Ca_Kabuli_Chr07 | 34205488                | GG                                     | AA                 | AA               | INTERGENIC                    |                    |                                       |
| SNP_56267_A_34206216 | NC_021166.1    | Ca_Kabuli_Chr07 | 34206216                | GG                                     | CC                 | CC               | DRR                           | 101498128          | probable splicing factor 3A subunit 1 |
| SNP_56268_A_34211501 | NC_021166.1    | Ca_Kabuli_Chr07 | 34211501                | CC                                     | TT                 | TT               | URR                           | 101498128          | probable splicing factor 3A subunit 1 |
| SNP_56269_A_34211513 | NC_021166.1    | Ca_Kabuli_Chr07 | 34211513                | TT                                     | CC                 | CC               | URR                           | 101498128          | probable splicing factor 3A subunit 1 |
| SNP_56270_A_34211571 | NC_021166.1    | Ca_Kabuli_Chr07 | 34211571                | AA                                     | CC                 | CC               | URR                           | 101498128          | probable splicing factor 3A subunit 1 |

| SNPs IDs             | Chromosome IDs | Chromosomes     | Physical positions (bp) | CDC Frontier genome (Reference genome) | (Pusa 1103 & HPNB) | (ILWC 46 & LPNB) | Sequence Components of genome | Gene accession IDs | Putative functions                        |
|----------------------|----------------|-----------------|-------------------------|----------------------------------------|--------------------|------------------|-------------------------------|--------------------|-------------------------------------------|
| SNP_56271_A_34211581 | NC_021166.1    | Ca_Kabuli_Chr07 | 34211581                | TT                                     | CC                 | CC               | URR                           | 101498128          | probable splicing factor 3A subunit 1     |
| SNP_56272_A_34211583 | NC_021166.1    | Ca_Kabuli_Chr07 | 34211583                | AA                                     | GG                 | GG               | URR                           | 101498128          | probable splicing factor 3A subunit 1     |
| SNP_56273_A_34211586 | NC_021166.1    | Ca_Kabuli_Chr07 | 34211586                | TT                                     | CC                 | CC               | URR                           | 101498128          | probable splicing factor 3A subunit 1     |
| SNP_56274_A_34211602 | NC_021166.1    | Ca_Kabuli_Chr07 | 34211602                | AA                                     | GG                 | GG               | URR                           | 101498128          | probable splicing factor 3A subunit 1     |
| SNP_56275_A_34213656 | NC_021166.1    | Ca_Kabuli_Chr07 | 34213656                | GG                                     | AA                 | AA               | INTERGENIC                    |                    |                                           |
| SNP_56276_A_34213712 | NC_021166.1    | Ca_Kabuli_Chr07 | 34213712                | TT                                     | CC                 | CC               | INTERGENIC                    |                    |                                           |
| SNP_56277_A_34213955 | NC_021166.1    | Ca_Kabuli_Chr07 | 34213955                | CC                                     | TT                 | TT               | INTERGENIC                    |                    |                                           |
| SNP_56279_A_34214028 | NC_021166.1    | Ca_Kabuli_Chr07 | 34214028                | TT                                     | GG                 | GG               | INTERGENIC                    |                    |                                           |
| SNP_56280_A_34214041 | NC_021166.1    | Ca_Kabuli_Chr07 | 34214041                | AA                                     | GG                 | GG               | INTERGENIC                    |                    |                                           |
| SNP_56281_A_34216009 | NC_021166.1    | Ca_Kabuli_Chr07 | 34216009                | AA                                     | TT                 | TT               | URR                           | 101497810          | Unknown function                          |
| SNP_56282_A_34217123 | NC_021166.1    | Ca_Kabuli_Chr07 | 34217123                | TT                                     | CC                 | CC               | DRR                           | 101498804          | uncharacterized protein C630.12           |
| SNP_56283_A_34217365 | NC_021166.1    | Ca_Kabuli_Chr07 | 34217365                | CC                                     | TT                 | TT               | DRR                           | 101498804          | uncharacterized protein C630.12           |
| SNP_56284_A_34221101 | NC_021166.1    | Ca_Kabuli_Chr07 | 34221101                | CC                                     | GG                 | GG               | INTRON                        | 101498804          | uncharacterized protein C630.12           |
| SNP_56285_A_34226137 | NC_021166.1    | Ca_Kabuli_Chr07 | 34226137                | TT                                     | CC                 | CC               | DRR                           | 101499322          | uncharacterized LOC101499322              |
| SNP_56286_A_34226463 | NC_021166.1    | Ca_Kabuli_Chr07 | 34226463                | GG                                     | CC                 | CC               | DRR                           | 101499322          | uncharacterized LOC101499322              |
| SNP_56287_A_34226776 | NC_021166.1    | Ca_Kabuli_Chr07 | 34226776                | CC                                     | TT                 | TT               | INTERGENIC                    |                    |                                           |
| SNP_56288_A_34227564 | NC_021166.1    | Ca_Kabuli_Chr07 | 34227564                | AA                                     | GG                 | GG               | SYNONYMOUS_CODING             | 101499322          | uncharacterized LOC101499322              |
| SNP_56289_A_34227585 | NC_021166.1    | Ca_Kabuli_Chr07 | 34227585                | TT                                     | CC                 | CC               | SYNONYMOUS_CODING             | 101499322          | uncharacterized LOC101499322              |
| SNP_56290_A_34231885 | NC_021166.1    | Ca_Kabuli_Chr07 | 34231885                | CC                                     | AA                 | AA               | URR                           | 101499322          | uncharacterized LOC101499322              |
| SNP_56291_A_34238745 | NC_021166.1    | Ca_Kabuli_Chr07 | 34238745                | AA                                     | TT                 | TT               | URR                           | 101500056          | tyrosine-sulfated glycopeptide receptor 1 |
| SNP_56292_A_34238749 | NC_021166.1    | Ca_Kabuli_Chr07 | 34238749                | GG                                     | CC                 | CC               | URR                           | 101500056          | tyrosine-sulfated glycopeptide receptor 1 |
| SNP_56293_A_34238769 | NC_021166.1    | Ca_Kabuli_Chr07 | 34238769                | AA                                     | GG                 | GG               | URR                           | 101500056          | tyrosine-sulfated glycopeptide receptor 1 |

| SNPs IDs             | Chromosome IDs | Chromosomes     | Physical positions (bp) | CDC Frontier (Reference genome) | (Pusa 1103 & HPNB) | (ILWC 46 & LPNB) | Sequence Components of genome | Gene accession IDs | Putative functions                                |
|----------------------|----------------|-----------------|-------------------------|---------------------------------|--------------------|------------------|-------------------------------|--------------------|---------------------------------------------------|
| SNP_56294_A_34238779 | NC_021166.1    | Ca_Kabuli_Chr07 | 34238779                | TT                              | CC                 | CC               | URR                           | 101500056          | tyrosine-sulfated glycopeptide receptor 1         |
| SNP_56296_A_34241469 | NC_021166.1    | Ca_Kabuli_Chr07 | 34241469                | GG                              | AA                 | AA               | INTERGENIC                    |                    |                                                   |
| SNP_56298_A_34241711 | NC_021166.1    | Ca_Kabuli_Chr07 | 34241711                | TT                              | CC                 | CC               | INTERGENIC                    |                    |                                                   |
| SNP_56299_A_34242901 | NC_021166.1    | Ca_Kabuli_Chr07 | 34242901                | AA                              | GG                 | GG               | INTERGENIC                    |                    |                                                   |
| SNP_56300_A_34243677 | NC_021166.1    | Ca_Kabuli_Chr07 | 34243677                | TT                              | GG                 | GG               | INTERGENIC                    |                    |                                                   |
| SNP_56301_A_34245938 | NC_021166.1    | Ca_Kabuli_Chr07 | 34245938                | AA                              | GG                 | GG               | INTERGENIC                    |                    |                                                   |
| SNP_56302_A_34246491 | NC_021166.1    | Ca_Kabuli_Chr07 | 34246491                | AA                              | GG                 | GG               | INTERGENIC                    |                    |                                                   |
| SNP_56303_A_34250847 | NC_021166.1    | Ca_Kabuli_Chr07 | 34250847                | TT                              | CC                 | CC               | DRR                           | 101500391          | transcription factor 25                           |
| SNP_56304_A_34251151 | NC_021166.1    | Ca_Kabuli_Chr07 | 34251151                | AA                              | TT                 | TT               | DRR                           | 101500391          | transcription factor 25                           |
| SNP_56306_A_34254859 | NC_021166.1    | Ca_Kabuli_Chr07 | 34254859                | TT                              | AA                 | AA               | NON_SYNONYMOUS_CODING         | 101500391          | transcription factor 25                           |
| SNP_56307_A_34255745 | NC_021166.1    | Ca_Kabuli_Chr07 | 34255745                | TT                              | CC                 | CC               | INTERGENIC                    |                    |                                                   |
| SNP_56309_A_34256685 | NC_021166.1    | Ca_Kabuli_Chr07 | 34256685                | AA                              | GG                 | GG               | URR                           | 101500391          | transcription factor 25                           |
| SNP_56310_A_34256708 | NC_021166.1    | Ca_Kabuli_Chr07 | 34256708                | TT                              | CC                 | CC               | URR                           | 101500391          | transcription factor 25                           |
| SNP_56311_A_34256912 | NC_021166.1    | Ca_Kabuli_Chr07 | 34256912                | CC                              | TT                 | TT               | URR                           | 101500391          | transcription factor 25                           |
| SNP_56312_A_34256914 | NC_021166.1    | Ca_Kabuli_Chr07 | 34256914                | CC                              | TT                 | TT               | URR                           | 101500391          | transcription factor 25                           |
| SNP_56313_A_34256924 | NC_021166.1    | Ca_Kabuli_Chr07 | 34256924                | TT                              | CC                 | CC               | URR                           | 101500391          | transcription factor 25                           |
| SNP_56314_A_34256988 | NC_021166.1    | Ca_Kabuli_Chr07 | 34256988                | CC                              | TT                 | TT               | DRR                           | 101500701          | uncharacterized protein C594.04c                  |
| SNP_56315_A_34256993 | NC_021166.1    | Ca_Kabuli_Chr07 | 34256993                | TT                              | CC                 | CC               | DRR                           | 101500701          | uncharacterized protein C594.04c                  |
| SNP_56316_A_34260597 | NC_021166.1    | Ca_Kabuli_Chr07 | 34260597                | AA                              | CC                 | CC               | URR                           | 101500701          | uncharacterized protein C594.04c                  |
| SNP_56317_A_34261305 | NC_021166.1    | Ca_Kabuli_Chr07 | 34261305                | TT                              | GG                 | GG               | URR                           | 101500701          | uncharacterized protein C594.04c                  |
| SNP_56318_A_34261626 | NC_021166.1    | Ca_Kabuli_Chr07 | 34261626                | GG                              | AA                 | AA               | DRR                           | 101501016          | probable inactive purple acid phosphatase 29-like |
| SNP_56319_A_34262053 | NC_021166.1    | Ca_Kabuli_Chr07 | 34262053                | CC                              | TT                 | TT               | DRR                           | 101501016          | probable inactive purple acid phosphatase 29-like |

| SNPs IDs             | Chromosome IDs | Chromosomes     | Physical positions (bp) | CDC Frontier genome (Reference genome) | (Pusa 1103 & HPNB) | (ILWC 46 & LPNB) | Sequence Components of genome | Gene accession IDs | Putative functions                                |
|----------------------|----------------|-----------------|-------------------------|----------------------------------------|--------------------|------------------|-------------------------------|--------------------|---------------------------------------------------|
| SNP_56320_A_34265788 | NC_021166.1    | Ca_Kabuli_Chr07 | 34265788                | CC                                     | TT                 | TT               | INTERGENIC                    |                    |                                                   |
| SNP_56321_A_34265850 | NC_021166.1    | Ca_Kabuli_Chr07 | 34265850                | GG                                     | TT                 | TT               | INTERGENIC                    |                    |                                                   |
| SNP_56322_A_34266858 | NC_021166.1    | Ca_Kabuli_Chr07 | 34266858                | TT                                     | CC                 | CC               | DRR                           | 101506807          | probable inactive purple acid phosphatase 29      |
| SNP_56323_A_34266901 | NC_021166.1    | Ca_Kabuli_Chr07 | 34266901                | AA                                     | TT                 | TT               | DRR                           | 101506807          | probable inactive purple acid phosphatase 29      |
| SNP_56324_A_34266919 | NC_021166.1    | Ca_Kabuli_Chr07 | 34266919                | GG                                     | TT                 | TT               | DRR                           | 101506807          | probable inactive purple acid phosphatase 29      |
| SNP_56325_A_34266976 | NC_021166.1    | Ca_Kabuli_Chr07 | 34266976                | TT                                     | AA                 | AA               | DRR                           | 101506807          | probable inactive purple acid phosphatase 29      |
| SNP_56326_A_34267557 | NC_021166.1    | Ca_Kabuli_Chr07 | 34267557                | TT                                     | GG                 | GG               | URR                           | 101501016          | probable inactive purple acid phosphatase 29-like |
| SNP_56327_A_34274323 | NC_021166.1    | Ca_Kabuli_Chr07 | 34274323                | TT                                     | AA                 | AA               | DRR                           | 101502294          | chlorophyll a-b binding protein 7, chloroplastic  |
| SNP_56330_A_34276187 | NC_021166.1    | Ca_Kabuli_Chr07 | 34276187                | TT                                     | CC                 | CC               | INTRON                        | 101502294          | chlorophyll a-b binding protein 7, chloroplastic  |
| SNP_56332_A_34277102 | NC_021166.1    | Ca_Kabuli_Chr07 | 34277102                | CC                                     | AA                 | AA               | INTERGENIC                    |                    |                                                   |
| SNP_56334_A_34277639 | NC_021166.1    | Ca_Kabuli_Chr07 | 34277639                | AA                                     | GG                 | GG               | URR                           | 101502294          | chlorophyll a-b binding protein 7, chloroplastic  |
| SNP_56335_A_34277676 | NC_021166.1    | Ca_Kabuli_Chr07 | 34277676                | AA                                     | GG                 | GG               | URR                           | 101502294          | chlorophyll a-b binding protein 7, chloroplastic  |
| SNP_56336_A_34277719 | NC_021166.1    | Ca_Kabuli_Chr07 | 34277719                | GG                                     | AA                 | AA               | URR                           | 101502294          | chlorophyll a-b binding protein 7, chloroplastic  |
| SNP_56337_A_34277733 | NC_021166.1    | Ca_Kabuli_Chr07 | 34277733                | TT                                     | CC                 | CC               | URR                           | 101502294          | chlorophyll a-b binding protein 7, chloroplastic  |
| SNP_56338_A_34277950 | NC_021166.1    | Ca_Kabuli_Chr07 | 34277950                | TT                                     | CC                 | CC               | URR                           | 101502294          | chlorophyll a-b binding protein 7, chloroplastic  |
| SNP_56339_A_34277961 | NC_021166.1    | Ca_Kabuli_Chr07 | 34277961                | CC                                     | TT                 | TT               | URR                           | 101502294          | chlorophyll a-b binding protein 7, chloroplastic  |
| SNP_56340_A_34278198 | NC_021166.1    | Ca_Kabuli_Chr07 | 34278198                | AA                                     | GG                 | GG               | URR                           | 101502294          | chlorophyll a-b binding protein 7, chloroplastic  |
| SNP_56342_A_34281988 | NC_021166.1    | Ca_Kabuli_Chr07 | 34281988                | CC                                     | TT                 | TT               | INTRON                        | 101502814          | ribosome production factor 1                      |
| SNP_56343_A_34283545 | NC_021166.1    | Ca_Kabuli_Chr07 | 34283545                | CC                                     | AA                 | AA               | URR                           | 101502814          | ribosome production factor 1                      |
| SNP_56345_A_34284017 | NC_021166.1    | Ca_Kabuli_Chr07 | 34284017                | AA                                     | CC                 | CC               | URR                           | 101502814          | ribosome production factor 1                      |
| SNP_56346_A_34284092 | NC_021166.1    | Ca_Kabuli_Chr07 | 34284092                | AA                                     | GG                 | GG               | URR                           | 101502814          | ribosome production factor 1                      |
| SNP_56347_A_34285790 | NC_021166.1    | Ca_Kabuli_Chr07 | 34285790                | CC                                     | TT                 | TT               | INTERGENIC                    |                    |                                                   |

| SNPs IDs             | Chromosome IDs | Chromosomes     | Physical positions (bp) | CDC Frontier genome (Reference genome) | (Pusa 1103 & HPNB) | (ILWC 46 & LPNB) | Sequence Components of genome | Gene accession IDs | Putative functions                                     |
|----------------------|----------------|-----------------|-------------------------|----------------------------------------|--------------------|------------------|-------------------------------|--------------------|--------------------------------------------------------|
| SNP_56349_A_34286443 | NC_021166.1    | Ca_Kabuli_Chr07 | 34286443                | AA                                     | GG                 | GG               | INTERGENIC                    |                    |                                                        |
| SNP_56350_A_34286455 | NC_021166.1    | Ca_Kabuli_Chr07 | 34286455                | GG                                     | CC                 | CC               | INTERGENIC                    |                    |                                                        |
| SNP_56352_A_34286568 | NC_021166.1    | Ca_Kabuli_Chr07 | 34286568                | TT                                     | CC                 | CC               | INTERGENIC                    |                    |                                                        |
| SNP_56353_A_34291683 | NC_021166.1    | Ca_Kabuli_Chr07 | 34291683                | CC                                     | AA                 | AA               | SYNONYMOUS_CODING             | 101503137          | uncharacterized calcium-binding protein At1g02270-like |
| SNP_56354_A_34293008 | NC_021166.1    | Ca_Kabuli_Chr07 | 34293008                | GG                                     | AA                 | AA               | URR                           | 101503137          | uncharacterized calcium-binding protein At1g02270-like |
| SNP_56355_A_34293251 | NC_021166.1    | Ca_Kabuli_Chr07 | 34293251                | AA                                     | CC                 | CC               | URR                           | 101503137          | uncharacterized calcium-binding protein At1g02270-like |
| SNP_56356_A_34293300 | NC_021166.1    | Ca_Kabuli_Chr07 | 34293300                | TT                                     | CC                 | CC               | URR                           | 101503137          | uncharacterized calcium-binding protein At1g02270-like |
| SNP_56357_A_34294085 | NC_021166.1    | Ca_Kabuli_Chr07 | 34294085                | GG                                     | AA                 | AA               | URR                           | 101503137          | uncharacterized calcium-binding protein At1g02270-like |
| SNP_56358_A_34295117 | NC_021166.1    | Ca_Kabuli_Chr07 | 34295117                | AA                                     | TT                 | TT               | INTERGENIC                    |                    |                                                        |
| SNP_56360_A_34296549 | NC_021166.1    | Ca_Kabuli_Chr07 | 34296549                | AA                                     | GG                 | GG               | DRR                           | 101503457          | protein NTM1-like 9                                    |
| SNP_56361_A_34296558 | NC_021166.1    | Ca_Kabuli_Chr07 | 34296558                | GG                                     | AA                 | AA               | DRR                           | 101503457          | protein NTM1-like 9                                    |
| SNP_56362_A_34299119 | NC_021166.1    | Ca_Kabuli_Chr07 | 34299119                | TT                                     | AA                 | AA               | NON_SYNONYMOUS_CODING         | 101503457          | protein NTM1-like 9                                    |
| SNP_56363_A_34300258 | NC_021166.1    | Ca_Kabuli_Chr07 | 34300258                | TT                                     | AA                 | AA               | NON_SYNONYMOUS_CODING         | 101503457          | protein NTM1-like 9                                    |
| SNP_56364_A_34302411 | NC_021166.1    | Ca_Kabuli_Chr07 | 34302411                | GG                                     | AA                 | AA               | URR                           | 101503457          | protein NTM1-like 9                                    |
| SNP_56365_A_34302446 | NC_021166.1    | Ca_Kabuli_Chr07 | 34302446                | GG                                     | AA                 | AA               | URR                           | 101503457          | protein NTM1-like 9                                    |
| SNP_56366_A_34302473 | NC_021166.1    | Ca_Kabuli_Chr07 | 34302473                | CC                                     | TT                 | TT               | URR                           | 101503457          | protein NTM1-like 9                                    |
| SNP_56367_A_34303659 | NC_021166.1    | Ca_Kabuli_Chr07 | 34303659                | AA                                     | GG                 | GG               | INTERGENIC                    |                    |                                                        |
| SNP_56368_A_34303675 | NC_021166.1    | Ca_Kabuli_Chr07 | 34303675                | AA                                     | GG                 | GG               | INTERGENIC                    |                    |                                                        |
| SNP_56370_A_34305279 | NC_021166.1    | Ca_Kabuli_Chr07 | 34305279                | CC                                     | TT                 | TT               | INTERGENIC                    |                    |                                                        |
| SNP_56372_A_34307163 | NC_021166.1    | Ca_Kabuli_Chr07 | 34307163                | GG                                     | TT                 | TT               | INTERGENIC                    |                    |                                                        |
| SNP_56373_A_34307206 | NC_021166.1    | Ca_Kabuli_Chr07 | 34307206                | TT                                     | CC                 | CC               | INTERGENIC                    |                    |                                                        |
| SNP_56374_A_34307275 | NC_021166.1    | Ca_Kabuli_Chr07 | 34307275                | GG                                     | AA                 | AA               | INTERGENIC                    |                    |                                                        |



| SNPs IDs             | Chromosome IDs | Chromosomes     | Physical positions (bp) | CDC Frontier genome (Reference genome) | (Pusa 1103 & HPNB) | (ILWC 46 & LPNB) | Sequence Components of genome | Gene accession IDs | Putative functions           |
|----------------------|----------------|-----------------|-------------------------|----------------------------------------|--------------------|------------------|-------------------------------|--------------------|------------------------------|
| SNP_56375_A_34307296 | NC_021166.1    | Ca_Kabuli_Chr07 | 34307296                | GG                                     | AA                 | AA               | INTERGENIC                    |                    |                              |
| SNP_56376_A_34307316 | NC_021166.1    | Ca_Kabuli_Chr07 | 34307316                | GG                                     | AA                 | AA               | INTERGENIC                    |                    |                              |
| SNP_56377_A_34307347 | NC_021166.1    | Ca_Kabuli_Chr07 | 34307347                | AA                                     | GG                 | GG               | INTERGENIC                    |                    |                              |
| SNP_56378_A_34311824 | NC_021166.1    | Ca_Kabuli_Chr07 | 34311824                | GG                                     | AA                 | AA               | INTERGENIC                    |                    |                              |
| SNP_56379_A_34312060 | NC_021166.1    | Ca_Kabuli_Chr07 | 34312060                | AA                                     | GG                 | GG               | INTERGENIC                    |                    |                              |
| SNP_56380_A_34312092 | NC_021166.1    | Ca_Kabuli_Chr07 | 34312092                | AA                                     | GG                 | GG               | INTERGENIC                    |                    |                              |
| SNP_56382_A_34312212 | NC_021166.1    | Ca_Kabuli_Chr07 | 34312212                | GG                                     | AA                 | AA               | INTERGENIC                    |                    |                              |
| SNP_56384_A_34312486 | NC_021166.1    | Ca_Kabuli_Chr07 | 34312486                | GG                                     | AA                 | AA               | INTERGENIC                    |                    |                              |
| SNP_56385_A_34312625 | NC_021166.1    | Ca_Kabuli_Chr07 | 34312625                | CC                                     | GG                 | GG               | INTERGENIC                    |                    |                              |
| SNP_56387_A_34312823 | NC_021166.1    | Ca_Kabuli_Chr07 | 34312823                | GG                                     | AA                 | AA               | INTERGENIC                    |                    |                              |
| SNP_56388_A_34312993 | NC_021166.1    | Ca_Kabuli_Chr07 | 34312993                | TT                                     | CC                 | CC               | INTERGENIC                    |                    |                              |
| SNP_56389_A_34313116 | NC_021166.1    | Ca_Kabuli_Chr07 | 34313116                | TT                                     | CC                 | CC               | INTERGENIC                    |                    |                              |
| SNP_56390_A_34313455 | NC_021166.1    | Ca_Kabuli_Chr07 | 34313455                | CC                                     | AA                 | AA               | INTERGENIC                    |                    |                              |
| SNP_56392_A_34314834 | NC_021166.1    | Ca_Kabuli_Chr07 | 34314834                | CC                                     | TT                 | TT               | INTERGENIC                    |                    |                              |
| SNP_56393_A_34314840 | NC_021166.1    | Ca_Kabuli_Chr07 | 34314840                | TT                                     | CC                 | CC               | INTERGENIC                    |                    |                              |
| SNP_56394_A_34316134 | NC_021166.1    | Ca_Kabuli_Chr07 | 34316134                | AA                                     | GG                 | GG               | DRR                           | 101503796          | uncharacterized LOC101503796 |
| SNP_56395_A_34316149 | NC_021166.1    | Ca_Kabuli_Chr07 | 34316149                | CC                                     | AA                 | AA               | DRR                           | 101503796          | uncharacterized LOC101503796 |
| SNP_56396_A_34316195 | NC_021166.1    | Ca_Kabuli_Chr07 | 34316195                | TT                                     | CC                 | CC               | DRR                           | 101503796          | uncharacterized LOC101503796 |
| SNP_56397_A_34316907 | NC_021166.1    | Ca_Kabuli_Chr07 | 34316907                | TT                                     | CC                 | CC               | INTRON                        | 101503796          | uncharacterized LOC101503796 |
| SNP_56398_A_34318115 | NC_021166.1    | Ca_Kabuli_Chr07 | 34318115                | AA                                     | TT                 | TT               | INTRON                        | 101503796          | uncharacterized LOC101503796 |
| SNP_56399_A_34318210 | NC_021166.1    | Ca_Kabuli_Chr07 | 34318210                | AA                                     | TT                 | TT               | INTRON                        | 101503796          | uncharacterized LOC101503796 |
| SNP_56402_A_34321084 | NC_021166.1    | Ca_Kabuli_Chr07 | 34321084                | TT                                     | GG                 | GG               | INTRON                        | 101503796          | uncharacterized LOC101503796 |

| SNPs IDs             | Chromosome IDs | Chromosomes     | Physical positions (bp) | CDC Frontier genome (Reference genome) | (Pusa 1103 & HPNB) | (ILWC 46 & LPNB) | Sequence Components of genome | Gene accession IDs | Putative functions           |
|----------------------|----------------|-----------------|-------------------------|----------------------------------------|--------------------|------------------|-------------------------------|--------------------|------------------------------|
| SNP_56404_A_34321212 | NC_021166.1    | Ca_Kabuli_Chr07 | 34321212                | AA                                     | TT                 | TT               | INTRON                        | 101503796          | uncharacterized LOC101503796 |
| SNP_56405_A_34321265 | NC_021166.1    | Ca_Kabuli_Chr07 | 34321265                | TT                                     | GG                 | GG               | URR                           | 101503796          | uncharacterized LOC101503796 |
| SNP_56406_A_34323682 | NC_021166.1    | Ca_Kabuli_Chr07 | 34323682                | AA                                     | GG                 | GG               | INTERGENIC                    |                    |                              |
| SNP_56408_A_34323973 | NC_021166.1    | Ca_Kabuli_Chr07 | 34323973                | GG                                     | AA                 | AA               | INTERGENIC                    |                    |                              |
| SNP_56409_A_34324147 | NC_021166.1    | Ca_Kabuli_Chr07 | 34324147                | AA                                     | TT                 | TT               | INTERGENIC                    |                    |                              |
| SNP_56410_A_34324184 | NC_021166.1    | Ca_Kabuli_Chr07 | 34324184                | TT                                     | CC                 | CC               | INTERGENIC                    |                    |                              |
| SNP_56411_A_34324207 | NC_021166.1    | Ca_Kabuli_Chr07 | 34324207                | TT                                     | CC                 | CC               | INTERGENIC                    |                    |                              |
| SNP_56413_A_34331412 | NC_021166.1    | Ca_Kabuli_Chr07 | 34331412                | AA                                     | CC                 | CC               | INTERGENIC                    |                    |                              |
| SNP_56414_A_34331420 | NC_021166.1    | Ca_Kabuli_Chr07 | 34331420                | TT                                     | CC                 | CC               | INTERGENIC                    |                    |                              |
| SNP_56415_A_34331432 | NC_021166.1    | Ca_Kabuli_Chr07 | 34331432                | TT                                     | CC                 | CC               | INTERGENIC                    |                    |                              |
| SNP_56416_A_34331511 | NC_021166.1    | Ca_Kabuli_Chr07 | 34331511                | TT                                     | GG                 | GG               | INTERGENIC                    |                    |                              |
| SNP_56417_A_34331888 | NC_021166.1    | Ca_Kabuli_Chr07 | 34331888                | TT                                     | CC                 | CC               | INTERGENIC                    |                    |                              |
| SNP_56418_A_34335869 | NC_021166.1    | Ca_Kabuli_Chr07 | 34335869                | TT                                     | AA                 | AA               | INTERGENIC                    |                    |                              |
| SNP_56419_A_34335880 | NC_021166.1    | Ca_Kabuli_Chr07 | 34335880                | TT                                     | CC                 | CC               | INTERGENIC                    |                    |                              |
| SNP_56420_A_34336053 | NC_021166.1    | Ca_Kabuli_Chr07 | 34336053                | AA                                     | GG                 | GG               | INTERGENIC                    |                    |                              |
| SNP_56421_A_34336075 | NC_021166.1    | Ca_Kabuli_Chr07 | 34336075                | AA                                     | TT                 | TT               | INTERGENIC                    |                    |                              |
| SNP_56423_A_34337352 | NC_021166.1    | Ca_Kabuli_Chr07 | 34337352                | TT                                     | AA                 | AA               | INTERGENIC                    |                    |                              |
| SNP_56424_A_34337438 | NC_021166.1    | Ca_Kabuli_Chr07 | 34337438                | AA                                     | GG                 | GG               | INTERGENIC                    |                    |                              |
| SNP_56425_A_34337473 | NC_021166.1    | Ca_Kabuli_Chr07 | 34337473                | GG                                     | AA                 | AA               | INTERGENIC                    |                    |                              |
| SNP_56426_A_34337474 | NC_021166.1    | Ca_Kabuli_Chr07 | 34337474                | CC                                     | TT                 | TT               | INTERGENIC                    |                    |                              |
| SNP_56427_A_34337488 | NC_021166.1    | Ca_Kabuli_Chr07 | 34337488                | AA                                     | GG                 | GG               | INTERGENIC                    |                    |                              |
| SNP_56428_A_34337491 | NC_021166.1    | Ca_Kabuli_Chr07 | 34337491                | GG                                     | AA                 | AA               | INTERGENIC                    |                    |                              |

| SNPs IDs             | Chromosome IDs | Chromosomes     | Physical positions (bp) | CDC Frontier genome (Reference genome) | (Pusa 1103 & HPNB) | (ILWC 46 & LPNB) | Sequence Components of genome | Gene accession IDs | Putative functions                                       |
|----------------------|----------------|-----------------|-------------------------|----------------------------------------|--------------------|------------------|-------------------------------|--------------------|----------------------------------------------------------|
| SNP_56430_A_34341950 | NC_021166.1    | Ca_Kabuli_Chr07 | 34341950                | CC                                     | TT                 | TT               | INTERGENIC                    |                    |                                                          |
| SNP_56431_A_34342001 | NC_021166.1    | Ca_Kabuli_Chr07 | 34342001                | CC                                     | TT                 | TT               | INTERGENIC                    |                    |                                                          |
| SNP_56432_A_34342017 | NC_021166.1    | Ca_Kabuli_Chr07 | 34342017                | AA                                     | GG                 | GG               | INTERGENIC                    |                    |                                                          |
| SNP_56433_A_34342018 | NC_021166.1    | Ca_Kabuli_Chr07 | 34342018                | GG                                     | TT                 | TT               | INTERGENIC                    |                    |                                                          |
| SNP_56434_A_34342021 | NC_021166.1    | Ca_Kabuli_Chr07 | 34342021                | AA                                     | GG                 | GG               | INTERGENIC                    |                    |                                                          |
| SNP_56435_A_34342022 | NC_021166.1    | Ca_Kabuli_Chr07 | 34342022                | TT                                     | CC                 | CC               | INTERGENIC                    |                    |                                                          |
| SNP_56437_A_34345292 | NC_021166.1    | Ca_Kabuli_Chr07 | 34345292                | TT                                     | AA                 | AA               | INTERGENIC                    |                    |                                                          |
| SNP_56438_A_34348298 | NC_021166.1    | Ca_Kabuli_Chr07 | 34348298                | CC                                     | AA                 | AA               | DRR                           | 101504117          | soluble inorganic pyrophosphatase 1-like                 |
| SNP_56439_A_34348300 | NC_021166.1    | Ca_Kabuli_Chr07 | 34348300                | CC                                     | TT                 | TT               | DRR                           | 101504117          | soluble inorganic pyrophosphatase 1-like                 |
| SNP_56440_A_34349619 | NC_021166.1    | Ca_Kabuli_Chr07 | 34349619                | CC                                     | GG                 | GG               | INTRON                        | 101504117          | soluble inorganic pyrophosphatase 1-like                 |
| SNP_56441_A_34349936 | NC_021166.1    | Ca_Kabuli_Chr07 | 34349936                | GG                                     | AA                 | AA               | INTRON                        | 101504117          | soluble inorganic pyrophosphatase 1-like                 |
| SNP_56442_A_34349957 | NC_021166.1    | Ca_Kabuli_Chr07 | 34349957                | AA                                     | GG                 | GG               | INTRON                        | 101504117          | soluble inorganic pyrophosphatase 1-like                 |
| SNP_56443_A_34349971 | NC_021166.1    | Ca_Kabuli_Chr07 | 34349971                | TT                                     | CC                 | CC               | INTRON                        | 101504117          | soluble inorganic pyrophosphatase 1-like                 |
| SNP_56444_A_34349978 | NC_021166.1    | Ca_Kabuli_Chr07 | 34349978                | TT                                     | CC                 | CC               | INTRON                        | 101504117          | soluble inorganic pyrophosphatase 1-like                 |
| SNP_56446_A_34365572 | NC_021166.1    | Ca_Kabuli_Chr07 | 34365572                | GG                                     | CC                 | CC               | NON_SYNONYMOUS_CODING         | 101504431          | probably inactive receptor-like protein kinase At2g46850 |
| SNP_56447_A_34368718 | NC_021166.1    | Ca_Kabuli_Chr07 | 34368718                | GG                                     | AA                 | AA               | URR                           | 101504431          | probably inactive receptor-like protein kinase At2g46850 |
| SNP_56448_A_34369376 | NC_021166.1    | Ca_Kabuli_Chr07 | 34369376                | GG                                     | AA                 | AA               | INTERGENIC                    |                    |                                                          |
| SNP_56449_A_34370177 | NC_021166.1    | Ca_Kabuli_Chr07 | 34370177                | GG                                     | CC                 | CC               | INTERGENIC                    |                    |                                                          |
| SNP_56450_A_34370952 | NC_021166.1    | Ca_Kabuli_Chr07 | 34370952                | CC                                     | GG                 | GG               | INTERGENIC                    |                    |                                                          |
| SNP_56451_A_34378637 | NC_021166.1    | Ca_Kabuli_Chr07 | 34378637                | CC                                     | TT                 | TT               | INTRON                        | 101504750          | serine/threonine-protein kinase ULK3                     |
| SNP_56452_A_34383597 | NC_021166.1    | Ca_Kabuli_Chr07 | 34383597                | GG                                     | AA                 | AA               | INTERGENIC                    |                    |                                                          |
| SNP_56453_A_34383604 | NC_021166.1    | Ca_Kabuli_Chr07 | 34383604                | CC                                     | TT                 | TT               | INTERGENIC                    |                    |                                                          |

| SNPs IDs             | Chromosome IDs | Chromosomes     | Physical positions (bp) | CDC Frontier genome (Reference genome) | (Pusa 1103 & HPNB) | (ILWC 46 & LPNB) | Sequence genome | Components of | Gene accession IDs | Putative functions |
|----------------------|----------------|-----------------|-------------------------|----------------------------------------|--------------------|------------------|-----------------|---------------|--------------------|--------------------|
| SNP_56455_A_34383864 | NC_021166.1    | Ca_Kabuli_Chr07 | 34383864                | GG                                     | TT                 | TT               | INTERGENIC      |               |                    |                    |
| SNP_56456_A_34384009 | NC_021166.1    | Ca_Kabuli_Chr07 | 34384009                | TT                                     | CC                 | CC               | INTERGENIC      |               |                    |                    |
| SNP_56457_A_34384021 | NC_021166.1    | Ca_Kabuli_Chr07 | 34384021                | GG                                     | AA                 | AA               | INTERGENIC      |               |                    |                    |
| SNP_56458_A_34384036 | NC_021166.1    | Ca_Kabuli_Chr07 | 34384036                | TT                                     | CC                 | CC               | INTERGENIC      |               |                    |                    |
| SNP_56459_A_34385221 | NC_021166.1    | Ca_Kabuli_Chr07 | 34385221                | GG                                     | AA                 | AA               | INTERGENIC      |               |                    |                    |
| SNP_56460_A_34385224 | NC_021166.1    | Ca_Kabuli_Chr07 | 34385224                | CC                                     | TT                 | TT               | INTERGENIC      |               |                    |                    |
| SNP_56461_A_34385227 | NC_021166.1    | Ca_Kabuli_Chr07 | 34385227                | TT                                     | CC                 | CC               | INTERGENIC      |               |                    |                    |
| SNP_56462_A_34385234 | NC_021166.1    | Ca_Kabuli_Chr07 | 34385234                | CC                                     | TT                 | TT               | INTERGENIC      |               |                    |                    |
| SNP_56463_A_34385235 | NC_021166.1    | Ca_Kabuli_Chr07 | 34385235                | AA                                     | GG                 | GG               | INTERGENIC      |               |                    |                    |
| SNP_56464_A_34385238 | NC_021166.1    | Ca_Kabuli_Chr07 | 34385238                | GG                                     | AA                 | AA               | INTERGENIC      |               |                    |                    |
| SNP_56465_A_34385450 | NC_021166.1    | Ca_Kabuli_Chr07 | 34385450                | TT                                     | AA                 | AA               | INTERGENIC      |               |                    |                    |
| SNP_56466_A_34385815 | NC_021166.1    | Ca_Kabuli_Chr07 | 34385815                | CC                                     | GG                 | GG               | INTERGENIC      |               |                    |                    |
| SNP_56467_A_34385861 | NC_021166.1    | Ca_Kabuli_Chr07 | 34385861                | AA                                     | GG                 | GG               | INTERGENIC      |               |                    |                    |
| SNP_56468_A_34387778 | NC_021166.1    | Ca_Kabuli_Chr07 | 34387778                | CC                                     | TT                 | TT               | INTERGENIC      |               |                    |                    |
| SNP_56469_A_34388111 | NC_021166.1    | Ca_Kabuli_Chr07 | 34388111                | GG                                     | AA                 | AA               | INTERGENIC      |               |                    |                    |
| SNP_56470_A_34388352 | NC_021166.1    | Ca_Kabuli_Chr07 | 34388352                | TT                                     | CC                 | CC               | INTERGENIC      |               |                    |                    |
| SNP_56471_A_34388354 | NC_021166.1    | Ca_Kabuli_Chr07 | 34388354                | TT                                     | AA                 | AA               | INTERGENIC      |               |                    |                    |
| SNP_56472_A_34391546 | NC_021166.1    | Ca_Kabuli_Chr07 | 34391546                | TT                                     | CC                 | CC               | INTERGENIC      |               |                    |                    |
| SNP_56474_A_34392028 | NC_021166.1    | Ca_Kabuli_Chr07 | 34392028                | AA                                     | GG                 | GG               | INTERGENIC      |               |                    |                    |
| SNP_56475_A_34392556 | NC_021166.1    | Ca_Kabuli_Chr07 | 34392556                | TT                                     | CC                 | CC               | INTERGENIC      |               |                    |                    |
| SNP_56476_A_34392562 | NC_021166.1    | Ca_Kabuli_Chr07 | 34392562                | CC                                     | TT                 | TT               | INTERGENIC      |               |                    |                    |
| SNP_56477_A_34392592 | NC_021166.1    | Ca_Kabuli_Chr07 | 34392592                | GG                                     | AA                 | AA               | INTERGENIC      |               |                    |                    |

| SNPs IDs             | Chromosome IDs | Chromosomes     | Physical positions (bp) | CDC Frontier genome (Reference genome) | (Pusa 1103 & HPNB) | (ILWC 46 & LPNB) | Sequence Components of genome | Gene accession IDs | Putative functions                         |
|----------------------|----------------|-----------------|-------------------------|----------------------------------------|--------------------|------------------|-------------------------------|--------------------|--------------------------------------------|
| SNP_56478_A_34392878 | NC_021166.1    | Ca_Kabuli_Chr07 | 34392878                | GG                                     | AA                 | AA               | INTERGENIC                    |                    |                                            |
| SNP_56479_A_34405454 | NC_021166.1    | Ca_Kabuli_Chr07 | 34405454                | TT                                     | AA                 | AA               | INTERGENIC                    |                    |                                            |
| SNP_56480_A_34407836 | NC_021166.1    | Ca_Kabuli_Chr07 | 34407836                | AA                                     | GG                 | GG               | DRR                           | 101505611          | cyclic nucleotide-gated ion channel 1-like |
| SNP_56481_A_34407864 | NC_021166.1    | Ca_Kabuli_Chr07 | 34407864                | AA                                     | GG                 | GG               | DRR                           | 101505611          | cyclic nucleotide-gated ion channel 1-like |
| SNP_56482_A_34408228 | NC_021166.1    | Ca_Kabuli_Chr07 | 34408228                | TT                                     | GG                 | GG               | INTRON                        | 101505611          | cyclic nucleotide-gated ion channel 1-like |
| SNP_56484_A_34408534 | NC_021166.1    | Ca_Kabuli_Chr07 | 34408534                | TT                                     | CC                 | CC               | INTRON                        | 101505611          | cyclic nucleotide-gated ion channel 1-like |
| SNP_56485_A_34408556 | NC_021166.1    | Ca_Kabuli_Chr07 | 34408556                | GG                                     | CC                 | CC               | INTRON                        | 101505611          | cyclic nucleotide-gated ion channel 1-like |
| SNP_56486_A_34408557 | NC_021166.1    | Ca_Kabuli_Chr07 | 34408557                | TT                                     | AA                 | AA               | INTRON                        | 101505611          | cyclic nucleotide-gated ion channel 1-like |
| SNP_56487_A_34408558 | NC_021166.1    | Ca_Kabuli_Chr07 | 34408558                | GG                                     | TT                 | TT               | INTRON                        | 101505611          | cyclic nucleotide-gated ion channel 1-like |
| SNP_56488_A_34408651 | NC_021166.1    | Ca_Kabuli_Chr07 | 34408651                | GG                                     | AA                 | AA               | INTRON                        | 101505611          | cyclic nucleotide-gated ion channel 1-like |
| SNP_56489_A_34414333 | NC_021166.1    | Ca_Kabuli_Chr07 | 34414333                | TT                                     | AA                 | AA               | URR                           | 101505611          | cyclic nucleotide-gated ion channel 1-like |
| SNP_56490_A_34451446 | NC_021166.1    | Ca_Kabuli_Chr07 | 34451446                | AA                                     | CC                 | CC               | INTERGENIC                    |                    |                                            |
| SNP_56491_A_34492437 | NC_021166.1    | Ca_Kabuli_Chr07 | 34492437                | GG                                     | AA                 | AA               | INTERGENIC                    |                    |                                            |
| SNP_56493_A_34605927 | NC_021166.1    | Ca_Kabuli_Chr07 | 34605927                | TT                                     | CC                 | CC               | INTERGENIC                    |                    |                                            |
| SNP_56494_A_34605931 | NC_021166.1    | Ca_Kabuli_Chr07 | 34605931                | TT                                     | AA                 | AA               | INTERGENIC                    |                    |                                            |
| SNP_56495_A_34661334 | NC_021166.1    | Ca_Kabuli_Chr07 | 34661334                | TT                                     | CC                 | CC               | INTERGENIC                    |                    |                                            |
| SNP_56496_A_34674416 | NC_021166.1    | Ca_Kabuli_Chr07 | 34674416                | AA                                     | GG                 | GG               | INTERGENIC                    |                    |                                            |
| SNP_56497_A_34676697 | NC_021166.1    | Ca_Kabuli_Chr07 | 34676697                | AA                                     | GG                 | GG               | INTERGENIC                    |                    |                                            |
| SNP_56498_A_34676704 | NC_021166.1    | Ca_Kabuli_Chr07 | 34676704                | TT                                     | CC                 | CC               | INTERGENIC                    |                    |                                            |
| SNP_56499_A_34779218 | NC_021166.1    | Ca_Kabuli_Chr07 | 34779218                | CC                                     | TT                 | TT               | INTERGENIC                    |                    |                                            |
| SNP_56500_A_34792760 | NC_021166.1    | Ca_Kabuli_Chr07 | 34792760                | AA                                     | CC                 | CC               | INTERGENIC                    |                    |                                            |
| SNP_56501_A_34792795 | NC_021166.1    | Ca_Kabuli_Chr07 | 34792795                | GG                                     | AA                 | AA               | INTERGENIC                    |                    |                                            |

| SNPs IDs             | Chromosome IDs | Chromosomes     | Physical positions (bp) | CDC Frontier genome (Reference genome) | (Pusa 1103 & HPNB) | (ILWC 46 & LPNB) | Sequence Components of genome | Gene accession IDs | Putative functions            |
|----------------------|----------------|-----------------|-------------------------|----------------------------------------|--------------------|------------------|-------------------------------|--------------------|-------------------------------|
| SNP_56502_A_34792796 | NC_021166.1    | Ca_Kabuli_Chr07 | 34792796                | TT                                     | CC                 | CC               | INTERGENIC                    |                    |                               |
| SNP_56503_A_34792870 | NC_021166.1    | Ca_Kabuli_Chr07 | 34792870                | TT                                     | GG                 | GG               | INTERGENIC                    |                    |                               |
| SNP_56504_A_34792969 | NC_021166.1    | Ca_Kabuli_Chr07 | 34792969                | GG                                     | TT                 | TT               | INTERGENIC                    |                    |                               |
| SNP_56505_A_34805194 | NC_021166.1    | Ca_Kabuli_Chr07 | 34805194                | TT                                     | AA                 | AA               | INTERGENIC                    |                    |                               |
| SNP_56506_A_34805199 | NC_021166.1    | Ca_Kabuli_Chr07 | 34805199                | CC                                     | TT                 | TT               | INTERGENIC                    |                    |                               |
| SNP_56507_A_34807649 | NC_021166.1    | Ca_Kabuli_Chr07 | 34807649                | CC                                     | TT                 | TT               | INTERGENIC                    |                    |                               |
| SNP_56508_A_34807692 | NC_021166.1    | Ca_Kabuli_Chr07 | 34807692                | TT                                     | CC                 | CC               | INTERGENIC                    |                    |                               |
| SNP_56509_A_34884970 | NC_021166.1    | Ca_Kabuli_Chr07 | 34884970                | AA                                     | GG                 | GG               | INTERGENIC                    |                    |                               |
| SNP_56510_A_34901758 | NC_021166.1    | Ca_Kabuli_Chr07 | 34901758                | AA                                     | GG                 | GG               | NON_SYNONYMOUS_CODING         | 101514738          | auxin response factor 16-like |
| SNP_56512_A_34961029 | NC_021166.1    | Ca_Kabuli_Chr07 | 34961029                | AA                                     | GG                 | GG               | INTERGENIC                    |                    |                               |
| SNP_56513_A_34981655 | NC_021166.1    | Ca_Kabuli_Chr07 | 34981655                | AA                                     | TT                 | TT               | INTERGENIC                    |                    |                               |
| SNP_56514_A_34989693 | NC_021166.1    | Ca_Kabuli_Chr07 | 34989693                | TT                                     | CC                 | CC               | INTERGENIC                    |                    |                               |
| SNP_56515_A_35007043 | NC_021166.1    | Ca_Kabuli_Chr07 | 35007043                | TT                                     | CC                 | CC               | INTERGENIC                    |                    |                               |
| SNP_56516_A_35013834 | NC_021166.1    | Ca_Kabuli_Chr07 | 35013834                | TT                                     | CC                 | CC               | INTERGENIC                    |                    |                               |
| SNP_56518_A_35041646 | NC_021166.1    | Ca_Kabuli_Chr07 | 35041646                | TT                                     | CC                 | CC               | INTERGENIC                    |                    |                               |
| SNP_56519_A_35059359 | NC_021166.1    | Ca_Kabuli_Chr07 | 35059359                | GG                                     | AA                 | AA               | INTRON                        | 101490119          | uncharacterized LOC101490119  |
| SNP_56520_A_35067686 | NC_021166.1    | Ca_Kabuli_Chr07 | 35067686                | GG                                     | AA                 | AA               | DRR                           | 101491185          | Unknown function              |
| SNP_56521_A_35069818 | NC_021166.1    | Ca_Kabuli_Chr07 | 35069818                | CC                                     | TT                 | TT               | URR                           | 101491185          | Unknown function              |
| SNP_56522_A_35084582 | NC_021166.1    | Ca_Kabuli_Chr07 | 35084582                | AA                                     | TT                 | TT               | INTERGENIC                    |                    |                               |
| SNP_56523_A_35087334 | NC_021166.1    | Ca_Kabuli_Chr07 | 35087334                | GG                                     | CC                 | CC               | INTRON                        | 101492136          | auxin response factor 18      |
| SNP_56524_A_35109099 | NC_021166.1    | Ca_Kabuli_Chr07 | 35109099                | AA                                     | GG                 | GG               | INTERGENIC                    |                    |                               |
| SNP_56525_A_35110128 | NC_021166.1    | Ca_Kabuli_Chr07 | 35110128                | AA                                     | TT                 | TT               | DRR                           | 101492715          | exportin-2                    |

| SNPs IDs             | Chromosome IDs | Chromosomes     | Physical positions (bp) | CDC Frontier genome (Reference genome) | (Pusa 1103 & HPNB) | (ILWC 46 & LPNB) | Sequence genome | Components of | Gene accession IDs | Putative functions                                   |
|----------------------|----------------|-----------------|-------------------------|----------------------------------------|--------------------|------------------|-----------------|---------------|--------------------|------------------------------------------------------|
| SNP_56526_A_35115905 | NC_021166.1    | Ca_Kabuli_Chr07 | 35115905                | TT                                     | AA                 | AA               | URR             |               | 101492715          | exportin-2                                           |
| SNP_56527_A_35116167 | NC_021166.1    | Ca_Kabuli_Chr07 | 35116167                | CC                                     | TT                 | TT               | URR             |               | 101492715          | exportin-2                                           |
| SNP_56528_A_35116168 | NC_021166.1    | Ca_Kabuli_Chr07 | 35116168                | CC                                     | GG                 | GG               | URR             |               | 101492715          | exportin-2                                           |
| SNP_56529_A_35116174 | NC_021166.1    | Ca_Kabuli_Chr07 | 35116174                | CC                                     | GG                 | GG               | URR             |               | 101492715          | exportin-2                                           |
| SNP_56530_A_35116189 | NC_021166.1    | Ca_Kabuli_Chr07 | 35116189                | GG                                     | TT                 | TT               | URR             |               | 101492715          | exportin-2                                           |
| SNP_56531_A_35117703 | NC_021166.1    | Ca_Kabuli_Chr07 | 35117703                | AA                                     | TT                 | TT               | URR             |               | 101492715          | exportin-2                                           |
| SNP_56532_A_35117794 | NC_021166.1    | Ca_Kabuli_Chr07 | 35117794                | AA                                     | GG                 | GG               | INTERGENIC      |               |                    |                                                      |
| SNP_56533_A_35118572 | NC_021166.1    | Ca_Kabuli_Chr07 | 35118572                | TT                                     | CC                 | CC               | INTERGENIC      |               |                    |                                                      |
| SNP_56534_A_35118581 | NC_021166.1    | Ca_Kabuli_Chr07 | 35118581                | CC                                     | TT                 | TT               | INTERGENIC      |               |                    |                                                      |
| SNP_56535_A_35119619 | NC_021166.1    | Ca_Kabuli_Chr07 | 35119619                | CC                                     | GG                 | GG               | INTERGENIC      |               |                    |                                                      |
| SNP_56536_A_35121335 | NC_021166.1    | Ca_Kabuli_Chr07 | 35121335                | AA                                     | TT                 | TT               | INTERGENIC      |               |                    |                                                      |
| SNP_56537_A_35121637 | NC_021166.1    | Ca_Kabuli_Chr07 | 35121637                | AA                                     | CC                 | CC               | INTERGENIC      |               |                    |                                                      |
| SNP_56538_A_35121648 | NC_021166.1    | Ca_Kabuli_Chr07 | 35121648                | TT                                     | AA                 | AA               | INTERGENIC      |               |                    |                                                      |
| SNP_56539_A_35121656 | NC_021166.1    | Ca_Kabuli_Chr07 | 35121656                | CC                                     | TT                 | TT               | INTERGENIC      |               |                    |                                                      |
| SNP_56541_A_35122147 | NC_021166.1    | Ca_Kabuli_Chr07 | 35122147                | AA                                     | GG                 | GG               | INTERGENIC      |               |                    |                                                      |
| SNP_56542_A_35130822 | NC_021166.1    | Ca_Kabuli_Chr07 | 35130822                | GG                                     | AA                 | AA               | INTERGENIC      |               |                    |                                                      |
| SNP_56544_A_35131835 | NC_021166.1    | Ca_Kabuli_Chr07 | 35131835                | AA                                     | GG                 | GG               | INTERGENIC      |               |                    |                                                      |
| SNP_56545_A_35131851 | NC_021166.1    | Ca_Kabuli_Chr07 | 35131851                | TT                                     | CC                 | CC               | INTERGENIC      |               |                    |                                                      |
| SNP_56546_A_35132146 | NC_021166.1    | Ca_Kabuli_Chr07 | 35132146                | GG                                     | CC                 | CC               | INTERGENIC      |               |                    |                                                      |
| SNP_56547_A_35136383 | NC_021166.1    | Ca_Kabuli_Chr07 | 35136383                | TT                                     | AA                 | AA               | URR             |               | 101493048          | ethylene-responsive transcription factor ERF023-like |
| SNP_56548_A_35136608 | NC_021166.1    | Ca_Kabuli_Chr07 | 35136608                | CC                                     | TT                 | TT               | URR             |               | 101493048          | ethylene-responsive transcription factor ERF023-like |
| SNP_56549_A_35136610 | NC_021166.1    | Ca_Kabuli_Chr07 | 35136610                | AA                                     | GG                 | GG               | URR             |               | 101493048          | ethylene-responsive transcription factor ERF023-like |

| SNPs IDs             | Chromosome IDs | Chromosomes     | Physical positions (bp) | CDC Frontier genome (Reference genome) | (Pusa 1103 & HPNB) | (ILWC 46 & LPNB) | Sequence genome | Components of | Gene accession IDs | Putative functions |
|----------------------|----------------|-----------------|-------------------------|----------------------------------------|--------------------|------------------|-----------------|---------------|--------------------|--------------------|
| SNP_56550_A_35138263 | NC_021166.1    | Ca_Kabuli_Chr07 | 35138263                | TT                                     | CC                 | CC               | INTERGENIC      |               |                    |                    |
| SNP_56552_A_35139224 | NC_021166.1    | Ca_Kabuli_Chr07 | 35139224                | GG                                     | AA                 | AA               | INTERGENIC      |               |                    |                    |
| SNP_56553_A_35139245 | NC_021166.1    | Ca_Kabuli_Chr07 | 35139245                | GG                                     | AA                 | AA               | INTERGENIC      |               |                    |                    |
| SNP_56554_A_35139262 | NC_021166.1    | Ca_Kabuli_Chr07 | 35139262                | AA                                     | GG                 | GG               | INTERGENIC      |               |                    |                    |
| SNP_56555_A_35140993 | NC_021166.1    | Ca_Kabuli_Chr07 | 35140993                | AA                                     | GG                 | GG               | INTERGENIC      |               |                    |                    |
| SNP_56556_A_35140994 | NC_021166.1    | Ca_Kabuli_Chr07 | 35140994                | GG                                     | AA                 | AA               | INTERGENIC      |               |                    |                    |
| SNP_56557_A_35144048 | NC_021166.1    | Ca_Kabuli_Chr07 | 35144048                | GG                                     | AA                 | AA               | INTERGENIC      |               |                    |                    |
| SNP_56558_A_35144138 | NC_021166.1    | Ca_Kabuli_Chr07 | 35144138                | GG                                     | AA                 | AA               | INTERGENIC      |               |                    |                    |
| SNP_56559_A_35144282 | NC_021166.1    | Ca_Kabuli_Chr07 | 35144282                | GG                                     | AA                 | AA               | INTERGENIC      |               |                    |                    |
| SNP_56560_A_35144737 | NC_021166.1    | Ca_Kabuli_Chr07 | 35144737                | GG                                     | AA                 | AA               | INTERGENIC      |               |                    |                    |
| SNP_56561_A_35145327 | NC_021166.1    | Ca_Kabuli_Chr07 | 35145327                | CC                                     | AA                 | AA               | INTERGENIC      |               |                    |                    |
| SNP_56562_A_35146255 | NC_021166.1    | Ca_Kabuli_Chr07 | 35146255                | TT                                     | AA                 | AA               | INTERGENIC      |               |                    |                    |
| SNP_56563_A_35146267 | NC_021166.1    | Ca_Kabuli_Chr07 | 35146267                | TT                                     | CC                 | CC               | INTERGENIC      |               |                    |                    |
| SNP_56564_A_35146268 | NC_021166.1    | Ca_Kabuli_Chr07 | 35146268                | GG                                     | AA                 | AA               | INTERGENIC      |               |                    |                    |
| SNP_56565_A_35146284 | NC_021166.1    | Ca_Kabuli_Chr07 | 35146284                | AA                                     | GG                 | GG               | INTERGENIC      |               |                    |                    |
| SNP_56566_A_35146690 | NC_021166.1    | Ca_Kabuli_Chr07 | 35146690                | TT                                     | CC                 | CC               | INTERGENIC      |               |                    |                    |
| SNP_56567_A_35147393 | NC_021166.1    | Ca_Kabuli_Chr07 | 35147393                | GG                                     | TT                 | TT               | INTERGENIC      |               |                    |                    |
| SNP_56568_A_35147569 | NC_021166.1    | Ca_Kabuli_Chr07 | 35147569                | TT                                     | CC                 | CC               | INTERGENIC      |               |                    |                    |
| SNP_56570_A_35149160 | NC_021166.1    | Ca_Kabuli_Chr07 | 35149160                | AA                                     | CC                 | CC               | INTERGENIC      |               |                    |                    |
| SNP_56571_A_35150066 | NC_021166.1    | Ca_Kabuli_Chr07 | 35150066                | CC                                     | TT                 | TT               | INTERGENIC      |               |                    |                    |
| SNP_56573_A_35150338 | NC_021166.1    | Ca_Kabuli_Chr07 | 35150338                | TT                                     | CC                 | CC               | INTERGENIC      |               |                    |                    |
| SNP_56574_A_35153608 | NC_021166.1    | Ca_Kabuli_Chr07 | 35153608                | GG                                     | AA                 | AA               | INTERGENIC      |               |                    |                    |



| SNPs IDs             | Chromosome IDs | Chromosomes     | Physical positions (bp) | CDC Frontier genome (Reference genome) | (Pusa 1103 & HPNB) | (ILWC 46 & LPNB) | Sequence genome | Components of | Gene accession IDs | Putative functions |
|----------------------|----------------|-----------------|-------------------------|----------------------------------------|--------------------|------------------|-----------------|---------------|--------------------|--------------------|
| SNP_56575_A_35154474 | NC_021166.1    | Ca_Kabuli_Chr07 | 35154474                | TT                                     | GG                 | GG               | INTERGENIC      |               |                    |                    |
| SNP_56576_A_35154476 | NC_021166.1    | Ca_Kabuli_Chr07 | 35154476                | AA                                     | GG                 | GG               | INTERGENIC      |               |                    |                    |
| SNP_56577_A_35154499 | NC_021166.1    | Ca_Kabuli_Chr07 | 35154499                | AA                                     | GG                 | GG               | INTERGENIC      |               |                    |                    |
| SNP_56579_A_35154829 | NC_021166.1    | Ca_Kabuli_Chr07 | 35154829                | CC                                     | AA                 | AA               | INTERGENIC      |               |                    |                    |
| SNP_56581_A_35154867 | NC_021166.1    | Ca_Kabuli_Chr07 | 35154867                | CC                                     | GG                 | GG               | INTERGENIC      |               |                    |                    |
| SNP_56582_A_35163410 | NC_021166.1    | Ca_Kabuli_Chr07 | 35163410                | AA                                     | TT                 | TT               | INTERGENIC      |               |                    |                    |
| SNP_56583_A_35165410 | NC_021166.1    | Ca_Kabuli_Chr07 | 35165410                | GG                                     | AA                 | AA               | INTERGENIC      |               |                    |                    |
| SNP_56584_A_35165550 | NC_021166.1    | Ca_Kabuli_Chr07 | 35165550                | AA                                     | CC                 | CC               | INTERGENIC      |               |                    |                    |
| SNP_56585_A_35165560 | NC_021166.1    | Ca_Kabuli_Chr07 | 35165560                | CC                                     | TT                 | TT               | INTERGENIC      |               |                    |                    |
| SNP_56586_A_35166039 | NC_021166.1    | Ca_Kabuli_Chr07 | 35166039                | GG                                     | AA                 | AA               | INTERGENIC      |               |                    |                    |
| SNP_56590_A_35166687 | NC_021166.1    | Ca_Kabuli_Chr07 | 35166687                | TT                                     | CC                 | CC               | INTERGENIC      |               |                    |                    |
| SNP_56591_A_35166700 | NC_021166.1    | Ca_Kabuli_Chr07 | 35166700                | TT                                     | CC                 | CC               | INTERGENIC      |               |                    |                    |
| SNP_56592_A_35172009 | NC_021166.1    | Ca_Kabuli_Chr07 | 35172009                | AA                                     | CC                 | CC               | INTERGENIC      |               |                    |                    |
| SNP_56593_A_35172023 | NC_021166.1    | Ca_Kabuli_Chr07 | 35172023                | CC                                     | TT                 | TT               | INTERGENIC      |               |                    |                    |
| SNP_56594_A_35172305 | NC_021166.1    | Ca_Kabuli_Chr07 | 35172305                | AA                                     | GG                 | GG               | INTERGENIC      |               |                    |                    |
| SNP_56595_A_35172311 | NC_021166.1    | Ca_Kabuli_Chr07 | 35172311                | CC                                     | AA                 | AA               | INTERGENIC      |               |                    |                    |
| SNP_56596_A_35172342 | NC_021166.1    | Ca_Kabuli_Chr07 | 35172342                | GG                                     | AA                 | AA               | INTERGENIC      |               |                    |                    |
| SNP_56597_A_35172456 | NC_021166.1    | Ca_Kabuli_Chr07 | 35172456                | CC                                     | TT                 | TT               | INTERGENIC      |               |                    |                    |
| SNP_56598_A_35172508 | NC_021166.1    | Ca_Kabuli_Chr07 | 35172508                | AA                                     | GG                 | GG               | INTERGENIC      |               |                    |                    |
| SNP_56601_A_35175875 | NC_021166.1    | Ca_Kabuli_Chr07 | 35175875                | AA                                     | GG                 | GG               | INTERGENIC      |               |                    |                    |
| SNP_56602_A_35175881 | NC_021166.1    | Ca_Kabuli_Chr07 | 35175881                | TT                                     | GG                 | GG               | INTERGENIC      |               |                    |                    |
| SNP_56603_A_35175883 | NC_021166.1    | Ca_Kabuli_Chr07 | 35175883                | TT                                     | AA                 | AA               | INTERGENIC      |               |                    |                    |

| SNPs IDs             | Chromosome IDs | Chromosomes     | Physical positions (bp) | CDC Frontier genome (Reference genome) | (Pusa 1103 & HPNB) | (ILWC 46 & LPNB) | Sequence genome | Components of | Gene accession IDs               | Putative functions |
|----------------------|----------------|-----------------|-------------------------|----------------------------------------|--------------------|------------------|-----------------|---------------|----------------------------------|--------------------|
| SNP_56604_A_35175919 | NC_021166.1    | Ca_Kabuli_Chr07 | 35175919                | TT                                     | CC                 | CC               | INTERGENIC      |               |                                  |                    |
| SNP_56606_A_35178741 | NC_021166.1    | Ca_Kabuli_Chr07 | 35178741                | GG                                     | AA                 | AA               | DRR             | 101493372     | transcription factor bHLH13-like |                    |
| SNP_56608_A_35182452 | NC_021166.1    | Ca_Kabuli_Chr07 | 35182452                | GG                                     | AA                 | AA               | URR             | 101493372     | transcription factor bHLH13-like |                    |
| SNP_56609_A_35182459 | NC_021166.1    | Ca_Kabuli_Chr07 | 35182459                | TT                                     | AA                 | AA               | URR             | 101493372     | transcription factor bHLH13-like |                    |
| SNP_56610_A_35186476 | NC_021166.1    | Ca_Kabuli_Chr07 | 35186476                | CC                                     | TT                 | TT               | INTERGENIC      |               |                                  |                    |
| SNP_56611_A_35187579 | NC_021166.1    | Ca_Kabuli_Chr07 | 35187579                | AA                                     | GG                 | GG               | INTERGENIC      |               |                                  |                    |
| SNP_56612_A_35187580 | NC_021166.1    | Ca_Kabuli_Chr07 | 35187580                | CC                                     | TT                 | TT               | INTERGENIC      |               |                                  |                    |
| SNP_56613_A_35187601 | NC_021166.1    | Ca_Kabuli_Chr07 | 35187601                | CC                                     | AA                 | AA               | INTERGENIC      |               |                                  |                    |
| SNP_56614_A_35189998 | NC_021166.1    | Ca_Kabuli_Chr07 | 35189998                | GG                                     | TT                 | TT               | INTERGENIC      |               |                                  |                    |
| SNP_56615_A_35190028 | NC_021166.1    | Ca_Kabuli_Chr07 | 35190028                | TT                                     | CC                 | CC               | INTERGENIC      |               |                                  |                    |
| SNP_56616_A_35190039 | NC_021166.1    | Ca_Kabuli_Chr07 | 35190039                | AA                                     | GG                 | GG               | INTERGENIC      |               |                                  |                    |
| SNP_56617_A_35206563 | NC_021166.1    | Ca_Kabuli_Chr07 | 35206563                | CC                                     | TT                 | TT               | INTERGENIC      |               |                                  |                    |
| SNP_56620_A_35207754 | NC_021166.1    | Ca_Kabuli_Chr07 | 35207754                | AA                                     | TT                 | TT               | INTERGENIC      |               |                                  |                    |
| SNP_56621_A_35209427 | NC_021166.1    | Ca_Kabuli_Chr07 | 35209427                | AA                                     | GG                 | GG               | INTERGENIC      |               |                                  |                    |
| SNP_56622_A_35210495 | NC_021166.1    | Ca_Kabuli_Chr07 | 35210495                | GG                                     | TT                 | TT               | INTERGENIC      |               |                                  |                    |
| SNP_56623_A_35210634 | NC_021166.1    | Ca_Kabuli_Chr07 | 35210634                | TT                                     | AA                 | AA               | INTERGENIC      |               |                                  |                    |
| SNP_56624_A_35210641 | NC_021166.1    | Ca_Kabuli_Chr07 | 35210641                | AA                                     | TT                 | TT               | INTERGENIC      |               |                                  |                    |
| SNP_56625_A_35211698 | NC_021166.1    | Ca_Kabuli_Chr07 | 35211698                | CC                                     | AA                 | AA               | INTERGENIC      |               |                                  |                    |
| SNP_56626_A_35212835 | NC_021166.1    | Ca_Kabuli_Chr07 | 35212835                | GG                                     | AA                 | AA               | INTERGENIC      |               |                                  |                    |
| SNP_56627_A_35213189 | NC_021166.1    | Ca_Kabuli_Chr07 | 35213189                | TT                                     | CC                 | CC               | INTERGENIC      |               |                                  |                    |
| SNP_56628_A_35213231 | NC_021166.1    | Ca_Kabuli_Chr07 | 35213231                | TT                                     | CC                 | CC               | INTERGENIC      |               |                                  |                    |
| SNP_56629_A_35213234 | NC_021166.1    | Ca_Kabuli_Chr07 | 35213234                | AA                                     | GG                 | GG               | INTERGENIC      |               |                                  |                    |

| SNPs IDs             | Chromosome IDs | Chromosomes     | Physical positions (bp) | CDC Frontier genome (Reference genome) | (Pusa 1103 & HPNB) | (ILWC 46 & LPNB) | Sequence Components of genome | Gene accession IDs | Putative functions                      |
|----------------------|----------------|-----------------|-------------------------|----------------------------------------|--------------------|------------------|-------------------------------|--------------------|-----------------------------------------|
| SNP_56630_A_35213498 | NC_021166.1    | Ca_Kabuli_Chr07 | 35213498                | CC                                     | TT                 | TT               | INTERGENIC                    |                    |                                         |
| SNP_56631_A_35213557 | NC_021166.1    | Ca_Kabuli_Chr07 | 35213557                | GG                                     | TT                 | TT               | INTERGENIC                    |                    |                                         |
| SNP_56634_A_35223514 | NC_021166.1    | Ca_Kabuli_Chr07 | 35223514                | GG                                     | TT                 | TT               | URR                           | 101493695          | E3 ubiquitin-protein ligase SINAT3-like |
| SNP_56635_A_35224090 | NC_021166.1    | Ca_Kabuli_Chr07 | 35224090                | TT                                     | CC                 | CC               | URR                           | 101493695          | E3 ubiquitin-protein ligase SINAT3-like |
| SNP_56636_A_35226950 | NC_021166.1    | Ca_Kabuli_Chr07 | 35226950                | AA                                     | TT                 | TT               | INTERGENIC                    |                    |                                         |
| SNP_56638_A_35229064 | NC_021166.1    | Ca_Kabuli_Chr07 | 35229064                | TT                                     | CC                 | CC               | URR                           | 101494013          | uncharacterized LOC101494013            |
| SNP_56639_A_35229065 | NC_021166.1    | Ca_Kabuli_Chr07 | 35229065                | TT                                     | AA                 | AA               | URR                           | 101494013          | uncharacterized LOC101494013            |
| SNP_56640_A_35229292 | NC_021166.1    | Ca_Kabuli_Chr07 | 35229292                | GG                                     | TT                 | TT               | URR                           | 101494013          | uncharacterized LOC101494013            |
| SNP_56641_A_35230465 | NC_021166.1    | Ca_Kabuli_Chr07 | 35230465                | TT                                     | CC                 | CC               | URR                           | 101494013          | uncharacterized LOC101494013            |
| SNP_56642_A_35230516 | NC_021166.1    | Ca_Kabuli_Chr07 | 35230516                | CC                                     | TT                 | TT               | URR                           | 101494013          | uncharacterized LOC101494013            |
| SNP_56644_A_35230539 | NC_021166.1    | Ca_Kabuli_Chr07 | 35230539                | GG                                     | AA                 | AA               | URR                           | 101494013          | uncharacterized LOC101494013            |
| SNP_56646_A_35231556 | NC_021166.1    | Ca_Kabuli_Chr07 | 35231556                | AA                                     | TT                 | TT               | DRR                           | 101494537          | uncharacterized LOC101494537            |
| SNP_56647_A_35231570 | NC_021166.1    | Ca_Kabuli_Chr07 | 35231570                | TT                                     | GG                 | GG               | DRR                           | 101494537          | uncharacterized LOC101494537            |
| SNP_56648_A_35232076 | NC_021166.1    | Ca_Kabuli_Chr07 | 35232076                | GG                                     | TT                 | TT               | INTERGENIC                    |                    |                                         |
| SNP_56649_A_35234563 | NC_021166.1    | Ca_Kabuli_Chr07 | 35234563                | AA                                     | GG                 | GG               | INTERGENIC                    |                    |                                         |
| SNP_56650_A_35235964 | NC_021166.1    | Ca_Kabuli_Chr07 | 35235964                | CC                                     | TT                 | TT               | INTERGENIC                    |                    |                                         |
| SNP_56651_A_35240821 | NC_021166.1    | Ca_Kabuli_Chr07 | 35240821                | GG                                     | AA                 | AA               | INTERGENIC                    |                    |                                         |
| SNP_56652_A_35259033 | NC_021166.1    | Ca_Kabuli_Chr07 | 35259033                | GG                                     | CC                 | CC               | INTERGENIC                    |                    |                                         |
| SNP_56653_A_35259804 | NC_021166.1    | Ca_Kabuli_Chr07 | 35259804                | CC                                     | TT                 | TT               | INTERGENIC                    |                    |                                         |
| SNP_56654_A_35261789 | NC_021166.1    | Ca_Kabuli_Chr07 | 35261789                | GG                                     | AA                 | AA               | INTERGENIC                    |                    |                                         |
| SNP_56655_A_35263308 | NC_021166.1    | Ca_Kabuli_Chr07 | 35263308                | GG                                     | AA                 | AA               | DRR                           | 101410578          | transfer RNA alanine (anticodon CGC)    |
| SNP_56656_A_35263422 | NC_021166.1    | Ca_Kabuli_Chr07 | 35263422                | CC                                     | TT                 | TT               | DRR                           | 101410578          | transfer RNA alanine (anticodon CGC)    |

| SNPs IDs             | Chromosome IDs | Chromosomes     | Physical positions (bp) | CDC Frontier genome (Reference genome) | (Pusa 1103 & HPNB) | (ILWC 46 & LPNB) | Sequence Components of genome | Gene accession IDs | Putative functions             |
|----------------------|----------------|-----------------|-------------------------|----------------------------------------|--------------------|------------------|-------------------------------|--------------------|--------------------------------|
| SNP_56657_A_35273352 | NC_021166.1    | Ca_Kabuli_Chr07 | 35273352                | CC                                     | TT                 | TT               | INTERGENIC                    |                    |                                |
| SNP_56658_A_35273353 | NC_021166.1    | Ca_Kabuli_Chr07 | 35273353                | CC                                     | TT                 | TT               | INTERGENIC                    |                    |                                |
| SNP_56660_A_35279507 | NC_021166.1    | Ca_Kabuli_Chr07 | 35279507                | TT                                     | CC                 | CC               | INTRON                        | 101495719          | clustered mitochondria protein |
| SNP_56661_A_35283047 | NC_021166.1    | Ca_Kabuli_Chr07 | 35283047                | TT                                     | AA                 | AA               | SYNONYMOUS_CODING             | 101495719          | clustered mitochondria protein |
| SNP_56664_A_35290189 | NC_021166.1    | Ca_Kabuli_Chr07 | 35290189                | TT                                     | AA                 | AA               | SYNONYMOUS_CODING             | 101495719          | clustered mitochondria protein |
| SNP_56666_A_35292349 | NC_021166.1    | Ca_Kabuli_Chr07 | 35292349                | GG                                     | AA                 | AA               | URR                           | 101495719          | clustered mitochondria protein |
| SNP_56670_A_35296716 | NC_021166.1    | Ca_Kabuli_Chr07 | 35296716                | CC                                     | TT                 | TT               | INTERGENIC                    |                    |                                |
| SNP_56671_A_35296759 | NC_021166.1    | Ca_Kabuli_Chr07 | 35296759                | CC                                     | TT                 | TT               | INTERGENIC                    |                    |                                |
| SNP_56672_A_35296763 | NC_021166.1    | Ca_Kabuli_Chr07 | 35296763                | CC                                     | TT                 | TT               | INTERGENIC                    |                    |                                |
| SNP_56673_A_35296912 | NC_021166.1    | Ca_Kabuli_Chr07 | 35296912                | TT                                     | CC                 | CC               | INTERGENIC                    |                    |                                |
| SNP_56674_A_35299814 | NC_021166.1    | Ca_Kabuli_Chr07 | 35299814                | TT                                     | CC                 | CC               | INTERGENIC                    |                    |                                |
| SNP_56675_A_35300471 | NC_021166.1    | Ca_Kabuli_Chr07 | 35300471                | GG                                     | AA                 | AA               | INTERGENIC                    |                    |                                |
| SNP_56676_A_35300824 | NC_021166.1    | Ca_Kabuli_Chr07 | 35300824                | CC                                     | TT                 | TT               | INTERGENIC                    |                    |                                |
| SNP_56677_A_35305229 | NC_021166.1    | Ca_Kabuli_Chr07 | 35305229                | GG                                     | AA                 | AA               | INTERGENIC                    |                    |                                |
| SNP_56678_A_35305917 | NC_021166.1    | Ca_Kabuli_Chr07 | 35305917                | GG                                     | AA                 | AA               | INTERGENIC                    |                    |                                |
| SNP_56679_A_35312126 | NC_021166.1    | Ca_Kabuli_Chr07 | 35312126                | TT                                     | CC                 | CC               | INTERGENIC                    |                    |                                |
| SNP_56680_A_35312128 | NC_021166.1    | Ca_Kabuli_Chr07 | 35312128                | TT                                     | CC                 | CC               | INTERGENIC                    |                    |                                |
| SNP_56681_A_35313603 | NC_021166.1    | Ca_Kabuli_Chr07 | 35313603                | GG                                     | AA                 | AA               | INTERGENIC                    |                    |                                |
| SNP_56683_A_35313830 | NC_021166.1    | Ca_Kabuli_Chr07 | 35313830                | AA                                     | TT                 | TT               | INTERGENIC                    |                    |                                |
| SNP_56684_A_35313839 | NC_021166.1    | Ca_Kabuli_Chr07 | 35313839                | TT                                     | GG                 | GG               | INTERGENIC                    |                    |                                |
| SNP_56685_A_35313872 | NC_021166.1    | Ca_Kabuli_Chr07 | 35313872                | GG                                     | TT                 | TT               | INTERGENIC                    |                    |                                |
| SNP_56686_A_35313952 | NC_021166.1    | Ca_Kabuli_Chr07 | 35313952                | GG                                     | AA                 | AA               | INTERGENIC                    |                    |                                |

| SNPs IDs             | Chromosome IDs | Chromosomes     | Physical positions (bp) | CDC Frontier (Reference genome) | (Pusa 1103 & HPNB) | (ILWC 46 & LPNB) | Sequence Components of genome | Gene accession IDs | Putative functions                           |
|----------------------|----------------|-----------------|-------------------------|---------------------------------|--------------------|------------------|-------------------------------|--------------------|----------------------------------------------|
| SNP_56687_A_35313968 | NC_021166.1    | Ca_Kabuli_Chr07 | 35313968                | CC                              | AA                 | AA               | INTERGENIC                    |                    |                                              |
| SNP_56688_A_35313985 | NC_021166.1    | Ca_Kabuli_Chr07 | 35313985                | CC                              | TT                 | TT               | INTERGENIC                    |                    |                                              |
| SNP_56689_A_35315107 | NC_021166.1    | Ca_Kabuli_Chr07 | 35315107                | CC                              | TT                 | TT               | INTERGENIC                    |                    |                                              |
| SNP_56690_A_35315298 | NC_021166.1    | Ca_Kabuli_Chr07 | 35315298                | GG                              | TT                 | TT               | INTERGENIC                    |                    |                                              |
| SNP_56691_A_35316289 | NC_021166.1    | Ca_Kabuli_Chr07 | 35316289                | CC                              | GG                 | GG               | INTERGENIC                    |                    |                                              |
| SNP_56692_A_35316932 | NC_021166.1    | Ca_Kabuli_Chr07 | 35316932                | AA                              | CC                 | CC               | INTERGENIC                    |                    |                                              |
| SNP_56694_A_35318530 | NC_021166.1    | Ca_Kabuli_Chr07 | 35318530                | AA                              | GG                 | GG               | INTERGENIC                    |                    |                                              |
| SNP_56695_A_35320631 | NC_021166.1    | Ca_Kabuli_Chr07 | 35320631                | CC                              | TT                 | TT               | NON_SYNONYMOUS_CODING         | 101496041          | histone-lysine N-methyltransferase ATX3-like |
| SNP_56696_A_35321927 | NC_021166.1    | Ca_Kabuli_Chr07 | 35321927                | AA                              | CC                 | CC               | INTRON                        | 101496041          | histone-lysine N-methyltransferase ATX3-like |
| SNP_56697_A_35322956 | NC_021166.1    | Ca_Kabuli_Chr07 | 35322956                | CC                              | TT                 | TT               | INTRON                        | 101496041          | histone-lysine N-methyltransferase ATX3-like |
| SNP_56699_A_35323102 | NC_021166.1    | Ca_Kabuli_Chr07 | 35323102                | TT                              | CC                 | CC               | INTRON                        | 101496041          | histone-lysine N-methyltransferase ATX3-like |
| SNP_56700_A_35323183 | NC_021166.1    | Ca_Kabuli_Chr07 | 35323183                | TT                              | GG                 | GG               | INTRON                        | 101496041          | histone-lysine N-methyltransferase ATX3-like |
| SNP_56701_A_35324207 | NC_021166.1    | Ca_Kabuli_Chr07 | 35324207                | GG                              | AA                 | AA               | INTRON                        | 101496041          | histone-lysine N-methyltransferase ATX3-like |
| SNP_56703_A_35332783 | NC_021166.1    | Ca_Kabuli_Chr07 | 35332783                | AA                              | GG                 | GG               | INTERGENIC                    |                    |                                              |
| SNP_56705_A_35333073 | NC_021166.1    | Ca_Kabuli_Chr07 | 35333073                | TT                              | CC                 | CC               | INTERGENIC                    |                    |                                              |
| SNP_56706_A_35333294 | NC_021166.1    | Ca_Kabuli_Chr07 | 35333294                | TT                              | CC                 | CC               | URR                           | 101496041          | histone-lysine N-methyltransferase ATX3-like |
| SNP_56707_A_35333332 | NC_021166.1    | Ca_Kabuli_Chr07 | 35333332                | GG                              | TT                 | TT               | URR                           | 101496041          | histone-lysine N-methyltransferase ATX3-like |
| SNP_56708_A_35333371 | NC_021166.1    | Ca_Kabuli_Chr07 | 35333371                | CC                              | AA                 | AA               | URR                           | 101496041          | histone-lysine N-methyltransferase ATX3-like |
| SNP_56709_A_35333427 | NC_021166.1    | Ca_Kabuli_Chr07 | 35333427                | AA                              | TT                 | TT               | URR                           | 101496041          | histone-lysine N-methyltransferase ATX3-like |
| SNP_56710_A_35335737 | NC_021166.1    | Ca_Kabuli_Chr07 | 35335737                | TT                              | CC                 | CC               | INTERGENIC                    |                    |                                              |
| SNP_56712_A_35337970 | NC_021166.1    | Ca_Kabuli_Chr07 | 35337970                | AA                              | TT                 | TT               | DRR                           | 101496599          | putative RING-H2 finger protein ATL21A       |
| SNP_56713_A_35337997 | NC_021166.1    | Ca_Kabuli_Chr07 | 35337997                | AA                              | TT                 | TT               | DRR                           | 101496599          | putative RING-H2 finger protein ATL21A       |

| SNPs IDs             | Chromosome IDs | Chromosomes     | Physical positions (bp) | CDC Frontier genome (Reference genome) | (Pusa 1103 & HPNB) | (ILWC 46 & LPNB) | Sequence Components of genome | Gene accession IDs | Putative functions                                    |
|----------------------|----------------|-----------------|-------------------------|----------------------------------------|--------------------|------------------|-------------------------------|--------------------|-------------------------------------------------------|
| SNP_56714_A_35339600 | NC_021166.1    | Ca_Kabuli_Chr07 | 35339600                | GG                                     | TT                 | TT               | URR                           | 101500285          | probable F-box protein At3g61730                      |
| SNP_56715_A_35339604 | NC_021166.1    | Ca_Kabuli_Chr07 | 35339604                | GG                                     | CC                 | CC               | URR                           | 101500285          | probable F-box protein At3g61730                      |
| SNP_56716_A_35340552 | NC_021166.1    | Ca_Kabuli_Chr07 | 35340552                | TT                                     | AA                 | AA               | INTERGENIC                    |                    |                                                       |
| SNP_56717_A_35340597 | NC_021166.1    | Ca_Kabuli_Chr07 | 35340597                | CC                                     | GG                 | GG               | INTERGENIC                    |                    |                                                       |
| SNP_56718_A_35340607 | NC_021166.1    | Ca_Kabuli_Chr07 | 35340607                | TT                                     | CC                 | CC               | INTERGENIC                    |                    |                                                       |
| SNP_56719_A_35345452 | NC_021166.1    | Ca_Kabuli_Chr07 | 35345452                | TT                                     | GG                 | GG               | INTERGENIC                    |                    |                                                       |
| SNP_56720_A_35345684 | NC_021166.1    | Ca_Kabuli_Chr07 | 35345684                | AA                                     | TT                 | TT               | INTERGENIC                    |                    |                                                       |
| SNP_56721_A_35345930 | NC_021166.1    | Ca_Kabuli_Chr07 | 35345930                | TT                                     | CC                 | CC               | INTERGENIC                    |                    |                                                       |
| SNP_56723_A_35347542 | NC_021166.1    | Ca_Kabuli_Chr07 | 35347542                | GG                                     | AA                 | AA               | URR                           | 101496921          | GDP-Man:Man(3)GlcNAc(2)-PP-Dol<br>mannosyltransferase |
| SNP_56725_A_35349345 | NC_021166.1    | Ca_Kabuli_Chr07 | 35349345                | AA                                     | GG                 | GG               | INTERGENIC                    |                    |                                                       |
| SNP_56726_A_35356954 | NC_021166.1    | Ca_Kabuli_Chr07 | 35356954                | GG                                     | AA                 | AA               | URR                           | 101497248          | cyclic nucleotide-gated ion channel 1                 |
| SNP_56727_A_35357203 | NC_021166.1    | Ca_Kabuli_Chr07 | 35357203                | AA                                     | GG                 | GG               | URR                           | 101497248          | cyclic nucleotide-gated ion channel 1                 |
| SNP_56728_A_35357501 | NC_021166.1    | Ca_Kabuli_Chr07 | 35357501                | TT                                     | GG                 | GG               | URR                           | 101497248          | cyclic nucleotide-gated ion channel 1                 |
| SNP_56729_A_35361253 | NC_021166.1    | Ca_Kabuli_Chr07 | 35361253                | AA                                     | GG                 | GG               | INTERGENIC                    |                    |                                                       |
| SNP_56730_A_35361314 | NC_021166.1    | Ca_Kabuli_Chr07 | 35361314                | GG                                     | CC                 | CC               | INTERGENIC                    |                    |                                                       |
| SNP_56731_A_35361315 | NC_021166.1    | Ca_Kabuli_Chr07 | 35361315                | TT                                     | AA                 | AA               | INTERGENIC                    |                    |                                                       |
| SNP_56733_A_35365194 | NC_021166.1    | Ca_Kabuli_Chr07 | 35365194                | AA                                     | TT                 | TT               | INTERGENIC                    |                    |                                                       |
| SNP_56734_A_35365242 | NC_021166.1    | Ca_Kabuli_Chr07 | 35365242                | TT                                     | AA                 | AA               | INTERGENIC                    |                    |                                                       |
| SNP_56735_A_35365245 | NC_021166.1    | Ca_Kabuli_Chr07 | 35365245                | AA                                     | GG                 | GG               | INTERGENIC                    |                    |                                                       |
| SNP_56736_A_35365253 | NC_021166.1    | Ca_Kabuli_Chr07 | 35365253                | TT                                     | CC                 | CC               | INTERGENIC                    |                    |                                                       |
| SNP_56737_A_35365456 | NC_021166.1    | Ca_Kabuli_Chr07 | 35365456                | TT                                     | CC                 | CC               | INTERGENIC                    |                    |                                                       |
| SNP_56738_A_35365851 | NC_021166.1    | Ca_Kabuli_Chr07 | 35365851                | GG                                     | AA                 | AA               | INTERGENIC                    |                    |                                                       |

| SNPs IDs             | Chromosome IDs | Chromosomes     | Physical positions (bp) | CDC Frontier genome (Reference genome) | (Pusa 1103 & HPNB) | (ILWC 46 & LPNB) | Sequence Components of genome | Gene accession IDs | Putative functions           |
|----------------------|----------------|-----------------|-------------------------|----------------------------------------|--------------------|------------------|-------------------------------|--------------------|------------------------------|
| SNP_56739_A_35366344 | NC_021166.1    | Ca_Kabuli_Chr07 | 35366344                | AA                                     | CC                 | CC               | INTERGENIC                    |                    |                              |
| SNP_56741_A_35366420 | NC_021166.1    | Ca_Kabuli_Chr07 | 35366420                | GG                                     | AA                 | AA               | INTERGENIC                    |                    |                              |
| SNP_56742_A_35366425 | NC_021166.1    | Ca_Kabuli_Chr07 | 35366425                | TT                                     | CC                 | CC               | INTERGENIC                    |                    |                              |
| SNP_56743_A_35366427 | NC_021166.1    | Ca_Kabuli_Chr07 | 35366427                | TT                                     | AA                 | AA               | INTERGENIC                    |                    |                              |
| SNP_56744_A_35367673 | NC_021166.1    | Ca_Kabuli_Chr07 | 35367673                | TT                                     | AA                 | AA               | INTERGENIC                    |                    |                              |
| SNP_56745_A_35367852 | NC_021166.1    | Ca_Kabuli_Chr07 | 35367852                | CC                                     | TT                 | TT               | INTERGENIC                    |                    |                              |
| SNP_56746_A_35369366 | NC_021166.1    | Ca_Kabuli_Chr07 | 35369366                | CC                                     | TT                 | TT               | INTERGENIC                    |                    |                              |
| SNP_56747_A_35371218 | NC_021166.1    | Ca_Kabuli_Chr07 | 35371218                | AA                                     | TT                 | TT               | INTERGENIC                    |                    |                              |
| SNP_56748_A_35375136 | NC_021166.1    | Ca_Kabuli_Chr07 | 35375136                | AA                                     | GG                 | GG               | INTRON                        | 101497811          | uncharacterized LOC101497811 |
| SNP_56749_A_35376584 | NC_021166.1    | Ca_Kabuli_Chr07 | 35376584                | TT                                     | CC                 | CC               | INTRON                        | 101497811          | uncharacterized LOC101497811 |
| SNP_56750_A_35376840 | NC_021166.1    | Ca_Kabuli_Chr07 | 35376840                | AA                                     | GG                 | GG               | INTRON                        | 101497811          | uncharacterized LOC101497811 |
| SNP_56751_A_35379748 | NC_021166.1    | Ca_Kabuli_Chr07 | 35379748                | AA                                     | GG                 | GG               | URR                           | 101497811          | uncharacterized LOC101497811 |
| SNP_56753_A_35379806 | NC_021166.1    | Ca_Kabuli_Chr07 | 35379806                | AA                                     | GG                 | GG               | URR                           | 101497811          | uncharacterized LOC101497811 |
| SNP_56755_A_35379852 | NC_021166.1    | Ca_Kabuli_Chr07 | 35379852                | GG                                     | AA                 | AA               | URR                           | 101497811          | uncharacterized LOC101497811 |
| SNP_56757_A_35380003 | NC_021166.1    | Ca_Kabuli_Chr07 | 35380003                | CC                                     | TT                 | TT               | INTERGENIC                    |                    |                              |
| SNP_56758_A_35382353 | NC_021166.1    | Ca_Kabuli_Chr07 | 35382353                | GG                                     | TT                 | TT               | INTERGENIC                    |                    |                              |
| SNP_56759_A_35382387 | NC_021166.1    | Ca_Kabuli_Chr07 | 35382387                | GG                                     | AA                 | AA               | INTERGENIC                    |                    |                              |
| SNP_56761_A_35382636 | NC_021166.1    | Ca_Kabuli_Chr07 | 35382636                | TT                                     | CC                 | CC               | INTERGENIC                    |                    |                              |
| SNP_56762_A_35382836 | NC_021166.1    | Ca_Kabuli_Chr07 | 35382836                | AA                                     | GG                 | GG               | INTERGENIC                    |                    |                              |
| SNP_56763_A_35382914 | NC_021166.1    | Ca_Kabuli_Chr07 | 35382914                | TT                                     | GG                 | GG               | INTERGENIC                    |                    |                              |
| SNP_56764_A_35383394 | NC_021166.1    | Ca_Kabuli_Chr07 | 35383394                | AA                                     | GG                 | GG               | INTERGENIC                    |                    |                              |
| SNP_56765_A_35384465 | NC_021166.1    | Ca_Kabuli_Chr07 | 35384465                | GG                                     | TT                 | TT               | INTERGENIC                    |                    |                              |

| SNPs IDs             | Chromosome IDs | Chromosomes     | Physical positions (bp) | CDC Frontier genome (Reference genome) | (Pusa 1103 & HPNB) | (ILWC 46 & LPNB) | Sequence genome | Components of | Gene accession IDs                    | Putative functions |
|----------------------|----------------|-----------------|-------------------------|----------------------------------------|--------------------|------------------|-----------------|---------------|---------------------------------------|--------------------|
| SNP_56767_A_35385177 | NC_021166.1    | Ca_Kabuli_Chr07 | 35385177                | GG                                     | CC                 | CC               | INTERGENIC      |               |                                       |                    |
| SNP_56768_A_35385487 | NC_021166.1    | Ca_Kabuli_Chr07 | 35385487                | TT                                     | AA                 | AA               | INTERGENIC      |               |                                       |                    |
| SNP_56770_A_35386572 | NC_021166.1    | Ca_Kabuli_Chr07 | 35386572                | CC                                     | TT                 | TT               | INTERGENIC      |               |                                       |                    |
| SNP_56772_A_35392720 | NC_021166.1    | Ca_Kabuli_Chr07 | 35392720                | CC                                     | TT                 | TT               | INTERGENIC      |               |                                       |                    |
| SNP_56773_A_35392730 | NC_021166.1    | Ca_Kabuli_Chr07 | 35392730                | CC                                     | TT                 | TT               | INTERGENIC      |               |                                       |                    |
| SNP_56774_A_35392736 | NC_021166.1    | Ca_Kabuli_Chr07 | 35392736                | CC                                     | TT                 | TT               | INTERGENIC      |               |                                       |                    |
| SNP_56775_A_35404017 | NC_021166.1    | Ca_Kabuli_Chr07 | 35404017                | TT                                     | CC                 | CC               | INTERGENIC      |               |                                       |                    |
| SNP_56776_A_35417610 | NC_021166.1    | Ca_Kabuli_Chr07 | 35417610                | CC                                     | TT                 | TT               | INTERGENIC      |               |                                       |                    |
| SNP_56777_A_35423243 | NC_021166.1    | Ca_Kabuli_Chr07 | 35423243                | CC                                     | TT                 | TT               | INTERGENIC      |               |                                       |                    |
| SNP_56779_A_35461922 | NC_021166.1    | Ca_Kabuli_Chr07 | 35461922                | TT                                     | CC                 | CC               | INTERGENIC      |               |                                       |                    |
| SNP_56780_A_35461977 | NC_021166.1    | Ca_Kabuli_Chr07 | 35461977                | TT                                     | CC                 | CC               | INTERGENIC      |               |                                       |                    |
| SNP_56781_A_35461983 | NC_021166.1    | Ca_Kabuli_Chr07 | 35461983                | AA                                     | GG                 | GG               | INTERGENIC      |               |                                       |                    |
| SNP_56782_A_35461993 | NC_021166.1    | Ca_Kabuli_Chr07 | 35461993                | AA                                     | TT                 | TT               | INTERGENIC      |               |                                       |                    |
| SNP_56783_A_35462012 | NC_021166.1    | Ca_Kabuli_Chr07 | 35462012                | TT                                     | CC                 | CC               | INTERGENIC      |               |                                       |                    |
| SNP_56784_A_35462035 | NC_021166.1    | Ca_Kabuli_Chr07 | 35462035                | AA                                     | CC                 | CC               | INTERGENIC      |               |                                       |                    |
| SNP_56785_A_35463554 | NC_021166.1    | Ca_Kabuli_Chr07 | 35463554                | CC                                     | AA                 | AA               | INTERGENIC      |               |                                       |                    |
| SNP_56786_A_35463574 | NC_021166.1    | Ca_Kabuli_Chr07 | 35463574                | AA                                     | CC                 | CC               | INTERGENIC      |               |                                       |                    |
| SNP_56787_A_35463597 | NC_021166.1    | Ca_Kabuli_Chr07 | 35463597                | TT                                     | CC                 | CC               | INTERGENIC      |               |                                       |                    |
| SNP_56788_A_35463623 | NC_021166.1    | Ca_Kabuli_Chr07 | 35463623                | TT                                     | CC                 | CC               | INTERGENIC      |               |                                       |                    |
| SNP_56789_A_35473144 | NC_021166.1    | Ca_Kabuli_Chr07 | 35473144                | GG                                     | AA                 | AA               | INTRON          | 101489242     | DNA polymerase epsilon subunit 2-like |                    |
| SNP_56790_A_35473182 | NC_021166.1    | Ca_Kabuli_Chr07 | 35473182                | AA                                     | TT                 | TT               | INTRON          | 101489242     | DNA polymerase epsilon subunit 2-like |                    |
| SNP_56791_A_35480393 | NC_021166.1    | Ca_Kabuli_Chr07 | 35480393                | AA                                     | CC                 | CC               | INTRON          | 101489242     | DNA polymerase epsilon subunit 2-like |                    |



| SNPs IDs             | Chromosome IDs | Chromosomes     | Physical positions (bp) | CDC Frontier genome (Reference genome) | (Pusa 1103 & HPNB) | (ILWC 46 & LPNB) | Sequence Components of genome | Gene accession IDs | Putative functions                    |
|----------------------|----------------|-----------------|-------------------------|----------------------------------------|--------------------|------------------|-------------------------------|--------------------|---------------------------------------|
| SNP_56792_A_35480402 | NC_021166.1    | Ca_Kabuli_Chr07 | 35480402                | AA                                     | GG                 | GG               | INTRON                        | 101489242          | DNA polymerase epsilon subunit 2-like |
| SNP_56793_A_35480442 | NC_021166.1    | Ca_Kabuli_Chr07 | 35480442                | AA                                     | CC                 | CC               | INTRON                        | 101489242          | DNA polymerase epsilon subunit 2-like |
| SNP_56794_A_35481300 | NC_021166.1    | Ca_Kabuli_Chr07 | 35481300                | AA                                     | TT                 | TT               | INTRON                        | 101489242          | DNA polymerase epsilon subunit 2-like |
| SNP_56796_A_35481337 | NC_021166.1    | Ca_Kabuli_Chr07 | 35481337                | CC                                     | TT                 | TT               | INTRON                        | 101489242          | DNA polymerase epsilon subunit 2-like |
| SNP_56798_A_35481469 | NC_021166.1    | Ca_Kabuli_Chr07 | 35481469                | CC                                     | TT                 | TT               | INTRON                        | 101489242          | DNA polymerase epsilon subunit 2-like |
| SNP_56799_A_35481622 | NC_021166.1    | Ca_Kabuli_Chr07 | 35481622                | AA                                     | CC                 | CC               | INTRON                        | 101489242          | DNA polymerase epsilon subunit 2-like |
| SNP_56800_A_35481640 | NC_021166.1    | Ca_Kabuli_Chr07 | 35481640                | AA                                     | TT                 | TT               | INTRON                        | 101489242          | DNA polymerase epsilon subunit 2-like |
| SNP_56801_A_35481683 | NC_021166.1    | Ca_Kabuli_Chr07 | 35481683                | AA                                     | CC                 | CC               | INTRON                        | 101489242          | DNA polymerase epsilon subunit 2-like |
| SNP_56802_A_35481686 | NC_021166.1    | Ca_Kabuli_Chr07 | 35481686                | GG                                     | AA                 | AA               | INTRON                        | 101489242          | DNA polymerase epsilon subunit 2-like |
| SNP_56803_A_35481740 | NC_021166.1    | Ca_Kabuli_Chr07 | 35481740                | TT                                     | CC                 | CC               | INTRON                        | 101489242          | DNA polymerase epsilon subunit 2-like |
| SNP_56804_A_35481758 | NC_021166.1    | Ca_Kabuli_Chr07 | 35481758                | CC                                     | AA                 | AA               | INTRON                        | 101489242          | DNA polymerase epsilon subunit 2-like |
| SNP_56805_A_35481808 | NC_021166.1    | Ca_Kabuli_Chr07 | 35481808                | TT                                     | CC                 | CC               | INTRON                        | 101489242          | DNA polymerase epsilon subunit 2-like |
| SNP_56806_A_35481818 | NC_021166.1    | Ca_Kabuli_Chr07 | 35481818                | CC                                     | TT                 | TT               | INTRON                        | 101489242          | DNA polymerase epsilon subunit 2-like |
| SNP_56807_A_35501004 | NC_021166.1    | Ca_Kabuli_Chr07 | 35501004                | GG                                     | TT                 | TT               | INTERGENIC                    |                    |                                       |
| SNP_56808_A_35501017 | NC_021166.1    | Ca_Kabuli_Chr07 | 35501017                | CC                                     | TT                 | AA               | INTERGENIC                    |                    |                                       |
| SNP_56809_A_35501363 | NC_021166.1    | Ca_Kabuli_Chr07 | 35501363                | GG                                     | AA                 | AA               | INTERGENIC                    |                    |                                       |
| SNP_56810_A_35501364 | NC_021166.1    | Ca_Kabuli_Chr07 | 35501364                | AA                                     | GG                 | GG               | INTERGENIC                    |                    |                                       |
| SNP_56811_A_35501408 | NC_021166.1    | Ca_Kabuli_Chr07 | 35501408                | TT                                     | CC                 | CC               | INTERGENIC                    |                    |                                       |
| SNP_56812_A_35501498 | NC_021166.1    | Ca_Kabuli_Chr07 | 35501498                | AA                                     | CC                 | CC               | INTERGENIC                    |                    |                                       |
| SNP_56813_A_35501542 | NC_021166.1    | Ca_Kabuli_Chr07 | 35501542                | TT                                     | CC                 | CC               | INTERGENIC                    |                    |                                       |
| SNP_56814_A_35501582 | NC_021166.1    | Ca_Kabuli_Chr07 | 35501582                | AA                                     | GG                 | GG               | DRR                           | 101502192          | uncharacterized LOC101502192          |
| SNP_56816_A_35573303 | NC_021166.1    | Ca_Kabuli_Chr07 | 35573303                | GG                                     | AA                 | AA               | INTERGENIC                    |                    |                                       |

| SNPs IDs             | Chromosome IDs | Chromosomes     | Physical positions (bp) | CDC Frontier genome (Reference genome) | (Pusa 1103 & HPNB) | (ILWC 46 & LPNB) | Sequence Components of genome | Gene accession IDs | Putative functions                          |
|----------------------|----------------|-----------------|-------------------------|----------------------------------------|--------------------|------------------|-------------------------------|--------------------|---------------------------------------------|
| SNP_56817_A_35574832 | NC_021166.1    | Ca_Kabuli_Chr07 | 35574832                | GG                                     | AA                 | AA               | DRR                           | 101504556          | reticulon-like protein B1                   |
| SNP_56818_A_35650857 | NC_021166.1    | Ca_Kabuli_Chr07 | 35650857                | CC                                     | TT                 | TT               | INTERGENIC                    |                    |                                             |
| SNP_56819_A_35662991 | NC_021166.1    | Ca_Kabuli_Chr07 | 35662991                | CC                                     | TT                 | TT               | URR                           | 101507146          | uncharacterized LOC101507146                |
| SNP_56821_A_35691985 | NC_021166.1    | Ca_Kabuli_Chr07 | 35691985                | AA                                     | CC                 | CC               | INTERGENIC                    |                    |                                             |
| SNP_56822_A_35694459 | NC_021166.1    | Ca_Kabuli_Chr07 | 35694459                | GG                                     | TT                 | TT               | INTERGENIC                    |                    |                                             |
| SNP_56823_A_35753004 | NC_021166.1    | Ca_Kabuli_Chr07 | 35753004                | AA                                     | GG                 | GG               | INTERGENIC                    |                    |                                             |
| SNP_56824_A_35753024 | NC_021166.1    | Ca_Kabuli_Chr07 | 35753024                | CC                                     | GG                 | GG               | INTERGENIC                    |                    |                                             |
| SNP_56825_A_35753042 | NC_021166.1    | Ca_Kabuli_Chr07 | 35753042                | TT                                     | CC                 | CC               | INTERGENIC                    |                    |                                             |
| SNP_56826_A_35785943 | NC_021166.1    | Ca_Kabuli_Chr07 | 35785943                | AA                                     | GG                 | GG               | INTERGENIC                    |                    |                                             |
| SNP_56827_A_35786366 | NC_021166.1    | Ca_Kabuli_Chr07 | 35786366                | GG                                     | AA                 | AA               | INTERGENIC                    |                    |                                             |
| SNP_56829_A_35802771 | NC_021166.1    | Ca_Kabuli_Chr07 | 35802771                | CC                                     | TT                 | TT               | DRR                           | 101510000          | eukaryotic translation initiation factor 1A |
| SNP_56830_A_35863340 | NC_021166.1    | Ca_Kabuli_Chr07 | 35863340                | AA                                     | GG                 | GG               | INTERGENIC                    |                    |                                             |
| SNP_56831_A_35864074 | NC_021166.1    | Ca_Kabuli_Chr07 | 35864074                | TT                                     | CC                 | CC               | INTERGENIC                    |                    |                                             |
| SNP_56832_A_35915812 | NC_021166.1    | Ca_Kabuli_Chr07 | 35915812                | GG                                     | AA                 | AA               | URR                           | 101494737          | uncharacterized LOC101494737                |
| SNP_56834_A_35925542 | NC_021166.1    | Ca_Kabuli_Chr07 | 35925542                | GG                                     | AA                 | AA               | INTRON                        | 101515174          | ribonuclease 2                              |
| SNP_56835_A_35942646 | NC_021166.1    | Ca_Kabuli_Chr07 | 35942646                | AA                                     | GG                 | GG               | INTERGENIC                    |                    |                                             |
| SNP_56836_A_35950963 | NC_021166.1    | Ca_Kabuli_Chr07 | 35950963                | AA                                     | GG                 | GG               | INTERGENIC                    |                    |                                             |
| SNP_56837_A_35950977 | NC_021166.1    | Ca_Kabuli_Chr07 | 35950977                | TT                                     | GG                 | GG               | INTERGENIC                    |                    |                                             |
| SNP_56838_A_35951584 | NC_021166.1    | Ca_Kabuli_Chr07 | 35951584                | AA                                     | GG                 | GG               | INTERGENIC                    |                    |                                             |
| SNP_56839_A_35953503 | NC_021166.1    | Ca_Kabuli_Chr07 | 35953503                | AA                                     | GG                 | GG               | INTERGENIC                    |                    |                                             |
| SNP_56840_A_35953527 | NC_021166.1    | Ca_Kabuli_Chr07 | 35953527                | GG                                     | TT                 | TT               | INTERGENIC                    |                    |                                             |
| SNP_56841_A_35953547 | NC_021166.1    | Ca_Kabuli_Chr07 | 35953547                | CC                                     | TT                 | TT               | INTERGENIC                    |                    |                                             |

| SNPs IDs             | Chromosome IDs | Chromosomes     | Physical positions (bp) | CDC Frontier genome (Reference genome) | (Pusa 1103 & HPNB) | (ILWC 46 & LPNB) | Sequence genome | Components of | Gene accession IDs | Putative functions |
|----------------------|----------------|-----------------|-------------------------|----------------------------------------|--------------------|------------------|-----------------|---------------|--------------------|--------------------|
| SNP_56842_A_35959650 | NC_021166.1    | Ca_Kabuli_Chr07 | 35959650                | TT                                     | CC                 | CC               | INTERGENIC      |               |                    |                    |
| SNP_56843_A_35959878 | NC_021166.1    | Ca_Kabuli_Chr07 | 35959878                | GG                                     | AA                 | AA               | INTERGENIC      |               |                    |                    |
| SNP_56844_A_35981728 | NC_021166.1    | Ca_Kabuli_Chr07 | 35981728                | TT                                     | CC                 | CC               | INTERGENIC      |               |                    |                    |
| SNP_56845_A_36060923 | NC_021166.1    | Ca_Kabuli_Chr07 | 36060923                | AA                                     | CC                 | CC               | INTERGENIC      |               |                    |                    |
| SNP_56847_A_36133028 | NC_021166.1    | Ca_Kabuli_Chr07 | 36133028                | TT                                     | CC                 | CC               | INTERGENIC      |               |                    |                    |
| SNP_56848_A_36133131 | NC_021166.1    | Ca_Kabuli_Chr07 | 36133131                | AA                                     | CC                 | CC               | INTERGENIC      |               |                    |                    |
| SNP_56849_A_36133189 | NC_021166.1    | Ca_Kabuli_Chr07 | 36133189                | TT                                     | CC                 | CC               | INTERGENIC      |               |                    |                    |
| SNP_56850_A_36133216 | NC_021166.1    | Ca_Kabuli_Chr07 | 36133216                | CC                                     | TT                 | TT               | INTERGENIC      |               |                    |                    |
| SNP_56851_A_36133272 | NC_021166.1    | Ca_Kabuli_Chr07 | 36133272                | AA                                     | GG                 | GG               | INTERGENIC      |               |                    |                    |
| SNP_56852_A_36135343 | NC_021166.1    | Ca_Kabuli_Chr07 | 36135343                | CC                                     | TT                 | TT               | INTERGENIC      |               |                    |                    |
| SNP_56853_A_36136514 | NC_021166.1    | Ca_Kabuli_Chr07 | 36136514                | GG                                     | AA                 | AA               | INTERGENIC      |               |                    |                    |
| SNP_56854_A_36168043 | NC_021166.1    | Ca_Kabuli_Chr07 | 36168043                | AA                                     | GG                 | GG               | INTERGENIC      |               |                    |                    |
| SNP_56858_A_36375785 | NC_021166.1    | Ca_Kabuli_Chr07 | 36375785                | AA                                     | GG                 | GG               | INTERGENIC      |               |                    |                    |
| SNP_56859_A_36375840 | NC_021166.1    | Ca_Kabuli_Chr07 | 36375840                | AA                                     | TT                 | TT               | INTERGENIC      |               |                    |                    |
| SNP_56860_A_36375875 | NC_021166.1    | Ca_Kabuli_Chr07 | 36375875                | TT                                     | CC                 | CC               | INTERGENIC      |               |                    |                    |
| SNP_56861_A_36375909 | NC_021166.1    | Ca_Kabuli_Chr07 | 36375909                | AA                                     | GG                 | GG               | INTERGENIC      |               |                    |                    |
| SNP_56862_A_36376007 | NC_021166.1    | Ca_Kabuli_Chr07 | 36376007                | CC                                     | TT                 | TT               | INTERGENIC      |               |                    |                    |
| SNP_56863_A_36383983 | NC_021166.1    | Ca_Kabuli_Chr07 | 36383983                | GG                                     | TT                 | TT               | INTERGENIC      |               |                    |                    |
| SNP_56864_A_36389971 | NC_021166.1    | Ca_Kabuli_Chr07 | 36389971                | AA                                     | TT                 | TT               | INTERGENIC      |               |                    |                    |
| SNP_56865_A_36407390 | NC_021166.1    | Ca_Kabuli_Chr07 | 36407390                | AA                                     | TT                 | TT               | INTERGENIC      |               |                    |                    |
| SNP_56866_A_36426141 | NC_021166.1    | Ca_Kabuli_Chr07 | 36426141                | CC                                     | GG                 | GG               | INTERGENIC      |               |                    |                    |
| SNP_56867_A_36459276 | NC_021166.1    | Ca_Kabuli_Chr07 | 36459276                | GG                                     | CC                 | CC               | INTERGENIC      |               |                    |                    |

| SNPs IDs             | Chromosome IDs | Chromosomes     | Physical positions (bp) | CDC Frontier genome (Reference genome) | (Pusa 1103 & HPNB) | (ILWC 46 & LPNB) | Sequence Components of genome | Gene accession IDs | Putative functions                       |
|----------------------|----------------|-----------------|-------------------------|----------------------------------------|--------------------|------------------|-------------------------------|--------------------|------------------------------------------|
| SNP_56869_A_36519165 | NC_021166.1    | Ca_Kabuli_Chr07 | 36519165                | GG                                     | TT                 | TT               | INTERGENIC                    |                    |                                          |
| SNP_56870_A_36524548 | NC_021166.1    | Ca_Kabuli_Chr07 | 36524548                | CC                                     | TT                 | TT               | INTERGENIC                    |                    |                                          |
| SNP_56871_A_36524923 | NC_021166.1    | Ca_Kabuli_Chr07 | 36524923                | GG                                     | CC                 | CC               | INTERGENIC                    |                    |                                          |
| SNP_56872_A_36524978 | NC_021166.1    | Ca_Kabuli_Chr07 | 36524978                | TT                                     | CC                 | CC               | INTERGENIC                    |                    |                                          |
| SNP_56873_A_36527643 | NC_021166.1    | Ca_Kabuli_Chr07 | 36527643                | CC                                     | AA                 | AA               | INTERGENIC                    |                    |                                          |
| SNP_56874_A_36527687 | NC_021166.1    | Ca_Kabuli_Chr07 | 36527687                | AA                                     | CC                 | CC               | INTERGENIC                    |                    |                                          |
| SNP_56875_A_36580921 | NC_021166.1    | Ca_Kabuli_Chr07 | 36580921                | AA                                     | GG                 | GG               | INTERGENIC                    |                    |                                          |
| SNP_56877_A_36638394 | NC_021166.1    | Ca_Kabuli_Chr07 | 36638394                | AA                                     | GG                 | GG               | INTERGENIC                    |                    |                                          |
| SNP_56878_A_36662789 | NC_021166.1    | Ca_Kabuli_Chr07 | 36662789                | CC                                     | TT                 | TT               | INTERGENIC                    |                    |                                          |
| SNP_56879_A_36699607 | NC_021166.1    | Ca_Kabuli_Chr07 | 36699607                | TT                                     | CC                 | CC               | INTERGENIC                    |                    |                                          |
| SNP_56880_A_36699611 | NC_021166.1    | Ca_Kabuli_Chr07 | 36699611                | CC                                     | AA                 | AA               | INTERGENIC                    |                    |                                          |
| SNP_56881_A_36699613 | NC_021166.1    | Ca_Kabuli_Chr07 | 36699613                | GG                                     | AA                 | AA               | INTERGENIC                    |                    |                                          |
| SNP_56882_A_36699663 | NC_021166.1    | Ca_Kabuli_Chr07 | 36699663                | AA                                     | GG                 | GG               | INTERGENIC                    |                    |                                          |
| SNP_56883_A_36750002 | NC_021166.1    | Ca_Kabuli_Chr07 | 36750002                | AA                                     | GG                 | GG               | INTRON                        | 101508926          | uncharacterized LOC101508926             |
| SNP_56884_A_36750437 | NC_021166.1    | Ca_Kabuli_Chr07 | 36750437                | TT                                     | CC                 | CC               | INTRON                        | 101508926          | uncharacterized LOC101508926             |
| SNP_56885_A_36750571 | NC_021166.1    | Ca_Kabuli_Chr07 | 36750571                | TT                                     | CC                 | CC               | INTRON                        | 101508926          | uncharacterized LOC101508926             |
| SNP_56886_A_36750599 | NC_021166.1    | Ca_Kabuli_Chr07 | 36750599                | CC                                     | TT                 | TT               | INTRON                        | 101508926          | uncharacterized LOC101508926             |
| SNP_56887_A_36750604 | NC_021166.1    | Ca_Kabuli_Chr07 | 36750604                | CC                                     | TT                 | TT               | INTRON                        | 101508926          | uncharacterized LOC101508926             |
| SNP_56888_A_36789791 | NC_021166.1    | Ca_Kabuli_Chr07 | 36789791                | CC                                     | TT                 | TT               | URR                           | 101510762          | UPF0187 protein At3g61320, chloroplastic |
| SNP_56891_A_36881396 | NC_021166.1    | Ca_Kabuli_Chr07 | 36881396                | AA                                     | GG                 | GG               | INTERGENIC                    |                    |                                          |
| SNP_56893_A_36897226 | NC_021166.1    | Ca_Kabuli_Chr07 | 36897226                | AA                                     | GG                 | GG               | INTERGENIC                    |                    |                                          |
| SNP_56894_A_36907023 | NC_021166.1    | Ca_Kabuli_Chr07 | 36907023                | CC                                     | TT                 | TT               | INTERGENIC                    |                    |                                          |

| SNPs IDs             | Chromosome IDs | Chromosomes     | Physical positions (bp) | CDC Frontier genome (Reference genome) | (Pusa 1103 & HPNB) | (ILWC 46 & LPNB) | Sequence Components of genome | Gene accession IDs | Putative functions                 |
|----------------------|----------------|-----------------|-------------------------|----------------------------------------|--------------------|------------------|-------------------------------|--------------------|------------------------------------|
| SNP_56895_A_36998824 | NC_021166.1    | Ca_Kabuli_Chr07 | 36998824                | GG                                     | AA                 | AA               | INTERGENIC                    |                    |                                    |
| SNP_56896_A_37009312 | NC_021166.1    | Ca_Kabuli_Chr07 | 37009312                | AA                                     | GG                 | GG               | INTRON                        | 101488921          | O-glucosyltransferase rumi homolog |
| SNP_56898_A_37013470 | NC_021166.1    | Ca_Kabuli_Chr07 | 37013470                | TT                                     | AA                 | AA               | INTRON                        | 101488921          | O-glucosyltransferase rumi homolog |
| SNP_56899_A_37016789 | NC_021166.1    | Ca_Kabuli_Chr07 | 37016789                | TT                                     | CC                 | CC               | INTRON                        | 101488921          | O-glucosyltransferase rumi homolog |
| SNP_56900_A_37112645 | NC_021166.1    | Ca_Kabuli_Chr07 | 37112645                | AA                                     | GG                 | GG               | INTERGENIC                    |                    |                                    |
| SNP_56901_A_37112725 | NC_021166.1    | Ca_Kabuli_Chr07 | 37112725                | GG                                     | AA                 | AA               | INTERGENIC                    |                    |                                    |
| SNP_56902_A_37181287 | NC_021166.1    | Ca_Kabuli_Chr07 | 37181287                | GG                                     | AA                 | AA               | INTERGENIC                    |                    |                                    |
| SNP_56904_A_37213050 | NC_021166.1    | Ca_Kabuli_Chr07 | 37213050                | TT                                     | CC                 | CC               | INTERGENIC                    |                    |                                    |
| SNP_56905_A_37213105 | NC_021166.1    | Ca_Kabuli_Chr07 | 37213105                | AA                                     | GG                 | GG               | INTERGENIC                    |                    |                                    |
| SNP_56906_A_37213156 | NC_021166.1    | Ca_Kabuli_Chr07 | 37213156                | CC                                     | AA                 | AA               | INTERGENIC                    |                    |                                    |
| SNP_56907_A_37213282 | NC_021166.1    | Ca_Kabuli_Chr07 | 37213282                | TT                                     | AA                 | AA               | INTERGENIC                    |                    |                                    |
| SNP_56908_A_37230442 | NC_021166.1    | Ca_Kabuli_Chr07 | 37230442                | TT                                     | GG                 | GG               | INTERGENIC                    |                    |                                    |
| SNP_56909_A_37236135 | NC_021166.1    | Ca_Kabuli_Chr07 | 37236135                | TT                                     | AA                 | AA               | INTRON                        | 101497249          | Unknown function                   |
| SNP_56910_A_37236223 | NC_021166.1    | Ca_Kabuli_Chr07 | 37236223                | GG                                     | AA                 | AA               | INTRON                        | 101497249          | Unknown function                   |
| SNP_56911_A_37236243 | NC_021166.1    | Ca_Kabuli_Chr07 | 37236243                | TT                                     | CC                 | CC               | INTRON                        | 101497249          | Unknown function                   |
| SNP_56912_A_37236290 | NC_021166.1    | Ca_Kabuli_Chr07 | 37236290                | AA                                     | GG                 | GG               | INTRON                        | 101497249          | Unknown function                   |
| SNP_56913_A_37241389 | NC_021166.1    | Ca_Kabuli_Chr07 | 37241389                | GG                                     | CC                 | CC               | INTRON                        | 101497249          | Unknown function                   |
| SNP_56914_A_37247916 | NC_021166.1    | Ca_Kabuli_Chr07 | 37247916                | TT                                     | CC                 | CC               | INTRON                        | 101497249          | Unknown function                   |
| SNP_56915_A_37252233 | NC_021166.1    | Ca_Kabuli_Chr07 | 37252233                | AA                                     | TT                 | TT               | INTRON                        | 101497249          | Unknown function                   |
| SNP_56916_A_37263945 | NC_021166.1    | Ca_Kabuli_Chr07 | 37263945                | AA                                     | CC                 | CC               | INTRON                        | 101497249          | Unknown function                   |
| SNP_56918_A_37265590 | NC_021166.1    | Ca_Kabuli_Chr07 | 37265590                | AA                                     | CC                 | CC               | INTRON                        | 101497249          | Unknown function                   |
| SNP_56919_A_37269059 | NC_021166.1    | Ca_Kabuli_Chr07 | 37269059                | GG                                     | TT                 | TT               | INTRON                        | 101497249          | Unknown function                   |

| SNPs IDs             | Chromosome IDs | Chromosomes     | Physical positions (bp) | CDC Frontier genome (Reference genome) | (Pusa 1103 & HPNB) | (ILWC 46 & LPNB) | Sequence Components of genome | Gene accession IDs | Putative functions |
|----------------------|----------------|-----------------|-------------------------|----------------------------------------|--------------------|------------------|-------------------------------|--------------------|--------------------|
| SNP_56920_A_37269082 | NC_021166.1    | Ca_Kabuli_Chr07 | 37269082                | GG                                     | AA                 | AA               | INTRON                        | 101497249          | Unknown function   |
| SNP_56921_A_37269123 | NC_021166.1    | Ca_Kabuli_Chr07 | 37269123                | TT                                     | AA                 | AA               | INTRON                        | 101497249          | Unknown function   |
| SNP_56922_A_37281954 | NC_021166.1    | Ca_Kabuli_Chr07 | 37281954                | AA                                     | TT                 | TT               | INTRON                        | 101497249          | Unknown function   |
| SNP_56924_A_37282115 | NC_021166.1    | Ca_Kabuli_Chr07 | 37282115                | TT                                     | CC                 | CC               | INTRON                        | 101497249          | Unknown function   |
| SNP_56925_A_37282148 | NC_021166.1    | Ca_Kabuli_Chr07 | 37282148                | AA                                     | GG                 | GG               | INTRON                        | 101497249          | Unknown function   |
| SNP_56926_A_37292301 | NC_021166.1    | Ca_Kabuli_Chr07 | 37292301                | AA                                     | GG                 | GG               | INTERGENIC                    |                    |                    |
| SNP_56927_A_37292376 | NC_021166.1    | Ca_Kabuli_Chr07 | 37292376                | AA                                     | GG                 | GG               | INTERGENIC                    |                    |                    |
| SNP_56928_A_37292380 | NC_021166.1    | Ca_Kabuli_Chr07 | 37292380                | CC                                     | TT                 | TT               | INTERGENIC                    |                    |                    |
| SNP_56929_A_37292523 | NC_021166.1    | Ca_Kabuli_Chr07 | 37292523                | GG                                     | AA                 | AA               | INTERGENIC                    |                    |                    |
| SNP_56930_A_37292550 | NC_021166.1    | Ca_Kabuli_Chr07 | 37292550                | AA                                     | TT                 | TT               | INTERGENIC                    |                    |                    |
| SNP_56931_A_37292610 | NC_021166.1    | Ca_Kabuli_Chr07 | 37292610                | GG                                     | TT                 | TT               | INTERGENIC                    |                    |                    |
| SNP_56932_A_37292634 | NC_021166.1    | Ca_Kabuli_Chr07 | 37292634                | TT                                     | GG                 | GG               | INTERGENIC                    |                    |                    |
| SNP_56933_A_37292662 | NC_021166.1    | Ca_Kabuli_Chr07 | 37292662                | CC                                     | AA                 | AA               | INTERGENIC                    |                    |                    |
| SNP_56934_A_37296881 | NC_021166.1    | Ca_Kabuli_Chr07 | 37296881                | AA                                     | CC                 | CC               | INTERGENIC                    |                    |                    |
| SNP_56935_A_37315291 | NC_021166.1    | Ca_Kabuli_Chr07 | 37315291                | CC                                     | TT                 | TT               | INTERGENIC                    |                    |                    |
| SNP_56936_A_37315366 | NC_021166.1    | Ca_Kabuli_Chr07 | 37315366                | AA                                     | GG                 | GG               | INTERGENIC                    |                    |                    |
| SNP_56937_A_37316499 | NC_021166.1    | Ca_Kabuli_Chr07 | 37316499                | AA                                     | GG                 | GG               | INTERGENIC                    |                    |                    |
| SNP_56938_A_37345767 | NC_021166.1    | Ca_Kabuli_Chr07 | 37345767                | GG                                     | CC                 | CC               | INTERGENIC                    |                    |                    |
| SNP_56939_A_37366683 | NC_021166.1    | Ca_Kabuli_Chr07 | 37366683                | CC                                     | TT                 | TT               | INTERGENIC                    |                    |                    |
| SNP_56940_A_37370080 | NC_021166.1    | Ca_Kabuli_Chr07 | 37370080                | AA                                     | TT                 | TT               | INTERGENIC                    |                    |                    |
| SNP_56941_A_37370333 | NC_021166.1    | Ca_Kabuli_Chr07 | 37370333                | GG                                     | TT                 | TT               | INTERGENIC                    |                    |                    |
| SNP_56942_A_37372128 | NC_021166.1    | Ca_Kabuli_Chr07 | 37372128                | GG                                     | TT                 | TT               | INTERGENIC                    |                    |                    |

| SNPs IDs             | Chromosome IDs | Chromosomes     | Physical positions (bp) | CDC Frontier genome (Reference genome) | (Pusa 1103 & HPNB) | (ILWC 46 & LPNB) | Sequence genome | Components of | Gene accession IDs | Putative functions |
|----------------------|----------------|-----------------|-------------------------|----------------------------------------|--------------------|------------------|-----------------|---------------|--------------------|--------------------|
| SNP_56943_A_37372158 | NC_021166.1    | Ca_Kabuli_Chr07 | 37372158                | AA                                     | TT                 | TT               | INTERGENIC      |               |                    |                    |
| SNP_56944_A_37372387 | NC_021166.1    | Ca_Kabuli_Chr07 | 37372387                | CC                                     | TT                 | TT               | INTERGENIC      |               |                    |                    |
| SNP_56945_A_37372955 | NC_021166.1    | Ca_Kabuli_Chr07 | 37372955                | TT                                     | CC                 | CC               | INTERGENIC      |               |                    |                    |
| SNP_56946_A_37372971 | NC_021166.1    | Ca_Kabuli_Chr07 | 37372971                | CC                                     | TT                 | TT               | INTERGENIC      |               |                    |                    |
| SNP_56947_A_37374030 | NC_021166.1    | Ca_Kabuli_Chr07 | 37374030                | CC                                     | AA                 | AA               | INTERGENIC      |               |                    |                    |
| SNP_56948_A_37374227 | NC_021166.1    | Ca_Kabuli_Chr07 | 37374227                | TT                                     | GG                 | GG               | INTERGENIC      |               |                    |                    |
| SNP_56949_A_37374243 | NC_021166.1    | Ca_Kabuli_Chr07 | 37374243                | TT                                     | GG                 | GG               | INTERGENIC      |               |                    |                    |
| SNP_56950_A_37374257 | NC_021166.1    | Ca_Kabuli_Chr07 | 37374257                | AA                                     | GG                 | GG               | INTERGENIC      |               |                    |                    |
| SNP_56951_A_37374269 | NC_021166.1    | Ca_Kabuli_Chr07 | 37374269                | TT                                     | CC                 | CC               | INTERGENIC      |               |                    |                    |
| SNP_56952_A_37396017 | NC_021166.1    | Ca_Kabuli_Chr07 | 37396017                | AA                                     | CC                 | CC               | INTERGENIC      |               |                    |                    |
| SNP_56953_A_37427275 | NC_021166.1    | Ca_Kabuli_Chr07 | 37427275                | CC                                     | TT                 | TT               | INTERGENIC      |               |                    |                    |
| SNP_56954_A_37427294 | NC_021166.1    | Ca_Kabuli_Chr07 | 37427294                | TT                                     | CC                 | CC               | INTERGENIC      |               |                    |                    |
| SNP_56955_A_37427583 | NC_021166.1    | Ca_Kabuli_Chr07 | 37427583                | AA                                     | CC                 | CC               | INTERGENIC      |               |                    |                    |
| SNP_56956_A_37427590 | NC_021166.1    | Ca_Kabuli_Chr07 | 37427590                | GG                                     | AA                 | AA               | INTERGENIC      |               |                    |                    |
| SNP_56957_A_37427608 | NC_021166.1    | Ca_Kabuli_Chr07 | 37427608                | TT                                     | CC                 | CC               | INTERGENIC      |               |                    |                    |
| SNP_56958_A_37437152 | NC_021166.1    | Ca_Kabuli_Chr07 | 37437152                | GG                                     | AA                 | AA               | INTERGENIC      |               |                    |                    |
| SNP_56959_A_37437572 | NC_021166.1    | Ca_Kabuli_Chr07 | 37437572                | TT                                     | GG                 | GG               | INTERGENIC      |               |                    |                    |
| SNP_56960_A_37437579 | NC_021166.1    | Ca_Kabuli_Chr07 | 37437579                | CC                                     | AA                 | AA               | INTERGENIC      |               |                    |                    |
| SNP_56961_A_37437580 | NC_021166.1    | Ca_Kabuli_Chr07 | 37437580                | GG                                     | TT                 | TT               | INTERGENIC      |               |                    |                    |
| SNP_56962_A_37439526 | NC_021166.1    | Ca_Kabuli_Chr07 | 37439526                | GG                                     | TT                 | TT               | INTERGENIC      |               |                    |                    |
| SNP_56963_A_37475284 | NC_021166.1    | Ca_Kabuli_Chr07 | 37475284                | TT                                     | CC                 | CC               | INTERGENIC      |               |                    |                    |
| SNP_56964_A_37478031 | NC_021166.1    | Ca_Kabuli_Chr07 | 37478031                | GG                                     | TT                 | TT               | INTERGENIC      |               |                    |                    |

| SNPs IDs             | Chromosome IDs | Chromosomes     | Physical positions (bp) | CDC Frontier genome (Reference genome) | (Pusa 1103 & HPNB) | (ILWC 46 & LPNB) | Sequence genome | Components of | Gene accession IDs | Putative functions |
|----------------------|----------------|-----------------|-------------------------|----------------------------------------|--------------------|------------------|-----------------|---------------|--------------------|--------------------|
| SNP_56965_A_37479171 | NC_021166.1    | Ca_Kabuli_Chr07 | 37479171                | CC                                     | TT                 | TT               | INTERGENIC      |               |                    |                    |
| SNP_56966_A_37479236 | NC_021166.1    | Ca_Kabuli_Chr07 | 37479236                | AA                                     | CC                 | CC               | INTERGENIC      |               |                    |                    |
| SNP_56967_A_37479267 | NC_021166.1    | Ca_Kabuli_Chr07 | 37479267                | GG                                     | AA                 | AA               | INTERGENIC      |               |                    |                    |
| SNP_56968_A_37479291 | NC_021166.1    | Ca_Kabuli_Chr07 | 37479291                | TT                                     | CC                 | CC               | INTERGENIC      |               |                    |                    |
| SNP_56969_A_37479294 | NC_021166.1    | Ca_Kabuli_Chr07 | 37479294                | GG                                     | AA                 | AA               | INTERGENIC      |               |                    |                    |
| SNP_56970_A_37479300 | NC_021166.1    | Ca_Kabuli_Chr07 | 37479300                | GG                                     | AA                 | AA               | INTERGENIC      |               |                    |                    |
| SNP_56971_A_37479550 | NC_021166.1    | Ca_Kabuli_Chr07 | 37479550                | TT                                     | CC                 | CC               | INTERGENIC      |               |                    |                    |
| SNP_56972_A_37479551 | NC_021166.1    | Ca_Kabuli_Chr07 | 37479551                | GG                                     | CC                 | CC               | INTERGENIC      |               |                    |                    |
| SNP_56973_A_37479589 | NC_021166.1    | Ca_Kabuli_Chr07 | 37479589                | GG                                     | AA                 | AA               | INTERGENIC      |               |                    |                    |
| SNP_56974_A_37479683 | NC_021166.1    | Ca_Kabuli_Chr07 | 37479683                | AA                                     | GG                 | GG               | INTERGENIC      |               |                    |                    |
| SNP_56975_A_37479738 | NC_021166.1    | Ca_Kabuli_Chr07 | 37479738                | AA                                     | TT                 | TT               | INTERGENIC      |               |                    |                    |
| SNP_56976_A_37479760 | NC_021166.1    | Ca_Kabuli_Chr07 | 37479760                | CC                                     | TT                 | TT               | INTERGENIC      |               |                    |                    |
| SNP_56977_A_37481196 | NC_021166.1    | Ca_Kabuli_Chr07 | 37481196                | TT                                     | GG                 | GG               | INTERGENIC      |               |                    |                    |
| SNP_56978_A_37481218 | NC_021166.1    | Ca_Kabuli_Chr07 | 37481218                | AA                                     | GG                 | GG               | INTERGENIC      |               |                    |                    |
| SNP_56979_A_37481598 | NC_021166.1    | Ca_Kabuli_Chr07 | 37481598                | TT                                     | AA                 | AA               | INTERGENIC      |               |                    |                    |
| SNP_56980_A_37484493 | NC_021166.1    | Ca_Kabuli_Chr07 | 37484493                | CC                                     | TT                 | TT               | INTERGENIC      |               |                    |                    |
| SNP_56981_A_37484509 | NC_021166.1    | Ca_Kabuli_Chr07 | 37484509                | TT                                     | CC                 | CC               | INTERGENIC      |               |                    |                    |
| SNP_56982_A_37488898 | NC_021166.1    | Ca_Kabuli_Chr07 | 37488898                | CC                                     | TT                 | TT               | INTERGENIC      |               |                    |                    |
| SNP_56983_A_37491262 | NC_021166.1    | Ca_Kabuli_Chr07 | 37491262                | GG                                     | TT                 | TT               | INTERGENIC      |               |                    |                    |
| SNP_56984_A_37496600 | NC_021166.1    | Ca_Kabuli_Chr07 | 37496600                | GG                                     | AA                 | AA               | INTERGENIC      |               |                    |                    |
| SNP_56985_A_37496908 | NC_021166.1    | Ca_Kabuli_Chr07 | 37496908                | AA                                     | CC                 | CC               | INTERGENIC      |               |                    |                    |
| SNP_56986_A_37497912 | NC_021166.1    | Ca_Kabuli_Chr07 | 37497912                | TT                                     | CC                 | CC               | INTERGENIC      |               |                    |                    |



| SNPs IDs             | Chromosome IDs | Chromosomes     | Physical positions (bp) | CDC Frontier (Reference genome) | (Pusa 1103 & HPNB) | (ILWC 46 & LPNB) | Sequence genome | Components of | Gene accession IDs | Putative functions |
|----------------------|----------------|-----------------|-------------------------|---------------------------------|--------------------|------------------|-----------------|---------------|--------------------|--------------------|
| SNP_56987_A_37497933 | NC_021166.1    | Ca_Kabuli_Chr07 | 37497933                | GG                              | AA                 | AA               | INTERGENIC      |               |                    |                    |
| SNP_56988_A_37498072 | NC_021166.1    | Ca_Kabuli_Chr07 | 37498072                | GG                              | AA                 | AA               | INTERGENIC      |               |                    |                    |
| SNP_56989_A_37498084 | NC_021166.1    | Ca_Kabuli_Chr07 | 37498084                | TT                              | AA                 | AA               | INTERGENIC      |               |                    |                    |
| SNP_56990_A_37498085 | NC_021166.1    | Ca_Kabuli_Chr07 | 37498085                | TT                              | CC                 | CC               | INTERGENIC      |               |                    |                    |
| SNP_56991_A_37498086 | NC_021166.1    | Ca_Kabuli_Chr07 | 37498086                | GG                              | TT                 | TT               | INTERGENIC      |               |                    |                    |
| SNP_56992_A_37502433 | NC_021166.1    | Ca_Kabuli_Chr07 | 37502433                | CC                              | AA                 | AA               | INTERGENIC      |               |                    |                    |
| SNP_56993_A_37502753 | NC_021166.1    | Ca_Kabuli_Chr07 | 37502753                | TT                              | CC                 | CC               | INTERGENIC      |               |                    |                    |
| SNP_56994_A_37502798 | NC_021166.1    | Ca_Kabuli_Chr07 | 37502798                | AA                              | CC                 | CC               | INTERGENIC      |               |                    |                    |
| SNP_56995_A_37502811 | NC_021166.1    | Ca_Kabuli_Chr07 | 37502811                | TT                              | AA                 | AA               | INTERGENIC      |               |                    |                    |
| SNP_56996_A_37502829 | NC_021166.1    | Ca_Kabuli_Chr07 | 37502829                | TT                              | CC                 | CC               | INTERGENIC      |               |                    |                    |
| SNP_56997_A_37502862 | NC_021166.1    | Ca_Kabuli_Chr07 | 37502862                | GG                              | AA                 | AA               | INTERGENIC      |               |                    |                    |
| SNP_56998_A_37504242 | NC_021166.1    | Ca_Kabuli_Chr07 | 37504242                | TT                              | GG                 | GG               | INTERGENIC      |               |                    |                    |
| SNP_56999_A_37504295 | NC_021166.1    | Ca_Kabuli_Chr07 | 37504295                | CC                              | AA                 | AA               | INTERGENIC      |               |                    |                    |
| SNP_57000_A_37504577 | NC_021166.1    | Ca_Kabuli_Chr07 | 37504577                | GG                              | CC                 | CC               | INTERGENIC      |               |                    |                    |
| SNP_57002_A_37507196 | NC_021166.1    | Ca_Kabuli_Chr07 | 37507196                | AA                              | TT                 | TT               | INTERGENIC      |               |                    |                    |
| SNP_57003_A_37507225 | NC_021166.1    | Ca_Kabuli_Chr07 | 37507225                | AA                              | CC                 | CC               | INTERGENIC      |               |                    |                    |
| SNP_57004_A_37507252 | NC_021166.1    | Ca_Kabuli_Chr07 | 37507252                | TT                              | CC                 | CC               | INTERGENIC      |               |                    |                    |
| SNP_57005_A_37510567 | NC_021166.1    | Ca_Kabuli_Chr07 | 37510567                | GG                              | AA                 | AA               | INTERGENIC      |               |                    |                    |
| SNP_57006_A_37511175 | NC_021166.1    | Ca_Kabuli_Chr07 | 37511175                | TT                              | CC                 | CC               | INTERGENIC      |               |                    |                    |
| SNP_57007_A_37511678 | NC_021166.1    | Ca_Kabuli_Chr07 | 37511678                | TT                              | CC                 | CC               | INTERGENIC      |               |                    |                    |
| SNP_57008_A_37513557 | NC_021166.1    | Ca_Kabuli_Chr07 | 37513557                | CC                              | TT                 | TT               | INTERGENIC      |               |                    |                    |
| SNP_57009_A_37514909 | NC_021166.1    | Ca_Kabuli_Chr07 | 37514909                | TT                              | CC                 | CC               | INTERGENIC      |               |                    |                    |

| SNPs IDs             | Chromosome IDs | Chromosomes     | Physical positions (bp) | CDC Frontier genome (Reference genome) | (Pusa 1103 & HPNB) | (ILWC 46 & LPNB) | Sequence genome | Components of | Gene accession IDs | Putative functions |
|----------------------|----------------|-----------------|-------------------------|----------------------------------------|--------------------|------------------|-----------------|---------------|--------------------|--------------------|
| SNP_57010_A_37517511 | NC_021166.1    | Ca_Kabuli_Chr07 | 37517511                | CC                                     | TT                 | TT               | INTERGENIC      |               |                    |                    |
| SNP_57011_A_37518568 | NC_021166.1    | Ca_Kabuli_Chr07 | 37518568                | CC                                     | TT                 | TT               | INTERGENIC      |               |                    |                    |
| SNP_57012_A_37520142 | NC_021166.1    | Ca_Kabuli_Chr07 | 37520142                | GG                                     | TT                 | TT               | INTERGENIC      |               |                    |                    |
| SNP_57013_A_37520244 | NC_021166.1    | Ca_Kabuli_Chr07 | 37520244                | TT                                     | AA                 | AA               | INTERGENIC      |               |                    |                    |
| SNP_57014_A_37529594 | NC_021166.1    | Ca_Kabuli_Chr07 | 37529594                | GG                                     | AA                 | AA               | INTERGENIC      |               |                    |                    |
| SNP_57015_A_37529724 | NC_021166.1    | Ca_Kabuli_Chr07 | 37529724                | AA                                     | GG                 | GG               | INTERGENIC      |               |                    |                    |
| SNP_57016_A_37529840 | NC_021166.1    | Ca_Kabuli_Chr07 | 37529840                | GG                                     | AA                 | AA               | INTERGENIC      |               |                    |                    |
| SNP_57017_A_37530372 | NC_021166.1    | Ca_Kabuli_Chr07 | 37530372                | TT                                     | CC                 | CC               | INTERGENIC      |               |                    |                    |
| SNP_57018_A_37530477 | NC_021166.1    | Ca_Kabuli_Chr07 | 37530477                | AA                                     | TT                 | TT               | INTERGENIC      |               |                    |                    |
| SNP_57019_A_37539012 | NC_021166.1    | Ca_Kabuli_Chr07 | 37539012                | TT                                     | CC                 | CC               | INTERGENIC      |               |                    |                    |
| SNP_57020_A_37539014 | NC_021166.1    | Ca_Kabuli_Chr07 | 37539014                | GG                                     | AA                 | AA               | INTERGENIC      |               |                    |                    |
| SNP_57021_A_37539112 | NC_021166.1    | Ca_Kabuli_Chr07 | 37539112                | TT                                     | CC                 | CC               | INTERGENIC      |               |                    |                    |
| SNP_57022_A_37546999 | NC_021166.1    | Ca_Kabuli_Chr07 | 37546999                | GG                                     | AA                 | AA               | INTERGENIC      |               |                    |                    |
| SNP_57023_A_37547042 | NC_021166.1    | Ca_Kabuli_Chr07 | 37547042                | CC                                     | TT                 | TT               | INTERGENIC      |               |                    |                    |
| SNP_57024_A_37547201 | NC_021166.1    | Ca_Kabuli_Chr07 | 37547201                | AA                                     | TT                 | TT               | INTERGENIC      |               |                    |                    |
| SNP_57025_A_37547374 | NC_021166.1    | Ca_Kabuli_Chr07 | 37547374                | AA                                     | CC                 | CC               | INTERGENIC      |               |                    |                    |
| SNP_57026_A_37548820 | NC_021166.1    | Ca_Kabuli_Chr07 | 37548820                | TT                                     | GG                 | GG               | INTERGENIC      |               |                    |                    |
| SNP_57027_A_37549718 | NC_021166.1    | Ca_Kabuli_Chr07 | 37549718                | TT                                     | CC                 | CC               | INTERGENIC      |               |                    |                    |
| SNP_57028_A_37551711 | NC_021166.1    | Ca_Kabuli_Chr07 | 37551711                | GG                                     | AA                 | AA               | INTERGENIC      |               |                    |                    |
| SNP_57029_A_37554564 | NC_021166.1    | Ca_Kabuli_Chr07 | 37554564                | TT                                     | AA                 | AA               | INTERGENIC      |               |                    |                    |
| SNP_57030_A_37555901 | NC_021166.1    | Ca_Kabuli_Chr07 | 37555901                | GG                                     | AA                 | AA               | INTERGENIC      |               |                    |                    |
| SNP_57031_A_37558474 | NC_021166.1    | Ca_Kabuli_Chr07 | 37558474                | AA                                     | GG                 | GG               | INTERGENIC      |               |                    |                    |

| SNPs IDs             | Chromosome IDs | Chromosomes     | Physical positions (bp) | CDC Frontier genome (Reference genome) | (Pusa 1103 & HPNB) | (ILWC 46 & LPNB) | Sequence genome | Components of | Gene accession IDs | Putative functions |
|----------------------|----------------|-----------------|-------------------------|----------------------------------------|--------------------|------------------|-----------------|---------------|--------------------|--------------------|
| SNP_57032_A_37560083 | NC_021166.1    | Ca_Kabuli_Chr07 | 37560083                | AA                                     | TT                 | TT               | INTERGENIC      |               |                    |                    |
| SNP_57033_A_37561497 | NC_021166.1    | Ca_Kabuli_Chr07 | 37561497                | GG                                     | TT                 | TT               | INTERGENIC      |               |                    |                    |
| SNP_57034_A_37562927 | NC_021166.1    | Ca_Kabuli_Chr07 | 37562927                | CC                                     | TT                 | TT               | INTERGENIC      |               |                    |                    |
| SNP_57035_A_37562941 | NC_021166.1    | Ca_Kabuli_Chr07 | 37562941                | CC                                     | TT                 | TT               | INTERGENIC      |               |                    |                    |
| SNP_57038_A_37570518 | NC_021166.1    | Ca_Kabuli_Chr07 | 37570518                | AA                                     | GG                 | GG               | INTERGENIC      |               |                    |                    |
| SNP_57039_A_37570556 | NC_021166.1    | Ca_Kabuli_Chr07 | 37570556                | CC                                     | TT                 | TT               | INTERGENIC      |               |                    |                    |
| SNP_57040_A_37570631 | NC_021166.1    | Ca_Kabuli_Chr07 | 37570631                | CC                                     | TT                 | TT               | INTERGENIC      |               |                    |                    |
| SNP_57041_A_37572174 | NC_021166.1    | Ca_Kabuli_Chr07 | 37572174                | AA                                     | CC                 | CC               | INTERGENIC      |               |                    |                    |
| SNP_57042_A_37573888 | NC_021166.1    | Ca_Kabuli_Chr07 | 37573888                | GG                                     | AA                 | AA               | INTERGENIC      |               |                    |                    |
| SNP_57044_A_37574387 | NC_021166.1    | Ca_Kabuli_Chr07 | 37574387                | AA                                     | GG                 | GG               | INTERGENIC      |               |                    |                    |
| SNP_57045_A_37577633 | NC_021166.1    | Ca_Kabuli_Chr07 | 37577633                | AA                                     | CC                 | CC               | INTERGENIC      |               |                    |                    |
| SNP_57046_A_37580214 | NC_021166.1    | Ca_Kabuli_Chr07 | 37580214                | TT                                     | AA                 | AA               | INTERGENIC      |               |                    |                    |
| SNP_57047_A_37585970 | NC_021166.1    | Ca_Kabuli_Chr07 | 37585970                | GG                                     | AA                 | AA               | INTERGENIC      |               |                    |                    |
| SNP_57048_A_37585976 | NC_021166.1    | Ca_Kabuli_Chr07 | 37585976                | AA                                     | GG                 | GG               | INTERGENIC      |               |                    |                    |
| SNP_57049_A_37586009 | NC_021166.1    | Ca_Kabuli_Chr07 | 37586009                | GG                                     | AA                 | AA               | INTERGENIC      |               |                    |                    |
| SNP_57050_A_37591782 | NC_021166.1    | Ca_Kabuli_Chr07 | 37591782                | TT                                     | CC                 | CC               | INTERGENIC      |               |                    |                    |
| SNP_57051_A_37592460 | NC_021166.1    | Ca_Kabuli_Chr07 | 37592460                | AA                                     | CC                 | CC               | INTERGENIC      |               |                    |                    |
| SNP_57053_A_37595223 | NC_021166.1    | Ca_Kabuli_Chr07 | 37595223                | GG                                     | AA                 | AA               | INTERGENIC      |               |                    |                    |
| SNP_57054_A_37614899 | NC_021166.1    | Ca_Kabuli_Chr07 | 37614899                | GG                                     | CC                 | CC               | INTERGENIC      |               |                    |                    |
| SNP_57055_A_37615039 | NC_021166.1    | Ca_Kabuli_Chr07 | 37615039                | GG                                     | AA                 | AA               | INTERGENIC      |               |                    |                    |
| SNP_57056_A_37615336 | NC_021166.1    | Ca_Kabuli_Chr07 | 37615336                | AA                                     | GG                 | GG               | INTERGENIC      |               |                    |                    |
| SNP_57057_A_37615573 | NC_021166.1    | Ca_Kabuli_Chr07 | 37615573                | GG                                     | AA                 | AA               | INTERGENIC      |               |                    |                    |

| SNPs IDs             | Chromosome IDs | Chromosomes     | Physical positions (bp) | CDC Frontier genome (Reference genome) | (Pusa 1103 & HPNB) | (ILWC 46 & LPNB) | Sequence genome | Components of | Gene accession IDs | Putative functions |
|----------------------|----------------|-----------------|-------------------------|----------------------------------------|--------------------|------------------|-----------------|---------------|--------------------|--------------------|
| SNP_57058_A_37616093 | NC_021166.1    | Ca_Kabuli_Chr07 | 37616093                | TT                                     | CC                 | CC               | INTERGENIC      |               |                    |                    |
| SNP_57059_A_37618247 | NC_021166.1    | Ca_Kabuli_Chr07 | 37618247                | TT                                     | CC                 | CC               | INTERGENIC      |               |                    |                    |
| SNP_57060_A_37622097 | NC_021166.1    | Ca_Kabuli_Chr07 | 37622097                | TT                                     | CC                 | CC               | INTERGENIC      |               |                    |                    |
| SNP_57061_A_37622163 | NC_021166.1    | Ca_Kabuli_Chr07 | 37622163                | TT                                     | CC                 | CC               | INTERGENIC      |               |                    |                    |
| SNP_57062_A_37622207 | NC_021166.1    | Ca_Kabuli_Chr07 | 37622207                | CC                                     | TT                 | TT               | INTERGENIC      |               |                    |                    |
| SNP_57063_A_37622247 | NC_021166.1    | Ca_Kabuli_Chr07 | 37622247                | AA                                     | TT                 | TT               | INTERGENIC      |               |                    |                    |
| SNP_57064_A_37622256 | NC_021166.1    | Ca_Kabuli_Chr07 | 37622256                | AA                                     | GG                 | GG               | INTERGENIC      |               |                    |                    |
| SNP_57066_A_37622427 | NC_021166.1    | Ca_Kabuli_Chr07 | 37622427                | CC                                     | AA                 | AA               | INTERGENIC      |               |                    |                    |
| SNP_57067_A_37622438 | NC_021166.1    | Ca_Kabuli_Chr07 | 37622438                | TT                                     | CC                 | CC               | INTERGENIC      |               |                    |                    |
| SNP_57068_A_37622482 | NC_021166.1    | Ca_Kabuli_Chr07 | 37622482                | TT                                     | CC                 | CC               | INTERGENIC      |               |                    |                    |
| SNP_57069_A_37622513 | NC_021166.1    | Ca_Kabuli_Chr07 | 37622513                | CC                                     | TT                 | TT               | INTERGENIC      |               |                    |                    |
| SNP_57070_A_37622563 | NC_021166.1    | Ca_Kabuli_Chr07 | 37622563                | TT                                     | CC                 | CC               | INTERGENIC      |               |                    |                    |
| SNP_57071_A_37622572 | NC_021166.1    | Ca_Kabuli_Chr07 | 37622572                | GG                                     | AA                 | AA               | INTERGENIC      |               |                    |                    |
| SNP_57072_A_37622582 | NC_021166.1    | Ca_Kabuli_Chr07 | 37622582                | GG                                     | AA                 | AA               | INTERGENIC      |               |                    |                    |
| SNP_57073_A_37622618 | NC_021166.1    | Ca_Kabuli_Chr07 | 37622618                | TT                                     | CC                 | CC               | INTERGENIC      |               |                    |                    |
| SNP_57074_A_37622658 | NC_021166.1    | Ca_Kabuli_Chr07 | 37622658                | TT                                     | CC                 | CC               | INTERGENIC      |               |                    |                    |
| SNP_57075_A_37622660 | NC_021166.1    | Ca_Kabuli_Chr07 | 37622660                | GG                                     | AA                 | AA               | INTERGENIC      |               |                    |                    |
| SNP_57076_A_37622661 | NC_021166.1    | Ca_Kabuli_Chr07 | 37622661                | CC                                     | TT                 | TT               | INTERGENIC      |               |                    |                    |
| SNP_57077_A_37622705 | NC_021166.1    | Ca_Kabuli_Chr07 | 37622705                | TT                                     | CC                 | CC               | INTERGENIC      |               |                    |                    |
| SNP_57078_A_37622722 | NC_021166.1    | Ca_Kabuli_Chr07 | 37622722                | GG                                     | CC                 | CC               | INTERGENIC      |               |                    |                    |
| SNP_57079_A_37622737 | NC_021166.1    | Ca_Kabuli_Chr07 | 37622737                | AA                                     | GG                 | GG               | INTERGENIC      |               |                    |                    |
| SNP_57080_A_37622860 | NC_021166.1    | Ca_Kabuli_Chr07 | 37622860                | AA                                     | TT                 | TT               | INTERGENIC      |               |                    |                    |

| SNPs IDs             | Chromosome IDs | Chromosomes     | Physical positions (bp) | CDC Frontier genome (Reference genome) | (Pusa 1103 & HPNB) | (ILWC 46 & LPNB) | Sequence genome | Components of | Gene accession IDs | Putative functions |
|----------------------|----------------|-----------------|-------------------------|----------------------------------------|--------------------|------------------|-----------------|---------------|--------------------|--------------------|
| SNP_57081_A_37622906 | NC_021166.1    | Ca_Kabuli_Chr07 | 37622906                | TT                                     | GG                 | GG               | INTERGENIC      |               |                    |                    |
| SNP_57082_A_37623004 | NC_021166.1    | Ca_Kabuli_Chr07 | 37623004                | AA                                     | GG                 | GG               | INTERGENIC      |               |                    |                    |
| SNP_57083_A_37623108 | NC_021166.1    | Ca_Kabuli_Chr07 | 37623108                | CC                                     | TT                 | TT               | INTERGENIC      |               |                    |                    |
| SNP_57084_A_37626226 | NC_021166.1    | Ca_Kabuli_Chr07 | 37626226                | GG                                     | AA                 | AA               | INTERGENIC      |               |                    |                    |
| SNP_57085_A_37626260 | NC_021166.1    | Ca_Kabuli_Chr07 | 37626260                | AA                                     | GG                 | GG               | INTERGENIC      |               |                    |                    |
| SNP_57086_A_37626287 | NC_021166.1    | Ca_Kabuli_Chr07 | 37626287                | TT                                     | CC                 | CC               | INTERGENIC      |               |                    |                    |
| SNP_57087_A_37626455 | NC_021166.1    | Ca_Kabuli_Chr07 | 37626455                | AA                                     | GG                 | GG               | INTERGENIC      |               |                    |                    |
| SNP_57088_A_37626518 | NC_021166.1    | Ca_Kabuli_Chr07 | 37626518                | TT                                     | CC                 | CC               | INTERGENIC      |               |                    |                    |
| SNP_57089_A_37626534 | NC_021166.1    | Ca_Kabuli_Chr07 | 37626534                | TT                                     | CC                 | CC               | INTERGENIC      |               |                    |                    |
| SNP_57090_A_37626538 | NC_021166.1    | Ca_Kabuli_Chr07 | 37626538                | CC                                     | TT                 | TT               | INTERGENIC      |               |                    |                    |
| SNP_57091_A_37626695 | NC_021166.1    | Ca_Kabuli_Chr07 | 37626695                | GG                                     | CC                 | CC               | INTERGENIC      |               |                    |                    |
| SNP_57092_A_37626701 | NC_021166.1    | Ca_Kabuli_Chr07 | 37626701                | AA                                     | GG                 | GG               | INTERGENIC      |               |                    |                    |
| SNP_57093_A_37626712 | NC_021166.1    | Ca_Kabuli_Chr07 | 37626712                | CC                                     | TT                 | TT               | INTERGENIC      |               |                    |                    |
| SNP_57094_A_37626827 | NC_021166.1    | Ca_Kabuli_Chr07 | 37626827                | GG                                     | AA                 | AA               | INTERGENIC      |               |                    |                    |
| SNP_57095_A_37641080 | NC_021166.1    | Ca_Kabuli_Chr07 | 37641080                | TT                                     | GG                 | GG               | INTERGENIC      |               |                    |                    |
| SNP_57096_A_37667166 | NC_021166.1    | Ca_Kabuli_Chr07 | 37667166                | AA                                     | GG                 | GG               | INTERGENIC      |               |                    |                    |
| SNP_57098_A_37710088 | NC_021166.1    | Ca_Kabuli_Chr07 | 37710088                | GG                                     | AA                 | AA               | INTERGENIC      |               |                    |                    |
| SNP_57100_A_37711495 | NC_021166.1    | Ca_Kabuli_Chr07 | 37711495                | CC                                     | GG                 | GG               | INTERGENIC      |               |                    |                    |
| SNP_57101_A_37711595 | NC_021166.1    | Ca_Kabuli_Chr07 | 37711595                | CC                                     | TT                 | TT               | INTERGENIC      |               |                    |                    |
| SNP_57102_A_37711596 | NC_021166.1    | Ca_Kabuli_Chr07 | 37711596                | GG                                     | AA                 | AA               | INTERGENIC      |               |                    |                    |
| SNP_57103_A_37711721 | NC_021166.1    | Ca_Kabuli_Chr07 | 37711721                | CC                                     | AA                 | AA               | INTERGENIC      |               |                    |                    |
| SNP_57104_A_37711767 | NC_021166.1    | Ca_Kabuli_Chr07 | 37711767                | GG                                     | AA                 | AA               | INTERGENIC      |               |                    |                    |

| SNPs IDs             | Chromosome IDs | Chromosomes     | Physical positions (bp) | CDC Frontier genome (Reference genome) | (Pusa 1103 & HPNB) | (ILWC 46 & LPNB) | Sequence genome | Components of | Gene accession IDs | Putative functions |
|----------------------|----------------|-----------------|-------------------------|----------------------------------------|--------------------|------------------|-----------------|---------------|--------------------|--------------------|
| SNP_57105_A_37711785 | NC_021166.1    | Ca_Kabuli_Chr07 | 37711785                | TT                                     | AA                 | AA               | INTERGENIC      |               |                    |                    |
| SNP_57106_A_37744727 | NC_021166.1    | Ca_Kabuli_Chr07 | 37744727                | GG                                     | AA                 | AA               | INTERGENIC      |               |                    |                    |
| SNP_57107_A_37745560 | NC_021166.1    | Ca_Kabuli_Chr07 | 37745560                | CC                                     | TT                 | TT               | INTERGENIC      |               |                    |                    |
| SNP_57109_A_37819473 | NC_021166.1    | Ca_Kabuli_Chr07 | 37819473                | CC                                     | TT                 | TT               | INTERGENIC      |               |                    |                    |
| SNP_57110_A_37819871 | NC_021166.1    | Ca_Kabuli_Chr07 | 37819871                | AA                                     | TT                 | TT               | INTERGENIC      |               |                    |                    |
| SNP_57111_A_37824395 | NC_021166.1    | Ca_Kabuli_Chr07 | 37824395                | CC                                     | AA                 | AA               | INTERGENIC      |               |                    |                    |
| SNP_57112_A_37824588 | NC_021166.1    | Ca_Kabuli_Chr07 | 37824588                | GG                                     | AA                 | AA               | INTERGENIC      |               |                    |                    |
| SNP_57113_A_37824612 | NC_021166.1    | Ca_Kabuli_Chr07 | 37824612                | TT                                     | AA                 | AA               | INTERGENIC      |               |                    |                    |
| SNP_57114_A_37837485 | NC_021166.1    | Ca_Kabuli_Chr07 | 37837485                | AA                                     | TT                 | TT               | INTERGENIC      |               |                    |                    |
| SNP_57115_A_37839870 | NC_021166.1    | Ca_Kabuli_Chr07 | 37839870                | AA                                     | TT                 | TT               | INTERGENIC      |               |                    |                    |
| SNP_57116_A_37845890 | NC_021166.1    | Ca_Kabuli_Chr07 | 37845890                | GG                                     | TT                 | TT               | INTERGENIC      |               |                    |                    |
| SNP_57117_A_37849767 | NC_021166.1    | Ca_Kabuli_Chr07 | 37849767                | AA                                     | CC                 | CC               | INTERGENIC      |               |                    |                    |
| SNP_57118_A_37849812 | NC_021166.1    | Ca_Kabuli_Chr07 | 37849812                | AA                                     | GG                 | GG               | INTERGENIC      |               |                    |                    |
| SNP_57119_A_37849909 | NC_021166.1    | Ca_Kabuli_Chr07 | 37849909                | TT                                     | AA                 | AA               | INTERGENIC      |               |                    |                    |
| SNP_57120_A_37849951 | NC_021166.1    | Ca_Kabuli_Chr07 | 37849951                | AA                                     | GG                 | GG               | INTERGENIC      |               |                    |                    |
| SNP_57121_A_37850116 | NC_021166.1    | Ca_Kabuli_Chr07 | 37850116                | TT                                     | GG                 | GG               | INTERGENIC      |               |                    |                    |
| SNP_57122_A_37850276 | NC_021166.1    | Ca_Kabuli_Chr07 | 37850276                | AA                                     | GG                 | GG               | INTERGENIC      |               |                    |                    |
| SNP_57123_A_37856907 | NC_021166.1    | Ca_Kabuli_Chr07 | 37856907                | GG                                     | TT                 | TT               | INTERGENIC      |               |                    |                    |
| SNP_57124_A_37856920 | NC_021166.1    | Ca_Kabuli_Chr07 | 37856920                | AA                                     | GG                 | GG               | INTERGENIC      |               |                    |                    |
| SNP_57125_A_37856932 | NC_021166.1    | Ca_Kabuli_Chr07 | 37856932                | GG                                     | TT                 | TT               | INTERGENIC      |               |                    |                    |
| SNP_57126_A_37856984 | NC_021166.1    | Ca_Kabuli_Chr07 | 37856984                | TT                                     | GG                 | GG               | INTERGENIC      |               |                    |                    |
| SNP_57127_A_37857338 | NC_021166.1    | Ca_Kabuli_Chr07 | 37857338                | GG                                     | CC                 | CC               | INTERGENIC      |               |                    |                    |

| SNPs IDs             | Chromosome IDs | Chromosomes     | Physical positions (bp) | CDC Frontier genome (Reference genome) | (Pusa 1103 & HPNB) | (ILWC 46 & LPNB) | Sequence genome | Components of | Gene accession IDs             | Putative functions |
|----------------------|----------------|-----------------|-------------------------|----------------------------------------|--------------------|------------------|-----------------|---------------|--------------------------------|--------------------|
| SNP_57128_A_37878313 | NC_021166.1    | Ca_Kabuli_Chr07 | 37878313                | TT                                     | AA                 | AA               | INTERGENIC      |               |                                |                    |
| SNP_57129_A_37893883 | NC_021166.1    | Ca_Kabuli_Chr07 | 37893883                | GG                                     | AA                 | AA               | INTERGENIC      |               |                                |                    |
| SNP_57130_A_37898921 | NC_021166.1    | Ca_Kabuli_Chr07 | 37898921                | TT                                     | AA                 | AA               | INTERGENIC      |               |                                |                    |
| SNP_57131_A_37904694 | NC_021166.1    | Ca_Kabuli_Chr07 | 37904694                | CC                                     | GG                 | GG               | INTERGENIC      |               |                                |                    |
| SNP_57132_A_37904906 | NC_021166.1    | Ca_Kabuli_Chr07 | 37904906                | TT                                     | GG                 | GG               | INTERGENIC      |               |                                |                    |
| SNP_57133_A_37914279 | NC_021166.1    | Ca_Kabuli_Chr07 | 37914279                | GG                                     | TT                 | TT               | INTERGENIC      |               |                                |                    |
| SNP_57134_A_37915205 | NC_021166.1    | Ca_Kabuli_Chr07 | 37915205                | CC                                     | TT                 | TT               | INTERGENIC      |               |                                |                    |
| SNP_57135_A_37915217 | NC_021166.1    | Ca_Kabuli_Chr07 | 37915217                | TT                                     | CC                 | CC               | INTERGENIC      |               |                                |                    |
| SNP_57139_A_37928575 | NC_021166.1    | Ca_Kabuli_Chr07 | 37928575                | GG                                     | AA                 | AA               | INTERGENIC      |               |                                |                    |
| SNP_57141_A_37931103 | NC_021166.1    | Ca_Kabuli_Chr07 | 37931103                | TT                                     | GG                 | GG               | DRR             | 101505286     | BON1-associated protein 2-like |                    |
| SNP_57142_A_37931106 | NC_021166.1    | Ca_Kabuli_Chr07 | 37931106                | TT                                     | CC                 | CC               | DRR             | 101505286     | BON1-associated protein 2-like |                    |
| SNP_57143_A_37948156 | NC_021166.1    | Ca_Kabuli_Chr07 | 37948156                | TT                                     | GG                 | GG               | INTERGENIC      |               |                                |                    |
| SNP_57145_A_37992834 | NC_021166.1    | Ca_Kabuli_Chr07 | 37992834                | TT                                     | AA                 | AA               | INTERGENIC      |               |                                |                    |
| SNP_57146_A_37992879 | NC_021166.1    | Ca_Kabuli_Chr07 | 37992879                | AA                                     | GG                 | GG               | INTERGENIC      |               |                                |                    |
| SNP_57147_A_37992892 | NC_021166.1    | Ca_Kabuli_Chr07 | 37992892                | GG                                     | AA                 | AA               | INTERGENIC      |               |                                |                    |
| SNP_57148_A_37992893 | NC_021166.1    | Ca_Kabuli_Chr07 | 37992893                | GG                                     | AA                 | AA               | INTERGENIC      |               |                                |                    |
| SNP_57149_A_37993015 | NC_021166.1    | Ca_Kabuli_Chr07 | 37993015                | CC                                     | TT                 | TT               | INTERGENIC      |               |                                |                    |
| SNP_57150_A_37993092 | NC_021166.1    | Ca_Kabuli_Chr07 | 37993092                | GG                                     | AA                 | AA               | INTERGENIC      |               |                                |                    |
| SNP_57151_A_37993146 | NC_021166.1    | Ca_Kabuli_Chr07 | 37993146                | AA                                     | GG                 | GG               | INTERGENIC      |               |                                |                    |
| SNP_57152_A_38046590 | NC_021166.1    | Ca_Kabuli_Chr07 | 38046590                | CC                                     | AA                 | AA               | INTERGENIC      |               |                                |                    |
| SNP_57153_A_38057795 | NC_021166.1    | Ca_Kabuli_Chr07 | 38057795                | AA                                     | GG                 | GG               | INTERGENIC      |               |                                |                    |
| SNP_57154_A_38063110 | NC_021166.1    | Ca_Kabuli_Chr07 | 38063110                | AA                                     | CC                 | CC               | INTERGENIC      |               |                                |                    |

| SNPs IDs             | Chromosome IDs | Chromosomes     | Physical positions (bp) | CDC Frontier genome (Reference genome) | (Pusa 1103 & HPNB) | (ILWC 46 & LPNB) | Sequence genome | Components of | Gene accession IDs | Putative functions |
|----------------------|----------------|-----------------|-------------------------|----------------------------------------|--------------------|------------------|-----------------|---------------|--------------------|--------------------|
| SNP_57156_A_38103773 | NC_021166.1    | Ca_Kabuli_Chr07 | 38103773                | AA                                     | TT                 | TT               | INTERGENIC      |               |                    |                    |
| SNP_57157_A_38118024 | NC_021166.1    | Ca_Kabuli_Chr07 | 38118024                | GG                                     | AA                 | AA               | INTERGENIC      |               |                    |                    |
| SNP_57158_A_38158441 | NC_021166.1    | Ca_Kabuli_Chr07 | 38158441                | GG                                     | AA                 | AA               | INTERGENIC      |               |                    |                    |
| SNP_57160_A_38166241 | NC_021166.1    | Ca_Kabuli_Chr07 | 38166241                | TT                                     | CC                 | CC               | INTERGENIC      |               |                    |                    |
| SNP_57161_A_38166391 | NC_021166.1    | Ca_Kabuli_Chr07 | 38166391                | TT                                     | CC                 | CC               | INTERGENIC      |               |                    |                    |
| SNP_57162_A_38232733 | NC_021166.1    | Ca_Kabuli_Chr07 | 38232733                | AA                                     | CC                 | CC               | INTERGENIC      |               |                    |                    |
| SNP_57163_A_38233130 | NC_021166.1    | Ca_Kabuli_Chr07 | 38233130                | GG                                     | AA                 | AA               | INTERGENIC      |               |                    |                    |
| SNP_57164_A_38252151 | NC_021166.1    | Ca_Kabuli_Chr07 | 38252151                | TT                                     | CC                 | CC               | INTERGENIC      |               |                    |                    |
| SNP_57165_A_38252687 | NC_021166.1    | Ca_Kabuli_Chr07 | 38252687                | CC                                     | TT                 | TT               | INTERGENIC      |               |                    |                    |
| SNP_57166_A_38264390 | NC_021166.1    | Ca_Kabuli_Chr07 | 38264390                | GG                                     | AA                 | AA               | INTERGENIC      |               |                    |                    |
| SNP_57167_A_38296123 | NC_021166.1    | Ca_Kabuli_Chr07 | 38296123                | TT                                     | AA                 | AA               | INTERGENIC      |               |                    |                    |
| SNP_57168_A_38296419 | NC_021166.1    | Ca_Kabuli_Chr07 | 38296419                | CC                                     | AA                 | AA               | INTERGENIC      |               |                    |                    |
| SNP_57169_A_38298303 | NC_021166.1    | Ca_Kabuli_Chr07 | 38298303                | TT                                     | CC                 | CC               | INTERGENIC      |               |                    |                    |
| SNP_57170_A_38298587 | NC_021166.1    | Ca_Kabuli_Chr07 | 38298587                | CC                                     | TT                 | TT               | INTERGENIC      |               |                    |                    |
| SNP_57171_A_38298588 | NC_021166.1    | Ca_Kabuli_Chr07 | 38298588                | AA                                     | CC                 | TT               | INTERGENIC      |               |                    |                    |
| SNP_57172_A_38298589 | NC_021166.1    | Ca_Kabuli_Chr07 | 38298589                | AA                                     | CC                 | CC               | INTERGENIC      |               |                    |                    |
| SNP_57173_A_38298591 | NC_021166.1    | Ca_Kabuli_Chr07 | 38298591                | CC                                     | TT                 | TT               | INTERGENIC      |               |                    |                    |
| SNP_57174_A_38298618 | NC_021166.1    | Ca_Kabuli_Chr07 | 38298618                | CC                                     | TT                 | TT               | INTERGENIC      |               |                    |                    |
| SNP_57175_A_38298624 | NC_021166.1    | Ca_Kabuli_Chr07 | 38298624                | GG                                     | AA                 | AA               | INTERGENIC      |               |                    |                    |
| SNP_57176_A_38298632 | NC_021166.1    | Ca_Kabuli_Chr07 | 38298632                | TT                                     | AA                 | AA               | INTERGENIC      |               |                    |                    |
| SNP_57177_A_38298769 | NC_021166.1    | Ca_Kabuli_Chr07 | 38298769                | CC                                     | AA                 | AA               | INTERGENIC      |               |                    |                    |
| SNP_57179_A_38298793 | NC_021166.1    | Ca_Kabuli_Chr07 | 38298793                | GG                                     | AA                 | AA               | INTERGENIC      |               |                    |                    |



| SNPs IDs             | Chromosome IDs | Chromosomes     | Physical positions (bp) | CDC Frontier (Reference genome) | (Pusa 1103 & HPNB) | (ILWC 46 & LPNB) | Sequence Components of genome | Gene accession IDs | Putative functions           |
|----------------------|----------------|-----------------|-------------------------|---------------------------------|--------------------|------------------|-------------------------------|--------------------|------------------------------|
| SNP_57180_A_38298799 | NC_021166.1    | Ca_Kabuli_Chr07 | 38298799                | GG                              | AA                 | AA               | INTERGENIC                    |                    |                              |
| SNP_57181_A_38298829 | NC_021166.1    | Ca_Kabuli_Chr07 | 38298829                | AA                              | GG                 | GG               | INTERGENIC                    |                    |                              |
| SNP_57182_A_38298854 | NC_021166.1    | Ca_Kabuli_Chr07 | 38298854                | TT                              | GG                 | GG               | INTERGENIC                    |                    |                              |
| SNP_57183_A_38301620 | NC_021166.1    | Ca_Kabuli_Chr07 | 38301620                | TT                              | CC                 | CC               | INTERGENIC                    |                    |                              |
| SNP_57184_A_38302039 | NC_021166.1    | Ca_Kabuli_Chr07 | 38302039                | GG                              | AA                 | AA               | DRR                           | 101513656          | uncharacterized LOC101513656 |
| SNP_57185_A_38302088 | NC_021166.1    | Ca_Kabuli_Chr07 | 38302088                | TT                              | CC                 | CC               | DRR                           | 101513656          | uncharacterized LOC101513656 |
| SNP_57187_A_38333652 | NC_021166.1    | Ca_Kabuli_Chr07 | 38333652                | GG                              | AA                 | AA               | DRR                           | 101514317          | ATPase ASNA1 homolog         |
| SNP_57188_A_38352667 | NC_021166.1    | Ca_Kabuli_Chr07 | 38352667                | AA                              | GG                 | GG               | INTERGENIC                    |                    |                              |
| SNP_57189_A_38368422 | NC_021166.1    | Ca_Kabuli_Chr07 | 38368422                | AA                              | GG                 | GG               | INTERGENIC                    |                    |                              |
| SNP_57191_A_38396549 | NC_021166.1    | Ca_Kabuli_Chr07 | 38396549                | CC                              | TT                 | TT               | INTERGENIC                    |                    |                              |
| SNP_57192_A_38399233 | NC_021166.1    | Ca_Kabuli_Chr07 | 38399233                | CC                              | TT                 | TT               | INTERGENIC                    |                    |                              |
| SNP_57193_A_38399858 | NC_021166.1    | Ca_Kabuli_Chr07 | 38399858                | CC                              | TT                 | TT               | INTERGENIC                    |                    |                              |
| SNP_57194_A_38399875 | NC_021166.1    | Ca_Kabuli_Chr07 | 38399875                | GG                              | AA                 | AA               | INTERGENIC                    |                    |                              |
| SNP_57195_A_38399879 | NC_021166.1    | Ca_Kabuli_Chr07 | 38399879                | TT                              | CC                 | CC               | INTERGENIC                    |                    |                              |
| SNP_57197_A_38449368 | NC_021166.1    | Ca_Kabuli_Chr07 | 38449368                | AA                              | TT                 | TT               | INTERGENIC                    |                    |                              |
| SNP_57198_A_38457014 | NC_021166.1    | Ca_Kabuli_Chr07 | 38457014                | AA                              | GG                 | GG               | INTERGENIC                    |                    |                              |
| SNP_57199_A_38457021 | NC_021166.1    | Ca_Kabuli_Chr07 | 38457021                | AA                              | GG                 | GG               | INTERGENIC                    |                    |                              |
| SNP_57202_A_38478340 | NC_021166.1    | Ca_Kabuli_Chr07 | 38478340                | TT                              | AA                 | AA               | INTERGENIC                    |                    |                              |
| SNP_57203_A_38478343 | NC_021166.1    | Ca_Kabuli_Chr07 | 38478343                | TT                              | GG                 | GG               | INTERGENIC                    |                    |                              |
| SNP_57204_A_38478363 | NC_021166.1    | Ca_Kabuli_Chr07 | 38478363                | AA                              | GG                 | GG               | INTERGENIC                    |                    |                              |
| SNP_57205_A_38478365 | NC_021166.1    | Ca_Kabuli_Chr07 | 38478365                | CC                              | TT                 | TT               | INTERGENIC                    |                    |                              |
| SNP_57206_A_38509762 | NC_021166.1    | Ca_Kabuli_Chr07 | 38509762                | TT                              | CC                 | CC               | INTERGENIC                    |                    |                              |

| SNPs IDs             | Chromosome IDs | Chromosomes     | Physical positions (bp) | CDC Frontier genome (Reference genome) | (Pusa 1103 & HPNB) | (ILWC 46 & LPNB) | Sequence Components of genome | Gene accession IDs | Putative functions            |
|----------------------|----------------|-----------------|-------------------------|----------------------------------------|--------------------|------------------|-------------------------------|--------------------|-------------------------------|
| SNP_57207_A_38514155 | NC_021166.1    | Ca_Kabuli_Chr07 | 38514155                | AA                                     | TT                 | TT               | URR                           | 101498130          | Unknown function              |
| SNP_57209_A_38555272 | NC_021166.1    | Ca_Kabuli_Chr07 | 38555272                | TT                                     | GG                 | GG               | INTERGENIC                    |                    |                               |
| SNP_57210_A_38555283 | NC_021166.1    | Ca_Kabuli_Chr07 | 38555283                | CC                                     | AA                 | AA               | INTERGENIC                    |                    |                               |
| SNP_57211_A_38555300 | NC_021166.1    | Ca_Kabuli_Chr07 | 38555300                | CC                                     | AA                 | AA               | INTERGENIC                    |                    |                               |
| SNP_57214_A_38613468 | NC_021166.1    | Ca_Kabuli_Chr07 | 38613468                | AA                                     | CC                 | CC               | INTERGENIC                    |                    |                               |
| SNP_57216_A_38631077 | NC_021166.1    | Ca_Kabuli_Chr07 | 38631077                | CC                                     | AA                 | AA               | INTERGENIC                    |                    |                               |
| SNP_57217_A_38647268 | NC_021166.1    | Ca_Kabuli_Chr07 | 38647268                | GG                                     | AA                 | AA               | INTRON                        | 101489691          | MADS-box protein SOC1         |
| SNP_57218_A_38647272 | NC_021166.1    | Ca_Kabuli_Chr07 | 38647272                | GG                                     | AA                 | AA               | INTRON                        | 101489691          | MADS-box protein SOC1         |
| SNP_57220_A_38677661 | NC_021166.1    | Ca_Kabuli_Chr07 | 38677661                | AA                                     | GG                 | GG               | INTERGENIC                    |                    |                               |
| SNP_57221_A_38718756 | NC_021166.1    | Ca_Kabuli_Chr07 | 38718756                | CC                                     | TT                 | TT               | INTERGENIC                    |                    |                               |
| SNP_57222_A_38720981 | NC_021166.1    | Ca_Kabuli_Chr07 | 38720981                | TT                                     | CC                 | CC               | INTERGENIC                    |                    |                               |
| SNP_57223_A_38739110 | NC_021166.1    | Ca_Kabuli_Chr07 | 38739110                | AA                                     | GG                 | GG               | INTERGENIC                    |                    |                               |
| SNP_57224_A_38740213 | NC_021166.1    | Ca_Kabuli_Chr07 | 38740213                | AA                                     | TT                 | TT               | INTERGENIC                    |                    |                               |
| SNP_57226_A_38744291 | NC_021166.1    | Ca_Kabuli_Chr07 | 38744291                | AA                                     | CC                 | CC               | INTERGENIC                    |                    |                               |
| SNP_57228_A_38778109 | NC_021166.1    | Ca_Kabuli_Chr07 | 38778109                | GG                                     | AA                 | AA               | INTERGENIC                    |                    |                               |
| SNP_57229_A_38809233 | NC_021166.1    | Ca_Kabuli_Chr07 | 38809233                | AA                                     | GG                 | GG               | URR                           | 101491937          | gibberellin 20 oxidase 2-like |
| SNP_57230_A_38810853 | NC_021166.1    | Ca_Kabuli_Chr07 | 38810853                | GG                                     | AA                 | AA               | INTERGENIC                    |                    |                               |
| SNP_57231_A_38810875 | NC_021166.1    | Ca_Kabuli_Chr07 | 38810875                | CC                                     | AA                 | AA               | INTERGENIC                    |                    |                               |
| SNP_57232_A_38826555 | NC_021166.1    | Ca_Kabuli_Chr07 | 38826555                | TT                                     | GG                 | GG               | INTERGENIC                    |                    |                               |
| SNP_57233_A_38847787 | NC_021166.1    | Ca_Kabuli_Chr07 | 38847787                | CC                                     | TT                 | TT               | INTERGENIC                    |                    |                               |
| SNP_57234_A_38861874 | NC_021166.1    | Ca_Kabuli_Chr07 | 38861874                | AA                                     | CC                 | CC               | INTERGENIC                    |                    |                               |
| SNP_57235_A_38861881 | NC_021166.1    | Ca_Kabuli_Chr07 | 38861881                | TT                                     | CC                 | CC               | INTERGENIC                    |                    |                               |

| SNPs IDs             | Chromosome IDs | Chromosomes     | Physical positions (bp) | CDC Frontier genome (Reference genome) | (Pusa 1103 & HPNB) | (ILWC 46 & LPNB) | Sequence genome | Components of | Gene accession IDs                           | Putative functions |
|----------------------|----------------|-----------------|-------------------------|----------------------------------------|--------------------|------------------|-----------------|---------------|----------------------------------------------|--------------------|
| SNP_57236_A_38861938 | NC_021166.1    | Ca_Kabuli_Chr07 | 38861938                | TT                                     | GG                 | GG               | INTERGENIC      |               |                                              |                    |
| SNP_57237_A_38866143 | NC_021166.1    | Ca_Kabuli_Chr07 | 38866143                | GG                                     | AA                 | AA               | INTERGENIC      |               |                                              |                    |
| SNP_57238_A_38872069 | NC_021166.1    | Ca_Kabuli_Chr07 | 38872069                | GG                                     | AA                 | AA               | INTERGENIC      |               |                                              |                    |
| SNP_57239_A_38882652 | NC_021166.1    | Ca_Kabuli_Chr07 | 38882652                | TT                                     | CC                 | CC               | INTERGENIC      |               |                                              |                    |
| SNP_57240_A_38882678 | NC_021166.1    | Ca_Kabuli_Chr07 | 38882678                | GG                                     | AA                 | AA               | INTERGENIC      |               |                                              |                    |
| SNP_57241_A_38882767 | NC_021166.1    | Ca_Kabuli_Chr07 | 38882767                | GG                                     | AA                 | AA               | INTERGENIC      |               |                                              |                    |
| SNP_57242_A_38883008 | NC_021166.1    | Ca_Kabuli_Chr07 | 38883008                | CC                                     | TT                 | TT               | INTERGENIC      |               |                                              |                    |
| SNP_57243_A_38883029 | NC_021166.1    | Ca_Kabuli_Chr07 | 38883029                | TT                                     | CC                 | CC               | INTERGENIC      |               |                                              |                    |
| SNP_57245_A_3889353  | NC_021166.1    | Ca_Kabuli_Chr07 | 3889353                 | TT                                     | CC                 | CC               | INTERGENIC      |               |                                              |                    |
| SNP_57246_A_38906121 | NC_021166.1    | Ca_Kabuli_Chr07 | 38906121                | TT                                     | GG                 | GG               | INTERGENIC      |               |                                              |                    |
| SNP_57247_A_38983863 | NC_021166.1    | Ca_Kabuli_Chr07 | 38983863                | AA                                     | GG                 | GG               | INTERGENIC      |               |                                              |                    |
| SNP_57248_A_38983949 | NC_021166.1    | Ca_Kabuli_Chr07 | 38983949                | GG                                     | AA                 | AA               | INTERGENIC      |               |                                              |                    |
| SNP_57249_A_38990969 | NC_021166.1    | Ca_Kabuli_Chr07 | 38990969                | TT                                     | GG                 | GG               | URR             | 101501335     | Unknown function                             |                    |
| SNP_57250_A_38991187 | NC_021166.1    | Ca_Kabuli_Chr07 | 38991187                | AA                                     | TT                 | TT               | URR             | 101501335     | Unknown function                             |                    |
| SNP_57251_A_38991210 | NC_021166.1    | Ca_Kabuli_Chr07 | 38991210                | CC                                     | AA                 | AA               | URR             | 101501335     | Unknown function                             |                    |
| SNP_57252_A_38991215 | NC_021166.1    | Ca_Kabuli_Chr07 | 38991215                | GG                                     | TT                 | TT               | URR             | 101501335     | Unknown function                             |                    |
| SNP_57253_A_38991261 | NC_021166.1    | Ca_Kabuli_Chr07 | 38991261                | GG                                     | AA                 | AA               | URR             | 101501335     | Unknown function                             |                    |
| SNP_57254_A_38993341 | NC_021166.1    | Ca_Kabuli_Chr07 | 38993341                | CC                                     | AA                 | AA               | INTERGENIC      |               |                                              |                    |
| SNP_57255_A_39005226 | NC_021166.1    | Ca_Kabuli_Chr07 | 39005226                | AA                                     | CC                 | CC               | INTERGENIC      |               |                                              |                    |
| SNP_57256_A_39011204 | NC_021166.1    | Ca_Kabuli_Chr07 | 39011204                | TT                                     | CC                 | CC               | INTRON          | 101501964     | 13-hydroxylupanine O-tigloyltransferase-like |                    |
| SNP_57257_A_39011208 | NC_021166.1    | Ca_Kabuli_Chr07 | 39011208                | AA                                     | CC                 | CC               | INTRON          | 101501964     | 13-hydroxylupanine O-tigloyltransferase-like |                    |
| SNP_57258_A_39011218 | NC_021166.1    | Ca_Kabuli_Chr07 | 39011218                | TT                                     | CC                 | CC               | INTRON          | 101501964     | 13-hydroxylupanine O-tigloyltransferase-like |                    |

| SNPs IDs             | Chromosome IDs | Chromosomes     | Physical positions (bp) | CDC Frontier genome (Reference genome) | (Pusa 1103 & HPNB) | (ILWC 46 & LPNB) | Sequence Components of genome | Gene accession IDs | Putative functions          |
|----------------------|----------------|-----------------|-------------------------|----------------------------------------|--------------------|------------------|-------------------------------|--------------------|-----------------------------|
| SNP_57259_A_39017594 | NC_021166.1    | Ca_Kabuli_Chr07 | 39017594                | GG                                     | AA                 | AA               | INTERGENIC                    |                    |                             |
| SNP_57260_A_39020750 | NC_021166.1    | Ca_Kabuli_Chr07 | 39020750                | GG                                     | TT                 | TT               | URR                           | 101493590          | probable carboxylesterase 8 |
| SNP_57261_A_39020774 | NC_021166.1    | Ca_Kabuli_Chr07 | 39020774                | GG                                     | AA                 | AA               | URR                           | 101493590          | probable carboxylesterase 8 |
| SNP_57262_A_39020801 | NC_021166.1    | Ca_Kabuli_Chr07 | 39020801                | TT                                     | CC                 | CC               | URR                           | 101493590          | probable carboxylesterase 8 |
| SNP_57263_A_39029638 | NC_021166.1    | Ca_Kabuli_Chr07 | 39029638                | AA                                     | GG                 | GG               | INTERGENIC                    |                    |                             |
| SNP_57264_A_39029639 | NC_021166.1    | Ca_Kabuli_Chr07 | 39029639                | CC                                     | TT                 | TT               | INTERGENIC                    |                    |                             |
| SNP_57265_A_39033377 | NC_021166.1    | Ca_Kabuli_Chr07 | 39033377                | TT                                     | AA                 | AA               | INTERGENIC                    |                    |                             |
| SNP_57266_A_39033437 | NC_021166.1    | Ca_Kabuli_Chr07 | 39033437                | TT                                     | CC                 | CC               | INTERGENIC                    |                    |                             |
| SNP_57267_A_39046983 | NC_021166.1    | Ca_Kabuli_Chr07 | 39046983                | TT                                     | CC                 | CC               | INTERGENIC                    |                    |                             |
| SNP_57268_A_39048445 | NC_021166.1    | Ca_Kabuli_Chr07 | 39048445                | TT                                     | CC                 | CC               | INTERGENIC                    |                    |                             |
| SNP_57269_A_39051772 | NC_021166.1    | Ca_Kabuli_Chr07 | 39051772                | GG                                     | AA                 | AA               | INTERGENIC                    |                    |                             |
| SNP_57270_A_39054960 | NC_021166.1    | Ca_Kabuli_Chr07 | 39054960                | GG                                     | AA                 | AA               | INTERGENIC                    |                    |                             |
| SNP_57271_A_39055173 | NC_021166.1    | Ca_Kabuli_Chr07 | 39055173                | AA                                     | CC                 | CC               | INTERGENIC                    |                    |                             |
| SNP_57272_A_39055178 | NC_021166.1    | Ca_Kabuli_Chr07 | 39055178                | TT                                     | AA                 | AA               | INTERGENIC                    |                    |                             |
| SNP_57273_A_39055354 | NC_021166.1    | Ca_Kabuli_Chr07 | 39055354                | AA                                     | GG                 | GG               | INTERGENIC                    |                    |                             |
| SNP_57274_A_39059605 | NC_021166.1    | Ca_Kabuli_Chr07 | 39059605                | AA                                     | GG                 | GG               | INTERGENIC                    |                    |                             |
| SNP_57275_A_39061375 | NC_021166.1    | Ca_Kabuli_Chr07 | 39061375                | AA                                     | GG                 | GG               | INTERGENIC                    |                    |                             |
| SNP_57276_A_39135531 | NC_021166.1    | Ca_Kabuli_Chr07 | 39135531                | TT                                     | AA                 | AA               | START_GAINED                  | 101503139          | synaptotagmin-5-like        |
| SNP_57277_A_39139211 | NC_021166.1    | Ca_Kabuli_Chr07 | 39139211                | GG                                     | AA                 | AA               | INTERGENIC                    |                    |                             |
| SNP_57278_A_39139268 | NC_021166.1    | Ca_Kabuli_Chr07 | 39139268                | GG                                     | AA                 | AA               | INTERGENIC                    |                    |                             |
| SNP_57279_A_39149687 | NC_021166.1    | Ca_Kabuli_Chr07 | 39149687                | CC                                     | TT                 | TT               | INTERGENIC                    |                    |                             |
| SNP_57281_A_39149781 | NC_021166.1    | Ca_Kabuli_Chr07 | 39149781                | TT                                     | GG                 | GG               | INTERGENIC                    |                    |                             |

| SNPs IDs             | Chromosome IDs | Chromosomes     | Physical positions (bp) | CDC Frontier genome (Reference genome) | (Pusa 1103 & HPNB) | (ILWC 46 & LPNB) | Sequence Components of genome | Gene accession IDs | Putative functions                                             |
|----------------------|----------------|-----------------|-------------------------|----------------------------------------|--------------------|------------------|-------------------------------|--------------------|----------------------------------------------------------------|
| SNP_57282_A_39149790 | NC_021166.1    | Ca_Kabuli_Chr07 | 39149790                | GG                                     | TT                 | TT               | INTERGENIC                    |                    |                                                                |
| SNP_57283_A_39149796 | NC_021166.1    | Ca_Kabuli_Chr07 | 39149796                | AA                                     | TT                 | TT               | INTERGENIC                    |                    |                                                                |
| SNP_57284_A_39204924 | NC_021166.1    | Ca_Kabuli_Chr07 | 39204924                | CC                                     | TT                 | TT               | INTRON                        | 101504120          | BEACH domain-containing protein lvsC-like                      |
| SNP_57286_A_39309472 | NC_021166.1    | Ca_Kabuli_Chr07 | 39309472                | CC                                     | TT                 | TT               | INTERGENIC                    |                    |                                                                |
| SNP_57287_A_39329300 | NC_021166.1    | Ca_Kabuli_Chr07 | 39329300                | CC                                     | AA                 | AA               | DRR                           | 101506253          | NADH dehydrogenase [ubiquinone] 1 alpha subcomplex subunit 8-B |
| SNP_57288_A_39370830 | NC_021166.1    | Ca_Kabuli_Chr07 | 39370830                | GG                                     | CC                 | CC               | INTERGENIC                    |                    |                                                                |
| SNP_57289_A_39371513 | NC_021166.1    | Ca_Kabuli_Chr07 | 39371513                | AA                                     | CC                 | CC               | INTERGENIC                    |                    |                                                                |
| SNP_57291_A_39461172 | NC_021166.1    | Ca_Kabuli_Chr07 | 39461172                | AA                                     | GG                 | GG               | INTERGENIC                    |                    |                                                                |
| SNP_57292_A_39521323 | NC_021166.1    | Ca_Kabuli_Chr07 | 39521323                | CC                                     | TT                 | TT               | INTERGENIC                    |                    |                                                                |
| SNP_57293_A_39521324 | NC_021166.1    | Ca_Kabuli_Chr07 | 39521324                | CC                                     | TT                 | TT               | INTERGENIC                    |                    |                                                                |
| SNP_57294_A_39521328 | NC_021166.1    | Ca_Kabuli_Chr07 | 39521328                | CC                                     | AA                 | AA               | INTERGENIC                    |                    |                                                                |
| SNP_57295_A_39523369 | NC_021166.1    | Ca_Kabuli_Chr07 | 39523369                | CC                                     | TT                 | TT               | INTERGENIC                    |                    |                                                                |
| SNP_57297_A_39554336 | NC_021166.1    | Ca_Kabuli_Chr07 | 39554336                | TT                                     | CC                 | CC               | INTERGENIC                    |                    |                                                                |
| SNP_57298_A_39554641 | NC_021166.1    | Ca_Kabuli_Chr07 | 39554641                | TT                                     | CC                 | CC               | INTERGENIC                    |                    |                                                                |
| SNP_57299_A_39554726 | NC_021166.1    | Ca_Kabuli_Chr07 | 39554726                | AA                                     | GG                 | GG               | INTERGENIC                    |                    |                                                                |
| SNP_57300_A_39575533 | NC_021166.1    | Ca_Kabuli_Chr07 | 39575533                | GG                                     | AA                 | AA               | INTERGENIC                    |                    |                                                                |
| SNP_57301_A_39575536 | NC_021166.1    | Ca_Kabuli_Chr07 | 39575536                | AA                                     | GG                 | GG               | INTERGENIC                    |                    |                                                                |
| SNP_57302_A_39575568 | NC_021166.1    | Ca_Kabuli_Chr07 | 39575568                | CC                                     | TT                 | TT               | INTERGENIC                    |                    |                                                                |
| SNP_57303_A_39577619 | NC_021166.1    | Ca_Kabuli_Chr07 | 39577619                | CC                                     | AA                 | AA               | INTERGENIC                    |                    |                                                                |
| SNP_57304_A_39582288 | NC_021166.1    | Ca_Kabuli_Chr07 | 39582288                | CC                                     | TT                 | TT               | INTERGENIC                    |                    |                                                                |
| SNP_57305_A_39602912 | NC_021166.1    | Ca_Kabuli_Chr07 | 39602912                | GG                                     | AA                 | AA               | INTERGENIC                    |                    |                                                                |
| SNP_57306_A_39621481 | NC_021166.1    | Ca_Kabuli_Chr07 | 39621481                | CC                                     | TT                 | TT               | INTERGENIC                    |                    |                                                                |

| SNPs IDs             | Chromosome IDs | Chromosomes     | Physical positions (bp) | CDC Frontier genome (Reference genome) | (Pusa 1103 & HPNB) | (ILWC 46 & LPNB) | Sequence Components of genome | Gene accession IDs | Putative functions                   |
|----------------------|----------------|-----------------|-------------------------|----------------------------------------|--------------------|------------------|-------------------------------|--------------------|--------------------------------------|
| SNP_57307_A_39621606 | NC_021166.1    | Ca_Kabuli_Chr07 | 39621606                | TT                                     | CC                 | CC               | INTERGENIC                    |                    |                                      |
| SNP_57308_A_39630382 | NC_021166.1    | Ca_Kabuli_Chr07 | 39630382                | GG                                     | AA                 | AA               | INTERGENIC                    |                    |                                      |
| SNP_57309_A_39630533 | NC_021166.1    | Ca_Kabuli_Chr07 | 39630533                | CC                                     | GG                 | GG               | INTERGENIC                    |                    |                                      |
| SNP_57310_A_39630635 | NC_021166.1    | Ca_Kabuli_Chr07 | 39630635                | CC                                     | GG                 | GG               | INTERGENIC                    |                    |                                      |
| SNP_57311_A_39630666 | NC_021166.1    | Ca_Kabuli_Chr07 | 39630666                | GG                                     | AA                 | AA               | INTERGENIC                    |                    |                                      |
| SNP_57312_A_39630696 | NC_021166.1    | Ca_Kabuli_Chr07 | 39630696                | GG                                     | AA                 | AA               | INTERGENIC                    |                    |                                      |
| SNP_57313_A_39630786 | NC_021166.1    | Ca_Kabuli_Chr07 | 39630786                | TT                                     | CC                 | CC               | INTERGENIC                    |                    |                                      |
| SNP_57314_A_39630799 | NC_021166.1    | Ca_Kabuli_Chr07 | 39630799                | CC                                     | TT                 | TT               | INTERGENIC                    |                    |                                      |
| SNP_57315_A_39639598 | NC_021166.1    | Ca_Kabuli_Chr07 | 39639598                | GG                                     | AA                 | AA               | INTERGENIC                    |                    |                                      |
| SNP_57316_A_39719823 | NC_021166.1    | Ca_Kabuli_Chr07 | 39719823                | CC                                     | AA                 | AA               | INTERGENIC                    |                    |                                      |
| SNP_57317_A_39760470 | NC_021166.1    | Ca_Kabuli_Chr07 | 39760470                | AA                                     | TT                 | TT               | INTERGENIC                    |                    |                                      |
| SNP_57318_A_39790544 | NC_021166.1    | Ca_Kabuli_Chr07 | 39790544                | TT                                     | CC                 | CC               | INTRON                        | 101514527          | MATE efflux family protein FRD3-like |
| SNP_57319_A_39819571 | NC_021166.1    | Ca_Kabuli_Chr07 | 39819571                | TT                                     | GG                 | GG               | INTERGENIC                    |                    |                                      |
| SNP_57320_A_39829230 | NC_021166.1    | Ca_Kabuli_Chr07 | 39829230                | AA                                     | GG                 | GG               | INTERGENIC                    |                    |                                      |
| SNP_57321_A_39829268 | NC_021166.1    | Ca_Kabuli_Chr07 | 39829268                | CC                                     | TT                 | TT               | INTERGENIC                    |                    |                                      |
| SNP_57322_A_39829293 | NC_021166.1    | Ca_Kabuli_Chr07 | 39829293                | AA                                     | GG                 | GG               | INTERGENIC                    |                    |                                      |
| SNP_57323_A_39829484 | NC_021166.1    | Ca_Kabuli_Chr07 | 39829484                | TT                                     | CC                 | CC               | INTERGENIC                    |                    |                                      |
| SNP_57324_A_39829493 | NC_021166.1    | Ca_Kabuli_Chr07 | 39829493                | GG                                     | AA                 | AA               | INTERGENIC                    |                    |                                      |
| SNP_57325_A_39829623 | NC_021166.1    | Ca_Kabuli_Chr07 | 39829623                | GG                                     | AA                 | AA               | INTERGENIC                    |                    |                                      |
| SNP_57326_A_39829645 | NC_021166.1    | Ca_Kabuli_Chr07 | 39829645                | GG                                     | TT                 | TT               | INTERGENIC                    |                    |                                      |
| SNP_57327_A_39829698 | NC_021166.1    | Ca_Kabuli_Chr07 | 39829698                | AA                                     | GG                 | GG               | INTERGENIC                    |                    |                                      |
| SNP_57328_A_39829751 | NC_021166.1    | Ca_Kabuli_Chr07 | 39829751                | GG                                     | CC                 | CC               | INTERGENIC                    |                    |                                      |

| SNPs IDs             | Chromosome IDs | Chromosomes     | Physical positions (bp) | CDC Frontier genome (Reference genome) | (Pusa 1103 & HPNB) | (ILWC 46 & LPNB) | Sequence genome | Components of | Gene accession IDs | Putative functions |
|----------------------|----------------|-----------------|-------------------------|----------------------------------------|--------------------|------------------|-----------------|---------------|--------------------|--------------------|
| SNP_57329_A_39829922 | NC_021166.1    | Ca_Kabuli_Chr07 | 39829922                | CC                                     | AA                 | AA               | INTERGENIC      |               |                    |                    |
| SNP_57330_A_39830287 | NC_021166.1    | Ca_Kabuli_Chr07 | 39830287                | GG                                     | CC                 | CC               | INTERGENIC      |               |                    |                    |
| SNP_57332_A_39830675 | NC_021166.1    | Ca_Kabuli_Chr07 | 39830675                | TT                                     | CC                 | CC               | INTERGENIC      |               |                    |                    |
| SNP_57333_A_39830907 | NC_021166.1    | Ca_Kabuli_Chr07 | 39830907                | CC                                     | GG                 | GG               | INTERGENIC      |               |                    |                    |
| SNP_57334_A_39844866 | NC_021166.1    | Ca_Kabuli_Chr07 | 39844866                | TT                                     | CC                 | CC               | INTERGENIC      |               |                    |                    |
| SNP_57335_A_39845456 | NC_021166.1    | Ca_Kabuli_Chr07 | 39845456                | GG                                     | AA                 | AA               | INTERGENIC      |               |                    |                    |
| SNP_57336_A_39846468 | NC_021166.1    | Ca_Kabuli_Chr07 | 39846468                | AA                                     | GG                 | GG               | INTERGENIC      |               |                    |                    |
| SNP_57337_A_39847577 | NC_021166.1    | Ca_Kabuli_Chr07 | 39847577                | GG                                     | AA                 | AA               | INTERGENIC      |               |                    |                    |
| SNP_57338_A_39847954 | NC_021166.1    | Ca_Kabuli_Chr07 | 39847954                | AA                                     | GG                 | GG               | INTERGENIC      |               |                    |                    |
| SNP_57339_A_39848111 | NC_021166.1    | Ca_Kabuli_Chr07 | 39848111                | AA                                     | CC                 | CC               | INTERGENIC      |               |                    |                    |
| SNP_57340_A_39848126 | NC_021166.1    | Ca_Kabuli_Chr07 | 39848126                | TT                                     | CC                 | CC               | INTERGENIC      |               |                    |                    |
| SNP_57341_A_39848151 | NC_021166.1    | Ca_Kabuli_Chr07 | 39848151                | AA                                     | CC                 | CC               | INTERGENIC      |               |                    |                    |
| SNP_57342_A_39850486 | NC_021166.1    | Ca_Kabuli_Chr07 | 39850486                | CC                                     | AA                 | AA               | INTERGENIC      |               |                    |                    |
| SNP_57343_A_39850539 | NC_021166.1    | Ca_Kabuli_Chr07 | 39850539                | GG                                     | AA                 | AA               | INTERGENIC      |               |                    |                    |
| SNP_57344_A_39850587 | NC_021166.1    | Ca_Kabuli_Chr07 | 39850587                | GG                                     | AA                 | AA               | INTERGENIC      |               |                    |                    |
| SNP_57345_A_39850610 | NC_021166.1    | Ca_Kabuli_Chr07 | 39850610                | CC                                     | AA                 | AA               | INTERGENIC      |               |                    |                    |
| SNP_57346_A_39850630 | NC_021166.1    | Ca_Kabuli_Chr07 | 39850630                | AA                                     | GG                 | GG               | INTERGENIC      |               |                    |                    |
| SNP_57347_A_39850746 | NC_021166.1    | Ca_Kabuli_Chr07 | 39850746                | CC                                     | TT                 | TT               | INTERGENIC      |               |                    |                    |
| SNP_57348_A_39850999 | NC_021166.1    | Ca_Kabuli_Chr07 | 39850999                | AA                                     | TT                 | TT               | INTERGENIC      |               |                    |                    |
| SNP_57349_A_39851001 | NC_021166.1    | Ca_Kabuli_Chr07 | 39851001                | TT                                     | CC                 | CC               | INTERGENIC      |               |                    |                    |
| SNP_57350_A_39851041 | NC_021166.1    | Ca_Kabuli_Chr07 | 39851041                | TT                                     | CC                 | CC               | INTERGENIC      |               |                    |                    |
| SNP_57352_A_39899449 | NC_021166.1    | Ca_Kabuli_Chr07 | 39899449                | TT                                     | AA                 | AA               | INTERGENIC      |               |                    |                    |

| SNPs IDs             | Chromosome IDs | Chromosomes     | Physical positions (bp) | CDC Frontier (Reference genome) | (Pusa 1103 & HPNB) | (ILWC 46 & LPNB) | Sequence genome | Components of | Gene accession IDs                  | Putative functions |
|----------------------|----------------|-----------------|-------------------------|---------------------------------|--------------------|------------------|-----------------|---------------|-------------------------------------|--------------------|
| SNP_57353_A_39900149 | NC_021166.1    | Ca_Kabuli_Chr07 | 39900149                | TT                              | CC                 | CC               | INTERGENIC      |               |                                     |                    |
| SNP_57354_A_39900165 | NC_021166.1    | Ca_Kabuli_Chr07 | 39900165                | AA                              | CC                 | CC               | INTERGENIC      |               |                                     |                    |
| SNP_57355_A_39900173 | NC_021166.1    | Ca_Kabuli_Chr07 | 39900173                | AA                              | CC                 | CC               | INTERGENIC      |               |                                     |                    |
| SNP_57356_A_39902293 | NC_021166.1    | Ca_Kabuli_Chr07 | 39902293                | GG                              | TT                 | TT               | INTERGENIC      |               |                                     |                    |
| SNP_57357_A_39930759 | NC_021166.1    | Ca_Kabuli_Chr07 | 39930759                | CC                              | AA                 | AA               | INTERGENIC      |               |                                     |                    |
| SNP_57360_A_39934656 | NC_021166.1    | Ca_Kabuli_Chr07 | 39934656                | TT                              | CC                 | CC               | URR             | 101488247     | 60S ribosomal protein L36-3-like    |                    |
| SNP_57361_A_39934667 | NC_021166.1    | Ca_Kabuli_Chr07 | 39934667                | AA                              | GG                 | GG               | URR             | 101488247     | 60S ribosomal protein L36-3-like    |                    |
| SNP_57362_A_39934685 | NC_021166.1    | Ca_Kabuli_Chr07 | 39934685                | TT                              | GG                 | GG               | URR             | 101488247     | 60S ribosomal protein L36-3-like    |                    |
| SNP_57363_A_39949690 | NC_021166.1    | Ca_Kabuli_Chr07 | 39949690                | TT                              | CC                 | CC               | INTERGENIC      |               |                                     |                    |
| SNP_57364_A_39973512 | NC_021166.1    | Ca_Kabuli_Chr07 | 39973512                | TT                              | GG                 | GG               | INTERGENIC      |               |                                     |                    |
| SNP_57365_A_39973514 | NC_021166.1    | Ca_Kabuli_Chr07 | 39973514                | AA                              | GG                 | GG               | INTERGENIC      |               |                                     |                    |
| SNP_57366_A_39983722 | NC_021166.1    | Ca_Kabuli_Chr07 | 39983722                | CC                              | AA                 | AA               | INTERGENIC      |               |                                     |                    |
| SNP_57368_A_39988233 | NC_021166.1    | Ca_Kabuli_Chr07 | 39988233                | CC                              | TT                 | TT               | INTERGENIC      |               |                                     |                    |
| SNP_57369_A_39998114 | NC_021166.1    | Ca_Kabuli_Chr07 | 39998114                | CC                              | AA                 | AA               | INTERGENIC      |               |                                     |                    |
| SNP_57370_A_40006408 | NC_021166.1    | Ca_Kabuli_Chr07 | 40006408                | AA                              | CC                 | CC               | INTERGENIC      |               |                                     |                    |
| SNP_57371_A_40013518 | NC_021166.1    | Ca_Kabuli_Chr07 | 40013518                | TT                              | CC                 | CC               | URR             | 101410603     | transfer RNA serine (anticodon GCU) |                    |
| SNP_57372_A_40013676 | NC_021166.1    | Ca_Kabuli_Chr07 | 40013676                | GG                              | TT                 | TT               | URR             | 101410603     | transfer RNA serine (anticodon GCU) |                    |
| SNP_57373_A_40036257 | NC_021166.1    | Ca_Kabuli_Chr07 | 40036257                | CC                              | TT                 | TT               | INTERGENIC      |               |                                     |                    |
| SNP_57374_A_40037237 | NC_021166.1    | Ca_Kabuli_Chr07 | 40037237                | TT                              | AA                 | AA               | INTERGENIC      |               |                                     |                    |
| SNP_57375_A_40037244 | NC_021166.1    | Ca_Kabuli_Chr07 | 40037244                | AA                              | GG                 | GG               | INTERGENIC      |               |                                     |                    |
| SNP_57376_A_40048887 | NC_021166.1    | Ca_Kabuli_Chr07 | 40048887                | TT                              | CC                 | CC               | INTERGENIC      |               |                                     |                    |
| SNP_57377_A_40048916 | NC_021166.1    | Ca_Kabuli_Chr07 | 40048916                | TT                              | CC                 | CC               | INTERGENIC      |               |                                     |                    |



| SNPs IDs             | Chromosome IDs | Chromosomes     | Physical positions (bp) | CDC Frontier genome (Reference genome) | (Pusa 1103 & HPNB) | (ILWC 46 & LPNB) | Sequence genome | Components of | Gene accession IDs                | Putative functions |
|----------------------|----------------|-----------------|-------------------------|----------------------------------------|--------------------|------------------|-----------------|---------------|-----------------------------------|--------------------|
| SNP_57378_A_40049138 | NC_021166.1    | Ca_Kabuli_Chr07 | 40049138                | TT                                     | CC                 | CC               | INTERGENIC      |               |                                   |                    |
| SNP_57379_A_40049580 | NC_021166.1    | Ca_Kabuli_Chr07 | 40049580                | CC                                     | GG                 | GG               | INTERGENIC      |               |                                   |                    |
| SNP_57380_A_40049596 | NC_021166.1    | Ca_Kabuli_Chr07 | 40049596                | AA                                     | CC                 | CC               | INTERGENIC      |               |                                   |                    |
| SNP_57381_A_40049662 | NC_021166.1    | Ca_Kabuli_Chr07 | 40049662                | TT                                     | CC                 | CC               | INTERGENIC      |               |                                   |                    |
| SNP_57382_A_40049697 | NC_021166.1    | Ca_Kabuli_Chr07 | 40049697                | GG                                     | AA                 | AA               | INTERGENIC      |               |                                   |                    |
| SNP_57383_A_40049744 | NC_021166.1    | Ca_Kabuli_Chr07 | 40049744                | TT                                     | CC                 | CC               | INTERGENIC      |               |                                   |                    |
| SNP_57384_A_40049757 | NC_021166.1    | Ca_Kabuli_Chr07 | 40049757                | TT                                     | AA                 | AA               | INTERGENIC      |               |                                   |                    |
| SNP_57385_A_40049763 | NC_021166.1    | Ca_Kabuli_Chr07 | 40049763                | AA                                     | GG                 | GG               | INTERGENIC      |               |                                   |                    |
| SNP_57386_A_40049900 | NC_021166.1    | Ca_Kabuli_Chr07 | 40049900                | AA                                     | GG                 | GG               | INTERGENIC      |               |                                   |                    |
| SNP_57387_A_40049907 | NC_021166.1    | Ca_Kabuli_Chr07 | 40049907                | AA                                     | GG                 | GG               | INTERGENIC      |               |                                   |                    |
| SNP_57388_A_40049909 | NC_021166.1    | Ca_Kabuli_Chr07 | 40049909                | AA                                     | GG                 | GG               | INTERGENIC      |               |                                   |                    |
| SNP_57389_A_40049965 | NC_021166.1    | Ca_Kabuli_Chr07 | 40049965                | AA                                     | GG                 | GG               | INTERGENIC      |               |                                   |                    |
| SNP_57390_A_40050007 | NC_021166.1    | Ca_Kabuli_Chr07 | 40050007                | TT                                     | GG                 | GG               | INTERGENIC      |               |                                   |                    |
| SNP_57391_A_40056539 | NC_021166.1    | Ca_Kabuli_Chr07 | 40056539                | TT                                     | CC                 | CC               | INTERGENIC      |               |                                   |                    |
| SNP_57392_A_40077684 | NC_021166.1    | Ca_Kabuli_Chr07 | 40077684                | GG                                     | TT                 | TT               | URR             | 101493473     | transcription factor bHLH130-like |                    |
| SNP_57394_A_40086996 | NC_021166.1    | Ca_Kabuli_Chr07 | 40086996                | AA                                     | TT                 | TT               | INTERGENIC      |               |                                   |                    |
| SNP_57395_A_40086997 | NC_021166.1    | Ca_Kabuli_Chr07 | 40086997                | TT                                     | GG                 | GG               | INTERGENIC      |               |                                   |                    |
| SNP_57396_A_40087001 | NC_021166.1    | Ca_Kabuli_Chr07 | 40087001                | TT                                     | CC                 | CC               | INTERGENIC      |               |                                   |                    |
| SNP_57397_A_40087179 | NC_021166.1    | Ca_Kabuli_Chr07 | 40087179                | TT                                     | AA                 | AA               | INTERGENIC      |               |                                   |                    |
| SNP_57398_A_40087196 | NC_021166.1    | Ca_Kabuli_Chr07 | 40087196                | AA                                     | GG                 | GG               | INTERGENIC      |               |                                   |                    |
| SNP_57399_A_40088496 | NC_021166.1    | Ca_Kabuli_Chr07 | 40088496                | AA                                     | GG                 | GG               | INTERGENIC      |               |                                   |                    |
| SNP_57400_A_40088561 | NC_021166.1    | Ca_Kabuli_Chr07 | 40088561                | AA                                     | GG                 | GG               | INTERGENIC      |               |                                   |                    |

| SNPs IDs             | Chromosome IDs | Chromosomes     | Physical positions (bp) | CDC Frontier genome (Reference genome) | (Pusa 1103 & HPNB) | (ILWC 46 & LPNB) | Sequence Components of genome | Gene accession IDs | Putative functions                       |
|----------------------|----------------|-----------------|-------------------------|----------------------------------------|--------------------|------------------|-------------------------------|--------------------|------------------------------------------|
| SNP_57401_A_40088598 | NC_021166.1    | Ca_Kabuli_Chr07 | 40088598                | CC                                     | AA                 | AA               | INTERGENIC                    |                    |                                          |
| SNP_57403_A_40089891 | NC_021166.1    | Ca_Kabuli_Chr07 | 40089891                | CC                                     | TT                 | TT               | INTERGENIC                    |                    |                                          |
| SNP_57404_A_40118888 | NC_021166.1    | Ca_Kabuli_Chr07 | 40118888                | AA                                     | GG                 | GG               | INTERGENIC                    |                    |                                          |
| SNP_57405_A_40118943 | NC_021166.1    | Ca_Kabuli_Chr07 | 40118943                | AA                                     | GG                 | GG               | INTERGENIC                    |                    |                                          |
| SNP_57406_A_40153296 | NC_021166.1    | Ca_Kabuli_Chr07 | 40153296                | AA                                     | GG                 | GG               | INTERGENIC                    |                    |                                          |
| SNP_57407_A_40153297 | NC_021166.1    | Ca_Kabuli_Chr07 | 40153297                | CC                                     | TT                 | TT               | INTERGENIC                    |                    |                                          |
| SNP_57409_A_40209862 | NC_021166.1    | Ca_Kabuli_Chr07 | 40209862                | AA                                     | CC                 | CC               | INTERGENIC                    |                    |                                          |
| SNP_57410_A_40224133 | NC_021166.1    | Ca_Kabuli_Chr07 | 40224133                | GG                                     | AA                 | AA               | INTERGENIC                    |                    |                                          |
| SNP_57411_A_40255801 | NC_021166.1    | Ca_Kabuli_Chr07 | 40255801                | TT                                     | AA                 | AA               | INTRON                        | 101499217          | classical arabinogalactan protein 9-like |
| SNP_57412_A_40277229 | NC_021166.1    | Ca_Kabuli_Chr07 | 40277229                | AA                                     | TT                 | TT               | INTERGENIC                    |                    |                                          |
| SNP_57413_A_40386630 | NC_021166.1    | Ca_Kabuli_Chr07 | 40386630                | CC                                     | TT                 | TT               | INTERGENIC                    |                    |                                          |
| SNP_57415_A_40429662 | NC_021166.1    | Ca_Kabuli_Chr07 | 40429662                | GG                                     | AA                 | AA               | INTERGENIC                    |                    |                                          |
| SNP_57416_A_40429663 | NC_021166.1    | Ca_Kabuli_Chr07 | 40429663                | AA                                     | GG                 | GG               | INTERGENIC                    |                    |                                          |
| SNP_57417_A_40429796 | NC_021166.1    | Ca_Kabuli_Chr07 | 40429796                | AA                                     | GG                 | GG               | INTERGENIC                    |                    |                                          |
| SNP_57418_A_40429870 | NC_021166.1    | Ca_Kabuli_Chr07 | 40429870                | CC                                     | GG                 | GG               | INTERGENIC                    |                    |                                          |
| SNP_57419_A_40429976 | NC_021166.1    | Ca_Kabuli_Chr07 | 40429976                | AA                                     | GG                 | GG               | INTERGENIC                    |                    |                                          |
| SNP_57420_A_40430085 | NC_021166.1    | Ca_Kabuli_Chr07 | 40430085                | AA                                     | CC                 | CC               | INTERGENIC                    |                    |                                          |
| SNP_57421_A_40430109 | NC_021166.1    | Ca_Kabuli_Chr07 | 40430109                | GG                                     | AA                 | AA               | INTERGENIC                    |                    |                                          |
| SNP_57422_A_40430110 | NC_021166.1    | Ca_Kabuli_Chr07 | 40430110                | AA                                     | GG                 | GG               | INTERGENIC                    |                    |                                          |
| SNP_57424_A_40430182 | NC_021166.1    | Ca_Kabuli_Chr07 | 40430182                | TT                                     | GG                 | GG               | INTERGENIC                    |                    |                                          |
| SNP_57425_A_40430183 | NC_021166.1    | Ca_Kabuli_Chr07 | 40430183                | TT                                     | CC                 | CC               | INTERGENIC                    |                    |                                          |
| SNP_57426_A_40474106 | NC_021166.1    | Ca_Kabuli_Chr07 | 40474106                | AA                                     | GG                 | GG               | INTERGENIC                    |                    |                                          |

| SNPs IDs             | Chromosome IDs | Chromosomes     | Physical positions (bp) | CDC Frontier genome (Reference genome) | (Pusa 1103 & HPNB) | (ILWC 46 & LPNB) | Sequence Components of genome | Gene accession IDs | Putative functions            |
|----------------------|----------------|-----------------|-------------------------|----------------------------------------|--------------------|------------------|-------------------------------|--------------------|-------------------------------|
| SNP_57427_A_40474107 | NC_021166.1    | Ca_Kabuli_Chr07 | 40474107                | AA                                     | TT                 | TT               | INTERGENIC                    |                    |                               |
| SNP_57428_A_40474108 | NC_021166.1    | Ca_Kabuli_Chr07 | 40474108                | AA                                     | TT                 | TT               | INTERGENIC                    |                    |                               |
| SNP_57429_A_40474121 | NC_021166.1    | Ca_Kabuli_Chr07 | 40474121                | TT                                     | CC                 | CC               | INTERGENIC                    |                    |                               |
| SNP_57430_A_40474281 | NC_021166.1    | Ca_Kabuli_Chr07 | 40474281                | CC                                     | GG                 | GG               | INTERGENIC                    |                    |                               |
| SNP_57431_A_40489992 | NC_021166.1    | Ca_Kabuli_Chr07 | 40489992                | CC                                     | AA                 | AA               | INTERGENIC                    |                    |                               |
| SNP_57432_A_40555097 | NC_021166.1    | Ca_Kabuli_Chr07 | 40555097                | TT                                     | CC                 | CC               | INTERGENIC                    |                    |                               |
| SNP_57433_A_40555188 | NC_021166.1    | Ca_Kabuli_Chr07 | 40555188                | AA                                     | GG                 | GG               | INTERGENIC                    |                    |                               |
| SNP_57434_A_40555322 | NC_021166.1    | Ca_Kabuli_Chr07 | 40555322                | TT                                     | CC                 | CC               | INTERGENIC                    |                    |                               |
| SNP_57435_A_40555345 | NC_021166.1    | Ca_Kabuli_Chr07 | 40555345                | GG                                     | TT                 | TT               | INTERGENIC                    |                    |                               |
| SNP_57436_A_40555542 | NC_021166.1    | Ca_Kabuli_Chr07 | 40555542                | TT                                     | CC                 | CC               | INTERGENIC                    |                    |                               |
| SNP_57437_A_40555580 | NC_021166.1    | Ca_Kabuli_Chr07 | 40555580                | CC                                     | TT                 | TT               | INTERGENIC                    |                    |                               |
| SNP_57438_A_40555614 | NC_021166.1    | Ca_Kabuli_Chr07 | 40555614                | CC                                     | AA                 | AA               | INTERGENIC                    |                    |                               |
| SNP_57439_A_40555641 | NC_021166.1    | Ca_Kabuli_Chr07 | 40555641                | TT                                     | CC                 | CC               | INTERGENIC                    |                    |                               |
| SNP_57440_A_40555686 | NC_021166.1    | Ca_Kabuli_Chr07 | 40555686                | TT                                     | GG                 | GG               | INTERGENIC                    |                    |                               |
| SNP_57441_A_40575885 | NC_021166.1    | Ca_Kabuli_Chr07 | 40575885                | GG                                     | AA                 | AA               | INTERGENIC                    |                    |                               |
| SNP_57442_A_40589452 | NC_021166.1    | Ca_Kabuli_Chr07 | 40589452                | AA                                     | GG                 | GG               | NON_SYNONYMOUS_CODING         | 101508612          | aspartic proteinase CDR1-like |
| SNP_57443_A_40589463 | NC_021166.1    | Ca_Kabuli_Chr07 | 40589463                | TT                                     | CC                 | CC               | SYNONYMOUS_CODING             | 101508612          | aspartic proteinase CDR1-like |
| SNP_57444_A_40589520 | NC_021166.1    | Ca_Kabuli_Chr07 | 40589520                | TT                                     | CC                 | CC               | SYNONYMOUS_CODING             | 101508612          | aspartic proteinase CDR1-like |
| SNP_57445_A_40589583 | NC_021166.1    | Ca_Kabuli_Chr07 | 40589583                | AA                                     | GG                 | GG               | SYNONYMOUS_CODING             | 101508612          | aspartic proteinase CDR1-like |
| SNP_57446_A_40589607 | NC_021166.1    | Ca_Kabuli_Chr07 | 40589607                | TT                                     | CC                 | CC               | SYNONYMOUS_CODING             | 101508612          | aspartic proteinase CDR1-like |
| SNP_57447_A_40589620 | NC_021166.1    | Ca_Kabuli_Chr07 | 40589620                | CC                                     | TT                 | TT               | NON_SYNONYMOUS_CODING         | 101508612          | aspartic proteinase CDR1-like |
| SNP_57448_A_40589642 | NC_021166.1    | Ca_Kabuli_Chr07 | 40589642                | TT                                     | CC                 | CC               | NON_SYNONYMOUS_CODING         | 101508612          | aspartic proteinase CDR1-like |

| SNPs IDs             | Chromosome IDs | Chromosomes     | Physical positions (bp) | CDC Frontier genome (Reference genome) | (Pusa 1103 & HPNB) | (ILWC 46 & LPNB) | Sequence Components of genome | Gene accession IDs | Putative functions                          |
|----------------------|----------------|-----------------|-------------------------|----------------------------------------|--------------------|------------------|-------------------------------|--------------------|---------------------------------------------|
| SNP_57449_A_40589649 | NC_021166.1    | Ca_Kabuli_Chr07 | 40589649                | AA                                     | TT                 | TT               | NON_SYNONYMOUS_CODING         | 101508612          | aspartic proteinase CDR1-like               |
| SNP_57450_A_40589673 | NC_021166.1    | Ca_Kabuli_Chr07 | 40589673                | GG                                     | AA                 | AA               | SYNONYMOUS_CODING             | 101508612          | aspartic proteinase CDR1-like               |
| SNP_57451_A_40589712 | NC_021166.1    | Ca_Kabuli_Chr07 | 40589712                | CC                                     | GG                 | GG               | NON_SYNONYMOUS_CODING         | 101508612          | aspartic proteinase CDR1-like               |
| SNP_57452_A_40589733 | NC_021166.1    | Ca_Kabuli_Chr07 | 40589733                | AA                                     | TT                 | TT               | SYNONYMOUS_CODING             | 101508612          | aspartic proteinase CDR1-like               |
| SNP_57453_A_40589903 | NC_021166.1    | Ca_Kabuli_Chr07 | 40589903                | AA                                     | CC                 | CC               | NON_SYNONYMOUS_CODING         | 101508612          | aspartic proteinase CDR1-like               |
| SNP_57454_A_40589912 | NC_021166.1    | Ca_Kabuli_Chr07 | 40589912                | AA                                     | CC                 | CC               | NON_SYNONYMOUS_CODING         | 101508612          | aspartic proteinase CDR1-like               |
| SNP_57455_A_40589935 | NC_021166.1    | Ca_Kabuli_Chr07 | 40589935                | TT                                     | CC                 | CC               | NON_SYNONYMOUS_CODING         | 101508612          | aspartic proteinase CDR1-like               |
| SNP_57456_A_40590049 | NC_021166.1    | Ca_Kabuli_Chr07 | 40590049                | TT                                     | GG                 | GG               | NON_SYNONYMOUS_CODING         | 101508612          | aspartic proteinase CDR1-like               |
| SNP_57458_A_40650339 | NC_021166.1    | Ca_Kabuli_Chr07 | 40650339                | TT                                     | CC                 | CC               | INTERGENIC                    |                    |                                             |
| SNP_57459_A_40659698 | NC_021166.1    | Ca_Kabuli_Chr07 | 40659698                | AA                                     | TT                 | TT               | INTRON                        | 101509242          | bidirectional sugar transporter SWEET2-like |
| SNP_57460_A_40748364 | NC_021166.1    | Ca_Kabuli_Chr07 | 40748364                | AA                                     | GG                 | GG               | INTERGENIC                    |                    |                                             |
| SNP_57461_A_40748781 | NC_021166.1    | Ca_Kabuli_Chr07 | 40748781                | TT                                     | GG                 | GG               | INTERGENIC                    |                    |                                             |
| SNP_57462_A_40748804 | NC_021166.1    | Ca_Kabuli_Chr07 | 40748804                | AA                                     | GG                 | GG               | INTERGENIC                    |                    |                                             |
| SNP_57463_A_40768803 | NC_021166.1    | Ca_Kabuli_Chr07 | 40768803                | CC                                     | TT                 | TT               | URR                           | 101410596          | transfer RNA arginine (anticodon ACG)       |
| SNP_57464_A_40768860 | NC_021166.1    | Ca_Kabuli_Chr07 | 40768860                | GG                                     | AA                 | AA               | URR                           | 101410596          | transfer RNA arginine (anticodon ACG)       |
| SNP_57465_A_40769167 | NC_021166.1    | Ca_Kabuli_Chr07 | 40769167                | CC                                     | AA                 | AA               | URR                           | 101410596          | transfer RNA arginine (anticodon ACG)       |
| SNP_57466_A_40781945 | NC_021166.1    | Ca_Kabuli_Chr07 | 40781945                | TT                                     | GG                 | GG               | INTERGENIC                    |                    |                                             |
| SNP_57467_A_40804812 | NC_021166.1    | Ca_Kabuli_Chr07 | 40804812                | AA                                     | TT                 | TT               | URR                           | 101510863          | aspartic proteinase CDR1-like               |
| SNP_57468_A_40888096 | NC_021166.1    | Ca_Kabuli_Chr07 | 40888096                | CC                                     | TT                 | TT               | INTERGENIC                    |                    |                                             |
| SNP_57469_A_40888258 | NC_021166.1    | Ca_Kabuli_Chr07 | 40888258                | TT                                     | CC                 | CC               | INTERGENIC                    |                    |                                             |
| SNP_57470_A_40888259 | NC_021166.1    | Ca_Kabuli_Chr07 | 40888259                | GG                                     | AA                 | AA               | INTERGENIC                    |                    |                                             |
| SNP_57471_A_40897899 | NC_021166.1    | Ca_Kabuli_Chr07 | 40897899                | CC                                     | AA                 | AA               | URR                           | 101511726          | aspartic proteinase CDR1-like               |

| SNPs IDs             | Chromosome IDs | Chromosomes     | Physical positions (bp) | CDC Frontier genome (Reference genome) | (Pusa 1103 & HPNB) | (ILWC 46 & LPNB) | Sequence genome       | Components of | Gene accession IDs            | Putative functions |
|----------------------|----------------|-----------------|-------------------------|----------------------------------------|--------------------|------------------|-----------------------|---------------|-------------------------------|--------------------|
| SNP_57472_A_40911879 | NC_021166.1    | Ca_Kabuli_Chr07 | 40911879                | AA                                     | CC                 | CC               | INTERGENIC            |               |                               |                    |
| SNP_57473_A_40957061 | NC_021166.1    | Ca_Kabuli_Chr07 | 40957061                | GG                                     | AA                 | AA               | INTERGENIC            |               |                               |                    |
| SNP_57474_A_40963878 | NC_021166.1    | Ca_Kabuli_Chr07 | 40963878                | CC                                     | TT                 | TT               | INTERGENIC            |               |                               |                    |
| SNP_57475_A_40965582 | NC_021166.1    | Ca_Kabuli_Chr07 | 40965582                | CC                                     | AA                 | AA               | INTERGENIC            |               |                               |                    |
| SNP_57476_A_40978541 | NC_021166.1    | Ca_Kabuli_Chr07 | 40978541                | AA                                     | TT                 | TT               | INTERGENIC            |               |                               |                    |
| SNP_57477_A_40978568 | NC_021166.1    | Ca_Kabuli_Chr07 | 40978568                | TT                                     | CC                 | CC               | INTERGENIC            |               |                               |                    |
| SNP_57478_A_40978599 | NC_021166.1    | Ca_Kabuli_Chr07 | 40978599                | CC                                     | AA                 | AA               | INTERGENIC            |               |                               |                    |
| SNP_57479_A_40978652 | NC_021166.1    | Ca_Kabuli_Chr07 | 40978652                | CC                                     | TT                 | TT               | INTERGENIC            |               |                               |                    |
| SNP_57480_A_40978653 | NC_021166.1    | Ca_Kabuli_Chr07 | 40978653                | GG                                     | AA                 | AA               | INTERGENIC            |               |                               |                    |
| SNP_57481_A_40978666 | NC_021166.1    | Ca_Kabuli_Chr07 | 40978666                | AA                                     | GG                 | GG               | INTERGENIC            |               |                               |                    |
| SNP_57482_A_40978670 | NC_021166.1    | Ca_Kabuli_Chr07 | 40978670                | CC                                     | GG                 | GG               | INTERGENIC            |               |                               |                    |
| SNP_57483_A_40978689 | NC_021166.1    | Ca_Kabuli_Chr07 | 40978689                | TT                                     | CC                 | CC               | INTERGENIC            |               |                               |                    |
| SNP_57484_A_40978692 | NC_021166.1    | Ca_Kabuli_Chr07 | 40978692                | TT                                     | CC                 | CC               | INTERGENIC            |               |                               |                    |
| SNP_57485_A_40980909 | NC_021166.1    | Ca_Kabuli_Chr07 | 40980909                | AA                                     | GG                 | GG               | INTERGENIC            |               |                               |                    |
| SNP_57486_A_40982263 | NC_021166.1    | Ca_Kabuli_Chr07 | 40982263                | AA                                     | GG                 | GG               | INTERGENIC            |               |                               |                    |
| SNP_57487_A_40982377 | NC_021166.1    | Ca_Kabuli_Chr07 | 40982377                | TT                                     | AA                 | AA               | INTERGENIC            |               |                               |                    |
| SNP_57488_A_40982406 | NC_021166.1    | Ca_Kabuli_Chr07 | 40982406                | TT                                     | CC                 | CC               | INTERGENIC            |               |                               |                    |
| SNP_57489_A_40982585 | NC_021166.1    | Ca_Kabuli_Chr07 | 40982585                | AA                                     | GG                 | GG               | INTERGENIC            |               |                               |                    |
| SNP_57491_A_40985058 | NC_021166.1    | Ca_Kabuli_Chr07 | 40985058                | AA                                     | TT                 | TT               | DRR                   | 101512042     | aspartic proteinase CDR1-like |                    |
| SNP_57492_A_40985074 | NC_021166.1    | Ca_Kabuli_Chr07 | 40985074                | CC                                     | AA                 | AA               | DRR                   | 101512042     | aspartic proteinase CDR1-like |                    |
| SNP_57493_A_40985089 | NC_021166.1    | Ca_Kabuli_Chr07 | 40985089                | CC                                     | TT                 | TT               | DRR                   | 101512042     | aspartic proteinase CDR1-like |                    |
| SNP_57494_A_40985097 | NC_021166.1    | Ca_Kabuli_Chr07 | 40985097                | GG                                     | AA                 | AA               | NON_SYNONYMOUS_CODING | 101512042     | aspartic proteinase CDR1-like |                    |

| SNPs IDs             | Chromosome IDs | Chromosomes     | Physical positions (bp) | CDC Frontier genome (Reference genome) | (Pusa 1103 & HPNB) | (ILWC 46 & LPNB) | Sequence Components of genome | Gene accession IDs | Putative functions            |
|----------------------|----------------|-----------------|-------------------------|----------------------------------------|--------------------|------------------|-------------------------------|--------------------|-------------------------------|
| SNP_57495_A_40985100 | NC_021166.1    | Ca_Kabuli_Chr07 | 40985100                | CC                                     | TT                 | TT               | NON_SYNONYMOUS_CODING         | 101512042          | aspartic proteinase CDR1-like |
| SNP_57496_A_40985109 | NC_021166.1    | Ca_Kabuli_Chr07 | 40985109                | CC                                     | GG                 | GG               | NON_SYNONYMOUS_CODING         | 101512042          | aspartic proteinase CDR1-like |
| SNP_57497_A_40985117 | NC_021166.1    | Ca_Kabuli_Chr07 | 40985117                | AA                                     | TT                 | TT               | SYNONYMOUS_CODING             | 101512042          | aspartic proteinase CDR1-like |
| SNP_57498_A_40985319 | NC_021166.1    | Ca_Kabuli_Chr07 | 40985319                | GG                                     | AA                 | AA               | NON_SYNONYMOUS_CODING         | 101512042          | aspartic proteinase CDR1-like |
| SNP_57499_A_40986757 | NC_021166.1    | Ca_Kabuli_Chr07 | 40986757                | AA                                     | TT                 | TT               | URR                           | 101512042          | aspartic proteinase CDR1-like |
| SNP_57500_A_40986759 | NC_021166.1    | Ca_Kabuli_Chr07 | 40986759                | TT                                     | AA                 | AA               | URR                           | 101512042          | aspartic proteinase CDR1-like |
| SNP_57501_A_40986781 | NC_021166.1    | Ca_Kabuli_Chr07 | 40986781                | AA                                     | TT                 | TT               | URR                           | 101512042          | aspartic proteinase CDR1-like |
| SNP_57502_A_40986787 | NC_021166.1    | Ca_Kabuli_Chr07 | 40986787                | TT                                     | AA                 | AA               | URR                           | 101512042          | aspartic proteinase CDR1-like |
| SNP_57503_A_40986794 | NC_021166.1    | Ca_Kabuli_Chr07 | 40986794                | AA                                     | TT                 | TT               | URR                           | 101512042          | aspartic proteinase CDR1-like |
| SNP_57504_A_40986816 | NC_021166.1    | Ca_Kabuli_Chr07 | 40986816                | AA                                     | CC                 | CC               | URR                           | 101512042          | aspartic proteinase CDR1-like |
| SNP_57505_A_40986817 | NC_021166.1    | Ca_Kabuli_Chr07 | 40986817                | TT                                     | CC                 | CC               | URR                           | 101512042          | aspartic proteinase CDR1-like |
| SNP_57506_A_40986820 | NC_021166.1    | Ca_Kabuli_Chr07 | 40986820                | AA                                     | TT                 | TT               | URR                           | 101512042          | aspartic proteinase CDR1-like |
| SNP_57507_A_40986853 | NC_021166.1    | Ca_Kabuli_Chr07 | 40986853                | AA                                     | CC                 | CC               | URR                           | 101512042          | aspartic proteinase CDR1-like |
| SNP_57508_A_40990867 | NC_021166.1    | Ca_Kabuli_Chr07 | 40990867                | GG                                     | TT                 | TT               | INTERGENIC                    |                    |                               |
| SNP_57509_A_40990890 | NC_021166.1    | Ca_Kabuli_Chr07 | 40990890                | GG                                     | AA                 | AA               | INTERGENIC                    |                    |                               |
| SNP_57510_A_40990917 | NC_021166.1    | Ca_Kabuli_Chr07 | 40990917                | AA                                     | GG                 | GG               | INTERGENIC                    |                    |                               |
| SNP_57511_A_40990919 | NC_021166.1    | Ca_Kabuli_Chr07 | 40990919                | AA                                     | GG                 | GG               | INTERGENIC                    |                    |                               |
| SNP_57512_A_40990950 | NC_021166.1    | Ca_Kabuli_Chr07 | 40990950                | CC                                     | TT                 | TT               | INTERGENIC                    |                    |                               |
| SNP_57513_A_40990959 | NC_021166.1    | Ca_Kabuli_Chr07 | 40990959                | CC                                     | AA                 | AA               | INTERGENIC                    |                    |                               |
| SNP_57515_A_41008436 | NC_021166.1    | Ca_Kabuli_Chr07 | 41008436                | AA                                     | GG                 | GG               | INTERGENIC                    |                    |                               |
| SNP_57516_A_41008458 | NC_021166.1    | Ca_Kabuli_Chr07 | 41008458                | TT                                     | GG                 | GG               | INTERGENIC                    |                    |                               |
| SNP_57517_A_41008493 | NC_021166.1    | Ca_Kabuli_Chr07 | 41008493                | TT                                     | AA                 | AA               | INTERGENIC                    |                    |                               |

| SNPs IDs             | Chromosome IDs | Chromosomes     | Physical positions (bp) | CDC Frontier genome (Reference genome) | (Pusa 1103 & HPNB) | (ILWC 46 & LPNB) | Sequence genome | Components of | Gene accession IDs | Putative functions |
|----------------------|----------------|-----------------|-------------------------|----------------------------------------|--------------------|------------------|-----------------|---------------|--------------------|--------------------|
| SNP_57518_A_41008546 | NC_021166.1    | Ca_Kabuli_Chr07 | 41008546                | CC                                     | TT                 | TT               | INTERGENIC      |               |                    |                    |
| SNP_57519_A_41008565 | NC_021166.1    | Ca_Kabuli_Chr07 | 41008565                | AA                                     | GG                 | GG               | INTERGENIC      |               |                    |                    |
| SNP_57520_A_41008607 | NC_021166.1    | Ca_Kabuli_Chr07 | 41008607                | CC                                     | GG                 | GG               | INTERGENIC      |               |                    |                    |
| SNP_57521_A_41008692 | NC_021166.1    | Ca_Kabuli_Chr07 | 41008692                | GG                                     | AA                 | TT               | INTERGENIC      |               |                    |                    |
| SNP_57522_A_41008705 | NC_021166.1    | Ca_Kabuli_Chr07 | 41008705                | AA                                     | GG                 | GG               | INTERGENIC      |               |                    |                    |
| SNP_57523_A_41008762 | NC_021166.1    | Ca_Kabuli_Chr07 | 41008762                | GG                                     | TT                 | TT               | INTERGENIC      |               |                    |                    |
| SNP_57524_A_41008824 | NC_021166.1    | Ca_Kabuli_Chr07 | 41008824                | AA                                     | CC                 | CC               | INTERGENIC      |               |                    |                    |
| SNP_57525_A_41008833 | NC_021166.1    | Ca_Kabuli_Chr07 | 41008833                | GG                                     | AA                 | AA               | INTERGENIC      |               |                    |                    |
| SNP_57526_A_41008839 | NC_021166.1    | Ca_Kabuli_Chr07 | 41008839                | CC                                     | TT                 | TT               | INTERGENIC      |               |                    |                    |
| SNP_57527_A_41008877 | NC_021166.1    | Ca_Kabuli_Chr07 | 41008877                | TT                                     | AA                 | AA               | INTERGENIC      |               |                    |                    |
| SNP_57528_A_41008915 | NC_021166.1    | Ca_Kabuli_Chr07 | 41008915                | AA                                     | GG                 | GG               | INTERGENIC      |               |                    |                    |
| SNP_57529_A_41008944 | NC_021166.1    | Ca_Kabuli_Chr07 | 41008944                | TT                                     | CC                 | CC               | INTERGENIC      |               |                    |                    |
| SNP_57530_A_41009240 | NC_021166.1    | Ca_Kabuli_Chr07 | 41009240                | CC                                     | GG                 | GG               | INTERGENIC      |               |                    |                    |
| SNP_57531_A_41009243 | NC_021166.1    | Ca_Kabuli_Chr07 | 41009243                | AA                                     | TT                 | TT               | INTERGENIC      |               |                    |                    |
| SNP_57532_A_41009249 | NC_021166.1    | Ca_Kabuli_Chr07 | 41009249                | AA                                     | TT                 | TT               | INTERGENIC      |               |                    |                    |
| SNP_57533_A_41009304 | NC_021166.1    | Ca_Kabuli_Chr07 | 41009304                | AA                                     | CC                 | CC               | INTERGENIC      |               |                    |                    |
| SNP_57534_A_41009399 | NC_021166.1    | Ca_Kabuli_Chr07 | 41009399                | AA                                     | TT                 | TT               | INTERGENIC      |               |                    |                    |
| SNP_57535_A_41009586 | NC_021166.1    | Ca_Kabuli_Chr07 | 41009586                | AA                                     | GG                 | GG               | INTERGENIC      |               |                    |                    |
| SNP_57537_A_41009987 | NC_021166.1    | Ca_Kabuli_Chr07 | 41009987                | GG                                     | AA                 | AA               | INTERGENIC      |               |                    |                    |
| SNP_57538_A_41010116 | NC_021166.1    | Ca_Kabuli_Chr07 | 41010116                | GG                                     | AA                 | AA               | INTERGENIC      |               |                    |                    |
| SNP_57540_A_41010247 | NC_021166.1    | Ca_Kabuli_Chr07 | 41010247                | TT                                     | AA                 | AA               | INTERGENIC      |               |                    |                    |
| SNP_57541_A_41010343 | NC_021166.1    | Ca_Kabuli_Chr07 | 41010343                | TT                                     | AA                 | AA               | INTERGENIC      |               |                    |                    |

| SNPs IDs             | Chromosome IDs | Chromosomes     | Physical positions (bp) | CDC Frontier genome (Reference genome) | (Pusa 1103 & HPNB) | (ILWC 46 & LPNB) | Sequence genome | Components of | Gene accession IDs           | Putative functions |
|----------------------|----------------|-----------------|-------------------------|----------------------------------------|--------------------|------------------|-----------------|---------------|------------------------------|--------------------|
| SNP_57542_A_41026064 | NC_021166.1    | Ca_Kabuli_Chr07 | 41026064                | AA                                     | CC                 | CC               | INTERGENIC      |               |                              |                    |
| SNP_57543_A_41027465 | NC_021166.1    | Ca_Kabuli_Chr07 | 41027465                | AA                                     | TT                 | TT               | INTERGENIC      |               |                              |                    |
| SNP_57544_A_41027569 | NC_021166.1    | Ca_Kabuli_Chr07 | 41027569                | AA                                     | CC                 | CC               | INTERGENIC      |               |                              |                    |
| SNP_57545_A_41027790 | NC_021166.1    | Ca_Kabuli_Chr07 | 41027790                | AA                                     | CC                 | CC               | INTERGENIC      |               |                              |                    |
| SNP_57546_A_41027861 | NC_021166.1    | Ca_Kabuli_Chr07 | 41027861                | AA                                     | GG                 | GG               | INTERGENIC      |               |                              |                    |
| SNP_57547_A_41027893 | NC_021166.1    | Ca_Kabuli_Chr07 | 41027893                | TT                                     | AA                 | AA               | INTERGENIC      |               |                              |                    |
| SNP_57548_A_41060475 | NC_021166.1    | Ca_Kabuli_Chr07 | 41060475                | CC                                     | TT                 | TT               | INTERGENIC      |               |                              |                    |
| SNP_57549_A_41060763 | NC_021166.1    | Ca_Kabuli_Chr07 | 41060763                | CC                                     | TT                 | TT               | INTERGENIC      |               |                              |                    |
| SNP_57550_A_41096459 | NC_021166.1    | Ca_Kabuli_Chr07 | 41096459                | TT                                     | GG                 | GG               | INTERGENIC      |               |                              |                    |
| SNP_57551_A_41098498 | NC_021166.1    | Ca_Kabuli_Chr07 | 41098498                | TT                                     | CC                 | CC               | INTERGENIC      |               |                              |                    |
| SNP_57552_A_41102694 | NC_021166.1    | Ca_Kabuli_Chr07 | 41102694                | GG                                     | TT                 | TT               | INTERGENIC      |               |                              |                    |
| SNP_57553_A_41111023 | NC_021166.1    | Ca_Kabuli_Chr07 | 41111023                | GG                                     | AA                 | AA               | URR             | 101497143     | uncharacterized LOC101497143 |                    |
| SNP_57554_A_41129610 | NC_021166.1    | Ca_Kabuli_Chr07 | 41129610                | CC                                     | TT                 | TT               | INTERGENIC      |               |                              |                    |
| SNP_57555_A_41129703 | NC_021166.1    | Ca_Kabuli_Chr07 | 41129703                | CC                                     | TT                 | TT               | INTERGENIC      |               |                              |                    |
| SNP_57556_A_41158558 | NC_021166.1    | Ca_Kabuli_Chr07 | 41158558                | AA                                     | CC                 | CC               | INTERGENIC      |               |                              |                    |
| SNP_57557_A_41158855 | NC_021166.1    | Ca_Kabuli_Chr07 | 41158855                | GG                                     | AA                 | AA               | INTERGENIC      |               |                              |                    |
| SNP_57558_A_41158866 | NC_021166.1    | Ca_Kabuli_Chr07 | 41158866                | AA                                     | CC                 | CC               | INTERGENIC      |               |                              |                    |
| SNP_57559_A_41167896 | NC_021166.1    | Ca_Kabuli_Chr07 | 41167896                | GG                                     | AA                 | AA               | INTERGENIC      |               |                              |                    |
| SNP_57560_A_41167901 | NC_021166.1    | Ca_Kabuli_Chr07 | 41167901                | GG                                     | AA                 | AA               | INTERGENIC      |               |                              |                    |
| SNP_57561_A_41167907 | NC_021166.1    | Ca_Kabuli_Chr07 | 41167907                | TT                                     | GG                 | GG               | INTERGENIC      |               |                              |                    |
| SNP_57562_A_41167913 | NC_021166.1    | Ca_Kabuli_Chr07 | 41167913                | AA                                     | CC                 | CC               | INTERGENIC      |               |                              |                    |
| SNP_57563_A_41167934 | NC_021166.1    | Ca_Kabuli_Chr07 | 41167934                | GG                                     | AA                 | AA               | INTERGENIC      |               |                              |                    |



| SNPs IDs             | Chromosome IDs | Chromosomes     | Physical positions (bp) | CDC Frontier genome (Reference genome) | (Pusa 1103 & HPNB) | (ILWC 46 & LPNB) | Sequence genome | Components of | Gene accession IDs | Putative functions                          |
|----------------------|----------------|-----------------|-------------------------|----------------------------------------|--------------------|------------------|-----------------|---------------|--------------------|---------------------------------------------|
| SNP_57564_A_41167952 | NC_021166.1    | Ca_Kabuli_Chr07 | 41167952                | AA                                     | GG                 | GG               | INTERGENIC      |               |                    |                                             |
| SNP_57565_A_41167970 | NC_021166.1    | Ca_Kabuli_Chr07 | 41167970                | CC                                     | AA                 | AA               | INTERGENIC      |               |                    |                                             |
| SNP_57566_A_41168205 | NC_021166.1    | Ca_Kabuli_Chr07 | 41168205                | AA                                     | GG                 | GG               | INTERGENIC      |               |                    |                                             |
| SNP_57567_A_41168230 | NC_021166.1    | Ca_Kabuli_Chr07 | 41168230                | AA                                     | CC                 | CC               | INTERGENIC      |               |                    |                                             |
| SNP_57568_A_41168269 | NC_021166.1    | Ca_Kabuli_Chr07 | 41168269                | GG                                     | TT                 | TT               | INTERGENIC      |               |                    |                                             |
| SNP_57569_A_41168333 | NC_021166.1    | Ca_Kabuli_Chr07 | 41168333                | TT                                     | AA                 | AA               | INTERGENIC      |               |                    |                                             |
| SNP_57571_A_41170116 | NC_021166.1    | Ca_Kabuli_Chr07 | 41170116                | TT                                     | CC                 | CC               | INTERGENIC      |               |                    |                                             |
| SNP_57572_A_41170121 | NC_021166.1    | Ca_Kabuli_Chr07 | 41170121                | TT                                     | AA                 | AA               | INTERGENIC      |               |                    |                                             |
| SNP_57573_A_41170143 | NC_021166.1    | Ca_Kabuli_Chr07 | 41170143                | AA                                     | GG                 | GG               | INTERGENIC      |               |                    |                                             |
| SNP_57574_A_41170275 | NC_021166.1    | Ca_Kabuli_Chr07 | 41170275                | CC                                     | GG                 | GG               | INTERGENIC      |               |                    |                                             |
| SNP_57575_A_41170311 | NC_021166.1    | Ca_Kabuli_Chr07 | 41170311                | CC                                     | AA                 | AA               | INTERGENIC      |               |                    |                                             |
| SNP_57576_A_41170466 | NC_021166.1    | Ca_Kabuli_Chr07 | 41170466                | AA                                     | TT                 | TT               | INTERGENIC      |               |                    |                                             |
| SNP_57577_A_41184882 | NC_021166.1    | Ca_Kabuli_Chr07 | 41184882                | CC                                     | TT                 | TT               | INTERGENIC      |               |                    |                                             |
| SNP_57578_A_41200763 | NC_021166.1    | Ca_Kabuli_Chr07 | 41200763                | TT                                     | AA                 | AA               | INTERGENIC      |               |                    |                                             |
| SNP_57579_A_41215435 | NC_021166.1    | Ca_Kabuli_Chr07 | 41215435                | AA                                     | CC                 | CC               | INTRON          | 101499124     |                    | bidirectional sugar transporter SWEET2-like |
| SNP_57580_A_41215657 | NC_021166.1    | Ca_Kabuli_Chr07 | 41215657                | GG                                     | CC                 | CC               | INTRON          | 101499124     |                    | bidirectional sugar transporter SWEET2-like |
| SNP_57582_A_41239000 | NC_021166.1    | Ca_Kabuli_Chr07 | 41239000                | GG                                     | TT                 | TT               | INTERGENIC      |               |                    |                                             |
| SNP_57583_A_41239055 | NC_021166.1    | Ca_Kabuli_Chr07 | 41239055                | AA                                     | CC                 | CC               | INTERGENIC      |               |                    |                                             |
| SNP_57584_A_41239078 | NC_021166.1    | Ca_Kabuli_Chr07 | 41239078                | CC                                     | TT                 | TT               | INTERGENIC      |               |                    |                                             |
| SNP_57585_A_41239084 | NC_021166.1    | Ca_Kabuli_Chr07 | 41239084                | TT                                     | CC                 | CC               | INTERGENIC      |               |                    |                                             |
| SNP_57586_A_41239241 | NC_021166.1    | Ca_Kabuli_Chr07 | 41239241                | AA                                     | GG                 | GG               | INTERGENIC      |               |                    |                                             |
| SNP_57587_A_41239244 | NC_021166.1    | Ca_Kabuli_Chr07 | 41239244                | AA                                     | GG                 | GG               | INTERGENIC      |               |                    |                                             |

| SNPs IDs             | Chromosome IDs | Chromosomes     | Physical positions (bp) | CDC Frontier genome (Reference genome) | (Pusa 1103 & HPNB) | (ILWC 46 & LPNB) | Sequence genome | Components of | Gene accession IDs | Putative functions |
|----------------------|----------------|-----------------|-------------------------|----------------------------------------|--------------------|------------------|-----------------|---------------|--------------------|--------------------|
| SNP_57588_A_41239248 | NC_021166.1    | Ca_Kabuli_Chr07 | 41239248                | TT                                     | CC                 | CC               | INTERGENIC      |               |                    |                    |
| SNP_57589_A_41239292 | NC_021166.1    | Ca_Kabuli_Chr07 | 41239292                | AA                                     | GG                 | GG               | INTERGENIC      |               |                    |                    |
| SNP_57590_A_41239315 | NC_021166.1    | Ca_Kabuli_Chr07 | 41239315                | TT                                     | AA                 | AA               | INTERGENIC      |               |                    |                    |
| SNP_57591_A_41239326 | NC_021166.1    | Ca_Kabuli_Chr07 | 41239326                | TT                                     | CC                 | CC               | INTERGENIC      |               |                    |                    |
| SNP_57592_A_41239344 | NC_021166.1    | Ca_Kabuli_Chr07 | 41239344                | TT                                     | CC                 | CC               | INTERGENIC      |               |                    |                    |
| SNP_57593_A_41240993 | NC_021166.1    | Ca_Kabuli_Chr07 | 41240993                | CC                                     | TT                 | TT               | INTERGENIC      |               |                    |                    |
| SNP_57594_A_41241020 | NC_021166.1    | Ca_Kabuli_Chr07 | 41241020                | GG                                     | TT                 | TT               | INTERGENIC      |               |                    |                    |
| SNP_57595_A_41241021 | NC_021166.1    | Ca_Kabuli_Chr07 | 41241021                | TT                                     | GG                 | GG               | INTERGENIC      |               |                    |                    |
| SNP_57596_A_41241032 | NC_021166.1    | Ca_Kabuli_Chr07 | 41241032                | GG                                     | AA                 | AA               | INTERGENIC      |               |                    |                    |
| SNP_57597_A_41241233 | NC_021166.1    | Ca_Kabuli_Chr07 | 41241233                | AA                                     | CC                 | CC               | INTERGENIC      |               |                    |                    |
| SNP_57598_A_41241239 | NC_021166.1    | Ca_Kabuli_Chr07 | 41241239                | TT                                     | GG                 | GG               | INTERGENIC      |               |                    |                    |
| SNP_57599_A_41241255 | NC_021166.1    | Ca_Kabuli_Chr07 | 41241255                | AA                                     | GG                 | GG               | INTERGENIC      |               |                    |                    |
| SNP_57600_A_41241260 | NC_021166.1    | Ca_Kabuli_Chr07 | 41241260                | AA                                     | CC                 | CC               | INTERGENIC      |               |                    |                    |
| SNP_57601_A_41241310 | NC_021166.1    | Ca_Kabuli_Chr07 | 41241310                | AA                                     | TT                 | TT               | INTERGENIC      |               |                    |                    |
| SNP_57603_A_41250653 | NC_021166.1    | Ca_Kabuli_Chr07 | 41250653                | AA                                     | GG                 | GG               | INTERGENIC      |               |                    |                    |
| SNP_57604_A_41250667 | NC_021166.1    | Ca_Kabuli_Chr07 | 41250667                | CC                                     | TT                 | TT               | INTERGENIC      |               |                    |                    |
| SNP_57605_A_41250827 | NC_021166.1    | Ca_Kabuli_Chr07 | 41250827                | GG                                     | AA                 | AA               | INTERGENIC      |               |                    |                    |
| SNP_57606_A_41250850 | NC_021166.1    | Ca_Kabuli_Chr07 | 41250850                | AA                                     | TT                 | TT               | INTERGENIC      |               |                    |                    |
| SNP_57607_A_41250852 | NC_021166.1    | Ca_Kabuli_Chr07 | 41250852                | TT                                     | AA                 | AA               | INTERGENIC      |               |                    |                    |
| SNP_57608_A_41250856 | NC_021166.1    | Ca_Kabuli_Chr07 | 41250856                | AA                                     | CC                 | CC               | INTERGENIC      |               |                    |                    |
| SNP_57610_A_41250944 | NC_021166.1    | Ca_Kabuli_Chr07 | 41250944                | TT                                     | CC                 | CC               | INTERGENIC      |               |                    |                    |
| SNP_57611_A_41250968 | NC_021166.1    | Ca_Kabuli_Chr07 | 41250968                | CC                                     | GG                 | GG               | INTERGENIC      |               |                    |                    |

| SNPs IDs             | Chromosome IDs | Chromosomes     | Physical positions (bp) | CDC Frontier genome (Reference genome) | (Pusa 1103 & HPNB) | (ILWC 46 & LPNB) | Sequence genome | Components of | Gene accession IDs | Putative functions |
|----------------------|----------------|-----------------|-------------------------|----------------------------------------|--------------------|------------------|-----------------|---------------|--------------------|--------------------|
| SNP_57612_A_41251003 | NC_021166.1    | Ca_Kabuli_Chr07 | 41251003                | GG                                     | TT                 | TT               | INTERGENIC      |               |                    |                    |
| SNP_57613_A_41251009 | NC_021166.1    | Ca_Kabuli_Chr07 | 41251009                | CC                                     | GG                 | GG               | INTERGENIC      |               |                    |                    |
| SNP_57614_A_41251026 | NC_021166.1    | Ca_Kabuli_Chr07 | 41251026                | GG                                     | AA                 | AA               | INTERGENIC      |               |                    |                    |
| SNP_57615_A_41251044 | NC_021166.1    | Ca_Kabuli_Chr07 | 41251044                | AA                                     | TT                 | TT               | INTERGENIC      |               |                    |                    |
| SNP_57616_A_41251119 | NC_021166.1    | Ca_Kabuli_Chr07 | 41251119                | GG                                     | AA                 | AA               | INTERGENIC      |               |                    |                    |
| SNP_57617_A_41251125 | NC_021166.1    | Ca_Kabuli_Chr07 | 41251125                | TT                                     | AA                 | AA               | INTERGENIC      |               |                    |                    |
| SNP_57618_A_41251132 | NC_021166.1    | Ca_Kabuli_Chr07 | 41251132                | GG                                     | CC                 | CC               | INTERGENIC      |               |                    |                    |
| SNP_57619_A_41251146 | NC_021166.1    | Ca_Kabuli_Chr07 | 41251146                | GG                                     | AA                 | AA               | INTERGENIC      |               |                    |                    |
| SNP_57620_A_41251151 | NC_021166.1    | Ca_Kabuli_Chr07 | 41251151                | CC                                     | GG                 | GG               | INTERGENIC      |               |                    |                    |
| SNP_57621_A_41251237 | NC_021166.1    | Ca_Kabuli_Chr07 | 41251237                | AA                                     | TT                 | TT               | INTERGENIC      |               |                    |                    |
| SNP_57622_A_41251242 | NC_021166.1    | Ca_Kabuli_Chr07 | 41251242                | CC                                     | TT                 | TT               | INTERGENIC      |               |                    |                    |
| SNP_57624_A_41251296 | NC_021166.1    | Ca_Kabuli_Chr07 | 41251296                | CC                                     | AA                 | AA               | INTERGENIC      |               |                    |                    |
| SNP_57625_A_41251325 | NC_021166.1    | Ca_Kabuli_Chr07 | 41251325                | AA                                     | GG                 | GG               | INTERGENIC      |               |                    |                    |
| SNP_57626_A_41251349 | NC_021166.1    | Ca_Kabuli_Chr07 | 41251349                | CC                                     | AA                 | AA               | INTERGENIC      |               |                    |                    |
| SNP_57627_A_41251402 | NC_021166.1    | Ca_Kabuli_Chr07 | 41251402                | TT                                     | CC                 | CC               | INTERGENIC      |               |                    |                    |
| SNP_57628_A_41251406 | NC_021166.1    | Ca_Kabuli_Chr07 | 41251406                | TT                                     | GG                 | GG               | INTERGENIC      |               |                    |                    |
| SNP_57629_A_41251418 | NC_021166.1    | Ca_Kabuli_Chr07 | 41251418                | CC                                     | GG                 | GG               | INTERGENIC      |               |                    |                    |
| SNP_57630_A_41251476 | NC_021166.1    | Ca_Kabuli_Chr07 | 41251476                | CC                                     | TT                 | TT               | INTERGENIC      |               |                    |                    |
| SNP_57631_A_41251594 | NC_021166.1    | Ca_Kabuli_Chr07 | 41251594                | AA                                     | GG                 | GG               | INTERGENIC      |               |                    |                    |
| SNP_57632_A_41251673 | NC_021166.1    | Ca_Kabuli_Chr07 | 41251673                | AA                                     | GG                 | GG               | INTERGENIC      |               |                    |                    |
| SNP_57633_A_41251684 | NC_021166.1    | Ca_Kabuli_Chr07 | 41251684                | GG                                     | AA                 | AA               | INTERGENIC      |               |                    |                    |
| SNP_57634_A_41251756 | NC_021166.1    | Ca_Kabuli_Chr07 | 41251756                | CC                                     | TT                 | TT               | INTERGENIC      |               |                    |                    |

| SNPs IDs             | Chromosome IDs | Chromosomes     | Physical positions (bp) | CDC Frontier genome (Reference genome) | (Pusa 1103 & HPNB) | (ILWC 46 & LPNB) | Sequence genome | Components of | Gene accession IDs | Putative functions |
|----------------------|----------------|-----------------|-------------------------|----------------------------------------|--------------------|------------------|-----------------|---------------|--------------------|--------------------|
| SNP_57635_A_41251801 | NC_021166.1    | Ca_Kabuli_Chr07 | 41251801                | GG                                     | TT                 | TT               | INTERGENIC      |               |                    |                    |
| SNP_57636_A_41251829 | NC_021166.1    | Ca_Kabuli_Chr07 | 41251829                | TT                                     | GG                 | GG               | INTERGENIC      |               |                    |                    |
| SNP_57637_A_41251889 | NC_021166.1    | Ca_Kabuli_Chr07 | 41251889                | TT                                     | CC                 | CC               | INTERGENIC      |               |                    |                    |
| SNP_57638_A_41251938 | NC_021166.1    | Ca_Kabuli_Chr07 | 41251938                | GG                                     | AA                 | AA               | INTERGENIC      |               |                    |                    |
| SNP_57639_A_41251987 | NC_021166.1    | Ca_Kabuli_Chr07 | 41251987                | CC                                     | TT                 | TT               | INTERGENIC      |               |                    |                    |
| SNP_57640_A_41252030 | NC_021166.1    | Ca_Kabuli_Chr07 | 41252030                | CC                                     | GG                 | GG               | INTERGENIC      |               |                    |                    |
| SNP_57641_A_41252046 | NC_021166.1    | Ca_Kabuli_Chr07 | 41252046                | TT                                     | CC                 | CC               | INTERGENIC      |               |                    |                    |
| SNP_57642_A_41252052 | NC_021166.1    | Ca_Kabuli_Chr07 | 41252052                | GG                                     | AA                 | AA               | INTERGENIC      |               |                    |                    |
| SNP_57643_A_41252113 | NC_021166.1    | Ca_Kabuli_Chr07 | 41252113                | GG                                     | CC                 | CC               | INTERGENIC      |               |                    |                    |
| SNP_57644_A_41252136 | NC_021166.1    | Ca_Kabuli_Chr07 | 41252136                | CC                                     | TT                 | TT               | INTERGENIC      |               |                    |                    |
| SNP_57645_A_41252138 | NC_021166.1    | Ca_Kabuli_Chr07 | 41252138                | CC                                     | TT                 | TT               | INTERGENIC      |               |                    |                    |
| SNP_57646_A_41252185 | NC_021166.1    | Ca_Kabuli_Chr07 | 41252185                | AA                                     | CC                 | CC               | INTERGENIC      |               |                    |                    |
| SNP_57647_A_41252210 | NC_021166.1    | Ca_Kabuli_Chr07 | 41252210                | TT                                     | CC                 | CC               | INTERGENIC      |               |                    |                    |
| SNP_57648_A_41252221 | NC_021166.1    | Ca_Kabuli_Chr07 | 41252221                | TT                                     | GG                 | GG               | INTERGENIC      |               |                    |                    |
| SNP_57649_A_41252242 | NC_021166.1    | Ca_Kabuli_Chr07 | 41252242                | CC                                     | TT                 | TT               | INTERGENIC      |               |                    |                    |
| SNP_57650_A_41252245 | NC_021166.1    | Ca_Kabuli_Chr07 | 41252245                | GG                                     | AA                 | AA               | INTERGENIC      |               |                    |                    |
| SNP_57652_A_41252369 | NC_021166.1    | Ca_Kabuli_Chr07 | 41252369                | CC                                     | TT                 | TT               | INTERGENIC      |               |                    |                    |
| SNP_57653_A_41252375 | NC_021166.1    | Ca_Kabuli_Chr07 | 41252375                | TT                                     | CC                 | CC               | INTERGENIC      |               |                    |                    |
| SNP_57654_A_41252388 | NC_021166.1    | Ca_Kabuli_Chr07 | 41252388                | CC                                     | TT                 | TT               | INTERGENIC      |               |                    |                    |
| SNP_57655_A_41282565 | NC_021166.1    | Ca_Kabuli_Chr07 | 41282565                | AA                                     | CC                 | CC               | INTERGENIC      |               |                    |                    |
| SNP_57656_A_41282755 | NC_021166.1    | Ca_Kabuli_Chr07 | 41282755                | GG                                     | AA                 | AA               | INTERGENIC      |               |                    |                    |
| SNP_57657_A_41282889 | NC_021166.1    | Ca_Kabuli_Chr07 | 41282889                | CC                                     | TT                 | TT               | INTERGENIC      |               |                    |                    |

| SNPs IDs             | Chromosome IDs | Chromosomes     | Physical positions (bp) | CDC Frontier genome (Reference genome) | (Pusa 1103 & HPNB) | (ILWC 46 & LPNB) | Sequence Components of genome | Gene accession IDs | Putative functions                     |
|----------------------|----------------|-----------------|-------------------------|----------------------------------------|--------------------|------------------|-------------------------------|--------------------|----------------------------------------|
| SNP_57658_A_41282937 | NC_021166.1    | Ca_Kabuli_Chr07 | 41282937                | TT                                     | GG                 | GG               | INTERGENIC                    |                    |                                        |
| SNP_57659_A_41282942 | NC_021166.1    | Ca_Kabuli_Chr07 | 41282942                | TT                                     | CC                 | CC               | INTERGENIC                    |                    |                                        |
| SNP_57661_A_41284434 | NC_021166.1    | Ca_Kabuli_Chr07 | 41284434                | TT                                     | AA                 | AA               | INTERGENIC                    |                    |                                        |
| SNP_57662_A_41309461 | NC_021166.1    | Ca_Kabuli_Chr07 | 41309461                | TT                                     | CC                 | CC               | INTERGENIC                    |                    |                                        |
| SNP_57663_A_41315077 | NC_021166.1    | Ca_Kabuli_Chr07 | 41315077                | CC                                     | AA                 | AA               | INTERGENIC                    |                    |                                        |
| SNP_57664_A_41322197 | NC_021166.1    | Ca_Kabuli_Chr07 | 41322197                | GG                                     | AA                 | AA               | INTERGENIC                    |                    |                                        |
| SNP_57665_A_41322221 | NC_021166.1    | Ca_Kabuli_Chr07 | 41322221                | GG                                     | AA                 | AA               | INTERGENIC                    |                    |                                        |
| SNP_57666_A_41322572 | NC_021166.1    | Ca_Kabuli_Chr07 | 41322572                | TT                                     | CC                 | CC               | INTERGENIC                    |                    |                                        |
| SNP_57667_A_41323041 | NC_021166.1    | Ca_Kabuli_Chr07 | 41323041                | CC                                     | TT                 | TT               | INTERGENIC                    |                    |                                        |
| SNP_57668_A_41323058 | NC_021166.1    | Ca_Kabuli_Chr07 | 41323058                | CC                                     | TT                 | TT               | INTERGENIC                    |                    |                                        |
| SNP_57669_A_41325509 | NC_021166.1    | Ca_Kabuli_Chr07 | 41325509                | TT                                     | AA                 | AA               | NON_SYNONYMOUS_CODING         | 101499750          | uridine 5'-monophosphate synthase-like |
| SNP_57670_A_41325519 | NC_021166.1    | Ca_Kabuli_Chr07 | 41325519                | TT                                     | GG                 | GG               | NON_SYNONYMOUS_CODING         | 101499750          | uridine 5'-monophosphate synthase-like |
| SNP_57671_A_41325523 | NC_021166.1    | Ca_Kabuli_Chr07 | 41325523                | AA                                     | GG                 | GG               | SYNONYMOUS_CODING             | 101499750          | uridine 5'-monophosphate synthase-like |
| SNP_57672_A_41325526 | NC_021166.1    | Ca_Kabuli_Chr07 | 41325526                | GG                                     | TT                 | TT               | SYNONYMOUS_CODING             | 101499750          | uridine 5'-monophosphate synthase-like |
| SNP_57673_A_41325814 | NC_021166.1    | Ca_Kabuli_Chr07 | 41325814                | CC                                     | TT                 | TT               | SYNONYMOUS_CODING             | 101499750          | uridine 5'-monophosphate synthase-like |
| SNP_57674_A_41325829 | NC_021166.1    | Ca_Kabuli_Chr07 | 41325829                | AA                                     | GG                 | GG               | SYNONYMOUS_CODING             | 101499750          | uridine 5'-monophosphate synthase-like |
| SNP_57675_A_41347597 | NC_021166.1    | Ca_Kabuli_Chr07 | 41347597                | GG                                     | AA                 | AA               | INTERGENIC                    |                    |                                        |
| SNP_57676_A_41371831 | NC_021166.1    | Ca_Kabuli_Chr07 | 41371831                | CC                                     | TT                 | TT               | URR                           | 101513553          | uncharacterized LOC101513553           |
| SNP_57677_A_41411210 | NC_021166.1    | Ca_Kabuli_Chr07 | 41411210                | CC                                     | TT                 | TT               | INTERGENIC                    |                    |                                        |
| SNP_57678_A_41427942 | NC_021166.1    | Ca_Kabuli_Chr07 | 41427942                | TT                                     | GG                 | GG               | INTERGENIC                    |                    |                                        |
| SNP_57679_A_41427963 | NC_021166.1    | Ca_Kabuli_Chr07 | 41427963                | AA                                     | GG                 | GG               | INTERGENIC                    |                    |                                        |
| SNP_57680_A_41428121 | NC_021166.1    | Ca_Kabuli_Chr07 | 41428121                | TT                                     | CC                 | CC               | INTERGENIC                    |                    |                                        |

| SNPs IDs             | Chromosome IDs | Chromosomes     | Physical positions (bp) | CDC Frontier genome (Reference genome) | (Pusa 1103 & HPNB) | (ILWC 46 & LPNB) | Sequence Components of genome | Gene accession IDs | Putative functions |
|----------------------|----------------|-----------------|-------------------------|----------------------------------------|--------------------|------------------|-------------------------------|--------------------|--------------------|
| SNP_57681_A_41428146 | NC_021166.1    | Ca_Kabuli_Chr07 | 41428146                | GG                                     | TT                 | TT               | INTERGENIC                    |                    |                    |
| SNP_57682_A_41428801 | NC_021166.1    | Ca_Kabuli_Chr07 | 41428801                | AA                                     | GG                 | GG               | INTERGENIC                    |                    |                    |
| SNP_57684_A_41464352 | NC_021166.1    | Ca_Kabuli_Chr07 | 41464352                | TT                                     | AA                 | AA               | INTRON                        | 101500704          | Unknown function   |
| SNP_57686_A_41498663 | NC_021166.1    | Ca_Kabuli_Chr07 | 41498663                | TT                                     | GG                 | GG               | INTERGENIC                    |                    |                    |
| SNP_57688_A_41571998 | NC_021166.1    | Ca_Kabuli_Chr07 | 41571998                | TT                                     | AA                 | AA               | INTERGENIC                    |                    |                    |
| SNP_57689_A_41580381 | NC_021166.1    | Ca_Kabuli_Chr07 | 41580381                | AA                                     | CC                 | CC               | INTERGENIC                    |                    |                    |
| SNP_57690_A_41598499 | NC_021166.1    | Ca_Kabuli_Chr07 | 41598499                | TT                                     | CC                 | CC               | INTERGENIC                    |                    |                    |
| SNP_57691_A_41612299 | NC_021166.1    | Ca_Kabuli_Chr07 | 41612299                | TT                                     | GG                 | GG               | INTERGENIC                    |                    |                    |
| SNP_57692_A_41612673 | NC_021166.1    | Ca_Kabuli_Chr07 | 41612673                | TT                                     | AA                 | AA               | INTERGENIC                    |                    |                    |
| SNP_57693_A_41615011 | NC_021166.1    | Ca_Kabuli_Chr07 | 41615011                | CC                                     | TT                 | TT               | INTERGENIC                    |                    |                    |
| SNP_57694_A_41693628 | NC_021166.1    | Ca_Kabuli_Chr07 | 41693628                | AA                                     | GG                 | GG               | INTERGENIC                    |                    |                    |
| SNP_57695_A_41731883 | NC_021166.1    | Ca_Kabuli_Chr07 | 41731883                | CC                                     | TT                 | TT               | INTERGENIC                    |                    |                    |
| SNP_57696_A_41766315 | NC_021166.1    | Ca_Kabuli_Chr07 | 41766315                | GG                                     | AA                 | AA               | INTERGENIC                    |                    |                    |
| SNP_57697_A_41786185 | NC_021166.1    | Ca_Kabuli_Chr07 | 41786185                | CC                                     | TT                 | TT               | INTERGENIC                    |                    |                    |
| SNP_57698_A_41794675 | NC_021166.1    | Ca_Kabuli_Chr07 | 41794675                | CC                                     | TT                 | TT               | INTERGENIC                    |                    |                    |
| SNP_57699_A_41794891 | NC_021166.1    | Ca_Kabuli_Chr07 | 41794891                | GG                                     | AA                 | AA               | INTERGENIC                    |                    |                    |
| SNP_57700_A_41806348 | NC_021166.1    | Ca_Kabuli_Chr07 | 41806348                | CC                                     | TT                 | TT               | INTERGENIC                    |                    |                    |
| SNP_57701_A_41841867 | NC_021166.1    | Ca_Kabuli_Chr07 | 41841867                | CC                                     | TT                 | TT               | URR                           | 101501966          | Unknown function   |
| SNP_57702_A_41898593 | NC_021166.1    | Ca_Kabuli_Chr07 | 41898593                | CC                                     | AA                 | AA               | INTERGENIC                    |                    |                    |
| SNP_57703_A_41911297 | NC_021166.1    | Ca_Kabuli_Chr07 | 41911297                | AA                                     | GG                 | GG               | INTERGENIC                    |                    |                    |
| SNP_57704_A_41928444 | NC_021166.1    | Ca_Kabuli_Chr07 | 41928444                | GG                                     | TT                 | TT               | INTERGENIC                    |                    |                    |
| SNP_57705_A_41932623 | NC_021166.1    | Ca_Kabuli_Chr07 | 41932623                | AA                                     | GG                 | GG               | INTERGENIC                    |                    |                    |

| SNPs IDs             | Chromosome IDs | Chromosomes     | Physical positions (bp) | CDC Frontier genome (Reference genome) | (Pusa 1103 & HPNB) | (ILWC 46 & LPNB) | Sequence Components of genome | Gene accession IDs | Putative functions                                   |
|----------------------|----------------|-----------------|-------------------------|----------------------------------------|--------------------|------------------|-------------------------------|--------------------|------------------------------------------------------|
| SNP_57706_A_41948621 | NC_021166.1    | Ca_Kabuli_Chr07 | 41948621                | AA                                     | GG                 | GG               | INTERGENIC                    |                    |                                                      |
| SNP_57707_A_41994380 | NC_021166.1    | Ca_Kabuli_Chr07 | 41994380                | AA                                     | CC                 | CC               | URR                           | 101492387          | mitochondrial inner membrane protease subunit 1-like |
| SNP_57708_A_41994381 | NC_021166.1    | Ca_Kabuli_Chr07 | 41994381                | AA                                     | CC                 | CC               | URR                           | 101492387          | mitochondrial inner membrane protease subunit 1-like |
| SNP_57709_A_42066790 | NC_021166.1    | Ca_Kabuli_Chr07 | 42066790                | CC                                     | TT                 | TT               | INTERGENIC                    |                    |                                                      |
| SNP_57711_A_42092700 | NC_021166.1    | Ca_Kabuli_Chr07 | 42092700                | CC                                     | TT                 | TT               | INTERGENIC                    |                    |                                                      |
| SNP_57712_A_42092701 | NC_021166.1    | Ca_Kabuli_Chr07 | 42092701                | AA                                     | GG                 | GG               | INTERGENIC                    |                    |                                                      |
| SNP_57713_A_42092708 | NC_021166.1    | Ca_Kabuli_Chr07 | 42092708                | CC                                     | TT                 | TT               | INTERGENIC                    |                    |                                                      |
| SNP_57714_A_42092733 | NC_021166.1    | Ca_Kabuli_Chr07 | 42092733                | AA                                     | CC                 | CC               | INTERGENIC                    |                    |                                                      |
| SNP_57715_A_42093029 | NC_021166.1    | Ca_Kabuli_Chr07 | 42093029                | CC                                     | GG                 | GG               | INTERGENIC                    |                    |                                                      |
| SNP_57716_A_42093639 | NC_021166.1    | Ca_Kabuli_Chr07 | 42093639                | CC                                     | GG                 | GG               | INTERGENIC                    |                    |                                                      |
| SNP_57717_A_42093677 | NC_021166.1    | Ca_Kabuli_Chr07 | 42093677                | GG                                     | CC                 | CC               | INTERGENIC                    |                    |                                                      |
| SNP_57718_A_42093679 | NC_021166.1    | Ca_Kabuli_Chr07 | 42093679                | GG                                     | CC                 | CC               | INTERGENIC                    |                    |                                                      |
| SNP_57719_A_42241851 | NC_021166.1    | Ca_Kabuli_Chr07 | 42241851                | TT                                     | GG                 | GG               | URR                           | 101495396          | 3'-5' exoribonuclease 1-like                         |
| SNP_57720_A_42307691 | NC_021166.1    | Ca_Kabuli_Chr07 | 42307691                | TT                                     | GG                 | GG               | INTERGENIC                    |                    |                                                      |
| SNP_57721_A_42307801 | NC_021166.1    | Ca_Kabuli_Chr07 | 42307801                | TT                                     | CC                 | CC               | INTERGENIC                    |                    |                                                      |
| SNP_57722_A_42352144 | NC_021166.1    | Ca_Kabuli_Chr07 | 42352144                | CC                                     | GG                 | GG               | INTERGENIC                    |                    |                                                      |
| SNP_57723_A_42352201 | NC_021166.1    | Ca_Kabuli_Chr07 | 42352201                | AA                                     | CC                 | CC               | INTERGENIC                    |                    |                                                      |
| SNP_57724_A_42356367 | NC_021166.1    | Ca_Kabuli_Chr07 | 42356367                | AA                                     | GG                 | GG               | INTERGENIC                    |                    |                                                      |
| SNP_57725_A_42356374 | NC_021166.1    | Ca_Kabuli_Chr07 | 42356374                | AA                                     | GG                 | GG               | INTERGENIC                    |                    |                                                      |
| SNP_57726_A_42356413 | NC_021166.1    | Ca_Kabuli_Chr07 | 42356413                | GG                                     | CC                 | CC               | INTERGENIC                    |                    |                                                      |
| SNP_57727_A_42356427 | NC_021166.1    | Ca_Kabuli_Chr07 | 42356427                | GG                                     | TT                 | TT               | INTERGENIC                    |                    |                                                      |
| SNP_57728_A_42356705 | NC_021166.1    | Ca_Kabuli_Chr07 | 42356705                | GG                                     | CC                 | CC               | INTERGENIC                    |                    |                                                      |

| SNPs IDs             | Chromosome IDs | Chromosomes     | Physical positions (bp) | CDC Frontier genome (Reference genome) | (Pusa 1103 & HPNB) | (ILWC 46 & LPNB) | Sequence Components of genome | Gene accession IDs | Putative functions           |
|----------------------|----------------|-----------------|-------------------------|----------------------------------------|--------------------|------------------|-------------------------------|--------------------|------------------------------|
| SNP_57729_A_42356758 | NC_021166.1    | Ca_Kabuli_Chr07 | 42356758                | CC                                     | TT                 | TT               | INTERGENIC                    |                    |                              |
| SNP_57730_A_42357046 | NC_021166.1    | Ca_Kabuli_Chr07 | 42357046                | AA                                     | GG                 | GG               | INTERGENIC                    |                    |                              |
| SNP_57731_A_42357055 | NC_021166.1    | Ca_Kabuli_Chr07 | 42357055                | GG                                     | AA                 | AA               | INTERGENIC                    |                    |                              |
| SNP_57732_A_42357087 | NC_021166.1    | Ca_Kabuli_Chr07 | 42357087                | GG                                     | AA                 | AA               | INTERGENIC                    |                    |                              |
| SNP_57733_A_42358193 | NC_021166.1    | Ca_Kabuli_Chr07 | 42358193                | TT                                     | GG                 | GG               | INTERGENIC                    |                    |                              |
| SNP_57734_A_42358220 | NC_021166.1    | Ca_Kabuli_Chr07 | 42358220                | GG                                     | TT                 | TT               | INTERGENIC                    |                    |                              |
| SNP_57735_A_42358280 | NC_021166.1    | Ca_Kabuli_Chr07 | 42358280                | AA                                     | GG                 | GG               | INTERGENIC                    |                    |                              |
| SNP_57737_A_42358593 | NC_021166.1    | Ca_Kabuli_Chr07 | 42358593                | GG                                     | AA                 | AA               | INTERGENIC                    |                    |                              |
| SNP_57738_A_42363897 | NC_021166.1    | Ca_Kabuli_Chr07 | 42363897                | AA                                     | GG                 | GG               | INTERGENIC                    |                    |                              |
| SNP_57740_A_42381889 | NC_021166.1    | Ca_Kabuli_Chr07 | 42381889                | AA                                     | GG                 | GG               | INTRON                        | 101505500          | uncharacterized LOC101505500 |
| SNP_57741_A_42384580 | NC_021166.1    | Ca_Kabuli_Chr07 | 42384580                | TT                                     | CC                 | CC               | INTRON                        | 101505500          | uncharacterized LOC101505500 |
| SNP_57742_A_42384635 | NC_021166.1    | Ca_Kabuli_Chr07 | 42384635                | TT                                     | AA                 | AA               | INTRON                        | 101505500          | uncharacterized LOC101505500 |
| SNP_57743_A_42385007 | NC_021166.1    | Ca_Kabuli_Chr07 | 42385007                | CC                                     | AA                 | AA               | INTRON                        | 101505500          | uncharacterized LOC101505500 |
| SNP_57744_A_42392104 | NC_021166.1    | Ca_Kabuli_Chr07 | 42392104                | GG                                     | AA                 | AA               | INTRON                        | 101505500          | uncharacterized LOC101505500 |
| SNP_57745_A_42392870 | NC_021166.1    | Ca_Kabuli_Chr07 | 42392870                | TT                                     | AA                 | AA               | INTRON                        | 101505500          | uncharacterized LOC101505500 |
| SNP_57746_A_42392972 | NC_021166.1    | Ca_Kabuli_Chr07 | 42392972                | GG                                     | AA                 | AA               | INTRON                        | 101505500          | uncharacterized LOC101505500 |
| SNP_57747_A_42393054 | NC_021166.1    | Ca_Kabuli_Chr07 | 42393054                | TT                                     | AA                 | AA               | INTRON                        | 101505500          | uncharacterized LOC101505500 |
| SNP_57748_A_42393064 | NC_021166.1    | Ca_Kabuli_Chr07 | 42393064                | GG                                     | TT                 | AA               | INTRON                        | 101505500          | uncharacterized LOC101505500 |
| SNP_57750_A_42393069 | NC_021166.1    | Ca_Kabuli_Chr07 | 42393069                | TT                                     | AA                 | AA               | INTRON                        | 101505500          | uncharacterized LOC101505500 |
| SNP_57751_A_42393080 | NC_021166.1    | Ca_Kabuli_Chr07 | 42393080                | GG                                     | TT                 | TT               | INTRON                        | 101505500          | uncharacterized LOC101505500 |
| SNP_57752_A_42393111 | NC_021166.1    | Ca_Kabuli_Chr07 | 42393111                | TT                                     | CC                 | CC               | INTRON                        | 101505500          | uncharacterized LOC101505500 |
| SNP_57753_A_42393133 | NC_021166.1    | Ca_Kabuli_Chr07 | 42393133                | GG                                     | AA                 | AA               | INTRON                        | 101505500          | uncharacterized LOC101505500 |



| SNPs IDs             | Chromosome IDs | Chromosomes     | Physical positions (bp) | CDC Frontier genome (Reference genome) | (Pusa 1103 & HPNB) | (ILWC 46 & LPNB) | Sequence Components of genome | Gene accession IDs | Putative functions           |
|----------------------|----------------|-----------------|-------------------------|----------------------------------------|--------------------|------------------|-------------------------------|--------------------|------------------------------|
| SNP_57754_A_42393162 | NC_021166.1    | Ca_Kabuli_Chr07 | 42393162                | TT                                     | AA                 | AA               | INTRON                        | 101505500          | uncharacterized LOC101505500 |
| SNP_57755_A_42396536 | NC_021166.1    | Ca_Kabuli_Chr07 | 42396536                | CC                                     | TT                 | TT               | INTRON                        | 101505500          | uncharacterized LOC101505500 |
| SNP_57756_A_42396945 | NC_021166.1    | Ca_Kabuli_Chr07 | 42396945                | TT                                     | GG                 | GG               | INTRON                        | 101505500          | uncharacterized LOC101505500 |
| SNP_57757_A_42397094 | NC_021166.1    | Ca_Kabuli_Chr07 | 42397094                | AA                                     | TT                 | TT               | INTRON                        | 101505500          | uncharacterized LOC101505500 |
| SNP_57758_A_42397108 | NC_021166.1    | Ca_Kabuli_Chr07 | 42397108                | TT                                     | CC                 | CC               | INTRON                        | 101505500          | uncharacterized LOC101505500 |
| SNP_57759_A_42399227 | NC_021166.1    | Ca_Kabuli_Chr07 | 42399227                | GG                                     | AA                 | AA               | URR                           | 101505500          | uncharacterized LOC101505500 |
| SNP_57760_A_42399249 | NC_021166.1    | Ca_Kabuli_Chr07 | 42399249                | GG                                     | AA                 | AA               | URR                           | 101505500          | uncharacterized LOC101505500 |
| SNP_57761_A_42403924 | NC_021166.1    | Ca_Kabuli_Chr07 | 42403924                | GG                                     | CC                 | CC               | INTERGENIC                    |                    |                              |
| SNP_57762_A_42405405 | NC_021166.1    | Ca_Kabuli_Chr07 | 42405405                | TT                                     | CC                 | CC               | INTERGENIC                    |                    |                              |
| SNP_57763_A_42405942 | NC_021166.1    | Ca_Kabuli_Chr07 | 42405942                | GG                                     | TT                 | TT               | INTERGENIC                    |                    |                              |
| SNP_57764_A_42405951 | NC_021166.1    | Ca_Kabuli_Chr07 | 42405951                | TT                                     | AA                 | AA               | INTERGENIC                    |                    |                              |
| SNP_57765_A_42406256 | NC_021166.1    | Ca_Kabuli_Chr07 | 42406256                | TT                                     | CC                 | CC               | INTERGENIC                    |                    |                              |
| SNP_57766_A_42406275 | NC_021166.1    | Ca_Kabuli_Chr07 | 42406275                | CC                                     | GG                 | GG               | INTERGENIC                    |                    |                              |
| SNP_57767_A_42406319 | NC_021166.1    | Ca_Kabuli_Chr07 | 42406319                | TT                                     | CC                 | CC               | INTERGENIC                    |                    |                              |
| SNP_57768_A_42410067 | NC_021166.1    | Ca_Kabuli_Chr07 | 42410067                | TT                                     | CC                 | CC               | INTERGENIC                    |                    |                              |
| SNP_57769_A_42410667 | NC_021166.1    | Ca_Kabuli_Chr07 | 42410667                | TT                                     | CC                 | CC               | INTERGENIC                    |                    |                              |
| SNP_57770_A_42421444 | NC_021166.1    | Ca_Kabuli_Chr07 | 42421444                | TT                                     | CC                 | CC               | INTERGENIC                    |                    |                              |
| SNP_57771_A_42421455 | NC_021166.1    | Ca_Kabuli_Chr07 | 42421455                | CC                                     | TT                 | TT               | INTERGENIC                    |                    |                              |
| SNP_57772_A_42427206 | NC_021166.1    | Ca_Kabuli_Chr07 | 42427206                | GG                                     | AA                 | AA               | INTERGENIC                    |                    |                              |
| SNP_57773_A_42458446 | NC_021166.1    | Ca_Kabuli_Chr07 | 42458446                | AA                                     | GG                 | GG               | INTERGENIC                    |                    |                              |
| SNP_57774_A_42458449 | NC_021166.1    | Ca_Kabuli_Chr07 | 42458449                | TT                                     | CC                 | CC               | INTERGENIC                    |                    |                              |
| SNP_57775_A_42458450 | NC_021166.1    | Ca_Kabuli_Chr07 | 42458450                | TT                                     | CC                 | CC               | INTERGENIC                    |                    |                              |

| SNPs IDs             | Chromosome IDs | Chromosomes     | Physical positions (bp) | CDC Frontier genome (Reference genome) | (Pusa 1103 & HPNB) | (ILWC 46 & LPNB) | Sequence Components of genome | Gene accession IDs | Putative functions          |
|----------------------|----------------|-----------------|-------------------------|----------------------------------------|--------------------|------------------|-------------------------------|--------------------|-----------------------------|
| SNP_57776_A_42458457 | NC_021166.1    | Ca_Kabuli_Chr07 | 42458457                | TT                                     | CC                 | CC               | INTERGENIC                    |                    |                             |
| SNP_57778_A_42458486 | NC_021166.1    | Ca_Kabuli_Chr07 | 42458486                | AA                                     | GG                 | GG               | INTERGENIC                    |                    |                             |
| SNP_57779_A_42459735 | NC_021166.1    | Ca_Kabuli_Chr07 | 42459735                | TT                                     | GG                 | GG               | INTERGENIC                    |                    |                             |
| SNP_57780_A_42459736 | NC_021166.1    | Ca_Kabuli_Chr07 | 42459736                | AA                                     | GG                 | GG               | INTERGENIC                    |                    |                             |
| SNP_57781_A_42459762 | NC_021166.1    | Ca_Kabuli_Chr07 | 42459762                | AA                                     | GG                 | GG               | INTERGENIC                    |                    |                             |
| SNP_57782_A_42459775 | NC_021166.1    | Ca_Kabuli_Chr07 | 42459775                | TT                                     | AA                 | AA               | INTERGENIC                    |                    |                             |
| SNP_57783_A_42459781 | NC_021166.1    | Ca_Kabuli_Chr07 | 42459781                | GG                                     | AA                 | AA               | INTERGENIC                    |                    |                             |
| SNP_57785_A_42461292 | NC_021166.1    | Ca_Kabuli_Chr07 | 42461292                | TT                                     | CC                 | CC               | INTERGENIC                    |                    |                             |
| SNP_57786_A_42461293 | NC_021166.1    | Ca_Kabuli_Chr07 | 42461293                | GG                                     | AA                 | AA               | INTERGENIC                    |                    |                             |
| SNP_57787_A_42461748 | NC_021166.1    | Ca_Kabuli_Chr07 | 42461748                | CC                                     | GG                 | GG               | INTERGENIC                    |                    |                             |
| SNP_57788_A_42472710 | NC_021166.1    | Ca_Kabuli_Chr07 | 42472710                | AA                                     | TT                 | TT               | DRR                           | 101514529          | heme-binding protein 2-like |
| SNP_57789_A_42472711 | NC_021166.1    | Ca_Kabuli_Chr07 | 42472711                | TT                                     | CC                 | CC               | DRR                           | 101514529          | heme-binding protein 2-like |
| SNP_57790_A_42472712 | NC_021166.1    | Ca_Kabuli_Chr07 | 42472712                | AA                                     | TT                 | TT               | DRR                           | 101514529          | heme-binding protein 2-like |
| SNP_57791_A_42472713 | NC_021166.1    | Ca_Kabuli_Chr07 | 42472713                | AA                                     | GG                 | GG               | DRR                           | 101514529          | heme-binding protein 2-like |
| SNP_57792_A_42472715 | NC_021166.1    | Ca_Kabuli_Chr07 | 42472715                | CC                                     | TT                 | TT               | DRR                           | 101514529          | heme-binding protein 2-like |
| SNP_57793_A_42472716 | NC_021166.1    | Ca_Kabuli_Chr07 | 42472716                | AA                                     | TT                 | TT               | DRR                           | 101514529          | heme-binding protein 2-like |
| SNP_57794_A_42472717 | NC_021166.1    | Ca_Kabuli_Chr07 | 42472717                | AA                                     | TT                 | TT               | DRR                           | 101514529          | heme-binding protein 2-like |
| SNP_57795_A_42472718 | NC_021166.1    | Ca_Kabuli_Chr07 | 42472718                | AA                                     | CC                 | CC               | DRR                           | 101514529          | heme-binding protein 2-like |
| SNP_57796_A_42472724 | NC_021166.1    | Ca_Kabuli_Chr07 | 42472724                | AA                                     | TT                 | TT               | DRR                           | 101514529          | heme-binding protein 2-like |
| SNP_57797_A_42472808 | NC_021166.1    | Ca_Kabuli_Chr07 | 42472808                | GG                                     | TT                 | TT               | DRR                           | 101514529          | heme-binding protein 2-like |
| SNP_57798_A_42472964 | NC_021166.1    | Ca_Kabuli_Chr07 | 42472964                | TT                                     | CC                 | CC               | DRR                           | 101514529          | heme-binding protein 2-like |
| SNP_57799_A_42473191 | NC_021166.1    | Ca_Kabuli_Chr07 | 42473191                | TT                                     | GG                 | GG               | DRR                           | 101514529          | heme-binding protein 2-like |

| SNPs IDs             | Chromosome IDs | Chromosomes     | Physical positions (bp) | CDC Frontier genome (Reference genome) | (Pusa 1103 & HPNB) | (ILWC 46 & LPNB) | Sequence Components of genome | Gene accession IDs | Putative functions          |
|----------------------|----------------|-----------------|-------------------------|----------------------------------------|--------------------|------------------|-------------------------------|--------------------|-----------------------------|
| SNP_57800_A_42473442 | NC_021166.1    | Ca_Kabuli_Chr07 | 42473442                | TT                                     | CC                 | CC               | STOP_LOST                     | 101514529          | heme-binding protein 2-like |
| SNP_57801_A_42473528 | NC_021166.1    | Ca_Kabuli_Chr07 | 42473528                | TT                                     | GG                 | GG               | INTRON                        | 101514529          | heme-binding protein 2-like |
| SNP_57802_A_42473536 | NC_021166.1    | Ca_Kabuli_Chr07 | 42473536                | TT                                     | CC                 | CC               | INTRON                        | 101514529          | heme-binding protein 2-like |
| SNP_57803_A_42473568 | NC_021166.1    | Ca_Kabuli_Chr07 | 42473568                | GG                                     | TT                 | TT               | INTRON                        | 101514529          | heme-binding protein 2-like |
| SNP_57804_A_42473602 | NC_021166.1    | Ca_Kabuli_Chr07 | 42473602                | CC                                     | GG                 | GG               | INTRON                        | 101514529          | heme-binding protein 2-like |
| SNP_57805_A_42473776 | NC_021166.1    | Ca_Kabuli_Chr07 | 42473776                | TT                                     | CC                 | CC               | INTRON                        | 101514529          | heme-binding protein 2-like |
| SNP_57806_A_42473864 | NC_021166.1    | Ca_Kabuli_Chr07 | 42473864                | CC                                     | TT                 | TT               | INTRON                        | 101514529          | heme-binding protein 2-like |
| SNP_57807_A_42473865 | NC_021166.1    | Ca_Kabuli_Chr07 | 42473865                | AA                                     | GG                 | GG               | INTRON                        | 101514529          | heme-binding protein 2-like |
| SNP_57808_A_42474661 | NC_021166.1    | Ca_Kabuli_Chr07 | 42474661                | GG                                     | CC                 | CC               | URR                           | 101514529          | heme-binding protein 2-like |
| SNP_57809_A_42474701 | NC_021166.1    | Ca_Kabuli_Chr07 | 42474701                | CC                                     | TT                 | TT               | URR                           | 101514529          | heme-binding protein 2-like |
| SNP_57810_A_42474939 | NC_021166.1    | Ca_Kabuli_Chr07 | 42474939                | TT                                     | AA                 | AA               | URR                           | 101514529          | heme-binding protein 2-like |
| SNP_57811_A_42474957 | NC_021166.1    | Ca_Kabuli_Chr07 | 42474957                | AA                                     | GG                 | GG               | URR                           | 101514529          | heme-binding protein 2-like |
| SNP_57812_A_42474960 | NC_021166.1    | Ca_Kabuli_Chr07 | 42474960                | AA                                     | TT                 | TT               | URR                           | 101514529          | heme-binding protein 2-like |
| SNP_57813_A_42475009 | NC_021166.1    | Ca_Kabuli_Chr07 | 42475009                | AA                                     | TT                 | TT               | URR                           | 101514529          | heme-binding protein 2-like |
| SNP_57814_A_42475018 | NC_021166.1    | Ca_Kabuli_Chr07 | 42475018                | TT                                     | AA                 | AA               | URR                           | 101514529          | heme-binding protein 2-like |
| SNP_57815_A_42475246 | NC_021166.1    | Ca_Kabuli_Chr07 | 42475246                | TT                                     | CC                 | CC               | URR                           | 101514529          | heme-binding protein 2-like |
| SNP_57816_A_42475278 | NC_021166.1    | Ca_Kabuli_Chr07 | 42475278                | TT                                     | CC                 | CC               | URR                           | 101514529          | heme-binding protein 2-like |
| SNP_57817_A_42475390 | NC_021166.1    | Ca_Kabuli_Chr07 | 42475390                | TT                                     | AA                 | AA               | URR                           | 101514529          | heme-binding protein 2-like |
| SNP_57818_A_42475537 | NC_021166.1    | Ca_Kabuli_Chr07 | 42475537                | CC                                     | TT                 | TT               | URR                           | 101514529          | heme-binding protein 2-like |
| SNP_57819_A_42475571 | NC_021166.1    | Ca_Kabuli_Chr07 | 42475571                | CC                                     | GG                 | GG               | URR                           | 101514529          | heme-binding protein 2-like |
| SNP_57820_A_42475693 | NC_021166.1    | Ca_Kabuli_Chr07 | 42475693                | AA                                     | GG                 | GG               | URR                           | 101514529          | heme-binding protein 2-like |
| SNP_57821_A_42475738 | NC_021166.1    | Ca_Kabuli_Chr07 | 42475738                | GG                                     | TT                 | TT               | URR                           | 101514529          | heme-binding protein 2-like |

| SNPs IDs             | Chromosome IDs | Chromosomes     | Physical positions (bp) | CDC Frontier genome (Reference genome) | (Pusa 1103 & HPNB) | (ILWC 46 & LPNB) | Sequence Components of genome | Gene accession IDs | Putative functions          |
|----------------------|----------------|-----------------|-------------------------|----------------------------------------|--------------------|------------------|-------------------------------|--------------------|-----------------------------|
| SNP_57822_A_42475747 | NC_021166.1    | Ca_Kabuli_Chr07 | 42475747                | TT                                     | CC                 | CC               | URR                           | 101514529          | heme-binding protein 2-like |
| SNP_57823_A_42475750 | NC_021166.1    | Ca_Kabuli_Chr07 | 42475750                | TT                                     | GG                 | GG               | URR                           | 101514529          | heme-binding protein 2-like |
| SNP_57824_A_42475773 | NC_021166.1    | Ca_Kabuli_Chr07 | 42475773                | TT                                     | AA                 | AA               | URR                           | 101514529          | heme-binding protein 2-like |
| SNP_57825_A_42475776 | NC_021166.1    | Ca_Kabuli_Chr07 | 42475776                | CC                                     | GG                 | GG               | URR                           | 101514529          | heme-binding protein 2-like |
| SNP_57826_A_42475824 | NC_021166.1    | Ca_Kabuli_Chr07 | 42475824                | AA                                     | TT                 | TT               | URR                           | 101514529          | heme-binding protein 2-like |
| SNP_57827_A_42475831 | NC_021166.1    | Ca_Kabuli_Chr07 | 42475831                | GG                                     | AA                 | AA               | URR                           | 101514529          | heme-binding protein 2-like |
| SNP_57828_A_42475832 | NC_021166.1    | Ca_Kabuli_Chr07 | 42475832                | TT                                     | AA                 | AA               | URR                           | 101514529          | heme-binding protein 2-like |
| SNP_57829_A_42475863 | NC_021166.1    | Ca_Kabuli_Chr07 | 42475863                | CC                                     | AA                 | AA               | URR                           | 101514529          | heme-binding protein 2-like |
| SNP_57830_A_42475889 | NC_021166.1    | Ca_Kabuli_Chr07 | 42475889                | CC                                     | AA                 | AA               | URR                           | 101514529          | heme-binding protein 2-like |
| SNP_57831_A_42475891 | NC_021166.1    | Ca_Kabuli_Chr07 | 42475891                | AA                                     | GG                 | GG               | URR                           | 101514529          | heme-binding protein 2-like |
| SNP_57832_A_42475934 | NC_021166.1    | Ca_Kabuli_Chr07 | 42475934                | CC                                     | GG                 | GG               | URR                           | 101514529          | heme-binding protein 2-like |
| SNP_57833_A_42475975 | NC_021166.1    | Ca_Kabuli_Chr07 | 42475975                | CC                                     | GG                 | GG               | URR                           | 101514529          | heme-binding protein 2-like |
| SNP_57834_A_42475988 | NC_021166.1    | Ca_Kabuli_Chr07 | 42475988                | GG                                     | AA                 | AA               | URR                           | 101514529          | heme-binding protein 2-like |
| SNP_57835_A_42476051 | NC_021166.1    | Ca_Kabuli_Chr07 | 42476051                | TT                                     | GG                 | GG               | URR                           | 101514529          | heme-binding protein 2-like |
| SNP_57836_A_42476153 | NC_021166.1    | Ca_Kabuli_Chr07 | 42476153                | CC                                     | TT                 | TT               | URR                           | 101514529          | heme-binding protein 2-like |
| SNP_57837_A_42476155 | NC_021166.1    | Ca_Kabuli_Chr07 | 42476155                | GG                                     | TT                 | TT               | URR                           | 101514529          | heme-binding protein 2-like |
| SNP_57838_A_42476198 | NC_021166.1    | Ca_Kabuli_Chr07 | 42476198                | CC                                     | TT                 | TT               | URR                           | 101514529          | heme-binding protein 2-like |
| SNP_57839_A_42476201 | NC_021166.1    | Ca_Kabuli_Chr07 | 42476201                | GG                                     | AA                 | AA               | URR                           | 101514529          | heme-binding protein 2-like |
| SNP_57840_A_42476217 | NC_021166.1    | Ca_Kabuli_Chr07 | 42476217                | CC                                     | TT                 | TT               | URR                           | 101514529          | heme-binding protein 2-like |
| SNP_57841_A_42476252 | NC_021166.1    | Ca_Kabuli_Chr07 | 42476252                | GG                                     | CC                 | CC               | URR                           | 101514529          | heme-binding protein 2-like |
| SNP_57842_A_42476319 | NC_021166.1    | Ca_Kabuli_Chr07 | 42476319                | TT                                     | AA                 | AA               | URR                           | 101514529          | heme-binding protein 2-like |
| SNP_57844_A_42497070 | NC_021166.1    | Ca_Kabuli_Chr07 | 42497070                | GG                                     | AA                 | AA               | INTERGENIC                    |                    |                             |

| SNPs IDs             | Chromosome IDs | Chromosomes     | Physical positions (bp) | CDC Frontier genome (Reference genome) | (Pusa 1103 & HPNB) | (ILWC 46 & LPNB) | Sequence Components of genome | Gene accession IDs | Putative functions           |
|----------------------|----------------|-----------------|-------------------------|----------------------------------------|--------------------|------------------|-------------------------------|--------------------|------------------------------|
| SNP_57845_A_42497723 | NC_021166.1    | Ca_Kabuli_Chr07 | 42497723                | GG                                     | AA                 | AA               | INTERGENIC                    |                    |                              |
| SNP_57846_A_42507316 | NC_021166.1    | Ca_Kabuli_Chr07 | 42507316                | TT                                     | AA                 | AA               | INTERGENIC                    |                    |                              |
| SNP_57847_A_42514540 | NC_021166.1    | Ca_Kabuli_Chr07 | 42514540                | GG                                     | AA                 | AA               | INTERGENIC                    |                    |                              |
| SNP_57848_A_42515992 | NC_021166.1    | Ca_Kabuli_Chr07 | 42515992                | CC                                     | TT                 | TT               | INTERGENIC                    |                    |                              |
| SNP_57849_A_42529134 | NC_021166.1    | Ca_Kabuli_Chr07 | 42529134                | TT                                     | AA                 | AA               | INTRON                        | 101506481          | heme-binding protein 2-like  |
| SNP_57850_A_42541323 | NC_021166.1    | Ca_Kabuli_Chr07 | 42541323                | AA                                     | GG                 | GG               | INTERGENIC                    |                    |                              |
| SNP_57851_A_42541332 | NC_021166.1    | Ca_Kabuli_Chr07 | 42541332                | AA                                     | TT                 | TT               | INTERGENIC                    |                    |                              |
| SNP_57852_A_42541333 | NC_021166.1    | Ca_Kabuli_Chr07 | 42541333                | TT                                     | GG                 | GG               | INTERGENIC                    |                    |                              |
| SNP_57853_A_42541372 | NC_021166.1    | Ca_Kabuli_Chr07 | 42541372                | AA                                     | GG                 | GG               | INTERGENIC                    |                    |                              |
| SNP_57854_A_42568322 | NC_021166.1    | Ca_Kabuli_Chr07 | 42568322                | GG                                     | TT                 | TT               | INTERGENIC                    |                    |                              |
| SNP_57857_A_42583234 | NC_021166.1    | Ca_Kabuli_Chr07 | 42583234                | CC                                     | TT                 | TT               | URR                           | 101515496          | uncharacterized LOC101515496 |
| SNP_57858_A_42583237 | NC_021166.1    | Ca_Kabuli_Chr07 | 42583237                | GG                                     | CC                 | CC               | URR                           | 101515496          | uncharacterized LOC101515496 |
| SNP_57859_A_42589438 | NC_021166.1    | Ca_Kabuli_Chr07 | 42589438                | GG                                     | AA                 | AA               | INTERGENIC                    |                    |                              |
| SNP_57860_A_42589454 | NC_021166.1    | Ca_Kabuli_Chr07 | 42589454                | GG                                     | TT                 | TT               | INTERGENIC                    |                    |                              |
| SNP_57862_A_42659920 | NC_021166.1    | Ca_Kabuli_Chr07 | 42659920                | AA                                     | CC                 | CC               | INTERGENIC                    |                    |                              |
| SNP_57863_A_42691213 | NC_021166.1    | Ca_Kabuli_Chr07 | 42691213                | TT                                     | CC                 | CC               | INTERGENIC                    |                    |                              |
| SNP_57864_A_42716257 | NC_021166.1    | Ca_Kabuli_Chr07 | 42716257                | GG                                     | CC                 | CC               | INTERGENIC                    |                    |                              |
| SNP_57865_A_42719038 | NC_021166.1    | Ca_Kabuli_Chr07 | 42719038                | GG                                     | AA                 | AA               | INTERGENIC                    |                    |                              |
| SNP_57867_A_42738842 | NC_021166.1    | Ca_Kabuli_Chr07 | 42738842                | CC                                     | AA                 | AA               | DRR                           | 101489247          | uncharacterized LOC101489247 |
| SNP_57868_A_42746616 | NC_021166.1    | Ca_Kabuli_Chr07 | 42746616                | TT                                     | GG                 | GG               | INTRON                        | 101489570          | Unknown function             |
| SNP_57869_A_42746652 | NC_021166.1    | Ca_Kabuli_Chr07 | 42746652                | GG                                     | AA                 | AA               | INTRON                        | 101489570          | Unknown function             |
| SNP_57870_A_42746663 | NC_021166.1    | Ca_Kabuli_Chr07 | 42746663                | GG                                     | AA                 | AA               | INTRON                        | 101489570          | Unknown function             |

| SNPs IDs             | Chromosome IDs | Chromosomes     | Physical positions (bp) | CDC Frontier genome (Reference genome) | (Pusa 1103 & HPNB) | (ILWC 46 & LPNB) | Sequence Components of genome | Gene accession IDs | Putative functions           |
|----------------------|----------------|-----------------|-------------------------|----------------------------------------|--------------------|------------------|-------------------------------|--------------------|------------------------------|
| SNP_57871_A_42746720 | NC_021166.1    | Ca_Kabuli_Chr07 | 42746720                | TT                                     | CC                 | CC               | NON_SYNONYMOUS_CODING         | 101489570          | Unknown function             |
| SNP_57872_A_42746918 | NC_021166.1    | Ca_Kabuli_Chr07 | 42746918                | TT                                     | CC                 | CC               | INTRON                        | 101489570          | Unknown function             |
| SNP_57873_A_42746979 | NC_021166.1    | Ca_Kabuli_Chr07 | 42746979                | GG                                     | TT                 | TT               | INTRON                        | 101489570          | Unknown function             |
| SNP_57874_A_42747075 | NC_021166.1    | Ca_Kabuli_Chr07 | 42747075                | AA                                     | GG                 | GG               | NON_SYNONYMOUS_CODING         | 101489570          | Unknown function             |
| SNP_57875_A_42754701 | NC_021166.1    | Ca_Kabuli_Chr07 | 42754701                | AA                                     | TT                 | TT               | INTERGENIC                    |                    |                              |
| SNP_57877_A_42778677 | NC_021166.1    | Ca_Kabuli_Chr07 | 42778677                | GG                                     | AA                 | AA               | INTERGENIC                    |                    |                              |
| SNP_57878_A_42779214 | NC_021166.1    | Ca_Kabuli_Chr07 | 42779214                | TT                                     | GG                 | GG               | INTERGENIC                    |                    |                              |
| SNP_57879_A_42827002 | NC_021166.1    | Ca_Kabuli_Chr07 | 42827002                | CC                                     | TT                 | TT               | NON_SYNONYMOUS_CODING         | 101491189          | uncharacterized LOC101491189 |
| SNP_57880_A_42832433 | NC_021166.1    | Ca_Kabuli_Chr07 | 42832433                | CC                                     | TT                 | TT               | DRR                           | 101511501          | uncharacterized LOC101511501 |
| SNP_57881_A_42832435 | NC_021166.1    | Ca_Kabuli_Chr07 | 42832435                | TT                                     | GG                 | GG               | DRR                           | 101511501          | uncharacterized LOC101511501 |
| SNP_57882_A_42832449 | NC_021166.1    | Ca_Kabuli_Chr07 | 42832449                | GG                                     | AA                 | AA               | DRR                           | 101511501          | uncharacterized LOC101511501 |
| SNP_57883_A_42832481 | NC_021166.1    | Ca_Kabuli_Chr07 | 42832481                | GG                                     | TT                 | TT               | DRR                           | 101511501          | uncharacterized LOC101511501 |
| SNP_57884_A_42832505 | NC_021166.1    | Ca_Kabuli_Chr07 | 42832505                | AA                                     | TT                 | TT               | DRR                           | 101511501          | uncharacterized LOC101511501 |
| SNP_57885_A_42832509 | NC_021166.1    | Ca_Kabuli_Chr07 | 42832509                | AA                                     | GG                 | GG               | DRR                           | 101511501          | uncharacterized LOC101511501 |
| SNP_57886_A_42832865 | NC_021166.1    | Ca_Kabuli_Chr07 | 42832865                | AA                                     | CC                 | CC               | INTERGENIC                    |                    |                              |
| SNP_57887_A_42832868 | NC_021166.1    | Ca_Kabuli_Chr07 | 42832868                | TT                                     | CC                 | CC               | INTERGENIC                    |                    |                              |
| SNP_57888_A_42833041 | NC_021166.1    | Ca_Kabuli_Chr07 | 42833041                | CC                                     | TT                 | TT               | INTERGENIC                    |                    |                              |
| SNP_57889_A_42833078 | NC_021166.1    | Ca_Kabuli_Chr07 | 42833078                | CC                                     | TT                 | TT               | INTERGENIC                    |                    |                              |
| SNP_57890_A_42833080 | NC_021166.1    | Ca_Kabuli_Chr07 | 42833080                | TT                                     | GG                 | GG               | INTERGENIC                    |                    |                              |
| SNP_57891_A_42833082 | NC_021166.1    | Ca_Kabuli_Chr07 | 42833082                | CC                                     | TT                 | TT               | INTERGENIC                    |                    |                              |
| SNP_57892_A_42833820 | NC_021166.1    | Ca_Kabuli_Chr07 | 42833820                | GG                                     | AA                 | AA               | INTERGENIC                    |                    |                              |
| SNP_57894_A_42848296 | NC_021166.1    | Ca_Kabuli_Chr07 | 42848296                | AA                                     | TT                 | TT               | INTERGENIC                    |                    |                              |

| SNPs IDs             | Chromosome IDs | Chromosomes     | Physical positions (bp) | CDC Frontier genome (Reference genome) | (Pusa 1103 & HPNB) | (ILWC 46 & LPNB) | Sequence Components of genome | Gene accession IDs | Putative functions                                        |
|----------------------|----------------|-----------------|-------------------------|----------------------------------------|--------------------|------------------|-------------------------------|--------------------|-----------------------------------------------------------|
| SNP_57895_A_42848326 | NC_021166.1    | Ca_Kabuli_Chr07 | 42848326                | TT                                     | CC                 | CC               | INTERGENIC                    |                    |                                                           |
| SNP_57896_A_42848536 | NC_021166.1    | Ca_Kabuli_Chr07 | 42848536                | AA                                     | TT                 | TT               | INTERGENIC                    |                    |                                                           |
| SNP_57897_A_42848607 | NC_021166.1    | Ca_Kabuli_Chr07 | 42848607                | CC                                     | TT                 | TT               | INTERGENIC                    |                    |                                                           |
| SNP_57898_A_42859485 | NC_021166.1    | Ca_Kabuli_Chr07 | 42859485                | GG                                     | AA                 | AA               | URR                           | 101511727          | probable choline kinase 2                                 |
| SNP_57899_A_42860832 | NC_021166.1    | Ca_Kabuli_Chr07 | 42860832                | TT                                     | GG                 | GG               | URR                           | 101511727          | probable choline kinase 2                                 |
| SNP_57900_A_42869738 | NC_021166.1    | Ca_Kabuli_Chr07 | 42869738                | TT                                     | CC                 | CC               | INTERGENIC                    |                    |                                                           |
| SNP_57901_A_42870333 | NC_021166.1    | Ca_Kabuli_Chr07 | 42870333                | AA                                     | TT                 | TT               | INTERGENIC                    |                    |                                                           |
| SNP_57902_A_42918632 | NC_021166.1    | Ca_Kabuli_Chr07 | 42918632                | AA                                     | GG                 | GG               | INTERGENIC                    |                    |                                                           |
| SNP_57903_A_42922965 | NC_021166.1    | Ca_Kabuli_Chr07 | 42922965                | GG                                     | TT                 | TT               | INTERGENIC                    |                    |                                                           |
| SNP_57904_A_42931056 | NC_021166.1    | Ca_Kabuli_Chr07 | 42931056                | AA                                     | TT                 | TT               | INTERGENIC                    |                    |                                                           |
| SNP_57905_A_42931473 | NC_021166.1    | Ca_Kabuli_Chr07 | 42931473                | TT                                     | CC                 | CC               | INTERGENIC                    |                    |                                                           |
| SNP_57907_A_43015969 | NC_021166.1    | Ca_Kabuli_Chr07 | 43015969                | TT                                     | CC                 | CC               | INTERGENIC                    |                    |                                                           |
| SNP_57908_A_43016059 | NC_021166.1    | Ca_Kabuli_Chr07 | 43016059                | AA                                     | GG                 | GG               | INTERGENIC                    |                    |                                                           |
| SNP_57909_A_43016076 | NC_021166.1    | Ca_Kabuli_Chr07 | 43016076                | AA                                     | GG                 | GG               | INTERGENIC                    |                    |                                                           |
| SNP_57910_A_43017809 | NC_021166.1    | Ca_Kabuli_Chr07 | 43017809                | CC                                     | TT                 | TT               | INTERGENIC                    |                    |                                                           |
| SNP_57911_A_43066342 | NC_021166.1    | Ca_Kabuli_Chr07 | 43066342                | AA                                     | TT                 | TT               | INTERGENIC                    |                    |                                                           |
| SNP_57912_A_43091460 | NC_021166.1    | Ca_Kabuli_Chr07 | 43091460                | AA                                     | TT                 | TT               | INTERGENIC                    |                    |                                                           |
| SNP_57913_A_43127676 | NC_021166.1    | Ca_Kabuli_Chr07 | 43127676                | GG                                     | TT                 | TT               | INTERGENIC                    |                    |                                                           |
| SNP_57914_A_43143652 | NC_021166.1    | Ca_Kabuli_Chr07 | 43143652                | AA                                     | CC                 | CC               | INTERGENIC                    |                    |                                                           |
| SNP_57915_A_43143658 | NC_021166.1    | Ca_Kabuli_Chr07 | 43143658                | CC                                     | TT                 | TT               | INTERGENIC                    |                    |                                                           |
| SNP_57916_A_43143667 | NC_021166.1    | Ca_Kabuli_Chr07 | 43143667                | AA                                     | CC                 | CC               | INTERGENIC                    |                    |                                                           |
| SNP_57917_A_43148335 | NC_021166.1    | Ca_Kabuli_Chr07 | 43148335                | GG                                     | AA                 | AA               | DRR                           | 101514206          | 1-aminocyclopropane-1-carboxylate oxidase homolog 11-like |

| SNPs IDs             | Chromosome IDs | Chromosomes     | Physical positions (bp) | CDC Frontier genome (Reference genome) | (Pusa 1103 & HPNB) | (ILWC 46 & LPNB) | Sequence genome | Components of | Gene accession IDs | Putative functions |
|----------------------|----------------|-----------------|-------------------------|----------------------------------------|--------------------|------------------|-----------------|---------------|--------------------|--------------------|
| SNP_57918_A_43168368 | NC_021166.1    | Ca_Kabuli_Chr07 | 43168368                | TT                                     | GG                 | GG               | INTERGENIC      |               |                    |                    |
| SNP_57919_A_43168988 | NC_021166.1    | Ca_Kabuli_Chr07 | 43168988                | GG                                     | CC                 | CC               | INTERGENIC      |               |                    |                    |
| SNP_57920_A_43169635 | NC_021166.1    | Ca_Kabuli_Chr07 | 43169635                | TT                                     | AA                 | AA               | INTERGENIC      |               |                    |                    |
| SNP_57921_A_43169653 | NC_021166.1    | Ca_Kabuli_Chr07 | 43169653                | CC                                     | AA                 | AA               | INTERGENIC      |               |                    |                    |
| SNP_57922_A_43208225 | NC_021166.1    | Ca_Kabuli_Chr07 | 43208225                | CC                                     | TT                 | TT               | INTERGENIC      |               |                    |                    |
| SNP_57923_A_43209690 | NC_021166.1    | Ca_Kabuli_Chr07 | 43209690                | CC                                     | TT                 | TT               | INTERGENIC      |               |                    |                    |
| SNP_57924_A_43210166 | NC_021166.1    | Ca_Kabuli_Chr07 | 43210166                | AA                                     | CC                 | CC               | INTERGENIC      |               |                    |                    |
| SNP_57925_A_43210597 | NC_021166.1    | Ca_Kabuli_Chr07 | 43210597                | AA                                     | GG                 | GG               | INTERGENIC      |               |                    |                    |
| SNP_57926_A_43214753 | NC_021166.1    | Ca_Kabuli_Chr07 | 43214753                | CC                                     | TT                 | TT               | INTERGENIC      |               |                    |                    |
| SNP_57927_A_43222543 | NC_021166.1    | Ca_Kabuli_Chr07 | 43222543                | GG                                     | AA                 | AA               | INTERGENIC      |               |                    |                    |
| SNP_57928_A_43231785 | NC_021166.1    | Ca_Kabuli_Chr07 | 43231785                | TT                                     | CC                 | CC               | INTERGENIC      |               |                    |                    |
| SNP_57929_A_43232295 | NC_021166.1    | Ca_Kabuli_Chr07 | 43232295                | GG                                     | AA                 | AA               | INTERGENIC      |               |                    |                    |
| SNP_57930_A_43232297 | NC_021166.1    | Ca_Kabuli_Chr07 | 43232297                | AA                                     | GG                 | GG               | INTERGENIC      |               |                    |                    |
| SNP_57931_A_43262230 | NC_021166.1    | Ca_Kabuli_Chr07 | 43262230                | GG                                     | CC                 | CC               | INTERGENIC      |               |                    |                    |
| SNP_57932_A_43262321 | NC_021166.1    | Ca_Kabuli_Chr07 | 43262321                | GG                                     | AA                 | AA               | INTERGENIC      |               |                    |                    |
| SNP_57933_A_43262335 | NC_021166.1    | Ca_Kabuli_Chr07 | 43262335                | CC                                     | TT                 | TT               | INTERGENIC      |               |                    |                    |
| SNP_57934_A_43262340 | NC_021166.1    | Ca_Kabuli_Chr07 | 43262340                | TT                                     | AA                 | AA               | INTERGENIC      |               |                    |                    |
| SNP_57935_A_43262351 | NC_021166.1    | Ca_Kabuli_Chr07 | 43262351                | GG                                     | TT                 | TT               | INTERGENIC      |               |                    |                    |
| SNP_57936_A_43269509 | NC_021166.1    | Ca_Kabuli_Chr07 | 43269509                | GG                                     | AA                 | AA               | INTERGENIC      |               |                    |                    |
| SNP_57937_A_43269599 | NC_021166.1    | Ca_Kabuli_Chr07 | 43269599                | CC                                     | AA                 | AA               | INTERGENIC      |               |                    |                    |
| SNP_57938_A_43269610 | NC_021166.1    | Ca_Kabuli_Chr07 | 43269610                | CC                                     | AA                 | GG               | INTERGENIC      |               |                    |                    |
| SNP_57939_A_43269655 | NC_021166.1    | Ca_Kabuli_Chr07 | 43269655                | TT                                     | GG                 | GG               | INTERGENIC      |               |                    |                    |



| SNPs IDs             | Chromosome IDs | Chromosomes     | Physical positions (bp) | CDC Frontier genome (Reference genome) | (Pusa 1103 & HPNB) | (ILWC 46 & LPNB) | Sequence Components of genome | Gene accession IDs | Putative functions             |
|----------------------|----------------|-----------------|-------------------------|----------------------------------------|--------------------|------------------|-------------------------------|--------------------|--------------------------------|
| SNP_57940_A_43290757 | NC_021166.1    | Ca_Kabuli_Chr07 | 43290757                | TT                                     | CC                 | CC               | INTERGENIC                    |                    |                                |
| SNP_57941_A_43291049 | NC_021166.1    | Ca_Kabuli_Chr07 | 43291049                | TT                                     | CC                 | CC               | INTERGENIC                    |                    |                                |
| SNP_57942_A_43311173 | NC_021166.1    | Ca_Kabuli_Chr07 | 43311173                | TT                                     | CC                 | CC               | INTERGENIC                    |                    |                                |
| SNP_57943_A_43325873 | NC_021166.1    | Ca_Kabuli_Chr07 | 43325873                | TT                                     | CC                 | CC               | INTERGENIC                    |                    |                                |
| SNP_57944_A_43333562 | NC_021166.1    | Ca_Kabuli_Chr07 | 43333562                | GG                                     | AA                 | AA               | INTERGENIC                    |                    |                                |
| SNP_57946_A_43375542 | NC_021166.1    | Ca_Kabuli_Chr07 | 43375542                | TT                                     | CC                 | CC               | INTERGENIC                    |                    |                                |
| SNP_57947_A_43375617 | NC_021166.1    | Ca_Kabuli_Chr07 | 43375617                | GG                                     | AA                 | AA               | INTERGENIC                    |                    |                                |
| SNP_57948_A_43375635 | NC_021166.1    | Ca_Kabuli_Chr07 | 43375635                | CC                                     | TT                 | TT               | INTERGENIC                    |                    |                                |
| SNP_57949_A_43383016 | NC_021166.1    | Ca_Kabuli_Chr07 | 43383016                | TT                                     | CC                 | CC               | INTERGENIC                    |                    |                                |
| SNP_57950_A_43395364 | NC_021166.1    | Ca_Kabuli_Chr07 | 43395364                | CC                                     | TT                 | TT               | URR                           | 101494963          | UPF0481 protein At3g47200-like |
| SNP_57951_A_43435069 | NC_021166.1    | Ca_Kabuli_Chr07 | 43435069                | AA                                     | GG                 | GG               | URR                           | 101500169          | uncharacterized LOC101500169   |
| SNP_57952_A_43435124 | NC_021166.1    | Ca_Kabuli_Chr07 | 43435124                | AA                                     | GG                 | GG               | URR                           | 101500169          | uncharacterized LOC101500169   |
| SNP_57953_A_43435125 | NC_021166.1    | Ca_Kabuli_Chr07 | 43435125                | GG                                     | CC                 | CC               | URR                           | 101500169          | uncharacterized LOC101500169   |
| SNP_57954_A_43435127 | NC_021166.1    | Ca_Kabuli_Chr07 | 43435127                | AA                                     | GG                 | GG               | URR                           | 101500169          | uncharacterized LOC101500169   |
| SNP_57955_A_43435132 | NC_021166.1    | Ca_Kabuli_Chr07 | 43435132                | AA                                     | TT                 | TT               | URR                           | 101500169          | uncharacterized LOC101500169   |
| SNP_57956_A_43435139 | NC_021166.1    | Ca_Kabuli_Chr07 | 43435139                | AA                                     | GG                 | GG               | URR                           | 101500169          | uncharacterized LOC101500169   |
| SNP_57957_A_43448658 | NC_021166.1    | Ca_Kabuli_Chr07 | 43448658                | GG                                     | AA                 | AA               | INTERGENIC                    |                    |                                |
| SNP_57958_A_43449083 | NC_021166.1    | Ca_Kabuli_Chr07 | 43449083                | CC                                     | AA                 | AA               | INTERGENIC                    |                    |                                |
| SNP_57959_A_43449090 | NC_021166.1    | Ca_Kabuli_Chr07 | 43449090                | GG                                     | AA                 | AA               | INTERGENIC                    |                    |                                |
| SNP_57960_A_43449100 | NC_021166.1    | Ca_Kabuli_Chr07 | 43449100                | CC                                     | TT                 | TT               | INTERGENIC                    |                    |                                |
| SNP_57961_A_43469122 | NC_021166.1    | Ca_Kabuli_Chr07 | 43469122                | AA                                     | CC                 | CC               | INTERGENIC                    |                    |                                |
| SNP_57962_A_43483233 | NC_021166.1    | Ca_Kabuli_Chr07 | 43483233                | TT                                     | GG                 | GG               | INTERGENIC                    |                    |                                |

| SNPs IDs             | Chromosome IDs | Chromosomes     | Physical positions (bp) | CDC Frontier genome (Reference genome) | (Pusa 1103 & HPNB) | (ILWC 46 & LPNB) | Sequence genome | Components of | Gene accession IDs | Putative functions                            |
|----------------------|----------------|-----------------|-------------------------|----------------------------------------|--------------------|------------------|-----------------|---------------|--------------------|-----------------------------------------------|
| SNP_57963_A_43485017 | NC_021166.1    | Ca_Kabuli_Chr07 | 43485017                | GG                                     | AA                 | AA               | INTERGENIC      |               |                    |                                               |
| SNP_57965_A_43504495 | NC_021166.1    | Ca_Kabuli_Chr07 | 43504495                | CC                                     | GG                 | GG               | INTERGENIC      |               |                    |                                               |
| SNP_57966_A_43504626 | NC_021166.1    | Ca_Kabuli_Chr07 | 43504626                | TT                                     | CC                 | CC               | INTERGENIC      |               |                    |                                               |
| SNP_57967_A_43504664 | NC_021166.1    | Ca_Kabuli_Chr07 | 43504664                | AA                                     | TT                 | TT               | INTERGENIC      |               |                    |                                               |
| SNP_57968_A_43504911 | NC_021166.1    | Ca_Kabuli_Chr07 | 43504911                | TT                                     | CC                 | CC               | INTERGENIC      |               |                    |                                               |
| SNP_57969_A_43504946 | NC_021166.1    | Ca_Kabuli_Chr07 | 43504946                | AA                                     | GG                 | GG               | INTERGENIC      |               |                    |                                               |
| SNP_57971_A_43566840 | NC_021166.1    | Ca_Kabuli_Chr07 | 43566840                | CC                                     | TT                 | TT               | INTERGENIC      |               |                    |                                               |
| SNP_57972_A_43566854 | NC_021166.1    | Ca_Kabuli_Chr07 | 43566854                | AA                                     | TT                 | TT               | INTERGENIC      |               |                    |                                               |
| SNP_57974_A_43608008 | NC_021166.1    | Ca_Kabuli_Chr07 | 43608008                | AA                                     | TT                 | TT               | INTERGENIC      |               |                    |                                               |
| SNP_57975_A_43608010 | NC_021166.1    | Ca_Kabuli_Chr07 | 43608010                | TT                                     | AA                 | AA               | INTERGENIC      |               |                    |                                               |
| SNP_57976_A_43608011 | NC_021166.1    | Ca_Kabuli_Chr07 | 43608011                | TT                                     | AA                 | AA               | INTERGENIC      |               |                    |                                               |
| SNP_57977_A_43608012 | NC_021166.1    | Ca_Kabuli_Chr07 | 43608012                | CC                                     | TT                 | TT               | INTERGENIC      |               |                    |                                               |
| SNP_57978_A_43613148 | NC_021166.1    | Ca_Kabuli_Chr07 | 43613148                | CC                                     | AA                 | AA               | INTERGENIC      |               |                    |                                               |
| SNP_57979_A_43616504 | NC_021166.1    | Ca_Kabuli_Chr07 | 43616504                | CC                                     | GG                 | GG               | INTERGENIC      |               |                    |                                               |
| SNP_57981_A_43625228 | NC_021166.1    | Ca_Kabuli_Chr07 | 43625228                | AA                                     | GG                 | GG               | INTRON          |               | 101501130          | probable polygalacturonase At3g15720          |
| SNP_57982_A_43641884 | NC_021166.1    | Ca_Kabuli_Chr07 | 43641884                | GG                                     | CC                 | CC               | DRR             |               | 101497251          | cysteine-rich receptor-like protein kinase 10 |
| SNP_57983_A_43641912 | NC_021166.1    | Ca_Kabuli_Chr07 | 43641912                | AA                                     | GG                 | GG               | DRR             |               | 101497251          | cysteine-rich receptor-like protein kinase 10 |
| SNP_57984_A_43641916 | NC_021166.1    | Ca_Kabuli_Chr07 | 43641916                | TT                                     | GG                 | GG               | DRR             |               | 101497251          | cysteine-rich receptor-like protein kinase 10 |
| SNP_57985_A_43654590 | NC_021166.1    | Ca_Kabuli_Chr07 | 43654590                | AA                                     | GG                 | GG               | INTERGENIC      |               |                    |                                               |
| SNP_57986_A_43675029 | NC_021166.1    | Ca_Kabuli_Chr07 | 43675029                | CC                                     | TT                 | TT               | INTERGENIC      |               |                    |                                               |
| SNP_57987_A_43677748 | NC_021166.1    | Ca_Kabuli_Chr07 | 43677748                | GG                                     | AA                 | AA               | INTERGENIC      |               |                    |                                               |
| SNP_57988_A_43685580 | NC_021166.1    | Ca_Kabuli_Chr07 | 43685580                | TT                                     | GG                 | GG               | INTERGENIC      |               |                    |                                               |

| SNPs IDs             | Chromosome IDs | Chromosomes     | Physical positions (bp) | CDC Frontier (Reference genome) | (Pusa 1103 & HPNB) | (ILWC 46 & LPNB) | Sequence Components of genome | Gene accession IDs | Putative functions           |
|----------------------|----------------|-----------------|-------------------------|---------------------------------|--------------------|------------------|-------------------------------|--------------------|------------------------------|
| SNP_57989_A_43693027 | NC_021166.1    | Ca_Kabuli_Chr07 | 43693027                | GG                              | AA                 | AA               | INTERGENIC                    |                    |                              |
| SNP_57990_A_43693049 | NC_021166.1    | Ca_Kabuli_Chr07 | 43693049                | GG                              | AA                 | AA               | INTERGENIC                    |                    |                              |
| SNP_57991_A_43693154 | NC_021166.1    | Ca_Kabuli_Chr07 | 43693154                | GG                              | AA                 | AA               | INTERGENIC                    |                    |                              |
| SNP_57992_A_43693175 | NC_021166.1    | Ca_Kabuli_Chr07 | 43693175                | GG                              | AA                 | AA               | INTERGENIC                    |                    |                              |
| SNP_57993_A_43693181 | NC_021166.1    | Ca_Kabuli_Chr07 | 43693181                | GG                              | CC                 | CC               | INTERGENIC                    |                    |                              |
| SNP_57994_A_43696187 | NC_021166.1    | Ca_Kabuli_Chr07 | 43696187                | TT                              | AA                 | AA               | INTERGENIC                    |                    |                              |
| SNP_57995_A_43703321 | NC_021166.1    | Ca_Kabuli_Chr07 | 43703321                | TT                              | AA                 | AA               | INTERGENIC                    |                    |                              |
| SNP_57996_A_43703991 | NC_021166.1    | Ca_Kabuli_Chr07 | 43703991                | CC                              | TT                 | TT               | INTERGENIC                    |                    |                              |
| SNP_57997_A_43703998 | NC_021166.1    | Ca_Kabuli_Chr07 | 43703998                | TT                              | GG                 | GG               | INTERGENIC                    |                    |                              |
| SNP_57998_A_43705901 | NC_021166.1    | Ca_Kabuli_Chr07 | 43705901                | AA                              | GG                 | GG               | INTERGENIC                    |                    |                              |
| SNP_57999_A_43715164 | NC_021166.1    | Ca_Kabuli_Chr07 | 43715164                | CC                              | GG                 | GG               | INTERGENIC                    |                    |                              |
| SNP_58000_A_43736102 | NC_021166.1    | Ca_Kabuli_Chr07 | 43736102                | AA                              | TT                 | TT               | INTERGENIC                    |                    |                              |
| SNP_58001_A_43738107 | NC_021166.1    | Ca_Kabuli_Chr07 | 43738107                | AA                              | GG                 | GG               | INTERGENIC                    |                    |                              |
| SNP_58002_A_43748287 | NC_021166.1    | Ca_Kabuli_Chr07 | 43748287                | GG                              | AA                 | AA               | URR                           | 101502082          | uncharacterized LOC101502082 |
| SNP_58003_A_43772708 | NC_021166.1    | Ca_Kabuli_Chr07 | 43772708                | GG                              | TT                 | TT               | URR                           | 101506812          | uncharacterized LOC101506812 |
| SNP_58004_A_43773271 | NC_021166.1    | Ca_Kabuli_Chr07 | 43773271                | AA                              | CC                 | CC               | URR                           | 101506812          | uncharacterized LOC101506812 |
| SNP_58005_A_43777483 | NC_021166.1    | Ca_Kabuli_Chr07 | 43777483                | CC                              | TT                 | TT               | INTERGENIC                    |                    |                              |
| SNP_58006_A_43777497 | NC_021166.1    | Ca_Kabuli_Chr07 | 43777497                | TT                              | CC                 | CC               | INTERGENIC                    |                    |                              |
| SNP_58007_A_43777519 | NC_021166.1    | Ca_Kabuli_Chr07 | 43777519                | AA                              | GG                 | GG               | INTERGENIC                    |                    |                              |
| SNP_58008_A_43780659 | NC_021166.1    | Ca_Kabuli_Chr07 | 43780659                | AA                              | GG                 | TT               | INTERGENIC                    |                    |                              |
| SNP_58009_A_43780902 | NC_021166.1    | Ca_Kabuli_Chr07 | 43780902                | AA                              | GG                 | GG               | INTERGENIC                    |                    |                              |
| SNP_58010_A_43780934 | NC_021166.1    | Ca_Kabuli_Chr07 | 43780934                | CC                              | TT                 | TT               | INTERGENIC                    |                    |                              |

| SNPs IDs             | Chromosome IDs | Chromosomes     | Physical positions (bp) | CDC Frontier (Reference genome) | (Pusa 1103 & HPNB) | (ILWC 46 & LPNB) | Sequence genome | Components of | Gene accession IDs | Putative functions           |
|----------------------|----------------|-----------------|-------------------------|---------------------------------|--------------------|------------------|-----------------|---------------|--------------------|------------------------------|
| SNP_58011_A_43781653 | NC_021166.1    | Ca_Kabuli_Chr07 | 43781653                | AA                              | GG                 | GG               | INTERGENIC      |               |                    |                              |
| SNP_58012_A_43786856 | NC_021166.1    | Ca_Kabuli_Chr07 | 43786856                | AA                              | GG                 | GG               | URR             | 101507149     |                    | uncharacterized LOC101507149 |
| SNP_58013_A_43796756 | NC_021166.1    | Ca_Kabuli_Chr07 | 43796756                | GG                              | TT                 | TT               | INTERGENIC      |               |                    |                              |
| SNP_58015_A_43832790 | NC_021166.1    | Ca_Kabuli_Chr07 | 43832790                | TT                              | CC                 | CC               | INTERGENIC      |               |                    |                              |
| SNP_58016_A_43838576 | NC_021166.1    | Ca_Kabuli_Chr07 | 43838576                | AA                              | TT                 | TT               | INTERGENIC      |               |                    |                              |
| SNP_58017_A_43838679 | NC_021166.1    | Ca_Kabuli_Chr07 | 43838679                | AA                              | GG                 | GG               | INTERGENIC      |               |                    |                              |
| SNP_58018_A_43838729 | NC_021166.1    | Ca_Kabuli_Chr07 | 43838729                | AA                              | CC                 | CC               | INTERGENIC      |               |                    |                              |
| SNP_58019_A_43838759 | NC_021166.1    | Ca_Kabuli_Chr07 | 43838759                | AA                              | GG                 | GG               | INTERGENIC      |               |                    |                              |
| SNP_58020_A_43841175 | NC_021166.1    | Ca_Kabuli_Chr07 | 43841175                | TT                              | CC                 | CC               | INTERGENIC      |               |                    |                              |
| SNP_58021_A_43864690 | NC_021166.1    | Ca_Kabuli_Chr07 | 43864690                | GG                              | CC                 | CC               | INTERGENIC      |               |                    |                              |
| SNP_58022_A_43879216 | NC_021166.1    | Ca_Kabuli_Chr07 | 43879216                | CC                              | TT                 | TT               | INTERGENIC      |               |                    |                              |
| SNP_58023_A_43971712 | NC_021166.1    | Ca_Kabuli_Chr07 | 43971712                | TT                              | CC                 | CC               | INTERGENIC      |               |                    |                              |
| SNP_58024_A_43993554 | NC_021166.1    | Ca_Kabuli_Chr07 | 43993554                | AA                              | GG                 | GG               | INTERGENIC      |               |                    |                              |
| SNP_58025_A_43993877 | NC_021166.1    | Ca_Kabuli_Chr07 | 43993877                | CC                              | GG                 | GG               | INTERGENIC      |               |                    |                              |
| SNP_58026_A_43993895 | NC_021166.1    | Ca_Kabuli_Chr07 | 43993895                | GG                              | TT                 | TT               | INTERGENIC      |               |                    |                              |
| SNP_58027_A_43999497 | NC_021166.1    | Ca_Kabuli_Chr07 | 43999497                | GG                              | AA                 | AA               | INTERGENIC      |               |                    |                              |
| SNP_58028_A_43999556 | NC_021166.1    | Ca_Kabuli_Chr07 | 43999556                | CC                              | TT                 | TT               | INTERGENIC      |               |                    |                              |
| SNP_58029_A_43999572 | NC_021166.1    | Ca_Kabuli_Chr07 | 43999572                | AA                              | GG                 | GG               | INTERGENIC      |               |                    |                              |
| SNP_58030_A_43999631 | NC_021166.1    | Ca_Kabuli_Chr07 | 43999631                | AA                              | GG                 | GG               | INTERGENIC      |               |                    |                              |
| SNP_58031_A_43999915 | NC_021166.1    | Ca_Kabuli_Chr07 | 43999915                | CC                              | TT                 | TT               | INTERGENIC      |               |                    |                              |
| SNP_58032_A_44001118 | NC_021166.1    | Ca_Kabuli_Chr07 | 44001118                | CC                              | TT                 | TT               | INTERGENIC      |               |                    |                              |
| SNP_58033_A_44001270 | NC_021166.1    | Ca_Kabuli_Chr07 | 44001270                | GG                              | TT                 | TT               | INTERGENIC      |               |                    |                              |

| SNPs IDs             | Chromosome IDs | Chromosomes     | Physical positions (bp) | CDC Frontier (Reference genome) | (Pusa 1103 & HPNB) | (ILWC 46 & LPNB) | Sequence genome | Components of | Gene accession IDs | Putative functions |
|----------------------|----------------|-----------------|-------------------------|---------------------------------|--------------------|------------------|-----------------|---------------|--------------------|--------------------|
| SNP_58034_A_44001301 | NC_021166.1    | Ca_Kabuli_Chr07 | 44001301                | TT                              | AA                 | AA               | INTERGENIC      |               |                    |                    |
| SNP_58035_A_44001326 | NC_021166.1    | Ca_Kabuli_Chr07 | 44001326                | TT                              | CC                 | CC               | INTERGENIC      |               |                    |                    |
| SNP_58036_A_44001370 | NC_021166.1    | Ca_Kabuli_Chr07 | 44001370                | TT                              | CC                 | CC               | INTERGENIC      |               |                    |                    |
| SNP_58037_A_44001417 | NC_021166.1    | Ca_Kabuli_Chr07 | 44001417                | CC                              | AA                 | AA               | INTERGENIC      |               |                    |                    |
| SNP_58038_A_44001427 | NC_021166.1    | Ca_Kabuli_Chr07 | 44001427                | GG                              | AA                 | AA               | INTERGENIC      |               |                    |                    |
| SNP_58039_A_44001431 | NC_021166.1    | Ca_Kabuli_Chr07 | 44001431                | CC                              | TT                 | TT               | INTERGENIC      |               |                    |                    |
| SNP_58040_A_44001558 | NC_021166.1    | Ca_Kabuli_Chr07 | 44001558                | CC                              | TT                 | TT               | INTERGENIC      |               |                    |                    |
| SNP_58042_A_44001626 | NC_021166.1    | Ca_Kabuli_Chr07 | 44001626                | AA                              | TT                 | TT               | INTERGENIC      |               |                    |                    |
| SNP_58043_A_44001885 | NC_021166.1    | Ca_Kabuli_Chr07 | 44001885                | AA                              | CC                 | CC               | INTERGENIC      |               |                    |                    |
| SNP_58044_A_44001939 | NC_021166.1    | Ca_Kabuli_Chr07 | 44001939                | TT                              | CC                 | CC               | INTERGENIC      |               |                    |                    |
| SNP_58045_A_44001948 | NC_021166.1    | Ca_Kabuli_Chr07 | 44001948                | CC                              | TT                 | TT               | INTERGENIC      |               |                    |                    |
| SNP_58046_A_44002223 | NC_021166.1    | Ca_Kabuli_Chr07 | 44002223                | TT                              | AA                 | AA               | INTERGENIC      |               |                    |                    |
| SNP_58047_A_44002291 | NC_021166.1    | Ca_Kabuli_Chr07 | 44002291                | AA                              | CC                 | CC               | INTERGENIC      |               |                    |                    |
| SNP_58048_A_44002344 | NC_021166.1    | Ca_Kabuli_Chr07 | 44002344                | CC                              | AA                 | AA               | INTERGENIC      |               |                    |                    |
| SNP_58049_A_44019270 | NC_021166.1    | Ca_Kabuli_Chr07 | 44019270                | GG                              | AA                 | AA               | INTERGENIC      |               |                    |                    |
| SNP_58050_A_44053425 | NC_021166.1    | Ca_Kabuli_Chr07 | 44053425                | CC                              | TT                 | TT               | INTERGENIC      |               |                    |                    |
| SNP_58051_A_44076016 | NC_021166.1    | Ca_Kabuli_Chr07 | 44076016                | CC                              | AA                 | AA               | INTERGENIC      |               |                    |                    |
| SNP_58052_A_44082832 | NC_021166.1    | Ca_Kabuli_Chr07 | 44082832                | GG                              | TT                 | TT               | INTERGENIC      |               |                    |                    |
| SNP_58054_A_44091771 | NC_021166.1    | Ca_Kabuli_Chr07 | 44091771                | CC                              | TT                 | TT               | INTERGENIC      |               |                    |                    |
| SNP_58055_A_44103859 | NC_021166.1    | Ca_Kabuli_Chr07 | 44103859                | TT                              | CC                 | CC               | INTERGENIC      |               |                    |                    |
| SNP_58056_A_44116357 | NC_021166.1    | Ca_Kabuli_Chr07 | 44116357                | TT                              | CC                 | CC               | INTERGENIC      |               |                    |                    |
| SNP_58057_A_44116384 | NC_021166.1    | Ca_Kabuli_Chr07 | 44116384                | AA                              | GG                 | GG               | INTERGENIC      |               |                    |                    |

| SNPs IDs             | Chromosome IDs | Chromosomes     | Physical positions (bp) | CDC Frontier genome (Reference genome) | (Pusa 1103 & HPNB) | (ILWC 46 & LPNB) | Sequence genome | Components of | Gene accession IDs | Putative functions |
|----------------------|----------------|-----------------|-------------------------|----------------------------------------|--------------------|------------------|-----------------|---------------|--------------------|--------------------|
| SNP_58058_A_44150066 | NC_021166.1    | Ca_Kabuli_Chr07 | 44150066                | GG                                     | AA                 | AA               | INTERGENIC      |               |                    |                    |
| SNP_58060_A_44161213 | NC_021166.1    | Ca_Kabuli_Chr07 | 44161213                | CC                                     | AA                 | AA               | INTERGENIC      |               |                    |                    |
| SNP_58061_A_44174082 | NC_021166.1    | Ca_Kabuli_Chr07 | 44174082                | AA                                     | GG                 | GG               | INTERGENIC      |               |                    |                    |
| SNP_58062_A_44185433 | NC_021166.1    | Ca_Kabuli_Chr07 | 44185433                | GG                                     | AA                 | AA               | INTERGENIC      |               |                    |                    |
| SNP_58063_A_44199235 | NC_021166.1    | Ca_Kabuli_Chr07 | 44199235                | GG                                     | AA                 | AA               | INTERGENIC      |               |                    |                    |
| SNP_58064_A_44213826 | NC_021166.1    | Ca_Kabuli_Chr07 | 44213826                | AA                                     | GG                 | GG               | INTERGENIC      |               |                    |                    |
| SNP_58065_A_44213889 | NC_021166.1    | Ca_Kabuli_Chr07 | 44213889                | AA                                     | TT                 | TT               | INTERGENIC      |               |                    |                    |
| SNP_58066_A_44214081 | NC_021166.1    | Ca_Kabuli_Chr07 | 44214081                | CC                                     | AA                 | AA               | INTERGENIC      |               |                    |                    |
| SNP_58067_A_44214117 | NC_021166.1    | Ca_Kabuli_Chr07 | 44214117                | AA                                     | GG                 | GG               | INTERGENIC      |               |                    |                    |
| SNP_58068_A_44214125 | NC_021166.1    | Ca_Kabuli_Chr07 | 44214125                | AA                                     | GG                 | GG               | INTERGENIC      |               |                    |                    |
| SNP_58069_A_44214294 | NC_021166.1    | Ca_Kabuli_Chr07 | 44214294                | CC                                     | AA                 | AA               | INTERGENIC      |               |                    |                    |
| SNP_58070_A_44214308 | NC_021166.1    | Ca_Kabuli_Chr07 | 44214308                | TT                                     | CC                 | CC               | INTERGENIC      |               |                    |                    |
| SNP_58071_A_44214492 | NC_021166.1    | Ca_Kabuli_Chr07 | 44214492                | TT                                     | CC                 | CC               | INTERGENIC      |               |                    |                    |
| SNP_58072_A_44214505 | NC_021166.1    | Ca_Kabuli_Chr07 | 44214505                | CC                                     | TT                 | TT               | INTERGENIC      |               |                    |                    |
| SNP_58073_A_44214559 | NC_021166.1    | Ca_Kabuli_Chr07 | 44214559                | TT                                     | AA                 | AA               | INTERGENIC      |               |                    |                    |
| SNP_58074_A_44242268 | NC_021166.1    | Ca_Kabuli_Chr07 | 44242268                | CC                                     | TT                 | TT               | INTERGENIC      |               |                    |                    |
| SNP_58075_A_44242275 | NC_021166.1    | Ca_Kabuli_Chr07 | 44242275                | TT                                     | CC                 | CC               | INTERGENIC      |               |                    |                    |
| SNP_58076_A_44242276 | NC_021166.1    | Ca_Kabuli_Chr07 | 44242276                | CC                                     | TT                 | TT               | INTERGENIC      |               |                    |                    |
| SNP_58077_A_44322209 | NC_021166.1    | Ca_Kabuli_Chr07 | 44322209                | AA                                     | CC                 | CC               | INTERGENIC      |               |                    |                    |
| SNP_58078_A_44325679 | NC_021166.1    | Ca_Kabuli_Chr07 | 44325679                | GG                                     | AA                 | AA               | INTERGENIC      |               |                    |                    |
| SNP_58079_A_44334041 | NC_021166.1    | Ca_Kabuli_Chr07 | 44334041                | GG                                     | CC                 | CC               | INTERGENIC      |               |                    |                    |
| SNP_58081_A_44391530 | NC_021166.1    | Ca_Kabuli_Chr07 | 44391530                | TT                                     | CC                 | CC               | INTERGENIC      |               |                    |                    |

| SNPs IDs             | Chromosome IDs | Chromosomes     | Physical positions (bp) | CDC Frontier genome (Reference genome) | (Pusa 1103 & HPNB) | (ILWC 46 & LPNB) | Sequence genome | Components of | Gene accession IDs | Putative functions |
|----------------------|----------------|-----------------|-------------------------|----------------------------------------|--------------------|------------------|-----------------|---------------|--------------------|--------------------|
| SNP_58082_A_44395922 | NC_021166.1    | Ca_Kabuli_Chr07 | 44395922                | AA                                     | CC                 | CC               | INTERGENIC      |               |                    |                    |
| SNP_58083_A_44395924 | NC_021166.1    | Ca_Kabuli_Chr07 | 44395924                | AA                                     | TT                 | TT               | INTERGENIC      |               |                    |                    |
| SNP_58084_A_44395937 | NC_021166.1    | Ca_Kabuli_Chr07 | 44395937                | AA                                     | CC                 | CC               | INTERGENIC      |               |                    |                    |
| SNP_58085_A_44396011 | NC_021166.1    | Ca_Kabuli_Chr07 | 44396011                | TT                                     | CC                 | CC               | INTERGENIC      |               |                    |                    |
| SNP_58086_A_44396026 | NC_021166.1    | Ca_Kabuli_Chr07 | 44396026                | AA                                     | GG                 | GG               | INTERGENIC      |               |                    |                    |
| SNP_58087_A_44396151 | NC_021166.1    | Ca_Kabuli_Chr07 | 44396151                | AA                                     | GG                 | GG               | INTERGENIC      |               |                    |                    |
| SNP_58088_A_44396158 | NC_021166.1    | Ca_Kabuli_Chr07 | 44396158                | TT                                     | CC                 | CC               | INTERGENIC      |               |                    |                    |
| SNP_58089_A_44396353 | NC_021166.1    | Ca_Kabuli_Chr07 | 44396353                | CC                                     | TT                 | TT               | INTERGENIC      |               |                    |                    |
| SNP_58090_A_44396359 | NC_021166.1    | Ca_Kabuli_Chr07 | 44396359                | AA                                     | GG                 | GG               | INTERGENIC      |               |                    |                    |
| SNP_58091_A_44396425 | NC_021166.1    | Ca_Kabuli_Chr07 | 44396425                | AA                                     | CC                 | CC               | INTERGENIC      |               |                    |                    |
| SNP_58093_A_44396493 | NC_021166.1    | Ca_Kabuli_Chr07 | 44396493                | AA                                     | GG                 | GG               | INTERGENIC      |               |                    |                    |
| SNP_58094_A_44396516 | NC_021166.1    | Ca_Kabuli_Chr07 | 44396516                | GG                                     | AA                 | AA               | INTERGENIC      |               |                    |                    |
| SNP_58095_A_44404721 | NC_021166.1    | Ca_Kabuli_Chr07 | 44404721                | TT                                     | CC                 | CC               | INTERGENIC      |               |                    |                    |
| SNP_58097_A_44440724 | NC_021166.1    | Ca_Kabuli_Chr07 | 44440724                | AA                                     | GG                 | GG               | INTERGENIC      |               |                    |                    |
| SNP_58098_A_44441043 | NC_021166.1    | Ca_Kabuli_Chr07 | 44441043                | GG                                     | AA                 | AA               | INTERGENIC      |               |                    |                    |
| SNP_58099_A_44442504 | NC_021166.1    | Ca_Kabuli_Chr07 | 44442504                | AA                                     | GG                 | GG               | INTERGENIC      |               |                    |                    |
| SNP_58100_A_44442506 | NC_021166.1    | Ca_Kabuli_Chr07 | 44442506                | AA                                     | TT                 | TT               | INTERGENIC      |               |                    |                    |
| SNP_58103_A_44497353 | NC_021166.1    | Ca_Kabuli_Chr07 | 44497353                | AA                                     | TT                 | TT               | INTERGENIC      |               |                    |                    |
| SNP_58104_A_44503837 | NC_021166.1    | Ca_Kabuli_Chr07 | 44503837                | CC                                     | GG                 | GG               | INTERGENIC      |               |                    |                    |
| SNP_58105_A_44504300 | NC_021166.1    | Ca_Kabuli_Chr07 | 44504300                | AA                                     | CC                 | CC               | INTERGENIC      |               |                    |                    |
| SNP_58106_A_44505296 | NC_021166.1    | Ca_Kabuli_Chr07 | 44505296                | TT                                     | AA                 | AA               | INTERGENIC      |               |                    |                    |
| SNP_58107_A_44508894 | NC_021166.1    | Ca_Kabuli_Chr07 | 44508894                | TT                                     | CC                 | CC               | INTERGENIC      |               |                    |                    |

| SNPs IDs             | Chromosome IDs | Chromosomes     | Physical positions (bp) | CDC Frontier genome (Reference genome) | (Pusa 1103 & HPNB) | (ILWC 46 & LPNB) | Sequence genome | Components of | Gene accession IDs | Putative functions           |
|----------------------|----------------|-----------------|-------------------------|----------------------------------------|--------------------|------------------|-----------------|---------------|--------------------|------------------------------|
| SNP_58108_A_44508909 | NC_021166.1    | Ca_Kabuli_Chr07 | 44508909                | GG                                     | TT                 | TT               | INTERGENIC      |               |                    |                              |
| SNP_58109_A_44533164 | NC_021166.1    | Ca_Kabuli_Chr07 | 44533164                | GG                                     | AA                 | AA               | URR             | 101511606     |                    | uncharacterized LOC101511606 |
| SNP_58110_A_44543118 | NC_021166.1    | Ca_Kabuli_Chr07 | 44543118                | TT                                     | AA                 | AA               | INTERGENIC      |               |                    |                              |
| SNP_58111_A_44543578 | NC_021166.1    | Ca_Kabuli_Chr07 | 44543578                | CC                                     | AA                 | AA               | INTERGENIC      |               |                    |                              |
| SNP_58112_A_44543651 | NC_021166.1    | Ca_Kabuli_Chr07 | 44543651                | GG                                     | TT                 | TT               | INTERGENIC      |               |                    |                              |
| SNP_58113_A_44543658 | NC_021166.1    | Ca_Kabuli_Chr07 | 44543658                | GG                                     | AA                 | AA               | INTERGENIC      |               |                    |                              |
| SNP_58114_A_44543665 | NC_021166.1    | Ca_Kabuli_Chr07 | 44543665                | CC                                     | AA                 | AA               | INTERGENIC      |               |                    |                              |
| SNP_58115_A_44543666 | NC_021166.1    | Ca_Kabuli_Chr07 | 44543666                | TT                                     | AA                 | AA               | INTERGENIC      |               |                    |                              |
| SNP_58116_A_44543670 | NC_021166.1    | Ca_Kabuli_Chr07 | 44543670                | AA                                     | TT                 | TT               | INTERGENIC      |               |                    |                              |
| SNP_58118_A_44543864 | NC_021166.1    | Ca_Kabuli_Chr07 | 44543864                | GG                                     | AA                 | AA               | INTERGENIC      |               |                    |                              |
| SNP_58119_A_44543995 | NC_021166.1    | Ca_Kabuli_Chr07 | 44543995                | TT                                     | GG                 | GG               | INTERGENIC      |               |                    |                              |
| SNP_58120_A_44544083 | NC_021166.1    | Ca_Kabuli_Chr07 | 44544083                | AA                                     | TT                 | TT               | INTERGENIC      |               |                    |                              |
| SNP_58121_A_44565077 | NC_021166.1    | Ca_Kabuli_Chr07 | 44565077                | TT                                     | CC                 | CC               | INTERGENIC      |               |                    |                              |
| SNP_58122_A_44571598 | NC_021166.1    | Ca_Kabuli_Chr07 | 44571598                | CC                                     | AA                 | AA               | INTERGENIC      |               |                    |                              |
| SNP_58123_A_44571730 | NC_021166.1    | Ca_Kabuli_Chr07 | 44571730                | AA                                     | GG                 | GG               | INTERGENIC      |               |                    |                              |
| SNP_58124_A_44571733 | NC_021166.1    | Ca_Kabuli_Chr07 | 44571733                | TT                                     | AA                 | AA               | INTERGENIC      |               |                    |                              |
| SNP_58125_A_44571988 | NC_021166.1    | Ca_Kabuli_Chr07 | 44571988                | GG                                     | AA                 | AA               | INTERGENIC      |               |                    |                              |
| SNP_58126_A_44572027 | NC_021166.1    | Ca_Kabuli_Chr07 | 44572027                | TT                                     | AA                 | AA               | INTERGENIC      |               |                    |                              |
| SNP_58127_A_44572129 | NC_021166.1    | Ca_Kabuli_Chr07 | 44572129                | TT                                     | AA                 | AA               | INTERGENIC      |               |                    |                              |
| SNP_58128_A_44675951 | NC_021166.1    | Ca_Kabuli_Chr07 | 44675951                | GG                                     | AA                 | AA               | INTERGENIC      |               |                    |                              |
| SNP_58129_A_44679898 | NC_021166.1    | Ca_Kabuli_Chr07 | 44679898                | TT                                     | CC                 | CC               | INTERGENIC      |               |                    |                              |
| SNP_58130_A_44689018 | NC_021166.1    | Ca_Kabuli_Chr07 | 44689018                | CC                                     | TT                 | TT               | INTERGENIC      |               |                    |                              |



| SNPs IDs             | Chromosome IDs | Chromosomes     | Physical positions (bp) | CDC Frontier genome (Reference genome) | (Pusa 1103 & HPNB) | (ILWC 46 & LPNB) | Sequence Components of genome | Gene accession IDs | Putative functions                   |
|----------------------|----------------|-----------------|-------------------------|----------------------------------------|--------------------|------------------|-------------------------------|--------------------|--------------------------------------|
| SNP_58131_A_44701706 | NC_021166.1    | Ca_Kabuli_Chr07 | 44701706                | CC                                     | TT                 | TT               | INTERGENIC                    |                    |                                      |
| SNP_58132_A_44707215 | NC_021166.1    | Ca_Kabuli_Chr07 | 44707215                | TT                                     | CC                 | CC               | INTERGENIC                    |                    |                                      |
| SNP_58133_A_44716395 | NC_021166.1    | Ca_Kabuli_Chr07 | 44716395                | TT                                     | GG                 | GG               | DRR                           | 101497144          | Unknown function                     |
| SNP_58134_A_44796461 | NC_021166.1    | Ca_Kabuli_Chr07 | 44796461                | CC                                     | GG                 | GG               | INTERGENIC                    |                    |                                      |
| SNP_58135_A_44821814 | NC_021166.1    | Ca_Kabuli_Chr07 | 44821814                | GG                                     | AA                 | AA               | INTERGENIC                    |                    |                                      |
| SNP_58136_A_44822404 | NC_021166.1    | Ca_Kabuli_Chr07 | 44822404                | AA                                     | TT                 | TT               | INTERGENIC                    |                    |                                      |
| SNP_58137_A_44822656 | NC_021166.1    | Ca_Kabuli_Chr07 | 44822656                | CC                                     | AA                 | AA               | INTERGENIC                    |                    |                                      |
| SNP_58138_A_44822659 | NC_021166.1    | Ca_Kabuli_Chr07 | 44822659                | AA                                     | GG                 | GG               | INTERGENIC                    |                    |                                      |
| SNP_58139_A_44822679 | NC_021166.1    | Ca_Kabuli_Chr07 | 44822679                | AA                                     | CC                 | CC               | INTERGENIC                    |                    |                                      |
| SNP_58140_A_44822702 | NC_021166.1    | Ca_Kabuli_Chr07 | 44822702                | TT                                     | CC                 | CC               | INTERGENIC                    |                    |                                      |
| SNP_58142_A_44823829 | NC_021166.1    | Ca_Kabuli_Chr07 | 44823829                | GG                                     | TT                 | TT               | INTERGENIC                    |                    |                                      |
| SNP_58144_A_44830231 | NC_021166.1    | Ca_Kabuli_Chr07 | 44830231                | AA                                     | GG                 | GG               | INTERGENIC                    |                    |                                      |
| SNP_58145_A_44830234 | NC_021166.1    | Ca_Kabuli_Chr07 | 44830234                | GG                                     | AA                 | AA               | INTERGENIC                    |                    |                                      |
| SNP_58146_A_44830235 | NC_021166.1    | Ca_Kabuli_Chr07 | 44830235                | CC                                     | TT                 | TT               | INTERGENIC                    |                    |                                      |
| SNP_58147_A_44830240 | NC_021166.1    | Ca_Kabuli_Chr07 | 44830240                | GG                                     | AA                 | AA               | INTERGENIC                    |                    |                                      |
| SNP_58148_A_44830245 | NC_021166.1    | Ca_Kabuli_Chr07 | 44830245                | TT                                     | CC                 | CC               | INTERGENIC                    |                    |                                      |
| SNP_58149_A_44832889 | NC_021166.1    | Ca_Kabuli_Chr07 | 44832889                | CC                                     | TT                 | TT               | INTERGENIC                    |                    |                                      |
| SNP_58150_A_44832910 | NC_021166.1    | Ca_Kabuli_Chr07 | 44832910                | AA                                     | GG                 | GG               | INTERGENIC                    |                    |                                      |
| SNP_58151_A_44832922 | NC_021166.1    | Ca_Kabuli_Chr07 | 44832922                | CC                                     | AA                 | AA               | INTERGENIC                    |                    |                                      |
| SNP_58152_A_44835044 | NC_021166.1    | Ca_Kabuli_Chr07 | 44835044                | AA                                     | GG                 | GG               | INTERGENIC                    |                    |                                      |
| SNP_58153_A_44892724 | NC_021166.1    | Ca_Kabuli_Chr07 | 44892724                | AA                                     | TT                 | TT               | URR                           | 101514638          | protein FAR1-RELATED SEQUENCE 3-like |
| SNP_58154_A_44897707 | NC_021166.1    | Ca_Kabuli_Chr07 | 44897707                | TT                                     | CC                 | CC               | DRR                           | 101515619          | uncharacterized LOC101515619         |

| SNPs IDs             | Chromosome IDs | Chromosomes     | Physical positions (bp) | CDC Frontier genome (Reference genome) | (Pusa 1103 & HPNB) | (ILWC 46 & LPNB) | Sequence Components of genome | Gene accession IDs | Putative functions |
|----------------------|----------------|-----------------|-------------------------|----------------------------------------|--------------------|------------------|-------------------------------|--------------------|--------------------|
| SNP_58155_A_44924492 | NC_021166.1    | Ca_Kabuli_Chr07 | 44924492                | GG                                     | AA                 | AA               | INTRON                        | 101498809          | Unknown function   |
| SNP_58156_A_44977051 | NC_021166.1    | Ca_Kabuli_Chr07 | 44977051                | CC                                     | TT                 | TT               | INTERGENIC                    |                    |                    |
| SNP_58157_A_44977158 | NC_021166.1    | Ca_Kabuli_Chr07 | 44977158                | TT                                     | CC                 | CC               | INTERGENIC                    |                    |                    |
| SNP_58158_A_44977182 | NC_021166.1    | Ca_Kabuli_Chr07 | 44977182                | TT                                     | AA                 | AA               | INTERGENIC                    |                    |                    |
| SNP_58159_A_44977183 | NC_021166.1    | Ca_Kabuli_Chr07 | 44977183                | CC                                     | AA                 | AA               | INTERGENIC                    |                    |                    |
| SNP_58161_A_44977215 | NC_021166.1    | Ca_Kabuli_Chr07 | 44977215                | TT                                     | CC                 | CC               | INTERGENIC                    |                    |                    |
| SNP_58162_A_45026048 | NC_021166.1    | Ca_Kabuli_Chr07 | 45026048                | GG                                     | CC                 | CC               | INTERGENIC                    |                    |                    |
| SNP_58163_A_45028330 | NC_021166.1    | Ca_Kabuli_Chr07 | 45028330                | GG                                     | TT                 | TT               | INTERGENIC                    |                    |                    |
| SNP_58164_A_45044164 | NC_021166.1    | Ca_Kabuli_Chr07 | 45044164                | GG                                     | CC                 | CC               | INTERGENIC                    |                    |                    |
| SNP_58165_A_45044246 | NC_021166.1    | Ca_Kabuli_Chr07 | 45044246                | AA                                     | GG                 | GG               | INTERGENIC                    |                    |                    |
| SNP_58166_A_45044467 | NC_021166.1    | Ca_Kabuli_Chr07 | 45044467                | CC                                     | TT                 | TT               | INTERGENIC                    |                    |                    |
| SNP_58167_A_45044520 | NC_021166.1    | Ca_Kabuli_Chr07 | 45044520                | AA                                     | GG                 | GG               | INTERGENIC                    |                    |                    |
| SNP_58168_A_45044538 | NC_021166.1    | Ca_Kabuli_Chr07 | 45044538                | AA                                     | GG                 | GG               | INTERGENIC                    |                    |                    |
| SNP_58169_A_45044543 | NC_021166.1    | Ca_Kabuli_Chr07 | 45044543                | GG                                     | AA                 | AA               | INTERGENIC                    |                    |                    |
| SNP_58170_A_45044561 | NC_021166.1    | Ca_Kabuli_Chr07 | 45044561                | GG                                     | AA                 | AA               | INTERGENIC                    |                    |                    |
| SNP_58171_A_45044569 | NC_021166.1    | Ca_Kabuli_Chr07 | 45044569                | CC                                     | TT                 | TT               | INTERGENIC                    |                    |                    |
| SNP_58172_A_45044625 | NC_021166.1    | Ca_Kabuli_Chr07 | 45044625                | TT                                     | CC                 | CC               | INTERGENIC                    |                    |                    |
| SNP_58173_A_45044655 | NC_021166.1    | Ca_Kabuli_Chr07 | 45044655                | AA                                     | GG                 | GG               | INTERGENIC                    |                    |                    |
| SNP_58174_A_45050952 | NC_021166.1    | Ca_Kabuli_Chr07 | 45050952                | AA                                     | GG                 | GG               | INTERGENIC                    |                    |                    |
| SNP_58175_A_45087639 | NC_021166.1    | Ca_Kabuli_Chr07 | 45087639                | CC                                     | TT                 | TT               | INTERGENIC                    |                    |                    |
| SNP_58176_A_45088016 | NC_021166.1    | Ca_Kabuli_Chr07 | 45088016                | CC                                     | AA                 | AA               | INTERGENIC                    |                    |                    |
| SNP_58178_A_45089358 | NC_021166.1    | Ca_Kabuli_Chr07 | 45089358                | GG                                     | AA                 | AA               | INTERGENIC                    |                    |                    |

| SNPs IDs             | Chromosome IDs | Chromosomes     | Physical positions (bp) | CDC Frontier genome (Reference genome) | (Pusa 1103 & HPNB) | (ILWC 46 & LPNB) | Sequence genome | Components of | Gene accession IDs             | Putative functions |
|----------------------|----------------|-----------------|-------------------------|----------------------------------------|--------------------|------------------|-----------------|---------------|--------------------------------|--------------------|
| SNP_58179_A_45089385 | NC_021166.1    | Ca_Kabuli_Chr07 | 45089385                | AA                                     | GG                 | GG               | INTERGENIC      |               |                                |                    |
| SNP_58180_A_45093773 | NC_021166.1    | Ca_Kabuli_Chr07 | 45093773                | GG                                     | AA                 | AA               | INTERGENIC      |               |                                |                    |
| SNP_58181_A_45094775 | NC_021166.1    | Ca_Kabuli_Chr07 | 45094775                | AA                                     | GG                 | GG               | INTERGENIC      |               |                                |                    |
| SNP_58182_A_45113244 | NC_021166.1    | Ca_Kabuli_Chr07 | 45113244                | CC                                     | TT                 | TT               | INTERGENIC      |               |                                |                    |
| SNP_58183_A_45113341 | NC_021166.1    | Ca_Kabuli_Chr07 | 45113341                | AA                                     | GG                 | GG               | INTERGENIC      |               |                                |                    |
| SNP_58184_A_45113447 | NC_021166.1    | Ca_Kabuli_Chr07 | 45113447                | AA                                     | GG                 | GG               | INTERGENIC      |               |                                |                    |
| SNP_58185_A_45113457 | NC_021166.1    | Ca_Kabuli_Chr07 | 45113457                | AA                                     | CC                 | CC               | INTERGENIC      |               |                                |                    |
| SNP_58186_A_45113473 | NC_021166.1    | Ca_Kabuli_Chr07 | 45113473                | GG                                     | AA                 | AA               | INTERGENIC      |               |                                |                    |
| SNP_58187_A_45113682 | NC_021166.1    | Ca_Kabuli_Chr07 | 45113682                | GG                                     | AA                 | AA               | INTERGENIC      |               |                                |                    |
| SNP_58188_A_45123171 | NC_021166.1    | Ca_Kabuli_Chr07 | 45123171                | CC                                     | AA                 | AA               | INTERGENIC      |               |                                |                    |
| SNP_58189_A_45124831 | NC_021166.1    | Ca_Kabuli_Chr07 | 45124831                | AA                                     | GG                 | GG               | INTERGENIC      |               |                                |                    |
| SNP_58190_A_45124874 | NC_021166.1    | Ca_Kabuli_Chr07 | 45124874                | AA                                     | TT                 | TT               | INTERGENIC      |               |                                |                    |
| SNP_58191_A_45127789 | NC_021166.1    | Ca_Kabuli_Chr07 | 45127789                | AA                                     | GG                 | GG               | INTERGENIC      |               |                                |                    |
| SNP_58192_A_45132289 | NC_021166.1    | Ca_Kabuli_Chr07 | 45132289                | CC                                     | TT                 | TT               | INTERGENIC      |               |                                |                    |
| SNP_58193_A_45135171 | NC_021166.1    | Ca_Kabuli_Chr07 | 45135171                | TT                                     | CC                 | CC               | INTERGENIC      |               |                                |                    |
| SNP_58194_A_45149736 | NC_021166.1    | Ca_Kabuli_Chr07 | 45149736                | AA                                     | GG                 | GG               | URR             | 101499447     | transcription factor GTE4-like |                    |
| SNP_58195_A_45149790 | NC_021166.1    | Ca_Kabuli_Chr07 | 45149790                | TT                                     | AA                 | AA               | URR             | 101499447     | transcription factor GTE4-like |                    |
| SNP_58196_A_45151007 | NC_021166.1    | Ca_Kabuli_Chr07 | 45151007                | TT                                     | CC                 | CC               | INTERGENIC      |               |                                |                    |
| SNP_58197_A_45151201 | NC_021166.1    | Ca_Kabuli_Chr07 | 45151201                | AA                                     | CC                 | CC               | INTERGENIC      |               |                                |                    |
| SNP_58198_A_45151257 | NC_021166.1    | Ca_Kabuli_Chr07 | 45151257                | AA                                     | GG                 | GG               | INTERGENIC      |               |                                |                    |
| SNP_58199_A_45151314 | NC_021166.1    | Ca_Kabuli_Chr07 | 45151314                | TT                                     | CC                 | CC               | INTERGENIC      |               |                                |                    |
| SNP_58200_A_45151494 | NC_021166.1    | Ca_Kabuli_Chr07 | 45151494                | TT                                     | CC                 | CC               | INTERGENIC      |               |                                |                    |

| SNPs IDs             | Chromosome IDs | Chromosomes     | Physical positions (bp) | CDC Frontier genome (Reference genome) | (Pusa 1103 & HPNB) | (ILWC 46 & LPNB) | Sequence Components of genome | Gene accession IDs | Putative functions              |
|----------------------|----------------|-----------------|-------------------------|----------------------------------------|--------------------|------------------|-------------------------------|--------------------|---------------------------------|
| SNP_58201_A_45151523 | NC_021166.1    | Ca_Kabuli_Chr07 | 45151523                | CC                                     | TT                 | TT               | INTERGENIC                    |                    |                                 |
| SNP_58202_A_45164254 | NC_021166.1    | Ca_Kabuli_Chr07 | 45164254                | GG                                     | CC                 | CC               | INTERGENIC                    |                    |                                 |
| SNP_58203_A_45169409 | NC_021166.1    | Ca_Kabuli_Chr07 | 45169409                | GG                                     | AA                 | AA               | INTRON                        | 101499752          | uncharacterized LOC101499752    |
| SNP_58204_A_45169882 | NC_021166.1    | Ca_Kabuli_Chr07 | 45169882                | CC                                     | TT                 | TT               | INTRON                        | 101499752          | uncharacterized LOC101499752    |
| SNP_58205_A_45177996 | NC_021166.1    | Ca_Kabuli_Chr07 | 45177996                | TT                                     | AA                 | AA               | INTERGENIC                    |                    |                                 |
| SNP_58206_A_45178040 | NC_021166.1    | Ca_Kabuli_Chr07 | 45178040                | CC                                     | TT                 | TT               | INTERGENIC                    |                    |                                 |
| SNP_58207_A_45178048 | NC_021166.1    | Ca_Kabuli_Chr07 | 45178048                | AA                                     | TT                 | TT               | INTERGENIC                    |                    |                                 |
| SNP_58208_A_45178096 | NC_021166.1    | Ca_Kabuli_Chr07 | 45178096                | TT                                     | AA                 | AA               | INTERGENIC                    |                    |                                 |
| SNP_58209_A_45178534 | NC_021166.1    | Ca_Kabuli_Chr07 | 45178534                | GG                                     | AA                 | AA               | INTERGENIC                    |                    |                                 |
| SNP_58210_A_45178931 | NC_021166.1    | Ca_Kabuli_Chr07 | 45178931                | GG                                     | AA                 | AA               | INTERGENIC                    |                    |                                 |
| SNP_58211_A_45178963 | NC_021166.1    | Ca_Kabuli_Chr07 | 45178963                | GG                                     | AA                 | AA               | INTERGENIC                    |                    |                                 |
| SNP_58212_A_45179010 | NC_021166.1    | Ca_Kabuli_Chr07 | 45179010                | TT                                     | AA                 | AA               | INTERGENIC                    |                    |                                 |
| SNP_58213_A_45179049 | NC_021166.1    | Ca_Kabuli_Chr07 | 45179049                | CC                                     | AA                 | AA               | INTERGENIC                    |                    |                                 |
| SNP_58214_A_45179224 | NC_021166.1    | Ca_Kabuli_Chr07 | 45179224                | AA                                     | GG                 | GG               | DRR                           | 101500061          | Unknown function                |
| SNP_58215_A_45179264 | NC_021166.1    | Ca_Kabuli_Chr07 | 45179264                | GG                                     | AA                 | AA               | DRR                           | 101500061          | Unknown function                |
| SNP_58216_A_45179427 | NC_021166.1    | Ca_Kabuli_Chr07 | 45179427                | AA                                     | TT                 | TT               | DRR                           | 101500061          | Unknown function                |
| SNP_58217_A_45179441 | NC_021166.1    | Ca_Kabuli_Chr07 | 45179441                | TT                                     | CC                 | CC               | DRR                           | 101500061          | Unknown function                |
| SNP_58218_A_45179494 | NC_021166.1    | Ca_Kabuli_Chr07 | 45179494                | TT                                     | GG                 | GG               | DRR                           | 101500061          | Unknown function                |
| SNP_58219_A_45182053 | NC_021166.1    | Ca_Kabuli_Chr07 | 45182053                | TT                                     | AA                 | AA               | URR                           | 101500061          | Unknown function                |
| SNP_58222_A_45235356 | NC_021166.1    | Ca_Kabuli_Chr07 | 45235356                | GG                                     | AA                 | AA               | INTERGENIC                    |                    |                                 |
| SNP_58223_A_45239190 | NC_021166.1    | Ca_Kabuli_Chr07 | 45239190                | TT                                     | AA                 | AA               | INTRON                        | 101490223          | caffeoylshikimate esterase-like |
| SNP_58224_A_45239191 | NC_021166.1    | Ca_Kabuli_Chr07 | 45239191                | TT                                     | AA                 | AA               | INTRON                        | 101490223          | caffeoylshikimate esterase-like |

| SNPs IDs             | Chromosome IDs | Chromosomes     | Physical positions (bp) | CDC Frontier genome (Reference genome) | (Pusa 1103 & HPNB) | (ILWC 46 & LPNB) | Sequence Components of genome | Gene accession IDs | Putative functions                              |
|----------------------|----------------|-----------------|-------------------------|----------------------------------------|--------------------|------------------|-------------------------------|--------------------|-------------------------------------------------|
| SNP_58225_A_45239711 | NC_021166.1    | Ca_Kabuli_Chr07 | 45239711                | CC                                     | AA                 | AA               | INTRON                        | 101490223          | caffeoylshikimate esterase-like                 |
| SNP_58228_A_45249099 | NC_021166.1    | Ca_Kabuli_Chr07 | 45249099                | TT                                     | AA                 | AA               | URR                           | 101490223          | caffeoylshikimate esterase-like                 |
| SNP_58229_A_45249100 | NC_021166.1    | Ca_Kabuli_Chr07 | 45249100                | TT                                     | AA                 | AA               | URR                           | 101490223          | caffeoylshikimate esterase-like                 |
| SNP_58230_A_45259722 | NC_021166.1    | Ca_Kabuli_Chr07 | 45259722                | TT                                     | CC                 | CC               | INTERGENIC                    |                    |                                                 |
| SNP_58231_A_45290953 | NC_021166.1    | Ca_Kabuli_Chr07 | 45290953                | CC                                     | TT                 | TT               | URR                           | 101491095          | chlorophyll(ide) b reductase NOL, chloroplastic |
| SNP_58232_A_45292618 | NC_021166.1    | Ca_Kabuli_Chr07 | 45292618                | AA                                     | TT                 | TT               | INTERGENIC                    |                    |                                                 |
| SNP_58233_A_45294595 | NC_021166.1    | Ca_Kabuli_Chr07 | 45294595                | CC                                     | AA                 | AA               | INTERGENIC                    |                    |                                                 |
| SNP_58234_A_45317457 | NC_021166.1    | Ca_Kabuli_Chr07 | 45317457                | CC                                     | AA                 | AA               | INTRON                        | 101491411          | ATP-dependent RNA helicase DHX36                |
| SNP_58235_A_45350489 | NC_021166.1    | Ca_Kabuli_Chr07 | 45350489                | CC                                     | TT                 | TT               | INTERGENIC                    |                    |                                                 |
| SNP_58236_A_45377557 | NC_021166.1    | Ca_Kabuli_Chr07 | 45377557                | GG                                     | CC                 | CC               | INTERGENIC                    |                    |                                                 |
| SNP_58237_A_45378377 | NC_021166.1    | Ca_Kabuli_Chr07 | 45378377                | CC                                     | TT                 | TT               | INTERGENIC                    |                    |                                                 |
| SNP_58238_A_45383582 | NC_021166.1    | Ca_Kabuli_Chr07 | 45383582                | TT                                     | AA                 | AA               | NON_SYNONYMOUS_CODING         | 101492046          | protein RBL-like                                |
| SNP_58239_A_45391224 | NC_021166.1    | Ca_Kabuli_Chr07 | 45391224                | AA                                     | GG                 | GG               | NON_SYNONYMOUS_CODING         | 101501019          | Unknown function                                |
| SNP_58240_A_45391299 | NC_021166.1    | Ca_Kabuli_Chr07 | 45391299                | AA                                     | GG                 | GG               | NON_SYNONYMOUS_CODING         | 101501019          | Unknown function                                |
| SNP_58241_A_45391404 | NC_021166.1    | Ca_Kabuli_Chr07 | 45391404                | TT                                     | CC                 | CC               | NON_SYNONYMOUS_CODING         | 101501019          | Unknown function                                |
| SNP_58242_A_45391545 | NC_021166.1    | Ca_Kabuli_Chr07 | 45391545                | AA                                     | GG                 | GG               | NON_SYNONYMOUS_CODING         | 101501019          | Unknown function                                |
| SNP_58243_A_45391598 | NC_021166.1    | Ca_Kabuli_Chr07 | 45391598                | GG                                     | TT                 | TT               | SYNONYMOUS_CODING             | 101501019          | Unknown function                                |
| SNP_58244_A_45391605 | NC_021166.1    | Ca_Kabuli_Chr07 | 45391605                | AA                                     | TT                 | TT               | NON_SYNONYMOUS_CODING         | 101501019          | Unknown function                                |
| SNP_58245_A_45391624 | NC_021166.1    | Ca_Kabuli_Chr07 | 45391624                | GG                                     | AA                 | AA               | NON_SYNONYMOUS_CODING         | 101501019          | Unknown function                                |
| SNP_58246_A_45392091 | NC_021166.1    | Ca_Kabuli_Chr07 | 45392091                | GG                                     | AA                 | AA               | URR                           | 101501019          | Unknown function                                |
| SNP_58247_A_45436633 | NC_021166.1    | Ca_Kabuli_Chr07 | 45436633                | TT                                     | CC                 | CC               | INTERGENIC                    |                    |                                                 |
| SNP_58248_A_45439807 | NC_021166.1    | Ca_Kabuli_Chr07 | 45439807                | AA                                     | GG                 | GG               | INTERGENIC                    |                    |                                                 |

| SNPs IDs             | Chromosome IDs | Chromosomes     | Physical positions (bp) | CDC Frontier genome (Reference genome) | (Pusa 1103 & HPNB) | (ILWC 46 & LPNB) | Sequence Components of genome | Gene accession IDs | Putative functions                     |
|----------------------|----------------|-----------------|-------------------------|----------------------------------------|--------------------|------------------|-------------------------------|--------------------|----------------------------------------|
| SNP_58249_A_45439822 | NC_021166.1    | Ca_Kabuli_Chr07 | 45439822                | CC                                     | TT                 | TT               | INTERGENIC                    |                    |                                        |
| SNP_58250_A_45439825 | NC_021166.1    | Ca_Kabuli_Chr07 | 45439825                | CC                                     | TT                 | TT               | INTERGENIC                    |                    |                                        |
| SNP_58251_A_45439849 | NC_021166.1    | Ca_Kabuli_Chr07 | 45439849                | AA                                     | GG                 | GG               | INTERGENIC                    |                    |                                        |
| SNP_58252_A_45439995 | NC_021166.1    | Ca_Kabuli_Chr07 | 45439995                | GG                                     | AA                 | AA               | INTERGENIC                    |                    |                                        |
| SNP_58253_A_45440005 | NC_021166.1    | Ca_Kabuli_Chr07 | 45440005                | AA                                     | CC                 | CC               | INTERGENIC                    |                    |                                        |
| SNP_58254_A_45443574 | NC_021166.1    | Ca_Kabuli_Chr07 | 45443574                | TT                                     | CC                 | CC               | INTERGENIC                    |                    |                                        |
| SNP_58255_A_45458218 | NC_021166.1    | Ca_Kabuli_Chr07 | 45458218                | TT                                     | AA                 | AA               | INTERGENIC                    |                    |                                        |
| SNP_58256_A_45499212 | NC_021166.1    | Ca_Kabuli_Chr07 | 45499212                | AA                                     | TT                 | TT               | DRR                           | 101493377          | MLP-like protein 43                    |
| SNP_58257_A_45538835 | NC_021166.1    | Ca_Kabuli_Chr07 | 45538835                | CC                                     | AA                 | AA               | INTRON                        | 101493377          | MLP-like protein 43                    |
| SNP_58258_A_45539220 | NC_021166.1    | Ca_Kabuli_Chr07 | 45539220                | GG                                     | AA                 | AA               | INTRON                        | 101493377          | MLP-like protein 43                    |
| SNP_58259_A_45539243 | NC_021166.1    | Ca_Kabuli_Chr07 | 45539243                | AA                                     | CC                 | CC               | INTRON                        | 101493377          | MLP-like protein 43                    |
| SNP_58260_A_45539549 | NC_021166.1    | Ca_Kabuli_Chr07 | 45539549                | AA                                     | CC                 | CC               | INTRON                        | 101493377          | MLP-like protein 43                    |
| SNP_58261_A_45539691 | NC_021166.1    | Ca_Kabuli_Chr07 | 45539691                | AA                                     | TT                 | TT               | INTRON                        | 101493377          | MLP-like protein 43                    |
| SNP_58262_A_45539698 | NC_021166.1    | Ca_Kabuli_Chr07 | 45539698                | TT                                     | AA                 | AA               | INTRON                        | 101493377          | MLP-like protein 43                    |
| SNP_58263_A_45539703 | NC_021166.1    | Ca_Kabuli_Chr07 | 45539703                | TT                                     | GG                 | GG               | INTRON                        | 101493377          | MLP-like protein 43                    |
| SNP_58264_A_45539870 | NC_021166.1    | Ca_Kabuli_Chr07 | 45539870                | CC                                     | TT                 | TT               | INTRON                        | 101493377          | MLP-like protein 43                    |
| SNP_58265_A_45553195 | NC_021166.1    | Ca_Kabuli_Chr07 | 45553195                | CC                                     | TT                 | TT               | INTRON                        | 101493377          | MLP-like protein 43                    |
| SNP_58266_A_45597746 | NC_021166.1    | Ca_Kabuli_Chr07 | 45597746                | TT                                     | CC                 | CC               | INTRON                        | 101493377          | MLP-like protein 43                    |
| SNP_58267_A_45603259 | NC_021166.1    | Ca_Kabuli_Chr07 | 45603259                | GG                                     | AA                 | AA               | INTRON                        | 101493377          | MLP-like protein 43                    |
| SNP_58268_A_45621920 | NC_021166.1    | Ca_Kabuli_Chr07 | 45621920                | AA                                     | GG                 | GG               | INTRON                        | 101493053          | embryonic abundant protein VF30.1-like |
| SNP_58269_A_45634261 | NC_021166.1    | Ca_Kabuli_Chr07 | 45634261                | AA                                     | GG                 | GG               | INTRON                        | 101493377          | MLP-like protein 43                    |
| SNP_58270_A_45634331 | NC_021166.1    | Ca_Kabuli_Chr07 | 45634331                | CC                                     | TT                 | TT               | INTRON                        | 101493377          | MLP-like protein 43                    |

| SNPs IDs             | Chromosome IDs | Chromosomes     | Physical positions (bp) | CDC Frontier genome (Reference genome) | (Pusa 1103 & HPNB) | (ILWC 46 & LPNB) | Sequence Components of genome | Gene accession IDs | Putative functions  |
|----------------------|----------------|-----------------|-------------------------|----------------------------------------|--------------------|------------------|-------------------------------|--------------------|---------------------|
| SNP_58271_A_45634332 | NC_021166.1    | Ca_Kabuli_Chr07 | 45634332                | TT                                     | CC                 | CC               | INTRON                        | 101493377          | MLP-like protein 43 |
| SNP_58272_A_45634342 | NC_021166.1    | Ca_Kabuli_Chr07 | 45634342                | AA                                     | TT                 | TT               | INTRON                        | 101493377          | MLP-like protein 43 |
| SNP_58273_A_45634344 | NC_021166.1    | Ca_Kabuli_Chr07 | 45634344                | CC                                     | TT                 | TT               | INTRON                        | 101493377          | MLP-like protein 43 |
| SNP_58274_A_45634345 | NC_021166.1    | Ca_Kabuli_Chr07 | 45634345                | AA                                     | GG                 | GG               | INTRON                        | 101493377          | MLP-like protein 43 |
| SNP_58275_A_45635553 | NC_021166.1    | Ca_Kabuli_Chr07 | 45635553                | TT                                     | CC                 | CC               | INTRON                        | 101493377          | MLP-like protein 43 |
| SNP_58276_A_45651577 | NC_021166.1    | Ca_Kabuli_Chr07 | 45651577                | AA                                     | TT                 | TT               | INTRON                        | 101493377          | MLP-like protein 43 |
| SNP_58277_A_45668343 | NC_021166.1    | Ca_Kabuli_Chr07 | 45668343                | CC                                     | TT                 | TT               | INTRON                        | 101502298          | Unknown function    |
| SNP_58278_A_45676983 | NC_021166.1    | Ca_Kabuli_Chr07 | 45676983                | CC                                     | TT                 | TT               | INTRON                        | 101502298          | Unknown function    |
| SNP_58279_A_45678582 | NC_021166.1    | Ca_Kabuli_Chr07 | 45678582                | CC                                     | TT                 | TT               | INTRON                        | 101502298          | Unknown function    |
| SNP_58280_A_45689438 | NC_021166.1    | Ca_Kabuli_Chr07 | 45689438                | AA                                     | CC                 | CC               | INTRON                        | 101502298          | Unknown function    |
| SNP_58281_A_45738166 | NC_021166.1    | Ca_Kabuli_Chr07 | 45738166                | AA                                     | CC                 | CC               | INTERGENIC                    |                    |                     |
| SNP_58282_A_45750574 | NC_021166.1    | Ca_Kabuli_Chr07 | 45750574                | TT                                     | CC                 | CC               | INTERGENIC                    |                    |                     |
| SNP_58284_A_45857065 | NC_021166.1    | Ca_Kabuli_Chr07 | 45857065                | GG                                     | TT                 | TT               | INTERGENIC                    |                    |                     |
| SNP_58285_A_45857429 | NC_021166.1    | Ca_Kabuli_Chr07 | 45857429                | TT                                     | CC                 | CC               | INTERGENIC                    |                    |                     |
| SNP_58286_A_45898282 | NC_021166.1    | Ca_Kabuli_Chr07 | 45898282                | AA                                     | GG                 | GG               | INTERGENIC                    |                    |                     |
| SNP_58287_A_45914424 | NC_021166.1    | Ca_Kabuli_Chr07 | 45914424                | TT                                     | CC                 | CC               | INTERGENIC                    |                    |                     |
| SNP_58288_A_45922809 | NC_021166.1    | Ca_Kabuli_Chr07 | 45922809                | TT                                     | GG                 | GG               | INTERGENIC                    |                    |                     |
| SNP_58289_A_45925356 | NC_021166.1    | Ca_Kabuli_Chr07 | 45925356                | AA                                     | CC                 | CC               | INTERGENIC                    |                    |                     |
| SNP_58290_A_45925360 | NC_021166.1    | Ca_Kabuli_Chr07 | 45925360                | TT                                     | CC                 | CC               | INTERGENIC                    |                    |                     |
| SNP_58291_A_45925453 | NC_021166.1    | Ca_Kabuli_Chr07 | 45925453                | AA                                     | CC                 | CC               | INTERGENIC                    |                    |                     |
| SNP_58292_A_45925471 | NC_021166.1    | Ca_Kabuli_Chr07 | 45925471                | CC                                     | TT                 | TT               | INTERGENIC                    |                    |                     |
| SNP_58293_A_45925516 | NC_021166.1    | Ca_Kabuli_Chr07 | 45925516                | TT                                     | CC                 | CC               | INTERGENIC                    |                    |                     |

| SNPs IDs             | Chromosome IDs | Chromosomes     | Physical positions (bp) | CDC Frontier genome (Reference genome) | (Pusa 1103 & HPNB) | (ILWC 46 & LPNB) | Sequence genome | Components of | Gene accession IDs | Putative functions |
|----------------------|----------------|-----------------|-------------------------|----------------------------------------|--------------------|------------------|-----------------|---------------|--------------------|--------------------|
| SNP_58294_A_45925519 | NC_021166.1    | Ca_Kabuli_Chr07 | 45925519                | TT                                     | CC                 | CC               | INTERGENIC      |               |                    |                    |
| SNP_58295_A_45925524 | NC_021166.1    | Ca_Kabuli_Chr07 | 45925524                | TT                                     | CC                 | CC               | INTERGENIC      |               |                    |                    |
| SNP_58296_A_45925533 | NC_021166.1    | Ca_Kabuli_Chr07 | 45925533                | AA                                     | CC                 | CC               | INTERGENIC      |               |                    |                    |
| SNP_58297_A_45925534 | NC_021166.1    | Ca_Kabuli_Chr07 | 45925534                | TT                                     | CC                 | CC               | INTERGENIC      |               |                    |                    |
| SNP_58298_A_45925564 | NC_021166.1    | Ca_Kabuli_Chr07 | 45925564                | CC                                     | TT                 | TT               | INTERGENIC      |               |                    |                    |
| SNP_58299_A_45925573 | NC_021166.1    | Ca_Kabuli_Chr07 | 45925573                | GG                                     | AA                 | AA               | INTERGENIC      |               |                    |                    |
| SNP_58300_A_45925588 | NC_021166.1    | Ca_Kabuli_Chr07 | 45925588                | TT                                     | AA                 | AA               | INTERGENIC      |               |                    |                    |
| SNP_58301_A_45925612 | NC_021166.1    | Ca_Kabuli_Chr07 | 45925612                | TT                                     | CC                 | CC               | INTERGENIC      |               |                    |                    |
| SNP_58302_A_45925631 | NC_021166.1    | Ca_Kabuli_Chr07 | 45925631                | GG                                     | CC                 | CC               | INTERGENIC      |               |                    |                    |
| SNP_58303_A_45925639 | NC_021166.1    | Ca_Kabuli_Chr07 | 45925639                | AA                                     | GG                 | GG               | INTERGENIC      |               |                    |                    |
| SNP_58304_A_45925656 | NC_021166.1    | Ca_Kabuli_Chr07 | 45925656                | TT                                     | AA                 | AA               | INTERGENIC      |               |                    |                    |
| SNP_58305_A_45925809 | NC_021166.1    | Ca_Kabuli_Chr07 | 45925809                | CC                                     | TT                 | TT               | INTERGENIC      |               |                    |                    |
| SNP_58306_A_45925813 | NC_021166.1    | Ca_Kabuli_Chr07 | 45925813                | AA                                     | TT                 | TT               | INTERGENIC      |               |                    |                    |
| SNP_58307_A_45925899 | NC_021166.1    | Ca_Kabuli_Chr07 | 45925899                | AA                                     | GG                 | GG               | INTERGENIC      |               |                    |                    |
| SNP_58308_A_45925929 | NC_021166.1    | Ca_Kabuli_Chr07 | 45925929                | CC                                     | TT                 | TT               | INTERGENIC      |               |                    |                    |
| SNP_58309_A_45925950 | NC_021166.1    | Ca_Kabuli_Chr07 | 45925950                | AA                                     | GG                 | GG               | INTERGENIC      |               |                    |                    |
| SNP_58310_A_45925962 | NC_021166.1    | Ca_Kabuli_Chr07 | 45925962                | CC                                     | TT                 | TT               | INTERGENIC      |               |                    |                    |
| SNP_58311_A_45925979 | NC_021166.1    | Ca_Kabuli_Chr07 | 45925979                | AA                                     | GG                 | GG               | INTERGENIC      |               |                    |                    |
| SNP_58312_A_45925986 | NC_021166.1    | Ca_Kabuli_Chr07 | 45925986                | CC                                     | TT                 | TT               | INTERGENIC      |               |                    |                    |
| SNP_58313_A_45926002 | NC_021166.1    | Ca_Kabuli_Chr07 | 45926002                | GG                                     | AA                 | AA               | INTERGENIC      |               |                    |                    |
| SNP_58314_A_45927848 | NC_021166.1    | Ca_Kabuli_Chr07 | 45927848                | TT                                     | CC                 | CC               | INTERGENIC      |               |                    |                    |
| SNP_58315_A_45927884 | NC_021166.1    | Ca_Kabuli_Chr07 | 45927884                | GG                                     | CC                 | CC               | INTERGENIC      |               |                    |                    |



| SNPs IDs             | Chromosome IDs | Chromosomes     | Physical positions (bp) | CDC Frontier genome (Reference genome) | (Pusa 1103 & HPNB) | (ILWC 46 & LPNB) | Sequence Components of genome | Gene accession IDs | Putative functions                         |
|----------------------|----------------|-----------------|-------------------------|----------------------------------------|--------------------|------------------|-------------------------------|--------------------|--------------------------------------------|
| SNP_58316_A_45927902 | NC_021166.1    | Ca_Kabuli_Chr07 | 45927902                | GG                                     | AA                 | AA               | INTERGENIC                    |                    |                                            |
| SNP_58317_A_45927942 | NC_021166.1    | Ca_Kabuli_Chr07 | 45927942                | CC                                     | TT                 | TT               | INTERGENIC                    |                    |                                            |
| SNP_58318_A_45927954 | NC_021166.1    | Ca_Kabuli_Chr07 | 45927954                | AA                                     | GG                 | GG               | INTERGENIC                    |                    |                                            |
| SNP_58319_A_45927975 | NC_021166.1    | Ca_Kabuli_Chr07 | 45927975                | CC                                     | TT                 | TT               | INTERGENIC                    |                    |                                            |
| SNP_58320_A_45927996 | NC_021166.1    | Ca_Kabuli_Chr07 | 45927996                | TT                                     | CC                 | CC               | INTERGENIC                    |                    |                                            |
| SNP_58321_A_45928012 | NC_021166.1    | Ca_Kabuli_Chr07 | 45928012                | TT                                     | CC                 | CC               | INTERGENIC                    |                    |                                            |
| SNP_58322_A_45928017 | NC_021166.1    | Ca_Kabuli_Chr07 | 45928017                | TT                                     | CC                 | CC               | INTERGENIC                    |                    |                                            |
| SNP_58323_A_45928020 | NC_021166.1    | Ca_Kabuli_Chr07 | 45928020                | AA                                     | GG                 | GG               | INTERGENIC                    |                    |                                            |
| SNP_58324_A_45931144 | NC_021166.1    | Ca_Kabuli_Chr07 | 45931144                | TT                                     | CC                 | CC               | INTERGENIC                    |                    |                                            |
| SNP_58325_A_45933596 | NC_021166.1    | Ca_Kabuli_Chr07 | 45933596                | AA                                     | GG                 | GG               | INTERGENIC                    |                    |                                            |
| SNP_58326_A_45944545 | NC_021166.1    | Ca_Kabuli_Chr07 | 45944545                | TT                                     | CC                 | CC               | INTRON                        | 101495183          | guanine nucleotide exchange factor SPIKE 1 |
| SNP_58327_A_45991233 | NC_021166.1    | Ca_Kabuli_Chr07 | 45991233                | GG                                     | TT                 | TT               | INTERGENIC                    |                    |                                            |
| SNP_58328_A_45991472 | NC_021166.1    | Ca_Kabuli_Chr07 | 45991472                | CC                                     | TT                 | TT               | INTERGENIC                    |                    |                                            |
| SNP_58329_A_45991660 | NC_021166.1    | Ca_Kabuli_Chr07 | 45991660                | GG                                     | TT                 | TT               | INTERGENIC                    |                    |                                            |
| SNP_58330_A_45991731 | NC_021166.1    | Ca_Kabuli_Chr07 | 45991731                | GG                                     | AA                 | AA               | INTERGENIC                    |                    |                                            |
| SNP_58331_A_46011999 | NC_021166.1    | Ca_Kabuli_Chr07 | 46011999                | AA                                     | TT                 | TT               | INTERGENIC                    |                    |                                            |
| SNP_58332_A_46025779 | NC_021166.1    | Ca_Kabuli_Chr07 | 46025779                | GG                                     | AA                 | AA               | INTERGENIC                    |                    |                                            |
| SNP_58333_A_46068157 | NC_021166.1    | Ca_Kabuli_Chr07 | 46068157                | AA                                     | GG                 | GG               | INTERGENIC                    |                    |                                            |
| SNP_58334_A_46068158 | NC_021166.1    | Ca_Kabuli_Chr07 | 46068158                | TT                                     | AA                 | AA               | INTERGENIC                    |                    |                                            |
| SNP_58336_A_46076195 | NC_021166.1    | Ca_Kabuli_Chr07 | 46076195                | AA                                     | GG                 | GG               | INTERGENIC                    |                    |                                            |
| SNP_58337_A_46121295 | NC_021166.1    | Ca_Kabuli_Chr07 | 46121295                | CC                                     | GG                 | GG               | INTERGENIC                    |                    |                                            |
| SNP_58338_A_46121304 | NC_021166.1    | Ca_Kabuli_Chr07 | 46121304                | GG                                     | TT                 | TT               | INTERGENIC                    |                    |                                            |

| SNPs IDs             | Chromosome IDs | Chromosomes     | Physical positions (bp) | CDC Frontier genome (Reference genome) | (Pusa 1103 & HPNB) | (ILWC 46 & LPNB) | Sequence Components of genome | Gene accession IDs | Putative functions   |
|----------------------|----------------|-----------------|-------------------------|----------------------------------------|--------------------|------------------|-------------------------------|--------------------|----------------------|
| SNP_58339_A_46121322 | NC_021166.1    | Ca_Kabuli_Chr07 | 46121322                | AA                                     | TT                 | TT               | INTERGENIC                    |                    |                      |
| SNP_58340_A_46121327 | NC_021166.1    | Ca_Kabuli_Chr07 | 46121327                | TT                                     | CC                 | CC               | INTERGENIC                    |                    |                      |
| SNP_58341_A_46121337 | NC_021166.1    | Ca_Kabuli_Chr07 | 46121337                | AA                                     | GG                 | GG               | INTERGENIC                    |                    |                      |
| SNP_58342_A_46121577 | NC_021166.1    | Ca_Kabuli_Chr07 | 46121577                | AA                                     | TT                 | TT               | INTERGENIC                    |                    |                      |
| SNP_58343_A_46127829 | NC_021166.1    | Ca_Kabuli_Chr07 | 46127829                | GG                                     | TT                 | TT               | INTERGENIC                    |                    |                      |
| SNP_58344_A_46127832 | NC_021166.1    | Ca_Kabuli_Chr07 | 46127832                | CC                                     | AA                 | TT               | INTERGENIC                    |                    |                      |
| SNP_58345_A_46127878 | NC_021166.1    | Ca_Kabuli_Chr07 | 46127878                | AA                                     | GG                 | GG               | INTERGENIC                    |                    |                      |
| SNP_58346_A_46127882 | NC_021166.1    | Ca_Kabuli_Chr07 | 46127882                | AA                                     | GG                 | GG               | INTERGENIC                    |                    |                      |
| SNP_58347_A_46127939 | NC_021166.1    | Ca_Kabuli_Chr07 | 46127939                | TT                                     | GG                 | GG               | INTERGENIC                    |                    |                      |
| SNP_58348_A_46127947 | NC_021166.1    | Ca_Kabuli_Chr07 | 46127947                | TT                                     | CC                 | CC               | INTERGENIC                    |                    |                      |
| SNP_58349_A_46127959 | NC_021166.1    | Ca_Kabuli_Chr07 | 46127959                | TT                                     | GG                 | GG               | INTERGENIC                    |                    |                      |
| SNP_58350_A_46128101 | NC_021166.1    | Ca_Kabuli_Chr07 | 46128101                | AA                                     | GG                 | GG               | INTERGENIC                    |                    |                      |
| SNP_58351_A_46128208 | NC_021166.1    | Ca_Kabuli_Chr07 | 46128208                | TT                                     | CC                 | CC               | INTERGENIC                    |                    |                      |
| SNP_58352_A_46132603 | NC_021166.1    | Ca_Kabuli_Chr07 | 46132603                | TT                                     | AA                 | AA               | INTERGENIC                    |                    |                      |
| SNP_58353_A_46132617 | NC_021166.1    | Ca_Kabuli_Chr07 | 46132617                | AA                                     | GG                 | GG               | INTERGENIC                    |                    |                      |
| SNP_58354_A_46178498 | NC_021166.1    | Ca_Kabuli_Chr07 | 46178498                | AA                                     | GG                 | GG               | INTRON                        | 101505731          | protein OS-9 homolog |
| SNP_58355_A_46178595 | NC_021166.1    | Ca_Kabuli_Chr07 | 46178595                | TT                                     | CC                 | CC               | INTRON                        | 101505731          | protein OS-9 homolog |
| SNP_58356_A_46178613 | NC_021166.1    | Ca_Kabuli_Chr07 | 46178613                | AA                                     | GG                 | GG               | INTRON                        | 101505731          | protein OS-9 homolog |
| SNP_58357_A_46178628 | NC_021166.1    | Ca_Kabuli_Chr07 | 46178628                | TT                                     | CC                 | CC               | INTRON                        | 101505731          | protein OS-9 homolog |
| SNP_58358_A_46178658 | NC_021166.1    | Ca_Kabuli_Chr07 | 46178658                | CC                                     | TT                 | TT               | INTRON                        | 101505731          | protein OS-9 homolog |
| SNP_58359_A_46178667 | NC_021166.1    | Ca_Kabuli_Chr07 | 46178667                | CC                                     | TT                 | TT               | INTRON                        | 101505731          | protein OS-9 homolog |
| SNP_58360_A_46178718 | NC_021166.1    | Ca_Kabuli_Chr07 | 46178718                | AA                                     | TT                 | TT               | INTRON                        | 101505731          | protein OS-9 homolog |

| SNPs IDs             | Chromosome IDs | Chromosomes     | Physical positions (bp) | CDC Frontier genome (Reference genome) | (Pusa 1103 & HPNB) | (ILWC 46 & LPNB) | Sequence Components of genome | Gene accession IDs | Putative functions           |
|----------------------|----------------|-----------------|-------------------------|----------------------------------------|--------------------|------------------|-------------------------------|--------------------|------------------------------|
| SNP_58361_A_46185499 | NC_021166.1    | Ca_Kabuli_Chr07 | 46185499                | CC                                     | AA                 | AA               | INTERGENIC                    |                    |                              |
| SNP_58362_A_46185500 | NC_021166.1    | Ca_Kabuli_Chr07 | 46185500                | AA                                     | GG                 | GG               | INTERGENIC                    |                    |                              |
| SNP_58363_A_46185508 | NC_021166.1    | Ca_Kabuli_Chr07 | 46185508                | TT                                     | CC                 | CC               | INTERGENIC                    |                    |                              |
| SNP_58364_A_46185553 | NC_021166.1    | Ca_Kabuli_Chr07 | 46185553                | AA                                     | GG                 | GG               | INTERGENIC                    |                    |                              |
| SNP_58365_A_46185626 | NC_021166.1    | Ca_Kabuli_Chr07 | 46185626                | GG                                     | AA                 | AA               | INTERGENIC                    |                    |                              |
| SNP_58366_A_46185671 | NC_021166.1    | Ca_Kabuli_Chr07 | 46185671                | TT                                     | CC                 | CC               | INTERGENIC                    |                    |                              |
| SNP_58367_A_46190380 | NC_021166.1    | Ca_Kabuli_Chr07 | 46190380                | AA                                     | TT                 | TT               | INTRON                        | 101507776          | uncharacterized LOC101507776 |
| SNP_58368_A_46221230 | NC_021166.1    | Ca_Kabuli_Chr07 | 46221230                | GG                                     | AA                 | AA               | INTERGENIC                    |                    |                              |
| SNP_58369_A_46230644 | NC_021166.1    | Ca_Kabuli_Chr07 | 46230644                | CC                                     | TT                 | TT               | INTERGENIC                    |                    |                              |
| SNP_58370_A_46250185 | NC_021166.1    | Ca_Kabuli_Chr07 | 46250185                | TT                                     | CC                 | CC               | INTERGENIC                    |                    |                              |
| SNP_58371_A_46250320 | NC_021166.1    | Ca_Kabuli_Chr07 | 46250320                | AA                                     | GG                 | GG               | INTERGENIC                    |                    |                              |
| SNP_58372_A_46250347 | NC_021166.1    | Ca_Kabuli_Chr07 | 46250347                | TT                                     | CC                 | CC               | INTERGENIC                    |                    |                              |
| SNP_58373_A_46250432 | NC_021166.1    | Ca_Kabuli_Chr07 | 46250432                | CC                                     | TT                 | TT               | INTERGENIC                    |                    |                              |
| SNP_58374_A_46250435 | NC_021166.1    | Ca_Kabuli_Chr07 | 46250435                | AA                                     | GG                 | GG               | INTERGENIC                    |                    |                              |
| SNP_58375_A_46250467 | NC_021166.1    | Ca_Kabuli_Chr07 | 46250467                | GG                                     | AA                 | AA               | INTERGENIC                    |                    |                              |
| SNP_58376_A_46250577 | NC_021166.1    | Ca_Kabuli_Chr07 | 46250577                | CC                                     | TT                 | TT               | INTERGENIC                    |                    |                              |
| SNP_58377_A_46250665 | NC_021166.1    | Ca_Kabuli_Chr07 | 46250665                | CC                                     | TT                 | TT               | INTERGENIC                    |                    |                              |
| SNP_58378_A_46250749 | NC_021166.1    | Ca_Kabuli_Chr07 | 46250749                | CC                                     | TT                 | TT               | INTERGENIC                    |                    |                              |
| SNP_58379_A_46250754 | NC_021166.1    | Ca_Kabuli_Chr07 | 46250754                | AA                                     | TT                 | TT               | INTERGENIC                    |                    |                              |
| SNP_58380_A_46279431 | NC_021166.1    | Ca_Kabuli_Chr07 | 46279431                | TT                                     | CC                 | CC               | INTERGENIC                    |                    |                              |
| SNP_58381_A_46279994 | NC_021166.1    | Ca_Kabuli_Chr07 | 46279994                | TT                                     | CC                 | CC               | INTERGENIC                    |                    |                              |
| SNP_58382_A_46318620 | NC_021166.1    | Ca_Kabuli_Chr07 | 46318620                | CC                                     | TT                 | TT               | INTERGENIC                    |                    |                              |

| SNPs IDs             | Chromosome IDs | Chromosomes     | Physical positions (bp) | CDC Frontier genome (Reference genome) | (Pusa 1103 & HPNB) | (ILWC 46 & LPNB) | Sequence genome | Components of | Gene accession IDs                     | Putative functions |
|----------------------|----------------|-----------------|-------------------------|----------------------------------------|--------------------|------------------|-----------------|---------------|----------------------------------------|--------------------|
| SNP_58383_A_46331645 | NC_021166.1    | Ca_Kabuli_Chr07 | 46331645                | TT                                     | CC                 | CC               | INTERGENIC      |               |                                        |                    |
| SNP_58384_A_46331672 | NC_021166.1    | Ca_Kabuli_Chr07 | 46331672                | TT                                     | CC                 | CC               | INTERGENIC      |               |                                        |                    |
| SNP_58386_A_46331873 | NC_021166.1    | Ca_Kabuli_Chr07 | 46331873                | TT                                     | AA                 | AA               | INTERGENIC      |               |                                        |                    |
| SNP_58387_A_46331883 | NC_021166.1    | Ca_Kabuli_Chr07 | 46331883                | TT                                     | CC                 | CC               | INTERGENIC      |               |                                        |                    |
| SNP_58388_A_46332210 | NC_021166.1    | Ca_Kabuli_Chr07 | 46332210                | AA                                     | TT                 | TT               | INTERGENIC      |               |                                        |                    |
| SNP_58389_A_46332234 | NC_021166.1    | Ca_Kabuli_Chr07 | 46332234                | TT                                     | CC                 | CC               | INTERGENIC      |               |                                        |                    |
| SNP_58390_A_46332271 | NC_021166.1    | Ca_Kabuli_Chr07 | 46332271                | GG                                     | AA                 | AA               | INTERGENIC      |               |                                        |                    |
| SNP_58392_A_46332442 | NC_021166.1    | Ca_Kabuli_Chr07 | 46332442                | CC                                     | TT                 | TT               | INTERGENIC      |               |                                        |                    |
| SNP_58393_A_46332470 | NC_021166.1    | Ca_Kabuli_Chr07 | 46332470                | AA                                     | TT                 | TT               | INTERGENIC      |               |                                        |                    |
| SNP_58394_A_46332473 | NC_021166.1    | Ca_Kabuli_Chr07 | 46332473                | TT                                     | AA                 | AA               | INTERGENIC      |               |                                        |                    |
| SNP_58395_A_46332552 | NC_021166.1    | Ca_Kabuli_Chr07 | 46332552                | CC                                     | TT                 | TT               | INTERGENIC      |               |                                        |                    |
| SNP_58396_A_46337763 | NC_021166.1    | Ca_Kabuli_Chr07 | 46337763                | GG                                     | AA                 | AA               | INTERGENIC      |               |                                        |                    |
| SNP_58397_A_46344517 | NC_021166.1    | Ca_Kabuli_Chr07 | 46344517                | CC                                     | TT                 | TT               | INTERGENIC      |               |                                        |                    |
| SNP_58398_A_46355699 | NC_021166.1    | Ca_Kabuli_Chr07 | 46355699                | GG                                     | AA                 | AA               | INTERGENIC      |               |                                        |                    |
| SNP_58399_A_46361211 | NC_021166.1    | Ca_Kabuli_Chr07 | 46361211                | AA                                     | GG                 | GG               | INTERGENIC      |               |                                        |                    |
| SNP_58400_A_46363482 | NC_021166.1    | Ca_Kabuli_Chr07 | 46363482                | CC                                     | TT                 | TT               | INTERGENIC      |               |                                        |                    |
| SNP_58401_A_46366656 | NC_021166.1    | Ca_Kabuli_Chr07 | 46366656                | CC                                     | TT                 | TT               | INTERGENIC      |               |                                        |                    |
| SNP_58402_A_46366670 | NC_021166.1    | Ca_Kabuli_Chr07 | 46366670                | CC                                     | AA                 | AA               | INTERGENIC      |               |                                        |                    |
| SNP_58403_A_46366677 | NC_021166.1    | Ca_Kabuli_Chr07 | 46366677                | TT                                     | AA                 | AA               | INTERGENIC      |               |                                        |                    |
| SNP_58404_A_46382672 | NC_021166.1    | Ca_Kabuli_Chr07 | 46382672                | TT                                     | AA                 | AA               | INTERGENIC      |               |                                        |                    |
| SNP_58405_A_46396326 | NC_021166.1    | Ca_Kabuli_Chr07 | 46396326                | CC                                     | TT                 | TT               | URR             | 101506054     | floral homeotic protein APETALA 2-like |                    |
| SNP_58406_A_46403609 | NC_021166.1    | Ca_Kabuli_Chr07 | 46403609                | GG                                     | AA                 | AA               | INTERGENIC      |               |                                        |                    |

| SNPs IDs             | Chromosome IDs | Chromosomes     | Physical positions (bp) | CDC Frontier (Reference genome) | (Pusa 1103 & HPNB) | (ILWC 46 & LPNB) | Sequence genome | Components of | Gene accession IDs | Putative functions                                                   |
|----------------------|----------------|-----------------|-------------------------|---------------------------------|--------------------|------------------|-----------------|---------------|--------------------|----------------------------------------------------------------------|
| SNP_58407_A_46418098 | NC_021166.1    | Ca_Kabuli_Chr07 | 46418098                | AA                              | GG                 | GG               | INTERGENIC      |               |                    |                                                                      |
| SNP_58408_A_46418492 | NC_021166.1    | Ca_Kabuli_Chr07 | 46418492                | AA                              | GG                 | GG               | INTERGENIC      |               |                    |                                                                      |
| SNP_58409_A_46432080 | NC_021166.1    | Ca_Kabuli_Chr07 | 46432080                | GG                              | AA                 | AA               | INTRON          |               | 101509361          | G-type lectin S-receptor-like serine/threonine-protein kinase CES101 |
| SNP_58410_A_46453371 | NC_021166.1    | Ca_Kabuli_Chr07 | 46453371                | AA                              | CC                 | CC               | INTERGENIC      |               |                    |                                                                      |
| SNP_58411_A_46453790 | NC_021166.1    | Ca_Kabuli_Chr07 | 46453790                | GG                              | AA                 | AA               | INTERGENIC      |               |                    |                                                                      |
| SNP_58413_A_46478835 | NC_021166.1    | Ca_Kabuli_Chr07 | 46478835                | GG                              | TT                 | TT               | INTERGENIC      |               |                    |                                                                      |
| SNP_58414_A_46478932 | NC_021166.1    | Ca_Kabuli_Chr07 | 46478932                | CC                              | AA                 | AA               | INTERGENIC      |               |                    |                                                                      |
| SNP_58415_A_46479493 | NC_021166.1    | Ca_Kabuli_Chr07 | 46479493                | CC                              | TT                 | TT               | INTERGENIC      |               |                    |                                                                      |
| SNP_58416_A_46479536 | NC_021166.1    | Ca_Kabuli_Chr07 | 46479536                | GG                              | TT                 | TT               | INTERGENIC      |               |                    |                                                                      |
| SNP_58417_A_46491605 | NC_021166.1    | Ca_Kabuli_Chr07 | 46491605                | AA                              | CC                 | CC               | INTERGENIC      |               |                    |                                                                      |
| SNP_58418_A_46491612 | NC_021166.1    | Ca_Kabuli_Chr07 | 46491612                | CC                              | TT                 | TT               | INTERGENIC      |               |                    |                                                                      |
| SNP_58419_A_46505538 | NC_021166.1    | Ca_Kabuli_Chr07 | 46505538                | CC                              | AA                 | AA               | INTERGENIC      |               |                    |                                                                      |
| SNP_58420_A_46519378 | NC_021166.1    | Ca_Kabuli_Chr07 | 46519378                | TT                              | CC                 | CC               | INTERGENIC      |               |                    |                                                                      |
| SNP_58421_A_46528126 | NC_021166.1    | Ca_Kabuli_Chr07 | 46528126                | AA                              | CC                 | CC               | INTERGENIC      |               |                    |                                                                      |
| SNP_58422_A_46537728 | NC_021166.1    | Ca_Kabuli_Chr07 | 46537728                | AA                              | TT                 | TT               | INTERGENIC      |               |                    |                                                                      |
| SNP_58423_A_46545195 | NC_021166.1    | Ca_Kabuli_Chr07 | 46545195                | CC                              | AA                 | AA               | INTERGENIC      |               |                    |                                                                      |
| SNP_58424_A_46545238 | NC_021166.1    | Ca_Kabuli_Chr07 | 46545238                | CC                              | TT                 | TT               | INTERGENIC      |               |                    |                                                                      |
| SNP_58425_A_46545255 | NC_021166.1    | Ca_Kabuli_Chr07 | 46545255                | GG                              | AA                 | AA               | INTERGENIC      |               |                    |                                                                      |
| SNP_58426_A_46549418 | NC_021166.1    | Ca_Kabuli_Chr07 | 46549418                | GG                              | TT                 | TT               | INTERGENIC      |               |                    |                                                                      |
| SNP_58427_A_46549717 | NC_021166.1    | Ca_Kabuli_Chr07 | 46549717                | TT                              | CC                 | CC               | INTERGENIC      |               |                    |                                                                      |
| SNP_58428_A_46551460 | NC_021166.1    | Ca_Kabuli_Chr07 | 46551460                | TT                              | CC                 | CC               | INTERGENIC      |               |                    |                                                                      |
| SNP_58430_A_46569958 | NC_021166.1    | Ca_Kabuli_Chr07 | 46569958                | CC                              | AA                 | AA               | INTERGENIC      |               |                    |                                                                      |

| SNPs IDs             | Chromosome IDs | Chromosomes     | Physical positions (bp) | CDC Frontier genome (Reference genome) | (Pusa 1103 & HPNB) | (ILWC 46 & LPNB) | Sequence genome | Components of | Gene accession IDs           | Putative functions |
|----------------------|----------------|-----------------|-------------------------|----------------------------------------|--------------------|------------------|-----------------|---------------|------------------------------|--------------------|
| SNP_58431_A_46569969 | NC_021166.1    | Ca_Kabuli_Chr07 | 46569969                | AA                                     | CC                 | CC               | INTERGENIC      |               |                              |                    |
| SNP_58432_A_46570006 | NC_021166.1    | Ca_Kabuli_Chr07 | 46570006                | AA                                     | GG                 | GG               | INTERGENIC      |               |                              |                    |
| SNP_58433_A_46570181 | NC_021166.1    | Ca_Kabuli_Chr07 | 46570181                | AA                                     | GG                 | GG               | INTERGENIC      |               |                              |                    |
| SNP_58434_A_46570251 | NC_021166.1    | Ca_Kabuli_Chr07 | 46570251                | CC                                     | TT                 | TT               | INTERGENIC      |               |                              |                    |
| SNP_58435_A_46570390 | NC_021166.1    | Ca_Kabuli_Chr07 | 46570390                | CC                                     | TT                 | TT               | INTERGENIC      |               |                              |                    |
| SNP_58436_A_46593660 | NC_021166.1    | Ca_Kabuli_Chr07 | 46593660                | CC                                     | AA                 | AA               | INTERGENIC      |               |                              |                    |
| SNP_58437_A_46593667 | NC_021166.1    | Ca_Kabuli_Chr07 | 46593667                | CC                                     | GG                 | GG               | INTERGENIC      |               |                              |                    |
| SNP_58438_A_46593669 | NC_021166.1    | Ca_Kabuli_Chr07 | 46593669                | CC                                     | TT                 | TT               | INTERGENIC      |               |                              |                    |
| SNP_58439_A_46606903 | NC_021166.1    | Ca_Kabuli_Chr07 | 46606903                | TT                                     | CC                 | CC               | INTERGENIC      |               |                              |                    |
| SNP_58440_A_46609182 | NC_021166.1    | Ca_Kabuli_Chr07 | 46609182                | TT                                     | CC                 | CC               | INTERGENIC      |               |                              |                    |
| SNP_58441_A_46626297 | NC_021166.1    | Ca_Kabuli_Chr07 | 46626297                | AA                                     | GG                 | GG               | INTRON          | 101510323     | Unknown function             |                    |
| SNP_58442_A_46657649 | NC_021166.1    | Ca_Kabuli_Chr07 | 46657649                | AA                                     | TT                 | TT               | INTERGENIC      |               |                              |                    |
| SNP_58443_A_46659557 | NC_021166.1    | Ca_Kabuli_Chr07 | 46659557                | TT                                     | CC                 | CC               | INTERGENIC      |               |                              |                    |
| SNP_58444_A_46732220 | NC_021166.1    | Ca_Kabuli_Chr07 | 46732220                | CC                                     | TT                 | TT               | INTERGENIC      |               |                              |                    |
| SNP_58445_A_46751925 | NC_021166.1    | Ca_Kabuli_Chr07 | 46751925                | CC                                     | TT                 | TT               | INTERGENIC      |               |                              |                    |
| SNP_58446_A_46782382 | NC_021166.1    | Ca_Kabuli_Chr07 | 46782382                | TT                                     | GG                 | GG               | INTERGENIC      |               |                              |                    |
| SNP_58447_A_46831178 | NC_021166.1    | Ca_Kabuli_Chr07 | 46831178                | GG                                     | AA                 | AA               | INTERGENIC      |               |                              |                    |
| SNP_58448_A_46834901 | NC_021166.1    | Ca_Kabuli_Chr07 | 46834901                | TT                                     | AA                 | AA               | INTERGENIC      |               |                              |                    |
| SNP_58449_A_46863914 | NC_021166.1    | Ca_Kabuli_Chr07 | 46863914                | CC                                     | TT                 | TT               | INTERGENIC      |               |                              |                    |
| SNP_58451_A_46885895 | NC_021166.1    | Ca_Kabuli_Chr07 | 46885895                | AA                                     | TT                 | TT               | INTRON          | 101514207     | uncharacterized LOC101514207 |                    |
| SNP_58452_A_46885896 | NC_021166.1    | Ca_Kabuli_Chr07 | 46885896                | AA                                     | CC                 | CC               | INTRON          | 101514207     | uncharacterized LOC101514207 |                    |
| SNP_58453_A_46885911 | NC_021166.1    | Ca_Kabuli_Chr07 | 46885911                | TT                                     | CC                 | CC               | INTRON          | 101514207     | uncharacterized LOC101514207 |                    |

| SNPs IDs             | Chromosome IDs | Chromosomes     | Physical positions (bp) | CDC Frontier (Reference genome) | (Pusa 1103 & HPNB) | (ILWC 46 & LPNB) | Sequence Components of genome | Gene accession IDs | Putative functions           |
|----------------------|----------------|-----------------|-------------------------|---------------------------------|--------------------|------------------|-------------------------------|--------------------|------------------------------|
| SNP_58454_A_46885912 | NC_021166.1    | Ca_Kabuli_Chr07 | 46885912                | TT                              | CC                 | CC               | INTRON                        | 101514207          | uncharacterized LOC101514207 |
| SNP_58455_A_46885931 | NC_021166.1    | Ca_Kabuli_Chr07 | 46885931                | GG                              | CC                 | CC               | INTRON                        | 101514207          | uncharacterized LOC101514207 |
| SNP_58456_A_46886007 | NC_021166.1    | Ca_Kabuli_Chr07 | 46886007                | TT                              | GG                 | GG               | INTRON                        | 101514207          | uncharacterized LOC101514207 |
| SNP_58457_A_46886062 | NC_021166.1    | Ca_Kabuli_Chr07 | 46886062                | CC                              | AA                 | AA               | INTRON                        | 101514207          | uncharacterized LOC101514207 |
| SNP_58458_A_46886996 | NC_021166.1    | Ca_Kabuli_Chr07 | 46886996                | AA                              | GG                 | GG               | INTRON                        | 101514207          | uncharacterized LOC101514207 |
| SNP_58459_A_46960411 | NC_021166.1    | Ca_Kabuli_Chr07 | 46960411                | AA                              | GG                 | GG               | INTERGENIC                    |                    |                              |
| SNP_58460_A_46960491 | NC_021166.1    | Ca_Kabuli_Chr07 | 46960491                | GG                              | AA                 | AA               | INTERGENIC                    |                    |                              |
| SNP_58461_A_46960516 | NC_021166.1    | Ca_Kabuli_Chr07 | 46960516                | TT                              | CC                 | CC               | INTERGENIC                    |                    |                              |
| SNP_58462_A_46960534 | NC_021166.1    | Ca_Kabuli_Chr07 | 46960534                | TT                              | CC                 | CC               | INTERGENIC                    |                    |                              |
| SNP_58463_A_46960543 | NC_021166.1    | Ca_Kabuli_Chr07 | 46960543                | CC                              | TT                 | TT               | INTERGENIC                    |                    |                              |
| SNP_58464_A_46960558 | NC_021166.1    | Ca_Kabuli_Chr07 | 46960558                | TT                              | AA                 | AA               | INTERGENIC                    |                    |                              |
| SNP_58465_A_46970768 | NC_021166.1    | Ca_Kabuli_Chr07 | 46970768                | GG                              | TT                 | TT               | INTERGENIC                    |                    |                              |
| SNP_58466_A_46986166 | NC_021166.1    | Ca_Kabuli_Chr07 | 46986166                | CC                              | TT                 | TT               | INTERGENIC                    |                    |                              |
| SNP_58467_A_46986226 | NC_021166.1    | Ca_Kabuli_Chr07 | 46986226                | TT                              | CC                 | CC               | INTERGENIC                    |                    |                              |
| SNP_58468_A_46990884 | NC_021166.1    | Ca_Kabuli_Chr07 | 46990884                | TT                              | CC                 | CC               | INTERGENIC                    |                    |                              |
| SNP_58469_A_46996775 | NC_021166.1    | Ca_Kabuli_Chr07 | 46996775                | CC                              | GG                 | GG               | INTERGENIC                    |                    |                              |
| SNP_58470_A_47032278 | NC_021166.1    | Ca_Kabuli_Chr07 | 47032278                | CC                              | AA                 | AA               | INTERGENIC                    |                    |                              |
| SNP_58471_A_47035495 | NC_021166.1    | Ca_Kabuli_Chr07 | 47035495                | GG                              | AA                 | AA               | INTERGENIC                    |                    |                              |
| SNP_58472_A_47058121 | NC_021166.1    | Ca_Kabuli_Chr07 | 47058121                | CC                              | GG                 | GG               | INTERGENIC                    |                    |                              |
| SNP_58473_A_47063867 | NC_021166.1    | Ca_Kabuli_Chr07 | 47063867                | TT                              | AA                 | AA               | INTERGENIC                    |                    |                              |
| SNP_58474_A_47083022 | NC_021166.1    | Ca_Kabuli_Chr07 | 47083022                | AA                              | GG                 | GG               | INTERGENIC                    |                    |                              |
| SNP_58475_A_47083086 | NC_021166.1    | Ca_Kabuli_Chr07 | 47083086                | CC                              | TT                 | TT               | INTERGENIC                    |                    |                              |

| SNPs IDs             | Chromosome IDs | Chromosomes     | Physical positions (bp) | CDC Frontier genome (Reference genome) | (Pusa 1103 & HPNB) | (ILWC 46 & LPNB) | Sequence Components of genome | Gene accession IDs | Putative functions |
|----------------------|----------------|-----------------|-------------------------|----------------------------------------|--------------------|------------------|-------------------------------|--------------------|--------------------|
| SNP_58476_A_47083092 | NC_021166.1    | Ca_Kabuli_Chr07 | 47083092                | GG                                     | AA                 | AA               | INTERGENIC                    |                    |                    |
| SNP_58477_A_47083108 | NC_021166.1    | Ca_Kabuli_Chr07 | 47083108                | AA                                     | GG                 | GG               | INTERGENIC                    |                    |                    |
| SNP_58479_A_47083390 | NC_021166.1    | Ca_Kabuli_Chr07 | 47083390                | GG                                     | CC                 | CC               | INTERGENIC                    |                    |                    |
| SNP_58480_A_47083487 | NC_021166.1    | Ca_Kabuli_Chr07 | 47083487                | CC                                     | TT                 | TT               | INTERGENIC                    |                    |                    |
| SNP_58481_A_47084957 | NC_021166.1    | Ca_Kabuli_Chr07 | 47084957                | GG                                     | AA                 | AA               | INTERGENIC                    |                    |                    |
| SNP_58482_A_47091326 | NC_021166.1    | Ca_Kabuli_Chr07 | 47091326                | TT                                     | GG                 | GG               | NON_SYNONYMOUS_CODING         | 101493475          | mucin-2-like       |
| SNP_58483_A_47091333 | NC_021166.1    | Ca_Kabuli_Chr07 | 47091333                | AA                                     | GG                 | GG               | NON_SYNONYMOUS_CODING         | 101493475          | mucin-2-like       |
| SNP_58484_A_47091491 | NC_021166.1    | Ca_Kabuli_Chr07 | 47091491                | GG                                     | AA                 | AA               | NON_SYNONYMOUS_CODING         | 101493475          | mucin-2-like       |
| SNP_58485_A_47093349 | NC_021166.1    | Ca_Kabuli_Chr07 | 47093349                | GG                                     | AA                 | AA               | URR                           | 101493475          | mucin-2-like       |
| SNP_58486_A_47093385 | NC_021166.1    | Ca_Kabuli_Chr07 | 47093385                | TT                                     | GG                 | GG               | URR                           | 101493475          | mucin-2-like       |
| SNP_58487_A_47093437 | NC_021166.1    | Ca_Kabuli_Chr07 | 47093437                | TT                                     | GG                 | GG               | URR                           | 101493475          | mucin-2-like       |
| SNP_58488_A_47093495 | NC_021166.1    | Ca_Kabuli_Chr07 | 47093495                | CC                                     | TT                 | TT               | URR                           | 101493475          | mucin-2-like       |
| SNP_58489_A_47093534 | NC_021166.1    | Ca_Kabuli_Chr07 | 47093534                | GG                                     | AA                 | AA               | URR                           | 101493475          | mucin-2-like       |
| SNP_58490_A_47093536 | NC_021166.1    | Ca_Kabuli_Chr07 | 47093536                | TT                                     | AA                 | AA               | URR                           | 101493475          | mucin-2-like       |
| SNP_58491_A_47093632 | NC_021166.1    | Ca_Kabuli_Chr07 | 47093632                | GG                                     | AA                 | AA               | URR                           | 101493475          | mucin-2-like       |
| SNP_58492_A_47093668 | NC_021166.1    | Ca_Kabuli_Chr07 | 47093668                | GG                                     | CC                 | CC               | URR                           | 101493475          | mucin-2-like       |
| SNP_58493_A_47093786 | NC_021166.1    | Ca_Kabuli_Chr07 | 47093786                | TT                                     | CC                 | CC               | URR                           | 101493475          | mucin-2-like       |
| SNP_58494_A_47093794 | NC_021166.1    | Ca_Kabuli_Chr07 | 47093794                | AA                                     | GG                 | GG               | URR                           | 101493475          | mucin-2-like       |
| SNP_58495_A_47093816 | NC_021166.1    | Ca_Kabuli_Chr07 | 47093816                | TT                                     | CC                 | CC               | URR                           | 101493475          | mucin-2-like       |
| SNP_58496_A_47108242 | NC_021166.1    | Ca_Kabuli_Chr07 | 47108242                | GG                                     | TT                 | TT               | INTERGENIC                    |                    |                    |
| SNP_58497_A_47108311 | NC_021166.1    | Ca_Kabuli_Chr07 | 47108311                | TT                                     | CC                 | CC               | INTERGENIC                    |                    |                    |
| SNP_58498_A_47108344 | NC_021166.1    | Ca_Kabuli_Chr07 | 47108344                | AA                                     | GG                 | GG               | INTERGENIC                    |                    |                    |



| SNPs IDs             | Chromosome IDs | Chromosomes     | Physical positions (bp) | CDC Frontier genome (Reference genome) | (Pusa 1103 & HPNB) | (ILWC 46 & LPNB) | Sequence Components of genome | Gene accession IDs | Putative functions             |
|----------------------|----------------|-----------------|-------------------------|----------------------------------------|--------------------|------------------|-------------------------------|--------------------|--------------------------------|
| SNP_58499_A_47108380 | NC_021166.1    | Ca_Kabuli_Chr07 | 47108380                | GG                                     | AA                 | AA               | INTERGENIC                    |                    |                                |
| SNP_58500_A_47108405 | NC_021166.1    | Ca_Kabuli_Chr07 | 47108405                | TT                                     | GG                 | GG               | INTERGENIC                    |                    |                                |
| SNP_58501_A_47108413 | NC_021166.1    | Ca_Kabuli_Chr07 | 47108413                | TT                                     | CC                 | CC               | INTERGENIC                    |                    |                                |
| SNP_58502_A_47108647 | NC_021166.1    | Ca_Kabuli_Chr07 | 47108647                | TT                                     | AA                 | AA               | INTERGENIC                    |                    |                                |
| SNP_58503_A_47108685 | NC_021166.1    | Ca_Kabuli_Chr07 | 47108685                | GG                                     | CC                 | CC               | INTERGENIC                    |                    |                                |
| SNP_58504_A_47124239 | NC_021166.1    | Ca_Kabuli_Chr07 | 47124239                | AA                                     | GG                 | GG               | INTERGENIC                    |                    |                                |
| SNP_58506_A_47139065 | NC_021166.1    | Ca_Kabuli_Chr07 | 47139065                | GG                                     | AA                 | AA               | INTERGENIC                    |                    |                                |
| SNP_58507_A_47182888 | NC_021166.1    | Ca_Kabuli_Chr07 | 47182888                | GG                                     | AA                 | AA               | INTERGENIC                    |                    |                                |
| SNP_58508_A_47182894 | NC_021166.1    | Ca_Kabuli_Chr07 | 47182894                | GG                                     | TT                 | TT               | INTERGENIC                    |                    |                                |
| SNP_58509_A_47182926 | NC_021166.1    | Ca_Kabuli_Chr07 | 47182926                | TT                                     | GG                 | GG               | INTERGENIC                    |                    |                                |
| SNP_58510_A_47182947 | NC_021166.1    | Ca_Kabuli_Chr07 | 47182947                | CC                                     | TT                 | TT               | INTERGENIC                    |                    |                                |
| SNP_58511_A_47182949 | NC_021166.1    | Ca_Kabuli_Chr07 | 47182949                | TT                                     | GG                 | GG               | INTERGENIC                    |                    |                                |
| SNP_58512_A_47186785 | NC_021166.1    | Ca_Kabuli_Chr07 | 47186785                | AA                                     | GG                 | GG               | INTERGENIC                    |                    |                                |
| SNP_58513_A_47196401 | NC_021166.1    | Ca_Kabuli_Chr07 | 47196401                | AA                                     | TT                 | TT               | INTRON                        | 101488581          | sucrose transport protein SUC3 |
| SNP_58514_A_47256480 | NC_021166.1    | Ca_Kabuli_Chr07 | 47256480                | AA                                     | GG                 | GG               | INTERGENIC                    |                    |                                |
| SNP_58515_A_47256497 | NC_021166.1    | Ca_Kabuli_Chr07 | 47256497                | TT                                     | CC                 | CC               | INTERGENIC                    |                    |                                |
| SNP_58516_A_47281183 | NC_021166.1    | Ca_Kabuli_Chr07 | 47281183                | TT                                     | CC                 | CC               | INTERGENIC                    |                    |                                |
| SNP_58517_A_47282739 | NC_021166.1    | Ca_Kabuli_Chr07 | 47282739                | AA                                     | TT                 | TT               | INTERGENIC                    |                    |                                |
| SNP_58518_A_47282953 | NC_021166.1    | Ca_Kabuli_Chr07 | 47282953                | GG                                     | AA                 | AA               | INTERGENIC                    |                    |                                |
| SNP_58519_A_47283571 | NC_021166.1    | Ca_Kabuli_Chr07 | 47283571                | GG                                     | AA                 | AA               | INTERGENIC                    |                    |                                |
| SNP_58520_A_47283671 | NC_021166.1    | Ca_Kabuli_Chr07 | 47283671                | GG                                     | TT                 | TT               | INTERGENIC                    |                    |                                |
| SNP_58521_A_47283794 | NC_021166.1    | Ca_Kabuli_Chr07 | 47283794                | TT                                     | CC                 | CC               | INTERGENIC                    |                    |                                |

| SNPs IDs             | Chromosome IDs | Chromosomes     | Physical positions (bp) | CDC Frontier genome (Reference genome) | (Pusa 1103 & HPNB) | (ILWC 46 & LPNB) | Sequence Components of genome | Gene accession IDs | Putative functions |
|----------------------|----------------|-----------------|-------------------------|----------------------------------------|--------------------|------------------|-------------------------------|--------------------|--------------------|
| SNP_58522_A_47284816 | NC_021166.1    | Ca_Kabuli_Chr07 | 47284816                | CC                                     | TT                 | TT               | INTERGENIC                    |                    |                    |
| SNP_58523_A_47295047 | NC_021166.1    | Ca_Kabuli_Chr07 | 47295047                | AA                                     | GG                 | GG               | INTERGENIC                    |                    |                    |
| SNP_58524_A_47295083 | NC_021166.1    | Ca_Kabuli_Chr07 | 47295083                | CC                                     | TT                 | TT               | INTERGENIC                    |                    |                    |
| SNP_58525_A_47295143 | NC_021166.1    | Ca_Kabuli_Chr07 | 47295143                | CC                                     | GG                 | GG               | INTERGENIC                    |                    |                    |
| SNP_58527_A_47295452 | NC_021166.1    | Ca_Kabuli_Chr07 | 47295452                | GG                                     | AA                 | AA               | INTERGENIC                    |                    |                    |
| SNP_58528_A_47324945 | NC_021166.1    | Ca_Kabuli_Chr07 | 47324945                | AA                                     | GG                 | GG               | INTERGENIC                    |                    |                    |
| SNP_58529_A_47324967 | NC_021166.1    | Ca_Kabuli_Chr07 | 47324967                | AA                                     | GG                 | GG               | INTERGENIC                    |                    |                    |
| SNP_58530_A_47324968 | NC_021166.1    | Ca_Kabuli_Chr07 | 47324968                | GG                                     | AA                 | AA               | INTERGENIC                    |                    |                    |
| SNP_58531_A_47324975 | NC_021166.1    | Ca_Kabuli_Chr07 | 47324975                | AA                                     | TT                 | TT               | INTERGENIC                    |                    |                    |
| SNP_58532_A_47325273 | NC_021166.1    | Ca_Kabuli_Chr07 | 47325273                | AA                                     | GG                 | GG               | INTERGENIC                    |                    |                    |
| SNP_58533_A_47325336 | NC_021166.1    | Ca_Kabuli_Chr07 | 47325336                | TT                                     | CC                 | CC               | INTERGENIC                    |                    |                    |
| SNP_58534_A_47325349 | NC_021166.1    | Ca_Kabuli_Chr07 | 47325349                | CC                                     | AA                 | AA               | INTERGENIC                    |                    |                    |
| SNP_58535_A_47325350 | NC_021166.1    | Ca_Kabuli_Chr07 | 47325350                | AA                                     | GG                 | GG               | INTERGENIC                    |                    |                    |
| SNP_58536_A_47325355 | NC_021166.1    | Ca_Kabuli_Chr07 | 47325355                | AA                                     | GG                 | GG               | INTERGENIC                    |                    |                    |
| SNP_58537_A_47327581 | NC_021166.1    | Ca_Kabuli_Chr07 | 47327581                | CC                                     | AA                 | AA               | INTERGENIC                    |                    |                    |
| SNP_58538_A_47327707 | NC_021166.1    | Ca_Kabuli_Chr07 | 47327707                | GG                                     | TT                 | TT               | INTERGENIC                    |                    |                    |
| SNP_58539_A_47327765 | NC_021166.1    | Ca_Kabuli_Chr07 | 47327765                | TT                                     | CC                 | CC               | INTERGENIC                    |                    |                    |
| SNP_58540_A_47327815 | NC_021166.1    | Ca_Kabuli_Chr07 | 47327815                | TT                                     | AA                 | AA               | INTERGENIC                    |                    |                    |
| SNP_58541_A_47346794 | NC_021166.1    | Ca_Kabuli_Chr07 | 47346794                | CC                                     | GG                 | GG               | INTERGENIC                    |                    |                    |
| SNP_58542_A_47346814 | NC_021166.1    | Ca_Kabuli_Chr07 | 47346814                | AA                                     | GG                 | GG               | INTERGENIC                    |                    |                    |
| SNP_58543_A_47359544 | NC_021166.1    | Ca_Kabuli_Chr07 | 47359544                | GG                                     | AA                 | AA               | DRR                           | 101495724          | DNA ligase 1-like  |
| SNP_58545_A_47364484 | NC_021166.1    | Ca_Kabuli_Chr07 | 47364484                | AA                                     | TT                 | TT               | INTRON                        | 101495724          | DNA ligase 1-like  |

| SNPs IDs             | Chromosome IDs | Chromosomes     | Physical positions (bp) | CDC Frontier genome (Reference genome) | (Pusa 1103 & HPNB) | (ILWC 46 & LPNB) | Sequence Components of genome | Gene accession IDs | Putative functions                    |
|----------------------|----------------|-----------------|-------------------------|----------------------------------------|--------------------|------------------|-------------------------------|--------------------|---------------------------------------|
| SNP_58546_A_47384569 | NC_021166.1    | Ca_Kabuli_Chr07 | 47384569                | CC                                     | TT                 | TT               | INTERGENIC                    |                    |                                       |
| SNP_58548_A_47478804 | NC_021166.1    | Ca_Kabuli_Chr07 | 47478804                | GG                                     | AA                 | AA               | INTERGENIC                    |                    |                                       |
| SNP_58549_A_47483689 | NC_021166.1    | Ca_Kabuli_Chr07 | 47483689                | TT                                     | CC                 | CC               | INTERGENIC                    |                    |                                       |
| SNP_58550_A_47484047 | NC_021166.1    | Ca_Kabuli_Chr07 | 47484047                | AA                                     | GG                 | GG               | INTERGENIC                    |                    |                                       |
| SNP_58551_A_47484507 | NC_021166.1    | Ca_Kabuli_Chr07 | 47484507                | AA                                     | TT                 | TT               | INTERGENIC                    |                    |                                       |
| SNP_58552_A_47490368 | NC_021166.1    | Ca_Kabuli_Chr07 | 47490368                | TT                                     | CC                 | CC               | INTERGENIC                    |                    |                                       |
| SNP_58553_A_47495297 | NC_021166.1    | Ca_Kabuli_Chr07 | 47495297                | AA                                     | TT                 | TT               | DRR                           | 101490012          | uncharacterized LOC101490012          |
| SNP_58554_A_47504265 | NC_021166.1    | Ca_Kabuli_Chr07 | 47504265                | AA                                     | GG                 | GG               | INTERGENIC                    |                    |                                       |
| SNP_58555_A_47504299 | NC_021166.1    | Ca_Kabuli_Chr07 | 47504299                | TT                                     | CC                 | CC               | INTERGENIC                    |                    |                                       |
| SNP_58556_A_47504564 | NC_021166.1    | Ca_Kabuli_Chr07 | 47504564                | TT                                     | CC                 | CC               | INTERGENIC                    |                    |                                       |
| SNP_58557_A_47504607 | NC_021166.1    | Ca_Kabuli_Chr07 | 47504607                | AA                                     | GG                 | GG               | INTERGENIC                    |                    |                                       |
| SNP_58558_A_47504632 | NC_021166.1    | Ca_Kabuli_Chr07 | 47504632                | AA                                     | GG                 | GG               | INTERGENIC                    |                    |                                       |
| SNP_58559_A_47529326 | NC_021166.1    | Ca_Kabuli_Chr07 | 47529326                | CC                                     | TT                 | TT               | INTERGENIC                    |                    |                                       |
| SNP_58560_A_47529328 | NC_021166.1    | Ca_Kabuli_Chr07 | 47529328                | GG                                     | AA                 | AA               | INTERGENIC                    |                    |                                       |
| SNP_58561_A_47529365 | NC_021166.1    | Ca_Kabuli_Chr07 | 47529365                | TT                                     | AA                 | AA               | INTERGENIC                    |                    |                                       |
| SNP_58562_A_47556616 | NC_021166.1    | Ca_Kabuli_Chr07 | 47556616                | TT                                     | CC                 | CC               | INTRON                        | 101490547          | ubiquitin-conjugating enzyme E2 2     |
| SNP_58563_A_47577551 | NC_021166.1    | Ca_Kabuli_Chr07 | 47577551                | GG                                     | TT                 | TT               | DRR                           | 101497022          | probable WRKY transcription factor 72 |
| SNP_58564_A_47577560 | NC_021166.1    | Ca_Kabuli_Chr07 | 47577560                | CC                                     | TT                 | TT               | DRR                           | 101497022          | probable WRKY transcription factor 72 |
| SNP_58565_A_47577584 | NC_021166.1    | Ca_Kabuli_Chr07 | 47577584                | TT                                     | GG                 | GG               | DRR                           | 101497022          | probable WRKY transcription factor 72 |
| SNP_58566_A_47604164 | NC_021166.1    | Ca_Kabuli_Chr07 | 47604164                | GG                                     | AA                 | AA               | INTERGENIC                    |                    |                                       |
| SNP_58567_A_47604449 | NC_021166.1    | Ca_Kabuli_Chr07 | 47604449                | TT                                     | CC                 | CC               | INTERGENIC                    |                    |                                       |
| SNP_58568_A_47604678 | NC_021166.1    | Ca_Kabuli_Chr07 | 47604678                | AA                                     | GG                 | GG               | INTERGENIC                    |                    |                                       |

| SNPs IDs             | Chromosome IDs | Chromosomes     | Physical positions (bp) | CDC Frontier genome (Reference genome) | (Pusa 1103 & HPNB) | (ILWC 46 & LPNB) | Sequence Components of genome | Gene accession IDs | Putative functions                          |
|----------------------|----------------|-----------------|-------------------------|----------------------------------------|--------------------|------------------|-------------------------------|--------------------|---------------------------------------------|
| SNP_58569_A_47604703 | NC_021166.1    | Ca_Kabuli_Chr07 | 47604703                | AA                                     | GG                 | GG               | INTERGENIC                    |                    |                                             |
| SNP_58570_A_47605302 | NC_021166.1    | Ca_Kabuli_Chr07 | 47605302                | CC                                     | TT                 | TT               | INTERGENIC                    |                    |                                             |
| SNP_58571_A_47605662 | NC_021166.1    | Ca_Kabuli_Chr07 | 47605662                | AA                                     | GG                 | GG               | INTERGENIC                    |                    |                                             |
| SNP_58572_A_47652725 | NC_021166.1    | Ca_Kabuli_Chr07 | 47652725                | TT                                     | AA                 | AA               | INTERGENIC                    |                    |                                             |
| SNP_58573_A_47659294 | NC_021166.1    | Ca_Kabuli_Chr07 | 47659294                | GG                                     | AA                 | AA               | INTERGENIC                    |                    |                                             |
| SNP_58574_A_47714411 | NC_021166.1    | Ca_Kabuli_Chr07 | 47714411                | TT                                     | CC                 | CC               | DRR                           | 101501968          | protein STRICTOSIDINE SYNTHASE-LIKE 12-like |
| SNP_58575_A_47714429 | NC_021166.1    | Ca_Kabuli_Chr07 | 47714429                | AA                                     | GG                 | GG               | DRR                           | 101501968          | protein STRICTOSIDINE SYNTHASE-LIKE 12-like |
| SNP_58576_A_47714436 | NC_021166.1    | Ca_Kabuli_Chr07 | 47714436                | TT                                     | CC                 | CC               | DRR                           | 101501968          | protein STRICTOSIDINE SYNTHASE-LIKE 12-like |
| SNP_58577_A_47714814 | NC_021166.1    | Ca_Kabuli_Chr07 | 47714814                | TT                                     | GG                 | GG               | DRR                           | 101501968          | protein STRICTOSIDINE SYNTHASE-LIKE 12-like |
| SNP_58578_A_47714862 | NC_021166.1    | Ca_Kabuli_Chr07 | 47714862                | AA                                     | GG                 | GG               | DRR                           | 101501968          | protein STRICTOSIDINE SYNTHASE-LIKE 12-like |
| SNP_58579_A_47715060 | NC_021166.1    | Ca_Kabuli_Chr07 | 47715060                | AA                                     | CC                 | CC               | DRR                           | 101501968          | protein STRICTOSIDINE SYNTHASE-LIKE 12-like |
| SNP_58580_A_47715413 | NC_021166.1    | Ca_Kabuli_Chr07 | 47715413                | AA                                     | CC                 | CC               | INTRON                        | 101501968          | protein STRICTOSIDINE SYNTHASE-LIKE 12-like |
| SNP_58581_A_47715572 | NC_021166.1    | Ca_Kabuli_Chr07 | 47715572                | GG                                     | CC                 | CC               | INTRON                        | 101501968          | protein STRICTOSIDINE SYNTHASE-LIKE 12-like |
| SNP_58582_A_47715601 | NC_021166.1    | Ca_Kabuli_Chr07 | 47715601                | AA                                     | GG                 | GG               | INTRON                        | 101501968          | protein STRICTOSIDINE SYNTHASE-LIKE 12-like |
| SNP_58583_A_47715636 | NC_021166.1    | Ca_Kabuli_Chr07 | 47715636                | TT                                     | GG                 | GG               | INTRON                        | 101501968          | protein STRICTOSIDINE SYNTHASE-LIKE 12-like |
| SNP_58584_A_47718194 | NC_021166.1    | Ca_Kabuli_Chr07 | 47718194                | TT                                     | AA                 | AA               | INTRON                        | 101501968          | protein STRICTOSIDINE SYNTHASE-LIKE 12-like |
| SNP_58585_A_47718330 | NC_021166.1    | Ca_Kabuli_Chr07 | 47718330                | AA                                     | GG                 | GG               | INTRON                        | 101501968          | protein STRICTOSIDINE SYNTHASE-LIKE 12-like |
| SNP_58586_A_47718345 | NC_021166.1    | Ca_Kabuli_Chr07 | 47718345                | TT                                     | AA                 | AA               | INTRON                        | 101501968          | protein STRICTOSIDINE SYNTHASE-LIKE 12-like |
| SNP_58587_A_47718346 | NC_021166.1    | Ca_Kabuli_Chr07 | 47718346                | TT                                     | CC                 | CC               | INTRON                        | 101501968          | protein STRICTOSIDINE SYNTHASE-LIKE 12-like |
| SNP_58588_A_47718373 | NC_021166.1    | Ca_Kabuli_Chr07 | 47718373                | CC                                     | TT                 | TT               | INTRON                        | 101501968          | protein STRICTOSIDINE SYNTHASE-LIKE 12-like |
| SNP_58589_A_47718396 | NC_021166.1    | Ca_Kabuli_Chr07 | 47718396                | GG                                     | AA                 | AA               | INTRON                        | 101501968          | protein STRICTOSIDINE SYNTHASE-LIKE 12-like |
| SNP_58590_A_47718416 | NC_021166.1    | Ca_Kabuli_Chr07 | 47718416                | AA                                     | CC                 | CC               | INTRON                        | 101501968          | protein STRICTOSIDINE SYNTHASE-LIKE 12-like |

| SNPs IDs             | Chromosome IDs | Chromosomes     | Physical positions (bp) | CDC Frontier (Reference genome) | (Pusa 1103 & HPNB) | (ILWC 46 & LPNB) | Sequence Components of genome | Gene accession IDs | Putative functions                          |
|----------------------|----------------|-----------------|-------------------------|---------------------------------|--------------------|------------------|-------------------------------|--------------------|---------------------------------------------|
| SNP_58591_A_47718441 | NC_021166.1    | Ca_Kabuli_Chr07 | 47718441                | AA                              | GG                 | GG               | INTRON                        | 101501968          | protein STRICTOSIDINE SYNTHASE-LIKE 12-like |
| SNP_58592_A_47718471 | NC_021166.1    | Ca_Kabuli_Chr07 | 47718471                | TT                              | CC                 | CC               | INTRON                        | 101501968          | protein STRICTOSIDINE SYNTHASE-LIKE 12-like |
| SNP_58593_A_47718503 | NC_021166.1    | Ca_Kabuli_Chr07 | 47718503                | TT                              | GG                 | GG               | INTRON                        | 101501968          | protein STRICTOSIDINE SYNTHASE-LIKE 12-like |
| SNP_58594_A_47772358 | NC_021166.1    | Ca_Kabuli_Chr07 | 47772358                | AA                              | GG                 | GG               | INTERGENIC                    |                    |                                             |
| SNP_58595_A_47772364 | NC_021166.1    | Ca_Kabuli_Chr07 | 47772364                | GG                              | AA                 | AA               | INTERGENIC                    |                    |                                             |
| SNP_58596_A_47772759 | NC_021166.1    | Ca_Kabuli_Chr07 | 47772759                | CC                              | TT                 | TT               | INTERGENIC                    |                    |                                             |
| SNP_58597_A_47778084 | NC_021166.1    | Ca_Kabuli_Chr07 | 47778084                | GG                              | AA                 | AA               | INTERGENIC                    |                    |                                             |
| SNP_58598_A_47778369 | NC_021166.1    | Ca_Kabuli_Chr07 | 47778369                | TT                              | GG                 | GG               | INTERGENIC                    |                    |                                             |
| SNP_58599_A_47778370 | NC_021166.1    | Ca_Kabuli_Chr07 | 47778370                | GG                              | TT                 | TT               | INTERGENIC                    |                    |                                             |
| SNP_58600_A_47792642 | NC_021166.1    | Ca_Kabuli_Chr07 | 47792642                | GG                              | AA                 | AA               | INTERGENIC                    |                    |                                             |
| SNP_58601_A_47794875 | NC_021166.1    | Ca_Kabuli_Chr07 | 47794875                | TT                              | CC                 | CC               | INTERGENIC                    |                    |                                             |
| SNP_58602_A_47819296 | NC_021166.1    | Ca_Kabuli_Chr07 | 47819296                | CC                              | TT                 | TT               | INTERGENIC                    |                    |                                             |
| SNP_58603_A_47822836 | NC_021166.1    | Ca_Kabuli_Chr07 | 47822836                | TT                              | CC                 | CC               | INTERGENIC                    |                    |                                             |
| SNP_58604_A_47829963 | NC_021166.1    | Ca_Kabuli_Chr07 | 47829963                | AA                              | CC                 | CC               | INTERGENIC                    |                    |                                             |
| SNP_58605_A_47829965 | NC_021166.1    | Ca_Kabuli_Chr07 | 47829965                | AA                              | TT                 | TT               | INTERGENIC                    |                    |                                             |
| SNP_58606_A_47855481 | NC_021166.1    | Ca_Kabuli_Chr07 | 47855481                | AA                              | GG                 | GG               | INTERGENIC                    |                    |                                             |
| SNP_58607_A_47855484 | NC_021166.1    | Ca_Kabuli_Chr07 | 47855484                | AA                              | GG                 | GG               | INTERGENIC                    |                    |                                             |
| SNP_58608_A_47858893 | NC_021166.1    | Ca_Kabuli_Chr07 | 47858893                | TT                              | CC                 | CC               | INTERGENIC                    |                    |                                             |
| SNP_58609_A_47865430 | NC_021166.1    | Ca_Kabuli_Chr07 | 47865430                | TT                              | CC                 | CC               | INTERGENIC                    |                    |                                             |
| SNP_58610_A_47865920 | NC_021166.1    | Ca_Kabuli_Chr07 | 47865920                | AA                              | GG                 | GG               | INTERGENIC                    |                    |                                             |
| SNP_58611_A_47865935 | NC_021166.1    | Ca_Kabuli_Chr07 | 47865935                | AA                              | GG                 | GG               | INTERGENIC                    |                    |                                             |
| SNP_58612_A_47901857 | NC_021166.1    | Ca_Kabuli_Chr07 | 47901857                | TT                              | CC                 | CC               | INTERGENIC                    |                    |                                             |

| SNPs IDs             | Chromosome IDs | Chromosomes     | Physical positions (bp) | CDC Frontier genome (Reference genome) | (Pusa 1103 & HPNB) | (ILWC 46 & LPNB) | Sequence genome | Components of | Gene accession IDs | Putative functions |
|----------------------|----------------|-----------------|-------------------------|----------------------------------------|--------------------|------------------|-----------------|---------------|--------------------|--------------------|
| SNP_58613_A_47909472 | NC_021166.1    | Ca_Kabuli_Chr07 | 47909472                | TT                                     | CC                 | CC               | INTERGENIC      |               |                    |                    |
| SNP_58614_A_47909568 | NC_021166.1    | Ca_Kabuli_Chr07 | 47909568                | CC                                     | TT                 | TT               | INTERGENIC      |               |                    |                    |
| SNP_58615_A_47909614 | NC_021166.1    | Ca_Kabuli_Chr07 | 47909614                | AA                                     | GG                 | GG               | INTERGENIC      |               |                    |                    |
| SNP_58616_A_47909638 | NC_021166.1    | Ca_Kabuli_Chr07 | 47909638                | AA                                     | GG                 | GG               | INTERGENIC      |               |                    |                    |
| SNP_58617_A_47909668 | NC_021166.1    | Ca_Kabuli_Chr07 | 47909668                | CC                                     | TT                 | TT               | INTERGENIC      |               |                    |                    |
| SNP_58618_A_47909910 | NC_021166.1    | Ca_Kabuli_Chr07 | 47909910                | TT                                     | CC                 | CC               | INTERGENIC      |               |                    |                    |
| SNP_58619_A_47910018 | NC_021166.1    | Ca_Kabuli_Chr07 | 47910018                | TT                                     | CC                 | CC               | INTERGENIC      |               |                    |                    |
| SNP_58620_A_47921057 | NC_021166.1    | Ca_Kabuli_Chr07 | 47921057                | CC                                     | AA                 | AA               | INTERGENIC      |               |                    |                    |
| SNP_58621_A_47942098 | NC_021166.1    | Ca_Kabuli_Chr07 | 47942098                | AA                                     | GG                 | GG               | INTERGENIC      |               |                    |                    |
| SNP_58622_A_47942113 | NC_021166.1    | Ca_Kabuli_Chr07 | 47942113                | GG                                     | AA                 | AA               | INTERGENIC      |               |                    |                    |
| SNP_58623_A_47942150 | NC_021166.1    | Ca_Kabuli_Chr07 | 47942150                | GG                                     | AA                 | AA               | INTERGENIC      |               |                    |                    |
| SNP_58624_A_47942508 | NC_021166.1    | Ca_Kabuli_Chr07 | 47942508                | TT                                     | CC                 | CC               | INTERGENIC      |               |                    |                    |
| SNP_58625_A_47954097 | NC_021166.1    | Ca_Kabuli_Chr07 | 47954097                | TT                                     | GG                 | GG               | INTERGENIC      |               |                    |                    |
| SNP_58626_A_47959494 | NC_021166.1    | Ca_Kabuli_Chr07 | 47959494                | TT                                     | GG                 | GG               | INTERGENIC      |               |                    |                    |
| SNP_58627_A_47959508 | NC_021166.1    | Ca_Kabuli_Chr07 | 47959508                | TT                                     | CC                 | CC               | INTERGENIC      |               |                    |                    |
| SNP_58628_A_47982624 | NC_021166.1    | Ca_Kabuli_Chr07 | 47982624                | AA                                     | TT                 | TT               | INTERGENIC      |               |                    |                    |
| SNP_58629_A_48017136 | NC_021166.1    | Ca_Kabuli_Chr07 | 48017136                | GG                                     | AA                 | AA               | INTERGENIC      |               |                    |                    |
| SNP_58630_A_48067138 | NC_021166.1    | Ca_Kabuli_Chr07 | 48067138                | AA                                     | GG                 | GG               | INTERGENIC      |               |                    |                    |
| SNP_58631_A_48067144 | NC_021166.1    | Ca_Kabuli_Chr07 | 48067144                | TT                                     | CC                 | CC               | INTERGENIC      |               |                    |                    |
| SNP_58632_A_48073468 | NC_021166.1    | Ca_Kabuli_Chr07 | 48073468                | CC                                     | TT                 | TT               | INTERGENIC      |               |                    |                    |
| SNP_58634_A_48141073 | NC_021166.1    | Ca_Kabuli_Chr07 | 48141073                | TT                                     | CC                 | CC               | INTERGENIC      |               |                    |                    |
| SNP_58635_A_48141483 | NC_021166.1    | Ca_Kabuli_Chr07 | 48141483                | GG                                     | AA                 | AA               | INTERGENIC      |               |                    |                    |

| SNPs IDs             | Chromosome IDs | Chromosomes     | Physical positions (bp) | CDC Frontier genome (Reference genome) | (Pusa 1103 & HPNB) | (ILWC 46 & LPNB) | Sequence Components of genome | Gene accession IDs | Putative functions                                              |
|----------------------|----------------|-----------------|-------------------------|----------------------------------------|--------------------|------------------|-------------------------------|--------------------|-----------------------------------------------------------------|
| SNP_58636_A_48141508 | NC_021166.1    | Ca_Kabuli_Chr07 | 48141508                | TT                                     | AA                 | AA               | INTERGENIC                    |                    |                                                                 |
| SNP_58637_A_48145043 | NC_021166.1    | Ca_Kabuli_Chr07 | 48145043                | GG                                     | CC                 | CC               | INTERGENIC                    |                    |                                                                 |
| SNP_58638_A_48145082 | NC_021166.1    | Ca_Kabuli_Chr07 | 48145082                | AA                                     | GG                 | GG               | INTERGENIC                    |                    |                                                                 |
| SNP_58639_A_48186840 | NC_021166.1    | Ca_Kabuli_Chr07 | 48186840                | GG                                     | AA                 | AA               | INTERGENIC                    |                    |                                                                 |
| SNP_58640_A_48204281 | NC_021166.1    | Ca_Kabuli_Chr07 | 48204281                | CC                                     | TT                 | TT               | INTERGENIC                    |                    |                                                                 |
| SNP_58642_A_48210936 | NC_021166.1    | Ca_Kabuli_Chr07 | 48210936                | CC                                     | GG                 | GG               | INTRON                        | 101500707          | protein SAWADEE HOMEODOMAIN HOMOLOG 2                           |
| SNP_58644_A_48245987 | NC_021166.1    | Ca_Kabuli_Chr07 | 48245987                | TT                                     | CC                 | CC               | INTRON                        | 101501336          | uncharacterized exonuclease domain-containing protein At3g15140 |
| SNP_58645_A_48246061 | NC_021166.1    | Ca_Kabuli_Chr07 | 48246061                | CC                                     | TT                 | TT               | INTRON                        | 101501336          | uncharacterized exonuclease domain-containing protein At3g15140 |
| SNP_58646_A_48246077 | NC_021166.1    | Ca_Kabuli_Chr07 | 48246077                | CC                                     | AA                 | AA               | INTRON                        | 101501336          | uncharacterized exonuclease domain-containing protein At3g15140 |
| SNP_58647_A_48246106 | NC_021166.1    | Ca_Kabuli_Chr07 | 48246106                | CC                                     | TT                 | TT               | INTRON                        | 101501336          | uncharacterized exonuclease domain-containing protein At3g15140 |
| SNP_58648_A_48246118 | NC_021166.1    | Ca_Kabuli_Chr07 | 48246118                | TT                                     | CC                 | CC               | INTRON                        | 101501336          | uncharacterized exonuclease domain-containing protein At3g15140 |
| SNP_58649_A_48246119 | NC_021166.1    | Ca_Kabuli_Chr07 | 48246119                | AA                                     | GG                 | GG               | INTRON                        | 101501336          | uncharacterized exonuclease domain-containing protein At3g15140 |
| SNP_58650_A_48246126 | NC_021166.1    | Ca_Kabuli_Chr07 | 48246126                | TT                                     | CC                 | CC               | INTRON                        | 101501336          | uncharacterized exonuclease domain-containing protein At3g15140 |
| SNP_58651_A_48246230 | NC_021166.1    | Ca_Kabuli_Chr07 | 48246230                | GG                                     | AA                 | AA               | INTRON                        | 101501336          | uncharacterized exonuclease domain-containing protein At3g15140 |
| SNP_58652_A_48246269 | NC_021166.1    | Ca_Kabuli_Chr07 | 48246269                | TT                                     | CC                 | CC               | INTRON                        | 101501336          | uncharacterized exonuclease domain-containing protein At3g15140 |
| SNP_58653_A_48246271 | NC_021166.1    | Ca_Kabuli_Chr07 | 48246271                | GG                                     | AA                 | AA               | INTRON                        | 101501336          | uncharacterized exonuclease domain-containing protein At3g15140 |
| SNP_58654_A_48246297 | NC_021166.1    | Ca_Kabuli_Chr07 | 48246297                | TT                                     | CC                 | CC               | INTRON                        | 101501336          | uncharacterized exonuclease domain-containing protein At3g15140 |
| SNP_58655_A_48246326 | NC_021166.1    | Ca_Kabuli_Chr07 | 48246326                | AA                                     | CC                 | CC               | INTRON                        | 101501336          | uncharacterized exonuclease domain-containing protein At3g15140 |
| SNP_58656_A_48246382 | NC_021166.1    | Ca_Kabuli_Chr07 | 48246382                | TT                                     | CC                 | CC               | INTRON                        | 101501336          | uncharacterized exonuclease domain-containing protein At3g15140 |
| SNP_58657_A_48246416 | NC_021166.1    | Ca_Kabuli_Chr07 | 48246416                | AA                                     | GG                 | GG               | INTRON                        | 101501336          | uncharacterized exonuclease domain-containing protein At3g15140 |
| SNP_58658_A_48246441 | NC_021166.1    | Ca_Kabuli_Chr07 | 48246441                | TT                                     | CC                 | CC               | INTRON                        | 101501336          | uncharacterized exonuclease domain-containing protein At3g15140 |
| SNP_58659_A_48246496 | NC_021166.1    | Ca_Kabuli_Chr07 | 48246496                | TT                                     | CC                 | CC               | INTRON                        | 101501336          | uncharacterized exonuclease domain-containing protein At3g15140 |

| SNPs IDs             | Chromosome IDs | Chromosomes     | Physical positions (bp) | CDC Frontier (Reference genome) | (Pusa 1103 & HPNB) | (ILWC 46 & LPNB) | Sequence Components of genome | Gene accession IDs | Putative functions                                              |
|----------------------|----------------|-----------------|-------------------------|---------------------------------|--------------------|------------------|-------------------------------|--------------------|-----------------------------------------------------------------|
| SNP_58660_A_48250012 | NC_021166.1    | Ca_Kabuli_Chr07 | 48250012                | AA                              | GG                 | GG               | INTRON                        | 101501336          | uncharacterized exonuclease domain-containing protein At3g15140 |
| SNP_58661_A_48280007 | NC_021166.1    | Ca_Kabuli_Chr07 | 48280007                | CC                              | TT                 | TT               | INTERGENIC                    |                    |                                                                 |
| SNP_58662_A_48309167 | NC_021166.1    | Ca_Kabuli_Chr07 | 48309167                | GG                              | AA                 | AA               | INTERGENIC                    |                    |                                                                 |
| SNP_58663_A_48311570 | NC_021166.1    | Ca_Kabuli_Chr07 | 48311570                | AA                              | GG                 | GG               | INTERGENIC                    |                    |                                                                 |
| SNP_58665_A_48312060 | NC_021166.1    | Ca_Kabuli_Chr07 | 48312060                | GG                              | TT                 | TT               | INTERGENIC                    |                    |                                                                 |
| SNP_58666_A_48312062 | NC_021166.1    | Ca_Kabuli_Chr07 | 48312062                | TT                              | GG                 | GG               | INTERGENIC                    |                    |                                                                 |
| SNP_58667_A_48312156 | NC_021166.1    | Ca_Kabuli_Chr07 | 48312156                | CC                              | AA                 | AA               | INTERGENIC                    |                    |                                                                 |
| SNP_58668_A_48312532 | NC_021166.1    | Ca_Kabuli_Chr07 | 48312532                | TT                              | GG                 | GG               | INTERGENIC                    |                    |                                                                 |
| SNP_58669_A_48312544 | NC_021166.1    | Ca_Kabuli_Chr07 | 48312544                | AA                              | GG                 | GG               | INTERGENIC                    |                    |                                                                 |
| SNP_58670_A_48312576 | NC_021166.1    | Ca_Kabuli_Chr07 | 48312576                | TT                              | CC                 | CC               | INTERGENIC                    |                    |                                                                 |
| SNP_58671_A_48312601 | NC_021166.1    | Ca_Kabuli_Chr07 | 48312601                | AA                              | GG                 | GG               | INTERGENIC                    |                    |                                                                 |
| SNP_58673_A_48312688 | NC_021166.1    | Ca_Kabuli_Chr07 | 48312688                | TT                              | GG                 | GG               | INTERGENIC                    |                    |                                                                 |
| SNP_58674_A_48312689 | NC_021166.1    | Ca_Kabuli_Chr07 | 48312689                | GG                              | AA                 | AA               | INTERGENIC                    |                    |                                                                 |
| SNP_58675_A_48312742 | NC_021166.1    | Ca_Kabuli_Chr07 | 48312742                | AA                              | GG                 | GG               | INTERGENIC                    |                    |                                                                 |
| SNP_58676_A_48312966 | NC_021166.1    | Ca_Kabuli_Chr07 | 48312966                | CC                              | AA                 | AA               | INTERGENIC                    |                    |                                                                 |
| SNP_58677_A_48313095 | NC_021166.1    | Ca_Kabuli_Chr07 | 48313095                | GG                              | AA                 | AA               | INTERGENIC                    |                    |                                                                 |
| SNP_58678_A_48328239 | NC_021166.1    | Ca_Kabuli_Chr07 | 48328239                | TT                              | CC                 | CC               | INTERGENIC                    |                    |                                                                 |
| SNP_58679_A_48328305 | NC_021166.1    | Ca_Kabuli_Chr07 | 48328305                | AA                              | TT                 | TT               | INTERGENIC                    |                    |                                                                 |
| SNP_58680_A_48328377 | NC_021166.1    | Ca_Kabuli_Chr07 | 48328377                | GG                              | AA                 | AA               | INTERGENIC                    |                    |                                                                 |
| SNP_58681_A_48328583 | NC_021166.1    | Ca_Kabuli_Chr07 | 48328583                | TT                              | CC                 | CC               | INTERGENIC                    |                    |                                                                 |
| SNP_58682_A_48329964 | NC_021166.1    | Ca_Kabuli_Chr07 | 48329964                | TT                              | CC                 | CC               | INTERGENIC                    |                    |                                                                 |
| SNP_58683_A_48329970 | NC_021166.1    | Ca_Kabuli_Chr07 | 48329970                | GG                              | TT                 | TT               | INTERGENIC                    |                    |                                                                 |



| SNPs IDs             | Chromosome IDs | Chromosomes     | Physical positions (bp) | CDC Frontier genome (Reference genome) | (Pusa 1103 & HPNB) | (ILWC 46 & LPNB) | Sequence genome | Components of | Gene accession IDs | Putative functions |
|----------------------|----------------|-----------------|-------------------------|----------------------------------------|--------------------|------------------|-----------------|---------------|--------------------|--------------------|
| SNP_58684_A_48329982 | NC_021166.1    | Ca_Kabuli_Chr07 | 48329982                | CC                                     | TT                 | TT               | INTERGENIC      |               |                    |                    |
| SNP_58685_A_48330012 | NC_021166.1    | Ca_Kabuli_Chr07 | 48330012                | AA                                     | TT                 | TT               | INTERGENIC      |               |                    |                    |
| SNP_58686_A_48337071 | NC_021166.1    | Ca_Kabuli_Chr07 | 48337071                | TT                                     | CC                 | CC               | INTERGENIC      |               |                    |                    |
| SNP_58687_A_48337267 | NC_021166.1    | Ca_Kabuli_Chr07 | 48337267                | TT                                     | GG                 | GG               | INTERGENIC      |               |                    |                    |
| SNP_58688_A_48337456 | NC_021166.1    | Ca_Kabuli_Chr07 | 48337456                | CC                                     | TT                 | TT               | INTERGENIC      |               |                    |                    |
| SNP_58689_A_48337486 | NC_021166.1    | Ca_Kabuli_Chr07 | 48337486                | TT                                     | CC                 | CC               | INTERGENIC      |               |                    |                    |
| SNP_58690_A_48378218 | NC_021166.1    | Ca_Kabuli_Chr07 | 48378218                | GG                                     | AA                 | AA               | INTERGENIC      |               |                    |                    |
| SNP_58691_A_48378249 | NC_021166.1    | Ca_Kabuli_Chr07 | 48378249                | GG                                     | TT                 | TT               | INTERGENIC      |               |                    |                    |
| SNP_58693_A_48392132 | NC_021166.1    | Ca_Kabuli_Chr07 | 48392132                | AA                                     | CC                 | CC               | INTERGENIC      |               |                    |                    |
| SNP_58694_A_48392226 | NC_021166.1    | Ca_Kabuli_Chr07 | 48392226                | TT                                     | CC                 | CC               | INTERGENIC      |               |                    |                    |
| SNP_58695_A_48392311 | NC_021166.1    | Ca_Kabuli_Chr07 | 48392311                | TT                                     | CC                 | CC               | INTERGENIC      |               |                    |                    |
| SNP_58696_A_48392323 | NC_021166.1    | Ca_Kabuli_Chr07 | 48392323                | AA                                     | GG                 | GG               | INTERGENIC      |               |                    |                    |
| SNP_58697_A_48392362 | NC_021166.1    | Ca_Kabuli_Chr07 | 48392362                | GG                                     | TT                 | TT               | INTERGENIC      |               |                    |                    |
| SNP_58698_A_48392409 | NC_021166.1    | Ca_Kabuli_Chr07 | 48392409                | CC                                     | TT                 | TT               | INTERGENIC      |               |                    |                    |
| SNP_58699_A_48392490 | NC_021166.1    | Ca_Kabuli_Chr07 | 48392490                | CC                                     | TT                 | TT               | INTERGENIC      |               |                    |                    |
| SNP_58700_A_48392610 | NC_021166.1    | Ca_Kabuli_Chr07 | 48392610                | CC                                     | AA                 | AA               | INTERGENIC      |               |                    |                    |
| SNP_58701_A_48392612 | NC_021166.1    | Ca_Kabuli_Chr07 | 48392612                | AA                                     | CC                 | CC               | INTERGENIC      |               |                    |                    |
| SNP_58703_A_48392699 | NC_021166.1    | Ca_Kabuli_Chr07 | 48392699                | TT                                     | AA                 | AA               | INTERGENIC      |               |                    |                    |
| SNP_58704_A_48392741 | NC_021166.1    | Ca_Kabuli_Chr07 | 48392741                | GG                                     | CC                 | CC               | INTERGENIC      |               |                    |                    |
| SNP_58705_A_48392915 | NC_021166.1    | Ca_Kabuli_Chr07 | 48392915                | AA                                     | GG                 | GG               | INTERGENIC      |               |                    |                    |
| SNP_58706_A_48392923 | NC_021166.1    | Ca_Kabuli_Chr07 | 48392923                | TT                                     | AA                 | AA               | INTERGENIC      |               |                    |                    |
| SNP_58707_A_48393015 | NC_021166.1    | Ca_Kabuli_Chr07 | 48393015                | TT                                     | CC                 | CC               | INTERGENIC      |               |                    |                    |

| SNPs IDs             | Chromosome IDs | Chromosomes     | Physical positions (bp) | CDC Frontier genome (Reference genome) | (Pusa 1103 & HPNB) | (ILWC 46 & LPNB) | Sequence genome | Components of | Gene accession IDs       | Putative functions |
|----------------------|----------------|-----------------|-------------------------|----------------------------------------|--------------------|------------------|-----------------|---------------|--------------------------|--------------------|
| SNP_58708_A_48400511 | NC_021166.1    | Ca_Kabuli_Chr07 | 48400511                | AA                                     | GG                 | GG               | INTERGENIC      |               |                          |                    |
| SNP_58709_A_48400536 | NC_021166.1    | Ca_Kabuli_Chr07 | 48400536                | AA                                     | CC                 | CC               | INTERGENIC      |               |                          |                    |
| SNP_58710_A_48429075 | NC_021166.1    | Ca_Kabuli_Chr07 | 48429075                | AA                                     | TT                 | TT               | INTERGENIC      |               |                          |                    |
| SNP_58711_A_48429256 | NC_021166.1    | Ca_Kabuli_Chr07 | 48429256                | AA                                     | CC                 | CC               | INTERGENIC      |               |                          |                    |
| SNP_58712_A_48535958 | NC_021166.1    | Ca_Kabuli_Chr07 | 48535958                | AA                                     | GG                 | GG               | INTERGENIC      |               |                          |                    |
| SNP_58713_A_48536433 | NC_021166.1    | Ca_Kabuli_Chr07 | 48536433                | GG                                     | AA                 | AA               | INTERGENIC      |               |                          |                    |
| SNP_58714_A_48572596 | NC_021166.1    | Ca_Kabuli_Chr07 | 48572596                | AA                                     | GG                 | GG               | URR             | 101505183     | dirigent protein 21-like |                    |
| SNP_58715_A_48592002 | NC_021166.1    | Ca_Kabuli_Chr07 | 48592002                | CC                                     | TT                 | TT               | INTERGENIC      |               |                          |                    |
| SNP_58716_A_48601410 | NC_021166.1    | Ca_Kabuli_Chr07 | 48601410                | CC                                     | TT                 | TT               | INTERGENIC      |               |                          |                    |
| SNP_58717_A_48611317 | NC_021166.1    | Ca_Kabuli_Chr07 | 48611317                | GG                                     | AA                 | AA               | INTERGENIC      |               |                          |                    |
| SNP_58718_A_48611464 | NC_021166.1    | Ca_Kabuli_Chr07 | 48611464                | TT                                     | AA                 | AA               | INTERGENIC      |               |                          |                    |
| SNP_58719_A_48611515 | NC_021166.1    | Ca_Kabuli_Chr07 | 48611515                | CC                                     | TT                 | TT               | INTERGENIC      |               |                          |                    |
| SNP_58720_A_48611542 | NC_021166.1    | Ca_Kabuli_Chr07 | 48611542                | TT                                     | CC                 | CC               | INTERGENIC      |               |                          |                    |
| SNP_58721_A_48612016 | NC_021166.1    | Ca_Kabuli_Chr07 | 48612016                | CC                                     | TT                 | TT               | INTERGENIC      |               |                          |                    |
| SNP_58722_A_48664703 | NC_021166.1    | Ca_Kabuli_Chr07 | 48664703                | AA                                     | CC                 | CC               | INTERGENIC      |               |                          |                    |
| SNP_58723_A_48664705 | NC_021166.1    | Ca_Kabuli_Chr07 | 48664705                | AA                                     | CC                 | CC               | INTERGENIC      |               |                          |                    |
| SNP_58724_A_48678186 | NC_021166.1    | Ca_Kabuli_Chr07 | 48678186                | CC                                     | TT                 | TT               | INTERGENIC      |               |                          |                    |
| SNP_58725_A_48678272 | NC_021166.1    | Ca_Kabuli_Chr07 | 48678272                | CC                                     | AA                 | AA               | INTERGENIC      |               |                          |                    |
| SNP_58726_A_48678279 | NC_021166.1    | Ca_Kabuli_Chr07 | 48678279                | AA                                     | CC                 | CC               | INTERGENIC      |               |                          |                    |
| SNP_58727_A_48678289 | NC_021166.1    | Ca_Kabuli_Chr07 | 48678289                | AA                                     | GG                 | GG               | INTERGENIC      |               |                          |                    |
| SNP_58728_A_48678296 | NC_021166.1    | Ca_Kabuli_Chr07 | 48678296                | TT                                     | CC                 | CC               | INTERGENIC      |               |                          |                    |
| SNP_58729_A_48678607 | NC_021166.1    | Ca_Kabuli_Chr07 | 48678607                | AA                                     | GG                 | GG               | INTERGENIC      |               |                          |                    |

| SNPs IDs             | Chromosome IDs | Chromosomes     | Physical positions (bp) | CDC Frontier genome (Reference genome) | (Pusa 1103 & HPNB) | (ILWC 46 & LPNB) | Sequence Components of genome | Gene accession IDs | Putative functions           |
|----------------------|----------------|-----------------|-------------------------|----------------------------------------|--------------------|------------------|-------------------------------|--------------------|------------------------------|
| SNP_58730_A_48678666 | NC_021166.1    | Ca_Kabuli_Chr07 | 48678666                | GG                                     | AA                 | AA               | INTERGENIC                    |                    |                              |
| SNP_58731_A_48678675 | NC_021166.1    | Ca_Kabuli_Chr07 | 48678675                | AA                                     | TT                 | TT               | INTERGENIC                    |                    |                              |
| SNP_58732_A_48679572 | NC_021166.1    | Ca_Kabuli_Chr07 | 48679572                | GG                                     | AA                 | AA               | INTERGENIC                    |                    |                              |
| SNP_58733_A_48703776 | NC_021166.1    | Ca_Kabuli_Chr07 | 48703776                | CC                                     | TT                 | TT               | INTERGENIC                    |                    |                              |
| SNP_58735_A_48708913 | NC_021166.1    | Ca_Kabuli_Chr07 | 48708913                | GG                                     | TT                 | TT               | INTRON                        | 101508099          | uncharacterized LOC101508099 |
| SNP_58736_A_48709796 | NC_021166.1    | Ca_Kabuli_Chr07 | 48709796                | GG                                     | AA                 | AA               | INTRON                        | 101508099          | uncharacterized LOC101508099 |
| SNP_58737_A_48728191 | NC_021166.1    | Ca_Kabuli_Chr07 | 48728191                | TT                                     | GG                 | GG               | INTERGENIC                    |                    |                              |
| SNP_58738_A_48729787 | NC_021166.1    | Ca_Kabuli_Chr07 | 48729787                | TT                                     | CC                 | CC               | INTERGENIC                    |                    |                              |
| SNP_58739_A_48746469 | NC_021166.1    | Ca_Kabuli_Chr07 | 48746469                | GG                                     | AA                 | AA               | INTRON                        | 101508414          | uncharacterized LOC101508414 |
| SNP_58740_A_48748546 | NC_021166.1    | Ca_Kabuli_Chr07 | 48748546                | AA                                     | GG                 | GG               | INTRON                        | 101508414          | uncharacterized LOC101508414 |
| SNP_58742_A_48785033 | NC_021166.1    | Ca_Kabuli_Chr07 | 48785033                | CC                                     | TT                 | TT               | INTERGENIC                    |                    |                              |
| SNP_58743_A_48785034 | NC_021166.1    | Ca_Kabuli_Chr07 | 48785034                | CC                                     | TT                 | TT               | INTERGENIC                    |                    |                              |
| SNP_58744_A_48785044 | NC_021166.1    | Ca_Kabuli_Chr07 | 48785044                | TT                                     | CC                 | CC               | INTERGENIC                    |                    |                              |
| SNP_58745_A_48785067 | NC_021166.1    | Ca_Kabuli_Chr07 | 48785067                | GG                                     | AA                 | AA               | INTERGENIC                    |                    |                              |
| SNP_58746_A_48785109 | NC_021166.1    | Ca_Kabuli_Chr07 | 48785109                | CC                                     | TT                 | TT               | INTERGENIC                    |                    |                              |
| SNP_58747_A_48788311 | NC_021166.1    | Ca_Kabuli_Chr07 | 48788311                | AA                                     | CC                 | CC               | INTERGENIC                    |                    |                              |
| SNP_58748_A_48788363 | NC_021166.1    | Ca_Kabuli_Chr07 | 48788363                | GG                                     | TT                 | TT               | INTERGENIC                    |                    |                              |
| SNP_58749_A_48788367 | NC_021166.1    | Ca_Kabuli_Chr07 | 48788367                | GG                                     | AA                 | AA               | INTERGENIC                    |                    |                              |
| SNP_58750_A_48796921 | NC_021166.1    | Ca_Kabuli_Chr07 | 48796921                | CC                                     | TT                 | TT               | INTRON                        | 101508724          | Unknown function             |
| SNP_58751_A_48814121 | NC_021166.1    | Ca_Kabuli_Chr07 | 48814121                | AA                                     | GG                 | GG               | INTERGENIC                    |                    |                              |
| SNP_58752_A_48816284 | NC_021166.1    | Ca_Kabuli_Chr07 | 48816284                | TT                                     | AA                 | AA               | URR                           | 101509362          | uncharacterized LOC101509362 |
| SNP_58753_A_48826605 | NC_021166.1    | Ca_Kabuli_Chr07 | 48826605                | CC                                     | TT                 | TT               | URR                           | 101509683          | uncharacterized LOC101509683 |

| SNPs IDs             | Chromosome IDs | Chromosomes     | Physical positions (bp) | CDC Frontier genome (Reference genome) | (Pusa 1103 & HPNB) | (ILWC 46 & LPNB) | Sequence Components of genome | Gene accession IDs | Putative functions           |
|----------------------|----------------|-----------------|-------------------------|----------------------------------------|--------------------|------------------|-------------------------------|--------------------|------------------------------|
| SNP_58756_A_48852096 | NC_021166.1    | Ca_Kabuli_Chr07 | 48852096                | AA                                     | GG                 | GG               | URR                           | 101510657          | uncharacterized LOC101510657 |
| SNP_58757_A_48871999 | NC_021166.1    | Ca_Kabuli_Chr07 | 48871999                | TT                                     | GG                 | GG               | INTERGENIC                    |                    |                              |
| SNP_58758_A_48872502 | NC_021166.1    | Ca_Kabuli_Chr07 | 48872502                | GG                                     | AA                 | AA               | INTERGENIC                    |                    |                              |
| SNP_58759_A_48872609 | NC_021166.1    | Ca_Kabuli_Chr07 | 48872609                | GG                                     | AA                 | AA               | INTERGENIC                    |                    |                              |
| SNP_58760_A_48872610 | NC_021166.1    | Ca_Kabuli_Chr07 | 48872610                | AA                                     | TT                 | TT               | INTERGENIC                    |                    |                              |
| SNP_58761_A_48875826 | NC_021166.1    | Ca_Kabuli_Chr07 | 48875826                | AA                                     | TT                 | TT               | INTERGENIC                    |                    |                              |
| SNP_58763_A_48879234 | NC_021166.1    | Ca_Kabuli_Chr07 | 48879234                | TT                                     | AA                 | AA               | INTERGENIC                    |                    |                              |
| SNP_58764_A_48879280 | NC_021166.1    | Ca_Kabuli_Chr07 | 48879280                | AA                                     | GG                 | GG               | INTERGENIC                    |                    |                              |
| SNP_58765_A_48879410 | NC_021166.1    | Ca_Kabuli_Chr07 | 48879410                | CC                                     | GG                 | GG               | INTERGENIC                    |                    |                              |
| SNP_58766_A_48879445 | NC_021166.1    | Ca_Kabuli_Chr07 | 48879445                | GG                                     | AA                 | AA               | INTERGENIC                    |                    |                              |
| SNP_58767_A_48879470 | NC_021166.1    | Ca_Kabuli_Chr07 | 48879470                | AA                                     | GG                 | GG               | INTERGENIC                    |                    |                              |
| SNP_58768_A_48917441 | NC_021166.1    | Ca_Kabuli_Chr07 | 48917441                | CC                                     | AA                 | AA               | INTERGENIC                    |                    |                              |
| SNP_58769_A_48922824 | NC_021166.1    | Ca_Kabuli_Chr07 | 48922824                | CC                                     | TT                 | TT               | INTERGENIC                    |                    |                              |
| SNP_58770_A_48926610 | NC_021166.1    | Ca_Kabuli_Chr07 | 48926610                | CC                                     | TT                 | TT               | INTERGENIC                    |                    |                              |
| SNP_58771_A_48929204 | NC_021166.1    | Ca_Kabuli_Chr07 | 48929204                | CC                                     | TT                 | TT               | INTERGENIC                    |                    |                              |
| SNP_58772_A_48946048 | NC_021166.1    | Ca_Kabuli_Chr07 | 48946048                | GG                                     | AA                 | AA               | INTERGENIC                    |                    |                              |
| SNP_58773_A_48946549 | NC_021166.1    | Ca_Kabuli_Chr07 | 48946549                | CC                                     | TT                 | TT               | INTERGENIC                    |                    |                              |
| SNP_58774_A_48957042 | NC_021166.1    | Ca_Kabuli_Chr07 | 48957042                | CC                                     | TT                 | TT               | INTERGENIC                    |                    |                              |
| SNP_58776_A_9984     | NC_021167.1    | Ca_Kabuli_Chr08 | 9984                    | GG                                     | TT                 | TT               | INTERGENIC                    |                    |                              |
| SNP_58777_A_12826    | NC_021167.1    | Ca_Kabuli_Chr08 | 12826                   | AA                                     | GG                 | GG               | INTERGENIC                    |                    |                              |
| SNP_58779_A_15586    | NC_021167.1    | Ca_Kabuli_Chr08 | 15586                   | AA                                     | TT                 | TT               | DRR                           | 101511287          | Unknown function             |
| SNP_58780_A_15774    | NC_021167.1    | Ca_Kabuli_Chr08 | 15774                   | AA                                     | GG                 | GG               | DRR                           | 101511287          | Unknown function             |

| SNPs IDs           | Chromosome IDs | Chromosomes     | Physical positions (bp) | CDC Frontier (Reference genome) | (Pusa 1103 & HPNB) | (ILWC 46 & LPNB) | Sequence Components of genome | Gene accession IDs | Putative functions                                         |
|--------------------|----------------|-----------------|-------------------------|---------------------------------|--------------------|------------------|-------------------------------|--------------------|------------------------------------------------------------|
| SNP_58781_A_15921  | NC_021167.1    | Ca_Kabuli_Chr08 | 15921                   | AA                              | GG                 | GG               | DRR                           | 101511287          | Unknown function                                           |
| SNP_58782_A_15940  | NC_021167.1    | Ca_Kabuli_Chr08 | 15940                   | GG                              | AA                 | AA               | DRR                           | 101511287          | Unknown function                                           |
| SNP_58783_A_16049  | NC_021167.1    | Ca_Kabuli_Chr08 | 16049                   | CC                              | AA                 | AA               | DRR                           | 101511287          | Unknown function                                           |
| SNP_58784_A_16747  | NC_021167.1    | Ca_Kabuli_Chr08 | 16747                   | CC                              | GG                 | GG               | NON_SYNONYMOUS_CODING         | id179896           | Unknown function                                           |
| SNP_58785_A_17770  | NC_021167.1    | Ca_Kabuli_Chr08 | 17770                   | AA                              | GG                 | GG               | NON_SYNONYMOUS_CODING         | id179896           | Unknown function                                           |
| SNP_58786_A_17812  | NC_021167.1    | Ca_Kabuli_Chr08 | 17812                   | TT                              | GG                 | GG               | NON_SYNONYMOUS_CODING         | id179896           | Unknown function                                           |
| SNP_58787_A_17961  | NC_021167.1    | Ca_Kabuli_Chr08 | 17961                   | AA                              | CC                 | CC               | NON_SYNONYMOUS_CODING         | id179896           | Unknown function                                           |
| SNP_58788_A_18055  | NC_021167.1    | Ca_Kabuli_Chr08 | 18055                   | AA                              | CC                 | CC               | NON_SYNONYMOUS_CODING         | id179896           | Unknown function                                           |
| SNP_58789_A_18205  | NC_021167.1    | Ca_Kabuli_Chr08 | 18205                   | TT                              | CC                 | CC               | NON_SYNONYMOUS_CODING         | id179896           | Unknown function                                           |
| SNP_58790_A_21356  | NC_021167.1    | Ca_Kabuli_Chr08 | 21356                   | AA                              | GG                 | GG               | INTERGENIC                    |                    |                                                            |
| SNP_58791_A_21982  | NC_021167.1    | Ca_Kabuli_Chr08 | 21982                   | AA                              | GG                 | GG               | INTERGENIC                    |                    |                                                            |
| SNP_58792_A_37460  | NC_021167.1    | Ca_Kabuli_Chr08 | 37460                   | AA                              | GG                 | GG               | INTRON                        | 101511505          | methionyl-tRNA formyltransferase, mitochondrial            |
| SNP_58794_A_187904 | NC_021167.1    | Ca_Kabuli_Chr08 | 187904                  | GG                              | AA                 | AA               | URR                           | 101489155          | uncharacterized LOC101489155                               |
| SNP_58795_A_187926 | NC_021167.1    | Ca_Kabuli_Chr08 | 187926                  | CC                              | TT                 | TT               | URR                           | 101489155          | uncharacterized LOC101489155                               |
| SNP_58796_A_193824 | NC_021167.1    | Ca_Kabuli_Chr08 | 193824                  | CC                              | TT                 | TT               | INTERGENIC                    |                    |                                                            |
| SNP_58797_A_193858 | NC_021167.1    | Ca_Kabuli_Chr08 | 193858                  | AA                              | GG                 | GG               | INTERGENIC                    |                    |                                                            |
| SNP_58798_A_193908 | NC_021167.1    | Ca_Kabuli_Chr08 | 193908                  | AA                              | GG                 | GG               | INTERGENIC                    |                    |                                                            |
| SNP_58799_A_194130 | NC_021167.1    | Ca_Kabuli_Chr08 | 194130                  | AA                              | GG                 | GG               | INTERGENIC                    |                    |                                                            |
| SNP_58800_A_195314 | NC_021167.1    | Ca_Kabuli_Chr08 | 195314                  | CC                              | TT                 | TT               | DRR                           | 101507556          | pentatricopeptide repeat-containing protein At4g20740-like |
| SNP_58801_A_203996 | NC_021167.1    | Ca_Kabuli_Chr08 | 203996                  | GG                              | CC                 | CC               | URR                           | 101489888          | Unknown function                                           |
| SNP_58802_A_207167 | NC_021167.1    | Ca_Kabuli_Chr08 | 207167                  | TT                              | CC                 | CC               | INTERGENIC                    |                    |                                                            |
| SNP_58803_A_209252 | NC_021167.1    | Ca_Kabuli_Chr08 | 209252                  | TT                              | CC                 | CC               | URR                           | 101508184          | pentatricopeptide repeat-containing protein At4g20740-like |

| SNPs IDs           | Chromosome IDs | Chromosomes     | Physical positions (bp) | CDC Frontier (Reference genome) | (Pusa 1103 & HPNB) | (ILWC 46 & LPNB) | Sequence Components of genome | Gene accession IDs | Putative functions                                        |
|--------------------|----------------|-----------------|-------------------------|---------------------------------|--------------------|------------------|-------------------------------|--------------------|-----------------------------------------------------------|
| SNP_58804_A_234558 | NC_021167.1    | Ca_Kabuli_Chr08 | 234558                  | AA                              | GG                 | GG               | URR                           | 101491192          | DNA repair protein REV1                                   |
| SNP_58805_A_256385 | NC_021167.1    | Ca_Kabuli_Chr08 | 256385                  | AA                              | GG                 | GG               | DRR                           | 101493796          | somatic embryogenesis receptor kinase 2-like              |
| SNP_58806_A_305437 | NC_021167.1    | Ca_Kabuli_Chr08 | 305437                  | GG                              | AA                 | AA               | DRR                           | 101497145          | myosin-2 heavy chain                                      |
| SNP_58807_A_329797 | NC_021167.1    | Ca_Kabuli_Chr08 | 329797                  | AA                              | GG                 | GG               | URR                           | 101498561          | magnesium transporter MRS2-3                              |
| SNP_58808_A_335259 | NC_021167.1    | Ca_Kabuli_Chr08 | 335259                  | CC                              | TT                 | TT               | INTERGENIC                    |                    |                                                           |
| SNP_58809_A_383509 | NC_021167.1    | Ca_Kabuli_Chr08 | 383509                  | CC                              | AA                 | AA               | DRR                           | 101500065          | uncharacterized LOC101500065                              |
| SNP_58810_A_383810 | NC_021167.1    | Ca_Kabuli_Chr08 | 383810                  | TT                              | AA                 | AA               | DRR                           | 101500065          | uncharacterized LOC101500065                              |
| SNP_58811_A_383817 | NC_021167.1    | Ca_Kabuli_Chr08 | 383817                  | AA                              | TT                 | TT               | DRR                           | 101500065          | uncharacterized LOC101500065                              |
| SNP_58812_A_399355 | NC_021167.1    | Ca_Kabuli_Chr08 | 399355                  | GG                              | AA                 | AA               | URR                           | 101500396          | uncharacterized LOC101500396                              |
| SNP_58814_A_436137 | NC_021167.1    | Ca_Kabuli_Chr08 | 436137                  | AA                              | TT                 | TT               | DRR                           | 101503907          | homeobox-leucine zipper protein PROTODERMAL FACTOR 2 like |
| SNP_58816_A_468708 | NC_021167.1    | Ca_Kabuli_Chr08 | 468708                  | AA                              | GG                 | GG               | INTERGENIC                    |                    |                                                           |
| SNP_58817_A_494317 | NC_021167.1    | Ca_Kabuli_Chr08 | 494317                  | GG                              | AA                 | AA               | INTERGENIC                    |                    |                                                           |
| SNP_58818_A_494479 | NC_021167.1    | Ca_Kabuli_Chr08 | 494479                  | CC                              | AA                 | AA               | INTERGENIC                    |                    |                                                           |
| SNP_58819_A_526634 | NC_021167.1    | Ca_Kabuli_Chr08 | 526634                  | AA                              | GG                 | GG               | URR                           | 101510115          | 2-hydroxyisoflavanone dehydratase-like                    |
| SNP_58820_A_530900 | NC_021167.1    | Ca_Kabuli_Chr08 | 530900                  | TT                              | AA                 | AA               | DRR                           | 101506370          | 2-hydroxyisoflavanone dehydratase-like                    |
| SNP_58822_A_696577 | NC_021167.1    | Ca_Kabuli_Chr08 | 696577                  | TT                              | CC                 | CC               | URR                           | 101515179          | uncharacterized LOC101515179                              |
| SNP_58823_A_696578 | NC_021167.1    | Ca_Kabuli_Chr08 | 696578                  | TT                              | GG                 | GG               | URR                           | 101515179          | uncharacterized LOC101515179                              |
| SNP_58825_A_751797 | NC_021167.1    | Ca_Kabuli_Chr08 | 751797                  | GG                              | AA                 | AA               | URR                           | 101491413          | type I inositol 1,4,5-trisphosphate 5-phosphatase CVP2    |
| SNP_58826_A_760731 | NC_021167.1    | Ca_Kabuli_Chr08 | 760731                  | CC                              | TT                 | TT               | INTERGENIC                    |                    |                                                           |
| SNP_58828_A_805218 | NC_021167.1    | Ca_Kabuli_Chr08 | 805218                  | TT                              | GG                 | GG               | URR                           | 101494426          | uncharacterized LOC101494426                              |
| SNP_58831_A_866042 | NC_021167.1    | Ca_Kabuli_Chr08 | 866042                  | TT                              | CC                 | CC               | INTERGENIC                    |                    |                                                           |
| SNP_58832_A_906477 | NC_021167.1    | Ca_Kabuli_Chr08 | 906477                  | CC                              | AA                 | AA               | URR                           | 101500810          | target of Myb protein 1                                   |

| SNPs IDs            | Chromosome IDs | Chromosomes     | Physical positions (bp) | CDC Frontier genome (Reference genome) | (Pusa 1103 & HPNB) | (ILWC 46 & LPNB) | Sequence Components of genome | Gene accession IDs | Putative functions                                |
|---------------------|----------------|-----------------|-------------------------|----------------------------------------|--------------------|------------------|-------------------------------|--------------------|---------------------------------------------------|
| SNP_58833_A_937829  | NC_021167.1    | Ca_Kabuli_Chr08 | 937829                  | CC                                     | GG                 | GG               | URR                           | 101502511          | ERAD-associated E3 ubiquitin-protein ligase HRD1B |
| SNP_58834_A_937837  | NC_021167.1    | Ca_Kabuli_Chr08 | 937837                  | CC                                     | GG                 | GG               | URR                           | 101502511          | ERAD-associated E3 ubiquitin-protein ligase HRD1B |
| SNP_58835_A_937841  | NC_021167.1    | Ca_Kabuli_Chr08 | 937841                  | AA                                     | GG                 | GG               | URR                           | 101502511          | ERAD-associated E3 ubiquitin-protein ligase HRD1B |
| SNP_58836_A_957462  | NC_021167.1    | Ca_Kabuli_Chr08 | 957462                  | CC                                     | TT                 | TT               | NON_SYNONYMOUS_CODING         | id181253           | Unknown function                                  |
| SNP_58837_A_957486  | NC_021167.1    | Ca_Kabuli_Chr08 | 957486                  | TT                                     | AA                 | AA               | NON_SYNONYMOUS_CODING         | id181253           | Unknown function                                  |
| SNP_58838_A_957495  | NC_021167.1    | Ca_Kabuli_Chr08 | 957495                  | CC                                     | TT                 | TT               | NON_SYNONYMOUS_CODING         | id181253           | Unknown function                                  |
| SNP_58839_A_960918  | NC_021167.1    | Ca_Kabuli_Chr08 | 960918                  | AA                                     | TT                 | TT               | INTERGENIC                    |                    |                                                   |
| SNP_58841_A_1066577 | NC_021167.1    | Ca_Kabuli_Chr08 | 1066577                 | AA                                     | TT                 | TT               | URR                           | 101515071          | cyclin-B1-2-like                                  |
| SNP_58844_A_1080050 | NC_021167.1    | Ca_Kabuli_Chr08 | 1080050                 | AA                                     | GG                 | GG               | INTERGENIC                    |                    |                                                   |
| SNP_58845_A_1080054 | NC_021167.1    | Ca_Kabuli_Chr08 | 1080054                 | GG                                     | AA                 | AA               | INTERGENIC                    |                    |                                                   |
| SNP_58846_A_1080057 | NC_021167.1    | Ca_Kabuli_Chr08 | 1080057                 | GG                                     | TT                 | TT               | INTERGENIC                    |                    |                                                   |
| SNP_58847_A_1105182 | NC_021167.1    | Ca_Kabuli_Chr08 | 1105182                 | GG                                     | CC                 | CC               | INTERGENIC                    |                    |                                                   |
| SNP_58848_A_1163596 | NC_021167.1    | Ca_Kabuli_Chr08 | 1163596                 | CC                                     | TT                 | TT               | INTERGENIC                    |                    |                                                   |
| SNP_58849_A_1183945 | NC_021167.1    | Ca_Kabuli_Chr08 | 1183945                 | GG                                     | TT                 | TT               | DRR                           | 101514855          | Unknown function                                  |
| SNP_58851_A_1210861 | NC_021167.1    | Ca_Kabuli_Chr08 | 1210861                 | TT                                     | GG                 | GG               | INTERGENIC                    |                    |                                                   |
| SNP_58852_A_1210896 | NC_021167.1    | Ca_Kabuli_Chr08 | 1210896                 | TT                                     | CC                 | CC               | INTERGENIC                    |                    |                                                   |
| SNP_58854_A_1342994 | NC_021167.1    | Ca_Kabuli_Chr08 | 1342994                 | TT                                     | CC                 | CC               | INTERGENIC                    |                    |                                                   |
| SNP_58855_A_1343026 | NC_021167.1    | Ca_Kabuli_Chr08 | 1343026                 | GG                                     | CC                 | CC               | INTERGENIC                    |                    |                                                   |
| SNP_58856_A_1343055 | NC_021167.1    | Ca_Kabuli_Chr08 | 1343055                 | AA                                     | CC                 | CC               | INTERGENIC                    |                    |                                                   |
| SNP_58858_A_1378968 | NC_021167.1    | Ca_Kabuli_Chr08 | 1378968                 | AA                                     | GG                 | GG               | URR                           | 101505078          | putative RING-H2 finger protein ATL21A            |
| SNP_58859_A_1389083 | NC_021167.1    | Ca_Kabuli_Chr08 | 1389083                 | TT                                     | CC                 | CC               | URR                           | 101505733          | uncharacterized LOC101505733                      |
| SNP_58860_A_1401089 | NC_021167.1    | Ca_Kabuli_Chr08 | 1401089                 | CC                                     | TT                 | TT               | INTERGENIC                    |                    |                                                   |

| SNPs IDs            | Chromosome IDs | Chromosomes     | Physical positions (bp) | CDC Frontier (Reference genome) | (Pusa 1103 & HPNB) | (ILWC 46 & LPNB) | Sequence Components of genome | Gene accession IDs | Putative functions                                       |
|---------------------|----------------|-----------------|-------------------------|---------------------------------|--------------------|------------------|-------------------------------|--------------------|----------------------------------------------------------|
| SNP_58861_A_1429576 | NC_021167.1    | Ca_Kabuli_Chr08 | 1429576                 | TT                              | CC                 | CC               | INTERGENIC                    |                    |                                                          |
| SNP_58863_A_1456389 | NC_021167.1    | Ca_Kabuli_Chr08 | 1456389                 | CC                              | TT                 | TT               | INTRON                        | 101507350          | mitochondrial adenine nucleotide transporter ADNT1-like  |
| SNP_58864_A_1494056 | NC_021167.1    | Ca_Kabuli_Chr08 | 1494056                 | GG                              | AA                 | AA               | DRR                           | 101509365          | ethylene-responsive transcription factor CRF2-like       |
| SNP_58865_A_1500184 | NC_021167.1    | Ca_Kabuli_Chr08 | 1500184                 | CC                              | TT                 | TT               | INTERGENIC                    |                    |                                                          |
| SNP_58866_A_1519588 | NC_021167.1    | Ca_Kabuli_Chr08 | 1519588                 | AA                              | GG                 | GG               | URR                           | 101510545          | probable beta-1,3-galactosyltransferase 11               |
| SNP_58867_A_1525131 | NC_021167.1    | Ca_Kabuli_Chr08 | 1525131                 | AA                              | GG                 | GG               | INTERGENIC                    |                    |                                                          |
| SNP_58868_A_1544870 | NC_021167.1    | Ca_Kabuli_Chr08 | 1544870                 | GG                              | TT                 | TT               | URR                           | 101511507          | uncharacterized protein At5g41620                        |
| SNP_58869_A_1586657 | NC_021167.1    | Ca_Kabuli_Chr08 | 1586657                 | GG                              | TT                 | TT               | INTERGENIC                    |                    |                                                          |
| SNP_58870_A_1606152 | NC_021167.1    | Ca_Kabuli_Chr08 | 1606152                 | TT                              | CC                 | CC               | INTRON                        | 101488928          | E3 SUMO-protein ligase pli1                              |
| SNP_58871_A_1655618 | NC_021167.1    | Ca_Kabuli_Chr08 | 1655618                 | GG                              | TT                 | TT               | INTRON                        | 101493061          | myb-like protein Q                                       |
| SNP_58872_A_1699965 | NC_021167.1    | Ca_Kabuli_Chr08 | 1699965                 | CC                              | TT                 | TT               | INTERGENIC                    |                    |                                                          |
| SNP_58873_A_1699974 | NC_021167.1    | Ca_Kabuli_Chr08 | 1699974                 | CC                              | GG                 | GG               | INTERGENIC                    |                    |                                                          |
| SNP_58875_A_1779543 | NC_021167.1    | Ca_Kabuli_Chr08 | 1779543                 | GG                              | TT                 | TT               | DRR                           | 101497147          | AT-hook motif nuclear-localized protein 5-like           |
| SNP_58876_A_1779546 | NC_021167.1    | Ca_Kabuli_Chr08 | 1779546                 | AA                              | GG                 | GG               | DRR                           | 101497147          | AT-hook motif nuclear-localized protein 5-like           |
| SNP_58877_A_1850381 | NC_021167.1    | Ca_Kabuli_Chr08 | 1850381                 | CC                              | TT                 | TT               | URR                           | 101500813          | transcription initiation factor IIE subunit beta-like    |
| SNP_58878_A_1863675 | NC_021167.1    | Ca_Kabuli_Chr08 | 1863675                 | CC                              | TT                 | TT               | NON_SYNONYMOUS_CODING         | 101501657          | serine/threonine-protein phosphatase 7 long form homolog |
| SNP_58879_A_1864342 | NC_021167.1    | Ca_Kabuli_Chr08 | 1864342                 | TT                              | CC                 | CC               | URR                           | 101501657          | serine/threonine-protein phosphatase 7 long form homolog |
| SNP_58880_A_1864346 | NC_021167.1    | Ca_Kabuli_Chr08 | 1864346                 | TT                              | CC                 | CC               | URR                           | 101501657          | serine/threonine-protein phosphatase 7 long form homolog |
| SNP_58881_A_1864403 | NC_021167.1    | Ca_Kabuli_Chr08 | 1864403                 | AA                              | GG                 | GG               | DRR                           | 101501970          | transcription factor MYB76-like                          |
| SNP_58882_A_1932000 | NC_021167.1    | Ca_Kabuli_Chr08 | 1932000                 | TT                              | AA                 | AA               | URR                           | 101504878          | proteasome subunit beta type-1                           |
| SNP_58883_A_1972404 | NC_021167.1    | Ca_Kabuli_Chr08 | 1972404                 | TT                              | CC                 | CC               | INTRON                        | 101506487          | DNA-directed RNA polymerase IV subunit 1                 |
| SNP_58885_A_1995666 | NC_021167.1    | Ca_Kabuli_Chr08 | 1995666                 | TT                              | GG                 | GG               | INTERGENIC                    |                    |                                                          |



| SNPs IDs            | Chromosome IDs | Chromosomes     | Physical positions (bp) | CDC Frontier (Reference genome) | (Pusa 1103 & HPNB) | (ILWC 46 & LPNB) | Sequence Components of genome | Gene accession IDs | Putative functions                  |
|---------------------|----------------|-----------------|-------------------------|---------------------------------|--------------------|------------------|-------------------------------|--------------------|-------------------------------------|
| SNP_58886_A_1995668 | NC_021167.1    | Ca_Kabuli_Chr08 | 1995668                 | TT                              | AA                 | AA               | INTERGENIC                    |                    |                                     |
| SNP_58887_A_2006778 | NC_021167.1    | Ca_Kabuli_Chr08 | 2006778                 | GG                              | AA                 | AA               | DRR                           | 101494339          | phospholipase D gamma 1-like        |
| SNP_58888_A_2032644 | NC_021167.1    | Ca_Kabuli_Chr08 | 2032644                 | CC                              | TT                 | TT               | URR                           | 101509044          | protein FAM63B                      |
| SNP_58889_A_2032829 | NC_021167.1    | Ca_Kabuli_Chr08 | 2032829                 | CC                              | TT                 | TT               | SYNONYMOUS_CODING             | 101494650          | uncharacterized LOC101494650        |
| SNP_58890_A_2033107 | NC_021167.1    | Ca_Kabuli_Chr08 | 2033107                 | CC                              | TT                 | TT               | NON_SYNONYMOUS_CODING         | 101494650          | uncharacterized LOC101494650        |
| SNP_58892_A_2033544 | NC_021167.1    | Ca_Kabuli_Chr08 | 2033544                 | TT                              | CC                 | CC               | URR                           | 101494650          | uncharacterized LOC101494650        |
| SNP_58893_A_2033802 | NC_021167.1    | Ca_Kabuli_Chr08 | 2033802                 | TT                              | CC                 | CC               | URR                           | 101494650          | uncharacterized LOC101494650        |
| SNP_58895_A_2145457 | NC_021167.1    | Ca_Kabuli_Chr08 | 2145457                 | TT                              | AA                 | AA               | INTERGENIC                    |                    |                                     |
| SNP_58897_A_2345806 | NC_021167.1    | Ca_Kabuli_Chr08 | 2345806                 | CC                              | TT                 | TT               | URR                           | 101499948          | vesicle-associated protein 1-2-like |
| SNP_58898_A_2345897 | NC_021167.1    | Ca_Kabuli_Chr08 | 2345897                 | TT                              | CC                 | CC               | URR                           | 101499948          | vesicle-associated protein 1-2-like |
| SNP_58899_A_2345961 | NC_021167.1    | Ca_Kabuli_Chr08 | 2345961                 | AA                              | GG                 | GG               | URR                           | 101499948          | vesicle-associated protein 1-2-like |
| SNP_58900_A_2345971 | NC_021167.1    | Ca_Kabuli_Chr08 | 2345971                 | AA                              | GG                 | GG               | URR                           | 101499948          | vesicle-associated protein 1-2-like |
| SNP_58901_A_2345992 | NC_021167.1    | Ca_Kabuli_Chr08 | 2345992                 | TT                              | GG                 | GG               | URR                           | 101499948          | vesicle-associated protein 1-2-like |
| SNP_58902_A_2346002 | NC_021167.1    | Ca_Kabuli_Chr08 | 2346002                 | CC                              | TT                 | TT               | URR                           | 101499948          | vesicle-associated protein 1-2-like |
| SNP_58903_A_2346043 | NC_021167.1    | Ca_Kabuli_Chr08 | 2346043                 | TT                              | CC                 | CC               | URR                           | 101499948          | vesicle-associated protein 1-2-like |
| SNP_58904_A_2346149 | NC_021167.1    | Ca_Kabuli_Chr08 | 2346149                 | CC                              | TT                 | TT               | URR                           | 101499948          | vesicle-associated protein 1-2-like |
| SNP_58905_A_2346274 | NC_021167.1    | Ca_Kabuli_Chr08 | 2346274                 | GG                              | AA                 | AA               | URR                           | 101499948          | vesicle-associated protein 1-2-like |
| SNP_58906_A_2346470 | NC_021167.1    | Ca_Kabuli_Chr08 | 2346470                 | TT                              | CC                 | CC               | URR                           | 101499948          | vesicle-associated protein 1-2-like |
| SNP_58907_A_2346577 | NC_021167.1    | Ca_Kabuli_Chr08 | 2346577                 | TT                              | GG                 | GG               | URR                           | 101499948          | vesicle-associated protein 1-2-like |
| SNP_58908_A_2479847 | NC_021167.1    | Ca_Kabuli_Chr08 | 2479847                 | AA                              | CC                 | CC               | URR                           | 101496607          | uncharacterized LOC101496607        |
| SNP_58909_A_2480828 | NC_021167.1    | Ca_Kabuli_Chr08 | 2480828                 | TT                              | GG                 | GG               | DRR                           | 101505621          | probable aquaporin TIP2-2           |
| SNP_58910_A_2480879 | NC_021167.1    | Ca_Kabuli_Chr08 | 2480879                 | TT                              | CC                 | CC               | DRR                           | 101505621          | probable aquaporin TIP2-2           |

| SNPs IDs            | Chromosome IDs | Chromosomes     | Physical positions (bp) | CDC Frontier (Reference genome) | (Pusa 1103 & HPNB) | (ILWC 46 & LPNB) | Sequence Components of genome | Gene accession IDs | Putative functions                                               |
|---------------------|----------------|-----------------|-------------------------|---------------------------------|--------------------|------------------|-------------------------------|--------------------|------------------------------------------------------------------|
| SNP_58911_A_2480880 | NC_021167.1    | Ca_Kabuli_Chr08 | 2480880                 | AA                              | TT                 | TT               | DRR                           | 101505621          | probable aquaporin TIP2-2                                        |
| SNP_58912_A_2490650 | NC_021167.1    | Ca_Kabuli_Chr08 | 2490650                 | TT                              | CC                 | CC               | URR                           | 101506257          | uncharacterized LOC101506257                                     |
| SNP_58913_A_2506425 | NC_021167.1    | Ca_Kabuli_Chr08 | 2506425                 | CC                              | AA                 | AA               | INTERGENIC                    |                    |                                                                  |
| SNP_58914_A_2506438 | NC_021167.1    | Ca_Kabuli_Chr08 | 2506438                 | AA                              | GG                 | GG               | INTERGENIC                    |                    |                                                                  |
| SNP_58915_A_2506465 | NC_021167.1    | Ca_Kabuli_Chr08 | 2506465                 | GG                              | AA                 | AA               | INTERGENIC                    |                    |                                                                  |
| SNP_58916_A_2506472 | NC_021167.1    | Ca_Kabuli_Chr08 | 2506472                 | CC                              | GG                 | GG               | INTERGENIC                    |                    |                                                                  |
| SNP_58917_A_2506491 | NC_021167.1    | Ca_Kabuli_Chr08 | 2506491                 | GG                              | AA                 | AA               | INTERGENIC                    |                    |                                                                  |
| SNP_58918_A_2516923 | NC_021167.1    | Ca_Kabuli_Chr08 | 2516923                 | GG                              | TT                 | TT               | INTRON                        | 101508298          | DNA mismatch repair protein MSH4                                 |
| SNP_58919_A_2608692 | NC_021167.1    | Ca_Kabuli_Chr08 | 2608692                 | CC                              | TT                 | TT               | INTERGENIC                    |                    |                                                                  |
| SNP_58921_A_2757344 | NC_021167.1    | Ca_Kabuli_Chr08 | 2757344                 | TT                              | GG                 | GG               | INTERGENIC                    |                    |                                                                  |
| SNP_58922_A_2781769 | NC_021167.1    | Ca_Kabuli_Chr08 | 2781769                 | AA                              | CC                 | CC               | INTERGENIC                    |                    |                                                                  |
| SNP_58923_A_2781770 | NC_021167.1    | Ca_Kabuli_Chr08 | 2781770                 | TT                              | CC                 | CC               | INTERGENIC                    |                    |                                                                  |
| SNP_58924_A_2884333 | NC_021167.1    | Ca_Kabuli_Chr08 | 2884333                 | AA                              | TT                 | TT               | DRR                           | 101495398          | Ion protease homolog 2, peroxisomal                              |
| SNP_58925_A_2894971 | NC_021167.1    | Ca_Kabuli_Chr08 | 2894971                 | CC                              | TT                 | TT               | URR                           | 101495398          | Ion protease homolog 2, peroxisomal                              |
| SNP_58927_A_3152362 | NC_021167.1    | Ca_Kabuli_Chr08 | 3152362                 | AA                              | TT                 | TT               | INTERGENIC                    |                    |                                                                  |
| SNP_58928_A_3156928 | NC_021167.1    | Ca_Kabuli_Chr08 | 3156928                 | TT                              | AA                 | AA               | URR                           | 101506918          | transcription factor bHLH18-like                                 |
| SNP_58929_A_3175436 | NC_021167.1    | Ca_Kabuli_Chr08 | 3175436                 | GG                              | AA                 | AA               | URR                           | 101507557          | transcription factor bHLH18-like                                 |
| SNP_58930_A_3192266 | NC_021167.1    | Ca_Kabuli_Chr08 | 3192266                 | TT                              | GG                 | GG               | INTERGENIC                    |                    |                                                                  |
| SNP_58931_A_3224377 | NC_021167.1    | Ca_Kabuli_Chr08 | 3224377                 | GG                              | AA                 | AA               | NON_SYNONYMOUS_CODING         | 101508185          | malate dehydrogenase, glyoxysomal                                |
| SNP_58932_A_3284986 | NC_021167.1    | Ca_Kabuli_Chr08 | 3284986                 | AA                              | GG                 | GG               | INTRON                        | 101510007          | branched-chain-amino-acid aminotransferase 5, chloroplastic-like |
| SNP_58933_A_3305877 | NC_021167.1    | Ca_Kabuli_Chr08 | 3305877                 | GG                              | TT                 | TT               | INTERGENIC                    |                    |                                                                  |
| SNP_58935_A_3335083 | NC_021167.1    | Ca_Kabuli_Chr08 | 3335083                 | TT                              | GG                 | GG               | INTERGENIC                    |                    |                                                                  |

| SNPs IDs            | Chromosome IDs | Chromosomes     | Physical positions (bp) | CDC Frontier genome (Reference genome) | (Pusa 1103 & HPNB) | (ILWC 46 & LPNB) | Sequence Components of genome | Gene accession IDs | Putative functions                                     |
|---------------------|----------------|-----------------|-------------------------|----------------------------------------|--------------------|------------------|-------------------------------|--------------------|--------------------------------------------------------|
| SNP_58936_A_3373894 | NC_021167.1    | Ca_Kabuli_Chr08 | 3373894                 | TT                                     | GG                 | GG               | URR                           | 101500176          | uncharacterized LOC101500176                           |
| SNP_58937_A_3482015 | NC_021167.1    | Ca_Kabuli_Chr08 | 3482015                 | CC                                     | TT                 | TT               | INTERGENIC                    |                    |                                                        |
| SNP_58938_A_3487954 | NC_021167.1    | Ca_Kabuli_Chr08 | 3487954                 | CC                                     | TT                 | TT               | INTERGENIC                    |                    |                                                        |
| SNP_58939_A_3487969 | NC_021167.1    | Ca_Kabuli_Chr08 | 3487969                 | CC                                     | TT                 | TT               | INTERGENIC                    |                    |                                                        |
| SNP_58940_A_3545657 | NC_021167.1    | Ca_Kabuli_Chr08 | 3545657                 | TT                                     | CC                 | CC               | URR                           | 101493275          | BTB/POZ domain-containing protein At3g49900            |
| SNP_58941_A_3545661 | NC_021167.1    | Ca_Kabuli_Chr08 | 3545661                 | GG                                     | CC                 | CC               | URR                           | 101493275          | BTB/POZ domain-containing protein At3g49900            |
| SNP_58943_A_3669431 | NC_021167.1    | Ca_Kabuli_Chr08 | 3669431                 | TT                                     | CC                 | CC               | INTERGENIC                    |                    |                                                        |
| SNP_58944_A_3669888 | NC_021167.1    | Ca_Kabuli_Chr08 | 3669888                 | GG                                     | TT                 | TT               | INTERGENIC                    |                    |                                                        |
| SNP_58945_A_3669942 | NC_021167.1    | Ca_Kabuli_Chr08 | 3669942                 | TT                                     | CC                 | CC               | INTERGENIC                    |                    |                                                        |
| SNP_58946_A_3676327 | NC_021167.1    | Ca_Kabuli_Chr08 | 3676327                 | CC                                     | TT                 | TT               | INTERGENIC                    |                    |                                                        |
| SNP_58947_A_3687110 | NC_021167.1    | Ca_Kabuli_Chr08 | 3687110                 | TT                                     | CC                 | CC               | INTERGENIC                    |                    |                                                        |
| SNP_58948_A_3732965 | NC_021167.1    | Ca_Kabuli_Chr08 | 3732965                 | AA                                     | CC                 | CC               | DRR                           | 101500815          | probable prolyl 4-hydroxylase 9                        |
| SNP_58949_A_3777781 | NC_021167.1    | Ca_Kabuli_Chr08 | 3777781                 | TT                                     | AA                 | AA               | URR                           | 101501446          | subtilisin-like protease SBT1.7                        |
| SNP_58950_A_3809247 | NC_021167.1    | Ca_Kabuli_Chr08 | 3809247                 | TT                                     | CC                 | CC               | URR                           | 101503264          | DNA-directed RNA polymerases II and IV subunit 5A-like |
| SNP_58951_A_3897021 | NC_021167.1    | Ca_Kabuli_Chr08 | 3897021                 | TT                                     | AA                 | AA               | INTERGENIC                    |                    |                                                        |
| SNP_58952_A_3897024 | NC_021167.1    | Ca_Kabuli_Chr08 | 3897024                 | AA                                     | CC                 | CC               | INTERGENIC                    |                    |                                                        |
| SNP_58953_A_3947159 | NC_021167.1    | Ca_Kabuli_Chr08 | 3947159                 | TT                                     | CC                 | CC               | INTERGENIC                    |                    |                                                        |
| SNP_58954_A_3947560 | NC_021167.1    | Ca_Kabuli_Chr08 | 3947560                 | AA                                     | GG                 | GG               | INTERGENIC                    |                    |                                                        |
| SNP_58955_A_3947998 | NC_021167.1    | Ca_Kabuli_Chr08 | 3947998                 | CC                                     | AA                 | AA               | INTERGENIC                    |                    |                                                        |
| SNP_58956_A_4026575 | NC_021167.1    | Ca_Kabuli_Chr08 | 4026575                 | CC                                     | TT                 | TT               | INTERGENIC                    |                    |                                                        |
| SNP_58958_A_4067647 | NC_021167.1    | Ca_Kabuli_Chr08 | 4067647                 | TT                                     | GG                 | GG               | INTERGENIC                    |                    |                                                        |
| SNP_58959_A_4138408 | NC_021167.1    | Ca_Kabuli_Chr08 | 4138408                 | CC                                     | TT                 | TT               | URR                           | 101490876          | transcription factor HEC2                              |

| SNPs IDs            | Chromosome IDs | Chromosomes     | Physical positions (bp) | CDC Frontier (Reference genome) | (Pusa 1103 & HPNB) | (ILWC 46 & LPNB) | Sequence Components of genome | Gene accession IDs | Putative functions                           |
|---------------------|----------------|-----------------|-------------------------|---------------------------------|--------------------|------------------|-------------------------------|--------------------|----------------------------------------------|
| SNP_58960_A_4214714 | NC_021167.1    | Ca_Kabuli_Chr08 | 4214714                 | AA                              | GG                 | GG               | INTERGENIC                    |                    |                                              |
| SNP_58961_A_4214749 | NC_021167.1    | Ca_Kabuli_Chr08 | 4214749                 | AA                              | GG                 | GG               | INTERGENIC                    |                    |                                              |
| SNP_58962_A_4292992 | NC_021167.1    | Ca_Kabuli_Chr08 | 4292992                 | TT                              | CC                 | CC               | URR                           | 101496927          | patatin-like protein 5                       |
| SNP_58963_A_4311355 | NC_021167.1    | Ca_Kabuli_Chr08 | 4311355                 | AA                              | GG                 | GG               | URR                           | 101498139          | uncharacterized LOC101498139                 |
| SNP_58964_A_4409654 | NC_021167.1    | Ca_Kabuli_Chr08 | 4409654                 | CC                              | TT                 | TT               | URR                           | 101503029          | LOB domain-containing protein 36-like        |
| SNP_58965_A_4489660 | NC_021167.1    | Ca_Kabuli_Chr08 | 4489660                 | AA                              | CC                 | CC               | URR                           | 101503355          | reticulon-like protein B13                   |
| SNP_58967_A_4537461 | NC_021167.1    | Ca_Kabuli_Chr08 | 4537461                 | AA                              | TT                 | TT               | DRR                           | 101504329          | Unknown function                             |
| SNP_58968_A_4550255 | NC_021167.1    | Ca_Kabuli_Chr08 | 4550255                 | AA                              | GG                 | GG               | INTERGENIC                    |                    |                                              |
| SNP_58969_A_4585155 | NC_021167.1    | Ca_Kabuli_Chr08 | 4585155                 | AA                              | TT                 | TT               | INTERGENIC                    |                    |                                              |
| SNP_58971_A_4684052 | NC_021167.1    | Ca_Kabuli_Chr08 | 4684052                 | TT                              | AA                 | AA               | INTERGENIC                    |                    |                                              |
| SNP_58972_A_4684055 | NC_021167.1    | Ca_Kabuli_Chr08 | 4684055                 | TT                              | GG                 | GG               | INTERGENIC                    |                    |                                              |
| SNP_58973_A_4819249 | NC_021167.1    | Ca_Kabuli_Chr08 | 4819249                 | GG                              | TT                 | TT               | INTERGENIC                    |                    |                                              |
| SNP_58975_A_4914394 | NC_021167.1    | Ca_Kabuli_Chr08 | 4914394                 | CC                              | TT                 | TT               | INTRON                        | 101493382          | DNA-directed RNA polymerase III subunit RPC5 |
| SNP_58978_A_5069471 | NC_021167.1    | Ca_Kabuli_Chr08 | 5069471                 | CC                              | TT                 | TT               | INTERGENIC                    |                    |                                              |
| SNP_58979_A_5069746 | NC_021167.1    | Ca_Kabuli_Chr08 | 5069746                 | TT                              | CC                 | CC               | INTERGENIC                    |                    |                                              |
| SNP_58980_A_5069841 | NC_021167.1    | Ca_Kabuli_Chr08 | 5069841                 | GG                              | AA                 | AA               | INTERGENIC                    |                    |                                              |
| SNP_58981_A_5069915 | NC_021167.1    | Ca_Kabuli_Chr08 | 5069915                 | TT                              | GG                 | GG               | INTERGENIC                    |                    |                                              |
| SNP_58983_A_5069959 | NC_021167.1    | Ca_Kabuli_Chr08 | 5069959                 | GG                              | TT                 | TT               | INTERGENIC                    |                    |                                              |
| SNP_58984_A_5069965 | NC_021167.1    | Ca_Kabuli_Chr08 | 5069965                 | TT                              | CC                 | CC               | INTERGENIC                    |                    |                                              |
| SNP_58985_A_5069979 | NC_021167.1    | Ca_Kabuli_Chr08 | 5069979                 | AA                              | CC                 | CC               | INTERGENIC                    |                    |                                              |
| SNP_58986_A_5070006 | NC_021167.1    | Ca_Kabuli_Chr08 | 5070006                 | CC                              | TT                 | TT               | INTERGENIC                    |                    |                                              |
| SNP_58987_A_5070019 | NC_021167.1    | Ca_Kabuli_Chr08 | 5070019                 | CC                              | AA                 | AA               | INTERGENIC                    |                    |                                              |

| SNPs IDs            | Chromosome IDs | Chromosomes     | Physical positions (bp) | CDC Frontier genome (Reference genome) | (Pusa 1103 & HPNB) | (ILWC 46 & LPNB) | Sequence Components of genome | Gene accession IDs | Putative functions                      |
|---------------------|----------------|-----------------|-------------------------|----------------------------------------|--------------------|------------------|-------------------------------|--------------------|-----------------------------------------|
| SNP_58989_A_5088588 | NC_021167.1    | Ca_Kabuli_Chr08 | 5088588                 | AA                                     | CC                 | CC               | INTERGENIC                    |                    |                                         |
| SNP_58990_A_5088635 | NC_021167.1    | Ca_Kabuli_Chr08 | 5088635                 | GG                                     | AA                 | AA               | INTERGENIC                    |                    |                                         |
| SNP_58991_A_5089202 | NC_021167.1    | Ca_Kabuli_Chr08 | 5089202                 | AA                                     | GG                 | GG               | INTERGENIC                    |                    |                                         |
| SNP_58992_A_5089275 | NC_021167.1    | Ca_Kabuli_Chr08 | 5089275                 | AA                                     | CC                 | CC               | INTERGENIC                    |                    |                                         |
| SNP_58993_A_5181884 | NC_021167.1    | Ca_Kabuli_Chr08 | 5181884                 | AA                                     | TT                 | TT               | INTERGENIC                    |                    |                                         |
| SNP_58994_A_5187997 | NC_021167.1    | Ca_Kabuli_Chr08 | 5187997                 | AA                                     | TT                 | TT               | URR                           | 101503030          | sugar transporter ERD6-like 6           |
| SNP_58996_A_5217981 | NC_021167.1    | Ca_Kabuli_Chr08 | 5217981                 | AA                                     | GG                 | GG               | DRR                           | 101507250          | Unknown function                        |
| SNP_58997_A_5218188 | NC_021167.1    | Ca_Kabuli_Chr08 | 5218188                 | AA                                     | GG                 | GG               | NON_SYNONYMOUS_CODING         | 101507250          | Unknown function                        |
| SNP_58998_A_5221737 | NC_021167.1    | Ca_Kabuli_Chr08 | 5221737                 | TT                                     | CC                 | CC               | INTRON                        | 101507250          | Unknown function                        |
| SNP_58999_A_5221945 | NC_021167.1    | Ca_Kabuli_Chr08 | 5221945                 | AA                                     | CC                 | CC               | INTRON                        | 101507250          | Unknown function                        |
| SNP_59000_A_5221952 | NC_021167.1    | Ca_Kabuli_Chr08 | 5221952                 | GG                                     | TT                 | TT               | INTRON                        | 101507250          | Unknown function                        |
| SNP_59001_A_5269145 | NC_021167.1    | Ca_Kabuli_Chr08 | 5269145                 | CC                                     | AA                 | AA               | INTRON                        | 101506700          | syntaxin-112                            |
| SNP_59002_A_5269208 | NC_021167.1    | Ca_Kabuli_Chr08 | 5269208                 | AA                                     | TT                 | TT               | INTRON                        | 101506700          | syntaxin-112                            |
| SNP_59003_A_5269309 | NC_021167.1    | Ca_Kabuli_Chr08 | 5269309                 | TT                                     | CC                 | CC               | INTRON                        | 101506700          | syntaxin-112                            |
| SNP_59005_A_5269355 | NC_021167.1    | Ca_Kabuli_Chr08 | 5269355                 | TT                                     | GG                 | GG               | INTRON                        | 101506700          | syntaxin-112                            |
| SNP_59006_A_5269394 | NC_021167.1    | Ca_Kabuli_Chr08 | 5269394                 | TT                                     | AA                 | AA               | INTRON                        | 101506700          | syntaxin-112                            |
| SNP_59007_A_5269412 | NC_021167.1    | Ca_Kabuli_Chr08 | 5269412                 | CC                                     | AA                 | AA               | INTRON                        | 101506700          | syntaxin-112                            |
| SNP_59008_A_5271017 | NC_021167.1    | Ca_Kabuli_Chr08 | 5271017                 | CC                                     | TT                 | TT               | INTRON                        | 101506700          | syntaxin-112                            |
| SNP_59009_A_5294145 | NC_021167.1    | Ca_Kabuli_Chr08 | 5294145                 | TT                                     | CC                 | CC               | INTRON                        | 101508103          | transmembrane protein 53-like           |
| SNP_59010_A_5346652 | NC_021167.1    | Ca_Kabuli_Chr08 | 5346652                 | AA                                     | GG                 | GG               | URR                           | 101509690          | uncharacterized LOC101509690            |
| SNP_59011_A_5377367 | NC_021167.1    | Ca_Kabuli_Chr08 | 5377367                 | CC                                     | TT                 | TT               | URR                           | 101511189          | probable mitochondrial chaperone BCS1-B |
| SNP_59012_A_5421914 | NC_021167.1    | Ca_Kabuli_Chr08 | 5421914                 | CC                                     | TT                 | TT               | DRR                           | 101513990          | uncharacterized LOC101513990            |

| SNPs IDs            | Chromosome IDs | Chromosomes     | Physical positions (bp) | CDC Frontier genome (Reference genome) | (Pusa 1103 & HPNB) | (ILWC 46 & LPNB) | Sequence Components of genome | Gene accession IDs | Putative functions            |
|---------------------|----------------|-----------------|-------------------------|----------------------------------------|--------------------|------------------|-------------------------------|--------------------|-------------------------------|
| SNP_59013_A_5533542 | NC_021167.1    | Ca_Kabuli_Chr08 | 5533542                 | CC                                     | TT                 | TT               | URR                           | 101507875          | Unknown function              |
| SNP_59014_A_5578425 | NC_021167.1    | Ca_Kabuli_Chr08 | 5578425                 | AA                                     | TT                 | TT               | INTERGENIC                    |                    |                               |
| SNP_59015_A_5578561 | NC_021167.1    | Ca_Kabuli_Chr08 | 5578561                 | CC                                     | TT                 | TT               | INTERGENIC                    |                    |                               |
| SNP_59016_A_5578988 | NC_021167.1    | Ca_Kabuli_Chr08 | 5578988                 | CC                                     | TT                 | TT               | INTERGENIC                    |                    |                               |
| SNP_59017_A_5616697 | NC_021167.1    | Ca_Kabuli_Chr08 | 5616697                 | CC                                     | TT                 | TT               | INTERGENIC                    |                    |                               |
| SNP_59019_A_5688753 | NC_021167.1    | Ca_Kabuli_Chr08 | 5688753                 | AA                                     | CC                 | CC               | URR                           | 101498231          | histone H1                    |
| SNP_59020_A_5703841 | NC_021167.1    | Ca_Kabuli_Chr08 | 5703841                 | TT                                     | CC                 | CC               | URR                           | 101499226          | 60S ribosomal protein L8-3    |
| SNP_59021_A_5709090 | NC_021167.1    | Ca_Kabuli_Chr08 | 5709090                 | TT                                     | CC                 | CC               | INTRON                        | 101499544          | filament-like plant protein 5 |
| SNP_59022_A_5718927 | NC_021167.1    | Ca_Kabuli_Chr08 | 5718927                 | AA                                     | CC                 | CC               | DRR                           | 101499842          | auxin-induced protein 15A     |
| SNP_59023_A_5718928 | NC_021167.1    | Ca_Kabuli_Chr08 | 5718928                 | TT                                     | CC                 | CC               | DRR                           | 101499842          | auxin-induced protein 15A     |
| SNP_59024_A_5719139 | NC_021167.1    | Ca_Kabuli_Chr08 | 5719139                 | CC                                     | TT                 | TT               | NON_SYNONYMOUS_CODING         | 101499842          | auxin-induced protein 15A     |
| SNP_59025_A_5719176 | NC_021167.1    | Ca_Kabuli_Chr08 | 5719176                 | GG                                     | AA                 | AA               | SYNONYMOUS_CODING             | 101499842          | auxin-induced protein 15A     |
| SNP_59026_A_5719181 | NC_021167.1    | Ca_Kabuli_Chr08 | 5719181                 | TT                                     | GG                 | GG               | NON_SYNONYMOUS_CODING         | 101499842          | auxin-induced protein 15A     |
| SNP_59027_A_5719191 | NC_021167.1    | Ca_Kabuli_Chr08 | 5719191                 | CC                                     | TT                 | TT               | SYNONYMOUS_CODING             | 101499842          | auxin-induced protein 15A     |
| SNP_59028_A_5719194 | NC_021167.1    | Ca_Kabuli_Chr08 | 5719194                 | TT                                     | GG                 | GG               | SYNONYMOUS_CODING             | 101499842          | auxin-induced protein 15A     |
| SNP_59029_A_5719252 | NC_021167.1    | Ca_Kabuli_Chr08 | 5719252                 | GG                                     | AA                 | AA               | URR                           | 101499842          | auxin-induced protein 15A     |
| SNP_59030_A_5719296 | NC_021167.1    | Ca_Kabuli_Chr08 | 5719296                 | GG                                     | TT                 | TT               | URR                           | 101499842          | auxin-induced protein 15A     |
| SNP_59031_A_5719338 | NC_021167.1    | Ca_Kabuli_Chr08 | 5719338                 | AA                                     | GG                 | GG               | URR                           | 101499842          | auxin-induced protein 15A     |
| SNP_59032_A_5719380 | NC_021167.1    | Ca_Kabuli_Chr08 | 5719380                 | TT                                     | CC                 | CC               | URR                           | 101499842          | auxin-induced protein 15A     |
| SNP_59033_A_5719399 | NC_021167.1    | Ca_Kabuli_Chr08 | 5719399                 | AA                                     | GG                 | GG               | URR                           | 101499842          | auxin-induced protein 15A     |
| SNP_59034_A_5719434 | NC_021167.1    | Ca_Kabuli_Chr08 | 5719434                 | CC                                     | TT                 | TT               | URR                           | 101499842          | auxin-induced protein 15A     |
| SNP_59035_A_5719461 | NC_021167.1    | Ca_Kabuli_Chr08 | 5719461                 | TT                                     | GG                 | GG               | URR                           | 101499842          | auxin-induced protein 15A     |

| SNPs IDs            | Chromosome IDs | Chromosomes     | Physical positions (bp) | CDC Frontier genome (Reference genome) | (Pusa 1103 & HPNB) | (ILWC 46 & LPNB) | Sequence Components of genome | Gene accession IDs | Putative functions                                     |
|---------------------|----------------|-----------------|-------------------------|----------------------------------------|--------------------|------------------|-------------------------------|--------------------|--------------------------------------------------------|
| SNP_59036_A_5719697 | NC_021167.1    | Ca_Kabuli_Chr08 | 5719697                 | GG                                     | AA                 | AA               | URR                           | 101499842          | auxin-induced protein 15A                              |
| SNP_59037_A_5719702 | NC_021167.1    | Ca_Kabuli_Chr08 | 5719702                 | CC                                     | TT                 | TT               | URR                           | 101499842          | auxin-induced protein 15A                              |
| SNP_59038_A_5719724 | NC_021167.1    | Ca_Kabuli_Chr08 | 5719724                 | CC                                     | TT                 | TT               | URR                           | 101499842          | auxin-induced protein 15A                              |
| SNP_59039_A_5719767 | NC_021167.1    | Ca_Kabuli_Chr08 | 5719767                 | AA                                     | CC                 | CC               | URR                           | 101499842          | auxin-induced protein 15A                              |
| SNP_59040_A_5719777 | NC_021167.1    | Ca_Kabuli_Chr08 | 5719777                 | AA                                     | TT                 | TT               | URR                           | 101499842          | auxin-induced protein 15A                              |
| SNP_59041_A_5719783 | NC_021167.1    | Ca_Kabuli_Chr08 | 5719783                 | TT                                     | CC                 | CC               | URR                           | 101499842          | auxin-induced protein 15A                              |
| SNP_59042_A_5719784 | NC_021167.1    | Ca_Kabuli_Chr08 | 5719784                 | AA                                     | TT                 | TT               | URR                           | 101499842          | auxin-induced protein 15A                              |
| SNP_59043_A_5719785 | NC_021167.1    | Ca_Kabuli_Chr08 | 5719785                 | AA                                     | GG                 | GG               | URR                           | 101499842          | auxin-induced protein 15A                              |
| SNP_59044_A_5720033 | NC_021167.1    | Ca_Kabuli_Chr08 | 5720033                 | CC                                     | TT                 | TT               | URR                           | 101499842          | auxin-induced protein 15A                              |
| SNP_59045_A_5720037 | NC_021167.1    | Ca_Kabuli_Chr08 | 5720037                 | CC                                     | TT                 | TT               | URR                           | 101499842          | auxin-induced protein 15A                              |
| SNP_59046_A_5720092 | NC_021167.1    | Ca_Kabuli_Chr08 | 5720092                 | AA                                     | GG                 | GG               | URR                           | 101499842          | auxin-induced protein 15A                              |
| SNP_59047_A_5720118 | NC_021167.1    | Ca_Kabuli_Chr08 | 5720118                 | TT                                     | AA                 | AA               | URR                           | 101499842          | auxin-induced protein 15A                              |
| SNP_59048_A_5720123 | NC_021167.1    | Ca_Kabuli_Chr08 | 5720123                 | CC                                     | TT                 | TT               | URR                           | 101499842          | auxin-induced protein 15A                              |
| SNP_59049_A_5720149 | NC_021167.1    | Ca_Kabuli_Chr08 | 5720149                 | CC                                     | TT                 | TT               | URR                           | 101499842          | auxin-induced protein 15A                              |
| SNP_59050_A_5724683 | NC_021167.1    | Ca_Kabuli_Chr08 | 5724683                 | TT                                     | AA                 | AA               | DRR                           | 101508826          | uncharacterized LOC101508826                           |
| SNP_59051_A_5733076 | NC_021167.1    | Ca_Kabuli_Chr08 | 5733076                 | CC                                     | TT                 | TT               | INTERGENIC                    |                    |                                                        |
| SNP_59052_A_5790937 | NC_021167.1    | Ca_Kabuli_Chr08 | 5790937                 | CC                                     | TT                 | TT               | INTERGENIC                    |                    |                                                        |
| SNP_59054_A_5878933 | NC_021167.1    | Ca_Kabuli_Chr08 | 5878933                 | GG                                     | AA                 | AA               | INTERGENIC                    |                    |                                                        |
| SNP_59055_A_5879022 | NC_021167.1    | Ca_Kabuli_Chr08 | 5879022                 | GG                                     | AA                 | AA               | INTERGENIC                    |                    |                                                        |
| SNP_59056_A_5879126 | NC_021167.1    | Ca_Kabuli_Chr08 | 5879126                 | AA                                     | GG                 | GG               | INTERGENIC                    |                    |                                                        |
| SNP_59057_A_5925420 | NC_021167.1    | Ca_Kabuli_Chr08 | 5925420                 | CC                                     | TT                 | TT               | DRR                           | 101506262          | 26S proteasome non-ATPase regulatory subunit 4 homolog |
| SNP_59058_A_5944256 | NC_021167.1    | Ca_Kabuli_Chr08 | 5944256                 | CC                                     | GG                 | GG               | INTERGENIC                    |                    |                                                        |

| SNPs IDs            | Chromosome IDs | Chromosomes     | Physical positions (bp) | CDC Frontier (Reference genome) | (Pusa 1103 & HPNB) | (ILWC 46 & LPNB) | Sequence Components of genome | Gene accession IDs | Putative functions                         |
|---------------------|----------------|-----------------|-------------------------|---------------------------------|--------------------|------------------|-------------------------------|--------------------|--------------------------------------------|
| SNP_59059_A_5963342 | NC_021167.1    | Ca_Kabuli_Chr08 | 5963342                 | AA                              | GG                 | GG               | DRR                           | 101508187          | uncharacterized protein At2g29880-like     |
| SNP_59060_A_5968735 | NC_021167.1    | Ca_Kabuli_Chr08 | 5968735                 | TT                              | CC                 | CC               | INTRON                        | 101508512          | rac-like GTP-binding protein RHO1          |
| SNP_59061_A_6014162 | NC_021167.1    | Ca_Kabuli_Chr08 | 6014162                 | TT                              | CC                 | CC               | INTERGENIC                    |                    |                                            |
| SNP_59062_A_6017395 | NC_021167.1    | Ca_Kabuli_Chr08 | 6017395                 | GG                              | AA                 | AA               | INTERGENIC                    |                    |                                            |
| SNP_59064_A_6056125 | NC_021167.1    | Ca_Kabuli_Chr08 | 6056125                 | CC                              | TT                 | TT               | URR                           | 101410591          | transfer RNA glutamic acid (anticodon UUC) |
| SNP_59065_A_6056214 | NC_021167.1    | Ca_Kabuli_Chr08 | 6056214                 | TT                              | GG                 | GG               | URR                           | 101410591          | transfer RNA glutamic acid (anticodon UUC) |
| SNP_59066_A_6056427 | NC_021167.1    | Ca_Kabuli_Chr08 | 6056427                 | TT                              | GG                 | GG               | URR                           | 101410591          | transfer RNA glutamic acid (anticodon UUC) |
| SNP_59067_A_6056450 | NC_021167.1    | Ca_Kabuli_Chr08 | 6056450                 | AA                              | GG                 | GG               | URR                           | 101410591          | transfer RNA glutamic acid (anticodon UUC) |
| SNP_59068_A_6056487 | NC_021167.1    | Ca_Kabuli_Chr08 | 6056487                 | TT                              | CC                 | CC               | URR                           | 101410591          | transfer RNA glutamic acid (anticodon UUC) |
| SNP_59069_A_6056496 | NC_021167.1    | Ca_Kabuli_Chr08 | 6056496                 | TT                              | CC                 | CC               | URR                           | 101410591          | transfer RNA glutamic acid (anticodon UUC) |
| SNP_59071_A_6056626 | NC_021167.1    | Ca_Kabuli_Chr08 | 6056626                 | AA                              | GG                 | GG               | URR                           | 101410591          | transfer RNA glutamic acid (anticodon UUC) |
| SNP_59072_A_6066992 | NC_021167.1    | Ca_Kabuli_Chr08 | 6066992                 | GG                              | TT                 | TT               | INTERGENIC                    |                    |                                            |
| SNP_59073_A_6082364 | NC_021167.1    | Ca_Kabuli_Chr08 | 6082364                 | GG                              | AA                 | AA               | URR                           | 101513337          | F-box protein At3g07870-like               |
| SNP_59074_A_6082464 | NC_021167.1    | Ca_Kabuli_Chr08 | 6082464                 | CC                              | AA                 | AA               | URR                           | 101513337          | F-box protein At3g07870-like               |
| SNP_59075_A_6086814 | NC_021167.1    | Ca_Kabuli_Chr08 | 6086814                 | GG                              | AA                 | AA               | INTERGENIC                    |                    |                                            |
| SNP_59076_A_6086921 | NC_021167.1    | Ca_Kabuli_Chr08 | 6086921                 | AA                              | GG                 | GG               | INTERGENIC                    |                    |                                            |
| SNP_59077_A_6087577 | NC_021167.1    | Ca_Kabuli_Chr08 | 6087577                 | AA                              | TT                 | TT               | INTERGENIC                    |                    |                                            |
| SNP_59078_A_6087639 | NC_021167.1    | Ca_Kabuli_Chr08 | 6087639                 | TT                              | AA                 | AA               | INTERGENIC                    |                    |                                            |
| SNP_59079_A_6087664 | NC_021167.1    | Ca_Kabuli_Chr08 | 6087664                 | AA                              | GG                 | GG               | INTERGENIC                    |                    |                                            |
| SNP_59080_A_6087967 | NC_021167.1    | Ca_Kabuli_Chr08 | 6087967                 | TT                              | GG                 | GG               | INTERGENIC                    |                    |                                            |
| SNP_59081_A_6094768 | NC_021167.1    | Ca_Kabuli_Chr08 | 6094768                 | AA                              | GG                 | GG               | INTERGENIC                    |                    |                                            |
| SNP_59082_A_6098399 | NC_021167.1    | Ca_Kabuli_Chr08 | 6098399                 | AA                              | CC                 | CC               | INTERGENIC                    |                    |                                            |



| SNPs IDs            | Chromosome IDs | Chromosomes     | Physical positions (bp) | CDC Frontier (Reference genome) | (Pusa 1103 & HPNB) | (ILWC 46 & LPNB) | Sequence Components of genome | Gene accession IDs | Putative functions                                       |
|---------------------|----------------|-----------------|-------------------------|---------------------------------|--------------------|------------------|-------------------------------|--------------------|----------------------------------------------------------|
| SNP_59083_A_6098400 | NC_021167.1    | Ca_Kabuli_Chr08 | 6098400                 | AA                              | CC                 | CC               | INTERGENIC                    |                    |                                                          |
| SNP_59085_A_6109972 | NC_021167.1    | Ca_Kabuli_Chr08 | 6109972                 | TT                              | CC                 | CC               | URR                           | 101513991          | la-related protein 1B-like                               |
| SNP_59086_A_6128055 | NC_021167.1    | Ca_Kabuli_Chr08 | 6128055                 | GG                              | AA                 | AA               | INTERGENIC                    |                    |                                                          |
| SNP_59087_A_6128984 | NC_021167.1    | Ca_Kabuli_Chr08 | 6128984                 | AA                              | GG                 | GG               | INTERGENIC                    |                    |                                                          |
| SNP_59088_A_6129406 | NC_021167.1    | Ca_Kabuli_Chr08 | 6129406                 | AA                              | GG                 | GG               | INTERGENIC                    |                    |                                                          |
| SNP_59089_A_6132282 | NC_021167.1    | Ca_Kabuli_Chr08 | 6132282                 | CC                              | TT                 | TT               | INTERGENIC                    |                    |                                                          |
| SNP_59090_A_6248937 | NC_021167.1    | Ca_Kabuli_Chr08 | 6248937                 | CC                              | AA                 | AA               | URR                           | 101493154          | uncharacterized LOC101493154                             |
| SNP_59092_A_6301111 | NC_021167.1    | Ca_Kabuli_Chr08 | 6301111                 | GG                              | AA                 | AA               | INTERGENIC                    |                    |                                                          |
| SNP_59093_A_6301121 | NC_021167.1    | Ca_Kabuli_Chr08 | 6301121                 | AA                              | GG                 | GG               | INTERGENIC                    |                    |                                                          |
| SNP_59094_A_6301413 | NC_021167.1    | Ca_Kabuli_Chr08 | 6301413                 | GG                              | TT                 | TT               | INTERGENIC                    |                    |                                                          |
| SNP_59095_A_6307062 | NC_021167.1    | Ca_Kabuli_Chr08 | 6307062                 | GG                              | AA                 | AA               | INTERGENIC                    |                    |                                                          |
| SNP_59097_A_6307197 | NC_021167.1    | Ca_Kabuli_Chr08 | 6307197                 | CC                              | TT                 | TT               | INTERGENIC                    |                    |                                                          |
| SNP_59098_A_6307283 | NC_021167.1    | Ca_Kabuli_Chr08 | 6307283                 | TT                              | CC                 | CC               | INTERGENIC                    |                    |                                                          |
| SNP_59099_A_6307426 | NC_021167.1    | Ca_Kabuli_Chr08 | 6307426                 | TT                              | CC                 | CC               | INTERGENIC                    |                    |                                                          |
| SNP_59100_A_6307460 | NC_021167.1    | Ca_Kabuli_Chr08 | 6307460                 | GG                              | AA                 | AA               | INTERGENIC                    |                    |                                                          |
| SNP_59101_A_6307971 | NC_021167.1    | Ca_Kabuli_Chr08 | 6307971                 | TT                              | CC                 | CC               | DRR                           | 101515397          | ganglioside-induced differentiation-associated protein 2 |
| SNP_59102_A_6318531 | NC_021167.1    | Ca_Kabuli_Chr08 | 6318531                 | CC                              | TT                 | TT               | INTERGENIC                    |                    |                                                          |
| SNP_59103_A_6330284 | NC_021167.1    | Ca_Kabuli_Chr08 | 6330284                 | GG                              | AA                 | AA               | INTERGENIC                    |                    |                                                          |
| SNP_59104_A_6330288 | NC_021167.1    | Ca_Kabuli_Chr08 | 6330288                 | CC                              | TT                 | TT               | INTERGENIC                    |                    |                                                          |
| SNP_59105_A_6364306 | NC_021167.1    | Ca_Kabuli_Chr08 | 6364306                 | CC                              | TT                 | TT               | URR                           | 101490015          | lysine histidine transporter-like 8                      |
| SNP_59106_A_6383028 | NC_021167.1    | Ca_Kabuli_Chr08 | 6383028                 | AA                              | GG                 | GG               | INTERGENIC                    |                    |                                                          |
| SNP_59107_A_6397407 | NC_021167.1    | Ca_Kabuli_Chr08 | 6397407                 | GG                              | AA                 | AA               | URR                           | 101493801          | putative DNA (cytosine-5)-methyltransferase CMT1         |

| SNPs IDs            | Chromosome IDs | Chromosomes     | Physical positions (bp) | CDC Frontier genome (Reference genome) | (Pusa 1103 & HPNB) | (ILWC 46 & LPNB) | Sequence Components of genome | Gene accession IDs | Putative functions                             |
|---------------------|----------------|-----------------|-------------------------|----------------------------------------|--------------------|------------------|-------------------------------|--------------------|------------------------------------------------|
| SNP_59108_A_6408395 | NC_021167.1    | Ca_Kabuli_Chr08 | 6408395                 | TT                                     | AA                 | AA               | INTRON                        | 101490678          | probable acyl-activating enzyme 1, peroxisomal |
| SNP_59109_A_6422465 | NC_021167.1    | Ca_Kabuli_Chr08 | 6422465                 | AA                                     | GG                 | GG               | INTERGENIC                    |                    |                                                |
| SNP_59111_A_6492087 | NC_021167.1    | Ca_Kabuli_Chr08 | 6492087                 | TT                                     | GG                 | GG               | NON_SYNONYMOUS_CODING         | 101493063          | G2/mitotic-specific cyclin-1-like              |
| SNP_59112_A_6492381 | NC_021167.1    | Ca_Kabuli_Chr08 | 6492381                 | CC                                     | TT                 | TT               | URR                           | 101493063          | G2/mitotic-specific cyclin-1-like              |
| SNP_59114_A_6492558 | NC_021167.1    | Ca_Kabuli_Chr08 | 6492558                 | TT                                     | AA                 | AA               | URR                           | 101493063          | G2/mitotic-specific cyclin-1-like              |
| SNP_59116_A_6492640 | NC_021167.1    | Ca_Kabuli_Chr08 | 6492640                 | CC                                     | TT                 | TT               | URR                           | 101493063          | G2/mitotic-specific cyclin-1-like              |
| SNP_59117_A_6492679 | NC_021167.1    | Ca_Kabuli_Chr08 | 6492679                 | CC                                     | TT                 | TT               | URR                           | 101493063          | G2/mitotic-specific cyclin-1-like              |
| SNP_59119_A_6492771 | NC_021167.1    | Ca_Kabuli_Chr08 | 6492771                 | AA                                     | GG                 | GG               | URR                           | 101493063          | G2/mitotic-specific cyclin-1-like              |
| SNP_59120_A_6492900 | NC_021167.1    | Ca_Kabuli_Chr08 | 6492900                 | GG                                     | AA                 | AA               | URR                           | 101493063          | G2/mitotic-specific cyclin-1-like              |
| SNP_59121_A_6492902 | NC_021167.1    | Ca_Kabuli_Chr08 | 6492902                 | AA                                     | TT                 | TT               | URR                           | 101493063          | G2/mitotic-specific cyclin-1-like              |
| SNP_59122_A_6492934 | NC_021167.1    | Ca_Kabuli_Chr08 | 6492934                 | AA                                     | CC                 | CC               | URR                           | 101493063          | G2/mitotic-specific cyclin-1-like              |
| SNP_59123_A_6493025 | NC_021167.1    | Ca_Kabuli_Chr08 | 6493025                 | AA                                     | GG                 | GG               | URR                           | 101493063          | G2/mitotic-specific cyclin-1-like              |
| SNP_59124_A_6493146 | NC_021167.1    | Ca_Kabuli_Chr08 | 6493146                 | TT                                     | AA                 | AA               | URR                           | 101493063          | G2/mitotic-specific cyclin-1-like              |
| SNP_59125_A_6493207 | NC_021167.1    | Ca_Kabuli_Chr08 | 6493207                 | CC                                     | TT                 | TT               | URR                           | 101493063          | G2/mitotic-specific cyclin-1-like              |
| SNP_59126_A_6493236 | NC_021167.1    | Ca_Kabuli_Chr08 | 6493236                 | CC                                     | AA                 | AA               | URR                           | 101493063          | G2/mitotic-specific cyclin-1-like              |
| SNP_59127_A_6493272 | NC_021167.1    | Ca_Kabuli_Chr08 | 6493272                 | CC                                     | TT                 | TT               | URR                           | 101493063          | G2/mitotic-specific cyclin-1-like              |
| SNP_59128_A_6493303 | NC_021167.1    | Ca_Kabuli_Chr08 | 6493303                 | AA                                     | GG                 | GG               | URR                           | 101493063          | G2/mitotic-specific cyclin-1-like              |
| SNP_59129_A_6493307 | NC_021167.1    | Ca_Kabuli_Chr08 | 6493307                 | AA                                     | TT                 | TT               | URR                           | 101493063          | G2/mitotic-specific cyclin-1-like              |
| SNP_59131_A_6493408 | NC_021167.1    | Ca_Kabuli_Chr08 | 6493408                 | GG                                     | CC                 | CC               | URR                           | 101493063          | G2/mitotic-specific cyclin-1-like              |
| SNP_59132_A_6493411 | NC_021167.1    | Ca_Kabuli_Chr08 | 6493411                 | GG                                     | AA                 | AA               | URR                           | 101493063          | G2/mitotic-specific cyclin-1-like              |
| SNP_59133_A_6493412 | NC_021167.1    | Ca_Kabuli_Chr08 | 6493412                 | AA                                     | CC                 | CC               | URR                           | 101493063          | G2/mitotic-specific cyclin-1-like              |
| SNP_59134_A_6493415 | NC_021167.1    | Ca_Kabuli_Chr08 | 6493415                 | GG                                     | AA                 | AA               | URR                           | 101493063          | G2/mitotic-specific cyclin-1-like              |

| SNPs IDs            | Chromosome IDs | Chromosomes     | Physical positions (bp) | CDC Frontier (Reference genome) | (Pusa 1103 & HPNB) | (ILWC 46 & LPNB) | Sequence genome       | Components of | Gene accession IDs | Putative functions                       |
|---------------------|----------------|-----------------|-------------------------|---------------------------------|--------------------|------------------|-----------------------|---------------|--------------------|------------------------------------------|
| SNP_59135_A_6493442 | NC_021167.1    | Ca_Kabuli_Chr08 | 6493442                 | CC                              | TT                 | TT               | URR                   |               | 101493063          | G2/mitotic-specific cyclin-1-like        |
| SNP_59136_A_6493444 | NC_021167.1    | Ca_Kabuli_Chr08 | 6493444                 | AA                              | GG                 | GG               | URR                   |               | 101493063          | G2/mitotic-specific cyclin-1-like        |
| SNP_59137_A_6493461 | NC_021167.1    | Ca_Kabuli_Chr08 | 6493461                 | CC                              | TT                 | TT               | URR                   |               | 101493063          | G2/mitotic-specific cyclin-1-like        |
| SNP_59138_A_6527640 | NC_021167.1    | Ca_Kabuli_Chr08 | 6527640                 | CC                              | TT                 | TT               | URR                   |               | 101494971          | 60S ribosomal protein L10-like           |
| SNP_59139_A_6530834 | NC_021167.1    | Ca_Kabuli_Chr08 | 6530834                 | CC                              | TT                 | TT               | INTERGENIC            |               |                    |                                          |
| SNP_59140_A_6532252 | NC_021167.1    | Ca_Kabuli_Chr08 | 6532252                 | TT                              | AA                 | AA               | INTERGENIC            |               |                    |                                          |
| SNP_59141_A_6621402 | NC_021167.1    | Ca_Kabuli_Chr08 | 6621402                 | GG                              | AA                 | AA               | INTERGENIC            |               |                    |                                          |
| SNP_59142_A_6636831 | NC_021167.1    | Ca_Kabuli_Chr08 | 6636831                 | GG                              | AA                 | AA               | INTERGENIC            |               |                    |                                          |
| SNP_59143_A_6665269 | NC_021167.1    | Ca_Kabuli_Chr08 | 6665269                 | CC                              | AA                 | AA               | DRR                   |               | 101500178          | DNA mismatch repair protein MLH3         |
| SNP_59144_A_6850176 | NC_021167.1    | Ca_Kabuli_Chr08 | 6850176                 | TT                              | CC                 | CC               | INTRON                |               | 101495300          | putative protease Do-like 14             |
| SNP_59145_A_6850188 | NC_021167.1    | Ca_Kabuli_Chr08 | 6850188                 | TT                              | CC                 | CC               | INTRON                |               | 101495300          | putative protease Do-like 14             |
| SNP_59147_A_6907817 | NC_021167.1    | Ca_Kabuli_Chr08 | 6907817                 | AA                              | TT                 | TT               | INTERGENIC            |               |                    |                                          |
| SNP_59148_A_6918847 | NC_021167.1    | Ca_Kabuli_Chr08 | 6918847                 | AA                              | GG                 | GG               | INTERGENIC            |               |                    |                                          |
| SNP_59149_A_6996577 | NC_021167.1    | Ca_Kabuli_Chr08 | 6996577                 | TT                              | GG                 | GG               | DRR                   |               | 101495624          | Unknown function                         |
| SNP_59150_A_7022864 | NC_021167.1    | Ca_Kabuli_Chr08 | 7022864                 | TT                              | AA                 | AA               | INTERGENIC            |               |                    |                                          |
| SNP_59151_A_7030370 | NC_021167.1    | Ca_Kabuli_Chr08 | 7030370                 | TT                              | AA                 | AA               | INTERGENIC            |               |                    |                                          |
| SNP_59153_A_7133603 | NC_021167.1    | Ca_Kabuli_Chr08 | 7133603                 | GG                              | AA                 | AA               | INTRON                |               | 101513757          | chitinase domain-containing protein 1    |
| SNP_59154_A_7133618 | NC_021167.1    | Ca_Kabuli_Chr08 | 7133618                 | GG                              | CC                 | CC               | NON_SYNONYMOUS_CODING |               | 101513757          | chitinase domain-containing protein 1    |
| SNP_59155_A_7133653 | NC_021167.1    | Ca_Kabuli_Chr08 | 7133653                 | TT                              | AA                 | AA               | SYNONYMOUS_CODING     |               | 101513757          | chitinase domain-containing protein 1    |
| SNP_59156_A_7155432 | NC_021167.1    | Ca_Kabuli_Chr08 | 7155432                 | TT                              | GG                 | GG               | DRR                   |               | 101496930          | protein FAR-RED IMPAIRED RESPONSE 1-like |
| SNP_59157_A_7155553 | NC_021167.1    | Ca_Kabuli_Chr08 | 7155553                 | CC                              | TT                 | TT               | URR                   |               | 101515503          | zinc finger MYM-type protein 1-like      |
| SNP_59158_A_7155831 | NC_021167.1    | Ca_Kabuli_Chr08 | 7155831                 | TT                              | CC                 | CC               | URR                   |               | 101515503          | zinc finger MYM-type protein 1-like      |

| SNPs IDs            | Chromosome IDs | Chromosomes     | Physical positions (bp) | CDC Frontier (Reference genome) | (Pusa 1103 & HPNB) | (ILWC 46 & LPNB) | Sequence Components of genome | Gene accession IDs | Putative functions                                                   |
|---------------------|----------------|-----------------|-------------------------|---------------------------------|--------------------|------------------|-------------------------------|--------------------|----------------------------------------------------------------------|
| SNP_59159_A_7160934 | NC_021167.1    | Ca_Kabuli_Chr08 | 7160934                 | AA                              | GG                 | GG               | INTERGENIC                    |                    |                                                                      |
| SNP_59161_A_7221696 | NC_021167.1    | Ca_Kabuli_Chr08 | 7221696                 | TT                              | CC                 | CC               | INTRON                        | 101490679          | abscisic acid 8'-hydroxylase 1-like                                  |
| SNP_59162_A_7221698 | NC_021167.1    | Ca_Kabuli_Chr08 | 7221698                 | AA                              | CC                 | CC               | INTRON                        | 101490679          | abscisic acid 8'-hydroxylase 1-like                                  |
| SNP_59165_A_7350303 | NC_021167.1    | Ca_Kabuli_Chr08 | 7350303                 | TT                              | GG                 | GG               | URR                           | 101498568          | probable LRR receptor-like serine/threonine-protein kinase At3g47570 |
| SNP_59167_A_7368904 | NC_021167.1    | Ca_Kabuli_Chr08 | 7368904                 | TT                              | CC                 | CC               | DRR                           | 101495623          | rop guanine nucleotide exchange factor 14                            |
| SNP_59168_A_7473156 | NC_021167.1    | Ca_Kabuli_Chr08 | 7473156                 | AA                              | CC                 | CC               | INTERGENIC                    |                    |                                                                      |
| SNP_59169_A_7473158 | NC_021167.1    | Ca_Kabuli_Chr08 | 7473158                 | AA                              | CC                 | CC               | INTERGENIC                    |                    |                                                                      |
| SNP_59170_A_7524403 | NC_021167.1    | Ca_Kabuli_Chr08 | 7524403                 | AA                              | GG                 | GG               | DRR                           | 101502517          | ankyrin repeat and protein kinase domain-containing protein 1 like   |
| SNP_59171_A_7524404 | NC_021167.1    | Ca_Kabuli_Chr08 | 7524404                 | AA                              | CC                 | CC               | DRR                           | 101502517          | ankyrin repeat and protein kinase domain-containing protein 1 like   |
| SNP_59172_A_7563385 | NC_021167.1    | Ca_Kabuli_Chr08 | 7563385                 | GG                              | TT                 | TT               | INTERGENIC                    |                    |                                                                      |
| SNP_59174_A_7563641 | NC_021167.1    | Ca_Kabuli_Chr08 | 7563641                 | CC                              | GG                 | GG               | INTERGENIC                    |                    |                                                                      |
| SNP_59175_A_7563696 | NC_021167.1    | Ca_Kabuli_Chr08 | 7563696                 | AA                              | GG                 | GG               | INTERGENIC                    |                    |                                                                      |
| SNP_59176_A_7563737 | NC_021167.1    | Ca_Kabuli_Chr08 | 7563737                 | AA                              | GG                 | GG               | INTERGENIC                    |                    |                                                                      |
| SNP_59177_A_7651509 | NC_021167.1    | Ca_Kabuli_Chr08 | 7651509                 | TT                              | AA                 | AA               | INTERGENIC                    |                    |                                                                      |
| SNP_59178_A_7651651 | NC_021167.1    | Ca_Kabuli_Chr08 | 7651651                 | AA                              | TT                 | TT               | INTERGENIC                    |                    |                                                                      |
| SNP_59180_A_7749874 | NC_021167.1    | Ca_Kabuli_Chr08 | 7749874                 | TT                              | CC                 | CC               | INTERGENIC                    |                    |                                                                      |
| SNP_59181_A_7775331 | NC_021167.1    | Ca_Kabuli_Chr08 | 7775331                 | AA                              | TT                 | TT               | INTERGENIC                    |                    |                                                                      |
| SNP_59182_A_7775357 | NC_021167.1    | Ca_Kabuli_Chr08 | 7775357                 | GG                              | CC                 | CC               | INTERGENIC                    |                    |                                                                      |
| SNP_59183_A_7775599 | NC_021167.1    | Ca_Kabuli_Chr08 | 7775599                 | TT                              | CC                 | CC               | INTERGENIC                    |                    |                                                                      |
| SNP_59184_A_7775610 | NC_021167.1    | Ca_Kabuli_Chr08 | 7775610                 | TT                              | CC                 | CC               | INTERGENIC                    |                    |                                                                      |
| SNP_59185_A_7775641 | NC_021167.1    | Ca_Kabuli_Chr08 | 7775641                 | TT                              | CC                 | CC               | INTERGENIC                    |                    |                                                                      |
| SNP_59186_A_7775663 | NC_021167.1    | Ca_Kabuli_Chr08 | 7775663                 | GG                              | AA                 | AA               | INTERGENIC                    |                    |                                                                      |

| SNPs IDs            | Chromosome IDs | Chromosomes     | Physical positions (bp) | CDC Frontier (Reference genome) | (Pusa 1103 & HPNB) | (ILWC 46 & LPNB) | Sequence genome | Components of | Gene accession IDs | Putative functions |
|---------------------|----------------|-----------------|-------------------------|---------------------------------|--------------------|------------------|-----------------|---------------|--------------------|--------------------|
| SNP_59187_A_7775667 | NC_021167.1    | Ca_Kabuli_Chr08 | 7775667                 | CC                              | TT                 | TT               | INTERGENIC      |               |                    |                    |
| SNP_59188_A_7775693 | NC_021167.1    | Ca_Kabuli_Chr08 | 7775693                 | CC                              | TT                 | TT               | INTERGENIC      |               |                    |                    |
| SNP_59189_A_7775708 | NC_021167.1    | Ca_Kabuli_Chr08 | 7775708                 | CC                              | TT                 | TT               | INTERGENIC      |               |                    |                    |
| SNP_59190_A_7775720 | NC_021167.1    | Ca_Kabuli_Chr08 | 7775720                 | GG                              | AA                 | AA               | INTERGENIC      |               |                    |                    |
| SNP_59191_A_7775822 | NC_021167.1    | Ca_Kabuli_Chr08 | 7775822                 | GG                              | AA                 | AA               | INTERGENIC      |               |                    |                    |
| SNP_59192_A_7775860 | NC_021167.1    | Ca_Kabuli_Chr08 | 7775860                 | TT                              | AA                 | AA               | INTERGENIC      |               |                    |                    |
| SNP_59193_A_7775861 | NC_021167.1    | Ca_Kabuli_Chr08 | 7775861                 | GG                              | CC                 | CC               | INTERGENIC      |               |                    |                    |
| SNP_59194_A_7775908 | NC_021167.1    | Ca_Kabuli_Chr08 | 7775908                 | TT                              | GG                 | GG               | INTERGENIC      |               |                    |                    |
| SNP_59195_A_7776014 | NC_021167.1    | Ca_Kabuli_Chr08 | 7776014                 | GG                              | TT                 | TT               | INTERGENIC      |               |                    |                    |
| SNP_59196_A_7776018 | NC_021167.1    | Ca_Kabuli_Chr08 | 7776018                 | CC                              | TT                 | TT               | INTERGENIC      |               |                    |                    |
| SNP_59197_A_7776041 | NC_021167.1    | Ca_Kabuli_Chr08 | 7776041                 | AA                              | CC                 | CC               | INTERGENIC      |               |                    |                    |
| SNP_59198_A_7776042 | NC_021167.1    | Ca_Kabuli_Chr08 | 7776042                 | CC                              | TT                 | TT               | INTERGENIC      |               |                    |                    |
| SNP_59199_A_7776130 | NC_021167.1    | Ca_Kabuli_Chr08 | 7776130                 | TT                              | AA                 | AA               | INTERGENIC      |               |                    |                    |
| SNP_59200_A_7776186 | NC_021167.1    | Ca_Kabuli_Chr08 | 7776186                 | GG                              | AA                 | AA               | INTERGENIC      |               |                    |                    |
| SNP_59201_A_7777195 | NC_021167.1    | Ca_Kabuli_Chr08 | 7777195                 | TT                              | CC                 | CC               | INTERGENIC      |               |                    |                    |
| SNP_59202_A_7777312 | NC_021167.1    | Ca_Kabuli_Chr08 | 7777312                 | AA                              | CC                 | CC               | INTERGENIC      |               |                    |                    |
| SNP_59203_A_7777396 | NC_021167.1    | Ca_Kabuli_Chr08 | 7777396                 | AA                              | GG                 | GG               | INTERGENIC      |               |                    |                    |
| SNP_59204_A_7777469 | NC_021167.1    | Ca_Kabuli_Chr08 | 7777469                 | TT                              | GG                 | GG               | INTERGENIC      |               |                    |                    |
| SNP_59205_A_7777497 | NC_021167.1    | Ca_Kabuli_Chr08 | 7777497                 | AA                              | TT                 | TT               | INTERGENIC      |               |                    |                    |
| SNP_59206_A_7777547 | NC_021167.1    | Ca_Kabuli_Chr08 | 7777547                 | GG                              | TT                 | TT               | INTERGENIC      |               |                    |                    |
| SNP_59207_A_7777575 | NC_021167.1    | Ca_Kabuli_Chr08 | 7777575                 | GG                              | AA                 | AA               | INTERGENIC      |               |                    |                    |
| SNP_59208_A_7777641 | NC_021167.1    | Ca_Kabuli_Chr08 | 7777641                 | AA                              | CC                 | CC               | INTERGENIC      |               |                    |                    |

| SNPs IDs            | Chromosome IDs | Chromosomes     | Physical positions (bp) | CDC Frontier (Reference genome) | (Pusa 1103 & HPNB) | (ILWC 46 & LPNB) | Sequence Components of genome | Gene accession IDs | Putative functions           |
|---------------------|----------------|-----------------|-------------------------|---------------------------------|--------------------|------------------|-------------------------------|--------------------|------------------------------|
| SNP_59210_A_7777741 | NC_021167.1    | Ca_Kabuli_Chr08 | 7777741                 | GG                              | CC                 | CC               | INTERGENIC                    |                    |                              |
| SNP_59211_A_7777749 | NC_021167.1    | Ca_Kabuli_Chr08 | 7777749                 | GG                              | CC                 | CC               | INTERGENIC                    |                    |                              |
| SNP_59212_A_7777920 | NC_021167.1    | Ca_Kabuli_Chr08 | 7777920                 | CC                              | TT                 | TT               | INTERGENIC                    |                    |                              |
| SNP_59213_A_7777971 | NC_021167.1    | Ca_Kabuli_Chr08 | 7777971                 | GG                              | CC                 | CC               | INTERGENIC                    |                    |                              |
| SNP_59214_A_7777973 | NC_021167.1    | Ca_Kabuli_Chr08 | 7777973                 | TT                              | CC                 | CC               | INTERGENIC                    |                    |                              |
| SNP_59215_A_7778075 | NC_021167.1    | Ca_Kabuli_Chr08 | 7778075                 | CC                              | TT                 | TT               | INTERGENIC                    |                    |                              |
| SNP_59216_A_7778090 | NC_021167.1    | Ca_Kabuli_Chr08 | 7778090                 | CC                              | GG                 | GG               | INTERGENIC                    |                    |                              |
| SNP_59217_A_7778124 | NC_021167.1    | Ca_Kabuli_Chr08 | 7778124                 | AA                              | GG                 | GG               | INTERGENIC                    |                    |                              |
| SNP_59218_A_7802500 | NC_021167.1    | Ca_Kabuli_Chr08 | 7802500                 | TT                              | CC                 | CC               | URR                           | 101515300          | protein PAM68, chloroplastic |
| SNP_59219_A_7802649 | NC_021167.1    | Ca_Kabuli_Chr08 | 7802649                 | TT                              | GG                 | GG               | URR                           | 101515300          | protein PAM68, chloroplastic |
| SNP_59220_A_7802681 | NC_021167.1    | Ca_Kabuli_Chr08 | 7802681                 | TT                              | CC                 | CC               | URR                           | 101515300          | protein PAM68, chloroplastic |
| SNP_59221_A_7802902 | NC_021167.1    | Ca_Kabuli_Chr08 | 7802902                 | CC                              | TT                 | TT               | URR                           | 101515300          | protein PAM68, chloroplastic |
| SNP_59222_A_7802913 | NC_021167.1    | Ca_Kabuli_Chr08 | 7802913                 | AA                              | CC                 | CC               | URR                           | 101515300          | protein PAM68, chloroplastic |
| SNP_59223_A_7802951 | NC_021167.1    | Ca_Kabuli_Chr08 | 7802951                 | AA                              | GG                 | GG               | URR                           | 101515300          | protein PAM68, chloroplastic |
| SNP_59224_A_7802999 | NC_021167.1    | Ca_Kabuli_Chr08 | 7802999                 | TT                              | CC                 | CC               | URR                           | 101515300          | protein PAM68, chloroplastic |
| SNP_59225_A_7881254 | NC_021167.1    | Ca_Kabuli_Chr08 | 7881254                 | TT                              | CC                 | CC               | INTERGENIC                    |                    |                              |
| SNP_59226_A_7883652 | NC_021167.1    | Ca_Kabuli_Chr08 | 7883652                 | AA                              | TT                 | TT               | INTERGENIC                    |                    |                              |
| SNP_59227_A_7883656 | NC_021167.1    | Ca_Kabuli_Chr08 | 7883656                 | AA                              | TT                 | TT               | INTERGENIC                    |                    |                              |
| SNP_59228_A_7883661 | NC_021167.1    | Ca_Kabuli_Chr08 | 7883661                 | GG                              | AA                 | AA               | INTERGENIC                    |                    |                              |
| SNP_59229_A_7883664 | NC_021167.1    | Ca_Kabuli_Chr08 | 7883664                 | TT                              | AA                 | AA               | INTERGENIC                    |                    |                              |
| SNP_59230_A_7884027 | NC_021167.1    | Ca_Kabuli_Chr08 | 7884027                 | GG                              | AA                 | AA               | INTERGENIC                    |                    |                              |
| SNP_59231_A_7884445 | NC_021167.1    | Ca_Kabuli_Chr08 | 7884445                 | TT                              | GG                 | GG               | INTERGENIC                    |                    |                              |

| SNPs IDs            | Chromosome IDs | Chromosomes     | Physical positions (bp) | CDC Frontier genome (Reference genome) | (Pusa 1103 & HPNB) | (ILWC 46 & LPNB) | Sequence genome | Components of | Gene accession IDs | Putative functions |
|---------------------|----------------|-----------------|-------------------------|----------------------------------------|--------------------|------------------|-----------------|---------------|--------------------|--------------------|
| SNP_59232_A_7895893 | NC_021167.1    | Ca_Kabuli_Chr08 | 7895893                 | GG                                     | AA                 | AA               | INTERGENIC      |               |                    |                    |
| SNP_59233_A_7895991 | NC_021167.1    | Ca_Kabuli_Chr08 | 7895991                 | GG                                     | AA                 | AA               | INTERGENIC      |               |                    |                    |
| SNP_59234_A_7895999 | NC_021167.1    | Ca_Kabuli_Chr08 | 7895999                 | AA                                     | TT                 | TT               | INTERGENIC      |               |                    |                    |
| SNP_59235_A_7896042 | NC_021167.1    | Ca_Kabuli_Chr08 | 7896042                 | GG                                     | AA                 | AA               | INTERGENIC      |               |                    |                    |
| SNP_59236_A_7896046 | NC_021167.1    | Ca_Kabuli_Chr08 | 7896046                 | GG                                     | TT                 | TT               | INTERGENIC      |               |                    |                    |
| SNP_59237_A_7896049 | NC_021167.1    | Ca_Kabuli_Chr08 | 7896049                 | AA                                     | GG                 | GG               | INTERGENIC      |               |                    |                    |
| SNP_59238_A_7896112 | NC_021167.1    | Ca_Kabuli_Chr08 | 7896112                 | TT                                     | CC                 | CC               | INTERGENIC      |               |                    |                    |
| SNP_59239_A_7896293 | NC_021167.1    | Ca_Kabuli_Chr08 | 7896293                 | CC                                     | TT                 | TT               | INTERGENIC      |               |                    |                    |
| SNP_59240_A_7896312 | NC_021167.1    | Ca_Kabuli_Chr08 | 7896312                 | TT                                     | CC                 | CC               | INTERGENIC      |               |                    |                    |
| SNP_59241_A_7896320 | NC_021167.1    | Ca_Kabuli_Chr08 | 7896320                 | AA                                     | GG                 | GG               | INTERGENIC      |               |                    |                    |
| SNP_59242_A_7896332 | NC_021167.1    | Ca_Kabuli_Chr08 | 7896332                 | GG                                     | AA                 | AA               | INTERGENIC      |               |                    |                    |
| SNP_59243_A_7896398 | NC_021167.1    | Ca_Kabuli_Chr08 | 7896398                 | TT                                     | GG                 | GG               | INTERGENIC      |               |                    |                    |
| SNP_59244_A_7896415 | NC_021167.1    | Ca_Kabuli_Chr08 | 7896415                 | TT                                     | CC                 | CC               | INTERGENIC      |               |                    |                    |
| SNP_59245_A_7896435 | NC_021167.1    | Ca_Kabuli_Chr08 | 7896435                 | GG                                     | AA                 | AA               | INTERGENIC      |               |                    |                    |
| SNP_59247_A_7896493 | NC_021167.1    | Ca_Kabuli_Chr08 | 7896493                 | CC                                     | TT                 | TT               | INTERGENIC      |               |                    |                    |
| SNP_59248_A_7896496 | NC_021167.1    | Ca_Kabuli_Chr08 | 7896496                 | GG                                     | TT                 | TT               | INTERGENIC      |               |                    |                    |
| SNP_59249_A_7896510 | NC_021167.1    | Ca_Kabuli_Chr08 | 7896510                 | GG                                     | CC                 | CC               | INTERGENIC      |               |                    |                    |
| SNP_59250_A_7896514 | NC_021167.1    | Ca_Kabuli_Chr08 | 7896514                 | TT                                     | CC                 | CC               | INTERGENIC      |               |                    |                    |
| SNP_59251_A_7896534 | NC_021167.1    | Ca_Kabuli_Chr08 | 7896534                 | TT                                     | GG                 | GG               | INTERGENIC      |               |                    |                    |
| SNP_59252_A_7896561 | NC_021167.1    | Ca_Kabuli_Chr08 | 7896561                 | CC                                     | AA                 | AA               | INTERGENIC      |               |                    |                    |
| SNP_59253_A_7896598 | NC_021167.1    | Ca_Kabuli_Chr08 | 7896598                 | AA                                     | CC                 | CC               | INTERGENIC      |               |                    |                    |
| SNP_59254_A_7896605 | NC_021167.1    | Ca_Kabuli_Chr08 | 7896605                 | GG                                     | AA                 | AA               | INTERGENIC      |               |                    |                    |

| SNPs IDs            | Chromosome IDs | Chromosomes     | Physical positions (bp) | CDC Frontier genome (Reference genome) | (Pusa 1103 & HPNB) | (ILWC 46 & LPNB) | Sequence Components of genome | Gene accession IDs | Putative functions             |
|---------------------|----------------|-----------------|-------------------------|----------------------------------------|--------------------|------------------|-------------------------------|--------------------|--------------------------------|
| SNP_59255_A_7900650 | NC_021167.1    | Ca_Kabuli_Chr08 | 7900650                 | GG                                     | AA                 | AA               | INTERGENIC                    |                    |                                |
| SNP_59256_A_7900881 | NC_021167.1    | Ca_Kabuli_Chr08 | 7900881                 | AA                                     | CC                 | CC               | INTERGENIC                    |                    |                                |
| SNP_59258_A_7912478 | NC_021167.1    | Ca_Kabuli_Chr08 | 7912478                 | TT                                     | CC                 | CC               | INTERGENIC                    |                    |                                |
| SNP_59259_A_7913527 | NC_021167.1    | Ca_Kabuli_Chr08 | 7913527                 | AA                                     | TT                 | TT               | INTERGENIC                    |                    |                                |
| SNP_59261_A_7913793 | NC_021167.1    | Ca_Kabuli_Chr08 | 7913793                 | GG                                     | AA                 | AA               | INTERGENIC                    |                    |                                |
| SNP_59262_A_7913842 | NC_021167.1    | Ca_Kabuli_Chr08 | 7913842                 | CC                                     | AA                 | AA               | INTERGENIC                    |                    |                                |
| SNP_59263_A_7924368 | NC_021167.1    | Ca_Kabuli_Chr08 | 7924368                 | TT                                     | CC                 | CC               | INTERGENIC                    |                    |                                |
| SNP_59264_A_7925053 | NC_021167.1    | Ca_Kabuli_Chr08 | 7925053                 | TT                                     | AA                 | AA               | DRR                           | 101515507          | uncharacterized LOC101515507   |
| SNP_59265_A_7925141 | NC_021167.1    | Ca_Kabuli_Chr08 | 7925141                 | AA                                     | TT                 | TT               | DRR                           | 101515507          | uncharacterized LOC101515507   |
| SNP_59266_A_7925248 | NC_021167.1    | Ca_Kabuli_Chr08 | 7925248                 | AA                                     | GG                 | GG               | DRR                           | 101515507          | uncharacterized LOC101515507   |
| SNP_59267_A_7926135 | NC_021167.1    | Ca_Kabuli_Chr08 | 7926135                 | AA                                     | GG                 | GG               | INTERGENIC                    |                    |                                |
| SNP_59268_A_7927164 | NC_021167.1    | Ca_Kabuli_Chr08 | 7927164                 | TT                                     | CC                 | CC               | DRR                           | 101501141          | elongation factor 1-alpha-like |
| SNP_59269_A_7927198 | NC_021167.1    | Ca_Kabuli_Chr08 | 7927198                 | AA                                     | CC                 | CC               | DRR                           | 101501141          | elongation factor 1-alpha-like |
| SNP_59270_A_7927213 | NC_021167.1    | Ca_Kabuli_Chr08 | 7927213                 | GG                                     | AA                 | AA               | DRR                           | 101501141          | elongation factor 1-alpha-like |
| SNP_59272_A_7927527 | NC_021167.1    | Ca_Kabuli_Chr08 | 7927527                 | AA                                     | GG                 | GG               | DRR                           | 101501141          | elongation factor 1-alpha-like |
| SNP_59274_A_7927631 | NC_021167.1    | Ca_Kabuli_Chr08 | 7927631                 | GG                                     | AA                 | AA               | DRR                           | 101501141          | elongation factor 1-alpha-like |
| SNP_59276_A_7927695 | NC_021167.1    | Ca_Kabuli_Chr08 | 7927695                 | CC                                     | GG                 | GG               | DRR                           | 101501141          | elongation factor 1-alpha-like |
| SNP_59277_A_7927931 | NC_021167.1    | Ca_Kabuli_Chr08 | 7927931                 | TT                                     | AA                 | AA               | URR                           | 101515507          | uncharacterized LOC101515507   |
| SNP_59278_A_7936051 | NC_021167.1    | Ca_Kabuli_Chr08 | 7936051                 | CC                                     | TT                 | TT               | INTERGENIC                    |                    |                                |
| SNP_59279_A_7937621 | NC_021167.1    | Ca_Kabuli_Chr08 | 7937621                 | AA                                     | GG                 | GG               | INTERGENIC                    |                    |                                |
| SNP_59280_A_7937636 | NC_021167.1    | Ca_Kabuli_Chr08 | 7937636                 | AA                                     | CC                 | CC               | INTERGENIC                    |                    |                                |
| SNP_59281_A_7937655 | NC_021167.1    | Ca_Kabuli_Chr08 | 7937655                 | TT                                     | CC                 | CC               | INTERGENIC                    |                    |                                |



| SNPs IDs            | Chromosome IDs | Chromosomes     | Physical positions (bp) | CDC Frontier (Reference genome) | (Pusa 1103 & HPNB) | (ILWC 46 & LPNB) | Sequence genome | Components of | Gene accession IDs | Putative functions |
|---------------------|----------------|-----------------|-------------------------|---------------------------------|--------------------|------------------|-----------------|---------------|--------------------|--------------------|
| SNP_59282_A_7937704 | NC_021167.1    | Ca_Kabuli_Chr08 | 7937704                 | GG                              | AA                 | AA               | INTERGENIC      |               |                    |                    |
| SNP_59283_A_7937708 | NC_021167.1    | Ca_Kabuli_Chr08 | 7937708                 | AA                              | CC                 | CC               | INTERGENIC      |               |                    |                    |
| SNP_59284_A_7937763 | NC_021167.1    | Ca_Kabuli_Chr08 | 7937763                 | AA                              | TT                 | TT               | INTERGENIC      |               |                    |                    |
| SNP_59285_A_7937771 | NC_021167.1    | Ca_Kabuli_Chr08 | 7937771                 | TT                              | CC                 | CC               | INTERGENIC      |               |                    |                    |
| SNP_59286_A_7937774 | NC_021167.1    | Ca_Kabuli_Chr08 | 7937774                 | AA                              | GG                 | GG               | INTERGENIC      |               |                    |                    |
| SNP_59287_A_7937828 | NC_021167.1    | Ca_Kabuli_Chr08 | 7937828                 | GG                              | AA                 | AA               | INTERGENIC      |               |                    |                    |
| SNP_59288_A_7937847 | NC_021167.1    | Ca_Kabuli_Chr08 | 7937847                 | TT                              | CC                 | CC               | INTERGENIC      |               |                    |                    |
| SNP_59289_A_7937881 | NC_021167.1    | Ca_Kabuli_Chr08 | 7937881                 | GG                              | AA                 | AA               | INTERGENIC      |               |                    |                    |
| SNP_59290_A_7937891 | NC_021167.1    | Ca_Kabuli_Chr08 | 7937891                 | AA                              | CC                 | CC               | INTERGENIC      |               |                    |                    |
| SNP_59291_A_7937907 | NC_021167.1    | Ca_Kabuli_Chr08 | 7937907                 | GG                              | AA                 | AA               | INTERGENIC      |               |                    |                    |
| SNP_59292_A_7937908 | NC_021167.1    | Ca_Kabuli_Chr08 | 7937908                 | TT                              | AA                 | AA               | INTERGENIC      |               |                    |                    |
| SNP_59293_A_7937924 | NC_021167.1    | Ca_Kabuli_Chr08 | 7937924                 | GG                              | CC                 | CC               | INTERGENIC      |               |                    |                    |
| SNP_59294_A_7937952 | NC_021167.1    | Ca_Kabuli_Chr08 | 7937952                 | AA                              | GG                 | GG               | INTERGENIC      |               |                    |                    |
| SNP_59295_A_7938027 | NC_021167.1    | Ca_Kabuli_Chr08 | 7938027                 | AA                              | GG                 | GG               | INTERGENIC      |               |                    |                    |
| SNP_59296_A_7938028 | NC_021167.1    | Ca_Kabuli_Chr08 | 7938028                 | AA                              | TT                 | TT               | INTERGENIC      |               |                    |                    |
| SNP_59297_A_7938076 | NC_021167.1    | Ca_Kabuli_Chr08 | 7938076                 | CC                              | TT                 | TT               | INTERGENIC      |               |                    |                    |
| SNP_59298_A_7938126 | NC_021167.1    | Ca_Kabuli_Chr08 | 7938126                 | AA                              | GG                 | GG               | INTERGENIC      |               |                    |                    |
| SNP_59299_A_7938199 | NC_021167.1    | Ca_Kabuli_Chr08 | 7938199                 | AA                              | TT                 | TT               | INTERGENIC      |               |                    |                    |
| SNP_59300_A_7943988 | NC_021167.1    | Ca_Kabuli_Chr08 | 7943988                 | CC                              | AA                 | AA               | INTERGENIC      |               |                    |                    |
| SNP_59301_A_7944316 | NC_021167.1    | Ca_Kabuli_Chr08 | 7944316                 | CC                              | TT                 | TT               | INTERGENIC      |               |                    |                    |
| SNP_59302_A_7947141 | NC_021167.1    | Ca_Kabuli_Chr08 | 7947141                 | TT                              | AA                 | AA               | INTERGENIC      |               |                    |                    |
| SNP_59303_A_7947989 | NC_021167.1    | Ca_Kabuli_Chr08 | 7947989                 | TT                              | CC                 | CC               | INTERGENIC      |               |                    |                    |

| SNPs IDs            | Chromosome IDs | Chromosomes     | Physical positions (bp) | CDC Frontier genome (Reference genome) | (Pusa 1103 & HPNB) | (ILWC 46 & LPNB) | Sequence genome | Components of | Gene accession IDs | Putative functions |
|---------------------|----------------|-----------------|-------------------------|----------------------------------------|--------------------|------------------|-----------------|---------------|--------------------|--------------------|
| SNP_59304_A_7948046 | NC_021167.1    | Ca_Kabuli_Chr08 | 7948046                 | TT                                     | AA                 | AA               | INTERGENIC      |               |                    |                    |
| SNP_59305_A_7948133 | NC_021167.1    | Ca_Kabuli_Chr08 | 7948133                 | AA                                     | GG                 | GG               | INTERGENIC      |               |                    |                    |
| SNP_59308_A_7948284 | NC_021167.1    | Ca_Kabuli_Chr08 | 7948284                 | GG                                     | AA                 | AA               | INTERGENIC      |               |                    |                    |
| SNP_59309_A_7948305 | NC_021167.1    | Ca_Kabuli_Chr08 | 7948305                 | AA                                     | TT                 | TT               | INTERGENIC      |               |                    |                    |
| SNP_59310_A_7948698 | NC_021167.1    | Ca_Kabuli_Chr08 | 7948698                 | CC                                     | TT                 | TT               | INTERGENIC      |               |                    |                    |
| SNP_59311_A_7950275 | NC_021167.1    | Ca_Kabuli_Chr08 | 7950275                 | TT                                     | GG                 | GG               | INTERGENIC      |               |                    |                    |
| SNP_59312_A_7950287 | NC_021167.1    | Ca_Kabuli_Chr08 | 7950287                 | TT                                     | CC                 | CC               | INTERGENIC      |               |                    |                    |
| SNP_59313_A_7950332 | NC_021167.1    | Ca_Kabuli_Chr08 | 7950332                 | AA                                     | GG                 | GG               | INTERGENIC      |               |                    |                    |
| SNP_59314_A_7950502 | NC_021167.1    | Ca_Kabuli_Chr08 | 7950502                 | CC                                     | GG                 | GG               | INTERGENIC      |               |                    |                    |
| SNP_59316_A_7950594 | NC_021167.1    | Ca_Kabuli_Chr08 | 7950594                 | CC                                     | TT                 | TT               | INTERGENIC      |               |                    |                    |
| SNP_59317_A_7950821 | NC_021167.1    | Ca_Kabuli_Chr08 | 7950821                 | CC                                     | TT                 | TT               | INTERGENIC      |               |                    |                    |
| SNP_59318_A_7950866 | NC_021167.1    | Ca_Kabuli_Chr08 | 7950866                 | TT                                     | CC                 | CC               | INTERGENIC      |               |                    |                    |
| SNP_59319_A_7951166 | NC_021167.1    | Ca_Kabuli_Chr08 | 7951166                 | TT                                     | CC                 | CC               | INTERGENIC      |               |                    |                    |
| SNP_59320_A_7951190 | NC_021167.1    | Ca_Kabuli_Chr08 | 7951190                 | AA                                     | GG                 | GG               | INTERGENIC      |               |                    |                    |
| SNP_59321_A_7951234 | NC_021167.1    | Ca_Kabuli_Chr08 | 7951234                 | TT                                     | AA                 | AA               | INTERGENIC      |               |                    |                    |
| SNP_59322_A_7951383 | NC_021167.1    | Ca_Kabuli_Chr08 | 7951383                 | TT                                     | CC                 | CC               | INTERGENIC      |               |                    |                    |
| SNP_59323_A_7951394 | NC_021167.1    | Ca_Kabuli_Chr08 | 7951394                 | AA                                     | GG                 | GG               | INTERGENIC      |               |                    |                    |
| SNP_59324_A_7951399 | NC_021167.1    | Ca_Kabuli_Chr08 | 7951399                 | CC                                     | TT                 | TT               | INTERGENIC      |               |                    |                    |
| SNP_59325_A_7951454 | NC_021167.1    | Ca_Kabuli_Chr08 | 7951454                 | CC                                     | TT                 | TT               | INTERGENIC      |               |                    |                    |
| SNP_59326_A_7951514 | NC_021167.1    | Ca_Kabuli_Chr08 | 7951514                 | CC                                     | GG                 | GG               | INTERGENIC      |               |                    |                    |
| SNP_59327_A_7951523 | NC_021167.1    | Ca_Kabuli_Chr08 | 7951523                 | CC                                     | TT                 | TT               | INTERGENIC      |               |                    |                    |
| SNP_59328_A_7951658 | NC_021167.1    | Ca_Kabuli_Chr08 | 7951658                 | TT                                     | CC                 | CC               | INTERGENIC      |               |                    |                    |

| SNPs IDs            | Chromosome IDs | Chromosomes     | Physical positions (bp) | CDC Frontier (Reference genome) | (Pusa 1103 & HPNB) | (ILWC 46 & LPNB) | Sequence genome | Components of | Gene accession IDs | Putative functions |
|---------------------|----------------|-----------------|-------------------------|---------------------------------|--------------------|------------------|-----------------|---------------|--------------------|--------------------|
| SNP_59329_A_7951735 | NC_021167.1    | Ca_Kabuli_Chr08 | 7951735                 | TT                              | CC                 | CC               | INTERGENIC      |               |                    |                    |
| SNP_59330_A_7951815 | NC_021167.1    | Ca_Kabuli_Chr08 | 7951815                 | TT                              | CC                 | CC               | INTERGENIC      |               |                    |                    |
| SNP_59332_A_7952016 | NC_021167.1    | Ca_Kabuli_Chr08 | 7952016                 | CC                              | TT                 | TT               | INTERGENIC      |               |                    |                    |
| SNP_59333_A_7952042 | NC_021167.1    | Ca_Kabuli_Chr08 | 7952042                 | AA                              | GG                 | GG               | INTERGENIC      |               |                    |                    |
| SNP_59334_A_7952123 | NC_021167.1    | Ca_Kabuli_Chr08 | 7952123                 | TT                              | CC                 | CC               | INTERGENIC      |               |                    |                    |
| SNP_59335_A_7952131 | NC_021167.1    | Ca_Kabuli_Chr08 | 7952131                 | GG                              | AA                 | AA               | INTERGENIC      |               |                    |                    |
| SNP_59336_A_7952340 | NC_021167.1    | Ca_Kabuli_Chr08 | 7952340                 | TT                              | GG                 | GG               | INTERGENIC      |               |                    |                    |
| SNP_59337_A_7952434 | NC_021167.1    | Ca_Kabuli_Chr08 | 7952434                 | AA                              | CC                 | CC               | INTERGENIC      |               |                    |                    |
| SNP_59338_A_7952546 | NC_021167.1    | Ca_Kabuli_Chr08 | 7952546                 | GG                              | CC                 | CC               | INTERGENIC      |               |                    |                    |
| SNP_59340_A_7952633 | NC_021167.1    | Ca_Kabuli_Chr08 | 7952633                 | TT                              | CC                 | CC               | INTERGENIC      |               |                    |                    |
| SNP_59341_A_7952636 | NC_021167.1    | Ca_Kabuli_Chr08 | 7952636                 | AA                              | GG                 | GG               | INTERGENIC      |               |                    |                    |
| SNP_59342_A_7952665 | NC_021167.1    | Ca_Kabuli_Chr08 | 7952665                 | GG                              | CC                 | CC               | INTERGENIC      |               |                    |                    |
| SNP_59343_A_7952737 | NC_021167.1    | Ca_Kabuli_Chr08 | 7952737                 | CC                              | AA                 | AA               | INTERGENIC      |               |                    |                    |
| SNP_59344_A_7952773 | NC_021167.1    | Ca_Kabuli_Chr08 | 7952773                 | GG                              | CC                 | CC               | INTERGENIC      |               |                    |                    |
| SNP_59345_A_7952810 | NC_021167.1    | Ca_Kabuli_Chr08 | 7952810                 | AA                              | TT                 | TT               | INTERGENIC      |               |                    |                    |
| SNP_59346_A_7952822 | NC_021167.1    | Ca_Kabuli_Chr08 | 7952822                 | AA                              | GG                 | GG               | INTERGENIC      |               |                    |                    |
| SNP_59347_A_7952831 | NC_021167.1    | Ca_Kabuli_Chr08 | 7952831                 | AA                              | TT                 | TT               | INTERGENIC      |               |                    |                    |
| SNP_59348_A_7952837 | NC_021167.1    | Ca_Kabuli_Chr08 | 7952837                 | GG                              | CC                 | CC               | INTERGENIC      |               |                    |                    |
| SNP_59349_A_7952840 | NC_021167.1    | Ca_Kabuli_Chr08 | 7952840                 | CC                              | AA                 | AA               | INTERGENIC      |               |                    |                    |
| SNP_59350_A_7952860 | NC_021167.1    | Ca_Kabuli_Chr08 | 7952860                 | AA                              | TT                 | TT               | INTERGENIC      |               |                    |                    |
| SNP_59351_A_7952924 | NC_021167.1    | Ca_Kabuli_Chr08 | 7952924                 | GG                              | AA                 | AA               | INTERGENIC      |               |                    |                    |
| SNP_59352_A_7953020 | NC_021167.1    | Ca_Kabuli_Chr08 | 7953020                 | TT                              | CC                 | CC               | INTERGENIC      |               |                    |                    |

| SNPs IDs            | Chromosome IDs | Chromosomes     | Physical positions (bp) | CDC Frontier genome (Reference genome) | (Pusa 1103 & HPNB) | (ILWC 46 & LPNB) | Sequence genome | Components of | Gene accession IDs | Putative functions |
|---------------------|----------------|-----------------|-------------------------|----------------------------------------|--------------------|------------------|-----------------|---------------|--------------------|--------------------|
| SNP_59353_A_7953024 | NC_021167.1    | Ca_Kabuli_Chr08 | 7953024                 | AA                                     | GG                 | GG               | INTERGENIC      |               |                    |                    |
| SNP_59354_A_7953046 | NC_021167.1    | Ca_Kabuli_Chr08 | 7953046                 | GG                                     | AA                 | AA               | INTERGENIC      |               |                    |                    |
| SNP_59356_A_7953116 | NC_021167.1    | Ca_Kabuli_Chr08 | 7953116                 | CC                                     | TT                 | TT               | INTERGENIC      |               |                    |                    |
| SNP_59357_A_7953157 | NC_021167.1    | Ca_Kabuli_Chr08 | 7953157                 | GG                                     | AA                 | AA               | INTERGENIC      |               |                    |                    |
| SNP_59358_A_7953268 | NC_021167.1    | Ca_Kabuli_Chr08 | 7953268                 | CC                                     | TT                 | TT               | INTERGENIC      |               |                    |                    |
| SNP_59359_A_7953276 | NC_021167.1    | Ca_Kabuli_Chr08 | 7953276                 | CC                                     | TT                 | TT               | INTERGENIC      |               |                    |                    |
| SNP_59360_A_7953297 | NC_021167.1    | Ca_Kabuli_Chr08 | 7953297                 | AA                                     | GG                 | GG               | INTERGENIC      |               |                    |                    |
| SNP_59361_A_7953338 | NC_021167.1    | Ca_Kabuli_Chr08 | 7953338                 | GG                                     | AA                 | AA               | INTERGENIC      |               |                    |                    |
| SNP_59362_A_7953416 | NC_021167.1    | Ca_Kabuli_Chr08 | 7953416                 | AA                                     | GG                 | GG               | INTERGENIC      |               |                    |                    |
| SNP_59363_A_7953455 | NC_021167.1    | Ca_Kabuli_Chr08 | 7953455                 | CC                                     | TT                 | TT               | INTERGENIC      |               |                    |                    |
| SNP_59364_A_7953508 | NC_021167.1    | Ca_Kabuli_Chr08 | 7953508                 | CC                                     | TT                 | TT               | INTERGENIC      |               |                    |                    |
| SNP_59365_A_7953581 | NC_021167.1    | Ca_Kabuli_Chr08 | 7953581                 | AA                                     | GG                 | GG               | INTERGENIC      |               |                    |                    |
| SNP_59366_A_7953649 | NC_021167.1    | Ca_Kabuli_Chr08 | 7953649                 | GG                                     | CC                 | CC               | INTERGENIC      |               |                    |                    |
| SNP_59367_A_7953677 | NC_021167.1    | Ca_Kabuli_Chr08 | 7953677                 | AA                                     | GG                 | GG               | INTERGENIC      |               |                    |                    |
| SNP_59368_A_7953711 | NC_021167.1    | Ca_Kabuli_Chr08 | 7953711                 | GG                                     | AA                 | AA               | INTERGENIC      |               |                    |                    |
| SNP_59369_A_7953724 | NC_021167.1    | Ca_Kabuli_Chr08 | 7953724                 | GG                                     | TT                 | TT               | INTERGENIC      |               |                    |                    |
| SNP_59370_A_7953778 | NC_021167.1    | Ca_Kabuli_Chr08 | 7953778                 | CC                                     | TT                 | TT               | INTERGENIC      |               |                    |                    |
| SNP_59372_A_7953856 | NC_021167.1    | Ca_Kabuli_Chr08 | 7953856                 | CC                                     | AA                 | AA               | INTERGENIC      |               |                    |                    |
| SNP_59373_A_7953902 | NC_021167.1    | Ca_Kabuli_Chr08 | 7953902                 | GG                                     | AA                 | AA               | INTERGENIC      |               |                    |                    |
| SNP_59374_A_7953932 | NC_021167.1    | Ca_Kabuli_Chr08 | 7953932                 | TT                                     | CC                 | CC               | INTERGENIC      |               |                    |                    |
| SNP_59375_A_7953989 | NC_021167.1    | Ca_Kabuli_Chr08 | 7953989                 | TT                                     | CC                 | CC               | INTERGENIC      |               |                    |                    |
| SNP_59376_A_7953998 | NC_021167.1    | Ca_Kabuli_Chr08 | 7953998                 | CC                                     | TT                 | TT               | INTERGENIC      |               |                    |                    |

| SNPs IDs            | Chromosome IDs | Chromosomes     | Physical positions (bp) | CDC Frontier genome (Reference genome) | (Pusa 1103 & HPNB) | (ILWC 46 & LPNB) | Sequence genome | Components of | Gene accession IDs | Putative functions |
|---------------------|----------------|-----------------|-------------------------|----------------------------------------|--------------------|------------------|-----------------|---------------|--------------------|--------------------|
| SNP_59377_A_7954075 | NC_021167.1    | Ca_Kabuli_Chr08 | 7954075                 | GG                                     | TT                 | TT               | INTERGENIC      |               |                    |                    |
| SNP_59378_A_7954166 | NC_021167.1    | Ca_Kabuli_Chr08 | 7954166                 | CC                                     | TT                 | TT               | INTERGENIC      |               |                    |                    |
| SNP_59379_A_7954194 | NC_021167.1    | Ca_Kabuli_Chr08 | 7954194                 | AA                                     | CC                 | CC               | INTERGENIC      |               |                    |                    |
| SNP_59380_A_7954379 | NC_021167.1    | Ca_Kabuli_Chr08 | 7954379                 | AA                                     | GG                 | GG               | INTERGENIC      |               |                    |                    |
| SNP_59382_A_7954405 | NC_021167.1    | Ca_Kabuli_Chr08 | 7954405                 | AA                                     | GG                 | GG               | INTERGENIC      |               |                    |                    |
| SNP_59383_A_7954416 | NC_021167.1    | Ca_Kabuli_Chr08 | 7954416                 | GG                                     | AA                 | AA               | INTERGENIC      |               |                    |                    |
| SNP_59384_A_7954476 | NC_021167.1    | Ca_Kabuli_Chr08 | 7954476                 | AA                                     | TT                 | TT               | INTERGENIC      |               |                    |                    |
| SNP_59385_A_7954490 | NC_021167.1    | Ca_Kabuli_Chr08 | 7954490                 | CC                                     | TT                 | TT               | INTERGENIC      |               |                    |                    |
| SNP_59387_A_7954529 | NC_021167.1    | Ca_Kabuli_Chr08 | 7954529                 | TT                                     | CC                 | CC               | INTERGENIC      |               |                    |                    |
| SNP_59388_A_7954533 | NC_021167.1    | Ca_Kabuli_Chr08 | 7954533                 | TT                                     | CC                 | CC               | INTERGENIC      |               |                    |                    |
| SNP_59389_A_7954572 | NC_021167.1    | Ca_Kabuli_Chr08 | 7954572                 | AA                                     | CC                 | CC               | INTERGENIC      |               |                    |                    |
| SNP_59390_A_7954617 | NC_021167.1    | Ca_Kabuli_Chr08 | 7954617                 | AA                                     | CC                 | CC               | INTERGENIC      |               |                    |                    |
| SNP_59391_A_7954648 | NC_021167.1    | Ca_Kabuli_Chr08 | 7954648                 | AA                                     | GG                 | GG               | INTERGENIC      |               |                    |                    |
| SNP_59392_A_7954706 | NC_021167.1    | Ca_Kabuli_Chr08 | 7954706                 | GG                                     | TT                 | TT               | INTERGENIC      |               |                    |                    |
| SNP_59393_A_7954718 | NC_021167.1    | Ca_Kabuli_Chr08 | 7954718                 | TT                                     | AA                 | AA               | INTERGENIC      |               |                    |                    |
| SNP_59394_A_7954745 | NC_021167.1    | Ca_Kabuli_Chr08 | 7954745                 | GG                                     | CC                 | CC               | INTERGENIC      |               |                    |                    |
| SNP_59395_A_7954803 | NC_021167.1    | Ca_Kabuli_Chr08 | 7954803                 | CC                                     | TT                 | TT               | INTERGENIC      |               |                    |                    |
| SNP_59396_A_7954805 | NC_021167.1    | Ca_Kabuli_Chr08 | 7954805                 | AA                                     | TT                 | TT               | INTERGENIC      |               |                    |                    |
| SNP_59397_A_7954824 | NC_021167.1    | Ca_Kabuli_Chr08 | 7954824                 | AA                                     | GG                 | GG               | INTERGENIC      |               |                    |                    |
| SNP_59398_A_7954855 | NC_021167.1    | Ca_Kabuli_Chr08 | 7954855                 | TT                                     | CC                 | CC               | INTERGENIC      |               |                    |                    |
| SNP_59399_A_7954873 | NC_021167.1    | Ca_Kabuli_Chr08 | 7954873                 | CC                                     | GG                 | GG               | INTERGENIC      |               |                    |                    |
| SNP_59400_A_7954880 | NC_021167.1    | Ca_Kabuli_Chr08 | 7954880                 | CC                                     | TT                 | TT               | INTERGENIC      |               |                    |                    |

| SNPs IDs            | Chromosome IDs | Chromosomes     | Physical positions (bp) | CDC Frontier (Reference genome) | (Pusa 1103 & HPNB) | (ILWC 46 & LPNB) | Sequence genome | Components of | Gene accession IDs | Putative functions             |
|---------------------|----------------|-----------------|-------------------------|---------------------------------|--------------------|------------------|-----------------|---------------|--------------------|--------------------------------|
| SNP_59401_A_7954928 | NC_021167.1    | Ca_Kabuli_Chr08 | 7954928                 | AA                              | TT                 | TT               | INTERGENIC      |               |                    |                                |
| SNP_59402_A_7954938 | NC_021167.1    | Ca_Kabuli_Chr08 | 7954938                 | CC                              | AA                 | AA               | INTERGENIC      |               |                    |                                |
| SNP_59403_A_7954998 | NC_021167.1    | Ca_Kabuli_Chr08 | 7954998                 | TT                              | CC                 | CC               | INTERGENIC      |               |                    |                                |
| SNP_59404_A_7955037 | NC_021167.1    | Ca_Kabuli_Chr08 | 7955037                 | GG                              | AA                 | AA               | INTERGENIC      |               |                    |                                |
| SNP_59405_A_7955041 | NC_021167.1    | Ca_Kabuli_Chr08 | 7955041                 | GG                              | TT                 | TT               | INTERGENIC      |               |                    |                                |
| SNP_59406_A_7955075 | NC_021167.1    | Ca_Kabuli_Chr08 | 7955075                 | AA                              | GG                 | GG               | INTERGENIC      |               |                    |                                |
| SNP_59407_A_7955340 | NC_021167.1    | Ca_Kabuli_Chr08 | 7955340                 | AA                              | TT                 | TT               | INTERGENIC      |               |                    |                                |
| SNP_59408_A_7955370 | NC_021167.1    | Ca_Kabuli_Chr08 | 7955370                 | CC                              | AA                 | AA               | INTERGENIC      |               |                    |                                |
| SNP_59409_A_7955457 | NC_021167.1    | Ca_Kabuli_Chr08 | 7955457                 | TT                              | AA                 | AA               | INTERGENIC      |               |                    |                                |
| SNP_59410_A_7955493 | NC_021167.1    | Ca_Kabuli_Chr08 | 7955493                 | GG                              | AA                 | AA               | INTERGENIC      |               |                    |                                |
| SNP_59412_A_7955550 | NC_021167.1    | Ca_Kabuli_Chr08 | 7955550                 | AA                              | CC                 | CC               | INTERGENIC      |               |                    |                                |
| SNP_59413_A_7955556 | NC_021167.1    | Ca_Kabuli_Chr08 | 7955556                 | TT                              | CC                 | CC               | INTERGENIC      |               |                    |                                |
| SNP_59415_A_7955596 | NC_021167.1    | Ca_Kabuli_Chr08 | 7955596                 | AA                              | GG                 | GG               | INTERGENIC      |               |                    |                                |
| SNP_59416_A_7955732 | NC_021167.1    | Ca_Kabuli_Chr08 | 7955732                 | CC                              | TT                 | TT               | INTERGENIC      |               |                    |                                |
| SNP_59417_A_7955741 | NC_021167.1    | Ca_Kabuli_Chr08 | 7955741                 | AA                              | CC                 | CC               | INTERGENIC      |               |                    |                                |
| SNP_59418_A_7955759 | NC_021167.1    | Ca_Kabuli_Chr08 | 7955759                 | CC                              | TT                 | TT               | INTERGENIC      |               |                    |                                |
| SNP_59419_A_7955882 | NC_021167.1    | Ca_Kabuli_Chr08 | 7955882                 | AA                              | GG                 | GG               | INTERGENIC      |               |                    |                                |
| SNP_59420_A_7956011 | NC_021167.1    | Ca_Kabuli_Chr08 | 7956011                 | AA                              | GG                 | GG               | INTERGENIC      |               |                    |                                |
| SNP_59422_A_7956217 | NC_021167.1    | Ca_Kabuli_Chr08 | 7956217                 | TT                              | CC                 | CC               | INTERGENIC      |               |                    |                                |
| SNP_59423_A_7956289 | NC_021167.1    | Ca_Kabuli_Chr08 | 7956289                 | TT                              | CC                 | CC               | INTERGENIC      |               |                    |                                |
| SNP_59424_A_7956486 | NC_021167.1    | Ca_Kabuli_Chr08 | 7956486                 | CC                              | TT                 | TT               | INTERGENIC      |               |                    |                                |
| SNP_59425_A_7994202 | NC_021167.1    | Ca_Kabuli_Chr08 | 7994202                 | AA                              | GG                 | GG               | URR             |               | 101502718          | 4-coumarate--CoA ligase-like 6 |

| SNPs IDs            | Chromosome IDs | Chromosomes     | Physical positions (bp) | CDC Frontier genome (Reference genome) | (Pusa 1103 & HPNB) | (ILWC 46 & LPNB) | Sequence genome | Components of | Gene accession IDs | Putative functions |
|---------------------|----------------|-----------------|-------------------------|----------------------------------------|--------------------|------------------|-----------------|---------------|--------------------|--------------------|
| SNP_59428_A_8053847 | NC_021167.1    | Ca_Kabuli_Chr08 | 8053847                 | AA                                     | GG                 | GG               | INTERGENIC      |               |                    |                    |
| SNP_59429_A_8074300 | NC_021167.1    | Ca_Kabuli_Chr08 | 8074300                 | AA                                     | GG                 | GG               | INTERGENIC      |               |                    |                    |
| SNP_59430_A_8074306 | NC_021167.1    | Ca_Kabuli_Chr08 | 8074306                 | GG                                     | CC                 | CC               | INTERGENIC      |               |                    |                    |
| SNP_59431_A_8074570 | NC_021167.1    | Ca_Kabuli_Chr08 | 8074570                 | CC                                     | TT                 | TT               | INTERGENIC      |               |                    |                    |
| SNP_59432_A_8074695 | NC_021167.1    | Ca_Kabuli_Chr08 | 8074695                 | GG                                     | TT                 | TT               | INTERGENIC      |               |                    |                    |
| SNP_59433_A_8074702 | NC_021167.1    | Ca_Kabuli_Chr08 | 8074702                 | AA                                     | TT                 | TT               | INTERGENIC      |               |                    |                    |
| SNP_59434_A_8074704 | NC_021167.1    | Ca_Kabuli_Chr08 | 8074704                 | CC                                     | AA                 | AA               | INTERGENIC      |               |                    |                    |
| SNP_59435_A_8074711 | NC_021167.1    | Ca_Kabuli_Chr08 | 8074711                 | TT                                     | CC                 | CC               | INTERGENIC      |               |                    |                    |
| SNP_59436_A_8074717 | NC_021167.1    | Ca_Kabuli_Chr08 | 8074717                 | GG                                     | TT                 | TT               | INTERGENIC      |               |                    |                    |
| SNP_59437_A_8074724 | NC_021167.1    | Ca_Kabuli_Chr08 | 8074724                 | TT                                     | CC                 | CC               | INTERGENIC      |               |                    |                    |
| SNP_59438_A_8074731 | NC_021167.1    | Ca_Kabuli_Chr08 | 8074731                 | AA                                     | GG                 | GG               | INTERGENIC      |               |                    |                    |
| SNP_59439_A_8074745 | NC_021167.1    | Ca_Kabuli_Chr08 | 8074745                 | GG                                     | AA                 | AA               | INTERGENIC      |               |                    |                    |
| SNP_59440_A_8074783 | NC_021167.1    | Ca_Kabuli_Chr08 | 8074783                 | GG                                     | AA                 | AA               | INTERGENIC      |               |                    |                    |
| SNP_59441_A_8074788 | NC_021167.1    | Ca_Kabuli_Chr08 | 8074788                 | AA                                     | GG                 | GG               | INTERGENIC      |               |                    |                    |
| SNP_59442_A_8074791 | NC_021167.1    | Ca_Kabuli_Chr08 | 8074791                 | CC                                     | TT                 | TT               | INTERGENIC      |               |                    |                    |
| SNP_59443_A_8074836 | NC_021167.1    | Ca_Kabuli_Chr08 | 8074836                 | CC                                     | AA                 | AA               | INTERGENIC      |               |                    |                    |
| SNP_59444_A_8074866 | NC_021167.1    | Ca_Kabuli_Chr08 | 8074866                 | TT                                     | AA                 | AA               | INTERGENIC      |               |                    |                    |
| SNP_59445_A_8074892 | NC_021167.1    | Ca_Kabuli_Chr08 | 8074892                 | TT                                     | AA                 | AA               | INTERGENIC      |               |                    |                    |
| SNP_59446_A_8074894 | NC_021167.1    | Ca_Kabuli_Chr08 | 8074894                 | TT                                     | AA                 | AA               | INTERGENIC      |               |                    |                    |
| SNP_59447_A_8075318 | NC_021167.1    | Ca_Kabuli_Chr08 | 8075318                 | TT                                     | CC                 | CC               | INTERGENIC      |               |                    |                    |
| SNP_59448_A_8075590 | NC_021167.1    | Ca_Kabuli_Chr08 | 8075590                 | GG                                     | TT                 | TT               | INTERGENIC      |               |                    |                    |
| SNP_59449_A_8075593 | NC_021167.1    | Ca_Kabuli_Chr08 | 8075593                 | CC                                     | AA                 | AA               | INTERGENIC      |               |                    |                    |

| SNPs IDs            | Chromosome IDs | Chromosomes     | Physical positions (bp) | CDC Frontier (Reference genome) | (Pusa 1103 & HPNB) | (ILWC 46 & LPNB) | Sequence genome | Components of | Gene accession IDs | Putative functions |
|---------------------|----------------|-----------------|-------------------------|---------------------------------|--------------------|------------------|-----------------|---------------|--------------------|--------------------|
| SNP_59451_A_8075975 | NC_021167.1    | Ca_Kabuli_Chr08 | 8075975                 | GG                              | AA                 | AA               | INTERGENIC      |               |                    |                    |
| SNP_59452_A_8076291 | NC_021167.1    | Ca_Kabuli_Chr08 | 8076291                 | CC                              | TT                 | TT               | INTERGENIC      |               |                    |                    |
| SNP_59453_A_8076323 | NC_021167.1    | Ca_Kabuli_Chr08 | 8076323                 | AA                              | GG                 | GG               | INTERGENIC      |               |                    |                    |
| SNP_59454_A_8084487 | NC_021167.1    | Ca_Kabuli_Chr08 | 8084487                 | AA                              | TT                 | TT               | INTERGENIC      |               |                    |                    |
| SNP_59455_A_8084586 | NC_021167.1    | Ca_Kabuli_Chr08 | 8084586                 | TT                              | CC                 | CC               | INTERGENIC      |               |                    |                    |
| SNP_59456_A_8084592 | NC_021167.1    | Ca_Kabuli_Chr08 | 8084592                 | GG                              | AA                 | AA               | INTERGENIC      |               |                    |                    |
| SNP_59457_A_8084632 | NC_021167.1    | Ca_Kabuli_Chr08 | 8084632                 | CC                              | AA                 | AA               | INTERGENIC      |               |                    |                    |
| SNP_59459_A_8084735 | NC_021167.1    | Ca_Kabuli_Chr08 | 8084735                 | AA                              | GG                 | GG               | INTERGENIC      |               |                    |                    |
| SNP_59460_A_8084747 | NC_021167.1    | Ca_Kabuli_Chr08 | 8084747                 | AA                              | GG                 | GG               | INTERGENIC      |               |                    |                    |
| SNP_59461_A_8084755 | NC_021167.1    | Ca_Kabuli_Chr08 | 8084755                 | GG                              | TT                 | TT               | INTERGENIC      |               |                    |                    |
| SNP_59462_A_8084758 | NC_021167.1    | Ca_Kabuli_Chr08 | 8084758                 | CC                              | AA                 | AA               | INTERGENIC      |               |                    |                    |
| SNP_59463_A_8084802 | NC_021167.1    | Ca_Kabuli_Chr08 | 8084802                 | AA                              | TT                 | TT               | INTERGENIC      |               |                    |                    |
| SNP_59464_A_8129009 | NC_021167.1    | Ca_Kabuli_Chr08 | 8129009                 | TT                              | CC                 | CC               | INTERGENIC      |               |                    |                    |
| SNP_59465_A_8162354 | NC_021167.1    | Ca_Kabuli_Chr08 | 8162354                 | TT                              | CC                 | CC               | INTERGENIC      |               |                    |                    |
| SNP_59467_A_8244683 | NC_021167.1    | Ca_Kabuli_Chr08 | 8244683                 | GG                              | AA                 | AA               | INTERGENIC      |               |                    |                    |
| SNP_59468_A_8247690 | NC_021167.1    | Ca_Kabuli_Chr08 | 8247690                 | GG                              | AA                 | AA               | INTERGENIC      |               |                    |                    |
| SNP_59469_A_8247705 | NC_021167.1    | Ca_Kabuli_Chr08 | 8247705                 | GG                              | TT                 | TT               | INTERGENIC      |               |                    |                    |
| SNP_59470_A_8248003 | NC_021167.1    | Ca_Kabuli_Chr08 | 8248003                 | CC                              | AA                 | AA               | INTERGENIC      |               |                    |                    |
| SNP_59471_A_8254575 | NC_021167.1    | Ca_Kabuli_Chr08 | 8254575                 | AA                              | GG                 | GG               | INTERGENIC      |               |                    |                    |
| SNP_59472_A_8254596 | NC_021167.1    | Ca_Kabuli_Chr08 | 8254596                 | AA                              | GG                 | GG               | INTERGENIC      |               |                    |                    |
| SNP_59473_A_8254601 | NC_021167.1    | Ca_Kabuli_Chr08 | 8254601                 | GG                              | AA                 | AA               | INTERGENIC      |               |                    |                    |
| SNP_59474_A_8254706 | NC_021167.1    | Ca_Kabuli_Chr08 | 8254706                 | AA                              | GG                 | GG               | INTERGENIC      |               |                    |                    |



| SNPs IDs            | Chromosome IDs | Chromosomes     | Physical positions (bp) | CDC Frontier (Reference genome) | (Pusa 1103 & HPNB) | (ILWC 46 & LPNB) | Sequence Components of genome | Gene accession IDs | Putative functions                               |
|---------------------|----------------|-----------------|-------------------------|---------------------------------|--------------------|------------------|-------------------------------|--------------------|--------------------------------------------------|
| SNP_59475_A_8254712 | NC_021167.1    | Ca_Kabuli_Chr08 | 8254712                 | AA                              | GG                 | GG               | INTERGENIC                    |                    |                                                  |
| SNP_59476_A_8254751 | NC_021167.1    | Ca_Kabuli_Chr08 | 8254751                 | TT                              | GG                 | GG               | INTERGENIC                    |                    |                                                  |
| SNP_59477_A_8254891 | NC_021167.1    | Ca_Kabuli_Chr08 | 8254891                 | AA                              | GG                 | GG               | INTERGENIC                    |                    |                                                  |
| SNP_59478_A_8254908 | NC_021167.1    | Ca_Kabuli_Chr08 | 8254908                 | AA                              | CC                 | CC               | INTERGENIC                    |                    |                                                  |
| SNP_59479_A_8254954 | NC_021167.1    | Ca_Kabuli_Chr08 | 8254954                 | CC                              | GG                 | GG               | INTERGENIC                    |                    |                                                  |
| SNP_59480_A_8257926 | NC_021167.1    | Ca_Kabuli_Chr08 | 8257926                 | CC                              | TT                 | TT               | INTERGENIC                    |                    |                                                  |
| SNP_59481_A_8272709 | NC_021167.1    | Ca_Kabuli_Chr08 | 8272709                 | GG                              | CC                 | CC               | URR                           | 101510441          | 60S ribosomal protein L17-1-like                 |
| SNP_59482_A_8272755 | NC_021167.1    | Ca_Kabuli_Chr08 | 8272755                 | CC                              | TT                 | TT               | URR                           | 101510441          | 60S ribosomal protein L17-1-like                 |
| SNP_59483_A_8272866 | NC_021167.1    | Ca_Kabuli_Chr08 | 8272866                 | AA                              | GG                 | GG               | URR                           | 101510441          | 60S ribosomal protein L17-1-like                 |
| SNP_59485_A_8272929 | NC_021167.1    | Ca_Kabuli_Chr08 | 8272929                 | TT                              | CC                 | CC               | URR                           | 101510441          | 60S ribosomal protein L17-1-like                 |
| SNP_59486_A_8273022 | NC_021167.1    | Ca_Kabuli_Chr08 | 8273022                 | CC                              | AA                 | AA               | INTERGENIC                    |                    |                                                  |
| SNP_59487_A_8273057 | NC_021167.1    | Ca_Kabuli_Chr08 | 8273057                 | TT                              | AA                 | AA               | INTERGENIC                    |                    |                                                  |
| SNP_59488_A_8273075 | NC_021167.1    | Ca_Kabuli_Chr08 | 8273075                 | TT                              | CC                 | CC               | INTERGENIC                    |                    |                                                  |
| SNP_59490_A_8276303 | NC_021167.1    | Ca_Kabuli_Chr08 | 8276303                 | CC                              | TT                 | TT               | INTERGENIC                    |                    |                                                  |
| SNP_59491_A_8277386 | NC_021167.1    | Ca_Kabuli_Chr08 | 8277386                 | TT                              | CC                 | CC               | INTERGENIC                    |                    |                                                  |
| SNP_59492_A_8289022 | NC_021167.1    | Ca_Kabuli_Chr08 | 8289022                 | TT                              | AA                 | AA               | DRR                           | 101511512          | 60S ribosomal protein L17-2-like                 |
| SNP_59493_A_8289045 | NC_021167.1    | Ca_Kabuli_Chr08 | 8289045                 | CC                              | GG                 | GG               | DRR                           | 101511512          | 60S ribosomal protein L17-2-like                 |
| SNP_59494_A_8289060 | NC_021167.1    | Ca_Kabuli_Chr08 | 8289060                 | TT                              | CC                 | CC               | DRR                           | 101511512          | 60S ribosomal protein L17-2-like                 |
| SNP_59495_A_8289174 | NC_021167.1    | Ca_Kabuli_Chr08 | 8289174                 | GG                              | CC                 | CC               | DRR                           | 101511512          | 60S ribosomal protein L17-2-like                 |
| SNP_59497_A_8395568 | NC_021167.1    | Ca_Kabuli_Chr08 | 8395568                 | AA                              | TT                 | TT               | DRR                           | 101488937          | putative peroxisomal acyl-coenzyme A oxidase 1.2 |
| SNP_59498_A_8395604 | NC_021167.1    | Ca_Kabuli_Chr08 | 8395604                 | TT                              | CC                 | CC               | DRR                           | 101488937          | putative peroxisomal acyl-coenzyme A oxidase 1.2 |
| SNP_59499_A_8395657 | NC_021167.1    | Ca_Kabuli_Chr08 | 8395657                 | TT                              | GG                 | GG               | DRR                           | 101488937          | putative peroxisomal acyl-coenzyme A oxidase 1.2 |

| SNPs IDs            | Chromosome IDs | Chromosomes     | Physical positions (bp) | CDC Frontier (Reference genome) | (Pusa 1103 & HPNB) | (ILWC 46 & LPNB) | Sequence Components of genome | Gene accession IDs | Putative functions                               |
|---------------------|----------------|-----------------|-------------------------|---------------------------------|--------------------|------------------|-------------------------------|--------------------|--------------------------------------------------|
| SNP_59500_A_8395668 | NC_021167.1    | Ca_Kabuli_Chr08 | 8395668                 | AA                              | CC                 | CC               | DRR                           | 101488937          | putative peroxisomal acyl-coenzyme A oxidase 1.2 |
| SNP_59501_A_8395669 | NC_021167.1    | Ca_Kabuli_Chr08 | 8395669                 | TT                              | CC                 | CC               | DRR                           | 101488937          | putative peroxisomal acyl-coenzyme A oxidase 1.2 |
| SNP_59502_A_8395682 | NC_021167.1    | Ca_Kabuli_Chr08 | 8395682                 | GG                              | AA                 | AA               | DRR                           | 101488937          | putative peroxisomal acyl-coenzyme A oxidase 1.2 |
| SNP_59503_A_8396241 | NC_021167.1    | Ca_Kabuli_Chr08 | 8396241                 | TT                              | CC                 | CC               | INTERGENIC                    |                    |                                                  |
| SNP_59504_A_8398225 | NC_021167.1    | Ca_Kabuli_Chr08 | 8398225                 | TT                              | AA                 | AA               | INTRON                        | 101488937          | putative peroxisomal acyl-coenzyme A oxidase 1.2 |
| SNP_59505_A_8401306 | NC_021167.1    | Ca_Kabuli_Chr08 | 8401306                 | TT                              | AA                 | AA               | INTERGENIC                    |                    |                                                  |
| SNP_59506_A_8401394 | NC_021167.1    | Ca_Kabuli_Chr08 | 8401394                 | CC                              | TT                 | TT               | INTERGENIC                    |                    |                                                  |
| SNP_59507_A_8401431 | NC_021167.1    | Ca_Kabuli_Chr08 | 8401431                 | GG                              | AA                 | AA               | INTERGENIC                    |                    |                                                  |
| SNP_59509_A_8475652 | NC_021167.1    | Ca_Kabuli_Chr08 | 8475652                 | GG                              | AA                 | AA               | INTERGENIC                    |                    |                                                  |
| SNP_59510_A_8475653 | NC_021167.1    | Ca_Kabuli_Chr08 | 8475653                 | CC                              | TT                 | TT               | INTERGENIC                    |                    |                                                  |
| SNP_59511_A_8536365 | NC_021167.1    | Ca_Kabuli_Chr08 | 8536365                 | AA                              | GG                 | GG               | URR                           | 101491512          | mitogen-activated protein kinase kinase 10       |
| SNP_59512_A_8577438 | NC_021167.1    | Ca_Kabuli_Chr08 | 8577438                 | GG                              | AA                 | AA               | INTERGENIC                    |                    |                                                  |
| SNP_59513_A_8577701 | NC_021167.1    | Ca_Kabuli_Chr08 | 8577701                 | CC                              | AA                 | AA               | INTERGENIC                    |                    |                                                  |
| SNP_59514_A_8577705 | NC_021167.1    | Ca_Kabuli_Chr08 | 8577705                 | GG                              | AA                 | AA               | INTERGENIC                    |                    |                                                  |
| SNP_59515_A_8577730 | NC_021167.1    | Ca_Kabuli_Chr08 | 8577730                 | GG                              | AA                 | AA               | INTERGENIC                    |                    |                                                  |
| SNP_59516_A_8586246 | NC_021167.1    | Ca_Kabuli_Chr08 | 8586246                 | AA                              | GG                 | GG               | INTRON                        | 101494238          | ABC transporter B family member 2-like           |
| SNP_59517_A_8606402 | NC_021167.1    | Ca_Kabuli_Chr08 | 8606402                 | TT                              | CC                 | CC               | INTERGENIC                    |                    |                                                  |
| SNP_59518_A_8609138 | NC_021167.1    | Ca_Kabuli_Chr08 | 8609138                 | GG                              | AA                 | AA               | INTERGENIC                    |                    |                                                  |
| SNP_59522_A_8624641 | NC_021167.1    | Ca_Kabuli_Chr08 | 8624641                 | AA                              | GG                 | GG               | INTERGENIC                    |                    |                                                  |
| SNP_59523_A_8624646 | NC_021167.1    | Ca_Kabuli_Chr08 | 8624646                 | TT                              | AA                 | AA               | INTERGENIC                    |                    |                                                  |
| SNP_59524_A_8624779 | NC_021167.1    | Ca_Kabuli_Chr08 | 8624779                 | GG                              | TT                 | TT               | INTERGENIC                    |                    |                                                  |
| SNP_59525_A_8684189 | NC_021167.1    | Ca_Kabuli_Chr08 | 8684189                 | AA                              | GG                 | GG               | INTERGENIC                    |                    |                                                  |

| SNPs IDs            | Chromosome IDs | Chromosomes     | Physical positions (bp) | CDC Frontier (Reference genome) | (Pusa 1103 & HPNB) | (ILWC 46 & LPNB) | Sequence Components of genome | Gene accession IDs | Putative functions                                       |
|---------------------|----------------|-----------------|-------------------------|---------------------------------|--------------------|------------------|-------------------------------|--------------------|----------------------------------------------------------|
| SNP_59526_A_8736794 | NC_021167.1    | Ca_Kabuli_Chr08 | 8736794                 | TT                              | GG                 | GG               | INTERGENIC                    |                    |                                                          |
| SNP_59528_A_8773979 | NC_021167.1    | Ca_Kabuli_Chr08 | 8773979                 | GG                              | TT                 | TT               | URR                           | 101490240          | serine/threonine-protein phosphatase 7 long form homolog |
| SNP_59529_A_8773994 | NC_021167.1    | Ca_Kabuli_Chr08 | 8773994                 | AA                              | GG                 | GG               | URR                           | 101490240          | serine/threonine-protein phosphatase 7 long form homolog |
| SNP_59530_A_8774033 | NC_021167.1    | Ca_Kabuli_Chr08 | 8774033                 | AA                              | TT                 | TT               | URR                           | 101490240          | serine/threonine-protein phosphatase 7 long form homolog |
| SNP_59531_A_8774227 | NC_021167.1    | Ca_Kabuli_Chr08 | 8774227                 | TT                              | AA                 | AA               | URR                           | 101490240          | serine/threonine-protein phosphatase 7 long form homolog |
| SNP_59532_A_8774313 | NC_021167.1    | Ca_Kabuli_Chr08 | 8774313                 | CC                              | TT                 | TT               | URR                           | 101490240          | serine/threonine-protein phosphatase 7 long form homolog |
| SNP_59534_A_8787756 | NC_021167.1    | Ca_Kabuli_Chr08 | 8787756                 | GG                              | AA                 | AA               | URR                           | 101498349          | uncharacterized LOC101498349                             |
| SNP_59535_A_8823786 | NC_021167.1    | Ca_Kabuli_Chr08 | 8823786                 | GG                              | AA                 | AA               | URR                           | 101499017          | ubiquitin carboxyl-terminal hydrolase 20                 |
| SNP_59536_A_8832565 | NC_021167.1    | Ca_Kabuli_Chr08 | 8832565                 | TT                              | CC                 | CC               | INTERGENIC                    |                    |                                                          |
| SNP_59537_A_8833494 | NC_021167.1    | Ca_Kabuli_Chr08 | 8833494                 | CC                              | TT                 | TT               | INTERGENIC                    |                    |                                                          |
| SNP_59538_A_8835822 | NC_021167.1    | Ca_Kabuli_Chr08 | 8835822                 | TT                              | CC                 | CC               | INTERGENIC                    |                    |                                                          |
| SNP_59539_A_8839008 | NC_021167.1    | Ca_Kabuli_Chr08 | 8839008                 | GG                              | AA                 | AA               | INTERGENIC                    |                    |                                                          |
| SNP_59540_A_8839400 | NC_021167.1    | Ca_Kabuli_Chr08 | 8839400                 | AA                              | GG                 | GG               | DRR                           | 101499336          | transcription factor MYC2-like                           |
| SNP_59541_A_8845247 | NC_021167.1    | Ca_Kabuli_Chr08 | 8845247                 | TT                              | CC                 | CC               | INTERGENIC                    |                    |                                                          |
| SNP_59546_A_8850129 | NC_021167.1    | Ca_Kabuli_Chr08 | 8850129                 | AA                              | GG                 | GG               | INTERGENIC                    |                    |                                                          |
| SNP_59547_A_8852988 | NC_021167.1    | Ca_Kabuli_Chr08 | 8852988                 | AA                              | CC                 | CC               | DRR                           | 101499650          | uncharacterized LOC101499650                             |
| SNP_59548_A_8853974 | NC_021167.1    | Ca_Kabuli_Chr08 | 8853974                 | CC                              | AA                 | AA               | INTERGENIC                    |                    |                                                          |
| SNP_59549_A_8856017 | NC_021167.1    | Ca_Kabuli_Chr08 | 8856017                 | TT                              | CC                 | CC               | URR                           | 101499650          | uncharacterized LOC101499650                             |
| SNP_59550_A_8856372 | NC_021167.1    | Ca_Kabuli_Chr08 | 8856372                 | CC                              | TT                 | TT               | URR                           | 101499650          | uncharacterized LOC101499650                             |
| SNP_59551_A_8856393 | NC_021167.1    | Ca_Kabuli_Chr08 | 8856393                 | TT                              | CC                 | CC               | URR                           | 101499650          | uncharacterized LOC101499650                             |
| SNP_59554_A_8858963 | NC_021167.1    | Ca_Kabuli_Chr08 | 8858963                 | TT                              | CC                 | CC               | INTERGENIC                    |                    |                                                          |
| SNP_59556_A_8862129 | NC_021167.1    | Ca_Kabuli_Chr08 | 8862129                 | CC                              | TT                 | TT               | URR                           | 101499953          | uncharacterized LOC101499953                             |

| SNPs IDs            | Chromosome IDs | Chromosomes     | Physical positions (bp) | CDC Frontier (Reference genome) | (Pusa 1103 & HPNB) | (ILWC 46 & LPNB) | Sequence Components of genome | Gene accession IDs | Putative functions          |
|---------------------|----------------|-----------------|-------------------------|---------------------------------|--------------------|------------------|-------------------------------|--------------------|-----------------------------|
| SNP_59558_A_8862570 | NC_021167.1    | Ca_Kabuli_Chr08 | 8862570                 | AA                              | GG                 | GG               | DRR                           | 101500298          | protein HAIKU1-like         |
| SNP_59559_A_8862576 | NC_021167.1    | Ca_Kabuli_Chr08 | 8862576                 | TT                              | CC                 | CC               | DRR                           | 101500298          | protein HAIKU1-like         |
| SNP_59560_A_8862578 | NC_021167.1    | Ca_Kabuli_Chr08 | 8862578                 | AA                              | GG                 | GG               | DRR                           | 101500298          | protein HAIKU1-like         |
| SNP_59561_A_8862585 | NC_021167.1    | Ca_Kabuli_Chr08 | 8862585                 | GG                              | AA                 | AA               | DRR                           | 101500298          | protein HAIKU1-like         |
| SNP_59562_A_8862589 | NC_021167.1    | Ca_Kabuli_Chr08 | 8862589                 | CC                              | TT                 | TT               | DRR                           | 101500298          | protein HAIKU1-like         |
| SNP_59563_A_8862917 | NC_021167.1    | Ca_Kabuli_Chr08 | 8862917                 | AA                              | GG                 | GG               | DRR                           | 101500298          | protein HAIKU1-like         |
| SNP_59565_A_8869113 | NC_021167.1    | Ca_Kabuli_Chr08 | 8869113                 | TT                              | AA                 | AA               | INTERGENIC                    |                    |                             |
| SNP_59567_A_8869659 | NC_021167.1    | Ca_Kabuli_Chr08 | 8869659                 | AA                              | TT                 | TT               | INTERGENIC                    |                    |                             |
| SNP_59568_A_8871037 | NC_021167.1    | Ca_Kabuli_Chr08 | 8871037                 | GG                              | AA                 | AA               | INTERGENIC                    |                    |                             |
| SNP_59570_A_8872763 | NC_021167.1    | Ca_Kabuli_Chr08 | 8872763                 | CC                              | GG                 | GG               | INTERGENIC                    |                    |                             |
| SNP_59571_A_8872766 | NC_021167.1    | Ca_Kabuli_Chr08 | 8872766                 | GG                              | AA                 | AA               | INTERGENIC                    |                    |                             |
| SNP_59572_A_8872784 | NC_021167.1    | Ca_Kabuli_Chr08 | 8872784                 | AA                              | GG                 | GG               | INTERGENIC                    |                    |                             |
| SNP_59573_A_8872785 | NC_021167.1    | Ca_Kabuli_Chr08 | 8872785                 | GG                              | CC                 | CC               | INTERGENIC                    |                    |                             |
| SNP_59574_A_8873106 | NC_021167.1    | Ca_Kabuli_Chr08 | 8873106                 | GG                              | AA                 | AA               | INTERGENIC                    |                    |                             |
| SNP_59576_A_8874476 | NC_021167.1    | Ca_Kabuli_Chr08 | 8874476                 | AA                              | TT                 | TT               | INTERGENIC                    |                    |                             |
| SNP_59577_A_8875714 | NC_021167.1    | Ca_Kabuli_Chr08 | 8875714                 | AA                              | GG                 | GG               | INTERGENIC                    |                    |                             |
| SNP_59578_A_8876794 | NC_021167.1    | Ca_Kabuli_Chr08 | 8876794                 | TT                              | AA                 | AA               | DRR                           | 101500611          | abscisic acid receptor PYL1 |
| SNP_59579_A_8877173 | NC_021167.1    | Ca_Kabuli_Chr08 | 8877173                 | AA                              | TT                 | TT               | DRR                           | 101500611          | abscisic acid receptor PYL1 |
| SNP_59580_A_8877175 | NC_021167.1    | Ca_Kabuli_Chr08 | 8877175                 | CC                              | TT                 | TT               | DRR                           | 101500611          | abscisic acid receptor PYL1 |
| SNP_59581_A_8878940 | NC_021167.1    | Ca_Kabuli_Chr08 | 8878940                 | CC                              | TT                 | TT               | URR                           | 101500611          | abscisic acid receptor PYL1 |
| SNP_59582_A_8878963 | NC_021167.1    | Ca_Kabuli_Chr08 | 8878963                 | TT                              | CC                 | CC               | URR                           | 101500611          | abscisic acid receptor PYL1 |
| SNP_59583_A_8878970 | NC_021167.1    | Ca_Kabuli_Chr08 | 8878970                 | AA                              | GG                 | GG               | URR                           | 101500611          | abscisic acid receptor PYL1 |

| SNPs IDs            | Chromosome IDs | Chromosomes     | Physical positions (bp) | CDC Frontier (Reference genome) | (Pusa 1103 & HPNB) | (ILWC 46 & LPNB) | Sequence Components of genome | Gene accession IDs | Putative functions                                         |
|---------------------|----------------|-----------------|-------------------------|---------------------------------|--------------------|------------------|-------------------------------|--------------------|------------------------------------------------------------|
| SNP_59584_A_8879979 | NC_021167.1    | Ca_Kabuli_Chr08 | 8879979                 | TT                              | CC                 | CC               | URR                           | 101500611          | abscisic acid receptor PYL1                                |
| SNP_59585_A_8881371 | NC_021167.1    | Ca_Kabuli_Chr08 | 8881371                 | GG                              | AA                 | AA               | INTERGENIC                    |                    |                                                            |
| SNP_59586_A_8881388 | NC_021167.1    | Ca_Kabuli_Chr08 | 8881388                 | AA                              | GG                 | GG               | INTERGENIC                    |                    |                                                            |
| SNP_59589_A_8882263 | NC_021167.1    | Ca_Kabuli_Chr08 | 8882263                 | TT                              | CC                 | CC               | INTERGENIC                    |                    |                                                            |
| SNP_59590_A_8883489 | NC_021167.1    | Ca_Kabuli_Chr08 | 8883489                 | AA                              | GG                 | GG               | INTERGENIC                    |                    |                                                            |
| SNP_59592_A_8886213 | NC_021167.1    | Ca_Kabuli_Chr08 | 8886213                 | CC                              | TT                 | TT               | DRR                           | 101501251          | mitochondrial carnitine/acylcarnitine carrier-like protein |
| SNP_59594_A_8886800 | NC_021167.1    | Ca_Kabuli_Chr08 | 8886800                 | CC                              | TT                 | TT               | URR                           | 101500919          | uncharacterized LOC101500919                               |
| SNP_59595_A_8887852 | NC_021167.1    | Ca_Kabuli_Chr08 | 8887852                 | CC                              | AA                 | AA               | URR                           | 101500919          | uncharacterized LOC101500919                               |
| SNP_59596_A_8887870 | NC_021167.1    | Ca_Kabuli_Chr08 | 8887870                 | AA                              | GG                 | GG               | URR                           | 101500919          | uncharacterized LOC101500919                               |
| SNP_59597_A_8887877 | NC_021167.1    | Ca_Kabuli_Chr08 | 8887877                 | TT                              | GG                 | GG               | URR                           | 101500919          | uncharacterized LOC101500919                               |
| SNP_59598_A_8888152 | NC_021167.1    | Ca_Kabuli_Chr08 | 8888152                 | CC                              | TT                 | TT               | INTRON                        | 101501251          | mitochondrial carnitine/acylcarnitine carrier-like protein |
| SNP_59599_A_8893341 | NC_021167.1    | Ca_Kabuli_Chr08 | 8893341                 | TT                              | CC                 | CC               | INTERGENIC                    |                    |                                                            |
| SNP_59600_A_8893607 | NC_021167.1    | Ca_Kabuli_Chr08 | 8893607                 | GG                              | AA                 | AA               | INTERGENIC                    |                    |                                                            |
| SNP_59601_A_8894374 | NC_021167.1    | Ca_Kabuli_Chr08 | 8894374                 | GG                              | AA                 | AA               | DRR                           | 101501560          | probable sphingolipid transporter spinstar homolog 2       |
| SNP_59602_A_8894393 | NC_021167.1    | Ca_Kabuli_Chr08 | 8894393                 | AA                              | GG                 | GG               | DRR                           | 101501560          | probable sphingolipid transporter spinstar homolog 2       |
| SNP_59603_A_8900082 | NC_021167.1    | Ca_Kabuli_Chr08 | 8900082                 | AA                              | TT                 | TT               | NON_SYNONYMOUS_CODING         | 101501560          | probable sphingolipid transporter spinstar homolog 2       |
| SNP_59605_A_8906896 | NC_021167.1    | Ca_Kabuli_Chr08 | 8906896                 | GG                              | AA                 | AA               | URR                           | 101501560          | probable sphingolipid transporter spinstar homolog 2       |
| SNP_59606_A_8907140 | NC_021167.1    | Ca_Kabuli_Chr08 | 8907140                 | TT                              | AA                 | AA               | URR                           | 101501560          | probable sphingolipid transporter spinstar homolog 2       |
| SNP_59607_A_8907141 | NC_021167.1    | Ca_Kabuli_Chr08 | 8907141                 | CC                              | TT                 | TT               | URR                           | 101501560          | probable sphingolipid transporter spinstar homolog 2       |
| SNP_59609_A_8907704 | NC_021167.1    | Ca_Kabuli_Chr08 | 8907704                 | AA                              | GG                 | GG               | URR                           | 101501560          | probable sphingolipid transporter spinstar homolog 2       |
| SNP_59610_A_8910046 | NC_021167.1    | Ca_Kabuli_Chr08 | 8910046                 | TT                              | CC                 | CC               | INTERGENIC                    |                    |                                                            |
| SNP_59612_A_8910889 | NC_021167.1    | Ca_Kabuli_Chr08 | 8910889                 | CC                              | TT                 | TT               | INTRON                        | 101502095          | probable starch synthase 4, chloroplastic/amyloplastic     |

| SNPs IDs            | Chromosome IDs | Chromosomes     | Physical positions (bp) | CDC Frontier (Reference genome) | (Pusa 1103 & HPNB) | (ILWC 46 & LPNB) | Sequence Components of genome | Gene accession IDs | Putative functions                                     |
|---------------------|----------------|-----------------|-------------------------|---------------------------------|--------------------|------------------|-------------------------------|--------------------|--------------------------------------------------------|
| SNP_59613_A_8910900 | NC_021167.1    | Ca_Kabuli_Chr08 | 8910900                 | AA                              | GG                 | GG               | INTRON                        | 101502095          | probable starch synthase 4, chloroplastic/amyloplastic |
| SNP_59614_A_8911129 | NC_021167.1    | Ca_Kabuli_Chr08 | 8911129                 | GG                              | AA                 | AA               | INTRON                        | 101502095          | probable starch synthase 4, chloroplastic/amyloplastic |
| SNP_59615_A_8914350 | NC_021167.1    | Ca_Kabuli_Chr08 | 8914350                 | TT                              | AA                 | AA               | INTRON                        | 101502095          | probable starch synthase 4, chloroplastic/amyloplastic |
| SNP_59616_A_8915337 | NC_021167.1    | Ca_Kabuli_Chr08 | 8915337                 | TT                              | CC                 | CC               | INTRON                        | 101502095          | probable starch synthase 4, chloroplastic/amyloplastic |
| SNP_59617_A_8918229 | NC_021167.1    | Ca_Kabuli_Chr08 | 8918229                 | GG                              | AA                 | AA               | INTERGENIC                    |                    |                                                        |
| SNP_59618_A_8922941 | NC_021167.1    | Ca_Kabuli_Chr08 | 8922941                 | TT                              | AA                 | AA               | DRR                           | 101503359          | protein SPT2 homolog                                   |
| SNP_59619_A_8923225 | NC_021167.1    | Ca_Kabuli_Chr08 | 8923225                 | GG                              | AA                 | AA               | INTERGENIC                    |                    |                                                        |
| SNP_59620_A_8923512 | NC_021167.1    | Ca_Kabuli_Chr08 | 8923512                 | TT                              | AA                 | AA               | INTRON                        | 101503359          | protein SPT2 homolog                                   |
| SNP_59621_A_8924340 | NC_021167.1    | Ca_Kabuli_Chr08 | 8924340                 | TT                              | CC                 | CC               | INTRON                        | 101503359          | protein SPT2 homolog                                   |
| SNP_59622_A_8924608 | NC_021167.1    | Ca_Kabuli_Chr08 | 8924608                 | TT                              | AA                 | AA               | INTRON                        | 101503359          | protein SPT2 homolog                                   |
| SNP_59624_A_8924848 | NC_021167.1    | Ca_Kabuli_Chr08 | 8924848                 | TT                              | CC                 | CC               | INTRON                        | 101503359          | protein SPT2 homolog                                   |
| SNP_59625_A_8925087 | NC_021167.1    | Ca_Kabuli_Chr08 | 8925087                 | CC                              | TT                 | TT               | SYNONYMOUS_CODING             | 101503359          | protein SPT2 homolog                                   |
| SNP_59626_A_8934922 | NC_021167.1    | Ca_Kabuli_Chr08 | 8934922                 | AA                              | TT                 | TT               | INTRON                        | 101503695          | phosphoenolpyruvate carboxykinase [ATP]                |
| SNP_59628_A_8938796 | NC_021167.1    | Ca_Kabuli_Chr08 | 8938796                 | AA                              | GG                 | GG               | INTERGENIC                    |                    |                                                        |
| SNP_59629_A_8939190 | NC_021167.1    | Ca_Kabuli_Chr08 | 8939190                 | AA                              | GG                 | GG               | INTERGENIC                    |                    |                                                        |
| SNP_59630_A_8939219 | NC_021167.1    | Ca_Kabuli_Chr08 | 8939219                 | TT                              | CC                 | CC               | INTERGENIC                    |                    |                                                        |
| SNP_59631_A_8939491 | NC_021167.1    | Ca_Kabuli_Chr08 | 8939491                 | TT                              | CC                 | CC               | URR                           | 101503695          | phosphoenolpyruvate carboxykinase [ATP]                |
| SNP_59632_A_8939928 | NC_021167.1    | Ca_Kabuli_Chr08 | 8939928                 | CC                              | TT                 | TT               | URR                           | 101503695          | phosphoenolpyruvate carboxykinase [ATP]                |
| SNP_59633_A_8940113 | NC_021167.1    | Ca_Kabuli_Chr08 | 8940113                 | TT                              | CC                 | CC               | URR                           | 101503695          | phosphoenolpyruvate carboxykinase [ATP]                |
| SNP_59634_A_8940165 | NC_021167.1    | Ca_Kabuli_Chr08 | 8940165                 | TT                              | AA                 | AA               | DRR                           | 101491513          | putative FBD-associated F-box protein At5g56700        |
| SNP_59635_A_8940186 | NC_021167.1    | Ca_Kabuli_Chr08 | 8940186                 | AA                              | GG                 | GG               | DRR                           | 101491513          | putative FBD-associated F-box protein At5g56700        |
| SNP_59636_A_8940280 | NC_021167.1    | Ca_Kabuli_Chr08 | 8940280                 | GG                              | AA                 | AA               | DRR                           | 101491513          | putative FBD-associated F-box protein At5g56700        |

| SNPs IDs            | Chromosome IDs | Chromosomes     | Physical positions (bp) | CDC Frontier (Reference genome) | (Pusa 1103 & HPNB) | (ILWC 46 & LPNB) | Sequence genome | Components of | Gene accession IDs | Putative functions |
|---------------------|----------------|-----------------|-------------------------|---------------------------------|--------------------|------------------|-----------------|---------------|--------------------|--------------------|
| SNP_59638_A_8954156 | NC_021167.1    | Ca_Kabuli_Chr08 | 8954156                 | GG                              | AA                 | AA               | INTERGENIC      |               |                    |                    |
| SNP_59640_A_8957835 | NC_021167.1    | Ca_Kabuli_Chr08 | 8957835                 | TT                              | CC                 | CC               | INTERGENIC      |               |                    |                    |
| SNP_59641_A_8958732 | NC_021167.1    | Ca_Kabuli_Chr08 | 8958732                 | GG                              | CC                 | CC               | INTERGENIC      |               |                    |                    |
| SNP_59642_A_8961404 | NC_021167.1    | Ca_Kabuli_Chr08 | 8961404                 | AA                              | GG                 | GG               | INTERGENIC      |               |                    |                    |
| SNP_59643_A_8962005 | NC_021167.1    | Ca_Kabuli_Chr08 | 8962005                 | TT                              | CC                 | CC               | INTERGENIC      |               |                    |                    |
| SNP_59644_A_8962047 | NC_021167.1    | Ca_Kabuli_Chr08 | 8962047                 | TT                              | AA                 | AA               | INTERGENIC      |               |                    |                    |
| SNP_59645_A_8964212 | NC_021167.1    | Ca_Kabuli_Chr08 | 8964212                 | AA                              | GG                 | GG               | INTERGENIC      |               |                    |                    |
| SNP_59648_A_8964241 | NC_021167.1    | Ca_Kabuli_Chr08 | 8964241                 | GG                              | TT                 | TT               | INTERGENIC      |               |                    |                    |
| SNP_59649_A_8969028 | NC_021167.1    | Ca_Kabuli_Chr08 | 8969028                 | AA                              | GG                 | GG               | INTERGENIC      |               |                    |                    |
| SNP_59650_A_8969052 | NC_021167.1    | Ca_Kabuli_Chr08 | 8969052                 | TT                              | GG                 | GG               | INTERGENIC      |               |                    |                    |
| SNP_59651_A_8969104 | NC_021167.1    | Ca_Kabuli_Chr08 | 8969104                 | AA                              | GG                 | GG               | INTERGENIC      |               |                    |                    |
| SNP_59652_A_8969109 | NC_021167.1    | Ca_Kabuli_Chr08 | 8969109                 | CC                              | TT                 | TT               | INTERGENIC      |               |                    |                    |
| SNP_59653_A_8969156 | NC_021167.1    | Ca_Kabuli_Chr08 | 8969156                 | GG                              | CC                 | CC               | INTERGENIC      |               |                    |                    |
| SNP_59655_A_8969584 | NC_021167.1    | Ca_Kabuli_Chr08 | 8969584                 | AA                              | GG                 | GG               | INTERGENIC      |               |                    |                    |
| SNP_59656_A_8969595 | NC_021167.1    | Ca_Kabuli_Chr08 | 8969595                 | TT                              | CC                 | CC               | INTERGENIC      |               |                    |                    |
| SNP_59657_A_8969649 | NC_021167.1    | Ca_Kabuli_Chr08 | 8969649                 | GG                              | AA                 | AA               | INTERGENIC      |               |                    |                    |
| SNP_59658_A_8969973 | NC_021167.1    | Ca_Kabuli_Chr08 | 8969973                 | TT                              | CC                 | CC               | INTERGENIC      |               |                    |                    |
| SNP_59659_A_8970202 | NC_021167.1    | Ca_Kabuli_Chr08 | 8970202                 | AA                              | GG                 | GG               | INTERGENIC      |               |                    |                    |
| SNP_59660_A_8970218 | NC_021167.1    | Ca_Kabuli_Chr08 | 8970218                 | GG                              | TT                 | TT               | INTERGENIC      |               |                    |                    |
| SNP_59661_A_8973145 | NC_021167.1    | Ca_Kabuli_Chr08 | 8973145                 | CC                              | TT                 | TT               | INTERGENIC      |               |                    |                    |
| SNP_59662_A_8973146 | NC_021167.1    | Ca_Kabuli_Chr08 | 8973146                 | AA                              | GG                 | GG               | INTERGENIC      |               |                    |                    |
| SNP_59663_A_8973147 | NC_021167.1    | Ca_Kabuli_Chr08 | 8973147                 | GG                              | AA                 | AA               | INTERGENIC      |               |                    |                    |

| SNPs IDs            | Chromosome IDs | Chromosomes     | Physical positions (bp) | CDC Frontier genome (Reference genome) | (Pusa 1103 & HPNB) | (ILWC 46 & LPNB) | Sequence genome | Components of | Gene accession IDs | Putative functions |
|---------------------|----------------|-----------------|-------------------------|----------------------------------------|--------------------|------------------|-----------------|---------------|--------------------|--------------------|
| SNP_59664_A_8979468 | NC_021167.1    | Ca_Kabuli_Chr08 | 8979468                 | GG                                     | AA                 | AA               | INTERGENIC      |               |                    |                    |
| SNP_59665_A_8979488 | NC_021167.1    | Ca_Kabuli_Chr08 | 8979488                 | TT                                     | CC                 | CC               | INTERGENIC      |               |                    |                    |
| SNP_59666_A_8979498 | NC_021167.1    | Ca_Kabuli_Chr08 | 8979498                 | TT                                     | CC                 | CC               | INTERGENIC      |               |                    |                    |
| SNP_59667_A_8980808 | NC_021167.1    | Ca_Kabuli_Chr08 | 8980808                 | CC                                     | TT                 | TT               | INTERGENIC      |               |                    |                    |
| SNP_59668_A_8980824 | NC_021167.1    | Ca_Kabuli_Chr08 | 8980824                 | TT                                     | CC                 | CC               | INTERGENIC      |               |                    |                    |
| SNP_59669_A_8980844 | NC_021167.1    | Ca_Kabuli_Chr08 | 8980844                 | TT                                     | CC                 | CC               | INTERGENIC      |               |                    |                    |
| SNP_59670_A_8981785 | NC_021167.1    | Ca_Kabuli_Chr08 | 8981785                 | AA                                     | GG                 | GG               | INTERGENIC      |               |                    |                    |
| SNP_59671_A_8981792 | NC_021167.1    | Ca_Kabuli_Chr08 | 8981792                 | TT                                     | CC                 | CC               | INTERGENIC      |               |                    |                    |
| SNP_59672_A_8981793 | NC_021167.1    | Ca_Kabuli_Chr08 | 8981793                 | GG                                     | CC                 | CC               | INTERGENIC      |               |                    |                    |
| SNP_59673_A_8981808 | NC_021167.1    | Ca_Kabuli_Chr08 | 8981808                 | TT                                     | AA                 | AA               | INTERGENIC      |               |                    |                    |
| SNP_59674_A_8981809 | NC_021167.1    | Ca_Kabuli_Chr08 | 8981809                 | TT                                     | AA                 | AA               | INTERGENIC      |               |                    |                    |
| SNP_59675_A_8981810 | NC_021167.1    | Ca_Kabuli_Chr08 | 8981810                 | TT                                     | CC                 | CC               | INTERGENIC      |               |                    |                    |
| SNP_59676_A_8981818 | NC_021167.1    | Ca_Kabuli_Chr08 | 8981818                 | TT                                     | CC                 | CC               | INTERGENIC      |               |                    |                    |
| SNP_59677_A_8982065 | NC_021167.1    | Ca_Kabuli_Chr08 | 8982065                 | TT                                     | CC                 | CC               | INTERGENIC      |               |                    |                    |
| SNP_59678_A_8982088 | NC_021167.1    | Ca_Kabuli_Chr08 | 8982088                 | CC                                     | TT                 | TT               | INTERGENIC      |               |                    |                    |
| SNP_59679_A_8982094 | NC_021167.1    | Ca_Kabuli_Chr08 | 8982094                 | TT                                     | CC                 | CC               | INTERGENIC      |               |                    |                    |
| SNP_59680_A_8982098 | NC_021167.1    | Ca_Kabuli_Chr08 | 8982098                 | CC                                     | TT                 | TT               | INTERGENIC      |               |                    |                    |
| SNP_59681_A_8982099 | NC_021167.1    | Ca_Kabuli_Chr08 | 8982099                 | GG                                     | TT                 | TT               | INTERGENIC      |               |                    |                    |
| SNP_59683_A_8994357 | NC_021167.1    | Ca_Kabuli_Chr08 | 8994357                 | TT                                     | CC                 | CC               | INTERGENIC      |               |                    |                    |
| SNP_59684_A_8994413 | NC_021167.1    | Ca_Kabuli_Chr08 | 8994413                 | CC                                     | TT                 | TT               | INTERGENIC      |               |                    |                    |
| SNP_59685_A_8994446 | NC_021167.1    | Ca_Kabuli_Chr08 | 8994446                 | CC                                     | TT                 | TT               | INTERGENIC      |               |                    |                    |
| SNP_59687_A_8995594 | NC_021167.1    | Ca_Kabuli_Chr08 | 8995594                 | AA                                     | TT                 | TT               | INTERGENIC      |               |                    |                    |



| SNPs IDs            | Chromosome IDs | Chromosomes     | Physical positions (bp) | CDC Frontier (Reference genome) | (Pusa 1103 & HPNB) | (ILWC 46 & LPNB) | Sequence Components of genome | Gene accession IDs | Putative functions               |
|---------------------|----------------|-----------------|-------------------------|---------------------------------|--------------------|------------------|-------------------------------|--------------------|----------------------------------|
| SNP_59688_A_8995595 | NC_021167.1    | Ca_Kabuli_Chr08 | 8995595                 | TT                              | CC                 | CC               | INTERGENIC                    |                    |                                  |
| SNP_59689_A_8995602 | NC_021167.1    | Ca_Kabuli_Chr08 | 8995602                 | CC                              | TT                 | TT               | INTERGENIC                    |                    |                                  |
| SNP_59690_A_8998261 | NC_021167.1    | Ca_Kabuli_Chr08 | 8998261                 | GG                              | AA                 | AA               | INTERGENIC                    |                    |                                  |
| SNP_59691_A_8998339 | NC_021167.1    | Ca_Kabuli_Chr08 | 8998339                 | CC                              | TT                 | TT               | INTERGENIC                    |                    |                                  |
| SNP_59692_A_8998381 | NC_021167.1    | Ca_Kabuli_Chr08 | 8998381                 | GG                              | CC                 | CC               | INTERGENIC                    |                    |                                  |
| SNP_59693_A_8998384 | NC_021167.1    | Ca_Kabuli_Chr08 | 8998384                 | AA                              | TT                 | TT               | INTERGENIC                    |                    |                                  |
| SNP_59694_A_8998400 | NC_021167.1    | Ca_Kabuli_Chr08 | 8998400                 | TT                              | CC                 | CC               | INTERGENIC                    |                    |                                  |
| SNP_59695_A_8998405 | NC_021167.1    | Ca_Kabuli_Chr08 | 8998405                 | GG                              | AA                 | AA               | INTERGENIC                    |                    |                                  |
| SNP_59696_A_8998470 | NC_021167.1    | Ca_Kabuli_Chr08 | 8998470                 | AA                              | GG                 | GG               | INTERGENIC                    |                    |                                  |
| SNP_59697_A_8998533 | NC_021167.1    | Ca_Kabuli_Chr08 | 8998533                 | CC                              | GG                 | GG               | INTERGENIC                    |                    |                                  |
| SNP_59698_A_8998557 | NC_021167.1    | Ca_Kabuli_Chr08 | 8998557                 | AA                              | GG                 | GG               | INTERGENIC                    |                    |                                  |
| SNP_59700_A_9000062 | NC_021167.1    | Ca_Kabuli_Chr08 | 9000062                 | GG                              | TT                 | TT               | INTERGENIC                    |                    |                                  |
| SNP_59703_A_9005069 | NC_021167.1    | Ca_Kabuli_Chr08 | 9005069                 | TT                              | CC                 | CC               | INTERGENIC                    |                    |                                  |
| SNP_59704_A_9019618 | NC_021167.1    | Ca_Kabuli_Chr08 | 9019618                 | AA                              | GG                 | GG               | INTERGENIC                    |                    |                                  |
| SNP_59705_A_9019621 | NC_021167.1    | Ca_Kabuli_Chr08 | 9019621                 | TT                              | CC                 | CC               | INTERGENIC                    |                    |                                  |
| SNP_59706_A_9019676 | NC_021167.1    | Ca_Kabuli_Chr08 | 9019676                 | TT                              | GG                 | GG               | INTERGENIC                    |                    |                                  |
| SNP_59708_A_9076758 | NC_021167.1    | Ca_Kabuli_Chr08 | 9076758                 | AA                              | CC                 | CC               | INTRON                        | 101505299          | transcription factor bHLH93-like |
| SNP_59709_A_9079489 | NC_021167.1    | Ca_Kabuli_Chr08 | 9079489                 | AA                              | CC                 | CC               | URR                           | 101505299          | transcription factor bHLH93-like |
| SNP_59710_A_9079494 | NC_021167.1    | Ca_Kabuli_Chr08 | 9079494                 | AA                              | GG                 | GG               | URR                           | 101505299          | transcription factor bHLH93-like |
| SNP_59711_A_9079496 | NC_021167.1    | Ca_Kabuli_Chr08 | 9079496                 | AA                              | CC                 | CC               | URR                           | 101505299          | transcription factor bHLH93-like |
| SNP_59712_A_9080866 | NC_021167.1    | Ca_Kabuli_Chr08 | 9080866                 | AA                              | GG                 | GG               | INTERGENIC                    |                    |                                  |
| SNP_59713_A_9081068 | NC_021167.1    | Ca_Kabuli_Chr08 | 9081068                 | TT                              | AA                 | AA               | INTERGENIC                    |                    |                                  |

| SNPs IDs            | Chromosome IDs | Chromosomes     | Physical positions (bp) | CDC Frontier genome (Reference genome) | (Pusa 1103 & HPNB) | (ILWC 46 & LPNB) | Sequence Components of genome | Gene accession IDs | Putative functions                               |
|---------------------|----------------|-----------------|-------------------------|----------------------------------------|--------------------|------------------|-------------------------------|--------------------|--------------------------------------------------|
| SNP_59715_A_9083676 | NC_021167.1    | Ca_Kabuli_Chr08 | 9083676                 | CC                                     | TT                 | TT               | INTERGENIC                    |                    |                                                  |
| SNP_59716_A_9083693 | NC_021167.1    | Ca_Kabuli_Chr08 | 9083693                 | CC                                     | GG                 | GG               | INTERGENIC                    |                    |                                                  |
| SNP_59718_A_9087352 | NC_021167.1    | Ca_Kabuli_Chr08 | 9087352                 | GG                                     | TT                 | TT               | INTERGENIC                    |                    |                                                  |
| SNP_59720_A_9088087 | NC_021167.1    | Ca_Kabuli_Chr08 | 9088087                 | TT                                     | GG                 | GG               | INTERGENIC                    |                    |                                                  |
| SNP_59721_A_9088151 | NC_021167.1    | Ca_Kabuli_Chr08 | 9088151                 | AA                                     | GG                 | GG               | INTERGENIC                    |                    |                                                  |
| SNP_59725_A_9097825 | NC_021167.1    | Ca_Kabuli_Chr08 | 9097825                 | CC                                     | TT                 | TT               | INTERGENIC                    |                    |                                                  |
| SNP_59726_A_9098953 | NC_021167.1    | Ca_Kabuli_Chr08 | 9098953                 | TT                                     | CC                 | CC               | SYNONYMOUS_CODING             | 101505631          | probable beta-D-xylosidase 6                     |
| SNP_59727_A_9100293 | NC_021167.1    | Ca_Kabuli_Chr08 | 9100293                 | GG                                     | AA                 | AA               | NON_SYNONYMOUS_CODING         | 101505631          | probable beta-D-xylosidase 6                     |
| SNP_59729_A_9113743 | NC_021167.1    | Ca_Kabuli_Chr08 | 9113743                 | CC                                     | TT                 | TT               | INTERGENIC                    |                    |                                                  |
| SNP_59730_A_9113767 | NC_021167.1    | Ca_Kabuli_Chr08 | 9113767                 | GG                                     | AA                 | AA               | INTERGENIC                    |                    |                                                  |
| SNP_59731_A_9116008 | NC_021167.1    | Ca_Kabuli_Chr08 | 9116008                 | CC                                     | TT                 | TT               | INTERGENIC                    |                    |                                                  |
| SNP_59732_A_9120317 | NC_021167.1    | Ca_Kabuli_Chr08 | 9120317                 | CC                                     | TT                 | TT               | INTRON                        | 101506704          | uncharacterized protein At4g37920, chloroplastic |
| SNP_59733_A_9120322 | NC_021167.1    | Ca_Kabuli_Chr08 | 9120322                 | TT                                     | GG                 | GG               | INTRON                        | 101506704          | uncharacterized protein At4g37920, chloroplastic |
| SNP_59734_A_9120325 | NC_021167.1    | Ca_Kabuli_Chr08 | 9120325                 | AA                                     | GG                 | GG               | INTRON                        | 101506704          | uncharacterized protein At4g37920, chloroplastic |
| SNP_59735_A_9122653 | NC_021167.1    | Ca_Kabuli_Chr08 | 9122653                 | AA                                     | TT                 | TT               | INTRON                        | 101506704          | uncharacterized protein At4g37920, chloroplastic |
| SNP_59736_A_9122909 | NC_021167.1    | Ca_Kabuli_Chr08 | 9122909                 | AA                                     | GG                 | GG               | INTRON                        | 101506704          | uncharacterized protein At4g37920, chloroplastic |
| SNP_59737_A_9124483 | NC_021167.1    | Ca_Kabuli_Chr08 | 9124483                 | TT                                     | CC                 | CC               | URR                           | 101506704          | uncharacterized protein At4g37920, chloroplastic |
| SNP_59738_A_9125611 | NC_021167.1    | Ca_Kabuli_Chr08 | 9125611                 | CC                                     | TT                 | TT               | INTERGENIC                    |                    |                                                  |
| SNP_59739_A_9127548 | NC_021167.1    | Ca_Kabuli_Chr08 | 9127548                 | TT                                     | CC                 | CC               | SYNONYMOUS_CODING             | 101492494          | ABC transporter G family member 17-like          |
| SNP_59740_A_9127551 | NC_021167.1    | Ca_Kabuli_Chr08 | 9127551                 | GG                                     | AA                 | AA               | SYNONYMOUS_CODING             | 101492494          | ABC transporter G family member 17-like          |
| SNP_59742_A_9130826 | NC_021167.1    | Ca_Kabuli_Chr08 | 9130826                 | CC                                     | TT                 | TT               | URR                           | 101492494          | ABC transporter G family member 17-like          |
| SNP_59743_A_9131091 | NC_021167.1    | Ca_Kabuli_Chr08 | 9131091                 | GG                                     | AA                 | AA               | URR                           | 101492494          | ABC transporter G family member 17-like          |

| SNPs IDs            | Chromosome IDs | Chromosomes     | Physical positions (bp) | CDC Frontier (Reference genome) | (Pusa 1103 & HPNB) | (ILWC 46 & LPNB) | Sequence Components of genome | Gene accession IDs | Putative functions                             |
|---------------------|----------------|-----------------|-------------------------|---------------------------------|--------------------|------------------|-------------------------------|--------------------|------------------------------------------------|
| SNP_59744_A_9131275 | NC_021167.1    | Ca_Kabuli_Chr08 | 9131275                 | CC                              | TT                 | TT               | URR                           | 101492494          | ABC transporter G family member 17-like        |
| SNP_59745_A_9131283 | NC_021167.1    | Ca_Kabuli_Chr08 | 9131283                 | TT                              | CC                 | CC               | URR                           | 101492494          | ABC transporter G family member 17-like        |
| SNP_59747_A_9131806 | NC_021167.1    | Ca_Kabuli_Chr08 | 9131806                 | CC                              | AA                 | AA               | URR                           | 101492494          | ABC transporter G family member 17-like        |
| SNP_59748_A_9131813 | NC_021167.1    | Ca_Kabuli_Chr08 | 9131813                 | TT                              | GG                 | GG               | URR                           | 101492494          | ABC transporter G family member 17-like        |
| SNP_59751_A_9151486 | NC_021167.1    | Ca_Kabuli_Chr08 | 9151486                 | AA                              | GG                 | GG               | DRR                           | 101507357          | probable cytosolic oligopeptidase A            |
| SNP_59753_A_9152464 | NC_021167.1    | Ca_Kabuli_Chr08 | 9152464                 | AA                              | GG                 | GG               | INTRON                        | 101507357          | probable cytosolic oligopeptidase A            |
| SNP_59755_A_9153303 | NC_021167.1    | Ca_Kabuli_Chr08 | 9153303                 | TT                              | GG                 | GG               | INTRON                        | 101507357          | probable cytosolic oligopeptidase A            |
| SNP_59756_A_9153363 | NC_021167.1    | Ca_Kabuli_Chr08 | 9153363                 | CC                              | TT                 | TT               | INTRON                        | 101507357          | probable cytosolic oligopeptidase A            |
| SNP_59757_A_9153377 | NC_021167.1    | Ca_Kabuli_Chr08 | 9153377                 | TT                              | GG                 | GG               | INTRON                        | 101507357          | probable cytosolic oligopeptidase A            |
| SNP_59758_A_9153538 | NC_021167.1    | Ca_Kabuli_Chr08 | 9153538                 | AA                              | GG                 | GG               | SYNONYMOUS_CODING             | 101507357          | probable cytosolic oligopeptidase A            |
| SNP_59759_A_9153571 | NC_021167.1    | Ca_Kabuli_Chr08 | 9153571                 | AA                              | GG                 | GG               | SYNONYMOUS_CODING             | 101507357          | probable cytosolic oligopeptidase A            |
| SNP_59761_A_9157862 | NC_021167.1    | Ca_Kabuli_Chr08 | 9157862                 | CC                              | TT                 | TT               | INTRON                        | 101507357          | probable cytosolic oligopeptidase A            |
| SNP_59762_A_9158513 | NC_021167.1    | Ca_Kabuli_Chr08 | 9158513                 | AA                              | TT                 | TT               | INTRON                        | 101507357          | probable cytosolic oligopeptidase A            |
| SNP_59763_A_9159030 | NC_021167.1    | Ca_Kabuli_Chr08 | 9159030                 | GG                              | CC                 | CC               | INTRON                        | 101507357          | probable cytosolic oligopeptidase A            |
| SNP_59764_A_9159156 | NC_021167.1    | Ca_Kabuli_Chr08 | 9159156                 | AA                              | GG                 | GG               | SYNONYMOUS_CODING             | 101507357          | probable cytosolic oligopeptidase A            |
| SNP_59765_A_9159182 | NC_021167.1    | Ca_Kabuli_Chr08 | 9159182                 | AA                              | CC                 | CC               | NON_SYNONYMOUS_CODING         | 101507357          | probable cytosolic oligopeptidase A            |
| SNP_59766_A_9170474 | NC_021167.1    | Ca_Kabuli_Chr08 | 9170474                 | AA                              | TT                 | TT               | INTRON                        | 101507995          | serine hydroxymethyltransferase, mitochondrial |
| SNP_59767_A_9170487 | NC_021167.1    | Ca_Kabuli_Chr08 | 9170487                 | GG                              | TT                 | TT               | INTRON                        | 101507995          | serine hydroxymethyltransferase, mitochondrial |
| SNP_59768_A_9170840 | NC_021167.1    | Ca_Kabuli_Chr08 | 9170840                 | CC                              | AA                 | AA               | INTRON                        | 101507995          | serine hydroxymethyltransferase, mitochondrial |
| SNP_59769_A_9185176 | NC_021167.1    | Ca_Kabuli_Chr08 | 9185176                 | TT                              | CC                 | CC               | INTERGENIC                    |                    |                                                |
| SNP_59770_A_9185195 | NC_021167.1    | Ca_Kabuli_Chr08 | 9185195                 | GG                              | TT                 | TT               | INTERGENIC                    |                    |                                                |
| SNP_59771_A_9185211 | NC_021167.1    | Ca_Kabuli_Chr08 | 9185211                 | TT                              | AA                 | AA               | INTERGENIC                    |                    |                                                |

| SNPs IDs            | Chromosome IDs | Chromosomes     | Physical positions (bp) | CDC Frontier (Reference genome) | (Pusa 1103 & HPNB) | (ILWC 46 & LPNB) | Sequence Components of genome | Gene accession IDs | Putative functions                  |
|---------------------|----------------|-----------------|-------------------------|---------------------------------|--------------------|------------------|-------------------------------|--------------------|-------------------------------------|
| SNP_59772_A_9185251 | NC_021167.1    | Ca_Kabuli_Chr08 | 9185251                 | AA                              | TT                 | TT               | INTERGENIC                    |                    |                                     |
| SNP_59773_A_9185578 | NC_021167.1    | Ca_Kabuli_Chr08 | 9185578                 | AA                              | TT                 | TT               | INTERGENIC                    |                    |                                     |
| SNP_59774_A_9189444 | NC_021167.1    | Ca_Kabuli_Chr08 | 9189444                 | GG                              | AA                 | AA               | DRR                           | 101508731          | Unknown function                    |
| SNP_59775_A_9189622 | NC_021167.1    | Ca_Kabuli_Chr08 | 9189622                 | TT                              | GG                 | GG               | DRR                           | 101508731          | Unknown function                    |
| SNP_59776_A_9189675 | NC_021167.1    | Ca_Kabuli_Chr08 | 9189675                 | CC                              | AA                 | AA               | DRR                           | 101508731          | Unknown function                    |
| SNP_59777_A_9195648 | NC_021167.1    | Ca_Kabuli_Chr08 | 9195648                 | AA                              | TT                 | TT               | INTERGENIC                    |                    |                                     |
| SNP_59778_A_9197105 | NC_021167.1    | Ca_Kabuli_Chr08 | 9197105                 | CC                              | AA                 | AA               | INTRON                        | 101509049          | agamous-like MADS-box protein AGL21 |
| SNP_59780_A_9200048 | NC_021167.1    | Ca_Kabuli_Chr08 | 9200048                 | CC                              | GG                 | GG               | INTRON                        | 101509049          | agamous-like MADS-box protein AGL21 |
| SNP_59781_A_9200089 | NC_021167.1    | Ca_Kabuli_Chr08 | 9200089                 | TT                              | CC                 | CC               | INTRON                        | 101509049          | agamous-like MADS-box protein AGL21 |
| SNP_59782_A_9200190 | NC_021167.1    | Ca_Kabuli_Chr08 | 9200190                 | GG                              | AA                 | AA               | INTRON                        | 101509049          | agamous-like MADS-box protein AGL21 |
| SNP_59783_A_9200255 | NC_021167.1    | Ca_Kabuli_Chr08 | 9200255                 | CC                              | GG                 | GG               | INTRON                        | 101509049          | agamous-like MADS-box protein AGL21 |
| SNP_59785_A_9201667 | NC_021167.1    | Ca_Kabuli_Chr08 | 9201667                 | AA                              | TT                 | TT               | URR                           | 101509049          | agamous-like MADS-box protein AGL21 |
| SNP_59786_A_9207311 | NC_021167.1    | Ca_Kabuli_Chr08 | 9207311                 | GG                              | AA                 | AA               | INTERGENIC                    |                    |                                     |
| SNP_59787_A_9214528 | NC_021167.1    | Ca_Kabuli_Chr08 | 9214528                 | GG                              | AA                 | AA               | INTERGENIC                    |                    |                                     |
| SNP_59789_A_9215363 | NC_021167.1    | Ca_Kabuli_Chr08 | 9215363                 | CC                              | TT                 | TT               | INTERGENIC                    |                    |                                     |
| SNP_59790_A_9216663 | NC_021167.1    | Ca_Kabuli_Chr08 | 9216663                 | AA                              | GG                 | GG               | INTERGENIC                    |                    |                                     |
| SNP_59791_A_9217317 | NC_021167.1    | Ca_Kabuli_Chr08 | 9217317                 | CC                              | AA                 | AA               | DRR                           | 101492826          | agglutinin-2-like                   |
| SNP_59793_A_9218054 | NC_021167.1    | Ca_Kabuli_Chr08 | 9218054                 | CC                              | TT                 | TT               | DRR                           | 101492826          | agglutinin-2-like                   |
| SNP_59794_A_9219855 | NC_021167.1    | Ca_Kabuli_Chr08 | 9219855                 | AA                              | GG                 | GG               | DRR                           | 101509372          | agglutinin-2-like                   |
| SNP_59795_A_9220054 | NC_021167.1    | Ca_Kabuli_Chr08 | 9220054                 | CC                              | AA                 | AA               | DRR                           | 101509372          | agglutinin-2-like                   |
| SNP_59797_A_9220074 | NC_021167.1    | Ca_Kabuli_Chr08 | 9220074                 | TT                              | AA                 | AA               | DRR                           | 101509372          | agglutinin-2-like                   |
| SNP_59798_A_9234057 | NC_021167.1    | Ca_Kabuli_Chr08 | 9234057                 | AA                              | TT                 | TT               | INTERGENIC                    |                    |                                     |

| SNPs IDs            | Chromosome IDs | Chromosomes     | Physical positions (bp) | CDC Frontier genome (Reference genome) | (Pusa 1103 & HPNB) | (ILWC 46 & LPNB) | Sequence Components of genome | Gene accession IDs | Putative functions                                    |
|---------------------|----------------|-----------------|-------------------------|----------------------------------------|--------------------|------------------|-------------------------------|--------------------|-------------------------------------------------------|
| SNP_59799_A_9234261 | NC_021167.1    | Ca_Kabuli_Chr08 | 9234261                 | AA                                     | CC                 | CC               | INTERGENIC                    |                    |                                                       |
| SNP_59800_A_9273778 | NC_021167.1    | Ca_Kabuli_Chr08 | 9273778                 | AA                                     | CC                 | CC               | URR                           | 101510988          | uncharacterized LOC101510988                          |
| SNP_59802_A_9274098 | NC_021167.1    | Ca_Kabuli_Chr08 | 9274098                 | CC                                     | TT                 | TT               | URR                           | 101510988          | uncharacterized LOC101510988                          |
| SNP_59803_A_9274139 | NC_021167.1    | Ca_Kabuli_Chr08 | 9274139                 | TT                                     | CC                 | CC               | URR                           | 101510988          | uncharacterized LOC101510988                          |
| SNP_59804_A_9274183 | NC_021167.1    | Ca_Kabuli_Chr08 | 9274183                 | TT                                     | CC                 | CC               | URR                           | 101510988          | uncharacterized LOC101510988                          |
| SNP_59805_A_9274390 | NC_021167.1    | Ca_Kabuli_Chr08 | 9274390                 | AA                                     | CC                 | CC               | URR                           | 101510988          | uncharacterized LOC101510988                          |
| SNP_59806_A_9274395 | NC_021167.1    | Ca_Kabuli_Chr08 | 9274395                 | AA                                     | TT                 | TT               | URR                           | 101510988          | uncharacterized LOC101510988                          |
| SNP_59807_A_9274396 | NC_021167.1    | Ca_Kabuli_Chr08 | 9274396                 | TT                                     | CC                 | CC               | URR                           | 101510988          | uncharacterized LOC101510988                          |
| SNP_59809_A_9283392 | NC_021167.1    | Ca_Kabuli_Chr08 | 9283392                 | AA                                     | GG                 | GG               | INTERGENIC                    |                    |                                                       |
| SNP_59810_A_9314721 | NC_021167.1    | Ca_Kabuli_Chr08 | 9314721                 | GG                                     | CC                 | CC               | INTERGENIC                    |                    |                                                       |
| SNP_59811_A_9322562 | NC_021167.1    | Ca_Kabuli_Chr08 | 9322562                 | TT                                     | AA                 | AA               | URR                           | 101511938          | dof zinc finger protein DOF5.7                        |
| SNP_59812_A_9323905 | NC_021167.1    | Ca_Kabuli_Chr08 | 9323905                 | TT                                     | AA                 | AA               | INTERGENIC                    |                    |                                                       |
| SNP_59816_A_9363645 | NC_021167.1    | Ca_Kabuli_Chr08 | 9363645                 | TT                                     | GG                 | GG               | INTERGENIC                    |                    |                                                       |
| SNP_59817_A_9363833 | NC_021167.1    | Ca_Kabuli_Chr08 | 9363833                 | GG                                     | AA                 | AA               | DRR                           | 101513759          | pentatricopeptide repeat-containing protein At5g65560 |
| SNP_59818_A_9363872 | NC_021167.1    | Ca_Kabuli_Chr08 | 9363872                 | CC                                     | TT                 | TT               | DRR                           | 101513759          | pentatricopeptide repeat-containing protein At5g65560 |
| SNP_59819_A_9363911 | NC_021167.1    | Ca_Kabuli_Chr08 | 9363911                 | CC                                     | GG                 | GG               | DRR                           | 101513759          | pentatricopeptide repeat-containing protein At5g65560 |
| SNP_59820_A_9363966 | NC_021167.1    | Ca_Kabuli_Chr08 | 9363966                 | CC                                     | TT                 | TT               | DRR                           | 101513759          | pentatricopeptide repeat-containing protein At5g65560 |
| SNP_59821_A_9363967 | NC_021167.1    | Ca_Kabuli_Chr08 | 9363967                 | AA                                     | GG                 | GG               | DRR                           | 101513759          | pentatricopeptide repeat-containing protein At5g65560 |
| SNP_59822_A_9364294 | NC_021167.1    | Ca_Kabuli_Chr08 | 9364294                 | AA                                     | CC                 | CC               | DRR                           | 101513759          | pentatricopeptide repeat-containing protein At5g65560 |
| SNP_59823_A_9364298 | NC_021167.1    | Ca_Kabuli_Chr08 | 9364298                 | CC                                     | GG                 | GG               | DRR                           | 101513759          | pentatricopeptide repeat-containing protein At5g65560 |
| SNP_59824_A_9364467 | NC_021167.1    | Ca_Kabuli_Chr08 | 9364467                 | TT                                     | GG                 | GG               | DRR                           | 101513759          | pentatricopeptide repeat-containing protein At5g65560 |
| SNP_59825_A_9364512 | NC_021167.1    | Ca_Kabuli_Chr08 | 9364512                 | AA                                     | CC                 | CC               | DRR                           | 101513759          | pentatricopeptide repeat-containing protein At5g65560 |

| SNPs IDs            | Chromosome IDs | Chromosomes     | Physical positions (bp) | CDC Frontier genome (Reference genome) | (Pusa 1103 & HPNB) | (ILWC 46 & LPNB) | Sequence Components of genome | Gene accession IDs | Putative functions                                    |
|---------------------|----------------|-----------------|-------------------------|----------------------------------------|--------------------|------------------|-------------------------------|--------------------|-------------------------------------------------------|
| SNP_59827_A_9364587 | NC_021167.1    | Ca_Kabuli_Chr08 | 9364587                 | TT                                     | CC                 | CC               | DRR                           | 101513759          | pentatricopeptide repeat-containing protein At5g65560 |
| SNP_59828_A_9371882 | NC_021167.1    | Ca_Kabuli_Chr08 | 9371882                 | TT                                     | CC                 | CC               | INTERGENIC                    |                    |                                                       |
| SNP_59829_A_9378060 | NC_021167.1    | Ca_Kabuli_Chr08 | 9378060                 | AA                                     | TT                 | TT               | INTERGENIC                    |                    |                                                       |
| SNP_59830_A_9378135 | NC_021167.1    | Ca_Kabuli_Chr08 | 9378135                 | CC                                     | TT                 | TT               | INTERGENIC                    |                    |                                                       |
| SNP_59832_A_9379275 | NC_021167.1    | Ca_Kabuli_Chr08 | 9379275                 | CC                                     | AA                 | AA               | DRR                           | 101514860          | translation initiation factor eIF-2B subunit beta     |
| SNP_59833_A_9379427 | NC_021167.1    | Ca_Kabuli_Chr08 | 9379427                 | GG                                     | AA                 | AA               | DRR                           | 101514860          | translation initiation factor eIF-2B subunit beta     |
| SNP_59834_A_9379467 | NC_021167.1    | Ca_Kabuli_Chr08 | 9379467                 | AA                                     | GG                 | GG               | DRR                           | 101514860          | translation initiation factor eIF-2B subunit beta     |
| SNP_59835_A_9379468 | NC_021167.1    | Ca_Kabuli_Chr08 | 9379468                 | GG                                     | AA                 | AA               | DRR                           | 101514860          | translation initiation factor eIF-2B subunit beta     |
| SNP_59836_A_9379478 | NC_021167.1    | Ca_Kabuli_Chr08 | 9379478                 | TT                                     | CC                 | CC               | DRR                           | 101514860          | translation initiation factor eIF-2B subunit beta     |
| SNP_59837_A_9379578 | NC_021167.1    | Ca_Kabuli_Chr08 | 9379578                 | GG                                     | TT                 | TT               | DRR                           | 101514860          | translation initiation factor eIF-2B subunit beta     |
| SNP_59838_A_9387897 | NC_021167.1    | Ca_Kabuli_Chr08 | 9387897                 | TT                                     | CC                 | CC               | INTRON                        | 101514860          | translation initiation factor eIF-2B subunit beta     |
| SNP_59839_A_9391880 | NC_021167.1    | Ca_Kabuli_Chr08 | 9391880                 | AA                                     | GG                 | GG               | INTERGENIC                    |                    |                                                       |
| SNP_59840_A_9395660 | NC_021167.1    | Ca_Kabuli_Chr08 | 9395660                 | CC                                     | TT                 | TT               | INTERGENIC                    |                    |                                                       |
| SNP_59841_A_9397306 | NC_021167.1    | Ca_Kabuli_Chr08 | 9397306                 | GG                                     | AA                 | AA               | INTERGENIC                    |                    |                                                       |
| SNP_59842_A_9402075 | NC_021167.1    | Ca_Kabuli_Chr08 | 9402075                 | CC                                     | GG                 | GG               | INTERGENIC                    |                    |                                                       |
| SNP_59843_A_9402355 | NC_021167.1    | Ca_Kabuli_Chr08 | 9402355                 | AA                                     | TT                 | TT               | INTERGENIC                    |                    |                                                       |
| SNP_59844_A_9402408 | NC_021167.1    | Ca_Kabuli_Chr08 | 9402408                 | TT                                     | CC                 | CC               | INTERGENIC                    |                    |                                                       |
| SNP_59845_A_9403873 | NC_021167.1    | Ca_Kabuli_Chr08 | 9403873                 | TT                                     | AA                 | AA               | INTERGENIC                    |                    |                                                       |
| SNP_59846_A_9416622 | NC_021167.1    | Ca_Kabuli_Chr08 | 9416622                 | AA                                     | CC                 | CC               | INTERGENIC                    |                    |                                                       |
| SNP_59847_A_9950744 | NC_021167.1    | Ca_Kabuli_Chr08 | 9950744                 | GG                                     | AA                 | AA               | NON_SYNONYMOUS_CODING         | 101493708          | uncharacterized LOC101493708                          |
| SNP_59848_A_9950803 | NC_021167.1    | Ca_Kabuli_Chr08 | 9950803                 | CC                                     | TT                 | TT               | INTRON                        | 101493708          | uncharacterized LOC101493708                          |
| SNP_59849_A_9950828 | NC_021167.1    | Ca_Kabuli_Chr08 | 9950828                 | TT                                     | AA                 | AA               | INTRON                        | 101493708          | uncharacterized LOC101493708                          |

| SNPs IDs            | Chromosome IDs | Chromosomes     | Physical positions (bp) | CDC Frontier (Reference genome) | (Pusa 1103 & HPNB) | (ILWC 46 & LPNB) | Sequence Components of genome | Gene accession IDs | Putative functions           |
|---------------------|----------------|-----------------|-------------------------|---------------------------------|--------------------|------------------|-------------------------------|--------------------|------------------------------|
| SNP_59850_A_9951643 | NC_021167.1    | Ca_Kabuli_Chr08 | 9951643                 | GG                              | AA                 | AA               | NON_SYNONYMOUS_CODING         | 101493708          | uncharacterized LOC101493708 |
| SNP_59851_A_9951664 | NC_021167.1    | Ca_Kabuli_Chr08 | 9951664                 | GG                              | TT                 | TT               | NON_SYNONYMOUS_CODING         | 101493708          | uncharacterized LOC101493708 |
| SNP_59853_A_9953395 | NC_021167.1    | Ca_Kabuli_Chr08 | 9953395                 | CC                              | AA                 | AA               | URR                           | 101493708          | uncharacterized LOC101493708 |
| SNP_59854_A_9957133 | NC_021167.1    | Ca_Kabuli_Chr08 | 9957133                 | CC                              | AA                 | AA               | INTERGENIC                    |                    |                              |
| SNP_59855_A_9957165 | NC_021167.1    | Ca_Kabuli_Chr08 | 9957165                 | CC                              | TT                 | TT               | INTERGENIC                    |                    |                              |
| SNP_59856_A_9957573 | NC_021167.1    | Ca_Kabuli_Chr08 | 9957573                 | GG                              | TT                 | TT               | INTERGENIC                    |                    |                              |
| SNP_59857_A_9957574 | NC_021167.1    | Ca_Kabuli_Chr08 | 9957574                 | TT                              | AA                 | AA               | INTERGENIC                    |                    |                              |
| SNP_59858_A_9957675 | NC_021167.1    | Ca_Kabuli_Chr08 | 9957675                 | CC                              | TT                 | TT               | INTERGENIC                    |                    |                              |
| SNP_59859_A_9957717 | NC_021167.1    | Ca_Kabuli_Chr08 | 9957717                 | GG                              | AA                 | AA               | INTERGENIC                    |                    |                              |
| SNP_59860_A_9958331 | NC_021167.1    | Ca_Kabuli_Chr08 | 9958331                 | AA                              | GG                 | GG               | DRR                           | 101513126          | uncharacterized LOC101513126 |
| SNP_59861_A_9958859 | NC_021167.1    | Ca_Kabuli_Chr08 | 9958859                 | GG                              | AA                 | AA               | DRR                           | 101513126          | uncharacterized LOC101513126 |
| SNP_59862_A_9959002 | NC_021167.1    | Ca_Kabuli_Chr08 | 9959002                 | CC                              | TT                 | TT               | DRR                           | 101513126          | uncharacterized LOC101513126 |
| SNP_59863_A_9959035 | NC_021167.1    | Ca_Kabuli_Chr08 | 9959035                 | AA                              | CC                 | CC               | DRR                           | 101513126          | uncharacterized LOC101513126 |
| SNP_59864_A_9959695 | NC_021167.1    | Ca_Kabuli_Chr08 | 9959695                 | AA                              | TT                 | TT               | INTERGENIC                    |                    |                              |
| SNP_59865_A_9959696 | NC_021167.1    | Ca_Kabuli_Chr08 | 9959696                 | CC                              | TT                 | TT               | INTERGENIC                    |                    |                              |
| SNP_59866_A_9959809 | NC_021167.1    | Ca_Kabuli_Chr08 | 9959809                 | CC                              | TT                 | TT               | INTERGENIC                    |                    |                              |
| SNP_59867_A_9959943 | NC_021167.1    | Ca_Kabuli_Chr08 | 9959943                 | GG                              | AA                 | AA               | INTERGENIC                    |                    |                              |
| SNP_59868_A_9959949 | NC_021167.1    | Ca_Kabuli_Chr08 | 9959949                 | AA                              | GG                 | GG               | INTERGENIC                    |                    |                              |
| SNP_59869_A_9959951 | NC_021167.1    | Ca_Kabuli_Chr08 | 9959951                 | TT                              | CC                 | CC               | INTERGENIC                    |                    |                              |
| SNP_59871_A_9960326 | NC_021167.1    | Ca_Kabuli_Chr08 | 9960326                 | GG                              | AA                 | AA               | INTERGENIC                    |                    |                              |
| SNP_59872_A_9960472 | NC_021167.1    | Ca_Kabuli_Chr08 | 9960472                 | CC                              | TT                 | TT               | INTERGENIC                    |                    |                              |
| SNP_59873_A_9960475 | NC_021167.1    | Ca_Kabuli_Chr08 | 9960475                 | TT                              | GG                 | GG               | INTERGENIC                    |                    |                              |

| SNPs IDs            | Chromosome IDs | Chromosomes     | Physical positions (bp) | CDC Frontier genome (Reference genome) | (Pusa 1103 & HPNB) | (ILWC 46 & LPNB) | Sequence Components of genome | Gene accession IDs | Putative functions           |
|---------------------|----------------|-----------------|-------------------------|----------------------------------------|--------------------|------------------|-------------------------------|--------------------|------------------------------|
| SNP_59874_A_9964677 | NC_021167.1    | Ca_Kabuli_Chr08 | 9964677                 | TT                                     | CC                 | CC               | INTRON                        | 101513451          | uncharacterized LOC101513451 |
| SNP_59875_A_9964722 | NC_021167.1    | Ca_Kabuli_Chr08 | 9964722                 | GG                                     | AA                 | AA               | INTRON                        | 101513451          | uncharacterized LOC101513451 |
| SNP_59876_A_9964726 | NC_021167.1    | Ca_Kabuli_Chr08 | 9964726                 | CC                                     | TT                 | TT               | INTRON                        | 101513451          | uncharacterized LOC101513451 |
| SNP_59877_A_9969160 | NC_021167.1    | Ca_Kabuli_Chr08 | 9969160                 | AA                                     | TT                 | TT               | INTRON                        | 101513451          | uncharacterized LOC101513451 |
| SNP_59878_A_9969170 | NC_021167.1    | Ca_Kabuli_Chr08 | 9969170                 | CC                                     | GG                 | GG               | INTRON                        | 101513451          | uncharacterized LOC101513451 |
| SNP_59879_A_9970910 | NC_021167.1    | Ca_Kabuli_Chr08 | 9970910                 | CC                                     | TT                 | TT               | INTRON                        | 101513451          | uncharacterized LOC101513451 |
| SNP_59880_A_9971054 | NC_021167.1    | Ca_Kabuli_Chr08 | 9971054                 | TT                                     | CC                 | CC               | INTRON                        | 101513451          | uncharacterized LOC101513451 |
| SNP_59881_A_9971058 | NC_021167.1    | Ca_Kabuli_Chr08 | 9971058                 | TT                                     | GG                 | GG               | INTRON                        | 101513451          | uncharacterized LOC101513451 |
| SNP_59882_A_9971182 | NC_021167.1    | Ca_Kabuli_Chr08 | 9971182                 | CC                                     | TT                 | TT               | INTRON                        | 101513451          | uncharacterized LOC101513451 |
| SNP_59883_A_9974267 | NC_021167.1    | Ca_Kabuli_Chr08 | 9974267                 | TT                                     | CC                 | CC               | INTERGENIC                    |                    |                              |
| SNP_59884_A_9974279 | NC_021167.1    | Ca_Kabuli_Chr08 | 9974279                 | CC                                     | TT                 | TT               | INTERGENIC                    |                    |                              |
| SNP_59885_A_9974315 | NC_021167.1    | Ca_Kabuli_Chr08 | 9974315                 | CC                                     | TT                 | TT               | INTERGENIC                    |                    |                              |
| SNP_59886_A_9974323 | NC_021167.1    | Ca_Kabuli_Chr08 | 9974323                 | AA                                     | CC                 | CC               | INTERGENIC                    |                    |                              |
| SNP_59887_A_9974325 | NC_021167.1    | Ca_Kabuli_Chr08 | 9974325                 | AA                                     | CC                 | CC               | INTERGENIC                    |                    |                              |
| SNP_59888_A_9974326 | NC_021167.1    | Ca_Kabuli_Chr08 | 9974326                 | GG                                     | AA                 | AA               | INTERGENIC                    |                    |                              |
| SNP_59889_A_9974417 | NC_021167.1    | Ca_Kabuli_Chr08 | 9974417                 | AA                                     | TT                 | TT               | URR                           | 101513451          | uncharacterized LOC101513451 |
| SNP_59890_A_9974601 | NC_021167.1    | Ca_Kabuli_Chr08 | 9974601                 | CC                                     | TT                 | TT               | URR                           | 101513451          | uncharacterized LOC101513451 |
| SNP_59891_A_9974624 | NC_021167.1    | Ca_Kabuli_Chr08 | 9974624                 | TT                                     | CC                 | CC               | URR                           | 101513451          | uncharacterized LOC101513451 |
| SNP_59892_A_9974654 | NC_021167.1    | Ca_Kabuli_Chr08 | 9974654                 | CC                                     | AA                 | AA               | URR                           | 101513451          | uncharacterized LOC101513451 |
| SNP_59893_A_9974670 | NC_021167.1    | Ca_Kabuli_Chr08 | 9974670                 | GG                                     | AA                 | AA               | URR                           | 101513451          | uncharacterized LOC101513451 |
| SNP_59894_A_9974672 | NC_021167.1    | Ca_Kabuli_Chr08 | 9974672                 | CC                                     | AA                 | AA               | URR                           | 101513451          | uncharacterized LOC101513451 |
| SNP_59895_A_9974680 | NC_021167.1    | Ca_Kabuli_Chr08 | 9974680                 | TT                                     | CC                 | CC               | URR                           | 101513451          | uncharacterized LOC101513451 |



| SNPs IDs             | Chromosome IDs | Chromosomes     | Physical positions (bp) | CDC Frontier genome (Reference genome) | (Pusa 1103 & HPNB) | (ILWC 46 & LPNB) | Sequence Components of genome | Gene accession IDs | Putative functions           |
|----------------------|----------------|-----------------|-------------------------|----------------------------------------|--------------------|------------------|-------------------------------|--------------------|------------------------------|
| SNP_59896_A_9974681  | NC_021167.1    | Ca_Kabuli_Chr08 | 9974681                 | AA                                     | GG                 | GG               | URR                           | 101513451          | uncharacterized LOC101513451 |
| SNP_59897_A_9974718  | NC_021167.1    | Ca_Kabuli_Chr08 | 9974718                 | AA                                     | GG                 | GG               | URR                           | 101513451          | uncharacterized LOC101513451 |
| SNP_59898_A_9974764  | NC_021167.1    | Ca_Kabuli_Chr08 | 9974764                 | GG                                     | TT                 | TT               | URR                           | 101513451          | uncharacterized LOC101513451 |
| SNP_59899_A_9974766  | NC_021167.1    | Ca_Kabuli_Chr08 | 9974766                 | GG                                     | AA                 | AA               | URR                           | 101513451          | uncharacterized LOC101513451 |
| SNP_59900_A_9974772  | NC_021167.1    | Ca_Kabuli_Chr08 | 9974772                 | AA                                     | CC                 | CC               | URR                           | 101513451          | uncharacterized LOC101513451 |
| SNP_59901_A_10023295 | NC_021167.1    | Ca_Kabuli_Chr08 | 10023295                | AA                                     | GG                 | GG               | INTERGENIC                    |                    |                              |
| SNP_59902_A_10023302 | NC_021167.1    | Ca_Kabuli_Chr08 | 10023302                | TT                                     | CC                 | CC               | INTERGENIC                    |                    |                              |
| SNP_59904_A_10023306 | NC_021167.1    | Ca_Kabuli_Chr08 | 10023306                | TT                                     | CC                 | CC               | INTERGENIC                    |                    |                              |
| SNP_59905_A_10023319 | NC_021167.1    | Ca_Kabuli_Chr08 | 10023319                | TT                                     | AA                 | AA               | INTERGENIC                    |                    |                              |
| SNP_59906_A_10064569 | NC_021167.1    | Ca_Kabuli_Chr08 | 10064569                | AA                                     | CC                 | CC               | INTERGENIC                    |                    |                              |
| SNP_59907_A_10064578 | NC_021167.1    | Ca_Kabuli_Chr08 | 10064578                | TT                                     | GG                 | GG               | INTERGENIC                    |                    |                              |
| SNP_59908_A_10064679 | NC_021167.1    | Ca_Kabuli_Chr08 | 10064679                | TT                                     | CC                 | CC               | INTERGENIC                    |                    |                              |
| SNP_59909_A_10064692 | NC_021167.1    | Ca_Kabuli_Chr08 | 10064692                | AA                                     | GG                 | GG               | INTERGENIC                    |                    |                              |
| SNP_59910_A_10064878 | NC_021167.1    | Ca_Kabuli_Chr08 | 10064878                | AA                                     | GG                 | GG               | INTERGENIC                    |                    |                              |
| SNP_59911_A_10064892 | NC_021167.1    | Ca_Kabuli_Chr08 | 10064892                | TT                                     | CC                 | CC               | INTERGENIC                    |                    |                              |
| SNP_59912_A_10064904 | NC_021167.1    | Ca_Kabuli_Chr08 | 10064904                | AA                                     | GG                 | GG               | INTERGENIC                    |                    |                              |
| SNP_59913_A_10064906 | NC_021167.1    | Ca_Kabuli_Chr08 | 10064906                | AA                                     | CC                 | CC               | INTERGENIC                    |                    |                              |
| SNP_59914_A_10064907 | NC_021167.1    | Ca_Kabuli_Chr08 | 10064907                | GG                                     | AA                 | AA               | INTERGENIC                    |                    |                              |
| SNP_59915_A_10064987 | NC_021167.1    | Ca_Kabuli_Chr08 | 10064987                | GG                                     | AA                 | AA               | INTERGENIC                    |                    |                              |
| SNP_59916_A_10069310 | NC_021167.1    | Ca_Kabuli_Chr08 | 10069310                | AA                                     | GG                 | GG               | INTERGENIC                    |                    |                              |
| SNP_59917_A_10107775 | NC_021167.1    | Ca_Kabuli_Chr08 | 10107775                | CC                                     | AA                 | AA               | INTERGENIC                    |                    |                              |
| SNP_59919_A_10217222 | NC_021167.1    | Ca_Kabuli_Chr08 | 10217222                | AA                                     | TT                 | TT               | URR                           | 101501252          | uncharacterized LOC101501252 |

| SNPs IDs             | Chromosome IDs | Chromosomes     | Physical positions (bp) | CDC Frontier genome (Reference genome) | (Pusa 1103 & HPNB) | (ILWC 46 & LPNB) | Sequence Components of genome | Gene accession IDs | Putative functions                                    |
|----------------------|----------------|-----------------|-------------------------|----------------------------------------|--------------------|------------------|-------------------------------|--------------------|-------------------------------------------------------|
| SNP_59920_A_10217410 | NC_021167.1    | Ca_Kabuli_Chr08 | 10217410                | CC                                     | TT                 | TT               | INTERGENIC                    |                    |                                                       |
| SNP_59922_A_10356134 | NC_021167.1    | Ca_Kabuli_Chr08 | 10356134                | AA                                     | CC                 | CC               | INTRON                        | 101508419          | transcription initiation factor TFIID subunit 4b-like |
| SNP_59923_A_10356170 | NC_021167.1    | Ca_Kabuli_Chr08 | 10356170                | AA                                     | GG                 | GG               | INTRON                        | 101508419          | transcription initiation factor TFIID subunit 4b-like |
| SNP_59925_A_10357254 | NC_021167.1    | Ca_Kabuli_Chr08 | 10357254                | AA                                     | CC                 | CC               | INTRON                        | 101508419          | transcription initiation factor TFIID subunit 4b-like |
| SNP_59926_A_10357277 | NC_021167.1    | Ca_Kabuli_Chr08 | 10357277                | GG                                     | AA                 | AA               | INTRON                        | 101508419          | transcription initiation factor TFIID subunit 4b-like |
| SNP_59927_A_10362494 | NC_021167.1    | Ca_Kabuli_Chr08 | 10362494                | CC                                     | AA                 | AA               | URR                           | 101508419          | transcription initiation factor TFIID subunit 4b-like |
| SNP_59928_A_10363410 | NC_021167.1    | Ca_Kabuli_Chr08 | 10363410                | GG                                     | AA                 | AA               | URR                           | 101508419          | transcription initiation factor TFIID subunit 4b-like |
| SNP_59929_A_10363499 | NC_021167.1    | Ca_Kabuli_Chr08 | 10363499                | AA                                     | TT                 | TT               | URR                           | 101508419          | transcription initiation factor TFIID subunit 4b-like |
| SNP_59930_A_10363823 | NC_021167.1    | Ca_Kabuli_Chr08 | 10363823                | AA                                     | CC                 | CC               | URR                           | 101508419          | transcription initiation factor TFIID subunit 4b-like |
| SNP_59931_A_10364122 | NC_021167.1    | Ca_Kabuli_Chr08 | 10364122                | GG                                     | AA                 | AA               | INTERGENIC                    |                    |                                                       |
| SNP_59932_A_10364556 | NC_021167.1    | Ca_Kabuli_Chr08 | 10364556                | CC                                     | TT                 | TT               | INTERGENIC                    |                    |                                                       |
| SNP_59934_A_10366760 | NC_021167.1    | Ca_Kabuli_Chr08 | 10366760                | GG                                     | TT                 | TT               | INTERGENIC                    |                    |                                                       |
| SNP_59935_A_10366874 | NC_021167.1    | Ca_Kabuli_Chr08 | 10366874                | TT                                     | CC                 | CC               | INTERGENIC                    |                    |                                                       |
| SNP_59936_A_10367254 | NC_021167.1    | Ca_Kabuli_Chr08 | 10367254                | TT                                     | CC                 | CC               | INTERGENIC                    |                    |                                                       |
| SNP_59937_A_10367281 | NC_021167.1    | Ca_Kabuli_Chr08 | 10367281                | TT                                     | CC                 | CC               | INTERGENIC                    |                    |                                                       |
| SNP_59938_A_10371991 | NC_021167.1    | Ca_Kabuli_Chr08 | 10371991                | AA                                     | GG                 | GG               | INTERGENIC                    |                    |                                                       |
| SNP_59939_A_10373553 | NC_021167.1    | Ca_Kabuli_Chr08 | 10373553                | CC                                     | GG                 | GG               | INTERGENIC                    |                    |                                                       |
| SNP_59940_A_10374319 | NC_021167.1    | Ca_Kabuli_Chr08 | 10374319                | CC                                     | TT                 | TT               | INTERGENIC                    |                    |                                                       |
| SNP_59941_A_10374825 | NC_021167.1    | Ca_Kabuli_Chr08 | 10374825                | AA                                     | GG                 | GG               | INTERGENIC                    |                    |                                                       |
| SNP_59942_A_10374959 | NC_021167.1    | Ca_Kabuli_Chr08 | 10374959                | TT                                     | CC                 | CC               | INTERGENIC                    |                    |                                                       |
| SNP_59943_A_10374988 | NC_021167.1    | Ca_Kabuli_Chr08 | 10374988                | TT                                     | GG                 | GG               | INTERGENIC                    |                    |                                                       |
| SNP_59944_A_10375081 | NC_021167.1    | Ca_Kabuli_Chr08 | 10375081                | TT                                     | CC                 | CC               | INTERGENIC                    |                    |                                                       |

| SNPs IDs             | Chromosome IDs | Chromosomes     | Physical positions (bp) | CDC Frontier genome (Reference genome) | (Pusa 1103 & HPNB) | (ILWC 46 & LPNB) | Sequence Components of genome | Gene accession IDs | Putative functions |
|----------------------|----------------|-----------------|-------------------------|----------------------------------------|--------------------|------------------|-------------------------------|--------------------|--------------------|
| SNP_59945_A_10375101 | NC_021167.1    | Ca_Kabuli_Chr08 | 10375101                | TT                                     | CC                 | CC               | INTERGENIC                    |                    |                    |
| SNP_59946_A_10375316 | NC_021167.1    | Ca_Kabuli_Chr08 | 10375316                | GG                                     | AA                 | AA               | INTERGENIC                    |                    |                    |
| SNP_59947_A_10375381 | NC_021167.1    | Ca_Kabuli_Chr08 | 10375381                | GG                                     | AA                 | AA               | INTERGENIC                    |                    |                    |
| SNP_59948_A_10375449 | NC_021167.1    | Ca_Kabuli_Chr08 | 10375449                | GG                                     | TT                 | TT               | DRR                           | 101508732          | Unknown function   |
| SNP_59949_A_10375504 | NC_021167.1    | Ca_Kabuli_Chr08 | 10375504                | CC                                     | AA                 | AA               | DRR                           | 101508732          | Unknown function   |
| SNP_59950_A_10375511 | NC_021167.1    | Ca_Kabuli_Chr08 | 10375511                | TT                                     | CC                 | CC               | DRR                           | 101508732          | Unknown function   |
| SNP_59951_A_10375520 | NC_021167.1    | Ca_Kabuli_Chr08 | 10375520                | AA                                     | GG                 | GG               | DRR                           | 101508732          | Unknown function   |
| SNP_59952_A_10375545 | NC_021167.1    | Ca_Kabuli_Chr08 | 10375545                | AA                                     | TT                 | TT               | DRR                           | 101508732          | Unknown function   |
| SNP_59953_A_10375554 | NC_021167.1    | Ca_Kabuli_Chr08 | 10375554                | AA                                     | TT                 | TT               | DRR                           | 101508732          | Unknown function   |
| SNP_59954_A_10375580 | NC_021167.1    | Ca_Kabuli_Chr08 | 10375580                | CC                                     | TT                 | TT               | DRR                           | 101508732          | Unknown function   |
| SNP_59955_A_10375602 | NC_021167.1    | Ca_Kabuli_Chr08 | 10375602                | AA                                     | GG                 | GG               | DRR                           | 101508732          | Unknown function   |
| SNP_59956_A_10375679 | NC_021167.1    | Ca_Kabuli_Chr08 | 10375679                | TT                                     | CC                 | CC               | DRR                           | 101508732          | Unknown function   |
| SNP_59957_A_10375682 | NC_021167.1    | Ca_Kabuli_Chr08 | 10375682                | CC                                     | GG                 | GG               | DRR                           | 101508732          | Unknown function   |
| SNP_59958_A_10375686 | NC_021167.1    | Ca_Kabuli_Chr08 | 10375686                | AA                                     | GG                 | GG               | DRR                           | 101508732          | Unknown function   |
| SNP_59959_A_10375690 | NC_021167.1    | Ca_Kabuli_Chr08 | 10375690                | CC                                     | TT                 | TT               | DRR                           | 101508732          | Unknown function   |
| SNP_59960_A_10375734 | NC_021167.1    | Ca_Kabuli_Chr08 | 10375734                | TT                                     | AA                 | AA               | DRR                           | 101508732          | Unknown function   |
| SNP_59961_A_10375752 | NC_021167.1    | Ca_Kabuli_Chr08 | 10375752                | CC                                     | TT                 | TT               | DRR                           | 101508732          | Unknown function   |
| SNP_59962_A_10375805 | NC_021167.1    | Ca_Kabuli_Chr08 | 10375805                | GG                                     | AA                 | AA               | DRR                           | 101508732          | Unknown function   |
| SNP_59963_A_10375832 | NC_021167.1    | Ca_Kabuli_Chr08 | 10375832                | GG                                     | AA                 | AA               | DRR                           | 101508732          | Unknown function   |
| SNP_59964_A_10375858 | NC_021167.1    | Ca_Kabuli_Chr08 | 10375858                | TT                                     | CC                 | CC               | DRR                           | 101508732          | Unknown function   |
| SNP_59965_A_10375910 | NC_021167.1    | Ca_Kabuli_Chr08 | 10375910                | TT                                     | CC                 | CC               | DRR                           | 101508732          | Unknown function   |
| SNP_59966_A_10375935 | NC_021167.1    | Ca_Kabuli_Chr08 | 10375935                | GG                                     | CC                 | CC               | DRR                           | 101508732          | Unknown function   |

| SNPs IDs             | Chromosome IDs | Chromosomes     | Physical positions (bp) | CDC Frontier genome (Reference genome) | (Pusa 1103 & HPNB) | (ILWC 46 & LPNB) | Sequence Components of genome | Gene accession IDs | Putative functions |
|----------------------|----------------|-----------------|-------------------------|----------------------------------------|--------------------|------------------|-------------------------------|--------------------|--------------------|
| SNP_59967_A_10376116 | NC_021167.1    | Ca_Kabuli_Chr08 | 10376116                | AA                                     | GG                 | GG               | DRR                           | 101508732          | Unknown function   |
| SNP_59968_A_10376121 | NC_021167.1    | Ca_Kabuli_Chr08 | 10376121                | CC                                     | TT                 | TT               | DRR                           | 101508732          | Unknown function   |
| SNP_59970_A_10376461 | NC_021167.1    | Ca_Kabuli_Chr08 | 10376461                | CC                                     | AA                 | AA               | NON_SYNONYMOUS_CODING         | 101508732          | Unknown function   |
| SNP_59971_A_10376568 | NC_021167.1    | Ca_Kabuli_Chr08 | 10376568                | TT                                     | CC                 | CC               | NON_SYNONYMOUS_CODING         | 101508732          | Unknown function   |
| SNP_59972_A_10378470 | NC_021167.1    | Ca_Kabuli_Chr08 | 10378470                | CC                                     | GG                 | GG               | INTRON                        | 101508732          | Unknown function   |
| SNP_59973_A_10378514 | NC_021167.1    | Ca_Kabuli_Chr08 | 10378514                | GG                                     | AA                 | AA               | INTRON                        | 101508732          | Unknown function   |
| SNP_59974_A_10378819 | NC_021167.1    | Ca_Kabuli_Chr08 | 10378819                | AA                                     | TT                 | TT               | INTERGENIC                    |                    |                    |
| SNP_59975_A_10378852 | NC_021167.1    | Ca_Kabuli_Chr08 | 10378852                | CC                                     | TT                 | TT               | INTERGENIC                    |                    |                    |
| SNP_59976_A_10378883 | NC_021167.1    | Ca_Kabuli_Chr08 | 10378883                | GG                                     | AA                 | AA               | INTERGENIC                    |                    |                    |
| SNP_59977_A_10380864 | NC_021167.1    | Ca_Kabuli_Chr08 | 10380864                | AA                                     | CC                 | CC               | URR                           | 101508732          | Unknown function   |
| SNP_59978_A_10380925 | NC_021167.1    | Ca_Kabuli_Chr08 | 10380925                | CC                                     | TT                 | TT               | URR                           | 101508732          | Unknown function   |
| SNP_59979_A_10380968 | NC_021167.1    | Ca_Kabuli_Chr08 | 10380968                | GG                                     | AA                 | AA               | URR                           | 101508732          | Unknown function   |
| SNP_59980_A_10381175 | NC_021167.1    | Ca_Kabuli_Chr08 | 10381175                | TT                                     | GG                 | GG               | URR                           | 101508732          | Unknown function   |
| SNP_59981_A_10381189 | NC_021167.1    | Ca_Kabuli_Chr08 | 10381189                | TT                                     | CC                 | CC               | URR                           | 101508732          | Unknown function   |
| SNP_59982_A_10381216 | NC_021167.1    | Ca_Kabuli_Chr08 | 10381216                | GG                                     | AA                 | AA               | URR                           | 101508732          | Unknown function   |
| SNP_59983_A_10381234 | NC_021167.1    | Ca_Kabuli_Chr08 | 10381234                | TT                                     | CC                 | CC               | URR                           | 101508732          | Unknown function   |
| SNP_59984_A_10381256 | NC_021167.1    | Ca_Kabuli_Chr08 | 10381256                | TT                                     | CC                 | CC               | URR                           | 101508732          | Unknown function   |
| SNP_59985_A_10381307 | NC_021167.1    | Ca_Kabuli_Chr08 | 10381307                | CC                                     | AA                 | AA               | URR                           | 101508732          | Unknown function   |
| SNP_59986_A_10381473 | NC_021167.1    | Ca_Kabuli_Chr08 | 10381473                | TT                                     | CC                 | CC               | URR                           | 101508732          | Unknown function   |
| SNP_59987_A_10381502 | NC_021167.1    | Ca_Kabuli_Chr08 | 10381502                | GG                                     | AA                 | AA               | URR                           | 101508732          | Unknown function   |
| SNP_59988_A_10381782 | NC_021167.1    | Ca_Kabuli_Chr08 | 10381782                | CC                                     | TT                 | TT               | INTERGENIC                    |                    |                    |
| SNP_59989_A_10386964 | NC_021167.1    | Ca_Kabuli_Chr08 | 10386964                | AA                                     | TT                 | TT               | URR                           | 101488498          | Unknown function   |

| SNPs IDs             | Chromosome IDs | Chromosomes     | Physical positions (bp) | CDC Frontier genome (Reference genome) | (Pusa 1103 & HPNB) | (ILWC 46 & LPNB) | Sequence Components of genome | Gene accession IDs | Putative functions           |
|----------------------|----------------|-----------------|-------------------------|----------------------------------------|--------------------|------------------|-------------------------------|--------------------|------------------------------|
| SNP_59990_A_10387025 | NC_021167.1    | Ca_Kabuli_Chr08 | 10387025                | TT                                     | CC                 | CC               | URR                           | 101488498          | Unknown function             |
| SNP_59991_A_10387074 | NC_021167.1    | Ca_Kabuli_Chr08 | 10387074                | AA                                     | GG                 | GG               | URR                           | 101488498          | Unknown function             |
| SNP_59992_A_10387189 | NC_021167.1    | Ca_Kabuli_Chr08 | 10387189                | TT                                     | AA                 | AA               | DRR                           | 101488838          | Unknown function             |
| SNP_59993_A_10387233 | NC_021167.1    | Ca_Kabuli_Chr08 | 10387233                | TT                                     | CC                 | CC               | DRR                           | 101488838          | Unknown function             |
| SNP_59994_A_10387238 | NC_021167.1    | Ca_Kabuli_Chr08 | 10387238                | TT                                     | AA                 | AA               | DRR                           | 101488838          | Unknown function             |
| SNP_59995_A_10387267 | NC_021167.1    | Ca_Kabuli_Chr08 | 10387267                | AA                                     | GG                 | GG               | DRR                           | 101488838          | Unknown function             |
| SNP_59996_A_10387292 | NC_021167.1    | Ca_Kabuli_Chr08 | 10387292                | GG                                     | TT                 | TT               | DRR                           | 101488838          | Unknown function             |
| SNP_59997_A_10387321 | NC_021167.1    | Ca_Kabuli_Chr08 | 10387321                | TT                                     | GG                 | GG               | DRR                           | 101488838          | Unknown function             |
| SNP_59998_A_10387409 | NC_021167.1    | Ca_Kabuli_Chr08 | 10387409                | AA                                     | CC                 | CC               | DRR                           | 101488838          | Unknown function             |
| SNP_59999_A_10387436 | NC_021167.1    | Ca_Kabuli_Chr08 | 10387436                | TT                                     | GG                 | GG               | DRR                           | 101488838          | Unknown function             |
| SNP_60000_A_10387454 | NC_021167.1    | Ca_Kabuli_Chr08 | 10387454                | AA                                     | GG                 | GG               | DRR                           | 101488838          | Unknown function             |
| SNP_60001_A_10387630 | NC_021167.1    | Ca_Kabuli_Chr08 | 10387630                | GG                                     | AA                 | AA               | DRR                           | 101488838          | Unknown function             |
| SNP_60002_A_10387683 | NC_021167.1    | Ca_Kabuli_Chr08 | 10387683                | GG                                     | TT                 | TT               | DRR                           | 101488838          | Unknown function             |
| SNP_60003_A_10387693 | NC_021167.1    | Ca_Kabuli_Chr08 | 10387693                | CC                                     | TT                 | TT               | DRR                           | 101488838          | Unknown function             |
| SNP_60004_A_10387698 | NC_021167.1    | Ca_Kabuli_Chr08 | 10387698                | AA                                     | TT                 | TT               | DRR                           | 101488838          | Unknown function             |
| SNP_60005_A_10387738 | NC_021167.1    | Ca_Kabuli_Chr08 | 10387738                | GG                                     | CC                 | CC               | DRR                           | 101488838          | Unknown function             |
| SNP_60006_A_10403285 | NC_021167.1    | Ca_Kabuli_Chr08 | 10403285                | AA                                     | TT                 | TT               | INTERGENIC                    |                    |                              |
| SNP_60007_A_10412284 | NC_021167.1    | Ca_Kabuli_Chr08 | 10412284                | GG                                     | AA                 | AA               | INTERGENIC                    |                    |                              |
| SNP_60008_A_10412347 | NC_021167.1    | Ca_Kabuli_Chr08 | 10412347                | CC                                     | TT                 | TT               | INTERGENIC                    |                    |                              |
| SNP_60010_A_10509107 | NC_021167.1    | Ca_Kabuli_Chr08 | 10509107                | CC                                     | TT                 | TT               | INTRON                        | 101490774          | uncharacterized LOC101490774 |
| SNP_60011_A_10509130 | NC_021167.1    | Ca_Kabuli_Chr08 | 10509130                | AA                                     | CC                 | CC               | INTRON                        | 101490774          | uncharacterized LOC101490774 |
| SNP_60012_A_10509134 | NC_021167.1    | Ca_Kabuli_Chr08 | 10509134                | CC                                     | TT                 | TT               | INTRON                        | 101490774          | uncharacterized LOC101490774 |

| SNPs IDs             | Chromosome IDs | Chromosomes     | Physical positions (bp) | CDC Frontier (Reference genome) | (Pusa 1103 & HPNB) | (ILWC 46 & LPNB) | Sequence Components of genome | Gene accession IDs | Putative functions           |
|----------------------|----------------|-----------------|-------------------------|---------------------------------|--------------------|------------------|-------------------------------|--------------------|------------------------------|
| SNP_60013_A_10509191 | NC_021167.1    | Ca_Kabuli_Chr08 | 10509191                | TT                              | CC                 | CC               | INTRON                        | 101490774          | uncharacterized LOC101490774 |
| SNP_60014_A_10509582 | NC_021167.1    | Ca_Kabuli_Chr08 | 10509582                | GG                              | AA                 | AA               | INTRON                        | 101490774          | uncharacterized LOC101490774 |
| SNP_60016_A_10556963 | NC_021167.1    | Ca_Kabuli_Chr08 | 10556963                | TT                              | CC                 | CC               | INTERGENIC                    |                    |                              |
| SNP_60017_A_10580177 | NC_021167.1    | Ca_Kabuli_Chr08 | 10580177                | GG                              | CC                 | CC               | INTERGENIC                    |                    |                              |
| SNP_60018_A_10589752 | NC_021167.1    | Ca_Kabuli_Chr08 | 10589752                | CC                              | TT                 | TT               | INTERGENIC                    |                    |                              |
| SNP_60019_A_10589808 | NC_021167.1    | Ca_Kabuli_Chr08 | 10589808                | GG                              | AA                 | AA               | INTERGENIC                    |                    |                              |
| SNP_60020_A_10590011 | NC_021167.1    | Ca_Kabuli_Chr08 | 10590011                | CC                              | GG                 | GG               | INTERGENIC                    |                    |                              |
| SNP_60021_A_10590020 | NC_021167.1    | Ca_Kabuli_Chr08 | 10590020                | TT                              | CC                 | CC               | INTERGENIC                    |                    |                              |
| SNP_60022_A_10590065 | NC_021167.1    | Ca_Kabuli_Chr08 | 10590065                | GG                              | CC                 | CC               | INTERGENIC                    |                    |                              |
| SNP_60024_A_10590230 | NC_021167.1    | Ca_Kabuli_Chr08 | 10590230                | AA                              | TT                 | TT               | INTERGENIC                    |                    |                              |
| SNP_60025_A_10590404 | NC_021167.1    | Ca_Kabuli_Chr08 | 10590404                | TT                              | AA                 | AA               | INTERGENIC                    |                    |                              |
| SNP_60026_A_10590416 | NC_021167.1    | Ca_Kabuli_Chr08 | 10590416                | GG                              | AA                 | AA               | INTERGENIC                    |                    |                              |
| SNP_60027_A_10590452 | NC_021167.1    | Ca_Kabuli_Chr08 | 10590452                | CC                              | TT                 | TT               | INTERGENIC                    |                    |                              |
| SNP_60028_A_10590693 | NC_021167.1    | Ca_Kabuli_Chr08 | 10590693                | GG                              | AA                 | AA               | INTERGENIC                    |                    |                              |
| SNP_60029_A_10590752 | NC_021167.1    | Ca_Kabuli_Chr08 | 10590752                | CC                              | AA                 | AA               | INTERGENIC                    |                    |                              |
| SNP_60030_A_10590884 | NC_021167.1    | Ca_Kabuli_Chr08 | 10590884                | CC                              | TT                 | TT               | INTERGENIC                    |                    |                              |
| SNP_60031_A_10591047 | NC_021167.1    | Ca_Kabuli_Chr08 | 10591047                | GG                              | TT                 | TT               | INTERGENIC                    |                    |                              |
| SNP_60032_A_10591062 | NC_021167.1    | Ca_Kabuli_Chr08 | 10591062                | CC                              | AA                 | AA               | INTERGENIC                    |                    |                              |
| SNP_60033_A_10591102 | NC_021167.1    | Ca_Kabuli_Chr08 | 10591102                | TT                              | AA                 | AA               | INTERGENIC                    |                    |                              |
| SNP_60035_A_10591148 | NC_021167.1    | Ca_Kabuli_Chr08 | 10591148                | GG                              | TT                 | TT               | INTERGENIC                    |                    |                              |
| SNP_60036_A_10591281 | NC_021167.1    | Ca_Kabuli_Chr08 | 10591281                | AA                              | GG                 | GG               | INTERGENIC                    |                    |                              |
| SNP_60037_A_10591282 | NC_021167.1    | Ca_Kabuli_Chr08 | 10591282                | CC                              | AA                 | TT               | INTERGENIC                    |                    |                              |

| SNPs IDs             | Chromosome IDs | Chromosomes     | Physical positions (bp) | CDC Frontier genome (Reference genome) | (Pusa 1103 & HPNB) | (ILWC 46 & LPNB) | Sequence genome | Components of | Gene accession IDs | Putative functions |
|----------------------|----------------|-----------------|-------------------------|----------------------------------------|--------------------|------------------|-----------------|---------------|--------------------|--------------------|
| SNP_60038_A_10591284 | NC_021167.1    | Ca_Kabuli_Chr08 | 10591284                | CC                                     | TT                 | TT               | INTERGENIC      |               |                    |                    |
| SNP_60039_A_10591288 | NC_021167.1    | Ca_Kabuli_Chr08 | 10591288                | AA                                     | TT                 | TT               | INTERGENIC      |               |                    |                    |
| SNP_60040_A_10591289 | NC_021167.1    | Ca_Kabuli_Chr08 | 10591289                | CC                                     | TT                 | TT               | INTERGENIC      |               |                    |                    |
| SNP_60041_A_10591291 | NC_021167.1    | Ca_Kabuli_Chr08 | 10591291                | TT                                     | CC                 | CC               | INTERGENIC      |               |                    |                    |
| SNP_60042_A_10591315 | NC_021167.1    | Ca_Kabuli_Chr08 | 10591315                | TT                                     | CC                 | CC               | INTERGENIC      |               |                    |                    |
| SNP_60043_A_10591327 | NC_021167.1    | Ca_Kabuli_Chr08 | 10591327                | AA                                     | TT                 | TT               | INTERGENIC      |               |                    |                    |
| SNP_60044_A_10591331 | NC_021167.1    | Ca_Kabuli_Chr08 | 10591331                | AA                                     | GG                 | GG               | INTERGENIC      |               |                    |                    |
| SNP_60045_A_10591334 | NC_021167.1    | Ca_Kabuli_Chr08 | 10591334                | CC                                     | GG                 | GG               | INTERGENIC      |               |                    |                    |
| SNP_60046_A_10591339 | NC_021167.1    | Ca_Kabuli_Chr08 | 10591339                | CC                                     | AA                 | AA               | INTERGENIC      |               |                    |                    |
| SNP_60047_A_10591355 | NC_021167.1    | Ca_Kabuli_Chr08 | 10591355                | GG                                     | AA                 | AA               | INTERGENIC      |               |                    |                    |
| SNP_60048_A_10591463 | NC_021167.1    | Ca_Kabuli_Chr08 | 10591463                | GG                                     | AA                 | AA               | INTERGENIC      |               |                    |                    |
| SNP_60049_A_10591529 | NC_021167.1    | Ca_Kabuli_Chr08 | 10591529                | TT                                     | AA                 | AA               | INTERGENIC      |               |                    |                    |
| SNP_60050_A_10591560 | NC_021167.1    | Ca_Kabuli_Chr08 | 10591560                | TT                                     | CC                 | CC               | INTERGENIC      |               |                    |                    |
| SNP_60051_A_10612439 | NC_021167.1    | Ca_Kabuli_Chr08 | 10612439                | AA                                     | CC                 | CC               | INTERGENIC      |               |                    |                    |
| SNP_60052_A_10612756 | NC_021167.1    | Ca_Kabuli_Chr08 | 10612756                | GG                                     | AA                 | AA               | INTERGENIC      |               |                    |                    |
| SNP_60053_A_10612771 | NC_021167.1    | Ca_Kabuli_Chr08 | 10612771                | GG                                     | AA                 | AA               | INTERGENIC      |               |                    |                    |
| SNP_60054_A_10612789 | NC_021167.1    | Ca_Kabuli_Chr08 | 10612789                | AA                                     | GG                 | GG               | INTERGENIC      |               |                    |                    |
| SNP_60056_A_10631954 | NC_021167.1    | Ca_Kabuli_Chr08 | 10631954                | AA                                     | GG                 | GG               | INTERGENIC      |               |                    |                    |
| SNP_60057_A_10645712 | NC_021167.1    | Ca_Kabuli_Chr08 | 10645712                | CC                                     | TT                 | TT               | INTERGENIC      |               |                    |                    |
| SNP_60058_A_10645835 | NC_021167.1    | Ca_Kabuli_Chr08 | 10645835                | AA                                     | TT                 | TT               | INTERGENIC      |               |                    |                    |
| SNP_60059_A_10646201 | NC_021167.1    | Ca_Kabuli_Chr08 | 10646201                | CC                                     | GG                 | GG               | INTERGENIC      |               |                    |                    |
| SNP_60062_A_10686627 | NC_021167.1    | Ca_Kabuli_Chr08 | 10686627                | GG                                     | AA                 | AA               | INTERGENIC      |               |                    |                    |

| SNPs IDs             | Chromosome IDs | Chromosomes     | Physical positions (bp) | CDC Frontier (Reference genome) | (Pusa 1103 & HPNB) | (ILWC 46 & LPNB) | Sequence Components of genome | Gene accession IDs | Putative functions                                       |
|----------------------|----------------|-----------------|-------------------------|---------------------------------|--------------------|------------------|-------------------------------|--------------------|----------------------------------------------------------|
| SNP_60063_A_10699341 | NC_021167.1    | Ca_Kabuli_Chr08 | 10699341                | TT                              | CC                 | CC               | URR                           | 101504019          | chlorophyll a-b binding protein AB80, chloroplastic-like |
| SNP_60064_A_10699353 | NC_021167.1    | Ca_Kabuli_Chr08 | 10699353                | AA                              | CC                 | CC               | URR                           | 101504019          | chlorophyll a-b binding protein AB80, chloroplastic-like |
| SNP_60065_A_10699360 | NC_021167.1    | Ca_Kabuli_Chr08 | 10699360                | CC                              | TT                 | TT               | URR                           | 101504019          | chlorophyll a-b binding protein AB80, chloroplastic-like |
| SNP_60066_A_10701357 | NC_021167.1    | Ca_Kabuli_Chr08 | 10701357                | AA                              | CC                 | CC               | INTERGENIC                    |                    |                                                          |
| SNP_60067_A_10701361 | NC_021167.1    | Ca_Kabuli_Chr08 | 10701361                | AA                              | CC                 | CC               | INTERGENIC                    |                    |                                                          |
| SNP_60068_A_10701397 | NC_021167.1    | Ca_Kabuli_Chr08 | 10701397                | AA                              | CC                 | CC               | INTERGENIC                    |                    |                                                          |
| SNP_60069_A_10701411 | NC_021167.1    | Ca_Kabuli_Chr08 | 10701411                | GG                              | AA                 | AA               | INTERGENIC                    |                    |                                                          |
| SNP_60070_A_10701414 | NC_021167.1    | Ca_Kabuli_Chr08 | 10701414                | CC                              | TT                 | TT               | INTERGENIC                    |                    |                                                          |
| SNP_60071_A_10701438 | NC_021167.1    | Ca_Kabuli_Chr08 | 10701438                | AA                              | GG                 | GG               | INTERGENIC                    |                    |                                                          |
| SNP_60072_A_10701470 | NC_021167.1    | Ca_Kabuli_Chr08 | 10701470                | AA                              | GG                 | GG               | INTERGENIC                    |                    |                                                          |
| SNP_60073_A_10701523 | NC_021167.1    | Ca_Kabuli_Chr08 | 10701523                | AA                              | TT                 | TT               | INTERGENIC                    |                    |                                                          |
| SNP_60074_A_10701556 | NC_021167.1    | Ca_Kabuli_Chr08 | 10701556                | CC                              | AA                 | AA               | INTERGENIC                    |                    |                                                          |
| SNP_60075_A_10701601 | NC_021167.1    | Ca_Kabuli_Chr08 | 10701601                | CC                              | TT                 | TT               | INTERGENIC                    |                    |                                                          |
| SNP_60076_A_10701611 | NC_021167.1    | Ca_Kabuli_Chr08 | 10701611                | AA                              | GG                 | GG               | INTERGENIC                    |                    |                                                          |
| SNP_60077_A_10701698 | NC_021167.1    | Ca_Kabuli_Chr08 | 10701698                | GG                              | AA                 | AA               | INTERGENIC                    |                    |                                                          |
| SNP_60078_A_10701702 | NC_021167.1    | Ca_Kabuli_Chr08 | 10701702                | GG                              | AA                 | AA               | INTERGENIC                    |                    |                                                          |
| SNP_60079_A_10701719 | NC_021167.1    | Ca_Kabuli_Chr08 | 10701719                | AA                              | GG                 | GG               | INTERGENIC                    |                    |                                                          |
| SNP_60080_A_10701745 | NC_021167.1    | Ca_Kabuli_Chr08 | 10701745                | CC                              | GG                 | GG               | INTERGENIC                    |                    |                                                          |
| SNP_60081_A_10701763 | NC_021167.1    | Ca_Kabuli_Chr08 | 10701763                | TT                              | AA                 | AA               | INTERGENIC                    |                    |                                                          |
| SNP_60082_A_10701815 | NC_021167.1    | Ca_Kabuli_Chr08 | 10701815                | CC                              | TT                 | TT               | INTERGENIC                    |                    |                                                          |
| SNP_60083_A_10701915 | NC_021167.1    | Ca_Kabuli_Chr08 | 10701915                | CC                              | TT                 | TT               | INTERGENIC                    |                    |                                                          |
| SNP_60084_A_10701925 | NC_021167.1    | Ca_Kabuli_Chr08 | 10701925                | GG                              | AA                 | AA               | INTERGENIC                    |                    |                                                          |



| SNPs IDs             | Chromosome IDs | Chromosomes     | Physical positions (bp) | CDC Frontier genome (Reference genome) | (Pusa 1103 & HPNB) | (ILWC 46 & LPNB) | Sequence Components of genome | Gene accession IDs | Putative functions                                                            |
|----------------------|----------------|-----------------|-------------------------|----------------------------------------|--------------------|------------------|-------------------------------|--------------------|-------------------------------------------------------------------------------|
| SNP_60087_A_10728066 | NC_021167.1    | Ca_Kabuli_Chr08 | 10728066                | CC                                     | AA                 | AA               | INTERGENIC                    |                    |                                                                               |
| SNP_60088_A_10728253 | NC_021167.1    | Ca_Kabuli_Chr08 | 10728253                | GG                                     | AA                 | AA               | INTERGENIC                    |                    |                                                                               |
| SNP_60089_A_10762466 | NC_021167.1    | Ca_Kabuli_Chr08 | 10762466                | AA                                     | GG                 | GG               | DRR                           | 101505301          | uncharacterized LOC101505301                                                  |
| SNP_60090_A_10790566 | NC_021167.1    | Ca_Kabuli_Chr08 | 10790566                | TT                                     | GG                 | GG               | INTERGENIC                    |                    |                                                                               |
| SNP_60091_A_10827800 | NC_021167.1    | Ca_Kabuli_Chr08 | 10827800                | CC                                     | TT                 | TT               | DRR                           | 101505633          | extensin-like                                                                 |
| SNP_60092_A_10905114 | NC_021167.1    | Ca_Kabuli_Chr08 | 10905114                | CC                                     | AA                 | AA               | NON_SYNONYMOUS_CODING         | 101506266          | Unknown function                                                              |
| SNP_60093_A_10915585 | NC_021167.1    | Ca_Kabuli_Chr08 | 10915585                | AA                                     | TT                 | TT               | INTERGENIC                    |                    |                                                                               |
| SNP_60094_A_10915594 | NC_021167.1    | Ca_Kabuli_Chr08 | 10915594                | CC                                     | AA                 | AA               | INTERGENIC                    |                    |                                                                               |
| SNP_60096_A_10938544 | NC_021167.1    | Ca_Kabuli_Chr08 | 10938544                | CC                                     | AA                 | AA               | INTERGENIC                    |                    |                                                                               |
| SNP_60097_A_10948285 | NC_021167.1    | Ca_Kabuli_Chr08 | 10948285                | CC                                     | TT                 | TT               | NON_SYNONYMOUS_CODING         | 101507565          | Unknown function                                                              |
| SNP_60098_A_10948318 | NC_021167.1    | Ca_Kabuli_Chr08 | 10948318                | TT                                     | CC                 | CC               | NON_SYNONYMOUS_CODING         | 101507565          | Unknown function                                                              |
| SNP_60099_A_10973489 | NC_021167.1    | Ca_Kabuli_Chr08 | 10973489                | CC                                     | TT                 | TT               | INTRON                        | 101508191          | putative pentatricopeptide repeat-containing protein At1g12700, mitochondrial |
| SNP_60100_A_10973662 | NC_021167.1    | Ca_Kabuli_Chr08 | 10973662                | TT                                     | CC                 | CC               | INTRON                        | 101508191          | putative pentatricopeptide repeat-containing protein At1g12700, mitochondrial |
| SNP_60102_A_10973867 | NC_021167.1    | Ca_Kabuli_Chr08 | 10973867                | AA                                     | CC                 | CC               | INTRON                        | 101508191          | putative pentatricopeptide repeat-containing protein At1g12700, mitochondrial |
| SNP_60103_A_11015471 | NC_021167.1    | Ca_Kabuli_Chr08 | 11015471                | CC                                     | GG                 | GG               | DRR                           | 101508828          | pentatricopeptide repeat-containing protein At3g22470, mitochondrial-like     |
| SNP_60104_A_11015550 | NC_021167.1    | Ca_Kabuli_Chr08 | 11015550                | AA                                     | CC                 | CC               | DRR                           | 101508828          | pentatricopeptide repeat-containing protein At3g22470, mitochondrial-like     |
| SNP_60106_A_11045493 | NC_021167.1    | Ca_Kabuli_Chr08 | 11045493                | AA                                     | CC                 | CC               | INTERGENIC                    |                    |                                                                               |
| SNP_60107_A_11059311 | NC_021167.1    | Ca_Kabuli_Chr08 | 11059311                | GG                                     | CC                 | CC               | INTERGENIC                    |                    |                                                                               |
| SNP_60108_A_11070494 | NC_021167.1    | Ca_Kabuli_Chr08 | 11070494                | AA                                     | CC                 | CC               | URR                           | 101509900          | MATE efflux family protein 5-like                                             |
| SNP_60109_A_11070504 | NC_021167.1    | Ca_Kabuli_Chr08 | 11070504                | AA                                     | TT                 | TT               | URR                           | 101509900          | MATE efflux family protein 5-like                                             |
| SNP_60110_A_11070732 | NC_021167.1    | Ca_Kabuli_Chr08 | 11070732                | CC                                     | TT                 | TT               | URR                           | 101509900          | MATE efflux family protein 5-like                                             |
| SNP_60112_A_11070812 | NC_021167.1    | Ca_Kabuli_Chr08 | 11070812                | CC                                     | TT                 | TT               | INTERGENIC                    |                    |                                                                               |

| SNPs IDs             | Chromosome IDs | Chromosomes     | Physical positions (bp) | CDC Frontier (Reference genome) | (Pusa 1103 & HPNB) | (ILWC 46 & LPNB) | Sequence Components of genome | Gene accession IDs | Putative functions                |
|----------------------|----------------|-----------------|-------------------------|---------------------------------|--------------------|------------------|-------------------------------|--------------------|-----------------------------------|
| SNP_60113_A_11070834 | NC_021167.1    | Ca_Kabuli_Chr08 | 11070834                | GG                              | AA                 | AA               | INTERGENIC                    |                    |                                   |
| SNP_60114_A_11071072 | NC_021167.1    | Ca_Kabuli_Chr08 | 11071072                | CC                              | TT                 | TT               | INTERGENIC                    |                    |                                   |
| SNP_60115_A_11072869 | NC_021167.1    | Ca_Kabuli_Chr08 | 11072869                | GG                              | AA                 | AA               | INTERGENIC                    |                    |                                   |
| SNP_60116_A_11072896 | NC_021167.1    | Ca_Kabuli_Chr08 | 11072896                | TT                              | CC                 | CC               | INTERGENIC                    |                    |                                   |
| SNP_60117_A_11084024 | NC_021167.1    | Ca_Kabuli_Chr08 | 11084024                | GG                              | AA                 | AA               | DRR                           | 101510554          | MATE efflux family protein 5-like |
| SNP_60118_A_11088701 | NC_021167.1    | Ca_Kabuli_Chr08 | 11088701                | AA                              | GG                 | GG               | INTRON                        | 101510554          | MATE efflux family protein 5-like |
| SNP_60119_A_11091882 | NC_021167.1    | Ca_Kabuli_Chr08 | 11091882                | TT                              | AA                 | AA               | URR                           | 101510554          | MATE efflux family protein 5-like |
| SNP_60120_A_11092304 | NC_021167.1    | Ca_Kabuli_Chr08 | 11092304                | AA                              | GG                 | GG               | URR                           | 101510554          | MATE efflux family protein 5-like |
| SNP_60121_A_11092370 | NC_021167.1    | Ca_Kabuli_Chr08 | 11092370                | GG                              | AA                 | AA               | URR                           | 101510554          | MATE efflux family protein 5-like |
| SNP_60122_A_11101158 | NC_021167.1    | Ca_Kabuli_Chr08 | 11101158                | TT                              | CC                 | CC               | INTRON                        | 101510875          | cyclin-dependent kinase D-3-like  |
| SNP_60123_A_11101161 | NC_021167.1    | Ca_Kabuli_Chr08 | 11101161                | TT                              | CC                 | CC               | INTRON                        | 101510875          | cyclin-dependent kinase D-3-like  |
| SNP_60124_A_11102884 | NC_021167.1    | Ca_Kabuli_Chr08 | 11102884                | TT                              | GG                 | GG               | INTRON                        | 101510875          | cyclin-dependent kinase D-3-like  |
| SNP_60125_A_11107152 | NC_021167.1    | Ca_Kabuli_Chr08 | 11107152                | TT                              | AA                 | AA               | URR                           | 101510875          | cyclin-dependent kinase D-3-like  |
| SNP_60126_A_11107399 | NC_021167.1    | Ca_Kabuli_Chr08 | 11107399                | GG                              | TT                 | TT               | URR                           | 101510875          | cyclin-dependent kinase D-3-like  |
| SNP_60127_A_11109572 | NC_021167.1    | Ca_Kabuli_Chr08 | 11109572                | AA                              | TT                 | TT               | INTERGENIC                    |                    |                                   |
| SNP_60128_A_11113300 | NC_021167.1    | Ca_Kabuli_Chr08 | 11113300                | CC                              | TT                 | TT               | INTERGENIC                    |                    |                                   |
| SNP_60129_A_11113467 | NC_021167.1    | Ca_Kabuli_Chr08 | 11113467                | GG                              | AA                 | AA               | INTERGENIC                    |                    |                                   |
| SNP_60133_A_11143619 | NC_021167.1    | Ca_Kabuli_Chr08 | 11143619                | TT                              | AA                 | AA               | INTERGENIC                    |                    |                                   |
| SNP_60134_A_11143802 | NC_021167.1    | Ca_Kabuli_Chr08 | 11143802                | TT                              | AA                 | AA               | INTERGENIC                    |                    |                                   |
| SNP_60135_A_11143902 | NC_021167.1    | Ca_Kabuli_Chr08 | 11143902                | GG                              | AA                 | AA               | INTERGENIC                    |                    |                                   |
| SNP_60136_A_11143959 | NC_021167.1    | Ca_Kabuli_Chr08 | 11143959                | AA                              | GG                 | GG               | INTERGENIC                    |                    |                                   |
| SNP_60137_A_11143996 | NC_021167.1    | Ca_Kabuli_Chr08 | 11143996                | AA                              | GG                 | GG               | INTERGENIC                    |                    |                                   |

| SNPs IDs             | Chromosome IDs | Chromosomes     | Physical positions (bp) | CDC Frontier genome (Reference genome) | (Pusa 1103 & HPNB) | (ILWC 46 & LPNB) | Sequence genome | Components of | Gene accession IDs | Putative functions |
|----------------------|----------------|-----------------|-------------------------|----------------------------------------|--------------------|------------------|-----------------|---------------|--------------------|--------------------|
| SNP_60138_A_11144005 | NC_021167.1    | Ca_Kabuli_Chr08 | 11144005                | GG                                     | AA                 | AA               | INTERGENIC      |               |                    |                    |
| SNP_60139_A_11144032 | NC_021167.1    | Ca_Kabuli_Chr08 | 11144032                | TT                                     | CC                 | CC               | INTERGENIC      |               |                    |                    |
| SNP_60140_A_11144190 | NC_021167.1    | Ca_Kabuli_Chr08 | 11144190                | GG                                     | AA                 | AA               | INTERGENIC      |               |                    |                    |
| SNP_60141_A_11144269 | NC_021167.1    | Ca_Kabuli_Chr08 | 11144269                | TT                                     | CC                 | CC               | INTERGENIC      |               |                    |                    |
| SNP_60143_A_11144397 | NC_021167.1    | Ca_Kabuli_Chr08 | 11144397                | AA                                     | TT                 | TT               | INTERGENIC      |               |                    |                    |
| SNP_60144_A_11144554 | NC_021167.1    | Ca_Kabuli_Chr08 | 11144554                | TT                                     | CC                 | CC               | INTERGENIC      |               |                    |                    |
| SNP_60145_A_11144773 | NC_021167.1    | Ca_Kabuli_Chr08 | 11144773                | GG                                     | AA                 | AA               | INTERGENIC      |               |                    |                    |
| SNP_60146_A_11144874 | NC_021167.1    | Ca_Kabuli_Chr08 | 11144874                | GG                                     | TT                 | TT               | INTERGENIC      |               |                    |                    |
| SNP_60147_A_11144943 | NC_021167.1    | Ca_Kabuli_Chr08 | 11144943                | GG                                     | AA                 | AA               | INTERGENIC      |               |                    |                    |
| SNP_60148_A_11144944 | NC_021167.1    | Ca_Kabuli_Chr08 | 11144944                | GG                                     | AA                 | AA               | INTERGENIC      |               |                    |                    |
| SNP_60149_A_11145023 | NC_021167.1    | Ca_Kabuli_Chr08 | 11145023                | GG                                     | AA                 | AA               | INTERGENIC      |               |                    |                    |
| SNP_60150_A_11145378 | NC_021167.1    | Ca_Kabuli_Chr08 | 11145378                | TT                                     | GG                 | GG               | INTERGENIC      |               |                    |                    |
| SNP_60151_A_11145609 | NC_021167.1    | Ca_Kabuli_Chr08 | 11145609                | AA                                     | CC                 | CC               | INTERGENIC      |               |                    |                    |
| SNP_60154_A_11145871 | NC_021167.1    | Ca_Kabuli_Chr08 | 11145871                | CC                                     | AA                 | AA               | INTERGENIC      |               |                    |                    |
| SNP_60155_A_11145921 | NC_021167.1    | Ca_Kabuli_Chr08 | 11145921                | AA                                     | GG                 | GG               | INTERGENIC      |               |                    |                    |
| SNP_60156_A_11146172 | NC_021167.1    | Ca_Kabuli_Chr08 | 11146172                | CC                                     | GG                 | GG               | INTERGENIC      |               |                    |                    |
| SNP_60159_A_11146576 | NC_021167.1    | Ca_Kabuli_Chr08 | 11146576                | CC                                     | TT                 | TT               | INTERGENIC      |               |                    |                    |
| SNP_60160_A_11146612 | NC_021167.1    | Ca_Kabuli_Chr08 | 11146612                | CC                                     | TT                 | TT               | INTERGENIC      |               |                    |                    |
| SNP_60161_A_11146679 | NC_021167.1    | Ca_Kabuli_Chr08 | 11146679                | TT                                     | AA                 | AA               | INTERGENIC      |               |                    |                    |
| SNP_60163_A_11146812 | NC_021167.1    | Ca_Kabuli_Chr08 | 11146812                | CC                                     | TT                 | TT               | INTERGENIC      |               |                    |                    |
| SNP_60164_A_11146889 | NC_021167.1    | Ca_Kabuli_Chr08 | 11146889                | AA                                     | GG                 | GG               | INTERGENIC      |               |                    |                    |
| SNP_60165_A_11146958 | NC_021167.1    | Ca_Kabuli_Chr08 | 11146958                | GG                                     | TT                 | TT               | INTERGENIC      |               |                    |                    |

| SNPs IDs             | Chromosome IDs | Chromosomes     | Physical positions (bp) | CDC Frontier genome (Reference genome) | (Pusa 1103 & HPNB) | (ILWC 46 & LPNB) | Sequence Components of genome | Gene accession IDs | Putative functions                        |
|----------------------|----------------|-----------------|-------------------------|----------------------------------------|--------------------|------------------|-------------------------------|--------------------|-------------------------------------------|
| SNP_60166_A_11147960 | NC_021167.1    | Ca_Kabuli_Chr08 | 11147960                | TT                                     | CC                 | CC               | INTERGENIC                    |                    |                                           |
| SNP_60168_A_11151651 | NC_021167.1    | Ca_Kabuli_Chr08 | 11151651                | GG                                     | TT                 | TT               | DRR                           | 101503033          | F-box/kelch-repeat protein At3g06240-like |
| SNP_60169_A_11151656 | NC_021167.1    | Ca_Kabuli_Chr08 | 11151656                | CC                                     | TT                 | TT               | DRR                           | 101503033          | F-box/kelch-repeat protein At3g06240-like |
| SNP_60170_A_11151928 | NC_021167.1    | Ca_Kabuli_Chr08 | 11151928                | GG                                     | AA                 | AA               | SYNONYMOUS_CODING             | 101503033          | F-box/kelch-repeat protein At3g06240-like |
| SNP_60171_A_11153733 | NC_021167.1    | Ca_Kabuli_Chr08 | 11153733                | AA                                     | CC                 | CC               | INTRON                        | 101503033          | F-box/kelch-repeat protein At3g06240-like |
| SNP_60173_A_11154936 | NC_021167.1    | Ca_Kabuli_Chr08 | 11154936                | TT                                     | GG                 | GG               | INTRON                        | 101503033          | F-box/kelch-repeat protein At3g06240-like |
| SNP_60174_A_11155211 | NC_021167.1    | Ca_Kabuli_Chr08 | 11155211                | CC                                     | AA                 | AA               | INTRON                        | 101503033          | F-box/kelch-repeat protein At3g06240-like |
| SNP_60175_A_11155244 | NC_021167.1    | Ca_Kabuli_Chr08 | 11155244                | CC                                     | TT                 | TT               | INTRON                        | 101503033          | F-box/kelch-repeat protein At3g06240-like |
| SNP_60176_A_11157955 | NC_021167.1    | Ca_Kabuli_Chr08 | 11157955                | TT                                     | CC                 | CC               | INTERGENIC                    |                    |                                           |
| SNP_60177_A_11158139 | NC_021167.1    | Ca_Kabuli_Chr08 | 11158139                | TT                                     | CC                 | CC               | INTERGENIC                    |                    |                                           |
| SNP_60178_A_11158208 | NC_021167.1    | Ca_Kabuli_Chr08 | 11158208                | TT                                     | CC                 | CC               | INTERGENIC                    |                    |                                           |
| SNP_60179_A_11158320 | NC_021167.1    | Ca_Kabuli_Chr08 | 11158320                | CC                                     | TT                 | TT               | INTERGENIC                    |                    |                                           |
| SNP_60180_A_11158347 | NC_021167.1    | Ca_Kabuli_Chr08 | 11158347                | GG                                     | AA                 | AA               | INTERGENIC                    |                    |                                           |
| SNP_60181_A_11158490 | NC_021167.1    | Ca_Kabuli_Chr08 | 11158490                | TT                                     | GG                 | GG               | INTERGENIC                    |                    |                                           |
| SNP_60182_A_11158496 | NC_021167.1    | Ca_Kabuli_Chr08 | 11158496                | AA                                     | GG                 | GG               | INTERGENIC                    |                    |                                           |
| SNP_60183_A_11158532 | NC_021167.1    | Ca_Kabuli_Chr08 | 11158532                | TT                                     | CC                 | CC               | INTERGENIC                    |                    |                                           |
| SNP_60184_A_11158552 | NC_021167.1    | Ca_Kabuli_Chr08 | 11158552                | CC                                     | AA                 | AA               | INTERGENIC                    |                    |                                           |
| SNP_60185_A_11158832 | NC_021167.1    | Ca_Kabuli_Chr08 | 11158832                | GG                                     | TT                 | TT               | INTERGENIC                    |                    |                                           |
| SNP_60186_A_11159279 | NC_021167.1    | Ca_Kabuli_Chr08 | 11159279                | GG                                     | TT                 | TT               | INTERGENIC                    |                    |                                           |
| SNP_60187_A_11160031 | NC_021167.1    | Ca_Kabuli_Chr08 | 11160031                | TT                                     | CC                 | CC               | INTERGENIC                    |                    |                                           |
| SNP_60188_A_11160040 | NC_021167.1    | Ca_Kabuli_Chr08 | 11160040                | AA                                     | GG                 | GG               | INTERGENIC                    |                    |                                           |
| SNP_60189_A_11160381 | NC_021167.1    | Ca_Kabuli_Chr08 | 11160381                | CC                                     | TT                 | TT               | INTERGENIC                    |                    |                                           |

| SNPs IDs             | Chromosome IDs | Chromosomes     | Physical positions (bp) | CDC Frontier (Reference genome) | (Pusa 1103 & HPNB) | (ILWC 46 & LPNB) | Sequence Components of genome | Gene accession IDs | Putative functions                        |
|----------------------|----------------|-----------------|-------------------------|---------------------------------|--------------------|------------------|-------------------------------|--------------------|-------------------------------------------|
| SNP_60190_A_11161522 | NC_021167.1    | Ca_Kabuli_Chr08 | 11161522                | CC                              | TT                 | TT               | DRR                           | 101503360          | F-box/kelch-repeat protein At3g06240-like |
| SNP_60191_A_11167196 | NC_021167.1    | Ca_Kabuli_Chr08 | 11167196                | TT                              | CC                 | CC               | INTERGENIC                    |                    |                                           |
| SNP_60192_A_11167203 | NC_021167.1    | Ca_Kabuli_Chr08 | 11167203                | GG                              | AA                 | AA               | INTERGENIC                    |                    |                                           |
| SNP_60193_A_11168788 | NC_021167.1    | Ca_Kabuli_Chr08 | 11168788                | CC                              | GG                 | GG               | INTERGENIC                    |                    |                                           |
| SNP_60194_A_11168880 | NC_021167.1    | Ca_Kabuli_Chr08 | 11168880                | CC                              | TT                 | TT               | INTERGENIC                    |                    |                                           |
| SNP_60195_A_11168904 | NC_021167.1    | Ca_Kabuli_Chr08 | 11168904                | CC                              | GG                 | GG               | INTERGENIC                    |                    |                                           |
| SNP_60196_A_11168930 | NC_021167.1    | Ca_Kabuli_Chr08 | 11168930                | AA                              | GG                 | GG               | INTERGENIC                    |                    |                                           |
| SNP_60197_A_11168931 | NC_021167.1    | Ca_Kabuli_Chr08 | 11168931                | GG                              | AA                 | AA               | INTERGENIC                    |                    |                                           |
| SNP_60198_A_11168949 | NC_021167.1    | Ca_Kabuli_Chr08 | 11168949                | TT                              | AA                 | AA               | INTERGENIC                    |                    |                                           |
| SNP_60199_A_11169105 | NC_021167.1    | Ca_Kabuli_Chr08 | 11169105                | TT                              | CC                 | CC               | INTERGENIC                    |                    |                                           |
| SNP_60200_A_11169132 | NC_021167.1    | Ca_Kabuli_Chr08 | 11169132                | TT                              | CC                 | CC               | INTERGENIC                    |                    |                                           |
| SNP_60201_A_11169151 | NC_021167.1    | Ca_Kabuli_Chr08 | 11169151                | GG                              | CC                 | CC               | INTERGENIC                    |                    |                                           |
| SNP_60202_A_11169198 | NC_021167.1    | Ca_Kabuli_Chr08 | 11169198                | GG                              | AA                 | AA               | INTERGENIC                    |                    |                                           |
| SNP_60203_A_11169285 | NC_021167.1    | Ca_Kabuli_Chr08 | 11169285                | CC                              | GG                 | GG               | INTERGENIC                    |                    |                                           |
| SNP_60204_A_11169346 | NC_021167.1    | Ca_Kabuli_Chr08 | 11169346                | AA                              | GG                 | GG               | INTERGENIC                    |                    |                                           |
| SNP_60205_A_11170762 | NC_021167.1    | Ca_Kabuli_Chr08 | 11170762                | AA                              | GG                 | GG               | INTERGENIC                    |                    |                                           |
| SNP_60206_A_11173116 | NC_021167.1    | Ca_Kabuli_Chr08 | 11173116                | TT                              | GG                 | GG               | INTERGENIC                    |                    |                                           |
| SNP_60207_A_11173549 | NC_021167.1    | Ca_Kabuli_Chr08 | 11173549                | CC                              | TT                 | TT               | INTERGENIC                    |                    |                                           |
| SNP_60208_A_11173552 | NC_021167.1    | Ca_Kabuli_Chr08 | 11173552                | AA                              | GG                 | GG               | INTERGENIC                    |                    |                                           |
| SNP_60209_A_11173601 | NC_021167.1    | Ca_Kabuli_Chr08 | 11173601                | CC                              | TT                 | TT               | INTERGENIC                    |                    |                                           |
| SNP_60210_A_11174000 | NC_021167.1    | Ca_Kabuli_Chr08 | 11174000                | CC                              | AA                 | AA               | INTERGENIC                    |                    |                                           |
| SNP_60211_A_11180842 | NC_021167.1    | Ca_Kabuli_Chr08 | 11180842                | GG                              | AA                 | AA               | INTERGENIC                    |                    |                                           |

| SNPs IDs             | Chromosome IDs | Chromosomes     | Physical positions (bp) | CDC Frontier genome (Reference genome) | (Pusa 1103 & HPNB) | (ILWC 46 & LPNB) | Sequence genome | Components of | Gene accession IDs | Putative functions                      |
|----------------------|----------------|-----------------|-------------------------|----------------------------------------|--------------------|------------------|-----------------|---------------|--------------------|-----------------------------------------|
| SNP_60212_A_11180956 | NC_021167.1    | Ca_Kabuli_Chr08 | 11180956                | CC                                     | AA                 | AA               | INTERGENIC      |               |                    |                                         |
| SNP_60213_A_11181115 | NC_021167.1    | Ca_Kabuli_Chr08 | 11181115                | AA                                     | CC                 | CC               | INTERGENIC      |               |                    |                                         |
| SNP_60214_A_11186109 | NC_021167.1    | Ca_Kabuli_Chr08 | 11186109                | GG                                     | AA                 | AA               | DRR             | 101511736     |                    | zinc finger protein VAR3, chloroplastic |
| SNP_60218_A_11317617 | NC_021167.1    | Ca_Kabuli_Chr08 | 11317617                | TT                                     | AA                 | AA               | INTERGENIC      |               |                    |                                         |
| SNP_60219_A_11317735 | NC_021167.1    | Ca_Kabuli_Chr08 | 11317735                | CC                                     | TT                 | TT               | INTERGENIC      |               |                    |                                         |
| SNP_60220_A_11321288 | NC_021167.1    | Ca_Kabuli_Chr08 | 11321288                | CC                                     | TT                 | TT               | INTERGENIC      |               |                    |                                         |
| SNP_60221_A_11340332 | NC_021167.1    | Ca_Kabuli_Chr08 | 11340332                | CC                                     | TT                 | TT               | INTERGENIC      |               |                    |                                         |
| SNP_60223_A_11359909 | NC_021167.1    | Ca_Kabuli_Chr08 | 11359909                | CC                                     | GG                 | GG               | INTERGENIC      |               |                    |                                         |
| SNP_60224_A_11391079 | NC_021167.1    | Ca_Kabuli_Chr08 | 11391079                | AA                                     | TT                 | TT               | INTERGENIC      |               |                    |                                         |
| SNP_60225_A_11415231 | NC_021167.1    | Ca_Kabuli_Chr08 | 11415231                | CC                                     | AA                 | AA               | INTERGENIC      |               |                    |                                         |
| SNP_60226_A_11415518 | NC_021167.1    | Ca_Kabuli_Chr08 | 11415518                | AA                                     | GG                 | GG               | INTERGENIC      |               |                    |                                         |
| SNP_60227_A_11415552 | NC_021167.1    | Ca_Kabuli_Chr08 | 11415552                | AA                                     | GG                 | GG               | INTERGENIC      |               |                    |                                         |
| SNP_60228_A_11415554 | NC_021167.1    | Ca_Kabuli_Chr08 | 11415554                | GG                                     | AA                 | AA               | INTERGENIC      |               |                    |                                         |
| SNP_60229_A_11421691 | NC_021167.1    | Ca_Kabuli_Chr08 | 11421691                | AA                                     | GG                 | GG               | INTERGENIC      |               |                    |                                         |
| SNP_60230_A_11422407 | NC_021167.1    | Ca_Kabuli_Chr08 | 11422407                | AA                                     | GG                 | GG               | INTERGENIC      |               |                    |                                         |
| SNP_60231_A_11422483 | NC_021167.1    | Ca_Kabuli_Chr08 | 11422483                | CC                                     | AA                 | AA               | INTERGENIC      |               |                    |                                         |
| SNP_60232_A_11422491 | NC_021167.1    | Ca_Kabuli_Chr08 | 11422491                | TT                                     | GG                 | GG               | INTERGENIC      |               |                    |                                         |
| SNP_60233_A_11422497 | NC_021167.1    | Ca_Kabuli_Chr08 | 11422497                | GG                                     | AA                 | AA               | INTERGENIC      |               |                    |                                         |
| SNP_60234_A_11422533 | NC_021167.1    | Ca_Kabuli_Chr08 | 11422533                | AA                                     | TT                 | TT               | INTERGENIC      |               |                    |                                         |
| SNP_60235_A_11422581 | NC_021167.1    | Ca_Kabuli_Chr08 | 11422581                | AA                                     | CC                 | CC               | INTERGENIC      |               |                    |                                         |
| SNP_60236_A_11422612 | NC_021167.1    | Ca_Kabuli_Chr08 | 11422612                | GG                                     | AA                 | AA               | INTERGENIC      |               |                    |                                         |
| SNP_60237_A_11422847 | NC_021167.1    | Ca_Kabuli_Chr08 | 11422847                | TT                                     | AA                 | AA               | INTERGENIC      |               |                    |                                         |

| SNPs IDs             | Chromosome IDs | Chromosomes     | Physical positions (bp) | CDC Frontier genome (Reference genome) | (Pusa 1103 & HPNB) | (ILWC 46 & LPNB) | Sequence Components of genome | Gene accession IDs | Putative functions                         |
|----------------------|----------------|-----------------|-------------------------|----------------------------------------|--------------------|------------------|-------------------------------|--------------------|--------------------------------------------|
| SNP_60238_A_11448950 | NC_021167.1    | Ca_Kabuli_Chr08 | 11448950                | GG                                     | AA                 | AA               | SYNONYMOUS_CODING             | 101508193          | F-box/kelch-repeat protein At3g06240-like  |
| SNP_60239_A_11449290 | NC_021167.1    | Ca_Kabuli_Chr08 | 11449290                | AA                                     | GG                 | GG               | NON_SYNONYMOUS_CODING         | 101508193          | F-box/kelch-repeat protein At3g06240-like  |
| SNP_60240_A_11449296 | NC_021167.1    | Ca_Kabuli_Chr08 | 11449296                | GG                                     | AA                 | AA               | NON_SYNONYMOUS_CODING         | 101508193          | F-box/kelch-repeat protein At3g06240-like  |
| SNP_60241_A_11458316 | NC_021167.1    | Ca_Kabuli_Chr08 | 11458316                | TT                                     | GG                 | GG               | NON_SYNONYMOUS_CODING         | 101508518          | F-box/kelch-repeat protein At3g06240-like  |
| SNP_60242_A_11458565 | NC_021167.1    | Ca_Kabuli_Chr08 | 11458565                | CC                                     | TT                 | TT               | NON_SYNONYMOUS_CODING         | 101508518          | F-box/kelch-repeat protein At3g06240-like  |
| SNP_60243_A_11458601 | NC_021167.1    | Ca_Kabuli_Chr08 | 11458601                | GG                                     | AA                 | AA               | NON_SYNONYMOUS_CODING         | 101508518          | F-box/kelch-repeat protein At3g06240-like  |
| SNP_60244_A_11463503 | NC_021167.1    | Ca_Kabuli_Chr08 | 11463503                | GG                                     | AA                 | AA               | INTERGENIC                    |                    |                                            |
| SNP_60245_A_11523118 | NC_021167.1    | Ca_Kabuli_Chr08 | 11523118                | TT                                     | GG                 | GG               | INTERGENIC                    |                    |                                            |
| SNP_60246_A_11528288 | NC_021167.1    | Ca_Kabuli_Chr08 | 11528288                | GG                                     | AA                 | AA               | INTERGENIC                    |                    |                                            |
| SNP_60247_A_11530316 | NC_021167.1    | Ca_Kabuli_Chr08 | 11530316                | GG                                     | TT                 | TT               | URR                           | 101509154          | Unknown function                           |
| SNP_60250_A_11545479 | NC_021167.1    | Ca_Kabuli_Chr08 | 11545479                | TT                                     | AA                 | AA               | INTRON                        | 101491826          | probable auxin efflux carrier component 1c |
| SNP_60251_A_11556163 | NC_021167.1    | Ca_Kabuli_Chr08 | 11556163                | TT                                     | CC                 | CC               | INTERGENIC                    |                    |                                            |
| SNP_60252_A_11603810 | NC_021167.1    | Ca_Kabuli_Chr08 | 11603810                | CC                                     | TT                 | TT               | INTERGENIC                    |                    |                                            |
| SNP_60253_A_11603897 | NC_021167.1    | Ca_Kabuli_Chr08 | 11603897                | GG                                     | TT                 | TT               | INTERGENIC                    |                    |                                            |
| SNP_60254_A_11604106 | NC_021167.1    | Ca_Kabuli_Chr08 | 11604106                | CC                                     | TT                 | TT               | INTERGENIC                    |                    |                                            |
| SNP_60255_A_11604167 | NC_021167.1    | Ca_Kabuli_Chr08 | 11604167                | TT                                     | AA                 | AA               | INTERGENIC                    |                    |                                            |
| SNP_60256_A_11604857 | NC_021167.1    | Ca_Kabuli_Chr08 | 11604857                | CC                                     | TT                 | TT               | INTERGENIC                    |                    |                                            |
| SNP_60257_A_11605010 | NC_021167.1    | Ca_Kabuli_Chr08 | 11605010                | CC                                     | TT                 | TT               | INTERGENIC                    |                    |                                            |
| SNP_60258_A_11605190 | NC_021167.1    | Ca_Kabuli_Chr08 | 11605190                | GG                                     | CC                 | CC               | INTERGENIC                    |                    |                                            |
| SNP_60259_A_11605201 | NC_021167.1    | Ca_Kabuli_Chr08 | 11605201                | CC                                     | TT                 | TT               | INTERGENIC                    |                    |                                            |
| SNP_60260_A_11605213 | NC_021167.1    | Ca_Kabuli_Chr08 | 11605213                | TT                                     | AA                 | AA               | INTERGENIC                    |                    |                                            |
| SNP_60261_A_11605246 | NC_021167.1    | Ca_Kabuli_Chr08 | 11605246                | TT                                     | GG                 | GG               | INTERGENIC                    |                    |                                            |

| SNPs IDs             | Chromosome IDs | Chromosomes     | Physical positions (bp) | CDC Frontier (Reference genome) | (Pusa 1103 & HPNB) | (ILWC 46 & LPNB) | Sequence Components of genome | Gene accession IDs | Putative functions            |
|----------------------|----------------|-----------------|-------------------------|---------------------------------|--------------------|------------------|-------------------------------|--------------------|-------------------------------|
| SNP_60262_A_11605247 | NC_021167.1    | Ca_Kabuli_Chr08 | 11605247                | AA                              | TT                 | TT               | INTERGENIC                    |                    |                               |
| SNP_60263_A_11605311 | NC_021167.1    | Ca_Kabuli_Chr08 | 11605311                | GG                              | TT                 | TT               | INTERGENIC                    |                    |                               |
| SNP_60264_A_11605315 | NC_021167.1    | Ca_Kabuli_Chr08 | 11605315                | AA                              | TT                 | TT               | INTERGENIC                    |                    |                               |
| SNP_60265_A_11605316 | NC_021167.1    | Ca_Kabuli_Chr08 | 11605316                | GG                              | AA                 | AA               | INTERGENIC                    |                    |                               |
| SNP_60266_A_11645893 | NC_021167.1    | Ca_Kabuli_Chr08 | 11645893                | CC                              | TT                 | TT               | URR                           | 101509479          | uncharacterized LOC101509479  |
| SNP_60267_A_11757482 | NC_021167.1    | Ca_Kabuli_Chr08 | 11757482                | TT                              | CC                 | CC               | INTERGENIC                    |                    |                               |
| SNP_60268_A_11849300 | NC_021167.1    | Ca_Kabuli_Chr08 | 11849300                | CC                              | TT                 | TT               | INTERGENIC                    |                    |                               |
| SNP_60270_A_11921626 | NC_021167.1    | Ca_Kabuli_Chr08 | 11921626                | TT                              | AA                 | AA               | INTERGENIC                    |                    |                               |
| SNP_60271_A_11921692 | NC_021167.1    | Ca_Kabuli_Chr08 | 11921692                | GG                              | AA                 | AA               | INTERGENIC                    |                    |                               |
| SNP_60274_A_11955482 | NC_021167.1    | Ca_Kabuli_Chr08 | 11955482                | CC                              | TT                 | TT               | INTERGENIC                    |                    |                               |
| SNP_60276_A_11969024 | NC_021167.1    | Ca_Kabuli_Chr08 | 11969024                | CC                              | AA                 | AA               | INTERGENIC                    |                    |                               |
| SNP_60277_A_11969487 | NC_021167.1    | Ca_Kabuli_Chr08 | 11969487                | CC                              | AA                 | AA               | INTERGENIC                    |                    |                               |
| SNP_60278_A_11969493 | NC_021167.1    | Ca_Kabuli_Chr08 | 11969493                | CC                              | TT                 | TT               | INTERGENIC                    |                    |                               |
| SNP_60279_A_11969525 | NC_021167.1    | Ca_Kabuli_Chr08 | 11969525                | AA                              | GG                 | GG               | INTERGENIC                    |                    |                               |
| SNP_60280_A_11969547 | NC_021167.1    | Ca_Kabuli_Chr08 | 11969547                | AA                              | TT                 | TT               | INTERGENIC                    |                    |                               |
| SNP_60281_A_11969563 | NC_021167.1    | Ca_Kabuli_Chr08 | 11969563                | CC                              | AA                 | AA               | INTERGENIC                    |                    |                               |
| SNP_60283_A_11975784 | NC_021167.1    | Ca_Kabuli_Chr08 | 11975784                | AA                              | TT                 | TT               | INTRON                        | 101514426          | TMV resistance protein N-like |
| SNP_60284_A_11975895 | NC_021167.1    | Ca_Kabuli_Chr08 | 11975895                | AA                              | GG                 | GG               | INTRON                        | 101514426          | TMV resistance protein N-like |
| SNP_60286_A_11976024 | NC_021167.1    | Ca_Kabuli_Chr08 | 11976024                | GG                              | AA                 | AA               | INTRON                        | 101514426          | TMV resistance protein N-like |
| SNP_60288_A_11976169 | NC_021167.1    | Ca_Kabuli_Chr08 | 11976169                | AA                              | GG                 | GG               | INTRON                        | 101514426          | TMV resistance protein N-like |
| SNP_60290_A_11976199 | NC_021167.1    | Ca_Kabuli_Chr08 | 11976199                | CC                              | TT                 | TT               | INTRON                        | 101514426          | TMV resistance protein N-like |
| SNP_60291_A_11976324 | NC_021167.1    | Ca_Kabuli_Chr08 | 11976324                | AA                              | TT                 | TT               | INTRON                        | 101514426          | TMV resistance protein N-like |



| SNPs IDs             | Chromosome IDs | Chromosomes     | Physical positions (bp) | CDC Frontier (Reference genome) | (Pusa 1103 & HPNB) | (ILWC 46 & LPNB) | Sequence Components of genome | Gene accession IDs | Putative functions                                                        |
|----------------------|----------------|-----------------|-------------------------|---------------------------------|--------------------|------------------|-------------------------------|--------------------|---------------------------------------------------------------------------|
| SNP_60292_A_11976329 | NC_021167.1    | Ca_Kabuli_Chr08 | 11976329                | AA                              | GG                 | GG               | INTRON                        | 101514426          | TMV resistance protein N-like                                             |
| SNP_60293_A_11976543 | NC_021167.1    | Ca_Kabuli_Chr08 | 11976543                | CC                              | TT                 | TT               | INTRON                        | 101514426          | TMV resistance protein N-like                                             |
| SNP_60294_A_11976580 | NC_021167.1    | Ca_Kabuli_Chr08 | 11976580                | CC                              | TT                 | TT               | INTRON                        | 101514426          | TMV resistance protein N-like                                             |
| SNP_60295_A_11979726 | NC_021167.1    | Ca_Kabuli_Chr08 | 11979726                | AA                              | GG                 | GG               | INTRON                        | 101514426          | TMV resistance protein N-like                                             |
| SNP_60296_A_11979746 | NC_021167.1    | Ca_Kabuli_Chr08 | 11979746                | TT                              | GG                 | GG               | INTRON                        | 101514426          | TMV resistance protein N-like                                             |
| SNP_60297_A_11979747 | NC_021167.1    | Ca_Kabuli_Chr08 | 11979747                | GG                              | TT                 | TT               | INTRON                        | 101514426          | TMV resistance protein N-like                                             |
| SNP_60298_A_11979785 | NC_021167.1    | Ca_Kabuli_Chr08 | 11979785                | GG                              | AA                 | AA               | INTRON                        | 101514426          | TMV resistance protein N-like                                             |
| SNP_60299_A_11979795 | NC_021167.1    | Ca_Kabuli_Chr08 | 11979795                | AA                              | GG                 | GG               | INTRON                        | 101514426          | TMV resistance protein N-like                                             |
| SNP_60300_A_11982960 | NC_021167.1    | Ca_Kabuli_Chr08 | 11982960                | GG                              | TT                 | TT               | INTRON                        | 101514426          | TMV resistance protein N-like                                             |
| SNP_60301_A_11982965 | NC_021167.1    | Ca_Kabuli_Chr08 | 11982965                | AA                              | GG                 | GG               | INTRON                        | 101514426          | TMV resistance protein N-like                                             |
| SNP_60302_A_11986056 | NC_021167.1    | Ca_Kabuli_Chr08 | 11986056                | GG                              | AA                 | AA               | DRR                           | 101513016          | pentatricopeptide repeat-containing protein At3g22470, mitochondrial-like |
| SNP_60303_A_11992934 | NC_021167.1    | Ca_Kabuli_Chr08 | 11992934                | TT                              | CC                 | CC               | INTERGENIC                    |                    |                                                                           |
| SNP_60304_A_11992956 | NC_021167.1    | Ca_Kabuli_Chr08 | 11992956                | GG                              | AA                 | AA               | INTERGENIC                    |                    |                                                                           |
| SNP_60305_A_11993264 | NC_021167.1    | Ca_Kabuli_Chr08 | 11993264                | GG                              | AA                 | AA               | INTERGENIC                    |                    |                                                                           |
| SNP_60306_A_11993277 | NC_021167.1    | Ca_Kabuli_Chr08 | 11993277                | TT                              | AA                 | AA               | INTERGENIC                    |                    |                                                                           |
| SNP_60307_A_12011596 | NC_021167.1    | Ca_Kabuli_Chr08 | 12011596                | GG                              | AA                 | AA               | INTERGENIC                    |                    |                                                                           |
| SNP_60309_A_12016912 | NC_021167.1    | Ca_Kabuli_Chr08 | 12016912                | AA                              | GG                 | GG               | INTRON                        | 101515401          | ATP-dependent RNA helicase DED1-like                                      |
| SNP_60310_A_12022569 | NC_021167.1    | Ca_Kabuli_Chr08 | 12022569                | TT                              | CC                 | CC               | INTRON                        | 101515736          | Unknown function                                                          |
| SNP_60311_A_12028757 | NC_021167.1    | Ca_Kabuli_Chr08 | 12028757                | TT                              | AA                 | AA               | URR                           | 101488499          | eukaryotic translation initiation factor 2A-like                          |
| SNP_60315_A_12048556 | NC_021167.1    | Ca_Kabuli_Chr08 | 12048556                | CC                              | TT                 | TT               | INTERGENIC                    |                    |                                                                           |
| SNP_60316_A_12048590 | NC_021167.1    | Ca_Kabuli_Chr08 | 12048590                | AA                              | GG                 | GG               | INTERGENIC                    |                    |                                                                           |
| SNP_60317_A_12048776 | NC_021167.1    | Ca_Kabuli_Chr08 | 12048776                | CC                              | AA                 | AA               | INTERGENIC                    |                    |                                                                           |

| SNPs IDs             | Chromosome IDs | Chromosomes     | Physical positions (bp) | CDC Frontier (Reference genome) | (Pusa 1103 & HPNB) | (ILWC 46 & LPNB) | Sequence genome | Components of | Gene accession IDs        | Putative functions |
|----------------------|----------------|-----------------|-------------------------|---------------------------------|--------------------|------------------|-----------------|---------------|---------------------------|--------------------|
| SNP_60318_A_12048782 | NC_021167.1    | Ca_Kabuli_Chr08 | 12048782                | TT                              | CC                 | CC               | INTERGENIC      |               |                           |                    |
| SNP_60319_A_12056286 | NC_021167.1    | Ca_Kabuli_Chr08 | 12056286                | AA                              | GG                 | GG               | INTERGENIC      |               |                           |                    |
| SNP_60320_A_12056308 | NC_021167.1    | Ca_Kabuli_Chr08 | 12056308                | TT                              | CC                 | CC               | INTERGENIC      |               |                           |                    |
| SNP_60321_A_12056463 | NC_021167.1    | Ca_Kabuli_Chr08 | 12056463                | AA                              | GG                 | GG               | INTERGENIC      |               |                           |                    |
| SNP_60322_A_12056567 | NC_021167.1    | Ca_Kabuli_Chr08 | 12056567                | GG                              | TT                 | TT               | INTERGENIC      |               |                           |                    |
| SNP_60323_A_12056696 | NC_021167.1    | Ca_Kabuli_Chr08 | 12056696                | AA                              | TT                 | TT               | INTERGENIC      |               |                           |                    |
| SNP_60324_A_12062307 | NC_021167.1    | Ca_Kabuli_Chr08 | 12062307                | TT                              | CC                 | CC               | INTERGENIC      |               |                           |                    |
| SNP_60325_A_12069606 | NC_021167.1    | Ca_Kabuli_Chr08 | 12069606                | TT                              | CC                 | CC               | INTERGENIC      |               |                           |                    |
| SNP_60328_A_12812417 | NC_021167.1    | Ca_Kabuli_Chr08 | 12812417                | CC                              | AA                 | AA               | INTERGENIC      |               |                           |                    |
| SNP_60329_A_12812420 | NC_021167.1    | Ca_Kabuli_Chr08 | 12812420                | TT                              | AA                 | AA               | INTERGENIC      |               |                           |                    |
| SNP_60330_A_12814099 | NC_021167.1    | Ca_Kabuli_Chr08 | 12814099                | TT                              | CC                 | CC               | INTERGENIC      |               |                           |                    |
| SNP_60331_A_12818192 | NC_021167.1    | Ca_Kabuli_Chr08 | 12818192                | CC                              | TT                 | TT               | INTERGENIC      |               |                           |                    |
| SNP_60332_A_12844214 | NC_021167.1    | Ca_Kabuli_Chr08 | 12844214                | TT                              | CC                 | CC               | INTERGENIC      |               |                           |                    |
| SNP_60333_A_12878103 | NC_021167.1    | Ca_Kabuli_Chr08 | 12878103                | AA                              | CC                 | CC               | INTERGENIC      |               |                           |                    |
| SNP_60334_A_12878107 | NC_021167.1    | Ca_Kabuli_Chr08 | 12878107                | TT                              | GG                 | GG               | INTERGENIC      |               |                           |                    |
| SNP_60335_A_12938661 | NC_021167.1    | Ca_Kabuli_Chr08 | 12938661                | GG                              | AA                 | AA               | INTRON          | 101491203     | putative transporter arsB |                    |
| SNP_60336_A_12978851 | NC_021167.1    | Ca_Kabuli_Chr08 | 12978851                | AA                              | GG                 | GG               | INTERGENIC      |               |                           |                    |
| SNP_60337_A_12978931 | NC_021167.1    | Ca_Kabuli_Chr08 | 12978931                | AA                              | GG                 | GG               | INTERGENIC      |               |                           |                    |
| SNP_60338_A_12978958 | NC_021167.1    | Ca_Kabuli_Chr08 | 12978958                | CC                              | AA                 | AA               | INTERGENIC      |               |                           |                    |
| SNP_60341_A_12979086 | NC_021167.1    | Ca_Kabuli_Chr08 | 12979086                | CC                              | GG                 | GG               | INTERGENIC      |               |                           |                    |
| SNP_60342_A_12979106 | NC_021167.1    | Ca_Kabuli_Chr08 | 12979106                | AA                              | TT                 | TT               | INTERGENIC      |               |                           |                    |
| SNP_60343_A_12979119 | NC_021167.1    | Ca_Kabuli_Chr08 | 12979119                | CC                              | AA                 | AA               | INTERGENIC      |               |                           |                    |

| SNPs IDs             | Chromosome IDs | Chromosomes     | Physical positions (bp) | CDC Frontier (Reference genome) | (Pusa 1103 & HPNB) | (ILWC 46 & LPNB) | Sequence genome | Components of | Gene accession IDs | Putative functions |
|----------------------|----------------|-----------------|-------------------------|---------------------------------|--------------------|------------------|-----------------|---------------|--------------------|--------------------|
| SNP_60344_A_12979161 | NC_021167.1    | Ca_Kabuli_Chr08 | 12979161                | CC                              | TT                 | TT               | INTERGENIC      |               |                    |                    |
| SNP_60345_A_12979166 | NC_021167.1    | Ca_Kabuli_Chr08 | 12979166                | AA                              | GG                 | GG               | INTERGENIC      |               |                    |                    |
| SNP_60346_A_12979204 | NC_021167.1    | Ca_Kabuli_Chr08 | 12979204                | TT                              | CC                 | CC               | INTERGENIC      |               |                    |                    |
| SNP_60347_A_12979252 | NC_021167.1    | Ca_Kabuli_Chr08 | 12979252                | AA                              | TT                 | TT               | INTERGENIC      |               |                    |                    |
| SNP_60348_A_12979296 | NC_021167.1    | Ca_Kabuli_Chr08 | 12979296                | TT                              | GG                 | GG               | INTERGENIC      |               |                    |                    |
| SNP_60349_A_12979338 | NC_021167.1    | Ca_Kabuli_Chr08 | 12979338                | AA                              | GG                 | GG               | INTERGENIC      |               |                    |                    |
| SNP_60350_A_12979367 | NC_021167.1    | Ca_Kabuli_Chr08 | 12979367                | TT                              | CC                 | CC               | INTERGENIC      |               |                    |                    |
| SNP_60351_A_12979513 | NC_021167.1    | Ca_Kabuli_Chr08 | 12979513                | AA                              | GG                 | GG               | INTERGENIC      |               |                    |                    |
| SNP_60352_A_12979573 | NC_021167.1    | Ca_Kabuli_Chr08 | 12979573                | CC                              | GG                 | GG               | INTERGENIC      |               |                    |                    |
| SNP_60353_A_12979615 | NC_021167.1    | Ca_Kabuli_Chr08 | 12979615                | TT                              | GG                 | GG               | INTERGENIC      |               |                    |                    |
| SNP_60354_A_12979772 | NC_021167.1    | Ca_Kabuli_Chr08 | 12979772                | TT                              | CC                 | CC               | INTERGENIC      |               |                    |                    |
| SNP_60355_A_12979826 | NC_021167.1    | Ca_Kabuli_Chr08 | 12979826                | TT                              | GG                 | GG               | INTERGENIC      |               |                    |                    |
| SNP_60356_A_12979882 | NC_021167.1    | Ca_Kabuli_Chr08 | 12979882                | TT                              | CC                 | CC               | INTERGENIC      |               |                    |                    |
| SNP_60357_A_12979943 | NC_021167.1    | Ca_Kabuli_Chr08 | 12979943                | CC                              | GG                 | GG               | INTERGENIC      |               |                    |                    |
| SNP_60358_A_12980029 | NC_021167.1    | Ca_Kabuli_Chr08 | 12980029                | AA                              | GG                 | GG               | INTERGENIC      |               |                    |                    |
| SNP_60359_A_12980036 | NC_021167.1    | Ca_Kabuli_Chr08 | 12980036                | AA                              | GG                 | GG               | INTERGENIC      |               |                    |                    |
| SNP_60360_A_12980043 | NC_021167.1    | Ca_Kabuli_Chr08 | 12980043                | AA                              | CC                 | CC               | INTERGENIC      |               |                    |                    |
| SNP_60361_A_12980538 | NC_021167.1    | Ca_Kabuli_Chr08 | 12980538                | CC                              | TT                 | TT               | INTERGENIC      |               |                    |                    |
| SNP_60362_A_12980632 | NC_021167.1    | Ca_Kabuli_Chr08 | 12980632                | GG                              | CC                 | CC               | INTERGENIC      |               |                    |                    |
| SNP_60363_A_12980656 | NC_021167.1    | Ca_Kabuli_Chr08 | 12980656                | TT                              | CC                 | CC               | INTERGENIC      |               |                    |                    |
| SNP_60364_A_12980711 | NC_021167.1    | Ca_Kabuli_Chr08 | 12980711                | CC                              | TT                 | TT               | INTERGENIC      |               |                    |                    |
| SNP_60365_A_12980880 | NC_021167.1    | Ca_Kabuli_Chr08 | 12980880                | AA                              | GG                 | GG               | INTERGENIC      |               |                    |                    |

| SNPs IDs             | Chromosome IDs | Chromosomes     | Physical positions (bp) | CDC Frontier genome (Reference genome) | (Pusa 1103 & HPNB) | (ILWC 46 & LPNB) | Sequence genome | Components of | Gene accession IDs | Putative functions |
|----------------------|----------------|-----------------|-------------------------|----------------------------------------|--------------------|------------------|-----------------|---------------|--------------------|--------------------|
| SNP_60366_A_12980927 | NC_021167.1    | Ca_Kabuli_Chr08 | 12980927                | CC                                     | TT                 | TT               | INTERGENIC      |               |                    |                    |
| SNP_60368_A_12981045 | NC_021167.1    | Ca_Kabuli_Chr08 | 12981045                | CC                                     | TT                 | TT               | INTERGENIC      |               |                    |                    |
| SNP_60369_A_12981062 | NC_021167.1    | Ca_Kabuli_Chr08 | 12981062                | TT                                     | AA                 | AA               | INTERGENIC      |               |                    |                    |
| SNP_60370_A_12982481 | NC_021167.1    | Ca_Kabuli_Chr08 | 12982481                | GG                                     | AA                 | AA               | INTERGENIC      |               |                    |                    |
| SNP_60371_A_12983429 | NC_021167.1    | Ca_Kabuli_Chr08 | 12983429                | CC                                     | TT                 | TT               | INTERGENIC      |               |                    |                    |
| SNP_60372_A_12983450 | NC_021167.1    | Ca_Kabuli_Chr08 | 12983450                | CC                                     | TT                 | TT               | INTERGENIC      |               |                    |                    |
| SNP_60374_A_12983529 | NC_021167.1    | Ca_Kabuli_Chr08 | 12983529                | AA                                     | GG                 | GG               | INTERGENIC      |               |                    |                    |
| SNP_60375_A_12983626 | NC_021167.1    | Ca_Kabuli_Chr08 | 12983626                | TT                                     | CC                 | CC               | INTERGENIC      |               |                    |                    |
| SNP_60376_A_12983705 | NC_021167.1    | Ca_Kabuli_Chr08 | 12983705                | AA                                     | GG                 | GG               | INTERGENIC      |               |                    |                    |
| SNP_60377_A_12983740 | NC_021167.1    | Ca_Kabuli_Chr08 | 12983740                | TT                                     | AA                 | AA               | INTERGENIC      |               |                    |                    |
| SNP_60378_A_12983762 | NC_021167.1    | Ca_Kabuli_Chr08 | 12983762                | CC                                     | TT                 | TT               | INTERGENIC      |               |                    |                    |
| SNP_60379_A_12983803 | NC_021167.1    | Ca_Kabuli_Chr08 | 12983803                | CC                                     | TT                 | TT               | INTERGENIC      |               |                    |                    |
| SNP_60380_A_12983854 | NC_021167.1    | Ca_Kabuli_Chr08 | 12983854                | CC                                     | AA                 | AA               | INTERGENIC      |               |                    |                    |
| SNP_60381_A_12983884 | NC_021167.1    | Ca_Kabuli_Chr08 | 12983884                | CC                                     | TT                 | TT               | INTERGENIC      |               |                    |                    |
| SNP_60383_A_12984004 | NC_021167.1    | Ca_Kabuli_Chr08 | 12984004                | AA                                     | GG                 | GG               | INTERGENIC      |               |                    |                    |
| SNP_60384_A_12984030 | NC_021167.1    | Ca_Kabuli_Chr08 | 12984030                | GG                                     | AA                 | AA               | INTERGENIC      |               |                    |                    |
| SNP_60385_A_12984031 | NC_021167.1    | Ca_Kabuli_Chr08 | 12984031                | GG                                     | AA                 | AA               | INTERGENIC      |               |                    |                    |
| SNP_60386_A_12984089 | NC_021167.1    | Ca_Kabuli_Chr08 | 12984089                | CC                                     | AA                 | AA               | INTERGENIC      |               |                    |                    |
| SNP_60387_A_12984090 | NC_021167.1    | Ca_Kabuli_Chr08 | 12984090                | AA                                     | CC                 | CC               | INTERGENIC      |               |                    |                    |
| SNP_60389_A_12984113 | NC_021167.1    | Ca_Kabuli_Chr08 | 12984113                | AA                                     | TT                 | TT               | INTERGENIC      |               |                    |                    |
| SNP_60390_A_12984150 | NC_021167.1    | Ca_Kabuli_Chr08 | 12984150                | TT                                     | CC                 | CC               | INTERGENIC      |               |                    |                    |
| SNP_60391_A_12984201 | NC_021167.1    | Ca_Kabuli_Chr08 | 12984201                | CC                                     | TT                 | TT               | INTERGENIC      |               |                    |                    |

| SNPs IDs             | Chromosome IDs | Chromosomes     | Physical positions (bp) | CDC Frontier genome (Reference genome) | (Pusa 1103 & HPNB) | (ILWC 46 & LPNB) | Sequence genome | Components of | Gene accession IDs | Putative functions |
|----------------------|----------------|-----------------|-------------------------|----------------------------------------|--------------------|------------------|-----------------|---------------|--------------------|--------------------|
| SNP_60392_A_12984238 | NC_021167.1    | Ca_Kabuli_Chr08 | 12984238                | AA                                     | GG                 | GG               | INTERGENIC      |               |                    |                    |
| SNP_60393_A_12984293 | NC_021167.1    | Ca_Kabuli_Chr08 | 12984293                | AA                                     | GG                 | GG               | INTERGENIC      |               |                    |                    |
| SNP_60394_A_12984320 | NC_021167.1    | Ca_Kabuli_Chr08 | 12984320                | TT                                     | AA                 | AA               | INTERGENIC      |               |                    |                    |
| SNP_60395_A_12984359 | NC_021167.1    | Ca_Kabuli_Chr08 | 12984359                | AA                                     | GG                 | GG               | INTERGENIC      |               |                    |                    |
| SNP_60396_A_12984375 | NC_021167.1    | Ca_Kabuli_Chr08 | 12984375                | TT                                     | CC                 | CC               | INTERGENIC      |               |                    |                    |
| SNP_60397_A_12984390 | NC_021167.1    | Ca_Kabuli_Chr08 | 12984390                | TT                                     | CC                 | CC               | INTERGENIC      |               |                    |                    |
| SNP_60398_A_12984562 | NC_021167.1    | Ca_Kabuli_Chr08 | 12984562                | CC                                     | TT                 | TT               | INTERGENIC      |               |                    |                    |
| SNP_60399_A_12984651 | NC_021167.1    | Ca_Kabuli_Chr08 | 12984651                | AA                                     | GG                 | GG               | INTERGENIC      |               |                    |                    |
| SNP_60400_A_12984734 | NC_021167.1    | Ca_Kabuli_Chr08 | 12984734                | AA                                     | TT                 | TT               | INTERGENIC      |               |                    |                    |
| SNP_60401_A_12984782 | NC_021167.1    | Ca_Kabuli_Chr08 | 12984782                | TT                                     | CC                 | CC               | INTERGENIC      |               |                    |                    |
| SNP_60402_A_12984791 | NC_021167.1    | Ca_Kabuli_Chr08 | 12984791                | CC                                     | GG                 | GG               | INTERGENIC      |               |                    |                    |
| SNP_60403_A_12984886 | NC_021167.1    | Ca_Kabuli_Chr08 | 12984886                | CC                                     | TT                 | TT               | INTERGENIC      |               |                    |                    |
| SNP_60404_A_12984943 | NC_021167.1    | Ca_Kabuli_Chr08 | 12984943                | GG                                     | AA                 | AA               | INTERGENIC      |               |                    |                    |
| SNP_60405_A_12984953 | NC_021167.1    | Ca_Kabuli_Chr08 | 12984953                | CC                                     | TT                 | TT               | INTERGENIC      |               |                    |                    |
| SNP_60406_A_12984971 | NC_021167.1    | Ca_Kabuli_Chr08 | 12984971                | AA                                     | GG                 | GG               | INTERGENIC      |               |                    |                    |
| SNP_60407_A_12984994 | NC_021167.1    | Ca_Kabuli_Chr08 | 12984994                | GG                                     | CC                 | CC               | INTERGENIC      |               |                    |                    |
| SNP_60408_A_12985038 | NC_021167.1    | Ca_Kabuli_Chr08 | 12985038                | AA                                     | CC                 | CC               | INTERGENIC      |               |                    |                    |
| SNP_60409_A_12985058 | NC_021167.1    | Ca_Kabuli_Chr08 | 12985058                | TT                                     | CC                 | CC               | INTERGENIC      |               |                    |                    |
| SNP_60410_A_12985116 | NC_021167.1    | Ca_Kabuli_Chr08 | 12985116                | AA                                     | GG                 | GG               | INTERGENIC      |               |                    |                    |
| SNP_60411_A_12985121 | NC_021167.1    | Ca_Kabuli_Chr08 | 12985121                | TT                                     | CC                 | CC               | INTERGENIC      |               |                    |                    |
| SNP_60412_A_12985151 | NC_021167.1    | Ca_Kabuli_Chr08 | 12985151                | AA                                     | CC                 | CC               | INTERGENIC      |               |                    |                    |
| SNP_60413_A_12985289 | NC_021167.1    | Ca_Kabuli_Chr08 | 12985289                | GG                                     | CC                 | CC               | INTERGENIC      |               |                    |                    |

| SNPs IDs             | Chromosome IDs | Chromosomes     | Physical positions (bp) | CDC Frontier genome (Reference genome) | (Pusa 1103 & HPNB) | (ILWC 46 & LPNB) | Sequence genome | Components of | Gene accession IDs | Putative functions |
|----------------------|----------------|-----------------|-------------------------|----------------------------------------|--------------------|------------------|-----------------|---------------|--------------------|--------------------|
| SNP_60414_A_12985340 | NC_021167.1    | Ca_Kabuli_Chr08 | 12985340                | TT                                     | AA                 | AA               | INTERGENIC      |               |                    |                    |
| SNP_60415_A_12985350 | NC_021167.1    | Ca_Kabuli_Chr08 | 12985350                | AA                                     | GG                 | GG               | INTERGENIC      |               |                    |                    |
| SNP_60416_A_12985586 | NC_021167.1    | Ca_Kabuli_Chr08 | 12985586                | GG                                     | AA                 | AA               | INTERGENIC      |               |                    |                    |
| SNP_60417_A_12985601 | NC_021167.1    | Ca_Kabuli_Chr08 | 12985601                | AA                                     | GG                 | GG               | INTERGENIC      |               |                    |                    |
| SNP_60418_A_12985618 | NC_021167.1    | Ca_Kabuli_Chr08 | 12985618                | CC                                     | TT                 | TT               | INTERGENIC      |               |                    |                    |
| SNP_60419_A_12985762 | NC_021167.1    | Ca_Kabuli_Chr08 | 12985762                | AA                                     | GG                 | GG               | INTERGENIC      |               |                    |                    |
| SNP_60420_A_12986964 | NC_021167.1    | Ca_Kabuli_Chr08 | 12986964                | AA                                     | CC                 | CC               | INTERGENIC      |               |                    |                    |
| SNP_60421_A_12987030 | NC_021167.1    | Ca_Kabuli_Chr08 | 12987030                | AA                                     | CC                 | CC               | INTERGENIC      |               |                    |                    |
| SNP_60422_A_12987145 | NC_021167.1    | Ca_Kabuli_Chr08 | 12987145                | GG                                     | AA                 | AA               | INTERGENIC      |               |                    |                    |
| SNP_60423_A_12987186 | NC_021167.1    | Ca_Kabuli_Chr08 | 12987186                | CC                                     | TT                 | TT               | INTERGENIC      |               |                    |                    |
| SNP_60424_A_12987197 | NC_021167.1    | Ca_Kabuli_Chr08 | 12987197                | CC                                     | TT                 | TT               | INTERGENIC      |               |                    |                    |
| SNP_60425_A_12987250 | NC_021167.1    | Ca_Kabuli_Chr08 | 12987250                | GG                                     | TT                 | TT               | INTERGENIC      |               |                    |                    |
| SNP_60426_A_12987314 | NC_021167.1    | Ca_Kabuli_Chr08 | 12987314                | TT                                     | GG                 | GG               | INTERGENIC      |               |                    |                    |
| SNP_60427_A_12987355 | NC_021167.1    | Ca_Kabuli_Chr08 | 12987355                | TT                                     | CC                 | CC               | INTERGENIC      |               |                    |                    |
| SNP_60428_A_12987382 | NC_021167.1    | Ca_Kabuli_Chr08 | 12987382                | CC                                     | TT                 | TT               | INTERGENIC      |               |                    |                    |
| SNP_60429_A_12987420 | NC_021167.1    | Ca_Kabuli_Chr08 | 12987420                | CC                                     | TT                 | TT               | INTERGENIC      |               |                    |                    |
| SNP_60430_A_12987435 | NC_021167.1    | Ca_Kabuli_Chr08 | 12987435                | GG                                     | AA                 | AA               | INTERGENIC      |               |                    |                    |
| SNP_60431_A_12987580 | NC_021167.1    | Ca_Kabuli_Chr08 | 12987580                | GG                                     | CC                 | CC               | INTERGENIC      |               |                    |                    |
| SNP_60432_A_12987587 | NC_021167.1    | Ca_Kabuli_Chr08 | 12987587                | GG                                     | AA                 | AA               | INTERGENIC      |               |                    |                    |
| SNP_60433_A_12987628 | NC_021167.1    | Ca_Kabuli_Chr08 | 12987628                | TT                                     | AA                 | AA               | INTERGENIC      |               |                    |                    |
| SNP_60434_A_12987713 | NC_021167.1    | Ca_Kabuli_Chr08 | 12987713                | GG                                     | AA                 | AA               | INTERGENIC      |               |                    |                    |
| SNP_60435_A_12987737 | NC_021167.1    | Ca_Kabuli_Chr08 | 12987737                | CC                                     | TT                 | TT               | INTERGENIC      |               |                    |                    |

| SNPs IDs             | Chromosome IDs | Chromosomes     | Physical positions (bp) | CDC Frontier (Reference genome) | (Pusa 1103 & HPNB) | (ILWC 46 & LPNB) | Sequence genome | Components of | Gene accession IDs | Putative functions |
|----------------------|----------------|-----------------|-------------------------|---------------------------------|--------------------|------------------|-----------------|---------------|--------------------|--------------------|
| SNP_60436_A_12987754 | NC_021167.1    | Ca_Kabuli_Chr08 | 12987754                | AA                              | GG                 | GG               | INTERGENIC      |               |                    |                    |
| SNP_60437_A_12987760 | NC_021167.1    | Ca_Kabuli_Chr08 | 12987760                | CC                              | TT                 | TT               | INTERGENIC      |               |                    |                    |
| SNP_60438_A_12987768 | NC_021167.1    | Ca_Kabuli_Chr08 | 12987768                | GG                              | TT                 | TT               | INTERGENIC      |               |                    |                    |
| SNP_60439_A_12987779 | NC_021167.1    | Ca_Kabuli_Chr08 | 12987779                | AA                              | GG                 | GG               | INTERGENIC      |               |                    |                    |
| SNP_60440_A_12987902 | NC_021167.1    | Ca_Kabuli_Chr08 | 12987902                | CC                              | TT                 | TT               | INTERGENIC      |               |                    |                    |
| SNP_60441_A_12987950 | NC_021167.1    | Ca_Kabuli_Chr08 | 12987950                | TT                              | CC                 | CC               | INTERGENIC      |               |                    |                    |
| SNP_60442_A_12987954 | NC_021167.1    | Ca_Kabuli_Chr08 | 12987954                | TT                              | AA                 | AA               | INTERGENIC      |               |                    |                    |
| SNP_60443_A_12988004 | NC_021167.1    | Ca_Kabuli_Chr08 | 12988004                | TT                              | GG                 | GG               | INTERGENIC      |               |                    |                    |
| SNP_60444_A_12988071 | NC_021167.1    | Ca_Kabuli_Chr08 | 12988071                | GG                              | TT                 | TT               | INTERGENIC      |               |                    |                    |
| SNP_60445_A_12988095 | NC_021167.1    | Ca_Kabuli_Chr08 | 12988095                | AA                              | GG                 | GG               | INTERGENIC      |               |                    |                    |
| SNP_60446_A_12988115 | NC_021167.1    | Ca_Kabuli_Chr08 | 12988115                | AA                              | GG                 | GG               | INTERGENIC      |               |                    |                    |
| SNP_60447_A_12988135 | NC_021167.1    | Ca_Kabuli_Chr08 | 12988135                | TT                              | GG                 | GG               | INTERGENIC      |               |                    |                    |
| SNP_60448_A_12988200 | NC_021167.1    | Ca_Kabuli_Chr08 | 12988200                | CC                              | TT                 | TT               | INTERGENIC      |               |                    |                    |
| SNP_60449_A_12988271 | NC_021167.1    | Ca_Kabuli_Chr08 | 12988271                | AA                              | TT                 | TT               | INTERGENIC      |               |                    |                    |
| SNP_60450_A_12988422 | NC_021167.1    | Ca_Kabuli_Chr08 | 12988422                | TT                              | CC                 | CC               | INTERGENIC      |               |                    |                    |
| SNP_60451_A_12988499 | NC_021167.1    | Ca_Kabuli_Chr08 | 12988499                | TT                              | GG                 | GG               | INTERGENIC      |               |                    |                    |
| SNP_60452_A_12988543 | NC_021167.1    | Ca_Kabuli_Chr08 | 12988543                | AA                              | TT                 | TT               | INTERGENIC      |               |                    |                    |
| SNP_60453_A_12988665 | NC_021167.1    | Ca_Kabuli_Chr08 | 12988665                | CC                              | TT                 | TT               | INTERGENIC      |               |                    |                    |
| SNP_60454_A_12988824 | NC_021167.1    | Ca_Kabuli_Chr08 | 12988824                | CC                              | AA                 | AA               | INTERGENIC      |               |                    |                    |
| SNP_60455_A_12988844 | NC_021167.1    | Ca_Kabuli_Chr08 | 12988844                | GG                              | AA                 | AA               | INTERGENIC      |               |                    |                    |
| SNP_60456_A_12988960 | NC_021167.1    | Ca_Kabuli_Chr08 | 12988960                | AA                              | CC                 | CC               | INTERGENIC      |               |                    |                    |
| SNP_60457_A_12988987 | NC_021167.1    | Ca_Kabuli_Chr08 | 12988987                | GG                              | CC                 | CC               | INTERGENIC      |               |                    |                    |

| SNPs IDs             | Chromosome IDs | Chromosomes     | Physical positions (bp) | CDC Frontier genome (Reference genome) | (Pusa 1103 & HPNB) | (ILWC 46 & LPNB) | Sequence Components of genome | Gene accession IDs | Putative functions |
|----------------------|----------------|-----------------|-------------------------|----------------------------------------|--------------------|------------------|-------------------------------|--------------------|--------------------|
| SNP_60458_A_12989033 | NC_021167.1    | Ca_Kabuli_Chr08 | 12989033                | CC                                     | TT                 | TT               | INTERGENIC                    |                    |                    |
| SNP_60459_A_12989035 | NC_021167.1    | Ca_Kabuli_Chr08 | 12989035                | AA                                     | GG                 | GG               | INTERGENIC                    |                    |                    |
| SNP_60460_A_12989064 | NC_021167.1    | Ca_Kabuli_Chr08 | 12989064                | CC                                     | GG                 | GG               | DRR                           | 101491943          | CEN-like protein 4 |
| SNP_60461_A_12989102 | NC_021167.1    | Ca_Kabuli_Chr08 | 12989102                | AA                                     | GG                 | GG               | DRR                           | 101491943          | CEN-like protein 4 |
| SNP_60462_A_12989143 | NC_021167.1    | Ca_Kabuli_Chr08 | 12989143                | CC                                     | TT                 | TT               | DRR                           | 101491943          | CEN-like protein 4 |
| SNP_60463_A_12989172 | NC_021167.1    | Ca_Kabuli_Chr08 | 12989172                | AA                                     | GG                 | GG               | DRR                           | 101491943          | CEN-like protein 4 |
| SNP_60464_A_12989221 | NC_021167.1    | Ca_Kabuli_Chr08 | 12989221                | TT                                     | AA                 | AA               | DRR                           | 101491943          | CEN-like protein 4 |
| SNP_60465_A_12989252 | NC_021167.1    | Ca_Kabuli_Chr08 | 12989252                | TT                                     | AA                 | AA               | DRR                           | 101491943          | CEN-like protein 4 |
| SNP_60466_A_12989285 | NC_021167.1    | Ca_Kabuli_Chr08 | 12989285                | GG                                     | AA                 | AA               | DRR                           | 101491943          | CEN-like protein 4 |
| SNP_60467_A_12989403 | NC_021167.1    | Ca_Kabuli_Chr08 | 12989403                | TT                                     | CC                 | CC               | DRR                           | 101491943          | CEN-like protein 4 |
| SNP_60468_A_12989412 | NC_021167.1    | Ca_Kabuli_Chr08 | 12989412                | AA                                     | GG                 | GG               | DRR                           | 101491943          | CEN-like protein 4 |
| SNP_60469_A_12989811 | NC_021167.1    | Ca_Kabuli_Chr08 | 12989811                | GG                                     | AA                 | AA               | DRR                           | 101491943          | CEN-like protein 4 |
| SNP_60470_A_12989855 | NC_021167.1    | Ca_Kabuli_Chr08 | 12989855                | AA                                     | GG                 | GG               | DRR                           | 101491943          | CEN-like protein 4 |
| SNP_60472_A_12990058 | NC_021167.1    | Ca_Kabuli_Chr08 | 12990058                | CC                                     | GG                 | GG               | INTERGENIC                    |                    |                    |
| SNP_60473_A_12996678 | NC_021167.1    | Ca_Kabuli_Chr08 | 12996678                | CC                                     | TT                 | TT               | URR                           | 101492277          | CEN-like protein 2 |
| SNP_60474_A_12998696 | NC_021167.1    | Ca_Kabuli_Chr08 | 12998696                | TT                                     | AA                 | AA               | INTERGENIC                    |                    |                    |
| SNP_60475_A_12998764 | NC_021167.1    | Ca_Kabuli_Chr08 | 12998764                | AA                                     | CC                 | CC               | INTERGENIC                    |                    |                    |
| SNP_60476_A_12998942 | NC_021167.1    | Ca_Kabuli_Chr08 | 12998942                | CC                                     | TT                 | TT               | INTERGENIC                    |                    |                    |
| SNP_60477_A_12998952 | NC_021167.1    | Ca_Kabuli_Chr08 | 12998952                | TT                                     | CC                 | CC               | INTERGENIC                    |                    |                    |
| SNP_60478_A_12998960 | NC_021167.1    | Ca_Kabuli_Chr08 | 12998960                | TT                                     | CC                 | CC               | INTERGENIC                    |                    |                    |
| SNP_60479_A_12999101 | NC_021167.1    | Ca_Kabuli_Chr08 | 12999101                | AA                                     | GG                 | GG               | INTERGENIC                    |                    |                    |
| SNP_60480_A_12999115 | NC_021167.1    | Ca_Kabuli_Chr08 | 12999115                | GG                                     | AA                 | AA               | INTERGENIC                    |                    |                    |



| SNPs IDs             | Chromosome IDs | Chromosomes     | Physical positions (bp) | CDC Frontier genome (Reference genome) | (Pusa 1103 & HPNB) | (ILWC 46 & LPNB) | Sequence genome | Components of | Gene accession IDs       | Putative functions |
|----------------------|----------------|-----------------|-------------------------|----------------------------------------|--------------------|------------------|-----------------|---------------|--------------------------|--------------------|
| SNP_60481_A_12999144 | NC_021167.1    | Ca_Kabuli_Chr08 | 12999144                | GG                                     | TT                 | TT               | INTERGENIC      |               |                          |                    |
| SNP_60482_A_13009242 | NC_021167.1    | Ca_Kabuli_Chr08 | 13009242                | CC                                     | GG                 | GG               | INTERGENIC      |               |                          |                    |
| SNP_60483_A_13009553 | NC_021167.1    | Ca_Kabuli_Chr08 | 13009553                | TT                                     | CC                 | CC               | INTERGENIC      |               |                          |                    |
| SNP_60484_A_13009603 | NC_021167.1    | Ca_Kabuli_Chr08 | 13009603                | GG                                     | AA                 | AA               | INTERGENIC      |               |                          |                    |
| SNP_60485_A_13009619 | NC_021167.1    | Ca_Kabuli_Chr08 | 13009619                | GG                                     | AA                 | AA               | INTERGENIC      |               |                          |                    |
| SNP_60486_A_13009638 | NC_021167.1    | Ca_Kabuli_Chr08 | 13009638                | TT                                     | CC                 | CC               | INTERGENIC      |               |                          |                    |
| SNP_60487_A_13010816 | NC_021167.1    | Ca_Kabuli_Chr08 | 13010816                | GG                                     | AA                 | AA               | INTERGENIC      |               |                          |                    |
| SNP_60488_A_13012674 | NC_021167.1    | Ca_Kabuli_Chr08 | 13012674                | TT                                     | AA                 | AA               | INTERGENIC      |               |                          |                    |
| SNP_60489_A_13039829 | NC_021167.1    | Ca_Kabuli_Chr08 | 13039829                | CC                                     | TT                 | TT               | INTERGENIC      |               |                          |                    |
| SNP_60490_A_13082128 | NC_021167.1    | Ca_Kabuli_Chr08 | 13082128                | TT                                     | GG                 | GG               | INTERGENIC      |               |                          |                    |
| SNP_60491_A_13083324 | NC_021167.1    | Ca_Kabuli_Chr08 | 13083324                | GG                                     | AA                 | AA               | INTERGENIC      |               |                          |                    |
| SNP_60492_A_13101385 | NC_021167.1    | Ca_Kabuli_Chr08 | 13101385                | AA                                     | CC                 | CC               | INTERGENIC      |               |                          |                    |
| SNP_60493_A_13101413 | NC_021167.1    | Ca_Kabuli_Chr08 | 13101413                | AA                                     | GG                 | GG               | INTERGENIC      |               |                          |                    |
| SNP_60494_A_13103673 | NC_021167.1    | Ca_Kabuli_Chr08 | 13103673                | CC                                     | TT                 | TT               | INTERGENIC      |               |                          |                    |
| SNP_60495_A_13103688 | NC_021167.1    | Ca_Kabuli_Chr08 | 13103688                | CC                                     | TT                 | TT               | INTERGENIC      |               |                          |                    |
| SNP_60496_A_13103691 | NC_021167.1    | Ca_Kabuli_Chr08 | 13103691                | GG                                     | AA                 | AA               | INTERGENIC      |               |                          |                    |
| SNP_60497_A_13103694 | NC_021167.1    | Ca_Kabuli_Chr08 | 13103694                | GG                                     | AA                 | AA               | INTERGENIC      |               |                          |                    |
| SNP_60498_A_13103700 | NC_021167.1    | Ca_Kabuli_Chr08 | 13103700                | AA                                     | GG                 | GG               | INTERGENIC      |               |                          |                    |
| SNP_60499_A_13103709 | NC_021167.1    | Ca_Kabuli_Chr08 | 13103709                | TT                                     | CC                 | CC               | INTERGENIC      |               |                          |                    |
| SNP_60500_A_13186775 | NC_021167.1    | Ca_Kabuli_Chr08 | 13186775                | CC                                     | GG                 | GG               | INTERGENIC      |               |                          |                    |
| SNP_60501_A_13227949 | NC_021167.1    | Ca_Kabuli_Chr08 | 13227949                | CC                                     | TT                 | TT               | URR             | 101495408     | BAHD acyltransferase DCR |                    |
| SNP_60502_A_13296982 | NC_021167.1    | Ca_Kabuli_Chr08 | 13296982                | TT                                     | CC                 | CC               | INTERGENIC      |               |                          |                    |

| SNPs IDs             | Chromosome IDs | Chromosomes     | Physical positions (bp) | CDC Frontier genome (Reference genome) | (Pusa 1103 & HPNB) | (ILWC 46 & LPNB) | Sequence genome | Components of | Gene accession IDs | Putative functions |
|----------------------|----------------|-----------------|-------------------------|----------------------------------------|--------------------|------------------|-----------------|---------------|--------------------|--------------------|
| SNP_60503_A_13297006 | NC_021167.1    | Ca_Kabuli_Chr08 | 13297006                | AA                                     | CC                 | CC               | INTERGENIC      |               |                    |                    |
| SNP_60504_A_13297017 | NC_021167.1    | Ca_Kabuli_Chr08 | 13297017                | TT                                     | CC                 | CC               | INTERGENIC      |               |                    |                    |
| SNP_60505_A_13297354 | NC_021167.1    | Ca_Kabuli_Chr08 | 13297354                | GG                                     | CC                 | CC               | INTERGENIC      |               |                    |                    |
| SNP_60506_A_13297361 | NC_021167.1    | Ca_Kabuli_Chr08 | 13297361                | TT                                     | CC                 | CC               | INTERGENIC      |               |                    |                    |
| SNP_60507_A_13297394 | NC_021167.1    | Ca_Kabuli_Chr08 | 13297394                | CC                                     | GG                 | GG               | INTERGENIC      |               |                    |                    |
| SNP_60508_A_13297916 | NC_021167.1    | Ca_Kabuli_Chr08 | 13297916                | TT                                     | GG                 | GG               | INTERGENIC      |               |                    |                    |
| SNP_60510_A_13298036 | NC_021167.1    | Ca_Kabuli_Chr08 | 13298036                | TT                                     | CC                 | CC               | INTERGENIC      |               |                    |                    |
| SNP_60511_A_13298057 | NC_021167.1    | Ca_Kabuli_Chr08 | 13298057                | GG                                     | AA                 | AA               | INTERGENIC      |               |                    |                    |
| SNP_60512_A_13298116 | NC_021167.1    | Ca_Kabuli_Chr08 | 13298116                | TT                                     | CC                 | CC               | INTERGENIC      |               |                    |                    |
| SNP_60513_A_13298200 | NC_021167.1    | Ca_Kabuli_Chr08 | 13298200                | AA                                     | TT                 | TT               | INTERGENIC      |               |                    |                    |
| SNP_60514_A_13308373 | NC_021167.1    | Ca_Kabuli_Chr08 | 13308373                | AA                                     | GG                 | GG               | INTERGENIC      |               |                    |                    |
| SNP_60515_A_13308756 | NC_021167.1    | Ca_Kabuli_Chr08 | 13308756                | TT                                     | GG                 | GG               | INTERGENIC      |               |                    |                    |
| SNP_60516_A_13310160 | NC_021167.1    | Ca_Kabuli_Chr08 | 13310160                | TT                                     | AA                 | AA               | INTERGENIC      |               |                    |                    |
| SNP_60517_A_13311065 | NC_021167.1    | Ca_Kabuli_Chr08 | 13311065                | AA                                     | CC                 | CC               | INTERGENIC      |               |                    |                    |
| SNP_60518_A_13311103 | NC_021167.1    | Ca_Kabuli_Chr08 | 13311103                | CC                                     | TT                 | TT               | INTERGENIC      |               |                    |                    |
| SNP_60519_A_13312481 | NC_021167.1    | Ca_Kabuli_Chr08 | 13312481                | AA                                     | CC                 | CC               | INTERGENIC      |               |                    |                    |
| SNP_60520_A_13312912 | NC_021167.1    | Ca_Kabuli_Chr08 | 13312912                | AA                                     | CC                 | CC               | INTERGENIC      |               |                    |                    |
| SNP_60521_A_13329419 | NC_021167.1    | Ca_Kabuli_Chr08 | 13329419                | CC                                     | TT                 | TT               | INTERGENIC      |               |                    |                    |
| SNP_60522_A_13329457 | NC_021167.1    | Ca_Kabuli_Chr08 | 13329457                | CC                                     | TT                 | TT               | INTERGENIC      |               |                    |                    |
| SNP_60523_A_13330504 | NC_021167.1    | Ca_Kabuli_Chr08 | 13330504                | GG                                     | AA                 | AA               | INTERGENIC      |               |                    |                    |
| SNP_60524_A_13330533 | NC_021167.1    | Ca_Kabuli_Chr08 | 13330533                | CC                                     | TT                 | TT               | INTERGENIC      |               |                    |                    |
| SNP_60526_A_13369128 | NC_021167.1    | Ca_Kabuli_Chr08 | 13369128                | AA                                     | GG                 | GG               | INTERGENIC      |               |                    |                    |

| SNPs IDs             | Chromosome IDs | Chromosomes     | Physical positions (bp) | CDC Frontier genome (Reference genome) | (Pusa 1103 & HPNB) | (ILWC 46 & LPNB) | Sequence genome | Components of | Gene accession IDs | Putative functions |
|----------------------|----------------|-----------------|-------------------------|----------------------------------------|--------------------|------------------|-----------------|---------------|--------------------|--------------------|
| SNP_60527_A_13369166 | NC_021167.1    | Ca_Kabuli_Chr08 | 13369166                | GG                                     | CC                 | CC               | INTERGENIC      |               |                    |                    |
| SNP_60528_A_13369258 | NC_021167.1    | Ca_Kabuli_Chr08 | 13369258                | AA                                     | GG                 | GG               | INTERGENIC      |               |                    |                    |
| SNP_60529_A_13369297 | NC_021167.1    | Ca_Kabuli_Chr08 | 13369297                | AA                                     | TT                 | TT               | INTERGENIC      |               |                    |                    |
| SNP_60530_A_13369390 | NC_021167.1    | Ca_Kabuli_Chr08 | 13369390                | AA                                     | GG                 | GG               | INTERGENIC      |               |                    |                    |
| SNP_60531_A_13369447 | NC_021167.1    | Ca_Kabuli_Chr08 | 13369447                | AA                                     | GG                 | GG               | INTERGENIC      |               |                    |                    |
| SNP_60533_A_13369858 | NC_021167.1    | Ca_Kabuli_Chr08 | 13369858                | GG                                     | AA                 | AA               | INTERGENIC      |               |                    |                    |
| SNP_60534_A_13369871 | NC_021167.1    | Ca_Kabuli_Chr08 | 13369871                | AA                                     | GG                 | GG               | INTERGENIC      |               |                    |                    |
| SNP_60535_A_13392416 | NC_021167.1    | Ca_Kabuli_Chr08 | 13392416                | GG                                     | AA                 | AA               | INTERGENIC      |               |                    |                    |
| SNP_60536_A_13401466 | NC_021167.1    | Ca_Kabuli_Chr08 | 13401466                | GG                                     | CC                 | CC               | INTERGENIC      |               |                    |                    |
| SNP_60537_A_13436545 | NC_021167.1    | Ca_Kabuli_Chr08 | 13436545                | CC                                     | TT                 | TT               | INTERGENIC      |               |                    |                    |
| SNP_60538_A_13460332 | NC_021167.1    | Ca_Kabuli_Chr08 | 13460332                | GG                                     | CC                 | CC               | INTERGENIC      |               |                    |                    |
| SNP_60539_A_13475509 | NC_021167.1    | Ca_Kabuli_Chr08 | 13475509                | GG                                     | AA                 | AA               | INTERGENIC      |               |                    |                    |
| SNP_60540_A_13475510 | NC_021167.1    | Ca_Kabuli_Chr08 | 13475510                | TT                                     | CC                 | CC               | INTERGENIC      |               |                    |                    |
| SNP_60541_A_13475513 | NC_021167.1    | Ca_Kabuli_Chr08 | 13475513                | TT                                     | AA                 | AA               | INTERGENIC      |               |                    |                    |
| SNP_60542_A_13475571 | NC_021167.1    | Ca_Kabuli_Chr08 | 13475571                | AA                                     | GG                 | GG               | INTERGENIC      |               |                    |                    |
| SNP_60544_A_13477878 | NC_021167.1    | Ca_Kabuli_Chr08 | 13477878                | CC                                     | TT                 | TT               | INTERGENIC      |               |                    |                    |
| SNP_60545_A_13702171 | NC_021167.1    | Ca_Kabuli_Chr08 | 13702171                | TT                                     | CC                 | CC               | INTERGENIC      |               |                    |                    |
| SNP_60546_A_13702175 | NC_021167.1    | Ca_Kabuli_Chr08 | 13702175                | CC                                     | TT                 | TT               | INTERGENIC      |               |                    |                    |
| SNP_60547_A_13702190 | NC_021167.1    | Ca_Kabuli_Chr08 | 13702190                | AA                                     | TT                 | TT               | INTERGENIC      |               |                    |                    |
| SNP_60548_A_13702252 | NC_021167.1    | Ca_Kabuli_Chr08 | 13702252                | TT                                     | CC                 | CC               | INTERGENIC      |               |                    |                    |
| SNP_60549_A_13702272 | NC_021167.1    | Ca_Kabuli_Chr08 | 13702272                | CC                                     | AA                 | AA               | INTERGENIC      |               |                    |                    |
| SNP_60550_A_13702509 | NC_021167.1    | Ca_Kabuli_Chr08 | 13702509                | TT                                     | CC                 | CC               | INTERGENIC      |               |                    |                    |

| SNPs IDs             | Chromosome IDs | Chromosomes     | Physical positions (bp) | CDC Frontier genome (Reference genome) | (Pusa 1103 & HPNB) | (ILWC 46 & LPNB) | Sequence Components of genome | Gene accession IDs | Putative functions           |
|----------------------|----------------|-----------------|-------------------------|----------------------------------------|--------------------|------------------|-------------------------------|--------------------|------------------------------|
| SNP_60551_A_13714445 | NC_021167.1    | Ca_Kabuli_Chr08 | 13714445                | AA                                     | CC                 | CC               | INTERGENIC                    |                    |                              |
| SNP_60552_A_13719955 | NC_021167.1    | Ca_Kabuli_Chr08 | 13719955                | GG                                     | AA                 | AA               | INTERGENIC                    |                    |                              |
| SNP_60553_A_13723896 | NC_021167.1    | Ca_Kabuli_Chr08 | 13723896                | AA                                     | GG                 | GG               | URR                           | 101502939          | uncharacterized LOC101502939 |
| SNP_60554_A_13727123 | NC_021167.1    | Ca_Kabuli_Chr08 | 13727123                | TT                                     | GG                 | GG               | INTERGENIC                    |                    |                              |
| SNP_60555_A_13727711 | NC_021167.1    | Ca_Kabuli_Chr08 | 13727711                | CC                                     | TT                 | TT               | INTERGENIC                    |                    |                              |
| SNP_60556_A_13727713 | NC_021167.1    | Ca_Kabuli_Chr08 | 13727713                | AA                                     | GG                 | GG               | INTERGENIC                    |                    |                              |
| SNP_60557_A_13727719 | NC_021167.1    | Ca_Kabuli_Chr08 | 13727719                | TT                                     | CC                 | CC               | INTERGENIC                    |                    |                              |
| SNP_60558_A_13727751 | NC_021167.1    | Ca_Kabuli_Chr08 | 13727751                | TT                                     | CC                 | CC               | INTERGENIC                    |                    |                              |
| SNP_60559_A_13727782 | NC_021167.1    | Ca_Kabuli_Chr08 | 13727782                | AA                                     | GG                 | GG               | INTERGENIC                    |                    |                              |
| SNP_60560_A_13727788 | NC_021167.1    | Ca_Kabuli_Chr08 | 13727788                | AA                                     | GG                 | GG               | INTERGENIC                    |                    |                              |
| SNP_60561_A_13728017 | NC_021167.1    | Ca_Kabuli_Chr08 | 13728017                | AA                                     | GG                 | GG               | INTERGENIC                    |                    |                              |
| SNP_60562_A_13728022 | NC_021167.1    | Ca_Kabuli_Chr08 | 13728022                | AA                                     | GG                 | GG               | INTERGENIC                    |                    |                              |
| SNP_60563_A_13728174 | NC_021167.1    | Ca_Kabuli_Chr08 | 13728174                | AA                                     | GG                 | GG               | INTERGENIC                    |                    |                              |
| SNP_60564_A_13728204 | NC_021167.1    | Ca_Kabuli_Chr08 | 13728204                | CC                                     | TT                 | TT               | INTERGENIC                    |                    |                              |
| SNP_60565_A_13728276 | NC_021167.1    | Ca_Kabuli_Chr08 | 13728276                | CC                                     | TT                 | TT               | INTERGENIC                    |                    |                              |
| SNP_60566_A_13728285 | NC_021167.1    | Ca_Kabuli_Chr08 | 13728285                | TT                                     | CC                 | CC               | INTERGENIC                    |                    |                              |
| SNP_60567_A_13728330 | NC_021167.1    | Ca_Kabuli_Chr08 | 13728330                | TT                                     | GG                 | GG               | INTERGENIC                    |                    |                              |
| SNP_60568_A_13728348 | NC_021167.1    | Ca_Kabuli_Chr08 | 13728348                | CC                                     | TT                 | TT               | INTERGENIC                    |                    |                              |
| SNP_60569_A_13728351 | NC_021167.1    | Ca_Kabuli_Chr08 | 13728351                | AA                                     | GG                 | GG               | INTERGENIC                    |                    |                              |
| SNP_60570_A_13743246 | NC_021167.1    | Ca_Kabuli_Chr08 | 13743246                | CC                                     | AA                 | AA               | INTERGENIC                    |                    |                              |
| SNP_60571_A_13749894 | NC_021167.1    | Ca_Kabuli_Chr08 | 13749894                | GG                                     | AA                 | AA               | INTERGENIC                    |                    |                              |
| SNP_60572_A_13750262 | NC_021167.1    | Ca_Kabuli_Chr08 | 13750262                | TT                                     | CC                 | CC               | INTERGENIC                    |                    |                              |

| SNPs IDs             | Chromosome IDs | Chromosomes     | Physical positions (bp) | CDC Frontier genome (Reference genome) | (Pusa 1103 & HPNB) | (ILWC 46 & LPNB) | Sequence Components of genome | Gene accession IDs | Putative functions           |
|----------------------|----------------|-----------------|-------------------------|----------------------------------------|--------------------|------------------|-------------------------------|--------------------|------------------------------|
| SNP_60573_A_13750280 | NC_021167.1    | Ca_Kabuli_Chr08 | 13750280                | TT                                     | CC                 | CC               | INTERGENIC                    |                    |                              |
| SNP_60574_A_13750328 | NC_021167.1    | Ca_Kabuli_Chr08 | 13750328                | CC                                     | TT                 | TT               | INTERGENIC                    |                    |                              |
| SNP_60575_A_13750404 | NC_021167.1    | Ca_Kabuli_Chr08 | 13750404                | AA                                     | GG                 | GG               | INTERGENIC                    |                    |                              |
| SNP_60576_A_13753623 | NC_021167.1    | Ca_Kabuli_Chr08 | 13753623                | CC                                     | TT                 | TT               | INTERGENIC                    |                    |                              |
| SNP_60577_A_13758248 | NC_021167.1    | Ca_Kabuli_Chr08 | 13758248                | AA                                     | GG                 | GG               | NON_SYNONYMOUS_CODING         | 101503590          | uncharacterized LOC101503590 |
| SNP_60578_A_13758316 | NC_021167.1    | Ca_Kabuli_Chr08 | 13758316                | GG                                     | AA                 | AA               | SYNONYMOUS_CODING             | 101503590          | uncharacterized LOC101503590 |
| SNP_60579_A_13758574 | NC_021167.1    | Ca_Kabuli_Chr08 | 13758574                | TT                                     | CC                 | CC               | SYNONYMOUS_CODING             | 101503590          | uncharacterized LOC101503590 |
| SNP_60580_A_13758737 | NC_021167.1    | Ca_Kabuli_Chr08 | 13758737                | TT                                     | CC                 | CC               | NON_SYNONYMOUS_CODING         | 101503590          | uncharacterized LOC101503590 |
| SNP_60581_A_13766603 | NC_021167.1    | Ca_Kabuli_Chr08 | 13766603                | GG                                     | AA                 | AA               | INTERGENIC                    |                    |                              |
| SNP_60582_A_13776435 | NC_021167.1    | Ca_Kabuli_Chr08 | 13776435                | GG                                     | TT                 | TT               | INTERGENIC                    |                    |                              |
| SNP_60585_A_13776497 | NC_021167.1    | Ca_Kabuli_Chr08 | 13776497                | CC                                     | TT                 | TT               | INTERGENIC                    |                    |                              |
| SNP_60586_A_13776506 | NC_021167.1    | Ca_Kabuli_Chr08 | 13776506                | TT                                     | CC                 | CC               | INTERGENIC                    |                    |                              |
| SNP_60587_A_13776602 | NC_021167.1    | Ca_Kabuli_Chr08 | 13776602                | TT                                     | CC                 | CC               | INTERGENIC                    |                    |                              |
| SNP_60588_A_13778413 | NC_021167.1    | Ca_Kabuli_Chr08 | 13778413                | TT                                     | GG                 | GG               | INTERGENIC                    |                    |                              |
| SNP_60589_A_13778822 | NC_021167.1    | Ca_Kabuli_Chr08 | 13778822                | AA                                     | GG                 | GG               | INTERGENIC                    |                    |                              |
| SNP_60590_A_13778862 | NC_021167.1    | Ca_Kabuli_Chr08 | 13778862                | TT                                     | AA                 | AA               | INTERGENIC                    |                    |                              |
| SNP_60591_A_13779189 | NC_021167.1    | Ca_Kabuli_Chr08 | 13779189                | TT                                     | CC                 | CC               | INTERGENIC                    |                    |                              |
| SNP_60592_A_13799753 | NC_021167.1    | Ca_Kabuli_Chr08 | 13799753                | GG                                     | AA                 | AA               | INTERGENIC                    |                    |                              |
| SNP_60593_A_13799873 | NC_021167.1    | Ca_Kabuli_Chr08 | 13799873                | AA                                     | CC                 | CC               | INTERGENIC                    |                    |                              |
| SNP_60594_A_13799882 | NC_021167.1    | Ca_Kabuli_Chr08 | 13799882                | TT                                     | CC                 | CC               | INTERGENIC                    |                    |                              |
| SNP_60595_A_13799894 | NC_021167.1    | Ca_Kabuli_Chr08 | 13799894                | TT                                     | CC                 | CC               | INTERGENIC                    |                    |                              |
| SNP_60596_A_13799921 | NC_021167.1    | Ca_Kabuli_Chr08 | 13799921                | AA                                     | GG                 | GG               | INTERGENIC                    |                    |                              |

| SNPs IDs             | Chromosome IDs | Chromosomes     | Physical positions (bp) | CDC Frontier genome (Reference genome) | (Pusa 1103 & HPNB) | (ILWC 46 & LPNB) | Sequence genome | Components of | Gene accession IDs | Putative functions |
|----------------------|----------------|-----------------|-------------------------|----------------------------------------|--------------------|------------------|-----------------|---------------|--------------------|--------------------|
| SNP_60597_A_13800049 | NC_021167.1    | Ca_Kabuli_Chr08 | 13800049                | CC                                     | TT                 | TT               | INTERGENIC      |               |                    |                    |
| SNP_60598_A_13800059 | NC_021167.1    | Ca_Kabuli_Chr08 | 13800059                | CC                                     | TT                 | TT               | INTERGENIC      |               |                    |                    |
| SNP_60599_A_13800095 | NC_021167.1    | Ca_Kabuli_Chr08 | 13800095                | AA                                     | GG                 | GG               | INTERGENIC      |               |                    |                    |
| SNP_60600_A_13802133 | NC_021167.1    | Ca_Kabuli_Chr08 | 13802133                | TT                                     | AA                 | AA               | INTERGENIC      |               |                    |                    |
| SNP_60601_A_13802510 | NC_021167.1    | Ca_Kabuli_Chr08 | 13802510                | TT                                     | AA                 | AA               | INTERGENIC      |               |                    |                    |
| SNP_60602_A_13802521 | NC_021167.1    | Ca_Kabuli_Chr08 | 13802521                | AA                                     | GG                 | GG               | INTERGENIC      |               |                    |                    |
| SNP_60603_A_13813386 | NC_021167.1    | Ca_Kabuli_Chr08 | 13813386                | GG                                     | AA                 | AA               | INTERGENIC      |               |                    |                    |
| SNP_60604_A_13813683 | NC_021167.1    | Ca_Kabuli_Chr08 | 13813683                | TT                                     | AA                 | AA               | INTERGENIC      |               |                    |                    |
| SNP_60605_A_13813715 | NC_021167.1    | Ca_Kabuli_Chr08 | 13813715                | CC                                     | TT                 | TT               | INTERGENIC      |               |                    |                    |
| SNP_60606_A_13813849 | NC_021167.1    | Ca_Kabuli_Chr08 | 13813849                | AA                                     | TT                 | TT               | INTERGENIC      |               |                    |                    |
| SNP_60607_A_13813887 | NC_021167.1    | Ca_Kabuli_Chr08 | 13813887                | AA                                     | GG                 | GG               | INTERGENIC      |               |                    |                    |
| SNP_60608_A_13813888 | NC_021167.1    | Ca_Kabuli_Chr08 | 13813888                | GG                                     | AA                 | AA               | INTERGENIC      |               |                    |                    |
| SNP_60609_A_13813908 | NC_021167.1    | Ca_Kabuli_Chr08 | 13813908                | CC                                     | TT                 | TT               | INTERGENIC      |               |                    |                    |
| SNP_60610_A_13814376 | NC_021167.1    | Ca_Kabuli_Chr08 | 13814376                | CC                                     | GG                 | GG               | INTERGENIC      |               |                    |                    |
| SNP_60611_A_13814878 | NC_021167.1    | Ca_Kabuli_Chr08 | 13814878                | CC                                     | TT                 | TT               | INTERGENIC      |               |                    |                    |
| SNP_60612_A_13815128 | NC_021167.1    | Ca_Kabuli_Chr08 | 13815128                | AA                                     | GG                 | GG               | INTERGENIC      |               |                    |                    |
| SNP_60613_A_13815137 | NC_021167.1    | Ca_Kabuli_Chr08 | 13815137                | CC                                     | TT                 | TT               | INTERGENIC      |               |                    |                    |
| SNP_60614_A_13815150 | NC_021167.1    | Ca_Kabuli_Chr08 | 13815150                | CC                                     | GG                 | GG               | INTERGENIC      |               |                    |                    |
| SNP_60615_A_13815171 | NC_021167.1    | Ca_Kabuli_Chr08 | 13815171                | AA                                     | TT                 | TT               | INTERGENIC      |               |                    |                    |
| SNP_60616_A_13815198 | NC_021167.1    | Ca_Kabuli_Chr08 | 13815198                | GG                                     | AA                 | AA               | INTERGENIC      |               |                    |                    |
| SNP_60617_A_13815204 | NC_021167.1    | Ca_Kabuli_Chr08 | 13815204                | CC                                     | GG                 | GG               | INTERGENIC      |               |                    |                    |
| SNP_60618_A_13815406 | NC_021167.1    | Ca_Kabuli_Chr08 | 13815406                | CC                                     | AA                 | AA               | INTERGENIC      |               |                    |                    |

| SNPs IDs             | Chromosome IDs | Chromosomes     | Physical positions (bp) | CDC Frontier genome (Reference genome) | (Pusa 1103 & HPNB) | (ILWC 46 & LPNB) | Sequence Components of genome | Gene accession IDs | Putative functions                                               |
|----------------------|----------------|-----------------|-------------------------|----------------------------------------|--------------------|------------------|-------------------------------|--------------------|------------------------------------------------------------------|
| SNP_60619_A_13815453 | NC_021167.1    | Ca_Kabuli_Chr08 | 13815453                | TT                                     | GG                 | GG               | INTERGENIC                    |                    |                                                                  |
| SNP_60620_A_13815469 | NC_021167.1    | Ca_Kabuli_Chr08 | 13815469                | TT                                     | CC                 | CC               | INTERGENIC                    |                    |                                                                  |
| SNP_60621_A_13815479 | NC_021167.1    | Ca_Kabuli_Chr08 | 13815479                | AA                                     | CC                 | CC               | INTERGENIC                    |                    |                                                                  |
| SNP_60622_A_13815524 | NC_021167.1    | Ca_Kabuli_Chr08 | 13815524                | TT                                     | AA                 | AA               | INTERGENIC                    |                    |                                                                  |
| SNP_60623_A_13815530 | NC_021167.1    | Ca_Kabuli_Chr08 | 13815530                | GG                                     | AA                 | AA               | INTERGENIC                    |                    |                                                                  |
| SNP_60624_A_13815533 | NC_021167.1    | Ca_Kabuli_Chr08 | 13815533                | TT                                     | AA                 | AA               | INTERGENIC                    |                    |                                                                  |
| SNP_60625_A_13815590 | NC_021167.1    | Ca_Kabuli_Chr08 | 13815590                | AA                                     | GG                 | GG               | INTERGENIC                    |                    |                                                                  |
| SNP_60626_A_13821623 | NC_021167.1    | Ca_Kabuli_Chr08 | 13821623                | CC                                     | TT                 | TT               | INTERGENIC                    |                    |                                                                  |
| SNP_60627_A_13821638 | NC_021167.1    | Ca_Kabuli_Chr08 | 13821638                | TT                                     | CC                 | CC               | INTERGENIC                    |                    |                                                                  |
| SNP_60628_A_13821871 | NC_021167.1    | Ca_Kabuli_Chr08 | 13821871                | CC                                     | TT                 | TT               | INTERGENIC                    |                    |                                                                  |
| SNP_60629_A_13821906 | NC_021167.1    | Ca_Kabuli_Chr08 | 13821906                | AA                                     | TT                 | TT               | INTERGENIC                    |                    |                                                                  |
| SNP_60630_A_13832756 | NC_021167.1    | Ca_Kabuli_Chr08 | 13832756                | GG                                     | CC                 | CC               | URR                           | 101503914          | probable ADP-ribosylation factor GTPase-activating protein AGD14 |
| SNP_60631_A_13833784 | NC_021167.1    | Ca_Kabuli_Chr08 | 13833784                | GG                                     | AA                 | AA               | INTERGENIC                    |                    |                                                                  |
| SNP_60632_A_13833812 | NC_021167.1    | Ca_Kabuli_Chr08 | 13833812                | GG                                     | TT                 | TT               | INTERGENIC                    |                    |                                                                  |
| SNP_60633_A_13834096 | NC_021167.1    | Ca_Kabuli_Chr08 | 13834096                | AA                                     | CC                 | CC               | INTERGENIC                    |                    |                                                                  |
| SNP_60634_A_13834218 | NC_021167.1    | Ca_Kabuli_Chr08 | 13834218                | CC                                     | AA                 | AA               | INTERGENIC                    |                    |                                                                  |
| SNP_60635_A_13848601 | NC_021167.1    | Ca_Kabuli_Chr08 | 13848601                | AA                                     | TT                 | TT               | INTERGENIC                    |                    |                                                                  |
| SNP_60636_A_13874838 | NC_021167.1    | Ca_Kabuli_Chr08 | 13874838                | GG                                     | AA                 | AA               | DRR                           | 101510335          | uncharacterized LOC101510335                                     |
| SNP_60637_A_13887498 | NC_021167.1    | Ca_Kabuli_Chr08 | 13887498                | GG                                     | AA                 | AA               | URR                           | 101505741          | uncharacterized LOC101505741                                     |
| SNP_60638_A_13921376 | NC_021167.1    | Ca_Kabuli_Chr08 | 13921376                | AA                                     | CC                 | CC               | INTERGENIC                    |                    |                                                                  |
| SNP_60639_A_13921380 | NC_021167.1    | Ca_Kabuli_Chr08 | 13921380                | AA                                     | GG                 | GG               | INTERGENIC                    |                    |                                                                  |
| SNP_60640_A_13929772 | NC_021167.1    | Ca_Kabuli_Chr08 | 13929772                | AA                                     | TT                 | TT               | INTERGENIC                    |                    |                                                                  |

| SNPs IDs             | Chromosome IDs | Chromosomes     | Physical positions (bp) | CDC Frontier genome (Reference genome) | (Pusa 1103 & HPNB) | (ILWC 46 & LPNB) | Sequence Components of genome | Gene accession IDs | Putative functions           |
|----------------------|----------------|-----------------|-------------------------|----------------------------------------|--------------------|------------------|-------------------------------|--------------------|------------------------------|
| SNP_60642_A_13993491 | NC_021167.1    | Ca_Kabuli_Chr08 | 13993491                | TT                                     | CC                 | CC               | URR                           | 101507997          | protein CASP                 |
| SNP_60643_A_13993529 | NC_021167.1    | Ca_Kabuli_Chr08 | 13993529                | GG                                     | AA                 | AA               | URR                           | 101507997          | protein CASP                 |
| SNP_60644_A_13993554 | NC_021167.1    | Ca_Kabuli_Chr08 | 13993554                | TT                                     | CC                 | CC               | URR                           | 101507997          | protein CASP                 |
| SNP_60645_A_13993565 | NC_021167.1    | Ca_Kabuli_Chr08 | 13993565                | AA                                     | GG                 | GG               | URR                           | 101507997          | protein CASP                 |
| SNP_60646_A_13993667 | NC_021167.1    | Ca_Kabuli_Chr08 | 13993667                | CC                                     | TT                 | TT               | URR                           | 101507997          | protein CASP                 |
| SNP_60647_A_13993680 | NC_021167.1    | Ca_Kabuli_Chr08 | 13993680                | AA                                     | TT                 | TT               | URR                           | 101507997          | protein CASP                 |
| SNP_60648_A_13993696 | NC_021167.1    | Ca_Kabuli_Chr08 | 13993696                | CC                                     | TT                 | TT               | URR                           | 101507997          | protein CASP                 |
| SNP_60649_A_13993703 | NC_021167.1    | Ca_Kabuli_Chr08 | 13993703                | GG                                     | AA                 | AA               | URR                           | 101507997          | protein CASP                 |
| SNP_60650_A_13993725 | NC_021167.1    | Ca_Kabuli_Chr08 | 13993725                | GG                                     | CC                 | CC               | URR                           | 101507997          | protein CASP                 |
| SNP_60651_A_13993768 | NC_021167.1    | Ca_Kabuli_Chr08 | 13993768                | CC                                     | TT                 | TT               | URR                           | 101507997          | protein CASP                 |
| SNP_60653_A_13993976 | NC_021167.1    | Ca_Kabuli_Chr08 | 13993976                | TT                                     | CC                 | CC               | URR                           | 101507997          | protein CASP                 |
| SNP_60654_A_13993985 | NC_021167.1    | Ca_Kabuli_Chr08 | 13993985                | TT                                     | CC                 | CC               | URR                           | 101507997          | protein CASP                 |
| SNP_60655_A_13993995 | NC_021167.1    | Ca_Kabuli_Chr08 | 13993995                | AA                                     | TT                 | TT               | URR                           | 101507997          | protein CASP                 |
| SNP_60656_A_14035127 | NC_021167.1    | Ca_Kabuli_Chr08 | 14035127                | TT                                     | AA                 | AA               | INTRON                        | 101511298          | uncharacterized LOC101511298 |
| SNP_60657_A_14035454 | NC_021167.1    | Ca_Kabuli_Chr08 | 14035454                | TT                                     | CC                 | CC               | INTRON                        | 101511298          | uncharacterized LOC101511298 |
| SNP_60658_A_14035568 | NC_021167.1    | Ca_Kabuli_Chr08 | 14035568                | AA                                     | GG                 | GG               | INTRON                        | 101511298          | uncharacterized LOC101511298 |
| SNP_60659_A_14035662 | NC_021167.1    | Ca_Kabuli_Chr08 | 14035662                | CC                                     | GG                 | GG               | INTRON                        | 101511298          | uncharacterized LOC101511298 |
| SNP_60660_A_14035779 | NC_021167.1    | Ca_Kabuli_Chr08 | 14035779                | CC                                     | TT                 | TT               | INTRON                        | 101511298          | uncharacterized LOC101511298 |
| SNP_60661_A_14035971 | NC_021167.1    | Ca_Kabuli_Chr08 | 14035971                | AA                                     | CC                 | CC               | INTRON                        | 101511298          | uncharacterized LOC101511298 |
| SNP_60662_A_14036135 | NC_021167.1    | Ca_Kabuli_Chr08 | 14036135                | TT                                     | CC                 | CC               | INTRON                        | 101511298          | uncharacterized LOC101511298 |
| SNP_60664_A_14063775 | NC_021167.1    | Ca_Kabuli_Chr08 | 14063775                | CC                                     | TT                 | TT               | INTRON                        | 101511618          | uncharacterized LOC101511618 |
| SNP_60665_A_14063813 | NC_021167.1    | Ca_Kabuli_Chr08 | 14063813                | AA                                     | GG                 | GG               | INTRON                        | 101511618          | uncharacterized LOC101511618 |



| SNPs IDs             | Chromosome IDs | Chromosomes     | Physical positions (bp) | CDC Frontier (Reference genome) | (Pusa 1103 & HPNB) | (ILWC 46 & LPNB) | Sequence Components of genome | Gene accession IDs | Putative functions           |
|----------------------|----------------|-----------------|-------------------------|---------------------------------|--------------------|------------------|-------------------------------|--------------------|------------------------------|
| SNP_60666_A_14063891 | NC_021167.1    | Ca_Kabuli_Chr08 | 14063891                | AA                              | CC                 | CC               | INTRON                        | 101511618          | uncharacterized LOC101511618 |
| SNP_60667_A_14063960 | NC_021167.1    | Ca_Kabuli_Chr08 | 14063960                | GG                              | CC                 | CC               | INTRON                        | 101511618          | uncharacterized LOC101511618 |
| SNP_60668_A_14063984 | NC_021167.1    | Ca_Kabuli_Chr08 | 14063984                | CC                              | TT                 | TT               | INTRON                        | 101511618          | uncharacterized LOC101511618 |
| SNP_60670_A_14064150 | NC_021167.1    | Ca_Kabuli_Chr08 | 14064150                | GG                              | CC                 | CC               | INTRON                        | 101511618          | uncharacterized LOC101511618 |
| SNP_60672_A_14064256 | NC_021167.1    | Ca_Kabuli_Chr08 | 14064256                | GG                              | AA                 | AA               | URR                           | 101511618          | uncharacterized LOC101511618 |
| SNP_60673_A_14064277 | NC_021167.1    | Ca_Kabuli_Chr08 | 14064277                | GG                              | AA                 | AA               | URR                           | 101511618          | uncharacterized LOC101511618 |
| SNP_60674_A_14064292 | NC_021167.1    | Ca_Kabuli_Chr08 | 14064292                | AA                              | GG                 | GG               | URR                           | 101511618          | uncharacterized LOC101511618 |
| SNP_60675_A_14064298 | NC_021167.1    | Ca_Kabuli_Chr08 | 14064298                | CC                              | GG                 | GG               | URR                           | 101511618          | uncharacterized LOC101511618 |
| SNP_60676_A_14064302 | NC_021167.1    | Ca_Kabuli_Chr08 | 14064302                | TT                              | AA                 | AA               | URR                           | 101511618          | uncharacterized LOC101511618 |
| SNP_60677_A_14064325 | NC_021167.1    | Ca_Kabuli_Chr08 | 14064325                | TT                              | AA                 | AA               | START_LOST                    | 101511618          | uncharacterized LOC101511618 |
| SNP_60678_A_14064362 | NC_021167.1    | Ca_Kabuli_Chr08 | 14064362                | CC                              | AA                 | AA               | SYNONYMOUS_CODING             | 101511618          | uncharacterized LOC101511618 |
| SNP_60679_A_14066725 | NC_021167.1    | Ca_Kabuli_Chr08 | 14066725                | TT                              | CC                 | CC               | SYNONYMOUS_CODING             | 101511618          | uncharacterized LOC101511618 |
| SNP_60680_A_14068972 | NC_021167.1    | Ca_Kabuli_Chr08 | 14068972                | CC                              | TT                 | TT               | URR                           | 101511618          | uncharacterized LOC101511618 |
| SNP_60681_A_14072694 | NC_021167.1    | Ca_Kabuli_Chr08 | 14072694                | CC                              | TT                 | TT               | INTERGENIC                    |                    |                              |
| SNP_60683_A_14072726 | NC_021167.1    | Ca_Kabuli_Chr08 | 14072726                | CC                              | TT                 | TT               | INTERGENIC                    |                    |                              |
| SNP_60684_A_14072737 | NC_021167.1    | Ca_Kabuli_Chr08 | 14072737                | CC                              | TT                 | TT               | INTERGENIC                    |                    |                              |
| SNP_60685_A_14072739 | NC_021167.1    | Ca_Kabuli_Chr08 | 14072739                | AA                              | GG                 | GG               | INTERGENIC                    |                    |                              |
| SNP_60686_A_14072763 | NC_021167.1    | Ca_Kabuli_Chr08 | 14072763                | TT                              | CC                 | CC               | INTERGENIC                    |                    |                              |
| SNP_60687_A_14072791 | NC_021167.1    | Ca_Kabuli_Chr08 | 14072791                | CC                              | AA                 | AA               | DRR                           | 101509696          | AP-3 complex subunit delta   |
| SNP_60688_A_14072800 | NC_021167.1    | Ca_Kabuli_Chr08 | 14072800                | AA                              | CC                 | CC               | DRR                           | 101509696          | AP-3 complex subunit delta   |
| SNP_60689_A_14072802 | NC_021167.1    | Ca_Kabuli_Chr08 | 14072802                | AA                              | GG                 | GG               | DRR                           | 101509696          | AP-3 complex subunit delta   |
| SNP_60690_A_14072810 | NC_021167.1    | Ca_Kabuli_Chr08 | 14072810                | CC                              | TT                 | TT               | DRR                           | 101509696          | AP-3 complex subunit delta   |

| SNPs IDs             | Chromosome IDs | Chromosomes     | Physical positions (bp) | CDC Frontier genome (Reference genome) | (Pusa 1103 & HPNB) | (ILWC 46 & LPNB) | Sequence Components of genome | Gene accession IDs | Putative functions                  |
|----------------------|----------------|-----------------|-------------------------|----------------------------------------|--------------------|------------------|-------------------------------|--------------------|-------------------------------------|
| SNP_60691_A_14072875 | NC_021167.1    | Ca_Kabuli_Chr08 | 14072875                | CC                                     | TT                 | TT               | DRR                           | 101509696          | AP-3 complex subunit delta          |
| SNP_60692_A_14072936 | NC_021167.1    | Ca_Kabuli_Chr08 | 14072936                | CC                                     | TT                 | TT               | DRR                           | 101509696          | AP-3 complex subunit delta          |
| SNP_60693_A_14072937 | NC_021167.1    | Ca_Kabuli_Chr08 | 14072937                | GG                                     | AA                 | AA               | DRR                           | 101509696          | AP-3 complex subunit delta          |
| SNP_60694_A_14072949 | NC_021167.1    | Ca_Kabuli_Chr08 | 14072949                | CC                                     | GG                 | GG               | DRR                           | 101509696          | AP-3 complex subunit delta          |
| SNP_60695_A_14073455 | NC_021167.1    | Ca_Kabuli_Chr08 | 14073455                | TT                                     | CC                 | CC               | DRR                           | 101509696          | AP-3 complex subunit delta          |
| SNP_60696_A_14073462 | NC_021167.1    | Ca_Kabuli_Chr08 | 14073462                | CC                                     | TT                 | TT               | DRR                           | 101509696          | AP-3 complex subunit delta          |
| SNP_60698_A_14073621 | NC_021167.1    | Ca_Kabuli_Chr08 | 14073621                | TT                                     | CC                 | CC               | DRR                           | 101509696          | AP-3 complex subunit delta          |
| SNP_60699_A_14073756 | NC_021167.1    | Ca_Kabuli_Chr08 | 14073756                | AA                                     | CC                 | CC               | DRR                           | 101509696          | AP-3 complex subunit delta          |
| SNP_60700_A_14074253 | NC_021167.1    | Ca_Kabuli_Chr08 | 14074253                | CC                                     | TT                 | TT               | SYNONYMOUS_CODING             | 101509696          | AP-3 complex subunit delta          |
| SNP_60702_A_14074313 | NC_021167.1    | Ca_Kabuli_Chr08 | 14074313                | CC                                     | GG                 | GG               | SYNONYMOUS_CODING             | 101509696          | AP-3 complex subunit delta          |
| SNP_60703_A_14074533 | NC_021167.1    | Ca_Kabuli_Chr08 | 14074533                | GG                                     | TT                 | TT               | NON_SYNONYMOUS_CODING         | 101509696          | AP-3 complex subunit delta          |
| SNP_60704_A_14074566 | NC_021167.1    | Ca_Kabuli_Chr08 | 14074566                | CC                                     | GG                 | GG               | NON_SYNONYMOUS_CODING         | 101509696          | AP-3 complex subunit delta          |
| SNP_60705_A_14074624 | NC_021167.1    | Ca_Kabuli_Chr08 | 14074624                | GG                                     | TT                 | TT               | NON_SYNONYMOUS_CODING         | 101509696          | AP-3 complex subunit delta          |
| SNP_60706_A_14074643 | NC_021167.1    | Ca_Kabuli_Chr08 | 14074643                | GG                                     | CC                 | CC               | SYNONYMOUS_CODING             | 101509696          | AP-3 complex subunit delta          |
| SNP_60707_A_14076621 | NC_021167.1    | Ca_Kabuli_Chr08 | 14076621                | CC                                     | AA                 | AA               | NON_SYNONYMOUS_CODING         | 101509696          | AP-3 complex subunit delta          |
| SNP_60708_A_14076817 | NC_021167.1    | Ca_Kabuli_Chr08 | 14076817                | GG                                     | TT                 | TT               | NON_SYNONYMOUS_CODING         | 101509696          | AP-3 complex subunit delta          |
| SNP_60710_A_14076969 | NC_021167.1    | Ca_Kabuli_Chr08 | 14076969                | GG                                     | TT                 | TT               | DRR                           | 101509696          | AP-3 complex subunit delta          |
| SNP_60711_A_14076993 | NC_021167.1    | Ca_Kabuli_Chr08 | 14076993                | AA                                     | CC                 | CC               | DRR                           | 101509696          | AP-3 complex subunit delta          |
| SNP_60712_A_14076994 | NC_021167.1    | Ca_Kabuli_Chr08 | 14076994                | GG                                     | AA                 | AA               | DRR                           | 101509696          | AP-3 complex subunit delta          |
| SNP_60715_A_14093677 | NC_021167.1    | Ca_Kabuli_Chr08 | 14093677                | AA                                     | TT                 | TT               | DRR                           | 101495193          | WAT1-related protein At3g18200-like |
| SNP_60716_A_14093906 | NC_021167.1    | Ca_Kabuli_Chr08 | 14093906                | TT                                     | AA                 | AA               | DRR                           | 101495193          | WAT1-related protein At3g18200-like |
| SNP_60717_A_14097963 | NC_021167.1    | Ca_Kabuli_Chr08 | 14097963                | TT                                     | CC                 | CC               | DRR                           | 101512154          | integrator complex subunit 9-like   |

| SNPs IDs             | Chromosome IDs | Chromosomes     | Physical positions (bp) | CDC Frontier genome (Reference genome) | (Pusa 1103 & HPNB) | (ILWC 46 & LPNB) | Sequence Components of genome | Gene accession IDs | Putative functions                                   |
|----------------------|----------------|-----------------|-------------------------|----------------------------------------|--------------------|------------------|-------------------------------|--------------------|------------------------------------------------------|
| SNP_60718_A_14107206 | NC_021167.1    | Ca_Kabuli_Chr08 | 14107206                | CC                                     | TT                 | TT               | INTRON                        | 101495193          | WAT1-related protein At3g18200-like                  |
| SNP_60719_A_14111574 | NC_021167.1    | Ca_Kabuli_Chr08 | 14111574                | CC                                     | TT                 | TT               | INTRON                        | 101495193          | WAT1-related protein At3g18200-like                  |
| SNP_60721_A_14113731 | NC_021167.1    | Ca_Kabuli_Chr08 | 14113731                | GG                                     | TT                 | TT               | INTERGENIC                    |                    |                                                      |
| SNP_60722_A_14116971 | NC_021167.1    | Ca_Kabuli_Chr08 | 14116971                | AA                                     | GG                 | GG               | INTERGENIC                    |                    |                                                      |
| SNP_60723_A_14120709 | NC_021167.1    | Ca_Kabuli_Chr08 | 14120709                | TT                                     | CC                 | CC               | INTERGENIC                    |                    |                                                      |
| SNP_60724_A_14120887 | NC_021167.1    | Ca_Kabuli_Chr08 | 14120887                | GG                                     | AA                 | AA               | INTERGENIC                    |                    |                                                      |
| SNP_60725_A_14120939 | NC_021167.1    | Ca_Kabuli_Chr08 | 14120939                | GG                                     | TT                 | TT               | INTERGENIC                    |                    |                                                      |
| SNP_60727_A_14124541 | NC_021167.1    | Ca_Kabuli_Chr08 | 14124541                | GG                                     | AA                 | AA               | INTERGENIC                    |                    |                                                      |
| SNP_60728_A_14125249 | NC_021167.1    | Ca_Kabuli_Chr08 | 14125249                | TT                                     | AA                 | AA               | INTRON                        | 101512799          | probable protein phosphatase 2C 8                    |
| SNP_60729_A_14126353 | NC_021167.1    | Ca_Kabuli_Chr08 | 14126353                | CC                                     | AA                 | AA               | INTRON                        | 101512799          | probable protein phosphatase 2C 8                    |
| SNP_60730_A_14126434 | NC_021167.1    | Ca_Kabuli_Chr08 | 14126434                | TT                                     | GG                 | GG               | INTRON                        | 101512799          | probable protein phosphatase 2C 8                    |
| SNP_60732_A_14127105 | NC_021167.1    | Ca_Kabuli_Chr08 | 14127105                | TT                                     | CC                 | CC               | INTRON                        | 101512799          | probable protein phosphatase 2C 8                    |
| SNP_60733_A_14128928 | NC_021167.1    | Ca_Kabuli_Chr08 | 14128928                | CC                                     | GG                 | GG               | INTRON                        | 101512799          | probable protein phosphatase 2C 8                    |
| SNP_60734_A_14129628 | NC_021167.1    | Ca_Kabuli_Chr08 | 14129628                | GG                                     | AA                 | AA               | URR                           | 101512799          | probable protein phosphatase 2C 8                    |
| SNP_60735_A_14129785 | NC_021167.1    | Ca_Kabuli_Chr08 | 14129785                | CC                                     | TT                 | TT               | URR                           | 101512799          | probable protein phosphatase 2C 8                    |
| SNP_60736_A_14130108 | NC_021167.1    | Ca_Kabuli_Chr08 | 14130108                | TT                                     | GG                 | GG               | URR                           | 101512799          | probable protein phosphatase 2C 8                    |
| SNP_60737_A_14130167 | NC_021167.1    | Ca_Kabuli_Chr08 | 14130167                | TT                                     | AA                 | AA               | URR                           | 101512799          | probable protein phosphatase 2C 8                    |
| SNP_60739_A_14131284 | NC_021167.1    | Ca_Kabuli_Chr08 | 14131284                | CC                                     | TT                 | TT               | DRR                           | 101513342          | uncharacterized PKHD-type hydroxylase At1g22950-like |
| SNP_60740_A_14132655 | NC_021167.1    | Ca_Kabuli_Chr08 | 14132655                | TT                                     | CC                 | CC               | INTRON                        | 101513342          | uncharacterized PKHD-type hydroxylase At1g22950-like |
| SNP_60741_A_14137796 | NC_021167.1    | Ca_Kabuli_Chr08 | 14137796                | TT                                     | AA                 | AA               | NON_SYNONYMOUS_CODING         | id191631           | Unknown function                                     |
| SNP_60742_A_14139124 | NC_021167.1    | Ca_Kabuli_Chr08 | 14139124                | TT                                     | AA                 | AA               | DRR                           | 101513762          | uncharacterized LOC101513762                         |
| SNP_60743_A_14144716 | NC_021167.1    | Ca_Kabuli_Chr08 | 14144716                | CC                                     | GG                 | GG               | URR                           | 101513762          | uncharacterized LOC101513762                         |

| SNPs IDs             | Chromosome IDs | Chromosomes     | Physical positions (bp) | CDC Frontier (Reference genome) | (Pusa 1103 & HPNB) | (ILWC 46 & LPNB) | Sequence Components of genome | Gene accession IDs | Putative functions                     |
|----------------------|----------------|-----------------|-------------------------|---------------------------------|--------------------|------------------|-------------------------------|--------------------|----------------------------------------|
| SNP_60744_A_14150025 | NC_021167.1    | Ca_Kabuli_Chr08 | 14150025                | AA                              | GG                 | GG               | INTRON                        | 101514104          | nuclear poly(A) polymerase 1           |
| SNP_60745_A_14151151 | NC_021167.1    | Ca_Kabuli_Chr08 | 14151151                | CC                              | GG                 | GG               | INTRON                        | 101514104          | nuclear poly(A) polymerase 1           |
| SNP_60746_A_14155293 | NC_021167.1    | Ca_Kabuli_Chr08 | 14155293                | AA                              | GG                 | GG               | URR                           | 101514104          | nuclear poly(A) polymerase 1           |
| SNP_60748_A_14163127 | NC_021167.1    | Ca_Kabuli_Chr08 | 14163127                | TT                              | AA                 | AA               | INTERGENIC                    |                    |                                        |
| SNP_60750_A_14166302 | NC_021167.1    | Ca_Kabuli_Chr08 | 14166302                | TT                              | CC                 | CC               | INTERGENIC                    |                    |                                        |
| SNP_60751_A_14194895 | NC_021167.1    | Ca_Kabuli_Chr08 | 14194895                | AA                              | TT                 | TT               | URR                           | 101495516          | uncharacterized protein At4g26485-like |
| SNP_60752_A_14194919 | NC_021167.1    | Ca_Kabuli_Chr08 | 14194919                | GG                              | AA                 | AA               | URR                           | 101495516          | uncharacterized protein At4g26485-like |
| SNP_60753_A_14203379 | NC_021167.1    | Ca_Kabuli_Chr08 | 14203379                | AA                              | TT                 | TT               | NON_SYNONYMOUS_CODING         | id191673           | Unknown function                       |
| SNP_60754_A_14203383 | NC_021167.1    | Ca_Kabuli_Chr08 | 14203383                | TT                              | CC                 | CC               | NON_SYNONYMOUS_CODING         | id191673           | Unknown function                       |
| SNP_60755_A_14210812 | NC_021167.1    | Ca_Kabuli_Chr08 | 14210812                | AA                              | CC                 | CC               | INTERGENIC                    |                    |                                        |
| SNP_60756_A_14210822 | NC_021167.1    | Ca_Kabuli_Chr08 | 14210822                | GG                              | TT                 | TT               | INTERGENIC                    |                    |                                        |
| SNP_60757_A_14213124 | NC_021167.1    | Ca_Kabuli_Chr08 | 14213124                | CC                              | AA                 | AA               | INTERGENIC                    |                    |                                        |
| SNP_60758_A_14213130 | NC_021167.1    | Ca_Kabuli_Chr08 | 14213130                | AA                              | CC                 | CC               | INTERGENIC                    |                    |                                        |
| SNP_60759_A_14218037 | NC_021167.1    | Ca_Kabuli_Chr08 | 14218037                | AA                              | TT                 | TT               | INTERGENIC                    |                    |                                        |
| SNP_60760_A_14218038 | NC_021167.1    | Ca_Kabuli_Chr08 | 14218038                | AA                              | TT                 | TT               | INTERGENIC                    |                    |                                        |
| SNP_60761_A_14218039 | NC_021167.1    | Ca_Kabuli_Chr08 | 14218039                | AA                              | TT                 | TT               | INTERGENIC                    |                    |                                        |
| SNP_60762_A_14218092 | NC_021167.1    | Ca_Kabuli_Chr08 | 14218092                | TT                              | CC                 | CC               | INTERGENIC                    |                    |                                        |
| SNP_60763_A_14218170 | NC_021167.1    | Ca_Kabuli_Chr08 | 14218170                | CC                              | GG                 | GG               | INTERGENIC                    |                    |                                        |
| SNP_60764_A_14218179 | NC_021167.1    | Ca_Kabuli_Chr08 | 14218179                | AA                              | GG                 | GG               | INTERGENIC                    |                    |                                        |
| SNP_60765_A_14218191 | NC_021167.1    | Ca_Kabuli_Chr08 | 14218191                | TT                              | CC                 | CC               | INTERGENIC                    |                    |                                        |
| SNP_60767_A_14218264 | NC_021167.1    | Ca_Kabuli_Chr08 | 14218264                | GG                              | AA                 | AA               | INTERGENIC                    |                    |                                        |
| SNP_60768_A_14218317 | NC_021167.1    | Ca_Kabuli_Chr08 | 14218317                | AA                              | GG                 | GG               | INTERGENIC                    |                    |                                        |

| SNPs IDs             | Chromosome IDs | Chromosomes     | Physical positions (bp) | CDC Frontier genome (Reference genome) | (Pusa 1103 & HPNB) | (ILWC 46 & LPNB) | Sequence genome | Components of | Gene accession IDs | Putative functions |
|----------------------|----------------|-----------------|-------------------------|----------------------------------------|--------------------|------------------|-----------------|---------------|--------------------|--------------------|
| SNP_60769_A_14218329 | NC_021167.1    | Ca_Kabuli_Chr08 | 14218329                | GG                                     | CC                 | CC               | INTERGENIC      |               |                    |                    |
| SNP_60770_A_14218377 | NC_021167.1    | Ca_Kabuli_Chr08 | 14218377                | GG                                     | TT                 | TT               | INTERGENIC      |               |                    |                    |
| SNP_60771_A_14218505 | NC_021167.1    | Ca_Kabuli_Chr08 | 14218505                | TT                                     | AA                 | AA               | INTERGENIC      |               |                    |                    |
| SNP_60772_A_14218534 | NC_021167.1    | Ca_Kabuli_Chr08 | 14218534                | TT                                     | CC                 | CC               | INTERGENIC      |               |                    |                    |
| SNP_60773_A_14218625 | NC_021167.1    | Ca_Kabuli_Chr08 | 14218625                | GG                                     | TT                 | TT               | INTERGENIC      |               |                    |                    |
| SNP_60774_A_14218704 | NC_021167.1    | Ca_Kabuli_Chr08 | 14218704                | TT                                     | AA                 | AA               | INTERGENIC      |               |                    |                    |
| SNP_60775_A_14218720 | NC_021167.1    | Ca_Kabuli_Chr08 | 14218720                | GG                                     | AA                 | AA               | INTERGENIC      |               |                    |                    |
| SNP_60776_A_14218726 | NC_021167.1    | Ca_Kabuli_Chr08 | 14218726                | AA                                     | GG                 | GG               | INTERGENIC      |               |                    |                    |
| SNP_60777_A_14218743 | NC_021167.1    | Ca_Kabuli_Chr08 | 14218743                | CC                                     | TT                 | TT               | INTERGENIC      |               |                    |                    |
| SNP_60778_A_14218792 | NC_021167.1    | Ca_Kabuli_Chr08 | 14218792                | GG                                     | AA                 | AA               | INTERGENIC      |               |                    |                    |
| SNP_60779_A_14218804 | NC_021167.1    | Ca_Kabuli_Chr08 | 14218804                | AA                                     | GG                 | GG               | INTERGENIC      |               |                    |                    |
| SNP_60780_A_14218807 | NC_021167.1    | Ca_Kabuli_Chr08 | 14218807                | CC                                     | TT                 | TT               | INTERGENIC      |               |                    |                    |
| SNP_60781_A_14220438 | NC_021167.1    | Ca_Kabuli_Chr08 | 14220438                | CC                                     | GG                 | GG               | INTERGENIC      |               |                    |                    |
| SNP_60782_A_14221931 | NC_021167.1    | Ca_Kabuli_Chr08 | 14221931                | TT                                     | CC                 | CC               | INTERGENIC      |               |                    |                    |
| SNP_60783_A_14223246 | NC_021167.1    | Ca_Kabuli_Chr08 | 14223246                | AA                                     | GG                 | GG               | INTERGENIC      |               |                    |                    |
| SNP_60784_A_14223740 | NC_021167.1    | Ca_Kabuli_Chr08 | 14223740                | AA                                     | TT                 | TT               | INTERGENIC      |               |                    |                    |
| SNP_60786_A_14231673 | NC_021167.1    | Ca_Kabuli_Chr08 | 14231673                | GG                                     | AA                 | AA               | INTERGENIC      |               |                    |                    |
| SNP_60787_A_14238327 | NC_021167.1    | Ca_Kabuli_Chr08 | 14238327                | GG                                     | TT                 | TT               | INTERGENIC      |               |                    |                    |
| SNP_60789_A_14238388 | NC_021167.1    | Ca_Kabuli_Chr08 | 14238388                | GG                                     | AA                 | AA               | INTERGENIC      |               |                    |                    |
| SNP_60790_A_14238674 | NC_021167.1    | Ca_Kabuli_Chr08 | 14238674                | GG                                     | AA                 | AA               | INTERGENIC      |               |                    |                    |
| SNP_60791_A_14239177 | NC_021167.1    | Ca_Kabuli_Chr08 | 14239177                | GG                                     | AA                 | AA               | INTERGENIC      |               |                    |                    |
| SNP_60792_A_14239374 | NC_021167.1    | Ca_Kabuli_Chr08 | 14239374                | TT                                     | CC                 | CC               | INTERGENIC      |               |                    |                    |

| SNPs IDs             | Chromosome IDs | Chromosomes     | Physical positions (bp) | CDC Frontier genome (Reference genome) | (Pusa 1103 & HPNB) | (ILWC 46 & LPNB) | Sequence Components of genome | Gene accession IDs | Putative functions           |
|----------------------|----------------|-----------------|-------------------------|----------------------------------------|--------------------|------------------|-------------------------------|--------------------|------------------------------|
| SNP_60793_A_14239406 | NC_021167.1    | Ca_Kabuli_Chr08 | 14239406                | TT                                     | CC                 | CC               | INTERGENIC                    |                    |                              |
| SNP_60794_A_14239430 | NC_021167.1    | Ca_Kabuli_Chr08 | 14239430                | TT                                     | AA                 | AA               | INTERGENIC                    |                    |                              |
| SNP_60795_A_14243954 | NC_021167.1    | Ca_Kabuli_Chr08 | 14243954                | AA                                     | TT                 | TT               | URR                           | 101496172          | Unknown function             |
| SNP_60796_A_14244022 | NC_021167.1    | Ca_Kabuli_Chr08 | 14244022                | TT                                     | GG                 | GG               | URR                           | 101496172          | Unknown function             |
| SNP_60797_A_14244269 | NC_021167.1    | Ca_Kabuli_Chr08 | 14244269                | TT                                     | CC                 | CC               | URR                           | 101496172          | Unknown function             |
| SNP_60798_A_14244308 | NC_021167.1    | Ca_Kabuli_Chr08 | 14244308                | TT                                     | GG                 | GG               | URR                           | 101496172          | Unknown function             |
| SNP_60800_A_14245156 | NC_021167.1    | Ca_Kabuli_Chr08 | 14245156                | GG                                     | TT                 | TT               | DRR                           | 101514979          | uncharacterized LOC101514979 |
| SNP_60801_A_14245578 | NC_021167.1    | Ca_Kabuli_Chr08 | 14245578                | CC                                     | AA                 | AA               | INTERGENIC                    |                    |                              |
| SNP_60802_A_14248979 | NC_021167.1    | Ca_Kabuli_Chr08 | 14248979                | TT                                     | CC                 | CC               | URR                           | 101514979          | uncharacterized LOC101514979 |
| SNP_60803_A_14250628 | NC_021167.1    | Ca_Kabuli_Chr08 | 14250628                | GG                                     | AA                 | AA               | URR                           | 101514979          | uncharacterized LOC101514979 |
| SNP_60805_A_14252408 | NC_021167.1    | Ca_Kabuli_Chr08 | 14252408                | TT                                     | GG                 | GG               | INTERGENIC                    |                    |                              |
| SNP_60806_A_14252417 | NC_021167.1    | Ca_Kabuli_Chr08 | 14252417                | CC                                     | TT                 | TT               | INTERGENIC                    |                    |                              |
| SNP_60807_A_14252419 | NC_021167.1    | Ca_Kabuli_Chr08 | 14252419                | CC                                     | TT                 | TT               | INTERGENIC                    |                    |                              |
| SNP_60808_A_14252426 | NC_021167.1    | Ca_Kabuli_Chr08 | 14252426                | CC                                     | TT                 | TT               | INTERGENIC                    |                    |                              |
| SNP_60809_A_14252427 | NC_021167.1    | Ca_Kabuli_Chr08 | 14252427                | GG                                     | AA                 | AA               | INTERGENIC                    |                    |                              |
| SNP_60810_A_14252436 | NC_021167.1    | Ca_Kabuli_Chr08 | 14252436                | CC                                     | TT                 | TT               | INTERGENIC                    |                    |                              |
| SNP_60811_A_14252726 | NC_021167.1    | Ca_Kabuli_Chr08 | 14252726                | CC                                     | TT                 | TT               | INTERGENIC                    |                    |                              |
| SNP_60812_A_14253348 | NC_021167.1    | Ca_Kabuli_Chr08 | 14253348                | CC                                     | TT                 | TT               | INTERGENIC                    |                    |                              |
| SNP_60813_A_14257349 | NC_021167.1    | Ca_Kabuli_Chr08 | 14257349                | AA                                     | GG                 | GG               | DRR                           | 101488257          | uncharacterized LOC101488257 |
| SNP_60815_A_14264258 | NC_021167.1    | Ca_Kabuli_Chr08 | 14264258                | TT                                     | AA                 | AA               | INTERGENIC                    |                    |                              |
| SNP_60816_A_14264259 | NC_021167.1    | Ca_Kabuli_Chr08 | 14264259                | TT                                     | AA                 | AA               | INTERGENIC                    |                    |                              |
| SNP_60817_A_14264260 | NC_021167.1    | Ca_Kabuli_Chr08 | 14264260                | TT                                     | AA                 | AA               | INTERGENIC                    |                    |                              |

| SNPs IDs             | Chromosome IDs | Chromosomes     | Physical positions (bp) | CDC Frontier genome (Reference genome) | (Pusa 1103 & HPNB) | (ILWC 46 & LPNB) | Sequence Components of genome | Gene accession IDs | Putative functions                          |
|----------------------|----------------|-----------------|-------------------------|----------------------------------------|--------------------|------------------|-------------------------------|--------------------|---------------------------------------------|
| SNP_60818_A_14264302 | NC_021167.1    | Ca_Kabuli_Chr08 | 14264302                | AA                                     | GG                 | GG               | INTERGENIC                    |                    |                                             |
| SNP_60819_A_14264309 | NC_021167.1    | Ca_Kabuli_Chr08 | 14264309                | CC                                     | AA                 | AA               | INTERGENIC                    |                    |                                             |
| SNP_60821_A_14268718 | NC_021167.1    | Ca_Kabuli_Chr08 | 14268718                | TT                                     | GG                 | GG               | INTERGENIC                    |                    |                                             |
| SNP_60822_A_14270850 | NC_021167.1    | Ca_Kabuli_Chr08 | 14270850                | GG                                     | TT                 | TT               | INTERGENIC                    |                    |                                             |
| SNP_60823_A_14270876 | NC_021167.1    | Ca_Kabuli_Chr08 | 14270876                | TT                                     | CC                 | CC               | INTERGENIC                    |                    |                                             |
| SNP_60824_A_14270878 | NC_021167.1    | Ca_Kabuli_Chr08 | 14270878                | GG                                     | TT                 | TT               | INTERGENIC                    |                    |                                             |
| SNP_60825_A_14271146 | NC_021167.1    | Ca_Kabuli_Chr08 | 14271146                | GG                                     | AA                 | AA               | INTERGENIC                    |                    |                                             |
| SNP_60826_A_14271191 | NC_021167.1    | Ca_Kabuli_Chr08 | 14271191                | AA                                     | GG                 | GG               | INTERGENIC                    |                    |                                             |
| SNP_60827_A_14271204 | NC_021167.1    | Ca_Kabuli_Chr08 | 14271204                | AA                                     | GG                 | GG               | INTERGENIC                    |                    |                                             |
| SNP_60828_A_14271221 | NC_021167.1    | Ca_Kabuli_Chr08 | 14271221                | CC                                     | TT                 | TT               | INTERGENIC                    |                    |                                             |
| SNP_60829_A_14286650 | NC_021167.1    | Ca_Kabuli_Chr08 | 14286650                | AA                                     | GG                 | GG               | INTRON                        | 101488940          | putative E3 ubiquitin-protein ligase RING1a |
| SNP_60831_A_14288593 | NC_021167.1    | Ca_Kabuli_Chr08 | 14288593                | AA                                     | TT                 | TT               | URR                           | 101488940          | putative E3 ubiquitin-protein ligase RING1a |
| SNP_60832_A_14288597 | NC_021167.1    | Ca_Kabuli_Chr08 | 14288597                | AA                                     | GG                 | GG               | URR                           | 101488940          | putative E3 ubiquitin-protein ligase RING1a |
| SNP_60833_A_14288620 | NC_021167.1    | Ca_Kabuli_Chr08 | 14288620                | TT                                     | CC                 | CC               | URR                           | 101488940          | putative E3 ubiquitin-protein ligase RING1a |
| SNP_60834_A_14288623 | NC_021167.1    | Ca_Kabuli_Chr08 | 14288623                | GG                                     | AA                 | AA               | URR                           | 101488940          | putative E3 ubiquitin-protein ligase RING1a |
| SNP_60835_A_14288701 | NC_021167.1    | Ca_Kabuli_Chr08 | 14288701                | GG                                     | AA                 | AA               | URR                           | 101488940          | putative E3 ubiquitin-protein ligase RING1a |
| SNP_60836_A_14290588 | NC_021167.1    | Ca_Kabuli_Chr08 | 14290588                | AA                                     | GG                 | GG               | INTERGENIC                    |                    |                                             |
| SNP_60838_A_14302514 | NC_021167.1    | Ca_Kabuli_Chr08 | 14302514                | GG                                     | TT                 | TT               | INTERGENIC                    |                    |                                             |
| SNP_60839_A_14302522 | NC_021167.1    | Ca_Kabuli_Chr08 | 14302522                | GG                                     | AA                 | AA               | INTERGENIC                    |                    |                                             |
| SNP_60840_A_14303305 | NC_021167.1    | Ca_Kabuli_Chr08 | 14303305                | TT                                     | GG                 | GG               | INTERGENIC                    |                    |                                             |
| SNP_60841_A_14303841 | NC_021167.1    | Ca_Kabuli_Chr08 | 14303841                | AA                                     | GG                 | GG               | DRR                           | 101410554          | transfer RNA leucine (anticodon CAG)        |
| SNP_60842_A_14306060 | NC_021167.1    | Ca_Kabuli_Chr08 | 14306060                | CC                                     | TT                 | TT               | URR                           | 101410554          | transfer RNA leucine (anticodon CAG)        |

| SNPs IDs             | Chromosome IDs | Chromosomes     | Physical positions (bp) | CDC Frontier (Reference genome) | (Pusa 1103 & HPNB) | (ILWC 46 & LPNB) | Sequence Components of genome | Gene accession IDs | Putative functions                   |
|----------------------|----------------|-----------------|-------------------------|---------------------------------|--------------------|------------------|-------------------------------|--------------------|--------------------------------------|
| SNP_60843_A_14306073 | NC_021167.1    | Ca_Kabuli_Chr08 | 14306073                | CC                              | TT                 | TT               | URR                           | 101410554          | transfer RNA leucine (anticodon CAG) |
| SNP_60846_A_14307847 | NC_021167.1    | Ca_Kabuli_Chr08 | 14307847                | CC                              | TT                 | TT               | DRR                           | 101489811          | reticulon-like protein B9            |
| SNP_60847_A_14308636 | NC_021167.1    | Ca_Kabuli_Chr08 | 14308636                | TT                              | GG                 | GG               | INTRON                        | 101489811          | reticulon-like protein B9            |
| SNP_60848_A_14308638 | NC_021167.1    | Ca_Kabuli_Chr08 | 14308638                | AA                              | TT                 | TT               | INTRON                        | 101489811          | reticulon-like protein B9            |
| SNP_60849_A_14308640 | NC_021167.1    | Ca_Kabuli_Chr08 | 14308640                | CC                              | TT                 | TT               | INTRON                        | 101489811          | reticulon-like protein B9            |
| SNP_60850_A_14310328 | NC_021167.1    | Ca_Kabuli_Chr08 | 14310328                | CC                              | AA                 | AA               | URR                           | 101489811          | reticulon-like protein B9            |
| SNP_60851_A_14312478 | NC_021167.1    | Ca_Kabuli_Chr08 | 14312478                | TT                              | CC                 | CC               | INTERGENIC                    |                    |                                      |
| SNP_60852_A_14312643 | NC_021167.1    | Ca_Kabuli_Chr08 | 14312643                | GG                              | AA                 | AA               | INTERGENIC                    |                    |                                      |
| SNP_60854_A_14315722 | NC_021167.1    | Ca_Kabuli_Chr08 | 14315722                | AA                              | CC                 | CC               | SYNONYMOUS_CODING             | 101490133          | chlorophyllase-1-like                |
| SNP_60855_A_14329495 | NC_021167.1    | Ca_Kabuli_Chr08 | 14329495                | GG                              | TT                 | TT               | URR                           | 101490775          | kinesin-like protein NACK1           |
| SNP_60856_A_14331064 | NC_021167.1    | Ca_Kabuli_Chr08 | 14331064                | TT                              | CC                 | CC               | DRR                           | 101491315          | uncharacterized LOC101491315         |
| SNP_60857_A_14331128 | NC_021167.1    | Ca_Kabuli_Chr08 | 14331128                | AA                              | GG                 | GG               | DRR                           | 101491315          | uncharacterized LOC101491315         |
| SNP_60858_A_14331345 | NC_021167.1    | Ca_Kabuli_Chr08 | 14331345                | AA                              | TT                 | TT               | INTERGENIC                    |                    |                                      |
| SNP_60859_A_14331355 | NC_021167.1    | Ca_Kabuli_Chr08 | 14331355                | GG                              | AA                 | AA               | INTERGENIC                    |                    |                                      |
| SNP_60860_A_14331579 | NC_021167.1    | Ca_Kabuli_Chr08 | 14331579                | CC                              | TT                 | TT               | INTERGENIC                    |                    |                                      |
| SNP_60861_A_14331592 | NC_021167.1    | Ca_Kabuli_Chr08 | 14331592                | CC                              | TT                 | TT               | INTERGENIC                    |                    |                                      |
| SNP_60862_A_14333042 | NC_021167.1    | Ca_Kabuli_Chr08 | 14333042                | AA                              | CC                 | CC               | NON_SYNONYMOUS_CODING         | 101491315          | uncharacterized LOC101491315         |
| SNP_60864_A_14342897 | NC_021167.1    | Ca_Kabuli_Chr08 | 14342897                | CC                              | GG                 | GG               | INTERGENIC                    |                    |                                      |
| SNP_60865_A_14342938 | NC_021167.1    | Ca_Kabuli_Chr08 | 14342938                | TT                              | AA                 | AA               | INTERGENIC                    |                    |                                      |
| SNP_60867_A_14347536 | NC_021167.1    | Ca_Kabuli_Chr08 | 14347536                | AA                              | GG                 | GG               | INTERGENIC                    |                    |                                      |
| SNP_60868_A_14349160 | NC_021167.1    | Ca_Kabuli_Chr08 | 14349160                | AA                              | TT                 | TT               | DRR                           | 101492278          | protein NETWORKED 4B-like            |
| SNP_60869_A_14349163 | NC_021167.1    | Ca_Kabuli_Chr08 | 14349163                | AA                              | GG                 | GG               | DRR                           | 101492278          | protein NETWORKED 4B-like            |



| SNPs IDs             | Chromosome IDs | Chromosomes     | Physical positions (bp) | CDC Frontier (Reference genome) | (Pusa 1103 & HPNB) | (ILWC 46 & LPNB) | Sequence Components of genome | Gene accession IDs | Putative functions                                    |
|----------------------|----------------|-----------------|-------------------------|---------------------------------|--------------------|------------------|-------------------------------|--------------------|-------------------------------------------------------|
| SNP_60870_A_14351501 | NC_021167.1    | Ca_Kabuli_Chr08 | 14351501                | AA                              | GG                 | GG               | SYNONYMOUS_CODING             | 101492278          | protein NETWORKED 4B-like                             |
| SNP_60871_A_14351534 | NC_021167.1    | Ca_Kabuli_Chr08 | 14351534                | GG                              | AA                 | AA               | SYNONYMOUS_CODING             | 101492278          | protein NETWORKED 4B-like                             |
| SNP_60872_A_14354683 | NC_021167.1    | Ca_Kabuli_Chr08 | 14354683                | CC                              | TT                 | TT               | INTRON                        | 101492278          | protein NETWORKED 4B-like                             |
| SNP_60873_A_14354934 | NC_021167.1    | Ca_Kabuli_Chr08 | 14354934                | TT                              | CC                 | CC               | URR                           | 101492278          | protein NETWORKED 4B-like                             |
| SNP_60874_A_14355032 | NC_021167.1    | Ca_Kabuli_Chr08 | 14355032                | AA                              | TT                 | TT               | URR                           | 101492278          | protein NETWORKED 4B-like                             |
| SNP_60876_A_14355071 | NC_021167.1    | Ca_Kabuli_Chr08 | 14355071                | TT                              | CC                 | CC               | URR                           | 101492278          | protein NETWORKED 4B-like                             |
| SNP_60877_A_14355187 | NC_021167.1    | Ca_Kabuli_Chr08 | 14355187                | CC                              | GG                 | GG               | URR                           | 101492278          | protein NETWORKED 4B-like                             |
| SNP_60879_A_14356873 | NC_021167.1    | Ca_Kabuli_Chr08 | 14356873                | GG                              | AA                 | AA               | URR                           | 101492278          | protein NETWORKED 4B-like                             |
| SNP_60880_A_14356884 | NC_021167.1    | Ca_Kabuli_Chr08 | 14356884                | GG                              | AA                 | AA               | URR                           | 101492278          | protein NETWORKED 4B-like                             |
| SNP_60881_A_14359546 | NC_021167.1    | Ca_Kabuli_Chr08 | 14359546                | AA                              | TT                 | TT               | INTERGENIC                    |                    |                                                       |
| SNP_60883_A_14362382 | NC_021167.1    | Ca_Kabuli_Chr08 | 14362382                | CC                              | TT                 | TT               | INTERGENIC                    |                    |                                                       |
| SNP_60885_A_14367047 | NC_021167.1    | Ca_Kabuli_Chr08 | 14367047                | TT                              | CC                 | CC               | INTERGENIC                    |                    |                                                       |
| SNP_60886_A_14370176 | NC_021167.1    | Ca_Kabuli_Chr08 | 14370176                | CC                              | TT                 | TT               | INTRON                        | 101492618          | probable serine/threonine-protein kinase At1g18390    |
| SNP_60887_A_14370251 | NC_021167.1    | Ca_Kabuli_Chr08 | 14370251                | GG                              | AA                 | AA               | INTRON                        | 101492618          | probable serine/threonine-protein kinase At1g18390    |
| SNP_60888_A_14370410 | NC_021167.1    | Ca_Kabuli_Chr08 | 14370410                | TT                              | AA                 | AA               | INTRON                        | 101492618          | probable serine/threonine-protein kinase At1g18390    |
| SNP_60889_A_14370412 | NC_021167.1    | Ca_Kabuli_Chr08 | 14370412                | GG                              | TT                 | TT               | INTRON                        | 101492618          | probable serine/threonine-protein kinase At1g18390    |
| SNP_60891_A_14370587 | NC_021167.1    | Ca_Kabuli_Chr08 | 14370587                | AA                              | GG                 | GG               | INTRON                        | 101492618          | probable serine/threonine-protein kinase At1g18390    |
| SNP_60896_A_14437565 | NC_021167.1    | Ca_Kabuli_Chr08 | 14437565                | TT                              | GG                 | GG               | INTERGENIC                    |                    |                                                       |
| SNP_60897_A_14437567 | NC_021167.1    | Ca_Kabuli_Chr08 | 14437567                | TT                              | GG                 | GG               | INTERGENIC                    |                    |                                                       |
| SNP_60898_A_14477041 | NC_021167.1    | Ca_Kabuli_Chr08 | 14477041                | AA                              | GG                 | GG               | INTERGENIC                    |                    |                                                       |
| SNP_60899_A_14505700 | NC_021167.1    | Ca_Kabuli_Chr08 | 14505700                | AA                              | CC                 | CC               | URR                           | 101497821          | pentatricopeptide repeat-containing protein At2g01860 |
| SNP_60901_A_14564999 | NC_021167.1    | Ca_Kabuli_Chr08 | 14564999                | TT                              | AA                 | AA               | INTERGENIC                    |                    |                                                       |

| SNPs IDs             | Chromosome IDs | Chromosomes     | Physical positions (bp) | CDC Frontier genome (Reference genome) | (Pusa 1103 & HPNB) | (ILWC 46 & LPNB) | Sequence Components of genome | Gene accession IDs | Putative functions                                             |
|----------------------|----------------|-----------------|-------------------------|----------------------------------------|--------------------|------------------|-------------------------------|--------------------|----------------------------------------------------------------|
| SNP_60902_A_14565743 | NC_021167.1    | Ca_Kabuli_Chr08 | 14565743                | CC                                     | TT                 | TT               | INTERGENIC                    |                    |                                                                |
| SNP_60904_A_14569766 | NC_021167.1    | Ca_Kabuli_Chr08 | 14569766                | GG                                     | AA                 | AA               | INTERGENIC                    |                    |                                                                |
| SNP_60905_A_14578703 | NC_021167.1    | Ca_Kabuli_Chr08 | 14578703                | CC                                     | TT                 | TT               | INTRON                        | 101500922          | kinesin-3                                                      |
| SNP_60907_A_14580156 | NC_021167.1    | Ca_Kabuli_Chr08 | 14580156                | AA                                     | GG                 | GG               | SYNONYMOUS_CODING             | 101500922          | kinesin-3                                                      |
| SNP_60908_A_14581193 | NC_021167.1    | Ca_Kabuli_Chr08 | 14581193                | AA                                     | TT                 | TT               | INTRON                        | 101500922          | kinesin-3                                                      |
| SNP_60909_A_14581650 | NC_021167.1    | Ca_Kabuli_Chr08 | 14581650                | AA                                     | TT                 | TT               | NON_SYNONYMOUS_CODING         | 101500922          | kinesin-3                                                      |
| SNP_60910_A_14585780 | NC_021167.1    | Ca_Kabuli_Chr08 | 14585780                | CC                                     | GG                 | GG               | INTRON                        | 101500922          | kinesin-3                                                      |
| SNP_60911_A_14585827 | NC_021167.1    | Ca_Kabuli_Chr08 | 14585827                | GG                                     | AA                 | AA               | INTRON                        | 101500922          | kinesin-3                                                      |
| SNP_60912_A_14586833 | NC_021167.1    | Ca_Kabuli_Chr08 | 14586833                | GG                                     | TT                 | TT               | DRR                           | 101501665          | putative disease resistance RPP13-like protein 1               |
| SNP_60913_A_14590739 | NC_021167.1    | Ca_Kabuli_Chr08 | 14590739                | TT                                     | CC                 | CC               | NON_SYNONYMOUS_CODING         | 101501665          | putative disease resistance RPP13-like protein 1               |
| SNP_60914_A_14601274 | NC_021167.1    | Ca_Kabuli_Chr08 | 14601274                | TT                                     | AA                 | AA               | INTRON                        | 101502099          | NADH dehydrogenase [ubiquinone] 1 beta subcomplex subunit 10-B |
| SNP_60915_A_14601278 | NC_021167.1    | Ca_Kabuli_Chr08 | 14601278                | TT                                     | AA                 | AA               | INTRON                        | 101502099          | NADH dehydrogenase [ubiquinone] 1 beta subcomplex subunit 10-B |
| SNP_60916_A_14603360 | NC_021167.1    | Ca_Kabuli_Chr08 | 14603360                | AA                                     | GG                 | GG               | INTRON                        | 101502099          | NADH dehydrogenase [ubiquinone] 1 beta subcomplex subunit 10-B |
| SNP_60919_A_14608948 | NC_021167.1    | Ca_Kabuli_Chr08 | 14608948                | AA                                     | TT                 | TT               | INTERGENIC                    |                    |                                                                |
| SNP_60920_A_14609018 | NC_021167.1    | Ca_Kabuli_Chr08 | 14609018                | CC                                     | TT                 | TT               | INTERGENIC                    |                    |                                                                |
| SNP_60921_A_14613560 | NC_021167.1    | Ca_Kabuli_Chr08 | 14613560                | AA                                     | GG                 | GG               | INTRON                        | 101502421          | carbon catabolite repressor protein 4 homolog 5                |
| SNP_60923_A_14615058 | NC_021167.1    | Ca_Kabuli_Chr08 | 14615058                | TT                                     | CC                 | CC               | INTRON                        | 101502421          | carbon catabolite repressor protein 4 homolog 5                |
| SNP_60925_A_14617759 | NC_021167.1    | Ca_Kabuli_Chr08 | 14617759                | GG                                     | AA                 | AA               | DRR                           | 101502723          | syntxin-81                                                     |
| SNP_60926_A_14619355 | NC_021167.1    | Ca_Kabuli_Chr08 | 14619355                | GG                                     | AA                 | AA               | INTERGENIC                    |                    |                                                                |
| SNP_60929_A_14629130 | NC_021167.1    | Ca_Kabuli_Chr08 | 14629130                | AA                                     | GG                 | GG               | INTERGENIC                    |                    |                                                                |
| SNP_60930_A_14629508 | NC_021167.1    | Ca_Kabuli_Chr08 | 14629508                | GG                                     | AA                 | AA               | INTERGENIC                    |                    |                                                                |
| SNP_60931_A_14629571 | NC_021167.1    | Ca_Kabuli_Chr08 | 14629571                | GG                                     | AA                 | AA               | INTERGENIC                    |                    |                                                                |

| SNPs IDs             | Chromosome IDs | Chromosomes     | Physical positions (bp) | CDC Frontier genome (Reference genome) | (Pusa 1103 & HPNB) | (ILWC 46 & LPNB) | Sequence genome | Components of | Gene accession IDs | Putative functions                                   |
|----------------------|----------------|-----------------|-------------------------|----------------------------------------|--------------------|------------------|-----------------|---------------|--------------------|------------------------------------------------------|
| SNP_60932_A_14630393 | NC_021167.1    | Ca_Kabuli_Chr08 | 14630393                | AA                                     | CC                 | CC               | INTERGENIC      |               |                    |                                                      |
| SNP_60933_A_14630886 | NC_021167.1    | Ca_Kabuli_Chr08 | 14630886                | CC                                     | GG                 | GG               | DRR             | 101503034     |                    | twinkle homolog protein, chloroplastic/mitochondrial |
| SNP_60934_A_14631138 | NC_021167.1    | Ca_Kabuli_Chr08 | 14631138                | AA                                     | TT                 | TT               | DRR             | 101503034     |                    | twinkle homolog protein, chloroplastic/mitochondrial |
| SNP_60935_A_14631452 | NC_021167.1    | Ca_Kabuli_Chr08 | 14631452                | CC                                     | TT                 | TT               | DRR             | 101503034     |                    | twinkle homolog protein, chloroplastic/mitochondrial |
| SNP_60936_A_14642677 | NC_021167.1    | Ca_Kabuli_Chr08 | 14642677                | GG                                     | CC                 | CC               | URR             | 101503034     |                    | twinkle homolog protein, chloroplastic/mitochondrial |
| SNP_60937_A_14642691 | NC_021167.1    | Ca_Kabuli_Chr08 | 14642691                | CC                                     | TT                 | TT               | URR             | 101503034     |                    | twinkle homolog protein, chloroplastic/mitochondrial |
| SNP_60938_A_14644268 | NC_021167.1    | Ca_Kabuli_Chr08 | 14644268                | GG                                     | AA                 | AA               | INTERGENIC      |               |                    |                                                      |
| SNP_60939_A_14644296 | NC_021167.1    | Ca_Kabuli_Chr08 | 14644296                | GG                                     | AA                 | AA               | INTERGENIC      |               |                    |                                                      |
| SNP_60940_A_14644304 | NC_021167.1    | Ca_Kabuli_Chr08 | 14644304                | CC                                     | TT                 | TT               | INTERGENIC      |               |                    |                                                      |
| SNP_60941_A_14644350 | NC_021167.1    | Ca_Kabuli_Chr08 | 14644350                | GG                                     | AA                 | AA               | INTERGENIC      |               |                    |                                                      |
| SNP_60942_A_14644363 | NC_021167.1    | Ca_Kabuli_Chr08 | 14644363                | CC                                     | TT                 | TT               | INTERGENIC      |               |                    |                                                      |
| SNP_60943_A_14644546 | NC_021167.1    | Ca_Kabuli_Chr08 | 14644546                | AA                                     | GG                 | GG               | INTERGENIC      |               |                    |                                                      |
| SNP_60944_A_14644839 | NC_021167.1    | Ca_Kabuli_Chr08 | 14644839                | TT                                     | AA                 | AA               | INTERGENIC      |               |                    |                                                      |
| SNP_60945_A_14644913 | NC_021167.1    | Ca_Kabuli_Chr08 | 14644913                | CC                                     | GG                 | GG               | INTERGENIC      |               |                    |                                                      |
| SNP_60946_A_14644987 | NC_021167.1    | Ca_Kabuli_Chr08 | 14644987                | GG                                     | AA                 | AA               | INTERGENIC      |               |                    |                                                      |
| SNP_60947_A_14645221 | NC_021167.1    | Ca_Kabuli_Chr08 | 14645221                | GG                                     | AA                 | AA               | INTERGENIC      |               |                    |                                                      |
| SNP_60948_A_14645238 | NC_021167.1    | Ca_Kabuli_Chr08 | 14645238                | GG                                     | AA                 | AA               | INTERGENIC      |               |                    |                                                      |
| SNP_60951_A_14647186 | NC_021167.1    | Ca_Kabuli_Chr08 | 14647186                | GG                                     | AA                 | AA               | INTERGENIC      |               |                    |                                                      |
| SNP_60952_A_14647257 | NC_021167.1    | Ca_Kabuli_Chr08 | 14647257                | CC                                     | TT                 | TT               | INTERGENIC      |               |                    |                                                      |
| SNP_60953_A_14648957 | NC_021167.1    | Ca_Kabuli_Chr08 | 14648957                | CC                                     | TT                 | TT               | INTERGENIC      |               |                    |                                                      |
| SNP_60954_A_14649021 | NC_021167.1    | Ca_Kabuli_Chr08 | 14649021                | GG                                     | TT                 | TT               | INTERGENIC      |               |                    |                                                      |
| SNP_60955_A_14649681 | NC_021167.1    | Ca_Kabuli_Chr08 | 14649681                | AA                                     | CC                 | CC               | INTERGENIC      |               |                    |                                                      |

| SNPs IDs             | Chromosome IDs | Chromosomes     | Physical positions (bp) | CDC Frontier genome (Reference genome) | (Pusa 1103 & HPNB) | (ILWC 46 & LPNB) | Sequence genome | Components of | Gene accession IDs | Putative functions |
|----------------------|----------------|-----------------|-------------------------|----------------------------------------|--------------------|------------------|-----------------|---------------|--------------------|--------------------|
| SNP_60956_A_14649686 | NC_021167.1    | Ca_Kabuli_Chr08 | 14649686                | AA                                     | GG                 | GG               | INTERGENIC      |               |                    |                    |
| SNP_60957_A_14649992 | NC_021167.1    | Ca_Kabuli_Chr08 | 14649992                | TT                                     | CC                 | CC               | INTERGENIC      |               |                    |                    |
| SNP_60958_A_14649997 | NC_021167.1    | Ca_Kabuli_Chr08 | 14649997                | CC                                     | TT                 | TT               | INTERGENIC      |               |                    |                    |
| SNP_60959_A_14650015 | NC_021167.1    | Ca_Kabuli_Chr08 | 14650015                | TT                                     | CC                 | CC               | INTERGENIC      |               |                    |                    |
| SNP_60960_A_14650032 | NC_021167.1    | Ca_Kabuli_Chr08 | 14650032                | TT                                     | CC                 | CC               | INTERGENIC      |               |                    |                    |
| SNP_60961_A_14650157 | NC_021167.1    | Ca_Kabuli_Chr08 | 14650157                | TT                                     | CC                 | CC               | INTERGENIC      |               |                    |                    |
| SNP_60962_A_14650416 | NC_021167.1    | Ca_Kabuli_Chr08 | 14650416                | AA                                     | TT                 | TT               | INTERGENIC      |               |                    |                    |
| SNP_60963_A_14650438 | NC_021167.1    | Ca_Kabuli_Chr08 | 14650438                | TT                                     | AA                 | AA               | INTERGENIC      |               |                    |                    |
| SNP_60964_A_14650738 | NC_021167.1    | Ca_Kabuli_Chr08 | 14650738                | CC                                     | AA                 | AA               | INTERGENIC      |               |                    |                    |
| SNP_60965_A_14652146 | NC_021167.1    | Ca_Kabuli_Chr08 | 14652146                | TT                                     | AA                 | AA               | INTERGENIC      |               |                    |                    |
| SNP_60966_A_14657229 | NC_021167.1    | Ca_Kabuli_Chr08 | 14657229                | TT                                     | AA                 | AA               | INTERGENIC      |               |                    |                    |
| SNP_60967_A_14658844 | NC_021167.1    | Ca_Kabuli_Chr08 | 14658844                | AA                                     | TT                 | TT               | INTERGENIC      |               |                    |                    |
| SNP_60968_A_14658883 | NC_021167.1    | Ca_Kabuli_Chr08 | 14658883                | GG                                     | CC                 | CC               | INTERGENIC      |               |                    |                    |
| SNP_60971_A_14659671 | NC_021167.1    | Ca_Kabuli_Chr08 | 14659671                | AA                                     | GG                 | GG               | INTERGENIC      |               |                    |                    |
| SNP_60972_A_14659899 | NC_021167.1    | Ca_Kabuli_Chr08 | 14659899                | TT                                     | CC                 | CC               | INTERGENIC      |               |                    |                    |
| SNP_60974_A_14660002 | NC_021167.1    | Ca_Kabuli_Chr08 | 14660002                | GG                                     | TT                 | TT               | INTERGENIC      |               |                    |                    |
| SNP_60975_A_14660062 | NC_021167.1    | Ca_Kabuli_Chr08 | 14660062                | GG                                     | AA                 | AA               | INTERGENIC      |               |                    |                    |
| SNP_60976_A_14660089 | NC_021167.1    | Ca_Kabuli_Chr08 | 14660089                | TT                                     | GG                 | GG               | INTERGENIC      |               |                    |                    |
| SNP_60977_A_14660372 | NC_021167.1    | Ca_Kabuli_Chr08 | 14660372                | AA                                     | GG                 | GG               | INTERGENIC      |               |                    |                    |
| SNP_60978_A_14660558 | NC_021167.1    | Ca_Kabuli_Chr08 | 14660558                | TT                                     | CC                 | CC               | INTERGENIC      |               |                    |                    |
| SNP_60979_A_14660679 | NC_021167.1    | Ca_Kabuli_Chr08 | 14660679                | CC                                     | TT                 | TT               | INTERGENIC      |               |                    |                    |
| SNP_60980_A_14660680 | NC_021167.1    | Ca_Kabuli_Chr08 | 14660680                | CC                                     | GG                 | GG               | INTERGENIC      |               |                    |                    |

| SNPs IDs             | Chromosome IDs | Chromosomes     | Physical positions (bp) | CDC Frontier (Reference genome) | (Pusa 1103 & HPNB) | (ILWC 46 & LPNB) | Sequence genome | Components of | Gene accession IDs           | Putative functions |
|----------------------|----------------|-----------------|-------------------------|---------------------------------|--------------------|------------------|-----------------|---------------|------------------------------|--------------------|
| SNP_60981_A_14660711 | NC_021167.1    | Ca_Kabuli_Chr08 | 14660711                | GG                              | AA                 | AA               | INTERGENIC      |               |                              |                    |
| SNP_60982_A_14660713 | NC_021167.1    | Ca_Kabuli_Chr08 | 14660713                | TT                              | AA                 | AA               | INTERGENIC      |               |                              |                    |
| SNP_60983_A_14660718 | NC_021167.1    | Ca_Kabuli_Chr08 | 14660718                | CC                              | AA                 | AA               | INTERGENIC      |               |                              |                    |
| SNP_60984_A_14660728 | NC_021167.1    | Ca_Kabuli_Chr08 | 14660728                | AA                              | TT                 | TT               | INTERGENIC      |               |                              |                    |
| SNP_60985_A_14660766 | NC_021167.1    | Ca_Kabuli_Chr08 | 14660766                | GG                              | AA                 | AA               | INTERGENIC      |               |                              |                    |
| SNP_60988_A_14662257 | NC_021167.1    | Ca_Kabuli_Chr08 | 14662257                | CC                              | TT                 | TT               | INTERGENIC      |               |                              |                    |
| SNP_60989_A_14662284 | NC_021167.1    | Ca_Kabuli_Chr08 | 14662284                | CC                              | TT                 | TT               | INTERGENIC      |               |                              |                    |
| SNP_60990_A_14662646 | NC_021167.1    | Ca_Kabuli_Chr08 | 14662646                | AA                              | GG                 | GG               | INTERGENIC      |               |                              |                    |
| SNP_60991_A_14662658 | NC_021167.1    | Ca_Kabuli_Chr08 | 14662658                | TT                              | CC                 | CC               | INTERGENIC      |               |                              |                    |
| SNP_60992_A_14662669 | NC_021167.1    | Ca_Kabuli_Chr08 | 14662669                | AA                              | GG                 | GG               | INTERGENIC      |               |                              |                    |
| SNP_60993_A_14662687 | NC_021167.1    | Ca_Kabuli_Chr08 | 14662687                | AA                              | GG                 | GG               | INTERGENIC      |               |                              |                    |
| SNP_60994_A_14665127 | NC_021167.1    | Ca_Kabuli_Chr08 | 14665127                | TT                              | AA                 | AA               | INTERGENIC      |               |                              |                    |
| SNP_60995_A_14668645 | NC_021167.1    | Ca_Kabuli_Chr08 | 14668645                | AA                              | GG                 | GG               | INTERGENIC      |               |                              |                    |
| SNP_60996_A_14671284 | NC_021167.1    | Ca_Kabuli_Chr08 | 14671284                | TT                              | CC                 | CC               | INTERGENIC      |               |                              |                    |
| SNP_60997_A_14671359 | NC_021167.1    | Ca_Kabuli_Chr08 | 14671359                | GG                              | AA                 | AA               | INTERGENIC      |               |                              |                    |
| SNP_60998_A_14671414 | NC_021167.1    | Ca_Kabuli_Chr08 | 14671414                | TT                              | AA                 | AA               | INTERGENIC      |               |                              |                    |
| SNP_61000_A_14671496 | NC_021167.1    | Ca_Kabuli_Chr08 | 14671496                | GG                              | AA                 | AA               | INTERGENIC      |               |                              |                    |
| SNP_61001_A_14676664 | NC_021167.1    | Ca_Kabuli_Chr08 | 14676664                | GG                              | AA                 | AA               | INTERGENIC      |               |                              |                    |
| SNP_61002_A_14677637 | NC_021167.1    | Ca_Kabuli_Chr08 | 14677637                | AA                              | CC                 | CC               | INTERGENIC      |               |                              |                    |
| SNP_61003_A_14680960 | NC_021167.1    | Ca_Kabuli_Chr08 | 14680960                | TT                              | AA                 | AA               | DRR             | 101503361     | uncharacterized LOC101503361 |                    |
| SNP_61004_A_14682751 | NC_021167.1    | Ca_Kabuli_Chr08 | 14682751                | GG                              | TT                 | TT               | URR             | 101503361     | uncharacterized LOC101503361 |                    |
| SNP_61005_A_14683515 | NC_021167.1    | Ca_Kabuli_Chr08 | 14683515                | CC                              | TT                 | TT               | URR             | 101503361     | uncharacterized LOC101503361 |                    |

| SNPs IDs             | Chromosome IDs | Chromosomes     | Physical positions (bp) | CDC Frontier genome (Reference genome) | (Pusa 1103 & HPNB) | (ILWC 46 & LPNB) | Sequence Components of genome | Gene accession IDs | Putative functions                            |
|----------------------|----------------|-----------------|-------------------------|----------------------------------------|--------------------|------------------|-------------------------------|--------------------|-----------------------------------------------|
| SNP_61006_A_14686736 | NC_021167.1    | Ca_Kabuli_Chr08 | 14686736                | AA                                     | GG                 | GG               | INTERGENIC                    |                    |                                               |
| SNP_61007_A_14686797 | NC_021167.1    | Ca_Kabuli_Chr08 | 14686797                | CC                                     | TT                 | TT               | INTERGENIC                    |                    |                                               |
| SNP_61009_A_14688513 | NC_021167.1    | Ca_Kabuli_Chr08 | 14688513                | GG                                     | AA                 | AA               | INTERGENIC                    |                    |                                               |
| SNP_61010_A_14692001 | NC_021167.1    | Ca_Kabuli_Chr08 | 14692001                | CC                                     | TT                 | TT               | INTRON                        | 101503700          | uncharacterized LOC101503700                  |
| SNP_61011_A_14692022 | NC_021167.1    | Ca_Kabuli_Chr08 | 14692022                | CC                                     | GG                 | GG               | INTRON                        | 101503700          | uncharacterized LOC101503700                  |
| SNP_61012_A_14693453 | NC_021167.1    | Ca_Kabuli_Chr08 | 14693453                | TT                                     | CC                 | CC               | INTERGENIC                    |                    |                                               |
| SNP_61013_A_14693509 | NC_021167.1    | Ca_Kabuli_Chr08 | 14693509                | CC                                     | GG                 | GG               | INTERGENIC                    |                    |                                               |
| SNP_61014_A_14699588 | NC_021167.1    | Ca_Kabuli_Chr08 | 14699588                | GG                                     | TT                 | TT               | URR                           | 101504022          | uncharacterized LOC101504022                  |
| SNP_61015_A_14702517 | NC_021167.1    | Ca_Kabuli_Chr08 | 14702517                | TT                                     | CC                 | CC               | INTERGENIC                    |                    |                                               |
| SNP_61016_A_14704940 | NC_021167.1    | Ca_Kabuli_Chr08 | 14704940                | TT                                     | CC                 | CC               | INTRON                        | 101504670          | aluminum-activated malate transporter 9-like  |
| SNP_61017_A_14704941 | NC_021167.1    | Ca_Kabuli_Chr08 | 14704941                | AA                                     | GG                 | GG               | INTRON                        | 101504670          | aluminum-activated malate transporter 9-like  |
| SNP_61018_A_14704953 | NC_021167.1    | Ca_Kabuli_Chr08 | 14704953                | CC                                     | TT                 | TT               | INTRON                        | 101504670          | aluminum-activated malate transporter 9-like  |
| SNP_61019_A_14705604 | NC_021167.1    | Ca_Kabuli_Chr08 | 14705604                | AA                                     | GG                 | GG               | INTRON                        | 101504670          | aluminum-activated malate transporter 9-like  |
| SNP_61020_A_14705736 | NC_021167.1    | Ca_Kabuli_Chr08 | 14705736                | TT                                     | CC                 | CC               | INTRON                        | 101504670          | aluminum-activated malate transporter 9-like  |
| SNP_61021_A_14705785 | NC_021167.1    | Ca_Kabuli_Chr08 | 14705785                | GG                                     | AA                 | AA               | INTRON                        | 101504670          | aluminum-activated malate transporter 9-like  |
| SNP_61022_A_14706496 | NC_021167.1    | Ca_Kabuli_Chr08 | 14706496                | GG                                     | TT                 | TT               | INTRON                        | 101504670          | aluminum-activated malate transporter 9-like  |
| SNP_61023_A_14707815 | NC_021167.1    | Ca_Kabuli_Chr08 | 14707815                | TT                                     | AA                 | AA               | INTRON                        | 101504670          | aluminum-activated malate transporter 9-like  |
| SNP_61025_A_14710229 | NC_021167.1    | Ca_Kabuli_Chr08 | 14710229                | TT                                     | AA                 | AA               | DRR                           | 101504990          | protein phosphatase PP2A regulatory subunit A |
| SNP_61026_A_14710244 | NC_021167.1    | Ca_Kabuli_Chr08 | 14710244                | TT                                     | CC                 | CC               | DRR                           | 101504990          | protein phosphatase PP2A regulatory subunit A |
| SNP_61027_A_14710506 | NC_021167.1    | Ca_Kabuli_Chr08 | 14710506                | GG                                     | TT                 | TT               | URR                           | 101504670          | aluminum-activated malate transporter 9-like  |
| SNP_61028_A_14712192 | NC_021167.1    | Ca_Kabuli_Chr08 | 14712192                | AA                                     | CC                 | CC               | INTERGENIC                    |                    |                                               |
| SNP_61029_A_14713153 | NC_021167.1    | Ca_Kabuli_Chr08 | 14713153                | TT                                     | CC                 | CC               | INTERGENIC                    |                    |                                               |

| SNPs IDs             | Chromosome IDs | Chromosomes     | Physical positions (bp) | CDC Frontier genome (Reference genome) | (Pusa 1103 & HPNB) | (ILWC 46 & LPNB) | Sequence Components of genome | Gene accession IDs | Putative functions             |
|----------------------|----------------|-----------------|-------------------------|----------------------------------------|--------------------|------------------|-------------------------------|--------------------|--------------------------------|
| SNP_61031_A_14713474 | NC_021167.1    | Ca_Kabuli_Chr08 | 14713474                | GG                                     | AA                 | AA               | INTERGENIC                    |                    |                                |
| SNP_61032_A_14722171 | NC_021167.1    | Ca_Kabuli_Chr08 | 14722171                | CC                                     | TT                 | TT               | INTRON                        | 101497154          | aspartic proteinase Asp1       |
| SNP_61033_A_14722204 | NC_021167.1    | Ca_Kabuli_Chr08 | 14722204                | TT                                     | AA                 | AA               | INTRON                        | 101497154          | aspartic proteinase Asp1       |
| SNP_61034_A_14722242 | NC_021167.1    | Ca_Kabuli_Chr08 | 14722242                | CC                                     | TT                 | TT               | INTRON                        | 101497154          | aspartic proteinase Asp1       |
| SNP_61036_A_14723003 | NC_021167.1    | Ca_Kabuli_Chr08 | 14723003                | TT                                     | AA                 | AA               | INTRON                        | 101497154          | aspartic proteinase Asp1       |
| SNP_61037_A_14723025 | NC_021167.1    | Ca_Kabuli_Chr08 | 14723025                | TT                                     | AA                 | AA               | INTRON                        | 101497154          | aspartic proteinase Asp1       |
| SNP_61038_A_14723066 | NC_021167.1    | Ca_Kabuli_Chr08 | 14723066                | TT                                     | AA                 | AA               | INTRON                        | 101497154          | aspartic proteinase Asp1       |
| SNP_61039_A_14727786 | NC_021167.1    | Ca_Kabuli_Chr08 | 14727786                | GG                                     | TT                 | TT               | URR                           | 101497154          | aspartic proteinase Asp1       |
| SNP_61040_A_14729155 | NC_021167.1    | Ca_Kabuli_Chr08 | 14729155                | CC                                     | TT                 | TT               | DRR                           | 101505303          | cytochrome P450 CYP736A12-like |
| SNP_61041_A_14729470 | NC_021167.1    | Ca_Kabuli_Chr08 | 14729470                | TT                                     | CC                 | CC               | SYNONYMOUS_CODING             | 101505303          | cytochrome P450 CYP736A12-like |
| SNP_61042_A_14730234 | NC_021167.1    | Ca_Kabuli_Chr08 | 14730234                | AA                                     | GG                 | GG               | INTRON                        | 101505303          | cytochrome P450 CYP736A12-like |
| SNP_61043_A_14730286 | NC_021167.1    | Ca_Kabuli_Chr08 | 14730286                | CC                                     | TT                 | TT               | INTRON                        | 101505303          | cytochrome P450 CYP736A12-like |
| SNP_61044_A_14730308 | NC_021167.1    | Ca_Kabuli_Chr08 | 14730308                | CC                                     | TT                 | TT               | INTRON                        | 101505303          | cytochrome P450 CYP736A12-like |
| SNP_61045_A_14730318 | NC_021167.1    | Ca_Kabuli_Chr08 | 14730318                | AA                                     | TT                 | TT               | INTRON                        | 101505303          | cytochrome P450 CYP736A12-like |
| SNP_61046_A_14730322 | NC_021167.1    | Ca_Kabuli_Chr08 | 14730322                | AA                                     | TT                 | TT               | INTRON                        | 101505303          | cytochrome P450 CYP736A12-like |
| SNP_61047_A_14733030 | NC_021167.1    | Ca_Kabuli_Chr08 | 14733030                | GG                                     | AA                 | AA               | URR                           | 101505303          | cytochrome P450 CYP736A12-like |
| SNP_61049_A_14734187 | NC_021167.1    | Ca_Kabuli_Chr08 | 14734187                | AA                                     | TT                 | TT               | INTERGENIC                    |                    |                                |
| SNP_61050_A_14736657 | NC_021167.1    | Ca_Kabuli_Chr08 | 14736657                | AA                                     | GG                 | GG               | SYNONYMOUS_CODING             | 101505636          | cytochrome P450 CYP736A12-like |
| SNP_61051_A_14737200 | NC_021167.1    | Ca_Kabuli_Chr08 | 14737200                | CC                                     | GG                 | GG               | INTRON                        | 101505636          | cytochrome P450 CYP736A12-like |
| SNP_61052_A_14737201 | NC_021167.1    | Ca_Kabuli_Chr08 | 14737201                | AA                                     | TT                 | TT               | INTRON                        | 101505636          | cytochrome P450 CYP736A12-like |
| SNP_61053_A_14737388 | NC_021167.1    | Ca_Kabuli_Chr08 | 14737388                | GG                                     | TT                 | TT               | INTRON                        | 101505636          | cytochrome P450 CYP736A12-like |
| SNP_61055_A_14737574 | NC_021167.1    | Ca_Kabuli_Chr08 | 14737574                | GG                                     | TT                 | TT               | INTRON                        | 101505636          | cytochrome P450 CYP736A12-like |

| SNPs IDs             | Chromosome IDs | Chromosomes     | Physical positions (bp) | CDC Frontier genome (Reference genome) | (Pusa 1103 & HPNB) | (ILWC 46 & LPNB) | Sequence Components of genome | Gene accession IDs | Putative functions                                         |
|----------------------|----------------|-----------------|-------------------------|----------------------------------------|--------------------|------------------|-------------------------------|--------------------|------------------------------------------------------------|
| SNP_61056_A_14739959 | NC_021167.1    | Ca_Kabuli_Chr08 | 14739959                | AA                                     | TT                 | TT               | INTRON                        | 101505636          | cytochrome P450 CYP736A12-like                             |
| SNP_61058_A_14746748 | NC_021167.1    | Ca_Kabuli_Chr08 | 14746748                | CC                                     | TT                 | TT               | URR                           | 101505636          | cytochrome P450 CYP736A12-like                             |
| SNP_61060_A_14748193 | NC_021167.1    | Ca_Kabuli_Chr08 | 14748193                | GG                                     | AA                 | AA               | INTRON                        | 101505961          | probable 3-beta-hydroxysteroid-Delta(8),Delta(7)-isomerase |
| SNP_61062_A_14751425 | NC_021167.1    | Ca_Kabuli_Chr08 | 14751425                | CC                                     | TT                 | TT               | INTERGENIC                    |                    |                                                            |
| SNP_61063_A_14751445 | NC_021167.1    | Ca_Kabuli_Chr08 | 14751445                | GG                                     | CC                 | CC               | INTERGENIC                    |                    |                                                            |
| SNP_61064_A_14751468 | NC_021167.1    | Ca_Kabuli_Chr08 | 14751468                | AA                                     | GG                 | GG               | URR                           | 101506269          | protein PLANT CADMIUM RESISTANCE 9                         |
| SNP_61065_A_14751534 | NC_021167.1    | Ca_Kabuli_Chr08 | 14751534                | GG                                     | TT                 | TT               | DRR                           | 101506593          | proteasome subunit beta type-4-like                        |
| SNP_61066_A_14751537 | NC_021167.1    | Ca_Kabuli_Chr08 | 14751537                | CC                                     | AA                 | AA               | DRR                           | 101506593          | proteasome subunit beta type-4-like                        |
| SNP_61067_A_14751573 | NC_021167.1    | Ca_Kabuli_Chr08 | 14751573                | CC                                     | TT                 | TT               | DRR                           | 101506593          | proteasome subunit beta type-4-like                        |
| SNP_61069_A_14753088 | NC_021167.1    | Ca_Kabuli_Chr08 | 14753088                | TT                                     | AA                 | AA               | URR                           | 101506269          | protein PLANT CADMIUM RESISTANCE 9                         |
| SNP_61070_A_14753515 | NC_021167.1    | Ca_Kabuli_Chr08 | 14753515                | GG                                     | AA                 | AA               | INTERGENIC                    |                    |                                                            |
| SNP_61071_A_14753542 | NC_021167.1    | Ca_Kabuli_Chr08 | 14753542                | GG                                     | TT                 | TT               | INTERGENIC                    |                    |                                                            |
| SNP_61072_A_14753763 | NC_021167.1    | Ca_Kabuli_Chr08 | 14753763                | TT                                     | CC                 | CC               | INTERGENIC                    |                    |                                                            |
| SNP_61073_A_14753774 | NC_021167.1    | Ca_Kabuli_Chr08 | 14753774                | AA                                     | GG                 | GG               | INTERGENIC                    |                    |                                                            |
| SNP_61074_A_14756778 | NC_021167.1    | Ca_Kabuli_Chr08 | 14756778                | TT                                     | AA                 | AA               | URR                           | 101506593          | proteasome subunit beta type-4-like                        |
| SNP_61075_A_14757491 | NC_021167.1    | Ca_Kabuli_Chr08 | 14757491                | AA                                     | TT                 | TT               | DRR                           | 101506927          | 40S ribosomal protein S7-1-like                            |
| SNP_61076_A_14758088 | NC_021167.1    | Ca_Kabuli_Chr08 | 14758088                | TT                                     | CC                 | CC               | DRR                           | 101506927          | 40S ribosomal protein S7-1-like                            |
| SNP_61077_A_14760129 | NC_021167.1    | Ca_Kabuli_Chr08 | 14760129                | AA                                     | TT                 | TT               | INTERGENIC                    |                    |                                                            |
| SNP_61078_A_14760722 | NC_021167.1    | Ca_Kabuli_Chr08 | 14760722                | GG                                     | AA                 | AA               | INTERGENIC                    |                    |                                                            |
| SNP_61079_A_14760725 | NC_021167.1    | Ca_Kabuli_Chr08 | 14760725                | GG                                     | AA                 | AA               | INTERGENIC                    |                    |                                                            |
| SNP_61081_A_14764539 | NC_021167.1    | Ca_Kabuli_Chr08 | 14764539                | CC                                     | GG                 | GG               | INTERGENIC                    |                    |                                                            |
| SNP_61082_A_14764540 | NC_021167.1    | Ca_Kabuli_Chr08 | 14764540                | AA                                     | CC                 | CC               | INTERGENIC                    |                    |                                                            |



| SNPs IDs             | Chromosome IDs | Chromosomes     | Physical positions (bp) | CDC Frontier genome (Reference genome) | (Pusa 1103 & HPNB) | (ILWC 46 & LPNB) | Sequence Components of genome | Gene accession IDs | Putative functions                        |
|----------------------|----------------|-----------------|-------------------------|----------------------------------------|--------------------|------------------|-------------------------------|--------------------|-------------------------------------------|
| SNP_61083_A_14764573 | NC_021167.1    | Ca_Kabuli_Chr08 | 14764573                | AA                                     | CC                 | CC               | DRR                           | 101497486          | Unknown function                          |
| SNP_61085_A_14770799 | NC_021167.1    | Ca_Kabuli_Chr08 | 14770799                | CC                                     | GG                 | GG               | URR                           | 101507255          | protein ASPARTIC PROTEASE IN GUARD CELL 1 |
| SNP_61086_A_14772050 | NC_021167.1    | Ca_Kabuli_Chr08 | 14772050                | CC                                     | AA                 | AA               | URR                           | 101507255          | protein ASPARTIC PROTEASE IN GUARD CELL 1 |
| SNP_61087_A_14774864 | NC_021167.1    | Ca_Kabuli_Chr08 | 14774864                | CC                                     | TT                 | TT               | INTERGENIC                    |                    |                                           |
| SNP_61088_A_14774896 | NC_021167.1    | Ca_Kabuli_Chr08 | 14774896                | CC                                     | TT                 | TT               | INTERGENIC                    |                    |                                           |
| SNP_61089_A_14777995 | NC_021167.1    | Ca_Kabuli_Chr08 | 14777995                | CC                                     | AA                 | AA               | DRR                           | 101507569          | uncharacterized LOC101507569              |
| SNP_61091_A_14778056 | NC_021167.1    | Ca_Kabuli_Chr08 | 14778056                | CC                                     | TT                 | TT               | DRR                           | 101507569          | uncharacterized LOC101507569              |
| SNP_61092_A_14778062 | NC_021167.1    | Ca_Kabuli_Chr08 | 14778062                | AA                                     | GG                 | GG               | DRR                           | 101507569          | uncharacterized LOC101507569              |
| SNP_61093_A_14778120 | NC_021167.1    | Ca_Kabuli_Chr08 | 14778120                | CC                                     | TT                 | TT               | DRR                           | 101507569          | uncharacterized LOC101507569              |
| SNP_61094_A_14778129 | NC_021167.1    | Ca_Kabuli_Chr08 | 14778129                | CC                                     | TT                 | TT               | DRR                           | 101507569          | uncharacterized LOC101507569              |
| SNP_61095_A_14778141 | NC_021167.1    | Ca_Kabuli_Chr08 | 14778141                | AA                                     | GG                 | GG               | DRR                           | 101507569          | uncharacterized LOC101507569              |
| SNP_61096_A_14778259 | NC_021167.1    | Ca_Kabuli_Chr08 | 14778259                | GG                                     | TT                 | TT               | DRR                           | 101507569          | uncharacterized LOC101507569              |
| SNP_61097_A_14778260 | NC_021167.1    | Ca_Kabuli_Chr08 | 14778260                | CC                                     | TT                 | TT               | DRR                           | 101507569          | uncharacterized LOC101507569              |
| SNP_61098_A_14779778 | NC_021167.1    | Ca_Kabuli_Chr08 | 14779778                | TT                                     | AA                 | AA               | INTRON                        | 101507569          | uncharacterized LOC101507569              |
| SNP_61099_A_14779818 | NC_021167.1    | Ca_Kabuli_Chr08 | 14779818                | CC                                     | AA                 | AA               | INTRON                        | 101507569          | uncharacterized LOC101507569              |
| SNP_61100_A_14779819 | NC_021167.1    | Ca_Kabuli_Chr08 | 14779819                | TT                                     | GG                 | GG               | INTRON                        | 101507569          | uncharacterized LOC101507569              |
| SNP_61101_A_14779824 | NC_021167.1    | Ca_Kabuli_Chr08 | 14779824                | CC                                     | AA                 | AA               | INTRON                        | 101507569          | uncharacterized LOC101507569              |
| SNP_61102_A_14779843 | NC_021167.1    | Ca_Kabuli_Chr08 | 14779843                | CC                                     | TT                 | TT               | INTRON                        | 101507569          | uncharacterized LOC101507569              |
| SNP_61103_A_14779890 | NC_021167.1    | Ca_Kabuli_Chr08 | 14779890                | TT                                     | AA                 | AA               | INTRON                        | 101507569          | uncharacterized LOC101507569              |
| SNP_61104_A_14780266 | NC_021167.1    | Ca_Kabuli_Chr08 | 14780266                | TT                                     | CC                 | CC               | INTRON                        | 101507569          | uncharacterized LOC101507569              |
| SNP_61105_A_14780277 | NC_021167.1    | Ca_Kabuli_Chr08 | 14780277                | GG                                     | CC                 | CC               | INTRON                        | 101507569          | uncharacterized LOC101507569              |
| SNP_61106_A_14780500 | NC_021167.1    | Ca_Kabuli_Chr08 | 14780500                | AA                                     | TT                 | TT               | NON_SYNONYMOUS_CODING         | 101507569          | uncharacterized LOC101507569              |

| SNPs IDs             | Chromosome IDs | Chromosomes     | Physical positions (bp) | CDC Frontier (Reference genome) | (Pusa 1103 & HPNB) | (ILWC 46 & LPNB) | Sequence Components of genome | Gene accession IDs | Putative functions                          |
|----------------------|----------------|-----------------|-------------------------|---------------------------------|--------------------|------------------|-------------------------------|--------------------|---------------------------------------------|
| SNP_61108_A_14780571 | NC_021167.1    | Ca_Kabuli_Chr08 | 14780571                | AA                              | GG                 | GG               | INTRON                        | 101507569          | uncharacterized LOC101507569                |
| SNP_61109_A_14780578 | NC_021167.1    | Ca_Kabuli_Chr08 | 14780578                | TT                              | AA                 | AA               | INTRON                        | 101507569          | uncharacterized LOC101507569                |
| SNP_61111_A_14781238 | NC_021167.1    | Ca_Kabuli_Chr08 | 14781238                | TT                              | CC                 | CC               | URR                           | 101507569          | uncharacterized LOC101507569                |
| SNP_61112_A_14781264 | NC_021167.1    | Ca_Kabuli_Chr08 | 14781264                | TT                              | AA                 | AA               | URR                           | 101507569          | uncharacterized LOC101507569                |
| SNP_61113_A_14781265 | NC_021167.1    | Ca_Kabuli_Chr08 | 14781265                | AA                              | TT                 | TT               | URR                           | 101507569          | uncharacterized LOC101507569                |
| SNP_61114_A_14781302 | NC_021167.1    | Ca_Kabuli_Chr08 | 14781302                | TT                              | CC                 | CC               | URR                           | 101507569          | uncharacterized LOC101507569                |
| SNP_61115_A_14782240 | NC_021167.1    | Ca_Kabuli_Chr08 | 14782240                | AA                              | GG                 | GG               | URR                           | 101507569          | uncharacterized LOC101507569                |
| SNP_61116_A_14783282 | NC_021167.1    | Ca_Kabuli_Chr08 | 14783282                | AA                              | GG                 | GG               | INTERGENIC                    |                    |                                             |
| SNP_61117_A_14783316 | NC_021167.1    | Ca_Kabuli_Chr08 | 14783316                | TT                              | CC                 | CC               | INTERGENIC                    |                    |                                             |
| SNP_61118_A_14783323 | NC_021167.1    | Ca_Kabuli_Chr08 | 14783323                | AA                              | GG                 | GG               | INTERGENIC                    |                    |                                             |
| SNP_61120_A_14783383 | NC_021167.1    | Ca_Kabuli_Chr08 | 14783383                | GG                              | CC                 | CC               | INTERGENIC                    |                    |                                             |
| SNP_61121_A_14785293 | NC_021167.1    | Ca_Kabuli_Chr08 | 14785293                | GG                              | AA                 | AA               | INTERGENIC                    |                    |                                             |
| SNP_61122_A_14789383 | NC_021167.1    | Ca_Kabuli_Chr08 | 14789383                | TT                              | CC                 | CC               | INTERGENIC                    |                    |                                             |
| SNP_61123_A_14794077 | NC_021167.1    | Ca_Kabuli_Chr08 | 14794077                | TT                              | GG                 | GG               | INTERGENIC                    |                    |                                             |
| SNP_61124_A_14803607 | NC_021167.1    | Ca_Kabuli_Chr08 | 14803607                | GG                              | AA                 | AA               | INTERGENIC                    |                    |                                             |
| SNP_61125_A_14803624 | NC_021167.1    | Ca_Kabuli_Chr08 | 14803624                | TT                              | GG                 | GG               | INTERGENIC                    |                    |                                             |
| SNP_61126_A_14803643 | NC_021167.1    | Ca_Kabuli_Chr08 | 14803643                | TT                              | AA                 | AA               | INTERGENIC                    |                    |                                             |
| SNP_61127_A_14803850 | NC_021167.1    | Ca_Kabuli_Chr08 | 14803850                | CC                              | TT                 | TT               | INTERGENIC                    |                    |                                             |
| SNP_61128_A_14808038 | NC_021167.1    | Ca_Kabuli_Chr08 | 14808038                | CC                              | TT                 | TT               | INTERGENIC                    |                    |                                             |
| SNP_61130_A_14808823 | NC_021167.1    | Ca_Kabuli_Chr08 | 14808823                | GG                              | AA                 | AA               | URR                           | 101508195          | nudix hydrolase 20, chloroplastic-like      |
| SNP_61131_A_14813023 | NC_021167.1    | Ca_Kabuli_Chr08 | 14813023                | AA                              | CC                 | CC               | INTRON                        | 101508520          | probable strigolactone esterase D14 homolog |
| SNP_61132_A_14813024 | NC_021167.1    | Ca_Kabuli_Chr08 | 14813024                | GG                              | AA                 | AA               | INTRON                        | 101508520          | probable strigolactone esterase D14 homolog |

| SNPs IDs             | Chromosome IDs | Chromosomes     | Physical positions (bp) | CDC Frontier genome (Reference genome) | (Pusa 1103 & HPNB) | (ILWC 46 & LPNB) | Sequence Components of genome | Gene accession IDs | Putative functions                                               |
|----------------------|----------------|-----------------|-------------------------|----------------------------------------|--------------------|------------------|-------------------------------|--------------------|------------------------------------------------------------------|
| SNP_61133_A_14813025 | NC_021167.1    | Ca_Kabuli_Chr08 | 14813025                | CC                                     | TT                 | TT               | INTRON                        | 101508520          | probable strigolactone esterase D14 homolog                      |
| SNP_61134_A_14813032 | NC_021167.1    | Ca_Kabuli_Chr08 | 14813032                | GG                                     | CC                 | CC               | INTRON                        | 101508520          | probable strigolactone esterase D14 homolog                      |
| SNP_61135_A_14813038 | NC_021167.1    | Ca_Kabuli_Chr08 | 14813038                | GG                                     | AA                 | AA               | INTRON                        | 101508520          | probable strigolactone esterase D14 homolog                      |
| SNP_61136_A_14813047 | NC_021167.1    | Ca_Kabuli_Chr08 | 14813047                | AA                                     | CC                 | CC               | INTRON                        | 101508520          | probable strigolactone esterase D14 homolog                      |
| SNP_61137_A_14813059 | NC_021167.1    | Ca_Kabuli_Chr08 | 14813059                | AA                                     | GG                 | GG               | INTRON                        | 101508520          | probable strigolactone esterase D14 homolog                      |
| SNP_61138_A_14813071 | NC_021167.1    | Ca_Kabuli_Chr08 | 14813071                | AA                                     | GG                 | GG               | INTRON                        | 101508520          | probable strigolactone esterase D14 homolog                      |
| SNP_61139_A_14813690 | NC_021167.1    | Ca_Kabuli_Chr08 | 14813690                | TT                                     | CC                 | CC               | INTRON                        | 101508520          | probable strigolactone esterase D14 homolog                      |
| SNP_61140_A_14813713 | NC_021167.1    | Ca_Kabuli_Chr08 | 14813713                | TT                                     | AA                 | AA               | INTRON                        | 101508520          | probable strigolactone esterase D14 homolog                      |
| SNP_61141_A_14813714 | NC_021167.1    | Ca_Kabuli_Chr08 | 14813714                | AA                                     | CC                 | CC               | INTRON                        | 101508520          | probable strigolactone esterase D14 homolog                      |
| SNP_61142_A_14814805 | NC_021167.1    | Ca_Kabuli_Chr08 | 14814805                | AA                                     | GG                 | GG               | INTRON                        | 101508520          | probable strigolactone esterase D14 homolog                      |
| SNP_61145_A_14821619 | NC_021167.1    | Ca_Kabuli_Chr08 | 14821619                | TT                                     | CC                 | CC               | INTRON                        | 101508833          | fe-S cluster assembly factor HCF101, chloroplastic               |
| SNP_61146_A_14821620 | NC_021167.1    | Ca_Kabuli_Chr08 | 14821620                | AA                                     | TT                 | TT               | INTRON                        | 101508833          | fe-S cluster assembly factor HCF101, chloroplastic               |
| SNP_61147_A_14821644 | NC_021167.1    | Ca_Kabuli_Chr08 | 14821644                | AA                                     | TT                 | TT               | INTRON                        | 101508833          | fe-S cluster assembly factor HCF101, chloroplastic               |
| SNP_61148_A_14824133 | NC_021167.1    | Ca_Kabuli_Chr08 | 14824133                | AA                                     | GG                 | GG               | SYNONYMOUS_CODING             | 101508833          | fe-S cluster assembly factor HCF101, chloroplastic               |
| SNP_61149_A_14866748 | NC_021167.1    | Ca_Kabuli_Chr08 | 14866748                | TT                                     | CC                 | CC               | URR                           | 101510668          | probable ADP-ribosylation factor GTPase-activating protein AGD14 |
| SNP_61150_A_14883324 | NC_021167.1    | Ca_Kabuli_Chr08 | 14883324                | GG                                     | AA                 | AA               | INTERGENIC                    |                    |                                                                  |
| SNP_61151_A_14883521 | NC_021167.1    | Ca_Kabuli_Chr08 | 14883521                | GG                                     | TT                 | TT               | INTERGENIC                    |                    |                                                                  |
| SNP_61152_A_14908726 | NC_021167.1    | Ca_Kabuli_Chr08 | 14908726                | TT                                     | AA                 | AA               | INTERGENIC                    |                    |                                                                  |
| SNP_61156_A_14941368 | NC_021167.1    | Ca_Kabuli_Chr08 | 14941368                | TT                                     | CC                 | CC               | INTERGENIC                    |                    |                                                                  |
| SNP_61157_A_14970874 | NC_021167.1    | Ca_Kabuli_Chr08 | 14970874                | GG                                     | CC                 | CC               | INTRON                        | 101513237          | DNA mismatch repair protein MSH7                                 |
| SNP_61159_A_15022913 | NC_021167.1    | Ca_Kabuli_Chr08 | 15022913                | TT                                     | CC                 | CC               | INTERGENIC                    |                    |                                                                  |
| SNP_61161_A_15052119 | NC_021167.1    | Ca_Kabuli_Chr08 | 15052119                | TT                                     | CC                 | CC               | INTERGENIC                    |                    |                                                                  |

| SNPs IDs             | Chromosome IDs | Chromosomes     | Physical positions (bp) | CDC Frontier (Reference genome) | (Pusa 1103 & HPNB) | (ILWC 46 & LPNB) | Sequence Components of genome | Gene accession IDs | Putative functions                |
|----------------------|----------------|-----------------|-------------------------|---------------------------------|--------------------|------------------|-------------------------------|--------------------|-----------------------------------|
| SNP_61162_A_15052701 | NC_021167.1    | Ca_Kabuli_Chr08 | 15052701                | TT                              | CC                 | CC               | INTERGENIC                    |                    |                                   |
| SNP_61163_A_15053169 | NC_021167.1    | Ca_Kabuli_Chr08 | 15053169                | TT                              | GG                 | GG               | INTERGENIC                    |                    |                                   |
| SNP_61164_A_15054260 | NC_021167.1    | Ca_Kabuli_Chr08 | 15054260                | CC                              | TT                 | TT               | INTERGENIC                    |                    |                                   |
| SNP_61165_A_15055797 | NC_021167.1    | Ca_Kabuli_Chr08 | 15055797                | TT                              | GG                 | GG               | INTERGENIC                    |                    |                                   |
| SNP_61166_A_15154725 | NC_021167.1    | Ca_Kabuli_Chr08 | 15154725                | AA                              | CC                 | CC               | INTERGENIC                    |                    |                                   |
| SNP_61167_A_15156147 | NC_021167.1    | Ca_Kabuli_Chr08 | 15156147                | GG                              | AA                 | AA               | INTERGENIC                    |                    |                                   |
| SNP_61168_A_15156319 | NC_021167.1    | Ca_Kabuli_Chr08 | 15156319                | GG                              | AA                 | AA               | INTERGENIC                    |                    |                                   |
| SNP_61169_A_15162146 | NC_021167.1    | Ca_Kabuli_Chr08 | 15162146                | AA                              | GG                 | GG               | INTERGENIC                    |                    |                                   |
| SNP_61171_A_15162431 | NC_021167.1    | Ca_Kabuli_Chr08 | 15162431                | GG                              | CC                 | CC               | INTERGENIC                    |                    |                                   |
| SNP_61172_A_15162474 | NC_021167.1    | Ca_Kabuli_Chr08 | 15162474                | TT                              | GG                 | GG               | INTERGENIC                    |                    |                                   |
| SNP_61173_A_15162815 | NC_021167.1    | Ca_Kabuli_Chr08 | 15162815                | GG                              | TT                 | TT               | INTERGENIC                    |                    |                                   |
| SNP_61174_A_15266554 | NC_021167.1    | Ca_Kabuli_Chr08 | 15266554                | GG                              | CC                 | CC               | INTERGENIC                    |                    |                                   |
| SNP_61175_A_15266718 | NC_021167.1    | Ca_Kabuli_Chr08 | 15266718                | TT                              | CC                 | CC               | INTERGENIC                    |                    |                                   |
| SNP_61176_A_15294310 | NC_021167.1    | Ca_Kabuli_Chr08 | 15294310                | GG                              | AA                 | AA               | URR                           | 101493921          | glutathione S-transferase T3-like |
| SNP_61177_A_15309649 | NC_021167.1    | Ca_Kabuli_Chr08 | 15309649                | GG                              | AA                 | AA               | INTERGENIC                    |                    |                                   |
| SNP_61178_A_15313912 | NC_021167.1    | Ca_Kabuli_Chr08 | 15313912                | TT                              | CC                 | CC               | DRR                           | 101494242          | uncharacterized LOC101494242      |
| SNP_61179_A_15314175 | NC_021167.1    | Ca_Kabuli_Chr08 | 15314175                | AA                              | GG                 | GG               | DRR                           | 101494242          | uncharacterized LOC101494242      |
| SNP_61180_A_15314185 | NC_021167.1    | Ca_Kabuli_Chr08 | 15314185                | AA                              | CC                 | CC               | DRR                           | 101494242          | uncharacterized LOC101494242      |
| SNP_61181_A_15314322 | NC_021167.1    | Ca_Kabuli_Chr08 | 15314322                | TT                              | GG                 | GG               | DRR                           | 101494242          | uncharacterized LOC101494242      |
| SNP_61182_A_15314343 | NC_021167.1    | Ca_Kabuli_Chr08 | 15314343                | GG                              | AA                 | AA               | DRR                           | 101494242          | uncharacterized LOC101494242      |
| SNP_61184_A_15318884 | NC_021167.1    | Ca_Kabuli_Chr08 | 15318884                | TT                              | CC                 | CC               | INTRON                        | 101494242          | uncharacterized LOC101494242      |
| SNP_61185_A_15348586 | NC_021167.1    | Ca_Kabuli_Chr08 | 15348586                | CC                              | GG                 | GG               | INTERGENIC                    |                    |                                   |

| SNPs IDs             | Chromosome IDs | Chromosomes     | Physical positions (bp) | CDC Frontier genome (Reference genome) | (Pusa 1103 & HPNB) | (ILWC 46 & LPNB) | Sequence Components of genome | Gene accession IDs | Putative functions                                                                    |
|----------------------|----------------|-----------------|-------------------------|----------------------------------------|--------------------|------------------|-------------------------------|--------------------|---------------------------------------------------------------------------------------|
| SNP_61186_A_15348918 | NC_021167.1    | Ca_Kabuli_Chr08 | 15348918                | GG                                     | AA                 | AA               | INTERGENIC                    |                    |                                                                                       |
| SNP_61187_A_15349031 | NC_021167.1    | Ca_Kabuli_Chr08 | 15349031                | TT                                     | CC                 | CC               | INTERGENIC                    |                    |                                                                                       |
| SNP_61188_A_15349080 | NC_021167.1    | Ca_Kabuli_Chr08 | 15349080                | AA                                     | GG                 | GG               | INTERGENIC                    |                    |                                                                                       |
| SNP_61189_A_15349123 | NC_021167.1    | Ca_Kabuli_Chr08 | 15349123                | AA                                     | GG                 | GG               | INTERGENIC                    |                    |                                                                                       |
| SNP_61190_A_15349141 | NC_021167.1    | Ca_Kabuli_Chr08 | 15349141                | GG                                     | AA                 | AA               | INTERGENIC                    |                    |                                                                                       |
| SNP_61192_A_15416678 | NC_021167.1    | Ca_Kabuli_Chr08 | 15416678                | GG                                     | TT                 | TT               | INTERGENIC                    |                    |                                                                                       |
| SNP_61195_A_15502449 | NC_021167.1    | Ca_Kabuli_Chr08 | 15502449                | CC                                     | TT                 | TT               | INTERGENIC                    |                    |                                                                                       |
| SNP_61196_A_15511932 | NC_021167.1    | Ca_Kabuli_Chr08 | 15511932                | CC                                     | TT                 | TT               | INTERGENIC                    |                    |                                                                                       |
| SNP_61197_A_15532407 | NC_021167.1    | Ca_Kabuli_Chr08 | 15532407                | TT                                     | CC                 | CC               | INTRON                        | 101506270          | casein kinase I-like                                                                  |
| SNP_61199_A_15576984 | NC_021167.1    | Ca_Kabuli_Chr08 | 15576984                | AA                                     | GG                 | GG               | INTRON                        | 101508734          | protein phosphatase 2C and cyclic nucleotide-binding/kinase domain-containing protein |
| SNP_61200_A_15577101 | NC_021167.1    | Ca_Kabuli_Chr08 | 15577101                | AA                                     | TT                 | TT               | INTRON                        | 101508734          | protein phosphatase 2C and cyclic nucleotide-binding/kinase domain-containing protein |
| SNP_61201_A_15577292 | NC_021167.1    | Ca_Kabuli_Chr08 | 15577292                | AA                                     | CC                 | CC               | INTRON                        | 101508734          | protein phosphatase 2C and cyclic nucleotide-binding/kinase domain-containing protein |
| SNP_61202_A_15577828 | NC_021167.1    | Ca_Kabuli_Chr08 | 15577828                | CC                                     | GG                 | GG               | NON_SYNONYMOUS_CODING         | 101508734          | protein phosphatase 2C and cyclic nucleotide-binding/kinase domain-containing protein |
| SNP_61203_A_15577833 | NC_021167.1    | Ca_Kabuli_Chr08 | 15577833                | CC                                     | AA                 | AA               | NON_SYNONYMOUS_CODING         | 101508734          | protein phosphatase 2C and cyclic nucleotide-binding/kinase domain-containing protein |
| SNP_61204_A_15577841 | NC_021167.1    | Ca_Kabuli_Chr08 | 15577841                | AA                                     | CC                 | CC               | NON_SYNONYMOUS_CODING         | 101508734          | protein phosphatase 2C and cyclic nucleotide-binding/kinase domain-containing protein |
| SNP_61206_A_15577907 | NC_021167.1    | Ca_Kabuli_Chr08 | 15577907                | TT                                     | CC                 | CC               | SYNONYMOUS_CODING             | 101508734          | protein phosphatase 2C and cyclic nucleotide-binding/kinase domain-containing protein |
| SNP_61207_A_15578042 | NC_021167.1    | Ca_Kabuli_Chr08 | 15578042                | CC                                     | TT                 | TT               | SYNONYMOUS_CODING             | 101508734          | protein phosphatase 2C and cyclic nucleotide-binding/kinase domain-containing protein |
| SNP_61208_A_15578303 | NC_021167.1    | Ca_Kabuli_Chr08 | 15578303                | CC                                     | AA                 | AA               | NON_SYNONYMOUS_CODING         | 101508734          | protein phosphatase 2C and cyclic nucleotide-binding/kinase domain-containing protein |
| SNP_61209_A_15579015 | NC_021167.1    | Ca_Kabuli_Chr08 | 15579015                | AA                                     | TT                 | TT               | URR                           | 101508734          | protein phosphatase 2C and cyclic nucleotide-binding/kinase domain-containing protein |
| SNP_61210_A_15579335 | NC_021167.1    | Ca_Kabuli_Chr08 | 15579335                | GG                                     | TT                 | TT               | URR                           | 101508734          | protein phosphatase 2C and cyclic nucleotide-binding/kinase domain-containing protein |
| SNP_61211_A_15579728 | NC_021167.1    | Ca_Kabuli_Chr08 | 15579728                | AA                                     | GG                 | GG               | URR                           | 101508734          | protein phosphatase 2C and cyclic nucleotide-binding/kinase domain-containing protein |
| SNP_61212_A_15579799 | NC_021167.1    | Ca_Kabuli_Chr08 | 15579799                | GG                                     | AA                 | AA               | URR                           | 101508734          | protein phosphatase 2C and cyclic nucleotide-binding/kinase domain-containing protein |

| SNPs IDs             | Chromosome IDs | Chromosomes     | Physical positions (bp) | CDC Frontier (Reference genome) | (Pusa 1103 & HPNB) | (ILWC 46 & LPNB) | Sequence Components of genome | Gene accession IDs | Putative functions                                                                    |
|----------------------|----------------|-----------------|-------------------------|---------------------------------|--------------------|------------------|-------------------------------|--------------------|---------------------------------------------------------------------------------------|
| SNP_61214_A_15580146 | NC_021167.1    | Ca_Kabuli_Chr08 | 15580146                | TT                              | CC                 | CC               | URR                           | 101508734          | protein phosphatase 2C and cyclic nucleotide-binding/kinase domain-containing protein |
| SNP_61215_A_15580638 | NC_021167.1    | Ca_Kabuli_Chr08 | 15580638                | AA                              | GG                 | GG               | URR                           | 101508734          | protein phosphatase 2C and cyclic nucleotide-binding/kinase domain-containing protein |
| SNP_61216_A_15635459 | NC_021167.1    | Ca_Kabuli_Chr08 | 15635459                | GG                              | CC                 | CC               | URR                           | 101510017          | lachrymatory-factor synthase-like                                                     |
| SNP_61218_A_15682052 | NC_021167.1    | Ca_Kabuli_Chr08 | 15682052                | CC                              | GG                 | GG               | INTERGENIC                    |                    |                                                                                       |
| SNP_61219_A_15684918 | NC_021167.1    | Ca_Kabuli_Chr08 | 15684918                | CC                              | GG                 | GG               | INTERGENIC                    |                    |                                                                                       |
| SNP_61220_A_15685083 | NC_021167.1    | Ca_Kabuli_Chr08 | 15685083                | TT                              | CC                 | CC               | INTERGENIC                    |                    |                                                                                       |
| SNP_61221_A_15685156 | NC_021167.1    | Ca_Kabuli_Chr08 | 15685156                | AA                              | GG                 | GG               | INTERGENIC                    |                    |                                                                                       |
| SNP_61223_A_15685308 | NC_021167.1    | Ca_Kabuli_Chr08 | 15685308                | TT                              | CC                 | CC               | INTERGENIC                    |                    |                                                                                       |
| SNP_61225_A_15685414 | NC_021167.1    | Ca_Kabuli_Chr08 | 15685414                | CC                              | TT                 | TT               | INTERGENIC                    |                    |                                                                                       |
| SNP_61227_A_15685663 | NC_021167.1    | Ca_Kabuli_Chr08 | 15685663                | TT                              | CC                 | CC               | INTERGENIC                    |                    |                                                                                       |
| SNP_61228_A_15685773 | NC_021167.1    | Ca_Kabuli_Chr08 | 15685773                | AA                              | GG                 | GG               | INTERGENIC                    |                    |                                                                                       |
| SNP_61231_A_15685922 | NC_021167.1    | Ca_Kabuli_Chr08 | 15685922                | GG                              | CC                 | CC               | INTERGENIC                    |                    |                                                                                       |
| SNP_61232_A_15685952 | NC_021167.1    | Ca_Kabuli_Chr08 | 15685952                | AA                              | GG                 | GG               | INTERGENIC                    |                    |                                                                                       |
| SNP_61233_A_15685957 | NC_021167.1    | Ca_Kabuli_Chr08 | 15685957                | AA                              | GG                 | GG               | INTERGENIC                    |                    |                                                                                       |
| SNP_61234_A_15685998 | NC_021167.1    | Ca_Kabuli_Chr08 | 15685998                | AA                              | GG                 | GG               | INTERGENIC                    |                    |                                                                                       |
| SNP_61235_A_15685999 | NC_021167.1    | Ca_Kabuli_Chr08 | 15685999                | AA                              | TT                 | TT               | INTERGENIC                    |                    |                                                                                       |
| SNP_61236_A_15686000 | NC_021167.1    | Ca_Kabuli_Chr08 | 15686000                | GG                              | CC                 | CC               | INTERGENIC                    |                    |                                                                                       |
| SNP_61237_A_15686004 | NC_021167.1    | Ca_Kabuli_Chr08 | 15686004                | AA                              | TT                 | TT               | INTERGENIC                    |                    |                                                                                       |
| SNP_61238_A_15686009 | NC_021167.1    | Ca_Kabuli_Chr08 | 15686009                | AA                              | TT                 | TT               | INTERGENIC                    |                    |                                                                                       |
| SNP_61241_A_15686012 | NC_021167.1    | Ca_Kabuli_Chr08 | 15686012                | CC                              | AA                 | AA               | INTERGENIC                    |                    |                                                                                       |
| SNP_61242_A_15686013 | NC_021167.1    | Ca_Kabuli_Chr08 | 15686013                | TT                              | AA                 | AA               | INTERGENIC                    |                    |                                                                                       |
| SNP_61243_A_15688206 | NC_021167.1    | Ca_Kabuli_Chr08 | 15688206                | AA                              | TT                 | TT               | INTRON                        | 101511942          | probable RNA-dependent RNA polymerase 5                                               |

| SNPs IDs             | Chromosome IDs | Chromosomes     | Physical positions (bp) | CDC Frontier genome (Reference genome) | (Pusa 1103 & HPNB) | (ILWC 46 & LPNB) | Sequence Components of genome | Gene accession IDs | Putative functions                      |
|----------------------|----------------|-----------------|-------------------------|----------------------------------------|--------------------|------------------|-------------------------------|--------------------|-----------------------------------------|
| SNP_61244_A_15689022 | NC_021167.1    | Ca_Kabuli_Chr08 | 15689022                | CC                                     | TT                 | TT               | INTRON                        | 101511942          | probable RNA-dependent RNA polymerase 5 |
| SNP_61245_A_15689034 | NC_021167.1    | Ca_Kabuli_Chr08 | 15689034                | CC                                     | TT                 | TT               | INTRON                        | 101511942          | probable RNA-dependent RNA polymerase 5 |
| SNP_61246_A_15689137 | NC_021167.1    | Ca_Kabuli_Chr08 | 15689137                | AA                                     | TT                 | TT               | INTRON                        | 101511942          | probable RNA-dependent RNA polymerase 5 |
| SNP_61247_A_15689376 | NC_021167.1    | Ca_Kabuli_Chr08 | 15689376                | CC                                     | TT                 | TT               | INTRON                        | 101511942          | probable RNA-dependent RNA polymerase 5 |
| SNP_61248_A_15689673 | NC_021167.1    | Ca_Kabuli_Chr08 | 15689673                | AA                                     | CC                 | CC               | NON_SYNONYMOUS_CODING         | 101511942          | probable RNA-dependent RNA polymerase 5 |
| SNP_61249_A_15689741 | NC_021167.1    | Ca_Kabuli_Chr08 | 15689741                | GG                                     | AA                 | AA               | NON_SYNONYMOUS_CODING         | 101511942          | probable RNA-dependent RNA polymerase 5 |
| SNP_61250_A_15689756 | NC_021167.1    | Ca_Kabuli_Chr08 | 15689756                | AA                                     | GG                 | GG               | NON_SYNONYMOUS_CODING         | 101511942          | probable RNA-dependent RNA polymerase 5 |
| SNP_61251_A_15691056 | NC_021167.1    | Ca_Kabuli_Chr08 | 15691056                | TT                                     | CC                 | CC               | INTRON                        | 101511942          | probable RNA-dependent RNA polymerase 5 |
| SNP_61252_A_15691466 | NC_021167.1    | Ca_Kabuli_Chr08 | 15691466                | AA                                     | GG                 | GG               | INTRON                        | 101511942          | probable RNA-dependent RNA polymerase 5 |
| SNP_61253_A_15691700 | NC_021167.1    | Ca_Kabuli_Chr08 | 15691700                | GG                                     | AA                 | AA               | INTRON                        | 101511942          | probable RNA-dependent RNA polymerase 5 |
| SNP_61254_A_15692070 | NC_021167.1    | Ca_Kabuli_Chr08 | 15692070                | GG                                     | AA                 | AA               | INTRON                        | 101511942          | probable RNA-dependent RNA polymerase 5 |
| SNP_61255_A_15692243 | NC_021167.1    | Ca_Kabuli_Chr08 | 15692243                | GG                                     | AA                 | AA               | INTRON                        | 101511942          | probable RNA-dependent RNA polymerase 5 |
| SNP_61256_A_15693803 | NC_021167.1    | Ca_Kabuli_Chr08 | 15693803                | TT                                     | CC                 | CC               | INTRON                        | 101511942          | probable RNA-dependent RNA polymerase 5 |
| SNP_61259_A_15789602 | NC_021167.1    | Ca_Kabuli_Chr08 | 15789602                | GG                                     | AA                 | AA               | INTERGENIC                    |                    |                                         |
| SNP_61260_A_15789746 | NC_021167.1    | Ca_Kabuli_Chr08 | 15789746                | AA                                     | GG                 | GG               | INTERGENIC                    |                    |                                         |
| SNP_61261_A_15790970 | NC_021167.1    | Ca_Kabuli_Chr08 | 15790970                | CC                                     | TT                 | TT               | INTERGENIC                    |                    |                                         |
| SNP_61262_A_15791206 | NC_021167.1    | Ca_Kabuli_Chr08 | 15791206                | TT                                     | CC                 | CC               | INTERGENIC                    |                    |                                         |
| SNP_61263_A_15791360 | NC_021167.1    | Ca_Kabuli_Chr08 | 15791360                | TT                                     | AA                 | AA               | INTERGENIC                    |                    |                                         |
| SNP_61265_A_15802597 | NC_021167.1    | Ca_Kabuli_Chr08 | 15802597                | TT                                     | CC                 | CC               | INTERGENIC                    |                    |                                         |
| SNP_61266_A_15827268 | NC_021167.1    | Ca_Kabuli_Chr08 | 15827268                | CC                                     | AA                 | AA               | DRR                           | 101489163          | hexokinase-1-like                       |
| SNP_61268_A_15850375 | NC_021167.1    | Ca_Kabuli_Chr08 | 15850375                | TT                                     | CC                 | CC               | INTERGENIC                    |                    |                                         |
| SNP_61269_A_15850392 | NC_021167.1    | Ca_Kabuli_Chr08 | 15850392                | GG                                     | AA                 | AA               | INTERGENIC                    |                    |                                         |

| SNPs IDs             | Chromosome IDs | Chromosomes     | Physical positions (bp) | CDC Frontier (Reference genome) | (Pusa 1103 & HPNB) | (ILWC 46 & LPNB) | Sequence Components of genome | Gene accession IDs | Putative functions           |
|----------------------|----------------|-----------------|-------------------------|---------------------------------|--------------------|------------------|-------------------------------|--------------------|------------------------------|
| SNP_61270_A_15850404 | NC_021167.1    | Ca_Kabuli_Chr08 | 15850404                | AA                              | TT                 | TT               | INTERGENIC                    |                    |                              |
| SNP_61271_A_15850493 | NC_021167.1    | Ca_Kabuli_Chr08 | 15850493                | AA                              | GG                 | GG               | INTERGENIC                    |                    |                              |
| SNP_61272_A_15850511 | NC_021167.1    | Ca_Kabuli_Chr08 | 15850511                | AA                              | GG                 | GG               | INTERGENIC                    |                    |                              |
| SNP_61273_A_15850739 | NC_021167.1    | Ca_Kabuli_Chr08 | 15850739                | GG                              | CC                 | CC               | INTERGENIC                    |                    |                              |
| SNP_61274_A_15880767 | NC_021167.1    | Ca_Kabuli_Chr08 | 15880767                | AA                              | GG                 | GG               | URR                           | 101490683          | uncharacterized LOC101490683 |
| SNP_61275_A_15880994 | NC_021167.1    | Ca_Kabuli_Chr08 | 15880994                | AA                              | GG                 | GG               | URR                           | 101490683          | uncharacterized LOC101490683 |
| SNP_61276_A_15881040 | NC_021167.1    | Ca_Kabuli_Chr08 | 15881040                | TT                              | AA                 | AA               | URR                           | 101490683          | uncharacterized LOC101490683 |
| SNP_61277_A_15881083 | NC_021167.1    | Ca_Kabuli_Chr08 | 15881083                | GG                              | AA                 | AA               | URR                           | 101490683          | uncharacterized LOC101490683 |
| SNP_61279_A_15882028 | NC_021167.1    | Ca_Kabuli_Chr08 | 15882028                | CC                              | GG                 | GG               | INTERGENIC                    |                    |                              |
| SNP_61280_A_15882599 | NC_021167.1    | Ca_Kabuli_Chr08 | 15882599                | GG                              | AA                 | AA               | INTERGENIC                    |                    |                              |
| SNP_61281_A_15882788 | NC_021167.1    | Ca_Kabuli_Chr08 | 15882788                | AA                              | TT                 | TT               | INTERGENIC                    |                    |                              |
| SNP_61282_A_15882790 | NC_021167.1    | Ca_Kabuli_Chr08 | 15882790                | AA                              | CC                 | CC               | INTERGENIC                    |                    |                              |
| SNP_61285_A_15891703 | NC_021167.1    | Ca_Kabuli_Chr08 | 15891703                | GG                              | AA                 | AA               | INTERGENIC                    |                    |                              |
| SNP_61286_A_15892340 | NC_021167.1    | Ca_Kabuli_Chr08 | 15892340                | GG                              | TT                 | TT               | INTERGENIC                    |                    |                              |
| SNP_61287_A_15892388 | NC_021167.1    | Ca_Kabuli_Chr08 | 15892388                | TT                              | CC                 | CC               | INTERGENIC                    |                    |                              |
| SNP_61288_A_15892468 | NC_021167.1    | Ca_Kabuli_Chr08 | 15892468                | CC                              | GG                 | GG               | INTERGENIC                    |                    |                              |
| SNP_61289_A_15892506 | NC_021167.1    | Ca_Kabuli_Chr08 | 15892506                | GG                              | TT                 | TT               | INTERGENIC                    |                    |                              |
| SNP_61290_A_15892608 | NC_021167.1    | Ca_Kabuli_Chr08 | 15892608                | TT                              | CC                 | CC               | INTERGENIC                    |                    |                              |
| SNP_61291_A_15892746 | NC_021167.1    | Ca_Kabuli_Chr08 | 15892746                | CC                              | AA                 | AA               | INTERGENIC                    |                    |                              |
| SNP_61293_A_15892808 | NC_021167.1    | Ca_Kabuli_Chr08 | 15892808                | TT                              | GG                 | GG               | INTERGENIC                    |                    |                              |
| SNP_61294_A_15895767 | NC_021167.1    | Ca_Kabuli_Chr08 | 15895767                | AA                              | TT                 | TT               | INTERGENIC                    |                    |                              |
| SNP_61295_A_15895779 | NC_021167.1    | Ca_Kabuli_Chr08 | 15895779                | TT                              | CC                 | CC               | INTERGENIC                    |                    |                              |



| SNPs IDs             | Chromosome IDs | Chromosomes     | Physical positions (bp) | CDC Frontier genome (Reference genome) | (Pusa 1103 & HPNB) | (ILWC 46 & LPNB) | Sequence Components of genome | Gene accession IDs | Putative functions           |
|----------------------|----------------|-----------------|-------------------------|----------------------------------------|--------------------|------------------|-------------------------------|--------------------|------------------------------|
| SNP_61296_A_15895810 | NC_021167.1    | Ca_Kabuli_Chr08 | 15895810                | GG                                     | AA                 | AA               | INTERGENIC                    |                    |                              |
| SNP_61297_A_15896010 | NC_021167.1    | Ca_Kabuli_Chr08 | 15896010                | TT                                     | AA                 | AA               | INTERGENIC                    |                    |                              |
| SNP_61298_A_15896202 | NC_021167.1    | Ca_Kabuli_Chr08 | 15896202                | AA                                     | TT                 | TT               | INTERGENIC                    |                    |                              |
| SNP_61299_A_15896219 | NC_021167.1    | Ca_Kabuli_Chr08 | 15896219                | GG                                     | AA                 | AA               | INTERGENIC                    |                    |                              |
| SNP_61300_A_15896356 | NC_021167.1    | Ca_Kabuli_Chr08 | 15896356                | AA                                     | GG                 | GG               | INTERGENIC                    |                    |                              |
| SNP_61301_A_15897593 | NC_021167.1    | Ca_Kabuli_Chr08 | 15897593                | AA                                     | GG                 | GG               | INTERGENIC                    |                    |                              |
| SNP_61302_A_15897753 | NC_021167.1    | Ca_Kabuli_Chr08 | 15897753                | CC                                     | AA                 | AA               | INTERGENIC                    |                    |                              |
| SNP_61303_A_15897932 | NC_021167.1    | Ca_Kabuli_Chr08 | 15897932                | CC                                     | TT                 | TT               | INTERGENIC                    |                    |                              |
| SNP_61304_A_15899251 | NC_021167.1    | Ca_Kabuli_Chr08 | 15899251                | CC                                     | GG                 | GG               | INTERGENIC                    |                    |                              |
| SNP_61305_A_15899257 | NC_021167.1    | Ca_Kabuli_Chr08 | 15899257                | GG                                     | CC                 | CC               | INTERGENIC                    |                    |                              |
| SNP_61307_A_15918519 | NC_021167.1    | Ca_Kabuli_Chr08 | 15918519                | AA                                     | CC                 | CC               | INTERGENIC                    |                    |                              |
| SNP_61308_A_15918537 | NC_021167.1    | Ca_Kabuli_Chr08 | 15918537                | GG                                     | AA                 | AA               | INTERGENIC                    |                    |                              |
| SNP_61310_A_15921425 | NC_021167.1    | Ca_Kabuli_Chr08 | 15921425                | CC                                     | TT                 | TT               | NON_SYNONYMOUS_CODING         | 101488260          | uncharacterized LOC101488260 |
| SNP_61311_A_15921617 | NC_021167.1    | Ca_Kabuli_Chr08 | 15921617                | AA                                     | GG                 | GG               | NON_SYNONYMOUS_CODING         | 101488260          | uncharacterized LOC101488260 |
| SNP_61312_A_15926061 | NC_021167.1    | Ca_Kabuli_Chr08 | 15926061                | TT                                     | CC                 | CC               | INTERGENIC                    |                    |                              |
| SNP_61313_A_15930288 | NC_021167.1    | Ca_Kabuli_Chr08 | 15930288                | AA                                     | GG                 | GG               | INTERGENIC                    |                    |                              |
| SNP_61314_A_15972217 | NC_021167.1    | Ca_Kabuli_Chr08 | 15972217                | TT                                     | AA                 | AA               | INTERGENIC                    |                    |                              |
| SNP_61315_A_15972283 | NC_021167.1    | Ca_Kabuli_Chr08 | 15972283                | AA                                     | CC                 | CC               | INTERGENIC                    |                    |                              |
| SNP_61316_A_15972322 | NC_021167.1    | Ca_Kabuli_Chr08 | 15972322                | CC                                     | TT                 | TT               | INTERGENIC                    |                    |                              |
| SNP_61317_A_15972397 | NC_021167.1    | Ca_Kabuli_Chr08 | 15972397                | CC                                     | TT                 | TT               | INTERGENIC                    |                    |                              |
| SNP_61318_A_15972407 | NC_021167.1    | Ca_Kabuli_Chr08 | 15972407                | TT                                     | AA                 | AA               | INTERGENIC                    |                    |                              |
| SNP_61319_A_15972493 | NC_021167.1    | Ca_Kabuli_Chr08 | 15972493                | TT                                     | CC                 | CC               | INTERGENIC                    |                    |                              |

| SNPs IDs             | Chromosome IDs | Chromosomes     | Physical positions (bp) | CDC Frontier genome (Reference genome) | (Pusa 1103 & HPNB) | (ILWC 46 & LPNB) | Sequence Components of genome | Gene accession IDs | Putative functions                          |
|----------------------|----------------|-----------------|-------------------------|----------------------------------------|--------------------|------------------|-------------------------------|--------------------|---------------------------------------------|
| SNP_61320_A_15972502 | NC_021167.1    | Ca_Kabuli_Chr08 | 15972502                | CC                                     | AA                 | AA               | INTERGENIC                    |                    |                                             |
| SNP_61321_A_15972510 | NC_021167.1    | Ca_Kabuli_Chr08 | 15972510                | TT                                     | AA                 | AA               | INTERGENIC                    |                    |                                             |
| SNP_61322_A_15972680 | NC_021167.1    | Ca_Kabuli_Chr08 | 15972680                | AA                                     | TT                 | TT               | INTERGENIC                    |                    |                                             |
| SNP_61323_A_15972683 | NC_021167.1    | Ca_Kabuli_Chr08 | 15972683                | TT                                     | CC                 | CC               | INTERGENIC                    |                    |                                             |
| SNP_61324_A_15972684 | NC_021167.1    | Ca_Kabuli_Chr08 | 15972684                | CC                                     | AA                 | AA               | INTERGENIC                    |                    |                                             |
| SNP_61325_A_15972686 | NC_021167.1    | Ca_Kabuli_Chr08 | 15972686                | AA                                     | GG                 | GG               | INTERGENIC                    |                    |                                             |
| SNP_61326_A_15972754 | NC_021167.1    | Ca_Kabuli_Chr08 | 15972754                | GG                                     | AA                 | AA               | INTERGENIC                    |                    |                                             |
| SNP_61327_A_15972759 | NC_021167.1    | Ca_Kabuli_Chr08 | 15972759                | GG                                     | AA                 | AA               | INTERGENIC                    |                    |                                             |
| SNP_61328_A_15972768 | NC_021167.1    | Ca_Kabuli_Chr08 | 15972768                | AA                                     | CC                 | CC               | INTERGENIC                    |                    |                                             |
| SNP_61329_A_15972809 | NC_021167.1    | Ca_Kabuli_Chr08 | 15972809                | AA                                     | GG                 | GG               | INTERGENIC                    |                    |                                             |
| SNP_61330_A_15972816 | NC_021167.1    | Ca_Kabuli_Chr08 | 15972816                | TT                                     | AA                 | AA               | INTERGENIC                    |                    |                                             |
| SNP_61331_A_15972837 | NC_021167.1    | Ca_Kabuli_Chr08 | 15972837                | AA                                     | CC                 | CC               | INTERGENIC                    |                    |                                             |
| SNP_61332_A_15972856 | NC_021167.1    | Ca_Kabuli_Chr08 | 15972856                | GG                                     | TT                 | TT               | INTERGENIC                    |                    |                                             |
| SNP_61333_A_15972910 | NC_021167.1    | Ca_Kabuli_Chr08 | 15972910                | AA                                     | GG                 | GG               | INTERGENIC                    |                    |                                             |
| SNP_61334_A_15972917 | NC_021167.1    | Ca_Kabuli_Chr08 | 15972917                | AA                                     | GG                 | GG               | INTERGENIC                    |                    |                                             |
| SNP_61335_A_15999059 | NC_021167.1    | Ca_Kabuli_Chr08 | 15999059                | CC                                     | TT                 | TT               | URR                           | 101494345          | 30S ribosomal protein 3, chloroplastic-like |
| SNP_61336_A_16058386 | NC_021167.1    | Ca_Kabuli_Chr08 | 16058386                | GG                                     | AA                 | AA               | INTERGENIC                    |                    |                                             |
| SNP_61338_A_16204215 | NC_021167.1    | Ca_Kabuli_Chr08 | 16204215                | CC                                     | TT                 | TT               | DRR                           | 101489589          | uncharacterized LOC101489589                |
| SNP_61339_A_16212786 | NC_021167.1    | Ca_Kabuli_Chr08 | 16212786                | TT                                     | GG                 | GG               | URR                           | 101489907          | uncharacterized LOC101489907                |
| SNP_61340_A_16213270 | NC_021167.1    | Ca_Kabuli_Chr08 | 16213270                | TT                                     | CC                 | CC               | INTERGENIC                    |                    |                                             |
| SNP_61341_A_16213280 | NC_021167.1    | Ca_Kabuli_Chr08 | 16213280                | GG                                     | TT                 | TT               | INTERGENIC                    |                    |                                             |
| SNP_61342_A_16213286 | NC_021167.1    | Ca_Kabuli_Chr08 | 16213286                | AA                                     | GG                 | GG               | INTERGENIC                    |                    |                                             |

| SNPs IDs             | Chromosome IDs | Chromosomes     | Physical positions (bp) | CDC Frontier (Reference genome) | (Pusa 1103 & HPNB) | (ILWC 46 & LPNB) | Sequence Components of genome | Gene accession IDs | Putative functions               |
|----------------------|----------------|-----------------|-------------------------|---------------------------------|--------------------|------------------|-------------------------------|--------------------|----------------------------------|
| SNP_61343_A_16252788 | NC_021167.1    | Ca_Kabuli_Chr08 | 16252788                | AA                              | CC                 | CC               | INTERGENIC                    |                    |                                  |
| SNP_61344_A_16292785 | NC_021167.1    | Ca_Kabuli_Chr08 | 16292785                | AA                              | TT                 | TT               | URR                           | 101490243          | probable cation transporter HKT6 |
| SNP_61345_A_16293020 | NC_021167.1    | Ca_Kabuli_Chr08 | 16293020                | AA                              | GG                 | GG               | URR                           | 101490243          | probable cation transporter HKT6 |
| SNP_61346_A_16314817 | NC_021167.1    | Ca_Kabuli_Chr08 | 16314817                | AA                              | TT                 | TT               | INTERGENIC                    |                    |                                  |
| SNP_61347_A_16314828 | NC_021167.1    | Ca_Kabuli_Chr08 | 16314828                | AA                              | GG                 | GG               | INTERGENIC                    |                    |                                  |
| SNP_61348_A_16314906 | NC_021167.1    | Ca_Kabuli_Chr08 | 16314906                | AA                              | GG                 | GG               | INTERGENIC                    |                    |                                  |
| SNP_61352_A_16315165 | NC_021167.1    | Ca_Kabuli_Chr08 | 16315165                | AA                              | GG                 | GG               | INTERGENIC                    |                    |                                  |
| SNP_61353_A_16315186 | NC_021167.1    | Ca_Kabuli_Chr08 | 16315186                | GG                              | TT                 | TT               | INTERGENIC                    |                    |                                  |
| SNP_61354_A_16315233 | NC_021167.1    | Ca_Kabuli_Chr08 | 16315233                | CC                              | TT                 | TT               | INTERGENIC                    |                    |                                  |
| SNP_61355_A_16315267 | NC_021167.1    | Ca_Kabuli_Chr08 | 16315267                | GG                              | TT                 | TT               | INTERGENIC                    |                    |                                  |
| SNP_61356_A_16316012 | NC_021167.1    | Ca_Kabuli_Chr08 | 16316012                | TT                              | AA                 | AA               | INTERGENIC                    |                    |                                  |
| SNP_61358_A_16316436 | NC_021167.1    | Ca_Kabuli_Chr08 | 16316436                | TT                              | AA                 | AA               | INTERGENIC                    |                    |                                  |
| SNP_61359_A_16316556 | NC_021167.1    | Ca_Kabuli_Chr08 | 16316556                | AA                              | TT                 | TT               | INTERGENIC                    |                    |                                  |
| SNP_61360_A_16316625 | NC_021167.1    | Ca_Kabuli_Chr08 | 16316625                | CC                              | TT                 | TT               | INTERGENIC                    |                    |                                  |
| SNP_61361_A_16316721 | NC_021167.1    | Ca_Kabuli_Chr08 | 16316721                | TT                              | CC                 | CC               | INTERGENIC                    |                    |                                  |
| SNP_61362_A_16316747 | NC_021167.1    | Ca_Kabuli_Chr08 | 16316747                | TT                              | GG                 | GG               | INTERGENIC                    |                    |                                  |
| SNP_61363_A_16316780 | NC_021167.1    | Ca_Kabuli_Chr08 | 16316780                | GG                              | AA                 | AA               | INTERGENIC                    |                    |                                  |
| SNP_61364_A_16326357 | NC_021167.1    | Ca_Kabuli_Chr08 | 16326357                | TT                              | CC                 | CC               | INTERGENIC                    |                    |                                  |
| SNP_61365_A_16326979 | NC_021167.1    | Ca_Kabuli_Chr08 | 16326979                | TT                              | CC                 | CC               | INTERGENIC                    |                    |                                  |
| SNP_61367_A_16463569 | NC_021167.1    | Ca_Kabuli_Chr08 | 16463569                | CC                              | TT                 | TT               | INTERGENIC                    |                    |                                  |
| SNP_61368_A_16463581 | NC_021167.1    | Ca_Kabuli_Chr08 | 16463581                | AA                              | GG                 | GG               | INTERGENIC                    |                    |                                  |
| SNP_61369_A_16463593 | NC_021167.1    | Ca_Kabuli_Chr08 | 16463593                | AA                              | TT                 | TT               | INTERGENIC                    |                    |                                  |

| SNPs IDs             | Chromosome IDs | Chromosomes     | Physical positions (bp) | CDC Frontier genome (Reference genome) | (Pusa 1103 & HPNB) | (ILWC 46 & LPNB) | Sequence genome | Components of | Gene accession IDs | Putative functions |
|----------------------|----------------|-----------------|-------------------------|----------------------------------------|--------------------|------------------|-----------------|---------------|--------------------|--------------------|
| SNP_61370_A_16463626 | NC_021167.1    | Ca_Kabuli_Chr08 | 16463626                | AA                                     | GG                 | GG               | INTERGENIC      |               |                    |                    |
| SNP_61371_A_16463638 | NC_021167.1    | Ca_Kabuli_Chr08 | 16463638                | AA                                     | GG                 | GG               | INTERGENIC      |               |                    |                    |
| SNP_61372_A_16463644 | NC_021167.1    | Ca_Kabuli_Chr08 | 16463644                | AA                                     | TT                 | TT               | INTERGENIC      |               |                    |                    |
| SNP_61373_A_16463680 | NC_021167.1    | Ca_Kabuli_Chr08 | 16463680                | AA                                     | TT                 | TT               | INTERGENIC      |               |                    |                    |
| SNP_61374_A_16463686 | NC_021167.1    | Ca_Kabuli_Chr08 | 16463686                | AA                                     | GG                 | GG               | INTERGENIC      |               |                    |                    |
| SNP_61375_A_16463695 | NC_021167.1    | Ca_Kabuli_Chr08 | 16463695                | TT                                     | GG                 | GG               | INTERGENIC      |               |                    |                    |
| SNP_61376_A_16463701 | NC_021167.1    | Ca_Kabuli_Chr08 | 16463701                | AA                                     | TT                 | TT               | INTERGENIC      |               |                    |                    |
| SNP_61377_A_16463733 | NC_021167.1    | Ca_Kabuli_Chr08 | 16463733                | AA                                     | GG                 | GG               | INTERGENIC      |               |                    |                    |
| SNP_61378_A_16463743 | NC_021167.1    | Ca_Kabuli_Chr08 | 16463743                | AA                                     | TT                 | TT               | INTERGENIC      |               |                    |                    |
| SNP_61379_A_16463764 | NC_021167.1    | Ca_Kabuli_Chr08 | 16463764                | AA                                     | GG                 | GG               | INTERGENIC      |               |                    |                    |
| SNP_61380_A_16463794 | NC_021167.1    | Ca_Kabuli_Chr08 | 16463794                | GG                                     | TT                 | TT               | INTERGENIC      |               |                    |                    |
| SNP_61381_A_16463797 | NC_021167.1    | Ca_Kabuli_Chr08 | 16463797                | TT                                     | AA                 | AA               | INTERGENIC      |               |                    |                    |
| SNP_61382_A_16463873 | NC_021167.1    | Ca_Kabuli_Chr08 | 16463873                | CC                                     | TT                 | TT               | INTERGENIC      |               |                    |                    |
| SNP_61383_A_16463964 | NC_021167.1    | Ca_Kabuli_Chr08 | 16463964                | AA                                     | TT                 | TT               | INTERGENIC      |               |                    |                    |
| SNP_61384_A_16463984 | NC_021167.1    | Ca_Kabuli_Chr08 | 16463984                | GG                                     | AA                 | AA               | INTERGENIC      |               |                    |                    |
| SNP_61385_A_16463991 | NC_021167.1    | Ca_Kabuli_Chr08 | 16463991                | CC                                     | AA                 | AA               | INTERGENIC      |               |                    |                    |
| SNP_61386_A_16463992 | NC_021167.1    | Ca_Kabuli_Chr08 | 16463992                | AA                                     | TT                 | TT               | INTERGENIC      |               |                    |                    |
| SNP_61387_A_16465023 | NC_021167.1    | Ca_Kabuli_Chr08 | 16465023                | AA                                     | GG                 | GG               | INTERGENIC      |               |                    |                    |
| SNP_61388_A_3888     | NW_004515637.1 | scaffold2       | 3888                    | AA                                     | CC                 | CC               | INTERGENIC      |               |                    |                    |
| SNP_61389_A_4076     | NW_004515637.1 | scaffold2       | 4076                    | TT                                     | CC                 | CC               | INTERGENIC      |               |                    |                    |
| SNP_61390_A_4079     | NW_004515637.1 | scaffold2       | 4079                    | AA                                     | GG                 | GG               | INTERGENIC      |               |                    |                    |
| SNP_61391_A_4100     | NW_004515637.1 | scaffold2       | 4100                    | AA                                     | GG                 | GG               | INTERGENIC      |               |                    |                    |

| SNPs IDs          | Chromosome IDs | Chromosomes | Physical positions (bp) | CDC Frontier (Reference genome) | (Pusa 1103 & HPNB) | (ILWC 46 & LPNB) | Sequence genome | Components of | Gene accession IDs | Putative functions |
|-------------------|----------------|-------------|-------------------------|---------------------------------|--------------------|------------------|-----------------|---------------|--------------------|--------------------|
| SNP_61392_A_4124  | NW_004515637.1 | scaffold2   | 4124                    | CC                              | AA                 | AA               | INTERGENIC      |               |                    |                    |
| SNP_61393_A_4132  | NW_004515637.1 | scaffold2   | 4132                    | GG                              | AA                 | AA               | INTERGENIC      |               |                    |                    |
| SNP_61394_A_8125  | NW_004515637.1 | scaffold2   | 8125                    | TT                              | CC                 | CC               | INTERGENIC      |               |                    |                    |
| SNP_61395_A_8165  | NW_004515637.1 | scaffold2   | 8165                    | TT                              | CC                 | CC               | INTERGENIC      |               |                    |                    |
| SNP_61396_A_8177  | NW_004515637.1 | scaffold2   | 8177                    | CC                              | TT                 | TT               | INTERGENIC      |               |                    |                    |
| SNP_61397_A_8192  | NW_004515637.1 | scaffold2   | 8192                    | CC                              | TT                 | TT               | INTERGENIC      |               |                    |                    |
| SNP_61398_A_8258  | NW_004515637.1 | scaffold2   | 8258                    | AA                              | GG                 | GG               | INTERGENIC      |               |                    |                    |
| SNP_61399_A_8370  | NW_004515637.1 | scaffold2   | 8370                    | CC                              | TT                 | TT               | INTERGENIC      |               |                    |                    |
| SNP_61400_A_8423  | NW_004515637.1 | scaffold2   | 8423                    | GG                              | TT                 | TT               | INTERGENIC      |               |                    |                    |
| SNP_61401_A_8948  | NW_004515637.1 | scaffold2   | 8948                    | TT                              | AA                 | AA               | INTERGENIC      |               |                    |                    |
| SNP_61402_A_8950  | NW_004515637.1 | scaffold2   | 8950                    | CC                              | TT                 | TT               | INTERGENIC      |               |                    |                    |
| SNP_61403_A_9922  | NW_004515637.1 | scaffold2   | 9922                    | GG                              | AA                 | AA               | INTERGENIC      |               |                    |                    |
| SNP_61405_A_18932 | NW_004515637.1 | scaffold2   | 18932                   | TT                              | AA                 | AA               | INTERGENIC      |               |                    |                    |
| SNP_61406_A_18934 | NW_004515637.1 | scaffold2   | 18934                   | CC                              | AA                 | AA               | INTERGENIC      |               |                    |                    |
| SNP_61409_A_69827 | NW_004515637.1 | scaffold2   | 69827                   | CC                              | TT                 | TT               | INTERGENIC      |               |                    |                    |
| SNP_61411_A_70024 | NW_004515637.1 | scaffold2   | 70024                   | CC                              | GG                 | GG               | INTERGENIC      |               |                    |                    |
| SNP_61412_A_70280 | NW_004515637.1 | scaffold2   | 70280                   | AA                              | GG                 | GG               | INTERGENIC      |               |                    |                    |
| SNP_61414_A_71746 | NW_004515637.1 | scaffold2   | 71746                   | AA                              | GG                 | GG               | INTERGENIC      |               |                    |                    |
| SNP_61415_A_71816 | NW_004515637.1 | scaffold2   | 71816                   | TT                              | CC                 | CC               | INTERGENIC      |               |                    |                    |
| SNP_61416_A_71834 | NW_004515637.1 | scaffold2   | 71834                   | AA                              | CC                 | CC               | INTERGENIC      |               |                    |                    |
| SNP_61417_A_83657 | NW_004515637.1 | scaffold2   | 83657                   | TT                              | CC                 | CC               | INTERGENIC      |               |                    |                    |
| SNP_61418_A_83835 | NW_004515637.1 | scaffold2   | 83835                   | AA                              | GG                 | GG               | INTERGENIC      |               |                    |                    |

| SNPs IDs           | Chromosome IDs | Chromosomes | Physical positions (bp) | CDC Frontier (Reference genome) | (Pusa 1103 & HPNB) | (ILWC 46 & LPNB) | Sequence genome | Components of | Gene accession IDs | Putative functions |
|--------------------|----------------|-------------|-------------------------|---------------------------------|--------------------|------------------|-----------------|---------------|--------------------|--------------------|
| SNP_61419_A_83863  | NW_004515637.1 | scaffold2   | 83863                   | GG                              | AA                 | AA               | INTERGENIC      |               |                    |                    |
| SNP_61420_A_103927 | NW_004515637.1 | scaffold2   | 103927                  | CC                              | TT                 | TT               | INTERGENIC      |               |                    |                    |
| SNP_61421_A_103938 | NW_004515637.1 | scaffold2   | 103938                  | TT                              | CC                 | CC               | INTERGENIC      |               |                    |                    |
| SNP_61422_A_103982 | NW_004515637.1 | scaffold2   | 103982                  | TT                              | CC                 | CC               | INTERGENIC      |               |                    |                    |
| SNP_61423_A_103996 | NW_004515637.1 | scaffold2   | 103996                  | CC                              | TT                 | TT               | INTERGENIC      |               |                    |                    |
| SNP_61424_A_144554 | NW_004515637.1 | scaffold2   | 144554                  | AA                              | CC                 | CC               | INTERGENIC      |               |                    |                    |
| SNP_61425_A_169521 | NW_004515637.1 | scaffold2   | 169521                  | CC                              | TT                 | TT               | INTERGENIC      |               |                    |                    |
| SNP_61426_A_200217 | NW_004515637.1 | scaffold2   | 200217                  | AA                              | GG                 | GG               | INTERGENIC      |               |                    |                    |
| SNP_61427_A_207920 | NW_004515637.1 | scaffold2   | 207920                  | TT                              | AA                 | AA               | INTERGENIC      |               |                    |                    |
| SNP_61428_A_210602 | NW_004515637.1 | scaffold2   | 210602                  | AA                              | GG                 | GG               | INTERGENIC      |               |                    |                    |
| SNP_61429_A_210691 | NW_004515637.1 | scaffold2   | 210691                  | AA                              | GG                 | GG               | INTERGENIC      |               |                    |                    |
| SNP_61430_A_211903 | NW_004515637.1 | scaffold2   | 211903                  | TT                              | CC                 | CC               | INTERGENIC      |               |                    |                    |
| SNP_61431_A_211930 | NW_004515637.1 | scaffold2   | 211930                  | GG                              | CC                 | CC               | INTERGENIC      |               |                    |                    |
| SNP_61432_A_211988 | NW_004515637.1 | scaffold2   | 211988                  | TT                              | CC                 | CC               | INTERGENIC      |               |                    |                    |
| SNP_61433_A_212230 | NW_004515637.1 | scaffold2   | 212230                  | GG                              | TT                 | TT               | INTERGENIC      |               |                    |                    |
| SNP_61434_A_212382 | NW_004515637.1 | scaffold2   | 212382                  | AA                              | GG                 | GG               | INTERGENIC      |               |                    |                    |
| SNP_61435_A_221738 | NW_004515637.1 | scaffold2   | 221738                  | AA                              | GG                 | GG               | INTERGENIC      |               |                    |                    |
| SNP_61436_A_239265 | NW_004515637.1 | scaffold2   | 239265                  | CC                              | TT                 | TT               | INTERGENIC      |               |                    |                    |
| SNP_61437_A_281539 | NW_004515637.1 | scaffold2   | 281539                  | GG                              | AA                 | AA               | INTERGENIC      |               |                    |                    |
| SNP_61438_A_286943 | NW_004515637.1 | scaffold2   | 286943                  | AA                              | GG                 | GG               | INTERGENIC      |               |                    |                    |
| SNP_61439_A_300992 | NW_004515637.1 | scaffold2   | 300992                  | TT                              | AA                 | AA               | INTERGENIC      |               |                    |                    |
| SNP_61440_A_308792 | NW_004515637.1 | scaffold2   | 308792                  | TT                              | GG                 | GG               | INTERGENIC      |               |                    |                    |

| SNPs IDs           | Chromosome IDs | Chromosomes | Physical positions (bp) | CDC Frontier (Reference genome) | (Pusa 1103 & HPNB) | (ILWC 46 & LPNB) | Sequence Components of genome | Gene accession IDs | Putative functions                                                        |
|--------------------|----------------|-------------|-------------------------|---------------------------------|--------------------|------------------|-------------------------------|--------------------|---------------------------------------------------------------------------|
| SNP_61441_A_317158 | NW_004515637.1 | scaffold2   | 317158                  | GG                              | TT                 | TT               | INTERGENIC                    |                    |                                                                           |
| SNP_61442_A_344753 | NW_004515637.1 | scaffold2   | 344753                  | TT                              | AA                 | AA               | INTRON                        | 101492279          | ATP-dependent DNA helicase 2 subunit KU80-like                            |
| SNP_61443_A_353790 | NW_004515637.1 | scaffold2   | 353790                  | TT                              | CC                 | CC               | INTERGENIC                    |                    |                                                                           |
| SNP_61444_A_353810 | NW_004515637.1 | scaffold2   | 353810                  | GG                              | CC                 | CC               | INTERGENIC                    |                    |                                                                           |
| SNP_61445_A_353945 | NW_004515637.1 | scaffold2   | 353945                  | TT                              | CC                 | CC               | INTERGENIC                    |                    |                                                                           |
| SNP_61447_A_368803 | NW_004515637.1 | scaffold2   | 368803                  | CC                              | TT                 | TT               | URR                           | 101491946          | uncharacterized LOC101491946                                              |
| SNP_61448_A_402757 | NW_004515637.1 | scaffold2   | 402757                  | AA                              | GG                 | GG               | INTERGENIC                    |                    |                                                                           |
| SNP_61449_A_407740 | NW_004515637.1 | scaffold2   | 407740                  | TT                              | GG                 | GG               | INTERGENIC                    |                    |                                                                           |
| SNP_61450_A_408001 | NW_004515637.1 | scaffold2   | 408001                  | TT                              | CC                 | CC               | INTERGENIC                    |                    |                                                                           |
| SNP_61451_A_408027 | NW_004515637.1 | scaffold2   | 408027                  | GG                              | AA                 | AA               | INTERGENIC                    |                    |                                                                           |
| SNP_61452_A_408033 | NW_004515637.1 | scaffold2   | 408033                  | TT                              | CC                 | CC               | INTERGENIC                    |                    |                                                                           |
| SNP_61453_A_408069 | NW_004515637.1 | scaffold2   | 408069                  | AA                              | TT                 | TT               | INTERGENIC                    |                    |                                                                           |
| SNP_61454_A_408119 | NW_004515637.1 | scaffold2   | 408119                  | TT                              | CC                 | CC               | INTERGENIC                    |                    |                                                                           |
| SNP_61455_A_408122 | NW_004515637.1 | scaffold2   | 408122                  | AA                              | CC                 | CC               | INTERGENIC                    |                    |                                                                           |
| SNP_61456_A_408132 | NW_004515637.1 | scaffold2   | 408132                  | TT                              | GG                 | GG               | INTERGENIC                    |                    |                                                                           |
| SNP_61457_A_411152 | NW_004515637.1 | scaffold2   | 411152                  | TT                              | GG                 | GG               | INTERGENIC                    |                    |                                                                           |
| SNP_61458_A_411543 | NW_004515637.1 | scaffold2   | 411543                  | AA                              | GG                 | GG               | INTERGENIC                    |                    |                                                                           |
| SNP_61459_A_411742 | NW_004515637.1 | scaffold2   | 411742                  | CC                              | TT                 | TT               | INTERGENIC                    |                    |                                                                           |
| SNP_61460_A_412519 | NW_004515637.1 | scaffold2   | 412519                  | CC                              | TT                 | TT               | INTERGENIC                    |                    |                                                                           |
| SNP_61461_A_442717 | NW_004515637.1 | scaffold2   | 442717                  | AA                              | GG                 | GG               | URR                           | 101492950          | proteasome subunit beta type-1-like                                       |
| SNP_61462_A_445442 | NW_004515637.1 | scaffold2   | 445442                  | CC                              | TT                 | TT               | URR                           | 101493283          | pentatricopeptide repeat-containing protein At1g09220, mitochondrial-like |
| SNP_61463_A_470547 | NW_004515637.1 | scaffold2   | 470547                  | GG                              | AA                 | AA               | INTERGENIC                    |                    |                                                                           |

| SNPs IDs           | Chromosome IDs | Chromosomes | Physical positions (bp) | CDC Frontier (Reference genome) | (Pusa 1103 & HPNB) | (ILWC 46 & LPNB) | Sequence genome | Components of | Gene accession IDs | Putative functions |
|--------------------|----------------|-------------|-------------------------|---------------------------------|--------------------|------------------|-----------------|---------------|--------------------|--------------------|
| SNP_61464_A_472745 | NW_004515637.1 | scaffold2   | 472745                  | TT                              | CC                 | CC               | INTERGENIC      |               |                    |                    |
| SNP_61465_A_500364 | NW_004515637.1 | scaffold2   | 500364                  | GG                              | TT                 | TT               | INTERGENIC      |               |                    |                    |
| SNP_61466_A_504086 | NW_004515637.1 | scaffold2   | 504086                  | CC                              | TT                 | TT               | INTERGENIC      |               |                    |                    |
| SNP_61467_A_504093 | NW_004515637.1 | scaffold2   | 504093                  | CC                              | TT                 | TT               | INTERGENIC      |               |                    |                    |
| SNP_61468_A_505961 | NW_004515637.1 | scaffold2   | 505961                  | TT                              | CC                 | CC               | INTERGENIC      |               |                    |                    |
| SNP_61470_A_540882 | NW_004515637.1 | scaffold2   | 540882                  | GG                              | CC                 | CC               | INTERGENIC      |               |                    |                    |
| SNP_61471_A_1496   | NW_004515638.1 | scaffold5   | 1496                    | AA                              | CC                 | CC               | INTERGENIC      |               |                    |                    |
| SNP_61472_A_1542   | NW_004515638.1 | scaffold5   | 1542                    | AA                              | GG                 | GG               | INTERGENIC      |               |                    |                    |
| SNP_61473_A_1565   | NW_004515638.1 | scaffold5   | 1565                    | AA                              | GG                 | GG               | INTERGENIC      |               |                    |                    |
| SNP_61475_A_5498   | NW_004515638.1 | scaffold5   | 5498                    | TT                              | CC                 | CC               | INTERGENIC      |               |                    |                    |
| SNP_61476_A_5948   | NW_004515638.1 | scaffold5   | 5948                    | AA                              | GG                 | GG               | INTERGENIC      |               |                    |                    |
| SNP_61477_A_17486  | NW_004515638.1 | scaffold5   | 17486                   | TT                              | CC                 | CC               | INTERGENIC      |               |                    |                    |
| SNP_61478_A_2090   | NW_004515639.1 | scaffold7   | 2090                    | TT                              | AA                 | AA               | INTERGENIC      |               |                    |                    |
| SNP_61479_A_13473  | NW_004515639.1 | scaffold7   | 13473                   | AA                              | TT                 | TT               | INTERGENIC      |               |                    |                    |
| SNP_61480_A_13474  | NW_004515639.1 | scaffold7   | 13474                   | AA                              | CC                 | CC               | INTERGENIC      |               |                    |                    |
| SNP_61481_A_13477  | NW_004515639.1 | scaffold7   | 13477                   | TT                              | CC                 | CC               | INTERGENIC      |               |                    |                    |
| SNP_61482_A_13487  | NW_004515639.1 | scaffold7   | 13487                   | GG                              | CC                 | CC               | INTERGENIC      |               |                    |                    |
| SNP_61483_A_34919  | NW_004515639.1 | scaffold7   | 34919                   | TT                              | CC                 | CC               | INTERGENIC      |               |                    |                    |
| SNP_61484_A_35156  | NW_004515639.1 | scaffold7   | 35156                   | TT                              | CC                 | CC               | INTERGENIC      |               |                    |                    |
| SNP_61485_A_50232  | NW_004515639.1 | scaffold7   | 50232                   | TT                              | CC                 | CC               | INTERGENIC      |               |                    |                    |
| SNP_61486_A_50486  | NW_004515639.1 | scaffold7   | 50486                   | GG                              | AA                 | AA               | INTERGENIC      |               |                    |                    |
| SNP_61487_A_50492  | NW_004515639.1 | scaffold7   | 50492                   | CC                              | TT                 | TT               | INTERGENIC      |               |                    |                    |



| SNPs IDs           | Chromosome IDs | Chromosomes | Physical positions (bp) | CDC Frontier genome (Reference genome) | (Pusa 1103 & HPNB) | (ILWC 46 & LPNB) | Sequence Components of genome | Gene accession IDs | Putative functions                     |
|--------------------|----------------|-------------|-------------------------|----------------------------------------|--------------------|------------------|-------------------------------|--------------------|----------------------------------------|
| SNP_61488_A_50519  | NW_004515639.1 | scaffold7   | 50519                   | CC                                     | GG                 | GG               | INTERGENIC                    |                    |                                        |
| SNP_61489_A_79369  | NW_004515639.1 | scaffold7   | 79369                   | AA                                     | GG                 | GG               | INTERGENIC                    |                    |                                        |
| SNP_61490_A_79381  | NW_004515639.1 | scaffold7   | 79381                   | GG                                     | CC                 | CC               | INTERGENIC                    |                    |                                        |
| SNP_61491_A_79393  | NW_004515639.1 | scaffold7   | 79393                   | TT                                     | CC                 | CC               | INTERGENIC                    |                    |                                        |
| SNP_61492_A_79497  | NW_004515639.1 | scaffold7   | 79497                   | TT                                     | AA                 | AA               | INTERGENIC                    |                    |                                        |
| SNP_61493_A_169671 | NW_004515639.1 | scaffold7   | 169671                  | AA                                     | TT                 | TT               | INTERGENIC                    |                    |                                        |
| SNP_61494_A_169789 | NW_004515639.1 | scaffold7   | 169789                  | AA                                     | GG                 | GG               | INTERGENIC                    |                    |                                        |
| SNP_61495_A_170154 | NW_004515639.1 | scaffold7   | 170154                  | TT                                     | CC                 | CC               | INTERGENIC                    |                    |                                        |
| SNP_61496_A_170195 | NW_004515639.1 | scaffold7   | 170195                  | AA                                     | CC                 | CC               | INTERGENIC                    |                    |                                        |
| SNP_61497_A_170228 | NW_004515639.1 | scaffold7   | 170228                  | TT                                     | CC                 | CC               | INTERGENIC                    |                    |                                        |
| SNP_61498_A_170269 | NW_004515639.1 | scaffold7   | 170269                  | AA                                     | GG                 | GG               | INTERGENIC                    |                    |                                        |
| SNP_61499_A_170303 | NW_004515639.1 | scaffold7   | 170303                  | AA                                     | TT                 | TT               | INTERGENIC                    |                    |                                        |
| SNP_61500_A_170426 | NW_004515639.1 | scaffold7   | 170426                  | TT                                     | AA                 | AA               | INTERGENIC                    |                    |                                        |
| SNP_61501_A_170445 | NW_004515639.1 | scaffold7   | 170445                  | TT                                     | CC                 | CC               | INTERGENIC                    |                    |                                        |
| SNP_61502_A_170456 | NW_004515639.1 | scaffold7   | 170456                  | AA                                     | GG                 | GG               | INTERGENIC                    |                    |                                        |
| SNP_61503_A_170476 | NW_004515639.1 | scaffold7   | 170476                  | CC                                     | TT                 | TT               | INTERGENIC                    |                    |                                        |
| SNP_61504_A_170492 | NW_004515639.1 | scaffold7   | 170492                  | TT                                     | CC                 | CC               | INTERGENIC                    |                    |                                        |
| SNP_61505_A_170515 | NW_004515639.1 | scaffold7   | 170515                  | CC                                     | TT                 | TT               | INTERGENIC                    |                    |                                        |
| SNP_61506_A_190326 | NW_004515639.1 | scaffold7   | 190326                  | CC                                     | TT                 | TT               | URR                           | 101494868          | uncharacterized protein At1g04910-like |
| SNP_61507_A_190528 | NW_004515639.1 | scaffold7   | 190528                  | TT                                     | CC                 | CC               | URR                           | 101494868          | uncharacterized protein At1g04910-like |
| SNP_61508_A_190553 | NW_004515639.1 | scaffold7   | 190553                  | TT                                     | CC                 | CC               | URR                           | 101494868          | uncharacterized protein At1g04910-like |
| SNP_61509_A_210748 | NW_004515639.1 | scaffold7   | 210748                  | AA                                     | TT                 | TT               | INTERGENIC                    |                    |                                        |

| SNPs IDs           | Chromosome IDs | Chromosomes | Physical positions (bp) | CDC Frontier (Reference genome) | (Pusa 1103 & HPNB) | (ILWC 46 & LPNB) | Sequence genome | Components of | Gene accession IDs | Putative functions |
|--------------------|----------------|-------------|-------------------------|---------------------------------|--------------------|------------------|-----------------|---------------|--------------------|--------------------|
| SNP_61510_A_210751 | NW_004515639.1 | scaffold7   | 210751                  | TT                              | CC                 | CC               | INTERGENIC      |               |                    |                    |
| SNP_61511_A_210769 | NW_004515639.1 | scaffold7   | 210769                  | AA                              | CC                 | CC               | INTERGENIC      |               |                    |                    |
| SNP_61512_A_210782 | NW_004515639.1 | scaffold7   | 210782                  | TT                              | CC                 | CC               | INTERGENIC      |               |                    |                    |
| SNP_61513_A_214542 | NW_004515639.1 | scaffold7   | 214542                  | CC                              | AA                 | AA               | INTERGENIC      |               |                    |                    |
| SNP_61514_A_214546 | NW_004515639.1 | scaffold7   | 214546                  | CC                              | AA                 | AA               | INTERGENIC      |               |                    |                    |
| SNP_61516_A_215351 | NW_004515639.1 | scaffold7   | 215351                  | TT                              | CC                 | CC               | INTERGENIC      |               |                    |                    |
| SNP_61517_A_215374 | NW_004515639.1 | scaffold7   | 215374                  | GG                              | AA                 | AA               | INTERGENIC      |               |                    |                    |
| SNP_61518_A_216613 | NW_004515639.1 | scaffold7   | 216613                  | CC                              | TT                 | TT               | INTERGENIC      |               |                    |                    |
| SNP_61519_A_247205 | NW_004515639.1 | scaffold7   | 247205                  | TT                              | CC                 | CC               | INTERGENIC      |               |                    |                    |
| SNP_61520_A_247327 | NW_004515639.1 | scaffold7   | 247327                  | GG                              | AA                 | AA               | INTERGENIC      |               |                    |                    |
| SNP_61521_A_247347 | NW_004515639.1 | scaffold7   | 247347                  | CC                              | TT                 | TT               | INTERGENIC      |               |                    |                    |
| SNP_61522_A_247349 | NW_004515639.1 | scaffold7   | 247349                  | GG                              | AA                 | AA               | INTERGENIC      |               |                    |                    |
| SNP_61523_A_247413 | NW_004515639.1 | scaffold7   | 247413                  | TT                              | AA                 | AA               | INTERGENIC      |               |                    |                    |
| SNP_61524_A_254693 | NW_004515639.1 | scaffold7   | 254693                  | AA                              | GG                 | GG               | INTERGENIC      |               |                    |                    |
| SNP_61525_A_254724 | NW_004515639.1 | scaffold7   | 254724                  | TT                              | CC                 | CC               | INTERGENIC      |               |                    |                    |
| SNP_61526_A_254883 | NW_004515639.1 | scaffold7   | 254883                  | AA                              | GG                 | GG               | INTERGENIC      |               |                    |                    |
| SNP_61527_A_255130 | NW_004515639.1 | scaffold7   | 255130                  | GG                              | TT                 | TT               | INTERGENIC      |               |                    |                    |
| SNP_61528_A_255148 | NW_004515639.1 | scaffold7   | 255148                  | TT                              | CC                 | CC               | INTERGENIC      |               |                    |                    |
| SNP_61529_A_255206 | NW_004515639.1 | scaffold7   | 255206                  | TT                              | CC                 | CC               | INTERGENIC      |               |                    |                    |
| SNP_61530_A_255261 | NW_004515639.1 | scaffold7   | 255261                  | TT                              | CC                 | CC               | INTERGENIC      |               |                    |                    |
| SNP_61531_A_273442 | NW_004515639.1 | scaffold7   | 273442                  | AA                              | GG                 | GG               | INTERGENIC      |               |                    |                    |
| SNP_61532_A_273446 | NW_004515639.1 | scaffold7   | 273446                  | TT                              | GG                 | GG               | INTERGENIC      |               |                    |                    |

| SNPs IDs           | Chromosome IDs | Chromosomes | Physical positions (bp) | CDC Frontier (Reference genome) | (Pusa 1103 & HPNB) | (ILWC 46 & LPNB) | Sequence genome | Components of | Gene accession IDs | Putative functions |
|--------------------|----------------|-------------|-------------------------|---------------------------------|--------------------|------------------|-----------------|---------------|--------------------|--------------------|
| SNP_61533_A_273473 | NW_004515639.1 | scaffold7   | 273473                  | TT                              | CC                 | CC               | INTERGENIC      |               |                    |                    |
| SNP_61534_A_273489 | NW_004515639.1 | scaffold7   | 273489                  | TT                              | CC                 | CC               | INTERGENIC      |               |                    |                    |
| SNP_61535_A_273811 | NW_004515639.1 | scaffold7   | 273811                  | AA                              | GG                 | GG               | INTERGENIC      |               |                    |                    |
| SNP_61536_A_274011 | NW_004515639.1 | scaffold7   | 274011                  | TT                              | GG                 | GG               | INTERGENIC      |               |                    |                    |
| SNP_61537_A_274038 | NW_004515639.1 | scaffold7   | 274038                  | GG                              | AA                 | AA               | INTERGENIC      |               |                    |                    |
| SNP_61538_A_274049 | NW_004515639.1 | scaffold7   | 274049                  | TT                              | GG                 | GG               | INTERGENIC      |               |                    |                    |
| SNP_61539_A_274147 | NW_004515639.1 | scaffold7   | 274147                  | AA                              | CC                 | CC               | INTERGENIC      |               |                    |                    |
| SNP_61540_A_274275 | NW_004515639.1 | scaffold7   | 274275                  | TT                              | AA                 | AA               | INTERGENIC      |               |                    |                    |
| SNP_61541_A_2005   | NW_004515640.1 | scaffold9   | 2005                    | CC                              | TT                 | TT               | INTERGENIC      |               |                    |                    |
| SNP_61542_A_8572   | NW_004515640.1 | scaffold9   | 8572                    | AA                              | CC                 | CC               | INTERGENIC      |               |                    |                    |
| SNP_61543_A_8663   | NW_004515640.1 | scaffold9   | 8663                    | CC                              | TT                 | TT               | INTERGENIC      |               |                    |                    |
| SNP_61544_A_8691   | NW_004515640.1 | scaffold9   | 8691                    | TT                              | CC                 | CC               | INTERGENIC      |               |                    |                    |
| SNP_61545_A_8698   | NW_004515640.1 | scaffold9   | 8698                    | AA                              | TT                 | TT               | INTERGENIC      |               |                    |                    |
| SNP_61546_A_12609  | NW_004515640.1 | scaffold9   | 12609                   | CC                              | TT                 | TT               | INTERGENIC      |               |                    |                    |
| SNP_61547_A_22315  | NW_004515640.1 | scaffold9   | 22315                   | TT                              | GG                 | GG               | INTERGENIC      |               |                    |                    |
| SNP_61548_A_34558  | NW_004515640.1 | scaffold9   | 34558                   | GG                              | TT                 | TT               | INTERGENIC      |               |                    |                    |
| SNP_61549_A_34564  | NW_004515640.1 | scaffold9   | 34564                   | AA                              | GG                 | GG               | INTERGENIC      |               |                    |                    |
| SNP_61551_A_34943  | NW_004515640.1 | scaffold9   | 34943                   | TT                              | AA                 | AA               | INTERGENIC      |               |                    |                    |
| SNP_61552_A_35106  | NW_004515640.1 | scaffold9   | 35106                   | TT                              | AA                 | AA               | INTERGENIC      |               |                    |                    |
| SNP_61553_A_76369  | NW_004515640.1 | scaffold9   | 76369                   | GG                              | AA                 | AA               | INTERGENIC      |               |                    |                    |
| SNP_61554_A_76398  | NW_004515640.1 | scaffold9   | 76398                   | AA                              | CC                 | CC               | INTERGENIC      |               |                    |                    |
| SNP_61555_A_76412  | NW_004515640.1 | scaffold9   | 76412                   | AA                              | GG                 | GG               | INTERGENIC      |               |                    |                    |

| SNPs IDs          | Chromosome IDs | Chromosomes | Physical positions (bp) | CDC Frontier (Reference genome) | (Pusa 1103 & HPNB) | (ILWC 46 & LPNB) | Sequence Components of genome | Gene accession IDs | Putative functions           |
|-------------------|----------------|-------------|-------------------------|---------------------------------|--------------------|------------------|-------------------------------|--------------------|------------------------------|
| SNP_61556_A_76908 | NW_004515640.1 | scaffold9   | 76908                   | GG                              | AA                 | AA               | INTERGENIC                    |                    |                              |
| SNP_61557_A_76965 | NW_004515640.1 | scaffold9   | 76965                   | AA                              | GG                 | GG               | INTERGENIC                    |                    |                              |
| SNP_61558_A_94203 | NW_004515640.1 | scaffold9   | 94203                   | GG                              | AA                 | AA               | INTERGENIC                    |                    |                              |
| SNP_61559_A_94207 | NW_004515640.1 | scaffold9   | 94207                   | TT                              | AA                 | AA               | INTERGENIC                    |                    |                              |
| SNP_61560_A_97339 | NW_004515640.1 | scaffold9   | 97339                   | TT                              | GG                 | GG               | INTERGENIC                    |                    |                              |
| SNP_61561_A_97386 | NW_004515640.1 | scaffold9   | 97386                   | GG                              | AA                 | AA               | INTERGENIC                    |                    |                              |
| SNP_61562_A_97444 | NW_004515640.1 | scaffold9   | 97444                   | TT                              | CC                 | CC               | INTERGENIC                    |                    |                              |
| SNP_61563_A_97603 | NW_004515640.1 | scaffold9   | 97603                   | GG                              | AA                 | AA               | INTERGENIC                    |                    |                              |
| SNP_61564_A_97606 | NW_004515640.1 | scaffold9   | 97606                   | TT                              | CC                 | CC               | INTERGENIC                    |                    |                              |
| SNP_61565_A_97638 | NW_004515640.1 | scaffold9   | 97638                   | CC                              | TT                 | TT               | INTERGENIC                    |                    |                              |
| SNP_61566_A_8732  | NW_004515641.1 | scaffold10  | 8732                    | CC                              | TT                 | TT               | DRR                           | 101497921          | uncharacterized LOC101497921 |
| SNP_61567_A_19910 | NW_004515641.1 | scaffold10  | 19910                   | CC                              | TT                 | TT               | URR                           | 101497921          | uncharacterized LOC101497921 |
| SNP_61568_A_23757 | NW_004515641.1 | scaffold10  | 23757                   | TT                              | CC                 | CC               | INTERGENIC                    |                    |                              |
| SNP_61569_A_34142 | NW_004515641.1 | scaffold10  | 34142                   | TT                              | AA                 | AA               | INTERGENIC                    |                    |                              |
| SNP_61570_A_34624 | NW_004515641.1 | scaffold10  | 34624                   | CC                              | TT                 | TT               | INTERGENIC                    |                    |                              |
| SNP_61571_A_34629 | NW_004515641.1 | scaffold10  | 34629                   | CC                              | TT                 | TT               | INTERGENIC                    |                    |                              |
| SNP_61572_A_34670 | NW_004515641.1 | scaffold10  | 34670                   | GG                              | CC                 | CC               | INTERGENIC                    |                    |                              |
| SNP_61573_A_34673 | NW_004515641.1 | scaffold10  | 34673                   | GG                              | AA                 | AA               | INTERGENIC                    |                    |                              |
| SNP_61574_A_34708 | NW_004515641.1 | scaffold10  | 34708                   | AA                              | TT                 | TT               | INTERGENIC                    |                    |                              |
| SNP_61575_A_34724 | NW_004515641.1 | scaffold10  | 34724                   | AA                              | GG                 | GG               | INTERGENIC                    |                    |                              |
| SNP_61576_A_63918 | NW_004515641.1 | scaffold10  | 63918                   | GG                              | CC                 | CC               | INTERGENIC                    |                    |                              |
| SNP_61578_A_70781 | NW_004515641.1 | scaffold10  | 70781                   | AA                              | GG                 | GG               | INTERGENIC                    |                    |                              |

| SNPs IDs          | Chromosome IDs | Chromosomes | Physical positions (bp) | CDC Frontier (Reference genome) | (Pusa 1103 & HPNB) | (ILWC 46 & LPNB) | Sequence Components of genome | Gene accession IDs | Putative functions           |
|-------------------|----------------|-------------|-------------------------|---------------------------------|--------------------|------------------|-------------------------------|--------------------|------------------------------|
| SNP_61579_A_87374 | NW_004515641.1 | scaffold10  | 87374                   | CC                              | TT                 | TT               | URR                           | 101498575          | uncharacterized LOC101498575 |
| SNP_61580_A_87377 | NW_004515641.1 | scaffold10  | 87377                   | GG                              | TT                 | TT               | URR                           | 101498575          | uncharacterized LOC101498575 |
| SNP_61581_A_87401 | NW_004515641.1 | scaffold10  | 87401                   | TT                              | CC                 | CC               | URR                           | 101498575          | uncharacterized LOC101498575 |
| SNP_61582_A_87411 | NW_004515641.1 | scaffold10  | 87411                   | TT                              | CC                 | CC               | URR                           | 101498575          | uncharacterized LOC101498575 |
| SNP_61583_A_87424 | NW_004515641.1 | scaffold10  | 87424                   | AA                              | GG                 | GG               | URR                           | 101498575          | uncharacterized LOC101498575 |
| SNP_61584_A_87462 | NW_004515641.1 | scaffold10  | 87462                   | CC                              | AA                 | AA               | URR                           | 101498575          | uncharacterized LOC101498575 |
| SNP_61585_A_87494 | NW_004515641.1 | scaffold10  | 87494                   | AA                              | GG                 | GG               | URR                           | 101498575          | uncharacterized LOC101498575 |
| SNP_61586_A_87763 | NW_004515641.1 | scaffold10  | 87763                   | AA                              | GG                 | GG               | URR                           | 101498575          | uncharacterized LOC101498575 |
| SNP_61587_A_87818 | NW_004515641.1 | scaffold10  | 87818                   | AA                              | GG                 | GG               | URR                           | 101498575          | uncharacterized LOC101498575 |
| SNP_61588_A_87907 | NW_004515641.1 | scaffold10  | 87907                   | TT                              | CC                 | CC               | URR                           | 101498575          | uncharacterized LOC101498575 |
| SNP_61589_A_91491 | NW_004515641.1 | scaffold10  | 91491                   | TT                              | AA                 | AA               | URR                           | 101498911          | uncharacterized LOC101498911 |
| SNP_61590_A_91517 | NW_004515641.1 | scaffold10  | 91517                   | TT                              | CC                 | CC               | URR                           | 101498911          | uncharacterized LOC101498911 |
| SNP_61591_A_91561 | NW_004515641.1 | scaffold10  | 91561                   | CC                              | TT                 | TT               | URR                           | 101498911          | uncharacterized LOC101498911 |
| SNP_61592_A_91619 | NW_004515641.1 | scaffold10  | 91619                   | GG                              | TT                 | TT               | URR                           | 101498911          | uncharacterized LOC101498911 |
| SNP_61593_A_91669 | NW_004515641.1 | scaffold10  | 91669                   | TT                              | AA                 | AA               | URR                           | 101498911          | uncharacterized LOC101498911 |
| SNP_61594_A_91720 | NW_004515641.1 | scaffold10  | 91720                   | AA                              | CC                 | CC               | URR                           | 101498911          | uncharacterized LOC101498911 |
| SNP_61595_A_91809 | NW_004515641.1 | scaffold10  | 91809                   | AA                              | GG                 | GG               | URR                           | 101498911          | uncharacterized LOC101498911 |
| SNP_61596_A_91886 | NW_004515641.1 | scaffold10  | 91886                   | CC                              | TT                 | TT               | URR                           | 101498911          | uncharacterized LOC101498911 |
| SNP_61597_A_91889 | NW_004515641.1 | scaffold10  | 91889                   | GG                              | TT                 | TT               | URR                           | 101498911          | uncharacterized LOC101498911 |
| SNP_61598_A_91909 | NW_004515641.1 | scaffold10  | 91909                   | GG                              | CC                 | CC               | URR                           | 101498911          | uncharacterized LOC101498911 |
| SNP_61599_A_91913 | NW_004515641.1 | scaffold10  | 91913                   | TT                              | CC                 | CC               | URR                           | 101498911          | uncharacterized LOC101498911 |
| SNP_61600_A_91923 | NW_004515641.1 | scaffold10  | 91923                   | TT                              | CC                 | CC               | URR                           | 101498911          | uncharacterized LOC101498911 |

| SNPs IDs           | Chromosome IDs | Chromosomes | Physical positions (bp) | CDC Frontier (Reference genome) | (Pusa 1103 & HPNB) | (ILWC 46 & LPNB) | Sequence genome | Components of | Gene accession IDs | Putative functions                     |
|--------------------|----------------|-------------|-------------------------|---------------------------------|--------------------|------------------|-----------------|---------------|--------------------|----------------------------------------|
| SNP_61601_A_91974  | NW_004515641.1 | scaffold10  | 91974                   | CC                              | AA                 | AA               | URR             |               | 101498911          | uncharacterized LOC101498911           |
| SNP_61602_A_92031  | NW_004515641.1 | scaffold10  | 92031                   | GG                              | AA                 | AA               | URR             |               | 101498911          | uncharacterized LOC101498911           |
| SNP_61603_A_92049  | NW_004515641.1 | scaffold10  | 92049                   | AA                              | CC                 | CC               | URR             |               | 101498911          | uncharacterized LOC101498911           |
| SNP_61604_A_92064  | NW_004515641.1 | scaffold10  | 92064                   | CC                              | AA                 | AA               | URR             |               | 101498911          | uncharacterized LOC101498911           |
| SNP_61605_A_92222  | NW_004515641.1 | scaffold10  | 92222                   | GG                              | AA                 | AA               | URR             |               | 101498911          | uncharacterized LOC101498911           |
| SNP_61606_A_92249  | NW_004515641.1 | scaffold10  | 92249                   | CC                              | AA                 | AA               | URR             |               | 101498911          | uncharacterized LOC101498911           |
| SNP_61607_A_92594  | NW_004515641.1 | scaffold10  | 92594                   | TT                              | CC                 | CC               | URR             |               | 101498911          | uncharacterized LOC101498911           |
| SNP_61608_A_92600  | NW_004515641.1 | scaffold10  | 92600                   | CC                              | TT                 | TT               | URR             |               | 101498911          | uncharacterized LOC101498911           |
| SNP_61609_A_92602  | NW_004515641.1 | scaffold10  | 92602                   | AA                              | CC                 | CC               | URR             |               | 101498911          | uncharacterized LOC101498911           |
| SNP_61610_A_29634  | NW_004515642.1 | scaffold11  | 29634                   | AA                              | CC                 | CC               | INTERGENIC      |               |                    |                                        |
| SNP_61611_A_29635  | NW_004515642.1 | scaffold11  | 29635                   | TT                              | AA                 | AA               | INTERGENIC      |               |                    |                                        |
| SNP_61612_A_9022   | NW_004515643.1 | scaffold12  | 9022                    | CC                              | AA                 | AA               | URR             |               | 101500076          | 40S ribosomal protein S8-like          |
| SNP_61613_A_16084  | NW_004515643.1 | scaffold12  | 16084                   | TT                              | CC                 | CC               | INTRON          |               | 101499236          | ABC transporter A family member 4-like |
| SNP_61614_A_16408  | NW_004515643.1 | scaffold12  | 16408                   | AA                              | GG                 | GG               | INTRON          |               | 101499236          | ABC transporter A family member 4-like |
| SNP_61615_A_16671  | NW_004515643.1 | scaffold12  | 16671                   | TT                              | CC                 | CC               | INTRON          |               | 101499236          | ABC transporter A family member 4-like |
| SNP_61616_A_16673  | NW_004515643.1 | scaffold12  | 16673                   | GG                              | AA                 | AA               | INTRON          |               | 101499236          | ABC transporter A family member 4-like |
| SNP_61617_A_16708  | NW_004515643.1 | scaffold12  | 16708                   | CC                              | AA                 | AA               | INTRON          |               | 101499236          | ABC transporter A family member 4-like |
| SNP_61618_A_58048  | NW_004515643.1 | scaffold12  | 58048                   | AA                              | GG                 | GG               | INTERGENIC      |               |                    |                                        |
| SNP_61619_A_58049  | NW_004515643.1 | scaffold12  | 58049                   | AA                              | GG                 | GG               | INTERGENIC      |               |                    |                                        |
| SNP_61620_A_101921 | NW_004515643.1 | scaffold12  | 101921                  | CC                              | AA                 | AA               | INTERGENIC      |               |                    |                                        |
| SNP_61621_A_110511 | NW_004515643.1 | scaffold12  | 110511                  | GG                              | AA                 | AA               | INTERGENIC      |               |                    |                                        |
| SNP_61622_A_110515 | NW_004515643.1 | scaffold12  | 110515                  | AA                              | CC                 | CC               | INTERGENIC      |               |                    |                                        |

| SNPs IDs           | Chromosome IDs | Chromosomes | Physical positions (bp) | CDC Frontier (Reference genome) | (Pusa 1103 & HPNB) | (ILWC 46 & LPNB) | Sequence genome | Components of | Gene accession IDs | Putative functions |
|--------------------|----------------|-------------|-------------------------|---------------------------------|--------------------|------------------|-----------------|---------------|--------------------|--------------------|
| SNP_61623_A_110556 | NW_004515643.1 | scaffold12  | 110556                  | GG                              | TT                 | TT               | INTERGENIC      |               |                    |                    |
| SNP_61624_A_110572 | NW_004515643.1 | scaffold12  | 110572                  | GG                              | TT                 | TT               | INTERGENIC      |               |                    |                    |
| SNP_61625_A_110680 | NW_004515643.1 | scaffold12  | 110680                  | TT                              | CC                 | CC               | INTERGENIC      |               |                    |                    |
| SNP_61626_A_110734 | NW_004515643.1 | scaffold12  | 110734                  | AA                              | TT                 | TT               | INTERGENIC      |               |                    |                    |
| SNP_61629_A_159630 | NW_004515643.1 | scaffold12  | 159630                  | AA                              | CC                 | CC               | INTERGENIC      |               |                    |                    |
| SNP_61630_A_160461 | NW_004515643.1 | scaffold12  | 160461                  | GG                              | AA                 | AA               | INTERGENIC      |               |                    |                    |
| SNP_61631_A_160462 | NW_004515643.1 | scaffold12  | 160462                  | AA                              | TT                 | TT               | INTERGENIC      |               |                    |                    |
| SNP_61632_A_160466 | NW_004515643.1 | scaffold12  | 160466                  | CC                              | TT                 | TT               | INTERGENIC      |               |                    |                    |
| SNP_61633_A_160519 | NW_004515643.1 | scaffold12  | 160519                  | GG                              | TT                 | TT               | INTERGENIC      |               |                    |                    |
| SNP_61634_A_160563 | NW_004515643.1 | scaffold12  | 160563                  | GG                              | AA                 | AA               | INTERGENIC      |               |                    |                    |
| SNP_61635_A_161007 | NW_004515643.1 | scaffold12  | 161007                  | TT                              | GG                 | GG               | INTERGENIC      |               |                    |                    |
| SNP_61636_A_190055 | NW_004515643.1 | scaffold12  | 190055                  | CC                              | TT                 | TT               | INTERGENIC      |               |                    |                    |
| SNP_61637_A_198390 | NW_004515643.1 | scaffold12  | 198390                  | GG                              | AA                 | AA               | INTERGENIC      |               |                    |                    |
| SNP_61638_A_198432 | NW_004515643.1 | scaffold12  | 198432                  | TT                              | CC                 | CC               | INTERGENIC      |               |                    |                    |
| SNP_61639_A_198467 | NW_004515643.1 | scaffold12  | 198467                  | GG                              | CC                 | CC               | INTERGENIC      |               |                    |                    |
| SNP_61640_A_198484 | NW_004515643.1 | scaffold12  | 198484                  | AA                              | GG                 | GG               | INTERGENIC      |               |                    |                    |
| SNP_61641_A_198500 | NW_004515643.1 | scaffold12  | 198500                  | TT                              | CC                 | CC               | INTERGENIC      |               |                    |                    |
| SNP_61642_A_198507 | NW_004515643.1 | scaffold12  | 198507                  | AA                              | GG                 | GG               | INTERGENIC      |               |                    |                    |
| SNP_61643_A_198691 | NW_004515643.1 | scaffold12  | 198691                  | TT                              | CC                 | CC               | INTERGENIC      |               |                    |                    |
| SNP_61644_A_198772 | NW_004515643.1 | scaffold12  | 198772                  | GG                              | TT                 | TT               | INTERGENIC      |               |                    |                    |
| SNP_61645_A_198824 | NW_004515643.1 | scaffold12  | 198824                  | GG                              | AA                 | AA               | INTERGENIC      |               |                    |                    |
| SNP_61646_A_198895 | NW_004515643.1 | scaffold12  | 198895                  | TT                              | CC                 | CC               | INTERGENIC      |               |                    |                    |

| SNPs IDs           | Chromosome IDs | Chromosomes | Physical positions (bp) | CDC Frontier (Reference genome) | (Pusa 1103 & HPNB) | (ILWC 46 & LPNB) | Sequence genome | Components of | Gene accession IDs | Putative functions |
|--------------------|----------------|-------------|-------------------------|---------------------------------|--------------------|------------------|-----------------|---------------|--------------------|--------------------|
| SNP_61648_A_238157 | NW_004515643.1 | scaffold12  | 238157                  | CC                              | AA                 | AA               | INTERGENIC      |               |                    |                    |
| SNP_61649_A_238190 | NW_004515643.1 | scaffold12  | 238190                  | TT                              | CC                 | CC               | INTERGENIC      |               |                    |                    |
| SNP_61650_A_238192 | NW_004515643.1 | scaffold12  | 238192                  | GG                              | TT                 | TT               | INTERGENIC      |               |                    |                    |
| SNP_61651_A_238197 | NW_004515643.1 | scaffold12  | 238197                  | AA                              | GG                 | GG               | INTERGENIC      |               |                    |                    |
| SNP_61652_A_238267 | NW_004515643.1 | scaffold12  | 238267                  | TT                              | CC                 | CC               | INTERGENIC      |               |                    |                    |
| SNP_61653_A_238270 | NW_004515643.1 | scaffold12  | 238270                  | TT                              | CC                 | CC               | INTERGENIC      |               |                    |                    |
| SNP_61654_A_238282 | NW_004515643.1 | scaffold12  | 238282                  | AA                              | GG                 | GG               | INTERGENIC      |               |                    |                    |
| SNP_61655_A_239915 | NW_004515643.1 | scaffold12  | 239915                  | AA                              | CC                 | CC               | INTERGENIC      |               |                    |                    |
| SNP_61656_A_240489 | NW_004515643.1 | scaffold12  | 240489                  | CC                              | GG                 | GG               | INTERGENIC      |               |                    |                    |
| SNP_61657_A_240560 | NW_004515643.1 | scaffold12  | 240560                  | CC                              | GG                 | GG               | INTERGENIC      |               |                    |                    |
| SNP_61658_A_240853 | NW_004515643.1 | scaffold12  | 240853                  | CC                              | GG                 | GG               | INTERGENIC      |               |                    |                    |
| SNP_61659_A_245295 | NW_004515643.1 | scaffold12  | 245295                  | CC                              | TT                 | TT               | INTERGENIC      |               |                    |                    |
| SNP_61660_A_245318 | NW_004515643.1 | scaffold12  | 245318                  | GG                              | AA                 | AA               | INTERGENIC      |               |                    |                    |
| SNP_61661_A_245338 | NW_004515643.1 | scaffold12  | 245338                  | TT                              | GG                 | GG               | INTERGENIC      |               |                    |                    |
| SNP_61663_A_279606 | NW_004515643.1 | scaffold12  | 279606                  | GG                              | TT                 | TT               | INTERGENIC      |               |                    |                    |
| SNP_61664_A_280720 | NW_004515643.1 | scaffold12  | 280720                  | TT                              | CC                 | CC               | INTERGENIC      |               |                    |                    |
| SNP_61665_A_296029 | NW_004515643.1 | scaffold12  | 296029                  | GG                              | AA                 | AA               | INTERGENIC      |               |                    |                    |
| SNP_61666_A_296054 | NW_004515643.1 | scaffold12  | 296054                  | AA                              | GG                 | GG               | INTERGENIC      |               |                    |                    |
| SNP_61667_A_296064 | NW_004515643.1 | scaffold12  | 296064                  | AA                              | GG                 | GG               | INTERGENIC      |               |                    |                    |
| SNP_61668_A_296078 | NW_004515643.1 | scaffold12  | 296078                  | GG                              | TT                 | TT               | INTERGENIC      |               |                    |                    |
| SNP_61669_A_296079 | NW_004515643.1 | scaffold12  | 296079                  | CC                              | TT                 | TT               | INTERGENIC      |               |                    |                    |
| SNP_61670_A_296247 | NW_004515643.1 | scaffold12  | 296247                  | AA                              | GG                 | GG               | INTERGENIC      |               |                    |                    |



| SNPs IDs           | Chromosome IDs | Chromosomes | Physical positions (bp) | CDC Frontier (Reference genome) | (Pusa 1103 & HPNB) | (ILWC 46 & LPNB) | Sequence genome | Components of | Gene accession IDs | Putative functions |
|--------------------|----------------|-------------|-------------------------|---------------------------------|--------------------|------------------|-----------------|---------------|--------------------|--------------------|
| SNP_61671_A_296449 | NW_004515643.1 | scaffold12  | 296449                  | AA                              | GG                 | GG               | INTERGENIC      |               |                    |                    |
| SNP_61672_A_296500 | NW_004515643.1 | scaffold12  | 296500                  | TT                              | GG                 | GG               | INTERGENIC      |               |                    |                    |
| SNP_61673_A_296528 | NW_004515643.1 | scaffold12  | 296528                  | TT                              | CC                 | CC               | INTERGENIC      |               |                    |                    |
| SNP_61674_A_296538 | NW_004515643.1 | scaffold12  | 296538                  | TT                              | CC                 | CC               | INTERGENIC      |               |                    |                    |
| SNP_61675_A_296582 | NW_004515643.1 | scaffold12  | 296582                  | TT                              | CC                 | CC               | INTERGENIC      |               |                    |                    |
| SNP_61676_A_305949 | NW_004515643.1 | scaffold12  | 305949                  | GG                              | TT                 | TT               | INTERGENIC      |               |                    |                    |
| SNP_61677_A_352166 | NW_004515643.1 | scaffold12  | 352166                  | CC                              | GG                 | GG               | INTERGENIC      |               |                    |                    |
| SNP_61679_A_3143   | NW_004515644.1 | scaffold13  | 3143                    | CC                              | TT                 | TT               | INTERGENIC      |               |                    |                    |
| SNP_61680_A_3481   | NW_004515644.1 | scaffold13  | 3481                    | TT                              | AA                 | AA               | INTERGENIC      |               |                    |                    |
| SNP_61681_A_3505   | NW_004515644.1 | scaffold13  | 3505                    | TT                              | AA                 | AA               | INTERGENIC      |               |                    |                    |
| SNP_61682_A_14219  | NW_004515644.1 | scaffold13  | 14219                   | TT                              | AA                 | AA               | INTERGENIC      |               |                    |                    |
| SNP_61683_A_14429  | NW_004515644.1 | scaffold13  | 14429                   | CC                              | AA                 | AA               | INTERGENIC      |               |                    |                    |
| SNP_61684_A_14430  | NW_004515644.1 | scaffold13  | 14430                   | CC                              | TT                 | TT               | INTERGENIC      |               |                    |                    |
| SNP_61685_A_16956  | NW_004515644.1 | scaffold13  | 16956                   | GG                              | CC                 | CC               | INTERGENIC      |               |                    |                    |
| SNP_61686_A_16980  | NW_004515644.1 | scaffold13  | 16980                   | TT                              | CC                 | CC               | INTERGENIC      |               |                    |                    |
| SNP_61687_A_16992  | NW_004515644.1 | scaffold13  | 16992                   | TT                              | CC                 | CC               | INTERGENIC      |               |                    |                    |
| SNP_61688_A_16995  | NW_004515644.1 | scaffold13  | 16995                   | AA                              | TT                 | TT               | INTERGENIC      |               |                    |                    |
| SNP_61689_A_17080  | NW_004515644.1 | scaffold13  | 17080                   | CC                              | AA                 | AA               | INTERGENIC      |               |                    |                    |
| SNP_61690_A_17081  | NW_004515644.1 | scaffold13  | 17081                   | TT                              | CC                 | CC               | INTERGENIC      |               |                    |                    |
| SNP_61691_A_17127  | NW_004515644.1 | scaffold13  | 17127                   | AA                              | TT                 | TT               | INTERGENIC      |               |                    |                    |
| SNP_61692_A_17201  | NW_004515644.1 | scaffold13  | 17201                   | GG                              | CC                 | CC               | INTERGENIC      |               |                    |                    |
| SNP_61693_A_22753  | NW_004515644.1 | scaffold13  | 22753                   | AA                              | TT                 | TT               | INTERGENIC      |               |                    |                    |

| SNPs IDs          | Chromosome IDs | Chromosomes | Physical positions (bp) | CDC Frontier (Reference genome) | (Pusa 1103 & HPNB) | (ILWC 46 & LPNB) | Sequence Components of genome | Gene accession IDs | Putative functions |
|-------------------|----------------|-------------|-------------------------|---------------------------------|--------------------|------------------|-------------------------------|--------------------|--------------------|
| SNP_61694_A_22968 | NW_004515644.1 | scaffold13  | 22968                   | TT                              | GG                 | GG               | INTERGENIC                    |                    |                    |
| SNP_61695_A_26400 | NW_004515644.1 | scaffold13  | 26400                   | CC                              | GG                 | GG               | INTERGENIC                    |                    |                    |
| SNP_61696_A_26629 | NW_004515644.1 | scaffold13  | 26629                   | TT                              | AA                 | AA               | INTERGENIC                    |                    |                    |
| SNP_61697_A_26690 | NW_004515644.1 | scaffold13  | 26690                   | AA                              | GG                 | GG               | INTERGENIC                    |                    |                    |
| SNP_61698_A_32872 | NW_004515644.1 | scaffold13  | 32872                   | TT                              | GG                 | GG               | URR                           | 101502311          | protein YLS9-like  |
| SNP_61699_A_32946 | NW_004515644.1 | scaffold13  | 32946                   | CC                              | TT                 | TT               | URR                           | 101502311          | protein YLS9-like  |
| SNP_61700_A_32987 | NW_004515644.1 | scaffold13  | 32987                   | AA                              | TT                 | TT               | URR                           | 101502311          | protein YLS9-like  |
| SNP_61701_A_33032 | NW_004515644.1 | scaffold13  | 33032                   | AA                              | GG                 | GG               | URR                           | 101502311          | protein YLS9-like  |
| SNP_61702_A_33049 | NW_004515644.1 | scaffold13  | 33049                   | CC                              | TT                 | TT               | URR                           | 101502311          | protein YLS9-like  |
| SNP_61703_A_33061 | NW_004515644.1 | scaffold13  | 33061                   | GG                              | AA                 | AA               | URR                           | 101502311          | protein YLS9-like  |
| SNP_61704_A_33074 | NW_004515644.1 | scaffold13  | 33074                   | CC                              | GG                 | GG               | URR                           | 101502311          | protein YLS9-like  |
| SNP_61705_A_33098 | NW_004515644.1 | scaffold13  | 33098                   | AA                              | TT                 | TT               | URR                           | 101502311          | protein YLS9-like  |
| SNP_61706_A_33099 | NW_004515644.1 | scaffold13  | 33099                   | TT                              | CC                 | CC               | URR                           | 101502311          | protein YLS9-like  |
| SNP_61707_A_33103 | NW_004515644.1 | scaffold13  | 33103                   | TT                              | CC                 | CC               | URR                           | 101502311          | protein YLS9-like  |
| SNP_61708_A_33150 | NW_004515644.1 | scaffold13  | 33150                   | AA                              | GG                 | GG               | URR                           | 101502311          | protein YLS9-like  |
| SNP_61709_A_33375 | NW_004515644.1 | scaffold13  | 33375                   | CC                              | TT                 | TT               | URR                           | 101502311          | protein YLS9-like  |
| SNP_61710_A_33806 | NW_004515644.1 | scaffold13  | 33806                   | CC                              | AA                 | AA               | INTERGENIC                    |                    |                    |
| SNP_61711_A_40505 | NW_004515644.1 | scaffold13  | 40505                   | CC                              | TT                 | TT               | INTERGENIC                    |                    |                    |
| SNP_61712_A_44106 | NW_004515644.1 | scaffold13  | 44106                   | AA                              | GG                 | GG               | INTERGENIC                    |                    |                    |
| SNP_61713_A_46012 | NW_004515644.1 | scaffold13  | 46012                   | AA                              | GG                 | GG               | INTERGENIC                    |                    |                    |
| SNP_61714_A_56499 | NW_004515644.1 | scaffold13  | 56499                   | TT                              | AA                 | AA               | INTERGENIC                    |                    |                    |
| SNP_61715_A_70809 | NW_004515644.1 | scaffold13  | 70809                   | AA                              | GG                 | GG               | INTERGENIC                    |                    |                    |

| SNPs IDs          | Chromosome IDs | Chromosomes | Physical positions (bp) | CDC Frontier (Reference genome) | (Pusa 1103 & HPNB) | (ILWC 46 & LPNB) | Sequence genome | Components of | Gene accession IDs | Putative functions |
|-------------------|----------------|-------------|-------------------------|---------------------------------|--------------------|------------------|-----------------|---------------|--------------------|--------------------|
| SNP_61716_A_70931 | NW_004515644.1 | scaffold13  | 70931                   | AA                              | TT                 | TT               | INTERGENIC      |               |                    |                    |
| SNP_61717_A_71274 | NW_004515644.1 | scaffold13  | 71274                   | CC                              | TT                 | TT               | INTERGENIC      |               |                    |                    |
| SNP_61718_A_85142 | NW_004515644.1 | scaffold13  | 85142                   | AA                              | CC                 | CC               | INTERGENIC      |               |                    |                    |
| SNP_61719_A_85154 | NW_004515644.1 | scaffold13  | 85154                   | TT                              | CC                 | CC               | INTERGENIC      |               |                    |                    |
| SNP_61720_A_85174 | NW_004515644.1 | scaffold13  | 85174                   | CC                              | TT                 | TT               | INTERGENIC      |               |                    |                    |
| SNP_61721_A_85178 | NW_004515644.1 | scaffold13  | 85178                   | TT                              | CC                 | CC               | INTERGENIC      |               |                    |                    |
| SNP_61722_A_85182 | NW_004515644.1 | scaffold13  | 85182                   | TT                              | AA                 | AA               | INTERGENIC      |               |                    |                    |
| SNP_61723_A_85195 | NW_004515644.1 | scaffold13  | 85195                   | GG                              | AA                 | AA               | INTERGENIC      |               |                    |                    |
| SNP_61724_A_85199 | NW_004515644.1 | scaffold13  | 85199                   | CC                              | TT                 | TT               | INTERGENIC      |               |                    |                    |
| SNP_61725_A_85201 | NW_004515644.1 | scaffold13  | 85201                   | TT                              | CC                 | CC               | INTERGENIC      |               |                    |                    |
| SNP_61726_A_3654  | NW_004515645.1 | scaffold15  | 3654                    | AA                              | TT                 | TT               | INTERGENIC      |               |                    |                    |
| SNP_61727_A_9084  | NW_004515645.1 | scaffold15  | 9084                    | AA                              | TT                 | TT               | INTERGENIC      |               |                    |                    |
| SNP_61728_A_10717 | NW_004515645.1 | scaffold15  | 10717                   | CC                              | TT                 | TT               | INTERGENIC      |               |                    |                    |
| SNP_61729_A_10733 | NW_004515645.1 | scaffold15  | 10733                   | GG                              | CC                 | CC               | INTERGENIC      |               |                    |                    |
| SNP_61730_A_10741 | NW_004515645.1 | scaffold15  | 10741                   | TT                              | AA                 | AA               | INTERGENIC      |               |                    |                    |
| SNP_61731_A_10742 | NW_004515645.1 | scaffold15  | 10742                   | TT                              | CC                 | CC               | INTERGENIC      |               |                    |                    |
| SNP_61732_A_19612 | NW_004515645.1 | scaffold15  | 19612                   | GG                              | AA                 | AA               | INTERGENIC      |               |                    |                    |
| SNP_61733_A_27464 | NW_004515645.1 | scaffold15  | 27464                   | GG                              | TT                 | TT               | INTERGENIC      |               |                    |                    |
| SNP_61734_A_27721 | NW_004515645.1 | scaffold15  | 27721                   | AA                              | GG                 | GG               | INTERGENIC      |               |                    |                    |
| SNP_61735_A_28944 | NW_004515645.1 | scaffold15  | 28944                   | AA                              | TT                 | TT               | INTERGENIC      |               |                    |                    |
| SNP_61736_A_32233 | NW_004515645.1 | scaffold15  | 32233                   | TT                              | CC                 | CC               | INTERGENIC      |               |                    |                    |
| SNP_61737_A_32242 | NW_004515645.1 | scaffold15  | 32242                   | GG                              | AA                 | AA               | INTERGENIC      |               |                    |                    |

| SNPs IDs           | Chromosome IDs | Chromosomes | Physical positions (bp) | CDC Frontier (Reference genome) | (Pusa 1103 & HPNB) | (ILWC 46 & LPNB) | Sequence genome | Components of | Gene accession IDs | Putative functions |
|--------------------|----------------|-------------|-------------------------|---------------------------------|--------------------|------------------|-----------------|---------------|--------------------|--------------------|
| SNP_61738_A_32245  | NW_004515645.1 | scaffold15  | 32245                   | GG                              | TT                 | TT               | INTERGENIC      |               |                    |                    |
| SNP_61739_A_32278  | NW_004515645.1 | scaffold15  | 32278                   | TT                              | AA                 | AA               | INTERGENIC      |               |                    |                    |
| SNP_61740_A_32280  | NW_004515645.1 | scaffold15  | 32280                   | AA                              | TT                 | TT               | INTERGENIC      |               |                    |                    |
| SNP_61741_A_32288  | NW_004515645.1 | scaffold15  | 32288                   | CC                              | GG                 | GG               | INTERGENIC      |               |                    |                    |
| SNP_61742_A_38669  | NW_004515645.1 | scaffold15  | 38669                   | CC                              | AA                 | AA               | INTERGENIC      |               |                    |                    |
| SNP_61743_A_45230  | NW_004515645.1 | scaffold15  | 45230                   | CC                              | GG                 | GG               | INTERGENIC      |               |                    |                    |
| SNP_61744_A_46923  | NW_004515645.1 | scaffold15  | 46923                   | GG                              | TT                 | TT               | INTERGENIC      |               |                    |                    |
| SNP_61745_A_49356  | NW_004515645.1 | scaffold15  | 49356                   | CC                              | GG                 | GG               | INTERGENIC      |               |                    |                    |
| SNP_61746_A_49498  | NW_004515645.1 | scaffold15  | 49498                   | CC                              | GG                 | GG               | INTERGENIC      |               |                    |                    |
| SNP_61747_A_49634  | NW_004515645.1 | scaffold15  | 49634                   | AA                              | TT                 | TT               | INTERGENIC      |               |                    |                    |
| SNP_61748_A_63134  | NW_004515645.1 | scaffold15  | 63134                   | GG                              | TT                 | TT               | INTERGENIC      |               |                    |                    |
| SNP_61749_A_63175  | NW_004515645.1 | scaffold15  | 63175                   | AA                              | CC                 | CC               | INTERGENIC      |               |                    |                    |
| SNP_61750_A_63193  | NW_004515645.1 | scaffold15  | 63193                   | GG                              | CC                 | CC               | INTERGENIC      |               |                    |                    |
| SNP_61751_A_69876  | NW_004515645.1 | scaffold15  | 69876                   | CC                              | GG                 | GG               | INTERGENIC      |               |                    |                    |
| SNP_61752_A_69890  | NW_004515645.1 | scaffold15  | 69890                   | CC                              | GG                 | GG               | INTERGENIC      |               |                    |                    |
| SNP_61753_A_70366  | NW_004515645.1 | scaffold15  | 70366                   | GG                              | AA                 | AA               | INTERGENIC      |               |                    |                    |
| SNP_61754_A_70569  | NW_004515645.1 | scaffold15  | 70569                   | GG                              | CC                 | CC               | INTERGENIC      |               |                    |                    |
| SNP_61755_A_70662  | NW_004515645.1 | scaffold15  | 70662                   | GG                              | AA                 | AA               | INTERGENIC      |               |                    |                    |
| SNP_61756_A_92287  | NW_004515645.1 | scaffold15  | 92287                   | GG                              | AA                 | AA               | INTERGENIC      |               |                    |                    |
| SNP_61757_A_92776  | NW_004515645.1 | scaffold15  | 92776                   | AA                              | TT                 | TT               | INTERGENIC      |               |                    |                    |
| SNP_61758_A_115553 | NW_004515645.1 | scaffold15  | 115553                  | CC                              | TT                 | TT               | INTERGENIC      |               |                    |                    |
| SNP_61759_A_119533 | NW_004515645.1 | scaffold15  | 119533                  | AA                              | GG                 | GG               | INTERGENIC      |               |                    |                    |

| SNPs IDs           | Chromosome IDs | Chromosomes | Physical positions (bp) | CDC Frontier genome (Reference genome) | (Pusa 1103 & HPNB) | (ILWC 46 & LPNB) | Sequence genome | Components of | Gene accession IDs | Putative functions |
|--------------------|----------------|-------------|-------------------------|----------------------------------------|--------------------|------------------|-----------------|---------------|--------------------|--------------------|
| SNP_61760_A_139632 | NW_004515645.1 | scaffold15  | 139632                  | AA                                     | TT                 | TT               | INTERGENIC      |               |                    |                    |
| SNP_61761_A_140899 | NW_004515645.1 | scaffold15  | 140899                  | GG                                     | CC                 | CC               | INTERGENIC      |               |                    |                    |
| SNP_61762_A_144076 | NW_004515645.1 | scaffold15  | 144076                  | GG                                     | AA                 | AA               | INTERGENIC      |               |                    |                    |
| SNP_61764_A_152770 | NW_004515645.1 | scaffold15  | 152770                  | AA                                     | CC                 | CC               | INTERGENIC      |               |                    |                    |
| SNP_61765_A_153146 | NW_004515645.1 | scaffold15  | 153146                  | TT                                     | AA                 | AA               | INTERGENIC      |               |                    |                    |
| SNP_61766_A_159714 | NW_004515645.1 | scaffold15  | 159714                  | CC                                     | GG                 | GG               | INTERGENIC      |               |                    |                    |
| SNP_61767_A_165754 | NW_004515645.1 | scaffold15  | 165754                  | TT                                     | GG                 | GG               | INTERGENIC      |               |                    |                    |
| SNP_61768_A_827    | NW_004515646.1 | scaffold16  | 827                     | TT                                     | GG                 | GG               | INTERGENIC      |               |                    |                    |
| SNP_61769_A_894    | NW_004515646.1 | scaffold16  | 894                     | TT                                     | CC                 | CC               | INTERGENIC      |               |                    |                    |
| SNP_61770_A_896    | NW_004515646.1 | scaffold16  | 896                     | GG                                     | AA                 | AA               | INTERGENIC      |               |                    |                    |
| SNP_61771_A_912    | NW_004515646.1 | scaffold16  | 912                     | GG                                     | AA                 | AA               | INTERGENIC      |               |                    |                    |
| SNP_61772_A_924    | NW_004515646.1 | scaffold16  | 924                     | AA                                     | GG                 | GG               | INTERGENIC      |               |                    |                    |
| SNP_61773_A_939    | NW_004515646.1 | scaffold16  | 939                     | GG                                     | AA                 | AA               | INTERGENIC      |               |                    |                    |
| SNP_61774_A_949    | NW_004515646.1 | scaffold16  | 949                     | AA                                     | GG                 | GG               | INTERGENIC      |               |                    |                    |
| SNP_61775_A_955    | NW_004515646.1 | scaffold16  | 955                     | AA                                     | GG                 | GG               | INTERGENIC      |               |                    |                    |
| SNP_61776_A_992    | NW_004515646.1 | scaffold16  | 992                     | AA                                     | CC                 | CC               | INTERGENIC      |               |                    |                    |
| SNP_61777_A_1009   | NW_004515646.1 | scaffold16  | 1009                    | TT                                     | GG                 | GG               | INTERGENIC      |               |                    |                    |
| SNP_61778_A_1068   | NW_004515646.1 | scaffold16  | 1068                    | TT                                     | CC                 | CC               | INTERGENIC      |               |                    |                    |
| SNP_61779_A_1088   | NW_004515646.1 | scaffold16  | 1088                    | TT                                     | AA                 | AA               | INTERGENIC      |               |                    |                    |
| SNP_61780_A_4567   | NW_004515646.1 | scaffold16  | 4567                    | CC                                     | TT                 | TT               | INTERGENIC      |               |                    |                    |
| SNP_61781_A_4600   | NW_004515646.1 | scaffold16  | 4600                    | AA                                     | CC                 | CC               | INTERGENIC      |               |                    |                    |
| SNP_61783_A_40821  | NW_004515647.1 | scaffold17  | 40821                   | GG                                     | AA                 | AA               | INTERGENIC      |               |                    |                    |

| SNPs IDs           | Chromosome IDs | Chromosomes | Physical positions (bp) | CDC Frontier (Reference genome) | (Pusa 1103 & HPNB) | (ILWC 46 & LPNB) | Sequence genome | Components of | Gene accession IDs           | Putative functions |
|--------------------|----------------|-------------|-------------------------|---------------------------------|--------------------|------------------|-----------------|---------------|------------------------------|--------------------|
| SNP_61784_A_95083  | NW_004515647.1 | scaffold17  | 95083                   | TT                              | AA                 | AA               | INTERGENIC      |               |                              |                    |
| SNP_61785_A_95598  | NW_004515647.1 | scaffold17  | 95598                   | CC                              | TT                 | TT               | INTERGENIC      |               |                              |                    |
| SNP_61786_A_96616  | NW_004515647.1 | scaffold17  | 96616                   | AA                              | GG                 | GG               | INTERGENIC      |               |                              |                    |
| SNP_61787_A_99790  | NW_004515647.1 | scaffold17  | 99790                   | CC                              | TT                 | TT               | INTERGENIC      |               |                              |                    |
| SNP_61788_A_99811  | NW_004515647.1 | scaffold17  | 99811                   | GG                              | AA                 | AA               | INTERGENIC      |               |                              |                    |
| SNP_61790_A_99964  | NW_004515647.1 | scaffold17  | 99964                   | GG                              | AA                 | AA               | INTERGENIC      |               |                              |                    |
| SNP_61791_A_101846 | NW_004515647.1 | scaffold17  | 101846                  | TT                              | CC                 | CC               | INTERGENIC      |               |                              |                    |
| SNP_61792_A_103341 | NW_004515647.1 | scaffold17  | 103341                  | TT                              | GG                 | GG               | INTERGENIC      |               |                              |                    |
| SNP_61793_A_103501 | NW_004515647.1 | scaffold17  | 103501                  | AA                              | GG                 | GG               | INTERGENIC      |               |                              |                    |
| SNP_61794_A_123132 | NW_004515647.1 | scaffold17  | 123132                  | TT                              | CC                 | CC               | INTERGENIC      |               |                              |                    |
| SNP_61795_A_123893 | NW_004515647.1 | scaffold17  | 123893                  | AA                              | GG                 | GG               | INTERGENIC      |               |                              |                    |
| SNP_61796_A_125114 | NW_004515647.1 | scaffold17  | 125114                  | CC                              | GG                 | GG               | INTERGENIC      |               |                              |                    |
| SNP_61797_A_125547 | NW_004515647.1 | scaffold17  | 125547                  | GG                              | TT                 | TT               | INTERGENIC      |               |                              |                    |
| SNP_61798_A_125584 | NW_004515647.1 | scaffold17  | 125584                  | TT                              | CC                 | CC               | INTERGENIC      |               |                              |                    |
| SNP_61799_A_128083 | NW_004515647.1 | scaffold17  | 128083                  | TT                              | GG                 | GG               | INTERGENIC      |               |                              |                    |
| SNP_61800_A_128304 | NW_004515647.1 | scaffold17  | 128304                  | TT                              | CC                 | CC               | INTERGENIC      |               |                              |                    |
| SNP_61801_A_128417 | NW_004515647.1 | scaffold17  | 128417                  | TT                              | GG                 | GG               | INTERGENIC      |               |                              |                    |
| SNP_61802_A_128427 | NW_004515647.1 | scaffold17  | 128427                  | GG                              | TT                 | TT               | INTERGENIC      |               |                              |                    |
| SNP_61803_A_128726 | NW_004515647.1 | scaffold17  | 128726                  | TT                              | GG                 | GG               | INTERGENIC      |               |                              |                    |
| SNP_61804_A_135696 | NW_004515647.1 | scaffold17  | 135696                  | CC                              | GG                 | GG               | INTERGENIC      |               |                              |                    |
| SNP_61805_A_135703 | NW_004515647.1 | scaffold17  | 135703                  | GG                              | AA                 | AA               | INTERGENIC      |               |                              |                    |
| SNP_61806_A_142646 | NW_004515647.1 | scaffold17  | 142646                  | TT                              | CC                 | CC               | DRR             | 101507674     | uncharacterized LOC101507674 |                    |

| SNPs IDs           | Chromosome IDs | Chromosomes | Physical positions (bp) | CDC Frontier (Reference genome) | (Pusa 1103 & HPNB) | (ILWC 46 & LPNB) | Sequence Components of genome | Gene accession IDs | Putative functions           |
|--------------------|----------------|-------------|-------------------------|---------------------------------|--------------------|------------------|-------------------------------|--------------------|------------------------------|
| SNP_61807_A_142734 | NW_004515647.1 | scaffold17  | 142734                  | CC                              | TT                 | TT               | DRR                           | 101507674          | uncharacterized LOC101507674 |
| SNP_61808_A_142801 | NW_004515647.1 | scaffold17  | 142801                  | GG                              | AA                 | AA               | DRR                           | 101507674          | uncharacterized LOC101507674 |
| SNP_61809_A_143168 | NW_004515647.1 | scaffold17  | 143168                  | CC                              | AA                 | AA               | INTERGENIC                    |                    |                              |
| SNP_61810_A_145721 | NW_004515647.1 | scaffold17  | 145721                  | TT                              | GG                 | GG               | INTRON                        | 101507674          | uncharacterized LOC101507674 |
| SNP_61811_A_145751 | NW_004515647.1 | scaffold17  | 145751                  | TT                              | CC                 | CC               | INTRON                        | 101507674          | uncharacterized LOC101507674 |
| SNP_61812_A_145778 | NW_004515647.1 | scaffold17  | 145778                  | AA                              | GG                 | GG               | INTRON                        | 101507674          | uncharacterized LOC101507674 |
| SNP_61813_A_146041 | NW_004515647.1 | scaffold17  | 146041                  | AA                              | GG                 | GG               | INTRON                        | 101507674          | uncharacterized LOC101507674 |
| SNP_61814_A_146140 | NW_004515647.1 | scaffold17  | 146140                  | GG                              | TT                 | TT               | INTRON                        | 101507674          | uncharacterized LOC101507674 |
| SNP_61815_A_146142 | NW_004515647.1 | scaffold17  | 146142                  | AA                              | GG                 | GG               | INTRON                        | 101507674          | uncharacterized LOC101507674 |
| SNP_61816_A_153125 | NW_004515647.1 | scaffold17  | 153125                  | TT                              | CC                 | CC               | URR                           | 101507674          | uncharacterized LOC101507674 |
| SNP_61817_A_153190 | NW_004515647.1 | scaffold17  | 153190                  | CC                              | TT                 | TT               | URR                           | 101507674          | uncharacterized LOC101507674 |
| SNP_61818_A_197503 | NW_004515647.1 | scaffold17  | 197503                  | TT                              | CC                 | CC               | INTERGENIC                    |                    |                              |
| SNP_61819_A_197512 | NW_004515647.1 | scaffold17  | 197512                  | GG                              | AA                 | AA               | INTERGENIC                    |                    |                              |
| SNP_61820_A_197518 | NW_004515647.1 | scaffold17  | 197518                  | GG                              | TT                 | TT               | INTERGENIC                    |                    |                              |
| SNP_61821_A_201234 | NW_004515647.1 | scaffold17  | 201234                  | AA                              | GG                 | GG               | INTERGENIC                    |                    |                              |
| SNP_61822_A_201241 | NW_004515647.1 | scaffold17  | 201241                  | TT                              | CC                 | CC               | INTERGENIC                    |                    |                              |
| SNP_61823_A_208249 | NW_004515647.1 | scaffold17  | 208249                  | GG                              | TT                 | TT               | INTERGENIC                    |                    |                              |
| SNP_61824_A_231824 | NW_004515647.1 | scaffold17  | 231824                  | TT                              | CC                 | CC               | INTERGENIC                    |                    |                              |
| SNP_61825_A_232065 | NW_004515647.1 | scaffold17  | 232065                  | AA                              | TT                 | TT               | INTERGENIC                    |                    |                              |
| SNP_61826_A_233595 | NW_004515647.1 | scaffold17  | 233595                  | CC                              | TT                 | TT               | INTERGENIC                    |                    |                              |
| SNP_61827_A_233659 | NW_004515647.1 | scaffold17  | 233659                  | AA                              | GG                 | GG               | INTERGENIC                    |                    |                              |
| SNP_61828_A_262751 | NW_004515647.1 | scaffold17  | 262751                  | AA                              | GG                 | GG               | INTERGENIC                    |                    |                              |

| SNPs IDs           | Chromosome IDs | Chromosomes | Physical positions (bp) | CDC Frontier (Reference genome) | (Pusa 1103 & HPNB) | (ILWC 46 & LPNB) | Sequence Components of genome | Gene accession IDs | Putative functions            |
|--------------------|----------------|-------------|-------------------------|---------------------------------|--------------------|------------------|-------------------------------|--------------------|-------------------------------|
| SNP_61829_A_278034 | NW_004515647.1 | scaffold17  | 278034                  | CC                              | TT                 | TT               | URR                           | 101505639          | Unknown function              |
| SNP_61830_A_281966 | NW_004515647.1 | scaffold17  | 281966                  | TT                              | CC                 | CC               | INTERGENIC                    |                    |                               |
| SNP_61831_A_291381 | NW_004515647.1 | scaffold17  | 291381                  | TT                              | CC                 | CC               | INTERGENIC                    |                    |                               |
| SNP_61832_A_291623 | NW_004515647.1 | scaffold17  | 291623                  | TT                              | CC                 | CC               | INTERGENIC                    |                    |                               |
| SNP_61833_A_291830 | NW_004515647.1 | scaffold17  | 291830                  | CC                              | TT                 | TT               | INTERGENIC                    |                    |                               |
| SNP_61834_A_292010 | NW_004515647.1 | scaffold17  | 292010                  | AA                              | TT                 | TT               | INTERGENIC                    |                    |                               |
| SNP_61835_A_292068 | NW_004515647.1 | scaffold17  | 292068                  | CC                              | TT                 | TT               | INTERGENIC                    |                    |                               |
| SNP_61836_A_292224 | NW_004515647.1 | scaffold17  | 292224                  | AA                              | GG                 | GG               | INTERGENIC                    |                    |                               |
| SNP_61837_A_292267 | NW_004515647.1 | scaffold17  | 292267                  | GG                              | AA                 | AA               | INTERGENIC                    |                    |                               |
| SNP_61838_A_292273 | NW_004515647.1 | scaffold17  | 292273                  | AA                              | CC                 | CC               | INTERGENIC                    |                    |                               |
| SNP_61839_A_292274 | NW_004515647.1 | scaffold17  | 292274                  | AA                              | GG                 | GG               | INTERGENIC                    |                    |                               |
| SNP_61840_A_292593 | NW_004515647.1 | scaffold17  | 292593                  | TT                              | GG                 | GG               | DRR                           | 101506163          | thioredoxin-like protein Clot |
| SNP_61841_A_292796 | NW_004515647.1 | scaffold17  | 292796                  | GG                              | AA                 | AA               | DRR                           | 101506163          | thioredoxin-like protein Clot |
| SNP_61842_A_292869 | NW_004515647.1 | scaffold17  | 292869                  | TT                              | CC                 | CC               | DRR                           | 101506163          | thioredoxin-like protein Clot |
| SNP_61843_A_293110 | NW_004515647.1 | scaffold17  | 293110                  | AA                              | TT                 | TT               | DRR                           | 101506163          | thioredoxin-like protein Clot |
| SNP_61844_A_293317 | NW_004515647.1 | scaffold17  | 293317                  | AA                              | CC                 | CC               | DRR                           | 101506163          | thioredoxin-like protein Clot |
| SNP_61845_A_294785 | NW_004515647.1 | scaffold17  | 294785                  | TT                              | AA                 | AA               | INTRON                        | 101506163          | thioredoxin-like protein Clot |
| SNP_61846_A_294810 | NW_004515647.1 | scaffold17  | 294810                  | AA                              | GG                 | GG               | INTRON                        | 101506163          | thioredoxin-like protein Clot |
| SNP_61847_A_295120 | NW_004515647.1 | scaffold17  | 295120                  | GG                              | AA                 | AA               | INTRON                        | 101506163          | thioredoxin-like protein Clot |
| SNP_61848_A_296737 | NW_004515647.1 | scaffold17  | 296737                  | CC                              | AA                 | AA               | INTRON                        | 101506163          | thioredoxin-like protein Clot |
| SNP_61849_A_296993 | NW_004515647.1 | scaffold17  | 296993                  | TT                              | CC                 | CC               | SPLICE_SITE_REGION            | 101506163          | thioredoxin-like protein Clot |
| SNP_61850_A_297240 | NW_004515647.1 | scaffold17  | 297240                  | GG                              | AA                 | AA               | URR                           | 101506163          | thioredoxin-like protein Clot |



| SNPs IDs           | Chromosome IDs | Chromosomes | Physical positions (bp) | CDC Frontier (Reference genome) | (Pusa 1103 & HPNB) | (ILWC 46 & LPNB) | Sequence Components of genome | Gene accession IDs | Putative functions            |
|--------------------|----------------|-------------|-------------------------|---------------------------------|--------------------|------------------|-------------------------------|--------------------|-------------------------------|
| SNP_61851_A_297266 | NW_004515647.1 | scaffold17  | 297266                  | TT                              | CC                 | CC               | URR                           | 101506163          | thioredoxin-like protein Clot |
| SNP_61852_A_297286 | NW_004515647.1 | scaffold17  | 297286                  | TT                              | CC                 | CC               | URR                           | 101506163          | thioredoxin-like protein Clot |
| SNP_61853_A_297289 | NW_004515647.1 | scaffold17  | 297289                  | CC                              | TT                 | TT               | URR                           | 101506163          | thioredoxin-like protein Clot |
| SNP_61854_A_297291 | NW_004515647.1 | scaffold17  | 297291                  | TT                              | CC                 | CC               | URR                           | 101506163          | thioredoxin-like protein Clot |
| SNP_61855_A_297296 | NW_004515647.1 | scaffold17  | 297296                  | TT                              | CC                 | CC               | URR                           | 101506163          | thioredoxin-like protein Clot |
| SNP_61856_A_297506 | NW_004515647.1 | scaffold17  | 297506                  | CC                              | TT                 | TT               | URR                           | 101506163          | thioredoxin-like protein Clot |
| SNP_61857_A_318278 | NW_004515647.1 | scaffold17  | 318278                  | TT                              | CC                 | CC               | URR                           | 101508308          | uncharacterized LOC101508308  |
| SNP_61858_A_539    | NW_004515648.1 | scaffold22  | 539                     | CC                              | TT                 | TT               | INTERGENIC                    |                    |                               |
| SNP_61859_A_976    | NW_004515648.1 | scaffold22  | 976                     | TT                              | CC                 | CC               | INTERGENIC                    |                    |                               |
| SNP_61860_A_14110  | NW_004515648.1 | scaffold22  | 14110                   | CC                              | TT                 | TT               | INTERGENIC                    |                    |                               |
| SNP_61861_A_24426  | NW_004515648.1 | scaffold22  | 24426                   | TT                              | GG                 | GG               | INTERGENIC                    |                    |                               |
| SNP_61863_A_24530  | NW_004515648.1 | scaffold22  | 24530                   | CC                              | TT                 | TT               | INTERGENIC                    |                    |                               |
| SNP_61864_A_24777  | NW_004515648.1 | scaffold22  | 24777                   | AA                              | CC                 | CC               | INTERGENIC                    |                    |                               |
| SNP_61865_A_24869  | NW_004515648.1 | scaffold22  | 24869                   | AA                              | GG                 | GG               | INTERGENIC                    |                    |                               |
| SNP_61866_A_24879  | NW_004515648.1 | scaffold22  | 24879                   | TT                              | CC                 | CC               | INTERGENIC                    |                    |                               |
| SNP_61867_A_24948  | NW_004515648.1 | scaffold22  | 24948                   | AA                              | TT                 | TT               | INTERGENIC                    |                    |                               |
| SNP_61868_A_34133  | NW_004515648.1 | scaffold22  | 34133                   | TT                              | CC                 | CC               | INTERGENIC                    |                    |                               |
| SNP_61869_A_34359  | NW_004515648.1 | scaffold22  | 34359                   | AA                              | CC                 | CC               | INTERGENIC                    |                    |                               |
| SNP_61870_A_34369  | NW_004515648.1 | scaffold22  | 34369                   | TT                              | CC                 | CC               | INTERGENIC                    |                    |                               |
| SNP_61871_A_34394  | NW_004515648.1 | scaffold22  | 34394                   | AA                              | GG                 | GG               | INTERGENIC                    |                    |                               |
| SNP_61872_A_34427  | NW_004515648.1 | scaffold22  | 34427                   | CC                              | AA                 | AA               | INTERGENIC                    |                    |                               |
| SNP_61873_A_34429  | NW_004515648.1 | scaffold22  | 34429                   | GG                              | AA                 | AA               | INTERGENIC                    |                    |                               |

| SNPs IDs          | Chromosome IDs | Chromosomes | Physical positions (bp) | CDC Frontier (Reference genome) | (Pusa 1103 & HPNB) | (ILWC 46 & LPNB) | Sequence genome | Components of | Gene accession IDs | Putative functions |
|-------------------|----------------|-------------|-------------------------|---------------------------------|--------------------|------------------|-----------------|---------------|--------------------|--------------------|
| SNP_61874_A_34434 | NW_004515648.1 | scaffold22  | 34434                   | TT                              | GG                 | GG               | INTERGENIC      |               |                    |                    |
| SNP_61875_A_34493 | NW_004515648.1 | scaffold22  | 34493                   | TT                              | GG                 | GG               | INTERGENIC      |               |                    |                    |
| SNP_61877_A_34585 | NW_004515648.1 | scaffold22  | 34585                   | CC                              | TT                 | TT               | INTERGENIC      |               |                    |                    |
| SNP_61878_A_34586 | NW_004515648.1 | scaffold22  | 34586                   | TT                              | GG                 | GG               | INTERGENIC      |               |                    |                    |
| SNP_61879_A_34592 | NW_004515648.1 | scaffold22  | 34592                   | CC                              | GG                 | GG               | INTERGENIC      |               |                    |                    |
| SNP_61880_A_34647 | NW_004515648.1 | scaffold22  | 34647                   | GG                              | TT                 | TT               | INTERGENIC      |               |                    |                    |
| SNP_61881_A_34724 | NW_004515648.1 | scaffold22  | 34724                   | TT                              | CC                 | CC               | INTERGENIC      |               |                    |                    |
| SNP_61882_A_34752 | NW_004515648.1 | scaffold22  | 34752                   | GG                              | AA                 | AA               | INTERGENIC      |               |                    |                    |
| SNP_61883_A_34761 | NW_004515648.1 | scaffold22  | 34761                   | AA                              | GG                 | GG               | INTERGENIC      |               |                    |                    |
| SNP_61884_A_34766 | NW_004515648.1 | scaffold22  | 34766                   | GG                              | AA                 | AA               | INTERGENIC      |               |                    |                    |
| SNP_61885_A_34767 | NW_004515648.1 | scaffold22  | 34767                   | GG                              | AA                 | AA               | INTERGENIC      |               |                    |                    |
| SNP_61886_A_34810 | NW_004515648.1 | scaffold22  | 34810                   | CC                              | AA                 | AA               | INTERGENIC      |               |                    |                    |
| SNP_61887_A_41747 | NW_004515648.1 | scaffold22  | 41747                   | AA                              | GG                 | GG               | INTERGENIC      |               |                    |                    |
| SNP_61888_A_41837 | NW_004515648.1 | scaffold22  | 41837                   | GG                              | TT                 | TT               | INTERGENIC      |               |                    |                    |
| SNP_61889_A_41915 | NW_004515648.1 | scaffold22  | 41915                   | AA                              | GG                 | GG               | INTERGENIC      |               |                    |                    |
| SNP_61890_A_243   | NW_004515649.1 | scaffold25  | 243                     | CC                              | TT                 | TT               | INTERGENIC      |               |                    |                    |
| SNP_61891_A_14163 | NW_004515649.1 | scaffold25  | 14163                   | AA                              | GG                 | GG               | INTERGENIC      |               |                    |                    |
| SNP_61892_A_14459 | NW_004515649.1 | scaffold25  | 14459                   | TT                              | AA                 | AA               | INTERGENIC      |               |                    |                    |
| SNP_61894_A_14756 | NW_004515649.1 | scaffold25  | 14756                   | CC                              | GG                 | GG               | INTERGENIC      |               |                    |                    |
| SNP_61895_A_16117 | NW_004515649.1 | scaffold25  | 16117                   | AA                              | GG                 | GG               | INTERGENIC      |               |                    |                    |
| SNP_61896_A_20091 | NW_004515649.1 | scaffold25  | 20091                   | CC                              | TT                 | TT               | INTERGENIC      |               |                    |                    |
| SNP_61897_A_22512 | NW_004515649.1 | scaffold25  | 22512                   | CC                              | TT                 | TT               | INTERGENIC      |               |                    |                    |

| SNPs IDs          | Chromosome IDs | Chromosomes | Physical positions (bp) | CDC Frontier genome (Reference genome) | (Pusa 1103 & HPNB) | (ILWC 46 & LPNB) | Sequence Components of genome | Gene accession IDs | Putative functions |
|-------------------|----------------|-------------|-------------------------|----------------------------------------|--------------------|------------------|-------------------------------|--------------------|--------------------|
| SNP_61898_A_33851 | NW_004515649.1 | scaffold25  | 33851                   | AA                                     | TT                 | TT               | INTERGENIC                    |                    |                    |
| SNP_61900_A_39357 | NW_004515649.1 | scaffold25  | 39357                   | GG                                     | AA                 | AA               | INTERGENIC                    |                    |                    |
| SNP_61901_A_39829 | NW_004515649.1 | scaffold25  | 39829                   | TT                                     | CC                 | CC               | INTERGENIC                    |                    |                    |
| SNP_61902_A_41084 | NW_004515649.1 | scaffold25  | 41084                   | GG                                     | AA                 | AA               | DRR                           | 101508625          | Unknown function   |
| SNP_61903_A_41791 | NW_004515649.1 | scaffold25  | 41791                   | GG                                     | TT                 | TT               | NON_SYNONYMOUS_CODING         | 101508625          | Unknown function   |
| SNP_61904_A_43124 | NW_004515649.1 | scaffold25  | 43124                   | CC                                     | TT                 | TT               | INTRON                        | 101508625          | Unknown function   |
| SNP_61905_A_43131 | NW_004515649.1 | scaffold25  | 43131                   | CC                                     | AA                 | AA               | INTRON                        | 101508625          | Unknown function   |
| SNP_61906_A_43451 | NW_004515649.1 | scaffold25  | 43451                   | TT                                     | AA                 | AA               | INTRON                        | 101508625          | Unknown function   |
| SNP_61907_A_50994 | NW_004515649.1 | scaffold25  | 50994                   | TT                                     | AA                 | AA               | INTERGENIC                    |                    |                    |
| SNP_61908_A_51182 | NW_004515649.1 | scaffold25  | 51182                   | TT                                     | CC                 | CC               | INTERGENIC                    |                    |                    |
| SNP_61909_A_51412 | NW_004515649.1 | scaffold25  | 51412                   | TT                                     | CC                 | CC               | INTERGENIC                    |                    |                    |
| SNP_61911_A_51860 | NW_004515649.1 | scaffold25  | 51860                   | CC                                     | TT                 | TT               | INTERGENIC                    |                    |                    |
| SNP_61912_A_52907 | NW_004515649.1 | scaffold25  | 52907                   | GG                                     | CC                 | CC               | INTERGENIC                    |                    |                    |
| SNP_61913_A_55396 | NW_004515649.1 | scaffold25  | 55396                   | AA                                     | TT                 | TT               | INTERGENIC                    |                    |                    |
| SNP_61914_A_55556 | NW_004515649.1 | scaffold25  | 55556                   | AA                                     | GG                 | GG               | INTERGENIC                    |                    |                    |
| SNP_61915_A_56303 | NW_004515649.1 | scaffold25  | 56303                   | TT                                     | GG                 | GG               | INTERGENIC                    |                    |                    |
| SNP_61916_A_57478 | NW_004515649.1 | scaffold25  | 57478                   | TT                                     | AA                 | AA               | INTERGENIC                    |                    |                    |
| SNP_61917_A_58218 | NW_004515649.1 | scaffold25  | 58218                   | CC                                     | GG                 | GG               | INTERGENIC                    |                    |                    |
| SNP_61918_A_60400 | NW_004515649.1 | scaffold25  | 60400                   | GG                                     | CC                 | CC               | INTERGENIC                    |                    |                    |
| SNP_61919_A_60420 | NW_004515649.1 | scaffold25  | 60420                   | AA                                     | CC                 | CC               | INTERGENIC                    |                    |                    |
| SNP_61920_A_60584 | NW_004515649.1 | scaffold25  | 60584                   | AA                                     | TT                 | TT               | INTERGENIC                    |                    |                    |
| SNP_61921_A_60686 | NW_004515649.1 | scaffold25  | 60686                   | AA                                     | GG                 | GG               | INTERGENIC                    |                    |                    |

| SNPs IDs           | Chromosome IDs | Chromosomes | Physical positions (bp) | CDC Frontier (Reference genome) | (Pusa 1103 & HPNB) | (ILWC 46 & LPNB) | Sequence Components of genome | Gene accession IDs | Putative functions |
|--------------------|----------------|-------------|-------------------------|---------------------------------|--------------------|------------------|-------------------------------|--------------------|--------------------|
| SNP_61922_A_61974  | NW_004515649.1 | scaffold25  | 61974                   | CC                              | GG                 | GG               | DRR                           | 101508943          | Unknown function   |
| SNP_61923_A_62048  | NW_004515649.1 | scaffold25  | 62048                   | CC                              | AA                 | AA               | DRR                           | 101508943          | Unknown function   |
| SNP_61925_A_62383  | NW_004515649.1 | scaffold25  | 62383                   | AA                              | GG                 | GG               | INTRON                        | 101508943          | Unknown function   |
| SNP_61926_A_67202  | NW_004515649.1 | scaffold25  | 67202                   | TT                              | CC                 | CC               | INTRON                        | 101508943          | Unknown function   |
| SNP_61927_A_67978  | NW_004515649.1 | scaffold25  | 67978                   | TT                              | CC                 | CC               | NON_SYNONYMOUS_CODING         | 101508943          | Unknown function   |
| SNP_61928_A_70207  | NW_004515649.1 | scaffold25  | 70207                   | GG                              | AA                 | AA               | SYNONYMOUS_CODING             | 101508943          | Unknown function   |
| SNP_61929_A_71238  | NW_004515649.1 | scaffold25  | 71238                   | AA                              | GG                 | GG               | URR                           | 101508943          | Unknown function   |
| SNP_61930_A_71304  | NW_004515649.1 | scaffold25  | 71304                   | GG                              | TT                 | TT               | URR                           | 101508943          | Unknown function   |
| SNP_61931_A_72136  | NW_004515649.1 | scaffold25  | 72136                   | GG                              | AA                 | AA               | URR                           | 101508943          | Unknown function   |
| SNP_61932_A_72137  | NW_004515649.1 | scaffold25  | 72137                   | AA                              | GG                 | GG               | URR                           | 101508943          | Unknown function   |
| SNP_61934_A_72741  | NW_004515649.1 | scaffold25  | 72741                   | AA                              | CC                 | CC               | INTERGENIC                    |                    |                    |
| SNP_61936_A_73453  | NW_004515649.1 | scaffold25  | 73453                   | CC                              | TT                 | TT               | INTERGENIC                    |                    |                    |
| SNP_61937_A_73699  | NW_004515649.1 | scaffold25  | 73699                   | GG                              | CC                 | CC               | INTERGENIC                    |                    |                    |
| SNP_61938_A_73847  | NW_004515649.1 | scaffold25  | 73847                   | AA                              | TT                 | TT               | INTERGENIC                    |                    |                    |
| SNP_61940_A_76169  | NW_004515649.1 | scaffold25  | 76169                   | CC                              | TT                 | TT               | INTERGENIC                    |                    |                    |
| SNP_61941_A_2453   | NW_004515650.1 | scaffold26  | 2453                    | AA                              | GG                 | GG               | INTERGENIC                    |                    |                    |
| SNP_61942_A_2830   | NW_004515650.1 | scaffold26  | 2830                    | CC                              | AA                 | AA               | INTERGENIC                    |                    |                    |
| SNP_61943_A_16259  | NW_004515650.1 | scaffold26  | 16259                   | AA                              | GG                 | GG               | INTERGENIC                    |                    |                    |
| SNP_61944_A_90797  | NW_004515650.1 | scaffold26  | 90797                   | TT                              | CC                 | CC               | NON_SYNONYMOUS_CODING         | id193824           | Unknown function   |
| SNP_61945_A_108357 | NW_004515650.1 | scaffold26  | 108357                  | GG                              | AA                 | AA               | INTERGENIC                    |                    |                    |
| SNP_61946_A_108368 | NW_004515650.1 | scaffold26  | 108368                  | TT                              | CC                 | CC               | INTERGENIC                    |                    |                    |
| SNP_61947_A_145329 | NW_004515650.1 | scaffold26  | 145329                  | CC                              | AA                 | AA               | INTERGENIC                    |                    |                    |

| SNPs IDs           | Chromosome IDs | Chromosomes | Physical positions (bp) | CDC Frontier (Reference genome) | (Pusa 1103 & HPNB) | (ILWC 46 & LPNB) | Sequence Components of genome | Gene accession IDs | Putative functions           |
|--------------------|----------------|-------------|-------------------------|---------------------------------|--------------------|------------------|-------------------------------|--------------------|------------------------------|
| SNP_61949_A_164743 | NW_004515650.1 | scaffold26  | 164743                  | AA                              | GG                 | GG               | INTERGENIC                    |                    |                              |
| SNP_61950_A_198795 | NW_004515650.1 | scaffold26  | 198795                  | GG                              | AA                 | AA               | INTERGENIC                    |                    |                              |
| SNP_61951_A_209158 | NW_004515650.1 | scaffold26  | 209158                  | TT                              | GG                 | GG               | URR                           | 101509482          | uncharacterized LOC101509482 |
| SNP_61952_A_209197 | NW_004515650.1 | scaffold26  | 209197                  | GG                              | TT                 | TT               | URR                           | 101509482          | uncharacterized LOC101509482 |
| SNP_61953_A_224290 | NW_004515650.1 | scaffold26  | 224290                  | TT                              | CC                 | CC               | INTERGENIC                    |                    |                              |
| SNP_61954_A_224308 | NW_004515650.1 | scaffold26  | 224308                  | TT                              | AA                 | AA               | INTERGENIC                    |                    |                              |
| SNP_61955_A_224325 | NW_004515650.1 | scaffold26  | 224325                  | GG                              | AA                 | AA               | INTERGENIC                    |                    |                              |
| SNP_61956_A_224354 | NW_004515650.1 | scaffold26  | 224354                  | GG                              | AA                 | AA               | INTERGENIC                    |                    |                              |
| SNP_61957_A_224358 | NW_004515650.1 | scaffold26  | 224358                  | GG                              | AA                 | AA               | INTERGENIC                    |                    |                              |
| SNP_61958_A_227551 | NW_004515650.1 | scaffold26  | 227551                  | TT                              | AA                 | AA               | INTERGENIC                    |                    |                              |
| SNP_61959_A_227573 | NW_004515650.1 | scaffold26  | 227573                  | GG                              | AA                 | AA               | INTERGENIC                    |                    |                              |
| SNP_61960_A_227668 | NW_004515650.1 | scaffold26  | 227668                  | TT                              | CC                 | CC               | INTERGENIC                    |                    |                              |
| SNP_61961_A_227820 | NW_004515650.1 | scaffold26  | 227820                  | AA                              | GG                 | GG               | INTERGENIC                    |                    |                              |
| SNP_61962_A_294707 | NW_004515650.1 | scaffold26  | 294707                  | GG                              | TT                 | TT               | INTERGENIC                    |                    |                              |
| SNP_61963_A_294816 | NW_004515650.1 | scaffold26  | 294816                  | AA                              | GG                 | GG               | INTERGENIC                    |                    |                              |
| SNP_61964_A_295048 | NW_004515650.1 | scaffold26  | 295048                  | CC                              | TT                 | TT               | INTERGENIC                    |                    |                              |
| SNP_61965_A_295068 | NW_004515650.1 | scaffold26  | 295068                  | GG                              | AA                 | AA               | INTERGENIC                    |                    |                              |
| SNP_61966_A_295077 | NW_004515650.1 | scaffold26  | 295077                  | CC                              | TT                 | TT               | INTERGENIC                    |                    |                              |
| SNP_61967_A_295090 | NW_004515650.1 | scaffold26  | 295090                  | GG                              | TT                 | TT               | INTERGENIC                    |                    |                              |
| SNP_61968_A_295120 | NW_004515650.1 | scaffold26  | 295120                  | GG                              | TT                 | TT               | INTERGENIC                    |                    |                              |
| SNP_61969_A_295129 | NW_004515650.1 | scaffold26  | 295129                  | TT                              | GG                 | GG               | INTERGENIC                    |                    |                              |
| SNP_61970_A_295135 | NW_004515650.1 | scaffold26  | 295135                  | GG                              | AA                 | AA               | INTERGENIC                    |                    |                              |

| SNPs IDs           | Chromosome IDs | Chromosomes | Physical positions (bp) | CDC Frontier (Reference genome) | (Pusa 1103 & HPNB) | (ILWC 46 & LPNB) | Sequence Components of genome | Gene accession IDs | Putative functions           |
|--------------------|----------------|-------------|-------------------------|---------------------------------|--------------------|------------------|-------------------------------|--------------------|------------------------------|
| SNP_61971_A_295168 | NW_004515650.1 | scaffold26  | 295168                  | CC                              | TT                 | TT               | INTERGENIC                    |                    |                              |
| SNP_61972_A_404327 | NW_004515650.1 | scaffold26  | 404327                  | TT                              | AA                 | AA               | INTERGENIC                    |                    |                              |
| SNP_61973_A_404332 | NW_004515650.1 | scaffold26  | 404332                  | TT                              | AA                 | AA               | INTERGENIC                    |                    |                              |
| SNP_61974_A_404337 | NW_004515650.1 | scaffold26  | 404337                  | AA                              | TT                 | TT               | INTERGENIC                    |                    |                              |
| SNP_61975_A_429913 | NW_004515650.1 | scaffold26  | 429913                  | GG                              | TT                 | TT               | INTERGENIC                    |                    |                              |
| SNP_61976_A_455741 | NW_004515650.1 | scaffold26  | 455741                  | AA                              | GG                 | GG               | URR                           | 101510879          | uncharacterized LOC101510879 |
| SNP_61977_A_469706 | NW_004515650.1 | scaffold26  | 469706                  | AA                              | TT                 | TT               | INTERGENIC                    |                    |                              |
| SNP_61978_A_469738 | NW_004515650.1 | scaffold26  | 469738                  | AA                              | CC                 | CC               | INTERGENIC                    |                    |                              |
| SNP_61979_A_486081 | NW_004515650.1 | scaffold26  | 486081                  | TT                              | CC                 | CC               | INTERGENIC                    |                    |                              |
| SNP_61980_A_486102 | NW_004515650.1 | scaffold26  | 486102                  | TT                              | CC                 | CC               | INTERGENIC                    |                    |                              |
| SNP_61981_A_486267 | NW_004515650.1 | scaffold26  | 486267                  | CC                              | TT                 | TT               | INTERGENIC                    |                    |                              |
| SNP_61982_A_486628 | NW_004515650.1 | scaffold26  | 486628                  | TT                              | CC                 | CC               | INTERGENIC                    |                    |                              |
| SNP_61983_A_499738 | NW_004515650.1 | scaffold26  | 499738                  | AA                              | TT                 | TT               | INTERGENIC                    |                    |                              |
| SNP_61984_A_499746 | NW_004515650.1 | scaffold26  | 499746                  | AA                              | GG                 | GG               | INTERGENIC                    |                    |                              |
| SNP_61985_A_501258 | NW_004515650.1 | scaffold26  | 501258                  | TT                              | GG                 | GG               | INTERGENIC                    |                    |                              |
| SNP_61986_A_501272 | NW_004515650.1 | scaffold26  | 501272                  | TT                              | GG                 | GG               | INTERGENIC                    |                    |                              |
| SNP_61987_A_501728 | NW_004515650.1 | scaffold26  | 501728                  | TT                              | CC                 | CC               | INTERGENIC                    |                    |                              |
| SNP_61988_A_502359 | NW_004515650.1 | scaffold26  | 502359                  | AA                              | GG                 | GG               | INTERGENIC                    |                    |                              |
| SNP_61989_A_502371 | NW_004515650.1 | scaffold26  | 502371                  | TT                              | CC                 | CC               | INTERGENIC                    |                    |                              |
| SNP_61990_A_502423 | NW_004515650.1 | scaffold26  | 502423                  | GG                              | AA                 | AA               | INTERGENIC                    |                    |                              |
| SNP_61991_A_502818 | NW_004515650.1 | scaffold26  | 502818                  | GG                              | AA                 | AA               | INTERGENIC                    |                    |                              |
| SNP_61992_A_502923 | NW_004515650.1 | scaffold26  | 502923                  | TT                              | AA                 | AA               | INTERGENIC                    |                    |                              |

| SNPs IDs           | Chromosome IDs | Chromosomes | Physical positions (bp) | CDC Frontier (Reference genome) | (Pusa 1103 & HPNB) | (ILWC 46 & LPNB) | Sequence genome | Components of | Gene accession IDs | Putative functions |
|--------------------|----------------|-------------|-------------------------|---------------------------------|--------------------|------------------|-----------------|---------------|--------------------|--------------------|
| SNP_61993_A_502956 | NW_004515650.1 | scaffold26  | 502956                  | GG                              | AA                 | AA               | INTERGENIC      |               |                    |                    |
| SNP_61994_A_502966 | NW_004515650.1 | scaffold26  | 502966                  | TT                              | CC                 | CC               | INTERGENIC      |               |                    |                    |
| SNP_61995_A_503238 | NW_004515650.1 | scaffold26  | 503238                  | AA                              | GG                 | GG               | INTERGENIC      |               |                    |                    |
| SNP_61996_A_503260 | NW_004515650.1 | scaffold26  | 503260                  | GG                              | AA                 | AA               | INTERGENIC      |               |                    |                    |
| SNP_61997_A_503274 | NW_004515650.1 | scaffold26  | 503274                  | AA                              | GG                 | GG               | INTERGENIC      |               |                    |                    |
| SNP_61998_A_503289 | NW_004515650.1 | scaffold26  | 503289                  | GG                              | CC                 | CC               | INTERGENIC      |               |                    |                    |
| SNP_61999_A_503328 | NW_004515650.1 | scaffold26  | 503328                  | AA                              | GG                 | GG               | INTERGENIC      |               |                    |                    |
| SNP_62000_A_503354 | NW_004515650.1 | scaffold26  | 503354                  | TT                              | CC                 | CC               | INTERGENIC      |               |                    |                    |
| SNP_62001_A_503370 | NW_004515650.1 | scaffold26  | 503370                  | AA                              | GG                 | GG               | INTERGENIC      |               |                    |                    |
| SNP_62002_A_503376 | NW_004515650.1 | scaffold26  | 503376                  | CC                              | TT                 | TT               | INTERGENIC      |               |                    |                    |
| SNP_62003_A_503383 | NW_004515650.1 | scaffold26  | 503383                  | TT                              | CC                 | CC               | INTERGENIC      |               |                    |                    |
| SNP_62004_A_503393 | NW_004515650.1 | scaffold26  | 503393                  | GG                              | AA                 | AA               | INTERGENIC      |               |                    |                    |
| SNP_62005_A_503409 | NW_004515650.1 | scaffold26  | 503409                  | TT                              | CC                 | CC               | INTERGENIC      |               |                    |                    |
| SNP_62006_A_503431 | NW_004515650.1 | scaffold26  | 503431                  | AA                              | GG                 | GG               | INTERGENIC      |               |                    |                    |
| SNP_62007_A_503437 | NW_004515650.1 | scaffold26  | 503437                  | TT                              | CC                 | CC               | INTERGENIC      |               |                    |                    |
| SNP_62009_A_511075 | NW_004515650.1 | scaffold26  | 511075                  | CC                              | AA                 | AA               | INTERGENIC      |               |                    |                    |
| SNP_62010_A_529576 | NW_004515650.1 | scaffold26  | 529576                  | CC                              | AA                 | AA               | INTERGENIC      |               |                    |                    |
| SNP_62011_A_543969 | NW_004515650.1 | scaffold26  | 543969                  | CC                              | TT                 | TT               | INTERGENIC      |               |                    |                    |
| SNP_62012_A_575643 | NW_004515650.1 | scaffold26  | 575643                  | AA                              | TT                 | TT               | INTERGENIC      |               |                    |                    |
| SNP_62015_A_575776 | NW_004515650.1 | scaffold26  | 575776                  | CC                              | AA                 | AA               | INTERGENIC      |               |                    |                    |
| SNP_62016_A_575788 | NW_004515650.1 | scaffold26  | 575788                  | GG                              | AA                 | AA               | INTERGENIC      |               |                    |                    |
| SNP_62017_A_404    | NW_004515651.1 | scaffold29  | 404                     | GG                              | AA                 | AA               | INTERGENIC      |               |                    |                    |

| SNPs IDs          | Chromosome IDs | Chromosomes | Physical positions (bp) | CDC Frontier (Reference genome) | (Pusa 1103 & HPNB) | (ILWC 46 & LPNB) | Sequence genome | Components of | Gene accession IDs | Putative functions |
|-------------------|----------------|-------------|-------------------------|---------------------------------|--------------------|------------------|-----------------|---------------|--------------------|--------------------|
| SNP_62018_A_658   | NW_004515651.1 | scaffold29  | 658                     | TT                              | GG                 | GG               | INTERGENIC      |               |                    |                    |
| SNP_62019_A_661   | NW_004515651.1 | scaffold29  | 661                     | AA                              | CC                 | CC               | INTERGENIC      |               |                    |                    |
| SNP_62020_A_670   | NW_004515651.1 | scaffold29  | 670                     | CC                              | AA                 | AA               | INTERGENIC      |               |                    |                    |
| SNP_62021_A_3108  | NW_004515651.1 | scaffold29  | 3108                    | AA                              | TT                 | TT               | INTERGENIC      |               |                    |                    |
| SNP_62022_A_3169  | NW_004515651.1 | scaffold29  | 3169                    | GG                              | AA                 | AA               | INTERGENIC      |               |                    |                    |
| SNP_62023_A_5685  | NW_004515651.1 | scaffold29  | 5685                    | TT                              | CC                 | CC               | INTERGENIC      |               |                    |                    |
| SNP_62024_A_7416  | NW_004515651.1 | scaffold29  | 7416                    | AA                              | GG                 | GG               | INTERGENIC      |               |                    |                    |
| SNP_62025_A_8803  | NW_004515651.1 | scaffold29  | 8803                    | AA                              | CC                 | CC               | INTERGENIC      |               |                    |                    |
| SNP_62026_A_12789 | NW_004515651.1 | scaffold29  | 12789                   | TT                              | CC                 | CC               | INTERGENIC      |               |                    |                    |
| SNP_62027_A_33852 | NW_004515651.1 | scaffold29  | 33852                   | TT                              | CC                 | CC               | INTERGENIC      |               |                    |                    |
| SNP_62028_A_42427 | NW_004515651.1 | scaffold29  | 42427                   | CC                              | GG                 | GG               | INTERGENIC      |               |                    |                    |
| SNP_62029_A_45465 | NW_004515651.1 | scaffold29  | 45465                   | AA                              | CC                 | CC               | INTERGENIC      |               |                    |                    |
| SNP_62030_A_45468 | NW_004515651.1 | scaffold29  | 45468                   | GG                              | TT                 | TT               | INTERGENIC      |               |                    |                    |
| SNP_62031_A_51999 | NW_004515651.1 | scaffold29  | 51999                   | GG                              | AA                 | AA               | INTERGENIC      |               |                    |                    |
| SNP_62032_A_55835 | NW_004515651.1 | scaffold29  | 55835                   | AA                              | GG                 | GG               | INTERGENIC      |               |                    |                    |
| SNP_62033_A_56238 | NW_004515651.1 | scaffold29  | 56238                   | GG                              | AA                 | AA               | INTERGENIC      |               |                    |                    |
| SNP_62034_A_63157 | NW_004515651.1 | scaffold29  | 63157                   | CC                              | TT                 | TT               | INTERGENIC      |               |                    |                    |
| SNP_62035_A_63278 | NW_004515651.1 | scaffold29  | 63278                   | CC                              | AA                 | AA               | INTERGENIC      |               |                    |                    |
| SNP_62036_A_63311 | NW_004515651.1 | scaffold29  | 63311                   | TT                              | CC                 | CC               | INTERGENIC      |               |                    |                    |
| SNP_62037_A_63352 | NW_004515651.1 | scaffold29  | 63352                   | GG                              | AA                 | AA               | INTERGENIC      |               |                    |                    |
| SNP_62038_A_63367 | NW_004515651.1 | scaffold29  | 63367                   | TT                              | CC                 | CC               | INTERGENIC      |               |                    |                    |
| SNP_62039_A_81939 | NW_004515651.1 | scaffold29  | 81939                   | TT                              | CC                 | CC               | INTERGENIC      |               |                    |                    |



| SNPs IDs          | Chromosome IDs | Chromosomes | Physical positions (bp) | CDC Frontier (Reference genome) | (Pusa 1103 & HPNB) | (ILWC 46 & LPNB) | Sequence genome | Components of | Gene accession IDs | Putative functions |
|-------------------|----------------|-------------|-------------------------|---------------------------------|--------------------|------------------|-----------------|---------------|--------------------|--------------------|
| SNP_62040_A_85958 | NW_004515651.1 | scaffold29  | 85958                   | CC                              | AA                 | AA               | INTERGENIC      |               |                    |                    |
| SNP_62041_A_91249 | NW_004515651.1 | scaffold29  | 91249                   | GG                              | TT                 | TT               | INTERGENIC      |               |                    |                    |
| SNP_62042_A_91251 | NW_004515651.1 | scaffold29  | 91251                   | GG                              | TT                 | TT               | INTERGENIC      |               |                    |                    |
| SNP_62043_A_91284 | NW_004515651.1 | scaffold29  | 91284                   | TT                              | CC                 | CC               | INTERGENIC      |               |                    |                    |
| SNP_62044_A_91325 | NW_004515651.1 | scaffold29  | 91325                   | TT                              | CC                 | CC               | INTERGENIC      |               |                    |                    |
| SNP_62045_A_91372 | NW_004515651.1 | scaffold29  | 91372                   | GG                              | AA                 | AA               | INTERGENIC      |               |                    |                    |
| SNP_62046_A_91424 | NW_004515651.1 | scaffold29  | 91424                   | TT                              | CC                 | CC               | INTERGENIC      |               |                    |                    |
| SNP_62047_A_91514 | NW_004515651.1 | scaffold29  | 91514                   | TT                              | GG                 | GG               | INTERGENIC      |               |                    |                    |
| SNP_62048_A_91785 | NW_004515651.1 | scaffold29  | 91785                   | TT                              | AA                 | AA               | INTERGENIC      |               |                    |                    |
| SNP_62049_A_91806 | NW_004515651.1 | scaffold29  | 91806                   | AA                              | GG                 | GG               | INTERGENIC      |               |                    |                    |
| SNP_62050_A_92071 | NW_004515651.1 | scaffold29  | 92071                   | AA                              | CC                 | CC               | INTERGENIC      |               |                    |                    |
| SNP_62051_A_92096 | NW_004515651.1 | scaffold29  | 92096                   | GG                              | TT                 | TT               | INTERGENIC      |               |                    |                    |
| SNP_62052_A_92212 | NW_004515651.1 | scaffold29  | 92212                   | AA                              | GG                 | GG               | INTERGENIC      |               |                    |                    |
| SNP_62053_A_93050 | NW_004515651.1 | scaffold29  | 93050                   | AA                              | CC                 | CC               | INTERGENIC      |               |                    |                    |
| SNP_62054_A_93232 | NW_004515651.1 | scaffold29  | 93232                   | GG                              | CC                 | CC               | INTERGENIC      |               |                    |                    |
| SNP_62055_A_93254 | NW_004515651.1 | scaffold29  | 93254                   | TT                              | AA                 | AA               | INTERGENIC      |               |                    |                    |
| SNP_62056_A_93260 | NW_004515651.1 | scaffold29  | 93260                   | TT                              | AA                 | AA               | INTERGENIC      |               |                    |                    |
| SNP_62057_A_93296 | NW_004515651.1 | scaffold29  | 93296                   | CC                              | AA                 | AA               | INTERGENIC      |               |                    |                    |
| SNP_62058_A_93300 | NW_004515651.1 | scaffold29  | 93300                   | AA                              | GG                 | GG               | INTERGENIC      |               |                    |                    |
| SNP_62059_A_93407 | NW_004515651.1 | scaffold29  | 93407                   | GG                              | AA                 | AA               | INTERGENIC      |               |                    |                    |
| SNP_62060_A_93429 | NW_004515651.1 | scaffold29  | 93429                   | TT                              | CC                 | CC               | INTERGENIC      |               |                    |                    |
| SNP_62061_A_93466 | NW_004515651.1 | scaffold29  | 93466                   | TT                              | CC                 | CC               | INTERGENIC      |               |                    |                    |

| SNPs IDs           | Chromosome IDs | Chromosomes | Physical positions (bp) | CDC Frontier (Reference genome) | (Pusa 1103 & HPNB) | (ILWC 46 & LPNB) | Sequence genome | Components of | Gene accession IDs | Putative functions |
|--------------------|----------------|-------------|-------------------------|---------------------------------|--------------------|------------------|-----------------|---------------|--------------------|--------------------|
| SNP_62062_A_93608  | NW_004515651.1 | scaffold29  | 93608                   | AA                              | CC                 | CC               | INTERGENIC      |               |                    |                    |
| SNP_62063_A_96448  | NW_004515651.1 | scaffold29  | 96448                   | TT                              | CC                 | CC               | INTERGENIC      |               |                    |                    |
| SNP_62064_A_96463  | NW_004515651.1 | scaffold29  | 96463                   | GG                              | AA                 | AA               | INTERGENIC      |               |                    |                    |
| SNP_62065_A_96478  | NW_004515651.1 | scaffold29  | 96478                   | CC                              | TT                 | TT               | INTERGENIC      |               |                    |                    |
| SNP_62066_A_97803  | NW_004515651.1 | scaffold29  | 97803                   | AA                              | TT                 | TT               | INTERGENIC      |               |                    |                    |
| SNP_62067_A_97969  | NW_004515651.1 | scaffold29  | 97969                   | GG                              | TT                 | TT               | INTERGENIC      |               |                    |                    |
| SNP_62068_A_97989  | NW_004515651.1 | scaffold29  | 97989                   | TT                              | GG                 | GG               | INTERGENIC      |               |                    |                    |
| SNP_62069_A_98048  | NW_004515651.1 | scaffold29  | 98048                   | GG                              | TT                 | TT               | INTERGENIC      |               |                    |                    |
| SNP_62070_A_98067  | NW_004515651.1 | scaffold29  | 98067                   | CC                              | GG                 | GG               | INTERGENIC      |               |                    |                    |
| SNP_62071_A_98162  | NW_004515651.1 | scaffold29  | 98162                   | CC                              | TT                 | TT               | INTERGENIC      |               |                    |                    |
| SNP_62072_A_98205  | NW_004515651.1 | scaffold29  | 98205                   | AA                              | GG                 | GG               | INTERGENIC      |               |                    |                    |
| SNP_62073_A_98388  | NW_004515651.1 | scaffold29  | 98388                   | CC                              | GG                 | GG               | INTERGENIC      |               |                    |                    |
| SNP_62074_A_98510  | NW_004515651.1 | scaffold29  | 98510                   | AA                              | GG                 | GG               | INTERGENIC      |               |                    |                    |
| SNP_62075_A_98513  | NW_004515651.1 | scaffold29  | 98513                   | AA                              | GG                 | GG               | INTERGENIC      |               |                    |                    |
| SNP_62076_A_98638  | NW_004515651.1 | scaffold29  | 98638                   | GG                              | CC                 | CC               | INTERGENIC      |               |                    |                    |
| SNP_62077_A_98659  | NW_004515651.1 | scaffold29  | 98659                   | TT                              | AA                 | AA               | INTERGENIC      |               |                    |                    |
| SNP_62078_A_98685  | NW_004515651.1 | scaffold29  | 98685                   | TT                              | CC                 | CC               | INTERGENIC      |               |                    |                    |
| SNP_62079_A_98702  | NW_004515651.1 | scaffold29  | 98702                   | TT                              | AA                 | AA               | INTERGENIC      |               |                    |                    |
| SNP_62080_A_98858  | NW_004515651.1 | scaffold29  | 98858                   | GG                              | AA                 | AA               | INTERGENIC      |               |                    |                    |
| SNP_62081_A_98967  | NW_004515651.1 | scaffold29  | 98967                   | AA                              | GG                 | GG               | INTERGENIC      |               |                    |                    |
| SNP_62082_A_99016  | NW_004515651.1 | scaffold29  | 99016                   | TT                              | GG                 | GG               | INTERGENIC      |               |                    |                    |
| SNP_62083_A_100657 | NW_004515651.1 | scaffold29  | 100657                  | GG                              | AA                 | AA               | INTERGENIC      |               |                    |                    |

| SNPs IDs           | Chromosome IDs | Chromosomes | Physical positions (bp) | CDC Frontier (Reference genome) | (Pusa 1103 & HPNB) | (ILWC 46 & LPNB) | Sequence genome | Components of | Gene accession IDs | Putative functions |
|--------------------|----------------|-------------|-------------------------|---------------------------------|--------------------|------------------|-----------------|---------------|--------------------|--------------------|
| SNP_62084_A_100738 | NW_004515651.1 | scaffold29  | 100738                  | AA                              | CC                 | CC               | INTERGENIC      |               |                    |                    |
| SNP_62085_A_100765 | NW_004515651.1 | scaffold29  | 100765                  | TT                              | GG                 | GG               | INTERGENIC      |               |                    |                    |
| SNP_62086_A_100794 | NW_004515651.1 | scaffold29  | 100794                  | TT                              | CC                 | CC               | INTERGENIC      |               |                    |                    |
| SNP_62087_A_100849 | NW_004515651.1 | scaffold29  | 100849                  | CC                              | AA                 | AA               | INTERGENIC      |               |                    |                    |
| SNP_62088_A_101000 | NW_004515651.1 | scaffold29  | 101000                  | GG                              | CC                 | CC               | INTERGENIC      |               |                    |                    |
| SNP_62090_A_101142 | NW_004515651.1 | scaffold29  | 101142                  | TT                              | AA                 | AA               | INTERGENIC      |               |                    |                    |
| SNP_62091_A_101159 | NW_004515651.1 | scaffold29  | 101159                  | TT                              | CC                 | CC               | INTERGENIC      |               |                    |                    |
| SNP_62092_A_101186 | NW_004515651.1 | scaffold29  | 101186                  | CC                              | TT                 | TT               | INTERGENIC      |               |                    |                    |
| SNP_62093_A_101381 | NW_004515651.1 | scaffold29  | 101381                  | TT                              | AA                 | AA               | INTERGENIC      |               |                    |                    |
| SNP_62094_A_101552 | NW_004515651.1 | scaffold29  | 101552                  | GG                              | CC                 | CC               | INTERGENIC      |               |                    |                    |
| SNP_62095_A_101585 | NW_004515651.1 | scaffold29  | 101585                  | TT                              | AA                 | AA               | INTERGENIC      |               |                    |                    |
| SNP_62096_A_101590 | NW_004515651.1 | scaffold29  | 101590                  | AA                              | GG                 | GG               | INTERGENIC      |               |                    |                    |
| SNP_62097_A_101606 | NW_004515651.1 | scaffold29  | 101606                  | CC                              | TT                 | TT               | INTERGENIC      |               |                    |                    |
| SNP_62098_A_101642 | NW_004515651.1 | scaffold29  | 101642                  | TT                              | CC                 | CC               | INTERGENIC      |               |                    |                    |
| SNP_62099_A_101654 | NW_004515651.1 | scaffold29  | 101654                  | TT                              | CC                 | CC               | INTERGENIC      |               |                    |                    |
| SNP_62100_A_101659 | NW_004515651.1 | scaffold29  | 101659                  | CC                              | TT                 | TT               | INTERGENIC      |               |                    |                    |
| SNP_62101_A_101693 | NW_004515651.1 | scaffold29  | 101693                  | CC                              | GG                 | GG               | INTERGENIC      |               |                    |                    |
| SNP_62102_A_101808 | NW_004515651.1 | scaffold29  | 101808                  | AA                              | CC                 | CC               | INTERGENIC      |               |                    |                    |
| SNP_62103_A_101913 | NW_004515651.1 | scaffold29  | 101913                  | GG                              | AA                 | AA               | INTERGENIC      |               |                    |                    |
| SNP_62104_A_102046 | NW_004515651.1 | scaffold29  | 102046                  | GG                              | AA                 | AA               | INTERGENIC      |               |                    |                    |
| SNP_62105_A_102060 | NW_004515651.1 | scaffold29  | 102060                  | CC                              | AA                 | AA               | INTERGENIC      |               |                    |                    |
| SNP_62106_A_102139 | NW_004515651.1 | scaffold29  | 102139                  | GG                              | TT                 | TT               | INTERGENIC      |               |                    |                    |

| SNPs IDs           | Chromosome IDs | Chromosomes | Physical positions (bp) | CDC Frontier (Reference genome) | (Pusa 1103 & HPNB) | (ILWC 46 & LPNB) | Sequence genome | Components of | Gene accession IDs | Putative functions |
|--------------------|----------------|-------------|-------------------------|---------------------------------|--------------------|------------------|-----------------|---------------|--------------------|--------------------|
| SNP_62107_A_102281 | NW_004515651.1 | scaffold29  | 102281                  | GG                              | CC                 | CC               | INTERGENIC      |               |                    |                    |
| SNP_62108_A_102321 | NW_004515651.1 | scaffold29  | 102321                  | AA                              | GG                 | GG               | INTERGENIC      |               |                    |                    |
| SNP_62109_A_102508 | NW_004515651.1 | scaffold29  | 102508                  | GG                              | AA                 | AA               | INTERGENIC      |               |                    |                    |
| SNP_62110_A_102545 | NW_004515651.1 | scaffold29  | 102545                  | GG                              | AA                 | AA               | INTERGENIC      |               |                    |                    |
| SNP_62111_A_102549 | NW_004515651.1 | scaffold29  | 102549                  | AA                              | CC                 | CC               | INTERGENIC      |               |                    |                    |
| SNP_62112_A_102616 | NW_004515651.1 | scaffold29  | 102616                  | AA                              | CC                 | CC               | INTERGENIC      |               |                    |                    |
| SNP_62113_A_102617 | NW_004515651.1 | scaffold29  | 102617                  | TT                              | GG                 | GG               | INTERGENIC      |               |                    |                    |
| SNP_62114_A_102962 | NW_004515651.1 | scaffold29  | 102962                  | GG                              | AA                 | AA               | INTERGENIC      |               |                    |                    |
| SNP_62115_A_108648 | NW_004515651.1 | scaffold29  | 108648                  | GG                              | TT                 | TT               | INTERGENIC      |               |                    |                    |
| SNP_62116_A_108921 | NW_004515651.1 | scaffold29  | 108921                  | TT                              | CC                 | CC               | INTERGENIC      |               |                    |                    |
| SNP_62117_A_109240 | NW_004515651.1 | scaffold29  | 109240                  | GG                              | AA                 | AA               | INTERGENIC      |               |                    |                    |
| SNP_62118_A_109507 | NW_004515651.1 | scaffold29  | 109507                  | GG                              | AA                 | AA               | INTERGENIC      |               |                    |                    |
| SNP_62120_A_112031 | NW_004515651.1 | scaffold29  | 112031                  | TT                              | CC                 | CC               | INTERGENIC      |               |                    |                    |
| SNP_62121_A_116086 | NW_004515651.1 | scaffold29  | 116086                  | CC                              | AA                 | AA               | INTERGENIC      |               |                    |                    |
| SNP_62122_A_118112 | NW_004515651.1 | scaffold29  | 118112                  | GG                              | TT                 | TT               | INTERGENIC      |               |                    |                    |
| SNP_62123_A_118140 | NW_004515651.1 | scaffold29  | 118140                  | GG                              | TT                 | TT               | INTERGENIC      |               |                    |                    |
| SNP_62124_A_118141 | NW_004515651.1 | scaffold29  | 118141                  | TT                              | CC                 | CC               | INTERGENIC      |               |                    |                    |
| SNP_62125_A_118164 | NW_004515651.1 | scaffold29  | 118164                  | AA                              | GG                 | GG               | INTERGENIC      |               |                    |                    |
| SNP_62126_A_118207 | NW_004515651.1 | scaffold29  | 118207                  | TT                              | CC                 | CC               | INTERGENIC      |               |                    |                    |
| SNP_62127_A_120029 | NW_004515651.1 | scaffold29  | 120029                  | CC                              | TT                 | TT               | INTERGENIC      |               |                    |                    |
| SNP_62128_A_120040 | NW_004515651.1 | scaffold29  | 120040                  | TT                              | CC                 | CC               | INTERGENIC      |               |                    |                    |
| SNP_62129_A_120063 | NW_004515651.1 | scaffold29  | 120063                  | GG                              | AA                 | AA               | INTERGENIC      |               |                    |                    |

| SNPs IDs           | Chromosome IDs | Chromosomes | Physical positions (bp) | CDC Frontier (Reference genome) | (Pusa 1103 & HPNB) | (ILWC 46 & LPNB) | Sequence genome | Components of | Gene accession IDs | Putative functions |
|--------------------|----------------|-------------|-------------------------|---------------------------------|--------------------|------------------|-----------------|---------------|--------------------|--------------------|
| SNP_62130_A_120082 | NW_004515651.1 | scaffold29  | 120082                  | TT                              | CC                 | CC               | INTERGENIC      |               |                    |                    |
| SNP_62131_A_120119 | NW_004515651.1 | scaffold29  | 120119                  | AA                              | GG                 | GG               | INTERGENIC      |               |                    |                    |
| SNP_62132_A_120135 | NW_004515651.1 | scaffold29  | 120135                  | CC                              | TT                 | TT               | INTERGENIC      |               |                    |                    |
| SNP_62133_A_120138 | NW_004515651.1 | scaffold29  | 120138                  | TT                              | AA                 | AA               | INTERGENIC      |               |                    |                    |
| SNP_62134_A_120275 | NW_004515651.1 | scaffold29  | 120275                  | TT                              | GG                 | GG               | INTERGENIC      |               |                    |                    |
| SNP_62135_A_120317 | NW_004515651.1 | scaffold29  | 120317                  | CC                              | AA                 | AA               | INTERGENIC      |               |                    |                    |
| SNP_62136_A_120407 | NW_004515651.1 | scaffold29  | 120407                  | AA                              | GG                 | GG               | INTERGENIC      |               |                    |                    |
| SNP_62137_A_120500 | NW_004515651.1 | scaffold29  | 120500                  | GG                              | AA                 | AA               | INTERGENIC      |               |                    |                    |
| SNP_62138_A_120801 | NW_004515651.1 | scaffold29  | 120801                  | TT                              | CC                 | CC               | INTERGENIC      |               |                    |                    |
| SNP_62139_A_120892 | NW_004515651.1 | scaffold29  | 120892                  | AA                              | TT                 | TT               | INTERGENIC      |               |                    |                    |
| SNP_62140_A_120929 | NW_004515651.1 | scaffold29  | 120929                  | AA                              | GG                 | GG               | INTERGENIC      |               |                    |                    |
| SNP_62141_A_120959 | NW_004515651.1 | scaffold29  | 120959                  | AA                              | TT                 | TT               | INTERGENIC      |               |                    |                    |
| SNP_62142_A_121000 | NW_004515651.1 | scaffold29  | 121000                  | GG                              | TT                 | TT               | INTERGENIC      |               |                    |                    |
| SNP_62143_A_121048 | NW_004515651.1 | scaffold29  | 121048                  | AA                              | CC                 | CC               | INTERGENIC      |               |                    |                    |
| SNP_62144_A_121063 | NW_004515651.1 | scaffold29  | 121063                  | GG                              | CC                 | CC               | INTERGENIC      |               |                    |                    |
| SNP_62145_A_134810 | NW_004515651.1 | scaffold29  | 134810                  | TT                              | AA                 | AA               | INTERGENIC      |               |                    |                    |
| SNP_62146_A_134841 | NW_004515651.1 | scaffold29  | 134841                  | TT                              | CC                 | CC               | INTERGENIC      |               |                    |                    |
| SNP_62147_A_134874 | NW_004515651.1 | scaffold29  | 134874                  | CC                              | AA                 | AA               | INTERGENIC      |               |                    |                    |
| SNP_62148_A_134952 | NW_004515651.1 | scaffold29  | 134952                  | TT                              | CC                 | CC               | INTERGENIC      |               |                    |                    |
| SNP_62149_A_134953 | NW_004515651.1 | scaffold29  | 134953                  | GG                              | AA                 | AA               | INTERGENIC      |               |                    |                    |
| SNP_62150_A_134958 | NW_004515651.1 | scaffold29  | 134958                  | CC                              | GG                 | GG               | INTERGENIC      |               |                    |                    |
| SNP_62151_A_134960 | NW_004515651.1 | scaffold29  | 134960                  | AA                              | GG                 | GG               | INTERGENIC      |               |                    |                    |

| SNPs IDs           | Chromosome IDs | Chromosomes | Physical positions (bp) | CDC Frontier (Reference genome) | (Pusa 1103 & HPNB) | (ILWC 46 & LPNB) | Sequence genome | Components of | Gene accession IDs | Putative functions |
|--------------------|----------------|-------------|-------------------------|---------------------------------|--------------------|------------------|-----------------|---------------|--------------------|--------------------|
| SNP_62152_A_134965 | NW_004515651.1 | scaffold29  | 134965                  | CC                              | AA                 | AA               | INTERGENIC      |               |                    |                    |
| SNP_62153_A_134973 | NW_004515651.1 | scaffold29  | 134973                  | AA                              | TT                 | TT               | INTERGENIC      |               |                    |                    |
| SNP_62154_A_134988 | NW_004515651.1 | scaffold29  | 134988                  | TT                              | AA                 | AA               | INTERGENIC      |               |                    |                    |
| SNP_62155_A_134989 | NW_004515651.1 | scaffold29  | 134989                  | TT                              | AA                 | AA               | INTERGENIC      |               |                    |                    |
| SNP_62156_A_135009 | NW_004515651.1 | scaffold29  | 135009                  | CC                              | AA                 | AA               | INTERGENIC      |               |                    |                    |
| SNP_62157_A_135027 | NW_004515651.1 | scaffold29  | 135027                  | TT                              | AA                 | AA               | INTERGENIC      |               |                    |                    |
| SNP_62158_A_135066 | NW_004515651.1 | scaffold29  | 135066                  | TT                              | GG                 | GG               | INTERGENIC      |               |                    |                    |
| SNP_62159_A_135067 | NW_004515651.1 | scaffold29  | 135067                  | TT                              | CC                 | CC               | INTERGENIC      |               |                    |                    |
| SNP_62160_A_135263 | NW_004515651.1 | scaffold29  | 135263                  | AA                              | GG                 | GG               | INTERGENIC      |               |                    |                    |
| SNP_62161_A_135421 | NW_004515651.1 | scaffold29  | 135421                  | TT                              | CC                 | CC               | INTERGENIC      |               |                    |                    |
| SNP_62162_A_135429 | NW_004515651.1 | scaffold29  | 135429                  | GG                              | CC                 | CC               | INTERGENIC      |               |                    |                    |
| SNP_62163_A_137620 | NW_004515651.1 | scaffold29  | 137620                  | TT                              | AA                 | AA               | INTERGENIC      |               |                    |                    |
| SNP_62164_A_137657 | NW_004515651.1 | scaffold29  | 137657                  | TT                              | AA                 | AA               | INTERGENIC      |               |                    |                    |
| SNP_62165_A_137803 | NW_004515651.1 | scaffold29  | 137803                  | TT                              | AA                 | AA               | INTERGENIC      |               |                    |                    |
| SNP_62166_A_137849 | NW_004515651.1 | scaffold29  | 137849                  | TT                              | GG                 | GG               | INTERGENIC      |               |                    |                    |
| SNP_62167_A_137857 | NW_004515651.1 | scaffold29  | 137857                  | TT                              | GG                 | GG               | INTERGENIC      |               |                    |                    |
| SNP_62168_A_137892 | NW_004515651.1 | scaffold29  | 137892                  | TT                              | CC                 | CC               | INTERGENIC      |               |                    |                    |
| SNP_62169_A_138079 | NW_004515651.1 | scaffold29  | 138079                  | CC                              | GG                 | GG               | INTERGENIC      |               |                    |                    |
| SNP_62170_A_138182 | NW_004515651.1 | scaffold29  | 138182                  | GG                              | CC                 | CC               | INTERGENIC      |               |                    |                    |
| SNP_62171_A_138237 | NW_004515651.1 | scaffold29  | 138237                  | GG                              | AA                 | AA               | INTERGENIC      |               |                    |                    |
| SNP_62172_A_138284 | NW_004515651.1 | scaffold29  | 138284                  | CC                              | GG                 | GG               | INTERGENIC      |               |                    |                    |
| SNP_62173_A_138344 | NW_004515651.1 | scaffold29  | 138344                  | CC                              | AA                 | AA               | INTERGENIC      |               |                    |                    |

| SNPs IDs           | Chromosome IDs | Chromosomes | Physical positions (bp) | CDC Frontier (Reference genome) | (Pusa 1103 & HPNB) | (ILWC 46 & LPNB) | Sequence genome | Components of | Gene accession IDs | Putative functions |
|--------------------|----------------|-------------|-------------------------|---------------------------------|--------------------|------------------|-----------------|---------------|--------------------|--------------------|
| SNP_62174_A_138381 | NW_004515651.1 | scaffold29  | 138381                  | TT                              | CC                 | CC               | INTERGENIC      |               |                    |                    |
| SNP_62175_A_138419 | NW_004515651.1 | scaffold29  | 138419                  | GG                              | TT                 | TT               | INTERGENIC      |               |                    |                    |
| SNP_62176_A_138436 | NW_004515651.1 | scaffold29  | 138436                  | GG                              | AA                 | AA               | INTERGENIC      |               |                    |                    |
| SNP_62177_A_138437 | NW_004515651.1 | scaffold29  | 138437                  | AA                              | TT                 | TT               | INTERGENIC      |               |                    |                    |
| SNP_62178_A_138513 | NW_004515651.1 | scaffold29  | 138513                  | TT                              | CC                 | CC               | INTERGENIC      |               |                    |                    |
| SNP_62179_A_138971 | NW_004515651.1 | scaffold29  | 138971                  | CC                              | GG                 | GG               | INTERGENIC      |               |                    |                    |
| SNP_62180_A_145033 | NW_004515651.1 | scaffold29  | 145033                  | TT                              | CC                 | CC               | INTERGENIC      |               |                    |                    |
| SNP_62181_A_145215 | NW_004515651.1 | scaffold29  | 145215                  | AA                              | GG                 | GG               | INTERGENIC      |               |                    |                    |
| SNP_62182_A_145230 | NW_004515651.1 | scaffold29  | 145230                  | AA                              | TT                 | TT               | INTERGENIC      |               |                    |                    |
| SNP_62183_A_145309 | NW_004515651.1 | scaffold29  | 145309                  | TT                              | AA                 | AA               | INTERGENIC      |               |                    |                    |
| SNP_62184_A_145346 | NW_004515651.1 | scaffold29  | 145346                  | AA                              | CC                 | CC               | INTERGENIC      |               |                    |                    |
| SNP_62185_A_145356 | NW_004515651.1 | scaffold29  | 145356                  | TT                              | GG                 | GG               | INTERGENIC      |               |                    |                    |
| SNP_62186_A_145366 | NW_004515651.1 | scaffold29  | 145366                  | TT                              | GG                 | GG               | INTERGENIC      |               |                    |                    |
| SNP_62187_A_145524 | NW_004515651.1 | scaffold29  | 145524                  | CC                              | TT                 | TT               | INTERGENIC      |               |                    |                    |
| SNP_62188_A_145632 | NW_004515651.1 | scaffold29  | 145632                  | GG                              | AA                 | AA               | INTERGENIC      |               |                    |                    |
| SNP_62189_A_147095 | NW_004515651.1 | scaffold29  | 147095                  | TT                              | GG                 | GG               | INTERGENIC      |               |                    |                    |
| SNP_62190_A_147118 | NW_004515651.1 | scaffold29  | 147118                  | CC                              | TT                 | TT               | INTERGENIC      |               |                    |                    |
| SNP_62191_A_147275 | NW_004515651.1 | scaffold29  | 147275                  | CC                              | TT                 | TT               | INTERGENIC      |               |                    |                    |
| SNP_62192_A_147284 | NW_004515651.1 | scaffold29  | 147284                  | AA                              | TT                 | TT               | INTERGENIC      |               |                    |                    |
| SNP_62193_A_147286 | NW_004515651.1 | scaffold29  | 147286                  | TT                              | AA                 | AA               | INTERGENIC      |               |                    |                    |
| SNP_62194_A_147411 | NW_004515651.1 | scaffold29  | 147411                  | AA                              | GG                 | GG               | INTERGENIC      |               |                    |                    |
| SNP_62195_A_147502 | NW_004515651.1 | scaffold29  | 147502                  | GG                              | CC                 | CC               | INTERGENIC      |               |                    |                    |

| SNPs IDs           | Chromosome IDs | Chromosomes | Physical positions (bp) | CDC Frontier (Reference genome) | (Pusa 1103 & HPNB) | (ILWC 46 & LPNB) | Sequence genome | Components of | Gene accession IDs | Putative functions |
|--------------------|----------------|-------------|-------------------------|---------------------------------|--------------------|------------------|-----------------|---------------|--------------------|--------------------|
| SNP_62196_A_147510 | NW_004515651.1 | scaffold29  | 147510                  | TT                              | AA                 | AA               | INTERGENIC      |               |                    |                    |
| SNP_62197_A_147626 | NW_004515651.1 | scaffold29  | 147626                  | TT                              | AA                 | AA               | INTERGENIC      |               |                    |                    |
| SNP_62198_A_147654 | NW_004515651.1 | scaffold29  | 147654                  | GG                              | AA                 | AA               | INTERGENIC      |               |                    |                    |
| SNP_62199_A_150801 | NW_004515651.1 | scaffold29  | 150801                  | CC                              | TT                 | TT               | INTERGENIC      |               |                    |                    |
| SNP_62200_A_150807 | NW_004515651.1 | scaffold29  | 150807                  | AA                              | GG                 | GG               | INTERGENIC      |               |                    |                    |
| SNP_62201_A_150840 | NW_004515651.1 | scaffold29  | 150840                  | TT                              | GG                 | GG               | INTERGENIC      |               |                    |                    |
| SNP_62202_A_150844 | NW_004515651.1 | scaffold29  | 150844                  | TT                              | GG                 | GG               | INTERGENIC      |               |                    |                    |
| SNP_62203_A_150898 | NW_004515651.1 | scaffold29  | 150898                  | GG                              | AA                 | AA               | INTERGENIC      |               |                    |                    |
| SNP_62204_A_150929 | NW_004515651.1 | scaffold29  | 150929                  | AA                              | TT                 | TT               | INTERGENIC      |               |                    |                    |
| SNP_62205_A_150936 | NW_004515651.1 | scaffold29  | 150936                  | TT                              | CC                 | CC               | INTERGENIC      |               |                    |                    |
| SNP_62206_A_151154 | NW_004515651.1 | scaffold29  | 151154                  | AA                              | GG                 | GG               | INTERGENIC      |               |                    |                    |
| SNP_62207_A_151166 | NW_004515651.1 | scaffold29  | 151166                  | TT                              | GG                 | GG               | INTERGENIC      |               |                    |                    |
| SNP_62208_A_163993 | NW_004515651.1 | scaffold29  | 163993                  | AA                              | GG                 | GG               | INTERGENIC      |               |                    |                    |
| SNP_62209_A_167403 | NW_004515651.1 | scaffold29  | 167403                  | GG                              | TT                 | TT               | INTERGENIC      |               |                    |                    |
| SNP_62210_A_186959 | NW_004515651.1 | scaffold29  | 186959                  | AA                              | TT                 | TT               | INTERGENIC      |               |                    |                    |
| SNP_62211_A_198427 | NW_004515651.1 | scaffold29  | 198427                  | CC                              | AA                 | AA               | INTERGENIC      |               |                    |                    |
| SNP_62213_A_200926 | NW_004515651.1 | scaffold29  | 200926                  | AA                              | GG                 | GG               | INTERGENIC      |               |                    |                    |
| SNP_62214_A_200958 | NW_004515651.1 | scaffold29  | 200958                  | TT                              | CC                 | CC               | INTERGENIC      |               |                    |                    |
| SNP_62215_A_209496 | NW_004515651.1 | scaffold29  | 209496                  | TT                              | GG                 | GG               | INTERGENIC      |               |                    |                    |
| SNP_62216_A_209543 | NW_004515651.1 | scaffold29  | 209543                  | AA                              | CC                 | CC               | INTERGENIC      |               |                    |                    |
| SNP_62217_A_209562 | NW_004515651.1 | scaffold29  | 209562                  | GG                              | AA                 | AA               | INTERGENIC      |               |                    |                    |
| SNP_62218_A_209571 | NW_004515651.1 | scaffold29  | 209571                  | AA                              | GG                 | GG               | INTERGENIC      |               |                    |                    |



| SNPs IDs           | Chromosome IDs | Chromosomes | Physical positions (bp) | CDC Frontier (Reference genome) | (Pusa 1103 & HPNB) | (ILWC 46 & LPNB) | Sequence genome | Components of | Gene accession IDs | Putative functions |
|--------------------|----------------|-------------|-------------------------|---------------------------------|--------------------|------------------|-----------------|---------------|--------------------|--------------------|
| SNP_62219_A_209682 | NW_004515651.1 | scaffold29  | 209682                  | CC                              | TT                 | TT               | INTERGENIC      |               |                    |                    |
| SNP_62220_A_209690 | NW_004515651.1 | scaffold29  | 209690                  | TT                              | GG                 | GG               | INTERGENIC      |               |                    |                    |
| SNP_62221_A_209711 | NW_004515651.1 | scaffold29  | 209711                  | AA                              | GG                 | GG               | INTERGENIC      |               |                    |                    |
| SNP_62222_A_209754 | NW_004515651.1 | scaffold29  | 209754                  | GG                              | TT                 | TT               | INTERGENIC      |               |                    |                    |
| SNP_62223_A_209764 | NW_004515651.1 | scaffold29  | 209764                  | TT                              | CC                 | CC               | INTERGENIC      |               |                    |                    |
| SNP_62224_A_218462 | NW_004515651.1 | scaffold29  | 218462                  | GG                              | AA                 | AA               | INTERGENIC      |               |                    |                    |
| SNP_62225_A_226371 | NW_004515651.1 | scaffold29  | 226371                  | CC                              | GG                 | GG               | INTERGENIC      |               |                    |                    |
| SNP_62226_A_230378 | NW_004515651.1 | scaffold29  | 230378                  | CC                              | TT                 | TT               | INTERGENIC      |               |                    |                    |
| SNP_62227_A_230379 | NW_004515651.1 | scaffold29  | 230379                  | AA                              | GG                 | GG               | INTERGENIC      |               |                    |                    |
| SNP_62228_A_230732 | NW_004515651.1 | scaffold29  | 230732                  | GG                              | TT                 | TT               | INTERGENIC      |               |                    |                    |
| SNP_62229_A_234317 | NW_004515651.1 | scaffold29  | 234317                  | CC                              | AA                 | AA               | INTERGENIC      |               |                    |                    |
| SNP_62230_A_234373 | NW_004515651.1 | scaffold29  | 234373                  | CC                              | TT                 | TT               | INTERGENIC      |               |                    |                    |
| SNP_62231_A_234374 | NW_004515651.1 | scaffold29  | 234374                  | AA                              | GG                 | GG               | INTERGENIC      |               |                    |                    |
| SNP_62232_A_234785 | NW_004515651.1 | scaffold29  | 234785                  | TT                              | CC                 | CC               | INTERGENIC      |               |                    |                    |
| SNP_62233_A_236577 | NW_004515651.1 | scaffold29  | 236577                  | GG                              | TT                 | TT               | INTERGENIC      |               |                    |                    |
| SNP_62234_A_238914 | NW_004515651.1 | scaffold29  | 238914                  | CC                              | TT                 | TT               | INTERGENIC      |               |                    |                    |
| SNP_62235_A_238929 | NW_004515651.1 | scaffold29  | 238929                  | TT                              | CC                 | CC               | INTERGENIC      |               |                    |                    |
| SNP_62236_A_238954 | NW_004515651.1 | scaffold29  | 238954                  | GG                              | AA                 | AA               | INTERGENIC      |               |                    |                    |
| SNP_62237_A_239332 | NW_004515651.1 | scaffold29  | 239332                  | AA                              | GG                 | GG               | INTERGENIC      |               |                    |                    |
| SNP_62238_A_240217 | NW_004515651.1 | scaffold29  | 240217                  | AA                              | GG                 | GG               | INTERGENIC      |               |                    |                    |
| SNP_62239_A_241581 | NW_004515651.1 | scaffold29  | 241581                  | TT                              | AA                 | AA               | INTERGENIC      |               |                    |                    |
| SNP_62240_A_241648 | NW_004515651.1 | scaffold29  | 241648                  | GG                              | TT                 | TT               | INTERGENIC      |               |                    |                    |

| SNPs IDs           | Chromosome IDs | Chromosomes | Physical positions (bp) | CDC Frontier (Reference genome) | (Pusa 1103 & HPNB) | (ILWC 46 & LPNB) | Sequence genome | Components of | Gene accession IDs | Putative functions |
|--------------------|----------------|-------------|-------------------------|---------------------------------|--------------------|------------------|-----------------|---------------|--------------------|--------------------|
| SNP_62241_A_241941 | NW_004515651.1 | scaffold29  | 241941                  | GG                              | TT                 | TT               | INTERGENIC      |               |                    |                    |
| SNP_62242_A_242312 | NW_004515651.1 | scaffold29  | 242312                  | AA                              | CC                 | CC               | INTERGENIC      |               |                    |                    |
| SNP_62243_A_242313 | NW_004515651.1 | scaffold29  | 242313                  | CC                              | GG                 | GG               | INTERGENIC      |               |                    |                    |
| SNP_62244_A_242375 | NW_004515651.1 | scaffold29  | 242375                  | AA                              | TT                 | TT               | INTERGENIC      |               |                    |                    |
| SNP_62245_A_830    | NW_004515652.1 | scaffold30  | 830                     | CC                              | AA                 | AA               | INTERGENIC      |               |                    |                    |
| SNP_62246_A_1564   | NW_004515652.1 | scaffold30  | 1564                    | AA                              | TT                 | TT               | INTERGENIC      |               |                    |                    |
| SNP_62247_A_1813   | NW_004515652.1 | scaffold30  | 1813                    | TT                              | GG                 | GG               | INTERGENIC      |               |                    |                    |
| SNP_62248_A_1828   | NW_004515652.1 | scaffold30  | 1828                    | TT                              | CC                 | CC               | INTERGENIC      |               |                    |                    |
| SNP_62249_A_1873   | NW_004515652.1 | scaffold30  | 1873                    | TT                              | CC                 | CC               | INTERGENIC      |               |                    |                    |
| SNP_62250_A_1908   | NW_004515652.1 | scaffold30  | 1908                    | AA                              | GG                 | GG               | INTERGENIC      |               |                    |                    |
| SNP_62251_A_1912   | NW_004515652.1 | scaffold30  | 1912                    | GG                              | AA                 | AA               | INTERGENIC      |               |                    |                    |
| SNP_62252_A_1921   | NW_004515652.1 | scaffold30  | 1921                    | AA                              | CC                 | CC               | INTERGENIC      |               |                    |                    |
| SNP_62253_A_1936   | NW_004515652.1 | scaffold30  | 1936                    | TT                              | CC                 | CC               | INTERGENIC      |               |                    |                    |
| SNP_62254_A_1946   | NW_004515652.1 | scaffold30  | 1946                    | GG                              | AA                 | AA               | INTERGENIC      |               |                    |                    |
| SNP_62255_A_1984   | NW_004515652.1 | scaffold30  | 1984                    | TT                              | CC                 | CC               | INTERGENIC      |               |                    |                    |
| SNP_62256_A_1992   | NW_004515652.1 | scaffold30  | 1992                    | TT                              | CC                 | CC               | INTERGENIC      |               |                    |                    |
| SNP_62257_A_2001   | NW_004515652.1 | scaffold30  | 2001                    | AA                              | CC                 | CC               | INTERGENIC      |               |                    |                    |
| SNP_62258_A_2002   | NW_004515652.1 | scaffold30  | 2002                    | TT                              | CC                 | CC               | INTERGENIC      |               |                    |                    |
| SNP_62259_A_2004   | NW_004515652.1 | scaffold30  | 2004                    | GG                              | CC                 | CC               | INTERGENIC      |               |                    |                    |
| SNP_62260_A_2032   | NW_004515652.1 | scaffold30  | 2032                    | CC                              | TT                 | TT               | INTERGENIC      |               |                    |                    |
| SNP_62261_A_2041   | NW_004515652.1 | scaffold30  | 2041                    | GG                              | AA                 | AA               | INTERGENIC      |               |                    |                    |
| SNP_62262_A_2050   | NW_004515652.1 | scaffold30  | 2050                    | TT                              | CC                 | CC               | INTERGENIC      |               |                    |                    |

| SNPs IDs          | Chromosome IDs | Chromosomes | Physical positions (bp) | CDC Frontier genome (Reference genome) | (Pusa 1103 & HPNB) | (ILWC 46 & LPNB) | Sequence genome | Components of | Gene accession IDs                   | Putative functions |
|-------------------|----------------|-------------|-------------------------|----------------------------------------|--------------------|------------------|-----------------|---------------|--------------------------------------|--------------------|
| SNP_62263_A_2056  | NW_004515652.1 | scaffold30  | 2056                    | TT                                     | AA                 | AA               | INTERGENIC      |               |                                      |                    |
| SNP_62264_A_2064  | NW_004515652.1 | scaffold30  | 2064                    | TT                                     | CC                 | CC               | INTERGENIC      |               |                                      |                    |
| SNP_62265_A_12708 | NW_004515652.1 | scaffold30  | 12708                   | CC                                     | TT                 | TT               | INTERGENIC      |               |                                      |                    |
| SNP_62266_A_12717 | NW_004515652.1 | scaffold30  | 12717                   | GG                                     | AA                 | AA               | INTERGENIC      |               |                                      |                    |
| SNP_62267_A_23881 | NW_004515652.1 | scaffold30  | 23881                   | GG                                     | AA                 | AA               | INTERGENIC      |               |                                      |                    |
| SNP_62268_A_44820 | NW_004515652.1 | scaffold30  | 44820                   | AA                                     | CC                 | CC               | URR             | 101514107     | WD repeat-containing protein 18-like |                    |
| SNP_62269_A_67121 | NW_004515652.1 | scaffold30  | 67121                   | AA                                     | TT                 | TT               | INTERGENIC      |               |                                      |                    |
| SNP_62270_A_68352 | NW_004515652.1 | scaffold30  | 68352                   | AA                                     | GG                 | GG               | INTERGENIC      |               |                                      |                    |
| SNP_62271_A_78673 | NW_004515652.1 | scaffold30  | 78673                   | TT                                     | AA                 | AA               | INTERGENIC      |               |                                      |                    |
| SNP_62272_A_78743 | NW_004515652.1 | scaffold30  | 78743                   | TT                                     | CC                 | CC               | INTERGENIC      |               |                                      |                    |
| SNP_62273_A_78800 | NW_004515652.1 | scaffold30  | 78800                   | CC                                     | AA                 | AA               | INTERGENIC      |               |                                      |                    |
| SNP_62274_A_84912 | NW_004515652.1 | scaffold30  | 84912                   | AA                                     | GG                 | GG               | INTERGENIC      |               |                                      |                    |
| SNP_62275_A_85346 | NW_004515652.1 | scaffold30  | 85346                   | AA                                     | GG                 | GG               | INTERGENIC      |               |                                      |                    |
| SNP_62276_A_85930 | NW_004515652.1 | scaffold30  | 85930                   | TT                                     | GG                 | GG               | INTERGENIC      |               |                                      |                    |
| SNP_62278_A_86042 | NW_004515652.1 | scaffold30  | 86042                   | TT                                     | CC                 | CC               | INTERGENIC      |               |                                      |                    |
| SNP_62279_A_86053 | NW_004515652.1 | scaffold30  | 86053                   | CC                                     | TT                 | TT               | INTERGENIC      |               |                                      |                    |
| SNP_62280_A_86068 | NW_004515652.1 | scaffold30  | 86068                   | CC                                     | TT                 | TT               | INTERGENIC      |               |                                      |                    |
| SNP_62281_A_86070 | NW_004515652.1 | scaffold30  | 86070                   | CC                                     | TT                 | TT               | INTERGENIC      |               |                                      |                    |
| SNP_62282_A_86108 | NW_004515652.1 | scaffold30  | 86108                   | GG                                     | CC                 | CC               | INTERGENIC      |               |                                      |                    |
| SNP_62283_A_86192 | NW_004515652.1 | scaffold30  | 86192                   | TT                                     | CC                 | CC               | INTERGENIC      |               |                                      |                    |
| SNP_62284_A_89499 | NW_004515652.1 | scaffold30  | 89499                   | GG                                     | AA                 | AA               | INTERGENIC      |               |                                      |                    |
| SNP_62285_A_93183 | NW_004515652.1 | scaffold30  | 93183                   | AA                                     | GG                 | GG               | INTERGENIC      |               |                                      |                    |

| SNPs IDs           | Chromosome IDs | Chromosomes | Physical positions (bp) | CDC Frontier (Reference genome) | (Pusa 1103 & HPNB) | (ILWC 46 & LPNB) | Sequence Components of genome | Gene accession IDs | Putative functions           |
|--------------------|----------------|-------------|-------------------------|---------------------------------|--------------------|------------------|-------------------------------|--------------------|------------------------------|
| SNP_62286_A_93185  | NW_004515652.1 | scaffold30  | 93185                   | CC                              | AA                 | AA               | INTERGENIC                    |                    |                              |
| SNP_62287_A_98755  | NW_004515652.1 | scaffold30  | 98755                   | AA                              | CC                 | CC               | INTERGENIC                    |                    |                              |
| SNP_62288_A_98980  | NW_004515652.1 | scaffold30  | 98980                   | TT                              | AA                 | AA               | INTERGENIC                    |                    |                              |
| SNP_62289_A_110106 | NW_004515652.1 | scaffold30  | 110106                  | TT                              | AA                 | AA               | INTERGENIC                    |                    |                              |
| SNP_62290_A_111739 | NW_004515652.1 | scaffold30  | 111739                  | AA                              | TT                 | TT               | INTERGENIC                    |                    |                              |
| SNP_62291_A_119454 | NW_004515652.1 | scaffold30  | 119454                  | TT                              | CC                 | CC               | INTERGENIC                    |                    |                              |
| SNP_62292_A_119455 | NW_004515652.1 | scaffold30  | 119455                  | TT                              | CC                 | CC               | INTERGENIC                    |                    |                              |
| SNP_62293_A_135829 | NW_004515652.1 | scaffold30  | 135829                  | GG                              | AA                 | AA               | INTERGENIC                    |                    |                              |
| SNP_62294_A_136493 | NW_004515652.1 | scaffold30  | 136493                  | GG                              | AA                 | AA               | INTERGENIC                    |                    |                              |
| SNP_62295_A_136523 | NW_004515652.1 | scaffold30  | 136523                  | AA                              | CC                 | CC               | INTERGENIC                    |                    |                              |
| SNP_62296_A_136525 | NW_004515652.1 | scaffold30  | 136525                  | AA                              | TT                 | TT               | INTERGENIC                    |                    |                              |
| SNP_62297_A_136537 | NW_004515652.1 | scaffold30  | 136537                  | CC                              | TT                 | TT               | INTERGENIC                    |                    |                              |
| SNP_62298_A_136543 | NW_004515652.1 | scaffold30  | 136543                  | AA                              | TT                 | TT               | INTERGENIC                    |                    |                              |
| SNP_62299_A_136609 | NW_004515652.1 | scaffold30  | 136609                  | CC                              | TT                 | TT               | INTERGENIC                    |                    |                              |
| SNP_62300_A_136757 | NW_004515652.1 | scaffold30  | 136757                  | TT                              | GG                 | GG               | INTERGENIC                    |                    |                              |
| SNP_62301_A_21340  | NW_004515653.1 | scaffold36  | 21340                   | AA                              | TT                 | TT               | INTERGENIC                    |                    |                              |
| SNP_62302_A_21710  | NW_004515653.1 | scaffold36  | 21710                   | TT                              | AA                 | AA               | INTERGENIC                    |                    |                              |
| SNP_62303_A_24955  | NW_004515653.1 | scaffold36  | 24955                   | CC                              | AA                 | AA               | INTERGENIC                    |                    |                              |
| SNP_62304_A_32518  | NW_004515653.1 | scaffold36  | 32518                   | CC                              | GG                 | GG               | INTERGENIC                    |                    |                              |
| SNP_62305_A_108225 | NW_004515653.1 | scaffold36  | 108225                  | AA                              | TT                 | TT               | URR                           | 101515633          | uncharacterized LOC101515633 |
| SNP_62307_A_151304 | NW_004515653.1 | scaffold36  | 151304                  | CC                              | TT                 | TT               | INTERGENIC                    |                    |                              |
| SNP_62308_A_203797 | NW_004515653.1 | scaffold36  | 203797                  | AA                              | GG                 | GG               | INTERGENIC                    |                    |                              |

| SNPs IDs           | Chromosome IDs | Chromosomes | Physical positions (bp) | CDC Frontier (Reference genome) | (Pusa 1103 & HPNB) | (ILWC 46 & LPNB) | Sequence genome | Components of | Gene accession IDs | Putative functions |
|--------------------|----------------|-------------|-------------------------|---------------------------------|--------------------|------------------|-----------------|---------------|--------------------|--------------------|
| SNP_62309_A_214985 | NW_004515653.1 | scaffold36  | 214985                  | AA                              | TT                 | TT               | INTERGENIC      |               |                    |                    |
| SNP_62310_A_214986 | NW_004515653.1 | scaffold36  | 214986                  | TT                              | AA                 | AA               | INTERGENIC      |               |                    |                    |
| SNP_62311_A_214992 | NW_004515653.1 | scaffold36  | 214992                  | TT                              | GG                 | GG               | INTERGENIC      |               |                    |                    |
| SNP_62312_A_215050 | NW_004515653.1 | scaffold36  | 215050                  | CC                              | AA                 | AA               | INTERGENIC      |               |                    |                    |
| SNP_62313_A_215062 | NW_004515653.1 | scaffold36  | 215062                  | AA                              | TT                 | TT               | INTERGENIC      |               |                    |                    |
| SNP_62314_A_215071 | NW_004515653.1 | scaffold36  | 215071                  | TT                              | CC                 | CC               | INTERGENIC      |               |                    |                    |
| SNP_62315_A_215421 | NW_004515653.1 | scaffold36  | 215421                  | CC                              | TT                 | TT               | INTERGENIC      |               |                    |                    |
| SNP_62316_A_221866 | NW_004515653.1 | scaffold36  | 221866                  | AA                              | GG                 | GG               | INTERGENIC      |               |                    |                    |
| SNP_62317_A_221882 | NW_004515653.1 | scaffold36  | 221882                  | CC                              | AA                 | AA               | INTERGENIC      |               |                    |                    |
| SNP_62318_A_221929 | NW_004515653.1 | scaffold36  | 221929                  | TT                              | CC                 | CC               | INTERGENIC      |               |                    |                    |
| SNP_62319_A_221944 | NW_004515653.1 | scaffold36  | 221944                  | GG                              | TT                 | TT               | INTERGENIC      |               |                    |                    |
| SNP_62320_A_221952 | NW_004515653.1 | scaffold36  | 221952                  | GG                              | AA                 | AA               | INTERGENIC      |               |                    |                    |
| SNP_62321_A_221966 | NW_004515653.1 | scaffold36  | 221966                  | GG                              | AA                 | AA               | INTERGENIC      |               |                    |                    |
| SNP_62322_A_221969 | NW_004515653.1 | scaffold36  | 221969                  | TT                              | CC                 | CC               | INTERGENIC      |               |                    |                    |
| SNP_62323_A_221999 | NW_004515653.1 | scaffold36  | 221999                  | AA                              | CC                 | CC               | INTERGENIC      |               |                    |                    |
| SNP_62324_A_222030 | NW_004515653.1 | scaffold36  | 222030                  | GG                              | CC                 | CC               | INTERGENIC      |               |                    |                    |
| SNP_62325_A_222063 | NW_004515653.1 | scaffold36  | 222063                  | GG                              | TT                 | TT               | INTERGENIC      |               |                    |                    |
| SNP_62326_A_222067 | NW_004515653.1 | scaffold36  | 222067                  | TT                              | GG                 | GG               | INTERGENIC      |               |                    |                    |
| SNP_62327_A_222139 | NW_004515653.1 | scaffold36  | 222139                  | TT                              | CC                 | CC               | INTERGENIC      |               |                    |                    |
| SNP_62328_A_222164 | NW_004515653.1 | scaffold36  | 222164                  | TT                              | GG                 | GG               | INTERGENIC      |               |                    |                    |
| SNP_62329_A_222225 | NW_004515653.1 | scaffold36  | 222225                  | AA                              | TT                 | TT               | INTERGENIC      |               |                    |                    |
| SNP_62330_A_222327 | NW_004515653.1 | scaffold36  | 222327                  | CC                              | GG                 | GG               | INTERGENIC      |               |                    |                    |

| SNPs IDs           | Chromosome IDs | Chromosomes | Physical positions (bp) | CDC Frontier (Reference genome) | (Pusa 1103 & HPNB) | (ILWC 46 & LPNB) | Sequence genome | Components of | Gene accession IDs | Putative functions |
|--------------------|----------------|-------------|-------------------------|---------------------------------|--------------------|------------------|-----------------|---------------|--------------------|--------------------|
| SNP_62331_A_222343 | NW_004515653.1 | scaffold36  | 222343                  | GG                              | TT                 | TT               | INTERGENIC      |               |                    |                    |
| SNP_62332_A_222396 | NW_004515653.1 | scaffold36  | 222396                  | GG                              | CC                 | CC               | INTERGENIC      |               |                    |                    |
| SNP_62333_A_228215 | NW_004515653.1 | scaffold36  | 228215                  | TT                              | AA                 | AA               | INTERGENIC      |               |                    |                    |
| SNP_62334_A_228223 | NW_004515653.1 | scaffold36  | 228223                  | AA                              | GG                 | GG               | INTERGENIC      |               |                    |                    |
| SNP_62335_A_236798 | NW_004515653.1 | scaffold36  | 236798                  | TT                              | CC                 | CC               | INTERGENIC      |               |                    |                    |
| SNP_62336_A_236808 | NW_004515653.1 | scaffold36  | 236808                  | TT                              | AA                 | AA               | INTERGENIC      |               |                    |                    |
| SNP_62337_A_236827 | NW_004515653.1 | scaffold36  | 236827                  | GG                              | AA                 | AA               | INTERGENIC      |               |                    |                    |
| SNP_62338_A_236838 | NW_004515653.1 | scaffold36  | 236838                  | AA                              | TT                 | TT               | INTERGENIC      |               |                    |                    |
| SNP_62339_A_236898 | NW_004515653.1 | scaffold36  | 236898                  | AA                              | TT                 | TT               | INTERGENIC      |               |                    |                    |
| SNP_62340_A_241512 | NW_004515653.1 | scaffold36  | 241512                  | AA                              | GG                 | GG               | INTERGENIC      |               |                    |                    |
| SNP_62341_A_241536 | NW_004515653.1 | scaffold36  | 241536                  | TT                              | AA                 | AA               | INTERGENIC      |               |                    |                    |
| SNP_62342_A_258104 | NW_004515653.1 | scaffold36  | 258104                  | TT                              | AA                 | AA               | INTERGENIC      |               |                    |                    |
| SNP_62343_A_261041 | NW_004515653.1 | scaffold36  | 261041                  | TT                              | GG                 | GG               | INTERGENIC      |               |                    |                    |
| SNP_62344_A_261238 | NW_004515653.1 | scaffold36  | 261238                  | GG                              | TT                 | TT               | INTERGENIC      |               |                    |                    |
| SNP_62345_A_267312 | NW_004515653.1 | scaffold36  | 267312                  | GG                              | CC                 | CC               | INTERGENIC      |               |                    |                    |
| SNP_62346_A_267319 | NW_004515653.1 | scaffold36  | 267319                  | TT                              | CC                 | CC               | INTERGENIC      |               |                    |                    |
| SNP_62347_A_283426 | NW_004515653.1 | scaffold36  | 283426                  | TT                              | CC                 | CC               | INTERGENIC      |               |                    |                    |
| SNP_62348_A_283455 | NW_004515653.1 | scaffold36  | 283455                  | AA                              | CC                 | CC               | INTERGENIC      |               |                    |                    |
| SNP_62349_A_283477 | NW_004515653.1 | scaffold36  | 283477                  | CC                              | AA                 | AA               | INTERGENIC      |               |                    |                    |
| SNP_62351_A_307959 | NW_004515653.1 | scaffold36  | 307959                  | TT                              | GG                 | GG               | INTERGENIC      |               |                    |                    |
| SNP_62352_A_308013 | NW_004515653.1 | scaffold36  | 308013                  | GG                              | TT                 | TT               | INTERGENIC      |               |                    |                    |
| SNP_62353_A_308369 | NW_004515653.1 | scaffold36  | 308369                  | AA                              | CC                 | CC               | INTERGENIC      |               |                    |                    |

| SNPs IDs           | Chromosome IDs | Chromosomes | Physical positions (bp) | CDC Frontier (Reference genome) | (Pusa 1103 & HPNB) | (ILWC 46 & LPNB) | Sequence Components of genome | Gene accession IDs | Putative functions           |
|--------------------|----------------|-------------|-------------------------|---------------------------------|--------------------|------------------|-------------------------------|--------------------|------------------------------|
| SNP_62354_A_308577 | NW_004515653.1 | scaffold36  | 308577                  | CC                              | TT                 | TT               | INTERGENIC                    |                    |                              |
| SNP_62355_A_308583 | NW_004515653.1 | scaffold36  | 308583                  | TT                              | CC                 | CC               | INTERGENIC                    |                    |                              |
| SNP_62356_A_308628 | NW_004515653.1 | scaffold36  | 308628                  | CC                              | TT                 | TT               | INTERGENIC                    |                    |                              |
| SNP_62357_A_308702 | NW_004515653.1 | scaffold36  | 308702                  | TT                              | CC                 | CC               | INTERGENIC                    |                    |                              |
| SNP_62358_A_308724 | NW_004515653.1 | scaffold36  | 308724                  | AA                              | GG                 | GG               | INTERGENIC                    |                    |                              |
| SNP_62359_A_317102 | NW_004515653.1 | scaffold36  | 317102                  | CC                              | AA                 | AA               | INTERGENIC                    |                    |                              |
| SNP_62360_A_317104 | NW_004515653.1 | scaffold36  | 317104                  | GG                              | CC                 | CC               | INTERGENIC                    |                    |                              |
| SNP_62361_A_319867 | NW_004515653.1 | scaffold36  | 319867                  | AA                              | GG                 | GG               | DRR                           | 101490565          | uncharacterized LOC101490565 |
| SNP_62362_A_319913 | NW_004515653.1 | scaffold36  | 319913                  | AA                              | CC                 | CC               | DRR                           | 101490565          | uncharacterized LOC101490565 |
| SNP_62363_A_319947 | NW_004515653.1 | scaffold36  | 319947                  | CC                              | AA                 | AA               | DRR                           | 101490565          | uncharacterized LOC101490565 |
| SNP_62364_A_319971 | NW_004515653.1 | scaffold36  | 319971                  | TT                              | CC                 | CC               | DRR                           | 101490565          | uncharacterized LOC101490565 |
| SNP_62365_A_319977 | NW_004515653.1 | scaffold36  | 319977                  | AA                              | TT                 | TT               | DRR                           | 101490565          | uncharacterized LOC101490565 |
| SNP_62366_A_319985 | NW_004515653.1 | scaffold36  | 319985                  | TT                              | CC                 | CC               | DRR                           | 101490565          | uncharacterized LOC101490565 |
| SNP_62367_A_320290 | NW_004515653.1 | scaffold36  | 320290                  | CC                              | TT                 | TT               | DRR                           | 101490565          | uncharacterized LOC101490565 |
| SNP_62368_A_326430 | NW_004515653.1 | scaffold36  | 326430                  | CC                              | TT                 | TT               | INTERGENIC                    |                    |                              |
| SNP_62369_A_330694 | NW_004515653.1 | scaffold36  | 330694                  | GG                              | AA                 | AA               | INTERGENIC                    |                    |                              |
| SNP_62370_A_330758 | NW_004515653.1 | scaffold36  | 330758                  | AA                              | TT                 | TT               | INTERGENIC                    |                    |                              |
| SNP_62371_A_336274 | NW_004515653.1 | scaffold36  | 336274                  | CC                              | TT                 | TT               | INTERGENIC                    |                    |                              |
| SNP_62372_A_15321  | NW_004515654.1 | scaffold37  | 15321                   | AA                              | TT                 | TT               | INTERGENIC                    |                    |                              |
| SNP_62373_A_22749  | NW_004515654.1 | scaffold37  | 22749                   | TT                              | CC                 | CC               | INTERGENIC                    |                    |                              |
| SNP_62374_A_22763  | NW_004515654.1 | scaffold37  | 22763                   | TT                              | AA                 | AA               | INTERGENIC                    |                    |                              |
| SNP_62375_A_22886  | NW_004515654.1 | scaffold37  | 22886                   | TT                              | GG                 | GG               | INTERGENIC                    |                    |                              |

| SNPs IDs           | Chromosome IDs | Chromosomes | Physical positions (bp) | CDC Frontier (Reference genome) | (Pusa 1103 & HPNB) | (ILWC 46 & LPNB) | Sequence genome | Components of | Gene accession IDs | Putative functions |
|--------------------|----------------|-------------|-------------------------|---------------------------------|--------------------|------------------|-----------------|---------------|--------------------|--------------------|
| SNP_62376_A_40046  | NW_004515654.1 | scaffold37  | 40046                   | AA                              | CC                 | CC               | INTERGENIC      |               |                    |                    |
| SNP_62377_A_85848  | NW_004515654.1 | scaffold37  | 85848                   | TT                              | CC                 | CC               | INTERGENIC      |               |                    |                    |
| SNP_62378_A_88515  | NW_004515654.1 | scaffold37  | 88515                   | TT                              | GG                 | GG               | INTERGENIC      |               |                    |                    |
| SNP_62379_A_115450 | NW_004515654.1 | scaffold37  | 115450                  | TT                              | CC                 | CC               | INTERGENIC      |               |                    |                    |
| SNP_62380_A_126732 | NW_004515654.1 | scaffold37  | 126732                  | GG                              | AA                 | AA               | INTERGENIC      |               |                    |                    |
| SNP_62381_A_134284 | NW_004515654.1 | scaffold37  | 134284                  | AA                              | CC                 | CC               | INTERGENIC      |               |                    |                    |
| SNP_62382_A_134329 | NW_004515654.1 | scaffold37  | 134329                  | AA                              | TT                 | TT               | INTERGENIC      |               |                    |                    |
| SNP_62383_A_134378 | NW_004515654.1 | scaffold37  | 134378                  | TT                              | AA                 | AA               | INTERGENIC      |               |                    |                    |
| SNP_62384_A_134470 | NW_004515654.1 | scaffold37  | 134470                  | GG                              | TT                 | TT               | INTERGENIC      |               |                    |                    |
| SNP_62385_A_134546 | NW_004515654.1 | scaffold37  | 134546                  | CC                              | TT                 | TT               | INTERGENIC      |               |                    |                    |
| SNP_62386_A_134562 | NW_004515654.1 | scaffold37  | 134562                  | GG                              | TT                 | TT               | INTERGENIC      |               |                    |                    |
| SNP_62387_A_134585 | NW_004515654.1 | scaffold37  | 134585                  | TT                              | CC                 | CC               | INTERGENIC      |               |                    |                    |
| SNP_62388_A_134641 | NW_004515654.1 | scaffold37  | 134641                  | CC                              | TT                 | TT               | INTERGENIC      |               |                    |                    |
| SNP_62389_A_134653 | NW_004515654.1 | scaffold37  | 134653                  | AA                              | GG                 | GG               | INTERGENIC      |               |                    |                    |
| SNP_62390_A_134674 | NW_004515654.1 | scaffold37  | 134674                  | TT                              | GG                 | GG               | INTERGENIC      |               |                    |                    |
| SNP_62391_A_134702 | NW_004515654.1 | scaffold37  | 134702                  | CC                              | TT                 | TT               | INTERGENIC      |               |                    |                    |
| SNP_62392_A_134711 | NW_004515654.1 | scaffold37  | 134711                  | GG                              | AA                 | AA               | INTERGENIC      |               |                    |                    |
| SNP_62393_A_136298 | NW_004515654.1 | scaffold37  | 136298                  | TT                              | GG                 | GG               | INTERGENIC      |               |                    |                    |
| SNP_62394_A_136719 | NW_004515654.1 | scaffold37  | 136719                  | AA                              | GG                 | GG               | INTERGENIC      |               |                    |                    |
| SNP_62395_A_136758 | NW_004515654.1 | scaffold37  | 136758                  | CC                              | TT                 | TT               | INTERGENIC      |               |                    |                    |
| SNP_62396_A_136770 | NW_004515654.1 | scaffold37  | 136770                  | TT                              | GG                 | GG               | INTERGENIC      |               |                    |                    |
| SNP_62397_A_136785 | NW_004515654.1 | scaffold37  | 136785                  | TT                              | CC                 | CC               | INTERGENIC      |               |                    |                    |



| SNPs IDs           | Chromosome IDs | Chromosomes | Physical positions (bp) | CDC Frontier (Reference genome) | (Pusa 1103 & HPNB) | (ILWC 46 & LPNB) | Sequence genome | Components of | Gene accession IDs | Putative functions |
|--------------------|----------------|-------------|-------------------------|---------------------------------|--------------------|------------------|-----------------|---------------|--------------------|--------------------|
| SNP_62398_A_136803 | NW_004515654.1 | scaffold37  | 136803                  | GG                              | TT                 | TT               | INTERGENIC      |               |                    |                    |
| SNP_62399_A_160344 | NW_004515654.1 | scaffold37  | 160344                  | AA                              | GG                 | GG               | INTERGENIC      |               |                    |                    |
| SNP_62401_A_160360 | NW_004515654.1 | scaffold37  | 160360                  | GG                              | TT                 | TT               | INTERGENIC      |               |                    |                    |
| SNP_62402_A_8061   | NW_004515655.1 | scaffold38  | 8061                    | GG                              | TT                 | TT               | INTERGENIC      |               |                    |                    |
| SNP_62403_A_8383   | NW_004515655.1 | scaffold38  | 8383                    | GG                              | AA                 | AA               | INTERGENIC      |               |                    |                    |
| SNP_62404_A_9897   | NW_004515655.1 | scaffold38  | 9897                    | TT                              | CC                 | CC               | INTERGENIC      |               |                    |                    |
| SNP_62405_A_9999   | NW_004515655.1 | scaffold38  | 9999                    | AA                              | CC                 | CC               | INTERGENIC      |               |                    |                    |
| SNP_62406_A_10401  | NW_004515655.1 | scaffold38  | 10401                   | TT                              | CC                 | CC               | INTERGENIC      |               |                    |                    |
| SNP_62408_A_43409  | NW_004515655.1 | scaffold38  | 43409                   | GG                              | AA                 | AA               | INTERGENIC      |               |                    |                    |
| SNP_62409_A_55103  | NW_004515655.1 | scaffold38  | 55103                   | GG                              | AA                 | AA               | INTERGENIC      |               |                    |                    |
| SNP_62410_A_56037  | NW_004515655.1 | scaffold38  | 56037                   | GG                              | AA                 | AA               | INTERGENIC      |               |                    |                    |
| SNP_62411_A_67367  | NW_004515655.1 | scaffold38  | 67367                   | CC                              | TT                 | TT               | INTERGENIC      |               |                    |                    |
| SNP_62412_A_69058  | NW_004515655.1 | scaffold38  | 69058                   | AA                              | GG                 | GG               | INTERGENIC      |               |                    |                    |
| SNP_62413_A_73796  | NW_004515655.1 | scaffold38  | 73796                   | AA                              | CC                 | CC               | INTERGENIC      |               |                    |                    |
| SNP_62414_A_74727  | NW_004515655.1 | scaffold38  | 74727                   | TT                              | CC                 | CC               | INTERGENIC      |               |                    |                    |
| SNP_62415_A_75468  | NW_004515655.1 | scaffold38  | 75468                   | GG                              | CC                 | CC               | INTERGENIC      |               |                    |                    |
| SNP_62416_A_78433  | NW_004515655.1 | scaffold38  | 78433                   | GG                              | TT                 | TT               | INTERGENIC      |               |                    |                    |
| SNP_62417_A_78457  | NW_004515655.1 | scaffold38  | 78457                   | TT                              | CC                 | CC               | INTERGENIC      |               |                    |                    |
| SNP_62418_A_78470  | NW_004515655.1 | scaffold38  | 78470                   | AA                              | GG                 | GG               | INTERGENIC      |               |                    |                    |
| SNP_62419_A_78490  | NW_004515655.1 | scaffold38  | 78490                   | CC                              | TT                 | TT               | INTERGENIC      |               |                    |                    |
| SNP_62420_A_83970  | NW_004515655.1 | scaffold38  | 83970                   | CC                              | TT                 | TT               | INTERGENIC      |               |                    |                    |
| SNP_62421_A_96587  | NW_004515655.1 | scaffold38  | 96587                   | AA                              | GG                 | GG               | INTERGENIC      |               |                    |                    |

| SNPs IDs           | Chromosome IDs | Chromosomes | Physical positions (bp) | CDC Frontier (Reference genome) | (Pusa 1103 & HPNB) | (ILWC 46 & LPNB) | Sequence Components of genome | Gene accession IDs | Putative functions           |
|--------------------|----------------|-------------|-------------------------|---------------------------------|--------------------|------------------|-------------------------------|--------------------|------------------------------|
| SNP_62422_A_96653  | NW_004515655.1 | scaffold38  | 96653                   | AA                              | GG                 | GG               | INTERGENIC                    |                    |                              |
| SNP_62423_A_98150  | NW_004515655.1 | scaffold38  | 98150                   | GG                              | AA                 | AA               | INTERGENIC                    |                    |                              |
| SNP_62424_A_98598  | NW_004515655.1 | scaffold38  | 98598                   | TT                              | CC                 | CC               | INTERGENIC                    |                    |                              |
| SNP_62425_A_98701  | NW_004515655.1 | scaffold38  | 98701                   | GG                              | AA                 | AA               | INTERGENIC                    |                    |                              |
| SNP_62426_A_114496 | NW_004515655.1 | scaffold38  | 114496                  | AA                              | TT                 | TT               | INTERGENIC                    |                    |                              |
| SNP_62427_A_122420 | NW_004515655.1 | scaffold38  | 122420                  | GG                              | AA                 | AA               | INTERGENIC                    |                    |                              |
| SNP_62428_A_129691 | NW_004515655.1 | scaffold38  | 129691                  | AA                              | GG                 | GG               | INTERGENIC                    |                    |                              |
| SNP_62429_A_129903 | NW_004515655.1 | scaffold38  | 129903                  | GG                              | AA                 | AA               | INTERGENIC                    |                    |                              |
| SNP_62430_A_130964 | NW_004515655.1 | scaffold38  | 130964                  | AA                              | GG                 | GG               | INTERGENIC                    |                    |                              |
| SNP_62431_A_133324 | NW_004515655.1 | scaffold38  | 133324                  | TT                              | CC                 | CC               | INTERGENIC                    |                    |                              |
| SNP_62432_A_133426 | NW_004515655.1 | scaffold38  | 133426                  | AA                              | GG                 | GG               | INTERGENIC                    |                    |                              |
| SNP_62433_A_133442 | NW_004515655.1 | scaffold38  | 133442                  | CC                              | TT                 | TT               | INTERGENIC                    |                    |                              |
| SNP_62434_A_133628 | NW_004515655.1 | scaffold38  | 133628                  | AA                              | GG                 | GG               | INTERGENIC                    |                    |                              |
| SNP_62435_A_133644 | NW_004515655.1 | scaffold38  | 133644                  | TT                              | CC                 | CC               | INTERGENIC                    |                    |                              |
| SNP_62437_A_137316 | NW_004515655.1 | scaffold38  | 137316                  | AA                              | GG                 | GG               | INTERGENIC                    |                    |                              |
| SNP_62438_A_137347 | NW_004515655.1 | scaffold38  | 137347                  | TT                              | CC                 | CC               | INTERGENIC                    |                    |                              |
| SNP_62439_A_137725 | NW_004515655.1 | scaffold38  | 137725                  | GG                              | TT                 | TT               | INTERGENIC                    |                    |                              |
| SNP_62441_A_141615 | NW_004515655.1 | scaffold38  | 141615                  | AA                              | TT                 | TT               | INTERGENIC                    |                    |                              |
| SNP_62442_A_186767 | NW_004515655.1 | scaffold38  | 186767                  | CC                              | TT                 | TT               | INTERGENIC                    |                    |                              |
| SNP_62443_A_188761 | NW_004515655.1 | scaffold38  | 188761                  | GG                              | AA                 | AA               | INTERGENIC                    |                    |                              |
| SNP_62444_A_200953 | NW_004515655.1 | scaffold38  | 200953                  | AA                              | GG                 | GG               | INTERGENIC                    |                    |                              |
| SNP_62445_A_205179 | NW_004515655.1 | scaffold38  | 205179                  | CC                              | TT                 | TT               | INTRON                        | 101494439          | uncharacterized LOC101494439 |

| SNPs IDs           | Chromosome IDs | Chromosomes | Physical positions (bp) | CDC Frontier (Reference genome) | (Pusa 1103 & HPNB) | (ILWC 46 & LPNB) | Sequence Components of genome | Gene accession IDs | Putative functions                          |
|--------------------|----------------|-------------|-------------------------|---------------------------------|--------------------|------------------|-------------------------------|--------------------|---------------------------------------------|
| SNP_62446_A_205538 | NW_004515655.1 | scaffold38  | 205538                  | GG                              | AA                 | AA               | INTRON                        | 101494439          | uncharacterized LOC101494439                |
| SNP_62447_A_214576 | NW_004515655.1 | scaffold38  | 214576                  | GG                              | AA                 | AA               | INTERGENIC                    |                    |                                             |
| SNP_62448_A_214911 | NW_004515655.1 | scaffold38  | 214911                  | GG                              | AA                 | AA               | INTERGENIC                    |                    |                                             |
| SNP_62449_A_217242 | NW_004515655.1 | scaffold38  | 217242                  | AA                              | GG                 | GG               | INTERGENIC                    |                    |                                             |
| SNP_62450_A_220048 | NW_004515655.1 | scaffold38  | 220048                  | GG                              | AA                 | AA               | INTERGENIC                    |                    |                                             |
| SNP_62452_A_233823 | NW_004515655.1 | scaffold38  | 233823                  | TT                              | CC                 | CC               | INTERGENIC                    |                    |                                             |
| SNP_62453_A_235124 | NW_004515655.1 | scaffold38  | 235124                  | AA                              | GG                 | GG               | INTERGENIC                    |                    |                                             |
| SNP_62455_A_238661 | NW_004515655.1 | scaffold38  | 238661                  | GG                              | AA                 | AA               | INTRON                        | 101495081          | bidirectional sugar transporter SWEET2-like |
| SNP_62456_A_243324 | NW_004515655.1 | scaffold38  | 243324                  | CC                              | TT                 | TT               | INTERGENIC                    |                    |                                             |
| SNP_62457_A_244241 | NW_004515655.1 | scaffold38  | 244241                  | CC                              | TT                 | TT               | INTERGENIC                    |                    |                                             |
| SNP_62458_A_246385 | NW_004515655.1 | scaffold38  | 246385                  | CC                              | TT                 | TT               | INTERGENIC                    |                    |                                             |
| SNP_62459_A_248686 | NW_004515655.1 | scaffold38  | 248686                  | TT                              | CC                 | CC               | INTERGENIC                    |                    |                                             |
| SNP_62460_A_252175 | NW_004515655.1 | scaffold38  | 252175                  | CC                              | AA                 | AA               | INTERGENIC                    |                    |                                             |
| SNP_62461_A_252178 | NW_004515655.1 | scaffold38  | 252178                  | AA                              | GG                 | GG               | INTERGENIC                    |                    |                                             |
| SNP_62462_A_252358 | NW_004515655.1 | scaffold38  | 252358                  | GG                              | CC                 | TT               | INTERGENIC                    |                    |                                             |
| SNP_62463_A_252381 | NW_004515655.1 | scaffold38  | 252381                  | TT                              | CC                 | CC               | INTERGENIC                    |                    |                                             |
| SNP_62464_A_261124 | NW_004515655.1 | scaffold38  | 261124                  | TT                              | AA                 | AA               | INTERGENIC                    |                    |                                             |
| SNP_62465_A_261987 | NW_004515655.1 | scaffold38  | 261987                  | GG                              | AA                 | AA               | INTERGENIC                    |                    |                                             |
| SNP_62467_A_262930 | NW_004515655.1 | scaffold38  | 262930                  | GG                              | AA                 | AA               | INTERGENIC                    |                    |                                             |
| SNP_62468_A_272788 | NW_004515655.1 | scaffold38  | 272788                  | CC                              | GG                 | GG               | INTERGENIC                    |                    |                                             |
| SNP_62469_A_275154 | NW_004515655.1 | scaffold38  | 275154                  | GG                              | AA                 | AA               | INTERGENIC                    |                    |                                             |
| SNP_62471_A_281950 | NW_004515655.1 | scaffold38  | 281950                  | GG                              | TT                 | TT               | INTERGENIC                    |                    |                                             |

| SNPs IDs           | Chromosome IDs | Chromosomes | Physical positions (bp) | CDC Frontier (Reference genome) | (Pusa 1103 & HPNB) | (ILWC 46 & LPNB) | Sequence Components of genome | Gene accession IDs | Putative functions           |
|--------------------|----------------|-------------|-------------------------|---------------------------------|--------------------|------------------|-------------------------------|--------------------|------------------------------|
| SNP_62473_A_289728 | NW_004515655.1 | scaffold38  | 289728                  | AA                              | GG                 | GG               | INTERGENIC                    |                    |                              |
| SNP_62474_A_290071 | NW_004515655.1 | scaffold38  | 290071                  | TT                              | CC                 | CC               | INTERGENIC                    |                    |                              |
| SNP_62475_A_290146 | NW_004515655.1 | scaffold38  | 290146                  | TT                              | CC                 | CC               | INTERGENIC                    |                    |                              |
| SNP_62476_A_291155 | NW_004515655.1 | scaffold38  | 291155                  | CC                              | TT                 | TT               | INTERGENIC                    |                    |                              |
| SNP_62477_A_318278 | NW_004515655.1 | scaffold38  | 318278                  | GG                              | TT                 | TT               | INTRON                        | 101495411          | uncharacterized LOC101495411 |
| SNP_62478_A_320801 | NW_004515655.1 | scaffold38  | 320801                  | TT                              | GG                 | GG               | INTRON                        | 101495411          | uncharacterized LOC101495411 |
| SNP_62480_A_335663 | NW_004515655.1 | scaffold38  | 335663                  | CC                              | TT                 | TT               | INTERGENIC                    |                    |                              |
| SNP_62481_A_340650 | NW_004515655.1 | scaffold38  | 340650                  | CC                              | TT                 | TT               | INTERGENIC                    |                    |                              |
| SNP_62482_A_341421 | NW_004515655.1 | scaffold38  | 341421                  | TT                              | AA                 | AA               | INTERGENIC                    |                    |                              |
| SNP_62483_A_342920 | NW_004515655.1 | scaffold38  | 342920                  | GG                              | TT                 | TT               | INTERGENIC                    |                    |                              |
| SNP_62484_A_345181 | NW_004515655.1 | scaffold38  | 345181                  | GG                              | AA                 | AA               | INTERGENIC                    |                    |                              |
| SNP_62487_A_358657 | NW_004515655.1 | scaffold38  | 358657                  | AA                              | CC                 | CC               | INTERGENIC                    |                    |                              |
| SNP_62488_A_361233 | NW_004515655.1 | scaffold38  | 361233                  | GG                              | AA                 | AA               | INTERGENIC                    |                    |                              |
| SNP_62489_A_363473 | NW_004515655.1 | scaffold38  | 363473                  | TT                              | AA                 | AA               | INTERGENIC                    |                    |                              |
| SNP_62490_A_364107 | NW_004515655.1 | scaffold38  | 364107                  | AA                              | CC                 | CC               | INTERGENIC                    |                    |                              |
| SNP_62491_A_389908 | NW_004515655.1 | scaffold38  | 389908                  | TT                              | CC                 | CC               | INTERGENIC                    |                    |                              |
| SNP_62492_A_396949 | NW_004515655.1 | scaffold38  | 396949                  | GG                              | AA                 | AA               | INTERGENIC                    |                    |                              |
| SNP_62493_A_401121 | NW_004515655.1 | scaffold38  | 401121                  | CC                              | TT                 | TT               | INTERGENIC                    |                    |                              |
| SNP_62495_A_404468 | NW_004515655.1 | scaffold38  | 404468                  | CC                              | TT                 | TT               | INTERGENIC                    |                    |                              |
| SNP_62496_A_406507 | NW_004515655.1 | scaffold38  | 406507                  | AA                              | CC                 | CC               | INTERGENIC                    |                    |                              |
| SNP_62497_A_407101 | NW_004515655.1 | scaffold38  | 407101                  | GG                              | AA                 | AA               | INTERGENIC                    |                    |                              |
| SNP_62498_A_411922 | NW_004515655.1 | scaffold38  | 411922                  | AA                              | GG                 | GG               | INTERGENIC                    |                    |                              |

| SNPs IDs           | Chromosome IDs | Chromosomes | Physical positions (bp) | CDC Frontier (Reference genome) | (Pusa 1103 & HPNB) | (ILWC 46 & LPNB) | Sequence Components of genome | Gene accession IDs | Putative functions                  |
|--------------------|----------------|-------------|-------------------------|---------------------------------|--------------------|------------------|-------------------------------|--------------------|-------------------------------------|
| SNP_62499_A_411941 | NW_004515655.1 | scaffold38  | 411941                  | TT                              | CC                 | CC               | INTERGENIC                    |                    |                                     |
| SNP_62500_A_411987 | NW_004515655.1 | scaffold38  | 411987                  | TT                              | AA                 | AA               | INTERGENIC                    |                    |                                     |
| SNP_62502_A_412267 | NW_004515655.1 | scaffold38  | 412267                  | TT                              | CC                 | CC               | INTERGENIC                    |                    |                                     |
| SNP_62503_A_412291 | NW_004515655.1 | scaffold38  | 412291                  | TT                              | CC                 | CC               | INTERGENIC                    |                    |                                     |
| SNP_62504_A_413785 | NW_004515655.1 | scaffold38  | 413785                  | GG                              | AA                 | AA               | INTERGENIC                    |                    |                                     |
| SNP_62506_A_413837 | NW_004515655.1 | scaffold38  | 413837                  | TT                              | CC                 | CC               | INTERGENIC                    |                    |                                     |
| SNP_62507_A_414086 | NW_004515655.1 | scaffold38  | 414086                  | AA                              | GG                 | GG               | INTERGENIC                    |                    |                                     |
| SNP_62509_A_421832 | NW_004515655.1 | scaffold38  | 421832                  | GG                              | TT                 | TT               | INTERGENIC                    |                    |                                     |
| SNP_62510_A_424457 | NW_004515655.1 | scaffold38  | 424457                  | TT                              | AA                 | AA               | INTERGENIC                    |                    |                                     |
| SNP_62511_A_431286 | NW_004515655.1 | scaffold38  | 431286                  | AA                              | GG                 | GG               | INTERGENIC                    |                    |                                     |
| SNP_62512_A_432687 | NW_004515655.1 | scaffold38  | 432687                  | TT                              | CC                 | CC               | INTERGENIC                    |                    |                                     |
| SNP_62513_A_432783 | NW_004515655.1 | scaffold38  | 432783                  | AA                              | TT                 | TT               | INTERGENIC                    |                    |                                     |
| SNP_62514_A_433968 | NW_004515655.1 | scaffold38  | 433968                  | GG                              | AA                 | AA               | INTERGENIC                    |                    |                                     |
| SNP_62515_A_467119 | NW_004515655.1 | scaffold38  | 467119                  | CC                              | AA                 | AA               | INTRON                        | 101491830          | serine/threonine-protein kinase TIO |
| SNP_62516_A_471719 | NW_004515655.1 | scaffold38  | 471719                  | CC                              | TT                 | TT               | URR                           | 101491830          | serine/threonine-protein kinase TIO |
| SNP_62518_A_477168 | NW_004515655.1 | scaffold38  | 477168                  | GG                              | AA                 | AA               | INTERGENIC                    |                    |                                     |
| SNP_62519_A_487822 | NW_004515655.1 | scaffold38  | 487822                  | TT                              | CC                 | CC               | INTERGENIC                    |                    |                                     |
| SNP_62520_A_487861 | NW_004515655.1 | scaffold38  | 487861                  | GG                              | TT                 | TT               | INTERGENIC                    |                    |                                     |
| SNP_62521_A_487925 | NW_004515655.1 | scaffold38  | 487925                  | AA                              | GG                 | GG               | INTERGENIC                    |                    |                                     |
| SNP_62522_A_488476 | NW_004515655.1 | scaffold38  | 488476                  | AA                              | TT                 | TT               | INTERGENIC                    |                    |                                     |
| SNP_62523_A_488542 | NW_004515655.1 | scaffold38  | 488542                  | TT                              | CC                 | CC               | INTERGENIC                    |                    |                                     |
| SNP_62524_A_488945 | NW_004515655.1 | scaffold38  | 488945                  | CC                              | TT                 | TT               | INTERGENIC                    |                    |                                     |

| SNPs IDs           | Chromosome IDs | Chromosomes | Physical positions (bp) | CDC Frontier (Reference genome) | (Pusa 1103 & HPNB) | (ILWC 46 & LPNB) | Sequence Components of genome | Gene accession IDs | Putative functions           |
|--------------------|----------------|-------------|-------------------------|---------------------------------|--------------------|------------------|-------------------------------|--------------------|------------------------------|
| SNP_62525_A_488973 | NW_004515655.1 | scaffold38  | 488973                  | TT                              | CC                 | CC               | INTERGENIC                    |                    |                              |
| SNP_62526_A_489218 | NW_004515655.1 | scaffold38  | 489218                  | TT                              | CC                 | CC               | INTERGENIC                    |                    |                              |
| SNP_62527_A_502133 | NW_004515655.1 | scaffold38  | 502133                  | CC                              | GG                 | GG               | INTERGENIC                    |                    |                              |
| SNP_62528_A_503805 | NW_004515655.1 | scaffold38  | 503805                  | AA                              | GG                 | GG               | INTERGENIC                    |                    |                              |
| SNP_62529_A_504299 | NW_004515655.1 | scaffold38  | 504299                  | AA                              | GG                 | GG               | INTERGENIC                    |                    |                              |
| SNP_62530_A_504349 | NW_004515655.1 | scaffold38  | 504349                  | TT                              | CC                 | CC               | INTERGENIC                    |                    |                              |
| SNP_62531_A_504366 | NW_004515655.1 | scaffold38  | 504366                  | AA                              | GG                 | GG               | INTERGENIC                    |                    |                              |
| SNP_62532_A_504391 | NW_004515655.1 | scaffold38  | 504391                  | AA                              | GG                 | GG               | INTERGENIC                    |                    |                              |
| SNP_62533_A_504401 | NW_004515655.1 | scaffold38  | 504401                  | TT                              | AA                 | AA               | INTERGENIC                    |                    |                              |
| SNP_62534_A_504413 | NW_004515655.1 | scaffold38  | 504413                  | TT                              | GG                 | GG               | INTERGENIC                    |                    |                              |
| SNP_62535_A_504417 | NW_004515655.1 | scaffold38  | 504417                  | CC                              | TT                 | TT               | INTERGENIC                    |                    |                              |
| SNP_62536_A_504432 | NW_004515655.1 | scaffold38  | 504432                  | TT                              | GG                 | GG               | INTERGENIC                    |                    |                              |
| SNP_62537_A_508917 | NW_004515655.1 | scaffold38  | 508917                  | TT                              | CC                 | CC               | INTERGENIC                    |                    |                              |
| SNP_62538_A_510286 | NW_004515655.1 | scaffold38  | 510286                  | TT                              | CC                 | CC               | INTERGENIC                    |                    |                              |
| SNP_62539_A_511966 | NW_004515655.1 | scaffold38  | 511966                  | CC                              | TT                 | TT               | INTERGENIC                    |                    |                              |
| SNP_62540_A_511981 | NW_004515655.1 | scaffold38  | 511981                  | TT                              | CC                 | CC               | INTERGENIC                    |                    |                              |
| SNP_62541_A_512790 | NW_004515655.1 | scaffold38  | 512790                  | GG                              | AA                 | AA               | INTERGENIC                    |                    |                              |
| SNP_62542_A_524232 | NW_004515655.1 | scaffold38  | 524232                  | TT                              | CC                 | CC               | URR                           | 101492832          | uncharacterized LOC101492832 |
| SNP_62543_A_524299 | NW_004515655.1 | scaffold38  | 524299                  | TT                              | CC                 | CC               | URR                           | 101492832          | uncharacterized LOC101492832 |
| SNP_62544_A_524526 | NW_004515655.1 | scaffold38  | 524526                  | CC                              | GG                 | GG               | NON_SYNONYMOUS_CODING         | 101492832          | uncharacterized LOC101492832 |
| SNP_62545_A_524584 | NW_004515655.1 | scaffold38  | 524584                  | GG                              | AA                 | AA               | NON_SYNONYMOUS_CODING         | 101492832          | uncharacterized LOC101492832 |
| SNP_62546_A_530889 | NW_004515655.1 | scaffold38  | 530889                  | AA                              | GG                 | GG               | INTERGENIC                    |                    |                              |

| SNPs IDs           | Chromosome IDs | Chromosomes | Physical positions (bp) | CDC Frontier (Reference genome) | (Pusa 1103 & HPNB) | (ILWC 46 & LPNB) | Sequence Components of genome | Gene accession IDs | Putative functions           |
|--------------------|----------------|-------------|-------------------------|---------------------------------|--------------------|------------------|-------------------------------|--------------------|------------------------------|
| SNP_62547_A_530901 | NW_004515655.1 | scaffold38  | 530901                  | GG                              | TT                 | TT               | INTERGENIC                    |                    |                              |
| SNP_62548_A_535510 | NW_004515655.1 | scaffold38  | 535510                  | GG                              | AA                 | AA               | INTERGENIC                    |                    |                              |
| SNP_62549_A_540326 | NW_004515655.1 | scaffold38  | 540326                  | CC                              | AA                 | AA               | INTERGENIC                    |                    |                              |
| SNP_62550_A_541439 | NW_004515655.1 | scaffold38  | 541439                  | CC                              | TT                 | TT               | INTERGENIC                    |                    |                              |
| SNP_62551_A_541795 | NW_004515655.1 | scaffold38  | 541795                  | GG                              | AA                 | AA               | INTERGENIC                    |                    |                              |
| SNP_62552_A_541839 | NW_004515655.1 | scaffold38  | 541839                  | TT                              | CC                 | CC               | INTERGENIC                    |                    |                              |
| SNP_62553_A_541844 | NW_004515655.1 | scaffold38  | 541844                  | CC                              | AA                 | AA               | INTERGENIC                    |                    |                              |
| SNP_62554_A_541876 | NW_004515655.1 | scaffold38  | 541876                  | AA                              | GG                 | GG               | INTERGENIC                    |                    |                              |
| SNP_62555_A_541918 | NW_004515655.1 | scaffold38  | 541918                  | AA                              | GG                 | GG               | INTERGENIC                    |                    |                              |
| SNP_62557_A_40146  | NW_004515656.1 | scaffold39  | 40146                   | TT                              | CC                 | CC               | INTERGENIC                    |                    |                              |
| SNP_62558_A_44789  | NW_004515656.1 | scaffold39  | 44789                   | AA                              | TT                 | TT               | INTERGENIC                    |                    |                              |
| SNP_62559_A_301    | NW_004515657.1 | scaffold40  | 301                     | TT                              | GG                 | GG               | INTERGENIC                    |                    |                              |
| SNP_62560_A_906    | NW_004515657.1 | scaffold40  | 906                     | TT                              | CC                 | CC               | INTERGENIC                    |                    |                              |
| SNP_62561_A_974    | NW_004515657.1 | scaffold40  | 974                     | AA                              | GG                 | GG               | INTERGENIC                    |                    |                              |
| SNP_62562_A_1155   | NW_004515657.1 | scaffold40  | 1155                    | AA                              | CC                 | CC               | INTERGENIC                    |                    |                              |
| SNP_62563_A_1157   | NW_004515657.1 | scaffold40  | 1157                    | TT                              | CC                 | CC               | INTERGENIC                    |                    |                              |
| SNP_62564_A_12442  | NW_004515657.1 | scaffold40  | 12442                   | CC                              | TT                 | TT               | INTERGENIC                    |                    |                              |
| SNP_62565_A_29994  | NW_004515657.1 | scaffold40  | 29994                   | CC                              | TT                 | TT               | INTERGENIC                    |                    |                              |
| SNP_62566_A_40457  | NW_004515657.1 | scaffold40  | 40457                   | CC                              | TT                 | TT               | INTRON                        | 101509483          | uncharacterized LOC101509483 |
| SNP_62567_A_40651  | NW_004515657.1 | scaffold40  | 40651                   | AA                              | GG                 | GG               | INTRON                        | 101509483          | uncharacterized LOC101509483 |
| SNP_62568_A_40967  | NW_004515657.1 | scaffold40  | 40967                   | CC                              | TT                 | TT               | INTRON                        | 101509483          | uncharacterized LOC101509483 |
| SNP_62569_A_40969  | NW_004515657.1 | scaffold40  | 40969                   | AA                              | GG                 | GG               | INTRON                        | 101509483          | uncharacterized LOC101509483 |

| SNPs IDs          | Chromosome IDs | Chromosomes | Physical positions (bp) | CDC Frontier (Reference genome) | (Pusa 1103 & HPNB) | (ILWC 46 & LPNB) | Sequence Components of genome | Gene accession IDs | Putative functions           |
|-------------------|----------------|-------------|-------------------------|---------------------------------|--------------------|------------------|-------------------------------|--------------------|------------------------------|
| SNP_62570_A_41035 | NW_004515657.1 | scaffold40  | 41035                   | GG                              | TT                 | TT               | INTRON                        | 101509483          | uncharacterized LOC101509483 |
| SNP_62574_A_56944 | NW_004515657.1 | scaffold40  | 56944                   | GG                              | AA                 | AA               | INTRON                        | 101509483          | uncharacterized LOC101509483 |
| SNP_62575_A_58162 | NW_004515657.1 | scaffold40  | 58162                   | AA                              | GG                 | GG               | URR                           | 101509483          | uncharacterized LOC101509483 |
| SNP_62576_A_58915 | NW_004515657.1 | scaffold40  | 58915                   | AA                              | CC                 | CC               | URR                           | 101509483          | uncharacterized LOC101509483 |
| SNP_62577_A_58937 | NW_004515657.1 | scaffold40  | 58937                   | TT                              | CC                 | CC               | URR                           | 101509483          | uncharacterized LOC101509483 |
| SNP_62578_A_58986 | NW_004515657.1 | scaffold40  | 58986                   | CC                              | TT                 | TT               | URR                           | 101509483          | uncharacterized LOC101509483 |
| SNP_62579_A_58990 | NW_004515657.1 | scaffold40  | 58990                   | TT                              | CC                 | CC               | URR                           | 101509483          | uncharacterized LOC101509483 |
| SNP_62580_A_58991 | NW_004515657.1 | scaffold40  | 58991                   | GG                              | TT                 | TT               | URR                           | 101509483          | uncharacterized LOC101509483 |
| SNP_62581_A_59033 | NW_004515657.1 | scaffold40  | 59033                   | GG                              | AA                 | AA               | URR                           | 101509483          | uncharacterized LOC101509483 |
| SNP_62582_A_59229 | NW_004515657.1 | scaffold40  | 59229                   | AA                              | GG                 | GG               | URR                           | 101509483          | uncharacterized LOC101509483 |
| SNP_62583_A_59265 | NW_004515657.1 | scaffold40  | 59265                   | TT                              | CC                 | CC               | URR                           | 101509483          | uncharacterized LOC101509483 |
| SNP_62584_A_59336 | NW_004515657.1 | scaffold40  | 59336                   | AA                              | GG                 | GG               | URR                           | 101509483          | uncharacterized LOC101509483 |
| SNP_62585_A_59341 | NW_004515657.1 | scaffold40  | 59341                   | CC                              | TT                 | TT               | URR                           | 101509483          | uncharacterized LOC101509483 |
| SNP_62586_A_59431 | NW_004515657.1 | scaffold40  | 59431                   | GG                              | TT                 | TT               | INTERGENIC                    |                    |                              |
| SNP_62587_A_59436 | NW_004515657.1 | scaffold40  | 59436                   | GG                              | CC                 | CC               | INTERGENIC                    |                    |                              |
| SNP_62588_A_59570 | NW_004515657.1 | scaffold40  | 59570                   | CC                              | TT                 | TT               | INTERGENIC                    |                    |                              |
| SNP_62589_A_59716 | NW_004515657.1 | scaffold40  | 59716                   | TT                              | CC                 | CC               | INTERGENIC                    |                    |                              |
| SNP_62590_A_59718 | NW_004515657.1 | scaffold40  | 59718                   | AA                              | GG                 | GG               | INTERGENIC                    |                    |                              |
| SNP_62591_A_59781 | NW_004515657.1 | scaffold40  | 59781                   | TT                              | CC                 | CC               | INTERGENIC                    |                    |                              |
| SNP_62592_A_68027 | NW_004515657.1 | scaffold40  | 68027                   | TT                              | GG                 | GG               | INTERGENIC                    |                    |                              |
| SNP_62593_A_68050 | NW_004515657.1 | scaffold40  | 68050                   | TT                              | CC                 | CC               | INTERGENIC                    |                    |                              |
| SNP_62594_A_68086 | NW_004515657.1 | scaffold40  | 68086                   | AA                              | GG                 | GG               | INTERGENIC                    |                    |                              |



| SNPs IDs           | Chromosome IDs | Chromosomes | Physical positions (bp) | CDC Frontier (Reference genome) | (Pusa 1103 & HPNB) | (ILWC 46 & LPNB) | Sequence genome | Components of | Gene accession IDs | Putative functions |
|--------------------|----------------|-------------|-------------------------|---------------------------------|--------------------|------------------|-----------------|---------------|--------------------|--------------------|
| SNP_62595_A_71484  | NW_004515657.1 | scaffold40  | 71484                   | AA                              | GG                 | GG               | INTERGENIC      |               |                    |                    |
| SNP_62596_A_76591  | NW_004515657.1 | scaffold40  | 76591                   | TT                              | CC                 | CC               | INTERGENIC      |               |                    |                    |
| SNP_62597_A_76694  | NW_004515657.1 | scaffold40  | 76694                   | TT                              | CC                 | CC               | INTERGENIC      |               |                    |                    |
| SNP_62598_A_76696  | NW_004515657.1 | scaffold40  | 76696                   | GG                              | AA                 | AA               | INTERGENIC      |               |                    |                    |
| SNP_62599_A_76749  | NW_004515657.1 | scaffold40  | 76749                   | TT                              | CC                 | CC               | INTERGENIC      |               |                    |                    |
| SNP_62600_A_98889  | NW_004515657.1 | scaffold40  | 98889                   | TT                              | CC                 | CC               | INTERGENIC      |               |                    |                    |
| SNP_62601_A_99280  | NW_004515657.1 | scaffold40  | 99280                   | CC                              | AA                 | AA               | INTERGENIC      |               |                    |                    |
| SNP_62602_A_100451 | NW_004515657.1 | scaffold40  | 100451                  | TT                              | CC                 | CC               | INTERGENIC      |               |                    |                    |
| SNP_62603_A_100855 | NW_004515657.1 | scaffold40  | 100855                  | CC                              | TT                 | TT               | INTERGENIC      |               |                    |                    |
| SNP_62604_A_100895 | NW_004515657.1 | scaffold40  | 100895                  | TT                              | CC                 | CC               | INTERGENIC      |               |                    |                    |
| SNP_62605_A_101126 | NW_004515657.1 | scaffold40  | 101126                  | AA                              | TT                 | TT               | INTERGENIC      |               |                    |                    |
| SNP_62606_A_101207 | NW_004515657.1 | scaffold40  | 101207                  | TT                              | AA                 | AA               | INTERGENIC      |               |                    |                    |
| SNP_62607_A_101389 | NW_004515657.1 | scaffold40  | 101389                  | TT                              | CC                 | CC               | INTERGENIC      |               |                    |                    |
| SNP_62608_A_101435 | NW_004515657.1 | scaffold40  | 101435                  | GG                              | AA                 | AA               | INTERGENIC      |               |                    |                    |
| SNP_62609_A_101453 | NW_004515657.1 | scaffold40  | 101453                  | GG                              | CC                 | CC               | INTERGENIC      |               |                    |                    |
| SNP_62610_A_101477 | NW_004515657.1 | scaffold40  | 101477                  | AA                              | GG                 | GG               | INTERGENIC      |               |                    |                    |
| SNP_62611_A_101478 | NW_004515657.1 | scaffold40  | 101478                  | GG                              | AA                 | AA               | INTERGENIC      |               |                    |                    |
| SNP_62612_A_101485 | NW_004515657.1 | scaffold40  | 101485                  | TT                              | CC                 | CC               | INTERGENIC      |               |                    |                    |
| SNP_62613_A_101487 | NW_004515657.1 | scaffold40  | 101487                  | AA                              | TT                 | TT               | INTERGENIC      |               |                    |                    |
| SNP_62614_A_101504 | NW_004515657.1 | scaffold40  | 101504                  | CC                              | TT                 | TT               | INTERGENIC      |               |                    |                    |
| SNP_62615_A_101510 | NW_004515657.1 | scaffold40  | 101510                  | CC                              | TT                 | TT               | INTERGENIC      |               |                    |                    |
| SNP_62616_A_101526 | NW_004515657.1 | scaffold40  | 101526                  | TT                              | AA                 | AA               | INTERGENIC      |               |                    |                    |

| SNPs IDs           | Chromosome IDs | Chromosomes | Physical positions (bp) | CDC Frontier (Reference genome) | (Pusa 1103 & HPNB) | (ILWC 46 & LPNB) | Sequence genome | Components of | Gene accession IDs | Putative functions |
|--------------------|----------------|-------------|-------------------------|---------------------------------|--------------------|------------------|-----------------|---------------|--------------------|--------------------|
| SNP_62617_A_101545 | NW_004515657.1 | scaffold40  | 101545                  | GG                              | AA                 | AA               | INTERGENIC      |               |                    |                    |
| SNP_62618_A_101663 | NW_004515657.1 | scaffold40  | 101663                  | TT                              | AA                 | AA               | INTERGENIC      |               |                    |                    |
| SNP_62619_A_101912 | NW_004515657.1 | scaffold40  | 101912                  | CC                              | GG                 | GG               | INTERGENIC      |               |                    |                    |
| SNP_62620_A_102079 | NW_004515657.1 | scaffold40  | 102079                  | AA                              | GG                 | GG               | INTERGENIC      |               |                    |                    |
| SNP_62621_A_108717 | NW_004515657.1 | scaffold40  | 108717                  | GG                              | AA                 | AA               | INTERGENIC      |               |                    |                    |
| SNP_62622_A_111134 | NW_004515657.1 | scaffold40  | 111134                  | AA                              | GG                 | GG               | INTERGENIC      |               |                    |                    |
| SNP_62624_A_133067 | NW_004515657.1 | scaffold40  | 133067                  | AA                              | TT                 | TT               | INTERGENIC      |               |                    |                    |
| SNP_62625_A_133892 | NW_004515657.1 | scaffold40  | 133892                  | TT                              | AA                 | AA               | INTERGENIC      |               |                    |                    |
| SNP_62626_A_133923 | NW_004515657.1 | scaffold40  | 133923                  | CC                              | TT                 | TT               | INTERGENIC      |               |                    |                    |
| SNP_62627_A_133939 | NW_004515657.1 | scaffold40  | 133939                  | CC                              | TT                 | TT               | INTERGENIC      |               |                    |                    |
| SNP_62628_A_133944 | NW_004515657.1 | scaffold40  | 133944                  | AA                              | GG                 | GG               | INTERGENIC      |               |                    |                    |
| SNP_62629_A_135162 | NW_004515657.1 | scaffold40  | 135162                  | TT                              | CC                 | CC               | INTERGENIC      |               |                    |                    |
| SNP_62630_A_135379 | NW_004515657.1 | scaffold40  | 135379                  | AA                              | CC                 | CC               | INTERGENIC      |               |                    |                    |
| SNP_62631_A_135484 | NW_004515657.1 | scaffold40  | 135484                  | TT                              | AA                 | AA               | INTERGENIC      |               |                    |                    |
| SNP_62632_A_191201 | NW_004515657.1 | scaffold40  | 191201                  | TT                              | CC                 | CC               | INTERGENIC      |               |                    |                    |
| SNP_62633_A_212461 | NW_004515657.1 | scaffold40  | 212461                  | TT                              | CC                 | CC               | INTERGENIC      |               |                    |                    |
| SNP_62634_A_212965 | NW_004515657.1 | scaffold40  | 212965                  | TT                              | GG                 | GG               | INTERGENIC      |               |                    |                    |
| SNP_62635_A_212989 | NW_004515657.1 | scaffold40  | 212989                  | AA                              | GG                 | GG               | INTERGENIC      |               |                    |                    |
| SNP_62636_A_212997 | NW_004515657.1 | scaffold40  | 212997                  | TT                              | CC                 | CC               | INTERGENIC      |               |                    |                    |
| SNP_62637_A_213015 | NW_004515657.1 | scaffold40  | 213015                  | AA                              | GG                 | GG               | INTERGENIC      |               |                    |                    |
| SNP_62638_A_213059 | NW_004515657.1 | scaffold40  | 213059                  | GG                              | AA                 | AA               | INTERGENIC      |               |                    |                    |
| SNP_62639_A_214979 | NW_004515657.1 | scaffold40  | 214979                  | CC                              | TT                 | TT               | INTERGENIC      |               |                    |                    |

| SNPs IDs           | Chromosome IDs | Chromosomes | Physical positions (bp) | CDC Frontier (Reference genome) | (Pusa 1103 & HPNB) | (ILWC 46 & LPNB) | Sequence genome | Components of | Gene accession IDs | Putative functions |
|--------------------|----------------|-------------|-------------------------|---------------------------------|--------------------|------------------|-----------------|---------------|--------------------|--------------------|
| SNP_62640_A_229194 | NW_004515657.1 | scaffold40  | 229194                  | TT                              | GG                 | GG               | INTERGENIC      |               |                    |                    |
| SNP_62641_A_229262 | NW_004515657.1 | scaffold40  | 229262                  | GG                              | AA                 | AA               | INTERGENIC      |               |                    |                    |
| SNP_62642_A_229453 | NW_004515657.1 | scaffold40  | 229453                  | TT                              | CC                 | CC               | INTERGENIC      |               |                    |                    |
| SNP_62643_A_229456 | NW_004515657.1 | scaffold40  | 229456                  | GG                              | TT                 | TT               | INTERGENIC      |               |                    |                    |
| SNP_62644_A_229492 | NW_004515657.1 | scaffold40  | 229492                  | AA                              | TT                 | TT               | INTERGENIC      |               |                    |                    |
| SNP_62645_A_229525 | NW_004515657.1 | scaffold40  | 229525                  | AA                              | GG                 | GG               | INTERGENIC      |               |                    |                    |
| SNP_62646_A_229571 | NW_004515657.1 | scaffold40  | 229571                  | AA                              | TT                 | TT               | INTERGENIC      |               |                    |                    |
| SNP_62647_A_229588 | NW_004515657.1 | scaffold40  | 229588                  | AA                              | GG                 | GG               | INTERGENIC      |               |                    |                    |
| SNP_62648_A_229618 | NW_004515657.1 | scaffold40  | 229618                  | CC                              | TT                 | TT               | INTERGENIC      |               |                    |                    |
| SNP_62649_A_229690 | NW_004515657.1 | scaffold40  | 229690                  | CC                              | AA                 | AA               | INTERGENIC      |               |                    |                    |
| SNP_62650_A_229693 | NW_004515657.1 | scaffold40  | 229693                  | TT                              | GG                 | GG               | INTERGENIC      |               |                    |                    |
| SNP_62651_A_362866 | NW_004515657.1 | scaffold40  | 362866                  | GG                              | AA                 | AA               | INTERGENIC      |               |                    |                    |
| SNP_62652_A_362911 | NW_004515657.1 | scaffold40  | 362911                  | TT                              | CC                 | CC               | INTERGENIC      |               |                    |                    |
| SNP_62653_A_362999 | NW_004515657.1 | scaffold40  | 362999                  | TT                              | AA                 | AA               | INTERGENIC      |               |                    |                    |
| SNP_62654_A_363106 | NW_004515657.1 | scaffold40  | 363106                  | TT                              | CC                 | CC               | INTERGENIC      |               |                    |                    |
| SNP_62655_A_363131 | NW_004515657.1 | scaffold40  | 363131                  | GG                              | AA                 | AA               | INTERGENIC      |               |                    |                    |
| SNP_62656_A_363235 | NW_004515657.1 | scaffold40  | 363235                  | CC                              | TT                 | TT               | INTERGENIC      |               |                    |                    |
| SNP_62657_A_363280 | NW_004515657.1 | scaffold40  | 363280                  | AA                              | TT                 | TT               | INTERGENIC      |               |                    |                    |
| SNP_62658_A_363469 | NW_004515657.1 | scaffold40  | 363469                  | CC                              | TT                 | TT               | INTERGENIC      |               |                    |                    |
| SNP_62659_A_363494 | NW_004515657.1 | scaffold40  | 363494                  | CC                              | TT                 | TT               | INTERGENIC      |               |                    |                    |
| SNP_62660_A_405074 | NW_004515657.1 | scaffold40  | 405074                  | AA                              | CC                 | CC               | INTERGENIC      |               |                    |                    |
| SNP_62662_A_405102 | NW_004515657.1 | scaffold40  | 405102                  | TT                              | CC                 | CC               | INTERGENIC      |               |                    |                    |

| SNPs IDs            | Chromosome IDs | Chromosomes | Physical positions (bp) | CDC Frontier (Reference genome) | (Pusa 1103 & HPNB) | (ILWC 46 & LPNB) | Sequence Components of genome | Gene accession IDs | Putative functions                                             |
|---------------------|----------------|-------------|-------------------------|---------------------------------|--------------------|------------------|-------------------------------|--------------------|----------------------------------------------------------------|
| SNP_62663_A_437123  | NW_004515657.1 | scaffold40  | 437123                  | CC                              | TT                 | TT               | INTRON                        | 101497262          | cysteine proteinase inhibitor-like                             |
| SNP_62665_A_466819  | NW_004515657.1 | scaffold40  | 466819                  | CC                              | GG                 | GG               | STOP_GAINED                   | 101510774          | phytochromobilin:ferredoxin oxidoreductase, chloroplastic-like |
| SNP_62667_A_616444  | NW_004515657.1 | scaffold40  | 616444                  | TT                              | CC                 | CC               | INTERGENIC                    |                    |                                                                |
| SNP_62668_A_648918  | NW_004515657.1 | scaffold40  | 648918                  | TT                              | CC                 | CC               | URR                           | 101502726          | pectinesterase 1-like                                          |
| SNP_62669_A_756112  | NW_004515657.1 | scaffold40  | 756112                  | TT                              | AA                 | AA               | INTERGENIC                    |                    |                                                                |
| SNP_62671_A_799562  | NW_004515657.1 | scaffold40  | 799562                  | AA                              | TT                 | TT               | INTERGENIC                    |                    |                                                                |
| SNP_62672_A_799917  | NW_004515657.1 | scaffold40  | 799917                  | GG                              | AA                 | AA               | INTERGENIC                    |                    |                                                                |
| SNP_62673_A_800095  | NW_004515657.1 | scaffold40  | 800095                  | GG                              | TT                 | TT               | INTERGENIC                    |                    |                                                                |
| SNP_62674_A_800100  | NW_004515657.1 | scaffold40  | 800100                  | GG                              | AA                 | AA               | INTERGENIC                    |                    |                                                                |
| SNP_62675_A_809434  | NW_004515657.1 | scaffold40  | 809434                  | TT                              | CC                 | CC               | INTERGENIC                    |                    |                                                                |
| SNP_62676_A_819201  | NW_004515657.1 | scaffold40  | 819201                  | CC                              | GG                 | GG               | INTERGENIC                    |                    |                                                                |
| SNP_62677_A_839679  | NW_004515657.1 | scaffold40  | 839679                  | TT                              | CC                 | CC               | INTERGENIC                    |                    |                                                                |
| SNP_62678_A_862625  | NW_004515657.1 | scaffold40  | 862625                  | TT                              | CC                 | CC               | INTERGENIC                    |                    |                                                                |
| SNP_62679_A_892266  | NW_004515657.1 | scaffold40  | 892266                  | TT                              | GG                 | GG               | INTRON                        | id194189           | Unknown function                                               |
| SNP_62681_A_929378  | NW_004515657.1 | scaffold40  | 929378                  | GG                              | AA                 | AA               | INTERGENIC                    |                    |                                                                |
| SNP_62682_A_937547  | NW_004515657.1 | scaffold40  | 937547                  | TT                              | CC                 | CC               | INTERGENIC                    |                    |                                                                |
| SNP_62683_A_938150  | NW_004515657.1 | scaffold40  | 938150                  | AA                              | TT                 | TT               | INTERGENIC                    |                    |                                                                |
| SNP_62684_A_939828  | NW_004515657.1 | scaffold40  | 939828                  | TT                              | CC                 | CC               | INTERGENIC                    |                    |                                                                |
| SNP_62685_A_967409  | NW_004515657.1 | scaffold40  | 967409                  | TT                              | CC                 | CC               | INTRON                        | 101506495          | uncharacterized LOC101506495                                   |
| SNP_62687_A_1030439 | NW_004515657.1 | scaffold40  | 1030439                 | CC                              | TT                 | TT               | DRR                           | 101508310          | purple acid phosphatase 17-like                                |
| SNP_62688_A_25125   | NW_004515658.1 | scaffold41  | 25125                   | CC                              | TT                 | TT               | INTERGENIC                    |                    |                                                                |
| SNP_62689_A_25143   | NW_004515658.1 | scaffold41  | 25143                   | GG                              | AA                 | AA               | INTERGENIC                    |                    |                                                                |

| SNPs IDs           | Chromosome IDs | Chromosomes | Physical positions (bp) | CDC Frontier (Reference genome) | (Pusa 1103 & HPNB) | (ILWC 46 & LPNB) | Sequence genome | Components of | Gene accession IDs | Putative functions |
|--------------------|----------------|-------------|-------------------------|---------------------------------|--------------------|------------------|-----------------|---------------|--------------------|--------------------|
| SNP_62690_A_25153  | NW_004515658.1 | scaffold41  | 25153                   | TT                              | CC                 | CC               | INTERGENIC      |               |                    |                    |
| SNP_62691_A_25161  | NW_004515658.1 | scaffold41  | 25161                   | GG                              | TT                 | TT               | INTERGENIC      |               |                    |                    |
| SNP_62692_A_25162  | NW_004515658.1 | scaffold41  | 25162                   | CC                              | AA                 | AA               | INTERGENIC      |               |                    |                    |
| SNP_62693_A_25164  | NW_004515658.1 | scaffold41  | 25164                   | CC                              | TT                 | TT               | INTERGENIC      |               |                    |                    |
| SNP_62694_A_25182  | NW_004515658.1 | scaffold41  | 25182                   | TT                              | CC                 | CC               | INTERGENIC      |               |                    |                    |
| SNP_62695_A_25237  | NW_004515658.1 | scaffold41  | 25237                   | GG                              | AA                 | AA               | INTERGENIC      |               |                    |                    |
| SNP_62696_A_25249  | NW_004515658.1 | scaffold41  | 25249                   | TT                              | GG                 | GG               | INTERGENIC      |               |                    |                    |
| SNP_62697_A_25260  | NW_004515658.1 | scaffold41  | 25260                   | TT                              | CC                 | CC               | INTERGENIC      |               |                    |                    |
| SNP_62698_A_25266  | NW_004515658.1 | scaffold41  | 25266                   | CC                              | TT                 | TT               | INTERGENIC      |               |                    |                    |
| SNP_62699_A_25296  | NW_004515658.1 | scaffold41  | 25296                   | GG                              | TT                 | TT               | INTERGENIC      |               |                    |                    |
| SNP_62700_A_25329  | NW_004515658.1 | scaffold41  | 25329                   | GG                              | AA                 | AA               | INTERGENIC      |               |                    |                    |
| SNP_62701_A_25555  | NW_004515658.1 | scaffold41  | 25555                   | GG                              | AA                 | AA               | INTERGENIC      |               |                    |                    |
| SNP_62702_A_33549  | NW_004515658.1 | scaffold41  | 33549                   | CC                              | GG                 | GG               | INTERGENIC      |               |                    |                    |
| SNP_62703_A_109304 | NW_004515658.1 | scaffold41  | 109304                  | CC                              | TT                 | TT               | INTERGENIC      |               |                    |                    |
| SNP_62704_A_109683 | NW_004515658.1 | scaffold41  | 109683                  | AA                              | TT                 | TT               | INTERGENIC      |               |                    |                    |
| SNP_62705_A_113817 | NW_004515658.1 | scaffold41  | 113817                  | AA                              | GG                 | GG               | INTERGENIC      |               |                    |                    |
| SNP_62706_A_114018 | NW_004515658.1 | scaffold41  | 114018                  | AA                              | TT                 | TT               | INTERGENIC      |               |                    |                    |
| SNP_62707_A_114062 | NW_004515658.1 | scaffold41  | 114062                  | TT                              | AA                 | AA               | INTERGENIC      |               |                    |                    |
| SNP_62708_A_114068 | NW_004515658.1 | scaffold41  | 114068                  | AA                              | TT                 | TT               | INTERGENIC      |               |                    |                    |
| SNP_62709_A_114118 | NW_004515658.1 | scaffold41  | 114118                  | GG                              | CC                 | CC               | INTERGENIC      |               |                    |                    |
| SNP_62711_A_114445 | NW_004515658.1 | scaffold41  | 114445                  | CC                              | TT                 | TT               | INTERGENIC      |               |                    |                    |
| SNP_62712_A_114744 | NW_004515658.1 | scaffold41  | 114744                  | TT                              | AA                 | AA               | INTERGENIC      |               |                    |                    |

| SNPs IDs           | Chromosome IDs | Chromosomes | Physical positions (bp) | CDC Frontier (Reference genome) | (Pusa 1103 & HPNB) | (ILWC 46 & LPNB) | Sequence genome | Components of | Gene accession IDs | Putative functions |
|--------------------|----------------|-------------|-------------------------|---------------------------------|--------------------|------------------|-----------------|---------------|--------------------|--------------------|
| SNP_62713_A_114772 | NW_004515658.1 | scaffold41  | 114772                  | TT                              | AA                 | AA               | INTERGENIC      |               |                    |                    |
| SNP_62714_A_114808 | NW_004515658.1 | scaffold41  | 114808                  | AA                              | GG                 | GG               | INTERGENIC      |               |                    |                    |
| SNP_62715_A_114861 | NW_004515658.1 | scaffold41  | 114861                  | TT                              | CC                 | CC               | INTERGENIC      |               |                    |                    |
| SNP_62716_A_115163 | NW_004515658.1 | scaffold41  | 115163                  | TT                              | GG                 | GG               | INTERGENIC      |               |                    |                    |
| SNP_62717_A_115295 | NW_004515658.1 | scaffold41  | 115295                  | AA                              | GG                 | GG               | INTERGENIC      |               |                    |                    |
| SNP_62718_A_116465 | NW_004515658.1 | scaffold41  | 116465                  | TT                              | GG                 | GG               | INTERGENIC      |               |                    |                    |
| SNP_62719_A_116543 | NW_004515658.1 | scaffold41  | 116543                  | AA                              | CC                 | CC               | INTERGENIC      |               |                    |                    |
| SNP_62720_A_116574 | NW_004515658.1 | scaffold41  | 116574                  | AA                              | CC                 | CC               | INTERGENIC      |               |                    |                    |
| SNP_62721_A_122127 | NW_004515658.1 | scaffold41  | 122127                  | TT                              | CC                 | CC               | INTERGENIC      |               |                    |                    |
| SNP_62722_A_122189 | NW_004515658.1 | scaffold41  | 122189                  | TT                              | CC                 | CC               | INTERGENIC      |               |                    |                    |
| SNP_62723_A_122203 | NW_004515658.1 | scaffold41  | 122203                  | AA                              | GG                 | GG               | INTERGENIC      |               |                    |                    |
| SNP_62724_A_122285 | NW_004515658.1 | scaffold41  | 122285                  | TT                              | CC                 | CC               | INTERGENIC      |               |                    |                    |
| SNP_62725_A_122286 | NW_004515658.1 | scaffold41  | 122286                  | GG                              | AA                 | AA               | INTERGENIC      |               |                    |                    |
| SNP_62726_A_122301 | NW_004515658.1 | scaffold41  | 122301                  | AA                              | GG                 | GG               | INTERGENIC      |               |                    |                    |
| SNP_62727_A_122302 | NW_004515658.1 | scaffold41  | 122302                  | TT                              | GG                 | GG               | INTERGENIC      |               |                    |                    |
| SNP_62730_A_122388 | NW_004515658.1 | scaffold41  | 122388                  | AA                              | CC                 | CC               | INTERGENIC      |               |                    |                    |
| SNP_62731_A_122409 | NW_004515658.1 | scaffold41  | 122409                  | CC                              | TT                 | TT               | INTERGENIC      |               |                    |                    |
| SNP_62732_A_122427 | NW_004515658.1 | scaffold41  | 122427                  | CC                              | GG                 | GG               | INTERGENIC      |               |                    |                    |
| SNP_62734_A_122449 | NW_004515658.1 | scaffold41  | 122449                  | AA                              | GG                 | GG               | INTERGENIC      |               |                    |                    |
| SNP_62735_A_122456 | NW_004515658.1 | scaffold41  | 122456                  | AA                              | GG                 | GG               | INTERGENIC      |               |                    |                    |
| SNP_62736_A_122465 | NW_004515658.1 | scaffold41  | 122465                  | TT                              | GG                 | GG               | INTERGENIC      |               |                    |                    |
| SNP_62737_A_122497 | NW_004515658.1 | scaffold41  | 122497                  | TT                              | CC                 | CC               | INTERGENIC      |               |                    |                    |

| SNPs IDs           | Chromosome IDs | Chromosomes | Physical positions (bp) | CDC Frontier genome (Reference genome) | (Pusa 1103 & HPNB) | (ILWC 46 & LPNB) | Sequence Components of genome | Gene accession IDs | Putative functions                                                   |
|--------------------|----------------|-------------|-------------------------|----------------------------------------|--------------------|------------------|-------------------------------|--------------------|----------------------------------------------------------------------|
| SNP_62738_A_122509 | NW_004515658.1 | scaffold41  | 122509                  | TT                                     | CC                 | CC               | INTERGENIC                    |                    |                                                                      |
| SNP_62739_A_122510 | NW_004515658.1 | scaffold41  | 122510                  | TT                                     | GG                 | GG               | INTERGENIC                    |                    |                                                                      |
| SNP_62740_A_122513 | NW_004515658.1 | scaffold41  | 122513                  | TT                                     | CC                 | CC               | INTERGENIC                    |                    |                                                                      |
| SNP_62741_A_122527 | NW_004515658.1 | scaffold41  | 122527                  | TT                                     | GG                 | GG               | INTERGENIC                    |                    |                                                                      |
| SNP_62742_A_122687 | NW_004515658.1 | scaffold41  | 122687                  | AA                                     | TT                 | TT               | INTERGENIC                    |                    |                                                                      |
| SNP_62743_A_122713 | NW_004515658.1 | scaffold41  | 122713                  | TT                                     | CC                 | CC               | INTERGENIC                    |                    |                                                                      |
| SNP_62744_A_127687 | NW_004515658.1 | scaffold41  | 127687                  | TT                                     | AA                 | AA               | INTERGENIC                    |                    |                                                                      |
| SNP_62745_A_165089 | NW_004515658.1 | scaffold41  | 165089                  | TT                                     | CC                 | CC               | INTERGENIC                    |                    |                                                                      |
| SNP_62746_A_157    | NW_004515660.1 | scaffold44  | 157                     | AA                                     | GG                 | GG               | INTERGENIC                    |                    |                                                                      |
| SNP_62747_A_637    | NW_004515660.1 | scaffold44  | 637                     | TT                                     | GG                 | GG               | INTERGENIC                    |                    |                                                                      |
| SNP_62748_A_106416 | NW_004515660.1 | scaffold44  | 106416                  | GG                                     | TT                 | TT               | INTERGENIC                    |                    |                                                                      |
| SNP_62749_A_127079 | NW_004515660.1 | scaffold44  | 127079                  | TT                                     | GG                 | GG               | INTRON                        | 101488947          | probable LRR receptor-like serine/threonine-protein kinase At1g53430 |
| SNP_62750_A_135652 | NW_004515660.1 | scaffold44  | 135652                  | TT                                     | CC                 | CC               | INTRON                        | 101488947          | probable LRR receptor-like serine/threonine-protein kinase At1g53430 |
| SNP_62751_A_140947 | NW_004515660.1 | scaffold44  | 140947                  | AA                                     | GG                 | GG               | INTRON                        | 101488947          | probable LRR receptor-like serine/threonine-protein kinase At1g53430 |
| SNP_62752_A_142453 | NW_004515660.1 | scaffold44  | 142453                  | GG                                     | AA                 | AA               | URR                           | 101488947          | probable LRR receptor-like serine/threonine-protein kinase At1g53430 |
| SNP_62753_A_147137 | NW_004515660.1 | scaffold44  | 147137                  | GG                                     | TT                 | TT               | INTERGENIC                    |                    |                                                                      |
| SNP_62754_A_147195 | NW_004515660.1 | scaffold44  | 147195                  | TT                                     | CC                 | CC               | INTERGENIC                    |                    |                                                                      |
| SNP_62755_A_147199 | NW_004515660.1 | scaffold44  | 147199                  | TT                                     | CC                 | CC               | INTERGENIC                    |                    |                                                                      |
| SNP_62756_A_170352 | NW_004515660.1 | scaffold44  | 170352                  | TT                                     | GG                 | GG               | INTERGENIC                    |                    |                                                                      |
| SNP_62757_A_170703 | NW_004515660.1 | scaffold44  | 170703                  | CC                                     | GG                 | GG               | INTERGENIC                    |                    |                                                                      |
| SNP_62758_A_189154 | NW_004515660.1 | scaffold44  | 189154                  | TT                                     | AA                 | AA               | INTERGENIC                    |                    |                                                                      |
| SNP_62759_A_238345 | NW_004515660.1 | scaffold44  | 238345                  | AA                                     | CC                 | CC               | INTERGENIC                    |                    |                                                                      |

| SNPs IDs           | Chromosome IDs | Chromosomes | Physical positions (bp) | CDC Frontier (Reference genome) | (Pusa 1103 & HPNB) | (ILWC 46 & LPNB) | Sequence genome | Components of | Gene accession IDs | Putative functions |
|--------------------|----------------|-------------|-------------------------|---------------------------------|--------------------|------------------|-----------------|---------------|--------------------|--------------------|
| SNP_62760_A_258380 | NW_004515660.1 | scaffold44  | 258380                  | AA                              | CC                 | CC               | INTERGENIC      |               |                    |                    |
| SNP_62761_A_282200 | NW_004515660.1 | scaffold44  | 282200                  | AA                              | GG                 | GG               | INTERGENIC      |               |                    |                    |
| SNP_62762_A_286598 | NW_004515660.1 | scaffold44  | 286598                  | TT                              | CC                 | CC               | INTERGENIC      |               |                    |                    |
| SNP_62763_A_286628 | NW_004515660.1 | scaffold44  | 286628                  | AA                              | GG                 | GG               | INTERGENIC      |               |                    |                    |
| SNP_62765_A_850    | NW_004515661.1 | scaffold46  | 850                     | GG                              | AA                 | AA               | INTERGENIC      |               |                    |                    |
| SNP_62766_A_900    | NW_004515661.1 | scaffold46  | 900                     | AA                              | GG                 | GG               | INTERGENIC      |               |                    |                    |
| SNP_62767_A_1607   | NW_004515661.1 | scaffold46  | 1607                    | AA                              | GG                 | GG               | INTERGENIC      |               |                    |                    |
| SNP_62768_A_1624   | NW_004515661.1 | scaffold46  | 1624                    | GG                              | AA                 | AA               | INTERGENIC      |               |                    |                    |
| SNP_62769_A_1823   | NW_004515661.1 | scaffold46  | 1823                    | AA                              | GG                 | GG               | INTERGENIC      |               |                    |                    |
| SNP_62770_A_1911   | NW_004515661.1 | scaffold46  | 1911                    | TT                              | CC                 | CC               | INTERGENIC      |               |                    |                    |
| SNP_62771_A_2064   | NW_004515661.1 | scaffold46  | 2064                    | AA                              | GG                 | GG               | INTERGENIC      |               |                    |                    |
| SNP_62772_A_2086   | NW_004515661.1 | scaffold46  | 2086                    | AA                              | GG                 | GG               | INTERGENIC      |               |                    |                    |
| SNP_62773_A_3022   | NW_004515661.1 | scaffold46  | 3022                    | TT                              | CC                 | CC               | INTERGENIC      |               |                    |                    |
| SNP_62774_A_3108   | NW_004515661.1 | scaffold46  | 3108                    | CC                              | TT                 | TT               | INTERGENIC      |               |                    |                    |
| SNP_62775_A_3190   | NW_004515661.1 | scaffold46  | 3190                    | AA                              | CC                 | CC               | INTERGENIC      |               |                    |                    |
| SNP_62776_A_3193   | NW_004515661.1 | scaffold46  | 3193                    | CC                              | GG                 | GG               | INTERGENIC      |               |                    |                    |
| SNP_62777_A_4185   | NW_004515661.1 | scaffold46  | 4185                    | GG                              | AA                 | AA               | INTERGENIC      |               |                    |                    |
| SNP_62778_A_4496   | NW_004515661.1 | scaffold46  | 4496                    | GG                              | AA                 | AA               | INTERGENIC      |               |                    |                    |
| SNP_62779_A_4544   | NW_004515661.1 | scaffold46  | 4544                    | TT                              | CC                 | CC               | INTERGENIC      |               |                    |                    |
| SNP_62780_A_5073   | NW_004515661.1 | scaffold46  | 5073                    | TT                              | GG                 | GG               | INTERGENIC      |               |                    |                    |
| SNP_62781_A_5087   | NW_004515661.1 | scaffold46  | 5087                    | TT                              | AA                 | AA               | INTERGENIC      |               |                    |                    |
| SNP_62782_A_5178   | NW_004515661.1 | scaffold46  | 5178                    | AA                              | GG                 | GG               | INTERGENIC      |               |                    |                    |



| SNPs IDs         | Chromosome IDs | Chromosomes | Physical positions (bp) | CDC Frontier (Reference genome) | (Pusa 1103 & HPNB) | (ILWC 46 & LPNB) | Sequence Components of genome | Gene accession IDs | Putative functions |
|------------------|----------------|-------------|-------------------------|---------------------------------|--------------------|------------------|-------------------------------|--------------------|--------------------|
| SNP_62783_A_5192 | NW_004515661.1 | scaffold46  | 5192                    | TT                              | CC                 | CC               | INTERGENIC                    |                    |                    |
| SNP_62784_A_5367 | NW_004515661.1 | scaffold46  | 5367                    | GG                              | TT                 | TT               | INTERGENIC                    |                    |                    |
| SNP_62785_A_5424 | NW_004515661.1 | scaffold46  | 5424                    | CC                              | TT                 | TT               | INTERGENIC                    |                    |                    |
| SNP_62786_A_5587 | NW_004515661.1 | scaffold46  | 5587                    | CC                              | TT                 | TT               | INTERGENIC                    |                    |                    |
| SNP_62787_A_5590 | NW_004515661.1 | scaffold46  | 5590                    | AA                              | CC                 | CC               | INTERGENIC                    |                    |                    |
| SNP_62788_A_5611 | NW_004515661.1 | scaffold46  | 5611                    | TT                              | CC                 | CC               | INTERGENIC                    |                    |                    |
| SNP_62789_A_5684 | NW_004515661.1 | scaffold46  | 5684                    | CC                              | TT                 | TT               | INTERGENIC                    |                    |                    |
| SNP_62790_A_5767 | NW_004515661.1 | scaffold46  | 5767                    | CC                              | TT                 | TT               | INTERGENIC                    |                    |                    |
| SNP_62791_A_5832 | NW_004515661.1 | scaffold46  | 5832                    | GG                              | AA                 | AA               | INTERGENIC                    |                    |                    |
| SNP_62792_A_5930 | NW_004515661.1 | scaffold46  | 5930                    | CC                              | TT                 | TT               | INTERGENIC                    |                    |                    |
| SNP_62794_A_6374 | NW_004515661.1 | scaffold46  | 6374                    | AA                              | GG                 | GG               | INTERGENIC                    |                    |                    |
| SNP_62795_A_6538 | NW_004515661.1 | scaffold46  | 6538                    | AA                              | GG                 | GG               | INTERGENIC                    |                    |                    |
| SNP_62796_A_6756 | NW_004515661.1 | scaffold46  | 6756                    | TT                              | GG                 | GG               | INTERGENIC                    |                    |                    |
| SNP_62797_A_7423 | NW_004515661.1 | scaffold46  | 7423                    | TT                              | CC                 | CC               | INTERGENIC                    |                    |                    |
| SNP_62798_A_7516 | NW_004515661.1 | scaffold46  | 7516                    | GG                              | CC                 | CC               | INTERGENIC                    |                    |                    |
| SNP_62799_A_7713 | NW_004515661.1 | scaffold46  | 7713                    | TT                              | GG                 | GG               | INTERGENIC                    |                    |                    |
| SNP_62800_A_7788 | NW_004515661.1 | scaffold46  | 7788                    | AA                              | TT                 | TT               | INTERGENIC                    |                    |                    |
| SNP_62801_A_7789 | NW_004515661.1 | scaffold46  | 7789                    | GG                              | AA                 | AA               | INTERGENIC                    |                    |                    |
| SNP_62802_A_7803 | NW_004515661.1 | scaffold46  | 7803                    | TT                              | GG                 | GG               | INTERGENIC                    |                    |                    |
| SNP_62803_A_7815 | NW_004515661.1 | scaffold46  | 7815                    | CC                              | GG                 | GG               | INTERGENIC                    |                    |                    |
| SNP_62804_A_7865 | NW_004515661.1 | scaffold46  | 7865                    | TT                              | AA                 | AA               | INTERGENIC                    |                    |                    |
| SNP_62805_A_7928 | NW_004515661.1 | scaffold46  | 7928                    | TT                              | CC                 | CC               | INTERGENIC                    |                    |                    |

| SNPs IDs          | Chromosome IDs | Chromosomes | Physical positions (bp) | CDC Frontier (Reference genome) | (Pusa 1103 & HPNB) | (ILWC 46 & LPNB) | Sequence genome | Components of | Gene accession IDs | Putative functions |
|-------------------|----------------|-------------|-------------------------|---------------------------------|--------------------|------------------|-----------------|---------------|--------------------|--------------------|
| SNP_62806_A_7952  | NW_004515661.1 | scaffold46  | 7952                    | GG                              | CC                 | CC               | INTERGENIC      |               |                    |                    |
| SNP_62807_A_8033  | NW_004515661.1 | scaffold46  | 8033                    | AA                              | GG                 | GG               | INTERGENIC      |               |                    |                    |
| SNP_62808_A_8091  | NW_004515661.1 | scaffold46  | 8091                    | AA                              | CC                 | CC               | INTERGENIC      |               |                    |                    |
| SNP_62809_A_8093  | NW_004515661.1 | scaffold46  | 8093                    | GG                              | TT                 | TT               | INTERGENIC      |               |                    |                    |
| SNP_62810_A_8193  | NW_004515661.1 | scaffold46  | 8193                    | GG                              | CC                 | CC               | INTERGENIC      |               |                    |                    |
| SNP_62811_A_8224  | NW_004515661.1 | scaffold46  | 8224                    | GG                              | AA                 | AA               | INTERGENIC      |               |                    |                    |
| SNP_62812_A_8350  | NW_004515661.1 | scaffold46  | 8350                    | CC                              | TT                 | TT               | INTERGENIC      |               |                    |                    |
| SNP_62813_A_8557  | NW_004515661.1 | scaffold46  | 8557                    | AA                              | CC                 | CC               | INTERGENIC      |               |                    |                    |
| SNP_62814_A_9196  | NW_004515661.1 | scaffold46  | 9196                    | AA                              | GG                 | GG               | INTERGENIC      |               |                    |                    |
| SNP_62815_A_9558  | NW_004515661.1 | scaffold46  | 9558                    | GG                              | CC                 | CC               | INTERGENIC      |               |                    |                    |
| SNP_62816_A_14172 | NW_004515661.1 | scaffold46  | 14172                   | TT                              | CC                 | CC               | INTERGENIC      |               |                    |                    |
| SNP_62817_A_14442 | NW_004515661.1 | scaffold46  | 14442                   | TT                              | GG                 | GG               | INTERGENIC      |               |                    |                    |
| SNP_62818_A_14449 | NW_004515661.1 | scaffold46  | 14449                   | CC                              | GG                 | GG               | INTERGENIC      |               |                    |                    |
| SNP_62819_A_14470 | NW_004515661.1 | scaffold46  | 14470                   | GG                              | CC                 | CC               | INTERGENIC      |               |                    |                    |
| SNP_62820_A_14484 | NW_004515661.1 | scaffold46  | 14484                   | TT                              | AA                 | AA               | INTERGENIC      |               |                    |                    |
| SNP_62821_A_14643 | NW_004515661.1 | scaffold46  | 14643                   | AA                              | GG                 | GG               | INTERGENIC      |               |                    |                    |
| SNP_62822_A_14691 | NW_004515661.1 | scaffold46  | 14691                   | TT                              | CC                 | CC               | INTERGENIC      |               |                    |                    |
| SNP_62823_A_14818 | NW_004515661.1 | scaffold46  | 14818                   | GG                              | CC                 | CC               | INTERGENIC      |               |                    |                    |
| SNP_62824_A_14821 | NW_004515661.1 | scaffold46  | 14821                   | TT                              | AA                 | AA               | INTERGENIC      |               |                    |                    |
| SNP_62825_A_14891 | NW_004515661.1 | scaffold46  | 14891                   | GG                              | AA                 | AA               | INTERGENIC      |               |                    |                    |
| SNP_62826_A_14960 | NW_004515661.1 | scaffold46  | 14960                   | TT                              | GG                 | GG               | INTERGENIC      |               |                    |                    |
| SNP_62827_A_14996 | NW_004515661.1 | scaffold46  | 14996                   | TT                              | AA                 | AA               | INTERGENIC      |               |                    |                    |

| SNPs IDs          | Chromosome IDs | Chromosomes | Physical positions (bp) | CDC Frontier (Reference genome) | (Pusa 1103 & HPNB) | (ILWC 46 & LPNB) | Sequence genome | Components of | Gene accession IDs | Putative functions |
|-------------------|----------------|-------------|-------------------------|---------------------------------|--------------------|------------------|-----------------|---------------|--------------------|--------------------|
| SNP_62828_A_15020 | NW_004515661.1 | scaffold46  | 15020                   | AA                              | GG                 | GG               | INTERGENIC      |               |                    |                    |
| SNP_62829_A_15035 | NW_004515661.1 | scaffold46  | 15035                   | GG                              | AA                 | AA               | INTERGENIC      |               |                    |                    |
| SNP_62830_A_15063 | NW_004515661.1 | scaffold46  | 15063                   | TT                              | CC                 | CC               | INTERGENIC      |               |                    |                    |
| SNP_62831_A_15140 | NW_004515661.1 | scaffold46  | 15140                   | TT                              | GG                 | GG               | INTERGENIC      |               |                    |                    |
| SNP_62832_A_15235 | NW_004515661.1 | scaffold46  | 15235                   | CC                              | TT                 | TT               | INTERGENIC      |               |                    |                    |
| SNP_62833_A_15266 | NW_004515661.1 | scaffold46  | 15266                   | AA                              | CC                 | CC               | INTERGENIC      |               |                    |                    |
| SNP_62834_A_15458 | NW_004515661.1 | scaffold46  | 15458                   | GG                              | AA                 | AA               | INTERGENIC      |               |                    |                    |
| SNP_62835_A_15460 | NW_004515661.1 | scaffold46  | 15460                   | TT                              | AA                 | AA               | INTERGENIC      |               |                    |                    |
| SNP_62836_A_15486 | NW_004515661.1 | scaffold46  | 15486                   | TT                              | CC                 | CC               | INTERGENIC      |               |                    |                    |
| SNP_62837_A_15929 | NW_004515661.1 | scaffold46  | 15929                   | CC                              | GG                 | GG               | INTERGENIC      |               |                    |                    |
| SNP_62838_A_16278 | NW_004515661.1 | scaffold46  | 16278                   | AA                              | GG                 | GG               | INTERGENIC      |               |                    |                    |
| SNP_62839_A_16718 | NW_004515661.1 | scaffold46  | 16718                   | GG                              | CC                 | CC               | INTERGENIC      |               |                    |                    |
| SNP_62840_A_17003 | NW_004515661.1 | scaffold46  | 17003                   | CC                              | AA                 | AA               | INTERGENIC      |               |                    |                    |
| SNP_62841_A_19877 | NW_004515661.1 | scaffold46  | 19877                   | CC                              | AA                 | AA               | INTERGENIC      |               |                    |                    |
| SNP_62842_A_19998 | NW_004515661.1 | scaffold46  | 19998                   | CC                              | AA                 | AA               | INTERGENIC      |               |                    |                    |
| SNP_62843_A_20311 | NW_004515661.1 | scaffold46  | 20311                   | AA                              | GG                 | GG               | INTERGENIC      |               |                    |                    |
| SNP_62844_A_20363 | NW_004515661.1 | scaffold46  | 20363                   | TT                              | CC                 | CC               | INTERGENIC      |               |                    |                    |
| SNP_62845_A_20697 | NW_004515661.1 | scaffold46  | 20697                   | AA                              | GG                 | GG               | INTERGENIC      |               |                    |                    |
| SNP_62846_A_20940 | NW_004515661.1 | scaffold46  | 20940                   | TT                              | AA                 | AA               | INTERGENIC      |               |                    |                    |
| SNP_62847_A_20959 | NW_004515661.1 | scaffold46  | 20959                   | AA                              | GG                 | GG               | INTERGENIC      |               |                    |                    |
| SNP_62848_A_20998 | NW_004515661.1 | scaffold46  | 20998                   | AA                              | CC                 | CC               | INTERGENIC      |               |                    |                    |
| SNP_62849_A_21069 | NW_004515661.1 | scaffold46  | 21069                   | GG                              | CC                 | CC               | INTERGENIC      |               |                    |                    |

| SNPs IDs          | Chromosome IDs | Chromosomes | Physical positions (bp) | CDC Frontier (Reference genome) | (Pusa 1103 & HPNB) | (ILWC 46 & LPNB) | Sequence genome | Components of | Gene accession IDs | Putative functions |
|-------------------|----------------|-------------|-------------------------|---------------------------------|--------------------|------------------|-----------------|---------------|--------------------|--------------------|
| SNP_62850_A_21150 | NW_004515661.1 | scaffold46  | 21150                   | GG                              | AA                 | AA               | INTERGENIC      |               |                    |                    |
| SNP_62851_A_21227 | NW_004515661.1 | scaffold46  | 21227                   | TT                              | AA                 | AA               | INTERGENIC      |               |                    |                    |
| SNP_62852_A_21382 | NW_004515661.1 | scaffold46  | 21382                   | CC                              | AA                 | AA               | INTERGENIC      |               |                    |                    |
| SNP_62853_A_21432 | NW_004515661.1 | scaffold46  | 21432                   | CC                              | TT                 | TT               | INTERGENIC      |               |                    |                    |
| SNP_62854_A_21437 | NW_004515661.1 | scaffold46  | 21437                   | AA                              | GG                 | GG               | INTERGENIC      |               |                    |                    |
| SNP_62855_A_24487 | NW_004515661.1 | scaffold46  | 24487                   | TT                              | AA                 | AA               | INTERGENIC      |               |                    |                    |
| SNP_62856_A_24506 | NW_004515661.1 | scaffold46  | 24506                   | GG                              | AA                 | AA               | INTERGENIC      |               |                    |                    |
| SNP_62857_A_24539 | NW_004515661.1 | scaffold46  | 24539                   | GG                              | AA                 | AA               | INTERGENIC      |               |                    |                    |
| SNP_62858_A_24545 | NW_004515661.1 | scaffold46  | 24545                   | GG                              | AA                 | AA               | INTERGENIC      |               |                    |                    |
| SNP_62859_A_27849 | NW_004515661.1 | scaffold46  | 27849                   | TT                              | CC                 | CC               | INTERGENIC      |               |                    |                    |
| SNP_62860_A_27943 | NW_004515661.1 | scaffold46  | 27943                   | TT                              | CC                 | CC               | INTERGENIC      |               |                    |                    |
| SNP_62861_A_28250 | NW_004515661.1 | scaffold46  | 28250                   | CC                              | TT                 | TT               | INTERGENIC      |               |                    |                    |
| SNP_62862_A_28438 | NW_004515661.1 | scaffold46  | 28438                   | TT                              | CC                 | CC               | INTERGENIC      |               |                    |                    |
| SNP_62863_A_32873 | NW_004515661.1 | scaffold46  | 32873                   | TT                              | CC                 | CC               | INTERGENIC      |               |                    |                    |
| SNP_62865_A_33336 | NW_004515661.1 | scaffold46  | 33336                   | TT                              | GG                 | GG               | INTERGENIC      |               |                    |                    |
| SNP_62866_A_33632 | NW_004515661.1 | scaffold46  | 33632                   | GG                              | TT                 | TT               | INTERGENIC      |               |                    |                    |
| SNP_62867_A_34172 | NW_004515661.1 | scaffold46  | 34172                   | AA                              | GG                 | GG               | INTERGENIC      |               |                    |                    |
| SNP_62868_A_34390 | NW_004515661.1 | scaffold46  | 34390                   | TT                              | CC                 | CC               | INTERGENIC      |               |                    |                    |
| SNP_62869_A_34399 | NW_004515661.1 | scaffold46  | 34399                   | CC                              | TT                 | TT               | INTERGENIC      |               |                    |                    |
| SNP_62870_A_34422 | NW_004515661.1 | scaffold46  | 34422                   | TT                              | GG                 | GG               | INTERGENIC      |               |                    |                    |
| SNP_62871_A_34517 | NW_004515661.1 | scaffold46  | 34517                   | CC                              | TT                 | TT               | INTERGENIC      |               |                    |                    |
| SNP_62872_A_34526 | NW_004515661.1 | scaffold46  | 34526                   | CC                              | TT                 | TT               | INTERGENIC      |               |                    |                    |

| SNPs IDs          | Chromosome IDs | Chromosomes | Physical positions (bp) | CDC Frontier genome (Reference genome) | (Pusa 1103 & HPNB) | (ILWC 46 & LPNB) | Sequence genome | Components of | Gene accession IDs | Putative functions |
|-------------------|----------------|-------------|-------------------------|----------------------------------------|--------------------|------------------|-----------------|---------------|--------------------|--------------------|
| SNP_62873_A_38898 | NW_004515661.1 | scaffold46  | 38898                   | AA                                     | GG                 | GG               | INTERGENIC      |               |                    |                    |
| SNP_62874_A_39470 | NW_004515661.1 | scaffold46  | 39470                   | CC                                     | TT                 | TT               | INTERGENIC      |               |                    |                    |
| SNP_62875_A_39631 | NW_004515661.1 | scaffold46  | 39631                   | AA                                     | GG                 | GG               | INTERGENIC      |               |                    |                    |
| SNP_62876_A_39695 | NW_004515661.1 | scaffold46  | 39695                   | GG                                     | AA                 | AA               | INTERGENIC      |               |                    |                    |
| SNP_62877_A_39855 | NW_004515661.1 | scaffold46  | 39855                   | CC                                     | GG                 | GG               | INTERGENIC      |               |                    |                    |
| SNP_62878_A_40004 | NW_004515661.1 | scaffold46  | 40004                   | TT                                     | CC                 | CC               | INTERGENIC      |               |                    |                    |
| SNP_62879_A_40015 | NW_004515661.1 | scaffold46  | 40015                   | TT                                     | CC                 | CC               | INTERGENIC      |               |                    |                    |
| SNP_62880_A_40089 | NW_004515661.1 | scaffold46  | 40089                   | CC                                     | AA                 | AA               | INTERGENIC      |               |                    |                    |
| SNP_62881_A_40122 | NW_004515661.1 | scaffold46  | 40122                   | GG                                     | CC                 | CC               | INTERGENIC      |               |                    |                    |
| SNP_62882_A_40132 | NW_004515661.1 | scaffold46  | 40132                   | GG                                     | CC                 | CC               | INTERGENIC      |               |                    |                    |
| SNP_62883_A_41715 | NW_004515661.1 | scaffold46  | 41715                   | AA                                     | TT                 | TT               | INTERGENIC      |               |                    |                    |
| SNP_62884_A_7738  | NW_004515662.1 | scaffold48  | 7738                    | AA                                     | TT                 | TT               | INTERGENIC      |               |                    |                    |
| SNP_62885_A_8017  | NW_004515662.1 | scaffold48  | 8017                    | GG                                     | TT                 | TT               | INTERGENIC      |               |                    |                    |
| SNP_62886_A_11789 | NW_004515662.1 | scaffold48  | 11789                   | TT                                     | AA                 | AA               | INTERGENIC      |               |                    |                    |
| SNP_62888_A_11918 | NW_004515662.1 | scaffold48  | 11918                   | GG                                     | AA                 | AA               | INTERGENIC      |               |                    |                    |
| SNP_62890_A_16156 | NW_004515662.1 | scaffold48  | 16156                   | AA                                     | GG                 | GG               | INTERGENIC      |               |                    |                    |
| SNP_62891_A_16194 | NW_004515662.1 | scaffold48  | 16194                   | TT                                     | CC                 | CC               | INTERGENIC      |               |                    |                    |
| SNP_62892_A_56538 | NW_004515662.1 | scaffold48  | 56538                   | TT                                     | CC                 | CC               | INTERGENIC      |               |                    |                    |
| SNP_62893_A_56619 | NW_004515662.1 | scaffold48  | 56619                   | AA                                     | GG                 | GG               | INTERGENIC      |               |                    |                    |
| SNP_62894_A_56664 | NW_004515662.1 | scaffold48  | 56664                   | GG                                     | AA                 | AA               | INTERGENIC      |               |                    |                    |
| SNP_62895_A_56847 | NW_004515662.1 | scaffold48  | 56847                   | TT                                     | GG                 | GG               | INTERGENIC      |               |                    |                    |
| SNP_62897_A_57024 | NW_004515662.1 | scaffold48  | 57024                   | TT                                     | CC                 | CC               | INTERGENIC      |               |                    |                    |

| SNPs IDs           | Chromosome IDs | Chromosomes | Physical positions (bp) | CDC Frontier (Reference genome) | (Pusa 1103 & HPNB) | (ILWC 46 & LPNB) | Sequence genome | Components of | Gene accession IDs | Putative functions |
|--------------------|----------------|-------------|-------------------------|---------------------------------|--------------------|------------------|-----------------|---------------|--------------------|--------------------|
| SNP_62898_A_61332  | NW_004515662.1 | scaffold48  | 61332                   | GG                              | AA                 | AA               | INTERGENIC      |               |                    |                    |
| SNP_62899_A_139714 | NW_004515662.1 | scaffold48  | 139714                  | TT                              | CC                 | CC               | INTERGENIC      |               |                    |                    |
| SNP_62901_A_140895 | NW_004515662.1 | scaffold48  | 140895                  | CC                              | GG                 | GG               | INTERGENIC      |               |                    |                    |
| SNP_62902_A_140913 | NW_004515662.1 | scaffold48  | 140913                  | TT                              | CC                 | CC               | INTERGENIC      |               |                    |                    |
| SNP_62903_A_140917 | NW_004515662.1 | scaffold48  | 140917                  | AA                              | GG                 | GG               | INTERGENIC      |               |                    |                    |
| SNP_62904_A_140926 | NW_004515662.1 | scaffold48  | 140926                  | TT                              | CC                 | CC               | INTERGENIC      |               |                    |                    |
| SNP_62905_A_140939 | NW_004515662.1 | scaffold48  | 140939                  | CC                              | AA                 | AA               | INTERGENIC      |               |                    |                    |
| SNP_62906_A_140943 | NW_004515662.1 | scaffold48  | 140943                  | GG                              | AA                 | AA               | INTERGENIC      |               |                    |                    |
| SNP_62907_A_140946 | NW_004515662.1 | scaffold48  | 140946                  | AA                              | GG                 | GG               | INTERGENIC      |               |                    |                    |
| SNP_62908_A_141081 | NW_004515662.1 | scaffold48  | 141081                  | TT                              | CC                 | CC               | INTERGENIC      |               |                    |                    |
| SNP_62909_A_141133 | NW_004515662.1 | scaffold48  | 141133                  | TT                              | CC                 | CC               | INTERGENIC      |               |                    |                    |
| SNP_62910_A_141134 | NW_004515662.1 | scaffold48  | 141134                  | AA                              | GG                 | GG               | INTERGENIC      |               |                    |                    |
| SNP_62911_A_326292 | NW_004515662.1 | scaffold48  | 326292                  | AA                              | GG                 | GG               | INTERGENIC      |               |                    |                    |
| SNP_62912_A_326309 | NW_004515662.1 | scaffold48  | 326309                  | TT                              | CC                 | CC               | INTERGENIC      |               |                    |                    |
| SNP_62913_A_326364 | NW_004515662.1 | scaffold48  | 326364                  | AA                              | CC                 | CC               | INTERGENIC      |               |                    |                    |
| SNP_62914_A_380464 | NW_004515662.1 | scaffold48  | 380464                  | AA                              | CC                 | CC               | INTERGENIC      |               |                    |                    |
| SNP_62915_A_381398 | NW_004515662.1 | scaffold48  | 381398                  | TT                              | GG                 | GG               | INTERGENIC      |               |                    |                    |
| SNP_62916_A_431955 | NW_004515662.1 | scaffold48  | 431955                  | CC                              | AA                 | AA               | INTERGENIC      |               |                    |                    |
| SNP_62917_A_443167 | NW_004515662.1 | scaffold48  | 443167                  | CC                              | GG                 | GG               | INTERGENIC      |               |                    |                    |
| SNP_62918_A_461601 | NW_004515662.1 | scaffold48  | 461601                  | AA                              | TT                 | TT               | INTERGENIC      |               |                    |                    |
| SNP_62919_A_461602 | NW_004515662.1 | scaffold48  | 461602                  | AA                              | GG                 | GG               | INTERGENIC      |               |                    |                    |
| SNP_62920_A_2557   | NW_004515664.1 | scaffold50  | 2557                    | CC                              | TT                 | TT               | INTERGENIC      |               |                    |                    |

| SNPs IDs          | Chromosome IDs | Chromosomes | Physical positions (bp) | CDC Frontier (Reference genome) | (Pusa 1103 & HPNB) | (ILWC 46 & LPNB) | Sequence genome | Components of | Gene accession IDs | Putative functions |
|-------------------|----------------|-------------|-------------------------|---------------------------------|--------------------|------------------|-----------------|---------------|--------------------|--------------------|
| SNP_62921_A_2559  | NW_004515664.1 | scaffold50  | 2559                    | AA                              | CC                 | CC               | INTERGENIC      |               |                    |                    |
| SNP_62922_A_2584  | NW_004515664.1 | scaffold50  | 2584                    | CC                              | TT                 | TT               | INTERGENIC      |               |                    |                    |
| SNP_62923_A_2644  | NW_004515664.1 | scaffold50  | 2644                    | GG                              | AA                 | AA               | INTERGENIC      |               |                    |                    |
| SNP_62924_A_3463  | NW_004515664.1 | scaffold50  | 3463                    | CC                              | AA                 | AA               | INTERGENIC      |               |                    |                    |
| SNP_62925_A_3464  | NW_004515664.1 | scaffold50  | 3464                    | CC                              | TT                 | TT               | INTERGENIC      |               |                    |                    |
| SNP_62926_A_3533  | NW_004515664.1 | scaffold50  | 3533                    | CC                              | TT                 | TT               | INTERGENIC      |               |                    |                    |
| SNP_62927_A_5734  | NW_004515664.1 | scaffold50  | 5734                    | CC                              | AA                 | AA               | INTERGENIC      |               |                    |                    |
| SNP_62928_A_5827  | NW_004515664.1 | scaffold50  | 5827                    | CC                              | TT                 | TT               | INTERGENIC      |               |                    |                    |
| SNP_62929_A_5916  | NW_004515664.1 | scaffold50  | 5916                    | CC                              | TT                 | TT               | INTERGENIC      |               |                    |                    |
| SNP_62930_A_5980  | NW_004515664.1 | scaffold50  | 5980                    | AA                              | GG                 | GG               | INTERGENIC      |               |                    |                    |
| SNP_62931_A_6106  | NW_004515664.1 | scaffold50  | 6106                    | CC                              | TT                 | TT               | INTERGENIC      |               |                    |                    |
| SNP_62932_A_6282  | NW_004515664.1 | scaffold50  | 6282                    | AA                              | GG                 | GG               | INTERGENIC      |               |                    |                    |
| SNP_62933_A_6395  | NW_004515664.1 | scaffold50  | 6395                    | TT                              | CC                 | CC               | INTERGENIC      |               |                    |                    |
| SNP_62934_A_6406  | NW_004515664.1 | scaffold50  | 6406                    | GG                              | AA                 | AA               | INTERGENIC      |               |                    |                    |
| SNP_62936_A_7021  | NW_004515664.1 | scaffold50  | 7021                    | AA                              | CC                 | CC               | INTERGENIC      |               |                    |                    |
| SNP_62937_A_10770 | NW_004515664.1 | scaffold50  | 10770                   | GG                              | AA                 | AA               | INTERGENIC      |               |                    |                    |
| SNP_62938_A_10776 | NW_004515664.1 | scaffold50  | 10776                   | GG                              | AA                 | AA               | INTERGENIC      |               |                    |                    |
| SNP_62939_A_12096 | NW_004515664.1 | scaffold50  | 12096                   | AA                              | TT                 | TT               | INTERGENIC      |               |                    |                    |
| SNP_62940_A_12168 | NW_004515664.1 | scaffold50  | 12168                   | AA                              | GG                 | GG               | INTERGENIC      |               |                    |                    |
| SNP_62941_A_12222 | NW_004515664.1 | scaffold50  | 12222                   | GG                              | CC                 | CC               | INTERGENIC      |               |                    |                    |
| SNP_62942_A_12288 | NW_004515664.1 | scaffold50  | 12288                   | CC                              | AA                 | AA               | INTERGENIC      |               |                    |                    |
| SNP_62943_A_12298 | NW_004515664.1 | scaffold50  | 12298                   | TT                              | AA                 | AA               | INTERGENIC      |               |                    |                    |

| SNPs IDs           | Chromosome IDs | Chromosomes | Physical positions (bp) | CDC Frontier (Reference genome) | (Pusa 1103 & HPNB) | (ILWC 46 & LPNB) | Sequence Components of genome | Gene accession IDs | Putative functions                                              |
|--------------------|----------------|-------------|-------------------------|---------------------------------|--------------------|------------------|-------------------------------|--------------------|-----------------------------------------------------------------|
| SNP_62944_A_12319  | NW_004515664.1 | scaffold50  | 12319                   | GG                              | AA                 | AA               | INTERGENIC                    |                    |                                                                 |
| SNP_62945_A_14322  | NW_004515664.1 | scaffold50  | 14322                   | AA                              | GG                 | GG               | INTERGENIC                    |                    |                                                                 |
| SNP_62946_A_14540  | NW_004515664.1 | scaffold50  | 14540                   | AA                              | GG                 | GG               | INTERGENIC                    |                    |                                                                 |
| SNP_62947_A_29631  | NW_004515664.1 | scaffold50  | 29631                   | CC                              | TT                 | TT               | INTERGENIC                    |                    |                                                                 |
| SNP_62948_A_46536  | NW_004515664.1 | scaffold50  | 46536                   | AA                              | GG                 | GG               | INTERGENIC                    |                    |                                                                 |
| SNP_62949_A_46562  | NW_004515664.1 | scaffold50  | 46562                   | TT                              | AA                 | AA               | INTERGENIC                    |                    |                                                                 |
| SNP_62950_A_46860  | NW_004515664.1 | scaffold50  | 46860                   | TT                              | CC                 | CC               | INTERGENIC                    |                    |                                                                 |
| SNP_62951_A_46875  | NW_004515664.1 | scaffold50  | 46875                   | AA                              | GG                 | GG               | INTERGENIC                    |                    |                                                                 |
| SNP_62952_A_46885  | NW_004515664.1 | scaffold50  | 46885                   | CC                              | AA                 | AA               | INTERGENIC                    |                    |                                                                 |
| SNP_62953_A_46901  | NW_004515664.1 | scaffold50  | 46901                   | TT                              | CC                 | CC               | INTERGENIC                    |                    |                                                                 |
| SNP_62954_A_64878  | NW_004515664.1 | scaffold50  | 64878                   | CC                              | TT                 | TT               | INTERGENIC                    |                    |                                                                 |
| SNP_62955_A_76564  | NW_004515664.1 | scaffold50  | 76564                   | GG                              | TT                 | TT               | DRR                           | 101495518          | probable serine/threonine-protein kinase At5g41260              |
| SNP_62956_A_84502  | NW_004515664.1 | scaffold50  | 84502                   | TT                              | CC                 | CC               | URR                           | 101495518          | probable serine/threonine-protein kinase At5g41260              |
| SNP_62958_A_99837  | NW_004515664.1 | scaffold50  | 99837                   | AA                              | GG                 | GG               | URR                           | 101495845          | phosphatidylinositol:ceramide inositolphosphotransferase 1-like |
| SNP_62959_A_100574 | NW_004515664.1 | scaffold50  | 100574                  | AA                              | GG                 | GG               | INTERGENIC                    |                    |                                                                 |
| SNP_62960_A_106412 | NW_004515664.1 | scaffold50  | 106412                  | CC                              | TT                 | TT               | INTERGENIC                    |                    |                                                                 |
| SNP_62961_A_106482 | NW_004515664.1 | scaffold50  | 106482                  | CC                              | AA                 | AA               | INTERGENIC                    |                    |                                                                 |
| SNP_62962_A_134433 | NW_004515664.1 | scaffold50  | 134433                  | AA                              | GG                 | GG               | INTERGENIC                    |                    |                                                                 |
| SNP_62963_A_135903 | NW_004515664.1 | scaffold50  | 135903                  | TT                              | GG                 | GG               | INTERGENIC                    |                    |                                                                 |
| SNP_62964_A_135907 | NW_004515664.1 | scaffold50  | 135907                  | TT                              | GG                 | GG               | INTERGENIC                    |                    |                                                                 |
| SNP_62965_A_139110 | NW_004515664.1 | scaffold50  | 139110                  | TT                              | CC                 | CC               | INTERGENIC                    |                    |                                                                 |
| SNP_62966_A_191709 | NW_004515664.1 | scaffold50  | 191709                  | AA                              | CC                 | CC               | INTERGENIC                    |                    |                                                                 |



| SNPs IDs           | Chromosome IDs | Chromosomes | Physical positions (bp) | CDC Frontier (Reference genome) | (Pusa 1103 & HPNB) | (ILWC 46 & LPNB) | Sequence Components of genome | Gene accession IDs | Putative functions                  |
|--------------------|----------------|-------------|-------------------------|---------------------------------|--------------------|------------------|-------------------------------|--------------------|-------------------------------------|
| SNP_62969_A_193159 | NW_004515664.1 | scaffold50  | 193159                  | GG                              | AA                 | AA               | DRR                           | 101500078          | zinc finger MYM-type protein 1-like |
| SNP_62970_A_193609 | NW_004515664.1 | scaffold50  | 193609                  | TT                              | CC                 | CC               | SYNONYMOUS_CODING             | 101500078          | zinc finger MYM-type protein 1-like |
| SNP_62971_A_196010 | NW_004515664.1 | scaffold50  | 196010                  | CC                              | AA                 | AA               | URR                           | 101500078          | zinc finger MYM-type protein 1-like |
| SNP_62972_A_196015 | NW_004515664.1 | scaffold50  | 196015                  | CC                              | AA                 | AA               | URR                           | 101500078          | zinc finger MYM-type protein 1-like |
| SNP_62973_A_196016 | NW_004515664.1 | scaffold50  | 196016                  | CC                              | TT                 | TT               | URR                           | 101500078          | zinc finger MYM-type protein 1-like |
| SNP_62974_A_196017 | NW_004515664.1 | scaffold50  | 196017                  | CC                              | GG                 | GG               | URR                           | 101500078          | zinc finger MYM-type protein 1-like |
| SNP_62975_A_196024 | NW_004515664.1 | scaffold50  | 196024                  | TT                              | CC                 | CC               | URR                           | 101500078          | zinc finger MYM-type protein 1-like |
| SNP_62976_A_196026 | NW_004515664.1 | scaffold50  | 196026                  | TT                              | AA                 | AA               | URR                           | 101500078          | zinc finger MYM-type protein 1-like |
| SNP_62977_A_196032 | NW_004515664.1 | scaffold50  | 196032                  | TT                              | AA                 | AA               | URR                           | 101500078          | zinc finger MYM-type protein 1-like |
| SNP_62978_A_196033 | NW_004515664.1 | scaffold50  | 196033                  | TT                              | AA                 | AA               | URR                           | 101500078          | zinc finger MYM-type protein 1-like |
| SNP_62979_A_196127 | NW_004515664.1 | scaffold50  | 196127                  | GG                              | TT                 | TT               | URR                           | 101500078          | zinc finger MYM-type protein 1-like |
| SNP_62980_A_196162 | NW_004515664.1 | scaffold50  | 196162                  | AA                              | GG                 | GG               | URR                           | 101500078          | zinc finger MYM-type protein 1-like |
| SNP_62981_A_201610 | NW_004515664.1 | scaffold50  | 201610                  | AA                              | CC                 | CC               | INTERGENIC                    |                    |                                     |
| SNP_62982_A_201660 | NW_004515664.1 | scaffold50  | 201660                  | AA                              | CC                 | CC               | INTERGENIC                    |                    |                                     |
| SNP_62983_A_201675 | NW_004515664.1 | scaffold50  | 201675                  | AA                              | GG                 | GG               | INTERGENIC                    |                    |                                     |
| SNP_62984_A_201730 | NW_004515664.1 | scaffold50  | 201730                  | AA                              | GG                 | GG               | INTERGENIC                    |                    |                                     |
| SNP_62985_A_201754 | NW_004515664.1 | scaffold50  | 201754                  | AA                              | GG                 | GG               | INTERGENIC                    |                    |                                     |
| SNP_62986_A_202129 | NW_004515664.1 | scaffold50  | 202129                  | CC                              | GG                 | GG               | INTERGENIC                    |                    |                                     |
| SNP_62987_A_202172 | NW_004515664.1 | scaffold50  | 202172                  | TT                              | CC                 | CC               | INTERGENIC                    |                    |                                     |
| SNP_62988_A_202233 | NW_004515664.1 | scaffold50  | 202233                  | GG                              | CC                 | CC               | INTERGENIC                    |                    |                                     |
| SNP_62989_A_202286 | NW_004515664.1 | scaffold50  | 202286                  | AA                              | GG                 | GG               | INTERGENIC                    |                    |                                     |
| SNP_62990_A_242569 | NW_004515664.1 | scaffold50  | 242569                  | TT                              | CC                 | CC               | INTERGENIC                    |                    |                                     |

| SNPs IDs           | Chromosome IDs | Chromosomes | Physical positions (bp) | CDC Frontier genome (Reference genome) | (Pusa 1103 & HPNB) | (ILWC 46 & LPNB) | Sequence Components of genome | Gene accession IDs | Putative functions               |
|--------------------|----------------|-------------|-------------------------|----------------------------------------|--------------------|------------------|-------------------------------|--------------------|----------------------------------|
| SNP_62991_A_300664 | NW_004515664.1 | scaffold50  | 300664                  | TT                                     | GG                 | GG               | INTERGENIC                    |                    |                                  |
| SNP_62992_A_307881 | NW_004515664.1 | scaffold50  | 307881                  | CC                                     | TT                 | TT               | INTERGENIC                    |                    |                                  |
| SNP_62993_A_318887 | NW_004515664.1 | scaffold50  | 318887                  | CC                                     | GG                 | GG               | INTERGENIC                    |                    |                                  |
| SNP_62994_A_336582 | NW_004515664.1 | scaffold50  | 336582                  | TT                                     | AA                 | AA               | INTERGENIC                    |                    |                                  |
| SNP_62995_A_345215 | NW_004515664.1 | scaffold50  | 345215                  | AA                                     | GG                 | GG               | URR                           | 101497924          | putative bark agglutinin LECRPA3 |
| SNP_62996_A_376505 | NW_004515664.1 | scaffold50  | 376505                  | CC                                     | TT                 | TT               | INTRON                        | 101498577          | Unknown function                 |
| SNP_62997_A_401566 | NW_004515664.1 | scaffold50  | 401566                  | AA                                     | GG                 | GG               | INTERGENIC                    |                    |                                  |
| SNP_62998_A_414551 | NW_004515664.1 | scaffold50  | 414551                  | TT                                     | CC                 | CC               | INTERGENIC                    |                    |                                  |
| SNP_62999_A_414555 | NW_004515664.1 | scaffold50  | 414555                  | GG                                     | AA                 | AA               | INTERGENIC                    |                    |                                  |
| SNP_63000_A_423452 | NW_004515664.1 | scaffold50  | 423452                  | CC                                     | TT                 | TT               | INTERGENIC                    |                    |                                  |
| SNP_63001_A_423492 | NW_004515664.1 | scaffold50  | 423492                  | AA                                     | GG                 | GG               | INTERGENIC                    |                    |                                  |
| SNP_63002_A_423511 | NW_004515664.1 | scaffold50  | 423511                  | AA                                     | GG                 | GG               | INTERGENIC                    |                    |                                  |
| SNP_63003_A_436981 | NW_004515664.1 | scaffold50  | 436981                  | GG                                     | AA                 | AA               | INTERGENIC                    |                    |                                  |
| SNP_63004_A_437005 | NW_004515664.1 | scaffold50  | 437005                  | AA                                     | TT                 | GG               | INTERGENIC                    |                    |                                  |
| SNP_63005_A_437124 | NW_004515664.1 | scaffold50  | 437124                  | TT                                     | CC                 | CC               | INTERGENIC                    |                    |                                  |
| SNP_63006_A_437131 | NW_004515664.1 | scaffold50  | 437131                  | AA                                     | GG                 | GG               | INTERGENIC                    |                    |                                  |
| SNP_63007_A_437352 | NW_004515664.1 | scaffold50  | 437352                  | TT                                     | CC                 | CC               | INTERGENIC                    |                    |                                  |
| SNP_63008_A_437410 | NW_004515664.1 | scaffold50  | 437410                  | CC                                     | TT                 | TT               | INTERGENIC                    |                    |                                  |
| SNP_63009_A_437471 | NW_004515664.1 | scaffold50  | 437471                  | CC                                     | TT                 | TT               | INTERGENIC                    |                    |                                  |
| SNP_63010_A_452219 | NW_004515664.1 | scaffold50  | 452219                  | TT                                     | AA                 | AA               | URR                           | 101499135          | uncharacterized LOC101499135     |
| SNP_63011_A_452231 | NW_004515664.1 | scaffold50  | 452231                  | AA                                     | CC                 | CC               | URR                           | 101499135          | uncharacterized LOC101499135     |
| SNP_63012_A_454413 | NW_004515664.1 | scaffold50  | 454413                  | GG                                     | CC                 | CC               | INTERGENIC                    |                    |                                  |

| SNPs IDs           | Chromosome IDs | Chromosomes | Physical positions (bp) | CDC Frontier (Reference genome) | (Pusa 1103 & HPNB) | (ILWC 46 & LPNB) | Sequence genome | Components of | Gene accession IDs | Putative functions |
|--------------------|----------------|-------------|-------------------------|---------------------------------|--------------------|------------------|-----------------|---------------|--------------------|--------------------|
| SNP_63013_A_464038 | NW_004515664.1 | scaffold50  | 464038                  | GG                              | AA                 | AA               | INTERGENIC      |               |                    |                    |
| SNP_63014_A_562    | NW_004515665.1 | scaffold53  | 562                     | TT                              | CC                 | CC               | INTERGENIC      |               |                    |                    |
| SNP_63015_A_576    | NW_004515665.1 | scaffold53  | 576                     | TT                              | CC                 | CC               | INTERGENIC      |               |                    |                    |
| SNP_63017_A_2211   | NW_004515665.1 | scaffold53  | 2211                    | TT                              | AA                 | AA               | INTERGENIC      |               |                    |                    |
| SNP_63018_A_2225   | NW_004515665.1 | scaffold53  | 2225                    | TT                              | CC                 | CC               | INTERGENIC      |               |                    |                    |
| SNP_63019_A_2295   | NW_004515665.1 | scaffold53  | 2295                    | TT                              | CC                 | CC               | INTERGENIC      |               |                    |                    |
| SNP_63020_A_27368  | NW_004515665.1 | scaffold53  | 27368                   | TT                              | AA                 | AA               | INTERGENIC      |               |                    |                    |
| SNP_63021_A_104118 | NW_004515665.1 | scaffold53  | 104118                  | CC                              | AA                 | AA               | INTERGENIC      |               |                    |                    |
| SNP_63022_A_124864 | NW_004515665.1 | scaffold53  | 124864                  | TT                              | AA                 | AA               | INTERGENIC      |               |                    |                    |
| SNP_63023_A_124905 | NW_004515665.1 | scaffold53  | 124905                  | CC                              | AA                 | AA               | INTERGENIC      |               |                    |                    |
| SNP_63024_A_125295 | NW_004515665.1 | scaffold53  | 125295                  | AA                              | GG                 | GG               | INTERGENIC      |               |                    |                    |
| SNP_63025_A_126868 | NW_004515665.1 | scaffold53  | 126868                  | GG                              | AA                 | AA               | INTERGENIC      |               |                    |                    |
| SNP_63026_A_126875 | NW_004515665.1 | scaffold53  | 126875                  | AA                              | TT                 | TT               | INTERGENIC      |               |                    |                    |
| SNP_63027_A_126946 | NW_004515665.1 | scaffold53  | 126946                  | AA                              | GG                 | GG               | INTERGENIC      |               |                    |                    |
| SNP_63028_A_127485 | NW_004515665.1 | scaffold53  | 127485                  | CC                              | TT                 | TT               | INTERGENIC      |               |                    |                    |
| SNP_63029_A_132274 | NW_004515665.1 | scaffold53  | 132274                  | CC                              | AA                 | AA               | INTERGENIC      |               |                    |                    |
| SNP_63030_A_132317 | NW_004515665.1 | scaffold53  | 132317                  | AA                              | GG                 | GG               | INTERGENIC      |               |                    |                    |
| SNP_63031_A_132900 | NW_004515665.1 | scaffold53  | 132900                  | TT                              | CC                 | CC               | INTERGENIC      |               |                    |                    |
| SNP_63032_A_134418 | NW_004515665.1 | scaffold53  | 134418                  | CC                              | TT                 | TT               | INTERGENIC      |               |                    |                    |
| SNP_63033_A_135032 | NW_004515665.1 | scaffold53  | 135032                  | AA                              | GG                 | GG               | INTERGENIC      |               |                    |                    |
| SNP_63034_A_135738 | NW_004515665.1 | scaffold53  | 135738                  | AA                              | TT                 | TT               | INTERGENIC      |               |                    |                    |
| SNP_63036_A_137570 | NW_004515665.1 | scaffold53  | 137570                  | TT                              | AA                 | AA               | INTERGENIC      |               |                    |                    |

| SNPs IDs           | Chromosome IDs | Chromosomes | Physical positions (bp) | CDC Frontier (Reference genome) | (Pusa 1103 & HPNB) | (ILWC 46 & LPNB) | Sequence genome | Components of | Gene accession IDs | Putative functions |
|--------------------|----------------|-------------|-------------------------|---------------------------------|--------------------|------------------|-----------------|---------------|--------------------|--------------------|
| SNP_63037_A_140201 | NW_004515665.1 | scaffold53  | 140201                  | CC                              | GG                 | GG               | INTERGENIC      |               |                    |                    |
| SNP_63038_A_140205 | NW_004515665.1 | scaffold53  | 140205                  | AA                              | CC                 | CC               | INTERGENIC      |               |                    |                    |
| SNP_63039_A_1012   | NW_004515667.1 | scaffold56  | 1012                    | TT                              | GG                 | GG               | INTERGENIC      |               |                    |                    |
| SNP_63040_A_2110   | NW_004515667.1 | scaffold56  | 2110                    | CC                              | TT                 | TT               | INTERGENIC      |               |                    |                    |
| SNP_63041_A_2230   | NW_004515667.1 | scaffold56  | 2230                    | TT                              | AA                 | AA               | INTERGENIC      |               |                    |                    |
| SNP_63042_A_2300   | NW_004515667.1 | scaffold56  | 2300                    | CC                              | TT                 | TT               | INTERGENIC      |               |                    |                    |
| SNP_63043_A_2538   | NW_004515667.1 | scaffold56  | 2538                    | AA                              | GG                 | GG               | INTERGENIC      |               |                    |                    |
| SNP_63044_A_2561   | NW_004515667.1 | scaffold56  | 2561                    | TT                              | CC                 | CC               | INTERGENIC      |               |                    |                    |
| SNP_63045_A_3074   | NW_004515667.1 | scaffold56  | 3074                    | AA                              | TT                 | TT               | INTERGENIC      |               |                    |                    |
| SNP_63046_A_3120   | NW_004515667.1 | scaffold56  | 3120                    | GG                              | CC                 | CC               | INTERGENIC      |               |                    |                    |
| SNP_63047_A_3396   | NW_004515667.1 | scaffold56  | 3396                    | TT                              | GG                 | GG               | INTERGENIC      |               |                    |                    |
| SNP_63048_A_3434   | NW_004515667.1 | scaffold56  | 3434                    | GG                              | AA                 | AA               | INTERGENIC      |               |                    |                    |
| SNP_63049_A_17932  | NW_004515668.1 | scaffold62  | 17932                   | TT                              | GG                 | GG               | INTERGENIC      |               |                    |                    |
| SNP_63050_A_18238  | NW_004515668.1 | scaffold62  | 18238                   | GG                              | TT                 | TT               | INTERGENIC      |               |                    |                    |
| SNP_63051_A_18245  | NW_004515668.1 | scaffold62  | 18245                   | GG                              | AA                 | AA               | INTERGENIC      |               |                    |                    |
| SNP_63052_A_18261  | NW_004515668.1 | scaffold62  | 18261                   | TT                              | GG                 | GG               | INTERGENIC      |               |                    |                    |
| SNP_63053_A_20338  | NW_004515668.1 | scaffold62  | 20338                   | TT                              | AA                 | AA               | INTERGENIC      |               |                    |                    |
| SNP_63054_A_20370  | NW_004515668.1 | scaffold62  | 20370                   | AA                              | CC                 | CC               | INTERGENIC      |               |                    |                    |
| SNP_63055_A_20375  | NW_004515668.1 | scaffold62  | 20375                   | AA                              | CC                 | CC               | INTERGENIC      |               |                    |                    |
| SNP_63056_A_20587  | NW_004515668.1 | scaffold62  | 20587                   | CC                              | TT                 | TT               | INTERGENIC      |               |                    |                    |
| SNP_63057_A_20626  | NW_004515668.1 | scaffold62  | 20626                   | TT                              | GG                 | GG               | INTERGENIC      |               |                    |                    |
| SNP_63058_A_20729  | NW_004515668.1 | scaffold62  | 20729                   | AA                              | GG                 | GG               | INTERGENIC      |               |                    |                    |

| SNPs IDs           | Chromosome IDs | Chromosomes | Physical positions (bp) | CDC Frontier (Reference genome) | (Pusa 1103 & HPNB) | (ILWC 46 & LPNB) | Sequence genome | Components of | Gene accession IDs | Putative functions |
|--------------------|----------------|-------------|-------------------------|---------------------------------|--------------------|------------------|-----------------|---------------|--------------------|--------------------|
| SNP_63059_A_20776  | NW_004515668.1 | scaffold62  | 20776                   | AA                              | GG                 | GG               | INTERGENIC      |               |                    |                    |
| SNP_63060_A_20837  | NW_004515668.1 | scaffold62  | 20837                   | CC                              | AA                 | AA               | INTERGENIC      |               |                    |                    |
| SNP_63061_A_45573  | NW_004515668.1 | scaffold62  | 45573                   | CC                              | TT                 | TT               | INTERGENIC      |               |                    |                    |
| SNP_63062_A_45591  | NW_004515668.1 | scaffold62  | 45591                   | AA                              | GG                 | GG               | INTERGENIC      |               |                    |                    |
| SNP_63063_A_45600  | NW_004515668.1 | scaffold62  | 45600                   | GG                              | TT                 | TT               | INTERGENIC      |               |                    |                    |
| SNP_63064_A_45631  | NW_004515668.1 | scaffold62  | 45631                   | CC                              | TT                 | TT               | INTERGENIC      |               |                    |                    |
| SNP_63065_A_45674  | NW_004515668.1 | scaffold62  | 45674                   | CC                              | TT                 | TT               | INTERGENIC      |               |                    |                    |
| SNP_63066_A_54414  | NW_004515668.1 | scaffold62  | 54414                   | GG                              | AA                 | AA               | INTERGENIC      |               |                    |                    |
| SNP_63067_A_54421  | NW_004515668.1 | scaffold62  | 54421                   | GG                              | CC                 | CC               | INTERGENIC      |               |                    |                    |
| SNP_63068_A_54429  | NW_004515668.1 | scaffold62  | 54429                   | CC                              | GG                 | GG               | INTERGENIC      |               |                    |                    |
| SNP_63069_A_75374  | NW_004515668.1 | scaffold62  | 75374                   | TT                              | CC                 | CC               | INTERGENIC      |               |                    |                    |
| SNP_63070_A_81916  | NW_004515668.1 | scaffold62  | 81916                   | AA                              | GG                 | GG               | INTERGENIC      |               |                    |                    |
| SNP_63071_A_81929  | NW_004515668.1 | scaffold62  | 81929                   | TT                              | AA                 | AA               | INTERGENIC      |               |                    |                    |
| SNP_63072_A_81935  | NW_004515668.1 | scaffold62  | 81935                   | AA                              | CC                 | CC               | INTERGENIC      |               |                    |                    |
| SNP_63073_A_95108  | NW_004515668.1 | scaffold62  | 95108                   | TT                              | GG                 | GG               | INTERGENIC      |               |                    |                    |
| SNP_63074_A_101278 | NW_004515668.1 | scaffold62  | 101278                  | TT                              | CC                 | CC               | INTERGENIC      |               |                    |                    |
| SNP_63075_A_114770 | NW_004515668.1 | scaffold62  | 114770                  | TT                              | CC                 | CC               | INTERGENIC      |               |                    |                    |
| SNP_63076_A_114915 | NW_004515668.1 | scaffold62  | 114915                  | GG                              | AA                 | AA               | INTERGENIC      |               |                    |                    |
| SNP_63077_A_116562 | NW_004515668.1 | scaffold62  | 116562                  | GG                              | AA                 | AA               | INTERGENIC      |               |                    |                    |
| SNP_63078_A_122461 | NW_004515668.1 | scaffold62  | 122461                  | TT                              | AA                 | AA               | INTERGENIC      |               |                    |                    |
| SNP_63079_A_122694 | NW_004515668.1 | scaffold62  | 122694                  | GG                              | AA                 | AA               | INTERGENIC      |               |                    |                    |
| SNP_63080_A_132265 | NW_004515668.1 | scaffold62  | 132265                  | GG                              | TT                 | TT               | INTERGENIC      |               |                    |                    |

| SNPs IDs           | Chromosome IDs | Chromosomes | Physical positions (bp) | CDC Frontier (Reference genome) | (Pusa 1103 & HPNB) | (ILWC 46 & LPNB) | Sequence genome | Components of | Gene accession IDs | Putative functions |
|--------------------|----------------|-------------|-------------------------|---------------------------------|--------------------|------------------|-----------------|---------------|--------------------|--------------------|
| SNP_63081_A_140834 | NW_004515668.1 | scaffold62  | 140834                  | TT                              | GG                 | GG               | INTERGENIC      |               |                    |                    |
| SNP_63082_A_141246 | NW_004515668.1 | scaffold62  | 141246                  | AA                              | GG                 | GG               | INTERGENIC      |               |                    |                    |
| SNP_63083_A_141305 | NW_004515668.1 | scaffold62  | 141305                  | AA                              | GG                 | GG               | INTERGENIC      |               |                    |                    |
| SNP_63084_A_148990 | NW_004515668.1 | scaffold62  | 148990                  | TT                              | CC                 | CC               | INTERGENIC      |               |                    |                    |
| SNP_63085_A_149852 | NW_004515668.1 | scaffold62  | 149852                  | AA                              | GG                 | GG               | INTERGENIC      |               |                    |                    |
| SNP_63086_A_150064 | NW_004515668.1 | scaffold62  | 150064                  | CC                              | TT                 | TT               | INTERGENIC      |               |                    |                    |
| SNP_63089_A_150840 | NW_004515668.1 | scaffold62  | 150840                  | AA                              | GG                 | GG               | INTERGENIC      |               |                    |                    |
| SNP_63090_A_150983 | NW_004515668.1 | scaffold62  | 150983                  | AA                              | TT                 | TT               | INTERGENIC      |               |                    |                    |
| SNP_63091_A_150990 | NW_004515668.1 | scaffold62  | 150990                  | AA                              | GG                 | GG               | INTERGENIC      |               |                    |                    |
| SNP_63092_A_152299 | NW_004515668.1 | scaffold62  | 152299                  | CC                              | TT                 | TT               | INTERGENIC      |               |                    |                    |
| SNP_63093_A_154059 | NW_004515668.1 | scaffold62  | 154059                  | GG                              | TT                 | TT               | INTERGENIC      |               |                    |                    |
| SNP_63094_A_154543 | NW_004515668.1 | scaffold62  | 154543                  | TT                              | CC                 | CC               | INTERGENIC      |               |                    |                    |
| SNP_63095_A_161661 | NW_004515668.1 | scaffold62  | 161661                  | AA                              | CC                 | CC               | INTERGENIC      |               |                    |                    |
| SNP_63096_A_161664 | NW_004515668.1 | scaffold62  | 161664                  | GG                              | CC                 | CC               | INTERGENIC      |               |                    |                    |
| SNP_63097_A_161714 | NW_004515668.1 | scaffold62  | 161714                  | AA                              | GG                 | GG               | INTERGENIC      |               |                    |                    |
| SNP_63099_A_162556 | NW_004515668.1 | scaffold62  | 162556                  | AA                              | GG                 | GG               | INTERGENIC      |               |                    |                    |
| SNP_63100_A_175567 | NW_004515668.1 | scaffold62  | 175567                  | GG                              | AA                 | AA               | INTERGENIC      |               |                    |                    |
| SNP_63101_A_176003 | NW_004515668.1 | scaffold62  | 176003                  | AA                              | GG                 | GG               | INTERGENIC      |               |                    |                    |
| SNP_63102_A_176016 | NW_004515668.1 | scaffold62  | 176016                  | GG                              | AA                 | AA               | INTERGENIC      |               |                    |                    |
| SNP_63103_A_176207 | NW_004515668.1 | scaffold62  | 176207                  | AA                              | GG                 | GG               | INTERGENIC      |               |                    |                    |
| SNP_63104_A_186805 | NW_004515668.1 | scaffold62  | 186805                  | CC                              | TT                 | TT               | INTERGENIC      |               |                    |                    |
| SNP_63105_A_205148 | NW_004515668.1 | scaffold62  | 205148                  | TT                              | CC                 | CC               | INTERGENIC      |               |                    |                    |

| SNPs IDs           | Chromosome IDs | Chromosomes | Physical positions (bp) | CDC Frontier (Reference genome) | (Pusa 1103 & HPNB) | (ILWC 46 & LPNB) | Sequence genome | Components of | Gene accession IDs | Putative functions |
|--------------------|----------------|-------------|-------------------------|---------------------------------|--------------------|------------------|-----------------|---------------|--------------------|--------------------|
| SNP_63106_A_205151 | NW_004515668.1 | scaffold62  | 205151                  | TT                              | CC                 | CC               | INTERGENIC      |               |                    |                    |
| SNP_63107_A_205590 | NW_004515668.1 | scaffold62  | 205590                  | TT                              | CC                 | CC               | INTERGENIC      |               |                    |                    |
| SNP_63108_A_207629 | NW_004515668.1 | scaffold62  | 207629                  | TT                              | CC                 | CC               | INTERGENIC      |               |                    |                    |
| SNP_63109_A_208846 | NW_004515668.1 | scaffold62  | 208846                  | AA                              | GG                 | GG               | INTERGENIC      |               |                    |                    |
| SNP_63110_A_208908 | NW_004515668.1 | scaffold62  | 208908                  | TT                              | CC                 | CC               | INTERGENIC      |               |                    |                    |
| SNP_63111_A_209127 | NW_004515668.1 | scaffold62  | 209127                  | AA                              | CC                 | CC               | INTERGENIC      |               |                    |                    |
| SNP_63112_A_209241 | NW_004515668.1 | scaffold62  | 209241                  | TT                              | AA                 | AA               | INTERGENIC      |               |                    |                    |
| SNP_63113_A_209260 | NW_004515668.1 | scaffold62  | 209260                  | TT                              | AA                 | AA               | INTERGENIC      |               |                    |                    |
| SNP_63114_A_209284 | NW_004515668.1 | scaffold62  | 209284                  | TT                              | GG                 | GG               | INTERGENIC      |               |                    |                    |
| SNP_63115_A_212568 | NW_004515668.1 | scaffold62  | 212568                  | AA                              | TT                 | TT               | INTERGENIC      |               |                    |                    |
| SNP_63116_A_212869 | NW_004515668.1 | scaffold62  | 212869                  | GG                              | AA                 | AA               | INTERGENIC      |               |                    |                    |
| SNP_63117_A_228289 | NW_004515668.1 | scaffold62  | 228289                  | TT                              | CC                 | CC               | INTERGENIC      |               |                    |                    |
| SNP_63118_A_228326 | NW_004515668.1 | scaffold62  | 228326                  | AA                              | GG                 | GG               | INTERGENIC      |               |                    |                    |
| SNP_63119_A_228331 | NW_004515668.1 | scaffold62  | 228331                  | CC                              | TT                 | TT               | INTERGENIC      |               |                    |                    |
| SNP_63120_A_228410 | NW_004515668.1 | scaffold62  | 228410                  | AA                              | GG                 | GG               | INTERGENIC      |               |                    |                    |
| SNP_63121_A_228516 | NW_004515668.1 | scaffold62  | 228516                  | GG                              | TT                 | TT               | INTERGENIC      |               |                    |                    |
| SNP_63122_A_228692 | NW_004515668.1 | scaffold62  | 228692                  | CC                              | TT                 | TT               | INTERGENIC      |               |                    |                    |
| SNP_63123_A_228693 | NW_004515668.1 | scaffold62  | 228693                  | AA                              | GG                 | GG               | INTERGENIC      |               |                    |                    |
| SNP_63124_A_229677 | NW_004515668.1 | scaffold62  | 229677                  | CC                              | TT                 | TT               | INTERGENIC      |               |                    |                    |
| SNP_63125_A_229678 | NW_004515668.1 | scaffold62  | 229678                  | CC                              | GG                 | GG               | INTERGENIC      |               |                    |                    |
| SNP_63126_A_230105 | NW_004515668.1 | scaffold62  | 230105                  | GG                              | AA                 | AA               | INTERGENIC      |               |                    |                    |
| SNP_63127_A_230121 | NW_004515668.1 | scaffold62  | 230121                  | AA                              | GG                 | GG               | INTERGENIC      |               |                    |                    |

| SNPs IDs           | Chromosome IDs | Chromosomes | Physical positions (bp) | CDC Frontier (Reference genome) | (Pusa 1103 & HPNB) | (ILWC 46 & LPNB) | Sequence genome | Components of | Gene accession IDs | Putative functions |
|--------------------|----------------|-------------|-------------------------|---------------------------------|--------------------|------------------|-----------------|---------------|--------------------|--------------------|
| SNP_63128_A_230128 | NW_004515668.1 | scaffold62  | 230128                  | TT                              | CC                 | CC               | INTERGENIC      |               |                    |                    |
| SNP_63129_A_230151 | NW_004515668.1 | scaffold62  | 230151                  | AA                              | GG                 | GG               | INTERGENIC      |               |                    |                    |
| SNP_63130_A_230219 | NW_004515668.1 | scaffold62  | 230219                  | AA                              | GG                 | GG               | INTERGENIC      |               |                    |                    |
| SNP_63131_A_230329 | NW_004515668.1 | scaffold62  | 230329                  | GG                              | CC                 | CC               | INTERGENIC      |               |                    |                    |
| SNP_63132_A_230648 | NW_004515668.1 | scaffold62  | 230648                  | CC                              | GG                 | GG               | INTERGENIC      |               |                    |                    |
| SNP_63133_A_240746 | NW_004515668.1 | scaffold62  | 240746                  | AA                              | CC                 | CC               | INTERGENIC      |               |                    |                    |
| SNP_63134_A_240838 | NW_004515668.1 | scaffold62  | 240838                  | GG                              | AA                 | AA               | INTERGENIC      |               |                    |                    |
| SNP_63135_A_241112 | NW_004515668.1 | scaffold62  | 241112                  | AA                              | GG                 | GG               | INTERGENIC      |               |                    |                    |
| SNP_63136_A_241140 | NW_004515668.1 | scaffold62  | 241140                  | CC                              | AA                 | AA               | INTERGENIC      |               |                    |                    |
| SNP_63137_A_241174 | NW_004515668.1 | scaffold62  | 241174                  | CC                              | TT                 | TT               | INTERGENIC      |               |                    |                    |
| SNP_63138_A_241181 | NW_004515668.1 | scaffold62  | 241181                  | TT                              | GG                 | GG               | INTERGENIC      |               |                    |                    |
| SNP_63139_A_242930 | NW_004515668.1 | scaffold62  | 242930                  | AA                              | GG                 | GG               | INTERGENIC      |               |                    |                    |
| SNP_63140_A_248753 | NW_004515668.1 | scaffold62  | 248753                  | AA                              | CC                 | CC               | INTERGENIC      |               |                    |                    |
| SNP_63141_A_248805 | NW_004515668.1 | scaffold62  | 248805                  | TT                              | GG                 | GG               | INTERGENIC      |               |                    |                    |
| SNP_63142_A_248844 | NW_004515668.1 | scaffold62  | 248844                  | TT                              | AA                 | AA               | INTERGENIC      |               |                    |                    |
| SNP_63143_A_248847 | NW_004515668.1 | scaffold62  | 248847                  | TT                              | AA                 | AA               | INTERGENIC      |               |                    |                    |
| SNP_63144_A_248848 | NW_004515668.1 | scaffold62  | 248848                  | GG                              | CC                 | CC               | INTERGENIC      |               |                    |                    |
| SNP_63145_A_248849 | NW_004515668.1 | scaffold62  | 248849                  | TT                              | AA                 | AA               | INTERGENIC      |               |                    |                    |
| SNP_63146_A_249886 | NW_004515668.1 | scaffold62  | 249886                  | CC                              | GG                 | GG               | INTERGENIC      |               |                    |                    |
| SNP_63147_A_249897 | NW_004515668.1 | scaffold62  | 249897                  | TT                              | AA                 | AA               | INTERGENIC      |               |                    |                    |
| SNP_63148_A_249914 | NW_004515668.1 | scaffold62  | 249914                  | TT                              | CC                 | CC               | INTERGENIC      |               |                    |                    |
| SNP_63149_A_250018 | NW_004515668.1 | scaffold62  | 250018                  | TT                              | CC                 | CC               | INTERGENIC      |               |                    |                    |



| SNPs IDs           | Chromosome IDs | Chromosomes | Physical positions (bp) | CDC Frontier (Reference genome) | (Pusa 1103 & HPNB) | (ILWC 46 & LPNB) | Sequence genome | Components of | Gene accession IDs | Putative functions |
|--------------------|----------------|-------------|-------------------------|---------------------------------|--------------------|------------------|-----------------|---------------|--------------------|--------------------|
| SNP_63150_A_250260 | NW_004515668.1 | scaffold62  | 250260                  | AA                              | TT                 | TT               | INTERGENIC      |               |                    |                    |
| SNP_63151_A_260435 | NW_004515668.1 | scaffold62  | 260435                  | AA                              | TT                 | TT               | INTERGENIC      |               |                    |                    |
| SNP_63152_A_260455 | NW_004515668.1 | scaffold62  | 260455                  | CC                              | AA                 | AA               | INTERGENIC      |               |                    |                    |
| SNP_63153_A_260497 | NW_004515668.1 | scaffold62  | 260497                  | CC                              | TT                 | TT               | INTERGENIC      |               |                    |                    |
| SNP_63154_A_260721 | NW_004515668.1 | scaffold62  | 260721                  | CC                              | TT                 | TT               | INTERGENIC      |               |                    |                    |
| SNP_63155_A_260764 | NW_004515668.1 | scaffold62  | 260764                  | AA                              | GG                 | GG               | INTERGENIC      |               |                    |                    |
| SNP_63156_A_260830 | NW_004515668.1 | scaffold62  | 260830                  | TT                              | AA                 | AA               | INTERGENIC      |               |                    |                    |
| SNP_63157_A_261211 | NW_004515668.1 | scaffold62  | 261211                  | GG                              | AA                 | AA               | INTERGENIC      |               |                    |                    |
| SNP_63158_A_264991 | NW_004515668.1 | scaffold62  | 264991                  | TT                              | AA                 | AA               | INTERGENIC      |               |                    |                    |
| SNP_63159_A_265009 | NW_004515668.1 | scaffold62  | 265009                  | TT                              | GG                 | GG               | INTERGENIC      |               |                    |                    |
| SNP_63160_A_273402 | NW_004515668.1 | scaffold62  | 273402                  | TT                              | CC                 | CC               | INTERGENIC      |               |                    |                    |
| SNP_63161_A_273425 | NW_004515668.1 | scaffold62  | 273425                  | CC                              | AA                 | AA               | INTERGENIC      |               |                    |                    |
| SNP_63162_A_273438 | NW_004515668.1 | scaffold62  | 273438                  | AA                              | GG                 | GG               | INTERGENIC      |               |                    |                    |
| SNP_63163_A_273441 | NW_004515668.1 | scaffold62  | 273441                  | TT                              | CC                 | CC               | INTERGENIC      |               |                    |                    |
| SNP_63164_A_279769 | NW_004515668.1 | scaffold62  | 279769                  | CC                              | TT                 | TT               | INTERGENIC      |               |                    |                    |
| SNP_63165_A_280709 | NW_004515668.1 | scaffold62  | 280709                  | GG                              | AA                 | AA               | INTERGENIC      |               |                    |                    |
| SNP_63166_A_283543 | NW_004515668.1 | scaffold62  | 283543                  | TT                              | AA                 | AA               | INTERGENIC      |               |                    |                    |
| SNP_63167_A_283650 | NW_004515668.1 | scaffold62  | 283650                  | AA                              | TT                 | TT               | INTERGENIC      |               |                    |                    |
| SNP_63168_A_283780 | NW_004515668.1 | scaffold62  | 283780                  | CC                              | TT                 | TT               | INTERGENIC      |               |                    |                    |
| SNP_63169_A_283784 | NW_004515668.1 | scaffold62  | 283784                  | TT                              | AA                 | AA               | INTERGENIC      |               |                    |                    |
| SNP_63170_A_283801 | NW_004515668.1 | scaffold62  | 283801                  | AA                              | GG                 | GG               | INTERGENIC      |               |                    |                    |
| SNP_63171_A_283922 | NW_004515668.1 | scaffold62  | 283922                  | GG                              | AA                 | AA               | INTERGENIC      |               |                    |                    |

| SNPs IDs           | Chromosome IDs | Chromosomes | Physical positions (bp) | CDC Frontier (Reference genome) | (Pusa 1103 & HPNB) | (ILWC 46 & LPNB) | Sequence genome       | Components of | Gene accession IDs | Putative functions |
|--------------------|----------------|-------------|-------------------------|---------------------------------|--------------------|------------------|-----------------------|---------------|--------------------|--------------------|
| SNP_63173_A_284049 | NW_004515668.1 | scaffold62  | 284049                  | CC                              | TT                 | TT               | INTERGENIC            |               |                    |                    |
| SNP_63174_A_284160 | NW_004515668.1 | scaffold62  | 284160                  | GG                              | AA                 | AA               | INTERGENIC            |               |                    |                    |
| SNP_63175_A_323920 | NW_004515668.1 | scaffold62  | 323920                  | AA                              | CC                 | CC               | INTERGENIC            |               |                    |                    |
| SNP_63176_A_324101 | NW_004515668.1 | scaffold62  | 324101                  | AA                              | GG                 | GG               | INTERGENIC            |               |                    |                    |
| SNP_63177_A_324112 | NW_004515668.1 | scaffold62  | 324112                  | CC                              | AA                 | AA               | INTERGENIC            |               |                    |                    |
| SNP_63178_A_324470 | NW_004515668.1 | scaffold62  | 324470                  | AA                              | TT                 | TT               | INTERGENIC            |               |                    |                    |
| SNP_63179_A_325016 | NW_004515668.1 | scaffold62  | 325016                  | AA                              | GG                 | GG               | INTERGENIC            |               |                    |                    |
| SNP_63180_A_325056 | NW_004515668.1 | scaffold62  | 325056                  | GG                              | AA                 | AA               | INTERGENIC            |               |                    |                    |
| SNP_63181_A_325068 | NW_004515668.1 | scaffold62  | 325068                  | AA                              | TT                 | TT               | INTERGENIC            |               |                    |                    |
| SNP_63182_A_327063 | NW_004515668.1 | scaffold62  | 327063                  | AA                              | CC                 | CC               | INTERGENIC            |               |                    |                    |
| SNP_63183_A_327077 | NW_004515668.1 | scaffold62  | 327077                  | CC                              | TT                 | TT               | INTERGENIC            |               |                    |                    |
| SNP_63184_A_338648 | NW_004515668.1 | scaffold62  | 338648                  | AA                              | TT                 | TT               | INTERGENIC            |               |                    |                    |
| SNP_63186_A_344052 | NW_004515668.1 | scaffold62  | 344052                  | TT                              | AA                 | AA               | INTERGENIC            |               |                    |                    |
| SNP_63187_A_5540   | NW_004515669.1 | scaffold63  | 5540                    | TT                              | AA                 | AA               | INTERGENIC            |               |                    |                    |
| SNP_63188_A_5569   | NW_004515669.1 | scaffold63  | 5569                    | GG                              | AA                 | AA               | INTERGENIC            |               |                    |                    |
| SNP_63190_A_6650   | NW_004515669.1 | scaffold63  | 6650                    | CC                              | TT                 | TT               | INTERGENIC            |               |                    |                    |
| SNP_63191_A_6798   | NW_004515669.1 | scaffold63  | 6798                    | CC                              | GG                 | GG               | INTERGENIC            |               |                    |                    |
| SNP_63192_A_6838   | NW_004515669.1 | scaffold63  | 6838                    | TT                              | CC                 | CC               | INTERGENIC            |               |                    |                    |
| SNP_63193_A_6924   | NW_004515669.1 | scaffold63  | 6924                    | TT                              | GG                 | GG               | INTERGENIC            |               |                    |                    |
| SNP_63194_A_6933   | NW_004515669.1 | scaffold63  | 6933                    | GG                              | TT                 | TT               | INTERGENIC            |               |                    |                    |
| SNP_63196_A_20376  | NW_004515669.1 | scaffold63  | 20376                   | AA                              | CC                 | CC               | DRR                   | 101502832     | Unknown function   |                    |
| SNP_63197_A_20877  | NW_004515669.1 | scaffold63  | 20877                   | TT                              | GG                 | GG               | NON_SYNONYMOUS_CODING | 101502832     | Unknown function   |                    |

| SNPs IDs          | Chromosome IDs | Chromosomes | Physical positions (bp) | CDC Frontier (Reference genome) | (Pusa 1103 & HPNB) | (ILWC 46 & LPNB) | Sequence Components of genome | Gene accession IDs | Putative functions |
|-------------------|----------------|-------------|-------------------------|---------------------------------|--------------------|------------------|-------------------------------|--------------------|--------------------|
| SNP_63198_A_20880 | NW_004515669.1 | scaffold63  | 20880                   | TT                              | AA                 | AA               | NON_SYNONYMOUS_CODING         | 101502832          | Unknown function   |
| SNP_63199_A_20905 | NW_004515669.1 | scaffold63  | 20905                   | GG                              | CC                 | CC               | NON_SYNONYMOUS_CODING         | 101502832          | Unknown function   |
| SNP_63200_A_21024 | NW_004515669.1 | scaffold63  | 21024                   | AA                              | GG                 | GG               | NON_SYNONYMOUS_CODING         | 101502832          | Unknown function   |
| SNP_63201_A_21300 | NW_004515669.1 | scaffold63  | 21300                   | TT                              | GG                 | GG               | NON_SYNONYMOUS_CODING         | 101502832          | Unknown function   |
| SNP_63202_A_21326 | NW_004515669.1 | scaffold63  | 21326                   | AA                              | GG                 | GG               | SYNONYMOUS_CODING             | 101502832          | Unknown function   |
| SNP_63203_A_21330 | NW_004515669.1 | scaffold63  | 21330                   | AA                              | GG                 | GG               | NON_SYNONYMOUS_CODING         | 101502832          | Unknown function   |
| SNP_63204_A_21735 | NW_004515669.1 | scaffold63  | 21735                   | AA                              | GG                 | GG               | INTRON                        | 101502832          | Unknown function   |
| SNP_63205_A_23027 | NW_004515669.1 | scaffold63  | 23027                   | AA                              | GG                 | GG               | INTRON                        | 101502832          | Unknown function   |
| SNP_63206_A_23057 | NW_004515669.1 | scaffold63  | 23057                   | AA                              | GG                 | GG               | URR                           | 101502832          | Unknown function   |
| SNP_63207_A_23132 | NW_004515669.1 | scaffold63  | 23132                   | CC                              | AA                 | AA               | URR                           | 101502832          | Unknown function   |
| SNP_63208_A_23211 | NW_004515669.1 | scaffold63  | 23211                   | CC                              | TT                 | TT               | URR                           | 101502832          | Unknown function   |
| SNP_63209_A_23235 | NW_004515669.1 | scaffold63  | 23235                   | GG                              | AA                 | AA               | URR                           | 101502832          | Unknown function   |
| SNP_63210_A_23362 | NW_004515669.1 | scaffold63  | 23362                   | TT                              | CC                 | CC               | URR                           | 101502832          | Unknown function   |
| SNP_63211_A_23365 | NW_004515669.1 | scaffold63  | 23365                   | AA                              | GG                 | GG               | URR                           | 101502832          | Unknown function   |
| SNP_63212_A_31101 | NW_004515669.1 | scaffold63  | 31101                   | CC                              | TT                 | TT               | INTERGENIC                    |                    |                    |
| SNP_63213_A_36288 | NW_004515669.1 | scaffold63  | 36288                   | TT                              | AA                 | AA               | INTERGENIC                    |                    |                    |
| SNP_63214_A_50106 | NW_004515669.1 | scaffold63  | 50106                   | AA                              | GG                 | GG               | INTERGENIC                    |                    |                    |
| SNP_63215_A_54093 | NW_004515669.1 | scaffold63  | 54093                   | AA                              | GG                 | GG               | INTERGENIC                    |                    |                    |
| SNP_63216_A_55002 | NW_004515669.1 | scaffold63  | 55002                   | TT                              | GG                 | GG               | INTERGENIC                    |                    |                    |
| SNP_63217_A_57413 | NW_004515669.1 | scaffold63  | 57413                   | TT                              | CC                 | CC               | INTERGENIC                    |                    |                    |
| SNP_63219_A_59350 | NW_004515669.1 | scaffold63  | 59350                   | AA                              | TT                 | TT               | INTERGENIC                    |                    |                    |
| SNP_63220_A_59395 | NW_004515669.1 | scaffold63  | 59395                   | TT                              | AA                 | AA               | INTERGENIC                    |                    |                    |

| SNPs IDs          | Chromosome IDs | Chromosomes | Physical positions (bp) | CDC Frontier genome (Reference genome) | (Pusa 1103 & HPNB) | (ILWC 46 & LPNB) | Sequence Components of genome | Gene accession IDs | Putative functions           |
|-------------------|----------------|-------------|-------------------------|----------------------------------------|--------------------|------------------|-------------------------------|--------------------|------------------------------|
| SNP_63221_A_59448 | NW_004515669.1 | scaffold63  | 59448                   | AA                                     | TT                 | TT               | INTERGENIC                    |                    |                              |
| SNP_63222_A_59541 | NW_004515669.1 | scaffold63  | 59541                   | AA                                     | CC                 | CC               | INTERGENIC                    |                    |                              |
| SNP_63223_A_59672 | NW_004515669.1 | scaffold63  | 59672                   | TT                                     | CC                 | CC               | INTERGENIC                    |                    |                              |
| SNP_63224_A_64477 | NW_004515669.1 | scaffold63  | 64477                   | AA                                     | TT                 | TT               | INTERGENIC                    |                    |                              |
| SNP_63225_A_64540 | NW_004515669.1 | scaffold63  | 64540                   | TT                                     | CC                 | CC               | INTERGENIC                    |                    |                              |
| SNP_63226_A_68179 | NW_004515669.1 | scaffold63  | 68179                   | AA                                     | GG                 | GG               | INTERGENIC                    |                    |                              |
| SNP_63227_A_12010 | NW_004515671.1 | scaffold71  | 12010                   | CC                                     | TT                 | TT               | INTERGENIC                    |                    |                              |
| SNP_63228_A_21009 | NW_004515671.1 | scaffold71  | 21009                   | TT                                     | CC                 | CC               | URR                           | 101503365          | uncharacterized LOC101503365 |
| SNP_63229_A_21012 | NW_004515671.1 | scaffold71  | 21012                   | CC                                     | GG                 | GG               | URR                           | 101503365          | uncharacterized LOC101503365 |
| SNP_63230_A_21024 | NW_004515671.1 | scaffold71  | 21024                   | GG                                     | TT                 | TT               | URR                           | 101503365          | uncharacterized LOC101503365 |
| SNP_63231_A_21044 | NW_004515671.1 | scaffold71  | 21044                   | CC                                     | GG                 | GG               | URR                           | 101503365          | uncharacterized LOC101503365 |
| SNP_63232_A_21270 | NW_004515671.1 | scaffold71  | 21270                   | TT                                     | CC                 | CC               | URR                           | 101503365          | uncharacterized LOC101503365 |
| SNP_63234_A_40758 | NW_004515671.1 | scaffold71  | 40758                   | CC                                     | TT                 | TT               | NON_SYNONYMOUS_CODING         | id194577           | Unknown function             |
| SNP_63235_A_15204 | NW_004515672.1 | scaffold72  | 15204                   | TT                                     | CC                 | CC               | INTERGENIC                    |                    |                              |
| SNP_63236_A_15250 | NW_004515672.1 | scaffold72  | 15250                   | GG                                     | TT                 | TT               | INTERGENIC                    |                    |                              |
| SNP_63237_A_15386 | NW_004515672.1 | scaffold72  | 15386                   | AA                                     | CC                 | CC               | INTERGENIC                    |                    |                              |
| SNP_63239_A_34299 | NW_004515674.1 | scaffold74  | 34299                   | GG                                     | AA                 | AA               | INTERGENIC                    |                    |                              |
| SNP_63240_A_43550 | NW_004515674.1 | scaffold74  | 43550                   | AA                                     | CC                 | CC               | INTERGENIC                    |                    |                              |
| SNP_63241_A_55314 | NW_004515674.1 | scaffold74  | 55314                   | CC                                     | TT                 | TT               | INTERGENIC                    |                    |                              |
| SNP_63242_A_55387 | NW_004515674.1 | scaffold74  | 55387                   | AA                                     | GG                 | GG               | INTERGENIC                    |                    |                              |
| SNP_63243_A_66314 | NW_004515674.1 | scaffold74  | 66314                   | AA                                     | TT                 | TT               | INTERGENIC                    |                    |                              |
| SNP_63244_A_68927 | NW_004515674.1 | scaffold74  | 68927                   | TT                                     | AA                 | AA               | INTERGENIC                    |                    |                              |

| SNPs IDs           | Chromosome IDs | Chromosomes | Physical positions (bp) | CDC Frontier (Reference genome) | (Pusa 1103 & HPNB) | (ILWC 46 & LPNB) | Sequence genome | Components of | Gene accession IDs | Putative functions |
|--------------------|----------------|-------------|-------------------------|---------------------------------|--------------------|------------------|-----------------|---------------|--------------------|--------------------|
| SNP_63245_A_70799  | NW_004515674.1 | scaffold74  | 70799                   | CC                              | TT                 | TT               | INTERGENIC      |               |                    |                    |
| SNP_63246_A_71111  | NW_004515674.1 | scaffold74  | 71111                   | AA                              | CC                 | CC               | INTERGENIC      |               |                    |                    |
| SNP_63247_A_71935  | NW_004515674.1 | scaffold74  | 71935                   | GG                              | TT                 | TT               | INTERGENIC      |               |                    |                    |
| SNP_63248_A_72231  | NW_004515674.1 | scaffold74  | 72231                   | TT                              | CC                 | CC               | INTERGENIC      |               |                    |                    |
| SNP_63249_A_72264  | NW_004515674.1 | scaffold74  | 72264                   | AA                              | CC                 | CC               | INTERGENIC      |               |                    |                    |
| SNP_63250_A_72269  | NW_004515674.1 | scaffold74  | 72269                   | TT                              | CC                 | CC               | INTERGENIC      |               |                    |                    |
| SNP_63251_A_72272  | NW_004515674.1 | scaffold74  | 72272                   | TT                              | AA                 | AA               | INTERGENIC      |               |                    |                    |
| SNP_63252_A_72273  | NW_004515674.1 | scaffold74  | 72273                   | CC                              | TT                 | TT               | INTERGENIC      |               |                    |                    |
| SNP_63253_A_72616  | NW_004515674.1 | scaffold74  | 72616                   | TT                              | CC                 | CC               | INTERGENIC      |               |                    |                    |
| SNP_63254_A_94000  | NW_004515674.1 | scaffold74  | 94000                   | TT                              | CC                 | CC               | INTERGENIC      |               |                    |                    |
| SNP_63255_A_101624 | NW_004515674.1 | scaffold74  | 101624                  | TT                              | CC                 | CC               | INTERGENIC      |               |                    |                    |
| SNP_63256_A_101625 | NW_004515674.1 | scaffold74  | 101625                  | TT                              | CC                 | CC               | INTERGENIC      |               |                    |                    |
| SNP_63257_A_64     | NW_004515675.1 | scaffold76  | 64                      | TT                              | CC                 | CC               | INTERGENIC      |               |                    |                    |
| SNP_63259_A_266    | NW_004515675.1 | scaffold76  | 266                     | CC                              | TT                 | TT               | INTERGENIC      |               |                    |                    |
| SNP_63260_A_380    | NW_004515675.1 | scaffold76  | 380                     | TT                              | AA                 | AA               | INTERGENIC      |               |                    |                    |
| SNP_63261_A_9641   | NW_004515676.1 | scaffold80  | 9641                    | CC                              | AA                 | AA               | URR             | 101507571     | Unknown function   |                    |
| SNP_63262_A_9848   | NW_004515676.1 | scaffold80  | 9848                    | AA                              | GG                 | GG               | URR             | 101507571     | Unknown function   |                    |
| SNP_63264_A_43437  | NW_004515676.1 | scaffold80  | 43437                   | AA                              | TT                 | TT               | INTERGENIC      |               |                    |                    |
| SNP_63265_A_56184  | NW_004515676.1 | scaffold80  | 56184                   | AA                              | GG                 | GG               | INTERGENIC      |               |                    |                    |
| SNP_63266_A_56668  | NW_004515676.1 | scaffold80  | 56668                   | TT                              | GG                 | GG               | INTERGENIC      |               |                    |                    |
| SNP_63267_A_56708  | NW_004515676.1 | scaffold80  | 56708                   | AA                              | CC                 | CC               | INTERGENIC      |               |                    |                    |
| SNP_63268_A_56758  | NW_004515676.1 | scaffold80  | 56758                   | TT                              | CC                 | CC               | INTERGENIC      |               |                    |                    |

| SNPs IDs           | Chromosome IDs | Chromosomes | Physical positions (bp) | CDC Frontier (Reference genome) | (Pusa 1103 & HPNB) | (ILWC 46 & LPNB) | Sequence genome | Components of | Gene accession IDs | Putative functions |
|--------------------|----------------|-------------|-------------------------|---------------------------------|--------------------|------------------|-----------------|---------------|--------------------|--------------------|
| SNP_63270_A_56850  | NW_004515676.1 | scaffold80  | 56850                   | TT                              | GG                 | GG               | INTERGENIC      |               |                    |                    |
| SNP_63271_A_66011  | NW_004515676.1 | scaffold80  | 66011                   | CC                              | TT                 | TT               | INTERGENIC      |               |                    |                    |
| SNP_63272_A_66429  | NW_004515676.1 | scaffold80  | 66429                   | AA                              | TT                 | TT               | INTERGENIC      |               |                    |                    |
| SNP_63273_A_79057  | NW_004515676.1 | scaffold80  | 79057                   | TT                              | CC                 | CC               | INTERGENIC      |               |                    |                    |
| SNP_63274_A_79446  | NW_004515676.1 | scaffold80  | 79446                   | AA                              | GG                 | GG               | INTERGENIC      |               |                    |                    |
| SNP_63275_A_79463  | NW_004515676.1 | scaffold80  | 79463                   | AA                              | GG                 | GG               | INTERGENIC      |               |                    |                    |
| SNP_63276_A_79464  | NW_004515676.1 | scaffold80  | 79464                   | AA                              | TT                 | TT               | INTERGENIC      |               |                    |                    |
| SNP_63277_A_83889  | NW_004515676.1 | scaffold80  | 83889                   | AA                              | GG                 | GG               | INTERGENIC      |               |                    |                    |
| SNP_63278_A_90178  | NW_004515676.1 | scaffold80  | 90178                   | AA                              | CC                 | CC               | INTERGENIC      |               |                    |                    |
| SNP_63279_A_90207  | NW_004515676.1 | scaffold80  | 90207                   | AA                              | GG                 | GG               | INTERGENIC      |               |                    |                    |
| SNP_63280_A_90234  | NW_004515676.1 | scaffold80  | 90234                   | TT                              | GG                 | GG               | INTERGENIC      |               |                    |                    |
| SNP_63281_A_101664 | NW_004515676.1 | scaffold80  | 101664                  | TT                              | CC                 | CC               | INTERGENIC      |               |                    |                    |
| SNP_63282_A_101818 | NW_004515676.1 | scaffold80  | 101818                  | CC                              | TT                 | TT               | INTERGENIC      |               |                    |                    |
| SNP_63283_A_101827 | NW_004515676.1 | scaffold80  | 101827                  | TT                              | CC                 | CC               | INTERGENIC      |               |                    |                    |
| SNP_63284_A_101828 | NW_004515676.1 | scaffold80  | 101828                  | TT                              | CC                 | CC               | INTERGENIC      |               |                    |                    |
| SNP_63285_A_101869 | NW_004515676.1 | scaffold80  | 101869                  | CC                              | TT                 | TT               | INTERGENIC      |               |                    |                    |
| SNP_63286_A_101895 | NW_004515676.1 | scaffold80  | 101895                  | CC                              | GG                 | GG               | INTERGENIC      |               |                    |                    |
| SNP_63287_A_125465 | NW_004515676.1 | scaffold80  | 125465                  | TT                              | AA                 | AA               | INTERGENIC      |               |                    |                    |
| SNP_63288_A_134445 | NW_004515676.1 | scaffold80  | 134445                  | GG                              | TT                 | TT               | INTERGENIC      |               |                    |                    |
| SNP_63289_A_134458 | NW_004515676.1 | scaffold80  | 134458                  | CC                              | TT                 | TT               | INTERGENIC      |               |                    |                    |
| SNP_63290_A_134476 | NW_004515676.1 | scaffold80  | 134476                  | AA                              | TT                 | TT               | INTERGENIC      |               |                    |                    |
| SNP_63291_A_144171 | NW_004515676.1 | scaffold80  | 144171                  | CC                              | AA                 | AA               | INTERGENIC      |               |                    |                    |

| SNPs IDs           | Chromosome IDs | Chromosomes | Physical positions (bp) | CDC Frontier (Reference genome) | (Pusa 1103 & HPNB) | (ILWC 46 & LPNB) | Sequence genome | Components of | Gene accession IDs                           | Putative functions |
|--------------------|----------------|-------------|-------------------------|---------------------------------|--------------------|------------------|-----------------|---------------|----------------------------------------------|--------------------|
| SNP_63292_A_144466 | NW_004515676.1 | scaffold80  | 144466                  | CC                              | TT                 | TT               | INTERGENIC      |               |                                              |                    |
| SNP_63293_A_145915 | NW_004515676.1 | scaffold80  | 145915                  | AA                              | TT                 | TT               | INTERGENIC      |               |                                              |                    |
| SNP_63294_A_150705 | NW_004515676.1 | scaffold80  | 150705                  | TT                              | GG                 | GG               | INTERGENIC      |               |                                              |                    |
| SNP_63295_A_150774 | NW_004515676.1 | scaffold80  | 150774                  | TT                              | CC                 | CC               | INTERGENIC      |               |                                              |                    |
| SNP_63296_A_150908 | NW_004515676.1 | scaffold80  | 150908                  | AA                              | GG                 | GG               | INTERGENIC      |               |                                              |                    |
| SNP_63297_A_151382 | NW_004515676.1 | scaffold80  | 151382                  | TT                              | CC                 | CC               | INTERGENIC      |               |                                              |                    |
| SNP_63298_A_162684 | NW_004515676.1 | scaffold80  | 162684                  | AA                              | GG                 | GG               | INTERGENIC      |               |                                              |                    |
| SNP_63299_A_173329 | NW_004515676.1 | scaffold80  | 173329                  | TT                              | AA                 | AA               | INTERGENIC      |               |                                              |                    |
| SNP_63301_A_173443 | NW_004515676.1 | scaffold80  | 173443                  | GG                              | AA                 | AA               | INTERGENIC      |               |                                              |                    |
| SNP_63302_A_177137 | NW_004515676.1 | scaffold80  | 177137                  | AA                              | TT                 | TT               | INTERGENIC      |               |                                              |                    |
| SNP_63304_A_241696 | NW_004515676.1 | scaffold80  | 241696                  | GG                              | AA                 | AA               | URR             | 101505843     | DEAD-box ATP-dependent RNA helicase 52C-like |                    |
| SNP_63305_A_259839 | NW_004515676.1 | scaffold80  | 259839                  | TT                              | CC                 | CC               | INTERGENIC      |               |                                              |                    |
| SNP_63306_A_273140 | NW_004515676.1 | scaffold80  | 273140                  | AA                              | GG                 | GG               | INTERGENIC      |               |                                              |                    |
| SNP_63307_A_273519 | NW_004515676.1 | scaffold80  | 273519                  | AA                              | GG                 | GG               | INTERGENIC      |               |                                              |                    |
| SNP_63309_A_350680 | NW_004515676.1 | scaffold80  | 350680                  | TT                              | CC                 | CC               | INTERGENIC      |               |                                              |                    |
| SNP_63310_A_350712 | NW_004515676.1 | scaffold80  | 350712                  | TT                              | CC                 | CC               | INTERGENIC      |               |                                              |                    |
| SNP_63311_A_354107 | NW_004515676.1 | scaffold80  | 354107                  | TT                              | CC                 | CC               | INTERGENIC      |               |                                              |                    |
| SNP_63312_A_355728 | NW_004515676.1 | scaffold80  | 355728                  | TT                              | CC                 | CC               | INTERGENIC      |               |                                              |                    |
| SNP_63313_A_357546 | NW_004515676.1 | scaffold80  | 357546                  | TT                              | GG                 | GG               | INTERGENIC      |               |                                              |                    |
| SNP_63314_A_358593 | NW_004515676.1 | scaffold80  | 358593                  | AA                              | GG                 | GG               | INTERGENIC      |               |                                              |                    |
| SNP_63315_A_364567 | NW_004515676.1 | scaffold80  | 364567                  | AA                              | GG                 | GG               | INTERGENIC      |               |                                              |                    |
| SNP_63316_A_364583 | NW_004515676.1 | scaffold80  | 364583                  | GG                              | AA                 | AA               | INTERGENIC      |               |                                              |                    |

| SNPs IDs           | Chromosome IDs | Chromosomes | Physical positions (bp) | CDC Frontier (Reference genome) | (Pusa 1103 & HPNB) | (ILWC 46 & LPNB) | Sequence Components of genome | Gene accession IDs | Putative functions                                     |
|--------------------|----------------|-------------|-------------------------|---------------------------------|--------------------|------------------|-------------------------------|--------------------|--------------------------------------------------------|
| SNP_63317_A_364594 | NW_004515676.1 | scaffold80  | 364594                  | AA                              | TT                 | TT               | INTERGENIC                    |                    |                                                        |
| SNP_63318_A_382495 | NW_004515676.1 | scaffold80  | 382495                  | TT                              | CC                 | CC               | INTERGENIC                    |                    |                                                        |
| SNP_63319_A_382498 | NW_004515676.1 | scaffold80  | 382498                  | AA                              | CC                 | CC               | INTERGENIC                    |                    |                                                        |
| SNP_63320_A_382518 | NW_004515676.1 | scaffold80  | 382518                  | TT                              | CC                 | CC               | INTERGENIC                    |                    |                                                        |
| SNP_63321_A_382521 | NW_004515676.1 | scaffold80  | 382521                  | TT                              | CC                 | CC               | INTERGENIC                    |                    |                                                        |
| SNP_63322_A_382543 | NW_004515676.1 | scaffold80  | 382543                  | AA                              | GG                 | GG               | INTERGENIC                    |                    |                                                        |
| SNP_63323_A_382570 | NW_004515676.1 | scaffold80  | 382570                  | TT                              | CC                 | CC               | INTERGENIC                    |                    |                                                        |
| SNP_63324_A_431561 | NW_004515676.1 | scaffold80  | 431561                  | AA                              | GG                 | GG               | INTRON                        | 101507045          | mediator of RNA polymerase II transcription subunit 25 |
| SNP_63325_A_446722 | NW_004515676.1 | scaffold80  | 446722                  | TT                              | CC                 | CC               | INTERGENIC                    |                    |                                                        |
| SNP_63327_A_66914  | NW_004515677.1 | scaffold81  | 66914                   | AA                              | GG                 | GG               | NON_SYNONYMOUS_CODING         | 101509156          | 31 kDa ribonucleoprotein, chloroplastic-like           |
| SNP_63328_A_67799  | NW_004515677.1 | scaffold81  | 67799                   | AA                              | CC                 | CC               | NON_SYNONYMOUS_CODING         | 101509156          | 31 kDa ribonucleoprotein, chloroplastic-like           |
| SNP_63329_A_90420  | NW_004515677.1 | scaffold81  | 90420                   | TT                              | AA                 | AA               | INTERGENIC                    |                    |                                                        |
| SNP_63330_A_90451  | NW_004515677.1 | scaffold81  | 90451                   | AA                              | GG                 | GG               | INTERGENIC                    |                    |                                                        |
| SNP_63331_A_90456  | NW_004515677.1 | scaffold81  | 90456                   | CC                              | TT                 | TT               | INTERGENIC                    |                    |                                                        |
| SNP_63332_A_90513  | NW_004515677.1 | scaffold81  | 90513                   | CC                              | AA                 | AA               | INTERGENIC                    |                    |                                                        |
| SNP_63333_A_90691  | NW_004515677.1 | scaffold81  | 90691                   | GG                              | TT                 | TT               | INTERGENIC                    |                    |                                                        |
| SNP_63334_A_90700  | NW_004515677.1 | scaffold81  | 90700                   | GG                              | AA                 | AA               | INTERGENIC                    |                    |                                                        |
| SNP_63335_A_91219  | NW_004515677.1 | scaffold81  | 91219                   | AA                              | TT                 | TT               | INTERGENIC                    |                    |                                                        |
| SNP_63336_A_91280  | NW_004515677.1 | scaffold81  | 91280                   | TT                              | AA                 | AA               | INTERGENIC                    |                    |                                                        |
| SNP_63337_A_91326  | NW_004515677.1 | scaffold81  | 91326                   | TT                              | AA                 | AA               | INTERGENIC                    |                    |                                                        |
| SNP_63338_A_91331  | NW_004515677.1 | scaffold81  | 91331                   | AA                              | GG                 | GG               | INTERGENIC                    |                    |                                                        |
| SNP_63339_A_91356  | NW_004515677.1 | scaffold81  | 91356                   | CC                              | TT                 | TT               | INTERGENIC                    |                    |                                                        |



| SNPs IDs          | Chromosome IDs | Chromosomes | Physical positions (bp) | CDC Frontier (Reference genome) | (Pusa 1103 & HPNB) | (ILWC 46 & LPNB) | Sequence genome | Components of | Gene accession IDs | Putative functions |
|-------------------|----------------|-------------|-------------------------|---------------------------------|--------------------|------------------|-----------------|---------------|--------------------|--------------------|
| SNP_63341_A_91424 | NW_004515677.1 | scaffold81  | 91424                   | GG                              | CC                 | CC               | INTERGENIC      |               |                    |                    |
| SNP_63342_A_91446 | NW_004515677.1 | scaffold81  | 91446                   | GG                              | AA                 | AA               | INTERGENIC      |               |                    |                    |
| SNP_63343_A_91448 | NW_004515677.1 | scaffold81  | 91448                   | GG                              | AA                 | AA               | INTERGENIC      |               |                    |                    |
| SNP_63344_A_91469 | NW_004515677.1 | scaffold81  | 91469                   | GG                              | CC                 | CC               | INTERGENIC      |               |                    |                    |
| SNP_63345_A_91499 | NW_004515677.1 | scaffold81  | 91499                   | TT                              | CC                 | CC               | INTERGENIC      |               |                    |                    |
| SNP_63346_A_91502 | NW_004515677.1 | scaffold81  | 91502                   | AA                              | TT                 | TT               | INTERGENIC      |               |                    |                    |
| SNP_63347_A_91513 | NW_004515677.1 | scaffold81  | 91513                   | AA                              | GG                 | GG               | INTERGENIC      |               |                    |                    |
| SNP_63348_A_91524 | NW_004515677.1 | scaffold81  | 91524                   | GG                              | AA                 | AA               | INTERGENIC      |               |                    |                    |
| SNP_63349_A_91561 | NW_004515677.1 | scaffold81  | 91561                   | GG                              | AA                 | AA               | INTERGENIC      |               |                    |                    |
| SNP_63350_A_91602 | NW_004515677.1 | scaffold81  | 91602                   | AA                              | CC                 | CC               | INTERGENIC      |               |                    |                    |
| SNP_63351_A_91603 | NW_004515677.1 | scaffold81  | 91603                   | CC                              | AA                 | AA               | INTERGENIC      |               |                    |                    |
| SNP_63352_A_91643 | NW_004515677.1 | scaffold81  | 91643                   | GG                              | AA                 | AA               | INTERGENIC      |               |                    |                    |
| SNP_63353_A_91665 | NW_004515677.1 | scaffold81  | 91665                   | AA                              | GG                 | GG               | INTERGENIC      |               |                    |                    |
| SNP_63354_A_91773 | NW_004515677.1 | scaffold81  | 91773                   | AA                              | TT                 | TT               | INTERGENIC      |               |                    |                    |
| SNP_63355_A_91778 | NW_004515677.1 | scaffold81  | 91778                   | GG                              | CC                 | CC               | INTERGENIC      |               |                    |                    |
| SNP_63356_A_91866 | NW_004515677.1 | scaffold81  | 91866                   | CC                              | TT                 | TT               | INTERGENIC      |               |                    |                    |
| SNP_63357_A_91928 | NW_004515677.1 | scaffold81  | 91928                   | AA                              | GG                 | GG               | INTERGENIC      |               |                    |                    |
| SNP_63358_A_91931 | NW_004515677.1 | scaffold81  | 91931                   | AA                              | TT                 | TT               | INTERGENIC      |               |                    |                    |
| SNP_63359_A_92003 | NW_004515677.1 | scaffold81  | 92003                   | AA                              | TT                 | TT               | INTERGENIC      |               |                    |                    |
| SNP_63360_A_92010 | NW_004515677.1 | scaffold81  | 92010                   | TT                              | AA                 | AA               | INTERGENIC      |               |                    |                    |
| SNP_63361_A_92017 | NW_004515677.1 | scaffold81  | 92017                   | AA                              | GG                 | GG               | INTERGENIC      |               |                    |                    |
| SNP_63362_A_92033 | NW_004515677.1 | scaffold81  | 92033                   | AA                              | TT                 | TT               | INTERGENIC      |               |                    |                    |

| SNPs IDs          | Chromosome IDs | Chromosomes | Physical positions (bp) | CDC Frontier (Reference genome) | (Pusa 1103 & HPNB) | (ILWC 46 & LPNB) | Sequence genome | Components of | Gene accession IDs | Putative functions |
|-------------------|----------------|-------------|-------------------------|---------------------------------|--------------------|------------------|-----------------|---------------|--------------------|--------------------|
| SNP_63363_A_92054 | NW_004515677.1 | scaffold81  | 92054                   | AA                              | CC                 | CC               | INTERGENIC      |               |                    |                    |
| SNP_63364_A_5972  | NW_004515679.1 | scaffold83  | 5972                    | TT                              | CC                 | CC               | INTERGENIC      |               |                    |                    |
| SNP_63365_A_6039  | NW_004515679.1 | scaffold83  | 6039                    | GG                              | AA                 | AA               | INTERGENIC      |               |                    |                    |
| SNP_63366_A_6063  | NW_004515679.1 | scaffold83  | 6063                    | AA                              | TT                 | TT               | INTERGENIC      |               |                    |                    |
| SNP_63367_A_6067  | NW_004515679.1 | scaffold83  | 6067                    | GG                              | AA                 | AA               | INTERGENIC      |               |                    |                    |
| SNP_63368_A_6079  | NW_004515679.1 | scaffold83  | 6079                    | CC                              | TT                 | TT               | INTERGENIC      |               |                    |                    |
| SNP_63369_A_6080  | NW_004515679.1 | scaffold83  | 6080                    | TT                              | CC                 | CC               | INTERGENIC      |               |                    |                    |
| SNP_63370_A_6199  | NW_004515679.1 | scaffold83  | 6199                    | GG                              | AA                 | AA               | INTERGENIC      |               |                    |                    |
| SNP_63371_A_6441  | NW_004515679.1 | scaffold83  | 6441                    | TT                              | AA                 | AA               | INTERGENIC      |               |                    |                    |
| SNP_63372_A_28651 | NW_004515681.1 | scaffold86  | 28651                   | TT                              | GG                 | GG               | INTERGENIC      |               |                    |                    |
| SNP_63373_A_28901 | NW_004515681.1 | scaffold86  | 28901                   | TT                              | GG                 | GG               | INTERGENIC      |               |                    |                    |
| SNP_63374_A_37272 | NW_004515681.1 | scaffold86  | 37272                   | AA                              | TT                 | TT               | INTERGENIC      |               |                    |                    |
| SNP_63375_A_39618 | NW_004515681.1 | scaffold86  | 39618                   | CC                              | TT                 | TT               | INTERGENIC      |               |                    |                    |
| SNP_63376_A_85708 | NW_004515681.1 | scaffold86  | 85708                   | AA                              | TT                 | TT               | INTERGENIC      |               |                    |                    |
| SNP_63377_A_88269 | NW_004515681.1 | scaffold86  | 88269                   | CC                              | TT                 | TT               | INTERGENIC      |               |                    |                    |
| SNP_63378_A_88275 | NW_004515681.1 | scaffold86  | 88275                   | AA                              | GG                 | GG               | INTERGENIC      |               |                    |                    |
| SNP_63379_A_88577 | NW_004515681.1 | scaffold86  | 88577                   | AA                              | GG                 | GG               | INTERGENIC      |               |                    |                    |
| SNP_63380_A_9071  | NW_004515682.1 | scaffold87  | 9071                    | AA                              | GG                 | GG               | INTERGENIC      |               |                    |                    |
| SNP_63381_A_9424  | NW_004515682.1 | scaffold87  | 9424                    | TT                              | CC                 | CC               | INTERGENIC      |               |                    |                    |
| SNP_63382_A_9456  | NW_004515682.1 | scaffold87  | 9456                    | AA                              | GG                 | GG               | INTERGENIC      |               |                    |                    |
| SNP_63383_A_9717  | NW_004515682.1 | scaffold87  | 9717                    | AA                              | GG                 | GG               | INTERGENIC      |               |                    |                    |
| SNP_63386_A_87145 | NW_004515682.1 | scaffold87  | 87145                   | TT                              | CC                 | CC               | INTERGENIC      |               |                    |                    |

| SNPs IDs           | Chromosome IDs | Chromosomes | Physical positions (bp) | CDC Frontier (Reference genome) | (Pusa 1103 & HPNB) | (ILWC 46 & LPNB) | Sequence genome | Components of | Gene accession IDs | Putative functions |
|--------------------|----------------|-------------|-------------------------|---------------------------------|--------------------|------------------|-----------------|---------------|--------------------|--------------------|
| SNP_63387_A_87311  | NW_004515682.1 | scaffold87  | 87311                   | CC                              | TT                 | TT               | INTERGENIC      |               |                    |                    |
| SNP_63388_A_87801  | NW_004515682.1 | scaffold87  | 87801                   | GG                              | AA                 | AA               | INTERGENIC      |               |                    |                    |
| SNP_63389_A_118021 | NW_004515682.1 | scaffold87  | 118021                  | GG                              | AA                 | AA               | INTERGENIC      |               |                    |                    |
| SNP_63390_A_118022 | NW_004515682.1 | scaffold87  | 118022                  | CC                              | TT                 | TT               | INTERGENIC      |               |                    |                    |
| SNP_63391_A_118025 | NW_004515682.1 | scaffold87  | 118025                  | TT                              | GG                 | GG               | INTERGENIC      |               |                    |                    |
| SNP_63392_A_118030 | NW_004515682.1 | scaffold87  | 118030                  | CC                              | TT                 | TT               | INTERGENIC      |               |                    |                    |
| SNP_63393_A_118039 | NW_004515682.1 | scaffold87  | 118039                  | TT                              | CC                 | CC               | INTERGENIC      |               |                    |                    |
| SNP_63394_A_118123 | NW_004515682.1 | scaffold87  | 118123                  | TT                              | CC                 | AA               | INTERGENIC      |               |                    |                    |
| SNP_63395_A_118265 | NW_004515682.1 | scaffold87  | 118265                  | CC                              | TT                 | TT               | INTERGENIC      |               |                    |                    |
| SNP_63396_A_118577 | NW_004515682.1 | scaffold87  | 118577                  | AA                              | GG                 | GG               | INTERGENIC      |               |                    |                    |
| SNP_63397_A_141923 | NW_004515682.1 | scaffold87  | 141923                  | GG                              | AA                 | AA               | INTERGENIC      |               |                    |                    |
| SNP_63398_A_149115 | NW_004515682.1 | scaffold87  | 149115                  | AA                              | GG                 | GG               | INTERGENIC      |               |                    |                    |
| SNP_63400_A_149408 | NW_004515682.1 | scaffold87  | 149408                  | GG                              | AA                 | AA               | INTERGENIC      |               |                    |                    |
| SNP_63401_A_158697 | NW_004515682.1 | scaffold87  | 158697                  | AA                              | GG                 | GG               | INTERGENIC      |               |                    |                    |
| SNP_63402_A_158889 | NW_004515682.1 | scaffold87  | 158889                  | TT                              | GG                 | GG               | INTERGENIC      |               |                    |                    |
| SNP_63403_A_158934 | NW_004515682.1 | scaffold87  | 158934                  | TT                              | CC                 | CC               | INTERGENIC      |               |                    |                    |
| SNP_63404_A_253583 | NW_004515682.1 | scaffold87  | 253583                  | AA                              | TT                 | TT               | INTERGENIC      |               |                    |                    |
| SNP_63405_A_306562 | NW_004515682.1 | scaffold87  | 306562                  | TT                              | CC                 | CC               | INTERGENIC      |               |                    |                    |
| SNP_63406_A_306863 | NW_004515682.1 | scaffold87  | 306863                  | AA                              | GG                 | GG               | INTERGENIC      |               |                    |                    |
| SNP_63407_A_306899 | NW_004515682.1 | scaffold87  | 306899                  | AA                              | GG                 | GG               | INTERGENIC      |               |                    |                    |
| SNP_63408_A_306982 | NW_004515682.1 | scaffold87  | 306982                  | AA                              | TT                 | TT               | INTERGENIC      |               |                    |                    |
| SNP_63410_A_419910 | NW_004515682.1 | scaffold87  | 419910                  | GG                              | TT                 | TT               | INTERGENIC      |               |                    |                    |

| SNPs IDs           | Chromosome IDs | Chromosomes | Physical positions (bp) | CDC Frontier (Reference genome) | (Pusa 1103 & HPNB) | (ILWC 46 & LPNB) | Sequence Components of genome | Gene accession IDs | Putative functions           |
|--------------------|----------------|-------------|-------------------------|---------------------------------|--------------------|------------------|-------------------------------|--------------------|------------------------------|
| SNP_63411_A_423971 | NW_004515682.1 | scaffold87  | 423971                  | AA                              | GG                 | GG               | INTERGENIC                    |                    |                              |
| SNP_63412_A_424661 | NW_004515682.1 | scaffold87  | 424661                  | GG                              | AA                 | AA               | INTERGENIC                    |                    |                              |
| SNP_63413_A_434715 | NW_004515682.1 | scaffold87  | 434715                  | CC                              | TT                 | TT               | INTERGENIC                    |                    |                              |
| SNP_63414_A_435106 | NW_004515682.1 | scaffold87  | 435106                  | CC                              | GG                 | GG               | INTERGENIC                    |                    |                              |
| SNP_63415_A_445393 | NW_004515682.1 | scaffold87  | 445393                  | CC                              | TT                 | TT               | INTRON                        | 101488264          | uncharacterized LOC101488264 |
| SNP_63416_A_462277 | NW_004515682.1 | scaffold87  | 462277                  | CC                              | GG                 | GG               | INTRON                        | 101488264          | uncharacterized LOC101488264 |
| SNP_63417_A_468733 | NW_004515682.1 | scaffold87  | 468733                  | TT                              | CC                 | CC               | INTRON                        | 101488264          | uncharacterized LOC101488264 |
| SNP_63418_A_468790 | NW_004515682.1 | scaffold87  | 468790                  | TT                              | CC                 | CC               | INTRON                        | 101488264          | uncharacterized LOC101488264 |
| SNP_63419_A_468916 | NW_004515682.1 | scaffold87  | 468916                  | CC                              | TT                 | TT               | INTRON                        | 101488264          | uncharacterized LOC101488264 |
| SNP_63422_A_469100 | NW_004515682.1 | scaffold87  | 469100                  | GG                              | AA                 | AA               | INTRON                        | 101488264          | uncharacterized LOC101488264 |
| SNP_63423_A_469134 | NW_004515682.1 | scaffold87  | 469134                  | TT                              | GG                 | GG               | INTRON                        | 101488264          | uncharacterized LOC101488264 |
| SNP_63424_A_469247 | NW_004515682.1 | scaffold87  | 469247                  | TT                              | CC                 | CC               | INTRON                        | 101488264          | uncharacterized LOC101488264 |
| SNP_63425_A_471444 | NW_004515682.1 | scaffold87  | 471444                  | AA                              | TT                 | TT               | INTRON                        | 101488264          | uncharacterized LOC101488264 |
| SNP_63426_A_471501 | NW_004515682.1 | scaffold87  | 471501                  | AA                              | GG                 | GG               | INTRON                        | 101488264          | uncharacterized LOC101488264 |
| SNP_63427_A_471945 | NW_004515682.1 | scaffold87  | 471945                  | GG                              | AA                 | AA               | INTRON                        | 101488264          | uncharacterized LOC101488264 |
| SNP_63428_A_474762 | NW_004515682.1 | scaffold87  | 474762                  | AA                              | CC                 | CC               | INTRON                        | 101488264          | uncharacterized LOC101488264 |
| SNP_63429_A_475554 | NW_004515682.1 | scaffold87  | 475554                  | TT                              | GG                 | GG               | INTRON                        | 101488264          | uncharacterized LOC101488264 |
| SNP_63430_A_475564 | NW_004515682.1 | scaffold87  | 475564                  | AA                              | TT                 | TT               | INTRON                        | 101488264          | uncharacterized LOC101488264 |
| SNP_63431_A_483231 | NW_004515682.1 | scaffold87  | 483231                  | CC                              | TT                 | TT               | INTRON                        | 101488264          | uncharacterized LOC101488264 |
| SNP_63432_A_503752 | NW_004515682.1 | scaffold87  | 503752                  | TT                              | CC                 | CC               | INTRON                        | 101488264          | uncharacterized LOC101488264 |
| SNP_63433_A_538907 | NW_004515682.1 | scaffold87  | 538907                  | CC                              | AA                 | AA               | INTRON                        | 101488264          | uncharacterized LOC101488264 |
| SNP_63434_A_538921 | NW_004515682.1 | scaffold87  | 538921                  | GG                              | AA                 | AA               | INTRON                        | 101488264          | uncharacterized LOC101488264 |

| SNPs IDs           | Chromosome IDs | Chromosomes | Physical positions (bp) | CDC Frontier (Reference genome) | (Pusa 1103 & HPNB) | (ILWC 46 & LPNB) | Sequence Components of genome | Gene accession IDs | Putative functions           |
|--------------------|----------------|-------------|-------------------------|---------------------------------|--------------------|------------------|-------------------------------|--------------------|------------------------------|
| SNP_63435_A_575954 | NW_004515682.1 | scaffold87  | 575954                  | CC                              | GG                 | GG               | URR                           | 101488264          | uncharacterized LOC101488264 |
| SNP_63437_A_593837 | NW_004515682.1 | scaffold87  | 593837                  | CC                              | AA                 | AA               | INTERGENIC                    |                    |                              |
| SNP_63438_A_593858 | NW_004515682.1 | scaffold87  | 593858                  | GG                              | AA                 | AA               | INTERGENIC                    |                    |                              |
| SNP_63439_A_593945 | NW_004515682.1 | scaffold87  | 593945                  | TT                              | AA                 | AA               | INTERGENIC                    |                    |                              |
| SNP_63440_A_594167 | NW_004515682.1 | scaffold87  | 594167                  | GG                              | TT                 | TT               | INTERGENIC                    |                    |                              |
| SNP_63442_A_595285 | NW_004515682.1 | scaffold87  | 595285                  | AA                              | GG                 | GG               | INTERGENIC                    |                    |                              |
| SNP_63443_A_595291 | NW_004515682.1 | scaffold87  | 595291                  | CC                              | TT                 | TT               | INTERGENIC                    |                    |                              |
| SNP_63444_A_595350 | NW_004515682.1 | scaffold87  | 595350                  | AA                              | GG                 | GG               | INTERGENIC                    |                    |                              |
| SNP_63445_A_595428 | NW_004515682.1 | scaffold87  | 595428                  | GG                              | AA                 | AA               | INTERGENIC                    |                    |                              |
| SNP_63446_A_595490 | NW_004515682.1 | scaffold87  | 595490                  | GG                              | TT                 | TT               | INTERGENIC                    |                    |                              |
| SNP_63447_A_595542 | NW_004515682.1 | scaffold87  | 595542                  | TT                              | AA                 | AA               | INTERGENIC                    |                    |                              |
| SNP_63448_A_595591 | NW_004515682.1 | scaffold87  | 595591                  | TT                              | CC                 | CC               | INTERGENIC                    |                    |                              |
| SNP_63449_A_595592 | NW_004515682.1 | scaffold87  | 595592                  | TT                              | AA                 | AA               | INTERGENIC                    |                    |                              |
| SNP_63450_A_595614 | NW_004515682.1 | scaffold87  | 595614                  | TT                              | CC                 | CC               | INTERGENIC                    |                    |                              |
| SNP_63451_A_595813 | NW_004515682.1 | scaffold87  | 595813                  | GG                              | AA                 | AA               | INTERGENIC                    |                    |                              |
| SNP_63452_A_595921 | NW_004515682.1 | scaffold87  | 595921                  | GG                              | AA                 | AA               | INTERGENIC                    |                    |                              |
| SNP_63453_A_596758 | NW_004515682.1 | scaffold87  | 596758                  | CC                              | GG                 | GG               | INTERGENIC                    |                    |                              |
| SNP_63454_A_596981 | NW_004515682.1 | scaffold87  | 596981                  | GG                              | AA                 | AA               | INTERGENIC                    |                    |                              |
| SNP_63456_A_597728 | NW_004515682.1 | scaffold87  | 597728                  | AA                              | GG                 | GG               | INTERGENIC                    |                    |                              |
| SNP_63457_A_598090 | NW_004515682.1 | scaffold87  | 598090                  | GG                              | TT                 | TT               | INTERGENIC                    |                    |                              |
| SNP_63458_A_598166 | NW_004515682.1 | scaffold87  | 598166                  | TT                              | CC                 | CC               | INTERGENIC                    |                    |                              |
| SNP_63459_A_598184 | NW_004515682.1 | scaffold87  | 598184                  | AA                              | GG                 | GG               | INTERGENIC                    |                    |                              |

| SNPs IDs           | Chromosome IDs | Chromosomes | Physical positions (bp) | CDC Frontier (Reference genome) | (Pusa 1103 & HPNB) | (ILWC 46 & LPNB) | Sequence Components of genome | Gene accession IDs | Putative functions                       |
|--------------------|----------------|-------------|-------------------------|---------------------------------|--------------------|------------------|-------------------------------|--------------------|------------------------------------------|
| SNP_63460_A_598308 | NW_004515682.1 | scaffold87  | 598308                  | GG                              | CC                 | CC               | INTERGENIC                    |                    |                                          |
| SNP_63461_A_598355 | NW_004515682.1 | scaffold87  | 598355                  | AA                              | TT                 | TT               | INTERGENIC                    |                    |                                          |
| SNP_63462_A_598388 | NW_004515682.1 | scaffold87  | 598388                  | CC                              | TT                 | TT               | INTERGENIC                    |                    |                                          |
| SNP_63463_A_598408 | NW_004515682.1 | scaffold87  | 598408                  | AA                              | TT                 | TT               | INTERGENIC                    |                    |                                          |
| SNP_63464_A_598409 | NW_004515682.1 | scaffold87  | 598409                  | TT                              | GG                 | GG               | INTERGENIC                    |                    |                                          |
| SNP_63465_A_598431 | NW_004515682.1 | scaffold87  | 598431                  | GG                              | AA                 | AA               | INTERGENIC                    |                    |                                          |
| SNP_63466_A_598481 | NW_004515682.1 | scaffold87  | 598481                  | TT                              | CC                 | CC               | INTERGENIC                    |                    |                                          |
| SNP_63467_A_11765  | NW_004515683.1 | scaffold88  | 11765                   | CC                              | TT                 | TT               | URR                           | 101489047          | putative 3,4-dihydroxy-2-butanone kinase |
| SNP_63470_A_123484 | NW_004515683.1 | scaffold88  | 123484                  | TT                              | CC                 | CC               | INTERGENIC                    |                    |                                          |
| SNP_63471_A_129001 | NW_004515683.1 | scaffold88  | 129001                  | AA                              | GG                 | GG               | INTERGENIC                    |                    |                                          |
| SNP_63472_A_133845 | NW_004515683.1 | scaffold88  | 133845                  | GG                              | TT                 | TT               | INTERGENIC                    |                    |                                          |
| SNP_63473_A_134229 | NW_004515683.1 | scaffold88  | 134229                  | TT                              | GG                 | GG               | INTERGENIC                    |                    |                                          |
| SNP_63474_A_165264 | NW_004515683.1 | scaffold88  | 165264                  | CC                              | TT                 | TT               | INTERGENIC                    |                    |                                          |
| SNP_63475_A_181325 | NW_004515683.1 | scaffold88  | 181325                  | CC                              | TT                 | TT               | INTERGENIC                    |                    |                                          |
| SNP_63476_A_181393 | NW_004515683.1 | scaffold88  | 181393                  | CC                              | TT                 | TT               | INTERGENIC                    |                    |                                          |
| SNP_63477_A_181413 | NW_004515683.1 | scaffold88  | 181413                  | GG                              | AA                 | AA               | INTERGENIC                    |                    |                                          |
| SNP_63478_A_181435 | NW_004515683.1 | scaffold88  | 181435                  | CC                              | TT                 | TT               | INTERGENIC                    |                    |                                          |
| SNP_63479_A_6576   | NW_004515684.1 | scaffold89  | 6576                    | GG                              | AA                 | AA               | INTRON                        | 101501454          | uncharacterized LOC101501454             |
| SNP_63480_A_6586   | NW_004515684.1 | scaffold89  | 6586                    | AA                              | GG                 | GG               | INTRON                        | 101501454          | uncharacterized LOC101501454             |
| SNP_63481_A_13164  | NW_004515684.1 | scaffold89  | 13164                   | CC                              | TT                 | TT               | INTRON                        | 101501454          | uncharacterized LOC101501454             |
| SNP_63482_A_13174  | NW_004515684.1 | scaffold89  | 13174                   | CC                              | AA                 | AA               | INTRON                        | 101501454          | uncharacterized LOC101501454             |
| SNP_63483_A_13220  | NW_004515684.1 | scaffold89  | 13220                   | GG                              | AA                 | AA               | INTRON                        | 101501454          | uncharacterized LOC101501454             |

| SNPs IDs           | Chromosome IDs | Chromosomes | Physical positions (bp) | CDC Frontier (Reference genome) | (Pusa 1103 & HPNB) | (ILWC 46 & LPNB) | Sequence Components of genome | Gene accession IDs | Putative functions                   |
|--------------------|----------------|-------------|-------------------------|---------------------------------|--------------------|------------------|-------------------------------|--------------------|--------------------------------------|
| SNP_63484_A_13223  | NW_004515684.1 | scaffold89  | 13223                   | AA                              | TT                 | TT               | INTRON                        | 101501454          | uncharacterized LOC101501454         |
| SNP_63485_A_13487  | NW_004515684.1 | scaffold89  | 13487                   | AA                              | CC                 | CC               | INTRON                        | 101501454          | uncharacterized LOC101501454         |
| SNP_63486_A_13505  | NW_004515684.1 | scaffold89  | 13505                   | AA                              | GG                 | GG               | INTRON                        | 101501454          | uncharacterized LOC101501454         |
| SNP_63487_A_13562  | NW_004515684.1 | scaffold89  | 13562                   | TT                              | CC                 | CC               | NON_SYNONYMOUS_CODING         | 101501454          | uncharacterized LOC101501454         |
| SNP_63488_A_13609  | NW_004515684.1 | scaffold89  | 13609                   | TT                              | GG                 | GG               | NON_SYNONYMOUS_CODING         | 101501454          | uncharacterized LOC101501454         |
| SNP_63489_A_22908  | NW_004515684.1 | scaffold89  | 22908                   | CC                              | TT                 | TT               | INTERGENIC                    |                    |                                      |
| SNP_63490_A_22948  | NW_004515684.1 | scaffold89  | 22948                   | CC                              | TT                 | TT               | INTERGENIC                    |                    |                                      |
| SNP_63491_A_23117  | NW_004515684.1 | scaffold89  | 23117                   | AA                              | GG                 | GG               | INTERGENIC                    |                    |                                      |
| SNP_63492_A_23562  | NW_004515684.1 | scaffold89  | 23562                   | TT                              | CC                 | CC               | INTERGENIC                    |                    |                                      |
| SNP_63493_A_23850  | NW_004515684.1 | scaffold89  | 23850                   | CC                              | TT                 | TT               | INTERGENIC                    |                    |                                      |
| SNP_63495_A_23943  | NW_004515684.1 | scaffold89  | 23943                   | TT                              | CC                 | CC               | INTERGENIC                    |                    |                                      |
| SNP_63496_A_23957  | NW_004515684.1 | scaffold89  | 23957                   | AA                              | GG                 | GG               | INTERGENIC                    |                    |                                      |
| SNP_63497_A_24052  | NW_004515684.1 | scaffold89  | 24052                   | GG                              | AA                 | AA               | INTERGENIC                    |                    |                                      |
| SNP_63498_A_24247  | NW_004515684.1 | scaffold89  | 24247                   | AA                              | GG                 | GG               | INTERGENIC                    |                    |                                      |
| SNP_63499_A_24271  | NW_004515684.1 | scaffold89  | 24271                   | CC                              | TT                 | TT               | INTERGENIC                    |                    |                                      |
| SNP_63501_A_126125 | NW_004515684.1 | scaffold89  | 126125                  | TT                              | CC                 | CC               | INTRON                        | 101503366          | histone acetyltransferase HAC12-like |
| SNP_63502_A_140148 | NW_004515684.1 | scaffold89  | 140148                  | TT                              | CC                 | CC               | INTERGENIC                    |                    |                                      |
| SNP_63503_A_142966 | NW_004515684.1 | scaffold89  | 142966                  | TT                              | AA                 | AA               | INTERGENIC                    |                    |                                      |
| SNP_63504_A_147022 | NW_004515684.1 | scaffold89  | 147022                  | TT                              | AA                 | AA               | INTERGENIC                    |                    |                                      |
| SNP_63505_A_169043 | NW_004515684.1 | scaffold89  | 169043                  | AA                              | GG                 | GG               | INTERGENIC                    |                    |                                      |
| SNP_63506_A_196666 | NW_004515684.1 | scaffold89  | 196666                  | CC                              | TT                 | TT               | INTRON                        | 101501148          | uncharacterized LOC101501148         |
| SNP_63507_A_218358 | NW_004515684.1 | scaffold89  | 218358                  | AA                              | GG                 | GG               | INTERGENIC                    |                    |                                      |

| SNPs IDs           | Chromosome IDs | Chromosomes | Physical positions (bp) | CDC Frontier (Reference genome) | (Pusa 1103 & HPNB) | (ILWC 46 & LPNB) | Sequence genome | Components of | Gene accession IDs | Putative functions |
|--------------------|----------------|-------------|-------------------------|---------------------------------|--------------------|------------------|-----------------|---------------|--------------------|--------------------|
| SNP_63508_A_221051 | NW_004515684.1 | scaffold89  | 221051                  | CC                              | TT                 | TT               | INTERGENIC      |               |                    |                    |
| SNP_63509_A_221478 | NW_004515684.1 | scaffold89  | 221478                  | AA                              | GG                 | GG               | INTERGENIC      |               |                    |                    |
| SNP_63510_A_221483 | NW_004515684.1 | scaffold89  | 221483                  | TT                              | CC                 | CC               | INTERGENIC      |               |                    |                    |
| SNP_63511_A_221799 | NW_004515684.1 | scaffold89  | 221799                  | AA                              | GG                 | GG               | INTERGENIC      |               |                    |                    |
| SNP_63512_A_221813 | NW_004515684.1 | scaffold89  | 221813                  | CC                              | TT                 | TT               | INTERGENIC      |               |                    |                    |
| SNP_63513_A_221854 | NW_004515684.1 | scaffold89  | 221854                  | TT                              | CC                 | CC               | INTERGENIC      |               |                    |                    |
| SNP_63514_A_221870 | NW_004515684.1 | scaffold89  | 221870                  | AA                              | GG                 | GG               | INTERGENIC      |               |                    |                    |
| SNP_63515_A_221904 | NW_004515684.1 | scaffold89  | 221904                  | TT                              | CC                 | CC               | INTERGENIC      |               |                    |                    |
| SNP_63516_A_221934 | NW_004515684.1 | scaffold89  | 221934                  | TT                              | CC                 | CC               | INTERGENIC      |               |                    |                    |
| SNP_63517_A_221981 | NW_004515684.1 | scaffold89  | 221981                  | TT                              | CC                 | CC               | INTERGENIC      |               |                    |                    |
| SNP_63518_A_222013 | NW_004515684.1 | scaffold89  | 222013                  | TT                              | CC                 | CC               | INTERGENIC      |               |                    |                    |
| SNP_63519_A_240765 | NW_004515684.1 | scaffold89  | 240765                  | CC                              | TT                 | TT               | INTERGENIC      |               |                    |                    |
| SNP_63520_A_3507   | NW_004515685.1 | scaffold92  | 3507                    | TT                              | CC                 | CC               | INTERGENIC      |               |                    |                    |
| SNP_63521_A_3702   | NW_004515685.1 | scaffold92  | 3702                    | CC                              | TT                 | TT               | INTERGENIC      |               |                    |                    |
| SNP_63522_A_4093   | NW_004515685.1 | scaffold92  | 4093                    | TT                              | CC                 | CC               | INTERGENIC      |               |                    |                    |
| SNP_63523_A_4125   | NW_004515685.1 | scaffold92  | 4125                    | CC                              | TT                 | TT               | INTERGENIC      |               |                    |                    |
| SNP_63524_A_4456   | NW_004515685.1 | scaffold92  | 4456                    | TT                              | AA                 | AA               | INTERGENIC      |               |                    |                    |
| SNP_63525_A_17045  | NW_004515685.1 | scaffold92  | 17045                   | TT                              | GG                 | GG               | INTERGENIC      |               |                    |                    |
| SNP_63526_A_17063  | NW_004515685.1 | scaffold92  | 17063                   | TT                              | CC                 | CC               | INTERGENIC      |               |                    |                    |
| SNP_63527_A_17398  | NW_004515685.1 | scaffold92  | 17398                   | CC                              | TT                 | TT               | INTERGENIC      |               |                    |                    |
| SNP_63528_A_18048  | NW_004515685.1 | scaffold92  | 18048                   | AA                              | TT                 | TT               | INTERGENIC      |               |                    |                    |
| SNP_63529_A_26826  | NW_004515685.1 | scaffold92  | 26826                   | AA                              | TT                 | TT               | INTERGENIC      |               |                    |                    |



| SNPs IDs          | Chromosome IDs | Chromosomes | Physical positions (bp) | CDC Frontier (Reference genome) | (Pusa 1103 & HPNB) | (ILWC 46 & LPNB) | Sequence genome | Components of | Gene accession IDs | Putative functions |
|-------------------|----------------|-------------|-------------------------|---------------------------------|--------------------|------------------|-----------------|---------------|--------------------|--------------------|
| SNP_63530_A_26828 | NW_004515685.1 | scaffold92  | 26828                   | CC                              | AA                 | AA               | INTERGENIC      |               |                    |                    |
| SNP_63531_A_28367 | NW_004515685.1 | scaffold92  | 28367                   | AA                              | GG                 | GG               | INTERGENIC      |               |                    |                    |
| SNP_63532_A_28865 | NW_004515685.1 | scaffold92  | 28865                   | GG                              | AA                 | AA               | INTERGENIC      |               |                    |                    |
| SNP_63533_A_28904 | NW_004515685.1 | scaffold92  | 28904                   | AA                              | GG                 | GG               | INTERGENIC      |               |                    |                    |
| SNP_63534_A_28921 | NW_004515685.1 | scaffold92  | 28921                   | AA                              | TT                 | TT               | INTERGENIC      |               |                    |                    |
| SNP_63535_A_28935 | NW_004515685.1 | scaffold92  | 28935                   | TT                              | AA                 | AA               | INTERGENIC      |               |                    |                    |
| SNP_63536_A_29117 | NW_004515685.1 | scaffold92  | 29117                   | AA                              | GG                 | GG               | INTERGENIC      |               |                    |                    |
| SNP_63537_A_29205 | NW_004515685.1 | scaffold92  | 29205                   | CC                              | TT                 | TT               | INTERGENIC      |               |                    |                    |
| SNP_63538_A_29219 | NW_004515685.1 | scaffold92  | 29219                   | GG                              | AA                 | AA               | INTERGENIC      |               |                    |                    |
| SNP_63539_A_29347 | NW_004515685.1 | scaffold92  | 29347                   | TT                              | AA                 | AA               | INTERGENIC      |               |                    |                    |
| SNP_63540_A_31342 | NW_004515685.1 | scaffold92  | 31342                   | AA                              | TT                 | TT               | INTERGENIC      |               |                    |                    |
| SNP_63541_A_31344 | NW_004515685.1 | scaffold92  | 31344                   | AA                              | CC                 | CC               | INTERGENIC      |               |                    |                    |
| SNP_63542_A_31741 | NW_004515685.1 | scaffold92  | 31741                   | GG                              | TT                 | TT               | INTERGENIC      |               |                    |                    |
| SNP_63543_A_31805 | NW_004515685.1 | scaffold92  | 31805                   | AA                              | CC                 | CC               | INTERGENIC      |               |                    |                    |
| SNP_63544_A_32663 | NW_004515685.1 | scaffold92  | 32663                   | AA                              | TT                 | TT               | INTERGENIC      |               |                    |                    |
| SNP_63545_A_32987 | NW_004515685.1 | scaffold92  | 32987                   | AA                              | TT                 | TT               | INTERGENIC      |               |                    |                    |
| SNP_63546_A_33200 | NW_004515685.1 | scaffold92  | 33200                   | GG                              | AA                 | AA               | INTERGENIC      |               |                    |                    |
| SNP_63547_A_34002 | NW_004515685.1 | scaffold92  | 34002                   | AA                              | TT                 | TT               | INTERGENIC      |               |                    |                    |
| SNP_63548_A_34203 | NW_004515685.1 | scaffold92  | 34203                   | TT                              | AA                 | AA               | INTERGENIC      |               |                    |                    |
| SNP_63549_A_34514 | NW_004515685.1 | scaffold92  | 34514                   | AA                              | CC                 | CC               | INTERGENIC      |               |                    |                    |
| SNP_63550_A_34563 | NW_004515685.1 | scaffold92  | 34563                   | GG                              | CC                 | CC               | INTERGENIC      |               |                    |                    |
| SNP_63551_A_34779 | NW_004515685.1 | scaffold92  | 34779                   | GG                              | CC                 | CC               | INTERGENIC      |               |                    |                    |

| SNPs IDs          | Chromosome IDs | Chromosomes | Physical positions (bp) | CDC Frontier (Reference genome) | (Pusa 1103 & HPNB) | (ILWC 46 & LPNB) | Sequence genome | Components of | Gene accession IDs | Putative functions |
|-------------------|----------------|-------------|-------------------------|---------------------------------|--------------------|------------------|-----------------|---------------|--------------------|--------------------|
| SNP_63552_A_34794 | NW_004515685.1 | scaffold92  | 34794                   | CC                              | TT                 | TT               | INTERGENIC      |               |                    |                    |
| SNP_63553_A_34919 | NW_004515685.1 | scaffold92  | 34919                   | TT                              | CC                 | CC               | INTERGENIC      |               |                    |                    |
| SNP_63554_A_34943 | NW_004515685.1 | scaffold92  | 34943                   | TT                              | CC                 | CC               | INTERGENIC      |               |                    |                    |
| SNP_63555_A_34975 | NW_004515685.1 | scaffold92  | 34975                   | AA                              | GG                 | GG               | INTERGENIC      |               |                    |                    |
| SNP_63556_A_35070 | NW_004515685.1 | scaffold92  | 35070                   | TT                              | CC                 | CC               | INTERGENIC      |               |                    |                    |
| SNP_63557_A_35106 | NW_004515685.1 | scaffold92  | 35106                   | CC                              | TT                 | TT               | INTERGENIC      |               |                    |                    |
| SNP_63558_A_35149 | NW_004515685.1 | scaffold92  | 35149                   | AA                              | GG                 | GG               | INTERGENIC      |               |                    |                    |
| SNP_63559_A_35151 | NW_004515685.1 | scaffold92  | 35151                   | AA                              | GG                 | GG               | INTERGENIC      |               |                    |                    |
| SNP_63560_A_35417 | NW_004515685.1 | scaffold92  | 35417                   | TT                              | GG                 | GG               | INTERGENIC      |               |                    |                    |
| SNP_63561_A_35451 | NW_004515685.1 | scaffold92  | 35451                   | CC                              | TT                 | TT               | INTERGENIC      |               |                    |                    |
| SNP_63562_A_35586 | NW_004515685.1 | scaffold92  | 35586                   | AA                              | GG                 | GG               | INTERGENIC      |               |                    |                    |
| SNP_63563_A_35648 | NW_004515685.1 | scaffold92  | 35648                   | AA                              | GG                 | GG               | INTERGENIC      |               |                    |                    |
| SNP_63564_A_35649 | NW_004515685.1 | scaffold92  | 35649                   | TT                              | CC                 | CC               | INTERGENIC      |               |                    |                    |
| SNP_63565_A_35656 | NW_004515685.1 | scaffold92  | 35656                   | TT                              | CC                 | CC               | INTERGENIC      |               |                    |                    |
| SNP_63566_A_35685 | NW_004515685.1 | scaffold92  | 35685                   | GG                              | AA                 | AA               | INTERGENIC      |               |                    |                    |
| SNP_63567_A_39428 | NW_004515685.1 | scaffold92  | 39428                   | AA                              | GG                 | GG               | INTERGENIC      |               |                    |                    |
| SNP_63568_A_41709 | NW_004515685.1 | scaffold92  | 41709                   | AA                              | TT                 | TT               | INTERGENIC      |               |                    |                    |
| SNP_63569_A_43452 | NW_004515685.1 | scaffold92  | 43452                   | GG                              | AA                 | AA               | INTERGENIC      |               |                    |                    |
| SNP_63570_A_45106 | NW_004515685.1 | scaffold92  | 45106                   | TT                              | AA                 | AA               | INTERGENIC      |               |                    |                    |
| SNP_63572_A_69101 | NW_004515685.1 | scaffold92  | 69101                   | TT                              | AA                 | AA               | INTERGENIC      |               |                    |                    |
| SNP_63573_A_69142 | NW_004515685.1 | scaffold92  | 69142                   | TT                              | CC                 | CC               | INTERGENIC      |               |                    |                    |
| SNP_63574_A_69169 | NW_004515685.1 | scaffold92  | 69169                   | AA                              | CC                 | CC               | INTERGENIC      |               |                    |                    |

| SNPs IDs           | Chromosome IDs | Chromosomes | Physical positions (bp) | CDC Frontier (Reference genome) | (Pusa 1103 & HPNB) | (ILWC 46 & LPNB) | Sequence genome | Components of | Gene accession IDs | Putative functions |
|--------------------|----------------|-------------|-------------------------|---------------------------------|--------------------|------------------|-----------------|---------------|--------------------|--------------------|
| SNP_63575_A_69170  | NW_004515685.1 | scaffold92  | 69170                   | AA                              | CC                 | CC               | INTERGENIC      |               |                    |                    |
| SNP_63576_A_69174  | NW_004515685.1 | scaffold92  | 69174                   | CC                              | GG                 | GG               | INTERGENIC      |               |                    |                    |
| SNP_63577_A_69179  | NW_004515685.1 | scaffold92  | 69179                   | CC                              | TT                 | TT               | INTERGENIC      |               |                    |                    |
| SNP_63578_A_69613  | NW_004515685.1 | scaffold92  | 69613                   | AA                              | GG                 | GG               | INTERGENIC      |               |                    |                    |
| SNP_63579_A_77648  | NW_004515685.1 | scaffold92  | 77648                   | CC                              | TT                 | TT               | INTERGENIC      |               |                    |                    |
| SNP_63580_A_85740  | NW_004515685.1 | scaffold92  | 85740                   | AA                              | GG                 | GG               | INTERGENIC      |               |                    |                    |
| SNP_63581_A_89077  | NW_004515685.1 | scaffold92  | 89077                   | GG                              | TT                 | TT               | INTERGENIC      |               |                    |                    |
| SNP_63582_A_92416  | NW_004515685.1 | scaffold92  | 92416                   | AA                              | CC                 | CC               | INTERGENIC      |               |                    |                    |
| SNP_63583_A_92471  | NW_004515685.1 | scaffold92  | 92471                   | TT                              | GG                 | GG               | INTERGENIC      |               |                    |                    |
| SNP_63584_A_109139 | NW_004515685.1 | scaffold92  | 109139                  | AA                              | GG                 | GG               | INTERGENIC      |               |                    |                    |
| SNP_63585_A_109150 | NW_004515685.1 | scaffold92  | 109150                  | CC                              | AA                 | AA               | INTERGENIC      |               |                    |                    |
| SNP_63586_A_109255 | NW_004515685.1 | scaffold92  | 109255                  | CC                              | TT                 | TT               | INTERGENIC      |               |                    |                    |
| SNP_63587_A_109482 | NW_004515685.1 | scaffold92  | 109482                  | TT                              | CC                 | CC               | INTERGENIC      |               |                    |                    |
| SNP_63588_A_109841 | NW_004515685.1 | scaffold92  | 109841                  | GG                              | CC                 | CC               | INTERGENIC      |               |                    |                    |
| SNP_63589_A_110101 | NW_004515685.1 | scaffold92  | 110101                  | CC                              | TT                 | TT               | INTERGENIC      |               |                    |                    |
| SNP_63590_A_114060 | NW_004515685.1 | scaffold92  | 114060                  | AA                              | GG                 | GG               | INTERGENIC      |               |                    |                    |
| SNP_63591_A_114380 | NW_004515685.1 | scaffold92  | 114380                  | AA                              | GG                 | GG               | INTERGENIC      |               |                    |                    |
| SNP_63592_A_5563   | NW_004515686.1 | scaffold93  | 5563                    | CC                              | GG                 | GG               | INTERGENIC      |               |                    |                    |
| SNP_63594_A_7687   | NW_004515686.1 | scaffold93  | 7687                    | GG                              | TT                 | TT               | INTERGENIC      |               |                    |                    |
| SNP_63595_A_7721   | NW_004515686.1 | scaffold93  | 7721                    | GG                              | AA                 | AA               | INTERGENIC      |               |                    |                    |
| SNP_63596_A_8468   | NW_004515686.1 | scaffold93  | 8468                    | CC                              | GG                 | GG               | INTERGENIC      |               |                    |                    |
| SNP_63597_A_8542   | NW_004515686.1 | scaffold93  | 8542                    | AA                              | GG                 | GG               | INTERGENIC      |               |                    |                    |

| SNPs IDs          | Chromosome IDs | Chromosomes | Physical positions (bp) | CDC Frontier genome (Reference genome) | (Pusa 1103 & HPNB) | (ILWC 46 & LPNB) | Sequence genome | Components of | Gene accession IDs | Putative functions |
|-------------------|----------------|-------------|-------------------------|----------------------------------------|--------------------|------------------|-----------------|---------------|--------------------|--------------------|
| SNP_63598_A_8732  | NW_004515686.1 | scaffold93  | 8732                    | TT                                     | CC                 | CC               | INTERGENIC      |               |                    |                    |
| SNP_63599_A_8769  | NW_004515686.1 | scaffold93  | 8769                    | TT                                     | CC                 | CC               | INTERGENIC      |               |                    |                    |
| SNP_63600_A_9382  | NW_004515686.1 | scaffold93  | 9382                    | TT                                     | GG                 | GG               | INTERGENIC      |               |                    |                    |
| SNP_63601_A_9457  | NW_004515686.1 | scaffold93  | 9457                    | AA                                     | GG                 | GG               | INTERGENIC      |               |                    |                    |
| SNP_63602_A_27758 | NW_004515686.1 | scaffold93  | 27758                   | TT                                     | CC                 | CC               | INTERGENIC      |               |                    |                    |
| SNP_63603_A_28412 | NW_004515686.1 | scaffold93  | 28412                   | TT                                     | AA                 | AA               | INTERGENIC      |               |                    |                    |
| SNP_63604_A_28420 | NW_004515686.1 | scaffold93  | 28420                   | CC                                     | TT                 | TT               | INTERGENIC      |               |                    |                    |
| SNP_63605_A_28423 | NW_004515686.1 | scaffold93  | 28423                   | TT                                     | CC                 | CC               | INTERGENIC      |               |                    |                    |
| SNP_63606_A_28682 | NW_004515686.1 | scaffold93  | 28682                   | CC                                     | TT                 | TT               | INTERGENIC      |               |                    |                    |
| SNP_63607_A_28715 | NW_004515686.1 | scaffold93  | 28715                   | CC                                     | AA                 | AA               | INTERGENIC      |               |                    |                    |
| SNP_63608_A_38601 | NW_004515686.1 | scaffold93  | 38601                   | GG                                     | AA                 | AA               | INTERGENIC      |               |                    |                    |
| SNP_63609_A_38629 | NW_004515686.1 | scaffold93  | 38629                   | CC                                     | AA                 | AA               | INTERGENIC      |               |                    |                    |
| SNP_63610_A_46796 | NW_004515686.1 | scaffold93  | 46796                   | AA                                     | GG                 | GG               | INTERGENIC      |               |                    |                    |
| SNP_63611_A_46867 | NW_004515686.1 | scaffold93  | 46867                   | TT                                     | CC                 | CC               | INTERGENIC      |               |                    |                    |
| SNP_63612_A_46884 | NW_004515686.1 | scaffold93  | 46884                   | AA                                     | GG                 | GG               | INTERGENIC      |               |                    |                    |
| SNP_63613_A_46895 | NW_004515686.1 | scaffold93  | 46895                   | TT                                     | AA                 | AA               | INTERGENIC      |               |                    |                    |
| SNP_63614_A_46902 | NW_004515686.1 | scaffold93  | 46902                   | TT                                     | CC                 | CC               | INTERGENIC      |               |                    |                    |
| SNP_63615_A_46930 | NW_004515686.1 | scaffold93  | 46930                   | AA                                     | CC                 | CC               | INTERGENIC      |               |                    |                    |
| SNP_63616_A_46946 | NW_004515686.1 | scaffold93  | 46946                   | CC                                     | TT                 | TT               | INTERGENIC      |               |                    |                    |
| SNP_63617_A_47465 | NW_004515686.1 | scaffold93  | 47465                   | TT                                     | CC                 | CC               | INTERGENIC      |               |                    |                    |
| SNP_63618_A_94557 | NW_004515686.1 | scaffold93  | 94557                   | TT                                     | AA                 | AA               | INTERGENIC      |               |                    |                    |
| SNP_63619_A_97175 | NW_004515686.1 | scaffold93  | 97175                   | TT                                     | CC                 | CC               | INTERGENIC      |               |                    |                    |

| SNPs IDs           | Chromosome IDs | Chromosomes | Physical positions (bp) | CDC Frontier (Reference genome) | (Pusa 1103 & HPNB) | (ILWC 46 & LPNB) | Sequence genome | Components of | Gene accession IDs | Putative functions |
|--------------------|----------------|-------------|-------------------------|---------------------------------|--------------------|------------------|-----------------|---------------|--------------------|--------------------|
| SNP_63621_A_132654 | NW_004515686.1 | scaffold93  | 132654                  | CC                              | TT                 | TT               | INTERGENIC      |               |                    |                    |
| SNP_63622_A_132658 | NW_004515686.1 | scaffold93  | 132658                  | GG                              | CC                 | CC               | INTERGENIC      |               |                    |                    |
| SNP_63623_A_132665 | NW_004515686.1 | scaffold93  | 132665                  | AA                              | CC                 | CC               | INTERGENIC      |               |                    |                    |
| SNP_63624_A_132680 | NW_004515686.1 | scaffold93  | 132680                  | AA                              | TT                 | TT               | INTERGENIC      |               |                    |                    |
| SNP_63625_A_140813 | NW_004515686.1 | scaffold93  | 140813                  | TT                              | CC                 | CC               | INTERGENIC      |               |                    |                    |
| SNP_63626_A_140886 | NW_004515686.1 | scaffold93  | 140886                  | AA                              | GG                 | GG               | INTERGENIC      |               |                    |                    |
| SNP_63627_A_141088 | NW_004515686.1 | scaffold93  | 141088                  | TT                              | CC                 | CC               | INTERGENIC      |               |                    |                    |
| SNP_63629_A_141174 | NW_004515686.1 | scaffold93  | 141174                  | CC                              | TT                 | TT               | INTERGENIC      |               |                    |                    |
| SNP_63630_A_141258 | NW_004515686.1 | scaffold93  | 141258                  | AA                              | GG                 | GG               | INTERGENIC      |               |                    |                    |
| SNP_63631_A_149053 | NW_004515686.1 | scaffold93  | 149053                  | AA                              | GG                 | GG               | INTERGENIC      |               |                    |                    |
| SNP_63632_A_149120 | NW_004515686.1 | scaffold93  | 149120                  | CC                              | TT                 | TT               | INTERGENIC      |               |                    |                    |
| SNP_63633_A_153621 | NW_004515686.1 | scaffold93  | 153621                  | TT                              | CC                 | CC               | INTERGENIC      |               |                    |                    |
| SNP_63634_A_153897 | NW_004515686.1 | scaffold93  | 153897                  | TT                              | CC                 | CC               | INTERGENIC      |               |                    |                    |
| SNP_63635_A_180662 | NW_004515686.1 | scaffold93  | 180662                  | AA                              | CC                 | CC               | INTERGENIC      |               |                    |                    |
| SNP_63636_A_180685 | NW_004515686.1 | scaffold93  | 180685                  | TT                              | CC                 | CC               | INTERGENIC      |               |                    |                    |
| SNP_63637_A_210398 | NW_004515686.1 | scaffold93  | 210398                  | TT                              | AA                 | AA               | INTERGENIC      |               |                    |                    |
| SNP_63638_A_210403 | NW_004515686.1 | scaffold93  | 210403                  | GG                              | AA                 | AA               | INTERGENIC      |               |                    |                    |
| SNP_63639_A_221813 | NW_004515686.1 | scaffold93  | 221813                  | CC                              | GG                 | GG               | INTERGENIC      |               |                    |                    |
| SNP_63640_A_264114 | NW_004515686.1 | scaffold93  | 264114                  | TT                              | CC                 | CC               | INTERGENIC      |               |                    |                    |
| SNP_63641_A_270265 | NW_004515686.1 | scaffold93  | 270265                  | GG                              | AA                 | AA               | INTERGENIC      |               |                    |                    |
| SNP_63642_A_296240 | NW_004515686.1 | scaffold93  | 296240                  | GG                              | AA                 | AA               | INTERGENIC      |               |                    |                    |
| SNP_63643_A_296248 | NW_004515686.1 | scaffold93  | 296248                  | GG                              | AA                 | AA               | INTERGENIC      |               |                    |                    |

| SNPs IDs           | Chromosome IDs | Chromosomes | Physical positions (bp) | CDC Frontier (Reference genome) | (Pusa 1103 & HPNB) | (ILWC 46 & LPNB) | Sequence Components of genome | Gene accession IDs | Putative functions                    |
|--------------------|----------------|-------------|-------------------------|---------------------------------|--------------------|------------------|-------------------------------|--------------------|---------------------------------------|
| SNP_63645_A_296561 | NW_004515686.1 | scaffold93  | 296561                  | CC                              | TT                 | TT               | INTERGENIC                    |                    |                                       |
| SNP_63646_A_296565 | NW_004515686.1 | scaffold93  | 296565                  | CC                              | TT                 | TT               | INTERGENIC                    |                    |                                       |
| SNP_63647_A_296596 | NW_004515686.1 | scaffold93  | 296596                  | TT                              | GG                 | GG               | INTERGENIC                    |                    |                                       |
| SNP_63648_A_296628 | NW_004515686.1 | scaffold93  | 296628                  | AA                              | CC                 | CC               | INTERGENIC                    |                    |                                       |
| SNP_63649_A_296671 | NW_004515686.1 | scaffold93  | 296671                  | TT                              | CC                 | CC               | INTERGENIC                    |                    |                                       |
| SNP_63650_A_296679 | NW_004515686.1 | scaffold93  | 296679                  | GG                              | AA                 | AA               | INTERGENIC                    |                    |                                       |
| SNP_63651_A_296720 | NW_004515686.1 | scaffold93  | 296720                  | TT                              | GG                 | GG               | INTERGENIC                    |                    |                                       |
| SNP_63652_A_337779 | NW_004515686.1 | scaffold93  | 337779                  | GG                              | AA                 | AA               | INTRON                        | 101505642          | crossover junction endonuclease MUS81 |
| SNP_63653_A_337851 | NW_004515686.1 | scaffold93  | 337851                  | TT                              | CC                 | CC               | INTRON                        | 101505642          | crossover junction endonuclease MUS81 |
| SNP_63654_A_337889 | NW_004515686.1 | scaffold93  | 337889                  | TT                              | CC                 | CC               | INTRON                        | 101505642          | crossover junction endonuclease MUS81 |
| SNP_63655_A_337925 | NW_004515686.1 | scaffold93  | 337925                  | TT                              | CC                 | CC               | INTRON                        | 101505642          | crossover junction endonuclease MUS81 |
| SNP_63657_A_338043 | NW_004515686.1 | scaffold93  | 338043                  | AA                              | CC                 | CC               | INTRON                        | 101505642          | crossover junction endonuclease MUS81 |
| SNP_63658_A_338084 | NW_004515686.1 | scaffold93  | 338084                  | CC                              | TT                 | TT               | INTRON                        | 101505642          | crossover junction endonuclease MUS81 |
| SNP_63659_A_338114 | NW_004515686.1 | scaffold93  | 338114                  | TT                              | GG                 | GG               | INTRON                        | 101505642          | crossover junction endonuclease MUS81 |
| SNP_63660_A_338135 | NW_004515686.1 | scaffold93  | 338135                  | GG                              | TT                 | TT               | INTRON                        | 101505642          | crossover junction endonuclease MUS81 |
| SNP_63661_A_338224 | NW_004515686.1 | scaffold93  | 338224                  | AA                              | GG                 | GG               | INTRON                        | 101505642          | crossover junction endonuclease MUS81 |
| SNP_63662_A_338408 | NW_004515686.1 | scaffold93  | 338408                  | GG                              | AA                 | AA               | INTRON                        | 101505642          | crossover junction endonuclease MUS81 |
| SNP_63663_A_355496 | NW_004515686.1 | scaffold93  | 355496                  | CC                              | TT                 | TT               | INTERGENIC                    |                    |                                       |
| SNP_63664_A_356048 | NW_004515686.1 | scaffold93  | 356048                  | CC                              | GG                 | GG               | INTERGENIC                    |                    |                                       |
| SNP_63665_A_387568 | NW_004515686.1 | scaffold93  | 387568                  | GG                              | AA                 | AA               | INTERGENIC                    |                    |                                       |
| SNP_63666_A_390751 | NW_004515686.1 | scaffold93  | 390751                  | TT                              | CC                 | CC               | INTERGENIC                    |                    |                                       |
| SNP_63667_A_469724 | NW_004515686.1 | scaffold93  | 469724                  | CC                              | AA                 | AA               | INTERGENIC                    |                    |                                       |

| SNPs IDs           | Chromosome IDs | Chromosomes | Physical positions (bp) | CDC Frontier (Reference genome) | (Pusa 1103 & HPNB) | (ILWC 46 & LPNB) | Sequence Components of genome | Gene accession IDs | Putative functions           |
|--------------------|----------------|-------------|-------------------------|---------------------------------|--------------------|------------------|-------------------------------|--------------------|------------------------------|
| SNP_63668_A_483517 | NW_004515686.1 | scaffold93  | 483517                  | AA                              | GG                 | GG               | INTERGENIC                    |                    |                              |
| SNP_63669_A_483613 | NW_004515686.1 | scaffold93  | 483613                  | GG                              | AA                 | AA               | INTERGENIC                    |                    |                              |
| SNP_63670_A_499606 | NW_004515686.1 | scaffold93  | 499606                  | TT                              | CC                 | CC               | INTERGENIC                    |                    |                              |
| SNP_63671_A_499998 | NW_004515686.1 | scaffold93  | 499998                  | AA                              | GG                 | GG               | INTERGENIC                    |                    |                              |
| SNP_63672_A_499999 | NW_004515686.1 | scaffold93  | 499999                  | GG                              | AA                 | AA               | INTERGENIC                    |                    |                              |
| SNP_63673_A_503477 | NW_004515686.1 | scaffold93  | 503477                  | GG                              | AA                 | AA               | INTERGENIC                    |                    |                              |
| SNP_63674_A_503489 | NW_004515686.1 | scaffold93  | 503489                  | TT                              | GG                 | GG               | INTERGENIC                    |                    |                              |
| SNP_63675_A_503529 | NW_004515686.1 | scaffold93  | 503529                  | AA                              | GG                 | GG               | INTERGENIC                    |                    |                              |
| SNP_63676_A_503537 | NW_004515686.1 | scaffold93  | 503537                  | TT                              | CC                 | CC               | INTERGENIC                    |                    |                              |
| SNP_63677_A_503540 | NW_004515686.1 | scaffold93  | 503540                  | AA                              | CC                 | CC               | INTERGENIC                    |                    |                              |
| SNP_63678_A_503547 | NW_004515686.1 | scaffold93  | 503547                  | AA                              | GG                 | GG               | INTERGENIC                    |                    |                              |
| SNP_63679_A_503550 | NW_004515686.1 | scaffold93  | 503550                  | GG                              | CC                 | CC               | INTERGENIC                    |                    |                              |
| SNP_63680_A_503556 | NW_004515686.1 | scaffold93  | 503556                  | GG                              | TT                 | TT               | INTERGENIC                    |                    |                              |
| SNP_63681_A_503562 | NW_004515686.1 | scaffold93  | 503562                  | AA                              | TT                 | TT               | INTERGENIC                    |                    |                              |
| SNP_63682_A_529696 | NW_004515686.1 | scaffold93  | 529696                  | CC                              | TT                 | TT               | INTERGENIC                    |                    |                              |
| SNP_63683_A_538998 | NW_004515686.1 | scaffold93  | 538998                  | AA                              | GG                 | GG               | INTERGENIC                    |                    |                              |
| SNP_63684_A_538999 | NW_004515686.1 | scaffold93  | 538999                  | GG                              | AA                 | AA               | INTERGENIC                    |                    |                              |
| SNP_63685_A_572803 | NW_004515686.1 | scaffold93  | 572803                  | CC                              | AA                 | AA               | URR                           | 101508738          | uncharacterized LOC101508738 |
| SNP_63686_A_572872 | NW_004515686.1 | scaffold93  | 572872                  | AA                              | TT                 | TT               | URR                           | 101508738          | uncharacterized LOC101508738 |
| SNP_63687_A_572953 | NW_004515686.1 | scaffold93  | 572953                  | TT                              | AA                 | AA               | URR                           | 101508738          | uncharacterized LOC101508738 |
| SNP_63688_A_573019 | NW_004515686.1 | scaffold93  | 573019                  | GG                              | CC                 | CC               | URR                           | 101508738          | uncharacterized LOC101508738 |
| SNP_63689_A_573062 | NW_004515686.1 | scaffold93  | 573062                  | TT                              | CC                 | CC               | URR                           | 101508738          | uncharacterized LOC101508738 |

| SNPs IDs           | Chromosome IDs | Chromosomes | Physical positions (bp) | CDC Frontier (Reference genome) | (Pusa 1103 & HPNB) | (ILWC 46 & LPNB) | Sequence Components of genome | Gene accession IDs | Putative functions           |
|--------------------|----------------|-------------|-------------------------|---------------------------------|--------------------|------------------|-------------------------------|--------------------|------------------------------|
| SNP_63690_A_573063 | NW_004515686.1 | scaffold93  | 573063                  | GG                              | AA                 | AA               | URR                           | 101508738          | uncharacterized LOC101508738 |
| SNP_63691_A_573273 | NW_004515686.1 | scaffold93  | 573273                  | CC                              | TT                 | TT               | URR                           | 101508738          | uncharacterized LOC101508738 |
| SNP_63692_A_573301 | NW_004515686.1 | scaffold93  | 573301                  | CC                              | AA                 | AA               | URR                           | 101508738          | uncharacterized LOC101508738 |
| SNP_63693_A_573472 | NW_004515686.1 | scaffold93  | 573472                  | GG                              | CC                 | CC               | URR                           | 101508738          | uncharacterized LOC101508738 |
| SNP_63694_A_573703 | NW_004515686.1 | scaffold93  | 573703                  | TT                              | GG                 | GG               | URR                           | 101508738          | uncharacterized LOC101508738 |
| SNP_63695_A_574270 | NW_004515686.1 | scaffold93  | 574270                  | CC                              | TT                 | TT               | DRR                           | 101514653          | uncharacterized LOC101514653 |
| SNP_63696_A_574346 | NW_004515686.1 | scaffold93  | 574346                  | CC                              | AA                 | AA               | DRR                           | 101514653          | uncharacterized LOC101514653 |
| SNP_63697_A_624417 | NW_004515686.1 | scaffold93  | 624417                  | CC                              | TT                 | TT               | INTERGENIC                    |                    |                              |
| SNP_63698_A_624509 | NW_004515686.1 | scaffold93  | 624509                  | CC                              | TT                 | TT               | INTERGENIC                    |                    |                              |
| SNP_63699_A_624903 | NW_004515686.1 | scaffold93  | 624903                  | TT                              | CC                 | CC               | INTERGENIC                    |                    |                              |
| SNP_63700_A_632355 | NW_004515686.1 | scaffold93  | 632355                  | AA                              | GG                 | GG               | INTERGENIC                    |                    |                              |
| SNP_63701_A_632358 | NW_004515686.1 | scaffold93  | 632358                  | AA                              | TT                 | TT               | INTERGENIC                    |                    |                              |
| SNP_63702_A_632392 | NW_004515686.1 | scaffold93  | 632392                  | GG                              | AA                 | AA               | INTERGENIC                    |                    |                              |
| SNP_63703_A_651794 | NW_004515686.1 | scaffold93  | 651794                  | CC                              | TT                 | TT               | INTERGENIC                    |                    |                              |
| SNP_63704_A_663130 | NW_004515686.1 | scaffold93  | 663130                  | TT                              | CC                 | CC               | URR                           | 101514981          | uncharacterized LOC101514981 |
| SNP_63705_A_2160   | NW_004515687.1 | scaffold96  | 2160                    | AA                              | CC                 | CC               | INTERGENIC                    |                    |                              |
| SNP_63706_A_2334   | NW_004515687.1 | scaffold96  | 2334                    | TT                              | CC                 | CC               | INTERGENIC                    |                    |                              |
| SNP_63707_A_2541   | NW_004515687.1 | scaffold96  | 2541                    | AA                              | GG                 | GG               | INTERGENIC                    |                    |                              |
| SNP_63708_A_108707 | NW_004515687.1 | scaffold96  | 108707                  | CC                              | GG                 | GG               | INTRON                        | 101490890          | uncharacterized LOC101490890 |
| SNP_63709_A_110279 | NW_004515687.1 | scaffold96  | 110279                  | CC                              | TT                 | TT               | INTRON                        | 101490890          | uncharacterized LOC101490890 |
| SNP_63710_A_118468 | NW_004515687.1 | scaffold96  | 118468                  | AA                              | TT                 | TT               | INTRON                        | 101490890          | uncharacterized LOC101490890 |
| SNP_63711_A_127902 | NW_004515687.1 | scaffold96  | 127902                  | GG                              | AA                 | AA               | INTRON                        | 101490890          | uncharacterized LOC101490890 |



| SNPs IDs           | Chromosome IDs | Chromosomes | Physical positions (bp) | CDC Frontier (Reference genome) | (Pusa 1103 & HPNB) | (ILWC 46 & LPNB) | Sequence Components of genome | Gene accession IDs | Putative functions           |
|--------------------|----------------|-------------|-------------------------|---------------------------------|--------------------|------------------|-------------------------------|--------------------|------------------------------|
| SNP_63712_A_153234 | NW_004515687.1 | scaffold96  | 153234                  | AA                              | GG                 | GG               | URR                           | 101490890          | uncharacterized LOC101490890 |
| SNP_63713_A_159863 | NW_004515687.1 | scaffold96  | 159863                  | GG                              | AA                 | AA               | INTERGENIC                    |                    |                              |
| SNP_63714_A_159889 | NW_004515687.1 | scaffold96  | 159889                  | GG                              | TT                 | TT               | INTERGENIC                    |                    |                              |
| SNP_63715_A_159950 | NW_004515687.1 | scaffold96  | 159950                  | GG                              | AA                 | AA               | INTERGENIC                    |                    |                              |
| SNP_63716_A_160024 | NW_004515687.1 | scaffold96  | 160024                  | TT                              | CC                 | CC               | INTERGENIC                    |                    |                              |
| SNP_63717_A_160043 | NW_004515687.1 | scaffold96  | 160043                  | TT                              | GG                 | GG               | INTERGENIC                    |                    |                              |
| SNP_63718_A_160069 | NW_004515687.1 | scaffold96  | 160069                  | TT                              | GG                 | GG               | INTERGENIC                    |                    |                              |
| SNP_63719_A_160091 | NW_004515687.1 | scaffold96  | 160091                  | TT                              | CC                 | CC               | INTERGENIC                    |                    |                              |
| SNP_63720_A_180943 | NW_004515687.1 | scaffold96  | 180943                  | GG                              | AA                 | AA               | INTERGENIC                    |                    |                              |
| SNP_63721_A_180952 | NW_004515687.1 | scaffold96  | 180952                  | TT                              | AA                 | AA               | INTERGENIC                    |                    |                              |
| SNP_63722_A_180961 | NW_004515687.1 | scaffold96  | 180961                  | AA                              | CC                 | CC               | INTERGENIC                    |                    |                              |
| SNP_63723_A_188039 | NW_004515687.1 | scaffold96  | 188039                  | TT                              | CC                 | CC               | INTERGENIC                    |                    |                              |
| SNP_63725_A_197941 | NW_004515687.1 | scaffold96  | 197941                  | CC                              | TT                 | TT               | INTERGENIC                    |                    |                              |
| SNP_63726_A_199451 | NW_004515687.1 | scaffold96  | 199451                  | AA                              | TT                 | TT               | INTERGENIC                    |                    |                              |
| SNP_63727_A_316485 | NW_004515687.1 | scaffold96  | 316485                  | AA                              | TT                 | TT               | INTRON                        | 101493166          | uncharacterized LOC101493166 |
| SNP_63728_A_316498 | NW_004515687.1 | scaffold96  | 316498                  | TT                              | CC                 | CC               | INTRON                        | 101493166          | uncharacterized LOC101493166 |
| SNP_63729_A_316524 | NW_004515687.1 | scaffold96  | 316524                  | CC                              | TT                 | TT               | INTRON                        | 101493166          | uncharacterized LOC101493166 |
| SNP_63730_A_316562 | NW_004515687.1 | scaffold96  | 316562                  | CC                              | TT                 | TT               | INTRON                        | 101493166          | uncharacterized LOC101493166 |
| SNP_63731_A_316637 | NW_004515687.1 | scaffold96  | 316637                  | CC                              | TT                 | TT               | INTRON                        | 101493166          | uncharacterized LOC101493166 |
| SNP_63732_A_324012 | NW_004515687.1 | scaffold96  | 324012                  | AA                              | GG                 | GG               | INTERGENIC                    |                    |                              |
| SNP_63733_A_335348 | NW_004515687.1 | scaffold96  | 335348                  | AA                              | CC                 | CC               | INTERGENIC                    |                    |                              |
| SNP_63734_A_13937  | NW_004515688.1 | scaffold98  | 13937                   | GG                              | AA                 | AA               | INTERGENIC                    |                    |                              |

| SNPs IDs           | Chromosome IDs | Chromosomes | Physical positions (bp) | CDC Frontier (Reference genome) | (Pusa 1103 & HPNB) | (ILWC 46 & LPNB) | Sequence genome | Components of | Gene accession IDs | Putative functions |
|--------------------|----------------|-------------|-------------------------|---------------------------------|--------------------|------------------|-----------------|---------------|--------------------|--------------------|
| SNP_63735_A_13943  | NW_004515688.1 | scaffold98  | 13943                   | GG                              | AA                 | AA               | INTERGENIC      |               |                    |                    |
| SNP_63736_A_13944  | NW_004515688.1 | scaffold98  | 13944                   | GG                              | AA                 | AA               | INTERGENIC      |               |                    |                    |
| SNP_63737_A_63963  | NW_004515688.1 | scaffold98  | 63963                   | GG                              | TT                 | TT               | INTERGENIC      |               |                    |                    |
| SNP_63738_A_63978  | NW_004515688.1 | scaffold98  | 63978                   | AA                              | GG                 | GG               | INTERGENIC      |               |                    |                    |
| SNP_63739_A_63979  | NW_004515688.1 | scaffold98  | 63979                   | AA                              | GG                 | GG               | INTERGENIC      |               |                    |                    |
| SNP_63740_A_89110  | NW_004515688.1 | scaffold98  | 89110                   | AA                              | GG                 | GG               | INTERGENIC      |               |                    |                    |
| SNP_63741_A_89115  | NW_004515688.1 | scaffold98  | 89115                   | AA                              | TT                 | TT               | INTERGENIC      |               |                    |                    |
| SNP_63742_A_89134  | NW_004515688.1 | scaffold98  | 89134                   | TT                              | CC                 | CC               | INTERGENIC      |               |                    |                    |
| SNP_63743_A_101998 | NW_004515688.1 | scaffold98  | 101998                  | TT                              | CC                 | CC               | INTERGENIC      |               |                    |                    |
| SNP_63744_A_108017 | NW_004515688.1 | scaffold98  | 108017                  | GG                              | TT                 | TT               | INTERGENIC      |               |                    |                    |
| SNP_63745_A_108987 | NW_004515688.1 | scaffold98  | 108987                  | TT                              | AA                 | AA               | INTERGENIC      |               |                    |                    |
| SNP_63746_A_162958 | NW_004515688.1 | scaffold98  | 162958                  | CC                              | TT                 | TT               | INTERGENIC      |               |                    |                    |
| SNP_63747_A_163858 | NW_004515688.1 | scaffold98  | 163858                  | GG                              | AA                 | AA               | INTERGENIC      |               |                    |                    |
| SNP_63750_A_255782 | NW_004515688.1 | scaffold98  | 255782                  | GG                              | AA                 | AA               | INTERGENIC      |               |                    |                    |
| SNP_63751_A_256072 | NW_004515688.1 | scaffold98  | 256072                  | CC                              | AA                 | AA               | INTERGENIC      |               |                    |                    |
| SNP_63752_A_256130 | NW_004515688.1 | scaffold98  | 256130                  | GG                              | TT                 | TT               | INTERGENIC      |               |                    |                    |
| SNP_63753_A_257095 | NW_004515688.1 | scaffold98  | 257095                  | GG                              | AA                 | AA               | INTERGENIC      |               |                    |                    |
| SNP_63754_A_271153 | NW_004515688.1 | scaffold98  | 271153                  | TT                              | CC                 | CC               | INTERGENIC      |               |                    |                    |
| SNP_63755_A_277296 | NW_004515688.1 | scaffold98  | 277296                  | GG                              | AA                 | AA               | INTERGENIC      |               |                    |                    |
| SNP_63756_A_277329 | NW_004515688.1 | scaffold98  | 277329                  | TT                              | CC                 | CC               | INTERGENIC      |               |                    |                    |
| SNP_63757_A_286078 | NW_004515688.1 | scaffold98  | 286078                  | CC                              | GG                 | GG               | INTERGENIC      |               |                    |                    |
| SNP_63758_A_312466 | NW_004515688.1 | scaffold98  | 312466                  | AA                              | TT                 | TT               | INTERGENIC      |               |                    |                    |

| SNPs IDs           | Chromosome IDs | Chromosomes | Physical positions (bp) | CDC Frontier (Reference genome) | (Pusa 1103 & HPNB) | (ILWC 46 & LPNB) | Sequence Components of genome | Gene accession IDs | Putative functions                                       |
|--------------------|----------------|-------------|-------------------------|---------------------------------|--------------------|------------------|-------------------------------|--------------------|----------------------------------------------------------|
| SNP_63759_A_334630 | NW_004515688.1 | scaffold98  | 334630                  | AA                              | GG                 | GG               | INTERGENIC                    |                    |                                                          |
| SNP_63760_A_335065 | NW_004515688.1 | scaffold98  | 335065                  | GG                              | AA                 | AA               | INTERGENIC                    |                    |                                                          |
| SNP_63761_A_335892 | NW_004515688.1 | scaffold98  | 335892                  | CC                              | AA                 | AA               | INTERGENIC                    |                    |                                                          |
| SNP_63762_A_376845 | NW_004515688.1 | scaffold98  | 376845                  | CC                              | TT                 | TT               | DRR                           | 101499853          | uncharacterized LOC101499853                             |
| SNP_63764_A_417298 | NW_004515688.1 | scaffold98  | 417298                  | CC                              | AA                 | AA               | INTERGENIC                    |                    |                                                          |
| SNP_63765_A_443324 | NW_004515688.1 | scaffold98  | 443324                  | AA                              | CC                 | CC               | URR                           | 101410591          | transfer RNA glutamic acid (anticodon UUC)               |
| SNP_63766_A_446684 | NW_004515688.1 | scaffold98  | 446684                  | GG                              | AA                 | AA               | DRR                           | 101495631          | probable pectinesterase/pectinesterase inhibitor 41      |
| SNP_63767_A_474668 | NW_004515688.1 | scaffold98  | 474668                  | TT                              | CC                 | CC               | INTERGENIC                    |                    |                                                          |
| SNP_63769_A_475072 | NW_004515688.1 | scaffold98  | 475072                  | AA                              | GG                 | GG               | INTERGENIC                    |                    |                                                          |
| SNP_63770_A_475086 | NW_004515688.1 | scaffold98  | 475086                  | CC                              | AA                 | AA               | INTERGENIC                    |                    |                                                          |
| SNP_63771_A_475115 | NW_004515688.1 | scaffold98  | 475115                  | GG                              | AA                 | AA               | INTERGENIC                    |                    |                                                          |
| SNP_63773_A_524460 | NW_004515688.1 | scaffold98  | 524460                  | AA                              | GG                 | GG               | DRR                           | 101501456          | uncharacterized LOC101501456                             |
| SNP_63774_A_524662 | NW_004515688.1 | scaffold98  | 524662                  | AA                              | CC                 | CC               | URR                           | 101501149          | serine/threonine-protein phosphatase 7 long form homolog |
| SNP_63775_A_566112 | NW_004515688.1 | scaffold98  | 566112                  | CC                              | TT                 | TT               | INTRON                        | 101496615          | uncharacterized LOC101496615                             |
| SNP_63776_A_587049 | NW_004515688.1 | scaffold98  | 587049                  | TT                              | GG                 | GG               | INTERGENIC                    |                    |                                                          |
| SNP_63777_A_602822 | NW_004515688.1 | scaffold98  | 602822                  | AA                              | TT                 | TT               | INTERGENIC                    |                    |                                                          |
| SNP_63778_A_641882 | NW_004515688.1 | scaffold98  | 641882                  | AA                              | CC                 | CC               | INTERGENIC                    |                    |                                                          |
| SNP_63779_A_660189 | NW_004515688.1 | scaffold98  | 660189                  | GG                              | AA                 | AA               | URR                           | 101410573          | transfer RNA threonine (anticodon UGU)                   |
| SNP_63780_A_668635 | NW_004515688.1 | scaffold98  | 668635                  | AA                              | GG                 | GG               | URR                           | 101497264          | uncharacterized LOC101497264                             |
| SNP_63781_A_892    | NW_004515689.1 | scaffold99  | 892                     | CC                              | TT                 | TT               | INTERGENIC                    |                    |                                                          |
| SNP_63782_A_5701   | NW_004515689.1 | scaffold99  | 5701                    | AA                              | CC                 | CC               | INTERGENIC                    |                    |                                                          |
| SNP_63783_A_5725   | NW_004515689.1 | scaffold99  | 5725                    | TT                              | CC                 | CC               | INTERGENIC                    |                    |                                                          |

| SNPs IDs           | Chromosome IDs | Chromosomes | Physical positions (bp) | CDC Frontier (Reference genome) | (Pusa 1103 & HPNB) | (ILWC 46 & LPNB) | Sequence Components of genome | Gene accession IDs | Putative functions           |
|--------------------|----------------|-------------|-------------------------|---------------------------------|--------------------|------------------|-------------------------------|--------------------|------------------------------|
| SNP_63784_A_5782   | NW_004515689.1 | scaffold99  | 5782                    | CC                              | AA                 | AA               | INTERGENIC                    |                    |                              |
| SNP_63785_A_11556  | NW_004515689.1 | scaffold99  | 11556                   | CC                              | GG                 | GG               | INTERGENIC                    |                    |                              |
| SNP_63786_A_11801  | NW_004515689.1 | scaffold99  | 11801                   | GG                              | TT                 | TT               | INTERGENIC                    |                    |                              |
| SNP_63787_A_29038  | NW_004515689.1 | scaffold99  | 29038                   | AA                              | GG                 | GG               | URR                           | 101502834          | uncharacterized LOC101502834 |
| SNP_63788_A_44461  | NW_004515689.1 | scaffold99  | 44461                   | CC                              | TT                 | TT               | INTERGENIC                    |                    |                              |
| SNP_63789_A_44476  | NW_004515689.1 | scaffold99  | 44476                   | GG                              | AA                 | AA               | INTERGENIC                    |                    |                              |
| SNP_63790_A_58352  | NW_004515689.1 | scaffold99  | 58352                   | CC                              | TT                 | TT               | INTERGENIC                    |                    |                              |
| SNP_63791_A_58378  | NW_004515689.1 | scaffold99  | 58378                   | CC                              | AA                 | AA               | INTERGENIC                    |                    |                              |
| SNP_63792_A_69590  | NW_004515689.1 | scaffold99  | 69590                   | GG                              | AA                 | AA               | INTERGENIC                    |                    |                              |
| SNP_63793_A_69634  | NW_004515689.1 | scaffold99  | 69634                   | AA                              | CC                 | CC               | INTERGENIC                    |                    |                              |
| SNP_63795_A_110442 | NW_004515689.1 | scaffold99  | 110442                  | TT                              | CC                 | CC               | INTERGENIC                    |                    |                              |
| SNP_63796_A_110486 | NW_004515689.1 | scaffold99  | 110486                  | AA                              | TT                 | TT               | INTERGENIC                    |                    |                              |
| SNP_63797_A_132461 | NW_004515689.1 | scaffold99  | 132461                  | AA                              | GG                 | GG               | INTERGENIC                    |                    |                              |
| SNP_63798_A_132473 | NW_004515689.1 | scaffold99  | 132473                  | GG                              | AA                 | AA               | INTERGENIC                    |                    |                              |
| SNP_63799_A_160695 | NW_004515689.1 | scaffold99  | 160695                  | TT                              | GG                 | GG               | INTERGENIC                    |                    |                              |
| SNP_63800_A_176534 | NW_004515689.1 | scaffold99  | 176534                  | GG                              | AA                 | AA               | INTERGENIC                    |                    |                              |
| SNP_63801_A_210575 | NW_004515689.1 | scaffold99  | 210575                  | AA                              | GG                 | GG               | INTERGENIC                    |                    |                              |
| SNP_63802_A_215175 | NW_004515689.1 | scaffold99  | 215175                  | AA                              | GG                 | GG               | INTERGENIC                    |                    |                              |
| SNP_63803_A_215181 | NW_004515689.1 | scaffold99  | 215181                  | TT                              | CC                 | CC               | INTERGENIC                    |                    |                              |
| SNP_63804_A_215569 | NW_004515689.1 | scaffold99  | 215569                  | GG                              | AA                 | AA               | INTERGENIC                    |                    |                              |
| SNP_63805_A_223287 | NW_004515689.1 | scaffold99  | 223287                  | TT                              | CC                 | CC               | INTERGENIC                    |                    |                              |
| SNP_63807_A_236912 | NW_004515689.1 | scaffold99  | 236912                  | TT                              | AA                 | AA               | INTERGENIC                    |                    |                              |

| SNPs IDs           | Chromosome IDs | Chromosomes | Physical positions (bp) | CDC Frontier (Reference genome) | (Pusa 1103 & HPNB) | (ILWC 46 & LPNB) | Sequence Components of genome | Gene accession IDs | Putative functions                         |
|--------------------|----------------|-------------|-------------------------|---------------------------------|--------------------|------------------|-------------------------------|--------------------|--------------------------------------------|
| SNP_63808_A_236958 | NW_004515689.1 | scaffold99  | 236958                  | TT                              | CC                 | CC               | INTERGENIC                    |                    |                                            |
| SNP_63809_A_242317 | NW_004515689.1 | scaffold99  | 242317                  | AA                              | GG                 | GG               | INTERGENIC                    |                    |                                            |
| SNP_63810_A_9022   | NW_004515690.1 | scaffold100 | 9022                    | CC                              | TT                 | TT               | INTERGENIC                    |                    |                                            |
| SNP_63811_A_9180   | NW_004515690.1 | scaffold100 | 9180                    | GG                              | TT                 | TT               | INTERGENIC                    |                    |                                            |
| SNP_63812_A_9189   | NW_004515690.1 | scaffold100 | 9189                    | CC                              | TT                 | TT               | INTERGENIC                    |                    |                                            |
| SNP_63813_A_9243   | NW_004515690.1 | scaffold100 | 9243                    | AA                              | TT                 | TT               | INTERGENIC                    |                    |                                            |
| SNP_63814_A_9616   | NW_004515690.1 | scaffold100 | 9616                    | TT                              | CC                 | CC               | INTERGENIC                    |                    |                                            |
| SNP_63815_A_9658   | NW_004515690.1 | scaffold100 | 9658                    | CC                              | TT                 | TT               | INTERGENIC                    |                    |                                            |
| SNP_63816_A_14030  | NW_004515690.1 | scaffold100 | 14030                   | TT                              | AA                 | AA               | URR                           | 101504768          | non-specific lipid-transfer protein A-like |
| SNP_63817_A_14637  | NW_004515690.1 | scaffold100 | 14637                   | TT                              | AA                 | AA               | INTERGENIC                    |                    |                                            |
| SNP_63818_A_18770  | NW_004515690.1 | scaffold100 | 18770                   | TT                              | AA                 | AA               | DRR                           | 101505089          | Unknown function                           |
| SNP_63819_A_18777  | NW_004515690.1 | scaffold100 | 18777                   | CC                              | TT                 | TT               | DRR                           | 101505089          | Unknown function                           |
| SNP_63820_A_18779  | NW_004515690.1 | scaffold100 | 18779                   | AA                              | GG                 | GG               | DRR                           | 101505089          | Unknown function                           |
| SNP_63821_A_18783  | NW_004515690.1 | scaffold100 | 18783                   | TT                              | CC                 | CC               | DRR                           | 101505089          | Unknown function                           |
| SNP_63822_A_18789  | NW_004515690.1 | scaffold100 | 18789                   | GG                              | AA                 | AA               | DRR                           | 101505089          | Unknown function                           |
| SNP_63823_A_18793  | NW_004515690.1 | scaffold100 | 18793                   | TT                              | GG                 | GG               | DRR                           | 101505089          | Unknown function                           |
| SNP_63824_A_18804  | NW_004515690.1 | scaffold100 | 18804                   | GG                              | CC                 | CC               | DRR                           | 101505089          | Unknown function                           |
| SNP_63825_A_18809  | NW_004515690.1 | scaffold100 | 18809                   | AA                              | TT                 | TT               | DRR                           | 101505089          | Unknown function                           |
| SNP_63826_A_18846  | NW_004515690.1 | scaffold100 | 18846                   | AA                              | GG                 | GG               | DRR                           | 101505089          | Unknown function                           |
| SNP_63827_A_18849  | NW_004515690.1 | scaffold100 | 18849                   | TT                              | CC                 | CC               | DRR                           | 101505089          | Unknown function                           |
| SNP_63828_A_18854  | NW_004515690.1 | scaffold100 | 18854                   | GG                              | TT                 | TT               | DRR                           | 101505089          | Unknown function                           |
| SNP_63829_A_18871  | NW_004515690.1 | scaffold100 | 18871                   | TT                              | AA                 | AA               | DRR                           | 101505089          | Unknown function                           |

| SNPs IDs           | Chromosome IDs | Chromosomes | Physical positions (bp) | CDC Frontier (Reference genome) | (Pusa 1103 & HPNB) | (ILWC 46 & LPNB) | Sequence Components of genome | Gene accession IDs | Putative functions                         |
|--------------------|----------------|-------------|-------------------------|---------------------------------|--------------------|------------------|-------------------------------|--------------------|--------------------------------------------|
| SNP_63830_A_18882  | NW_004515690.1 | scaffold100 | 18882                   | CC                              | TT                 | TT               | DRR                           | 101505089          | Unknown function                           |
| SNP_63831_A_18895  | NW_004515690.1 | scaffold100 | 18895                   | GG                              | AA                 | AA               | DRR                           | 101505089          | Unknown function                           |
| SNP_63832_A_18900  | NW_004515690.1 | scaffold100 | 18900                   | TT                              | CC                 | CC               | DRR                           | 101505089          | Unknown function                           |
| SNP_63833_A_18902  | NW_004515690.1 | scaffold100 | 18902                   | GG                              | CC                 | CC               | DRR                           | 101505089          | Unknown function                           |
| SNP_63834_A_18904  | NW_004515690.1 | scaffold100 | 18904                   | GG                              | AA                 | AA               | DRR                           | 101505089          | Unknown function                           |
| SNP_63835_A_19220  | NW_004515690.1 | scaffold100 | 19220                   | TT                              | CC                 | CC               | NON_SYNONYMOUS_CODING         | 101505089          | Unknown function                           |
| SNP_63836_A_19231  | NW_004515690.1 | scaffold100 | 19231                   | AA                              | GG                 | GG               | NON_SYNONYMOUS_CODING         | 101505089          | Unknown function                           |
| SNP_63837_A_19301  | NW_004515690.1 | scaffold100 | 19301                   | GG                              | TT                 | TT               | NON_SYNONYMOUS_CODING         | 101505089          | Unknown function                           |
| SNP_63838_A_41455  | NW_004515690.1 | scaffold100 | 41455                   | TT                              | CC                 | CC               | INTERGENIC                    |                    |                                            |
| SNP_63839_A_48285  | NW_004515690.1 | scaffold100 | 48285                   | GG                              | AA                 | AA               | DRR                           | 101410548          | transfer RNA phenylalanine (anticodon GAA) |
| SNP_63840_A_53545  | NW_004515690.1 | scaffold100 | 53545                   | AA                              | GG                 | GG               | INTERGENIC                    |                    |                                            |
| SNP_63841_A_53550  | NW_004515690.1 | scaffold100 | 53550                   | TT                              | GG                 | GG               | INTERGENIC                    |                    |                                            |
| SNP_63842_A_46894  | NW_004515691.1 | scaffold102 | 46894                   | CC                              | GG                 | GG               | INTERGENIC                    |                    |                                            |
| SNP_63843_A_51019  | NW_004515691.1 | scaffold102 | 51019                   | TT                              | GG                 | GG               | INTERGENIC                    |                    |                                            |
| SNP_63844_A_104695 | NW_004515691.1 | scaffold102 | 104695                  | TT                              | CC                 | CC               | INTERGENIC                    |                    |                                            |
| SNP_63845_A_104842 | NW_004515691.1 | scaffold102 | 104842                  | CC                              | TT                 | TT               | INTERGENIC                    |                    |                                            |
| SNP_63846_A_105059 | NW_004515691.1 | scaffold102 | 105059                  | AA                              | GG                 | GG               | INTERGENIC                    |                    |                                            |
| SNP_63847_A_106792 | NW_004515691.1 | scaffold102 | 106792                  | GG                              | TT                 | TT               | INTERGENIC                    |                    |                                            |
| SNP_63848_A_121784 | NW_004515691.1 | scaffold102 | 121784                  | TT                              | AA                 | AA               | INTERGENIC                    |                    |                                            |
| SNP_63849_A_144133 | NW_004515691.1 | scaffold102 | 144133                  | AA                              | CC                 | CC               | INTERGENIC                    |                    |                                            |
| SNP_63850_A_144175 | NW_004515691.1 | scaffold102 | 144175                  | TT                              | AA                 | AA               | INTERGENIC                    |                    |                                            |
| SNP_63851_A_1198   | NW_004515693.1 | scaffold106 | 1198                    | CC                              | TT                 | TT               | INTERGENIC                    |                    |                                            |

| SNPs IDs           | Chromosome IDs | Chromosomes   | Physical positions (bp) | CDC Frontier (Reference genome) | (Pusa 1103 & HPNB) | (ILWC 46 & LPNB) | Sequence genome | Components of | Gene accession IDs | Putative functions |
|--------------------|----------------|---------------|-------------------------|---------------------------------|--------------------|------------------|-----------------|---------------|--------------------|--------------------|
| SNP_63852_A_8281   | NW_004515694.1 | scaffold109_1 | 8281                    | GG                              | AA                 | AA               | INTERGENIC      |               |                    |                    |
| SNP_63853_A_8339   | NW_004515694.1 | scaffold109_1 | 8339                    | AA                              | GG                 | GG               | INTERGENIC      |               |                    |                    |
| SNP_63854_A_12627  | NW_004515694.1 | scaffold109_1 | 12627                   | TT                              | GG                 | GG               | INTERGENIC      |               |                    |                    |
| SNP_63855_A_60582  | NW_004515694.1 | scaffold109_1 | 60582                   | CC                              | AA                 | AA               | INTERGENIC      |               |                    |                    |
| SNP_63856_A_60669  | NW_004515694.1 | scaffold109_1 | 60669                   | AA                              | GG                 | GG               | INTERGENIC      |               |                    |                    |
| SNP_63857_A_60778  | NW_004515694.1 | scaffold109_1 | 60778                   | TT                              | GG                 | GG               | INTERGENIC      |               |                    |                    |
| SNP_63858_A_60798  | NW_004515694.1 | scaffold109_1 | 60798                   | AA                              | CC                 | CC               | INTERGENIC      |               |                    |                    |
| SNP_63859_A_60837  | NW_004515694.1 | scaffold109_1 | 60837                   | AA                              | CC                 | CC               | INTERGENIC      |               |                    |                    |
| SNP_63860_A_60840  | NW_004515694.1 | scaffold109_1 | 60840                   | TT                              | CC                 | CC               | INTERGENIC      |               |                    |                    |
| SNP_63861_A_60922  | NW_004515694.1 | scaffold109_1 | 60922                   | GG                              | AA                 | AA               | INTERGENIC      |               |                    |                    |
| SNP_63862_A_60945  | NW_004515694.1 | scaffold109_1 | 60945                   | TT                              | CC                 | CC               | INTERGENIC      |               |                    |                    |
| SNP_63863_A_60970  | NW_004515694.1 | scaffold109_1 | 60970                   | TT                              | AA                 | AA               | INTERGENIC      |               |                    |                    |
| SNP_63864_A_61024  | NW_004515694.1 | scaffold109_1 | 61024                   | CC                              | TT                 | TT               | INTERGENIC      |               |                    |                    |
| SNP_63865_A_61030  | NW_004515694.1 | scaffold109_1 | 61030                   | GG                              | AA                 | AA               | INTERGENIC      |               |                    |                    |
| SNP_63866_A_61033  | NW_004515694.1 | scaffold109_1 | 61033                   | CC                              | TT                 | TT               | INTERGENIC      |               |                    |                    |
| SNP_63867_A_61051  | NW_004515694.1 | scaffold109_1 | 61051                   | AA                              | CC                 | CC               | INTERGENIC      |               |                    |                    |
| SNP_63868_A_61054  | NW_004515694.1 | scaffold109_1 | 61054                   | AA                              | TT                 | TT               | INTERGENIC      |               |                    |                    |
| SNP_63869_A_61084  | NW_004515694.1 | scaffold109_1 | 61084                   | TT                              | CC                 | CC               | INTERGENIC      |               |                    |                    |
| SNP_63870_A_61114  | NW_004515694.1 | scaffold109_1 | 61114                   | TT                              | CC                 | CC               | INTERGENIC      |               |                    |                    |
| SNP_63871_A_61159  | NW_004515694.1 | scaffold109_1 | 61159                   | GG                              | AA                 | AA               | INTERGENIC      |               |                    |                    |
| SNP_63872_A_95531  | NW_004515694.1 | scaffold109_1 | 95531                   | GG                              | TT                 | TT               | INTERGENIC      |               |                    |                    |
| SNP_63877_A_221279 | NW_004515694.1 | scaffold109_1 | 221279                  | AA                              | GG                 | GG               | INTERGENIC      |               |                    |                    |

| SNPs IDs           | Chromosome IDs | Chromosomes   | Physical positions (bp) | CDC Frontier (Reference genome) | (Pusa 1103 & HPNB) | (ILWC 46 & LPNB) | Sequence Components of genome | Gene accession IDs | Putative functions                           |
|--------------------|----------------|---------------|-------------------------|---------------------------------|--------------------|------------------|-------------------------------|--------------------|----------------------------------------------|
| SNP_63878_A_245825 | NW_004515694.1 | scaffold109_1 | 245825                  | AA                              | GG                 | GG               | URR                           | 101510445          | uncharacterized LOC101510445                 |
| SNP_63879_A_245826 | NW_004515694.1 | scaffold109_1 | 245826                  | AA                              | CC                 | CC               | URR                           | 101510445          | uncharacterized LOC101510445                 |
| SNP_63880_A_246827 | NW_004515694.1 | scaffold109_1 | 246827                  | CC                              | GG                 | GG               | URR                           | 101510445          | uncharacterized LOC101510445                 |
| SNP_63881_A_246847 | NW_004515694.1 | scaffold109_1 | 246847                  | TT                              | GG                 | GG               | URR                           | 101510445          | uncharacterized LOC101510445                 |
| SNP_63882_A_246970 | NW_004515694.1 | scaffold109_1 | 246970                  | CC                              | TT                 | TT               | URR                           | 101510445          | uncharacterized LOC101510445                 |
| SNP_63883_A_247276 | NW_004515694.1 | scaffold109_1 | 247276                  | AA                              | CC                 | CC               | URR                           | 101510445          | uncharacterized LOC101510445                 |
| SNP_63884_A_247313 | NW_004515694.1 | scaffold109_1 | 247313                  | TT                              | CC                 | CC               | URR                           | 101510445          | uncharacterized LOC101510445                 |
| SNP_63885_A_248646 | NW_004515694.1 | scaffold109_1 | 248646                  | AA                              | GG                 | GG               | INTERGENIC                    |                    |                                              |
| SNP_63886_A_310111 | NW_004515694.1 | scaffold109_1 | 310111                  | CC                              | TT                 | TT               | INTERGENIC                    |                    |                                              |
| SNP_63889_A_410584 | NW_004515694.1 | scaffold109_1 | 410584                  | TT                              | AA                 | AA               | URR                           | 101496839          | probable flavin-containing monooxygenase 1   |
| SNP_63891_A_488771 | NW_004515694.1 | scaffold109_1 | 488771                  | GG                              | AA                 | AA               | INTERGENIC                    |                    |                                              |
| SNP_63892_A_504436 | NW_004515694.1 | scaffold109_1 | 504436                  | GG                              | AA                 | AA               | INTERGENIC                    |                    |                                              |
| SNP_63893_A_504517 | NW_004515694.1 | scaffold109_1 | 504517                  | TT                              | CC                 | CC               | INTERGENIC                    |                    |                                              |
| SNP_63894_A_504764 | NW_004515694.1 | scaffold109_1 | 504764                  | AA                              | GG                 | GG               | INTERGENIC                    |                    |                                              |
| SNP_63895_A_504855 | NW_004515694.1 | scaffold109_1 | 504855                  | AA                              | CC                 | CC               | INTERGENIC                    |                    |                                              |
| SNP_63896_A_504878 | NW_004515694.1 | scaffold109_1 | 504878                  | GG                              | TT                 | TT               | INTERGENIC                    |                    |                                              |
| SNP_63897_A_504932 | NW_004515694.1 | scaffold109_1 | 504932                  | AA                              | GG                 | GG               | INTERGENIC                    |                    |                                              |
| SNP_63898_A_504936 | NW_004515694.1 | scaffold109_1 | 504936                  | TT                              | CC                 | CC               | INTERGENIC                    |                    |                                              |
| SNP_63899_A_539343 | NW_004515694.1 | scaffold109_1 | 539343                  | TT                              | GG                 | GG               | INTERGENIC                    |                    |                                              |
| SNP_63900_A_564236 | NW_004515694.1 | scaffold109_1 | 564236                  | AA                              | CC                 | CC               | DRR                           | 101490364          | mechanosensitive ion channel protein 10-like |
| SNP_63901_A_569418 | NW_004515694.1 | scaffold109_1 | 569418                  | TT                              | CC                 | CC               | URR                           | 101490364          | mechanosensitive ion channel protein 10-like |
| SNP_63902_A_569445 | NW_004515694.1 | scaffold109_1 | 569445                  | TT                              | CC                 | CC               | URR                           | 101490364          | mechanosensitive ion channel protein 10-like |



| SNPs IDs           | Chromosome IDs | Chromosomes   | Physical positions (bp) | CDC Frontier (Reference genome) | (Pusa 1103 & HPNB) | (ILWC 46 & LPNB) | Sequence Components of genome | Gene accession IDs | Putative functions                           |
|--------------------|----------------|---------------|-------------------------|---------------------------------|--------------------|------------------|-------------------------------|--------------------|----------------------------------------------|
| SNP_63903_A_569506 | NW_004515694.1 | scaffold109_1 | 569506                  | AA                              | GG                 | GG               | URR                           | 101490364          | mechanosensitive ion channel protein 10-like |
| SNP_63904_A_628044 | NW_004515694.1 | scaffold109_1 | 628044                  | AA                              | GG                 | GG               | INTERGENIC                    |                    |                                              |
| SNP_63905_A_670594 | NW_004515694.1 | scaffold109_1 | 670594                  | AA                              | GG                 | GG               | INTERGENIC                    |                    |                                              |
| SNP_63906_A_671451 | NW_004515694.1 | scaffold109_1 | 671451                  | TT                              | AA                 | AA               | INTERGENIC                    |                    |                                              |
| SNP_63907_A_728576 | NW_004515694.1 | scaffold109_1 | 728576                  | AA                              | GG                 | GG               | INTERGENIC                    |                    |                                              |
| SNP_63908_A_759395 | NW_004515694.1 | scaffold109_1 | 759395                  | CC                              | TT                 | TT               | INTERGENIC                    |                    |                                              |
| SNP_63909_A_763675 | NW_004515694.1 | scaffold109_1 | 763675                  | CC                              | TT                 | TT               | INTERGENIC                    |                    |                                              |
| SNP_63910_A_5876   | NW_004515695.1 | scaffold110   | 5876                    | CC                              | TT                 | TT               | INTERGENIC                    |                    |                                              |
| SNP_63911_A_49665  | NW_004515696.1 | scaffold111   | 49665                   | TT                              | CC                 | CC               | URR                           | 101500412          | uncharacterized LOC101500412                 |
| SNP_63912_A_49675  | NW_004515696.1 | scaffold111   | 49675                   | CC                              | TT                 | TT               | URR                           | 101500412          | uncharacterized LOC101500412                 |
| SNP_63913_A_67975  | NW_004515696.1 | scaffold111   | 67975                   | GG                              | TT                 | TT               | INTERGENIC                    |                    |                                              |
| SNP_63914_A_69986  | NW_004515696.1 | scaffold111   | 69986                   | AA                              | TT                 | TT               | INTERGENIC                    |                    |                                              |
| SNP_63915_A_72229  | NW_004515696.1 | scaffold111   | 72229                   | AA                              | TT                 | TT               | INTERGENIC                    |                    |                                              |
| SNP_63916_A_72237  | NW_004515696.1 | scaffold111   | 72237                   | AA                              | GG                 | GG               | INTERGENIC                    |                    |                                              |
| SNP_63917_A_72250  | NW_004515696.1 | scaffold111   | 72250                   | TT                              | AA                 | AA               | INTERGENIC                    |                    |                                              |
| SNP_63920_A_4037   | NW_004515697.1 | scaffold113   | 4037                    | TT                              | CC                 | CC               | INTERGENIC                    |                    |                                              |
| SNP_63921_A_4196   | NW_004515697.1 | scaffold113   | 4196                    | AA                              | TT                 | TT               | INTERGENIC                    |                    |                                              |
| SNP_63922_A_5106   | NW_004515699.1 | scaffold115   | 5106                    | CC                              | GG                 | GG               | INTERGENIC                    |                    |                                              |
| SNP_63923_A_8708   | NW_004515699.1 | scaffold115   | 8708                    | AA                              | CC                 | CC               | INTERGENIC                    |                    |                                              |
| SNP_63924_A_45624  | NW_004515699.1 | scaffold115   | 45624                   | AA                              | GG                 | GG               | INTERGENIC                    |                    |                                              |
| SNP_63925_A_51732  | NW_004515699.1 | scaffold115   | 51732                   | GG                              | AA                 | AA               | INTERGENIC                    |                    |                                              |
| SNP_63926_A_52045  | NW_004515699.1 | scaffold115   | 52045                   | CC                              | GG                 | GG               | INTERGENIC                    |                    |                                              |

| SNPs IDs          | Chromosome IDs | Chromosomes | Physical positions (bp) | CDC Frontier (Reference genome) | (Pusa 1103 & HPNB) | (ILWC 46 & LPNB) | Sequence genome | Components of | Gene accession IDs | Putative functions |
|-------------------|----------------|-------------|-------------------------|---------------------------------|--------------------|------------------|-----------------|---------------|--------------------|--------------------|
| SNP_63928_A_52231 | NW_004515699.1 | scaffold115 | 52231                   | TT                              | AA                 | AA               | INTERGENIC      |               |                    |                    |
| SNP_63929_A_52249 | NW_004515699.1 | scaffold115 | 52249                   | TT                              | CC                 | CC               | INTERGENIC      |               |                    |                    |
| SNP_63930_A_52259 | NW_004515699.1 | scaffold115 | 52259                   | AA                              | CC                 | CC               | INTERGENIC      |               |                    |                    |
| SNP_63931_A_52360 | NW_004515699.1 | scaffold115 | 52360                   | CC                              | TT                 | TT               | INTERGENIC      |               |                    |                    |
| SNP_63932_A_52400 | NW_004515699.1 | scaffold115 | 52400                   | CC                              | AA                 | AA               | INTERGENIC      |               |                    |                    |
| SNP_63933_A_52459 | NW_004515699.1 | scaffold115 | 52459                   | CC                              | AA                 | AA               | INTERGENIC      |               |                    |                    |
| SNP_63934_A_52551 | NW_004515699.1 | scaffold115 | 52551                   | GG                              | TT                 | TT               | INTERGENIC      |               |                    |                    |
| SNP_63935_A_52896 | NW_004515699.1 | scaffold115 | 52896                   | GG                              | AA                 | AA               | INTERGENIC      |               |                    |                    |
| SNP_63936_A_52939 | NW_004515699.1 | scaffold115 | 52939                   | CC                              | TT                 | TT               | INTERGENIC      |               |                    |                    |
| SNP_63937_A_52984 | NW_004515699.1 | scaffold115 | 52984                   | GG                              | AA                 | AA               | INTERGENIC      |               |                    |                    |
| SNP_63938_A_52993 | NW_004515699.1 | scaffold115 | 52993                   | TT                              | AA                 | AA               | INTERGENIC      |               |                    |                    |
| SNP_63939_A_53576 | NW_004515699.1 | scaffold115 | 53576                   | CC                              | AA                 | AA               | INTERGENIC      |               |                    |                    |
| SNP_63940_A_56838 | NW_004515699.1 | scaffold115 | 56838                   | AA                              | CC                 | CC               | INTERGENIC      |               |                    |                    |
| SNP_63941_A_57116 | NW_004515699.1 | scaffold115 | 57116                   | CC                              | AA                 | AA               | INTERGENIC      |               |                    |                    |
| SNP_63942_A_57118 | NW_004515699.1 | scaffold115 | 57118                   | AA                              | CC                 | CC               | INTERGENIC      |               |                    |                    |
| SNP_63943_A_26891 | NW_004515700.1 | scaffold118 | 26891                   | CC                              | AA                 | AA               | INTERGENIC      |               |                    |                    |
| SNP_63944_A_27176 | NW_004515700.1 | scaffold118 | 27176                   | GG                              | AA                 | AA               | INTERGENIC      |               |                    |                    |
| SNP_63945_A_27200 | NW_004515700.1 | scaffold118 | 27200                   | GG                              | AA                 | AA               | INTERGENIC      |               |                    |                    |
| SNP_63946_A_27241 | NW_004515700.1 | scaffold118 | 27241                   | AA                              | GG                 | GG               | INTERGENIC      |               |                    |                    |
| SNP_63947_A_30528 | NW_004515700.1 | scaffold118 | 30528                   | TT                              | CC                 | CC               | INTERGENIC      |               |                    |                    |
| SNP_63948_A_30534 | NW_004515700.1 | scaffold118 | 30534                   | AA                              | GG                 | GG               | INTERGENIC      |               |                    |                    |
| SNP_63949_A_30566 | NW_004515700.1 | scaffold118 | 30566                   | TT                              | CC                 | CC               | INTERGENIC      |               |                    |                    |

| SNPs IDs           | Chromosome IDs | Chromosomes | Physical positions (bp) | CDC Frontier (Reference genome) | (Pusa 1103 & HPNB) | (ILWC 46 & LPNB) | Sequence Components of genome | Gene accession IDs | Putative functions           |
|--------------------|----------------|-------------|-------------------------|---------------------------------|--------------------|------------------|-------------------------------|--------------------|------------------------------|
| SNP_63950_A_80425  | NW_004515700.1 | scaffold118 | 80425                   | CC                              | TT                 | TT               | INTERGENIC                    |                    |                              |
| SNP_63951_A_80598  | NW_004515700.1 | scaffold118 | 80598                   | GG                              | AA                 | AA               | INTERGENIC                    |                    |                              |
| SNP_63953_A_113345 | NW_004515700.1 | scaffold118 | 113345                  | CC                              | TT                 | TT               | INTRON                        | 101504884          | uncharacterized LOC101504884 |
| SNP_63954_A_113357 | NW_004515700.1 | scaffold118 | 113357                  | CC                              | TT                 | TT               | INTRON                        | 101504884          | uncharacterized LOC101504884 |
| SNP_63955_A_113452 | NW_004515700.1 | scaffold118 | 113452                  | TT                              | CC                 | CC               | INTRON                        | 101504884          | uncharacterized LOC101504884 |
| SNP_63956_A_113471 | NW_004515700.1 | scaffold118 | 113471                  | TT                              | CC                 | CC               | INTRON                        | 101504884          | uncharacterized LOC101504884 |
| SNP_63957_A_118255 | NW_004515700.1 | scaffold118 | 118255                  | CC                              | AA                 | AA               | INTRON                        | 101504884          | uncharacterized LOC101504884 |
| SNP_63958_A_118269 | NW_004515700.1 | scaffold118 | 118269                  | GG                              | AA                 | AA               | INTRON                        | 101504884          | uncharacterized LOC101504884 |
| SNP_63959_A_118502 | NW_004515700.1 | scaffold118 | 118502                  | AA                              | GG                 | GG               | INTRON                        | 101504884          | uncharacterized LOC101504884 |
| SNP_63960_A_152723 | NW_004515700.1 | scaffold118 | 152723                  | CC                              | TT                 | TT               | INTERGENIC                    |                    |                              |
| SNP_63961_A_171253 | NW_004515700.1 | scaffold118 | 171253                  | TT                              | AA                 | AA               | INTERGENIC                    |                    |                              |
| SNP_63962_A_173131 | NW_004515700.1 | scaffold118 | 173131                  | CC                              | TT                 | TT               | INTERGENIC                    |                    |                              |
| SNP_63964_A_178466 | NW_004515700.1 | scaffold118 | 178466                  | CC                              | TT                 | TT               | INTERGENIC                    |                    |                              |
| SNP_63965_A_178471 | NW_004515700.1 | scaffold118 | 178471                  | AA                              | GG                 | GG               | INTERGENIC                    |                    |                              |
| SNP_63966_A_178477 | NW_004515700.1 | scaffold118 | 178477                  | AA                              | GG                 | GG               | INTERGENIC                    |                    |                              |
| SNP_63967_A_463287 | NW_004515700.1 | scaffold118 | 463287                  | GG                              | AA                 | AA               | INTERGENIC                    |                    |                              |
| SNP_63968_A_463288 | NW_004515700.1 | scaffold118 | 463288                  | AA                              | TT                 | TT               | INTERGENIC                    |                    |                              |
| SNP_63969_A_463296 | NW_004515700.1 | scaffold118 | 463296                  | TT                              | GG                 | GG               | INTERGENIC                    |                    |                              |
| SNP_63970_A_463346 | NW_004515700.1 | scaffold118 | 463346                  | TT                              | CC                 | CC               | INTERGENIC                    |                    |                              |
| SNP_63971_A_463349 | NW_004515700.1 | scaffold118 | 463349                  | CC                              | TT                 | TT               | INTERGENIC                    |                    |                              |
| SNP_63972_A_465492 | NW_004515700.1 | scaffold118 | 465492                  | TT                              | CC                 | CC               | INTERGENIC                    |                    |                              |
| SNP_63973_A_465787 | NW_004515700.1 | scaffold118 | 465787                  | TT                              | GG                 | GG               | INTERGENIC                    |                    |                              |

| SNPs IDs           | Chromosome IDs | Chromosomes | Physical positions (bp) | CDC Frontier (Reference genome) | (Pusa 1103 & HPNB) | (ILWC 46 & LPNB) | Sequence Components of genome | Gene accession IDs | Putative functions           |
|--------------------|----------------|-------------|-------------------------|---------------------------------|--------------------|------------------|-------------------------------|--------------------|------------------------------|
| SNP_63974_A_465864 | NW_004515700.1 | scaffold118 | 465864                  | CC                              | TT                 | TT               | INTERGENIC                    |                    |                              |
| SNP_63975_A_465896 | NW_004515700.1 | scaffold118 | 465896                  | CC                              | GG                 | GG               | INTERGENIC                    |                    |                              |
| SNP_63976_A_466136 | NW_004515700.1 | scaffold118 | 466136                  | TT                              | CC                 | CC               | INTERGENIC                    |                    |                              |
| SNP_63977_A_512252 | NW_004515700.1 | scaffold118 | 512252                  | GG                              | AA                 | AA               | INTERGENIC                    |                    |                              |
| SNP_63978_A_549161 | NW_004515700.1 | scaffold118 | 549161                  | TT                              | CC                 | CC               | INTERGENIC                    |                    |                              |
| SNP_63979_A_554065 | NW_004515700.1 | scaffold118 | 554065                  | GG                              | AA                 | AA               | DRR                           | 101508425          | uncharacterized LOC101508425 |
| SNP_63980_A_554588 | NW_004515700.1 | scaffold118 | 554588                  | CC                              | TT                 | TT               | SYNONYMOUS_CODING             | 101508425          | uncharacterized LOC101508425 |
| SNP_63981_A_558213 | NW_004515700.1 | scaffold118 | 558213                  | AA                              | GG                 | GG               | NON_SYNONYMOUS_CODING         | 101508425          | uncharacterized LOC101508425 |
| SNP_63982_A_558919 | NW_004515700.1 | scaffold118 | 558919                  | TT                              | CC                 | CC               | INTRON                        | 101508425          | uncharacterized LOC101508425 |
| SNP_63983_A_560636 | NW_004515700.1 | scaffold118 | 560636                  | TT                              | CC                 | CC               | INTRON                        | 101508425          | uncharacterized LOC101508425 |
| SNP_63985_A_592467 | NW_004515700.1 | scaffold118 | 592467                  | AA                              | CC                 | CC               | INTERGENIC                    |                    |                              |
| SNP_63986_A_592566 | NW_004515700.1 | scaffold118 | 592566                  | CC                              | GG                 | GG               | INTERGENIC                    |                    |                              |
| SNP_63987_A_593072 | NW_004515700.1 | scaffold118 | 593072                  | GG                              | AA                 | AA               | INTERGENIC                    |                    |                              |
| SNP_63988_A_12060  | NW_004515701.1 | scaffold119 | 12060                   | AA                              | GG                 | GG               | INTERGENIC                    |                    |                              |
| SNP_63990_A_12279  | NW_004515701.1 | scaffold119 | 12279                   | GG                              | AA                 | AA               | INTERGENIC                    |                    |                              |
| SNP_63991_A_15749  | NW_004515701.1 | scaffold119 | 15749                   | CC                              | TT                 | TT               | INTERGENIC                    |                    |                              |
| SNP_63992_A_16238  | NW_004515701.1 | scaffold119 | 16238                   | AA                              | CC                 | CC               | INTERGENIC                    |                    |                              |
| SNP_63994_A_16302  | NW_004515701.1 | scaffold119 | 16302                   | AA                              | TT                 | TT               | INTERGENIC                    |                    |                              |
| SNP_63996_A_16659  | NW_004515701.1 | scaffold119 | 16659                   | CC                              | AA                 | AA               | INTERGENIC                    |                    |                              |
| SNP_63997_A_16902  | NW_004515701.1 | scaffold119 | 16902                   | GG                              | AA                 | AA               | INTERGENIC                    |                    |                              |
| SNP_63998_A_17087  | NW_004515701.1 | scaffold119 | 17087                   | TT                              | AA                 | AA               | INTERGENIC                    |                    |                              |
| SNP_63999_A_17237  | NW_004515701.1 | scaffold119 | 17237                   | GG                              | AA                 | AA               | INTERGENIC                    |                    |                              |

| SNPs IDs          | Chromosome IDs | Chromosomes | Physical positions (bp) | CDC Frontier (Reference genome) | (Pusa 1103 & HPNB) | (ILWC 46 & LPNB) | Sequence genome | Components of | Gene accession IDs | Putative functions |
|-------------------|----------------|-------------|-------------------------|---------------------------------|--------------------|------------------|-----------------|---------------|--------------------|--------------------|
| SNP_64000_A_17437 | NW_004515701.1 | scaffold119 | 17437                   | GG                              | AA                 | AA               | INTERGENIC      |               |                    |                    |
| SNP_64001_A_17487 | NW_004515701.1 | scaffold119 | 17487                   | GG                              | AA                 | AA               | INTERGENIC      |               |                    |                    |
| SNP_64002_A_17740 | NW_004515701.1 | scaffold119 | 17740                   | AA                              | GG                 | GG               | INTERGENIC      |               |                    |                    |
| SNP_64003_A_17977 | NW_004515701.1 | scaffold119 | 17977                   | AA                              | TT                 | TT               | INTERGENIC      |               |                    |                    |
| SNP_64004_A_18283 | NW_004515701.1 | scaffold119 | 18283                   | TT                              | GG                 | GG               | INTERGENIC      |               |                    |                    |
| SNP_64005_A_18354 | NW_004515701.1 | scaffold119 | 18354                   | GG                              | CC                 | CC               | INTERGENIC      |               |                    |                    |
| SNP_64006_A_26547 | NW_004515701.1 | scaffold119 | 26547                   | GG                              | AA                 | AA               | INTERGENIC      |               |                    |                    |
| SNP_64008_A_48164 | NW_004515701.1 | scaffold119 | 48164                   | TT                              | CC                 | CC               | INTERGENIC      |               |                    |                    |
| SNP_64009_A_48211 | NW_004515701.1 | scaffold119 | 48211                   | GG                              | AA                 | AA               | INTERGENIC      |               |                    |                    |
| SNP_64010_A_48588 | NW_004515701.1 | scaffold119 | 48588                   | TT                              | CC                 | CC               | INTERGENIC      |               |                    |                    |
| SNP_64011_A_48596 | NW_004515701.1 | scaffold119 | 48596                   | AA                              | GG                 | GG               | INTERGENIC      |               |                    |                    |
| SNP_64012_A_52777 | NW_004515701.1 | scaffold119 | 52777                   | TT                              | GG                 | GG               | INTERGENIC      |               |                    |                    |
| SNP_64013_A_70308 | NW_004515701.1 | scaffold119 | 70308                   | TT                              | CC                 | CC               | INTERGENIC      |               |                    |                    |
| SNP_64015_A_71253 | NW_004515701.1 | scaffold119 | 71253                   | GG                              | AA                 | AA               | INTERGENIC      |               |                    |                    |
| SNP_64016_A_71263 | NW_004515701.1 | scaffold119 | 71263                   | TT                              | AA                 | AA               | INTERGENIC      |               |                    |                    |
| SNP_64017_A_16170 | NW_004515702.1 | scaffold120 | 16170                   | GG                              | AA                 | AA               | INTERGENIC      |               |                    |                    |
| SNP_64018_A_16240 | NW_004515702.1 | scaffold120 | 16240                   | GG                              | AA                 | AA               | INTERGENIC      |               |                    |                    |
| SNP_64019_A_9104  | NW_004515703.1 | scaffold123 | 9104                    | AA                              | TT                 | TT               | INTERGENIC      |               |                    |                    |
| SNP_64020_A_33511 | NW_004515703.1 | scaffold123 | 33511                   | TT                              | AA                 | AA               | INTERGENIC      |               |                    |                    |
| SNP_64021_A_33714 | NW_004515703.1 | scaffold123 | 33714                   | TT                              | CC                 | CC               | INTERGENIC      |               |                    |                    |
| SNP_64022_A_33723 | NW_004515703.1 | scaffold123 | 33723                   | AA                              | GG                 | GG               | INTERGENIC      |               |                    |                    |
| SNP_64024_A_35049 | NW_004515703.1 | scaffold123 | 35049                   | AA                              | GG                 | GG               | INTERGENIC      |               |                    |                    |

| SNPs IDs           | Chromosome IDs | Chromosomes | Physical positions (bp) | CDC Frontier (Reference genome) | (Pusa 1103 & HPNB) | (ILWC 46 & LPNB) | Sequence genome | Components of | Gene accession IDs | Putative functions |
|--------------------|----------------|-------------|-------------------------|---------------------------------|--------------------|------------------|-----------------|---------------|--------------------|--------------------|
| SNP_64025_A_35392  | NW_004515703.1 | scaffold123 | 35392                   | GG                              | AA                 | AA               | INTERGENIC      |               |                    |                    |
| SNP_64026_A_37574  | NW_004515703.1 | scaffold123 | 37574                   | GG                              | AA                 | AA               | INTERGENIC      |               |                    |                    |
| SNP_64027_A_37578  | NW_004515703.1 | scaffold123 | 37578                   | TT                              | GG                 | GG               | INTERGENIC      |               |                    |                    |
| SNP_64028_A_37579  | NW_004515703.1 | scaffold123 | 37579                   | CC                              | GG                 | GG               | INTERGENIC      |               |                    |                    |
| SNP_64029_A_66723  | NW_004515703.1 | scaffold123 | 66723                   | TT                              | CC                 | CC               | INTERGENIC      |               |                    |                    |
| SNP_64030_A_66799  | NW_004515703.1 | scaffold123 | 66799                   | TT                              | CC                 | CC               | INTERGENIC      |               |                    |                    |
| SNP_64031_A_66956  | NW_004515703.1 | scaffold123 | 66956                   | TT                              | CC                 | CC               | INTERGENIC      |               |                    |                    |
| SNP_64032_A_67162  | NW_004515703.1 | scaffold123 | 67162                   | AA                              | GG                 | GG               | INTERGENIC      |               |                    |                    |
| SNP_64034_A_136477 | NW_004515703.1 | scaffold123 | 136477                  | AA                              | GG                 | GG               | INTERGENIC      |               |                    |                    |
| SNP_64035_A_141782 | NW_004515703.1 | scaffold123 | 141782                  | TT                              | AA                 | AA               | INTERGENIC      |               |                    |                    |
| SNP_64036_A_235209 | NW_004515703.1 | scaffold123 | 235209                  | CC                              | TT                 | TT               | INTERGENIC      |               |                    |                    |
| SNP_64037_A_300316 | NW_004515703.1 | scaffold123 | 300316                  | CC                              | AA                 | AA               | INTERGENIC      |               |                    |                    |
| SNP_64039_A_3372   | NW_004515705.1 | scaffold126 | 3372                    | CC                              | TT                 | TT               | INTERGENIC      |               |                    |                    |
| SNP_64040_A_6879   | NW_004515705.1 | scaffold126 | 6879                    | GG                              | AA                 | AA               | INTERGENIC      |               |                    |                    |
| SNP_64041_A_6889   | NW_004515705.1 | scaffold126 | 6889                    | CC                              | AA                 | AA               | INTERGENIC      |               |                    |                    |
| SNP_64042_A_7711   | NW_004515705.1 | scaffold126 | 7711                    | CC                              | TT                 | TT               | INTERGENIC      |               |                    |                    |
| SNP_64043_A_12166  | NW_004515705.1 | scaffold126 | 12166                   | CC                              | AA                 | AA               | INTERGENIC      |               |                    |                    |
| SNP_64044_A_16344  | NW_004515705.1 | scaffold126 | 16344                   | GG                              | AA                 | AA               | INTERGENIC      |               |                    |                    |
| SNP_64045_A_16349  | NW_004515705.1 | scaffold126 | 16349                   | TT                              | CC                 | CC               | INTERGENIC      |               |                    |                    |
| SNP_64046_A_16404  | NW_004515705.1 | scaffold126 | 16404                   | TT                              | CC                 | CC               | INTERGENIC      |               |                    |                    |
| SNP_64047_A_610    | NW_004515706.1 | scaffold127 | 610                     | TT                              | AA                 | AA               | INTERGENIC      |               |                    |                    |
| SNP_64048_A_3021   | NW_004515706.1 | scaffold127 | 3021                    | TT                              | AA                 | AA               | INTERGENIC      |               |                    |                    |

| SNPs IDs           | Chromosome IDs | Chromosomes | Physical positions (bp) | CDC Frontier (Reference genome) | (Pusa 1103 & HPNB) | (ILWC 46 & LPNB) | Sequence genome | Components of | Gene accession IDs | Putative functions |
|--------------------|----------------|-------------|-------------------------|---------------------------------|--------------------|------------------|-----------------|---------------|--------------------|--------------------|
| SNP_64049_A_19927  | NW_004515706.1 | scaffold127 | 19927                   | TT                              | AA                 | AA               | INTERGENIC      |               |                    |                    |
| SNP_64050_A_20213  | NW_004515706.1 | scaffold127 | 20213                   | GG                              | TT                 | TT               | INTERGENIC      |               |                    |                    |
| SNP_64051_A_20389  | NW_004515706.1 | scaffold127 | 20389                   | GG                              | TT                 | TT               | INTERGENIC      |               |                    |                    |
| SNP_64052_A_20421  | NW_004515706.1 | scaffold127 | 20421                   | AA                              | GG                 | GG               | INTERGENIC      |               |                    |                    |
| SNP_64053_A_20555  | NW_004515706.1 | scaffold127 | 20555                   | AA                              | GG                 | GG               | INTERGENIC      |               |                    |                    |
| SNP_64054_A_46836  | NW_004515706.1 | scaffold127 | 46836                   | AA                              | GG                 | GG               | INTERGENIC      |               |                    |                    |
| SNP_64055_A_47111  | NW_004515706.1 | scaffold127 | 47111                   | TT                              | AA                 | AA               | INTERGENIC      |               |                    |                    |
| SNP_64056_A_47169  | NW_004515706.1 | scaffold127 | 47169                   | CC                              | TT                 | TT               | INTERGENIC      |               |                    |                    |
| SNP_64057_A_53605  | NW_004515706.1 | scaffold127 | 53605                   | TT                              | GG                 | GG               | INTERGENIC      |               |                    |                    |
| SNP_64058_A_53607  | NW_004515706.1 | scaffold127 | 53607                   | TT                              | AA                 | AA               | INTERGENIC      |               |                    |                    |
| SNP_64059_A_53608  | NW_004515706.1 | scaffold127 | 53608                   | GG                              | AA                 | AA               | INTERGENIC      |               |                    |                    |
| SNP_64060_A_54097  | NW_004515706.1 | scaffold127 | 54097                   | AA                              | TT                 | TT               | INTERGENIC      |               |                    |                    |
| SNP_64061_A_54510  | NW_004515706.1 | scaffold127 | 54510                   | GG                              | TT                 | TT               | INTERGENIC      |               |                    |                    |
| SNP_64062_A_54740  | NW_004515706.1 | scaffold127 | 54740                   | AA                              | GG                 | GG               | INTERGENIC      |               |                    |                    |
| SNP_64063_A_55066  | NW_004515706.1 | scaffold127 | 55066                   | TT                              | CC                 | CC               | INTERGENIC      |               |                    |                    |
| SNP_64064_A_55117  | NW_004515706.1 | scaffold127 | 55117                   | TT                              | CC                 | CC               | INTERGENIC      |               |                    |                    |
| SNP_64066_A_69573  | NW_004515706.1 | scaffold127 | 69573                   | CC                              | TT                 | TT               | INTERGENIC      |               |                    |                    |
| SNP_64067_A_114329 | NW_004515706.1 | scaffold127 | 114329                  | CC                              | TT                 | TT               | INTERGENIC      |               |                    |                    |
| SNP_64068_A_132604 | NW_004515706.1 | scaffold127 | 132604                  | GG                              | TT                 | TT               | INTERGENIC      |               |                    |                    |
| SNP_64069_A_135547 | NW_004515706.1 | scaffold127 | 135547                  | TT                              | GG                 | GG               | INTERGENIC      |               |                    |                    |
| SNP_64070_A_135809 | NW_004515706.1 | scaffold127 | 135809                  | GG                              | AA                 | AA               | INTERGENIC      |               |                    |                    |
| SNP_64071_A_135892 | NW_004515706.1 | scaffold127 | 135892                  | GG                              | AA                 | AA               | INTERGENIC      |               |                    |                    |

| SNPs IDs           | Chromosome IDs | Chromosomes | Physical positions (bp) | CDC Frontier (Reference genome) | (Pusa 1103 & HPNB) | (ILWC 46 & LPNB) | Sequence genome | Components of | Gene accession IDs | Putative functions |
|--------------------|----------------|-------------|-------------------------|---------------------------------|--------------------|------------------|-----------------|---------------|--------------------|--------------------|
| SNP_64072_A_135893 | NW_004515706.1 | scaffold127 | 135893                  | CC                              | TT                 | TT               | INTERGENIC      |               |                    |                    |
| SNP_64073_A_136033 | NW_004515706.1 | scaffold127 | 136033                  | GG                              | AA                 | AA               | INTERGENIC      |               |                    |                    |
| SNP_64074_A_136446 | NW_004515706.1 | scaffold127 | 136446                  | TT                              | CC                 | CC               | INTERGENIC      |               |                    |                    |
| SNP_64075_A_136876 | NW_004515706.1 | scaffold127 | 136876                  | AA                              | TT                 | TT               | INTERGENIC      |               |                    |                    |
| SNP_64076_A_144628 | NW_004515706.1 | scaffold127 | 144628                  | CC                              | AA                 | AA               | INTERGENIC      |               |                    |                    |
| SNP_64078_A_152281 | NW_004515706.1 | scaffold127 | 152281                  | TT                              | CC                 | CC               | INTERGENIC      |               |                    |                    |
| SNP_64079_A_165654 | NW_004515706.1 | scaffold127 | 165654                  | GG                              | CC                 | CC               | INTERGENIC      |               |                    |                    |
| SNP_64080_A_184777 | NW_004515706.1 | scaffold127 | 184777                  | TT                              | CC                 | CC               | INTERGENIC      |               |                    |                    |
| SNP_64081_A_184819 | NW_004515706.1 | scaffold127 | 184819                  | AA                              | GG                 | GG               | INTERGENIC      |               |                    |                    |
| SNP_64082_A_184885 | NW_004515706.1 | scaffold127 | 184885                  | AA                              | CC                 | CC               | INTERGENIC      |               |                    |                    |
| SNP_64083_A_184892 | NW_004515706.1 | scaffold127 | 184892                  | CC                              | TT                 | TT               | INTERGENIC      |               |                    |                    |
| SNP_64084_A_184910 | NW_004515706.1 | scaffold127 | 184910                  | CC                              | TT                 | TT               | INTERGENIC      |               |                    |                    |
| SNP_64085_A_184921 | NW_004515706.1 | scaffold127 | 184921                  | CC                              | TT                 | TT               | INTERGENIC      |               |                    |                    |
| SNP_64086_A_184953 | NW_004515706.1 | scaffold127 | 184953                  | TT                              | AA                 | AA               | INTERGENIC      |               |                    |                    |
| SNP_64087_A_184979 | NW_004515706.1 | scaffold127 | 184979                  | AA                              | GG                 | GG               | INTERGENIC      |               |                    |                    |
| SNP_64088_A_185067 | NW_004515706.1 | scaffold127 | 185067                  | TT                              | CC                 | CC               | INTERGENIC      |               |                    |                    |
| SNP_64089_A_185125 | NW_004515706.1 | scaffold127 | 185125                  | TT                              | CC                 | CC               | INTERGENIC      |               |                    |                    |
| SNP_64090_A_185201 | NW_004515706.1 | scaffold127 | 185201                  | GG                              | AA                 | AA               | INTERGENIC      |               |                    |                    |
| SNP_64091_A_198435 | NW_004515706.1 | scaffold127 | 198435                  | TT                              | AA                 | AA               | INTERGENIC      |               |                    |                    |
| SNP_64092_A_198447 | NW_004515706.1 | scaffold127 | 198447                  | TT                              | CC                 | CC               | INTERGENIC      |               |                    |                    |
| SNP_64093_A_198457 | NW_004515706.1 | scaffold127 | 198457                  | AA                              | GG                 | GG               | INTERGENIC      |               |                    |                    |
| SNP_64094_A_199697 | NW_004515706.1 | scaffold127 | 199697                  | TT                              | CC                 | CC               | INTERGENIC      |               |                    |                    |



| SNPs IDs           | Chromosome IDs | Chromosomes | Physical positions (bp) | CDC Frontier (Reference genome) | (Pusa 1103 & HPNB) | (ILWC 46 & LPNB) | Sequence genome | Components of | Gene accession IDs | Putative functions |
|--------------------|----------------|-------------|-------------------------|---------------------------------|--------------------|------------------|-----------------|---------------|--------------------|--------------------|
| SNP_64095_A_216827 | NW_004515706.1 | scaffold127 | 216827                  | CC                              | TT                 | TT               | INTERGENIC      |               |                    |                    |
| SNP_64096_A_229371 | NW_004515706.1 | scaffold127 | 229371                  | AA                              | GG                 | GG               | INTERGENIC      |               |                    |                    |
| SNP_64097_A_229456 | NW_004515706.1 | scaffold127 | 229456                  | TT                              | CC                 | CC               | INTERGENIC      |               |                    |                    |
| SNP_64098_A_229457 | NW_004515706.1 | scaffold127 | 229457                  | AA                              | GG                 | GG               | INTERGENIC      |               |                    |                    |
| SNP_64099_A_229469 | NW_004515706.1 | scaffold127 | 229469                  | GG                              | AA                 | AA               | INTERGENIC      |               |                    |                    |
| SNP_64100_A_232071 | NW_004515706.1 | scaffold127 | 232071                  | CC                              | TT                 | TT               | INTERGENIC      |               |                    |                    |
| SNP_64101_A_232103 | NW_004515706.1 | scaffold127 | 232103                  | AA                              | CC                 | CC               | INTERGENIC      |               |                    |                    |
| SNP_64102_A_232149 | NW_004515706.1 | scaffold127 | 232149                  | TT                              | CC                 | CC               | INTERGENIC      |               |                    |                    |
| SNP_64103_A_240276 | NW_004515706.1 | scaffold127 | 240276                  | TT                              | AA                 | AA               | INTERGENIC      |               |                    |                    |
| SNP_64104_A_240287 | NW_004515706.1 | scaffold127 | 240287                  | CC                              | TT                 | TT               | INTERGENIC      |               |                    |                    |
| SNP_64105_A_242739 | NW_004515706.1 | scaffold127 | 242739                  | GG                              | CC                 | CC               | INTERGENIC      |               |                    |                    |
| SNP_64106_A_255784 | NW_004515706.1 | scaffold127 | 255784                  | TT                              | CC                 | CC               | INTERGENIC      |               |                    |                    |
| SNP_64107_A_256051 | NW_004515706.1 | scaffold127 | 256051                  | AA                              | TT                 | TT               | INTERGENIC      |               |                    |                    |
| SNP_64108_A_256064 | NW_004515706.1 | scaffold127 | 256064                  | TT                              | CC                 | CC               | INTERGENIC      |               |                    |                    |
| SNP_64110_A_256106 | NW_004515706.1 | scaffold127 | 256106                  | AA                              | TT                 | TT               | INTERGENIC      |               |                    |                    |
| SNP_64111_A_256808 | NW_004515706.1 | scaffold127 | 256808                  | AA                              | CC                 | CC               | INTERGENIC      |               |                    |                    |
| SNP_64112_A_265792 | NW_004515706.1 | scaffold127 | 265792                  | AA                              | TT                 | TT               | INTERGENIC      |               |                    |                    |
| SNP_64113_A_265873 | NW_004515706.1 | scaffold127 | 265873                  | CC                              | TT                 | TT               | INTERGENIC      |               |                    |                    |
| SNP_64114_A_270011 | NW_004515706.1 | scaffold127 | 270011                  | TT                              | CC                 | CC               | INTERGENIC      |               |                    |                    |
| SNP_64115_A_270012 | NW_004515706.1 | scaffold127 | 270012                  | AA                              | CC                 | CC               | INTERGENIC      |               |                    |                    |
| SNP_64117_A_270062 | NW_004515706.1 | scaffold127 | 270062                  | GG                              | AA                 | AA               | INTERGENIC      |               |                    |                    |
| SNP_64118_A_270214 | NW_004515706.1 | scaffold127 | 270214                  | GG                              | AA                 | AA               | INTERGENIC      |               |                    |                    |

| SNPs IDs           | Chromosome IDs | Chromosomes | Physical positions (bp) | CDC Frontier (Reference genome) | (Pusa 1103 & HPNB) | (ILWC 46 & LPNB) | Sequence genome | Components of | Gene accession IDs           | Putative functions |
|--------------------|----------------|-------------|-------------------------|---------------------------------|--------------------|------------------|-----------------|---------------|------------------------------|--------------------|
| SNP_64119_A_270319 | NW_004515706.1 | scaffold127 | 270319                  | AA                              | CC                 | CC               | INTERGENIC      |               |                              |                    |
| SNP_64120_A_270342 | NW_004515706.1 | scaffold127 | 270342                  | TT                              | CC                 | CC               | INTERGENIC      |               |                              |                    |
| SNP_64121_A_270343 | NW_004515706.1 | scaffold127 | 270343                  | CC                              | TT                 | TT               | INTERGENIC      |               |                              |                    |
| SNP_64123_A_270537 | NW_004515706.1 | scaffold127 | 270537                  | AA                              | GG                 | GG               | INTERGENIC      |               |                              |                    |
| SNP_64124_A_271126 | NW_004515706.1 | scaffold127 | 271126                  | TT                              | CC                 | CC               | INTERGENIC      |               |                              |                    |
| SNP_64125_A_271175 | NW_004515706.1 | scaffold127 | 271175                  | AA                              | TT                 | TT               | INTERGENIC      |               |                              |                    |
| SNP_64126_A_271188 | NW_004515706.1 | scaffold127 | 271188                  | CC                              | TT                 | TT               | INTERGENIC      |               |                              |                    |
| SNP_64127_A_271198 | NW_004515706.1 | scaffold127 | 271198                  | TT                              | AA                 | AA               | INTERGENIC      |               |                              |                    |
| SNP_64128_A_275006 | NW_004515706.1 | scaffold127 | 275006                  | TT                              | CC                 | CC               | INTERGENIC      |               |                              |                    |
| SNP_64129_A_279755 | NW_004515706.1 | scaffold127 | 279755                  | GG                              | TT                 | TT               | INTERGENIC      |               |                              |                    |
| SNP_64130_A_299611 | NW_004515706.1 | scaffold127 | 299611                  | AA                              | GG                 | GG               | INTERGENIC      |               |                              |                    |
| SNP_64131_A_304939 | NW_004515706.1 | scaffold127 | 304939                  | AA                              | GG                 | GG               | INTERGENIC      |               |                              |                    |
| SNP_64132_A_304960 | NW_004515706.1 | scaffold127 | 304960                  | TT                              | GG                 | GG               | INTERGENIC      |               |                              |                    |
| SNP_64133_A_5690   | NW_004515707.1 | scaffold128 | 5690                    | AA                              | CC                 | TT               | INTERGENIC      |               |                              |                    |
| SNP_64134_A_5692   | NW_004515707.1 | scaffold128 | 5692                    | AA                              | GG                 | GG               | INTERGENIC      |               |                              |                    |
| SNP_64135_A_5728   | NW_004515707.1 | scaffold128 | 5728                    | TT                              | GG                 | GG               | INTERGENIC      |               |                              |                    |
| SNP_64136_A_5961   | NW_004515707.1 | scaffold128 | 5961                    | AA                              | CC                 | CC               | INTERGENIC      |               |                              |                    |
| SNP_64137_A_6065   | NW_004515707.1 | scaffold128 | 6065                    | AA                              | GG                 | GG               | INTERGENIC      |               |                              |                    |
| SNP_64138_A_20596  | NW_004515707.1 | scaffold128 | 20596                   | GG                              | TT                 | TT               | INTERGENIC      |               |                              |                    |
| SNP_64139_A_32585  | NW_004515707.1 | scaffold128 | 32585                   | AA                              | CC                 | CC               | URR             | 101490026     | uncharacterized LOC101490026 |                    |
| SNP_64140_A_32595  | NW_004515707.1 | scaffold128 | 32595                   | AA                              | GG                 | GG               | URR             | 101490026     | uncharacterized LOC101490026 |                    |
| SNP_64141_A_32599  | NW_004515707.1 | scaffold128 | 32599                   | CC                              | TT                 | TT               | URR             | 101490026     | uncharacterized LOC101490026 |                    |

| SNPs IDs           | Chromosome IDs | Chromosomes | Physical positions (bp) | CDC Frontier (Reference genome) | (Pusa 1103 & HPNB) | (ILWC 46 & LPNB) | Sequence Components of genome | Gene accession IDs | Putative functions                                                   |
|--------------------|----------------|-------------|-------------------------|---------------------------------|--------------------|------------------|-------------------------------|--------------------|----------------------------------------------------------------------|
| SNP_64142_A_32622  | NW_004515707.1 | scaffold128 | 32622                   | AA                              | GG                 | GG               | URR                           | 101490026          | uncharacterized LOC101490026                                         |
| SNP_64143_A_32691  | NW_004515707.1 | scaffold128 | 32691                   | GG                              | CC                 | CC               | INTERGENIC                    |                    |                                                                      |
| SNP_64144_A_32711  | NW_004515707.1 | scaffold128 | 32711                   | GG                              | AA                 | AA               | INTERGENIC                    |                    |                                                                      |
| SNP_64145_A_32767  | NW_004515707.1 | scaffold128 | 32767                   | TT                              | CC                 | CC               | INTERGENIC                    |                    |                                                                      |
| SNP_64146_A_32812  | NW_004515707.1 | scaffold128 | 32812                   | TT                              | CC                 | CC               | INTERGENIC                    |                    |                                                                      |
| SNP_64147_A_32836  | NW_004515707.1 | scaffold128 | 32836                   | CC                              | AA                 | AA               | INTERGENIC                    |                    |                                                                      |
| SNP_64149_A_51993  | NW_004515707.1 | scaffold128 | 51993                   | GG                              | AA                 | AA               | INTRON                        | 101490365          | uncharacterized LOC101490365                                         |
| SNP_64151_A_177018 | NW_004515707.1 | scaffold128 | 177018                  | TT                              | CC                 | CC               | DRR                           | 101514225          | uncharacterized LOC101514225                                         |
| SNP_64152_A_177144 | NW_004515707.1 | scaffold128 | 177144                  | AA                              | TT                 | TT               | DRR                           | 101514225          | uncharacterized LOC101514225                                         |
| SNP_64153_A_197778 | NW_004515707.1 | scaffold128 | 197778                  | TT                              | GG                 | GG               | INTRON                        | 101514433          | G-type lectin S-receptor-like serine/threonine-protein kinase SD1-13 |
| SNP_64154_A_197781 | NW_004515707.1 | scaffold128 | 197781                  | TT                              | CC                 | CC               | INTRON                        | 101514433          | G-type lectin S-receptor-like serine/threonine-protein kinase SD1-13 |
| SNP_64155_A_197803 | NW_004515707.1 | scaffold128 | 197803                  | AA                              | GG                 | GG               | INTRON                        | 101514433          | G-type lectin S-receptor-like serine/threonine-protein kinase SD1-13 |
| SNP_64156_A_227866 | NW_004515707.1 | scaffold128 | 227866                  | GG                              | TT                 | TT               | NON_SYNONYMOUS_CODING         | 101491006          | uncharacterized LOC101491006                                         |
| SNP_64157_A_227875 | NW_004515707.1 | scaffold128 | 227875                  | TT                              | CC                 | CC               | SYNONYMOUS_CODING             | 101491006          | uncharacterized LOC101491006                                         |
| SNP_64158_A_240687 | NW_004515707.1 | scaffold128 | 240687                  | TT                              | CC                 | CC               | INTERGENIC                    |                    |                                                                      |
| SNP_64159_A_285506 | NW_004515707.1 | scaffold128 | 285506                  | GG                              | AA                 | AA               | INTERGENIC                    |                    |                                                                      |
| SNP_64160_A_344005 | NW_004515707.1 | scaffold128 | 344005                  | CC                              | TT                 | TT               | INTERGENIC                    |                    |                                                                      |
| SNP_64161_A_346086 | NW_004515707.1 | scaffold128 | 346086                  | AA                              | GG                 | GG               | INTERGENIC                    |                    |                                                                      |
| SNP_64162_A_346113 | NW_004515707.1 | scaffold128 | 346113                  | AA                              | GG                 | GG               | INTERGENIC                    |                    |                                                                      |
| SNP_64163_A_346122 | NW_004515707.1 | scaffold128 | 346122                  | TT                              | AA                 | AA               | INTERGENIC                    |                    |                                                                      |
| SNP_64164_A_346172 | NW_004515707.1 | scaffold128 | 346172                  | AA                              | GG                 | GG               | INTERGENIC                    |                    |                                                                      |
| SNP_64165_A_346336 | NW_004515707.1 | scaffold128 | 346336                  | TT                              | CC                 | CC               | INTERGENIC                    |                    |                                                                      |

| SNPs IDs           | Chromosome IDs | Chromosomes | Physical positions (bp) | CDC Frontier (Reference genome) | (Pusa 1103 & HPNB) | (ILWC 46 & LPNB) | Sequence genome | Components of | Gene accession IDs | Putative functions |
|--------------------|----------------|-------------|-------------------------|---------------------------------|--------------------|------------------|-----------------|---------------|--------------------|--------------------|
| SNP_64168_A_393099 | NW_004515707.1 | scaffold128 | 393099                  | TT                              | CC                 | CC               | INTERGENIC      |               |                    |                    |
| SNP_64169_A_393384 | NW_004515707.1 | scaffold128 | 393384                  | TT                              | CC                 | CC               | INTERGENIC      |               |                    |                    |
| SNP_64170_A_393520 | NW_004515707.1 | scaffold128 | 393520                  | AA                              | TT                 | TT               | INTERGENIC      |               |                    |                    |
| SNP_64171_A_393613 | NW_004515707.1 | scaffold128 | 393613                  | AA                              | TT                 | TT               | INTERGENIC      |               |                    |                    |
| SNP_64172_A_407777 | NW_004515707.1 | scaffold128 | 407777                  | TT                              | CC                 | CC               | INTERGENIC      |               |                    |                    |
| SNP_64173_A_416825 | NW_004515707.1 | scaffold128 | 416825                  | TT                              | CC                 | CC               | INTERGENIC      |               |                    |                    |
| SNP_64174_A_416833 | NW_004515707.1 | scaffold128 | 416833                  | TT                              | GG                 | GG               | INTERGENIC      |               |                    |                    |
| SNP_64175_A_417222 | NW_004515707.1 | scaffold128 | 417222                  | TT                              | CC                 | CC               | INTERGENIC      |               |                    |                    |
| SNP_64176_A_427975 | NW_004515707.1 | scaffold128 | 427975                  | TT                              | CC                 | CC               | INTERGENIC      |               |                    |                    |
| SNP_64177_A_429459 | NW_004515707.1 | scaffold128 | 429459                  | GG                              | TT                 | TT               | INTERGENIC      |               |                    |                    |
| SNP_64178_A_430434 | NW_004515707.1 | scaffold128 | 430434                  | GG                              | AA                 | AA               | INTERGENIC      |               |                    |                    |
| SNP_64179_A_433605 | NW_004515707.1 | scaffold128 | 433605                  | AA                              | CC                 | CC               | INTERGENIC      |               |                    |                    |
| SNP_64180_A_435907 | NW_004515707.1 | scaffold128 | 435907                  | AA                              | TT                 | TT               | INTERGENIC      |               |                    |                    |
| SNP_64182_A_437346 | NW_004515707.1 | scaffold128 | 437346                  | AA                              | TT                 | TT               | INTERGENIC      |               |                    |                    |
| SNP_64183_A_448594 | NW_004515707.1 | scaffold128 | 448594                  | TT                              | AA                 | AA               | INTERGENIC      |               |                    |                    |
| SNP_64184_A_450425 | NW_004515707.1 | scaffold128 | 450425                  | CC                              | AA                 | AA               | INTERGENIC      |               |                    |                    |
| SNP_64185_A_450878 | NW_004515707.1 | scaffold128 | 450878                  | AA                              | TT                 | TT               | INTERGENIC      |               |                    |                    |
| SNP_64186_A_452886 | NW_004515707.1 | scaffold128 | 452886                  | AA                              | GG                 | GG               | INTERGENIC      |               |                    |                    |
| SNP_64187_A_475930 | NW_004515707.1 | scaffold128 | 475930                  | AA                              | CC                 | CC               | URR             | 101488386     | protein TPLATE     |                    |
| SNP_64188_A_531913 | NW_004515707.1 | scaffold128 | 531913                  | AA                              | TT                 | TT               | INTERGENIC      |               |                    |                    |
| SNP_64189_A_532045 | NW_004515707.1 | scaffold128 | 532045                  | TT                              | CC                 | CC               | INTERGENIC      |               |                    |                    |
| SNP_64190_A_532049 | NW_004515707.1 | scaffold128 | 532049                  | TT                              | CC                 | CC               | INTERGENIC      |               |                    |                    |

| SNPs IDs           | Chromosome IDs | Chromosomes | Physical positions (bp) | CDC Frontier (Reference genome) | (Pusa 1103 & HPNB) | (ILWC 46 & LPNB) | Sequence Components of genome | Gene accession IDs | Putative functions           |
|--------------------|----------------|-------------|-------------------------|---------------------------------|--------------------|------------------|-------------------------------|--------------------|------------------------------|
| SNP_64191_A_532175 | NW_004515707.1 | scaffold128 | 532175                  | TT                              | CC                 | CC               | URR                           | 101492952          | uncharacterized LOC101492952 |
| SNP_64192_A_537743 | NW_004515707.1 | scaffold128 | 537743                  | TT                              | CC                 | CC               | INTRON                        | 101493287          | uncharacterized LOC101493287 |
| SNP_64193_A_540495 | NW_004515707.1 | scaffold128 | 540495                  | TT                              | CC                 | CC               | INTRON                        | 101493287          | uncharacterized LOC101493287 |
| SNP_64194_A_540569 | NW_004515707.1 | scaffold128 | 540569                  | AA                              | GG                 | GG               | INTRON                        | 101493287          | uncharacterized LOC101493287 |
| SNP_64196_A_578374 | NW_004515707.1 | scaffold128 | 578374                  | AA                              | TT                 | TT               | URR                           | 101493928          | Unknown function             |
| SNP_64197_A_578559 | NW_004515707.1 | scaffold128 | 578559                  | TT                              | CC                 | CC               | URR                           | 101493928          | Unknown function             |
| SNP_64198_A_578870 | NW_004515707.1 | scaffold128 | 578870                  | AA                              | GG                 | GG               | URR                           | 101494249          | uncharacterized LOC101494249 |
| SNP_64199_A_578923 | NW_004515707.1 | scaffold128 | 578923                  | TT                              | CC                 | CC               | URR                           | 101494249          | uncharacterized LOC101494249 |
| SNP_64200_A_580854 | NW_004515707.1 | scaffold128 | 580854                  | GG                              | TT                 | TT               | INTERGENIC                    |                    |                              |
| SNP_64201_A_581010 | NW_004515707.1 | scaffold128 | 581010                  | CC                              | TT                 | TT               | INTERGENIC                    |                    |                              |
| SNP_64202_A_581023 | NW_004515707.1 | scaffold128 | 581023                  | GG                              | AA                 | AA               | INTERGENIC                    |                    |                              |
| SNP_64203_A_581024 | NW_004515707.1 | scaffold128 | 581024                  | AA                              | GG                 | GG               | INTERGENIC                    |                    |                              |
| SNP_64204_A_581026 | NW_004515707.1 | scaffold128 | 581026                  | AA                              | CC                 | CC               | INTERGENIC                    |                    |                              |
| SNP_64205_A_581225 | NW_004515707.1 | scaffold128 | 581225                  | GG                              | CC                 | CC               | INTERGENIC                    |                    |                              |
| SNP_64206_A_587743 | NW_004515707.1 | scaffold128 | 587743                  | TT                              | CC                 | CC               | INTERGENIC                    |                    |                              |
| SNP_64208_A_588068 | NW_004515707.1 | scaffold128 | 588068                  | AA                              | GG                 | GG               | INTERGENIC                    |                    |                              |
| SNP_64209_A_608030 | NW_004515707.1 | scaffold128 | 608030                  | AA                              | GG                 | GG               | INTERGENIC                    |                    |                              |
| SNP_64210_A_656089 | NW_004515707.1 | scaffold128 | 656089                  | GG                              | AA                 | AA               | INTERGENIC                    |                    |                              |
| SNP_64211_A_673625 | NW_004515707.1 | scaffold128 | 673625                  | TT                              | CC                 | CC               | INTERGENIC                    |                    |                              |
| SNP_64212_A_680693 | NW_004515707.1 | scaffold128 | 680693                  | GG                              | AA                 | AA               | INTERGENIC                    |                    |                              |
| SNP_64213_A_700939 | NW_004515707.1 | scaffold128 | 700939                  | AA                              | GG                 | GG               | INTERGENIC                    |                    |                              |
| SNP_64214_A_700954 | NW_004515707.1 | scaffold128 | 700954                  | AA                              | GG                 | GG               | INTERGENIC                    |                    |                              |

| SNPs IDs           | Chromosome IDs | Chromosomes | Physical positions (bp) | CDC Frontier (Reference genome) | (Pusa 1103 & HPNB) | (ILWC 46 & LPNB) | Sequence genome | Components of | Gene accession IDs | Putative functions |
|--------------------|----------------|-------------|-------------------------|---------------------------------|--------------------|------------------|-----------------|---------------|--------------------|--------------------|
| SNP_64215_A_700959 | NW_004515707.1 | scaffold128 | 700959                  | TT                              | GG                 | GG               | INTERGENIC      |               |                    |                    |
| SNP_64216_A_701124 | NW_004515707.1 | scaffold128 | 701124                  | CC                              | TT                 | TT               | INTERGENIC      |               |                    |                    |
| SNP_64217_A_701474 | NW_004515707.1 | scaffold128 | 701474                  | TT                              | AA                 | AA               | INTERGENIC      |               |                    |                    |
| SNP_64219_A_711377 | NW_004515707.1 | scaffold128 | 711377                  | CC                              | GG                 | GG               | INTERGENIC      |               |                    |                    |
| SNP_64220_A_711382 | NW_004515707.1 | scaffold128 | 711382                  | TT                              | CC                 | CC               | INTERGENIC      |               |                    |                    |
| SNP_64221_A_711394 | NW_004515707.1 | scaffold128 | 711394                  | TT                              | CC                 | CC               | INTERGENIC      |               |                    |                    |
| SNP_64222_A_719345 | NW_004515707.1 | scaffold128 | 719345                  | TT                              | AA                 | AA               | INTERGENIC      |               |                    |                    |
| SNP_64223_A_719582 | NW_004515707.1 | scaffold128 | 719582                  | TT                              | CC                 | CC               | INTERGENIC      |               |                    |                    |
| SNP_64224_A_721442 | NW_004515707.1 | scaffold128 | 721442                  | AA                              | TT                 | TT               | INTERGENIC      |               |                    |                    |
| SNP_64225_A_721443 | NW_004515707.1 | scaffold128 | 721443                  | GG                              | TT                 | TT               | INTERGENIC      |               |                    |                    |
| SNP_64226_A_729770 | NW_004515707.1 | scaffold128 | 729770                  | GG                              | AA                 | AA               | INTERGENIC      |               |                    |                    |
| SNP_64227_A_732465 | NW_004515707.1 | scaffold128 | 732465                  | TT                              | CC                 | CC               | INTERGENIC      |               |                    |                    |
| SNP_64228_A_732515 | NW_004515707.1 | scaffold128 | 732515                  | AA                              | TT                 | TT               | INTERGENIC      |               |                    |                    |
| SNP_64230_A_732718 | NW_004515707.1 | scaffold128 | 732718                  | AA                              | GG                 | GG               | INTERGENIC      |               |                    |                    |
| SNP_64231_A_732744 | NW_004515707.1 | scaffold128 | 732744                  | GG                              | AA                 | AA               | INTERGENIC      |               |                    |                    |
| SNP_64232_A_732772 | NW_004515707.1 | scaffold128 | 732772                  | CC                              | AA                 | AA               | INTERGENIC      |               |                    |                    |
| SNP_64233_A_732802 | NW_004515707.1 | scaffold128 | 732802                  | AA                              | CC                 | CC               | INTERGENIC      |               |                    |                    |
| SNP_64234_A_732874 | NW_004515707.1 | scaffold128 | 732874                  | CC                              | TT                 | TT               | INTERGENIC      |               |                    |                    |
| SNP_64235_A_732958 | NW_004515707.1 | scaffold128 | 732958                  | TT                              | AA                 | AA               | INTERGENIC      |               |                    |                    |
| SNP_64236_A_746221 | NW_004515707.1 | scaffold128 | 746221                  | GG                              | TT                 | TT               | INTERGENIC      |               |                    |                    |
| SNP_64239_A_747506 | NW_004515707.1 | scaffold128 | 747506                  | AA                              | CC                 | CC               | INTERGENIC      |               |                    |                    |
| SNP_64240_A_747693 | NW_004515707.1 | scaffold128 | 747693                  | AA                              | GG                 | GG               | INTERGENIC      |               |                    |                    |

| SNPs IDs           | Chromosome IDs | Chromosomes | Physical positions (bp) | CDC Frontier (Reference genome) | (Pusa 1103 & HPNB) | (ILWC 46 & LPNB) | Sequence Components of genome | Gene accession IDs | Putative functions |
|--------------------|----------------|-------------|-------------------------|---------------------------------|--------------------|------------------|-------------------------------|--------------------|--------------------|
| SNP_64241_A_747694 | NW_004515707.1 | scaffold128 | 747694                  | TT                              | AA                 | AA               | INTERGENIC                    |                    |                    |
| SNP_64242_A_816970 | NW_004515707.1 | scaffold128 | 816970                  | CC                              | AA                 | AA               | INTERGENIC                    |                    |                    |
| SNP_64243_A_820564 | NW_004515707.1 | scaffold128 | 820564                  | TT                              | CC                 | CC               | INTERGENIC                    |                    |                    |
| SNP_64244_A_820672 | NW_004515707.1 | scaffold128 | 820672                  | GG                              | CC                 | CC               | INTERGENIC                    |                    |                    |
| SNP_64245_A_820681 | NW_004515707.1 | scaffold128 | 820681                  | AA                              | TT                 | TT               | INTERGENIC                    |                    |                    |
| SNP_64246_A_820695 | NW_004515707.1 | scaffold128 | 820695                  | AA                              | CC                 | CC               | INTERGENIC                    |                    |                    |
| SNP_64247_A_820697 | NW_004515707.1 | scaffold128 | 820697                  | AA                              | CC                 | CC               | INTERGENIC                    |                    |                    |
| SNP_64248_A_820876 | NW_004515707.1 | scaffold128 | 820876                  | TT                              | CC                 | CC               | INTERGENIC                    |                    |                    |
| SNP_64249_A_822400 | NW_004515707.1 | scaffold128 | 822400                  | GG                              | TT                 | TT               | INTERGENIC                    |                    |                    |
| SNP_64250_A_841948 | NW_004515707.1 | scaffold128 | 841948                  | CC                              | TT                 | TT               | INTRON                        | 101494554          | Unknown function   |
| SNP_64251_A_859729 | NW_004515707.1 | scaffold128 | 859729                  | GG                              | AA                 | AA               | INTERGENIC                    |                    |                    |
| SNP_64252_A_859731 | NW_004515707.1 | scaffold128 | 859731                  | GG                              | AA                 | AA               | INTERGENIC                    |                    |                    |
| SNP_64253_A_887556 | NW_004515707.1 | scaffold128 | 887556                  | GG                              | TT                 | TT               | INTERGENIC                    |                    |                    |
| SNP_64255_A_13021  | NW_004515708.1 | scaffold131 | 13021                   | TT                              | GG                 | GG               | INTERGENIC                    |                    |                    |
| SNP_64256_A_13026  | NW_004515708.1 | scaffold131 | 13026                   | AA                              | GG                 | GG               | INTERGENIC                    |                    |                    |
| SNP_64257_A_13291  | NW_004515708.1 | scaffold131 | 13291                   | TT                              | CC                 | CC               | INTERGENIC                    |                    |                    |
| SNP_64258_A_13373  | NW_004515708.1 | scaffold131 | 13373                   | AA                              | TT                 | TT               | INTERGENIC                    |                    |                    |
| SNP_64259_A_28677  | NW_004515708.1 | scaffold131 | 28677                   | AA                              | TT                 | TT               | INTERGENIC                    |                    |                    |
| SNP_64260_A_30537  | NW_004515708.1 | scaffold131 | 30537                   | TT                              | GG                 | GG               | INTERGENIC                    |                    |                    |
| SNP_64261_A_38181  | NW_004515708.1 | scaffold131 | 38181                   | CC                              | TT                 | TT               | INTERGENIC                    |                    |                    |
| SNP_64262_A_31656  | NW_004515709.1 | scaffold132 | 31656                   | CC                              | TT                 | TT               | INTERGENIC                    |                    |                    |
| SNP_64263_A_31658  | NW_004515709.1 | scaffold132 | 31658                   | AA                              | GG                 | GG               | INTERGENIC                    |                    |                    |

| SNPs IDs           | Chromosome IDs | Chromosomes | Physical positions (bp) | CDC Frontier (Reference genome) | (Pusa 1103 & HPNB) | (ILWC 46 & LPNB) | Sequence genome | Components of | Gene accession IDs | Putative functions |
|--------------------|----------------|-------------|-------------------------|---------------------------------|--------------------|------------------|-----------------|---------------|--------------------|--------------------|
| SNP_64264_A_41654  | NW_004515709.1 | scaffold132 | 41654                   | CC                              | TT                 | TT               | INTERGENIC      |               |                    |                    |
| SNP_64265_A_41660  | NW_004515709.1 | scaffold132 | 41660                   | TT                              | AA                 | AA               | INTERGENIC      |               |                    |                    |
| SNP_64266_A_41673  | NW_004515709.1 | scaffold132 | 41673                   | TT                              | GG                 | GG               | INTERGENIC      |               |                    |                    |
| SNP_64268_A_47419  | NW_004515709.1 | scaffold132 | 47419                   | GG                              | TT                 | TT               | INTERGENIC      |               |                    |                    |
| SNP_64269_A_53968  | NW_004515709.1 | scaffold132 | 53968                   | AA                              | GG                 | GG               | INTERGENIC      |               |                    |                    |
| SNP_64270_A_53991  | NW_004515709.1 | scaffold132 | 53991                   | TT                              | GG                 | GG               | INTERGENIC      |               |                    |                    |
| SNP_64271_A_54019  | NW_004515709.1 | scaffold132 | 54019                   | TT                              | AA                 | AA               | INTERGENIC      |               |                    |                    |
| SNP_64272_A_54050  | NW_004515709.1 | scaffold132 | 54050                   | GG                              | CC                 | CC               | INTERGENIC      |               |                    |                    |
| SNP_64273_A_54075  | NW_004515709.1 | scaffold132 | 54075                   | GG                              | AA                 | AA               | INTERGENIC      |               |                    |                    |
| SNP_64274_A_54487  | NW_004515709.1 | scaffold132 | 54487                   | GG                              | AA                 | AA               | INTERGENIC      |               |                    |                    |
| SNP_64275_A_60629  | NW_004515709.1 | scaffold132 | 60629                   | CC                              | TT                 | TT               | INTERGENIC      |               |                    |                    |
| SNP_64276_A_60722  | NW_004515709.1 | scaffold132 | 60722                   | AA                              | GG                 | GG               | INTERGENIC      |               |                    |                    |
| SNP_64277_A_87266  | NW_004515709.1 | scaffold132 | 87266                   | GG                              | CC                 | CC               | INTERGENIC      |               |                    |                    |
| SNP_64278_A_94655  | NW_004515709.1 | scaffold132 | 94655                   | TT                              | CC                 | CC               | INTERGENIC      |               |                    |                    |
| SNP_64279_A_153196 | NW_004515709.1 | scaffold132 | 153196                  | GG                              | TT                 | TT               | INTERGENIC      |               |                    |                    |
| SNP_64280_A_153198 | NW_004515709.1 | scaffold132 | 153198                  | CC                              | GG                 | GG               | INTERGENIC      |               |                    |                    |
| SNP_64281_A_153199 | NW_004515709.1 | scaffold132 | 153199                  | GG                              | TT                 | TT               | INTERGENIC      |               |                    |                    |
| SNP_64282_A_153200 | NW_004515709.1 | scaffold132 | 153200                  | GG                              | CC                 | CC               | INTERGENIC      |               |                    |                    |
| SNP_64283_A_153212 | NW_004515709.1 | scaffold132 | 153212                  | GG                              | TT                 | TT               | INTERGENIC      |               |                    |                    |
| SNP_64284_A_13425  | NW_004515710.1 | scaffold133 | 13425                   | TT                              | AA                 | AA               | INTERGENIC      |               |                    |                    |
| SNP_64285_A_13455  | NW_004515710.1 | scaffold133 | 13455                   | CC                              | TT                 | TT               | INTERGENIC      |               |                    |                    |
| SNP_64286_A_13687  | NW_004515710.1 | scaffold133 | 13687                   | GG                              | AA                 | AA               | INTERGENIC      |               |                    |                    |



| SNPs IDs           | Chromosome IDs | Chromosomes | Physical positions (bp) | CDC Frontier (Reference genome) | (Pusa 1103 & HPNB) | (ILWC 46 & LPNB) | Sequence Components of genome | Gene accession IDs | Putative functions                                     |
|--------------------|----------------|-------------|-------------------------|---------------------------------|--------------------|------------------|-------------------------------|--------------------|--------------------------------------------------------|
| SNP_64287_A_15985  | NW_004515711.1 | scaffold134 | 15985                   | AA                              | GG                 | GG               | INTERGENIC                    |                    |                                                        |
| SNP_64288_A_36583  | NW_004515711.1 | scaffold134 | 36583                   | TT                              | GG                 | GG               | INTERGENIC                    |                    |                                                        |
| SNP_64289_A_39371  | NW_004515711.1 | scaffold134 | 39371                   | TT                              | AA                 | AA               | INTERGENIC                    |                    |                                                        |
| SNP_64291_A_103242 | NW_004515711.1 | scaffold134 | 103242                  | CC                              | TT                 | TT               | INTERGENIC                    |                    |                                                        |
| SNP_64293_A_185675 | NW_004515711.1 | scaffold134 | 185675                  | AA                              | TT                 | TT               | INTERGENIC                    |                    |                                                        |
| SNP_64294_A_274599 | NW_004515711.1 | scaffold134 | 274599                  | CC                              | TT                 | TT               | INTRON                        | 101498358          | dehydration-responsive element-binding protein 2A-like |
| SNP_64296_A_323246 | NW_004515711.1 | scaffold134 | 323246                  | TT                              | CC                 | CC               | SYNONYMOUS_CODING             | 101504030          | Unknown function                                       |
| SNP_64297_A_323258 | NW_004515711.1 | scaffold134 | 323258                  | AA                              | GG                 | GG               | SYNONYMOUS_CODING             | 101504030          | Unknown function                                       |
| SNP_64298_A_323261 | NW_004515711.1 | scaffold134 | 323261                  | TT                              | CC                 | CC               | NON_SYNONYMOUS_CODING         | 101504030          | Unknown function                                       |
| SNP_64299_A_334340 | NW_004515711.1 | scaffold134 | 334340                  | AA                              | GG                 | GG               | INTERGENIC                    |                    |                                                        |
| SNP_64300_A_334396 | NW_004515711.1 | scaffold134 | 334396                  | TT                              | GG                 | GG               | INTERGENIC                    |                    |                                                        |
| SNP_64302_A_334569 | NW_004515711.1 | scaffold134 | 334569                  | GG                              | AA                 | AA               | INTERGENIC                    |                    |                                                        |
| SNP_64303_A_334694 | NW_004515711.1 | scaffold134 | 334694                  | AA                              | TT                 | TT               | INTERGENIC                    |                    |                                                        |
| SNP_64304_A_336531 | NW_004515711.1 | scaffold134 | 336531                  | TT                              | CC                 | CC               | INTERGENIC                    |                    |                                                        |
| SNP_64305_A_336532 | NW_004515711.1 | scaffold134 | 336532                  | TT                              | CC                 | CC               | INTERGENIC                    |                    |                                                        |
| SNP_64306_A_336534 | NW_004515711.1 | scaffold134 | 336534                  | TT                              | CC                 | CC               | INTERGENIC                    |                    |                                                        |
| SNP_64307_A_336564 | NW_004515711.1 | scaffold134 | 336564                  | TT                              | CC                 | CC               | INTERGENIC                    |                    |                                                        |
| SNP_64308_A_336664 | NW_004515711.1 | scaffold134 | 336664                  | TT                              | CC                 | CC               | INTERGENIC                    |                    |                                                        |
| SNP_64309_A_336666 | NW_004515711.1 | scaffold134 | 336666                  | AA                              | CC                 | CC               | INTERGENIC                    |                    |                                                        |
| SNP_64310_A_336670 | NW_004515711.1 | scaffold134 | 336670                  | TT                              | AA                 | AA               | INTERGENIC                    |                    |                                                        |
| SNP_64311_A_336712 | NW_004515711.1 | scaffold134 | 336712                  | TT                              | AA                 | AA               | INTERGENIC                    |                    |                                                        |
| SNP_64312_A_336788 | NW_004515711.1 | scaffold134 | 336788                  | TT                              | CC                 | CC               | INTERGENIC                    |                    |                                                        |

| SNPs IDs           | Chromosome IDs | Chromosomes | Physical positions (bp) | CDC Frontier (Reference genome) | (Pusa 1103 & HPNB) | (ILWC 46 & LPNB) | Sequence Components of genome | Gene accession IDs | Putative functions                                                      |
|--------------------|----------------|-------------|-------------------------|---------------------------------|--------------------|------------------|-------------------------------|--------------------|-------------------------------------------------------------------------|
| SNP_64313_A_337151 | NW_004515711.1 | scaffold134 | 337151                  | TT                              | CC                 | CC               | INTERGENIC                    |                    |                                                                         |
| SNP_64314_A_345925 | NW_004515711.1 | scaffold134 | 345925                  | CC                              | TT                 | TT               | URR                           | 101499959          | G-type lectin S-receptor-like serine/threonine-protein kinase At4g03230 |
| SNP_64316_A_364832 | NW_004515711.1 | scaffold134 | 364832                  | GG                              | AA                 | AA               | URR                           | 101504342          | uncharacterized LOC101504342                                            |
| SNP_64317_A_364892 | NW_004515711.1 | scaffold134 | 364892                  | TT                              | CC                 | CC               | URR                           | 101504342          | uncharacterized LOC101504342                                            |
| SNP_64318_A_364915 | NW_004515711.1 | scaffold134 | 364915                  | AA                              | CC                 | CC               | URR                           | 101504342          | uncharacterized LOC101504342                                            |
| SNP_64319_A_365205 | NW_004515711.1 | scaffold134 | 365205                  | AA                              | TT                 | TT               | URR                           | 101504342          | uncharacterized LOC101504342                                            |
| SNP_64320_A_365236 | NW_004515711.1 | scaffold134 | 365236                  | GG                              | TT                 | TT               | URR                           | 101504342          | uncharacterized LOC101504342                                            |
| SNP_64321_A_365237 | NW_004515711.1 | scaffold134 | 365237                  | AA                              | GG                 | GG               | URR                           | 101504342          | uncharacterized LOC101504342                                            |
| SNP_64322_A_451490 | NW_004515711.1 | scaffold134 | 451490                  | TT                              | GG                 | GG               | INTERGENIC                    |                    |                                                                         |
| SNP_64323_A_451491 | NW_004515711.1 | scaffold134 | 451491                  | AA                              | TT                 | TT               | INTERGENIC                    |                    |                                                                         |
| SNP_64324_A_454511 | NW_004515711.1 | scaffold134 | 454511                  | TT                              | CC                 | CC               | INTERGENIC                    |                    |                                                                         |
| SNP_64325_A_454638 | NW_004515711.1 | scaffold134 | 454638                  | CC                              | TT                 | TT               | INTERGENIC                    |                    |                                                                         |
| SNP_64326_A_463417 | NW_004515711.1 | scaffold134 | 463417                  | GG                              | TT                 | TT               | INTERGENIC                    |                    |                                                                         |
| SNP_64327_A_472556 | NW_004515711.1 | scaffold134 | 472556                  | AA                              | CC                 | CC               | INTERGENIC                    |                    |                                                                         |
| SNP_64328_A_564026 | NW_004515711.1 | scaffold134 | 564026                  | AA                              | TT                 | TT               | URR                           | 101504676          | Unknown function                                                        |
| SNP_64329_A_564079 | NW_004515711.1 | scaffold134 | 564079                  | CC                              | TT                 | TT               | INTERGENIC                    |                    |                                                                         |
| SNP_64330_A_564146 | NW_004515711.1 | scaffold134 | 564146                  | AA                              | GG                 | GG               | INTERGENIC                    |                    |                                                                         |
| SNP_64331_A_260    | NW_004515712.1 | scaffold135 | 260                     | TT                              | CC                 | CC               | INTERGENIC                    |                    |                                                                         |
| SNP_64332_A_3707   | NW_004515712.1 | scaffold135 | 3707                    | CC                              | AA                 | AA               | INTERGENIC                    |                    |                                                                         |
| SNP_64333_A_53295  | NW_004515712.1 | scaffold135 | 53295                   | GG                              | CC                 | CC               | INTERGENIC                    |                    |                                                                         |
| SNP_64334_A_56896  | NW_004515712.1 | scaffold135 | 56896                   | AA                              | GG                 | GG               | INTERGENIC                    |                    |                                                                         |
| SNP_64335_A_57115  | NW_004515712.1 | scaffold135 | 57115                   | CC                              | TT                 | TT               | INTERGENIC                    |                    |                                                                         |

| SNPs IDs           | Chromosome IDs | Chromosomes | Physical positions (bp) | CDC Frontier (Reference genome) | (Pusa 1103 & HPNB) | (ILWC 46 & LPNB) | Sequence genome | Components of | Gene accession IDs | Putative functions |
|--------------------|----------------|-------------|-------------------------|---------------------------------|--------------------|------------------|-----------------|---------------|--------------------|--------------------|
| SNP_64336_A_57175  | NW_004515712.1 | scaffold135 | 57175                   | CC                              | TT                 | TT               | INTERGENIC      |               |                    |                    |
| SNP_64337_A_57179  | NW_004515712.1 | scaffold135 | 57179                   | TT                              | AA                 | AA               | INTERGENIC      |               |                    |                    |
| SNP_64338_A_57206  | NW_004515712.1 | scaffold135 | 57206                   | TT                              | AA                 | AA               | INTERGENIC      |               |                    |                    |
| SNP_64339_A_57408  | NW_004515712.1 | scaffold135 | 57408                   | CC                              | AA                 | AA               | INTERGENIC      |               |                    |                    |
| SNP_64340_A_57410  | NW_004515712.1 | scaffold135 | 57410                   | TT                              | CC                 | CC               | INTERGENIC      |               |                    |                    |
| SNP_64341_A_57414  | NW_004515712.1 | scaffold135 | 57414                   | TT                              | AA                 | AA               | INTERGENIC      |               |                    |                    |
| SNP_64342_A_57550  | NW_004515712.1 | scaffold135 | 57550                   | CC                              | TT                 | TT               | INTERGENIC      |               |                    |                    |
| SNP_64343_A_57636  | NW_004515712.1 | scaffold135 | 57636                   | TT                              | CC                 | CC               | INTERGENIC      |               |                    |                    |
| SNP_64344_A_73331  | NW_004515712.1 | scaffold135 | 73331                   | AA                              | GG                 | GG               | INTERGENIC      |               |                    |                    |
| SNP_64345_A_73348  | NW_004515712.1 | scaffold135 | 73348                   | AA                              | GG                 | GG               | INTERGENIC      |               |                    |                    |
| SNP_64346_A_73775  | NW_004515712.1 | scaffold135 | 73775                   | CC                              | GG                 | GG               | INTERGENIC      |               |                    |                    |
| SNP_64347_A_95342  | NW_004515712.1 | scaffold135 | 95342                   | TT                              | CC                 | CC               | INTERGENIC      |               |                    |                    |
| SNP_64348_A_95962  | NW_004515712.1 | scaffold135 | 95962                   | CC                              | AA                 | AA               | INTERGENIC      |               |                    |                    |
| SNP_64349_A_96408  | NW_004515712.1 | scaffold135 | 96408                   | AA                              | TT                 | TT               | INTERGENIC      |               |                    |                    |
| SNP_64350_A_96427  | NW_004515712.1 | scaffold135 | 96427                   | AA                              | GG                 | GG               | INTERGENIC      |               |                    |                    |
| SNP_64351_A_96464  | NW_004515712.1 | scaffold135 | 96464                   | CC                              | AA                 | AA               | INTERGENIC      |               |                    |                    |
| SNP_64352_A_111205 | NW_004515712.1 | scaffold135 | 111205                  | TT                              | CC                 | CC               | INTERGENIC      |               |                    |                    |
| SNP_64353_A_111248 | NW_004515712.1 | scaffold135 | 111248                  | TT                              | CC                 | CC               | INTERGENIC      |               |                    |                    |
| SNP_64354_A_111256 | NW_004515712.1 | scaffold135 | 111256                  | AA                              | CC                 | CC               | INTERGENIC      |               |                    |                    |
| SNP_64355_A_111275 | NW_004515712.1 | scaffold135 | 111275                  | TT                              | CC                 | CC               | INTERGENIC      |               |                    |                    |
| SNP_64356_A_111609 | NW_004515712.1 | scaffold135 | 111609                  | TT                              | CC                 | CC               | INTERGENIC      |               |                    |                    |
| SNP_64357_A_111629 | NW_004515712.1 | scaffold135 | 111629                  | TT                              | CC                 | CC               | INTERGENIC      |               |                    |                    |

| SNPs IDs           | Chromosome IDs | Chromosomes | Physical positions (bp) | CDC Frontier (Reference genome) | (Pusa 1103 & HPNB) | (ILWC 46 & LPNB) | Sequence genome | Components of | Gene accession IDs | Putative functions |
|--------------------|----------------|-------------|-------------------------|---------------------------------|--------------------|------------------|-----------------|---------------|--------------------|--------------------|
| SNP_64359_A_115487 | NW_004515712.1 | scaffold135 | 115487                  | TT                              | CC                 | CC               | INTERGENIC      |               |                    |                    |
| SNP_64360_A_115603 | NW_004515712.1 | scaffold135 | 115603                  | TT                              | CC                 | CC               | INTERGENIC      |               |                    |                    |
| SNP_64361_A_115623 | NW_004515712.1 | scaffold135 | 115623                  | TT                              | CC                 | CC               | INTERGENIC      |               |                    |                    |
| SNP_64362_A_115625 | NW_004515712.1 | scaffold135 | 115625                  | AA                              | TT                 | TT               | INTERGENIC      |               |                    |                    |
| SNP_64363_A_115629 | NW_004515712.1 | scaffold135 | 115629                  | GG                              | AA                 | AA               | INTERGENIC      |               |                    |                    |
| SNP_64364_A_115717 | NW_004515712.1 | scaffold135 | 115717                  | CC                              | TT                 | TT               | INTERGENIC      |               |                    |                    |
| SNP_64365_A_115730 | NW_004515712.1 | scaffold135 | 115730                  | TT                              | CC                 | CC               | INTERGENIC      |               |                    |                    |
| SNP_64366_A_115854 | NW_004515712.1 | scaffold135 | 115854                  | AA                              | TT                 | TT               | INTERGENIC      |               |                    |                    |
| SNP_64367_A_115891 | NW_004515712.1 | scaffold135 | 115891                  | CC                              | TT                 | TT               | INTERGENIC      |               |                    |                    |
| SNP_64368_A_115911 | NW_004515712.1 | scaffold135 | 115911                  | TT                              | CC                 | CC               | INTERGENIC      |               |                    |                    |
| SNP_64369_A_115924 | NW_004515712.1 | scaffold135 | 115924                  | AA                              | GG                 | GG               | INTERGENIC      |               |                    |                    |
| SNP_64370_A_115985 | NW_004515712.1 | scaffold135 | 115985                  | CC                              | TT                 | TT               | INTERGENIC      |               |                    |                    |
| SNP_64373_A_3422   | NW_004515715.1 | scaffold140 | 3422                    | GG                              | AA                 | AA               | INTERGENIC      |               |                    |                    |
| SNP_64374_A_5344   | NW_004515715.1 | scaffold140 | 5344                    | TT                              | AA                 | AA               | INTERGENIC      |               |                    |                    |
| SNP_64375_A_5718   | NW_004515715.1 | scaffold140 | 5718                    | CC                              | AA                 | AA               | INTERGENIC      |               |                    |                    |
| SNP_64377_A_7734   | NW_004515715.1 | scaffold140 | 7734                    | TT                              | GG                 | GG               | INTERGENIC      |               |                    |                    |
| SNP_64378_A_15962  | NW_004515715.1 | scaffold140 | 15962                   | AA                              | TT                 | TT               | INTERGENIC      |               |                    |                    |
| SNP_64379_A_16350  | NW_004515715.1 | scaffold140 | 16350                   | TT                              | AA                 | AA               | INTERGENIC      |               |                    |                    |
| SNP_64380_A_24716  | NW_004515715.1 | scaffold140 | 24716                   | CC                              | TT                 | TT               | INTERGENIC      |               |                    |                    |
| SNP_64381_A_25687  | NW_004515715.1 | scaffold140 | 25687                   | CC                              | TT                 | TT               | INTERGENIC      |               |                    |                    |
| SNP_64382_A_25697  | NW_004515715.1 | scaffold140 | 25697                   | GG                              | CC                 | CC               | INTERGENIC      |               |                    |                    |
| SNP_64383_A_25719  | NW_004515715.1 | scaffold140 | 25719                   | GG                              | TT                 | TT               | INTERGENIC      |               |                    |                    |

| SNPs IDs          | Chromosome IDs | Chromosomes | Physical positions (bp) | CDC Frontier (Reference genome) | (Pusa 1103 & HPNB) | (ILWC 46 & LPNB) | Sequence genome | Components of | Gene accession IDs | Putative functions |
|-------------------|----------------|-------------|-------------------------|---------------------------------|--------------------|------------------|-----------------|---------------|--------------------|--------------------|
| SNP_64384_A_25721 | NW_004515715.1 | scaffold140 | 25721                   | AA                              | GG                 | GG               | INTERGENIC      |               |                    |                    |
| SNP_64386_A_25822 | NW_004515715.1 | scaffold140 | 25822                   | GG                              | AA                 | AA               | INTERGENIC      |               |                    |                    |
| SNP_64387_A_25823 | NW_004515715.1 | scaffold140 | 25823                   | TT                              | GG                 | GG               | INTERGENIC      |               |                    |                    |
| SNP_64388_A_26443 | NW_004515715.1 | scaffold140 | 26443                   | AA                              | GG                 | GG               | INTERGENIC      |               |                    |                    |
| SNP_64389_A_26446 | NW_004515715.1 | scaffold140 | 26446                   | TT                              | CC                 | CC               | INTERGENIC      |               |                    |                    |
| SNP_64390_A_26484 | NW_004515715.1 | scaffold140 | 26484                   | TT                              | CC                 | CC               | INTERGENIC      |               |                    |                    |
| SNP_64391_A_26496 | NW_004515715.1 | scaffold140 | 26496                   | AA                              | GG                 | GG               | INTERGENIC      |               |                    |                    |
| SNP_64392_A_27358 | NW_004515715.1 | scaffold140 | 27358                   | TT                              | GG                 | GG               | INTERGENIC      |               |                    |                    |
| SNP_64393_A_37135 | NW_004515715.1 | scaffold140 | 37135                   | TT                              | AA                 | AA               | INTERGENIC      |               |                    |                    |
| SNP_64394_A_37256 | NW_004515715.1 | scaffold140 | 37256                   | AA                              | TT                 | TT               | INTERGENIC      |               |                    |                    |
| SNP_64395_A_37293 | NW_004515715.1 | scaffold140 | 37293                   | AA                              | GG                 | GG               | INTERGENIC      |               |                    |                    |
| SNP_64396_A_37336 | NW_004515715.1 | scaffold140 | 37336                   | AA                              | GG                 | GG               | INTERGENIC      |               |                    |                    |
| SNP_64397_A_52847 | NW_004515715.1 | scaffold140 | 52847                   | CC                              | TT                 | TT               | INTERGENIC      |               |                    |                    |
| SNP_64398_A_277   | NW_004515716.1 | scaffold141 | 277                     | TT                              | AA                 | AA               | INTERGENIC      |               |                    |                    |
| SNP_64399_A_415   | NW_004515716.1 | scaffold141 | 415                     | TT                              | AA                 | AA               | INTERGENIC      |               |                    |                    |
| SNP_64400_A_11725 | NW_004515716.1 | scaffold141 | 11725                   | GG                              | AA                 | AA               | URR             | 101507788     | Unknown function   |                    |
| SNP_64401_A_12207 | NW_004515716.1 | scaffold141 | 12207                   | TT                              | CC                 | CC               | URR             | 101507788     | Unknown function   |                    |
| SNP_64402_A_12264 | NW_004515716.1 | scaffold141 | 12264                   | CC                              | TT                 | TT               | URR             | 101507788     | Unknown function   |                    |
| SNP_64403_A_12299 | NW_004515716.1 | scaffold141 | 12299                   | AA                              | CC                 | CC               | URR             | 101507788     | Unknown function   |                    |
| SNP_64404_A_14090 | NW_004515716.1 | scaffold141 | 14090                   | CC                              | TT                 | TT               | INTERGENIC      |               |                    |                    |
| SNP_64405_A_14442 | NW_004515716.1 | scaffold141 | 14442                   | TT                              | CC                 | CC               | INTERGENIC      |               |                    |                    |
| SNP_64406_A_16225 | NW_004515716.1 | scaffold141 | 16225                   | GG                              | AA                 | AA               | INTERGENIC      |               |                    |                    |

| SNPs IDs          | Chromosome IDs | Chromosomes | Physical positions (bp) | CDC Frontier (Reference genome) | (Pusa 1103 & HPNB) | (ILWC 46 & LPNB) | Sequence genome | Components of | Gene accession IDs | Putative functions |
|-------------------|----------------|-------------|-------------------------|---------------------------------|--------------------|------------------|-----------------|---------------|--------------------|--------------------|
| SNP_64407_A_16489 | NW_004515716.1 | scaffold141 | 16489                   | CC                              | AA                 | AA               | INTERGENIC      |               |                    |                    |
| SNP_64408_A_16866 | NW_004515716.1 | scaffold141 | 16866                   | CC                              | TT                 | TT               | INTERGENIC      |               |                    |                    |
| SNP_64409_A_16883 | NW_004515716.1 | scaffold141 | 16883                   | GG                              | AA                 | AA               | INTERGENIC      |               |                    |                    |
| SNP_64410_A_16884 | NW_004515716.1 | scaffold141 | 16884                   | AA                              | GG                 | GG               | INTERGENIC      |               |                    |                    |
| SNP_64411_A_16888 | NW_004515716.1 | scaffold141 | 16888                   | GG                              | TT                 | TT               | INTERGENIC      |               |                    |                    |
| SNP_64412_A_16991 | NW_004515716.1 | scaffold141 | 16991                   | AA                              | GG                 | GG               | INTERGENIC      |               |                    |                    |
| SNP_64413_A_17725 | NW_004515716.1 | scaffold141 | 17725                   | AA                              | GG                 | GG               | INTERGENIC      |               |                    |                    |
| SNP_64414_A_18079 | NW_004515716.1 | scaffold141 | 18079                   | CC                              | TT                 | TT               | INTERGENIC      |               |                    |                    |
| SNP_64415_A_26290 | NW_004515716.1 | scaffold141 | 26290                   | TT                              | AA                 | AA               | INTERGENIC      |               |                    |                    |
| SNP_64416_A_48432 | NW_004515716.1 | scaffold141 | 48432                   | TT                              | GG                 | GG               | INTERGENIC      |               |                    |                    |
| SNP_64417_A_55914 | NW_004515716.1 | scaffold141 | 55914                   | TT                              | CC                 | CC               | INTERGENIC      |               |                    |                    |
| SNP_64418_A_56389 | NW_004515716.1 | scaffold141 | 56389                   | AA                              | GG                 | GG               | INTERGENIC      |               |                    |                    |
| SNP_64419_A_56419 | NW_004515716.1 | scaffold141 | 56419                   | AA                              | GG                 | GG               | INTERGENIC      |               |                    |                    |
| SNP_64420_A_56426 | NW_004515716.1 | scaffold141 | 56426                   | CC                              | AA                 | AA               | INTERGENIC      |               |                    |                    |
| SNP_64421_A_67171 | NW_004515716.1 | scaffold141 | 67171                   | TT                              | CC                 | CC               | INTERGENIC      |               |                    |                    |
| SNP_64422_A_67477 | NW_004515716.1 | scaffold141 | 67477                   | GG                              | AA                 | AA               | INTERGENIC      |               |                    |                    |
| SNP_64423_A_68708 | NW_004515716.1 | scaffold141 | 68708                   | CC                              | TT                 | TT               | INTERGENIC      |               |                    |                    |
| SNP_64424_A_68875 | NW_004515716.1 | scaffold141 | 68875                   | GG                              | TT                 | TT               | INTERGENIC      |               |                    |                    |
| SNP_64425_A_68899 | NW_004515716.1 | scaffold141 | 68899                   | CC                              | TT                 | TT               | INTERGENIC      |               |                    |                    |
| SNP_64426_A_69215 | NW_004515716.1 | scaffold141 | 69215                   | TT                              | GG                 | GG               | INTERGENIC      |               |                    |                    |
| SNP_64427_A_77168 | NW_004515716.1 | scaffold141 | 77168                   | TT                              | AA                 | AA               | INTERGENIC      |               |                    |                    |
| SNP_64428_A_79575 | NW_004515716.1 | scaffold141 | 79575                   | AA                              | CC                 | CC               | INTERGENIC      |               |                    |                    |

| SNPs IDs           | Chromosome IDs | Chromosomes | Physical positions (bp) | CDC Frontier (Reference genome) | (Pusa 1103 & HPNB) | (ILWC 46 & LPNB) | Sequence genome | Components of | Gene accession IDs | Putative functions |
|--------------------|----------------|-------------|-------------------------|---------------------------------|--------------------|------------------|-----------------|---------------|--------------------|--------------------|
| SNP_64429_A_81552  | NW_004515716.1 | scaffold141 | 81552                   | CC                              | TT                 | TT               | INTERGENIC      |               |                    |                    |
| SNP_64430_A_101610 | NW_004515716.1 | scaffold141 | 101610                  | AA                              | TT                 | TT               | INTERGENIC      |               |                    |                    |
| SNP_64431_A_102239 | NW_004515716.1 | scaffold141 | 102239                  | CC                              | GG                 | GG               | INTERGENIC      |               |                    |                    |
| SNP_64432_A_102276 | NW_004515716.1 | scaffold141 | 102276                  | GG                              | CC                 | CC               | INTERGENIC      |               |                    |                    |
| SNP_64433_A_106906 | NW_004515716.1 | scaffold141 | 106906                  | AA                              | GG                 | GG               | INTERGENIC      |               |                    |                    |
| SNP_64434_A_106938 | NW_004515716.1 | scaffold141 | 106938                  | TT                              | CC                 | CC               | INTERGENIC      |               |                    |                    |
| SNP_64435_A_106944 | NW_004515716.1 | scaffold141 | 106944                  | GG                              | TT                 | TT               | INTERGENIC      |               |                    |                    |
| SNP_64436_A_112482 | NW_004515716.1 | scaffold141 | 112482                  | AA                              | TT                 | TT               | INTERGENIC      |               |                    |                    |
| SNP_64437_A_114437 | NW_004515716.1 | scaffold141 | 114437                  | CC                              | GG                 | GG               | INTERGENIC      |               |                    |                    |
| SNP_64438_A_128446 | NW_004515716.1 | scaffold141 | 128446                  | TT                              | GG                 | GG               | URR             | 101507261     | Unknown function   |                    |
| SNP_64439_A_132750 | NW_004515716.1 | scaffold141 | 132750                  | AA                              | GG                 | GG               | INTERGENIC      |               |                    |                    |
| SNP_64440_A_132781 | NW_004515716.1 | scaffold141 | 132781                  | TT                              | GG                 | GG               | INTERGENIC      |               |                    |                    |
| SNP_64441_A_133049 | NW_004515716.1 | scaffold141 | 133049                  | CC                              | TT                 | TT               | INTERGENIC      |               |                    |                    |
| SNP_64442_A_133150 | NW_004515716.1 | scaffold141 | 133150                  | TT                              | GG                 | GG               | INTERGENIC      |               |                    |                    |
| SNP_64443_A_133166 | NW_004515716.1 | scaffold141 | 133166                  | CC                              | TT                 | TT               | INTERGENIC      |               |                    |                    |
| SNP_64444_A_133169 | NW_004515716.1 | scaffold141 | 133169                  | TT                              | GG                 | GG               | INTERGENIC      |               |                    |                    |
| SNP_64445_A_133233 | NW_004515716.1 | scaffold141 | 133233                  | GG                              | AA                 | AA               | INTERGENIC      |               |                    |                    |
| SNP_64446_A_133237 | NW_004515716.1 | scaffold141 | 133237                  | AA                              | CC                 | CC               | INTERGENIC      |               |                    |                    |
| SNP_64447_A_133242 | NW_004515716.1 | scaffold141 | 133242                  | CC                              | TT                 | TT               | INTERGENIC      |               |                    |                    |
| SNP_64448_A_138695 | NW_004515716.1 | scaffold141 | 138695                  | GG                              | TT                 | TT               | INTERGENIC      |               |                    |                    |
| SNP_64449_A_139951 | NW_004515716.1 | scaffold141 | 139951                  | TT                              | CC                 | CC               | INTERGENIC      |               |                    |                    |
| SNP_64450_A_140185 | NW_004515716.1 | scaffold141 | 140185                  | TT                              | GG                 | GG               | INTERGENIC      |               |                    |                    |

| SNPs IDs           | Chromosome IDs | Chromosomes | Physical positions (bp) | CDC Frontier (Reference genome) | (Pusa 1103 & HPNB) | (ILWC 46 & LPNB) | Sequence genome | Components of | Gene accession IDs | Putative functions |
|--------------------|----------------|-------------|-------------------------|---------------------------------|--------------------|------------------|-----------------|---------------|--------------------|--------------------|
| SNP_64451_A_140554 | NW_004515716.1 | scaffold141 | 140554                  | AA                              | CC                 | CC               | INTERGENIC      |               |                    |                    |
| SNP_64452_A_140750 | NW_004515716.1 | scaffold141 | 140750                  | TT                              | CC                 | CC               | INTERGENIC      |               |                    |                    |
| SNP_64453_A_146633 | NW_004515716.1 | scaffold141 | 146633                  | AA                              | TT                 | TT               | INTERGENIC      |               |                    |                    |
| SNP_64454_A_146784 | NW_004515716.1 | scaffold141 | 146784                  | AA                              | GG                 | GG               | INTERGENIC      |               |                    |                    |
| SNP_64455_A_146944 | NW_004515716.1 | scaffold141 | 146944                  | TT                              | GG                 | GG               | INTERGENIC      |               |                    |                    |
| SNP_64456_A_147003 | NW_004515716.1 | scaffold141 | 147003                  | AA                              | GG                 | GG               | INTERGENIC      |               |                    |                    |
| SNP_64457_A_147487 | NW_004515716.1 | scaffold141 | 147487                  | AA                              | CC                 | CC               | INTERGENIC      |               |                    |                    |
| SNP_64458_A_147554 | NW_004515716.1 | scaffold141 | 147554                  | GG                              | CC                 | CC               | INTERGENIC      |               |                    |                    |
| SNP_64459_A_148113 | NW_004515716.1 | scaffold141 | 148113                  | CC                              | GG                 | GG               | INTERGENIC      |               |                    |                    |
| SNP_64460_A_166121 | NW_004515716.1 | scaffold141 | 166121                  | TT                              | GG                 | GG               | INTERGENIC      |               |                    |                    |
| SNP_64461_A_166510 | NW_004515716.1 | scaffold141 | 166510                  | GG                              | AA                 | AA               | INTERGENIC      |               |                    |                    |
| SNP_64462_A_166681 | NW_004515716.1 | scaffold141 | 166681                  | TT                              | CC                 | CC               | INTERGENIC      |               |                    |                    |
| SNP_64463_A_172027 | NW_004515716.1 | scaffold141 | 172027                  | AA                              | TT                 | TT               | URR             | 101508111     | Unknown function   |                    |
| SNP_64464_A_172136 | NW_004515716.1 | scaffold141 | 172136                  | AA                              | GG                 | GG               | URR             | 101508111     | Unknown function   |                    |
| SNP_64465_A_172182 | NW_004515716.1 | scaffold141 | 172182                  | CC                              | GG                 | GG               | URR             | 101508111     | Unknown function   |                    |
| SNP_64466_A_172226 | NW_004515716.1 | scaffold141 | 172226                  | AA                              | GG                 | GG               | URR             | 101508111     | Unknown function   |                    |
| SNP_64467_A_4689   | NW_004515717.1 | scaffold142 | 4689                    | GG                              | TT                 | TT               | INTERGENIC      |               |                    |                    |
| SNP_64468_A_5347   | NW_004515717.1 | scaffold142 | 5347                    | AA                              | GG                 | GG               | INTERGENIC      |               |                    |                    |
| SNP_64469_A_8805   | NW_004515718.1 | scaffold143 | 8805                    | TT                              | AA                 | AA               | INTERGENIC      |               |                    |                    |
| SNP_64470_A_14103  | NW_004515718.1 | scaffold143 | 14103                   | TT                              | CC                 | CC               | INTERGENIC      |               |                    |                    |
| SNP_64471_A_15413  | NW_004515718.1 | scaffold143 | 15413                   | AA                              | GG                 | GG               | INTERGENIC      |               |                    |                    |
| SNP_64472_A_25499  | NW_004515718.1 | scaffold143 | 25499                   | TT                              | CC                 | CC               | INTERGENIC      |               |                    |                    |



| SNPs IDs           | Chromosome IDs | Chromosomes | Physical positions (bp) | CDC Frontier (Reference genome) | (Pusa 1103 & HPNB) | (ILWC 46 & LPNB) | Sequence genome | Components of | Gene accession IDs | Putative functions |
|--------------------|----------------|-------------|-------------------------|---------------------------------|--------------------|------------------|-----------------|---------------|--------------------|--------------------|
| SNP_64473_A_38411  | NW_004515718.1 | scaffold143 | 38411                   | AA                              | CC                 | CC               | INTERGENIC      |               |                    |                    |
| SNP_64474_A_67417  | NW_004515718.1 | scaffold143 | 67417                   | TT                              | CC                 | CC               | INTERGENIC      |               |                    |                    |
| SNP_64475_A_67418  | NW_004515718.1 | scaffold143 | 67418                   | TT                              | CC                 | CC               | INTERGENIC      |               |                    |                    |
| SNP_64476_A_67472  | NW_004515718.1 | scaffold143 | 67472                   | AA                              | GG                 | GG               | INTERGENIC      |               |                    |                    |
| SNP_64478_A_67536  | NW_004515718.1 | scaffold143 | 67536                   | AA                              | TT                 | TT               | INTERGENIC      |               |                    |                    |
| SNP_64479_A_67543  | NW_004515718.1 | scaffold143 | 67543                   | CC                              | TT                 | TT               | INTERGENIC      |               |                    |                    |
| SNP_64480_A_67578  | NW_004515718.1 | scaffold143 | 67578                   | CC                              | TT                 | TT               | INTERGENIC      |               |                    |                    |
| SNP_64481_A_67679  | NW_004515718.1 | scaffold143 | 67679                   | AA                              | TT                 | TT               | INTERGENIC      |               |                    |                    |
| SNP_64482_A_67698  | NW_004515718.1 | scaffold143 | 67698                   | AA                              | TT                 | TT               | INTERGENIC      |               |                    |                    |
| SNP_64483_A_67889  | NW_004515718.1 | scaffold143 | 67889                   | AA                              | CC                 | CC               | INTERGENIC      |               |                    |                    |
| SNP_64484_A_67988  | NW_004515718.1 | scaffold143 | 67988                   | TT                              | GG                 | GG               | INTERGENIC      |               |                    |                    |
| SNP_64485_A_68042  | NW_004515718.1 | scaffold143 | 68042                   | CC                              | TT                 | TT               | INTERGENIC      |               |                    |                    |
| SNP_64487_A_68128  | NW_004515718.1 | scaffold143 | 68128                   | AA                              | GG                 | GG               | INTERGENIC      |               |                    |                    |
| SNP_64488_A_70579  | NW_004515718.1 | scaffold143 | 70579                   | AA                              | GG                 | GG               | INTERGENIC      |               |                    |                    |
| SNP_64489_A_90437  | NW_004515718.1 | scaffold143 | 90437                   | AA                              | GG                 | GG               | INTERGENIC      |               |                    |                    |
| SNP_64490_A_124818 | NW_004515718.1 | scaffold143 | 124818                  | GG                              | TT                 | TT               | INTERGENIC      |               |                    |                    |
| SNP_64491_A_124893 | NW_004515718.1 | scaffold143 | 124893                  | AA                              | TT                 | TT               | INTERGENIC      |               |                    |                    |
| SNP_64492_A_152887 | NW_004515718.1 | scaffold143 | 152887                  | TT                              | CC                 | CC               | INTERGENIC      |               |                    |                    |
| SNP_64493_A_152950 | NW_004515718.1 | scaffold143 | 152950                  | AA                              | CC                 | CC               | INTERGENIC      |               |                    |                    |
| SNP_64494_A_152952 | NW_004515718.1 | scaffold143 | 152952                  | CC                              | TT                 | TT               | INTERGENIC      |               |                    |                    |
| SNP_64495_A_234047 | NW_004515718.1 | scaffold143 | 234047                  | CC                              | TT                 | TT               | INTERGENIC      |               |                    |                    |
| SNP_64496_A_786    | NW_004515719.1 | scaffold144 | 786                     | CC                              | TT                 | TT               | INTERGENIC      |               |                    |                    |

| SNPs IDs          | Chromosome IDs | Chromosomes | Physical positions (bp) | CDC Frontier (Reference genome) | (Pusa 1103 & HPNB) | (ILWC 46 & LPNB) | Sequence genome | Components of | Gene accession IDs | Putative functions |
|-------------------|----------------|-------------|-------------------------|---------------------------------|--------------------|------------------|-----------------|---------------|--------------------|--------------------|
| SNP_64497_A_852   | NW_004515719.1 | scaffold144 | 852                     | TT                              | AA                 | AA               | INTERGENIC      |               |                    |                    |
| SNP_64498_A_1095  | NW_004515719.1 | scaffold144 | 1095                    | AA                              | GG                 | GG               | INTERGENIC      |               |                    |                    |
| SNP_64499_A_1099  | NW_004515719.1 | scaffold144 | 1099                    | AA                              | TT                 | TT               | INTERGENIC      |               |                    |                    |
| SNP_64500_A_1107  | NW_004515719.1 | scaffold144 | 1107                    | AA                              | TT                 | TT               | INTERGENIC      |               |                    |                    |
| SNP_64501_A_1117  | NW_004515719.1 | scaffold144 | 1117                    | GG                              | CC                 | CC               | INTERGENIC      |               |                    |                    |
| SNP_64502_A_1560  | NW_004515719.1 | scaffold144 | 1560                    | AA                              | CC                 | CC               | INTERGENIC      |               |                    |                    |
| SNP_64503_A_1790  | NW_004515719.1 | scaffold144 | 1790                    | AA                              | CC                 | CC               | INTERGENIC      |               |                    |                    |
| SNP_64504_A_2221  | NW_004515719.1 | scaffold144 | 2221                    | TT                              | GG                 | GG               | INTERGENIC      |               |                    |                    |
| SNP_64505_A_2627  | NW_004515719.1 | scaffold144 | 2627                    | GG                              | AA                 | AA               | INTERGENIC      |               |                    |                    |
| SNP_64506_A_2679  | NW_004515719.1 | scaffold144 | 2679                    | AA                              | GG                 | GG               | INTERGENIC      |               |                    |                    |
| SNP_64507_A_3864  | NW_004515719.1 | scaffold144 | 3864                    | GG                              | CC                 | CC               | INTERGENIC      |               |                    |                    |
| SNP_64508_A_3882  | NW_004515719.1 | scaffold144 | 3882                    | TT                              | AA                 | AA               | INTERGENIC      |               |                    |                    |
| SNP_64509_A_4788  | NW_004515719.1 | scaffold144 | 4788                    | GG                              | AA                 | AA               | INTERGENIC      |               |                    |                    |
| SNP_64510_A_4819  | NW_004515719.1 | scaffold144 | 4819                    | CC                              | AA                 | AA               | INTERGENIC      |               |                    |                    |
| SNP_64511_A_6513  | NW_004515719.1 | scaffold144 | 6513                    | CC                              | GG                 | GG               | INTERGENIC      |               |                    |                    |
| SNP_64512_A_6517  | NW_004515719.1 | scaffold144 | 6517                    | TT                              | GG                 | GG               | INTERGENIC      |               |                    |                    |
| SNP_64513_A_6530  | NW_004515719.1 | scaffold144 | 6530                    | GG                              | CC                 | CC               | INTERGENIC      |               |                    |                    |
| SNP_64514_A_7710  | NW_004515719.1 | scaffold144 | 7710                    | GG                              | AA                 | AA               | INTERGENIC      |               |                    |                    |
| SNP_64515_A_7712  | NW_004515719.1 | scaffold144 | 7712                    | CC                              | GG                 | GG               | INTERGENIC      |               |                    |                    |
| SNP_64516_A_7737  | NW_004515719.1 | scaffold144 | 7737                    | GG                              | AA                 | AA               | INTERGENIC      |               |                    |                    |
| SNP_64517_A_11333 | NW_004515719.1 | scaffold144 | 11333                   | CC                              | AA                 | AA               | INTERGENIC      |               |                    |                    |
| SNP_64518_A_17058 | NW_004515719.1 | scaffold144 | 17058                   | TT                              | CC                 | CC               | INTERGENIC      |               |                    |                    |

| SNPs IDs          | Chromosome IDs | Chromosomes | Physical positions (bp) | CDC Frontier (Reference genome) | (Pusa 1103 & HPNB) | (ILWC 46 & LPNB) | Sequence Components of genome | Gene accession IDs | Putative functions           |
|-------------------|----------------|-------------|-------------------------|---------------------------------|--------------------|------------------|-------------------------------|--------------------|------------------------------|
| SNP_64519_A_17173 | NW_004515719.1 | scaffold144 | 17173                   | TT                              | AA                 | AA               | INTERGENIC                    |                    |                              |
| SNP_64520_A_17182 | NW_004515719.1 | scaffold144 | 17182                   | AA                              | GG                 | GG               | INTERGENIC                    |                    |                              |
| SNP_64521_A_17198 | NW_004515719.1 | scaffold144 | 17198                   | TT                              | CC                 | CC               | INTERGENIC                    |                    |                              |
| SNP_64522_A_17201 | NW_004515719.1 | scaffold144 | 17201                   | CC                              | TT                 | TT               | INTERGENIC                    |                    |                              |
| SNP_64523_A_17226 | NW_004515719.1 | scaffold144 | 17226                   | AA                              | GG                 | GG               | INTERGENIC                    |                    |                              |
| SNP_64524_A_17377 | NW_004515719.1 | scaffold144 | 17377                   | GG                              | AA                 | AA               | INTERGENIC                    |                    |                              |
| SNP_64525_A_17670 | NW_004515719.1 | scaffold144 | 17670                   | TT                              | GG                 | GG               | INTERGENIC                    |                    |                              |
| SNP_64526_A_17806 | NW_004515719.1 | scaffold144 | 17806                   | AA                              | CC                 | CC               | INTERGENIC                    |                    |                              |
| SNP_64527_A_9486  | NW_004515720.1 | scaffold146 | 9486                    | GG                              | TT                 | TT               | INTERGENIC                    |                    |                              |
| SNP_64529_A_9656  | NW_004515720.1 | scaffold146 | 9656                    | AA                              | CC                 | CC               | DRR                           | 101510343          | uncharacterized LOC101510343 |
| SNP_64530_A_9666  | NW_004515720.1 | scaffold146 | 9666                    | GG                              | CC                 | CC               | DRR                           | 101510343          | uncharacterized LOC101510343 |
| SNP_64531_A_9671  | NW_004515720.1 | scaffold146 | 9671                    | TT                              | AA                 | AA               | DRR                           | 101510343          | uncharacterized LOC101510343 |
| SNP_64532_A_9847  | NW_004515720.1 | scaffold146 | 9847                    | AA                              | GG                 | GG               | DRR                           | 101510343          | uncharacterized LOC101510343 |
| SNP_64533_A_12181 | NW_004515720.1 | scaffold146 | 12181                   | TT                              | CC                 | CC               | URR                           | 101510343          | uncharacterized LOC101510343 |
| SNP_64534_A_12186 | NW_004515720.1 | scaffold146 | 12186                   | AA                              | GG                 | GG               | URR                           | 101510343          | uncharacterized LOC101510343 |
| SNP_64535_A_12221 | NW_004515720.1 | scaffold146 | 12221                   | GG                              | TT                 | TT               | URR                           | 101510343          | uncharacterized LOC101510343 |
| SNP_64536_A_12226 | NW_004515720.1 | scaffold146 | 12226                   | AA                              | GG                 | GG               | URR                           | 101510343          | uncharacterized LOC101510343 |
| SNP_64537_A_12233 | NW_004515720.1 | scaffold146 | 12233                   | TT                              | CC                 | CC               | URR                           | 101510343          | uncharacterized LOC101510343 |
| SNP_64538_A_12258 | NW_004515720.1 | scaffold146 | 12258                   | CC                              | TT                 | TT               | URR                           | 101510343          | uncharacterized LOC101510343 |
| SNP_64539_A_12284 | NW_004515720.1 | scaffold146 | 12284                   | CC                              | GG                 | GG               | URR                           | 101510343          | uncharacterized LOC101510343 |
| SNP_64540_A_12316 | NW_004515720.1 | scaffold146 | 12316                   | TT                              | CC                 | CC               | URR                           | 101510343          | uncharacterized LOC101510343 |
| SNP_64541_A_12384 | NW_004515720.1 | scaffold146 | 12384                   | TT                              | GG                 | GG               | URR                           | 101510343          | uncharacterized LOC101510343 |

| SNPs IDs          | Chromosome IDs | Chromosomes | Physical positions (bp) | CDC Frontier (Reference genome) | (Pusa 1103 & HPNB) | (ILWC 46 & LPNB) | Sequence genome | Components of | Gene accession IDs | Putative functions |
|-------------------|----------------|-------------|-------------------------|---------------------------------|--------------------|------------------|-----------------|---------------|--------------------|--------------------|
| SNP_64542_A_28125 | NW_004515720.1 | scaffold146 | 28125                   | AA                              | TT                 | TT               | INTERGENIC      |               |                    |                    |
| SNP_64543_A_43100 | NW_004515720.1 | scaffold146 | 43100                   | CC                              | TT                 | TT               | INTERGENIC      |               |                    |                    |
| SNP_64544_A_43142 | NW_004515720.1 | scaffold146 | 43142                   | AA                              | GG                 | GG               | INTERGENIC      |               |                    |                    |
| SNP_64545_A_47739 | NW_004515720.1 | scaffold146 | 47739                   | AA                              | GG                 | GG               | INTERGENIC      |               |                    |                    |
| SNP_64546_A_70100 | NW_004515720.1 | scaffold146 | 70100                   | AA                              | GG                 | GG               | INTERGENIC      |               |                    |                    |
| SNP_64547_A_70113 | NW_004515720.1 | scaffold146 | 70113                   | AA                              | GG                 | GG               | INTERGENIC      |               |                    |                    |
| SNP_64548_A_70234 | NW_004515720.1 | scaffold146 | 70234                   | TT                              | CC                 | CC               | INTERGENIC      |               |                    |                    |
| SNP_64549_A_70235 | NW_004515720.1 | scaffold146 | 70235                   | AA                              | TT                 | TT               | INTERGENIC      |               |                    |                    |
| SNP_64550_A_70309 | NW_004515720.1 | scaffold146 | 70309                   | AA                              | CC                 | CC               | INTERGENIC      |               |                    |                    |
| SNP_64551_A_70514 | NW_004515720.1 | scaffold146 | 70514                   | AA                              | GG                 | GG               | INTERGENIC      |               |                    |                    |
| SNP_64552_A_70875 | NW_004515720.1 | scaffold146 | 70875                   | AA                              | GG                 | GG               | INTERGENIC      |               |                    |                    |
| SNP_64553_A_70881 | NW_004515720.1 | scaffold146 | 70881                   | GG                              | AA                 | AA               | INTERGENIC      |               |                    |                    |
| SNP_64554_A_70890 | NW_004515720.1 | scaffold146 | 70890                   | AA                              | GG                 | GG               | INTERGENIC      |               |                    |                    |
| SNP_64556_A_71720 | NW_004515720.1 | scaffold146 | 71720                   | AA                              | TT                 | TT               | INTERGENIC      |               |                    |                    |
| SNP_64557_A_82138 | NW_004515720.1 | scaffold146 | 82138                   | AA                              | GG                 | GG               | INTERGENIC      |               |                    |                    |
| SNP_64558_A_82691 | NW_004515720.1 | scaffold146 | 82691                   | GG                              | CC                 | CC               | INTERGENIC      |               |                    |                    |
| SNP_64559_A_83317 | NW_004515720.1 | scaffold146 | 83317                   | GG                              | AA                 | AA               | INTERGENIC      |               |                    |                    |
| SNP_64560_A_83318 | NW_004515720.1 | scaffold146 | 83318                   | AA                              | TT                 | TT               | INTERGENIC      |               |                    |                    |
| SNP_64561_A_83340 | NW_004515720.1 | scaffold146 | 83340                   | GG                              | TT                 | TT               | INTERGENIC      |               |                    |                    |
| SNP_64562_A_83351 | NW_004515720.1 | scaffold146 | 83351                   | AA                              | TT                 | TT               | INTERGENIC      |               |                    |                    |
| SNP_64563_A_83378 | NW_004515720.1 | scaffold146 | 83378                   | CC                              | TT                 | TT               | INTERGENIC      |               |                    |                    |
| SNP_64564_A_83380 | NW_004515720.1 | scaffold146 | 83380                   | AA                              | TT                 | TT               | INTERGENIC      |               |                    |                    |

| SNPs IDs          | Chromosome IDs | Chromosomes | Physical positions (bp) | CDC Frontier (Reference genome) | (Pusa 1103 & HPNB) | (ILWC 46 & LPNB) | Sequence genome | Components of | Gene accession IDs | Putative functions |
|-------------------|----------------|-------------|-------------------------|---------------------------------|--------------------|------------------|-----------------|---------------|--------------------|--------------------|
| SNP_64565_A_83385 | NW_004515720.1 | scaffold146 | 83385                   | AA                              | GG                 | GG               | INTERGENIC      |               |                    |                    |
| SNP_64566_A_83400 | NW_004515720.1 | scaffold146 | 83400                   | CC                              | TT                 | TT               | INTERGENIC      |               |                    |                    |
| SNP_64567_A_83430 | NW_004515720.1 | scaffold146 | 83430                   | AA                              | GG                 | GG               | INTERGENIC      |               |                    |                    |
| SNP_64568_A_83447 | NW_004515720.1 | scaffold146 | 83447                   | TT                              | AA                 | AA               | INTERGENIC      |               |                    |                    |
| SNP_64569_A_83460 | NW_004515720.1 | scaffold146 | 83460                   | TT                              | GG                 | GG               | INTERGENIC      |               |                    |                    |
| SNP_64570_A_83527 | NW_004515720.1 | scaffold146 | 83527                   | GG                              | CC                 | CC               | INTERGENIC      |               |                    |                    |
| SNP_64571_A_83536 | NW_004515720.1 | scaffold146 | 83536                   | AA                              | CC                 | CC               | INTERGENIC      |               |                    |                    |
| SNP_64572_A_83708 | NW_004515720.1 | scaffold146 | 83708                   | CC                              | AA                 | AA               | INTERGENIC      |               |                    |                    |
| SNP_64573_A_83760 | NW_004515720.1 | scaffold146 | 83760                   | AA                              | TT                 | TT               | INTERGENIC      |               |                    |                    |
| SNP_64574_A_83770 | NW_004515720.1 | scaffold146 | 83770                   | TT                              | AA                 | AA               | INTERGENIC      |               |                    |                    |
| SNP_64575_A_84306 | NW_004515720.1 | scaffold146 | 84306                   | TT                              | AA                 | AA               | INTERGENIC      |               |                    |                    |
| SNP_64576_A_86121 | NW_004515720.1 | scaffold146 | 86121                   | CC                              | GG                 | GG               | INTERGENIC      |               |                    |                    |
| SNP_64578_A_638   | NW_004515722.1 | scaffold151 | 638                     | TT                              | AA                 | AA               | INTERGENIC      |               |                    |                    |
| SNP_64580_A_860   | NW_004515722.1 | scaffold151 | 860                     | TT                              | AA                 | AA               | INTERGENIC      |               |                    |                    |
| SNP_64581_A_1159  | NW_004515722.1 | scaffold151 | 1159                    | AA                              | TT                 | TT               | INTERGENIC      |               |                    |                    |
| SNP_64582_A_1175  | NW_004515722.1 | scaffold151 | 1175                    | AA                              | GG                 | GG               | INTERGENIC      |               |                    |                    |
| SNP_64584_A_2160  | NW_004515722.1 | scaffold151 | 2160                    | CC                              | AA                 | AA               | INTERGENIC      |               |                    |                    |
| SNP_64586_A_4586  | NW_004515722.1 | scaffold151 | 4586                    | GG                              | TT                 | TT               | INTERGENIC      |               |                    |                    |
| SNP_64587_A_4757  | NW_004515722.1 | scaffold151 | 4757                    | TT                              | CC                 | CC               | INTERGENIC      |               |                    |                    |
| SNP_64589_A_5042  | NW_004515722.1 | scaffold151 | 5042                    | CC                              | TT                 | TT               | INTERGENIC      |               |                    |                    |
| SNP_64590_A_5423  | NW_004515722.1 | scaffold151 | 5423                    | AA                              | GG                 | GG               | INTERGENIC      |               |                    |                    |
| SNP_64592_A_6336  | NW_004515722.1 | scaffold151 | 6336                    | AA                              | GG                 | GG               | INTERGENIC      |               |                    |                    |

| SNPs IDs          | Chromosome IDs | Chromosomes | Physical positions (bp) | CDC Frontier (Reference genome) | (Pusa 1103 & HPNB) | (ILWC 46 & LPNB) | Sequence genome | Components of | Gene accession IDs | Putative functions |
|-------------------|----------------|-------------|-------------------------|---------------------------------|--------------------|------------------|-----------------|---------------|--------------------|--------------------|
| SNP_64593_A_6472  | NW_004515722.1 | scaffold151 | 6472                    | AA                              | TT                 | TT               | INTERGENIC      |               |                    |                    |
| SNP_64594_A_6801  | NW_004515722.1 | scaffold151 | 6801                    | AA                              | GG                 | GG               | INTERGENIC      |               |                    |                    |
| SNP_64595_A_6898  | NW_004515722.1 | scaffold151 | 6898                    | AA                              | GG                 | GG               | INTERGENIC      |               |                    |                    |
| SNP_64596_A_7096  | NW_004515722.1 | scaffold151 | 7096                    | TT                              | GG                 | GG               | INTERGENIC      |               |                    |                    |
| SNP_64597_A_7122  | NW_004515722.1 | scaffold151 | 7122                    | CC                              | TT                 | TT               | INTERGENIC      |               |                    |                    |
| SNP_64598_A_7126  | NW_004515722.1 | scaffold151 | 7126                    | CC                              | TT                 | TT               | INTERGENIC      |               |                    |                    |
| SNP_64599_A_7153  | NW_004515722.1 | scaffold151 | 7153                    | TT                              | CC                 | CC               | INTERGENIC      |               |                    |                    |
| SNP_64600_A_7176  | NW_004515722.1 | scaffold151 | 7176                    | GG                              | AA                 | AA               | INTERGENIC      |               |                    |                    |
| SNP_64601_A_7265  | NW_004515722.1 | scaffold151 | 7265                    | AA                              | CC                 | CC               | INTERGENIC      |               |                    |                    |
| SNP_64602_A_7464  | NW_004515722.1 | scaffold151 | 7464                    | AA                              | GG                 | GG               | INTERGENIC      |               |                    |                    |
| SNP_64603_A_7656  | NW_004515722.1 | scaffold151 | 7656                    | AA                              | GG                 | GG               | INTERGENIC      |               |                    |                    |
| SNP_64606_A_9572  | NW_004515722.1 | scaffold151 | 9572                    | CC                              | TT                 | TT               | INTERGENIC      |               |                    |                    |
| SNP_64607_A_9664  | NW_004515722.1 | scaffold151 | 9664                    | TT                              | CC                 | CC               | INTERGENIC      |               |                    |                    |
| SNP_64608_A_10458 | NW_004515722.1 | scaffold151 | 10458                   | CC                              | TT                 | TT               | INTERGENIC      |               |                    |                    |
| SNP_64609_A_11038 | NW_004515722.1 | scaffold151 | 11038                   | TT                              | CC                 | CC               | INTERGENIC      |               |                    |                    |
| SNP_64610_A_11041 | NW_004515722.1 | scaffold151 | 11041                   | TT                              | CC                 | CC               | INTERGENIC      |               |                    |                    |
| SNP_64611_A_11072 | NW_004515722.1 | scaffold151 | 11072                   | AA                              | GG                 | GG               | INTERGENIC      |               |                    |                    |
| SNP_64612_A_11237 | NW_004515722.1 | scaffold151 | 11237                   | AA                              | GG                 | GG               | INTERGENIC      |               |                    |                    |
| SNP_64613_A_17511 | NW_004515722.1 | scaffold151 | 17511                   | TT                              | CC                 | CC               | INTERGENIC      |               |                    |                    |
| SNP_64614_A_18261 | NW_004515722.1 | scaffold151 | 18261                   | CC                              | TT                 | TT               | INTERGENIC      |               |                    |                    |
| SNP_64615_A_18429 | NW_004515722.1 | scaffold151 | 18429                   | GG                              | AA                 | AA               | INTERGENIC      |               |                    |                    |
| SNP_64616_A_18638 | NW_004515722.1 | scaffold151 | 18638                   | GG                              | AA                 | AA               | INTERGENIC      |               |                    |                    |

| SNPs IDs          | Chromosome IDs | Chromosomes | Physical positions (bp) | CDC Frontier (Reference genome) | (Pusa 1103 & HPNB) | (ILWC 46 & LPNB) | Sequence genome | Components of | Gene accession IDs | Putative functions |
|-------------------|----------------|-------------|-------------------------|---------------------------------|--------------------|------------------|-----------------|---------------|--------------------|--------------------|
| SNP_64617_A_18789 | NW_004515722.1 | scaffold151 | 18789                   | GG                              | AA                 | AA               | INTERGENIC      |               |                    |                    |
| SNP_64618_A_18874 | NW_004515722.1 | scaffold151 | 18874                   | AA                              | TT                 | TT               | INTERGENIC      |               |                    |                    |
| SNP_64619_A_19030 | NW_004515722.1 | scaffold151 | 19030                   | GG                              | AA                 | AA               | INTERGENIC      |               |                    |                    |
| SNP_64620_A_19351 | NW_004515722.1 | scaffold151 | 19351                   | TT                              | AA                 | AA               | INTERGENIC      |               |                    |                    |
| SNP_64621_A_19352 | NW_004515722.1 | scaffold151 | 19352                   | CC                              | TT                 | TT               | INTERGENIC      |               |                    |                    |
| SNP_64622_A_19402 | NW_004515722.1 | scaffold151 | 19402                   | GG                              | AA                 | AA               | INTERGENIC      |               |                    |                    |
| SNP_64623_A_19528 | NW_004515722.1 | scaffold151 | 19528                   | AA                              | GG                 | GG               | INTERGENIC      |               |                    |                    |
| SNP_64624_A_25189 | NW_004515722.1 | scaffold151 | 25189                   | CC                              | TT                 | TT               | INTERGENIC      |               |                    |                    |
| SNP_64625_A_25405 | NW_004515722.1 | scaffold151 | 25405                   | AA                              | TT                 | TT               | INTERGENIC      |               |                    |                    |
| SNP_64626_A_25917 | NW_004515722.1 | scaffold151 | 25917                   | CC                              | GG                 | GG               | INTERGENIC      |               |                    |                    |
| SNP_64627_A_26582 | NW_004515722.1 | scaffold151 | 26582                   | GG                              | TT                 | TT               | INTERGENIC      |               |                    |                    |
| SNP_64628_A_27009 | NW_004515722.1 | scaffold151 | 27009                   | GG                              | CC                 | CC               | INTERGENIC      |               |                    |                    |
| SNP_64629_A_27428 | NW_004515722.1 | scaffold151 | 27428                   | AA                              | TT                 | TT               | INTERGENIC      |               |                    |                    |
| SNP_64630_A_27429 | NW_004515722.1 | scaffold151 | 27429                   | TT                              | AA                 | AA               | INTERGENIC      |               |                    |                    |
| SNP_64631_A_27596 | NW_004515722.1 | scaffold151 | 27596                   | GG                              | AA                 | AA               | INTERGENIC      |               |                    |                    |
| SNP_64632_A_27905 | NW_004515722.1 | scaffold151 | 27905                   | CC                              | TT                 | TT               | INTERGENIC      |               |                    |                    |
| SNP_64633_A_27928 | NW_004515722.1 | scaffold151 | 27928                   | AA                              | GG                 | GG               | INTERGENIC      |               |                    |                    |
| SNP_64634_A_28234 | NW_004515722.1 | scaffold151 | 28234                   | CC                              | TT                 | TT               | INTERGENIC      |               |                    |                    |
| SNP_64635_A_28391 | NW_004515722.1 | scaffold151 | 28391                   | CC                              | TT                 | TT               | INTERGENIC      |               |                    |                    |
| SNP_64636_A_28547 | NW_004515722.1 | scaffold151 | 28547                   | GG                              | AA                 | AA               | INTERGENIC      |               |                    |                    |
| SNP_64637_A_28613 | NW_004515722.1 | scaffold151 | 28613                   | CC                              | AA                 | AA               | INTERGENIC      |               |                    |                    |
| SNP_64638_A_29369 | NW_004515722.1 | scaffold151 | 29369                   | TT                              | AA                 | AA               | INTERGENIC      |               |                    |                    |

| SNPs IDs           | Chromosome IDs | Chromosomes | Physical positions (bp) | CDC Frontier (Reference genome) | (Pusa 1103 & HPNB) | (ILWC 46 & LPNB) | Sequence genome | Components of | Gene accession IDs | Putative functions |
|--------------------|----------------|-------------|-------------------------|---------------------------------|--------------------|------------------|-----------------|---------------|--------------------|--------------------|
| SNP_64639_A_29479  | NW_004515722.1 | scaffold151 | 29479                   | GG                              | AA                 | AA               | INTERGENIC      |               |                    |                    |
| SNP_64640_A_35733  | NW_004515722.1 | scaffold151 | 35733                   | CC                              | GG                 | GG               | INTERGENIC      |               |                    |                    |
| SNP_64641_A_35740  | NW_004515722.1 | scaffold151 | 35740                   | AA                              | GG                 | GG               | INTERGENIC      |               |                    |                    |
| SNP_64642_A_35741  | NW_004515722.1 | scaffold151 | 35741                   | CC                              | TT                 | TT               | INTERGENIC      |               |                    |                    |
| SNP_64643_A_35768  | NW_004515722.1 | scaffold151 | 35768                   | TT                              | CC                 | CC               | INTERGENIC      |               |                    |                    |
| SNP_64644_A_35802  | NW_004515722.1 | scaffold151 | 35802                   | TT                              | AA                 | AA               | INTERGENIC      |               |                    |                    |
| SNP_64645_A_35812  | NW_004515722.1 | scaffold151 | 35812                   | AA                              | CC                 | CC               | INTERGENIC      |               |                    |                    |
| SNP_64646_A_35875  | NW_004515722.1 | scaffold151 | 35875                   | GG                              | AA                 | AA               | INTERGENIC      |               |                    |                    |
| SNP_64647_A_35898  | NW_004515722.1 | scaffold151 | 35898                   | AA                              | GG                 | GG               | INTERGENIC      |               |                    |                    |
| SNP_64649_A_36091  | NW_004515722.1 | scaffold151 | 36091                   | TT                              | AA                 | AA               | INTERGENIC      |               |                    |                    |
| SNP_64650_A_36108  | NW_004515722.1 | scaffold151 | 36108                   | AA                              | GG                 | GG               | INTERGENIC      |               |                    |                    |
| SNP_64651_A_36131  | NW_004515722.1 | scaffold151 | 36131                   | GG                              | CC                 | CC               | INTERGENIC      |               |                    |                    |
| SNP_64652_A_42549  | NW_004515722.1 | scaffold151 | 42549                   | TT                              | CC                 | CC               | INTERGENIC      |               |                    |                    |
| SNP_64653_A_42562  | NW_004515722.1 | scaffold151 | 42562                   | TT                              | AA                 | AA               | INTERGENIC      |               |                    |                    |
| SNP_64654_A_42658  | NW_004515722.1 | scaffold151 | 42658                   | AA                              | GG                 | GG               | INTERGENIC      |               |                    |                    |
| SNP_64655_A_45226  | NW_004515722.1 | scaffold151 | 45226                   | GG                              | AA                 | AA               | INTERGENIC      |               |                    |                    |
| SNP_64656_A_45239  | NW_004515722.1 | scaffold151 | 45239                   | GG                              | AA                 | AA               | INTERGENIC      |               |                    |                    |
| SNP_64658_A_61787  | NW_004515722.1 | scaffold151 | 61787                   | TT                              | CC                 | CC               | INTERGENIC      |               |                    |                    |
| SNP_64659_A_65877  | NW_004515722.1 | scaffold151 | 65877                   | CC                              | TT                 | TT               | INTERGENIC      |               |                    |                    |
| SNP_64661_A_99051  | NW_004515722.1 | scaffold151 | 99051                   | GG                              | AA                 | AA               | INTERGENIC      |               |                    |                    |
| SNP_64662_A_107437 | NW_004515722.1 | scaffold151 | 107437                  | TT                              | CC                 | CC               | INTERGENIC      |               |                    |                    |
| SNP_64663_A_112009 | NW_004515722.1 | scaffold151 | 112009                  | AA                              | GG                 | GG               | INTERGENIC      |               |                    |                    |



| SNPs IDs           | Chromosome IDs | Chromosomes | Physical positions (bp) | CDC Frontier (Reference genome) | (Pusa 1103 & HPNB) | (ILWC 46 & LPNB) | Sequence genome | Components of | Gene accession IDs | Putative functions |
|--------------------|----------------|-------------|-------------------------|---------------------------------|--------------------|------------------|-----------------|---------------|--------------------|--------------------|
| SNP_64664_A_178044 | NW_004515722.1 | scaffold151 | 178044                  | AA                              | CC                 | CC               | INTERGENIC      |               |                    |                    |
| SNP_64665_A_216362 | NW_004515722.1 | scaffold151 | 216362                  | TT                              | CC                 | CC               | INTERGENIC      |               |                    |                    |
| SNP_64666_A_216552 | NW_004515722.1 | scaffold151 | 216552                  | TT                              | CC                 | CC               | INTERGENIC      |               |                    |                    |
| SNP_64667_A_217474 | NW_004515722.1 | scaffold151 | 217474                  | GG                              | CC                 | TT               | INTERGENIC      |               |                    |                    |
| SNP_64668_A_220703 | NW_004515722.1 | scaffold151 | 220703                  | TT                              | AA                 | AA               | INTERGENIC      |               |                    |                    |
| SNP_64670_A_222272 | NW_004515722.1 | scaffold151 | 222272                  | CC                              | GG                 | GG               | INTERGENIC      |               |                    |                    |
| SNP_64671_A_224186 | NW_004515722.1 | scaffold151 | 224186                  | AA                              | GG                 | GG               | INTERGENIC      |               |                    |                    |
| SNP_64673_A_296552 | NW_004515722.1 | scaffold151 | 296552                  | CC                              | AA                 | AA               | INTERGENIC      |               |                    |                    |
| SNP_64674_A_308843 | NW_004515722.1 | scaffold151 | 308843                  | TT                              | CC                 | CC               | INTERGENIC      |               |                    |                    |
| SNP_64675_A_308844 | NW_004515722.1 | scaffold151 | 308844                  | TT                              | GG                 | GG               | INTERGENIC      |               |                    |                    |
| SNP_64676_A_1183   | NW_004515723.1 | scaffold153 | 1183                    | TT                              | AA                 | AA               | INTERGENIC      |               |                    |                    |
| SNP_64677_A_17942  | NW_004515723.1 | scaffold153 | 17942                   | CC                              | TT                 | TT               | INTERGENIC      |               |                    |                    |
| SNP_64678_A_18892  | NW_004515723.1 | scaffold153 | 18892                   | AA                              | TT                 | TT               | INTERGENIC      |               |                    |                    |
| SNP_64679_A_19303  | NW_004515723.1 | scaffold153 | 19303                   | GG                              | CC                 | CC               | INTERGENIC      |               |                    |                    |
| SNP_64680_A_19347  | NW_004515723.1 | scaffold153 | 19347                   | AA                              | GG                 | GG               | INTERGENIC      |               |                    |                    |
| SNP_64681_A_19919  | NW_004515723.1 | scaffold153 | 19919                   | TT                              | AA                 | AA               | INTERGENIC      |               |                    |                    |
| SNP_64682_A_20014  | NW_004515723.1 | scaffold153 | 20014                   | GG                              | AA                 | AA               | INTERGENIC      |               |                    |                    |
| SNP_64683_A_27964  | NW_004515723.1 | scaffold153 | 27964                   | AA                              | GG                 | GG               | INTERGENIC      |               |                    |                    |
| SNP_64685_A_28114  | NW_004515723.1 | scaffold153 | 28114                   | GG                              | AA                 | AA               | INTERGENIC      |               |                    |                    |
| SNP_64686_A_28122  | NW_004515723.1 | scaffold153 | 28122                   | GG                              | TT                 | TT               | INTERGENIC      |               |                    |                    |
| SNP_64687_A_28124  | NW_004515723.1 | scaffold153 | 28124                   | TT                              | GG                 | GG               | INTERGENIC      |               |                    |                    |
| SNP_64688_A_31079  | NW_004515723.1 | scaffold153 | 31079                   | TT                              | GG                 | GG               | INTERGENIC      |               |                    |                    |

| SNPs IDs           | Chromosome IDs | Chromosomes | Physical positions (bp) | CDC Frontier (Reference genome) | (Pusa 1103 & HPNB) | (ILWC 46 & LPNB) | Sequence genome | Components of | Gene accession IDs | Putative functions |
|--------------------|----------------|-------------|-------------------------|---------------------------------|--------------------|------------------|-----------------|---------------|--------------------|--------------------|
| SNP_64689_A_35165  | NW_004515723.1 | scaffold153 | 35165                   | GG                              | AA                 | AA               | INTERGENIC      |               |                    |                    |
| SNP_64690_A_35325  | NW_004515723.1 | scaffold153 | 35325                   | GG                              | AA                 | AA               | INTERGENIC      |               |                    |                    |
| SNP_64691_A_45468  | NW_004515723.1 | scaffold153 | 45468                   | TT                              | CC                 | CC               | INTERGENIC      |               |                    |                    |
| SNP_64692_A_45522  | NW_004515723.1 | scaffold153 | 45522                   | GG                              | AA                 | AA               | INTERGENIC      |               |                    |                    |
| SNP_64693_A_77279  | NW_004515723.1 | scaffold153 | 77279                   | GG                              | TT                 | TT               | INTERGENIC      |               |                    |                    |
| SNP_64694_A_81518  | NW_004515723.1 | scaffold153 | 81518                   | AA                              | TT                 | TT               | INTERGENIC      |               |                    |                    |
| SNP_64695_A_89793  | NW_004515723.1 | scaffold153 | 89793                   | TT                              | CC                 | CC               | INTERGENIC      |               |                    |                    |
| SNP_64696_A_89899  | NW_004515723.1 | scaffold153 | 89899                   | TT                              | AA                 | AA               | INTERGENIC      |               |                    |                    |
| SNP_64697_A_90006  | NW_004515723.1 | scaffold153 | 90006                   | TT                              | GG                 | GG               | INTERGENIC      |               |                    |                    |
| SNP_64698_A_90056  | NW_004515723.1 | scaffold153 | 90056                   | CC                              | TT                 | TT               | INTERGENIC      |               |                    |                    |
| SNP_64699_A_90302  | NW_004515723.1 | scaffold153 | 90302                   | TT                              | GG                 | GG               | INTERGENIC      |               |                    |                    |
| SNP_64700_A_92073  | NW_004515723.1 | scaffold153 | 92073                   | TT                              | CC                 | CC               | INTERGENIC      |               |                    |                    |
| SNP_64701_A_107372 | NW_004515723.1 | scaffold153 | 107372                  | AA                              | GG                 | GG               | INTERGENIC      |               |                    |                    |
| SNP_64702_A_107389 | NW_004515723.1 | scaffold153 | 107389                  | AA                              | GG                 | GG               | INTERGENIC      |               |                    |                    |
| SNP_64703_A_107686 | NW_004515723.1 | scaffold153 | 107686                  | CC                              | AA                 | AA               | INTERGENIC      |               |                    |                    |
| SNP_64704_A_107694 | NW_004515723.1 | scaffold153 | 107694                  | CC                              | GG                 | GG               | INTERGENIC      |               |                    |                    |
| SNP_64705_A_107716 | NW_004515723.1 | scaffold153 | 107716                  | AA                              | TT                 | TT               | INTERGENIC      |               |                    |                    |
| SNP_64706_A_107724 | NW_004515723.1 | scaffold153 | 107724                  | AA                              | GG                 | GG               | INTERGENIC      |               |                    |                    |
| SNP_64707_A_107910 | NW_004515723.1 | scaffold153 | 107910                  | GG                              | AA                 | AA               | INTERGENIC      |               |                    |                    |
| SNP_64708_A_116046 | NW_004515723.1 | scaffold153 | 116046                  | TT                              | CC                 | CC               | INTERGENIC      |               |                    |                    |
| SNP_64709_A_27127  | NW_004515725.1 | scaffold157 | 27127                   | TT                              | GG                 | GG               | INTERGENIC      |               |                    |                    |
| SNP_64710_A_27389  | NW_004515725.1 | scaffold157 | 27389                   | TT                              | CC                 | CC               | INTERGENIC      |               |                    |                    |

| SNPs IDs           | Chromosome IDs | Chromosomes | Physical positions (bp) | CDC Frontier (Reference genome) | (Pusa 1103 & HPNB) | (ILWC 46 & LPNB) | Sequence Components of genome | Gene accession IDs | Putative functions                                 |
|--------------------|----------------|-------------|-------------------------|---------------------------------|--------------------|------------------|-------------------------------|--------------------|----------------------------------------------------|
| SNP_64711_A_82682  | NW_004515725.1 | scaffold157 | 82682                   | GG                              | AA                 | AA               | DRR                           | 101514542          | isoliquiritigenin 2'-O-methyltransferase-like      |
| SNP_64713_A_169295 | NW_004515725.1 | scaffold157 | 169295                  | CC                              | AA                 | AA               | INTERGENIC                    |                    |                                                    |
| SNP_64714_A_169764 | NW_004515725.1 | scaffold157 | 169764                  | TT                              | CC                 | CC               | INTERGENIC                    |                    |                                                    |
| SNP_64715_A_172850 | NW_004515725.1 | scaffold157 | 172850                  | TT                              | CC                 | CC               | INTERGENIC                    |                    |                                                    |
| SNP_64716_A_182929 | NW_004515725.1 | scaffold157 | 182929                  | AA                              | GG                 | GG               | DRR                           | 101494137          | E3 ubiquitin-protein ligase RNF4-like              |
| SNP_64717_A_195643 | NW_004515725.1 | scaffold157 | 195643                  | AA                              | GG                 | GG               | INTERGENIC                    |                    |                                                    |
| SNP_64719_A_244763 | NW_004515725.1 | scaffold157 | 244763                  | GG                              | AA                 | AA               | INTERGENIC                    |                    |                                                    |
| SNP_64720_A_248133 | NW_004515725.1 | scaffold157 | 248133                  | AA                              | CC                 | CC               | INTERGENIC                    |                    |                                                    |
| SNP_64722_A_248353 | NW_004515725.1 | scaffold157 | 248353                  | TT                              | CC                 | CC               | INTERGENIC                    |                    |                                                    |
| SNP_64723_A_248355 | NW_004515725.1 | scaffold157 | 248355                  | GG                              | AA                 | AA               | INTERGENIC                    |                    |                                                    |
| SNP_64724_A_248377 | NW_004515725.1 | scaffold157 | 248377                  | GG                              | AA                 | AA               | INTERGENIC                    |                    |                                                    |
| SNP_64725_A_248824 | NW_004515725.1 | scaffold157 | 248824                  | GG                              | AA                 | AA               | DRR                           | 101495417          | xyloglucan galactosyltransferase KATAMAR11 homolog |
| SNP_64726_A_248833 | NW_004515725.1 | scaffold157 | 248833                  | TT                              | AA                 | AA               | DRR                           | 101495417          | xyloglucan galactosyltransferase KATAMAR11 homolog |
| SNP_64727_A_248849 | NW_004515725.1 | scaffold157 | 248849                  | TT                              | CC                 | CC               | DRR                           | 101495417          | xyloglucan galactosyltransferase KATAMAR11 homolog |
| SNP_64728_A_251092 | NW_004515725.1 | scaffold157 | 251092                  | CC                              | TT                 | TT               | URR                           | 101495417          | xyloglucan galactosyltransferase KATAMAR11 homolog |
| SNP_64729_A_252258 | NW_004515725.1 | scaffold157 | 252258                  | TT                              | CC                 | CC               | URR                           | 101495417          | xyloglucan galactosyltransferase KATAMAR11 homolog |
| SNP_64732_A_257942 | NW_004515725.1 | scaffold157 | 257942                  | AA                              | GG                 | GG               | URR                           | 101495748          | Unknown function                                   |
| SNP_64733_A_258036 | NW_004515725.1 | scaffold157 | 258036                  | AA                              | GG                 | GG               | URR                           | 101495748          | Unknown function                                   |
| SNP_64734_A_258179 | NW_004515725.1 | scaffold157 | 258179                  | AA                              | GG                 | GG               | URR                           | 101495748          | Unknown function                                   |
| SNP_64735_A_258256 | NW_004515725.1 | scaffold157 | 258256                  | AA                              | GG                 | GG               | URR                           | 101495748          | Unknown function                                   |
| SNP_64736_A_258272 | NW_004515725.1 | scaffold157 | 258272                  | TT                              | CC                 | CC               | URR                           | 101495748          | Unknown function                                   |
| SNP_64737_A_258309 | NW_004515725.1 | scaffold157 | 258309                  | GG                              | TT                 | TT               | URR                           | 101495748          | Unknown function                                   |

| SNPs IDs           | Chromosome IDs | Chromosomes | Physical positions (bp) | CDC Frontier genome (Reference genome) | (Pusa 1103 & HPNB) | (ILWC 46 & LPNB) | Sequence genome | Components of | Gene accession IDs | Putative functions |
|--------------------|----------------|-------------|-------------------------|----------------------------------------|--------------------|------------------|-----------------|---------------|--------------------|--------------------|
| SNP_64738_A_280313 | NW_004515725.1 | scaffold157 | 280313                  | GG                                     | TT                 | TT               | INTERGENIC      |               |                    |                    |
| SNP_64739_A_280548 | NW_004515725.1 | scaffold157 | 280548                  | GG                                     | AA                 | AA               | INTERGENIC      |               |                    |                    |
| SNP_64740_A_280775 | NW_004515725.1 | scaffold157 | 280775                  | TT                                     | CC                 | CC               | INTERGENIC      |               |                    |                    |
| SNP_64741_A_280851 | NW_004515725.1 | scaffold157 | 280851                  | GG                                     | AA                 | AA               | INTERGENIC      |               |                    |                    |
| SNP_64742_A_282757 | NW_004515725.1 | scaffold157 | 282757                  | TT                                     | AA                 | AA               | INTERGENIC      |               |                    |                    |
| SNP_64743_A_288972 | NW_004515725.1 | scaffold157 | 288972                  | CC                                     | TT                 | TT               | INTERGENIC      |               |                    |                    |
| SNP_64744_A_289207 | NW_004515725.1 | scaffold157 | 289207                  | TT                                     | GG                 | GG               | INTERGENIC      |               |                    |                    |
| SNP_64745_A_289254 | NW_004515725.1 | scaffold157 | 289254                  | TT                                     | AA                 | AA               | INTERGENIC      |               |                    |                    |
| SNP_64747_A_289329 | NW_004515725.1 | scaffold157 | 289329                  | TT                                     | CC                 | CC               | INTERGENIC      |               |                    |                    |
| SNP_64748_A_289331 | NW_004515725.1 | scaffold157 | 289331                  | GG                                     | AA                 | AA               | INTERGENIC      |               |                    |                    |
| SNP_64749_A_289341 | NW_004515725.1 | scaffold157 | 289341                  | TT                                     | GG                 | GG               | INTERGENIC      |               |                    |                    |
| SNP_64750_A_290655 | NW_004515725.1 | scaffold157 | 290655                  | TT                                     | GG                 | GG               | INTERGENIC      |               |                    |                    |
| SNP_64751_A_302061 | NW_004515725.1 | scaffold157 | 302061                  | GG                                     | TT                 | TT               | INTERGENIC      |               |                    |                    |
| SNP_64752_A_303050 | NW_004515725.1 | scaffold157 | 303050                  | TT                                     | AA                 | AA               | INTERGENIC      |               |                    |                    |
| SNP_64753_A_303350 | NW_004515725.1 | scaffold157 | 303350                  | AA                                     | GG                 | GG               | INTERGENIC      |               |                    |                    |
| SNP_64754_A_305497 | NW_004515725.1 | scaffold157 | 305497                  | AA                                     | GG                 | GG               | INTERGENIC      |               |                    |                    |
| SNP_64755_A_305531 | NW_004515725.1 | scaffold157 | 305531                  | TT                                     | CC                 | CC               | INTERGENIC      |               |                    |                    |
| SNP_64756_A_305557 | NW_004515725.1 | scaffold157 | 305557                  | GG                                     | TT                 | TT               | INTERGENIC      |               |                    |                    |
| SNP_64757_A_305561 | NW_004515725.1 | scaffold157 | 305561                  | AA                                     | CC                 | CC               | INTERGENIC      |               |                    |                    |
| SNP_64758_A_305595 | NW_004515725.1 | scaffold157 | 305595                  | GG                                     | TT                 | TT               | INTERGENIC      |               |                    |                    |
| SNP_64759_A_305602 | NW_004515725.1 | scaffold157 | 305602                  | AA                                     | GG                 | GG               | INTERGENIC      |               |                    |                    |
| SNP_64760_A_305618 | NW_004515725.1 | scaffold157 | 305618                  | AA                                     | GG                 | GG               | INTERGENIC      |               |                    |                    |

| SNPs IDs           | Chromosome IDs | Chromosomes | Physical positions (bp) | CDC Frontier (Reference genome) | (Pusa 1103 & HPNB) | (ILWC 46 & LPNB) | Sequence Components of genome | Gene accession IDs | Putative functions           |
|--------------------|----------------|-------------|-------------------------|---------------------------------|--------------------|------------------|-------------------------------|--------------------|------------------------------|
| SNP_64761_A_305623 | NW_004515725.1 | scaffold157 | 305623                  | TT                              | GG                 | GG               | INTERGENIC                    |                    |                              |
| SNP_64762_A_305787 | NW_004515725.1 | scaffold157 | 305787                  | TT                              | CC                 | CC               | INTERGENIC                    |                    |                              |
| SNP_64763_A_305804 | NW_004515725.1 | scaffold157 | 305804                  | AA                              | GG                 | GG               | INTERGENIC                    |                    |                              |
| SNP_64764_A_305871 | NW_004515725.1 | scaffold157 | 305871                  | AA                              | TT                 | TT               | INTERGENIC                    |                    |                              |
| SNP_64765_A_307238 | NW_004515725.1 | scaffold157 | 307238                  | GG                              | AA                 | AA               | INTERGENIC                    |                    |                              |
| SNP_64766_A_308419 | NW_004515725.1 | scaffold157 | 308419                  | TT                              | CC                 | CC               | INTERGENIC                    |                    |                              |
| SNP_64767_A_308579 | NW_004515725.1 | scaffold157 | 308579                  | TT                              | CC                 | CC               | INTERGENIC                    |                    |                              |
| SNP_64768_A_308590 | NW_004515725.1 | scaffold157 | 308590                  | GG                              | TT                 | TT               | INTERGENIC                    |                    |                              |
| SNP_64769_A_308649 | NW_004515725.1 | scaffold157 | 308649                  | AA                              | GG                 | GG               | INTERGENIC                    |                    |                              |
| SNP_64770_A_308931 | NW_004515725.1 | scaffold157 | 308931                  | GG                              | AA                 | AA               | INTERGENIC                    |                    |                              |
| SNP_64772_A_309375 | NW_004515725.1 | scaffold157 | 309375                  | TT                              | CC                 | CC               | INTERGENIC                    |                    |                              |
| SNP_64773_A_312379 | NW_004515725.1 | scaffold157 | 312379                  | AA                              | CC                 | CC               | INTERGENIC                    |                    |                              |
| SNP_64774_A_312451 | NW_004515725.1 | scaffold157 | 312451                  | AA                              | GG                 | GG               | INTERGENIC                    |                    |                              |
| SNP_64775_A_312591 | NW_004515725.1 | scaffold157 | 312591                  | CC                              | AA                 | AA               | INTERGENIC                    |                    |                              |
| SNP_64776_A_322809 | NW_004515725.1 | scaffold157 | 322809                  | AA                              | CC                 | CC               | INTRON                        | 101490247          | uncharacterized LOC101490247 |
| SNP_64777_A_327202 | NW_004515725.1 | scaffold157 | 327202                  | CC                              | AA                 | AA               | INTRON                        | 101490247          | uncharacterized LOC101490247 |
| SNP_64778_A_328657 | NW_004515725.1 | scaffold157 | 328657                  | GG                              | AA                 | AA               | URR                           | 101490247          | uncharacterized LOC101490247 |
| SNP_64779_A_328702 | NW_004515725.1 | scaffold157 | 328702                  | TT                              | CC                 | CC               | URR                           | 101490247          | uncharacterized LOC101490247 |
| SNP_64780_A_329255 | NW_004515725.1 | scaffold157 | 329255                  | CC                              | TT                 | TT               | URR                           | 101490247          | uncharacterized LOC101490247 |
| SNP_64781_A_329263 | NW_004515725.1 | scaffold157 | 329263                  | AA                              | GG                 | GG               | URR                           | 101490247          | uncharacterized LOC101490247 |
| SNP_64782_A_330623 | NW_004515725.1 | scaffold157 | 330623                  | AA                              | GG                 | GG               | INTERGENIC                    |                    |                              |
| SNP_64783_A_330637 | NW_004515725.1 | scaffold157 | 330637                  | TT                              | GG                 | GG               | INTERGENIC                    |                    |                              |

| SNPs IDs           | Chromosome IDs | Chromosomes | Physical positions (bp) | CDC Frontier (Reference genome) | (Pusa 1103 & HPNB) | (ILWC 46 & LPNB) | Sequence Components of genome | Gene accession IDs | Putative functions                                       |
|--------------------|----------------|-------------|-------------------------|---------------------------------|--------------------|------------------|-------------------------------|--------------------|----------------------------------------------------------|
| SNP_64784_A_330676 | NW_004515725.1 | scaffold157 | 330676                  | AA                              | GG                 | GG               | INTERGENIC                    |                    |                                                          |
| SNP_64785_A_330724 | NW_004515725.1 | scaffold157 | 330724                  | GG                              | AA                 | AA               | INTERGENIC                    |                    |                                                          |
| SNP_64786_A_330730 | NW_004515725.1 | scaffold157 | 330730                  | AA                              | GG                 | GG               | INTERGENIC                    |                    |                                                          |
| SNP_64787_A_330736 | NW_004515725.1 | scaffold157 | 330736                  | AA                              | GG                 | GG               | INTERGENIC                    |                    |                                                          |
| SNP_64788_A_330991 | NW_004515725.1 | scaffold157 | 330991                  | AA                              | GG                 | GG               | INTERGENIC                    |                    |                                                          |
| SNP_64789_A_330993 | NW_004515725.1 | scaffold157 | 330993                  | AA                              | GG                 | GG               | INTERGENIC                    |                    |                                                          |
| SNP_64790_A_331003 | NW_004515725.1 | scaffold157 | 331003                  | GG                              | AA                 | AA               | INTERGENIC                    |                    |                                                          |
| SNP_64791_A_331020 | NW_004515725.1 | scaffold157 | 331020                  | CC                              | GG                 | GG               | INTERGENIC                    |                    |                                                          |
| SNP_64793_A_332789 | NW_004515725.1 | scaffold157 | 332789                  | CC                              | TT                 | TT               | DRR                           | 101496070          | serine/threonine-protein phosphatase 7 long form homolog |
| SNP_64794_A_333002 | NW_004515725.1 | scaffold157 | 333002                  | GG                              | AA                 | AA               | DRR                           | 101496070          | serine/threonine-protein phosphatase 7 long form homolog |
| SNP_64795_A_333047 | NW_004515725.1 | scaffold157 | 333047                  | AA                              | GG                 | GG               | DRR                           | 101496070          | serine/threonine-protein phosphatase 7 long form homolog |
| SNP_64796_A_334885 | NW_004515725.1 | scaffold157 | 334885                  | GG                              | AA                 | AA               | URR                           | 101496070          | serine/threonine-protein phosphatase 7 long form homolog |
| SNP_64798_A_337190 | NW_004515725.1 | scaffold157 | 337190                  | AA                              | TT                 | TT               | INTERGENIC                    |                    |                                                          |
| SNP_64799_A_337191 | NW_004515725.1 | scaffold157 | 337191                  | GG                              | AA                 | AA               | INTERGENIC                    |                    |                                                          |
| SNP_64800_A_337477 | NW_004515725.1 | scaffold157 | 337477                  | CC                              | TT                 | TT               | INTERGENIC                    |                    |                                                          |
| SNP_64801_A_337771 | NW_004515725.1 | scaffold157 | 337771                  | CC                              | TT                 | TT               | INTERGENIC                    |                    |                                                          |
| SNP_64802_A_337779 | NW_004515725.1 | scaffold157 | 337779                  | GG                              | AA                 | AA               | INTERGENIC                    |                    |                                                          |
| SNP_64803_A_340627 | NW_004515725.1 | scaffold157 | 340627                  | CC                              | TT                 | TT               | INTERGENIC                    |                    |                                                          |
| SNP_64804_A_341734 | NW_004515725.1 | scaffold157 | 341734                  | TT                              | CC                 | CC               | INTERGENIC                    |                    |                                                          |
| SNP_64805_A_341747 | NW_004515725.1 | scaffold157 | 341747                  | TT                              | CC                 | CC               | INTERGENIC                    |                    |                                                          |
| SNP_64806_A_341759 | NW_004515725.1 | scaffold157 | 341759                  | CC                              | TT                 | TT               | INTERGENIC                    |                    |                                                          |
| SNP_64807_A_342068 | NW_004515725.1 | scaffold157 | 342068                  | AA                              | GG                 | GG               | INTERGENIC                    |                    |                                                          |

| SNPs IDs           | Chromosome IDs | Chromosomes | Physical positions (bp) | CDC Frontier (Reference genome) | (Pusa 1103 & HPNB) | (ILWC 46 & LPNB) | Sequence Components of genome | Gene accession IDs | Putative functions           |
|--------------------|----------------|-------------|-------------------------|---------------------------------|--------------------|------------------|-------------------------------|--------------------|------------------------------|
| SNP_64808_A_342125 | NW_004515725.1 | scaffold157 | 342125                  | CC                              | TT                 | TT               | INTERGENIC                    |                    |                              |
| SNP_64809_A_342366 | NW_004515725.1 | scaffold157 | 342366                  | GG                              | TT                 | TT               | INTERGENIC                    |                    |                              |
| SNP_64810_A_347304 | NW_004515725.1 | scaffold157 | 347304                  | GG                              | AA                 | AA               | INTERGENIC                    |                    |                              |
| SNP_64811_A_348046 | NW_004515725.1 | scaffold157 | 348046                  | TT                              | CC                 | CC               | INTERGENIC                    |                    |                              |
| SNP_64812_A_348319 | NW_004515725.1 | scaffold157 | 348319                  | CC                              | TT                 | TT               | INTERGENIC                    |                    |                              |
| SNP_64813_A_348464 | NW_004515725.1 | scaffold157 | 348464                  | TT                              | AA                 | AA               | INTERGENIC                    |                    |                              |
| SNP_64814_A_348472 | NW_004515725.1 | scaffold157 | 348472                  | GG                              | AA                 | AA               | INTERGENIC                    |                    |                              |
| SNP_64817_A_358685 | NW_004515725.1 | scaffold157 | 358685                  | CC                              | TT                 | TT               | URR                           | 101491109          | uncharacterized LOC101491109 |
| SNP_64819_A_359510 | NW_004515725.1 | scaffold157 | 359510                  | TT                              | AA                 | AA               | URR                           | 101491109          | uncharacterized LOC101491109 |
| SNP_64820_A_359520 | NW_004515725.1 | scaffold157 | 359520                  | CC                              | AA                 | AA               | URR                           | 101491109          | uncharacterized LOC101491109 |
| SNP_64821_A_359828 | NW_004515725.1 | scaffold157 | 359828                  | AA                              | CC                 | CC               | URR                           | 101491109          | uncharacterized LOC101491109 |
| SNP_64822_A_360498 | NW_004515725.1 | scaffold157 | 360498                  | GG                              | CC                 | CC               | DRR                           | 101496398          | serpin-ZX-like               |
| SNP_64823_A_399953 | NW_004515725.1 | scaffold157 | 399953                  | TT                              | CC                 | CC               | INTERGENIC                    |                    |                              |
| SNP_64824_A_410071 | NW_004515725.1 | scaffold157 | 410071                  | CC                              | TT                 | TT               | INTERGENIC                    |                    |                              |
| SNP_64825_A_460044 | NW_004515725.1 | scaffold157 | 460044                  | GG                              | AA                 | AA               | INTERGENIC                    |                    |                              |
| SNP_64826_A_477341 | NW_004515725.1 | scaffold157 | 477341                  | TT                              | AA                 | AA               | INTERGENIC                    |                    |                              |
| SNP_64827_A_8681   | NW_004515726.1 | scaffold158 | 8681                    | CC                              | TT                 | TT               | INTERGENIC                    |                    |                              |
| SNP_64828_A_10732  | NW_004515726.1 | scaffold158 | 10732                   | GG                              | AA                 | AA               | INTERGENIC                    |                    |                              |
| SNP_64829_A_80096  | NW_004515726.1 | scaffold158 | 80096                   | GG                              | CC                 | CC               | DRR                           | 101498027          | Unknown function             |
| SNP_64830_A_121704 | NW_004515726.1 | scaffold158 | 121704                  | CC                              | GG                 | GG               | URR                           | 101497703          | Unknown function             |
| SNP_64831_A_121931 | NW_004515726.1 | scaffold158 | 121931                  | GG                              | TT                 | TT               | URR                           | 101497703          | Unknown function             |
| SNP_64832_A_121958 | NW_004515726.1 | scaffold158 | 121958                  | CC                              | TT                 | TT               | URR                           | 101497703          | Unknown function             |

| SNPs IDs           | Chromosome IDs | Chromosomes | Physical positions (bp) | CDC Frontier (Reference genome) | (Pusa 1103 & HPNB) | (ILWC 46 & LPNB) | Sequence Components of genome | Gene accession IDs | Putative functions                                  |
|--------------------|----------------|-------------|-------------------------|---------------------------------|--------------------|------------------|-------------------------------|--------------------|-----------------------------------------------------|
| SNP_64833_A_121978 | NW_004515726.1 | scaffold158 | 121978                  | AA                              | CC                 | CC               | URR                           | 101497703          | Unknown function                                    |
| SNP_64834_A_122023 | NW_004515726.1 | scaffold158 | 122023                  | GG                              | TT                 | TT               | URR                           | 101497703          | Unknown function                                    |
| SNP_64835_A_131630 | NW_004515726.1 | scaffold158 | 131630                  | GG                              | AA                 | AA               | INTRON                        | 101498699          | late cornified envelope-like proline-rich protein 1 |
| SNP_64837_A_131652 | NW_004515726.1 | scaffold158 | 131652                  | TT                              | CC                 | CC               | INTRON                        | 101498699          | late cornified envelope-like proline-rich protein 1 |
| SNP_64838_A_131701 | NW_004515726.1 | scaffold158 | 131701                  | CC                              | TT                 | TT               | INTRON                        | 101498699          | late cornified envelope-like proline-rich protein 1 |
| SNP_64839_A_131754 | NW_004515726.1 | scaffold158 | 131754                  | CC                              | AA                 | AA               | INTRON                        | 101498699          | late cornified envelope-like proline-rich protein 1 |
| SNP_64840_A_131762 | NW_004515726.1 | scaffold158 | 131762                  | AA                              | GG                 | GG               | INTRON                        | 101498699          | late cornified envelope-like proline-rich protein 1 |
| SNP_64841_A_131797 | NW_004515726.1 | scaffold158 | 131797                  | TT                              | CC                 | CC               | INTRON                        | 101498699          | late cornified envelope-like proline-rich protein 1 |
| SNP_64842_A_131953 | NW_004515726.1 | scaffold158 | 131953                  | AA                              | TT                 | TT               | INTRON                        | 101498699          | late cornified envelope-like proline-rich protein 1 |
| SNP_64843_A_132136 | NW_004515726.1 | scaffold158 | 132136                  | AA                              | CC                 | CC               | INTRON                        | 101498699          | late cornified envelope-like proline-rich protein 1 |
| SNP_64844_A_132213 | NW_004515726.1 | scaffold158 | 132213                  | TT                              | CC                 | CC               | INTRON                        | 101498699          | late cornified envelope-like proline-rich protein 1 |
| SNP_64845_A_132228 | NW_004515726.1 | scaffold158 | 132228                  | TT                              | GG                 | GG               | INTRON                        | 101498699          | late cornified envelope-like proline-rich protein 1 |
| SNP_64846_A_132242 | NW_004515726.1 | scaffold158 | 132242                  | TT                              | CC                 | CC               | INTRON                        | 101498699          | late cornified envelope-like proline-rich protein 1 |
| SNP_64848_A_40607  | NW_004515728.1 | scaffold166 | 40607                   | CC                              | GG                 | GG               | INTERGENIC                    |                    |                                                     |
| SNP_64849_A_40681  | NW_004515728.1 | scaffold166 | 40681                   | AA                              | GG                 | GG               | INTERGENIC                    |                    |                                                     |
| SNP_64850_A_68293  | NW_004515728.1 | scaffold166 | 68293                   | GG                              | AA                 | AA               | INTERGENIC                    |                    |                                                     |
| SNP_64851_A_98411  | NW_004515728.1 | scaffold166 | 98411                   | CC                              | GG                 | GG               | INTERGENIC                    |                    |                                                     |
| SNP_64852_A_98701  | NW_004515728.1 | scaffold166 | 98701                   | GG                              | AA                 | AA               | INTERGENIC                    |                    |                                                     |
| SNP_64853_A_98781  | NW_004515728.1 | scaffold166 | 98781                   | TT                              | GG                 | GG               | INTERGENIC                    |                    |                                                     |
| SNP_64854_A_143261 | NW_004515728.1 | scaffold166 | 143261                  | TT                              | GG                 | GG               | INTERGENIC                    |                    |                                                     |
| SNP_64855_A_166954 | NW_004515728.1 | scaffold166 | 166954                  | CC                              | TT                 | TT               | INTERGENIC                    |                    |                                                     |
| SNP_64856_A_166988 | NW_004515728.1 | scaffold166 | 166988                  | GG                              | TT                 | TT               | INTERGENIC                    |                    |                                                     |



| SNPs IDs           | Chromosome IDs | Chromosomes | Physical positions (bp) | CDC Frontier (Reference genome) | (Pusa 1103 & HPNB) | (ILWC 46 & LPNB) | Sequence Components of genome | Gene accession IDs | Putative functions |
|--------------------|----------------|-------------|-------------------------|---------------------------------|--------------------|------------------|-------------------------------|--------------------|--------------------|
| SNP_64857_A_175385 | NW_004515728.1 | scaffold166 | 175385                  | AA                              | TT                 | TT               | INTERGENIC                    |                    |                    |
| SNP_64858_A_189245 | NW_004515728.1 | scaffold166 | 189245                  | AA                              | GG                 | GG               | INTERGENIC                    |                    |                    |
| SNP_64859_A_196891 | NW_004515728.1 | scaffold166 | 196891                  | CC                              | GG                 | GG               | INTERGENIC                    |                    |                    |
| SNP_64860_A_199587 | NW_004515728.1 | scaffold166 | 199587                  | TT                              | CC                 | CC               | INTERGENIC                    |                    |                    |
| SNP_64861_A_199612 | NW_004515728.1 | scaffold166 | 199612                  | CC                              | TT                 | TT               | INTERGENIC                    |                    |                    |
| SNP_64862_A_199898 | NW_004515728.1 | scaffold166 | 199898                  | AA                              | GG                 | GG               | INTERGENIC                    |                    |                    |
| SNP_64863_A_211508 | NW_004515728.1 | scaffold166 | 211508                  | CC                              | TT                 | TT               | INTERGENIC                    |                    |                    |
| SNP_64864_A_226968 | NW_004515728.1 | scaffold166 | 226968                  | AA                              | GG                 | GG               | INTERGENIC                    |                    |                    |
| SNP_64865_A_227286 | NW_004515728.1 | scaffold166 | 227286                  | CC                              | TT                 | TT               | INTERGENIC                    |                    |                    |
| SNP_64866_A_227305 | NW_004515728.1 | scaffold166 | 227305                  | GG                              | TT                 | TT               | INTERGENIC                    |                    |                    |
| SNP_64867_A_298924 | NW_004515728.1 | scaffold166 | 298924                  | GG                              | TT                 | TT               | INTERGENIC                    |                    |                    |
| SNP_64868_A_298945 | NW_004515728.1 | scaffold166 | 298945                  | TT                              | CC                 | CC               | INTERGENIC                    |                    |                    |
| SNP_64869_A_298972 | NW_004515728.1 | scaffold166 | 298972                  | GG                              | TT                 | TT               | INTERGENIC                    |                    |                    |
| SNP_64870_A_299005 | NW_004515728.1 | scaffold166 | 299005                  | CC                              | TT                 | TT               | INTERGENIC                    |                    |                    |
| SNP_64871_A_299022 | NW_004515728.1 | scaffold166 | 299022                  | TT                              | CC                 | CC               | INTERGENIC                    |                    |                    |
| SNP_64872_A_299028 | NW_004515728.1 | scaffold166 | 299028                  | AA                              | GG                 | GG               | INTERGENIC                    |                    |                    |
| SNP_64873_A_299052 | NW_004515728.1 | scaffold166 | 299052                  | AA                              | TT                 | TT               | INTERGENIC                    |                    |                    |
| SNP_64874_A_299117 | NW_004515728.1 | scaffold166 | 299117                  | CC                              | TT                 | TT               | INTERGENIC                    |                    |                    |
| SNP_64875_A_299137 | NW_004515728.1 | scaffold166 | 299137                  | TT                              | CC                 | CC               | INTERGENIC                    |                    |                    |
| SNP_64876_A_299330 | NW_004515728.1 | scaffold166 | 299330                  | TT                              | CC                 | CC               | INTERGENIC                    |                    |                    |
| SNP_64877_A_299340 | NW_004515728.1 | scaffold166 | 299340                  | TT                              | GG                 | GG               | INTERGENIC                    |                    |                    |
| SNP_64880_A_38630  | NW_004515729.1 | scaffold167 | 38630                   | GG                              | AA                 | AA               | STOP_GAINED                   | 101506166          | Unknown function   |

| SNPs IDs           | Chromosome IDs | Chromosomes | Physical positions (bp) | CDC Frontier (Reference genome) | (Pusa 1103 & HPNB) | (ILWC 46 & LPNB) | Sequence Components of genome | Gene accession IDs | Putative functions |
|--------------------|----------------|-------------|-------------------------|---------------------------------|--------------------|------------------|-------------------------------|--------------------|--------------------|
| SNP_64881_A_38705  | NW_004515729.1 | scaffold167 | 38705                   | TT                              | CC                 | CC               | NON_SYNONYMOUS_CODING         | 101506166          | Unknown function   |
| SNP_64882_A_38766  | NW_004515729.1 | scaffold167 | 38766                   | GG                              | CC                 | CC               | NON_SYNONYMOUS_CODING         | 101506166          | Unknown function   |
| SNP_64883_A_38986  | NW_004515729.1 | scaffold167 | 38986                   | CC                              | TT                 | TT               | NON_SYNONYMOUS_CODING         | 101506166          | Unknown function   |
| SNP_64884_A_39032  | NW_004515729.1 | scaffold167 | 39032                   | TT                              | GG                 | GG               | NON_SYNONYMOUS_CODING         | 101506166          | Unknown function   |
| SNP_64885_A_39159  | NW_004515729.1 | scaffold167 | 39159                   | GG                              | AA                 | AA               | SYNONYMOUS_CODING             | 101506166          | Unknown function   |
| SNP_64886_A_39197  | NW_004515729.1 | scaffold167 | 39197                   | TT                              | GG                 | GG               | NON_SYNONYMOUS_CODING         | 101506166          | Unknown function   |
| SNP_64887_A_54210  | NW_004515729.1 | scaffold167 | 54210                   | CC                              | TT                 | TT               | INTERGENIC                    |                    |                    |
| SNP_64888_A_68200  | NW_004515729.1 | scaffold167 | 68200                   | GG                              | AA                 | AA               | INTERGENIC                    |                    |                    |
| SNP_64889_A_68372  | NW_004515729.1 | scaffold167 | 68372                   | TT                              | CC                 | CC               | INTERGENIC                    |                    |                    |
| SNP_64890_A_68440  | NW_004515729.1 | scaffold167 | 68440                   | TT                              | CC                 | CC               | INTERGENIC                    |                    |                    |
| SNP_64891_A_68453  | NW_004515729.1 | scaffold167 | 68453                   | GG                              | CC                 | CC               | INTERGENIC                    |                    |                    |
| SNP_64892_A_153211 | NW_004515729.1 | scaffold167 | 153211                  | TT                              | CC                 | CC               | INTERGENIC                    |                    |                    |
| SNP_64893_A_202129 | NW_004515729.1 | scaffold167 | 202129                  | TT                              | CC                 | CC               | INTERGENIC                    |                    |                    |
| SNP_64894_A_217802 | NW_004515729.1 | scaffold167 | 217802                  | AA                              | CC                 | CC               | INTERGENIC                    |                    |                    |
| SNP_64895_A_217816 | NW_004515729.1 | scaffold167 | 217816                  | TT                              | GG                 | GG               | INTERGENIC                    |                    |                    |
| SNP_64896_A_217837 | NW_004515729.1 | scaffold167 | 217837                  | AA                              | GG                 | GG               | INTERGENIC                    |                    |                    |
| SNP_64897_A_217951 | NW_004515729.1 | scaffold167 | 217951                  | GG                              | AA                 | AA               | INTERGENIC                    |                    |                    |
| SNP_64898_A_217964 | NW_004515729.1 | scaffold167 | 217964                  | AA                              | CC                 | CC               | INTERGENIC                    |                    |                    |
| SNP_64899_A_217983 | NW_004515729.1 | scaffold167 | 217983                  | AA                              | GG                 | GG               | INTERGENIC                    |                    |                    |
| SNP_64902_A_219289 | NW_004515729.1 | scaffold167 | 219289                  | AA                              | GG                 | GG               | INTERGENIC                    |                    |                    |
| SNP_64903_A_219319 | NW_004515729.1 | scaffold167 | 219319                  | GG                              | AA                 | AA               | INTERGENIC                    |                    |                    |
| SNP_64904_A_219332 | NW_004515729.1 | scaffold167 | 219332                  | TT                              | AA                 | AA               | INTERGENIC                    |                    |                    |

| SNPs IDs           | Chromosome IDs | Chromosomes | Physical positions (bp) | CDC Frontier (Reference genome) | (Pusa 1103 & HPNB) | (ILWC 46 & LPNB) | Sequence genome | Components of | Gene accession IDs | Putative functions |
|--------------------|----------------|-------------|-------------------------|---------------------------------|--------------------|------------------|-----------------|---------------|--------------------|--------------------|
| SNP_64905_A_219384 | NW_004515729.1 | scaffold167 | 219384                  | AA                              | GG                 | GG               | INTERGENIC      |               |                    |                    |
| SNP_64906_A_219597 | NW_004515729.1 | scaffold167 | 219597                  | TT                              | CC                 | CC               | INTERGENIC      |               |                    |                    |
| SNP_64907_A_219813 | NW_004515729.1 | scaffold167 | 219813                  | CC                              | TT                 | TT               | INTERGENIC      |               |                    |                    |
| SNP_64908_A_219851 | NW_004515729.1 | scaffold167 | 219851                  | AA                              | GG                 | GG               | INTERGENIC      |               |                    |                    |
| SNP_64909_A_219860 | NW_004515729.1 | scaffold167 | 219860                  | CC                              | TT                 | TT               | INTERGENIC      |               |                    |                    |
| SNP_64910_A_219985 | NW_004515729.1 | scaffold167 | 219985                  | AA                              | GG                 | GG               | INTERGENIC      |               |                    |                    |
| SNP_64911_A_219992 | NW_004515729.1 | scaffold167 | 219992                  | AA                              | GG                 | GG               | INTERGENIC      |               |                    |                    |
| SNP_64912_A_220003 | NW_004515729.1 | scaffold167 | 220003                  | AA                              | GG                 | GG               | INTERGENIC      |               |                    |                    |
| SNP_64913_A_220059 | NW_004515729.1 | scaffold167 | 220059                  | CC                              | GG                 | GG               | INTERGENIC      |               |                    |                    |
| SNP_64914_A_220063 | NW_004515729.1 | scaffold167 | 220063                  | CC                              | TT                 | TT               | INTERGENIC      |               |                    |                    |
| SNP_64915_A_220072 | NW_004515729.1 | scaffold167 | 220072                  | TT                              | CC                 | CC               | INTERGENIC      |               |                    |                    |
| SNP_64916_A_220191 | NW_004515729.1 | scaffold167 | 220191                  | AA                              | GG                 | GG               | INTERGENIC      |               |                    |                    |
| SNP_64917_A_220229 | NW_004515729.1 | scaffold167 | 220229                  | AA                              | CC                 | CC               | INTERGENIC      |               |                    |                    |
| SNP_64918_A_220301 | NW_004515729.1 | scaffold167 | 220301                  | AA                              | CC                 | CC               | INTERGENIC      |               |                    |                    |
| SNP_64919_A_220303 | NW_004515729.1 | scaffold167 | 220303                  | GG                              | AA                 | AA               | INTERGENIC      |               |                    |                    |
| SNP_64920_A_220397 | NW_004515729.1 | scaffold167 | 220397                  | AA                              | GG                 | GG               | INTERGENIC      |               |                    |                    |
| SNP_64921_A_222734 | NW_004515729.1 | scaffold167 | 222734                  | AA                              | GG                 | GG               | INTERGENIC      |               |                    |                    |
| SNP_64922_A_295259 | NW_004515729.1 | scaffold167 | 295259                  | AA                              | GG                 | GG               | INTERGENIC      |               |                    |                    |
| SNP_64923_A_303081 | NW_004515729.1 | scaffold167 | 303081                  | TT                              | CC                 | CC               | INTERGENIC      |               |                    |                    |
| SNP_64924_A_303097 | NW_004515729.1 | scaffold167 | 303097                  | AA                              | GG                 | GG               | INTERGENIC      |               |                    |                    |
| SNP_64925_A_303098 | NW_004515729.1 | scaffold167 | 303098                  | CC                              | AA                 | AA               | INTERGENIC      |               |                    |                    |
| SNP_64926_A_303103 | NW_004515729.1 | scaffold167 | 303103                  | CC                              | TT                 | TT               | INTERGENIC      |               |                    |                    |

| SNPs IDs           | Chromosome IDs | Chromosomes | Physical positions (bp) | CDC Frontier (Reference genome) | (Pusa 1103 & HPNB) | (ILWC 46 & LPNB) | Sequence genome | Components of | Gene accession IDs | Putative functions |
|--------------------|----------------|-------------|-------------------------|---------------------------------|--------------------|------------------|-----------------|---------------|--------------------|--------------------|
| SNP_64927_A_303143 | NW_004515729.1 | scaffold167 | 303143                  | TT                              | CC                 | CC               | INTERGENIC      |               |                    |                    |
| SNP_64928_A_303181 | NW_004515729.1 | scaffold167 | 303181                  | CC                              | TT                 | TT               | INTERGENIC      |               |                    |                    |
| SNP_64929_A_303194 | NW_004515729.1 | scaffold167 | 303194                  | CC                              | TT                 | TT               | INTERGENIC      |               |                    |                    |
| SNP_64930_A_303222 | NW_004515729.1 | scaffold167 | 303222                  | GG                              | TT                 | TT               | INTERGENIC      |               |                    |                    |
| SNP_64931_A_303286 | NW_004515729.1 | scaffold167 | 303286                  | AA                              | GG                 | GG               | INTERGENIC      |               |                    |                    |
| SNP_64932_A_303429 | NW_004515729.1 | scaffold167 | 303429                  | GG                              | AA                 | AA               | INTERGENIC      |               |                    |                    |
| SNP_64933_A_303524 | NW_004515729.1 | scaffold167 | 303524                  | GG                              | TT                 | TT               | INTERGENIC      |               |                    |                    |
| SNP_64934_A_303534 | NW_004515729.1 | scaffold167 | 303534                  | AA                              | GG                 | GG               | INTERGENIC      |               |                    |                    |
| SNP_64935_A_303553 | NW_004515729.1 | scaffold167 | 303553                  | AA                              | GG                 | GG               | INTERGENIC      |               |                    |                    |
| SNP_64936_A_303898 | NW_004515729.1 | scaffold167 | 303898                  | TT                              | GG                 | GG               | INTERGENIC      |               |                    |                    |
| SNP_64937_A_303925 | NW_004515729.1 | scaffold167 | 303925                  | TT                              | GG                 | GG               | INTERGENIC      |               |                    |                    |
| SNP_64938_A_320806 | NW_004515729.1 | scaffold167 | 320806                  | AA                              | GG                 | GG               | INTERGENIC      |               |                    |                    |
| SNP_64939_A_320830 | NW_004515729.1 | scaffold167 | 320830                  | GG                              | AA                 | AA               | INTERGENIC      |               |                    |                    |
| SNP_64940_A_320872 | NW_004515729.1 | scaffold167 | 320872                  | AA                              | CC                 | CC               | INTERGENIC      |               |                    |                    |
| SNP_64941_A_320898 | NW_004515729.1 | scaffold167 | 320898                  | AA                              | CC                 | CC               | INTERGENIC      |               |                    |                    |
| SNP_64942_A_322726 | NW_004515729.1 | scaffold167 | 322726                  | AA                              | CC                 | CC               | INTERGENIC      |               |                    |                    |
| SNP_64943_A_322859 | NW_004515729.1 | scaffold167 | 322859                  | TT                              | AA                 | AA               | INTERGENIC      |               |                    |                    |
| SNP_64944_A_331993 | NW_004515729.1 | scaffold167 | 331993                  | CC                              | TT                 | TT               | INTERGENIC      |               |                    |                    |
| SNP_64945_A_332023 | NW_004515729.1 | scaffold167 | 332023                  | TT                              | CC                 | CC               | INTERGENIC      |               |                    |                    |
| SNP_64946_A_332305 | NW_004515729.1 | scaffold167 | 332305                  | GG                              | TT                 | TT               | INTERGENIC      |               |                    |                    |
| SNP_64947_A_332306 | NW_004515729.1 | scaffold167 | 332306                  | TT                              | AA                 | AA               | INTERGENIC      |               |                    |                    |
| SNP_64948_A_332321 | NW_004515729.1 | scaffold167 | 332321                  | AA                              | GG                 | GG               | INTERGENIC      |               |                    |                    |

| SNPs IDs           | Chromosome IDs | Chromosomes | Physical positions (bp) | CDC Frontier (Reference genome) | (Pusa 1103 & HPNB) | (ILWC 46 & LPNB) | Sequence genome | Components of | Gene accession IDs | Putative functions |
|--------------------|----------------|-------------|-------------------------|---------------------------------|--------------------|------------------|-----------------|---------------|--------------------|--------------------|
| SNP_64949_A_332358 | NW_004515729.1 | scaffold167 | 332358                  | GG                              | AA                 | AA               | INTERGENIC      |               |                    |                    |
| SNP_64952_A_403222 | NW_004515729.1 | scaffold167 | 403222                  | AA                              | CC                 | CC               | INTERGENIC      |               |                    |                    |
| SNP_64953_A_403224 | NW_004515729.1 | scaffold167 | 403224                  | TT                              | AA                 | AA               | INTERGENIC      |               |                    |                    |
| SNP_64954_A_447299 | NW_004515729.1 | scaffold167 | 447299                  | TT                              | CC                 | CC               | INTERGENIC      |               |                    |                    |
| SNP_64955_A_449656 | NW_004515729.1 | scaffold167 | 449656                  | CC                              | TT                 | TT               | INTERGENIC      |               |                    |                    |
| SNP_64956_A_467591 | NW_004515729.1 | scaffold167 | 467591                  | TT                              | CC                 | CC               | INTERGENIC      |               |                    |                    |
| SNP_64957_A_13307  | NW_004515730.1 | scaffold170 | 13307                   | CC                              | TT                 | TT               | INTERGENIC      |               |                    |                    |
| SNP_64958_A_13340  | NW_004515730.1 | scaffold170 | 13340                   | GG                              | AA                 | AA               | INTERGENIC      |               |                    |                    |
| SNP_64959_A_13454  | NW_004515730.1 | scaffold170 | 13454                   | GG                              | AA                 | AA               | INTERGENIC      |               |                    |                    |
| SNP_64960_A_13504  | NW_004515730.1 | scaffold170 | 13504                   | TT                              | CC                 | CC               | INTERGENIC      |               |                    |                    |
| SNP_64961_A_13656  | NW_004515730.1 | scaffold170 | 13656                   | AA                              | GG                 | GG               | INTERGENIC      |               |                    |                    |
| SNP_64962_A_13676  | NW_004515730.1 | scaffold170 | 13676                   | TT                              | CC                 | CC               | INTERGENIC      |               |                    |                    |
| SNP_64963_A_13739  | NW_004515730.1 | scaffold170 | 13739                   | TT                              | CC                 | CC               | INTERGENIC      |               |                    |                    |
| SNP_64964_A_8159   | NW_004515731.1 | scaffold171 | 8159                    | TT                              | CC                 | CC               | INTERGENIC      |               |                    |                    |
| SNP_64965_A_8175   | NW_004515731.1 | scaffold171 | 8175                    | AA                              | TT                 | TT               | INTERGENIC      |               |                    |                    |
| SNP_64966_A_12748  | NW_004515731.1 | scaffold171 | 12748                   | CC                              | GG                 | GG               | INTERGENIC      |               |                    |                    |
| SNP_64967_A_15298  | NW_004515731.1 | scaffold171 | 15298                   | AA                              | GG                 | GG               | INTERGENIC      |               |                    |                    |
| SNP_64968_A_15435  | NW_004515731.1 | scaffold171 | 15435                   | AA                              | GG                 | GG               | INTERGENIC      |               |                    |                    |
| SNP_64969_A_18135  | NW_004515731.1 | scaffold171 | 18135                   | TT                              | GG                 | GG               | INTERGENIC      |               |                    |                    |
| SNP_64970_A_19258  | NW_004515731.1 | scaffold171 | 19258                   | CC                              | AA                 | AA               | INTERGENIC      |               |                    |                    |
| SNP_64971_A_26486  | NW_004515731.1 | scaffold171 | 26486                   | AA                              | CC                 | CC               | INTERGENIC      |               |                    |                    |
| SNP_64972_A_26523  | NW_004515731.1 | scaffold171 | 26523                   | TT                              | GG                 | GG               | INTERGENIC      |               |                    |                    |

| SNPs IDs           | Chromosome IDs | Chromosomes | Physical positions (bp) | CDC Frontier (Reference genome) | (Pusa 1103 & HPNB) | (ILWC 46 & LPNB) | Sequence Components of genome | Gene accession IDs | Putative functions |
|--------------------|----------------|-------------|-------------------------|---------------------------------|--------------------|------------------|-------------------------------|--------------------|--------------------|
| SNP_64973_A_27040  | NW_004515731.1 | scaffold171 | 27040                   | TT                              | GG                 | GG               | INTERGENIC                    |                    |                    |
| SNP_64974_A_36906  | NW_004515731.1 | scaffold171 | 36906                   | AA                              | GG                 | GG               | INTERGENIC                    |                    |                    |
| SNP_64975_A_46054  | NW_004515731.1 | scaffold171 | 46054                   | AA                              | GG                 | GG               | INTERGENIC                    |                    |                    |
| SNP_64976_A_49100  | NW_004515731.1 | scaffold171 | 49100                   | TT                              | CC                 | CC               | INTERGENIC                    |                    |                    |
| SNP_64977_A_49404  | NW_004515731.1 | scaffold171 | 49404                   | GG                              | AA                 | AA               | INTERGENIC                    |                    |                    |
| SNP_64978_A_54486  | NW_004515731.1 | scaffold171 | 54486                   | CC                              | AA                 | AA               | INTERGENIC                    |                    |                    |
| SNP_64979_A_105663 | NW_004515731.1 | scaffold171 | 105663                  | TT                              | CC                 | CC               | INTERGENIC                    |                    |                    |
| SNP_64980_A_105700 | NW_004515731.1 | scaffold171 | 105700                  | CC                              | AA                 | AA               | INTERGENIC                    |                    |                    |
| SNP_64981_A_106890 | NW_004515731.1 | scaffold171 | 106890                  | CC                              | TT                 | TT               | INTERGENIC                    |                    |                    |
| SNP_64982_A_107094 | NW_004515731.1 | scaffold171 | 107094                  | AA                              | CC                 | CC               | INTERGENIC                    |                    |                    |
| SNP_64983_A_107215 | NW_004515731.1 | scaffold171 | 107215                  | CC                              | TT                 | TT               | INTERGENIC                    |                    |                    |
| SNP_64984_A_114451 | NW_004515731.1 | scaffold171 | 114451                  | TT                              | AA                 | AA               | INTERGENIC                    |                    |                    |
| SNP_64985_A_117095 | NW_004515731.1 | scaffold171 | 117095                  | CC                              | TT                 | TT               | NON_SYNONYMOUS_CODING         | id196814           | Unknown function   |
| SNP_64986_A_121627 | NW_004515731.1 | scaffold171 | 121627                  | TT                              | CC                 | CC               | INTERGENIC                    |                    |                    |
| SNP_64987_A_121851 | NW_004515731.1 | scaffold171 | 121851                  | GG                              | AA                 | AA               | INTERGENIC                    |                    |                    |
| SNP_64988_A_125640 | NW_004515731.1 | scaffold171 | 125640                  | CC                              | TT                 | TT               | INTERGENIC                    |                    |                    |
| SNP_64989_A_130088 | NW_004515731.1 | scaffold171 | 130088                  | GG                              | TT                 | TT               | INTERGENIC                    |                    |                    |
| SNP_64990_A_130103 | NW_004515731.1 | scaffold171 | 130103                  | GG                              | AA                 | AA               | INTERGENIC                    |                    |                    |
| SNP_64991_A_130107 | NW_004515731.1 | scaffold171 | 130107                  | AA                              | TT                 | TT               | INTERGENIC                    |                    |                    |
| SNP_64992_A_130118 | NW_004515731.1 | scaffold171 | 130118                  | TT                              | CC                 | CC               | INTERGENIC                    |                    |                    |
| SNP_64993_A_130161 | NW_004515731.1 | scaffold171 | 130161                  | AA                              | GG                 | GG               | INTERGENIC                    |                    |                    |
| SNP_64994_A_130231 | NW_004515731.1 | scaffold171 | 130231                  | TT                              | CC                 | CC               | INTERGENIC                    |                    |                    |

| SNPs IDs           | Chromosome IDs | Chromosomes | Physical positions (bp) | CDC Frontier genome (Reference genome) | (Pusa 1103 & HPNB) | (ILWC 46 & LPNB) | Sequence genome | Components of | Gene accession IDs           | Putative functions |
|--------------------|----------------|-------------|-------------------------|----------------------------------------|--------------------|------------------|-----------------|---------------|------------------------------|--------------------|
| SNP_64996_A_130458 | NW_004515731.1 | scaffold171 | 130458                  | CC                                     | GG                 | GG               | INTERGENIC      |               |                              |                    |
| SNP_64997_A_133222 | NW_004515731.1 | scaffold171 | 133222                  | AA                                     | CC                 | CC               | INTERGENIC      |               |                              |                    |
| SNP_64998_A_135849 | NW_004515731.1 | scaffold171 | 135849                  | TT                                     | CC                 | CC               | INTERGENIC      |               |                              |                    |
| SNP_64999_A_136051 | NW_004515731.1 | scaffold171 | 136051                  | GG                                     | AA                 | AA               | INTERGENIC      |               |                              |                    |
| SNP_65001_A_151083 | NW_004515731.1 | scaffold171 | 151083                  | CC                                     | AA                 | AA               | INTERGENIC      |               |                              |                    |
| SNP_65002_A_159656 | NW_004515731.1 | scaffold171 | 159656                  | CC                                     | AA                 | AA               | INTERGENIC      |               |                              |                    |
| SNP_65003_A_166530 | NW_004515731.1 | scaffold171 | 166530                  | CC                                     | GG                 | GG               | INTERGENIC      |               |                              |                    |
| SNP_65004_A_176083 | NW_004515731.1 | scaffold171 | 176083                  | AA                                     | GG                 | GG               | INTERGENIC      |               |                              |                    |
| SNP_65006_A_182602 | NW_004515731.1 | scaffold171 | 182602                  | TT                                     | AA                 | AA               | INTERGENIC      |               |                              |                    |
| SNP_65008_A_184539 | NW_004515731.1 | scaffold171 | 184539                  | GG                                     | CC                 | CC               | INTERGENIC      |               |                              |                    |
| SNP_65009_A_190168 | NW_004515731.1 | scaffold171 | 190168                  | CC                                     | AA                 | AA               | INTERGENIC      |               |                              |                    |
| SNP_65011_A_190809 | NW_004515731.1 | scaffold171 | 190809                  | CC                                     | TT                 | TT               | INTERGENIC      |               |                              |                    |
| SNP_65012_A_192974 | NW_004515731.1 | scaffold171 | 192974                  | AA                                     | CC                 | CC               | INTERGENIC      |               |                              |                    |
| SNP_65013_A_201664 | NW_004515731.1 | scaffold171 | 201664                  | TT                                     | CC                 | CC               | INTERGENIC      |               |                              |                    |
| SNP_65014_A_201665 | NW_004515731.1 | scaffold171 | 201665                  | TT                                     | CC                 | CC               | INTERGENIC      |               |                              |                    |
| SNP_65015_A_201698 | NW_004515731.1 | scaffold171 | 201698                  | CC                                     | TT                 | TT               | INTERGENIC      |               |                              |                    |
| SNP_65016_A_218810 | NW_004515731.1 | scaffold171 | 218810                  | CC                                     | AA                 | AA               | URR             | 101510345     | uncharacterized LOC101510345 |                    |
| SNP_65017_A_220994 | NW_004515731.1 | scaffold171 | 220994                  | CC                                     | AA                 | AA               | INTERGENIC      |               |                              |                    |
| SNP_65018_A_223744 | NW_004515731.1 | scaffold171 | 223744                  | TT                                     | CC                 | CC               | INTERGENIC      |               |                              |                    |
| SNP_65020_A_225545 | NW_004515731.1 | scaffold171 | 225545                  | AA                                     | GG                 | GG               | INTERGENIC      |               |                              |                    |
| SNP_65021_A_225896 | NW_004515731.1 | scaffold171 | 225896                  | CC                                     | TT                 | TT               | INTERGENIC      |               |                              |                    |
| SNP_65022_A_227493 | NW_004515731.1 | scaffold171 | 227493                  | TT                                     | CC                 | CC               | INTERGENIC      |               |                              |                    |

| SNPs IDs           | Chromosome IDs | Chromosomes | Physical positions (bp) | CDC Frontier (Reference genome) | (Pusa 1103 & HPNB) | (ILWC 46 & LPNB) | Sequence Components of genome | Gene accession IDs | Putative functions                                      |
|--------------------|----------------|-------------|-------------------------|---------------------------------|--------------------|------------------|-------------------------------|--------------------|---------------------------------------------------------|
| SNP_65023_A_227618 | NW_004515731.1 | scaffold171 | 227618                  | CC                              | TT                 | TT               | INTERGENIC                    |                    |                                                         |
| SNP_65024_A_228567 | NW_004515731.1 | scaffold171 | 228567                  | GG                              | TT                 | TT               | INTERGENIC                    |                    |                                                         |
| SNP_65025_A_1850   | NW_004515733.1 | scaffold174 | 1850                    | TT                              | GG                 | GG               | INTERGENIC                    |                    |                                                         |
| SNP_65026_A_5210   | NW_004515733.1 | scaffold174 | 5210                    | CC                              | AA                 | AA               | INTERGENIC                    |                    |                                                         |
| SNP_65027_A_11220  | NW_004515733.1 | scaffold174 | 11220                   | CC                              | TT                 | TT               | INTERGENIC                    |                    |                                                         |
| SNP_65028_A_14918  | NW_004515733.1 | scaffold174 | 14918                   | GG                              | TT                 | TT               | INTERGENIC                    |                    |                                                         |
| SNP_65029_A_15006  | NW_004515733.1 | scaffold174 | 15006                   | AA                              | GG                 | GG               | INTERGENIC                    |                    |                                                         |
| SNP_65030_A_15154  | NW_004515733.1 | scaffold174 | 15154                   | AA                              | GG                 | GG               | INTERGENIC                    |                    |                                                         |
| SNP_65032_A_48279  | NW_004515733.1 | scaffold174 | 48279                   | AA                              | GG                 | GG               | INTRON                        | 101511520          | chaperone protein dnaJ 6-like                           |
| SNP_65033_A_51483  | NW_004515733.1 | scaffold174 | 51483                   | TT                              | AA                 | AA               | INTRON                        | 101511520          | chaperone protein dnaJ 6-like                           |
| SNP_65034_A_68115  | NW_004515733.1 | scaffold174 | 68115                   | TT                              | CC                 | CC               | INTERGENIC                    |                    |                                                         |
| SNP_65035_A_70382  | NW_004515733.1 | scaffold174 | 70382                   | AA                              | GG                 | GG               | INTERGENIC                    |                    |                                                         |
| SNP_65036_A_80475  | NW_004515733.1 | scaffold174 | 80475                   | TT                              | CC                 | CC               | INTRON                        | 101513245          | carboxyl-terminal-processing peptidase 3, chloroplastic |
| SNP_65038_A_85280  | NW_004515733.1 | scaffold174 | 85280                   | CC                              | TT                 | TT               | URR                           | 101513245          | carboxyl-terminal-processing peptidase 3, chloroplastic |
| SNP_65039_A_88383  | NW_004515733.1 | scaffold174 | 88383                   | GG                              | AA                 | AA               | INTERGENIC                    |                    |                                                         |
| SNP_65040_A_89898  | NW_004515733.1 | scaffold174 | 89898                   | TT                              | CC                 | CC               | INTERGENIC                    |                    |                                                         |
| SNP_65041_A_89899  | NW_004515733.1 | scaffold174 | 89899                   | AA                              | GG                 | GG               | INTERGENIC                    |                    |                                                         |
| SNP_65042_A_89909  | NW_004515733.1 | scaffold174 | 89909                   | GG                              | AA                 | AA               | INTERGENIC                    |                    |                                                         |
| SNP_65043_A_89934  | NW_004515733.1 | scaffold174 | 89934                   | CC                              | TT                 | TT               | INTERGENIC                    |                    |                                                         |
| SNP_65044_A_89945  | NW_004515733.1 | scaffold174 | 89945                   | TT                              | AA                 | AA               | INTERGENIC                    |                    |                                                         |
| SNP_65046_A_89997  | NW_004515733.1 | scaffold174 | 89997                   | GG                              | TT                 | TT               | INTERGENIC                    |                    |                                                         |
| SNP_65047_A_90051  | NW_004515733.1 | scaffold174 | 90051                   | AA                              | GG                 | GG               | INTERGENIC                    |                    |                                                         |



| SNPs IDs           | Chromosome IDs | Chromosomes | Physical positions (bp) | CDC Frontier (Reference genome) | (Pusa 1103 & HPNB) | (ILWC 46 & LPNB) | Sequence Components of genome | Gene accession IDs | Putative functions            |
|--------------------|----------------|-------------|-------------------------|---------------------------------|--------------------|------------------|-------------------------------|--------------------|-------------------------------|
| SNP_65048_A_90107  | NW_004515733.1 | scaffold174 | 90107                   | AA                              | TT                 | TT               | INTERGENIC                    |                    |                               |
| SNP_65049_A_90169  | NW_004515733.1 | scaffold174 | 90169                   | TT                              | AA                 | AA               | INTERGENIC                    |                    |                               |
| SNP_65050_A_90187  | NW_004515733.1 | scaffold174 | 90187                   | AA                              | TT                 | TT               | INTERGENIC                    |                    |                               |
| SNP_65051_A_90416  | NW_004515733.1 | scaffold174 | 90416                   | AA                              | GG                 | GG               | INTERGENIC                    |                    |                               |
| SNP_65052_A_90478  | NW_004515733.1 | scaffold174 | 90478                   | TT                              | AA                 | AA               | INTERGENIC                    |                    |                               |
| SNP_65053_A_90531  | NW_004515733.1 | scaffold174 | 90531                   | TT                              | CC                 | CC               | INTERGENIC                    |                    |                               |
| SNP_65056_A_131295 | NW_004515733.1 | scaffold174 | 131295                  | AA                              | CC                 | CC               | INTERGENIC                    |                    |                               |
| SNP_65057_A_134479 | NW_004515733.1 | scaffold174 | 134479                  | CC                              | GG                 | GG               | DRR                           | 101488506          | uncharacterized LOC101488506  |
| SNP_65060_A_142723 | NW_004515733.1 | scaffold174 | 142723                  | CC                              | TT                 | TT               | URR                           | 101488506          | uncharacterized LOC101488506  |
| SNP_65061_A_151961 | NW_004515733.1 | scaffold174 | 151961                  | CC                              | AA                 | AA               | INTERGENIC                    |                    |                               |
| SNP_65062_A_153646 | NW_004515733.1 | scaffold174 | 153646                  | TT                              | CC                 | CC               | INTERGENIC                    |                    |                               |
| SNP_65064_A_167147 | NW_004515733.1 | scaffold174 | 167147                  | GG                              | TT                 | TT               | INTERGENIC                    |                    |                               |
| SNP_65066_A_179646 | NW_004515733.1 | scaffold174 | 179646                  | GG                              | TT                 | TT               | INTERGENIC                    |                    |                               |
| SNP_65067_A_180894 | NW_004515733.1 | scaffold174 | 180894                  | AA                              | GG                 | GG               | INTERGENIC                    |                    |                               |
| SNP_65068_A_185187 | NW_004515733.1 | scaffold174 | 185187                  | GG                              | AA                 | AA               | INTERGENIC                    |                    |                               |
| SNP_65069_A_185544 | NW_004515733.1 | scaffold174 | 185544                  | CC                              | TT                 | TT               | INTERGENIC                    |                    |                               |
| SNP_65070_A_186959 | NW_004515733.1 | scaffold174 | 186959                  | AA                              | GG                 | GG               | INTERGENIC                    |                    |                               |
| SNP_65071_A_191316 | NW_004515733.1 | scaffold174 | 191316                  | AA                              | GG                 | GG               | INTRON                        | 101513884          | zinc finger protein WIP2-like |
| SNP_65072_A_191349 | NW_004515733.1 | scaffold174 | 191349                  | CC                              | TT                 | TT               | INTRON                        | 101513884          | zinc finger protein WIP2-like |
| SNP_65073_A_191359 | NW_004515733.1 | scaffold174 | 191359                  | CC                              | GG                 | GG               | INTRON                        | 101513884          | zinc finger protein WIP2-like |
| SNP_65074_A_191401 | NW_004515733.1 | scaffold174 | 191401                  | TT                              | AA                 | AA               | INTRON                        | 101513884          | zinc finger protein WIP2-like |
| SNP_65075_A_191452 | NW_004515733.1 | scaffold174 | 191452                  | AA                              | GG                 | GG               | INTRON                        | 101513884          | zinc finger protein WIP2-like |

| SNPs IDs           | Chromosome IDs | Chromosomes | Physical positions (bp) | CDC Frontier (Reference genome) | (Pusa 1103 & HPNB) | (ILWC 46 & LPNB) | Sequence Components of genome | Gene accession IDs | Putative functions            |
|--------------------|----------------|-------------|-------------------------|---------------------------------|--------------------|------------------|-------------------------------|--------------------|-------------------------------|
| SNP_65076_A_192235 | NW_004515733.1 | scaffold174 | 192235                  | AA                              | GG                 | GG               | URR                           | 101513884          | zinc finger protein WIP2-like |
| SNP_65078_A_193193 | NW_004515733.1 | scaffold174 | 193193                  | TT                              | CC                 | CC               | URR                           | 101513884          | zinc finger protein WIP2-like |
| SNP_65079_A_193194 | NW_004515733.1 | scaffold174 | 193194                  | CC                              | AA                 | AA               | URR                           | 101513884          | zinc finger protein WIP2-like |
| SNP_65080_A_195676 | NW_004515733.1 | scaffold174 | 195676                  | AA                              | GG                 | GG               | INTERGENIC                    |                    |                               |
| SNP_65081_A_198560 | NW_004515733.1 | scaffold174 | 198560                  | TT                              | GG                 | GG               | INTERGENIC                    |                    |                               |
| SNP_65082_A_201018 | NW_004515733.1 | scaffold174 | 201018                  | AA                              | TT                 | TT               | INTERGENIC                    |                    |                               |
| SNP_65083_A_202063 | NW_004515733.1 | scaffold174 | 202063                  | GG                              | CC                 | CC               | INTERGENIC                    |                    |                               |
| SNP_65084_A_205743 | NW_004515733.1 | scaffold174 | 205743                  | TT                              | CC                 | CC               | INTERGENIC                    |                    |                               |
| SNP_65086_A_208366 | NW_004515733.1 | scaffold174 | 208366                  | TT                              | AA                 | AA               | INTERGENIC                    |                    |                               |
| SNP_65087_A_208506 | NW_004515733.1 | scaffold174 | 208506                  | AA                              | GG                 | GG               | INTERGENIC                    |                    |                               |
| SNP_65088_A_208766 | NW_004515733.1 | scaffold174 | 208766                  | TT                              | GG                 | GG               | INTERGENIC                    |                    |                               |
| SNP_65089_A_208809 | NW_004515733.1 | scaffold174 | 208809                  | GG                              | AA                 | AA               | INTERGENIC                    |                    |                               |
| SNP_65090_A_221448 | NW_004515733.1 | scaffold174 | 221448                  | TT                              | AA                 | AA               | INTERGENIC                    |                    |                               |
| SNP_65091_A_223804 | NW_004515733.1 | scaffold174 | 223804                  | CC                              | TT                 | TT               | INTERGENIC                    |                    |                               |
| SNP_65092_A_224802 | NW_004515733.1 | scaffold174 | 224802                  | AA                              | GG                 | GG               | INTERGENIC                    |                    |                               |
| SNP_65094_A_230699 | NW_004515733.1 | scaffold174 | 230699                  | TT                              | GG                 | GG               | INTERGENIC                    |                    |                               |
| SNP_65095_A_230725 | NW_004515733.1 | scaffold174 | 230725                  | AA                              | GG                 | GG               | INTERGENIC                    |                    |                               |
| SNP_65096_A_233279 | NW_004515733.1 | scaffold174 | 233279                  | CC                              | TT                 | TT               | INTERGENIC                    |                    |                               |
| SNP_65097_A_233282 | NW_004515733.1 | scaffold174 | 233282                  | AA                              | CC                 | CC               | INTERGENIC                    |                    |                               |
| SNP_65098_A_233283 | NW_004515733.1 | scaffold174 | 233283                  | AA                              | CC                 | CC               | INTERGENIC                    |                    |                               |
| SNP_65099_A_236160 | NW_004515733.1 | scaffold174 | 236160                  | AA                              | GG                 | GG               | INTERGENIC                    |                    |                               |
| SNP_65100_A_258876 | NW_004515733.1 | scaffold174 | 258876                  | TT                              | CC                 | CC               | INTERGENIC                    |                    |                               |

| SNPs IDs           | Chromosome IDs | Chromosomes | Physical positions (bp) | CDC Frontier (Reference genome) | (Pusa 1103 & HPNB) | (ILWC 46 & LPNB) | Sequence Components of genome | Gene accession IDs | Putative functions                              |
|--------------------|----------------|-------------|-------------------------|---------------------------------|--------------------|------------------|-------------------------------|--------------------|-------------------------------------------------|
| SNP_65101_A_259065 | NW_004515733.1 | scaffold174 | 259065                  | AA                              | GG                 | GG               | INTERGENIC                    |                    |                                                 |
| SNP_65102_A_259289 | NW_004515733.1 | scaffold174 | 259289                  | TT                              | GG                 | GG               | INTERGENIC                    |                    |                                                 |
| SNP_65103_A_259313 | NW_004515733.1 | scaffold174 | 259313                  | GG                              | TT                 | TT               | INTERGENIC                    |                    |                                                 |
| SNP_65104_A_259359 | NW_004515733.1 | scaffold174 | 259359                  | CC                              | GG                 | GG               | INTERGENIC                    |                    |                                                 |
| SNP_65105_A_262589 | NW_004515733.1 | scaffold174 | 262589                  | CC                              | TT                 | TT               | DRR                           | 101488843          | DNA-directed RNA polymerase I subunit rpa1-like |
| SNP_65106_A_270025 | NW_004515733.1 | scaffold174 | 270025                  | GG                              | AA                 | AA               | INTRON                        | 101488843          | DNA-directed RNA polymerase I subunit rpa1-like |
| SNP_65107_A_279258 | NW_004515733.1 | scaffold174 | 279258                  | TT                              | CC                 | CC               | INTERGENIC                    |                    |                                                 |
| SNP_65109_A_279970 | NW_004515733.1 | scaffold174 | 279970                  | CC                              | TT                 | TT               | INTERGENIC                    |                    |                                                 |
| SNP_65110_A_281357 | NW_004515733.1 | scaffold174 | 281357                  | AA                              | GG                 | GG               | INTERGENIC                    |                    |                                                 |
| SNP_65111_A_298619 | NW_004515733.1 | scaffold174 | 298619                  | CC                              | TT                 | TT               | INTERGENIC                    |                    |                                                 |
| SNP_65112_A_298628 | NW_004515733.1 | scaffold174 | 298628                  | AA                              | GG                 | GG               | INTERGENIC                    |                    |                                                 |
| SNP_65113_A_303938 | NW_004515733.1 | scaffold174 | 303938                  | GG                              | TT                 | TT               | INTERGENIC                    |                    |                                                 |
| SNP_65114_A_307072 | NW_004515733.1 | scaffold174 | 307072                  | GG                              | TT                 | TT               | INTERGENIC                    |                    |                                                 |
| SNP_65115_A_307352 | NW_004515733.1 | scaffold174 | 307352                  | TT                              | CC                 | CC               | INTERGENIC                    |                    |                                                 |
| SNP_65116_A_307501 | NW_004515733.1 | scaffold174 | 307501                  | GG                              | AA                 | AA               | INTERGENIC                    |                    |                                                 |
| SNP_65117_A_326480 | NW_004515733.1 | scaffold174 | 326480                  | CC                              | GG                 | GG               | INTERGENIC                    |                    |                                                 |
| SNP_65118_A_327084 | NW_004515733.1 | scaffold174 | 327084                  | TT                              | GG                 | GG               | INTERGENIC                    |                    |                                                 |
| SNP_65120_A_330356 | NW_004515733.1 | scaffold174 | 330356                  | GG                              | AA                 | AA               | INTERGENIC                    |                    |                                                 |
| SNP_65122_A_351737 | NW_004515733.1 | scaffold174 | 351737                  | TT                              | GG                 | GG               | INTERGENIC                    |                    |                                                 |
| SNP_65123_A_352099 | NW_004515733.1 | scaffold174 | 352099                  | TT                              | CC                 | CC               | INTERGENIC                    |                    |                                                 |
| SNP_65124_A_352583 | NW_004515733.1 | scaffold174 | 352583                  | TT                              | CC                 | CC               | INTERGENIC                    |                    |                                                 |
| SNP_65125_A_352584 | NW_004515733.1 | scaffold174 | 352584                  | AA                              | GG                 | GG               | INTERGENIC                    |                    |                                                 |

| SNPs IDs           | Chromosome IDs | Chromosomes | Physical positions (bp) | CDC Frontier (Reference genome) | (Pusa 1103 & HPNB) | (ILWC 46 & LPNB) | Sequence genome | Components of | Gene accession IDs                                    | Putative functions |
|--------------------|----------------|-------------|-------------------------|---------------------------------|--------------------|------------------|-----------------|---------------|-------------------------------------------------------|--------------------|
| SNP_65126_A_352779 | NW_004515733.1 | scaffold174 | 352779                  | AA                              | CC                 | CC               | INTERGENIC      |               |                                                       |                    |
| SNP_65127_A_352830 | NW_004515733.1 | scaffold174 | 352830                  | AA                              | GG                 | GG               | INTERGENIC      |               |                                                       |                    |
| SNP_65129_A_359922 | NW_004515733.1 | scaffold174 | 359922                  | AA                              | TT                 | TT               | INTERGENIC      |               |                                                       |                    |
| SNP_65130_A_369731 | NW_004515733.1 | scaffold174 | 369731                  | AA                              | TT                 | TT               | INTERGENIC      |               |                                                       |                    |
| SNP_65131_A_369988 | NW_004515733.1 | scaffold174 | 369988                  | GG                              | AA                 | AA               | INTERGENIC      |               |                                                       |                    |
| SNP_65132_A_371481 | NW_004515733.1 | scaffold174 | 371481                  | GG                              | TT                 | TT               | INTERGENIC      |               |                                                       |                    |
| SNP_65133_A_373421 | NW_004515733.1 | scaffold174 | 373421                  | GG                              | TT                 | TT               | INTERGENIC      |               |                                                       |                    |
| SNP_65135_A_373756 | NW_004515733.1 | scaffold174 | 373756                  | GG                              | AA                 | AA               | INTERGENIC      |               |                                                       |                    |
| SNP_65136_A_374254 | NW_004515733.1 | scaffold174 | 374254                  | GG                              | CC                 | CC               | INTERGENIC      |               |                                                       |                    |
| SNP_65138_A_380612 | NW_004515733.1 | scaffold174 | 380612                  | TT                              | CC                 | CC               | INTERGENIC      |               |                                                       |                    |
| SNP_65139_A_381363 | NW_004515733.1 | scaffold174 | 381363                  | AA                              | GG                 | GG               | INTERGENIC      |               |                                                       |                    |
| SNP_65140_A_381807 | NW_004515733.1 | scaffold174 | 381807                  | GG                              | AA                 | AA               | INTERGENIC      |               |                                                       |                    |
| SNP_65141_A_383268 | NW_004515733.1 | scaffold174 | 383268                  | CC                              | AA                 | AA               | INTERGENIC      |               |                                                       |                    |
| SNP_65142_A_384251 | NW_004515733.1 | scaffold174 | 384251                  | AA                              | GG                 | GG               | DRR             | 101514758     | 1-acyl-sn-glycerol-3-phosphate acyltransferase 2-like |                    |
| SNP_65143_A_384771 | NW_004515733.1 | scaffold174 | 384771                  | AA                              | GG                 | GG               | DRR             | 101514758     | 1-acyl-sn-glycerol-3-phosphate acyltransferase 2-like |                    |
| SNP_65144_A_386761 | NW_004515733.1 | scaffold174 | 386761                  | GG                              | TT                 | TT               | INTRON          | 101514758     | 1-acyl-sn-glycerol-3-phosphate acyltransferase 2-like |                    |
| SNP_65145_A_409295 | NW_004515733.1 | scaffold174 | 409295                  | CC                              | TT                 | TT               | INTERGENIC      |               |                                                       |                    |
| SNP_65146_A_422780 | NW_004515733.1 | scaffold174 | 422780                  | CC                              | TT                 | TT               | INTERGENIC      |               |                                                       |                    |
| SNP_65147_A_422828 | NW_004515733.1 | scaffold174 | 422828                  | TT                              | AA                 | AA               | INTERGENIC      |               |                                                       |                    |
| SNP_65148_A_423903 | NW_004515733.1 | scaffold174 | 423903                  | TT                              | CC                 | CC               | INTERGENIC      |               |                                                       |                    |
| SNP_65149_A_427616 | NW_004515733.1 | scaffold174 | 427616                  | CC                              | TT                 | TT               | INTERGENIC      |               |                                                       |                    |
| SNP_65150_A_429826 | NW_004515733.1 | scaffold174 | 429826                  | GG                              | AA                 | AA               | INTERGENIC      |               |                                                       |                    |

| SNPs IDs           | Chromosome IDs | Chromosomes | Physical positions (bp) | CDC Frontier (Reference genome) | (Pusa 1103 & HPNB) | (ILWC 46 & LPNB) | Sequence Components of genome | Gene accession IDs | Putative functions                      |
|--------------------|----------------|-------------|-------------------------|---------------------------------|--------------------|------------------|-------------------------------|--------------------|-----------------------------------------|
| SNP_65151_A_456834 | NW_004515733.1 | scaffold174 | 456834                  | AA                              | CC                 | CC               | INTRON                        | 101515084          | probable helicase MAGATAMA 3            |
| SNP_65152_A_462730 | NW_004515733.1 | scaffold174 | 462730                  | CC                              | TT                 | TT               | URR                           | 101515084          | probable helicase MAGATAMA 3            |
| SNP_65153_A_468389 | NW_004515733.1 | scaffold174 | 468389                  | AA                              | GG                 | GG               | INTERGENIC                    |                    |                                         |
| SNP_65154_A_470283 | NW_004515733.1 | scaffold174 | 470283                  | GG                              | AA                 | AA               | URR                           | 101410558          | transfer RNA methionine (anticodon CAU) |
| SNP_65155_A_470380 | NW_004515733.1 | scaffold174 | 470380                  | CC                              | TT                 | TT               | URR                           | 101410558          | transfer RNA methionine (anticodon CAU) |
| SNP_65156_A_470510 | NW_004515733.1 | scaffold174 | 470510                  | AA                              | GG                 | GG               | URR                           | 101410558          | transfer RNA methionine (anticodon CAU) |
| SNP_65157_A_470520 | NW_004515733.1 | scaffold174 | 470520                  | GG                              | TT                 | TT               | URR                           | 101410558          | transfer RNA methionine (anticodon CAU) |
| SNP_65158_A_470528 | NW_004515733.1 | scaffold174 | 470528                  | AA                              | TT                 | TT               | URR                           | 101410558          | transfer RNA methionine (anticodon CAU) |
| SNP_65159_A_470534 | NW_004515733.1 | scaffold174 | 470534                  | CC                              | AA                 | AA               | URR                           | 101410558          | transfer RNA methionine (anticodon CAU) |
| SNP_65160_A_470558 | NW_004515733.1 | scaffold174 | 470558                  | GG                              | AA                 | AA               | URR                           | 101410558          | transfer RNA methionine (anticodon CAU) |
| SNP_65161_A_470587 | NW_004515733.1 | scaffold174 | 470587                  | AA                              | GG                 | GG               | URR                           | 101410558          | transfer RNA methionine (anticodon CAU) |
| SNP_65162_A_470666 | NW_004515733.1 | scaffold174 | 470666                  | GG                              | AA                 | AA               | URR                           | 101410558          | transfer RNA methionine (anticodon CAU) |
| SNP_65164_A_470693 | NW_004515733.1 | scaffold174 | 470693                  | GG                              | AA                 | AA               | URR                           | 101410558          | transfer RNA methionine (anticodon CAU) |
| SNP_65165_A_470971 | NW_004515733.1 | scaffold174 | 470971                  | GG                              | CC                 | CC               | URR                           | 101410558          | transfer RNA methionine (anticodon CAU) |
| SNP_65167_A_479486 | NW_004515733.1 | scaffold174 | 479486                  | GG                              | TT                 | TT               | INTERGENIC                    |                    |                                         |
| SNP_65168_A_479714 | NW_004515733.1 | scaffold174 | 479714                  | TT                              | GG                 | GG               | INTERGENIC                    |                    |                                         |
| SNP_65169_A_479730 | NW_004515733.1 | scaffold174 | 479730                  | GG                              | TT                 | TT               | INTERGENIC                    |                    |                                         |
| SNP_65170_A_479760 | NW_004515733.1 | scaffold174 | 479760                  | AA                              | CC                 | CC               | INTERGENIC                    |                    |                                         |
| SNP_65171_A_479837 | NW_004515733.1 | scaffold174 | 479837                  | GG                              | AA                 | AA               | INTERGENIC                    |                    |                                         |
| SNP_65172_A_481947 | NW_004515733.1 | scaffold174 | 481947                  | AA                              | GG                 | GG               | INTERGENIC                    |                    |                                         |
| SNP_65173_A_486895 | NW_004515733.1 | scaffold174 | 486895                  | AA                              | TT                 | TT               | INTERGENIC                    |                    |                                         |
| SNP_65174_A_487851 | NW_004515733.1 | scaffold174 | 487851                  | TT                              | CC                 | CC               | INTERGENIC                    |                    |                                         |

| SNPs IDs           | Chromosome IDs | Chromosomes | Physical positions (bp) | CDC Frontier (Reference genome) | (Pusa 1103 & HPNB) | (ILWC 46 & LPNB) | Sequence Components of genome | Gene accession IDs | Putative functions            |
|--------------------|----------------|-------------|-------------------------|---------------------------------|--------------------|------------------|-------------------------------|--------------------|-------------------------------|
| SNP_65175_A_490388 | NW_004515733.1 | scaffold174 | 490388                  | TT                              | CC                 | CC               | INTERGENIC                    |                    |                               |
| SNP_65177_A_493978 | NW_004515733.1 | scaffold174 | 493978                  | GG                              | AA                 | AA               | INTERGENIC                    |                    |                               |
| SNP_65178_A_495298 | NW_004515733.1 | scaffold174 | 495298                  | GG                              | TT                 | TT               | INTERGENIC                    |                    |                               |
| SNP_65180_A_34697  | NW_004515735.1 | scaffold181 | 34697                   | AA                              | GG                 | GG               | INTRON                        | 101491007          | carboxylesterase 1-like       |
| SNP_65181_A_75749  | NW_004515735.1 | scaffold181 | 75749                   | CC                              | AA                 | AA               | INTERGENIC                    |                    |                               |
| SNP_65182_A_83283  | NW_004515735.1 | scaffold181 | 83283                   | AA                              | CC                 | CC               | INTERGENIC                    |                    |                               |
| SNP_65183_A_94294  | NW_004515735.1 | scaffold181 | 94294                   | GG                              | TT                 | TT               | INTERGENIC                    |                    |                               |
| SNP_65184_A_94330  | NW_004515735.1 | scaffold181 | 94330                   | AA                              | GG                 | GG               | INTERGENIC                    |                    |                               |
| SNP_65185_A_94337  | NW_004515735.1 | scaffold181 | 94337                   | AA                              | CC                 | CC               | INTERGENIC                    |                    |                               |
| SNP_65186_A_122044 | NW_004515735.1 | scaffold181 | 122044                  | TT                              | CC                 | CC               | INTERGENIC                    |                    |                               |
| SNP_65187_A_126815 | NW_004515735.1 | scaffold181 | 126815                  | TT                              | AA                 | AA               | INTERGENIC                    |                    |                               |
| SNP_65188_A_136934 | NW_004515735.1 | scaffold181 | 136934                  | AA                              | GG                 | GG               | INTERGENIC                    |                    |                               |
| SNP_65189_A_165039 | NW_004515735.1 | scaffold181 | 165039                  | GG                              | AA                 | AA               | INTERGENIC                    |                    |                               |
| SNP_65190_A_198610 | NW_004515735.1 | scaffold181 | 198610                  | CC                              | TT                 | TT               | INTERGENIC                    |                    |                               |
| SNP_65191_A_203774 | NW_004515735.1 | scaffold181 | 203774                  | AA                              | GG                 | GG               | INTERGENIC                    |                    |                               |
| SNP_65192_A_25689  | NW_004515738.1 | scaffold186 | 25689                   | AA                              | GG                 | GG               | URR                           | 101493067          | TMV resistance protein N-like |
| SNP_65193_A_25726  | NW_004515738.1 | scaffold186 | 25726                   | AA                              | TT                 | TT               | URR                           | 101493067          | TMV resistance protein N-like |
| SNP_65194_A_65058  | NW_004515738.1 | scaffold186 | 65058                   | TT                              | CC                 | CC               | INTERGENIC                    |                    |                               |
| SNP_65195_A_79299  | NW_004515738.1 | scaffold186 | 79299                   | AA                              | CC                 | CC               | INTERGENIC                    |                    |                               |
| SNP_65196_A_79326  | NW_004515738.1 | scaffold186 | 79326                   | GG                              | AA                 | AA               | INTERGENIC                    |                    |                               |
| SNP_65197_A_79332  | NW_004515738.1 | scaffold186 | 79332                   | GG                              | AA                 | AA               | INTERGENIC                    |                    |                               |
| SNP_65198_A_108060 | NW_004515738.1 | scaffold186 | 108060                  | TT                              | CC                 | CC               | INTERGENIC                    |                    |                               |

| SNPs IDs           | Chromosome IDs | Chromosomes | Physical positions (bp) | CDC Frontier (Reference genome) | (Pusa 1103 & HPNB) | (ILWC 46 & LPNB) | Sequence genome | Components of | Gene accession IDs | Putative functions |
|--------------------|----------------|-------------|-------------------------|---------------------------------|--------------------|------------------|-----------------|---------------|--------------------|--------------------|
| SNP_65199_A_112117 | NW_004515738.1 | scaffold186 | 112117                  | GG                              | AA                 | AA               | INTERGENIC      |               |                    |                    |
| SNP_65200_A_112341 | NW_004515738.1 | scaffold186 | 112341                  | CC                              | TT                 | TT               | INTERGENIC      |               |                    |                    |
| SNP_65201_A_122192 | NW_004515738.1 | scaffold186 | 122192                  | CC                              | TT                 | TT               | INTERGENIC      |               |                    |                    |
| SNP_65202_A_124727 | NW_004515738.1 | scaffold186 | 124727                  | CC                              | TT                 | TT               | INTERGENIC      |               |                    |                    |
| SNP_65203_A_125093 | NW_004515738.1 | scaffold186 | 125093                  | CC                              | TT                 | TT               | INTERGENIC      |               |                    |                    |
| SNP_65204_A_125184 | NW_004515738.1 | scaffold186 | 125184                  | AA                              | GG                 | GG               | INTERGENIC      |               |                    |                    |
| SNP_65205_A_151599 | NW_004515738.1 | scaffold186 | 151599                  | AA                              | TT                 | TT               | INTERGENIC      |               |                    |                    |
| SNP_65206_A_151641 | NW_004515738.1 | scaffold186 | 151641                  | AA                              | GG                 | GG               | INTERGENIC      |               |                    |                    |
| SNP_65207_A_157872 | NW_004515738.1 | scaffold186 | 157872                  | AA                              | GG                 | GG               | INTERGENIC      |               |                    |                    |
| SNP_65208_A_176380 | NW_004515738.1 | scaffold186 | 176380                  | TT                              | GG                 | GG               | INTERGENIC      |               |                    |                    |
| SNP_65209_A_176412 | NW_004515738.1 | scaffold186 | 176412                  | TT                              | CC                 | CC               | INTERGENIC      |               |                    |                    |
| SNP_65210_A_176708 | NW_004515738.1 | scaffold186 | 176708                  | GG                              | AA                 | AA               | INTERGENIC      |               |                    |                    |
| SNP_65211_A_176736 | NW_004515738.1 | scaffold186 | 176736                  | CC                              | TT                 | TT               | INTERGENIC      |               |                    |                    |
| SNP_65212_A_176826 | NW_004515738.1 | scaffold186 | 176826                  | GG                              | CC                 | CC               | INTERGENIC      |               |                    |                    |
| SNP_65213_A_176828 | NW_004515738.1 | scaffold186 | 176828                  | TT                              | CC                 | CC               | INTERGENIC      |               |                    |                    |
| SNP_65214_A_176830 | NW_004515738.1 | scaffold186 | 176830                  | CC                              | AA                 | AA               | INTERGENIC      |               |                    |                    |
| SNP_65215_A_176831 | NW_004515738.1 | scaffold186 | 176831                  | AA                              | GG                 | GG               | INTERGENIC      |               |                    |                    |
| SNP_65216_A_178783 | NW_004515738.1 | scaffold186 | 178783                  | TT                              | CC                 | CC               | INTERGENIC      |               |                    |                    |
| SNP_65217_A_178816 | NW_004515738.1 | scaffold186 | 178816                  | CC                              | TT                 | TT               | INTERGENIC      |               |                    |                    |
| SNP_65218_A_178827 | NW_004515738.1 | scaffold186 | 178827                  | AA                              | GG                 | GG               | INTERGENIC      |               |                    |                    |
| SNP_65219_A_178849 | NW_004515738.1 | scaffold186 | 178849                  | TT                              | AA                 | AA               | INTERGENIC      |               |                    |                    |
| SNP_65220_A_179100 | NW_004515738.1 | scaffold186 | 179100                  | GG                              | AA                 | AA               | INTERGENIC      |               |                    |                    |

| SNPs IDs           | Chromosome IDs | Chromosomes | Physical positions (bp) | CDC Frontier (Reference genome) | (Pusa 1103 & HPNB) | (ILWC 46 & LPNB) | Sequence genome | Components of | Gene accession IDs | Putative functions |
|--------------------|----------------|-------------|-------------------------|---------------------------------|--------------------|------------------|-----------------|---------------|--------------------|--------------------|
| SNP_65221_A_179126 | NW_004515738.1 | scaffold186 | 179126                  | CC                              | AA                 | AA               | INTERGENIC      |               |                    |                    |
| SNP_65222_A_179146 | NW_004515738.1 | scaffold186 | 179146                  | TT                              | CC                 | CC               | INTERGENIC      |               |                    |                    |
| SNP_65223_A_181336 | NW_004515738.1 | scaffold186 | 181336                  | GG                              | TT                 | TT               | INTERGENIC      |               |                    |                    |
| SNP_65224_A_181348 | NW_004515738.1 | scaffold186 | 181348                  | AA                              | CC                 | CC               | INTERGENIC      |               |                    |                    |
| SNP_65225_A_181357 | NW_004515738.1 | scaffold186 | 181357                  | TT                              | AA                 | AA               | INTERGENIC      |               |                    |                    |
| SNP_65226_A_181397 | NW_004515738.1 | scaffold186 | 181397                  | CC                              | GG                 | GG               | INTERGENIC      |               |                    |                    |
| SNP_65227_A_181398 | NW_004515738.1 | scaffold186 | 181398                  | TT                              | AA                 | AA               | INTERGENIC      |               |                    |                    |
| SNP_65228_A_181400 | NW_004515738.1 | scaffold186 | 181400                  | GG                              | CC                 | CC               | INTERGENIC      |               |                    |                    |
| SNP_65229_A_219373 | NW_004515738.1 | scaffold186 | 219373                  | TT                              | CC                 | CC               | INTERGENIC      |               |                    |                    |
| SNP_65230_A_223097 | NW_004515738.1 | scaffold186 | 223097                  | CC                              | TT                 | TT               | INTERGENIC      |               |                    |                    |
| SNP_65231_A_234789 | NW_004515738.1 | scaffold186 | 234789                  | TT                              | CC                 | CC               | INTERGENIC      |               |                    |                    |
| SNP_65232_A_299943 | NW_004515738.1 | scaffold186 | 299943                  | AA                              | GG                 | GG               | INTERGENIC      |               |                    |                    |
| SNP_65233_A_301981 | NW_004515738.1 | scaffold186 | 301981                  | TT                              | GG                 | GG               | INTERGENIC      |               |                    |                    |
| SNP_65234_A_304782 | NW_004515738.1 | scaffold186 | 304782                  | CC                              | TT                 | TT               | INTERGENIC      |               |                    |                    |
| SNP_65235_A_307266 | NW_004515738.1 | scaffold186 | 307266                  | TT                              | CC                 | CC               | INTERGENIC      |               |                    |                    |
| SNP_65236_A_307472 | NW_004515738.1 | scaffold186 | 307472                  | AA                              | GG                 | GG               | INTERGENIC      |               |                    |                    |
| SNP_65237_A_307483 | NW_004515738.1 | scaffold186 | 307483                  | AA                              | GG                 | GG               | INTERGENIC      |               |                    |                    |
| SNP_65238_A_311428 | NW_004515738.1 | scaffold186 | 311428                  | GG                              | AA                 | AA               | INTERGENIC      |               |                    |                    |
| SNP_65239_A_311432 | NW_004515738.1 | scaffold186 | 311432                  | CC                              | TT                 | TT               | INTERGENIC      |               |                    |                    |
| SNP_65240_A_311433 | NW_004515738.1 | scaffold186 | 311433                  | AA                              | GG                 | GG               | INTERGENIC      |               |                    |                    |
| SNP_65241_A_311439 | NW_004515738.1 | scaffold186 | 311439                  | CC                              | GG                 | GG               | INTERGENIC      |               |                    |                    |
| SNP_65242_A_327255 | NW_004515738.1 | scaffold186 | 327255                  | CC                              | TT                 | TT               | INTERGENIC      |               |                    |                    |



| SNPs IDs           | Chromosome IDs | Chromosomes | Physical positions (bp) | CDC Frontier (Reference genome) | (Pusa 1103 & HPNB) | (ILWC 46 & LPNB) | Sequence Components of genome | Gene accession IDs | Putative functions                      |
|--------------------|----------------|-------------|-------------------------|---------------------------------|--------------------|------------------|-------------------------------|--------------------|-----------------------------------------|
| SNP_65243_A_349630 | NW_004515738.1 | scaffold186 | 349630                  | GG                              | AA                 | AA               | INTERGENIC                    |                    |                                         |
| SNP_65244_A_349659 | NW_004515738.1 | scaffold186 | 349659                  | GG                              | AA                 | AA               | INTERGENIC                    |                    |                                         |
| SNP_65245_A_351436 | NW_004515738.1 | scaffold186 | 351436                  | TT                              | CC                 | CC               | INTERGENIC                    |                    |                                         |
| SNP_65246_A_351440 | NW_004515738.1 | scaffold186 | 351440                  | TT                              | GG                 | GG               | INTERGENIC                    |                    |                                         |
| SNP_65247_A_351515 | NW_004515738.1 | scaffold186 | 351515                  | TT                              | AA                 | AA               | INTERGENIC                    |                    |                                         |
| SNP_65248_A_360100 | NW_004515738.1 | scaffold186 | 360100                  | AA                              | CC                 | CC               | INTERGENIC                    |                    |                                         |
| SNP_65249_A_370709 | NW_004515738.1 | scaffold186 | 370709                  | AA                              | TT                 | TT               | INTERGENIC                    |                    |                                         |
| SNP_65250_A_370714 | NW_004515738.1 | scaffold186 | 370714                  | AA                              | TT                 | TT               | INTERGENIC                    |                    |                                         |
| SNP_65251_A_370716 | NW_004515738.1 | scaffold186 | 370716                  | AA                              | TT                 | TT               | INTERGENIC                    |                    |                                         |
| SNP_65252_A_370725 | NW_004515738.1 | scaffold186 | 370725                  | AA                              | GG                 | GG               | INTERGENIC                    |                    |                                         |
| SNP_65253_A_371227 | NW_004515738.1 | scaffold186 | 371227                  | GG                              | AA                 | AA               | INTERGENIC                    |                    |                                         |
| SNP_65254_A_383488 | NW_004515738.1 | scaffold186 | 383488                  | GG                              | TT                 | TT               | INTERGENIC                    |                    |                                         |
| SNP_65255_A_449625 | NW_004515738.1 | scaffold186 | 449625                  | TT                              | CC                 | CC               | INTERGENIC                    |                    |                                         |
| SNP_65256_A_9862   | NW_004515740.1 | scaffold193 | 9862                    | TT                              | CC                 | CC               | INTERGENIC                    |                    |                                         |
| SNP_65257_A_32828  | NW_004515740.1 | scaffold193 | 32828                   | AA                              | TT                 | TT               | URR                           | 101495305          | 50S ribosomal protein L1, chloroplastic |
| SNP_65258_A_63823  | NW_004515740.1 | scaffold193 | 63823                   | GG                              | AA                 | AA               | INTERGENIC                    |                    |                                         |
| SNP_65260_A_64856  | NW_004515740.1 | scaffold193 | 64856                   | AA                              | GG                 | GG               | INTERGENIC                    |                    |                                         |
| SNP_65261_A_65818  | NW_004515740.1 | scaffold193 | 65818                   | GG                              | TT                 | TT               | INTERGENIC                    |                    |                                         |
| SNP_65262_A_65826  | NW_004515740.1 | scaffold193 | 65826                   | CC                              | AA                 | AA               | INTERGENIC                    |                    |                                         |
| SNP_65263_A_79469  | NW_004515740.1 | scaffold193 | 79469                   | AA                              | CC                 | CC               | URR                           | 101498029          | Unknown function                        |
| SNP_65264_A_79478  | NW_004515740.1 | scaffold193 | 79478                   | TT                              | CC                 | CC               | URR                           | 101498029          | Unknown function                        |
| SNP_65265_A_79545  | NW_004515740.1 | scaffold193 | 79545                   | AA                              | GG                 | GG               | URR                           | 101498029          | Unknown function                        |

| SNPs IDs           | Chromosome IDs | Chromosomes | Physical positions (bp) | CDC Frontier (Reference genome) | (Pusa 1103 & HPNB) | (ILWC 46 & LPNB) | Sequence Components of genome | Gene accession IDs | Putative functions           |
|--------------------|----------------|-------------|-------------------------|---------------------------------|--------------------|------------------|-------------------------------|--------------------|------------------------------|
| SNP_65267_A_79661  | NW_004515740.1 | scaffold193 | 79661                   | TT                              | AA                 | AA               | URR                           | 101498029          | Unknown function             |
| SNP_65269_A_79774  | NW_004515740.1 | scaffold193 | 79774                   | TT                              | CC                 | CC               | URR                           | 101498029          | Unknown function             |
| SNP_65270_A_79830  | NW_004515740.1 | scaffold193 | 79830                   | GG                              | AA                 | AA               | URR                           | 101498029          | Unknown function             |
| SNP_65271_A_80018  | NW_004515740.1 | scaffold193 | 80018                   | AA                              | CC                 | CC               | URR                           | 101498029          | Unknown function             |
| SNP_65272_A_86146  | NW_004515740.1 | scaffold193 | 86146                   | AA                              | TT                 | TT               | INTERGENIC                    |                    |                              |
| SNP_65273_A_160487 | NW_004515740.1 | scaffold193 | 160487                  | GG                              | CC                 | CC               | INTERGENIC                    |                    |                              |
| SNP_65274_A_165204 | NW_004515740.1 | scaffold193 | 165204                  | TT                              | CC                 | CC               | INTRON                        | 101499656          | Unknown function             |
| SNP_65275_A_165205 | NW_004515740.1 | scaffold193 | 165205                  | TT                              | CC                 | CC               | INTRON                        | 101499656          | Unknown function             |
| SNP_65276_A_168471 | NW_004515740.1 | scaffold193 | 168471                  | GG                              | TT                 | TT               | INTRON                        | 101499656          | Unknown function             |
| SNP_65277_A_201639 | NW_004515740.1 | scaffold193 | 201639                  | CC                              | AA                 | AA               | INTERGENIC                    |                    |                              |
| SNP_65278_A_201979 | NW_004515740.1 | scaffold193 | 201979                  | TT                              | CC                 | CC               | INTERGENIC                    |                    |                              |
| SNP_65279_A_208333 | NW_004515740.1 | scaffold193 | 208333                  | TT                              | CC                 | CC               | INTERGENIC                    |                    |                              |
| SNP_65280_A_208361 | NW_004515740.1 | scaffold193 | 208361                  | GG                              | AA                 | AA               | INTERGENIC                    |                    |                              |
| SNP_65281_A_208382 | NW_004515740.1 | scaffold193 | 208382                  | TT                              | CC                 | CC               | INTERGENIC                    |                    |                              |
| SNP_65282_A_208386 | NW_004515740.1 | scaffold193 | 208386                  | TT                              | CC                 | CC               | INTERGENIC                    |                    |                              |
| SNP_65283_A_208486 | NW_004515740.1 | scaffold193 | 208486                  | AA                              | GG                 | GG               | INTERGENIC                    |                    |                              |
| SNP_65285_A_208727 | NW_004515740.1 | scaffold193 | 208727                  | CC                              | GG                 | GG               | INTERGENIC                    |                    |                              |
| SNP_65286_A_208773 | NW_004515740.1 | scaffold193 | 208773                  | GG                              | CC                 | CC               | INTERGENIC                    |                    |                              |
| SNP_65287_A_213066 | NW_004515740.1 | scaffold193 | 213066                  | GG                              | AA                 | AA               | INTERGENIC                    |                    |                              |
| SNP_65289_A_255505 | NW_004515740.1 | scaffold193 | 255505                  | TT                              | CC                 | CC               | INTRON                        | 101497375          | uncharacterized LOC101497375 |
| SNP_65290_A_255506 | NW_004515740.1 | scaffold193 | 255506                  | CC                              | TT                 | TT               | INTRON                        | 101497375          | uncharacterized LOC101497375 |
| SNP_65291_A_272179 | NW_004515740.1 | scaffold193 | 272179                  | AA                              | TT                 | TT               | INTERGENIC                    |                    |                              |

| SNPs IDs           | Chromosome IDs | Chromosomes | Physical positions (bp) | CDC Frontier (Reference genome) | (Pusa 1103 & HPNB) | (ILWC 46 & LPNB) | Sequence genome | Components of | Gene accession IDs | Putative functions |
|--------------------|----------------|-------------|-------------------------|---------------------------------|--------------------|------------------|-----------------|---------------|--------------------|--------------------|
| SNP_65292_A_280341 | NW_004515740.1 | scaffold193 | 280341                  | CC                              | TT                 | TT               | INTERGENIC      |               |                    |                    |
| SNP_65293_A_280669 | NW_004515740.1 | scaffold193 | 280669                  | GG                              | TT                 | TT               | INTERGENIC      |               |                    |                    |
| SNP_65294_A_280671 | NW_004515740.1 | scaffold193 | 280671                  | TT                              | CC                 | CC               | INTERGENIC      |               |                    |                    |
| SNP_65295_A_289769 | NW_004515740.1 | scaffold193 | 289769                  | AA                              | GG                 | GG               | INTERGENIC      |               |                    |                    |
| SNP_65296_A_295630 | NW_004515740.1 | scaffold193 | 295630                  | AA                              | GG                 | GG               | INTERGENIC      |               |                    |                    |
| SNP_65297_A_295646 | NW_004515740.1 | scaffold193 | 295646                  | AA                              | GG                 | GG               | INTERGENIC      |               |                    |                    |
| SNP_65298_A_295650 | NW_004515740.1 | scaffold193 | 295650                  | TT                              | CC                 | CC               | INTERGENIC      |               |                    |                    |
| SNP_65299_A_295654 | NW_004515740.1 | scaffold193 | 295654                  | TT                              | GG                 | GG               | INTERGENIC      |               |                    |                    |
| SNP_65300_A_295685 | NW_004515740.1 | scaffold193 | 295685                  | GG                              | AA                 | AA               | INTERGENIC      |               |                    |                    |
| SNP_65301_A_295711 | NW_004515740.1 | scaffold193 | 295711                  | GG                              | AA                 | AA               | INTERGENIC      |               |                    |                    |
| SNP_65302_A_295754 | NW_004515740.1 | scaffold193 | 295754                  | AA                              | TT                 | TT               | INTERGENIC      |               |                    |                    |
| SNP_65303_A_295778 | NW_004515740.1 | scaffold193 | 295778                  | GG                              | TT                 | TT               | INTERGENIC      |               |                    |                    |
| SNP_65304_A_295781 | NW_004515740.1 | scaffold193 | 295781                  | GG                              | AA                 | AA               | INTERGENIC      |               |                    |                    |
| SNP_65305_A_295813 | NW_004515740.1 | scaffold193 | 295813                  | CC                              | TT                 | TT               | INTERGENIC      |               |                    |                    |
| SNP_65306_A_295859 | NW_004515740.1 | scaffold193 | 295859                  | CC                              | TT                 | TT               | INTERGENIC      |               |                    |                    |
| SNP_65307_A_296010 | NW_004515740.1 | scaffold193 | 296010                  | GG                              | AA                 | AA               | INTERGENIC      |               |                    |                    |
| SNP_65308_A_296025 | NW_004515740.1 | scaffold193 | 296025                  | GG                              | AA                 | AA               | INTERGENIC      |               |                    |                    |
| SNP_65309_A_296250 | NW_004515740.1 | scaffold193 | 296250                  | AA                              | GG                 | GG               | INTERGENIC      |               |                    |                    |
| SNP_65310_A_305615 | NW_004515740.1 | scaffold193 | 305615                  | TT                              | CC                 | CC               | INTERGENIC      |               |                    |                    |
| SNP_65311_A_310216 | NW_004515740.1 | scaffold193 | 310216                  | CC                              | GG                 | GG               | INTERGENIC      |               |                    |                    |
| SNP_65312_A_310232 | NW_004515740.1 | scaffold193 | 310232                  | CC                              | TT                 | TT               | INTERGENIC      |               |                    |                    |
| SNP_65313_A_310239 | NW_004515740.1 | scaffold193 | 310239                  | CC                              | TT                 | TT               | INTERGENIC      |               |                    |                    |

| SNPs IDs           | Chromosome IDs | Chromosomes | Physical positions (bp) | CDC Frontier (Reference genome) | (Pusa 1103 & HPNB) | (ILWC 46 & LPNB) | Sequence genome | Components of | Gene accession IDs | Putative functions |
|--------------------|----------------|-------------|-------------------------|---------------------------------|--------------------|------------------|-----------------|---------------|--------------------|--------------------|
| SNP_65314_A_310256 | NW_004515740.1 | scaffold193 | 310256                  | CC                              | TT                 | TT               | INTERGENIC      |               |                    |                    |
| SNP_65315_A_310275 | NW_004515740.1 | scaffold193 | 310275                  | TT                              | GG                 | GG               | INTERGENIC      |               |                    |                    |
| SNP_65316_A_310279 | NW_004515740.1 | scaffold193 | 310279                  | AA                              | CC                 | CC               | INTERGENIC      |               |                    |                    |
| SNP_65317_A_310350 | NW_004515740.1 | scaffold193 | 310350                  | GG                              | AA                 | AA               | INTERGENIC      |               |                    |                    |
| SNP_65318_A_310385 | NW_004515740.1 | scaffold193 | 310385                  | TT                              | CC                 | CC               | INTERGENIC      |               |                    |                    |
| SNP_65319_A_310386 | NW_004515740.1 | scaffold193 | 310386                  | TT                              | GG                 | GG               | INTERGENIC      |               |                    |                    |
| SNP_65320_A_310478 | NW_004515740.1 | scaffold193 | 310478                  | CC                              | AA                 | AA               | INTERGENIC      |               |                    |                    |
| SNP_65321_A_310514 | NW_004515740.1 | scaffold193 | 310514                  | TT                              | AA                 | AA               | INTERGENIC      |               |                    |                    |
| SNP_65322_A_316225 | NW_004515740.1 | scaffold193 | 316225                  | TT                              | GG                 | GG               | INTERGENIC      |               |                    |                    |
| SNP_65323_A_316668 | NW_004515740.1 | scaffold193 | 316668                  | CC                              | TT                 | TT               | INTERGENIC      |               |                    |                    |
| SNP_65324_A_316891 | NW_004515740.1 | scaffold193 | 316891                  | TT                              | CC                 | CC               | INTERGENIC      |               |                    |                    |
| SNP_65325_A_318918 | NW_004515740.1 | scaffold193 | 318918                  | GG                              | AA                 | AA               | INTERGENIC      |               |                    |                    |
| SNP_65326_A_352794 | NW_004515740.1 | scaffold193 | 352794                  | TT                              | CC                 | CC               | INTERGENIC      |               |                    |                    |
| SNP_65328_A_417526 | NW_004515740.1 | scaffold193 | 417526                  | TT                              | GG                 | GG               | INTERGENIC      |               |                    |                    |
| SNP_65329_A_417537 | NW_004515740.1 | scaffold193 | 417537                  | TT                              | GG                 | GG               | INTERGENIC      |               |                    |                    |
| SNP_65330_A_417551 | NW_004515740.1 | scaffold193 | 417551                  | AA                              | GG                 | GG               | INTERGENIC      |               |                    |                    |
| SNP_65331_A_417566 | NW_004515740.1 | scaffold193 | 417566                  | TT                              | GG                 | GG               | INTERGENIC      |               |                    |                    |
| SNP_65332_A_417900 | NW_004515740.1 | scaffold193 | 417900                  | TT                              | CC                 | CC               | INTERGENIC      |               |                    |                    |
| SNP_65333_A_426292 | NW_004515740.1 | scaffold193 | 426292                  | GG                              | AA                 | AA               | INTERGENIC      |               |                    |                    |
| SNP_65334_A_426293 | NW_004515740.1 | scaffold193 | 426293                  | GG                              | AA                 | AA               | INTERGENIC      |               |                    |                    |
| SNP_65335_A_426537 | NW_004515740.1 | scaffold193 | 426537                  | CC                              | TT                 | TT               | INTERGENIC      |               |                    |                    |
| SNP_65336_A_426549 | NW_004515740.1 | scaffold193 | 426549                  | CC                              | TT                 | TT               | INTERGENIC      |               |                    |                    |

| SNPs IDs           | Chromosome IDs | Chromosomes | Physical positions (bp) | CDC Frontier (Reference genome) | (Pusa 1103 & HPNB) | (ILWC 46 & LPNB) | Sequence genome | Components of | Gene accession IDs | Putative functions |
|--------------------|----------------|-------------|-------------------------|---------------------------------|--------------------|------------------|-----------------|---------------|--------------------|--------------------|
| SNP_65337_A_426554 | NW_004515740.1 | scaffold193 | 426554                  | AA                              | GG                 | GG               | INTERGENIC      |               |                    |                    |
| SNP_65338_A_428970 | NW_004515740.1 | scaffold193 | 428970                  | TT                              | CC                 | CC               | INTERGENIC      |               |                    |                    |
| SNP_65339_A_428972 | NW_004515740.1 | scaffold193 | 428972                  | GG                              | TT                 | TT               | INTERGENIC      |               |                    |                    |
| SNP_65340_A_429014 | NW_004515740.1 | scaffold193 | 429014                  | TT                              | GG                 | GG               | INTERGENIC      |               |                    |                    |
| SNP_65341_A_429247 | NW_004515740.1 | scaffold193 | 429247                  | CC                              | TT                 | TT               | INTERGENIC      |               |                    |                    |
| SNP_65342_A_429251 | NW_004515740.1 | scaffold193 | 429251                  | AA                              | GG                 | GG               | INTERGENIC      |               |                    |                    |
| SNP_65343_A_7881   | NW_004515743.1 | scaffold196 | 7881                    | GG                              | CC                 | CC               | INTERGENIC      |               |                    |                    |
| SNP_65344_A_25130  | NW_004515744.1 | scaffold198 | 25130                   | CC                              | TT                 | TT               | INTERGENIC      |               |                    |                    |
| SNP_65345_A_46177  | NW_004515744.1 | scaffold198 | 46177                   | CC                              | TT                 | TT               | INTERGENIC      |               |                    |                    |
| SNP_65346_A_54436  | NW_004515744.1 | scaffold198 | 54436                   | TT                              | CC                 | CC               | INTERGENIC      |               |                    |                    |
| SNP_65347_A_54441  | NW_004515744.1 | scaffold198 | 54441                   | AA                              | TT                 | TT               | INTERGENIC      |               |                    |                    |
| SNP_65348_A_54480  | NW_004515744.1 | scaffold198 | 54480                   | TT                              | AA                 | AA               | INTERGENIC      |               |                    |                    |
| SNP_65349_A_54484  | NW_004515744.1 | scaffold198 | 54484                   | AA                              | GG                 | GG               | INTERGENIC      |               |                    |                    |
| SNP_65350_A_54486  | NW_004515744.1 | scaffold198 | 54486                   | TT                              | AA                 | AA               | INTERGENIC      |               |                    |                    |
| SNP_65351_A_54777  | NW_004515744.1 | scaffold198 | 54777                   | TT                              | CC                 | CC               | INTERGENIC      |               |                    |                    |
| SNP_65352_A_56495  | NW_004515744.1 | scaffold198 | 56495                   | TT                              | CC                 | CC               | INTERGENIC      |               |                    |                    |
| SNP_65353_A_56496  | NW_004515744.1 | scaffold198 | 56496                   | CC                              | GG                 | GG               | INTERGENIC      |               |                    |                    |
| SNP_65354_A_56529  | NW_004515744.1 | scaffold198 | 56529                   | AA                              | GG                 | GG               | INTERGENIC      |               |                    |                    |
| SNP_65355_A_56548  | NW_004515744.1 | scaffold198 | 56548                   | TT                              | CC                 | CC               | INTERGENIC      |               |                    |                    |
| SNP_65356_A_56586  | NW_004515744.1 | scaffold198 | 56586                   | GG                              | AA                 | AA               | INTERGENIC      |               |                    |                    |
| SNP_65358_A_98211  | NW_004515744.1 | scaffold198 | 98211                   | TT                              | AA                 | AA               | INTERGENIC      |               |                    |                    |
| SNP_65360_A_177412 | NW_004515744.1 | scaffold198 | 177412                  | TT                              | CC                 | CC               | INTERGENIC      |               |                    |                    |

| SNPs IDs           | Chromosome IDs | Chromosomes | Physical positions (bp) | CDC Frontier (Reference genome) | (Pusa 1103 & HPNB) | (ILWC 46 & LPNB) | Sequence genome | Components of | Gene accession IDs                     | Putative functions |
|--------------------|----------------|-------------|-------------------------|---------------------------------|--------------------|------------------|-----------------|---------------|----------------------------------------|--------------------|
| SNP_65361_A_183104 | NW_004515744.1 | scaffold198 | 183104                  | TT                              | GG                 | GG               | INTERGENIC      |               |                                        |                    |
| SNP_65362_A_183433 | NW_004515744.1 | scaffold198 | 183433                  | GG                              | AA                 | AA               | INTERGENIC      |               |                                        |                    |
| SNP_65363_A_188102 | NW_004515744.1 | scaffold198 | 188102                  | GG                              | AA                 | AA               | INTERGENIC      |               |                                        |                    |
| SNP_65364_A_188108 | NW_004515744.1 | scaffold198 | 188108                  | CC                              | TT                 | TT               | INTERGENIC      |               |                                        |                    |
| SNP_65365_A_188113 | NW_004515744.1 | scaffold198 | 188113                  | TT                              | CC                 | CC               | INTERGENIC      |               |                                        |                    |
| SNP_65366_A_235764 | NW_004515744.1 | scaffold198 | 235764                  | GG                              | TT                 | TT               | INTERGENIC      |               |                                        |                    |
| SNP_65367_A_251488 | NW_004515744.1 | scaffold198 | 251488                  | AA                              | GG                 | GG               | INTERGENIC      |               |                                        |                    |
| SNP_65368_A_251556 | NW_004515744.1 | scaffold198 | 251556                  | CC                              | TT                 | TT               | INTERGENIC      |               |                                        |                    |
| SNP_65369_A_251569 | NW_004515744.1 | scaffold198 | 251569                  | AA                              | GG                 | GG               | INTERGENIC      |               |                                        |                    |
| SNP_65370_A_267507 | NW_004515744.1 | scaffold198 | 267507                  | CC                              | TT                 | TT               | INTERGENIC      |               |                                        |                    |
| SNP_65371_A_267578 | NW_004515744.1 | scaffold198 | 267578                  | GG                              | AA                 | AA               | INTERGENIC      |               |                                        |                    |
| SNP_65372_A_267592 | NW_004515744.1 | scaffold198 | 267592                  | AA                              | TT                 | TT               | INTERGENIC      |               |                                        |                    |
| SNP_65374_A_267640 | NW_004515744.1 | scaffold198 | 267640                  | TT                              | AA                 | AA               | INTERGENIC      |               |                                        |                    |
| SNP_65375_A_267647 | NW_004515744.1 | scaffold198 | 267647                  | CC                              | TT                 | TT               | INTERGENIC      |               |                                        |                    |
| SNP_65376_A_271179 | NW_004515744.1 | scaffold198 | 271179                  | GG                              | AA                 | AA               | INTERGENIC      |               |                                        |                    |
| SNP_65378_A_287031 | NW_004515744.1 | scaffold198 | 287031                  | TT                              | GG                 | GG               | URR             | 101507364     | cationic amino acid transporter 1-like |                    |
| SNP_65379_A_318351 | NW_004515744.1 | scaffold198 | 318351                  | TT                              | CC                 | CC               | INTRON          | 101507677     | Unknown function                       |                    |
| SNP_65380_A_330416 | NW_004515744.1 | scaffold198 | 330416                  | TT                              | CC                 | CC               | INTERGENIC      |               |                                        |                    |
| SNP_65381_A_330678 | NW_004515744.1 | scaffold198 | 330678                  | TT                              | GG                 | GG               | INTERGENIC      |               |                                        |                    |
| SNP_65382_A_330749 | NW_004515744.1 | scaffold198 | 330749                  | GG                              | AA                 | AA               | INTERGENIC      |               |                                        |                    |
| SNP_65383_A_335540 | NW_004515744.1 | scaffold198 | 335540                  | TT                              | GG                 | GG               | INTERGENIC      |               |                                        |                    |
| SNP_65384_A_335588 | NW_004515744.1 | scaffold198 | 335588                  | AA                              | GG                 | GG               | INTERGENIC      |               |                                        |                    |

| SNPs IDs           | Chromosome IDs | Chromosomes | Physical positions (bp) | CDC Frontier (Reference genome) | (Pusa 1103 & HPNB) | (ILWC 46 & LPNB) | Sequence genome | Components of | Gene accession IDs | Putative functions |
|--------------------|----------------|-------------|-------------------------|---------------------------------|--------------------|------------------|-----------------|---------------|--------------------|--------------------|
| SNP_65385_A_335739 | NW_004515744.1 | scaffold198 | 335739                  | TT                              | GG                 | GG               | INTERGENIC      |               |                    |                    |
| SNP_65386_A_335815 | NW_004515744.1 | scaffold198 | 335815                  | GG                              | AA                 | AA               | INTERGENIC      |               |                    |                    |
| SNP_65388_A_337543 | NW_004515744.1 | scaffold198 | 337543                  | AA                              | GG                 | GG               | INTERGENIC      |               |                    |                    |
| SNP_65389_A_348233 | NW_004515744.1 | scaffold198 | 348233                  | GG                              | CC                 | CC               | INTERGENIC      |               |                    |                    |
| SNP_65390_A_416319 | NW_004515744.1 | scaffold198 | 416319                  | AA                              | GG                 | GG               | INTERGENIC      |               |                    |                    |
| SNP_65391_A_420138 | NW_004515744.1 | scaffold198 | 420138                  | GG                              | AA                 | AA               | INTERGENIC      |               |                    |                    |
| SNP_65392_A_420152 | NW_004515744.1 | scaffold198 | 420152                  | CC                              | TT                 | TT               | INTERGENIC      |               |                    |                    |
| SNP_65393_A_420695 | NW_004515744.1 | scaffold198 | 420695                  | CC                              | AA                 | AA               | INTERGENIC      |               |                    |                    |
| SNP_65394_A_420716 | NW_004515744.1 | scaffold198 | 420716                  | TT                              | GG                 | GG               | INTERGENIC      |               |                    |                    |
| SNP_65395_A_420806 | NW_004515744.1 | scaffold198 | 420806                  | AA                              | TT                 | TT               | INTERGENIC      |               |                    |                    |
| SNP_65396_A_420807 | NW_004515744.1 | scaffold198 | 420807                  | AA                              | TT                 | TT               | INTERGENIC      |               |                    |                    |
| SNP_65397_A_421018 | NW_004515744.1 | scaffold198 | 421018                  | AA                              | GG                 | GG               | INTERGENIC      |               |                    |                    |
| SNP_65398_A_421030 | NW_004515744.1 | scaffold198 | 421030                  | TT                              | CC                 | CC               | INTERGENIC      |               |                    |                    |
| SNP_65399_A_421049 | NW_004515744.1 | scaffold198 | 421049                  | AA                              | TT                 | TT               | INTERGENIC      |               |                    |                    |
| SNP_65400_A_421052 | NW_004515744.1 | scaffold198 | 421052                  | TT                              | CC                 | CC               | INTERGENIC      |               |                    |                    |
| SNP_65401_A_421134 | NW_004515744.1 | scaffold198 | 421134                  | CC                              | TT                 | TT               | INTERGENIC      |               |                    |                    |
| SNP_65402_A_423018 | NW_004515744.1 | scaffold198 | 423018                  | GG                              | AA                 | AA               | INTERGENIC      |               |                    |                    |
| SNP_65403_A_423239 | NW_004515744.1 | scaffold198 | 423239                  | AA                              | GG                 | GG               | INTERGENIC      |               |                    |                    |
| SNP_65404_A_423475 | NW_004515744.1 | scaffold198 | 423475                  | TT                              | CC                 | CC               | INTERGENIC      |               |                    |                    |
| SNP_65405_A_444825 | NW_004515744.1 | scaffold198 | 444825                  | AA                              | GG                 | GG               | INTERGENIC      |               |                    |                    |
| SNP_65406_A_444833 | NW_004515744.1 | scaffold198 | 444833                  | GG                              | AA                 | AA               | INTERGENIC      |               |                    |                    |
| SNP_65407_A_472975 | NW_004515744.1 | scaffold198 | 472975                  | AA                              | CC                 | CC               | INTERGENIC      |               |                    |                    |

| SNPs IDs           | Chromosome IDs | Chromosomes | Physical positions (bp) | CDC Frontier (Reference genome) | (Pusa 1103 & HPNB) | (ILWC 46 & LPNB) | Sequence genome | Components of | Gene accession IDs | Putative functions |
|--------------------|----------------|-------------|-------------------------|---------------------------------|--------------------|------------------|-----------------|---------------|--------------------|--------------------|
| SNP_65408_A_473058 | NW_004515744.1 | scaffold198 | 473058                  | TT                              | CC                 | CC               | INTERGENIC      |               |                    |                    |
| SNP_65409_A_473092 | NW_004515744.1 | scaffold198 | 473092                  | AA                              | GG                 | GG               | INTERGENIC      |               |                    |                    |
| SNP_65410_A_473337 | NW_004515744.1 | scaffold198 | 473337                  | TT                              | GG                 | GG               | INTERGENIC      |               |                    |                    |
| SNP_65411_A_490922 | NW_004515744.1 | scaffold198 | 490922                  | AA                              | TT                 | TT               | INTERGENIC      |               |                    |                    |
| SNP_65412_A_500211 | NW_004515744.1 | scaffold198 | 500211                  | GG                              | AA                 | AA               | INTERGENIC      |               |                    |                    |
| SNP_65413_A_501036 | NW_004515744.1 | scaffold198 | 501036                  | GG                              | TT                 | TT               | INTERGENIC      |               |                    |                    |
| SNP_65414_A_501433 | NW_004515744.1 | scaffold198 | 501433                  | TT                              | AA                 | AA               | INTERGENIC      |               |                    |                    |
| SNP_65415_A_501474 | NW_004515744.1 | scaffold198 | 501474                  | CC                              | AA                 | AA               | INTERGENIC      |               |                    |                    |
| SNP_65417_A_501524 | NW_004515744.1 | scaffold198 | 501524                  | GG                              | TT                 | TT               | INTERGENIC      |               |                    |                    |
| SNP_65418_A_501550 | NW_004515744.1 | scaffold198 | 501550                  | TT                              | CC                 | CC               | INTERGENIC      |               |                    |                    |
| SNP_65419_A_501606 | NW_004515744.1 | scaffold198 | 501606                  | AA                              | GG                 | GG               | INTERGENIC      |               |                    |                    |
| SNP_65420_A_501738 | NW_004515744.1 | scaffold198 | 501738                  | AA                              | TT                 | TT               | INTERGENIC      |               |                    |                    |
| SNP_65421_A_509784 | NW_004515744.1 | scaffold198 | 509784                  | GG                              | AA                 | AA               | INTERGENIC      |               |                    |                    |
| SNP_65422_A_510161 | NW_004515744.1 | scaffold198 | 510161                  | AA                              | GG                 | GG               | INTERGENIC      |               |                    |                    |
| SNP_65423_A_510249 | NW_004515744.1 | scaffold198 | 510249                  | AA                              | GG                 | GG               | INTERGENIC      |               |                    |                    |
| SNP_65424_A_510286 | NW_004515744.1 | scaffold198 | 510286                  | GG                              | TT                 | TT               | INTERGENIC      |               |                    |                    |
| SNP_65425_A_519772 | NW_004515744.1 | scaffold198 | 519772                  | AA                              | GG                 | GG               | INTERGENIC      |               |                    |                    |
| SNP_65426_A_561491 | NW_004515744.1 | scaffold198 | 561491                  | TT                              | CC                 | CC               | INTERGENIC      |               |                    |                    |
| SNP_65427_A_594049 | NW_004515744.1 | scaffold198 | 594049                  | AA                              | GG                 | GG               | INTERGENIC      |               |                    |                    |
| SNP_65428_A_594109 | NW_004515744.1 | scaffold198 | 594109                  | GG                              | AA                 | AA               | INTERGENIC      |               |                    |                    |
| SNP_65429_A_594305 | NW_004515744.1 | scaffold198 | 594305                  | GG                              | CC                 | CC               | INTERGENIC      |               |                    |                    |
| SNP_65430_A_594306 | NW_004515744.1 | scaffold198 | 594306                  | CC                              | AA                 | AA               | INTERGENIC      |               |                    |                    |



| SNPs IDs           | Chromosome IDs | Chromosomes | Physical positions (bp) | CDC Frontier (Reference genome) | (Pusa 1103 & HPNB) | (ILWC 46 & LPNB) | Sequence genome | Components of | Gene accession IDs | Putative functions |
|--------------------|----------------|-------------|-------------------------|---------------------------------|--------------------|------------------|-----------------|---------------|--------------------|--------------------|
| SNP_65431_A_594507 | NW_004515744.1 | scaffold198 | 594507                  | CC                              | AA                 | AA               | INTERGENIC      |               |                    |                    |
| SNP_65432_A_594560 | NW_004515744.1 | scaffold198 | 594560                  | AA                              | GG                 | GG               | INTERGENIC      |               |                    |                    |
| SNP_65433_A_594569 | NW_004515744.1 | scaffold198 | 594569                  | GG                              | AA                 | AA               | INTERGENIC      |               |                    |                    |
| SNP_65434_A_601049 | NW_004515744.1 | scaffold198 | 601049                  | CC                              | AA                 | AA               | INTERGENIC      |               |                    |                    |
| SNP_65435_A_621197 | NW_004515744.1 | scaffold198 | 621197                  | GG                              | AA                 | AA               | INTERGENIC      |               |                    |                    |
| SNP_65436_A_621234 | NW_004515744.1 | scaffold198 | 621234                  | TT                              | CC                 | CC               | INTERGENIC      |               |                    |                    |
| SNP_65437_A_621239 | NW_004515744.1 | scaffold198 | 621239                  | GG                              | CC                 | CC               | INTERGENIC      |               |                    |                    |
| SNP_65438_A_621550 | NW_004515744.1 | scaffold198 | 621550                  | CC                              | AA                 | AA               | INTERGENIC      |               |                    |                    |
| SNP_65440_A_631467 | NW_004515744.1 | scaffold198 | 631467                  | GG                              | TT                 | TT               | INTERGENIC      |               |                    |                    |
| SNP_65441_A_631654 | NW_004515744.1 | scaffold198 | 631654                  | CC                              | GG                 | GG               | INTERGENIC      |               |                    |                    |
| SNP_65442_A_631671 | NW_004515744.1 | scaffold198 | 631671                  | AA                              | GG                 | GG               | INTERGENIC      |               |                    |                    |
| SNP_65443_A_632944 | NW_004515744.1 | scaffold198 | 632944                  | GG                              | CC                 | CC               | INTERGENIC      |               |                    |                    |
| SNP_65444_A_633055 | NW_004515744.1 | scaffold198 | 633055                  | CC                              | AA                 | AA               | INTERGENIC      |               |                    |                    |
| SNP_65445_A_633415 | NW_004515744.1 | scaffold198 | 633415                  | GG                              | CC                 | CC               | INTERGENIC      |               |                    |                    |
| SNP_65446_A_633596 | NW_004515744.1 | scaffold198 | 633596                  | TT                              | CC                 | CC               | INTERGENIC      |               |                    |                    |
| SNP_65447_A_633607 | NW_004515744.1 | scaffold198 | 633607                  | GG                              | TT                 | TT               | INTERGENIC      |               |                    |                    |
| SNP_65449_A_633878 | NW_004515744.1 | scaffold198 | 633878                  | CC                              | TT                 | TT               | INTERGENIC      |               |                    |                    |
| SNP_65450_A_633881 | NW_004515744.1 | scaffold198 | 633881                  | GG                              | TT                 | TT               | INTERGENIC      |               |                    |                    |
| SNP_65451_A_637418 | NW_004515744.1 | scaffold198 | 637418                  | AA                              | CC                 | CC               | INTERGENIC      |               |                    |                    |
| SNP_65453_A_637904 | NW_004515744.1 | scaffold198 | 637904                  | GG                              | AA                 | AA               | INTERGENIC      |               |                    |                    |
| SNP_65454_A_638747 | NW_004515744.1 | scaffold198 | 638747                  | CC                              | TT                 | TT               | INTERGENIC      |               |                    |                    |
| SNP_65455_A_5247   | NW_004515746.1 | scaffold200 | 5247                    | AA                              | CC                 | CC               | INTERGENIC      |               |                    |                    |

| SNPs IDs           | Chromosome IDs | Chromosomes | Physical positions (bp) | CDC Frontier (Reference genome) | (Pusa 1103 & HPNB) | (ILWC 46 & LPNB) | Sequence Components of genome | Gene accession IDs | Putative functions                         |
|--------------------|----------------|-------------|-------------------------|---------------------------------|--------------------|------------------|-------------------------------|--------------------|--------------------------------------------|
| SNP_65456_A_5788   | NW_004515746.1 | scaffold200 | 5788                    | TT                              | AA                 | AA               | INTERGENIC                    |                    |                                            |
| SNP_65457_A_5789   | NW_004515746.1 | scaffold200 | 5789                    | TT                              | AA                 | AA               | INTERGENIC                    |                    |                                            |
| SNP_65458_A_35731  | NW_004515746.1 | scaffold200 | 35731                   | AA                              | CC                 | CC               | INTERGENIC                    |                    |                                            |
| SNP_65459_A_43823  | NW_004515746.1 | scaffold200 | 43823                   | CC                              | AA                 | AA               | INTERGENIC                    |                    |                                            |
| SNP_65460_A_49485  | NW_004515746.1 | scaffold200 | 49485                   | AA                              | TT                 | TT               | INTERGENIC                    |                    |                                            |
| SNP_65461_A_66755  | NW_004515746.1 | scaffold200 | 66755                   | TT                              | AA                 | AA               | INTERGENIC                    |                    |                                            |
| SNP_65462_A_82277  | NW_004515746.1 | scaffold200 | 82277                   | TT                              | CC                 | CC               | INTERGENIC                    |                    |                                            |
| SNP_65463_A_82601  | NW_004515746.1 | scaffold200 | 82601                   | AA                              | GG                 | GG               | INTERGENIC                    |                    |                                            |
| SNP_65464_A_87762  | NW_004515746.1 | scaffold200 | 87762                   | GG                              | AA                 | AA               | INTERGENIC                    |                    |                                            |
| SNP_65465_A_107389 | NW_004515746.1 | scaffold200 | 107389                  | AA                              | GG                 | GG               | INTERGENIC                    |                    |                                            |
| SNP_65466_A_107548 | NW_004515746.1 | scaffold200 | 107548                  | CC                              | TT                 | TT               | INTERGENIC                    |                    |                                            |
| SNP_65467_A_1430   | NW_004515747.1 | scaffold202 | 1430                    | CC                              | TT                 | TT               | INTERGENIC                    |                    |                                            |
| SNP_65468_A_4225   | NW_004515747.1 | scaffold202 | 4225                    | CC                              | AA                 | AA               | DRR                           | 101410548          | transfer RNA phenylalanine (anticodon GAA) |
| SNP_65469_A_10420  | NW_004515747.1 | scaffold202 | 10420                   | TT                              | CC                 | CC               | INTERGENIC                    |                    |                                            |
| SNP_65470_A_10431  | NW_004515747.1 | scaffold202 | 10431                   | AA                              | GG                 | GG               | INTERGENIC                    |                    |                                            |
| SNP_65471_A_16842  | NW_004515747.1 | scaffold202 | 16842                   | CC                              | GG                 | GG               | INTERGENIC                    |                    |                                            |
| SNP_65472_A_16849  | NW_004515747.1 | scaffold202 | 16849                   | GG                              | AA                 | AA               | INTERGENIC                    |                    |                                            |
| SNP_65473_A_17161  | NW_004515747.1 | scaffold202 | 17161                   | CC                              | AA                 | AA               | INTERGENIC                    |                    |                                            |
| SNP_65474_A_17248  | NW_004515747.1 | scaffold202 | 17248                   | AA                              | TT                 | TT               | INTERGENIC                    |                    |                                            |
| SNP_65475_A_17342  | NW_004515747.1 | scaffold202 | 17342                   | TT                              | CC                 | CC               | INTERGENIC                    |                    |                                            |
| SNP_65476_A_17421  | NW_004515747.1 | scaffold202 | 17421                   | GG                              | TT                 | TT               | INTERGENIC                    |                    |                                            |
| SNP_65477_A_17508  | NW_004515747.1 | scaffold202 | 17508                   | CC                              | AA                 | AA               | INTERGENIC                    |                    |                                            |

| SNPs IDs          | Chromosome IDs | Chromosomes | Physical positions (bp) | CDC Frontier (Reference genome) | (Pusa 1103 & HPNB) | (ILWC 46 & LPNB) | Sequence genome | Components of | Gene accession IDs | Putative functions |
|-------------------|----------------|-------------|-------------------------|---------------------------------|--------------------|------------------|-----------------|---------------|--------------------|--------------------|
| SNP_65478_A_17518 | NW_004515747.1 | scaffold202 | 17518                   | TT                              | GG                 | GG               | INTERGENIC      |               |                    |                    |
| SNP_65479_A_17630 | NW_004515747.1 | scaffold202 | 17630                   | GG                              | AA                 | AA               | INTERGENIC      |               |                    |                    |
| SNP_65481_A_17752 | NW_004515747.1 | scaffold202 | 17752                   | CC                              | TT                 | TT               | INTERGENIC      |               |                    |                    |
| SNP_65482_A_17767 | NW_004515747.1 | scaffold202 | 17767                   | AA                              | GG                 | GG               | INTERGENIC      |               |                    |                    |
| SNP_65484_A_17850 | NW_004515747.1 | scaffold202 | 17850                   | GG                              | AA                 | AA               | INTERGENIC      |               |                    |                    |
| SNP_65485_A_17857 | NW_004515747.1 | scaffold202 | 17857                   | GG                              | AA                 | AA               | INTERGENIC      |               |                    |                    |
| SNP_65486_A_17913 | NW_004515747.1 | scaffold202 | 17913                   | AA                              | CC                 | CC               | INTERGENIC      |               |                    |                    |
| SNP_65487_A_18091 | NW_004515747.1 | scaffold202 | 18091                   | CC                              | GG                 | GG               | INTERGENIC      |               |                    |                    |
| SNP_65488_A_18092 | NW_004515747.1 | scaffold202 | 18092                   | AA                              | TT                 | TT               | INTERGENIC      |               |                    |                    |
| SNP_65489_A_19922 | NW_004515747.1 | scaffold202 | 19922                   | GG                              | AA                 | AA               | INTERGENIC      |               |                    |                    |
| SNP_65491_A_19985 | NW_004515747.1 | scaffold202 | 19985                   | GG                              | AA                 | AA               | INTERGENIC      |               |                    |                    |
| SNP_65492_A_19994 | NW_004515747.1 | scaffold202 | 19994                   | TT                              | AA                 | AA               | INTERGENIC      |               |                    |                    |
| SNP_65493_A_20097 | NW_004515747.1 | scaffold202 | 20097                   | AA                              | CC                 | CC               | INTERGENIC      |               |                    |                    |
| SNP_65494_A_20219 | NW_004515747.1 | scaffold202 | 20219                   | GG                              | TT                 | TT               | INTERGENIC      |               |                    |                    |
| SNP_65495_A_20297 | NW_004515747.1 | scaffold202 | 20297                   | GG                              | AA                 | AA               | INTERGENIC      |               |                    |                    |
| SNP_65496_A_20303 | NW_004515747.1 | scaffold202 | 20303                   | GG                              | TT                 | TT               | INTERGENIC      |               |                    |                    |
| SNP_65497_A_20338 | NW_004515747.1 | scaffold202 | 20338                   | TT                              | AA                 | AA               | INTERGENIC      |               |                    |                    |
| SNP_65498_A_20389 | NW_004515747.1 | scaffold202 | 20389                   | TT                              | CC                 | CC               | INTERGENIC      |               |                    |                    |
| SNP_65499_A_20403 | NW_004515747.1 | scaffold202 | 20403                   | AA                              | GG                 | GG               | INTERGENIC      |               |                    |                    |
| SNP_65500_A_20471 | NW_004515747.1 | scaffold202 | 20471                   | AA                              | GG                 | GG               | INTERGENIC      |               |                    |                    |
| SNP_65501_A_20474 | NW_004515747.1 | scaffold202 | 20474                   | GG                              | TT                 | TT               | INTERGENIC      |               |                    |                    |
| SNP_65503_A_20572 | NW_004515747.1 | scaffold202 | 20572                   | CC                              | TT                 | TT               | INTERGENIC      |               |                    |                    |

| SNPs IDs          | Chromosome IDs | Chromosomes | Physical positions (bp) | CDC Frontier (Reference genome) | (Pusa 1103 & HPNB) | (ILWC 46 & LPNB) | Sequence genome | Components of | Gene accession IDs | Putative functions |
|-------------------|----------------|-------------|-------------------------|---------------------------------|--------------------|------------------|-----------------|---------------|--------------------|--------------------|
| SNP_65504_A_20613 | NW_004515747.1 | scaffold202 | 20613                   | CC                              | TT                 | TT               | INTERGENIC      |               |                    |                    |
| SNP_65505_A_20821 | NW_004515747.1 | scaffold202 | 20821                   | TT                              | AA                 | AA               | INTERGENIC      |               |                    |                    |
| SNP_65506_A_20914 | NW_004515747.1 | scaffold202 | 20914                   | TT                              | CC                 | CC               | INTERGENIC      |               |                    |                    |
| SNP_65507_A_20925 | NW_004515747.1 | scaffold202 | 20925                   | CC                              | TT                 | TT               | INTERGENIC      |               |                    |                    |
| SNP_65508_A_20976 | NW_004515747.1 | scaffold202 | 20976                   | TT                              | AA                 | AA               | INTERGENIC      |               |                    |                    |
| SNP_65509_A_21020 | NW_004515747.1 | scaffold202 | 21020                   | CC                              | TT                 | TT               | INTERGENIC      |               |                    |                    |
| SNP_65510_A_21028 | NW_004515747.1 | scaffold202 | 21028                   | AA                              | GG                 | GG               | INTERGENIC      |               |                    |                    |
| SNP_65511_A_22198 | NW_004515747.1 | scaffold202 | 22198                   | CC                              | TT                 | TT               | INTERGENIC      |               |                    |                    |
| SNP_65514_A_22796 | NW_004515747.1 | scaffold202 | 22796                   | TT                              | GG                 | GG               | INTERGENIC      |               |                    |                    |
| SNP_65515_A_22899 | NW_004515747.1 | scaffold202 | 22899                   | AA                              | TT                 | TT               | INTERGENIC      |               |                    |                    |
| SNP_65516_A_22951 | NW_004515747.1 | scaffold202 | 22951                   | AA                              | TT                 | TT               | INTERGENIC      |               |                    |                    |
| SNP_65517_A_23698 | NW_004515747.1 | scaffold202 | 23698                   | AA                              | GG                 | GG               | INTERGENIC      |               |                    |                    |
| SNP_65518_A_23920 | NW_004515747.1 | scaffold202 | 23920                   | AA                              | CC                 | CC               | INTERGENIC      |               |                    |                    |
| SNP_65519_A_24044 | NW_004515747.1 | scaffold202 | 24044                   | TT                              | CC                 | CC               | INTERGENIC      |               |                    |                    |
| SNP_65520_A_24363 | NW_004515747.1 | scaffold202 | 24363                   | TT                              | GG                 | GG               | INTERGENIC      |               |                    |                    |
| SNP_65521_A_24406 | NW_004515747.1 | scaffold202 | 24406                   | AA                              | GG                 | GG               | INTERGENIC      |               |                    |                    |
| SNP_65522_A_24642 | NW_004515747.1 | scaffold202 | 24642                   | AA                              | GG                 | GG               | INTERGENIC      |               |                    |                    |
| SNP_65523_A_24663 | NW_004515747.1 | scaffold202 | 24663                   | TT                              | CC                 | CC               | INTERGENIC      |               |                    |                    |
| SNP_65524_A_24664 | NW_004515747.1 | scaffold202 | 24664                   | AA                              | GG                 | GG               | INTERGENIC      |               |                    |                    |
| SNP_65525_A_24700 | NW_004515747.1 | scaffold202 | 24700                   | AA                              | GG                 | GG               | INTERGENIC      |               |                    |                    |
| SNP_65526_A_24728 | NW_004515747.1 | scaffold202 | 24728                   | TT                              | CC                 | CC               | INTERGENIC      |               |                    |                    |
| SNP_65527_A_24845 | NW_004515747.1 | scaffold202 | 24845                   | TT                              | AA                 | AA               | INTERGENIC      |               |                    |                    |

| SNPs IDs          | Chromosome IDs | Chromosomes | Physical positions (bp) | CDC Frontier (Reference genome) | (Pusa 1103 & HPNB) | (ILWC 46 & LPNB) | Sequence genome | Components of | Gene accession IDs | Putative functions |
|-------------------|----------------|-------------|-------------------------|---------------------------------|--------------------|------------------|-----------------|---------------|--------------------|--------------------|
| SNP_65528_A_24878 | NW_004515747.1 | scaffold202 | 24878                   | GG                              | AA                 | AA               | INTERGENIC      |               |                    |                    |
| SNP_65529_A_27514 | NW_004515747.1 | scaffold202 | 27514                   | CC                              | TT                 | TT               | INTERGENIC      |               |                    |                    |
| SNP_65530_A_27575 | NW_004515747.1 | scaffold202 | 27575                   | AA                              | CC                 | CC               | INTERGENIC      |               |                    |                    |
| SNP_65531_A_27629 | NW_004515747.1 | scaffold202 | 27629                   | GG                              | AA                 | AA               | INTERGENIC      |               |                    |                    |
| SNP_65532_A_27674 | NW_004515747.1 | scaffold202 | 27674                   | GG                              | AA                 | AA               | INTERGENIC      |               |                    |                    |
| SNP_65533_A_27675 | NW_004515747.1 | scaffold202 | 27675                   | CC                              | TT                 | TT               | INTERGENIC      |               |                    |                    |
| SNP_65534_A_27684 | NW_004515747.1 | scaffold202 | 27684                   | TT                              | CC                 | CC               | INTERGENIC      |               |                    |                    |
| SNP_65535_A_27769 | NW_004515747.1 | scaffold202 | 27769                   | GG                              | TT                 | TT               | INTERGENIC      |               |                    |                    |
| SNP_65536_A_34949 | NW_004515747.1 | scaffold202 | 34949                   | CC                              | AA                 | AA               | INTERGENIC      |               |                    |                    |
| SNP_65537_A_35665 | NW_004515747.1 | scaffold202 | 35665                   | CC                              | GG                 | GG               | INTERGENIC      |               |                    |                    |
| SNP_65538_A_35778 | NW_004515747.1 | scaffold202 | 35778                   | CC                              | TT                 | TT               | INTERGENIC      |               |                    |                    |
| SNP_65539_A_35834 | NW_004515747.1 | scaffold202 | 35834                   | AA                              | GG                 | GG               | INTERGENIC      |               |                    |                    |
| SNP_65540_A_35907 | NW_004515747.1 | scaffold202 | 35907                   | AA                              | GG                 | GG               | INTERGENIC      |               |                    |                    |
| SNP_65541_A_35941 | NW_004515747.1 | scaffold202 | 35941                   | CC                              | TT                 | TT               | INTERGENIC      |               |                    |                    |
| SNP_65542_A_35976 | NW_004515747.1 | scaffold202 | 35976                   | AA                              | CC                 | CC               | INTERGENIC      |               |                    |                    |
| SNP_65543_A_36173 | NW_004515747.1 | scaffold202 | 36173                   | GG                              | AA                 | AA               | INTERGENIC      |               |                    |                    |
| SNP_65544_A_36332 | NW_004515747.1 | scaffold202 | 36332                   | CC                              | TT                 | TT               | INTERGENIC      |               |                    |                    |
| SNP_65545_A_36463 | NW_004515747.1 | scaffold202 | 36463                   | CC                              | TT                 | TT               | INTERGENIC      |               |                    |                    |
| SNP_65546_A_36503 | NW_004515747.1 | scaffold202 | 36503                   | GG                              | AA                 | AA               | INTERGENIC      |               |                    |                    |
| SNP_65547_A_36549 | NW_004515747.1 | scaffold202 | 36549                   | TT                              | GG                 | GG               | INTERGENIC      |               |                    |                    |
| SNP_65548_A_36619 | NW_004515747.1 | scaffold202 | 36619                   | GG                              | TT                 | TT               | INTERGENIC      |               |                    |                    |
| SNP_65550_A_36855 | NW_004515747.1 | scaffold202 | 36855                   | TT                              | GG                 | GG               | INTERGENIC      |               |                    |                    |

| SNPs IDs          | Chromosome IDs | Chromosomes | Physical positions (bp) | CDC Frontier (Reference genome) | (Pusa 1103 & HPNB) | (ILWC 46 & LPNB) | Sequence genome | Components of | Gene accession IDs | Putative functions |
|-------------------|----------------|-------------|-------------------------|---------------------------------|--------------------|------------------|-----------------|---------------|--------------------|--------------------|
| SNP_65551_A_36941 | NW_004515747.1 | scaffold202 | 36941                   | AA                              | TT                 | TT               | INTERGENIC      |               |                    |                    |
| SNP_65552_A_37140 | NW_004515747.1 | scaffold202 | 37140                   | TT                              | GG                 | GG               | INTERGENIC      |               |                    |                    |
| SNP_65553_A_37244 | NW_004515747.1 | scaffold202 | 37244                   | TT                              | CC                 | CC               | INTERGENIC      |               |                    |                    |
| SNP_65554_A_37375 | NW_004515747.1 | scaffold202 | 37375                   | AA                              | GG                 | GG               | INTERGENIC      |               |                    |                    |
| SNP_65555_A_37400 | NW_004515747.1 | scaffold202 | 37400                   | GG                              | CC                 | CC               | INTERGENIC      |               |                    |                    |
| SNP_65556_A_37585 | NW_004515747.1 | scaffold202 | 37585                   | TT                              | AA                 | AA               | INTERGENIC      |               |                    |                    |
| SNP_65557_A_37825 | NW_004515747.1 | scaffold202 | 37825                   | AA                              | TT                 | TT               | INTERGENIC      |               |                    |                    |
| SNP_65560_A_37989 | NW_004515747.1 | scaffold202 | 37989                   | GG                              | AA                 | AA               | INTERGENIC      |               |                    |                    |
| SNP_65561_A_37994 | NW_004515747.1 | scaffold202 | 37994                   | TT                              | CC                 | CC               | INTERGENIC      |               |                    |                    |
| SNP_65562_A_38080 | NW_004515747.1 | scaffold202 | 38080                   | TT                              | GG                 | GG               | INTERGENIC      |               |                    |                    |
| SNP_65563_A_38083 | NW_004515747.1 | scaffold202 | 38083                   | AA                              | GG                 | GG               | INTERGENIC      |               |                    |                    |
| SNP_65564_A_38090 | NW_004515747.1 | scaffold202 | 38090                   | GG                              | AA                 | AA               | INTERGENIC      |               |                    |                    |
| SNP_65565_A_38236 | NW_004515747.1 | scaffold202 | 38236                   | GG                              | AA                 | AA               | INTERGENIC      |               |                    |                    |
| SNP_65566_A_38539 | NW_004515747.1 | scaffold202 | 38539                   | TT                              | GG                 | GG               | INTERGENIC      |               |                    |                    |
| SNP_65567_A_38675 | NW_004515747.1 | scaffold202 | 38675                   | AA                              | TT                 | TT               | INTERGENIC      |               |                    |                    |
| SNP_65568_A_38695 | NW_004515747.1 | scaffold202 | 38695                   | GG                              | TT                 | TT               | INTERGENIC      |               |                    |                    |
| SNP_65569_A_38746 | NW_004515747.1 | scaffold202 | 38746                   | GG                              | AA                 | AA               | INTERGENIC      |               |                    |                    |
| SNP_65570_A_38775 | NW_004515747.1 | scaffold202 | 38775                   | CC                              | TT                 | TT               | INTERGENIC      |               |                    |                    |
| SNP_65571_A_38796 | NW_004515747.1 | scaffold202 | 38796                   | GG                              | AA                 | AA               | INTERGENIC      |               |                    |                    |
| SNP_65572_A_38836 | NW_004515747.1 | scaffold202 | 38836                   | CC                              | TT                 | TT               | INTERGENIC      |               |                    |                    |
| SNP_65573_A_38846 | NW_004515747.1 | scaffold202 | 38846                   | GG                              | AA                 | AA               | INTERGENIC      |               |                    |                    |
| SNP_65574_A_38848 | NW_004515747.1 | scaffold202 | 38848                   | TT                              | CC                 | CC               | INTERGENIC      |               |                    |                    |

| SNPs IDs          | Chromosome IDs | Chromosomes | Physical positions (bp) | CDC Frontier genome (Reference genome) | (Pusa 1103 & HPNB) | (ILWC 46 & LPNB) | Sequence genome | Components of | Gene accession IDs           | Putative functions |
|-------------------|----------------|-------------|-------------------------|----------------------------------------|--------------------|------------------|-----------------|---------------|------------------------------|--------------------|
| SNP_65575_A_38895 | NW_004515747.1 | scaffold202 | 38895                   | AA                                     | GG                 | GG               | INTERGENIC      |               |                              |                    |
| SNP_65576_A_38989 | NW_004515747.1 | scaffold202 | 38989                   | AA                                     | CC                 | CC               | INTERGENIC      |               |                              |                    |
| SNP_65577_A_39013 | NW_004515747.1 | scaffold202 | 39013                   | GG                                     | AA                 | AA               | INTERGENIC      |               |                              |                    |
| SNP_65578_A_39178 | NW_004515747.1 | scaffold202 | 39178                   | GG                                     | AA                 | AA               | INTERGENIC      |               |                              |                    |
| SNP_65581_A_39344 | NW_004515747.1 | scaffold202 | 39344                   | GG                                     | AA                 | AA               | INTERGENIC      |               |                              |                    |
| SNP_65582_A_39351 | NW_004515747.1 | scaffold202 | 39351                   | TT                                     | CC                 | CC               | INTERGENIC      |               |                              |                    |
| SNP_65583_A_39377 | NW_004515747.1 | scaffold202 | 39377                   | GG                                     | AA                 | AA               | INTERGENIC      |               |                              |                    |
| SNP_65584_A_39418 | NW_004515747.1 | scaffold202 | 39418                   | TT                                     | GG                 | GG               | INTERGENIC      |               |                              |                    |
| SNP_65585_A_39645 | NW_004515747.1 | scaffold202 | 39645                   | CC                                     | TT                 | TT               | INTERGENIC      |               |                              |                    |
| SNP_65586_A_39684 | NW_004515747.1 | scaffold202 | 39684                   | CC                                     | TT                 | TT               | INTERGENIC      |               |                              |                    |
| SNP_65587_A_40755 | NW_004515747.1 | scaffold202 | 40755                   | CC                                     | AA                 | AA               | INTERGENIC      |               |                              |                    |
| SNP_65588_A_40848 | NW_004515747.1 | scaffold202 | 40848                   | AA                                     | CC                 | CC               | INTERGENIC      |               |                              |                    |
| SNP_65589_A_41208 | NW_004515747.1 | scaffold202 | 41208                   | CC                                     | TT                 | TT               | INTERGENIC      |               |                              |                    |
| SNP_65590_A_45789 | NW_004515747.1 | scaffold202 | 45789                   | AA                                     | GG                 | GG               | INTRON          | 101509905     | uncharacterized LOC101509905 |                    |
| SNP_65591_A_45848 | NW_004515747.1 | scaffold202 | 45848                   | CC                                     | TT                 | TT               | INTRON          | 101509905     | uncharacterized LOC101509905 |                    |
| SNP_65592_A_52529 | NW_004515747.1 | scaffold202 | 52529                   | GG                                     | TT                 | TT               | INTRON          | 101509905     | uncharacterized LOC101509905 |                    |
| SNP_65593_A_52542 | NW_004515747.1 | scaffold202 | 52542                   | GG                                     | CC                 | CC               | INTRON          | 101509905     | uncharacterized LOC101509905 |                    |
| SNP_65594_A_52858 | NW_004515747.1 | scaffold202 | 52858                   | AA                                     | TT                 | TT               | INTRON          | 101509905     | uncharacterized LOC101509905 |                    |
| SNP_65595_A_53336 | NW_004515747.1 | scaffold202 | 53336                   | CC                                     | TT                 | TT               | INTRON          | 101509905     | uncharacterized LOC101509905 |                    |
| SNP_65596_A_53473 | NW_004515747.1 | scaffold202 | 53473                   | TT                                     | AA                 | AA               | INTRON          | 101509905     | uncharacterized LOC101509905 |                    |
| SNP_65597_A_53503 | NW_004515747.1 | scaffold202 | 53503                   | TT                                     | CC                 | CC               | INTRON          | 101509905     | uncharacterized LOC101509905 |                    |
| SNP_65598_A_53512 | NW_004515747.1 | scaffold202 | 53512                   | CC                                     | AA                 | AA               | INTRON          | 101509905     | uncharacterized LOC101509905 |                    |

| SNPs IDs          | Chromosome IDs | Chromosomes | Physical positions (bp) | CDC Frontier (Reference genome) | (Pusa 1103 & HPNB) | (ILWC 46 & LPNB) | Sequence Components of genome | Gene accession IDs | Putative functions           |
|-------------------|----------------|-------------|-------------------------|---------------------------------|--------------------|------------------|-------------------------------|--------------------|------------------------------|
| SNP_65599_A_53522 | NW_004515747.1 | scaffold202 | 53522                   | GG                              | AA                 | AA               | INTRON                        | 101509905          | uncharacterized LOC101509905 |
| SNP_65600_A_53550 | NW_004515747.1 | scaffold202 | 53550                   | AA                              | GG                 | GG               | INTRON                        | 101509905          | uncharacterized LOC101509905 |
| SNP_65601_A_60969 | NW_004515747.1 | scaffold202 | 60969                   | CC                              | TT                 | TT               | INTRON                        | 101509905          | uncharacterized LOC101509905 |
| SNP_65603_A_62088 | NW_004515747.1 | scaffold202 | 62088                   | GG                              | TT                 | TT               | SYNONYMOUS_CODING             | 101509905          | uncharacterized LOC101509905 |
| SNP_65604_A_62615 | NW_004515747.1 | scaffold202 | 62615                   | GG                              | AA                 | AA               | INTRON                        | 101509905          | uncharacterized LOC101509905 |
| SNP_65605_A_90523 | NW_004515747.1 | scaffold202 | 90523                   | GG                              | TT                 | TT               | INTRON                        | 101509905          | uncharacterized LOC101509905 |
| SNP_65606_A_90597 | NW_004515747.1 | scaffold202 | 90597                   | GG                              | CC                 | CC               | INTRON                        | 101509905          | uncharacterized LOC101509905 |
| SNP_65607_A_90773 | NW_004515747.1 | scaffold202 | 90773                   | TT                              | CC                 | CC               | NON_SYNONYMOUS_CODING         | 101509905          | uncharacterized LOC101509905 |
| SNP_65608_A_93016 | NW_004515747.1 | scaffold202 | 93016                   | GG                              | AA                 | AA               | SYNONYMOUS_CODING             | 101509905          | uncharacterized LOC101509905 |
| SNP_65609_A_93081 | NW_004515747.1 | scaffold202 | 93081                   | GG                              | TT                 | TT               | INTRON                        | 101509905          | uncharacterized LOC101509905 |
| SNP_65610_A_93108 | NW_004515747.1 | scaffold202 | 93108                   | GG                              | TT                 | TT               | INTRON                        | 101509905          | uncharacterized LOC101509905 |
| SNP_65611_A_93142 | NW_004515747.1 | scaffold202 | 93142                   | AA                              | TT                 | TT               | INTRON                        | 101509905          | uncharacterized LOC101509905 |
| SNP_65612_A_93654 | NW_004515747.1 | scaffold202 | 93654                   | GG                              | AA                 | AA               | SYNONYMOUS_CODING             | 101509905          | uncharacterized LOC101509905 |
| SNP_65613_A_93702 | NW_004515747.1 | scaffold202 | 93702                   | AA                              | GG                 | GG               | INTRON                        | 101509905          | uncharacterized LOC101509905 |
| SNP_65615_A_94030 | NW_004515747.1 | scaffold202 | 94030                   | CC                              | GG                 | GG               | INTRON                        | 101509905          | uncharacterized LOC101509905 |
| SNP_65616_A_94097 | NW_004515747.1 | scaffold202 | 94097                   | AA                              | GG                 | GG               | INTRON                        | 101509905          | uncharacterized LOC101509905 |
| SNP_65617_A_94235 | NW_004515747.1 | scaffold202 | 94235                   | CC                              | TT                 | TT               | INTRON                        | 101509905          | uncharacterized LOC101509905 |
| SNP_65618_A_94241 | NW_004515747.1 | scaffold202 | 94241                   | CC                              | AA                 | AA               | INTRON                        | 101509905          | uncharacterized LOC101509905 |
| SNP_65619_A_94318 | NW_004515747.1 | scaffold202 | 94318                   | GG                              | TT                 | TT               | INTRON                        | 101509905          | uncharacterized LOC101509905 |
| SNP_65620_A_94482 | NW_004515747.1 | scaffold202 | 94482                   | TT                              | CC                 | CC               | INTRON                        | 101509905          | uncharacterized LOC101509905 |
| SNP_65621_A_94594 | NW_004515747.1 | scaffold202 | 94594                   | CC                              | TT                 | TT               | INTRON                        | 101509905          | uncharacterized LOC101509905 |
| SNP_65622_A_94787 | NW_004515747.1 | scaffold202 | 94787                   | AA                              | GG                 | GG               | INTRON                        | 101509905          | uncharacterized LOC101509905 |



| SNPs IDs          | Chromosome IDs | Chromosomes | Physical positions (bp) | CDC Frontier (Reference genome) | (Pusa 1103 & HPNB) | (ILWC 46 & LPNB) | Sequence Components of genome | Gene accession IDs | Putative functions           |
|-------------------|----------------|-------------|-------------------------|---------------------------------|--------------------|------------------|-------------------------------|--------------------|------------------------------|
| SNP_65623_A_94912 | NW_004515747.1 | scaffold202 | 94912                   | AA                              | GG                 | GG               | INTRON                        | 101509905          | uncharacterized LOC101509905 |
| SNP_65624_A_94918 | NW_004515747.1 | scaffold202 | 94918                   | CC                              | TT                 | TT               | INTRON                        | 101509905          | uncharacterized LOC101509905 |
| SNP_65625_A_94919 | NW_004515747.1 | scaffold202 | 94919                   | AA                              | GG                 | GG               | INTRON                        | 101509905          | uncharacterized LOC101509905 |
| SNP_65626_A_95070 | NW_004515747.1 | scaffold202 | 95070                   | TT                              | GG                 | GG               | INTRON                        | 101509905          | uncharacterized LOC101509905 |
| SNP_65627_A_95071 | NW_004515747.1 | scaffold202 | 95071                   | AA                              | CC                 | CC               | INTRON                        | 101509905          | uncharacterized LOC101509905 |
| SNP_65628_A_95182 | NW_004515747.1 | scaffold202 | 95182                   | GG                              | AA                 | AA               | INTRON                        | 101509905          | uncharacterized LOC101509905 |
| SNP_65629_A_95246 | NW_004515747.1 | scaffold202 | 95246                   | AA                              | TT                 | TT               | INTRON                        | 101509905          | uncharacterized LOC101509905 |
| SNP_65630_A_95276 | NW_004515747.1 | scaffold202 | 95276                   | TT                              | CC                 | CC               | INTRON                        | 101509905          | uncharacterized LOC101509905 |
| SNP_65631_A_95429 | NW_004515747.1 | scaffold202 | 95429                   | AA                              | GG                 | GG               | INTERGENIC                    |                    |                              |
| SNP_65632_A_95438 | NW_004515747.1 | scaffold202 | 95438                   | AA                              | GG                 | GG               | INTERGENIC                    |                    |                              |
| SNP_65633_A_95496 | NW_004515747.1 | scaffold202 | 95496                   | AA                              | GG                 | GG               | INTERGENIC                    |                    |                              |
| SNP_65634_A_95533 | NW_004515747.1 | scaffold202 | 95533                   | AA                              | GG                 | GG               | INTERGENIC                    |                    |                              |
| SNP_65635_A_95609 | NW_004515747.1 | scaffold202 | 95609                   | TT                              | CC                 | CC               | INTERGENIC                    |                    |                              |
| SNP_65636_A_95619 | NW_004515747.1 | scaffold202 | 95619                   | GG                              | AA                 | AA               | INTERGENIC                    |                    |                              |
| SNP_65637_A_95708 | NW_004515747.1 | scaffold202 | 95708                   | GG                              | AA                 | AA               | INTERGENIC                    |                    |                              |
| SNP_65638_A_95792 | NW_004515747.1 | scaffold202 | 95792                   | GG                              | AA                 | AA               | INTERGENIC                    |                    |                              |
| SNP_65639_A_95869 | NW_004515747.1 | scaffold202 | 95869                   | TT                              | CC                 | CC               | INTERGENIC                    |                    |                              |
| SNP_65640_A_95904 | NW_004515747.1 | scaffold202 | 95904                   | AA                              | GG                 | GG               | INTERGENIC                    |                    |                              |
| SNP_65641_A_95942 | NW_004515747.1 | scaffold202 | 95942                   | TT                              | CC                 | CC               | INTERGENIC                    |                    |                              |
| SNP_65642_A_96043 | NW_004515747.1 | scaffold202 | 96043                   | GG                              | AA                 | AA               | INTERGENIC                    |                    |                              |
| SNP_65643_A_96074 | NW_004515747.1 | scaffold202 | 96074                   | AA                              | GG                 | GG               | INTERGENIC                    |                    |                              |
| SNP_65644_A_96097 | NW_004515747.1 | scaffold202 | 96097                   | GG                              | AA                 | AA               | INTERGENIC                    |                    |                              |

| SNPs IDs           | Chromosome IDs | Chromosomes | Physical positions (bp) | CDC Frontier (Reference genome) | (Pusa 1103 & HPNB) | (ILWC 46 & LPNB) | Sequence genome | Components of | Gene accession IDs           | Putative functions |
|--------------------|----------------|-------------|-------------------------|---------------------------------|--------------------|------------------|-----------------|---------------|------------------------------|--------------------|
| SNP_65645_A_96140  | NW_004515747.1 | scaffold202 | 96140                   | TT                              | CC                 | CC               | INTERGENIC      |               |                              |                    |
| SNP_65646_A_96281  | NW_004515747.1 | scaffold202 | 96281                   | AA                              | GG                 | GG               | INTERGENIC      |               |                              |                    |
| SNP_65647_A_96333  | NW_004515747.1 | scaffold202 | 96333                   | AA                              | GG                 | GG               | INTERGENIC      |               |                              |                    |
| SNP_65648_A_96363  | NW_004515747.1 | scaffold202 | 96363                   | GG                              | TT                 | TT               | INTERGENIC      |               |                              |                    |
| SNP_65649_A_96394  | NW_004515747.1 | scaffold202 | 96394                   | AA                              | TT                 | TT               | INTERGENIC      |               |                              |                    |
| SNP_65650_A_96397  | NW_004515747.1 | scaffold202 | 96397                   | AA                              | GG                 | GG               | INTERGENIC      |               |                              |                    |
| SNP_65651_A_96444  | NW_004515747.1 | scaffold202 | 96444                   | AA                              | GG                 | GG               | INTERGENIC      |               |                              |                    |
| SNP_65652_A_96456  | NW_004515747.1 | scaffold202 | 96456                   | CC                              | TT                 | TT               | INTERGENIC      |               |                              |                    |
| SNP_65653_A_96532  | NW_004515747.1 | scaffold202 | 96532                   | TT                              | GG                 | GG               | INTERGENIC      |               |                              |                    |
| SNP_65654_A_96580  | NW_004515747.1 | scaffold202 | 96580                   | GG                              | TT                 | TT               | INTERGENIC      |               |                              |                    |
| SNP_65655_A_96589  | NW_004515747.1 | scaffold202 | 96589                   | TT                              | AA                 | AA               | INTERGENIC      |               |                              |                    |
| SNP_65656_A_96614  | NW_004515747.1 | scaffold202 | 96614                   | TT                              | CC                 | CC               | INTERGENIC      |               |                              |                    |
| SNP_65657_A_96868  | NW_004515747.1 | scaffold202 | 96868                   | CC                              | AA                 | AA               | INTERGENIC      |               |                              |                    |
| SNP_65658_A_97636  | NW_004515747.1 | scaffold202 | 97636                   | AA                              | GG                 | GG               | INTERGENIC      |               |                              |                    |
| SNP_65659_A_97768  | NW_004515747.1 | scaffold202 | 97768                   | CC                              | GG                 | GG               | INTERGENIC      |               |                              |                    |
| SNP_65660_A_98607  | NW_004515747.1 | scaffold202 | 98607                   | GG                              | AA                 | AA               | INTERGENIC      |               |                              |                    |
| SNP_65661_A_98848  | NW_004515747.1 | scaffold202 | 98848                   | CC                              | AA                 | AA               | INTERGENIC      |               |                              |                    |
| SNP_65662_A_99123  | NW_004515747.1 | scaffold202 | 99123                   | TT                              | CC                 | CC               | URR             | 101509905     | uncharacterized LOC101509905 |                    |
| SNP_65663_A_99208  | NW_004515747.1 | scaffold202 | 99208                   | CC                              | TT                 | TT               | URR             | 101509905     | uncharacterized LOC101509905 |                    |
| SNP_65664_A_99273  | NW_004515747.1 | scaffold202 | 99273                   | GG                              | CC                 | CC               | URR             | 101509905     | uncharacterized LOC101509905 |                    |
| SNP_65666_A_99849  | NW_004515747.1 | scaffold202 | 99849                   | AA                              | TT                 | TT               | DRR             | 101510224     | sm-like protein LSM3A        |                    |
| SNP_65667_A_100132 | NW_004515747.1 | scaffold202 | 100132                  | CC                              | TT                 | TT               | DRR             | 101510224     | sm-like protein LSM3A        |                    |

| SNPs IDs           | Chromosome IDs | Chromosomes | Physical positions (bp) | CDC Frontier (Reference genome) | (Pusa 1103 & HPNB) | (ILWC 46 & LPNB) | Sequence Components of genome | Gene accession IDs | Putative functions           |
|--------------------|----------------|-------------|-------------------------|---------------------------------|--------------------|------------------|-------------------------------|--------------------|------------------------------|
| SNP_65668_A_100138 | NW_004515747.1 | scaffold202 | 100138                  | GG                              | AA                 | AA               | DRR                           | 101510224          | sm-like protein LSM3A        |
| SNP_65669_A_100186 | NW_004515747.1 | scaffold202 | 100186                  | TT                              | CC                 | CC               | DRR                           | 101510224          | sm-like protein LSM3A        |
| SNP_65670_A_100216 | NW_004515747.1 | scaffold202 | 100216                  | AA                              | TT                 | TT               | DRR                           | 101510224          | sm-like protein LSM3A        |
| SNP_65671_A_100359 | NW_004515747.1 | scaffold202 | 100359                  | CC                              | AA                 | AA               | URR                           | 101509905          | uncharacterized LOC101509905 |
| SNP_65673_A_100722 | NW_004515747.1 | scaffold202 | 100722                  | AA                              | TT                 | TT               | URR                           | 101509905          | uncharacterized LOC101509905 |
| SNP_65674_A_103956 | NW_004515747.1 | scaffold202 | 103956                  | GG                              | AA                 | AA               | URR                           | 101510224          | sm-like protein LSM3A        |
| SNP_65676_A_104037 | NW_004515747.1 | scaffold202 | 104037                  | AA                              | TT                 | TT               | URR                           | 101510224          | sm-like protein LSM3A        |
| SNP_65677_A_104043 | NW_004515747.1 | scaffold202 | 104043                  | TT                              | AA                 | AA               | URR                           | 101510224          | sm-like protein LSM3A        |
| SNP_65678_A_104044 | NW_004515747.1 | scaffold202 | 104044                  | TT                              | AA                 | AA               | URR                           | 101510224          | sm-like protein LSM3A        |
| SNP_65679_A_104045 | NW_004515747.1 | scaffold202 | 104045                  | AA                              | TT                 | TT               | URR                           | 101510224          | sm-like protein LSM3A        |
| SNP_65680_A_104082 | NW_004515747.1 | scaffold202 | 104082                  | CC                              | TT                 | TT               | URR                           | 101510224          | sm-like protein LSM3A        |
| SNP_65681_A_104187 | NW_004515747.1 | scaffold202 | 104187                  | AA                              | CC                 | CC               | URR                           | 101510224          | sm-like protein LSM3A        |
| SNP_65683_A_104407 | NW_004515747.1 | scaffold202 | 104407                  | GG                              | AA                 | AA               | URR                           | 101510224          | sm-like protein LSM3A        |
| SNP_65684_A_104669 | NW_004515747.1 | scaffold202 | 104669                  | TT                              | GG                 | GG               | URR                           | 101510224          | sm-like protein LSM3A        |
| SNP_65685_A_104714 | NW_004515747.1 | scaffold202 | 104714                  | AA                              | TT                 | TT               | URR                           | 101510224          | sm-like protein LSM3A        |
| SNP_65687_A_23583  | NW_004515748.1 | scaffold204 | 23583                   | CC                              | TT                 | TT               | INTERGENIC                    |                    |                              |
| SNP_65688_A_23814  | NW_004515748.1 | scaffold204 | 23814                   | GG                              | AA                 | AA               | INTERGENIC                    |                    |                              |
| SNP_65689_A_23859  | NW_004515748.1 | scaffold204 | 23859                   | AA                              | CC                 | CC               | INTERGENIC                    |                    |                              |
| SNP_65690_A_52617  | NW_004515748.1 | scaffold204 | 52617                   | GG                              | CC                 | CC               | INTERGENIC                    |                    |                              |
| SNP_65691_A_52640  | NW_004515748.1 | scaffold204 | 52640                   | TT                              | CC                 | CC               | INTERGENIC                    |                    |                              |
| SNP_65692_A_52648  | NW_004515748.1 | scaffold204 | 52648                   | AA                              | GG                 | GG               | INTERGENIC                    |                    |                              |
| SNP_65693_A_31778  | NW_004515749.1 | scaffold205 | 31778                   | TT                              | CC                 | CC               | INTERGENIC                    |                    |                              |

| SNPs IDs          | Chromosome IDs | Chromosomes | Physical positions (bp) | CDC Frontier (Reference genome) | (Pusa 1103 & HPNB) | (ILWC 46 & LPNB) | Sequence genome | Components of | Gene accession IDs | Putative functions |
|-------------------|----------------|-------------|-------------------------|---------------------------------|--------------------|------------------|-----------------|---------------|--------------------|--------------------|
| SNP_65695_A_40896 | NW_004515749.1 | scaffold205 | 40896                   | TT                              | CC                 | CC               | INTERGENIC      |               |                    |                    |
| SNP_65696_A_40964 | NW_004515749.1 | scaffold205 | 40964                   | TT                              | CC                 | CC               | INTERGENIC      |               |                    |                    |
| SNP_65697_A_40983 | NW_004515749.1 | scaffold205 | 40983                   | AA                              | GG                 | GG               | INTERGENIC      |               |                    |                    |
| SNP_65698_A_40993 | NW_004515749.1 | scaffold205 | 40993                   | AA                              | TT                 | TT               | INTERGENIC      |               |                    |                    |
| SNP_65699_A_41016 | NW_004515749.1 | scaffold205 | 41016                   | AA                              | GG                 | GG               | INTERGENIC      |               |                    |                    |
| SNP_65700_A_41020 | NW_004515749.1 | scaffold205 | 41020                   | GG                              | AA                 | AA               | INTERGENIC      |               |                    |                    |
| SNP_65701_A_41078 | NW_004515749.1 | scaffold205 | 41078                   | CC                              | TT                 | TT               | INTERGENIC      |               |                    |                    |
| SNP_65702_A_41600 | NW_004515749.1 | scaffold205 | 41600                   | CC                              | TT                 | TT               | INTERGENIC      |               |                    |                    |
| SNP_65703_A_41634 | NW_004515749.1 | scaffold205 | 41634                   | AA                              | GG                 | GG               | INTERGENIC      |               |                    |                    |
| SNP_65704_A_41688 | NW_004515749.1 | scaffold205 | 41688                   | AA                              | CC                 | CC               | INTERGENIC      |               |                    |                    |
| SNP_65705_A_41708 | NW_004515749.1 | scaffold205 | 41708                   | TT                              | CC                 | CC               | INTERGENIC      |               |                    |                    |
| SNP_65706_A_41758 | NW_004515749.1 | scaffold205 | 41758                   | TT                              | CC                 | CC               | INTERGENIC      |               |                    |                    |
| SNP_65707_A_41997 | NW_004515749.1 | scaffold205 | 41997                   | TT                              | CC                 | CC               | INTERGENIC      |               |                    |                    |
| SNP_65708_A_42023 | NW_004515749.1 | scaffold205 | 42023                   | CC                              | TT                 | TT               | INTERGENIC      |               |                    |                    |
| SNP_65709_A_42048 | NW_004515749.1 | scaffold205 | 42048                   | GG                              | AA                 | AA               | INTERGENIC      |               |                    |                    |
| SNP_65710_A_42052 | NW_004515749.1 | scaffold205 | 42052                   | TT                              | CC                 | CC               | INTERGENIC      |               |                    |                    |
| SNP_65711_A_42248 | NW_004515749.1 | scaffold205 | 42248                   | CC                              | TT                 | TT               | INTERGENIC      |               |                    |                    |
| SNP_65712_A_42290 | NW_004515749.1 | scaffold205 | 42290                   | AA                              | GG                 | GG               | INTERGENIC      |               |                    |                    |
| SNP_65713_A_44973 | NW_004515749.1 | scaffold205 | 44973                   | CC                              | TT                 | TT               | INTERGENIC      |               |                    |                    |
| SNP_65714_A_46569 | NW_004515749.1 | scaffold205 | 46569                   | AA                              | GG                 | GG               | INTERGENIC      |               |                    |                    |
| SNP_65716_A_75575 | NW_004515749.1 | scaffold205 | 75575                   | AA                              | GG                 | GG               | INTERGENIC      |               |                    |                    |
| SNP_65717_A_75592 | NW_004515749.1 | scaffold205 | 75592                   | CC                              | TT                 | TT               | INTERGENIC      |               |                    |                    |

| SNPs IDs           | Chromosome IDs | Chromosomes | Physical positions (bp) | CDC Frontier (Reference genome) | (Pusa 1103 & HPNB) | (ILWC 46 & LPNB) | Sequence genome | Components of | Gene accession IDs | Putative functions |
|--------------------|----------------|-------------|-------------------------|---------------------------------|--------------------|------------------|-----------------|---------------|--------------------|--------------------|
| SNP_65719_A_112657 | NW_004515749.1 | scaffold205 | 112657                  | TT                              | CC                 | CC               | INTERGENIC      |               |                    |                    |
| SNP_65720_A_113012 | NW_004515749.1 | scaffold205 | 113012                  | GG                              | TT                 | TT               | INTERGENIC      |               |                    |                    |
| SNP_65721_A_113401 | NW_004515749.1 | scaffold205 | 113401                  | AA                              | TT                 | TT               | INTERGENIC      |               |                    |                    |
| SNP_65722_A_113402 | NW_004515749.1 | scaffold205 | 113402                  | AA                              | GG                 | GG               | INTERGENIC      |               |                    |                    |
| SNP_65723_A_114640 | NW_004515749.1 | scaffold205 | 114640                  | AA                              | GG                 | GG               | INTERGENIC      |               |                    |                    |
| SNP_65724_A_115058 | NW_004515749.1 | scaffold205 | 115058                  | GG                              | AA                 | AA               | INTERGENIC      |               |                    |                    |
| SNP_65725_A_115766 | NW_004515749.1 | scaffold205 | 115766                  | CC                              | TT                 | TT               | INTERGENIC      |               |                    |                    |
| SNP_65726_A_115776 | NW_004515749.1 | scaffold205 | 115776                  | TT                              | CC                 | CC               | INTERGENIC      |               |                    |                    |
| SNP_65727_A_121372 | NW_004515749.1 | scaffold205 | 121372                  | CC                              | TT                 | TT               | INTERGENIC      |               |                    |                    |
| SNP_65728_A_149768 | NW_004515749.1 | scaffold205 | 149768                  | TT                              | CC                 | CC               | INTERGENIC      |               |                    |                    |
| SNP_65729_A_149888 | NW_004515749.1 | scaffold205 | 149888                  | GG                              | AA                 | AA               | INTERGENIC      |               |                    |                    |
| SNP_65730_A_150565 | NW_004515749.1 | scaffold205 | 150565                  | TT                              | CC                 | CC               | INTERGENIC      |               |                    |                    |
| SNP_65731_A_195021 | NW_004515749.1 | scaffold205 | 195021                  | TT                              | CC                 | CC               | INTERGENIC      |               |                    |                    |
| SNP_65732_A_195042 | NW_004515749.1 | scaffold205 | 195042                  | AA                              | CC                 | CC               | INTERGENIC      |               |                    |                    |
| SNP_65733_A_195057 | NW_004515749.1 | scaffold205 | 195057                  | AA                              | CC                 | CC               | INTERGENIC      |               |                    |                    |
| SNP_65734_A_195305 | NW_004515749.1 | scaffold205 | 195305                  | GG                              | AA                 | AA               | INTERGENIC      |               |                    |                    |
| SNP_65735_A_195346 | NW_004515749.1 | scaffold205 | 195346                  | AA                              | GG                 | GG               | INTERGENIC      |               |                    |                    |
| SNP_65736_A_195378 | NW_004515749.1 | scaffold205 | 195378                  | GG                              | AA                 | AA               | INTERGENIC      |               |                    |                    |
| SNP_65737_A_198934 | NW_004515749.1 | scaffold205 | 198934                  | CC                              | GG                 | GG               | INTERGENIC      |               |                    |                    |
| SNP_65738_A_198972 | NW_004515749.1 | scaffold205 | 198972                  | AA                              | GG                 | GG               | INTERGENIC      |               |                    |                    |
| SNP_65739_A_199165 | NW_004515749.1 | scaffold205 | 199165                  | AA                              | TT                 | TT               | INTERGENIC      |               |                    |                    |
| SNP_65740_A_199233 | NW_004515749.1 | scaffold205 | 199233                  | CC                              | TT                 | TT               | INTERGENIC      |               |                    |                    |

| SNPs IDs           | Chromosome IDs | Chromosomes | Physical positions (bp) | CDC Frontier (Reference genome) | (Pusa 1103 & HPNB) | (ILWC 46 & LPNB) | Sequence Components of genome | Gene accession IDs | Putative functions |
|--------------------|----------------|-------------|-------------------------|---------------------------------|--------------------|------------------|-------------------------------|--------------------|--------------------|
| SNP_65741_A_199237 | NW_004515749.1 | scaffold205 | 199237                  | TT                              | CC                 | CC               | INTERGENIC                    |                    |                    |
| SNP_65742_A_199440 | NW_004515749.1 | scaffold205 | 199440                  | TT                              | CC                 | CC               | DRR                           | 101513132          | Unknown function   |
| SNP_65743_A_199501 | NW_004515749.1 | scaffold205 | 199501                  | TT                              | AA                 | AA               | DRR                           | 101513132          | Unknown function   |
| SNP_65744_A_199534 | NW_004515749.1 | scaffold205 | 199534                  | GG                              | TT                 | TT               | DRR                           | 101513132          | Unknown function   |
| SNP_65745_A_214037 | NW_004515749.1 | scaffold205 | 214037                  | GG                              | AA                 | AA               | NON_SYNONYMOUS_CODING         | 101513458          | Unknown function   |
| SNP_65746_A_5098   | NW_004515750.1 | scaffold206 | 5098                    | GG                              | AA                 | AA               | INTERGENIC                    |                    |                    |
| SNP_65747_A_59691  | NW_004515750.1 | scaffold206 | 59691                   | CC                              | TT                 | TT               | INTERGENIC                    |                    |                    |
| SNP_65748_A_60027  | NW_004515750.1 | scaffold206 | 60027                   | GG                              | AA                 | AA               | INTERGENIC                    |                    |                    |
| SNP_65749_A_62134  | NW_004515750.1 | scaffold206 | 62134                   | AA                              | GG                 | GG               | INTERGENIC                    |                    |                    |
| SNP_65750_A_62141  | NW_004515750.1 | scaffold206 | 62141                   | AA                              | GG                 | GG               | INTERGENIC                    |                    |                    |
| SNP_65751_A_67992  | NW_004515750.1 | scaffold206 | 67992                   | GG                              | TT                 | TT               | INTERGENIC                    |                    |                    |
| SNP_65752_A_68193  | NW_004515750.1 | scaffold206 | 68193                   | GG                              | AA                 | AA               | INTERGENIC                    |                    |                    |
| SNP_65753_A_68231  | NW_004515750.1 | scaffold206 | 68231                   | GG                              | CC                 | CC               | INTERGENIC                    |                    |                    |
| SNP_65754_A_68241  | NW_004515750.1 | scaffold206 | 68241                   | AA                              | GG                 | GG               | INTERGENIC                    |                    |                    |
| SNP_65755_A_68268  | NW_004515750.1 | scaffold206 | 68268                   | CC                              | TT                 | TT               | INTERGENIC                    |                    |                    |
| SNP_65756_A_68395  | NW_004515750.1 | scaffold206 | 68395                   | AA                              | CC                 | CC               | INTERGENIC                    |                    |                    |
| SNP_65757_A_68481  | NW_004515750.1 | scaffold206 | 68481                   | AA                              | TT                 | TT               | INTERGENIC                    |                    |                    |
| SNP_65758_A_74171  | NW_004515750.1 | scaffold206 | 74171                   | TT                              | CC                 | CC               | INTERGENIC                    |                    |                    |
| SNP_65759_A_82630  | NW_004515750.1 | scaffold206 | 82630                   | CC                              | TT                 | TT               | INTERGENIC                    |                    |                    |
| SNP_65760_A_89931  | NW_004515750.1 | scaffold206 | 89931                   | AA                              | GG                 | GG               | INTERGENIC                    |                    |                    |
| SNP_65761_A_115275 | NW_004515750.1 | scaffold206 | 115275                  | TT                              | GG                 | GG               | URR                           | 101515195          | Unknown function   |
| SNP_65762_A_115461 | NW_004515750.1 | scaffold206 | 115461                  | TT                              | AA                 | AA               | URR                           | 101515195          | Unknown function   |

| SNPs IDs           | Chromosome IDs | Chromosomes | Physical positions (bp) | CDC Frontier (Reference genome) | (Pusa 1103 & HPNB) | (ILWC 46 & LPNB) | Sequence Components of genome | Gene accession IDs | Putative functions                         |
|--------------------|----------------|-------------|-------------------------|---------------------------------|--------------------|------------------|-------------------------------|--------------------|--------------------------------------------|
| SNP_65763_A_115824 | NW_004515750.1 | scaffold206 | 115824                  | TT                              | CC                 | CC               | URR                           | 101515195          | Unknown function                           |
| SNP_65764_A_120157 | NW_004515750.1 | scaffold206 | 120157                  | GG                              | AA                 | AA               | INTERGENIC                    |                    |                                            |
| SNP_65765_A_120240 | NW_004515750.1 | scaffold206 | 120240                  | CC                              | GG                 | GG               | INTERGENIC                    |                    |                                            |
| SNP_65766_A_120247 | NW_004515750.1 | scaffold206 | 120247                  | GG                              | CC                 | CC               | INTERGENIC                    |                    |                                            |
| SNP_65767_A_137073 | NW_004515750.1 | scaffold206 | 137073                  | TT                              | AA                 | AA               | INTERGENIC                    |                    |                                            |
| SNP_65768_A_137803 | NW_004515750.1 | scaffold206 | 137803                  | AA                              | GG                 | GG               | INTERGENIC                    |                    |                                            |
| SNP_65769_A_139924 | NW_004515750.1 | scaffold206 | 139924                  | AA                              | GG                 | GG               | INTERGENIC                    |                    |                                            |
| SNP_65770_A_139932 | NW_004515750.1 | scaffold206 | 139932                  | TT                              | GG                 | GG               | INTERGENIC                    |                    |                                            |
| SNP_65771_A_139990 | NW_004515750.1 | scaffold206 | 139990                  | CC                              | TT                 | TT               | INTERGENIC                    |                    |                                            |
| SNP_65772_A_140006 | NW_004515750.1 | scaffold206 | 140006                  | TT                              | GG                 | GG               | INTERGENIC                    |                    |                                            |
| SNP_65773_A_140017 | NW_004515750.1 | scaffold206 | 140017                  | AA                              | GG                 | GG               | INTERGENIC                    |                    |                                            |
| SNP_65774_A_140018 | NW_004515750.1 | scaffold206 | 140018                  | GG                              | AA                 | AA               | INTERGENIC                    |                    |                                            |
| SNP_65776_A_140105 | NW_004515750.1 | scaffold206 | 140105                  | TT                              | CC                 | CC               | INTERGENIC                    |                    |                                            |
| SNP_65777_A_140159 | NW_004515750.1 | scaffold206 | 140159                  | CC                              | TT                 | TT               | INTERGENIC                    |                    |                                            |
| SNP_65778_A_140181 | NW_004515750.1 | scaffold206 | 140181                  | TT                              | CC                 | CC               | INTERGENIC                    |                    |                                            |
| SNP_65779_A_140210 | NW_004515750.1 | scaffold206 | 140210                  | CC                              | TT                 | TT               | INTERGENIC                    |                    |                                            |
| SNP_65780_A_140237 | NW_004515750.1 | scaffold206 | 140237                  | AA                              | GG                 | GG               | INTERGENIC                    |                    |                                            |
| SNP_65781_A_152402 | NW_004515750.1 | scaffold206 | 152402                  | GG                              | TT                 | TT               | URR                           | 101410590          | transfer RNA aspartic acid (anticodon GUC) |
| SNP_65782_A_157228 | NW_004515750.1 | scaffold206 | 157228                  | CC                              | AA                 | AA               | INTERGENIC                    |                    |                                            |
| SNP_65783_A_159719 | NW_004515750.1 | scaffold206 | 159719                  | AA                              | CC                 | CC               | INTERGENIC                    |                    |                                            |
| SNP_65784_A_159734 | NW_004515750.1 | scaffold206 | 159734                  | TT                              | AA                 | AA               | INTERGENIC                    |                    |                                            |
| SNP_65785_A_160148 | NW_004515750.1 | scaffold206 | 160148                  | AA                              | GG                 | GG               | INTERGENIC                    |                    |                                            |

| SNPs IDs           | Chromosome IDs | Chromosomes | Physical positions (bp) | CDC Frontier (Reference genome) | (Pusa 1103 & HPNB) | (ILWC 46 & LPNB) | Sequence Components of genome | Gene accession IDs | Putative functions           |
|--------------------|----------------|-------------|-------------------------|---------------------------------|--------------------|------------------|-------------------------------|--------------------|------------------------------|
| SNP_65786_A_160177 | NW_004515750.1 | scaffold206 | 160177                  | AA                              | GG                 | GG               | INTERGENIC                    |                    |                              |
| SNP_65787_A_160189 | NW_004515750.1 | scaffold206 | 160189                  | GG                              | AA                 | AA               | INTERGENIC                    |                    |                              |
| SNP_65789_A_166683 | NW_004515750.1 | scaffold206 | 166683                  | TT                              | AA                 | AA               | INTERGENIC                    |                    |                              |
| SNP_65790_A_175519 | NW_004515750.1 | scaffold206 | 175519                  | TT                              | AA                 | AA               | DRR                           | 101514656          | uncharacterized LOC101514656 |
| SNP_65791_A_175581 | NW_004515750.1 | scaffold206 | 175581                  | TT                              | AA                 | AA               | DRR                           | 101514656          | uncharacterized LOC101514656 |
| SNP_65792_A_175594 | NW_004515750.1 | scaffold206 | 175594                  | GG                              | AA                 | AA               | DRR                           | 101514656          | uncharacterized LOC101514656 |
| SNP_65793_A_175760 | NW_004515750.1 | scaffold206 | 175760                  | TT                              | CC                 | CC               | DRR                           | 101514656          | uncharacterized LOC101514656 |
| SNP_65794_A_175767 | NW_004515750.1 | scaffold206 | 175767                  | AA                              | TT                 | TT               | DRR                           | 101514656          | uncharacterized LOC101514656 |
| SNP_65795_A_175775 | NW_004515750.1 | scaffold206 | 175775                  | CC                              | TT                 | TT               | DRR                           | 101514656          | uncharacterized LOC101514656 |
| SNP_65797_A_189547 | NW_004515750.1 | scaffold206 | 189547                  | AA                              | TT                 | TT               | INTERGENIC                    |                    |                              |
| SNP_65798_A_189582 | NW_004515750.1 | scaffold206 | 189582                  | AA                              | GG                 | GG               | INTERGENIC                    |                    |                              |
| SNP_65799_A_190545 | NW_004515750.1 | scaffold206 | 190545                  | CC                              | TT                 | TT               | INTERGENIC                    |                    |                              |
| SNP_65800_A_190577 | NW_004515750.1 | scaffold206 | 190577                  | CC                              | TT                 | TT               | INTERGENIC                    |                    |                              |
| SNP_65801_A_190582 | NW_004515750.1 | scaffold206 | 190582                  | CC                              | TT                 | TT               | INTERGENIC                    |                    |                              |
| SNP_65802_A_190583 | NW_004515750.1 | scaffold206 | 190583                  | GG                              | AA                 | AA               | INTERGENIC                    |                    |                              |
| SNP_65804_A_195548 | NW_004515750.1 | scaffold206 | 195548                  | AA                              | TT                 | TT               | INTRON                        | 101488949          | uncharacterized LOC101488949 |
| SNP_65805_A_199511 | NW_004515750.1 | scaffold206 | 199511                  | TT                              | CC                 | CC               | INTRON                        | 101488949          | uncharacterized LOC101488949 |
| SNP_65806_A_233701 | NW_004515750.1 | scaffold206 | 233701                  | CC                              | GG                 | GG               | INTERGENIC                    |                    |                              |
| SNP_65807_A_234390 | NW_004515750.1 | scaffold206 | 234390                  | GG                              | TT                 | TT               | INTERGENIC                    |                    |                              |
| SNP_65808_A_234946 | NW_004515750.1 | scaffold206 | 234946                  | TT                              | CC                 | CC               | INTERGENIC                    |                    |                              |
| SNP_65809_A_234963 | NW_004515750.1 | scaffold206 | 234963                  | CC                              | TT                 | TT               | INTERGENIC                    |                    |                              |
| SNP_65810_A_235021 | NW_004515750.1 | scaffold206 | 235021                  | TT                              | CC                 | CC               | INTERGENIC                    |                    |                              |



| SNPs IDs           | Chromosome IDs | Chromosomes | Physical positions (bp) | CDC Frontier (Reference genome) | (Pusa 1103 & HPNB) | (ILWC 46 & LPNB) | Sequence genome | Components of | Gene accession IDs | Putative functions |
|--------------------|----------------|-------------|-------------------------|---------------------------------|--------------------|------------------|-----------------|---------------|--------------------|--------------------|
| SNP_65811_A_238554 | NW_004515750.1 | scaffold206 | 238554                  | TT                              | CC                 | CC               | INTERGENIC      |               |                    |                    |
| SNP_65812_A_238563 | NW_004515750.1 | scaffold206 | 238563                  | CC                              | TT                 | TT               | INTERGENIC      |               |                    |                    |
| SNP_65813_A_239006 | NW_004515750.1 | scaffold206 | 239006                  | GG                              | AA                 | AA               | INTERGENIC      |               |                    |                    |
| SNP_65814_A_247485 | NW_004515750.1 | scaffold206 | 247485                  | TT                              | GG                 | GG               | INTERGENIC      |               |                    |                    |
| SNP_65815_A_272965 | NW_004515750.1 | scaffold206 | 272965                  | TT                              | CC                 | CC               | INTERGENIC      |               |                    |                    |
| SNP_65816_A_2783   | NW_004515751.1 | scaffold207 | 2783                    | GG                              | CC                 | CC               | INTERGENIC      |               |                    |                    |
| SNP_65817_A_5987   | NW_004515751.1 | scaffold207 | 5987                    | TT                              | GG                 | GG               | INTERGENIC      |               |                    |                    |
| SNP_65818_A_6042   | NW_004515751.1 | scaffold207 | 6042                    | TT                              | CC                 | CC               | INTERGENIC      |               |                    |                    |
| SNP_65819_A_6236   | NW_004515751.1 | scaffold207 | 6236                    | AA                              | GG                 | GG               | INTERGENIC      |               |                    |                    |
| SNP_65820_A_6242   | NW_004515751.1 | scaffold207 | 6242                    | TT                              | CC                 | CC               | INTERGENIC      |               |                    |                    |
| SNP_65821_A_6251   | NW_004515751.1 | scaffold207 | 6251                    | TT                              | GG                 | GG               | INTERGENIC      |               |                    |                    |
| SNP_65823_A_6961   | NW_004515751.1 | scaffold207 | 6961                    | CC                              | AA                 | AA               | INTERGENIC      |               |                    |                    |
| SNP_65824_A_7484   | NW_004515751.1 | scaffold207 | 7484                    | GG                              | TT                 | TT               | INTERGENIC      |               |                    |                    |
| SNP_65825_A_7760   | NW_004515751.1 | scaffold207 | 7760                    | TT                              | CC                 | CC               | INTERGENIC      |               |                    |                    |
| SNP_65826_A_8056   | NW_004515751.1 | scaffold207 | 8056                    | AA                              | GG                 | GG               | INTERGENIC      |               |                    |                    |
| SNP_65827_A_8215   | NW_004515751.1 | scaffold207 | 8215                    | AA                              | GG                 | GG               | INTERGENIC      |               |                    |                    |
| SNP_65828_A_8217   | NW_004515751.1 | scaffold207 | 8217                    | GG                              | TT                 | TT               | INTERGENIC      |               |                    |                    |
| SNP_65829_A_8439   | NW_004515751.1 | scaffold207 | 8439                    | TT                              | CC                 | CC               | INTERGENIC      |               |                    |                    |
| SNP_65830_A_9466   | NW_004515751.1 | scaffold207 | 9466                    | CC                              | TT                 | TT               | INTERGENIC      |               |                    |                    |
| SNP_65831_A_9513   | NW_004515751.1 | scaffold207 | 9513                    | AA                              | GG                 | GG               | INTERGENIC      |               |                    |                    |
| SNP_65832_A_9580   | NW_004515751.1 | scaffold207 | 9580                    | AA                              | CC                 | CC               | INTERGENIC      |               |                    |                    |
| SNP_65833_A_9640   | NW_004515751.1 | scaffold207 | 9640                    | AA                              | TT                 | TT               | INTERGENIC      |               |                    |                    |

| SNPs IDs           | Chromosome IDs | Chromosomes | Physical positions (bp) | CDC Frontier (Reference genome) | (Pusa 1103 & HPNB) | (ILWC 46 & LPNB) | Sequence Components of genome | Gene accession IDs | Putative functions                         |
|--------------------|----------------|-------------|-------------------------|---------------------------------|--------------------|------------------|-------------------------------|--------------------|--------------------------------------------|
| SNP_65834_A_9831   | NW_004515751.1 | scaffold207 | 9831                    | TT                              | AA                 | AA               | INTERGENIC                    |                    |                                            |
| SNP_65835_A_9943   | NW_004515751.1 | scaffold207 | 9943                    | AA                              | GG                 | GG               | INTERGENIC                    |                    |                                            |
| SNP_65836_A_9946   | NW_004515751.1 | scaffold207 | 9946                    | TT                              | AA                 | AA               | INTERGENIC                    |                    |                                            |
| SNP_65837_A_16123  | NW_004515752.1 | scaffold208 | 16123                   | AA                              | GG                 | GG               | INTERGENIC                    |                    |                                            |
| SNP_65838_A_20315  | NW_004515752.1 | scaffold208 | 20315                   | GG                              | AA                 | AA               | URR                           | 101490460          | non-specific lipid-transfer protein A-like |
| SNP_65839_A_20982  | NW_004515752.1 | scaffold208 | 20982                   | CC                              | TT                 | TT               | INTERGENIC                    |                    |                                            |
| SNP_65840_A_21035  | NW_004515752.1 | scaffold208 | 21035                   | AA                              | GG                 | GG               | INTERGENIC                    |                    |                                            |
| SNP_65841_A_22008  | NW_004515752.1 | scaffold208 | 22008                   | CC                              | GG                 | GG               | DRR                           | 101490781          | non-specific lipid-transfer protein A-like |
| SNP_65842_A_22034  | NW_004515752.1 | scaffold208 | 22034                   | CC                              | TT                 | TT               | DRR                           | 101490781          | non-specific lipid-transfer protein A-like |
| SNP_65843_A_22035  | NW_004515752.1 | scaffold208 | 22035                   | TT                              | AA                 | AA               | DRR                           | 101490781          | non-specific lipid-transfer protein A-like |
| SNP_65844_A_22037  | NW_004515752.1 | scaffold208 | 22037                   | TT                              | AA                 | AA               | DRR                           | 101490781          | non-specific lipid-transfer protein A-like |
| SNP_65845_A_23932  | NW_004515752.1 | scaffold208 | 23932                   | CC                              | TT                 | TT               | URR                           | 101490781          | non-specific lipid-transfer protein A-like |
| SNP_65846_A_38863  | NW_004515752.1 | scaffold208 | 38863                   | TT                              | AA                 | AA               | INTERGENIC                    |                    |                                            |
| SNP_65847_A_49698  | NW_004515752.1 | scaffold208 | 49698                   | AA                              | CC                 | CC               | INTERGENIC                    |                    |                                            |
| SNP_65849_A_105496 | NW_004515752.1 | scaffold208 | 105496                  | AA                              | TT                 | TT               | INTERGENIC                    |                    |                                            |
| SNP_65850_A_119629 | NW_004515752.1 | scaffold208 | 119629                  | TT                              | CC                 | CC               | INTERGENIC                    |                    |                                            |
| SNP_65851_A_126343 | NW_004515752.1 | scaffold208 | 126343                  | GG                              | TT                 | TT               | INTERGENIC                    |                    |                                            |
| SNP_65852_A_127392 | NW_004515752.1 | scaffold208 | 127392                  | TT                              | CC                 | CC               | INTERGENIC                    |                    |                                            |
| SNP_65853_A_127452 | NW_004515752.1 | scaffold208 | 127452                  | CC                              | TT                 | TT               | INTERGENIC                    |                    |                                            |
| SNP_65854_A_127758 | NW_004515752.1 | scaffold208 | 127758                  | CC                              | AA                 | AA               | INTERGENIC                    |                    |                                            |
| SNP_65855_A_131463 | NW_004515752.1 | scaffold208 | 131463                  | TT                              | CC                 | CC               | INTERGENIC                    |                    |                                            |
| SNP_65857_A_131610 | NW_004515752.1 | scaffold208 | 131610                  | AA                              | TT                 | TT               | INTERGENIC                    |                    |                                            |

| SNPs IDs           | Chromosome IDs | Chromosomes | Physical positions (bp) | CDC Frontier (Reference genome) | (Pusa 1103 & HPNB) | (ILWC 46 & LPNB) | Sequence genome | Components of | Gene accession IDs                         | Putative functions |
|--------------------|----------------|-------------|-------------------------|---------------------------------|--------------------|------------------|-----------------|---------------|--------------------------------------------|--------------------|
| SNP_65858_A_152327 | NW_004515752.1 | scaffold208 | 152327                  | AA                              | GG                 | GG               | INTERGENIC      |               |                                            |                    |
| SNP_65859_A_155613 | NW_004515752.1 | scaffold208 | 155613                  | AA                              | GG                 | GG               | INTERGENIC      |               |                                            |                    |
| SNP_65860_A_161040 | NW_004515752.1 | scaffold208 | 161040                  | TT                              | CC                 | CC               | INTERGENIC      |               |                                            |                    |
| SNP_65861_A_173958 | NW_004515752.1 | scaffold208 | 173958                  | GG                              | AA                 | AA               | INTERGENIC      |               |                                            |                    |
| SNP_65862_A_174028 | NW_004515752.1 | scaffold208 | 174028                  | CC                              | TT                 | TT               | INTERGENIC      |               |                                            |                    |
| SNP_65864_A_174362 | NW_004515752.1 | scaffold208 | 174362                  | GG                              | AA                 | AA               | INTERGENIC      |               |                                            |                    |
| SNP_65865_A_174372 | NW_004515752.1 | scaffold208 | 174372                  | TT                              | CC                 | CC               | INTERGENIC      |               |                                            |                    |
| SNP_65866_A_195121 | NW_004515752.1 | scaffold208 | 195121                  | CC                              | TT                 | TT               | URR             | 101492062     | non-specific lipid-transfer protein A-like |                    |
| SNP_65867_A_253989 | NW_004515752.1 | scaffold208 | 253989                  | AA                              | TT                 | TT               | INTERGENIC      |               |                                            |                    |
| SNP_65868_A_254337 | NW_004515752.1 | scaffold208 | 254337                  | GG                              | TT                 | TT               | INTERGENIC      |               |                                            |                    |
| SNP_65869_A_312686 | NW_004515752.1 | scaffold208 | 312686                  | CC                              | AA                 | AA               | INTERGENIC      |               |                                            |                    |
| SNP_65870_A_320480 | NW_004515752.1 | scaffold208 | 320480                  | CC                              | TT                 | TT               | INTERGENIC      |               |                                            |                    |
| SNP_65871_A_355167 | NW_004515752.1 | scaffold208 | 355167                  | AA                              | TT                 | TT               | INTERGENIC      |               |                                            |                    |
| SNP_65872_A_356801 | NW_004515752.1 | scaffold208 | 356801                  | GG                              | AA                 | AA               | INTERGENIC      |               |                                            |                    |
| SNP_65873_A_446749 | NW_004515752.1 | scaffold208 | 446749                  | CC                              | TT                 | TT               | INTERGENIC      |               |                                            |                    |
| SNP_65874_A_553    | NW_004515753.1 | scaffold209 | 553                     | TT                              | AA                 | AA               | INTERGENIC      |               |                                            |                    |
| SNP_65875_A_2295   | NW_004515753.1 | scaffold209 | 2295                    | CC                              | TT                 | TT               | INTERGENIC      |               |                                            |                    |
| SNP_65876_A_2314   | NW_004515753.1 | scaffold209 | 2314                    | GG                              | AA                 | AA               | INTERGENIC      |               |                                            |                    |
| SNP_65877_A_2595   | NW_004515753.1 | scaffold209 | 2595                    | GG                              | CC                 | CC               | INTERGENIC      |               |                                            |                    |
| SNP_65878_A_2625   | NW_004515753.1 | scaffold209 | 2625                    | GG                              | TT                 | TT               | INTERGENIC      |               |                                            |                    |
| SNP_65879_A_2674   | NW_004515753.1 | scaffold209 | 2674                    | AA                              | CC                 | CC               | INTERGENIC      |               |                                            |                    |
| SNP_65880_A_5620   | NW_004515753.1 | scaffold209 | 5620                    | TT                              | AA                 | AA               | INTERGENIC      |               |                                            |                    |

| SNPs IDs          | Chromosome IDs | Chromosomes | Physical positions (bp) | CDC Frontier (Reference genome) | (Pusa 1103 & HPNB) | (ILWC 46 & LPNB) | Sequence genome | Components of | Gene accession IDs | Putative functions |
|-------------------|----------------|-------------|-------------------------|---------------------------------|--------------------|------------------|-----------------|---------------|--------------------|--------------------|
| SNP_65881_A_5629  | NW_004515753.1 | scaffold209 | 5629                    | GG                              | CC                 | CC               | INTERGENIC      |               |                    |                    |
| SNP_65882_A_5768  | NW_004515753.1 | scaffold209 | 5768                    | AA                              | GG                 | GG               | INTERGENIC      |               |                    |                    |
| SNP_65883_A_5770  | NW_004515753.1 | scaffold209 | 5770                    | TT                              | AA                 | AA               | INTERGENIC      |               |                    |                    |
| SNP_65884_A_5826  | NW_004515753.1 | scaffold209 | 5826                    | AA                              | TT                 | TT               | INTERGENIC      |               |                    |                    |
| SNP_65885_A_5958  | NW_004515753.1 | scaffold209 | 5958                    | TT                              | CC                 | CC               | INTERGENIC      |               |                    |                    |
| SNP_65886_A_6040  | NW_004515753.1 | scaffold209 | 6040                    | AA                              | TT                 | TT               | INTERGENIC      |               |                    |                    |
| SNP_65887_A_6138  | NW_004515753.1 | scaffold209 | 6138                    | GG                              | CC                 | CC               | INTERGENIC      |               |                    |                    |
| SNP_65888_A_6210  | NW_004515753.1 | scaffold209 | 6210                    | AA                              | CC                 | CC               | INTERGENIC      |               |                    |                    |
| SNP_65889_A_6213  | NW_004515753.1 | scaffold209 | 6213                    | TT                              | CC                 | CC               | INTERGENIC      |               |                    |                    |
| SNP_65890_A_6218  | NW_004515753.1 | scaffold209 | 6218                    | CC                              | GG                 | GG               | INTERGENIC      |               |                    |                    |
| SNP_65891_A_6318  | NW_004515753.1 | scaffold209 | 6318                    | GG                              | AA                 | AA               | INTERGENIC      |               |                    |                    |
| SNP_65892_A_7506  | NW_004515753.1 | scaffold209 | 7506                    | TT                              | CC                 | CC               | INTERGENIC      |               |                    |                    |
| SNP_65893_A_7526  | NW_004515753.1 | scaffold209 | 7526                    | AA                              | TT                 | TT               | INTERGENIC      |               |                    |                    |
| SNP_65894_A_7754  | NW_004515753.1 | scaffold209 | 7754                    | GG                              | CC                 | CC               | INTERGENIC      |               |                    |                    |
| SNP_65895_A_7759  | NW_004515753.1 | scaffold209 | 7759                    | AA                              | CC                 | CC               | INTERGENIC      |               |                    |                    |
| SNP_65896_A_7789  | NW_004515753.1 | scaffold209 | 7789                    | GG                              | TT                 | TT               | INTERGENIC      |               |                    |                    |
| SNP_65897_A_7999  | NW_004515753.1 | scaffold209 | 7999                    | TT                              | CC                 | CC               | INTERGENIC      |               |                    |                    |
| SNP_65898_A_61108 | NW_004515753.1 | scaffold209 | 61108                   | TT                              | CC                 | CC               | INTERGENIC      |               |                    |                    |
| SNP_65899_A_76470 | NW_004515753.1 | scaffold209 | 76470                   | AA                              | TT                 | TT               | INTERGENIC      |               |                    |                    |
| SNP_65900_A_78021 | NW_004515753.1 | scaffold209 | 78021                   | GG                              | AA                 | AA               | INTERGENIC      |               |                    |                    |
| SNP_65901_A_78030 | NW_004515753.1 | scaffold209 | 78030                   | TT                              | CC                 | CC               | INTERGENIC      |               |                    |                    |
| SNP_65902_A_78034 | NW_004515753.1 | scaffold209 | 78034                   | CC                              | TT                 | TT               | INTERGENIC      |               |                    |                    |

| SNPs IDs           | Chromosome IDs | Chromosomes | Physical positions (bp) | CDC Frontier (Reference genome) | (Pusa 1103 & HPNB) | (ILWC 46 & LPNB) | Sequence genome   | Components of | Gene accession IDs | Putative functions |
|--------------------|----------------|-------------|-------------------------|---------------------------------|--------------------|------------------|-------------------|---------------|--------------------|--------------------|
| SNP_65903_A_78037  | NW_004515753.1 | scaffold209 | 78037                   | TT                              | CC                 | CC               | INTERGENIC        |               |                    |                    |
| SNP_65904_A_78039  | NW_004515753.1 | scaffold209 | 78039                   | TT                              | AA                 | AA               | INTERGENIC        |               |                    |                    |
| SNP_65905_A_79274  | NW_004515753.1 | scaffold209 | 79274                   | TT                              | AA                 | AA               | INTERGENIC        |               |                    |                    |
| SNP_65906_A_79521  | NW_004515753.1 | scaffold209 | 79521                   | TT                              | CC                 | CC               | INTERGENIC        |               |                    |                    |
| SNP_65907_A_89506  | NW_004515753.1 | scaffold209 | 89506                   | CC                              | AA                 | AA               | INTERGENIC        |               |                    |                    |
| SNP_65908_A_92709  | NW_004515753.1 | scaffold209 | 92709                   | CC                              | TT                 | TT               | INTERGENIC        |               |                    |                    |
| SNP_65909_A_96671  | NW_004515753.1 | scaffold209 | 96671                   | CC                              | AA                 | AA               | INTERGENIC        |               |                    |                    |
| SNP_65910_A_108932 | NW_004515753.1 | scaffold209 | 108932                  | CC                              | TT                 | TT               | INTERGENIC        |               |                    |                    |
| SNP_65911_A_114124 | NW_004515753.1 | scaffold209 | 114124                  | AA                              | CC                 | CC               | INTERGENIC        |               |                    |                    |
| SNP_65912_A_114144 | NW_004515753.1 | scaffold209 | 114144                  | CC                              | GG                 | GG               | INTERGENIC        |               |                    |                    |
| SNP_65913_A_138858 | NW_004515753.1 | scaffold209 | 138858                  | AA                              | TT                 | TT               | INTERGENIC        |               |                    |                    |
| SNP_65914_A_139293 | NW_004515753.1 | scaffold209 | 139293                  | AA                              | GG                 | GG               | INTERGENIC        |               |                    |                    |
| SNP_65915_A_145473 | NW_004515753.1 | scaffold209 | 145473                  | AA                              | GG                 | GG               | INTERGENIC        |               |                    |                    |
| SNP_65916_A_145551 | NW_004515753.1 | scaffold209 | 145551                  | GG                              | TT                 | TT               | INTERGENIC        |               |                    |                    |
| SNP_65917_A_145588 | NW_004515753.1 | scaffold209 | 145588                  | AA                              | CC                 | CC               | INTERGENIC        |               |                    |                    |
| SNP_65918_A_164104 | NW_004515753.1 | scaffold209 | 164104                  | TT                              | AA                 | AA               | INTERGENIC        |               |                    |                    |
| SNP_65919_A_198596 | NW_004515753.1 | scaffold209 | 198596                  | GG                              | AA                 | AA               | INTERGENIC        |               |                    |                    |
| SNP_65920_A_198613 | NW_004515753.1 | scaffold209 | 198613                  | AA                              | TT                 | TT               | INTERGENIC        |               |                    |                    |
| SNP_65921_A_222904 | NW_004515753.1 | scaffold209 | 222904                  | TT                              | CC                 | CC               | INTERGENIC        |               |                    |                    |
| SNP_65922_A_258003 | NW_004515753.1 | scaffold209 | 258003                  | GG                              | TT                 | TT               | INTERGENIC        |               |                    |                    |
| SNP_65923_A_258324 | NW_004515753.1 | scaffold209 | 258324                  | GG                              | AA                 | AA               | INTERGENIC        |               |                    |                    |
| SNP_65924_A_264627 | NW_004515753.1 | scaffold209 | 264627                  | AA                              | GG                 | GG               | SYNONYMOUS_CODING | 101496178     | Unknown function   |                    |

| SNPs IDs           | Chromosome IDs | Chromosomes | Physical positions (bp) | CDC Frontier (Reference genome) | (Pusa 1103 & HPNB) | (ILWC 46 & LPNB) | Sequence Components of genome | Gene accession IDs | Putative functions |
|--------------------|----------------|-------------|-------------------------|---------------------------------|--------------------|------------------|-------------------------------|--------------------|--------------------|
| SNP_65925_A_265468 | NW_004515753.1 | scaffold209 | 265468                  | TT                              | GG                 | GG               | INTRON                        | 101496178          | Unknown function   |
| SNP_65926_A_329420 | NW_004515753.1 | scaffold209 | 329420                  | GG                              | AA                 | AA               | INTERGENIC                    |                    |                    |
| SNP_65927_A_329436 | NW_004515753.1 | scaffold209 | 329436                  | GG                              | AA                 | AA               | INTERGENIC                    |                    |                    |
| SNP_65928_A_329439 | NW_004515753.1 | scaffold209 | 329439                  | CC                              | AA                 | AA               | INTERGENIC                    |                    |                    |
| SNP_65929_A_329440 | NW_004515753.1 | scaffold209 | 329440                  | AA                              | CC                 | CC               | INTERGENIC                    |                    |                    |
| SNP_65930_A_329486 | NW_004515753.1 | scaffold209 | 329486                  | TT                              | AA                 | AA               | INTERGENIC                    |                    |                    |
| SNP_65931_A_329508 | NW_004515753.1 | scaffold209 | 329508                  | AA                              | TT                 | TT               | INTERGENIC                    |                    |                    |
| SNP_65932_A_329565 | NW_004515753.1 | scaffold209 | 329565                  | GG                              | TT                 | TT               | INTERGENIC                    |                    |                    |
| SNP_65933_A_329582 | NW_004515753.1 | scaffold209 | 329582                  | GG                              | TT                 | TT               | INTERGENIC                    |                    |                    |
| SNP_65934_A_329606 | NW_004515753.1 | scaffold209 | 329606                  | AA                              | CC                 | CC               | INTERGENIC                    |                    |                    |
| SNP_65935_A_329607 | NW_004515753.1 | scaffold209 | 329607                  | GG                              | TT                 | TT               | INTERGENIC                    |                    |                    |
| SNP_65936_A_329915 | NW_004515753.1 | scaffold209 | 329915                  | TT                              | GG                 | GG               | INTERGENIC                    |                    |                    |
| SNP_65937_A_329916 | NW_004515753.1 | scaffold209 | 329916                  | GG                              | AA                 | AA               | INTERGENIC                    |                    |                    |
| SNP_65938_A_329954 | NW_004515753.1 | scaffold209 | 329954                  | TT                              | AA                 | AA               | INTERGENIC                    |                    |                    |
| SNP_65939_A_330112 | NW_004515753.1 | scaffold209 | 330112                  | AA                              | CC                 | CC               | INTERGENIC                    |                    |                    |
| SNP_65940_A_344769 | NW_004515753.1 | scaffold209 | 344769                  | GG                              | TT                 | TT               | INTERGENIC                    |                    |                    |
| SNP_65941_A_345077 | NW_004515753.1 | scaffold209 | 345077                  | TT                              | CC                 | CC               | INTERGENIC                    |                    |                    |
| SNP_65942_A_345109 | NW_004515753.1 | scaffold209 | 345109                  | AA                              | GG                 | GG               | INTERGENIC                    |                    |                    |
| SNP_65943_A_345154 | NW_004515753.1 | scaffold209 | 345154                  | AA                              | GG                 | GG               | INTERGENIC                    |                    |                    |
| SNP_65944_A_345174 | NW_004515753.1 | scaffold209 | 345174                  | CC                              | GG                 | GG               | INTERGENIC                    |                    |                    |
| SNP_65945_A_345190 | NW_004515753.1 | scaffold209 | 345190                  | GG                              | TT                 | TT               | INTERGENIC                    |                    |                    |
| SNP_65946_A_345278 | NW_004515753.1 | scaffold209 | 345278                  | AA                              | GG                 | GG               | INTERGENIC                    |                    |                    |

| SNPs IDs           | Chromosome IDs | Chromosomes | Physical positions (bp) | CDC Frontier (Reference genome) | (Pusa 1103 & HPNB) | (ILWC 46 & LPNB) | Sequence genome | Components of | Gene accession IDs | Putative functions |
|--------------------|----------------|-------------|-------------------------|---------------------------------|--------------------|------------------|-----------------|---------------|--------------------|--------------------|
| SNP_65947_A_345303 | NW_004515753.1 | scaffold209 | 345303                  | GG                              | AA                 | AA               | INTERGENIC      |               |                    |                    |
| SNP_65948_A_345316 | NW_004515753.1 | scaffold209 | 345316                  | TT                              | CC                 | CC               | INTERGENIC      |               |                    |                    |
| SNP_65949_A_345348 | NW_004515753.1 | scaffold209 | 345348                  | AA                              | GG                 | GG               | INTERGENIC      |               |                    |                    |
| SNP_65950_A_345410 | NW_004515753.1 | scaffold209 | 345410                  | AA                              | GG                 | GG               | INTERGENIC      |               |                    |                    |
| SNP_65951_A_345413 | NW_004515753.1 | scaffold209 | 345413                  | GG                              | AA                 | AA               | INTERGENIC      |               |                    |                    |
| SNP_65952_A_345509 | NW_004515753.1 | scaffold209 | 345509                  | CC                              | AA                 | AA               | INTERGENIC      |               |                    |                    |
| SNP_65953_A_345560 | NW_004515753.1 | scaffold209 | 345560                  | AA                              | TT                 | TT               | INTERGENIC      |               |                    |                    |
| SNP_65954_A_345582 | NW_004515753.1 | scaffold209 | 345582                  | GG                              | TT                 | TT               | INTERGENIC      |               |                    |                    |
| SNP_65955_A_345612 | NW_004515753.1 | scaffold209 | 345612                  | CC                              | AA                 | AA               | INTERGENIC      |               |                    |                    |
| SNP_65956_A_345659 | NW_004515753.1 | scaffold209 | 345659                  | TT                              | AA                 | AA               | INTERGENIC      |               |                    |                    |
| SNP_65957_A_345718 | NW_004515753.1 | scaffold209 | 345718                  | GG                              | TT                 | TT               | INTERGENIC      |               |                    |                    |
| SNP_65958_A_345822 | NW_004515753.1 | scaffold209 | 345822                  | AA                              | CC                 | CC               | INTERGENIC      |               |                    |                    |
| SNP_65959_A_358106 | NW_004515753.1 | scaffold209 | 358106                  | AA                              | GG                 | GG               | INTERGENIC      |               |                    |                    |
| SNP_65960_A_358158 | NW_004515753.1 | scaffold209 | 358158                  | GG                              | AA                 | AA               | INTERGENIC      |               |                    |                    |
| SNP_65961_A_358193 | NW_004515753.1 | scaffold209 | 358193                  | CC                              | TT                 | TT               | INTERGENIC      |               |                    |                    |
| SNP_65962_A_358200 | NW_004515753.1 | scaffold209 | 358200                  | GG                              | AA                 | AA               | INTERGENIC      |               |                    |                    |
| SNP_65963_A_358249 | NW_004515753.1 | scaffold209 | 358249                  | TT                              | AA                 | AA               | INTERGENIC      |               |                    |                    |
| SNP_65964_A_358351 | NW_004515753.1 | scaffold209 | 358351                  | AA                              | GG                 | GG               | INTERGENIC      |               |                    |                    |
| SNP_65965_A_358390 | NW_004515753.1 | scaffold209 | 358390                  | TT                              | GG                 | GG               | INTERGENIC      |               |                    |                    |
| SNP_65966_A_358478 | NW_004515753.1 | scaffold209 | 358478                  | TT                              | GG                 | GG               | INTERGENIC      |               |                    |                    |
| SNP_65967_A_358511 | NW_004515753.1 | scaffold209 | 358511                  | GG                              | AA                 | AA               | INTERGENIC      |               |                    |                    |
| SNP_65968_A_378604 | NW_004515753.1 | scaffold209 | 378604                  | TT                              | CC                 | CC               | INTERGENIC      |               |                    |                    |

| SNPs IDs           | Chromosome IDs | Chromosomes | Physical positions (bp) | CDC Frontier (Reference genome) | (Pusa 1103 & HPNB) | (ILWC 46 & LPNB) | Sequence genome | Components of | Gene accession IDs | Putative functions |
|--------------------|----------------|-------------|-------------------------|---------------------------------|--------------------|------------------|-----------------|---------------|--------------------|--------------------|
| SNP_65969_A_378610 | NW_004515753.1 | scaffold209 | 378610                  | AA                              | CC                 | CC               | INTERGENIC      |               |                    |                    |
| SNP_65970_A_378780 | NW_004515753.1 | scaffold209 | 378780                  | CC                              | GG                 | GG               | INTERGENIC      |               |                    |                    |
| SNP_65971_A_378946 | NW_004515753.1 | scaffold209 | 378946                  | CC                              | TT                 | TT               | INTERGENIC      |               |                    |                    |
| SNP_65972_A_379013 | NW_004515753.1 | scaffold209 | 379013                  | TT                              | CC                 | CC               | INTERGENIC      |               |                    |                    |
| SNP_65973_A_31548  | NW_004515754.1 | scaffold210 | 31548                   | AA                              | GG                 | GG               | INTERGENIC      |               |                    |                    |
| SNP_65974_A_31555  | NW_004515754.1 | scaffold210 | 31555                   | AA                              | GG                 | GG               | INTERGENIC      |               |                    |                    |
| SNP_65975_A_31634  | NW_004515754.1 | scaffold210 | 31634                   | TT                              | AA                 | AA               | INTERGENIC      |               |                    |                    |
| SNP_65976_A_31649  | NW_004515754.1 | scaffold210 | 31649                   | TT                              | CC                 | CC               | INTERGENIC      |               |                    |                    |
| SNP_65977_A_31654  | NW_004515754.1 | scaffold210 | 31654                   | AA                              | GG                 | GG               | INTERGENIC      |               |                    |                    |
| SNP_65979_A_31728  | NW_004515754.1 | scaffold210 | 31728                   | TT                              | CC                 | CC               | INTERGENIC      |               |                    |                    |
| SNP_65980_A_31830  | NW_004515754.1 | scaffold210 | 31830                   | CC                              | GG                 | GG               | INTERGENIC      |               |                    |                    |
| SNP_65981_A_31831  | NW_004515754.1 | scaffold210 | 31831                   | AA                              | GG                 | GG               | INTERGENIC      |               |                    |                    |
| SNP_65982_A_31854  | NW_004515754.1 | scaffold210 | 31854                   | TT                              | AA                 | AA               | INTERGENIC      |               |                    |                    |
| SNP_65983_A_31856  | NW_004515754.1 | scaffold210 | 31856                   | AA                              | GG                 | GG               | INTERGENIC      |               |                    |                    |
| SNP_65984_A_31883  | NW_004515754.1 | scaffold210 | 31883                   | TT                              | CC                 | CC               | INTERGENIC      |               |                    |                    |
| SNP_65985_A_32424  | NW_004515754.1 | scaffold210 | 32424                   | CC                              | AA                 | AA               | INTERGENIC      |               |                    |                    |
| SNP_65987_A_87547  | NW_004515754.1 | scaffold210 | 87547                   | TT                              | GG                 | GG               | INTERGENIC      |               |                    |                    |
| SNP_65988_A_95493  | NW_004515754.1 | scaffold210 | 95493                   | AA                              | TT                 | TT               | INTERGENIC      |               |                    |                    |
| SNP_65989_A_95848  | NW_004515754.1 | scaffold210 | 95848                   | TT                              | AA                 | AA               | DRR             | 101498030     | Unknown function   |                    |
| SNP_65990_A_95856  | NW_004515754.1 | scaffold210 | 95856                   | TT                              | CC                 | CC               | DRR             | 101498030     | Unknown function   |                    |
| SNP_65991_A_95912  | NW_004515754.1 | scaffold210 | 95912                   | TT                              | GG                 | GG               | DRR             | 101498030     | Unknown function   |                    |
| SNP_65992_A_95913  | NW_004515754.1 | scaffold210 | 95913                   | TT                              | AA                 | AA               | DRR             | 101498030     | Unknown function   |                    |



| SNPs IDs           | Chromosome IDs | Chromosomes | Physical positions (bp) | CDC Frontier (Reference genome) | (Pusa 1103 & HPNB) | (ILWC 46 & LPNB) | Sequence genome | Components of | Gene accession IDs | Putative functions |
|--------------------|----------------|-------------|-------------------------|---------------------------------|--------------------|------------------|-----------------|---------------|--------------------|--------------------|
| SNP_65993_A_191197 | NW_004515754.1 | scaffold210 | 191197                  | CC                              | TT                 | TT               | INTERGENIC      |               |                    |                    |
| SNP_65994_A_191273 | NW_004515754.1 | scaffold210 | 191273                  | AA                              | GG                 | GG               | INTERGENIC      |               |                    |                    |
| SNP_65995_A_191292 | NW_004515754.1 | scaffold210 | 191292                  | AA                              | GG                 | GG               | INTERGENIC      |               |                    |                    |
| SNP_65996_A_192378 | NW_004515754.1 | scaffold210 | 192378                  | AA                              | GG                 | GG               | INTERGENIC      |               |                    |                    |
| SNP_65997_A_192667 | NW_004515754.1 | scaffold210 | 192667                  | TT                              | CC                 | CC               | INTERGENIC      |               |                    |                    |
| SNP_65998_A_192670 | NW_004515754.1 | scaffold210 | 192670                  | TT                              | CC                 | CC               | INTERGENIC      |               |                    |                    |
| SNP_65999_A_192697 | NW_004515754.1 | scaffold210 | 192697                  | TT                              | CC                 | CC               | INTERGENIC      |               |                    |                    |
| SNP_66000_A_192712 | NW_004515754.1 | scaffold210 | 192712                  | TT                              | GG                 | GG               | INTERGENIC      |               |                    |                    |
| SNP_66001_A_192734 | NW_004515754.1 | scaffold210 | 192734                  | AA                              | GG                 | GG               | INTERGENIC      |               |                    |                    |
| SNP_66002_A_192791 | NW_004515754.1 | scaffold210 | 192791                  | TT                              | CC                 | CC               | INTERGENIC      |               |                    |                    |
| SNP_66003_A_192822 | NW_004515754.1 | scaffold210 | 192822                  | GG                              | AA                 | AA               | INTERGENIC      |               |                    |                    |
| SNP_66004_A_192825 | NW_004515754.1 | scaffold210 | 192825                  | AA                              | TT                 | TT               | INTERGENIC      |               |                    |                    |
| SNP_66005_A_192867 | NW_004515754.1 | scaffold210 | 192867                  | AA                              | GG                 | GG               | INTERGENIC      |               |                    |                    |
| SNP_66006_A_234011 | NW_004515754.1 | scaffold210 | 234011                  | TT                              | GG                 | GG               | INTERGENIC      |               |                    |                    |
| SNP_66007_A_256465 | NW_004515754.1 | scaffold210 | 256465                  | GG                              | AA                 | AA               | INTERGENIC      |               |                    |                    |
| SNP_66008_A_269377 | NW_004515754.1 | scaffold210 | 269377                  | AA                              | GG                 | GG               | INTERGENIC      |               |                    |                    |
| SNP_66009_A_269379 | NW_004515754.1 | scaffold210 | 269379                  | AA                              | GG                 | GG               | INTERGENIC      |               |                    |                    |
| SNP_66010_A_298803 | NW_004515754.1 | scaffold210 | 298803                  | GG                              | AA                 | AA               | INTERGENIC      |               |                    |                    |
| SNP_66011_A_298816 | NW_004515754.1 | scaffold210 | 298816                  | AA                              | GG                 | GG               | INTERGENIC      |               |                    |                    |
| SNP_66012_A_298817 | NW_004515754.1 | scaffold210 | 298817                  | TT                              | AA                 | AA               | INTERGENIC      |               |                    |                    |
| SNP_66013_A_298818 | NW_004515754.1 | scaffold210 | 298818                  | TT                              | AA                 | AA               | INTERGENIC      |               |                    |                    |
| SNP_66015_A_299118 | NW_004515754.1 | scaffold210 | 299118                  | TT                              | CC                 | CC               | INTERGENIC      |               |                    |                    |

| SNPs IDs           | Chromosome IDs | Chromosomes | Physical positions (bp) | CDC Frontier (Reference genome) | (Pusa 1103 & HPNB) | (ILWC 46 & LPNB) | Sequence genome | Components of | Gene accession IDs | Putative functions |
|--------------------|----------------|-------------|-------------------------|---------------------------------|--------------------|------------------|-----------------|---------------|--------------------|--------------------|
| SNP_66017_A_300815 | NW_004515754.1 | scaffold210 | 300815                  | CC                              | GG                 | GG               | INTERGENIC      |               |                    |                    |
| SNP_66018_A_302438 | NW_004515754.1 | scaffold210 | 302438                  | GG                              | AA                 | AA               | INTERGENIC      |               |                    |                    |
| SNP_66019_A_343872 | NW_004515754.1 | scaffold210 | 343872                  | CC                              | GG                 | GG               | INTERGENIC      |               |                    |                    |
| SNP_66020_A_345205 | NW_004515754.1 | scaffold210 | 345205                  | GG                              | AA                 | AA               | INTERGENIC      |               |                    |                    |
| SNP_66021_A_345233 | NW_004515754.1 | scaffold210 | 345233                  | GG                              | AA                 | AA               | INTERGENIC      |               |                    |                    |
| SNP_66022_A_382104 | NW_004515754.1 | scaffold210 | 382104                  | CC                              | AA                 | AA               | INTERGENIC      |               |                    |                    |
| SNP_66023_A_388211 | NW_004515754.1 | scaffold210 | 388211                  | AA                              | GG                 | GG               | INTERGENIC      |               |                    |                    |
| SNP_66024_A_388266 | NW_004515754.1 | scaffold210 | 388266                  | CC                              | TT                 | TT               | INTERGENIC      |               |                    |                    |
| SNP_66026_A_429654 | NW_004515754.1 | scaffold210 | 429654                  | AA                              | GG                 | GG               | INTERGENIC      |               |                    |                    |
| SNP_66027_A_429663 | NW_004515754.1 | scaffold210 | 429663                  | TT                              | AA                 | AA               | INTERGENIC      |               |                    |                    |
| SNP_66028_A_429715 | NW_004515754.1 | scaffold210 | 429715                  | CC                              | TT                 | TT               | INTERGENIC      |               |                    |                    |
| SNP_66029_A_429731 | NW_004515754.1 | scaffold210 | 429731                  | AA                              | CC                 | CC               | INTERGENIC      |               |                    |                    |
| SNP_66030_A_429752 | NW_004515754.1 | scaffold210 | 429752                  | AA                              | GG                 | GG               | INTERGENIC      |               |                    |                    |
| SNP_66031_A_429757 | NW_004515754.1 | scaffold210 | 429757                  | TT                              | CC                 | CC               | INTERGENIC      |               |                    |                    |
| SNP_66032_A_429784 | NW_004515754.1 | scaffold210 | 429784                  | AA                              | TT                 | TT               | INTERGENIC      |               |                    |                    |
| SNP_66033_A_429788 | NW_004515754.1 | scaffold210 | 429788                  | CC                              | GG                 | GG               | INTERGENIC      |               |                    |                    |
| SNP_66034_A_429794 | NW_004515754.1 | scaffold210 | 429794                  | TT                              | GG                 | GG               | INTERGENIC      |               |                    |                    |
| SNP_66035_A_513583 | NW_004515754.1 | scaffold210 | 513583                  | TT                              | GG                 | GG               | INTERGENIC      |               |                    |                    |
| SNP_66036_A_513599 | NW_004515754.1 | scaffold210 | 513599                  | CC                              | TT                 | TT               | INTERGENIC      |               |                    |                    |
| SNP_66037_A_513661 | NW_004515754.1 | scaffold210 | 513661                  | AA                              | GG                 | GG               | INTERGENIC      |               |                    |                    |
| SNP_66038_A_513681 | NW_004515754.1 | scaffold210 | 513681                  | TT                              | AA                 | AA               | INTERGENIC      |               |                    |                    |
| SNP_66039_A_529625 | NW_004515754.1 | scaffold210 | 529625                  | TT                              | CC                 | CC               | INTERGENIC      |               |                    |                    |

| SNPs IDs           | Chromosome IDs | Chromosomes | Physical positions (bp) | CDC Frontier (Reference genome) | (Pusa 1103 & HPNB) | (ILWC 46 & LPNB) | Sequence genome | Components of | Gene accession IDs | Putative functions |
|--------------------|----------------|-------------|-------------------------|---------------------------------|--------------------|------------------|-----------------|---------------|--------------------|--------------------|
| SNP_66041_A_572907 | NW_004515754.1 | scaffold210 | 572907                  | CC                              | TT                 | TT               | INTERGENIC      |               |                    |                    |
| SNP_66042_A_572925 | NW_004515754.1 | scaffold210 | 572925                  | GG                              | TT                 | TT               | INTERGENIC      |               |                    |                    |
| SNP_66043_A_572975 | NW_004515754.1 | scaffold210 | 572975                  | TT                              | CC                 | CC               | INTERGENIC      |               |                    |                    |
| SNP_66044_A_573013 | NW_004515754.1 | scaffold210 | 573013                  | AA                              | GG                 | GG               | INTERGENIC      |               |                    |                    |
| SNP_66045_A_576672 | NW_004515754.1 | scaffold210 | 576672                  | CC                              | AA                 | AA               | INTERGENIC      |               |                    |                    |
| SNP_66046_A_576694 | NW_004515754.1 | scaffold210 | 576694                  | TT                              | GG                 | GG               | INTERGENIC      |               |                    |                    |
| SNP_66047_A_576711 | NW_004515754.1 | scaffold210 | 576711                  | AA                              | CC                 | CC               | INTERGENIC      |               |                    |                    |
| SNP_66048_A_576766 | NW_004515754.1 | scaffold210 | 576766                  | TT                              | AA                 | AA               | INTERGENIC      |               |                    |                    |
| SNP_66049_A_576855 | NW_004515754.1 | scaffold210 | 576855                  | CC                              | TT                 | TT               | INTERGENIC      |               |                    |                    |
| SNP_66050_A_576909 | NW_004515754.1 | scaffold210 | 576909                  | GG                              | CC                 | CC               | INTERGENIC      |               |                    |                    |
| SNP_66051_A_576950 | NW_004515754.1 | scaffold210 | 576950                  | GG                              | AA                 | AA               | INTERGENIC      |               |                    |                    |
| SNP_66052_A_577006 | NW_004515754.1 | scaffold210 | 577006                  | TT                              | AA                 | AA               | INTERGENIC      |               |                    |                    |
| SNP_66053_A_577019 | NW_004515754.1 | scaffold210 | 577019                  | GG                              | TT                 | TT               | INTERGENIC      |               |                    |                    |
| SNP_66054_A_577028 | NW_004515754.1 | scaffold210 | 577028                  | AA                              | TT                 | TT               | INTERGENIC      |               |                    |                    |
| SNP_66056_A_577402 | NW_004515754.1 | scaffold210 | 577402                  | AA                              | GG                 | GG               | INTERGENIC      |               |                    |                    |
| SNP_66057_A_577466 | NW_004515754.1 | scaffold210 | 577466                  | AA                              | GG                 | GG               | INTERGENIC      |               |                    |                    |
| SNP_66058_A_577491 | NW_004515754.1 | scaffold210 | 577491                  | GG                              | AA                 | AA               | INTERGENIC      |               |                    |                    |
| SNP_66059_A_577591 | NW_004515754.1 | scaffold210 | 577591                  | GG                              | AA                 | AA               | INTERGENIC      |               |                    |                    |
| SNP_66060_A_577641 | NW_004515754.1 | scaffold210 | 577641                  | AA                              | CC                 | CC               | INTERGENIC      |               |                    |                    |
| SNP_66061_A_577677 | NW_004515754.1 | scaffold210 | 577677                  | GG                              | AA                 | AA               | INTERGENIC      |               |                    |                    |
| SNP_66062_A_577698 | NW_004515754.1 | scaffold210 | 577698                  | GG                              | AA                 | AA               | INTERGENIC      |               |                    |                    |
| SNP_66063_A_577781 | NW_004515754.1 | scaffold210 | 577781                  | AA                              | GG                 | GG               | INTERGENIC      |               |                    |                    |

| SNPs IDs           | Chromosome IDs | Chromosomes | Physical positions (bp) | CDC Frontier (Reference genome) | (Pusa 1103 & HPNB) | (ILWC 46 & LPNB) | Sequence Components of genome | Gene accession IDs | Putative functions |
|--------------------|----------------|-------------|-------------------------|---------------------------------|--------------------|------------------|-------------------------------|--------------------|--------------------|
| SNP_66064_A_580337 | NW_004515754.1 | scaffold210 | 580337                  | CC                              | GG                 | GG               | DRR                           | 101500309          | Unknown function   |
| SNP_66065_A_580628 | NW_004515754.1 | scaffold210 | 580628                  | TT                              | AA                 | AA               | DRR                           | 101500309          | Unknown function   |
| SNP_66066_A_580670 | NW_004515754.1 | scaffold210 | 580670                  | CC                              | AA                 | AA               | DRR                           | 101500309          | Unknown function   |
| SNP_66067_A_620807 | NW_004515754.1 | scaffold210 | 620807                  | GG                              | TT                 | TT               | INTERGENIC                    |                    |                    |
| SNP_66068_A_620819 | NW_004515754.1 | scaffold210 | 620819                  | TT                              | CC                 | CC               | INTERGENIC                    |                    |                    |
| SNP_66069_A_621139 | NW_004515754.1 | scaffold210 | 621139                  | TT                              | GG                 | GG               | INTERGENIC                    |                    |                    |
| SNP_66070_A_621563 | NW_004515754.1 | scaffold210 | 621563                  | CC                              | AA                 | AA               | INTERGENIC                    |                    |                    |
| SNP_66071_A_621606 | NW_004515754.1 | scaffold210 | 621606                  | TT                              | CC                 | CC               | INTERGENIC                    |                    |                    |
| SNP_66072_A_621614 | NW_004515754.1 | scaffold210 | 621614                  | AA                              | GG                 | GG               | INTERGENIC                    |                    |                    |
| SNP_66073_A_621645 | NW_004515754.1 | scaffold210 | 621645                  | AA                              | GG                 | GG               | INTERGENIC                    |                    |                    |
| SNP_66074_A_621857 | NW_004515754.1 | scaffold210 | 621857                  | TT                              | AA                 | AA               | INTERGENIC                    |                    |                    |
| SNP_66075_A_622528 | NW_004515754.1 | scaffold210 | 622528                  | GG                              | CC                 | CC               | INTERGENIC                    |                    |                    |
| SNP_66076_A_623751 | NW_004515754.1 | scaffold210 | 623751                  | TT                              | AA                 | AA               | INTERGENIC                    |                    |                    |
| SNP_66077_A_3652   | NW_004515755.1 | scaffold212 | 3652                    | CC                              | AA                 | AA               | INTERGENIC                    |                    |                    |
| SNP_66078_A_8739   | NW_004515755.1 | scaffold212 | 8739                    | CC                              | GG                 | GG               | INTERGENIC                    |                    |                    |
| SNP_66079_A_8808   | NW_004515755.1 | scaffold212 | 8808                    | CC                              | TT                 | TT               | INTERGENIC                    |                    |                    |
| SNP_66080_A_9052   | NW_004515755.1 | scaffold212 | 9052                    | TT                              | GG                 | GG               | INTERGENIC                    |                    |                    |
| SNP_66081_A_9132   | NW_004515755.1 | scaffold212 | 9132                    | AA                              | GG                 | GG               | INTERGENIC                    |                    |                    |
| SNP_66082_A_40380  | NW_004515755.1 | scaffold212 | 40380                   | AA                              | GG                 | GG               | INTERGENIC                    |                    |                    |
| SNP_66083_A_45770  | NW_004515755.1 | scaffold212 | 45770                   | AA                              | GG                 | GG               | INTERGENIC                    |                    |                    |
| SNP_66084_A_64573  | NW_004515755.1 | scaffold212 | 64573                   | CC                              | GG                 | GG               | INTERGENIC                    |                    |                    |
| SNP_66085_A_64609  | NW_004515755.1 | scaffold212 | 64609                   | CC                              | AA                 | AA               | INTERGENIC                    |                    |                    |

| SNPs IDs           | Chromosome IDs | Chromosomes | Physical positions (bp) | CDC Frontier (Reference genome) | (Pusa 1103 & HPNB) | (ILWC 46 & LPNB) | Sequence genome | Components of | Gene accession IDs | Putative functions |
|--------------------|----------------|-------------|-------------------------|---------------------------------|--------------------|------------------|-----------------|---------------|--------------------|--------------------|
| SNP_66086_A_66275  | NW_004515755.1 | scaffold212 | 66275                   | TT                              | CC                 | CC               | INTERGENIC      |               |                    |                    |
| SNP_66087_A_83918  | NW_004515755.1 | scaffold212 | 83918                   | CC                              | AA                 | AA               | INTERGENIC      |               |                    |                    |
| SNP_66088_A_83920  | NW_004515755.1 | scaffold212 | 83920                   | AA                              | GG                 | GG               | INTERGENIC      |               |                    |                    |
| SNP_66089_A_87652  | NW_004515755.1 | scaffold212 | 87652                   | AA                              | CC                 | CC               | INTERGENIC      |               |                    |                    |
| SNP_66090_A_88055  | NW_004515755.1 | scaffold212 | 88055                   | AA                              | GG                 | GG               | INTERGENIC      |               |                    |                    |
| SNP_66091_A_101260 | NW_004515755.1 | scaffold212 | 101260                  | CC                              | AA                 | AA               | INTERGENIC      |               |                    |                    |
| SNP_66093_A_161438 | NW_004515755.1 | scaffold212 | 161438                  | AA                              | CC                 | CC               | INTERGENIC      |               |                    |                    |
| SNP_66094_A_161447 | NW_004515755.1 | scaffold212 | 161447                  | CC                              | TT                 | TT               | INTERGENIC      |               |                    |                    |
| SNP_66095_A_161458 | NW_004515755.1 | scaffold212 | 161458                  | AA                              | GG                 | GG               | INTERGENIC      |               |                    |                    |
| SNP_66096_A_161490 | NW_004515755.1 | scaffold212 | 161490                  | TT                              | GG                 | GG               | INTERGENIC      |               |                    |                    |
| SNP_66097_A_180582 | NW_004515755.1 | scaffold212 | 180582                  | CC                              | AA                 | AA               | INTERGENIC      |               |                    |                    |
| SNP_66099_A_180832 | NW_004515755.1 | scaffold212 | 180832                  | CC                              | TT                 | TT               | INTERGENIC      |               |                    |                    |
| SNP_66100_A_180938 | NW_004515755.1 | scaffold212 | 180938                  | TT                              | GG                 | GG               | INTERGENIC      |               |                    |                    |
| SNP_66101_A_180981 | NW_004515755.1 | scaffold212 | 180981                  | TT                              | AA                 | AA               | INTERGENIC      |               |                    |                    |
| SNP_66102_A_181056 | NW_004515755.1 | scaffold212 | 181056                  | CC                              | AA                 | AA               | INTERGENIC      |               |                    |                    |
| SNP_66103_A_181153 | NW_004515755.1 | scaffold212 | 181153                  | CC                              | AA                 | AA               | INTERGENIC      |               |                    |                    |
| SNP_66104_A_181362 | NW_004515755.1 | scaffold212 | 181362                  | CC                              | TT                 | TT               | INTERGENIC      |               |                    |                    |
| SNP_66105_A_181367 | NW_004515755.1 | scaffold212 | 181367                  | AA                              | TT                 | TT               | INTERGENIC      |               |                    |                    |
| SNP_66106_A_183238 | NW_004515755.1 | scaffold212 | 183238                  | AA                              | GG                 | GG               | INTERGENIC      |               |                    |                    |
| SNP_66107_A_186371 | NW_004515755.1 | scaffold212 | 186371                  | CC                              | TT                 | TT               | INTERGENIC      |               |                    |                    |
| SNP_66108_A_207339 | NW_004515755.1 | scaffold212 | 207339                  | TT                              | CC                 | CC               | INTERGENIC      |               |                    |                    |
| SNP_66109_A_207477 | NW_004515755.1 | scaffold212 | 207477                  | AA                              | TT                 | TT               | INTERGENIC      |               |                    |                    |

| SNPs IDs           | Chromosome IDs | Chromosomes | Physical positions (bp) | CDC Frontier (Reference genome) | (Pusa 1103 & HPNB) | (ILWC 46 & LPNB) | Sequence genome | Components of | Gene accession IDs | Putative functions |
|--------------------|----------------|-------------|-------------------------|---------------------------------|--------------------|------------------|-----------------|---------------|--------------------|--------------------|
| SNP_66110_A_207758 | NW_004515755.1 | scaffold212 | 207758                  | GG                              | AA                 | AA               | INTERGENIC      |               |                    |                    |
| SNP_66111_A_207809 | NW_004515755.1 | scaffold212 | 207809                  | TT                              | CC                 | CC               | INTERGENIC      |               |                    |                    |
| SNP_66112_A_207838 | NW_004515755.1 | scaffold212 | 207838                  | TT                              | CC                 | CC               | INTERGENIC      |               |                    |                    |
| SNP_66113_A_209695 | NW_004515755.1 | scaffold212 | 209695                  | TT                              | CC                 | CC               | INTERGENIC      |               |                    |                    |
| SNP_66114_A_215710 | NW_004515755.1 | scaffold212 | 215710                  | GG                              | TT                 | TT               | INTERGENIC      |               |                    |                    |
| SNP_66115_A_216105 | NW_004515755.1 | scaffold212 | 216105                  | TT                              | CC                 | CC               | INTERGENIC      |               |                    |                    |
| SNP_66116_A_216116 | NW_004515755.1 | scaffold212 | 216116                  | AA                              | GG                 | GG               | INTERGENIC      |               |                    |                    |
| SNP_66117_A_253417 | NW_004515755.1 | scaffold212 | 253417                  | GG                              | AA                 | AA               | INTERGENIC      |               |                    |                    |
| SNP_66118_A_296366 | NW_004515755.1 | scaffold212 | 296366                  | GG                              | TT                 | TT               | INTERGENIC      |               |                    |                    |
| SNP_66119_A_296972 | NW_004515755.1 | scaffold212 | 296972                  | AA                              | GG                 | GG               | INTERGENIC      |               |                    |                    |
| SNP_66120_A_332844 | NW_004515755.1 | scaffold212 | 332844                  | AA                              | CC                 | CC               | INTERGENIC      |               |                    |                    |
| SNP_66121_A_333315 | NW_004515755.1 | scaffold212 | 333315                  | CC                              | TT                 | TT               | INTERGENIC      |               |                    |                    |
| SNP_66122_A_353924 | NW_004515755.1 | scaffold212 | 353924                  | CC                              | AA                 | AA               | INTERGENIC      |               |                    |                    |
| SNP_66123_A_353931 | NW_004515755.1 | scaffold212 | 353931                  | AA                              | TT                 | TT               | INTERGENIC      |               |                    |                    |
| SNP_66124_A_354322 | NW_004515755.1 | scaffold212 | 354322                  | AA                              | GG                 | GG               | INTERGENIC      |               |                    |                    |
| SNP_66125_A_356364 | NW_004515755.1 | scaffold212 | 356364                  | AA                              | CC                 | CC               | INTERGENIC      |               |                    |                    |
| SNP_66126_A_356394 | NW_004515755.1 | scaffold212 | 356394                  | TT                              | CC                 | CC               | INTERGENIC      |               |                    |                    |
| SNP_66127_A_356470 | NW_004515755.1 | scaffold212 | 356470                  | GG                              | CC                 | CC               | INTERGENIC      |               |                    |                    |
| SNP_66128_A_356490 | NW_004515755.1 | scaffold212 | 356490                  | AA                              | CC                 | CC               | INTERGENIC      |               |                    |                    |
| SNP_66129_A_356527 | NW_004515755.1 | scaffold212 | 356527                  | AA                              | TT                 | TT               | INTERGENIC      |               |                    |                    |
| SNP_66130_A_356531 | NW_004515755.1 | scaffold212 | 356531                  | AA                              | GG                 | GG               | INTERGENIC      |               |                    |                    |
| SNP_66132_A_356587 | NW_004515755.1 | scaffold212 | 356587                  | TT                              | CC                 | CC               | INTERGENIC      |               |                    |                    |

| SNPs IDs           | Chromosome IDs | Chromosomes | Physical positions (bp) | CDC Frontier (Reference genome) | (Pusa 1103 & HPNB) | (ILWC 46 & LPNB) | Sequence genome | Components of | Gene accession IDs | Putative functions |
|--------------------|----------------|-------------|-------------------------|---------------------------------|--------------------|------------------|-----------------|---------------|--------------------|--------------------|
| SNP_66134_A_356814 | NW_004515755.1 | scaffold212 | 356814                  | TT                              | CC                 | CC               | INTERGENIC      |               |                    |                    |
| SNP_66135_A_356837 | NW_004515755.1 | scaffold212 | 356837                  | AA                              | GG                 | GG               | INTERGENIC      |               |                    |                    |
| SNP_66136_A_356840 | NW_004515755.1 | scaffold212 | 356840                  | AA                              | GG                 | GG               | INTERGENIC      |               |                    |                    |
| SNP_66138_A_356937 | NW_004515755.1 | scaffold212 | 356937                  | GG                              | AA                 | AA               | INTERGENIC      |               |                    |                    |
| SNP_66139_A_356940 | NW_004515755.1 | scaffold212 | 356940                  | TT                              | GG                 | GG               | INTERGENIC      |               |                    |                    |
| SNP_66140_A_356979 | NW_004515755.1 | scaffold212 | 356979                  | GG                              | AA                 | AA               | INTERGENIC      |               |                    |                    |
| SNP_66141_A_357016 | NW_004515755.1 | scaffold212 | 357016                  | CC                              | TT                 | TT               | INTERGENIC      |               |                    |                    |
| SNP_66142_A_365672 | NW_004515755.1 | scaffold212 | 365672                  | AA                              | GG                 | GG               | INTERGENIC      |               |                    |                    |
| SNP_66143_A_366004 | NW_004515755.1 | scaffold212 | 366004                  | TT                              | CC                 | CC               | INTERGENIC      |               |                    |                    |
| SNP_66144_A_366039 | NW_004515755.1 | scaffold212 | 366039                  | TT                              | CC                 | CC               | INTERGENIC      |               |                    |                    |
| SNP_66145_A_367957 | NW_004515755.1 | scaffold212 | 367957                  | AA                              | GG                 | GG               | INTERGENIC      |               |                    |                    |
| SNP_66146_A_368558 | NW_004515755.1 | scaffold212 | 368558                  | AA                              | GG                 | GG               | INTERGENIC      |               |                    |                    |
| SNP_66147_A_368868 | NW_004515755.1 | scaffold212 | 368868                  | GG                              | TT                 | TT               | INTERGENIC      |               |                    |                    |
| SNP_66148_A_381109 | NW_004515755.1 | scaffold212 | 381109                  | GG                              | TT                 | TT               | INTERGENIC      |               |                    |                    |
| SNP_66149_A_463452 | NW_004515755.1 | scaffold212 | 463452                  | GG                              | AA                 | AA               | INTERGENIC      |               |                    |                    |
| SNP_66150_A_463476 | NW_004515755.1 | scaffold212 | 463476                  | TT                              | GG                 | GG               | INTERGENIC      |               |                    |                    |
| SNP_66151_A_463503 | NW_004515755.1 | scaffold212 | 463503                  | TT                              | AA                 | AA               | INTERGENIC      |               |                    |                    |
| SNP_66152_A_463544 | NW_004515755.1 | scaffold212 | 463544                  | AA                              | GG                 | GG               | INTERGENIC      |               |                    |                    |
| SNP_66153_A_463583 | NW_004515755.1 | scaffold212 | 463583                  | GG                              | AA                 | AA               | INTERGENIC      |               |                    |                    |
| SNP_66154_A_463584 | NW_004515755.1 | scaffold212 | 463584                  | GG                              | CC                 | CC               | INTERGENIC      |               |                    |                    |
| SNP_66155_A_463589 | NW_004515755.1 | scaffold212 | 463589                  | AA                              | GG                 | GG               | INTERGENIC      |               |                    |                    |
| SNP_66156_A_463928 | NW_004515755.1 | scaffold212 | 463928                  | TT                              | CC                 | CC               | INTERGENIC      |               |                    |                    |

| SNPs IDs           | Chromosome IDs | Chromosomes | Physical positions (bp) | CDC Frontier (Reference genome) | (Pusa 1103 & HPNB) | (ILWC 46 & LPNB) | Sequence genome | Components of | Gene accession IDs | Putative functions |
|--------------------|----------------|-------------|-------------------------|---------------------------------|--------------------|------------------|-----------------|---------------|--------------------|--------------------|
| SNP_66157_A_464562 | NW_004515755.1 | scaffold212 | 464562                  | AA                              | GG                 | GG               | INTERGENIC      |               |                    |                    |
| SNP_66158_A_464598 | NW_004515755.1 | scaffold212 | 464598                  | GG                              | AA                 | AA               | INTERGENIC      |               |                    |                    |
| SNP_66159_A_495343 | NW_004515755.1 | scaffold212 | 495343                  | AA                              | GG                 | GG               | INTERGENIC      |               |                    |                    |
| SNP_66160_A_500661 | NW_004515755.1 | scaffold212 | 500661                  | CC                              | TT                 | TT               | INTERGENIC      |               |                    |                    |
| SNP_66161_A_500664 | NW_004515755.1 | scaffold212 | 500664                  | TT                              | CC                 | CC               | INTERGENIC      |               |                    |                    |
| SNP_66162_A_500670 | NW_004515755.1 | scaffold212 | 500670                  | GG                              | AA                 | AA               | INTERGENIC      |               |                    |                    |
| SNP_66163_A_500674 | NW_004515755.1 | scaffold212 | 500674                  | CC                              | TT                 | TT               | INTERGENIC      |               |                    |                    |
| SNP_66164_A_500687 | NW_004515755.1 | scaffold212 | 500687                  | TT                              | GG                 | GG               | INTERGENIC      |               |                    |                    |
| SNP_66165_A_500932 | NW_004515755.1 | scaffold212 | 500932                  | AA                              | TT                 | TT               | INTERGENIC      |               |                    |                    |
| SNP_66166_A_500934 | NW_004515755.1 | scaffold212 | 500934                  | TT                              | GG                 | GG               | INTERGENIC      |               |                    |                    |
| SNP_66167_A_500941 | NW_004515755.1 | scaffold212 | 500941                  | AA                              | CC                 | CC               | INTERGENIC      |               |                    |                    |
| SNP_66168_A_500942 | NW_004515755.1 | scaffold212 | 500942                  | GG                              | AA                 | AA               | INTERGENIC      |               |                    |                    |
| SNP_66169_A_500949 | NW_004515755.1 | scaffold212 | 500949                  | TT                              | CC                 | CC               | INTERGENIC      |               |                    |                    |
| SNP_66170_A_501001 | NW_004515755.1 | scaffold212 | 501001                  | GG                              | CC                 | CC               | INTERGENIC      |               |                    |                    |
| SNP_66171_A_501033 | NW_004515755.1 | scaffold212 | 501033                  | TT                              | GG                 | GG               | INTERGENIC      |               |                    |                    |
| SNP_66172_A_501047 | NW_004515755.1 | scaffold212 | 501047                  | CC                              | GG                 | GG               | INTERGENIC      |               |                    |                    |
| SNP_66173_A_501058 | NW_004515755.1 | scaffold212 | 501058                  | CC                              | TT                 | TT               | INTERGENIC      |               |                    |                    |
| SNP_66174_A_6875   | NW_004515756.1 | scaffold214 | 6875                    | GG                              | TT                 | TT               | INTERGENIC      |               |                    |                    |
| SNP_66175_A_6937   | NW_004515756.1 | scaffold214 | 6937                    | CC                              | TT                 | TT               | INTERGENIC      |               |                    |                    |
| SNP_66176_A_6993   | NW_004515756.1 | scaffold214 | 6993                    | GG                              | TT                 | TT               | INTERGENIC      |               |                    |                    |
| SNP_66177_A_7511   | NW_004515756.1 | scaffold214 | 7511                    | AA                              | TT                 | TT               | INTERGENIC      |               |                    |                    |
| SNP_66178_A_7599   | NW_004515756.1 | scaffold214 | 7599                    | CC                              | TT                 | TT               | INTERGENIC      |               |                    |                    |



| SNPs IDs          | Chromosome IDs | Chromosomes | Physical positions (bp) | CDC Frontier (Reference genome) | (Pusa 1103 & HPNB) | (ILWC 46 & LPNB) | Sequence genome | Components of | Gene accession IDs | Putative functions |
|-------------------|----------------|-------------|-------------------------|---------------------------------|--------------------|------------------|-----------------|---------------|--------------------|--------------------|
| SNP_66179_A_14322 | NW_004515756.1 | scaffold214 | 14322                   | AA                              | CC                 | CC               | INTERGENIC      |               |                    |                    |
| SNP_66180_A_14400 | NW_004515756.1 | scaffold214 | 14400                   | AA                              | GG                 | GG               | INTERGENIC      |               |                    |                    |
| SNP_66182_A_19171 | NW_004515756.1 | scaffold214 | 19171                   | AA                              | GG                 | GG               | INTERGENIC      |               |                    |                    |
| SNP_66183_A_19302 | NW_004515756.1 | scaffold214 | 19302                   | TT                              | CC                 | CC               | INTERGENIC      |               |                    |                    |
| SNP_66184_A_23731 | NW_004515756.1 | scaffold214 | 23731                   | CC                              | TT                 | TT               | INTERGENIC      |               |                    |                    |
| SNP_66185_A_24773 | NW_004515756.1 | scaffold214 | 24773                   | AA                              | GG                 | GG               | INTERGENIC      |               |                    |                    |
| SNP_66186_A_34593 | NW_004515756.1 | scaffold214 | 34593                   | AA                              | CC                 | CC               | INTERGENIC      |               |                    |                    |
| SNP_66187_A_34823 | NW_004515756.1 | scaffold214 | 34823                   | AA                              | TT                 | TT               | INTERGENIC      |               |                    |                    |
| SNP_66188_A_34983 | NW_004515756.1 | scaffold214 | 34983                   | TT                              | GG                 | GG               | INTERGENIC      |               |                    |                    |
| SNP_66189_A_35004 | NW_004515756.1 | scaffold214 | 35004                   | GG                              | TT                 | TT               | INTERGENIC      |               |                    |                    |
| SNP_66190_A_35095 | NW_004515756.1 | scaffold214 | 35095                   | CC                              | AA                 | AA               | INTERGENIC      |               |                    |                    |
| SNP_66191_A_35219 | NW_004515756.1 | scaffold214 | 35219                   | TT                              | GG                 | GG               | INTERGENIC      |               |                    |                    |
| SNP_66192_A_39306 | NW_004515756.1 | scaffold214 | 39306                   | AA                              | GG                 | GG               | INTERGENIC      |               |                    |                    |
| SNP_66193_A_39343 | NW_004515756.1 | scaffold214 | 39343                   | AA                              | TT                 | TT               | INTERGENIC      |               |                    |                    |
| SNP_66194_A_49309 | NW_004515756.1 | scaffold214 | 49309                   | CC                              | TT                 | TT               | INTERGENIC      |               |                    |                    |
| SNP_66195_A_49796 | NW_004515756.1 | scaffold214 | 49796                   | CC                              | TT                 | TT               | INTERGENIC      |               |                    |                    |
| SNP_66196_A_51943 | NW_004515756.1 | scaffold214 | 51943                   | TT                              | CC                 | CC               | INTERGENIC      |               |                    |                    |
| SNP_66197_A_52029 | NW_004515756.1 | scaffold214 | 52029                   | CC                              | TT                 | TT               | INTERGENIC      |               |                    |                    |
| SNP_66198_A_52033 | NW_004515756.1 | scaffold214 | 52033                   | TT                              | AA                 | AA               | INTERGENIC      |               |                    |                    |
| SNP_66200_A_52040 | NW_004515756.1 | scaffold214 | 52040                   | AA                              | GG                 | GG               | INTERGENIC      |               |                    |                    |
| SNP_66201_A_52044 | NW_004515756.1 | scaffold214 | 52044                   | TT                              | GG                 | GG               | INTERGENIC      |               |                    |                    |
| SNP_66202_A_52048 | NW_004515756.1 | scaffold214 | 52048                   | CC                              | TT                 | TT               | INTERGENIC      |               |                    |                    |

| SNPs IDs           | Chromosome IDs | Chromosomes | Physical positions (bp) | CDC Frontier (Reference genome) | (Pusa 1103 & HPNB) | (ILWC 46 & LPNB) | Sequence genome | Components of | Gene accession IDs | Putative functions |
|--------------------|----------------|-------------|-------------------------|---------------------------------|--------------------|------------------|-----------------|---------------|--------------------|--------------------|
| SNP_66203_A_52267  | NW_004515756.1 | scaffold214 | 52267                   | AA                              | GG                 | GG               | INTERGENIC      |               |                    |                    |
| SNP_66204_A_54754  | NW_004515756.1 | scaffold214 | 54754                   | CC                              | TT                 | TT               | INTERGENIC      |               |                    |                    |
| SNP_66205_A_54832  | NW_004515756.1 | scaffold214 | 54832                   | TT                              | GG                 | GG               | INTERGENIC      |               |                    |                    |
| SNP_66206_A_54890  | NW_004515756.1 | scaffold214 | 54890                   | TT                              | AA                 | AA               | INTERGENIC      |               |                    |                    |
| SNP_66207_A_55172  | NW_004515756.1 | scaffold214 | 55172                   | CC                              | TT                 | TT               | INTERGENIC      |               |                    |                    |
| SNP_66208_A_55243  | NW_004515756.1 | scaffold214 | 55243                   | TT                              | CC                 | CC               | INTERGENIC      |               |                    |                    |
| SNP_66209_A_55245  | NW_004515756.1 | scaffold214 | 55245                   | TT                              | CC                 | CC               | INTERGENIC      |               |                    |                    |
| SNP_66210_A_55261  | NW_004515756.1 | scaffold214 | 55261                   | GG                              | AA                 | AA               | INTERGENIC      |               |                    |                    |
| SNP_66211_A_59809  | NW_004515756.1 | scaffold214 | 59809                   | CC                              | GG                 | GG               | INTERGENIC      |               |                    |                    |
| SNP_66212_A_59823  | NW_004515756.1 | scaffold214 | 59823                   | GG                              | AA                 | AA               | INTERGENIC      |               |                    |                    |
| SNP_66213_A_79522  | NW_004515756.1 | scaffold214 | 79522                   | AA                              | GG                 | GG               | INTERGENIC      |               |                    |                    |
| SNP_66214_A_81036  | NW_004515756.1 | scaffold214 | 81036                   | TT                              | GG                 | GG               | INTERGENIC      |               |                    |                    |
| SNP_66215_A_81093  | NW_004515756.1 | scaffold214 | 81093                   | AA                              | TT                 | TT               | INTERGENIC      |               |                    |                    |
| SNP_66216_A_89109  | NW_004515756.1 | scaffold214 | 89109                   | CC                              | TT                 | TT               | INTERGENIC      |               |                    |                    |
| SNP_66217_A_89159  | NW_004515756.1 | scaffold214 | 89159                   | TT                              | CC                 | CC               | INTERGENIC      |               |                    |                    |
| SNP_66218_A_92340  | NW_004515756.1 | scaffold214 | 92340                   | GG                              | AA                 | AA               | INTERGENIC      |               |                    |                    |
| SNP_66219_A_102598 | NW_004515756.1 | scaffold214 | 102598                  | CC                              | TT                 | TT               | INTERGENIC      |               |                    |                    |
| SNP_66220_A_103268 | NW_004515756.1 | scaffold214 | 103268                  | CC                              | TT                 | TT               | INTERGENIC      |               |                    |                    |
| SNP_66221_A_120227 | NW_004515756.1 | scaffold214 | 120227                  | CC                              | AA                 | AA               | INTERGENIC      |               |                    |                    |
| SNP_66222_A_122889 | NW_004515756.1 | scaffold214 | 122889                  | GG                              | AA                 | AA               | INTERGENIC      |               |                    |                    |
| SNP_66223_A_122927 | NW_004515756.1 | scaffold214 | 122927                  | TT                              | AA                 | AA               | INTERGENIC      |               |                    |                    |
| SNP_66224_A_122951 | NW_004515756.1 | scaffold214 | 122951                  | TT                              | AA                 | AA               | INTERGENIC      |               |                    |                    |

| SNPs IDs           | Chromosome IDs | Chromosomes | Physical positions (bp) | CDC Frontier (Reference genome) | (Pusa 1103 & HPNB) | (ILWC 46 & LPNB) | Sequence genome | Components of | Gene accession IDs | Putative functions |
|--------------------|----------------|-------------|-------------------------|---------------------------------|--------------------|------------------|-----------------|---------------|--------------------|--------------------|
| SNP_66225_A_125677 | NW_004515756.1 | scaffold214 | 125677                  | GG                              | AA                 | AA               | INTERGENIC      |               |                    |                    |
| SNP_66226_A_125782 | NW_004515756.1 | scaffold214 | 125782                  | GG                              | AA                 | AA               | INTERGENIC      |               |                    |                    |
| SNP_66227_A_126095 | NW_004515756.1 | scaffold214 | 126095                  | TT                              | GG                 | GG               | INTERGENIC      |               |                    |                    |
| SNP_66228_A_127876 | NW_004515756.1 | scaffold214 | 127876                  | AA                              | CC                 | CC               | INTERGENIC      |               |                    |                    |
| SNP_66229_A_128104 | NW_004515756.1 | scaffold214 | 128104                  | CC                              | TT                 | TT               | INTERGENIC      |               |                    |                    |
| SNP_66230_A_128109 | NW_004515756.1 | scaffold214 | 128109                  | CC                              | TT                 | TT               | INTERGENIC      |               |                    |                    |
| SNP_66231_A_131111 | NW_004515756.1 | scaffold214 | 131111                  | TT                              | AA                 | AA               | INTERGENIC      |               |                    |                    |
| SNP_66232_A_131186 | NW_004515756.1 | scaffold214 | 131186                  | CC                              | TT                 | TT               | INTERGENIC      |               |                    |                    |
| SNP_66233_A_131287 | NW_004515756.1 | scaffold214 | 131287                  | GG                              | AA                 | AA               | INTERGENIC      |               |                    |                    |
| SNP_66234_A_138400 | NW_004515756.1 | scaffold214 | 138400                  | GG                              | AA                 | AA               | INTERGENIC      |               |                    |                    |
| SNP_66235_A_138486 | NW_004515756.1 | scaffold214 | 138486                  | GG                              | TT                 | TT               | INTERGENIC      |               |                    |                    |
| SNP_66236_A_138712 | NW_004515756.1 | scaffold214 | 138712                  | TT                              | GG                 | GG               | INTERGENIC      |               |                    |                    |
| SNP_66237_A_138771 | NW_004515756.1 | scaffold214 | 138771                  | AA                              | GG                 | GG               | INTERGENIC      |               |                    |                    |
| SNP_66238_A_138871 | NW_004515756.1 | scaffold214 | 138871                  | TT                              | GG                 | GG               | INTERGENIC      |               |                    |                    |
| SNP_66239_A_139070 | NW_004515756.1 | scaffold214 | 139070                  | GG                              | TT                 | TT               | INTERGENIC      |               |                    |                    |
| SNP_66240_A_139206 | NW_004515756.1 | scaffold214 | 139206                  | CC                              | TT                 | TT               | INTERGENIC      |               |                    |                    |
| SNP_66241_A_139295 | NW_004515756.1 | scaffold214 | 139295                  | CC                              | GG                 | GG               | INTERGENIC      |               |                    |                    |
| SNP_66242_A_139309 | NW_004515756.1 | scaffold214 | 139309                  | AA                              | CC                 | CC               | INTERGENIC      |               |                    |                    |
| SNP_66243_A_139601 | NW_004515756.1 | scaffold214 | 139601                  | TT                              | CC                 | CC               | INTERGENIC      |               |                    |                    |
| SNP_66244_A_139602 | NW_004515756.1 | scaffold214 | 139602                  | GG                              | AA                 | AA               | INTERGENIC      |               |                    |                    |
| SNP_66245_A_139625 | NW_004515756.1 | scaffold214 | 139625                  | TT                              | AA                 | AA               | INTERGENIC      |               |                    |                    |
| SNP_66246_A_141797 | NW_004515756.1 | scaffold214 | 141797                  | AA                              | CC                 | CC               | INTERGENIC      |               |                    |                    |

| SNPs IDs           | Chromosome IDs | Chromosomes | Physical positions (bp) | CDC Frontier (Reference genome) | (Pusa 1103 & HPNB) | (ILWC 46 & LPNB) | Sequence genome | Components of | Gene accession IDs | Putative functions |
|--------------------|----------------|-------------|-------------------------|---------------------------------|--------------------|------------------|-----------------|---------------|--------------------|--------------------|
| SNP_66247_A_141882 | NW_004515756.1 | scaffold214 | 141882                  | GG                              | AA                 | AA               | INTERGENIC      |               |                    |                    |
| SNP_66248_A_141932 | NW_004515756.1 | scaffold214 | 141932                  | GG                              | AA                 | AA               | INTERGENIC      |               |                    |                    |
| SNP_66249_A_141935 | NW_004515756.1 | scaffold214 | 141935                  | CC                              | TT                 | TT               | INTERGENIC      |               |                    |                    |
| SNP_66250_A_142781 | NW_004515756.1 | scaffold214 | 142781                  | AA                              | GG                 | GG               | INTERGENIC      |               |                    |                    |
| SNP_66251_A_143703 | NW_004515756.1 | scaffold214 | 143703                  | AA                              | GG                 | GG               | INTERGENIC      |               |                    |                    |
| SNP_66252_A_143876 | NW_004515756.1 | scaffold214 | 143876                  | AA                              | CC                 | CC               | INTERGENIC      |               |                    |                    |
| SNP_66253_A_144334 | NW_004515756.1 | scaffold214 | 144334                  | TT                              | GG                 | GG               | INTERGENIC      |               |                    |                    |
| SNP_66254_A_144470 | NW_004515756.1 | scaffold214 | 144470                  | GG                              | TT                 | TT               | INTERGENIC      |               |                    |                    |
| SNP_66255_A_144563 | NW_004515756.1 | scaffold214 | 144563                  | AA                              | GG                 | GG               | INTERGENIC      |               |                    |                    |
| SNP_66256_A_144612 | NW_004515756.1 | scaffold214 | 144612                  | TT                              | AA                 | AA               | INTERGENIC      |               |                    |                    |
| SNP_66257_A_144738 | NW_004515756.1 | scaffold214 | 144738                  | CC                              | TT                 | TT               | INTERGENIC      |               |                    |                    |
| SNP_66258_A_144774 | NW_004515756.1 | scaffold214 | 144774                  | AA                              | TT                 | TT               | INTERGENIC      |               |                    |                    |
| SNP_66259_A_144834 | NW_004515756.1 | scaffold214 | 144834                  | AA                              | CC                 | CC               | INTERGENIC      |               |                    |                    |
| SNP_66260_A_144894 | NW_004515756.1 | scaffold214 | 144894                  | AA                              | GG                 | GG               | INTERGENIC      |               |                    |                    |
| SNP_66261_A_14175  | NW_004515757.1 | scaffold217 | 14175                   | GG                              | TT                 | TT               | INTERGENIC      |               |                    |                    |
| SNP_66262_A_16808  | NW_004515757.1 | scaffold217 | 16808                   | CC                              | AA                 | AA               | INTERGENIC      |               |                    |                    |
| SNP_66263_A_1646   | NW_004515758.1 | scaffold220 | 1646                    | GG                              | TT                 | TT               | INTERGENIC      |               |                    |                    |
| SNP_66264_A_1708   | NW_004515758.1 | scaffold220 | 1708                    | AA                              | CC                 | CC               | INTERGENIC      |               |                    |                    |
| SNP_66265_A_4706   | NW_004515758.1 | scaffold220 | 4706                    | TT                              | AA                 | AA               | INTERGENIC      |               |                    |                    |
| SNP_66266_A_4812   | NW_004515758.1 | scaffold220 | 4812                    | GG                              | CC                 | CC               | INTERGENIC      |               |                    |                    |
| SNP_66267_A_4845   | NW_004515758.1 | scaffold220 | 4845                    | AA                              | CC                 | CC               | INTERGENIC      |               |                    |                    |
| SNP_66268_A_4981   | NW_004515758.1 | scaffold220 | 4981                    | AA                              | GG                 | GG               | INTERGENIC      |               |                    |                    |

| SNPs IDs           | Chromosome IDs | Chromosomes | Physical positions (bp) | CDC Frontier (Reference genome) | (Pusa 1103 & HPNB) | (ILWC 46 & LPNB) | Sequence Components of genome | Gene accession IDs | Putative functions                        |
|--------------------|----------------|-------------|-------------------------|---------------------------------|--------------------|------------------|-------------------------------|--------------------|-------------------------------------------|
| SNP_66269_A_5028   | NW_004515758.1 | scaffold220 | 5028                    | TT                              | CC                 | CC               | INTERGENIC                    |                    |                                           |
| SNP_66270_A_5414   | NW_004515758.1 | scaffold220 | 5414                    | AA                              | TT                 | TT               | INTERGENIC                    |                    |                                           |
| SNP_66271_A_32344  | NW_004515759.1 | scaffold221 | 32344                   | AA                              | CC                 | CC               | INTERGENIC                    |                    |                                           |
| SNP_66272_A_37270  | NW_004515759.1 | scaffold221 | 37270                   | AA                              | TT                 | TT               | INTERGENIC                    |                    |                                           |
| SNP_66273_A_43781  | NW_004515759.1 | scaffold221 | 43781                   | TT                              | CC                 | CC               | DRR                           | 101505748          | Unknown function                          |
| SNP_66274_A_43786  | NW_004515759.1 | scaffold221 | 43786                   | TT                              | GG                 | GG               | DRR                           | 101505748          | Unknown function                          |
| SNP_66275_A_61219  | NW_004515759.1 | scaffold221 | 61219                   | TT                              | CC                 | CC               | INTERGENIC                    |                    |                                           |
| SNP_66277_A_61644  | NW_004515759.1 | scaffold221 | 61644                   | AA                              | GG                 | GG               | INTERGENIC                    |                    |                                           |
| SNP_66278_A_92573  | NW_004515759.1 | scaffold221 | 92573                   | AA                              | GG                 | GG               | INTERGENIC                    |                    |                                           |
| SNP_66279_A_94040  | NW_004515759.1 | scaffold221 | 94040                   | AA                              | GG                 | GG               | INTERGENIC                    |                    |                                           |
| SNP_66280_A_94049  | NW_004515759.1 | scaffold221 | 94049                   | TT                              | CC                 | CC               | INTERGENIC                    |                    |                                           |
| SNP_66281_A_110024 | NW_004515759.1 | scaffold221 | 110024                  | GG                              | AA                 | AA               | INTERGENIC                    |                    |                                           |
| SNP_66282_A_110034 | NW_004515759.1 | scaffold221 | 110034                  | AA                              | GG                 | GG               | INTERGENIC                    |                    |                                           |
| SNP_66283_A_110066 | NW_004515759.1 | scaffold221 | 110066                  | CC                              | TT                 | TT               | INTERGENIC                    |                    |                                           |
| SNP_66284_A_110179 | NW_004515759.1 | scaffold221 | 110179                  | AA                              | TT                 | TT               | INTERGENIC                    |                    |                                           |
| SNP_66285_A_110291 | NW_004515759.1 | scaffold221 | 110291                  | TT                              | CC                 | CC               | INTERGENIC                    |                    |                                           |
| SNP_66286_A_110376 | NW_004515759.1 | scaffold221 | 110376                  | GG                              | CC                 | CC               | INTERGENIC                    |                    |                                           |
| SNP_66287_A_110459 | NW_004515759.1 | scaffold221 | 110459                  | CC                              | AA                 | AA               | INTERGENIC                    |                    |                                           |
| SNP_66288_A_4157   | NW_004515760.1 | scaffold222 | 4157                    | TT                              | CC                 | CC               | INTERGENIC                    |                    |                                           |
| SNP_66289_A_5923   | NW_004515760.1 | scaffold222 | 5923                    | TT                              | CC                 | CC               | INTERGENIC                    |                    |                                           |
| SNP_66290_A_25888  | NW_004515760.1 | scaffold222 | 25888                   | CC                              | GG                 | GG               | INTRON                        | 101506067          | 7-deoxyloganetin glucosyltransferase-like |
| SNP_66291_A_25914  | NW_004515760.1 | scaffold222 | 25914                   | CC                              | TT                 | TT               | INTRON                        | 101506067          | 7-deoxyloganetin glucosyltransferase-like |

| SNPs IDs           | Chromosome IDs | Chromosomes | Physical positions (bp) | CDC Frontier (Reference genome) | (Pusa 1103 & HPNB) | (ILWC 46 & LPNB) | Sequence Components of genome | Gene accession IDs | Putative functions                                        |
|--------------------|----------------|-------------|-------------------------|---------------------------------|--------------------|------------------|-------------------------------|--------------------|-----------------------------------------------------------|
| SNP_66292_A_25958  | NW_004515760.1 | scaffold222 | 25958                   | AA                              | TT                 | TT               | INTRON                        | 101506067          | 7-deoxyloganetin glucosyltransferase-like                 |
| SNP_66295_A_46735  | NW_004515760.1 | scaffold222 | 46735                   | AA                              | GG                 | GG               | INTERGENIC                    |                    |                                                           |
| SNP_66296_A_47168  | NW_004515760.1 | scaffold222 | 47168                   | TT                              | CC                 | CC               | INTERGENIC                    |                    |                                                           |
| SNP_66297_A_47180  | NW_004515760.1 | scaffold222 | 47180                   | GG                              | AA                 | AA               | INTERGENIC                    |                    |                                                           |
| SNP_66298_A_55220  | NW_004515760.1 | scaffold222 | 55220                   | CC                              | TT                 | TT               | INTERGENIC                    |                    |                                                           |
| SNP_66299_A_65367  | NW_004515760.1 | scaffold222 | 65367                   | AA                              | GG                 | GG               | INTERGENIC                    |                    |                                                           |
| SNP_66300_A_65377  | NW_004515760.1 | scaffold222 | 65377                   | GG                              | CC                 | CC               | INTERGENIC                    |                    |                                                           |
| SNP_66301_A_70040  | NW_004515760.1 | scaffold222 | 70040                   | TT                              | CC                 | CC               | INTERGENIC                    |                    |                                                           |
| SNP_66302_A_12204  | NW_004515761.1 | scaffold223 | 12204                   | AA                              | GG                 | GG               | URR                           | 101507047          | two-component response regulator ARR9-like                |
| SNP_66303_A_21477  | NW_004515761.1 | scaffold223 | 21477                   | AA                              | CC                 | CC               | INTRON                        | 101508314          | probable sugar phosphate/phosphate translocator At5g25400 |
| SNP_66304_A_36543  | NW_004515761.1 | scaffold223 | 36543                   | TT                              | GG                 | GG               | INTERGENIC                    |                    |                                                           |
| SNP_66305_A_61172  | NW_004515761.1 | scaffold223 | 61172                   | GG                              | AA                 | AA               | INTRON                        | 101507365          | vacuolar amino acid transporter 1-like                    |
| SNP_66306_A_63392  | NW_004515761.1 | scaffold223 | 63392                   | CC                              | TT                 | TT               | INTRON                        | 101507365          | vacuolar amino acid transporter 1-like                    |
| SNP_66308_A_84748  | NW_004515761.1 | scaffold223 | 84748                   | AA                              | GG                 | GG               | INTERGENIC                    |                    |                                                           |
| SNP_66309_A_88432  | NW_004515761.1 | scaffold223 | 88432                   | TT                              | AA                 | AA               | INTERGENIC                    |                    |                                                           |
| SNP_66310_A_90112  | NW_004515761.1 | scaffold223 | 90112                   | AA                              | GG                 | GG               | INTERGENIC                    |                    |                                                           |
| SNP_66311_A_95301  | NW_004515761.1 | scaffold223 | 95301                   | CC                              | AA                 | AA               | NON_SYNONYMOUS_CODING         | 101508631          | uncharacterized LOC101508631                              |
| SNP_66312_A_95723  | NW_004515761.1 | scaffold223 | 95723                   | CC                              | TT                 | TT               | INTRON                        | 101508631          | uncharacterized LOC101508631                              |
| SNP_66314_A_149074 | NW_004515761.1 | scaffold223 | 149074                  | AA                              | GG                 | GG               | INTERGENIC                    |                    |                                                           |
| SNP_66315_A_175051 | NW_004515761.1 | scaffold223 | 175051                  | CC                              | AA                 | AA               | INTERGENIC                    |                    |                                                           |
| SNP_66317_A_181273 | NW_004515761.1 | scaffold223 | 181273                  | TT                              | GG                 | GG               | INTERGENIC                    |                    |                                                           |
| SNP_66318_A_182153 | NW_004515761.1 | scaffold223 | 182153                  | CC                              | TT                 | TT               | INTERGENIC                    |                    |                                                           |

| SNPs IDs           | Chromosome IDs | Chromosomes | Physical positions (bp) | CDC Frontier (Reference genome) | (Pusa 1103 & HPNB) | (ILWC 46 & LPNB) | Sequence genome | Components of | Gene accession IDs | Putative functions |
|--------------------|----------------|-------------|-------------------------|---------------------------------|--------------------|------------------|-----------------|---------------|--------------------|--------------------|
| SNP_66319_A_182154 | NW_004515761.1 | scaffold223 | 182154                  | TT                              | CC                 | CC               | INTERGENIC      |               |                    |                    |
| SNP_66320_A_1270   | NW_004515762.1 | scaffold224 | 1270                    | AA                              | CC                 | CC               | INTERGENIC      |               |                    |                    |
| SNP_66321_A_8045   | NW_004515762.1 | scaffold224 | 8045                    | TT                              | AA                 | AA               | INTERGENIC      |               |                    |                    |
| SNP_66322_A_8128   | NW_004515762.1 | scaffold224 | 8128                    | AA                              | CC                 | CC               | INTERGENIC      |               |                    |                    |
| SNP_66323_A_8154   | NW_004515762.1 | scaffold224 | 8154                    | AA                              | GG                 | GG               | INTERGENIC      |               |                    |                    |
| SNP_66324_A_8380   | NW_004515762.1 | scaffold224 | 8380                    | AA                              | GG                 | GG               | INTERGENIC      |               |                    |                    |
| SNP_66325_A_8475   | NW_004515762.1 | scaffold224 | 8475                    | TT                              | CC                 | CC               | INTERGENIC      |               |                    |                    |
| SNP_66326_A_20428  | NW_004515762.1 | scaffold224 | 20428                   | GG                              | AA                 | AA               | INTERGENIC      |               |                    |                    |
| SNP_66327_A_20488  | NW_004515762.1 | scaffold224 | 20488                   | CC                              | AA                 | AA               | INTERGENIC      |               |                    |                    |
| SNP_66328_A_20526  | NW_004515762.1 | scaffold224 | 20526                   | TT                              | GG                 | GG               | INTERGENIC      |               |                    |                    |
| SNP_66329_A_20878  | NW_004515762.1 | scaffold224 | 20878                   | TT                              | CC                 | CC               | INTERGENIC      |               |                    |                    |
| SNP_66330_A_20942  | NW_004515762.1 | scaffold224 | 20942                   | GG                              | AA                 | AA               | INTERGENIC      |               |                    |                    |
| SNP_66331_A_24014  | NW_004515762.1 | scaffold224 | 24014                   | AA                              | GG                 | GG               | INTERGENIC      |               |                    |                    |
| SNP_66332_A_32536  | NW_004515762.1 | scaffold224 | 32536                   | TT                              | AA                 | AA               | INTERGENIC      |               |                    |                    |
| SNP_66333_A_32731  | NW_004515762.1 | scaffold224 | 32731                   | CC                              | TT                 | TT               | INTERGENIC      |               |                    |                    |
| SNP_66334_A_34842  | NW_004515762.1 | scaffold224 | 34842                   | GG                              | AA                 | AA               | INTERGENIC      |               |                    |                    |
| SNP_66335_A_34861  | NW_004515762.1 | scaffold224 | 34861                   | AA                              | GG                 | GG               | INTERGENIC      |               |                    |                    |
| SNP_66336_A_152163 | NW_004515762.1 | scaffold224 | 152163                  | AA                              | CC                 | CC               | URR             | 101511200     | Unknown function   |                    |
| SNP_66337_A_152179 | NW_004515762.1 | scaffold224 | 152179                  | AA                              | TT                 | TT               | URR             | 101511200     | Unknown function   |                    |
| SNP_66338_A_152191 | NW_004515762.1 | scaffold224 | 152191                  | AA                              | GG                 | GG               | URR             | 101511200     | Unknown function   |                    |
| SNP_66339_A_152192 | NW_004515762.1 | scaffold224 | 152192                  | TT                              | AA                 | AA               | URR             | 101511200     | Unknown function   |                    |
| SNP_66340_A_152197 | NW_004515762.1 | scaffold224 | 152197                  | GG                              | AA                 | AA               | URR             | 101511200     | Unknown function   |                    |

| SNPs IDs           | Chromosome IDs | Chromosomes | Physical positions (bp) | CDC Frontier (Reference genome) | (Pusa 1103 & HPNB) | (ILWC 46 & LPNB) | Sequence Components of genome | Gene accession IDs | Putative functions |
|--------------------|----------------|-------------|-------------------------|---------------------------------|--------------------|------------------|-------------------------------|--------------------|--------------------|
| SNP_66341_A_152228 | NW_004515762.1 | scaffold224 | 152228                  | GG                              | CC                 | CC               | URR                           | 101511200          | Unknown function   |
| SNP_66342_A_152236 | NW_004515762.1 | scaffold224 | 152236                  | GG                              | CC                 | CC               | URR                           | 101511200          | Unknown function   |
| SNP_66343_A_152251 | NW_004515762.1 | scaffold224 | 152251                  | TT                              | AA                 | AA               | URR                           | 101511200          | Unknown function   |
| SNP_66344_A_152252 | NW_004515762.1 | scaffold224 | 152252                  | TT                              | CC                 | CC               | URR                           | 101511200          | Unknown function   |
| SNP_66345_A_152570 | NW_004515762.1 | scaffold224 | 152570                  | AA                              | GG                 | GG               | URR                           | 101511200          | Unknown function   |
| SNP_66346_A_152579 | NW_004515762.1 | scaffold224 | 152579                  | AA                              | TT                 | TT               | URR                           | 101511200          | Unknown function   |
| SNP_66347_A_152595 | NW_004515762.1 | scaffold224 | 152595                  | GG                              | AA                 | AA               | URR                           | 101511200          | Unknown function   |
| SNP_66348_A_152669 | NW_004515762.1 | scaffold224 | 152669                  | AA                              | GG                 | GG               | URR                           | 101511200          | Unknown function   |
| SNP_66349_A_158517 | NW_004515762.1 | scaffold224 | 158517                  | GG                              | CC                 | CC               | DRR                           | 101511522          | Unknown function   |
| SNP_66350_A_161091 | NW_004515762.1 | scaffold224 | 161091                  | CC                              | TT                 | TT               | DRR                           | 101511849          | Unknown function   |
| SNP_66351_A_161097 | NW_004515762.1 | scaffold224 | 161097                  | AA                              | GG                 | GG               | DRR                           | 101511849          | Unknown function   |
| SNP_66352_A_161114 | NW_004515762.1 | scaffold224 | 161114                  | TT                              | CC                 | CC               | DRR                           | 101511849          | Unknown function   |
| SNP_66353_A_161249 | NW_004515762.1 | scaffold224 | 161249                  | CC                              | TT                 | TT               | DRR                           | 101511849          | Unknown function   |
| SNP_66354_A_161257 | NW_004515762.1 | scaffold224 | 161257                  | TT                              | GG                 | GG               | DRR                           | 101511849          | Unknown function   |
| SNP_66355_A_161314 | NW_004515762.1 | scaffold224 | 161314                  | TT                              | CC                 | CC               | URR                           | 101511522          | Unknown function   |
| SNP_66356_A_161320 | NW_004515762.1 | scaffold224 | 161320                  | TT                              | CC                 | CC               | URR                           | 101511522          | Unknown function   |
| SNP_66357_A_161322 | NW_004515762.1 | scaffold224 | 161322                  | AA                              | GG                 | GG               | URR                           | 101511522          | Unknown function   |
| SNP_66358_A_161324 | NW_004515762.1 | scaffold224 | 161324                  | TT                              | CC                 | CC               | URR                           | 101511522          | Unknown function   |
| SNP_66359_A_161332 | NW_004515762.1 | scaffold224 | 161332                  | TT                              | CC                 | CC               | URR                           | 101511522          | Unknown function   |
| SNP_66360_A_161525 | NW_004515762.1 | scaffold224 | 161525                  | AA                              | GG                 | GG               | URR                           | 101511522          | Unknown function   |
| SNP_66361_A_161547 | NW_004515762.1 | scaffold224 | 161547                  | TT                              | CC                 | CC               | URR                           | 101511522          | Unknown function   |
| SNP_66362_A_161632 | NW_004515762.1 | scaffold224 | 161632                  | AA                              | GG                 | GG               | URR                           | 101511522          | Unknown function   |



| SNPs IDs           | Chromosome IDs | Chromosomes | Physical positions (bp) | CDC Frontier (Reference genome) | (Pusa 1103 & HPNB) | (ILWC 46 & LPNB) | Sequence Components of genome | Gene accession IDs | Putative functions           |
|--------------------|----------------|-------------|-------------------------|---------------------------------|--------------------|------------------|-------------------------------|--------------------|------------------------------|
| SNP_66363_A_161659 | NW_004515762.1 | scaffold224 | 161659                  | TT                              | CC                 | CC               | URR                           | 101511522          | Unknown function             |
| SNP_66364_A_161683 | NW_004515762.1 | scaffold224 | 161683                  | AA                              | GG                 | GG               | URR                           | 101511522          | Unknown function             |
| SNP_66365_A_161694 | NW_004515762.1 | scaffold224 | 161694                  | CC                              | GG                 | GG               | URR                           | 101511522          | Unknown function             |
| SNP_66366_A_165323 | NW_004515762.1 | scaffold224 | 165323                  | AA                              | GG                 | GG               | INTRON                        | 101512161          | uncharacterized LOC101512161 |
| SNP_66367_A_165328 | NW_004515762.1 | scaffold224 | 165328                  | GG                              | TT                 | TT               | INTRON                        | 101512161          | uncharacterized LOC101512161 |
| SNP_66368_A_174896 | NW_004515762.1 | scaffold224 | 174896                  | TT                              | CC                 | CC               | INTERGENIC                    |                    |                              |
| SNP_66369_A_174913 | NW_004515762.1 | scaffold224 | 174913                  | TT                              | GG                 | GG               | INTERGENIC                    |                    |                              |
| SNP_66370_A_175012 | NW_004515762.1 | scaffold224 | 175012                  | AA                              | GG                 | GG               | DRR                           | 101509580          | uncharacterized LOC101509580 |
| SNP_66371_A_175028 | NW_004515762.1 | scaffold224 | 175028                  | GG                              | CC                 | CC               | DRR                           | 101509580          | uncharacterized LOC101509580 |
| SNP_66372_A_186158 | NW_004515762.1 | scaffold224 | 186158                  | AA                              | GG                 | GG               | INTRON                        | 101512161          | uncharacterized LOC101512161 |
| SNP_66373_A_186187 | NW_004515762.1 | scaffold224 | 186187                  | TT                              | CC                 | CC               | INTRON                        | 101512161          | uncharacterized LOC101512161 |
| SNP_66374_A_186188 | NW_004515762.1 | scaffold224 | 186188                  | GG                              | CC                 | CC               | INTRON                        | 101512161          | uncharacterized LOC101512161 |
| SNP_66375_A_186225 | NW_004515762.1 | scaffold224 | 186225                  | GG                              | TT                 | TT               | INTRON                        | 101512161          | uncharacterized LOC101512161 |
| SNP_66376_A_186233 | NW_004515762.1 | scaffold224 | 186233                  | TT                              | CC                 | CC               | INTRON                        | 101512161          | uncharacterized LOC101512161 |
| SNP_66377_A_186235 | NW_004515762.1 | scaffold224 | 186235                  | AA                              | GG                 | GG               | INTRON                        | 101512161          | uncharacterized LOC101512161 |
| SNP_66378_A_186248 | NW_004515762.1 | scaffold224 | 186248                  | AA                              | GG                 | GG               | INTRON                        | 101512161          | uncharacterized LOC101512161 |
| SNP_66379_A_186254 | NW_004515762.1 | scaffold224 | 186254                  | AA                              | GG                 | GG               | INTRON                        | 101512161          | uncharacterized LOC101512161 |
| SNP_66380_A_186270 | NW_004515762.1 | scaffold224 | 186270                  | AA                              | GG                 | GG               | INTRON                        | 101512161          | uncharacterized LOC101512161 |
| SNP_66381_A_186289 | NW_004515762.1 | scaffold224 | 186289                  | TT                              | GG                 | GG               | INTRON                        | 101512161          | uncharacterized LOC101512161 |
| SNP_66382_A_186323 | NW_004515762.1 | scaffold224 | 186323                  | AA                              | GG                 | GG               | INTRON                        | 101512161          | uncharacterized LOC101512161 |
| SNP_66383_A_186356 | NW_004515762.1 | scaffold224 | 186356                  | TT                              | CC                 | CC               | INTRON                        | 101512161          | uncharacterized LOC101512161 |
| SNP_66384_A_186357 | NW_004515762.1 | scaffold224 | 186357                  | AA                              | GG                 | GG               | INTRON                        | 101512161          | uncharacterized LOC101512161 |

| SNPs IDs           | Chromosome IDs | Chromosomes | Physical positions (bp) | CDC Frontier (Reference genome) | (Pusa 1103 & HPNB) | (ILWC 46 & LPNB) | Sequence Components of genome | Gene accession IDs | Putative functions           |
|--------------------|----------------|-------------|-------------------------|---------------------------------|--------------------|------------------|-------------------------------|--------------------|------------------------------|
| SNP_66385_A_186371 | NW_004515762.1 | scaffold224 | 186371                  | TT                              | CC                 | CC               | INTRON                        | 101512161          | uncharacterized LOC101512161 |
| SNP_66386_A_186398 | NW_004515762.1 | scaffold224 | 186398                  | AA                              | GG                 | GG               | INTRON                        | 101512161          | uncharacterized LOC101512161 |
| SNP_66387_A_246426 | NW_004515762.1 | scaffold224 | 246426                  | AA                              | TT                 | TT               | INTERGENIC                    |                    |                              |
| SNP_66388_A_246427 | NW_004515762.1 | scaffold224 | 246427                  | AA                              | CC                 | CC               | INTERGENIC                    |                    |                              |
| SNP_66389_A_249297 | NW_004515762.1 | scaffold224 | 249297                  | AA                              | GG                 | GG               | INTERGENIC                    |                    |                              |
| SNP_66390_A_249791 | NW_004515762.1 | scaffold224 | 249791                  | AA                              | GG                 | GG               | INTERGENIC                    |                    |                              |
| SNP_66391_A_288442 | NW_004515762.1 | scaffold224 | 288442                  | TT                              | AA                 | AA               | INTERGENIC                    |                    |                              |
| SNP_66392_A_288444 | NW_004515762.1 | scaffold224 | 288444                  | TT                              | GG                 | GG               | INTERGENIC                    |                    |                              |
| SNP_66393_A_294281 | NW_004515762.1 | scaffold224 | 294281                  | CC                              | TT                 | TT               | INTERGENIC                    |                    |                              |
| SNP_66394_A_302414 | NW_004515762.1 | scaffold224 | 302414                  | AA                              | CC                 | CC               | INTERGENIC                    |                    |                              |
| SNP_66395_A_32394  | NW_004515763.1 | scaffold227 | 32394                   | GG                              | AA                 | AA               | INTERGENIC                    |                    |                              |
| SNP_66396_A_32397  | NW_004515763.1 | scaffold227 | 32397                   | CC                              | AA                 | AA               | INTERGENIC                    |                    |                              |
| SNP_66397_A_32401  | NW_004515763.1 | scaffold227 | 32401                   | TT                              | CC                 | CC               | INTERGENIC                    |                    |                              |
| SNP_66398_A_32415  | NW_004515763.1 | scaffold227 | 32415                   | TT                              | CC                 | CC               | INTERGENIC                    |                    |                              |
| SNP_66399_A_32423  | NW_004515763.1 | scaffold227 | 32423                   | CC                              | TT                 | TT               | INTERGENIC                    |                    |                              |
| SNP_66400_A_32431  | NW_004515763.1 | scaffold227 | 32431                   | CC                              | GG                 | GG               | INTERGENIC                    |                    |                              |
| SNP_66401_A_32455  | NW_004515763.1 | scaffold227 | 32455                   | CC                              | TT                 | TT               | INTERGENIC                    |                    |                              |
| SNP_66402_A_32496  | NW_004515763.1 | scaffold227 | 32496                   | TT                              | AA                 | AA               | INTERGENIC                    |                    |                              |
| SNP_66403_A_32505  | NW_004515763.1 | scaffold227 | 32505                   | GG                              | AA                 | AA               | INTERGENIC                    |                    |                              |
| SNP_66404_A_32507  | NW_004515763.1 | scaffold227 | 32507                   | AA                              | CC                 | CC               | INTERGENIC                    |                    |                              |
| SNP_66405_A_32556  | NW_004515763.1 | scaffold227 | 32556                   | AA                              | CC                 | CC               | INTERGENIC                    |                    |                              |
| SNP_66406_A_32610  | NW_004515763.1 | scaffold227 | 32610                   | AA                              | TT                 | TT               | INTERGENIC                    |                    |                              |

| SNPs IDs           | Chromosome IDs | Chromosomes | Physical positions (bp) | CDC Frontier (Reference genome) | (Pusa 1103 & HPNB) | (ILWC 46 & LPNB) | Sequence Components of genome | Gene accession IDs | Putative functions |
|--------------------|----------------|-------------|-------------------------|---------------------------------|--------------------|------------------|-------------------------------|--------------------|--------------------|
| SNP_66407_A_59907  | NW_004515763.1 | scaffold227 | 59907                   | GG                              | AA                 | AA               | INTERGENIC                    |                    |                    |
| SNP_66408_A_59983  | NW_004515763.1 | scaffold227 | 59983                   | AA                              | CC                 | CC               | INTERGENIC                    |                    |                    |
| SNP_66409_A_59986  | NW_004515763.1 | scaffold227 | 59986                   | AA                              | CC                 | CC               | INTERGENIC                    |                    |                    |
| SNP_66410_A_108830 | NW_004515763.1 | scaffold227 | 108830                  | AA                              | GG                 | GG               | INTERGENIC                    |                    |                    |
| SNP_66411_A_127129 | NW_004515763.1 | scaffold227 | 127129                  | TT                              | AA                 | AA               | INTERGENIC                    |                    |                    |
| SNP_66412_A_134791 | NW_004515763.1 | scaffold227 | 134791                  | AA                              | GG                 | GG               | URR                           | 101512805          | Unknown function   |
| SNP_66413_A_135455 | NW_004515763.1 | scaffold227 | 135455                  | TT                              | CC                 | CC               | URR                           | 101512805          | Unknown function   |
| SNP_66415_A_135525 | NW_004515763.1 | scaffold227 | 135525                  | AA                              | GG                 | GG               | URR                           | 101512805          | Unknown function   |
| SNP_66416_A_135532 | NW_004515763.1 | scaffold227 | 135532                  | AA                              | CC                 | CC               | URR                           | 101512805          | Unknown function   |
| SNP_66417_A_136507 | NW_004515763.1 | scaffold227 | 136507                  | AA                              | GG                 | GG               | INTERGENIC                    |                    |                    |
| SNP_66418_A_136515 | NW_004515763.1 | scaffold227 | 136515                  | AA                              | TT                 | TT               | INTERGENIC                    |                    |                    |
| SNP_66419_A_136528 | NW_004515763.1 | scaffold227 | 136528                  | CC                              | GG                 | GG               | INTERGENIC                    |                    |                    |
| SNP_66420_A_136878 | NW_004515763.1 | scaffold227 | 136878                  | TT                              | CC                 | CC               | INTERGENIC                    |                    |                    |
| SNP_66421_A_136917 | NW_004515763.1 | scaffold227 | 136917                  | TT                              | AA                 | AA               | INTERGENIC                    |                    |                    |
| SNP_66422_A_136935 | NW_004515763.1 | scaffold227 | 136935                  | TT                              | AA                 | AA               | INTERGENIC                    |                    |                    |
| SNP_66423_A_140572 | NW_004515763.1 | scaffold227 | 140572                  | AA                              | GG                 | GG               | INTRON                        | id197586           | Unknown function   |
| SNP_66424_A_140577 | NW_004515763.1 | scaffold227 | 140577                  | TT                              | CC                 | CC               | INTRON                        | id197586           | Unknown function   |
| SNP_66425_A_140918 | NW_004515763.1 | scaffold227 | 140918                  | AA                              | CC                 | CC               | DRR                           | 101512488          | Unknown function   |
| SNP_66426_A_140921 | NW_004515763.1 | scaffold227 | 140921                  | AA                              | CC                 | CC               | DRR                           | 101512488          | Unknown function   |
| SNP_66427_A_140937 | NW_004515763.1 | scaffold227 | 140937                  | AA                              | TT                 | TT               | DRR                           | 101512488          | Unknown function   |
| SNP_66429_A_141016 | NW_004515763.1 | scaffold227 | 141016                  | GG                              | TT                 | TT               | DRR                           | 101512488          | Unknown function   |
| SNP_66430_A_141037 | NW_004515763.1 | scaffold227 | 141037                  | TT                              | CC                 | CC               | DRR                           | 101512488          | Unknown function   |

| SNPs IDs           | Chromosome IDs | Chromosomes | Physical positions (bp) | CDC Frontier (Reference genome) | (Pusa 1103 & HPNB) | (ILWC 46 & LPNB) | Sequence Components of genome | Gene accession IDs | Putative functions |
|--------------------|----------------|-------------|-------------------------|---------------------------------|--------------------|------------------|-------------------------------|--------------------|--------------------|
| SNP_66431_A_141068 | NW_004515763.1 | scaffold227 | 141068                  | AA                              | GG                 | GG               | DRR                           | 101512488          | Unknown function   |
| SNP_66432_A_141082 | NW_004515763.1 | scaffold227 | 141082                  | TT                              | CC                 | CC               | DRR                           | 101512488          | Unknown function   |
| SNP_66433_A_141164 | NW_004515763.1 | scaffold227 | 141164                  | GG                              | AA                 | AA               | DRR                           | 101512488          | Unknown function   |
| SNP_66434_A_141177 | NW_004515763.1 | scaffold227 | 141177                  | TT                              | CC                 | CC               | DRR                           | 101512488          | Unknown function   |
| SNP_66435_A_141207 | NW_004515763.1 | scaffold227 | 141207                  | TT                              | AA                 | AA               | DRR                           | 101512488          | Unknown function   |
| SNP_66436_A_141256 | NW_004515763.1 | scaffold227 | 141256                  | TT                              | CC                 | CC               | DRR                           | 101512488          | Unknown function   |
| SNP_66437_A_141386 | NW_004515763.1 | scaffold227 | 141386                  | TT                              | CC                 | CC               | DRR                           | 101512488          | Unknown function   |
| SNP_66438_A_142520 | NW_004515763.1 | scaffold227 | 142520                  | TT                              | CC                 | CC               | URR                           | 101513459          | Unknown function   |
| SNP_66439_A_142522 | NW_004515763.1 | scaffold227 | 142522                  | CC                              | AA                 | AA               | URR                           | 101513459          | Unknown function   |
| SNP_66440_A_142524 | NW_004515763.1 | scaffold227 | 142524                  | TT                              | CC                 | CC               | URR                           | 101513459          | Unknown function   |
| SNP_66441_A_142531 | NW_004515763.1 | scaffold227 | 142531                  | TT                              | CC                 | CC               | URR                           | 101513459          | Unknown function   |
| SNP_66442_A_142564 | NW_004515763.1 | scaffold227 | 142564                  | AA                              | CC                 | CC               | URR                           | 101513459          | Unknown function   |
| SNP_66443_A_142981 | NW_004515763.1 | scaffold227 | 142981                  | TT                              | CC                 | CC               | DRR                           | 101513769          | Unknown function   |
| SNP_66444_A_143022 | NW_004515763.1 | scaffold227 | 143022                  | AA                              | GG                 | GG               | DRR                           | 101513769          | Unknown function   |
| SNP_66445_A_144233 | NW_004515763.1 | scaffold227 | 144233                  | AA                              | GG                 | GG               | INTERGENIC                    |                    |                    |
| SNP_66446_A_144260 | NW_004515763.1 | scaffold227 | 144260                  | TT                              | CC                 | CC               | INTERGENIC                    |                    |                    |
| SNP_66447_A_144291 | NW_004515763.1 | scaffold227 | 144291                  | AA                              | GG                 | GG               | INTERGENIC                    |                    |                    |
| SNP_66448_A_144406 | NW_004515763.1 | scaffold227 | 144406                  | TT                              | CC                 | CC               | INTERGENIC                    |                    |                    |
| SNP_66450_A_144525 | NW_004515763.1 | scaffold227 | 144525                  | AA                              | CC                 | CC               | INTERGENIC                    |                    |                    |
| SNP_66451_A_144542 | NW_004515763.1 | scaffold227 | 144542                  | AA                              | GG                 | GG               | INTERGENIC                    |                    |                    |
| SNP_66452_A_144561 | NW_004515763.1 | scaffold227 | 144561                  | TT                              | CC                 | CC               | INTERGENIC                    |                    |                    |
| SNP_66453_A_144587 | NW_004515763.1 | scaffold227 | 144587                  | AA                              | GG                 | GG               | INTERGENIC                    |                    |                    |

| SNPs IDs           | Chromosome IDs | Chromosomes | Physical positions (bp) | CDC Frontier (Reference genome) | (Pusa 1103 & HPNB) | (ILWC 46 & LPNB) | Sequence Components of genome | Gene accession IDs | Putative functions |
|--------------------|----------------|-------------|-------------------------|---------------------------------|--------------------|------------------|-------------------------------|--------------------|--------------------|
| SNP_66456_A_194866 | NW_004515763.1 | scaffold227 | 194866                  | GG                              | AA                 | AA               | INTRON                        | 101513769          | Unknown function   |
| SNP_66457_A_194901 | NW_004515763.1 | scaffold227 | 194901                  | TT                              | CC                 | CC               | INTRON                        | 101513769          | Unknown function   |
| SNP_66458_A_194934 | NW_004515763.1 | scaffold227 | 194934                  | CC                              | TT                 | TT               | INTRON                        | 101513769          | Unknown function   |
| SNP_66459_A_195033 | NW_004515763.1 | scaffold227 | 195033                  | GG                              | TT                 | TT               | INTRON                        | 101513769          | Unknown function   |
| SNP_66460_A_195072 | NW_004515763.1 | scaffold227 | 195072                  | CC                              | AA                 | AA               | INTRON                        | 101513769          | Unknown function   |
| SNP_66461_A_195080 | NW_004515763.1 | scaffold227 | 195080                  | AA                              | CC                 | CC               | INTRON                        | 101513769          | Unknown function   |
| SNP_66462_A_195088 | NW_004515763.1 | scaffold227 | 195088                  | GG                              | AA                 | AA               | INTRON                        | 101513769          | Unknown function   |
| SNP_66463_A_195092 | NW_004515763.1 | scaffold227 | 195092                  | TT                              | CC                 | CC               | INTRON                        | 101513769          | Unknown function   |
| SNP_66464_A_195149 | NW_004515763.1 | scaffold227 | 195149                  | TT                              | GG                 | GG               | INTRON                        | 101513769          | Unknown function   |
| SNP_66465_A_195271 | NW_004515763.1 | scaffold227 | 195271                  | AA                              | TT                 | TT               | INTRON                        | 101513769          | Unknown function   |
| SNP_66466_A_195412 | NW_004515763.1 | scaffold227 | 195412                  | AA                              | GG                 | GG               | INTRON                        | 101513769          | Unknown function   |
| SNP_66467_A_195547 | NW_004515763.1 | scaffold227 | 195547                  | TT                              | CC                 | CC               | INTRON                        | 101513769          | Unknown function   |
| SNP_66468_A_195606 | NW_004515763.1 | scaffold227 | 195606                  | AA                              | CC                 | CC               | INTRON                        | 101513769          | Unknown function   |
| SNP_66469_A_195667 | NW_004515763.1 | scaffold227 | 195667                  | AA                              | GG                 | GG               | INTRON                        | 101513769          | Unknown function   |
| SNP_66471_A_195725 | NW_004515763.1 | scaffold227 | 195725                  | AA                              | GG                 | GG               | INTRON                        | 101513769          | Unknown function   |
| SNP_66472_A_195734 | NW_004515763.1 | scaffold227 | 195734                  | CC                              | GG                 | GG               | INTRON                        | 101513769          | Unknown function   |
| SNP_66473_A_195790 | NW_004515763.1 | scaffold227 | 195790                  | TT                              | AA                 | AA               | INTRON                        | 101513769          | Unknown function   |
| SNP_66474_A_195856 | NW_004515763.1 | scaffold227 | 195856                  | AA                              | CC                 | CC               | INTRON                        | 101513769          | Unknown function   |
| SNP_66475_A_195891 | NW_004515763.1 | scaffold227 | 195891                  | GG                              | TT                 | TT               | INTRON                        | 101513769          | Unknown function   |
| SNP_66476_A_195936 | NW_004515763.1 | scaffold227 | 195936                  | CC                              | TT                 | TT               | INTRON                        | 101513769          | Unknown function   |
| SNP_66477_A_195940 | NW_004515763.1 | scaffold227 | 195940                  | AA                              | CC                 | CC               | INTRON                        | 101513769          | Unknown function   |
| SNP_66478_A_196046 | NW_004515763.1 | scaffold227 | 196046                  | TT                              | CC                 | CC               | INTRON                        | 101513769          | Unknown function   |

| SNPs IDs           | Chromosome IDs | Chromosomes | Physical positions (bp) | CDC Frontier (Reference genome) | (Pusa 1103 & HPNB) | (ILWC 46 & LPNB) | Sequence Components of genome | Gene accession IDs | Putative functions |
|--------------------|----------------|-------------|-------------------------|---------------------------------|--------------------|------------------|-------------------------------|--------------------|--------------------|
| SNP_66479_A_196089 | NW_004515763.1 | scaffold227 | 196089                  | AA                              | GG                 | GG               | INTRON                        | 101513769          | Unknown function   |
| SNP_66480_A_196095 | NW_004515763.1 | scaffold227 | 196095                  | AA                              | GG                 | GG               | INTRON                        | 101513769          | Unknown function   |
| SNP_66482_A_196149 | NW_004515763.1 | scaffold227 | 196149                  | AA                              | TT                 | TT               | INTRON                        | 101513769          | Unknown function   |
| SNP_66483_A_196185 | NW_004515763.1 | scaffold227 | 196185                  | AA                              | GG                 | GG               | INTRON                        | 101513769          | Unknown function   |
| SNP_66485_A_196469 | NW_004515763.1 | scaffold227 | 196469                  | TT                              | CC                 | CC               | INTRON                        | 101513769          | Unknown function   |
| SNP_66486_A_196496 | NW_004515763.1 | scaffold227 | 196496                  | TT                              | CC                 | CC               | INTRON                        | 101513769          | Unknown function   |
| SNP_66487_A_196583 | NW_004515763.1 | scaffold227 | 196583                  | GG                              | AA                 | AA               | INTRON                        | 101513769          | Unknown function   |
| SNP_66488_A_197139 | NW_004515763.1 | scaffold227 | 197139                  | GG                              | AA                 | AA               | INTRON                        | 101513769          | Unknown function   |
| SNP_66489_A_197296 | NW_004515763.1 | scaffold227 | 197296                  | GG                              | AA                 | AA               | INTRON                        | 101513769          | Unknown function   |
| SNP_66490_A_197349 | NW_004515763.1 | scaffold227 | 197349                  | TT                              | CC                 | CC               | INTRON                        | 101513769          | Unknown function   |
| SNP_66491_A_197397 | NW_004515763.1 | scaffold227 | 197397                  | TT                              | CC                 | CC               | INTRON                        | 101513769          | Unknown function   |
| SNP_66493_A_197506 | NW_004515763.1 | scaffold227 | 197506                  | CC                              | TT                 | TT               | INTRON                        | 101513769          | Unknown function   |
| SNP_66494_A_197552 | NW_004515763.1 | scaffold227 | 197552                  | AA                              | TT                 | TT               | INTRON                        | 101513769          | Unknown function   |
| SNP_66495_A_197575 | NW_004515763.1 | scaffold227 | 197575                  | CC                              | TT                 | TT               | INTRON                        | 101513769          | Unknown function   |
| SNP_66496_A_197615 | NW_004515763.1 | scaffold227 | 197615                  | AA                              | CC                 | CC               | INTRON                        | 101513769          | Unknown function   |
| SNP_66497_A_197630 | NW_004515763.1 | scaffold227 | 197630                  | AA                              | GG                 | GG               | INTRON                        | 101513769          | Unknown function   |
| SNP_66498_A_197633 | NW_004515763.1 | scaffold227 | 197633                  | GG                              | AA                 | AA               | INTRON                        | 101513769          | Unknown function   |
| SNP_66499_A_197727 | NW_004515763.1 | scaffold227 | 197727                  | CC                              | GG                 | GG               | INTRON                        | 101513769          | Unknown function   |
| SNP_66500_A_197730 | NW_004515763.1 | scaffold227 | 197730                  | GG                              | TT                 | TT               | INTRON                        | 101513769          | Unknown function   |
| SNP_66501_A_197747 | NW_004515763.1 | scaffold227 | 197747                  | CC                              | TT                 | TT               | INTRON                        | 101513769          | Unknown function   |
| SNP_66502_A_197792 | NW_004515763.1 | scaffold227 | 197792                  | TT                              | AA                 | AA               | INTRON                        | 101513769          | Unknown function   |
| SNP_66503_A_197937 | NW_004515763.1 | scaffold227 | 197937                  | GG                              | CC                 | CC               | INTRON                        | 101513769          | Unknown function   |

| SNPs IDs           | Chromosome IDs | Chromosomes | Physical positions (bp) | CDC Frontier (Reference genome) | (Pusa 1103 & HPNB) | (ILWC 46 & LPNB) | Sequence Components of genome | Gene accession IDs | Putative functions |
|--------------------|----------------|-------------|-------------------------|---------------------------------|--------------------|------------------|-------------------------------|--------------------|--------------------|
| SNP_66504_A_197954 | NW_004515763.1 | scaffold227 | 197954                  | AA                              | GG                 | GG               | INTRON                        | 101513769          | Unknown function   |
| SNP_66505_A_197997 | NW_004515763.1 | scaffold227 | 197997                  | AA                              | CC                 | CC               | INTRON                        | 101513769          | Unknown function   |
| SNP_66506_A_198003 | NW_004515763.1 | scaffold227 | 198003                  | GG                              | CC                 | CC               | INTRON                        | 101513769          | Unknown function   |
| SNP_66507_A_198046 | NW_004515763.1 | scaffold227 | 198046                  | TT                              | CC                 | CC               | INTRON                        | 101513769          | Unknown function   |
| SNP_66508_A_198061 | NW_004515763.1 | scaffold227 | 198061                  | CC                              | TT                 | TT               | INTRON                        | 101513769          | Unknown function   |
| SNP_66509_A_198137 | NW_004515763.1 | scaffold227 | 198137                  | AA                              | GG                 | GG               | INTRON                        | 101513769          | Unknown function   |
| SNP_66510_A_198148 | NW_004515763.1 | scaffold227 | 198148                  | GG                              | AA                 | AA               | INTRON                        | 101513769          | Unknown function   |
| SNP_66511_A_204829 | NW_004515763.1 | scaffold227 | 204829                  | CC                              | GG                 | GG               | INTRON                        | 101513769          | Unknown function   |
| SNP_66512_A_204832 | NW_004515763.1 | scaffold227 | 204832                  | TT                              | CC                 | CC               | INTRON                        | 101513769          | Unknown function   |
| SNP_66513_A_250384 | NW_004515763.1 | scaffold227 | 250384                  | CC                              | TT                 | TT               | INTERGENIC                    |                    |                    |
| SNP_66514_A_315113 | NW_004515763.1 | scaffold227 | 315113                  | CC                              | TT                 | TT               | STOP_GAINED                   | 101514111          | Unknown function   |
| SNP_66515_A_315927 | NW_004515763.1 | scaffold227 | 315927                  | CC                              | TT                 | TT               | URR                           | 101514111          | Unknown function   |
| SNP_66516_A_317425 | NW_004515763.1 | scaffold227 | 317425                  | CC                              | TT                 | TT               | INTERGENIC                    |                    |                    |
| SNP_66517_A_320062 | NW_004515763.1 | scaffold227 | 320062                  | CC                              | TT                 | TT               | INTERGENIC                    |                    |                    |
| SNP_66518_A_325220 | NW_004515763.1 | scaffold227 | 325220                  | AA                              | GG                 | GG               | INTERGENIC                    |                    |                    |
| SNP_66520_A_325975 | NW_004515763.1 | scaffold227 | 325975                  | CC                              | TT                 | TT               | INTERGENIC                    |                    |                    |
| SNP_66521_A_341426 | NW_004515763.1 | scaffold227 | 341426                  | CC                              | AA                 | AA               | INTERGENIC                    |                    |                    |
| SNP_66522_A_351510 | NW_004515763.1 | scaffold227 | 351510                  | AA                              | GG                 | GG               | INTERGENIC                    |                    |                    |
| SNP_66523_A_365091 | NW_004515763.1 | scaffold227 | 365091                  | AA                              | GG                 | GG               | INTERGENIC                    |                    |                    |
| SNP_66524_A_371562 | NW_004515763.1 | scaffold227 | 371562                  | GG                              | CC                 | CC               | INTERGENIC                    |                    |                    |
| SNP_66525_A_371765 | NW_004515763.1 | scaffold227 | 371765                  | CC                              | AA                 | AA               | INTERGENIC                    |                    |                    |
| SNP_66526_A_9539   | NW_004515764.1 | scaffold228 | 9539                    | TT                              | CC                 | CC               | INTERGENIC                    |                    |                    |

| SNPs IDs           | Chromosome IDs | Chromosomes | Physical positions (bp) | CDC Frontier (Reference genome) | (Pusa 1103 & HPNB) | (ILWC 46 & LPNB) | Sequence genome | Components of | Gene accession IDs | Putative functions |
|--------------------|----------------|-------------|-------------------------|---------------------------------|--------------------|------------------|-----------------|---------------|--------------------|--------------------|
| SNP_66528_A_9929   | NW_004515764.1 | scaffold228 | 9929                    | GG                              | TT                 | TT               | INTERGENIC      |               |                    |                    |
| SNP_66529_A_24882  | NW_004515764.1 | scaffold228 | 24882                   | TT                              | GG                 | GG               | INTERGENIC      |               |                    |                    |
| SNP_66530_A_26046  | NW_004515764.1 | scaffold228 | 26046                   | GG                              | AA                 | AA               | INTERGENIC      |               |                    |                    |
| SNP_66531_A_64741  | NW_004515764.1 | scaffold228 | 64741                   | AA                              | GG                 | GG               | INTERGENIC      |               |                    |                    |
| SNP_66532_A_99535  | NW_004515764.1 | scaffold228 | 99535                   | CC                              | GG                 | GG               | INTERGENIC      |               |                    |                    |
| SNP_66533_A_117125 | NW_004515764.1 | scaffold228 | 117125                  | TT                              | CC                 | CC               | INTERGENIC      |               |                    |                    |
| SNP_66534_A_117431 | NW_004515764.1 | scaffold228 | 117431                  | AA                              | GG                 | GG               | INTERGENIC      |               |                    |                    |
| SNP_66535_A_117653 | NW_004515764.1 | scaffold228 | 117653                  | TT                              | CC                 | CC               | INTERGENIC      |               |                    |                    |
| SNP_66536_A_117740 | NW_004515764.1 | scaffold228 | 117740                  | GG                              | AA                 | AA               | INTERGENIC      |               |                    |                    |
| SNP_66537_A_117755 | NW_004515764.1 | scaffold228 | 117755                  | TT                              | CC                 | CC               | INTERGENIC      |               |                    |                    |
| SNP_66538_A_117759 | NW_004515764.1 | scaffold228 | 117759                  | CC                              | TT                 | TT               | INTERGENIC      |               |                    |                    |
| SNP_66539_A_117892 | NW_004515764.1 | scaffold228 | 117892                  | TT                              | CC                 | CC               | INTERGENIC      |               |                    |                    |
| SNP_66540_A_121976 | NW_004515764.1 | scaffold228 | 121976                  | AA                              | TT                 | TT               | INTERGENIC      |               |                    |                    |
| SNP_66541_A_122053 | NW_004515764.1 | scaffold228 | 122053                  | CC                              | TT                 | TT               | INTERGENIC      |               |                    |                    |
| SNP_66542_A_122066 | NW_004515764.1 | scaffold228 | 122066                  | CC                              | AA                 | AA               | INTERGENIC      |               |                    |                    |
| SNP_66543_A_122102 | NW_004515764.1 | scaffold228 | 122102                  | TT                              | AA                 | AA               | INTERGENIC      |               |                    |                    |
| SNP_66544_A_122636 | NW_004515764.1 | scaffold228 | 122636                  | TT                              | CC                 | CC               | INTERGENIC      |               |                    |                    |
| SNP_66545_A_133738 | NW_004515764.1 | scaffold228 | 133738                  | TT                              | CC                 | CC               | INTERGENIC      |               |                    |                    |
| SNP_66546_A_134883 | NW_004515764.1 | scaffold228 | 134883                  | TT                              | CC                 | CC               | INTERGENIC      |               |                    |                    |
| SNP_66547_A_134913 | NW_004515764.1 | scaffold228 | 134913                  | AA                              | GG                 | GG               | INTERGENIC      |               |                    |                    |
| SNP_66548_A_134945 | NW_004515764.1 | scaffold228 | 134945                  | AA                              | TT                 | TT               | INTERGENIC      |               |                    |                    |
| SNP_66549_A_134996 | NW_004515764.1 | scaffold228 | 134996                  | GG                              | CC                 | CC               | INTERGENIC      |               |                    |                    |



| SNPs IDs           | Chromosome IDs | Chromosomes | Physical positions (bp) | CDC Frontier (Reference genome) | (Pusa 1103 & HPNB) | (ILWC 46 & LPNB) | Sequence genome | Components of | Gene accession IDs | Putative functions |
|--------------------|----------------|-------------|-------------------------|---------------------------------|--------------------|------------------|-----------------|---------------|--------------------|--------------------|
| SNP_66550_A_135109 | NW_004515764.1 | scaffold228 | 135109                  | CC                              | TT                 | TT               | INTERGENIC      |               |                    |                    |
| SNP_66551_A_135253 | NW_004515764.1 | scaffold228 | 135253                  | TT                              | CC                 | CC               | INTERGENIC      |               |                    |                    |
| SNP_66554_A_137197 | NW_004515764.1 | scaffold228 | 137197                  | AA                              | GG                 | GG               | INTERGENIC      |               |                    |                    |
| SNP_66555_A_137284 | NW_004515764.1 | scaffold228 | 137284                  | TT                              | CC                 | CC               | INTERGENIC      |               |                    |                    |
| SNP_66556_A_144220 | NW_004515764.1 | scaffold228 | 144220                  | GG                              | AA                 | AA               | INTERGENIC      |               |                    |                    |
| SNP_66557_A_144229 | NW_004515764.1 | scaffold228 | 144229                  | GG                              | TT                 | TT               | INTERGENIC      |               |                    |                    |
| SNP_66558_A_147239 | NW_004515764.1 | scaffold228 | 147239                  | CC                              | GG                 | GG               | INTERGENIC      |               |                    |                    |
| SNP_66559_A_147575 | NW_004515764.1 | scaffold228 | 147575                  | CC                              | TT                 | TT               | INTERGENIC      |               |                    |                    |
| SNP_66560_A_148094 | NW_004515764.1 | scaffold228 | 148094                  | TT                              | CC                 | CC               | INTERGENIC      |               |                    |                    |
| SNP_66561_A_148187 | NW_004515764.1 | scaffold228 | 148187                  | TT                              | CC                 | CC               | INTERGENIC      |               |                    |                    |
| SNP_66562_A_148584 | NW_004515764.1 | scaffold228 | 148584                  | CC                              | TT                 | TT               | INTERGENIC      |               |                    |                    |
| SNP_66563_A_148585 | NW_004515764.1 | scaffold228 | 148585                  | CC                              | GG                 | GG               | INTERGENIC      |               |                    |                    |
| SNP_66564_A_148593 | NW_004515764.1 | scaffold228 | 148593                  | AA                              | GG                 | GG               | INTERGENIC      |               |                    |                    |
| SNP_66565_A_148598 | NW_004515764.1 | scaffold228 | 148598                  | AA                              | TT                 | TT               | INTERGENIC      |               |                    |                    |
| SNP_66566_A_149806 | NW_004515764.1 | scaffold228 | 149806                  | TT                              | CC                 | CC               | INTERGENIC      |               |                    |                    |
| SNP_66567_A_149811 | NW_004515764.1 | scaffold228 | 149811                  | GG                              | CC                 | CC               | INTERGENIC      |               |                    |                    |
| SNP_66568_A_149927 | NW_004515764.1 | scaffold228 | 149927                  | TT                              | CC                 | CC               | INTERGENIC      |               |                    |                    |
| SNP_66569_A_154847 | NW_004515764.1 | scaffold228 | 154847                  | TT                              | CC                 | CC               | INTERGENIC      |               |                    |                    |
| SNP_66570_A_155091 | NW_004515764.1 | scaffold228 | 155091                  | TT                              | CC                 | CC               | INTERGENIC      |               |                    |                    |
| SNP_66571_A_155484 | NW_004515764.1 | scaffold228 | 155484                  | TT                              | CC                 | CC               | INTERGENIC      |               |                    |                    |
| SNP_66572_A_155571 | NW_004515764.1 | scaffold228 | 155571                  | AA                              | TT                 | TT               | INTERGENIC      |               |                    |                    |
| SNP_66573_A_155720 | NW_004515764.1 | scaffold228 | 155720                  | CC                              | TT                 | TT               | INTERGENIC      |               |                    |                    |

| SNPs IDs           | Chromosome IDs | Chromosomes | Physical positions (bp) | CDC Frontier (Reference genome) | (Pusa 1103 & HPNB) | (ILWC 46 & LPNB) | Sequence genome | Components of | Gene accession IDs | Putative functions |
|--------------------|----------------|-------------|-------------------------|---------------------------------|--------------------|------------------|-----------------|---------------|--------------------|--------------------|
| SNP_66574_A_155721 | NW_004515764.1 | scaffold228 | 155721                  | GG                              | AA                 | AA               | INTERGENIC      |               |                    |                    |
| SNP_66575_A_155774 | NW_004515764.1 | scaffold228 | 155774                  | TT                              | CC                 | CC               | INTERGENIC      |               |                    |                    |
| SNP_66576_A_155959 | NW_004515764.1 | scaffold228 | 155959                  | AA                              | GG                 | GG               | INTERGENIC      |               |                    |                    |
| SNP_66577_A_156113 | NW_004515764.1 | scaffold228 | 156113                  | CC                              | TT                 | TT               | INTERGENIC      |               |                    |                    |
| SNP_66578_A_157981 | NW_004515764.1 | scaffold228 | 157981                  | TT                              | AA                 | AA               | INTERGENIC      |               |                    |                    |
| SNP_66579_A_158320 | NW_004515764.1 | scaffold228 | 158320                  | AA                              | GG                 | GG               | INTERGENIC      |               |                    |                    |
| SNP_66580_A_158370 | NW_004515764.1 | scaffold228 | 158370                  | AA                              | GG                 | GG               | INTERGENIC      |               |                    |                    |
| SNP_66581_A_158371 | NW_004515764.1 | scaffold228 | 158371                  | GG                              | CC                 | CC               | INTERGENIC      |               |                    |                    |
| SNP_66582_A_158372 | NW_004515764.1 | scaffold228 | 158372                  | AA                              | CC                 | CC               | INTERGENIC      |               |                    |                    |
| SNP_66583_A_164607 | NW_004515764.1 | scaffold228 | 164607                  | GG                              | AA                 | AA               | INTERGENIC      |               |                    |                    |
| SNP_66584_A_164612 | NW_004515764.1 | scaffold228 | 164612                  | GG                              | CC                 | CC               | INTERGENIC      |               |                    |                    |
| SNP_66585_A_164733 | NW_004515764.1 | scaffold228 | 164733                  | AA                              | TT                 | TT               | INTERGENIC      |               |                    |                    |
| SNP_66586_A_164800 | NW_004515764.1 | scaffold228 | 164800                  | CC                              | TT                 | TT               | INTERGENIC      |               |                    |                    |
| SNP_66587_A_164801 | NW_004515764.1 | scaffold228 | 164801                  | CC                              | AA                 | AA               | INTERGENIC      |               |                    |                    |
| SNP_66588_A_164805 | NW_004515764.1 | scaffold228 | 164805                  | GG                              | AA                 | AA               | INTERGENIC      |               |                    |                    |
| SNP_66589_A_164809 | NW_004515764.1 | scaffold228 | 164809                  | TT                              | CC                 | CC               | INTERGENIC      |               |                    |                    |
| SNP_66590_A_164811 | NW_004515764.1 | scaffold228 | 164811                  | GG                              | AA                 | AA               | INTERGENIC      |               |                    |                    |
| SNP_66591_A_164891 | NW_004515764.1 | scaffold228 | 164891                  | CC                              | TT                 | TT               | INTERGENIC      |               |                    |                    |
| SNP_66592_A_164908 | NW_004515764.1 | scaffold228 | 164908                  | CC                              | TT                 | TT               | INTERGENIC      |               |                    |                    |
| SNP_66593_A_164910 | NW_004515764.1 | scaffold228 | 164910                  | AA                              | GG                 | GG               | INTERGENIC      |               |                    |                    |
| SNP_66594_A_164932 | NW_004515764.1 | scaffold228 | 164932                  | GG                              | TT                 | TT               | INTERGENIC      |               |                    |                    |
| SNP_66595_A_164936 | NW_004515764.1 | scaffold228 | 164936                  | AA                              | GG                 | GG               | INTERGENIC      |               |                    |                    |

| SNPs IDs           | Chromosome IDs | Chromosomes | Physical positions (bp) | CDC Frontier (Reference genome) | (Pusa 1103 & HPNB) | (ILWC 46 & LPNB) | Sequence genome | Components of | Gene accession IDs | Putative functions |
|--------------------|----------------|-------------|-------------------------|---------------------------------|--------------------|------------------|-----------------|---------------|--------------------|--------------------|
| SNP_66596_A_165013 | NW_004515764.1 | scaffold228 | 165013                  | AA                              | GG                 | GG               | INTERGENIC      |               |                    |                    |
| SNP_66597_A_165049 | NW_004515764.1 | scaffold228 | 165049                  | AA                              | GG                 | GG               | INTERGENIC      |               |                    |                    |
| SNP_66598_A_165240 | NW_004515764.1 | scaffold228 | 165240                  | AA                              | GG                 | GG               | INTERGENIC      |               |                    |                    |
| SNP_66599_A_174503 | NW_004515764.1 | scaffold228 | 174503                  | AA                              | TT                 | TT               | INTERGENIC      |               |                    |                    |
| SNP_66600_A_174526 | NW_004515764.1 | scaffold228 | 174526                  | TT                              | AA                 | AA               | INTERGENIC      |               |                    |                    |
| SNP_66601_A_174801 | NW_004515764.1 | scaffold228 | 174801                  | CC                              | TT                 | TT               | INTERGENIC      |               |                    |                    |
| SNP_66602_A_176165 | NW_004515764.1 | scaffold228 | 176165                  | AA                              | CC                 | CC               | INTERGENIC      |               |                    |                    |
| SNP_66603_A_176602 | NW_004515764.1 | scaffold228 | 176602                  | TT                              | CC                 | CC               | INTERGENIC      |               |                    |                    |
| SNP_66604_A_176610 | NW_004515764.1 | scaffold228 | 176610                  | AA                              | GG                 | GG               | INTERGENIC      |               |                    |                    |
| SNP_66605_A_176643 | NW_004515764.1 | scaffold228 | 176643                  | TT                              | GG                 | GG               | INTERGENIC      |               |                    |                    |
| SNP_66606_A_176671 | NW_004515764.1 | scaffold228 | 176671                  | TT                              | AA                 | AA               | INTERGENIC      |               |                    |                    |
| SNP_66608_A_177819 | NW_004515764.1 | scaffold228 | 177819                  | AA                              | GG                 | GG               | INTERGENIC      |               |                    |                    |
| SNP_66609_A_177977 | NW_004515764.1 | scaffold228 | 177977                  | GG                              | AA                 | AA               | INTERGENIC      |               |                    |                    |
| SNP_66610_A_178072 | NW_004515764.1 | scaffold228 | 178072                  | GG                              | AA                 | AA               | INTERGENIC      |               |                    |                    |
| SNP_66611_A_178147 | NW_004515764.1 | scaffold228 | 178147                  | GG                              | AA                 | AA               | INTERGENIC      |               |                    |                    |
| SNP_66612_A_179320 | NW_004515764.1 | scaffold228 | 179320                  | AA                              | GG                 | GG               | INTERGENIC      |               |                    |                    |
| SNP_66613_A_179369 | NW_004515764.1 | scaffold228 | 179369                  | TT                              | CC                 | CC               | INTERGENIC      |               |                    |                    |
| SNP_66614_A_179441 | NW_004515764.1 | scaffold228 | 179441                  | TT                              | CC                 | CC               | INTERGENIC      |               |                    |                    |
| SNP_66615_A_179503 | NW_004515764.1 | scaffold228 | 179503                  | TT                              | CC                 | CC               | INTERGENIC      |               |                    |                    |
| SNP_66616_A_179545 | NW_004515764.1 | scaffold228 | 179545                  | GG                              | CC                 | CC               | INTERGENIC      |               |                    |                    |
| SNP_66617_A_179636 | NW_004515764.1 | scaffold228 | 179636                  | TT                              | CC                 | CC               | INTERGENIC      |               |                    |                    |
| SNP_66618_A_179669 | NW_004515764.1 | scaffold228 | 179669                  | AA                              | TT                 | TT               | INTERGENIC      |               |                    |                    |

| SNPs IDs           | Chromosome IDs | Chromosomes | Physical positions (bp) | CDC Frontier (Reference genome) | (Pusa 1103 & HPNB) | (ILWC 46 & LPNB) | Sequence genome | Components of | Gene accession IDs | Putative functions |
|--------------------|----------------|-------------|-------------------------|---------------------------------|--------------------|------------------|-----------------|---------------|--------------------|--------------------|
| SNP_66619_A_179903 | NW_004515764.1 | scaffold228 | 179903                  | TT                              | CC                 | CC               | INTERGENIC      |               |                    |                    |
| SNP_66620_A_179914 | NW_004515764.1 | scaffold228 | 179914                  | GG                              | CC                 | CC               | INTERGENIC      |               |                    |                    |
| SNP_66621_A_179919 | NW_004515764.1 | scaffold228 | 179919                  | CC                              | TT                 | TT               | INTERGENIC      |               |                    |                    |
| SNP_66622_A_179925 | NW_004515764.1 | scaffold228 | 179925                  | CC                              | AA                 | AA               | INTERGENIC      |               |                    |                    |
| SNP_66623_A_179946 | NW_004515764.1 | scaffold228 | 179946                  | TT                              | CC                 | CC               | INTERGENIC      |               |                    |                    |
| SNP_66624_A_179976 | NW_004515764.1 | scaffold228 | 179976                  | TT                              | GG                 | GG               | INTERGENIC      |               |                    |                    |
| SNP_66625_A_180110 | NW_004515764.1 | scaffold228 | 180110                  | TT                              | GG                 | GG               | INTERGENIC      |               |                    |                    |
| SNP_66626_A_180502 | NW_004515764.1 | scaffold228 | 180502                  | AA                              | GG                 | GG               | INTERGENIC      |               |                    |                    |
| SNP_66627_A_180704 | NW_004515764.1 | scaffold228 | 180704                  | AA                              | TT                 | TT               | INTERGENIC      |               |                    |                    |
| SNP_66628_A_183303 | NW_004515764.1 | scaffold228 | 183303                  | AA                              | TT                 | TT               | INTERGENIC      |               |                    |                    |
| SNP_66629_A_183325 | NW_004515764.1 | scaffold228 | 183325                  | TT                              | CC                 | CC               | INTERGENIC      |               |                    |                    |
| SNP_66630_A_183361 | NW_004515764.1 | scaffold228 | 183361                  | TT                              | CC                 | CC               | INTERGENIC      |               |                    |                    |
| SNP_66631_A_184339 | NW_004515764.1 | scaffold228 | 184339                  | GG                              | AA                 | AA               | INTERGENIC      |               |                    |                    |
| SNP_66632_A_184357 | NW_004515764.1 | scaffold228 | 184357                  | CC                              | AA                 | AA               | INTERGENIC      |               |                    |                    |
| SNP_66633_A_184374 | NW_004515764.1 | scaffold228 | 184374                  | AA                              | GG                 | GG               | INTERGENIC      |               |                    |                    |
| SNP_66634_A_184391 | NW_004515764.1 | scaffold228 | 184391                  | AA                              | TT                 | TT               | INTERGENIC      |               |                    |                    |
| SNP_66635_A_184552 | NW_004515764.1 | scaffold228 | 184552                  | AA                              | GG                 | GG               | INTERGENIC      |               |                    |                    |
| SNP_66636_A_184571 | NW_004515764.1 | scaffold228 | 184571                  | TT                              | AA                 | AA               | INTERGENIC      |               |                    |                    |
| SNP_66637_A_185410 | NW_004515764.1 | scaffold228 | 185410                  | TT                              | CC                 | CC               | INTERGENIC      |               |                    |                    |
| SNP_66638_A_185459 | NW_004515764.1 | scaffold228 | 185459                  | AA                              | CC                 | CC               | INTERGENIC      |               |                    |                    |
| SNP_66639_A_185822 | NW_004515764.1 | scaffold228 | 185822                  | CC                              | AA                 | AA               | INTERGENIC      |               |                    |                    |
| SNP_66640_A_185914 | NW_004515764.1 | scaffold228 | 185914                  | TT                              | AA                 | AA               | INTERGENIC      |               |                    |                    |

| SNPs IDs           | Chromosome IDs | Chromosomes | Physical positions (bp) | CDC Frontier (Reference genome) | (Pusa 1103 & HPNB) | (ILWC 46 & LPNB) | Sequence genome | Components of | Gene accession IDs | Putative functions |
|--------------------|----------------|-------------|-------------------------|---------------------------------|--------------------|------------------|-----------------|---------------|--------------------|--------------------|
| SNP_66641_A_186006 | NW_004515764.1 | scaffold228 | 186006                  | TT                              | CC                 | CC               | INTERGENIC      |               |                    |                    |
| SNP_66642_A_186708 | NW_004515764.1 | scaffold228 | 186708                  | AA                              | CC                 | CC               | INTERGENIC      |               |                    |                    |
| SNP_66643_A_186756 | NW_004515764.1 | scaffold228 | 186756                  | AA                              | GG                 | GG               | INTERGENIC      |               |                    |                    |
| SNP_66644_A_187077 | NW_004515764.1 | scaffold228 | 187077                  | AA                              | GG                 | GG               | INTERGENIC      |               |                    |                    |
| SNP_66645_A_187996 | NW_004515764.1 | scaffold228 | 187996                  | CC                              | TT                 | TT               | INTERGENIC      |               |                    |                    |
| SNP_66646_A_188031 | NW_004515764.1 | scaffold228 | 188031                  | TT                              | CC                 | CC               | INTERGENIC      |               |                    |                    |
| SNP_66647_A_188049 | NW_004515764.1 | scaffold228 | 188049                  | GG                              | AA                 | AA               | INTERGENIC      |               |                    |                    |
| SNP_66648_A_188065 | NW_004515764.1 | scaffold228 | 188065                  | TT                              | CC                 | CC               | INTERGENIC      |               |                    |                    |
| SNP_66649_A_188269 | NW_004515764.1 | scaffold228 | 188269                  | AA                              | CC                 | CC               | INTERGENIC      |               |                    |                    |
| SNP_66650_A_188400 | NW_004515764.1 | scaffold228 | 188400                  | GG                              | AA                 | AA               | INTERGENIC      |               |                    |                    |
| SNP_66651_A_188442 | NW_004515764.1 | scaffold228 | 188442                  | GG                              | AA                 | AA               | INTERGENIC      |               |                    |                    |
| SNP_66652_A_188492 | NW_004515764.1 | scaffold228 | 188492                  | GG                              | AA                 | AA               | INTERGENIC      |               |                    |                    |
| SNP_66653_A_188553 | NW_004515764.1 | scaffold228 | 188553                  | CC                              | TT                 | TT               | INTERGENIC      |               |                    |                    |
| SNP_66654_A_188645 | NW_004515764.1 | scaffold228 | 188645                  | TT                              | AA                 | AA               | INTERGENIC      |               |                    |                    |
| SNP_66655_A_188891 | NW_004515764.1 | scaffold228 | 188891                  | GG                              | AA                 | AA               | INTERGENIC      |               |                    |                    |
| SNP_66656_A_189018 | NW_004515764.1 | scaffold228 | 189018                  | CC                              | AA                 | AA               | INTERGENIC      |               |                    |                    |
| SNP_66657_A_13522  | NW_004515765.1 | scaffold229 | 13522                   | AA                              | TT                 | TT               | INTERGENIC      |               |                    |                    |
| SNP_66658_A_13581  | NW_004515765.1 | scaffold229 | 13581                   | AA                              | CC                 | CC               | INTERGENIC      |               |                    |                    |
| SNP_66660_A_33544  | NW_004515765.1 | scaffold229 | 33544                   | AA                              | GG                 | GG               | INTERGENIC      |               |                    |                    |
| SNP_66661_A_33781  | NW_004515765.1 | scaffold229 | 33781                   | AA                              | GG                 | GG               | INTERGENIC      |               |                    |                    |
| SNP_66662_A_36784  | NW_004515765.1 | scaffold229 | 36784                   | AA                              | TT                 | TT               | INTERGENIC      |               |                    |                    |
| SNP_66663_A_36901  | NW_004515765.1 | scaffold229 | 36901                   | TT                              | GG                 | GG               | INTERGENIC      |               |                    |                    |

| SNPs IDs           | Chromosome IDs | Chromosomes | Physical positions (bp) | CDC Frontier (Reference genome) | (Pusa 1103 & HPNB) | (ILWC 46 & LPNB) | Sequence genome | Components of | Gene accession IDs | Putative functions |
|--------------------|----------------|-------------|-------------------------|---------------------------------|--------------------|------------------|-----------------|---------------|--------------------|--------------------|
| SNP_66664_A_36915  | NW_004515765.1 | scaffold229 | 36915                   | CC                              | TT                 | TT               | INTERGENIC      |               |                    |                    |
| SNP_66665_A_47686  | NW_004515765.1 | scaffold229 | 47686                   | TT                              | AA                 | AA               | INTERGENIC      |               |                    |                    |
| SNP_66666_A_48885  | NW_004515765.1 | scaffold229 | 48885                   | AA                              | GG                 | GG               | INTERGENIC      |               |                    |                    |
| SNP_66667_A_49137  | NW_004515765.1 | scaffold229 | 49137                   | TT                              | AA                 | AA               | INTERGENIC      |               |                    |                    |
| SNP_66668_A_49170  | NW_004515765.1 | scaffold229 | 49170                   | GG                              | AA                 | AA               | INTERGENIC      |               |                    |                    |
| SNP_66669_A_73436  | NW_004515765.1 | scaffold229 | 73436                   | TT                              | AA                 | AA               | INTERGENIC      |               |                    |                    |
| SNP_66671_A_82193  | NW_004515765.1 | scaffold229 | 82193                   | GG                              | CC                 | CC               | INTERGENIC      |               |                    |                    |
| SNP_66672_A_82226  | NW_004515765.1 | scaffold229 | 82226                   | TT                              | CC                 | CC               | INTERGENIC      |               |                    |                    |
| SNP_66673_A_82651  | NW_004515765.1 | scaffold229 | 82651                   | AA                              | GG                 | GG               | INTERGENIC      |               |                    |                    |
| SNP_66674_A_97864  | NW_004515765.1 | scaffold229 | 97864                   | AA                              | CC                 | CC               | INTERGENIC      |               |                    |                    |
| SNP_66675_A_97876  | NW_004515765.1 | scaffold229 | 97876                   | GG                              | AA                 | AA               | INTERGENIC      |               |                    |                    |
| SNP_66676_A_102931 | NW_004515765.1 | scaffold229 | 102931                  | TT                              | CC                 | CC               | INTERGENIC      |               |                    |                    |
| SNP_66677_A_102997 | NW_004515765.1 | scaffold229 | 102997                  | AA                              | CC                 | CC               | INTERGENIC      |               |                    |                    |
| SNP_66678_A_106378 | NW_004515765.1 | scaffold229 | 106378                  | AA                              | TT                 | TT               | INTERGENIC      |               |                    |                    |
| SNP_66679_A_114183 | NW_004515765.1 | scaffold229 | 114183                  | TT                              | CC                 | CC               | INTERGENIC      |               |                    |                    |
| SNP_66680_A_114591 | NW_004515765.1 | scaffold229 | 114591                  | CC                              | AA                 | AA               | INTERGENIC      |               |                    |                    |
| SNP_66681_A_114628 | NW_004515765.1 | scaffold229 | 114628                  | AA                              | CC                 | CC               | INTERGENIC      |               |                    |                    |
| SNP_66682_A_114636 | NW_004515765.1 | scaffold229 | 114636                  | CC                              | GG                 | GG               | INTERGENIC      |               |                    |                    |
| SNP_66683_A_114638 | NW_004515765.1 | scaffold229 | 114638                  | GG                              | CC                 | CC               | INTERGENIC      |               |                    |                    |
| SNP_66684_A_114645 | NW_004515765.1 | scaffold229 | 114645                  | TT                              | GG                 | GG               | INTERGENIC      |               |                    |                    |
| SNP_66685_A_116639 | NW_004515765.1 | scaffold229 | 116639                  | AA                              | GG                 | GG               | INTERGENIC      |               |                    |                    |
| SNP_66686_A_126420 | NW_004515765.1 | scaffold229 | 126420                  | TT                              | AA                 | AA               | INTERGENIC      |               |                    |                    |

| SNPs IDs           | Chromosome IDs | Chromosomes | Physical positions (bp) | CDC Frontier (Reference genome) | (Pusa 1103 & HPNB) | (ILWC 46 & LPNB) | Sequence genome | Components of | Gene accession IDs | Putative functions |
|--------------------|----------------|-------------|-------------------------|---------------------------------|--------------------|------------------|-----------------|---------------|--------------------|--------------------|
| SNP_66687_A_156314 | NW_004515765.1 | scaffold229 | 156314                  | AA                              | CC                 | CC               | INTERGENIC      |               |                    |                    |
| SNP_66688_A_160660 | NW_004515765.1 | scaffold229 | 160660                  | TT                              | AA                 | AA               | INTERGENIC      |               |                    |                    |
| SNP_66689_A_160669 | NW_004515765.1 | scaffold229 | 160669                  | GG                              | AA                 | AA               | INTERGENIC      |               |                    |                    |
| SNP_66690_A_160701 | NW_004515765.1 | scaffold229 | 160701                  | TT                              | CC                 | CC               | INTERGENIC      |               |                    |                    |
| SNP_66691_A_160764 | NW_004515765.1 | scaffold229 | 160764                  | AA                              | GG                 | GG               | INTERGENIC      |               |                    |                    |
| SNP_66692_A_160789 | NW_004515765.1 | scaffold229 | 160789                  | AA                              | GG                 | GG               | INTERGENIC      |               |                    |                    |
| SNP_66693_A_10331  | NW_004515766.1 | scaffold231 | 10331                   | CC                              | GG                 | GG               | INTERGENIC      |               |                    |                    |
| SNP_66694_A_27393  | NW_004515766.1 | scaffold231 | 27393                   | GG                              | TT                 | TT               | INTERGENIC      |               |                    |                    |
| SNP_66695_A_42137  | NW_004515769.1 | scaffold235 | 42137                   | AA                              | CC                 | CC               | INTERGENIC      |               |                    |                    |
| SNP_66696_A_47067  | NW_004515769.1 | scaffold235 | 47067                   | AA                              | CC                 | CC               | INTERGENIC      |               |                    |                    |
| SNP_66697_A_47146  | NW_004515769.1 | scaffold235 | 47146                   | AA                              | GG                 | GG               | INTERGENIC      |               |                    |                    |
| SNP_66698_A_47181  | NW_004515769.1 | scaffold235 | 47181                   | AA                              | TT                 | TT               | INTERGENIC      |               |                    |                    |
| SNP_66699_A_47544  | NW_004515769.1 | scaffold235 | 47544                   | AA                              | GG                 | GG               | INTERGENIC      |               |                    |                    |
| SNP_66700_A_47549  | NW_004515769.1 | scaffold235 | 47549                   | CC                              | TT                 | TT               | INTERGENIC      |               |                    |                    |
| SNP_66701_A_48003  | NW_004515769.1 | scaffold235 | 48003                   | CC                              | TT                 | TT               | INTERGENIC      |               |                    |                    |
| SNP_66702_A_57284  | NW_004515769.1 | scaffold235 | 57284                   | CC                              | AA                 | AA               | INTERGENIC      |               |                    |                    |
| SNP_66704_A_99402  | NW_004515769.1 | scaffold235 | 99402                   | AA                              | GG                 | GG               | INTERGENIC      |               |                    |                    |
| SNP_66706_A_101181 | NW_004515769.1 | scaffold235 | 101181                  | GG                              | AA                 | AA               | INTERGENIC      |               |                    |                    |
| SNP_66707_A_101225 | NW_004515769.1 | scaffold235 | 101225                  | CC                              | TT                 | TT               | INTERGENIC      |               |                    |                    |
| SNP_66708_A_101259 | NW_004515769.1 | scaffold235 | 101259                  | GG                              | AA                 | AA               | INTERGENIC      |               |                    |                    |
| SNP_66709_A_108073 | NW_004515769.1 | scaffold235 | 108073                  | GG                              | AA                 | AA               | INTERGENIC      |               |                    |                    |
| SNP_66710_A_149014 | NW_004515769.1 | scaffold235 | 149014                  | CC                              | AA                 | AA               | INTERGENIC      |               |                    |                    |

| SNPs IDs           | Chromosome IDs | Chromosomes | Physical positions (bp) | CDC Frontier (Reference genome) | (Pusa 1103 & HPNB) | (ILWC 46 & LPNB) | Sequence Components of genome | Gene accession IDs | Putative functions           |
|--------------------|----------------|-------------|-------------------------|---------------------------------|--------------------|------------------|-------------------------------|--------------------|------------------------------|
| SNP_66711_A_149019 | NW_004515769.1 | scaffold235 | 149019                  | TT                              | AA                 | AA               | INTERGENIC                    |                    |                              |
| SNP_66712_A_149020 | NW_004515769.1 | scaffold235 | 149020                  | CC                              | TT                 | TT               | INTERGENIC                    |                    |                              |
| SNP_66713_A_149049 | NW_004515769.1 | scaffold235 | 149049                  | GG                              | CC                 | CC               | INTERGENIC                    |                    |                              |
| SNP_66714_A_162935 | NW_004515769.1 | scaffold235 | 162935                  | GG                              | AA                 | AA               | INTERGENIC                    |                    |                              |
| SNP_66716_A_205257 | NW_004515769.1 | scaffold235 | 205257                  | GG                              | AA                 | AA               | INTERGENIC                    |                    |                              |
| SNP_66717_A_205288 | NW_004515769.1 | scaffold235 | 205288                  | AA                              | GG                 | GG               | INTERGENIC                    |                    |                              |
| SNP_66718_A_205328 | NW_004515769.1 | scaffold235 | 205328                  | AA                              | GG                 | GG               | INTERGENIC                    |                    |                              |
| SNP_66719_A_205335 | NW_004515769.1 | scaffold235 | 205335                  | GG                              | AA                 | AA               | INTERGENIC                    |                    |                              |
| SNP_66720_A_205384 | NW_004515769.1 | scaffold235 | 205384                  | AA                              | CC                 | CC               | INTERGENIC                    |                    |                              |
| SNP_66721_A_205388 | NW_004515769.1 | scaffold235 | 205388                  | TT                              | CC                 | CC               | INTERGENIC                    |                    |                              |
| SNP_66722_A_205413 | NW_004515769.1 | scaffold235 | 205413                  | GG                              | AA                 | AA               | INTERGENIC                    |                    |                              |
| SNP_66723_A_205430 | NW_004515769.1 | scaffold235 | 205430                  | GG                              | TT                 | TT               | INTERGENIC                    |                    |                              |
| SNP_66724_A_205435 | NW_004515769.1 | scaffold235 | 205435                  | GG                              | CC                 | CC               | INTERGENIC                    |                    |                              |
| SNP_66725_A_205514 | NW_004515769.1 | scaffold235 | 205514                  | CC                              | TT                 | TT               | INTERGENIC                    |                    |                              |
| SNP_66726_A_205535 | NW_004515769.1 | scaffold235 | 205535                  | TT                              | CC                 | CC               | INTERGENIC                    |                    |                              |
| SNP_66727_A_205554 | NW_004515769.1 | scaffold235 | 205554                  | TT                              | CC                 | CC               | INTERGENIC                    |                    |                              |
| SNP_66728_A_205604 | NW_004515769.1 | scaffold235 | 205604                  | TT                              | GG                 | GG               | INTERGENIC                    |                    |                              |
| SNP_66729_A_231848 | NW_004515769.1 | scaffold235 | 231848                  | GG                              | AA                 | AA               | INTERGENIC                    |                    |                              |
| SNP_66730_A_2258   | NW_004515770.1 | scaffold236 | 2258                    | TT                              | GG                 | GG               | INTRON                        | 101515634          | uncharacterized LOC101515634 |
| SNP_66731_A_5195   | NW_004515770.1 | scaffold236 | 5195                    | TT                              | GG                 | GG               | INTERGENIC                    |                    |                              |
| SNP_66732_A_5285   | NW_004515770.1 | scaffold236 | 5285                    | AA                              | GG                 | GG               | INTERGENIC                    |                    |                              |
| SNP_66733_A_5365   | NW_004515770.1 | scaffold236 | 5365                    | TT                              | AA                 | AA               | INTERGENIC                    |                    |                              |



| SNPs IDs          | Chromosome IDs | Chromosomes | Physical positions (bp) | CDC Frontier genome (Reference genome) | (Pusa 1103 & HPNB) | (ILWC 46 & LPNB) | Sequence Components of genome | Gene accession IDs | Putative functions |
|-------------------|----------------|-------------|-------------------------|----------------------------------------|--------------------|------------------|-------------------------------|--------------------|--------------------|
| SNP_66734_A_5485  | NW_004515770.1 | scaffold236 | 5485                    | AA                                     | GG                 | GG               | INTERGENIC                    |                    |                    |
| SNP_66735_A_15839 | NW_004515770.1 | scaffold236 | 15839                   | GG                                     | AA                 | AA               | INTERGENIC                    |                    |                    |
| SNP_66736_A_16147 | NW_004515770.1 | scaffold236 | 16147                   | AA                                     | CC                 | CC               | INTERGENIC                    |                    |                    |
| SNP_66737_A_16148 | NW_004515770.1 | scaffold236 | 16148                   | TT                                     | AA                 | AA               | INTERGENIC                    |                    |                    |
| SNP_66738_A_17123 | NW_004515770.1 | scaffold236 | 17123                   | CC                                     | GG                 | GG               | INTERGENIC                    |                    |                    |
| SNP_66739_A_17127 | NW_004515770.1 | scaffold236 | 17127                   | AA                                     | GG                 | GG               | INTERGENIC                    |                    |                    |
| SNP_66740_A_17333 | NW_004515770.1 | scaffold236 | 17333                   | CC                                     | AA                 | AA               | INTERGENIC                    |                    |                    |
| SNP_66741_A_23066 | NW_004515770.1 | scaffold236 | 23066                   | TT                                     | AA                 | AA               | INTRON                        | 101488388          | Unknown function   |
| SNP_66742_A_23092 | NW_004515770.1 | scaffold236 | 23092                   | CC                                     | AA                 | AA               | INTRON                        | 101488388          | Unknown function   |
| SNP_66743_A_23099 | NW_004515770.1 | scaffold236 | 23099                   | CC                                     | TT                 | TT               | INTRON                        | 101488388          | Unknown function   |
| SNP_66744_A_23112 | NW_004515770.1 | scaffold236 | 23112                   | AA                                     | GG                 | GG               | INTRON                        | 101488388          | Unknown function   |
| SNP_66745_A_23131 | NW_004515770.1 | scaffold236 | 23131                   | CC                                     | TT                 | TT               | INTRON                        | 101488388          | Unknown function   |
| SNP_66746_A_23133 | NW_004515770.1 | scaffold236 | 23133                   | GG                                     | TT                 | TT               | INTRON                        | 101488388          | Unknown function   |
| SNP_66747_A_23166 | NW_004515770.1 | scaffold236 | 23166                   | TT                                     | CC                 | CC               | INTRON                        | 101488388          | Unknown function   |
| SNP_66748_A_23468 | NW_004515770.1 | scaffold236 | 23468                   | AA                                     | TT                 | TT               | NON_SYNONYMOUS_CODING         | 101488388          | Unknown function   |
| SNP_66749_A_23561 | NW_004515770.1 | scaffold236 | 23561                   | AA                                     | GG                 | GG               | INTRON                        | 101488388          | Unknown function   |
| SNP_66750_A_23608 | NW_004515770.1 | scaffold236 | 23608                   | AA                                     | GG                 | GG               | SYNONYMOUS_CODING             | 101488388          | Unknown function   |
| SNP_66751_A_23827 | NW_004515770.1 | scaffold236 | 23827                   | AA                                     | GG                 | GG               | NON_SYNONYMOUS_CODING         | 101488388          | Unknown function   |
| SNP_66752_A_23964 | NW_004515770.1 | scaffold236 | 23964                   | TT                                     | CC                 | CC               | NON_SYNONYMOUS_CODING         | 101488388          | Unknown function   |
| SNP_66753_A_23971 | NW_004515770.1 | scaffold236 | 23971                   | CC                                     | TT                 | TT               | NON_SYNONYMOUS_CODING         | 101488388          | Unknown function   |
| SNP_66754_A_25477 | NW_004515770.1 | scaffold236 | 25477                   | AA                                     | GG                 | GG               | URR                           | 101488388          | Unknown function   |
| SNP_66755_A_25613 | NW_004515770.1 | scaffold236 | 25613                   | GG                                     | AA                 | AA               | URR                           | 101488388          | Unknown function   |

| SNPs IDs          | Chromosome IDs | Chromosomes | Physical positions (bp) | CDC Frontier (Reference genome) | (Pusa 1103 & HPNB) | (ILWC 46 & LPNB) | Sequence Components of genome | Gene accession IDs | Putative functions |
|-------------------|----------------|-------------|-------------------------|---------------------------------|--------------------|------------------|-------------------------------|--------------------|--------------------|
| SNP_66756_A_25617 | NW_004515770.1 | scaffold236 | 25617                   | AA                              | TT                 | TT               | URR                           | 101488388          | Unknown function   |
| SNP_66757_A_25688 | NW_004515770.1 | scaffold236 | 25688                   | CC                              | AA                 | AA               | URR                           | 101488388          | Unknown function   |
| SNP_66758_A_25872 | NW_004515770.1 | scaffold236 | 25872                   | TT                              | CC                 | CC               | URR                           | 101488388          | Unknown function   |
| SNP_66759_A_25889 | NW_004515770.1 | scaffold236 | 25889                   | GG                              | TT                 | TT               | URR                           | 101488388          | Unknown function   |
| SNP_66760_A_26025 | NW_004515770.1 | scaffold236 | 26025                   | CC                              | TT                 | TT               | URR                           | 101488388          | Unknown function   |
| SNP_66761_A_26040 | NW_004515770.1 | scaffold236 | 26040                   | CC                              | TT                 | TT               | URR                           | 101488388          | Unknown function   |
| SNP_66762_A_26083 | NW_004515770.1 | scaffold236 | 26083                   | AA                              | TT                 | TT               | URR                           | 101488388          | Unknown function   |
| SNP_66763_A_26238 | NW_004515770.1 | scaffold236 | 26238                   | GG                              | AA                 | AA               | INTERGENIC                    |                    |                    |
| SNP_66764_A_26618 | NW_004515770.1 | scaffold236 | 26618                   | TT                              | CC                 | CC               | INTERGENIC                    |                    |                    |
| SNP_66765_A_26718 | NW_004515770.1 | scaffold236 | 26718                   | CC                              | TT                 | TT               | INTERGENIC                    |                    |                    |
| SNP_66766_A_26863 | NW_004515770.1 | scaffold236 | 26863                   | AA                              | CC                 | CC               | INTERGENIC                    |                    |                    |
| SNP_66767_A_26894 | NW_004515770.1 | scaffold236 | 26894                   | AA                              | TT                 | TT               | INTERGENIC                    |                    |                    |
| SNP_66768_A_26947 | NW_004515770.1 | scaffold236 | 26947                   | AA                              | GG                 | GG               | INTERGENIC                    |                    |                    |
| SNP_66769_A_26954 | NW_004515770.1 | scaffold236 | 26954                   | AA                              | CC                 | CC               | INTERGENIC                    |                    |                    |
| SNP_66770_A_27495 | NW_004515770.1 | scaffold236 | 27495                   | TT                              | CC                 | CC               | INTERGENIC                    |                    |                    |
| SNP_66771_A_29072 | NW_004515770.1 | scaffold236 | 29072                   | TT                              | AA                 | AA               | INTERGENIC                    |                    |                    |
| SNP_66772_A_29100 | NW_004515770.1 | scaffold236 | 29100                   | GG                              | AA                 | AA               | INTERGENIC                    |                    |                    |
| SNP_66773_A_29128 | NW_004515770.1 | scaffold236 | 29128                   | CC                              | AA                 | AA               | INTERGENIC                    |                    |                    |
| SNP_66774_A_29131 | NW_004515770.1 | scaffold236 | 29131                   | CC                              | TT                 | TT               | INTERGENIC                    |                    |                    |
| SNP_66775_A_29223 | NW_004515770.1 | scaffold236 | 29223                   | AA                              | GG                 | GG               | INTERGENIC                    |                    |                    |
| SNP_66776_A_29243 | NW_004515770.1 | scaffold236 | 29243                   | TT                              | CC                 | CC               | INTERGENIC                    |                    |                    |
| SNP_66777_A_29525 | NW_004515770.1 | scaffold236 | 29525                   | AA                              | CC                 | CC               | INTERGENIC                    |                    |                    |

| SNPs IDs          | Chromosome IDs | Chromosomes | Physical positions (bp) | CDC Frontier (Reference genome) | (Pusa 1103 & HPNB) | (ILWC 46 & LPNB) | Sequence genome | Components of | Gene accession IDs | Putative functions |
|-------------------|----------------|-------------|-------------------------|---------------------------------|--------------------|------------------|-----------------|---------------|--------------------|--------------------|
| SNP_66778_A_29671 | NW_004515770.1 | scaffold236 | 29671                   | TT                              | AA                 | AA               | INTERGENIC      |               |                    |                    |
| SNP_66779_A_29795 | NW_004515770.1 | scaffold236 | 29795                   | CC                              | TT                 | TT               | INTERGENIC      |               |                    |                    |
| SNP_66780_A_29836 | NW_004515770.1 | scaffold236 | 29836                   | GG                              | TT                 | TT               | INTERGENIC      |               |                    |                    |
| SNP_66781_A_29865 | NW_004515770.1 | scaffold236 | 29865                   | AA                              | TT                 | TT               | INTERGENIC      |               |                    |                    |
| SNP_66782_A_30822 | NW_004515770.1 | scaffold236 | 30822                   | CC                              | AA                 | AA               | INTERGENIC      |               |                    |                    |
| SNP_66783_A_31537 | NW_004515770.1 | scaffold236 | 31537                   | CC                              | TT                 | TT               | INTERGENIC      |               |                    |                    |
| SNP_66784_A_31607 | NW_004515770.1 | scaffold236 | 31607                   | GG                              | AA                 | AA               | INTERGENIC      |               |                    |                    |
| SNP_66785_A_36327 | NW_004515770.1 | scaffold236 | 36327                   | GG                              | AA                 | AA               | INTERGENIC      |               |                    |                    |
| SNP_66786_A_41629 | NW_004515770.1 | scaffold236 | 41629                   | GG                              | TT                 | TT               | INTERGENIC      |               |                    |                    |
| SNP_66787_A_42201 | NW_004515770.1 | scaffold236 | 42201                   | GG                              | TT                 | TT               | INTERGENIC      |               |                    |                    |
| SNP_66788_A_42733 | NW_004515770.1 | scaffold236 | 42733                   | GG                              | AA                 | AA               | INTERGENIC      |               |                    |                    |
| SNP_66789_A_43130 | NW_004515770.1 | scaffold236 | 43130                   | CC                              | TT                 | TT               | INTERGENIC      |               |                    |                    |
| SNP_66790_A_43261 | NW_004515770.1 | scaffold236 | 43261                   | GG                              | AA                 | AA               | INTERGENIC      |               |                    |                    |
| SNP_66791_A_44115 | NW_004515770.1 | scaffold236 | 44115                   | TT                              | CC                 | CC               | INTERGENIC      |               |                    |                    |
| SNP_66792_A_45300 | NW_004515770.1 | scaffold236 | 45300                   | GG                              | CC                 | CC               | INTERGENIC      |               |                    |                    |
| SNP_66794_A_45586 | NW_004515770.1 | scaffold236 | 45586                   | CC                              | TT                 | TT               | INTERGENIC      |               |                    |                    |
| SNP_66795_A_45597 | NW_004515770.1 | scaffold236 | 45597                   | GG                              | TT                 | TT               | INTERGENIC      |               |                    |                    |
| SNP_66796_A_45621 | NW_004515770.1 | scaffold236 | 45621                   | CC                              | GG                 | GG               | INTERGENIC      |               |                    |                    |
| SNP_66797_A_45746 | NW_004515770.1 | scaffold236 | 45746                   | AA                              | GG                 | GG               | INTERGENIC      |               |                    |                    |
| SNP_66798_A_45990 | NW_004515770.1 | scaffold236 | 45990                   | CC                              | TT                 | TT               | INTERGENIC      |               |                    |                    |
| SNP_66799_A_46054 | NW_004515770.1 | scaffold236 | 46054                   | AA                              | GG                 | GG               | INTERGENIC      |               |                    |                    |
| SNP_66800_A_46405 | NW_004515770.1 | scaffold236 | 46405                   | AA                              | GG                 | GG               | INTERGENIC      |               |                    |                    |

| SNPs IDs          | Chromosome IDs | Chromosomes | Physical positions (bp) | CDC Frontier (Reference genome) | (Pusa 1103 & HPNB) | (ILWC 46 & LPNB) | Sequence Components of genome | Gene accession IDs | Putative functions |
|-------------------|----------------|-------------|-------------------------|---------------------------------|--------------------|------------------|-------------------------------|--------------------|--------------------|
| SNP_66801_A_51701 | NW_004515770.1 | scaffold236 | 51701                   | AA                              | TT                 | TT               | INTERGENIC                    |                    |                    |
| SNP_66802_A_51927 | NW_004515770.1 | scaffold236 | 51927                   | TT                              | CC                 | CC               | INTERGENIC                    |                    |                    |
| SNP_66803_A_51942 | NW_004515770.1 | scaffold236 | 51942                   | GG                              | TT                 | TT               | INTERGENIC                    |                    |                    |
| SNP_66804_A_52077 | NW_004515770.1 | scaffold236 | 52077                   | CC                              | GG                 | GG               | INTERGENIC                    |                    |                    |
| SNP_66805_A_52440 | NW_004515770.1 | scaffold236 | 52440                   | CC                              | TT                 | TT               | INTERGENIC                    |                    |                    |
| SNP_66806_A_53451 | NW_004515770.1 | scaffold236 | 53451                   | GG                              | TT                 | TT               | INTERGENIC                    |                    |                    |
| SNP_66807_A_59223 | NW_004515770.1 | scaffold236 | 59223                   | GG                              | CC                 | CC               | INTERGENIC                    |                    |                    |
| SNP_66808_A_59538 | NW_004515770.1 | scaffold236 | 59538                   | TT                              | GG                 | GG               | INTERGENIC                    |                    |                    |
| SNP_66809_A_59636 | NW_004515770.1 | scaffold236 | 59636                   | CC                              | GG                 | GG               | INTERGENIC                    |                    |                    |
| SNP_66810_A_59907 | NW_004515770.1 | scaffold236 | 59907                   | GG                              | AA                 | AA               | INTERGENIC                    |                    |                    |
| SNP_66812_A_60221 | NW_004515770.1 | scaffold236 | 60221                   | AA                              | TT                 | TT               | INTERGENIC                    |                    |                    |
| SNP_66813_A_64301 | NW_004515770.1 | scaffold236 | 64301                   | GG                              | AA                 | AA               | NON_SYNONYMOUS_CODING         | 101488714          | Unknown function   |
| SNP_66814_A_66326 | NW_004515770.1 | scaffold236 | 66326                   | GG                              | CC                 | CC               | URR                           | 101488714          | Unknown function   |
| SNP_66815_A_71890 | NW_004515770.1 | scaffold236 | 71890                   | TT                              | AA                 | AA               | INTERGENIC                    |                    |                    |
| SNP_66816_A_71934 | NW_004515770.1 | scaffold236 | 71934                   | CC                              | TT                 | TT               | INTERGENIC                    |                    |                    |
| SNP_66817_A_2477  | NW_004515771.1 | scaffold237 | 2477                    | TT                              | CC                 | CC               | INTERGENIC                    |                    |                    |
| SNP_66818_A_16147 | NW_004515771.1 | scaffold237 | 16147                   | AA                              | TT                 | TT               | INTERGENIC                    |                    |                    |
| SNP_66819_A_16150 | NW_004515771.1 | scaffold237 | 16150                   | AA                              | CC                 | CC               | INTERGENIC                    |                    |                    |
| SNP_66820_A_16243 | NW_004515771.1 | scaffold237 | 16243                   | TT                              | GG                 | GG               | INTERGENIC                    |                    |                    |
| SNP_66821_A_16499 | NW_004515771.1 | scaffold237 | 16499                   | AA                              | GG                 | GG               | INTERGENIC                    |                    |                    |
| SNP_66822_A_16845 | NW_004515771.1 | scaffold237 | 16845                   | CC                              | AA                 | AA               | INTERGENIC                    |                    |                    |
| SNP_66823_A_22128 | NW_004515771.1 | scaffold237 | 22128                   | CC                              | TT                 | TT               | INTERGENIC                    |                    |                    |

| SNPs IDs          | Chromosome IDs | Chromosomes | Physical positions (bp) | CDC Frontier (Reference genome) | (Pusa 1103 & HPNB) | (ILWC 46 & LPNB) | Sequence genome | Components of | Gene accession IDs | Putative functions |
|-------------------|----------------|-------------|-------------------------|---------------------------------|--------------------|------------------|-----------------|---------------|--------------------|--------------------|
| SNP_66824_A_22407 | NW_004515771.1 | scaffold237 | 22407                   | CC                              | TT                 | TT               | INTERGENIC      |               |                    |                    |
| SNP_66825_A_22417 | NW_004515771.1 | scaffold237 | 22417                   | TT                              | AA                 | AA               | INTERGENIC      |               |                    |                    |
| SNP_66826_A_22418 | NW_004515771.1 | scaffold237 | 22418                   | AA                              | GG                 | GG               | INTERGENIC      |               |                    |                    |
| SNP_66827_A_22462 | NW_004515771.1 | scaffold237 | 22462                   | AA                              | CC                 | CC               | INTERGENIC      |               |                    |                    |
| SNP_66828_A_22554 | NW_004515771.1 | scaffold237 | 22554                   | TT                              | AA                 | AA               | INTERGENIC      |               |                    |                    |
| SNP_66829_A_22632 | NW_004515771.1 | scaffold237 | 22632                   | CC                              | TT                 | TT               | INTERGENIC      |               |                    |                    |
| SNP_66830_A_22670 | NW_004515771.1 | scaffold237 | 22670                   | GG                              | AA                 | AA               | INTERGENIC      |               |                    |                    |
| SNP_66831_A_22837 | NW_004515771.1 | scaffold237 | 22837                   | TT                              | CC                 | CC               | INTERGENIC      |               |                    |                    |
| SNP_66832_A_22950 | NW_004515771.1 | scaffold237 | 22950                   | AA                              | GG                 | GG               | INTERGENIC      |               |                    |                    |
| SNP_66833_A_52617 | NW_004515771.1 | scaffold237 | 52617                   | TT                              | AA                 | AA               | INTERGENIC      |               |                    |                    |
| SNP_66834_A_52899 | NW_004515771.1 | scaffold237 | 52899                   | TT                              | GG                 | GG               | INTERGENIC      |               |                    |                    |
| SNP_66835_A_57696 | NW_004515771.1 | scaffold237 | 57696                   | CC                              | AA                 | AA               | INTERGENIC      |               |                    |                    |
| SNP_66836_A_57964 | NW_004515771.1 | scaffold237 | 57964                   | AA                              | TT                 | TT               | INTERGENIC      |               |                    |                    |
| SNP_66837_A_58051 | NW_004515771.1 | scaffold237 | 58051                   | CC                              | GG                 | GG               | INTERGENIC      |               |                    |                    |
| SNP_66838_A_58105 | NW_004515771.1 | scaffold237 | 58105                   | TT                              | CC                 | CC               | INTERGENIC      |               |                    |                    |
| SNP_66839_A_58363 | NW_004515771.1 | scaffold237 | 58363                   | TT                              | GG                 | GG               | INTERGENIC      |               |                    |                    |
| SNP_66840_A_58445 | NW_004515771.1 | scaffold237 | 58445                   | AA                              | TT                 | TT               | INTERGENIC      |               |                    |                    |
| SNP_66841_A_58455 | NW_004515771.1 | scaffold237 | 58455                   | AA                              | GG                 | GG               | INTERGENIC      |               |                    |                    |
| SNP_66842_A_60074 | NW_004515771.1 | scaffold237 | 60074                   | AA                              | GG                 | GG               | INTERGENIC      |               |                    |                    |
| SNP_66843_A_71142 | NW_004515771.1 | scaffold237 | 71142                   | CC                              | AA                 | AA               | INTERGENIC      |               |                    |                    |
| SNP_66844_A_71585 | NW_004515771.1 | scaffold237 | 71585                   | TT                              | GG                 | GG               | INTERGENIC      |               |                    |                    |
| SNP_66845_A_629   | NW_004515772.1 | scaffold238 | 629                     | GG                              | CC                 | CC               | INTERGENIC      |               |                    |                    |

| SNPs IDs          | Chromosome IDs | Chromosomes | Physical positions (bp) | CDC Frontier (Reference genome) | (Pusa 1103 & HPNB) | (ILWC 46 & LPNB) | Sequence genome | Components of | Gene accession IDs | Putative functions |
|-------------------|----------------|-------------|-------------------------|---------------------------------|--------------------|------------------|-----------------|---------------|--------------------|--------------------|
| SNP_66846_A_643   | NW_004515772.1 | scaffold238 | 643                     | GG                              | TT                 | TT               | INTERGENIC      |               |                    |                    |
| SNP_66847_A_688   | NW_004515772.1 | scaffold238 | 688                     | AA                              | GG                 | GG               | INTERGENIC      |               |                    |                    |
| SNP_66848_A_731   | NW_004515772.1 | scaffold238 | 731                     | CC                              | TT                 | TT               | INTERGENIC      |               |                    |                    |
| SNP_66849_A_928   | NW_004515772.1 | scaffold238 | 928                     | TT                              | AA                 | AA               | INTERGENIC      |               |                    |                    |
| SNP_66850_A_1092  | NW_004515772.1 | scaffold238 | 1092                    | GG                              | AA                 | AA               | INTERGENIC      |               |                    |                    |
| SNP_66851_A_1102  | NW_004515772.1 | scaffold238 | 1102                    | TT                              | GG                 | GG               | INTERGENIC      |               |                    |                    |
| SNP_66852_A_1111  | NW_004515772.1 | scaffold238 | 1111                    | AA                              | GG                 | GG               | INTERGENIC      |               |                    |                    |
| SNP_66853_A_1155  | NW_004515772.1 | scaffold238 | 1155                    | TT                              | CC                 | CC               | INTERGENIC      |               |                    |                    |
| SNP_66854_A_1169  | NW_004515772.1 | scaffold238 | 1169                    | TT                              | CC                 | CC               | INTERGENIC      |               |                    |                    |
| SNP_66855_A_1259  | NW_004515772.1 | scaffold238 | 1259                    | TT                              | AA                 | AA               | INTERGENIC      |               |                    |                    |
| SNP_66856_A_1291  | NW_004515772.1 | scaffold238 | 1291                    | AA                              | CC                 | CC               | INTERGENIC      |               |                    |                    |
| SNP_66857_A_1342  | NW_004515772.1 | scaffold238 | 1342                    | CC                              | TT                 | TT               | INTERGENIC      |               |                    |                    |
| SNP_66858_A_1381  | NW_004515772.1 | scaffold238 | 1381                    | TT                              | AA                 | AA               | INTERGENIC      |               |                    |                    |
| SNP_66859_A_4443  | NW_004515772.1 | scaffold238 | 4443                    | AA                              | TT                 | TT               | INTERGENIC      |               |                    |                    |
| SNP_66860_A_13670 | NW_004515772.1 | scaffold238 | 13670                   | CC                              | AA                 | AA               | INTERGENIC      |               |                    |                    |
| SNP_66861_A_17464 | NW_004515772.1 | scaffold238 | 17464                   | AA                              | TT                 | TT               | INTERGENIC      |               |                    |                    |
| SNP_66862_A_18915 | NW_004515772.1 | scaffold238 | 18915                   | TT                              | CC                 | CC               | INTERGENIC      |               |                    |                    |
| SNP_66863_A_18933 | NW_004515772.1 | scaffold238 | 18933                   | AA                              | GG                 | GG               | INTERGENIC      |               |                    |                    |
| SNP_66864_A_18941 | NW_004515772.1 | scaffold238 | 18941                   | CC                              | TT                 | TT               | INTERGENIC      |               |                    |                    |
| SNP_66865_A_19191 | NW_004515772.1 | scaffold238 | 19191                   | TT                              | AA                 | AA               | INTERGENIC      |               |                    |                    |
| SNP_66866_A_19227 | NW_004515772.1 | scaffold238 | 19227                   | AA                              | CC                 | CC               | INTERGENIC      |               |                    |                    |
| SNP_66867_A_20672 | NW_004515772.1 | scaffold238 | 20672                   | GG                              | AA                 | AA               | INTERGENIC      |               |                    |                    |

| SNPs IDs          | Chromosome IDs | Chromosomes | Physical positions (bp) | CDC Frontier (Reference genome) | (Pusa 1103 & HPNB) | (ILWC 46 & LPNB) | Sequence genome | Components of | Gene accession IDs | Putative functions |
|-------------------|----------------|-------------|-------------------------|---------------------------------|--------------------|------------------|-----------------|---------------|--------------------|--------------------|
| SNP_66868_A_20675 | NW_004515772.1 | scaffold238 | 20675                   | AA                              | CC                 | CC               | INTERGENIC      |               |                    |                    |
| SNP_66869_A_21094 | NW_004515772.1 | scaffold238 | 21094                   | CC                              | AA                 | AA               | INTERGENIC      |               |                    |                    |
| SNP_66870_A_23823 | NW_004515772.1 | scaffold238 | 23823                   | AA                              | TT                 | TT               | INTERGENIC      |               |                    |                    |
| SNP_66871_A_23849 | NW_004515772.1 | scaffold238 | 23849                   | CC                              | TT                 | TT               | INTERGENIC      |               |                    |                    |
| SNP_66872_A_23915 | NW_004515772.1 | scaffold238 | 23915                   | AA                              | GG                 | GG               | INTERGENIC      |               |                    |                    |
| SNP_66873_A_23964 | NW_004515772.1 | scaffold238 | 23964                   | CC                              | TT                 | TT               | INTERGENIC      |               |                    |                    |
| SNP_66874_A_27241 | NW_004515772.1 | scaffold238 | 27241                   | CC                              | TT                 | TT               | INTERGENIC      |               |                    |                    |
| SNP_66875_A_27371 | NW_004515772.1 | scaffold238 | 27371                   | CC                              | AA                 | AA               | INTERGENIC      |               |                    |                    |
| SNP_66876_A_27705 | NW_004515772.1 | scaffold238 | 27705                   | TT                              | CC                 | CC               | INTERGENIC      |               |                    |                    |
| SNP_66877_A_5061  | NW_004515773.1 | scaffold239 | 5061                    | AA                              | GG                 | GG               | INTERGENIC      |               |                    |                    |
| SNP_66878_A_15110 | NW_004515773.1 | scaffold239 | 15110                   | TT                              | AA                 | AA               | INTERGENIC      |               |                    |                    |
| SNP_66879_A_15332 | NW_004515773.1 | scaffold239 | 15332                   | GG                              | AA                 | AA               | INTERGENIC      |               |                    |                    |
| SNP_66880_A_19647 | NW_004515773.1 | scaffold239 | 19647                   | CC                              | AA                 | AA               | INTERGENIC      |               |                    |                    |
| SNP_66881_A_19649 | NW_004515773.1 | scaffold239 | 19649                   | CC                              | AA                 | AA               | INTERGENIC      |               |                    |                    |
| SNP_66882_A_28065 | NW_004515773.1 | scaffold239 | 28065                   | AA                              | TT                 | TT               | INTERGENIC      |               |                    |                    |
| SNP_66883_A_36989 | NW_004515773.1 | scaffold239 | 36989                   | CC                              | AA                 | AA               | INTERGENIC      |               |                    |                    |
| SNP_66884_A_49915 | NW_004515773.1 | scaffold239 | 49915                   | CC                              | TT                 | TT               | INTERGENIC      |               |                    |                    |
| SNP_66885_A_49921 | NW_004515773.1 | scaffold239 | 49921                   | AA                              | TT                 | TT               | INTERGENIC      |               |                    |                    |
| SNP_66886_A_49923 | NW_004515773.1 | scaffold239 | 49923                   | AA                              | TT                 | TT               | INTERGENIC      |               |                    |                    |
| SNP_66887_A_49950 | NW_004515773.1 | scaffold239 | 49950                   | AA                              | GG                 | GG               | INTERGENIC      |               |                    |                    |
| SNP_66888_A_50183 | NW_004515773.1 | scaffold239 | 50183                   | AA                              | TT                 | TT               | INTERGENIC      |               |                    |                    |
| SNP_66889_A_50184 | NW_004515773.1 | scaffold239 | 50184                   | AA                              | GG                 | GG               | INTERGENIC      |               |                    |                    |

| SNPs IDs          | Chromosome IDs | Chromosomes | Physical positions (bp) | CDC Frontier (Reference genome) | (Pusa 1103 & HPNB) | (ILWC 46 & LPNB) | Sequence genome | Components of | Gene accession IDs | Putative functions |
|-------------------|----------------|-------------|-------------------------|---------------------------------|--------------------|------------------|-----------------|---------------|--------------------|--------------------|
| SNP_66890_A_50210 | NW_004515773.1 | scaffold239 | 50210                   | AA                              | CC                 | CC               | INTERGENIC      |               |                    |                    |
| SNP_66891_A_50213 | NW_004515773.1 | scaffold239 | 50213                   | TT                              | AA                 | AA               | INTERGENIC      |               |                    |                    |
| SNP_66892_A_50221 | NW_004515773.1 | scaffold239 | 50221                   | GG                              | AA                 | AA               | INTERGENIC      |               |                    |                    |
| SNP_66893_A_50224 | NW_004515773.1 | scaffold239 | 50224                   | AA                              | TT                 | TT               | INTERGENIC      |               |                    |                    |
| SNP_66894_A_50232 | NW_004515773.1 | scaffold239 | 50232                   | GG                              | AA                 | AA               | INTERGENIC      |               |                    |                    |
| SNP_66896_A_50292 | NW_004515773.1 | scaffold239 | 50292                   | TT                              | CC                 | CC               | INTERGENIC      |               |                    |                    |
| SNP_66897_A_50357 | NW_004515773.1 | scaffold239 | 50357                   | AA                              | GG                 | GG               | INTERGENIC      |               |                    |                    |
| SNP_66898_A_50581 | NW_004515773.1 | scaffold239 | 50581                   | GG                              | AA                 | AA               | INTERGENIC      |               |                    |                    |
| SNP_66899_A_50588 | NW_004515773.1 | scaffold239 | 50588                   | AA                              | GG                 | GG               | INTERGENIC      |               |                    |                    |
| SNP_66900_A_53907 | NW_004515773.1 | scaffold239 | 53907                   | CC                              | GG                 | GG               | INTERGENIC      |               |                    |                    |
| SNP_66901_A_54148 | NW_004515773.1 | scaffold239 | 54148                   | TT                              | AA                 | AA               | INTERGENIC      |               |                    |                    |
| SNP_66902_A_55779 | NW_004515773.1 | scaffold239 | 55779                   | AA                              | TT                 | TT               | INTERGENIC      |               |                    |                    |
| SNP_66903_A_64794 | NW_004515773.1 | scaffold239 | 64794                   | TT                              | CC                 | CC               | INTERGENIC      |               |                    |                    |
| SNP_66904_A_64796 | NW_004515773.1 | scaffold239 | 64796                   | CC                              | TT                 | TT               | INTERGENIC      |               |                    |                    |
| SNP_66905_A_64813 | NW_004515773.1 | scaffold239 | 64813                   | TT                              | GG                 | GG               | INTERGENIC      |               |                    |                    |
| SNP_66906_A_76056 | NW_004515773.1 | scaffold239 | 76056                   | AA                              | CC                 | CC               | INTERGENIC      |               |                    |                    |
| SNP_66907_A_81010 | NW_004515773.1 | scaffold239 | 81010                   | TT                              | AA                 | AA               | INTERGENIC      |               |                    |                    |
| SNP_66908_A_83787 | NW_004515773.1 | scaffold239 | 83787                   | TT                              | CC                 | CC               | INTERGENIC      |               |                    |                    |
| SNP_66909_A_85004 | NW_004515773.1 | scaffold239 | 85004                   | AA                              | GG                 | GG               | INTERGENIC      |               |                    |                    |
| SNP_66910_A_89206 | NW_004515773.1 | scaffold239 | 89206                   | GG                              | AA                 | AA               | INTERGENIC      |               |                    |                    |
| SNP_66911_A_89222 | NW_004515773.1 | scaffold239 | 89222                   | CC                              | TT                 | TT               | INTERGENIC      |               |                    |                    |
| SNP_66912_A_89296 | NW_004515773.1 | scaffold239 | 89296                   | CC                              | GG                 | GG               | INTERGENIC      |               |                    |                    |



| SNPs IDs          | Chromosome IDs | Chromosomes | Physical positions (bp) | CDC Frontier (Reference genome) | (Pusa 1103 & HPNB) | (ILWC 46 & LPNB) | Sequence genome | Components of | Gene accession IDs | Putative functions |
|-------------------|----------------|-------------|-------------------------|---------------------------------|--------------------|------------------|-----------------|---------------|--------------------|--------------------|
| SNP_66913_A_89375 | NW_004515773.1 | scaffold239 | 89375                   | GG                              | TT                 | TT               | INTERGENIC      |               |                    |                    |
| SNP_66914_A_89387 | NW_004515773.1 | scaffold239 | 89387                   | CC                              | AA                 | AA               | INTERGENIC      |               |                    |                    |
| SNP_66915_A_89475 | NW_004515773.1 | scaffold239 | 89475                   | AA                              | GG                 | GG               | INTERGENIC      |               |                    |                    |
| SNP_66916_A_89477 | NW_004515773.1 | scaffold239 | 89477                   | GG                              | CC                 | CC               | INTERGENIC      |               |                    |                    |
| SNP_66917_A_89484 | NW_004515773.1 | scaffold239 | 89484                   | AA                              | GG                 | GG               | INTERGENIC      |               |                    |                    |
| SNP_66918_A_89667 | NW_004515773.1 | scaffold239 | 89667                   | TT                              | CC                 | CC               | INTERGENIC      |               |                    |                    |
| SNP_66919_A_89681 | NW_004515773.1 | scaffold239 | 89681                   | AA                              | TT                 | TT               | INTERGENIC      |               |                    |                    |
| SNP_66920_A_89718 | NW_004515773.1 | scaffold239 | 89718                   | CC                              | AA                 | AA               | INTERGENIC      |               |                    |                    |
| SNP_66921_A_89801 | NW_004515773.1 | scaffold239 | 89801                   | GG                              | AA                 | AA               | INTERGENIC      |               |                    |                    |
| SNP_66922_A_89802 | NW_004515773.1 | scaffold239 | 89802                   | GG                              | AA                 | AA               | INTERGENIC      |               |                    |                    |
| SNP_66923_A_89836 | NW_004515773.1 | scaffold239 | 89836                   | CC                              | TT                 | TT               | INTERGENIC      |               |                    |                    |
| SNP_66924_A_89900 | NW_004515773.1 | scaffold239 | 89900                   | TT                              | AA                 | AA               | INTERGENIC      |               |                    |                    |
| SNP_66925_A_89991 | NW_004515773.1 | scaffold239 | 89991                   | TT                              | AA                 | AA               | INTERGENIC      |               |                    |                    |
| SNP_66926_A_90011 | NW_004515773.1 | scaffold239 | 90011                   | CC                              | AA                 | AA               | INTERGENIC      |               |                    |                    |
| SNP_66927_A_90065 | NW_004515773.1 | scaffold239 | 90065                   | GG                              | CC                 | CC               | INTERGENIC      |               |                    |                    |
| SNP_66928_A_90070 | NW_004515773.1 | scaffold239 | 90070                   | CC                              | TT                 | TT               | INTERGENIC      |               |                    |                    |
| SNP_66929_A_96743 | NW_004515773.1 | scaffold239 | 96743                   | GG                              | AA                 | AA               | INTERGENIC      |               |                    |                    |
| SNP_66930_A_96778 | NW_004515773.1 | scaffold239 | 96778                   | GG                              | TT                 | TT               | INTERGENIC      |               |                    |                    |
| SNP_66931_A_96793 | NW_004515773.1 | scaffold239 | 96793                   | AA                              | TT                 | TT               | INTERGENIC      |               |                    |                    |
| SNP_66932_A_97093 | NW_004515773.1 | scaffold239 | 97093                   | AA                              | GG                 | GG               | INTERGENIC      |               |                    |                    |
| SNP_66933_A_97379 | NW_004515773.1 | scaffold239 | 97379                   | CC                              | TT                 | TT               | INTERGENIC      |               |                    |                    |
| SNP_66934_A_97493 | NW_004515773.1 | scaffold239 | 97493                   | GG                              | TT                 | TT               | INTERGENIC      |               |                    |                    |

| SNPs IDs          | Chromosome IDs | Chromosomes | Physical positions (bp) | CDC Frontier (Reference genome) | (Pusa 1103 & HPNB) | (ILWC 46 & LPNB) | Sequence genome | Components of | Gene accession IDs | Putative functions |
|-------------------|----------------|-------------|-------------------------|---------------------------------|--------------------|------------------|-----------------|---------------|--------------------|--------------------|
| SNP_66935_A_97504 | NW_004515773.1 | scaffold239 | 97504                   | CC                              | GG                 | GG               | INTERGENIC      |               |                    |                    |
| SNP_66936_A_97574 | NW_004515773.1 | scaffold239 | 97574                   | CC                              | TT                 | TT               | INTERGENIC      |               |                    |                    |
| SNP_66937_A_97611 | NW_004515773.1 | scaffold239 | 97611                   | TT                              | CC                 | CC               | INTERGENIC      |               |                    |                    |
| SNP_66938_A_97676 | NW_004515773.1 | scaffold239 | 97676                   | TT                              | CC                 | CC               | INTERGENIC      |               |                    |                    |
| SNP_66939_A_97712 | NW_004515773.1 | scaffold239 | 97712                   | AA                              | CC                 | CC               | INTERGENIC      |               |                    |                    |
| SNP_66940_A_97748 | NW_004515773.1 | scaffold239 | 97748                   | CC                              | TT                 | TT               | INTERGENIC      |               |                    |                    |
| SNP_66941_A_97799 | NW_004515773.1 | scaffold239 | 97799                   | GG                              | TT                 | TT               | INTERGENIC      |               |                    |                    |
| SNP_66942_A_97962 | NW_004515773.1 | scaffold239 | 97962                   | TT                              | CC                 | CC               | INTERGENIC      |               |                    |                    |
| SNP_66943_A_97978 | NW_004515773.1 | scaffold239 | 97978                   | CC                              | TT                 | TT               | INTERGENIC      |               |                    |                    |
| SNP_66944_A_98019 | NW_004515773.1 | scaffold239 | 98019                   | TT                              | AA                 | AA               | INTERGENIC      |               |                    |                    |
| SNP_66945_A_98034 | NW_004515773.1 | scaffold239 | 98034                   | CC                              | GG                 | GG               | INTERGENIC      |               |                    |                    |
| SNP_66946_A_98044 | NW_004515773.1 | scaffold239 | 98044                   | GG                              | TT                 | TT               | INTERGENIC      |               |                    |                    |
| SNP_66947_A_98061 | NW_004515773.1 | scaffold239 | 98061                   | TT                              | AA                 | AA               | INTERGENIC      |               |                    |                    |
| SNP_66948_A_98104 | NW_004515773.1 | scaffold239 | 98104                   | CC                              | GG                 | GG               | INTERGENIC      |               |                    |                    |
| SNP_66949_A_98121 | NW_004515773.1 | scaffold239 | 98121                   | GG                              | AA                 | AA               | INTERGENIC      |               |                    |                    |
| SNP_66950_A_98176 | NW_004515773.1 | scaffold239 | 98176                   | TT                              | CC                 | CC               | INTERGENIC      |               |                    |                    |
| SNP_66951_A_98177 | NW_004515773.1 | scaffold239 | 98177                   | GG                              | AA                 | AA               | INTERGENIC      |               |                    |                    |
| SNP_66952_A_98182 | NW_004515773.1 | scaffold239 | 98182                   | AA                              | CC                 | CC               | INTERGENIC      |               |                    |                    |
| SNP_66953_A_98197 | NW_004515773.1 | scaffold239 | 98197                   | CC                              | TT                 | TT               | INTERGENIC      |               |                    |                    |
| SNP_66954_A_98221 | NW_004515773.1 | scaffold239 | 98221                   | GG                              | AA                 | AA               | INTERGENIC      |               |                    |                    |
| SNP_66955_A_98237 | NW_004515773.1 | scaffold239 | 98237                   | TT                              | CC                 | CC               | INTERGENIC      |               |                    |                    |
| SNP_66956_A_98263 | NW_004515773.1 | scaffold239 | 98263                   | AA                              | GG                 | GG               | INTERGENIC      |               |                    |                    |

| SNPs IDs           | Chromosome IDs | Chromosomes | Physical positions (bp) | CDC Frontier (Reference genome) | (Pusa 1103 & HPNB) | (ILWC 46 & LPNB) | Sequence genome | Components of | Gene accession IDs | Putative functions |
|--------------------|----------------|-------------|-------------------------|---------------------------------|--------------------|------------------|-----------------|---------------|--------------------|--------------------|
| SNP_66957_A_98313  | NW_004515773.1 | scaffold239 | 98313                   | CC                              | TT                 | TT               | INTERGENIC      |               |                    |                    |
| SNP_66958_A_98339  | NW_004515773.1 | scaffold239 | 98339                   | TT                              | CC                 | CC               | INTERGENIC      |               |                    |                    |
| SNP_66959_A_98360  | NW_004515773.1 | scaffold239 | 98360                   | TT                              | AA                 | AA               | INTERGENIC      |               |                    |                    |
| SNP_66960_A_98363  | NW_004515773.1 | scaffold239 | 98363                   | GG                              | TT                 | TT               | INTERGENIC      |               |                    |                    |
| SNP_66961_A_98371  | NW_004515773.1 | scaffold239 | 98371                   | TT                              | GG                 | GG               | INTERGENIC      |               |                    |                    |
| SNP_66962_A_98372  | NW_004515773.1 | scaffold239 | 98372                   | TT                              | CC                 | CC               | INTERGENIC      |               |                    |                    |
| SNP_66963_A_98401  | NW_004515773.1 | scaffold239 | 98401                   | TT                              | AA                 | AA               | INTERGENIC      |               |                    |                    |
| SNP_66964_A_98434  | NW_004515773.1 | scaffold239 | 98434                   | GG                              | TT                 | TT               | INTERGENIC      |               |                    |                    |
| SNP_66965_A_98439  | NW_004515773.1 | scaffold239 | 98439                   | TT                              | AA                 | AA               | INTERGENIC      |               |                    |                    |
| SNP_66966_A_98711  | NW_004515773.1 | scaffold239 | 98711                   | GG                              | AA                 | AA               | INTERGENIC      |               |                    |                    |
| SNP_66968_A_109683 | NW_004515773.1 | scaffold239 | 109683                  | AA                              | GG                 | GG               | INTERGENIC      |               |                    |                    |
| SNP_66969_A_109888 | NW_004515773.1 | scaffold239 | 109888                  | GG                              | TT                 | TT               | INTERGENIC      |               |                    |                    |
| SNP_66970_A_109954 | NW_004515773.1 | scaffold239 | 109954                  | CC                              | TT                 | TT               | INTERGENIC      |               |                    |                    |
| SNP_66971_A_2036   | NW_004515774.1 | scaffold240 | 2036                    | GG                              | CC                 | CC               | INTERGENIC      |               |                    |                    |
| SNP_66972_A_4629   | NW_004515774.1 | scaffold240 | 4629                    | CC                              | TT                 | TT               | INTERGENIC      |               |                    |                    |
| SNP_66973_A_38660  | NW_004515774.1 | scaffold240 | 38660                   | GG                              | AA                 | AA               | INTERGENIC      |               |                    |                    |
| SNP_66975_A_69829  | NW_004515774.1 | scaffold240 | 69829                   | TT                              | CC                 | CC               | INTERGENIC      |               |                    |                    |
| SNP_66976_A_73014  | NW_004515774.1 | scaffold240 | 73014                   | TT                              | GG                 | GG               | INTERGENIC      |               |                    |                    |
| SNP_66977_A_73019  | NW_004515774.1 | scaffold240 | 73019                   | GG                              | AA                 | AA               | INTERGENIC      |               |                    |                    |
| SNP_66978_A_73052  | NW_004515774.1 | scaffold240 | 73052                   | CC                              | TT                 | TT               | INTERGENIC      |               |                    |                    |
| SNP_66979_A_73069  | NW_004515774.1 | scaffold240 | 73069                   | TT                              | AA                 | AA               | INTERGENIC      |               |                    |                    |
| SNP_66980_A_73119  | NW_004515774.1 | scaffold240 | 73119                   | AA                              | GG                 | GG               | INTERGENIC      |               |                    |                    |

| SNPs IDs           | Chromosome IDs | Chromosomes | Physical positions (bp) | CDC Frontier (Reference genome) | (Pusa 1103 & HPNB) | (ILWC 46 & LPNB) | Sequence Components of genome | Gene accession IDs | Putative functions           |
|--------------------|----------------|-------------|-------------------------|---------------------------------|--------------------|------------------|-------------------------------|--------------------|------------------------------|
| SNP_66982_A_73525  | NW_004515774.1 | scaffold240 | 73525                   | AA                              | CC                 | CC               | INTERGENIC                    |                    |                              |
| SNP_66983_A_73530  | NW_004515774.1 | scaffold240 | 73530                   | TT                              | AA                 | AA               | INTERGENIC                    |                    |                              |
| SNP_66984_A_73554  | NW_004515774.1 | scaffold240 | 73554                   | TT                              | GG                 | GG               | INTERGENIC                    |                    |                              |
| SNP_66985_A_73557  | NW_004515774.1 | scaffold240 | 73557                   | TT                              | GG                 | GG               | INTERGENIC                    |                    |                              |
| SNP_66986_A_83681  | NW_004515774.1 | scaffold240 | 83681                   | GG                              | AA                 | AA               | INTERGENIC                    |                    |                              |
| SNP_66987_A_94711  | NW_004515774.1 | scaffold240 | 94711                   | AA                              | TT                 | TT               | INTERGENIC                    |                    |                              |
| SNP_66988_A_117062 | NW_004515774.1 | scaffold240 | 117062                  | GG                              | TT                 | TT               | INTERGENIC                    |                    |                              |
| SNP_66989_A_138292 | NW_004515774.1 | scaffold240 | 138292                  | TT                              | GG                 | GG               | URR                           | 101490689          | Unknown function             |
| SNP_66990_A_139332 | NW_004515774.1 | scaffold240 | 139332                  | AA                              | GG                 | GG               | DRR                           | 101491008          | uncharacterized LOC101491008 |
| SNP_66991_A_142329 | NW_004515774.1 | scaffold240 | 142329                  | CC                              | AA                 | AA               | URR                           | 101491008          | uncharacterized LOC101491008 |
| SNP_66992_A_142344 | NW_004515774.1 | scaffold240 | 142344                  | TT                              | GG                 | GG               | URR                           | 101491008          | uncharacterized LOC101491008 |
| SNP_66993_A_142774 | NW_004515774.1 | scaffold240 | 142774                  | CC                              | TT                 | TT               | URR                           | 101491008          | uncharacterized LOC101491008 |
| SNP_66994_A_142776 | NW_004515774.1 | scaffold240 | 142776                  | TT                              | CC                 | CC               | URR                           | 101491008          | uncharacterized LOC101491008 |
| SNP_66995_A_142791 | NW_004515774.1 | scaffold240 | 142791                  | CC                              | TT                 | TT               | URR                           | 101491008          | uncharacterized LOC101491008 |
| SNP_66996_A_142917 | NW_004515774.1 | scaffold240 | 142917                  | TT                              | GG                 | GG               | URR                           | 101491008          | uncharacterized LOC101491008 |
| SNP_66997_A_142920 | NW_004515774.1 | scaffold240 | 142920                  | TT                              | CC                 | CC               | URR                           | 101491008          | uncharacterized LOC101491008 |
| SNP_66998_A_142921 | NW_004515774.1 | scaffold240 | 142921                  | GG                              | AA                 | AA               | URR                           | 101491008          | uncharacterized LOC101491008 |
| SNP_66999_A_142922 | NW_004515774.1 | scaffold240 | 142922                  | AA                              | CC                 | CC               | URR                           | 101491008          | uncharacterized LOC101491008 |
| SNP_67000_A_142944 | NW_004515774.1 | scaffold240 | 142944                  | TT                              | CC                 | CC               | URR                           | 101491008          | uncharacterized LOC101491008 |
| SNP_67001_A_143754 | NW_004515774.1 | scaffold240 | 143754                  | TT                              | AA                 | AA               | INTERGENIC                    |                    |                              |
| SNP_67002_A_143768 | NW_004515774.1 | scaffold240 | 143768                  | CC                              | AA                 | AA               | INTERGENIC                    |                    |                              |
| SNP_67003_A_145027 | NW_004515774.1 | scaffold240 | 145027                  | CC                              | TT                 | TT               | INTERGENIC                    |                    |                              |

| SNPs IDs           | Chromosome IDs | Chromosomes | Physical positions (bp) | CDC Frontier (Reference genome) | (Pusa 1103 & HPNB) | (ILWC 46 & LPNB) | Sequence Components of genome | Gene accession IDs | Putative functions |
|--------------------|----------------|-------------|-------------------------|---------------------------------|--------------------|------------------|-------------------------------|--------------------|--------------------|
| SNP_67004_A_145182 | NW_004515774.1 | scaffold240 | 145182                  | CC                              | TT                 | TT               | URR                           | 101491322          | Unknown function   |
| SNP_67005_A_145185 | NW_004515774.1 | scaffold240 | 145185                  | TT                              | GG                 | GG               | URR                           | 101491322          | Unknown function   |
| SNP_67006_A_147268 | NW_004515774.1 | scaffold240 | 147268                  | AA                              | GG                 | GG               | INTERGENIC                    |                    |                    |
| SNP_67007_A_147677 | NW_004515774.1 | scaffold240 | 147677                  | CC                              | TT                 | TT               | INTERGENIC                    |                    |                    |
| SNP_67008_A_149727 | NW_004515774.1 | scaffold240 | 149727                  | CC                              | TT                 | TT               | INTERGENIC                    |                    |                    |
| SNP_67010_A_150309 | NW_004515774.1 | scaffold240 | 150309                  | AA                              | GG                 | GG               | INTERGENIC                    |                    |                    |
| SNP_67012_A_151401 | NW_004515774.1 | scaffold240 | 151401                  | CC                              | TT                 | TT               | INTERGENIC                    |                    |                    |
| SNP_67013_A_151905 | NW_004515774.1 | scaffold240 | 151905                  | GG                              | AA                 | AA               | INTERGENIC                    |                    |                    |
| SNP_67014_A_153962 | NW_004515774.1 | scaffold240 | 153962                  | TT                              | CC                 | CC               | INTERGENIC                    |                    |                    |
| SNP_67015_A_155587 | NW_004515774.1 | scaffold240 | 155587                  | CC                              | TT                 | TT               | INTERGENIC                    |                    |                    |
| SNP_67017_A_157115 | NW_004515774.1 | scaffold240 | 157115                  | GG                              | TT                 | TT               | INTERGENIC                    |                    |                    |
| SNP_67018_A_157504 | NW_004515774.1 | scaffold240 | 157504                  | GG                              | AA                 | AA               | INTERGENIC                    |                    |                    |
| SNP_67019_A_159079 | NW_004515774.1 | scaffold240 | 159079                  | GG                              | AA                 | AA               | INTERGENIC                    |                    |                    |
| SNP_67020_A_6786   | NW_004515775.1 | scaffold242 | 6786                    | CC                              | TT                 | TT               | INTERGENIC                    |                    |                    |
| SNP_67021_A_7065   | NW_004515775.1 | scaffold242 | 7065                    | TT                              | GG                 | GG               | INTERGENIC                    |                    |                    |
| SNP_67022_A_8474   | NW_004515775.1 | scaffold242 | 8474                    | AA                              | CC                 | CC               | INTERGENIC                    |                    |                    |
| SNP_67023_A_8973   | NW_004515775.1 | scaffold242 | 8973                    | AA                              | CC                 | CC               | INTERGENIC                    |                    |                    |
| SNP_67024_A_9073   | NW_004515775.1 | scaffold242 | 9073                    | TT                              | CC                 | CC               | INTERGENIC                    |                    |                    |
| SNP_67025_A_10971  | NW_004515775.1 | scaffold242 | 10971                   | AA                              | GG                 | GG               | INTERGENIC                    |                    |                    |
| SNP_67026_A_17219  | NW_004515775.1 | scaffold242 | 17219                   | GG                              | CC                 | CC               | INTERGENIC                    |                    |                    |
| SNP_67027_A_17432  | NW_004515775.1 | scaffold242 | 17432                   | GG                              | TT                 | TT               | INTERGENIC                    |                    |                    |
| SNP_67028_A_20665  | NW_004515775.1 | scaffold242 | 20665                   | CC                              | AA                 | AA               | INTERGENIC                    |                    |                    |

| SNPs IDs          | Chromosome IDs | Chromosomes | Physical positions (bp) | CDC Frontier (Reference genome) | (Pusa 1103 & HPNB) | (ILWC 46 & LPNB) | Sequence genome | Components of | Gene accession IDs | Putative functions |
|-------------------|----------------|-------------|-------------------------|---------------------------------|--------------------|------------------|-----------------|---------------|--------------------|--------------------|
| SNP_67029_A_20685 | NW_004515775.1 | scaffold242 | 20685                   | GG                              | CC                 | CC               | INTERGENIC      |               |                    |                    |
| SNP_67030_A_20686 | NW_004515775.1 | scaffold242 | 20686                   | TT                              | AA                 | AA               | INTERGENIC      |               |                    |                    |
| SNP_67031_A_25018 | NW_004515775.1 | scaffold242 | 25018                   | GG                              | CC                 | CC               | INTERGENIC      |               |                    |                    |
| SNP_67032_A_32564 | NW_004515775.1 | scaffold242 | 32564                   | TT                              | CC                 | CC               | INTERGENIC      |               |                    |                    |
| SNP_67033_A_34297 | NW_004515775.1 | scaffold242 | 34297                   | TT                              | CC                 | CC               | INTERGENIC      |               |                    |                    |
| SNP_67034_A_34304 | NW_004515775.1 | scaffold242 | 34304                   | TT                              | CC                 | CC               | INTERGENIC      |               |                    |                    |
| SNP_67035_A_42110 | NW_004515775.1 | scaffold242 | 42110                   | GG                              | AA                 | AA               | INTERGENIC      |               |                    |                    |
| SNP_67037_A_42896 | NW_004515775.1 | scaffold242 | 42896                   | CC                              | AA                 | AA               | INTERGENIC      |               |                    |                    |
| SNP_67038_A_44671 | NW_004515775.1 | scaffold242 | 44671                   | CC                              | GG                 | GG               | INTERGENIC      |               |                    |                    |
| SNP_67039_A_44722 | NW_004515775.1 | scaffold242 | 44722                   | TT                              | CC                 | CC               | INTERGENIC      |               |                    |                    |
| SNP_67040_A_44820 | NW_004515775.1 | scaffold242 | 44820                   | TT                              | CC                 | CC               | INTERGENIC      |               |                    |                    |
| SNP_67041_A_44837 | NW_004515775.1 | scaffold242 | 44837                   | TT                              | GG                 | GG               | INTERGENIC      |               |                    |                    |
| SNP_67042_A_44839 | NW_004515775.1 | scaffold242 | 44839                   | CC                              | AA                 | AA               | INTERGENIC      |               |                    |                    |
| SNP_67043_A_44853 | NW_004515775.1 | scaffold242 | 44853                   | CC                              | AA                 | AA               | INTERGENIC      |               |                    |                    |
| SNP_67044_A_45094 | NW_004515775.1 | scaffold242 | 45094                   | TT                              | CC                 | CC               | INTERGENIC      |               |                    |                    |
| SNP_67045_A_45227 | NW_004515775.1 | scaffold242 | 45227                   | TT                              | GG                 | GG               | INTERGENIC      |               |                    |                    |
| SNP_67046_A_45228 | NW_004515775.1 | scaffold242 | 45228                   | AA                              | GG                 | GG               | INTERGENIC      |               |                    |                    |
| SNP_67047_A_45243 | NW_004515775.1 | scaffold242 | 45243                   | AA                              | GG                 | GG               | INTERGENIC      |               |                    |                    |
| SNP_67048_A_45294 | NW_004515775.1 | scaffold242 | 45294                   | AA                              | GG                 | GG               | INTERGENIC      |               |                    |                    |
| SNP_67049_A_45366 | NW_004515775.1 | scaffold242 | 45366                   | TT                              | CC                 | CC               | INTERGENIC      |               |                    |                    |
| SNP_67050_A_45468 | NW_004515775.1 | scaffold242 | 45468                   | TT                              | AA                 | AA               | INTERGENIC      |               |                    |                    |
| SNP_67051_A_45475 | NW_004515775.1 | scaffold242 | 45475                   | AA                              | GG                 | GG               | INTERGENIC      |               |                    |                    |

| SNPs IDs           | Chromosome IDs | Chromosomes | Physical positions (bp) | CDC Frontier (Reference genome) | (Pusa 1103 & HPNB) | (ILWC 46 & LPNB) | Sequence Components of genome | Gene accession IDs | Putative functions           |
|--------------------|----------------|-------------|-------------------------|---------------------------------|--------------------|------------------|-------------------------------|--------------------|------------------------------|
| SNP_67052_A_45483  | NW_004515775.1 | scaffold242 | 45483                   | GG                              | AA                 | AA               | INTERGENIC                    |                    |                              |
| SNP_67053_A_45485  | NW_004515775.1 | scaffold242 | 45485                   | GG                              | TT                 | TT               | INTERGENIC                    |                    |                              |
| SNP_67054_A_48827  | NW_004515775.1 | scaffold242 | 48827                   | CC                              | TT                 | TT               | INTERGENIC                    |                    |                              |
| SNP_67055_A_49412  | NW_004515775.1 | scaffold242 | 49412                   | GG                              | AA                 | AA               | INTERGENIC                    |                    |                              |
| SNP_67056_A_50356  | NW_004515775.1 | scaffold242 | 50356                   | GG                              | AA                 | AA               | INTERGENIC                    |                    |                              |
| SNP_67057_A_50365  | NW_004515775.1 | scaffold242 | 50365                   | CC                              | GG                 | GG               | INTERGENIC                    |                    |                              |
| SNP_67058_A_50421  | NW_004515775.1 | scaffold242 | 50421                   | AA                              | GG                 | GG               | INTERGENIC                    |                    |                              |
| SNP_67059_A_50426  | NW_004515775.1 | scaffold242 | 50426                   | TT                              | CC                 | CC               | INTERGENIC                    |                    |                              |
| SNP_67060_A_50832  | NW_004515775.1 | scaffold242 | 50832                   | AA                              | GG                 | GG               | INTERGENIC                    |                    |                              |
| SNP_67061_A_50861  | NW_004515775.1 | scaffold242 | 50861                   | TT                              | CC                 | CC               | INTERGENIC                    |                    |                              |
| SNP_67062_A_51027  | NW_004515775.1 | scaffold242 | 51027                   | TT                              | CC                 | CC               | INTERGENIC                    |                    |                              |
| SNP_67063_A_52203  | NW_004515775.1 | scaffold242 | 52203                   | TT                              | CC                 | CC               | INTERGENIC                    |                    |                              |
| SNP_67064_A_52204  | NW_004515775.1 | scaffold242 | 52204                   | AA                              | TT                 | TT               | INTERGENIC                    |                    |                              |
| SNP_67065_A_52210  | NW_004515775.1 | scaffold242 | 52210                   | AA                              | CC                 | CC               | INTERGENIC                    |                    |                              |
| SNP_67067_A_64769  | NW_004515775.1 | scaffold242 | 64769                   | GG                              | AA                 | AA               | INTRON                        | 101491645          | uncharacterized LOC101491645 |
| SNP_67068_A_82394  | NW_004515775.1 | scaffold242 | 82394                   | GG                              | TT                 | TT               | INTERGENIC                    |                    |                              |
| SNP_67069_A_87179  | NW_004515775.1 | scaffold242 | 87179                   | AA                              | GG                 | GG               | INTERGENIC                    |                    |                              |
| SNP_67070_A_103749 | NW_004515775.1 | scaffold242 | 103749                  | CC                              | TT                 | TT               | INTERGENIC                    |                    |                              |
| SNP_67071_A_103775 | NW_004515775.1 | scaffold242 | 103775                  | CC                              | TT                 | TT               | INTERGENIC                    |                    |                              |
| SNP_67072_A_103779 | NW_004515775.1 | scaffold242 | 103779                  | CC                              | AA                 | AA               | INTERGENIC                    |                    |                              |
| SNP_67073_A_103993 | NW_004515775.1 | scaffold242 | 103993                  | AA                              | GG                 | GG               | INTERGENIC                    |                    |                              |
| SNP_67074_A_103998 | NW_004515775.1 | scaffold242 | 103998                  | CC                              | TT                 | TT               | INTERGENIC                    |                    |                              |

| SNPs IDs           | Chromosome IDs | Chromosomes | Physical positions (bp) | CDC Frontier (Reference genome) | (Pusa 1103 & HPNB) | (ILWC 46 & LPNB) | Sequence Components of genome | Gene accession IDs | Putative functions     |
|--------------------|----------------|-------------|-------------------------|---------------------------------|--------------------|------------------|-------------------------------|--------------------|------------------------|
| SNP_67075_A_104050 | NW_004515775.1 | scaffold242 | 104050                  | AA                              | GG                 | GG               | INTERGENIC                    |                    |                        |
| SNP_67076_A_104172 | NW_004515775.1 | scaffold242 | 104172                  | CC                              | AA                 | AA               | INTERGENIC                    |                    |                        |
| SNP_67077_A_105712 | NW_004515775.1 | scaffold242 | 105712                  | TT                              | AA                 | AA               | INTERGENIC                    |                    |                        |
| SNP_67078_A_108197 | NW_004515775.1 | scaffold242 | 108197                  | CC                              | TT                 | TT               | INTERGENIC                    |                    |                        |
| SNP_67079_A_109816 | NW_004515775.1 | scaffold242 | 109816                  | GG                              | TT                 | TT               | INTERGENIC                    |                    |                        |
| SNP_67080_A_112354 | NW_004515775.1 | scaffold242 | 112354                  | CC                              | AA                 | AA               | INTERGENIC                    |                    |                        |
| SNP_67081_A_113989 | NW_004515775.1 | scaffold242 | 113989                  | AA                              | GG                 | GG               | INTERGENIC                    |                    |                        |
| SNP_67082_A_122934 | NW_004515775.1 | scaffold242 | 122934                  | GG                              | CC                 | CC               | INTERGENIC                    |                    |                        |
| SNP_67083_A_123010 | NW_004515775.1 | scaffold242 | 123010                  | CC                              | TT                 | TT               | INTERGENIC                    |                    |                        |
| SNP_67085_A_133212 | NW_004515775.1 | scaffold242 | 133212                  | GG                              | TT                 | TT               | INTERGENIC                    |                    |                        |
| SNP_67086_A_146432 | NW_004515775.1 | scaffold242 | 146432                  | AA                              | TT                 | TT               | INTERGENIC                    |                    |                        |
| SNP_67087_A_155620 | NW_004515775.1 | scaffold242 | 155620                  | AA                              | GG                 | GG               | INTERGENIC                    |                    |                        |
| SNP_67088_A_160286 | NW_004515775.1 | scaffold242 | 160286                  | TT                              | CC                 | CC               | INTRON                        | 101492624          | polygalacturonase-like |
| SNP_67089_A_161394 | NW_004515775.1 | scaffold242 | 161394                  | AA                              | TT                 | TT               | URR                           | 101492624          | polygalacturonase-like |
| SNP_67090_A_171711 | NW_004515775.1 | scaffold242 | 171711                  | CC                              | AA                 | AA               | INTERGENIC                    |                    |                        |
| SNP_67091_A_173086 | NW_004515775.1 | scaffold242 | 173086                  | CC                              | TT                 | TT               | INTERGENIC                    |                    |                        |
| SNP_67092_A_178081 | NW_004515775.1 | scaffold242 | 178081                  | CC                              | GG                 | GG               | INTERGENIC                    |                    |                        |
| SNP_67093_A_181630 | NW_004515775.1 | scaffold242 | 181630                  | GG                              | AA                 | AA               | INTERGENIC                    |                    |                        |
| SNP_67094_A_186122 | NW_004515775.1 | scaffold242 | 186122                  | CC                              | TT                 | TT               | INTERGENIC                    |                    |                        |
| SNP_67095_A_191423 | NW_004515775.1 | scaffold242 | 191423                  | GG                              | AA                 | AA               | INTERGENIC                    |                    |                        |
| SNP_67096_A_191472 | NW_004515775.1 | scaffold242 | 191472                  | AA                              | GG                 | GG               | INTERGENIC                    |                    |                        |
| SNP_67097_A_191552 | NW_004515775.1 | scaffold242 | 191552                  | TT                              | CC                 | CC               | INTERGENIC                    |                    |                        |



| SNPs IDs           | Chromosome IDs | Chromosomes | Physical positions (bp) | CDC Frontier (Reference genome) | (Pusa 1103 & HPNB) | (ILWC 46 & LPNB) | Sequence genome | Components of | Gene accession IDs | Putative functions |
|--------------------|----------------|-------------|-------------------------|---------------------------------|--------------------|------------------|-----------------|---------------|--------------------|--------------------|
| SNP_67098_A_192336 | NW_004515775.1 | scaffold242 | 192336                  | AA                              | TT                 | TT               | INTERGENIC      |               |                    |                    |
| SNP_67099_A_194425 | NW_004515775.1 | scaffold242 | 194425                  | TT                              | CC                 | CC               | INTERGENIC      |               |                    |                    |
| SNP_67100_A_195978 | NW_004515775.1 | scaffold242 | 195978                  | AA                              | TT                 | TT               | INTERGENIC      |               |                    |                    |
| SNP_67101_A_211548 | NW_004515775.1 | scaffold242 | 211548                  | AA                              | GG                 | GG               | INTERGENIC      |               |                    |                    |
| SNP_67102_A_213089 | NW_004515775.1 | scaffold242 | 213089                  | TT                              | AA                 | AA               | INTERGENIC      |               |                    |                    |
| SNP_67103_A_222500 | NW_004515775.1 | scaffold242 | 222500                  | CC                              | AA                 | AA               | INTERGENIC      |               |                    |                    |
| SNP_67105_A_226310 | NW_004515775.1 | scaffold242 | 226310                  | AA                              | GG                 | GG               | INTERGENIC      |               |                    |                    |
| SNP_67106_A_229946 | NW_004515775.1 | scaffold242 | 229946                  | CC                              | AA                 | AA               | INTERGENIC      |               |                    |                    |
| SNP_67107_A_236701 | NW_004515775.1 | scaffold242 | 236701                  | TT                              | AA                 | AA               | INTERGENIC      |               |                    |                    |
| SNP_67109_A_254050 | NW_004515775.1 | scaffold242 | 254050                  | TT                              | CC                 | CC               | INTERGENIC      |               |                    |                    |
| SNP_67110_A_255754 | NW_004515775.1 | scaffold242 | 255754                  | CC                              | AA                 | AA               | INTERGENIC      |               |                    |                    |
| SNP_67111_A_255757 | NW_004515775.1 | scaffold242 | 255757                  | CC                              | TT                 | TT               | INTERGENIC      |               |                    |                    |
| SNP_67113_A_266563 | NW_004515775.1 | scaffold242 | 266563                  | CC                              | TT                 | TT               | INTERGENIC      |               |                    |                    |
| SNP_67114_A_268375 | NW_004515775.1 | scaffold242 | 268375                  | TT                              | CC                 | CC               | INTERGENIC      |               |                    |                    |
| SNP_67115_A_270709 | NW_004515775.1 | scaffold242 | 270709                  | CC                              | AA                 | AA               | INTERGENIC      |               |                    |                    |
| SNP_67116_A_290133 | NW_004515775.1 | scaffold242 | 290133                  | TT                              | AA                 | AA               | INTERGENIC      |               |                    |                    |
| SNP_67117_A_304627 | NW_004515775.1 | scaffold242 | 304627                  | CC                              | TT                 | TT               | INTERGENIC      |               |                    |                    |
| SNP_67118_A_305697 | NW_004515775.1 | scaffold242 | 305697                  | CC                              | TT                 | TT               | INTERGENIC      |               |                    |                    |
| SNP_67119_A_310372 | NW_004515775.1 | scaffold242 | 310372                  | CC                              | GG                 | GG               | INTERGENIC      |               |                    |                    |
| SNP_67120_A_313260 | NW_004515775.1 | scaffold242 | 313260                  | CC                              | GG                 | GG               | INTERGENIC      |               |                    |                    |
| SNP_67121_A_313347 | NW_004515775.1 | scaffold242 | 313347                  | TT                              | CC                 | CC               | INTERGENIC      |               |                    |                    |
| SNP_67122_A_314727 | NW_004515775.1 | scaffold242 | 314727                  | CC                              | AA                 | AA               | INTERGENIC      |               |                    |                    |

| SNPs IDs           | Chromosome IDs | Chromosomes | Physical positions (bp) | CDC Frontier (Reference genome) | (Pusa 1103 & HPNB) | (ILWC 46 & LPNB) | Sequence Components of genome | Gene accession IDs | Putative functions                      |
|--------------------|----------------|-------------|-------------------------|---------------------------------|--------------------|------------------|-------------------------------|--------------------|-----------------------------------------|
| SNP_67123_A_316002 | NW_004515775.1 | scaffold242 | 316002                  | CC                              | AA                 | AA               | INTERGENIC                    |                    |                                         |
| SNP_67125_A_317174 | NW_004515775.1 | scaffold242 | 317174                  | GG                              | AA                 | AA               | INTERGENIC                    |                    |                                         |
| SNP_67126_A_336670 | NW_004515775.1 | scaffold242 | 336670                  | GG                              | AA                 | AA               | INTERGENIC                    |                    |                                         |
| SNP_67127_A_337119 | NW_004515775.1 | scaffold242 | 337119                  | CC                              | TT                 | TT               | INTERGENIC                    |                    |                                         |
| SNP_67128_A_342051 | NW_004515775.1 | scaffold242 | 342051                  | GG                              | AA                 | AA               | INTERGENIC                    |                    |                                         |
| SNP_67129_A_344720 | NW_004515775.1 | scaffold242 | 344720                  | TT                              | AA                 | AA               | INTERGENIC                    |                    |                                         |
| SNP_67130_A_354694 | NW_004515775.1 | scaffold242 | 354694                  | AA                              | TT                 | TT               | INTRON                        | 101497709          | Unknown function                        |
| SNP_67131_A_354716 | NW_004515775.1 | scaffold242 | 354716                  | TT                              | CC                 | CC               | INTRON                        | 101497709          | Unknown function                        |
| SNP_67132_A_355102 | NW_004515775.1 | scaffold242 | 355102                  | GG                              | AA                 | AA               | INTRON                        | 101497709          | Unknown function                        |
| SNP_67133_A_356992 | NW_004515775.1 | scaffold242 | 356992                  | CC                              | AA                 | AA               | URR                           | 101497709          | Unknown function                        |
| SNP_67134_A_357270 | NW_004515775.1 | scaffold242 | 357270                  | AA                              | CC                 | CC               | URR                           | 101497709          | Unknown function                        |
| SNP_67135_A_359774 | NW_004515775.1 | scaffold242 | 359774                  | CC                              | TT                 | TT               | INTERGENIC                    |                    |                                         |
| SNP_67136_A_363285 | NW_004515775.1 | scaffold242 | 363285                  | AA                              | CC                 | CC               | INTERGENIC                    |                    |                                         |
| SNP_67137_A_374227 | NW_004515775.1 | scaffold242 | 374227                  | AA                              | GG                 | GG               | INTERGENIC                    |                    |                                         |
| SNP_67138_A_376435 | NW_004515775.1 | scaffold242 | 376435                  | CC                              | TT                 | TT               | DRR                           | 101498032          | Unknown function                        |
| SNP_67139_A_377088 | NW_004515775.1 | scaffold242 | 377088                  | TT                              | CC                 | CC               | NON_SYNONYMOUS_CODING         | 101498032          | Unknown function                        |
| SNP_67140_A_393667 | NW_004515775.1 | scaffold242 | 393667                  | AA                              | GG                 | GG               | URR                           | 101493713          | calcium-dependent protein kinase 8-like |
| SNP_67141_A_393670 | NW_004515775.1 | scaffold242 | 393670                  | TT                              | GG                 | GG               | URR                           | 101493713          | calcium-dependent protein kinase 8-like |
| SNP_67144_A_399247 | NW_004515775.1 | scaffold242 | 399247                  | CC                              | GG                 | GG               | INTERGENIC                    |                    |                                         |
| SNP_67145_A_402687 | NW_004515775.1 | scaffold242 | 402687                  | GG                              | AA                 | AA               | INTERGENIC                    |                    |                                         |
| SNP_67146_A_402704 | NW_004515775.1 | scaffold242 | 402704                  | CC                              | TT                 | TT               | INTERGENIC                    |                    |                                         |
| SNP_67147_A_405725 | NW_004515775.1 | scaffold242 | 405725                  | AA                              | GG                 | GG               | INTERGENIC                    |                    |                                         |

| SNPs IDs           | Chromosome IDs | Chromosomes | Physical positions (bp) | CDC Frontier (Reference genome) | (Pusa 1103 & HPNB) | (ILWC 46 & LPNB) | Sequence Components of genome | Gene accession IDs | Putative functions                                                        |
|--------------------|----------------|-------------|-------------------------|---------------------------------|--------------------|------------------|-------------------------------|--------------------|---------------------------------------------------------------------------|
| SNP_67148_A_405929 | NW_004515775.1 | scaffold242 | 405929                  | CC                              | TT                 | TT               | INTERGENIC                    |                    |                                                                           |
| SNP_67149_A_405939 | NW_004515775.1 | scaffold242 | 405939                  | CC                              | TT                 | TT               | INTERGENIC                    |                    |                                                                           |
| SNP_67150_A_411892 | NW_004515775.1 | scaffold242 | 411892                  | AA                              | TT                 | TT               | INTERGENIC                    |                    |                                                                           |
| SNP_67151_A_412167 | NW_004515775.1 | scaffold242 | 412167                  | TT                              | CC                 | CC               | INTERGENIC                    |                    |                                                                           |
| SNP_67152_A_413659 | NW_004515775.1 | scaffold242 | 413659                  | CC                              | TT                 | TT               | INTERGENIC                    |                    |                                                                           |
| SNP_67154_A_416595 | NW_004515775.1 | scaffold242 | 416595                  | AA                              | GG                 | GG               | INTERGENIC                    |                    |                                                                           |
| SNP_67155_A_418292 | NW_004515775.1 | scaffold242 | 418292                  | AA                              | GG                 | GG               | INTERGENIC                    |                    |                                                                           |
| SNP_67156_A_418611 | NW_004515775.1 | scaffold242 | 418611                  | CC                              | AA                 | AA               | INTERGENIC                    |                    |                                                                           |
| SNP_67157_A_423019 | NW_004515775.1 | scaffold242 | 423019                  | TT                              | CC                 | CC               | INTERGENIC                    |                    |                                                                           |
| SNP_67158_A_423715 | NW_004515775.1 | scaffold242 | 423715                  | TT                              | CC                 | CC               | INTERGENIC                    |                    |                                                                           |
| SNP_67159_A_424788 | NW_004515775.1 | scaffold242 | 424788                  | AA                              | GG                 | GG               | INTERGENIC                    |                    |                                                                           |
| SNP_67160_A_424799 | NW_004515775.1 | scaffold242 | 424799                  | TT                              | CC                 | CC               | INTERGENIC                    |                    |                                                                           |
| SNP_67161_A_429851 | NW_004515775.1 | scaffold242 | 429851                  | CC                              | AA                 | AA               | INTERGENIC                    |                    |                                                                           |
| SNP_67162_A_430717 | NW_004515775.1 | scaffold242 | 430717                  | CC                              | GG                 | GG               | INTERGENIC                    |                    |                                                                           |
| SNP_67164_A_440782 | NW_004515775.1 | scaffold242 | 440782                  | TT                              | AA                 | AA               | DRR                           | 101498363          | Unknown function                                                          |
| SNP_67165_A_446810 | NW_004515775.1 | scaffold242 | 446810                  | GG                              | TT                 | TT               | INTERGENIC                    |                    |                                                                           |
| SNP_67166_A_450172 | NW_004515775.1 | scaffold242 | 450172                  | GG                              | AA                 | AA               | INTERGENIC                    |                    |                                                                           |
| SNP_67167_A_450173 | NW_004515775.1 | scaffold242 | 450173                  | CC                              | GG                 | GG               | INTERGENIC                    |                    |                                                                           |
| SNP_67168_A_455617 | NW_004515775.1 | scaffold242 | 455617                  | GG                              | AA                 | AA               | INTERGENIC                    |                    |                                                                           |
| SNP_67170_A_464891 | NW_004515775.1 | scaffold242 | 464891                  | GG                              | AA                 | AA               | URR                           | 101498704          | pentatricopeptide repeat-containing protein At1g74600, chloroplastic-like |
| SNP_67171_A_470387 | NW_004515775.1 | scaffold242 | 470387                  | CC                              | AA                 | AA               | URR                           | 101494875          | uncharacterized protein At3g61260-like                                    |
| SNP_67172_A_484596 | NW_004515775.1 | scaffold242 | 484596                  | CC                              | TT                 | TT               | INTERGENIC                    |                    |                                                                           |

| SNPs IDs           | Chromosome IDs | Chromosomes | Physical positions (bp) | CDC Frontier (Reference genome) | (Pusa 1103 & HPNB) | (ILWC 46 & LPNB) | Sequence Components of genome | Gene accession IDs | Putative functions |
|--------------------|----------------|-------------|-------------------------|---------------------------------|--------------------|------------------|-------------------------------|--------------------|--------------------|
| SNP_67173_A_493279 | NW_004515775.1 | scaffold242 | 493279                  | AA                              | TT                 | TT               | INTERGENIC                    |                    |                    |
| SNP_67174_A_493986 | NW_004515775.1 | scaffold242 | 493986                  | CC                              | TT                 | TT               | INTERGENIC                    |                    |                    |
| SNP_67177_A_495802 | NW_004515775.1 | scaffold242 | 495802                  | CC                              | TT                 | TT               | DRR                           | 101499658          | Unknown function   |
| SNP_67178_A_495803 | NW_004515775.1 | scaffold242 | 495803                  | AA                              | TT                 | TT               | DRR                           | 101499658          | Unknown function   |
| SNP_67179_A_506286 | NW_004515775.1 | scaffold242 | 506286                  | AA                              | GG                 | GG               | INTERGENIC                    |                    |                    |
| SNP_67180_A_506292 | NW_004515775.1 | scaffold242 | 506292                  | AA                              | GG                 | GG               | INTERGENIC                    |                    |                    |
| SNP_67181_A_506296 | NW_004515775.1 | scaffold242 | 506296                  | AA                              | CC                 | CC               | INTERGENIC                    |                    |                    |
| SNP_67184_A_513602 | NW_004515775.1 | scaffold242 | 513602                  | GG                              | TT                 | TT               | INTERGENIC                    |                    |                    |
| SNP_67185_A_514747 | NW_004515775.1 | scaffold242 | 514747                  | TT                              | GG                 | GG               | INTERGENIC                    |                    |                    |
| SNP_67186_A_518735 | NW_004515775.1 | scaffold242 | 518735                  | TT                              | CC                 | CC               | INTERGENIC                    |                    |                    |
| SNP_67187_A_519115 | NW_004515775.1 | scaffold242 | 519115                  | TT                              | GG                 | GG               | INTERGENIC                    |                    |                    |
| SNP_67188_A_519573 | NW_004515775.1 | scaffold242 | 519573                  | GG                              | TT                 | TT               | INTERGENIC                    |                    |                    |
| SNP_67189_A_523419 | NW_004515775.1 | scaffold242 | 523419                  | GG                              | AA                 | AA               | INTERGENIC                    |                    |                    |
| SNP_67190_A_523622 | NW_004515775.1 | scaffold242 | 523622                  | GG                              | TT                 | TT               | INTERGENIC                    |                    |                    |
| SNP_67192_A_531787 | NW_004515775.1 | scaffold242 | 531787                  | GG                              | AA                 | AA               | INTERGENIC                    |                    |                    |
| SNP_67193_A_531797 | NW_004515775.1 | scaffold242 | 531797                  | GG                              | AA                 | AA               | INTERGENIC                    |                    |                    |
| SNP_67194_A_531999 | NW_004515775.1 | scaffold242 | 531999                  | AA                              | GG                 | GG               | INTERGENIC                    |                    |                    |
| SNP_67195_A_534540 | NW_004515775.1 | scaffold242 | 534540                  | GG                              | AA                 | AA               | INTERGENIC                    |                    |                    |
| SNP_67196_A_534553 | NW_004515775.1 | scaffold242 | 534553                  | TT                              | GG                 | GG               | INTERGENIC                    |                    |                    |
| SNP_67197_A_534555 | NW_004515775.1 | scaffold242 | 534555                  | GG                              | AA                 | AA               | INTERGENIC                    |                    |                    |
| SNP_67198_A_534561 | NW_004515775.1 | scaffold242 | 534561                  | AA                              | GG                 | GG               | INTERGENIC                    |                    |                    |
| SNP_67199_A_535015 | NW_004515775.1 | scaffold242 | 535015                  | AA                              | TT                 | TT               | INTERGENIC                    |                    |                    |

| SNPs IDs           | Chromosome IDs | Chromosomes | Physical positions (bp) | CDC Frontier genome (Reference genome) | (Pusa 1103 & HPNB) | (ILWC 46 & LPNB) | Sequence genome | Components of | Gene accession IDs | Putative functions |
|--------------------|----------------|-------------|-------------------------|----------------------------------------|--------------------|------------------|-----------------|---------------|--------------------|--------------------|
| SNP_67200_A_536822 | NW_004515775.1 | scaffold242 | 536822                  | GG                                     | AA                 | AA               | INTERGENIC      |               |                    |                    |
| SNP_67201_A_536823 | NW_004515775.1 | scaffold242 | 536823                  | GG                                     | AA                 | AA               | INTERGENIC      |               |                    |                    |
| SNP_67202_A_536902 | NW_004515775.1 | scaffold242 | 536902                  | CC                                     | AA                 | AA               | INTERGENIC      |               |                    |                    |
| SNP_67203_A_536915 | NW_004515775.1 | scaffold242 | 536915                  | GG                                     | AA                 | AA               | INTERGENIC      |               |                    |                    |
| SNP_67204_A_537327 | NW_004515775.1 | scaffold242 | 537327                  | GG                                     | AA                 | AA               | INTERGENIC      |               |                    |                    |
| SNP_67205_A_538074 | NW_004515775.1 | scaffold242 | 538074                  | GG                                     | AA                 | AA               | INTERGENIC      |               |                    |                    |
| SNP_67207_A_539645 | NW_004515775.1 | scaffold242 | 539645                  | AA                                     | CC                 | CC               | INTERGENIC      |               |                    |                    |
| SNP_67208_A_539828 | NW_004515775.1 | scaffold242 | 539828                  | TT                                     | CC                 | CC               | INTERGENIC      |               |                    |                    |
| SNP_67209_A_539944 | NW_004515775.1 | scaffold242 | 539944                  | GG                                     | TT                 | TT               | INTERGENIC      |               |                    |                    |
| SNP_67210_A_540099 | NW_004515775.1 | scaffold242 | 540099                  | CC                                     | TT                 | TT               | INTERGENIC      |               |                    |                    |
| SNP_67211_A_540119 | NW_004515775.1 | scaffold242 | 540119                  | AA                                     | GG                 | GG               | INTERGENIC      |               |                    |                    |
| SNP_67212_A_540683 | NW_004515775.1 | scaffold242 | 540683                  | AA                                     | TT                 | TT               | INTERGENIC      |               |                    |                    |
| SNP_67213_A_546056 | NW_004515775.1 | scaffold242 | 546056                  | TT                                     | AA                 | AA               | INTERGENIC      |               |                    |                    |
| SNP_67214_A_553024 | NW_004515775.1 | scaffold242 | 553024                  | GG                                     | TT                 | TT               | INTERGENIC      |               |                    |                    |
| SNP_67215_A_553458 | NW_004515775.1 | scaffold242 | 553458                  | GG                                     | AA                 | AA               | INTERGENIC      |               |                    |                    |
| SNP_67216_A_562110 | NW_004515775.1 | scaffold242 | 562110                  | TT                                     | CC                 | CC               | INTERGENIC      |               |                    |                    |
| SNP_67217_A_578605 | NW_004515775.1 | scaffold242 | 578605                  | AA                                     | GG                 | GG               | INTERGENIC      |               |                    |                    |
| SNP_67219_A_598819 | NW_004515775.1 | scaffold242 | 598819                  | TT                                     | AA                 | AA               | INTERGENIC      |               |                    |                    |
| SNP_67220_A_601809 | NW_004515775.1 | scaffold242 | 601809                  | CC                                     | TT                 | TT               | DRR             | 101501260     | Unknown function   |                    |
| SNP_67221_A_603518 | NW_004515775.1 | scaffold242 | 603518                  | AA                                     | CC                 | CC               | URR             | 101501260     | Unknown function   |                    |
| SNP_67222_A_603540 | NW_004515775.1 | scaffold242 | 603540                  | CC                                     | TT                 | TT               | URR             | 101501260     | Unknown function   |                    |
| SNP_67223_A_604019 | NW_004515775.1 | scaffold242 | 604019                  | TT                                     | CC                 | CC               | URR             | 101501260     | Unknown function   |                    |

| SNPs IDs           | Chromosome IDs | Chromosomes | Physical positions (bp) | CDC Frontier (Reference genome) | (Pusa 1103 & HPNB) | (ILWC 46 & LPNB) | Sequence Components of genome | Gene accession IDs | Putative functions |
|--------------------|----------------|-------------|-------------------------|---------------------------------|--------------------|------------------|-------------------------------|--------------------|--------------------|
| SNP_67224_A_604497 | NW_004515775.1 | scaffold242 | 604497                  | AA                              | TT                 | TT               | URR                           | 101501260          | Unknown function   |
| SNP_67225_A_606313 | NW_004515775.1 | scaffold242 | 606313                  | GG                              | AA                 | AA               | INTERGENIC                    |                    |                    |
| SNP_67226_A_606329 | NW_004515775.1 | scaffold242 | 606329                  | GG                              | AA                 | AA               | INTERGENIC                    |                    |                    |
| SNP_67227_A_606374 | NW_004515775.1 | scaffold242 | 606374                  | CC                              | TT                 | TT               | INTERGENIC                    |                    |                    |
| SNP_67228_A_606506 | NW_004515775.1 | scaffold242 | 606506                  | CC                              | TT                 | TT               | INTERGENIC                    |                    |                    |
| SNP_67229_A_606508 | NW_004515775.1 | scaffold242 | 606508                  | AA                              | GG                 | GG               | INTERGENIC                    |                    |                    |
| SNP_67230_A_607768 | NW_004515775.1 | scaffold242 | 607768                  | GG                              | AA                 | AA               | INTERGENIC                    |                    |                    |
| SNP_67231_A_610622 | NW_004515775.1 | scaffold242 | 610622                  | AA                              | CC                 | CC               | INTERGENIC                    |                    |                    |
| SNP_67232_A_610862 | NW_004515775.1 | scaffold242 | 610862                  | CC                              | TT                 | TT               | INTERGENIC                    |                    |                    |
| SNP_67233_A_612678 | NW_004515775.1 | scaffold242 | 612678                  | AA                              | TT                 | TT               | INTERGENIC                    |                    |                    |
| SNP_67234_A_612707 | NW_004515775.1 | scaffold242 | 612707                  | GG                              | AA                 | AA               | INTERGENIC                    |                    |                    |
| SNP_67235_A_613290 | NW_004515775.1 | scaffold242 | 613290                  | GG                              | AA                 | AA               | INTERGENIC                    |                    |                    |
| SNP_67236_A_613298 | NW_004515775.1 | scaffold242 | 613298                  | CC                              | TT                 | TT               | INTERGENIC                    |                    |                    |
| SNP_67237_A_614799 | NW_004515775.1 | scaffold242 | 614799                  | TT                              | CC                 | CC               | INTERGENIC                    |                    |                    |
| SNP_67238_A_614989 | NW_004515775.1 | scaffold242 | 614989                  | TT                              | CC                 | CC               | INTERGENIC                    |                    |                    |
| SNP_67239_A_615259 | NW_004515775.1 | scaffold242 | 615259                  | CC                              | TT                 | TT               | INTERGENIC                    |                    |                    |
| SNP_67240_A_618328 | NW_004515775.1 | scaffold242 | 618328                  | CC                              | TT                 | TT               | INTERGENIC                    |                    |                    |
| SNP_67241_A_618584 | NW_004515775.1 | scaffold242 | 618584                  | AA                              | GG                 | GG               | INTERGENIC                    |                    |                    |
| SNP_67242_A_618617 | NW_004515775.1 | scaffold242 | 618617                  | AA                              | GG                 | GG               | INTERGENIC                    |                    |                    |
| SNP_67243_A_618646 | NW_004515775.1 | scaffold242 | 618646                  | TT                              | CC                 | CC               | INTERGENIC                    |                    |                    |
| SNP_67244_A_624581 | NW_004515775.1 | scaffold242 | 624581                  | AA                              | GG                 | GG               | INTERGENIC                    |                    |                    |
| SNP_67245_A_624631 | NW_004515775.1 | scaffold242 | 624631                  | AA                              | GG                 | GG               | INTERGENIC                    |                    |                    |

| SNPs IDs           | Chromosome IDs | Chromosomes | Physical positions (bp) | CDC Frontier (Reference genome) | (Pusa 1103 & HPNB) | (ILWC 46 & LPNB) | Sequence Components of genome | Gene accession IDs | Putative functions                                  |
|--------------------|----------------|-------------|-------------------------|---------------------------------|--------------------|------------------|-------------------------------|--------------------|-----------------------------------------------------|
| SNP_67246_A_624679 | NW_004515775.1 | scaffold242 | 624679                  | GG                              | AA                 | AA               | INTERGENIC                    |                    |                                                     |
| SNP_67247_A_624707 | NW_004515775.1 | scaffold242 | 624707                  | AA                              | GG                 | GG               | INTERGENIC                    |                    |                                                     |
| SNP_67248_A_624901 | NW_004515775.1 | scaffold242 | 624901                  | CC                              | AA                 | AA               | INTERGENIC                    |                    |                                                     |
| SNP_67249_A_624983 | NW_004515775.1 | scaffold242 | 624983                  | TT                              | CC                 | CC               | INTERGENIC                    |                    |                                                     |
| SNP_67250_A_625021 | NW_004515775.1 | scaffold242 | 625021                  | TT                              | CC                 | CC               | INTERGENIC                    |                    |                                                     |
| SNP_67251_A_625042 | NW_004515775.1 | scaffold242 | 625042                  | AA                              | GG                 | GG               | INTERGENIC                    |                    |                                                     |
| SNP_67253_A_629676 | NW_004515775.1 | scaffold242 | 629676                  | CC                              | TT                 | TT               | DRR                           | 101495199          | putative disease resistance protein RGA3            |
| SNP_67254_A_633742 | NW_004515775.1 | scaffold242 | 633742                  | TT                              | AA                 | AA               | URR                           | 101495199          | putative disease resistance protein RGA3            |
| SNP_67255_A_633768 | NW_004515775.1 | scaffold242 | 633768                  | CC                              | TT                 | TT               | URR                           | 101495199          | putative disease resistance protein RGA3            |
| SNP_67256_A_638769 | NW_004515775.1 | scaffold242 | 638769                  | AA                              | TT                 | TT               | INTERGENIC                    |                    |                                                     |
| SNP_67257_A_642555 | NW_004515775.1 | scaffold242 | 642555                  | CC                              | AA                 | AA               | INTERGENIC                    |                    |                                                     |
| SNP_67259_A_645855 | NW_004515775.1 | scaffold242 | 645855                  | AA                              | TT                 | TT               | INTERGENIC                    |                    |                                                     |
| SNP_67260_A_653639 | NW_004515775.1 | scaffold242 | 653639                  | GG                              | AA                 | AA               | INTERGENIC                    |                    |                                                     |
| SNP_67261_A_669341 | NW_004515775.1 | scaffold242 | 669341                  | GG                              | AA                 | AA               | INTERGENIC                    |                    |                                                     |
| SNP_67262_A_670917 | NW_004515775.1 | scaffold242 | 670917                  | CC                              | TT                 | TT               | INTERGENIC                    |                    |                                                     |
| SNP_67263_A_672872 | NW_004515775.1 | scaffold242 | 672872                  | AA                              | GG                 | GG               | INTERGENIC                    |                    |                                                     |
| SNP_67264_A_673137 | NW_004515775.1 | scaffold242 | 673137                  | GG                              | CC                 | CC               | INTERGENIC                    |                    |                                                     |
| SNP_67265_A_675594 | NW_004515775.1 | scaffold242 | 675594                  | CC                              | TT                 | TT               | DRR                           | 101501570          | cyclin-dependent protein kinase inhibitor SMR3-like |
| SNP_67266_A_679051 | NW_004515775.1 | scaffold242 | 679051                  | CC                              | TT                 | TT               | INTERGENIC                    |                    |                                                     |
| SNP_67269_A_697961 | NW_004515775.1 | scaffold242 | 697961                  | AA                              | GG                 | GG               | URR                           | 101495522          | guanylate kinase 1-like                             |
| SNP_67270_A_701350 | NW_004515775.1 | scaffold242 | 701350                  | CC                              | TT                 | TT               | INTERGENIC                    |                    |                                                     |
| SNP_67271_A_701668 | NW_004515775.1 | scaffold242 | 701668                  | CC                              | TT                 | TT               | INTERGENIC                    |                    |                                                     |

| SNPs IDs           | Chromosome IDs | Chromosomes | Physical positions (bp) | CDC Frontier (Reference genome) | (Pusa 1103 & HPNB) | (ILWC 46 & LPNB) | Sequence Components of genome | Gene accession IDs | Putative functions                       |
|--------------------|----------------|-------------|-------------------------|---------------------------------|--------------------|------------------|-------------------------------|--------------------|------------------------------------------|
| SNP_67274_A_710783 | NW_004515775.1 | scaffold242 | 710783                  | AA                              | GG                 | GG               | URR                           | 101496073          | putative disease resistance protein RGA3 |
| SNP_67275_A_718091 | NW_004515775.1 | scaffold242 | 718091                  | AA                              | GG                 | GG               | INTERGENIC                    |                    |                                          |
| SNP_67276_A_718837 | NW_004515775.1 | scaffold242 | 718837                  | AA                              | GG                 | GG               | INTERGENIC                    |                    |                                          |
| SNP_67277_A_718838 | NW_004515775.1 | scaffold242 | 718838                  | CC                              | TT                 | TT               | INTERGENIC                    |                    |                                          |
| SNP_67280_A_722129 | NW_004515775.1 | scaffold242 | 722129                  | AA                              | TT                 | TT               | INTERGENIC                    |                    |                                          |
| SNP_67281_A_727133 | NW_004515775.1 | scaffold242 | 727133                  | GG                              | TT                 | TT               | INTERGENIC                    |                    |                                          |
| SNP_67282_A_729978 | NW_004515775.1 | scaffold242 | 729978                  | TT                              | CC                 | CC               | INTERGENIC                    |                    |                                          |
| SNP_67283_A_730802 | NW_004515775.1 | scaffold242 | 730802                  | AA                              | GG                 | GG               | INTERGENIC                    |                    |                                          |
| SNP_67284_A_732712 | NW_004515775.1 | scaffold242 | 732712                  | AA                              | GG                 | GG               | INTERGENIC                    |                    |                                          |
| SNP_67285_A_735409 | NW_004515775.1 | scaffold242 | 735409                  | AA                              | TT                 | TT               | INTERGENIC                    |                    |                                          |
| SNP_67286_A_735417 | NW_004515775.1 | scaffold242 | 735417                  | CC                              | TT                 | TT               | INTERGENIC                    |                    |                                          |
| SNP_67288_A_735830 | NW_004515775.1 | scaffold242 | 735830                  | TT                              | AA                 | AA               | INTERGENIC                    |                    |                                          |
| SNP_67289_A_735833 | NW_004515775.1 | scaffold242 | 735833                  | TT                              | CC                 | CC               | INTERGENIC                    |                    |                                          |
| SNP_67290_A_740600 | NW_004515775.1 | scaffold242 | 740600                  | TT                              | GG                 | GG               | INTERGENIC                    |                    |                                          |
| SNP_67291_A_740936 | NW_004515775.1 | scaffold242 | 740936                  | AA                              | TT                 | TT               | INTERGENIC                    |                    |                                          |
| SNP_67292_A_761912 | NW_004515775.1 | scaffold242 | 761912                  | CC                              | TT                 | TT               | INTERGENIC                    |                    |                                          |
| SNP_67293_A_764574 | NW_004515775.1 | scaffold242 | 764574                  | AA                              | GG                 | GG               | INTERGENIC                    |                    |                                          |
| SNP_67294_A_765927 | NW_004515775.1 | scaffold242 | 765927                  | AA                              | GG                 | GG               | INTERGENIC                    |                    |                                          |
| SNP_67295_A_769990 | NW_004515775.1 | scaffold242 | 769990                  | AA                              | CC                 | CC               | INTERGENIC                    |                    |                                          |
| SNP_67298_A_771814 | NW_004515775.1 | scaffold242 | 771814                  | GG                              | CC                 | CC               | INTERGENIC                    |                    |                                          |
| SNP_67299_A_772190 | NW_004515775.1 | scaffold242 | 772190                  | GG                              | CC                 | CC               | INTERGENIC                    |                    |                                          |
| SNP_67300_A_772279 | NW_004515775.1 | scaffold242 | 772279                  | GG                              | AA                 | AA               | INTERGENIC                    |                    |                                          |



| SNPs IDs           | Chromosome IDs | Chromosomes | Physical positions (bp) | CDC Frontier (Reference genome) | (Pusa 1103 & HPNB) | (ILWC 46 & LPNB) | Sequence Components of genome | Gene accession IDs | Putative functions |
|--------------------|----------------|-------------|-------------------------|---------------------------------|--------------------|------------------|-------------------------------|--------------------|--------------------|
| SNP_67301_A_772350 | NW_004515775.1 | scaffold242 | 772350                  | CC                              | AA                 | AA               | INTERGENIC                    |                    |                    |
| SNP_67302_A_775747 | NW_004515775.1 | scaffold242 | 775747                  | AA                              | CC                 | CC               | INTERGENIC                    |                    |                    |
| SNP_67303_A_785100 | NW_004515775.1 | scaffold242 | 785100                  | TT                              | GG                 | GG               | INTRON                        | 101502208          | Unknown function   |
| SNP_67304_A_786973 | NW_004515775.1 | scaffold242 | 786973                  | CC                              | TT                 | TT               | INTRON                        | 101502208          | Unknown function   |
| SNP_67305_A_787576 | NW_004515775.1 | scaffold242 | 787576                  | GG                              | AA                 | AA               | INTRON                        | 101502208          | Unknown function   |
| SNP_67306_A_792864 | NW_004515775.1 | scaffold242 | 792864                  | GG                              | TT                 | TT               | INTERGENIC                    |                    |                    |
| SNP_67307_A_801521 | NW_004515775.1 | scaffold242 | 801521                  | CC                              | AA                 | AA               | INTERGENIC                    |                    |                    |
| SNP_67308_A_801849 | NW_004515775.1 | scaffold242 | 801849                  | CC                              | GG                 | GG               | INTERGENIC                    |                    |                    |
| SNP_67310_A_802896 | NW_004515775.1 | scaffold242 | 802896                  | TT                              | CC                 | CC               | INTERGENIC                    |                    |                    |
| SNP_67311_A_802947 | NW_004515775.1 | scaffold242 | 802947                  | CC                              | AA                 | AA               | INTERGENIC                    |                    |                    |
| SNP_67312_A_803008 | NW_004515775.1 | scaffold242 | 803008                  | GG                              | AA                 | AA               | INTERGENIC                    |                    |                    |
| SNP_67313_A_803019 | NW_004515775.1 | scaffold242 | 803019                  | GG                              | AA                 | AA               | INTERGENIC                    |                    |                    |
| SNP_67314_A_803082 | NW_004515775.1 | scaffold242 | 803082                  | TT                              | CC                 | CC               | INTERGENIC                    |                    |                    |
| SNP_67317_A_804360 | NW_004515775.1 | scaffold242 | 804360                  | GG                              | AA                 | AA               | INTERGENIC                    |                    |                    |
| SNP_67318_A_804366 | NW_004515775.1 | scaffold242 | 804366                  | GG                              | CC                 | CC               | INTERGENIC                    |                    |                    |
| SNP_67319_A_804668 | NW_004515775.1 | scaffold242 | 804668                  | TT                              | CC                 | CC               | INTERGENIC                    |                    |                    |
| SNP_67320_A_804939 | NW_004515775.1 | scaffold242 | 804939                  | CC                              | AA                 | AA               | INTERGENIC                    |                    |                    |
| SNP_67321_A_804968 | NW_004515775.1 | scaffold242 | 804968                  | AA                              | GG                 | GG               | INTERGENIC                    |                    |                    |
| SNP_67322_A_804978 | NW_004515775.1 | scaffold242 | 804978                  | TT                              | AA                 | AA               | INTERGENIC                    |                    |                    |
| SNP_67323_A_805333 | NW_004515775.1 | scaffold242 | 805333                  | GG                              | TT                 | TT               | INTERGENIC                    |                    |                    |
| SNP_67324_A_809787 | NW_004515775.1 | scaffold242 | 809787                  | CC                              | TT                 | TT               | INTERGENIC                    |                    |                    |
| SNP_67325_A_809881 | NW_004515775.1 | scaffold242 | 809881                  | CC                              | TT                 | TT               | INTERGENIC                    |                    |                    |

| SNPs IDs           | Chromosome IDs | Chromosomes | Physical positions (bp) | CDC Frontier (Reference genome) | (Pusa 1103 & HPNB) | (ILWC 46 & LPNB) | Sequence genome | Components of | Gene accession IDs | Putative functions |
|--------------------|----------------|-------------|-------------------------|---------------------------------|--------------------|------------------|-----------------|---------------|--------------------|--------------------|
| SNP_67326_A_811024 | NW_004515775.1 | scaffold242 | 811024                  | CC                              | AA                 | AA               | INTERGENIC      |               |                    |                    |
| SNP_67327_A_811165 | NW_004515775.1 | scaffold242 | 811165                  | CC                              | AA                 | AA               | INTERGENIC      |               |                    |                    |
| SNP_67328_A_811639 | NW_004515775.1 | scaffold242 | 811639                  | TT                              | CC                 | CC               | INTERGENIC      |               |                    |                    |
| SNP_67329_A_811703 | NW_004515775.1 | scaffold242 | 811703                  | AA                              | CC                 | CC               | INTERGENIC      |               |                    |                    |
| SNP_67330_A_811831 | NW_004515775.1 | scaffold242 | 811831                  | CC                              | AA                 | AA               | INTERGENIC      |               |                    |                    |
| SNP_67331_A_813672 | NW_004515775.1 | scaffold242 | 813672                  | GG                              | TT                 | TT               | INTERGENIC      |               |                    |                    |
| SNP_67332_A_813886 | NW_004515775.1 | scaffold242 | 813886                  | CC                              | TT                 | TT               | INTERGENIC      |               |                    |                    |
| SNP_67333_A_814154 | NW_004515775.1 | scaffold242 | 814154                  | AA                              | GG                 | GG               | INTERGENIC      |               |                    |                    |
| SNP_67334_A_815978 | NW_004515775.1 | scaffold242 | 815978                  | CC                              | TT                 | TT               | INTERGENIC      |               |                    |                    |
| SNP_67335_A_816820 | NW_004515775.1 | scaffold242 | 816820                  | CC                              | TT                 | TT               | INTERGENIC      |               |                    |                    |
| SNP_67336_A_820672 | NW_004515775.1 | scaffold242 | 820672                  | TT                              | CC                 | CC               | INTERGENIC      |               |                    |                    |
| SNP_67337_A_820885 | NW_004515775.1 | scaffold242 | 820885                  | GG                              | CC                 | CC               | INTERGENIC      |               |                    |                    |
| SNP_67338_A_820907 | NW_004515775.1 | scaffold242 | 820907                  | GG                              | TT                 | TT               | INTERGENIC      |               |                    |                    |
| SNP_67339_A_407    | NW_004515776.1 | scaffold243 | 407                     | AA                              | GG                 | GG               | INTERGENIC      |               |                    |                    |
| SNP_67340_A_442    | NW_004515776.1 | scaffold243 | 442                     | CC                              | AA                 | AA               | INTERGENIC      |               |                    |                    |
| SNP_67341_A_599    | NW_004515777.1 | scaffold244 | 599                     | TT                              | GG                 | GG               | INTERGENIC      |               |                    |                    |
| SNP_67342_A_636    | NW_004515777.1 | scaffold244 | 636                     | AA                              | TT                 | TT               | INTERGENIC      |               |                    |                    |
| SNP_67343_A_681    | NW_004515777.1 | scaffold244 | 681                     | CC                              | TT                 | TT               | INTERGENIC      |               |                    |                    |
| SNP_67344_A_838    | NW_004515777.1 | scaffold244 | 838                     | CC                              | TT                 | TT               | INTERGENIC      |               |                    |                    |
| SNP_67345_A_14245  | NW_004515777.1 | scaffold244 | 14245                   | TT                              | CC                 | CC               | INTERGENIC      |               |                    |                    |
| SNP_67346_A_461    | NW_004515778.1 | scaffold246 | 461                     | GG                              | TT                 | TT               | INTERGENIC      |               |                    |                    |
| SNP_67347_A_1255   | NW_004515778.1 | scaffold246 | 1255                    | CC                              | GG                 | GG               | INTERGENIC      |               |                    |                    |

| SNPs IDs          | Chromosome IDs | Chromosomes | Physical positions (bp) | CDC Frontier (Reference genome) | (Pusa 1103 & HPNB) | (ILWC 46 & LPNB) | Sequence genome | Components of | Gene accession IDs | Putative functions |
|-------------------|----------------|-------------|-------------------------|---------------------------------|--------------------|------------------|-----------------|---------------|--------------------|--------------------|
| SNP_67348_A_1702  | NW_004515778.1 | scaffold246 | 1702                    | GG                              | AA                 | AA               | INTERGENIC      |               |                    |                    |
| SNP_67349_A_1900  | NW_004515778.1 | scaffold246 | 1900                    | GG                              | TT                 | TT               | INTERGENIC      |               |                    |                    |
| SNP_67350_A_1910  | NW_004515778.1 | scaffold246 | 1910                    | CC                              | AA                 | AA               | INTERGENIC      |               |                    |                    |
| SNP_67351_A_1915  | NW_004515778.1 | scaffold246 | 1915                    | GG                              | AA                 | AA               | INTERGENIC      |               |                    |                    |
| SNP_67352_A_14238 | NW_004515778.1 | scaffold246 | 14238                   | AA                              | TT                 | TT               | INTERGENIC      |               |                    |                    |
| SNP_67353_A_14239 | NW_004515778.1 | scaffold246 | 14239                   | TT                              | CC                 | CC               | INTERGENIC      |               |                    |                    |
| SNP_67354_A_54511 | NW_004515778.1 | scaffold246 | 54511                   | CC                              | TT                 | TT               | INTERGENIC      |               |                    |                    |
| SNP_67355_A_54512 | NW_004515778.1 | scaffold246 | 54512                   | GG                              | CC                 | CC               | INTERGENIC      |               |                    |                    |
| SNP_67356_A_55214 | NW_004515778.1 | scaffold246 | 55214                   | GG                              | TT                 | TT               | INTERGENIC      |               |                    |                    |
| SNP_67357_A_55341 | NW_004515778.1 | scaffold246 | 55341                   | TT                              | AA                 | AA               | INTERGENIC      |               |                    |                    |
| SNP_67358_A_67664 | NW_004515778.1 | scaffold246 | 67664                   | TT                              | CC                 | CC               | INTERGENIC      |               |                    |                    |
| SNP_67359_A_1275  | NW_004515779.1 | scaffold249 | 1275                    | CC                              | AA                 | AA               | INTERGENIC      |               |                    |                    |
| SNP_67360_A_1489  | NW_004515779.1 | scaffold249 | 1489                    | TT                              | GG                 | GG               | INTERGENIC      |               |                    |                    |
| SNP_67361_A_1566  | NW_004515779.1 | scaffold249 | 1566                    | TT                              | GG                 | GG               | INTERGENIC      |               |                    |                    |
| SNP_67362_A_1621  | NW_004515779.1 | scaffold249 | 1621                    | TT                              | AA                 | AA               | INTERGENIC      |               |                    |                    |
| SNP_67363_A_1632  | NW_004515779.1 | scaffold249 | 1632                    | GG                              | TT                 | TT               | INTERGENIC      |               |                    |                    |
| SNP_67364_A_1633  | NW_004515779.1 | scaffold249 | 1633                    | GG                              | CC                 | CC               | INTERGENIC      |               |                    |                    |
| SNP_67365_A_1718  | NW_004515779.1 | scaffold249 | 1718                    | CC                              | TT                 | TT               | INTERGENIC      |               |                    |                    |
| SNP_67366_A_1719  | NW_004515779.1 | scaffold249 | 1719                    | GG                              | AA                 | AA               | INTERGENIC      |               |                    |                    |
| SNP_67367_A_1750  | NW_004515779.1 | scaffold249 | 1750                    | AA                              | GG                 | GG               | INTERGENIC      |               |                    |                    |
| SNP_67368_A_2069  | NW_004515779.1 | scaffold249 | 2069                    | GG                              | AA                 | AA               | INTERGENIC      |               |                    |                    |
| SNP_67369_A_4252  | NW_004515779.1 | scaffold249 | 4252                    | GG                              | AA                 | AA               | INTERGENIC      |               |                    |                    |

| SNPs IDs          | Chromosome IDs | Chromosomes | Physical positions (bp) | CDC Frontier (Reference genome) | (Pusa 1103 & HPNB) | (ILWC 46 & LPNB) | Sequence genome | Components of | Gene accession IDs | Putative functions |
|-------------------|----------------|-------------|-------------------------|---------------------------------|--------------------|------------------|-----------------|---------------|--------------------|--------------------|
| SNP_67370_A_4488  | NW_004515779.1 | scaffold249 | 4488                    | TT                              | AA                 | AA               | INTERGENIC      |               |                    |                    |
| SNP_67371_A_10988 | NW_004515779.1 | scaffold249 | 10988                   | CC                              | TT                 | TT               | INTERGENIC      |               |                    |                    |
| SNP_67372_A_18469 | NW_004515779.1 | scaffold249 | 18469                   | GG                              | TT                 | TT               | INTERGENIC      |               |                    |                    |
| SNP_67373_A_19359 | NW_004515779.1 | scaffold249 | 19359                   | GG                              | CC                 | CC               | INTERGENIC      |               |                    |                    |
| SNP_67374_A_20258 | NW_004515779.1 | scaffold249 | 20258                   | CC                              | AA                 | AA               | INTERGENIC      |               |                    |                    |
| SNP_67375_A_20277 | NW_004515779.1 | scaffold249 | 20277                   | GG                              | AA                 | AA               | INTERGENIC      |               |                    |                    |
| SNP_67376_A_20284 | NW_004515779.1 | scaffold249 | 20284                   | GG                              | AA                 | AA               | INTERGENIC      |               |                    |                    |
| SNP_67377_A_20286 | NW_004515779.1 | scaffold249 | 20286                   | TT                              | AA                 | AA               | INTERGENIC      |               |                    |                    |
| SNP_67378_A_20287 | NW_004515779.1 | scaffold249 | 20287                   | TT                              | GG                 | GG               | INTERGENIC      |               |                    |                    |
| SNP_67379_A_20291 | NW_004515779.1 | scaffold249 | 20291                   | GG                              | CC                 | CC               | INTERGENIC      |               |                    |                    |
| SNP_67380_A_23798 | NW_004515779.1 | scaffold249 | 23798                   | TT                              | CC                 | CC               | INTERGENIC      |               |                    |                    |
| SNP_67381_A_23864 | NW_004515779.1 | scaffold249 | 23864                   | AA                              | TT                 | TT               | INTERGENIC      |               |                    |                    |
| SNP_67382_A_54094 | NW_004515779.1 | scaffold249 | 54094                   | TT                              | GG                 | GG               | INTERGENIC      |               |                    |                    |
| SNP_67383_A_54111 | NW_004515779.1 | scaffold249 | 54111                   | AA                              | TT                 | TT               | INTERGENIC      |               |                    |                    |
| SNP_67385_A_54166 | NW_004515779.1 | scaffold249 | 54166                   | AA                              | TT                 | TT               | INTERGENIC      |               |                    |                    |
| SNP_67386_A_54343 | NW_004515779.1 | scaffold249 | 54343                   | TT                              | CC                 | CC               | INTERGENIC      |               |                    |                    |
| SNP_67387_A_54418 | NW_004515779.1 | scaffold249 | 54418                   | AA                              | GG                 | GG               | INTERGENIC      |               |                    |                    |
| SNP_67388_A_54447 | NW_004515779.1 | scaffold249 | 54447                   | TT                              | GG                 | GG               | INTERGENIC      |               |                    |                    |
| SNP_67389_A_54461 | NW_004515779.1 | scaffold249 | 54461                   | GG                              | AA                 | AA               | INTERGENIC      |               |                    |                    |
| SNP_67390_A_60038 | NW_004515779.1 | scaffold249 | 60038                   | GG                              | CC                 | CC               | INTERGENIC      |               |                    |                    |
| SNP_67392_A_73373 | NW_004515779.1 | scaffold249 | 73373                   | GG                              | AA                 | AA               | INTERGENIC      |               |                    |                    |
| SNP_67393_A_73377 | NW_004515779.1 | scaffold249 | 73377                   | GG                              | TT                 | TT               | INTERGENIC      |               |                    |                    |

| SNPs IDs           | Chromosome IDs | Chromosomes | Physical positions (bp) | CDC Frontier (Reference genome) | (Pusa 1103 & HPNB) | (ILWC 46 & LPNB) | Sequence genome | Components of | Gene accession IDs | Putative functions |
|--------------------|----------------|-------------|-------------------------|---------------------------------|--------------------|------------------|-----------------|---------------|--------------------|--------------------|
| SNP_67394_A_73541  | NW_004515779.1 | scaffold249 | 73541                   | CC                              | GG                 | GG               | INTERGENIC      |               |                    |                    |
| SNP_67395_A_73679  | NW_004515779.1 | scaffold249 | 73679                   | AA                              | TT                 | TT               | INTERGENIC      |               |                    |                    |
| SNP_67396_A_73715  | NW_004515779.1 | scaffold249 | 73715                   | AA                              | GG                 | GG               | INTERGENIC      |               |                    |                    |
| SNP_67397_A_92011  | NW_004515779.1 | scaffold249 | 92011                   | CC                              | TT                 | TT               | INTERGENIC      |               |                    |                    |
| SNP_67398_A_111447 | NW_004515779.1 | scaffold249 | 111447                  | GG                              | AA                 | AA               | INTERGENIC      |               |                    |                    |
| SNP_67399_A_133125 | NW_004515779.1 | scaffold249 | 133125                  | TT                              | AA                 | AA               | INTERGENIC      |               |                    |                    |
| SNP_67400_A_141719 | NW_004515779.1 | scaffold249 | 141719                  | GG                              | AA                 | AA               | INTERGENIC      |               |                    |                    |
| SNP_67401_A_141767 | NW_004515779.1 | scaffold249 | 141767                  | TT                              | GG                 | GG               | INTERGENIC      |               |                    |                    |
| SNP_67402_A_141825 | NW_004515779.1 | scaffold249 | 141825                  | AA                              | GG                 | GG               | INTERGENIC      |               |                    |                    |
| SNP_67403_A_141976 | NW_004515779.1 | scaffold249 | 141976                  | GG                              | AA                 | AA               | INTERGENIC      |               |                    |                    |
| SNP_67404_A_142049 | NW_004515779.1 | scaffold249 | 142049                  | TT                              | AA                 | AA               | INTERGENIC      |               |                    |                    |
| SNP_67405_A_142136 | NW_004515779.1 | scaffold249 | 142136                  | AA                              | GG                 | GG               | INTERGENIC      |               |                    |                    |
| SNP_67406_A_142457 | NW_004515779.1 | scaffold249 | 142457                  | GG                              | AA                 | AA               | INTERGENIC      |               |                    |                    |
| SNP_67407_A_142473 | NW_004515779.1 | scaffold249 | 142473                  | TT                              | AA                 | AA               | INTERGENIC      |               |                    |                    |
| SNP_67408_A_144894 | NW_004515779.1 | scaffold249 | 144894                  | AA                              | TT                 | TT               | INTERGENIC      |               |                    |                    |
| SNP_67409_A_145053 | NW_004515779.1 | scaffold249 | 145053                  | CC                              | TT                 | TT               | INTERGENIC      |               |                    |                    |
| SNP_67410_A_145121 | NW_004515779.1 | scaffold249 | 145121                  | CC                              | GG                 | GG               | INTERGENIC      |               |                    |                    |
| SNP_67411_A_145148 | NW_004515779.1 | scaffold249 | 145148                  | GG                              | CC                 | CC               | INTERGENIC      |               |                    |                    |
| SNP_67412_A_145171 | NW_004515779.1 | scaffold249 | 145171                  | CC                              | AA                 | AA               | INTERGENIC      |               |                    |                    |
| SNP_67413_A_145313 | NW_004515779.1 | scaffold249 | 145313                  | TT                              | AA                 | AA               | INTERGENIC      |               |                    |                    |
| SNP_67414_A_145373 | NW_004515779.1 | scaffold249 | 145373                  | TT                              | AA                 | AA               | INTERGENIC      |               |                    |                    |
| SNP_67415_A_145507 | NW_004515779.1 | scaffold249 | 145507                  | AA                              | GG                 | GG               | INTERGENIC      |               |                    |                    |

| SNPs IDs           | Chromosome IDs | Chromosomes | Physical positions (bp) | CDC Frontier (Reference genome) | (Pusa 1103 & HPNB) | (ILWC 46 & LPNB) | Sequence genome | Components of | Gene accession IDs | Putative functions |
|--------------------|----------------|-------------|-------------------------|---------------------------------|--------------------|------------------|-----------------|---------------|--------------------|--------------------|
| SNP_67416_A_145546 | NW_004515779.1 | scaffold249 | 145546                  | AA                              | TT                 | TT               | INTERGENIC      |               |                    |                    |
| SNP_67417_A_145559 | NW_004515779.1 | scaffold249 | 145559                  | AA                              | TT                 | TT               | INTERGENIC      |               |                    |                    |
| SNP_67418_A_145652 | NW_004515779.1 | scaffold249 | 145652                  | AA                              | TT                 | TT               | INTERGENIC      |               |                    |                    |
| SNP_67419_A_145686 | NW_004515779.1 | scaffold249 | 145686                  | CC                              | AA                 | AA               | INTERGENIC      |               |                    |                    |
| SNP_67420_A_145688 | NW_004515779.1 | scaffold249 | 145688                  | AA                              | CC                 | CC               | INTERGENIC      |               |                    |                    |
| SNP_67421_A_145689 | NW_004515779.1 | scaffold249 | 145689                  | GG                              | CC                 | CC               | INTERGENIC      |               |                    |                    |
| SNP_67422_A_145693 | NW_004515779.1 | scaffold249 | 145693                  | GG                              | AA                 | AA               | INTERGENIC      |               |                    |                    |
| SNP_67423_A_145703 | NW_004515779.1 | scaffold249 | 145703                  | TT                              | CC                 | CC               | INTERGENIC      |               |                    |                    |
| SNP_67424_A_145713 | NW_004515779.1 | scaffold249 | 145713                  | AA                              | CC                 | CC               | INTERGENIC      |               |                    |                    |
| SNP_67425_A_145820 | NW_004515779.1 | scaffold249 | 145820                  | TT                              | AA                 | AA               | INTERGENIC      |               |                    |                    |
| SNP_67426_A_167633 | NW_004515779.1 | scaffold249 | 167633                  | CC                              | AA                 | AA               | INTERGENIC      |               |                    |                    |
| SNP_67427_A_169104 | NW_004515779.1 | scaffold249 | 169104                  | TT                              | AA                 | AA               | INTERGENIC      |               |                    |                    |
| SNP_67428_A_169126 | NW_004515779.1 | scaffold249 | 169126                  | AA                              | GG                 | GG               | INTERGENIC      |               |                    |                    |
| SNP_67429_A_169148 | NW_004515779.1 | scaffold249 | 169148                  | CC                              | GG                 | GG               | INTERGENIC      |               |                    |                    |
| SNP_67430_A_170588 | NW_004515779.1 | scaffold249 | 170588                  | TT                              | CC                 | CC               | INTERGENIC      |               |                    |                    |
| SNP_67431_A_183297 | NW_004515779.1 | scaffold249 | 183297                  | CC                              | TT                 | TT               | INTERGENIC      |               |                    |                    |
| SNP_67432_A_184443 | NW_004515779.1 | scaffold249 | 184443                  | GG                              | AA                 | AA               | INTERGENIC      |               |                    |                    |
| SNP_67433_A_196002 | NW_004515779.1 | scaffold249 | 196002                  | TT                              | CC                 | CC               | INTERGENIC      |               |                    |                    |
| SNP_67434_A_196380 | NW_004515779.1 | scaffold249 | 196380                  | CC                              | TT                 | TT               | INTERGENIC      |               |                    |                    |
| SNP_67435_A_196413 | NW_004515779.1 | scaffold249 | 196413                  | GG                              | AA                 | AA               | INTERGENIC      |               |                    |                    |
| SNP_67436_A_196417 | NW_004515779.1 | scaffold249 | 196417                  | AA                              | GG                 | GG               | INTERGENIC      |               |                    |                    |
| SNP_67437_A_196485 | NW_004515779.1 | scaffold249 | 196485                  | AA                              | GG                 | GG               | INTERGENIC      |               |                    |                    |

| SNPs IDs           | Chromosome IDs | Chromosomes | Physical positions (bp) | CDC Frontier (Reference genome) | (Pusa 1103 & HPNB) | (ILWC 46 & LPNB) | Sequence Components of genome | Gene accession IDs | Putative functions                                      |
|--------------------|----------------|-------------|-------------------------|---------------------------------|--------------------|------------------|-------------------------------|--------------------|---------------------------------------------------------|
| SNP_67439_A_196527 | NW_004515779.1 | scaffold249 | 196527                  | CC                              | TT                 | TT               | INTERGENIC                    |                    |                                                         |
| SNP_67441_A_2085   | NW_004515780.1 | scaffold250 | 2085                    | TT                              | CC                 | CC               | INTERGENIC                    |                    |                                                         |
| SNP_67442_A_9091   | NW_004515780.1 | scaffold250 | 9091                    | CC                              | TT                 | TT               | INTERGENIC                    |                    |                                                         |
| SNP_67443_A_53250  | NW_004515780.1 | scaffold250 | 53250                   | AA                              | GG                 | GG               | DRR                           | 101503598          | peptide methionine sulfoxide reductase B1, chloroplatic |
| SNP_67444_A_77484  | NW_004515780.1 | scaffold250 | 77484                   | TT                              | CC                 | CC               | INTERGENIC                    |                    |                                                         |
| SNP_67445_A_77506  | NW_004515780.1 | scaffold250 | 77506                   | AA                              | GG                 | GG               | INTERGENIC                    |                    |                                                         |
| SNP_67446_A_77709  | NW_004515780.1 | scaffold250 | 77709                   | CC                              | TT                 | TT               | INTERGENIC                    |                    |                                                         |
| SNP_67447_A_77710  | NW_004515780.1 | scaffold250 | 77710                   | AA                              | TT                 | TT               | INTERGENIC                    |                    |                                                         |
| SNP_67448_A_77751  | NW_004515780.1 | scaffold250 | 77751                   | TT                              | CC                 | CC               | INTERGENIC                    |                    |                                                         |
| SNP_67449_A_77760  | NW_004515780.1 | scaffold250 | 77760                   | AA                              | CC                 | CC               | INTERGENIC                    |                    |                                                         |
| SNP_67450_A_77788  | NW_004515780.1 | scaffold250 | 77788                   | TT                              | CC                 | CC               | INTERGENIC                    |                    |                                                         |
| SNP_67451_A_77794  | NW_004515780.1 | scaffold250 | 77794                   | TT                              | CC                 | CC               | INTERGENIC                    |                    |                                                         |
| SNP_67452_A_77808  | NW_004515780.1 | scaffold250 | 77808                   | AA                              | GG                 | GG               | INTERGENIC                    |                    |                                                         |
| SNP_67453_A_77823  | NW_004515780.1 | scaffold250 | 77823                   | CC                              | AA                 | AA               | INTERGENIC                    |                    |                                                         |
| SNP_67454_A_81991  | NW_004515780.1 | scaffold250 | 81991                   | AA                              | GG                 | GG               | DRR                           | 101504240          | Unknown function                                        |
| SNP_67455_A_82172  | NW_004515780.1 | scaffold250 | 82172                   | AA                              | GG                 | GG               | DRR                           | 101504240          | Unknown function                                        |
| SNP_67456_A_82252  | NW_004515780.1 | scaffold250 | 82252                   | CC                              | TT                 | TT               | DRR                           | 101504240          | Unknown function                                        |
| SNP_67457_A_82447  | NW_004515780.1 | scaffold250 | 82447                   | CC                              | AA                 | AA               | URR                           | 101503919          | uncharacterized LOC101503919                            |
| SNP_67458_A_82517  | NW_004515780.1 | scaffold250 | 82517                   | CC                              | TT                 | TT               | URR                           | 101503919          | uncharacterized LOC101503919                            |
| SNP_67459_A_86148  | NW_004515780.1 | scaffold250 | 86148                   | AA                              | GG                 | GG               | URR                           | 101504240          | Unknown function                                        |
| SNP_67460_A_86187  | NW_004515780.1 | scaffold250 | 86187                   | GG                              | AA                 | AA               | URR                           | 101504240          | Unknown function                                        |
| SNP_67461_A_86191  | NW_004515780.1 | scaffold250 | 86191                   | AA                              | GG                 | GG               | URR                           | 101504240          | Unknown function                                        |

| SNPs IDs          | Chromosome IDs | Chromosomes | Physical positions (bp) | CDC Frontier (Reference genome) | (Pusa 1103 & HPNB) | (ILWC 46 & LPNB) | Sequence Components of genome | Gene accession IDs | Putative functions |
|-------------------|----------------|-------------|-------------------------|---------------------------------|--------------------|------------------|-------------------------------|--------------------|--------------------|
| SNP_67462_A_86195 | NW_004515780.1 | scaffold250 | 86195                   | CC                              | TT                 | TT               | URR                           | 101504240          | Unknown function   |
| SNP_67463_A_86221 | NW_004515780.1 | scaffold250 | 86221                   | GG                              | CC                 | CC               | URR                           | 101504240          | Unknown function   |
| SNP_67464_A_86235 | NW_004515780.1 | scaffold250 | 86235                   | CC                              | TT                 | TT               | URR                           | 101504240          | Unknown function   |
| SNP_67465_A_91927 | NW_004515780.1 | scaffold250 | 91927                   | GG                              | AA                 | AA               | INTERGENIC                    |                    |                    |
| SNP_67466_A_593   | NW_004515781.1 | scaffold251 | 593                     | AA                              | TT                 | TT               | INTERGENIC                    |                    |                    |
| SNP_67467_A_2669  | NW_004515781.1 | scaffold251 | 2669                    | AA                              | CC                 | CC               | INTERGENIC                    |                    |                    |
| SNP_67468_A_3166  | NW_004515781.1 | scaffold251 | 3166                    | TT                              | GG                 | GG               | INTERGENIC                    |                    |                    |
| SNP_67469_A_6065  | NW_004515781.1 | scaffold251 | 6065                    | GG                              | AA                 | AA               | INTERGENIC                    |                    |                    |
| SNP_67470_A_6369  | NW_004515781.1 | scaffold251 | 6369                    | CC                              | AA                 | AA               | INTERGENIC                    |                    |                    |
| SNP_67471_A_6619  | NW_004515781.1 | scaffold251 | 6619                    | AA                              | GG                 | GG               | INTERGENIC                    |                    |                    |
| SNP_67472_A_8307  | NW_004515781.1 | scaffold251 | 8307                    | CC                              | TT                 | TT               | INTERGENIC                    |                    |                    |
| SNP_67473_A_2175  | NW_004515782.1 | scaffold253 | 2175                    | CC                              | GG                 | GG               | INTERGENIC                    |                    |                    |
| SNP_67474_A_8917  | NW_004515784.1 | scaffold255 | 8917                    | CC                              | TT                 | TT               | INTERGENIC                    |                    |                    |
| SNP_67475_A_8923  | NW_004515784.1 | scaffold255 | 8923                    | GG                              | AA                 | AA               | INTERGENIC                    |                    |                    |
| SNP_67476_A_9165  | NW_004515784.1 | scaffold255 | 9165                    | AA                              | GG                 | GG               | INTERGENIC                    |                    |                    |
| SNP_67477_A_9184  | NW_004515784.1 | scaffold255 | 9184                    | TT                              | CC                 | CC               | INTERGENIC                    |                    |                    |
| SNP_67478_A_9194  | NW_004515784.1 | scaffold255 | 9194                    | CC                              | TT                 | TT               | INTERGENIC                    |                    |                    |
| SNP_67479_A_9211  | NW_004515784.1 | scaffold255 | 9211                    | AA                              | GG                 | GG               | INTERGENIC                    |                    |                    |
| SNP_67480_A_9220  | NW_004515784.1 | scaffold255 | 9220                    | AA                              | GG                 | GG               | INTERGENIC                    |                    |                    |
| SNP_67481_A_9226  | NW_004515784.1 | scaffold255 | 9226                    | TT                              | CC                 | CC               | INTERGENIC                    |                    |                    |
| SNP_67482_A_9259  | NW_004515784.1 | scaffold255 | 9259                    | GG                              | AA                 | AA               | INTERGENIC                    |                    |                    |
| SNP_67483_A_9263  | NW_004515784.1 | scaffold255 | 9263                    | AA                              | GG                 | GG               | INTERGENIC                    |                    |                    |



| SNPs IDs          | Chromosome IDs | Chromosomes | Physical positions (bp) | CDC Frontier (Reference genome) | (Pusa 1103 & HPNB) | (ILWC 46 & LPNB) | Sequence genome | Components of | Gene accession IDs | Putative functions |
|-------------------|----------------|-------------|-------------------------|---------------------------------|--------------------|------------------|-----------------|---------------|--------------------|--------------------|
| SNP_67484_A_9304  | NW_004515784.1 | scaffold255 | 9304                    | TT                              | GG                 | GG               | INTERGENIC      |               |                    |                    |
| SNP_67485_A_35130 | NW_004515784.1 | scaffold255 | 35130                   | AA                              | GG                 | GG               | INTERGENIC      |               |                    |                    |
| SNP_67486_A_43686 | NW_004515784.1 | scaffold255 | 43686                   | TT                              | GG                 | GG               | INTERGENIC      |               |                    |                    |
| SNP_67487_A_44636 | NW_004515784.1 | scaffold255 | 44636                   | AA                              | GG                 | GG               | INTERGENIC      |               |                    |                    |
| SNP_67488_A_45960 | NW_004515784.1 | scaffold255 | 45960                   | GG                              | TT                 | TT               | INTERGENIC      |               |                    |                    |
| SNP_67489_A_46259 | NW_004515784.1 | scaffold255 | 46259                   | TT                              | AA                 | AA               | INTERGENIC      |               |                    |                    |
| SNP_67490_A_47670 | NW_004515784.1 | scaffold255 | 47670                   | CC                              | TT                 | TT               | INTERGENIC      |               |                    |                    |
| SNP_67491_A_47673 | NW_004515784.1 | scaffold255 | 47673                   | AA                              | GG                 | GG               | INTERGENIC      |               |                    |                    |
| SNP_67492_A_51621 | NW_004515784.1 | scaffold255 | 51621                   | TT                              | CC                 | CC               | INTERGENIC      |               |                    |                    |
| SNP_67493_A_70026 | NW_004515784.1 | scaffold255 | 70026                   | GG                              | CC                 | CC               | INTERGENIC      |               |                    |                    |
| SNP_67494_A_70040 | NW_004515784.1 | scaffold255 | 70040                   | TT                              | CC                 | CC               | INTERGENIC      |               |                    |                    |
| SNP_67495_A_70113 | NW_004515784.1 | scaffold255 | 70113                   | TT                              | CC                 | CC               | INTERGENIC      |               |                    |                    |
| SNP_67496_A_70327 | NW_004515784.1 | scaffold255 | 70327                   | AA                              | CC                 | CC               | INTERGENIC      |               |                    |                    |
| SNP_67497_A_70347 | NW_004515784.1 | scaffold255 | 70347                   | AA                              | CC                 | CC               | INTERGENIC      |               |                    |                    |
| SNP_67498_A_70400 | NW_004515784.1 | scaffold255 | 70400                   | CC                              | TT                 | TT               | INTERGENIC      |               |                    |                    |
| SNP_67499_A_70412 | NW_004515784.1 | scaffold255 | 70412                   | CC                              | TT                 | TT               | INTERGENIC      |               |                    |                    |
| SNP_67500_A_79510 | NW_004515784.1 | scaffold255 | 79510                   | TT                              | GG                 | GG               | INTERGENIC      |               |                    |                    |
| SNP_67501_A_85549 | NW_004515784.1 | scaffold255 | 85549                   | GG                              | AA                 | AA               | INTERGENIC      |               |                    |                    |
| SNP_67502_A_85685 | NW_004515784.1 | scaffold255 | 85685                   | TT                              | GG                 | GG               | INTERGENIC      |               |                    |                    |
| SNP_67503_A_365   | NW_004515785.1 | scaffold256 | 365                     | GG                              | TT                 | TT               | INTERGENIC      |               |                    |                    |
| SNP_67504_A_2438  | NW_004515785.1 | scaffold256 | 2438                    | AA                              | TT                 | TT               | INTERGENIC      |               |                    |                    |
| SNP_67505_A_2439  | NW_004515785.1 | scaffold256 | 2439                    | AA                              | TT                 | TT               | INTERGENIC      |               |                    |                    |

| SNPs IDs           | Chromosome IDs | Chromosomes | Physical positions (bp) | CDC Frontier (Reference genome) | (Pusa 1103 & HPNB) | (ILWC 46 & LPNB) | Sequence genome | Components of | Gene accession IDs | Putative functions |
|--------------------|----------------|-------------|-------------------------|---------------------------------|--------------------|------------------|-----------------|---------------|--------------------|--------------------|
| SNP_67506_A_43641  | NW_004515785.1 | scaffold256 | 43641                   | GG                              | AA                 | AA               | INTERGENIC      |               |                    |                    |
| SNP_67507_A_43698  | NW_004515785.1 | scaffold256 | 43698                   | CC                              | AA                 | AA               | INTERGENIC      |               |                    |                    |
| SNP_67508_A_43760  | NW_004515785.1 | scaffold256 | 43760                   | TT                              | AA                 | AA               | INTERGENIC      |               |                    |                    |
| SNP_67509_A_43848  | NW_004515785.1 | scaffold256 | 43848                   | AA                              | GG                 | GG               | INTERGENIC      |               |                    |                    |
| SNP_67510_A_61884  | NW_004515785.1 | scaffold256 | 61884                   | AA                              | GG                 | GG               | INTERGENIC      |               |                    |                    |
| SNP_67511_A_92137  | NW_004515785.1 | scaffold256 | 92137                   | GG                              | AA                 | AA               | INTERGENIC      |               |                    |                    |
| SNP_67512_A_101362 | NW_004515785.1 | scaffold256 | 101362                  | CC                              | GG                 | GG               | INTERGENIC      |               |                    |                    |
| SNP_67513_A_101453 | NW_004515785.1 | scaffold256 | 101453                  | TT                              | AA                 | AA               | INTERGENIC      |               |                    |                    |
| SNP_67514_A_101455 | NW_004515785.1 | scaffold256 | 101455                  | AA                              | GG                 | GG               | INTERGENIC      |               |                    |                    |
| SNP_67515_A_101657 | NW_004515785.1 | scaffold256 | 101657                  | CC                              | AA                 | AA               | INTERGENIC      |               |                    |                    |
| SNP_67516_A_101663 | NW_004515785.1 | scaffold256 | 101663                  | TT                              | AA                 | AA               | INTERGENIC      |               |                    |                    |
| SNP_67517_A_101719 | NW_004515785.1 | scaffold256 | 101719                  | AA                              | TT                 | TT               | INTERGENIC      |               |                    |                    |
| SNP_67518_A_101724 | NW_004515785.1 | scaffold256 | 101724                  | TT                              | AA                 | AA               | INTERGENIC      |               |                    |                    |
| SNP_67519_A_101791 | NW_004515785.1 | scaffold256 | 101791                  | TT                              | CC                 | CC               | INTERGENIC      |               |                    |                    |
| SNP_67520_A_101898 | NW_004515785.1 | scaffold256 | 101898                  | TT                              | CC                 | CC               | INTERGENIC      |               |                    |                    |
| SNP_67521_A_108516 | NW_004515785.1 | scaffold256 | 108516                  | TT                              | GG                 | GG               | INTERGENIC      |               |                    |                    |
| SNP_67522_A_108517 | NW_004515785.1 | scaffold256 | 108517                  | CC                              | AA                 | AA               | INTERGENIC      |               |                    |                    |
| SNP_67523_A_111711 | NW_004515785.1 | scaffold256 | 111711                  | GG                              | AA                 | AA               | INTERGENIC      |               |                    |                    |
| SNP_67524_A_111855 | NW_004515785.1 | scaffold256 | 111855                  | TT                              | CC                 | CC               | INTERGENIC      |               |                    |                    |
| SNP_67525_A_121415 | NW_004515785.1 | scaffold256 | 121415                  | AA                              | TT                 | TT               | INTERGENIC      |               |                    |                    |
| SNP_67526_A_147864 | NW_004515785.1 | scaffold256 | 147864                  | GG                              | AA                 | AA               | INTERGENIC      |               |                    |                    |
| SNP_67527_A_147870 | NW_004515785.1 | scaffold256 | 147870                  | AA                              | CC                 | CC               | INTERGENIC      |               |                    |                    |

| SNPs IDs           | Chromosome IDs | Chromosomes | Physical positions (bp) | CDC Frontier genome (Reference genome) | (Pusa 1103 & HPNB) | (ILWC 46 & LPNB) | Sequence genome | Components of | Gene accession IDs | Putative functions |
|--------------------|----------------|-------------|-------------------------|----------------------------------------|--------------------|------------------|-----------------|---------------|--------------------|--------------------|
| SNP_67528_A_171607 | NW_004515785.1 | scaffold256 | 171607                  | AA                                     | GG                 | GG               | INTERGENIC      |               |                    |                    |
| SNP_67529_A_171893 | NW_004515785.1 | scaffold256 | 171893                  | AA                                     | TT                 | TT               | INTERGENIC      |               |                    |                    |
| SNP_67530_A_171952 | NW_004515785.1 | scaffold256 | 171952                  | CC                                     | TT                 | TT               | INTERGENIC      |               |                    |                    |
| SNP_67531_A_172039 | NW_004515785.1 | scaffold256 | 172039                  | GG                                     | AA                 | AA               | INTERGENIC      |               |                    |                    |
| SNP_67532_A_1628   | NW_004515786.1 | scaffold260 | 1628                    | TT                                     | AA                 | AA               | INTERGENIC      |               |                    |                    |
| SNP_67533_A_1646   | NW_004515786.1 | scaffold260 | 1646                    | CC                                     | TT                 | TT               | INTERGENIC      |               |                    |                    |
| SNP_67534_A_35116  | NW_004515786.1 | scaffold260 | 35116                   | AA                                     | CC                 | CC               | INTERGENIC      |               |                    |                    |
| SNP_67535_A_58220  | NW_004515786.1 | scaffold260 | 58220                   | TT                                     | CC                 | CC               | URR             | 101507164     | Unknown function   |                    |
| SNP_67536_A_62542  | NW_004515786.1 | scaffold260 | 62542                   | AA                                     | TT                 | TT               | INTERGENIC      |               |                    |                    |
| SNP_67537_A_64939  | NW_004515786.1 | scaffold260 | 64939                   | AA                                     | TT                 | TT               | INTERGENIC      |               |                    |                    |
| SNP_67538_A_65031  | NW_004515786.1 | scaffold260 | 65031                   | TT                                     | AA                 | AA               | INTERGENIC      |               |                    |                    |
| SNP_67539_A_65035  | NW_004515786.1 | scaffold260 | 65035                   | AA                                     | TT                 | TT               | INTERGENIC      |               |                    |                    |
| SNP_67540_A_65048  | NW_004515786.1 | scaffold260 | 65048                   | CC                                     | TT                 | TT               | INTERGENIC      |               |                    |                    |
| SNP_67541_A_65332  | NW_004515786.1 | scaffold260 | 65332                   | TT                                     | AA                 | AA               | INTERGENIC      |               |                    |                    |
| SNP_67542_A_87292  | NW_004515786.1 | scaffold260 | 87292                   | CC                                     | TT                 | TT               | INTERGENIC      |               |                    |                    |
| SNP_67543_A_129257 | NW_004515786.1 | scaffold260 | 129257                  | AA                                     | GG                 | GG               | INTERGENIC      |               |                    |                    |
| SNP_67544_A_205043 | NW_004515786.1 | scaffold260 | 205043                  | AA                                     | CC                 | CC               | INTERGENIC      |               |                    |                    |
| SNP_67545_A_205184 | NW_004515786.1 | scaffold260 | 205184                  | TT                                     | AA                 | AA               | INTERGENIC      |               |                    |                    |
| SNP_67546_A_209493 | NW_004515786.1 | scaffold260 | 209493                  | CC                                     | TT                 | TT               | INTERGENIC      |               |                    |                    |
| SNP_67547_A_209518 | NW_004515786.1 | scaffold260 | 209518                  | GG                                     | AA                 | AA               | INTERGENIC      |               |                    |                    |
| SNP_67548_A_209585 | NW_004515786.1 | scaffold260 | 209585                  | TT                                     | AA                 | AA               | INTERGENIC      |               |                    |                    |
| SNP_67549_A_209751 | NW_004515786.1 | scaffold260 | 209751                  | AA                                     | GG                 | GG               | INTERGENIC      |               |                    |                    |

| SNPs IDs           | Chromosome IDs | Chromosomes | Physical positions (bp) | CDC Frontier (Reference genome) | (Pusa 1103 & HPNB) | (ILWC 46 & LPNB) | Sequence genome | Components of | Gene accession IDs | Putative functions |
|--------------------|----------------|-------------|-------------------------|---------------------------------|--------------------|------------------|-----------------|---------------|--------------------|--------------------|
| SNP_67550_A_209758 | NW_004515786.1 | scaffold260 | 209758                  | AA                              | GG                 | GG               | INTERGENIC      |               |                    |                    |
| SNP_67551_A_233674 | NW_004515786.1 | scaffold260 | 233674                  | GG                              | TT                 | TT               | INTERGENIC      |               |                    |                    |
| SNP_67552_A_233704 | NW_004515786.1 | scaffold260 | 233704                  | CC                              | TT                 | TT               | INTERGENIC      |               |                    |                    |
| SNP_67553_A_255760 | NW_004515786.1 | scaffold260 | 255760                  | TT                              | CC                 | CC               | INTERGENIC      |               |                    |                    |
| SNP_67554_A_257318 | NW_004515786.1 | scaffold260 | 257318                  | TT                              | CC                 | CC               | INTERGENIC      |               |                    |                    |
| SNP_67555_A_276144 | NW_004515786.1 | scaffold260 | 276144                  | CC                              | TT                 | TT               | INTERGENIC      |               |                    |                    |
| SNP_67556_A_278212 | NW_004515786.1 | scaffold260 | 278212                  | AA                              | GG                 | GG               | INTERGENIC      |               |                    |                    |
| SNP_67558_A_330698 | NW_004515786.1 | scaffold260 | 330698                  | AA                              | GG                 | GG               | INTERGENIC      |               |                    |                    |
| SNP_67559_A_332527 | NW_004515786.1 | scaffold260 | 332527                  | AA                              | GG                 | GG               | INTERGENIC      |               |                    |                    |
| SNP_67561_A_349242 | NW_004515786.1 | scaffold260 | 349242                  | TT                              | CC                 | CC               | INTERGENIC      |               |                    |                    |
| SNP_67562_A_354892 | NW_004515786.1 | scaffold260 | 354892                  | CC                              | TT                 | TT               | INTERGENIC      |               |                    |                    |
| SNP_67563_A_354924 | NW_004515786.1 | scaffold260 | 354924                  | AA                              | TT                 | TT               | INTERGENIC      |               |                    |                    |
| SNP_67564_A_354927 | NW_004515786.1 | scaffold260 | 354927                  | AA                              | GG                 | GG               | INTERGENIC      |               |                    |                    |
| SNP_67565_A_354928 | NW_004515786.1 | scaffold260 | 354928                  | CC                              | TT                 | TT               | INTERGENIC      |               |                    |                    |
| SNP_67566_A_354944 | NW_004515786.1 | scaffold260 | 354944                  | AA                              | CC                 | CC               | INTERGENIC      |               |                    |                    |
| SNP_67567_A_355036 | NW_004515786.1 | scaffold260 | 355036                  | AA                              | CC                 | CC               | INTERGENIC      |               |                    |                    |
| SNP_67569_A_355736 | NW_004515786.1 | scaffold260 | 355736                  | AA                              | GG                 | GG               | INTERGENIC      |               |                    |                    |
| SNP_67570_A_356023 | NW_004515786.1 | scaffold260 | 356023                  | GG                              | AA                 | AA               | INTERGENIC      |               |                    |                    |
| SNP_67571_A_356532 | NW_004515786.1 | scaffold260 | 356532                  | AA                              | GG                 | GG               | INTERGENIC      |               |                    |                    |
| SNP_67572_A_356544 | NW_004515786.1 | scaffold260 | 356544                  | CC                              | AA                 | AA               | INTERGENIC      |               |                    |                    |
| SNP_67576_A_444479 | NW_004515786.1 | scaffold260 | 444479                  | AA                              | CC                 | CC               | INTERGENIC      |               |                    |                    |
| SNP_67577_A_444480 | NW_004515786.1 | scaffold260 | 444480                  | AA                              | TT                 | TT               | INTERGENIC      |               |                    |                    |

| SNPs IDs           | Chromosome IDs | Chromosomes | Physical positions (bp) | CDC Frontier (Reference genome) | (Pusa 1103 & HPNB) | (ILWC 46 & LPNB) | Sequence genome | Components of | Gene accession IDs | Putative functions |
|--------------------|----------------|-------------|-------------------------|---------------------------------|--------------------|------------------|-----------------|---------------|--------------------|--------------------|
| SNP_67578_A_20643  | NW_004515788.1 | scaffold263 | 20643                   | CC                              | GG                 | GG               | INTERGENIC      |               |                    |                    |
| SNP_67579_A_20672  | NW_004515788.1 | scaffold263 | 20672                   | TT                              | GG                 | GG               | INTERGENIC      |               |                    |                    |
| SNP_67580_A_36443  | NW_004515788.1 | scaffold263 | 36443                   | CC                              | TT                 | TT               | INTERGENIC      |               |                    |                    |
| SNP_67581_A_42451  | NW_004515788.1 | scaffold263 | 42451                   | AA                              | GG                 | GG               | INTERGENIC      |               |                    |                    |
| SNP_67582_A_81515  | NW_004515788.1 | scaffold263 | 81515                   | AA                              | GG                 | GG               | INTERGENIC      |               |                    |                    |
| SNP_67583_A_124042 | NW_004515788.1 | scaffold263 | 124042                  | AA                              | TT                 | TT               | INTERGENIC      |               |                    |                    |
| SNP_67584_A_142505 | NW_004515788.1 | scaffold263 | 142505                  | TT                              | CC                 | CC               | INTERGENIC      |               |                    |                    |
| SNP_67585_A_165454 | NW_004515788.1 | scaffold263 | 165454                  | GG                              | AA                 | AA               | INTERGENIC      |               |                    |                    |
| SNP_67586_A_165821 | NW_004515788.1 | scaffold263 | 165821                  | TT                              | CC                 | CC               | INTERGENIC      |               |                    |                    |
| SNP_67587_A_165875 | NW_004515788.1 | scaffold263 | 165875                  | GG                              | AA                 | AA               | INTERGENIC      |               |                    |                    |
| SNP_67588_A_165880 | NW_004515788.1 | scaffold263 | 165880                  | TT                              | GG                 | GG               | INTERGENIC      |               |                    |                    |
| SNP_67589_A_165940 | NW_004515788.1 | scaffold263 | 165940                  | AA                              | GG                 | GG               | INTERGENIC      |               |                    |                    |
| SNP_67590_A_165970 | NW_004515788.1 | scaffold263 | 165970                  | TT                              | CC                 | CC               | INTERGENIC      |               |                    |                    |
| SNP_67591_A_166013 | NW_004515788.1 | scaffold263 | 166013                  | TT                              | CC                 | CC               | INTERGENIC      |               |                    |                    |
| SNP_67592_A_166352 | NW_004515788.1 | scaffold263 | 166352                  | CC                              | TT                 | TT               | INTERGENIC      |               |                    |                    |
| SNP_67593_A_166357 | NW_004515788.1 | scaffold263 | 166357                  | CC                              | TT                 | TT               | INTERGENIC      |               |                    |                    |
| SNP_67594_A_166757 | NW_004515788.1 | scaffold263 | 166757                  | GG                              | AA                 | AA               | INTERGENIC      |               |                    |                    |
| SNP_67595_A_166772 | NW_004515788.1 | scaffold263 | 166772                  | TT                              | GG                 | GG               | INTERGENIC      |               |                    |                    |
| SNP_67596_A_166775 | NW_004515788.1 | scaffold263 | 166775                  | GG                              | AA                 | AA               | INTERGENIC      |               |                    |                    |
| SNP_67597_A_166865 | NW_004515788.1 | scaffold263 | 166865                  | TT                              | CC                 | CC               | INTERGENIC      |               |                    |                    |
| SNP_67598_A_172904 | NW_004515788.1 | scaffold263 | 172904                  | AA                              | GG                 | GG               | INTERGENIC      |               |                    |                    |
| SNP_67599_A_174169 | NW_004515788.1 | scaffold263 | 174169                  | CC                              | TT                 | TT               | INTERGENIC      |               |                    |                    |

| SNPs IDs           | Chromosome IDs | Chromosomes | Physical positions (bp) | CDC Frontier (Reference genome) | (Pusa 1103 & HPNB) | (ILWC 46 & LPNB) | Sequence genome | Components of | Gene accession IDs | Putative functions |
|--------------------|----------------|-------------|-------------------------|---------------------------------|--------------------|------------------|-----------------|---------------|--------------------|--------------------|
| SNP_67600_A_174170 | NW_004515788.1 | scaffold263 | 174170                  | TT                              | CC                 | CC               | INTERGENIC      |               |                    |                    |
| SNP_67601_A_176269 | NW_004515788.1 | scaffold263 | 176269                  | AA                              | GG                 | GG               | INTERGENIC      |               |                    |                    |
| SNP_67602_A_176353 | NW_004515788.1 | scaffold263 | 176353                  | GG                              | TT                 | TT               | INTERGENIC      |               |                    |                    |
| SNP_67603_A_176538 | NW_004515788.1 | scaffold263 | 176538                  | TT                              | CC                 | CC               | INTERGENIC      |               |                    |                    |
| SNP_67604_A_176623 | NW_004515788.1 | scaffold263 | 176623                  | CC                              | TT                 | TT               | INTERGENIC      |               |                    |                    |
| SNP_67605_A_176630 | NW_004515788.1 | scaffold263 | 176630                  | GG                              | AA                 | AA               | INTERGENIC      |               |                    |                    |
| SNP_67606_A_176635 | NW_004515788.1 | scaffold263 | 176635                  | CC                              | TT                 | TT               | INTERGENIC      |               |                    |                    |
| SNP_67607_A_176655 | NW_004515788.1 | scaffold263 | 176655                  | CC                              | TT                 | TT               | INTERGENIC      |               |                    |                    |
| SNP_67608_A_177642 | NW_004515788.1 | scaffold263 | 177642                  | GG                              | TT                 | TT               | INTERGENIC      |               |                    |                    |
| SNP_67610_A_177975 | NW_004515788.1 | scaffold263 | 177975                  | TT                              | AA                 | AA               | INTERGENIC      |               |                    |                    |
| SNP_67611_A_178162 | NW_004515788.1 | scaffold263 | 178162                  | AA                              | GG                 | GG               | INTERGENIC      |               |                    |                    |
| SNP_67612_A_178188 | NW_004515788.1 | scaffold263 | 178188                  | CC                              | TT                 | TT               | INTERGENIC      |               |                    |                    |
| SNP_67613_A_178248 | NW_004515788.1 | scaffold263 | 178248                  | CC                              | TT                 | TT               | INTERGENIC      |               |                    |                    |
| SNP_67614_A_178782 | NW_004515788.1 | scaffold263 | 178782                  | GG                              | TT                 | TT               | INTERGENIC      |               |                    |                    |
| SNP_67615_A_4679   | NW_004515790.1 | scaffold268 | 4679                    | TT                              | CC                 | CC               | INTERGENIC      |               |                    |                    |
| SNP_67616_A_4693   | NW_004515790.1 | scaffold268 | 4693                    | CC                              | TT                 | TT               | INTERGENIC      |               |                    |                    |
| SNP_67617_A_4698   | NW_004515790.1 | scaffold268 | 4698                    | CC                              | GG                 | GG               | INTERGENIC      |               |                    |                    |
| SNP_67618_A_4700   | NW_004515790.1 | scaffold268 | 4700                    | AA                              | TT                 | TT               | INTERGENIC      |               |                    |                    |
| SNP_67619_A_13150  | NW_004515790.1 | scaffold268 | 13150                   | GG                              | TT                 | TT               | INTERGENIC      |               |                    |                    |
| SNP_67620_A_13180  | NW_004515790.1 | scaffold268 | 13180                   | CC                              | AA                 | AA               | INTERGENIC      |               |                    |                    |
| SNP_67621_A_13200  | NW_004515790.1 | scaffold268 | 13200                   | TT                              | CC                 | CC               | INTERGENIC      |               |                    |                    |
| SNP_67622_A_13202  | NW_004515790.1 | scaffold268 | 13202                   | GG                              | TT                 | TT               | INTERGENIC      |               |                    |                    |

| SNPs IDs          | Chromosome IDs | Chromosomes | Physical positions (bp) | CDC Frontier (Reference genome) | (Pusa 1103 & HPNB) | (ILWC 46 & LPNB) | Sequence genome | Components of | Gene accession IDs | Putative functions |
|-------------------|----------------|-------------|-------------------------|---------------------------------|--------------------|------------------|-----------------|---------------|--------------------|--------------------|
| SNP_67623_A_13216 | NW_004515790.1 | scaffold268 | 13216                   | TT                              | CC                 | CC               | INTERGENIC      |               |                    |                    |
| SNP_67624_A_13223 | NW_004515790.1 | scaffold268 | 13223                   | GG                              | TT                 | TT               | INTERGENIC      |               |                    |                    |
| SNP_67625_A_13229 | NW_004515790.1 | scaffold268 | 13229                   | AA                              | GG                 | GG               | INTERGENIC      |               |                    |                    |
| SNP_67626_A_13237 | NW_004515790.1 | scaffold268 | 13237                   | CC                              | AA                 | AA               | INTERGENIC      |               |                    |                    |
| SNP_67627_A_13327 | NW_004515790.1 | scaffold268 | 13327                   | CC                              | TT                 | TT               | INTERGENIC      |               |                    |                    |
| SNP_67628_A_13452 | NW_004515790.1 | scaffold268 | 13452                   | AA                              | TT                 | TT               | INTERGENIC      |               |                    |                    |
| SNP_67629_A_13453 | NW_004515790.1 | scaffold268 | 13453                   | CC                              | AA                 | AA               | INTERGENIC      |               |                    |                    |
| SNP_67630_A_13454 | NW_004515790.1 | scaffold268 | 13454                   | TT                              | AA                 | AA               | INTERGENIC      |               |                    |                    |
| SNP_67631_A_15865 | NW_004515790.1 | scaffold268 | 15865                   | CC                              | TT                 | TT               | INTERGENIC      |               |                    |                    |
| SNP_67632_A_15866 | NW_004515790.1 | scaffold268 | 15866                   | TT                              | CC                 | CC               | INTERGENIC      |               |                    |                    |
| SNP_67633_A_15895 | NW_004515790.1 | scaffold268 | 15895                   | CC                              | TT                 | TT               | INTERGENIC      |               |                    |                    |
| SNP_67634_A_15940 | NW_004515790.1 | scaffold268 | 15940                   | TT                              | CC                 | CC               | INTERGENIC      |               |                    |                    |
| SNP_67635_A_15948 | NW_004515790.1 | scaffold268 | 15948                   | AA                              | CC                 | CC               | INTERGENIC      |               |                    |                    |
| SNP_67636_A_16130 | NW_004515790.1 | scaffold268 | 16130                   | AA                              | GG                 | GG               | INTERGENIC      |               |                    |                    |
| SNP_67637_A_30715 | NW_004515790.1 | scaffold268 | 30715                   | GG                              | TT                 | TT               | INTERGENIC      |               |                    |                    |
| SNP_67638_A_43077 | NW_004515790.1 | scaffold268 | 43077                   | TT                              | CC                 | CC               | INTERGENIC      |               |                    |                    |
| SNP_67639_A_43846 | NW_004515790.1 | scaffold268 | 43846                   | AA                              | GG                 | GG               | INTERGENIC      |               |                    |                    |
| SNP_67640_A_44729 | NW_004515790.1 | scaffold268 | 44729                   | CC                              | TT                 | TT               | INTERGENIC      |               |                    |                    |
| SNP_67641_A_45132 | NW_004515790.1 | scaffold268 | 45132                   | TT                              | CC                 | CC               | INTERGENIC      |               |                    |                    |
| SNP_67642_A_45733 | NW_004515790.1 | scaffold268 | 45733                   | AA                              | TT                 | TT               | INTERGENIC      |               |                    |                    |
| SNP_67643_A_3176  | NW_004515791.1 | scaffold269 | 3176                    | GG                              | AA                 | AA               | INTERGENIC      |               |                    |                    |
| SNP_67644_A_3193  | NW_004515791.1 | scaffold269 | 3193                    | AA                              | GG                 | GG               | INTERGENIC      |               |                    |                    |

| SNPs IDs          | Chromosome IDs | Chromosomes | Physical positions (bp) | CDC Frontier (Reference genome) | (Pusa 1103 & HPNB) | (ILWC 46 & LPNB) | Sequence genome | Components of | Gene accession IDs | Putative functions |
|-------------------|----------------|-------------|-------------------------|---------------------------------|--------------------|------------------|-----------------|---------------|--------------------|--------------------|
| SNP_67645_A_3378  | NW_004515791.1 | scaffold269 | 3378                    | TT                              | CC                 | CC               | INTERGENIC      |               |                    |                    |
| SNP_67646_A_3398  | NW_004515791.1 | scaffold269 | 3398                    | GG                              | AA                 | AA               | INTERGENIC      |               |                    |                    |
| SNP_67647_A_3558  | NW_004515791.1 | scaffold269 | 3558                    | GG                              | AA                 | AA               | INTERGENIC      |               |                    |                    |
| SNP_67648_A_3592  | NW_004515791.1 | scaffold269 | 3592                    | AA                              | GG                 | GG               | INTERGENIC      |               |                    |                    |
| SNP_67649_A_3612  | NW_004515791.1 | scaffold269 | 3612                    | AA                              | CC                 | CC               | INTERGENIC      |               |                    |                    |
| SNP_67650_A_3794  | NW_004515791.1 | scaffold269 | 3794                    | CC                              | GG                 | GG               | INTERGENIC      |               |                    |                    |
| SNP_67651_A_3824  | NW_004515791.1 | scaffold269 | 3824                    | AA                              | TT                 | TT               | INTERGENIC      |               |                    |                    |
| SNP_67652_A_9293  | NW_004515792.1 | scaffold271 | 9293                    | CC                              | TT                 | TT               | INTERGENIC      |               |                    |                    |
| SNP_67653_A_14234 | NW_004515792.1 | scaffold271 | 14234                   | CC                              | GG                 | GG               | INTERGENIC      |               |                    |                    |
| SNP_67654_A_15591 | NW_004515792.1 | scaffold271 | 15591                   | TT                              | AA                 | AA               | INTERGENIC      |               |                    |                    |
| SNP_67655_A_19504 | NW_004515792.1 | scaffold271 | 19504                   | TT                              | CC                 | CC               | INTERGENIC      |               |                    |                    |
| SNP_67657_A_19600 | NW_004515792.1 | scaffold271 | 19600                   | CC                              | TT                 | TT               | INTERGENIC      |               |                    |                    |
| SNP_67658_A_19690 | NW_004515792.1 | scaffold271 | 19690                   | TT                              | CC                 | CC               | INTERGENIC      |               |                    |                    |
| SNP_67659_A_19720 | NW_004515792.1 | scaffold271 | 19720                   | CC                              | TT                 | TT               | INTERGENIC      |               |                    |                    |
| SNP_67660_A_19732 | NW_004515792.1 | scaffold271 | 19732                   | TT                              | CC                 | CC               | INTERGENIC      |               |                    |                    |
| SNP_67661_A_19756 | NW_004515792.1 | scaffold271 | 19756                   | CC                              | TT                 | TT               | INTERGENIC      |               |                    |                    |
| SNP_67662_A_19927 | NW_004515792.1 | scaffold271 | 19927                   | AA                              | GG                 | GG               | INTERGENIC      |               |                    |                    |
| SNP_67663_A_19958 | NW_004515792.1 | scaffold271 | 19958                   | TT                              | AA                 | AA               | INTERGENIC      |               |                    |                    |
| SNP_67664_A_20006 | NW_004515792.1 | scaffold271 | 20006                   | AA                              | GG                 | GG               | INTERGENIC      |               |                    |                    |
| SNP_67665_A_20015 | NW_004515792.1 | scaffold271 | 20015                   | TT                              | CC                 | CC               | INTERGENIC      |               |                    |                    |
| SNP_67666_A_20018 | NW_004515792.1 | scaffold271 | 20018                   | TT                              | AA                 | AA               | INTERGENIC      |               |                    |                    |
| SNP_67667_A_20035 | NW_004515792.1 | scaffold271 | 20035                   | GG                              | AA                 | AA               | INTERGENIC      |               |                    |                    |



| SNPs IDs           | Chromosome IDs | Chromosomes | Physical positions (bp) | CDC Frontier (Reference genome) | (Pusa 1103 & HPNB) | (ILWC 46 & LPNB) | Sequence genome | Components of | Gene accession IDs           | Putative functions |
|--------------------|----------------|-------------|-------------------------|---------------------------------|--------------------|------------------|-----------------|---------------|------------------------------|--------------------|
| SNP_67668_A_20063  | NW_004515792.1 | scaffold271 | 20063                   | GG                              | AA                 | AA               | INTERGENIC      |               |                              |                    |
| SNP_67669_A_20075  | NW_004515792.1 | scaffold271 | 20075                   | CC                              | TT                 | TT               | INTERGENIC      |               |                              |                    |
| SNP_67670_A_20102  | NW_004515792.1 | scaffold271 | 20102                   | GG                              | AA                 | AA               | INTERGENIC      |               |                              |                    |
| SNP_67671_A_26654  | NW_004515792.1 | scaffold271 | 26654                   | GG                              | TT                 | TT               | INTERGENIC      |               |                              |                    |
| SNP_67672_A_27143  | NW_004515792.1 | scaffold271 | 27143                   | CC                              | TT                 | TT               | INTERGENIC      |               |                              |                    |
| SNP_67673_A_27177  | NW_004515792.1 | scaffold271 | 27177                   | CC                              | TT                 | TT               | INTERGENIC      |               |                              |                    |
| SNP_67674_A_71295  | NW_004515792.1 | scaffold271 | 71295                   | CC                              | AA                 | AA               | INTERGENIC      |               |                              |                    |
| SNP_67675_A_93534  | NW_004515792.1 | scaffold271 | 93534                   | TT                              | AA                 | AA               | INTERGENIC      |               |                              |                    |
| SNP_67676_A_96049  | NW_004515792.1 | scaffold271 | 96049                   | GG                              | TT                 | TT               | INTERGENIC      |               |                              |                    |
| SNP_67679_A_204852 | NW_004515792.1 | scaffold271 | 204852                  | AA                              | GG                 | GG               | INTERGENIC      |               |                              |                    |
| SNP_67680_A_204954 | NW_004515792.1 | scaffold271 | 204954                  | GG                              | AA                 | AA               | INTERGENIC      |               |                              |                    |
| SNP_67681_A_204988 | NW_004515792.1 | scaffold271 | 204988                  | GG                              | AA                 | AA               | INTERGENIC      |               |                              |                    |
| SNP_67682_A_205082 | NW_004515792.1 | scaffold271 | 205082                  | AA                              | GG                 | GG               | INTERGENIC      |               |                              |                    |
| SNP_67683_A_205119 | NW_004515792.1 | scaffold271 | 205119                  | AA                              | GG                 | GG               | INTERGENIC      |               |                              |                    |
| SNP_67684_A_205135 | NW_004515792.1 | scaffold271 | 205135                  | AA                              | GG                 | GG               | INTERGENIC      |               |                              |                    |
| SNP_67685_A_205167 | NW_004515792.1 | scaffold271 | 205167                  | GG                              | AA                 | AA               | INTERGENIC      |               |                              |                    |
| SNP_67686_A_205186 | NW_004515792.1 | scaffold271 | 205186                  | GG                              | CC                 | CC               | INTERGENIC      |               |                              |                    |
| SNP_67687_A_205308 | NW_004515792.1 | scaffold271 | 205308                  | GG                              | AA                 | AA               | INTERGENIC      |               |                              |                    |
| SNP_67688_A_205688 | NW_004515792.1 | scaffold271 | 205688                  | AA                              | GG                 | GG               | INTERGENIC      |               |                              |                    |
| SNP_67689_A_205919 | NW_004515792.1 | scaffold271 | 205919                  | AA                              | CC                 | CC               | INTERGENIC      |               |                              |                    |
| SNP_67691_A_205984 | NW_004515792.1 | scaffold271 | 205984                  | CC                              | TT                 | TT               | INTERGENIC      |               |                              |                    |
| SNP_67693_A_276755 | NW_004515792.1 | scaffold271 | 276755                  | CC                              | GG                 | GG               | URR             | 101511953     | uncharacterized LOC101511953 |                    |

| SNPs IDs           | Chromosome IDs | Chromosomes | Physical positions (bp) | CDC Frontier (Reference genome) | (Pusa 1103 & HPNB) | (ILWC 46 & LPNB) | Sequence Components of genome | Gene accession IDs | Putative functions                      |
|--------------------|----------------|-------------|-------------------------|---------------------------------|--------------------|------------------|-------------------------------|--------------------|-----------------------------------------|
| SNP_67694_A_276872 | NW_004515792.1 | scaffold271 | 276872                  | GG                              | AA                 | AA               | URR                           | 101511953          | uncharacterized LOC101511953            |
| SNP_67695_A_277292 | NW_004515792.1 | scaffold271 | 277292                  | GG                              | AA                 | AA               | URR                           | 101511953          | uncharacterized LOC101511953            |
| SNP_67696_A_26207  | NW_004515793.1 | scaffold273 | 26207                   | TT                              | AA                 | AA               | INTERGENIC                    |                    |                                         |
| SNP_67698_A_48834  | NW_004515793.1 | scaffold273 | 48834                   | TT                              | CC                 | CC               | INTERGENIC                    |                    |                                         |
| SNP_67701_A_50195  | NW_004515793.1 | scaffold273 | 50195                   | TT                              | AA                 | AA               | INTERGENIC                    |                    |                                         |
| SNP_67702_A_50199  | NW_004515793.1 | scaffold273 | 50199                   | TT                              | CC                 | CC               | INTERGENIC                    |                    |                                         |
| SNP_67703_A_50222  | NW_004515793.1 | scaffold273 | 50222                   | AA                              | TT                 | TT               | INTERGENIC                    |                    |                                         |
| SNP_67704_A_50430  | NW_004515793.1 | scaffold273 | 50430                   | GG                              | AA                 | AA               | INTERGENIC                    |                    |                                         |
| SNP_67705_A_50452  | NW_004515793.1 | scaffold273 | 50452                   | AA                              | GG                 | GG               | INTERGENIC                    |                    |                                         |
| SNP_67706_A_83263  | NW_004515793.1 | scaffold273 | 83263                   | TT                              | CC                 | CC               | INTERGENIC                    |                    |                                         |
| SNP_67707_A_83266  | NW_004515793.1 | scaffold273 | 83266                   | AA                              | GG                 | GG               | INTERGENIC                    |                    |                                         |
| SNP_67708_A_83287  | NW_004515793.1 | scaffold273 | 83287                   | AA                              | GG                 | GG               | INTERGENIC                    |                    |                                         |
| SNP_67709_A_83293  | NW_004515793.1 | scaffold273 | 83293                   | TT                              | CC                 | CC               | INTERGENIC                    |                    |                                         |
| SNP_67711_A_144009 | NW_004515793.1 | scaffold273 | 144009                  | TT                              | CC                 | CC               | INTERGENIC                    |                    |                                         |
| SNP_67712_A_190296 | NW_004515793.1 | scaffold273 | 190296                  | AA                              | GG                 | GG               | DRR                           | 101410558          | transfer RNA methionine (anticodon CAU) |
| SNP_67713_A_190348 | NW_004515793.1 | scaffold273 | 190348                  | AA                              | GG                 | GG               | DRR                           | 101410558          | transfer RNA methionine (anticodon CAU) |
| SNP_67714_A_190438 | NW_004515793.1 | scaffold273 | 190438                  | TT                              | CC                 | CC               | DRR                           | 101410558          | transfer RNA methionine (anticodon CAU) |
| SNP_67715_A_190486 | NW_004515793.1 | scaffold273 | 190486                  | CC                              | TT                 | TT               | DRR                           | 101410558          | transfer RNA methionine (anticodon CAU) |
| SNP_67716_A_190564 | NW_004515793.1 | scaffold273 | 190564                  | AA                              | CC                 | CC               | DRR                           | 101410558          | transfer RNA methionine (anticodon CAU) |
| SNP_67718_A_190683 | NW_004515793.1 | scaffold273 | 190683                  | GG                              | TT                 | TT               | DRR                           | 101410558          | transfer RNA methionine (anticodon CAU) |
| SNP_67719_A_190691 | NW_004515793.1 | scaffold273 | 190691                  | TT                              | CC                 | CC               | DRR                           | 101410558          | transfer RNA methionine (anticodon CAU) |
| SNP_67720_A_190765 | NW_004515793.1 | scaffold273 | 190765                  | AA                              | GG                 | GG               | DRR                           | 101410558          | transfer RNA methionine (anticodon CAU) |

| SNPs IDs           | Chromosome IDs | Chromosomes | Physical positions (bp) | CDC Frontier (Reference genome) | (Pusa 1103 & HPNB) | (ILWC 46 & LPNB) | Sequence Components of genome | Gene accession IDs | Putative functions                      |
|--------------------|----------------|-------------|-------------------------|---------------------------------|--------------------|------------------|-------------------------------|--------------------|-----------------------------------------|
| SNP_67721_A_190882 | NW_004515793.1 | scaffold273 | 190882                  | TT                              | CC                 | CC               | DRR                           | 101410558          | transfer RNA methionine (anticodon CAU) |
| SNP_67722_A_190905 | NW_004515793.1 | scaffold273 | 190905                  | TT                              | CC                 | CC               | DRR                           | 101410558          | transfer RNA methionine (anticodon CAU) |
| SNP_67723_A_190949 | NW_004515793.1 | scaffold273 | 190949                  | TT                              | GG                 | GG               | DRR                           | 101410558          | transfer RNA methionine (anticodon CAU) |
| SNP_67724_A_191739 | NW_004515793.1 | scaffold273 | 191739                  | TT                              | CC                 | CC               | URR                           | 101410558          | transfer RNA methionine (anticodon CAU) |
| SNP_67725_A_191750 | NW_004515793.1 | scaffold273 | 191750                  | GG                              | CC                 | CC               | URR                           | 101410558          | transfer RNA methionine (anticodon CAU) |
| SNP_67726_A_191760 | NW_004515793.1 | scaffold273 | 191760                  | AA                              | GG                 | GG               | URR                           | 101410558          | transfer RNA methionine (anticodon CAU) |
| SNP_67727_A_191841 | NW_004515793.1 | scaffold273 | 191841                  | TT                              | CC                 | CC               | URR                           | 101410558          | transfer RNA methionine (anticodon CAU) |
| SNP_67728_A_191857 | NW_004515793.1 | scaffold273 | 191857                  | AA                              | GG                 | GG               | URR                           | 101410558          | transfer RNA methionine (anticodon CAU) |
| SNP_67729_A_191858 | NW_004515793.1 | scaffold273 | 191858                  | CC                              | TT                 | TT               | URR                           | 101410558          | transfer RNA methionine (anticodon CAU) |
| SNP_67730_A_191870 | NW_004515793.1 | scaffold273 | 191870                  | TT                              | CC                 | CC               | URR                           | 101410558          | transfer RNA methionine (anticodon CAU) |
| SNP_67731_A_209802 | NW_004515793.1 | scaffold273 | 209802                  | TT                              | CC                 | CC               | URR                           | 101512919          | Unknown function                        |
| SNP_67733_A_209846 | NW_004515793.1 | scaffold273 | 209846                  | AA                              | CC                 | CC               | URR                           | 101512919          | Unknown function                        |
| SNP_67734_A_6470   | NW_004515794.1 | scaffold275 | 6470                    | AA                              | CC                 | CC               | INTERGENIC                    |                    |                                         |
| SNP_67735_A_7014   | NW_004515794.1 | scaffold275 | 7014                    | TT                              | CC                 | CC               | INTERGENIC                    |                    |                                         |
| SNP_67736_A_7834   | NW_004515794.1 | scaffold275 | 7834                    | AA                              | GG                 | GG               | INTERGENIC                    |                    |                                         |
| SNP_67737_A_57196  | NW_004515794.1 | scaffold275 | 57196                   | CC                              | TT                 | TT               | INTERGENIC                    |                    |                                         |
| SNP_67738_A_57199  | NW_004515794.1 | scaffold275 | 57199                   | TT                              | CC                 | CC               | INTERGENIC                    |                    |                                         |
| SNP_67739_A_57208  | NW_004515794.1 | scaffold275 | 57208                   | GG                              | CC                 | CC               | INTERGENIC                    |                    |                                         |
| SNP_67740_A_57214  | NW_004515794.1 | scaffold275 | 57214                   | AA                              | GG                 | GG               | INTERGENIC                    |                    |                                         |
| SNP_67741_A_59502  | NW_004515794.1 | scaffold275 | 59502                   | GG                              | AA                 | AA               | INTERGENIC                    |                    |                                         |
| SNP_67742_A_67385  | NW_004515794.1 | scaffold275 | 67385                   | CC                              | TT                 | TT               | INTERGENIC                    |                    |                                         |
| SNP_67744_A_78148  | NW_004515794.1 | scaffold275 | 78148                   | AA                              | CC                 | CC               | INTERGENIC                    |                    |                                         |

| SNPs IDs           | Chromosome IDs | Chromosomes | Physical positions (bp) | CDC Frontier (Reference genome) | (Pusa 1103 & HPNB) | (ILWC 46 & LPNB) | Sequence genome | Components of | Gene accession IDs | Putative functions |
|--------------------|----------------|-------------|-------------------------|---------------------------------|--------------------|------------------|-----------------|---------------|--------------------|--------------------|
| SNP_67745_A_115499 | NW_004515794.1 | scaffold275 | 115499                  | CC                              | TT                 | TT               | INTERGENIC      |               |                    |                    |
| SNP_67746_A_143668 | NW_004515794.1 | scaffold275 | 143668                  | CC                              | TT                 | TT               | INTERGENIC      |               |                    |                    |
| SNP_67747_A_143681 | NW_004515794.1 | scaffold275 | 143681                  | CC                              | TT                 | TT               | INTERGENIC      |               |                    |                    |
| SNP_67748_A_143768 | NW_004515794.1 | scaffold275 | 143768                  | AA                              | TT                 | TT               | INTERGENIC      |               |                    |                    |
| SNP_67749_A_143781 | NW_004515794.1 | scaffold275 | 143781                  | TT                              | CC                 | CC               | INTERGENIC      |               |                    |                    |
| SNP_67750_A_143900 | NW_004515794.1 | scaffold275 | 143900                  | TT                              | CC                 | CC               | INTERGENIC      |               |                    |                    |
| SNP_67751_A_144073 | NW_004515794.1 | scaffold275 | 144073                  | CC                              | TT                 | TT               | INTERGENIC      |               |                    |                    |
| SNP_67752_A_144086 | NW_004515794.1 | scaffold275 | 144086                  | CC                              | GG                 | GG               | INTERGENIC      |               |                    |                    |
| SNP_67753_A_145942 | NW_004515794.1 | scaffold275 | 145942                  | AA                              | GG                 | GG               | INTERGENIC      |               |                    |                    |
| SNP_67754_A_146150 | NW_004515794.1 | scaffold275 | 146150                  | AA                              | GG                 | GG               | INTERGENIC      |               |                    |                    |
| SNP_67755_A_146161 | NW_004515794.1 | scaffold275 | 146161                  | TT                              | CC                 | CC               | INTERGENIC      |               |                    |                    |
| SNP_67756_A_146249 | NW_004515794.1 | scaffold275 | 146249                  | CC                              | TT                 | TT               | INTERGENIC      |               |                    |                    |
| SNP_67757_A_146309 | NW_004515794.1 | scaffold275 | 146309                  | AA                              | CC                 | CC               | INTERGENIC      |               |                    |                    |
| SNP_67758_A_147189 | NW_004515794.1 | scaffold275 | 147189                  | CC                              | TT                 | TT               | INTERGENIC      |               |                    |                    |
| SNP_67759_A_147269 | NW_004515794.1 | scaffold275 | 147269                  | GG                              | AA                 | AA               | INTERGENIC      |               |                    |                    |
| SNP_67760_A_147583 | NW_004515794.1 | scaffold275 | 147583                  | TT                              | CC                 | CC               | INTERGENIC      |               |                    |                    |
| SNP_67761_A_147859 | NW_004515794.1 | scaffold275 | 147859                  | TT                              | AA                 | AA               | INTERGENIC      |               |                    |                    |
| SNP_67762_A_147889 | NW_004515794.1 | scaffold275 | 147889                  | CC                              | TT                 | TT               | INTERGENIC      |               |                    |                    |
| SNP_67763_A_148036 | NW_004515794.1 | scaffold275 | 148036                  | TT                              | CC                 | CC               | INTERGENIC      |               |                    |                    |
| SNP_67764_A_160838 | NW_004515794.1 | scaffold275 | 160838                  | TT                              | GG                 | GG               | INTERGENIC      |               |                    |                    |
| SNP_67765_A_162126 | NW_004515794.1 | scaffold275 | 162126                  | CC                              | GG                 | GG               | INTERGENIC      |               |                    |                    |
| SNP_67766_A_162270 | NW_004515794.1 | scaffold275 | 162270                  | TT                              | CC                 | CC               | INTERGENIC      |               |                    |                    |

| SNPs IDs           | Chromosome IDs | Chromosomes | Physical positions (bp) | CDC Frontier (Reference genome) | (Pusa 1103 & HPNB) | (ILWC 46 & LPNB) | Sequence Components of genome | Gene accession IDs | Putative functions           |
|--------------------|----------------|-------------|-------------------------|---------------------------------|--------------------|------------------|-------------------------------|--------------------|------------------------------|
| SNP_67768_A_162392 | NW_004515794.1 | scaffold275 | 162392                  | TT                              | AA                 | AA               | INTERGENIC                    |                    |                              |
| SNP_67769_A_162473 | NW_004515794.1 | scaffold275 | 162473                  | TT                              | AA                 | AA               | INTERGENIC                    |                    |                              |
| SNP_67771_A_208450 | NW_004515794.1 | scaffold275 | 208450                  | AA                              | GG                 | GG               | INTERGENIC                    |                    |                              |
| SNP_67772_A_208768 | NW_004515794.1 | scaffold275 | 208768                  | AA                              | GG                 | GG               | INTERGENIC                    |                    |                              |
| SNP_67773_A_208793 | NW_004515794.1 | scaffold275 | 208793                  | CC                              | GG                 | GG               | INTERGENIC                    |                    |                              |
| SNP_67774_A_208824 | NW_004515794.1 | scaffold275 | 208824                  | AA                              | GG                 | GG               | INTERGENIC                    |                    |                              |
| SNP_67775_A_208837 | NW_004515794.1 | scaffold275 | 208837                  | TT                              | CC                 | CC               | INTERGENIC                    |                    |                              |
| SNP_67776_A_275422 | NW_004515794.1 | scaffold275 | 275422                  | AA                              | GG                 | GG               | URR                           | 101489594          | uncharacterized LOC101489594 |
| SNP_67777_A_276858 | NW_004515794.1 | scaffold275 | 276858                  | CC                              | TT                 | TT               | INTERGENIC                    |                    |                              |
| SNP_67778_A_294527 | NW_004515794.1 | scaffold275 | 294527                  | GG                              | TT                 | TT               | INTERGENIC                    |                    |                              |
| SNP_67779_A_343927 | NW_004515794.1 | scaffold275 | 343927                  | TT                              | AA                 | AA               | URR                           | 101490250          | Unknown function             |
| SNP_67781_A_377116 | NW_004515794.1 | scaffold275 | 377116                  | TT                              | CC                 | CC               | INTERGENIC                    |                    |                              |
| SNP_67782_A_377585 | NW_004515794.1 | scaffold275 | 377585                  | AA                              | GG                 | GG               | DRR                           | 101514000          | Unknown function             |
| SNP_67783_A_383211 | NW_004515794.1 | scaffold275 | 383211                  | TT                              | CC                 | CC               | INTERGENIC                    |                    |                              |
| SNP_67784_A_403851 | NW_004515794.1 | scaffold275 | 403851                  | TT                              | CC                 | CC               | INTERGENIC                    |                    |                              |
| SNP_67785_A_405116 | NW_004515794.1 | scaffold275 | 405116                  | TT                              | CC                 | CC               | INTERGENIC                    |                    |                              |
| SNP_67786_A_405254 | NW_004515794.1 | scaffold275 | 405254                  | AA                              | CC                 | CC               | INTERGENIC                    |                    |                              |
| SNP_67787_A_405263 | NW_004515794.1 | scaffold275 | 405263                  | AA                              | GG                 | GG               | INTERGENIC                    |                    |                              |
| SNP_67788_A_405320 | NW_004515794.1 | scaffold275 | 405320                  | TT                              | CC                 | CC               | INTERGENIC                    |                    |                              |
| SNP_67789_A_405349 | NW_004515794.1 | scaffold275 | 405349                  | AA                              | GG                 | GG               | INTERGENIC                    |                    |                              |
| SNP_67790_A_406314 | NW_004515794.1 | scaffold275 | 406314                  | CC                              | GG                 | GG               | INTERGENIC                    |                    |                              |
| SNP_67791_A_406347 | NW_004515794.1 | scaffold275 | 406347                  | TT                              | GG                 | GG               | INTERGENIC                    |                    |                              |

| SNPs IDs           | Chromosome IDs | Chromosomes | Physical positions (bp) | CDC Frontier (Reference genome) | (Pusa 1103 & HPNB) | (ILWC 46 & LPNB) | Sequence Components of genome | Gene accession IDs | Putative functions                                 |
|--------------------|----------------|-------------|-------------------------|---------------------------------|--------------------|------------------|-------------------------------|--------------------|----------------------------------------------------|
| SNP_67792_A_424633 | NW_004515794.1 | scaffold275 | 424633                  | AA                              | TT                 | TT               | INTERGENIC                    |                    |                                                    |
| SNP_67793_A_491336 | NW_004515794.1 | scaffold275 | 491336                  | GG                              | TT                 | TT               | INTERGENIC                    |                    |                                                    |
| SNP_67794_A_491337 | NW_004515794.1 | scaffold275 | 491337                  | CC                              | AA                 | AA               | INTERGENIC                    |                    |                                                    |
| SNP_67795_A_491432 | NW_004515794.1 | scaffold275 | 491432                  | CC                              | TT                 | TT               | INTERGENIC                    |                    |                                                    |
| SNP_67796_A_491450 | NW_004515794.1 | scaffold275 | 491450                  | CC                              | TT                 | TT               | INTERGENIC                    |                    |                                                    |
| SNP_67797_A_491544 | NW_004515794.1 | scaffold275 | 491544                  | AA                              | TT                 | TT               | INTERGENIC                    |                    |                                                    |
| SNP_67798_A_491545 | NW_004515794.1 | scaffold275 | 491545                  | TT                              | AA                 | AA               | INTERGENIC                    |                    |                                                    |
| SNP_67799_A_492057 | NW_004515794.1 | scaffold275 | 492057                  | GG                              | AA                 | AA               | INTERGENIC                    |                    |                                                    |
| SNP_67800_A_492230 | NW_004515794.1 | scaffold275 | 492230                  | CC                              | TT                 | TT               | INTERGENIC                    |                    |                                                    |
| SNP_67801_A_492232 | NW_004515794.1 | scaffold275 | 492232                  | GG                              | AA                 | AA               | INTERGENIC                    |                    |                                                    |
| SNP_67802_A_492234 | NW_004515794.1 | scaffold275 | 492234                  | CC                              | AA                 | AA               | INTERGENIC                    |                    |                                                    |
| SNP_67803_A_492290 | NW_004515794.1 | scaffold275 | 492290                  | TT                              | AA                 | AA               | INTERGENIC                    |                    |                                                    |
| SNP_67804_A_492306 | NW_004515794.1 | scaffold275 | 492306                  | AA                              | GG                 | GG               | INTERGENIC                    |                    |                                                    |
| SNP_67805_A_546635 | NW_004515794.1 | scaffold275 | 546635                  | AA                              | GG                 | GG               | INTRON                        | 101514229          | activating signal cointegrator 1 complex subunit 3 |
| SNP_67806_A_546901 | NW_004515794.1 | scaffold275 | 546901                  | TT                              | CC                 | CC               | INTRON                        | 101514229          | activating signal cointegrator 1 complex subunit 3 |
| SNP_67807_A_546942 | NW_004515794.1 | scaffold275 | 546942                  | TT                              | CC                 | CC               | INTRON                        | 101514229          | activating signal cointegrator 1 complex subunit 3 |
| SNP_67808_A_546983 | NW_004515794.1 | scaffold275 | 546983                  | GG                              | AA                 | AA               | INTRON                        | 101514229          | activating signal cointegrator 1 complex subunit 3 |
| SNP_67809_A_563031 | NW_004515794.1 | scaffold275 | 563031                  | AA                              | GG                 | GG               | INTRON                        | 101514229          | activating signal cointegrator 1 complex subunit 3 |
| SNP_67810_A_570142 | NW_004515794.1 | scaffold275 | 570142                  | TT                              | CC                 | CC               | INTERGENIC                    |                    |                                                    |
| SNP_67811_A_577924 | NW_004515794.1 | scaffold275 | 577924                  | AA                              | GG                 | GG               | INTERGENIC                    |                    |                                                    |
| SNP_67812_A_578238 | NW_004515794.1 | scaffold275 | 578238                  | CC                              | TT                 | TT               | INTERGENIC                    |                    |                                                    |
| SNP_67813_A_581068 | NW_004515794.1 | scaffold275 | 581068                  | TT                              | AA                 | AA               | INTERGENIC                    |                    |                                                    |

| SNPs IDs           | Chromosome IDs | Chromosomes | Physical positions (bp) | CDC Frontier (Reference genome) | (Pusa 1103 & HPNB) | (ILWC 46 & LPNB) | Sequence genome | Components of | Gene accession IDs | Putative functions |
|--------------------|----------------|-------------|-------------------------|---------------------------------|--------------------|------------------|-----------------|---------------|--------------------|--------------------|
| SNP_67814_A_581078 | NW_004515794.1 | scaffold275 | 581078                  | AA                              | TT                 | TT               | INTERGENIC      |               |                    |                    |
| SNP_67815_A_581084 | NW_004515794.1 | scaffold275 | 581084                  | AA                              | CC                 | CC               | INTERGENIC      |               |                    |                    |
| SNP_67816_A_586290 | NW_004515794.1 | scaffold275 | 586290                  | AA                              | CC                 | CC               | INTERGENIC      |               |                    |                    |
| SNP_67817_A_586311 | NW_004515794.1 | scaffold275 | 586311                  | AA                              | GG                 | GG               | INTERGENIC      |               |                    |                    |
| SNP_67818_A_607272 | NW_004515794.1 | scaffold275 | 607272                  | TT                              | CC                 | CC               | INTERGENIC      |               |                    |                    |
| SNP_67819_A_607336 | NW_004515794.1 | scaffold275 | 607336                  | AA                              | GG                 | GG               | INTERGENIC      |               |                    |                    |
| SNP_67820_A_607341 | NW_004515794.1 | scaffold275 | 607341                  | GG                              | TT                 | TT               | INTERGENIC      |               |                    |                    |
| SNP_67821_A_622310 | NW_004515794.1 | scaffold275 | 622310                  | AA                              | TT                 | TT               | INTERGENIC      |               |                    |                    |
| SNP_67822_A_624306 | NW_004515794.1 | scaffold275 | 624306                  | TT                              | AA                 | AA               | INTERGENIC      |               |                    |                    |
| SNP_67823_A_624732 | NW_004515794.1 | scaffold275 | 624732                  | GG                              | TT                 | TT               | INTERGENIC      |               |                    |                    |
| SNP_67824_A_636739 | NW_004515794.1 | scaffold275 | 636739                  | AA                              | GG                 | GG               | INTERGENIC      |               |                    |                    |
| SNP_67825_A_647937 | NW_004515794.1 | scaffold275 | 647937                  | GG                              | TT                 | TT               | INTERGENIC      |               |                    |                    |
| SNP_67826_A_647956 | NW_004515794.1 | scaffold275 | 647956                  | TT                              | AA                 | AA               | INTERGENIC      |               |                    |                    |
| SNP_67827_A_655862 | NW_004515794.1 | scaffold275 | 655862                  | GG                              | AA                 | AA               | INTERGENIC      |               |                    |                    |
| SNP_67828_A_656871 | NW_004515794.1 | scaffold275 | 656871                  | GG                              | TT                 | TT               | INTERGENIC      |               |                    |                    |
| SNP_67829_A_671664 | NW_004515794.1 | scaffold275 | 671664                  | AA                              | TT                 | TT               | INTERGENIC      |               |                    |                    |
| SNP_67830_A_674562 | NW_004515794.1 | scaffold275 | 674562                  | AA                              | GG                 | GG               | INTERGENIC      |               |                    |                    |
| SNP_67831_A_681340 | NW_004515794.1 | scaffold275 | 681340                  | TT                              | CC                 | CC               | INTERGENIC      |               |                    |                    |
| SNP_67832_A_748846 | NW_004515794.1 | scaffold275 | 748846                  | GG                              | AA                 | AA               | INTERGENIC      |               |                    |                    |
| SNP_67833_A_749219 | NW_004515794.1 | scaffold275 | 749219                  | GG                              | AA                 | AA               | INTERGENIC      |               |                    |                    |
| SNP_67834_A_749222 | NW_004515794.1 | scaffold275 | 749222                  | TT                              | GG                 | GG               | INTERGENIC      |               |                    |                    |
| SNP_67835_A_758498 | NW_004515794.1 | scaffold275 | 758498                  | CC                              | GG                 | GG               | INTERGENIC      |               |                    |                    |

| SNPs IDs           | Chromosome IDs | Chromosomes | Physical positions (bp) | CDC Frontier (Reference genome) | (Pusa 1103 & HPNB) | (ILWC 46 & LPNB) | Sequence genome | Components of | Gene accession IDs | Putative functions |
|--------------------|----------------|-------------|-------------------------|---------------------------------|--------------------|------------------|-----------------|---------------|--------------------|--------------------|
| SNP_67836_A_758512 | NW_004515794.1 | scaffold275 | 758512                  | TT                              | CC                 | CC               | INTERGENIC      |               |                    |                    |
| SNP_67837_A_781095 | NW_004515794.1 | scaffold275 | 781095                  | GG                              | TT                 | TT               | INTERGENIC      |               |                    |                    |
| SNP_67838_A_781109 | NW_004515794.1 | scaffold275 | 781109                  | CC                              | TT                 | TT               | INTERGENIC      |               |                    |                    |
| SNP_67839_A_781135 | NW_004515794.1 | scaffold275 | 781135                  | GG                              | AA                 | AA               | INTERGENIC      |               |                    |                    |
| SNP_67840_A_781149 | NW_004515794.1 | scaffold275 | 781149                  | CC                              | AA                 | AA               | INTERGENIC      |               |                    |                    |
| SNP_67841_A_781174 | NW_004515794.1 | scaffold275 | 781174                  | AA                              | GG                 | GG               | INTERGENIC      |               |                    |                    |
| SNP_67842_A_781394 | NW_004515794.1 | scaffold275 | 781394                  | TT                              | AA                 | AA               | INTERGENIC      |               |                    |                    |
| SNP_67843_A_781420 | NW_004515794.1 | scaffold275 | 781420                  | AA                              | CC                 | CC               | INTERGENIC      |               |                    |                    |
| SNP_67844_A_781486 | NW_004515794.1 | scaffold275 | 781486                  | CC                              | GG                 | GG               | INTERGENIC      |               |                    |                    |
| SNP_67845_A_781502 | NW_004515794.1 | scaffold275 | 781502                  | GG                              | AA                 | AA               | INTERGENIC      |               |                    |                    |
| SNP_67846_A_781505 | NW_004515794.1 | scaffold275 | 781505                  | GG                              | AA                 | AA               | INTERGENIC      |               |                    |                    |
| SNP_67847_A_781881 | NW_004515794.1 | scaffold275 | 781881                  | CC                              | GG                 | GG               | INTERGENIC      |               |                    |                    |
| SNP_67848_A_782140 | NW_004515794.1 | scaffold275 | 782140                  | CC                              | TT                 | TT               | INTERGENIC      |               |                    |                    |
| SNP_67849_A_783272 | NW_004515794.1 | scaffold275 | 783272                  | AA                              | GG                 | GG               | INTERGENIC      |               |                    |                    |
| SNP_67850_A_783287 | NW_004515794.1 | scaffold275 | 783287                  | CC                              | AA                 | AA               | INTERGENIC      |               |                    |                    |
| SNP_67851_A_797836 | NW_004515794.1 | scaffold275 | 797836                  | AA                              | GG                 | GG               | INTERGENIC      |               |                    |                    |
| SNP_67853_A_798193 | NW_004515794.1 | scaffold275 | 798193                  | CC                              | AA                 | AA               | INTERGENIC      |               |                    |                    |
| SNP_67854_A_798214 | NW_004515794.1 | scaffold275 | 798214                  | AA                              | CC                 | CC               | INTERGENIC      |               |                    |                    |
| SNP_67855_A_798221 | NW_004515794.1 | scaffold275 | 798221                  | AA                              | GG                 | GG               | INTERGENIC      |               |                    |                    |
| SNP_67856_A_798394 | NW_004515794.1 | scaffold275 | 798394                  | AA                              | GG                 | GG               | INTERGENIC      |               |                    |                    |
| SNP_67857_A_802652 | NW_004515794.1 | scaffold275 | 802652                  | TT                              | AA                 | AA               | INTERGENIC      |               |                    |                    |
| SNP_67858_A_812186 | NW_004515794.1 | scaffold275 | 812186                  | GG                              | AA                 | AA               | INTERGENIC      |               |                    |                    |



| SNPs IDs           | Chromosome IDs | Chromosomes | Physical positions (bp) | CDC Frontier (Reference genome) | (Pusa 1103 & HPNB) | (ILWC 46 & LPNB) | Sequence genome | Components of | Gene accession IDs              | Putative functions |
|--------------------|----------------|-------------|-------------------------|---------------------------------|--------------------|------------------|-----------------|---------------|---------------------------------|--------------------|
| SNP_67859_A_812275 | NW_004515794.1 | scaffold275 | 812275                  | GG                              | AA                 | AA               | INTERGENIC      |               |                                 |                    |
| SNP_67860_A_812361 | NW_004515794.1 | scaffold275 | 812361                  | TT                              | AA                 | AA               | INTERGENIC      |               |                                 |                    |
| SNP_67861_A_812608 | NW_004515794.1 | scaffold275 | 812608                  | CC                              | TT                 | TT               | INTERGENIC      |               |                                 |                    |
| SNP_67862_A_812661 | NW_004515794.1 | scaffold275 | 812661                  | GG                              | CC                 | CC               | INTERGENIC      |               |                                 |                    |
| SNP_67863_A_812688 | NW_004515794.1 | scaffold275 | 812688                  | TT                              | GG                 | GG               | INTERGENIC      |               |                                 |                    |
| SNP_67864_A_812717 | NW_004515794.1 | scaffold275 | 812717                  | CC                              | TT                 | TT               | INTERGENIC      |               |                                 |                    |
| SNP_67865_A_812718 | NW_004515794.1 | scaffold275 | 812718                  | CC                              | TT                 | TT               | INTERGENIC      |               |                                 |                    |
| SNP_67866_A_813747 | NW_004515794.1 | scaffold275 | 813747                  | AA                              | CC                 | CC               | INTERGENIC      |               |                                 |                    |
| SNP_67867_A_1193   | NW_004515795.1 | scaffold276 | 1193                    | CC                              | TT                 | TT               | INTERGENIC      |               |                                 |                    |
| SNP_67869_A_1256   | NW_004515795.1 | scaffold276 | 1256                    | GG                              | AA                 | AA               | INTERGENIC      |               |                                 |                    |
| SNP_67870_A_1301   | NW_004515795.1 | scaffold276 | 1301                    | TT                              | CC                 | CC               | INTERGENIC      |               |                                 |                    |
| SNP_67871_A_21571  | NW_004515795.1 | scaffold276 | 21571                   | TT                              | CC                 | CC               | INTERGENIC      |               |                                 |                    |
| SNP_67872_A_53120  | NW_004515795.1 | scaffold276 | 53120                   | TT                              | GG                 | GG               | INTERGENIC      |               |                                 |                    |
| SNP_67873_A_483    | NW_004515796.1 | scaffold277 | 483                     | GG                              | TT                 | TT               | INTERGENIC      |               |                                 |                    |
| SNP_67874_A_642    | NW_004515796.1 | scaffold277 | 642                     | GG                              | AA                 | AA               | INTERGENIC      |               |                                 |                    |
| SNP_67875_A_675    | NW_004515796.1 | scaffold277 | 675                     | GG                              | TT                 | TT               | DRR             | 101492840     | sugar transport protein 10-like |                    |
| SNP_67876_A_729    | NW_004515796.1 | scaffold277 | 729                     | CC                              | TT                 | TT               | DRR             | 101492840     | sugar transport protein 10-like |                    |
| SNP_67877_A_823    | NW_004515796.1 | scaffold277 | 823                     | TT                              | GG                 | GG               | DRR             | 101492840     | sugar transport protein 10-like |                    |
| SNP_67878_A_873    | NW_004515796.1 | scaffold277 | 873                     | AA                              | GG                 | GG               | DRR             | 101492840     | sugar transport protein 10-like |                    |
| SNP_67879_A_879    | NW_004515796.1 | scaffold277 | 879                     | AA                              | GG                 | GG               | DRR             | 101492840     | sugar transport protein 10-like |                    |
| SNP_67880_A_975    | NW_004515796.1 | scaffold277 | 975                     | TT                              | CC                 | CC               | DRR             | 101492840     | sugar transport protein 10-like |                    |
| SNP_67881_A_1486   | NW_004515796.1 | scaffold277 | 1486                    | GG                              | AA                 | AA               | DRR             | 101492840     | sugar transport protein 10-like |                    |

| SNPs IDs          | Chromosome IDs | Chromosomes | Physical positions (bp) | CDC Frontier (Reference genome) | (Pusa 1103 & HPNB) | (ILWC 46 & LPNB) | Sequence Components of genome | Gene accession IDs | Putative functions              |
|-------------------|----------------|-------------|-------------------------|---------------------------------|--------------------|------------------|-------------------------------|--------------------|---------------------------------|
| SNP_67882_A_1514  | NW_004515796.1 | scaffold277 | 1514                    | TT                              | CC                 | CC               | DRR                           | 101492840          | sugar transport protein 10-like |
| SNP_67883_A_1596  | NW_004515796.1 | scaffold277 | 1596                    | AA                              | CC                 | CC               | DRR                           | 101492840          | sugar transport protein 10-like |
| SNP_67884_A_4322  | NW_004515796.1 | scaffold277 | 4322                    | AA                              | GG                 | GG               | URR                           | 101492840          | sugar transport protein 10-like |
| SNP_67886_A_4504  | NW_004515796.1 | scaffold277 | 4504                    | GG                              | AA                 | AA               | URR                           | 101492840          | sugar transport protein 10-like |
| SNP_67888_A_4781  | NW_004515796.1 | scaffold277 | 4781                    | AA                              | GG                 | GG               | URR                           | 101492840          | sugar transport protein 10-like |
| SNP_67890_A_4929  | NW_004515796.1 | scaffold277 | 4929                    | CC                              | GG                 | GG               | URR                           | 101492840          | sugar transport protein 10-like |
| SNP_67891_A_5231  | NW_004515796.1 | scaffold277 | 5231                    | CC                              | GG                 | GG               | URR                           | 101492840          | sugar transport protein 10-like |
| SNP_67892_A_5290  | NW_004515796.1 | scaffold277 | 5290                    | AA                              | GG                 | GG               | URR                           | 101492840          | sugar transport protein 10-like |
| SNP_67893_A_5326  | NW_004515796.1 | scaffold277 | 5326                    | GG                              | AA                 | AA               | URR                           | 101492840          | sugar transport protein 10-like |
| SNP_67894_A_5363  | NW_004515796.1 | scaffold277 | 5363                    | AA                              | TT                 | TT               | URR                           | 101492840          | sugar transport protein 10-like |
| SNP_67895_A_5367  | NW_004515796.1 | scaffold277 | 5367                    | AA                              | TT                 | TT               | URR                           | 101492840          | sugar transport protein 10-like |
| SNP_67896_A_5419  | NW_004515796.1 | scaffold277 | 5419                    | TT                              | CC                 | CC               | INTERGENIC                    |                    |                                 |
| SNP_67897_A_5467  | NW_004515796.1 | scaffold277 | 5467                    | TT                              | CC                 | CC               | INTERGENIC                    |                    |                                 |
| SNP_67898_A_5483  | NW_004515796.1 | scaffold277 | 5483                    | GG                              | AA                 | AA               | INTERGENIC                    |                    |                                 |
| SNP_67899_A_5488  | NW_004515796.1 | scaffold277 | 5488                    | CC                              | AA                 | AA               | INTERGENIC                    |                    |                                 |
| SNP_67900_A_5501  | NW_004515796.1 | scaffold277 | 5501                    | GG                              | TT                 | TT               | INTERGENIC                    |                    |                                 |
| SNP_67901_A_5502  | NW_004515796.1 | scaffold277 | 5502                    | GG                              | AA                 | AA               | INTERGENIC                    |                    |                                 |
| SNP_67902_A_5579  | NW_004515796.1 | scaffold277 | 5579                    | TT                              | CC                 | CC               | INTERGENIC                    |                    |                                 |
| SNP_67903_A_18779 | NW_004515796.1 | scaffold277 | 18779                   | CC                              | AA                 | AA               | INTERGENIC                    |                    |                                 |
| SNP_67904_A_59703 | NW_004515796.1 | scaffold277 | 59703                   | GG                              | AA                 | AA               | INTERGENIC                    |                    |                                 |
| SNP_67905_A_59710 | NW_004515796.1 | scaffold277 | 59710                   | GG                              | AA                 | AA               | INTERGENIC                    |                    |                                 |
| SNP_67906_A_59711 | NW_004515796.1 | scaffold277 | 59711                   | CC                              | AA                 | AA               | INTERGENIC                    |                    |                                 |

| SNPs IDs           | Chromosome IDs | Chromosomes | Physical positions (bp) | CDC Frontier (Reference genome) | (Pusa 1103 & HPNB) | (ILWC 46 & LPNB) | Sequence genome | Components of | Gene accession IDs | Putative functions |
|--------------------|----------------|-------------|-------------------------|---------------------------------|--------------------|------------------|-----------------|---------------|--------------------|--------------------|
| SNP_67907_A_60497  | NW_004515796.1 | scaffold277 | 60497                   | TT                              | CC                 | CC               | INTERGENIC      |               |                    |                    |
| SNP_67908_A_60583  | NW_004515796.1 | scaffold277 | 60583                   | AA                              | GG                 | GG               | INTERGENIC      |               |                    |                    |
| SNP_67909_A_63176  | NW_004515796.1 | scaffold277 | 63176                   | CC                              | AA                 | AA               | INTERGENIC      |               |                    |                    |
| SNP_67910_A_65765  | NW_004515796.1 | scaffold277 | 65765                   | GG                              | CC                 | CC               | INTERGENIC      |               |                    |                    |
| SNP_67911_A_72443  | NW_004515796.1 | scaffold277 | 72443                   | AA                              | GG                 | GG               | INTERGENIC      |               |                    |                    |
| SNP_67912_A_77075  | NW_004515796.1 | scaffold277 | 77075                   | TT                              | GG                 | GG               | INTERGENIC      |               |                    |                    |
| SNP_67913_A_79334  | NW_004515796.1 | scaffold277 | 79334                   | AA                              | CC                 | CC               | INTERGENIC      |               |                    |                    |
| SNP_67914_A_79360  | NW_004515796.1 | scaffold277 | 79360                   | CC                              | AA                 | AA               | INTERGENIC      |               |                    |                    |
| SNP_67915_A_79398  | NW_004515796.1 | scaffold277 | 79398                   | GG                              | AA                 | AA               | INTERGENIC      |               |                    |                    |
| SNP_67916_A_79713  | NW_004515796.1 | scaffold277 | 79713                   | CC                              | AA                 | AA               | INTERGENIC      |               |                    |                    |
| SNP_67917_A_79934  | NW_004515796.1 | scaffold277 | 79934                   | TT                              | GG                 | GG               | INTERGENIC      |               |                    |                    |
| SNP_67918_A_79947  | NW_004515796.1 | scaffold277 | 79947                   | TT                              | GG                 | GG               | INTERGENIC      |               |                    |                    |
| SNP_67919_A_132331 | NW_004515796.1 | scaffold277 | 132331                  | TT                              | CC                 | CC               | INTERGENIC      |               |                    |                    |
| SNP_67920_A_132337 | NW_004515796.1 | scaffold277 | 132337                  | TT                              | CC                 | CC               | INTERGENIC      |               |                    |                    |
| SNP_67921_A_132341 | NW_004515796.1 | scaffold277 | 132341                  | AA                              | GG                 | GG               | INTERGENIC      |               |                    |                    |
| SNP_67922_A_133884 | NW_004515796.1 | scaffold277 | 133884                  | AA                              | GG                 | GG               | INTERGENIC      |               |                    |                    |
| SNP_67923_A_142834 | NW_004515796.1 | scaffold277 | 142834                  | TT                              | AA                 | AA               | INTERGENIC      |               |                    |                    |
| SNP_67924_A_165452 | NW_004515796.1 | scaffold277 | 165452                  | GG                              | CC                 | CC               | INTERGENIC      |               |                    |                    |
| SNP_67925_A_165750 | NW_004515796.1 | scaffold277 | 165750                  | GG                              | TT                 | TT               | INTERGENIC      |               |                    |                    |
| SNP_67926_A_165758 | NW_004515796.1 | scaffold277 | 165758                  | AA                              | TT                 | TT               | INTERGENIC      |               |                    |                    |
| SNP_67927_A_165825 | NW_004515796.1 | scaffold277 | 165825                  | GG                              | TT                 | TT               | INTERGENIC      |               |                    |                    |
| SNP_67928_A_165865 | NW_004515796.1 | scaffold277 | 165865                  | TT                              | AA                 | AA               | INTERGENIC      |               |                    |                    |

| SNPs IDs           | Chromosome IDs | Chromosomes | Physical positions (bp) | CDC Frontier (Reference genome) | (Pusa 1103 & HPNB) | (ILWC 46 & LPNB) | Sequence genome | Components of | Gene accession IDs | Putative functions |
|--------------------|----------------|-------------|-------------------------|---------------------------------|--------------------|------------------|-----------------|---------------|--------------------|--------------------|
| SNP_67929_A_165979 | NW_004515796.1 | scaffold277 | 165979                  | TT                              | GG                 | GG               | INTERGENIC      |               |                    |                    |
| SNP_67930_A_166003 | NW_004515796.1 | scaffold277 | 166003                  | AA                              | TT                 | TT               | INTERGENIC      |               |                    |                    |
| SNP_67931_A_166230 | NW_004515796.1 | scaffold277 | 166230                  | TT                              | AA                 | AA               | INTERGENIC      |               |                    |                    |
| SNP_67932_A_185172 | NW_004515796.1 | scaffold277 | 185172                  | AA                              | GG                 | GG               | INTERGENIC      |               |                    |                    |
| SNP_67933_A_185189 | NW_004515796.1 | scaffold277 | 185189                  | TT                              | GG                 | GG               | INTERGENIC      |               |                    |                    |
| SNP_67934_A_188835 | NW_004515796.1 | scaffold277 | 188835                  | CC                              | AA                 | AA               | INTERGENIC      |               |                    |                    |
| SNP_67935_A_201691 | NW_004515796.1 | scaffold277 | 201691                  | TT                              | CC                 | CC               | INTERGENIC      |               |                    |                    |
| SNP_67936_A_201940 | NW_004515796.1 | scaffold277 | 201940                  | AA                              | GG                 | GG               | INTERGENIC      |               |                    |                    |
| SNP_67937_A_202038 | NW_004515796.1 | scaffold277 | 202038                  | AA                              | CC                 | CC               | INTERGENIC      |               |                    |                    |
| SNP_67938_A_202539 | NW_004515796.1 | scaffold277 | 202539                  | AA                              | GG                 | GG               | INTERGENIC      |               |                    |                    |
| SNP_67939_A_202681 | NW_004515796.1 | scaffold277 | 202681                  | TT                              | AA                 | AA               | INTERGENIC      |               |                    |                    |
| SNP_67940_A_202716 | NW_004515796.1 | scaffold277 | 202716                  | CC                              | TT                 | TT               | INTERGENIC      |               |                    |                    |
| SNP_67941_A_202796 | NW_004515796.1 | scaffold277 | 202796                  | AA                              | GG                 | GG               | INTERGENIC      |               |                    |                    |
| SNP_67942_A_202812 | NW_004515796.1 | scaffold277 | 202812                  | AA                              | GG                 | GG               | INTERGENIC      |               |                    |                    |
| SNP_67943_A_202839 | NW_004515796.1 | scaffold277 | 202839                  | AA                              | GG                 | GG               | INTERGENIC      |               |                    |                    |
| SNP_67944_A_202880 | NW_004515796.1 | scaffold277 | 202880                  | TT                              | GG                 | GG               | INTERGENIC      |               |                    |                    |
| SNP_67945_A_202903 | NW_004515796.1 | scaffold277 | 202903                  | GG                              | AA                 | AA               | INTERGENIC      |               |                    |                    |
| SNP_67946_A_203096 | NW_004515796.1 | scaffold277 | 203096                  | AA                              | TT                 | TT               | INTERGENIC      |               |                    |                    |
| SNP_67947_A_203196 | NW_004515796.1 | scaffold277 | 203196                  | GG                              | AA                 | AA               | INTERGENIC      |               |                    |                    |
| SNP_67948_A_205116 | NW_004515796.1 | scaffold277 | 205116                  | TT                              | CC                 | CC               | INTERGENIC      |               |                    |                    |
| SNP_67949_A_205166 | NW_004515796.1 | scaffold277 | 205166                  | GG                              | TT                 | TT               | INTERGENIC      |               |                    |                    |
| SNP_67950_A_205179 | NW_004515796.1 | scaffold277 | 205179                  | AA                              | GG                 | GG               | INTERGENIC      |               |                    |                    |

| SNPs IDs           | Chromosome IDs | Chromosomes | Physical positions (bp) | CDC Frontier (Reference genome) | (Pusa 1103 & HPNB) | (ILWC 46 & LPNB) | Sequence genome | Components of | Gene accession IDs | Putative functions |
|--------------------|----------------|-------------|-------------------------|---------------------------------|--------------------|------------------|-----------------|---------------|--------------------|--------------------|
| SNP_67951_A_205331 | NW_004515796.1 | scaffold277 | 205331                  | TT                              | CC                 | CC               | INTERGENIC      |               |                    |                    |
| SNP_67952_A_205337 | NW_004515796.1 | scaffold277 | 205337                  | TT                              | CC                 | CC               | INTERGENIC      |               |                    |                    |
| SNP_67953_A_205353 | NW_004515796.1 | scaffold277 | 205353                  | CC                              | TT                 | TT               | INTERGENIC      |               |                    |                    |
| SNP_67954_A_205416 | NW_004515796.1 | scaffold277 | 205416                  | TT                              | CC                 | CC               | INTERGENIC      |               |                    |                    |
| SNP_67956_A_211021 | NW_004515796.1 | scaffold277 | 211021                  | GG                              | TT                 | TT               | INTERGENIC      |               |                    |                    |
| SNP_67957_A_211032 | NW_004515796.1 | scaffold277 | 211032                  | GG                              | AA                 | AA               | INTERGENIC      |               |                    |                    |
| SNP_67958_A_218472 | NW_004515796.1 | scaffold277 | 218472                  | AA                              | TT                 | TT               | INTERGENIC      |               |                    |                    |
| SNP_67959_A_218582 | NW_004515796.1 | scaffold277 | 218582                  | AA                              | GG                 | GG               | INTERGENIC      |               |                    |                    |
| SNP_67960_A_218598 | NW_004515796.1 | scaffold277 | 218598                  | AA                              | TT                 | TT               | INTERGENIC      |               |                    |                    |
| SNP_67961_A_219641 | NW_004515796.1 | scaffold277 | 219641                  | GG                              | TT                 | TT               | INTERGENIC      |               |                    |                    |
| SNP_67962_A_247178 | NW_004515796.1 | scaffold277 | 247178                  | AA                              | CC                 | CC               | INTERGENIC      |               |                    |                    |
| SNP_67963_A_247438 | NW_004515796.1 | scaffold277 | 247438                  | AA                              | TT                 | TT               | INTERGENIC      |               |                    |                    |
| SNP_67964_A_247446 | NW_004515796.1 | scaffold277 | 247446                  | CC                              | TT                 | TT               | INTERGENIC      |               |                    |                    |
| SNP_67965_A_252096 | NW_004515796.1 | scaffold277 | 252096                  | CC                              | TT                 | TT               | INTERGENIC      |               |                    |                    |
| SNP_67966_A_252116 | NW_004515796.1 | scaffold277 | 252116                  | CC                              | TT                 | TT               | INTERGENIC      |               |                    |                    |
| SNP_67967_A_252175 | NW_004515796.1 | scaffold277 | 252175                  | TT                              | CC                 | CC               | INTERGENIC      |               |                    |                    |
| SNP_67968_A_252220 | NW_004515796.1 | scaffold277 | 252220                  | CC                              | AA                 | AA               | INTERGENIC      |               |                    |                    |
| SNP_67969_A_252352 | NW_004515796.1 | scaffold277 | 252352                  | AA                              | GG                 | GG               | INTERGENIC      |               |                    |                    |
| SNP_67970_A_252378 | NW_004515796.1 | scaffold277 | 252378                  | GG                              | AA                 | AA               | INTERGENIC      |               |                    |                    |
| SNP_67972_A_252496 | NW_004515796.1 | scaffold277 | 252496                  | AA                              | GG                 | GG               | INTERGENIC      |               |                    |                    |
| SNP_67973_A_5176   | NW_004515797.1 | scaffold280 | 5176                    | TT                              | AA                 | AA               | INTERGENIC      |               |                    |                    |
| SNP_67974_A_5203   | NW_004515797.1 | scaffold280 | 5203                    | CC                              | AA                 | AA               | INTERGENIC      |               |                    |                    |

| SNPs IDs          | Chromosome IDs | Chromosomes | Physical positions (bp) | CDC Frontier (Reference genome) | (Pusa 1103 & HPNB) | (ILWC 46 & LPNB) | Sequence genome | Components of | Gene accession IDs | Putative functions |
|-------------------|----------------|-------------|-------------------------|---------------------------------|--------------------|------------------|-----------------|---------------|--------------------|--------------------|
| SNP_67975_A_5220  | NW_004515797.1 | scaffold280 | 5220                    | TT                              | CC                 | CC               | INTERGENIC      |               |                    |                    |
| SNP_67976_A_5228  | NW_004515797.1 | scaffold280 | 5228                    | GG                              | AA                 | AA               | INTERGENIC      |               |                    |                    |
| SNP_67977_A_6449  | NW_004515797.1 | scaffold280 | 6449                    | CC                              | TT                 | TT               | INTERGENIC      |               |                    |                    |
| SNP_67978_A_10581 | NW_004515797.1 | scaffold280 | 10581                   | AA                              | CC                 | CC               | INTERGENIC      |               |                    |                    |
| SNP_67979_A_10664 | NW_004515797.1 | scaffold280 | 10664                   | TT                              | CC                 | CC               | INTERGENIC      |               |                    |                    |
| SNP_67981_A_15581 | NW_004515797.1 | scaffold280 | 15581                   | CC                              | AA                 | AA               | INTERGENIC      |               |                    |                    |
| SNP_67982_A_15602 | NW_004515797.1 | scaffold280 | 15602                   | CC                              | AA                 | AA               | INTERGENIC      |               |                    |                    |
| SNP_67983_A_17697 | NW_004515797.1 | scaffold280 | 17697                   | TT                              | GG                 | GG               | INTERGENIC      |               |                    |                    |
| SNP_67984_A_17730 | NW_004515797.1 | scaffold280 | 17730                   | AA                              | TT                 | TT               | INTERGENIC      |               |                    |                    |
| SNP_67985_A_17731 | NW_004515797.1 | scaffold280 | 17731                   | GG                              | AA                 | AA               | INTERGENIC      |               |                    |                    |
| SNP_67986_A_17755 | NW_004515797.1 | scaffold280 | 17755                   | AA                              | GG                 | GG               | INTERGENIC      |               |                    |                    |
| SNP_67987_A_17932 | NW_004515797.1 | scaffold280 | 17932                   | CC                              | AA                 | AA               | INTERGENIC      |               |                    |                    |
| SNP_67988_A_17936 | NW_004515797.1 | scaffold280 | 17936                   | TT                              | AA                 | AA               | INTERGENIC      |               |                    |                    |
| SNP_67989_A_17976 | NW_004515797.1 | scaffold280 | 17976                   | CC                              | AA                 | AA               | INTERGENIC      |               |                    |                    |
| SNP_67990_A_17984 | NW_004515797.1 | scaffold280 | 17984                   | AA                              | GG                 | GG               | INTERGENIC      |               |                    |                    |
| SNP_67991_A_18017 | NW_004515797.1 | scaffold280 | 18017                   | TT                              | CC                 | CC               | INTERGENIC      |               |                    |                    |
| SNP_67992_A_18020 | NW_004515797.1 | scaffold280 | 18020                   | GG                              | CC                 | CC               | INTERGENIC      |               |                    |                    |
| SNP_67993_A_23337 | NW_004515797.1 | scaffold280 | 23337                   | GG                              | AA                 | AA               | INTERGENIC      |               |                    |                    |
| SNP_67994_A_35056 | NW_004515797.1 | scaffold280 | 35056                   | AA                              | GG                 | GG               | URR             | 101495419     | Unknown function   |                    |
| SNP_67995_A_35138 | NW_004515797.1 | scaffold280 | 35138                   | GG                              | AA                 | AA               | URR             | 101495419     | Unknown function   |                    |
| SNP_67996_A_35181 | NW_004515797.1 | scaffold280 | 35181                   | TT                              | CC                 | CC               | INTERGENIC      |               |                    |                    |
| SNP_67997_A_35318 | NW_004515797.1 | scaffold280 | 35318                   | AA                              | TT                 | TT               | INTERGENIC      |               |                    |                    |

| SNPs IDs          | Chromosome IDs | Chromosomes | Physical positions (bp) | CDC Frontier (Reference genome) | (Pusa 1103 & HPNB) | (ILWC 46 & LPNB) | Sequence genome | Components of | Gene accession IDs | Putative functions |
|-------------------|----------------|-------------|-------------------------|---------------------------------|--------------------|------------------|-----------------|---------------|--------------------|--------------------|
| SNP_67998_A_47771 | NW_004515797.1 | scaffold280 | 47771                   | CC                              | GG                 | GG               | INTERGENIC      |               |                    |                    |
| SNP_67999_A_47777 | NW_004515797.1 | scaffold280 | 47777                   | TT                              | CC                 | CC               | INTERGENIC      |               |                    |                    |
| SNP_68001_A_58573 | NW_004515797.1 | scaffold280 | 58573                   | AA                              | CC                 | CC               | INTERGENIC      |               |                    |                    |
| SNP_68002_A_61294 | NW_004515797.1 | scaffold280 | 61294                   | AA                              | TT                 | TT               | INTERGENIC      |               |                    |                    |
| SNP_68003_A_61321 | NW_004515797.1 | scaffold280 | 61321                   | CC                              | TT                 | TT               | INTERGENIC      |               |                    |                    |
| SNP_68004_A_61333 | NW_004515797.1 | scaffold280 | 61333                   | AA                              | TT                 | TT               | INTERGENIC      |               |                    |                    |
| SNP_68005_A_61348 | NW_004515797.1 | scaffold280 | 61348                   | CC                              | AA                 | AA               | INTERGENIC      |               |                    |                    |
| SNP_68006_A_62526 | NW_004515797.1 | scaffold280 | 62526                   | CC                              | AA                 | AA               | INTERGENIC      |               |                    |                    |
| SNP_68007_A_70571 | NW_004515797.1 | scaffold280 | 70571                   | AA                              | GG                 | GG               | INTERGENIC      |               |                    |                    |
| SNP_68008_A_73649 | NW_004515797.1 | scaffold280 | 73649                   | TT                              | CC                 | CC               | INTERGENIC      |               |                    |                    |
| SNP_68009_A_73659 | NW_004515797.1 | scaffold280 | 73659                   | GG                              | TT                 | TT               | INTERGENIC      |               |                    |                    |
| SNP_68010_A_73675 | NW_004515797.1 | scaffold280 | 73675                   | GG                              | CC                 | CC               | INTERGENIC      |               |                    |                    |
| SNP_68011_A_73740 | NW_004515797.1 | scaffold280 | 73740                   | CC                              | TT                 | TT               | INTERGENIC      |               |                    |                    |
| SNP_68012_A_74198 | NW_004515797.1 | scaffold280 | 74198                   | TT                              | CC                 | CC               | INTERGENIC      |               |                    |                    |
| SNP_68013_A_74205 | NW_004515797.1 | scaffold280 | 74205                   | TT                              | CC                 | CC               | INTERGENIC      |               |                    |                    |
| SNP_68014_A_74222 | NW_004515797.1 | scaffold280 | 74222                   | CC                              | AA                 | AA               | INTERGENIC      |               |                    |                    |
| SNP_68015_A_74245 | NW_004515797.1 | scaffold280 | 74245                   | TT                              | GG                 | GG               | INTERGENIC      |               |                    |                    |
| SNP_68016_A_74248 | NW_004515797.1 | scaffold280 | 74248                   | TT                              | CC                 | CC               | INTERGENIC      |               |                    |                    |
| SNP_68017_A_77324 | NW_004515797.1 | scaffold280 | 77324                   | GG                              | AA                 | AA               | INTERGENIC      |               |                    |                    |
| SNP_68018_A_77344 | NW_004515797.1 | scaffold280 | 77344                   | AA                              | TT                 | TT               | INTERGENIC      |               |                    |                    |
| SNP_68019_A_77358 | NW_004515797.1 | scaffold280 | 77358                   | TT                              | AA                 | AA               | INTERGENIC      |               |                    |                    |
| SNP_68020_A_79300 | NW_004515797.1 | scaffold280 | 79300                   | AA                              | CC                 | CC               | INTERGENIC      |               |                    |                    |

| SNPs IDs           | Chromosome IDs | Chromosomes | Physical positions (bp) | CDC Frontier (Reference genome) | (Pusa 1103 & HPNB) | (ILWC 46 & LPNB) | Sequence Components of genome | Gene accession IDs | Putative functions           |
|--------------------|----------------|-------------|-------------------------|---------------------------------|--------------------|------------------|-------------------------------|--------------------|------------------------------|
| SNP_68022_A_92653  | NW_004515797.1 | scaffold280 | 92653                   | TT                              | AA                 | AA               | INTERGENIC                    |                    |                              |
| SNP_68023_A_97919  | NW_004515797.1 | scaffold280 | 97919                   | CC                              | AA                 | AA               | SYNONYMOUS_CODING             | 101494761          | uncharacterized LOC101494761 |
| SNP_68024_A_97957  | NW_004515797.1 | scaffold280 | 97957                   | TT                              | AA                 | AA               | NON_SYNONYMOUS_CODING         | 101494761          | uncharacterized LOC101494761 |
| SNP_68025_A_97959  | NW_004515797.1 | scaffold280 | 97959                   | TT                              | GG                 | GG               | NON_SYNONYMOUS_CODING         | 101494761          | uncharacterized LOC101494761 |
| SNP_68026_A_97978  | NW_004515797.1 | scaffold280 | 97978                   | TT                              | CC                 | CC               | INTRON                        | 101494761          | uncharacterized LOC101494761 |
| SNP_68027_A_97995  | NW_004515797.1 | scaffold280 | 97995                   | TT                              | CC                 | CC               | INTRON                        | 101494761          | uncharacterized LOC101494761 |
| SNP_68028_A_98175  | NW_004515797.1 | scaffold280 | 98175                   | AA                              | CC                 | CC               | SYNONYMOUS_CODING             | 101494761          | uncharacterized LOC101494761 |
| SNP_68029_A_98417  | NW_004515797.1 | scaffold280 | 98417                   | AA                              | CC                 | CC               | NON_SYNONYMOUS_CODING         | 101494761          | uncharacterized LOC101494761 |
| SNP_68030_A_106204 | NW_004515797.1 | scaffold280 | 106204                  | TT                              | AA                 | AA               | INTERGENIC                    |                    |                              |
| SNP_68031_A_106224 | NW_004515797.1 | scaffold280 | 106224                  | AA                              | GG                 | GG               | INTERGENIC                    |                    |                              |
| SNP_68032_A_106241 | NW_004515797.1 | scaffold280 | 106241                  | AA                              | GG                 | GG               | INTERGENIC                    |                    |                              |
| SNP_68033_A_106554 | NW_004515797.1 | scaffold280 | 106554                  | TT                              | AA                 | AA               | INTERGENIC                    |                    |                              |
| SNP_68034_A_106581 | NW_004515797.1 | scaffold280 | 106581                  | TT                              | CC                 | CC               | INTERGENIC                    |                    |                              |
| SNP_68035_A_107588 | NW_004515797.1 | scaffold280 | 107588                  | AA                              | GG                 | GG               | INTERGENIC                    |                    |                              |
| SNP_68036_A_107713 | NW_004515797.1 | scaffold280 | 107713                  | TT                              | GG                 | GG               | INTERGENIC                    |                    |                              |
| SNP_68037_A_107734 | NW_004515797.1 | scaffold280 | 107734                  | AA                              | CC                 | CC               | INTERGENIC                    |                    |                              |
| SNP_68038_A_107758 | NW_004515797.1 | scaffold280 | 107758                  | AA                              | GG                 | GG               | INTERGENIC                    |                    |                              |
| SNP_68039_A_107794 | NW_004515797.1 | scaffold280 | 107794                  | TT                              | CC                 | CC               | INTERGENIC                    |                    |                              |
| SNP_68040_A_107841 | NW_004515797.1 | scaffold280 | 107841                  | TT                              | GG                 | GG               | INTERGENIC                    |                    |                              |
| SNP_68041_A_108030 | NW_004515797.1 | scaffold280 | 108030                  | AA                              | TT                 | TT               | INTERGENIC                    |                    |                              |
| SNP_68042_A_108043 | NW_004515797.1 | scaffold280 | 108043                  | AA                              | GG                 | GG               | INTERGENIC                    |                    |                              |
| SNP_68043_A_108048 | NW_004515797.1 | scaffold280 | 108048                  | AA                              | CC                 | CC               | INTERGENIC                    |                    |                              |



| SNPs IDs           | Chromosome IDs | Chromosomes | Physical positions (bp) | CDC Frontier (Reference genome) | (Pusa 1103 & HPNB) | (ILWC 46 & LPNB) | Sequence Components of genome | Gene accession IDs | Putative functions |
|--------------------|----------------|-------------|-------------------------|---------------------------------|--------------------|------------------|-------------------------------|--------------------|--------------------|
| SNP_68044_A_108185 | NW_004515797.1 | scaffold280 | 108185                  | GG                              | CC                 | CC               | INTERGENIC                    |                    |                    |
| SNP_68045_A_110262 | NW_004515797.1 | scaffold280 | 110262                  | AA                              | GG                 | GG               | NON_SYNONYMOUS_CODING         | 101495089          | Unknown function   |
| SNP_68046_A_110356 | NW_004515797.1 | scaffold280 | 110356                  | TT                              | CC                 | CC               | SYNONYMOUS_CODING             | 101495089          | Unknown function   |
| SNP_68047_A_112047 | NW_004515797.1 | scaffold280 | 112047                  | AA                              | GG                 | GG               | URR                           | 101495089          | Unknown function   |
| SNP_68048_A_112072 | NW_004515797.1 | scaffold280 | 112072                  | CC                              | AA                 | AA               | URR                           | 101495089          | Unknown function   |
| SNP_68049_A_112108 | NW_004515797.1 | scaffold280 | 112108                  | GG                              | AA                 | AA               | URR                           | 101495089          | Unknown function   |
| SNP_68050_A_112145 | NW_004515797.1 | scaffold280 | 112145                  | AA                              | GG                 | GG               | URR                           | 101495089          | Unknown function   |
| SNP_68051_A_113381 | NW_004515797.1 | scaffold280 | 113381                  | AA                              | TT                 | TT               | URR                           | 101495089          | Unknown function   |
| SNP_68052_A_113385 | NW_004515797.1 | scaffold280 | 113385                  | TT                              | GG                 | GG               | URR                           | 101495089          | Unknown function   |
| SNP_68053_A_113428 | NW_004515797.1 | scaffold280 | 113428                  | GG                              | TT                 | TT               | URR                           | 101495089          | Unknown function   |
| SNP_68054_A_113440 | NW_004515797.1 | scaffold280 | 113440                  | TT                              | GG                 | GG               | URR                           | 101495089          | Unknown function   |
| SNP_68055_A_113463 | NW_004515797.1 | scaffold280 | 113463                  | AA                              | GG                 | GG               | URR                           | 101495089          | Unknown function   |
| SNP_68056_A_113514 | NW_004515797.1 | scaffold280 | 113514                  | TT                              | GG                 | GG               | URR                           | 101495089          | Unknown function   |
| SNP_68057_A_113527 | NW_004515797.1 | scaffold280 | 113527                  | AA                              | CC                 | CC               | URR                           | 101495089          | Unknown function   |
| SNP_68058_A_113567 | NW_004515797.1 | scaffold280 | 113567                  | CC                              | GG                 | GG               | INTERGENIC                    |                    |                    |
| SNP_68059_A_113783 | NW_004515797.1 | scaffold280 | 113783                  | AA                              | GG                 | GG               | INTERGENIC                    |                    |                    |
| SNP_68060_A_113826 | NW_004515797.1 | scaffold280 | 113826                  | AA                              | GG                 | GG               | INTERGENIC                    |                    |                    |
| SNP_68061_A_113883 | NW_004515797.1 | scaffold280 | 113883                  | AA                              | GG                 | GG               | INTERGENIC                    |                    |                    |
| SNP_68062_A_114202 | NW_004515797.1 | scaffold280 | 114202                  | AA                              | GG                 | GG               | INTERGENIC                    |                    |                    |
| SNP_68064_A_114817 | NW_004515797.1 | scaffold280 | 114817                  | TT                              | CC                 | CC               | INTERGENIC                    |                    |                    |
| SNP_68065_A_114840 | NW_004515797.1 | scaffold280 | 114840                  | AA                              | GG                 | GG               | INTERGENIC                    |                    |                    |
| SNP_68066_A_114920 | NW_004515797.1 | scaffold280 | 114920                  | TT                              | CC                 | CC               | INTERGENIC                    |                    |                    |

| SNPs IDs           | Chromosome IDs | Chromosomes | Physical positions (bp) | CDC Frontier (Reference genome) | (Pusa 1103 & HPNB) | (ILWC 46 & LPNB) | Sequence Components of genome | Gene accession IDs | Putative functions                      |
|--------------------|----------------|-------------|-------------------------|---------------------------------|--------------------|------------------|-------------------------------|--------------------|-----------------------------------------|
| SNP_68067_A_114938 | NW_004515797.1 | scaffold280 | 114938                  | AA                              | GG                 | GG               | INTERGENIC                    |                    |                                         |
| SNP_68068_A_115013 | NW_004515797.1 | scaffold280 | 115013                  | GG                              | AA                 | AA               | INTERGENIC                    |                    |                                         |
| SNP_68069_A_115105 | NW_004515797.1 | scaffold280 | 115105                  | AA                              | GG                 | GG               | INTERGENIC                    |                    |                                         |
| SNP_68070_A_115124 | NW_004515797.1 | scaffold280 | 115124                  | AA                              | GG                 | GG               | INTERGENIC                    |                    |                                         |
| SNP_68071_A_115195 | NW_004515797.1 | scaffold280 | 115195                  | TT                              | CC                 | CC               | INTERGENIC                    |                    |                                         |
| SNP_68072_A_115377 | NW_004515797.1 | scaffold280 | 115377                  | AA                              | GG                 | GG               | INTERGENIC                    |                    |                                         |
| SNP_68073_A_115460 | NW_004515797.1 | scaffold280 | 115460                  | TT                              | CC                 | CC               | INTERGENIC                    |                    |                                         |
| SNP_68074_A_115508 | NW_004515797.1 | scaffold280 | 115508                  | AA                              | GG                 | GG               | INTERGENIC                    |                    |                                         |
| SNP_68075_A_116800 | NW_004515797.1 | scaffold280 | 116800                  | TT                              | CC                 | CC               | DRR                           | 101410595          | transfer RNA tryptophan (anticodon CCA) |
| SNP_68076_A_116803 | NW_004515797.1 | scaffold280 | 116803                  | AA                              | GG                 | GG               | DRR                           | 101410595          | transfer RNA tryptophan (anticodon CCA) |
| SNP_68077_A_116899 | NW_004515797.1 | scaffold280 | 116899                  | AA                              | CC                 | CC               | DRR                           | 101410595          | transfer RNA tryptophan (anticodon CCA) |
| SNP_68078_A_116904 | NW_004515797.1 | scaffold280 | 116904                  | TT                              | CC                 | CC               | DRR                           | 101410595          | transfer RNA tryptophan (anticodon CCA) |
| SNP_68079_A_116930 | NW_004515797.1 | scaffold280 | 116930                  | AA                              | GG                 | GG               | DRR                           | 101410595          | transfer RNA tryptophan (anticodon CCA) |
| SNP_68080_A_118402 | NW_004515797.1 | scaffold280 | 118402                  | AA                              | GG                 | GG               | URR                           | 101410595          | transfer RNA tryptophan (anticodon CCA) |
| SNP_68081_A_118610 | NW_004515797.1 | scaffold280 | 118610                  | AA                              | CC                 | CC               | URR                           | 101410595          | transfer RNA tryptophan (anticodon CCA) |
| SNP_68082_A_118782 | NW_004515797.1 | scaffold280 | 118782                  | TT                              | CC                 | CC               | URR                           | 101410595          | transfer RNA tryptophan (anticodon CCA) |
| SNP_68083_A_118823 | NW_004515797.1 | scaffold280 | 118823                  | AA                              | GG                 | GG               | URR                           | 101410595          | transfer RNA tryptophan (anticodon CCA) |
| SNP_68084_A_118904 | NW_004515797.1 | scaffold280 | 118904                  | TT                              | CC                 | CC               | URR                           | 101410595          | transfer RNA tryptophan (anticodon CCA) |
| SNP_68085_A_118947 | NW_004515797.1 | scaffold280 | 118947                  | AA                              | CC                 | CC               | URR                           | 101410595          | transfer RNA tryptophan (anticodon CCA) |
| SNP_68086_A_119037 | NW_004515797.1 | scaffold280 | 119037                  | GG                              | CC                 | CC               | URR                           | 101410595          | transfer RNA tryptophan (anticodon CCA) |
| SNP_68087_A_119045 | NW_004515797.1 | scaffold280 | 119045                  | AA                              | GG                 | GG               | URR                           | 101410595          | transfer RNA tryptophan (anticodon CCA) |
| SNP_68088_A_119079 | NW_004515797.1 | scaffold280 | 119079                  | TT                              | GG                 | GG               | URR                           | 101410595          | transfer RNA tryptophan (anticodon CCA) |

| SNPs IDs           | Chromosome IDs | Chromosomes | Physical positions (bp) | CDC Frontier (Reference genome) | (Pusa 1103 & HPNB) | (ILWC 46 & LPNB) | Sequence genome | Components of | Gene accession IDs | Putative functions                      |
|--------------------|----------------|-------------|-------------------------|---------------------------------|--------------------|------------------|-----------------|---------------|--------------------|-----------------------------------------|
| SNP_68089_A_119080 | NW_004515797.1 | scaffold280 | 119080                  | AA                              | TT                 | TT               | URR             |               | 101410595          | transfer RNA tryptophan (anticodon CCA) |
| SNP_68090_A_119310 | NW_004515797.1 | scaffold280 | 119310                  | AA                              | CC                 | CC               | URR             |               | 101410595          | transfer RNA tryptophan (anticodon CCA) |
| SNP_68091_A_119320 | NW_004515797.1 | scaffold280 | 119320                  | TT                              | CC                 | CC               | URR             |               | 101410595          | transfer RNA tryptophan (anticodon CCA) |
| SNP_68092_A_119333 | NW_004515797.1 | scaffold280 | 119333                  | CC                              | TT                 | TT               | URR             |               | 101410595          | transfer RNA tryptophan (anticodon CCA) |
| SNP_68093_A_119412 | NW_004515797.1 | scaffold280 | 119412                  | AA                              | CC                 | CC               | URR             |               | 101410595          | transfer RNA tryptophan (anticodon CCA) |
| SNP_68094_A_119422 | NW_004515797.1 | scaffold280 | 119422                  | AA                              | GG                 | GG               | URR             |               | 101410595          | transfer RNA tryptophan (anticodon CCA) |
| SNP_68095_A_126670 | NW_004515797.1 | scaffold280 | 126670                  | AA                              | CC                 | CC               | INTERGENIC      |               |                    |                                         |
| SNP_68097_A_129022 | NW_004515797.1 | scaffold280 | 129022                  | AA                              | GG                 | GG               | INTERGENIC      |               |                    |                                         |
| SNP_68098_A_132330 | NW_004515797.1 | scaffold280 | 132330                  | GG                              | AA                 | AA               | INTERGENIC      |               |                    |                                         |
| SNP_68099_A_132336 | NW_004515797.1 | scaffold280 | 132336                  | TT                              | CC                 | CC               | INTERGENIC      |               |                    |                                         |
| SNP_68101_A_144312 | NW_004515797.1 | scaffold280 | 144312                  | TT                              | AA                 | AA               | INTERGENIC      |               |                    |                                         |
| SNP_68102_A_166230 | NW_004515797.1 | scaffold280 | 166230                  | CC                              | TT                 | TT               | INTERGENIC      |               |                    |                                         |
| SNP_68103_A_166261 | NW_004515797.1 | scaffold280 | 166261                  | GG                              | AA                 | AA               | INTERGENIC      |               |                    |                                         |
| SNP_68104_A_166308 | NW_004515797.1 | scaffold280 | 166308                  | CC                              | AA                 | AA               | INTERGENIC      |               |                    |                                         |
| SNP_68105_A_166500 | NW_004515797.1 | scaffold280 | 166500                  | GG                              | AA                 | AA               | INTERGENIC      |               |                    |                                         |
| SNP_68106_A_166564 | NW_004515797.1 | scaffold280 | 166564                  | AA                              | TT                 | TT               | INTERGENIC      |               |                    |                                         |
| SNP_68107_A_166630 | NW_004515797.1 | scaffold280 | 166630                  | TT                              | AA                 | AA               | INTERGENIC      |               |                    |                                         |
| SNP_68108_A_174152 | NW_004515797.1 | scaffold280 | 174152                  | GG                              | TT                 | TT               | INTERGENIC      |               |                    |                                         |
| SNP_68109_A_199482 | NW_004515797.1 | scaffold280 | 199482                  | AA                              | GG                 | GG               | INTERGENIC      |               |                    |                                         |
| SNP_68110_A_199889 | NW_004515797.1 | scaffold280 | 199889                  | GG                              | AA                 | AA               | INTERGENIC      |               |                    |                                         |
| SNP_68111_A_206063 | NW_004515797.1 | scaffold280 | 206063                  | AA                              | GG                 | GG               | INTERGENIC      |               |                    |                                         |
| SNP_68112_A_206136 | NW_004515797.1 | scaffold280 | 206136                  | CC                              | GG                 | GG               | INTERGENIC      |               |                    |                                         |

| SNPs IDs           | Chromosome IDs | Chromosomes | Physical positions (bp) | CDC Frontier (Reference genome) | (Pusa 1103 & HPNB) | (ILWC 46 & LPNB) | Sequence genome | Components of | Gene accession IDs | Putative functions |
|--------------------|----------------|-------------|-------------------------|---------------------------------|--------------------|------------------|-----------------|---------------|--------------------|--------------------|
| SNP_68113_A_206273 | NW_004515797.1 | scaffold280 | 206273                  | CC                              | AA                 | AA               | INTERGENIC      |               |                    |                    |
| SNP_68114_A_216661 | NW_004515797.1 | scaffold280 | 216661                  | GG                              | AA                 | AA               | INTERGENIC      |               |                    |                    |
| SNP_68115_A_217409 | NW_004515797.1 | scaffold280 | 217409                  | AA                              | GG                 | GG               | INTERGENIC      |               |                    |                    |
| SNP_68116_A_220271 | NW_004515797.1 | scaffold280 | 220271                  | AA                              | CC                 | CC               | INTERGENIC      |               |                    |                    |
| SNP_68117_A_258911 | NW_004515797.1 | scaffold280 | 258911                  | CC                              | AA                 | AA               | INTERGENIC      |               |                    |                    |
| SNP_68119_A_283234 | NW_004515797.1 | scaffold280 | 283234                  | GG                              | AA                 | AA               | INTERGENIC      |               |                    |                    |
| SNP_68120_A_294680 | NW_004515797.1 | scaffold280 | 294680                  | AA                              | GG                 | GG               | INTERGENIC      |               |                    |                    |
| SNP_68121_A_294681 | NW_004515797.1 | scaffold280 | 294681                  | AA                              | GG                 | GG               | INTERGENIC      |               |                    |                    |
| SNP_68122_A_294980 | NW_004515797.1 | scaffold280 | 294980                  | AA                              | GG                 | GG               | INTERGENIC      |               |                    |                    |
| SNP_68123_A_298356 | NW_004515797.1 | scaffold280 | 298356                  | TT                              | AA                 | AA               | INTERGENIC      |               |                    |                    |
| SNP_68124_A_302072 | NW_004515797.1 | scaffold280 | 302072                  | TT                              | CC                 | CC               | INTERGENIC      |               |                    |                    |
| SNP_68125_A_302468 | NW_004515797.1 | scaffold280 | 302468                  | GG                              | CC                 | CC               | INTERGENIC      |               |                    |                    |
| SNP_68126_A_302535 | NW_004515797.1 | scaffold280 | 302535                  | AA                              | CC                 | CC               | INTERGENIC      |               |                    |                    |
| SNP_68127_A_309062 | NW_004515797.1 | scaffold280 | 309062                  | GG                              | TT                 | TT               | INTERGENIC      |               |                    |                    |
| SNP_68128_A_309065 | NW_004515797.1 | scaffold280 | 309065                  | TT                              | AA                 | AA               | INTERGENIC      |               |                    |                    |
| SNP_68129_A_319725 | NW_004515797.1 | scaffold280 | 319725                  | TT                              | GG                 | GG               | INTERGENIC      |               |                    |                    |
| SNP_68130_A_319835 | NW_004515797.1 | scaffold280 | 319835                  | TT                              | GG                 | GG               | INTERGENIC      |               |                    |                    |
| SNP_68131_A_319848 | NW_004515797.1 | scaffold280 | 319848                  | CC                              | AA                 | AA               | INTERGENIC      |               |                    |                    |
| SNP_68132_A_320172 | NW_004515797.1 | scaffold280 | 320172                  | TT                              | CC                 | CC               | INTERGENIC      |               |                    |                    |
| SNP_68133_A_324390 | NW_004515797.1 | scaffold280 | 324390                  | TT                              | GG                 | GG               | INTERGENIC      |               |                    |                    |
| SNP_68134_A_324426 | NW_004515797.1 | scaffold280 | 324426                  | CC                              | TT                 | TT               | INTERGENIC      |               |                    |                    |
| SNP_68135_A_324466 | NW_004515797.1 | scaffold280 | 324466                  | AA                              | CC                 | CC               | INTERGENIC      |               |                    |                    |

| SNPs IDs           | Chromosome IDs | Chromosomes | Physical positions (bp) | CDC Frontier (Reference genome) | (Pusa 1103 & HPNB) | (ILWC 46 & LPNB) | Sequence Components of genome | Gene accession IDs | Putative functions |
|--------------------|----------------|-------------|-------------------------|---------------------------------|--------------------|------------------|-------------------------------|--------------------|--------------------|
| SNP_68136_A_324472 | NW_004515797.1 | scaffold280 | 324472                  | GG                              | AA                 | AA               | INTERGENIC                    |                    |                    |
| SNP_68137_A_324527 | NW_004515797.1 | scaffold280 | 324527                  | TT                              | AA                 | AA               | INTERGENIC                    |                    |                    |
| SNP_68138_A_335237 | NW_004515797.1 | scaffold280 | 335237                  | TT                              | CC                 | CC               | INTERGENIC                    |                    |                    |
| SNP_68139_A_344009 | NW_004515797.1 | scaffold280 | 344009                  | TT                              | AA                 | AA               | INTERGENIC                    |                    |                    |
| SNP_68140_A_351773 | NW_004515797.1 | scaffold280 | 351773                  | GG                              | AA                 | AA               | INTERGENIC                    |                    |                    |
| SNP_68141_A_351906 | NW_004515797.1 | scaffold280 | 351906                  | CC                              | TT                 | TT               | INTERGENIC                    |                    |                    |
| SNP_68142_A_352432 | NW_004515797.1 | scaffold280 | 352432                  | CC                              | AA                 | AA               | INTERGENIC                    |                    |                    |
| SNP_68143_A_352450 | NW_004515797.1 | scaffold280 | 352450                  | TT                              | CC                 | CC               | INTERGENIC                    |                    |                    |
| SNP_68144_A_352542 | NW_004515797.1 | scaffold280 | 352542                  | TT                              | CC                 | CC               | INTERGENIC                    |                    |                    |
| SNP_68145_A_366869 | NW_004515797.1 | scaffold280 | 366869                  | GG                              | TT                 | TT               | INTERGENIC                    |                    |                    |
| SNP_68146_A_373421 | NW_004515797.1 | scaffold280 | 373421                  | AA                              | GG                 | GG               | URR                           | 101495750          | Unknown function   |
| SNP_68147_A_373494 | NW_004515797.1 | scaffold280 | 373494                  | GG                              | AA                 | AA               | URR                           | 101495750          | Unknown function   |
| SNP_68148_A_373644 | NW_004515797.1 | scaffold280 | 373644                  | TT                              | CC                 | CC               | URR                           | 101495750          | Unknown function   |
| SNP_68149_A_373785 | NW_004515797.1 | scaffold280 | 373785                  | AA                              | GG                 | GG               | URR                           | 101495750          | Unknown function   |
| SNP_68150_A_374425 | NW_004515797.1 | scaffold280 | 374425                  | AA                              | CC                 | CC               | INTERGENIC                    |                    |                    |
| SNP_68151_A_374436 | NW_004515797.1 | scaffold280 | 374436                  | CC                              | TT                 | TT               | INTERGENIC                    |                    |                    |
| SNP_68152_A_374764 | NW_004515797.1 | scaffold280 | 374764                  | AA                              | GG                 | GG               | INTERGENIC                    |                    |                    |
| SNP_68153_A_374789 | NW_004515797.1 | scaffold280 | 374789                  | TT                              | GG                 | GG               | INTERGENIC                    |                    |                    |
| SNP_68154_A_374811 | NW_004515797.1 | scaffold280 | 374811                  | AA                              | GG                 | GG               | INTERGENIC                    |                    |                    |
| SNP_68155_A_375152 | NW_004515797.1 | scaffold280 | 375152                  | AA                              | GG                 | GG               | INTERGENIC                    |                    |                    |
| SNP_68156_A_375214 | NW_004515797.1 | scaffold280 | 375214                  | AA                              | CC                 | CC               | INTERGENIC                    |                    |                    |
| SNP_68157_A_375412 | NW_004515797.1 | scaffold280 | 375412                  | CC                              | TT                 | TT               | INTERGENIC                    |                    |                    |

| SNPs IDs           | Chromosome IDs | Chromosomes | Physical positions (bp) | CDC Frontier (Reference genome) | (Pusa 1103 & HPNB) | (ILWC 46 & LPNB) | Sequence genome | Components of | Gene accession IDs | Putative functions |
|--------------------|----------------|-------------|-------------------------|---------------------------------|--------------------|------------------|-----------------|---------------|--------------------|--------------------|
| SNP_68158_A_378853 | NW_004515797.1 | scaffold280 | 378853                  | CC                              | AA                 | AA               | INTERGENIC      |               |                    |                    |
| SNP_68159_A_378885 | NW_004515797.1 | scaffold280 | 378885                  | TT                              | AA                 | AA               | INTERGENIC      |               |                    |                    |
| SNP_68160_A_378934 | NW_004515797.1 | scaffold280 | 378934                  | TT                              | CC                 | CC               | INTERGENIC      |               |                    |                    |
| SNP_68161_A_379510 | NW_004515797.1 | scaffold280 | 379510                  | TT                              | CC                 | CC               | INTERGENIC      |               |                    |                    |
| SNP_68162_A_379573 | NW_004515797.1 | scaffold280 | 379573                  | AA                              | TT                 | TT               | INTERGENIC      |               |                    |                    |
| SNP_68163_A_380426 | NW_004515797.1 | scaffold280 | 380426                  | GG                              | AA                 | AA               | INTERGENIC      |               |                    |                    |
| SNP_68164_A_381816 | NW_004515797.1 | scaffold280 | 381816                  | AA                              | CC                 | CC               | INTERGENIC      |               |                    |                    |
| SNP_68165_A_381825 | NW_004515797.1 | scaffold280 | 381825                  | AA                              | TT                 | TT               | INTERGENIC      |               |                    |                    |
| SNP_68166_A_381827 | NW_004515797.1 | scaffold280 | 381827                  | AA                              | GG                 | GG               | INTERGENIC      |               |                    |                    |
| SNP_68167_A_381835 | NW_004515797.1 | scaffold280 | 381835                  | TT                              | GG                 | GG               | INTERGENIC      |               |                    |                    |
| SNP_68168_A_381909 | NW_004515797.1 | scaffold280 | 381909                  | GG                              | AA                 | AA               | INTERGENIC      |               |                    |                    |
| SNP_68169_A_382141 | NW_004515797.1 | scaffold280 | 382141                  | GG                              | TT                 | TT               | INTERGENIC      |               |                    |                    |
| SNP_68170_A_382196 | NW_004515797.1 | scaffold280 | 382196                  | GG                              | AA                 | AA               | INTERGENIC      |               |                    |                    |
| SNP_68171_A_385613 | NW_004515797.1 | scaffold280 | 385613                  | GG                              | AA                 | AA               | INTERGENIC      |               |                    |                    |
| SNP_68172_A_385616 | NW_004515797.1 | scaffold280 | 385616                  | CC                              | AA                 | AA               | INTERGENIC      |               |                    |                    |
| SNP_68173_A_385678 | NW_004515797.1 | scaffold280 | 385678                  | AA                              | CC                 | CC               | INTERGENIC      |               |                    |                    |
| SNP_68174_A_385887 | NW_004515797.1 | scaffold280 | 385887                  | GG                              | TT                 | TT               | INTERGENIC      |               |                    |                    |
| SNP_68175_A_626    | NW_004515798.1 | scaffold281 | 626                     | TT                              | CC                 | CC               | INTERGENIC      |               |                    |                    |
| SNP_68176_A_629    | NW_004515798.1 | scaffold281 | 629                     | CC                              | TT                 | TT               | INTERGENIC      |               |                    |                    |
| SNP_68177_A_699    | NW_004515798.1 | scaffold281 | 699                     | AA                              | GG                 | GG               | INTERGENIC      |               |                    |                    |
| SNP_68178_A_739    | NW_004515798.1 | scaffold281 | 739                     | AA                              | TT                 | TT               | INTERGENIC      |               |                    |                    |
| SNP_68179_A_791    | NW_004515798.1 | scaffold281 | 791                     | GG                              | AA                 | AA               | INTERGENIC      |               |                    |                    |

| SNPs IDs         | Chromosome IDs | Chromosomes | Physical positions (bp) | CDC Frontier (Reference genome) | (Pusa 1103 & HPNB) | (ILWC 46 & LPNB) | Sequence genome | Components of | Gene accession IDs | Putative functions |
|------------------|----------------|-------------|-------------------------|---------------------------------|--------------------|------------------|-----------------|---------------|--------------------|--------------------|
| SNP_68180_A_793  | NW_004515798.1 | scaffold281 | 793                     | GG                              | AA                 | AA               | INTERGENIC      |               |                    |                    |
| SNP_68181_A_802  | NW_004515798.1 | scaffold281 | 802                     | AA                              | GG                 | GG               | INTERGENIC      |               |                    |                    |
| SNP_68182_A_817  | NW_004515798.1 | scaffold281 | 817                     | CC                              | GG                 | GG               | INTERGENIC      |               |                    |                    |
| SNP_68183_A_857  | NW_004515798.1 | scaffold281 | 857                     | GG                              | AA                 | AA               | INTERGENIC      |               |                    |                    |
| SNP_68184_A_895  | NW_004515798.1 | scaffold281 | 895                     | AA                              | CC                 | CC               | INTERGENIC      |               |                    |                    |
| SNP_68185_A_910  | NW_004515798.1 | scaffold281 | 910                     | TT                              | CC                 | CC               | INTERGENIC      |               |                    |                    |
| SNP_68186_A_930  | NW_004515798.1 | scaffold281 | 930                     | GG                              | AA                 | AA               | INTERGENIC      |               |                    |                    |
| SNP_68187_A_1045 | NW_004515798.1 | scaffold281 | 1045                    | GG                              | AA                 | AA               | INTERGENIC      |               |                    |                    |
| SNP_68188_A_1170 | NW_004515798.1 | scaffold281 | 1170                    | CC                              | TT                 | TT               | INTERGENIC      |               |                    |                    |
| SNP_68189_A_1195 | NW_004515798.1 | scaffold281 | 1195                    | CC                              | TT                 | TT               | INTERGENIC      |               |                    |                    |
| SNP_68190_A_1217 | NW_004515798.1 | scaffold281 | 1217                    | GG                              | TT                 | TT               | INTERGENIC      |               |                    |                    |
| SNP_68191_A_1251 | NW_004515798.1 | scaffold281 | 1251                    | AA                              | GG                 | GG               | INTERGENIC      |               |                    |                    |
| SNP_68193_A_1322 | NW_004515798.1 | scaffold281 | 1322                    | TT                              | CC                 | CC               | INTERGENIC      |               |                    |                    |
| SNP_68196_A_1547 | NW_004515798.1 | scaffold281 | 1547                    | TT                              | CC                 | CC               | INTERGENIC      |               |                    |                    |
| SNP_68197_A_1618 | NW_004515798.1 | scaffold281 | 1618                    | GG                              | TT                 | TT               | INTERGENIC      |               |                    |                    |
| SNP_68198_A_1652 | NW_004515798.1 | scaffold281 | 1652                    | TT                              | AA                 | AA               | INTERGENIC      |               |                    |                    |
| SNP_68199_A_1653 | NW_004515798.1 | scaffold281 | 1653                    | GG                              | AA                 | AA               | INTERGENIC      |               |                    |                    |
| SNP_68200_A_1657 | NW_004515798.1 | scaffold281 | 1657                    | TT                              | CC                 | CC               | INTERGENIC      |               |                    |                    |
| SNP_68201_A_1661 | NW_004515798.1 | scaffold281 | 1661                    | TT                              | CC                 | CC               | INTERGENIC      |               |                    |                    |
| SNP_68202_A_1711 | NW_004515798.1 | scaffold281 | 1711                    | AA                              | GG                 | GG               | INTERGENIC      |               |                    |                    |
| SNP_68203_A_1744 | NW_004515798.1 | scaffold281 | 1744                    | AA                              | GG                 | GG               | INTERGENIC      |               |                    |                    |
| SNP_68204_A_1755 | NW_004515798.1 | scaffold281 | 1755                    | CC                              | TT                 | TT               | INTERGENIC      |               |                    |                    |

| SNPs IDs         | Chromosome IDs | Chromosomes | Physical positions (bp) | CDC Frontier (Reference genome) | (Pusa 1103 & HPNB) | (ILWC 46 & LPNB) | Sequence genome | Components of | Gene accession IDs | Putative functions |
|------------------|----------------|-------------|-------------------------|---------------------------------|--------------------|------------------|-----------------|---------------|--------------------|--------------------|
| SNP_68205_A_1775 | NW_004515798.1 | scaffold281 | 1775                    | AA                              | GG                 | GG               | INTERGENIC      |               |                    |                    |
| SNP_68206_A_1779 | NW_004515798.1 | scaffold281 | 1779                    | AA                              | GG                 | GG               | INTERGENIC      |               |                    |                    |
| SNP_68207_A_1782 | NW_004515798.1 | scaffold281 | 1782                    | GG                              | AA                 | AA               | INTERGENIC      |               |                    |                    |
| SNP_68208_A_2138 | NW_004515798.1 | scaffold281 | 2138                    | AA                              | GG                 | GG               | INTERGENIC      |               |                    |                    |
| SNP_68209_A_2159 | NW_004515798.1 | scaffold281 | 2159                    | GG                              | CC                 | CC               | INTERGENIC      |               |                    |                    |
| SNP_68211_A_2273 | NW_004515798.1 | scaffold281 | 2273                    | CC                              | TT                 | TT               | INTERGENIC      |               |                    |                    |
| SNP_68212_A_2278 | NW_004515798.1 | scaffold281 | 2278                    | TT                              | CC                 | CC               | INTERGENIC      |               |                    |                    |
| SNP_68213_A_2286 | NW_004515798.1 | scaffold281 | 2286                    | AA                              | TT                 | TT               | INTERGENIC      |               |                    |                    |
| SNP_68214_A_2624 | NW_004515798.1 | scaffold281 | 2624                    | TT                              | CC                 | CC               | INTERGENIC      |               |                    |                    |
| SNP_68215_A_2625 | NW_004515798.1 | scaffold281 | 2625                    | TT                              | GG                 | GG               | INTERGENIC      |               |                    |                    |
| SNP_68216_A_2659 | NW_004515798.1 | scaffold281 | 2659                    | CC                              | TT                 | TT               | INTERGENIC      |               |                    |                    |
| SNP_68217_A_2935 | NW_004515798.1 | scaffold281 | 2935                    | GG                              | TT                 | TT               | INTERGENIC      |               |                    |                    |
| SNP_68219_A_3034 | NW_004515798.1 | scaffold281 | 3034                    | CC                              | TT                 | TT               | INTERGENIC      |               |                    |                    |
| SNP_68221_A_3141 | NW_004515798.1 | scaffold281 | 3141                    | AA                              | CC                 | CC               | INTERGENIC      |               |                    |                    |
| SNP_68222_A_3256 | NW_004515798.1 | scaffold281 | 3256                    | TT                              | CC                 | CC               | INTERGENIC      |               |                    |                    |
| SNP_68223_A_3274 | NW_004515798.1 | scaffold281 | 3274                    | TT                              | CC                 | CC               | INTERGENIC      |               |                    |                    |
| SNP_68224_A_3362 | NW_004515798.1 | scaffold281 | 3362                    | CC                              | AA                 | AA               | INTERGENIC      |               |                    |                    |
| SNP_68226_A_3433 | NW_004515798.1 | scaffold281 | 3433                    | TT                              | AA                 | AA               | INTERGENIC      |               |                    |                    |
| SNP_68227_A_3439 | NW_004515798.1 | scaffold281 | 3439                    | GG                              | AA                 | AA               | INTERGENIC      |               |                    |                    |
| SNP_68228_A_3442 | NW_004515798.1 | scaffold281 | 3442                    | GG                              | CC                 | CC               | INTERGENIC      |               |                    |                    |
| SNP_68229_A_3480 | NW_004515798.1 | scaffold281 | 3480                    | CC                              | GG                 | GG               | INTERGENIC      |               |                    |                    |
| SNP_68230_A_3510 | NW_004515798.1 | scaffold281 | 3510                    | TT                              | CC                 | CC               | INTERGENIC      |               |                    |                    |



| SNPs IDs         | Chromosome IDs | Chromosomes | Physical positions (bp) | CDC Frontier (Reference genome) | (Pusa 1103 & HPNB) | (ILWC 46 & LPNB) | Sequence genome | Components of | Gene accession IDs | Putative functions |
|------------------|----------------|-------------|-------------------------|---------------------------------|--------------------|------------------|-----------------|---------------|--------------------|--------------------|
| SNP_68231_A_3561 | NW_004515798.1 | scaffold281 | 3561                    | AA                              | TT                 | TT               | INTERGENIC      |               |                    |                    |
| SNP_68232_A_3603 | NW_004515798.1 | scaffold281 | 3603                    | AA                              | GG                 | GG               | INTERGENIC      |               |                    |                    |
| SNP_68233_A_3648 | NW_004515798.1 | scaffold281 | 3648                    | AA                              | GG                 | GG               | INTERGENIC      |               |                    |                    |
| SNP_68234_A_3651 | NW_004515798.1 | scaffold281 | 3651                    | TT                              | CC                 | CC               | INTERGENIC      |               |                    |                    |
| SNP_68235_A_3694 | NW_004515798.1 | scaffold281 | 3694                    | TT                              | CC                 | CC               | INTERGENIC      |               |                    |                    |
| SNP_68236_A_3719 | NW_004515798.1 | scaffold281 | 3719                    | CC                              | TT                 | TT               | INTERGENIC      |               |                    |                    |
| SNP_68238_A_3757 | NW_004515798.1 | scaffold281 | 3757                    | CC                              | TT                 | TT               | INTERGENIC      |               |                    |                    |
| SNP_68239_A_3810 | NW_004515798.1 | scaffold281 | 3810                    | GG                              | CC                 | CC               | INTERGENIC      |               |                    |                    |
| SNP_68240_A_3880 | NW_004515798.1 | scaffold281 | 3880                    | AA                              | GG                 | GG               | INTERGENIC      |               |                    |                    |
| SNP_68241_A_3908 | NW_004515798.1 | scaffold281 | 3908                    | AA                              | CC                 | CC               | INTERGENIC      |               |                    |                    |
| SNP_68242_A_4031 | NW_004515798.1 | scaffold281 | 4031                    | AA                              | CC                 | CC               | INTERGENIC      |               |                    |                    |
| SNP_68243_A_4093 | NW_004515798.1 | scaffold281 | 4093                    | TT                              | AA                 | AA               | INTERGENIC      |               |                    |                    |
| SNP_68245_A_4173 | NW_004515798.1 | scaffold281 | 4173                    | AA                              | GG                 | GG               | INTERGENIC      |               |                    |                    |
| SNP_68247_A_4234 | NW_004515798.1 | scaffold281 | 4234                    | TT                              | CC                 | CC               | INTERGENIC      |               |                    |                    |
| SNP_68248_A_4248 | NW_004515798.1 | scaffold281 | 4248                    | TT                              | CC                 | CC               | INTERGENIC      |               |                    |                    |
| SNP_68249_A_4347 | NW_004515798.1 | scaffold281 | 4347                    | TT                              | AA                 | AA               | INTERGENIC      |               |                    |                    |
| SNP_68250_A_4976 | NW_004515798.1 | scaffold281 | 4976                    | AA                              | CC                 | CC               | INTERGENIC      |               |                    |                    |
| SNP_68251_A_5168 | NW_004515798.1 | scaffold281 | 5168                    | TT                              | CC                 | CC               | INTERGENIC      |               |                    |                    |
| SNP_68252_A_5181 | NW_004515798.1 | scaffold281 | 5181                    | TT                              | AA                 | AA               | INTERGENIC      |               |                    |                    |
| SNP_68253_A_5182 | NW_004515798.1 | scaffold281 | 5182                    | AA                              | CC                 | CC               | INTERGENIC      |               |                    |                    |
| SNP_68254_A_5200 | NW_004515798.1 | scaffold281 | 5200                    | CC                              | TT                 | TT               | INTERGENIC      |               |                    |                    |
| SNP_68255_A_5345 | NW_004515798.1 | scaffold281 | 5345                    | TT                              | CC                 | CC               | INTERGENIC      |               |                    |                    |

| SNPs IDs          | Chromosome IDs | Chromosomes | Physical positions (bp) | CDC Frontier (Reference genome) | (Pusa 1103 & HPNB) | (ILWC 46 & LPNB) | Sequence genome | Components of | Gene accession IDs | Putative functions |
|-------------------|----------------|-------------|-------------------------|---------------------------------|--------------------|------------------|-----------------|---------------|--------------------|--------------------|
| SNP_68256_A_5362  | NW_004515798.1 | scaffold281 | 5362                    | AA                              | GG                 | GG               | INTERGENIC      |               |                    |                    |
| SNP_68257_A_5363  | NW_004515798.1 | scaffold281 | 5363                    | CC                              | GG                 | GG               | INTERGENIC      |               |                    |                    |
| SNP_68258_A_8402  | NW_004515798.1 | scaffold281 | 8402                    | TT                              | CC                 | CC               | INTERGENIC      |               |                    |                    |
| SNP_68259_A_8457  | NW_004515798.1 | scaffold281 | 8457                    | CC                              | AA                 | AA               | INTERGENIC      |               |                    |                    |
| SNP_68260_A_8574  | NW_004515798.1 | scaffold281 | 8574                    | TT                              | CC                 | CC               | INTERGENIC      |               |                    |                    |
| SNP_68261_A_8824  | NW_004515798.1 | scaffold281 | 8824                    | AA                              | TT                 | TT               | INTERGENIC      |               |                    |                    |
| SNP_68262_A_9277  | NW_004515798.1 | scaffold281 | 9277                    | GG                              | CC                 | CC               | INTERGENIC      |               |                    |                    |
| SNP_68264_A_9337  | NW_004515798.1 | scaffold281 | 9337                    | CC                              | TT                 | TT               | INTERGENIC      |               |                    |                    |
| SNP_68265_A_9372  | NW_004515798.1 | scaffold281 | 9372                    | TT                              | CC                 | CC               | INTERGENIC      |               |                    |                    |
| SNP_68266_A_27037 | NW_004515798.1 | scaffold281 | 27037                   | CC                              | TT                 | TT               | INTERGENIC      |               |                    |                    |
| SNP_68267_A_27223 | NW_004515798.1 | scaffold281 | 27223                   | CC                              | TT                 | TT               | INTERGENIC      |               |                    |                    |
| SNP_68269_A_27245 | NW_004515798.1 | scaffold281 | 27245                   | AA                              | GG                 | GG               | INTERGENIC      |               |                    |                    |
| SNP_68270_A_27248 | NW_004515798.1 | scaffold281 | 27248                   | AA                              | GG                 | GG               | INTERGENIC      |               |                    |                    |
| SNP_68271_A_27249 | NW_004515798.1 | scaffold281 | 27249                   | TT                              | GG                 | GG               | INTERGENIC      |               |                    |                    |
| SNP_68272_A_27268 | NW_004515798.1 | scaffold281 | 27268                   | AA                              | GG                 | GG               | INTERGENIC      |               |                    |                    |
| SNP_68273_A_27314 | NW_004515798.1 | scaffold281 | 27314                   | AA                              | GG                 | GG               | INTERGENIC      |               |                    |                    |
| SNP_68274_A_27317 | NW_004515798.1 | scaffold281 | 27317                   | AA                              | GG                 | GG               | INTERGENIC      |               |                    |                    |
| SNP_68275_A_27338 | NW_004515798.1 | scaffold281 | 27338                   | AA                              | GG                 | GG               | INTERGENIC      |               |                    |                    |
| SNP_68276_A_27349 | NW_004515798.1 | scaffold281 | 27349                   | GG                              | AA                 | AA               | INTERGENIC      |               |                    |                    |
| SNP_68277_A_27394 | NW_004515798.1 | scaffold281 | 27394                   | AA                              | TT                 | TT               | INTERGENIC      |               |                    |                    |
| SNP_68278_A_27396 | NW_004515798.1 | scaffold281 | 27396                   | AA                              | TT                 | TT               | INTERGENIC      |               |                    |                    |
| SNP_68279_A_27468 | NW_004515798.1 | scaffold281 | 27468                   | GG                              | TT                 | TT               | INTERGENIC      |               |                    |                    |

| SNPs IDs          | Chromosome IDs | Chromosomes | Physical positions (bp) | CDC Frontier (Reference genome) | (Pusa 1103 & HPNB) | (ILWC 46 & LPNB) | Sequence genome | Components of | Gene accession IDs | Putative functions |
|-------------------|----------------|-------------|-------------------------|---------------------------------|--------------------|------------------|-----------------|---------------|--------------------|--------------------|
| SNP_68280_A_29202 | NW_004515798.1 | scaffold281 | 29202                   | TT                              | GG                 | GG               | INTERGENIC      |               |                    |                    |
| SNP_68281_A_34319 | NW_004515798.1 | scaffold281 | 34319                   | AA                              | GG                 | GG               | INTERGENIC      |               |                    |                    |
| SNP_68282_A_6049  | NW_004515799.1 | scaffold282 | 6049                    | AA                              | CC                 | CC               | INTERGENIC      |               |                    |                    |
| SNP_68283_A_39469 | NW_004515799.1 | scaffold282 | 39469                   | TT                              | GG                 | GG               | INTERGENIC      |               |                    |                    |
| SNP_68284_A_39573 | NW_004515799.1 | scaffold282 | 39573                   | CC                              | TT                 | TT               | INTERGENIC      |               |                    |                    |
| SNP_68285_A_39578 | NW_004515799.1 | scaffold282 | 39578                   | CC                              | TT                 | TT               | INTERGENIC      |               |                    |                    |
| SNP_68286_A_39717 | NW_004515799.1 | scaffold282 | 39717                   | GG                              | CC                 | CC               | INTERGENIC      |               |                    |                    |
| SNP_68287_A_39728 | NW_004515799.1 | scaffold282 | 39728                   | CC                              | TT                 | TT               | INTERGENIC      |               |                    |                    |
| SNP_68288_A_39732 | NW_004515799.1 | scaffold282 | 39732                   | GG                              | CC                 | CC               | INTERGENIC      |               |                    |                    |
| SNP_68289_A_39921 | NW_004515799.1 | scaffold282 | 39921                   | CC                              | TT                 | TT               | INTERGENIC      |               |                    |                    |
| SNP_68290_A_39947 | NW_004515799.1 | scaffold282 | 39947                   | GG                              | AA                 | AA               | INTERGENIC      |               |                    |                    |
| SNP_68291_A_52007 | NW_004515799.1 | scaffold282 | 52007                   | GG                              | AA                 | AA               | INTERGENIC      |               |                    |                    |
| SNP_68292_A_65391 | NW_004515799.1 | scaffold282 | 65391                   | CC                              | AA                 | AA               | INTERGENIC      |               |                    |                    |
| SNP_68293_A_75273 | NW_004515799.1 | scaffold282 | 75273                   | GG                              | TT                 | TT               | INTERGENIC      |               |                    |                    |
| SNP_68294_A_75274 | NW_004515799.1 | scaffold282 | 75274                   | GG                              | AA                 | AA               | INTERGENIC      |               |                    |                    |
| SNP_68295_A_75288 | NW_004515799.1 | scaffold282 | 75288                   | CC                              | TT                 | TT               | INTERGENIC      |               |                    |                    |
| SNP_68296_A_75296 | NW_004515799.1 | scaffold282 | 75296                   | AA                              | GG                 | GG               | INTERGENIC      |               |                    |                    |
| SNP_68297_A_75311 | NW_004515799.1 | scaffold282 | 75311                   | AA                              | GG                 | GG               | INTERGENIC      |               |                    |                    |
| SNP_68298_A_75328 | NW_004515799.1 | scaffold282 | 75328                   | AA                              | GG                 | GG               | INTERGENIC      |               |                    |                    |
| SNP_68299_A_75387 | NW_004515799.1 | scaffold282 | 75387                   | CC                              | TT                 | TT               | INTERGENIC      |               |                    |                    |
| SNP_68300_A_75425 | NW_004515799.1 | scaffold282 | 75425                   | CC                              | TT                 | TT               | INTERGENIC      |               |                    |                    |
| SNP_68301_A_78115 | NW_004515799.1 | scaffold282 | 78115                   | AA                              | GG                 | GG               | INTERGENIC      |               |                    |                    |

| SNPs IDs           | Chromosome IDs | Chromosomes | Physical positions (bp) | CDC Frontier (Reference genome) | (Pusa 1103 & HPNB) | (ILWC 46 & LPNB) | Sequence genome | Components of | Gene accession IDs | Putative functions |
|--------------------|----------------|-------------|-------------------------|---------------------------------|--------------------|------------------|-----------------|---------------|--------------------|--------------------|
| SNP_68302_A_5429   | NW_004515800.1 | scaffold283 | 5429                    | TT                              | CC                 | CC               | INTERGENIC      |               |                    |                    |
| SNP_68303_A_5882   | NW_004515800.1 | scaffold283 | 5882                    | TT                              | CC                 | CC               | INTERGENIC      |               |                    |                    |
| SNP_68304_A_5900   | NW_004515800.1 | scaffold283 | 5900                    | AA                              | TT                 | TT               | INTERGENIC      |               |                    |                    |
| SNP_68305_A_16369  | NW_004515800.1 | scaffold283 | 16369                   | AA                              | GG                 | GG               | INTERGENIC      |               |                    |                    |
| SNP_68307_A_16493  | NW_004515800.1 | scaffold283 | 16493                   | AA                              | GG                 | GG               | INTERGENIC      |               |                    |                    |
| SNP_68308_A_16513  | NW_004515800.1 | scaffold283 | 16513                   | TT                              | CC                 | CC               | INTERGENIC      |               |                    |                    |
| SNP_68309_A_24655  | NW_004515800.1 | scaffold283 | 24655                   | AA                              | TT                 | TT               | INTERGENIC      |               |                    |                    |
| SNP_68310_A_29409  | NW_004515800.1 | scaffold283 | 29409                   | CC                              | GG                 | GG               | INTERGENIC      |               |                    |                    |
| SNP_68311_A_29924  | NW_004515800.1 | scaffold283 | 29924                   | AA                              | GG                 | GG               | INTERGENIC      |               |                    |                    |
| SNP_68312_A_91167  | NW_004515800.1 | scaffold283 | 91167                   | AA                              | GG                 | GG               | INTERGENIC      |               |                    |                    |
| SNP_68313_A_95602  | NW_004515800.1 | scaffold283 | 95602                   | CC                              | TT                 | TT               | INTERGENIC      |               |                    |                    |
| SNP_68314_A_95918  | NW_004515800.1 | scaffold283 | 95918                   | AA                              | GG                 | GG               | INTERGENIC      |               |                    |                    |
| SNP_68315_A_95966  | NW_004515800.1 | scaffold283 | 95966                   | TT                              | GG                 | GG               | INTERGENIC      |               |                    |                    |
| SNP_68316_A_110710 | NW_004515800.1 | scaffold283 | 110710                  | TT                              | AA                 | AA               | INTERGENIC      |               |                    |                    |
| SNP_68317_A_3921   | NW_004515801.1 | scaffold284 | 3921                    | CC                              | TT                 | TT               | INTERGENIC      |               |                    |                    |
| SNP_68319_A_4740   | NW_004515801.1 | scaffold284 | 4740                    | TT                              | CC                 | CC               | INTERGENIC      |               |                    |                    |
| SNP_68320_A_4815   | NW_004515801.1 | scaffold284 | 4815                    | CC                              | GG                 | GG               | INTERGENIC      |               |                    |                    |
| SNP_68321_A_4913   | NW_004515801.1 | scaffold284 | 4913                    | AA                              | CC                 | CC               | INTERGENIC      |               |                    |                    |
| SNP_68322_A_4950   | NW_004515801.1 | scaffold284 | 4950                    | TT                              | CC                 | CC               | INTERGENIC      |               |                    |                    |
| SNP_68323_A_6182   | NW_004515801.1 | scaffold284 | 6182                    | GG                              | AA                 | AA               | INTERGENIC      |               |                    |                    |
| SNP_68324_A_7270   | NW_004515801.1 | scaffold284 | 7270                    | CC                              | GG                 | GG               | INTERGENIC      |               |                    |                    |
| SNP_68325_A_10354  | NW_004515801.1 | scaffold284 | 10354                   | CC                              | TT                 | TT               | INTERGENIC      |               |                    |                    |

| SNPs IDs          | Chromosome IDs | Chromosomes | Physical positions (bp) | CDC Frontier (Reference genome) | (Pusa 1103 & HPNB) | (ILWC 46 & LPNB) | Sequence genome | Components of | Gene accession IDs | Putative functions |
|-------------------|----------------|-------------|-------------------------|---------------------------------|--------------------|------------------|-----------------|---------------|--------------------|--------------------|
| SNP_68326_A_10799 | NW_004515801.1 | scaffold284 | 10799                   | GG                              | AA                 | AA               | INTERGENIC      |               |                    |                    |
| SNP_68327_A_10820 | NW_004515801.1 | scaffold284 | 10820                   | GG                              | AA                 | AA               | INTERGENIC      |               |                    |                    |
| SNP_68328_A_12292 | NW_004515801.1 | scaffold284 | 12292                   | TT                              | AA                 | AA               | INTERGENIC      |               |                    |                    |
| SNP_68329_A_13103 | NW_004515801.1 | scaffold284 | 13103                   | GG                              | TT                 | TT               | INTERGENIC      |               |                    |                    |
| SNP_68330_A_13123 | NW_004515801.1 | scaffold284 | 13123                   | AA                              | CC                 | CC               | INTERGENIC      |               |                    |                    |
| SNP_68332_A_14633 | NW_004515801.1 | scaffold284 | 14633                   | AA                              | GG                 | GG               | INTERGENIC      |               |                    |                    |
| SNP_68334_A_15416 | NW_004515801.1 | scaffold284 | 15416                   | GG                              | TT                 | TT               | INTERGENIC      |               |                    |                    |
| SNP_68335_A_15536 | NW_004515801.1 | scaffold284 | 15536                   | TT                              | AA                 | AA               | INTERGENIC      |               |                    |                    |
| SNP_68336_A_16966 | NW_004515801.1 | scaffold284 | 16966                   | GG                              | AA                 | AA               | INTERGENIC      |               |                    |                    |
| SNP_68337_A_17371 | NW_004515801.1 | scaffold284 | 17371                   | CC                              | TT                 | TT               | INTERGENIC      |               |                    |                    |
| SNP_68338_A_21576 | NW_004515801.1 | scaffold284 | 21576                   | GG                              | TT                 | TT               | INTERGENIC      |               |                    |                    |
| SNP_68339_A_21742 | NW_004515801.1 | scaffold284 | 21742                   | GG                              | AA                 | AA               | INTERGENIC      |               |                    |                    |
| SNP_68340_A_21839 | NW_004515801.1 | scaffold284 | 21839                   | AA                              | CC                 | CC               | INTERGENIC      |               |                    |                    |
| SNP_68341_A_21868 | NW_004515801.1 | scaffold284 | 21868                   | AA                              | TT                 | TT               | INTERGENIC      |               |                    |                    |
| SNP_68342_A_22099 | NW_004515801.1 | scaffold284 | 22099                   | AA                              | TT                 | TT               | INTERGENIC      |               |                    |                    |
| SNP_68343_A_22131 | NW_004515801.1 | scaffold284 | 22131                   | CC                              | TT                 | TT               | INTERGENIC      |               |                    |                    |
| SNP_68344_A_40767 | NW_004515801.1 | scaffold284 | 40767                   | TT                              | AA                 | AA               | INTERGENIC      |               |                    |                    |
| SNP_68345_A_40773 | NW_004515801.1 | scaffold284 | 40773                   | CC                              | AA                 | AA               | INTERGENIC      |               |                    |                    |
| SNP_68346_A_40779 | NW_004515801.1 | scaffold284 | 40779                   | AA                              | TT                 | TT               | INTERGENIC      |               |                    |                    |
| SNP_68348_A_49893 | NW_004515801.1 | scaffold284 | 49893                   | TT                              | GG                 | GG               | INTERGENIC      |               |                    |                    |
| SNP_68349_A_49916 | NW_004515801.1 | scaffold284 | 49916                   | GG                              | CC                 | CC               | INTERGENIC      |               |                    |                    |
| SNP_68350_A_49951 | NW_004515801.1 | scaffold284 | 49951                   | AA                              | GG                 | GG               | INTERGENIC      |               |                    |                    |

| SNPs IDs           | Chromosome IDs | Chromosomes | Physical positions (bp) | CDC Frontier (Reference genome) | (Pusa 1103 & HPNB) | (ILWC 46 & LPNB) | Sequence genome | Components of | Gene accession IDs | Putative functions |
|--------------------|----------------|-------------|-------------------------|---------------------------------|--------------------|------------------|-----------------|---------------|--------------------|--------------------|
| SNP_68351_A_49962  | NW_004515801.1 | scaffold284 | 49962                   | GG                              | AA                 | AA               | INTERGENIC      |               |                    |                    |
| SNP_68352_A_49971  | NW_004515801.1 | scaffold284 | 49971                   | GG                              | AA                 | AA               | INTERGENIC      |               |                    |                    |
| SNP_68353_A_50028  | NW_004515801.1 | scaffold284 | 50028                   | CC                              | TT                 | TT               | INTERGENIC      |               |                    |                    |
| SNP_68354_A_50099  | NW_004515801.1 | scaffold284 | 50099                   | AA                              | TT                 | TT               | INTERGENIC      |               |                    |                    |
| SNP_68355_A_50111  | NW_004515801.1 | scaffold284 | 50111                   | GG                              | AA                 | AA               | INTERGENIC      |               |                    |                    |
| SNP_68356_A_50116  | NW_004515801.1 | scaffold284 | 50116                   | TT                              | GG                 | GG               | INTERGENIC      |               |                    |                    |
| SNP_68357_A_50148  | NW_004515801.1 | scaffold284 | 50148                   | TT                              | AA                 | AA               | INTERGENIC      |               |                    |                    |
| SNP_68358_A_50173  | NW_004515801.1 | scaffold284 | 50173                   | GG                              | CC                 | CC               | INTERGENIC      |               |                    |                    |
| SNP_68359_A_50201  | NW_004515801.1 | scaffold284 | 50201                   | TT                              | AA                 | AA               | INTERGENIC      |               |                    |                    |
| SNP_68360_A_50221  | NW_004515801.1 | scaffold284 | 50221                   | AA                              | GG                 | GG               | INTERGENIC      |               |                    |                    |
| SNP_68361_A_50230  | NW_004515801.1 | scaffold284 | 50230                   | AA                              | TT                 | TT               | INTERGENIC      |               |                    |                    |
| SNP_68362_A_50264  | NW_004515801.1 | scaffold284 | 50264                   | GG                              | TT                 | TT               | INTERGENIC      |               |                    |                    |
| SNP_68363_A_50268  | NW_004515801.1 | scaffold284 | 50268                   | AA                              | GG                 | GG               | INTERGENIC      |               |                    |                    |
| SNP_68364_A_50291  | NW_004515801.1 | scaffold284 | 50291                   | GG                              | TT                 | TT               | INTERGENIC      |               |                    |                    |
| SNP_68365_A_50302  | NW_004515801.1 | scaffold284 | 50302                   | TT                              | AA                 | AA               | INTERGENIC      |               |                    |                    |
| SNP_68366_A_64328  | NW_004515801.1 | scaffold284 | 64328                   | TT                              | AA                 | AA               | INTERGENIC      |               |                    |                    |
| SNP_68367_A_104480 | NW_004515801.1 | scaffold284 | 104480                  | GG                              | TT                 | TT               | INTERGENIC      |               |                    |                    |
| SNP_68369_A_105263 | NW_004515801.1 | scaffold284 | 105263                  | GG                              | AA                 | AA               | INTERGENIC      |               |                    |                    |
| SNP_68370_A_105266 | NW_004515801.1 | scaffold284 | 105266                  | TT                              | CC                 | CC               | INTERGENIC      |               |                    |                    |
| SNP_68372_A_206950 | NW_004515801.1 | scaffold284 | 206950                  | TT                              | GG                 | GG               | INTERGENIC      |               |                    |                    |
| SNP_68373_A_207167 | NW_004515801.1 | scaffold284 | 207167                  | CC                              | TT                 | TT               | INTERGENIC      |               |                    |                    |
| SNP_68374_A_207176 | NW_004515801.1 | scaffold284 | 207176                  | CC                              | TT                 | TT               | INTERGENIC      |               |                    |                    |

| SNPs IDs           | Chromosome IDs | Chromosomes | Physical positions (bp) | CDC Frontier (Reference genome) | (Pusa 1103 & HPNB) | (ILWC 46 & LPNB) | Sequence genome | Components of | Gene accession IDs | Putative functions |
|--------------------|----------------|-------------|-------------------------|---------------------------------|--------------------|------------------|-----------------|---------------|--------------------|--------------------|
| SNP_68375_A_207339 | NW_004515801.1 | scaffold284 | 207339                  | TT                              | GG                 | GG               | INTERGENIC      |               |                    |                    |
| SNP_68376_A_257130 | NW_004515801.1 | scaffold284 | 257130                  | TT                              | CC                 | CC               | INTERGENIC      |               |                    |                    |
| SNP_68377_A_257134 | NW_004515801.1 | scaffold284 | 257134                  | TT                              | AA                 | AA               | INTERGENIC      |               |                    |                    |
| SNP_68378_A_257141 | NW_004515801.1 | scaffold284 | 257141                  | CC                              | TT                 | TT               | INTERGENIC      |               |                    |                    |
| SNP_68379_A_257170 | NW_004515801.1 | scaffold284 | 257170                  | CC                              | AA                 | AA               | INTERGENIC      |               |                    |                    |
| SNP_68380_A_257181 | NW_004515801.1 | scaffold284 | 257181                  | TT                              | CC                 | CC               | INTERGENIC      |               |                    |                    |
| SNP_68381_A_257184 | NW_004515801.1 | scaffold284 | 257184                  | AA                              | TT                 | TT               | INTERGENIC      |               |                    |                    |
| SNP_68382_A_257186 | NW_004515801.1 | scaffold284 | 257186                  | AA                              | GG                 | GG               | INTERGENIC      |               |                    |                    |
| SNP_68383_A_257210 | NW_004515801.1 | scaffold284 | 257210                  | GG                              | AA                 | AA               | INTERGENIC      |               |                    |                    |
| SNP_68384_A_257246 | NW_004515801.1 | scaffold284 | 257246                  | CC                              | TT                 | TT               | INTERGENIC      |               |                    |                    |
| SNP_68385_A_257251 | NW_004515801.1 | scaffold284 | 257251                  | GG                              | AA                 | AA               | INTERGENIC      |               |                    |                    |
| SNP_68386_A_257252 | NW_004515801.1 | scaffold284 | 257252                  | AA                              | TT                 | TT               | INTERGENIC      |               |                    |                    |
| SNP_68387_A_257435 | NW_004515801.1 | scaffold284 | 257435                  | CC                              | AA                 | AA               | INTERGENIC      |               |                    |                    |
| SNP_68388_A_257557 | NW_004515801.1 | scaffold284 | 257557                  | GG                              | TT                 | TT               | INTERGENIC      |               |                    |                    |
| SNP_68389_A_257560 | NW_004515801.1 | scaffold284 | 257560                  | AA                              | GG                 | GG               | INTERGENIC      |               |                    |                    |
| SNP_68390_A_266872 | NW_004515801.1 | scaffold284 | 266872                  | AA                              | CC                 | CC               | INTERGENIC      |               |                    |                    |
| SNP_68391_A_328545 | NW_004515801.1 | scaffold284 | 328545                  | AA                              | TT                 | TT               | INTERGENIC      |               |                    |                    |
| SNP_68392_A_352335 | NW_004515801.1 | scaffold284 | 352335                  | AA                              | GG                 | GG               | INTERGENIC      |               |                    |                    |
| SNP_68393_A_352630 | NW_004515801.1 | scaffold284 | 352630                  | GG                              | AA                 | AA               | INTERGENIC      |               |                    |                    |
| SNP_68394_A_352672 | NW_004515801.1 | scaffold284 | 352672                  | AA                              | GG                 | GG               | INTERGENIC      |               |                    |                    |
| SNP_68395_A_352906 | NW_004515801.1 | scaffold284 | 352906                  | GG                              | TT                 | TT               | INTERGENIC      |               |                    |                    |
| SNP_68396_A_352945 | NW_004515801.1 | scaffold284 | 352945                  | AA                              | GG                 | GG               | INTERGENIC      |               |                    |                    |

| SNPs IDs           | Chromosome IDs | Chromosomes | Physical positions (bp) | CDC Frontier (Reference genome) | (Pusa 1103 & HPNB) | (ILWC 46 & LPNB) | Sequence genome | Components of | Gene accession IDs | Putative functions |
|--------------------|----------------|-------------|-------------------------|---------------------------------|--------------------|------------------|-----------------|---------------|--------------------|--------------------|
| SNP_68397_A_353197 | NW_004515801.1 | scaffold284 | 353197                  | GG                              | AA                 | AA               | INTERGENIC      |               |                    |                    |
| SNP_68398_A_353392 | NW_004515801.1 | scaffold284 | 353392                  | TT                              | CC                 | CC               | INTERGENIC      |               |                    |                    |
| SNP_68400_A_463245 | NW_004515801.1 | scaffold284 | 463245                  | CC                              | AA                 | AA               | INTERGENIC      |               |                    |                    |
| SNP_68401_A_463254 | NW_004515801.1 | scaffold284 | 463254                  | TT                              | GG                 | GG               | INTERGENIC      |               |                    |                    |
| SNP_68402_A_465821 | NW_004515801.1 | scaffold284 | 465821                  | CC                              | TT                 | TT               | INTERGENIC      |               |                    |                    |
| SNP_68403_A_472743 | NW_004515801.1 | scaffold284 | 472743                  | CC                              | TT                 | TT               | INTERGENIC      |               |                    |                    |
| SNP_68404_A_473093 | NW_004515801.1 | scaffold284 | 473093                  | AA                              | GG                 | GG               | INTERGENIC      |               |                    |                    |
| SNP_68407_A_537236 | NW_004515801.1 | scaffold284 | 537236                  | GG                              | TT                 | TT               | INTERGENIC      |               |                    |                    |
| SNP_68409_A_766553 | NW_004515801.1 | scaffold284 | 766553                  | CC                              | TT                 | TT               | INTERGENIC      |               |                    |                    |
| SNP_68410_A_766623 | NW_004515801.1 | scaffold284 | 766623                  | AA                              | CC                 | CC               | INTERGENIC      |               |                    |                    |
| SNP_68411_A_771334 | NW_004515801.1 | scaffold284 | 771334                  | GG                              | AA                 | AA               | INTERGENIC      |               |                    |                    |
| SNP_68412_A_778528 | NW_004515801.1 | scaffold284 | 778528                  | CC                              | TT                 | TT               | INTERGENIC      |               |                    |                    |
| SNP_68413_A_803441 | NW_004515801.1 | scaffold284 | 803441                  | TT                              | GG                 | GG               | INTERGENIC      |               |                    |                    |
| SNP_68414_A_803445 | NW_004515801.1 | scaffold284 | 803445                  | GG                              | TT                 | TT               | INTERGENIC      |               |                    |                    |
| SNP_68415_A_829049 | NW_004515801.1 | scaffold284 | 829049                  | TT                              | AA                 | AA               | INTERGENIC      |               |                    |                    |
| SNP_68416_A_870831 | NW_004515801.1 | scaffold284 | 870831                  | TT                              | CC                 | CC               | INTERGENIC      |               |                    |                    |
| SNP_68417_A_871060 | NW_004515801.1 | scaffold284 | 871060                  | GG                              | AA                 | AA               | INTERGENIC      |               |                    |                    |
| SNP_68418_A_871072 | NW_004515801.1 | scaffold284 | 871072                  | AA                              | CC                 | CC               | INTERGENIC      |               |                    |                    |
| SNP_68419_A_902093 | NW_004515801.1 | scaffold284 | 902093                  | TT                              | AA                 | AA               | INTERGENIC      |               |                    |                    |
| SNP_68420_A_902098 | NW_004515801.1 | scaffold284 | 902098                  | CC                              | AA                 | AA               | INTERGENIC      |               |                    |                    |
| SNP_68421_A_902101 | NW_004515801.1 | scaffold284 | 902101                  | AA                              | GG                 | GG               | INTERGENIC      |               |                    |                    |
| SNP_68422_A_902108 | NW_004515801.1 | scaffold284 | 902108                  | TT                              | CC                 | CC               | INTERGENIC      |               |                    |                    |



| SNPs IDs           | Chromosome IDs | Chromosomes | Physical positions (bp) | CDC Frontier (Reference genome) | (Pusa 1103 & HPNB) | (ILWC 46 & LPNB) | Sequence Components of genome | Gene accession IDs | Putative functions           |
|--------------------|----------------|-------------|-------------------------|---------------------------------|--------------------|------------------|-------------------------------|--------------------|------------------------------|
| SNP_68423_A_902112 | NW_004515801.1 | scaffold284 | 902112                  | AA                              | TT                 | TT               | INTERGENIC                    |                    |                              |
| SNP_68424_A_902114 | NW_004515801.1 | scaffold284 | 902114                  | TT                              | AA                 | AA               | INTERGENIC                    |                    |                              |
| SNP_68425_A_902124 | NW_004515801.1 | scaffold284 | 902124                  | GG                              | TT                 | TT               | INTERGENIC                    |                    |                              |
| SNP_68426_A_902128 | NW_004515801.1 | scaffold284 | 902128                  | AA                              | CC                 | CC               | INTERGENIC                    |                    |                              |
| SNP_68427_A_902137 | NW_004515801.1 | scaffold284 | 902137                  | AA                              | CC                 | CC               | INTERGENIC                    |                    |                              |
| SNP_68428_A_902139 | NW_004515801.1 | scaffold284 | 902139                  | CC                              | GG                 | GG               | INTERGENIC                    |                    |                              |
| SNP_68429_A_908304 | NW_004515801.1 | scaffold284 | 908304                  | CC                              | AA                 | AA               | INTERGENIC                    |                    |                              |
| SNP_68430_A_915520 | NW_004515801.1 | scaffold284 | 915520                  | GG                              | AA                 | AA               | INTERGENIC                    |                    |                              |
| SNP_68431_A_18511  | NW_004515803.1 | scaffold287 | 18511                   | AA                              | TT                 | TT               | URR                           | 101505749          | Unknown function             |
| SNP_68432_A_18542  | NW_004515803.1 | scaffold287 | 18542                   | GG                              | AA                 | AA               | URR                           | 101505749          | Unknown function             |
| SNP_68433_A_18551  | NW_004515803.1 | scaffold287 | 18551                   | GG                              | TT                 | TT               | URR                           | 101505749          | Unknown function             |
| SNP_68434_A_19223  | NW_004515803.1 | scaffold287 | 19223                   | GG                              | CC                 | CC               | URR                           | 101505749          | Unknown function             |
| SNP_68435_A_19253  | NW_004515803.1 | scaffold287 | 19253                   | AA                              | TT                 | TT               | URR                           | 101505749          | Unknown function             |
| SNP_68436_A_19257  | NW_004515803.1 | scaffold287 | 19257                   | TT                              | GG                 | GG               | URR                           | 101505749          | Unknown function             |
| SNP_68437_A_19429  | NW_004515803.1 | scaffold287 | 19429                   | AA                              | TT                 | TT               | URR                           | 101505749          | Unknown function             |
| SNP_68438_A_19462  | NW_004515803.1 | scaffold287 | 19462                   | TT                              | GG                 | GG               | URR                           | 101505749          | Unknown function             |
| SNP_68439_A_19519  | NW_004515803.1 | scaffold287 | 19519                   | TT                              | AA                 | AA               | URR                           | 101505749          | Unknown function             |
| SNP_68440_A_19534  | NW_004515803.1 | scaffold287 | 19534                   | TT                              | CC                 | CC               | URR                           | 101505749          | Unknown function             |
| SNP_68441_A_19565  | NW_004515803.1 | scaffold287 | 19565                   | TT                              | GG                 | GG               | URR                           | 101505749          | Unknown function             |
| SNP_68442_A_19571  | NW_004515803.1 | scaffold287 | 19571                   | AA                              | CC                 | CC               | URR                           | 101505749          | Unknown function             |
| SNP_68443_A_21495  | NW_004515803.1 | scaffold287 | 21495                   | CC                              | GG                 | GG               | DRR                           | 101506068          | uncharacterized LOC101506068 |
| SNP_68444_A_22251  | NW_004515803.1 | scaffold287 | 22251                   | TT                              | GG                 | GG               | DRR                           | 101508315          | uncharacterized LOC101508315 |

| SNPs IDs           | Chromosome IDs | Chromosomes | Physical positions (bp) | CDC Frontier (Reference genome) | (Pusa 1103 & HPNB) | (ILWC 46 & LPNB) | Sequence Components of genome | Gene accession IDs | Putative functions           |
|--------------------|----------------|-------------|-------------------------|---------------------------------|--------------------|------------------|-------------------------------|--------------------|------------------------------|
| SNP_68445_A_22419  | NW_004515803.1 | scaffold287 | 22419                   | CC                              | TT                 | TT               | DRR                           | 101508315          | uncharacterized LOC101508315 |
| SNP_68446_A_22669  | NW_004515803.1 | scaffold287 | 22669                   | TT                              | CC                 | CC               | DRR                           | 101508315          | uncharacterized LOC101508315 |
| SNP_68447_A_22725  | NW_004515803.1 | scaffold287 | 22725                   | AA                              | GG                 | GG               | URR                           | 101506068          | uncharacterized LOC101506068 |
| SNP_68448_A_22732  | NW_004515803.1 | scaffold287 | 22732                   | GG                              | AA                 | AA               | URR                           | 101506068          | uncharacterized LOC101506068 |
| SNP_68449_A_22752  | NW_004515803.1 | scaffold287 | 22752                   | AA                              | GG                 | GG               | URR                           | 101506068          | uncharacterized LOC101506068 |
| SNP_68450_A_22971  | NW_004515803.1 | scaffold287 | 22971                   | GG                              | TT                 | TT               | URR                           | 101506068          | uncharacterized LOC101506068 |
| SNP_68451_A_26693  | NW_004515803.1 | scaffold287 | 26693                   | TT                              | GG                 | GG               | URR                           | 101506384          | uncharacterized LOC101506384 |
| SNP_68452_A_27171  | NW_004515803.1 | scaffold287 | 27171                   | TT                              | CC                 | CC               | URR                           | 101506384          | uncharacterized LOC101506384 |
| SNP_68453_A_27201  | NW_004515803.1 | scaffold287 | 27201                   | CC                              | TT                 | TT               | URR                           | 101506384          | uncharacterized LOC101506384 |
| SNP_68454_A_27552  | NW_004515803.1 | scaffold287 | 27552                   | AA                              | GG                 | GG               | URR                           | 101506384          | uncharacterized LOC101506384 |
| SNP_68455_A_27568  | NW_004515803.1 | scaffold287 | 27568                   | GG                              | TT                 | TT               | URR                           | 101506384          | uncharacterized LOC101506384 |
| SNP_68456_A_27618  | NW_004515803.1 | scaffold287 | 27618                   | AA                              | TT                 | TT               | URR                           | 101506384          | uncharacterized LOC101506384 |
| SNP_68457_A_83646  | NW_004515803.1 | scaffold287 | 83646                   | GG                              | AA                 | AA               | INTERGENIC                    |                    |                              |
| SNP_68458_A_84824  | NW_004515803.1 | scaffold287 | 84824                   | CC                              | GG                 | GG               | INTERGENIC                    |                    |                              |
| SNP_68459_A_84835  | NW_004515803.1 | scaffold287 | 84835                   | TT                              | CC                 | CC               | INTERGENIC                    |                    |                              |
| SNP_68460_A_84838  | NW_004515803.1 | scaffold287 | 84838                   | AA                              | TT                 | TT               | INTERGENIC                    |                    |                              |
| SNP_68461_A_137477 | NW_004515803.1 | scaffold287 | 137477                  | TT                              | AA                 | AA               | INTERGENIC                    |                    |                              |
| SNP_68462_A_137484 | NW_004515803.1 | scaffold287 | 137484                  | GG                              | TT                 | TT               | INTERGENIC                    |                    |                              |
| SNP_68463_A_170444 | NW_004515803.1 | scaffold287 | 170444                  | GG                              | TT                 | TT               | INTERGENIC                    |                    |                              |
| SNP_68464_A_170746 | NW_004515803.1 | scaffold287 | 170746                  | TT                              | GG                 | GG               | INTERGENIC                    |                    |                              |
| SNP_68465_A_170758 | NW_004515803.1 | scaffold287 | 170758                  | TT                              | AA                 | AA               | INTERGENIC                    |                    |                              |
| SNP_68466_A_170765 | NW_004515803.1 | scaffold287 | 170765                  | TT                              | AA                 | AA               | INTERGENIC                    |                    |                              |

| SNPs IDs           | Chromosome IDs | Chromosomes | Physical positions (bp) | CDC Frontier (Reference genome) | (Pusa 1103 & HPNB) | (ILWC 46 & LPNB) | Sequence Components of genome | Gene accession IDs | Putative functions                            |
|--------------------|----------------|-------------|-------------------------|---------------------------------|--------------------|------------------|-------------------------------|--------------------|-----------------------------------------------|
| SNP_68467_A_170812 | NW_004515803.1 | scaffold287 | 170812                  | CC                              | TT                 | TT               | INTERGENIC                    |                    |                                               |
| SNP_68468_A_170828 | NW_004515803.1 | scaffold287 | 170828                  | AA                              | CC                 | CC               | INTERGENIC                    |                    |                                               |
| SNP_68471_A_186470 | NW_004515803.1 | scaffold287 | 186470                  | CC                              | TT                 | TT               | INTERGENIC                    |                    |                                               |
| SNP_68472_A_221886 | NW_004515803.1 | scaffold287 | 221886                  | TT                              | GG                 | GG               | INTRON                        | 101507048          | probable serine/threonine-protein kinase WNK6 |
| SNP_68473_A_244961 | NW_004515803.1 | scaffold287 | 244961                  | AA                              | CC                 | CC               | INTERGENIC                    |                    |                                               |
| SNP_68474_A_258975 | NW_004515803.1 | scaffold287 | 258975                  | AA                              | GG                 | GG               | INTERGENIC                    |                    |                                               |
| SNP_68475_A_274030 | NW_004515803.1 | scaffold287 | 274030                  | AA                              | GG                 | GG               | INTERGENIC                    |                    |                                               |
| SNP_68476_A_317075 | NW_004515803.1 | scaffold287 | 317075                  | TT                              | GG                 | GG               | INTERGENIC                    |                    |                                               |
| SNP_68477_A_351842 | NW_004515803.1 | scaffold287 | 351842                  | AA                              | GG                 | GG               | INTERGENIC                    |                    |                                               |
| SNP_68478_A_4403   | NW_004515805.1 | scaffold290 | 4403                    | TT                              | GG                 | GG               | INTERGENIC                    |                    |                                               |
| SNP_68479_A_12634  | NW_004515805.1 | scaffold290 | 12634                   | CC                              | TT                 | TT               | INTERGENIC                    |                    |                                               |
| SNP_68480_A_13823  | NW_004515805.1 | scaffold290 | 13823                   | TT                              | AA                 | AA               | INTERGENIC                    |                    |                                               |
| SNP_68481_A_13831  | NW_004515805.1 | scaffold290 | 13831                   | AA                              | TT                 | TT               | INTERGENIC                    |                    |                                               |
| SNP_68483_A_14075  | NW_004515805.1 | scaffold290 | 14075                   | CC                              | AA                 | AA               | INTERGENIC                    |                    |                                               |
| SNP_68484_A_14110  | NW_004515805.1 | scaffold290 | 14110                   | CC                              | AA                 | AA               | INTERGENIC                    |                    |                                               |
| SNP_68485_A_33731  | NW_004515805.1 | scaffold290 | 33731                   | CC                              | AA                 | AA               | INTERGENIC                    |                    |                                               |
| SNP_68486_A_35332  | NW_004515805.1 | scaffold290 | 35332                   | CC                              | TT                 | TT               | DRR                           | 101514230          | Unknown function                              |
| SNP_68487_A_35548  | NW_004515805.1 | scaffold290 | 35548                   | CC                              | TT                 | TT               | DRR                           | 101514230          | Unknown function                              |
| SNP_68488_A_41203  | NW_004515805.1 | scaffold290 | 41203                   | AA                              | TT                 | TT               | INTRON                        | 101514544          | uncharacterized LOC101514544                  |
| SNP_68489_A_44835  | NW_004515805.1 | scaffold290 | 44835                   | AA                              | CC                 | CC               | INTRON                        | 101514544          | uncharacterized LOC101514544                  |
| SNP_68490_A_44836  | NW_004515805.1 | scaffold290 | 44836                   | TT                              | AA                 | AA               | INTRON                        | 101514544          | uncharacterized LOC101514544                  |
| SNP_68491_A_46892  | NW_004515805.1 | scaffold290 | 46892                   | TT                              | CC                 | CC               | INTRON                        | 101514544          | uncharacterized LOC101514544                  |

| SNPs IDs           | Chromosome IDs | Chromosomes | Physical positions (bp) | CDC Frontier (Reference genome) | (Pusa 1103 & HPNB) | (ILWC 46 & LPNB) | Sequence Components of genome | Gene accession IDs | Putative functions                          |
|--------------------|----------------|-------------|-------------------------|---------------------------------|--------------------|------------------|-------------------------------|--------------------|---------------------------------------------|
| SNP_68492_A_51496  | NW_004515805.1 | scaffold290 | 51496                   | AA                              | GG                 | GG               | INTRON                        | 101514544          | uncharacterized LOC101514544                |
| SNP_68493_A_55424  | NW_004515805.1 | scaffold290 | 55424                   | GG                              | AA                 | AA               | URR                           | 101514544          | uncharacterized LOC101514544                |
| SNP_68494_A_69107  | NW_004515805.1 | scaffold290 | 69107                   | GG                              | AA                 | AA               | INTERGENIC                    |                    |                                             |
| SNP_68495_A_75237  | NW_004515805.1 | scaffold290 | 75237                   | CC                              | TT                 | TT               | DRR                           | 101510562          | uncharacterized LOC101510562                |
| SNP_68496_A_78180  | NW_004515805.1 | scaffold290 | 78180                   | TT                              | AA                 | AA               | INTERGENIC                    |                    |                                             |
| SNP_68497_A_78181  | NW_004515805.1 | scaffold290 | 78181                   | TT                              | GG                 | GG               | INTERGENIC                    |                    |                                             |
| SNP_68498_A_90394  | NW_004515805.1 | scaffold290 | 90394                   | TT                              | CC                 | CC               | INTERGENIC                    |                    |                                             |
| SNP_68499_A_96681  | NW_004515805.1 | scaffold290 | 96681                   | GG                              | AA                 | AA               | URR                           | 101511201          | protein N-terminal glutamine amidohydrolase |
| SNP_68500_A_110441 | NW_004515805.1 | scaffold290 | 110441                  | TT                              | CC                 | CC               | INTRON                        | 101511523          | gibberellin-regulated protein 14-like       |
| SNP_68502_A_115518 | NW_004515805.1 | scaffold290 | 115518                  | AA                              | GG                 | GG               | INTERGENIC                    |                    |                                             |
| SNP_68503_A_117115 | NW_004515805.1 | scaffold290 | 117115                  | CC                              | TT                 | TT               | INTERGENIC                    |                    |                                             |
| SNP_68504_A_122795 | NW_004515805.1 | scaffold290 | 122795                  | TT                              | AA                 | AA               | INTERGENIC                    |                    |                                             |
| SNP_68507_A_135327 | NW_004515805.1 | scaffold290 | 135327                  | AA                              | TT                 | TT               | INTERGENIC                    |                    |                                             |
| SNP_68508_A_138431 | NW_004515805.1 | scaffold290 | 138431                  | AA                              | TT                 | TT               | INTERGENIC                    |                    |                                             |
| SNP_68509_A_141516 | NW_004515805.1 | scaffold290 | 141516                  | AA                              | TT                 | TT               | INTERGENIC                    |                    |                                             |
| SNP_68510_A_141517 | NW_004515805.1 | scaffold290 | 141517                  | AA                              | TT                 | TT               | INTERGENIC                    |                    |                                             |
| SNP_68511_A_142739 | NW_004515805.1 | scaffold290 | 142739                  | CC                              | TT                 | TT               | INTERGENIC                    |                    |                                             |
| SNP_68512_A_145002 | NW_004515805.1 | scaffold290 | 145002                  | TT                              | CC                 | CC               | INTERGENIC                    |                    |                                             |
| SNP_68513_A_146483 | NW_004515805.1 | scaffold290 | 146483                  | CC                              | TT                 | TT               | INTERGENIC                    |                    |                                             |
| SNP_68514_A_146502 | NW_004515805.1 | scaffold290 | 146502                  | TT                              | AA                 | AA               | INTERGENIC                    |                    |                                             |
| SNP_68515_A_146871 | NW_004515805.1 | scaffold290 | 146871                  | TT                              | CC                 | CC               | INTERGENIC                    |                    |                                             |
| SNP_68516_A_146899 | NW_004515805.1 | scaffold290 | 146899                  | AA                              | CC                 | CC               | INTERGENIC                    |                    |                                             |

| SNPs IDs           | Chromosome IDs | Chromosomes | Physical positions (bp) | CDC Frontier (Reference genome) | (Pusa 1103 & HPNB) | (ILWC 46 & LPNB) | Sequence Components of genome | Gene accession IDs | Putative functions |
|--------------------|----------------|-------------|-------------------------|---------------------------------|--------------------|------------------|-------------------------------|--------------------|--------------------|
| SNP_68517_A_150485 | NW_004515805.1 | scaffold290 | 150485                  | TT                              | CC                 | CC               | INTERGENIC                    |                    |                    |
| SNP_68518_A_150599 | NW_004515805.1 | scaffold290 | 150599                  | TT                              | CC                 | CC               | INTERGENIC                    |                    |                    |
| SNP_68519_A_153693 | NW_004515805.1 | scaffold290 | 153693                  | TT                              | GG                 | GG               | INTERGENIC                    |                    |                    |
| SNP_68520_A_154099 | NW_004515805.1 | scaffold290 | 154099                  | GG                              | AA                 | AA               | INTERGENIC                    |                    |                    |
| SNP_68521_A_158832 | NW_004515805.1 | scaffold290 | 158832                  | GG                              | AA                 | AA               | INTERGENIC                    |                    |                    |
| SNP_68522_A_161641 | NW_004515805.1 | scaffold290 | 161641                  | CC                              | TT                 | TT               | INTERGENIC                    |                    |                    |
| SNP_68523_A_170933 | NW_004515805.1 | scaffold290 | 170933                  | TT                              | GG                 | GG               | INTERGENIC                    |                    |                    |
| SNP_68524_A_171723 | NW_004515805.1 | scaffold290 | 171723                  | GG                              | AA                 | AA               | INTERGENIC                    |                    |                    |
| SNP_68525_A_174311 | NW_004515805.1 | scaffold290 | 174311                  | TT                              | CC                 | CC               | INTERGENIC                    |                    |                    |
| SNP_68527_A_184849 | NW_004515805.1 | scaffold290 | 184849                  | AA                              | GG                 | GG               | INTERGENIC                    |                    |                    |
| SNP_68529_A_191007 | NW_004515805.1 | scaffold290 | 191007                  | TT                              | CC                 | CC               | INTERGENIC                    |                    |                    |
| SNP_68530_A_200929 | NW_004515805.1 | scaffold290 | 200929                  | TT                              | CC                 | CC               | NON_SYNONYMOUS_CODING         | 101515198          | Unknown function   |
| SNP_68531_A_201344 | NW_004515805.1 | scaffold290 | 201344                  | TT                              | AA                 | AA               | INTRON                        | 101515198          | Unknown function   |
| SNP_68534_A_208458 | NW_004515805.1 | scaffold290 | 208458                  | AA                              | GG                 | GG               | INTERGENIC                    |                    |                    |
| SNP_68535_A_209395 | NW_004515805.1 | scaffold290 | 209395                  | GG                              | AA                 | AA               | INTERGENIC                    |                    |                    |
| SNP_68536_A_210823 | NW_004515805.1 | scaffold290 | 210823                  | GG                              | TT                 | TT               | INTERGENIC                    |                    |                    |
| SNP_68537_A_215841 | NW_004515805.1 | scaffold290 | 215841                  | TT                              | CC                 | CC               | INTERGENIC                    |                    |                    |
| SNP_68540_A_250467 | NW_004515805.1 | scaffold290 | 250467                  | CC                              | TT                 | TT               | INTRON                        | 101512162          | villin-3-like      |
| SNP_68541_A_250847 | NW_004515805.1 | scaffold290 | 250847                  | TT                              | CC                 | CC               | INTRON                        | 101512162          | villin-3-like      |
| SNP_68542_A_250893 | NW_004515805.1 | scaffold290 | 250893                  | CC                              | TT                 | TT               | INTRON                        | 101512162          | villin-3-like      |
| SNP_68543_A_250951 | NW_004515805.1 | scaffold290 | 250951                  | TT                              | CC                 | CC               | INTRON                        | 101512162          | villin-3-like      |
| SNP_68544_A_251390 | NW_004515805.1 | scaffold290 | 251390                  | GG                              | AA                 | AA               | INTRON                        | 101512162          | villin-3-like      |

| SNPs IDs           | Chromosome IDs | Chromosomes | Physical positions (bp) | CDC Frontier (Reference genome) | (Pusa 1103 & HPNB) | (ILWC 46 & LPNB) | Sequence Components of genome | Gene accession IDs | Putative functions |
|--------------------|----------------|-------------|-------------------------|---------------------------------|--------------------|------------------|-------------------------------|--------------------|--------------------|
| SNP_68545_A_251400 | NW_004515805.1 | scaffold290 | 251400                  | GG                              | AA                 | AA               | INTRON                        | 101512162          | villin-3-like      |
| SNP_68546_A_251415 | NW_004515805.1 | scaffold290 | 251415                  | AA                              | GG                 | GG               | INTRON                        | 101512162          | villin-3-like      |
| SNP_68547_A_251988 | NW_004515805.1 | scaffold290 | 251988                  | AA                              | CC                 | CC               | INTRON                        | 101512162          | villin-3-like      |
| SNP_68548_A_252002 | NW_004515805.1 | scaffold290 | 252002                  | CC                              | GG                 | GG               | INTRON                        | 101512162          | villin-3-like      |
| SNP_68549_A_252005 | NW_004515805.1 | scaffold290 | 252005                  | TT                              | CC                 | CC               | INTRON                        | 101512162          | villin-3-like      |
| SNP_68550_A_252152 | NW_004515805.1 | scaffold290 | 252152                  | TT                              | CC                 | CC               | INTRON                        | 101512162          | villin-3-like      |
| SNP_68551_A_252196 | NW_004515805.1 | scaffold290 | 252196                  | AA                              | GG                 | GG               | INTRON                        | 101512162          | villin-3-like      |
| SNP_68552_A_252204 | NW_004515805.1 | scaffold290 | 252204                  | TT                              | CC                 | CC               | INTRON                        | 101512162          | villin-3-like      |
| SNP_68553_A_252509 | NW_004515805.1 | scaffold290 | 252509                  | CC                              | TT                 | TT               | INTRON                        | 101512162          | villin-3-like      |
| SNP_68554_A_252529 | NW_004515805.1 | scaffold290 | 252529                  | CC                              | GG                 | GG               | INTRON                        | 101512162          | villin-3-like      |
| SNP_68555_A_252965 | NW_004515805.1 | scaffold290 | 252965                  | CC                              | TT                 | TT               | INTRON                        | 101512162          | villin-3-like      |
| SNP_68556_A_252979 | NW_004515805.1 | scaffold290 | 252979                  | GG                              | TT                 | TT               | INTRON                        | 101512162          | villin-3-like      |
| SNP_68557_A_271108 | NW_004515805.1 | scaffold290 | 271108                  | TT                              | CC                 | CC               | INTERGENIC                    |                    |                    |
| SNP_68558_A_272212 | NW_004515805.1 | scaffold290 | 272212                  | AA                              | TT                 | TT               | INTERGENIC                    |                    |                    |
| SNP_68559_A_272893 | NW_004515805.1 | scaffold290 | 272893                  | CC                              | GG                 | GG               | INTERGENIC                    |                    |                    |
| SNP_68560_A_274663 | NW_004515805.1 | scaffold290 | 274663                  | CC                              | AA                 | AA               | INTERGENIC                    |                    |                    |
| SNP_68561_A_275648 | NW_004515805.1 | scaffold290 | 275648                  | TT                              | CC                 | CC               | INTERGENIC                    |                    |                    |
| SNP_68563_A_283502 | NW_004515805.1 | scaffold290 | 283502                  | CC                              | TT                 | TT               | INTERGENIC                    |                    |                    |
| SNP_68566_A_294422 | NW_004515805.1 | scaffold290 | 294422                  | TT                              | AA                 | AA               | INTERGENIC                    |                    |                    |
| SNP_68568_A_302066 | NW_004515805.1 | scaffold290 | 302066                  | TT                              | CC                 | CC               | INTERGENIC                    |                    |                    |
| SNP_68569_A_306189 | NW_004515805.1 | scaffold290 | 306189                  | GG                              | TT                 | TT               | INTERGENIC                    |                    |                    |
| SNP_68570_A_309152 | NW_004515805.1 | scaffold290 | 309152                  | AA                              | TT                 | TT               | INTERGENIC                    |                    |                    |

| SNPs IDs           | Chromosome IDs | Chromosomes | Physical positions (bp) | CDC Frontier (Reference genome) | (Pusa 1103 & HPNB) | (ILWC 46 & LPNB) | Sequence Components of genome | Gene accession IDs | Putative functions |
|--------------------|----------------|-------------|-------------------------|---------------------------------|--------------------|------------------|-------------------------------|--------------------|--------------------|
| SNP_68571_A_312144 | NW_004515805.1 | scaffold290 | 312144                  | GG                              | AA                 | AA               | INTERGENIC                    |                    |                    |
| SNP_68572_A_312357 | NW_004515805.1 | scaffold290 | 312357                  | GG                              | AA                 | AA               | INTERGENIC                    |                    |                    |
| SNP_68573_A_312376 | NW_004515805.1 | scaffold290 | 312376                  | CC                              | TT                 | TT               | INTERGENIC                    |                    |                    |
| SNP_68574_A_317174 | NW_004515805.1 | scaffold290 | 317174                  | CC                              | GG                 | GG               | INTERGENIC                    |                    |                    |
| SNP_68575_A_336191 | NW_004515805.1 | scaffold290 | 336191                  | TT                              | CC                 | CC               | NON_SYNONYMOUS_CODING         | 101488599          | Unknown function   |
| SNP_68576_A_337017 | NW_004515805.1 | scaffold290 | 337017                  | CC                              | TT                 | TT               | URR                           | 101488599          | Unknown function   |
| SNP_68577_A_339888 | NW_004515805.1 | scaffold290 | 339888                  | CC                              | GG                 | GG               | INTERGENIC                    |                    |                    |
| SNP_68578_A_341583 | NW_004515805.1 | scaffold290 | 341583                  | GG                              | AA                 | AA               | INTERGENIC                    |                    |                    |
| SNP_68579_A_341602 | NW_004515805.1 | scaffold290 | 341602                  | TT                              | CC                 | CC               | INTERGENIC                    |                    |                    |
| SNP_68580_A_348919 | NW_004515805.1 | scaffold290 | 348919                  | TT                              | GG                 | GG               | INTERGENIC                    |                    |                    |
| SNP_68581_A_361613 | NW_004515805.1 | scaffold290 | 361613                  | GG                              | AA                 | AA               | INTERGENIC                    |                    |                    |
| SNP_68582_A_372766 | NW_004515805.1 | scaffold290 | 372766                  | AA                              | CC                 | CC               | INTERGENIC                    |                    |                    |
| SNP_68583_A_373123 | NW_004515805.1 | scaffold290 | 373123                  | AA                              | GG                 | GG               | INTERGENIC                    |                    |                    |
| SNP_68584_A_373177 | NW_004515805.1 | scaffold290 | 373177                  | GG                              | AA                 | AA               | INTERGENIC                    |                    |                    |
| SNP_68586_A_377932 | NW_004515805.1 | scaffold290 | 377932                  | GG                              | TT                 | TT               | INTERGENIC                    |                    |                    |
| SNP_68587_A_380741 | NW_004515805.1 | scaffold290 | 380741                  | AA                              | GG                 | GG               | INTERGENIC                    |                    |                    |
| SNP_68588_A_380932 | NW_004515805.1 | scaffold290 | 380932                  | CC                              | TT                 | TT               | INTERGENIC                    |                    |                    |
| SNP_68589_A_381433 | NW_004515805.1 | scaffold290 | 381433                  | TT                              | CC                 | CC               | INTERGENIC                    |                    |                    |
| SNP_68590_A_391167 | NW_004515805.1 | scaffold290 | 391167                  | GG                              | TT                 | TT               | INTERGENIC                    |                    |                    |
| SNP_68591_A_392525 | NW_004515805.1 | scaffold290 | 392525                  | AA                              | GG                 | GG               | INTERGENIC                    |                    |                    |
| SNP_68592_A_393299 | NW_004515805.1 | scaffold290 | 393299                  | TT                              | CC                 | CC               | INTERGENIC                    |                    |                    |
| SNP_68593_A_397822 | NW_004515805.1 | scaffold290 | 397822                  | AA                              | TT                 | TT               | INTERGENIC                    |                    |                    |

| SNPs IDs           | Chromosome IDs | Chromosomes | Physical positions (bp) | CDC Frontier (Reference genome) | (Pusa 1103 & HPNB) | (ILWC 46 & LPNB) | Sequence Components of genome | Gene accession IDs | Putative functions                                  |
|--------------------|----------------|-------------|-------------------------|---------------------------------|--------------------|------------------|-------------------------------|--------------------|-----------------------------------------------------|
| SNP_68594_A_398369 | NW_004515805.1 | scaffold290 | 398369                  | CC                              | TT                 | TT               | INTERGENIC                    |                    |                                                     |
| SNP_68596_A_398570 | NW_004515805.1 | scaffold290 | 398570                  | AA                              | GG                 | GG               | INTERGENIC                    |                    |                                                     |
| SNP_68598_A_400935 | NW_004515805.1 | scaffold290 | 400935                  | AA                              | TT                 | TT               | INTERGENIC                    |                    |                                                     |
| SNP_68599_A_407155 | NW_004515805.1 | scaffold290 | 407155                  | CC                              | TT                 | TT               | INTERGENIC                    |                    |                                                     |
| SNP_68600_A_416569 | NW_004515805.1 | scaffold290 | 416569                  | CC                              | TT                 | TT               | INTERGENIC                    |                    |                                                     |
| SNP_68602_A_422895 | NW_004515805.1 | scaffold290 | 422895                  | TT                              | CC                 | CC               | INTERGENIC                    |                    |                                                     |
| SNP_68604_A_433256 | NW_004515805.1 | scaffold290 | 433256                  | GG                              | AA                 | AA               | SYNONYMOUS_CODING             | 101489273          | uncharacterized LOC101489273                        |
| SNP_68605_A_433957 | NW_004515805.1 | scaffold290 | 433957                  | TT                              | GG                 | GG               | URR                           | 101489273          | uncharacterized LOC101489273                        |
| SNP_68609_A_453572 | NW_004515805.1 | scaffold290 | 453572                  | GG                              | AA                 | AA               | INTERGENIC                    |                    |                                                     |
| SNP_68610_A_459188 | NW_004515805.1 | scaffold290 | 459188                  | GG                              | AA                 | AA               | DRR                           | 101489917          | uncharacterized LOC101489917                        |
| SNP_68611_A_467677 | NW_004515805.1 | scaffold290 | 467677                  | GG                              | AA                 | AA               | URR                           | 101512490          | tyrosine-tRNA ligase, cytoplasmic                   |
| SNP_68612_A_473948 | NW_004515805.1 | scaffold290 | 473948                  | CC                              | TT                 | TT               | DRR                           | 101490251          | histone acetyltransferase of the MYST family 1-like |
| SNP_68613_A_489457 | NW_004515805.1 | scaffold290 | 489457                  | TT                              | AA                 | AA               | INTERGENIC                    |                    |                                                     |
| SNP_68614_A_489997 | NW_004515805.1 | scaffold290 | 489997                  | AA                              | GG                 | GG               | INTERGENIC                    |                    |                                                     |
| SNP_68615_A_495202 | NW_004515805.1 | scaffold290 | 495202                  | CC                              | TT                 | TT               | URR                           | 101490570          | Unknown function                                    |
| SNP_68616_A_499851 | NW_004515805.1 | scaffold290 | 499851                  | GG                              | AA                 | AA               | INTERGENIC                    |                    |                                                     |
| SNP_68617_A_499954 | NW_004515805.1 | scaffold290 | 499954                  | CC                              | TT                 | TT               | INTERGENIC                    |                    |                                                     |
| SNP_68618_A_500017 | NW_004515805.1 | scaffold290 | 500017                  | AA                              | GG                 | GG               | INTERGENIC                    |                    |                                                     |
| SNP_68619_A_500031 | NW_004515805.1 | scaffold290 | 500031                  | CC                              | TT                 | TT               | INTERGENIC                    |                    |                                                     |
| SNP_68620_A_500066 | NW_004515805.1 | scaffold290 | 500066                  | AA                              | GG                 | GG               | INTERGENIC                    |                    |                                                     |
| SNP_68621_A_500068 | NW_004515805.1 | scaffold290 | 500068                  | AA                              | GG                 | GG               | INTERGENIC                    |                    |                                                     |
| SNP_68622_A_500078 | NW_004515805.1 | scaffold290 | 500078                  | TT                              | GG                 | GG               | INTERGENIC                    |                    |                                                     |



| SNPs IDs           | Chromosome IDs | Chromosomes | Physical positions (bp) | CDC Frontier (Reference genome) | (Pusa 1103 & HPNB) | (ILWC 46 & LPNB) | Sequence genome | Components of | Gene accession IDs | Putative functions |
|--------------------|----------------|-------------|-------------------------|---------------------------------|--------------------|------------------|-----------------|---------------|--------------------|--------------------|
| SNP_68623_A_500380 | NW_004515805.1 | scaffold290 | 500380                  | TT                              | CC                 | CC               | INTERGENIC      |               |                    |                    |
| SNP_68624_A_500438 | NW_004515805.1 | scaffold290 | 500438                  | TT                              | CC                 | CC               | INTERGENIC      |               |                    |                    |
| SNP_68625_A_500449 | NW_004515805.1 | scaffold290 | 500449                  | AA                              | GG                 | GG               | INTERGENIC      |               |                    |                    |
| SNP_68626_A_500468 | NW_004515805.1 | scaffold290 | 500468                  | AA                              | TT                 | TT               | INTERGENIC      |               |                    |                    |
| SNP_68627_A_500472 | NW_004515805.1 | scaffold290 | 500472                  | TT                              | AA                 | AA               | INTERGENIC      |               |                    |                    |
| SNP_68628_A_504840 | NW_004515805.1 | scaffold290 | 504840                  | TT                              | CC                 | CC               | INTERGENIC      |               |                    |                    |
| SNP_68629_A_506207 | NW_004515805.1 | scaffold290 | 506207                  | CC                              | AA                 | AA               | INTERGENIC      |               |                    |                    |
| SNP_68630_A_511444 | NW_004515805.1 | scaffold290 | 511444                  | TT                              | CC                 | CC               | INTERGENIC      |               |                    |                    |
| SNP_68631_A_512684 | NW_004515805.1 | scaffold290 | 512684                  | CC                              | TT                 | TT               | INTERGENIC      |               |                    |                    |
| SNP_68632_A_512708 | NW_004515805.1 | scaffold290 | 512708                  | GG                              | TT                 | TT               | INTERGENIC      |               |                    |                    |
| SNP_68633_A_512718 | NW_004515805.1 | scaffold290 | 512718                  | GG                              | AA                 | AA               | INTERGENIC      |               |                    |                    |
| SNP_68634_A_514697 | NW_004515805.1 | scaffold290 | 514697                  | AA                              | GG                 | GG               | INTERGENIC      |               |                    |                    |
| SNP_68636_A_544450 | NW_004515805.1 | scaffold290 | 544450                  | TT                              | CC                 | CC               | INTERGENIC      |               |                    |                    |
| SNP_68637_A_544517 | NW_004515805.1 | scaffold290 | 544517                  | TT                              | CC                 | CC               | INTERGENIC      |               |                    |                    |
| SNP_68638_A_544533 | NW_004515805.1 | scaffold290 | 544533                  | CC                              | AA                 | AA               | INTERGENIC      |               |                    |                    |
| SNP_68639_A_544623 | NW_004515805.1 | scaffold290 | 544623                  | AA                              | GG                 | GG               | INTERGENIC      |               |                    |                    |
| SNP_68640_A_544653 | NW_004515805.1 | scaffold290 | 544653                  | AA                              | GG                 | GG               | INTERGENIC      |               |                    |                    |
| SNP_68642_A_544858 | NW_004515805.1 | scaffold290 | 544858                  | GG                              | AA                 | AA               | INTERGENIC      |               |                    |                    |
| SNP_68643_A_550663 | NW_004515805.1 | scaffold290 | 550663                  | CC                              | GG                 | GG               | INTERGENIC      |               |                    |                    |
| SNP_68644_A_551953 | NW_004515805.1 | scaffold290 | 551953                  | TT                              | AA                 | AA               | INTERGENIC      |               |                    |                    |
| SNP_68645_A_561500 | NW_004515805.1 | scaffold290 | 561500                  | TT                              | CC                 | CC               | INTERGENIC      |               |                    |                    |
| SNP_68646_A_561511 | NW_004515805.1 | scaffold290 | 561511                  | GG                              | TT                 | TT               | INTERGENIC      |               |                    |                    |

| SNPs IDs           | Chromosome IDs | Chromosomes | Physical positions (bp) | CDC Frontier (Reference genome) | (Pusa 1103 & HPNB) | (ILWC 46 & LPNB) | Sequence genome | Components of | Gene accession IDs | Putative functions |
|--------------------|----------------|-------------|-------------------------|---------------------------------|--------------------|------------------|-----------------|---------------|--------------------|--------------------|
| SNP_68647_A_561594 | NW_004515805.1 | scaffold290 | 561594                  | GG                              | AA                 | AA               | INTERGENIC      |               |                    |                    |
| SNP_68648_A_561843 | NW_004515805.1 | scaffold290 | 561843                  | GG                              | AA                 | AA               | INTERGENIC      |               |                    |                    |
| SNP_68650_A_571682 | NW_004515805.1 | scaffold290 | 571682                  | CC                              | AA                 | AA               | INTERGENIC      |               |                    |                    |
| SNP_68651_A_571699 | NW_004515805.1 | scaffold290 | 571699                  | AA                              | GG                 | GG               | INTERGENIC      |               |                    |                    |
| SNP_68652_A_571709 | NW_004515805.1 | scaffold290 | 571709                  | AA                              | GG                 | GG               | INTERGENIC      |               |                    |                    |
| SNP_68653_A_571717 | NW_004515805.1 | scaffold290 | 571717                  | TT                              | CC                 | CC               | INTERGENIC      |               |                    |                    |
| SNP_68654_A_572089 | NW_004515805.1 | scaffold290 | 572089                  | CC                              | TT                 | TT               | INTERGENIC      |               |                    |                    |
| SNP_68655_A_572090 | NW_004515805.1 | scaffold290 | 572090                  | AA                              | CC                 | CC               | INTERGENIC      |               |                    |                    |
| SNP_68656_A_572091 | NW_004515805.1 | scaffold290 | 572091                  | AA                              | GG                 | GG               | INTERGENIC      |               |                    |                    |
| SNP_68657_A_572100 | NW_004515805.1 | scaffold290 | 572100                  | TT                              | CC                 | CC               | INTERGENIC      |               |                    |                    |
| SNP_68658_A_572129 | NW_004515805.1 | scaffold290 | 572129                  | TT                              | AA                 | AA               | INTERGENIC      |               |                    |                    |
| SNP_68659_A_572231 | NW_004515805.1 | scaffold290 | 572231                  | TT                              | CC                 | CC               | INTERGENIC      |               |                    |                    |
| SNP_68660_A_572249 | NW_004515805.1 | scaffold290 | 572249                  | AA                              | GG                 | GG               | INTERGENIC      |               |                    |                    |
| SNP_68661_A_572275 | NW_004515805.1 | scaffold290 | 572275                  | AA                              | TT                 | TT               | INTERGENIC      |               |                    |                    |
| SNP_68662_A_572325 | NW_004515805.1 | scaffold290 | 572325                  | AA                              | TT                 | TT               | INTERGENIC      |               |                    |                    |
| SNP_68663_A_572611 | NW_004515805.1 | scaffold290 | 572611                  | AA                              | GG                 | GG               | INTERGENIC      |               |                    |                    |
| SNP_68665_A_579150 | NW_004515805.1 | scaffold290 | 579150                  | GG                              | AA                 | AA               | INTERGENIC      |               |                    |                    |
| SNP_68666_A_587632 | NW_004515805.1 | scaffold290 | 587632                  | TT                              | GG                 | GG               | INTERGENIC      |               |                    |                    |
| SNP_68667_A_590167 | NW_004515805.1 | scaffold290 | 590167                  | TT                              | AA                 | AA               | INTERGENIC      |               |                    |                    |
| SNP_68668_A_590897 | NW_004515805.1 | scaffold290 | 590897                  | CC                              | TT                 | TT               | INTERGENIC      |               |                    |                    |
| SNP_68670_A_605107 | NW_004515805.1 | scaffold290 | 605107                  | AA                              | CC                 | CC               | INTERGENIC      |               |                    |                    |
| SNP_68672_A_605959 | NW_004515805.1 | scaffold290 | 605959                  | GG                              | TT                 | TT               | INTERGENIC      |               |                    |                    |

| SNPs IDs           | Chromosome IDs | Chromosomes | Physical positions (bp) | CDC Frontier (Reference genome) | (Pusa 1103 & HPNB) | (ILWC 46 & LPNB) | Sequence Components of genome | Gene accession IDs | Putative functions                      |
|--------------------|----------------|-------------|-------------------------|---------------------------------|--------------------|------------------|-------------------------------|--------------------|-----------------------------------------|
| SNP_68673_A_613664 | NW_004515805.1 | scaffold290 | 613664                  | TT                              | CC                 | CC               | INTERGENIC                    |                    |                                         |
| SNP_68674_A_615997 | NW_004515805.1 | scaffold290 | 615997                  | TT                              | GG                 | GG               | URR                           | 101492510          | Unknown function                        |
| SNP_68675_A_617460 | NW_004515805.1 | scaffold290 | 617460                  | AA                              | CC                 | CC               | URR                           | 101492510          | Unknown function                        |
| SNP_68676_A_618416 | NW_004515805.1 | scaffold290 | 618416                  | CC                              | TT                 | TT               | INTERGENIC                    |                    |                                         |
| SNP_68677_A_618462 | NW_004515805.1 | scaffold290 | 618462                  | CC                              | GG                 | GG               | INTERGENIC                    |                    |                                         |
| SNP_68679_A_630775 | NW_004515805.1 | scaffold290 | 630775                  | CC                              | TT                 | TT               | INTRON                        | 101513349          | NADPH-dependent thioredoxin reductase 3 |
| SNP_68680_A_636449 | NW_004515805.1 | scaffold290 | 636449                  | CC                              | AA                 | AA               | URR                           | 101513349          | NADPH-dependent thioredoxin reductase 3 |
| SNP_68681_A_637146 | NW_004515805.1 | scaffold290 | 637146                  | AA                              | GG                 | GG               | URR                           | 101513349          | NADPH-dependent thioredoxin reductase 3 |
| SNP_68682_A_639210 | NW_004515805.1 | scaffold290 | 639210                  | CC                              | TT                 | TT               | INTERGENIC                    |                    |                                         |
| SNP_68683_A_640921 | NW_004515805.1 | scaffold290 | 640921                  | TT                              | AA                 | AA               | INTERGENIC                    |                    |                                         |
| SNP_68684_A_641104 | NW_004515805.1 | scaffold290 | 641104                  | CC                              | TT                 | TT               | INTERGENIC                    |                    |                                         |
| SNP_68685_A_643395 | NW_004515805.1 | scaffold290 | 643395                  | GG                              | AA                 | AA               | INTERGENIC                    |                    |                                         |
| SNP_68686_A_649328 | NW_004515805.1 | scaffold290 | 649328                  | TT                              | AA                 | AA               | INTERGENIC                    |                    |                                         |
| SNP_68687_A_660228 | NW_004515805.1 | scaffold290 | 660228                  | AA                              | GG                 | GG               | INTERGENIC                    |                    |                                         |
| SNP_68688_A_664622 | NW_004515805.1 | scaffold290 | 664622                  | AA                              | GG                 | GG               | INTERGENIC                    |                    |                                         |
| SNP_68689_A_670140 | NW_004515805.1 | scaffold290 | 670140                  | CC                              | TT                 | TT               | INTERGENIC                    |                    |                                         |
| SNP_68690_A_670900 | NW_004515805.1 | scaffold290 | 670900                  | AA                              | GG                 | GG               | INTERGENIC                    |                    |                                         |
| SNP_68691_A_673427 | NW_004515805.1 | scaffold290 | 673427                  | CC                              | TT                 | TT               | INTERGENIC                    |                    |                                         |
| SNP_68692_A_674377 | NW_004515805.1 | scaffold290 | 674377                  | CC                              | TT                 | TT               | INTERGENIC                    |                    |                                         |
| SNP_68694_A_675012 | NW_004515805.1 | scaffold290 | 675012                  | GG                              | AA                 | AA               | INTERGENIC                    |                    |                                         |
| SNP_68695_A_680335 | NW_004515805.1 | scaffold290 | 680335                  | AA                              | GG                 | GG               | INTERGENIC                    |                    |                                         |
| SNP_68696_A_690991 | NW_004515805.1 | scaffold290 | 690991                  | TT                              | CC                 | CC               | INTERGENIC                    |                    |                                         |

| SNPs IDs           | Chromosome IDs | Chromosomes | Physical positions (bp) | CDC Frontier (Reference genome) | (Pusa 1103 & HPNB) | (ILWC 46 & LPNB) | Sequence Components of genome | Gene accession IDs | Putative functions           |
|--------------------|----------------|-------------|-------------------------|---------------------------------|--------------------|------------------|-------------------------------|--------------------|------------------------------|
| SNP_68697_A_691771 | NW_004515805.1 | scaffold290 | 691771                  | AA                              | GG                 | GG               | INTERGENIC                    |                    |                              |
| SNP_68698_A_691823 | NW_004515805.1 | scaffold290 | 691823                  | GG                              | TT                 | TT               | INTERGENIC                    |                    |                              |
| SNP_68699_A_698995 | NW_004515805.1 | scaffold290 | 698995                  | GG                              | TT                 | TT               | INTERGENIC                    |                    |                              |
| SNP_68700_A_702592 | NW_004515805.1 | scaffold290 | 702592                  | TT                              | CC                 | CC               | INTERGENIC                    |                    |                              |
| SNP_68701_A_709724 | NW_004515805.1 | scaffold290 | 709724                  | CC                              | GG                 | GG               | INTERGENIC                    |                    |                              |
| SNP_68702_A_711136 | NW_004515805.1 | scaffold290 | 711136                  | TT                              | GG                 | GG               | INTERGENIC                    |                    |                              |
| SNP_68705_A_721106 | NW_004515805.1 | scaffold290 | 721106                  | GG                              | CC                 | CC               | INTERGENIC                    |                    |                              |
| SNP_68706_A_729372 | NW_004515805.1 | scaffold290 | 729372                  | TT                              | CC                 | CC               | URR                           | 101513671          | uncharacterized LOC101513671 |
| SNP_68707_A_729551 | NW_004515805.1 | scaffold290 | 729551                  | TT                              | CC                 | CC               | URR                           | 101513671          | uncharacterized LOC101513671 |
| SNP_68708_A_752342 | NW_004515805.1 | scaffold290 | 752342                  | GG                              | AA                 | AA               | INTERGENIC                    |                    |                              |
| SNP_68709_A_753260 | NW_004515805.1 | scaffold290 | 753260                  | CC                              | TT                 | TT               | INTERGENIC                    |                    |                              |
| SNP_68710_A_755526 | NW_004515805.1 | scaffold290 | 755526                  | AA                              | CC                 | CC               | INTERGENIC                    |                    |                              |
| SNP_68711_A_757675 | NW_004515805.1 | scaffold290 | 757675                  | CC                              | TT                 | TT               | INTERGENIC                    |                    |                              |
| SNP_68712_A_762663 | NW_004515805.1 | scaffold290 | 762663                  | AA                              | TT                 | TT               | INTERGENIC                    |                    |                              |
| SNP_68713_A_763745 | NW_004515805.1 | scaffold290 | 763745                  | AA                              | CC                 | CC               | INTERGENIC                    |                    |                              |
| SNP_68714_A_764044 | NW_004515805.1 | scaffold290 | 764044                  | TT                              | CC                 | CC               | INTERGENIC                    |                    |                              |
| SNP_68715_A_764095 | NW_004515805.1 | scaffold290 | 764095                  | CC                              | AA                 | AA               | INTERGENIC                    |                    |                              |
| SNP_68716_A_771814 | NW_004515805.1 | scaffold290 | 771814                  | GG                              | AA                 | AA               | INTERGENIC                    |                    |                              |
| SNP_68717_A_774404 | NW_004515805.1 | scaffold290 | 774404                  | CC                              | TT                 | TT               | INTERGENIC                    |                    |                              |
| SNP_68718_A_774437 | NW_004515805.1 | scaffold290 | 774437                  | GG                              | AA                 | AA               | INTERGENIC                    |                    |                              |
| SNP_68719_A_777912 | NW_004515805.1 | scaffold290 | 777912                  | TT                              | CC                 | CC               | INTERGENIC                    |                    |                              |
| SNP_68720_A_778414 | NW_004515805.1 | scaffold290 | 778414                  | TT                              | AA                 | AA               | INTERGENIC                    |                    |                              |

| SNPs IDs           | Chromosome IDs | Chromosomes | Physical positions (bp) | CDC Frontier (Reference genome) | (Pusa 1103 & HPNB) | (ILWC 46 & LPNB) | Sequence genome | Components of | Gene accession IDs | Putative functions |
|--------------------|----------------|-------------|-------------------------|---------------------------------|--------------------|------------------|-----------------|---------------|--------------------|--------------------|
| SNP_68721_A_797340 | NW_004515805.1 | scaffold290 | 797340                  | CC                              | TT                 | TT               | INTERGENIC      |               |                    |                    |
| SNP_68722_A_797360 | NW_004515805.1 | scaffold290 | 797360                  | AA                              | TT                 | TT               | INTERGENIC      |               |                    |                    |
| SNP_68723_A_797379 | NW_004515805.1 | scaffold290 | 797379                  | TT                              | GG                 | GG               | INTERGENIC      |               |                    |                    |
| SNP_68724_A_797388 | NW_004515805.1 | scaffold290 | 797388                  | TT                              | CC                 | CC               | INTERGENIC      |               |                    |                    |
| SNP_68725_A_797391 | NW_004515805.1 | scaffold290 | 797391                  | CC                              | TT                 | TT               | INTERGENIC      |               |                    |                    |
| SNP_68726_A_797422 | NW_004515805.1 | scaffold290 | 797422                  | GG                              | CC                 | CC               | INTERGENIC      |               |                    |                    |
| SNP_68727_A_797438 | NW_004515805.1 | scaffold290 | 797438                  | AA                              | GG                 | GG               | INTERGENIC      |               |                    |                    |
| SNP_68728_A_797450 | NW_004515805.1 | scaffold290 | 797450                  | TT                              | CC                 | CC               | INTERGENIC      |               |                    |                    |
| SNP_68729_A_797569 | NW_004515805.1 | scaffold290 | 797569                  | GG                              | AA                 | AA               | INTERGENIC      |               |                    |                    |
| SNP_68730_A_797715 | NW_004515805.1 | scaffold290 | 797715                  | GG                              | AA                 | AA               | INTERGENIC      |               |                    |                    |
| SNP_68731_A_798289 | NW_004515805.1 | scaffold290 | 798289                  | CC                              | TT                 | TT               | INTERGENIC      |               |                    |                    |
| SNP_68732_A_805285 | NW_004515805.1 | scaffold290 | 805285                  | AA                              | CC                 | CC               | INTERGENIC      |               |                    |                    |
| SNP_68733_A_805342 | NW_004515805.1 | scaffold290 | 805342                  | AA                              | TT                 | TT               | INTERGENIC      |               |                    |                    |
| SNP_68734_A_805410 | NW_004515805.1 | scaffold290 | 805410                  | GG                              | CC                 | CC               | INTERGENIC      |               |                    |                    |
| SNP_68735_A_809912 | NW_004515805.1 | scaffold290 | 809912                  | TT                              | AA                 | AA               | INTERGENIC      |               |                    |                    |
| SNP_68736_A_813677 | NW_004515805.1 | scaffold290 | 813677                  | CC                              | TT                 | TT               | INTERGENIC      |               |                    |                    |
| SNP_68737_A_813710 | NW_004515805.1 | scaffold290 | 813710                  | TT                              | CC                 | CC               | INTERGENIC      |               |                    |                    |
| SNP_68738_A_813722 | NW_004515805.1 | scaffold290 | 813722                  | TT                              | CC                 | CC               | INTERGENIC      |               |                    |                    |
| SNP_68739_A_813749 | NW_004515805.1 | scaffold290 | 813749                  | AA                              | GG                 | GG               | INTERGENIC      |               |                    |                    |
| SNP_68740_A_813788 | NW_004515805.1 | scaffold290 | 813788                  | TT                              | GG                 | GG               | INTERGENIC      |               |                    |                    |
| SNP_68741_A_813837 | NW_004515805.1 | scaffold290 | 813837                  | AA                              | GG                 | GG               | INTERGENIC      |               |                    |                    |
| SNP_68742_A_813851 | NW_004515805.1 | scaffold290 | 813851                  | GG                              | CC                 | CC               | INTERGENIC      |               |                    |                    |

| SNPs IDs           | Chromosome IDs | Chromosomes | Physical positions (bp) | CDC Frontier (Reference genome) | (Pusa 1103 & HPNB) | (ILWC 46 & LPNB) | Sequence genome | Components of | Gene accession IDs | Putative functions |
|--------------------|----------------|-------------|-------------------------|---------------------------------|--------------------|------------------|-----------------|---------------|--------------------|--------------------|
| SNP_68743_A_814602 | NW_004515805.1 | scaffold290 | 814602                  | GG                              | CC                 | CC               | INTERGENIC      |               |                    |                    |
| SNP_68744_A_817702 | NW_004515805.1 | scaffold290 | 817702                  | TT                              | GG                 | GG               | INTERGENIC      |               |                    |                    |
| SNP_68745_A_818291 | NW_004515805.1 | scaffold290 | 818291                  | AA                              | CC                 | CC               | INTERGENIC      |               |                    |                    |
| SNP_68747_A_820404 | NW_004515805.1 | scaffold290 | 820404                  | TT                              | CC                 | CC               | INTERGENIC      |               |                    |                    |
| SNP_68748_A_825515 | NW_004515805.1 | scaffold290 | 825515                  | AA                              | TT                 | TT               | INTERGENIC      |               |                    |                    |
| SNP_68749_A_829363 | NW_004515805.1 | scaffold290 | 829363                  | TT                              | GG                 | GG               | INTERGENIC      |               |                    |                    |
| SNP_68750_A_844964 | NW_004515805.1 | scaffold290 | 844964                  | AA                              | GG                 | GG               | INTERGENIC      |               |                    |                    |
| SNP_68751_A_845269 | NW_004515805.1 | scaffold290 | 845269                  | GG                              | AA                 | AA               | INTERGENIC      |               |                    |                    |
| SNP_68752_A_848988 | NW_004515805.1 | scaffold290 | 848988                  | TT                              | GG                 | GG               | INTERGENIC      |               |                    |                    |
| SNP_68753_A_849249 | NW_004515805.1 | scaffold290 | 849249                  | CC                              | TT                 | TT               | INTERGENIC      |               |                    |                    |
| SNP_68755_A_867755 | NW_004515805.1 | scaffold290 | 867755                  | AA                              | CC                 | CC               | INTERGENIC      |               |                    |                    |
| SNP_68756_A_868394 | NW_004515805.1 | scaffold290 | 868394                  | GG                              | AA                 | AA               | INTERGENIC      |               |                    |                    |
| SNP_68758_A_878935 | NW_004515805.1 | scaffold290 | 878935                  | AA                              | TT                 | TT               | INTERGENIC      |               |                    |                    |
| SNP_68760_A_879617 | NW_004515805.1 | scaffold290 | 879617                  | AA                              | TT                 | TT               | INTERGENIC      |               |                    |                    |
| SNP_68761_A_892462 | NW_004515805.1 | scaffold290 | 892462                  | TT                              | GG                 | GG               | INTERGENIC      |               |                    |                    |
| SNP_68762_A_899671 | NW_004515805.1 | scaffold290 | 899671                  | TT                              | GG                 | GG               | INTERGENIC      |               |                    |                    |
| SNP_68763_A_900458 | NW_004515805.1 | scaffold290 | 900458                  | CC                              | TT                 | TT               | INTERGENIC      |               |                    |                    |
| SNP_68764_A_910032 | NW_004515805.1 | scaffold290 | 910032                  | GG                              | AA                 | AA               | INTERGENIC      |               |                    |                    |
| SNP_68765_A_2156   | NW_004515806.1 | scaffold292 | 2156                    | GG                              | CC                 | CC               | INTERGENIC      |               |                    |                    |
| SNP_68766_A_5219   | NW_004515806.1 | scaffold292 | 5219                    | AA                              | GG                 | GG               | INTERGENIC      |               |                    |                    |
| SNP_68767_A_5242   | NW_004515806.1 | scaffold292 | 5242                    | AA                              | CC                 | CC               | INTERGENIC      |               |                    |                    |
| SNP_68768_A_5316   | NW_004515806.1 | scaffold292 | 5316                    | TT                              | AA                 | AA               | INTERGENIC      |               |                    |                    |

| SNPs IDs          | Chromosome IDs | Chromosomes | Physical positions (bp) | CDC Frontier (Reference genome) | (Pusa 1103 & HPNB) | (ILWC 46 & LPNB) | Sequence genome | Components of | Gene accession IDs | Putative functions |
|-------------------|----------------|-------------|-------------------------|---------------------------------|--------------------|------------------|-----------------|---------------|--------------------|--------------------|
| SNP_68769_A_5498  | NW_004515806.1 | scaffold292 | 5498                    | AA                              | CC                 | CC               | INTERGENIC      |               |                    |                    |
| SNP_68770_A_6060  | NW_004515807.1 | scaffold293 | 6060                    | AA                              | GG                 | GG               | INTERGENIC      |               |                    |                    |
| SNP_68771_A_6455  | NW_004515807.1 | scaffold293 | 6455                    | CC                              | TT                 | TT               | INTERGENIC      |               |                    |                    |
| SNP_68772_A_11518 | NW_004515807.1 | scaffold293 | 11518                   | TT                              | AA                 | AA               | INTERGENIC      |               |                    |                    |
| SNP_68773_A_12976 | NW_004515807.1 | scaffold293 | 12976                   | GG                              | AA                 | AA               | INTERGENIC      |               |                    |                    |
| SNP_68774_A_12983 | NW_004515807.1 | scaffold293 | 12983                   | TT                              | AA                 | AA               | INTERGENIC      |               |                    |                    |
| SNP_68775_A_12997 | NW_004515807.1 | scaffold293 | 12997                   | TT                              | CC                 | CC               | INTERGENIC      |               |                    |                    |
| SNP_68776_A_13006 | NW_004515807.1 | scaffold293 | 13006                   | TT                              | CC                 | CC               | INTERGENIC      |               |                    |                    |
| SNP_68777_A_13015 | NW_004515807.1 | scaffold293 | 13015                   | CC                              | GG                 | GG               | INTERGENIC      |               |                    |                    |
| SNP_68778_A_19964 | NW_004515807.1 | scaffold293 | 19964                   | AA                              | TT                 | TT               | INTERGENIC      |               |                    |                    |
| SNP_68779_A_19977 | NW_004515807.1 | scaffold293 | 19977                   | AA                              | CC                 | CC               | INTERGENIC      |               |                    |                    |
| SNP_68780_A_23867 | NW_004515807.1 | scaffold293 | 23867                   | CC                              | AA                 | AA               | INTERGENIC      |               |                    |                    |
| SNP_68781_A_30190 | NW_004515807.1 | scaffold293 | 30190                   | TT                              | GG                 | GG               | INTERGENIC      |               |                    |                    |
| SNP_68782_A_30222 | NW_004515807.1 | scaffold293 | 30222                   | TT                              | CC                 | CC               | INTERGENIC      |               |                    |                    |
| SNP_68783_A_30395 | NW_004515807.1 | scaffold293 | 30395                   | AA                              | GG                 | GG               | INTERGENIC      |               |                    |                    |
| SNP_68784_A_30428 | NW_004515807.1 | scaffold293 | 30428                   | AA                              | GG                 | GG               | INTERGENIC      |               |                    |                    |
| SNP_68785_A_30431 | NW_004515807.1 | scaffold293 | 30431                   | CC                              | TT                 | TT               | INTERGENIC      |               |                    |                    |
| SNP_68787_A_30457 | NW_004515807.1 | scaffold293 | 30457                   | TT                              | CC                 | CC               | INTERGENIC      |               |                    |                    |
| SNP_68788_A_30467 | NW_004515807.1 | scaffold293 | 30467                   | TT                              | CC                 | CC               | INTERGENIC      |               |                    |                    |
| SNP_68789_A_33685 | NW_004515807.1 | scaffold293 | 33685                   | AA                              | GG                 | GG               | INTERGENIC      |               |                    |                    |
| SNP_68790_A_35422 | NW_004515807.1 | scaffold293 | 35422                   | TT                              | AA                 | AA               | INTERGENIC      |               |                    |                    |
| SNP_68791_A_363   | NW_004515808.1 | scaffold295 | 363                     | TT                              | GG                 | GG               | INTERGENIC      |               |                    |                    |

| SNPs IDs          | Chromosome IDs | Chromosomes | Physical positions (bp) | CDC Frontier (Reference genome) | (Pusa 1103 & HPNB) | (ILWC 46 & LPNB) | Sequence genome | Components of | Gene accession IDs | Putative functions |
|-------------------|----------------|-------------|-------------------------|---------------------------------|--------------------|------------------|-----------------|---------------|--------------------|--------------------|
| SNP_68792_A_368   | NW_004515808.1 | scaffold295 | 368                     | TT                              | AA                 | AA               | INTERGENIC      |               |                    |                    |
| SNP_68793_A_379   | NW_004515808.1 | scaffold295 | 379                     | AA                              | TT                 | TT               | INTERGENIC      |               |                    |                    |
| SNP_68794_A_607   | NW_004515808.1 | scaffold295 | 607                     | GG                              | AA                 | AA               | INTERGENIC      |               |                    |                    |
| SNP_68795_A_608   | NW_004515808.1 | scaffold295 | 608                     | AA                              | GG                 | GG               | INTERGENIC      |               |                    |                    |
| SNP_68796_A_617   | NW_004515808.1 | scaffold295 | 617                     | TT                              | AA                 | AA               | INTERGENIC      |               |                    |                    |
| SNP_68797_A_703   | NW_004515808.1 | scaffold295 | 703                     | TT                              | CC                 | CC               | INTERGENIC      |               |                    |                    |
| SNP_68798_A_723   | NW_004515808.1 | scaffold295 | 723                     | TT                              | CC                 | CC               | INTERGENIC      |               |                    |                    |
| SNP_68799_A_844   | NW_004515808.1 | scaffold295 | 844                     | GG                              | CC                 | CC               | INTERGENIC      |               |                    |                    |
| SNP_68800_A_879   | NW_004515808.1 | scaffold295 | 879                     | TT                              | GG                 | GG               | INTERGENIC      |               |                    |                    |
| SNP_68801_A_6449  | NW_004515808.1 | scaffold295 | 6449                    | TT                              | CC                 | CC               | INTERGENIC      |               |                    |                    |
| SNP_68802_A_10167 | NW_004515809.1 | scaffold296 | 10167                   | CC                              | TT                 | TT               | INTERGENIC      |               |                    |                    |
| SNP_68803_A_10422 | NW_004515809.1 | scaffold296 | 10422                   | CC                              | AA                 | AA               | INTERGENIC      |               |                    |                    |
| SNP_68804_A_10592 | NW_004515809.1 | scaffold296 | 10592                   | GG                              | AA                 | AA               | INTERGENIC      |               |                    |                    |
| SNP_68805_A_11152 | NW_004515809.1 | scaffold296 | 11152                   | GG                              | TT                 | TT               | INTERGENIC      |               |                    |                    |
| SNP_68806_A_11193 | NW_004515809.1 | scaffold296 | 11193                   | GG                              | AA                 | AA               | INTERGENIC      |               |                    |                    |
| SNP_68807_A_11296 | NW_004515809.1 | scaffold296 | 11296                   | CC                              | TT                 | TT               | INTERGENIC      |               |                    |                    |
| SNP_68809_A_11376 | NW_004515809.1 | scaffold296 | 11376                   | CC                              | TT                 | TT               | INTERGENIC      |               |                    |                    |
| SNP_68810_A_11586 | NW_004515809.1 | scaffold296 | 11586                   | GG                              | AA                 | AA               | INTERGENIC      |               |                    |                    |
| SNP_68811_A_11829 | NW_004515809.1 | scaffold296 | 11829                   | CC                              | TT                 | TT               | INTERGENIC      |               |                    |                    |
| SNP_68812_A_12012 | NW_004515809.1 | scaffold296 | 12012                   | TT                              | CC                 | CC               | INTERGENIC      |               |                    |                    |
| SNP_68813_A_14275 | NW_004515809.1 | scaffold296 | 14275                   | TT                              | AA                 | AA               | INTERGENIC      |               |                    |                    |
| SNP_68814_A_14473 | NW_004515809.1 | scaffold296 | 14473                   | CC                              | TT                 | TT               | INTERGENIC      |               |                    |                    |



| SNPs IDs          | Chromosome IDs | Chromosomes | Physical positions (bp) | CDC Frontier (Reference genome) | (Pusa 1103 & HPNB) | (ILWC 46 & LPNB) | Sequence genome | Components of | Gene accession IDs | Putative functions |
|-------------------|----------------|-------------|-------------------------|---------------------------------|--------------------|------------------|-----------------|---------------|--------------------|--------------------|
| SNP_68815_A_14800 | NW_004515809.1 | scaffold296 | 14800                   | GG                              | AA                 | AA               | INTERGENIC      |               |                    |                    |
| SNP_68816_A_14809 | NW_004515809.1 | scaffold296 | 14809                   | CC                              | AA                 | AA               | INTERGENIC      |               |                    |                    |
| SNP_68817_A_14960 | NW_004515809.1 | scaffold296 | 14960                   | GG                              | AA                 | AA               | INTERGENIC      |               |                    |                    |
| SNP_68818_A_15029 | NW_004515809.1 | scaffold296 | 15029                   | TT                              | CC                 | CC               | INTERGENIC      |               |                    |                    |
| SNP_68819_A_15212 | NW_004515809.1 | scaffold296 | 15212                   | TT                              | CC                 | CC               | INTERGENIC      |               |                    |                    |
| SNP_68820_A_15232 | NW_004515809.1 | scaffold296 | 15232                   | TT                              | CC                 | CC               | INTERGENIC      |               |                    |                    |
| SNP_68821_A_15250 | NW_004515809.1 | scaffold296 | 15250                   | AA                              | CC                 | CC               | INTERGENIC      |               |                    |                    |
| SNP_68822_A_15253 | NW_004515809.1 | scaffold296 | 15253                   | CC                              | TT                 | TT               | INTERGENIC      |               |                    |                    |
| SNP_68823_A_15320 | NW_004515809.1 | scaffold296 | 15320                   | CC                              | TT                 | TT               | INTERGENIC      |               |                    |                    |
| SNP_68824_A_15377 | NW_004515809.1 | scaffold296 | 15377                   | TT                              | CC                 | CC               | INTERGENIC      |               |                    |                    |
| SNP_68825_A_15419 | NW_004515809.1 | scaffold296 | 15419                   | AA                              | TT                 | TT               | INTERGENIC      |               |                    |                    |
| SNP_68826_A_15424 | NW_004515809.1 | scaffold296 | 15424                   | GG                              | AA                 | AA               | INTERGENIC      |               |                    |                    |
| SNP_68827_A_15458 | NW_004515809.1 | scaffold296 | 15458                   | GG                              | AA                 | AA               | INTERGENIC      |               |                    |                    |
| SNP_68828_A_15460 | NW_004515809.1 | scaffold296 | 15460                   | CC                              | TT                 | TT               | INTERGENIC      |               |                    |                    |
| SNP_68829_A_15486 | NW_004515809.1 | scaffold296 | 15486                   | GG                              | AA                 | AA               | INTERGENIC      |               |                    |                    |
| SNP_68830_A_15507 | NW_004515809.1 | scaffold296 | 15507                   | TT                              | CC                 | CC               | INTERGENIC      |               |                    |                    |
| SNP_68831_A_15519 | NW_004515809.1 | scaffold296 | 15519                   | AA                              | GG                 | GG               | INTERGENIC      |               |                    |                    |
| SNP_68832_A_15523 | NW_004515809.1 | scaffold296 | 15523                   | TT                              | AA                 | AA               | INTERGENIC      |               |                    |                    |
| SNP_68833_A_15540 | NW_004515809.1 | scaffold296 | 15540                   | CC                              | AA                 | AA               | INTERGENIC      |               |                    |                    |
| SNP_68834_A_15572 | NW_004515809.1 | scaffold296 | 15572                   | GG                              | AA                 | AA               | INTERGENIC      |               |                    |                    |
| SNP_68835_A_15596 | NW_004515809.1 | scaffold296 | 15596                   | CC                              | TT                 | TT               | INTERGENIC      |               |                    |                    |
| SNP_68836_A_15625 | NW_004515809.1 | scaffold296 | 15625                   | TT                              | CC                 | CC               | INTERGENIC      |               |                    |                    |

| SNPs IDs          | Chromosome IDs | Chromosomes | Physical positions (bp) | CDC Frontier (Reference genome) | (Pusa 1103 & HPNB) | (ILWC 46 & LPNB) | Sequence genome | Components of | Gene accession IDs | Putative functions |
|-------------------|----------------|-------------|-------------------------|---------------------------------|--------------------|------------------|-----------------|---------------|--------------------|--------------------|
| SNP_68837_A_15641 | NW_004515809.1 | scaffold296 | 15641                   | AA                              | CC                 | CC               | INTERGENIC      |               |                    |                    |
| SNP_68838_A_15645 | NW_004515809.1 | scaffold296 | 15645                   | CC                              | AA                 | AA               | INTERGENIC      |               |                    |                    |
| SNP_68839_A_15744 | NW_004515809.1 | scaffold296 | 15744                   | TT                              | GG                 | GG               | INTERGENIC      |               |                    |                    |
| SNP_68840_A_15769 | NW_004515809.1 | scaffold296 | 15769                   | AA                              | GG                 | GG               | INTERGENIC      |               |                    |                    |
| SNP_68841_A_15770 | NW_004515809.1 | scaffold296 | 15770                   | GG                              | AA                 | AA               | INTERGENIC      |               |                    |                    |
| SNP_68842_A_15787 | NW_004515809.1 | scaffold296 | 15787                   | CC                              | GG                 | GG               | INTERGENIC      |               |                    |                    |
| SNP_68843_A_15789 | NW_004515809.1 | scaffold296 | 15789                   | GG                              | AA                 | AA               | INTERGENIC      |               |                    |                    |
| SNP_68844_A_15791 | NW_004515809.1 | scaffold296 | 15791                   | AA                              | CC                 | CC               | INTERGENIC      |               |                    |                    |
| SNP_68845_A_15802 | NW_004515809.1 | scaffold296 | 15802                   | CC                              | TT                 | TT               | INTERGENIC      |               |                    |                    |
| SNP_68846_A_15823 | NW_004515809.1 | scaffold296 | 15823                   | TT                              | GG                 | GG               | INTERGENIC      |               |                    |                    |
| SNP_68847_A_15835 | NW_004515809.1 | scaffold296 | 15835                   | GG                              | AA                 | AA               | INTERGENIC      |               |                    |                    |
| SNP_68848_A_15861 | NW_004515809.1 | scaffold296 | 15861                   | TT                              | GG                 | GG               | INTERGENIC      |               |                    |                    |
| SNP_68849_A_15872 | NW_004515809.1 | scaffold296 | 15872                   | GG                              | AA                 | AA               | INTERGENIC      |               |                    |                    |
| SNP_68850_A_15882 | NW_004515809.1 | scaffold296 | 15882                   | CC                              | AA                 | AA               | INTERGENIC      |               |                    |                    |
| SNP_68851_A_15928 | NW_004515809.1 | scaffold296 | 15928                   | AA                              | CC                 | CC               | INTERGENIC      |               |                    |                    |
| SNP_68852_A_15992 | NW_004515809.1 | scaffold296 | 15992                   | CC                              | AA                 | AA               | INTERGENIC      |               |                    |                    |
| SNP_68853_A_16152 | NW_004515809.1 | scaffold296 | 16152                   | AA                              | CC                 | CC               | INTERGENIC      |               |                    |                    |
| SNP_68855_A_16313 | NW_004515809.1 | scaffold296 | 16313                   | GG                              | CC                 | CC               | INTERGENIC      |               |                    |                    |
| SNP_68856_A_16328 | NW_004515809.1 | scaffold296 | 16328                   | CC                              | AA                 | AA               | INTERGENIC      |               |                    |                    |
| SNP_68857_A_16336 | NW_004515809.1 | scaffold296 | 16336                   | CC                              | TT                 | TT               | INTERGENIC      |               |                    |                    |
| SNP_68858_A_16351 | NW_004515809.1 | scaffold296 | 16351                   | CC                              | TT                 | TT               | INTERGENIC      |               |                    |                    |
| SNP_68859_A_16354 | NW_004515809.1 | scaffold296 | 16354                   | AA                              | GG                 | GG               | INTERGENIC      |               |                    |                    |

| SNPs IDs          | Chromosome IDs | Chromosomes | Physical positions (bp) | CDC Frontier (Reference genome) | (Pusa 1103 & HPNB) | (ILWC 46 & LPNB) | Sequence genome | Components of | Gene accession IDs | Putative functions |
|-------------------|----------------|-------------|-------------------------|---------------------------------|--------------------|------------------|-----------------|---------------|--------------------|--------------------|
| SNP_68860_A_16380 | NW_004515809.1 | scaffold296 | 16380                   | TT                              | GG                 | GG               | INTERGENIC      |               |                    |                    |
| SNP_68861_A_16409 | NW_004515809.1 | scaffold296 | 16409                   | TT                              | CC                 | CC               | INTERGENIC      |               |                    |                    |
| SNP_68862_A_16454 | NW_004515809.1 | scaffold296 | 16454                   | TT                              | CC                 | CC               | INTERGENIC      |               |                    |                    |
| SNP_68863_A_16456 | NW_004515809.1 | scaffold296 | 16456                   | GG                              | AA                 | AA               | INTERGENIC      |               |                    |                    |
| SNP_68864_A_16472 | NW_004515809.1 | scaffold296 | 16472                   | TT                              | GG                 | GG               | INTERGENIC      |               |                    |                    |
| SNP_68865_A_16496 | NW_004515809.1 | scaffold296 | 16496                   | TT                              | CC                 | CC               | INTERGENIC      |               |                    |                    |
| SNP_68866_A_16503 | NW_004515809.1 | scaffold296 | 16503                   | TT                              | AA                 | AA               | INTERGENIC      |               |                    |                    |
| SNP_68867_A_16564 | NW_004515809.1 | scaffold296 | 16564                   | AA                              | GG                 | GG               | INTERGENIC      |               |                    |                    |
| SNP_68868_A_16589 | NW_004515809.1 | scaffold296 | 16589                   | CC                              | TT                 | TT               | INTERGENIC      |               |                    |                    |
| SNP_68869_A_16594 | NW_004515809.1 | scaffold296 | 16594                   | AA                              | GG                 | GG               | INTERGENIC      |               |                    |                    |
| SNP_68870_A_16637 | NW_004515809.1 | scaffold296 | 16637                   | CC                              | TT                 | TT               | INTERGENIC      |               |                    |                    |
| SNP_68871_A_16646 | NW_004515809.1 | scaffold296 | 16646                   | AA                              | GG                 | GG               | INTERGENIC      |               |                    |                    |
| SNP_68872_A_16693 | NW_004515809.1 | scaffold296 | 16693                   | CC                              | TT                 | TT               | INTERGENIC      |               |                    |                    |
| SNP_68873_A_16703 | NW_004515809.1 | scaffold296 | 16703                   | AA                              | GG                 | GG               | INTERGENIC      |               |                    |                    |
| SNP_68874_A_16730 | NW_004515809.1 | scaffold296 | 16730                   | GG                              | TT                 | TT               | INTERGENIC      |               |                    |                    |
| SNP_68875_A_16747 | NW_004515809.1 | scaffold296 | 16747                   | AA                              | CC                 | CC               | INTERGENIC      |               |                    |                    |
| SNP_68876_A_16798 | NW_004515809.1 | scaffold296 | 16798                   | TT                              | CC                 | CC               | INTERGENIC      |               |                    |                    |
| SNP_68877_A_16856 | NW_004515809.1 | scaffold296 | 16856                   | GG                              | AA                 | AA               | INTERGENIC      |               |                    |                    |
| SNP_68878_A_16867 | NW_004515809.1 | scaffold296 | 16867                   | AA                              | TT                 | TT               | INTERGENIC      |               |                    |                    |
| SNP_68879_A_16874 | NW_004515809.1 | scaffold296 | 16874                   | TT                              | CC                 | CC               | INTERGENIC      |               |                    |                    |
| SNP_68880_A_16898 | NW_004515809.1 | scaffold296 | 16898                   | TT                              | CC                 | CC               | INTERGENIC      |               |                    |                    |
| SNP_68881_A_16944 | NW_004515809.1 | scaffold296 | 16944                   | GG                              | TT                 | TT               | INTERGENIC      |               |                    |                    |

| SNPs IDs           | Chromosome IDs | Chromosomes | Physical positions (bp) | CDC Frontier (Reference genome) | (Pusa 1103 & HPNB) | (ILWC 46 & LPNB) | Sequence Components of genome | Gene accession IDs | Putative functions                    |
|--------------------|----------------|-------------|-------------------------|---------------------------------|--------------------|------------------|-------------------------------|--------------------|---------------------------------------|
| SNP_68883_A_78724  | NW_004515809.1 | scaffold296 | 78724                   | GG                              | AA                 | AA               | INTERGENIC                    |                    |                                       |
| SNP_68884_A_78771  | NW_004515809.1 | scaffold296 | 78771                   | AA                              | GG                 | GG               | INTERGENIC                    |                    |                                       |
| SNP_68885_A_78783  | NW_004515809.1 | scaffold296 | 78783                   | GG                              | TT                 | TT               | INTERGENIC                    |                    |                                       |
| SNP_68886_A_78799  | NW_004515809.1 | scaffold296 | 78799                   | AA                              | GG                 | GG               | INTERGENIC                    |                    |                                       |
| SNP_68887_A_78816  | NW_004515809.1 | scaffold296 | 78816                   | GG                              | AA                 | AA               | INTERGENIC                    |                    |                                       |
| SNP_68888_A_78951  | NW_004515809.1 | scaffold296 | 78951                   | TT                              | GG                 | GG               | INTERGENIC                    |                    |                                       |
| SNP_68889_A_78989  | NW_004515809.1 | scaffold296 | 78989                   | TT                              | CC                 | CC               | INTERGENIC                    |                    |                                       |
| SNP_68890_A_79092  | NW_004515809.1 | scaffold296 | 79092                   | TT                              | GG                 | GG               | INTERGENIC                    |                    |                                       |
| SNP_68891_A_79187  | NW_004515809.1 | scaffold296 | 79187                   | AA                              | GG                 | GG               | INTERGENIC                    |                    |                                       |
| SNP_68893_A_94050  | NW_004515809.1 | scaffold296 | 94050                   | AA                              | GG                 | GG               | INTERGENIC                    |                    |                                       |
| SNP_68894_A_107773 | NW_004515809.1 | scaffold296 | 107773                  | GG                              | CC                 | CC               | INTERGENIC                    |                    |                                       |
| SNP_68895_A_119604 | NW_004515809.1 | scaffold296 | 119604                  | AA                              | GG                 | GG               | DRR                           | 101500189          | Unknown function                      |
| SNP_68896_A_140242 | NW_004515809.1 | scaffold296 | 140242                  | AA                              | CC                 | CC               | INTRON                        | 101500503          | probable WRKY transcription factor 31 |
| SNP_68897_A_197310 | NW_004515809.1 | scaffold296 | 197310                  | GG                              | AA                 | AA               | INTERGENIC                    |                    |                                       |
| SNP_68898_A_213669 | NW_004515809.1 | scaffold296 | 213669                  | AA                              | GG                 | GG               | URR                           | 101496735          | uncharacterized LOC101496735          |
| SNP_68899_A_224696 | NW_004515809.1 | scaffold296 | 224696                  | CC                              | TT                 | TT               | INTRON                        | 101497043          | uncharacterized LOC101497043          |
| SNP_68900_A_225117 | NW_004515809.1 | scaffold296 | 225117                  | CC                              | AA                 | AA               | INTRON                        | 101497043          | uncharacterized LOC101497043          |
| SNP_68901_A_225127 | NW_004515809.1 | scaffold296 | 225127                  | GG                              | AA                 | AA               | INTRON                        | 101497043          | uncharacterized LOC101497043          |
| SNP_68902_A_225140 | NW_004515809.1 | scaffold296 | 225140                  | TT                              | AA                 | AA               | INTRON                        | 101497043          | uncharacterized LOC101497043          |
| SNP_68903_A_225151 | NW_004515809.1 | scaffold296 | 225151                  | GG                              | CC                 | CC               | INTRON                        | 101497043          | uncharacterized LOC101497043          |
| SNP_68904_A_225152 | NW_004515809.1 | scaffold296 | 225152                  | AA                              | GG                 | GG               | INTRON                        | 101497043          | uncharacterized LOC101497043          |
| SNP_68906_A_258982 | NW_004515809.1 | scaffold296 | 258982                  | CC                              | AA                 | AA               | INTERGENIC                    |                    |                                       |

| SNPs IDs           | Chromosome IDs | Chromosomes | Physical positions (bp) | CDC Frontier (Reference genome) | (Pusa 1103 & HPNB) | (ILWC 46 & LPNB) | Sequence genome | Components of | Gene accession IDs | Putative functions |
|--------------------|----------------|-------------|-------------------------|---------------------------------|--------------------|------------------|-----------------|---------------|--------------------|--------------------|
| SNP_68907_A_259037 | NW_004515809.1 | scaffold296 | 259037                  | GG                              | AA                 | AA               | INTERGENIC      |               |                    |                    |
| SNP_68909_A_259058 | NW_004515809.1 | scaffold296 | 259058                  | TT                              | GG                 | GG               | INTERGENIC      |               |                    |                    |
| SNP_68910_A_259141 | NW_004515809.1 | scaffold296 | 259141                  | TT                              | AA                 | AA               | INTERGENIC      |               |                    |                    |
| SNP_68911_A_259200 | NW_004515809.1 | scaffold296 | 259200                  | AA                              | TT                 | TT               | INTERGENIC      |               |                    |                    |
| SNP_68912_A_259221 | NW_004515809.1 | scaffold296 | 259221                  | AA                              | GG                 | GG               | INTERGENIC      |               |                    |                    |
| SNP_68913_A_259230 | NW_004515809.1 | scaffold296 | 259230                  | AA                              | TT                 | TT               | INTERGENIC      |               |                    |                    |
| SNP_68914_A_259231 | NW_004515809.1 | scaffold296 | 259231                  | AA                              | TT                 | TT               | INTERGENIC      |               |                    |                    |
| SNP_68915_A_259241 | NW_004515809.1 | scaffold296 | 259241                  | AA                              | GG                 | GG               | INTERGENIC      |               |                    |                    |
| SNP_68916_A_259247 | NW_004515809.1 | scaffold296 | 259247                  | CC                              | TT                 | TT               | INTERGENIC      |               |                    |                    |
| SNP_68917_A_259341 | NW_004515809.1 | scaffold296 | 259341                  | GG                              | AA                 | AA               | INTERGENIC      |               |                    |                    |
| SNP_68918_A_260876 | NW_004515809.1 | scaffold296 | 260876                  | TT                              | CC                 | CC               | INTERGENIC      |               |                    |                    |
| SNP_68919_A_261194 | NW_004515809.1 | scaffold296 | 261194                  | AA                              | GG                 | GG               | INTERGENIC      |               |                    |                    |
| SNP_68920_A_261254 | NW_004515809.1 | scaffold296 | 261254                  | AA                              | GG                 | GG               | INTERGENIC      |               |                    |                    |
| SNP_68921_A_261259 | NW_004515809.1 | scaffold296 | 261259                  | TT                              | CC                 | CC               | INTERGENIC      |               |                    |                    |
| SNP_68922_A_261290 | NW_004515809.1 | scaffold296 | 261290                  | TT                              | CC                 | CC               | INTERGENIC      |               |                    |                    |
| SNP_68923_A_261347 | NW_004515809.1 | scaffold296 | 261347                  | AA                              | GG                 | GG               | INTERGENIC      |               |                    |                    |
| SNP_68925_A_261476 | NW_004515809.1 | scaffold296 | 261476                  | CC                              | TT                 | TT               | INTERGENIC      |               |                    |                    |
| SNP_68926_A_261535 | NW_004515809.1 | scaffold296 | 261535                  | TT                              | AA                 | AA               | INTERGENIC      |               |                    |                    |
| SNP_68927_A_261545 | NW_004515809.1 | scaffold296 | 261545                  | AA                              | TT                 | TT               | INTERGENIC      |               |                    |                    |
| SNP_68928_A_261546 | NW_004515809.1 | scaffold296 | 261546                  | AA                              | GG                 | GG               | INTERGENIC      |               |                    |                    |
| SNP_68929_A_261564 | NW_004515809.1 | scaffold296 | 261564                  | TT                              | CC                 | CC               | INTERGENIC      |               |                    |                    |
| SNP_68931_A_261701 | NW_004515809.1 | scaffold296 | 261701                  | AA                              | GG                 | GG               | INTERGENIC      |               |                    |                    |

| SNPs IDs           | Chromosome IDs | Chromosomes | Physical positions (bp) | CDC Frontier (Reference genome) | (Pusa 1103 & HPNB) | (ILWC 46 & LPNB) | Sequence genome | Components of | Gene accession IDs | Putative functions |
|--------------------|----------------|-------------|-------------------------|---------------------------------|--------------------|------------------|-----------------|---------------|--------------------|--------------------|
| SNP_68933_A_262010 | NW_004515809.1 | scaffold296 | 262010                  | TT                              | CC                 | CC               | INTERGENIC      |               |                    |                    |
| SNP_68934_A_262028 | NW_004515809.1 | scaffold296 | 262028                  | CC                              | TT                 | TT               | INTERGENIC      |               |                    |                    |
| SNP_68935_A_262173 | NW_004515809.1 | scaffold296 | 262173                  | AA                              | GG                 | GG               | INTERGENIC      |               |                    |                    |
| SNP_68936_A_262323 | NW_004515809.1 | scaffold296 | 262323                  | CC                              | AA                 | AA               | INTERGENIC      |               |                    |                    |
| SNP_68937_A_262730 | NW_004515809.1 | scaffold296 | 262730                  | CC                              | GG                 | GG               | INTERGENIC      |               |                    |                    |
| SNP_68938_A_262755 | NW_004515809.1 | scaffold296 | 262755                  | GG                              | AA                 | AA               | INTERGENIC      |               |                    |                    |
| SNP_68939_A_262803 | NW_004515809.1 | scaffold296 | 262803                  | AA                              | GG                 | GG               | INTERGENIC      |               |                    |                    |
| SNP_68941_A_262852 | NW_004515809.1 | scaffold296 | 262852                  | AA                              | GG                 | GG               | INTERGENIC      |               |                    |                    |
| SNP_68942_A_263050 | NW_004515809.1 | scaffold296 | 263050                  | TT                              | GG                 | GG               | INTERGENIC      |               |                    |                    |
| SNP_68943_A_264867 | NW_004515809.1 | scaffold296 | 264867                  | AA                              | CC                 | CC               | INTERGENIC      |               |                    |                    |
| SNP_68944_A_264971 | NW_004515809.1 | scaffold296 | 264971                  | TT                              | CC                 | CC               | INTERGENIC      |               |                    |                    |
| SNP_68945_A_265058 | NW_004515809.1 | scaffold296 | 265058                  | GG                              | CC                 | CC               | INTERGENIC      |               |                    |                    |
| SNP_68946_A_265145 | NW_004515809.1 | scaffold296 | 265145                  | TT                              | AA                 | AA               | INTERGENIC      |               |                    |                    |
| SNP_68947_A_265208 | NW_004515809.1 | scaffold296 | 265208                  | GG                              | CC                 | CC               | INTERGENIC      |               |                    |                    |
| SNP_68948_A_265274 | NW_004515809.1 | scaffold296 | 265274                  | GG                              | AA                 | AA               | INTERGENIC      |               |                    |                    |
| SNP_68950_A_265369 | NW_004515809.1 | scaffold296 | 265369                  | AA                              | GG                 | GG               | INTERGENIC      |               |                    |                    |
| SNP_68951_A_265378 | NW_004515809.1 | scaffold296 | 265378                  | TT                              | CC                 | CC               | INTERGENIC      |               |                    |                    |
| SNP_68952_A_265435 | NW_004515809.1 | scaffold296 | 265435                  | GG                              | TT                 | TT               | INTERGENIC      |               |                    |                    |
| SNP_68953_A_265458 | NW_004515809.1 | scaffold296 | 265458                  | TT                              | CC                 | CC               | INTERGENIC      |               |                    |                    |
| SNP_68954_A_265518 | NW_004515809.1 | scaffold296 | 265518                  | GG                              | CC                 | CC               | INTERGENIC      |               |                    |                    |
| SNP_68955_A_265530 | NW_004515809.1 | scaffold296 | 265530                  | AA                              | GG                 | GG               | INTERGENIC      |               |                    |                    |
| SNP_68956_A_265584 | NW_004515809.1 | scaffold296 | 265584                  | TT                              | CC                 | CC               | INTERGENIC      |               |                    |                    |

| SNPs IDs           | Chromosome IDs | Chromosomes | Physical positions (bp) | CDC Frontier (Reference genome) | (Pusa 1103 & HPNB) | (ILWC 46 & LPNB) | Sequence genome | Components of | Gene accession IDs | Putative functions |
|--------------------|----------------|-------------|-------------------------|---------------------------------|--------------------|------------------|-----------------|---------------|--------------------|--------------------|
| SNP_68957_A_266216 | NW_004515809.1 | scaffold296 | 266216                  | AA                              | TT                 | TT               | INTERGENIC      |               |                    |                    |
| SNP_68959_A_336586 | NW_004515809.1 | scaffold296 | 336586                  | AA                              | GG                 | GG               | INTERGENIC      |               |                    |                    |
| SNP_68960_A_336587 | NW_004515809.1 | scaffold296 | 336587                  | TT                              | GG                 | GG               | INTERGENIC      |               |                    |                    |
| SNP_68961_A_349676 | NW_004515809.1 | scaffold296 | 349676                  | TT                              | AA                 | AA               | INTERGENIC      |               |                    |                    |
| SNP_68963_A_367732 | NW_004515809.1 | scaffold296 | 367732                  | AA                              | GG                 | GG               | INTERGENIC      |               |                    |                    |
| SNP_68964_A_391653 | NW_004515809.1 | scaffold296 | 391653                  | AA                              | GG                 | GG               | INTERGENIC      |               |                    |                    |
| SNP_68965_A_398758 | NW_004515809.1 | scaffold296 | 398758                  | AA                              | TT                 | TT               | INTERGENIC      |               |                    |                    |
| SNP_68967_A_406920 | NW_004515809.1 | scaffold296 | 406920                  | CC                              | GG                 | GG               | INTERGENIC      |               |                    |                    |
| SNP_68968_A_434792 | NW_004515809.1 | scaffold296 | 434792                  | TT                              | AA                 | AA               | INTERGENIC      |               |                    |                    |
| SNP_68969_A_450452 | NW_004515809.1 | scaffold296 | 450452                  | TT                              | CC                 | CC               | INTERGENIC      |               |                    |                    |
| SNP_68970_A_485294 | NW_004515809.1 | scaffold296 | 485294                  | GG                              | AA                 | AA               | INTERGENIC      |               |                    |                    |
| SNP_68971_A_485302 | NW_004515809.1 | scaffold296 | 485302                  | TT                              | AA                 | AA               | INTERGENIC      |               |                    |                    |
| SNP_68972_A_485328 | NW_004515809.1 | scaffold296 | 485328                  | CC                              | GG                 | GG               | INTERGENIC      |               |                    |                    |
| SNP_68973_A_648    | NW_004515810.1 | scaffold298 | 648                     | AA                              | CC                 | CC               | INTERGENIC      |               |                    |                    |
| SNP_68974_A_1493   | NW_004515810.1 | scaffold298 | 1493                    | AA                              | TT                 | TT               | INTERGENIC      |               |                    |                    |
| SNP_68975_A_1575   | NW_004515810.1 | scaffold298 | 1575                    | AA                              | GG                 | GG               | INTERGENIC      |               |                    |                    |
| SNP_68976_A_2106   | NW_004515810.1 | scaffold298 | 2106                    | TT                              | CC                 | CC               | INTERGENIC      |               |                    |                    |
| SNP_68977_A_2223   | NW_004515810.1 | scaffold298 | 2223                    | TT                              | GG                 | GG               | INTERGENIC      |               |                    |                    |
| SNP_68978_A_2594   | NW_004515810.1 | scaffold298 | 2594                    | AA                              | TT                 | TT               | INTERGENIC      |               |                    |                    |
| SNP_68980_A_2686   | NW_004515810.1 | scaffold298 | 2686                    | TT                              | CC                 | CC               | INTERGENIC      |               |                    |                    |
| SNP_68981_A_2712   | NW_004515810.1 | scaffold298 | 2712                    | CC                              | TT                 | TT               | INTERGENIC      |               |                    |                    |
| SNP_68982_A_2807   | NW_004515810.1 | scaffold298 | 2807                    | TT                              | AA                 | AA               | INTERGENIC      |               |                    |                    |

| SNPs IDs         | Chromosome IDs | Chromosomes | Physical positions (bp) | CDC Frontier (Reference genome) | (Pusa 1103 & HPNB) | (ILWC 46 & LPNB) | Sequence genome | Components of | Gene accession IDs           | Putative functions |
|------------------|----------------|-------------|-------------------------|---------------------------------|--------------------|------------------|-----------------|---------------|------------------------------|--------------------|
| SNP_68983_A_2808 | NW_004515810.1 | scaffold298 | 2808                    | TT                              | AA                 | AA               | INTERGENIC      |               |                              |                    |
| SNP_68984_A_2917 | NW_004515810.1 | scaffold298 | 2917                    | TT                              | AA                 | AA               | INTERGENIC      |               |                              |                    |
| SNP_68985_A_2937 | NW_004515810.1 | scaffold298 | 2937                    | AA                              | TT                 | TT               | INTERGENIC      |               |                              |                    |
| SNP_68986_A_2938 | NW_004515810.1 | scaffold298 | 2938                    | CC                              | AA                 | AA               | INTERGENIC      |               |                              |                    |
| SNP_68987_A_2983 | NW_004515810.1 | scaffold298 | 2983                    | AA                              | GG                 | GG               | INTERGENIC      |               |                              |                    |
| SNP_68988_A_3194 | NW_004515810.1 | scaffold298 | 3194                    | TT                              | AA                 | AA               | INTERGENIC      |               |                              |                    |
| SNP_68989_A_3234 | NW_004515810.1 | scaffold298 | 3234                    | GG                              | CC                 | CC               | INTERGENIC      |               |                              |                    |
| SNP_68990_A_3567 | NW_004515810.1 | scaffold298 | 3567                    | TT                              | CC                 | CC               | INTERGENIC      |               |                              |                    |
| SNP_68991_A_3606 | NW_004515810.1 | scaffold298 | 3606                    | TT                              | AA                 | AA               | INTERGENIC      |               |                              |                    |
| SNP_68992_A_3751 | NW_004515810.1 | scaffold298 | 3751                    | TT                              | CC                 | CC               | INTERGENIC      |               |                              |                    |
| SNP_68993_A_3768 | NW_004515810.1 | scaffold298 | 3768                    | GG                              | CC                 | CC               | INTERGENIC      |               |                              |                    |
| SNP_68994_A_3773 | NW_004515810.1 | scaffold298 | 3773                    | CC                              | TT                 | TT               | INTERGENIC      |               |                              |                    |
| SNP_68995_A_3777 | NW_004515810.1 | scaffold298 | 3777                    | GG                              | AA                 | AA               | INTERGENIC      |               |                              |                    |
| SNP_68996_A_3784 | NW_004515810.1 | scaffold298 | 3784                    | CC                              | AA                 | AA               | INTERGENIC      |               |                              |                    |
| SNP_68997_A_3830 | NW_004515810.1 | scaffold298 | 3830                    | CC                              | AA                 | TT               | INTERGENIC      |               |                              |                    |
| SNP_68998_A_4163 | NW_004515810.1 | scaffold298 | 4163                    | TT                              | GG                 | GG               | INTERGENIC      |               |                              |                    |
| SNP_68999_A_4184 | NW_004515810.1 | scaffold298 | 4184                    | TT                              | GG                 | GG               | INTERGENIC      |               |                              |                    |
| SNP_69000_A_5342 | NW_004515810.1 | scaffold298 | 5342                    | CC                              | TT                 | TT               | INTERGENIC      |               |                              |                    |
| SNP_69001_A_6364 | NW_004515810.1 | scaffold298 | 6364                    | AA                              | CC                 | CC               | DRR             | 101502315     | uncharacterized LOC101502315 |                    |
| SNP_69002_A_7940 | NW_004515810.1 | scaffold298 | 7940                    | AA                              | CC                 | CC               | URR             | 101502315     | uncharacterized LOC101502315 |                    |
| SNP_69003_A_7987 | NW_004515810.1 | scaffold298 | 7987                    | AA                              | TT                 | TT               | URR             | 101502315     | uncharacterized LOC101502315 |                    |
| SNP_69005_A_8261 | NW_004515810.1 | scaffold298 | 8261                    | TT                              | GG                 | GG               | URR             | 101502315     | uncharacterized LOC101502315 |                    |



| SNPs IDs           | Chromosome IDs | Chromosomes | Physical positions (bp) | CDC Frontier (Reference genome) | (Pusa 1103 & HPNB) | (ILWC 46 & LPNB) | Sequence Components of genome | Gene accession IDs | Putative functions           |
|--------------------|----------------|-------------|-------------------------|---------------------------------|--------------------|------------------|-------------------------------|--------------------|------------------------------|
| SNP_69006_A_8429   | NW_004515810.1 | scaffold298 | 8429                    | AA                              | TT                 | TT               | URR                           | 101502315          | uncharacterized LOC101502315 |
| SNP_69007_A_8578   | NW_004515810.1 | scaffold298 | 8578                    | CC                              | TT                 | TT               | URR                           | 101502315          | uncharacterized LOC101502315 |
| SNP_69008_A_8788   | NW_004515810.1 | scaffold298 | 8788                    | CC                              | AA                 | AA               | URR                           | 101502315          | uncharacterized LOC101502315 |
| SNP_69009_A_9117   | NW_004515810.1 | scaffold298 | 9117                    | TT                              | CC                 | CC               | URR                           | 101502315          | uncharacterized LOC101502315 |
| SNP_69010_A_9494   | NW_004515810.1 | scaffold298 | 9494                    | AA                              | TT                 | TT               | INTERGENIC                    |                    |                              |
| SNP_69011_A_9709   | NW_004515810.1 | scaffold298 | 9709                    | TT                              | AA                 | AA               | INTERGENIC                    |                    |                              |
| SNP_69012_A_9748   | NW_004515810.1 | scaffold298 | 9748                    | TT                              | CC                 | CC               | INTERGENIC                    |                    |                              |
| SNP_69013_A_9802   | NW_004515810.1 | scaffold298 | 9802                    | TT                              | CC                 | CC               | INTERGENIC                    |                    |                              |
| SNP_69014_A_9816   | NW_004515810.1 | scaffold298 | 9816                    | AA                              | TT                 | TT               | INTERGENIC                    |                    |                              |
| SNP_69015_A_10034  | NW_004515810.1 | scaffold298 | 10034                   | TT                              | CC                 | CC               | INTERGENIC                    |                    |                              |
| SNP_69016_A_10039  | NW_004515810.1 | scaffold298 | 10039                   | TT                              | GG                 | GG               | INTERGENIC                    |                    |                              |
| SNP_69017_A_10174  | NW_004515810.1 | scaffold298 | 10174                   | TT                              | CC                 | CC               | INTERGENIC                    |                    |                              |
| SNP_69018_A_10414  | NW_004515810.1 | scaffold298 | 10414                   | GG                              | TT                 | TT               | INTERGENIC                    |                    |                              |
| SNP_69019_A_14212  | NW_004515810.1 | scaffold298 | 14212                   | CC                              | AA                 | AA               | INTERGENIC                    |                    |                              |
| SNP_69020_A_61723  | NW_004515810.1 | scaffold298 | 61723                   | GG                              | AA                 | AA               | INTERGENIC                    |                    |                              |
| SNP_69021_A_70942  | NW_004515810.1 | scaffold298 | 70942                   | TT                              | GG                 | GG               | INTERGENIC                    |                    |                              |
| SNP_69022_A_70974  | NW_004515810.1 | scaffold298 | 70974                   | CC                              | AA                 | AA               | INTERGENIC                    |                    |                              |
| SNP_69024_A_85626  | NW_004515810.1 | scaffold298 | 85626                   | CC                              | TT                 | TT               | INTERGENIC                    |                    |                              |
| SNP_69025_A_106497 | NW_004515810.1 | scaffold298 | 106497                  | TT                              | CC                 | CC               | INTERGENIC                    |                    |                              |
| SNP_69026_A_107194 | NW_004515810.1 | scaffold298 | 107194                  | CC                              | TT                 | TT               | INTERGENIC                    |                    |                              |
| SNP_69027_A_127098 | NW_004515810.1 | scaffold298 | 127098                  | AA                              | GG                 | GG               | INTERGENIC                    |                    |                              |
| SNP_69028_A_127141 | NW_004515810.1 | scaffold298 | 127141                  | CC                              | GG                 | GG               | INTERGENIC                    |                    |                              |

| SNPs IDs           | Chromosome IDs | Chromosomes | Physical positions (bp) | CDC Frontier (Reference genome) | (Pusa 1103 & HPNB) | (ILWC 46 & LPNB) | Sequence genome | Components of | Gene accession IDs | Putative functions |
|--------------------|----------------|-------------|-------------------------|---------------------------------|--------------------|------------------|-----------------|---------------|--------------------|--------------------|
| SNP_69029_A_127511 | NW_004515810.1 | scaffold298 | 127511                  | AA                              | CC                 | CC               | INTERGENIC      |               |                    |                    |
| SNP_69031_A_127523 | NW_004515810.1 | scaffold298 | 127523                  | AA                              | GG                 | GG               | INTERGENIC      |               |                    |                    |
| SNP_69032_A_127526 | NW_004515810.1 | scaffold298 | 127526                  | TT                              | CC                 | CC               | INTERGENIC      |               |                    |                    |
| SNP_69033_A_132016 | NW_004515810.1 | scaffold298 | 132016                  | GG                              | TT                 | TT               | INTERGENIC      |               |                    |                    |
| SNP_69034_A_155336 | NW_004515810.1 | scaffold298 | 155336                  | GG                              | TT                 | TT               | INTERGENIC      |               |                    |                    |
| SNP_69035_A_155370 | NW_004515810.1 | scaffold298 | 155370                  | AA                              | GG                 | GG               | INTERGENIC      |               |                    |                    |
| SNP_69036_A_155394 | NW_004515810.1 | scaffold298 | 155394                  | TT                              | CC                 | CC               | INTERGENIC      |               |                    |                    |
| SNP_69037_A_155408 | NW_004515810.1 | scaffold298 | 155408                  | TT                              | GG                 | GG               | INTERGENIC      |               |                    |                    |
| SNP_69038_A_155513 | NW_004515810.1 | scaffold298 | 155513                  | CC                              | TT                 | TT               | INTERGENIC      |               |                    |                    |
| SNP_69040_A_155700 | NW_004515810.1 | scaffold298 | 155700                  | GG                              | AA                 | AA               | INTERGENIC      |               |                    |                    |
| SNP_69041_A_156101 | NW_004515810.1 | scaffold298 | 156101                  | AA                              | GG                 | GG               | INTERGENIC      |               |                    |                    |
| SNP_69042_A_168037 | NW_004515810.1 | scaffold298 | 168037                  | GG                              | AA                 | AA               | INTERGENIC      |               |                    |                    |
| SNP_69043_A_189951 | NW_004515810.1 | scaffold298 | 189951                  | AA                              | CC                 | CC               | INTERGENIC      |               |                    |                    |
| SNP_69044_A_193600 | NW_004515810.1 | scaffold298 | 193600                  | AA                              | CC                 | CC               | INTERGENIC      |               |                    |                    |
| SNP_69045_A_193639 | NW_004515810.1 | scaffold298 | 193639                  | TT                              | GG                 | GG               | INTERGENIC      |               |                    |                    |
| SNP_69046_A_193658 | NW_004515810.1 | scaffold298 | 193658                  | GG                              | AA                 | AA               | INTERGENIC      |               |                    |                    |
| SNP_69047_A_201695 | NW_004515810.1 | scaffold298 | 201695                  | CC                              | GG                 | TT               | INTERGENIC      |               |                    |                    |
| SNP_69048_A_202012 | NW_004515810.1 | scaffold298 | 202012                  | AA                              | GG                 | GG               | INTERGENIC      |               |                    |                    |
| SNP_69049_A_202059 | NW_004515810.1 | scaffold298 | 202059                  | AA                              | GG                 | GG               | INTERGENIC      |               |                    |                    |
| SNP_69050_A_202091 | NW_004515810.1 | scaffold298 | 202091                  | AA                              | GG                 | GG               | INTERGENIC      |               |                    |                    |
| SNP_69051_A_207801 | NW_004515810.1 | scaffold298 | 207801                  | TT                              | AA                 | AA               | INTERGENIC      |               |                    |                    |
| SNP_69052_A_207852 | NW_004515810.1 | scaffold298 | 207852                  | TT                              | GG                 | GG               | INTERGENIC      |               |                    |                    |

| SNPs IDs           | Chromosome IDs | Chromosomes | Physical positions (bp) | CDC Frontier (Reference genome) | (Pusa 1103 & HPNB) | (ILWC 46 & LPNB) | Sequence genome | Components of | Gene accession IDs | Putative functions |
|--------------------|----------------|-------------|-------------------------|---------------------------------|--------------------|------------------|-----------------|---------------|--------------------|--------------------|
| SNP_69053_A_207915 | NW_004515810.1 | scaffold298 | 207915                  | AA                              | CC                 | CC               | INTERGENIC      |               |                    |                    |
| SNP_69054_A_207966 | NW_004515810.1 | scaffold298 | 207966                  | GG                              | TT                 | TT               | INTERGENIC      |               |                    |                    |
| SNP_69055_A_208076 | NW_004515810.1 | scaffold298 | 208076                  | AA                              | GG                 | GG               | INTERGENIC      |               |                    |                    |
| SNP_69057_A_208249 | NW_004515810.1 | scaffold298 | 208249                  | CC                              | TT                 | TT               | INTERGENIC      |               |                    |                    |
| SNP_69058_A_208347 | NW_004515810.1 | scaffold298 | 208347                  | AA                              | GG                 | GG               | INTERGENIC      |               |                    |                    |
| SNP_69059_A_208376 | NW_004515810.1 | scaffold298 | 208376                  | CC                              | GG                 | GG               | INTERGENIC      |               |                    |                    |
| SNP_69060_A_208381 | NW_004515810.1 | scaffold298 | 208381                  | GG                              | AA                 | AA               | INTERGENIC      |               |                    |                    |
| SNP_69061_A_208490 | NW_004515810.1 | scaffold298 | 208490                  | GG                              | AA                 | AA               | INTERGENIC      |               |                    |                    |
| SNP_69062_A_208502 | NW_004515810.1 | scaffold298 | 208502                  | GG                              | AA                 | AA               | INTERGENIC      |               |                    |                    |
| SNP_69063_A_208619 | NW_004515810.1 | scaffold298 | 208619                  | TT                              | AA                 | AA               | INTERGENIC      |               |                    |                    |
| SNP_69064_A_208620 | NW_004515810.1 | scaffold298 | 208620                  | AA                              | TT                 | TT               | INTERGENIC      |               |                    |                    |
| SNP_69065_A_208664 | NW_004515810.1 | scaffold298 | 208664                  | AA                              | GG                 | GG               | INTERGENIC      |               |                    |                    |
| SNP_69066_A_210715 | NW_004515810.1 | scaffold298 | 210715                  | GG                              | AA                 | AA               | INTERGENIC      |               |                    |                    |
| SNP_69067_A_210851 | NW_004515810.1 | scaffold298 | 210851                  | GG                              | TT                 | TT               | INTERGENIC      |               |                    |                    |
| SNP_69068_A_210898 | NW_004515810.1 | scaffold298 | 210898                  | AA                              | GG                 | GG               | INTERGENIC      |               |                    |                    |
| SNP_69069_A_211096 | NW_004515810.1 | scaffold298 | 211096                  | AA                              | GG                 | GG               | INTERGENIC      |               |                    |                    |
| SNP_69070_A_211731 | NW_004515810.1 | scaffold298 | 211731                  | AA                              | CC                 | CC               | INTERGENIC      |               |                    |                    |
| SNP_69071_A_211739 | NW_004515810.1 | scaffold298 | 211739                  | GG                              | TT                 | TT               | INTERGENIC      |               |                    |                    |
| SNP_69072_A_211963 | NW_004515810.1 | scaffold298 | 211963                  | AA                              | TT                 | TT               | INTERGENIC      |               |                    |                    |
| SNP_69073_A_212157 | NW_004515810.1 | scaffold298 | 212157                  | GG                              | TT                 | TT               | INTERGENIC      |               |                    |                    |
| SNP_69074_A_212176 | NW_004515810.1 | scaffold298 | 212176                  | AA                              | TT                 | TT               | INTERGENIC      |               |                    |                    |
| SNP_69075_A_10885  | NW_004515811.1 | scaffold299 | 10885                   | GG                              | AA                 | AA               | INTERGENIC      |               |                    |                    |

| SNPs IDs           | Chromosome IDs | Chromosomes | Physical positions (bp) | CDC Frontier (Reference genome) | (Pusa 1103 & HPNB) | (ILWC 46 & LPNB) | Sequence Components of genome | Gene accession IDs | Putative functions                    |
|--------------------|----------------|-------------|-------------------------|---------------------------------|--------------------|------------------|-------------------------------|--------------------|---------------------------------------|
| SNP_69076_A_10887  | NW_004515811.1 | scaffold299 | 10887                   | TT                              | GG                 | GG               | INTERGENIC                    |                    |                                       |
| SNP_69077_A_10943  | NW_004515811.1 | scaffold299 | 10943                   | CC                              | TT                 | TT               | INTERGENIC                    |                    |                                       |
| SNP_69078_A_10944  | NW_004515811.1 | scaffold299 | 10944                   | TT                              | AA                 | AA               | INTERGENIC                    |                    |                                       |
| SNP_69079_A_10967  | NW_004515811.1 | scaffold299 | 10967                   | GG                              | AA                 | AA               | INTERGENIC                    |                    |                                       |
| SNP_69080_A_10979  | NW_004515811.1 | scaffold299 | 10979                   | TT                              | CC                 | CC               | INTERGENIC                    |                    |                                       |
| SNP_69081_A_10993  | NW_004515811.1 | scaffold299 | 10993                   | AA                              | TT                 | TT               | INTERGENIC                    |                    |                                       |
| SNP_69082_A_10994  | NW_004515811.1 | scaffold299 | 10994                   | GG                              | AA                 | AA               | INTERGENIC                    |                    |                                       |
| SNP_69083_A_11001  | NW_004515811.1 | scaffold299 | 11001                   | TT                              | GG                 | GG               | INTERGENIC                    |                    |                                       |
| SNP_69085_A_36705  | NW_004515811.1 | scaffold299 | 36705                   | TT                              | CC                 | CC               | INTERGENIC                    |                    |                                       |
| SNP_69086_A_52696  | NW_004515811.1 | scaffold299 | 52696                   | TT                              | GG                 | GG               | INTERGENIC                    |                    |                                       |
| SNP_69087_A_52697  | NW_004515811.1 | scaffold299 | 52697                   | GG                              | AA                 | AA               | INTERGENIC                    |                    |                                       |
| SNP_69089_A_135144 | NW_004515811.1 | scaffold299 | 135144                  | AA                              | CC                 | CC               | INTRON                        | 101503158          | pescadillo homolog                    |
| SNP_69090_A_135167 | NW_004515811.1 | scaffold299 | 135167                  | AA                              | TT                 | TT               | INTRON                        | 101503158          | pescadillo homolog                    |
| SNP_69091_A_135185 | NW_004515811.1 | scaffold299 | 135185                  | AA                              | GG                 | GG               | INTRON                        | 101503158          | pescadillo homolog                    |
| SNP_69092_A_135189 | NW_004515811.1 | scaffold299 | 135189                  | TT                              | GG                 | GG               | INTRON                        | 101503158          | pescadillo homolog                    |
| SNP_69093_A_135241 | NW_004515811.1 | scaffold299 | 135241                  | TT                              | AA                 | AA               | INTRON                        | 101503158          | pescadillo homolog                    |
| SNP_69094_A_152514 | NW_004515811.1 | scaffold299 | 152514                  | CC                              | AA                 | AA               | INTERGENIC                    |                    |                                       |
| SNP_69095_A_157869 | NW_004515811.1 | scaffold299 | 157869                  | AA                              | CC                 | CC               | STOP_LOST                     | 101504679          | probable UDP-arabinopyranose mutase 5 |
| SNP_69096_A_158540 | NW_004515811.1 | scaffold299 | 158540                  | AA                              | TT                 | TT               | URR                           | 101504679          | probable UDP-arabinopyranose mutase 5 |
| SNP_69097_A_158625 | NW_004515811.1 | scaffold299 | 158625                  | AA                              | GG                 | GG               | URR                           | 101504679          | probable UDP-arabinopyranose mutase 5 |
| SNP_69098_A_158654 | NW_004515811.1 | scaffold299 | 158654                  | AA                              | GG                 | GG               | URR                           | 101504679          | probable UDP-arabinopyranose mutase 5 |
| SNP_69099_A_158693 | NW_004515811.1 | scaffold299 | 158693                  | TT                              | GG                 | GG               | URR                           | 101504679          | probable UDP-arabinopyranose mutase 5 |

| SNPs IDs           | Chromosome IDs | Chromosomes | Physical positions (bp) | CDC Frontier (Reference genome) | (Pusa 1103 & HPNB) | (ILWC 46 & LPNB) | Sequence Components of genome | Gene accession IDs | Putative functions                    |
|--------------------|----------------|-------------|-------------------------|---------------------------------|--------------------|------------------|-------------------------------|--------------------|---------------------------------------|
| SNP_69100_A_158720 | NW_004515811.1 | scaffold299 | 158720                  | GG                              | AA                 | AA               | URR                           | 101504679          | probable UDP-arabinopyranose mutase 5 |
| SNP_69101_A_158734 | NW_004515811.1 | scaffold299 | 158734                  | CC                              | TT                 | TT               | URR                           | 101504679          | probable UDP-arabinopyranose mutase 5 |
| SNP_69102_A_158948 | NW_004515811.1 | scaffold299 | 158948                  | AA                              | GG                 | GG               | URR                           | 101504679          | probable UDP-arabinopyranose mutase 5 |
| SNP_69103_A_158966 | NW_004515811.1 | scaffold299 | 158966                  | AA                              | CC                 | CC               | URR                           | 101504679          | probable UDP-arabinopyranose mutase 5 |
| SNP_69104_A_195251 | NW_004515811.1 | scaffold299 | 195251                  | TT                              | CC                 | CC               | INTERGENIC                    |                    |                                       |
| SNP_69105_A_196494 | NW_004515811.1 | scaffold299 | 196494                  | AA                              | GG                 | GG               | INTERGENIC                    |                    |                                       |
| SNP_69106_A_206088 | NW_004515811.1 | scaffold299 | 206088                  | CC                              | TT                 | TT               | INTERGENIC                    |                    |                                       |
| SNP_69107_A_206110 | NW_004515811.1 | scaffold299 | 206110                  | TT                              | GG                 | GG               | INTERGENIC                    |                    |                                       |
| SNP_69108_A_206172 | NW_004515811.1 | scaffold299 | 206172                  | CC                              | TT                 | TT               | INTERGENIC                    |                    |                                       |
| SNP_69109_A_206216 | NW_004515811.1 | scaffold299 | 206216                  | AA                              | GG                 | GG               | INTERGENIC                    |                    |                                       |
| SNP_69110_A_206471 | NW_004515811.1 | scaffold299 | 206471                  | AA                              | GG                 | GG               | INTERGENIC                    |                    |                                       |
| SNP_69111_A_206535 | NW_004515811.1 | scaffold299 | 206535                  | AA                              | CC                 | GG               | INTERGENIC                    |                    |                                       |
| SNP_69112_A_211233 | NW_004515811.1 | scaffold299 | 211233                  | CC                              | TT                 | TT               | INTERGENIC                    |                    |                                       |
| SNP_69114_A_213801 | NW_004515811.1 | scaffold299 | 213801                  | TT                              | CC                 | CC               | INTERGENIC                    |                    |                                       |
| SNP_69115_A_214233 | NW_004515811.1 | scaffold299 | 214233                  | CC                              | TT                 | TT               | INTERGENIC                    |                    |                                       |
| SNP_69116_A_2778   | NW_004515812.1 | scaffold300 | 2778                    | AA                              | TT                 | TT               | INTERGENIC                    |                    |                                       |
| SNP_69117_A_6570   | NW_004515812.1 | scaffold300 | 6570                    | TT                              | AA                 | AA               | INTERGENIC                    |                    |                                       |
| SNP_69118_A_8004   | NW_004515812.1 | scaffold300 | 8004                    | TT                              | GG                 | GG               | INTERGENIC                    |                    |                                       |
| SNP_69119_A_12567  | NW_004515812.1 | scaffold300 | 12567                   | AA                              | TT                 | TT               | INTERGENIC                    |                    |                                       |
| SNP_69120_A_27601  | NW_004515812.1 | scaffold300 | 27601                   | TT                              | AA                 | AA               | INTERGENIC                    |                    |                                       |
| SNP_69121_A_41063  | NW_004515812.1 | scaffold300 | 41063                   | AA                              | GG                 | GG               | INTERGENIC                    |                    |                                       |
| SNP_69122_A_41064  | NW_004515812.1 | scaffold300 | 41064                   | CC                              | GG                 | GG               | INTERGENIC                    |                    |                                       |

| SNPs IDs           | Chromosome IDs | Chromosomes | Physical positions (bp) | CDC Frontier (Reference genome) | (Pusa 1103 & HPNB) | (ILWC 46 & LPNB) | Sequence genome | Components of | Gene accession IDs | Putative functions |
|--------------------|----------------|-------------|-------------------------|---------------------------------|--------------------|------------------|-----------------|---------------|--------------------|--------------------|
| SNP_69123_A_41115  | NW_004515812.1 | scaffold300 | 41115                   | TT                              | AA                 | AA               | INTERGENIC      |               |                    |                    |
| SNP_69124_A_45448  | NW_004515812.1 | scaffold300 | 45448                   | AA                              | GG                 | GG               | INTERGENIC      |               |                    |                    |
| SNP_69125_A_45454  | NW_004515812.1 | scaffold300 | 45454                   | AA                              | TT                 | TT               | INTERGENIC      |               |                    |                    |
| SNP_69126_A_45455  | NW_004515812.1 | scaffold300 | 45455                   | CC                              | TT                 | TT               | INTERGENIC      |               |                    |                    |
| SNP_69127_A_45456  | NW_004515812.1 | scaffold300 | 45456                   | AA                              | GG                 | GG               | INTERGENIC      |               |                    |                    |
| SNP_69128_A_45459  | NW_004515812.1 | scaffold300 | 45459                   | CC                              | AA                 | AA               | INTERGENIC      |               |                    |                    |
| SNP_69129_A_74150  | NW_004515812.1 | scaffold300 | 74150                   | AA                              | GG                 | GG               | INTERGENIC      |               |                    |                    |
| SNP_69130_A_74752  | NW_004515812.1 | scaffold300 | 74752                   | AA                              | CC                 | CC               | INTERGENIC      |               |                    |                    |
| SNP_69131_A_84165  | NW_004515812.1 | scaffold300 | 84165                   | AA                              | CC                 | CC               | INTERGENIC      |               |                    |                    |
| SNP_69132_A_89480  | NW_004515812.1 | scaffold300 | 89480                   | CC                              | AA                 | AA               | INTERGENIC      |               |                    |                    |
| SNP_69133_A_101023 | NW_004515812.1 | scaffold300 | 101023                  | TT                              | CC                 | CC               | INTERGENIC      |               |                    |                    |
| SNP_69134_A_101412 | NW_004515812.1 | scaffold300 | 101412                  | AA                              | CC                 | CC               | INTERGENIC      |               |                    |                    |
| SNP_69135_A_101452 | NW_004515812.1 | scaffold300 | 101452                  | AA                              | GG                 | GG               | INTERGENIC      |               |                    |                    |
| SNP_69136_A_101495 | NW_004515812.1 | scaffold300 | 101495                  | TT                              | GG                 | GG               | INTERGENIC      |               |                    |                    |
| SNP_69137_A_1214   | NW_004515813.1 | scaffold301 | 1214                    | TT                              | GG                 | GG               | INTERGENIC      |               |                    |                    |
| SNP_69138_A_1249   | NW_004515813.1 | scaffold301 | 1249                    | CC                              | AA                 | AA               | INTERGENIC      |               |                    |                    |
| SNP_69139_A_5233   | NW_004515814.1 | scaffold303 | 5233                    | TT                              | CC                 | CC               | INTERGENIC      |               |                    |                    |
| SNP_69140_A_9944   | NW_004515814.1 | scaffold303 | 9944                    | TT                              | GG                 | GG               | INTERGENIC      |               |                    |                    |
| SNP_69142_A_30257  | NW_004515814.1 | scaffold303 | 30257                   | GG                              | TT                 | TT               | INTERGENIC      |               |                    |                    |
| SNP_69143_A_85515  | NW_004515814.1 | scaffold303 | 85515                   | AA                              | GG                 | GG               | INTERGENIC      |               |                    |                    |
| SNP_69144_A_120605 | NW_004515814.1 | scaffold303 | 120605                  | GG                              | TT                 | TT               | INTERGENIC      |               |                    |                    |
| SNP_69145_A_120655 | NW_004515814.1 | scaffold303 | 120655                  | TT                              | CC                 | CC               | INTERGENIC      |               |                    |                    |

| SNPs IDs           | Chromosome IDs | Chromosomes | Physical positions (bp) | CDC Frontier (Reference genome) | (Pusa 1103 & HPNB) | (ILWC 46 & LPNB) | Sequence genome | Components of | Gene accession IDs | Putative functions |
|--------------------|----------------|-------------|-------------------------|---------------------------------|--------------------|------------------|-----------------|---------------|--------------------|--------------------|
| SNP_69147_A_648    | NW_004515815.1 | scaffold304 | 648                     | TT                              | AA                 | AA               | INTERGENIC      |               |                    |                    |
| SNP_69148_A_649    | NW_004515815.1 | scaffold304 | 649                     | AA                              | TT                 | TT               | INTERGENIC      |               |                    |                    |
| SNP_69149_A_2305   | NW_004515816.1 | scaffold305 | 2305                    | AA                              | GG                 | GG               | INTERGENIC      |               |                    |                    |
| SNP_69150_A_4100   | NW_004515816.1 | scaffold305 | 4100                    | CC                              | TT                 | TT               | INTERGENIC      |               |                    |                    |
| SNP_69151_A_4106   | NW_004515816.1 | scaffold305 | 4106                    | CC                              | AA                 | AA               | INTERGENIC      |               |                    |                    |
| SNP_69152_A_4122   | NW_004515816.1 | scaffold305 | 4122                    | CC                              | TT                 | TT               | INTERGENIC      |               |                    |                    |
| SNP_69153_A_31578  | NW_004515816.1 | scaffold305 | 31578                   | GG                              | AA                 | AA               | INTERGENIC      |               |                    |                    |
| SNP_69154_A_31733  | NW_004515816.1 | scaffold305 | 31733                   | TT                              | CC                 | CC               | INTERGENIC      |               |                    |                    |
| SNP_69155_A_31771  | NW_004515816.1 | scaffold305 | 31771                   | TT                              | GG                 | GG               | INTERGENIC      |               |                    |                    |
| SNP_69156_A_31781  | NW_004515816.1 | scaffold305 | 31781                   | TT                              | CC                 | CC               | INTERGENIC      |               |                    |                    |
| SNP_69157_A_31927  | NW_004515816.1 | scaffold305 | 31927                   | CC                              | TT                 | TT               | INTERGENIC      |               |                    |                    |
| SNP_69158_A_31948  | NW_004515816.1 | scaffold305 | 31948                   | AA                              | GG                 | GG               | INTERGENIC      |               |                    |                    |
| SNP_69159_A_31958  | NW_004515816.1 | scaffold305 | 31958                   | CC                              | TT                 | TT               | INTERGENIC      |               |                    |                    |
| SNP_69160_A_31994  | NW_004515816.1 | scaffold305 | 31994                   | GG                              | AA                 | AA               | INTERGENIC      |               |                    |                    |
| SNP_69161_A_32054  | NW_004515816.1 | scaffold305 | 32054                   | CC                              | TT                 | TT               | INTERGENIC      |               |                    |                    |
| SNP_69162_A_32110  | NW_004515816.1 | scaffold305 | 32110                   | TT                              | CC                 | CC               | INTERGENIC      |               |                    |                    |
| SNP_69163_A_32112  | NW_004515816.1 | scaffold305 | 32112                   | TT                              | GG                 | GG               | INTERGENIC      |               |                    |                    |
| SNP_69164_A_99787  | NW_004515816.1 | scaffold305 | 99787                   | GG                              | TT                 | TT               | INTERGENIC      |               |                    |                    |
| SNP_69165_A_99805  | NW_004515816.1 | scaffold305 | 99805                   | GG                              | TT                 | TT               | INTERGENIC      |               |                    |                    |
| SNP_69166_A_124800 | NW_004515816.1 | scaffold305 | 124800                  | CC                              | AA                 | AA               | INTERGENIC      |               |                    |                    |
| SNP_69167_A_124816 | NW_004515816.1 | scaffold305 | 124816                  | TT                              | CC                 | CC               | INTERGENIC      |               |                    |                    |
| SNP_69168_A_124848 | NW_004515816.1 | scaffold305 | 124848                  | GG                              | TT                 | TT               | INTERGENIC      |               |                    |                    |

| SNPs IDs           | Chromosome IDs | Chromosomes | Physical positions (bp) | CDC Frontier genome (Reference genome) | (Pusa 1103 & HPNB) | (ILWC 46 & LPNB) | Sequence genome | Components of | Gene accession IDs      | Putative functions |
|--------------------|----------------|-------------|-------------------------|----------------------------------------|--------------------|------------------|-----------------|---------------|-------------------------|--------------------|
| SNP_69169_A_145554 | NW_004515816.1 | scaffold305 | 145554                  | TT                                     | CC                 | CC               | INTERGENIC      |               |                         |                    |
| SNP_69170_A_157229 | NW_004515816.1 | scaffold305 | 157229                  | GG                                     | AA                 | AA               | INTERGENIC      |               |                         |                    |
| SNP_69172_A_193196 | NW_004515816.1 | scaffold305 | 193196                  | AA                                     | GG                 | GG               | INTERGENIC      |               |                         |                    |
| SNP_69173_A_196652 | NW_004515816.1 | scaffold305 | 196652                  | TT                                     | AA                 | AA               | INTERGENIC      |               |                         |                    |
| SNP_69174_A_196654 | NW_004515816.1 | scaffold305 | 196654                  | TT                                     | GG                 | GG               | INTERGENIC      |               |                         |                    |
| SNP_69175_A_196689 | NW_004515816.1 | scaffold305 | 196689                  | CC                                     | AA                 | AA               | INTERGENIC      |               |                         |                    |
| SNP_69176_A_205064 | NW_004515816.1 | scaffold305 | 205064                  | AA                                     | GG                 | GG               | INTERGENIC      |               |                         |                    |
| SNP_69177_A_205093 | NW_004515816.1 | scaffold305 | 205093                  | CC                                     | TT                 | TT               | INTERGENIC      |               |                         |                    |
| SNP_69178_A_205098 | NW_004515816.1 | scaffold305 | 205098                  | AA                                     | TT                 | TT               | INTERGENIC      |               |                         |                    |
| SNP_69179_A_205131 | NW_004515816.1 | scaffold305 | 205131                  | CC                                     | AA                 | AA               | INTERGENIC      |               |                         |                    |
| SNP_69180_A_205166 | NW_004515816.1 | scaffold305 | 205166                  | TT                                     | CC                 | CC               | INTERGENIC      |               |                         |                    |
| SNP_69181_A_205183 | NW_004515816.1 | scaffold305 | 205183                  | GG                                     | TT                 | TT               | INTERGENIC      |               |                         |                    |
| SNP_69182_A_205193 | NW_004515816.1 | scaffold305 | 205193                  | TT                                     | GG                 | GG               | INTERGENIC      |               |                         |                    |
| SNP_69183_A_205282 | NW_004515816.1 | scaffold305 | 205282                  | TT                                     | CC                 | CC               | INTERGENIC      |               |                         |                    |
| SNP_69184_A_205292 | NW_004515816.1 | scaffold305 | 205292                  | CC                                     | GG                 | GG               | INTERGENIC      |               |                         |                    |
| SNP_69185_A_205355 | NW_004515816.1 | scaffold305 | 205355                  | AA                                     | GG                 | GG               | INTERGENIC      |               |                         |                    |
| SNP_69186_A_205461 | NW_004515816.1 | scaffold305 | 205461                  | AA                                     | TT                 | TT               | INTERGENIC      |               |                         |                    |
| SNP_69187_A_24705  | NW_004515817.1 | scaffold306 | 24705                   | CC                                     | TT                 | TT               | INTRON          | 101510780     | GTP-binding protein ERG |                    |
| SNP_69188_A_48050  | NW_004515817.1 | scaffold306 | 48050                   | GG                                     | TT                 | TT               | INTERGENIC      |               |                         |                    |
| SNP_69189_A_58867  | NW_004515817.1 | scaffold306 | 58867                   | GG                                     | AA                 | AA               | INTERGENIC      |               |                         |                    |
| SNP_69190_A_58885  | NW_004515817.1 | scaffold306 | 58885                   | GG                                     | AA                 | AA               | INTERGENIC      |               |                         |                    |
| SNP_69191_A_58898  | NW_004515817.1 | scaffold306 | 58898                   | TT                                     | AA                 | AA               | INTERGENIC      |               |                         |                    |



| SNPs IDs           | Chromosome IDs | Chromosomes | Physical positions (bp) | CDC Frontier (Reference genome) | (Pusa 1103 & HPNB) | (ILWC 46 & LPNB) | Sequence Components of genome | Gene accession IDs | Putative functions                           |
|--------------------|----------------|-------------|-------------------------|---------------------------------|--------------------|------------------|-------------------------------|--------------------|----------------------------------------------|
| SNP_69193_A_59164  | NW_004515817.1 | scaffold306 | 59164                   | GG                              | CC                 | CC               | INTERGENIC                    |                    |                                              |
| SNP_69194_A_59283  | NW_004515817.1 | scaffold306 | 59283                   | AA                              | GG                 | GG               | INTERGENIC                    |                    |                                              |
| SNP_69195_A_59288  | NW_004515817.1 | scaffold306 | 59288                   | TT                              | AA                 | AA               | INTERGENIC                    |                    |                                              |
| SNP_69196_A_59303  | NW_004515817.1 | scaffold306 | 59303                   | TT                              | CC                 | CC               | INTERGENIC                    |                    |                                              |
| SNP_69197_A_88755  | NW_004515817.1 | scaffold306 | 88755                   | TT                              | CC                 | CC               | INTERGENIC                    |                    |                                              |
| SNP_69198_A_88789  | NW_004515817.1 | scaffold306 | 88789                   | CC                              | AA                 | AA               | INTERGENIC                    |                    |                                              |
| SNP_69199_A_88890  | NW_004515817.1 | scaffold306 | 88890                   | CC                              | GG                 | GG               | INTERGENIC                    |                    |                                              |
| SNP_69200_A_89074  | NW_004515817.1 | scaffold306 | 89074                   | GG                              | AA                 | AA               | INTERGENIC                    |                    |                                              |
| SNP_69201_A_109900 | NW_004515817.1 | scaffold306 | 109900                  | CC                              | GG                 | GG               | INTERGENIC                    |                    |                                              |
| SNP_69202_A_125472 | NW_004515817.1 | scaffold306 | 125472                  | TT                              | CC                 | CC               | INTRON                        | 101514232          | 13-hydroxylupanine O-tigloyltransferase-like |
| SNP_69203_A_126419 | NW_004515817.1 | scaffold306 | 126419                  | TT                              | GG                 | GG               | INTRON                        | 101514232          | 13-hydroxylupanine O-tigloyltransferase-like |
| SNP_69205_A_128864 | NW_004515817.1 | scaffold306 | 128864                  | AA                              | GG                 | GG               | INTRON                        | 101514232          | 13-hydroxylupanine O-tigloyltransferase-like |
| SNP_69208_A_130525 | NW_004515817.1 | scaffold306 | 130525                  | CC                              | TT                 | TT               | INTRON                        | 101514232          | 13-hydroxylupanine O-tigloyltransferase-like |
| SNP_69209_A_130556 | NW_004515817.1 | scaffold306 | 130556                  | TT                              | CC                 | CC               | INTRON                        | 101514232          | 13-hydroxylupanine O-tigloyltransferase-like |
| SNP_69210_A_130699 | NW_004515817.1 | scaffold306 | 130699                  | AA                              | CC                 | CC               | INTRON                        | 101514232          | 13-hydroxylupanine O-tigloyltransferase-like |
| SNP_69211_A_130767 | NW_004515817.1 | scaffold306 | 130767                  | AA                              | CC                 | CC               | INTRON                        | 101514232          | 13-hydroxylupanine O-tigloyltransferase-like |
| SNP_69212_A_131271 | NW_004515817.1 | scaffold306 | 131271                  | AA                              | TT                 | TT               | INTRON                        | 101514232          | 13-hydroxylupanine O-tigloyltransferase-like |
| SNP_69213_A_131368 | NW_004515817.1 | scaffold306 | 131368                  | TT                              | CC                 | CC               | INTRON                        | 101514232          | 13-hydroxylupanine O-tigloyltransferase-like |
| SNP_69215_A_180468 | NW_004515817.1 | scaffold306 | 180468                  | TT                              | GG                 | GG               | INTERGENIC                    |                    |                                              |
| SNP_69216_A_186590 | NW_004515817.1 | scaffold306 | 186590                  | TT                              | AA                 | AA               | INTRON                        | 101511955          | 13-hydroxylupanine O-tigloyltransferase-like |
| SNP_69217_A_186702 | NW_004515817.1 | scaffold306 | 186702                  | TT                              | CC                 | CC               | INTRON                        | 101511955          | 13-hydroxylupanine O-tigloyltransferase-like |
| SNP_69218_A_196782 | NW_004515817.1 | scaffold306 | 196782                  | TT                              | AA                 | AA               | INTRON                        | 101511955          | 13-hydroxylupanine O-tigloyltransferase-like |

| SNPs IDs           | Chromosome IDs | Chromosomes | Physical positions (bp) | CDC Frontier (Reference genome) | (Pusa 1103 & HPNB) | (ILWC 46 & LPNB) | Sequence Components of genome | Gene accession IDs | Putative functions                          |
|--------------------|----------------|-------------|-------------------------|---------------------------------|--------------------|------------------|-------------------------------|--------------------|---------------------------------------------|
| SNP_69220_A_197395 | NW_004515817.1 | scaffold306 | 197395                  | TT                              | CC                 | CC               | NON_SYNONYMOUS_CODING         | 101511955          | 13-hydroxylupanine O-ligoyltransferase-like |
| SNP_69221_A_197432 | NW_004515817.1 | scaffold306 | 197432                  | TT                              | AA                 | AA               | NON_SYNONYMOUS_CODING         | 101511955          | 13-hydroxylupanine O-ligoyltransferase-like |
| SNP_69222_A_203645 | NW_004515817.1 | scaffold306 | 203645                  | TT                              | GG                 | GG               | INTERGENIC                    |                    |                                             |
| SNP_69223_A_208691 | NW_004515817.1 | scaffold306 | 208691                  | TT                              | CC                 | CC               | INTERGENIC                    |                    |                                             |
| SNP_69224_A_210975 | NW_004515817.1 | scaffold306 | 210975                  | GG                              | AA                 | AA               | INTERGENIC                    |                    |                                             |
| SNP_69225_A_216430 | NW_004515817.1 | scaffold306 | 216430                  | TT                              | GG                 | GG               | URR                           | 101514546          | uncharacterized LOC101514546                |
| SNP_69226_A_216864 | NW_004515817.1 | scaffold306 | 216864                  | TT                              | CC                 | CC               | URR                           | 101514546          | uncharacterized LOC101514546                |
| SNP_69227_A_216943 | NW_004515817.1 | scaffold306 | 216943                  | TT                              | GG                 | GG               | URR                           | 101514546          | uncharacterized LOC101514546                |
| SNP_69228_A_219494 | NW_004515817.1 | scaffold306 | 219494                  | AA                              | GG                 | GG               | INTERGENIC                    |                    |                                             |
| SNP_69229_A_219654 | NW_004515817.1 | scaffold306 | 219654                  | CC                              | TT                 | TT               | INTERGENIC                    |                    |                                             |
| SNP_69230_A_227272 | NW_004515817.1 | scaffold306 | 227272                  | TT                              | AA                 | AA               | INTERGENIC                    |                    |                                             |
| SNP_69231_A_236773 | NW_004515817.1 | scaffold306 | 236773                  | CC                              | AA                 | AA               | INTERGENIC                    |                    |                                             |
| SNP_69232_A_252765 | NW_004515817.1 | scaffold306 | 252765                  | AA                              | CC                 | CC               | INTERGENIC                    |                    |                                             |
| SNP_69233_A_252766 | NW_004515817.1 | scaffold306 | 252766                  | CC                              | AA                 | AA               | INTERGENIC                    |                    |                                             |
| SNP_69234_A_301909 | NW_004515817.1 | scaffold306 | 301909                  | TT                              | CC                 | CC               | INTERGENIC                    |                    |                                             |
| SNP_69235_A_302242 | NW_004515817.1 | scaffold306 | 302242                  | AA                              | GG                 | GG               | INTERGENIC                    |                    |                                             |
| SNP_69236_A_302441 | NW_004515817.1 | scaffold306 | 302441                  | CC                              | AA                 | AA               | INTERGENIC                    |                    |                                             |
| SNP_69237_A_334394 | NW_004515817.1 | scaffold306 | 334394                  | GG                              | TT                 | TT               | INTERGENIC                    |                    |                                             |
| SNP_69238_A_370894 | NW_004515817.1 | scaffold306 | 370894                  | AA                              | CC                 | CC               | INTERGENIC                    |                    |                                             |
| SNP_69239_A_373398 | NW_004515817.1 | scaffold306 | 373398                  | TT                              | CC                 | CC               | INTERGENIC                    |                    |                                             |
| SNP_69240_A_410959 | NW_004515817.1 | scaffold306 | 410959                  | GG                              | TT                 | TT               | INTERGENIC                    |                    |                                             |
| SNP_69241_A_431671 | NW_004515817.1 | scaffold306 | 431671                  | CC                              | TT                 | TT               | INTERGENIC                    |                    |                                             |

| SNPs IDs           | Chromosome IDs | Chromosomes   | Physical positions (bp) | CDC Frontier (Reference genome) | (Pusa 1103 & HPNB) | (ILWC 46 & LPNB) | Sequence Components of genome | Gene accession IDs | Putative functions           |
|--------------------|----------------|---------------|-------------------------|---------------------------------|--------------------|------------------|-------------------------------|--------------------|------------------------------|
| SNP_69242_A_447316 | NW_004515817.1 | scaffold306   | 447316                  | TT                              | CC                 | CC               | INTERGENIC                    |                    |                              |
| SNP_69243_A_449394 | NW_004515817.1 | scaffold306   | 449394                  | AA                              | TT                 | TT               | DRR                           | 101488270          | Unknown function             |
| SNP_69244_A_464470 | NW_004515817.1 | scaffold306   | 464470                  | CC                              | TT                 | TT               | INTERGENIC                    |                    |                              |
| SNP_69245_A_471537 | NW_004515817.1 | scaffold306   | 471537                  | CC                              | TT                 | TT               | INTERGENIC                    |                    |                              |
| SNP_69247_A_485702 | NW_004515817.1 | scaffold306   | 485702                  | AA                              | TT                 | TT               | INTERGENIC                    |                    |                              |
| SNP_69248_A_48612  | NW_004515818.1 | scaffold308_2 | 48612                   | GG                              | AA                 | AA               | INTERGENIC                    |                    |                              |
| SNP_69249_A_68464  | NW_004515818.1 | scaffold308_2 | 68464                   | AA                              | CC                 | CC               | INTERGENIC                    |                    |                              |
| SNP_69250_A_70211  | NW_004515818.1 | scaffold308_2 | 70211                   | AA                              | GG                 | GG               | INTERGENIC                    |                    |                              |
| SNP_69251_A_76429  | NW_004515818.1 | scaffold308_2 | 76429                   | GG                              | AA                 | AA               | URR                           | 101493714          | sucrose synthase 6-like      |
| SNP_69253_A_78111  | NW_004515818.1 | scaffold308_2 | 78111                   | TT                              | CC                 | CC               | INTERGENIC                    |                    |                              |
| SNP_69255_A_84096  | NW_004515818.1 | scaffold308_2 | 84096                   | AA                              | GG                 | GG               | URR                           | 101494350          | sucrose synthase 6-like      |
| SNP_69256_A_84622  | NW_004515818.1 | scaffold308_2 | 84622                   | TT                              | AA                 | AA               | URR                           | 101494350          | sucrose synthase 6-like      |
| SNP_69257_A_84675  | NW_004515818.1 | scaffold308_2 | 84675                   | CC                              | TT                 | TT               | URR                           | 101494350          | sucrose synthase 6-like      |
| SNP_69258_A_84683  | NW_004515818.1 | scaffold308_2 | 84683                   | GG                              | AA                 | AA               | URR                           | 101494350          | sucrose synthase 6-like      |
| SNP_69259_A_84767  | NW_004515818.1 | scaffold308_2 | 84767                   | TT                              | CC                 | CC               | URR                           | 101494350          | sucrose synthase 6-like      |
| SNP_69260_A_84848  | NW_004515818.1 | scaffold308_2 | 84848                   | AA                              | GG                 | GG               | URR                           | 101494350          | sucrose synthase 6-like      |
| SNP_69261_A_84889  | NW_004515818.1 | scaffold308_2 | 84889                   | TT                              | AA                 | AA               | URR                           | 101494350          | sucrose synthase 6-like      |
| SNP_69262_A_85441  | NW_004515818.1 | scaffold308_2 | 85441                   | TT                              | AA                 | AA               | INTERGENIC                    |                    |                              |
| SNP_69263_A_93009  | NW_004515818.1 | scaffold308_2 | 93009                   | CC                              | AA                 | AA               | URR                           | 101494981          | sucrose synthase 6-like      |
| SNP_69264_A_96857  | NW_004515818.1 | scaffold308_2 | 96857                   | GG                              | AA                 | AA               | INTERGENIC                    |                    |                              |
| SNP_69265_A_106655 | NW_004515818.1 | scaffold308_2 | 106655                  | TT                              | CC                 | CC               | SYNONYMOUS_CODING             | 101495307          | uncharacterized LOC101495307 |
| SNP_69266_A_123506 | NW_004515818.1 | scaffold308_2 | 123506                  | TT                              | CC                 | CC               | INTERGENIC                    |                    |                              |

| SNPs IDs           | Chromosome IDs | Chromosomes   | Physical positions (bp) | CDC Frontier (Reference genome) | (Pusa 1103 & HPNB) | (ILWC 46 & LPNB) | Sequence Components of genome | Gene accession IDs | Putative functions                            |
|--------------------|----------------|---------------|-------------------------|---------------------------------|--------------------|------------------|-------------------------------|--------------------|-----------------------------------------------|
| SNP_69267_A_173363 | NW_004515818.1 | scaffold308_2 | 173363                  | TT                              | CC                 | CC               | INTERGENIC                    |                    |                                               |
| SNP_69268_A_173909 | NW_004515818.1 | scaffold308_2 | 173909                  | AA                              | GG                 | GG               | INTERGENIC                    |                    |                                               |
| SNP_69269_A_173974 | NW_004515818.1 | scaffold308_2 | 173974                  | TT                              | CC                 | CC               | INTERGENIC                    |                    |                                               |
| SNP_69270_A_174292 | NW_004515818.1 | scaffold308_2 | 174292                  | AA                              | GG                 | GG               | INTERGENIC                    |                    |                                               |
| SNP_69273_A_247022 | NW_004515818.1 | scaffold308_2 | 247022                  | TT                              | GG                 | GG               | INTERGENIC                    |                    |                                               |
| SNP_69274_A_262469 | NW_004515818.1 | scaffold308_2 | 262469                  | AA                              | GG                 | GG               | DRR                           | 101491428          | photosystem II reaction center protein K-like |
| SNP_69276_A_263428 | NW_004515818.1 | scaffold308_2 | 263428                  | AA                              | GG                 | GG               | URR                           | 101491428          | photosystem II reaction center protein K-like |
| SNP_69278_A_263534 | NW_004515818.1 | scaffold308_2 | 263534                  | GG                              | CC                 | CC               | URR                           | 101491428          | photosystem II reaction center protein K-like |
| SNP_69279_A_263546 | NW_004515818.1 | scaffold308_2 | 263546                  | CC                              | TT                 | TT               | URR                           | 101491428          | photosystem II reaction center protein K-like |
| SNP_69280_A_263580 | NW_004515818.1 | scaffold308_2 | 263580                  | AA                              | GG                 | GG               | URR                           | 101491428          | photosystem II reaction center protein K-like |
| SNP_69281_A_263596 | NW_004515818.1 | scaffold308_2 | 263596                  | TT                              | CC                 | CC               | URR                           | 101491428          | photosystem II reaction center protein K-like |
| SNP_69282_A_263630 | NW_004515818.1 | scaffold308_2 | 263630                  | CC                              | GG                 | GG               | URR                           | 101491428          | photosystem II reaction center protein K-like |
| SNP_69283_A_263639 | NW_004515818.1 | scaffold308_2 | 263639                  | GG                              | AA                 | AA               | URR                           | 101491428          | photosystem II reaction center protein K-like |
| SNP_69284_A_263649 | NW_004515818.1 | scaffold308_2 | 263649                  | CC                              | AA                 | AA               | URR                           | 101491428          | photosystem II reaction center protein K-like |
| SNP_69285_A_263650 | NW_004515818.1 | scaffold308_2 | 263650                  | TT                              | CC                 | CC               | URR                           | 101491428          | photosystem II reaction center protein K-like |
| SNP_69286_A_263675 | NW_004515818.1 | scaffold308_2 | 263675                  | TT                              | CC                 | CC               | URR                           | 101491428          | photosystem II reaction center protein K-like |
| SNP_69287_A_263677 | NW_004515818.1 | scaffold308_2 | 263677                  | CC                              | TT                 | TT               | URR                           | 101491428          | photosystem II reaction center protein K-like |
| SNP_69288_A_264340 | NW_004515818.1 | scaffold308_2 | 264340                  | AA                              | GG                 | GG               | URR                           | 101491428          | photosystem II reaction center protein K-like |
| SNP_69289_A_264341 | NW_004515818.1 | scaffold308_2 | 264341                  | CC                              | AA                 | AA               | URR                           | 101491428          | photosystem II reaction center protein K-like |
| SNP_69290_A_264371 | NW_004515818.1 | scaffold308_2 | 264371                  | GG                              | TT                 | TT               | URR                           | 101491428          | photosystem II reaction center protein K-like |
| SNP_69292_A_264419 | NW_004515818.1 | scaffold308_2 | 264419                  | AA                              | GG                 | GG               | URR                           | 101491428          | photosystem II reaction center protein K-like |
| SNP_69293_A_264589 | NW_004515818.1 | scaffold308_2 | 264589                  | TT                              | AA                 | AA               | URR                           | 101491428          | photosystem II reaction center protein K-like |

| SNPs IDs           | Chromosome IDs | Chromosomes   | Physical positions (bp) | CDC Frontier (Reference genome) | (Pusa 1103 & HPNB) | (ILWC 46 & LPNB) | Sequence genome | Components of | Gene accession IDs | Putative functions                            |
|--------------------|----------------|---------------|-------------------------|---------------------------------|--------------------|------------------|-----------------|---------------|--------------------|-----------------------------------------------|
| SNP_69294_A_264602 | NW_004515818.1 | scaffold308_2 | 264602                  | AA                              | GG                 | GG               | URR             |               | 101491428          | photosystem II reaction center protein K-like |
| SNP_69295_A_264880 | NW_004515818.1 | scaffold308_2 | 264880                  | CC                              | AA                 | AA               | URR             |               | 101491428          | photosystem II reaction center protein K-like |
| SNP_69296_A_264885 | NW_004515818.1 | scaffold308_2 | 264885                  | TT                              | AA                 | AA               | URR             |               | 101491428          | photosystem II reaction center protein K-like |
| SNP_69297_A_264912 | NW_004515818.1 | scaffold308_2 | 264912                  | TT                              | CC                 | CC               | URR             |               | 101491428          | photosystem II reaction center protein K-like |
| SNP_69298_A_264956 | NW_004515818.1 | scaffold308_2 | 264956                  | AA                              | GG                 | GG               | URR             |               | 101491428          | photosystem II reaction center protein K-like |
| SNP_69299_A_265008 | NW_004515818.1 | scaffold308_2 | 265008                  | TT                              | CC                 | CC               | URR             |               | 101491428          | photosystem II reaction center protein K-like |
| SNP_69300_A_265368 | NW_004515818.1 | scaffold308_2 | 265368                  | GG                              | AA                 | AA               | URR             |               | 101491741          | photosystem II reaction center protein I-like |
| SNP_69301_A_265395 | NW_004515818.1 | scaffold308_2 | 265395                  | TT                              | CC                 | CC               | URR             |               | 101491741          | photosystem II reaction center protein I-like |
| SNP_69302_A_265423 | NW_004515818.1 | scaffold308_2 | 265423                  | AA                              | GG                 | GG               | URR             |               | 101491741          | photosystem II reaction center protein I-like |
| SNP_69303_A_265767 | NW_004515818.1 | scaffold308_2 | 265767                  | TT                              | CC                 | CC               | URR             |               | 101491741          | photosystem II reaction center protein I-like |
| SNP_69304_A_265963 | NW_004515818.1 | scaffold308_2 | 265963                  | TT                              | CC                 | CC               | URR             |               | 101491741          | photosystem II reaction center protein I-like |
| SNP_69305_A_266021 | NW_004515818.1 | scaffold308_2 | 266021                  | TT                              | CC                 | CC               | URR             |               | 101491741          | photosystem II reaction center protein I-like |
| SNP_69307_A_266366 | NW_004515818.1 | scaffold308_2 | 266366                  | AA                              | GG                 | GG               | INTERGENIC      |               |                    |                                               |
| SNP_69308_A_266372 | NW_004515818.1 | scaffold308_2 | 266372                  | TT                              | AA                 | AA               | INTERGENIC      |               |                    |                                               |
| SNP_69309_A_266380 | NW_004515818.1 | scaffold308_2 | 266380                  | TT                              | CC                 | CC               | INTERGENIC      |               |                    |                                               |
| SNP_69310_A_266464 | NW_004515818.1 | scaffold308_2 | 266464                  | AA                              | CC                 | CC               | INTERGENIC      |               |                    |                                               |
| SNP_69311_A_268222 | NW_004515818.1 | scaffold308_2 | 268222                  | TT                              | CC                 | CC               | URR             |               | 101495957          | Unknown function                              |
| SNP_69312_A_307305 | NW_004515818.1 | scaffold308_2 | 307305                  | GG                              | AA                 | AA               | INTERGENIC      |               |                    |                                               |
| SNP_69313_A_307355 | NW_004515818.1 | scaffold308_2 | 307355                  | TT                              | CC                 | CC               | INTERGENIC      |               |                    |                                               |
| SNP_69314_A_320736 | NW_004515818.1 | scaffold308_2 | 320736                  | AA                              | GG                 | GG               | INTERGENIC      |               |                    |                                               |
| SNP_69315_A_325199 | NW_004515818.1 | scaffold308_2 | 325199                  | TT                              | CC                 | CC               | INTERGENIC      |               |                    |                                               |
| SNP_69316_A_325474 | NW_004515818.1 | scaffold308_2 | 325474                  | TT                              | AA                 | AA               | INTERGENIC      |               |                    |                                               |

| SNPs IDs           | Chromosome IDs | Chromosomes   | Physical positions (bp) | CDC Frontier (Reference genome) | (Pusa 1103 & HPNB) | (ILWC 46 & LPNB) | Sequence genome | Components of | Gene accession IDs | Putative functions |
|--------------------|----------------|---------------|-------------------------|---------------------------------|--------------------|------------------|-----------------|---------------|--------------------|--------------------|
| SNP_69317_A_325584 | NW_004515818.1 | scaffold308_2 | 325584                  | CC                              | TT                 | TT               | INTERGENIC      |               |                    |                    |
| SNP_69318_A_325598 | NW_004515818.1 | scaffold308_2 | 325598                  | CC                              | TT                 | TT               | INTERGENIC      |               |                    |                    |
| SNP_69319_A_325662 | NW_004515818.1 | scaffold308_2 | 325662                  | GG                              | AA                 | AA               | INTERGENIC      |               |                    |                    |
| SNP_69320_A_325713 | NW_004515818.1 | scaffold308_2 | 325713                  | AA                              | TT                 | TT               | INTERGENIC      |               |                    |                    |
| SNP_69321_A_357185 | NW_004515818.1 | scaffold308_2 | 357185                  | TT                              | CC                 | CC               | INTERGENIC      |               |                    |                    |
| SNP_69322_A_357229 | NW_004515818.1 | scaffold308_2 | 357229                  | AA                              | GG                 | GG               | INTERGENIC      |               |                    |                    |
| SNP_69323_A_6444   | NW_004515819.1 | scaffold310   | 6444                    | AA                              | CC                 | CC               | INTERGENIC      |               |                    |                    |
| SNP_69324_A_6486   | NW_004515819.1 | scaffold310   | 6486                    | GG                              | CC                 | CC               | INTERGENIC      |               |                    |                    |
| SNP_69325_A_6792   | NW_004515819.1 | scaffold310   | 6792                    | TT                              | CC                 | CC               | INTERGENIC      |               |                    |                    |
| SNP_69326_A_6986   | NW_004515819.1 | scaffold310   | 6986                    | TT                              | CC                 | CC               | INTERGENIC      |               |                    |                    |
| SNP_69327_A_7429   | NW_004515819.1 | scaffold310   | 7429                    | CC                              | TT                 | TT               | INTERGENIC      |               |                    |                    |
| SNP_69328_A_7456   | NW_004515819.1 | scaffold310   | 7456                    | TT                              | CC                 | CC               | INTERGENIC      |               |                    |                    |
| SNP_69329_A_7515   | NW_004515819.1 | scaffold310   | 7515                    | TT                              | CC                 | CC               | INTERGENIC      |               |                    |                    |
| SNP_69330_A_7564   | NW_004515819.1 | scaffold310   | 7564                    | AA                              | CC                 | CC               | INTERGENIC      |               |                    |                    |
| SNP_69331_A_7565   | NW_004515819.1 | scaffold310   | 7565                    | TT                              | CC                 | CC               | INTERGENIC      |               |                    |                    |
| SNP_69332_A_7857   | NW_004515819.1 | scaffold310   | 7857                    | GG                              | CC                 | CC               | INTERGENIC      |               |                    |                    |
| SNP_69333_A_12478  | NW_004515819.1 | scaffold310   | 12478                   | GG                              | AA                 | AA               | INTERGENIC      |               |                    |                    |
| SNP_69334_A_23922  | NW_004515819.1 | scaffold310   | 23922                   | AA                              | TT                 | TT               | INTERGENIC      |               |                    |                    |
| SNP_69335_A_24041  | NW_004515819.1 | scaffold310   | 24041                   | AA                              | GG                 | GG               | INTERGENIC      |               |                    |                    |
| SNP_69336_A_24047  | NW_004515819.1 | scaffold310   | 24047                   | TT                              | AA                 | AA               | INTERGENIC      |               |                    |                    |
| SNP_69337_A_24201  | NW_004515819.1 | scaffold310   | 24201                   | GG                              | AA                 | AA               | INTERGENIC      |               |                    |                    |
| SNP_69338_A_26171  | NW_004515819.1 | scaffold310   | 26171                   | TT                              | AA                 | AA               | INTERGENIC      |               |                    |                    |

| SNPs IDs          | Chromosome IDs | Chromosomes | Physical positions (bp) | CDC Frontier (Reference genome) | (Pusa 1103 & HPNB) | (ILWC 46 & LPNB) | Sequence genome | Components of | Gene accession IDs | Putative functions |
|-------------------|----------------|-------------|-------------------------|---------------------------------|--------------------|------------------|-----------------|---------------|--------------------|--------------------|
| SNP_69339_A_26214 | NW_004515819.1 | scaffold310 | 26214                   | CC                              | TT                 | TT               | INTERGENIC      |               |                    |                    |
| SNP_69341_A_26254 | NW_004515819.1 | scaffold310 | 26254                   | CC                              | TT                 | TT               | INTERGENIC      |               |                    |                    |
| SNP_69342_A_26294 | NW_004515819.1 | scaffold310 | 26294                   | GG                              | AA                 | AA               | INTERGENIC      |               |                    |                    |
| SNP_69343_A_37948 | NW_004515819.1 | scaffold310 | 37948                   | TT                              | AA                 | AA               | INTERGENIC      |               |                    |                    |
| SNP_69344_A_38250 | NW_004515819.1 | scaffold310 | 38250                   | TT                              | AA                 | AA               | INTERGENIC      |               |                    |                    |
| SNP_69345_A_38268 | NW_004515819.1 | scaffold310 | 38268                   | AA                              | TT                 | TT               | INTERGENIC      |               |                    |                    |
| SNP_69346_A_39835 | NW_004515819.1 | scaffold310 | 39835                   | TT                              | AA                 | AA               | INTERGENIC      |               |                    |                    |
| SNP_69347_A_4226  | NW_004515820.1 | scaffold311 | 4226                    | AA                              | GG                 | GG               | INTERGENIC      |               |                    |                    |
| SNP_69348_A_4507  | NW_004515820.1 | scaffold311 | 4507                    | TT                              | CC                 | CC               | INTERGENIC      |               |                    |                    |
| SNP_69349_A_8637  | NW_004515820.1 | scaffold311 | 8637                    | AA                              | GG                 | GG               | INTERGENIC      |               |                    |                    |
| SNP_69350_A_8638  | NW_004515820.1 | scaffold311 | 8638                    | TT                              | CC                 | CC               | INTERGENIC      |               |                    |                    |
| SNP_69351_A_21365 | NW_004515820.1 | scaffold311 | 21365                   | CC                              | TT                 | TT               | INTERGENIC      |               |                    |                    |
| SNP_69352_A_22771 | NW_004515820.1 | scaffold311 | 22771                   | AA                              | TT                 | TT               | INTERGENIC      |               |                    |                    |
| SNP_69353_A_23153 | NW_004515820.1 | scaffold311 | 23153                   | GG                              | CC                 | CC               | INTERGENIC      |               |                    |                    |
| SNP_69354_A_24003 | NW_004515820.1 | scaffold311 | 24003                   | GG                              | CC                 | CC               | INTERGENIC      |               |                    |                    |
| SNP_69355_A_24045 | NW_004515820.1 | scaffold311 | 24045                   | CC                              | GG                 | GG               | INTERGENIC      |               |                    |                    |
| SNP_69356_A_24053 | NW_004515820.1 | scaffold311 | 24053                   | GG                              | CC                 | CC               | INTERGENIC      |               |                    |                    |
| SNP_69357_A_24533 | NW_004515820.1 | scaffold311 | 24533                   | TT                              | GG                 | GG               | INTERGENIC      |               |                    |                    |
| SNP_69358_A_24844 | NW_004515820.1 | scaffold311 | 24844                   | GG                              | CC                 | CC               | INTERGENIC      |               |                    |                    |
| SNP_69359_A_24864 | NW_004515820.1 | scaffold311 | 24864                   | AA                              | GG                 | GG               | INTERGENIC      |               |                    |                    |
| SNP_69360_A_24933 | NW_004515820.1 | scaffold311 | 24933                   | GG                              | TT                 | TT               | INTERGENIC      |               |                    |                    |
| SNP_69361_A_25236 | NW_004515820.1 | scaffold311 | 25236                   | GG                              | CC                 | CC               | INTERGENIC      |               |                    |                    |

| SNPs IDs           | Chromosome IDs | Chromosomes | Physical positions (bp) | CDC Frontier (Reference genome) | (Pusa 1103 & HPNB) | (ILWC 46 & LPNB) | Sequence genome | Components of | Gene accession IDs | Putative functions |
|--------------------|----------------|-------------|-------------------------|---------------------------------|--------------------|------------------|-----------------|---------------|--------------------|--------------------|
| SNP_69363_A_43475  | NW_004515820.1 | scaffold311 | 43475                   | GG                              | AA                 | AA               | INTERGENIC      |               |                    |                    |
| SNP_69364_A_43722  | NW_004515820.1 | scaffold311 | 43722                   | AA                              | GG                 | GG               | INTERGENIC      |               |                    |                    |
| SNP_69365_A_44163  | NW_004515820.1 | scaffold311 | 44163                   | TT                              | CC                 | CC               | INTERGENIC      |               |                    |                    |
| SNP_69366_A_56275  | NW_004515820.1 | scaffold311 | 56275                   | GG                              | CC                 | CC               | INTERGENIC      |               |                    |                    |
| SNP_69367_A_65253  | NW_004515820.1 | scaffold311 | 65253                   | CC                              | GG                 | GG               | INTERGENIC      |               |                    |                    |
| SNP_69368_A_65254  | NW_004515820.1 | scaffold311 | 65254                   | GG                              | AA                 | AA               | INTERGENIC      |               |                    |                    |
| SNP_69369_A_90320  | NW_004515820.1 | scaffold311 | 90320                   | TT                              | AA                 | AA               | INTERGENIC      |               |                    |                    |
| SNP_69370_A_90583  | NW_004515820.1 | scaffold311 | 90583                   | GG                              | TT                 | TT               | INTERGENIC      |               |                    |                    |
| SNP_69371_A_90600  | NW_004515820.1 | scaffold311 | 90600                   | AA                              | CC                 | CC               | INTERGENIC      |               |                    |                    |
| SNP_69372_A_90674  | NW_004515820.1 | scaffold311 | 90674                   | AA                              | CC                 | CC               | INTERGENIC      |               |                    |                    |
| SNP_69373_A_90675  | NW_004515820.1 | scaffold311 | 90675                   | AA                              | TT                 | TT               | INTERGENIC      |               |                    |                    |
| SNP_69374_A_90714  | NW_004515820.1 | scaffold311 | 90714                   | CC                              | GG                 | GG               | INTERGENIC      |               |                    |                    |
| SNP_69375_A_91626  | NW_004515820.1 | scaffold311 | 91626                   | GG                              | TT                 | TT               | INTERGENIC      |               |                    |                    |
| SNP_69378_A_91809  | NW_004515820.1 | scaffold311 | 91809                   | TT                              | CC                 | CC               | INTERGENIC      |               |                    |                    |
| SNP_69379_A_91812  | NW_004515820.1 | scaffold311 | 91812                   | GG                              | TT                 | TT               | INTERGENIC      |               |                    |                    |
| SNP_69380_A_91819  | NW_004515820.1 | scaffold311 | 91819                   | AA                              | CC                 | CC               | INTERGENIC      |               |                    |                    |
| SNP_69381_A_98112  | NW_004515820.1 | scaffold311 | 98112                   | AA                              | TT                 | TT               | INTERGENIC      |               |                    |                    |
| SNP_69382_A_98143  | NW_004515820.1 | scaffold311 | 98143                   | GG                              | TT                 | TT               | INTERGENIC      |               |                    |                    |
| SNP_69383_A_102099 | NW_004515820.1 | scaffold311 | 102099                  | GG                              | TT                 | TT               | INTERGENIC      |               |                    |                    |
| SNP_69384_A_102119 | NW_004515820.1 | scaffold311 | 102119                  | GG                              | AA                 | AA               | INTERGENIC      |               |                    |                    |
| SNP_69385_A_102205 | NW_004515820.1 | scaffold311 | 102205                  | TT                              | AA                 | AA               | INTERGENIC      |               |                    |                    |
| SNP_69386_A_102208 | NW_004515820.1 | scaffold311 | 102208                  | GG                              | TT                 | TT               | INTERGENIC      |               |                    |                    |



| SNPs IDs           | Chromosome IDs | Chromosomes | Physical positions (bp) | CDC Frontier (Reference genome) | (Pusa 1103 & HPNB) | (ILWC 46 & LPNB) | Sequence genome | Components of | Gene accession IDs | Putative functions |
|--------------------|----------------|-------------|-------------------------|---------------------------------|--------------------|------------------|-----------------|---------------|--------------------|--------------------|
| SNP_69387_A_102424 | NW_004515820.1 | scaffold311 | 102424                  | AA                              | CC                 | CC               | INTERGENIC      |               |                    |                    |
| SNP_69388_A_102433 | NW_004515820.1 | scaffold311 | 102433                  | AA                              | TT                 | TT               | INTERGENIC      |               |                    |                    |
| SNP_69389_A_123204 | NW_004515820.1 | scaffold311 | 123204                  | CC                              | TT                 | TT               | INTERGENIC      |               |                    |                    |
| SNP_69390_A_123354 | NW_004515820.1 | scaffold311 | 123354                  | AA                              | TT                 | TT               | INTERGENIC      |               |                    |                    |
| SNP_69391_A_123536 | NW_004515820.1 | scaffold311 | 123536                  | AA                              | TT                 | TT               | INTERGENIC      |               |                    |                    |
| SNP_69392_A_123575 | NW_004515820.1 | scaffold311 | 123575                  | TT                              | CC                 | CC               | INTERGENIC      |               |                    |                    |
| SNP_69393_A_123601 | NW_004515820.1 | scaffold311 | 123601                  | AA                              | TT                 | TT               | INTERGENIC      |               |                    |                    |
| SNP_69394_A_123603 | NW_004515820.1 | scaffold311 | 123603                  | AA                              | CC                 | CC               | INTERGENIC      |               |                    |                    |
| SNP_69395_A_123609 | NW_004515820.1 | scaffold311 | 123609                  | TT                              | CC                 | CC               | INTERGENIC      |               |                    |                    |
| SNP_69396_A_123622 | NW_004515820.1 | scaffold311 | 123622                  | CC                              | GG                 | GG               | INTERGENIC      |               |                    |                    |
| SNP_69397_A_129569 | NW_004515820.1 | scaffold311 | 129569                  | AA                              | CC                 | CC               | INTERGENIC      |               |                    |                    |
| SNP_69398_A_131355 | NW_004515820.1 | scaffold311 | 131355                  | GG                              | CC                 | CC               | INTERGENIC      |               |                    |                    |
| SNP_69400_A_131668 | NW_004515820.1 | scaffold311 | 131668                  | TT                              | CC                 | CC               | INTERGENIC      |               |                    |                    |
| SNP_69401_A_131669 | NW_004515820.1 | scaffold311 | 131669                  | GG                              | AA                 | AA               | INTERGENIC      |               |                    |                    |
| SNP_69402_A_160278 | NW_004515820.1 | scaffold311 | 160278                  | AA                              | CC                 | CC               | INTERGENIC      |               |                    |                    |
| SNP_69403_A_160279 | NW_004515820.1 | scaffold311 | 160279                  | CC                              | AA                 | AA               | INTERGENIC      |               |                    |                    |
| SNP_69404_A_160324 | NW_004515820.1 | scaffold311 | 160324                  | CC                              | TT                 | TT               | INTERGENIC      |               |                    |                    |
| SNP_69405_A_160583 | NW_004515820.1 | scaffold311 | 160583                  | AA                              | GG                 | GG               | INTERGENIC      |               |                    |                    |
| SNP_69406_A_160651 | NW_004515820.1 | scaffold311 | 160651                  | TT                              | GG                 | GG               | INTERGENIC      |               |                    |                    |
| SNP_69407_A_160735 | NW_004515820.1 | scaffold311 | 160735                  | TT                              | CC                 | CC               | INTERGENIC      |               |                    |                    |
| SNP_69408_A_160879 | NW_004515820.1 | scaffold311 | 160879                  | CC                              | TT                 | TT               | INTERGENIC      |               |                    |                    |
| SNP_69409_A_160880 | NW_004515820.1 | scaffold311 | 160880                  | TT                              | AA                 | AA               | INTERGENIC      |               |                    |                    |

| SNPs IDs           | Chromosome IDs | Chromosomes | Physical positions (bp) | CDC Frontier (Reference genome) | (Pusa 1103 & HPNB) | (ILWC 46 & LPNB) | Sequence genome | Components of | Gene accession IDs | Putative functions |
|--------------------|----------------|-------------|-------------------------|---------------------------------|--------------------|------------------|-----------------|---------------|--------------------|--------------------|
| SNP_69410_A_160979 | NW_004515820.1 | scaffold311 | 160979                  | GG                              | CC                 | CC               | INTERGENIC      |               |                    |                    |
| SNP_69411_A_160986 | NW_004515820.1 | scaffold311 | 160986                  | CC                              | AA                 | AA               | INTERGENIC      |               |                    |                    |
| SNP_69412_A_169908 | NW_004515820.1 | scaffold311 | 169908                  | GG                              | AA                 | AA               | INTERGENIC      |               |                    |                    |
| SNP_69413_A_169970 | NW_004515820.1 | scaffold311 | 169970                  | TT                              | CC                 | CC               | INTERGENIC      |               |                    |                    |
| SNP_69414_A_170227 | NW_004515820.1 | scaffold311 | 170227                  | AA                              | GG                 | GG               | INTERGENIC      |               |                    |                    |
| SNP_69415_A_180563 | NW_004515820.1 | scaffold311 | 180563                  | TT                              | GG                 | GG               | INTERGENIC      |               |                    |                    |
| SNP_69416_A_180656 | NW_004515820.1 | scaffold311 | 180656                  | AA                              | GG                 | GG               | INTERGENIC      |               |                    |                    |
| SNP_69417_A_180742 | NW_004515820.1 | scaffold311 | 180742                  | TT                              | CC                 | CC               | INTERGENIC      |               |                    |                    |
| SNP_69418_A_180906 | NW_004515820.1 | scaffold311 | 180906                  | GG                              | AA                 | AA               | INTERGENIC      |               |                    |                    |
| SNP_69419_A_180936 | NW_004515820.1 | scaffold311 | 180936                  | TT                              | CC                 | CC               | INTERGENIC      |               |                    |                    |
| SNP_69420_A_180937 | NW_004515820.1 | scaffold311 | 180937                  | GG                              | AA                 | AA               | INTERGENIC      |               |                    |                    |
| SNP_69421_A_180966 | NW_004515820.1 | scaffold311 | 180966                  | CC                              | TT                 | TT               | INTERGENIC      |               |                    |                    |
| SNP_69422_A_180984 | NW_004515820.1 | scaffold311 | 180984                  | TT                              | CC                 | CC               | INTERGENIC      |               |                    |                    |
| SNP_69423_A_180997 | NW_004515820.1 | scaffold311 | 180997                  | AA                              | TT                 | TT               | INTERGENIC      |               |                    |                    |
| SNP_69424_A_181014 | NW_004515820.1 | scaffold311 | 181014                  | GG                              | AA                 | AA               | INTERGENIC      |               |                    |                    |
| SNP_69425_A_181017 | NW_004515820.1 | scaffold311 | 181017                  | CC                              | TT                 | TT               | INTERGENIC      |               |                    |                    |
| SNP_69426_A_181029 | NW_004515820.1 | scaffold311 | 181029                  | AA                              | GG                 | GG               | INTERGENIC      |               |                    |                    |
| SNP_69427_A_181049 | NW_004515820.1 | scaffold311 | 181049                  | GG                              | AA                 | AA               | INTERGENIC      |               |                    |                    |
| SNP_69428_A_181081 | NW_004515820.1 | scaffold311 | 181081                  | TT                              | CC                 | CC               | INTERGENIC      |               |                    |                    |
| SNP_69429_A_181086 | NW_004515820.1 | scaffold311 | 181086                  | TT                              | CC                 | CC               | INTERGENIC      |               |                    |                    |
| SNP_69430_A_181095 | NW_004515820.1 | scaffold311 | 181095                  | GG                              | AA                 | AA               | INTERGENIC      |               |                    |                    |
| SNP_69431_A_186255 | NW_004515820.1 | scaffold311 | 186255                  | CC                              | AA                 | AA               | INTERGENIC      |               |                    |                    |

| SNPs IDs           | Chromosome IDs | Chromosomes | Physical positions (bp) | CDC Frontier (Reference genome) | (Pusa 1103 & HPNB) | (ILWC 46 & LPNB) | Sequence genome | Components of | Gene accession IDs | Putative functions |
|--------------------|----------------|-------------|-------------------------|---------------------------------|--------------------|------------------|-----------------|---------------|--------------------|--------------------|
| SNP_69432_A_188197 | NW_004515820.1 | scaffold311 | 188197                  | GG                              | CC                 | CC               | INTERGENIC      |               |                    |                    |
| SNP_69433_A_205852 | NW_004515820.1 | scaffold311 | 205852                  | TT                              | CC                 | CC               | INTERGENIC      |               |                    |                    |
| SNP_69434_A_227872 | NW_004515820.1 | scaffold311 | 227872                  | AA                              | GG                 | GG               | INTERGENIC      |               |                    |                    |
| SNP_69435_A_227883 | NW_004515820.1 | scaffold311 | 227883                  | TT                              | CC                 | CC               | INTERGENIC      |               |                    |                    |
| SNP_69436_A_231462 | NW_004515820.1 | scaffold311 | 231462                  | TT                              | CC                 | CC               | INTERGENIC      |               |                    |                    |
| SNP_69437_A_3213   | NW_004515822.1 | scaffold313 | 3213                    | GG                              | CC                 | CC               | INTERGENIC      |               |                    |                    |
| SNP_69439_A_6274   | NW_004515822.1 | scaffold313 | 6274                    | CC                              | GG                 | GG               | INTERGENIC      |               |                    |                    |
| SNP_69440_A_6575   | NW_004515822.1 | scaffold313 | 6575                    | TT                              | GG                 | GG               | INTERGENIC      |               |                    |                    |
| SNP_69441_A_6723   | NW_004515822.1 | scaffold313 | 6723                    | AA                              | CC                 | CC               | INTERGENIC      |               |                    |                    |
| SNP_69442_A_6733   | NW_004515822.1 | scaffold313 | 6733                    | CC                              | TT                 | TT               | INTERGENIC      |               |                    |                    |
| SNP_69443_A_6774   | NW_004515822.1 | scaffold313 | 6774                    | AA                              | GG                 | GG               | INTERGENIC      |               |                    |                    |
| SNP_69444_A_6841   | NW_004515822.1 | scaffold313 | 6841                    | AA                              | TT                 | TT               | INTERGENIC      |               |                    |                    |
| SNP_69445_A_7441   | NW_004515822.1 | scaffold313 | 7441                    | AA                              | GG                 | GG               | INTERGENIC      |               |                    |                    |
| SNP_69446_A_10746  | NW_004515822.1 | scaffold313 | 10746                   | GG                              | CC                 | CC               | INTERGENIC      |               |                    |                    |
| SNP_69448_A_22645  | NW_004515823.1 | scaffold314 | 22645                   | AA                              | GG                 | GG               | INTERGENIC      |               |                    |                    |
| SNP_69449_A_22686  | NW_004515823.1 | scaffold314 | 22686                   | AA                              | GG                 | GG               | INTERGENIC      |               |                    |                    |
| SNP_69450_A_22699  | NW_004515823.1 | scaffold314 | 22699                   | TT                              | CC                 | CC               | INTERGENIC      |               |                    |                    |
| SNP_69451_A_22706  | NW_004515823.1 | scaffold314 | 22706                   | CC                              | AA                 | AA               | INTERGENIC      |               |                    |                    |
| SNP_69452_A_22723  | NW_004515823.1 | scaffold314 | 22723                   | GG                              | AA                 | AA               | INTERGENIC      |               |                    |                    |
| SNP_69453_A_22765  | NW_004515823.1 | scaffold314 | 22765                   | TT                              | CC                 | CC               | INTERGENIC      |               |                    |                    |
| SNP_69454_A_22786  | NW_004515823.1 | scaffold314 | 22786                   | GG                              | CC                 | CC               | INTERGENIC      |               |                    |                    |
| SNP_69455_A_22813  | NW_004515823.1 | scaffold314 | 22813                   | TT                              | CC                 | CC               | INTERGENIC      |               |                    |                    |

| SNPs IDs          | Chromosome IDs | Chromosomes | Physical positions (bp) | CDC Frontier (Reference genome) | (Pusa 1103 & HPNB) | (ILWC 46 & LPNB) | Sequence genome | Components of | Gene accession IDs | Putative functions |
|-------------------|----------------|-------------|-------------------------|---------------------------------|--------------------|------------------|-----------------|---------------|--------------------|--------------------|
| SNP_69456_A_22831 | NW_004515823.1 | scaffold314 | 22831                   | AA                              | GG                 | GG               | INTERGENIC      |               |                    |                    |
| SNP_69457_A_22839 | NW_004515823.1 | scaffold314 | 22839                   | CC                              | TT                 | TT               | INTERGENIC      |               |                    |                    |
| SNP_69458_A_22858 | NW_004515823.1 | scaffold314 | 22858                   | AA                              | GG                 | GG               | INTERGENIC      |               |                    |                    |
| SNP_69459_A_22880 | NW_004515823.1 | scaffold314 | 22880                   | CC                              | GG                 | GG               | INTERGENIC      |               |                    |                    |
| SNP_69460_A_22890 | NW_004515823.1 | scaffold314 | 22890                   | CC                              | TT                 | TT               | INTERGENIC      |               |                    |                    |
| SNP_69461_A_22918 | NW_004515823.1 | scaffold314 | 22918                   | AA                              | GG                 | GG               | INTERGENIC      |               |                    |                    |
| SNP_69462_A_23037 | NW_004515823.1 | scaffold314 | 23037                   | AA                              | GG                 | GG               | INTERGENIC      |               |                    |                    |
| SNP_69463_A_23163 | NW_004515823.1 | scaffold314 | 23163                   | CC                              | TT                 | TT               | INTERGENIC      |               |                    |                    |
| SNP_69464_A_23164 | NW_004515823.1 | scaffold314 | 23164                   | CC                              | TT                 | TT               | INTERGENIC      |               |                    |                    |
| SNP_69465_A_23165 | NW_004515823.1 | scaffold314 | 23165                   | TT                              | CC                 | CC               | INTERGENIC      |               |                    |                    |
| SNP_69466_A_23196 | NW_004515823.1 | scaffold314 | 23196                   | GG                              | TT                 | TT               | INTERGENIC      |               |                    |                    |
| SNP_69467_A_23218 | NW_004515823.1 | scaffold314 | 23218                   | GG                              | AA                 | AA               | INTERGENIC      |               |                    |                    |
| SNP_69468_A_23232 | NW_004515823.1 | scaffold314 | 23232                   | TT                              | CC                 | CC               | INTERGENIC      |               |                    |                    |
| SNP_69469_A_23236 | NW_004515823.1 | scaffold314 | 23236                   | GG                              | TT                 | TT               | INTERGENIC      |               |                    |                    |
| SNP_69470_A_23241 | NW_004515823.1 | scaffold314 | 23241                   | TT                              | GG                 | GG               | INTERGENIC      |               |                    |                    |
| SNP_69471_A_23297 | NW_004515823.1 | scaffold314 | 23297                   | AA                              | GG                 | GG               | INTERGENIC      |               |                    |                    |
| SNP_69472_A_33020 | NW_004515823.1 | scaffold314 | 33020                   | GG                              | CC                 | CC               | INTERGENIC      |               |                    |                    |
| SNP_69473_A_55035 | NW_004515823.1 | scaffold314 | 55035                   | CC                              | TT                 | TT               | INTERGENIC      |               |                    |                    |
| SNP_69474_A_77368 | NW_004515823.1 | scaffold314 | 77368                   | AA                              | GG                 | GG               | INTERGENIC      |               |                    |                    |
| SNP_69475_A_79188 | NW_004515823.1 | scaffold314 | 79188                   | GG                              | CC                 | CC               | INTERGENIC      |               |                    |                    |
| SNP_69476_A_79705 | NW_004515823.1 | scaffold314 | 79705                   | TT                              | CC                 | CC               | INTERGENIC      |               |                    |                    |
| SNP_69477_A_79745 | NW_004515823.1 | scaffold314 | 79745                   | CC                              | TT                 | TT               | INTERGENIC      |               |                    |                    |

| SNPs IDs           | Chromosome IDs | Chromosomes | Physical positions (bp) | CDC Frontier (Reference genome) | (Pusa 1103 & HPNB) | (ILWC 46 & LPNB) | Sequence genome | Components of | Gene accession IDs | Putative functions |
|--------------------|----------------|-------------|-------------------------|---------------------------------|--------------------|------------------|-----------------|---------------|--------------------|--------------------|
| SNP_69479_A_97443  | NW_004515823.1 | scaffold314 | 97443                   | TT                              | CC                 | CC               | INTERGENIC      |               |                    |                    |
| SNP_69480_A_102147 | NW_004515823.1 | scaffold314 | 102147                  | GG                              | AA                 | AA               | INTERGENIC      |               |                    |                    |
| SNP_69481_A_112908 | NW_004515823.1 | scaffold314 | 112908                  | GG                              | TT                 | TT               | INTERGENIC      |               |                    |                    |
| SNP_69482_A_112915 | NW_004515823.1 | scaffold314 | 112915                  | AA                              | TT                 | TT               | INTERGENIC      |               |                    |                    |
| SNP_69483_A_127258 | NW_004515823.1 | scaffold314 | 127258                  | TT                              | GG                 | GG               | INTERGENIC      |               |                    |                    |
| SNP_69484_A_127267 | NW_004515823.1 | scaffold314 | 127267                  | AA                              | CC                 | CC               | INTERGENIC      |               |                    |                    |
| SNP_69485_A_127277 | NW_004515823.1 | scaffold314 | 127277                  | AA                              | TT                 | TT               | INTERGENIC      |               |                    |                    |
| SNP_69486_A_127279 | NW_004515823.1 | scaffold314 | 127279                  | TT                              | AA                 | AA               | INTERGENIC      |               |                    |                    |
| SNP_69487_A_127280 | NW_004515823.1 | scaffold314 | 127280                  | GG                              | TT                 | TT               | INTERGENIC      |               |                    |                    |
| SNP_69488_A_127281 | NW_004515823.1 | scaffold314 | 127281                  | TT                              | AA                 | AA               | INTERGENIC      |               |                    |                    |
| SNP_69489_A_127282 | NW_004515823.1 | scaffold314 | 127282                  | TT                              | CC                 | CC               | INTERGENIC      |               |                    |                    |
| SNP_69490_A_157308 | NW_004515823.1 | scaffold314 | 157308                  | TT                              | GG                 | GG               | INTERGENIC      |               |                    |                    |
| SNP_69491_A_157356 | NW_004515823.1 | scaffold314 | 157356                  | AA                              | GG                 | GG               | INTERGENIC      |               |                    |                    |
| SNP_69492_A_157374 | NW_004515823.1 | scaffold314 | 157374                  | CC                              | TT                 | TT               | INTERGENIC      |               |                    |                    |
| SNP_69493_A_222657 | NW_004515823.1 | scaffold314 | 222657                  | CC                              | TT                 | TT               | INTERGENIC      |               |                    |                    |
| SNP_69494_A_222730 | NW_004515823.1 | scaffold314 | 222730                  | CC                              | TT                 | TT               | INTERGENIC      |               |                    |                    |
| SNP_69495_A_222989 | NW_004515823.1 | scaffold314 | 222989                  | CC                              | TT                 | TT               | INTERGENIC      |               |                    |                    |
| SNP_69496_A_222997 | NW_004515823.1 | scaffold314 | 222997                  | AA                              | TT                 | TT               | INTERGENIC      |               |                    |                    |
| SNP_69497_A_223479 | NW_004515823.1 | scaffold314 | 223479                  | GG                              | AA                 | AA               | INTERGENIC      |               |                    |                    |
| SNP_69498_A_223938 | NW_004515823.1 | scaffold314 | 223938                  | AA                              | TT                 | TT               | INTERGENIC      |               |                    |                    |
| SNP_69499_A_224056 | NW_004515823.1 | scaffold314 | 224056                  | TT                              | CC                 | CC               | INTERGENIC      |               |                    |                    |
| SNP_69500_A_224324 | NW_004515823.1 | scaffold314 | 224324                  | CC                              | TT                 | TT               | INTERGENIC      |               |                    |                    |

| SNPs IDs           | Chromosome IDs | Chromosomes | Physical positions (bp) | CDC Frontier genome (Reference genome) | (Pusa 1103 & HPNB) | (ILWC 46 & LPNB) | Sequence genome | Components of | Gene accession IDs                                                      | Putative functions |
|--------------------|----------------|-------------|-------------------------|----------------------------------------|--------------------|------------------|-----------------|---------------|-------------------------------------------------------------------------|--------------------|
| SNP_69501_A_224500 | NW_004515823.1 | scaffold314 | 224500                  | TT                                     | GG                 | GG               | INTERGENIC      |               |                                                                         |                    |
| SNP_69502_A_225033 | NW_004515823.1 | scaffold314 | 225033                  | TT                                     | CC                 | CC               | INTERGENIC      |               |                                                                         |                    |
| SNP_69503_A_231144 | NW_004515823.1 | scaffold314 | 231144                  | GG                                     | AA                 | AA               | INTERGENIC      |               |                                                                         |                    |
| SNP_69504_A_231751 | NW_004515823.1 | scaffold314 | 231751                  | GG                                     | AA                 | AA               | INTERGENIC      |               |                                                                         |                    |
| SNP_69505_A_232451 | NW_004515823.1 | scaffold314 | 232451                  | TT                                     | GG                 | GG               | INTERGENIC      |               |                                                                         |                    |
| SNP_69506_A_273754 | NW_004515823.1 | scaffold314 | 273754                  | TT                                     | GG                 | GG               | INTERGENIC      |               |                                                                         |                    |
| SNP_69507_A_275295 | NW_004515823.1 | scaffold314 | 275295                  | TT                                     | CC                 | CC               | INTERGENIC      |               |                                                                         |                    |
| SNP_69508_A_275416 | NW_004515823.1 | scaffold314 | 275416                  | AA                                     | CC                 | CC               | INTERGENIC      |               |                                                                         |                    |
| SNP_69509_A_275550 | NW_004515823.1 | scaffold314 | 275550                  | AA                                     | GG                 | GG               | INTERGENIC      |               |                                                                         |                    |
| SNP_69510_A_275593 | NW_004515823.1 | scaffold314 | 275593                  | AA                                     | TT                 | TT               | INTERGENIC      |               |                                                                         |                    |
| SNP_69511_A_275594 | NW_004515823.1 | scaffold314 | 275594                  | GG                                     | TT                 | TT               | INTERGENIC      |               |                                                                         |                    |
| SNP_69512_A_275596 | NW_004515823.1 | scaffold314 | 275596                  | GG                                     | TT                 | TT               | INTERGENIC      |               |                                                                         |                    |
| SNP_69513_A_275619 | NW_004515823.1 | scaffold314 | 275619                  | TT                                     | CC                 | CC               | INTERGENIC      |               |                                                                         |                    |
| SNP_69514_A_276073 | NW_004515823.1 | scaffold314 | 276073                  | GG                                     | AA                 | AA               | INTERGENIC      |               |                                                                         |                    |
| SNP_69515_A_302803 | NW_004515823.1 | scaffold314 | 302803                  | GG                                     | AA                 | AA               | URR             | 101497828     | G-type lectin S-receptor-like serine/threonine-protein kinase At4g27290 |                    |
| SNP_69516_A_302811 | NW_004515823.1 | scaffold314 | 302811                  | AA                                     | GG                 | GG               | URR             | 101497828     | G-type lectin S-receptor-like serine/threonine-protein kinase At4g27290 |                    |
| SNP_69517_A_340963 | NW_004515823.1 | scaffold314 | 340963                  | AA                                     | GG                 | GG               | INTERGENIC      |               |                                                                         |                    |
| SNP_69518_A_340972 | NW_004515823.1 | scaffold314 | 340972                  | AA                                     | GG                 | GG               | INTERGENIC      |               |                                                                         |                    |
| SNP_69519_A_340992 | NW_004515823.1 | scaffold314 | 340992                  | AA                                     | GG                 | GG               | INTERGENIC      |               |                                                                         |                    |
| SNP_69520_A_340994 | NW_004515823.1 | scaffold314 | 340994                  | CC                                     | TT                 | TT               | INTERGENIC      |               |                                                                         |                    |
| SNP_69521_A_341120 | NW_004515823.1 | scaffold314 | 341120                  | TT                                     | GG                 | GG               | INTERGENIC      |               |                                                                         |                    |
| SNP_69522_A_341387 | NW_004515823.1 | scaffold314 | 341387                  | CC                                     | TT                 | TT               | INTERGENIC      |               |                                                                         |                    |

| SNPs IDs           | Chromosome IDs | Chromosomes | Physical positions (bp) | CDC Frontier (Reference genome) | (Pusa 1103 & HPNB) | (ILWC 46 & LPNB) | Sequence Components of genome | Gene accession IDs | Putative functions                             |
|--------------------|----------------|-------------|-------------------------|---------------------------------|--------------------|------------------|-------------------------------|--------------------|------------------------------------------------|
| SNP_69523_A_378504 | NW_004515823.1 | scaffold314 | 378504                  | AA                              | GG                 | GG               | INTERGENIC                    |                    |                                                |
| SNP_69525_A_506184 | NW_004515823.1 | scaffold314 | 506184                  | CC                              | TT                 | TT               | INTERGENIC                    |                    |                                                |
| SNP_69526_A_506191 | NW_004515823.1 | scaffold314 | 506191                  | AA                              | GG                 | GG               | INTERGENIC                    |                    |                                                |
| SNP_69527_A_512134 | NW_004515823.1 | scaffold314 | 512134                  | CC                              | AA                 | AA               | INTERGENIC                    |                    |                                                |
| SNP_69528_A_512327 | NW_004515823.1 | scaffold314 | 512327                  | CC                              | TT                 | TT               | INTERGENIC                    |                    |                                                |
| SNP_69529_A_512558 | NW_004515823.1 | scaffold314 | 512558                  | CC                              | TT                 | TT               | INTERGENIC                    |                    |                                                |
| SNP_69530_A_512625 | NW_004515823.1 | scaffold314 | 512625                  | AA                              | GG                 | GG               | INTERGENIC                    |                    |                                                |
| SNP_69531_A_541323 | NW_004515823.1 | scaffold314 | 541323                  | TT                              | AA                 | AA               | INTRON                        | 101506385          | dual specificity protein phosphatase PHS1-like |
| SNP_69533_A_553156 | NW_004515823.1 | scaffold314 | 553156                  | AA                              | CC                 | CC               | INTRON                        | 101506385          | dual specificity protein phosphatase PHS1-like |
| SNP_69534_A_595160 | NW_004515823.1 | scaffold314 | 595160                  | GG                              | AA                 | AA               | INTERGENIC                    |                    |                                                |
| SNP_69535_A_740745 | NW_004515823.1 | scaffold314 | 740745                  | TT                              | AA                 | AA               | INTERGENIC                    |                    |                                                |
| SNP_69536_A_742246 | NW_004515823.1 | scaffold314 | 742246                  | AA                              | TT                 | TT               | INTERGENIC                    |                    |                                                |
| SNP_69537_A_760045 | NW_004515823.1 | scaffold314 | 760045                  | TT                              | CC                 | CC               | INTERGENIC                    |                    |                                                |
| SNP_69538_A_1020   | NW_004515824.1 | scaffold315 | 1020                    | GG                              | CC                 | CC               | INTERGENIC                    |                    |                                                |
| SNP_69539_A_308    | NW_004515825.1 | scaffold317 | 308                     | GG                              | AA                 | AA               | INTERGENIC                    |                    |                                                |
| SNP_69540_A_673    | NW_004515825.1 | scaffold317 | 673                     | CC                              | TT                 | TT               | INTERGENIC                    |                    |                                                |
| SNP_69541_A_6490   | NW_004515825.1 | scaffold317 | 6490                    | CC                              | TT                 | TT               | INTERGENIC                    |                    |                                                |
| SNP_69543_A_11294  | NW_004515825.1 | scaffold317 | 11294                   | GG                              | AA                 | AA               | INTERGENIC                    |                    |                                                |
| SNP_69545_A_41139  | NW_004515825.1 | scaffold317 | 41139                   | GG                              | AA                 | AA               | INTERGENIC                    |                    |                                                |
| SNP_69546_A_46281  | NW_004515825.1 | scaffold317 | 46281                   | AA                              | GG                 | GG               | INTERGENIC                    |                    |                                                |
| SNP_69547_A_46286  | NW_004515825.1 | scaffold317 | 46286                   | AA                              | GG                 | GG               | INTERGENIC                    |                    |                                                |
| SNP_69548_A_46388  | NW_004515825.1 | scaffold317 | 46388                   | CC                              | TT                 | TT               | INTERGENIC                    |                    |                                                |

| SNPs IDs           | Chromosome IDs | Chromosomes | Physical positions (bp) | CDC Frontier (Reference genome) | (Pusa 1103 & HPNB) | (ILWC 46 & LPNB) | Sequence Components of genome | Gene accession IDs | Putative functions           |
|--------------------|----------------|-------------|-------------------------|---------------------------------|--------------------|------------------|-------------------------------|--------------------|------------------------------|
| SNP_69549_A_46476  | NW_004515825.1 | scaffold317 | 46476                   | AA                              | GG                 | GG               | INTERGENIC                    |                    |                              |
| SNP_69550_A_46500  | NW_004515825.1 | scaffold317 | 46500                   | TT                              | CC                 | CC               | INTERGENIC                    |                    |                              |
| SNP_69551_A_46565  | NW_004515825.1 | scaffold317 | 46565                   | GG                              | TT                 | TT               | INTERGENIC                    |                    |                              |
| SNP_69552_A_46681  | NW_004515825.1 | scaffold317 | 46681                   | GG                              | CC                 | CC               | INTERGENIC                    |                    |                              |
| SNP_69553_A_46710  | NW_004515825.1 | scaffold317 | 46710                   | AA                              | GG                 | GG               | INTERGENIC                    |                    |                              |
| SNP_69554_A_46737  | NW_004515825.1 | scaffold317 | 46737                   | AA                              | GG                 | GG               | INTERGENIC                    |                    |                              |
| SNP_69555_A_46770  | NW_004515825.1 | scaffold317 | 46770                   | TT                              | CC                 | CC               | INTERGENIC                    |                    |                              |
| SNP_69556_A_46872  | NW_004515825.1 | scaffold317 | 46872                   | AA                              | GG                 | GG               | INTERGENIC                    |                    |                              |
| SNP_69557_A_53213  | NW_004515825.1 | scaffold317 | 53213                   | CC                              | TT                 | TT               | INTERGENIC                    |                    |                              |
| SNP_69558_A_53224  | NW_004515825.1 | scaffold317 | 53224                   | AA                              | GG                 | GG               | INTERGENIC                    |                    |                              |
| SNP_69559_A_53236  | NW_004515825.1 | scaffold317 | 53236                   | CC                              | TT                 | TT               | INTERGENIC                    |                    |                              |
| SNP_69560_A_53267  | NW_004515825.1 | scaffold317 | 53267                   | CC                              | TT                 | TT               | INTERGENIC                    |                    |                              |
| SNP_69561_A_54223  | NW_004515825.1 | scaffold317 | 54223                   | TT                              | GG                 | GG               | INTERGENIC                    |                    |                              |
| SNP_69562_A_54232  | NW_004515825.1 | scaffold317 | 54232                   | GG                              | AA                 | AA               | INTERGENIC                    |                    |                              |
| SNP_69563_A_54275  | NW_004515825.1 | scaffold317 | 54275                   | TT                              | GG                 | GG               | INTERGENIC                    |                    |                              |
| SNP_69564_A_54588  | NW_004515825.1 | scaffold317 | 54588                   | AA                              | GG                 | GG               | INTERGENIC                    |                    |                              |
| SNP_69565_A_60239  | NW_004515825.1 | scaffold317 | 60239                   | AA                              | TT                 | TT               | INTERGENIC                    |                    |                              |
| SNP_69567_A_80822  | NW_004515825.1 | scaffold317 | 80822                   | GG                              | AA                 | AA               | INTERGENIC                    |                    |                              |
| SNP_69568_A_105563 | NW_004515825.1 | scaffold317 | 105563                  | TT                              | GG                 | GG               | INTERGENIC                    |                    |                              |
| SNP_69569_A_107912 | NW_004515825.1 | scaffold317 | 107912                  | TT                              | CC                 | CC               | INTERGENIC                    |                    |                              |
| SNP_69570_A_111180 | NW_004515825.1 | scaffold317 | 111180                  | GG                              | AA                 | AA               | INTERGENIC                    |                    |                              |
| SNP_69571_A_140460 | NW_004515825.1 | scaffold317 | 140460                  | GG                              | CC                 | CC               | INTRON                        | 101508115          | uncharacterized LOC101508115 |



| SNPs IDs           | Chromosome IDs | Chromosomes | Physical positions (bp) | CDC Frontier (Reference genome) | (Pusa 1103 & HPNB) | (ILWC 46 & LPNB) | Sequence genome | Components of | Gene accession IDs | Putative functions |
|--------------------|----------------|-------------|-------------------------|---------------------------------|--------------------|------------------|-----------------|---------------|--------------------|--------------------|
| SNP_69572_A_145899 | NW_004515825.1 | scaffold317 | 145899                  | GG                              | AA                 | AA               | INTERGENIC      |               |                    |                    |
| SNP_69573_A_145919 | NW_004515825.1 | scaffold317 | 145919                  | AA                              | GG                 | GG               | INTERGENIC      |               |                    |                    |
| SNP_69574_A_145973 | NW_004515825.1 | scaffold317 | 145973                  | TT                              | GG                 | GG               | INTERGENIC      |               |                    |                    |
| SNP_69575_A_163483 | NW_004515825.1 | scaffold317 | 163483                  | TT                              | CC                 | CC               | INTERGENIC      |               |                    |                    |
| SNP_69576_A_171862 | NW_004515825.1 | scaffold317 | 171862                  | AA                              | GG                 | GG               | INTERGENIC      |               |                    |                    |
| SNP_69577_A_171928 | NW_004515825.1 | scaffold317 | 171928                  | CC                              | TT                 | TT               | INTERGENIC      |               |                    |                    |
| SNP_69578_A_180241 | NW_004515825.1 | scaffold317 | 180241                  | AA                              | TT                 | TT               | INTERGENIC      |               |                    |                    |
| SNP_69579_A_180247 | NW_004515825.1 | scaffold317 | 180247                  | AA                              | GG                 | GG               | INTERGENIC      |               |                    |                    |
| SNP_69580_A_180258 | NW_004515825.1 | scaffold317 | 180258                  | CC                              | TT                 | TT               | INTERGENIC      |               |                    |                    |
| SNP_69581_A_180259 | NW_004515825.1 | scaffold317 | 180259                  | AA                              | GG                 | GG               | INTERGENIC      |               |                    |                    |
| SNP_69582_A_180274 | NW_004515825.1 | scaffold317 | 180274                  | TT                              | GG                 | GG               | INTERGENIC      |               |                    |                    |
| SNP_69583_A_180298 | NW_004515825.1 | scaffold317 | 180298                  | TT                              | GG                 | GG               | INTERGENIC      |               |                    |                    |
| SNP_69584_A_180364 | NW_004515825.1 | scaffold317 | 180364                  | CC                              | AA                 | AA               | INTERGENIC      |               |                    |                    |
| SNP_69585_A_180394 | NW_004515825.1 | scaffold317 | 180394                  | GG                              | TT                 | TT               | INTERGENIC      |               |                    |                    |
| SNP_69586_A_180410 | NW_004515825.1 | scaffold317 | 180410                  | AA                              | GG                 | GG               | INTERGENIC      |               |                    |                    |
| SNP_69587_A_180619 | NW_004515825.1 | scaffold317 | 180619                  | GG                              | AA                 | AA               | INTERGENIC      |               |                    |                    |
| SNP_69588_A_180704 | NW_004515825.1 | scaffold317 | 180704                  | TT                              | GG                 | GG               | INTERGENIC      |               |                    |                    |
| SNP_69589_A_184718 | NW_004515825.1 | scaffold317 | 184718                  | AA                              | CC                 | CC               | INTERGENIC      |               |                    |                    |
| SNP_69590_A_189778 | NW_004515825.1 | scaffold317 | 189778                  | TT                              | GG                 | GG               | INTERGENIC      |               |                    |                    |
| SNP_69591_A_189836 | NW_004515825.1 | scaffold317 | 189836                  | CC                              | TT                 | TT               | INTERGENIC      |               |                    |                    |
| SNP_69592_A_189861 | NW_004515825.1 | scaffold317 | 189861                  | GG                              | CC                 | CC               | INTERGENIC      |               |                    |                    |
| SNP_69593_A_190079 | NW_004515825.1 | scaffold317 | 190079                  | GG                              | AA                 | AA               | INTERGENIC      |               |                    |                    |

| SNPs IDs           | Chromosome IDs | Chromosomes | Physical positions (bp) | CDC Frontier (Reference genome) | (Pusa 1103 & HPNB) | (ILWC 46 & LPNB) | Sequence genome | Components of | Gene accession IDs | Putative functions |
|--------------------|----------------|-------------|-------------------------|---------------------------------|--------------------|------------------|-----------------|---------------|--------------------|--------------------|
| SNP_69594_A_195082 | NW_004515825.1 | scaffold317 | 195082                  | TT                              | GG                 | GG               | INTERGENIC      |               |                    |                    |
| SNP_69595_A_195129 | NW_004515825.1 | scaffold317 | 195129                  | GG                              | CC                 | CC               | INTERGENIC      |               |                    |                    |
| SNP_69597_A_215489 | NW_004515825.1 | scaffold317 | 215489                  | AA                              | GG                 | GG               | INTERGENIC      |               |                    |                    |
| SNP_69598_A_215493 | NW_004515825.1 | scaffold317 | 215493                  | TT                              | CC                 | CC               | INTERGENIC      |               |                    |                    |
| SNP_69599_A_215587 | NW_004515825.1 | scaffold317 | 215587                  | TT                              | GG                 | GG               | INTERGENIC      |               |                    |                    |
| SNP_69600_A_215589 | NW_004515825.1 | scaffold317 | 215589                  | TT                              | CC                 | CC               | INTERGENIC      |               |                    |                    |
| SNP_69601_A_215590 | NW_004515825.1 | scaffold317 | 215590                  | GG                              | AA                 | AA               | INTERGENIC      |               |                    |                    |
| SNP_69602_A_215650 | NW_004515825.1 | scaffold317 | 215650                  | AA                              | GG                 | GG               | INTERGENIC      |               |                    |                    |
| SNP_69603_A_215673 | NW_004515825.1 | scaffold317 | 215673                  | TT                              | CC                 | CC               | INTERGENIC      |               |                    |                    |
| SNP_69604_A_215683 | NW_004515825.1 | scaffold317 | 215683                  | CC                              | TT                 | TT               | INTERGENIC      |               |                    |                    |
| SNP_69605_A_215699 | NW_004515825.1 | scaffold317 | 215699                  | AA                              | GG                 | GG               | INTERGENIC      |               |                    |                    |
| SNP_69606_A_215748 | NW_004515825.1 | scaffold317 | 215748                  | CC                              | AA                 | AA               | INTERGENIC      |               |                    |                    |
| SNP_69607_A_215808 | NW_004515825.1 | scaffold317 | 215808                  | TT                              | CC                 | CC               | INTERGENIC      |               |                    |                    |
| SNP_69608_A_217734 | NW_004515825.1 | scaffold317 | 217734                  | AA                              | GG                 | GG               | INTERGENIC      |               |                    |                    |
| SNP_69609_A_217744 | NW_004515825.1 | scaffold317 | 217744                  | CC                              | TT                 | TT               | INTERGENIC      |               |                    |                    |
| SNP_69610_A_217750 | NW_004515825.1 | scaffold317 | 217750                  | CC                              | TT                 | TT               | INTERGENIC      |               |                    |                    |
| SNP_69612_A_217948 | NW_004515825.1 | scaffold317 | 217948                  | CC                              | TT                 | TT               | INTERGENIC      |               |                    |                    |
| SNP_69613_A_218045 | NW_004515825.1 | scaffold317 | 218045                  | AA                              | TT                 | TT               | INTERGENIC      |               |                    |                    |
| SNP_69614_A_218108 | NW_004515825.1 | scaffold317 | 218108                  | GG                              | AA                 | AA               | INTERGENIC      |               |                    |                    |
| SNP_69615_A_218138 | NW_004515825.1 | scaffold317 | 218138                  | CC                              | TT                 | TT               | INTERGENIC      |               |                    |                    |
| SNP_69617_A_218170 | NW_004515825.1 | scaffold317 | 218170                  | TT                              | CC                 | CC               | INTERGENIC      |               |                    |                    |
| SNP_69618_A_218213 | NW_004515825.1 | scaffold317 | 218213                  | CC                              | GG                 | GG               | INTERGENIC      |               |                    |                    |

| SNPs IDs           | Chromosome IDs | Chromosomes | Physical positions (bp) | CDC Frontier (Reference genome) | (Pusa 1103 & HPNB) | (ILWC 46 & LPNB) | Sequence genome | Components of | Gene accession IDs | Putative functions |
|--------------------|----------------|-------------|-------------------------|---------------------------------|--------------------|------------------|-----------------|---------------|--------------------|--------------------|
| SNP_69619_A_218226 | NW_004515825.1 | scaffold317 | 218226                  | TT                              | AA                 | AA               | INTERGENIC      |               |                    |                    |
| SNP_69620_A_219954 | NW_004515825.1 | scaffold317 | 219954                  | CC                              | TT                 | TT               | INTERGENIC      |               |                    |                    |
| SNP_69621_A_219978 | NW_004515825.1 | scaffold317 | 219978                  | AA                              | GG                 | GG               | INTERGENIC      |               |                    |                    |
| SNP_69622_A_219987 | NW_004515825.1 | scaffold317 | 219987                  | TT                              | CC                 | CC               | INTERGENIC      |               |                    |                    |
| SNP_69623_A_220007 | NW_004515825.1 | scaffold317 | 220007                  | GG                              | AA                 | AA               | INTERGENIC      |               |                    |                    |
| SNP_69624_A_220014 | NW_004515825.1 | scaffold317 | 220014                  | CC                              | TT                 | TT               | INTERGENIC      |               |                    |                    |
| SNP_69626_A_6687   | NW_004515826.1 | scaffold319 | 6687                    | GG                              | AA                 | AA               | INTERGENIC      |               |                    |                    |
| SNP_69627_A_6733   | NW_004515826.1 | scaffold319 | 6733                    | CC                              | GG                 | GG               | INTERGENIC      |               |                    |                    |
| SNP_69628_A_6759   | NW_004515826.1 | scaffold319 | 6759                    | GG                              | AA                 | AA               | INTERGENIC      |               |                    |                    |
| SNP_69629_A_6774   | NW_004515826.1 | scaffold319 | 6774                    | AA                              | CC                 | CC               | INTERGENIC      |               |                    |                    |
| SNP_69630_A_7174   | NW_004515826.1 | scaffold319 | 7174                    | GG                              | TT                 | TT               | INTERGENIC      |               |                    |                    |
| SNP_69631_A_7175   | NW_004515826.1 | scaffold319 | 7175                    | GG                              | AA                 | AA               | INTERGENIC      |               |                    |                    |
| SNP_69632_A_7178   | NW_004515826.1 | scaffold319 | 7178                    | TT                              | CC                 | CC               | INTERGENIC      |               |                    |                    |
| SNP_69633_A_7179   | NW_004515826.1 | scaffold319 | 7179                    | CC                              | TT                 | TT               | INTERGENIC      |               |                    |                    |
| SNP_69635_A_11992  | NW_004515826.1 | scaffold319 | 11992                   | TT                              | CC                 | CC               | INTERGENIC      |               |                    |                    |
| SNP_69636_A_12046  | NW_004515826.1 | scaffold319 | 12046                   | GG                              | TT                 | TT               | INTERGENIC      |               |                    |                    |
| SNP_69637_A_14763  | NW_004515826.1 | scaffold319 | 14763                   | CC                              | GG                 | GG               | INTERGENIC      |               |                    |                    |
| SNP_69638_A_16161  | NW_004515826.1 | scaffold319 | 16161                   | GG                              | TT                 | TT               | INTERGENIC      |               |                    |                    |
| SNP_69639_A_20996  | NW_004515826.1 | scaffold319 | 20996                   | AA                              | GG                 | GG               | INTERGENIC      |               |                    |                    |
| SNP_69640_A_20998  | NW_004515826.1 | scaffold319 | 20998                   | TT                              | CC                 | CC               | INTERGENIC      |               |                    |                    |
| SNP_69641_A_21000  | NW_004515826.1 | scaffold319 | 21000                   | GG                              | AA                 | AA               | INTERGENIC      |               |                    |                    |
| SNP_69642_A_33362  | NW_004515826.1 | scaffold319 | 33362                   | TT                              | GG                 | GG               | INTERGENIC      |               |                    |                    |

| SNPs IDs          | Chromosome IDs | Chromosomes | Physical positions (bp) | CDC Frontier (Reference genome) | (Pusa 1103 & HPNB) | (ILWC 46 & LPNB) | Sequence genome | Components of | Gene accession IDs | Putative functions |
|-------------------|----------------|-------------|-------------------------|---------------------------------|--------------------|------------------|-----------------|---------------|--------------------|--------------------|
| SNP_69643_A_33368 | NW_004515826.1 | scaffold319 | 33368                   | CC                              | TT                 | TT               | INTERGENIC      |               |                    |                    |
| SNP_69644_A_33656 | NW_004515826.1 | scaffold319 | 33656                   | AA                              | GG                 | GG               | INTERGENIC      |               |                    |                    |
| SNP_69645_A_35428 | NW_004515826.1 | scaffold319 | 35428                   | TT                              | CC                 | CC               | INTERGENIC      |               |                    |                    |
| SNP_69646_A_35488 | NW_004515826.1 | scaffold319 | 35488                   | TT                              | CC                 | CC               | INTERGENIC      |               |                    |                    |
| SNP_69647_A_40703 | NW_004515826.1 | scaffold319 | 40703                   | TT                              | AA                 | AA               | INTERGENIC      |               |                    |                    |
| SNP_69648_A_40712 | NW_004515826.1 | scaffold319 | 40712                   | TT                              | CC                 | CC               | INTERGENIC      |               |                    |                    |
| SNP_69649_A_42904 | NW_004515826.1 | scaffold319 | 42904                   | TT                              | AA                 | AA               | INTERGENIC      |               |                    |                    |
| SNP_69650_A_43222 | NW_004515826.1 | scaffold319 | 43222                   | GG                              | TT                 | TT               | INTERGENIC      |               |                    |                    |
| SNP_69651_A_43298 | NW_004515826.1 | scaffold319 | 43298                   | TT                              | AA                 | AA               | INTERGENIC      |               |                    |                    |
| SNP_69652_A_43318 | NW_004515826.1 | scaffold319 | 43318                   | AA                              | TT                 | TT               | INTERGENIC      |               |                    |                    |
| SNP_69653_A_43354 | NW_004515826.1 | scaffold319 | 43354                   | GG                              | TT                 | TT               | INTERGENIC      |               |                    |                    |
| SNP_69654_A_43355 | NW_004515826.1 | scaffold319 | 43355                   | TT                              | AA                 | AA               | INTERGENIC      |               |                    |                    |
| SNP_69655_A_43360 | NW_004515826.1 | scaffold319 | 43360                   | AA                              | GG                 | GG               | INTERGENIC      |               |                    |                    |
| SNP_69656_A_43388 | NW_004515826.1 | scaffold319 | 43388                   | TT                              | AA                 | AA               | INTERGENIC      |               |                    |                    |
| SNP_69657_A_43620 | NW_004515826.1 | scaffold319 | 43620                   | AA                              | TT                 | TT               | INTERGENIC      |               |                    |                    |
| SNP_69658_A_47028 | NW_004515826.1 | scaffold319 | 47028                   | TT                              | CC                 | CC               | INTERGENIC      |               |                    |                    |
| SNP_69659_A_56000 | NW_004515826.1 | scaffold319 | 56000                   | AA                              | GG                 | GG               | INTERGENIC      |               |                    |                    |
| SNP_69660_A_56547 | NW_004515826.1 | scaffold319 | 56547                   | CC                              | AA                 | AA               | INTERGENIC      |               |                    |                    |
| SNP_69661_A_56611 | NW_004515826.1 | scaffold319 | 56611                   | TT                              | CC                 | CC               | INTERGENIC      |               |                    |                    |
| SNP_69662_A_56612 | NW_004515826.1 | scaffold319 | 56612                   | TT                              | CC                 | CC               | INTERGENIC      |               |                    |                    |
| SNP_69663_A_64    | NW_004515827.1 | scaffold321 | 64                      | CC                              | GG                 | GG               | INTERGENIC      |               |                    |                    |
| SNP_69664_A_108   | NW_004515827.1 | scaffold321 | 108                     | TT                              | AA                 | AA               | INTERGENIC      |               |                    |                    |

| SNPs IDs          | Chromosome IDs | Chromosomes | Physical positions (bp) | CDC Frontier (Reference genome) | (Pusa 1103 & HPNB) | (ILWC 46 & LPNB) | Sequence genome | Components of | Gene accession IDs | Putative functions |
|-------------------|----------------|-------------|-------------------------|---------------------------------|--------------------|------------------|-----------------|---------------|--------------------|--------------------|
| SNP_69665_A_174   | NW_004515827.1 | scaffold321 | 174                     | TT                              | CC                 | CC               | INTERGENIC      |               |                    |                    |
| SNP_69666_A_201   | NW_004515827.1 | scaffold321 | 201                     | GG                              | AA                 | AA               | INTERGENIC      |               |                    |                    |
| SNP_69667_A_208   | NW_004515827.1 | scaffold321 | 208                     | TT                              | AA                 | AA               | INTERGENIC      |               |                    |                    |
| SNP_69668_A_6908  | NW_004515827.1 | scaffold321 | 6908                    | CC                              | GG                 | GG               | INTERGENIC      |               |                    |                    |
| SNP_69669_A_9843  | NW_004515827.1 | scaffold321 | 9843                    | TT                              | AA                 | AA               | INTERGENIC      |               |                    |                    |
| SNP_69670_A_9883  | NW_004515827.1 | scaffold321 | 9883                    | AA                              | GG                 | GG               | INTERGENIC      |               |                    |                    |
| SNP_69671_A_9997  | NW_004515827.1 | scaffold321 | 9997                    | AA                              | GG                 | GG               | INTERGENIC      |               |                    |                    |
| SNP_69672_A_10117 | NW_004515827.1 | scaffold321 | 10117                   | AA                              | GG                 | GG               | INTERGENIC      |               |                    |                    |
| SNP_69673_A_13130 | NW_004515827.1 | scaffold321 | 13130                   | TT                              | CC                 | CC               | INTERGENIC      |               |                    |                    |
| SNP_69674_A_13737 | NW_004515827.1 | scaffold321 | 13737                   | TT                              | GG                 | GG               | INTERGENIC      |               |                    |                    |
| SNP_69675_A_14400 | NW_004515827.1 | scaffold321 | 14400                   | GG                              | CC                 | CC               | INTERGENIC      |               |                    |                    |
| SNP_69676_A_14523 | NW_004515827.1 | scaffold321 | 14523                   | AA                              | GG                 | GG               | INTERGENIC      |               |                    |                    |
| SNP_69677_A_27725 | NW_004515827.1 | scaffold321 | 27725                   | CC                              | TT                 | TT               | INTERGENIC      |               |                    |                    |
| SNP_69678_A_27751 | NW_004515827.1 | scaffold321 | 27751                   | GG                              | AA                 | AA               | INTERGENIC      |               |                    |                    |
| SNP_69679_A_27782 | NW_004515827.1 | scaffold321 | 27782                   | AA                              | CC                 | CC               | INTERGENIC      |               |                    |                    |
| SNP_69680_A_27828 | NW_004515827.1 | scaffold321 | 27828                   | GG                              | AA                 | AA               | INTERGENIC      |               |                    |                    |
| SNP_69681_A_27855 | NW_004515827.1 | scaffold321 | 27855                   | TT                              | AA                 | AA               | INTERGENIC      |               |                    |                    |
| SNP_69682_A_27998 | NW_004515827.1 | scaffold321 | 27998                   | GG                              | AA                 | AA               | INTERGENIC      |               |                    |                    |
| SNP_69683_A_28065 | NW_004515827.1 | scaffold321 | 28065                   | TT                              | CC                 | CC               | INTERGENIC      |               |                    |                    |
| SNP_69684_A_28084 | NW_004515827.1 | scaffold321 | 28084                   | AA                              | GG                 | GG               | INTERGENIC      |               |                    |                    |
| SNP_69685_A_28130 | NW_004515827.1 | scaffold321 | 28130                   | GG                              | CC                 | CC               | INTERGENIC      |               |                    |                    |
| SNP_69686_A_33096 | NW_004515827.1 | scaffold321 | 33096                   | AA                              | CC                 | CC               | INTERGENIC      |               |                    |                    |

| SNPs IDs          | Chromosome IDs | Chromosomes | Physical positions (bp) | CDC Frontier (Reference genome) | (Pusa 1103 & HPNB) | (ILWC 46 & LPNB) | Sequence genome | Components of | Gene accession IDs | Putative functions |
|-------------------|----------------|-------------|-------------------------|---------------------------------|--------------------|------------------|-----------------|---------------|--------------------|--------------------|
| SNP_69687_A_36125 | NW_004515827.1 | scaffold321 | 36125                   | CC                              | AA                 | AA               | INTERGENIC      |               |                    |                    |
| SNP_69688_A_36756 | NW_004515827.1 | scaffold321 | 36756                   | AA                              | TT                 | TT               | INTERGENIC      |               |                    |                    |
| SNP_69689_A_36829 | NW_004515827.1 | scaffold321 | 36829                   | GG                              | TT                 | TT               | INTERGENIC      |               |                    |                    |
| SNP_69690_A_37605 | NW_004515827.1 | scaffold321 | 37605                   | GG                              | AA                 | AA               | INTERGENIC      |               |                    |                    |
| SNP_69691_A_38274 | NW_004515827.1 | scaffold321 | 38274                   | TT                              | AA                 | AA               | INTERGENIC      |               |                    |                    |
| SNP_69692_A_38315 | NW_004515827.1 | scaffold321 | 38315                   | CC                              | TT                 | TT               | INTERGENIC      |               |                    |                    |
| SNP_69693_A_38316 | NW_004515827.1 | scaffold321 | 38316                   | CC                              | AA                 | AA               | INTERGENIC      |               |                    |                    |
| SNP_69694_A_38360 | NW_004515827.1 | scaffold321 | 38360                   | AA                              | CC                 | CC               | INTERGENIC      |               |                    |                    |
| SNP_69695_A_38400 | NW_004515827.1 | scaffold321 | 38400                   | CC                              | GG                 | GG               | INTERGENIC      |               |                    |                    |
| SNP_69696_A_38424 | NW_004515827.1 | scaffold321 | 38424                   | GG                              | TT                 | TT               | INTERGENIC      |               |                    |                    |
| SNP_69698_A_38539 | NW_004515827.1 | scaffold321 | 38539                   | TT                              | CC                 | CC               | INTERGENIC      |               |                    |                    |
| SNP_69699_A_38641 | NW_004515827.1 | scaffold321 | 38641                   | GG                              | AA                 | AA               | INTERGENIC      |               |                    |                    |
| SNP_69700_A_38706 | NW_004515827.1 | scaffold321 | 38706                   | TT                              | AA                 | AA               | INTERGENIC      |               |                    |                    |
| SNP_69701_A_38760 | NW_004515827.1 | scaffold321 | 38760                   | TT                              | AA                 | AA               | INTERGENIC      |               |                    |                    |
| SNP_69702_A_38778 | NW_004515827.1 | scaffold321 | 38778                   | AA                              | TT                 | TT               | INTERGENIC      |               |                    |                    |
| SNP_69703_A_38785 | NW_004515827.1 | scaffold321 | 38785                   | GG                              | CC                 | CC               | INTERGENIC      |               |                    |                    |
| SNP_69704_A_38788 | NW_004515827.1 | scaffold321 | 38788                   | GG                              | AA                 | AA               | INTERGENIC      |               |                    |                    |
| SNP_69705_A_38795 | NW_004515827.1 | scaffold321 | 38795                   | AA                              | GG                 | GG               | INTERGENIC      |               |                    |                    |
| SNP_69706_A_38852 | NW_004515827.1 | scaffold321 | 38852                   | AA                              | TT                 | TT               | INTERGENIC      |               |                    |                    |
| SNP_69707_A_38914 | NW_004515827.1 | scaffold321 | 38914                   | GG                              | AA                 | AA               | INTERGENIC      |               |                    |                    |
| SNP_69708_A_38983 | NW_004515827.1 | scaffold321 | 38983                   | GG                              | AA                 | AA               | INTERGENIC      |               |                    |                    |
| SNP_69709_A_39068 | NW_004515827.1 | scaffold321 | 39068                   | TT                              | AA                 | AA               | INTERGENIC      |               |                    |                    |

| SNPs IDs          | Chromosome IDs | Chromosomes | Physical positions (bp) | CDC Frontier (Reference genome) | (Pusa 1103 & HPNB) | (ILWC 46 & LPNB) | Sequence genome | Components of | Gene accession IDs | Putative functions |
|-------------------|----------------|-------------|-------------------------|---------------------------------|--------------------|------------------|-----------------|---------------|--------------------|--------------------|
| SNP_69710_A_39085 | NW_004515827.1 | scaffold321 | 39085                   | AA                              | GG                 | GG               | INTERGENIC      |               |                    |                    |
| SNP_69711_A_39109 | NW_004515827.1 | scaffold321 | 39109                   | CC                              | AA                 | AA               | INTERGENIC      |               |                    |                    |
| SNP_69712_A_39144 | NW_004515827.1 | scaffold321 | 39144                   | GG                              | AA                 | AA               | INTERGENIC      |               |                    |                    |
| SNP_69713_A_39290 | NW_004515827.1 | scaffold321 | 39290                   | AA                              | CC                 | CC               | INTERGENIC      |               |                    |                    |
| SNP_69714_A_39328 | NW_004515827.1 | scaffold321 | 39328                   | GG                              | AA                 | AA               | INTERGENIC      |               |                    |                    |
| SNP_69715_A_39340 | NW_004515827.1 | scaffold321 | 39340                   | TT                              | CC                 | CC               | INTERGENIC      |               |                    |                    |
| SNP_69716_A_39372 | NW_004515827.1 | scaffold321 | 39372                   | AA                              | GG                 | GG               | INTERGENIC      |               |                    |                    |
| SNP_69717_A_39383 | NW_004515827.1 | scaffold321 | 39383                   | AA                              | GG                 | GG               | INTERGENIC      |               |                    |                    |
| SNP_69718_A_43928 | NW_004515827.1 | scaffold321 | 43928                   | GG                              | TT                 | TT               | INTERGENIC      |               |                    |                    |
| SNP_69719_A_43929 | NW_004515827.1 | scaffold321 | 43929                   | AA                              | GG                 | GG               | INTERGENIC      |               |                    |                    |
| SNP_69720_A_43941 | NW_004515827.1 | scaffold321 | 43941                   | CC                              | AA                 | AA               | INTERGENIC      |               |                    |                    |
| SNP_69721_A_44357 | NW_004515827.1 | scaffold321 | 44357                   | AA                              | TT                 | TT               | INTERGENIC      |               |                    |                    |
| SNP_69722_A_51576 | NW_004515827.1 | scaffold321 | 51576                   | AA                              | CC                 | CC               | INTERGENIC      |               |                    |                    |
| SNP_69723_A_54141 | NW_004515827.1 | scaffold321 | 54141                   | CC                              | TT                 | TT               | INTERGENIC      |               |                    |                    |
| SNP_69724_A_58465 | NW_004515827.1 | scaffold321 | 58465                   | GG                              | AA                 | AA               | INTERGENIC      |               |                    |                    |
| SNP_69725_A_58470 | NW_004515827.1 | scaffold321 | 58470                   | GG                              | TT                 | TT               | INTERGENIC      |               |                    |                    |
| SNP_69726_A_58855 | NW_004515827.1 | scaffold321 | 58855                   | CC                              | TT                 | TT               | INTERGENIC      |               |                    |                    |
| SNP_69727_A_58865 | NW_004515827.1 | scaffold321 | 58865                   | CC                              | TT                 | TT               | INTERGENIC      |               |                    |                    |
| SNP_69728_A_66718 | NW_004515827.1 | scaffold321 | 66718                   | AA                              | GG                 | GG               | INTERGENIC      |               |                    |                    |
| SNP_69729_A_66730 | NW_004515827.1 | scaffold321 | 66730                   | AA                              | GG                 | GG               | INTERGENIC      |               |                    |                    |
| SNP_69730_A_67715 | NW_004515827.1 | scaffold321 | 67715                   | AA                              | GG                 | GG               | INTERGENIC      |               |                    |                    |
| SNP_69731_A_67721 | NW_004515827.1 | scaffold321 | 67721                   | AA                              | GG                 | GG               | INTERGENIC      |               |                    |                    |

| SNPs IDs          | Chromosome IDs | Chromosomes | Physical positions (bp) | CDC Frontier (Reference genome) | (Pusa 1103 & HPNB) | (ILWC 46 & LPNB) | Sequence genome | Components of | Gene accession IDs | Putative functions |
|-------------------|----------------|-------------|-------------------------|---------------------------------|--------------------|------------------|-----------------|---------------|--------------------|--------------------|
| SNP_69732_A_67849 | NW_004515827.1 | scaffold321 | 67849                   | CC                              | TT                 | TT               | INTERGENIC      |               |                    |                    |
| SNP_69733_A_67869 | NW_004515827.1 | scaffold321 | 67869                   | CC                              | TT                 | TT               | INTERGENIC      |               |                    |                    |
| SNP_69735_A_73063 | NW_004515827.1 | scaffold321 | 73063                   | CC                              | AA                 | AA               | INTERGENIC      |               |                    |                    |
| SNP_69737_A_81060 | NW_004515827.1 | scaffold321 | 81060                   | AA                              | CC                 | CC               | INTERGENIC      |               |                    |                    |
| SNP_69738_A_81153 | NW_004515827.1 | scaffold321 | 81153                   | TT                              | CC                 | CC               | INTERGENIC      |               |                    |                    |
| SNP_69739_A_81376 | NW_004515827.1 | scaffold321 | 81376                   | AA                              | GG                 | GG               | INTERGENIC      |               |                    |                    |
| SNP_69740_A_83237 | NW_004515827.1 | scaffold321 | 83237                   | AA                              | TT                 | TT               | INTERGENIC      |               |                    |                    |
| SNP_69741_A_83306 | NW_004515827.1 | scaffold321 | 83306                   | AA                              | GG                 | GG               | INTERGENIC      |               |                    |                    |
| SNP_69742_A_83311 | NW_004515827.1 | scaffold321 | 83311                   | CC                              | TT                 | TT               | INTERGENIC      |               |                    |                    |
| SNP_69743_A_83361 | NW_004515827.1 | scaffold321 | 83361                   | CC                              | GG                 | GG               | INTERGENIC      |               |                    |                    |
| SNP_69744_A_83362 | NW_004515827.1 | scaffold321 | 83362                   | AA                              | CC                 | CC               | INTERGENIC      |               |                    |                    |
| SNP_69745_A_83499 | NW_004515827.1 | scaffold321 | 83499                   | GG                              | AA                 | AA               | INTERGENIC      |               |                    |                    |
| SNP_69746_A_83866 | NW_004515827.1 | scaffold321 | 83866                   | AA                              | CC                 | CC               | INTERGENIC      |               |                    |                    |
| SNP_69747_A_2482  | NW_004515828.1 | scaffold322 | 2482                    | TT                              | GG                 | GG               | INTERGENIC      |               |                    |                    |
| SNP_69749_A_4212  | NW_004515828.1 | scaffold322 | 4212                    | AA                              | GG                 | GG               | INTERGENIC      |               |                    |                    |
| SNP_69750_A_26972 | NW_004515828.1 | scaffold322 | 26972                   | TT                              | AA                 | AA               | INTERGENIC      |               |                    |                    |
| SNP_69751_A_27294 | NW_004515828.1 | scaffold322 | 27294                   | TT                              | CC                 | CC               | INTERGENIC      |               |                    |                    |
| SNP_69752_A_27950 | NW_004515828.1 | scaffold322 | 27950                   | TT                              | GG                 | GG               | INTERGENIC      |               |                    |                    |
| SNP_69753_A_30533 | NW_004515828.1 | scaffold322 | 30533                   | TT                              | AA                 | AA               | INTERGENIC      |               |                    |                    |
| SNP_69755_A_37742 | NW_004515828.1 | scaffold322 | 37742                   | CC                              | GG                 | GG               | INTERGENIC      |               |                    |                    |
| SNP_69756_A_38104 | NW_004515828.1 | scaffold322 | 38104                   | GG                              | TT                 | TT               | INTERGENIC      |               |                    |                    |
| SNP_69757_A_38108 | NW_004515828.1 | scaffold322 | 38108                   | GG                              | AA                 | AA               | INTERGENIC      |               |                    |                    |



| SNPs IDs           | Chromosome IDs | Chromosomes | Physical positions (bp) | CDC Frontier (Reference genome) | (Pusa 1103 & HPNB) | (ILWC 46 & LPNB) | Sequence genome | Components of | Gene accession IDs | Putative functions |
|--------------------|----------------|-------------|-------------------------|---------------------------------|--------------------|------------------|-----------------|---------------|--------------------|--------------------|
| SNP_69758_A_54079  | NW_004515828.1 | scaffold322 | 54079                   | CC                              | GG                 | GG               | INTERGENIC      |               |                    |                    |
| SNP_69759_A_54097  | NW_004515828.1 | scaffold322 | 54097                   | GG                              | CC                 | CC               | INTERGENIC      |               |                    |                    |
| SNP_69760_A_55475  | NW_004515828.1 | scaffold322 | 55475                   | GG                              | AA                 | AA               | INTERGENIC      |               |                    |                    |
| SNP_69761_A_55479  | NW_004515828.1 | scaffold322 | 55479                   | GG                              | TT                 | TT               | INTERGENIC      |               |                    |                    |
| SNP_69763_A_55823  | NW_004515828.1 | scaffold322 | 55823                   | TT                              | CC                 | CC               | INTERGENIC      |               |                    |                    |
| SNP_69765_A_81251  | NW_004515828.1 | scaffold322 | 81251                   | GG                              | AA                 | AA               | INTERGENIC      |               |                    |                    |
| SNP_69767_A_85541  | NW_004515828.1 | scaffold322 | 85541                   | AA                              | CC                 | CC               | INTERGENIC      |               |                    |                    |
| SNP_69768_A_86908  | NW_004515828.1 | scaffold322 | 86908                   | TT                              | CC                 | CC               | INTERGENIC      |               |                    |                    |
| SNP_69769_A_87115  | NW_004515828.1 | scaffold322 | 87115                   | TT                              | CC                 | CC               | INTERGENIC      |               |                    |                    |
| SNP_69770_A_87159  | NW_004515828.1 | scaffold322 | 87159                   | GG                              | AA                 | AA               | INTERGENIC      |               |                    |                    |
| SNP_69771_A_89196  | NW_004515828.1 | scaffold322 | 89196                   | GG                              | TT                 | TT               | INTERGENIC      |               |                    |                    |
| SNP_69772_A_89248  | NW_004515828.1 | scaffold322 | 89248                   | CC                              | TT                 | TT               | INTERGENIC      |               |                    |                    |
| SNP_69773_A_90105  | NW_004515828.1 | scaffold322 | 90105                   | TT                              | GG                 | GG               | INTERGENIC      |               |                    |                    |
| SNP_69774_A_99548  | NW_004515828.1 | scaffold322 | 99548                   | AA                              | GG                 | GG               | INTERGENIC      |               |                    |                    |
| SNP_69775_A_151531 | NW_004515828.1 | scaffold322 | 151531                  | CC                              | AA                 | AA               | INTERGENIC      |               |                    |                    |
| SNP_69776_A_151541 | NW_004515828.1 | scaffold322 | 151541                  | AA                              | CC                 | CC               | INTERGENIC      |               |                    |                    |
| SNP_69777_A_151547 | NW_004515828.1 | scaffold322 | 151547                  | TT                              | GG                 | GG               | INTERGENIC      |               |                    |                    |
| SNP_69778_A_151580 | NW_004515828.1 | scaffold322 | 151580                  | AA                              | GG                 | GG               | INTERGENIC      |               |                    |                    |
| SNP_69779_A_151634 | NW_004515828.1 | scaffold322 | 151634                  | GG                              | AA                 | AA               | INTERGENIC      |               |                    |                    |
| SNP_69780_A_151881 | NW_004515828.1 | scaffold322 | 151881                  | GG                              | AA                 | AA               | INTERGENIC      |               |                    |                    |
| SNP_69781_A_151905 | NW_004515828.1 | scaffold322 | 151905                  | TT                              | CC                 | CC               | INTERGENIC      |               |                    |                    |
| SNP_69782_A_151957 | NW_004515828.1 | scaffold322 | 151957                  | GG                              | CC                 | CC               | INTERGENIC      |               |                    |                    |

| SNPs IDs           | Chromosome IDs | Chromosomes | Physical positions (bp) | CDC Frontier (Reference genome) | (Pusa 1103 & HPNB) | (ILWC 46 & LPNB) | Sequence genome | Components of | Gene accession IDs | Putative functions |
|--------------------|----------------|-------------|-------------------------|---------------------------------|--------------------|------------------|-----------------|---------------|--------------------|--------------------|
| SNP_69783_A_152024 | NW_004515828.1 | scaffold322 | 152024                  | CC                              | AA                 | AA               | INTERGENIC      |               |                    |                    |
| SNP_69784_A_152036 | NW_004515828.1 | scaffold322 | 152036                  | CC                              | GG                 | GG               | INTERGENIC      |               |                    |                    |
| SNP_69785_A_152104 | NW_004515828.1 | scaffold322 | 152104                  | TT                              | CC                 | CC               | INTERGENIC      |               |                    |                    |
| SNP_69786_A_152133 | NW_004515828.1 | scaffold322 | 152133                  | AA                              | CC                 | CC               | INTERGENIC      |               |                    |                    |
| SNP_69787_A_152162 | NW_004515828.1 | scaffold322 | 152162                  | GG                              | CC                 | CC               | INTERGENIC      |               |                    |                    |
| SNP_69788_A_152215 | NW_004515828.1 | scaffold322 | 152215                  | AA                              | TT                 | TT               | INTERGENIC      |               |                    |                    |
| SNP_69789_A_152222 | NW_004515828.1 | scaffold322 | 152222                  | AA                              | GG                 | GG               | INTERGENIC      |               |                    |                    |
| SNP_69790_A_162284 | NW_004515828.1 | scaffold322 | 162284                  | GG                              | TT                 | TT               | INTERGENIC      |               |                    |                    |
| SNP_69791_A_168595 | NW_004515828.1 | scaffold322 | 168595                  | TT                              | AA                 | AA               | INTERGENIC      |               |                    |                    |
| SNP_69792_A_168609 | NW_004515828.1 | scaffold322 | 168609                  | TT                              | CC                 | CC               | INTERGENIC      |               |                    |                    |
| SNP_69793_A_168613 | NW_004515828.1 | scaffold322 | 168613                  | AA                              | CC                 | CC               | INTERGENIC      |               |                    |                    |
| SNP_69794_A_168639 | NW_004515828.1 | scaffold322 | 168639                  | GG                              | AA                 | AA               | INTERGENIC      |               |                    |                    |
| SNP_69795_A_168751 | NW_004515828.1 | scaffold322 | 168751                  | CC                              | AA                 | AA               | INTERGENIC      |               |                    |                    |
| SNP_69796_A_168786 | NW_004515828.1 | scaffold322 | 168786                  | TT                              | CC                 | CC               | INTERGENIC      |               |                    |                    |
| SNP_69797_A_168889 | NW_004515828.1 | scaffold322 | 168889                  | GG                              | AA                 | AA               | INTERGENIC      |               |                    |                    |
| SNP_69798_A_168919 | NW_004515828.1 | scaffold322 | 168919                  | AA                              | TT                 | TT               | INTERGENIC      |               |                    |                    |
| SNP_69799_A_169003 | NW_004515828.1 | scaffold322 | 169003                  | GG                              | CC                 | CC               | INTERGENIC      |               |                    |                    |
| SNP_69800_A_169006 | NW_004515828.1 | scaffold322 | 169006                  | TT                              | CC                 | CC               | INTERGENIC      |               |                    |                    |
| SNP_69801_A_169019 | NW_004515828.1 | scaffold322 | 169019                  | TT                              | AA                 | AA               | INTERGENIC      |               |                    |                    |
| SNP_69802_A_169059 | NW_004515828.1 | scaffold322 | 169059                  | AA                              | TT                 | TT               | INTERGENIC      |               |                    |                    |
| SNP_69803_A_169072 | NW_004515828.1 | scaffold322 | 169072                  | TT                              | CC                 | CC               | INTERGENIC      |               |                    |                    |
| SNP_69804_A_169105 | NW_004515828.1 | scaffold322 | 169105                  | TT                              | AA                 | AA               | INTERGENIC      |               |                    |                    |

| SNPs IDs           | Chromosome IDs | Chromosomes | Physical positions (bp) | CDC Frontier (Reference genome) | (Pusa 1103 & HPNB) | (ILWC 46 & LPNB) | Sequence genome | Components of | Gene accession IDs | Putative functions |
|--------------------|----------------|-------------|-------------------------|---------------------------------|--------------------|------------------|-----------------|---------------|--------------------|--------------------|
| SNP_69805_A_169113 | NW_004515828.1 | scaffold322 | 169113                  | GG                              | CC                 | CC               | INTERGENIC      |               |                    |                    |
| SNP_69806_A_169116 | NW_004515828.1 | scaffold322 | 169116                  | CC                              | GG                 | GG               | INTERGENIC      |               |                    |                    |
| SNP_69807_A_169475 | NW_004515828.1 | scaffold322 | 169475                  | GG                              | AA                 | AA               | INTERGENIC      |               |                    |                    |
| SNP_69808_A_170041 | NW_004515828.1 | scaffold322 | 170041                  | TT                              | CC                 | CC               | INTERGENIC      |               |                    |                    |
| SNP_69809_A_170476 | NW_004515828.1 | scaffold322 | 170476                  | TT                              | CC                 | CC               | INTERGENIC      |               |                    |                    |
| SNP_69810_A_174517 | NW_004515828.1 | scaffold322 | 174517                  | GG                              | CC                 | CC               | INTERGENIC      |               |                    |                    |
| SNP_69811_A_174825 | NW_004515828.1 | scaffold322 | 174825                  | TT                              | CC                 | CC               | INTERGENIC      |               |                    |                    |
| SNP_69812_A_174832 | NW_004515828.1 | scaffold322 | 174832                  | GG                              | AA                 | AA               | INTERGENIC      |               |                    |                    |
| SNP_69813_A_150    | NW_004515829.1 | scaffold323 | 150                     | CC                              | TT                 | TT               | INTERGENIC      |               |                    |                    |
| SNP_69814_A_2071   | NW_004515829.1 | scaffold323 | 2071                    | CC                              | AA                 | AA               | INTERGENIC      |               |                    |                    |
| SNP_69815_A_2080   | NW_004515829.1 | scaffold323 | 2080                    | CC                              | GG                 | GG               | INTERGENIC      |               |                    |                    |
| SNP_69816_A_2196   | NW_004515829.1 | scaffold323 | 2196                    | TT                              | CC                 | CC               | INTERGENIC      |               |                    |                    |
| SNP_69817_A_2207   | NW_004515829.1 | scaffold323 | 2207                    | TT                              | GG                 | GG               | INTERGENIC      |               |                    |                    |
| SNP_69818_A_2243   | NW_004515829.1 | scaffold323 | 2243                    | AA                              | CC                 | CC               | INTERGENIC      |               |                    |                    |
| SNP_69819_A_2258   | NW_004515829.1 | scaffold323 | 2258                    | TT                              | CC                 | CC               | INTERGENIC      |               |                    |                    |
| SNP_69820_A_2311   | NW_004515829.1 | scaffold323 | 2311                    | TT                              | AA                 | AA               | INTERGENIC      |               |                    |                    |
| SNP_69821_A_2329   | NW_004515829.1 | scaffold323 | 2329                    | TT                              | AA                 | AA               | INTERGENIC      |               |                    |                    |
| SNP_69822_A_2374   | NW_004515829.1 | scaffold323 | 2374                    | TT                              | AA                 | AA               | INTERGENIC      |               |                    |                    |
| SNP_69823_A_2559   | NW_004515829.1 | scaffold323 | 2559                    | TT                              | CC                 | CC               | INTERGENIC      |               |                    |                    |
| SNP_69824_A_2590   | NW_004515829.1 | scaffold323 | 2590                    | AA                              | GG                 | GG               | INTERGENIC      |               |                    |                    |
| SNP_69825_A_7933   | NW_004515829.1 | scaffold323 | 7933                    | TT                              | CC                 | CC               | INTERGENIC      |               |                    |                    |
| SNP_69826_A_11838  | NW_004515829.1 | scaffold323 | 11838                   | GG                              | AA                 | AA               | INTERGENIC      |               |                    |                    |

| SNPs IDs          | Chromosome IDs | Chromosomes | Physical positions (bp) | CDC Frontier (Reference genome) | (Pusa 1103 & HPNB) | (ILWC 46 & LPNB) | Sequence genome | Components of | Gene accession IDs | Putative functions |
|-------------------|----------------|-------------|-------------------------|---------------------------------|--------------------|------------------|-----------------|---------------|--------------------|--------------------|
| SNP_69827_A_17510 | NW_004515829.1 | scaffold323 | 17510                   | CC                              | TT                 | TT               | INTERGENIC      |               |                    |                    |
| SNP_69828_A_29592 | NW_004515829.1 | scaffold323 | 29592                   | GG                              | TT                 | TT               | INTERGENIC      |               |                    |                    |
| SNP_69829_A_45913 | NW_004515829.1 | scaffold323 | 45913                   | GG                              | TT                 | TT               | INTERGENIC      |               |                    |                    |
| SNP_69830_A_47439 | NW_004515829.1 | scaffold323 | 47439                   | AA                              | CC                 | CC               | INTERGENIC      |               |                    |                    |
| SNP_69831_A_53966 | NW_004515829.1 | scaffold323 | 53966                   | TT                              | GG                 | GG               | INTERGENIC      |               |                    |                    |
| SNP_69832_A_58187 | NW_004515829.1 | scaffold323 | 58187                   | AA                              | TT                 | TT               | INTERGENIC      |               |                    |                    |
| SNP_69833_A_59301 | NW_004515829.1 | scaffold323 | 59301                   | TT                              | AA                 | AA               | INTERGENIC      |               |                    |                    |
| SNP_69834_A_64349 | NW_004515829.1 | scaffold323 | 64349                   | TT                              | AA                 | AA               | INTERGENIC      |               |                    |                    |
| SNP_69836_A_3840  | NW_004515830.1 | scaffold324 | 3840                    | GG                              | AA                 | AA               | INTERGENIC      |               |                    |                    |
| SNP_69837_A_3843  | NW_004515830.1 | scaffold324 | 3843                    | AA                              | GG                 | GG               | INTERGENIC      |               |                    |                    |
| SNP_69838_A_6319  | NW_004515830.1 | scaffold324 | 6319                    | AA                              | CC                 | CC               | INTERGENIC      |               |                    |                    |
| SNP_69839_A_10722 | NW_004515830.1 | scaffold324 | 10722                   | TT                              | GG                 | GG               | INTERGENIC      |               |                    |                    |
| SNP_69840_A_19694 | NW_004515830.1 | scaffold324 | 19694                   | AA                              | CC                 | CC               | INTERGENIC      |               |                    |                    |
| SNP_69841_A_19748 | NW_004515830.1 | scaffold324 | 19748                   | TT                              | AA                 | AA               | INTERGENIC      |               |                    |                    |
| SNP_69842_A_19754 | NW_004515830.1 | scaffold324 | 19754                   | AA                              | GG                 | GG               | INTERGENIC      |               |                    |                    |
| SNP_69843_A_20051 | NW_004515830.1 | scaffold324 | 20051                   | CC                              | TT                 | TT               | INTERGENIC      |               |                    |                    |
| SNP_69844_A_24189 | NW_004515830.1 | scaffold324 | 24189                   | AA                              | TT                 | TT               | INTERGENIC      |               |                    |                    |
| SNP_69845_A_24380 | NW_004515830.1 | scaffold324 | 24380                   | CC                              | AA                 | AA               | INTERGENIC      |               |                    |                    |
| SNP_69846_A_26296 | NW_004515830.1 | scaffold324 | 26296                   | GG                              | AA                 | AA               | INTERGENIC      |               |                    |                    |
| SNP_69847_A_26871 | NW_004515830.1 | scaffold324 | 26871                   | TT                              | AA                 | AA               | INTERGENIC      |               |                    |                    |
| SNP_69848_A_26931 | NW_004515830.1 | scaffold324 | 26931                   | TT                              | CC                 | CC               | INTERGENIC      |               |                    |                    |
| SNP_69849_A_27306 | NW_004515830.1 | scaffold324 | 27306                   | TT                              | CC                 | CC               | INTERGENIC      |               |                    |                    |

| SNPs IDs          | Chromosome IDs | Chromosomes | Physical positions (bp) | CDC Frontier (Reference genome) | (Pusa 1103 & HPNB) | (ILWC 46 & LPNB) | Sequence genome | Components of | Gene accession IDs | Putative functions |
|-------------------|----------------|-------------|-------------------------|---------------------------------|--------------------|------------------|-----------------|---------------|--------------------|--------------------|
| SNP_69850_A_27345 | NW_004515830.1 | scaffold324 | 27345                   | AA                              | CC                 | CC               | INTERGENIC      |               |                    |                    |
| SNP_69851_A_27716 | NW_004515830.1 | scaffold324 | 27716                   | TT                              | CC                 | CC               | INTERGENIC      |               |                    |                    |
| SNP_69852_A_27746 | NW_004515830.1 | scaffold324 | 27746                   | GG                              | AA                 | AA               | INTERGENIC      |               |                    |                    |
| SNP_69853_A_27966 | NW_004515830.1 | scaffold324 | 27966                   | GG                              | AA                 | AA               | INTERGENIC      |               |                    |                    |
| SNP_69854_A_34003 | NW_004515830.1 | scaffold324 | 34003                   | CC                              | TT                 | TT               | INTERGENIC      |               |                    |                    |
| SNP_69855_A_34259 | NW_004515830.1 | scaffold324 | 34259                   | TT                              | AA                 | AA               | INTERGENIC      |               |                    |                    |
| SNP_69856_A_34290 | NW_004515830.1 | scaffold324 | 34290                   | CC                              | TT                 | TT               | INTERGENIC      |               |                    |                    |
| SNP_69857_A_34350 | NW_004515830.1 | scaffold324 | 34350                   | TT                              | CC                 | CC               | INTERGENIC      |               |                    |                    |
| SNP_69858_A_45372 | NW_004515830.1 | scaffold324 | 45372                   | AA                              | GG                 | GG               | INTERGENIC      |               |                    |                    |
| SNP_69859_A_45589 | NW_004515830.1 | scaffold324 | 45589                   | AA                              | GG                 | GG               | INTERGENIC      |               |                    |                    |
| SNP_69860_A_45599 | NW_004515830.1 | scaffold324 | 45599                   | TT                              | GG                 | GG               | INTERGENIC      |               |                    |                    |
| SNP_69861_A_53186 | NW_004515830.1 | scaffold324 | 53186                   | TT                              | CC                 | CC               | INTERGENIC      |               |                    |                    |
| SNP_69862_A_58589 | NW_004515830.1 | scaffold324 | 58589                   | GG                              | AA                 | AA               | INTERGENIC      |               |                    |                    |
| SNP_69863_A_58689 | NW_004515830.1 | scaffold324 | 58689                   | GG                              | CC                 | CC               | INTERGENIC      |               |                    |                    |
| SNP_69864_A_59469 | NW_004515830.1 | scaffold324 | 59469                   | GG                              | TT                 | TT               | INTERGENIC      |               |                    |                    |
| SNP_69865_A_59605 | NW_004515830.1 | scaffold324 | 59605                   | CC                              | TT                 | TT               | INTERGENIC      |               |                    |                    |
| SNP_69866_A_59700 | NW_004515830.1 | scaffold324 | 59700                   | CC                              | TT                 | TT               | INTERGENIC      |               |                    |                    |
| SNP_69867_A_69163 | NW_004515830.1 | scaffold324 | 69163                   | TT                              | AA                 | AA               | INTERGENIC      |               |                    |                    |
| SNP_69868_A_77931 | NW_004515830.1 | scaffold324 | 77931                   | AA                              | GG                 | GG               | INTERGENIC      |               |                    |                    |
| SNP_69869_A_81184 | NW_004515830.1 | scaffold324 | 81184                   | CC                              | TT                 | TT               | INTERGENIC      |               |                    |                    |
| SNP_69870_A_85922 | NW_004515830.1 | scaffold324 | 85922                   | AA                              | CC                 | CC               | INTERGENIC      |               |                    |                    |
| SNP_69871_A_85958 | NW_004515830.1 | scaffold324 | 85958                   | CC                              | TT                 | TT               | INTERGENIC      |               |                    |                    |

| SNPs IDs           | Chromosome IDs | Chromosomes | Physical positions (bp) | CDC Frontier (Reference genome) | (Pusa 1103 & HPNB) | (ILWC 46 & LPNB) | Sequence genome | Components of | Gene accession IDs           | Putative functions |
|--------------------|----------------|-------------|-------------------------|---------------------------------|--------------------|------------------|-----------------|---------------|------------------------------|--------------------|
| SNP_69872_A_85988  | NW_004515830.1 | scaffold324 | 85988                   | CC                              | AA                 | AA               | INTERGENIC      |               |                              |                    |
| SNP_69873_A_86008  | NW_004515830.1 | scaffold324 | 86008                   | AA                              | GG                 | GG               | INTERGENIC      |               |                              |                    |
| SNP_69874_A_86041  | NW_004515830.1 | scaffold324 | 86041                   | GG                              | AA                 | AA               | INTERGENIC      |               |                              |                    |
| SNP_69876_A_95908  | NW_004515830.1 | scaffold324 | 95908                   | AA                              | TT                 | TT               | INTERGENIC      |               |                              |                    |
| SNP_69877_A_96374  | NW_004515830.1 | scaffold324 | 96374                   | GG                              | AA                 | AA               | INTERGENIC      |               |                              |                    |
| SNP_69878_A_134028 | NW_004515830.1 | scaffold324 | 134028                  | CC                              | AA                 | AA               | INTERGENIC      |               |                              |                    |
| SNP_69879_A_134063 | NW_004515830.1 | scaffold324 | 134063                  | TT                              | AA                 | AA               | INTERGENIC      |               |                              |                    |
| SNP_69880_A_137944 | NW_004515830.1 | scaffold324 | 137944                  | CC                              | AA                 | AA               | DRR             | 101510347     | uncharacterized LOC101510347 |                    |
| SNP_69881_A_137948 | NW_004515830.1 | scaffold324 | 137948                  | TT                              | GG                 | GG               | DRR             | 101510347     | uncharacterized LOC101510347 |                    |
| SNP_69883_A_148914 | NW_004515830.1 | scaffold324 | 148914                  | TT                              | AA                 | AA               | INTERGENIC      |               |                              |                    |
| SNP_69884_A_164918 | NW_004515830.1 | scaffold324 | 164918                  | TT                              | CC                 | CC               | INTERGENIC      |               |                              |                    |
| SNP_69885_A_165726 | NW_004515830.1 | scaffold324 | 165726                  | GG                              | AA                 | AA               | INTERGENIC      |               |                              |                    |
| SNP_69886_A_180435 | NW_004515830.1 | scaffold324 | 180435                  | AA                              | CC                 | CC               | INTERGENIC      |               |                              |                    |
| SNP_69887_A_185373 | NW_004515830.1 | scaffold324 | 185373                  | TT                              | GG                 | GG               | INTERGENIC      |               |                              |                    |
| SNP_69888_A_219771 | NW_004515830.1 | scaffold324 | 219771                  | GG                              | TT                 | TT               | INTERGENIC      |               |                              |                    |
| SNP_69889_A_224465 | NW_004515830.1 | scaffold324 | 224465                  | TT                              | CC                 | CC               | INTERGENIC      |               |                              |                    |
| SNP_69890_A_224501 | NW_004515830.1 | scaffold324 | 224501                  | AA                              | GG                 | GG               | INTERGENIC      |               |                              |                    |
| SNP_69891_A_243196 | NW_004515830.1 | scaffold324 | 243196                  | GG                              | AA                 | AA               | INTERGENIC      |               |                              |                    |
| SNP_69892_A_244074 | NW_004515830.1 | scaffold324 | 244074                  | GG                              | AA                 | AA               | INTERGENIC      |               |                              |                    |
| SNP_69893_A_269518 | NW_004515830.1 | scaffold324 | 269518                  | GG                              | AA                 | AA               | INTERGENIC      |               |                              |                    |
| SNP_69894_A_277179 | NW_004515830.1 | scaffold324 | 277179                  | AA                              | CC                 | CC               | INTERGENIC      |               |                              |                    |
| SNP_69895_A_279729 | NW_004515830.1 | scaffold324 | 279729                  | TT                              | AA                 | AA               | INTERGENIC      |               |                              |                    |

| SNPs IDs           | Chromosome IDs | Chromosomes | Physical positions (bp) | CDC Frontier (Reference genome) | (Pusa 1103 & HPNB) | (ILWC 46 & LPNB) | Sequence genome | Components of | Gene accession IDs | Putative functions |
|--------------------|----------------|-------------|-------------------------|---------------------------------|--------------------|------------------|-----------------|---------------|--------------------|--------------------|
| SNP_69896_A_280030 | NW_004515830.1 | scaffold324 | 280030                  | CC                              | AA                 | AA               | INTERGENIC      |               |                    |                    |
| SNP_69897_A_280058 | NW_004515830.1 | scaffold324 | 280058                  | AA                              | GG                 | GG               | INTERGENIC      |               |                    |                    |
| SNP_69898_A_299259 | NW_004515830.1 | scaffold324 | 299259                  | AA                              | GG                 | GG               | INTERGENIC      |               |                    |                    |
| SNP_69899_A_299265 | NW_004515830.1 | scaffold324 | 299265                  | AA                              | GG                 | GG               | INTERGENIC      |               |                    |                    |
| SNP_69900_A_308309 | NW_004515830.1 | scaffold324 | 308309                  | CC                              | AA                 | AA               | INTERGENIC      |               |                    |                    |
| SNP_69901_A_308310 | NW_004515830.1 | scaffold324 | 308310                  | AA                              | GG                 | GG               | INTERGENIC      |               |                    |                    |
| SNP_69902_A_308312 | NW_004515830.1 | scaffold324 | 308312                  | TT                              | CC                 | CC               | INTERGENIC      |               |                    |                    |
| SNP_69903_A_310287 | NW_004515830.1 | scaffold324 | 310287                  | CC                              | AA                 | AA               | INTERGENIC      |               |                    |                    |
| SNP_69904_A_312275 | NW_004515830.1 | scaffold324 | 312275                  | AA                              | CC                 | CC               | INTERGENIC      |               |                    |                    |
| SNP_69905_A_312463 | NW_004515830.1 | scaffold324 | 312463                  | CC                              | GG                 | GG               | INTERGENIC      |               |                    |                    |
| SNP_69906_A_312530 | NW_004515830.1 | scaffold324 | 312530                  | AA                              | GG                 | GG               | INTERGENIC      |               |                    |                    |
| SNP_69907_A_312538 | NW_004515830.1 | scaffold324 | 312538                  | TT                              | CC                 | CC               | INTERGENIC      |               |                    |                    |
| SNP_69908_A_344042 | NW_004515830.1 | scaffold324 | 344042                  | AA                              | GG                 | GG               | INTERGENIC      |               |                    |                    |
| SNP_69909_A_344044 | NW_004515830.1 | scaffold324 | 344044                  | AA                              | TT                 | TT               | INTERGENIC      |               |                    |                    |
| SNP_69910_A_347342 | NW_004515830.1 | scaffold324 | 347342                  | AA                              | TT                 | TT               | INTERGENIC      |               |                    |                    |
| SNP_69911_A_347368 | NW_004515830.1 | scaffold324 | 347368                  | GG                              | CC                 | CC               | INTERGENIC      |               |                    |                    |
| SNP_69912_A_347841 | NW_004515830.1 | scaffold324 | 347841                  | TT                              | GG                 | GG               | INTERGENIC      |               |                    |                    |
| SNP_69913_A_357307 | NW_004515830.1 | scaffold324 | 357307                  | GG                              | AA                 | AA               | INTERGENIC      |               |                    |                    |
| SNP_69914_A_357317 | NW_004515830.1 | scaffold324 | 357317                  | AA                              | CC                 | CC               | INTERGENIC      |               |                    |                    |
| SNP_69915_A_357321 | NW_004515830.1 | scaffold324 | 357321                  | GG                              | AA                 | AA               | INTERGENIC      |               |                    |                    |
| SNP_69916_A_357322 | NW_004515830.1 | scaffold324 | 357322                  | TT                              | CC                 | CC               | INTERGENIC      |               |                    |                    |
| SNP_69917_A_367639 | NW_004515830.1 | scaffold324 | 367639                  | AA                              | GG                 | GG               | INTERGENIC      |               |                    |                    |

| SNPs IDs           | Chromosome IDs | Chromosomes | Physical positions (bp) | CDC Frontier (Reference genome) | (Pusa 1103 & HPNB) | (ILWC 46 & LPNB) | Sequence genome | Components of | Gene accession IDs | Putative functions |
|--------------------|----------------|-------------|-------------------------|---------------------------------|--------------------|------------------|-----------------|---------------|--------------------|--------------------|
| SNP_69918_A_371055 | NW_004515830.1 | scaffold324 | 371055                  | TT                              | GG                 | GG               | INTERGENIC      |               |                    |                    |
| SNP_69919_A_371111 | NW_004515830.1 | scaffold324 | 371111                  | AA                              | CC                 | CC               | INTERGENIC      |               |                    |                    |
| SNP_69920_A_371178 | NW_004515830.1 | scaffold324 | 371178                  | TT                              | AA                 | AA               | INTERGENIC      |               |                    |                    |
| SNP_69921_A_371243 | NW_004515830.1 | scaffold324 | 371243                  | TT                              | CC                 | CC               | INTERGENIC      |               |                    |                    |
| SNP_69922_A_371466 | NW_004515830.1 | scaffold324 | 371466                  | AA                              | GG                 | GG               | INTERGENIC      |               |                    |                    |
| SNP_69923_A_372687 | NW_004515830.1 | scaffold324 | 372687                  | TT                              | CC                 | CC               | INTERGENIC      |               |                    |                    |
| SNP_69924_A_374851 | NW_004515830.1 | scaffold324 | 374851                  | AA                              | GG                 | GG               | INTERGENIC      |               |                    |                    |
| SNP_69925_A_377276 | NW_004515830.1 | scaffold324 | 377276                  | GG                              | AA                 | AA               | INTERGENIC      |               |                    |                    |
| SNP_69926_A_383416 | NW_004515830.1 | scaffold324 | 383416                  | AA                              | GG                 | GG               | INTERGENIC      |               |                    |                    |
| SNP_69927_A_383440 | NW_004515830.1 | scaffold324 | 383440                  | CC                              | TT                 | TT               | INTERGENIC      |               |                    |                    |
| SNP_69928_A_383514 | NW_004515830.1 | scaffold324 | 383514                  | AA                              | GG                 | GG               | INTERGENIC      |               |                    |                    |
| SNP_69929_A_383528 | NW_004515830.1 | scaffold324 | 383528                  | CC                              | GG                 | GG               | INTERGENIC      |               |                    |                    |
| SNP_69930_A_383541 | NW_004515830.1 | scaffold324 | 383541                  | AA                              | GG                 | GG               | INTERGENIC      |               |                    |                    |
| SNP_69931_A_383552 | NW_004515830.1 | scaffold324 | 383552                  | GG                              | AA                 | AA               | INTERGENIC      |               |                    |                    |
| SNP_69932_A_385526 | NW_004515830.1 | scaffold324 | 385526                  | AA                              | TT                 | TT               | INTERGENIC      |               |                    |                    |
| SNP_69933_A_386747 | NW_004515830.1 | scaffold324 | 386747                  | CC                              | GG                 | GG               | INTERGENIC      |               |                    |                    |
| SNP_69934_A_386788 | NW_004515830.1 | scaffold324 | 386788                  | CC                              | AA                 | AA               | INTERGENIC      |               |                    |                    |
| SNP_69935_A_387185 | NW_004515830.1 | scaffold324 | 387185                  | CC                              | TT                 | TT               | INTERGENIC      |               |                    |                    |
| SNP_69936_A_387209 | NW_004515830.1 | scaffold324 | 387209                  | TT                              | GG                 | GG               | INTERGENIC      |               |                    |                    |
| SNP_69937_A_387315 | NW_004515830.1 | scaffold324 | 387315                  | AA                              | GG                 | GG               | INTERGENIC      |               |                    |                    |
| SNP_69938_A_387539 | NW_004515830.1 | scaffold324 | 387539                  | TT                              | CC                 | CC               | INTERGENIC      |               |                    |                    |
| SNP_69939_A_387667 | NW_004515830.1 | scaffold324 | 387667                  | AA                              | TT                 | TT               | INTERGENIC      |               |                    |                    |



| SNPs IDs           | Chromosome IDs | Chromosomes | Physical positions (bp) | CDC Frontier (Reference genome) | (Pusa 1103 & HPNB) | (ILWC 46 & LPNB) | Sequence genome | Components of | Gene accession IDs | Putative functions |
|--------------------|----------------|-------------|-------------------------|---------------------------------|--------------------|------------------|-----------------|---------------|--------------------|--------------------|
| SNP_69940_A_387687 | NW_004515830.1 | scaffold324 | 387687                  | GG                              | AA                 | AA               | INTERGENIC      |               |                    |                    |
| SNP_69941_A_387733 | NW_004515830.1 | scaffold324 | 387733                  | GG                              | AA                 | AA               | INTERGENIC      |               |                    |                    |
| SNP_69942_A_387788 | NW_004515830.1 | scaffold324 | 387788                  | GG                              | TT                 | TT               | INTERGENIC      |               |                    |                    |
| SNP_69943_A_387807 | NW_004515830.1 | scaffold324 | 387807                  | AA                              | CC                 | CC               | INTERGENIC      |               |                    |                    |
| SNP_69944_A_390354 | NW_004515830.1 | scaffold324 | 390354                  | CC                              | TT                 | TT               | INTERGENIC      |               |                    |                    |
| SNP_69945_A_393437 | NW_004515830.1 | scaffold324 | 393437                  | TT                              | CC                 | CC               | INTERGENIC      |               |                    |                    |
| SNP_69946_A_393472 | NW_004515830.1 | scaffold324 | 393472                  | GG                              | AA                 | AA               | INTERGENIC      |               |                    |                    |
| SNP_69947_A_406178 | NW_004515830.1 | scaffold324 | 406178                  | AA                              | GG                 | GG               | INTERGENIC      |               |                    |                    |
| SNP_69948_A_411675 | NW_004515830.1 | scaffold324 | 411675                  | GG                              | AA                 | AA               | INTERGENIC      |               |                    |                    |
| SNP_69949_A_414567 | NW_004515830.1 | scaffold324 | 414567                  | GG                              | TT                 | TT               | INTERGENIC      |               |                    |                    |
| SNP_69950_A_417383 | NW_004515830.1 | scaffold324 | 417383                  | CC                              | AA                 | AA               | INTERGENIC      |               |                    |                    |
| SNP_69951_A_427921 | NW_004515830.1 | scaffold324 | 427921                  | AA                              | GG                 | CC               | INTERGENIC      |               |                    |                    |
| SNP_69952_A_430602 | NW_004515830.1 | scaffold324 | 430602                  | AA                              | GG                 | GG               | INTERGENIC      |               |                    |                    |
| SNP_69953_A_450805 | NW_004515830.1 | scaffold324 | 450805                  | GG                              | AA                 | AA               | INTERGENIC      |               |                    |                    |
| SNP_69954_A_451240 | NW_004515830.1 | scaffold324 | 451240                  | AA                              | CC                 | CC               | INTERGENIC      |               |                    |                    |
| SNP_69955_A_451251 | NW_004515830.1 | scaffold324 | 451251                  | AA                              | GG                 | GG               | INTERGENIC      |               |                    |                    |
| SNP_69956_A_451252 | NW_004515830.1 | scaffold324 | 451252                  | AA                              | GG                 | GG               | INTERGENIC      |               |                    |                    |
| SNP_69957_A_457108 | NW_004515830.1 | scaffold324 | 457108                  | AA                              | CC                 | CC               | INTERGENIC      |               |                    |                    |
| SNP_69958_A_457127 | NW_004515830.1 | scaffold324 | 457127                  | TT                              | CC                 | CC               | INTERGENIC      |               |                    |                    |
| SNP_69959_A_457252 | NW_004515830.1 | scaffold324 | 457252                  | GG                              | CC                 | CC               | INTERGENIC      |               |                    |                    |
| SNP_69960_A_457514 | NW_004515830.1 | scaffold324 | 457514                  | TT                              | GG                 | GG               | INTERGENIC      |               |                    |                    |
| SNP_69961_A_1633   | NW_004515831.1 | scaffold325 | 1633                    | AA                              | CC                 | CC               | INTERGENIC      |               |                    |                    |

| SNPs IDs          | Chromosome IDs | Chromosomes | Physical positions (bp) | CDC Frontier (Reference genome) | (Pusa 1103 & HPNB) | (ILWC 46 & LPNB) | Sequence genome | Components of | Gene accession IDs | Putative functions |
|-------------------|----------------|-------------|-------------------------|---------------------------------|--------------------|------------------|-----------------|---------------|--------------------|--------------------|
| SNP_69962_A_1657  | NW_004515831.1 | scaffold325 | 1657                    | AA                              | CC                 | CC               | INTERGENIC      |               |                    |                    |
| SNP_69963_A_1664  | NW_004515831.1 | scaffold325 | 1664                    | CC                              | TT                 | TT               | INTERGENIC      |               |                    |                    |
| SNP_69964_A_2417  | NW_004515831.1 | scaffold325 | 2417                    | CC                              | AA                 | AA               | INTERGENIC      |               |                    |                    |
| SNP_69965_A_2423  | NW_004515831.1 | scaffold325 | 2423                    | CC                              | TT                 | TT               | INTERGENIC      |               |                    |                    |
| SNP_69966_A_5323  | NW_004515831.1 | scaffold325 | 5323                    | TT                              | AA                 | AA               | INTERGENIC      |               |                    |                    |
| SNP_69967_A_5355  | NW_004515831.1 | scaffold325 | 5355                    | GG                              | AA                 | AA               | INTERGENIC      |               |                    |                    |
| SNP_69968_A_64    | NW_004515832.1 | scaffold326 | 64                      | TT                              | GG                 | GG               | INTERGENIC      |               |                    |                    |
| SNP_69969_A_107   | NW_004515832.1 | scaffold326 | 107                     | TT                              | CC                 | CC               | INTERGENIC      |               |                    |                    |
| SNP_69970_A_12139 | NW_004515834.1 | scaffold328 | 12139                   | TT                              | GG                 | GG               | INTERGENIC      |               |                    |                    |
| SNP_69971_A_12151 | NW_004515834.1 | scaffold328 | 12151                   | CC                              | GG                 | GG               | INTERGENIC      |               |                    |                    |
| SNP_69972_A_12233 | NW_004515834.1 | scaffold328 | 12233                   | TT                              | AA                 | AA               | INTERGENIC      |               |                    |                    |
| SNP_69973_A_12260 | NW_004515834.1 | scaffold328 | 12260                   | AA                              | GG                 | GG               | INTERGENIC      |               |                    |                    |
| SNP_69974_A_12278 | NW_004515834.1 | scaffold328 | 12278                   | CC                              | TT                 | TT               | INTERGENIC      |               |                    |                    |
| SNP_69975_A_12289 | NW_004515834.1 | scaffold328 | 12289                   | GG                              | TT                 | TT               | INTERGENIC      |               |                    |                    |
| SNP_69976_A_12364 | NW_004515834.1 | scaffold328 | 12364                   | CC                              | AA                 | AA               | INTERGENIC      |               |                    |                    |
| SNP_69977_A_12666 | NW_004515834.1 | scaffold328 | 12666                   | TT                              | AA                 | AA               | INTERGENIC      |               |                    |                    |
| SNP_69978_A_12667 | NW_004515834.1 | scaffold328 | 12667                   | TT                              | GG                 | GG               | INTERGENIC      |               |                    |                    |
| SNP_69979_A_12684 | NW_004515834.1 | scaffold328 | 12684                   | AA                              | GG                 | GG               | INTERGENIC      |               |                    |                    |
| SNP_69980_A_2330  | NW_004515835.1 | scaffold330 | 2330                    | GG                              | AA                 | AA               | INTERGENIC      |               |                    |                    |
| SNP_69981_A_2379  | NW_004515835.1 | scaffold330 | 2379                    | GG                              | AA                 | AA               | INTERGENIC      |               |                    |                    |
| SNP_69982_A_2397  | NW_004515835.1 | scaffold330 | 2397                    | GG                              | CC                 | CC               | INTERGENIC      |               |                    |                    |
| SNP_69983_A_2607  | NW_004515835.1 | scaffold330 | 2607                    | AA                              | GG                 | GG               | INTERGENIC      |               |                    |                    |

| SNPs IDs          | Chromosome IDs | Chromosomes | Physical positions (bp) | CDC Frontier (Reference genome) | (Pusa 1103 & HPNB) | (ILWC 46 & LPNB) | Sequence genome | Components of | Gene accession IDs | Putative functions |
|-------------------|----------------|-------------|-------------------------|---------------------------------|--------------------|------------------|-----------------|---------------|--------------------|--------------------|
| SNP_69984_A_2788  | NW_004515835.1 | scaffold330 | 2788                    | AA                              | TT                 | TT               | INTERGENIC      |               |                    |                    |
| SNP_69985_A_2818  | NW_004515835.1 | scaffold330 | 2818                    | CC                              | GG                 | GG               | INTERGENIC      |               |                    |                    |
| SNP_69986_A_2907  | NW_004515835.1 | scaffold330 | 2907                    | CC                              | TT                 | TT               | INTERGENIC      |               |                    |                    |
| SNP_69987_A_2924  | NW_004515835.1 | scaffold330 | 2924                    | AA                              | TT                 | GG               | INTERGENIC      |               |                    |                    |
| SNP_69988_A_2964  | NW_004515835.1 | scaffold330 | 2964                    | AA                              | GG                 | GG               | INTERGENIC      |               |                    |                    |
| SNP_69989_A_7668  | NW_004515835.1 | scaffold330 | 7668                    | AA                              | GG                 | GG               | INTERGENIC      |               |                    |                    |
| SNP_69990_A_8040  | NW_004515835.1 | scaffold330 | 8040                    | TT                              | CC                 | CC               | INTERGENIC      |               |                    |                    |
| SNP_69991_A_8053  | NW_004515835.1 | scaffold330 | 8053                    | AA                              | CC                 | CC               | INTERGENIC      |               |                    |                    |
| SNP_69992_A_9059  | NW_004515835.1 | scaffold330 | 9059                    | AA                              | TT                 | TT               | INTERGENIC      |               |                    |                    |
| SNP_69993_A_9951  | NW_004515835.1 | scaffold330 | 9951                    | TT                              | CC                 | CC               | INTERGENIC      |               |                    |                    |
| SNP_69994_A_9963  | NW_004515835.1 | scaffold330 | 9963                    | GG                              | CC                 | CC               | INTERGENIC      |               |                    |                    |
| SNP_69996_A_10224 | NW_004515835.1 | scaffold330 | 10224                   | CC                              | GG                 | GG               | INTERGENIC      |               |                    |                    |
| SNP_69997_A_10244 | NW_004515835.1 | scaffold330 | 10244                   | CC                              | TT                 | TT               | INTERGENIC      |               |                    |                    |
| SNP_69998_A_10247 | NW_004515835.1 | scaffold330 | 10247                   | TT                              | GG                 | GG               | INTERGENIC      |               |                    |                    |
| SNP_69999_A_10257 | NW_004515835.1 | scaffold330 | 10257                   | AA                              | TT                 | TT               | INTERGENIC      |               |                    |                    |
| SNP_70000_A_10268 | NW_004515835.1 | scaffold330 | 10268                   | CC                              | TT                 | TT               | INTERGENIC      |               |                    |                    |
| SNP_70001_A_10294 | NW_004515835.1 | scaffold330 | 10294                   | CC                              | TT                 | TT               | INTERGENIC      |               |                    |                    |
| SNP_70002_A_10296 | NW_004515835.1 | scaffold330 | 10296                   | GG                              | CC                 | CC               | INTERGENIC      |               |                    |                    |
| SNP_70004_A_10603 | NW_004515835.1 | scaffold330 | 10603                   | AA                              | GG                 | GG               | INTERGENIC      |               |                    |                    |
| SNP_70005_A_10606 | NW_004515835.1 | scaffold330 | 10606                   | GG                              | TT                 | TT               | INTERGENIC      |               |                    |                    |
| SNP_70006_A_10622 | NW_004515835.1 | scaffold330 | 10622                   | AA                              | TT                 | TT               | INTERGENIC      |               |                    |                    |
| SNP_70008_A_726   | NW_004515836.1 | scaffold331 | 726                     | AA                              | TT                 | TT               | INTERGENIC      |               |                    |                    |

| SNPs IDs           | Chromosome IDs | Chromosomes | Physical positions (bp) | CDC Frontier (Reference genome) | (Pusa 1103 & HPNB) | (ILWC 46 & LPNB) | Sequence genome | Components of | Gene accession IDs | Putative functions |
|--------------------|----------------|-------------|-------------------------|---------------------------------|--------------------|------------------|-----------------|---------------|--------------------|--------------------|
| SNP_70009_A_760    | NW_004515836.1 | scaffold331 | 760                     | AA                              | CC                 | CC               | INTERGENIC      |               |                    |                    |
| SNP_70010_A_780    | NW_004515836.1 | scaffold331 | 780                     | AA                              | GG                 | GG               | INTERGENIC      |               |                    |                    |
| SNP_70011_A_834    | NW_004515836.1 | scaffold331 | 834                     | AA                              | TT                 | TT               | INTERGENIC      |               |                    |                    |
| SNP_70012_A_1237   | NW_004515836.1 | scaffold331 | 1237                    | GG                              | AA                 | AA               | INTERGENIC      |               |                    |                    |
| SNP_70013_A_5222   | NW_004515836.1 | scaffold331 | 5222                    | TT                              | AA                 | AA               | INTERGENIC      |               |                    |                    |
| SNP_70014_A_17256  | NW_004515836.1 | scaffold331 | 17256                   | AA                              | GG                 | GG               | INTERGENIC      |               |                    |                    |
| SNP_70015_A_20955  | NW_004515836.1 | scaffold331 | 20955                   | TT                              | CC                 | CC               | INTERGENIC      |               |                    |                    |
| SNP_70016_A_21027  | NW_004515836.1 | scaffold331 | 21027                   | TT                              | GG                 | GG               | INTERGENIC      |               |                    |                    |
| SNP_70017_A_25912  | NW_004515836.1 | scaffold331 | 25912                   | TT                              | GG                 | GG               | INTERGENIC      |               |                    |                    |
| SNP_70018_A_34416  | NW_004515836.1 | scaffold331 | 34416                   | AA                              | TT                 | TT               | INTERGENIC      |               |                    |                    |
| SNP_70019_A_38462  | NW_004515836.1 | scaffold331 | 38462                   | GG                              | CC                 | CC               | INTERGENIC      |               |                    |                    |
| SNP_70020_A_43695  | NW_004515836.1 | scaffold331 | 43695                   | CC                              | TT                 | TT               | INTERGENIC      |               |                    |                    |
| SNP_70021_A_43957  | NW_004515836.1 | scaffold331 | 43957                   | TT                              | CC                 | CC               | INTERGENIC      |               |                    |                    |
| SNP_70022_A_43968  | NW_004515836.1 | scaffold331 | 43968                   | GG                              | AA                 | AA               | INTERGENIC      |               |                    |                    |
| SNP_70023_A_44027  | NW_004515836.1 | scaffold331 | 44027                   | TT                              | GG                 | GG               | INTERGENIC      |               |                    |                    |
| SNP_70024_A_44057  | NW_004515836.1 | scaffold331 | 44057                   | AA                              | TT                 | TT               | INTERGENIC      |               |                    |                    |
| SNP_70025_A_50228  | NW_004515836.1 | scaffold331 | 50228                   | TT                              | CC                 | CC               | INTERGENIC      |               |                    |                    |
| SNP_70026_A_50994  | NW_004515836.1 | scaffold331 | 50994                   | CC                              | TT                 | TT               | INTERGENIC      |               |                    |                    |
| SNP_70027_A_59101  | NW_004515836.1 | scaffold331 | 59101                   | GG                              | TT                 | TT               | INTERGENIC      |               |                    |                    |
| SNP_70028_A_62227  | NW_004515836.1 | scaffold331 | 62227                   | AA                              | CC                 | CC               | INTERGENIC      |               |                    |                    |
| SNP_70029_A_62233  | NW_004515836.1 | scaffold331 | 62233                   | TT                              | CC                 | CC               | INTERGENIC      |               |                    |                    |
| SNP_70030_A_104651 | NW_004515836.1 | scaffold331 | 104651                  | TT                              | CC                 | CC               | INTERGENIC      |               |                    |                    |

| SNPs IDs           | Chromosome IDs | Chromosomes | Physical positions (bp) | CDC Frontier (Reference genome) | (Pusa 1103 & HPNB) | (ILWC 46 & LPNB) | Sequence Components of genome | Gene accession IDs | Putative functions                     |
|--------------------|----------------|-------------|-------------------------|---------------------------------|--------------------|------------------|-------------------------------|--------------------|----------------------------------------|
| SNP_70031_A_112124 | NW_004515836.1 | scaffold331 | 112124                  | GG                              | AA                 | AA               | URR                           | 101512922          | Unknown function                       |
| SNP_70032_A_129444 | NW_004515836.1 | scaffold331 | 129444                  | AA                              | GG                 | GG               | INTERGENIC                    |                    |                                        |
| SNP_70033_A_129494 | NW_004515836.1 | scaffold331 | 129494                  | CC                              | TT                 | TT               | INTERGENIC                    |                    |                                        |
| SNP_70034_A_129758 | NW_004515836.1 | scaffold331 | 129758                  | CC                              | TT                 | TT               | INTERGENIC                    |                    |                                        |
| SNP_70037_A_219666 | NW_004515836.1 | scaffold331 | 219666                  | AA                              | GG                 | GG               | INTERGENIC                    |                    |                                        |
| SNP_70038_A_220264 | NW_004515836.1 | scaffold331 | 220264                  | GG                              | AA                 | AA               | INTERGENIC                    |                    |                                        |
| SNP_70039_A_221459 | NW_004515836.1 | scaffold331 | 221459                  | GG                              | TT                 | TT               | INTERGENIC                    |                    |                                        |
| SNP_70040_A_243161 | NW_004515836.1 | scaffold331 | 243161                  | CC                              | AA                 | AA               | INTRON                        | 101512285          | mitogen-activated protein kinase 15    |
| SNP_70041_A_243169 | NW_004515836.1 | scaffold331 | 243169                  | GG                              | AA                 | AA               | INTRON                        | 101512285          | mitogen-activated protein kinase 15    |
| SNP_70042_A_48648  | NW_004515837.1 | scaffold332 | 48648                   | TT                              | CC                 | CC               | INTERGENIC                    |                    |                                        |
| SNP_70043_A_48665  | NW_004515837.1 | scaffold332 | 48665                   | TT                              | CC                 | CC               | INTERGENIC                    |                    |                                        |
| SNP_70044_A_48731  | NW_004515837.1 | scaffold332 | 48731                   | AA                              | GG                 | GG               | INTERGENIC                    |                    |                                        |
| SNP_70045_A_48874  | NW_004515837.1 | scaffold332 | 48874                   | TT                              | CC                 | CC               | INTERGENIC                    |                    |                                        |
| SNP_70046_A_48919  | NW_004515837.1 | scaffold332 | 48919                   | AA                              | GG                 | GG               | INTERGENIC                    |                    |                                        |
| SNP_70047_A_51816  | NW_004515837.1 | scaffold332 | 51816                   | AA                              | GG                 | GG               | INTERGENIC                    |                    |                                        |
| SNP_70048_A_51982  | NW_004515837.1 | scaffold332 | 51982                   | TT                              | GG                 | GG               | INTERGENIC                    |                    |                                        |
| SNP_70049_A_51990  | NW_004515837.1 | scaffold332 | 51990                   | TT                              | GG                 | GG               | INTERGENIC                    |                    |                                        |
| SNP_70050_A_52697  | NW_004515837.1 | scaffold332 | 52697                   | TT                              | GG                 | GG               | INTERGENIC                    |                    |                                        |
| SNP_70051_A_52836  | NW_004515837.1 | scaffold332 | 52836                   | TT                              | CC                 | CC               | INTERGENIC                    |                    |                                        |
| SNP_70052_A_67850  | NW_004515837.1 | scaffold332 | 67850                   | GG                              | TT                 | TT               | INTRON                        | 101513888          | phosphoglycerate mutase-like protein 1 |
| SNP_70053_A_154150 | NW_004515837.1 | scaffold332 | 154150                  | CC                              | TT                 | TT               | INTERGENIC                    |                    |                                        |
| SNP_70054_A_156089 | NW_004515837.1 | scaffold332 | 156089                  | TT                              | CC                 | CC               | INTERGENIC                    |                    |                                        |

| SNPs IDs           | Chromosome IDs | Chromosomes | Physical positions (bp) | CDC Frontier (Reference genome) | (Pusa 1103 & HPNB) | (ILWC 46 & LPNB) | Sequence Components of genome | Gene accession IDs | Putative functions                                  |
|--------------------|----------------|-------------|-------------------------|---------------------------------|--------------------|------------------|-------------------------------|--------------------|-----------------------------------------------------|
| SNP_70055_A_183609 | NW_004515837.1 | scaffold332 | 183609                  | AA                              | GG                 | GG               | INTERGENIC                    |                    |                                                     |
| SNP_70056_A_203756 | NW_004515837.1 | scaffold332 | 203756                  | CC                              | TT                 | TT               | NON_SYNONYMOUS_CODING         | 101488602          | probable protein phosphatase 2C 42                  |
| SNP_70057_A_214366 | NW_004515837.1 | scaffold332 | 214366                  | CC                              | AA                 | AA               | DRR                           | 101488952          | probable pectinesterase/pectinesterase inhibitor 32 |
| SNP_70058_A_219761 | NW_004515837.1 | scaffold332 | 219761                  | AA                              | GG                 | GG               | INTERGENIC                    |                    |                                                     |
| SNP_70059_A_5048   | NW_004515838.1 | scaffold333 | 5048                    | GG                              | AA                 | AA               | INTERGENIC                    |                    |                                                     |
| SNP_70061_A_12701  | NW_004515838.1 | scaffold333 | 12701                   | GG                              | AA                 | AA               | INTERGENIC                    |                    |                                                     |
| SNP_70062_A_12775  | NW_004515838.1 | scaffold333 | 12775                   | AA                              | GG                 | GG               | INTERGENIC                    |                    |                                                     |
| SNP_70063_A_12847  | NW_004515838.1 | scaffold333 | 12847                   | CC                              | TT                 | TT               | INTERGENIC                    |                    |                                                     |
| SNP_70064_A_14346  | NW_004515838.1 | scaffold333 | 14346                   | AA                              | GG                 | GG               | INTERGENIC                    |                    |                                                     |
| SNP_70065_A_16222  | NW_004515838.1 | scaffold333 | 16222                   | GG                              | AA                 | AA               | INTERGENIC                    |                    |                                                     |
| SNP_70066_A_16806  | NW_004515838.1 | scaffold333 | 16806                   | CC                              | TT                 | TT               | INTERGENIC                    |                    |                                                     |
| SNP_70067_A_19399  | NW_004515838.1 | scaffold333 | 19399                   | GG                              | AA                 | AA               | INTERGENIC                    |                    |                                                     |
| SNP_70068_A_19668  | NW_004515838.1 | scaffold333 | 19668                   | TT                              | CC                 | CC               | INTERGENIC                    |                    |                                                     |
| SNP_70069_A_19883  | NW_004515838.1 | scaffold333 | 19883                   | TT                              | AA                 | AA               | INTERGENIC                    |                    |                                                     |
| SNP_70070_A_20034  | NW_004515838.1 | scaffold333 | 20034                   | AA                              | CC                 | CC               | INTERGENIC                    |                    |                                                     |
| SNP_70071_A_22352  | NW_004515838.1 | scaffold333 | 22352                   | CC                              | AA                 | AA               | INTERGENIC                    |                    |                                                     |
| SNP_70072_A_22519  | NW_004515838.1 | scaffold333 | 22519                   | TT                              | CC                 | CC               | INTERGENIC                    |                    |                                                     |
| SNP_70073_A_22525  | NW_004515838.1 | scaffold333 | 22525                   | CC                              | TT                 | TT               | INTERGENIC                    |                    |                                                     |
| SNP_70074_A_22621  | NW_004515838.1 | scaffold333 | 22621                   | GG                              | TT                 | TT               | INTERGENIC                    |                    |                                                     |
| SNP_70075_A_22845  | NW_004515838.1 | scaffold333 | 22845                   | CC                              | TT                 | TT               | INTERGENIC                    |                    |                                                     |
| SNP_70076_A_22890  | NW_004515838.1 | scaffold333 | 22890                   | TT                              | GG                 | GG               | INTERGENIC                    |                    |                                                     |
| SNP_70077_A_22904  | NW_004515838.1 | scaffold333 | 22904                   | AA                              | CC                 | CC               | INTERGENIC                    |                    |                                                     |

| SNPs IDs          | Chromosome IDs | Chromosomes | Physical positions (bp) | CDC Frontier (Reference genome) | (Pusa 1103 & HPNB) | (ILWC 46 & LPNB) | Sequence genome | Components of | Gene accession IDs | Putative functions |
|-------------------|----------------|-------------|-------------------------|---------------------------------|--------------------|------------------|-----------------|---------------|--------------------|--------------------|
| SNP_70078_A_22907 | NW_004515838.1 | scaffold333 | 22907                   | AA                              | GG                 | GG               | INTERGENIC      |               |                    |                    |
| SNP_70079_A_23327 | NW_004515838.1 | scaffold333 | 23327                   | GG                              | CC                 | CC               | INTERGENIC      |               |                    |                    |
| SNP_70080_A_23478 | NW_004515838.1 | scaffold333 | 23478                   | CC                              | GG                 | GG               | INTERGENIC      |               |                    |                    |
| SNP_70081_A_26682 | NW_004515838.1 | scaffold333 | 26682                   | TT                              | GG                 | GG               | INTERGENIC      |               |                    |                    |
| SNP_70082_A_28021 | NW_004515838.1 | scaffold333 | 28021                   | GG                              | AA                 | AA               | INTERGENIC      |               |                    |                    |
| SNP_70083_A_28081 | NW_004515838.1 | scaffold333 | 28081                   | GG                              | AA                 | AA               | INTERGENIC      |               |                    |                    |
| SNP_70084_A_28429 | NW_004515838.1 | scaffold333 | 28429                   | TT                              | CC                 | CC               | INTERGENIC      |               |                    |                    |
| SNP_70085_A_28455 | NW_004515838.1 | scaffold333 | 28455                   | TT                              | CC                 | CC               | INTERGENIC      |               |                    |                    |
| SNP_70086_A_44562 | NW_004515838.1 | scaffold333 | 44562                   | TT                              | AA                 | AA               | INTERGENIC      |               |                    |                    |
| SNP_70087_A_44644 | NW_004515838.1 | scaffold333 | 44644                   | CC                              | AA                 | AA               | INTERGENIC      |               |                    |                    |
| SNP_70088_A_44800 | NW_004515838.1 | scaffold333 | 44800                   | GG                              | AA                 | AA               | INTERGENIC      |               |                    |                    |
| SNP_70089_A_44950 | NW_004515838.1 | scaffold333 | 44950                   | TT                              | GG                 | GG               | INTERGENIC      |               |                    |                    |
| SNP_70090_A_45090 | NW_004515838.1 | scaffold333 | 45090                   | TT                              | AA                 | AA               | INTERGENIC      |               |                    |                    |
| SNP_70091_A_52048 | NW_004515838.1 | scaffold333 | 52048                   | GG                              | AA                 | AA               | INTERGENIC      |               |                    |                    |
| SNP_70092_A_52225 | NW_004515838.1 | scaffold333 | 52225                   | GG                              | TT                 | TT               | INTERGENIC      |               |                    |                    |
| SNP_70093_A_52476 | NW_004515838.1 | scaffold333 | 52476                   | TT                              | CC                 | CC               | INTERGENIC      |               |                    |                    |
| SNP_70094_A_52504 | NW_004515838.1 | scaffold333 | 52504                   | AA                              | TT                 | TT               | INTERGENIC      |               |                    |                    |
| SNP_70095_A_52831 | NW_004515838.1 | scaffold333 | 52831                   | TT                              | CC                 | CC               | INTERGENIC      |               |                    |                    |
| SNP_70096_A_53161 | NW_004515838.1 | scaffold333 | 53161                   | AA                              | CC                 | CC               | INTERGENIC      |               |                    |                    |
| SNP_70097_A_53243 | NW_004515838.1 | scaffold333 | 53243                   | CC                              | GG                 | GG               | INTERGENIC      |               |                    |                    |
| SNP_70098_A_64931 | NW_004515838.1 | scaffold333 | 64931                   | TT                              | CC                 | CC               | INTERGENIC      |               |                    |                    |
| SNP_70099_A_64943 | NW_004515838.1 | scaffold333 | 64943                   | GG                              | CC                 | CC               | INTERGENIC      |               |                    |                    |

| SNPs IDs           | Chromosome IDs | Chromosomes | Physical positions (bp) | CDC Frontier (Reference genome) | (Pusa 1103 & HPNB) | (ILWC 46 & LPNB) | Sequence Components of genome | Gene accession IDs | Putative functions           |
|--------------------|----------------|-------------|-------------------------|---------------------------------|--------------------|------------------|-------------------------------|--------------------|------------------------------|
| SNP_70100_A_71621  | NW_004515838.1 | scaffold333 | 71621                   | CC                              | TT                 | TT               | INTERGENIC                    |                    |                              |
| SNP_70101_A_71649  | NW_004515838.1 | scaffold333 | 71649                   | TT                              | CC                 | CC               | INTERGENIC                    |                    |                              |
| SNP_70102_A_71707  | NW_004515838.1 | scaffold333 | 71707                   | TT                              | AA                 | AA               | INTERGENIC                    |                    |                              |
| SNP_70104_A_91943  | NW_004515838.1 | scaffold333 | 91943                   | GG                              | AA                 | AA               | INTERGENIC                    |                    |                              |
| SNP_70105_A_100716 | NW_004515838.1 | scaffold333 | 100716                  | TT                              | CC                 | CC               | INTERGENIC                    |                    |                              |
| SNP_70106_A_100728 | NW_004515838.1 | scaffold333 | 100728                  | GG                              | AA                 | AA               | INTERGENIC                    |                    |                              |
| SNP_70107_A_100786 | NW_004515838.1 | scaffold333 | 100786                  | TT                              | CC                 | CC               | INTERGENIC                    |                    |                              |
| SNP_70108_A_101094 | NW_004515838.1 | scaffold333 | 101094                  | AA                              | GG                 | GG               | INTERGENIC                    |                    |                              |
| SNP_70109_A_101130 | NW_004515838.1 | scaffold333 | 101130                  | TT                              | GG                 | GG               | INTERGENIC                    |                    |                              |
| SNP_70110_A_101184 | NW_004515838.1 | scaffold333 | 101184                  | AA                              | TT                 | TT               | INTERGENIC                    |                    |                              |
| SNP_70111_A_5080   | NW_004515839.1 | scaffold334 | 5080                    | TT                              | CC                 | CC               | INTERGENIC                    |                    |                              |
| SNP_70112_A_5106   | NW_004515839.1 | scaffold334 | 5106                    | AA                              | GG                 | GG               | INTERGENIC                    |                    |                              |
| SNP_70113_A_5142   | NW_004515839.1 | scaffold334 | 5142                    | AA                              | GG                 | GG               | INTERGENIC                    |                    |                              |
| SNP_70114_A_40763  | NW_004515839.1 | scaffold334 | 40763                   | AA                              | GG                 | GG               | INTERGENIC                    |                    |                              |
| SNP_70115_A_40799  | NW_004515839.1 | scaffold334 | 40799                   | CC                              | TT                 | TT               | INTERGENIC                    |                    |                              |
| SNP_70116_A_40949  | NW_004515839.1 | scaffold334 | 40949                   | GG                              | AA                 | AA               | INTERGENIC                    |                    |                              |
| SNP_70117_A_68792  | NW_004515839.1 | scaffold334 | 68792                   | AA                              | CC                 | CC               | NON_SYNONYMOUS_CODING         | 101490894          | uncharacterized LOC101490894 |
| SNP_70118_A_69021  | NW_004515839.1 | scaffold334 | 69021                   | TT                              | CC                 | CC               | NON_SYNONYMOUS_CODING         | 101490894          | uncharacterized LOC101490894 |
| SNP_70119_A_69151  | NW_004515839.1 | scaffold334 | 69151                   | AA                              | CC                 | CC               | URR                           | 101490894          | uncharacterized LOC101490894 |
| SNP_70120_A_69173  | NW_004515839.1 | scaffold334 | 69173                   | AA                              | GG                 | GG               | URR                           | 101490894          | uncharacterized LOC101490894 |
| SNP_70121_A_105844 | NW_004515839.1 | scaffold334 | 105844                  | CC                              | TT                 | TT               | INTERGENIC                    |                    |                              |
| SNP_70122_A_105852 | NW_004515839.1 | scaffold334 | 105852                  | CC                              | AA                 | AA               | INTERGENIC                    |                    |                              |



| SNPs IDs           | Chromosome IDs | Chromosomes | Physical positions (bp) | CDC Frontier (Reference genome) | (Pusa 1103 & HPNB) | (ILWC 46 & LPNB) | Sequence genome | Components of | Gene accession IDs | Putative functions |
|--------------------|----------------|-------------|-------------------------|---------------------------------|--------------------|------------------|-----------------|---------------|--------------------|--------------------|
| SNP_70123_A_105903 | NW_004515839.1 | scaffold334 | 105903                  | TT                              | AA                 | AA               | INTERGENIC      |               |                    |                    |
| SNP_70124_A_105913 | NW_004515839.1 | scaffold334 | 105913                  | TT                              | CC                 | CC               | INTERGENIC      |               |                    |                    |
| SNP_70125_A_105945 | NW_004515839.1 | scaffold334 | 105945                  | TT                              | AA                 | AA               | INTERGENIC      |               |                    |                    |
| SNP_70126_A_105951 | NW_004515839.1 | scaffold334 | 105951                  | AA                              | CC                 | CC               | INTERGENIC      |               |                    |                    |
| SNP_70127_A_105960 | NW_004515839.1 | scaffold334 | 105960                  | TT                              | CC                 | CC               | INTERGENIC      |               |                    |                    |
| SNP_70128_A_105966 | NW_004515839.1 | scaffold334 | 105966                  | TT                              | AA                 | AA               | INTERGENIC      |               |                    |                    |
| SNP_70129_A_105984 | NW_004515839.1 | scaffold334 | 105984                  | AA                              | GG                 | GG               | INTERGENIC      |               |                    |                    |
| SNP_70130_A_106002 | NW_004515839.1 | scaffold334 | 106002                  | TT                              | AA                 | AA               | INTERGENIC      |               |                    |                    |
| SNP_70131_A_106008 | NW_004515839.1 | scaffold334 | 106008                  | TT                              | CC                 | CC               | INTERGENIC      |               |                    |                    |
| SNP_70132_A_106020 | NW_004515839.1 | scaffold334 | 106020                  | TT                              | CC                 | CC               | INTERGENIC      |               |                    |                    |
| SNP_70133_A_106080 | NW_004515839.1 | scaffold334 | 106080                  | AA                              | CC                 | CC               | INTERGENIC      |               |                    |                    |
| SNP_70134_A_106214 | NW_004515839.1 | scaffold334 | 106214                  | GG                              | TT                 | TT               | INTERGENIC      |               |                    |                    |
| SNP_70135_A_106322 | NW_004515839.1 | scaffold334 | 106322                  | TT                              | CC                 | CC               | INTERGENIC      |               |                    |                    |
| SNP_70136_A_108584 | NW_004515839.1 | scaffold334 | 108584                  | TT                              | AA                 | AA               | INTERGENIC      |               |                    |                    |
| SNP_70137_A_108596 | NW_004515839.1 | scaffold334 | 108596                  | GG                              | TT                 | TT               | INTERGENIC      |               |                    |                    |
| SNP_70138_A_108714 | NW_004515839.1 | scaffold334 | 108714                  | AA                              | CC                 | CC               | INTERGENIC      |               |                    |                    |
| SNP_70139_A_108721 | NW_004515839.1 | scaffold334 | 108721                  | AA                              | GG                 | GG               | INTERGENIC      |               |                    |                    |
| SNP_70140_A_108805 | NW_004515839.1 | scaffold334 | 108805                  | TT                              | CC                 | CC               | INTERGENIC      |               |                    |                    |
| SNP_70141_A_108912 | NW_004515839.1 | scaffold334 | 108912                  | CC                              | AA                 | AA               | INTERGENIC      |               |                    |                    |
| SNP_70142_A_108939 | NW_004515839.1 | scaffold334 | 108939                  | AA                              | TT                 | TT               | INTERGENIC      |               |                    |                    |
| SNP_70143_A_109006 | NW_004515839.1 | scaffold334 | 109006                  | GG                              | AA                 | AA               | INTERGENIC      |               |                    |                    |
| SNP_70144_A_109017 | NW_004515839.1 | scaffold334 | 109017                  | CC                              | TT                 | TT               | INTERGENIC      |               |                    |                    |

| SNPs IDs           | Chromosome IDs | Chromosomes | Physical positions (bp) | CDC Frontier (Reference genome) | (Pusa 1103 & HPNB) | (ILWC 46 & LPNB) | Sequence genome | Components of | Gene accession IDs | Putative functions |
|--------------------|----------------|-------------|-------------------------|---------------------------------|--------------------|------------------|-----------------|---------------|--------------------|--------------------|
| SNP_70145_A_109019 | NW_004515839.1 | scaffold334 | 109019                  | TT                              | CC                 | CC               | INTERGENIC      |               |                    |                    |
| SNP_70146_A_109083 | NW_004515839.1 | scaffold334 | 109083                  | TT                              | CC                 | CC               | INTERGENIC      |               |                    |                    |
| SNP_70147_A_110607 | NW_004515839.1 | scaffold334 | 110607                  | AA                              | CC                 | CC               | INTERGENIC      |               |                    |                    |
| SNP_70148_A_112484 | NW_004515839.1 | scaffold334 | 112484                  | CC                              | TT                 | TT               | INTERGENIC      |               |                    |                    |
| SNP_70149_A_112508 | NW_004515839.1 | scaffold334 | 112508                  | GG                              | AA                 | AA               | INTERGENIC      |               |                    |                    |
| SNP_70150_A_166008 | NW_004515839.1 | scaffold334 | 166008                  | GG                              | TT                 | TT               | INTERGENIC      |               |                    |                    |
| SNP_70151_A_28813  | NW_004515840.1 | scaffold335 | 28813                   | TT                              | CC                 | CC               | INTERGENIC      |               |                    |                    |
| SNP_70152_A_28818  | NW_004515840.1 | scaffold335 | 28818                   | AA                              | GG                 | GG               | INTERGENIC      |               |                    |                    |
| SNP_70153_A_28888  | NW_004515840.1 | scaffold335 | 28888                   | TT                              | CC                 | CC               | INTERGENIC      |               |                    |                    |
| SNP_70154_A_28901  | NW_004515840.1 | scaffold335 | 28901                   | TT                              | GG                 | GG               | INTERGENIC      |               |                    |                    |
| SNP_70155_A_28902  | NW_004515840.1 | scaffold335 | 28902                   | AA                              | TT                 | TT               | INTERGENIC      |               |                    |                    |
| SNP_70158_A_134598 | NW_004515840.1 | scaffold335 | 134598                  | AA                              | TT                 | TT               | INTERGENIC      |               |                    |                    |
| SNP_70159_A_134745 | NW_004515840.1 | scaffold335 | 134745                  | TT                              | CC                 | CC               | INTERGENIC      |               |                    |                    |
| SNP_70160_A_134918 | NW_004515840.1 | scaffold335 | 134918                  | GG                              | AA                 | AA               | INTERGENIC      |               |                    |                    |
| SNP_70161_A_134930 | NW_004515840.1 | scaffold335 | 134930                  | TT                              | GG                 | GG               | INTERGENIC      |               |                    |                    |
| SNP_70162_A_137327 | NW_004515840.1 | scaffold335 | 137327                  | GG                              | AA                 | AA               | INTERGENIC      |               |                    |                    |
| SNP_70163_A_137396 | NW_004515840.1 | scaffold335 | 137396                  | TT                              | GG                 | GG               | INTERGENIC      |               |                    |                    |
| SNP_70164_A_137449 | NW_004515840.1 | scaffold335 | 137449                  | AA                              | CC                 | CC               | INTERGENIC      |               |                    |                    |
| SNP_70165_A_137465 | NW_004515840.1 | scaffold335 | 137465                  | CC                              | GG                 | GG               | INTERGENIC      |               |                    |                    |
| SNP_70166_A_137492 | NW_004515840.1 | scaffold335 | 137492                  | AA                              | TT                 | TT               | INTERGENIC      |               |                    |                    |
| SNP_70167_A_137528 | NW_004515840.1 | scaffold335 | 137528                  | CC                              | TT                 | TT               | INTERGENIC      |               |                    |                    |
| SNP_70168_A_137670 | NW_004515840.1 | scaffold335 | 137670                  | GG                              | AA                 | AA               | INTERGENIC      |               |                    |                    |

| SNPs IDs           | Chromosome IDs | Chromosomes | Physical positions (bp) | CDC Frontier (Reference genome) | (Pusa 1103 & HPNB) | (ILWC 46 & LPNB) | Sequence genome | Components of | Gene accession IDs | Putative functions |
|--------------------|----------------|-------------|-------------------------|---------------------------------|--------------------|------------------|-----------------|---------------|--------------------|--------------------|
| SNP_70169_A_137746 | NW_004515840.1 | scaffold335 | 137746                  | AA                              | TT                 | TT               | INTERGENIC      |               |                    |                    |
| SNP_70170_A_137800 | NW_004515840.1 | scaffold335 | 137800                  | TT                              | GG                 | GG               | INTERGENIC      |               |                    |                    |
| SNP_70171_A_137817 | NW_004515840.1 | scaffold335 | 137817                  | TT                              | CC                 | CC               | INTERGENIC      |               |                    |                    |
| SNP_70172_A_137833 | NW_004515840.1 | scaffold335 | 137833                  | AA                              | GG                 | GG               | INTERGENIC      |               |                    |                    |
| SNP_70173_A_137975 | NW_004515840.1 | scaffold335 | 137975                  | AA                              | GG                 | GG               | INTERGENIC      |               |                    |                    |
| SNP_70174_A_139581 | NW_004515840.1 | scaffold335 | 139581                  | GG                              | CC                 | CC               | INTERGENIC      |               |                    |                    |
| SNP_70175_A_139586 | NW_004515840.1 | scaffold335 | 139586                  | GG                              | AA                 | AA               | INTERGENIC      |               |                    |                    |
| SNP_70176_A_142244 | NW_004515840.1 | scaffold335 | 142244                  | GG                              | AA                 | AA               | INTERGENIC      |               |                    |                    |
| SNP_70177_A_142249 | NW_004515840.1 | scaffold335 | 142249                  | CC                              | TT                 | TT               | INTERGENIC      |               |                    |                    |
| SNP_70178_A_157799 | NW_004515840.1 | scaffold335 | 157799                  | AA                              | GG                 | GG               | INTERGENIC      |               |                    |                    |
| SNP_70179_A_157976 | NW_004515840.1 | scaffold335 | 157976                  | TT                              | CC                 | CC               | INTERGENIC      |               |                    |                    |
| SNP_70180_A_164802 | NW_004515840.1 | scaffold335 | 164802                  | GG                              | AA                 | AA               | INTERGENIC      |               |                    |                    |
| SNP_70181_A_174825 | NW_004515840.1 | scaffold335 | 174825                  | GG                              | TT                 | TT               | INTERGENIC      |               |                    |                    |
| SNP_70182_A_193847 | NW_004515840.1 | scaffold335 | 193847                  | GG                              | AA                 | AA               | INTERGENIC      |               |                    |                    |
| SNP_70183_A_193867 | NW_004515840.1 | scaffold335 | 193867                  | CC                              | GG                 | GG               | INTERGENIC      |               |                    |                    |
| SNP_70184_A_195396 | NW_004515840.1 | scaffold335 | 195396                  | AA                              | GG                 | GG               | INTERGENIC      |               |                    |                    |
| SNP_70185_A_202770 | NW_004515840.1 | scaffold335 | 202770                  | CC                              | TT                 | TT               | INTERGENIC      |               |                    |                    |
| SNP_70186_A_202777 | NW_004515840.1 | scaffold335 | 202777                  | AA                              | GG                 | GG               | INTERGENIC      |               |                    |                    |
| SNP_70189_A_211420 | NW_004515840.1 | scaffold335 | 211420                  | TT                              | CC                 | CC               | INTERGENIC      |               |                    |                    |
| SNP_70190_A_211558 | NW_004515840.1 | scaffold335 | 211558                  | CC                              | TT                 | TT               | INTERGENIC      |               |                    |                    |
| SNP_70191_A_215192 | NW_004515840.1 | scaffold335 | 215192                  | GG                              | AA                 | AA               | INTERGENIC      |               |                    |                    |
| SNP_70192_A_218765 | NW_004515840.1 | scaffold335 | 218765                  | CC                              | GG                 | GG               | INTERGENIC      |               |                    |                    |

| SNPs IDs           | Chromosome IDs | Chromosomes | Physical positions (bp) | CDC Frontier (Reference genome) | (Pusa 1103 & HPNB) | (ILWC 46 & LPNB) | Sequence genome | Components of | Gene accession IDs | Putative functions |
|--------------------|----------------|-------------|-------------------------|---------------------------------|--------------------|------------------|-----------------|---------------|--------------------|--------------------|
| SNP_70193_A_232556 | NW_004515840.1 | scaffold335 | 232556                  | AA                              | GG                 | GG               | INTERGENIC      |               |                    |                    |
| SNP_70195_A_12180  | NW_004515841.1 | scaffold336 | 12180                   | TT                              | CC                 | CC               | INTERGENIC      |               |                    |                    |
| SNP_70196_A_13591  | NW_004515841.1 | scaffold336 | 13591                   | AA                              | TT                 | TT               | INTERGENIC      |               |                    |                    |
| SNP_70197_A_13677  | NW_004515841.1 | scaffold336 | 13677                   | AA                              | GG                 | GG               | INTERGENIC      |               |                    |                    |
| SNP_70198_A_13685  | NW_004515841.1 | scaffold336 | 13685                   | CC                              | TT                 | TT               | INTERGENIC      |               |                    |                    |
| SNP_70199_A_13740  | NW_004515841.1 | scaffold336 | 13740                   | AA                              | GG                 | GG               | INTERGENIC      |               |                    |                    |
| SNP_70200_A_20214  | NW_004515841.1 | scaffold336 | 20214                   | TT                              | GG                 | GG               | INTERGENIC      |               |                    |                    |
| SNP_70201_A_63808  | NW_004515841.1 | scaffold336 | 63808                   | AA                              | GG                 | GG               | INTERGENIC      |               |                    |                    |
| SNP_70202_A_63822  | NW_004515841.1 | scaffold336 | 63822                   | AA                              | GG                 | GG               | INTERGENIC      |               |                    |                    |
| SNP_70203_A_64062  | NW_004515841.1 | scaffold336 | 64062                   | GG                              | CC                 | CC               | INTERGENIC      |               |                    |                    |
| SNP_70204_A_64423  | NW_004515841.1 | scaffold336 | 64423                   | TT                              | GG                 | GG               | INTERGENIC      |               |                    |                    |
| SNP_70205_A_65436  | NW_004515841.1 | scaffold336 | 65436                   | TT                              | GG                 | GG               | INTERGENIC      |               |                    |                    |
| SNP_70207_A_68816  | NW_004515841.1 | scaffold336 | 68816                   | AA                              | CC                 | CC               | INTERGENIC      |               |                    |                    |
| SNP_70208_A_68830  | NW_004515841.1 | scaffold336 | 68830                   | TT                              | AA                 | AA               | INTERGENIC      |               |                    |                    |
| SNP_70209_A_68864  | NW_004515841.1 | scaffold336 | 68864                   | GG                              | TT                 | TT               | INTERGENIC      |               |                    |                    |
| SNP_70210_A_90934  | NW_004515841.1 | scaffold336 | 90934                   | GG                              | AA                 | AA               | INTERGENIC      |               |                    |                    |
| SNP_70211_A_90981  | NW_004515841.1 | scaffold336 | 90981                   | AA                              | GG                 | GG               | INTERGENIC      |               |                    |                    |
| SNP_70212_A_99303  | NW_004515841.1 | scaffold336 | 99303                   | GG                              | CC                 | CC               | INTERGENIC      |               |                    |                    |
| SNP_70213_A_106120 | NW_004515841.1 | scaffold336 | 106120                  | GG                              | AA                 | AA               | INTERGENIC      |               |                    |                    |
| SNP_70214_A_120869 | NW_004515841.1 | scaffold336 | 120869                  | TT                              | GG                 | GG               | INTERGENIC      |               |                    |                    |
| SNP_70215_A_151364 | NW_004515841.1 | scaffold336 | 151364                  | GG                              | AA                 | AA               | INTERGENIC      |               |                    |                    |
| SNP_70216_A_152942 | NW_004515841.1 | scaffold336 | 152942                  | TT                              | CC                 | CC               | INTERGENIC      |               |                    |                    |

| SNPs IDs           | Chromosome IDs | Chromosomes | Physical positions (bp) | CDC Frontier (Reference genome) | (Pusa 1103 & HPNB) | (ILWC 46 & LPNB) | Sequence Components of genome | Gene accession IDs | Putative functions           |
|--------------------|----------------|-------------|-------------------------|---------------------------------|--------------------|------------------|-------------------------------|--------------------|------------------------------|
| SNP_70217_A_178220 | NW_004515841.1 | scaffold336 | 178220                  | AA                              | GG                 | GG               | URR                           | 101497928          | uncharacterized LOC101497928 |
| SNP_70218_A_178959 | NW_004515841.1 | scaffold336 | 178959                  | AA                              | CC                 | CC               | URR                           | 101497928          | uncharacterized LOC101497928 |
| SNP_70219_A_216742 | NW_004515841.1 | scaffold336 | 216742                  | CC                              | TT                 | TT               | INTERGENIC                    |                    |                              |
| SNP_70220_A_224794 | NW_004515841.1 | scaffold336 | 224794                  | GG                              | TT                 | TT               | INTERGENIC                    |                    |                              |
| SNP_70222_A_329756 | NW_004515841.1 | scaffold336 | 329756                  | TT                              | CC                 | CC               | INTERGENIC                    |                    |                              |
| SNP_70223_A_360823 | NW_004515841.1 | scaffold336 | 360823                  | TT                              | CC                 | CC               | INTERGENIC                    |                    |                              |
| SNP_70225_A_360932 | NW_004515841.1 | scaffold336 | 360932                  | AA                              | CC                 | CC               | INTERGENIC                    |                    |                              |
| SNP_70226_A_360971 | NW_004515841.1 | scaffold336 | 360971                  | AA                              | CC                 | CC               | INTERGENIC                    |                    |                              |
| SNP_70227_A_375241 | NW_004515841.1 | scaffold336 | 375241                  | TT                              | GG                 | GG               | INTERGENIC                    |                    |                              |
| SNP_70228_A_386576 | NW_004515841.1 | scaffold336 | 386576                  | TT                              | AA                 | AA               | INTERGENIC                    |                    |                              |
| SNP_70229_A_392714 | NW_004515841.1 | scaffold336 | 392714                  | TT                              | GG                 | GG               | INTERGENIC                    |                    |                              |
| SNP_70230_A_392718 | NW_004515841.1 | scaffold336 | 392718                  | AA                              | GG                 | GG               | INTERGENIC                    |                    |                              |
| SNP_70231_A_400144 | NW_004515841.1 | scaffold336 | 400144                  | TT                              | AA                 | AA               | INTERGENIC                    |                    |                              |
| SNP_70232_A_400536 | NW_004515841.1 | scaffold336 | 400536                  | CC                              | AA                 | AA               | INTERGENIC                    |                    |                              |
| SNP_70233_A_427333 | NW_004515841.1 | scaffold336 | 427333                  | TT                              | AA                 | AA               | INTERGENIC                    |                    |                              |
| SNP_70234_A_427334 | NW_004515841.1 | scaffold336 | 427334                  | CC                              | AA                 | AA               | INTERGENIC                    |                    |                              |
| SNP_70236_A_455682 | NW_004515841.1 | scaffold336 | 455682                  | CC                              | AA                 | AA               | INTERGENIC                    |                    |                              |
| SNP_70237_A_529802 | NW_004515841.1 | scaffold336 | 529802                  | TT                              | CC                 | CC               | INTERGENIC                    |                    |                              |
| SNP_70238_A_530181 | NW_004515841.1 | scaffold336 | 530181                  | TT                              | GG                 | GG               | INTERGENIC                    |                    |                              |
| SNP_70239_A_538373 | NW_004515841.1 | scaffold336 | 538373                  | AA                              | GG                 | GG               | INTERGENIC                    |                    |                              |
| SNP_70240_A_538401 | NW_004515841.1 | scaffold336 | 538401                  | TT                              | GG                 | GG               | INTERGENIC                    |                    |                              |
| SNP_70241_A_538409 | NW_004515841.1 | scaffold336 | 538409                  | GG                              | AA                 | AA               | INTERGENIC                    |                    |                              |

| SNPs IDs           | Chromosome IDs | Chromosomes | Physical positions (bp) | CDC Frontier (Reference genome) | (Pusa 1103 & HPNB) | (ILWC 46 & LPNB) | Sequence genome | Components of | Gene accession IDs             | Putative functions |
|--------------------|----------------|-------------|-------------------------|---------------------------------|--------------------|------------------|-----------------|---------------|--------------------------------|--------------------|
| SNP_70242_A_538479 | NW_004515841.1 | scaffold336 | 538479                  | TT                              | GG                 | GG               | INTERGENIC      |               |                                |                    |
| SNP_70243_A_538530 | NW_004515841.1 | scaffold336 | 538530                  | GG                              | AA                 | AA               | INTERGENIC      |               |                                |                    |
| SNP_70244_A_538542 | NW_004515841.1 | scaffold336 | 538542                  | GG                              | AA                 | AA               | INTERGENIC      |               |                                |                    |
| SNP_70245_A_538689 | NW_004515841.1 | scaffold336 | 538689                  | AA                              | GG                 | GG               | INTERGENIC      |               |                                |                    |
| SNP_70246_A_538741 | NW_004515841.1 | scaffold336 | 538741                  | AA                              | GG                 | GG               | INTERGENIC      |               |                                |                    |
| SNP_70247_A_538761 | NW_004515841.1 | scaffold336 | 538761                  | GG                              | AA                 | AA               | INTERGENIC      |               |                                |                    |
| SNP_70248_A_538780 | NW_004515841.1 | scaffold336 | 538780                  | TT                              | CC                 | CC               | INTERGENIC      |               |                                |                    |
| SNP_70249_A_538854 | NW_004515841.1 | scaffold336 | 538854                  | TT                              | GG                 | GG               | INTERGENIC      |               |                                |                    |
| SNP_70250_A_538862 | NW_004515841.1 | scaffold336 | 538862                  | CC                              | AA                 | AA               | INTERGENIC      |               |                                |                    |
| SNP_70251_A_543002 | NW_004515841.1 | scaffold336 | 543002                  | AA                              | CC                 | CC               | INTERGENIC      |               |                                |                    |
| SNP_70253_A_565417 | NW_004515841.1 | scaffold336 | 565417                  | AA                              | GG                 | GG               | INTERGENIC      |               |                                |                    |
| SNP_70255_A_565839 | NW_004515841.1 | scaffold336 | 565839                  | CC                              | AA                 | AA               | INTERGENIC      |               |                                |                    |
| SNP_70256_A_565854 | NW_004515841.1 | scaffold336 | 565854                  | GG                              | AA                 | AA               | INTERGENIC      |               |                                |                    |
| SNP_70257_A_583619 | NW_004515841.1 | scaffold336 | 583619                  | TT                              | GG                 | GG               | INTRON          | 101495850     | RNA-directed DNA methylation 4 |                    |
| SNP_70258_A_583629 | NW_004515841.1 | scaffold336 | 583629                  | CC                              | AA                 | AA               | INTRON          | 101495850     | RNA-directed DNA methylation 4 |                    |
| SNP_70259_A_583640 | NW_004515841.1 | scaffold336 | 583640                  | AA                              | GG                 | GG               | INTRON          | 101495850     | RNA-directed DNA methylation 4 |                    |
| SNP_70260_A_583658 | NW_004515841.1 | scaffold336 | 583658                  | TT                              | CC                 | CC               | INTRON          | 101495850     | RNA-directed DNA methylation 4 |                    |
| SNP_70261_A_583664 | NW_004515841.1 | scaffold336 | 583664                  | AA                              | GG                 | GG               | INTRON          | 101495850     | RNA-directed DNA methylation 4 |                    |
| SNP_70262_A_583697 | NW_004515841.1 | scaffold336 | 583697                  | AA                              | CC                 | CC               | INTRON          | 101495850     | RNA-directed DNA methylation 4 |                    |
| SNP_70263_A_584021 | NW_004515841.1 | scaffold336 | 584021                  | AA                              | GG                 | GG               | INTRON          | 101495850     | RNA-directed DNA methylation 4 |                    |
| SNP_70264_A_613695 | NW_004515841.1 | scaffold336 | 613695                  | GG                              | AA                 | AA               | INTERGENIC      |               |                                |                    |
| SNP_70265_A_616959 | NW_004515841.1 | scaffold336 | 616959                  | CC                              | TT                 | TT               | INTERGENIC      |               |                                |                    |

| SNPs IDs           | Chromosome IDs | Chromosomes | Physical positions (bp) | CDC Frontier (Reference genome) | (Pusa 1103 & HPNB) | (ILWC 46 & LPNB) | Sequence Components of genome | Gene accession IDs | Putative functions                                     |
|--------------------|----------------|-------------|-------------------------|---------------------------------|--------------------|------------------|-------------------------------|--------------------|--------------------------------------------------------|
| SNP_70266_A_617479 | NW_004515841.1 | scaffold336 | 617479                  | CC                              | AA                 | AA               | DRR                           | 101499558          | ABC transporter B family member 26, chloroplastic-like |
| SNP_70269_A_634151 | NW_004515841.1 | scaffold336 | 634151                  | GG                              | AA                 | AA               | INTRON                        | 101499558          | ABC transporter B family member 26, chloroplastic-like |
| SNP_70270_A_634155 | NW_004515841.1 | scaffold336 | 634155                  | AA                              | GG                 | GG               | INTRON                        | 101499558          | ABC transporter B family member 26, chloroplastic-like |
| SNP_70271_A_634188 | NW_004515841.1 | scaffold336 | 634188                  | GG                              | AA                 | AA               | INTRON                        | 101499558          | ABC transporter B family member 26, chloroplastic-like |
| SNP_70272_A_634248 | NW_004515841.1 | scaffold336 | 634248                  | TT                              | CC                 | CC               | INTRON                        | 101499558          | ABC transporter B family member 26, chloroplastic-like |
| SNP_70273_A_634266 | NW_004515841.1 | scaffold336 | 634266                  | AA                              | GG                 | GG               | INTRON                        | 101499558          | ABC transporter B family member 26, chloroplastic-like |
| SNP_70274_A_634377 | NW_004515841.1 | scaffold336 | 634377                  | AA                              | GG                 | GG               | INTRON                        | 101499558          | ABC transporter B family member 26, chloroplastic-like |
| SNP_70275_A_645546 | NW_004515841.1 | scaffold336 | 645546                  | TT                              | CC                 | CC               | INTRON                        | 101499558          | ABC transporter B family member 26, chloroplastic-like |
| SNP_70276_A_647474 | NW_004515841.1 | scaffold336 | 647474                  | TT                              | GG                 | GG               | INTRON                        | 101499558          | ABC transporter B family member 26, chloroplastic-like |
| SNP_70277_A_647489 | NW_004515841.1 | scaffold336 | 647489                  | AA                              | GG                 | GG               | INTRON                        | 101499558          | ABC transporter B family member 26, chloroplastic-like |
| SNP_70278_A_680179 | NW_004515841.1 | scaffold336 | 680179                  | AA                              | CC                 | CC               | INTERGENIC                    |                    |                                                        |
| SNP_70279_A_709844 | NW_004515841.1 | scaffold336 | 709844                  | AA                              | GG                 | GG               | URR                           | 101499856          | Unknown function                                       |
| SNP_70280_A_709937 | NW_004515841.1 | scaffold336 | 709937                  | TT                              | GG                 | GG               | URR                           | 101499856          | Unknown function                                       |
| SNP_70281_A_710048 | NW_004515841.1 | scaffold336 | 710048                  | AA                              | GG                 | GG               | URR                           | 101499856          | Unknown function                                       |
| SNP_70282_A_710068 | NW_004515841.1 | scaffold336 | 710068                  | GG                              | TT                 | TT               | URR                           | 101499856          | Unknown function                                       |
| SNP_70283_A_710249 | NW_004515841.1 | scaffold336 | 710249                  | TT                              | CC                 | CC               | URR                           | 101499856          | Unknown function                                       |
| SNP_70284_A_710286 | NW_004515841.1 | scaffold336 | 710286                  | AA                              | GG                 | GG               | URR                           | 101499856          | Unknown function                                       |
| SNP_70285_A_710314 | NW_004515841.1 | scaffold336 | 710314                  | CC                              | TT                 | TT               | URR                           | 101500190          | Unknown function                                       |
| SNP_70287_A_710497 | NW_004515841.1 | scaffold336 | 710497                  | CC                              | TT                 | TT               | URR                           | 101500190          | Unknown function                                       |
| SNP_70288_A_758051 | NW_004515841.1 | scaffold336 | 758051                  | TT                              | CC                 | CC               | INTERGENIC                    |                    |                                                        |
| SNP_70289_A_758059 | NW_004515841.1 | scaffold336 | 758059                  | TT                              | CC                 | CC               | INTERGENIC                    |                    |                                                        |
| SNP_70290_A_758076 | NW_004515841.1 | scaffold336 | 758076                  | AA                              | GG                 | GG               | INTERGENIC                    |                    |                                                        |

| SNPs IDs           | Chromosome IDs | Chromosomes | Physical positions (bp) | CDC Frontier (Reference genome) | (Pusa 1103 & HPNB) | (ILWC 46 & LPNB) | Sequence Components of genome | Gene accession IDs | Putative functions                                  |
|--------------------|----------------|-------------|-------------------------|---------------------------------|--------------------|------------------|-------------------------------|--------------------|-----------------------------------------------------|
| SNP_70291_A_764483 | NW_004515841.1 | scaffold336 | 764483                  | AA                              | CC                 | CC               | INTERGENIC                    |                    |                                                     |
| SNP_70292_A_786092 | NW_004515841.1 | scaffold336 | 786092                  | CC                              | GG                 | GG               | INTERGENIC                    |                    |                                                     |
| SNP_70293_A_805497 | NW_004515841.1 | scaffold336 | 805497                  | CC                              | TT                 | TT               | INTERGENIC                    |                    |                                                     |
| SNP_70294_A_805532 | NW_004515841.1 | scaffold336 | 805532                  | TT                              | GG                 | GG               | INTERGENIC                    |                    |                                                     |
| SNP_70295_A_805909 | NW_004515841.1 | scaffold336 | 805909                  | AA                              | GG                 | GG               | INTERGENIC                    |                    |                                                     |
| SNP_70296_A_805921 | NW_004515841.1 | scaffold336 | 805921                  | TT                              | CC                 | CC               | INTERGENIC                    |                    |                                                     |
| SNP_70297_A_813810 | NW_004515841.1 | scaffold336 | 813810                  | AA                              | TT                 | TT               | INTERGENIC                    |                    |                                                     |
| SNP_70299_A_867384 | NW_004515841.1 | scaffold336 | 867384                  | GG                              | TT                 | TT               | INTERGENIC                    |                    |                                                     |
| SNP_70300_A_867454 | NW_004515841.1 | scaffold336 | 867454                  | AA                              | GG                 | GG               | INTERGENIC                    |                    |                                                     |
| SNP_70301_A_867455 | NW_004515841.1 | scaffold336 | 867455                  | AA                              | GG                 | GG               | INTERGENIC                    |                    |                                                     |
| SNP_70302_A_867806 | NW_004515841.1 | scaffold336 | 867806                  | GG                              | AA                 | AA               | INTERGENIC                    |                    |                                                     |
| SNP_70303_A_71170  | NW_004515842.1 | scaffold338 | 71170                   | TT                              | CC                 | CC               | INTERGENIC                    |                    |                                                     |
| SNP_70304_A_71253  | NW_004515842.1 | scaffold338 | 71253                   | AA                              | TT                 | TT               | INTERGENIC                    |                    |                                                     |
| SNP_70305_A_71497  | NW_004515842.1 | scaffold338 | 71497                   | AA                              | GG                 | GG               | INTERGENIC                    |                    |                                                     |
| SNP_70306_A_71725  | NW_004515842.1 | scaffold338 | 71725                   | GG                              | AA                 | AA               | INTERGENIC                    |                    |                                                     |
| SNP_70308_A_12123  | NW_004515843.1 | scaffold340 | 12123                   | AA                              | CC                 | CC               | INTERGENIC                    |                    |                                                     |
| SNP_70309_A_12171  | NW_004515843.1 | scaffold340 | 12171                   | TT                              | AA                 | AA               | INTERGENIC                    |                    |                                                     |
| SNP_70310_A_12175  | NW_004515843.1 | scaffold340 | 12175                   | CC                              | AA                 | AA               | INTERGENIC                    |                    |                                                     |
| SNP_70311_A_12394  | NW_004515843.1 | scaffold340 | 12394                   | CC                              | AA                 | AA               | INTERGENIC                    |                    |                                                     |
| SNP_70312_A_12399  | NW_004515843.1 | scaffold340 | 12399                   | TT                              | CC                 | CC               | INTERGENIC                    |                    |                                                     |
| SNP_70313_A_21553  | NW_004515843.1 | scaffold340 | 21553                   | AA                              | GG                 | GG               | INTRON                        | 101503481          | chromosome transmission fidelity protein 18 homolog |
| SNP_70314_A_25058  | NW_004515843.1 | scaffold340 | 25058                   | GG                              | AA                 | AA               | INTRON                        | 101503481          | chromosome transmission fidelity protein 18 homolog |



| SNPs IDs          | Chromosome IDs | Chromosomes | Physical positions (bp) | CDC Frontier (Reference genome) | (Pusa 1103 & HPNB) | (ILWC 46 & LPNB) | Sequence Components of genome | Gene accession IDs | Putative functions                                  |
|-------------------|----------------|-------------|-------------------------|---------------------------------|--------------------|------------------|-------------------------------|--------------------|-----------------------------------------------------|
| SNP_70315_A_40846 | NW_004515843.1 | scaffold340 | 40846                   | CC                              | TT                 | TT               | INTRON                        | 101503481          | chromosome transmission fidelity protein 18 homolog |
| SNP_70318_A_59307 | NW_004515843.1 | scaffold340 | 59307                   | GG                              | AA                 | AA               | URR                           | 101503481          | chromosome transmission fidelity protein 18 homolog |
| SNP_70319_A_63077 | NW_004515843.1 | scaffold340 | 63077                   | GG                              | AA                 | AA               | INTERGENIC                    |                    |                                                     |
| SNP_70320_A_65683 | NW_004515843.1 | scaffold340 | 65683                   | AA                              | TT                 | TT               | INTERGENIC                    |                    |                                                     |
| SNP_70321_A_66358 | NW_004515843.1 | scaffold340 | 66358                   | AA                              | CC                 | CC               | INTERGENIC                    |                    |                                                     |
| SNP_70323_A_68876 | NW_004515843.1 | scaffold340 | 68876                   | AA                              | GG                 | GG               | INTERGENIC                    |                    |                                                     |
| SNP_70324_A_68955 | NW_004515843.1 | scaffold340 | 68955                   | AA                              | GG                 | GG               | INTERGENIC                    |                    |                                                     |
| SNP_70325_A_69053 | NW_004515843.1 | scaffold340 | 69053                   | CC                              | TT                 | TT               | INTERGENIC                    |                    |                                                     |
| SNP_70326_A_69119 | NW_004515843.1 | scaffold340 | 69119                   | TT                              | GG                 | GG               | INTERGENIC                    |                    |                                                     |
| SNP_70327_A_69317 | NW_004515843.1 | scaffold340 | 69317                   | GG                              | AA                 | AA               | INTERGENIC                    |                    |                                                     |
| SNP_70328_A_69332 | NW_004515843.1 | scaffold340 | 69332                   | GG                              | AA                 | AA               | INTERGENIC                    |                    |                                                     |
| SNP_70329_A_69451 | NW_004515843.1 | scaffold340 | 69451                   | GG                              | CC                 | CC               | INTERGENIC                    |                    |                                                     |
| SNP_70330_A_77331 | NW_004515843.1 | scaffold340 | 77331                   | AA                              | TT                 | TT               | INTERGENIC                    |                    |                                                     |
| SNP_70331_A_77355 | NW_004515843.1 | scaffold340 | 77355                   | GG                              | TT                 | TT               | INTERGENIC                    |                    |                                                     |
| SNP_70332_A_77387 | NW_004515843.1 | scaffold340 | 77387                   | AA                              | GG                 | GG               | INTERGENIC                    |                    |                                                     |
| SNP_70333_A_79161 | NW_004515843.1 | scaffold340 | 79161                   | AA                              | GG                 | GG               | INTERGENIC                    |                    |                                                     |
| SNP_70334_A_85709 | NW_004515843.1 | scaffold340 | 85709                   | AA                              | GG                 | GG               | INTERGENIC                    |                    |                                                     |
| SNP_70335_A_90236 | NW_004515843.1 | scaffold340 | 90236                   | CC                              | TT                 | TT               | INTERGENIC                    |                    |                                                     |
| SNP_70337_A_90701 | NW_004515843.1 | scaffold340 | 90701                   | GG                              | AA                 | AA               | INTERGENIC                    |                    |                                                     |
| SNP_70338_A_90716 | NW_004515843.1 | scaffold340 | 90716                   | GG                              | AA                 | AA               | INTERGENIC                    |                    |                                                     |
| SNP_70339_A_90790 | NW_004515843.1 | scaffold340 | 90790                   | CC                              | TT                 | TT               | INTERGENIC                    |                    |                                                     |
| SNP_70340_A_91168 | NW_004515843.1 | scaffold340 | 91168                   | TT                              | AA                 | AA               | INTERGENIC                    |                    |                                                     |

| SNPs IDs           | Chromosome IDs | Chromosomes | Physical positions (bp) | CDC Frontier (Reference genome) | (Pusa 1103 & HPNB) | (ILWC 46 & LPNB) | Sequence genome | Components of | Gene accession IDs | Putative functions |
|--------------------|----------------|-------------|-------------------------|---------------------------------|--------------------|------------------|-----------------|---------------|--------------------|--------------------|
| SNP_70341_A_100176 | NW_004515843.1 | scaffold340 | 100176                  | GG                              | AA                 | AA               | INTERGENIC      |               |                    |                    |
| SNP_70343_A_101527 | NW_004515843.1 | scaffold340 | 101527                  | CC                              | TT                 | TT               | INTERGENIC      |               |                    |                    |
| SNP_70344_A_103756 | NW_004515843.1 | scaffold340 | 103756                  | GG                              | AA                 | AA               | INTERGENIC      |               |                    |                    |
| SNP_70345_A_105064 | NW_004515843.1 | scaffold340 | 105064                  | AA                              | GG                 | GG               | INTERGENIC      |               |                    |                    |
| SNP_70346_A_107699 | NW_004515843.1 | scaffold340 | 107699                  | GG                              | AA                 | AA               | INTERGENIC      |               |                    |                    |
| SNP_70347_A_110522 | NW_004515843.1 | scaffold340 | 110522                  | CC                              | AA                 | AA               | INTERGENIC      |               |                    |                    |
| SNP_70348_A_110609 | NW_004515843.1 | scaffold340 | 110609                  | TT                              | CC                 | CC               | INTERGENIC      |               |                    |                    |
| SNP_70349_A_110907 | NW_004515843.1 | scaffold340 | 110907                  | GG                              | AA                 | AA               | INTERGENIC      |               |                    |                    |
| SNP_70350_A_111784 | NW_004515843.1 | scaffold340 | 111784                  | TT                              | CC                 | CC               | INTERGENIC      |               |                    |                    |
| SNP_70351_A_111946 | NW_004515843.1 | scaffold340 | 111946                  | CC                              | AA                 | AA               | INTERGENIC      |               |                    |                    |
| SNP_70352_A_111948 | NW_004515843.1 | scaffold340 | 111948                  | AA                              | TT                 | TT               | INTERGENIC      |               |                    |                    |
| SNP_70353_A_113203 | NW_004515843.1 | scaffold340 | 113203                  | AA                              | TT                 | TT               | INTERGENIC      |               |                    |                    |
| SNP_70354_A_114180 | NW_004515843.1 | scaffold340 | 114180                  | GG                              | TT                 | TT               | INTERGENIC      |               |                    |                    |
| SNP_70355_A_118715 | NW_004515843.1 | scaffold340 | 118715                  | AA                              | GG                 | GG               | INTERGENIC      |               |                    |                    |
| SNP_70356_A_118986 | NW_004515843.1 | scaffold340 | 118986                  | TT                              | GG                 | GG               | INTERGENIC      |               |                    |                    |
| SNP_70357_A_118991 | NW_004515843.1 | scaffold340 | 118991                  | TT                              | CC                 | CC               | INTERGENIC      |               |                    |                    |
| SNP_70358_A_119034 | NW_004515843.1 | scaffold340 | 119034                  | AA                              | GG                 | GG               | INTERGENIC      |               |                    |                    |
| SNP_70360_A_122848 | NW_004515843.1 | scaffold340 | 122848                  | TT                              | CC                 | CC               | INTERGENIC      |               |                    |                    |
| SNP_70361_A_124944 | NW_004515843.1 | scaffold340 | 124944                  | GG                              | AA                 | AA               | INTERGENIC      |               |                    |                    |
| SNP_70362_A_128250 | NW_004515843.1 | scaffold340 | 128250                  | TT                              | CC                 | CC               | INTERGENIC      |               |                    |                    |
| SNP_70363_A_128470 | NW_004515843.1 | scaffold340 | 128470                  | GG                              | TT                 | TT               | INTERGENIC      |               |                    |                    |
| SNP_70364_A_128544 | NW_004515843.1 | scaffold340 | 128544                  | AA                              | GG                 | GG               | INTERGENIC      |               |                    |                    |

| SNPs IDs           | Chromosome IDs | Chromosomes | Physical positions (bp) | CDC Frontier genome (Reference genome) | (Pusa 1103 & HPNB) | (ILWC 46 & LPNB) | Sequence Components of genome | Gene accession IDs | Putative functions |
|--------------------|----------------|-------------|-------------------------|----------------------------------------|--------------------|------------------|-------------------------------|--------------------|--------------------|
| SNP_70365_A_128667 | NW_004515843.1 | scaffold340 | 128667                  | GG                                     | AA                 | AA               | INTERGENIC                    |                    |                    |
| SNP_70366_A_128884 | NW_004515843.1 | scaffold340 | 128884                  | CC                                     | TT                 | TT               | INTERGENIC                    |                    |                    |
| SNP_70367_A_128959 | NW_004515843.1 | scaffold340 | 128959                  | CC                                     | TT                 | TT               | INTERGENIC                    |                    |                    |
| SNP_70368_A_130922 | NW_004515843.1 | scaffold340 | 130922                  | TT                                     | AA                 | AA               | INTERGENIC                    |                    |                    |
| SNP_70369_A_134084 | NW_004515843.1 | scaffold340 | 134084                  | GG                                     | AA                 | AA               | INTERGENIC                    |                    |                    |
| SNP_70371_A_137135 | NW_004515843.1 | scaffold340 | 137135                  | GG                                     | AA                 | AA               | INTERGENIC                    |                    |                    |
| SNP_70372_A_137201 | NW_004515843.1 | scaffold340 | 137201                  | TT                                     | AA                 | AA               | INTERGENIC                    |                    |                    |
| SNP_70373_A_149006 | NW_004515843.1 | scaffold340 | 149006                  | TT                                     | GG                 | GG               | INTERGENIC                    |                    |                    |
| SNP_70374_A_150311 | NW_004515843.1 | scaffold340 | 150311                  | TT                                     | CC                 | CC               | INTERGENIC                    |                    |                    |
| SNP_70375_A_150336 | NW_004515843.1 | scaffold340 | 150336                  | AA                                     | TT                 | TT               | INTERGENIC                    |                    |                    |
| SNP_70376_A_154840 | NW_004515843.1 | scaffold340 | 154840                  | TT                                     | GG                 | GG               | INTERGENIC                    |                    |                    |
| SNP_70377_A_155737 | NW_004515843.1 | scaffold340 | 155737                  | CC                                     | TT                 | TT               | INTERGENIC                    |                    |                    |
| SNP_70378_A_157389 | NW_004515843.1 | scaffold340 | 157389                  | AA                                     | GG                 | GG               | INTERGENIC                    |                    |                    |
| SNP_70379_A_157446 | NW_004515843.1 | scaffold340 | 157446                  | AA                                     | GG                 | GG               | INTERGENIC                    |                    |                    |
| SNP_70380_A_158193 | NW_004515843.1 | scaffold340 | 158193                  | TT                                     | GG                 | GG               | INTERGENIC                    |                    |                    |
| SNP_70381_A_160328 | NW_004515843.1 | scaffold340 | 160328                  | GG                                     | AA                 | AA               | SYNONYMOUS_CODING             | 101504138          | Unknown function   |
| SNP_70382_A_160332 | NW_004515843.1 | scaffold340 | 160332                  | CC                                     | TT                 | TT               | NON_SYNONYMOUS_CODING         | 101504138          | Unknown function   |
| SNP_70383_A_160362 | NW_004515843.1 | scaffold340 | 160362                  | CC                                     | GG                 | GG               | NON_SYNONYMOUS_CODING         | 101504138          | Unknown function   |
| SNP_70385_A_164894 | NW_004515843.1 | scaffold340 | 164894                  | CC                                     | GG                 | GG               | INTRON                        | 101504138          | Unknown function   |
| SNP_70386_A_165109 | NW_004515843.1 | scaffold340 | 165109                  | AA                                     | GG                 | GG               | INTRON                        | 101504138          | Unknown function   |
| SNP_70387_A_165175 | NW_004515843.1 | scaffold340 | 165175                  | TT                                     | AA                 | AA               | INTRON                        | 101504138          | Unknown function   |
| SNP_70388_A_169348 | NW_004515843.1 | scaffold340 | 169348                  | AA                                     | GG                 | GG               | NON_SYNONYMOUS_CODING         | 101504138          | Unknown function   |

| SNPs IDs           | Chromosome IDs | Chromosomes | Physical positions (bp) | CDC Frontier (Reference genome) | (Pusa 1103 & HPNB) | (ILWC 46 & LPNB) | Sequence Components of genome | Gene accession IDs | Putative functions           |
|--------------------|----------------|-------------|-------------------------|---------------------------------|--------------------|------------------|-------------------------------|--------------------|------------------------------|
| SNP_70389_A_172119 | NW_004515843.1 | scaffold340 | 172119                  | CC                              | AA                 | AA               | URR                           | 101504138          | Unknown function             |
| SNP_70390_A_173941 | NW_004515843.1 | scaffold340 | 173941                  | GG                              | AA                 | AA               | INTERGENIC                    |                    |                              |
| SNP_70391_A_174835 | NW_004515843.1 | scaffold340 | 174835                  | TT                              | GG                 | GG               | INTERGENIC                    |                    |                              |
| SNP_70392_A_176027 | NW_004515843.1 | scaffold340 | 176027                  | CC                              | TT                 | TT               | INTERGENIC                    |                    |                              |
| SNP_70393_A_192064 | NW_004515843.1 | scaffold340 | 192064                  | GG                              | AA                 | AA               | DRR                           | 101502948          | uncharacterized LOC101502948 |
| SNP_70394_A_197905 | NW_004515843.1 | scaffold340 | 197905                  | CC                              | AA                 | AA               | INTERGENIC                    |                    |                              |
| SNP_70395_A_198222 | NW_004515843.1 | scaffold340 | 198222                  | CC                              | GG                 | GG               | INTERGENIC                    |                    |                              |
| SNP_70396_A_198506 | NW_004515843.1 | scaffold340 | 198506                  | TT                              | AA                 | AA               | INTERGENIC                    |                    |                              |
| SNP_70397_A_200649 | NW_004515843.1 | scaffold340 | 200649                  | TT                              | CC                 | CC               | INTERGENIC                    |                    |                              |
| SNP_70398_A_201999 | NW_004515843.1 | scaffold340 | 201999                  | TT                              | CC                 | CC               | INTERGENIC                    |                    |                              |
| SNP_70399_A_202248 | NW_004515843.1 | scaffold340 | 202248                  | CC                              | GG                 | GG               | INTERGENIC                    |                    |                              |
| SNP_70401_A_204582 | NW_004515843.1 | scaffold340 | 204582                  | TT                              | CC                 | CC               | INTERGENIC                    |                    |                              |
| SNP_70402_A_204796 | NW_004515843.1 | scaffold340 | 204796                  | GG                              | AA                 | AA               | INTERGENIC                    |                    |                              |
| SNP_70403_A_205440 | NW_004515843.1 | scaffold340 | 205440                  | GG                              | TT                 | TT               | INTERGENIC                    |                    |                              |
| SNP_70404_A_205466 | NW_004515843.1 | scaffold340 | 205466                  | AA                              | GG                 | GG               | INTERGENIC                    |                    |                              |
| SNP_70405_A_205483 | NW_004515843.1 | scaffold340 | 205483                  | AA                              | GG                 | GG               | INTERGENIC                    |                    |                              |
| SNP_70406_A_205501 | NW_004515843.1 | scaffold340 | 205501                  | TT                              | GG                 | GG               | INTERGENIC                    |                    |                              |
| SNP_70407_A_205508 | NW_004515843.1 | scaffold340 | 205508                  | GG                              | AA                 | AA               | INTERGENIC                    |                    |                              |
| SNP_70410_A_210551 | NW_004515843.1 | scaffold340 | 210551                  | GG                              | AA                 | AA               | INTERGENIC                    |                    |                              |
| SNP_70411_A_212606 | NW_004515843.1 | scaffold340 | 212606                  | TT                              | CC                 | CC               | INTERGENIC                    |                    |                              |
| SNP_70412_A_219247 | NW_004515843.1 | scaffold340 | 219247                  | GG                              | CC                 | CC               | INTERGENIC                    |                    |                              |
| SNP_70414_A_219397 | NW_004515843.1 | scaffold340 | 219397                  | CC                              | TT                 | TT               | INTERGENIC                    |                    |                              |

| SNPs IDs           | Chromosome IDs | Chromosomes | Physical positions (bp) | CDC Frontier (Reference genome) | (Pusa 1103 & HPNB) | (ILWC 46 & LPNB) | Sequence genome | Components of | Gene accession IDs | Putative functions |
|--------------------|----------------|-------------|-------------------------|---------------------------------|--------------------|------------------|-----------------|---------------|--------------------|--------------------|
| SNP_70415_A_219749 | NW_004515843.1 | scaffold340 | 219749                  | GG                              | AA                 | AA               | INTERGENIC      |               |                    |                    |
| SNP_70416_A_220207 | NW_004515843.1 | scaffold340 | 220207                  | TT                              | GG                 | GG               | INTERGENIC      |               |                    |                    |
| SNP_70417_A_220237 | NW_004515843.1 | scaffold340 | 220237                  | GG                              | AA                 | AA               | INTERGENIC      |               |                    |                    |
| SNP_70418_A_221504 | NW_004515843.1 | scaffold340 | 221504                  | GG                              | AA                 | AA               | INTERGENIC      |               |                    |                    |
| SNP_70419_A_223514 | NW_004515843.1 | scaffold340 | 223514                  | AA                              | GG                 | GG               | INTERGENIC      |               |                    |                    |
| SNP_70420_A_223609 | NW_004515843.1 | scaffold340 | 223609                  | TT                              | CC                 | CC               | INTERGENIC      |               |                    |                    |
| SNP_70422_A_228217 | NW_004515843.1 | scaffold340 | 228217                  | GG                              | AA                 | AA               | INTERGENIC      |               |                    |                    |
| SNP_70423_A_238445 | NW_004515843.1 | scaffold340 | 238445                  | GG                              | TT                 | TT               | INTERGENIC      |               |                    |                    |
| SNP_70424_A_238465 | NW_004515843.1 | scaffold340 | 238465                  | CC                              | TT                 | TT               | INTERGENIC      |               |                    |                    |
| SNP_70425_A_239553 | NW_004515843.1 | scaffold340 | 239553                  | TT                              | CC                 | CC               | INTERGENIC      |               |                    |                    |
| SNP_70426_A_242042 | NW_004515843.1 | scaffold340 | 242042                  | AA                              | GG                 | GG               | INTERGENIC      |               |                    |                    |
| SNP_70427_A_242097 | NW_004515843.1 | scaffold340 | 242097                  | AA                              | GG                 | GG               | INTERGENIC      |               |                    |                    |
| SNP_70429_A_242159 | NW_004515843.1 | scaffold340 | 242159                  | AA                              | GG                 | GG               | INTERGENIC      |               |                    |                    |
| SNP_70430_A_242168 | NW_004515843.1 | scaffold340 | 242168                  | CC                              | TT                 | TT               | INTERGENIC      |               |                    |                    |
| SNP_70431_A_242225 | NW_004515843.1 | scaffold340 | 242225                  | AA                              | CC                 | CC               | INTERGENIC      |               |                    |                    |
| SNP_70432_A_242461 | NW_004515843.1 | scaffold340 | 242461                  | TT                              | CC                 | CC               | INTERGENIC      |               |                    |                    |
| SNP_70433_A_242472 | NW_004515843.1 | scaffold340 | 242472                  | TT                              | GG                 | GG               | INTERGENIC      |               |                    |                    |
| SNP_70434_A_242473 | NW_004515843.1 | scaffold340 | 242473                  | GG                              | TT                 | TT               | INTERGENIC      |               |                    |                    |
| SNP_70435_A_243384 | NW_004515843.1 | scaffold340 | 243384                  | TT                              | CC                 | CC               | INTERGENIC      |               |                    |                    |
| SNP_70436_A_245500 | NW_004515843.1 | scaffold340 | 245500                  | CC                              | TT                 | TT               | INTERGENIC      |               |                    |                    |
| SNP_70437_A_245531 | NW_004515843.1 | scaffold340 | 245531                  | GG                              | AA                 | AA               | INTERGENIC      |               |                    |                    |
| SNP_70438_A_246677 | NW_004515843.1 | scaffold340 | 246677                  | TT                              | GG                 | GG               | INTERGENIC      |               |                    |                    |

| SNPs IDs           | Chromosome IDs | Chromosomes | Physical positions (bp) | CDC Frontier (Reference genome) | (Pusa 1103 & HPNB) | (ILWC 46 & LPNB) | Sequence Components of genome | Gene accession IDs | Putative functions                                                  |
|--------------------|----------------|-------------|-------------------------|---------------------------------|--------------------|------------------|-------------------------------|--------------------|---------------------------------------------------------------------|
| SNP_70439_A_252850 | NW_004515843.1 | scaffold340 | 252850                  | TT                              | GG                 | GG               | URR                           | 101503161          | probable leucine-rich repeat receptor-like protein kinase At2g33170 |
| SNP_70440_A_259960 | NW_004515843.1 | scaffold340 | 259960                  | GG                              | AA                 | AA               | INTERGENIC                    |                    |                                                                     |
| SNP_70441_A_261459 | NW_004515843.1 | scaffold340 | 261459                  | CC                              | TT                 | TT               | INTERGENIC                    |                    |                                                                     |
| SNP_70442_A_261461 | NW_004515843.1 | scaffold340 | 261461                  | GG                              | AA                 | AA               | INTERGENIC                    |                    |                                                                     |
| SNP_70445_A_264142 | NW_004515843.1 | scaffold340 | 264142                  | AA                              | GG                 | GG               | INTERGENIC                    |                    |                                                                     |
| SNP_70446_A_274570 | NW_004515843.1 | scaffold340 | 274570                  | TT                              | CC                 | CC               | INTERGENIC                    |                    |                                                                     |
| SNP_70447_A_275496 | NW_004515843.1 | scaffold340 | 275496                  | TT                              | AA                 | AA               | INTERGENIC                    |                    |                                                                     |
| SNP_70448_A_275578 | NW_004515843.1 | scaffold340 | 275578                  | TT                              | CC                 | CC               | INTERGENIC                    |                    |                                                                     |
| SNP_70449_A_275792 | NW_004515843.1 | scaffold340 | 275792                  | AA                              | CC                 | CC               | INTERGENIC                    |                    |                                                                     |
| SNP_70450_A_280335 | NW_004515843.1 | scaffold340 | 280335                  | CC                              | TT                 | TT               | INTERGENIC                    |                    |                                                                     |
| SNP_70451_A_284980 | NW_004515843.1 | scaffold340 | 284980                  | AA                              | GG                 | GG               | INTERGENIC                    |                    |                                                                     |
| SNP_70453_A_289793 | NW_004515843.1 | scaffold340 | 289793                  | AA                              | TT                 | TT               | INTRON                        | 101504456          | Unknown function                                                    |
| SNP_70454_A_289794 | NW_004515843.1 | scaffold340 | 289794                  | AA                              | GG                 | GG               | INTRON                        | 101504456          | Unknown function                                                    |
| SNP_70455_A_290022 | NW_004515843.1 | scaffold340 | 290022                  | CC                              | TT                 | TT               | INTRON                        | 101504456          | Unknown function                                                    |
| SNP_70456_A_290044 | NW_004515843.1 | scaffold340 | 290044                  | CC                              | GG                 | GG               | INTRON                        | 101504456          | Unknown function                                                    |
| SNP_70457_A_290903 | NW_004515843.1 | scaffold340 | 290903                  | CC                              | TT                 | TT               | INTRON                        | 101504456          | Unknown function                                                    |
| SNP_70458_A_293829 | NW_004515843.1 | scaffold340 | 293829                  | CC                              | TT                 | TT               | INTRON                        | 101504456          | Unknown function                                                    |
| SNP_70459_A_294730 | NW_004515843.1 | scaffold340 | 294730                  | GG                              | AA                 | AA               | NON_SYNONYMOUS_CODING         | 101504456          | Unknown function                                                    |
| SNP_70460_A_295069 | NW_004515843.1 | scaffold340 | 295069                  | CC                              | TT                 | TT               | URR                           | 101504456          | Unknown function                                                    |
| SNP_70461_A_295097 | NW_004515843.1 | scaffold340 | 295097                  | AA                              | TT                 | TT               | URR                           | 101504456          | Unknown function                                                    |
| SNP_70462_A_295426 | NW_004515843.1 | scaffold340 | 295426                  | CC                              | TT                 | TT               | URR                           | 101504456          | Unknown function                                                    |
| SNP_70463_A_295473 | NW_004515843.1 | scaffold340 | 295473                  | TT                              | CC                 | CC               | URR                           | 101504456          | Unknown function                                                    |

| SNPs IDs           | Chromosome IDs | Chromosomes | Physical positions (bp) | CDC Frontier (Reference genome) | (Pusa 1103 & HPNB) | (ILWC 46 & LPNB) | Sequence Components of genome | Gene accession IDs | Putative functions                    |
|--------------------|----------------|-------------|-------------------------|---------------------------------|--------------------|------------------|-------------------------------|--------------------|---------------------------------------|
| SNP_70464_A_295497 | NW_004515843.1 | scaffold340 | 295497                  | TT                              | AA                 | AA               | URR                           | 101504456          | Unknown function                      |
| SNP_70466_A_299011 | NW_004515843.1 | scaffold340 | 299011                  | TT                              | CC                 | CC               | INTERGENIC                    |                    |                                       |
| SNP_70467_A_315101 | NW_004515843.1 | scaffold340 | 315101                  | GG                              | TT                 | TT               | INTERGENIC                    |                    |                                       |
| SNP_70468_A_316374 | NW_004515843.1 | scaffold340 | 316374                  | CC                              | TT                 | TT               | INTERGENIC                    |                    |                                       |
| SNP_70470_A_318121 | NW_004515843.1 | scaffold340 | 318121                  | GG                              | AA                 | AA               | INTERGENIC                    |                    |                                       |
| SNP_70471_A_318145 | NW_004515843.1 | scaffold340 | 318145                  | TT                              | CC                 | CC               | INTERGENIC                    |                    |                                       |
| SNP_70472_A_3924   | NW_004515844.1 | scaffold341 | 3924                    | CC                              | TT                 | TT               | INTERGENIC                    |                    |                                       |
| SNP_70473_A_67905  | NW_004515844.1 | scaffold341 | 67905                   | TT                              | CC                 | CC               | INTERGENIC                    |                    |                                       |
| SNP_70474_A_68166  | NW_004515844.1 | scaffold341 | 68166                   | AA                              | CC                 | CC               | INTERGENIC                    |                    |                                       |
| SNP_70475_A_85417  | NW_004515844.1 | scaffold341 | 85417                   | CC                              | TT                 | TT               | INTERGENIC                    |                    |                                       |
| SNP_70476_A_102427 | NW_004515844.1 | scaffold341 | 102427                  | TT                              | CC                 | CC               | URR                           | 101505416          | glucan endo-1,3-beta-glucosidase-like |
| SNP_70477_A_102622 | NW_004515844.1 | scaffold341 | 102622                  | GG                              | TT                 | TT               | URR                           | 101505416          | glucan endo-1,3-beta-glucosidase-like |
| SNP_70478_A_122356 | NW_004515844.1 | scaffold341 | 122356                  | AA                              | TT                 | TT               | INTERGENIC                    |                    |                                       |
| SNP_70479_A_135144 | NW_004515844.1 | scaffold341 | 135144                  | AA                              | GG                 | GG               | INTERGENIC                    |                    |                                       |
| SNP_70480_A_135151 | NW_004515844.1 | scaffold341 | 135151                  | TT                              | CC                 | CC               | INTERGENIC                    |                    |                                       |
| SNP_70481_A_135180 | NW_004515844.1 | scaffold341 | 135180                  | TT                              | GG                 | GG               | INTERGENIC                    |                    |                                       |
| SNP_70483_A_135265 | NW_004515844.1 | scaffold341 | 135265                  | AA                              | GG                 | GG               | INTERGENIC                    |                    |                                       |
| SNP_70485_A_135509 | NW_004515844.1 | scaffold341 | 135509                  | GG                              | AA                 | AA               | INTERGENIC                    |                    |                                       |
| SNP_70486_A_135546 | NW_004515844.1 | scaffold341 | 135546                  | TT                              | AA                 | AA               | INTERGENIC                    |                    |                                       |
| SNP_70487_A_135569 | NW_004515844.1 | scaffold341 | 135569                  | GG                              | TT                 | TT               | INTERGENIC                    |                    |                                       |
| SNP_70488_A_137511 | NW_004515844.1 | scaffold341 | 137511                  | AA                              | GG                 | GG               | INTERGENIC                    |                    |                                       |
| SNP_70489_A_144852 | NW_004515844.1 | scaffold341 | 144852                  | AA                              | CC                 | CC               | INTERGENIC                    |                    |                                       |

| SNPs IDs           | Chromosome IDs | Chromosomes | Physical positions (bp) | CDC Frontier (Reference genome) | (Pusa 1103 & HPNB) | (ILWC 46 & LPNB) | Sequence genome | Components of | Gene accession IDs | Putative functions |
|--------------------|----------------|-------------|-------------------------|---------------------------------|--------------------|------------------|-----------------|---------------|--------------------|--------------------|
| SNP_70490_A_144879 | NW_004515844.1 | scaffold341 | 144879                  | AA                              | GG                 | GG               | INTERGENIC      |               |                    |                    |
| SNP_70491_A_184974 | NW_004515844.1 | scaffold341 | 184974                  | AA                              | CC                 | CC               | INTERGENIC      |               |                    |                    |
| SNP_70492_A_185029 | NW_004515844.1 | scaffold341 | 185029                  | AA                              | TT                 | TT               | INTERGENIC      |               |                    |                    |
| SNP_70493_A_185055 | NW_004515844.1 | scaffold341 | 185055                  | TT                              | CC                 | CC               | INTERGENIC      |               |                    |                    |
| SNP_70494_A_185067 | NW_004515844.1 | scaffold341 | 185067                  | CC                              | TT                 | TT               | INTERGENIC      |               |                    |                    |
| SNP_70495_A_185546 | NW_004515844.1 | scaffold341 | 185546                  | AA                              | GG                 | GG               | INTERGENIC      |               |                    |                    |
| SNP_70496_A_622    | NW_004515845.1 | scaffold342 | 622                     | CC                              | TT                 | TT               | INTERGENIC      |               |                    |                    |
| SNP_70497_A_651    | NW_004515845.1 | scaffold342 | 651                     | TT                              | GG                 | GG               | INTERGENIC      |               |                    |                    |
| SNP_70498_A_652    | NW_004515845.1 | scaffold342 | 652                     | TT                              | CC                 | CC               | INTERGENIC      |               |                    |                    |
| SNP_70499_A_674    | NW_004515845.1 | scaffold342 | 674                     | AA                              | GG                 | GG               | INTERGENIC      |               |                    |                    |
| SNP_70500_A_681    | NW_004515845.1 | scaffold342 | 681                     | TT                              | CC                 | CC               | INTERGENIC      |               |                    |                    |
| SNP_70501_A_706    | NW_004515845.1 | scaffold342 | 706                     | AA                              | GG                 | GG               | INTERGENIC      |               |                    |                    |
| SNP_70502_A_881    | NW_004515845.1 | scaffold342 | 881                     | AA                              | GG                 | GG               | INTERGENIC      |               |                    |                    |
| SNP_70503_A_979    | NW_004515845.1 | scaffold342 | 979                     | GG                              | AA                 | AA               | INTERGENIC      |               |                    |                    |
| SNP_70504_A_19149  | NW_004515845.1 | scaffold342 | 19149                   | GG                              | AA                 | AA               | INTERGENIC      |               |                    |                    |
| SNP_70505_A_19257  | NW_004515845.1 | scaffold342 | 19257                   | CC                              | GG                 | GG               | INTERGENIC      |               |                    |                    |
| SNP_70506_A_19344  | NW_004515845.1 | scaffold342 | 19344                   | GG                              | TT                 | TT               | INTERGENIC      |               |                    |                    |
| SNP_70507_A_19525  | NW_004515845.1 | scaffold342 | 19525                   | TT                              | CC                 | CC               | INTERGENIC      |               |                    |                    |
| SNP_70508_A_19564  | NW_004515845.1 | scaffold342 | 19564                   | AA                              | CC                 | CC               | INTERGENIC      |               |                    |                    |
| SNP_70509_A_19565  | NW_004515845.1 | scaffold342 | 19565                   | TT                              | AA                 | AA               | INTERGENIC      |               |                    |                    |
| SNP_70510_A_19566  | NW_004515845.1 | scaffold342 | 19566                   | CC                              | AA                 | AA               | INTERGENIC      |               |                    |                    |
| SNP_70511_A_19567  | NW_004515845.1 | scaffold342 | 19567                   | TT                              | CC                 | CC               | INTERGENIC      |               |                    |                    |



| SNPs IDs           | Chromosome IDs | Chromosomes | Physical positions (bp) | CDC Frontier (Reference genome) | (Pusa 1103 & HPNB) | (ILWC 46 & LPNB) | Sequence Components of genome | Gene accession IDs | Putative functions                             |
|--------------------|----------------|-------------|-------------------------|---------------------------------|--------------------|------------------|-------------------------------|--------------------|------------------------------------------------|
| SNP_70512_A_19633  | NW_004515845.1 | scaffold342 | 19633                   | TT                              | CC                 | CC               | INTERGENIC                    |                    |                                                |
| SNP_70513_A_23950  | NW_004515845.1 | scaffold342 | 23950                   | TT                              | AA                 | AA               | INTERGENIC                    |                    |                                                |
| SNP_70514_A_23996  | NW_004515845.1 | scaffold342 | 23996                   | TT                              | CC                 | CC               | INTERGENIC                    |                    |                                                |
| SNP_70515_A_61003  | NW_004515845.1 | scaffold342 | 61003                   | CC                              | AA                 | AA               | INTRON                        | 101508007          | Unknown function                               |
| SNP_70516_A_61026  | NW_004515845.1 | scaffold342 | 61026                   | CC                              | TT                 | TT               | INTRON                        | 101508007          | Unknown function                               |
| SNP_70517_A_61574  | NW_004515845.1 | scaffold342 | 61574                   | TT                              | CC                 | CC               | NON_SYNONYMOUS_CODING         | 101508007          | Unknown function                               |
| SNP_70518_A_80405  | NW_004515845.1 | scaffold342 | 80405                   | GG                              | AA                 | AA               | INTRON                        | 101508634          | kelch repeat-containing protein At3g27220-like |
| SNP_70519_A_121080 | NW_004515845.1 | scaffold342 | 121080                  | GG                              | TT                 | TT               | INTERGENIC                    |                    |                                                |
| SNP_70521_A_125463 | NW_004515845.1 | scaffold342 | 125463                  | TT                              | CC                 | CC               | INTERGENIC                    |                    |                                                |
| SNP_70522_A_125558 | NW_004515845.1 | scaffold342 | 125558                  | TT                              | CC                 | CC               | INTERGENIC                    |                    |                                                |
| SNP_70523_A_125580 | NW_004515845.1 | scaffold342 | 125580                  | GG                              | AA                 | AA               | INTERGENIC                    |                    |                                                |
| SNP_70524_A_125621 | NW_004515845.1 | scaffold342 | 125621                  | AA                              | TT                 | TT               | INTERGENIC                    |                    |                                                |
| SNP_70525_A_125627 | NW_004515845.1 | scaffold342 | 125627                  | TT                              | AA                 | AA               | INTERGENIC                    |                    |                                                |
| SNP_70526_A_125636 | NW_004515845.1 | scaffold342 | 125636                  | GG                              | AA                 | AA               | INTERGENIC                    |                    |                                                |
| SNP_70527_A_125728 | NW_004515845.1 | scaffold342 | 125728                  | AA                              | CC                 | CC               | INTERGENIC                    |                    |                                                |
| SNP_70528_A_125831 | NW_004515845.1 | scaffold342 | 125831                  | TT                              | CC                 | CC               | INTERGENIC                    |                    |                                                |
| SNP_70529_A_125899 | NW_004515845.1 | scaffold342 | 125899                  | AA                              | GG                 | GG               | INTERGENIC                    |                    |                                                |
| SNP_70530_A_125940 | NW_004515845.1 | scaffold342 | 125940                  | TT                              | CC                 | CC               | INTERGENIC                    |                    |                                                |
| SNP_70531_A_126136 | NW_004515845.1 | scaffold342 | 126136                  | TT                              | CC                 | CC               | INTERGENIC                    |                    |                                                |
| SNP_70532_A_131940 | NW_004515845.1 | scaffold342 | 131940                  | TT                              | CC                 | CC               | INTERGENIC                    |                    |                                                |
| SNP_70533_A_132992 | NW_004515845.1 | scaffold342 | 132992                  | GG                              | TT                 | TT               | INTERGENIC                    |                    |                                                |
| SNP_70534_A_133253 | NW_004515845.1 | scaffold342 | 133253                  | TT                              | CC                 | CC               | INTERGENIC                    |                    |                                                |

| SNPs IDs           | Chromosome IDs | Chromosomes | Physical positions (bp) | CDC Frontier (Reference genome) | (Pusa 1103 & HPNB) | (ILWC 46 & LPNB) | Sequence genome | Components of | Gene accession IDs           | Putative functions |
|--------------------|----------------|-------------|-------------------------|---------------------------------|--------------------|------------------|-----------------|---------------|------------------------------|--------------------|
| SNP_70535_A_133329 | NW_004515845.1 | scaffold342 | 133329                  | TT                              | AA                 | AA               | INTERGENIC      |               |                              |                    |
| SNP_70536_A_133337 | NW_004515845.1 | scaffold342 | 133337                  | TT                              | CC                 | CC               | INTERGENIC      |               |                              |                    |
| SNP_70537_A_133382 | NW_004515845.1 | scaffold342 | 133382                  | TT                              | CC                 | CC               | INTERGENIC      |               |                              |                    |
| SNP_70538_A_133388 | NW_004515845.1 | scaffold342 | 133388                  | TT                              | AA                 | AA               | INTERGENIC      |               |                              |                    |
| SNP_70539_A_157932 | NW_004515845.1 | scaffold342 | 157932                  | GG                              | AA                 | AA               | INTERGENIC      |               |                              |                    |
| SNP_70541_A_168452 | NW_004515845.1 | scaffold342 | 168452                  | CC                              | AA                 | AA               | INTERGENIC      |               |                              |                    |
| SNP_70542_A_183508 | NW_004515845.1 | scaffold342 | 183508                  | AA                              | GG                 | GG               | INTERGENIC      |               |                              |                    |
| SNP_70543_A_183570 | NW_004515845.1 | scaffold342 | 183570                  | TT                              | GG                 | GG               | INTERGENIC      |               |                              |                    |
| SNP_70544_A_183650 | NW_004515845.1 | scaffold342 | 183650                  | TT                              | CC                 | CC               | INTERGENIC      |               |                              |                    |
| SNP_70545_A_183758 | NW_004515845.1 | scaffold342 | 183758                  | AA                              | TT                 | TT               | INTERGENIC      |               |                              |                    |
| SNP_70546_A_183762 | NW_004515845.1 | scaffold342 | 183762                  | TT                              | CC                 | CC               | INTERGENIC      |               |                              |                    |
| SNP_70547_A_207132 | NW_004515845.1 | scaffold342 | 207132                  | GG                              | CC                 | CC               | INTERGENIC      |               |                              |                    |
| SNP_70548_A_207396 | NW_004515845.1 | scaffold342 | 207396                  | TT                              | CC                 | CC               | INTERGENIC      |               |                              |                    |
| SNP_70549_A_241678 | NW_004515845.1 | scaffold342 | 241678                  | CC                              | TT                 | TT               | INTERGENIC      |               |                              |                    |
| SNP_70550_A_241698 | NW_004515845.1 | scaffold342 | 241698                  | GG                              | AA                 | AA               | INTERGENIC      |               |                              |                    |
| SNP_70553_A_310797 | NW_004515845.1 | scaffold342 | 310797                  | GG                              | CC                 | CC               | URR             | 101506070     | uncharacterized LOC101506070 |                    |
| SNP_70554_A_313477 | NW_004515845.1 | scaffold342 | 313477                  | TT                              | AA                 | AA               | INTERGENIC      |               |                              |                    |
| SNP_70555_A_325320 | NW_004515845.1 | scaffold342 | 325320                  | CC                              | AA                 | AA               | INTERGENIC      |               |                              |                    |
| SNP_70556_A_336191 | NW_004515845.1 | scaffold342 | 336191                  | TT                              | AA                 | AA               | INTERGENIC      |               |                              |                    |
| SNP_70557_A_340113 | NW_004515845.1 | scaffold342 | 340113                  | TT                              | CC                 | CC               | INTERGENIC      |               |                              |                    |
| SNP_70558_A_340175 | NW_004515845.1 | scaffold342 | 340175                  | AA                              | GG                 | GG               | INTERGENIC      |               |                              |                    |
| SNP_70559_A_340176 | NW_004515845.1 | scaffold342 | 340176                  | GG                              | AA                 | AA               | INTERGENIC      |               |                              |                    |

| SNPs IDs           | Chromosome IDs | Chromosomes   | Physical positions (bp) | CDC Frontier (Reference genome) | (Pusa 1103 & HPNB) | (ILWC 46 & LPNB) | Sequence Components of genome | Gene accession IDs | Putative functions                 |
|--------------------|----------------|---------------|-------------------------|---------------------------------|--------------------|------------------|-------------------------------|--------------------|------------------------------------|
| SNP_70560_A_340499 | NW_004515845.1 | scaffold342   | 340499                  | CC                              | GG                 | GG               | INTERGENIC                    |                    |                                    |
| SNP_70562_A_344583 | NW_004515845.1 | scaffold342   | 344583                  | CC                              | TT                 | TT               | INTERGENIC                    |                    |                                    |
| SNP_70563_A_344837 | NW_004515845.1 | scaffold342   | 344837                  | TT                              | CC                 | CC               | INTERGENIC                    |                    |                                    |
| SNP_70564_A_345028 | NW_004515845.1 | scaffold342   | 345028                  | CC                              | GG                 | GG               | INTERGENIC                    |                    |                                    |
| SNP_70565_A_345224 | NW_004515845.1 | scaffold342   | 345224                  | TT                              | CC                 | CC               | INTERGENIC                    |                    |                                    |
| SNP_70566_A_356060 | NW_004515845.1 | scaffold342   | 356060                  | TT                              | CC                 | CC               | URR                           | 101506602          | uncharacterized LOC101506602       |
| SNP_70567_A_356062 | NW_004515845.1 | scaffold342   | 356062                  | CC                              | AA                 | AA               | URR                           | 101506602          | uncharacterized LOC101506602       |
| SNP_70568_A_358888 | NW_004515845.1 | scaffold342   | 358888                  | GG                              | AA                 | AA               | INTRON                        | 101509911          | Unknown function                   |
| SNP_70569_A_359214 | NW_004515845.1 | scaffold342   | 359214                  | AA                              | CC                 | CC               | INTRON                        | 101509911          | Unknown function                   |
| SNP_70571_A_370710 | NW_004515845.1 | scaffold342   | 370710                  | AA                              | GG                 | GG               | INTERGENIC                    |                    |                                    |
| SNP_70572_A_372349 | NW_004515845.1 | scaffold342   | 372349                  | AA                              | CC                 | CC               | INTERGENIC                    |                    |                                    |
| SNP_70573_A_30176  | NW_004515847.1 | scaffold346_1 | 30176                   | TT                              | CC                 | CC               | SYNONYMOUS_CODING             | 101514986          | aspartic proteinase-like protein 2 |
| SNP_70574_A_30253  | NW_004515847.1 | scaffold346_1 | 30253                   | TT                              | CC                 | CC               | INTRON                        | 101514986          | aspartic proteinase-like protein 2 |
| SNP_70575_A_41391  | NW_004515847.1 | scaffold346_1 | 41391                   | CC                              | GG                 | GG               | INTERGENIC                    |                    |                                    |
| SNP_70576_A_41581  | NW_004515847.1 | scaffold346_1 | 41581                   | GG                              | CC                 | CC               | INTERGENIC                    |                    |                                    |
| SNP_70577_A_41881  | NW_004515847.1 | scaffold346_1 | 41881                   | CC                              | TT                 | TT               | INTERGENIC                    |                    |                                    |
| SNP_70578_A_41904  | NW_004515847.1 | scaffold346_1 | 41904                   | GG                              | AA                 | AA               | INTERGENIC                    |                    |                                    |
| SNP_70579_A_41984  | NW_004515847.1 | scaffold346_1 | 41984                   | AA                              | CC                 | CC               | INTERGENIC                    |                    |                                    |
| SNP_70580_A_42068  | NW_004515847.1 | scaffold346_1 | 42068                   | GG                              | CC                 | CC               | INTERGENIC                    |                    |                                    |
| SNP_70581_A_42109  | NW_004515847.1 | scaffold346_1 | 42109                   | AA                              | GG                 | GG               | INTERGENIC                    |                    |                                    |
| SNP_70582_A_42134  | NW_004515847.1 | scaffold346_1 | 42134                   | GG                              | AA                 | AA               | INTERGENIC                    |                    |                                    |
| SNP_70583_A_42169  | NW_004515847.1 | scaffold346_1 | 42169                   | TT                              | CC                 | CC               | INTERGENIC                    |                    |                                    |

| SNPs IDs           | Chromosome IDs | Chromosomes   | Physical positions (bp) | CDC Frontier (Reference genome) | (Pusa 1103 & HPNB) | (ILWC 46 & LPNB) | Sequence Components of genome | Gene accession IDs | Putative functions                  |
|--------------------|----------------|---------------|-------------------------|---------------------------------|--------------------|------------------|-------------------------------|--------------------|-------------------------------------|
| SNP_70584_A_42170  | NW_004515847.1 | scaffold346_1 | 42170                   | GG                              | AA                 | AA               | INTERGENIC                    |                    |                                     |
| SNP_70585_A_42281  | NW_004515847.1 | scaffold346_1 | 42281                   | AA                              | GG                 | GG               | INTERGENIC                    |                    |                                     |
| SNP_70586_A_42439  | NW_004515847.1 | scaffold346_1 | 42439                   | GG                              | TT                 | TT               | DRR                           | 101510564          | Unknown function                    |
| SNP_70587_A_42521  | NW_004515847.1 | scaffold346_1 | 42521                   | AA                              | GG                 | GG               | URR                           | 101511001          | uncharacterized LOC101511001        |
| SNP_70588_A_42554  | NW_004515847.1 | scaffold346_1 | 42554                   | CC                              | TT                 | TT               | URR                           | 101511001          | uncharacterized LOC101511001        |
| SNP_70589_A_42668  | NW_004515847.1 | scaffold346_1 | 42668                   | CC                              | TT                 | TT               | URR                           | 101511001          | uncharacterized LOC101511001        |
| SNP_70590_A_42864  | NW_004515847.1 | scaffold346_1 | 42864                   | CC                              | TT                 | TT               | URR                           | 101511001          | uncharacterized LOC101511001        |
| SNP_70591_A_78986  | NW_004515847.1 | scaffold346_1 | 78986                   | GG                              | TT                 | TT               | INTERGENIC                    |                    |                                     |
| SNP_70592_A_107939 | NW_004515847.1 | scaffold346_1 | 107939                  | AA                              | TT                 | TT               | INTRON                        | 101512492          | traB domain-containing protein-like |
| SNP_70594_A_199112 | NW_004515847.1 | scaffold346_1 | 199112                  | TT                              | CC                 | CC               | INTERGENIC                    |                    |                                     |
| SNP_70595_A_199119 | NW_004515847.1 | scaffold346_1 | 199119                  | AA                              | GG                 | GG               | INTERGENIC                    |                    |                                     |
| SNP_70596_A_199245 | NW_004515847.1 | scaffold346_1 | 199245                  | CC                              | TT                 | TT               | INTERGENIC                    |                    |                                     |
| SNP_70597_A_199293 | NW_004515847.1 | scaffold346_1 | 199293                  | GG                              | AA                 | AA               | INTERGENIC                    |                    |                                     |
| SNP_70598_A_199326 | NW_004515847.1 | scaffold346_1 | 199326                  | AA                              | GG                 | GG               | INTERGENIC                    |                    |                                     |
| SNP_70599_A_199449 | NW_004515847.1 | scaffold346_1 | 199449                  | AA                              | GG                 | GG               | INTERGENIC                    |                    |                                     |
| SNP_70600_A_199684 | NW_004515847.1 | scaffold346_1 | 199684                  | AA                              | GG                 | GG               | INTERGENIC                    |                    |                                     |
| SNP_70601_A_256675 | NW_004515847.1 | scaffold346_1 | 256675                  | TT                              | CC                 | CC               | INTRON                        | 101489709          | probable E3 ubiquitin ligase SUD1   |
| SNP_70602_A_264941 | NW_004515847.1 | scaffold346_1 | 264941                  | TT                              | AA                 | AA               | INTRON                        | 101489709          | probable E3 ubiquitin ligase SUD1   |
| SNP_70603_A_306567 | NW_004515847.1 | scaffold346_1 | 306567                  | CC                              | TT                 | TT               | INTRON                        | 101489709          | probable E3 ubiquitin ligase SUD1   |
| SNP_70604_A_1278   | NW_004515849.1 | scaffold349   | 1278                    | AA                              | CC                 | CC               | INTERGENIC                    |                    |                                     |
| SNP_70605_A_1286   | NW_004515849.1 | scaffold349   | 1286                    | GG                              | AA                 | AA               | INTERGENIC                    |                    |                                     |
| SNP_70606_A_67752  | NW_004515849.1 | scaffold349   | 67752                   | AA                              | GG                 | GG               | INTERGENIC                    |                    |                                     |

| SNPs IDs           | Chromosome IDs | Chromosomes | Physical positions (bp) | CDC Frontier (Reference genome) | (Pusa 1103 & HPNB) | (ILWC 46 & LPNB) | Sequence genome | Components of | Gene accession IDs | Putative functions |
|--------------------|----------------|-------------|-------------------------|---------------------------------|--------------------|------------------|-----------------|---------------|--------------------|--------------------|
| SNP_70608_A_91869  | NW_004515849.1 | scaffold349 | 91869                   | GG                              | CC                 | CC               | INTERGENIC      |               |                    |                    |
| SNP_70609_A_91986  | NW_004515849.1 | scaffold349 | 91986                   | AA                              | CC                 | CC               | INTERGENIC      |               |                    |                    |
| SNP_70610_A_92313  | NW_004515849.1 | scaffold349 | 92313                   | AA                              | GG                 | GG               | INTERGENIC      |               |                    |                    |
| SNP_70611_A_98798  | NW_004515849.1 | scaffold349 | 98798                   | GG                              | TT                 | TT               | INTERGENIC      |               |                    |                    |
| SNP_70612_A_145874 | NW_004515849.1 | scaffold349 | 145874                  | GG                              | AA                 | AA               | INTERGENIC      |               |                    |                    |
| SNP_70613_A_159508 | NW_004515849.1 | scaffold349 | 159508                  | GG                              | TT                 | TT               | INTERGENIC      |               |                    |                    |
| SNP_70614_A_159882 | NW_004515849.1 | scaffold349 | 159882                  | TT                              | CC                 | CC               | INTERGENIC      |               |                    |                    |
| SNP_70615_A_159886 | NW_004515849.1 | scaffold349 | 159886                  | AA                              | GG                 | GG               | INTERGENIC      |               |                    |                    |
| SNP_70616_A_160000 | NW_004515849.1 | scaffold349 | 160000                  | AA                              | TT                 | TT               | INTERGENIC      |               |                    |                    |
| SNP_70617_A_160011 | NW_004515849.1 | scaffold349 | 160011                  | CC                              | TT                 | TT               | INTERGENIC      |               |                    |                    |
| SNP_70618_A_160031 | NW_004515849.1 | scaffold349 | 160031                  | TT                              | CC                 | CC               | INTERGENIC      |               |                    |                    |
| SNP_70619_A_160089 | NW_004515849.1 | scaffold349 | 160089                  | AA                              | GG                 | GG               | INTERGENIC      |               |                    |                    |
| SNP_70620_A_177697 | NW_004515849.1 | scaffold349 | 177697                  | GG                              | AA                 | AA               | INTERGENIC      |               |                    |                    |
| SNP_70621_A_177715 | NW_004515849.1 | scaffold349 | 177715                  | TT                              | CC                 | CC               | INTERGENIC      |               |                    |                    |
| SNP_70623_A_178108 | NW_004515849.1 | scaffold349 | 178108                  | CC                              | TT                 | TT               | INTERGENIC      |               |                    |                    |
| SNP_70624_A_222848 | NW_004515849.1 | scaffold349 | 222848                  | AA                              | TT                 | TT               | INTERGENIC      |               |                    |                    |
| SNP_70625_A_238378 | NW_004515849.1 | scaffold349 | 238378                  | TT                              | AA                 | AA               | INTERGENIC      |               |                    |                    |
| SNP_70626_A_238410 | NW_004515849.1 | scaffold349 | 238410                  | CC                              | TT                 | TT               | INTERGENIC      |               |                    |                    |
| SNP_70627_A_238431 | NW_004515849.1 | scaffold349 | 238431                  | AA                              | GG                 | GG               | INTERGENIC      |               |                    |                    |
| SNP_70628_A_238434 | NW_004515849.1 | scaffold349 | 238434                  | TT                              | CC                 | CC               | INTERGENIC      |               |                    |                    |
| SNP_70629_A_238453 | NW_004515849.1 | scaffold349 | 238453                  | CC                              | TT                 | TT               | INTERGENIC      |               |                    |                    |
| SNP_70630_A_238887 | NW_004515849.1 | scaffold349 | 238887                  | TT                              | CC                 | CC               | INTERGENIC      |               |                    |                    |

| SNPs IDs           | Chromosome IDs | Chromosomes | Physical positions (bp) | CDC Frontier (Reference genome) | (Pusa 1103 & HPNB) | (ILWC 46 & LPNB) | Sequence genome | Components of | Gene accession IDs           | Putative functions |
|--------------------|----------------|-------------|-------------------------|---------------------------------|--------------------|------------------|-----------------|---------------|------------------------------|--------------------|
| SNP_70631_A_238899 | NW_004515849.1 | scaffold349 | 238899                  | TT                              | CC                 | CC               | INTERGENIC      |               |                              |                    |
| SNP_70632_A_295247 | NW_004515849.1 | scaffold349 | 295247                  | TT                              | CC                 | CC               | INTERGENIC      |               |                              |                    |
| SNP_70633_A_335211 | NW_004515849.1 | scaffold349 | 335211                  | GG                              | AA                 | AA               | INTERGENIC      |               |                              |                    |
| SNP_70634_A_335237 | NW_004515849.1 | scaffold349 | 335237                  | GG                              | AA                 | AA               | INTERGENIC      |               |                              |                    |
| SNP_70636_A_5627   | NW_004515850.1 | scaffold350 | 5627                    | AA                              | TT                 | TT               | INTERGENIC      |               |                              |                    |
| SNP_70637_A_5639   | NW_004515850.1 | scaffold350 | 5639                    | GG                              | AA                 | AA               | INTERGENIC      |               |                              |                    |
| SNP_70638_A_42013  | NW_004515850.1 | scaffold350 | 42013                   | GG                              | AA                 | AA               | INTERGENIC      |               |                              |                    |
| SNP_70640_A_69486  | NW_004515850.1 | scaffold350 | 69486                   | CC                              | GG                 | GG               | INTERGENIC      |               |                              |                    |
| SNP_70641_A_69521  | NW_004515850.1 | scaffold350 | 69521                   | AA                              | CC                 | CC               | INTERGENIC      |               |                              |                    |
| SNP_70642_A_69549  | NW_004515850.1 | scaffold350 | 69549                   | CC                              | TT                 | TT               | INTERGENIC      |               |                              |                    |
| SNP_70643_A_69552  | NW_004515850.1 | scaffold350 | 69552                   | GG                              | AA                 | AA               | INTERGENIC      |               |                              |                    |
| SNP_70644_A_69564  | NW_004515850.1 | scaffold350 | 69564                   | CC                              | TT                 | TT               | INTERGENIC      |               |                              |                    |
| SNP_70645_A_69980  | NW_004515850.1 | scaffold350 | 69980                   | TT                              | CC                 | CC               | INTERGENIC      |               |                              |                    |
| SNP_70646_A_70052  | NW_004515850.1 | scaffold350 | 70052                   | CC                              | TT                 | TT               | INTERGENIC      |               |                              |                    |
| SNP_70647_A_86571  | NW_004515850.1 | scaffold350 | 86571                   | TT                              | CC                 | CC               | INTERGENIC      |               |                              |                    |
| SNP_70648_A_86826  | NW_004515850.1 | scaffold350 | 86826                   | TT                              | GG                 | GG               | INTERGENIC      |               |                              |                    |
| SNP_70649_A_86839  | NW_004515850.1 | scaffold350 | 86839                   | AA                              | GG                 | GG               | INTERGENIC      |               |                              |                    |
| SNP_70650_A_111540 | NW_004515850.1 | scaffold350 | 111540                  | TT                              | CC                 | CC               | INTERGENIC      |               |                              |                    |
| SNP_70651_A_165244 | NW_004515850.1 | scaffold350 | 165244                  | GG                              | CC                 | CC               | DRR             | 101494351     | uncharacterized LOC101494351 |                    |
| SNP_70653_A_165798 | NW_004515850.1 | scaffold350 | 165798                  | TT                              | CC                 | CC               | DRR             | 101494351     | uncharacterized LOC101494351 |                    |
| SNP_70654_A_4388   | NW_004515851.1 | scaffold351 | 4388                    | AA                              | GG                 | GG               | INTERGENIC      |               |                              |                    |
| SNP_70655_A_4414   | NW_004515851.1 | scaffold351 | 4414                    | CC                              | GG                 | GG               | INTERGENIC      |               |                              |                    |

| SNPs IDs          | Chromosome IDs | Chromosomes | Physical positions (bp) | CDC Frontier (Reference genome) | (Pusa 1103 & HPNB) | (ILWC 46 & LPNB) | Sequence Components of genome | Gene accession IDs | Putative functions           |
|-------------------|----------------|-------------|-------------------------|---------------------------------|--------------------|------------------|-------------------------------|--------------------|------------------------------|
| SNP_70656_A_4743  | NW_004515851.1 | scaffold351 | 4743                    | AA                              | GG                 | GG               | INTERGENIC                    |                    |                              |
| SNP_70657_A_4760  | NW_004515851.1 | scaffold351 | 4760                    | TT                              | AA                 | AA               | INTERGENIC                    |                    |                              |
| SNP_70658_A_8263  | NW_004515851.1 | scaffold351 | 8263                    | AA                              | TT                 | TT               | INTERGENIC                    |                    |                              |
| SNP_70659_A_15725 | NW_004515851.1 | scaffold351 | 15725                   | AA                              | TT                 | TT               | INTERGENIC                    |                    |                              |
| SNP_70660_A_24268 | NW_004515851.1 | scaffold351 | 24268                   | GG                              | AA                 | AA               | DRR                           | 101495851          | uncharacterized LOC101495851 |
| SNP_70661_A_24285 | NW_004515851.1 | scaffold351 | 24285                   | CC                              | GG                 | GG               | DRR                           | 101495851          | uncharacterized LOC101495851 |
| SNP_70662_A_66533 | NW_004515851.1 | scaffold351 | 66533                   | GG                              | AA                 | AA               | INTERGENIC                    |                    |                              |
| SNP_70663_A_67199 | NW_004515851.1 | scaffold351 | 67199                   | CC                              | TT                 | TT               | INTERGENIC                    |                    |                              |
| SNP_70664_A_70946 | NW_004515851.1 | scaffold351 | 70946                   | TT                              | GG                 | GG               | INTERGENIC                    |                    |                              |
| SNP_70665_A_20927 | NW_004515852.1 | scaffold352 | 20927                   | AA                              | GG                 | GG               | INTERGENIC                    |                    |                              |
| SNP_70666_A_20952 | NW_004515852.1 | scaffold352 | 20952                   | TT                              | GG                 | GG               | INTERGENIC                    |                    |                              |
| SNP_70667_A_20958 | NW_004515852.1 | scaffold352 | 20958                   | AA                              | GG                 | GG               | INTERGENIC                    |                    |                              |
| SNP_70668_A_21219 | NW_004515852.1 | scaffold352 | 21219                   | AA                              | GG                 | GG               | INTERGENIC                    |                    |                              |
| SNP_70669_A_21344 | NW_004515852.1 | scaffold352 | 21344                   | AA                              | GG                 | GG               | INTERGENIC                    |                    |                              |
| SNP_70670_A_22275 | NW_004515852.1 | scaffold352 | 22275                   | CC                              | AA                 | AA               | INTERGENIC                    |                    |                              |
| SNP_70671_A_23106 | NW_004515852.1 | scaffold352 | 23106                   | TT                              | CC                 | CC               | INTERGENIC                    |                    |                              |
| SNP_70672_A_23223 | NW_004515852.1 | scaffold352 | 23223                   | AA                              | GG                 | GG               | INTERGENIC                    |                    |                              |
| SNP_70673_A_23238 | NW_004515852.1 | scaffold352 | 23238                   | GG                              | AA                 | AA               | INTERGENIC                    |                    |                              |
| SNP_70674_A_23291 | NW_004515852.1 | scaffold352 | 23291                   | CC                              | TT                 | TT               | INTERGENIC                    |                    |                              |
| SNP_70676_A_33799 | NW_004515852.1 | scaffold352 | 33799                   | GG                              | AA                 | AA               | INTERGENIC                    |                    |                              |
| SNP_70677_A_35193 | NW_004515852.1 | scaffold352 | 35193                   | AA                              | GG                 | GG               | INTERGENIC                    |                    |                              |
| SNP_70678_A_35197 | NW_004515852.1 | scaffold352 | 35197                   | TT                              | CC                 | CC               | INTERGENIC                    |                    |                              |

| SNPs IDs           | Chromosome IDs | Chromosomes | Physical positions (bp) | CDC Frontier genome (Reference genome) | (Pusa 1103 & HPNB) | (ILWC 46 & LPNB) | Sequence genome | Components of | Gene accession IDs | Putative functions |
|--------------------|----------------|-------------|-------------------------|----------------------------------------|--------------------|------------------|-----------------|---------------|--------------------|--------------------|
| SNP_70679_A_48759  | NW_004515852.1 | scaffold352 | 48759                   | GG                                     | AA                 | AA               | INTERGENIC      |               |                    |                    |
| SNP_70680_A_48783  | NW_004515852.1 | scaffold352 | 48783                   | TT                                     | AA                 | AA               | INTERGENIC      |               |                    |                    |
| SNP_70681_A_48787  | NW_004515852.1 | scaffold352 | 48787                   | GG                                     | AA                 | AA               | INTERGENIC      |               |                    |                    |
| SNP_70682_A_53683  | NW_004515852.1 | scaffold352 | 53683                   | TT                                     | GG                 | GG               | INTERGENIC      |               |                    |                    |
| SNP_70683_A_54815  | NW_004515852.1 | scaffold352 | 54815                   | GG                                     | AA                 | AA               | INTERGENIC      |               |                    |                    |
| SNP_70684_A_63811  | NW_004515852.1 | scaffold352 | 63811                   | TT                                     | CC                 | CC               | INTERGENIC      |               |                    |                    |
| SNP_70685_A_93604  | NW_004515852.1 | scaffold352 | 93604                   | GG                                     | AA                 | AA               | INTERGENIC      |               |                    |                    |
| SNP_70687_A_106702 | NW_004515852.1 | scaffold352 | 106702                  | GG                                     | TT                 | TT               | INTERGENIC      |               |                    |                    |
| SNP_70688_A_106721 | NW_004515852.1 | scaffold352 | 106721                  | TT                                     | GG                 | GG               | INTERGENIC      |               |                    |                    |
| SNP_70689_A_106773 | NW_004515852.1 | scaffold352 | 106773                  | TT                                     | CC                 | CC               | INTERGENIC      |               |                    |                    |
| SNP_70690_A_106775 | NW_004515852.1 | scaffold352 | 106775                  | GG                                     | TT                 | TT               | INTERGENIC      |               |                    |                    |
| SNP_70691_A_106820 | NW_004515852.1 | scaffold352 | 106820                  | AA                                     | GG                 | GG               | INTERGENIC      |               |                    |                    |
| SNP_70692_A_107908 | NW_004515852.1 | scaffold352 | 107908                  | CC                                     | TT                 | TT               | INTERGENIC      |               |                    |                    |
| SNP_70693_A_109087 | NW_004515852.1 | scaffold352 | 109087                  | AA                                     | TT                 | TT               | INTERGENIC      |               |                    |                    |
| SNP_70694_A_121103 | NW_004515852.1 | scaffold352 | 121103                  | GG                                     | CC                 | CC               | INTERGENIC      |               |                    |                    |
| SNP_70695_A_133447 | NW_004515852.1 | scaffold352 | 133447                  | TT                                     | AA                 | AA               | INTERGENIC      |               |                    |                    |
| SNP_70697_A_172571 | NW_004515852.1 | scaffold352 | 172571                  | AA                                     | CC                 | CC               | INTERGENIC      |               |                    |                    |
| SNP_70698_A_172628 | NW_004515852.1 | scaffold352 | 172628                  | GG                                     | CC                 | CC               | INTERGENIC      |               |                    |                    |
| SNP_70699_A_172666 | NW_004515852.1 | scaffold352 | 172666                  | TT                                     | GG                 | GG               | INTERGENIC      |               |                    |                    |
| SNP_70700_A_173059 | NW_004515852.1 | scaffold352 | 173059                  | CC                                     | TT                 | TT               | INTERGENIC      |               |                    |                    |
| SNP_70701_A_174544 | NW_004515852.1 | scaffold352 | 174544                  | AA                                     | GG                 | GG               | INTERGENIC      |               |                    |                    |
| SNP_70702_A_174548 | NW_004515852.1 | scaffold352 | 174548                  | CC                                     | GG                 | GG               | INTERGENIC      |               |                    |                    |



| SNPs IDs           | Chromosome IDs | Chromosomes | Physical positions (bp) | CDC Frontier genome (Reference genome) | (Pusa 1103 & HPNB) | (ILWC 46 & LPNB) | Sequence Components of genome | Gene accession IDs | Putative functions                          |
|--------------------|----------------|-------------|-------------------------|----------------------------------------|--------------------|------------------|-------------------------------|--------------------|---------------------------------------------|
| SNP_70703_A_174549 | NW_004515852.1 | scaffold352 | 174549                  | GG                                     | AA                 | AA               | INTERGENIC                    |                    |                                             |
| SNP_70704_A_177507 | NW_004515852.1 | scaffold352 | 177507                  | GG                                     | AA                 | AA               | URR                           | 101497163          | F-box/FBD/LRR-repeat protein At3g26920-like |
| SNP_70705_A_177578 | NW_004515852.1 | scaffold352 | 177578                  | CC                                     | TT                 | TT               | URR                           | 101497163          | F-box/FBD/LRR-repeat protein At3g26920-like |
| SNP_70706_A_177643 | NW_004515852.1 | scaffold352 | 177643                  | TT                                     | CC                 | CC               | URR                           | 101497163          | F-box/FBD/LRR-repeat protein At3g26920-like |
| SNP_70707_A_177875 | NW_004515852.1 | scaffold352 | 177875                  | AA                                     | GG                 | GG               | URR                           | 101497163          | F-box/FBD/LRR-repeat protein At3g26920-like |
| SNP_70708_A_177908 | NW_004515852.1 | scaffold352 | 177908                  | CC                                     | TT                 | TT               | URR                           | 101497163          | F-box/FBD/LRR-repeat protein At3g26920-like |
| SNP_70709_A_177951 | NW_004515852.1 | scaffold352 | 177951                  | CC                                     | TT                 | TT               | URR                           | 101497163          | F-box/FBD/LRR-repeat protein At3g26920-like |
| SNP_70711_A_178017 | NW_004515852.1 | scaffold352 | 178017                  | AA                                     | TT                 | TT               | URR                           | 101497163          | F-box/FBD/LRR-repeat protein At3g26920-like |
| SNP_70712_A_178129 | NW_004515852.1 | scaffold352 | 178129                  | AA                                     | GG                 | GG               | URR                           | 101497163          | F-box/FBD/LRR-repeat protein At3g26920-like |
| SNP_70713_A_178191 | NW_004515852.1 | scaffold352 | 178191                  | CC                                     | GG                 | GG               | URR                           | 101497163          | F-box/FBD/LRR-repeat protein At3g26920-like |
| SNP_70714_A_178247 | NW_004515852.1 | scaffold352 | 178247                  | GG                                     | CC                 | CC               | URR                           | 101497163          | F-box/FBD/LRR-repeat protein At3g26920-like |
| SNP_70715_A_178351 | NW_004515852.1 | scaffold352 | 178351                  | TT                                     | GG                 | GG               | URR                           | 101497163          | F-box/FBD/LRR-repeat protein At3g26920-like |
| SNP_70716_A_178473 | NW_004515852.1 | scaffold352 | 178473                  | TT                                     | GG                 | GG               | URR                           | 101497163          | F-box/FBD/LRR-repeat protein At3g26920-like |
| SNP_70717_A_178478 | NW_004515852.1 | scaffold352 | 178478                  | CC                                     | GG                 | GG               | URR                           | 101497163          | F-box/FBD/LRR-repeat protein At3g26920-like |
| SNP_70719_A_178720 | NW_004515852.1 | scaffold352 | 178720                  | GG                                     | CC                 | CC               | URR                           | 101497163          | F-box/FBD/LRR-repeat protein At3g26920-like |
| SNP_70720_A_178739 | NW_004515852.1 | scaffold352 | 178739                  | GG                                     | CC                 | CC               | URR                           | 101497163          | F-box/FBD/LRR-repeat protein At3g26920-like |
| SNP_70721_A_179013 | NW_004515852.1 | scaffold352 | 179013                  | TT                                     | CC                 | CC               | URR                           | 101497163          | F-box/FBD/LRR-repeat protein At3g26920-like |
| SNP_70722_A_188959 | NW_004515852.1 | scaffold352 | 188959                  | GG                                     | TT                 | TT               | INTERGENIC                    |                    |                                             |
| SNP_70723_A_189172 | NW_004515852.1 | scaffold352 | 189172                  | CC                                     | AA                 | AA               | INTERGENIC                    |                    |                                             |
| SNP_70724_A_189381 | NW_004515852.1 | scaffold352 | 189381                  | GG                                     | AA                 | AA               | INTERGENIC                    |                    |                                             |
| SNP_70725_A_189478 | NW_004515852.1 | scaffold352 | 189478                  | AA                                     | CC                 | CC               | INTERGENIC                    |                    |                                             |
| SNP_70726_A_189492 | NW_004515852.1 | scaffold352 | 189492                  | CC                                     | TT                 | TT               | INTERGENIC                    |                    |                                             |

| SNPs IDs           | Chromosome IDs | Chromosomes | Physical positions (bp) | CDC Frontier (Reference genome) | (Pusa 1103 & HPNB) | (ILWC 46 & LPNB) | Sequence genome | Components of | Gene accession IDs | Putative functions |
|--------------------|----------------|-------------|-------------------------|---------------------------------|--------------------|------------------|-----------------|---------------|--------------------|--------------------|
| SNP_70727_A_189528 | NW_004515852.1 | scaffold352 | 189528                  | CC                              | TT                 | TT               | INTERGENIC      |               |                    |                    |
| SNP_70728_A_191678 | NW_004515852.1 | scaffold352 | 191678                  | GG                              | AA                 | AA               | INTERGENIC      |               |                    |                    |
| SNP_70729_A_191709 | NW_004515852.1 | scaffold352 | 191709                  | AA                              | GG                 | GG               | INTERGENIC      |               |                    |                    |
| SNP_70730_A_191887 | NW_004515852.1 | scaffold352 | 191887                  | GG                              | AA                 | AA               | INTERGENIC      |               |                    |                    |
| SNP_70731_A_192059 | NW_004515852.1 | scaffold352 | 192059                  | GG                              | AA                 | AA               | INTERGENIC      |               |                    |                    |
| SNP_70733_A_193088 | NW_004515852.1 | scaffold352 | 193088                  | TT                              | CC                 | CC               | INTERGENIC      |               |                    |                    |
| SNP_70734_A_193321 | NW_004515852.1 | scaffold352 | 193321                  | CC                              | TT                 | TT               | INTERGENIC      |               |                    |                    |
| SNP_70735_A_194023 | NW_004515852.1 | scaffold352 | 194023                  | GG                              | AA                 | AA               | INTERGENIC      |               |                    |                    |
| SNP_70736_A_194038 | NW_004515852.1 | scaffold352 | 194038                  | AA                              | TT                 | TT               | INTERGENIC      |               |                    |                    |
| SNP_70737_A_194338 | NW_004515852.1 | scaffold352 | 194338                  | AA                              | TT                 | TT               | INTERGENIC      |               |                    |                    |
| SNP_70738_A_194412 | NW_004515852.1 | scaffold352 | 194412                  | TT                              | AA                 | AA               | INTERGENIC      |               |                    |                    |
| SNP_70739_A_194555 | NW_004515852.1 | scaffold352 | 194555                  | CC                              | TT                 | TT               | INTERGENIC      |               |                    |                    |
| SNP_70740_A_31175  | NW_004515853.1 | scaffold353 | 31175                   | AA                              | CC                 | CC               | INTERGENIC      |               |                    |                    |
| SNP_70741_A_59153  | NW_004515853.1 | scaffold353 | 59153                   | TT                              | CC                 | CC               | INTERGENIC      |               |                    |                    |
| SNP_70742_A_59182  | NW_004515853.1 | scaffold353 | 59182                   | GG                              | AA                 | AA               | INTERGENIC      |               |                    |                    |
| SNP_70743_A_999    | NW_004515855.1 | scaffold355 | 999                     | AA                              | CC                 | CC               | INTERGENIC      |               |                    |                    |
| SNP_70744_A_1055   | NW_004515855.1 | scaffold355 | 1055                    | GG                              | AA                 | AA               | INTERGENIC      |               |                    |                    |
| SNP_70746_A_1433   | NW_004515855.1 | scaffold355 | 1433                    | CC                              | TT                 | TT               | INTERGENIC      |               |                    |                    |
| SNP_70747_A_1446   | NW_004515855.1 | scaffold355 | 1446                    | GG                              | AA                 | AA               | INTERGENIC      |               |                    |                    |
| SNP_70748_A_15722  | NW_004515855.1 | scaffold355 | 15722                   | TT                              | AA                 | AA               | INTERGENIC      |               |                    |                    |
| SNP_70749_A_15759  | NW_004515855.1 | scaffold355 | 15759                   | CC                              | AA                 | AA               | INTERGENIC      |               |                    |                    |
| SNP_70750_A_16039  | NW_004515855.1 | scaffold355 | 16039                   | CC                              | TT                 | TT               | INTERGENIC      |               |                    |                    |

| SNPs IDs          | Chromosome IDs | Chromosomes | Physical positions (bp) | CDC Frontier (Reference genome) | (Pusa 1103 & HPNB) | (ILWC 46 & LPNB) | Sequence genome | Components of | Gene accession IDs | Putative functions |
|-------------------|----------------|-------------|-------------------------|---------------------------------|--------------------|------------------|-----------------|---------------|--------------------|--------------------|
| SNP_70751_A_16875 | NW_004515855.1 | scaffold355 | 16875                   | CC                              | TT                 | TT               | INTERGENIC      |               |                    |                    |
| SNP_70752_A_51979 | NW_004515855.1 | scaffold355 | 51979                   | TT                              | CC                 | CC               | INTERGENIC      |               |                    |                    |
| SNP_70753_A_59208 | NW_004515855.1 | scaffold355 | 59208                   | TT                              | CC                 | CC               | INTERGENIC      |               |                    |                    |
| SNP_70754_A_86555 | NW_004515855.1 | scaffold355 | 86555                   | TT                              | CC                 | CC               | INTERGENIC      |               |                    |                    |
| SNP_70755_A_86567 | NW_004515855.1 | scaffold355 | 86567                   | AA                              | GG                 | GG               | INTERGENIC      |               |                    |                    |
| SNP_70756_A_86570 | NW_004515855.1 | scaffold355 | 86570                   | CC                              | GG                 | GG               | INTERGENIC      |               |                    |                    |
| SNP_70757_A_86659 | NW_004515855.1 | scaffold355 | 86659                   | AA                              | CC                 | CC               | INTERGENIC      |               |                    |                    |
| SNP_70758_A_86698 | NW_004515855.1 | scaffold355 | 86698                   | TT                              | CC                 | CC               | INTERGENIC      |               |                    |                    |
| SNP_70759_A_86724 | NW_004515855.1 | scaffold355 | 86724                   | AA                              | GG                 | GG               | INTERGENIC      |               |                    |                    |
| SNP_70760_A_86899 | NW_004515855.1 | scaffold355 | 86899                   | AA                              | CC                 | CC               | INTERGENIC      |               |                    |                    |
| SNP_70761_A_87056 | NW_004515855.1 | scaffold355 | 87056                   | TT                              | AA                 | AA               | INTERGENIC      |               |                    |                    |
| SNP_70762_A_88592 | NW_004515855.1 | scaffold355 | 88592                   | CC                              | AA                 | AA               | INTERGENIC      |               |                    |                    |
| SNP_70763_A_88609 | NW_004515855.1 | scaffold355 | 88609                   | AA                              | GG                 | GG               | INTERGENIC      |               |                    |                    |
| SNP_70764_A_88619 | NW_004515855.1 | scaffold355 | 88619                   | TT                              | CC                 | CC               | INTERGENIC      |               |                    |                    |
| SNP_70765_A_88620 | NW_004515855.1 | scaffold355 | 88620                   | CC                              | TT                 | TT               | INTERGENIC      |               |                    |                    |
| SNP_70766_A_88630 | NW_004515855.1 | scaffold355 | 88630                   | CC                              | GG                 | GG               | INTERGENIC      |               |                    |                    |
| SNP_70767_A_88647 | NW_004515855.1 | scaffold355 | 88647                   | TT                              | CC                 | CC               | INTERGENIC      |               |                    |                    |
| SNP_70768_A_88694 | NW_004515855.1 | scaffold355 | 88694                   | AA                              | GG                 | GG               | INTERGENIC      |               |                    |                    |
| SNP_70769_A_1635  | NW_004515856.1 | scaffold357 | 1635                    | CC                              | TT                 | TT               | INTERGENIC      |               |                    |                    |
| SNP_70770_A_1651  | NW_004515856.1 | scaffold357 | 1651                    | CC                              | AA                 | AA               | INTERGENIC      |               |                    |                    |
| SNP_70771_A_1656  | NW_004515856.1 | scaffold357 | 1656                    | CC                              | GG                 | GG               | INTERGENIC      |               |                    |                    |
| SNP_70772_A_1661  | NW_004515856.1 | scaffold357 | 1661                    | CC                              | AA                 | AA               | INTERGENIC      |               |                    |                    |

| SNPs IDs          | Chromosome IDs | Chromosomes | Physical positions (bp) | CDC Frontier (Reference genome) | (Pusa 1103 & HPNB) | (ILWC 46 & LPNB) | Sequence genome | Components of | Gene accession IDs | Putative functions |
|-------------------|----------------|-------------|-------------------------|---------------------------------|--------------------|------------------|-----------------|---------------|--------------------|--------------------|
| SNP_70773_A_1712  | NW_004515856.1 | scaffold357 | 1712                    | AA                              | TT                 | TT               | INTERGENIC      |               |                    |                    |
| SNP_70774_A_1763  | NW_004515856.1 | scaffold357 | 1763                    | AA                              | TT                 | TT               | INTERGENIC      |               |                    |                    |
| SNP_70775_A_1854  | NW_004515856.1 | scaffold357 | 1854                    | GG                              | AA                 | AA               | INTERGENIC      |               |                    |                    |
| SNP_70776_A_1860  | NW_004515856.1 | scaffold357 | 1860                    | TT                              | GG                 | GG               | INTERGENIC      |               |                    |                    |
| SNP_70777_A_1885  | NW_004515856.1 | scaffold357 | 1885                    | AA                              | GG                 | GG               | INTERGENIC      |               |                    |                    |
| SNP_70778_A_1910  | NW_004515856.1 | scaffold357 | 1910                    | AA                              | CC                 | CC               | INTERGENIC      |               |                    |                    |
| SNP_70779_A_1963  | NW_004515856.1 | scaffold357 | 1963                    | TT                              | AA                 | AA               | INTERGENIC      |               |                    |                    |
| SNP_70780_A_13845 | NW_004515858.1 | scaffold362 | 13845                   | AA                              | CC                 | CC               | INTERGENIC      |               |                    |                    |
| SNP_70781_A_14159 | NW_004515858.1 | scaffold362 | 14159                   | TT                              | CC                 | CC               | INTERGENIC      |               |                    |                    |
| SNP_70782_A_14187 | NW_004515858.1 | scaffold362 | 14187                   | AA                              | GG                 | GG               | INTERGENIC      |               |                    |                    |
| SNP_70783_A_15577 | NW_004515858.1 | scaffold362 | 15577                   | AA                              | GG                 | GG               | INTERGENIC      |               |                    |                    |
| SNP_70784_A_15600 | NW_004515858.1 | scaffold362 | 15600                   | CC                              | AA                 | AA               | INTERGENIC      |               |                    |                    |
| SNP_70785_A_18306 | NW_004515858.1 | scaffold362 | 18306                   | TT                              | CC                 | CC               | INTERGENIC      |               |                    |                    |
| SNP_70787_A_80535 | NW_004515858.1 | scaffold362 | 80535                   | CC                              | TT                 | TT               | INTERGENIC      |               |                    |                    |
| SNP_70788_A_80662 | NW_004515858.1 | scaffold362 | 80662                   | TT                              | CC                 | CC               | INTERGENIC      |               |                    |                    |
| SNP_70789_A_80714 | NW_004515858.1 | scaffold362 | 80714                   | TT                              | CC                 | CC               | INTERGENIC      |               |                    |                    |
| SNP_70790_A_80883 | NW_004515858.1 | scaffold362 | 80883                   | GG                              | AA                 | AA               | INTERGENIC      |               |                    |                    |
| SNP_70791_A_80911 | NW_004515858.1 | scaffold362 | 80911                   | AA                              | GG                 | GG               | INTERGENIC      |               |                    |                    |
| SNP_70792_A_80924 | NW_004515858.1 | scaffold362 | 80924                   | TT                              | AA                 | AA               | INTERGENIC      |               |                    |                    |
| SNP_70793_A_81024 | NW_004515858.1 | scaffold362 | 81024                   | CC                              | TT                 | TT               | INTERGENIC      |               |                    |                    |
| SNP_70794_A_81057 | NW_004515858.1 | scaffold362 | 81057                   | CC                              | AA                 | AA               | INTERGENIC      |               |                    |                    |
| SNP_70795_A_81070 | NW_004515858.1 | scaffold362 | 81070                   | AA                              | GG                 | GG               | INTERGENIC      |               |                    |                    |

| SNPs IDs           | Chromosome IDs | Chromosomes | Physical positions (bp) | CDC Frontier (Reference genome) | (Pusa 1103 & HPNB) | (ILWC 46 & LPNB) | Sequence Components of genome | Gene accession IDs | Putative functions                             |
|--------------------|----------------|-------------|-------------------------|---------------------------------|--------------------|------------------|-------------------------------|--------------------|------------------------------------------------|
| SNP_70796_A_81089  | NW_004515858.1 | scaffold362 | 81089                   | TT                              | CC                 | CC               | INTERGENIC                    |                    |                                                |
| SNP_70797_A_84382  | NW_004515858.1 | scaffold362 | 84382                   | CC                              | AA                 | AA               | INTERGENIC                    |                    |                                                |
| SNP_70798_A_131348 | NW_004515858.1 | scaffold362 | 131348                  | CC                              | AA                 | AA               | INTERGENIC                    |                    |                                                |
| SNP_70800_A_149311 | NW_004515858.1 | scaffold362 | 149311                  | TT                              | AA                 | AA               | DRR                           | 101501782          | Unknown function                               |
| SNP_70801_A_163844 | NW_004515858.1 | scaffold362 | 163844                  | AA                              | GG                 | GG               | INTERGENIC                    |                    |                                                |
| SNP_70802_A_166063 | NW_004515858.1 | scaffold362 | 166063                  | CC                              | AA                 | AA               | URR                           | 101502106          | aldehyde dehydrogenase family 3 member H1-like |
| SNP_70803_A_166243 | NW_004515858.1 | scaffold362 | 166243                  | TT                              | AA                 | AA               | URR                           | 101502106          | aldehyde dehydrogenase family 3 member H1-like |
| SNP_70805_A_166535 | NW_004515858.1 | scaffold362 | 166535                  | CC                              | AA                 | AA               | URR                           | 101502106          | aldehyde dehydrogenase family 3 member H1-like |
| SNP_70806_A_166584 | NW_004515858.1 | scaffold362 | 166584                  | TT                              | AA                 | AA               | URR                           | 101502106          | aldehyde dehydrogenase family 3 member H1-like |
| SNP_70807_A_166636 | NW_004515858.1 | scaffold362 | 166636                  | AA                              | GG                 | GG               | URR                           | 101502106          | aldehyde dehydrogenase family 3 member H1-like |
| SNP_70808_A_180022 | NW_004515858.1 | scaffold362 | 180022                  | TT                              | CC                 | CC               | INTERGENIC                    |                    |                                                |
| SNP_70809_A_195781 | NW_004515858.1 | scaffold362 | 195781                  | AA                              | GG                 | GG               | INTERGENIC                    |                    |                                                |
| SNP_70810_A_196456 | NW_004515858.1 | scaffold362 | 196456                  | AA                              | GG                 | GG               | INTERGENIC                    |                    |                                                |
| SNP_70812_A_263891 | NW_004515858.1 | scaffold362 | 263891                  | CC                              | AA                 | AA               | INTERGENIC                    |                    |                                                |
| SNP_70813_A_264263 | NW_004515858.1 | scaffold362 | 264263                  | GG                              | TT                 | TT               | INTERGENIC                    |                    |                                                |
| SNP_70815_A_321068 | NW_004515858.1 | scaffold362 | 321068                  | AA                              | TT                 | TT               | DRR                           | 101499559          | putative lipid-transfer protein DIR1           |
| SNP_70816_A_342324 | NW_004515858.1 | scaffold362 | 342324                  | GG                              | AA                 | AA               | URR                           | 101499857          | uncharacterized LOC101499857                   |
| SNP_70817_A_374761 | NW_004515858.1 | scaffold362 | 374761                  | GG                              | TT                 | TT               | INTERGENIC                    |                    |                                                |
| SNP_70818_A_392125 | NW_004515858.1 | scaffold362 | 392125                  | TT                              | CC                 | CC               | INTERGENIC                    |                    |                                                |
| SNP_70819_A_257    | NW_004515859.1 | scaffold363 | 257                     | TT                              | CC                 | CC               | INTERGENIC                    |                    |                                                |
| SNP_70820_A_334    | NW_004515859.1 | scaffold363 | 334                     | CC                              | GG                 | GG               | INTERGENIC                    |                    |                                                |
| SNP_70821_A_368    | NW_004515859.1 | scaffold363 | 368                     | GG                              | AA                 | AA               | INTERGENIC                    |                    |                                                |

| SNPs IDs          | Chromosome IDs | Chromosomes | Physical positions (bp) | CDC Frontier (Reference genome) | (Pusa 1103 & HPNB) | (ILWC 46 & LPNB) | Sequence genome | Components of | Gene accession IDs | Putative functions |
|-------------------|----------------|-------------|-------------------------|---------------------------------|--------------------|------------------|-----------------|---------------|--------------------|--------------------|
| SNP_70822_A_724   | NW_004515859.1 | scaffold363 | 724                     | GG                              | TT                 | TT               | INTERGENIC      |               |                    |                    |
| SNP_70823_A_734   | NW_004515859.1 | scaffold363 | 734                     | CC                              | TT                 | TT               | INTERGENIC      |               |                    |                    |
| SNP_70826_A_85727 | NW_004515859.1 | scaffold363 | 85727                   | CC                              | GG                 | GG               | INTERGENIC      |               |                    |                    |
| SNP_70827_A_85772 | NW_004515859.1 | scaffold363 | 85772                   | AA                              | GG                 | GG               | INTERGENIC      |               |                    |                    |
| SNP_70828_A_85864 | NW_004515859.1 | scaffold363 | 85864                   | TT                              | GG                 | GG               | INTERGENIC      |               |                    |                    |
| SNP_70829_A_96420 | NW_004515859.1 | scaffold363 | 96420                   | TT                              | CC                 | CC               | INTERGENIC      |               |                    |                    |
| SNP_70830_A_96421 | NW_004515859.1 | scaffold363 | 96421                   | GG                              | TT                 | TT               | INTERGENIC      |               |                    |                    |
| SNP_70831_A_96455 | NW_004515859.1 | scaffold363 | 96455                   | AA                              | GG                 | GG               | INTERGENIC      |               |                    |                    |
| SNP_70832_A_96461 | NW_004515859.1 | scaffold363 | 96461                   | TT                              | AA                 | AA               | INTERGENIC      |               |                    |                    |
| SNP_70833_A_96477 | NW_004515859.1 | scaffold363 | 96477                   | GG                              | TT                 | TT               | INTERGENIC      |               |                    |                    |
| SNP_70834_A_96501 | NW_004515859.1 | scaffold363 | 96501                   | AA                              | TT                 | TT               | INTERGENIC      |               |                    |                    |
| SNP_70835_A_96515 | NW_004515859.1 | scaffold363 | 96515                   | CC                              | TT                 | TT               | INTERGENIC      |               |                    |                    |
| SNP_70836_A_96560 | NW_004515859.1 | scaffold363 | 96560                   | GG                              | AA                 | AA               | INTERGENIC      |               |                    |                    |
| SNP_70837_A_96561 | NW_004515859.1 | scaffold363 | 96561                   | CC                              | TT                 | TT               | INTERGENIC      |               |                    |                    |
| SNP_70838_A_96566 | NW_004515859.1 | scaffold363 | 96566                   | CC                              | TT                 | TT               | INTERGENIC      |               |                    |                    |
| SNP_70839_A_96581 | NW_004515859.1 | scaffold363 | 96581                   | TT                              | CC                 | CC               | INTERGENIC      |               |                    |                    |
| SNP_70840_A_96587 | NW_004515859.1 | scaffold363 | 96587                   | AA                              | GG                 | GG               | INTERGENIC      |               |                    |                    |
| SNP_70841_A_96602 | NW_004515859.1 | scaffold363 | 96602                   | TT                              | AA                 | AA               | INTERGENIC      |               |                    |                    |
| SNP_70844_A_96730 | NW_004515859.1 | scaffold363 | 96730                   | GG                              | AA                 | AA               | INTERGENIC      |               |                    |                    |
| SNP_70845_A_96768 | NW_004515859.1 | scaffold363 | 96768                   | TT                              | CC                 | CC               | INTERGENIC      |               |                    |                    |
| SNP_70846_A_96900 | NW_004515859.1 | scaffold363 | 96900                   | TT                              | GG                 | GG               | INTERGENIC      |               |                    |                    |
| SNP_70847_A_96909 | NW_004515859.1 | scaffold363 | 96909                   | CC                              | TT                 | TT               | INTERGENIC      |               |                    |                    |

| SNPs IDs           | Chromosome IDs | Chromosomes | Physical positions (bp) | CDC Frontier (Reference genome) | (Pusa 1103 & HPNB) | (ILWC 46 & LPNB) | Sequence Components of genome | Gene accession IDs | Putative functions           |
|--------------------|----------------|-------------|-------------------------|---------------------------------|--------------------|------------------|-------------------------------|--------------------|------------------------------|
| SNP_70848_A_96914  | NW_004515859.1 | scaffold363 | 96914                   | CC                              | TT                 | TT               | INTERGENIC                    |                    |                              |
| SNP_70849_A_96919  | NW_004515859.1 | scaffold363 | 96919                   | TT                              | CC                 | CC               | INTERGENIC                    |                    |                              |
| SNP_70850_A_34322  | NW_004515861.1 | scaffold366 | 34322                   | AA                              | GG                 | GG               | INTERGENIC                    |                    |                              |
| SNP_70851_A_34405  | NW_004515861.1 | scaffold366 | 34405                   | GG                              | AA                 | AA               | INTERGENIC                    |                    |                              |
| SNP_70852_A_68167  | NW_004515861.1 | scaffold366 | 68167                   | GG                              | AA                 | AA               | INTRON                        | 101507052          | uncharacterized LOC101507052 |
| SNP_70853_A_68468  | NW_004515861.1 | scaffold366 | 68468                   | TT                              | CC                 | CC               | INTRON                        | 101507052          | uncharacterized LOC101507052 |
| SNP_70854_A_107525 | NW_004515861.1 | scaffold366 | 107525                  | CC                              | TT                 | TT               | INTERGENIC                    |                    |                              |
| SNP_70855_A_107629 | NW_004515861.1 | scaffold366 | 107629                  | AA                              | GG                 | GG               | INTERGENIC                    |                    |                              |
| SNP_70856_A_107639 | NW_004515861.1 | scaffold366 | 107639                  | CC                              | GG                 | GG               | INTERGENIC                    |                    |                              |
| SNP_70857_A_107946 | NW_004515861.1 | scaffold366 | 107946                  | GG                              | TT                 | TT               | INTERGENIC                    |                    |                              |
| SNP_70858_A_108079 | NW_004515861.1 | scaffold366 | 108079                  | CC                              | TT                 | TT               | INTERGENIC                    |                    |                              |
| SNP_70859_A_108082 | NW_004515861.1 | scaffold366 | 108082                  | GG                              | AA                 | AA               | INTERGENIC                    |                    |                              |
| SNP_70860_A_156016 | NW_004515861.1 | scaffold366 | 156016                  | CC                              | TT                 | TT               | INTERGENIC                    |                    |                              |
| SNP_70861_A_156163 | NW_004515861.1 | scaffold366 | 156163                  | TT                              | CC                 | CC               | INTERGENIC                    |                    |                              |
| SNP_70862_A_156167 | NW_004515861.1 | scaffold366 | 156167                  | GG                              | AA                 | AA               | INTERGENIC                    |                    |                              |
| SNP_70863_A_168379 | NW_004515861.1 | scaffold366 | 168379                  | CC                              | AA                 | AA               | INTERGENIC                    |                    |                              |
| SNP_70864_A_2644   | NW_004515862.1 | scaffold367 | 2644                    | TT                              | CC                 | CC               | INTERGENIC                    |                    |                              |
| SNP_70866_A_6667   | NW_004515862.1 | scaffold367 | 6667                    | TT                              | AA                 | AA               | NON_SYNONYMOUS_CODING         | 101507682          | uncharacterized LOC101507682 |
| SNP_70867_A_6698   | NW_004515862.1 | scaffold367 | 6698                    | GG                              | TT                 | TT               | INTRON                        | 101507682          | uncharacterized LOC101507682 |
| SNP_70868_A_6727   | NW_004515862.1 | scaffold367 | 6727                    | CC                              | TT                 | TT               | INTRON                        | 101507682          | uncharacterized LOC101507682 |
| SNP_70869_A_6737   | NW_004515862.1 | scaffold367 | 6737                    | TT                              | GG                 | GG               | INTRON                        | 101507682          | uncharacterized LOC101507682 |
| SNP_70870_A_15290  | NW_004515862.1 | scaffold367 | 15290                   | AA                              | TT                 | TT               | URR                           | 101508008          | uncharacterized LOC101508008 |

| SNPs IDs          | Chromosome IDs | Chromosomes | Physical positions (bp) | CDC Frontier (Reference genome) | (Pusa 1103 & HPNB) | (ILWC 46 & LPNB) | Sequence genome | Components of | Gene accession IDs     | Putative functions |
|-------------------|----------------|-------------|-------------------------|---------------------------------|--------------------|------------------|-----------------|---------------|------------------------|--------------------|
| SNP_70872_A_19728 | NW_004515862.1 | scaffold367 | 19728                   | CC                              | TT                 | TT               | INTERGENIC      |               |                        |                    |
| SNP_70873_A_20090 | NW_004515862.1 | scaffold367 | 20090                   | TT                              | CC                 | CC               | INTERGENIC      |               |                        |                    |
| SNP_70874_A_20095 | NW_004515862.1 | scaffold367 | 20095                   | TT                              | CC                 | CC               | INTERGENIC      |               |                        |                    |
| SNP_70875_A_20110 | NW_004515862.1 | scaffold367 | 20110                   | GG                              | AA                 | AA               | INTERGENIC      |               |                        |                    |
| SNP_70876_A_20205 | NW_004515862.1 | scaffold367 | 20205                   | TT                              | AA                 | AA               | INTERGENIC      |               |                        |                    |
| SNP_70877_A_20215 | NW_004515862.1 | scaffold367 | 20215                   | CC                              | AA                 | AA               | INTERGENIC      |               |                        |                    |
| SNP_70878_A_24636 | NW_004515862.1 | scaffold367 | 24636                   | AA                              | GG                 | GG               | INTERGENIC      |               |                        |                    |
| SNP_70879_A_25126 | NW_004515862.1 | scaffold367 | 25126                   | TT                              | AA                 | AA               | INTERGENIC      |               |                        |                    |
| SNP_70880_A_25200 | NW_004515862.1 | scaffold367 | 25200                   | TT                              | CC                 | CC               | INTERGENIC      |               |                        |                    |
| SNP_70881_A_25222 | NW_004515862.1 | scaffold367 | 25222                   | TT                              | CC                 | CC               | INTERGENIC      |               |                        |                    |
| SNP_70882_A_34550 | NW_004515862.1 | scaffold367 | 34550                   | CC                              | TT                 | TT               | INTERGENIC      |               |                        |                    |
| SNP_70883_A_34559 | NW_004515862.1 | scaffold367 | 34559                   | CC                              | TT                 | TT               | INTERGENIC      |               |                        |                    |
| SNP_70884_A_45300 | NW_004515862.1 | scaffold367 | 45300                   | AA                              | GG                 | GG               | URR             | 101508318     | basic 7S globulin-like |                    |
| SNP_70885_A_45307 | NW_004515862.1 | scaffold367 | 45307                   | CC                              | AA                 | AA               | URR             | 101508318     | basic 7S globulin-like |                    |
| SNP_70886_A_45403 | NW_004515862.1 | scaffold367 | 45403                   | TT                              | GG                 | GG               | URR             | 101508318     | basic 7S globulin-like |                    |
| SNP_70887_A_45413 | NW_004515862.1 | scaffold367 | 45413                   | AA                              | GG                 | GG               | URR             | 101508318     | basic 7S globulin-like |                    |
| SNP_70888_A_51407 | NW_004515862.1 | scaffold367 | 51407                   | CC                              | TT                 | TT               | INTERGENIC      |               |                        |                    |
| SNP_70889_A_51439 | NW_004515862.1 | scaffold367 | 51439                   | TT                              | GG                 | GG               | INTERGENIC      |               |                        |                    |
| SNP_70890_A_51452 | NW_004515862.1 | scaffold367 | 51452                   | AA                              | CC                 | CC               | INTERGENIC      |               |                        |                    |
| SNP_70891_A_51465 | NW_004515862.1 | scaffold367 | 51465                   | GG                              | AA                 | AA               | INTERGENIC      |               |                        |                    |
| SNP_70892_A_51474 | NW_004515862.1 | scaffold367 | 51474                   | GG                              | TT                 | TT               | INTERGENIC      |               |                        |                    |
| SNP_70893_A_51493 | NW_004515862.1 | scaffold367 | 51493                   | CC                              | TT                 | TT               | INTERGENIC      |               |                        |                    |



| SNPs IDs          | Chromosome IDs | Chromosomes | Physical positions (bp) | CDC Frontier (Reference genome) | (Pusa 1103 & HPNB) | (ILWC 46 & LPNB) | Sequence Components of genome | Gene accession IDs | Putative functions       |
|-------------------|----------------|-------------|-------------------------|---------------------------------|--------------------|------------------|-------------------------------|--------------------|--------------------------|
| SNP_70894_A_51519 | NW_004515862.1 | scaffold367 | 51519                   | CC                              | TT                 | TT               | INTERGENIC                    |                    |                          |
| SNP_70895_A_51552 | NW_004515862.1 | scaffold367 | 51552                   | TT                              | AA                 | AA               | INTERGENIC                    |                    |                          |
| SNP_70896_A_51565 | NW_004515862.1 | scaffold367 | 51565                   | GG                              | CC                 | CC               | INTERGENIC                    |                    |                          |
| SNP_70897_A_51613 | NW_004515862.1 | scaffold367 | 51613                   | TT                              | CC                 | CC               | INTERGENIC                    |                    |                          |
| SNP_70898_A_52450 | NW_004515862.1 | scaffold367 | 52450                   | AA                              | GG                 | GG               | INTERGENIC                    |                    |                          |
| SNP_70899_A_52497 | NW_004515862.1 | scaffold367 | 52497                   | TT                              | AA                 | AA               | INTERGENIC                    |                    |                          |
| SNP_70900_A_52539 | NW_004515862.1 | scaffold367 | 52539                   | GG                              | CC                 | CC               | INTERGENIC                    |                    |                          |
| SNP_70901_A_55744 | NW_004515862.1 | scaffold367 | 55744                   | AA                              | CC                 | CC               | INTERGENIC                    |                    |                          |
| SNP_70902_A_55811 | NW_004515862.1 | scaffold367 | 55811                   | TT                              | CC                 | CC               | INTERGENIC                    |                    |                          |
| SNP_70903_A_61872 | NW_004515862.1 | scaffold367 | 61872                   | CC                              | TT                 | TT               | INTERGENIC                    |                    |                          |
| SNP_70904_A_62128 | NW_004515862.1 | scaffold367 | 62128                   | AA                              | GG                 | GG               | INTERGENIC                    |                    |                          |
| SNP_70905_A_67713 | NW_004515862.1 | scaffold367 | 67713                   | AA                              | GG                 | GG               | INTERGENIC                    |                    |                          |
| SNP_70906_A_72151 | NW_004515862.1 | scaffold367 | 72151                   | AA                              | TT                 | TT               | INTERGENIC                    |                    |                          |
| SNP_70907_A_72175 | NW_004515862.1 | scaffold367 | 72175                   | CC                              | GG                 | GG               | INTERGENIC                    |                    |                          |
| SNP_70908_A_72195 | NW_004515862.1 | scaffold367 | 72195                   | AA                              | CC                 | CC               | INTERGENIC                    |                    |                          |
| SNP_70909_A_72278 | NW_004515862.1 | scaffold367 | 72278                   | AA                              | GG                 | GG               | INTERGENIC                    |                    |                          |
| SNP_70910_A_72284 | NW_004515862.1 | scaffold367 | 72284                   | TT                              | CC                 | CC               | INTERGENIC                    |                    |                          |
| SNP_70911_A_72306 | NW_004515862.1 | scaffold367 | 72306                   | TT                              | CC                 | CC               | INTERGENIC                    |                    |                          |
| SNP_70912_A_79012 | NW_004515862.1 | scaffold367 | 79012                   | GG                              | AA                 | AA               | INTRON                        | 101508635          | basic 7S globulin 2-like |
| SNP_70913_A_79352 | NW_004515862.1 | scaffold367 | 79352                   | AA                              | GG                 | GG               | INTRON                        | 101508635          | basic 7S globulin 2-like |
| SNP_70914_A_79378 | NW_004515862.1 | scaffold367 | 79378                   | TT                              | CC                 | CC               | INTRON                        | 101508635          | basic 7S globulin 2-like |
| SNP_70915_A_79380 | NW_004515862.1 | scaffold367 | 79380                   | CC                              | AA                 | AA               | INTRON                        | 101508635          | basic 7S globulin 2-like |

| SNPs IDs           | Chromosome IDs | Chromosomes | Physical positions (bp) | CDC Frontier (Reference genome) | (Pusa 1103 & HPNB) | (ILWC 46 & LPNB) | Sequence genome | Components of | Gene accession IDs       | Putative functions |
|--------------------|----------------|-------------|-------------------------|---------------------------------|--------------------|------------------|-----------------|---------------|--------------------------|--------------------|
| SNP_70916_A_89728  | NW_004515862.1 | scaffold367 | 89728                   | AA                              | GG                 | GG               | INTERGENIC      |               |                          |                    |
| SNP_70917_A_89733  | NW_004515862.1 | scaffold367 | 89733                   | AA                              | GG                 | GG               | INTERGENIC      |               |                          |                    |
| SNP_70918_A_92781  | NW_004515862.1 | scaffold367 | 92781                   | CC                              | TT                 | TT               | INTERGENIC      |               |                          |                    |
| SNP_70919_A_107126 | NW_004515862.1 | scaffold367 | 107126                  | AA                              | GG                 | GG               | INTERGENIC      |               |                          |                    |
| SNP_70920_A_119149 | NW_004515862.1 | scaffold367 | 119149                  | TT                              | AA                 | AA               | INTERGENIC      |               |                          |                    |
| SNP_70921_A_119179 | NW_004515862.1 | scaffold367 | 119179                  | TT                              | CC                 | CC               | INTERGENIC      |               |                          |                    |
| SNP_70922_A_119777 | NW_004515862.1 | scaffold367 | 119777                  | TT                              | CC                 | CC               | INTERGENIC      |               |                          |                    |
| SNP_70923_A_119784 | NW_004515862.1 | scaffold367 | 119784                  | TT                              | GG                 | GG               | INTERGENIC      |               |                          |                    |
| SNP_70924_A_119791 | NW_004515862.1 | scaffold367 | 119791                  | AA                              | GG                 | GG               | INTERGENIC      |               |                          |                    |
| SNP_70925_A_119802 | NW_004515862.1 | scaffold367 | 119802                  | GG                              | AA                 | AA               | INTERGENIC      |               |                          |                    |
| SNP_70927_A_119831 | NW_004515862.1 | scaffold367 | 119831                  | TT                              | GG                 | GG               | INTERGENIC      |               |                          |                    |
| SNP_70928_A_133841 | NW_004515862.1 | scaffold367 | 133841                  | AA                              | GG                 | GG               | INTERGENIC      |               |                          |                    |
| SNP_70929_A_149394 | NW_004515862.1 | scaffold367 | 149394                  | CC                              | GG                 | GG               | URR             | 101509267     | F-box protein CPR30-like |                    |
| SNP_70930_A_663    | NW_004515863.1 | scaffold369 | 663                     | AA                              | GG                 | GG               | INTERGENIC      |               |                          |                    |
| SNP_70931_A_11369  | NW_004515863.1 | scaffold369 | 11369                   | AA                              | GG                 | GG               | URR             | 101509913     | probable pectate lyase 4 |                    |
| SNP_70932_A_11377  | NW_004515863.1 | scaffold369 | 11377                   | GG                              | AA                 | AA               | URR             | 101509913     | probable pectate lyase 4 |                    |
| SNP_70933_A_15892  | NW_004515863.1 | scaffold369 | 15892                   | CC                              | TT                 | TT               | INTERGENIC      |               |                          |                    |
| SNP_70935_A_79536  | NW_004515863.1 | scaffold369 | 79536                   | TT                              | CC                 | CC               | INTERGENIC      |               |                          |                    |
| SNP_70936_A_153109 | NW_004515863.1 | scaffold369 | 153109                  | AA                              | GG                 | GG               | INTERGENIC      |               |                          |                    |
| SNP_70937_A_20985  | NW_004515864.1 | scaffold370 | 20985                   | AA                              | GG                 | GG               | INTERGENIC      |               |                          |                    |
| SNP_70938_A_20993  | NW_004515864.1 | scaffold370 | 20993                   | TT                              | GG                 | GG               | INTERGENIC      |               |                          |                    |
| SNP_70939_A_23510  | NW_004515864.1 | scaffold370 | 23510                   | CC                              | AA                 | AA               | INTERGENIC      |               |                          |                    |

| SNPs IDs          | Chromosome IDs | Chromosomes | Physical positions (bp) | CDC Frontier (Reference genome) | (Pusa 1103 & HPNB) | (ILWC 46 & LPNB) | Sequence genome | Components of | Gene accession IDs | Putative functions |
|-------------------|----------------|-------------|-------------------------|---------------------------------|--------------------|------------------|-----------------|---------------|--------------------|--------------------|
| SNP_70940_A_23549 | NW_004515864.1 | scaffold370 | 23549                   | GG                              | CC                 | CC               | INTERGENIC      |               |                    |                    |
| SNP_70941_A_23833 | NW_004515864.1 | scaffold370 | 23833                   | CC                              | AA                 | AA               | INTERGENIC      |               |                    |                    |
| SNP_70942_A_28971 | NW_004515864.1 | scaffold370 | 28971                   | CC                              | TT                 | TT               | INTERGENIC      |               |                    |                    |
| SNP_70943_A_28995 | NW_004515864.1 | scaffold370 | 28995                   | TT                              | CC                 | CC               | INTERGENIC      |               |                    |                    |
| SNP_70944_A_29007 | NW_004515864.1 | scaffold370 | 29007                   | TT                              | AA                 | AA               | INTERGENIC      |               |                    |                    |
| SNP_70945_A_29075 | NW_004515864.1 | scaffold370 | 29075                   | GG                              | AA                 | AA               | INTERGENIC      |               |                    |                    |
| SNP_70946_A_29081 | NW_004515864.1 | scaffold370 | 29081                   | TT                              | CC                 | CC               | INTERGENIC      |               |                    |                    |
| SNP_70947_A_29170 | NW_004515864.1 | scaffold370 | 29170                   | CC                              | TT                 | TT               | INTERGENIC      |               |                    |                    |
| SNP_70948_A_29280 | NW_004515864.1 | scaffold370 | 29280                   | AA                              | GG                 | GG               | INTERGENIC      |               |                    |                    |
| SNP_70949_A_29315 | NW_004515864.1 | scaffold370 | 29315                   | GG                              | CC                 | CC               | INTERGENIC      |               |                    |                    |
| SNP_70950_A_29353 | NW_004515864.1 | scaffold370 | 29353                   | CC                              | TT                 | TT               | INTERGENIC      |               |                    |                    |
| SNP_70951_A_29372 | NW_004515864.1 | scaffold370 | 29372                   | CC                              | AA                 | AA               | INTERGENIC      |               |                    |                    |
| SNP_70952_A_29522 | NW_004515864.1 | scaffold370 | 29522                   | AA                              | TT                 | TT               | INTERGENIC      |               |                    |                    |
| SNP_70953_A_29593 | NW_004515864.1 | scaffold370 | 29593                   | AA                              | GG                 | GG               | INTERGENIC      |               |                    |                    |
| SNP_70954_A_29599 | NW_004515864.1 | scaffold370 | 29599                   | AA                              | GG                 | GG               | INTERGENIC      |               |                    |                    |
| SNP_70955_A_29606 | NW_004515864.1 | scaffold370 | 29606                   | CC                              | TT                 | TT               | INTERGENIC      |               |                    |                    |
| SNP_70956_A_29753 | NW_004515864.1 | scaffold370 | 29753                   | AA                              | GG                 | GG               | INTERGENIC      |               |                    |                    |
| SNP_70957_A_29815 | NW_004515864.1 | scaffold370 | 29815                   | CC                              | AA                 | AA               | INTERGENIC      |               |                    |                    |
| SNP_70958_A_31759 | NW_004515864.1 | scaffold370 | 31759                   | TT                              | CC                 | CC               | INTERGENIC      |               |                    |                    |
| SNP_70959_A_32002 | NW_004515864.1 | scaffold370 | 32002                   | TT                              | CC                 | CC               | INTERGENIC      |               |                    |                    |
| SNP_70960_A_32087 | NW_004515864.1 | scaffold370 | 32087                   | AA                              | TT                 | TT               | INTERGENIC      |               |                    |                    |
| SNP_70961_A_32120 | NW_004515864.1 | scaffold370 | 32120                   | AA                              | GG                 | GG               | INTERGENIC      |               |                    |                    |

| SNPs IDs          | Chromosome IDs | Chromosomes | Physical positions (bp) | CDC Frontier (Reference genome) | (Pusa 1103 & HPNB) | (ILWC 46 & LPNB) | Sequence genome | Components of | Gene accession IDs | Putative functions |
|-------------------|----------------|-------------|-------------------------|---------------------------------|--------------------|------------------|-----------------|---------------|--------------------|--------------------|
| SNP_70962_A_32362 | NW_004515864.1 | scaffold370 | 32362                   | TT                              | CC                 | CC               | INTERGENIC      |               |                    |                    |
| SNP_70963_A_32400 | NW_004515864.1 | scaffold370 | 32400                   | TT                              | CC                 | CC               | INTERGENIC      |               |                    |                    |
| SNP_70964_A_32405 | NW_004515864.1 | scaffold370 | 32405                   | CC                              | GG                 | GG               | INTERGENIC      |               |                    |                    |
| SNP_70965_A_32419 | NW_004515864.1 | scaffold370 | 32419                   | AA                              | GG                 | GG               | INTERGENIC      |               |                    |                    |
| SNP_70966_A_32429 | NW_004515864.1 | scaffold370 | 32429                   | CC                              | AA                 | AA               | INTERGENIC      |               |                    |                    |
| SNP_70967_A_32430 | NW_004515864.1 | scaffold370 | 32430                   | CC                              | AA                 | AA               | INTERGENIC      |               |                    |                    |
| SNP_70968_A_32613 | NW_004515864.1 | scaffold370 | 32613                   | TT                              | GG                 | GG               | INTERGENIC      |               |                    |                    |
| SNP_70969_A_32646 | NW_004515864.1 | scaffold370 | 32646                   | GG                              | AA                 | AA               | INTERGENIC      |               |                    |                    |
| SNP_70970_A_32648 | NW_004515864.1 | scaffold370 | 32648                   | CC                              | TT                 | TT               | INTERGENIC      |               |                    |                    |
| SNP_70971_A_32757 | NW_004515864.1 | scaffold370 | 32757                   | AA                              | GG                 | GG               | INTERGENIC      |               |                    |                    |
| SNP_70972_A_33947 | NW_004515864.1 | scaffold370 | 33947                   | AA                              | GG                 | GG               | INTERGENIC      |               |                    |                    |
| SNP_70973_A_34053 | NW_004515864.1 | scaffold370 | 34053                   | CC                              | TT                 | TT               | INTERGENIC      |               |                    |                    |
| SNP_70974_A_34192 | NW_004515864.1 | scaffold370 | 34192                   | GG                              | AA                 | AA               | INTERGENIC      |               |                    |                    |
| SNP_70975_A_34353 | NW_004515864.1 | scaffold370 | 34353                   | TT                              | AA                 | AA               | INTERGENIC      |               |                    |                    |
| SNP_70976_A_34388 | NW_004515864.1 | scaffold370 | 34388                   | AA                              | TT                 | TT               | INTERGENIC      |               |                    |                    |
| SNP_70977_A_34442 | NW_004515864.1 | scaffold370 | 34442                   | CC                              | TT                 | TT               | INTERGENIC      |               |                    |                    |
| SNP_70978_A_34479 | NW_004515864.1 | scaffold370 | 34479                   | CC                              | TT                 | TT               | INTERGENIC      |               |                    |                    |
| SNP_70979_A_34504 | NW_004515864.1 | scaffold370 | 34504                   | CC                              | TT                 | TT               | INTERGENIC      |               |                    |                    |
| SNP_70980_A_34610 | NW_004515864.1 | scaffold370 | 34610                   | TT                              | CC                 | CC               | INTERGENIC      |               |                    |                    |
| SNP_70981_A_34678 | NW_004515864.1 | scaffold370 | 34678                   | CC                              | TT                 | TT               | INTERGENIC      |               |                    |                    |
| SNP_70982_A_34746 | NW_004515864.1 | scaffold370 | 34746                   | TT                              | GG                 | GG               | INTERGENIC      |               |                    |                    |
| SNP_70983_A_34754 | NW_004515864.1 | scaffold370 | 34754                   | CC                              | GG                 | GG               | INTERGENIC      |               |                    |                    |

| SNPs IDs          | Chromosome IDs | Chromosomes | Physical positions (bp) | CDC Frontier (Reference genome) | (Pusa 1103 & HPNB) | (ILWC 46 & LPNB) | Sequence genome | Components of | Gene accession IDs | Putative functions |
|-------------------|----------------|-------------|-------------------------|---------------------------------|--------------------|------------------|-----------------|---------------|--------------------|--------------------|
| SNP_70984_A_34762 | NW_004515864.1 | scaffold370 | 34762                   | AA                              | GG                 | GG               | INTERGENIC      |               |                    |                    |
| SNP_70985_A_34773 | NW_004515864.1 | scaffold370 | 34773                   | TT                              | CC                 | CC               | INTERGENIC      |               |                    |                    |
| SNP_70986_A_34979 | NW_004515864.1 | scaffold370 | 34979                   | CC                              | AA                 | AA               | INTERGENIC      |               |                    |                    |
| SNP_70987_A_35081 | NW_004515864.1 | scaffold370 | 35081                   | GG                              | AA                 | AA               | INTERGENIC      |               |                    |                    |
| SNP_70988_A_35363 | NW_004515864.1 | scaffold370 | 35363                   | CC                              | TT                 | TT               | INTERGENIC      |               |                    |                    |
| SNP_70989_A_35420 | NW_004515864.1 | scaffold370 | 35420                   | CC                              | TT                 | TT               | INTERGENIC      |               |                    |                    |
| SNP_70990_A_35461 | NW_004515864.1 | scaffold370 | 35461                   | AA                              | CC                 | CC               | INTERGENIC      |               |                    |                    |
| SNP_70991_A_35479 | NW_004515864.1 | scaffold370 | 35479                   | AA                              | GG                 | GG               | INTERGENIC      |               |                    |                    |
| SNP_70992_A_35741 | NW_004515864.1 | scaffold370 | 35741                   | GG                              | TT                 | TT               | INTERGENIC      |               |                    |                    |
| SNP_70993_A_35752 | NW_004515864.1 | scaffold370 | 35752                   | AA                              | CC                 | CC               | INTERGENIC      |               |                    |                    |
| SNP_70994_A_35824 | NW_004515864.1 | scaffold370 | 35824                   | GG                              | AA                 | AA               | INTERGENIC      |               |                    |                    |
| SNP_70995_A_35865 | NW_004515864.1 | scaffold370 | 35865                   | CC                              | TT                 | TT               | INTERGENIC      |               |                    |                    |
| SNP_70996_A_35868 | NW_004515864.1 | scaffold370 | 35868                   | TT                              | CC                 | CC               | INTERGENIC      |               |                    |                    |
| SNP_70997_A_36003 | NW_004515864.1 | scaffold370 | 36003                   | TT                              | CC                 | CC               | INTERGENIC      |               |                    |                    |
| SNP_70998_A_36033 | NW_004515864.1 | scaffold370 | 36033                   | AA                              | GG                 | GG               | INTERGENIC      |               |                    |                    |
| SNP_70999_A_36056 | NW_004515864.1 | scaffold370 | 36056                   | GG                              | TT                 | TT               | INTERGENIC      |               |                    |                    |
| SNP_71000_A_36078 | NW_004515864.1 | scaffold370 | 36078                   | CC                              | GG                 | GG               | INTERGENIC      |               |                    |                    |
| SNP_71001_A_36728 | NW_004515864.1 | scaffold370 | 36728                   | CC                              | TT                 | TT               | INTERGENIC      |               |                    |                    |
| SNP_71002_A_36757 | NW_004515864.1 | scaffold370 | 36757                   | AA                              | GG                 | GG               | INTERGENIC      |               |                    |                    |
| SNP_71003_A_36843 | NW_004515864.1 | scaffold370 | 36843                   | CC                              | AA                 | AA               | INTERGENIC      |               |                    |                    |
| SNP_71004_A_36881 | NW_004515864.1 | scaffold370 | 36881                   | AA                              | GG                 | GG               | INTERGENIC      |               |                    |                    |
| SNP_71005_A_36922 | NW_004515864.1 | scaffold370 | 36922                   | CC                              | TT                 | TT               | INTERGENIC      |               |                    |                    |

| SNPs IDs          | Chromosome IDs | Chromosomes | Physical positions (bp) | CDC Frontier (Reference genome) | (Pusa 1103 & HPNB) | (ILWC 46 & LPNB) | Sequence genome | Components of | Gene accession IDs | Putative functions |
|-------------------|----------------|-------------|-------------------------|---------------------------------|--------------------|------------------|-----------------|---------------|--------------------|--------------------|
| SNP_71006_A_37008 | NW_004515864.1 | scaffold370 | 37008                   | AA                              | CC                 | CC               | INTERGENIC      |               |                    |                    |
| SNP_71007_A_37065 | NW_004515864.1 | scaffold370 | 37065                   | TT                              | CC                 | CC               | INTERGENIC      |               |                    |                    |
| SNP_71008_A_37073 | NW_004515864.1 | scaffold370 | 37073                   | AA                              | GG                 | GG               | INTERGENIC      |               |                    |                    |
| SNP_71009_A_37122 | NW_004515864.1 | scaffold370 | 37122                   | TT                              | CC                 | CC               | INTERGENIC      |               |                    |                    |
| SNP_71010_A_37273 | NW_004515864.1 | scaffold370 | 37273                   | GG                              | AA                 | AA               | INTERGENIC      |               |                    |                    |
| SNP_71011_A_37738 | NW_004515864.1 | scaffold370 | 37738                   | GG                              | AA                 | AA               | INTERGENIC      |               |                    |                    |
| SNP_71013_A_37882 | NW_004515864.1 | scaffold370 | 37882                   | AA                              | CC                 | CC               | INTERGENIC      |               |                    |                    |
| SNP_71014_A_37912 | NW_004515864.1 | scaffold370 | 37912                   | GG                              | AA                 | AA               | INTERGENIC      |               |                    |                    |
| SNP_71015_A_37950 | NW_004515864.1 | scaffold370 | 37950                   | CC                              | TT                 | TT               | INTERGENIC      |               |                    |                    |
| SNP_71016_A_38006 | NW_004515864.1 | scaffold370 | 38006                   | AA                              | TT                 | TT               | INTERGENIC      |               |                    |                    |
| SNP_71017_A_38053 | NW_004515864.1 | scaffold370 | 38053                   | CC                              | TT                 | TT               | INTERGENIC      |               |                    |                    |
| SNP_71018_A_38054 | NW_004515864.1 | scaffold370 | 38054                   | TT                              | CC                 | CC               | INTERGENIC      |               |                    |                    |
| SNP_71019_A_38065 | NW_004515864.1 | scaffold370 | 38065                   | GG                              | TT                 | TT               | INTERGENIC      |               |                    |                    |
| SNP_71020_A_38069 | NW_004515864.1 | scaffold370 | 38069                   | CC                              | AA                 | AA               | INTERGENIC      |               |                    |                    |
| SNP_71021_A_38074 | NW_004515864.1 | scaffold370 | 38074                   | TT                              | GG                 | GG               | INTERGENIC      |               |                    |                    |
| SNP_71022_A_38099 | NW_004515864.1 | scaffold370 | 38099                   | GG                              | CC                 | CC               | INTERGENIC      |               |                    |                    |
| SNP_71023_A_38157 | NW_004515864.1 | scaffold370 | 38157                   | TT                              | CC                 | CC               | INTERGENIC      |               |                    |                    |
| SNP_71024_A_38180 | NW_004515864.1 | scaffold370 | 38180                   | TT                              | AA                 | AA               | INTERGENIC      |               |                    |                    |
| SNP_71025_A_38192 | NW_004515864.1 | scaffold370 | 38192                   | TT                              | CC                 | CC               | INTERGENIC      |               |                    |                    |
| SNP_71026_A_38261 | NW_004515864.1 | scaffold370 | 38261                   | GG                              | TT                 | TT               | INTERGENIC      |               |                    |                    |
| SNP_71027_A_38263 | NW_004515864.1 | scaffold370 | 38263                   | TT                              | CC                 | CC               | INTERGENIC      |               |                    |                    |
| SNP_71028_A_38349 | NW_004515864.1 | scaffold370 | 38349                   | TT                              | CC                 | CC               | INTERGENIC      |               |                    |                    |

| SNPs IDs          | Chromosome IDs | Chromosomes | Physical positions (bp) | CDC Frontier (Reference genome) | (Pusa 1103 & HPNB) | (ILWC 46 & LPNB) | Sequence genome | Components of | Gene accession IDs | Putative functions |
|-------------------|----------------|-------------|-------------------------|---------------------------------|--------------------|------------------|-----------------|---------------|--------------------|--------------------|
| SNP_71029_A_38352 | NW_004515864.1 | scaffold370 | 38352                   | GG                              | AA                 | AA               | INTERGENIC      |               |                    |                    |
| SNP_71030_A_38430 | NW_004515864.1 | scaffold370 | 38430                   | TT                              | CC                 | CC               | INTERGENIC      |               |                    |                    |
| SNP_71031_A_38477 | NW_004515864.1 | scaffold370 | 38477                   | TT                              | CC                 | CC               | INTERGENIC      |               |                    |                    |
| SNP_71032_A_38565 | NW_004515864.1 | scaffold370 | 38565                   | CC                              | AA                 | AA               | INTERGENIC      |               |                    |                    |
| SNP_71033_A_39992 | NW_004515864.1 | scaffold370 | 39992                   | GG                              | TT                 | TT               | INTERGENIC      |               |                    |                    |
| SNP_71034_A_40009 | NW_004515864.1 | scaffold370 | 40009                   | GG                              | CC                 | CC               | INTERGENIC      |               |                    |                    |
| SNP_71035_A_40024 | NW_004515864.1 | scaffold370 | 40024                   | TT                              | GG                 | GG               | INTERGENIC      |               |                    |                    |
| SNP_71036_A_40142 | NW_004515864.1 | scaffold370 | 40142                   | GG                              | AA                 | AA               | INTERGENIC      |               |                    |                    |
| SNP_71037_A_40149 | NW_004515864.1 | scaffold370 | 40149                   | GG                              | AA                 | AA               | INTERGENIC      |               |                    |                    |
| SNP_71038_A_40154 | NW_004515864.1 | scaffold370 | 40154                   | AA                              | GG                 | GG               | INTERGENIC      |               |                    |                    |
| SNP_71039_A_40196 | NW_004515864.1 | scaffold370 | 40196                   | AA                              | GG                 | GG               | INTERGENIC      |               |                    |                    |
| SNP_71040_A_40215 | NW_004515864.1 | scaffold370 | 40215                   | TT                              | CC                 | CC               | INTERGENIC      |               |                    |                    |
| SNP_71041_A_40273 | NW_004515864.1 | scaffold370 | 40273                   | AA                              | CC                 | CC               | INTERGENIC      |               |                    |                    |
| SNP_71042_A_40351 | NW_004515864.1 | scaffold370 | 40351                   | AA                              | GG                 | GG               | INTERGENIC      |               |                    |                    |
| SNP_71043_A_40404 | NW_004515864.1 | scaffold370 | 40404                   | TT                              | CC                 | CC               | INTERGENIC      |               |                    |                    |
| SNP_71044_A_40440 | NW_004515864.1 | scaffold370 | 40440                   | CC                              | GG                 | GG               | INTERGENIC      |               |                    |                    |
| SNP_71045_A_40442 | NW_004515864.1 | scaffold370 | 40442                   | CC                              | TT                 | TT               | INTERGENIC      |               |                    |                    |
| SNP_71046_A_40445 | NW_004515864.1 | scaffold370 | 40445                   | TT                              | CC                 | CC               | INTERGENIC      |               |                    |                    |
| SNP_71047_A_40458 | NW_004515864.1 | scaffold370 | 40458                   | TT                              | AA                 | AA               | INTERGENIC      |               |                    |                    |
| SNP_71048_A_40604 | NW_004515864.1 | scaffold370 | 40604                   | GG                              | AA                 | AA               | INTERGENIC      |               |                    |                    |
| SNP_71049_A_41665 | NW_004515864.1 | scaffold370 | 41665                   | GG                              | AA                 | AA               | INTERGENIC      |               |                    |                    |
| SNP_71050_A_43528 | NW_004515864.1 | scaffold370 | 43528                   | TT                              | GG                 | GG               | INTERGENIC      |               |                    |                    |

| SNPs IDs          | Chromosome IDs | Chromosomes | Physical positions (bp) | CDC Frontier (Reference genome) | (Pusa 1103 & HPNB) | (ILWC 46 & LPNB) | Sequence genome | Components of | Gene accession IDs | Putative functions |
|-------------------|----------------|-------------|-------------------------|---------------------------------|--------------------|------------------|-----------------|---------------|--------------------|--------------------|
| SNP_71051_A_43547 | NW_004515864.1 | scaffold370 | 43547                   | AA                              | GG                 | GG               | INTERGENIC      |               |                    |                    |
| SNP_71052_A_43609 | NW_004515864.1 | scaffold370 | 43609                   | GG                              | AA                 | AA               | INTERGENIC      |               |                    |                    |
| SNP_71053_A_43631 | NW_004515864.1 | scaffold370 | 43631                   | TT                              | CC                 | CC               | INTERGENIC      |               |                    |                    |
| SNP_71054_A_43644 | NW_004515864.1 | scaffold370 | 43644                   | TT                              | CC                 | CC               | INTERGENIC      |               |                    |                    |
| SNP_71055_A_44406 | NW_004515864.1 | scaffold370 | 44406                   | GG                              | AA                 | AA               | INTERGENIC      |               |                    |                    |
| SNP_71056_A_45128 | NW_004515864.1 | scaffold370 | 45128                   | GG                              | TT                 | TT               | INTERGENIC      |               |                    |                    |
| SNP_71057_A_45144 | NW_004515864.1 | scaffold370 | 45144                   | CC                              | TT                 | TT               | INTERGENIC      |               |                    |                    |
| SNP_71058_A_45467 | NW_004515864.1 | scaffold370 | 45467                   | GG                              | AA                 | AA               | INTERGENIC      |               |                    |                    |
| SNP_71059_A_45477 | NW_004515864.1 | scaffold370 | 45477                   | CC                              | AA                 | AA               | INTERGENIC      |               |                    |                    |
| SNP_71060_A_45481 | NW_004515864.1 | scaffold370 | 45481                   | GG                              | AA                 | AA               | INTERGENIC      |               |                    |                    |
| SNP_71061_A_45516 | NW_004515864.1 | scaffold370 | 45516                   | CC                              | AA                 | AA               | INTERGENIC      |               |                    |                    |
| SNP_71062_A_45560 | NW_004515864.1 | scaffold370 | 45560                   | CC                              | GG                 | GG               | INTERGENIC      |               |                    |                    |
| SNP_71063_A_45567 | NW_004515864.1 | scaffold370 | 45567                   | CC                              | AA                 | AA               | INTERGENIC      |               |                    |                    |
| SNP_71064_A_45593 | NW_004515864.1 | scaffold370 | 45593                   | TT                              | CC                 | CC               | INTERGENIC      |               |                    |                    |
| SNP_71065_A_45628 | NW_004515864.1 | scaffold370 | 45628                   | TT                              | CC                 | CC               | INTERGENIC      |               |                    |                    |
| SNP_71066_A_45648 | NW_004515864.1 | scaffold370 | 45648                   | CC                              | TT                 | TT               | INTERGENIC      |               |                    |                    |
| SNP_71067_A_45695 | NW_004515864.1 | scaffold370 | 45695                   | AA                              | GG                 | GG               | INTERGENIC      |               |                    |                    |
| SNP_71068_A_45699 | NW_004515864.1 | scaffold370 | 45699                   | GG                              | TT                 | TT               | INTERGENIC      |               |                    |                    |
| SNP_71069_A_45714 | NW_004515864.1 | scaffold370 | 45714                   | TT                              | CC                 | CC               | INTERGENIC      |               |                    |                    |
| SNP_71070_A_45719 | NW_004515864.1 | scaffold370 | 45719                   | AA                              | GG                 | GG               | INTERGENIC      |               |                    |                    |
| SNP_71071_A_45731 | NW_004515864.1 | scaffold370 | 45731                   | AA                              | CC                 | CC               | INTERGENIC      |               |                    |                    |
| SNP_71072_A_45739 | NW_004515864.1 | scaffold370 | 45739                   | GG                              | AA                 | AA               | INTERGENIC      |               |                    |                    |



| SNPs IDs          | Chromosome IDs | Chromosomes | Physical positions (bp) | CDC Frontier (Reference genome) | (Pusa 1103 & HPNB) | (ILWC 46 & LPNB) | Sequence genome | Components of | Gene accession IDs | Putative functions |
|-------------------|----------------|-------------|-------------------------|---------------------------------|--------------------|------------------|-----------------|---------------|--------------------|--------------------|
| SNP_71073_A_45785 | NW_004515864.1 | scaffold370 | 45785                   | CC                              | TT                 | TT               | INTERGENIC      |               |                    |                    |
| SNP_71074_A_45844 | NW_004515864.1 | scaffold370 | 45844                   | GG                              | CC                 | CC               | INTERGENIC      |               |                    |                    |
| SNP_71075_A_45871 | NW_004515864.1 | scaffold370 | 45871                   | GG                              | AA                 | AA               | INTERGENIC      |               |                    |                    |
| SNP_71076_A_46036 | NW_004515864.1 | scaffold370 | 46036                   | CC                              | TT                 | TT               | INTERGENIC      |               |                    |                    |
| SNP_71077_A_46217 | NW_004515864.1 | scaffold370 | 46217                   | GG                              | AA                 | AA               | INTERGENIC      |               |                    |                    |
| SNP_71078_A_46219 | NW_004515864.1 | scaffold370 | 46219                   | CC                              | AA                 | AA               | INTERGENIC      |               |                    |                    |
| SNP_71079_A_46327 | NW_004515864.1 | scaffold370 | 46327                   | TT                              | GG                 | GG               | INTERGENIC      |               |                    |                    |
| SNP_71080_A_46358 | NW_004515864.1 | scaffold370 | 46358                   | TT                              | CC                 | CC               | INTERGENIC      |               |                    |                    |
| SNP_71081_A_46897 | NW_004515864.1 | scaffold370 | 46897                   | GG                              | AA                 | AA               | INTERGENIC      |               |                    |                    |
| SNP_71082_A_48935 | NW_004515864.1 | scaffold370 | 48935                   | AA                              | TT                 | TT               | INTERGENIC      |               |                    |                    |
| SNP_71083_A_49062 | NW_004515864.1 | scaffold370 | 49062                   | TT                              | CC                 | CC               | INTERGENIC      |               |                    |                    |
| SNP_71084_A_50636 | NW_004515864.1 | scaffold370 | 50636                   | TT                              | CC                 | CC               | INTERGENIC      |               |                    |                    |
| SNP_71085_A_50651 | NW_004515864.1 | scaffold370 | 50651                   | GG                              | TT                 | TT               | INTERGENIC      |               |                    |                    |
| SNP_71086_A_50765 | NW_004515864.1 | scaffold370 | 50765                   | CC                              | TT                 | TT               | INTERGENIC      |               |                    |                    |
| SNP_71087_A_50796 | NW_004515864.1 | scaffold370 | 50796                   | GG                              | CC                 | CC               | INTERGENIC      |               |                    |                    |
| SNP_71088_A_55628 | NW_004515864.1 | scaffold370 | 55628                   | TT                              | CC                 | CC               | INTERGENIC      |               |                    |                    |
| SNP_71089_A_56218 | NW_004515864.1 | scaffold370 | 56218                   | TT                              | AA                 | AA               | INTERGENIC      |               |                    |                    |
| SNP_71090_A_56219 | NW_004515864.1 | scaffold370 | 56219                   | AA                              | TT                 | TT               | INTERGENIC      |               |                    |                    |
| SNP_71091_A_56228 | NW_004515864.1 | scaffold370 | 56228                   | CC                              | TT                 | TT               | INTERGENIC      |               |                    |                    |
| SNP_71092_A_56308 | NW_004515864.1 | scaffold370 | 56308                   | AA                              | TT                 | TT               | INTERGENIC      |               |                    |                    |
| SNP_71093_A_56344 | NW_004515864.1 | scaffold370 | 56344                   | TT                              | GG                 | GG               | INTERGENIC      |               |                    |                    |
| SNP_71094_A_56614 | NW_004515864.1 | scaffold370 | 56614                   | GG                              | TT                 | TT               | INTERGENIC      |               |                    |                    |

| SNPs IDs          | Chromosome IDs | Chromosomes | Physical positions (bp) | CDC Frontier (Reference genome) | (Pusa 1103 & HPNB) | (ILWC 46 & LPNB) | Sequence genome | Components of | Gene accession IDs | Putative functions |
|-------------------|----------------|-------------|-------------------------|---------------------------------|--------------------|------------------|-----------------|---------------|--------------------|--------------------|
| SNP_71095_A_56695 | NW_004515864.1 | scaffold370 | 56695                   | TT                              | GG                 | GG               | INTERGENIC      |               |                    |                    |
| SNP_71096_A_56737 | NW_004515864.1 | scaffold370 | 56737                   | TT                              | GG                 | GG               | INTERGENIC      |               |                    |                    |
| SNP_71097_A_56738 | NW_004515864.1 | scaffold370 | 56738                   | CC                              | TT                 | TT               | INTERGENIC      |               |                    |                    |
| SNP_71098_A_56744 | NW_004515864.1 | scaffold370 | 56744                   | AA                              | GG                 | GG               | INTERGENIC      |               |                    |                    |
| SNP_71099_A_56814 | NW_004515864.1 | scaffold370 | 56814                   | TT                              | AA                 | AA               | INTERGENIC      |               |                    |                    |
| SNP_71100_A_56840 | NW_004515864.1 | scaffold370 | 56840                   | CC                              | GG                 | GG               | INTERGENIC      |               |                    |                    |
| SNP_71101_A_56981 | NW_004515864.1 | scaffold370 | 56981                   | AA                              | TT                 | TT               | INTERGENIC      |               |                    |                    |
| SNP_71102_A_56984 | NW_004515864.1 | scaffold370 | 56984                   | AA                              | GG                 | GG               | INTERGENIC      |               |                    |                    |
| SNP_71103_A_57068 | NW_004515864.1 | scaffold370 | 57068                   | TT                              | CC                 | CC               | INTERGENIC      |               |                    |                    |
| SNP_71104_A_57109 | NW_004515864.1 | scaffold370 | 57109                   | AA                              | TT                 | TT               | INTERGENIC      |               |                    |                    |
| SNP_71105_A_57128 | NW_004515864.1 | scaffold370 | 57128                   | TT                              | CC                 | CC               | INTERGENIC      |               |                    |                    |
| SNP_71106_A_57215 | NW_004515864.1 | scaffold370 | 57215                   | TT                              | CC                 | CC               | INTERGENIC      |               |                    |                    |
| SNP_71107_A_57623 | NW_004515864.1 | scaffold370 | 57623                   | CC                              | AA                 | AA               | INTERGENIC      |               |                    |                    |
| SNP_71108_A_57802 | NW_004515864.1 | scaffold370 | 57802                   | TT                              | CC                 | CC               | INTERGENIC      |               |                    |                    |
| SNP_71109_A_57848 | NW_004515864.1 | scaffold370 | 57848                   | AA                              | GG                 | GG               | INTERGENIC      |               |                    |                    |
| SNP_71110_A_57911 | NW_004515864.1 | scaffold370 | 57911                   | GG                              | CC                 | CC               | INTERGENIC      |               |                    |                    |
| SNP_71111_A_58205 | NW_004515864.1 | scaffold370 | 58205                   | CC                              | TT                 | TT               | INTERGENIC      |               |                    |                    |
| SNP_71112_A_58235 | NW_004515864.1 | scaffold370 | 58235                   | CC                              | TT                 | TT               | INTERGENIC      |               |                    |                    |
| SNP_71113_A_58275 | NW_004515864.1 | scaffold370 | 58275                   | CC                              | TT                 | TT               | INTERGENIC      |               |                    |                    |
| SNP_71114_A_58330 | NW_004515864.1 | scaffold370 | 58330                   | AA                              | CC                 | CC               | INTERGENIC      |               |                    |                    |
| SNP_71115_A_58364 | NW_004515864.1 | scaffold370 | 58364                   | CC                              | AA                 | AA               | INTERGENIC      |               |                    |                    |
| SNP_71117_A_58767 | NW_004515864.1 | scaffold370 | 58767                   | TT                              | GG                 | GG               | INTERGENIC      |               |                    |                    |

| SNPs IDs          | Chromosome IDs | Chromosomes | Physical positions (bp) | CDC Frontier (Reference genome) | (Pusa 1103 & HPNB) | (ILWC 46 & LPNB) | Sequence genome | Components of | Gene accession IDs | Putative functions |
|-------------------|----------------|-------------|-------------------------|---------------------------------|--------------------|------------------|-----------------|---------------|--------------------|--------------------|
| SNP_71118_A_58865 | NW_004515864.1 | scaffold370 | 58865                   | AA                              | GG                 | GG               | INTERGENIC      |               |                    |                    |
| SNP_71119_A_58897 | NW_004515864.1 | scaffold370 | 58897                   | TT                              | CC                 | CC               | INTERGENIC      |               |                    |                    |
| SNP_71120_A_58956 | NW_004515864.1 | scaffold370 | 58956                   | CC                              | GG                 | GG               | INTERGENIC      |               |                    |                    |
| SNP_71121_A_58971 | NW_004515864.1 | scaffold370 | 58971                   | AA                              | GG                 | GG               | INTERGENIC      |               |                    |                    |
| SNP_71122_A_59099 | NW_004515864.1 | scaffold370 | 59099                   | TT                              | AA                 | AA               | INTERGENIC      |               |                    |                    |
| SNP_71123_A_59123 | NW_004515864.1 | scaffold370 | 59123                   | GG                              | CC                 | CC               | INTERGENIC      |               |                    |                    |
| SNP_71124_A_59166 | NW_004515864.1 | scaffold370 | 59166                   | CC                              | TT                 | TT               | INTERGENIC      |               |                    |                    |
| SNP_71125_A_59179 | NW_004515864.1 | scaffold370 | 59179                   | CC                              | TT                 | TT               | INTERGENIC      |               |                    |                    |
| SNP_71126_A_59223 | NW_004515864.1 | scaffold370 | 59223                   | TT                              | AA                 | AA               | INTERGENIC      |               |                    |                    |
| SNP_71127_A_59341 | NW_004515864.1 | scaffold370 | 59341                   | CC                              | TT                 | TT               | INTERGENIC      |               |                    |                    |
| SNP_71128_A_59426 | NW_004515864.1 | scaffold370 | 59426                   | AA                              | GG                 | GG               | INTERGENIC      |               |                    |                    |
| SNP_71129_A_59440 | NW_004515864.1 | scaffold370 | 59440                   | AA                              | GG                 | GG               | INTERGENIC      |               |                    |                    |
| SNP_71130_A_59473 | NW_004515864.1 | scaffold370 | 59473                   | GG                              | AA                 | AA               | INTERGENIC      |               |                    |                    |
| SNP_71131_A_59744 | NW_004515864.1 | scaffold370 | 59744                   | TT                              | AA                 | AA               | INTERGENIC      |               |                    |                    |
| SNP_71132_A_60089 | NW_004515864.1 | scaffold370 | 60089                   | AA                              | GG                 | GG               | INTERGENIC      |               |                    |                    |
| SNP_71133_A_60427 | NW_004515864.1 | scaffold370 | 60427                   | AA                              | GG                 | GG               | INTERGENIC      |               |                    |                    |
| SNP_71134_A_62480 | NW_004515864.1 | scaffold370 | 62480                   | AA                              | CC                 | CC               | INTERGENIC      |               |                    |                    |
| SNP_71135_A_62545 | NW_004515864.1 | scaffold370 | 62545                   | TT                              | CC                 | CC               | INTERGENIC      |               |                    |                    |
| SNP_71136_A_62870 | NW_004515864.1 | scaffold370 | 62870                   | GG                              | AA                 | AA               | INTERGENIC      |               |                    |                    |
| SNP_71137_A_62945 | NW_004515864.1 | scaffold370 | 62945                   | CC                              | TT                 | TT               | INTERGENIC      |               |                    |                    |
| SNP_71138_A_62997 | NW_004515864.1 | scaffold370 | 62997                   | GG                              | AA                 | AA               | INTERGENIC      |               |                    |                    |
| SNP_71139_A_62999 | NW_004515864.1 | scaffold370 | 62999                   | AA                              | TT                 | TT               | INTERGENIC      |               |                    |                    |

| SNPs IDs          | Chromosome IDs | Chromosomes | Physical positions (bp) | CDC Frontier (Reference genome) | (Pusa 1103 & HPNB) | (ILWC 46 & LPNB) | Sequence genome | Components of | Gene accession IDs | Putative functions |
|-------------------|----------------|-------------|-------------------------|---------------------------------|--------------------|------------------|-----------------|---------------|--------------------|--------------------|
| SNP_71140_A_63034 | NW_004515864.1 | scaffold370 | 63034                   | CC                              | TT                 | TT               | INTERGENIC      |               |                    |                    |
| SNP_71141_A_63117 | NW_004515864.1 | scaffold370 | 63117                   | GG                              | TT                 | TT               | INTERGENIC      |               |                    |                    |
| SNP_71142_A_63254 | NW_004515864.1 | scaffold370 | 63254                   | CC                              | AA                 | AA               | INTERGENIC      |               |                    |                    |
| SNP_71143_A_63280 | NW_004515864.1 | scaffold370 | 63280                   | TT                              | CC                 | CC               | INTERGENIC      |               |                    |                    |
| SNP_71144_A_63309 | NW_004515864.1 | scaffold370 | 63309                   | AA                              | GG                 | GG               | INTERGENIC      |               |                    |                    |
| SNP_71145_A_63382 | NW_004515864.1 | scaffold370 | 63382                   | CC                              | GG                 | GG               | INTERGENIC      |               |                    |                    |
| SNP_71146_A_63450 | NW_004515864.1 | scaffold370 | 63450                   | GG                              | AA                 | AA               | INTERGENIC      |               |                    |                    |
| SNP_71147_A_63605 | NW_004515864.1 | scaffold370 | 63605                   | GG                              | TT                 | TT               | INTERGENIC      |               |                    |                    |
| SNP_71148_A_63680 | NW_004515864.1 | scaffold370 | 63680                   | GG                              | AA                 | AA               | INTERGENIC      |               |                    |                    |
| SNP_71149_A_63711 | NW_004515864.1 | scaffold370 | 63711                   | CC                              | TT                 | TT               | INTERGENIC      |               |                    |                    |
| SNP_71150_A_63783 | NW_004515864.1 | scaffold370 | 63783                   | CC                              | TT                 | TT               | INTERGENIC      |               |                    |                    |
| SNP_71151_A_63810 | NW_004515864.1 | scaffold370 | 63810                   | CC                              | TT                 | TT               | INTERGENIC      |               |                    |                    |
| SNP_71152_A_63812 | NW_004515864.1 | scaffold370 | 63812                   | AA                              | TT                 | TT               | INTERGENIC      |               |                    |                    |
| SNP_71153_A_63828 | NW_004515864.1 | scaffold370 | 63828                   | AA                              | TT                 | TT               | INTERGENIC      |               |                    |                    |
| SNP_71154_A_63866 | NW_004515864.1 | scaffold370 | 63866                   | GG                              | AA                 | AA               | INTERGENIC      |               |                    |                    |
| SNP_71155_A_63867 | NW_004515864.1 | scaffold370 | 63867                   | AA                              | GG                 | GG               | INTERGENIC      |               |                    |                    |
| SNP_71156_A_63962 | NW_004515864.1 | scaffold370 | 63962                   | AA                              | TT                 | TT               | INTERGENIC      |               |                    |                    |
| SNP_71157_A_63990 | NW_004515864.1 | scaffold370 | 63990                   | GG                              | AA                 | AA               | INTERGENIC      |               |                    |                    |
| SNP_71158_A_64010 | NW_004515864.1 | scaffold370 | 64010                   | TT                              | GG                 | GG               | INTERGENIC      |               |                    |                    |
| SNP_71159_A_64026 | NW_004515864.1 | scaffold370 | 64026                   | TT                              | GG                 | GG               | INTERGENIC      |               |                    |                    |
| SNP_71160_A_64055 | NW_004515864.1 | scaffold370 | 64055                   | CC                              | TT                 | TT               | INTERGENIC      |               |                    |                    |
| SNP_71161_A_64099 | NW_004515864.1 | scaffold370 | 64099                   | TT                              | CC                 | CC               | INTERGENIC      |               |                    |                    |

| SNPs IDs          | Chromosome IDs | Chromosomes | Physical positions (bp) | CDC Frontier (Reference genome) | (Pusa 1103 & HPNB) | (ILWC 46 & LPNB) | Sequence genome | Components of | Gene accession IDs | Putative functions |
|-------------------|----------------|-------------|-------------------------|---------------------------------|--------------------|------------------|-----------------|---------------|--------------------|--------------------|
| SNP_71162_A_64103 | NW_004515864.1 | scaffold370 | 64103                   | CC                              | GG                 | GG               | INTERGENIC      |               |                    |                    |
| SNP_71163_A_64173 | NW_004515864.1 | scaffold370 | 64173                   | AA                              | GG                 | GG               | INTERGENIC      |               |                    |                    |
| SNP_71164_A_64285 | NW_004515864.1 | scaffold370 | 64285                   | CC                              | GG                 | GG               | INTERGENIC      |               |                    |                    |
| SNP_71165_A_64448 | NW_004515864.1 | scaffold370 | 64448                   | TT                              | CC                 | CC               | INTERGENIC      |               |                    |                    |
| SNP_71166_A_64473 | NW_004515864.1 | scaffold370 | 64473                   | GG                              | AA                 | AA               | INTERGENIC      |               |                    |                    |
| SNP_71167_A_64521 | NW_004515864.1 | scaffold370 | 64521                   | TT                              | CC                 | CC               | INTERGENIC      |               |                    |                    |
| SNP_71168_A_64536 | NW_004515864.1 | scaffold370 | 64536                   | TT                              | CC                 | CC               | INTERGENIC      |               |                    |                    |
| SNP_71169_A_64662 | NW_004515864.1 | scaffold370 | 64662                   | AA                              | CC                 | CC               | INTERGENIC      |               |                    |                    |
| SNP_71170_A_64804 | NW_004515864.1 | scaffold370 | 64804                   | CC                              | TT                 | TT               | INTERGENIC      |               |                    |                    |
| SNP_71171_A_64920 | NW_004515864.1 | scaffold370 | 64920                   | AA                              | GG                 | GG               | INTERGENIC      |               |                    |                    |
| SNP_71172_A_64933 | NW_004515864.1 | scaffold370 | 64933                   | TT                              | GG                 | GG               | INTERGENIC      |               |                    |                    |
| SNP_71173_A_64945 | NW_004515864.1 | scaffold370 | 64945                   | AA                              | TT                 | TT               | INTERGENIC      |               |                    |                    |
| SNP_71174_A_65046 | NW_004515864.1 | scaffold370 | 65046                   | GG                              | TT                 | TT               | INTERGENIC      |               |                    |                    |
| SNP_71175_A_65769 | NW_004515864.1 | scaffold370 | 65769                   | GG                              | CC                 | CC               | INTERGENIC      |               |                    |                    |
| SNP_71176_A_66209 | NW_004515864.1 | scaffold370 | 66209                   | CC                              | TT                 | TT               | INTERGENIC      |               |                    |                    |
| SNP_71177_A_66210 | NW_004515864.1 | scaffold370 | 66210                   | CC                              | TT                 | TT               | INTERGENIC      |               |                    |                    |
| SNP_71178_A_66309 | NW_004515864.1 | scaffold370 | 66309                   | TT                              | AA                 | AA               | INTERGENIC      |               |                    |                    |
| SNP_71179_A_66310 | NW_004515864.1 | scaffold370 | 66310                   | TT                              | CC                 | CC               | INTERGENIC      |               |                    |                    |
| SNP_71180_A_66320 | NW_004515864.1 | scaffold370 | 66320                   | TT                              | CC                 | CC               | INTERGENIC      |               |                    |                    |
| SNP_71181_A_66332 | NW_004515864.1 | scaffold370 | 66332                   | CC                              | GG                 | GG               | INTERGENIC      |               |                    |                    |
| SNP_71182_A_66403 | NW_004515864.1 | scaffold370 | 66403                   | GG                              | AA                 | AA               | INTERGENIC      |               |                    |                    |
| SNP_71183_A_66432 | NW_004515864.1 | scaffold370 | 66432                   | TT                              | GG                 | GG               | INTERGENIC      |               |                    |                    |

| SNPs IDs          | Chromosome IDs | Chromosomes | Physical positions (bp) | CDC Frontier (Reference genome) | (Pusa 1103 & HPNB) | (ILWC 46 & LPNB) | Sequence genome | Components of | Gene accession IDs | Putative functions |
|-------------------|----------------|-------------|-------------------------|---------------------------------|--------------------|------------------|-----------------|---------------|--------------------|--------------------|
| SNP_71184_A_66510 | NW_004515864.1 | scaffold370 | 66510                   | AA                              | GG                 | GG               | INTERGENIC      |               |                    |                    |
| SNP_71185_A_66534 | NW_004515864.1 | scaffold370 | 66534                   | GG                              | CC                 | CC               | INTERGENIC      |               |                    |                    |
| SNP_71186_A_66589 | NW_004515864.1 | scaffold370 | 66589                   | CC                              | GG                 | GG               | INTERGENIC      |               |                    |                    |
| SNP_71187_A_66594 | NW_004515864.1 | scaffold370 | 66594                   | GG                              | TT                 | TT               | INTERGENIC      |               |                    |                    |
| SNP_71188_A_66665 | NW_004515864.1 | scaffold370 | 66665                   | TT                              | CC                 | CC               | INTERGENIC      |               |                    |                    |
| SNP_71189_A_66715 | NW_004515864.1 | scaffold370 | 66715                   | AA                              | TT                 | TT               | INTERGENIC      |               |                    |                    |
| SNP_71190_A_66782 | NW_004515864.1 | scaffold370 | 66782                   | TT                              | GG                 | GG               | INTERGENIC      |               |                    |                    |
| SNP_71191_A_66812 | NW_004515864.1 | scaffold370 | 66812                   | TT                              | AA                 | AA               | INTERGENIC      |               |                    |                    |
| SNP_71192_A_66846 | NW_004515864.1 | scaffold370 | 66846                   | GG                              | TT                 | TT               | INTERGENIC      |               |                    |                    |
| SNP_71193_A_66887 | NW_004515864.1 | scaffold370 | 66887                   | GG                              | AA                 | AA               | INTERGENIC      |               |                    |                    |
| SNP_71194_A_66902 | NW_004515864.1 | scaffold370 | 66902                   | AA                              | CC                 | CC               | INTERGENIC      |               |                    |                    |
| SNP_71195_A_66932 | NW_004515864.1 | scaffold370 | 66932                   | AA                              | GG                 | GG               | INTERGENIC      |               |                    |                    |
| SNP_71196_A_66947 | NW_004515864.1 | scaffold370 | 66947                   | TT                              | CC                 | CC               | INTERGENIC      |               |                    |                    |
| SNP_71197_A_66965 | NW_004515864.1 | scaffold370 | 66965                   | TT                              | CC                 | CC               | INTERGENIC      |               |                    |                    |
| SNP_71198_A_66981 | NW_004515864.1 | scaffold370 | 66981                   | AA                              | TT                 | TT               | INTERGENIC      |               |                    |                    |
| SNP_71199_A_66988 | NW_004515864.1 | scaffold370 | 66988                   | TT                              | CC                 | CC               | INTERGENIC      |               |                    |                    |
| SNP_71200_A_67010 | NW_004515864.1 | scaffold370 | 67010                   | GG                              | AA                 | AA               | INTERGENIC      |               |                    |                    |
| SNP_71201_A_67029 | NW_004515864.1 | scaffold370 | 67029                   | CC                              | AA                 | AA               | INTERGENIC      |               |                    |                    |
| SNP_71202_A_67037 | NW_004515864.1 | scaffold370 | 67037                   | TT                              | CC                 | GG               | INTERGENIC      |               |                    |                    |
| SNP_71203_A_67084 | NW_004515864.1 | scaffold370 | 67084                   | GG                              | AA                 | AA               | INTERGENIC      |               |                    |                    |
| SNP_71204_A_67242 | NW_004515864.1 | scaffold370 | 67242                   | AA                              | GG                 | GG               | INTERGENIC      |               |                    |                    |
| SNP_71205_A_67803 | NW_004515864.1 | scaffold370 | 67803                   | GG                              | CC                 | CC               | INTERGENIC      |               |                    |                    |

| SNPs IDs          | Chromosome IDs | Chromosomes | Physical positions (bp) | CDC Frontier (Reference genome) | (Pusa 1103 & HPNB) | (ILWC 46 & LPNB) | Sequence genome | Components of | Gene accession IDs | Putative functions |
|-------------------|----------------|-------------|-------------------------|---------------------------------|--------------------|------------------|-----------------|---------------|--------------------|--------------------|
| SNP_71206_A_70939 | NW_004515864.1 | scaffold370 | 70939                   | CC                              | TT                 | TT               | INTERGENIC      |               |                    |                    |
| SNP_71207_A_71015 | NW_004515864.1 | scaffold370 | 71015                   | AA                              | TT                 | TT               | INTERGENIC      |               |                    |                    |
| SNP_71208_A_71257 | NW_004515864.1 | scaffold370 | 71257                   | AA                              | TT                 | TT               | INTERGENIC      |               |                    |                    |
| SNP_71209_A_74350 | NW_004515864.1 | scaffold370 | 74350                   | AA                              | TT                 | TT               | INTERGENIC      |               |                    |                    |
| SNP_71210_A_74552 | NW_004515864.1 | scaffold370 | 74552                   | AA                              | TT                 | TT               | INTERGENIC      |               |                    |                    |
| SNP_71211_A_74596 | NW_004515864.1 | scaffold370 | 74596                   | AA                              | GG                 | GG               | INTERGENIC      |               |                    |                    |
| SNP_71212_A_74665 | NW_004515864.1 | scaffold370 | 74665                   | TT                              | CC                 | CC               | INTERGENIC      |               |                    |                    |
| SNP_71213_A_74811 | NW_004515864.1 | scaffold370 | 74811                   | AA                              | CC                 | CC               | INTERGENIC      |               |                    |                    |
| SNP_71214_A_74831 | NW_004515864.1 | scaffold370 | 74831                   | CC                              | AA                 | AA               | INTERGENIC      |               |                    |                    |
| SNP_71215_A_74885 | NW_004515864.1 | scaffold370 | 74885                   | AA                              | GG                 | GG               | INTERGENIC      |               |                    |                    |
| SNP_71216_A_74898 | NW_004515864.1 | scaffold370 | 74898                   | CC                              | TT                 | TT               | INTERGENIC      |               |                    |                    |
| SNP_71217_A_74918 | NW_004515864.1 | scaffold370 | 74918                   | GG                              | TT                 | TT               | INTERGENIC      |               |                    |                    |
| SNP_71218_A_74982 | NW_004515864.1 | scaffold370 | 74982                   | CC                              | TT                 | TT               | INTERGENIC      |               |                    |                    |
| SNP_71219_A_74995 | NW_004515864.1 | scaffold370 | 74995                   | TT                              | AA                 | AA               | INTERGENIC      |               |                    |                    |
| SNP_71220_A_75018 | NW_004515864.1 | scaffold370 | 75018                   | CC                              | TT                 | TT               | INTERGENIC      |               |                    |                    |
| SNP_71221_A_75019 | NW_004515864.1 | scaffold370 | 75019                   | GG                              | TT                 | TT               | INTERGENIC      |               |                    |                    |
| SNP_71222_A_75060 | NW_004515864.1 | scaffold370 | 75060                   | AA                              | TT                 | TT               | INTERGENIC      |               |                    |                    |
| SNP_71223_A_75064 | NW_004515864.1 | scaffold370 | 75064                   | GG                              | AA                 | AA               | INTERGENIC      |               |                    |                    |
| SNP_71225_A_75181 | NW_004515864.1 | scaffold370 | 75181                   | TT                              | CC                 | CC               | INTERGENIC      |               |                    |                    |
| SNP_71226_A_75183 | NW_004515864.1 | scaffold370 | 75183                   | AA                              | GG                 | GG               | INTERGENIC      |               |                    |                    |
| SNP_71227_A_75222 | NW_004515864.1 | scaffold370 | 75222                   | TT                              | GG                 | GG               | INTERGENIC      |               |                    |                    |
| SNP_71228_A_75268 | NW_004515864.1 | scaffold370 | 75268                   | GG                              | CC                 | CC               | INTERGENIC      |               |                    |                    |

| SNPs IDs          | Chromosome IDs | Chromosomes | Physical positions (bp) | CDC Frontier genome (Reference genome) | (Pusa 1103 & HPNB) | (ILWC 46 & LPNB) | Sequence genome | Components of | Gene accession IDs | Putative functions |
|-------------------|----------------|-------------|-------------------------|----------------------------------------|--------------------|------------------|-----------------|---------------|--------------------|--------------------|
| SNP_71229_A_75304 | NW_004515864.1 | scaffold370 | 75304                   | GG                                     | AA                 | AA               | INTERGENIC      |               |                    |                    |
| SNP_71230_A_75326 | NW_004515864.1 | scaffold370 | 75326                   | CC                                     | TT                 | TT               | INTERGENIC      |               |                    |                    |
| SNP_71231_A_75396 | NW_004515864.1 | scaffold370 | 75396                   | GG                                     | AA                 | AA               | INTERGENIC      |               |                    |                    |
| SNP_71232_A_75399 | NW_004515864.1 | scaffold370 | 75399                   | CC                                     | GG                 | GG               | INTERGENIC      |               |                    |                    |
| SNP_71233_A_75412 | NW_004515864.1 | scaffold370 | 75412                   | GG                                     | AA                 | AA               | INTERGENIC      |               |                    |                    |
| SNP_71234_A_75435 | NW_004515864.1 | scaffold370 | 75435                   | GG                                     | CC                 | CC               | INTERGENIC      |               |                    |                    |
| SNP_71235_A_75444 | NW_004515864.1 | scaffold370 | 75444                   | CC                                     | AA                 | AA               | INTERGENIC      |               |                    |                    |
| SNP_71236_A_75453 | NW_004515864.1 | scaffold370 | 75453                   | TT                                     | GG                 | GG               | INTERGENIC      |               |                    |                    |
| SNP_71237_A_75605 | NW_004515864.1 | scaffold370 | 75605                   | GG                                     | CC                 | CC               | INTERGENIC      |               |                    |                    |
| SNP_71238_A_75672 | NW_004515864.1 | scaffold370 | 75672                   | AA                                     | GG                 | GG               | INTERGENIC      |               |                    |                    |
| SNP_71239_A_76053 | NW_004515864.1 | scaffold370 | 76053                   | AA                                     | GG                 | GG               | INTERGENIC      |               |                    |                    |
| SNP_71240_A_76732 | NW_004515864.1 | scaffold370 | 76732                   | TT                                     | AA                 | AA               | INTERGENIC      |               |                    |                    |
| SNP_71241_A_76803 | NW_004515864.1 | scaffold370 | 76803                   | TT                                     | GG                 | GG               | INTERGENIC      |               |                    |                    |
| SNP_71242_A_76858 | NW_004515864.1 | scaffold370 | 76858                   | AA                                     | GG                 | GG               | INTERGENIC      |               |                    |                    |
| SNP_71243_A_76885 | NW_004515864.1 | scaffold370 | 76885                   | GG                                     | AA                 | AA               | INTERGENIC      |               |                    |                    |
| SNP_71244_A_76908 | NW_004515864.1 | scaffold370 | 76908                   | CC                                     | TT                 | TT               | INTERGENIC      |               |                    |                    |
| SNP_71245_A_76909 | NW_004515864.1 | scaffold370 | 76909                   | GG                                     | TT                 | TT               | INTERGENIC      |               |                    |                    |
| SNP_71246_A_77144 | NW_004515864.1 | scaffold370 | 77144                   | TT                                     | AA                 | AA               | INTERGENIC      |               |                    |                    |
| SNP_71247_A_77161 | NW_004515864.1 | scaffold370 | 77161                   | AA                                     | GG                 | GG               | INTERGENIC      |               |                    |                    |
| SNP_71248_A_77181 | NW_004515864.1 | scaffold370 | 77181                   | TT                                     | AA                 | AA               | INTERGENIC      |               |                    |                    |
| SNP_71249_A_77183 | NW_004515864.1 | scaffold370 | 77183                   | CC                                     | AA                 | AA               | INTERGENIC      |               |                    |                    |
| SNP_71250_A_77213 | NW_004515864.1 | scaffold370 | 77213                   | TT                                     | CC                 | CC               | INTERGENIC      |               |                    |                    |



| SNPs IDs          | Chromosome IDs | Chromosomes | Physical positions (bp) | CDC Frontier (Reference genome) | (Pusa 1103 & HPNB) | (ILWC 46 & LPNB) | Sequence genome | Components of | Gene accession IDs | Putative functions |
|-------------------|----------------|-------------|-------------------------|---------------------------------|--------------------|------------------|-----------------|---------------|--------------------|--------------------|
| SNP_71251_A_77256 | NW_004515864.1 | scaffold370 | 77256                   | AA                              | CC                 | CC               | INTERGENIC      |               |                    |                    |
| SNP_71252_A_77258 | NW_004515864.1 | scaffold370 | 77258                   | GG                              | AA                 | AA               | INTERGENIC      |               |                    |                    |
| SNP_71253_A_77267 | NW_004515864.1 | scaffold370 | 77267                   | AA                              | CC                 | CC               | INTERGENIC      |               |                    |                    |
| SNP_71254_A_77327 | NW_004515864.1 | scaffold370 | 77327                   | AA                              | TT                 | TT               | INTERGENIC      |               |                    |                    |
| SNP_71255_A_77345 | NW_004515864.1 | scaffold370 | 77345                   | TT                              | CC                 | CC               | INTERGENIC      |               |                    |                    |
| SNP_71256_A_77368 | NW_004515864.1 | scaffold370 | 77368                   | AA                              | TT                 | TT               | INTERGENIC      |               |                    |                    |
| SNP_71257_A_77523 | NW_004515864.1 | scaffold370 | 77523                   | CC                              | TT                 | TT               | INTERGENIC      |               |                    |                    |
| SNP_71258_A_77545 | NW_004515864.1 | scaffold370 | 77545                   | AA                              | TT                 | TT               | INTERGENIC      |               |                    |                    |
| SNP_71259_A_77570 | NW_004515864.1 | scaffold370 | 77570                   | GG                              | TT                 | TT               | INTERGENIC      |               |                    |                    |
| SNP_71260_A_77667 | NW_004515864.1 | scaffold370 | 77667                   | AA                              | GG                 | GG               | INTERGENIC      |               |                    |                    |
| SNP_71261_A_77673 | NW_004515864.1 | scaffold370 | 77673                   | CC                              | TT                 | TT               | INTERGENIC      |               |                    |                    |
| SNP_71262_A_77952 | NW_004515864.1 | scaffold370 | 77952                   | CC                              | TT                 | TT               | INTERGENIC      |               |                    |                    |
| SNP_71263_A_78254 | NW_004515864.1 | scaffold370 | 78254                   | AA                              | TT                 | TT               | INTERGENIC      |               |                    |                    |
| SNP_71264_A_78259 | NW_004515864.1 | scaffold370 | 78259                   | AA                              | TT                 | TT               | INTERGENIC      |               |                    |                    |
| SNP_71265_A_78383 | NW_004515864.1 | scaffold370 | 78383                   | TT                              | CC                 | CC               | INTERGENIC      |               |                    |                    |
| SNP_71266_A_78419 | NW_004515864.1 | scaffold370 | 78419                   | CC                              | TT                 | TT               | INTERGENIC      |               |                    |                    |
| SNP_71267_A_78421 | NW_004515864.1 | scaffold370 | 78421                   | CC                              | AA                 | AA               | INTERGENIC      |               |                    |                    |
| SNP_71268_A_78585 | NW_004515864.1 | scaffold370 | 78585                   | AA                              | GG                 | GG               | INTERGENIC      |               |                    |                    |
| SNP_71269_A_78593 | NW_004515864.1 | scaffold370 | 78593                   | AA                              | GG                 | GG               | INTERGENIC      |               |                    |                    |
| SNP_71270_A_78644 | NW_004515864.1 | scaffold370 | 78644                   | AA                              | CC                 | CC               | INTERGENIC      |               |                    |                    |
| SNP_71271_A_78867 | NW_004515864.1 | scaffold370 | 78867                   | GG                              | AA                 | AA               | INTERGENIC      |               |                    |                    |
| SNP_71273_A_79782 | NW_004515864.1 | scaffold370 | 79782                   | GG                              | AA                 | AA               | INTERGENIC      |               |                    |                    |

| SNPs IDs          | Chromosome IDs | Chromosomes | Physical positions (bp) | CDC Frontier (Reference genome) | (Pusa 1103 & HPNB) | (ILWC 46 & LPNB) | Sequence genome | Components of | Gene accession IDs | Putative functions |
|-------------------|----------------|-------------|-------------------------|---------------------------------|--------------------|------------------|-----------------|---------------|--------------------|--------------------|
| SNP_71274_A_79891 | NW_004515864.1 | scaffold370 | 79891                   | TT                              | CC                 | CC               | INTERGENIC      |               |                    |                    |
| SNP_71275_A_79928 | NW_004515864.1 | scaffold370 | 79928                   | TT                              | CC                 | CC               | INTERGENIC      |               |                    |                    |
| SNP_71276_A_80014 | NW_004515864.1 | scaffold370 | 80014                   | CC                              | TT                 | TT               | INTERGENIC      |               |                    |                    |
| SNP_71277_A_80020 | NW_004515864.1 | scaffold370 | 80020                   | TT                              | AA                 | AA               | INTERGENIC      |               |                    |                    |
| SNP_71278_A_80490 | NW_004515864.1 | scaffold370 | 80490                   | GG                              | CC                 | CC               | INTERGENIC      |               |                    |                    |
| SNP_71279_A_80835 | NW_004515864.1 | scaffold370 | 80835                   | GG                              | CC                 | CC               | INTERGENIC      |               |                    |                    |
| SNP_71280_A_80955 | NW_004515864.1 | scaffold370 | 80955                   | GG                              | CC                 | CC               | INTERGENIC      |               |                    |                    |
| SNP_71281_A_81069 | NW_004515864.1 | scaffold370 | 81069                   | GG                              | AA                 | AA               | INTERGENIC      |               |                    |                    |
| SNP_71282_A_81296 | NW_004515864.1 | scaffold370 | 81296                   | GG                              | TT                 | TT               | INTERGENIC      |               |                    |                    |
| SNP_71283_A_81311 | NW_004515864.1 | scaffold370 | 81311                   | TT                              | CC                 | CC               | INTERGENIC      |               |                    |                    |
| SNP_71284_A_81387 | NW_004515864.1 | scaffold370 | 81387                   | AA                              | CC                 | CC               | INTERGENIC      |               |                    |                    |
| SNP_71285_A_81396 | NW_004515864.1 | scaffold370 | 81396                   | AA                              | GG                 | GG               | INTERGENIC      |               |                    |                    |
| SNP_71286_A_81488 | NW_004515864.1 | scaffold370 | 81488                   | GG                              | AA                 | AA               | INTERGENIC      |               |                    |                    |
| SNP_71287_A_81500 | NW_004515864.1 | scaffold370 | 81500                   | GG                              | CC                 | CC               | INTERGENIC      |               |                    |                    |
| SNP_71288_A_81528 | NW_004515864.1 | scaffold370 | 81528                   | GG                              | AA                 | AA               | INTERGENIC      |               |                    |                    |
| SNP_71289_A_81581 | NW_004515864.1 | scaffold370 | 81581                   | CC                              | TT                 | TT               | INTERGENIC      |               |                    |                    |
| SNP_71290_A_81594 | NW_004515864.1 | scaffold370 | 81594                   | TT                              | AA                 | AA               | INTERGENIC      |               |                    |                    |
| SNP_71291_A_81636 | NW_004515864.1 | scaffold370 | 81636                   | AA                              | TT                 | TT               | INTERGENIC      |               |                    |                    |
| SNP_71292_A_81668 | NW_004515864.1 | scaffold370 | 81668                   | GG                              | TT                 | TT               | INTERGENIC      |               |                    |                    |
| SNP_71293_A_81670 | NW_004515864.1 | scaffold370 | 81670                   | TT                              | CC                 | CC               | INTERGENIC      |               |                    |                    |
| SNP_71294_A_81833 | NW_004515864.1 | scaffold370 | 81833                   | AA                              | CC                 | CC               | INTERGENIC      |               |                    |                    |
| SNP_71295_A_81865 | NW_004515864.1 | scaffold370 | 81865                   | TT                              | CC                 | CC               | INTERGENIC      |               |                    |                    |

| SNPs IDs          | Chromosome IDs | Chromosomes | Physical positions (bp) | CDC Frontier (Reference genome) | (Pusa 1103 & HPNB) | (ILWC 46 & LPNB) | Sequence genome | Components of | Gene accession IDs | Putative functions |
|-------------------|----------------|-------------|-------------------------|---------------------------------|--------------------|------------------|-----------------|---------------|--------------------|--------------------|
| SNP_71296_A_81932 | NW_004515864.1 | scaffold370 | 81932                   | CC                              | TT                 | TT               | INTERGENIC      |               |                    |                    |
| SNP_71297_A_81957 | NW_004515864.1 | scaffold370 | 81957                   | GG                              | TT                 | TT               | INTERGENIC      |               |                    |                    |
| SNP_71298_A_82072 | NW_004515864.1 | scaffold370 | 82072                   | GG                              | AA                 | AA               | INTERGENIC      |               |                    |                    |
| SNP_71299_A_82092 | NW_004515864.1 | scaffold370 | 82092                   | TT                              | CC                 | CC               | INTERGENIC      |               |                    |                    |
| SNP_71300_A_82461 | NW_004515864.1 | scaffold370 | 82461                   | TT                              | CC                 | CC               | INTERGENIC      |               |                    |                    |
| SNP_71301_A_82728 | NW_004515864.1 | scaffold370 | 82728                   | TT                              | CC                 | CC               | INTERGENIC      |               |                    |                    |
| SNP_71302_A_82730 | NW_004515864.1 | scaffold370 | 82730                   | CC                              | TT                 | TT               | INTERGENIC      |               |                    |                    |
| SNP_71303_A_82920 | NW_004515864.1 | scaffold370 | 82920                   | GG                              | AA                 | AA               | INTERGENIC      |               |                    |                    |
| SNP_71304_A_83061 | NW_004515864.1 | scaffold370 | 83061                   | TT                              | CC                 | CC               | INTERGENIC      |               |                    |                    |
| SNP_71305_A_85092 | NW_004515864.1 | scaffold370 | 85092                   | TT                              | CC                 | CC               | INTERGENIC      |               |                    |                    |
| SNP_71306_A_85396 | NW_004515864.1 | scaffold370 | 85396                   | CC                              | AA                 | AA               | INTERGENIC      |               |                    |                    |
| SNP_71307_A_85455 | NW_004515864.1 | scaffold370 | 85455                   | TT                              | CC                 | CC               | INTERGENIC      |               |                    |                    |
| SNP_71308_A_85625 | NW_004515864.1 | scaffold370 | 85625                   | TT                              | GG                 | GG               | INTERGENIC      |               |                    |                    |
| SNP_71309_A_87725 | NW_004515864.1 | scaffold370 | 87725                   | GG                              | AA                 | AA               | INTERGENIC      |               |                    |                    |
| SNP_71310_A_87802 | NW_004515864.1 | scaffold370 | 87802                   | GG                              | AA                 | AA               | INTERGENIC      |               |                    |                    |
| SNP_71311_A_87919 | NW_004515864.1 | scaffold370 | 87919                   | TT                              | AA                 | AA               | INTERGENIC      |               |                    |                    |
| SNP_71312_A_88272 | NW_004515864.1 | scaffold370 | 88272                   | AA                              | GG                 | GG               | INTERGENIC      |               |                    |                    |
| SNP_71313_A_88288 | NW_004515864.1 | scaffold370 | 88288                   | TT                              | GG                 | GG               | INTERGENIC      |               |                    |                    |
| SNP_71314_A_88299 | NW_004515864.1 | scaffold370 | 88299                   | AA                              | GG                 | GG               | INTERGENIC      |               |                    |                    |
| SNP_71315_A_88448 | NW_004515864.1 | scaffold370 | 88448                   | CC                              | TT                 | TT               | INTERGENIC      |               |                    |                    |
| SNP_71316_A_88476 | NW_004515864.1 | scaffold370 | 88476                   | TT                              | CC                 | CC               | INTERGENIC      |               |                    |                    |
| SNP_71317_A_88685 | NW_004515864.1 | scaffold370 | 88685                   | TT                              | CC                 | CC               | INTERGENIC      |               |                    |                    |

| SNPs IDs          | Chromosome IDs | Chromosomes | Physical positions (bp) | CDC Frontier (Reference genome) | (Pusa 1103 & HPNB) | (ILWC 46 & LPNB) | Sequence genome | Components of | Gene accession IDs | Putative functions |
|-------------------|----------------|-------------|-------------------------|---------------------------------|--------------------|------------------|-----------------|---------------|--------------------|--------------------|
| SNP_71318_A_89238 | NW_004515864.1 | scaffold370 | 89238                   | CC                              | GG                 | GG               | INTERGENIC      |               |                    |                    |
| SNP_71319_A_89291 | NW_004515864.1 | scaffold370 | 89291                   | TT                              | CC                 | CC               | INTERGENIC      |               |                    |                    |
| SNP_71320_A_89299 | NW_004515864.1 | scaffold370 | 89299                   | TT                              | CC                 | CC               | INTERGENIC      |               |                    |                    |
| SNP_71321_A_89338 | NW_004515864.1 | scaffold370 | 89338                   | TT                              | CC                 | CC               | INTERGENIC      |               |                    |                    |
| SNP_71322_A_89413 | NW_004515864.1 | scaffold370 | 89413                   | CC                              | AA                 | AA               | INTERGENIC      |               |                    |                    |
| SNP_71323_A_89460 | NW_004515864.1 | scaffold370 | 89460                   | TT                              | CC                 | CC               | INTERGENIC      |               |                    |                    |
| SNP_71324_A_89500 | NW_004515864.1 | scaffold370 | 89500                   | AA                              | TT                 | TT               | INTERGENIC      |               |                    |                    |
| SNP_71325_A_89601 | NW_004515864.1 | scaffold370 | 89601                   | GG                              | AA                 | AA               | INTERGENIC      |               |                    |                    |
| SNP_71326_A_89703 | NW_004515864.1 | scaffold370 | 89703                   | AA                              | TT                 | TT               | INTERGENIC      |               |                    |                    |
| SNP_71327_A_89749 | NW_004515864.1 | scaffold370 | 89749                   | GG                              | AA                 | AA               | INTERGENIC      |               |                    |                    |
| SNP_71329_A_89808 | NW_004515864.1 | scaffold370 | 89808                   | GG                              | AA                 | AA               | INTERGENIC      |               |                    |                    |
| SNP_71330_A_89864 | NW_004515864.1 | scaffold370 | 89864                   | CC                              | TT                 | TT               | INTERGENIC      |               |                    |                    |
| SNP_71331_A_90106 | NW_004515864.1 | scaffold370 | 90106                   | TT                              | CC                 | CC               | INTERGENIC      |               |                    |                    |
| SNP_71332_A_90117 | NW_004515864.1 | scaffold370 | 90117                   | GG                              | AA                 | AA               | INTERGENIC      |               |                    |                    |
| SNP_71333_A_90166 | NW_004515864.1 | scaffold370 | 90166                   | AA                              | TT                 | TT               | INTERGENIC      |               |                    |                    |
| SNP_71334_A_90250 | NW_004515864.1 | scaffold370 | 90250                   | TT                              | GG                 | GG               | INTERGENIC      |               |                    |                    |
| SNP_71335_A_90296 | NW_004515864.1 | scaffold370 | 90296                   | GG                              | TT                 | TT               | INTERGENIC      |               |                    |                    |
| SNP_71336_A_90343 | NW_004515864.1 | scaffold370 | 90343                   | AA                              | GG                 | GG               | INTERGENIC      |               |                    |                    |
| SNP_71337_A_90386 | NW_004515864.1 | scaffold370 | 90386                   | TT                              | AA                 | AA               | INTERGENIC      |               |                    |                    |
| SNP_71338_A_90555 | NW_004515864.1 | scaffold370 | 90555                   | GG                              | AA                 | AA               | INTERGENIC      |               |                    |                    |
| SNP_71339_A_90593 | NW_004515864.1 | scaffold370 | 90593                   | TT                              | CC                 | CC               | INTERGENIC      |               |                    |                    |
| SNP_71340_A_90615 | NW_004515864.1 | scaffold370 | 90615                   | GG                              | AA                 | AA               | INTERGENIC      |               |                    |                    |

| SNPs IDs           | Chromosome IDs | Chromosomes | Physical positions (bp) | CDC Frontier (Reference genome) | (Pusa 1103 & HPNB) | (ILWC 46 & LPNB) | Sequence genome | Components of | Gene accession IDs | Putative functions |
|--------------------|----------------|-------------|-------------------------|---------------------------------|--------------------|------------------|-----------------|---------------|--------------------|--------------------|
| SNP_71341_A_92682  | NW_004515864.1 | scaffold370 | 92682                   | CC                              | AA                 | AA               | INTERGENIC      |               |                    |                    |
| SNP_71342_A_92738  | NW_004515864.1 | scaffold370 | 92738                   | AA                              | CC                 | CC               | INTERGENIC      |               |                    |                    |
| SNP_71343_A_92780  | NW_004515864.1 | scaffold370 | 92780                   | GG                              | TT                 | TT               | INTERGENIC      |               |                    |                    |
| SNP_71344_A_92909  | NW_004515864.1 | scaffold370 | 92909                   | TT                              | CC                 | CC               | INTERGENIC      |               |                    |                    |
| SNP_71345_A_92931  | NW_004515864.1 | scaffold370 | 92931                   | AA                              | GG                 | GG               | INTERGENIC      |               |                    |                    |
| SNP_71346_A_92988  | NW_004515864.1 | scaffold370 | 92988                   | CC                              | TT                 | TT               | INTERGENIC      |               |                    |                    |
| SNP_71347_A_93085  | NW_004515864.1 | scaffold370 | 93085                   | GG                              | AA                 | AA               | INTERGENIC      |               |                    |                    |
| SNP_71348_A_93113  | NW_004515864.1 | scaffold370 | 93113                   | TT                              | GG                 | GG               | INTERGENIC      |               |                    |                    |
| SNP_71349_A_94449  | NW_004515864.1 | scaffold370 | 94449                   | GG                              | CC                 | CC               | INTERGENIC      |               |                    |                    |
| SNP_71350_A_94702  | NW_004515864.1 | scaffold370 | 94702                   | AA                              | TT                 | TT               | INTERGENIC      |               |                    |                    |
| SNP_71351_A_94897  | NW_004515864.1 | scaffold370 | 94897                   | AA                              | CC                 | CC               | INTERGENIC      |               |                    |                    |
| SNP_71352_A_94912  | NW_004515864.1 | scaffold370 | 94912                   | CC                              | GG                 | GG               | INTERGENIC      |               |                    |                    |
| SNP_71353_A_95259  | NW_004515864.1 | scaffold370 | 95259                   | TT                              | CC                 | CC               | INTERGENIC      |               |                    |                    |
| SNP_71354_A_95297  | NW_004515864.1 | scaffold370 | 95297                   | TT                              | CC                 | CC               | INTERGENIC      |               |                    |                    |
| SNP_71355_A_99887  | NW_004515864.1 | scaffold370 | 99887                   | GG                              | TT                 | TT               | INTERGENIC      |               |                    |                    |
| SNP_71356_A_99909  | NW_004515864.1 | scaffold370 | 99909                   | GG                              | TT                 | TT               | INTERGENIC      |               |                    |                    |
| SNP_71357_A_99930  | NW_004515864.1 | scaffold370 | 99930                   | GG                              | AA                 | AA               | INTERGENIC      |               |                    |                    |
| SNP_71358_A_100207 | NW_004515864.1 | scaffold370 | 100207                  | TT                              | CC                 | CC               | INTERGENIC      |               |                    |                    |
| SNP_71359_A_100403 | NW_004515864.1 | scaffold370 | 100403                  | GG                              | AA                 | AA               | INTERGENIC      |               |                    |                    |
| SNP_71360_A_100510 | NW_004515864.1 | scaffold370 | 100510                  | GG                              | AA                 | AA               | INTERGENIC      |               |                    |                    |
| SNP_71361_A_100606 | NW_004515864.1 | scaffold370 | 100606                  | AA                              | GG                 | GG               | INTERGENIC      |               |                    |                    |
| SNP_71362_A_100862 | NW_004515864.1 | scaffold370 | 100862                  | CC                              | AA                 | AA               | INTERGENIC      |               |                    |                    |

| SNPs IDs           | Chromosome IDs | Chromosomes | Physical positions (bp) | CDC Frontier (Reference genome) | (Pusa 1103 & HPNB) | (ILWC 46 & LPNB) | Sequence genome | Components of | Gene accession IDs | Putative functions |
|--------------------|----------------|-------------|-------------------------|---------------------------------|--------------------|------------------|-----------------|---------------|--------------------|--------------------|
| SNP_71363_A_100882 | NW_004515864.1 | scaffold370 | 100882                  | TT                              | CC                 | CC               | INTERGENIC      |               |                    |                    |
| SNP_71364_A_100883 | NW_004515864.1 | scaffold370 | 100883                  | TT                              | AA                 | AA               | INTERGENIC      |               |                    |                    |
| SNP_71365_A_100898 | NW_004515864.1 | scaffold370 | 100898                  | GG                              | AA                 | AA               | INTERGENIC      |               |                    |                    |
| SNP_71366_A_101009 | NW_004515864.1 | scaffold370 | 101009                  | AA                              | GG                 | GG               | INTERGENIC      |               |                    |                    |
| SNP_71367_A_101019 | NW_004515864.1 | scaffold370 | 101019                  | TT                              | AA                 | AA               | INTERGENIC      |               |                    |                    |
| SNP_71368_A_101021 | NW_004515864.1 | scaffold370 | 101021                  | CC                              | AA                 | AA               | INTERGENIC      |               |                    |                    |
| SNP_71369_A_101031 | NW_004515864.1 | scaffold370 | 101031                  | TT                              | CC                 | CC               | INTERGENIC      |               |                    |                    |
| SNP_71371_A_101101 | NW_004515864.1 | scaffold370 | 101101                  | AA                              | GG                 | GG               | INTERGENIC      |               |                    |                    |
| SNP_71372_A_101133 | NW_004515864.1 | scaffold370 | 101133                  | CC                              | AA                 | AA               | INTERGENIC      |               |                    |                    |
| SNP_71373_A_102561 | NW_004515864.1 | scaffold370 | 102561                  | AA                              | GG                 | GG               | INTERGENIC      |               |                    |                    |
| SNP_71374_A_102571 | NW_004515864.1 | scaffold370 | 102571                  | TT                              | GG                 | GG               | INTERGENIC      |               |                    |                    |
| SNP_71375_A_102579 | NW_004515864.1 | scaffold370 | 102579                  | AA                              | CC                 | CC               | INTERGENIC      |               |                    |                    |
| SNP_71376_A_102614 | NW_004515864.1 | scaffold370 | 102614                  | TT                              | AA                 | AA               | INTERGENIC      |               |                    |                    |
| SNP_71377_A_102942 | NW_004515864.1 | scaffold370 | 102942                  | AA                              | GG                 | GG               | INTERGENIC      |               |                    |                    |
| SNP_71378_A_102945 | NW_004515864.1 | scaffold370 | 102945                  | AA                              | GG                 | GG               | INTERGENIC      |               |                    |                    |
| SNP_71379_A_103099 | NW_004515864.1 | scaffold370 | 103099                  | AA                              | GG                 | GG               | INTERGENIC      |               |                    |                    |
| SNP_71380_A_104982 | NW_004515864.1 | scaffold370 | 104982                  | TT                              | CC                 | CC               | INTERGENIC      |               |                    |                    |
| SNP_71381_A_106184 | NW_004515864.1 | scaffold370 | 106184                  | TT                              | AA                 | AA               | INTERGENIC      |               |                    |                    |
| SNP_71382_A_106562 | NW_004515864.1 | scaffold370 | 106562                  | CC                              | GG                 | GG               | INTERGENIC      |               |                    |                    |
| SNP_71383_A_106630 | NW_004515864.1 | scaffold370 | 106630                  | AA                              | TT                 | TT               | INTERGENIC      |               |                    |                    |
| SNP_71384_A_106631 | NW_004515864.1 | scaffold370 | 106631                  | AA                              | CC                 | CC               | INTERGENIC      |               |                    |                    |
| SNP_71385_A_107126 | NW_004515864.1 | scaffold370 | 107126                  | CC                              | TT                 | TT               | INTERGENIC      |               |                    |                    |

| SNPs IDs           | Chromosome IDs | Chromosomes | Physical positions (bp) | CDC Frontier (Reference genome) | (Pusa 1103 & HPNB) | (ILWC 46 & LPNB) | Sequence genome | Components of | Gene accession IDs | Putative functions |
|--------------------|----------------|-------------|-------------------------|---------------------------------|--------------------|------------------|-----------------|---------------|--------------------|--------------------|
| SNP_71386_A_107129 | NW_004515864.1 | scaffold370 | 107129                  | CC                              | GG                 | GG               | INTERGENIC      |               |                    |                    |
| SNP_71387_A_107238 | NW_004515864.1 | scaffold370 | 107238                  | AA                              | GG                 | GG               | INTERGENIC      |               |                    |                    |
| SNP_71388_A_107409 | NW_004515864.1 | scaffold370 | 107409                  | AA                              | TT                 | TT               | INTERGENIC      |               |                    |                    |
| SNP_71389_A_107445 | NW_004515864.1 | scaffold370 | 107445                  | GG                              | TT                 | TT               | INTERGENIC      |               |                    |                    |
| SNP_71390_A_107450 | NW_004515864.1 | scaffold370 | 107450                  | TT                              | CC                 | CC               | INTERGENIC      |               |                    |                    |
| SNP_71391_A_107456 | NW_004515864.1 | scaffold370 | 107456                  | AA                              | GG                 | GG               | INTERGENIC      |               |                    |                    |
| SNP_71392_A_107492 | NW_004515864.1 | scaffold370 | 107492                  | TT                              | AA                 | AA               | INTERGENIC      |               |                    |                    |
| SNP_71393_A_107856 | NW_004515864.1 | scaffold370 | 107856                  | CC                              | AA                 | AA               | INTERGENIC      |               |                    |                    |
| SNP_71394_A_107941 | NW_004515864.1 | scaffold370 | 107941                  | GG                              | AA                 | AA               | INTERGENIC      |               |                    |                    |
| SNP_71395_A_108013 | NW_004515864.1 | scaffold370 | 108013                  | TT                              | CC                 | CC               | INTERGENIC      |               |                    |                    |
| SNP_71396_A_108143 | NW_004515864.1 | scaffold370 | 108143                  | GG                              | TT                 | TT               | INTERGENIC      |               |                    |                    |
| SNP_71397_A_108166 | NW_004515864.1 | scaffold370 | 108166                  | TT                              | GG                 | GG               | INTERGENIC      |               |                    |                    |
| SNP_71398_A_109478 | NW_004515864.1 | scaffold370 | 109478                  | GG                              | AA                 | AA               | INTERGENIC      |               |                    |                    |
| SNP_71399_A_109547 | NW_004515864.1 | scaffold370 | 109547                  | CC                              | AA                 | AA               | INTERGENIC      |               |                    |                    |
| SNP_71400_A_109552 | NW_004515864.1 | scaffold370 | 109552                  | TT                              | AA                 | AA               | INTERGENIC      |               |                    |                    |
| SNP_71401_A_109553 | NW_004515864.1 | scaffold370 | 109553                  | GG                              | TT                 | TT               | INTERGENIC      |               |                    |                    |
| SNP_71402_A_109554 | NW_004515864.1 | scaffold370 | 109554                  | TT                              | AA                 | AA               | INTERGENIC      |               |                    |                    |
| SNP_71403_A_110232 | NW_004515864.1 | scaffold370 | 110232                  | GG                              | TT                 | TT               | INTERGENIC      |               |                    |                    |
| SNP_71404_A_110378 | NW_004515864.1 | scaffold370 | 110378                  | CC                              | TT                 | TT               | INTERGENIC      |               |                    |                    |
| SNP_71405_A_110494 | NW_004515864.1 | scaffold370 | 110494                  | AA                              | TT                 | TT               | INTERGENIC      |               |                    |                    |
| SNP_71406_A_110511 | NW_004515864.1 | scaffold370 | 110511                  | GG                              | AA                 | AA               | INTERGENIC      |               |                    |                    |
| SNP_71407_A_110612 | NW_004515864.1 | scaffold370 | 110612                  | GG                              | AA                 | AA               | INTERGENIC      |               |                    |                    |

| SNPs IDs           | Chromosome IDs | Chromosomes | Physical positions (bp) | CDC Frontier (Reference genome) | (Pusa 1103 & HPNB) | (ILWC 46 & LPNB) | Sequence genome | Components of | Gene accession IDs | Putative functions |
|--------------------|----------------|-------------|-------------------------|---------------------------------|--------------------|------------------|-----------------|---------------|--------------------|--------------------|
| SNP_71408_A_110656 | NW_004515864.1 | scaffold370 | 110656                  | TT                              | CC                 | CC               | INTERGENIC      |               |                    |                    |
| SNP_71409_A_110675 | NW_004515864.1 | scaffold370 | 110675                  | GG                              | TT                 | TT               | INTERGENIC      |               |                    |                    |
| SNP_71410_A_110876 | NW_004515864.1 | scaffold370 | 110876                  | TT                              | CC                 | CC               | INTERGENIC      |               |                    |                    |
| SNP_71411_A_111135 | NW_004515864.1 | scaffold370 | 111135                  | CC                              | AA                 | AA               | INTERGENIC      |               |                    |                    |
| SNP_71412_A_112405 | NW_004515864.1 | scaffold370 | 112405                  | AA                              | TT                 | TT               | INTERGENIC      |               |                    |                    |
| SNP_71413_A_122802 | NW_004515864.1 | scaffold370 | 122802                  | CC                              | AA                 | AA               | INTERGENIC      |               |                    |                    |
| SNP_71414_A_123062 | NW_004515864.1 | scaffold370 | 123062                  | AA                              | GG                 | GG               | INTERGENIC      |               |                    |                    |
| SNP_71415_A_123071 | NW_004515864.1 | scaffold370 | 123071                  | CC                              | AA                 | AA               | INTERGENIC      |               |                    |                    |
| SNP_71416_A_123108 | NW_004515864.1 | scaffold370 | 123108                  | TT                              | CC                 | CC               | INTERGENIC      |               |                    |                    |
| SNP_71417_A_125394 | NW_004515864.1 | scaffold370 | 125394                  | TT                              | AA                 | AA               | INTERGENIC      |               |                    |                    |
| SNP_71418_A_125478 | NW_004515864.1 | scaffold370 | 125478                  | AA                              | TT                 | TT               | INTERGENIC      |               |                    |                    |
| SNP_71419_A_125512 | NW_004515864.1 | scaffold370 | 125512                  | AA                              | GG                 | GG               | INTERGENIC      |               |                    |                    |
| SNP_71420_A_136001 | NW_004515864.1 | scaffold370 | 136001                  | TT                              | CC                 | CC               | INTERGENIC      |               |                    |                    |
| SNP_71421_A_137460 | NW_004515864.1 | scaffold370 | 137460                  | TT                              | CC                 | CC               | INTERGENIC      |               |                    |                    |
| SNP_71422_A_137473 | NW_004515864.1 | scaffold370 | 137473                  | TT                              | CC                 | CC               | INTERGENIC      |               |                    |                    |
| SNP_71423_A_137525 | NW_004515864.1 | scaffold370 | 137525                  | AA                              | CC                 | CC               | INTERGENIC      |               |                    |                    |
| SNP_71424_A_137864 | NW_004515864.1 | scaffold370 | 137864                  | GG                              | AA                 | AA               | DRR             | 101512059     | Unknown function   |                    |
| SNP_71425_A_159245 | NW_004515864.1 | scaffold370 | 159245                  | AA                              | GG                 | GG               | INTERGENIC      |               |                    |                    |
| SNP_71426_A_159316 | NW_004515864.1 | scaffold370 | 159316                  | CC                              | TT                 | TT               | INTERGENIC      |               |                    |                    |
| SNP_71427_A_159384 | NW_004515864.1 | scaffold370 | 159384                  | CC                              | TT                 | TT               | INTERGENIC      |               |                    |                    |
| SNP_71428_A_159393 | NW_004515864.1 | scaffold370 | 159393                  | GG                              | CC                 | CC               | INTERGENIC      |               |                    |                    |
| SNP_71429_A_164825 | NW_004515864.1 | scaffold370 | 164825                  | TT                              | CC                 | CC               | INTERGENIC      |               |                    |                    |



| SNPs IDs           | Chromosome IDs | Chromosomes | Physical positions (bp) | CDC Frontier (Reference genome) | (Pusa 1103 & HPNB) | (ILWC 46 & LPNB) | Sequence genome | Components of | Gene accession IDs | Putative functions |
|--------------------|----------------|-------------|-------------------------|---------------------------------|--------------------|------------------|-----------------|---------------|--------------------|--------------------|
| SNP_71430_A_166523 | NW_004515864.1 | scaffold370 | 166523                  | CC                              | TT                 | TT               | INTERGENIC      |               |                    |                    |
| SNP_71431_A_166876 | NW_004515864.1 | scaffold370 | 166876                  | TT                              | CC                 | CC               | INTERGENIC      |               |                    |                    |
| SNP_71432_A_166958 | NW_004515864.1 | scaffold370 | 166958                  | GG                              | AA                 | AA               | INTERGENIC      |               |                    |                    |
| SNP_71433_A_180842 | NW_004515864.1 | scaffold370 | 180842                  | TT                              | CC                 | CC               | INTERGENIC      |               |                    |                    |
| SNP_71434_A_181592 | NW_004515864.1 | scaffold370 | 181592                  | AA                              | GG                 | GG               | INTERGENIC      |               |                    |                    |
| SNP_71435_A_181644 | NW_004515864.1 | scaffold370 | 181644                  | CC                              | TT                 | TT               | INTERGENIC      |               |                    |                    |
| SNP_71436_A_181747 | NW_004515864.1 | scaffold370 | 181747                  | CC                              | AA                 | AA               | INTERGENIC      |               |                    |                    |
| SNP_71437_A_181792 | NW_004515864.1 | scaffold370 | 181792                  | AA                              | CC                 | CC               | INTERGENIC      |               |                    |                    |
| SNP_71438_A_182300 | NW_004515864.1 | scaffold370 | 182300                  | TT                              | CC                 | CC               | INTERGENIC      |               |                    |                    |
| SNP_71439_A_182520 | NW_004515864.1 | scaffold370 | 182520                  | TT                              | CC                 | CC               | INTERGENIC      |               |                    |                    |
| SNP_71440_A_182671 | NW_004515864.1 | scaffold370 | 182671                  | GG                              | TT                 | TT               | INTERGENIC      |               |                    |                    |
| SNP_71441_A_182880 | NW_004515864.1 | scaffold370 | 182880                  | AA                              | GG                 | GG               | INTERGENIC      |               |                    |                    |
| SNP_71442_A_187914 | NW_004515864.1 | scaffold370 | 187914                  | AA                              | GG                 | GG               | INTERGENIC      |               |                    |                    |
| SNP_71443_A_192376 | NW_004515864.1 | scaffold370 | 192376                  | CC                              | TT                 | TT               | INTERGENIC      |               |                    |                    |
| SNP_71444_A_192469 | NW_004515864.1 | scaffold370 | 192469                  | AA                              | TT                 | TT               | INTERGENIC      |               |                    |                    |
| SNP_71445_A_837    | NW_004515865.1 | scaffold373 | 837                     | CC                              | TT                 | TT               | INTERGENIC      |               |                    |                    |
| SNP_71446_A_978    | NW_004515865.1 | scaffold373 | 978                     | TT                              | GG                 | GG               | INTERGENIC      |               |                    |                    |
| SNP_71447_A_1396   | NW_004515865.1 | scaffold373 | 1396                    | TT                              | AA                 | AA               | INTERGENIC      |               |                    |                    |
| SNP_71448_A_1413   | NW_004515865.1 | scaffold373 | 1413                    | TT                              | CC                 | CC               | INTERGENIC      |               |                    |                    |
| SNP_71449_A_1428   | NW_004515865.1 | scaffold373 | 1428                    | AA                              | GG                 | GG               | INTERGENIC      |               |                    |                    |
| SNP_71450_A_1442   | NW_004515865.1 | scaffold373 | 1442                    | AA                              | TT                 | TT               | INTERGENIC      |               |                    |                    |
| SNP_71453_A_25098  | NW_004515865.1 | scaffold373 | 25098                   | TT                              | GG                 | GG               | INTERGENIC      |               |                    |                    |

| SNPs IDs          | Chromosome IDs | Chromosomes | Physical positions (bp) | CDC Frontier (Reference genome) | (Pusa 1103 & HPNB) | (ILWC 46 & LPNB) | Sequence genome | Components of | Gene accession IDs                                                            | Putative functions |
|-------------------|----------------|-------------|-------------------------|---------------------------------|--------------------|------------------|-----------------|---------------|-------------------------------------------------------------------------------|--------------------|
| SNP_71454_A_25107 | NW_004515865.1 | scaffold373 | 25107                   | TT                              | CC                 | CC               | INTERGENIC      |               |                                                                               |                    |
| SNP_71455_A_25118 | NW_004515865.1 | scaffold373 | 25118                   | AA                              | CC                 | CC               | INTERGENIC      |               |                                                                               |                    |
| SNP_71456_A_25372 | NW_004515865.1 | scaffold373 | 25372                   | AA                              | GG                 | GG               | INTERGENIC      |               |                                                                               |                    |
| SNP_71457_A_25373 | NW_004515865.1 | scaffold373 | 25373                   | GG                              | AA                 | AA               | INTERGENIC      |               |                                                                               |                    |
| SNP_71458_A_25461 | NW_004515865.1 | scaffold373 | 25461                   | TT                              | AA                 | AA               | INTERGENIC      |               |                                                                               |                    |
| SNP_71459_A_25534 | NW_004515865.1 | scaffold373 | 25534                   | TT                              | CC                 | CC               | INTERGENIC      |               |                                                                               |                    |
| SNP_71460_A_25686 | NW_004515865.1 | scaffold373 | 25686                   | AA                              | TT                 | TT               | INTERGENIC      |               |                                                                               |                    |
| SNP_71461_A_25690 | NW_004515865.1 | scaffold373 | 25690                   | AA                              | TT                 | TT               | INTERGENIC      |               |                                                                               |                    |
| SNP_71462_A_25701 | NW_004515865.1 | scaffold373 | 25701                   | TT                              | GG                 | GG               | INTERGENIC      |               |                                                                               |                    |
| SNP_71463_A_25767 | NW_004515865.1 | scaffold373 | 25767                   | AA                              | CC                 | CC               | INTERGENIC      |               |                                                                               |                    |
| SNP_71464_A_25847 | NW_004515865.1 | scaffold373 | 25847                   | CC                              | TT                 | TT               | INTERGENIC      |               |                                                                               |                    |
| SNP_71466_A_25908 | NW_004515865.1 | scaffold373 | 25908                   | TT                              | CC                 | CC               | INTERGENIC      |               |                                                                               |                    |
| SNP_71467_A_34741 | NW_004515865.1 | scaffold373 | 34741                   | GG                              | AA                 | AA               | INTERGENIC      |               |                                                                               |                    |
| SNP_71468_A_50151 | NW_004515865.1 | scaffold373 | 50151                   | AA                              | TT                 | TT               | INTERGENIC      |               |                                                                               |                    |
| SNP_71469_A_2231  | NW_004515866.1 | scaffold374 | 2231                    | CC                              | TT                 | TT               | INTERGENIC      |               |                                                                               |                    |
| SNP_71470_A_2263  | NW_004515866.1 | scaffold374 | 2263                    | AA                              | GG                 | GG               | INTERGENIC      |               |                                                                               |                    |
| SNP_71471_A_2825  | NW_004515866.1 | scaffold374 | 2825                    | TT                              | CC                 | CC               | INTERGENIC      |               |                                                                               |                    |
| SNP_71472_A_12991 | NW_004515866.1 | scaffold374 | 12991                   | AA                              | GG                 | GG               | INTERGENIC      |               |                                                                               |                    |
| SNP_71475_A_23912 | NW_004515866.1 | scaffold374 | 23912                   | AA                              | GG                 | GG               | DRR             | 101512388     | putative pentatricopeptide repeat-containing protein At1g12700, mitochondrial |                    |
| SNP_71476_A_47811 | NW_004515866.1 | scaffold374 | 47811                   | AA                              | GG                 | GG               | INTERGENIC      |               |                                                                               |                    |
| SNP_71477_A_47816 | NW_004515866.1 | scaffold374 | 47816                   | CC                              | TT                 | TT               | INTERGENIC      |               |                                                                               |                    |
| SNP_71478_A_47826 | NW_004515866.1 | scaffold374 | 47826                   | AA                              | GG                 | GG               | INTERGENIC      |               |                                                                               |                    |

| SNPs IDs           | Chromosome IDs | Chromosomes | Physical positions (bp) | CDC Frontier (Reference genome) | (Pusa 1103 & HPNB) | (ILWC 46 & LPNB) | Sequence Components of genome | Gene accession IDs | Putative functions           |
|--------------------|----------------|-------------|-------------------------|---------------------------------|--------------------|------------------|-------------------------------|--------------------|------------------------------|
| SNP_71479_A_47856  | NW_004515866.1 | scaffold374 | 47856                   | TT                              | CC                 | CC               | INTERGENIC                    |                    |                              |
| SNP_71480_A_47881  | NW_004515866.1 | scaffold374 | 47881                   | AA                              | GG                 | GG               | INTERGENIC                    |                    |                              |
| SNP_71481_A_47921  | NW_004515866.1 | scaffold374 | 47921                   | AA                              | GG                 | GG               | INTERGENIC                    |                    |                              |
| SNP_71482_A_47967  | NW_004515866.1 | scaffold374 | 47967                   | AA                              | GG                 | GG               | INTERGENIC                    |                    |                              |
| SNP_71483_A_47971  | NW_004515866.1 | scaffold374 | 47971                   | TT                              | GG                 | GG               | INTERGENIC                    |                    |                              |
| SNP_71484_A_48262  | NW_004515866.1 | scaffold374 | 48262                   | TT                              | GG                 | GG               | INTERGENIC                    |                    |                              |
| SNP_71485_A_48300  | NW_004515866.1 | scaffold374 | 48300                   | TT                              | CC                 | CC               | INTERGENIC                    |                    |                              |
| SNP_71486_A_52952  | NW_004515866.1 | scaffold374 | 52952                   | CC                              | TT                 | TT               | INTERGENIC                    |                    |                              |
| SNP_71487_A_77170  | NW_004515866.1 | scaffold374 | 77170                   | TT                              | AA                 | AA               | NON_SYNONYMOUS_CODING         | 101514875          | uncharacterized LOC101514875 |
| SNP_71488_A_77182  | NW_004515866.1 | scaffold374 | 77182                   | GG                              | AA                 | AA               | NON_SYNONYMOUS_CODING         | 101514875          | uncharacterized LOC101514875 |
| SNP_71489_A_83780  | NW_004515866.1 | scaffold374 | 83780                   | AA                              | TT                 | TT               | INTERGENIC                    |                    |                              |
| SNP_71490_A_117552 | NW_004515866.1 | scaffold374 | 117552                  | GG                              | CC                 | CC               | INTERGENIC                    |                    |                              |
| SNP_71491_A_118531 | NW_004515866.1 | scaffold374 | 118531                  | GG                              | AA                 | AA               | INTERGENIC                    |                    |                              |
| SNP_71492_A_118558 | NW_004515866.1 | scaffold374 | 118558                  | TT                              | GG                 | GG               | INTERGENIC                    |                    |                              |
| SNP_71493_A_118693 | NW_004515866.1 | scaffold374 | 118693                  | AA                              | TT                 | TT               | INTERGENIC                    |                    |                              |
| SNP_71494_A_118950 | NW_004515866.1 | scaffold374 | 118950                  | AA                              | CC                 | CC               | INTERGENIC                    |                    |                              |
| SNP_71495_A_119019 | NW_004515866.1 | scaffold374 | 119019                  | GG                              | TT                 | TT               | INTERGENIC                    |                    |                              |
| SNP_71496_A_119567 | NW_004515866.1 | scaffold374 | 119567                  | TT                              | AA                 | AA               | INTERGENIC                    |                    |                              |
| SNP_71497_A_119822 | NW_004515866.1 | scaffold374 | 119822                  | GG                              | AA                 | AA               | INTERGENIC                    |                    |                              |
| SNP_71498_A_120052 | NW_004515866.1 | scaffold374 | 120052                  | CC                              | GG                 | GG               | INTERGENIC                    |                    |                              |
| SNP_71499_A_120118 | NW_004515866.1 | scaffold374 | 120118                  | AA                              | CC                 | CC               | INTERGENIC                    |                    |                              |
| SNP_71500_A_120220 | NW_004515866.1 | scaffold374 | 120220                  | CC                              | TT                 | TT               | INTERGENIC                    |                    |                              |

| SNPs IDs           | Chromosome IDs | Chromosomes | Physical positions (bp) | CDC Frontier (Reference genome) | (Pusa 1103 & HPNB) | (ILWC 46 & LPNB) | Sequence genome | Components of | Gene accession IDs | Putative functions |
|--------------------|----------------|-------------|-------------------------|---------------------------------|--------------------|------------------|-----------------|---------------|--------------------|--------------------|
| SNP_71501_A_120234 | NW_004515866.1 | scaffold374 | 120234                  | TT                              | CC                 | CC               | INTERGENIC      |               |                    |                    |
| SNP_71502_A_120250 | NW_004515866.1 | scaffold374 | 120250                  | TT                              | CC                 | CC               | INTERGENIC      |               |                    |                    |
| SNP_71503_A_121859 | NW_004515866.1 | scaffold374 | 121859                  | TT                              | AA                 | AA               | INTERGENIC      |               |                    |                    |
| SNP_71504_A_121892 | NW_004515866.1 | scaffold374 | 121892                  | TT                              | GG                 | GG               | INTERGENIC      |               |                    |                    |
| SNP_71505_A_121899 | NW_004515866.1 | scaffold374 | 121899                  | CC                              | TT                 | TT               | INTERGENIC      |               |                    |                    |
| SNP_71506_A_121953 | NW_004515866.1 | scaffold374 | 121953                  | GG                              | AA                 | AA               | INTERGENIC      |               |                    |                    |
| SNP_71507_A_121978 | NW_004515866.1 | scaffold374 | 121978                  | GG                              | AA                 | AA               | INTERGENIC      |               |                    |                    |
| SNP_71508_A_123267 | NW_004515866.1 | scaffold374 | 123267                  | TT                              | AA                 | AA               | INTERGENIC      |               |                    |                    |
| SNP_71509_A_128831 | NW_004515866.1 | scaffold374 | 128831                  | CC                              | TT                 | TT               | INTERGENIC      |               |                    |                    |
| SNP_71510_A_128836 | NW_004515866.1 | scaffold374 | 128836                  | CC                              | AA                 | AA               | INTERGENIC      |               |                    |                    |
| SNP_71511_A_128860 | NW_004515866.1 | scaffold374 | 128860                  | CC                              | TT                 | TT               | INTERGENIC      |               |                    |                    |
| SNP_71512_A_128924 | NW_004515866.1 | scaffold374 | 128924                  | CC                              | TT                 | TT               | INTERGENIC      |               |                    |                    |
| SNP_71513_A_128948 | NW_004515866.1 | scaffold374 | 128948                  | CC                              | TT                 | TT               | INTERGENIC      |               |                    |                    |
| SNP_71514_A_129246 | NW_004515866.1 | scaffold374 | 129246                  | TT                              | CC                 | CC               | INTERGENIC      |               |                    |                    |
| SNP_71515_A_141992 | NW_004515866.1 | scaffold374 | 141992                  | CC                              | TT                 | TT               | INTERGENIC      |               |                    |                    |
| SNP_71517_A_142015 | NW_004515866.1 | scaffold374 | 142015                  | AA                              | GG                 | GG               | INTERGENIC      |               |                    |                    |
| SNP_71518_A_142057 | NW_004515866.1 | scaffold374 | 142057                  | AA                              | TT                 | TT               | INTERGENIC      |               |                    |                    |
| SNP_71520_A_142062 | NW_004515866.1 | scaffold374 | 142062                  | CC                              | AA                 | TT               | INTERGENIC      |               |                    |                    |
| SNP_71521_A_142072 | NW_004515866.1 | scaffold374 | 142072                  | AA                              | TT                 | TT               | INTERGENIC      |               |                    |                    |
| SNP_71522_A_142080 | NW_004515866.1 | scaffold374 | 142080                  | TT                              | AA                 | AA               | INTERGENIC      |               |                    |                    |
| SNP_71523_A_142125 | NW_004515866.1 | scaffold374 | 142125                  | TT                              | GG                 | GG               | INTERGENIC      |               |                    |                    |
| SNP_71524_A_142141 | NW_004515866.1 | scaffold374 | 142141                  | GG                              | AA                 | AA               | INTERGENIC      |               |                    |                    |

| SNPs IDs           | Chromosome IDs | Chromosomes | Physical positions (bp) | CDC Frontier genome (Reference genome) | (Pusa 1103 & HPNB) | (ILWC 46 & LPNB) | Sequence Components of genome | Gene accession IDs | Putative functions |
|--------------------|----------------|-------------|-------------------------|----------------------------------------|--------------------|------------------|-------------------------------|--------------------|--------------------|
| SNP_71525_A_142145 | NW_004515866.1 | scaffold374 | 142145                  | TT                                     | AA                 | AA               | INTERGENIC                    |                    |                    |
| SNP_71526_A_142445 | NW_004515866.1 | scaffold374 | 142445                  | TT                                     | GG                 | GG               | INTERGENIC                    |                    |                    |
| SNP_71527_A_147298 | NW_004515866.1 | scaffold374 | 147298                  | GG                                     | AA                 | AA               | INTERGENIC                    |                    |                    |
| SNP_71528_A_147305 | NW_004515866.1 | scaffold374 | 147305                  | TT                                     | CC                 | CC               | INTERGENIC                    |                    |                    |
| SNP_71529_A_147327 | NW_004515866.1 | scaffold374 | 147327                  | GG                                     | AA                 | AA               | INTERGENIC                    |                    |                    |
| SNP_71530_A_147336 | NW_004515866.1 | scaffold374 | 147336                  | AA                                     | TT                 | TT               | INTERGENIC                    |                    |                    |
| SNP_71531_A_147379 | NW_004515866.1 | scaffold374 | 147379                  | TT                                     | AA                 | AA               | INTERGENIC                    |                    |                    |
| SNP_71532_A_149255 | NW_004515866.1 | scaffold374 | 149255                  | CC                                     | AA                 | AA               | INTERGENIC                    |                    |                    |
| SNP_71533_A_149256 | NW_004515866.1 | scaffold374 | 149256                  | CC                                     | TT                 | TT               | INTERGENIC                    |                    |                    |
| SNP_71534_A_149465 | NW_004515866.1 | scaffold374 | 149465                  | AA                                     | TT                 | TT               | INTERGENIC                    |                    |                    |
| SNP_71536_A_149563 | NW_004515866.1 | scaffold374 | 149563                  | TT                                     | AA                 | AA               | INTERGENIC                    |                    |                    |
| SNP_71537_A_149565 | NW_004515866.1 | scaffold374 | 149565                  | TT                                     | CC                 | CC               | INTERGENIC                    |                    |                    |
| SNP_71538_A_149601 | NW_004515866.1 | scaffold374 | 149601                  | AA                                     | GG                 | GG               | INTERGENIC                    |                    |                    |
| SNP_71539_A_149626 | NW_004515866.1 | scaffold374 | 149626                  | TT                                     | CC                 | CC               | INTERGENIC                    |                    |                    |
| SNP_71541_A_154757 | NW_004515866.1 | scaffold374 | 154757                  | AA                                     | CC                 | CC               | INTERGENIC                    |                    |                    |
| SNP_71542_A_155119 | NW_004515866.1 | scaffold374 | 155119                  | AA                                     | TT                 | TT               | INTERGENIC                    |                    |                    |
| SNP_71543_A_156453 | NW_004515866.1 | scaffold374 | 156453                  | TT                                     | CC                 | CC               | SYNONYMOUS_CODING             | 101515522          | Unknown function   |
| SNP_71544_A_156704 | NW_004515866.1 | scaffold374 | 156704                  | TT                                     | GG                 | GG               | NON_SYNONYMOUS_CODING         | 101515522          | Unknown function   |
| SNP_71545_A_156728 | NW_004515866.1 | scaffold374 | 156728                  | AA                                     | GG                 | GG               | SYNONYMOUS_CODING             | 101515522          | Unknown function   |
| SNP_71546_A_157366 | NW_004515866.1 | scaffold374 | 157366                  | TT                                     | CC                 | CC               | URR                           | 101515522          | Unknown function   |
| SNP_71548_A_196118 | NW_004515866.1 | scaffold374 | 196118                  | AA                                     | CC                 | CC               | INTERGENIC                    |                    |                    |
| SNP_71549_A_196138 | NW_004515866.1 | scaffold374 | 196138                  | GG                                     | TT                 | TT               | INTERGENIC                    |                    |                    |

| SNPs IDs           | Chromosome IDs | Chromosomes | Physical positions (bp) | CDC Frontier (Reference genome) | (Pusa 1103 & HPNB) | (ILWC 46 & LPNB) | Sequence Components of genome | Gene accession IDs | Putative functions            |
|--------------------|----------------|-------------|-------------------------|---------------------------------|--------------------|------------------|-------------------------------|--------------------|-------------------------------|
| SNP_71550_A_196150 | NW_004515866.1 | scaffold374 | 196150                  | AA                              | GG                 | GG               | INTERGENIC                    |                    |                               |
| SNP_71551_A_196157 | NW_004515866.1 | scaffold374 | 196157                  | AA                              | CC                 | CC               | INTERGENIC                    |                    |                               |
| SNP_71552_A_196215 | NW_004515866.1 | scaffold374 | 196215                  | TT                              | AA                 | AA               | INTERGENIC                    |                    |                               |
| SNP_71553_A_196217 | NW_004515866.1 | scaffold374 | 196217                  | GG                              | AA                 | AA               | INTERGENIC                    |                    |                               |
| SNP_71554_A_196247 | NW_004515866.1 | scaffold374 | 196247                  | CC                              | GG                 | GG               | INTERGENIC                    |                    |                               |
| SNP_71555_A_196261 | NW_004515866.1 | scaffold374 | 196261                  | GG                              | AA                 | AA               | INTERGENIC                    |                    |                               |
| SNP_71556_A_200006 | NW_004515866.1 | scaffold374 | 200006                  | TT                              | GG                 | GG               | URR                           | 101513891          | Unknown function              |
| SNP_71557_A_200180 | NW_004515866.1 | scaffold374 | 200180                  | AA                              | TT                 | TT               | URR                           | 101513891          | Unknown function              |
| SNP_71558_A_202814 | NW_004515866.1 | scaffold374 | 202814                  | CC                              | TT                 | TT               | DRR                           | 101514234          | RNA-binding protein pno1-like |
| SNP_71559_A_203052 | NW_004515866.1 | scaffold374 | 203052                  | TT                              | CC                 | CC               | DRR                           | 101514234          | RNA-binding protein pno1-like |
| SNP_71560_A_203451 | NW_004515866.1 | scaffold374 | 203451                  | CC                              | GG                 | GG               | DRR                           | 101514234          | RNA-binding protein pno1-like |
| SNP_71561_A_204002 | NW_004515866.1 | scaffold374 | 204002                  | AA                              | CC                 | CC               | INTRON                        | 101514234          | RNA-binding protein pno1-like |
| SNP_71562_A_205502 | NW_004515866.1 | scaffold374 | 205502                  | AA                              | TT                 | TT               | URR                           | 101514234          | RNA-binding protein pno1-like |
| SNP_71563_A_205787 | NW_004515866.1 | scaffold374 | 205787                  | GG                              | AA                 | AA               | URR                           | 101514234          | RNA-binding protein pno1-like |
| SNP_71566_A_206219 | NW_004515866.1 | scaffold374 | 206219                  | TT                              | AA                 | AA               | URR                           | 101514234          | RNA-binding protein pno1-like |
| SNP_71567_A_206222 | NW_004515866.1 | scaffold374 | 206222                  | GG                              | AA                 | AA               | URR                           | 101514234          | RNA-binding protein pno1-like |
| SNP_71568_A_7454   | NW_004515867.1 | scaffold377 | 7454                    | TT                              | AA                 | AA               | INTERGENIC                    |                    |                               |
| SNP_71569_A_21976  | NW_004515867.1 | scaffold377 | 21976                   | TT                              | GG                 | GG               | INTERGENIC                    |                    |                               |
| SNP_71570_A_30646  | NW_004515867.1 | scaffold377 | 30646                   | AA                              | GG                 | GG               | INTERGENIC                    |                    |                               |
| SNP_71571_A_30671  | NW_004515867.1 | scaffold377 | 30671                   | CC                              | TT                 | TT               | INTERGENIC                    |                    |                               |
| SNP_71572_A_30744  | NW_004515867.1 | scaffold377 | 30744                   | GG                              | AA                 | AA               | INTERGENIC                    |                    |                               |
| SNP_71573_A_30780  | NW_004515867.1 | scaffold377 | 30780                   | AA                              | GG                 | GG               | INTERGENIC                    |                    |                               |

| SNPs IDs           | Chromosome IDs | Chromosomes | Physical positions (bp) | CDC Frontier (Reference genome) | (Pusa 1103 & HPNB) | (ILWC 46 & LPNB) | Sequence genome | Components of | Gene accession IDs | Putative functions |
|--------------------|----------------|-------------|-------------------------|---------------------------------|--------------------|------------------|-----------------|---------------|--------------------|--------------------|
| SNP_71574_A_30885  | NW_004515867.1 | scaffold377 | 30885                   | AA                              | GG                 | GG               | INTERGENIC      |               |                    |                    |
| SNP_71575_A_31133  | NW_004515867.1 | scaffold377 | 31133                   | CC                              | TT                 | TT               | INTERGENIC      |               |                    |                    |
| SNP_71576_A_31232  | NW_004515867.1 | scaffold377 | 31232                   | GG                              | AA                 | AA               | INTERGENIC      |               |                    |                    |
| SNP_71577_A_31272  | NW_004515867.1 | scaffold377 | 31272                   | CC                              | TT                 | TT               | INTERGENIC      |               |                    |                    |
| SNP_71578_A_38380  | NW_004515867.1 | scaffold377 | 38380                   | TT                              | AA                 | AA               | INTERGENIC      |               |                    |                    |
| SNP_71579_A_75249  | NW_004515867.1 | scaffold377 | 75249                   | GG                              | AA                 | AA               | INTERGENIC      |               |                    |                    |
| SNP_71581_A_75462  | NW_004515867.1 | scaffold377 | 75462                   | AA                              | TT                 | TT               | INTERGENIC      |               |                    |                    |
| SNP_71582_A_75561  | NW_004515867.1 | scaffold377 | 75561                   | TT                              | AA                 | AA               | INTERGENIC      |               |                    |                    |
| SNP_71583_A_75569  | NW_004515867.1 | scaffold377 | 75569                   | CC                              | AA                 | AA               | INTERGENIC      |               |                    |                    |
| SNP_71584_A_75849  | NW_004515867.1 | scaffold377 | 75849                   | GG                              | AA                 | AA               | INTERGENIC      |               |                    |                    |
| SNP_71585_A_75904  | NW_004515867.1 | scaffold377 | 75904                   | GG                              | AA                 | AA               | INTERGENIC      |               |                    |                    |
| SNP_71586_A_98718  | NW_004515867.1 | scaffold377 | 98718                   | CC                              | GG                 | GG               | INTERGENIC      |               |                    |                    |
| SNP_71587_A_98852  | NW_004515867.1 | scaffold377 | 98852                   | CC                              | TT                 | TT               | INTERGENIC      |               |                    |                    |
| SNP_71588_A_98914  | NW_004515867.1 | scaffold377 | 98914                   | TT                              | AA                 | AA               | INTERGENIC      |               |                    |                    |
| SNP_71589_A_139707 | NW_004515867.1 | scaffold377 | 139707                  | TT                              | GG                 | GG               | INTERGENIC      |               |                    |                    |
| SNP_71590_A_182512 | NW_004515867.1 | scaffold377 | 182512                  | AA                              | GG                 | GG               | INTERGENIC      |               |                    |                    |
| SNP_71591_A_182585 | NW_004515867.1 | scaffold377 | 182585                  | TT                              | CC                 | CC               | INTERGENIC      |               |                    |                    |
| SNP_71592_A_182602 | NW_004515867.1 | scaffold377 | 182602                  | TT                              | GG                 | GG               | INTERGENIC      |               |                    |                    |
| SNP_71593_A_191620 | NW_004515867.1 | scaffold377 | 191620                  | AA                              | GG                 | GG               | INTERGENIC      |               |                    |                    |
| SNP_71594_A_191656 | NW_004515867.1 | scaffold377 | 191656                  | TT                              | GG                 | GG               | INTERGENIC      |               |                    |                    |
| SNP_71595_A_191832 | NW_004515867.1 | scaffold377 | 191832                  | AA                              | CC                 | CC               | INTERGENIC      |               |                    |                    |
| SNP_71596_A_207558 | NW_004515867.1 | scaffold377 | 207558                  | TT                              | GG                 | GG               | INTERGENIC      |               |                    |                    |

| SNPs IDs           | Chromosome IDs | Chromosomes | Physical positions (bp) | CDC Frontier (Reference genome) | (Pusa 1103 & HPNB) | (ILWC 46 & LPNB) | Sequence genome | Components of | Gene accession IDs | Putative functions |
|--------------------|----------------|-------------|-------------------------|---------------------------------|--------------------|------------------|-----------------|---------------|--------------------|--------------------|
| SNP_71597_A_223249 | NW_004515867.1 | scaffold377 | 223249                  | GG                              | AA                 | AA               | INTERGENIC      |               |                    |                    |
| SNP_71598_A_248987 | NW_004515867.1 | scaffold377 | 248987                  | CC                              | TT                 | TT               | INTERGENIC      |               |                    |                    |
| SNP_71599_A_251392 | NW_004515867.1 | scaffold377 | 251392                  | GG                              | AA                 | AA               | INTERGENIC      |               |                    |                    |
| SNP_71600_A_251395 | NW_004515867.1 | scaffold377 | 251395                  | AA                              | TT                 | TT               | INTERGENIC      |               |                    |                    |
| SNP_71601_A_251401 | NW_004515867.1 | scaffold377 | 251401                  | GG                              | AA                 | AA               | INTERGENIC      |               |                    |                    |
| SNP_71602_A_251489 | NW_004515867.1 | scaffold377 | 251489                  | GG                              | AA                 | AA               | INTERGENIC      |               |                    |                    |
| SNP_71603_A_251516 | NW_004515867.1 | scaffold377 | 251516                  | AA                              | GG                 | GG               | INTERGENIC      |               |                    |                    |
| SNP_71604_A_251523 | NW_004515867.1 | scaffold377 | 251523                  | GG                              | AA                 | AA               | INTERGENIC      |               |                    |                    |
| SNP_71605_A_251530 | NW_004515867.1 | scaffold377 | 251530                  | AA                              | GG                 | GG               | INTERGENIC      |               |                    |                    |
| SNP_71606_A_251534 | NW_004515867.1 | scaffold377 | 251534                  | TT                              | CC                 | CC               | INTERGENIC      |               |                    |                    |
| SNP_71607_A_251543 | NW_004515867.1 | scaffold377 | 251543                  | AA                              | GG                 | GG               | INTERGENIC      |               |                    |                    |
| SNP_71608_A_251571 | NW_004515867.1 | scaffold377 | 251571                  | AA                              | GG                 | GG               | INTERGENIC      |               |                    |                    |
| SNP_71609_A_251822 | NW_004515867.1 | scaffold377 | 251822                  | AA                              | TT                 | TT               | INTERGENIC      |               |                    |                    |
| SNP_71610_A_261578 | NW_004515867.1 | scaffold377 | 261578                  | TT                              | AA                 | AA               | INTERGENIC      |               |                    |                    |
| SNP_71611_A_261583 | NW_004515867.1 | scaffold377 | 261583                  | AA                              | GG                 | GG               | INTERGENIC      |               |                    |                    |
| SNP_71612_A_261670 | NW_004515867.1 | scaffold377 | 261670                  | TT                              | CC                 | CC               | INTERGENIC      |               |                    |                    |
| SNP_71613_A_331009 | NW_004515867.1 | scaffold377 | 331009                  | CC                              | AA                 | AA               | INTERGENIC      |               |                    |                    |
| SNP_71615_A_331055 | NW_004515867.1 | scaffold377 | 331055                  | GG                              | AA                 | AA               | INTERGENIC      |               |                    |                    |
| SNP_71616_A_331083 | NW_004515867.1 | scaffold377 | 331083                  | AA                              | TT                 | TT               | INTERGENIC      |               |                    |                    |
| SNP_71617_A_343090 | NW_004515867.1 | scaffold377 | 343090                  | TT                              | CC                 | CC               | INTERGENIC      |               |                    |                    |
| SNP_71618_A_358325 | NW_004515867.1 | scaffold377 | 358325                  | CC                              | TT                 | TT               | INTERGENIC      |               |                    |                    |
| SNP_71619_A_389761 | NW_004515867.1 | scaffold377 | 389761                  | CC                              | AA                 | AA               | INTERGENIC      |               |                    |                    |



| SNPs IDs           | Chromosome IDs | Chromosomes | Physical positions (bp) | CDC Frontier (Reference genome) | (Pusa 1103 & HPNB) | (ILWC 46 & LPNB) | Sequence genome | Components of | Gene accession IDs     | Putative functions |
|--------------------|----------------|-------------|-------------------------|---------------------------------|--------------------|------------------|-----------------|---------------|------------------------|--------------------|
| SNP_71620_A_393624 | NW_004515867.1 | scaffold377 | 393624                  | AA                              | GG                 | GG               | INTERGENIC      |               |                        |                    |
| SNP_71621_A_394431 | NW_004515867.1 | scaffold377 | 394431                  | TT                              | CC                 | CC               | INTERGENIC      |               |                        |                    |
| SNP_71622_A_394467 | NW_004515867.1 | scaffold377 | 394467                  | GG                              | TT                 | TT               | INTERGENIC      |               |                        |                    |
| SNP_71623_A_400093 | NW_004515867.1 | scaffold377 | 400093                  | GG                              | AA                 | AA               | INTERGENIC      |               |                        |                    |
| SNP_71624_A_400204 | NW_004515867.1 | scaffold377 | 400204                  | GG                              | AA                 | AA               | INTERGENIC      |               |                        |                    |
| SNP_71625_A_400450 | NW_004515867.1 | scaffold377 | 400450                  | AA                              | GG                 | GG               | INTERGENIC      |               |                        |                    |
| SNP_71626_A_400509 | NW_004515867.1 | scaffold377 | 400509                  | GG                              | AA                 | AA               | INTERGENIC      |               |                        |                    |
| SNP_71627_A_418994 | NW_004515867.1 | scaffold377 | 418994                  | TT                              | AA                 | AA               | INTERGENIC      |               |                        |                    |
| SNP_71628_A_20783  | NW_004515869.1 | scaffold379 | 20783                   | CC                              | AA                 | AA               | INTERGENIC      |               |                        |                    |
| SNP_71629_A_22745  | NW_004515869.1 | scaffold379 | 22745                   | AA                              | CC                 | CC               | INTERGENIC      |               |                        |                    |
| SNP_71630_A_71600  | NW_004515869.1 | scaffold379 | 71600                   | TT                              | CC                 | CC               | URR             | 101490785     | GPI inositol-deacylase |                    |
| SNP_71631_A_91586  | NW_004515869.1 | scaffold379 | 91586                   | AA                              | GG                 | GG               | INTERGENIC      |               |                        |                    |
| SNP_71632_A_93076  | NW_004515869.1 | scaffold379 | 93076                   | TT                              | AA                 | AA               | INTERGENIC      |               |                        |                    |
| SNP_71633_A_93077  | NW_004515869.1 | scaffold379 | 93077                   | TT                              | AA                 | AA               | INTERGENIC      |               |                        |                    |
| SNP_71634_A_106207 | NW_004515869.1 | scaffold379 | 106207                  | CC                              | TT                 | TT               | INTERGENIC      |               |                        |                    |
| SNP_71635_A_108186 | NW_004515869.1 | scaffold379 | 108186                  | CC                              | TT                 | TT               | INTERGENIC      |               |                        |                    |
| SNP_71636_A_108217 | NW_004515869.1 | scaffold379 | 108217                  | TT                              | CC                 | CC               | INTERGENIC      |               |                        |                    |
| SNP_71637_A_108245 | NW_004515869.1 | scaffold379 | 108245                  | TT                              | CC                 | CC               | INTERGENIC      |               |                        |                    |
| SNP_71638_A_108286 | NW_004515869.1 | scaffold379 | 108286                  | TT                              | GG                 | GG               | INTERGENIC      |               |                        |                    |
| SNP_71639_A_108310 | NW_004515869.1 | scaffold379 | 108310                  | GG                              | AA                 | AA               | INTERGENIC      |               |                        |                    |
| SNP_71642_A_135757 | NW_004515869.1 | scaffold379 | 135757                  | CC                              | AA                 | AA               | INTERGENIC      |               |                        |                    |
| SNP_71643_A_135875 | NW_004515869.1 | scaffold379 | 135875                  | CC                              | GG                 | GG               | INTERGENIC      |               |                        |                    |

| SNPs IDs           | Chromosome IDs | Chromosomes | Physical positions (bp) | CDC Frontier (Reference genome) | (Pusa 1103 & HPNB) | (ILWC 46 & LPNB) | Sequence genome | Components of | Gene accession IDs | Putative functions |
|--------------------|----------------|-------------|-------------------------|---------------------------------|--------------------|------------------|-----------------|---------------|--------------------|--------------------|
| SNP_71644_A_136337 | NW_004515869.1 | scaffold379 | 136337                  | TT                              | CC                 | CC               | INTERGENIC      |               |                    |                    |
| SNP_71645_A_136398 | NW_004515869.1 | scaffold379 | 136398                  | GG                              | AA                 | AA               | INTERGENIC      |               |                    |                    |
| SNP_71646_A_162899 | NW_004515869.1 | scaffold379 | 162899                  | TT                              | AA                 | AA               | INTERGENIC      |               |                    |                    |
| SNP_71647_A_162900 | NW_004515869.1 | scaffold379 | 162900                  | AA                              | TT                 | TT               | INTERGENIC      |               |                    |                    |
| SNP_71648_A_175374 | NW_004515869.1 | scaffold379 | 175374                  | AA                              | GG                 | GG               | INTRON          | 101493292     | Unknown function   |                    |
| SNP_71649_A_175398 | NW_004515869.1 | scaffold379 | 175398                  | AA                              | GG                 | GG               | INTRON          | 101493292     | Unknown function   |                    |
| SNP_71651_A_194822 | NW_004515869.1 | scaffold379 | 194822                  | AA                              | TT                 | TT               | INTERGENIC      |               |                    |                    |
| SNP_71652_A_6568   | NW_004515870.1 | scaffold381 | 6568                    | CC                              | GG                 | GG               | INTERGENIC      |               |                    |                    |
| SNP_71653_A_6571   | NW_004515870.1 | scaffold381 | 6571                    | TT                              | AA                 | AA               | INTERGENIC      |               |                    |                    |
| SNP_71654_A_6668   | NW_004515870.1 | scaffold381 | 6668                    | TT                              | AA                 | AA               | INTERGENIC      |               |                    |                    |
| SNP_71655_A_6691   | NW_004515870.1 | scaffold381 | 6691                    | GG                              | AA                 | AA               | INTERGENIC      |               |                    |                    |
| SNP_71657_A_6698   | NW_004515870.1 | scaffold381 | 6698                    | GG                              | TT                 | TT               | INTERGENIC      |               |                    |                    |
| SNP_71658_A_6817   | NW_004515870.1 | scaffold381 | 6817                    | CC                              | AA                 | AA               | INTERGENIC      |               |                    |                    |
| SNP_71660_A_6929   | NW_004515870.1 | scaffold381 | 6929                    | AA                              | TT                 | TT               | INTERGENIC      |               |                    |                    |
| SNP_71661_A_8338   | NW_004515870.1 | scaffold381 | 8338                    | AA                              | TT                 | TT               | INTERGENIC      |               |                    |                    |
| SNP_71662_A_8526   | NW_004515870.1 | scaffold381 | 8526                    | GG                              | TT                 | TT               | INTERGENIC      |               |                    |                    |
| SNP_71663_A_8585   | NW_004515870.1 | scaffold381 | 8585                    | GG                              | AA                 | AA               | INTERGENIC      |               |                    |                    |
| SNP_71664_A_9958   | NW_004515870.1 | scaffold381 | 9958                    | CC                              | AA                 | AA               | INTERGENIC      |               |                    |                    |
| SNP_71665_A_10024  | NW_004515870.1 | scaffold381 | 10024                   | AA                              | GG                 | GG               | INTERGENIC      |               |                    |                    |
| SNP_71666_A_10165  | NW_004515870.1 | scaffold381 | 10165                   | CC                              | GG                 | GG               | INTERGENIC      |               |                    |                    |
| SNP_71667_A_10168  | NW_004515870.1 | scaffold381 | 10168                   | TT                              | GG                 | GG               | INTERGENIC      |               |                    |                    |
| SNP_71669_A_10299  | NW_004515870.1 | scaffold381 | 10299                   | AA                              | CC                 | CC               | INTERGENIC      |               |                    |                    |

| SNPs IDs          | Chromosome IDs | Chromosomes | Physical positions (bp) | CDC Frontier (Reference genome) | (Pusa 1103 & HPNB) | (ILWC 46 & LPNB) | Sequence genome | Components of | Gene accession IDs | Putative functions |
|-------------------|----------------|-------------|-------------------------|---------------------------------|--------------------|------------------|-----------------|---------------|--------------------|--------------------|
| SNP_71670_A_10301 | NW_004515870.1 | scaffold381 | 10301                   | GG                              | AA                 | AA               | INTERGENIC      |               |                    |                    |
| SNP_71671_A_10341 | NW_004515870.1 | scaffold381 | 10341                   | GG                              | TT                 | TT               | INTERGENIC      |               |                    |                    |
| SNP_71672_A_12667 | NW_004515870.1 | scaffold381 | 12667                   | TT                              | CC                 | CC               | INTERGENIC      |               |                    |                    |
| SNP_71673_A_22838 | NW_004515871.1 | scaffold382 | 22838                   | TT                              | CC                 | CC               | INTERGENIC      |               |                    |                    |
| SNP_71674_A_24874 | NW_004515871.1 | scaffold382 | 24874                   | TT                              | AA                 | AA               | INTERGENIC      |               |                    |                    |
| SNP_71675_A_27149 | NW_004515871.1 | scaffold382 | 27149                   | TT                              | CC                 | CC               | INTERGENIC      |               |                    |                    |
| SNP_71676_A_27157 | NW_004515871.1 | scaffold382 | 27157                   | TT                              | AA                 | AA               | INTERGENIC      |               |                    |                    |
| SNP_71677_A_27162 | NW_004515871.1 | scaffold382 | 27162                   | TT                              | CC                 | CC               | INTERGENIC      |               |                    |                    |
| SNP_71678_A_61062 | NW_004515871.1 | scaffold382 | 61062                   | GG                              | AA                 | AA               | INTERGENIC      |               |                    |                    |
| SNP_71679_A_65145 | NW_004515871.1 | scaffold382 | 65145                   | CC                              | AA                 | AA               | INTERGENIC      |               |                    |                    |
| SNP_71680_A_82241 | NW_004515871.1 | scaffold382 | 82241                   | TT                              | GG                 | GG               | INTERGENIC      |               |                    |                    |
| SNP_71681_A_82247 | NW_004515871.1 | scaffold382 | 82247                   | TT                              | CC                 | CC               | INTERGENIC      |               |                    |                    |
| SNP_71682_A_90785 | NW_004515871.1 | scaffold382 | 90785                   | AA                              | GG                 | GG               | INTERGENIC      |               |                    |                    |
| SNP_71683_A_90807 | NW_004515871.1 | scaffold382 | 90807                   | CC                              | TT                 | TT               | INTERGENIC      |               |                    |                    |
| SNP_71684_A_90823 | NW_004515871.1 | scaffold382 | 90823                   | CC                              | TT                 | TT               | INTERGENIC      |               |                    |                    |
| SNP_71685_A_90984 | NW_004515871.1 | scaffold382 | 90984                   | CC                              | GG                 | GG               | INTERGENIC      |               |                    |                    |
| SNP_71686_A_91008 | NW_004515871.1 | scaffold382 | 91008                   | GG                              | AA                 | AA               | INTERGENIC      |               |                    |                    |
| SNP_71687_A_91088 | NW_004515871.1 | scaffold382 | 91088                   | CC                              | AA                 | AA               | INTERGENIC      |               |                    |                    |
| SNP_71688_A_91129 | NW_004515871.1 | scaffold382 | 91129                   | TT                              | CC                 | CC               | INTERGENIC      |               |                    |                    |
| SNP_71689_A_91259 | NW_004515871.1 | scaffold382 | 91259                   | TT                              | GG                 | GG               | INTERGENIC      |               |                    |                    |
| SNP_71690_A_91295 | NW_004515871.1 | scaffold382 | 91295                   | GG                              | AA                 | AA               | INTERGENIC      |               |                    |                    |
| SNP_71691_A_91332 | NW_004515871.1 | scaffold382 | 91332                   | GG                              | CC                 | CC               | INTERGENIC      |               |                    |                    |

| SNPs IDs          | Chromosome IDs | Chromosomes | Physical positions (bp) | CDC Frontier (Reference genome) | (Pusa 1103 & HPNB) | (ILWC 46 & LPNB) | Sequence genome | Components of | Gene accession IDs | Putative functions |
|-------------------|----------------|-------------|-------------------------|---------------------------------|--------------------|------------------|-----------------|---------------|--------------------|--------------------|
| SNP_71692_A_9695  | NW_004515872.1 | scaffold383 | 9695                    | CC                              | TT                 | TT               | INTERGENIC      |               |                    |                    |
| SNP_71693_A_9766  | NW_004515872.1 | scaffold383 | 9766                    | GG                              | AA                 | AA               | INTERGENIC      |               |                    |                    |
| SNP_71694_A_9788  | NW_004515872.1 | scaffold383 | 9788                    | TT                              | CC                 | CC               | INTERGENIC      |               |                    |                    |
| SNP_71695_A_9867  | NW_004515872.1 | scaffold383 | 9867                    | AA                              | CC                 | CC               | INTERGENIC      |               |                    |                    |
| SNP_71696_A_9893  | NW_004515872.1 | scaffold383 | 9893                    | AA                              | GG                 | GG               | INTERGENIC      |               |                    |                    |
| SNP_71697_A_9932  | NW_004515872.1 | scaffold383 | 9932                    | TT                              | CC                 | CC               | INTERGENIC      |               |                    |                    |
| SNP_71698_A_16961 | NW_004515872.1 | scaffold383 | 16961                   | AA                              | GG                 | GG               | INTERGENIC      |               |                    |                    |
| SNP_71699_A_17444 | NW_004515872.1 | scaffold383 | 17444                   | GG                              | CC                 | CC               | INTERGENIC      |               |                    |                    |
| SNP_71700_A_17454 | NW_004515872.1 | scaffold383 | 17454                   | TT                              | GG                 | GG               | INTERGENIC      |               |                    |                    |
| SNP_71701_A_17501 | NW_004515872.1 | scaffold383 | 17501                   | TT                              | CC                 | CC               | INTERGENIC      |               |                    |                    |
| SNP_71702_A_17667 | NW_004515872.1 | scaffold383 | 17667                   | AA                              | GG                 | GG               | INTERGENIC      |               |                    |                    |
| SNP_71703_A_57990 | NW_004515872.1 | scaffold383 | 57990                   | CC                              | GG                 | GG               | INTERGENIC      |               |                    |                    |
| SNP_71704_A_77250 | NW_004515872.1 | scaffold383 | 77250                   | AA                              | GG                 | GG               | INTERGENIC      |               |                    |                    |
| SNP_71705_A_80210 | NW_004515872.1 | scaffold383 | 80210                   | TT                              | GG                 | GG               | INTERGENIC      |               |                    |                    |
| SNP_71706_A_81392 | NW_004515872.1 | scaffold383 | 81392                   | AA                              | TT                 | TT               | INTERGENIC      |               |                    |                    |
| SNP_71707_A_81403 | NW_004515872.1 | scaffold383 | 81403                   | TT                              | CC                 | CC               | INTERGENIC      |               |                    |                    |
| SNP_71708_A_81457 | NW_004515872.1 | scaffold383 | 81457                   | GG                              | AA                 | AA               | INTERGENIC      |               |                    |                    |
| SNP_71709_A_81485 | NW_004515872.1 | scaffold383 | 81485                   | AA                              | GG                 | GG               | INTERGENIC      |               |                    |                    |
| SNP_71710_A_81730 | NW_004515872.1 | scaffold383 | 81730                   | AA                              | GG                 | GG               | INTERGENIC      |               |                    |                    |
| SNP_71711_A_81744 | NW_004515872.1 | scaffold383 | 81744                   | CC                              | TT                 | TT               | INTERGENIC      |               |                    |                    |
| SNP_71712_A_81805 | NW_004515872.1 | scaffold383 | 81805                   | CC                              | AA                 | AA               | INTERGENIC      |               |                    |                    |
| SNP_71713_A_81811 | NW_004515872.1 | scaffold383 | 81811                   | GG                              | AA                 | AA               | INTERGENIC      |               |                    |                    |

| SNPs IDs           | Chromosome IDs | Chromosomes | Physical positions (bp) | CDC Frontier (Reference genome) | (Pusa 1103 & HPNB) | (ILWC 46 & LPNB) | Sequence genome | Components of | Gene accession IDs | Putative functions |
|--------------------|----------------|-------------|-------------------------|---------------------------------|--------------------|------------------|-----------------|---------------|--------------------|--------------------|
| SNP_71714_A_93813  | NW_004515872.1 | scaffold383 | 93813                   | AA                              | GG                 | GG               | INTERGENIC      |               |                    |                    |
| SNP_71715_A_94019  | NW_004515872.1 | scaffold383 | 94019                   | TT                              | GG                 | GG               | INTERGENIC      |               |                    |                    |
| SNP_71716_A_112484 | NW_004515872.1 | scaffold383 | 112484                  | TT                              | CC                 | CC               | INTERGENIC      |               |                    |                    |
| SNP_71717_A_118733 | NW_004515872.1 | scaffold383 | 118733                  | CC                              | GG                 | GG               | INTERGENIC      |               |                    |                    |
| SNP_71718_A_118755 | NW_004515872.1 | scaffold383 | 118755                  | AA                              | GG                 | GG               | INTERGENIC      |               |                    |                    |
| SNP_71719_A_119074 | NW_004515872.1 | scaffold383 | 119074                  | AA                              | GG                 | GG               | INTERGENIC      |               |                    |                    |
| SNP_71720_A_137309 | NW_004515872.1 | scaffold383 | 137309                  | TT                              | CC                 | CC               | INTERGENIC      |               |                    |                    |
| SNP_71721_A_137452 | NW_004515872.1 | scaffold383 | 137452                  | AA                              | GG                 | GG               | INTERGENIC      |               |                    |                    |
| SNP_71722_A_137468 | NW_004515872.1 | scaffold383 | 137468                  | GG                              | TT                 | TT               | INTERGENIC      |               |                    |                    |
| SNP_71723_A_137888 | NW_004515872.1 | scaffold383 | 137888                  | TT                              | AA                 | AA               | INTERGENIC      |               |                    |                    |
| SNP_71724_A_138514 | NW_004515872.1 | scaffold383 | 138514                  | AA                              | GG                 | GG               | INTERGENIC      |               |                    |                    |
| SNP_71725_A_138774 | NW_004515872.1 | scaffold383 | 138774                  | AA                              | GG                 | GG               | INTERGENIC      |               |                    |                    |
| SNP_71726_A_182265 | NW_004515872.1 | scaffold383 | 182265                  | GG                              | AA                 | AA               | INTERGENIC      |               |                    |                    |
| SNP_71727_A_182488 | NW_004515872.1 | scaffold383 | 182488                  | AA                              | CC                 | CC               | INTERGENIC      |               |                    |                    |
| SNP_71728_A_195666 | NW_004515872.1 | scaffold383 | 195666                  | TT                              | CC                 | CC               | INTERGENIC      |               |                    |                    |
| SNP_71729_A_195796 | NW_004515872.1 | scaffold383 | 195796                  | CC                              | TT                 | TT               | INTERGENIC      |               |                    |                    |
| SNP_71730_A_195890 | NW_004515872.1 | scaffold383 | 195890                  | TT                              | CC                 | CC               | INTERGENIC      |               |                    |                    |
| SNP_71731_A_195962 | NW_004515872.1 | scaffold383 | 195962                  | TT                              | CC                 | CC               | INTERGENIC      |               |                    |                    |
| SNP_71732_A_195976 | NW_004515872.1 | scaffold383 | 195976                  | GG                              | AA                 | AA               | INTERGENIC      |               |                    |                    |
| SNP_71733_A_205338 | NW_004515872.1 | scaffold383 | 205338                  | CC                              | GG                 | GG               | INTERGENIC      |               |                    |                    |
| SNP_71734_A_209972 | NW_004515872.1 | scaffold383 | 209972                  | AA                              | TT                 | TT               | INTERGENIC      |               |                    |                    |
| SNP_71736_A_210001 | NW_004515872.1 | scaffold383 | 210001                  | AA                              | GG                 | GG               | INTERGENIC      |               |                    |                    |

| SNPs IDs           | Chromosome IDs | Chromosomes | Physical positions (bp) | CDC Frontier (Reference genome) | (Pusa 1103 & HPNB) | (ILWC 46 & LPNB) | Sequence genome | Components of | Gene accession IDs | Putative functions |
|--------------------|----------------|-------------|-------------------------|---------------------------------|--------------------|------------------|-----------------|---------------|--------------------|--------------------|
| SNP_71737_A_210364 | NW_004515872.1 | scaffold383 | 210364                  | GG                              | AA                 | AA               | INTERGENIC      |               |                    |                    |
| SNP_71738_A_2509   | NW_004515873.1 | scaffold387 | 2509                    | TT                              | GG                 | GG               | INTERGENIC      |               |                    |                    |
| SNP_71739_A_2764   | NW_004515873.1 | scaffold387 | 2764                    | GG                              | TT                 | TT               | INTERGENIC      |               |                    |                    |
| SNP_71740_A_15809  | NW_004515873.1 | scaffold387 | 15809                   | AA                              | GG                 | GG               | INTERGENIC      |               |                    |                    |
| SNP_71741_A_15888  | NW_004515873.1 | scaffold387 | 15888                   | GG                              | TT                 | TT               | INTERGENIC      |               |                    |                    |
| SNP_71742_A_15911  | NW_004515873.1 | scaffold387 | 15911                   | AA                              | CC                 | CC               | INTERGENIC      |               |                    |                    |
| SNP_71743_A_15946  | NW_004515873.1 | scaffold387 | 15946                   | AA                              | TT                 | TT               | INTERGENIC      |               |                    |                    |
| SNP_71744_A_15990  | NW_004515873.1 | scaffold387 | 15990                   | TT                              | CC                 | CC               | INTERGENIC      |               |                    |                    |
| SNP_71745_A_16000  | NW_004515873.1 | scaffold387 | 16000                   | TT                              | AA                 | AA               | INTERGENIC      |               |                    |                    |
| SNP_71747_A_16114  | NW_004515873.1 | scaffold387 | 16114                   | TT                              | CC                 | CC               | INTERGENIC      |               |                    |                    |
| SNP_71748_A_16158  | NW_004515873.1 | scaffold387 | 16158                   | TT                              | GG                 | GG               | INTERGENIC      |               |                    |                    |
| SNP_71749_A_16197  | NW_004515873.1 | scaffold387 | 16197                   | GG                              | TT                 | TT               | INTERGENIC      |               |                    |                    |
| SNP_71750_A_16288  | NW_004515873.1 | scaffold387 | 16288                   | CC                              | TT                 | TT               | INTERGENIC      |               |                    |                    |
| SNP_71751_A_16297  | NW_004515873.1 | scaffold387 | 16297                   | GG                              | AA                 | AA               | INTERGENIC      |               |                    |                    |
| SNP_71752_A_16341  | NW_004515873.1 | scaffold387 | 16341                   | AA                              | CC                 | CC               | INTERGENIC      |               |                    |                    |
| SNP_71753_A_16368  | NW_004515873.1 | scaffold387 | 16368                   | GG                              | AA                 | AA               | INTERGENIC      |               |                    |                    |
| SNP_71754_A_16441  | NW_004515873.1 | scaffold387 | 16441                   | TT                              | AA                 | GG               | INTERGENIC      |               |                    |                    |
| SNP_71755_A_16452  | NW_004515873.1 | scaffold387 | 16452                   | CC                              | GG                 | GG               | INTERGENIC      |               |                    |                    |
| SNP_71756_A_16494  | NW_004515873.1 | scaffold387 | 16494                   | TT                              | CC                 | CC               | INTERGENIC      |               |                    |                    |
| SNP_71757_A_16605  | NW_004515873.1 | scaffold387 | 16605                   | GG                              | AA                 | AA               | INTERGENIC      |               |                    |                    |
| SNP_71758_A_16629  | NW_004515873.1 | scaffold387 | 16629                   | GG                              | TT                 | TT               | INTERGENIC      |               |                    |                    |
| SNP_71759_A_16636  | NW_004515873.1 | scaffold387 | 16636                   | TT                              | GG                 | GG               | INTERGENIC      |               |                    |                    |

| SNPs IDs          | Chromosome IDs | Chromosomes | Physical positions (bp) | CDC Frontier (Reference genome) | (Pusa 1103 & HPNB) | (ILWC 46 & LPNB) | Sequence genome | Components of | Gene accession IDs | Putative functions |
|-------------------|----------------|-------------|-------------------------|---------------------------------|--------------------|------------------|-----------------|---------------|--------------------|--------------------|
| SNP_71760_A_16668 | NW_004515873.1 | scaffold387 | 16668                   | TT                              | CC                 | CC               | INTERGENIC      |               |                    |                    |
| SNP_71761_A_16679 | NW_004515873.1 | scaffold387 | 16679                   | AA                              | GG                 | GG               | INTERGENIC      |               |                    |                    |
| SNP_71762_A_16692 | NW_004515873.1 | scaffold387 | 16692                   | GG                              | CC                 | CC               | INTERGENIC      |               |                    |                    |
| SNP_71763_A_16703 | NW_004515873.1 | scaffold387 | 16703                   | TT                              | AA                 | AA               | INTERGENIC      |               |                    |                    |
| SNP_71764_A_16760 | NW_004515873.1 | scaffold387 | 16760                   | CC                              | TT                 | TT               | INTERGENIC      |               |                    |                    |
| SNP_71765_A_16789 | NW_004515873.1 | scaffold387 | 16789                   | GG                              | AA                 | AA               | INTERGENIC      |               |                    |                    |
| SNP_71766_A_16797 | NW_004515873.1 | scaffold387 | 16797                   | GG                              | TT                 | TT               | INTERGENIC      |               |                    |                    |
| SNP_71767_A_16805 | NW_004515873.1 | scaffold387 | 16805                   | CC                              | GG                 | GG               | INTERGENIC      |               |                    |                    |
| SNP_71768_A_16816 | NW_004515873.1 | scaffold387 | 16816                   | AA                              | GG                 | GG               | INTERGENIC      |               |                    |                    |
| SNP_71769_A_16827 | NW_004515873.1 | scaffold387 | 16827                   | AA                              | GG                 | GG               | INTERGENIC      |               |                    |                    |
| SNP_71770_A_16842 | NW_004515873.1 | scaffold387 | 16842                   | TT                              | CC                 | CC               | INTERGENIC      |               |                    |                    |
| SNP_71771_A_16891 | NW_004515873.1 | scaffold387 | 16891                   | CC                              | TT                 | TT               | INTERGENIC      |               |                    |                    |
| SNP_71772_A_16897 | NW_004515873.1 | scaffold387 | 16897                   | GG                              | TT                 | TT               | INTERGENIC      |               |                    |                    |
| SNP_71774_A_17282 | NW_004515873.1 | scaffold387 | 17282                   | TT                              | CC                 | CC               | INTERGENIC      |               |                    |                    |
| SNP_71775_A_17613 | NW_004515873.1 | scaffold387 | 17613                   | CC                              | AA                 | AA               | INTERGENIC      |               |                    |                    |
| SNP_71776_A_17718 | NW_004515873.1 | scaffold387 | 17718                   | CC                              | TT                 | TT               | INTERGENIC      |               |                    |                    |
| SNP_71777_A_17760 | NW_004515873.1 | scaffold387 | 17760                   | AA                              | GG                 | GG               | INTERGENIC      |               |                    |                    |
| SNP_71778_A_17766 | NW_004515873.1 | scaffold387 | 17766                   | CC                              | TT                 | TT               | INTERGENIC      |               |                    |                    |
| SNP_71779_A_17775 | NW_004515873.1 | scaffold387 | 17775                   | CC                              | TT                 | TT               | INTERGENIC      |               |                    |                    |
| SNP_71780_A_18058 | NW_004515873.1 | scaffold387 | 18058                   | CC                              | TT                 | TT               | INTERGENIC      |               |                    |                    |
| SNP_71781_A_18101 | NW_004515873.1 | scaffold387 | 18101                   | AA                              | TT                 | TT               | INTERGENIC      |               |                    |                    |
| SNP_71782_A_18107 | NW_004515873.1 | scaffold387 | 18107                   | GG                              | AA                 | AA               | INTERGENIC      |               |                    |                    |

| SNPs IDs          | Chromosome IDs | Chromosomes | Physical positions (bp) | CDC Frontier (Reference genome) | (Pusa 1103 & HPNB) | (ILWC 46 & LPNB) | Sequence genome | Components of | Gene accession IDs | Putative functions |
|-------------------|----------------|-------------|-------------------------|---------------------------------|--------------------|------------------|-----------------|---------------|--------------------|--------------------|
| SNP_71783_A_18154 | NW_004515873.1 | scaffold387 | 18154                   | CC                              | TT                 | TT               | INTERGENIC      |               |                    |                    |
| SNP_71784_A_18171 | NW_004515873.1 | scaffold387 | 18171                   | TT                              | AA                 | AA               | INTERGENIC      |               |                    |                    |
| SNP_71785_A_18177 | NW_004515873.1 | scaffold387 | 18177                   | CC                              | TT                 | TT               | INTERGENIC      |               |                    |                    |
| SNP_71786_A_18225 | NW_004515873.1 | scaffold387 | 18225                   | GG                              | AA                 | AA               | INTERGENIC      |               |                    |                    |
| SNP_71787_A_18463 | NW_004515873.1 | scaffold387 | 18463                   | CC                              | AA                 | AA               | INTERGENIC      |               |                    |                    |
| SNP_71788_A_18486 | NW_004515873.1 | scaffold387 | 18486                   | CC                              | TT                 | TT               | INTERGENIC      |               |                    |                    |
| SNP_71789_A_18495 | NW_004515873.1 | scaffold387 | 18495                   | AA                              | GG                 | GG               | INTERGENIC      |               |                    |                    |
| SNP_71790_A_18496 | NW_004515873.1 | scaffold387 | 18496                   | TT                              | CC                 | CC               | INTERGENIC      |               |                    |                    |
| SNP_71791_A_18587 | NW_004515873.1 | scaffold387 | 18587                   | AA                              | GG                 | GG               | INTERGENIC      |               |                    |                    |
| SNP_71792_A_18606 | NW_004515873.1 | scaffold387 | 18606                   | GG                              | AA                 | AA               | INTERGENIC      |               |                    |                    |
| SNP_71793_A_18646 | NW_004515873.1 | scaffold387 | 18646                   | GG                              | TT                 | TT               | INTERGENIC      |               |                    |                    |
| SNP_71794_A_18676 | NW_004515873.1 | scaffold387 | 18676                   | AA                              | GG                 | GG               | INTERGENIC      |               |                    |                    |
| SNP_71795_A_18703 | NW_004515873.1 | scaffold387 | 18703                   | CC                              | GG                 | GG               | INTERGENIC      |               |                    |                    |
| SNP_71796_A_18704 | NW_004515873.1 | scaffold387 | 18704                   | AA                              | GG                 | GG               | INTERGENIC      |               |                    |                    |
| SNP_71797_A_18732 | NW_004515873.1 | scaffold387 | 18732                   | TT                              | CC                 | CC               | INTERGENIC      |               |                    |                    |
| SNP_71798_A_18780 | NW_004515873.1 | scaffold387 | 18780                   | CC                              | TT                 | TT               | INTERGENIC      |               |                    |                    |
| SNP_71799_A_18910 | NW_004515873.1 | scaffold387 | 18910                   | TT                              | CC                 | CC               | INTERGENIC      |               |                    |                    |
| SNP_71800_A_18916 | NW_004515873.1 | scaffold387 | 18916                   | CC                              | AA                 | AA               | INTERGENIC      |               |                    |                    |
| SNP_71801_A_18943 | NW_004515873.1 | scaffold387 | 18943                   | AA                              | CC                 | CC               | INTERGENIC      |               |                    |                    |
| SNP_71802_A_18944 | NW_004515873.1 | scaffold387 | 18944                   | AA                              | TT                 | TT               | INTERGENIC      |               |                    |                    |
| SNP_71803_A_18989 | NW_004515873.1 | scaffold387 | 18989                   | GG                              | TT                 | TT               | INTERGENIC      |               |                    |                    |
| SNP_71804_A_19010 | NW_004515873.1 | scaffold387 | 19010                   | AA                              | GG                 | GG               | INTERGENIC      |               |                    |                    |



| SNPs IDs          | Chromosome IDs | Chromosomes | Physical positions (bp) | CDC Frontier (Reference genome) | (Pusa 1103 & HPNB) | (ILWC 46 & LPNB) | Sequence genome | Components of | Gene accession IDs | Putative functions |
|-------------------|----------------|-------------|-------------------------|---------------------------------|--------------------|------------------|-----------------|---------------|--------------------|--------------------|
| SNP_71805_A_19020 | NW_004515873.1 | scaffold387 | 19020                   | GG                              | AA                 | AA               | INTERGENIC      |               |                    |                    |
| SNP_71806_A_19068 | NW_004515873.1 | scaffold387 | 19068                   | CC                              | AA                 | AA               | INTERGENIC      |               |                    |                    |
| SNP_71807_A_19175 | NW_004515873.1 | scaffold387 | 19175                   | AA                              | GG                 | GG               | INTERGENIC      |               |                    |                    |
| SNP_71808_A_19178 | NW_004515873.1 | scaffold387 | 19178                   | AA                              | CC                 | CC               | INTERGENIC      |               |                    |                    |
| SNP_71809_A_19247 | NW_004515873.1 | scaffold387 | 19247                   | TT                              | AA                 | AA               | INTERGENIC      |               |                    |                    |
| SNP_71811_A_19284 | NW_004515873.1 | scaffold387 | 19284                   | GG                              | TT                 | TT               | INTERGENIC      |               |                    |                    |
| SNP_71812_A_19395 | NW_004515873.1 | scaffold387 | 19395                   | CC                              | TT                 | TT               | INTERGENIC      |               |                    |                    |
| SNP_71813_A_19467 | NW_004515873.1 | scaffold387 | 19467                   | TT                              | GG                 | GG               | INTERGENIC      |               |                    |                    |
| SNP_71814_A_19545 | NW_004515873.1 | scaffold387 | 19545                   | CC                              | AA                 | AA               | INTERGENIC      |               |                    |                    |
| SNP_71815_A_19574 | NW_004515873.1 | scaffold387 | 19574                   | GG                              | AA                 | AA               | INTERGENIC      |               |                    |                    |
| SNP_71816_A_20794 | NW_004515873.1 | scaffold387 | 20794                   | TT                              | CC                 | CC               | INTERGENIC      |               |                    |                    |
| SNP_71818_A_20802 | NW_004515873.1 | scaffold387 | 20802                   | TT                              | GG                 | GG               | INTERGENIC      |               |                    |                    |
| SNP_71819_A_22841 | NW_004515873.1 | scaffold387 | 22841                   | GG                              | AA                 | AA               | INTERGENIC      |               |                    |                    |
| SNP_71820_A_22845 | NW_004515873.1 | scaffold387 | 22845                   | CC                              | AA                 | AA               | INTERGENIC      |               |                    |                    |
| SNP_71821_A_22907 | NW_004515873.1 | scaffold387 | 22907                   | GG                              | TT                 | TT               | INTERGENIC      |               |                    |                    |
| SNP_71822_A_22932 | NW_004515873.1 | scaffold387 | 22932                   | AA                              | CC                 | CC               | INTERGENIC      |               |                    |                    |
| SNP_71824_A_23003 | NW_004515873.1 | scaffold387 | 23003                   | TT                              | GG                 | GG               | INTERGENIC      |               |                    |                    |
| SNP_71825_A_23028 | NW_004515873.1 | scaffold387 | 23028                   | GG                              | AA                 | AA               | INTERGENIC      |               |                    |                    |
| SNP_71826_A_23087 | NW_004515873.1 | scaffold387 | 23087                   | GG                              | AA                 | AA               | INTERGENIC      |               |                    |                    |
| SNP_71829_A_23519 | NW_004515873.1 | scaffold387 | 23519                   | AA                              | CC                 | CC               | INTERGENIC      |               |                    |                    |
| SNP_71830_A_23531 | NW_004515873.1 | scaffold387 | 23531                   | TT                              | AA                 | AA               | INTERGENIC      |               |                    |                    |
| SNP_71831_A_23538 | NW_004515873.1 | scaffold387 | 23538                   | GG                              | AA                 | AA               | INTERGENIC      |               |                    |                    |

| SNPs IDs           | Chromosome IDs | Chromosomes | Physical positions (bp) | CDC Frontier (Reference genome) | (Pusa 1103 & HPNB) | (ILWC 46 & LPNB) | Sequence genome | Components of | Gene accession IDs | Putative functions |
|--------------------|----------------|-------------|-------------------------|---------------------------------|--------------------|------------------|-----------------|---------------|--------------------|--------------------|
| SNP_71833_A_23612  | NW_004515873.1 | scaffold387 | 23612                   | TT                              | AA                 | AA               | INTERGENIC      |               |                    |                    |
| SNP_71834_A_23792  | NW_004515873.1 | scaffold387 | 23792                   | GG                              | AA                 | AA               | INTERGENIC      |               |                    |                    |
| SNP_71835_A_23799  | NW_004515873.1 | scaffold387 | 23799                   | CC                              | TT                 | TT               | INTERGENIC      |               |                    |                    |
| SNP_71836_A_23828  | NW_004515873.1 | scaffold387 | 23828                   | CC                              | AA                 | AA               | INTERGENIC      |               |                    |                    |
| SNP_71837_A_23859  | NW_004515873.1 | scaffold387 | 23859                   | CC                              | TT                 | TT               | INTERGENIC      |               |                    |                    |
| SNP_71838_A_23985  | NW_004515873.1 | scaffold387 | 23985                   | GG                              | TT                 | TT               | INTERGENIC      |               |                    |                    |
| SNP_71839_A_24824  | NW_004515873.1 | scaffold387 | 24824                   | TT                              | CC                 | CC               | INTERGENIC      |               |                    |                    |
| SNP_71840_A_25050  | NW_004515873.1 | scaffold387 | 25050                   | TT                              | AA                 | AA               | INTERGENIC      |               |                    |                    |
| SNP_71841_A_25158  | NW_004515873.1 | scaffold387 | 25158                   | TT                              | GG                 | GG               | INTERGENIC      |               |                    |                    |
| SNP_71842_A_31138  | NW_004515873.1 | scaffold387 | 31138                   | TT                              | AA                 | AA               | INTERGENIC      |               |                    |                    |
| SNP_71843_A_31178  | NW_004515873.1 | scaffold387 | 31178                   | TT                              | CC                 | CC               | INTERGENIC      |               |                    |                    |
| SNP_71844_A_40583  | NW_004515873.1 | scaffold387 | 40583                   | AA                              | GG                 | GG               | INTERGENIC      |               |                    |                    |
| SNP_71845_A_71073  | NW_004515873.1 | scaffold387 | 71073                   | GG                              | CC                 | CC               | INTERGENIC      |               |                    |                    |
| SNP_71846_A_97320  | NW_004515873.1 | scaffold387 | 97320                   | TT                              | CC                 | CC               | INTERGENIC      |               |                    |                    |
| SNP_71847_A_97332  | NW_004515873.1 | scaffold387 | 97332                   | AA                              | GG                 | GG               | INTERGENIC      |               |                    |                    |
| SNP_71848_A_114598 | NW_004515873.1 | scaffold387 | 114598                  | GG                              | AA                 | AA               | INTERGENIC      |               |                    |                    |
| SNP_71849_A_121166 | NW_004515873.1 | scaffold387 | 121166                  | TT                              | CC                 | CC               | INTERGENIC      |               |                    |                    |
| SNP_71850_A_121205 | NW_004515873.1 | scaffold387 | 121205                  | AA                              | GG                 | GG               | INTERGENIC      |               |                    |                    |
| SNP_71851_A_123913 | NW_004515873.1 | scaffold387 | 123913                  | GG                              | AA                 | AA               | INTERGENIC      |               |                    |                    |
| SNP_71852_A_123944 | NW_004515873.1 | scaffold387 | 123944                  | AA                              | GG                 | GG               | INTERGENIC      |               |                    |                    |
| SNP_71853_A_159563 | NW_004515873.1 | scaffold387 | 159563                  | TT                              | AA                 | AA               | INTERGENIC      |               |                    |                    |
| SNP_71854_A_159607 | NW_004515873.1 | scaffold387 | 159607                  | GG                              | AA                 | AA               | INTERGENIC      |               |                    |                    |

| SNPs IDs           | Chromosome IDs | Chromosomes | Physical positions (bp) | CDC Frontier (Reference genome) | (Pusa 1103 & HPNB) | (ILWC 46 & LPNB) | Sequence genome | Components of | Gene accession IDs | Putative functions |
|--------------------|----------------|-------------|-------------------------|---------------------------------|--------------------|------------------|-----------------|---------------|--------------------|--------------------|
| SNP_71855_A_159610 | NW_004515873.1 | scaffold387 | 159610                  | AA                              | GG                 | GG               | INTERGENIC      |               |                    |                    |
| SNP_71856_A_159614 | NW_004515873.1 | scaffold387 | 159614                  | GG                              | AA                 | AA               | INTERGENIC      |               |                    |                    |
| SNP_71857_A_159615 | NW_004515873.1 | scaffold387 | 159615                  | AA                              | CC                 | CC               | INTERGENIC      |               |                    |                    |
| SNP_71858_A_159616 | NW_004515873.1 | scaffold387 | 159616                  | TT                              | AA                 | AA               | INTERGENIC      |               |                    |                    |
| SNP_71859_A_159617 | NW_004515873.1 | scaffold387 | 159617                  | GG                              | CC                 | CC               | INTERGENIC      |               |                    |                    |
| SNP_71860_A_160046 | NW_004515873.1 | scaffold387 | 160046                  | AA                              | GG                 | GG               | INTERGENIC      |               |                    |                    |
| SNP_71861_A_160796 | NW_004515873.1 | scaffold387 | 160796                  | AA                              | CC                 | CC               | INTERGENIC      |               |                    |                    |
| SNP_71862_A_160836 | NW_004515873.1 | scaffold387 | 160836                  | CC                              | TT                 | TT               | INTERGENIC      |               |                    |                    |
| SNP_71863_A_160844 | NW_004515873.1 | scaffold387 | 160844                  | TT                              | CC                 | CC               | INTERGENIC      |               |                    |                    |
| SNP_71864_A_160846 | NW_004515873.1 | scaffold387 | 160846                  | GG                              | AA                 | AA               | INTERGENIC      |               |                    |                    |
| SNP_71865_A_160916 | NW_004515873.1 | scaffold387 | 160916                  | CC                              | GG                 | GG               | INTERGENIC      |               |                    |                    |
| SNP_71866_A_160947 | NW_004515873.1 | scaffold387 | 160947                  | CC                              | TT                 | TT               | INTERGENIC      |               |                    |                    |
| SNP_71867_A_160959 | NW_004515873.1 | scaffold387 | 160959                  | AA                              | TT                 | TT               | INTERGENIC      |               |                    |                    |
| SNP_71869_A_161031 | NW_004515873.1 | scaffold387 | 161031                  | AA                              | GG                 | GG               | INTERGENIC      |               |                    |                    |
| SNP_71870_A_161103 | NW_004515873.1 | scaffold387 | 161103                  | AA                              | GG                 | GG               | INTERGENIC      |               |                    |                    |
| SNP_71871_A_161136 | NW_004515873.1 | scaffold387 | 161136                  | GG                              | AA                 | AA               | INTERGENIC      |               |                    |                    |
| SNP_71872_A_161141 | NW_004515873.1 | scaffold387 | 161141                  | AA                              | GG                 | GG               | INTERGENIC      |               |                    |                    |
| SNP_71873_A_161207 | NW_004515873.1 | scaffold387 | 161207                  | GG                              | AA                 | AA               | INTERGENIC      |               |                    |                    |
| SNP_71874_A_161211 | NW_004515873.1 | scaffold387 | 161211                  | AA                              | TT                 | TT               | INTERGENIC      |               |                    |                    |
| SNP_71875_A_161283 | NW_004515873.1 | scaffold387 | 161283                  | AA                              | GG                 | GG               | INTERGENIC      |               |                    |                    |
| SNP_71876_A_161353 | NW_004515873.1 | scaffold387 | 161353                  | AA                              | CC                 | CC               | INTERGENIC      |               |                    |                    |
| SNP_71877_A_161446 | NW_004515873.1 | scaffold387 | 161446                  | TT                              | CC                 | CC               | INTERGENIC      |               |                    |                    |

| SNPs IDs           | Chromosome IDs | Chromosomes | Physical positions (bp) | CDC Frontier (Reference genome) | (Pusa 1103 & HPNB) | (ILWC 46 & LPNB) | Sequence genome | Components of | Gene accession IDs | Putative functions |
|--------------------|----------------|-------------|-------------------------|---------------------------------|--------------------|------------------|-----------------|---------------|--------------------|--------------------|
| SNP_71878_A_161543 | NW_004515873.1 | scaffold387 | 161543                  | TT                              | CC                 | CC               | INTERGENIC      |               |                    |                    |
| SNP_71879_A_7707   | NW_004515874.1 | scaffold388 | 7707                    | TT                              | GG                 | GG               | INTERGENIC      |               |                    |                    |
| SNP_71880_A_12259  | NW_004515874.1 | scaffold388 | 12259                   | CC                              | AA                 | AA               | INTERGENIC      |               |                    |                    |
| SNP_71881_A_17147  | NW_004515874.1 | scaffold388 | 17147                   | TT                              | AA                 | AA               | INTERGENIC      |               |                    |                    |
| SNP_71882_A_23523  | NW_004515874.1 | scaffold388 | 23523                   | AA                              | CC                 | CC               | INTERGENIC      |               |                    |                    |
| SNP_71883_A_26885  | NW_004515874.1 | scaffold388 | 26885                   | AA                              | GG                 | GG               | INTERGENIC      |               |                    |                    |
| SNP_71884_A_30224  | NW_004515874.1 | scaffold388 | 30224                   | CC                              | TT                 | TT               | INTERGENIC      |               |                    |                    |
| SNP_71885_A_30375  | NW_004515874.1 | scaffold388 | 30375                   | CC                              | TT                 | TT               | INTERGENIC      |               |                    |                    |
| SNP_71886_A_30377  | NW_004515874.1 | scaffold388 | 30377                   | GG                              | AA                 | AA               | INTERGENIC      |               |                    |                    |
| SNP_71887_A_30398  | NW_004515874.1 | scaffold388 | 30398                   | CC                              | TT                 | TT               | INTERGENIC      |               |                    |                    |
| SNP_71888_A_30436  | NW_004515874.1 | scaffold388 | 30436                   | AA                              | GG                 | GG               | INTERGENIC      |               |                    |                    |
| SNP_71889_A_31819  | NW_004515874.1 | scaffold388 | 31819                   | GG                              | TT                 | TT               | INTERGENIC      |               |                    |                    |
| SNP_71890_A_31843  | NW_004515874.1 | scaffold388 | 31843                   | GG                              | AA                 | AA               | INTERGENIC      |               |                    |                    |
| SNP_71891_A_31879  | NW_004515874.1 | scaffold388 | 31879                   | CC                              | TT                 | TT               | INTERGENIC      |               |                    |                    |
| SNP_71892_A_31944  | NW_004515874.1 | scaffold388 | 31944                   | CC                              | TT                 | TT               | INTERGENIC      |               |                    |                    |
| SNP_71893_A_32743  | NW_004515874.1 | scaffold388 | 32743                   | CC                              | TT                 | TT               | INTERGENIC      |               |                    |                    |
| SNP_71894_A_33406  | NW_004515874.1 | scaffold388 | 33406                   | CC                              | TT                 | TT               | INTERGENIC      |               |                    |                    |
| SNP_71895_A_34011  | NW_004515874.1 | scaffold388 | 34011                   | AA                              | GG                 | GG               | INTERGENIC      |               |                    |                    |
| SNP_71896_A_35255  | NW_004515874.1 | scaffold388 | 35255                   | AA                              | TT                 | TT               | INTERGENIC      |               |                    |                    |
| SNP_71897_A_35278  | NW_004515874.1 | scaffold388 | 35278                   | GG                              | AA                 | AA               | INTERGENIC      |               |                    |                    |
| SNP_71898_A_35373  | NW_004515874.1 | scaffold388 | 35373                   | GG                              | TT                 | TT               | INTERGENIC      |               |                    |                    |
| SNP_71899_A_35375  | NW_004515874.1 | scaffold388 | 35375                   | GG                              | AA                 | AA               | INTERGENIC      |               |                    |                    |

| SNPs IDs          | Chromosome IDs | Chromosomes | Physical positions (bp) | CDC Frontier (Reference genome) | (Pusa 1103 & HPNB) | (ILWC 46 & LPNB) | Sequence genome | Components of | Gene accession IDs | Putative functions |
|-------------------|----------------|-------------|-------------------------|---------------------------------|--------------------|------------------|-----------------|---------------|--------------------|--------------------|
| SNP_71900_A_37089 | NW_004515874.1 | scaffold388 | 37089                   | CC                              | AA                 | AA               | INTERGENIC      |               |                    |                    |
| SNP_71901_A_37117 | NW_004515874.1 | scaffold388 | 37117                   | CC                              | TT                 | TT               | INTERGENIC      |               |                    |                    |
| SNP_71902_A_42629 | NW_004515874.1 | scaffold388 | 42629                   | TT                              | GG                 | GG               | INTERGENIC      |               |                    |                    |
| SNP_71903_A_42679 | NW_004515874.1 | scaffold388 | 42679                   | AA                              | CC                 | CC               | INTERGENIC      |               |                    |                    |
| SNP_71904_A_45606 | NW_004515874.1 | scaffold388 | 45606                   | TT                              | AA                 | AA               | INTERGENIC      |               |                    |                    |
| SNP_71905_A_45612 | NW_004515874.1 | scaffold388 | 45612                   | GG                              | TT                 | TT               | INTERGENIC      |               |                    |                    |
| SNP_71906_A_45613 | NW_004515874.1 | scaffold388 | 45613                   | TT                              | AA                 | AA               | INTERGENIC      |               |                    |                    |
| SNP_71907_A_45615 | NW_004515874.1 | scaffold388 | 45615                   | CC                              | TT                 | TT               | INTERGENIC      |               |                    |                    |
| SNP_71908_A_46955 | NW_004515874.1 | scaffold388 | 46955                   | CC                              | AA                 | AA               | INTERGENIC      |               |                    |                    |
| SNP_71910_A_47130 | NW_004515874.1 | scaffold388 | 47130                   | AA                              | TT                 | TT               | INTERGENIC      |               |                    |                    |
| SNP_71911_A_47874 | NW_004515874.1 | scaffold388 | 47874                   | AA                              | CC                 | CC               | INTERGENIC      |               |                    |                    |
| SNP_71912_A_49911 | NW_004515874.1 | scaffold388 | 49911                   | AA                              | TT                 | TT               | INTERGENIC      |               |                    |                    |
| SNP_71913_A_49912 | NW_004515874.1 | scaffold388 | 49912                   | AA                              | TT                 | TT               | INTERGENIC      |               |                    |                    |
| SNP_71914_A_49927 | NW_004515874.1 | scaffold388 | 49927                   | GG                              | AA                 | AA               | INTERGENIC      |               |                    |                    |
| SNP_71915_A_50595 | NW_004515874.1 | scaffold388 | 50595                   | AA                              | TT                 | TT               | INTERGENIC      |               |                    |                    |
| SNP_71916_A_50914 | NW_004515874.1 | scaffold388 | 50914                   | GG                              | CC                 | CC               | INTERGENIC      |               |                    |                    |
| SNP_71917_A_51215 | NW_004515874.1 | scaffold388 | 51215                   | TT                              | CC                 | CC               | INTERGENIC      |               |                    |                    |
| SNP_71918_A_51246 | NW_004515874.1 | scaffold388 | 51246                   | GG                              | TT                 | TT               | INTERGENIC      |               |                    |                    |
| SNP_71919_A_6979  | NW_004515879.1 | scaffold395 | 6979                    | CC                              | TT                 | TT               | INTERGENIC      |               |                    |                    |
| SNP_71920_A_7023  | NW_004515879.1 | scaffold395 | 7023                    | AA                              | GG                 | GG               | INTERGENIC      |               |                    |                    |
| SNP_71922_A_7229  | NW_004515879.1 | scaffold395 | 7229                    | TT                              | CC                 | CC               | INTERGENIC      |               |                    |                    |
| SNP_71923_A_7302  | NW_004515879.1 | scaffold395 | 7302                    | AA                              | GG                 | GG               | INTERGENIC      |               |                    |                    |

| SNPs IDs           | Chromosome IDs | Chromosomes | Physical positions (bp) | CDC Frontier (Reference genome) | (Pusa 1103 & HPNB) | (ILWC 46 & LPNB) | Sequence Components of genome | Gene accession IDs | Putative functions           |
|--------------------|----------------|-------------|-------------------------|---------------------------------|--------------------|------------------|-------------------------------|--------------------|------------------------------|
| SNP_71924_A_7554   | NW_004515879.1 | scaffold395 | 7554                    | TT                              | CC                 | CC               | INTERGENIC                    |                    |                              |
| SNP_71925_A_8113   | NW_004515879.1 | scaffold395 | 8113                    | GG                              | AA                 | AA               | INTERGENIC                    |                    |                              |
| SNP_71926_A_8126   | NW_004515879.1 | scaffold395 | 8126                    | TT                              | CC                 | CC               | INTERGENIC                    |                    |                              |
| SNP_71927_A_8129   | NW_004515879.1 | scaffold395 | 8129                    | AA                              | TT                 | TT               | INTERGENIC                    |                    |                              |
| SNP_71928_A_8137   | NW_004515879.1 | scaffold395 | 8137                    | GG                              | AA                 | AA               | INTERGENIC                    |                    |                              |
| SNP_71929_A_8149   | NW_004515879.1 | scaffold395 | 8149                    | AA                              | GG                 | GG               | INTERGENIC                    |                    |                              |
| SNP_71930_A_21705  | NW_004515879.1 | scaffold395 | 21705                   | CC                              | TT                 | TT               | INTRON                        | 101498710          | uncharacterized LOC101498710 |
| SNP_71931_A_31601  | NW_004515879.1 | scaffold395 | 31601                   | TT                              | GG                 | GG               | INTERGENIC                    |                    |                              |
| SNP_71932_A_31603  | NW_004515879.1 | scaffold395 | 31603                   | GG                              | TT                 | TT               | INTERGENIC                    |                    |                              |
| SNP_71933_A_32289  | NW_004515879.1 | scaffold395 | 32289                   | AA                              | GG                 | GG               | INTERGENIC                    |                    |                              |
| SNP_71934_A_32332  | NW_004515879.1 | scaffold395 | 32332                   | TT                              | AA                 | AA               | INTERGENIC                    |                    |                              |
| SNP_71935_A_32338  | NW_004515879.1 | scaffold395 | 32338                   | AA                              | CC                 | CC               | INTERGENIC                    |                    |                              |
| SNP_71938_A_125685 | NW_004515879.1 | scaffold395 | 125685                  | CC                              | AA                 | AA               | INTERGENIC                    |                    |                              |
| SNP_71939_A_125702 | NW_004515879.1 | scaffold395 | 125702                  | TT                              | CC                 | CC               | INTERGENIC                    |                    |                              |
| SNP_71940_A_125765 | NW_004515879.1 | scaffold395 | 125765                  | TT                              | CC                 | CC               | INTERGENIC                    |                    |                              |
| SNP_71941_A_125795 | NW_004515879.1 | scaffold395 | 125795                  | AA                              | GG                 | GG               | INTERGENIC                    |                    |                              |
| SNP_71942_A_125970 | NW_004515879.1 | scaffold395 | 125970                  | TT                              | CC                 | CC               | INTERGENIC                    |                    |                              |
| SNP_71943_A_125975 | NW_004515879.1 | scaffold395 | 125975                  | TT                              | CC                 | CC               | INTERGENIC                    |                    |                              |
| SNP_71945_A_126093 | NW_004515879.1 | scaffold395 | 126093                  | CC                              | TT                 | TT               | INTERGENIC                    |                    |                              |
| SNP_71946_A_126771 | NW_004515879.1 | scaffold395 | 126771                  | AA                              | GG                 | GG               | INTERGENIC                    |                    |                              |
| SNP_71947_A_126831 | NW_004515879.1 | scaffold395 | 126831                  | CC                              | TT                 | TT               | INTERGENIC                    |                    |                              |
| SNP_71948_A_126859 | NW_004515879.1 | scaffold395 | 126859                  | TT                              | CC                 | CC               | INTERGENIC                    |                    |                              |

| SNPs IDs           | Chromosome IDs | Chromosomes | Physical positions (bp) | CDC Frontier (Reference genome) | (Pusa 1103 & HPNB) | (ILWC 46 & LPNB) | Sequence genome | Components of | Gene accession IDs | Putative functions |
|--------------------|----------------|-------------|-------------------------|---------------------------------|--------------------|------------------|-----------------|---------------|--------------------|--------------------|
| SNP_71949_A_126994 | NW_004515879.1 | scaffold395 | 126994                  | CC                              | TT                 | TT               | INTERGENIC      |               |                    |                    |
| SNP_71950_A_127007 | NW_004515879.1 | scaffold395 | 127007                  | CC                              | TT                 | TT               | INTERGENIC      |               |                    |                    |
| SNP_71951_A_127042 | NW_004515879.1 | scaffold395 | 127042                  | AA                              | GG                 | GG               | INTERGENIC      |               |                    |                    |
| SNP_71952_A_127053 | NW_004515879.1 | scaffold395 | 127053                  | TT                              | CC                 | CC               | INTERGENIC      |               |                    |                    |
| SNP_71953_A_127063 | NW_004515879.1 | scaffold395 | 127063                  | AA                              | CC                 | CC               | INTERGENIC      |               |                    |                    |
| SNP_71954_A_127066 | NW_004515879.1 | scaffold395 | 127066                  | GG                              | TT                 | TT               | INTERGENIC      |               |                    |                    |
| SNP_71955_A_127072 | NW_004515879.1 | scaffold395 | 127072                  | TT                              | CC                 | CC               | INTERGENIC      |               |                    |                    |
| SNP_71956_A_127091 | NW_004515879.1 | scaffold395 | 127091                  | CC                              | TT                 | TT               | INTERGENIC      |               |                    |                    |
| SNP_71957_A_127238 | NW_004515879.1 | scaffold395 | 127238                  | CC                              | TT                 | TT               | INTERGENIC      |               |                    |                    |
| SNP_71958_A_161465 | NW_004515879.1 | scaffold395 | 161465                  | TT                              | AA                 | AA               | INTERGENIC      |               |                    |                    |
| SNP_71959_A_178544 | NW_004515879.1 | scaffold395 | 178544                  | AA                              | GG                 | GG               | INTERGENIC      |               |                    |                    |
| SNP_71960_A_205401 | NW_004515879.1 | scaffold395 | 205401                  | AA                              | CC                 | CC               | INTERGENIC      |               |                    |                    |
| SNP_71961_A_327321 | NW_004515879.1 | scaffold395 | 327321                  | TT                              | GG                 | GG               | INTERGENIC      |               |                    |                    |
| SNP_71962_A_327340 | NW_004515879.1 | scaffold395 | 327340                  | AA                              | GG                 | GG               | INTERGENIC      |               |                    |                    |
| SNP_71963_A_327375 | NW_004515879.1 | scaffold395 | 327375                  | CC                              | TT                 | TT               | INTERGENIC      |               |                    |                    |
| SNP_71964_A_327447 | NW_004515879.1 | scaffold395 | 327447                  | TT                              | CC                 | CC               | INTERGENIC      |               |                    |                    |
| SNP_71965_A_327549 | NW_004515879.1 | scaffold395 | 327549                  | AA                              | GG                 | GG               | INTERGENIC      |               |                    |                    |
| SNP_71966_A_328024 | NW_004515879.1 | scaffold395 | 328024                  | AA                              | GG                 | GG               | INTERGENIC      |               |                    |                    |
| SNP_71967_A_328091 | NW_004515879.1 | scaffold395 | 328091                  | TT                              | CC                 | CC               | INTERGENIC      |               |                    |                    |
| SNP_71968_A_328156 | NW_004515879.1 | scaffold395 | 328156                  | TT                              | CC                 | CC               | INTERGENIC      |               |                    |                    |
| SNP_71969_A_328411 | NW_004515879.1 | scaffold395 | 328411                  | AA                              | GG                 | GG               | INTERGENIC      |               |                    |                    |
| SNP_71970_A_328534 | NW_004515879.1 | scaffold395 | 328534                  | AA                              | GG                 | GG               | INTERGENIC      |               |                    |                    |

| SNPs IDs           | Chromosome IDs | Chromosomes | Physical positions (bp) | CDC Frontier (Reference genome) | (Pusa 1103 & HPNB) | (ILWC 46 & LPNB) | Sequence genome | Components of | Gene accession IDs           | Putative functions |
|--------------------|----------------|-------------|-------------------------|---------------------------------|--------------------|------------------|-----------------|---------------|------------------------------|--------------------|
| SNP_71971_A_328593 | NW_004515879.1 | scaffold395 | 328593                  | CC                              | TT                 | TT               | INTERGENIC      |               |                              |                    |
| SNP_71972_A_331762 | NW_004515879.1 | scaffold395 | 331762                  | AA                              | GG                 | GG               | INTERGENIC      |               |                              |                    |
| SNP_71973_A_97     | NW_004515880.1 | scaffold396 | 97                      | AA                              | GG                 | GG               | INTERGENIC      |               |                              |                    |
| SNP_71974_A_6186   | NW_004515880.1 | scaffold396 | 6186                    | GG                              | AA                 | AA               | INTERGENIC      |               |                              |                    |
| SNP_71975_A_6213   | NW_004515880.1 | scaffold396 | 6213                    | CC                              | TT                 | TT               | INTERGENIC      |               |                              |                    |
| SNP_71976_A_31332  | NW_004515880.1 | scaffold396 | 31332                   | GG                              | AA                 | AA               | DRR             | 101504349     | uncharacterized LOC101504349 |                    |
| SNP_71977_A_114378 | NW_004515880.1 | scaffold396 | 114378                  | TT                              | GG                 | GG               | INTERGENIC      |               |                              |                    |
| SNP_71978_A_141518 | NW_004515880.1 | scaffold396 | 141518                  | GG                              | TT                 | TT               | INTERGENIC      |               |                              |                    |
| SNP_71979_A_158121 | NW_004515880.1 | scaffold396 | 158121                  | AA                              | TT                 | TT               | INTERGENIC      |               |                              |                    |
| SNP_71980_A_158465 | NW_004515880.1 | scaffold396 | 158465                  | TT                              | CC                 | CC               | INTERGENIC      |               |                              |                    |
| SNP_71981_A_243568 | NW_004515880.1 | scaffold396 | 243568                  | TT                              | AA                 | AA               | INTERGENIC      |               |                              |                    |
| SNP_71982_A_273292 | NW_004515880.1 | scaffold396 | 273292                  | AA                              | GG                 | GG               | INTERGENIC      |               |                              |                    |
| SNP_71983_A_275466 | NW_004515880.1 | scaffold396 | 275466                  | TT                              | AA                 | AA               | INTERGENIC      |               |                              |                    |
| SNP_71984_A_275504 | NW_004515880.1 | scaffold396 | 275504                  | TT                              | CC                 | CC               | INTERGENIC      |               |                              |                    |
| SNP_71985_A_275545 | NW_004515880.1 | scaffold396 | 275545                  | AA                              | CC                 | CC               | INTERGENIC      |               |                              |                    |
| SNP_71986_A_275825 | NW_004515880.1 | scaffold396 | 275825                  | TT                              | GG                 | GG               | INTERGENIC      |               |                              |                    |
| SNP_71989_A_425408 | NW_004515880.1 | scaffold396 | 425408                  | TT                              | AA                 | AA               | INTERGENIC      |               |                              |                    |
| SNP_71990_A_425471 | NW_004515880.1 | scaffold396 | 425471                  | TT                              | CC                 | CC               | INTERGENIC      |               |                              |                    |
| SNP_71991_A_458527 | NW_004515880.1 | scaffold396 | 458527                  | CC                              | TT                 | TT               | INTERGENIC      |               |                              |                    |
| SNP_71992_A_467514 | NW_004515880.1 | scaffold396 | 467514                  | GG                              | TT                 | TT               | INTERGENIC      |               |                              |                    |
| SNP_71993_A_467626 | NW_004515880.1 | scaffold396 | 467626                  | TT                              | AA                 | AA               | INTERGENIC      |               |                              |                    |
| SNP_71994_A_477322 | NW_004515880.1 | scaffold396 | 477322                  | AA                              | GG                 | GG               | INTERGENIC      |               |                              |                    |



| SNPs IDs           | Chromosome IDs | Chromosomes | Physical positions (bp) | CDC Frontier (Reference genome) | (Pusa 1103 & HPNB) | (ILWC 46 & LPNB) | Sequence genome | Components of | Gene accession IDs | Putative functions |
|--------------------|----------------|-------------|-------------------------|---------------------------------|--------------------|------------------|-----------------|---------------|--------------------|--------------------|
| SNP_71995_A_477326 | NW_004515880.1 | scaffold396 | 477326                  | CC                              | AA                 | AA               | INTERGENIC      |               |                    |                    |
| SNP_71996_A_477628 | NW_004515880.1 | scaffold396 | 477628                  | AA                              | GG                 | GG               | INTERGENIC      |               |                    |                    |
| SNP_71997_A_477781 | NW_004515880.1 | scaffold396 | 477781                  | AA                              | TT                 | TT               | INTERGENIC      |               |                    |                    |
| SNP_71998_A_477801 | NW_004515880.1 | scaffold396 | 477801                  | TT                              | CC                 | CC               | INTERGENIC      |               |                    |                    |
| SNP_71999_A_477814 | NW_004515880.1 | scaffold396 | 477814                  | AA                              | CC                 | CC               | INTERGENIC      |               |                    |                    |
| SNP_72000_A_478135 | NW_004515880.1 | scaffold396 | 478135                  | TT                              | AA                 | AA               | INTERGENIC      |               |                    |                    |
| SNP_72001_A_478146 | NW_004515880.1 | scaffold396 | 478146                  | TT                              | GG                 | GG               | INTERGENIC      |               |                    |                    |
| SNP_72002_A_478152 | NW_004515880.1 | scaffold396 | 478152                  | CC                              | GG                 | GG               | INTERGENIC      |               |                    |                    |
| SNP_72003_A_520378 | NW_004515880.1 | scaffold396 | 520378                  | TT                              | CC                 | CC               | INTERGENIC      |               |                    |                    |
| SNP_72004_A_520413 | NW_004515880.1 | scaffold396 | 520413                  | TT                              | GG                 | GG               | INTERGENIC      |               |                    |                    |
| SNP_72005_A_520549 | NW_004515880.1 | scaffold396 | 520549                  | AA                              | TT                 | TT               | INTERGENIC      |               |                    |                    |
| SNP_72006_A_520558 | NW_004515880.1 | scaffold396 | 520558                  | CC                              | AA                 | AA               | INTERGENIC      |               |                    |                    |
| SNP_72007_A_520785 | NW_004515880.1 | scaffold396 | 520785                  | CC                              | AA                 | AA               | INTERGENIC      |               |                    |                    |
| SNP_72008_A_525239 | NW_004515880.1 | scaffold396 | 525239                  | TT                              | CC                 | CC               | INTERGENIC      |               |                    |                    |
| SNP_72009_A_525270 | NW_004515880.1 | scaffold396 | 525270                  | CC                              | TT                 | TT               | INTERGENIC      |               |                    |                    |
| SNP_72010_A_525550 | NW_004515880.1 | scaffold396 | 525550                  | AA                              | GG                 | GG               | INTERGENIC      |               |                    |                    |
| SNP_72011_A_525599 | NW_004515880.1 | scaffold396 | 525599                  | CC                              | AA                 | AA               | INTERGENIC      |               |                    |                    |
| SNP_72012_A_528994 | NW_004515880.1 | scaffold396 | 528994                  | AA                              | GG                 | GG               | INTERGENIC      |               |                    |                    |
| SNP_72013_A_529162 | NW_004515880.1 | scaffold396 | 529162                  | TT                              | GG                 | GG               | INTERGENIC      |               |                    |                    |
| SNP_72014_A_529186 | NW_004515880.1 | scaffold396 | 529186                  | CC                              | GG                 | GG               | INTERGENIC      |               |                    |                    |
| SNP_72015_A_529378 | NW_004515880.1 | scaffold396 | 529378                  | CC                              | GG                 | GG               | INTERGENIC      |               |                    |                    |
| SNP_72016_A_529453 | NW_004515880.1 | scaffold396 | 529453                  | AA                              | CC                 | CC               | INTERGENIC      |               |                    |                    |

| SNPs IDs           | Chromosome IDs | Chromosomes | Physical positions (bp) | CDC Frontier (Reference genome) | (Pusa 1103 & HPNB) | (ILWC 46 & LPNB) | Sequence genome | Components of | Gene accession IDs           | Putative functions |
|--------------------|----------------|-------------|-------------------------|---------------------------------|--------------------|------------------|-----------------|---------------|------------------------------|--------------------|
| SNP_72017_A_529454 | NW_004515880.1 | scaffold396 | 529454                  | TT                              | AA                 | AA               | INTERGENIC      |               |                              |                    |
| SNP_72018_A_529492 | NW_004515880.1 | scaffold396 | 529492                  | TT                              | GG                 | GG               | INTERGENIC      |               |                              |                    |
| SNP_72019_A_529558 | NW_004515880.1 | scaffold396 | 529558                  | AA                              | TT                 | TT               | INTERGENIC      |               |                              |                    |
| SNP_72020_A_556172 | NW_004515880.1 | scaffold396 | 556172                  | AA                              | CC                 | CC               | INTERGENIC      |               |                              |                    |
| SNP_72021_A_556214 | NW_004515880.1 | scaffold396 | 556214                  | CC                              | GG                 | GG               | INTERGENIC      |               |                              |                    |
| SNP_72022_A_556343 | NW_004515880.1 | scaffold396 | 556343                  | AA                              | TT                 | TT               | INTERGENIC      |               |                              |                    |
| SNP_72023_A_577392 | NW_004515880.1 | scaffold396 | 577392                  | TT                              | GG                 | GG               | INTERGENIC      |               |                              |                    |
| SNP_72024_A_577476 | NW_004515880.1 | scaffold396 | 577476                  | AA                              | GG                 | GG               | INTERGENIC      |               |                              |                    |
| SNP_72025_A_577481 | NW_004515880.1 | scaffold396 | 577481                  | AA                              | CC                 | CC               | INTERGENIC      |               |                              |                    |
| SNP_72026_A_577493 | NW_004515880.1 | scaffold396 | 577493                  | AA                              | CC                 | CC               | INTERGENIC      |               |                              |                    |
| SNP_72027_A_577497 | NW_004515880.1 | scaffold396 | 577497                  | AA                              | TT                 | TT               | INTERGENIC      |               |                              |                    |
| SNP_72028_A_577498 | NW_004515880.1 | scaffold396 | 577498                  | AA                              | GG                 | GG               | INTERGENIC      |               |                              |                    |
| SNP_72030_A_577615 | NW_004515880.1 | scaffold396 | 577615                  | TT                              | GG                 | GG               | INTERGENIC      |               |                              |                    |
| SNP_72032_A_577976 | NW_004515880.1 | scaffold396 | 577976                  | AA                              | CC                 | CC               | INTERGENIC      |               |                              |                    |
| SNP_72034_A_588535 | NW_004515880.1 | scaffold396 | 588535                  | TT                              | AA                 | AA               | INTERGENIC      |               |                              |                    |
| SNP_72035_A_592937 | NW_004515880.1 | scaffold396 | 592937                  | TT                              | CC                 | CC               | URR             | 101508202     | uncharacterized LOC101508202 |                    |
| SNP_72036_A_593087 | NW_004515880.1 | scaffold396 | 593087                  | TT                              | CC                 | CC               | URR             | 101508202     | uncharacterized LOC101508202 |                    |
| SNP_72037_A_593190 | NW_004515880.1 | scaffold396 | 593190                  | TT                              | AA                 | AA               | URR             | 101508202     | uncharacterized LOC101508202 |                    |
| SNP_72038_A_593209 | NW_004515880.1 | scaffold396 | 593209                  | AA                              | CC                 | CC               | URR             | 101508202     | uncharacterized LOC101508202 |                    |
| SNP_72039_A_593216 | NW_004515880.1 | scaffold396 | 593216                  | TT                              | AA                 | AA               | URR             | 101508202     | uncharacterized LOC101508202 |                    |
| SNP_72040_A_593454 | NW_004515880.1 | scaffold396 | 593454                  | TT                              | AA                 | AA               | INTERGENIC      |               |                              |                    |
| SNP_72041_A_598671 | NW_004515880.1 | scaffold396 | 598671                  | TT                              | GG                 | GG               | INTERGENIC      |               |                              |                    |

| SNPs IDs           | Chromosome IDs | Chromosomes | Physical positions (bp) | CDC Frontier (Reference genome) | (Pusa 1103 & HPNB) | (ILWC 46 & LPNB) | Sequence genome | Components of | Gene accession IDs | Putative functions |
|--------------------|----------------|-------------|-------------------------|---------------------------------|--------------------|------------------|-----------------|---------------|--------------------|--------------------|
| SNP_72042_A_8465   | NW_004515881.1 | scaffold397 | 8465                    | CC                              | TT                 | TT               | INTERGENIC      |               |                    |                    |
| SNP_72043_A_9122   | NW_004515881.1 | scaffold397 | 9122                    | TT                              | CC                 | CC               | INTERGENIC      |               |                    |                    |
| SNP_72044_A_10136  | NW_004515881.1 | scaffold397 | 10136                   | CC                              | TT                 | TT               | INTERGENIC      |               |                    |                    |
| SNP_72046_A_85771  | NW_004515881.1 | scaffold397 | 85771                   | TT                              | CC                 | CC               | INTERGENIC      |               |                    |                    |
| SNP_72047_A_87186  | NW_004515881.1 | scaffold397 | 87186                   | AA                              | TT                 | TT               | INTERGENIC      |               |                    |                    |
| SNP_72048_A_96180  | NW_004515881.1 | scaffold397 | 96180                   | GG                              | TT                 | TT               | INTERGENIC      |               |                    |                    |
| SNP_72049_A_96990  | NW_004515881.1 | scaffold397 | 96990                   | GG                              | AA                 | AA               | INTERGENIC      |               |                    |                    |
| SNP_72050_A_131144 | NW_004515881.1 | scaffold397 | 131144                  | CC                              | TT                 | TT               | INTERGENIC      |               |                    |                    |
| SNP_72051_A_131201 | NW_004515881.1 | scaffold397 | 131201                  | CC                              | GG                 | GG               | INTERGENIC      |               |                    |                    |
| SNP_72052_A_131257 | NW_004515881.1 | scaffold397 | 131257                  | GG                              | AA                 | AA               | INTERGENIC      |               |                    |                    |
| SNP_72053_A_143498 | NW_004515881.1 | scaffold397 | 143498                  | AA                              | TT                 | TT               | INTERGENIC      |               |                    |                    |
| SNP_72054_A_143776 | NW_004515881.1 | scaffold397 | 143776                  | TT                              | CC                 | CC               | INTERGENIC      |               |                    |                    |
| SNP_72055_A_143806 | NW_004515881.1 | scaffold397 | 143806                  | TT                              | CC                 | CC               | INTERGENIC      |               |                    |                    |
| SNP_72056_A_143815 | NW_004515881.1 | scaffold397 | 143815                  | AA                              | GG                 | GG               | INTERGENIC      |               |                    |                    |
| SNP_72057_A_143831 | NW_004515881.1 | scaffold397 | 143831                  | AA                              | GG                 | GG               | INTERGENIC      |               |                    |                    |
| SNP_72058_A_143911 | NW_004515881.1 | scaffold397 | 143911                  | TT                              | CC                 | CC               | INTERGENIC      |               |                    |                    |
| SNP_72059_A_143913 | NW_004515881.1 | scaffold397 | 143913                  | GG                              | TT                 | TT               | INTERGENIC      |               |                    |                    |
| SNP_72060_A_143932 | NW_004515881.1 | scaffold397 | 143932                  | CC                              | TT                 | TT               | INTERGENIC      |               |                    |                    |
| SNP_72061_A_143947 | NW_004515881.1 | scaffold397 | 143947                  | TT                              | CC                 | CC               | INTERGENIC      |               |                    |                    |
| SNP_72062_A_144790 | NW_004515881.1 | scaffold397 | 144790                  | CC                              | TT                 | TT               | INTERGENIC      |               |                    |                    |
| SNP_72063_A_166941 | NW_004515881.1 | scaffold397 | 166941                  | TT                              | CC                 | CC               | INTERGENIC      |               |                    |                    |
| SNP_72064_A_167197 | NW_004515881.1 | scaffold397 | 167197                  | AA                              | CC                 | CC               | INTERGENIC      |               |                    |                    |

| SNPs IDs           | Chromosome IDs | Chromosomes | Physical positions (bp) | CDC Frontier (Reference genome) | (Pusa 1103 & HPNB) | (ILWC 46 & LPNB) | Sequence Components of genome | Gene accession IDs | Putative functions |
|--------------------|----------------|-------------|-------------------------|---------------------------------|--------------------|------------------|-------------------------------|--------------------|--------------------|
| SNP_72066_A_175276 | NW_004515881.1 | scaffold397 | 175276                  | CC                              | TT                 | TT               | INTERGENIC                    |                    |                    |
| SNP_72067_A_185153 | NW_004515881.1 | scaffold397 | 185153                  | AA                              | GG                 | GG               | INTERGENIC                    |                    |                    |
| SNP_72068_A_185160 | NW_004515881.1 | scaffold397 | 185160                  | CC                              | TT                 | TT               | INTERGENIC                    |                    |                    |
| SNP_72069_A_185373 | NW_004515881.1 | scaffold397 | 185373                  | TT                              | CC                 | CC               | INTERGENIC                    |                    |                    |
| SNP_72070_A_185414 | NW_004515881.1 | scaffold397 | 185414                  | CC                              | AA                 | AA               | INTERGENIC                    |                    |                    |
| SNP_72071_A_195269 | NW_004515881.1 | scaffold397 | 195269                  | CC                              | TT                 | TT               | INTERGENIC                    |                    |                    |
| SNP_72072_A_232123 | NW_004515881.1 | scaffold397 | 232123                  | GG                              | CC                 | CC               | INTERGENIC                    |                    |                    |
| SNP_72073_A_331264 | NW_004515881.1 | scaffold397 | 331264                  | AA                              | GG                 | GG               | INTRON                        | 101509160          | Unknown function   |
| SNP_72074_A_331586 | NW_004515881.1 | scaffold397 | 331586                  | CC                              | TT                 | TT               | INTRON                        | 101509160          | Unknown function   |
| SNP_72075_A_331596 | NW_004515881.1 | scaffold397 | 331596                  | CC                              | TT                 | TT               | INTRON                        | 101509160          | Unknown function   |
| SNP_72076_A_331604 | NW_004515881.1 | scaffold397 | 331604                  | AA                              | TT                 | TT               | INTRON                        | 101509160          | Unknown function   |
| SNP_72077_A_331612 | NW_004515881.1 | scaffold397 | 331612                  | TT                              | AA                 | AA               | INTRON                        | 101509160          | Unknown function   |
| SNP_72078_A_350791 | NW_004515881.1 | scaffold397 | 350791                  | CC                              | TT                 | TT               | INTRON                        | 101509160          | Unknown function   |
| SNP_72079_A_391775 | NW_004515881.1 | scaffold397 | 391775                  | CC                              | AA                 | AA               | INTERGENIC                    |                    |                    |
| SNP_72080_A_422492 | NW_004515881.1 | scaffold397 | 422492                  | CC                              | TT                 | TT               | INTERGENIC                    |                    |                    |
| SNP_72081_A_436067 | NW_004515881.1 | scaffold397 | 436067                  | AA                              | TT                 | TT               | INTERGENIC                    |                    |                    |
| SNP_72082_A_436101 | NW_004515881.1 | scaffold397 | 436101                  | CC                              | AA                 | AA               | INTERGENIC                    |                    |                    |
| SNP_72083_A_436241 | NW_004515881.1 | scaffold397 | 436241                  | GG                              | CC                 | CC               | INTERGENIC                    |                    |                    |
| SNP_72084_A_436260 | NW_004515881.1 | scaffold397 | 436260                  | TT                              | AA                 | AA               | INTERGENIC                    |                    |                    |
| SNP_72085_A_436368 | NW_004515881.1 | scaffold397 | 436368                  | AA                              | TT                 | TT               | INTERGENIC                    |                    |                    |
| SNP_72086_A_436416 | NW_004515881.1 | scaffold397 | 436416                  | TT                              | CC                 | CC               | INTERGENIC                    |                    |                    |
| SNP_72088_A_12238  | NW_004515882.1 | scaffold398 | 12238                   | AA                              | TT                 | TT               | INTERGENIC                    |                    |                    |

| SNPs IDs          | Chromosome IDs | Chromosomes | Physical positions (bp) | CDC Frontier (Reference genome) | (Pusa 1103 & HPNB) | (ILWC 46 & LPNB) | Sequence genome | Components of | Gene accession IDs | Putative functions |
|-------------------|----------------|-------------|-------------------------|---------------------------------|--------------------|------------------|-----------------|---------------|--------------------|--------------------|
| SNP_72089_A_13106 | NW_004515882.1 | scaffold398 | 13106                   | GG                              | AA                 | AA               | INTERGENIC      |               |                    |                    |
| SNP_72090_A_17867 | NW_004515882.1 | scaffold398 | 17867                   | AA                              | TT                 | TT               | INTERGENIC      |               |                    |                    |
| SNP_72093_A_18073 | NW_004515882.1 | scaffold398 | 18073                   | CC                              | AA                 | AA               | INTERGENIC      |               |                    |                    |
| SNP_72094_A_18191 | NW_004515882.1 | scaffold398 | 18191                   | AA                              | GG                 | GG               | INTERGENIC      |               |                    |                    |
| SNP_72095_A_21248 | NW_004515882.1 | scaffold398 | 21248                   | AA                              | GG                 | GG               | INTERGENIC      |               |                    |                    |
| SNP_72096_A_21254 | NW_004515882.1 | scaffold398 | 21254                   | AA                              | GG                 | GG               | INTERGENIC      |               |                    |                    |
| SNP_72097_A_21265 | NW_004515882.1 | scaffold398 | 21265                   | GG                              | AA                 | AA               | INTERGENIC      |               |                    |                    |
| SNP_72098_A_21281 | NW_004515882.1 | scaffold398 | 21281                   | GG                              | AA                 | AA               | INTERGENIC      |               |                    |                    |
| SNP_72099_A_21287 | NW_004515882.1 | scaffold398 | 21287                   | CC                              | TT                 | TT               | INTERGENIC      |               |                    |                    |
| SNP_72100_A_21293 | NW_004515882.1 | scaffold398 | 21293                   | TT                              | CC                 | CC               | INTERGENIC      |               |                    |                    |
| SNP_72101_A_21301 | NW_004515882.1 | scaffold398 | 21301                   | GG                              | CC                 | CC               | INTERGENIC      |               |                    |                    |
| SNP_72102_A_21314 | NW_004515882.1 | scaffold398 | 21314                   | AA                              | CC                 | CC               | INTERGENIC      |               |                    |                    |
| SNP_72104_A_21374 | NW_004515882.1 | scaffold398 | 21374                   | GG                              | AA                 | AA               | INTERGENIC      |               |                    |                    |
| SNP_72105_A_21396 | NW_004515882.1 | scaffold398 | 21396                   | CC                              | TT                 | TT               | INTERGENIC      |               |                    |                    |
| SNP_72106_A_21449 | NW_004515882.1 | scaffold398 | 21449                   | CC                              | TT                 | TT               | INTERGENIC      |               |                    |                    |
| SNP_72107_A_21452 | NW_004515882.1 | scaffold398 | 21452                   | CC                              | TT                 | TT               | INTERGENIC      |               |                    |                    |
| SNP_72108_A_21458 | NW_004515882.1 | scaffold398 | 21458                   | AA                              | TT                 | TT               | INTERGENIC      |               |                    |                    |
| SNP_72109_A_21470 | NW_004515882.1 | scaffold398 | 21470                   | CC                              | AA                 | AA               | INTERGENIC      |               |                    |                    |
| SNP_72110_A_21476 | NW_004515882.1 | scaffold398 | 21476                   | GG                              | TT                 | TT               | INTERGENIC      |               |                    |                    |
| SNP_72111_A_21600 | NW_004515882.1 | scaffold398 | 21600                   | AA                              | TT                 | TT               | INTERGENIC      |               |                    |                    |
| SNP_72112_A_21762 | NW_004515882.1 | scaffold398 | 21762                   | CC                              | TT                 | TT               | INTERGENIC      |               |                    |                    |
| SNP_72113_A_21785 | NW_004515882.1 | scaffold398 | 21785                   | CC                              | AA                 | AA               | INTERGENIC      |               |                    |                    |

| SNPs IDs          | Chromosome IDs | Chromosomes | Physical positions (bp) | CDC Frontier (Reference genome) | (Pusa 1103 & HPNB) | (ILWC 46 & LPNB) | Sequence genome | Components of | Gene accession IDs | Putative functions |
|-------------------|----------------|-------------|-------------------------|---------------------------------|--------------------|------------------|-----------------|---------------|--------------------|--------------------|
| SNP_72114_A_25144 | NW_004515882.1 | scaffold398 | 25144                   | GG                              | AA                 | AA               | INTERGENIC      |               |                    |                    |
| SNP_72116_A_31646 | NW_004515882.1 | scaffold398 | 31646                   | AA                              | GG                 | GG               | INTERGENIC      |               |                    |                    |
| SNP_72118_A_33266 | NW_004515882.1 | scaffold398 | 33266                   | AA                              | GG                 | GG               | INTERGENIC      |               |                    |                    |
| SNP_72120_A_33381 | NW_004515882.1 | scaffold398 | 33381                   | GG                              | AA                 | AA               | INTERGENIC      |               |                    |                    |
| SNP_72121_A_33497 | NW_004515882.1 | scaffold398 | 33497                   | AA                              | GG                 | GG               | INTERGENIC      |               |                    |                    |
| SNP_72122_A_33553 | NW_004515882.1 | scaffold398 | 33553                   | CC                              | AA                 | AA               | INTERGENIC      |               |                    |                    |
| SNP_72123_A_33595 | NW_004515882.1 | scaffold398 | 33595                   | AA                              | TT                 | TT               | INTERGENIC      |               |                    |                    |
| SNP_72124_A_33695 | NW_004515882.1 | scaffold398 | 33695                   | TT                              | CC                 | CC               | INTERGENIC      |               |                    |                    |
| SNP_72127_A_33943 | NW_004515882.1 | scaffold398 | 33943                   | TT                              | AA                 | AA               | INTERGENIC      |               |                    |                    |
| SNP_72128_A_34039 | NW_004515882.1 | scaffold398 | 34039                   | GG                              | TT                 | TT               | INTERGENIC      |               |                    |                    |
| SNP_72129_A_34092 | NW_004515882.1 | scaffold398 | 34092                   | TT                              | GG                 | GG               | INTERGENIC      |               |                    |                    |
| SNP_72130_A_36333 | NW_004515882.1 | scaffold398 | 36333                   | AA                              | TT                 | TT               | INTERGENIC      |               |                    |                    |
| SNP_72131_A_39956 | NW_004515882.1 | scaffold398 | 39956                   | CC                              | TT                 | TT               | INTERGENIC      |               |                    |                    |
| SNP_72132_A_43361 | NW_004515882.1 | scaffold398 | 43361                   | TT                              | CC                 | CC               | INTERGENIC      |               |                    |                    |
| SNP_72133_A_44210 | NW_004515882.1 | scaffold398 | 44210                   | CC                              | GG                 | GG               | INTERGENIC      |               |                    |                    |
| SNP_72135_A_45433 | NW_004515882.1 | scaffold398 | 45433                   | GG                              | AA                 | AA               | INTERGENIC      |               |                    |                    |
| SNP_72136_A_48961 | NW_004515882.1 | scaffold398 | 48961                   | CC                              | TT                 | TT               | INTERGENIC      |               |                    |                    |
| SNP_72137_A_51336 | NW_004515882.1 | scaffold398 | 51336                   | GG                              | AA                 | AA               | INTERGENIC      |               |                    |                    |
| SNP_72138_A_61213 | NW_004515882.1 | scaffold398 | 61213                   | AA                              | GG                 | GG               | INTERGENIC      |               |                    |                    |
| SNP_72139_A_64757 | NW_004515882.1 | scaffold398 | 64757                   | TT                              | CC                 | CC               | INTERGENIC      |               |                    |                    |
| SNP_72140_A_68140 | NW_004515882.1 | scaffold398 | 68140                   | AA                              | GG                 | GG               | INTERGENIC      |               |                    |                    |
| SNP_72141_A_68223 | NW_004515882.1 | scaffold398 | 68223                   | CC                              | TT                 | TT               | INTERGENIC      |               |                    |                    |

| SNPs IDs           | Chromosome IDs | Chromosomes | Physical positions (bp) | CDC Frontier (Reference genome) | (Pusa 1103 & HPNB) | (ILWC 46 & LPNB) | Sequence genome | Components of | Gene accession IDs           | Putative functions |
|--------------------|----------------|-------------|-------------------------|---------------------------------|--------------------|------------------|-----------------|---------------|------------------------------|--------------------|
| SNP_72142_A_68422  | NW_004515882.1 | scaffold398 | 68422                   | AA                              | GG                 | GG               | INTERGENIC      |               |                              |                    |
| SNP_72143_A_68485  | NW_004515882.1 | scaffold398 | 68485                   | AA                              | GG                 | GG               | INTERGENIC      |               |                              |                    |
| SNP_72144_A_68855  | NW_004515882.1 | scaffold398 | 68855                   | GG                              | AA                 | AA               | INTERGENIC      |               |                              |                    |
| SNP_72145_A_69381  | NW_004515882.1 | scaffold398 | 69381                   | CC                              | TT                 | TT               | INTERGENIC      |               |                              |                    |
| SNP_72146_A_71140  | NW_004515882.1 | scaffold398 | 71140                   | CC                              | TT                 | TT               | INTERGENIC      |               |                              |                    |
| SNP_72147_A_73980  | NW_004515882.1 | scaffold398 | 73980                   | GG                              | AA                 | AA               | INTERGENIC      |               |                              |                    |
| SNP_72148_A_88751  | NW_004515882.1 | scaffold398 | 88751                   | GG                              | AA                 | AA               | INTERGENIC      |               |                              |                    |
| SNP_72149_A_89525  | NW_004515882.1 | scaffold398 | 89525                   | CC                              | TT                 | TT               | INTERGENIC      |               |                              |                    |
| SNP_72150_A_89626  | NW_004515882.1 | scaffold398 | 89626                   | AA                              | GG                 | GG               | INTERGENIC      |               |                              |                    |
| SNP_72151_A_90135  | NW_004515882.1 | scaffold398 | 90135                   | AA                              | CC                 | CC               | INTERGENIC      |               |                              |                    |
| SNP_72152_A_91458  | NW_004515882.1 | scaffold398 | 91458                   | GG                              | AA                 | AA               | INTERGENIC      |               |                              |                    |
| SNP_72153_A_95271  | NW_004515882.1 | scaffold398 | 95271                   | CC                              | AA                 | AA               | INTERGENIC      |               |                              |                    |
| SNP_72154_A_101950 | NW_004515882.1 | scaffold398 | 101950                  | TT                              | AA                 | AA               | DRR             | 101514437     | uncharacterized LOC101514437 |                    |
| SNP_72155_A_101956 | NW_004515882.1 | scaffold398 | 101956                  | AA                              | TT                 | TT               | DRR             | 101514437     | uncharacterized LOC101514437 |                    |
| SNP_72156_A_103564 | NW_004515882.1 | scaffold398 | 103564                  | CC                              | TT                 | TT               | URR             | 101514437     | uncharacterized LOC101514437 |                    |
| SNP_72157_A_105649 | NW_004515882.1 | scaffold398 | 105649                  | AA                              | GG                 | GG               | INTERGENIC      |               |                              |                    |
| SNP_72158_A_110797 | NW_004515882.1 | scaffold398 | 110797                  | GG                              | AA                 | AA               | INTERGENIC      |               |                              |                    |
| SNP_72159_A_110798 | NW_004515882.1 | scaffold398 | 110798                  | AA                              | GG                 | GG               | INTERGENIC      |               |                              |                    |
| SNP_72160_A_121579 | NW_004515882.1 | scaffold398 | 121579                  | GG                              | CC                 | CC               | URR             | 101514761     | Unknown function             |                    |
| SNP_72161_A_125931 | NW_004515882.1 | scaffold398 | 125931                  | GG                              | AA                 | AA               | INTERGENIC      |               |                              |                    |
| SNP_72162_A_129822 | NW_004515882.1 | scaffold398 | 129822                  | AA                              | CC                 | CC               | INTERGENIC      |               |                              |                    |
| SNP_72163_A_131706 | NW_004515882.1 | scaffold398 | 131706                  | GG                              | AA                 | AA               | INTERGENIC      |               |                              |                    |

| SNPs IDs           | Chromosome IDs | Chromosomes | Physical positions (bp) | CDC Frontier (Reference genome) | (Pusa 1103 & HPNB) | (ILWC 46 & LPNB) | Sequence Components of genome | Gene accession IDs | Putative functions           |
|--------------------|----------------|-------------|-------------------------|---------------------------------|--------------------|------------------|-------------------------------|--------------------|------------------------------|
| SNP_72164_A_132634 | NW_004515882.1 | scaffold398 | 132634                  | CC                              | TT                 | TT               | INTERGENIC                    |                    |                              |
| SNP_72167_A_206571 | NW_004515882.1 | scaffold398 | 206571                  | CC                              | TT                 | TT               | INTERGENIC                    |                    |                              |
| SNP_72168_A_206723 | NW_004515882.1 | scaffold398 | 206723                  | AA                              | TT                 | TT               | INTERGENIC                    |                    |                              |
| SNP_72169_A_209906 | NW_004515882.1 | scaffold398 | 209906                  | AA                              | GG                 | GG               | INTERGENIC                    |                    |                              |
| SNP_72170_A_211650 | NW_004515882.1 | scaffold398 | 211650                  | CC                              | TT                 | TT               | INTERGENIC                    |                    |                              |
| SNP_72171_A_213393 | NW_004515882.1 | scaffold398 | 213393                  | TT                              | CC                 | CC               | INTERGENIC                    |                    |                              |
| SNP_72173_A_213652 | NW_004515882.1 | scaffold398 | 213652                  | CC                              | AA                 | AA               | INTERGENIC                    |                    |                              |
| SNP_72174_A_215214 | NW_004515882.1 | scaffold398 | 215214                  | TT                              | GG                 | GG               | INTERGENIC                    |                    |                              |
| SNP_72175_A_247617 | NW_004515882.1 | scaffold398 | 247617                  | GG                              | TT                 | TT               | URR                           | 101515410          | uncharacterized LOC101515410 |
| SNP_72176_A_247645 | NW_004515882.1 | scaffold398 | 247645                  | GG                              | AA                 | AA               | URR                           | 101515410          | uncharacterized LOC101515410 |
| SNP_72177_A_247652 | NW_004515882.1 | scaffold398 | 247652                  | CC                              | AA                 | GG               | URR                           | 101515410          | uncharacterized LOC101515410 |
| SNP_72178_A_247663 | NW_004515882.1 | scaffold398 | 247663                  | AA                              | GG                 | GG               | URR                           | 101515410          | uncharacterized LOC101515410 |
| SNP_72179_A_247664 | NW_004515882.1 | scaffold398 | 247664                  | GG                              | AA                 | AA               | URR                           | 101515410          | uncharacterized LOC101515410 |
| SNP_72180_A_247673 | NW_004515882.1 | scaffold398 | 247673                  | AA                              | CC                 | CC               | URR                           | 101515410          | uncharacterized LOC101515410 |
| SNP_72181_A_248311 | NW_004515882.1 | scaffold398 | 248311                  | TT                              | AA                 | AA               | URR                           | 101515410          | uncharacterized LOC101515410 |
| SNP_72182_A_249951 | NW_004515882.1 | scaffold398 | 249951                  | CC                              | GG                 | GG               | INTERGENIC                    |                    |                              |
| SNP_72183_A_251310 | NW_004515882.1 | scaffold398 | 251310                  | AA                              | GG                 | GG               | INTERGENIC                    |                    |                              |
| SNP_72184_A_252587 | NW_004515882.1 | scaffold398 | 252587                  | CC                              | TT                 | TT               | INTERGENIC                    |                    |                              |
| SNP_72186_A_253489 | NW_004515882.1 | scaffold398 | 253489                  | AA                              | GG                 | GG               | DRR                           | 101510450          | uncharacterized LOC101510450 |
| SNP_72187_A_257757 | NW_004515882.1 | scaffold398 | 257757                  | AA                              | GG                 | GG               | URR                           | 101510450          | uncharacterized LOC101510450 |
| SNP_72188_A_258851 | NW_004515882.1 | scaffold398 | 258851                  | CC                              | TT                 | TT               | URR                           | 101510450          | uncharacterized LOC101510450 |
| SNP_72191_A_268616 | NW_004515882.1 | scaffold398 | 268616                  | CC                              | TT                 | TT               | INTERGENIC                    |                    |                              |



| SNPs IDs           | Chromosome IDs | Chromosomes | Physical positions (bp) | CDC Frontier (Reference genome) | (Pusa 1103 & HPNB) | (ILWC 46 & LPNB) | Sequence Components of genome | Gene accession IDs | Putative functions                                                   |
|--------------------|----------------|-------------|-------------------------|---------------------------------|--------------------|------------------|-------------------------------|--------------------|----------------------------------------------------------------------|
| SNP_72192_A_268651 | NW_004515882.1 | scaffold398 | 268651                  | CC                              | TT                 | TT               | INTERGENIC                    |                    |                                                                      |
| SNP_72193_A_269345 | NW_004515882.1 | scaffold398 | 269345                  | AA                              | GG                 | GG               | DRR                           | 101410606          | transfer RNA glycine (anticodon UCC)                                 |
| SNP_72195_A_269510 | NW_004515882.1 | scaffold398 | 269510                  | CC                              | TT                 | TT               | DRR                           | 101410606          | transfer RNA glycine (anticodon UCC)                                 |
| SNP_72197_A_270519 | NW_004515882.1 | scaffold398 | 270519                  | CC                              | TT                 | TT               | URR                           | 101410606          | transfer RNA glycine (anticodon UCC)                                 |
| SNP_72199_A_271609 | NW_004515882.1 | scaffold398 | 271609                  | TT                              | AA                 | AA               | URR                           | 101410606          | transfer RNA glycine (anticodon UCC)                                 |
| SNP_72200_A_271624 | NW_004515882.1 | scaffold398 | 271624                  | CC                              | GG                 | GG               | URR                           | 101410606          | transfer RNA glycine (anticodon UCC)                                 |
| SNP_72201_A_275131 | NW_004515882.1 | scaffold398 | 275131                  | CC                              | TT                 | TT               | INTERGENIC                    |                    |                                                                      |
| SNP_72202_A_275653 | NW_004515882.1 | scaffold398 | 275653                  | AA                              | GG                 | GG               | DRR                           | 101511307          | histone-lysine N-methyltransferase ATXR4                             |
| SNP_72203_A_275954 | NW_004515882.1 | scaffold398 | 275954                  | CC                              | TT                 | TT               | DRR                           | 101511307          | histone-lysine N-methyltransferase ATXR4                             |
| SNP_72204_A_287934 | NW_004515882.1 | scaffold398 | 287934                  | CC                              | TT                 | TT               | INTERGENIC                    |                    |                                                                      |
| SNP_72206_A_288429 | NW_004515882.1 | scaffold398 | 288429                  | CC                              | TT                 | TT               | INTERGENIC                    |                    |                                                                      |
| SNP_72208_A_289080 | NW_004515882.1 | scaffold398 | 289080                  | TT                              | CC                 | CC               | INTERGENIC                    |                    |                                                                      |
| SNP_72209_A_289576 | NW_004515882.1 | scaffold398 | 289576                  | TT                              | CC                 | CC               | INTERGENIC                    |                    |                                                                      |
| SNP_72210_A_290320 | NW_004515882.1 | scaffold398 | 290320                  | CC                              | AA                 | AA               | INTERGENIC                    |                    |                                                                      |
| SNP_72211_A_290333 | NW_004515882.1 | scaffold398 | 290333                  | CC                              | TT                 | TT               | INTERGENIC                    |                    |                                                                      |
| SNP_72214_A_290857 | NW_004515882.1 | scaffold398 | 290857                  | GG                              | AA                 | AA               | INTERGENIC                    |                    |                                                                      |
| SNP_72215_A_301411 | NW_004515882.1 | scaffold398 | 301411                  | CC                              | TT                 | TT               | URR                           | 101511632          | DEAD-box ATP-dependent RNA helicase 37-like                          |
| SNP_72216_A_301782 | NW_004515882.1 | scaffold398 | 301782                  | GG                              | CC                 | CC               | URR                           | 101511632          | DEAD-box ATP-dependent RNA helicase 37-like                          |
| SNP_72217_A_302172 | NW_004515882.1 | scaffold398 | 302172                  | GG                              | AA                 | AA               | URR                           | 101511632          | DEAD-box ATP-dependent RNA helicase 37-like                          |
| SNP_72219_A_308902 | NW_004515882.1 | scaffold398 | 308902                  | CC                              | AA                 | AA               | INTERGENIC                    |                    |                                                                      |
| SNP_72220_A_315585 | NW_004515882.1 | scaffold398 | 315585                  | AA                              | TT                 | TT               | URR                           | 101511959          | F-box protein At3g58530                                              |
| SNP_72221_A_319018 | NW_004515882.1 | scaffold398 | 319018                  | TT                              | CC                 | CC               | URR                           | 101512287          | pentatricopeptide repeat-containing protein At2g45350, chloroplastic |

| SNPs IDs           | Chromosome IDs | Chromosomes | Physical positions (bp) | CDC Frontier (Reference genome) | (Pusa 1103 & HPNB) | (ILWC 46 & LPNB) | Sequence Components of genome | Gene accession IDs | Putative functions                                   |
|--------------------|----------------|-------------|-------------------------|---------------------------------|--------------------|------------------|-------------------------------|--------------------|------------------------------------------------------|
| SNP_72223_A_328960 | NW_004515882.1 | scaffold398 | 328960                  | AA                              | GG                 | GG               | INTERGENIC                    |                    |                                                      |
| SNP_72224_A_331130 | NW_004515882.1 | scaffold398 | 331130                  | CC                              | TT                 | TT               | INTERGENIC                    |                    |                                                      |
| SNP_72225_A_331476 | NW_004515882.1 | scaffold398 | 331476                  | GG                              | AA                 | AA               | INTERGENIC                    |                    |                                                      |
| SNP_72226_A_331477 | NW_004515882.1 | scaffold398 | 331477                  | TT                              | GG                 | GG               | INTERGENIC                    |                    |                                                      |
| SNP_72227_A_331777 | NW_004515882.1 | scaffold398 | 331777                  | GG                              | AA                 | AA               | INTERGENIC                    |                    |                                                      |
| SNP_72228_A_332581 | NW_004515882.1 | scaffold398 | 332581                  | AA                              | GG                 | GG               | INTERGENIC                    |                    |                                                      |
| SNP_72229_A_332605 | NW_004515882.1 | scaffold398 | 332605                  | GG                              | AA                 | AA               | INTERGENIC                    |                    |                                                      |
| SNP_72230_A_332627 | NW_004515882.1 | scaffold398 | 332627                  | CC                              | GG                 | GG               | INTERGENIC                    |                    |                                                      |
| SNP_72231_A_332628 | NW_004515882.1 | scaffold398 | 332628                  | AA                              | GG                 | GG               | INTERGENIC                    |                    |                                                      |
| SNP_72232_A_333328 | NW_004515882.1 | scaffold398 | 333328                  | TT                              | CC                 | CC               | INTERGENIC                    |                    |                                                      |
| SNP_72233_A_333332 | NW_004515882.1 | scaffold398 | 333332                  | AA                              | GG                 | GG               | INTERGENIC                    |                    |                                                      |
| SNP_72234_A_334941 | NW_004515882.1 | scaffold398 | 334941                  | CC                              | GG                 | GG               | INTERGENIC                    |                    |                                                      |
| SNP_72235_A_335003 | NW_004515882.1 | scaffold398 | 335003                  | AA                              | GG                 | GG               | INTERGENIC                    |                    |                                                      |
| SNP_72236_A_339214 | NW_004515882.1 | scaffold398 | 339214                  | GG                              | AA                 | AA               | DRR                           | 101512617          | carbon catabolite repressor protein 4 homolog 2-like |
| SNP_72237_A_339285 | NW_004515882.1 | scaffold398 | 339285                  | CC                              | AA                 | AA               | DRR                           | 101512617          | carbon catabolite repressor protein 4 homolog 2-like |
| SNP_72239_A_339365 | NW_004515882.1 | scaffold398 | 339365                  | GG                              | AA                 | AA               | DRR                           | 101512617          | carbon catabolite repressor protein 4 homolog 2-like |
| SNP_72240_A_339377 | NW_004515882.1 | scaffold398 | 339377                  | AA                              | GG                 | GG               | DRR                           | 101512617          | carbon catabolite repressor protein 4 homolog 2-like |
| SNP_72242_A_339546 | NW_004515882.1 | scaffold398 | 339546                  | GG                              | AA                 | AA               | DRR                           | 101512617          | carbon catabolite repressor protein 4 homolog 2-like |
| SNP_72243_A_339558 | NW_004515882.1 | scaffold398 | 339558                  | TT                              | CC                 | CC               | DRR                           | 101512617          | carbon catabolite repressor protein 4 homolog 2-like |
| SNP_72244_A_339923 | NW_004515882.1 | scaffold398 | 339923                  | AA                              | GG                 | GG               | DRR                           | 101512617          | carbon catabolite repressor protein 4 homolog 2-like |
| SNP_72245_A_340160 | NW_004515882.1 | scaffold398 | 340160                  | GG                              | CC                 | CC               | DRR                           | 101512617          | carbon catabolite repressor protein 4 homolog 2-like |
| SNP_72246_A_344575 | NW_004515882.1 | scaffold398 | 344575                  | GG                              | AA                 | AA               | INTRON                        | 101512617          | carbon catabolite repressor protein 4 homolog 2-like |

| SNPs IDs           | Chromosome IDs | Chromosomes | Physical positions (bp) | CDC Frontier (Reference genome) | (Pusa 1103 & HPNB) | (ILWC 46 & LPNB) | Sequence Components of genome | Gene accession IDs | Putative functions                                   |
|--------------------|----------------|-------------|-------------------------|---------------------------------|--------------------|------------------|-------------------------------|--------------------|------------------------------------------------------|
| SNP_72248_A_345467 | NW_004515882.1 | scaffold398 | 345467                  | GG                              | CC                 | CC               | INTRON                        | 101512617          | carbon catabolite repressor protein 4 homolog 2-like |
| SNP_72249_A_347386 | NW_004515882.1 | scaffold398 | 347386                  | CC                              | TT                 | TT               | URR                           | 101512617          | carbon catabolite repressor protein 4 homolog 2-like |
| SNP_72251_A_348033 | NW_004515882.1 | scaffold398 | 348033                  | GG                              | TT                 | TT               | URR                           | 101512617          | carbon catabolite repressor protein 4 homolog 2-like |
| SNP_72252_A_352507 | NW_004515882.1 | scaffold398 | 352507                  | TT                              | GG                 | GG               | INTERGENIC                    |                    |                                                      |
| SNP_72253_A_365333 | NW_004515882.1 | scaffold398 | 365333                  | AA                              | CC                 | CC               | INTERGENIC                    |                    |                                                      |
| SNP_72254_A_366740 | NW_004515882.1 | scaffold398 | 366740                  | TT                              | GG                 | GG               | DRR                           | 101513136          | dirigent protein 22-like                             |
| SNP_72255_A_366946 | NW_004515882.1 | scaffold398 | 366946                  | AA                              | TT                 | TT               | DRR                           | 101513136          | dirigent protein 22-like                             |
| SNP_72256_A_366979 | NW_004515882.1 | scaffold398 | 366979                  | CC                              | TT                 | TT               | DRR                           | 101513136          | dirigent protein 22-like                             |
| SNP_72257_A_367035 | NW_004515882.1 | scaffold398 | 367035                  | TT                              | CC                 | CC               | DRR                           | 101513136          | dirigent protein 22-like                             |
| SNP_72260_A_373810 | NW_004515882.1 | scaffold398 | 373810                  | TT                              | CC                 | CC               | INTRON                        | 101513463          | elongation factor 1-alpha-like                       |
| SNP_72261_A_377918 | NW_004515882.1 | scaffold398 | 377918                  | GG                              | AA                 | AA               | INTERGENIC                    |                    |                                                      |
| SNP_72262_A_378674 | NW_004515882.1 | scaffold398 | 378674                  | AA                              | GG                 | GG               | INTERGENIC                    |                    |                                                      |
| SNP_72263_A_378703 | NW_004515882.1 | scaffold398 | 378703                  | TT                              | CC                 | CC               | INTERGENIC                    |                    |                                                      |
| SNP_72264_A_378801 | NW_004515882.1 | scaffold398 | 378801                  | AA                              | GG                 | GG               | INTERGENIC                    |                    |                                                      |
| SNP_72265_A_378810 | NW_004515882.1 | scaffold398 | 378810                  | AA                              | GG                 | GG               | INTERGENIC                    |                    |                                                      |
| SNP_72266_A_378827 | NW_004515882.1 | scaffold398 | 378827                  | AA                              | GG                 | GG               | INTERGENIC                    |                    |                                                      |
| SNP_72267_A_378869 | NW_004515882.1 | scaffold398 | 378869                  | GG                              | AA                 | AA               | INTERGENIC                    |                    |                                                      |
| SNP_72268_A_378990 | NW_004515882.1 | scaffold398 | 378990                  | AA                              | CC                 | CC               | INTERGENIC                    |                    |                                                      |
| SNP_72269_A_379026 | NW_004515882.1 | scaffold398 | 379026                  | CC                              | TT                 | TT               | INTERGENIC                    |                    |                                                      |
| SNP_72270_A_379041 | NW_004515882.1 | scaffold398 | 379041                  | CC                              | TT                 | TT               | INTERGENIC                    |                    |                                                      |
| SNP_72272_A_379155 | NW_004515882.1 | scaffold398 | 379155                  | AA                              | TT                 | TT               | INTERGENIC                    |                    |                                                      |
| SNP_72273_A_382682 | NW_004515882.1 | scaffold398 | 382682                  | AA                              | CC                 | CC               | DRR                           | 101488508          | Unknown function                                     |

| SNPs IDs           | Chromosome IDs | Chromosomes | Physical positions (bp) | CDC Frontier (Reference genome) | (Pusa 1103 & HPNB) | (ILWC 46 & LPNB) | Sequence Components of genome | Gene accession IDs | Putative functions |
|--------------------|----------------|-------------|-------------------------|---------------------------------|--------------------|------------------|-------------------------------|--------------------|--------------------|
| SNP_72274_A_383276 | NW_004515882.1 | scaffold398 | 383276                  | GG                              | AA                 | AA               | DRR                           | 101488508          | Unknown function   |
| SNP_72275_A_384210 | NW_004515882.1 | scaffold398 | 384210                  | GG                              | TT                 | TT               | INTRON                        | 101488508          | Unknown function   |
| SNP_72276_A_390284 | NW_004515882.1 | scaffold398 | 390284                  | AA                              | CC                 | CC               | INTERGENIC                    |                    |                    |
| SNP_72277_A_390475 | NW_004515882.1 | scaffold398 | 390475                  | TT                              | GG                 | GG               | INTERGENIC                    |                    |                    |
| SNP_72278_A_390482 | NW_004515882.1 | scaffold398 | 390482                  | GG                              | TT                 | TT               | INTERGENIC                    |                    |                    |
| SNP_72279_A_390506 | NW_004515882.1 | scaffold398 | 390506                  | TT                              | CC                 | CC               | INTERGENIC                    |                    |                    |
| SNP_72280_A_390530 | NW_004515882.1 | scaffold398 | 390530                  | TT                              | CC                 | CC               | INTERGENIC                    |                    |                    |
| SNP_72281_A_390552 | NW_004515882.1 | scaffold398 | 390552                  | GG                              | AA                 | AA               | INTERGENIC                    |                    |                    |
| SNP_72282_A_392083 | NW_004515882.1 | scaffold398 | 392083                  | TT                              | AA                 | AA               | INTERGENIC                    |                    |                    |
| SNP_72283_A_393223 | NW_004515882.1 | scaffold398 | 393223                  | CC                              | TT                 | TT               | INTERGENIC                    |                    |                    |
| SNP_72284_A_393241 | NW_004515882.1 | scaffold398 | 393241                  | CC                              | TT                 | TT               | INTERGENIC                    |                    |                    |
| SNP_72285_A_395623 | NW_004515882.1 | scaffold398 | 395623                  | AA                              | GG                 | GG               | DRR                           | 101488847          | Unknown function   |
| SNP_72286_A_401088 | NW_004515882.1 | scaffold398 | 401088                  | AA                              | GG                 | GG               | URR                           | 101488847          | Unknown function   |
| SNP_72287_A_403711 | NW_004515882.1 | scaffold398 | 403711                  | AA                              | GG                 | GG               | INTERGENIC                    |                    |                    |
| SNP_72288_A_404608 | NW_004515882.1 | scaffold398 | 404608                  | GG                              | AA                 | AA               | INTERGENIC                    |                    |                    |
| SNP_72289_A_404755 | NW_004515882.1 | scaffold398 | 404755                  | GG                              | AA                 | AA               | INTERGENIC                    |                    |                    |
| SNP_72290_A_405612 | NW_004515882.1 | scaffold398 | 405612                  | GG                              | TT                 | TT               | INTERGENIC                    |                    |                    |
| SNP_72291_A_407094 | NW_004515882.1 | scaffold398 | 407094                  | TT                              | GG                 | GG               | INTERGENIC                    |                    |                    |
| SNP_72292_A_407475 | NW_004515882.1 | scaffold398 | 407475                  | AA                              | GG                 | GG               | INTERGENIC                    |                    |                    |
| SNP_72293_A_409132 | NW_004515882.1 | scaffold398 | 409132                  | TT                              | CC                 | CC               | INTERGENIC                    |                    |                    |
| SNP_72294_A_409327 | NW_004515882.1 | scaffold398 | 409327                  | CC                              | TT                 | TT               | INTERGENIC                    |                    |                    |
| SNP_72295_A_413821 | NW_004515882.1 | scaffold398 | 413821                  | CC                              | TT                 | TT               | INTERGENIC                    |                    |                    |

| SNPs IDs           | Chromosome IDs | Chromosomes | Physical positions (bp) | CDC Frontier (Reference genome) | (Pusa 1103 & HPNB) | (ILWC 46 & LPNB) | Sequence Components of genome | Gene accession IDs | Putative functions           |
|--------------------|----------------|-------------|-------------------------|---------------------------------|--------------------|------------------|-------------------------------|--------------------|------------------------------|
| SNP_72296_A_427993 | NW_004515882.1 | scaffold398 | 427993                  | AA                              | GG                 | GG               | INTERGENIC                    |                    |                              |
| SNP_72297_A_434484 | NW_004515882.1 | scaffold398 | 434484                  | TT                              | CC                 | CC               | INTERGENIC                    |                    |                              |
| SNP_72298_A_434904 | NW_004515882.1 | scaffold398 | 434904                  | GG                              | AA                 | AA               | INTERGENIC                    |                    |                              |
| SNP_72301_A_443445 | NW_004515882.1 | scaffold398 | 443445                  | AA                              | GG                 | GG               | URR                           | 101513771          | uncharacterized LOC101513771 |
| SNP_72302_A_451750 | NW_004515882.1 | scaffold398 | 451750                  | AA                              | GG                 | GG               | INTERGENIC                    |                    |                              |
| SNP_72303_A_452033 | NW_004515882.1 | scaffold398 | 452033                  | AA                              | GG                 | GG               | INTERGENIC                    |                    |                              |
| SNP_72304_A_453485 | NW_004515882.1 | scaffold398 | 453485                  | CC                              | TT                 | TT               | INTERGENIC                    |                    |                              |
| SNP_72305_A_454779 | NW_004515882.1 | scaffold398 | 454779                  | AA                              | GG                 | GG               | INTERGENIC                    |                    |                              |
| SNP_72307_A_455091 | NW_004515882.1 | scaffold398 | 455091                  | GG                              | CC                 | CC               | INTERGENIC                    |                    |                              |
| SNP_72308_A_455247 | NW_004515882.1 | scaffold398 | 455247                  | TT                              | CC                 | CC               | INTERGENIC                    |                    |                              |
| SNP_72309_A_457641 | NW_004515882.1 | scaffold398 | 457641                  | AA                              | GG                 | GG               | INTERGENIC                    |                    |                              |
| SNP_72310_A_457857 | NW_004515882.1 | scaffold398 | 457857                  | TT                              | CC                 | CC               | INTERGENIC                    |                    |                              |
| SNP_72311_A_457991 | NW_004515882.1 | scaffold398 | 457991                  | TT                              | AA                 | AA               | INTERGENIC                    |                    |                              |
| SNP_72312_A_459529 | NW_004515882.1 | scaffold398 | 459529                  | TT                              | AA                 | AA               | INTERGENIC                    |                    |                              |
| SNP_72314_A_463166 | NW_004515882.1 | scaffold398 | 463166                  | CC                              | TT                 | TT               | INTERGENIC                    |                    |                              |
| SNP_72315_A_465974 | NW_004515882.1 | scaffold398 | 465974                  | GG                              | AA                 | AA               | INTERGENIC                    |                    |                              |
| SNP_72317_A_466440 | NW_004515882.1 | scaffold398 | 466440                  | GG                              | CC                 | CC               | INTERGENIC                    |                    |                              |
| SNP_72318_A_469203 | NW_004515882.1 | scaffold398 | 469203                  | AA                              | GG                 | GG               | INTERGENIC                    |                    |                              |
| SNP_72319_A_469580 | NW_004515882.1 | scaffold398 | 469580                  | GG                              | AA                 | AA               | INTERGENIC                    |                    |                              |
| SNP_72320_A_477471 | NW_004515882.1 | scaffold398 | 477471                  | AA                              | GG                 | GG               | INTERGENIC                    |                    |                              |
| SNP_72322_A_482822 | NW_004515882.1 | scaffold398 | 482822                  | GG                              | AA                 | AA               | INTERGENIC                    |                    |                              |
| SNP_72324_A_490867 | NW_004515882.1 | scaffold398 | 490867                  | GG                              | AA                 | AA               | URR                           | 101514113          | zinc finger protein 8        |

| SNPs IDs           | Chromosome IDs | Chromosomes | Physical positions (bp) | CDC Frontier (Reference genome) | (Pusa 1103 & HPNB) | (ILWC 46 & LPNB) | Sequence Components of genome | Gene accession IDs | Putative functions    |
|--------------------|----------------|-------------|-------------------------|---------------------------------|--------------------|------------------|-------------------------------|--------------------|-----------------------|
| SNP_72325_A_490990 | NW_004515882.1 | scaffold398 | 490990                  | TT                              | CC                 | CC               | URR                           | 101514113          | zinc finger protein 8 |
| SNP_72326_A_491406 | NW_004515882.1 | scaffold398 | 491406                  | GG                              | TT                 | TT               | URR                           | 101514113          | zinc finger protein 8 |
| SNP_72328_A_492578 | NW_004515882.1 | scaffold398 | 492578                  | AA                              | TT                 | TT               | INTERGENIC                    |                    |                       |
| SNP_72329_A_493661 | NW_004515882.1 | scaffold398 | 493661                  | CC                              | TT                 | TT               | INTERGENIC                    |                    |                       |
| SNP_72330_A_493672 | NW_004515882.1 | scaffold398 | 493672                  | TT                              | CC                 | CC               | INTERGENIC                    |                    |                       |
| SNP_72331_A_494273 | NW_004515882.1 | scaffold398 | 494273                  | CC                              | TT                 | TT               | INTERGENIC                    |                    |                       |
| SNP_72332_A_495376 | NW_004515882.1 | scaffold398 | 495376                  | GG                              | TT                 | TT               | INTERGENIC                    |                    |                       |
| SNP_72333_A_495377 | NW_004515882.1 | scaffold398 | 495377                  | AA                              | GG                 | GG               | INTERGENIC                    |                    |                       |
| SNP_72334_A_495463 | NW_004515882.1 | scaffold398 | 495463                  | GG                              | AA                 | AA               | INTERGENIC                    |                    |                       |
| SNP_72335_A_495474 | NW_004515882.1 | scaffold398 | 495474                  | TT                              | CC                 | CC               | INTERGENIC                    |                    |                       |
| SNP_72336_A_495671 | NW_004515882.1 | scaffold398 | 495671                  | CC                              | AA                 | AA               | INTERGENIC                    |                    |                       |
| SNP_72338_A_495796 | NW_004515882.1 | scaffold398 | 495796                  | CC                              | TT                 | TT               | INTERGENIC                    |                    |                       |
| SNP_72339_A_495798 | NW_004515882.1 | scaffold398 | 495798                  | CC                              | TT                 | TT               | INTERGENIC                    |                    |                       |
| SNP_72340_A_495894 | NW_004515882.1 | scaffold398 | 495894                  | TT                              | AA                 | AA               | INTERGENIC                    |                    |                       |
| SNP_72341_A_29476  | NW_004515883.1 | scaffold399 | 29476                   | GG                              | CC                 | CC               | INTERGENIC                    |                    |                       |
| SNP_72342_A_44351  | NW_004515883.1 | scaffold399 | 44351                   | AA                              | TT                 | TT               | INTERGENIC                    |                    |                       |
| SNP_72343_A_49518  | NW_004515883.1 | scaffold399 | 49518                   | TT                              | AA                 | AA               | INTERGENIC                    |                    |                       |
| SNP_72344_A_49542  | NW_004515883.1 | scaffold399 | 49542                   | AA                              | GG                 | GG               | INTERGENIC                    |                    |                       |
| SNP_72345_A_49914  | NW_004515883.1 | scaffold399 | 49914                   | GG                              | CC                 | CC               | INTERGENIC                    |                    |                       |
| SNP_72346_A_72236  | NW_004515883.1 | scaffold399 | 72236                   | TT                              | CC                 | CC               | INTERGENIC                    |                    |                       |
| SNP_72347_A_72398  | NW_004515883.1 | scaffold399 | 72398                   | AA                              | CC                 | CC               | INTERGENIC                    |                    |                       |
| SNP_72348_A_74228  | NW_004515883.1 | scaffold399 | 74228                   | AA                              | CC                 | CC               | INTERGENIC                    |                    |                       |

| SNPs IDs           | Chromosome IDs | Chromosomes | Physical positions (bp) | CDC Frontier (Reference genome) | (Pusa 1103 & HPNB) | (ILWC 46 & LPNB) | Sequence genome | Components of | Gene accession IDs | Putative functions |
|--------------------|----------------|-------------|-------------------------|---------------------------------|--------------------|------------------|-----------------|---------------|--------------------|--------------------|
| SNP_72349_A_74236  | NW_004515883.1 | scaffold399 | 74236                   | GG                              | TT                 | TT               | INTERGENIC      |               |                    |                    |
| SNP_72350_A_74285  | NW_004515883.1 | scaffold399 | 74285                   | CC                              | AA                 | AA               | INTERGENIC      |               |                    |                    |
| SNP_72351_A_74324  | NW_004515883.1 | scaffold399 | 74324                   | AA                              | GG                 | GG               | INTERGENIC      |               |                    |                    |
| SNP_72352_A_74342  | NW_004515883.1 | scaffold399 | 74342                   | AA                              | GG                 | GG               | INTERGENIC      |               |                    |                    |
| SNP_72353_A_81810  | NW_004515883.1 | scaffold399 | 81810                   | AA                              | GG                 | GG               | INTERGENIC      |               |                    |                    |
| SNP_72354_A_82533  | NW_004515883.1 | scaffold399 | 82533                   | AA                              | GG                 | GG               | INTERGENIC      |               |                    |                    |
| SNP_72355_A_82565  | NW_004515883.1 | scaffold399 | 82565                   | TT                              | AA                 | AA               | INTERGENIC      |               |                    |                    |
| SNP_72356_A_92605  | NW_004515883.1 | scaffold399 | 92605                   | CC                              | TT                 | TT               | INTERGENIC      |               |                    |                    |
| SNP_72357_A_111173 | NW_004515883.1 | scaffold399 | 111173                  | AA                              | GG                 | GG               | INTERGENIC      |               |                    |                    |
| SNP_72358_A_504    | NW_004515884.1 | scaffold400 | 504                     | GG                              | AA                 | AA               | INTERGENIC      |               |                    |                    |
| SNP_72359_A_2406   | NW_004515884.1 | scaffold400 | 2406                    | AA                              | TT                 | TT               | INTERGENIC      |               |                    |                    |
| SNP_72360_A_17772  | NW_004515884.1 | scaffold400 | 17772                   | AA                              | GG                 | GG               | INTERGENIC      |               |                    |                    |
| SNP_72361_A_41279  | NW_004515884.1 | scaffold400 | 41279                   | AA                              | TT                 | TT               | INTERGENIC      |               |                    |                    |
| SNP_72362_A_41301  | NW_004515884.1 | scaffold400 | 41301                   | TT                              | GG                 | GG               | INTERGENIC      |               |                    |                    |
| SNP_72363_A_41309  | NW_004515884.1 | scaffold400 | 41309                   | AA                              | GG                 | GG               | INTERGENIC      |               |                    |                    |
| SNP_72364_A_41665  | NW_004515884.1 | scaffold400 | 41665                   | GG                              | AA                 | AA               | INTERGENIC      |               |                    |                    |
| SNP_72365_A_41693  | NW_004515884.1 | scaffold400 | 41693                   | TT                              | CC                 | CC               | INTERGENIC      |               |                    |                    |
| SNP_72366_A_41696  | NW_004515884.1 | scaffold400 | 41696                   | GG                              | AA                 | AA               | INTERGENIC      |               |                    |                    |
| SNP_72367_A_41714  | NW_004515884.1 | scaffold400 | 41714                   | TT                              | CC                 | CC               | INTERGENIC      |               |                    |                    |
| SNP_72368_A_41800  | NW_004515884.1 | scaffold400 | 41800                   | AA                              | CC                 | CC               | INTERGENIC      |               |                    |                    |
| SNP_72369_A_41853  | NW_004515884.1 | scaffold400 | 41853                   | GG                              | AA                 | AA               | INTERGENIC      |               |                    |                    |
| SNP_72370_A_41930  | NW_004515884.1 | scaffold400 | 41930                   | CC                              | AA                 | AA               | INTERGENIC      |               |                    |                    |

| SNPs IDs          | Chromosome IDs | Chromosomes | Physical positions (bp) | CDC Frontier (Reference genome) | (Pusa 1103 & HPNB) | (ILWC 46 & LPNB) | Sequence genome | Components of | Gene accession IDs | Putative functions |
|-------------------|----------------|-------------|-------------------------|---------------------------------|--------------------|------------------|-----------------|---------------|--------------------|--------------------|
| SNP_72371_A_41938 | NW_004515884.1 | scaffold400 | 41938                   | TT                              | AA                 | AA               | INTERGENIC      |               |                    |                    |
| SNP_72372_A_41948 | NW_004515884.1 | scaffold400 | 41948                   | GG                              | AA                 | AA               | INTERGENIC      |               |                    |                    |
| SNP_72373_A_41994 | NW_004515884.1 | scaffold400 | 41994                   | TT                              | CC                 | CC               | INTERGENIC      |               |                    |                    |
| SNP_72374_A_42027 | NW_004515884.1 | scaffold400 | 42027                   | GG                              | AA                 | AA               | INTERGENIC      |               |                    |                    |
| SNP_72375_A_42075 | NW_004515884.1 | scaffold400 | 42075                   | CC                              | AA                 | AA               | INTERGENIC      |               |                    |                    |
| SNP_72376_A_42090 | NW_004515884.1 | scaffold400 | 42090                   | AA                              | TT                 | TT               | INTERGENIC      |               |                    |                    |
| SNP_72377_A_42099 | NW_004515884.1 | scaffold400 | 42099                   | GG                              | AA                 | AA               | INTERGENIC      |               |                    |                    |
| SNP_72378_A_42101 | NW_004515884.1 | scaffold400 | 42101                   | CC                              | TT                 | TT               | INTERGENIC      |               |                    |                    |
| SNP_72379_A_42115 | NW_004515884.1 | scaffold400 | 42115                   | TT                              | CC                 | CC               | INTERGENIC      |               |                    |                    |
| SNP_72380_A_42184 | NW_004515884.1 | scaffold400 | 42184                   | AA                              | TT                 | TT               | INTERGENIC      |               |                    |                    |
| SNP_72381_A_42193 | NW_004515884.1 | scaffold400 | 42193                   | TT                              | AA                 | AA               | INTERGENIC      |               |                    |                    |
| SNP_72382_A_42194 | NW_004515884.1 | scaffold400 | 42194                   | AA                              | TT                 | TT               | INTERGENIC      |               |                    |                    |
| SNP_72383_A_42196 | NW_004515884.1 | scaffold400 | 42196                   | GG                              | CC                 | CC               | INTERGENIC      |               |                    |                    |
| SNP_72384_A_42255 | NW_004515884.1 | scaffold400 | 42255                   | GG                              | TT                 | TT               | INTERGENIC      |               |                    |                    |
| SNP_72385_A_42291 | NW_004515884.1 | scaffold400 | 42291                   | TT                              | CC                 | CC               | INTERGENIC      |               |                    |                    |
| SNP_72386_A_42373 | NW_004515884.1 | scaffold400 | 42373                   | TT                              | GG                 | GG               | INTERGENIC      |               |                    |                    |
| SNP_72387_A_42433 | NW_004515884.1 | scaffold400 | 42433                   | TT                              | CC                 | CC               | INTERGENIC      |               |                    |                    |
| SNP_72388_A_42441 | NW_004515884.1 | scaffold400 | 42441                   | AA                              | TT                 | TT               | INTERGENIC      |               |                    |                    |
| SNP_72389_A_42503 | NW_004515884.1 | scaffold400 | 42503                   | TT                              | CC                 | CC               | INTERGENIC      |               |                    |                    |
| SNP_72390_A_42544 | NW_004515884.1 | scaffold400 | 42544                   | TT                              | AA                 | AA               | INTERGENIC      |               |                    |                    |
| SNP_72391_A_42806 | NW_004515884.1 | scaffold400 | 42806                   | CC                              | TT                 | TT               | INTERGENIC      |               |                    |                    |
| SNP_72392_A_42810 | NW_004515884.1 | scaffold400 | 42810                   | CC                              | GG                 | GG               | INTERGENIC      |               |                    |                    |



| SNPs IDs           | Chromosome IDs | Chromosomes | Physical positions (bp) | CDC Frontier (Reference genome) | (Pusa 1103 & HPNB) | (ILWC 46 & LPNB) | Sequence genome | Components of | Gene accession IDs                       | Putative functions |
|--------------------|----------------|-------------|-------------------------|---------------------------------|--------------------|------------------|-----------------|---------------|------------------------------------------|--------------------|
| SNP_72393_A_42818  | NW_004515884.1 | scaffold400 | 42818                   | TT                              | CC                 | CC               | INTERGENIC      |               |                                          |                    |
| SNP_72394_A_43070  | NW_004515884.1 | scaffold400 | 43070                   | CC                              | GG                 | GG               | INTERGENIC      |               |                                          |                    |
| SNP_72395_A_43194  | NW_004515884.1 | scaffold400 | 43194                   | CC                              | AA                 | AA               | INTERGENIC      |               |                                          |                    |
| SNP_72396_A_43238  | NW_004515884.1 | scaffold400 | 43238                   | CC                              | AA                 | AA               | INTERGENIC      |               |                                          |                    |
| SNP_72397_A_43463  | NW_004515884.1 | scaffold400 | 43463                   | TT                              | AA                 | AA               | INTERGENIC      |               |                                          |                    |
| SNP_72398_A_43620  | NW_004515884.1 | scaffold400 | 43620                   | CC                              | TT                 | TT               | INTERGENIC      |               |                                          |                    |
| SNP_72399_A_43649  | NW_004515884.1 | scaffold400 | 43649                   | CC                              | GG                 | GG               | INTERGENIC      |               |                                          |                    |
| SNP_72401_A_62677  | NW_004515884.1 | scaffold400 | 62677                   | AA                              | GG                 | GG               | INTERGENIC      |               |                                          |                    |
| SNP_72402_A_66610  | NW_004515884.1 | scaffold400 | 66610                   | AA                              | GG                 | GG               | INTERGENIC      |               |                                          |                    |
| SNP_72403_A_69523  | NW_004515884.1 | scaffold400 | 69523                   | GG                              | AA                 | AA               | INTERGENIC      |               |                                          |                    |
| SNP_72404_A_33879  | NW_004515885.1 | scaffold401 | 33879                   | AA                              | GG                 | GG               | INTERGENIC      |               |                                          |                    |
| SNP_72405_A_50634  | NW_004515885.1 | scaffold401 | 50634                   | AA                              | GG                 | GG               | INTERGENIC      |               |                                          |                    |
| SNP_72406_A_100442 | NW_004515885.1 | scaffold401 | 100442                  | CC                              | TT                 | TT               | URR             | 101492407     | protein FAR-RED IMPAIRED RESPONSE 1-like |                    |
| SNP_72407_A_102164 | NW_004515885.1 | scaffold401 | 102164                  | TT                              | CC                 | CC               | INTERGENIC      |               |                                          |                    |
| SNP_72408_A_102483 | NW_004515885.1 | scaffold401 | 102483                  | CC                              | TT                 | TT               | INTERGENIC      |               |                                          |                    |
| SNP_72409_A_156435 | NW_004515885.1 | scaffold401 | 156435                  | AA                              | TT                 | TT               | STOP_LOST       | id200497      | Unknown function                         |                    |
| SNP_72410_A_166624 | NW_004515885.1 | scaffold401 | 166624                  | TT                              | CC                 | CC               | INTERGENIC      |               |                                          |                    |
| SNP_72411_A_166656 | NW_004515885.1 | scaffold401 | 166656                  | TT                              | CC                 | CC               | INTERGENIC      |               |                                          |                    |
| SNP_72412_A_166924 | NW_004515885.1 | scaffold401 | 166924                  | TT                              | AA                 | AA               | INTERGENIC      |               |                                          |                    |
| SNP_72413_A_166941 | NW_004515885.1 | scaffold401 | 166941                  | AA                              | GG                 | GG               | INTERGENIC      |               |                                          |                    |
| SNP_72414_A_167002 | NW_004515885.1 | scaffold401 | 167002                  | TT                              | CC                 | CC               | INTERGENIC      |               |                                          |                    |
| SNP_72415_A_167073 | NW_004515885.1 | scaffold401 | 167073                  | AA                              | GG                 | GG               | INTERGENIC      |               |                                          |                    |

| SNPs IDs           | Chromosome IDs | Chromosomes | Physical positions (bp) | CDC Frontier (Reference genome) | (Pusa 1103 & HPNB) | (ILWC 46 & LPNB) | Sequence genome | Components of | Gene accession IDs | Putative functions |
|--------------------|----------------|-------------|-------------------------|---------------------------------|--------------------|------------------|-----------------|---------------|--------------------|--------------------|
| SNP_72416_A_167086 | NW_004515885.1 | scaffold401 | 167086                  | TT                              | GG                 | GG               | INTERGENIC      |               |                    |                    |
| SNP_72417_A_172214 | NW_004515885.1 | scaffold401 | 172214                  | AA                              | TT                 | TT               | INTERGENIC      |               |                    |                    |
| SNP_72418_A_172224 | NW_004515885.1 | scaffold401 | 172224                  | CC                              | TT                 | TT               | INTERGENIC      |               |                    |                    |
| SNP_72419_A_172225 | NW_004515885.1 | scaffold401 | 172225                  | AA                              | GG                 | GG               | INTERGENIC      |               |                    |                    |
| SNP_72420_A_183051 | NW_004515885.1 | scaffold401 | 183051                  | GG                              | AA                 | AA               | INTERGENIC      |               |                    |                    |
| SNP_72421_A_2667   | NW_004515886.1 | scaffold404 | 2667                    | AA                              | GG                 | GG               | INTERGENIC      |               |                    |                    |
| SNP_72422_A_2753   | NW_004515886.1 | scaffold404 | 2753                    | AA                              | CC                 | CC               | INTERGENIC      |               |                    |                    |
| SNP_72423_A_2830   | NW_004515886.1 | scaffold404 | 2830                    | AA                              | GG                 | GG               | INTERGENIC      |               |                    |                    |
| SNP_72424_A_2925   | NW_004515886.1 | scaffold404 | 2925                    | TT                              | CC                 | CC               | INTERGENIC      |               |                    |                    |
| SNP_72425_A_5356   | NW_004515886.1 | scaffold404 | 5356                    | AA                              | CC                 | CC               | INTERGENIC      |               |                    |                    |
| SNP_72426_A_5376   | NW_004515886.1 | scaffold404 | 5376                    | TT                              | CC                 | CC               | INTERGENIC      |               |                    |                    |
| SNP_72427_A_5941   | NW_004515886.1 | scaffold404 | 5941                    | TT                              | GG                 | GG               | INTERGENIC      |               |                    |                    |
| SNP_72428_A_6252   | NW_004515886.1 | scaffold404 | 6252                    | GG                              | TT                 | TT               | INTERGENIC      |               |                    |                    |
| SNP_72429_A_6493   | NW_004515886.1 | scaffold404 | 6493                    | GG                              | CC                 | CC               | INTERGENIC      |               |                    |                    |
| SNP_72431_A_13110  | NW_004515886.1 | scaffold404 | 13110                   | AA                              | GG                 | GG               | INTERGENIC      |               |                    |                    |
| SNP_72432_A_15281  | NW_004515886.1 | scaffold404 | 15281                   | TT                              | AA                 | AA               | INTERGENIC      |               |                    |                    |
| SNP_72433_A_23970  | NW_004515886.1 | scaffold404 | 23970                   | GG                              | AA                 | AA               | INTERGENIC      |               |                    |                    |
| SNP_72434_A_24183  | NW_004515886.1 | scaffold404 | 24183                   | AA                              | CC                 | CC               | INTERGENIC      |               |                    |                    |
| SNP_72435_A_25409  | NW_004515886.1 | scaffold404 | 25409                   | AA                              | GG                 | GG               | INTERGENIC      |               |                    |                    |
| SNP_72436_A_25500  | NW_004515886.1 | scaffold404 | 25500                   | CC                              | GG                 | GG               | INTERGENIC      |               |                    |                    |
| SNP_72437_A_25508  | NW_004515886.1 | scaffold404 | 25508                   | GG                              | AA                 | AA               | INTERGENIC      |               |                    |                    |
| SNP_72438_A_25612  | NW_004515886.1 | scaffold404 | 25612                   | CC                              | TT                 | TT               | INTERGENIC      |               |                    |                    |

| SNPs IDs          | Chromosome IDs | Chromosomes | Physical positions (bp) | CDC Frontier (Reference genome) | (Pusa 1103 & HPNB) | (ILWC 46 & LPNB) | Sequence genome | Components of | Gene accession IDs | Putative functions |
|-------------------|----------------|-------------|-------------------------|---------------------------------|--------------------|------------------|-----------------|---------------|--------------------|--------------------|
| SNP_72439_A_25709 | NW_004515886.1 | scaffold404 | 25709                   | AA                              | GG                 | GG               | INTERGENIC      |               |                    |                    |
| SNP_72440_A_25717 | NW_004515886.1 | scaffold404 | 25717                   | TT                              | CC                 | CC               | INTERGENIC      |               |                    |                    |
| SNP_72441_A_25800 | NW_004515886.1 | scaffold404 | 25800                   | AA                              | CC                 | CC               | INTERGENIC      |               |                    |                    |
| SNP_72442_A_25840 | NW_004515886.1 | scaffold404 | 25840                   | TT                              | AA                 | AA               | INTERGENIC      |               |                    |                    |
| SNP_72443_A_25867 | NW_004515886.1 | scaffold404 | 25867                   | AA                              | GG                 | GG               | INTERGENIC      |               |                    |                    |
| SNP_72444_A_25933 | NW_004515886.1 | scaffold404 | 25933                   | AA                              | TT                 | TT               | INTERGENIC      |               |                    |                    |
| SNP_72445_A_25943 | NW_004515886.1 | scaffold404 | 25943                   | AA                              | GG                 | GG               | INTERGENIC      |               |                    |                    |
| SNP_72446_A_25960 | NW_004515886.1 | scaffold404 | 25960                   | GG                              | AA                 | AA               | INTERGENIC      |               |                    |                    |
| SNP_72447_A_25978 | NW_004515886.1 | scaffold404 | 25978                   | TT                              | CC                 | CC               | INTERGENIC      |               |                    |                    |
| SNP_72448_A_37049 | NW_004515886.1 | scaffold404 | 37049                   | TT                              | CC                 | CC               | INTERGENIC      |               |                    |                    |
| SNP_72449_A_38229 | NW_004515886.1 | scaffold404 | 38229                   | CC                              | TT                 | TT               | INTERGENIC      |               |                    |                    |
| SNP_72450_A_40634 | NW_004515886.1 | scaffold404 | 40634                   | GG                              | AA                 | AA               | INTERGENIC      |               |                    |                    |
| SNP_72451_A_43788 | NW_004515886.1 | scaffold404 | 43788                   | CC                              | TT                 | TT               | INTERGENIC      |               |                    |                    |
| SNP_72452_A_43792 | NW_004515886.1 | scaffold404 | 43792                   | GG                              | AA                 | AA               | INTERGENIC      |               |                    |                    |
| SNP_72453_A_44294 | NW_004515886.1 | scaffold404 | 44294                   | TT                              | CC                 | CC               | INTERGENIC      |               |                    |                    |
| SNP_72454_A_44791 | NW_004515886.1 | scaffold404 | 44791                   | CC                              | TT                 | TT               | INTERGENIC      |               |                    |                    |
| SNP_72455_A_44825 | NW_004515886.1 | scaffold404 | 44825                   | AA                              | TT                 | TT               | INTERGENIC      |               |                    |                    |
| SNP_72456_A_44838 | NW_004515886.1 | scaffold404 | 44838                   | GG                              | TT                 | TT               | INTERGENIC      |               |                    |                    |
| SNP_72457_A_44839 | NW_004515886.1 | scaffold404 | 44839                   | TT                              | GG                 | CC               | INTERGENIC      |               |                    |                    |
| SNP_72458_A_44840 | NW_004515886.1 | scaffold404 | 44840                   | GG                              | TT                 | TT               | INTERGENIC      |               |                    |                    |
| SNP_72459_A_44854 | NW_004515886.1 | scaffold404 | 44854                   | AA                              | TT                 | TT               | INTERGENIC      |               |                    |                    |
| SNP_72460_A_44937 | NW_004515886.1 | scaffold404 | 44937                   | GG                              | TT                 | TT               | INTERGENIC      |               |                    |                    |

| SNPs IDs          | Chromosome IDs | Chromosomes | Physical positions (bp) | CDC Frontier (Reference genome) | (Pusa 1103 & HPNB) | (ILWC 46 & LPNB) | Sequence genome | Components of | Gene accession IDs | Putative functions |
|-------------------|----------------|-------------|-------------------------|---------------------------------|--------------------|------------------|-----------------|---------------|--------------------|--------------------|
| SNP_72461_A_45390 | NW_004515886.1 | scaffold404 | 45390                   | AA                              | GG                 | GG               | INTERGENIC      |               |                    |                    |
| SNP_72462_A_46742 | NW_004515886.1 | scaffold404 | 46742                   | GG                              | AA                 | AA               | INTERGENIC      |               |                    |                    |
| SNP_72463_A_49990 | NW_004515886.1 | scaffold404 | 49990                   | AA                              | TT                 | TT               | INTERGENIC      |               |                    |                    |
| SNP_72464_A_50057 | NW_004515886.1 | scaffold404 | 50057                   | TT                              | AA                 | AA               | INTERGENIC      |               |                    |                    |
| SNP_72465_A_61652 | NW_004515886.1 | scaffold404 | 61652                   | CC                              | GG                 | GG               | INTERGENIC      |               |                    |                    |
| SNP_72466_A_61700 | NW_004515886.1 | scaffold404 | 61700                   | AA                              | TT                 | TT               | INTERGENIC      |               |                    |                    |
| SNP_72467_A_61726 | NW_004515886.1 | scaffold404 | 61726                   | AA                              | CC                 | CC               | INTERGENIC      |               |                    |                    |
| SNP_72468_A_62224 | NW_004515886.1 | scaffold404 | 62224                   | AA                              | GG                 | GG               | INTERGENIC      |               |                    |                    |
| SNP_72469_A_62229 | NW_004515886.1 | scaffold404 | 62229                   | TT                              | CC                 | CC               | INTERGENIC      |               |                    |                    |
| SNP_72470_A_62257 | NW_004515886.1 | scaffold404 | 62257                   | CC                              | TT                 | TT               | INTERGENIC      |               |                    |                    |
| SNP_72471_A_62267 | NW_004515886.1 | scaffold404 | 62267                   | CC                              | TT                 | TT               | INTERGENIC      |               |                    |                    |
| SNP_72472_A_62276 | NW_004515886.1 | scaffold404 | 62276                   | GG                              | AA                 | AA               | INTERGENIC      |               |                    |                    |
| SNP_72473_A_63600 | NW_004515886.1 | scaffold404 | 63600                   | CC                              | TT                 | TT               | INTERGENIC      |               |                    |                    |
| SNP_72474_A_63650 | NW_004515886.1 | scaffold404 | 63650                   | AA                              | CC                 | CC               | INTERGENIC      |               |                    |                    |
| SNP_72475_A_63960 | NW_004515886.1 | scaffold404 | 63960                   | AA                              | GG                 | GG               | INTERGENIC      |               |                    |                    |
| SNP_72476_A_64017 | NW_004515886.1 | scaffold404 | 64017                   | TT                              | AA                 | AA               | INTERGENIC      |               |                    |                    |
| SNP_72477_A_64209 | NW_004515886.1 | scaffold404 | 64209                   | AA                              | TT                 | TT               | INTERGENIC      |               |                    |                    |
| SNP_72478_A_64260 | NW_004515886.1 | scaffold404 | 64260                   | AA                              | CC                 | CC               | INTERGENIC      |               |                    |                    |
| SNP_72479_A_64326 | NW_004515886.1 | scaffold404 | 64326                   | AA                              | TT                 | TT               | INTERGENIC      |               |                    |                    |
| SNP_72480_A_64640 | NW_004515886.1 | scaffold404 | 64640                   | AA                              | TT                 | TT               | INTERGENIC      |               |                    |                    |
| SNP_72481_A_64645 | NW_004515886.1 | scaffold404 | 64645                   | AA                              | GG                 | GG               | INTERGENIC      |               |                    |                    |
| SNP_72482_A_64674 | NW_004515886.1 | scaffold404 | 64674                   | TT                              | CC                 | CC               | INTERGENIC      |               |                    |                    |

| SNPs IDs           | Chromosome IDs | Chromosomes | Physical positions (bp) | CDC Frontier (Reference genome) | (Pusa 1103 & HPNB) | (ILWC 46 & LPNB) | Sequence Components of genome | Gene accession IDs | Putative functions |
|--------------------|----------------|-------------|-------------------------|---------------------------------|--------------------|------------------|-------------------------------|--------------------|--------------------|
| SNP_72483_A_64707  | NW_004515886.1 | scaffold404 | 64707                   | TT                              | AA                 | AA               | INTERGENIC                    |                    |                    |
| SNP_72484_A_82120  | NW_004515886.1 | scaffold404 | 82120                   | TT                              | AA                 | AA               | INTERGENIC                    |                    |                    |
| SNP_72485_A_96846  | NW_004515886.1 | scaffold404 | 96846                   | TT                              | GG                 | GG               | INTERGENIC                    |                    |                    |
| SNP_72486_A_143549 | NW_004515886.1 | scaffold404 | 143549                  | TT                              | GG                 | GG               | INTERGENIC                    |                    |                    |
| SNP_72487_A_143559 | NW_004515886.1 | scaffold404 | 143559                  | CC                              | TT                 | TT               | INTERGENIC                    |                    |                    |
| SNP_72488_A_156517 | NW_004515886.1 | scaffold404 | 156517                  | GG                              | TT                 | TT               | INTERGENIC                    |                    |                    |
| SNP_72489_A_161379 | NW_004515886.1 | scaffold404 | 161379                  | AA                              | GG                 | GG               | INTERGENIC                    |                    |                    |
| SNP_72491_A_161868 | NW_004515886.1 | scaffold404 | 161868                  | AA                              | GG                 | GG               | INTERGENIC                    |                    |                    |
| SNP_72492_A_164166 | NW_004515886.1 | scaffold404 | 164166                  | AA                              | TT                 | TT               | INTERGENIC                    |                    |                    |
| SNP_72493_A_180167 | NW_004515886.1 | scaffold404 | 180167                  | GG                              | TT                 | TT               | INTERGENIC                    |                    |                    |
| SNP_72494_A_180203 | NW_004515886.1 | scaffold404 | 180203                  | GG                              | AA                 | AA               | INTERGENIC                    |                    |                    |
| SNP_72496_A_180259 | NW_004515886.1 | scaffold404 | 180259                  | GG                              | TT                 | TT               | DRR                           | 101496841          | Unknown function   |
| SNP_72497_A_180599 | NW_004515886.1 | scaffold404 | 180599                  | GG                              | TT                 | TT               | DRR                           | 101496841          | Unknown function   |
| SNP_72498_A_181169 | NW_004515886.1 | scaffold404 | 181169                  | TT                              | CC                 | CC               | DRR                           | 101496841          | Unknown function   |
| SNP_72499_A_183911 | NW_004515886.1 | scaffold404 | 183911                  | GG                              | CC                 | CC               | NON_SYNONYMOUS_CODING         | 101496841          | Unknown function   |
| SNP_72500_A_184064 | NW_004515886.1 | scaffold404 | 184064                  | GG                              | CC                 | CC               | NON_SYNONYMOUS_CODING         | 101496841          | Unknown function   |
| SNP_72501_A_184116 | NW_004515886.1 | scaffold404 | 184116                  | TT                              | CC                 | CC               | URR                           | 101496841          | Unknown function   |
| SNP_72502_A_184126 | NW_004515886.1 | scaffold404 | 184126                  | AA                              | GG                 | GG               | URR                           | 101496841          | Unknown function   |
| SNP_72503_A_184196 | NW_004515886.1 | scaffold404 | 184196                  | AA                              | GG                 | GG               | URR                           | 101496841          | Unknown function   |
| SNP_72504_A_184308 | NW_004515886.1 | scaffold404 | 184308                  | TT                              | GG                 | GG               | URR                           | 101496841          | Unknown function   |
| SNP_72505_A_184368 | NW_004515886.1 | scaffold404 | 184368                  | TT                              | CC                 | CC               | URR                           | 101496841          | Unknown function   |
| SNP_72506_A_184373 | NW_004515886.1 | scaffold404 | 184373                  | CC                              | TT                 | TT               | URR                           | 101496841          | Unknown function   |

| SNPs IDs           | Chromosome IDs | Chromosomes | Physical positions (bp) | CDC Frontier (Reference genome) | (Pusa 1103 & HPNB) | (ILWC 46 & LPNB) | Sequence Components of genome | Gene accession IDs | Putative functions  |
|--------------------|----------------|-------------|-------------------------|---------------------------------|--------------------|------------------|-------------------------------|--------------------|---------------------|
| SNP_72507_A_184379 | NW_004515886.1 | scaffold404 | 184379                  | GG                              | AA                 | AA               | URR                           | 101496841          | Unknown function    |
| SNP_72508_A_184393 | NW_004515886.1 | scaffold404 | 184393                  | TT                              | AA                 | AA               | URR                           | 101496841          | Unknown function    |
| SNP_72509_A_184394 | NW_004515886.1 | scaffold404 | 184394                  | CC                              | AA                 | AA               | URR                           | 101496841          | Unknown function    |
| SNP_72510_A_184423 | NW_004515886.1 | scaffold404 | 184423                  | TT                              | CC                 | CC               | URR                           | 101496841          | Unknown function    |
| SNP_72511_A_185699 | NW_004515886.1 | scaffold404 | 185699                  | AA                              | GG                 | GG               | URR                           | 101496841          | Unknown function    |
| SNP_72512_A_185706 | NW_004515886.1 | scaffold404 | 185706                  | GG                              | CC                 | CC               | URR                           | 101496841          | Unknown function    |
| SNP_72513_A_185765 | NW_004515886.1 | scaffold404 | 185765                  | AA                              | GG                 | GG               | URR                           | 101496841          | Unknown function    |
| SNP_72514_A_185766 | NW_004515886.1 | scaffold404 | 185766                  | TT                              | CC                 | CC               | URR                           | 101496841          | Unknown function    |
| SNP_72515_A_185783 | NW_004515886.1 | scaffold404 | 185783                  | GG                              | TT                 | TT               | URR                           | 101496841          | Unknown function    |
| SNP_72516_A_185794 | NW_004515886.1 | scaffold404 | 185794                  | CC                              | TT                 | TT               | URR                           | 101496841          | Unknown function    |
| SNP_72517_A_185976 | NW_004515886.1 | scaffold404 | 185976                  | CC                              | AA                 | AA               | URR                           | 101496841          | Unknown function    |
| SNP_72518_A_186000 | NW_004515886.1 | scaffold404 | 186000                  | GG                              | TT                 | TT               | URR                           | 101496841          | Unknown function    |
| SNP_72519_A_186001 | NW_004515886.1 | scaffold404 | 186001                  | TT                              | GG                 | GG               | URR                           | 101496841          | Unknown function    |
| SNP_72521_A_236820 | NW_004515886.1 | scaffold404 | 236820                  | CC                              | TT                 | TT               | INTERGENIC                    |                    |                     |
| SNP_72523_A_247425 | NW_004515886.1 | scaffold404 | 247425                  | TT                              | GG                 | GG               | INTRON                        | 101494037          | endonuclease 2-like |
| SNP_72524_A_247426 | NW_004515886.1 | scaffold404 | 247426                  | TT                              | GG                 | GG               | INTRON                        | 101494037          | endonuclease 2-like |
| SNP_72525_A_263716 | NW_004515886.1 | scaffold404 | 263716                  | TT                              | CC                 | CC               | INTERGENIC                    |                    |                     |
| SNP_72526_A_264057 | NW_004515886.1 | scaffold404 | 264057                  | CC                              | GG                 | GG               | INTERGENIC                    |                    |                     |
| SNP_72527_A_264072 | NW_004515886.1 | scaffold404 | 264072                  | TT                              | CC                 | CC               | INTERGENIC                    |                    |                     |
| SNP_72528_A_304587 | NW_004515886.1 | scaffold404 | 304587                  | CC                              | TT                 | TT               | INTERGENIC                    |                    |                     |
| SNP_72529_A_304611 | NW_004515886.1 | scaffold404 | 304611                  | CC                              | TT                 | TT               | INTERGENIC                    |                    |                     |
| SNP_72530_A_356780 | NW_004515886.1 | scaffold404 | 356780                  | CC                              | TT                 | TT               | INTERGENIC                    |                    |                     |

| SNPs IDs           | Chromosome IDs | Chromosomes | Physical positions (bp) | CDC Frontier (Reference genome) | (Pusa 1103 & HPNB) | (ILWC 46 & LPNB) | Sequence genome | Components of | Gene accession IDs | Putative functions |
|--------------------|----------------|-------------|-------------------------|---------------------------------|--------------------|------------------|-----------------|---------------|--------------------|--------------------|
| SNP_72531_A_357184 | NW_004515886.1 | scaffold404 | 357184                  | CC                              | TT                 | TT               | INTERGENIC      |               |                    |                    |
| SNP_72532_A_386735 | NW_004515886.1 | scaffold404 | 386735                  | GG                              | AA                 | AA               | INTERGENIC      |               |                    |                    |
| SNP_72534_A_64     | NW_004515887.1 | scaffold408 | 64                      | GG                              | CC                 | CC               | INTERGENIC      |               |                    |                    |
| SNP_72535_A_988    | NW_004515887.1 | scaffold408 | 988                     | AA                              | TT                 | TT               | INTERGENIC      |               |                    |                    |
| SNP_72536_A_1001   | NW_004515887.1 | scaffold408 | 1001                    | TT                              | CC                 | CC               | INTERGENIC      |               |                    |                    |
| SNP_72537_A_1003   | NW_004515887.1 | scaffold408 | 1003                    | CC                              | AA                 | AA               | INTERGENIC      |               |                    |                    |
| SNP_72538_A_1195   | NW_004515887.1 | scaffold408 | 1195                    | TT                              | AA                 | AA               | INTERGENIC      |               |                    |                    |
| SNP_72539_A_1196   | NW_004515887.1 | scaffold408 | 1196                    | GG                              | TT                 | TT               | INTERGENIC      |               |                    |                    |
| SNP_72540_A_1446   | NW_004515887.1 | scaffold408 | 1446                    | TT                              | CC                 | CC               | INTERGENIC      |               |                    |                    |
| SNP_72541_A_1760   | NW_004515887.1 | scaffold408 | 1760                    | CC                              | TT                 | TT               | INTERGENIC      |               |                    |                    |
| SNP_72542_A_2527   | NW_004515887.1 | scaffold408 | 2527                    | GG                              | AA                 | AA               | INTERGENIC      |               |                    |                    |
| SNP_72543_A_2573   | NW_004515887.1 | scaffold408 | 2573                    | AA                              | CC                 | CC               | INTERGENIC      |               |                    |                    |
| SNP_72544_A_2803   | NW_004515887.1 | scaffold408 | 2803                    | GG                              | TT                 | TT               | INTERGENIC      |               |                    |                    |
| SNP_72545_A_3043   | NW_004515887.1 | scaffold408 | 3043                    | GG                              | AA                 | AA               | INTERGENIC      |               |                    |                    |
| SNP_72546_A_3084   | NW_004515887.1 | scaffold408 | 3084                    | AA                              | GG                 | GG               | INTERGENIC      |               |                    |                    |
| SNP_72548_A_3542   | NW_004515887.1 | scaffold408 | 3542                    | TT                              | CC                 | CC               | INTERGENIC      |               |                    |                    |
| SNP_72550_A_12211  | NW_004515887.1 | scaffold408 | 12211                   | CC                              | GG                 | GG               | INTERGENIC      |               |                    |                    |
| SNP_72551_A_12234  | NW_004515887.1 | scaffold408 | 12234                   | TT                              | GG                 | GG               | INTERGENIC      |               |                    |                    |
| SNP_72552_A_12448  | NW_004515887.1 | scaffold408 | 12448                   | TT                              | AA                 | AA               | INTERGENIC      |               |                    |                    |
| SNP_72553_A_12475  | NW_004515887.1 | scaffold408 | 12475                   | GG                              | AA                 | AA               | INTERGENIC      |               |                    |                    |
| SNP_72554_A_12613  | NW_004515887.1 | scaffold408 | 12613                   | TT                              | AA                 | AA               | INTERGENIC      |               |                    |                    |
| SNP_72555_A_20453  | NW_004515887.1 | scaffold408 | 20453                   | TT                              | CC                 | CC               | INTERGENIC      |               |                    |                    |

| SNPs IDs          | Chromosome IDs | Chromosomes | Physical positions (bp) | CDC Frontier (Reference genome) | (Pusa 1103 & HPNB) | (ILWC 46 & LPNB) | Sequence genome | Components of | Gene accession IDs | Putative functions |
|-------------------|----------------|-------------|-------------------------|---------------------------------|--------------------|------------------|-----------------|---------------|--------------------|--------------------|
| SNP_72556_A_20483 | NW_004515887.1 | scaffold408 | 20483                   | GG                              | CC                 | CC               | INTERGENIC      |               |                    |                    |
| SNP_72557_A_20490 | NW_004515887.1 | scaffold408 | 20490                   | CC                              | TT                 | TT               | INTERGENIC      |               |                    |                    |
| SNP_72558_A_20533 | NW_004515887.1 | scaffold408 | 20533                   | AA                              | TT                 | TT               | INTERGENIC      |               |                    |                    |
| SNP_72559_A_20548 | NW_004515887.1 | scaffold408 | 20548                   | AA                              | GG                 | GG               | INTERGENIC      |               |                    |                    |
| SNP_72560_A_20582 | NW_004515887.1 | scaffold408 | 20582                   | TT                              | GG                 | GG               | INTERGENIC      |               |                    |                    |
| SNP_72561_A_20590 | NW_004515887.1 | scaffold408 | 20590                   | AA                              | TT                 | TT               | INTERGENIC      |               |                    |                    |
| SNP_72562_A_20597 | NW_004515887.1 | scaffold408 | 20597                   | TT                              | AA                 | AA               | INTERGENIC      |               |                    |                    |
| SNP_72563_A_20787 | NW_004515887.1 | scaffold408 | 20787                   | CC                              | TT                 | TT               | INTERGENIC      |               |                    |                    |
| SNP_72564_A_20880 | NW_004515887.1 | scaffold408 | 20880                   | CC                              | TT                 | TT               | INTERGENIC      |               |                    |                    |
| SNP_72565_A_20940 | NW_004515887.1 | scaffold408 | 20940                   | AA                              | GG                 | GG               | INTERGENIC      |               |                    |                    |
| SNP_72566_A_21116 | NW_004515887.1 | scaffold408 | 21116                   | TT                              | AA                 | AA               | INTERGENIC      |               |                    |                    |
| SNP_72567_A_21200 | NW_004515887.1 | scaffold408 | 21200                   | AA                              | GG                 | GG               | INTERGENIC      |               |                    |                    |
| SNP_72568_A_21203 | NW_004515887.1 | scaffold408 | 21203                   | AA                              | TT                 | TT               | INTERGENIC      |               |                    |                    |
| SNP_72569_A_21239 | NW_004515887.1 | scaffold408 | 21239                   | TT                              | CC                 | CC               | INTERGENIC      |               |                    |                    |
| SNP_72570_A_21302 | NW_004515887.1 | scaffold408 | 21302                   | TT                              | AA                 | AA               | INTERGENIC      |               |                    |                    |
| SNP_72571_A_21323 | NW_004515887.1 | scaffold408 | 21323                   | AA                              | GG                 | GG               | INTERGENIC      |               |                    |                    |
| SNP_72572_A_31339 | NW_004515887.1 | scaffold408 | 31339                   | GG                              | AA                 | AA               | INTERGENIC      |               |                    |                    |
| SNP_72573_A_51031 | NW_004515887.1 | scaffold408 | 51031                   | AA                              | GG                 | GG               | INTERGENIC      |               |                    |                    |
| SNP_72574_A_84403 | NW_004515887.1 | scaffold408 | 84403                   | TT                              | GG                 | GG               | INTERGENIC      |               |                    |                    |
| SNP_72575_A_84413 | NW_004515887.1 | scaffold408 | 84413                   | AA                              | CC                 | CC               | INTERGENIC      |               |                    |                    |
| SNP_72576_A_84481 | NW_004515887.1 | scaffold408 | 84481                   | AA                              | GG                 | GG               | INTERGENIC      |               |                    |                    |
| SNP_72577_A_84702 | NW_004515887.1 | scaffold408 | 84702                   | AA                              | CC                 | CC               | INTERGENIC      |               |                    |                    |



| SNPs IDs           | Chromosome IDs | Chromosomes | Physical positions (bp) | CDC Frontier (Reference genome) | (Pusa 1103 & HPNB) | (ILWC 46 & LPNB) | Sequence Components of genome | Gene accession IDs | Putative functions |
|--------------------|----------------|-------------|-------------------------|---------------------------------|--------------------|------------------|-------------------------------|--------------------|--------------------|
| SNP_72578_A_84715  | NW_004515887.1 | scaffold408 | 84715                   | TT                              | CC                 | CC               | INTERGENIC                    |                    |                    |
| SNP_72579_A_84864  | NW_004515887.1 | scaffold408 | 84864                   | TT                              | GG                 | GG               | INTERGENIC                    |                    |                    |
| SNP_72580_A_111577 | NW_004515887.1 | scaffold408 | 111577                  | GG                              | TT                 | TT               | INTERGENIC                    |                    |                    |
| SNP_72581_A_130476 | NW_004515887.1 | scaffold408 | 130476                  | TT                              | CC                 | CC               | INTRON                        | 101498148          | cucumisin-like     |
| SNP_72582_A_130914 | NW_004515887.1 | scaffold408 | 130914                  | AA                              | GG                 | GG               | INTRON                        | 101498148          | cucumisin-like     |
| SNP_72583_A_130929 | NW_004515887.1 | scaffold408 | 130929                  | TT                              | AA                 | AA               | INTRON                        | 101498148          | cucumisin-like     |
| SNP_72586_A_131049 | NW_004515887.1 | scaffold408 | 131049                  | GG                              | AA                 | AA               | INTRON                        | 101498148          | cucumisin-like     |
| SNP_72587_A_131124 | NW_004515887.1 | scaffold408 | 131124                  | GG                              | AA                 | AA               | INTRON                        | 101498148          | cucumisin-like     |
| SNP_72588_A_131127 | NW_004515887.1 | scaffold408 | 131127                  | AA                              | TT                 | TT               | INTRON                        | 101498148          | cucumisin-like     |
| SNP_72589_A_131161 | NW_004515887.1 | scaffold408 | 131161                  | AA                              | TT                 | TT               | INTRON                        | 101498148          | cucumisin-like     |
| SNP_72590_A_131180 | NW_004515887.1 | scaffold408 | 131180                  | AA                              | GG                 | GG               | INTRON                        | 101498148          | cucumisin-like     |
| SNP_72591_A_131272 | NW_004515887.1 | scaffold408 | 131272                  | TT                              | AA                 | AA               | INTRON                        | 101498148          | cucumisin-like     |
| SNP_72592_A_2483   | NW_004515888.1 | scaffold409 | 2483                    | AA                              | GG                 | GG               | INTERGENIC                    |                    |                    |
| SNP_72593_A_2604   | NW_004515888.1 | scaffold409 | 2604                    | CC                              | TT                 | TT               | INTERGENIC                    |                    |                    |
| SNP_72594_A_2630   | NW_004515888.1 | scaffold409 | 2630                    | TT                              | CC                 | CC               | INTERGENIC                    |                    |                    |
| SNP_72595_A_2631   | NW_004515888.1 | scaffold409 | 2631                    | CC                              | AA                 | AA               | INTERGENIC                    |                    |                    |
| SNP_72596_A_2673   | NW_004515888.1 | scaffold409 | 2673                    | GG                              | AA                 | AA               | INTERGENIC                    |                    |                    |
| SNP_72597_A_36882  | NW_004515888.1 | scaffold409 | 36882                   | TT                              | AA                 | AA               | INTERGENIC                    |                    |                    |
| SNP_72598_A_17369  | NW_004515889.1 | scaffold411 | 17369                   | AA                              | GG                 | GG               | INTERGENIC                    |                    |                    |
| SNP_72599_A_41671  | NW_004515889.1 | scaffold411 | 41671                   | CC                              | TT                 | TT               | INTERGENIC                    |                    |                    |
| SNP_72600_A_41678  | NW_004515889.1 | scaffold411 | 41678                   | CC                              | TT                 | TT               | INTERGENIC                    |                    |                    |
| SNP_72601_A_41679  | NW_004515889.1 | scaffold411 | 41679                   | GG                              | AA                 | AA               | INTERGENIC                    |                    |                    |

| SNPs IDs           | Chromosome IDs | Chromosomes | Physical positions (bp) | CDC Frontier (Reference genome) | (Pusa 1103 & HPNB) | (ILWC 46 & LPNB) | Sequence genome | Components of | Gene accession IDs | Putative functions |
|--------------------|----------------|-------------|-------------------------|---------------------------------|--------------------|------------------|-----------------|---------------|--------------------|--------------------|
| SNP_72602_A_41686  | NW_004515889.1 | scaffold411 | 41686                   | TT                              | CC                 | CC               | INTERGENIC      |               |                    |                    |
| SNP_72603_A_41687  | NW_004515889.1 | scaffold411 | 41687                   | AA                              | GG                 | GG               | INTERGENIC      |               |                    |                    |
| SNP_72604_A_41694  | NW_004515889.1 | scaffold411 | 41694                   | AA                              | GG                 | GG               | INTERGENIC      |               |                    |                    |
| SNP_72605_A_41703  | NW_004515889.1 | scaffold411 | 41703                   | GG                              | AA                 | AA               | INTERGENIC      |               |                    |                    |
| SNP_72606_A_41738  | NW_004515889.1 | scaffold411 | 41738                   | AA                              | GG                 | GG               | INTERGENIC      |               |                    |                    |
| SNP_72607_A_41833  | NW_004515889.1 | scaffold411 | 41833                   | GG                              | AA                 | AA               | INTERGENIC      |               |                    |                    |
| SNP_72608_A_42664  | NW_004515889.1 | scaffold411 | 42664                   | GG                              | AA                 | AA               | INTERGENIC      |               |                    |                    |
| SNP_72609_A_42714  | NW_004515889.1 | scaffold411 | 42714                   | TT                              | CC                 | CC               | INTERGENIC      |               |                    |                    |
| SNP_72610_A_42729  | NW_004515889.1 | scaffold411 | 42729                   | AA                              | GG                 | GG               | INTERGENIC      |               |                    |                    |
| SNP_72612_A_42790  | NW_004515889.1 | scaffold411 | 42790                   | TT                              | AA                 | AA               | INTERGENIC      |               |                    |                    |
| SNP_72613_A_43051  | NW_004515889.1 | scaffold411 | 43051                   | AA                              | GG                 | GG               | INTERGENIC      |               |                    |                    |
| SNP_72614_A_65702  | NW_004515889.1 | scaffold411 | 65702                   | AA                              | TT                 | TT               | INTERGENIC      |               |                    |                    |
| SNP_72615_A_73804  | NW_004515889.1 | scaffold411 | 73804                   | CC                              | TT                 | TT               | INTERGENIC      |               |                    |                    |
| SNP_72616_A_74036  | NW_004515889.1 | scaffold411 | 74036                   | AA                              | TT                 | TT               | INTERGENIC      |               |                    |                    |
| SNP_72617_A_74044  | NW_004515889.1 | scaffold411 | 74044                   | GG                              | AA                 | AA               | INTERGENIC      |               |                    |                    |
| SNP_72618_A_74091  | NW_004515889.1 | scaffold411 | 74091                   | GG                              | AA                 | AA               | INTERGENIC      |               |                    |                    |
| SNP_72619_A_81749  | NW_004515889.1 | scaffold411 | 81749                   | GG                              | AA                 | AA               | INTERGENIC      |               |                    |                    |
| SNP_72620_A_98512  | NW_004515889.1 | scaffold411 | 98512                   | AA                              | GG                 | GG               | INTERGENIC      |               |                    |                    |
| SNP_72621_A_120316 | NW_004515889.1 | scaffold411 | 120316                  | AA                              | TT                 | TT               | INTERGENIC      |               |                    |                    |
| SNP_72622_A_124098 | NW_004515889.1 | scaffold411 | 124098                  | TT                              | AA                 | AA               | INTERGENIC      |               |                    |                    |
| SNP_72623_A_124422 | NW_004515889.1 | scaffold411 | 124422                  | CC                              | AA                 | AA               | INTERGENIC      |               |                    |                    |
| SNP_72625_A_151050 | NW_004515889.1 | scaffold411 | 151050                  | CC                              | TT                 | TT               | INTERGENIC      |               |                    |                    |

| SNPs IDs           | Chromosome IDs | Chromosomes | Physical positions (bp) | CDC Frontier (Reference genome) | (Pusa 1103 & HPNB) | (ILWC 46 & LPNB) | Sequence Components of genome | Gene accession IDs | Putative functions           |
|--------------------|----------------|-------------|-------------------------|---------------------------------|--------------------|------------------|-------------------------------|--------------------|------------------------------|
| SNP_72626_A_151814 | NW_004515889.1 | scaffold411 | 151814                  | AA                              | GG                 | GG               | INTERGENIC                    |                    |                              |
| SNP_72627_A_162147 | NW_004515889.1 | scaffold411 | 162147                  | AA                              | GG                 | GG               | URR                           | 101500086          | Unknown function             |
| SNP_72628_A_162162 | NW_004515889.1 | scaffold411 | 162162                  | AA                              | CC                 | CC               | URR                           | 101500086          | Unknown function             |
| SNP_72630_A_196972 | NW_004515889.1 | scaffold411 | 196972                  | AA                              | CC                 | CC               | INTERGENIC                    |                    |                              |
| SNP_72631_A_230423 | NW_004515889.1 | scaffold411 | 230423                  | AA                              | GG                 | GG               | INTERGENIC                    |                    |                              |
| SNP_72632_A_231481 | NW_004515889.1 | scaffold411 | 231481                  | TT                              | CC                 | CC               | INTERGENIC                    |                    |                              |
| SNP_72633_A_231677 | NW_004515889.1 | scaffold411 | 231677                  | AA                              | GG                 | GG               | INTERGENIC                    |                    |                              |
| SNP_72634_A_231680 | NW_004515889.1 | scaffold411 | 231680                  | AA                              | GG                 | GG               | INTERGENIC                    |                    |                              |
| SNP_72635_A_231897 | NW_004515889.1 | scaffold411 | 231897                  | AA                              | GG                 | GG               | INTERGENIC                    |                    |                              |
| SNP_72636_A_231952 | NW_004515889.1 | scaffold411 | 231952                  | TT                              | CC                 | CC               | INTERGENIC                    |                    |                              |
| SNP_72637_A_231972 | NW_004515889.1 | scaffold411 | 231972                  | TT                              | CC                 | CC               | INTERGENIC                    |                    |                              |
| SNP_72639_A_252830 | NW_004515889.1 | scaffold411 | 252830                  | AA                              | GG                 | GG               | NON_SYNONYMOUS_CODING         | 101500724          | sugar transporter ERD6-like  |
| SNP_72640_A_259232 | NW_004515889.1 | scaffold411 | 259232                  | AA                              | GG                 | GG               | INTRON                        | 101500724          | sugar transporter ERD6-like  |
| SNP_72641_A_298120 | NW_004515889.1 | scaffold411 | 298120                  | GG                              | CC                 | CC               | INTERGENIC                    |                    |                              |
| SNP_72642_A_298443 | NW_004515889.1 | scaffold411 | 298443                  | GG                              | AA                 | AA               | INTERGENIC                    |                    |                              |
| SNP_72644_A_298529 | NW_004515889.1 | scaffold411 | 298529                  | TT                              | CC                 | CC               | INTERGENIC                    |                    |                              |
| SNP_72645_A_298615 | NW_004515889.1 | scaffold411 | 298615                  | CC                              | GG                 | GG               | INTERGENIC                    |                    |                              |
| SNP_72646_A_308381 | NW_004515889.1 | scaffold411 | 308381                  | AA                              | GG                 | GG               | INTERGENIC                    |                    |                              |
| SNP_72647_A_308988 | NW_004515889.1 | scaffold411 | 308988                  | TT                              | CC                 | CC               | INTERGENIC                    |                    |                              |
| SNP_72648_A_323140 | NW_004515889.1 | scaffold411 | 323140                  | TT                              | GG                 | GG               | URR                           | 101501353          | Unknown function             |
| SNP_72649_A_334311 | NW_004515889.1 | scaffold411 | 334311                  | TT                              | CC                 | CC               | URR                           | 101501674          | uncharacterized LOC101501674 |
| SNP_72651_A_334524 | NW_004515889.1 | scaffold411 | 334524                  | TT                              | CC                 | CC               | URR                           | 101501674          | uncharacterized LOC101501674 |

| SNPs IDs           | Chromosome IDs | Chromosomes | Physical positions (bp) | CDC Frontier (Reference genome) | (Pusa 1103 & HPNB) | (ILWC 46 & LPNB) | Sequence Components of genome | Gene accession IDs | Putative functions           |
|--------------------|----------------|-------------|-------------------------|---------------------------------|--------------------|------------------|-------------------------------|--------------------|------------------------------|
| SNP_72652_A_335376 | NW_004515889.1 | scaffold411 | 335376                  | TT                              | AA                 | AA               | URR                           | 101501674          | uncharacterized LOC101501674 |
| SNP_72653_A_336425 | NW_004515889.1 | scaffold411 | 336425                  | CC                              | AA                 | AA               | INTERGENIC                    |                    |                              |
| SNP_72656_A_343453 | NW_004515889.1 | scaffold411 | 343453                  | AA                              | GG                 | GG               | INTERGENIC                    |                    |                              |
| SNP_72658_A_347539 | NW_004515889.1 | scaffold411 | 347539                  | GG                              | TT                 | TT               | INTERGENIC                    |                    |                              |
| SNP_72659_A_347540 | NW_004515889.1 | scaffold411 | 347540                  | TT                              | AA                 | AA               | INTERGENIC                    |                    |                              |
| SNP_72660_A_348519 | NW_004515889.1 | scaffold411 | 348519                  | CC                              | AA                 | AA               | INTERGENIC                    |                    |                              |
| SNP_72661_A_348524 | NW_004515889.1 | scaffold411 | 348524                  | AA                              | GG                 | GG               | INTERGENIC                    |                    |                              |
| SNP_72662_A_369161 | NW_004515889.1 | scaffold411 | 369161                  | GG                              | AA                 | AA               | INTERGENIC                    |                    |                              |
| SNP_72663_A_369200 | NW_004515889.1 | scaffold411 | 369200                  | GG                              | AA                 | AA               | INTERGENIC                    |                    |                              |
| SNP_72664_A_369239 | NW_004515889.1 | scaffold411 | 369239                  | GG                              | AA                 | AA               | INTERGENIC                    |                    |                              |
| SNP_72665_A_369366 | NW_004515889.1 | scaffold411 | 369366                  | AA                              | GG                 | GG               | INTERGENIC                    |                    |                              |
| SNP_72666_A_375324 | NW_004515889.1 | scaffold411 | 375324                  | AA                              | GG                 | GG               | INTERGENIC                    |                    |                              |
| SNP_72667_A_377884 | NW_004515889.1 | scaffold411 | 377884                  | TT                              | CC                 | CC               | INTERGENIC                    |                    |                              |
| SNP_72668_A_377942 | NW_004515889.1 | scaffold411 | 377942                  | TT                              | CC                 | CC               | INTERGENIC                    |                    |                              |
| SNP_72669_A_403103 | NW_004515889.1 | scaffold411 | 403103                  | TT                              | CC                 | CC               | INTERGENIC                    |                    |                              |
| SNP_72671_A_436057 | NW_004515889.1 | scaffold411 | 436057                  | TT                              | CC                 | CC               | INTERGENIC                    |                    |                              |
| SNP_72672_A_436537 | NW_004515889.1 | scaffold411 | 436537                  | CC                              | GG                 | GG               | INTERGENIC                    |                    |                              |
| SNP_72673_A_6025   | NW_004515890.1 | scaffold413 | 6025                    | CC                              | AA                 | AA               | INTERGENIC                    |                    |                              |
| SNP_72674_A_6122   | NW_004515890.1 | scaffold413 | 6122                    | AA                              | CC                 | CC               | INTERGENIC                    |                    |                              |
| SNP_72675_A_6185   | NW_004515890.1 | scaffold413 | 6185                    | TT                              | GG                 | GG               | INTERGENIC                    |                    |                              |
| SNP_72676_A_6474   | NW_004515890.1 | scaffold413 | 6474                    | GG                              | TT                 | TT               | INTERGENIC                    |                    |                              |
| SNP_72677_A_6509   | NW_004515890.1 | scaffold413 | 6509                    | AA                              | GG                 | GG               | INTERGENIC                    |                    |                              |

| SNPs IDs          | Chromosome IDs | Chromosomes | Physical positions (bp) | CDC Frontier (Reference genome) | (Pusa 1103 & HPNB) | (ILWC 46 & LPNB) | Sequence genome | Components of | Gene accession IDs | Putative functions |
|-------------------|----------------|-------------|-------------------------|---------------------------------|--------------------|------------------|-----------------|---------------|--------------------|--------------------|
| SNP_72678_A_7185  | NW_004515890.1 | scaffold413 | 7185                    | GG                              | CC                 | CC               | INTERGENIC      |               |                    |                    |
| SNP_72679_A_7202  | NW_004515890.1 | scaffold413 | 7202                    | AA                              | TT                 | TT               | INTERGENIC      |               |                    |                    |
| SNP_72680_A_7228  | NW_004515890.1 | scaffold413 | 7228                    | AA                              | GG                 | GG               | INTERGENIC      |               |                    |                    |
| SNP_72681_A_7235  | NW_004515890.1 | scaffold413 | 7235                    | AA                              | GG                 | GG               | INTERGENIC      |               |                    |                    |
| SNP_72682_A_7362  | NW_004515890.1 | scaffold413 | 7362                    | CC                              | GG                 | GG               | INTERGENIC      |               |                    |                    |
| SNP_72683_A_7377  | NW_004515890.1 | scaffold413 | 7377                    | TT                              | CC                 | CC               | INTERGENIC      |               |                    |                    |
| SNP_72684_A_7454  | NW_004515890.1 | scaffold413 | 7454                    | GG                              | AA                 | AA               | INTERGENIC      |               |                    |                    |
| SNP_72685_A_7482  | NW_004515890.1 | scaffold413 | 7482                    | TT                              | CC                 | CC               | INTERGENIC      |               |                    |                    |
| SNP_72686_A_7721  | NW_004515890.1 | scaffold413 | 7721                    | TT                              | CC                 | CC               | INTERGENIC      |               |                    |                    |
| SNP_72687_A_7908  | NW_004515890.1 | scaffold413 | 7908                    | AA                              | TT                 | TT               | INTERGENIC      |               |                    |                    |
| SNP_72688_A_8005  | NW_004515890.1 | scaffold413 | 8005                    | CC                              | TT                 | TT               | INTERGENIC      |               |                    |                    |
| SNP_72689_A_8086  | NW_004515890.1 | scaffold413 | 8086                    | AA                              | GG                 | GG               | INTERGENIC      |               |                    |                    |
| SNP_72690_A_13108 | NW_004515890.1 | scaffold413 | 13108                   | CC                              | GG                 | GG               | INTERGENIC      |               |                    |                    |
| SNP_72691_A_5291  | NW_004515891.1 | scaffold414 | 5291                    | GG                              | AA                 | AA               | INTERGENIC      |               |                    |                    |
| SNP_72692_A_5334  | NW_004515891.1 | scaffold414 | 5334                    | AA                              | TT                 | TT               | INTERGENIC      |               |                    |                    |
| SNP_72693_A_5363  | NW_004515891.1 | scaffold414 | 5363                    | GG                              | TT                 | TT               | INTERGENIC      |               |                    |                    |
| SNP_72694_A_5660  | NW_004515891.1 | scaffold414 | 5660                    | AA                              | CC                 | CC               | INTERGENIC      |               |                    |                    |
| SNP_72695_A_6790  | NW_004515891.1 | scaffold414 | 6790                    | TT                              | AA                 | AA               | INTERGENIC      |               |                    |                    |
| SNP_72696_A_6795  | NW_004515891.1 | scaffold414 | 6795                    | TT                              | AA                 | AA               | INTERGENIC      |               |                    |                    |
| SNP_72697_A_6827  | NW_004515891.1 | scaffold414 | 6827                    | AA                              | GG                 | GG               | INTERGENIC      |               |                    |                    |
| SNP_72698_A_7170  | NW_004515891.1 | scaffold414 | 7170                    | GG                              | CC                 | CC               | INTERGENIC      |               |                    |                    |
| SNP_72699_A_8072  | NW_004515891.1 | scaffold414 | 8072                    | TT                              | AA                 | AA               | INTERGENIC      |               |                    |                    |

| SNPs IDs          | Chromosome IDs | Chromosomes | Physical positions (bp) | CDC Frontier (Reference genome) | (Pusa 1103 & HPNB) | (ILWC 46 & LPNB) | Sequence genome | Components of | Gene accession IDs | Putative functions |
|-------------------|----------------|-------------|-------------------------|---------------------------------|--------------------|------------------|-----------------|---------------|--------------------|--------------------|
| SNP_72700_A_8453  | NW_004515891.1 | scaffold414 | 8453                    | CC                              | AA                 | AA               | INTERGENIC      |               |                    |                    |
| SNP_72703_A_22233 | NW_004515891.1 | scaffold414 | 22233                   | TT                              | CC                 | CC               | INTERGENIC      |               |                    |                    |
| SNP_72704_A_52116 | NW_004515891.1 | scaffold414 | 52116                   | CC                              | TT                 | TT               | INTERGENIC      |               |                    |                    |
| SNP_72705_A_52117 | NW_004515891.1 | scaffold414 | 52117                   | TT                              | GG                 | GG               | INTERGENIC      |               |                    |                    |
| SNP_72706_A_52226 | NW_004515891.1 | scaffold414 | 52226                   | GG                              | AA                 | AA               | INTERGENIC      |               |                    |                    |
| SNP_72707_A_53392 | NW_004515891.1 | scaffold414 | 53392                   | TT                              | CC                 | CC               | INTERGENIC      |               |                    |                    |
| SNP_72708_A_53434 | NW_004515891.1 | scaffold414 | 53434                   | TT                              | CC                 | CC               | INTERGENIC      |               |                    |                    |
| SNP_72709_A_53441 | NW_004515891.1 | scaffold414 | 53441                   | AA                              | TT                 | TT               | INTERGENIC      |               |                    |                    |
| SNP_72710_A_53866 | NW_004515891.1 | scaffold414 | 53866                   | GG                              | AA                 | AA               | INTERGENIC      |               |                    |                    |
| SNP_72711_A_53887 | NW_004515891.1 | scaffold414 | 53887                   | TT                              | AA                 | AA               | INTERGENIC      |               |                    |                    |
| SNP_72712_A_54136 | NW_004515891.1 | scaffold414 | 54136                   | TT                              | AA                 | AA               | INTERGENIC      |               |                    |                    |
| SNP_72713_A_631   | NW_004515892.1 | scaffold415 | 631                     | GG                              | AA                 | AA               | INTERGENIC      |               |                    |                    |
| SNP_72714_A_993   | NW_004515892.1 | scaffold415 | 993                     | TT                              | CC                 | CC               | INTERGENIC      |               |                    |                    |
| SNP_72715_A_1041  | NW_004515892.1 | scaffold415 | 1041                    | GG                              | AA                 | AA               | INTERGENIC      |               |                    |                    |
| SNP_72716_A_1048  | NW_004515892.1 | scaffold415 | 1048                    | TT                              | AA                 | AA               | INTERGENIC      |               |                    |                    |
| SNP_72717_A_1073  | NW_004515892.1 | scaffold415 | 1073                    | GG                              | AA                 | AA               | INTERGENIC      |               |                    |                    |
| SNP_72718_A_1322  | NW_004515892.1 | scaffold415 | 1322                    | TT                              | CC                 | CC               | INTERGENIC      |               |                    |                    |
| SNP_72719_A_1384  | NW_004515892.1 | scaffold415 | 1384                    | TT                              | CC                 | CC               | INTERGENIC      |               |                    |                    |
| SNP_72720_A_1413  | NW_004515892.1 | scaffold415 | 1413                    | AA                              | GG                 | GG               | INTERGENIC      |               |                    |                    |
| SNP_72721_A_9372  | NW_004515892.1 | scaffold415 | 9372                    | AA                              | CC                 | CC               | INTERGENIC      |               |                    |                    |
| SNP_72722_A_9634  | NW_004515892.1 | scaffold415 | 9634                    | AA                              | TT                 | TT               | INTERGENIC      |               |                    |                    |
| SNP_72723_A_9655  | NW_004515892.1 | scaffold415 | 9655                    | AA                              | GG                 | GG               | INTERGENIC      |               |                    |                    |

| SNPs IDs          | Chromosome IDs | Chromosomes | Physical positions (bp) | CDC Frontier genome (Reference genome) | (Pusa 1103 & HPNB) | (ILWC 46 & LPNB) | Sequence Components of genome | Gene accession IDs | Putative functions                                         |
|-------------------|----------------|-------------|-------------------------|----------------------------------------|--------------------|------------------|-------------------------------|--------------------|------------------------------------------------------------|
| SNP_72725_A_9659  | NW_004515893.1 | scaffold418 | 9659                    | GG                                     | CC                 | CC               | INTERGENIC                    |                    |                                                            |
| SNP_72726_A_9660  | NW_004515893.1 | scaffold418 | 9660                    | AA                                     | GG                 | GG               | INTERGENIC                    |                    |                                                            |
| SNP_72727_A_9724  | NW_004515893.1 | scaffold418 | 9724                    | CC                                     | AA                 | AA               | INTERGENIC                    |                    |                                                            |
| SNP_72728_A_9763  | NW_004515893.1 | scaffold418 | 9763                    | TT                                     | AA                 | AA               | INTERGENIC                    |                    |                                                            |
| SNP_72729_A_10043 | NW_004515893.1 | scaffold418 | 10043                   | TT                                     | CC                 | CC               | INTERGENIC                    |                    |                                                            |
| SNP_72730_A_10060 | NW_004515893.1 | scaffold418 | 10060                   | AA                                     | TT                 | TT               | INTERGENIC                    |                    |                                                            |
| SNP_72731_A_10076 | NW_004515893.1 | scaffold418 | 10076                   | AA                                     | GG                 | GG               | INTERGENIC                    |                    |                                                            |
| SNP_72732_A_19249 | NW_004515893.1 | scaffold418 | 19249                   | CC                                     | TT                 | TT               | DRR                           | 101505651          | benzyl alcohol O-benzoyltransferase-like                   |
| SNP_72733_A_21427 | NW_004515893.1 | scaffold418 | 21427                   | TT                                     | CC                 | CC               | INTRON                        | 101505651          | benzyl alcohol O-benzoyltransferase-like                   |
| SNP_72734_A_21447 | NW_004515893.1 | scaffold418 | 21447                   | TT                                     | GG                 | GG               | INTRON                        | 101505651          | benzyl alcohol O-benzoyltransferase-like                   |
| SNP_72735_A_38899 | NW_004515893.1 | scaffold418 | 38899                   | GG                                     | AA                 | AA               | INTRON                        | 101505976          | salicylic acid-binding protein 2-like                      |
| SNP_72736_A_82367 | NW_004515893.1 | scaffold418 | 82367                   | TT                                     | CC                 | CC               | URR                           | 101505000          | pentatricopeptide repeat-containing protein At1g09900-like |
| SNP_72737_A_82505 | NW_004515893.1 | scaffold418 | 82505                   | GG                                     | CC                 | CC               | URR                           | 101505000          | pentatricopeptide repeat-containing protein At1g09900-like |
| SNP_72738_A_82546 | NW_004515893.1 | scaffold418 | 82546                   | TT                                     | AA                 | AA               | URR                           | 101505000          | pentatricopeptide repeat-containing protein At1g09900-like |
| SNP_72739_A_82652 | NW_004515893.1 | scaffold418 | 82652                   | AA                                     | GG                 | GG               | URR                           | 101505000          | pentatricopeptide repeat-containing protein At1g09900-like |
| SNP_72740_A_82748 | NW_004515893.1 | scaffold418 | 82748                   | GG                                     | TT                 | TT               | URR                           | 101505000          | pentatricopeptide repeat-containing protein At1g09900-like |
| SNP_72741_A_82753 | NW_004515893.1 | scaffold418 | 82753                   | AA                                     | TT                 | TT               | URR                           | 101505000          | pentatricopeptide repeat-containing protein At1g09900-like |
| SNP_72742_A_82794 | NW_004515893.1 | scaffold418 | 82794                   | GG                                     | TT                 | TT               | URR                           | 101505000          | pentatricopeptide repeat-containing protein At1g09900-like |
| SNP_72743_A_82802 | NW_004515893.1 | scaffold418 | 82802                   | TT                                     | CC                 | CC               | URR                           | 101505000          | pentatricopeptide repeat-containing protein At1g09900-like |
| SNP_72744_A_82863 | NW_004515893.1 | scaffold418 | 82863                   | AA                                     | CC                 | CC               | URR                           | 101505000          | pentatricopeptide repeat-containing protein At1g09900-like |
| SNP_72745_A_83126 | NW_004515893.1 | scaffold418 | 83126                   | CC                                     | TT                 | TT               | URR                           | 101505000          | pentatricopeptide repeat-containing protein At1g09900-like |
| SNP_72746_A_83127 | NW_004515893.1 | scaffold418 | 83127                   | AA                                     | GG                 | GG               | URR                           | 101505000          | pentatricopeptide repeat-containing protein At1g09900-like |

| SNPs IDs           | Chromosome IDs | Chromosomes | Physical positions (bp) | CDC Frontier (Reference genome) | (Pusa 1103 & HPNB) | (ILWC 46 & LPNB) | Sequence Components of genome | Gene accession IDs | Putative functions                                                        |
|--------------------|----------------|-------------|-------------------------|---------------------------------|--------------------|------------------|-------------------------------|--------------------|---------------------------------------------------------------------------|
| SNP_72747_A_83135  | NW_004515893.1 | scaffold418 | 83135                   | TT                              | AA                 | AA               | URR                           | 101505000          | pentatricopeptide repeat-containing protein At1g09900-like                |
| SNP_72748_A_83163  | NW_004515893.1 | scaffold418 | 83163                   | TT                              | CC                 | CC               | URR                           | 101505000          | pentatricopeptide repeat-containing protein At1g09900-like                |
| SNP_72749_A_83195  | NW_004515893.1 | scaffold418 | 83195                   | AA                              | GG                 | GG               | URR                           | 101505000          | pentatricopeptide repeat-containing protein At1g09900-like                |
| SNP_72750_A_89812  | NW_004515893.1 | scaffold418 | 89812                   | AA                              | GG                 | GG               | INTERGENIC                    |                    |                                                                           |
| SNP_72751_A_89887  | NW_004515893.1 | scaffold418 | 89887                   | AA                              | TT                 | TT               | INTERGENIC                    |                    |                                                                           |
| SNP_72752_A_90055  | NW_004515893.1 | scaffold418 | 90055                   | GG                              | TT                 | TT               | INTERGENIC                    |                    |                                                                           |
| SNP_72753_A_90080  | NW_004515893.1 | scaffold418 | 90080                   | CC                              | TT                 | TT               | INTERGENIC                    |                    |                                                                           |
| SNP_72754_A_90142  | NW_004515893.1 | scaffold418 | 90142                   | TT                              | GG                 | GG               | INTERGENIC                    |                    |                                                                           |
| SNP_72755_A_90159  | NW_004515893.1 | scaffold418 | 90159                   | GG                              | AA                 | AA               | INTERGENIC                    |                    |                                                                           |
| SNP_72756_A_90250  | NW_004515893.1 | scaffold418 | 90250                   | GG                              | TT                 | TT               | INTERGENIC                    |                    |                                                                           |
| SNP_72757_A_90263  | NW_004515893.1 | scaffold418 | 90263                   | TT                              | CC                 | CC               | INTERGENIC                    |                    |                                                                           |
| SNP_72758_A_90347  | NW_004515893.1 | scaffold418 | 90347                   | GG                              | TT                 | TT               | INTERGENIC                    |                    |                                                                           |
| SNP_72759_A_115255 | NW_004515893.1 | scaffold418 | 115255                  | CC                              | TT                 | TT               | INTRON                        | 101506939          | alpha-galactosidase-like                                                  |
| SNP_72760_A_115817 | NW_004515893.1 | scaffold418 | 115817                  | CC                              | GG                 | GG               | INTRON                        | 101506939          | alpha-galactosidase-like                                                  |
| SNP_72761_A_116744 | NW_004515893.1 | scaffold418 | 116744                  | GG                              | AA                 | AA               | INTRON                        | 101506939          | alpha-galactosidase-like                                                  |
| SNP_72762_A_116797 | NW_004515893.1 | scaffold418 | 116797                  | CC                              | TT                 | TT               | INTRON                        | 101506939          | alpha-galactosidase-like                                                  |
| SNP_72763_A_119145 | NW_004515893.1 | scaffold418 | 119145                  | TT                              | CC                 | CC               | INTRON                        | 101506939          | alpha-galactosidase-like                                                  |
| SNP_72764_A_119303 | NW_004515893.1 | scaffold418 | 119303                  | GG                              | AA                 | AA               | INTRON                        | 101506939          | alpha-galactosidase-like                                                  |
| SNP_72765_A_135363 | NW_004515893.1 | scaffold418 | 135363                  | GG                              | TT                 | TT               | INTERGENIC                    |                    |                                                                           |
| SNP_72766_A_135733 | NW_004515893.1 | scaffold418 | 135733                  | TT                              | AA                 | AA               | DRR                           | 101505316          | pentatricopeptide repeat-containing protein At1g62670, mitochondrial-like |
| SNP_72767_A_135735 | NW_004515893.1 | scaffold418 | 135735                  | GG                              | TT                 | TT               | DRR                           | 101505316          | pentatricopeptide repeat-containing protein At1g62670, mitochondrial-like |
| SNP_72768_A_136032 | NW_004515893.1 | scaffold418 | 136032                  | GG                              | AA                 | AA               | DRR                           | 101505316          | pentatricopeptide repeat-containing protein At1g62670, mitochondrial-like |



| SNPs IDs           | Chromosome IDs | Chromosomes | Physical positions (bp) | CDC Frontier (Reference genome) | (Pusa 1103 & HPNB) | (ILWC 46 & LPNB) | Sequence Components of genome | Gene accession IDs | Putative functions                          |
|--------------------|----------------|-------------|-------------------------|---------------------------------|--------------------|------------------|-------------------------------|--------------------|---------------------------------------------|
| SNP_72769_A_141070 | NW_004515893.1 | scaffold418 | 141070                  | AA                              | TT                 | TT               | INTERGENIC                    |                    |                                             |
| SNP_72770_A_141107 | NW_004515893.1 | scaffold418 | 141107                  | AA                              | GG                 | GG               | INTERGENIC                    |                    |                                             |
| SNP_72771_A_153883 | NW_004515893.1 | scaffold418 | 153883                  | TT                              | CC                 | CC               | INTERGENIC                    |                    |                                             |
| SNP_72773_A_155550 | NW_004515893.1 | scaffold418 | 155550                  | AA                              | TT                 | TT               | INTERGENIC                    |                    |                                             |
| SNP_72775_A_127348 | NW_004515894.1 | scaffold419 | 127348                  | TT                              | GG                 | GG               | INTERGENIC                    |                    |                                             |
| SNP_72776_A_148591 | NW_004515894.1 | scaffold419 | 148591                  | CC                              | TT                 | TT               | DRR                           | 101508319          | Golgi SNAP receptor complex member 1-2-like |
| SNP_72778_A_184979 | NW_004515894.1 | scaffold419 | 184979                  | TT                              | GG                 | GG               | INTERGENIC                    |                    |                                             |
| SNP_72779_A_200244 | NW_004515894.1 | scaffold419 | 200244                  | AA                              | GG                 | GG               | DRR                           | 101508636          | uncharacterized LOC101508636                |
| SNP_72780_A_218943 | NW_004515894.1 | scaffold419 | 218943                  | GG                              | TT                 | TT               | INTRON                        | 101510233          | Unknown function                            |
| SNP_72781_A_219000 | NW_004515894.1 | scaffold419 | 219000                  | AA                              | TT                 | TT               | INTRON                        | 101510233          | Unknown function                            |
| SNP_72782_A_219635 | NW_004515894.1 | scaffold419 | 219635                  | GG                              | AA                 | AA               | INTRON                        | 101510233          | Unknown function                            |
| SNP_72783_A_219681 | NW_004515894.1 | scaffold419 | 219681                  | AA                              | TT                 | TT               | INTRON                        | 101510233          | Unknown function                            |
| SNP_72784_A_219694 | NW_004515894.1 | scaffold419 | 219694                  | CC                              | TT                 | TT               | INTRON                        | 101510233          | Unknown function                            |
| SNP_72785_A_242227 | NW_004515894.1 | scaffold419 | 242227                  | TT                              | CC                 | CC               | INTRON                        | 101510233          | Unknown function                            |
| SNP_72786_A_242231 | NW_004515894.1 | scaffold419 | 242231                  | GG                              | AA                 | AA               | INTRON                        | 101510233          | Unknown function                            |
| SNP_72787_A_323709 | NW_004515894.1 | scaffold419 | 323709                  | TT                              | CC                 | CC               | INTERGENIC                    |                    |                                             |
| SNP_72789_A_340990 | NW_004515894.1 | scaffold419 | 340990                  | GG                              | TT                 | TT               | INTERGENIC                    |                    |                                             |
| SNP_72790_A_341256 | NW_004515894.1 | scaffold419 | 341256                  | TT                              | CC                 | CC               | INTERGENIC                    |                    |                                             |
| SNP_72791_A_17959  | NW_004515895.1 | scaffold420 | 17959                   | AA                              | GG                 | GG               | DRR                           | 101489056          | uncharacterized LOC101489056                |
| SNP_72792_A_64660  | NW_004515895.1 | scaffold420 | 64660                   | TT                              | GG                 | GG               | URR                           | 101490031          | uncharacterized LOC101490031                |
| SNP_72794_A_69678  | NW_004515895.1 | scaffold420 | 69678                   | GG                              | TT                 | TT               | INTERGENIC                    |                    |                                             |
| SNP_72795_A_69690  | NW_004515895.1 | scaffold420 | 69690                   | CC                              | TT                 | TT               | INTERGENIC                    |                    |                                             |

| SNPs IDs           | Chromosome IDs | Chromosomes | Physical positions (bp) | CDC Frontier (Reference genome) | (Pusa 1103 & HPNB) | (ILWC 46 & LPNB) | Sequence genome | Components of | Gene accession IDs | Putative functions |
|--------------------|----------------|-------------|-------------------------|---------------------------------|--------------------|------------------|-----------------|---------------|--------------------|--------------------|
| SNP_72796_A_70035  | NW_004515895.1 | scaffold420 | 70035                   | TT                              | GG                 | GG               | INTERGENIC      |               |                    |                    |
| SNP_72797_A_78369  | NW_004515895.1 | scaffold420 | 78369                   | TT                              | CC                 | CC               | INTERGENIC      |               |                    |                    |
| SNP_72798_A_78464  | NW_004515895.1 | scaffold420 | 78464                   | TT                              | GG                 | GG               | INTERGENIC      |               |                    |                    |
| SNP_72799_A_78505  | NW_004515895.1 | scaffold420 | 78505                   | CC                              | TT                 | TT               | INTERGENIC      |               |                    |                    |
| SNP_72800_A_78514  | NW_004515895.1 | scaffold420 | 78514                   | TT                              | CC                 | CC               | INTERGENIC      |               |                    |                    |
| SNP_72801_A_78522  | NW_004515895.1 | scaffold420 | 78522                   | AA                              | GG                 | GG               | INTERGENIC      |               |                    |                    |
| SNP_72802_A_78748  | NW_004515895.1 | scaffold420 | 78748                   | CC                              | TT                 | TT               | INTERGENIC      |               |                    |                    |
| SNP_72803_A_78777  | NW_004515895.1 | scaffold420 | 78777                   | AA                              | GG                 | GG               | INTERGENIC      |               |                    |                    |
| SNP_72804_A_82304  | NW_004515895.1 | scaffold420 | 82304                   | GG                              | CC                 | CC               | INTERGENIC      |               |                    |                    |
| SNP_72806_A_86849  | NW_004515895.1 | scaffold420 | 86849                   | TT                              | AA                 | AA               | INTERGENIC      |               |                    |                    |
| SNP_72807_A_86850  | NW_004515895.1 | scaffold420 | 86850                   | TT                              | CC                 | CC               | INTERGENIC      |               |                    |                    |
| SNP_72808_A_92812  | NW_004515895.1 | scaffold420 | 92812                   | GG                              | CC                 | CC               | INTERGENIC      |               |                    |                    |
| SNP_72811_A_185348 | NW_004515895.1 | scaffold420 | 185348                  | AA                              | GG                 | GG               | INTERGENIC      |               |                    |                    |
| SNP_72812_A_185349 | NW_004515895.1 | scaffold420 | 185349                  | AA                              | CC                 | CC               | INTERGENIC      |               |                    |                    |
| SNP_72813_A_249310 | NW_004515895.1 | scaffold420 | 249310                  | CC                              | TT                 | TT               | INTERGENIC      |               |                    |                    |
| SNP_72814_A_249376 | NW_004515895.1 | scaffold420 | 249376                  | TT                              | CC                 | CC               | INTERGENIC      |               |                    |                    |
| SNP_72815_A_249381 | NW_004515895.1 | scaffold420 | 249381                  | AA                              | CC                 | CC               | INTERGENIC      |               |                    |                    |
| SNP_72816_A_249618 | NW_004515895.1 | scaffold420 | 249618                  | AA                              | TT                 | TT               | INTERGENIC      |               |                    |                    |
| SNP_72817_A_249620 | NW_004515895.1 | scaffold420 | 249620                  | GG                              | CC                 | CC               | INTERGENIC      |               |                    |                    |
| SNP_72818_A_249710 | NW_004515895.1 | scaffold420 | 249710                  | TT                              | CC                 | CC               | INTERGENIC      |               |                    |                    |
| SNP_72819_A_249829 | NW_004515895.1 | scaffold420 | 249829                  | AA                              | GG                 | GG               | INTERGENIC      |               |                    |                    |
| SNP_72820_A_250158 | NW_004515895.1 | scaffold420 | 250158                  | GG                              | AA                 | AA               | INTERGENIC      |               |                    |                    |

| SNPs IDs           | Chromosome IDs | Chromosomes   | Physical positions (bp) | CDC Frontier (Reference genome) | (Pusa 1103 & HPNB) | (ILWC 46 & LPNB) | Sequence Components of genome | Gene accession IDs | Putative functions       |
|--------------------|----------------|---------------|-------------------------|---------------------------------|--------------------|------------------|-------------------------------|--------------------|--------------------------|
| SNP_72822_A_266572 | NW_004515895.1 | scaffold420   | 266572                  | TT                              | GG                 | GG               | INTRON                        | 101490695          | Unknown function         |
| SNP_72823_A_266772 | NW_004515895.1 | scaffold420   | 266772                  | GG                              | TT                 | TT               | INTRON                        | 101490695          | Unknown function         |
| SNP_72824_A_268711 | NW_004515895.1 | scaffold420   | 268711                  | AA                              | GG                 | GG               | INTRON                        | 101490695          | Unknown function         |
| SNP_72825_A_269913 | NW_004515895.1 | scaffold420   | 269913                  | GG                              | AA                 | AA               | INTERGENIC                    |                    |                          |
| SNP_72826_A_270994 | NW_004515895.1 | scaffold420   | 270994                  | GG                              | AA                 | AA               | INTERGENIC                    |                    |                          |
| SNP_72827_A_311961 | NW_004515895.1 | scaffold420   | 311961                  | AA                              | GG                 | GG               | INTRON                        | 101488394          | beta-glucosidase 10-like |
| SNP_72828_A_311963 | NW_004515895.1 | scaffold420   | 311963                  | AA                              | GG                 | GG               | INTRON                        | 101488394          | beta-glucosidase 10-like |
| SNP_72829_A_312590 | NW_004515895.1 | scaffold420   | 312590                  | CC                              | GG                 | GG               | INTRON                        | 101488394          | beta-glucosidase 10-like |
| SNP_72830_A_324411 | NW_004515895.1 | scaffold420   | 324411                  | TT                              | GG                 | GG               | INTERGENIC                    |                    |                          |
| SNP_72831_A_324484 | NW_004515895.1 | scaffold420   | 324484                  | AA                              | CC                 | CC               | INTERGENIC                    |                    |                          |
| SNP_72832_A_324523 | NW_004515895.1 | scaffold420   | 324523                  | AA                              | GG                 | GG               | INTERGENIC                    |                    |                          |
| SNP_72833_A_324530 | NW_004515895.1 | scaffold420   | 324530                  | TT                              | CC                 | CC               | INTERGENIC                    |                    |                          |
| SNP_72834_A_324616 | NW_004515895.1 | scaffold420   | 324616                  | AA                              | GG                 | GG               | INTERGENIC                    |                    |                          |
| SNP_72835_A_324662 | NW_004515895.1 | scaffold420   | 324662                  | TT                              | CC                 | CC               | INTERGENIC                    |                    |                          |
| SNP_72837_A_45620  | NW_004515896.1 | scaffold421_2 | 45620                   | TT                              | AA                 | AA               | INTERGENIC                    |                    |                          |
| SNP_72838_A_45693  | NW_004515896.1 | scaffold421_2 | 45693                   | CC                              | TT                 | TT               | INTERGENIC                    |                    |                          |
| SNP_72839_A_45827  | NW_004515896.1 | scaffold421_2 | 45827                   | TT                              | AA                 | AA               | INTERGENIC                    |                    |                          |
| SNP_72840_A_45857  | NW_004515896.1 | scaffold421_2 | 45857                   | AA                              | CC                 | CC               | INTERGENIC                    |                    |                          |
| SNP_72841_A_45899  | NW_004515896.1 | scaffold421_2 | 45899                   | AA                              | GG                 | GG               | INTERGENIC                    |                    |                          |
| SNP_72842_A_77969  | NW_004515896.1 | scaffold421_2 | 77969                   | GG                              | AA                 | AA               | INTERGENIC                    |                    |                          |
| SNP_72843_A_91603  | NW_004515896.1 | scaffold421_2 | 91603                   | GG                              | AA                 | AA               | INTERGENIC                    |                    |                          |
| SNP_72845_A_149868 | NW_004515896.1 | scaffold421_2 | 149868                  | TT                              | CC                 | CC               | INTERGENIC                    |                    |                          |

| SNPs IDs           | Chromosome IDs | Chromosomes   | Physical positions (bp) | CDC Frontier (Reference genome) | (Pusa 1103 & HPNB) | (ILWC 46 & LPNB) | Sequence genome | Components of | Gene accession IDs | Putative functions |
|--------------------|----------------|---------------|-------------------------|---------------------------------|--------------------|------------------|-----------------|---------------|--------------------|--------------------|
| SNP_72846_A_162532 | NW_004515896.1 | scaffold421_2 | 162532                  | CC                              | TT                 | TT               | INTERGENIC      |               |                    |                    |
| SNP_72847_A_249715 | NW_004515896.1 | scaffold421_2 | 249715                  | CC                              | TT                 | TT               | INTERGENIC      |               |                    |                    |
| SNP_72848_A_249738 | NW_004515896.1 | scaffold421_2 | 249738                  | GG                              | AA                 | AA               | INTERGENIC      |               |                    |                    |
| SNP_72849_A_249740 | NW_004515896.1 | scaffold421_2 | 249740                  | TT                              | CC                 | CC               | INTERGENIC      |               |                    |                    |
| SNP_72850_A_249830 | NW_004515896.1 | scaffold421_2 | 249830                  | TT                              | CC                 | CC               | INTERGENIC      |               |                    |                    |
| SNP_72851_A_249871 | NW_004515896.1 | scaffold421_2 | 249871                  | TT                              | CC                 | CC               | INTERGENIC      |               |                    |                    |
| SNP_72852_A_249872 | NW_004515896.1 | scaffold421_2 | 249872                  | AA                              | GG                 | GG               | INTERGENIC      |               |                    |                    |
| SNP_72853_A_249911 | NW_004515896.1 | scaffold421_2 | 249911                  | TT                              | GG                 | GG               | INTERGENIC      |               |                    |                    |
| SNP_72854_A_249958 | NW_004515896.1 | scaffold421_2 | 249958                  | AA                              | GG                 | GG               | INTERGENIC      |               |                    |                    |
| SNP_72855_A_249969 | NW_004515896.1 | scaffold421_2 | 249969                  | AA                              | GG                 | GG               | INTERGENIC      |               |                    |                    |
| SNP_72856_A_275366 | NW_004515896.1 | scaffold421_2 | 275366                  | TT                              | AA                 | AA               | INTERGENIC      |               |                    |                    |
| SNP_72857_A_275369 | NW_004515896.1 | scaffold421_2 | 275369                  | TT                              | CC                 | CC               | INTERGENIC      |               |                    |                    |
| SNP_72858_A_311114 | NW_004515896.1 | scaffold421_2 | 311114                  | TT                              | AA                 | AA               | INTRON          | 101493497     | Unknown function   |                    |
| SNP_72859_A_318646 | NW_004515896.1 | scaffold421_2 | 318646                  | CC                              | TT                 | TT               | INTRON          | 101493497     | Unknown function   |                    |
| SNP_72860_A_318647 | NW_004515896.1 | scaffold421_2 | 318647                  | AA                              | GG                 | GG               | INTRON          | 101493497     | Unknown function   |                    |
| SNP_72862_A_323165 | NW_004515896.1 | scaffold421_2 | 323165                  | TT                              | GG                 | GG               | URR             | 101493497     | Unknown function   |                    |
| SNP_72863_A_323476 | NW_004515896.1 | scaffold421_2 | 323476                  | TT                              | CC                 | CC               | URR             | 101493497     | Unknown function   |                    |
| SNP_72864_A_323553 | NW_004515896.1 | scaffold421_2 | 323553                  | AA                              | GG                 | GG               | URR             | 101493497     | Unknown function   |                    |
| SNP_72865_A_325630 | NW_004515896.1 | scaffold421_2 | 325630                  | CC                              | TT                 | TT               | INTERGENIC      |               |                    |                    |
| SNP_72867_A_349917 | NW_004515896.1 | scaffold421_2 | 349917                  | TT                              | CC                 | CC               | INTERGENIC      |               |                    |                    |
| SNP_72868_A_350173 | NW_004515896.1 | scaffold421_2 | 350173                  | AA                              | GG                 | GG               | INTERGENIC      |               |                    |                    |
| SNP_72869_A_365246 | NW_004515896.1 | scaffold421_2 | 365246                  | TT                              | AA                 | AA               | INTERGENIC      |               |                    |                    |

| SNPs IDs           | Chromosome IDs | Chromosomes   | Physical positions (bp) | CDC Frontier (Reference genome) | (Pusa 1103 & HPNB) | (ILWC 46 & LPNB) | Sequence genome | Components of | Gene accession IDs | Putative functions |
|--------------------|----------------|---------------|-------------------------|---------------------------------|--------------------|------------------|-----------------|---------------|--------------------|--------------------|
| SNP_72871_A_382073 | NW_004515896.1 | scaffold421_2 | 382073                  | CC                              | TT                 | TT               | INTERGENIC      |               |                    |                    |
| SNP_72872_A_395046 | NW_004515896.1 | scaffold421_2 | 395046                  | AA                              | TT                 | TT               | INTERGENIC      |               |                    |                    |
| SNP_72873_A_401792 | NW_004515896.1 | scaffold421_2 | 401792                  | GG                              | AA                 | AA               | INTERGENIC      |               |                    |                    |
| SNP_72874_A_413474 | NW_004515896.1 | scaffold421_2 | 413474                  | GG                              | CC                 | CC               | INTERGENIC      |               |                    |                    |
| SNP_72875_A_416998 | NW_004515896.1 | scaffold421_2 | 416998                  | GG                              | AA                 | AA               | INTERGENIC      |               |                    |                    |
| SNP_72876_A_420266 | NW_004515896.1 | scaffold421_2 | 420266                  | GG                              | AA                 | AA               | INTERGENIC      |               |                    |                    |
| SNP_72878_A_425802 | NW_004515896.1 | scaffold421_2 | 425802                  | TT                              | AA                 | AA               | INTERGENIC      |               |                    |                    |
| SNP_72879_A_447414 | NW_004515896.1 | scaffold421_2 | 447414                  | GG                              | AA                 | AA               | INTERGENIC      |               |                    |                    |
| SNP_72880_A_447639 | NW_004515896.1 | scaffold421_2 | 447639                  | AA                              | GG                 | GG               | INTERGENIC      |               |                    |                    |
| SNP_72881_A_447754 | NW_004515896.1 | scaffold421_2 | 447754                  | GG                              | AA                 | AA               | INTERGENIC      |               |                    |                    |
| SNP_72882_A_456027 | NW_004515896.1 | scaffold421_2 | 456027                  | TT                              | CC                 | CC               | INTERGENIC      |               |                    |                    |
| SNP_72883_A_456068 | NW_004515896.1 | scaffold421_2 | 456068                  | AA                              | TT                 | TT               | INTERGENIC      |               |                    |                    |
| SNP_72884_A_462450 | NW_004515896.1 | scaffold421_2 | 462450                  | AA                              | TT                 | TT               | INTERGENIC      |               |                    |                    |
| SNP_72885_A_465577 | NW_004515896.1 | scaffold421_2 | 465577                  | TT                              | CC                 | CC               | INTERGENIC      |               |                    |                    |
| SNP_72886_A_465639 | NW_004515896.1 | scaffold421_2 | 465639                  | AA                              | GG                 | GG               | INTERGENIC      |               |                    |                    |
| SNP_72887_A_501581 | NW_004515896.1 | scaffold421_2 | 501581                  | AA                              | GG                 | GG               | INTERGENIC      |               |                    |                    |
| SNP_72888_A_501599 | NW_004515896.1 | scaffold421_2 | 501599                  | TT                              | GG                 | GG               | INTERGENIC      |               |                    |                    |
| SNP_72889_A_501630 | NW_004515896.1 | scaffold421_2 | 501630                  | TT                              | CC                 | CC               | INTERGENIC      |               |                    |                    |
| SNP_72890_A_513390 | NW_004515896.1 | scaffold421_2 | 513390                  | AA                              | GG                 | GG               | INTERGENIC      |               |                    |                    |
| SNP_72892_A_539416 | NW_004515896.1 | scaffold421_2 | 539416                  | TT                              | CC                 | CC               | INTERGENIC      |               |                    |                    |
| SNP_72893_A_571933 | NW_004515896.1 | scaffold421_2 | 571933                  | CC                              | AA                 | AA               | INTERGENIC      |               |                    |                    |
| SNP_72894_A_581410 | NW_004515896.1 | scaffold421_2 | 581410                  | TT                              | CC                 | CC               | INTERGENIC      |               |                    |                    |

| SNPs IDs           | Chromosome IDs | Chromosomes   | Physical positions (bp) | CDC Frontier (Reference genome) | (Pusa 1103 & HPNB) | (ILWC 46 & LPNB) | Sequence genome | Components of | Gene accession IDs | Putative functions |
|--------------------|----------------|---------------|-------------------------|---------------------------------|--------------------|------------------|-----------------|---------------|--------------------|--------------------|
| SNP_72895_A_581782 | NW_004515896.1 | scaffold421_2 | 581782                  | GG                              | AA                 | AA               | INTERGENIC      |               |                    |                    |
| SNP_72896_A_581851 | NW_004515896.1 | scaffold421_2 | 581851                  | TT                              | CC                 | CC               | INTERGENIC      |               |                    |                    |
| SNP_72897_A_581961 | NW_004515896.1 | scaffold421_2 | 581961                  | GG                              | AA                 | AA               | INTERGENIC      |               |                    |                    |
| SNP_72898_A_581968 | NW_004515896.1 | scaffold421_2 | 581968                  | TT                              | CC                 | CC               | INTERGENIC      |               |                    |                    |
| SNP_72899_A_581970 | NW_004515896.1 | scaffold421_2 | 581970                  | CC                              | AA                 | AA               | INTERGENIC      |               |                    |                    |
| SNP_72900_A_582192 | NW_004515896.1 | scaffold421_2 | 582192                  | TT                              | AA                 | AA               | INTERGENIC      |               |                    |                    |
| SNP_72901_A_582979 | NW_004515896.1 | scaffold421_2 | 582979                  | AA                              | TT                 | TT               | INTERGENIC      |               |                    |                    |
| SNP_72902_A_583134 | NW_004515896.1 | scaffold421_2 | 583134                  | TT                              | CC                 | CC               | INTERGENIC      |               |                    |                    |
| SNP_72903_A_583148 | NW_004515896.1 | scaffold421_2 | 583148                  | GG                              | AA                 | AA               | INTERGENIC      |               |                    |                    |
| SNP_72904_A_597587 | NW_004515896.1 | scaffold421_2 | 597587                  | GG                              | AA                 | AA               | INTERGENIC      |               |                    |                    |
| SNP_72905_A_597801 | NW_004515896.1 | scaffold421_2 | 597801                  | CC                              | TT                 | TT               | INTERGENIC      |               |                    |                    |
| SNP_72906_A_597864 | NW_004515896.1 | scaffold421_2 | 597864                  | TT                              | CC                 | CC               | INTERGENIC      |               |                    |                    |
| SNP_72907_A_597874 | NW_004515896.1 | scaffold421_2 | 597874                  | AA                              | GG                 | GG               | INTERGENIC      |               |                    |                    |
| SNP_72908_A_597883 | NW_004515896.1 | scaffold421_2 | 597883                  | AA                              | TT                 | TT               | INTERGENIC      |               |                    |                    |
| SNP_72909_A_597939 | NW_004515896.1 | scaffold421_2 | 597939                  | CC                              | TT                 | TT               | INTERGENIC      |               |                    |                    |
| SNP_72910_A_284    | NW_004515897.1 | scaffold421_1 | 284                     | AA                              | CC                 | CC               | INTERGENIC      |               |                    |                    |
| SNP_72911_A_2616   | NW_004515897.1 | scaffold421_1 | 2616                    | GG                              | AA                 | AA               | INTERGENIC      |               |                    |                    |
| SNP_72913_A_2945   | NW_004515897.1 | scaffold421_1 | 2945                    | GG                              | CC                 | CC               | INTERGENIC      |               |                    |                    |
| SNP_72914_A_3012   | NW_004515897.1 | scaffold421_1 | 3012                    | CC                              | AA                 | AA               | INTERGENIC      |               |                    |                    |
| SNP_72915_A_3033   | NW_004515897.1 | scaffold421_1 | 3033                    | CC                              | TT                 | TT               | INTERGENIC      |               |                    |                    |
| SNP_72916_A_3227   | NW_004515897.1 | scaffold421_1 | 3227                    | GG                              | AA                 | AA               | INTERGENIC      |               |                    |                    |
| SNP_72917_A_3290   | NW_004515897.1 | scaffold421_1 | 3290                    | CC                              | GG                 | GG               | INTERGENIC      |               |                    |                    |

| SNPs IDs          | Chromosome IDs | Chromosomes   | Physical positions (bp) | CDC Frontier (Reference genome) | (Pusa 1103 & HPNB) | (ILWC 46 & LPNB) | Sequence Components of genome | Gene accession IDs | Putative functions |
|-------------------|----------------|---------------|-------------------------|---------------------------------|--------------------|------------------|-------------------------------|--------------------|--------------------|
| SNP_72918_A_4641  | NW_004515897.1 | scaffold421_1 | 4641                    | CC                              | TT                 | TT               | INTERGENIC                    |                    |                    |
| SNP_72919_A_87790 | NW_004515897.1 | scaffold421_1 | 87790                   | CC                              | TT                 | TT               | INTERGENIC                    |                    |                    |
| SNP_72920_A_97196 | NW_004515897.1 | scaffold421_1 | 97196                   | GG                              | AA                 | AA               | INTERGENIC                    |                    |                    |
| SNP_72921_A_97471 | NW_004515897.1 | scaffold421_1 | 97471                   | AA                              | GG                 | GG               | INTERGENIC                    |                    |                    |
| SNP_72922_A_98647 | NW_004515897.1 | scaffold421_1 | 98647                   | AA                              | GG                 | GG               | INTERGENIC                    |                    |                    |
| SNP_72923_A_98652 | NW_004515897.1 | scaffold421_1 | 98652                   | AA                              | CC                 | CC               | INTERGENIC                    |                    |                    |
| SNP_72924_A_98653 | NW_004515897.1 | scaffold421_1 | 98653                   | TT                              | AA                 | AA               | INTERGENIC                    |                    |                    |
| SNP_72925_A_98693 | NW_004515897.1 | scaffold421_1 | 98693                   | AA                              | GG                 | GG               | INTERGENIC                    |                    |                    |
| SNP_72927_A_33997 | NW_004515899.1 | scaffold424   | 33997                   | TT                              | GG                 | GG               | INTRON                        | id201099           | Unknown function   |
| SNP_72929_A_40714 | NW_004515899.1 | scaffold424   | 40714                   | GG                              | CC                 | CC               | URR                           | 101498150          | Unknown function   |
| SNP_72930_A_41004 | NW_004515899.1 | scaffold424   | 41004                   | GG                              | AA                 | AA               | INTERGENIC                    |                    |                    |
| SNP_72931_A_50912 | NW_004515899.1 | scaffold424   | 50912                   | TT                              | CC                 | CC               | INTERGENIC                    |                    |                    |
| SNP_72932_A_50914 | NW_004515899.1 | scaffold424   | 50914                   | GG                              | AA                 | AA               | INTERGENIC                    |                    |                    |
| SNP_72933_A_50915 | NW_004515899.1 | scaffold424   | 50915                   | GG                              | CC                 | CC               | INTERGENIC                    |                    |                    |
| SNP_72934_A_50918 | NW_004515899.1 | scaffold424   | 50918                   | TT                              | CC                 | CC               | INTERGENIC                    |                    |                    |
| SNP_72935_A_61159 | NW_004515899.1 | scaffold424   | 61159                   | AA                              | GG                 | GG               | INTERGENIC                    |                    |                    |
| SNP_72936_A_63209 | NW_004515899.1 | scaffold424   | 63209                   | AA                              | CC                 | CC               | INTERGENIC                    |                    |                    |
| SNP_72937_A_70081 | NW_004515899.1 | scaffold424   | 70081                   | AA                              | GG                 | GG               | INTERGENIC                    |                    |                    |
| SNP_72938_A_80241 | NW_004515899.1 | scaffold424   | 80241                   | CC                              | TT                 | TT               | INTERGENIC                    |                    |                    |
| SNP_72939_A_80261 | NW_004515899.1 | scaffold424   | 80261                   | GG                              | AA                 | AA               | INTERGENIC                    |                    |                    |
| SNP_72940_A_80265 | NW_004515899.1 | scaffold424   | 80265                   | TT                              | GG                 | GG               | INTERGENIC                    |                    |                    |
| SNP_72941_A_88778 | NW_004515899.1 | scaffold424   | 88778                   | TT                              | AA                 | AA               | INTERGENIC                    |                    |                    |

| SNPs IDs           | Chromosome IDs | Chromosomes | Physical positions (bp) | CDC Frontier (Reference genome) | (Pusa 1103 & HPNB) | (ILWC 46 & LPNB) | Sequence Components of genome | Gene accession IDs | Putative functions           |
|--------------------|----------------|-------------|-------------------------|---------------------------------|--------------------|------------------|-------------------------------|--------------------|------------------------------|
| SNP_72942_A_88819  | NW_004515899.1 | scaffold424 | 88819                   | AA                              | CC                 | CC               | INTERGENIC                    |                    |                              |
| SNP_72943_A_90467  | NW_004515899.1 | scaffold424 | 90467                   | AA                              | TT                 | TT               | INTERGENIC                    |                    |                              |
| SNP_72944_A_92161  | NW_004515899.1 | scaffold424 | 92161                   | CC                              | AA                 | AA               | INTERGENIC                    |                    |                              |
| SNP_72945_A_92298  | NW_004515899.1 | scaffold424 | 92298                   | TT                              | CC                 | CC               | INTERGENIC                    |                    |                              |
| SNP_72946_A_104192 | NW_004515899.1 | scaffold424 | 104192                  | AA                              | GG                 | GG               | INTERGENIC                    |                    |                              |
| SNP_72947_A_104530 | NW_004515899.1 | scaffold424 | 104530                  | TT                              | GG                 | GG               | INTERGENIC                    |                    |                              |
| SNP_72948_A_106657 | NW_004515899.1 | scaffold424 | 106657                  | GG                              | AA                 | AA               | INTERGENIC                    |                    |                              |
| SNP_72949_A_110047 | NW_004515899.1 | scaffold424 | 110047                  | AA                              | GG                 | GG               | INTERGENIC                    |                    |                              |
| SNP_72950_A_112404 | NW_004515899.1 | scaffold424 | 112404                  | AA                              | GG                 | GG               | INTERGENIC                    |                    |                              |
| SNP_72951_A_113082 | NW_004515899.1 | scaffold424 | 113082                  | GG                              | AA                 | AA               | INTERGENIC                    |                    |                              |
| SNP_72952_A_113135 | NW_004515899.1 | scaffold424 | 113135                  | TT                              | CC                 | CC               | INTERGENIC                    |                    |                              |
| SNP_72953_A_113207 | NW_004515899.1 | scaffold424 | 113207                  | CC                              | GG                 | GG               | INTERGENIC                    |                    |                              |
| SNP_72954_A_113228 | NW_004515899.1 | scaffold424 | 113228                  | TT                              | AA                 | AA               | INTERGENIC                    |                    |                              |
| SNP_72955_A_113489 | NW_004515899.1 | scaffold424 | 113489                  | AA                              | TT                 | TT               | INTERGENIC                    |                    |                              |
| SNP_72956_A_113494 | NW_004515899.1 | scaffold424 | 113494                  | CC                              | AA                 | AA               | INTERGENIC                    |                    |                              |
| SNP_72957_A_124295 | NW_004515899.1 | scaffold424 | 124295                  | AA                              | GG                 | GG               | INTERGENIC                    |                    |                              |
| SNP_72958_A_124326 | NW_004515899.1 | scaffold424 | 124326                  | TT                              | GG                 | GG               | INTERGENIC                    |                    |                              |
| SNP_72959_A_755    | NW_004515900.1 | scaffold425 | 755                     | AA                              | CC                 | CC               | INTERGENIC                    |                    |                              |
| SNP_72960_A_15736  | NW_004515901.1 | scaffold427 | 15736                   | CC                              | AA                 | AA               | INTRON                        | 101498712          | uncharacterized LOC101498712 |
| SNP_72961_A_15755  | NW_004515901.1 | scaffold427 | 15755                   | GG                              | TT                 | TT               | INTRON                        | 101498712          | uncharacterized LOC101498712 |
| SNP_72962_A_16060  | NW_004515901.1 | scaffold427 | 16060                   | TT                              | AA                 | AA               | INTRON                        | 101498712          | uncharacterized LOC101498712 |
| SNP_72963_A_16097  | NW_004515901.1 | scaffold427 | 16097                   | AA                              | TT                 | TT               | INTRON                        | 101498712          | uncharacterized LOC101498712 |



| SNPs IDs           | Chromosome IDs | Chromosomes | Physical positions (bp) | CDC Frontier (Reference genome) | (Pusa 1103 & HPNB) | (ILWC 46 & LPNB) | Sequence genome | Components of | Gene accession IDs | Putative functions |
|--------------------|----------------|-------------|-------------------------|---------------------------------|--------------------|------------------|-----------------|---------------|--------------------|--------------------|
| SNP_72964_A_72475  | NW_004515901.1 | scaffold427 | 72475                   | GG                              | AA                 | AA               | INTERGENIC      |               |                    |                    |
| SNP_72965_A_82747  | NW_004515901.1 | scaffold427 | 82747                   | TT                              | CC                 | CC               | INTERGENIC      |               |                    |                    |
| SNP_72966_A_83070  | NW_004515901.1 | scaffold427 | 83070                   | CC                              | GG                 | GG               | INTERGENIC      |               |                    |                    |
| SNP_72967_A_83133  | NW_004515901.1 | scaffold427 | 83133                   | TT                              | AA                 | AA               | INTERGENIC      |               |                    |                    |
| SNP_72968_A_83661  | NW_004515901.1 | scaffold427 | 83661                   | TT                              | AA                 | AA               | INTERGENIC      |               |                    |                    |
| SNP_72969_A_88666  | NW_004515901.1 | scaffold427 | 88666                   | TT                              | AA                 | AA               | INTERGENIC      |               |                    |                    |
| SNP_72970_A_92373  | NW_004515901.1 | scaffold427 | 92373                   | GG                              | AA                 | AA               | INTERGENIC      |               |                    |                    |
| SNP_72971_A_105107 | NW_004515901.1 | scaffold427 | 105107                  | AA                              | TT                 | TT               | INTERGENIC      |               |                    |                    |
| SNP_72972_A_105113 | NW_004515901.1 | scaffold427 | 105113                  | AA                              | TT                 | TT               | INTERGENIC      |               |                    |                    |
| SNP_72974_A_105124 | NW_004515901.1 | scaffold427 | 105124                  | CC                              | AA                 | AA               | INTERGENIC      |               |                    |                    |
| SNP_72975_A_107641 | NW_004515901.1 | scaffold427 | 107641                  | CC                              | TT                 | TT               | INTERGENIC      |               |                    |                    |
| SNP_72976_A_116799 | NW_004515901.1 | scaffold427 | 116799                  | GG                              | CC                 | CC               | INTERGENIC      |               |                    |                    |
| SNP_72977_A_19851  | NW_004515902.1 | scaffold428 | 19851                   | AA                              | GG                 | GG               | INTERGENIC      |               |                    |                    |
| SNP_72979_A_19963  | NW_004515902.1 | scaffold428 | 19963                   | AA                              | GG                 | GG               | INTERGENIC      |               |                    |                    |
| SNP_72980_A_20004  | NW_004515902.1 | scaffold428 | 20004                   | AA                              | GG                 | GG               | INTERGENIC      |               |                    |                    |
| SNP_72981_A_20055  | NW_004515902.1 | scaffold428 | 20055                   | AA                              | GG                 | GG               | INTERGENIC      |               |                    |                    |
| SNP_72982_A_20094  | NW_004515902.1 | scaffold428 | 20094                   | AA                              | GG                 | GG               | INTERGENIC      |               |                    |                    |
| SNP_72983_A_263    | NW_004515903.1 | scaffold429 | 263                     | AA                              | GG                 | GG               | INTERGENIC      |               |                    |                    |
| SNP_72984_A_268    | NW_004515903.1 | scaffold429 | 268                     | CC                              | GG                 | GG               | INTERGENIC      |               |                    |                    |
| SNP_72985_A_323    | NW_004515903.1 | scaffold429 | 323                     | AA                              | TT                 | TT               | INTERGENIC      |               |                    |                    |
| SNP_72986_A_391    | NW_004515903.1 | scaffold429 | 391                     | CC                              | TT                 | TT               | INTERGENIC      |               |                    |                    |
| SNP_72987_A_393    | NW_004515903.1 | scaffold429 | 393                     | TT                              | CC                 | CC               | INTERGENIC      |               |                    |                    |

| SNPs IDs         | Chromosome IDs | Chromosomes | Physical positions (bp) | CDC Frontier (Reference genome) | (Pusa 1103 & HPNB) | (ILWC 46 & LPNB) | Sequence genome | Components of | Gene accession IDs | Putative functions |
|------------------|----------------|-------------|-------------------------|---------------------------------|--------------------|------------------|-----------------|---------------|--------------------|--------------------|
| SNP_72988_A_410  | NW_004515903.1 | scaffold429 | 410                     | CC                              | AA                 | AA               | INTERGENIC      |               |                    |                    |
| SNP_72989_A_497  | NW_004515903.1 | scaffold429 | 497                     | GG                              | CC                 | CC               | INTERGENIC      |               |                    |                    |
| SNP_72990_A_539  | NW_004515903.1 | scaffold429 | 539                     | CC                              | TT                 | TT               | INTERGENIC      |               |                    |                    |
| SNP_72991_A_684  | NW_004515903.1 | scaffold429 | 684                     | CC                              | TT                 | TT               | INTERGENIC      |               |                    |                    |
| SNP_72992_A_687  | NW_004515903.1 | scaffold429 | 687                     | AA                              | TT                 | TT               | INTERGENIC      |               |                    |                    |
| SNP_72993_A_2846 | NW_004515903.1 | scaffold429 | 2846                    | TT                              | AA                 | AA               | INTERGENIC      |               |                    |                    |
| SNP_72994_A_2855 | NW_004515903.1 | scaffold429 | 2855                    | TT                              | CC                 | CC               | INTERGENIC      |               |                    |                    |
| SNP_72995_A_8144 | NW_004515903.1 | scaffold429 | 8144                    | TT                              | AA                 | AA               | INTERGENIC      |               |                    |                    |
| SNP_72996_A_8222 | NW_004515903.1 | scaffold429 | 8222                    | AA                              | GG                 | GG               | INTERGENIC      |               |                    |                    |
| SNP_72997_A_8262 | NW_004515903.1 | scaffold429 | 8262                    | AA                              | TT                 | TT               | INTERGENIC      |               |                    |                    |
| SNP_72998_A_8263 | NW_004515903.1 | scaffold429 | 8263                    | AA                              | GG                 | GG               | INTERGENIC      |               |                    |                    |
| SNP_72999_A_8317 | NW_004515903.1 | scaffold429 | 8317                    | GG                              | AA                 | AA               | INTERGENIC      |               |                    |                    |
| SNP_73000_A_8343 | NW_004515903.1 | scaffold429 | 8343                    | AA                              | GG                 | GG               | INTERGENIC      |               |                    |                    |
| SNP_73001_A_8405 | NW_004515903.1 | scaffold429 | 8405                    | AA                              | TT                 | TT               | INTERGENIC      |               |                    |                    |
| SNP_73002_A_8422 | NW_004515903.1 | scaffold429 | 8422                    | AA                              | TT                 | TT               | INTERGENIC      |               |                    |                    |
| SNP_73003_A_8459 | NW_004515903.1 | scaffold429 | 8459                    | AA                              | TT                 | TT               | INTERGENIC      |               |                    |                    |
| SNP_73004_A_8478 | NW_004515903.1 | scaffold429 | 8478                    | CC                              | AA                 | AA               | INTERGENIC      |               |                    |                    |
| SNP_73005_A_8577 | NW_004515903.1 | scaffold429 | 8577                    | CC                              | GG                 | GG               | INTERGENIC      |               |                    |                    |
| SNP_73006_A_8583 | NW_004515903.1 | scaffold429 | 8583                    | AA                              | GG                 | GG               | INTERGENIC      |               |                    |                    |
| SNP_73007_A_8628 | NW_004515903.1 | scaffold429 | 8628                    | TT                              | CC                 | CC               | INTERGENIC      |               |                    |                    |
| SNP_73008_A_8826 | NW_004515903.1 | scaffold429 | 8826                    | GG                              | CC                 | CC               | INTERGENIC      |               |                    |                    |
| SNP_73009_A_9006 | NW_004515903.1 | scaffold429 | 9006                    | TT                              | GG                 | GG               | INTERGENIC      |               |                    |                    |

| SNPs IDs          | Chromosome IDs | Chromosomes | Physical positions (bp) | CDC Frontier (Reference genome) | (Pusa 1103 & HPNB) | (ILWC 46 & LPNB) | Sequence genome | Components of | Gene accession IDs | Putative functions |
|-------------------|----------------|-------------|-------------------------|---------------------------------|--------------------|------------------|-----------------|---------------|--------------------|--------------------|
| SNP_73010_A_9015  | NW_004515903.1 | scaffold429 | 9015                    | TT                              | CC                 | CC               | INTERGENIC      |               |                    |                    |
| SNP_73011_A_9025  | NW_004515903.1 | scaffold429 | 9025                    | GG                              | TT                 | TT               | INTERGENIC      |               |                    |                    |
| SNP_73012_A_9031  | NW_004515903.1 | scaffold429 | 9031                    | GG                              | AA                 | AA               | INTERGENIC      |               |                    |                    |
| SNP_73013_A_9108  | NW_004515903.1 | scaffold429 | 9108                    | CC                              | TT                 | TT               | INTERGENIC      |               |                    |                    |
| SNP_73014_A_9119  | NW_004515903.1 | scaffold429 | 9119                    | TT                              | GG                 | GG               | INTERGENIC      |               |                    |                    |
| SNP_73015_A_9120  | NW_004515903.1 | scaffold429 | 9120                    | TT                              | AA                 | AA               | INTERGENIC      |               |                    |                    |
| SNP_73016_A_11537 | NW_004515903.1 | scaffold429 | 11537                   | AA                              | TT                 | TT               | INTERGENIC      |               |                    |                    |
| SNP_73017_A_14476 | NW_004515903.1 | scaffold429 | 14476                   | GG                              | CC                 | CC               | INTERGENIC      |               |                    |                    |
| SNP_73018_A_14478 | NW_004515903.1 | scaffold429 | 14478                   | TT                              | CC                 | CC               | INTERGENIC      |               |                    |                    |
| SNP_73019_A_15519 | NW_004515903.1 | scaffold429 | 15519                   | CC                              | TT                 | TT               | INTERGENIC      |               |                    |                    |
| SNP_73020_A_15575 | NW_004515903.1 | scaffold429 | 15575                   | GG                              | AA                 | AA               | INTERGENIC      |               |                    |                    |
| SNP_73021_A_15595 | NW_004515903.1 | scaffold429 | 15595                   | AA                              | CC                 | CC               | INTERGENIC      |               |                    |                    |
| SNP_73022_A_15703 | NW_004515903.1 | scaffold429 | 15703                   | AA                              | GG                 | GG               | INTERGENIC      |               |                    |                    |
| SNP_73023_A_15709 | NW_004515903.1 | scaffold429 | 15709                   | TT                              | GG                 | GG               | INTERGENIC      |               |                    |                    |
| SNP_73024_A_15752 | NW_004515903.1 | scaffold429 | 15752                   | AA                              | GG                 | GG               | INTERGENIC      |               |                    |                    |
| SNP_73025_A_15772 | NW_004515903.1 | scaffold429 | 15772                   | CC                              | TT                 | TT               | INTERGENIC      |               |                    |                    |
| SNP_73026_A_17752 | NW_004515903.1 | scaffold429 | 17752                   | AA                              | GG                 | GG               | INTERGENIC      |               |                    |                    |
| SNP_73027_A_28697 | NW_004515903.1 | scaffold429 | 28697                   | AA                              | GG                 | GG               | INTERGENIC      |               |                    |                    |
| SNP_73028_A_28907 | NW_004515903.1 | scaffold429 | 28907                   | TT                              | GG                 | GG               | INTERGENIC      |               |                    |                    |
| SNP_73029_A_28918 | NW_004515903.1 | scaffold429 | 28918                   | TT                              | AA                 | AA               | INTERGENIC      |               |                    |                    |
| SNP_73030_A_28934 | NW_004515903.1 | scaffold429 | 28934                   | AA                              | CC                 | CC               | INTERGENIC      |               |                    |                    |
| SNP_73031_A_29257 | NW_004515903.1 | scaffold429 | 29257                   | GG                              | CC                 | CC               | INTERGENIC      |               |                    |                    |

| SNPs IDs          | Chromosome IDs | Chromosomes | Physical positions (bp) | CDC Frontier (Reference genome) | (Pusa 1103 & HPNB) | (ILWC 46 & LPNB) | Sequence genome | Components of | Gene accession IDs | Putative functions |
|-------------------|----------------|-------------|-------------------------|---------------------------------|--------------------|------------------|-----------------|---------------|--------------------|--------------------|
| SNP_73032_A_29477 | NW_004515903.1 | scaffold429 | 29477                   | AA                              | CC                 | CC               | INTERGENIC      |               |                    |                    |
| SNP_73033_A_29529 | NW_004515903.1 | scaffold429 | 29529                   | CC                              | AA                 | AA               | INTERGENIC      |               |                    |                    |
| SNP_73034_A_29531 | NW_004515903.1 | scaffold429 | 29531                   | TT                              | GG                 | GG               | INTERGENIC      |               |                    |                    |
| SNP_73035_A_29552 | NW_004515903.1 | scaffold429 | 29552                   | AA                              | GG                 | GG               | INTERGENIC      |               |                    |                    |
| SNP_73036_A_29554 | NW_004515903.1 | scaffold429 | 29554                   | TT                              | CC                 | CC               | INTERGENIC      |               |                    |                    |
| SNP_73037_A_29610 | NW_004515903.1 | scaffold429 | 29610                   | TT                              | CC                 | CC               | INTERGENIC      |               |                    |                    |
| SNP_73038_A_29755 | NW_004515903.1 | scaffold429 | 29755                   | AA                              | TT                 | TT               | INTERGENIC      |               |                    |                    |
| SNP_73039_A_31335 | NW_004515903.1 | scaffold429 | 31335                   | GG                              | AA                 | AA               | INTERGENIC      |               |                    |                    |
| SNP_73041_A_59341 | NW_004515903.1 | scaffold429 | 59341                   | AA                              | CC                 | CC               | INTERGENIC      |               |                    |                    |
| SNP_73042_A_59384 | NW_004515903.1 | scaffold429 | 59384                   | AA                              | GG                 | GG               | INTERGENIC      |               |                    |                    |
| SNP_73043_A_59583 | NW_004515903.1 | scaffold429 | 59583                   | AA                              | CC                 | CC               | INTERGENIC      |               |                    |                    |
| SNP_73044_A_59754 | NW_004515903.1 | scaffold429 | 59754                   | TT                              | CC                 | CC               | INTERGENIC      |               |                    |                    |
| SNP_73045_A_72477 | NW_004515903.1 | scaffold429 | 72477                   | AA                              | TT                 | TT               | INTERGENIC      |               |                    |                    |
| SNP_73046_A_72481 | NW_004515903.1 | scaffold429 | 72481                   | AA                              | TT                 | TT               | INTERGENIC      |               |                    |                    |
| SNP_73047_A_72504 | NW_004515903.1 | scaffold429 | 72504                   | AA                              | GG                 | GG               | INTERGENIC      |               |                    |                    |
| SNP_73048_A_72563 | NW_004515903.1 | scaffold429 | 72563                   | GG                              | AA                 | AA               | INTERGENIC      |               |                    |                    |
| SNP_73049_A_72568 | NW_004515903.1 | scaffold429 | 72568                   | TT                              | CC                 | CC               | INTERGENIC      |               |                    |                    |
| SNP_73050_A_72681 | NW_004515903.1 | scaffold429 | 72681                   | AA                              | TT                 | TT               | INTERGENIC      |               |                    |                    |
| SNP_73051_A_72685 | NW_004515903.1 | scaffold429 | 72685                   | TT                              | AA                 | AA               | INTERGENIC      |               |                    |                    |
| SNP_73052_A_77785 | NW_004515903.1 | scaffold429 | 77785                   | TT                              | CC                 | CC               | INTERGENIC      |               |                    |                    |
| SNP_73053_A_78480 | NW_004515903.1 | scaffold429 | 78480                   | GG                              | AA                 | AA               | INTERGENIC      |               |                    |                    |
| SNP_73055_A_96300 | NW_004515903.1 | scaffold429 | 96300                   | TT                              | GG                 | GG               | INTERGENIC      |               |                    |                    |

| SNPs IDs           | Chromosome IDs | Chromosomes | Physical positions (bp) | CDC Frontier genome (Reference genome) | (Pusa 1103 & HPNB) | (ILWC 46 & LPNB) | Sequence Components of genome | Gene accession IDs | Putative functions |
|--------------------|----------------|-------------|-------------------------|----------------------------------------|--------------------|------------------|-------------------------------|--------------------|--------------------|
| SNP_73056_A_96690  | NW_004515903.1 | scaffold429 | 96690                   | TT                                     | CC                 | CC               | INTERGENIC                    |                    |                    |
| SNP_73057_A_96700  | NW_004515903.1 | scaffold429 | 96700                   | GG                                     | AA                 | AA               | INTERGENIC                    |                    |                    |
| SNP_73058_A_96712  | NW_004515903.1 | scaffold429 | 96712                   | TT                                     | CC                 | CC               | INTERGENIC                    |                    |                    |
| SNP_73059_A_96754  | NW_004515903.1 | scaffold429 | 96754                   | AA                                     | GG                 | GG               | INTERGENIC                    |                    |                    |
| SNP_73060_A_96779  | NW_004515903.1 | scaffold429 | 96779                   | TT                                     | CC                 | CC               | INTERGENIC                    |                    |                    |
| SNP_73061_A_98308  | NW_004515903.1 | scaffold429 | 98308                   | GG                                     | AA                 | AA               | INTERGENIC                    |                    |                    |
| SNP_73062_A_111607 | NW_004515903.1 | scaffold429 | 111607                  | TT                                     | CC                 | CC               | INTRON                        | 101499036          | Unknown function   |
| SNP_73063_A_111764 | NW_004515903.1 | scaffold429 | 111764                  | TT                                     | AA                 | AA               | NON_SYNONYMOUS_CODING         | 101499036          | Unknown function   |
| SNP_73064_A_128714 | NW_004515903.1 | scaffold429 | 128714                  | GG                                     | AA                 | AA               | INTERGENIC                    |                    |                    |
| SNP_73065_A_128717 | NW_004515903.1 | scaffold429 | 128717                  | AA                                     | TT                 | TT               | INTERGENIC                    |                    |                    |
| SNP_73066_A_128834 | NW_004515903.1 | scaffold429 | 128834                  | GG                                     | CC                 | CC               | INTERGENIC                    |                    |                    |
| SNP_73067_A_128851 | NW_004515903.1 | scaffold429 | 128851                  | TT                                     | AA                 | AA               | INTERGENIC                    |                    |                    |
| SNP_73068_A_129086 | NW_004515903.1 | scaffold429 | 129086                  | AA                                     | TT                 | TT               | INTERGENIC                    |                    |                    |
| SNP_73069_A_129153 | NW_004515903.1 | scaffold429 | 129153                  | CC                                     | TT                 | TT               | INTERGENIC                    |                    |                    |
| SNP_73070_A_129215 | NW_004515903.1 | scaffold429 | 129215                  | TT                                     | GG                 | GG               | INTERGENIC                    |                    |                    |
| SNP_73071_A_129727 | NW_004515903.1 | scaffold429 | 129727                  | AA                                     | CC                 | CC               | INTERGENIC                    |                    |                    |
| SNP_73072_A_135559 | NW_004515903.1 | scaffold429 | 135559                  | AA                                     | TT                 | TT               | INTERGENIC                    |                    |                    |
| SNP_73073_A_146422 | NW_004515903.1 | scaffold429 | 146422                  | AA                                     | GG                 | GG               | INTERGENIC                    |                    |                    |
| SNP_73074_A_146440 | NW_004515903.1 | scaffold429 | 146440                  | TT                                     | AA                 | AA               | INTERGENIC                    |                    |                    |
| SNP_73075_A_146454 | NW_004515903.1 | scaffold429 | 146454                  | CC                                     | TT                 | TT               | INTERGENIC                    |                    |                    |
| SNP_73076_A_149076 | NW_004515903.1 | scaffold429 | 149076                  | TT                                     | CC                 | CC               | INTERGENIC                    |                    |                    |
| SNP_73077_A_149128 | NW_004515903.1 | scaffold429 | 149128                  | CC                                     | TT                 | TT               | INTERGENIC                    |                    |                    |

| SNPs IDs           | Chromosome IDs | Chromosomes | Physical positions (bp) | CDC Frontier (Reference genome) | (Pusa 1103 & HPNB) | (ILWC 46 & LPNB) | Sequence Components of genome | Gene accession IDs | Putative functions           |
|--------------------|----------------|-------------|-------------------------|---------------------------------|--------------------|------------------|-------------------------------|--------------------|------------------------------|
| SNP_73078_A_158623 | NW_004515903.1 | scaffold429 | 158623                  | AA                              | CC                 | CC               | INTRON                        | 101499348          | uncharacterized LOC101499348 |
| SNP_73079_A_161302 | NW_004515903.1 | scaffold429 | 161302                  | AA                              | TT                 | TT               | INTRON                        | 101499348          | uncharacterized LOC101499348 |
| SNP_73080_A_178991 | NW_004515903.1 | scaffold429 | 178991                  | CC                              | AA                 | AA               | NON_SYNONYMOUS_CODING         | 101499348          | uncharacterized LOC101499348 |
| SNP_73081_A_181400 | NW_004515903.1 | scaffold429 | 181400                  | TT                              | GG                 | GG               | INTERGENIC                    |                    |                              |
| SNP_73082_A_181411 | NW_004515903.1 | scaffold429 | 181411                  | AA                              | GG                 | GG               | INTERGENIC                    |                    |                              |
| SNP_73083_A_181433 | NW_004515903.1 | scaffold429 | 181433                  | AA                              | GG                 | GG               | INTERGENIC                    |                    |                              |
| SNP_73084_A_181805 | NW_004515903.1 | scaffold429 | 181805                  | GG                              | AA                 | AA               | INTERGENIC                    |                    |                              |
| SNP_73085_A_181899 | NW_004515903.1 | scaffold429 | 181899                  | GG                              | AA                 | AA               | INTERGENIC                    |                    |                              |
| SNP_73086_A_1985   | NW_004515905.1 | scaffold432 | 1985                    | TT                              | AA                 | AA               | INTERGENIC                    |                    |                              |
| SNP_73087_A_2156   | NW_004515905.1 | scaffold432 | 2156                    | AA                              | TT                 | TT               | INTERGENIC                    |                    |                              |
| SNP_73088_A_2399   | NW_004515905.1 | scaffold432 | 2399                    | TT                              | CC                 | CC               | INTERGENIC                    |                    |                              |
| SNP_73089_A_2669   | NW_004515905.1 | scaffold432 | 2669                    | GG                              | AA                 | AA               | INTERGENIC                    |                    |                              |
| SNP_73090_A_2737   | NW_004515905.1 | scaffold432 | 2737                    | TT                              | CC                 | CC               | INTERGENIC                    |                    |                              |
| SNP_73091_A_4280   | NW_004515905.1 | scaffold432 | 4280                    | CC                              | AA                 | AA               | INTERGENIC                    |                    |                              |
| SNP_73092_A_4281   | NW_004515905.1 | scaffold432 | 4281                    | GG                              | AA                 | AA               | INTERGENIC                    |                    |                              |
| SNP_73093_A_4645   | NW_004515905.1 | scaffold432 | 4645                    | TT                              | CC                 | CC               | INTERGENIC                    |                    |                              |
| SNP_73094_A_4766   | NW_004515905.1 | scaffold432 | 4766                    | AA                              | CC                 | CC               | INTERGENIC                    |                    |                              |
| SNP_73095_A_4816   | NW_004515905.1 | scaffold432 | 4816                    | TT                              | CC                 | CC               | INTERGENIC                    |                    |                              |
| SNP_73096_A_4819   | NW_004515905.1 | scaffold432 | 4819                    | TT                              | AA                 | AA               | INTERGENIC                    |                    |                              |
| SNP_73097_A_7435   | NW_004515905.1 | scaffold432 | 7435                    | AA                              | CC                 | CC               | INTERGENIC                    |                    |                              |
| SNP_73098_A_7450   | NW_004515905.1 | scaffold432 | 7450                    | GG                              | AA                 | AA               | INTERGENIC                    |                    |                              |
| SNP_73099_A_10948  | NW_004515905.1 | scaffold432 | 10948                   | GG                              | TT                 | TT               | INTERGENIC                    |                    |                              |

| SNPs IDs          | Chromosome IDs | Chromosomes | Physical positions (bp) | CDC Frontier (Reference genome) | (Pusa 1103 & HPNB) | (ILWC 46 & LPNB) | Sequence genome | Components of | Gene accession IDs | Putative functions |
|-------------------|----------------|-------------|-------------------------|---------------------------------|--------------------|------------------|-----------------|---------------|--------------------|--------------------|
| SNP_73100_A_16019 | NW_004515905.1 | scaffold432 | 16019                   | CC                              | TT                 | TT               | INTERGENIC      |               |                    |                    |
| SNP_73101_A_16039 | NW_004515905.1 | scaffold432 | 16039                   | TT                              | AA                 | AA               | INTERGENIC      |               |                    |                    |
| SNP_73102_A_16063 | NW_004515905.1 | scaffold432 | 16063                   | AA                              | GG                 | GG               | INTERGENIC      |               |                    |                    |
| SNP_73103_A_16142 | NW_004515905.1 | scaffold432 | 16142                   | AA                              | TT                 | TT               | INTERGENIC      |               |                    |                    |
| SNP_73104_A_16332 | NW_004515905.1 | scaffold432 | 16332                   | GG                              | AA                 | AA               | INTERGENIC      |               |                    |                    |
| SNP_73105_A_16352 | NW_004515905.1 | scaffold432 | 16352                   | TT                              | AA                 | AA               | INTERGENIC      |               |                    |                    |
| SNP_73106_A_16395 | NW_004515905.1 | scaffold432 | 16395                   | GG                              | AA                 | AA               | INTERGENIC      |               |                    |                    |
| SNP_73107_A_16926 | NW_004515905.1 | scaffold432 | 16926                   | TT                              | CC                 | CC               | INTERGENIC      |               |                    |                    |
| SNP_73108_A_16927 | NW_004515905.1 | scaffold432 | 16927                   | CC                              | TT                 | TT               | INTERGENIC      |               |                    |                    |
| SNP_73109_A_17270 | NW_004515905.1 | scaffold432 | 17270                   | CC                              | TT                 | TT               | INTERGENIC      |               |                    |                    |
| SNP_73110_A_17736 | NW_004515905.1 | scaffold432 | 17736                   | AA                              | GG                 | GG               | INTERGENIC      |               |                    |                    |
| SNP_73111_A_17835 | NW_004515905.1 | scaffold432 | 17835                   | AA                              | TT                 | TT               | INTERGENIC      |               |                    |                    |
| SNP_73112_A_17863 | NW_004515905.1 | scaffold432 | 17863                   | GG                              | TT                 | TT               | INTERGENIC      |               |                    |                    |
| SNP_73113_A_17884 | NW_004515905.1 | scaffold432 | 17884                   | AA                              | TT                 | TT               | INTERGENIC      |               |                    |                    |
| SNP_73114_A_17908 | NW_004515905.1 | scaffold432 | 17908                   | AA                              | CC                 | CC               | INTERGENIC      |               |                    |                    |
| SNP_73115_A_17987 | NW_004515905.1 | scaffold432 | 17987                   | GG                              | AA                 | AA               | INTERGENIC      |               |                    |                    |
| SNP_73116_A_17990 | NW_004515905.1 | scaffold432 | 17990                   | AA                              | TT                 | TT               | INTERGENIC      |               |                    |                    |
| SNP_73117_A_18085 | NW_004515905.1 | scaffold432 | 18085                   | AA                              | TT                 | TT               | INTERGENIC      |               |                    |                    |
| SNP_73118_A_18112 | NW_004515905.1 | scaffold432 | 18112                   | CC                              | TT                 | TT               | INTERGENIC      |               |                    |                    |
| SNP_73119_A_18137 | NW_004515905.1 | scaffold432 | 18137                   | AA                              | CC                 | CC               | INTERGENIC      |               |                    |                    |
| SNP_73120_A_18149 | NW_004515905.1 | scaffold432 | 18149                   | CC                              | TT                 | TT               | INTERGENIC      |               |                    |                    |
| SNP_73121_A_18161 | NW_004515905.1 | scaffold432 | 18161                   | TT                              | CC                 | CC               | INTERGENIC      |               |                    |                    |

| SNPs IDs          | Chromosome IDs | Chromosomes | Physical positions (bp) | CDC Frontier (Reference genome) | (Pusa 1103 & HPNB) | (ILWC 46 & LPNB) | Sequence genome | Components of | Gene accession IDs | Putative functions |
|-------------------|----------------|-------------|-------------------------|---------------------------------|--------------------|------------------|-----------------|---------------|--------------------|--------------------|
| SNP_73122_A_18642 | NW_004515905.1 | scaffold432 | 18642                   | TT                              | GG                 | GG               | INTERGENIC      |               |                    |                    |
| SNP_73123_A_19070 | NW_004515905.1 | scaffold432 | 19070                   | AA                              | TT                 | TT               | INTERGENIC      |               |                    |                    |
| SNP_73124_A_4002  | NW_004515906.1 | scaffold433 | 4002                    | AA                              | GG                 | GG               | INTERGENIC      |               |                    |                    |
| SNP_73125_A_4348  | NW_004515906.1 | scaffold433 | 4348                    | CC                              | TT                 | TT               | INTERGENIC      |               |                    |                    |
| SNP_73126_A_7431  | NW_004515906.1 | scaffold433 | 7431                    | CC                              | GG                 | GG               | INTERGENIC      |               |                    |                    |
| SNP_73127_A_8218  | NW_004515906.1 | scaffold433 | 8218                    | AA                              | GG                 | GG               | INTERGENIC      |               |                    |                    |
| SNP_73129_A_8869  | NW_004515906.1 | scaffold433 | 8869                    | GG                              | AA                 | AA               | INTERGENIC      |               |                    |                    |
| SNP_73130_A_10269 | NW_004515906.1 | scaffold433 | 10269                   | AA                              | GG                 | GG               | INTERGENIC      |               |                    |                    |
| SNP_73131_A_11146 | NW_004515906.1 | scaffold433 | 11146                   | AA                              | GG                 | GG               | INTERGENIC      |               |                    |                    |
| SNP_73132_A_11703 | NW_004515906.1 | scaffold433 | 11703                   | AA                              | TT                 | TT               | INTERGENIC      |               |                    |                    |
| SNP_73133_A_11829 | NW_004515906.1 | scaffold433 | 11829                   | AA                              | GG                 | GG               | INTERGENIC      |               |                    |                    |
| SNP_73134_A_12040 | NW_004515906.1 | scaffold433 | 12040                   | GG                              | AA                 | AA               | INTERGENIC      |               |                    |                    |
| SNP_73135_A_12521 | NW_004515906.1 | scaffold433 | 12521                   | CC                              | GG                 | GG               | INTERGENIC      |               |                    |                    |
| SNP_73137_A_20583 | NW_004515906.1 | scaffold433 | 20583                   | GG                              | TT                 | TT               | INTERGENIC      |               |                    |                    |
| SNP_73138_A_23814 | NW_004515906.1 | scaffold433 | 23814                   | CC                              | TT                 | TT               | INTERGENIC      |               |                    |                    |
| SNP_73139_A_25289 | NW_004515906.1 | scaffold433 | 25289                   | CC                              | GG                 | GG               | INTERGENIC      |               |                    |                    |
| SNP_73140_A_25290 | NW_004515906.1 | scaffold433 | 25290                   | AA                              | TT                 | TT               | INTERGENIC      |               |                    |                    |
| SNP_73141_A_26446 | NW_004515906.1 | scaffold433 | 26446                   | AA                              | GG                 | GG               | INTERGENIC      |               |                    |                    |
| SNP_73142_A_29088 | NW_004515906.1 | scaffold433 | 29088                   | GG                              | AA                 | AA               | INTERGENIC      |               |                    |                    |
| SNP_73143_A_29095 | NW_004515906.1 | scaffold433 | 29095                   | TT                              | CC                 | CC               | INTERGENIC      |               |                    |                    |
| SNP_73144_A_29106 | NW_004515906.1 | scaffold433 | 29106                   | TT                              | AA                 | AA               | INTERGENIC      |               |                    |                    |
| SNP_73145_A_29111 | NW_004515906.1 | scaffold433 | 29111                   | AA                              | GG                 | GG               | INTERGENIC      |               |                    |                    |



| SNPs IDs          | Chromosome IDs | Chromosomes | Physical positions (bp) | CDC Frontier (Reference genome) | (Pusa 1103 & HPNB) | (ILWC 46 & LPNB) | Sequence genome | Components of | Gene accession IDs | Putative functions |
|-------------------|----------------|-------------|-------------------------|---------------------------------|--------------------|------------------|-----------------|---------------|--------------------|--------------------|
| SNP_73146_A_29170 | NW_004515906.1 | scaffold433 | 29170                   | TT                              | AA                 | AA               | INTERGENIC      |               |                    |                    |
| SNP_73147_A_29222 | NW_004515906.1 | scaffold433 | 29222                   | CC                              | GG                 | GG               | INTERGENIC      |               |                    |                    |
| SNP_73148_A_29239 | NW_004515906.1 | scaffold433 | 29239                   | GG                              | TT                 | TT               | INTERGENIC      |               |                    |                    |
| SNP_73149_A_29263 | NW_004515906.1 | scaffold433 | 29263                   | AA                              | TT                 | TT               | INTERGENIC      |               |                    |                    |
| SNP_73150_A_29281 | NW_004515906.1 | scaffold433 | 29281                   | GG                              | CC                 | CC               | INTERGENIC      |               |                    |                    |
| SNP_73151_A_29285 | NW_004515906.1 | scaffold433 | 29285                   | GG                              | AA                 | AA               | INTERGENIC      |               |                    |                    |
| SNP_73152_A_29347 | NW_004515906.1 | scaffold433 | 29347                   | AA                              | GG                 | GG               | INTERGENIC      |               |                    |                    |
| SNP_73153_A_29580 | NW_004515906.1 | scaffold433 | 29580                   | GG                              | TT                 | TT               | INTERGENIC      |               |                    |                    |
| SNP_73154_A_29951 | NW_004515906.1 | scaffold433 | 29951                   | AA                              | GG                 | GG               | INTERGENIC      |               |                    |                    |
| SNP_73155_A_36044 | NW_004515906.1 | scaffold433 | 36044                   | AA                              | GG                 | GG               | INTERGENIC      |               |                    |                    |
| SNP_73156_A_36072 | NW_004515906.1 | scaffold433 | 36072                   | CC                              | AA                 | AA               | INTERGENIC      |               |                    |                    |
| SNP_73157_A_36086 | NW_004515906.1 | scaffold433 | 36086                   | GG                              | AA                 | AA               | INTERGENIC      |               |                    |                    |
| SNP_73158_A_36179 | NW_004515906.1 | scaffold433 | 36179                   | CC                              | AA                 | AA               | INTERGENIC      |               |                    |                    |
| SNP_73160_A_54094 | NW_004515906.1 | scaffold433 | 54094                   | GG                              | AA                 | AA               | INTERGENIC      |               |                    |                    |
| SNP_73161_A_54278 | NW_004515906.1 | scaffold433 | 54278                   | AA                              | CC                 | CC               | INTERGENIC      |               |                    |                    |
| SNP_73162_A_55750 | NW_004515906.1 | scaffold433 | 55750                   | TT                              | CC                 | CC               | INTERGENIC      |               |                    |                    |
| SNP_73163_A_59478 | NW_004515906.1 | scaffold433 | 59478                   | AA                              | GG                 | GG               | INTERGENIC      |               |                    |                    |
| SNP_73164_A_59667 | NW_004515906.1 | scaffold433 | 59667                   | TT                              | AA                 | AA               | INTERGENIC      |               |                    |                    |
| SNP_73165_A_67102 | NW_004515906.1 | scaffold433 | 67102                   | AA                              | TT                 | TT               | INTERGENIC      |               |                    |                    |
| SNP_73166_A_67329 | NW_004515906.1 | scaffold433 | 67329                   | GG                              | TT                 | TT               | INTERGENIC      |               |                    |                    |
| SNP_73167_A_67584 | NW_004515906.1 | scaffold433 | 67584                   | TT                              | GG                 | GG               | INTERGENIC      |               |                    |                    |
| SNP_73169_A_86242 | NW_004515906.1 | scaffold433 | 86242                   | AA                              | GG                 | GG               | INTERGENIC      |               |                    |                    |

| SNPs IDs           | Chromosome IDs | Chromosomes | Physical positions (bp) | CDC Frontier (Reference genome) | (Pusa 1103 & HPNB) | (ILWC 46 & LPNB) | Sequence genome | Components of | Gene accession IDs | Putative functions |
|--------------------|----------------|-------------|-------------------------|---------------------------------|--------------------|------------------|-----------------|---------------|--------------------|--------------------|
| SNP_73171_A_86476  | NW_004515906.1 | scaffold433 | 86476                   | AA                              | GG                 | GG               | INTERGENIC      |               |                    |                    |
| SNP_73173_A_102776 | NW_004515906.1 | scaffold433 | 102776                  | TT                              | CC                 | CC               | INTERGENIC      |               |                    |                    |
| SNP_73174_A_104333 | NW_004515906.1 | scaffold433 | 104333                  | CC                              | AA                 | AA               | INTERGENIC      |               |                    |                    |
| SNP_73175_A_110957 | NW_004515906.1 | scaffold433 | 110957                  | TT                              | GG                 | GG               | INTERGENIC      |               |                    |                    |
| SNP_73176_A_112624 | NW_004515906.1 | scaffold433 | 112624                  | CC                              | TT                 | TT               | INTERGENIC      |               |                    |                    |
| SNP_73177_A_116081 | NW_004515906.1 | scaffold433 | 116081                  | AA                              | TT                 | TT               | INTERGENIC      |               |                    |                    |
| SNP_73178_A_127206 | NW_004515906.1 | scaffold433 | 127206                  | AA                              | GG                 | GG               | INTERGENIC      |               |                    |                    |
| SNP_73179_A_127238 | NW_004515906.1 | scaffold433 | 127238                  | GG                              | TT                 | TT               | INTERGENIC      |               |                    |                    |
| SNP_73180_A_127271 | NW_004515906.1 | scaffold433 | 127271                  | AA                              | GG                 | GG               | INTERGENIC      |               |                    |                    |
| SNP_73181_A_129103 | NW_004515906.1 | scaffold433 | 129103                  | TT                              | CC                 | CC               | INTERGENIC      |               |                    |                    |
| SNP_73182_A_132611 | NW_004515906.1 | scaffold433 | 132611                  | AA                              | GG                 | GG               | INTERGENIC      |               |                    |                    |
| SNP_73183_A_132808 | NW_004515906.1 | scaffold433 | 132808                  | CC                              | AA                 | AA               | INTERGENIC      |               |                    |                    |
| SNP_73184_A_132817 | NW_004515906.1 | scaffold433 | 132817                  | GG                              | CC                 | CC               | INTERGENIC      |               |                    |                    |
| SNP_73185_A_132865 | NW_004515906.1 | scaffold433 | 132865                  | GG                              | AA                 | AA               | INTERGENIC      |               |                    |                    |
| SNP_73186_A_141002 | NW_004515906.1 | scaffold433 | 141002                  | CC                              | AA                 | AA               | INTERGENIC      |               |                    |                    |
| SNP_73187_A_141066 | NW_004515906.1 | scaffold433 | 141066                  | CC                              | GG                 | GG               | INTERGENIC      |               |                    |                    |
| SNP_73188_A_141273 | NW_004515906.1 | scaffold433 | 141273                  | CC                              | TT                 | TT               | INTERGENIC      |               |                    |                    |
| SNP_73189_A_142398 | NW_004515906.1 | scaffold433 | 142398                  | GG                              | AA                 | AA               | INTERGENIC      |               |                    |                    |
| SNP_73190_A_142614 | NW_004515906.1 | scaffold433 | 142614                  | CC                              | TT                 | TT               | INTERGENIC      |               |                    |                    |
| SNP_73191_A_142744 | NW_004515906.1 | scaffold433 | 142744                  | TT                              | CC                 | CC               | INTERGENIC      |               |                    |                    |
| SNP_73193_A_145218 | NW_004515906.1 | scaffold433 | 145218                  | AA                              | CC                 | CC               | INTERGENIC      |               |                    |                    |
| SNP_73195_A_146566 | NW_004515906.1 | scaffold433 | 146566                  | AA                              | TT                 | TT               | INTERGENIC      |               |                    |                    |

| SNPs IDs           | Chromosome IDs | Chromosomes | Physical positions (bp) | CDC Frontier (Reference genome) | (Pusa 1103 & HPNB) | (ILWC 46 & LPNB) | Sequence genome | Components of | Gene accession IDs | Putative functions |
|--------------------|----------------|-------------|-------------------------|---------------------------------|--------------------|------------------|-----------------|---------------|--------------------|--------------------|
| SNP_73196_A_146777 | NW_004515906.1 | scaffold433 | 146777                  | CC                              | TT                 | TT               | INTERGENIC      |               |                    |                    |
| SNP_73199_A_147516 | NW_004515906.1 | scaffold433 | 147516                  | TT                              | AA                 | AA               | INTERGENIC      |               |                    |                    |
| SNP_73201_A_148222 | NW_004515906.1 | scaffold433 | 148222                  | TT                              | AA                 | AA               | INTERGENIC      |               |                    |                    |
| SNP_73202_A_148608 | NW_004515906.1 | scaffold433 | 148608                  | TT                              | CC                 | CC               | INTERGENIC      |               |                    |                    |
| SNP_73203_A_149115 | NW_004515906.1 | scaffold433 | 149115                  | CC                              | TT                 | TT               | INTERGENIC      |               |                    |                    |
| SNP_73204_A_149160 | NW_004515906.1 | scaffold433 | 149160                  | AA                              | GG                 | GG               | INTERGENIC      |               |                    |                    |
| SNP_73205_A_149199 | NW_004515906.1 | scaffold433 | 149199                  | TT                              | CC                 | CC               | INTERGENIC      |               |                    |                    |
| SNP_73206_A_149495 | NW_004515906.1 | scaffold433 | 149495                  | CC                              | TT                 | TT               | INTERGENIC      |               |                    |                    |
| SNP_73207_A_150566 | NW_004515906.1 | scaffold433 | 150566                  | TT                              | CC                 | CC               | INTERGENIC      |               |                    |                    |
| SNP_73208_A_150765 | NW_004515906.1 | scaffold433 | 150765                  | GG                              | CC                 | CC               | INTERGENIC      |               |                    |                    |
| SNP_73209_A_151689 | NW_004515906.1 | scaffold433 | 151689                  | CC                              | AA                 | AA               | INTERGENIC      |               |                    |                    |
| SNP_73210_A_151690 | NW_004515906.1 | scaffold433 | 151690                  | AA                              | GG                 | GG               | INTERGENIC      |               |                    |                    |
| SNP_73211_A_151715 | NW_004515906.1 | scaffold433 | 151715                  | AA                              | GG                 | GG               | INTERGENIC      |               |                    |                    |
| SNP_73212_A_151740 | NW_004515906.1 | scaffold433 | 151740                  | TT                              | CC                 | CC               | INTERGENIC      |               |                    |                    |
| SNP_73213_A_152091 | NW_004515906.1 | scaffold433 | 152091                  | CC                              | TT                 | TT               | INTERGENIC      |               |                    |                    |
| SNP_73214_A_152212 | NW_004515906.1 | scaffold433 | 152212                  | AA                              | GG                 | GG               | INTERGENIC      |               |                    |                    |
| SNP_73215_A_152427 | NW_004515906.1 | scaffold433 | 152427                  | GG                              | AA                 | AA               | INTERGENIC      |               |                    |                    |
| SNP_73216_A_152477 | NW_004515906.1 | scaffold433 | 152477                  | AA                              | GG                 | GG               | INTERGENIC      |               |                    |                    |
| SNP_73217_A_152492 | NW_004515906.1 | scaffold433 | 152492                  | GG                              | AA                 | AA               | INTERGENIC      |               |                    |                    |
| SNP_73218_A_152499 | NW_004515906.1 | scaffold433 | 152499                  | CC                              | AA                 | AA               | INTERGENIC      |               |                    |                    |
| SNP_73219_A_152513 | NW_004515906.1 | scaffold433 | 152513                  | GG                              | AA                 | AA               | INTERGENIC      |               |                    |                    |
| SNP_73220_A_153431 | NW_004515906.1 | scaffold433 | 153431                  | GG                              | AA                 | AA               | INTERGENIC      |               |                    |                    |

| SNPs IDs           | Chromosome IDs | Chromosomes | Physical positions (bp) | CDC Frontier (Reference genome) | (Pusa 1103 & HPNB) | (ILWC 46 & LPNB) | Sequence genome | Components of | Gene accession IDs | Putative functions |
|--------------------|----------------|-------------|-------------------------|---------------------------------|--------------------|------------------|-----------------|---------------|--------------------|--------------------|
| SNP_73221_A_155246 | NW_004515906.1 | scaffold433 | 155246                  | CC                              | TT                 | TT               | INTERGENIC      |               |                    |                    |
| SNP_73222_A_155394 | NW_004515906.1 | scaffold433 | 155394                  | AA                              | CC                 | CC               | INTERGENIC      |               |                    |                    |
| SNP_73223_A_155405 | NW_004515906.1 | scaffold433 | 155405                  | AA                              | GG                 | GG               | INTERGENIC      |               |                    |                    |
| SNP_73224_A_155414 | NW_004515906.1 | scaffold433 | 155414                  | CC                              | GG                 | GG               | INTERGENIC      |               |                    |                    |
| SNP_73225_A_155432 | NW_004515906.1 | scaffold433 | 155432                  | CC                              | TT                 | TT               | INTERGENIC      |               |                    |                    |
| SNP_73226_A_155470 | NW_004515906.1 | scaffold433 | 155470                  | TT                              | CC                 | CC               | INTERGENIC      |               |                    |                    |
| SNP_73227_A_155483 | NW_004515906.1 | scaffold433 | 155483                  | AA                              | GG                 | GG               | INTERGENIC      |               |                    |                    |
| SNP_73228_A_155490 | NW_004515906.1 | scaffold433 | 155490                  | TT                              | CC                 | CC               | INTERGENIC      |               |                    |                    |
| SNP_73229_A_155506 | NW_004515906.1 | scaffold433 | 155506                  | AA                              | TT                 | TT               | INTERGENIC      |               |                    |                    |
| SNP_73230_A_155519 | NW_004515906.1 | scaffold433 | 155519                  | AA                              | GG                 | GG               | INTERGENIC      |               |                    |                    |
| SNP_73231_A_155829 | NW_004515906.1 | scaffold433 | 155829                  | CC                              | GG                 | GG               | INTERGENIC      |               |                    |                    |
| SNP_73232_A_157391 | NW_004515906.1 | scaffold433 | 157391                  | CC                              | AA                 | AA               | INTERGENIC      |               |                    |                    |
| SNP_73233_A_157529 | NW_004515906.1 | scaffold433 | 157529                  | CC                              | GG                 | GG               | INTERGENIC      |               |                    |                    |
| SNP_73235_A_157730 | NW_004515906.1 | scaffold433 | 157730                  | AA                              | CC                 | CC               | INTERGENIC      |               |                    |                    |
| SNP_73236_A_158035 | NW_004515906.1 | scaffold433 | 158035                  | AA                              | CC                 | CC               | INTERGENIC      |               |                    |                    |
| SNP_73237_A_158200 | NW_004515906.1 | scaffold433 | 158200                  | TT                              | CC                 | CC               | INTERGENIC      |               |                    |                    |
| SNP_73238_A_158206 | NW_004515906.1 | scaffold433 | 158206                  | AA                              | GG                 | GG               | INTERGENIC      |               |                    |                    |
| SNP_73239_A_158633 | NW_004515906.1 | scaffold433 | 158633                  | TT                              | AA                 | AA               | INTERGENIC      |               |                    |                    |
| SNP_73241_A_158735 | NW_004515906.1 | scaffold433 | 158735                  | AA                              | TT                 | TT               | INTERGENIC      |               |                    |                    |
| SNP_73242_A_158747 | NW_004515906.1 | scaffold433 | 158747                  | TT                              | CC                 | CC               | INTERGENIC      |               |                    |                    |
| SNP_73243_A_160104 | NW_004515906.1 | scaffold433 | 160104                  | TT                              | AA                 | AA               | INTERGENIC      |               |                    |                    |
| SNP_73244_A_160211 | NW_004515906.1 | scaffold433 | 160211                  | TT                              | AA                 | AA               | INTERGENIC      |               |                    |                    |

| SNPs IDs           | Chromosome IDs | Chromosomes | Physical positions (bp) | CDC Frontier (Reference genome) | (Pusa 1103 & HPNB) | (ILWC 46 & LPNB) | Sequence genome | Components of | Gene accession IDs | Putative functions |
|--------------------|----------------|-------------|-------------------------|---------------------------------|--------------------|------------------|-----------------|---------------|--------------------|--------------------|
| SNP_73245_A_161434 | NW_004515906.1 | scaffold433 | 161434                  | GG                              | AA                 | AA               | INTERGENIC      |               |                    |                    |
| SNP_73246_A_161610 | NW_004515906.1 | scaffold433 | 161610                  | GG                              | AA                 | AA               | INTERGENIC      |               |                    |                    |
| SNP_73247_A_162012 | NW_004515906.1 | scaffold433 | 162012                  | CC                              | TT                 | TT               | INTERGENIC      |               |                    |                    |
| SNP_73248_A_162252 | NW_004515906.1 | scaffold433 | 162252                  | TT                              | CC                 | CC               | INTERGENIC      |               |                    |                    |
| SNP_73249_A_165757 | NW_004515906.1 | scaffold433 | 165757                  | GG                              | AA                 | AA               | INTERGENIC      |               |                    |                    |
| SNP_73250_A_165760 | NW_004515906.1 | scaffold433 | 165760                  | AA                              | CC                 | CC               | INTERGENIC      |               |                    |                    |
| SNP_73251_A_165765 | NW_004515906.1 | scaffold433 | 165765                  | AA                              | CC                 | CC               | INTERGENIC      |               |                    |                    |
| SNP_73252_A_165876 | NW_004515906.1 | scaffold433 | 165876                  | CC                              | TT                 | TT               | INTERGENIC      |               |                    |                    |
| SNP_73253_A_165888 | NW_004515906.1 | scaffold433 | 165888                  | TT                              | CC                 | CC               | INTERGENIC      |               |                    |                    |
| SNP_73254_A_165900 | NW_004515906.1 | scaffold433 | 165900                  | TT                              | CC                 | CC               | INTERGENIC      |               |                    |                    |
| SNP_73257_A_166595 | NW_004515906.1 | scaffold433 | 166595                  | CC                              | TT                 | TT               | INTERGENIC      |               |                    |                    |
| SNP_73258_A_166624 | NW_004515906.1 | scaffold433 | 166624                  | GG                              | AA                 | AA               | INTERGENIC      |               |                    |                    |
| SNP_73259_A_166672 | NW_004515906.1 | scaffold433 | 166672                  | TT                              | CC                 | CC               | INTERGENIC      |               |                    |                    |
| SNP_73260_A_166676 | NW_004515906.1 | scaffold433 | 166676                  | TT                              | GG                 | GG               | INTERGENIC      |               |                    |                    |
| SNP_73261_A_166739 | NW_004515906.1 | scaffold433 | 166739                  | GG                              | AA                 | AA               | INTERGENIC      |               |                    |                    |
| SNP_73262_A_166798 | NW_004515906.1 | scaffold433 | 166798                  | GG                              | TT                 | TT               | INTERGENIC      |               |                    |                    |
| SNP_73263_A_168110 | NW_004515906.1 | scaffold433 | 168110                  | AA                              | GG                 | GG               | INTERGENIC      |               |                    |                    |
| SNP_73264_A_168925 | NW_004515906.1 | scaffold433 | 168925                  | GG                              | AA                 | AA               | INTERGENIC      |               |                    |                    |
| SNP_73265_A_168937 | NW_004515906.1 | scaffold433 | 168937                  | AA                              | GG                 | GG               | INTERGENIC      |               |                    |                    |
| SNP_73266_A_168975 | NW_004515906.1 | scaffold433 | 168975                  | AA                              | GG                 | GG               | INTERGENIC      |               |                    |                    |
| SNP_73267_A_169025 | NW_004515906.1 | scaffold433 | 169025                  | GG                              | AA                 | AA               | INTERGENIC      |               |                    |                    |
| SNP_73268_A_169187 | NW_004515906.1 | scaffold433 | 169187                  | TT                              | CC                 | CC               | INTERGENIC      |               |                    |                    |

| SNPs IDs           | Chromosome IDs | Chromosomes | Physical positions (bp) | CDC Frontier (Reference genome) | (Pusa 1103 & HPNB) | (ILWC 46 & LPNB) | Sequence genome | Components of | Gene accession IDs | Putative functions |
|--------------------|----------------|-------------|-------------------------|---------------------------------|--------------------|------------------|-----------------|---------------|--------------------|--------------------|
| SNP_73269_A_169334 | NW_004515906.1 | scaffold433 | 169334                  | CC                              | GG                 | GG               | INTERGENIC      |               |                    |                    |
| SNP_73270_A_169461 | NW_004515906.1 | scaffold433 | 169461                  | AA                              | GG                 | GG               | INTERGENIC      |               |                    |                    |
| SNP_73271_A_169851 | NW_004515906.1 | scaffold433 | 169851                  | CC                              | GG                 | GG               | INTERGENIC      |               |                    |                    |
| SNP_73272_A_2028   | NW_004515908.1 | scaffold435 | 2028                    | GG                              | AA                 | AA               | INTERGENIC      |               |                    |                    |
| SNP_73273_A_50112  | NW_004515908.1 | scaffold435 | 50112                   | TT                              | AA                 | AA               | INTERGENIC      |               |                    |                    |
| SNP_73274_A_50123  | NW_004515908.1 | scaffold435 | 50123                   | TT                              | CC                 | CC               | INTERGENIC      |               |                    |                    |
| SNP_73275_A_50124  | NW_004515908.1 | scaffold435 | 50124                   | TT                              | AA                 | AA               | INTERGENIC      |               |                    |                    |
| SNP_73276_A_50830  | NW_004515908.1 | scaffold435 | 50830                   | CC                              | TT                 | TT               | INTERGENIC      |               |                    |                    |
| SNP_73277_A_108961 | NW_004515908.1 | scaffold435 | 108961                  | TT                              | GG                 | GG               | INTERGENIC      |               |                    |                    |
| SNP_73278_A_109050 | NW_004515908.1 | scaffold435 | 109050                  | TT                              | CC                 | CC               | INTERGENIC      |               |                    |                    |
| SNP_73279_A_109064 | NW_004515908.1 | scaffold435 | 109064                  | CC                              | TT                 | TT               | INTERGENIC      |               |                    |                    |
| SNP_73280_A_109108 | NW_004515908.1 | scaffold435 | 109108                  | CC                              | TT                 | TT               | INTERGENIC      |               |                    |                    |
| SNP_73282_A_109143 | NW_004515908.1 | scaffold435 | 109143                  | CC                              | TT                 | TT               | INTERGENIC      |               |                    |                    |
| SNP_73283_A_109152 | NW_004515908.1 | scaffold435 | 109152                  | AA                              | GG                 | GG               | INTERGENIC      |               |                    |                    |
| SNP_73284_A_109377 | NW_004515908.1 | scaffold435 | 109377                  | AA                              | TT                 | TT               | INTERGENIC      |               |                    |                    |
| SNP_73285_A_109387 | NW_004515908.1 | scaffold435 | 109387                  | CC                              | AA                 | AA               | INTERGENIC      |               |                    |                    |
| SNP_73286_A_109390 | NW_004515908.1 | scaffold435 | 109390                  | GG                              | AA                 | AA               | INTERGENIC      |               |                    |                    |
| SNP_73287_A_109401 | NW_004515908.1 | scaffold435 | 109401                  | AA                              | TT                 | TT               | INTERGENIC      |               |                    |                    |
| SNP_73288_A_109503 | NW_004515908.1 | scaffold435 | 109503                  | CC                              | AA                 | AA               | INTERGENIC      |               |                    |                    |
| SNP_73289_A_118079 | NW_004515908.1 | scaffold435 | 118079                  | AA                              | GG                 | GG               | INTERGENIC      |               |                    |                    |
| SNP_73290_A_2290   | NW_004515909.1 | scaffold436 | 2290                    | GG                              | TT                 | TT               | INTERGENIC      |               |                    |                    |
| SNP_73291_A_2302   | NW_004515909.1 | scaffold436 | 2302                    | AA                              | TT                 | TT               | INTERGENIC      |               |                    |                    |

| SNPs IDs          | Chromosome IDs | Chromosomes | Physical positions (bp) | CDC Frontier (Reference genome) | (Pusa 1103 & HPNB) | (ILWC 46 & LPNB) | Sequence genome | Components of | Gene accession IDs | Putative functions |
|-------------------|----------------|-------------|-------------------------|---------------------------------|--------------------|------------------|-----------------|---------------|--------------------|--------------------|
| SNP_73292_A_2311  | NW_004515909.1 | scaffold436 | 2311                    | AA                              | TT                 | TT               | INTERGENIC      |               |                    |                    |
| SNP_73293_A_2314  | NW_004515909.1 | scaffold436 | 2314                    | AA                              | TT                 | TT               | INTERGENIC      |               |                    |                    |
| SNP_73294_A_2363  | NW_004515909.1 | scaffold436 | 2363                    | GG                              | AA                 | AA               | INTERGENIC      |               |                    |                    |
| SNP_73295_A_2371  | NW_004515909.1 | scaffold436 | 2371                    | TT                              | CC                 | CC               | INTERGENIC      |               |                    |                    |
| SNP_73296_A_2423  | NW_004515909.1 | scaffold436 | 2423                    | GG                              | AA                 | AA               | INTERGENIC      |               |                    |                    |
| SNP_73297_A_2431  | NW_004515909.1 | scaffold436 | 2431                    | TT                              | CC                 | CC               | INTERGENIC      |               |                    |                    |
| SNP_73298_A_2446  | NW_004515909.1 | scaffold436 | 2446                    | TT                              | GG                 | GG               | INTERGENIC      |               |                    |                    |
| SNP_73299_A_2697  | NW_004515909.1 | scaffold436 | 2697                    | AA                              | TT                 | TT               | INTERGENIC      |               |                    |                    |
| SNP_73300_A_2720  | NW_004515909.1 | scaffold436 | 2720                    | CC                              | TT                 | TT               | INTERGENIC      |               |                    |                    |
| SNP_73301_A_2807  | NW_004515909.1 | scaffold436 | 2807                    | TT                              | GG                 | GG               | INTERGENIC      |               |                    |                    |
| SNP_73302_A_2816  | NW_004515909.1 | scaffold436 | 2816                    | AA                              | GG                 | GG               | INTERGENIC      |               |                    |                    |
| SNP_73303_A_4498  | NW_004515909.1 | scaffold436 | 4498                    | AA                              | TT                 | TT               | INTERGENIC      |               |                    |                    |
| SNP_73304_A_4507  | NW_004515909.1 | scaffold436 | 4507                    | GG                              | AA                 | AA               | INTERGENIC      |               |                    |                    |
| SNP_73305_A_5935  | NW_004515909.1 | scaffold436 | 5935                    | AA                              | GG                 | GG               | INTERGENIC      |               |                    |                    |
| SNP_73306_A_5991  | NW_004515909.1 | scaffold436 | 5991                    | GG                              | AA                 | AA               | INTERGENIC      |               |                    |                    |
| SNP_73307_A_6039  | NW_004515909.1 | scaffold436 | 6039                    | GG                              | AA                 | AA               | INTERGENIC      |               |                    |                    |
| SNP_73308_A_20165 | NW_004515909.1 | scaffold436 | 20165                   | AA                              | TT                 | TT               | INTERGENIC      |               |                    |                    |
| SNP_73309_A_35255 | NW_004515909.1 | scaffold436 | 35255                   | AA                              | GG                 | GG               | INTERGENIC      |               |                    |                    |
| SNP_73310_A_35258 | NW_004515909.1 | scaffold436 | 35258                   | TT                              | CC                 | CC               | INTERGENIC      |               |                    |                    |
| SNP_73311_A_38060 | NW_004515909.1 | scaffold436 | 38060                   | GG                              | AA                 | AA               | INTERGENIC      |               |                    |                    |
| SNP_73312_A_38067 | NW_004515909.1 | scaffold436 | 38067                   | TT                              | GG                 | AA               | INTERGENIC      |               |                    |                    |
| SNP_73313_A_67123 | NW_004515909.1 | scaffold436 | 67123                   | AA                              | GG                 | GG               | INTERGENIC      |               |                    |                    |

| SNPs IDs          | Chromosome IDs | Chromosomes | Physical positions (bp) | CDC Frontier (Reference genome) | (Pusa 1103 & HPNB) | (ILWC 46 & LPNB) | Sequence Components of genome | Gene accession IDs | Putative functions |
|-------------------|----------------|-------------|-------------------------|---------------------------------|--------------------|------------------|-------------------------------|--------------------|--------------------|
| SNP_73314_A_67130 | NW_004515909.1 | scaffold436 | 67130                   | TT                              | AA                 | AA               | INTERGENIC                    |                    |                    |
| SNP_73316_A_67153 | NW_004515909.1 | scaffold436 | 67153                   | GG                              | AA                 | AA               | INTERGENIC                    |                    |                    |
| SNP_73318_A_74019 | NW_004515909.1 | scaffold436 | 74019                   | CC                              | TT                 | TT               | INTERGENIC                    |                    |                    |
| SNP_73319_A_74081 | NW_004515909.1 | scaffold436 | 74081                   | TT                              | AA                 | AA               | INTERGENIC                    |                    |                    |
| SNP_73320_A_57    | NW_004515910.1 | scaffold437 | 57                      | GG                              | CC                 | CC               | INTERGENIC                    |                    |                    |
| SNP_73322_A_2040  | NW_004515910.1 | scaffold437 | 2040                    | AA                              | TT                 | TT               | DRR                           | 101501575          | extensin-like      |
| SNP_73323_A_2113  | NW_004515910.1 | scaffold437 | 2113                    | TT                              | GG                 | GG               | DRR                           | 101501575          | extensin-like      |
| SNP_73324_A_2472  | NW_004515910.1 | scaffold437 | 2472                    | TT                              | AA                 | AA               | NON_SYNONYMOUS_CODING         | 101501575          | extensin-like      |
| SNP_73326_A_3005  | NW_004515910.1 | scaffold437 | 3005                    | CC                              | AA                 | AA               | INTRON                        | 101501575          | extensin-like      |
| SNP_73327_A_3069  | NW_004515910.1 | scaffold437 | 3069                    | CC                              | TT                 | TT               | INTRON                        | 101501575          | extensin-like      |
| SNP_73328_A_3975  | NW_004515910.1 | scaffold437 | 3975                    | CC                              | TT                 | TT               | INTRON                        | 101501575          | extensin-like      |
| SNP_73329_A_4086  | NW_004515910.1 | scaffold437 | 4086                    | AA                              | GG                 | GG               | INTRON                        | 101501575          | extensin-like      |
| SNP_73330_A_4090  | NW_004515910.1 | scaffold437 | 4090                    | TT                              | AA                 | AA               | INTRON                        | 101501575          | extensin-like      |
| SNP_73331_A_4101  | NW_004515910.1 | scaffold437 | 4101                    | TT                              | AA                 | AA               | INTRON                        | 101501575          | extensin-like      |
| SNP_73332_A_4103  | NW_004515910.1 | scaffold437 | 4103                    | TT                              | CC                 | CC               | INTRON                        | 101501575          | extensin-like      |
| SNP_73333_A_4119  | NW_004515910.1 | scaffold437 | 4119                    | TT                              | CC                 | CC               | SPLICE_SITE_REGION            | 101501575          | extensin-like      |
| SNP_73334_A_4557  | NW_004515910.1 | scaffold437 | 4557                    | TT                              | GG                 | GG               | URR                           | 101501575          | extensin-like      |
| SNP_73335_A_4569  | NW_004515910.1 | scaffold437 | 4569                    | AA                              | GG                 | GG               | URR                           | 101501575          | extensin-like      |
| SNP_73336_A_4619  | NW_004515910.1 | scaffold437 | 4619                    | TT                              | CC                 | CC               | URR                           | 101501575          | extensin-like      |
| SNP_73337_A_4688  | NW_004515910.1 | scaffold437 | 4688                    | TT                              | CC                 | CC               | URR                           | 101501575          | extensin-like      |
| SNP_73338_A_4725  | NW_004515910.1 | scaffold437 | 4725                    | CC                              | AA                 | AA               | URR                           | 101501575          | extensin-like      |
| SNP_73339_A_4767  | NW_004515910.1 | scaffold437 | 4767                    | CC                              | GG                 | GG               | URR                           | 101501575          | extensin-like      |



| SNPs IDs          | Chromosome IDs | Chromosomes | Physical positions (bp) | CDC Frontier genome (Reference genome) | (Pusa 1103 & HPNB) | (ILWC 46 & LPNB) | Sequence Components of genome | Gene accession IDs | Putative functions |
|-------------------|----------------|-------------|-------------------------|----------------------------------------|--------------------|------------------|-------------------------------|--------------------|--------------------|
| SNP_73340_A_5603  | NW_004515910.1 | scaffold437 | 5603                    | GG                                     | AA                 | AA               | URR                           | 101501575          | extensin-like      |
| SNP_73341_A_6551  | NW_004515910.1 | scaffold437 | 6551                    | GG                                     | AA                 | AA               | INTERGENIC                    |                    |                    |
| SNP_73342_A_10337 | NW_004515910.1 | scaffold437 | 10337                   | GG                                     | CC                 | CC               | INTRON                        | 101501885          | extensin-like      |
| SNP_73344_A_13473 | NW_004515910.1 | scaffold437 | 13473                   | GG                                     | AA                 | AA               | INTERGENIC                    |                    |                    |
| SNP_73345_A_19539 | NW_004515910.1 | scaffold437 | 19539                   | AA                                     | CC                 | CC               | INTERGENIC                    |                    |                    |
| SNP_73346_A_19575 | NW_004515910.1 | scaffold437 | 19575                   | GG                                     | AA                 | AA               | INTERGENIC                    |                    |                    |
| SNP_73347_A_19586 | NW_004515910.1 | scaffold437 | 19586                   | CC                                     | TT                 | TT               | INTERGENIC                    |                    |                    |
| SNP_73348_A_21131 | NW_004515910.1 | scaffold437 | 21131                   | AA                                     | GG                 | GG               | DRR                           | 101502213          | extensin-like      |
| SNP_73349_A_22193 | NW_004515910.1 | scaffold437 | 22193                   | GG                                     | AA                 | AA               | URR                           | 101502213          | extensin-like      |
| SNP_73350_A_26615 | NW_004515910.1 | scaffold437 | 26615                   | GG                                     | AA                 | AA               | INTERGENIC                    |                    |                    |
| SNP_73351_A_26616 | NW_004515910.1 | scaffold437 | 26616                   | AA                                     | CC                 | CC               | INTERGENIC                    |                    |                    |
| SNP_73352_A_27208 | NW_004515910.1 | scaffold437 | 27208                   | GG                                     | AA                 | AA               | INTERGENIC                    |                    |                    |
| SNP_73354_A_28236 | NW_004515910.1 | scaffold437 | 28236                   | TT                                     | AA                 | AA               | INTERGENIC                    |                    |                    |
| SNP_73355_A_28280 | NW_004515910.1 | scaffold437 | 28280                   | TT                                     | AA                 | AA               | INTERGENIC                    |                    |                    |
| SNP_73356_A_28283 | NW_004515910.1 | scaffold437 | 28283                   | TT                                     | AA                 | AA               | INTERGENIC                    |                    |                    |
| SNP_73357_A_28403 | NW_004515910.1 | scaffold437 | 28403                   | TT                                     | AA                 | AA               | INTERGENIC                    |                    |                    |
| SNP_73358_A_30878 | NW_004515910.1 | scaffold437 | 30878                   | AA                                     | GG                 | GG               | INTERGENIC                    |                    |                    |
| SNP_73359_A_30934 | NW_004515910.1 | scaffold437 | 30934                   | AA                                     | TT                 | TT               | INTERGENIC                    |                    |                    |
| SNP_73360_A_34868 | NW_004515910.1 | scaffold437 | 34868                   | CC                                     | AA                 | AA               | INTERGENIC                    |                    |                    |
| SNP_73361_A_34869 | NW_004515910.1 | scaffold437 | 34869                   | AA                                     | TT                 | TT               | INTERGENIC                    |                    |                    |
| SNP_73362_A_34870 | NW_004515910.1 | scaffold437 | 34870                   | TT                                     | AA                 | AA               | INTERGENIC                    |                    |                    |
| SNP_73363_A_34962 | NW_004515910.1 | scaffold437 | 34962                   | TT                                     | CC                 | CC               | INTERGENIC                    |                    |                    |

| SNPs IDs          | Chromosome IDs | Chromosomes | Physical positions (bp) | CDC Frontier (Reference genome) | (Pusa 1103 & HPNB) | (ILWC 46 & LPNB) | Sequence genome | Components of | Gene accession IDs | Putative functions |
|-------------------|----------------|-------------|-------------------------|---------------------------------|--------------------|------------------|-----------------|---------------|--------------------|--------------------|
| SNP_73364_A_34963 | NW_004515910.1 | scaffold437 | 34963                   | CC                              | AA                 | AA               | INTERGENIC      |               |                    |                    |
| SNP_73365_A_34986 | NW_004515910.1 | scaffold437 | 34986                   | TT                              | CC                 | CC               | INTERGENIC      |               |                    |                    |
| SNP_73366_A_35033 | NW_004515910.1 | scaffold437 | 35033                   | CC                              | TT                 | TT               | INTERGENIC      |               |                    |                    |
| SNP_73367_A_35056 | NW_004515910.1 | scaffold437 | 35056                   | TT                              | CC                 | CC               | INTERGENIC      |               |                    |                    |
| SNP_73368_A_35090 | NW_004515910.1 | scaffold437 | 35090                   | AA                              | GG                 | GG               | INTERGENIC      |               |                    |                    |
| SNP_73369_A_35128 | NW_004515910.1 | scaffold437 | 35128                   | TT                              | CC                 | CC               | INTERGENIC      |               |                    |                    |
| SNP_73370_A_35173 | NW_004515910.1 | scaffold437 | 35173                   | AA                              | GG                 | GG               | INTERGENIC      |               |                    |                    |
| SNP_73371_A_35202 | NW_004515910.1 | scaffold437 | 35202                   | TT                              | CC                 | CC               | INTERGENIC      |               |                    |                    |
| SNP_73372_A_35244 | NW_004515910.1 | scaffold437 | 35244                   | AA                              | GG                 | GG               | INTERGENIC      |               |                    |                    |
| SNP_73373_A_35333 | NW_004515910.1 | scaffold437 | 35333                   | TT                              | CC                 | CC               | INTERGENIC      |               |                    |                    |
| SNP_73374_A_35674 | NW_004515910.1 | scaffold437 | 35674                   | TT                              | AA                 | AA               | INTERGENIC      |               |                    |                    |
| SNP_73375_A_35693 | NW_004515910.1 | scaffold437 | 35693                   | AA                              | TT                 | TT               | INTERGENIC      |               |                    |                    |
| SNP_73376_A_35742 | NW_004515910.1 | scaffold437 | 35742                   | TT                              | AA                 | AA               | INTERGENIC      |               |                    |                    |
| SNP_73377_A_35759 | NW_004515910.1 | scaffold437 | 35759                   | CC                              | TT                 | TT               | INTERGENIC      |               |                    |                    |
| SNP_73378_A_35763 | NW_004515910.1 | scaffold437 | 35763                   | TT                              | CC                 | CC               | INTERGENIC      |               |                    |                    |
| SNP_73379_A_35946 | NW_004515910.1 | scaffold437 | 35946                   | GG                              | TT                 | TT               | INTERGENIC      |               |                    |                    |
| SNP_73380_A_39853 | NW_004515910.1 | scaffold437 | 39853                   | AA                              | CC                 | CC               | INTERGENIC      |               |                    |                    |
| SNP_73381_A_45212 | NW_004515910.1 | scaffold437 | 45212                   | CC                              | TT                 | TT               | INTERGENIC      |               |                    |                    |
| SNP_73383_A_50625 | NW_004515910.1 | scaffold437 | 50625                   | AA                              | GG                 | GG               | INTERGENIC      |               |                    |                    |
| SNP_73384_A_50648 | NW_004515910.1 | scaffold437 | 50648                   | CC                              | TT                 | TT               | INTERGENIC      |               |                    |                    |
| SNP_73385_A_50649 | NW_004515910.1 | scaffold437 | 50649                   | AA                              | TT                 | TT               | INTERGENIC      |               |                    |                    |
| SNP_73386_A_50655 | NW_004515910.1 | scaffold437 | 50655                   | AA                              | CC                 | CC               | INTERGENIC      |               |                    |                    |

| SNPs IDs          | Chromosome IDs | Chromosomes | Physical positions (bp) | CDC Frontier (Reference genome) | (Pusa 1103 & HPNB) | (ILWC 46 & LPNB) | Sequence Components of genome | Gene accession IDs | Putative functions |
|-------------------|----------------|-------------|-------------------------|---------------------------------|--------------------|------------------|-------------------------------|--------------------|--------------------|
| SNP_73387_A_52276 | NW_004515910.1 | scaffold437 | 52276                   | GG                              | AA                 | AA               | INTERGENIC                    |                    |                    |
| SNP_73388_A_60347 | NW_004515910.1 | scaffold437 | 60347                   | GG                              | TT                 | TT               | INTERGENIC                    |                    |                    |
| SNP_73389_A_60348 | NW_004515910.1 | scaffold437 | 60348                   | TT                              | CC                 | CC               | INTERGENIC                    |                    |                    |
| SNP_73390_A_60389 | NW_004515910.1 | scaffold437 | 60389                   | AA                              | CC                 | CC               | INTERGENIC                    |                    |                    |
| SNP_73391_A_60494 | NW_004515910.1 | scaffold437 | 60494                   | TT                              | AA                 | AA               | INTERGENIC                    |                    |                    |
| SNP_73392_A_60497 | NW_004515910.1 | scaffold437 | 60497                   | GG                              | AA                 | AA               | INTERGENIC                    |                    |                    |
| SNP_73393_A_60966 | NW_004515910.1 | scaffold437 | 60966                   | GG                              | TT                 | TT               | INTERGENIC                    |                    |                    |
| SNP_73394_A_63475 | NW_004515910.1 | scaffold437 | 63475                   | CC                              | AA                 | AA               | DRR                           | 101502535          | extensin-like      |
| SNP_73395_A_70352 | NW_004515910.1 | scaffold437 | 70352                   | TT                              | CC                 | CC               | INTRON                        | 101502535          | extensin-like      |
| SNP_73396_A_72340 | NW_004515910.1 | scaffold437 | 72340                   | CC                              | TT                 | TT               | INTRON                        | 101502535          | extensin-like      |
| SNP_73397_A_77387 | NW_004515910.1 | scaffold437 | 77387                   | CC                              | AA                 | AA               | INTRON                        | 101502535          | extensin-like      |
| SNP_73399_A_1108  | NW_004515911.1 | scaffold438 | 1108                    | AA                              | GG                 | GG               | INTERGENIC                    |                    |                    |
| SNP_73400_A_1633  | NW_004515911.1 | scaffold438 | 1633                    | AA                              | GG                 | GG               | INTERGENIC                    |                    |                    |
| SNP_73401_A_1636  | NW_004515911.1 | scaffold438 | 1636                    | TT                              | CC                 | CC               | INTERGENIC                    |                    |                    |
| SNP_73402_A_1639  | NW_004515911.1 | scaffold438 | 1639                    | TT                              | CC                 | CC               | INTERGENIC                    |                    |                    |
| SNP_73403_A_1657  | NW_004515911.1 | scaffold438 | 1657                    | GG                              | AA                 | AA               | INTERGENIC                    |                    |                    |
| SNP_73404_A_1669  | NW_004515911.1 | scaffold438 | 1669                    | AA                              | GG                 | GG               | INTERGENIC                    |                    |                    |
| SNP_73405_A_1870  | NW_004515911.1 | scaffold438 | 1870                    | GG                              | TT                 | TT               | INTERGENIC                    |                    |                    |
| SNP_73406_A_1969  | NW_004515911.1 | scaffold438 | 1969                    | AA                              | GG                 | GG               | INTERGENIC                    |                    |                    |
| SNP_73407_A_3726  | NW_004515911.1 | scaffold438 | 3726                    | TT                              | CC                 | CC               | INTERGENIC                    |                    |                    |
| SNP_73408_A_3874  | NW_004515911.1 | scaffold438 | 3874                    | CC                              | TT                 | TT               | INTERGENIC                    |                    |                    |
| SNP_73409_A_3954  | NW_004515911.1 | scaffold438 | 3954                    | TT                              | GG                 | GG               | INTERGENIC                    |                    |                    |

| SNPs IDs          | Chromosome IDs | Chromosomes | Physical positions (bp) | CDC Frontier (Reference genome) | (Pusa 1103 & HPNB) | (ILWC 46 & LPNB) | Sequence genome | Components of | Gene accession IDs | Putative functions |
|-------------------|----------------|-------------|-------------------------|---------------------------------|--------------------|------------------|-----------------|---------------|--------------------|--------------------|
| SNP_73410_A_6821  | NW_004515911.1 | scaffold438 | 6821                    | CC                              | TT                 | TT               | INTERGENIC      |               |                    |                    |
| SNP_73411_A_6879  | NW_004515911.1 | scaffold438 | 6879                    | AA                              | TT                 | TT               | INTERGENIC      |               |                    |                    |
| SNP_73412_A_6923  | NW_004515911.1 | scaffold438 | 6923                    | GG                              | AA                 | AA               | INTERGENIC      |               |                    |                    |
| SNP_73414_A_6977  | NW_004515911.1 | scaffold438 | 6977                    | GG                              | AA                 | AA               | INTERGENIC      |               |                    |                    |
| SNP_73415_A_14979 | NW_004515911.1 | scaffold438 | 14979                   | GG                              | TT                 | TT               | INTERGENIC      |               |                    |                    |
| SNP_73416_A_47534 | NW_004515911.1 | scaffold438 | 47534                   | GG                              | TT                 | TT               | INTERGENIC      |               |                    |                    |
| SNP_73417_A_48072 | NW_004515911.1 | scaffold438 | 48072                   | CC                              | GG                 | GG               | INTERGENIC      |               |                    |                    |
| SNP_73418_A_74759 | NW_004515911.1 | scaffold438 | 74759                   | TT                              | AA                 | AA               | INTERGENIC      |               |                    |                    |
| SNP_73419_A_74860 | NW_004515911.1 | scaffold438 | 74860                   | CC                              | AA                 | AA               | INTERGENIC      |               |                    |                    |
| SNP_73420_A_74893 | NW_004515911.1 | scaffold438 | 74893                   | AA                              | GG                 | GG               | INTERGENIC      |               |                    |                    |
| SNP_73421_A_74936 | NW_004515911.1 | scaffold438 | 74936                   | AA                              | TT                 | TT               | INTERGENIC      |               |                    |                    |
| SNP_73423_A_75021 | NW_004515911.1 | scaffold438 | 75021                   | AA                              | GG                 | GG               | INTERGENIC      |               |                    |                    |
| SNP_73424_A_75053 | NW_004515911.1 | scaffold438 | 75053                   | AA                              | CC                 | CC               | INTERGENIC      |               |                    |                    |
| SNP_73425_A_76520 | NW_004515911.1 | scaffold438 | 76520                   | GG                              | TT                 | TT               | INTERGENIC      |               |                    |                    |
| SNP_73426_A_76867 | NW_004515911.1 | scaffold438 | 76867                   | CC                              | AA                 | AA               | INTERGENIC      |               |                    |                    |
| SNP_73427_A_76901 | NW_004515911.1 | scaffold438 | 76901                   | TT                              | GG                 | GG               | INTERGENIC      |               |                    |                    |
| SNP_73428_A_93306 | NW_004515911.1 | scaffold438 | 93306                   | TT                              | CC                 | CC               | INTERGENIC      |               |                    |                    |
| SNP_73429_A_93386 | NW_004515911.1 | scaffold438 | 93386                   | AA                              | GG                 | GG               | INTERGENIC      |               |                    |                    |
| SNP_73430_A_97807 | NW_004515911.1 | scaffold438 | 97807                   | CC                              | TT                 | TT               | INTERGENIC      |               |                    |                    |
| SNP_73431_A_97825 | NW_004515911.1 | scaffold438 | 97825                   | TT                              | CC                 | CC               | INTERGENIC      |               |                    |                    |
| SNP_73432_A_97942 | NW_004515911.1 | scaffold438 | 97942                   | CC                              | TT                 | TT               | INTERGENIC      |               |                    |                    |
| SNP_73433_A_97943 | NW_004515911.1 | scaffold438 | 97943                   | AA                              | TT                 | TT               | INTERGENIC      |               |                    |                    |

| SNPs IDs          | Chromosome IDs | Chromosomes | Physical positions (bp) | CDC Frontier (Reference genome) | (Pusa 1103 & HPNB) | (ILWC 46 & LPNB) | Sequence genome | Components of | Gene accession IDs | Putative functions |
|-------------------|----------------|-------------|-------------------------|---------------------------------|--------------------|------------------|-----------------|---------------|--------------------|--------------------|
| SNP_73434_A_98004 | NW_004515911.1 | scaffold438 | 98004                   | TT                              | CC                 | CC               | INTERGENIC      |               |                    |                    |
| SNP_73435_A_98010 | NW_004515911.1 | scaffold438 | 98010                   | CC                              | TT                 | TT               | INTERGENIC      |               |                    |                    |
| SNP_73436_A_98011 | NW_004515911.1 | scaffold438 | 98011                   | AA                              | GG                 | GG               | INTERGENIC      |               |                    |                    |
| SNP_73437_A_98015 | NW_004515911.1 | scaffold438 | 98015                   | AA                              | CC                 | CC               | INTERGENIC      |               |                    |                    |
| SNP_73438_A_98024 | NW_004515911.1 | scaffold438 | 98024                   | GG                              | CC                 | CC               | INTERGENIC      |               |                    |                    |
| SNP_73439_A_98097 | NW_004515911.1 | scaffold438 | 98097                   | CC                              | GG                 | GG               | INTERGENIC      |               |                    |                    |
| SNP_73440_A_98168 | NW_004515911.1 | scaffold438 | 98168                   | TT                              | GG                 | GG               | INTERGENIC      |               |                    |                    |
| SNP_73441_A_98217 | NW_004515911.1 | scaffold438 | 98217                   | TT                              | AA                 | AA               | INTERGENIC      |               |                    |                    |
| SNP_73442_A_98218 | NW_004515911.1 | scaffold438 | 98218                   | TT                              | CC                 | CC               | INTERGENIC      |               |                    |                    |
| SNP_73443_A_98220 | NW_004515911.1 | scaffold438 | 98220                   | TT                              | AA                 | AA               | INTERGENIC      |               |                    |                    |
| SNP_73444_A_98258 | NW_004515911.1 | scaffold438 | 98258                   | AA                              | GG                 | GG               | INTERGENIC      |               |                    |                    |
| SNP_73445_A_98261 | NW_004515911.1 | scaffold438 | 98261                   | GG                              | TT                 | TT               | INTERGENIC      |               |                    |                    |
| SNP_73446_A_23172 | NW_004515912.1 | scaffold440 | 23172                   | GG                              | CC                 | CC               | INTERGENIC      |               |                    |                    |
| SNP_73447_A_30117 | NW_004515912.1 | scaffold440 | 30117                   | CC                              | AA                 | AA               | INTERGENIC      |               |                    |                    |
| SNP_73448_A_30196 | NW_004515912.1 | scaffold440 | 30196                   | CC                              | AA                 | AA               | INTERGENIC      |               |                    |                    |
| SNP_73450_A_30308 | NW_004515912.1 | scaffold440 | 30308                   | GG                              | TT                 | TT               | INTERGENIC      |               |                    |                    |
| SNP_73451_A_30340 | NW_004515912.1 | scaffold440 | 30340                   | AA                              | GG                 | GG               | INTERGENIC      |               |                    |                    |
| SNP_73452_A_30425 | NW_004515912.1 | scaffold440 | 30425                   | GG                              | AA                 | AA               | INTERGENIC      |               |                    |                    |
| SNP_73453_A_30473 | NW_004515912.1 | scaffold440 | 30473                   | GG                              | TT                 | TT               | INTERGENIC      |               |                    |                    |
| SNP_73454_A_37231 | NW_004515912.1 | scaffold440 | 37231                   | CC                              | AA                 | AA               | INTERGENIC      |               |                    |                    |
| SNP_73455_A_37261 | NW_004515912.1 | scaffold440 | 37261                   | TT                              | CC                 | CC               | INTERGENIC      |               |                    |                    |
| SNP_73456_A_14569 | NW_004515913.1 | scaffold441 | 14569                   | TT                              | AA                 | AA               | INTERGENIC      |               |                    |                    |

| SNPs IDs          | Chromosome IDs | Chromosomes | Physical positions (bp) | CDC Frontier (Reference genome) | (Pusa 1103 & HPNB) | (ILWC 46 & LPNB) | Sequence genome | Components of | Gene accession IDs | Putative functions |
|-------------------|----------------|-------------|-------------------------|---------------------------------|--------------------|------------------|-----------------|---------------|--------------------|--------------------|
| SNP_73457_A_33549 | NW_004515913.1 | scaffold441 | 33549                   | AA                              | CC                 | CC               | INTERGENIC      |               |                    |                    |
| SNP_73458_A_34040 | NW_004515913.1 | scaffold441 | 34040                   | CC                              | GG                 | GG               | INTERGENIC      |               |                    |                    |
| SNP_73459_A_34127 | NW_004515913.1 | scaffold441 | 34127                   | GG                              | AA                 | AA               | INTERGENIC      |               |                    |                    |
| SNP_73460_A_14513 | NW_004515914.1 | scaffold442 | 14513                   | AA                              | CC                 | CC               | INTERGENIC      |               |                    |                    |
| SNP_73462_A_35105 | NW_004515914.1 | scaffold442 | 35105                   | CC                              | AA                 | AA               | INTERGENIC      |               |                    |                    |
| SNP_73463_A_35605 | NW_004515914.1 | scaffold442 | 35605                   | CC                              | TT                 | TT               | INTERGENIC      |               |                    |                    |
| SNP_73464_A_35606 | NW_004515914.1 | scaffold442 | 35606                   | GG                              | TT                 | TT               | INTERGENIC      |               |                    |                    |
| SNP_73465_A_36427 | NW_004515914.1 | scaffold442 | 36427                   | CC                              | TT                 | TT               | INTERGENIC      |               |                    |                    |
| SNP_73466_A_36428 | NW_004515914.1 | scaffold442 | 36428                   | TT                              | GG                 | GG               | INTERGENIC      |               |                    |                    |
| SNP_73467_A_36721 | NW_004515914.1 | scaffold442 | 36721                   | TT                              | CC                 | CC               | INTERGENIC      |               |                    |                    |
| SNP_73468_A_36964 | NW_004515914.1 | scaffold442 | 36964                   | AA                              | GG                 | GG               | INTERGENIC      |               |                    |                    |
| SNP_73469_A_37093 | NW_004515914.1 | scaffold442 | 37093                   | CC                              | TT                 | TT               | INTERGENIC      |               |                    |                    |
| SNP_73470_A_41424 | NW_004515914.1 | scaffold442 | 41424                   | GG                              | TT                 | TT               | INTERGENIC      |               |                    |                    |
| SNP_73471_A_42744 | NW_004515914.1 | scaffold442 | 42744                   | TT                              | CC                 | CC               | INTERGENIC      |               |                    |                    |
| SNP_73472_A_42749 | NW_004515914.1 | scaffold442 | 42749                   | CC                              | AA                 | AA               | INTERGENIC      |               |                    |                    |
| SNP_73473_A_49999 | NW_004515914.1 | scaffold442 | 49999                   | TT                              | CC                 | CC               | INTERGENIC      |               |                    |                    |
| SNP_73474_A_50017 | NW_004515914.1 | scaffold442 | 50017                   | AA                              | GG                 | GG               | INTERGENIC      |               |                    |                    |
| SNP_73475_A_54958 | NW_004515914.1 | scaffold442 | 54958                   | TT                              | CC                 | CC               | INTERGENIC      |               |                    |                    |
| SNP_73476_A_71565 | NW_004515914.1 | scaffold442 | 71565                   | TT                              | CC                 | CC               | INTERGENIC      |               |                    |                    |
| SNP_73477_A_71825 | NW_004515914.1 | scaffold442 | 71825                   | GG                              | TT                 | TT               | INTERGENIC      |               |                    |                    |
| SNP_73478_A_85764 | NW_004515914.1 | scaffold442 | 85764                   | AA                              | CC                 | CC               | INTERGENIC      |               |                    |                    |
| SNP_73479_A_2125  | NW_004515916.1 | scaffold446 | 2125                    | CC                              | GG                 | GG               | INTERGENIC      |               |                    |                    |

| SNPs IDs          | Chromosome IDs | Chromosomes | Physical positions (bp) | CDC Frontier genome (Reference genome) | (Pusa 1103 & HPNB) | (ILWC 46 & LPNB) | Sequence genome | Components of | Gene accession IDs | Putative functions |
|-------------------|----------------|-------------|-------------------------|----------------------------------------|--------------------|------------------|-----------------|---------------|--------------------|--------------------|
| SNP_73480_A_9823  | NW_004515916.1 | scaffold446 | 9823                    | GG                                     | TT                 | TT               | INTERGENIC      |               |                    |                    |
| SNP_73481_A_12795 | NW_004515916.1 | scaffold446 | 12795                   | AA                                     | GG                 | GG               | INTERGENIC      |               |                    |                    |
| SNP_73482_A_12830 | NW_004515916.1 | scaffold446 | 12830                   | TT                                     | CC                 | CC               | INTERGENIC      |               |                    |                    |
| SNP_73483_A_12831 | NW_004515916.1 | scaffold446 | 12831                   | CC                                     | AA                 | AA               | INTERGENIC      |               |                    |                    |
| SNP_73484_A_12837 | NW_004515916.1 | scaffold446 | 12837                   | CC                                     | TT                 | TT               | INTERGENIC      |               |                    |                    |
| SNP_73485_A_12843 | NW_004515916.1 | scaffold446 | 12843                   | AA                                     | GG                 | GG               | INTERGENIC      |               |                    |                    |
| SNP_73487_A_12880 | NW_004515916.1 | scaffold446 | 12880                   | TT                                     | AA                 | AA               | INTERGENIC      |               |                    |                    |
| SNP_73488_A_13047 | NW_004515916.1 | scaffold446 | 13047                   | GG                                     | TT                 | TT               | INTERGENIC      |               |                    |                    |
| SNP_73489_A_13252 | NW_004515916.1 | scaffold446 | 13252                   | TT                                     | AA                 | AA               | INTERGENIC      |               |                    |                    |
| SNP_73490_A_13297 | NW_004515916.1 | scaffold446 | 13297                   | GG                                     | AA                 | AA               | INTERGENIC      |               |                    |                    |
| SNP_73491_A_13327 | NW_004515916.1 | scaffold446 | 13327                   | GG                                     | AA                 | AA               | INTERGENIC      |               |                    |                    |
| SNP_73492_A_13371 | NW_004515916.1 | scaffold446 | 13371                   | GG                                     | AA                 | AA               | INTERGENIC      |               |                    |                    |
| SNP_73493_A_13372 | NW_004515916.1 | scaffold446 | 13372                   | AA                                     | TT                 | TT               | INTERGENIC      |               |                    |                    |
| SNP_73494_A_14415 | NW_004515916.1 | scaffold446 | 14415                   | TT                                     | CC                 | CC               | INTERGENIC      |               |                    |                    |
| SNP_73495_A_34066 | NW_004515916.1 | scaffold446 | 34066                   | AA                                     | GG                 | GG               | INTERGENIC      |               |                    |                    |
| SNP_73496_A_34347 | NW_004515916.1 | scaffold446 | 34347                   | AA                                     | GG                 | GG               | INTERGENIC      |               |                    |                    |
| SNP_73497_A_36133 | NW_004515916.1 | scaffold446 | 36133                   | AA                                     | GG                 | GG               | INTERGENIC      |               |                    |                    |
| SNP_73498_A_36145 | NW_004515916.1 | scaffold446 | 36145                   | GG                                     | TT                 | TT               | INTERGENIC      |               |                    |                    |
| SNP_73499_A_50715 | NW_004515916.1 | scaffold446 | 50715                   | GG                                     | AA                 | AA               | INTERGENIC      |               |                    |                    |
| SNP_73500_A_65404 | NW_004515916.1 | scaffold446 | 65404                   | AA                                     | GG                 | GG               | INTERGENIC      |               |                    |                    |
| SNP_73501_A_65922 | NW_004515916.1 | scaffold446 | 65922                   | TT                                     | GG                 | GG               | INTERGENIC      |               |                    |                    |
| SNP_73502_A_65983 | NW_004515916.1 | scaffold446 | 65983                   | CC                                     | TT                 | TT               | INTERGENIC      |               |                    |                    |

| SNPs IDs          | Chromosome IDs | Chromosomes | Physical positions (bp) | CDC Frontier (Reference genome) | (Pusa 1103 & HPNB) | (ILWC 46 & LPNB) | Sequence genome | Components of | Gene accession IDs | Putative functions |
|-------------------|----------------|-------------|-------------------------|---------------------------------|--------------------|------------------|-----------------|---------------|--------------------|--------------------|
| SNP_73503_A_66049 | NW_004515916.1 | scaffold446 | 66049                   | CC                              | TT                 | TT               | INTERGENIC      |               |                    |                    |
| SNP_73504_A_66066 | NW_004515916.1 | scaffold446 | 66066                   | TT                              | CC                 | CC               | INTERGENIC      |               |                    |                    |
| SNP_73505_A_66127 | NW_004515916.1 | scaffold446 | 66127                   | TT                              | AA                 | AA               | INTERGENIC      |               |                    |                    |
| SNP_73506_A_66134 | NW_004515916.1 | scaffold446 | 66134                   | TT                              | CC                 | CC               | INTERGENIC      |               |                    |                    |
| SNP_73507_A_66181 | NW_004515916.1 | scaffold446 | 66181                   | AA                              | CC                 | CC               | INTERGENIC      |               |                    |                    |
| SNP_73508_A_66211 | NW_004515916.1 | scaffold446 | 66211                   | AA                              | CC                 | CC               | INTERGENIC      |               |                    |                    |
| SNP_73509_A_66222 | NW_004515916.1 | scaffold446 | 66222                   | CC                              | AA                 | AA               | INTERGENIC      |               |                    |                    |
| SNP_73510_A_66249 | NW_004515916.1 | scaffold446 | 66249                   | TT                              | CC                 | CC               | INTERGENIC      |               |                    |                    |
| SNP_73511_A_66259 | NW_004515916.1 | scaffold446 | 66259                   | AA                              | CC                 | CC               | INTERGENIC      |               |                    |                    |
| SNP_73512_A_66275 | NW_004515916.1 | scaffold446 | 66275                   | TT                              | CC                 | CC               | INTERGENIC      |               |                    |                    |
| SNP_73513_A_66385 | NW_004515916.1 | scaffold446 | 66385                   | CC                              | GG                 | GG               | INTERGENIC      |               |                    |                    |
| SNP_73514_A_66435 | NW_004515916.1 | scaffold446 | 66435                   | GG                              | CC                 | CC               | INTERGENIC      |               |                    |                    |
| SNP_73515_A_66510 | NW_004515916.1 | scaffold446 | 66510                   | CC                              | AA                 | AA               | INTERGENIC      |               |                    |                    |
| SNP_73516_A_67629 | NW_004515916.1 | scaffold446 | 67629                   | CC                              | AA                 | AA               | INTERGENIC      |               |                    |                    |
| SNP_73517_A_67638 | NW_004515916.1 | scaffold446 | 67638                   | CC                              | AA                 | AA               | INTERGENIC      |               |                    |                    |
| SNP_73518_A_67709 | NW_004515916.1 | scaffold446 | 67709                   | GG                              | AA                 | AA               | INTERGENIC      |               |                    |                    |
| SNP_73519_A_67730 | NW_004515916.1 | scaffold446 | 67730                   | CC                              | TT                 | TT               | INTERGENIC      |               |                    |                    |
| SNP_73520_A_67731 | NW_004515916.1 | scaffold446 | 67731                   | AA                              | GG                 | GG               | INTERGENIC      |               |                    |                    |
| SNP_73521_A_67774 | NW_004515916.1 | scaffold446 | 67774                   | TT                              | CC                 | CC               | INTERGENIC      |               |                    |                    |
| SNP_73522_A_67848 | NW_004515916.1 | scaffold446 | 67848                   | AA                              | TT                 | TT               | INTERGENIC      |               |                    |                    |
| SNP_73523_A_67862 | NW_004515916.1 | scaffold446 | 67862                   | AA                              | TT                 | TT               | INTERGENIC      |               |                    |                    |
| SNP_73524_A_67874 | NW_004515916.1 | scaffold446 | 67874                   | TT                              | AA                 | AA               | INTERGENIC      |               |                    |                    |



| SNPs IDs          | Chromosome IDs | Chromosomes | Physical positions (bp) | CDC Frontier (Reference genome) | (Pusa 1103 & HPNB) | (ILWC 46 & LPNB) | Sequence genome | Components of | Gene accession IDs | Putative functions |
|-------------------|----------------|-------------|-------------------------|---------------------------------|--------------------|------------------|-----------------|---------------|--------------------|--------------------|
| SNP_73525_A_67948 | NW_004515916.1 | scaffold446 | 67948                   | TT                              | AA                 | AA               | INTERGENIC      |               |                    |                    |
| SNP_73526_A_67960 | NW_004515916.1 | scaffold446 | 67960                   | AA                              | TT                 | TT               | INTERGENIC      |               |                    |                    |
| SNP_73527_A_67971 | NW_004515916.1 | scaffold446 | 67971                   | AA                              | TT                 | TT               | INTERGENIC      |               |                    |                    |
| SNP_73528_A_67985 | NW_004515916.1 | scaffold446 | 67985                   | AA                              | TT                 | TT               | INTERGENIC      |               |                    |                    |
| SNP_73529_A_68014 | NW_004515916.1 | scaffold446 | 68014                   | TT                              | AA                 | AA               | INTERGENIC      |               |                    |                    |
| SNP_73530_A_68106 | NW_004515916.1 | scaffold446 | 68106                   | TT                              | AA                 | AA               | INTERGENIC      |               |                    |                    |
| SNP_73531_A_68213 | NW_004515916.1 | scaffold446 | 68213                   | AA                              | TT                 | TT               | INTERGENIC      |               |                    |                    |
| SNP_73532_A_68239 | NW_004515916.1 | scaffold446 | 68239                   | TT                              | CC                 | CC               | INTERGENIC      |               |                    |                    |
| SNP_73533_A_77220 | NW_004515916.1 | scaffold446 | 77220                   | GG                              | AA                 | AA               | INTERGENIC      |               |                    |                    |
| SNP_73534_A_77221 | NW_004515916.1 | scaffold446 | 77221                   | TT                              | GG                 | GG               | INTERGENIC      |               |                    |                    |
| SNP_73535_A_79085 | NW_004515916.1 | scaffold446 | 79085                   | TT                              | GG                 | GG               | INTERGENIC      |               |                    |                    |
| SNP_73536_A_80878 | NW_004515916.1 | scaffold446 | 80878                   | TT                              | CC                 | CC               | INTERGENIC      |               |                    |                    |
| SNP_73537_A_81344 | NW_004515916.1 | scaffold446 | 81344                   | AA                              | CC                 | CC               | INTERGENIC      |               |                    |                    |
| SNP_73538_A_82534 | NW_004515916.1 | scaffold446 | 82534                   | AA                              | CC                 | CC               | INTERGENIC      |               |                    |                    |
| SNP_73539_A_88844 | NW_004515916.1 | scaffold446 | 88844                   | CC                              | TT                 | TT               | INTERGENIC      |               |                    |                    |
| SNP_73540_A_88846 | NW_004515916.1 | scaffold446 | 88846                   | AA                              | GG                 | GG               | INTERGENIC      |               |                    |                    |
| SNP_73541_A_92257 | NW_004515916.1 | scaffold446 | 92257                   | TT                              | CC                 | CC               | INTERGENIC      |               |                    |                    |
| SNP_73542_A_94917 | NW_004515916.1 | scaffold446 | 94917                   | AA                              | GG                 | GG               | INTERGENIC      |               |                    |                    |
| SNP_73543_A_95550 | NW_004515916.1 | scaffold446 | 95550                   | CC                              | TT                 | TT               | INTERGENIC      |               |                    |                    |
| SNP_73544_A_99238 | NW_004515916.1 | scaffold446 | 99238                   | GG                              | AA                 | AA               | INTERGENIC      |               |                    |                    |
| SNP_73545_A_99464 | NW_004515916.1 | scaffold446 | 99464                   | TT                              | AA                 | AA               | INTERGENIC      |               |                    |                    |
| SNP_73546_A_99592 | NW_004515916.1 | scaffold446 | 99592                   | GG                              | AA                 | AA               | INTERGENIC      |               |                    |                    |

| SNPs IDs           | Chromosome IDs | Chromosomes | Physical positions (bp) | CDC Frontier (Reference genome) | (Pusa 1103 & HPNB) | (ILWC 46 & LPNB) | Sequence genome | Components of | Gene accession IDs | Putative functions |
|--------------------|----------------|-------------|-------------------------|---------------------------------|--------------------|------------------|-----------------|---------------|--------------------|--------------------|
| SNP_73547_A_99684  | NW_004515916.1 | scaffold446 | 99684                   | TT                              | CC                 | GG               | INTERGENIC      |               |                    |                    |
| SNP_73548_A_99748  | NW_004515916.1 | scaffold446 | 99748                   | AA                              | GG                 | GG               | INTERGENIC      |               |                    |                    |
| SNP_73549_A_102615 | NW_004515916.1 | scaffold446 | 102615                  | GG                              | CC                 | CC               | INTERGENIC      |               |                    |                    |
| SNP_73550_A_102715 | NW_004515916.1 | scaffold446 | 102715                  | AA                              | GG                 | GG               | INTERGENIC      |               |                    |                    |
| SNP_73551_A_109650 | NW_004515916.1 | scaffold446 | 109650                  | GG                              | CC                 | CC               | INTERGENIC      |               |                    |                    |
| SNP_73552_A_109831 | NW_004515916.1 | scaffold446 | 109831                  | TT                              | CC                 | CC               | INTERGENIC      |               |                    |                    |
| SNP_73553_A_110343 | NW_004515916.1 | scaffold446 | 110343                  | AA                              | TT                 | TT               | INTERGENIC      |               |                    |                    |
| SNP_73554_A_117980 | NW_004515916.1 | scaffold446 | 117980                  | GG                              | AA                 | AA               | INTERGENIC      |               |                    |                    |
| SNP_73555_A_117998 | NW_004515916.1 | scaffold446 | 117998                  | TT                              | CC                 | CC               | INTERGENIC      |               |                    |                    |
| SNP_73556_A_118907 | NW_004515916.1 | scaffold446 | 118907                  | AA                              | GG                 | GG               | INTERGENIC      |               |                    |                    |
| SNP_73557_A_124912 | NW_004515916.1 | scaffold446 | 124912                  | GG                              | AA                 | AA               | INTERGENIC      |               |                    |                    |
| SNP_73558_A_124928 | NW_004515916.1 | scaffold446 | 124928                  | TT                              | GG                 | GG               | INTERGENIC      |               |                    |                    |
| SNP_73559_A_133667 | NW_004515916.1 | scaffold446 | 133667                  | GG                              | TT                 | TT               | INTERGENIC      |               |                    |                    |
| SNP_73560_A_133701 | NW_004515916.1 | scaffold446 | 133701                  | AA                              | GG                 | GG               | INTERGENIC      |               |                    |                    |
| SNP_73561_A_133807 | NW_004515916.1 | scaffold446 | 133807                  | TT                              | CC                 | CC               | INTERGENIC      |               |                    |                    |
| SNP_73562_A_135790 | NW_004515916.1 | scaffold446 | 135790                  | TT                              | AA                 | AA               | INTERGENIC      |               |                    |                    |
| SNP_73563_A_152340 | NW_004515916.1 | scaffold446 | 152340                  | AA                              | TT                 | TT               | INTERGENIC      |               |                    |                    |
| SNP_73564_A_152453 | NW_004515916.1 | scaffold446 | 152453                  | CC                              | TT                 | TT               | INTERGENIC      |               |                    |                    |
| SNP_73565_A_153752 | NW_004515916.1 | scaffold446 | 153752                  | CC                              | TT                 | TT               | INTERGENIC      |               |                    |                    |
| SNP_73566_A_153794 | NW_004515916.1 | scaffold446 | 153794                  | TT                              | AA                 | AA               | INTERGENIC      |               |                    |                    |
| SNP_73567_A_153830 | NW_004515916.1 | scaffold446 | 153830                  | CC                              | TT                 | TT               | INTERGENIC      |               |                    |                    |
| SNP_73568_A_153836 | NW_004515916.1 | scaffold446 | 153836                  | AA                              | CC                 | CC               | INTERGENIC      |               |                    |                    |

| SNPs IDs           | Chromosome IDs | Chromosomes | Physical positions (bp) | CDC Frontier (Reference genome) | (Pusa 1103 & HPNB) | (ILWC 46 & LPNB) | Sequence genome | Components of | Gene accession IDs | Putative functions |
|--------------------|----------------|-------------|-------------------------|---------------------------------|--------------------|------------------|-----------------|---------------|--------------------|--------------------|
| SNP_73569_A_156864 | NW_004515916.1 | scaffold446 | 156864                  | TT                              | CC                 | CC               | INTERGENIC      |               |                    |                    |
| SNP_73570_A_156956 | NW_004515916.1 | scaffold446 | 156956                  | CC                              | TT                 | TT               | INTERGENIC      |               |                    |                    |
| SNP_73571_A_157055 | NW_004515916.1 | scaffold446 | 157055                  | TT                              | GG                 | GG               | INTERGENIC      |               |                    |                    |
| SNP_73572_A_157112 | NW_004515916.1 | scaffold446 | 157112                  | AA                              | TT                 | TT               | INTERGENIC      |               |                    |                    |
| SNP_73573_A_157357 | NW_004515916.1 | scaffold446 | 157357                  | GG                              | AA                 | AA               | INTERGENIC      |               |                    |                    |
| SNP_73575_A_157480 | NW_004515916.1 | scaffold446 | 157480                  | TT                              | CC                 | CC               | INTERGENIC      |               |                    |                    |
| SNP_73576_A_161089 | NW_004515916.1 | scaffold446 | 161089                  | AA                              | GG                 | GG               | INTERGENIC      |               |                    |                    |
| SNP_73577_A_161470 | NW_004515916.1 | scaffold446 | 161470                  | AA                              | GG                 | GG               | INTERGENIC      |               |                    |                    |
| SNP_73578_A_161516 | NW_004515916.1 | scaffold446 | 161516                  | CC                              | TT                 | TT               | INTERGENIC      |               |                    |                    |
| SNP_73579_A_161521 | NW_004515916.1 | scaffold446 | 161521                  | AA                              | TT                 | CC               | INTERGENIC      |               |                    |                    |
| SNP_73580_A_163449 | NW_004515916.1 | scaffold446 | 163449                  | CC                              | TT                 | TT               | INTERGENIC      |               |                    |                    |
| SNP_73581_A_163487 | NW_004515916.1 | scaffold446 | 163487                  | CC                              | TT                 | TT               | INTERGENIC      |               |                    |                    |
| SNP_73582_A_163765 | NW_004515916.1 | scaffold446 | 163765                  | TT                              | GG                 | GG               | INTERGENIC      |               |                    |                    |
| SNP_73583_A_163774 | NW_004515916.1 | scaffold446 | 163774                  | CC                              | TT                 | TT               | INTERGENIC      |               |                    |                    |
| SNP_73584_A_163790 | NW_004515916.1 | scaffold446 | 163790                  | TT                              | CC                 | CC               | INTERGENIC      |               |                    |                    |
| SNP_73585_A_163805 | NW_004515916.1 | scaffold446 | 163805                  | CC                              | TT                 | TT               | INTERGENIC      |               |                    |                    |
| SNP_73586_A_163831 | NW_004515916.1 | scaffold446 | 163831                  | AA                              | GG                 | GG               | INTERGENIC      |               |                    |                    |
| SNP_73587_A_163873 | NW_004515916.1 | scaffold446 | 163873                  | AA                              | GG                 | GG               | INTERGENIC      |               |                    |                    |
| SNP_73588_A_163918 | NW_004515916.1 | scaffold446 | 163918                  | AA                              | GG                 | GG               | INTERGENIC      |               |                    |                    |
| SNP_73589_A_164280 | NW_004515916.1 | scaffold446 | 164280                  | TT                              | CC                 | CC               | INTERGENIC      |               |                    |                    |
| SNP_73590_A_164354 | NW_004515916.1 | scaffold446 | 164354                  | GG                              | TT                 | TT               | INTERGENIC      |               |                    |                    |
| SNP_73591_A_164380 | NW_004515916.1 | scaffold446 | 164380                  | TT                              | AA                 | AA               | INTERGENIC      |               |                    |                    |

| SNPs IDs           | Chromosome IDs | Chromosomes | Physical positions (bp) | CDC Frontier (Reference genome) | (Pusa 1103 & HPNB) | (ILWC 46 & LPNB) | Sequence genome | Components of | Gene accession IDs | Putative functions |
|--------------------|----------------|-------------|-------------------------|---------------------------------|--------------------|------------------|-----------------|---------------|--------------------|--------------------|
| SNP_73592_A_164387 | NW_004515916.1 | scaffold446 | 164387                  | TT                              | CC                 | CC               | INTERGENIC      |               |                    |                    |
| SNP_73593_A_165203 | NW_004515916.1 | scaffold446 | 165203                  | AA                              | TT                 | TT               | INTERGENIC      |               |                    |                    |
| SNP_73594_A_165600 | NW_004515916.1 | scaffold446 | 165600                  | TT                              | AA                 | AA               | INTERGENIC      |               |                    |                    |
| SNP_73595_A_166749 | NW_004515916.1 | scaffold446 | 166749                  | AA                              | GG                 | GG               | INTERGENIC      |               |                    |                    |
| SNP_73596_A_166789 | NW_004515916.1 | scaffold446 | 166789                  | TT                              | CC                 | CC               | INTERGENIC      |               |                    |                    |
| SNP_73597_A_166815 | NW_004515916.1 | scaffold446 | 166815                  | AA                              | TT                 | TT               | INTERGENIC      |               |                    |                    |
| SNP_73598_A_170540 | NW_004515916.1 | scaffold446 | 170540                  | AA                              | GG                 | GG               | INTERGENIC      |               |                    |                    |
| SNP_73599_A_170542 | NW_004515916.1 | scaffold446 | 170542                  | TT                              | GG                 | GG               | INTERGENIC      |               |                    |                    |
| SNP_73600_A_170550 | NW_004515916.1 | scaffold446 | 170550                  | AA                              | TT                 | TT               | INTERGENIC      |               |                    |                    |
| SNP_73601_A_177487 | NW_004515916.1 | scaffold446 | 177487                  | GG                              | TT                 | TT               | INTERGENIC      |               |                    |                    |
| SNP_73602_A_177500 | NW_004515916.1 | scaffold446 | 177500                  | TT                              | CC                 | CC               | INTERGENIC      |               |                    |                    |
| SNP_73603_A_177530 | NW_004515916.1 | scaffold446 | 177530                  | GG                              | TT                 | TT               | INTERGENIC      |               |                    |                    |
| SNP_73604_A_181379 | NW_004515916.1 | scaffold446 | 181379                  | TT                              | CC                 | CC               | INTERGENIC      |               |                    |                    |
| SNP_73605_A_181380 | NW_004515916.1 | scaffold446 | 181380                  | AA                              | CC                 | CC               | INTERGENIC      |               |                    |                    |
| SNP_73606_A_187262 | NW_004515916.1 | scaffold446 | 187262                  | GG                              | TT                 | TT               | INTERGENIC      |               |                    |                    |
| SNP_73607_A_214744 | NW_004515916.1 | scaffold446 | 214744                  | CC                              | TT                 | TT               | INTERGENIC      |               |                    |                    |
| SNP_73608_A_218989 | NW_004515916.1 | scaffold446 | 218989                  | GG                              | AA                 | AA               | INTERGENIC      |               |                    |                    |
| SNP_73611_A_224882 | NW_004515916.1 | scaffold446 | 224882                  | TT                              | GG                 | GG               | INTERGENIC      |               |                    |                    |
| SNP_73612_A_233316 | NW_004515916.1 | scaffold446 | 233316                  | AA                              | CC                 | CC               | INTERGENIC      |               |                    |                    |
| SNP_73613_A_233320 | NW_004515916.1 | scaffold446 | 233320                  | AA                              | GG                 | GG               | INTERGENIC      |               |                    |                    |
| SNP_73614_A_233353 | NW_004515916.1 | scaffold446 | 233353                  | CC                              | TT                 | TT               | INTERGENIC      |               |                    |                    |
| SNP_73615_A_233375 | NW_004515916.1 | scaffold446 | 233375                  | CC                              | TT                 | TT               | INTERGENIC      |               |                    |                    |

| SNPs IDs           | Chromosome IDs | Chromosomes | Physical positions (bp) | CDC Frontier (Reference genome) | (Pusa 1103 & HPNB) | (ILWC 46 & LPNB) | Sequence genome | Components of | Gene accession IDs | Putative functions |
|--------------------|----------------|-------------|-------------------------|---------------------------------|--------------------|------------------|-----------------|---------------|--------------------|--------------------|
| SNP_73616_A_233376 | NW_004515916.1 | scaffold446 | 233376                  | AA                              | GG                 | GG               | INTERGENIC      |               |                    |                    |
| SNP_73617_A_233467 | NW_004515916.1 | scaffold446 | 233467                  | AA                              | GG                 | GG               | INTERGENIC      |               |                    |                    |
| SNP_73618_A_233618 | NW_004515916.1 | scaffold446 | 233618                  | GG                              | AA                 | AA               | INTERGENIC      |               |                    |                    |
| SNP_73619_A_233625 | NW_004515916.1 | scaffold446 | 233625                  | AA                              | GG                 | GG               | INTERGENIC      |               |                    |                    |
| SNP_73620_A_233653 | NW_004515916.1 | scaffold446 | 233653                  | TT                              | CC                 | CC               | INTERGENIC      |               |                    |                    |
| SNP_73621_A_233673 | NW_004515916.1 | scaffold446 | 233673                  | GG                              | AA                 | AA               | INTERGENIC      |               |                    |                    |
| SNP_73622_A_235004 | NW_004515916.1 | scaffold446 | 235004                  | AA                              | TT                 | TT               | INTERGENIC      |               |                    |                    |
| SNP_73623_A_235007 | NW_004515916.1 | scaffold446 | 235007                  | AA                              | TT                 | TT               | INTERGENIC      |               |                    |                    |
| SNP_73624_A_235018 | NW_004515916.1 | scaffold446 | 235018                  | TT                              | CC                 | CC               | INTERGENIC      |               |                    |                    |
| SNP_73626_A_245341 | NW_004515916.1 | scaffold446 | 245341                  | GG                              | TT                 | TT               | INTERGENIC      |               |                    |                    |
| SNP_73627_A_245391 | NW_004515916.1 | scaffold446 | 245391                  | AA                              | GG                 | GG               | INTERGENIC      |               |                    |                    |
| SNP_73628_A_250492 | NW_004515916.1 | scaffold446 | 250492                  | TT                              | AA                 | AA               | INTERGENIC      |               |                    |                    |
| SNP_73629_A_250517 | NW_004515916.1 | scaffold446 | 250517                  | AA                              | GG                 | GG               | INTERGENIC      |               |                    |                    |
| SNP_73630_A_250952 | NW_004515916.1 | scaffold446 | 250952                  | AA                              | GG                 | GG               | INTERGENIC      |               |                    |                    |
| SNP_73631_A_267597 | NW_004515916.1 | scaffold446 | 267597                  | AA                              | GG                 | GG               | INTERGENIC      |               |                    |                    |
| SNP_73632_A_273660 | NW_004515916.1 | scaffold446 | 273660                  | TT                              | AA                 | AA               | INTERGENIC      |               |                    |                    |
| SNP_73634_A_92480  | NW_004515917.1 | scaffold450 | 92480                   | TT                              | CC                 | CC               | INTERGENIC      |               |                    |                    |
| SNP_73635_A_107536 | NW_004515917.1 | scaffold450 | 107536                  | AA                              | GG                 | GG               | INTERGENIC      |               |                    |                    |
| SNP_73637_A_128254 | NW_004515917.1 | scaffold450 | 128254                  | CC                              | GG                 | GG               | INTERGENIC      |               |                    |                    |
| SNP_73638_A_129957 | NW_004515917.1 | scaffold450 | 129957                  | AA                              | CC                 | CC               | INTERGENIC      |               |                    |                    |
| SNP_73639_A_129996 | NW_004515917.1 | scaffold450 | 129996                  | AA                              | TT                 | TT               | INTERGENIC      |               |                    |                    |
| SNP_73641_A_133829 | NW_004515917.1 | scaffold450 | 133829                  | AA                              | TT                 | TT               | INTERGENIC      |               |                    |                    |

| SNPs IDs           | Chromosome IDs | Chromosomes | Physical positions (bp) | CDC Frontier (Reference genome) | (Pusa 1103 & HPNB) | (ILWC 46 & LPNB) | Sequence genome | Components of | Gene accession IDs                                                  | Putative functions |
|--------------------|----------------|-------------|-------------------------|---------------------------------|--------------------|------------------|-----------------|---------------|---------------------------------------------------------------------|--------------------|
| SNP_73643_A_133883 | NW_004515917.1 | scaffold450 | 133883                  | TT                              | GG                 | GG               | INTERGENIC      |               |                                                                     |                    |
| SNP_73644_A_134006 | NW_004515917.1 | scaffold450 | 134006                  | AA                              | GG                 | GG               | INTERGENIC      |               |                                                                     |                    |
| SNP_73645_A_134024 | NW_004515917.1 | scaffold450 | 134024                  | AA                              | CC                 | CC               | INTERGENIC      |               |                                                                     |                    |
| SNP_73646_A_134051 | NW_004515917.1 | scaffold450 | 134051                  | AA                              | GG                 | GG               | INTERGENIC      |               |                                                                     |                    |
| SNP_73647_A_134367 | NW_004515917.1 | scaffold450 | 134367                  | TT                              | CC                 | CC               | INTERGENIC      |               |                                                                     |                    |
| SNP_73648_A_134368 | NW_004515917.1 | scaffold450 | 134368                  | GG                              | TT                 | TT               | INTERGENIC      |               |                                                                     |                    |
| SNP_73649_A_152961 | NW_004515917.1 | scaffold450 | 152961                  | TT                              | CC                 | CC               | INTERGENIC      |               |                                                                     |                    |
| SNP_73650_A_162200 | NW_004515917.1 | scaffold450 | 162200                  | GG                              | AA                 | AA               | INTERGENIC      |               |                                                                     |                    |
| SNP_73651_A_235459 | NW_004515917.1 | scaffold450 | 235459                  | CC                              | AA                 | AA               | INTERGENIC      |               |                                                                     |                    |
| SNP_73652_A_235811 | NW_004515917.1 | scaffold450 | 235811                  | AA                              | GG                 | GG               | INTERGENIC      |               |                                                                     |                    |
| SNP_73656_A_367157 | NW_004515917.1 | scaffold450 | 367157                  | AA                              | GG                 | GG               | INTRON          | 101504779     | endoplasmic reticulum-Golgi intermediate compartment protein 3-like |                    |
| SNP_73657_A_368992 | NW_004515917.1 | scaffold450 | 368992                  | GG                              | AA                 | AA               | INTRON          | 101504779     | endoplasmic reticulum-Golgi intermediate compartment protein 3-like |                    |
| SNP_73658_A_427885 | NW_004515917.1 | scaffold450 | 427885                  | TT                              | CC                 | CC               | INTERGENIC      |               |                                                                     |                    |
| SNP_73659_A_457218 | NW_004515917.1 | scaffold450 | 457218                  | GG                              | AA                 | AA               | INTERGENIC      |               |                                                                     |                    |
| SNP_73661_A_459117 | NW_004515917.1 | scaffold450 | 459117                  | TT                              | AA                 | AA               | INTERGENIC      |               |                                                                     |                    |
| SNP_73662_A_476131 | NW_004515917.1 | scaffold450 | 476131                  | AA                              | GG                 | GG               | INTERGENIC      |               |                                                                     |                    |
| SNP_73663_A_482331 | NW_004515917.1 | scaffold450 | 482331                  | CC                              | TT                 | TT               | INTERGENIC      |               |                                                                     |                    |
| SNP_73664_A_482361 | NW_004515917.1 | scaffold450 | 482361                  | GG                              | CC                 | CC               | INTERGENIC      |               |                                                                     |                    |
| SNP_73665_A_497825 | NW_004515917.1 | scaffold450 | 497825                  | TT                              | AA                 | AA               | INTERGENIC      |               |                                                                     |                    |
| SNP_73666_A_509727 | NW_004515917.1 | scaffold450 | 509727                  | TT                              | CC                 | CC               | INTERGENIC      |               |                                                                     |                    |
| SNP_73667_A_509740 | NW_004515917.1 | scaffold450 | 509740                  | AA                              | CC                 | CC               | INTERGENIC      |               |                                                                     |                    |
| SNP_73668_A_509829 | NW_004515917.1 | scaffold450 | 509829                  | GG                              | CC                 | CC               | INTERGENIC      |               |                                                                     |                    |

| SNPs IDs           | Chromosome IDs | Chromosomes | Physical positions (bp) | CDC Frontier (Reference genome) | (Pusa 1103 & HPNB) | (ILWC 46 & LPNB) | Sequence genome | Components of | Gene accession IDs | Putative functions                                                      |
|--------------------|----------------|-------------|-------------------------|---------------------------------|--------------------|------------------|-----------------|---------------|--------------------|-------------------------------------------------------------------------|
| SNP_73669_A_509958 | NW_004515917.1 | scaffold450 | 509958                  | CC                              | TT                 | TT               | INTERGENIC      |               |                    |                                                                         |
| SNP_73670_A_509959 | NW_004515917.1 | scaffold450 | 509959                  | AA                              | GG                 | GG               | INTERGENIC      |               |                    |                                                                         |
| SNP_73671_A_510026 | NW_004515917.1 | scaffold450 | 510026                  | CC                              | TT                 | TT               | INTERGENIC      |               |                    |                                                                         |
| SNP_73672_A_510397 | NW_004515917.1 | scaffold450 | 510397                  | AA                              | GG                 | GG               | INTERGENIC      |               |                    |                                                                         |
| SNP_73673_A_510474 | NW_004515917.1 | scaffold450 | 510474                  | AA                              | TT                 | TT               | INTERGENIC      |               |                    |                                                                         |
| SNP_73674_A_510564 | NW_004515917.1 | scaffold450 | 510564                  | CC                              | GG                 | GG               | INTERGENIC      |               |                    |                                                                         |
| SNP_73675_A_510610 | NW_004515917.1 | scaffold450 | 510610                  | CC                              | GG                 | GG               | INTERGENIC      |               |                    |                                                                         |
| SNP_73676_A_513906 | NW_004515917.1 | scaffold450 | 513906                  | AA                              | TT                 | TT               | INTERGENIC      |               |                    |                                                                         |
| SNP_73677_A_515928 | NW_004515917.1 | scaffold450 | 515928                  | AA                              | GG                 | GG               | INTERGENIC      |               |                    |                                                                         |
| SNP_73678_A_515950 | NW_004515917.1 | scaffold450 | 515950                  | GG                              | AA                 | AA               | INTERGENIC      |               |                    |                                                                         |
| SNP_73679_A_515955 | NW_004515917.1 | scaffold450 | 515955                  | CC                              | AA                 | AA               | INTERGENIC      |               |                    |                                                                         |
| SNP_73680_A_517418 | NW_004515917.1 | scaffold450 | 517418                  | TT                              | AA                 | AA               | INTERGENIC      |               |                    |                                                                         |
| SNP_73681_A_517807 | NW_004515917.1 | scaffold450 | 517807                  | TT                              | CC                 | CC               | INTERGENIC      |               |                    |                                                                         |
| SNP_73682_A_518313 | NW_004515917.1 | scaffold450 | 518313                  | AA                              | CC                 | CC               | INTERGENIC      |               |                    |                                                                         |
| SNP_73683_A_518361 | NW_004515917.1 | scaffold450 | 518361                  | AA                              | CC                 | CC               | INTERGENIC      |               |                    |                                                                         |
| SNP_73684_A_518418 | NW_004515917.1 | scaffold450 | 518418                  | CC                              | TT                 | TT               | INTERGENIC      |               |                    |                                                                         |
| SNP_73685_A_518460 | NW_004515917.1 | scaffold450 | 518460                  | AA                              | GG                 | GG               | INTERGENIC      |               |                    |                                                                         |
| SNP_73686_A_518517 | NW_004515917.1 | scaffold450 | 518517                  | CC                              | AA                 | AA               | INTERGENIC      |               |                    |                                                                         |
| SNP_73687_A_518561 | NW_004515917.1 | scaffold450 | 518561                  | TT                              | CC                 | CC               | INTERGENIC      |               |                    |                                                                         |
| SNP_73688_A_518791 | NW_004515917.1 | scaffold450 | 518791                  | CC                              | TT                 | TT               | INTERGENIC      |               |                    |                                                                         |
| SNP_73689_A_518792 | NW_004515917.1 | scaffold450 | 518792                  | GG                              | AA                 | AA               | INTERGENIC      |               |                    |                                                                         |
| SNP_73690_A_1328   | NW_004515918.1 | scaffold451 | 1328                    | TT                              | CC                 | CC               | INTRON          |               | 101512703          | G-type lectin S-receptor-like serine/threonine-protein kinase At1g11330 |

| SNPs IDs           | Chromosome IDs | Chromosomes | Physical positions (bp) | CDC Frontier (Reference genome) | (Pusa 1103 & HPNB) | (ILWC 46 & LPNB) | Sequence Components of genome | Gene accession IDs | Putative functions                                                      |
|--------------------|----------------|-------------|-------------------------|---------------------------------|--------------------|------------------|-------------------------------|--------------------|-------------------------------------------------------------------------|
| SNP_73691_A_1716   | NW_004515918.1 | scaffold451 | 1716                    | AA                              | CC                 | CC               | INTRON                        | 101512703          | G-type lectin S-receptor-like serine/threonine-protein kinase At1g11330 |
| SNP_73693_A_11190  | NW_004515918.1 | scaffold451 | 11190                   | TT                              | GG                 | GG               | INTRON                        | 101512703          | G-type lectin S-receptor-like serine/threonine-protein kinase At1g11330 |
| SNP_73695_A_17649  | NW_004515918.1 | scaffold451 | 17649                   | CC                              | GG                 | GG               | INTERGENIC                    |                    |                                                                         |
| SNP_73696_A_17683  | NW_004515918.1 | scaffold451 | 17683                   | CC                              | TT                 | TT               | INTERGENIC                    |                    |                                                                         |
| SNP_73697_A_19210  | NW_004515918.1 | scaffold451 | 19210                   | AA                              | GG                 | GG               | URR                           | 101507372          | uncharacterized LOC101507372                                            |
| SNP_73698_A_19950  | NW_004515918.1 | scaffold451 | 19950                   | AA                              | TT                 | TT               | URR                           | 101507372          | uncharacterized LOC101507372                                            |
| SNP_73699_A_21267  | NW_004515918.1 | scaffold451 | 21267                   | AA                              | CC                 | CC               | INTERGENIC                    |                    |                                                                         |
| SNP_73700_A_21281  | NW_004515918.1 | scaffold451 | 21281                   | AA                              | GG                 | GG               | INTERGENIC                    |                    |                                                                         |
| SNP_73701_A_25103  | NW_004515918.1 | scaffold451 | 25103                   | TT                              | CC                 | CC               | INTERGENIC                    |                    |                                                                         |
| SNP_73702_A_25315  | NW_004515918.1 | scaffold451 | 25315                   | TT                              | CC                 | CC               | INTERGENIC                    |                    |                                                                         |
| SNP_73703_A_28622  | NW_004515918.1 | scaffold451 | 28622                   | GG                              | AA                 | AA               | DRR                           | 101513024          | probable WRKY transcription factor 19                                   |
| SNP_73706_A_61228  | NW_004515918.1 | scaffold451 | 61228                   | AA                              | CC                 | CC               | INTERGENIC                    |                    |                                                                         |
| SNP_73707_A_65220  | NW_004515918.1 | scaffold451 | 65220                   | AA                              | GG                 | GG               | INTERGENIC                    |                    |                                                                         |
| SNP_73708_A_65437  | NW_004515918.1 | scaffold451 | 65437                   | CC                              | TT                 | TT               | INTERGENIC                    |                    |                                                                         |
| SNP_73709_A_65509  | NW_004515918.1 | scaffold451 | 65509                   | TT                              | GG                 | GG               | INTERGENIC                    |                    |                                                                         |
| SNP_73710_A_74098  | NW_004515918.1 | scaffold451 | 74098                   | TT                              | CC                 | CC               | INTERGENIC                    |                    |                                                                         |
| SNP_73711_A_74148  | NW_004515918.1 | scaffold451 | 74148                   | TT                              | CC                 | CC               | INTERGENIC                    |                    |                                                                         |
| SNP_73712_A_77803  | NW_004515918.1 | scaffold451 | 77803                   | AA                              | GG                 | GG               | INTERGENIC                    |                    |                                                                         |
| SNP_73713_A_77904  | NW_004515918.1 | scaffold451 | 77904                   | AA                              | GG                 | GG               | INTERGENIC                    |                    |                                                                         |
| SNP_73714_A_78357  | NW_004515918.1 | scaffold451 | 78357                   | TT                              | CC                 | CC               | INTERGENIC                    |                    |                                                                         |
| SNP_73715_A_111962 | NW_004515918.1 | scaffold451 | 111962                  | TT                              | AA                 | AA               | INTERGENIC                    |                    |                                                                         |
| SNP_73716_A_111965 | NW_004515918.1 | scaffold451 | 111965                  | AA                              | TT                 | TT               | INTERGENIC                    |                    |                                                                         |



| SNPs IDs           | Chromosome IDs | Chromosomes | Physical positions (bp) | CDC Frontier (Reference genome) | (Pusa 1103 & HPNB) | (ILWC 46 & LPNB) | Sequence Components of genome | Gene accession IDs | Putative functions            |
|--------------------|----------------|-------------|-------------------------|---------------------------------|--------------------|------------------|-------------------------------|--------------------|-------------------------------|
| SNP_73717_A_166394 | NW_004515918.1 | scaffold451 | 166394                  | CC                              | TT                 | TT               | INTERGENIC                    |                    |                               |
| SNP_73718_A_200755 | NW_004515918.1 | scaffold451 | 200755                  | TT                              | CC                 | CC               | URR                           | 101514989          | uncharacterized LOC101514989  |
| SNP_73720_A_238192 | NW_004515918.1 | scaffold451 | 238192                  | TT                              | GG                 | GG               | INTERGENIC                    |                    |                               |
| SNP_73721_A_241367 | NW_004515918.1 | scaffold451 | 241367                  | AA                              | TT                 | TT               | INTERGENIC                    |                    |                               |
| SNP_73722_A_247248 | NW_004515918.1 | scaffold451 | 247248                  | AA                              | GG                 | GG               | INTERGENIC                    |                    |                               |
| SNP_73723_A_247259 | NW_004515918.1 | scaffold451 | 247259                  | AA                              | TT                 | TT               | INTERGENIC                    |                    |                               |
| SNP_73725_A_326460 | NW_004515918.1 | scaffold451 | 326460                  | CC                              | TT                 | TT               | INTERGENIC                    |                    |                               |
| SNP_73726_A_326510 | NW_004515918.1 | scaffold451 | 326510                  | CC                              | TT                 | TT               | INTERGENIC                    |                    |                               |
| SNP_73727_A_326681 | NW_004515918.1 | scaffold451 | 326681                  | GG                              | TT                 | TT               | INTERGENIC                    |                    |                               |
| SNP_73728_A_326690 | NW_004515918.1 | scaffold451 | 326690                  | TT                              | GG                 | GG               | INTERGENIC                    |                    |                               |
| SNP_73729_A_326739 | NW_004515918.1 | scaffold451 | 326739                  | AA                              | GG                 | GG               | INTERGENIC                    |                    |                               |
| SNP_73730_A_326833 | NW_004515918.1 | scaffold451 | 326833                  | TT                              | CC                 | CC               | INTERGENIC                    |                    |                               |
| SNP_73731_A_334249 | NW_004515918.1 | scaffold451 | 334249                  | GG                              | AA                 | AA               | INTERGENIC                    |                    |                               |
| SNP_73732_A_349649 | NW_004515918.1 | scaffold451 | 349649                  | CC                              | AA                 | AA               | INTERGENIC                    |                    |                               |
| SNP_73733_A_349655 | NW_004515918.1 | scaffold451 | 349655                  | GG                              | TT                 | TT               | INTERGENIC                    |                    |                               |
| SNP_73734_A_349656 | NW_004515918.1 | scaffold451 | 349656                  | TT                              | AA                 | AA               | INTERGENIC                    |                    |                               |
| SNP_73735_A_349698 | NW_004515918.1 | scaffold451 | 349698                  | AA                              | GG                 | GG               | INTERGENIC                    |                    |                               |
| SNP_73736_A_390443 | NW_004515918.1 | scaffold451 | 390443                  | CC                              | TT                 | TT               | INTERGENIC                    |                    |                               |
| SNP_73737_A_390546 | NW_004515918.1 | scaffold451 | 390546                  | TT                              | CC                 | CC               | INTERGENIC                    |                    |                               |
| SNP_73738_A_390709 | NW_004515918.1 | scaffold451 | 390709                  | AA                              | CC                 | CC               | INTERGENIC                    |                    |                               |
| SNP_73739_A_464942 | NW_004515918.1 | scaffold451 | 464942                  | AA                              | TT                 | TT               | INTRON                        | 101512390          | transcription factor HY5-like |
| SNP_73740_A_469893 | NW_004515918.1 | scaffold451 | 469893                  | AA                              | GG                 | GG               | INTERGENIC                    |                    |                               |

| SNPs IDs           | Chromosome IDs | Chromosomes | Physical positions (bp) | CDC Frontier (Reference genome) | (Pusa 1103 & HPNB) | (ILWC 46 & LPNB) | Sequence genome | Components of | Gene accession IDs | Putative functions |
|--------------------|----------------|-------------|-------------------------|---------------------------------|--------------------|------------------|-----------------|---------------|--------------------|--------------------|
| SNP_73741_A_491084 | NW_004515918.1 | scaffold451 | 491084                  | TT                              | CC                 | CC               | INTERGENIC      |               |                    |                    |
| SNP_73742_A_491452 | NW_004515918.1 | scaffold451 | 491452                  | AA                              | GG                 | GG               | INTERGENIC      |               |                    |                    |
| SNP_73743_A_509802 | NW_004515918.1 | scaffold451 | 509802                  | CC                              | TT                 | TT               | INTERGENIC      |               |                    |                    |
| SNP_73744_A_519463 | NW_004515918.1 | scaffold451 | 519463                  | GG                              | AA                 | AA               | INTERGENIC      |               |                    |                    |
| SNP_73745_A_4487   | NW_004515919.1 | scaffold452 | 4487                    | TT                              | AA                 | AA               | INTERGENIC      |               |                    |                    |
| SNP_73746_A_4843   | NW_004515919.1 | scaffold452 | 4843                    | TT                              | CC                 | CC               | INTERGENIC      |               |                    |                    |
| SNP_73747_A_7192   | NW_004515919.1 | scaffold452 | 7192                    | AA                              | CC                 | CC               | INTERGENIC      |               |                    |                    |
| SNP_73748_A_7194   | NW_004515919.1 | scaffold452 | 7194                    | AA                              | GG                 | GG               | INTERGENIC      |               |                    |                    |
| SNP_73749_A_7222   | NW_004515919.1 | scaffold452 | 7222                    | TT                              | CC                 | CC               | INTERGENIC      |               |                    |                    |
| SNP_73750_A_4958   | NW_004515920.1 | scaffold453 | 4958                    | AA                              | GG                 | GG               | INTERGENIC      |               |                    |                    |
| SNP_73751_A_4978   | NW_004515920.1 | scaffold453 | 4978                    | GG                              | AA                 | AA               | INTERGENIC      |               |                    |                    |
| SNP_73752_A_20051  | NW_004515920.1 | scaffold453 | 20051                   | AA                              | CC                 | CC               | INTERGENIC      |               |                    |                    |
| SNP_73753_A_20104  | NW_004515920.1 | scaffold453 | 20104                   | TT                              | GG                 | GG               | INTERGENIC      |               |                    |                    |
| SNP_73754_A_20142  | NW_004515920.1 | scaffold453 | 20142                   | CC                              | AA                 | AA               | INTERGENIC      |               |                    |                    |
| SNP_73755_A_20156  | NW_004515920.1 | scaffold453 | 20156                   | AA                              | GG                 | GG               | INTERGENIC      |               |                    |                    |
| SNP_73756_A_20248  | NW_004515920.1 | scaffold453 | 20248                   | AA                              | CC                 | CC               | INTERGENIC      |               |                    |                    |
| SNP_73757_A_20531  | NW_004515920.1 | scaffold453 | 20531                   | TT                              | CC                 | CC               | INTERGENIC      |               |                    |                    |
| SNP_73758_A_76763  | NW_004515920.1 | scaffold453 | 76763                   | GG                              | AA                 | AA               | INTERGENIC      |               |                    |                    |
| SNP_73760_A_79728  | NW_004515920.1 | scaffold453 | 79728                   | AA                              | CC                 | CC               | INTERGENIC      |               |                    |                    |
| SNP_73762_A_80407  | NW_004515920.1 | scaffold453 | 80407                   | GG                              | AA                 | AA               | INTERGENIC      |               |                    |                    |
| SNP_73763_A_80420  | NW_004515920.1 | scaffold453 | 80420                   | TT                              | CC                 | CC               | INTERGENIC      |               |                    |                    |
| SNP_73764_A_107779 | NW_004515920.1 | scaffold453 | 107779                  | AA                              | GG                 | GG               | INTERGENIC      |               |                    |                    |

| SNPs IDs           | Chromosome IDs | Chromosomes | Physical positions (bp) | CDC Frontier (Reference genome) | (Pusa 1103 & HPNB) | (ILWC 46 & LPNB) | Sequence Components of genome | Gene accession IDs | Putative functions                    |
|--------------------|----------------|-------------|-------------------------|---------------------------------|--------------------|------------------|-------------------------------|--------------------|---------------------------------------|
| SNP_73765_A_146605 | NW_004515920.1 | scaffold453 | 146605                  | TT                              | CC                 | CC               | INTERGENIC                    |                    |                                       |
| SNP_73766_A_148678 | NW_004515920.1 | scaffold453 | 148678                  | CC                              | TT                 | TT               | DRR                           | 101492175          | CO(2)-response secreted protease-like |
| SNP_73767_A_150892 | NW_004515920.1 | scaffold453 | 150892                  | AA                              | GG                 | GG               | INTRON                        | 101492175          | CO(2)-response secreted protease-like |
| SNP_73768_A_168171 | NW_004515920.1 | scaffold453 | 168171                  | TT                              | CC                 | CC               | INTERGENIC                    |                    |                                       |
| SNP_73769_A_267346 | NW_004515920.1 | scaffold453 | 267346                  | AA                              | GG                 | GG               | INTERGENIC                    |                    |                                       |
| SNP_73771_A_296628 | NW_004515920.1 | scaffold453 | 296628                  | GG                              | TT                 | TT               | INTERGENIC                    |                    |                                       |
| SNP_73772_A_314415 | NW_004515920.1 | scaffold453 | 314415                  | AA                              | GG                 | GG               | INTERGENIC                    |                    |                                       |
| SNP_73773_A_338976 | NW_004515920.1 | scaffold453 | 338976                  | AA                              | GG                 | GG               | INTERGENIC                    |                    |                                       |
| SNP_73774_A_338981 | NW_004515920.1 | scaffold453 | 338981                  | AA                              | CC                 | CC               | INTERGENIC                    |                    |                                       |
| SNP_73775_A_385020 | NW_004515920.1 | scaffold453 | 385020                  | CC                              | GG                 | GG               | INTERGENIC                    |                    |                                       |
| SNP_73776_A_385204 | NW_004515920.1 | scaffold453 | 385204                  | TT                              | CC                 | CC               | INTERGENIC                    |                    |                                       |
| SNP_73777_A_386233 | NW_004515920.1 | scaffold453 | 386233                  | AA                              | GG                 | GG               | INTERGENIC                    |                    |                                       |
| SNP_73778_A_386389 | NW_004515920.1 | scaffold453 | 386389                  | TT                              | CC                 | CC               | INTERGENIC                    |                    |                                       |
| SNP_73779_A_386477 | NW_004515920.1 | scaffold453 | 386477                  | TT                              | CC                 | CC               | INTERGENIC                    |                    |                                       |
| SNP_73780_A_398687 | NW_004515920.1 | scaffold453 | 398687                  | GG                              | TT                 | TT               | INTERGENIC                    |                    |                                       |
| SNP_73781_A_401860 | NW_004515920.1 | scaffold453 | 401860                  | TT                              | CC                 | CC               | INTERGENIC                    |                    |                                       |
| SNP_73782_A_401913 | NW_004515920.1 | scaffold453 | 401913                  | CC                              | TT                 | TT               | INTERGENIC                    |                    |                                       |
| SNP_73783_A_401919 | NW_004515920.1 | scaffold453 | 401919                  | TT                              | AA                 | AA               | INTERGENIC                    |                    |                                       |
| SNP_73784_A_436613 | NW_004515920.1 | scaffold453 | 436613                  | CC                              | TT                 | TT               | DRR                           | 101497381          | Unknown function                      |
| SNP_73785_A_466877 | NW_004515920.1 | scaffold453 | 466877                  | CC                              | TT                 | TT               | INTERGENIC                    |                    |                                       |
| SNP_73786_A_495074 | NW_004515920.1 | scaffold453 | 495074                  | GG                              | AA                 | AA               | INTRON                        | 101494567          | SAC3 family protein 2                 |
| SNP_73787_A_495562 | NW_004515920.1 | scaffold453 | 495562                  | GG                              | AA                 | AA               | INTRON                        | 101494567          | SAC3 family protein 2                 |

| SNPs IDs           | Chromosome IDs | Chromosomes | Physical positions (bp) | CDC Frontier (Reference genome) | (Pusa 1103 & HPNB) | (ILWC 46 & LPNB) | Sequence Components of genome | Gene accession IDs | Putative functions    |
|--------------------|----------------|-------------|-------------------------|---------------------------------|--------------------|------------------|-------------------------------|--------------------|-----------------------|
| SNP_73788_A_496017 | NW_004515920.1 | scaffold453 | 496017                  | AA                              | GG                 | GG               | SYNONYMOUS_CODING             | 101494567          | SAC3 family protein 2 |
| SNP_73790_A_497912 | NW_004515920.1 | scaffold453 | 497912                  | CC                              | TT                 | TT               | URR                           | 101494567          | SAC3 family protein 2 |
| SNP_73791_A_498568 | NW_004515920.1 | scaffold453 | 498568                  | GG                              | AA                 | AA               | URR                           | 101494567          | SAC3 family protein 2 |
| SNP_73792_A_498597 | NW_004515920.1 | scaffold453 | 498597                  | GG                              | AA                 | AA               | URR                           | 101494567          | SAC3 family protein 2 |
| SNP_73793_A_498704 | NW_004515920.1 | scaffold453 | 498704                  | CC                              | TT                 | TT               | URR                           | 101494567          | SAC3 family protein 2 |
| SNP_73795_A_500811 | NW_004515920.1 | scaffold453 | 500811                  | AA                              | TT                 | TT               | INTERGENIC                    |                    |                       |
| SNP_73796_A_500828 | NW_004515920.1 | scaffold453 | 500828                  | TT                              | AA                 | AA               | INTERGENIC                    |                    |                       |
| SNP_73797_A_501823 | NW_004515920.1 | scaffold453 | 501823                  | TT                              | AA                 | AA               | INTERGENIC                    |                    |                       |
| SNP_73798_A_501839 | NW_004515920.1 | scaffold453 | 501839                  | TT                              | CC                 | CC               | INTERGENIC                    |                    |                       |
| SNP_73799_A_503019 | NW_004515920.1 | scaffold453 | 503019                  | AA                              | GG                 | GG               | INTERGENIC                    |                    |                       |
| SNP_73800_A_503064 | NW_004515920.1 | scaffold453 | 503064                  | CC                              | TT                 | TT               | INTERGENIC                    |                    |                       |
| SNP_73802_A_503744 | NW_004515920.1 | scaffold453 | 503744                  | CC                              | TT                 | TT               | INTERGENIC                    |                    |                       |
| SNP_73803_A_503919 | NW_004515920.1 | scaffold453 | 503919                  | CC                              | TT                 | TT               | INTERGENIC                    |                    |                       |
| SNP_73805_A_526247 | NW_004515920.1 | scaffold453 | 526247                  | CC                              | TT                 | TT               | INTERGENIC                    |                    |                       |
| SNP_73806_A_526268 | NW_004515920.1 | scaffold453 | 526268                  | CC                              | TT                 | TT               | INTERGENIC                    |                    |                       |
| SNP_73807_A_526592 | NW_004515920.1 | scaffold453 | 526592                  | TT                              | CC                 | CC               | INTERGENIC                    |                    |                       |
| SNP_73808_A_907    | NW_004515921.1 | scaffold454 | 907                     | AA                              | CC                 | CC               | INTERGENIC                    |                    |                       |
| SNP_73809_A_3553   | NW_004515921.1 | scaffold454 | 3553                    | CC                              | TT                 | TT               | INTERGENIC                    |                    |                       |
| SNP_73810_A_3569   | NW_004515921.1 | scaffold454 | 3569                    | CC                              | TT                 | TT               | INTERGENIC                    |                    |                       |
| SNP_73811_A_4084   | NW_004515921.1 | scaffold454 | 4084                    | TT                              | GG                 | GG               | INTERGENIC                    |                    |                       |
| SNP_73812_A_3957   | NW_004515926.1 | scaffold461 | 3957                    | AA                              | GG                 | GG               | INTERGENIC                    |                    |                       |
| SNP_73813_A_5456   | NW_004515926.1 | scaffold461 | 5456                    | TT                              | AA                 | AA               | INTERGENIC                    |                    |                       |

| SNPs IDs          | Chromosome IDs | Chromosomes | Physical positions (bp) | CDC Frontier (Reference genome) | (Pusa 1103 & HPNB) | (ILWC 46 & LPNB) | Sequence genome | Components of | Gene accession IDs | Putative functions |
|-------------------|----------------|-------------|-------------------------|---------------------------------|--------------------|------------------|-----------------|---------------|--------------------|--------------------|
| SNP_73814_A_22619 | NW_004515926.1 | scaffold461 | 22619                   | TT                              | CC                 | CC               | INTERGENIC      |               |                    |                    |
| SNP_73815_A_22886 | NW_004515926.1 | scaffold461 | 22886                   | TT                              | CC                 | CC               | INTERGENIC      |               |                    |                    |
| SNP_73816_A_22894 | NW_004515926.1 | scaffold461 | 22894                   | TT                              | CC                 | CC               | INTERGENIC      |               |                    |                    |
| SNP_73817_A_22896 | NW_004515926.1 | scaffold461 | 22896                   | CC                              | TT                 | TT               | INTERGENIC      |               |                    |                    |
| SNP_73818_A_22992 | NW_004515926.1 | scaffold461 | 22992                   | CC                              | TT                 | TT               | INTERGENIC      |               |                    |                    |
| SNP_73819_A_23018 | NW_004515926.1 | scaffold461 | 23018                   | TT                              | GG                 | GG               | INTERGENIC      |               |                    |                    |
| SNP_73820_A_23019 | NW_004515926.1 | scaffold461 | 23019                   | GG                              | AA                 | AA               | INTERGENIC      |               |                    |                    |
| SNP_73821_A_23020 | NW_004515926.1 | scaffold461 | 23020                   | GG                              | AA                 | AA               | INTERGENIC      |               |                    |                    |
| SNP_73822_A_26170 | NW_004515926.1 | scaffold461 | 26170                   | CC                              | TT                 | TT               | INTERGENIC      |               |                    |                    |
| SNP_73823_A_26269 | NW_004515926.1 | scaffold461 | 26269                   | TT                              | AA                 | AA               | INTERGENIC      |               |                    |                    |
| SNP_73825_A_26325 | NW_004515926.1 | scaffold461 | 26325                   | TT                              | GG                 | GG               | INTERGENIC      |               |                    |                    |
| SNP_73826_A_26393 | NW_004515926.1 | scaffold461 | 26393                   | AA                              | TT                 | TT               | INTERGENIC      |               |                    |                    |
| SNP_73827_A_12370 | NW_004515929.1 | scaffold465 | 12370                   | TT                              | AA                 | AA               | INTERGENIC      |               |                    |                    |
| SNP_73828_A_548   | NW_004515930.1 | scaffold466 | 548                     | GG                              | TT                 | TT               | INTERGENIC      |               |                    |                    |
| SNP_73829_A_552   | NW_004515930.1 | scaffold466 | 552                     | AA                              | GG                 | GG               | INTERGENIC      |               |                    |                    |
| SNP_73830_A_614   | NW_004515930.1 | scaffold466 | 614                     | GG                              | CC                 | CC               | INTERGENIC      |               |                    |                    |
| SNP_73831_A_631   | NW_004515930.1 | scaffold466 | 631                     | TT                              | GG                 | GG               | INTERGENIC      |               |                    |                    |
| SNP_73833_A_12183 | NW_004515930.1 | scaffold466 | 12183                   | GG                              | AA                 | AA               | INTERGENIC      |               |                    |                    |
| SNP_73834_A_12218 | NW_004515930.1 | scaffold466 | 12218                   | GG                              | AA                 | AA               | INTERGENIC      |               |                    |                    |
| SNP_73835_A_12553 | NW_004515930.1 | scaffold466 | 12553                   | TT                              | CC                 | CC               | INTERGENIC      |               |                    |                    |
| SNP_73836_A_18803 | NW_004515930.1 | scaffold466 | 18803                   | TT                              | CC                 | CC               | INTERGENIC      |               |                    |                    |
| SNP_73837_A_30423 | NW_004515930.1 | scaffold466 | 30423                   | CC                              | TT                 | TT               | INTERGENIC      |               |                    |                    |

| SNPs IDs           | Chromosome IDs | Chromosomes | Physical positions (bp) | CDC Frontier genome (Reference genome) | (Pusa 1103 & HPNB) | (ILWC 46 & LPNB) | Sequence Components of genome | Gene accession IDs | Putative functions |
|--------------------|----------------|-------------|-------------------------|----------------------------------------|--------------------|------------------|-------------------------------|--------------------|--------------------|
| SNP_73838_A_38987  | NW_004515930.1 | scaffold466 | 38987                   | AA                                     | GG                 | GG               | INTERGENIC                    |                    |                    |
| SNP_73839_A_66245  | NW_004515930.1 | scaffold466 | 66245                   | CC                                     | TT                 | TT               | INTERGENIC                    |                    |                    |
| SNP_73840_A_66679  | NW_004515930.1 | scaffold466 | 66679                   | CC                                     | AA                 | AA               | INTERGENIC                    |                    |                    |
| SNP_73841_A_78077  | NW_004515930.1 | scaffold466 | 78077                   | GG                                     | AA                 | AA               | INTERGENIC                    |                    |                    |
| SNP_73842_A_111065 | NW_004515930.1 | scaffold466 | 111065                  | CC                                     | AA                 | AA               | INTERGENIC                    |                    |                    |
| SNP_73843_A_132776 | NW_004515930.1 | scaffold466 | 132776                  | GG                                     | AA                 | AA               | INTRON                        | 101499663          | Unknown function   |
| SNP_73844_A_133213 | NW_004515930.1 | scaffold466 | 133213                  | TT                                     | AA                 | AA               | INTRON                        | 101499663          | Unknown function   |
| SNP_73845_A_133491 | NW_004515930.1 | scaffold466 | 133491                  | CC                                     | TT                 | TT               | INTRON                        | 101499663          | Unknown function   |
| SNP_73846_A_133555 | NW_004515930.1 | scaffold466 | 133555                  | AA                                     | GG                 | GG               | INTRON                        | 101499663          | Unknown function   |
| SNP_73847_A_164074 | NW_004515930.1 | scaffold466 | 164074                  | TT                                     | AA                 | AA               | DRR                           | 101499967          | Unknown function   |
| SNP_73848_A_164081 | NW_004515930.1 | scaffold466 | 164081                  | TT                                     | CC                 | CC               | DRR                           | 101499967          | Unknown function   |
| SNP_73849_A_164094 | NW_004515930.1 | scaffold466 | 164094                  | TT                                     | CC                 | CC               | DRR                           | 101499967          | Unknown function   |
| SNP_73850_A_164106 | NW_004515930.1 | scaffold466 | 164106                  | AA                                     | GG                 | GG               | DRR                           | 101499967          | Unknown function   |
| SNP_73851_A_164353 | NW_004515930.1 | scaffold466 | 164353                  | CC                                     | GG                 | GG               | DRR                           | 101499967          | Unknown function   |
| SNP_73852_A_164358 | NW_004515930.1 | scaffold466 | 164358                  | TT                                     | GG                 | GG               | DRR                           | 101499967          | Unknown function   |
| SNP_73853_A_164381 | NW_004515930.1 | scaffold466 | 164381                  | AA                                     | GG                 | GG               | DRR                           | 101499967          | Unknown function   |
| SNP_73854_A_164387 | NW_004515930.1 | scaffold466 | 164387                  | AA                                     | GG                 | GG               | DRR                           | 101499967          | Unknown function   |
| SNP_73855_A_164398 | NW_004515930.1 | scaffold466 | 164398                  | AA                                     | GG                 | GG               | DRR                           | 101499967          | Unknown function   |
| SNP_73856_A_164410 | NW_004515930.1 | scaffold466 | 164410                  | AA                                     | GG                 | GG               | DRR                           | 101499967          | Unknown function   |
| SNP_73857_A_164417 | NW_004515930.1 | scaffold466 | 164417                  | TT                                     | CC                 | CC               | DRR                           | 101499967          | Unknown function   |
| SNP_73858_A_164575 | NW_004515930.1 | scaffold466 | 164575                  | TT                                     | CC                 | CC               | DRR                           | 101499967          | Unknown function   |
| SNP_73859_A_164591 | NW_004515930.1 | scaffold466 | 164591                  | AA                                     | GG                 | GG               | DRR                           | 101499967          | Unknown function   |

| SNPs IDs           | Chromosome IDs | Chromosomes | Physical positions (bp) | CDC Frontier genome (Reference genome) | (Pusa 1103 & HPNB) | (ILWC 46 & LPNB) | Sequence Components of genome | Gene accession IDs | Putative functions |
|--------------------|----------------|-------------|-------------------------|----------------------------------------|--------------------|------------------|-------------------------------|--------------------|--------------------|
| SNP_73860_A_164597 | NW_004515930.1 | scaffold466 | 164597                  | TT                                     | CC                 | CC               | DRR                           | 101499967          | Unknown function   |
| SNP_73861_A_164716 | NW_004515930.1 | scaffold466 | 164716                  | AA                                     | CC                 | CC               | DRR                           | 101499967          | Unknown function   |
| SNP_73862_A_164823 | NW_004515930.1 | scaffold466 | 164823                  | CC                                     | TT                 | TT               | DRR                           | 101499967          | Unknown function   |
| SNP_73863_A_165681 | NW_004515930.1 | scaffold466 | 165681                  | CC                                     | TT                 | TT               | URR                           | 101499350          | Unknown function   |
| SNP_73864_A_165695 | NW_004515930.1 | scaffold466 | 165695                  | AA                                     | CC                 | CC               | URR                           | 101499350          | Unknown function   |
| SNP_73865_A_165780 | NW_004515930.1 | scaffold466 | 165780                  | TT                                     | CC                 | CC               | URR                           | 101499350          | Unknown function   |
| SNP_73866_A_165844 | NW_004515930.1 | scaffold466 | 165844                  | TT                                     | CC                 | CC               | URR                           | 101499350          | Unknown function   |
| SNP_73867_A_166006 | NW_004515930.1 | scaffold466 | 166006                  | TT                                     | CC                 | CC               | URR                           | 101499350          | Unknown function   |
| SNP_73868_A_166114 | NW_004515930.1 | scaffold466 | 166114                  | AA                                     | GG                 | GG               | URR                           | 101499350          | Unknown function   |
| SNP_73869_A_166211 | NW_004515930.1 | scaffold466 | 166211                  | CC                                     | TT                 | TT               | URR                           | 101499967          | Unknown function   |
| SNP_73870_A_166248 | NW_004515930.1 | scaffold466 | 166248                  | TT                                     | CC                 | CC               | URR                           | 101499967          | Unknown function   |
| SNP_73871_A_166249 | NW_004515930.1 | scaffold466 | 166249                  | GG                                     | CC                 | CC               | URR                           | 101499967          | Unknown function   |
| SNP_73872_A_166266 | NW_004515930.1 | scaffold466 | 166266                  | AA                                     | GG                 | GG               | URR                           | 101499967          | Unknown function   |
| SNP_73873_A_166788 | NW_004515930.1 | scaffold466 | 166788                  | TT                                     | CC                 | CC               | URR                           | 101499967          | Unknown function   |
| SNP_73874_A_166792 | NW_004515930.1 | scaffold466 | 166792                  | AA                                     | GG                 | GG               | URR                           | 101499967          | Unknown function   |
| SNP_73875_A_166986 | NW_004515930.1 | scaffold466 | 166986                  | TT                                     | CC                 | CC               | URR                           | 101499967          | Unknown function   |
| SNP_73877_A_169636 | NW_004515930.1 | scaffold466 | 169636                  | GG                                     | CC                 | CC               | INTERGENIC                    |                    |                    |
| SNP_73878_A_169640 | NW_004515930.1 | scaffold466 | 169640                  | TT                                     | AA                 | AA               | INTERGENIC                    |                    |                    |
| SNP_73879_A_169652 | NW_004515930.1 | scaffold466 | 169652                  | TT                                     | AA                 | AA               | INTERGENIC                    |                    |                    |
| SNP_73880_A_169680 | NW_004515930.1 | scaffold466 | 169680                  | AA                                     | GG                 | GG               | INTERGENIC                    |                    |                    |
| SNP_73882_A_169767 | NW_004515930.1 | scaffold466 | 169767                  | TT                                     | CC                 | CC               | INTERGENIC                    |                    |                    |
| SNP_73883_A_169819 | NW_004515930.1 | scaffold466 | 169819                  | AA                                     | TT                 | TT               | INTERGENIC                    |                    |                    |

| SNPs IDs           | Chromosome IDs | Chromosomes | Physical positions (bp) | CDC Frontier (Reference genome) | (Pusa 1103 & HPNB) | (ILWC 46 & LPNB) | Sequence Components of genome | Gene accession IDs | Putative functions |
|--------------------|----------------|-------------|-------------------------|---------------------------------|--------------------|------------------|-------------------------------|--------------------|--------------------|
| SNP_73884_A_169820 | NW_004515930.1 | scaffold466 | 169820                  | TT                              | AA                 | AA               | INTERGENIC                    |                    |                    |
| SNP_73885_A_169821 | NW_004515930.1 | scaffold466 | 169821                  | AA                              | CC                 | CC               | INTERGENIC                    |                    |                    |
| SNP_73886_A_169830 | NW_004515930.1 | scaffold466 | 169830                  | AA                              | GG                 | GG               | INTERGENIC                    |                    |                    |
| SNP_73887_A_169831 | NW_004515930.1 | scaffold466 | 169831                  | AA                              | GG                 | GG               | INTERGENIC                    |                    |                    |
| SNP_73888_A_169835 | NW_004515930.1 | scaffold466 | 169835                  | TT                              | GG                 | GG               | INTERGENIC                    |                    |                    |
| SNP_73889_A_169836 | NW_004515930.1 | scaffold466 | 169836                  | TT                              | CC                 | CC               | INTERGENIC                    |                    |                    |
| SNP_73890_A_169841 | NW_004515930.1 | scaffold466 | 169841                  | AA                              | GG                 | GG               | INTERGENIC                    |                    |                    |
| SNP_73891_A_169852 | NW_004515930.1 | scaffold466 | 169852                  | AA                              | GG                 | GG               | INTERGENIC                    |                    |                    |
| SNP_73892_A_169856 | NW_004515930.1 | scaffold466 | 169856                  | AA                              | CC                 | CC               | INTERGENIC                    |                    |                    |
| SNP_73893_A_169875 | NW_004515930.1 | scaffold466 | 169875                  | AA                              | GG                 | GG               | INTERGENIC                    |                    |                    |
| SNP_73894_A_169933 | NW_004515930.1 | scaffold466 | 169933                  | GG                              | TT                 | TT               | INTERGENIC                    |                    |                    |
| SNP_73895_A_169974 | NW_004515930.1 | scaffold466 | 169974                  | TT                              | CC                 | CC               | INTERGENIC                    |                    |                    |
| SNP_73897_A_171285 | NW_004515930.1 | scaffold466 | 171285                  | AA                              | GG                 | GG               | SYNONYMOUS_CODING             | id201638           | Unknown function   |
| SNP_73898_A_171289 | NW_004515930.1 | scaffold466 | 171289                  | TT                              | CC                 | CC               | NON_SYNONYMOUS_CODING         | id201638           | Unknown function   |
| SNP_73899_A_171305 | NW_004515930.1 | scaffold466 | 171305                  | AA                              | GG                 | GG               | NON_SYNONYMOUS_CODING         | id201638           | Unknown function   |
| SNP_73900_A_171333 | NW_004515930.1 | scaffold466 | 171333                  | AA                              | GG                 | GG               | SYNONYMOUS_CODING             | id201638           | Unknown function   |
| SNP_73901_A_171347 | NW_004515930.1 | scaffold466 | 171347                  | GG                              | AA                 | AA               | NON_SYNONYMOUS_CODING         | id201638           | Unknown function   |
| SNP_73902_A_171350 | NW_004515930.1 | scaffold466 | 171350                  | TT                              | AA                 | AA               | NON_SYNONYMOUS_CODING         | id201638           | Unknown function   |
| SNP_73903_A_171363 | NW_004515930.1 | scaffold466 | 171363                  | GG                              | CC                 | CC               | SYNONYMOUS_CODING             | id201638           | Unknown function   |
| SNP_73904_A_171480 | NW_004515930.1 | scaffold466 | 171480                  | AA                              | CC                 | CC               | INTRON                        | id201638           | Unknown function   |
| SNP_73905_A_171484 | NW_004515930.1 | scaffold466 | 171484                  | AA                              | GG                 | GG               | INTRON                        | id201638           | Unknown function   |
| SNP_73906_A_190268 | NW_004515930.1 | scaffold466 | 190268                  | TT                              | GG                 | GG               | INTERGENIC                    |                    |                    |



| SNPs IDs           | Chromosome IDs | Chromosomes | Physical positions (bp) | CDC Frontier (Reference genome) | (Pusa 1103 & HPNB) | (ILWC 46 & LPNB) | Sequence genome | Components of | Gene accession IDs | Putative functions |
|--------------------|----------------|-------------|-------------------------|---------------------------------|--------------------|------------------|-----------------|---------------|--------------------|--------------------|
| SNP_73907_A_190278 | NW_004515930.1 | scaffold466 | 190278                  | CC                              | TT                 | TT               | INTERGENIC      |               |                    |                    |
| SNP_73908_A_211926 | NW_004515930.1 | scaffold466 | 211926                  | CC                              | GG                 | GG               | INTERGENIC      |               |                    |                    |
| SNP_73909_A_212210 | NW_004515930.1 | scaffold466 | 212210                  | GG                              | AA                 | AA               | INTERGENIC      |               |                    |                    |
| SNP_73910_A_212218 | NW_004515930.1 | scaffold466 | 212218                  | GG                              | AA                 | AA               | INTERGENIC      |               |                    |                    |
| SNP_73911_A_212228 | NW_004515930.1 | scaffold466 | 212228                  | AA                              | GG                 | GG               | INTERGENIC      |               |                    |                    |
| SNP_73912_A_241851 | NW_004515930.1 | scaffold466 | 241851                  | GG                              | TT                 | TT               | INTERGENIC      |               |                    |                    |
| SNP_73913_A_242937 | NW_004515930.1 | scaffold466 | 242937                  | AA                              | GG                 | GG               | INTERGENIC      |               |                    |                    |
| SNP_73914_A_254235 | NW_004515930.1 | scaffold466 | 254235                  | GG                              | AA                 | AA               | INTERGENIC      |               |                    |                    |
| SNP_73915_A_254285 | NW_004515930.1 | scaffold466 | 254285                  | AA                              | TT                 | TT               | INTERGENIC      |               |                    |                    |
| SNP_73917_A_254315 | NW_004515930.1 | scaffold466 | 254315                  | AA                              | TT                 | TT               | INTERGENIC      |               |                    |                    |
| SNP_73918_A_254368 | NW_004515930.1 | scaffold466 | 254368                  | AA                              | GG                 | GG               | INTERGENIC      |               |                    |                    |
| SNP_73919_A_271024 | NW_004515930.1 | scaffold466 | 271024                  | TT                              | AA                 | AA               | INTERGENIC      |               |                    |                    |
| SNP_73920_A_278840 | NW_004515930.1 | scaffold466 | 278840                  | TT                              | GG                 | GG               | INTERGENIC      |               |                    |                    |
| SNP_73921_A_281522 | NW_004515930.1 | scaffold466 | 281522                  | AA                              | GG                 | GG               | INTERGENIC      |               |                    |                    |
| SNP_73922_A_292880 | NW_004515930.1 | scaffold466 | 292880                  | GG                              | AA                 | AA               | INTERGENIC      |               |                    |                    |
| SNP_73923_A_292899 | NW_004515930.1 | scaffold466 | 292899                  | AA                              | GG                 | GG               | INTERGENIC      |               |                    |                    |
| SNP_73924_A_3452   | NW_004515931.1 | scaffold467 | 3452                    | AA                              | TT                 | TT               | INTERGENIC      |               |                    |                    |
| SNP_73926_A_18417  | NW_004515932.1 | scaffold469 | 18417                   | CC                              | AA                 | AA               | INTERGENIC      |               |                    |                    |
| SNP_73927_A_18553  | NW_004515932.1 | scaffold469 | 18553                   | GG                              | AA                 | AA               | INTERGENIC      |               |                    |                    |
| SNP_73928_A_18597  | NW_004515932.1 | scaffold469 | 18597                   | AA                              | TT                 | TT               | INTERGENIC      |               |                    |                    |
| SNP_73929_A_19339  | NW_004515932.1 | scaffold469 | 19339                   | AA                              | GG                 | GG               | INTERGENIC      |               |                    |                    |
| SNP_73930_A_19341  | NW_004515932.1 | scaffold469 | 19341                   | AA                              | CC                 | CC               | INTERGENIC      |               |                    |                    |

| SNPs IDs           | Chromosome IDs | Chromosomes | Physical positions (bp) | CDC Frontier (Reference genome) | (Pusa 1103 & HPNB) | (ILWC 46 & LPNB) | Sequence Components of genome | Gene accession IDs | Putative functions           |
|--------------------|----------------|-------------|-------------------------|---------------------------------|--------------------|------------------|-------------------------------|--------------------|------------------------------|
| SNP_73931_A_19376  | NW_004515932.1 | scaffold469 | 19376                   | AA                              | TT                 | TT               | INTERGENIC                    |                    |                              |
| SNP_73932_A_22079  | NW_004515932.1 | scaffold469 | 22079                   | TT                              | GG                 | GG               | INTERGENIC                    |                    |                              |
| SNP_73933_A_49156  | NW_004515932.1 | scaffold469 | 49156                   | AA                              | CC                 | CC               | INTERGENIC                    |                    |                              |
| SNP_73934_A_77552  | NW_004515932.1 | scaffold469 | 77552                   | AA                              | GG                 | GG               | INTERGENIC                    |                    |                              |
| SNP_73935_A_193258 | NW_004515932.1 | scaffold469 | 193258                  | TT                              | CC                 | CC               | INTERGENIC                    |                    |                              |
| SNP_73936_A_208019 | NW_004515932.1 | scaffold469 | 208019                  | CC                              | TT                 | TT               | INTERGENIC                    |                    |                              |
| SNP_73937_A_208315 | NW_004515932.1 | scaffold469 | 208315                  | AA                              | CC                 | CC               | INTERGENIC                    |                    |                              |
| SNP_73938_A_219462 | NW_004515932.1 | scaffold469 | 219462                  | TT                              | CC                 | CC               | INTERGENIC                    |                    |                              |
| SNP_73939_A_220199 | NW_004515932.1 | scaffold469 | 220199                  | TT                              | AA                 | AA               | INTERGENIC                    |                    |                              |
| SNP_73940_A_222747 | NW_004515932.1 | scaffold469 | 222747                  | GG                              | TT                 | TT               | INTERGENIC                    |                    |                              |
| SNP_73941_A_4290   | NW_004515933.1 | scaffold470 | 4290                    | GG                              | TT                 | TT               | INTERGENIC                    |                    |                              |
| SNP_73942_A_31754  | NW_004515933.1 | scaffold470 | 31754                   | TT                              | CC                 | CC               | NON_SYNONYMOUS_CODING         | 101504681          | uncharacterized LOC101504681 |
| SNP_73943_A_42718  | NW_004515933.1 | scaffold470 | 42718                   | GG                              | AA                 | AA               | INTERGENIC                    |                    |                              |
| SNP_73944_A_42978  | NW_004515933.1 | scaffold470 | 42978                   | TT                              | AA                 | AA               | INTERGENIC                    |                    |                              |
| SNP_73945_A_43228  | NW_004515933.1 | scaffold470 | 43228                   | AA                              | GG                 | GG               | INTERGENIC                    |                    |                              |
| SNP_73946_A_45989  | NW_004515933.1 | scaffold470 | 45989                   | TT                              | CC                 | CC               | INTERGENIC                    |                    |                              |
| SNP_73947_A_45990  | NW_004515933.1 | scaffold470 | 45990                   | TT                              | CC                 | CC               | INTERGENIC                    |                    |                              |
| SNP_73948_A_46004  | NW_004515933.1 | scaffold470 | 46004                   | GG                              | TT                 | TT               | INTERGENIC                    |                    |                              |
| SNP_73949_A_126335 | NW_004515933.1 | scaffold470 | 126335                  | GG                              | TT                 | TT               | INTERGENIC                    |                    |                              |
| SNP_73950_A_128098 | NW_004515933.1 | scaffold470 | 128098                  | AA                              | GG                 | GG               | INTERGENIC                    |                    |                              |
| SNP_73952_A_185956 | NW_004515933.1 | scaffold470 | 185956                  | AA                              | TT                 | TT               | INTERGENIC                    |                    |                              |
| SNP_73953_A_186026 | NW_004515933.1 | scaffold470 | 186026                  | GG                              | AA                 | AA               | INTERGENIC                    |                    |                              |

| SNPs IDs           | Chromosome IDs | Chromosomes | Physical positions (bp) | CDC Frontier (Reference genome) | (Pusa 1103 & HPNB) | (ILWC 46 & LPNB) | Sequence genome | Components of | Gene accession IDs | Putative functions |
|--------------------|----------------|-------------|-------------------------|---------------------------------|--------------------|------------------|-----------------|---------------|--------------------|--------------------|
| SNP_73954_A_186805 | NW_004515933.1 | scaffold470 | 186805                  | TT                              | AA                 | AA               | INTERGENIC      |               |                    |                    |
| SNP_73955_A_287604 | NW_004515933.1 | scaffold470 | 287604                  | AA                              | GG                 | GG               | INTERGENIC      |               |                    |                    |
| SNP_73956_A_287644 | NW_004515933.1 | scaffold470 | 287644                  | AA                              | CC                 | CC               | INTERGENIC      |               |                    |                    |
| SNP_73957_A_287863 | NW_004515933.1 | scaffold470 | 287863                  | GG                              | TT                 | TT               | INTERGENIC      |               |                    |                    |
| SNP_73958_A_288916 | NW_004515933.1 | scaffold470 | 288916                  | CC                              | TT                 | TT               | INTERGENIC      |               |                    |                    |
| SNP_73960_A_321637 | NW_004515933.1 | scaffold470 | 321637                  | TT                              | GG                 | GG               | INTERGENIC      |               |                    |                    |
| SNP_73961_A_321728 | NW_004515933.1 | scaffold470 | 321728                  | AA                              | GG                 | GG               | INTERGENIC      |               |                    |                    |
| SNP_73962_A_321981 | NW_004515933.1 | scaffold470 | 321981                  | AA                              | GG                 | GG               | INTERGENIC      |               |                    |                    |
| SNP_73963_A_322009 | NW_004515933.1 | scaffold470 | 322009                  | AA                              | TT                 | TT               | INTERGENIC      |               |                    |                    |
| SNP_73964_A_322010 | NW_004515933.1 | scaffold470 | 322010                  | AA                              | CC                 | CC               | INTERGENIC      |               |                    |                    |
| SNP_73965_A_322020 | NW_004515933.1 | scaffold470 | 322020                  | CC                              | TT                 | TT               | INTERGENIC      |               |                    |                    |
| SNP_73966_A_322037 | NW_004515933.1 | scaffold470 | 322037                  | TT                              | AA                 | AA               | INTERGENIC      |               |                    |                    |
| SNP_73967_A_322115 | NW_004515933.1 | scaffold470 | 322115                  | AA                              | GG                 | GG               | INTERGENIC      |               |                    |                    |
| SNP_73968_A_336035 | NW_004515933.1 | scaffold470 | 336035                  | CC                              | TT                 | TT               | INTERGENIC      |               |                    |                    |
| SNP_73969_A_336075 | NW_004515933.1 | scaffold470 | 336075                  | TT                              | CC                 | CC               | INTERGENIC      |               |                    |                    |
| SNP_73970_A_336090 | NW_004515933.1 | scaffold470 | 336090                  | GG                              | AA                 | AA               | INTERGENIC      |               |                    |                    |
| SNP_73971_A_336106 | NW_004515933.1 | scaffold470 | 336106                  | GG                              | AA                 | AA               | INTERGENIC      |               |                    |                    |
| SNP_73972_A_336119 | NW_004515933.1 | scaffold470 | 336119                  | AA                              | TT                 | TT               | INTERGENIC      |               |                    |                    |
| SNP_73973_A_336127 | NW_004515933.1 | scaffold470 | 336127                  | CC                              | TT                 | TT               | INTERGENIC      |               |                    |                    |
| SNP_73974_A_336172 | NW_004515933.1 | scaffold470 | 336172                  | CC                              | TT                 | TT               | INTERGENIC      |               |                    |                    |
| SNP_73975_A_336193 | NW_004515933.1 | scaffold470 | 336193                  | AA                              | TT                 | TT               | INTERGENIC      |               |                    |                    |
| SNP_73976_A_336208 | NW_004515933.1 | scaffold470 | 336208                  | AA                              | GG                 | GG               | INTERGENIC      |               |                    |                    |

| SNPs IDs           | Chromosome IDs | Chromosomes | Physical positions (bp) | CDC Frontier (Reference genome) | (Pusa 1103 & HPNB) | (ILWC 46 & LPNB) | Sequence Components of genome | Gene accession IDs | Putative functions           |
|--------------------|----------------|-------------|-------------------------|---------------------------------|--------------------|------------------|-------------------------------|--------------------|------------------------------|
| SNP_73977_A_336246 | NW_004515933.1 | scaffold470 | 336246                  | AA                              | TT                 | TT               | INTERGENIC                    |                    |                              |
| SNP_73978_A_336252 | NW_004515933.1 | scaffold470 | 336252                  | AA                              | TT                 | TT               | INTERGENIC                    |                    |                              |
| SNP_73980_A_336375 | NW_004515933.1 | scaffold470 | 336375                  | GG                              | TT                 | TT               | INTERGENIC                    |                    |                              |
| SNP_73981_A_336393 | NW_004515933.1 | scaffold470 | 336393                  | AA                              | TT                 | TT               | INTERGENIC                    |                    |                              |
| SNP_73982_A_336417 | NW_004515933.1 | scaffold470 | 336417                  | TT                              | AA                 | AA               | INTERGENIC                    |                    |                              |
| SNP_73983_A_336450 | NW_004515933.1 | scaffold470 | 336450                  | TT                              | CC                 | CC               | INTERGENIC                    |                    |                              |
| SNP_73984_A_336559 | NW_004515933.1 | scaffold470 | 336559                  | GG                              | AA                 | AA               | INTERGENIC                    |                    |                              |
| SNP_73985_A_336560 | NW_004515933.1 | scaffold470 | 336560                  | AA                              | TT                 | TT               | INTERGENIC                    |                    |                              |
| SNP_73986_A_336672 | NW_004515933.1 | scaffold470 | 336672                  | GG                              | AA                 | AA               | INTERGENIC                    |                    |                              |
| SNP_73987_A_337671 | NW_004515933.1 | scaffold470 | 337671                  | GG                              | AA                 | AA               | INTERGENIC                    |                    |                              |
| SNP_73988_A_337674 | NW_004515933.1 | scaffold470 | 337674                  | GG                              | AA                 | AA               | INTERGENIC                    |                    |                              |
| SNP_73989_A_340070 | NW_004515933.1 | scaffold470 | 340070                  | AA                              | TT                 | TT               | INTERGENIC                    |                    |                              |
| SNP_73990_A_348242 | NW_004515933.1 | scaffold470 | 348242                  | CC                              | AA                 | AA               | INTERGENIC                    |                    |                              |
| SNP_73991_A_348445 | NW_004515933.1 | scaffold470 | 348445                  | AA                              | GG                 | GG               | INTERGENIC                    |                    |                              |
| SNP_73992_A_348475 | NW_004515933.1 | scaffold470 | 348475                  | AA                              | CC                 | CC               | INTERGENIC                    |                    |                              |
| SNP_73993_A_348637 | NW_004515933.1 | scaffold470 | 348637                  | AA                              | TT                 | TT               | INTERGENIC                    |                    |                              |
| SNP_73994_A_348713 | NW_004515933.1 | scaffold470 | 348713                  | AA                              | CC                 | CC               | INTERGENIC                    |                    |                              |
| SNP_73995_A_349186 | NW_004515933.1 | scaffold470 | 349186                  | TT                              | GG                 | GG               | INTERGENIC                    |                    |                              |
| SNP_73996_A_349488 | NW_004515933.1 | scaffold470 | 349488                  | TT                              | CC                 | CC               | INTERGENIC                    |                    |                              |
| SNP_73998_A_368685 | NW_004515933.1 | scaffold470 | 368685                  | GG                              | AA                 | AA               | INTRON                        | 101506606          | uncharacterized LOC101506606 |
| SNP_73999_A_369179 | NW_004515933.1 | scaffold470 | 369179                  | TT                              | GG                 | GG               | INTRON                        | 101506606          | uncharacterized LOC101506606 |
| SNP_74000_A_369250 | NW_004515933.1 | scaffold470 | 369250                  | TT                              | CC                 | CC               | INTRON                        | 101506606          | uncharacterized LOC101506606 |

| SNPs IDs           | Chromosome IDs | Chromosomes | Physical positions (bp) | CDC Frontier (Reference genome) | (Pusa 1103 & HPNB) | (ILWC 46 & LPNB) | Sequence Components of genome | Gene accession IDs | Putative functions           |
|--------------------|----------------|-------------|-------------------------|---------------------------------|--------------------|------------------|-------------------------------|--------------------|------------------------------|
| SNP_74001_A_369656 | NW_004515933.1 | scaffold470 | 369656                  | TT                              | GG                 | GG               | INTRON                        | 101506606          | uncharacterized LOC101506606 |
| SNP_74002_A_370461 | NW_004515933.1 | scaffold470 | 370461                  | CC                              | TT                 | TT               | INTRON                        | 101506606          | uncharacterized LOC101506606 |
| SNP_74003_A_370478 | NW_004515933.1 | scaffold470 | 370478                  | GG                              | AA                 | AA               | INTRON                        | 101506606          | uncharacterized LOC101506606 |
| SNP_74004_A_370639 | NW_004515933.1 | scaffold470 | 370639                  | GG                              | AA                 | AA               | INTRON                        | 101506606          | uncharacterized LOC101506606 |
| SNP_74006_A_370833 | NW_004515933.1 | scaffold470 | 370833                  | AA                              | GG                 | GG               | INTRON                        | 101506606          | uncharacterized LOC101506606 |
| SNP_74007_A_370908 | NW_004515933.1 | scaffold470 | 370908                  | AA                              | TT                 | TT               | INTRON                        | 101506606          | uncharacterized LOC101506606 |
| SNP_74008_A_372122 | NW_004515933.1 | scaffold470 | 372122                  | CC                              | AA                 | AA               | URR                           | 101506606          | uncharacterized LOC101506606 |
| SNP_74009_A_372188 | NW_004515933.1 | scaffold470 | 372188                  | CC                              | TT                 | TT               | URR                           | 101506606          | uncharacterized LOC101506606 |
| SNP_74010_A_372246 | NW_004515933.1 | scaffold470 | 372246                  | TT                              | CC                 | CC               | URR                           | 101506606          | uncharacterized LOC101506606 |
| SNP_74011_A_372407 | NW_004515933.1 | scaffold470 | 372407                  | CC                              | TT                 | TT               | URR                           | 101506606          | uncharacterized LOC101506606 |
| SNP_74012_A_372610 | NW_004515933.1 | scaffold470 | 372610                  | CC                              | TT                 | TT               | URR                           | 101506606          | uncharacterized LOC101506606 |
| SNP_74014_A_372805 | NW_004515933.1 | scaffold470 | 372805                  | CC                              | TT                 | TT               | URR                           | 101506606          | uncharacterized LOC101506606 |
| SNP_74015_A_373041 | NW_004515933.1 | scaffold470 | 373041                  | TT                              | CC                 | CC               | URR                           | 101506606          | uncharacterized LOC101506606 |
| SNP_74016_A_373101 | NW_004515933.1 | scaffold470 | 373101                  | TT                              | GG                 | GG               | URR                           | 101506606          | uncharacterized LOC101506606 |
| SNP_74017_A_373103 | NW_004515933.1 | scaffold470 | 373103                  | TT                              | AA                 | AA               | URR                           | 101506606          | uncharacterized LOC101506606 |
| SNP_74018_A_373290 | NW_004515933.1 | scaffold470 | 373290                  | CC                              | GG                 | GG               | INTERGENIC                    |                    |                              |
| SNP_74019_A_373578 | NW_004515933.1 | scaffold470 | 373578                  | AA                              | CC                 | CC               | INTERGENIC                    |                    |                              |
| SNP_74020_A_373971 | NW_004515933.1 | scaffold470 | 373971                  | TT                              | CC                 | CC               | INTERGENIC                    |                    |                              |
| SNP_74021_A_374262 | NW_004515933.1 | scaffold470 | 374262                  | CC                              | AA                 | AA               | INTERGENIC                    |                    |                              |
| SNP_74022_A_374414 | NW_004515933.1 | scaffold470 | 374414                  | CC                              | TT                 | TT               | INTERGENIC                    |                    |                              |
| SNP_74024_A_377042 | NW_004515933.1 | scaffold470 | 377042                  | CC                              | TT                 | TT               | INTERGENIC                    |                    |                              |
| SNP_74025_A_377105 | NW_004515933.1 | scaffold470 | 377105                  | GG                              | AA                 | AA               | INTERGENIC                    |                    |                              |

| SNPs IDs           | Chromosome IDs | Chromosomes | Physical positions (bp) | CDC Frontier (Reference genome) | (Pusa 1103 & HPNB) | (ILWC 46 & LPNB) | Sequence Components of genome | Gene accession IDs | Putative functions               |
|--------------------|----------------|-------------|-------------------------|---------------------------------|--------------------|------------------|-------------------------------|--------------------|----------------------------------|
| SNP_74026_A_377536 | NW_004515933.1 | scaffold470 | 377536                  | GG                              | AA                 | AA               | INTERGENIC                    |                    |                                  |
| SNP_74027_A_377631 | NW_004515933.1 | scaffold470 | 377631                  | GG                              | TT                 | TT               | INTERGENIC                    |                    |                                  |
| SNP_74028_A_377812 | NW_004515933.1 | scaffold470 | 377812                  | CC                              | TT                 | TT               | INTERGENIC                    |                    |                                  |
| SNP_74029_A_380037 | NW_004515933.1 | scaffold470 | 380037                  | CC                              | TT                 | TT               | INTERGENIC                    |                    |                                  |
| SNP_74030_A_382476 | NW_004515933.1 | scaffold470 | 382476                  | AA                              | TT                 | TT               | INTERGENIC                    |                    |                                  |
| SNP_74031_A_383895 | NW_004515933.1 | scaffold470 | 383895                  | GG                              | CC                 | CC               | NON_SYNONYMOUS_CODING         | 101507265          | uncharacterized LOC101507265     |
| SNP_74032_A_385999 | NW_004515933.1 | scaffold470 | 385999                  | CC                              | TT                 | TT               | URR                           | 101507265          | uncharacterized LOC101507265     |
| SNP_74033_A_386302 | NW_004515933.1 | scaffold470 | 386302                  | TT                              | CC                 | CC               | INTERGENIC                    |                    |                                  |
| SNP_74034_A_387140 | NW_004515933.1 | scaffold470 | 387140                  | GG                              | AA                 | AA               | INTERGENIC                    |                    |                                  |
| SNP_74035_A_389700 | NW_004515933.1 | scaffold470 | 389700                  | TT                              | CC                 | CC               | INTERGENIC                    |                    |                                  |
| SNP_74036_A_389750 | NW_004515933.1 | scaffold470 | 389750                  | TT                              | GG                 | GG               | INTERGENIC                    |                    |                                  |
| SNP_74037_A_389794 | NW_004515933.1 | scaffold470 | 389794                  | TT                              | CC                 | CC               | INTERGENIC                    |                    |                                  |
| SNP_74038_A_390002 | NW_004515933.1 | scaffold470 | 390002                  | CC                              | TT                 | TT               | INTERGENIC                    |                    |                                  |
| SNP_74039_A_390093 | NW_004515933.1 | scaffold470 | 390093                  | GG                              | CC                 | CC               | INTERGENIC                    |                    |                                  |
| SNP_74040_A_5883   | NW_004515935.1 | scaffold473 | 5883                    | CC                              | GG                 | GG               | INTERGENIC                    |                    |                                  |
| SNP_74041_A_6306   | NW_004515935.1 | scaffold473 | 6306                    | AA                              | GG                 | GG               | INTERGENIC                    |                    |                                  |
| SNP_74042_A_6328   | NW_004515935.1 | scaffold473 | 6328                    | CC                              | AA                 | AA               | INTERGENIC                    |                    |                                  |
| SNP_74043_A_6335   | NW_004515935.1 | scaffold473 | 6335                    | AA                              | GG                 | GG               | INTERGENIC                    |                    |                                  |
| SNP_74044_A_6397   | NW_004515935.1 | scaffold473 | 6397                    | CC                              | TT                 | TT               | INTERGENIC                    |                    |                                  |
| SNP_74045_A_12705  | NW_004515935.1 | scaffold473 | 12705                   | AA                              | TT                 | TT               | DRR                           | 101508204          | probable methyltransferase PMT19 |
| SNP_74046_A_12843  | NW_004515935.1 | scaffold473 | 12843                   | TT                              | GG                 | GG               | DRR                           | 101508204          | probable methyltransferase PMT19 |
| SNP_74047_A_12871  | NW_004515935.1 | scaffold473 | 12871                   | GG                              | AA                 | AA               | DRR                           | 101508204          | probable methyltransferase PMT19 |

| SNPs IDs          | Chromosome IDs | Chromosomes | Physical positions (bp) | CDC Frontier (Reference genome) | (Pusa 1103 & HPNB) | (ILWC 46 & LPNB) | Sequence Components of genome | Gene accession IDs | Putative functions                        |
|-------------------|----------------|-------------|-------------------------|---------------------------------|--------------------|------------------|-------------------------------|--------------------|-------------------------------------------|
| SNP_74048_A_12918 | NW_004515935.1 | scaffold473 | 12918                   | GG                              | TT                 | TT               | NON_SYNONYMOUS_CODING         | 101508204          | probable methyltransferase PMT19          |
| SNP_74049_A_12997 | NW_004515935.1 | scaffold473 | 12997                   | GG                              | CC                 | CC               | NON_SYNONYMOUS_CODING         | 101508204          | probable methyltransferase PMT19          |
| SNP_74050_A_13092 | NW_004515935.1 | scaffold473 | 13092                   | AA                              | GG                 | GG               | SYNONYMOUS_CODING             | 101508204          | probable methyltransferase PMT19          |
| SNP_74051_A_13098 | NW_004515935.1 | scaffold473 | 13098                   | AA                              | TT                 | TT               | SYNONYMOUS_CODING             | 101508204          | probable methyltransferase PMT19          |
| SNP_74052_A_13099 | NW_004515935.1 | scaffold473 | 13099                   | CC                              | GG                 | GG               | NON_SYNONYMOUS_CODING         | 101508204          | probable methyltransferase PMT19          |
| SNP_74053_A_13215 | NW_004515935.1 | scaffold473 | 13215                   | TT                              | AA                 | AA               | INTRON                        | 101508204          | probable methyltransferase PMT19          |
| SNP_74054_A_13253 | NW_004515935.1 | scaffold473 | 13253                   | AA                              | CC                 | CC               | INTRON                        | 101508204          | probable methyltransferase PMT19          |
| SNP_74055_A_13323 | NW_004515935.1 | scaffold473 | 13323                   | AA                              | GG                 | GG               | INTRON                        | 101508204          | probable methyltransferase PMT19          |
| SNP_74056_A_13331 | NW_004515935.1 | scaffold473 | 13331                   | AA                              | GG                 | GG               | INTRON                        | 101508204          | probable methyltransferase PMT19          |
| SNP_74057_A_30356 | NW_004515935.1 | scaffold473 | 30356                   | GG                              | TT                 | TT               | INTRON                        | 101507893          | superkiller viralicidic activity 2-like 2 |
| SNP_74058_A_9858  | NW_004515936.1 | scaffold475 | 9858                    | CC                              | TT                 | TT               | INTERGENIC                    |                    |                                           |
| SNP_74059_A_13937 | NW_004515936.1 | scaffold475 | 13937                   | GG                              | AA                 | AA               | INTERGENIC                    |                    |                                           |
| SNP_74060_A_20221 | NW_004515936.1 | scaffold475 | 20221                   | TT                              | CC                 | CC               | INTERGENIC                    |                    |                                           |
| SNP_74061_A_20255 | NW_004515936.1 | scaffold475 | 20255                   | AA                              | GG                 | GG               | INTERGENIC                    |                    |                                           |
| SNP_74062_A_23137 | NW_004515936.1 | scaffold475 | 23137                   | AA                              | GG                 | GG               | INTERGENIC                    |                    |                                           |
| SNP_74063_A_23138 | NW_004515936.1 | scaffold475 | 23138                   | AA                              | GG                 | GG               | INTERGENIC                    |                    |                                           |
| SNP_74064_A_36513 | NW_004515936.1 | scaffold475 | 36513                   | AA                              | TT                 | TT               | INTERGENIC                    |                    |                                           |
| SNP_74065_A_36713 | NW_004515936.1 | scaffold475 | 36713                   | AA                              | CC                 | CC               | INTERGENIC                    |                    |                                           |
| SNP_74066_A_36714 | NW_004515936.1 | scaffold475 | 36714                   | TT                              | CC                 | CC               | INTERGENIC                    |                    |                                           |
| SNP_74067_A_36715 | NW_004515936.1 | scaffold475 | 36715                   | GG                              | AA                 | AA               | INTERGENIC                    |                    |                                           |
| SNP_74068_A_44359 | NW_004515936.1 | scaffold475 | 44359                   | GG                              | CC                 | CC               | INTERGENIC                    |                    |                                           |
| SNP_74069_A_73346 | NW_004515936.1 | scaffold475 | 73346                   | CC                              | TT                 | TT               | INTERGENIC                    |                    |                                           |

| SNPs IDs           | Chromosome IDs | Chromosomes | Physical positions (bp) | CDC Frontier (Reference genome) | (Pusa 1103 & HPNB) | (ILWC 46 & LPNB) | Sequence Components of genome | Gene accession IDs | Putative functions |
|--------------------|----------------|-------------|-------------------------|---------------------------------|--------------------|------------------|-------------------------------|--------------------|--------------------|
| SNP_74070_A_84150  | NW_004515936.1 | scaffold475 | 84150                   | TT                              | GG                 | GG               | INTERGENIC                    |                    |                    |
| SNP_74071_A_84366  | NW_004515936.1 | scaffold475 | 84366                   | TT                              | AA                 | AA               | INTERGENIC                    |                    |                    |
| SNP_74072_A_88872  | NW_004515936.1 | scaffold475 | 88872                   | AA                              | GG                 | GG               | INTERGENIC                    |                    |                    |
| SNP_74073_A_89244  | NW_004515936.1 | scaffold475 | 89244                   | GG                              | AA                 | AA               | INTERGENIC                    |                    |                    |
| SNP_74074_A_89266  | NW_004515936.1 | scaffold475 | 89266                   | TT                              | CC                 | CC               | INTERGENIC                    |                    |                    |
| SNP_74075_A_89286  | NW_004515936.1 | scaffold475 | 89286                   | TT                              | CC                 | CC               | INTERGENIC                    |                    |                    |
| SNP_74076_A_93052  | NW_004515936.1 | scaffold475 | 93052                   | AA                              | CC                 | CC               | INTERGENIC                    |                    |                    |
| SNP_74077_A_127031 | NW_004515936.1 | scaffold475 | 127031                  | TT                              | CC                 | CC               | INTERGENIC                    |                    |                    |
| SNP_74078_A_130700 | NW_004515936.1 | scaffold475 | 130700                  | TT                              | GG                 | GG               | INTERGENIC                    |                    |                    |
| SNP_74079_A_140907 | NW_004515936.1 | scaffold475 | 140907                  | TT                              | CC                 | CC               | INTERGENIC                    |                    |                    |
| SNP_74080_A_141120 | NW_004515936.1 | scaffold475 | 141120                  | AA                              | GG                 | GG               | INTERGENIC                    |                    |                    |
| SNP_74082_A_141573 | NW_004515936.1 | scaffold475 | 141573                  | GG                              | CC                 | CC               | INTERGENIC                    |                    |                    |
| SNP_74083_A_144184 | NW_004515936.1 | scaffold475 | 144184                  | AA                              | GG                 | GG               | DRR                           | 101508528          | Unknown function   |
| SNP_74084_A_144346 | NW_004515936.1 | scaffold475 | 144346                  | TT                              | CC                 | CC               | DRR                           | 101508528          | Unknown function   |
| SNP_74085_A_144470 | NW_004515936.1 | scaffold475 | 144470                  | AA                              | TT                 | TT               | DRR                           | 101508528          | Unknown function   |
| SNP_74086_A_144483 | NW_004515936.1 | scaffold475 | 144483                  | GG                              | CC                 | CC               | DRR                           | 101508528          | Unknown function   |
| SNP_74087_A_144507 | NW_004515936.1 | scaffold475 | 144507                  | TT                              | CC                 | CC               | DRR                           | 101508528          | Unknown function   |
| SNP_74088_A_144509 | NW_004515936.1 | scaffold475 | 144509                  | AA                              | CC                 | CC               | DRR                           | 101508528          | Unknown function   |
| SNP_74089_A_144902 | NW_004515936.1 | scaffold475 | 144902                  | TT                              | CC                 | CC               | INTERGENIC                    |                    |                    |
| SNP_74090_A_144920 | NW_004515936.1 | scaffold475 | 144920                  | AA                              | CC                 | CC               | INTERGENIC                    |                    |                    |
| SNP_74091_A_144942 | NW_004515936.1 | scaffold475 | 144942                  | TT                              | AA                 | AA               | INTERGENIC                    |                    |                    |
| SNP_74092_A_144995 | NW_004515936.1 | scaffold475 | 144995                  | CC                              | TT                 | TT               | INTERGENIC                    |                    |                    |



| SNPs IDs           | Chromosome IDs | Chromosomes | Physical positions (bp) | CDC Frontier (Reference genome) | (Pusa 1103 & HPNB) | (ILWC 46 & LPNB) | Sequence Components of genome | Gene accession IDs | Putative functions |
|--------------------|----------------|-------------|-------------------------|---------------------------------|--------------------|------------------|-------------------------------|--------------------|--------------------|
| SNP_74093_A_145006 | NW_004515936.1 | scaffold475 | 145006                  | TT                              | AA                 | AA               | INTERGENIC                    |                    |                    |
| SNP_74094_A_145013 | NW_004515936.1 | scaffold475 | 145013                  | AA                              | GG                 | GG               | INTERGENIC                    |                    |                    |
| SNP_74095_A_145025 | NW_004515936.1 | scaffold475 | 145025                  | TT                              | GG                 | GG               | INTERGENIC                    |                    |                    |
| SNP_74096_A_145070 | NW_004515936.1 | scaffold475 | 145070                  | AA                              | GG                 | GG               | INTERGENIC                    |                    |                    |
| SNP_74097_A_145178 | NW_004515936.1 | scaffold475 | 145178                  | AA                              | GG                 | GG               | INTERGENIC                    |                    |                    |
| SNP_74098_A_145201 | NW_004515936.1 | scaffold475 | 145201                  | AA                              | GG                 | GG               | INTERGENIC                    |                    |                    |
| SNP_74099_A_145389 | NW_004515936.1 | scaffold475 | 145389                  | GG                              | CC                 | CC               | INTERGENIC                    |                    |                    |
| SNP_74100_A_145454 | NW_004515936.1 | scaffold475 | 145454                  | AA                              | GG                 | GG               | INTERGENIC                    |                    |                    |
| SNP_74101_A_149782 | NW_004515936.1 | scaffold475 | 149782                  | CC                              | AA                 | AA               | URR                           | 101508841          | Unknown function   |
| SNP_74103_A_163218 | NW_004515936.1 | scaffold475 | 163218                  | TT                              | CC                 | CC               | INTERGENIC                    |                    |                    |
| SNP_74104_A_163225 | NW_004515936.1 | scaffold475 | 163225                  | AA                              | GG                 | GG               | INTERGENIC                    |                    |                    |
| SNP_74105_A_163253 | NW_004515936.1 | scaffold475 | 163253                  | TT                              | GG                 | GG               | INTERGENIC                    |                    |                    |
| SNP_74106_A_163296 | NW_004515936.1 | scaffold475 | 163296                  | AA                              | CC                 | CC               | INTERGENIC                    |                    |                    |
| SNP_74107_A_163316 | NW_004515936.1 | scaffold475 | 163316                  | GG                              | CC                 | CC               | INTERGENIC                    |                    |                    |
| SNP_74108_A_163332 | NW_004515936.1 | scaffold475 | 163332                  | TT                              | CC                 | CC               | INTERGENIC                    |                    |                    |
| SNP_74109_A_163367 | NW_004515936.1 | scaffold475 | 163367                  | GG                              | CC                 | CC               | INTERGENIC                    |                    |                    |
| SNP_74110_A_163389 | NW_004515936.1 | scaffold475 | 163389                  | TT                              | CC                 | CC               | INTERGENIC                    |                    |                    |
| SNP_74111_A_163424 | NW_004515936.1 | scaffold475 | 163424                  | AA                              | GG                 | GG               | INTERGENIC                    |                    |                    |
| SNP_74112_A_163438 | NW_004515936.1 | scaffold475 | 163438                  | TT                              | CC                 | CC               | INTERGENIC                    |                    |                    |
| SNP_74113_A_163458 | NW_004515936.1 | scaffold475 | 163458                  | TT                              | CC                 | CC               | INTERGENIC                    |                    |                    |
| SNP_74114_A_163467 | NW_004515936.1 | scaffold475 | 163467                  | TT                              | GG                 | GG               | INTERGENIC                    |                    |                    |
| SNP_74115_A_163514 | NW_004515936.1 | scaffold475 | 163514                  | AA                              | GG                 | GG               | INTERGENIC                    |                    |                    |

| SNPs IDs           | Chromosome IDs | Chromosomes | Physical positions (bp) | CDC Frontier (Reference genome) | (Pusa 1103 & HPNB) | (ILWC 46 & LPNB) | Sequence genome | Components of | Gene accession IDs | Putative functions |
|--------------------|----------------|-------------|-------------------------|---------------------------------|--------------------|------------------|-----------------|---------------|--------------------|--------------------|
| SNP_74116_A_163559 | NW_004515936.1 | scaffold475 | 163559                  | TT                              | CC                 | CC               | INTERGENIC      |               |                    |                    |
| SNP_74117_A_163616 | NW_004515936.1 | scaffold475 | 163616                  | TT                              | CC                 | CC               | INTERGENIC      |               |                    |                    |
| SNP_74118_A_163688 | NW_004515936.1 | scaffold475 | 163688                  | AA                              | GG                 | GG               | INTERGENIC      |               |                    |                    |
| SNP_74119_A_163755 | NW_004515936.1 | scaffold475 | 163755                  | CC                              | AA                 | AA               | INTERGENIC      |               |                    |                    |
| SNP_74120_A_163786 | NW_004515936.1 | scaffold475 | 163786                  | TT                              | CC                 | CC               | INTERGENIC      |               |                    |                    |
| SNP_74121_A_163787 | NW_004515936.1 | scaffold475 | 163787                  | AA                              | GG                 | GG               | INTERGENIC      |               |                    |                    |
| SNP_74122_A_163824 | NW_004515936.1 | scaffold475 | 163824                  | CC                              | TT                 | TT               | INTERGENIC      |               |                    |                    |
| SNP_74123_A_163825 | NW_004515936.1 | scaffold475 | 163825                  | AA                              | GG                 | GG               | INTERGENIC      |               |                    |                    |
| SNP_74124_A_163850 | NW_004515936.1 | scaffold475 | 163850                  | TT                              | GG                 | GG               | INTERGENIC      |               |                    |                    |
| SNP_74125_A_163886 | NW_004515936.1 | scaffold475 | 163886                  | AA                              | CC                 | CC               | INTERGENIC      |               |                    |                    |
| SNP_74126_A_164152 | NW_004515936.1 | scaffold475 | 164152                  | TT                              | CC                 | CC               | INTERGENIC      |               |                    |                    |
| SNP_74127_A_164259 | NW_004515936.1 | scaffold475 | 164259                  | TT                              | CC                 | CC               | INTERGENIC      |               |                    |                    |
| SNP_74128_A_164291 | NW_004515936.1 | scaffold475 | 164291                  | AA                              | GG                 | GG               | INTERGENIC      |               |                    |                    |
| SNP_74129_A_164409 | NW_004515936.1 | scaffold475 | 164409                  | GG                              | TT                 | TT               | INTERGENIC      |               |                    |                    |
| SNP_74130_A_167552 | NW_004515936.1 | scaffold475 | 167552                  | TT                              | CC                 | CC               | DRR             | 101509164     | Unknown function   |                    |
| SNP_74131_A_167779 | NW_004515936.1 | scaffold475 | 167779                  | TT                              | GG                 | GG               | DRR             | 101509164     | Unknown function   |                    |
| SNP_74132_A_168035 | NW_004515936.1 | scaffold475 | 168035                  | TT                              | AA                 | AA               | DRR             | 101509164     | Unknown function   |                    |
| SNP_74134_A_174726 | NW_004515936.1 | scaffold475 | 174726                  | AA                              | TT                 | TT               | INTERGENIC      |               |                    |                    |
| SNP_74135_A_174744 | NW_004515936.1 | scaffold475 | 174744                  | AA                              | TT                 | TT               | INTERGENIC      |               |                    |                    |
| SNP_74136_A_174775 | NW_004515936.1 | scaffold475 | 174775                  | AA                              | TT                 | TT               | INTERGENIC      |               |                    |                    |
| SNP_74137_A_175112 | NW_004515936.1 | scaffold475 | 175112                  | CC                              | GG                 | GG               | INTERGENIC      |               |                    |                    |
| SNP_74138_A_175341 | NW_004515936.1 | scaffold475 | 175341                  | AA                              | CC                 | CC               | INTERGENIC      |               |                    |                    |

| SNPs IDs           | Chromosome IDs | Chromosomes | Physical positions (bp) | CDC Frontier (Reference genome) | (Pusa 1103 & HPNB) | (ILWC 46 & LPNB) | Sequence genome | Components of | Gene accession IDs | Putative functions |
|--------------------|----------------|-------------|-------------------------|---------------------------------|--------------------|------------------|-----------------|---------------|--------------------|--------------------|
| SNP_74139_A_189681 | NW_004515936.1 | scaffold475 | 189681                  | GG                              | TT                 | TT               | INTERGENIC      |               |                    |                    |
| SNP_74140_A_189685 | NW_004515936.1 | scaffold475 | 189685                  | AA                              | CC                 | CC               | INTERGENIC      |               |                    |                    |
| SNP_74141_A_189701 | NW_004515936.1 | scaffold475 | 189701                  | AA                              | GG                 | GG               | INTERGENIC      |               |                    |                    |
| SNP_74142_A_189731 | NW_004515936.1 | scaffold475 | 189731                  | TT                              | AA                 | AA               | INTERGENIC      |               |                    |                    |
| SNP_74143_A_190477 | NW_004515936.1 | scaffold475 | 190477                  | AA                              | GG                 | GG               | INTERGENIC      |               |                    |                    |
| SNP_74144_A_190491 | NW_004515936.1 | scaffold475 | 190491                  | AA                              | GG                 | GG               | INTERGENIC      |               |                    |                    |
| SNP_74145_A_172    | NW_004515937.1 | scaffold476 | 172                     | AA                              | TT                 | TT               | INTERGENIC      |               |                    |                    |
| SNP_74146_A_224    | NW_004515937.1 | scaffold476 | 224                     | TT                              | CC                 | CC               | INTERGENIC      |               |                    |                    |
| SNP_74147_A_295    | NW_004515937.1 | scaffold476 | 295                     | CC                              | TT                 | TT               | INTERGENIC      |               |                    |                    |
| SNP_74148_A_308    | NW_004515937.1 | scaffold476 | 308                     | TT                              | CC                 | CC               | INTERGENIC      |               |                    |                    |
| SNP_74149_A_401    | NW_004515937.1 | scaffold476 | 401                     | GG                              | CC                 | CC               | INTERGENIC      |               |                    |                    |
| SNP_74150_A_420    | NW_004515937.1 | scaffold476 | 420                     | CC                              | TT                 | TT               | INTERGENIC      |               |                    |                    |
| SNP_74151_A_604    | NW_004515937.1 | scaffold476 | 604                     | AA                              | TT                 | TT               | INTERGENIC      |               |                    |                    |
| SNP_74152_A_645    | NW_004515937.1 | scaffold476 | 645                     | GG                              | AA                 | AA               | INTERGENIC      |               |                    |                    |
| SNP_74153_A_724    | NW_004515937.1 | scaffold476 | 724                     | AA                              | CC                 | CC               | INTERGENIC      |               |                    |                    |
| SNP_74154_A_763    | NW_004515937.1 | scaffold476 | 763                     | AA                              | GG                 | GG               | INTERGENIC      |               |                    |                    |
| SNP_74155_A_814    | NW_004515937.1 | scaffold476 | 814                     | TT                              | CC                 | CC               | INTERGENIC      |               |                    |                    |
| SNP_74156_A_1007   | NW_004515937.1 | scaffold476 | 1007                    | GG                              | TT                 | TT               | INTERGENIC      |               |                    |                    |
| SNP_74157_A_1131   | NW_004515937.1 | scaffold476 | 1131                    | GG                              | TT                 | TT               | INTERGENIC      |               |                    |                    |
| SNP_74158_A_1183   | NW_004515937.1 | scaffold476 | 1183                    | AA                              | CC                 | CC               | INTERGENIC      |               |                    |                    |
| SNP_74159_A_1223   | NW_004515937.1 | scaffold476 | 1223                    | TT                              | GG                 | GG               | INTERGENIC      |               |                    |                    |
| SNP_74160_A_1350   | NW_004515937.1 | scaffold476 | 1350                    | TT                              | GG                 | GG               | INTERGENIC      |               |                    |                    |

| SNPs IDs          | Chromosome IDs | Chromosomes | Physical positions (bp) | CDC Frontier (Reference genome) | (Pusa 1103 & HPNB) | (ILWC 46 & LPNB) | Sequence genome | Components of | Gene accession IDs | Putative functions |
|-------------------|----------------|-------------|-------------------------|---------------------------------|--------------------|------------------|-----------------|---------------|--------------------|--------------------|
| SNP_74161_A_1370  | NW_004515937.1 | scaffold476 | 1370                    | TT                              | AA                 | AA               | INTERGENIC      |               |                    |                    |
| SNP_74162_A_1567  | NW_004515937.1 | scaffold476 | 1567                    | TT                              | CC                 | CC               | INTERGENIC      |               |                    |                    |
| SNP_74163_A_3843  | NW_004515937.1 | scaffold476 | 3843                    | AA                              | GG                 | GG               | INTERGENIC      |               |                    |                    |
| SNP_74164_A_4215  | NW_004515937.1 | scaffold476 | 4215                    | AA                              | GG                 | GG               | INTERGENIC      |               |                    |                    |
| SNP_74165_A_4219  | NW_004515937.1 | scaffold476 | 4219                    | TT                              | CC                 | CC               | INTERGENIC      |               |                    |                    |
| SNP_74166_A_6201  | NW_004515937.1 | scaffold476 | 6201                    | CC                              | GG                 | GG               | INTERGENIC      |               |                    |                    |
| SNP_74167_A_9869  | NW_004515937.1 | scaffold476 | 9869                    | GG                              | AA                 | AA               | INTERGENIC      |               |                    |                    |
| SNP_74169_A_9888  | NW_004515937.1 | scaffold476 | 9888                    | CC                              | TT                 | TT               | INTERGENIC      |               |                    |                    |
| SNP_74170_A_10250 | NW_004515937.1 | scaffold476 | 10250                   | TT                              | GG                 | GG               | INTERGENIC      |               |                    |                    |
| SNP_74171_A_10640 | NW_004515937.1 | scaffold476 | 10640                   | TT                              | CC                 | CC               | INTERGENIC      |               |                    |                    |
| SNP_74172_A_10775 | NW_004515937.1 | scaffold476 | 10775                   | CC                              | GG                 | GG               | INTERGENIC      |               |                    |                    |
| SNP_74173_A_10856 | NW_004515937.1 | scaffold476 | 10856                   | AA                              | GG                 | GG               | INTERGENIC      |               |                    |                    |
| SNP_74174_A_10929 | NW_004515937.1 | scaffold476 | 10929                   | TT                              | CC                 | CC               | INTERGENIC      |               |                    |                    |
| SNP_74175_A_10930 | NW_004515937.1 | scaffold476 | 10930                   | TT                              | CC                 | CC               | INTERGENIC      |               |                    |                    |
| SNP_74176_A_10961 | NW_004515937.1 | scaffold476 | 10961                   | AA                              | GG                 | GG               | INTERGENIC      |               |                    |                    |
| SNP_74177_A_11018 | NW_004515937.1 | scaffold476 | 11018                   | AA                              | GG                 | GG               | INTERGENIC      |               |                    |                    |
| SNP_74178_A_11423 | NW_004515937.1 | scaffold476 | 11423                   | GG                              | AA                 | AA               | INTERGENIC      |               |                    |                    |
| SNP_74179_A_11426 | NW_004515937.1 | scaffold476 | 11426                   | GG                              | AA                 | AA               | INTERGENIC      |               |                    |                    |
| SNP_74180_A_11440 | NW_004515937.1 | scaffold476 | 11440                   | AA                              | GG                 | GG               | INTERGENIC      |               |                    |                    |
| SNP_74181_A_11472 | NW_004515937.1 | scaffold476 | 11472                   | CC                              | GG                 | GG               | INTERGENIC      |               |                    |                    |
| SNP_74182_A_4449  | NW_004515938.1 | scaffold477 | 4449                    | TT                              | CC                 | CC               | INTERGENIC      |               |                    |                    |
| SNP_74183_A_4705  | NW_004515938.1 | scaffold477 | 4705                    | CC                              | GG                 | GG               | INTERGENIC      |               |                    |                    |

| SNPs IDs          | Chromosome IDs | Chromosomes | Physical positions (bp) | CDC Frontier (Reference genome) | (Pusa 1103 & HPNB) | (ILWC 46 & LPNB) | Sequence genome | Components of | Gene accession IDs | Putative functions |
|-------------------|----------------|-------------|-------------------------|---------------------------------|--------------------|------------------|-----------------|---------------|--------------------|--------------------|
| SNP_74184_A_5406  | NW_004515938.1 | scaffold477 | 5406                    | CC                              | GG                 | GG               | INTERGENIC      |               |                    |                    |
| SNP_74185_A_6452  | NW_004515938.1 | scaffold477 | 6452                    | CC                              | TT                 | TT               | INTERGENIC      |               |                    |                    |
| SNP_74186_A_6510  | NW_004515938.1 | scaffold477 | 6510                    | CC                              | TT                 | TT               | INTERGENIC      |               |                    |                    |
| SNP_74187_A_6705  | NW_004515938.1 | scaffold477 | 6705                    | AA                              | GG                 | GG               | INTERGENIC      |               |                    |                    |
| SNP_74188_A_7149  | NW_004515938.1 | scaffold477 | 7149                    | TT                              | CC                 | CC               | INTERGENIC      |               |                    |                    |
| SNP_74189_A_7264  | NW_004515938.1 | scaffold477 | 7264                    | GG                              | AA                 | AA               | INTERGENIC      |               |                    |                    |
| SNP_74190_A_7622  | NW_004515938.1 | scaffold477 | 7622                    | TT                              | CC                 | CC               | INTERGENIC      |               |                    |                    |
| SNP_74191_A_8303  | NW_004515938.1 | scaffold477 | 8303                    | GG                              | AA                 | AA               | INTERGENIC      |               |                    |                    |
| SNP_74192_A_8790  | NW_004515938.1 | scaffold477 | 8790                    | TT                              | CC                 | CC               | INTERGENIC      |               |                    |                    |
| SNP_74193_A_9157  | NW_004515938.1 | scaffold477 | 9157                    | AA                              | GG                 | GG               | INTERGENIC      |               |                    |                    |
| SNP_74194_A_9381  | NW_004515938.1 | scaffold477 | 9381                    | CC                              | GG                 | GG               | INTERGENIC      |               |                    |                    |
| SNP_74195_A_9416  | NW_004515938.1 | scaffold477 | 9416                    | CC                              | GG                 | GG               | INTERGENIC      |               |                    |                    |
| SNP_74196_A_9466  | NW_004515938.1 | scaffold477 | 9466                    | CC                              | AA                 | AA               | INTERGENIC      |               |                    |                    |
| SNP_74197_A_9620  | NW_004515938.1 | scaffold477 | 9620                    | GG                              | AA                 | AA               | INTERGENIC      |               |                    |                    |
| SNP_74198_A_9779  | NW_004515938.1 | scaffold477 | 9779                    | CC                              | GG                 | GG               | INTERGENIC      |               |                    |                    |
| SNP_74199_A_9929  | NW_004515938.1 | scaffold477 | 9929                    | GG                              | AA                 | AA               | INTERGENIC      |               |                    |                    |
| SNP_74200_A_9983  | NW_004515938.1 | scaffold477 | 9983                    | GG                              | AA                 | AA               | INTERGENIC      |               |                    |                    |
| SNP_74201_A_10141 | NW_004515938.1 | scaffold477 | 10141                   | TT                              | CC                 | CC               | INTERGENIC      |               |                    |                    |
| SNP_74202_A_10229 | NW_004515938.1 | scaffold477 | 10229                   | AA                              | TT                 | TT               | INTERGENIC      |               |                    |                    |
| SNP_74204_A_10326 | NW_004515938.1 | scaffold477 | 10326                   | GG                              | TT                 | TT               | INTERGENIC      |               |                    |                    |
| SNP_74205_A_10333 | NW_004515938.1 | scaffold477 | 10333                   | TT                              | GG                 | GG               | INTERGENIC      |               |                    |                    |
| SNP_74206_A_10402 | NW_004515938.1 | scaffold477 | 10402                   | AA                              | GG                 | GG               | INTERGENIC      |               |                    |                    |

| SNPs IDs          | Chromosome IDs | Chromosomes | Physical positions (bp) | CDC Frontier (Reference genome) | (Pusa 1103 & HPNB) | (ILWC 46 & LPNB) | Sequence genome | Components of | Gene accession IDs | Putative functions |
|-------------------|----------------|-------------|-------------------------|---------------------------------|--------------------|------------------|-----------------|---------------|--------------------|--------------------|
| SNP_74207_A_10601 | NW_004515938.1 | scaffold477 | 10601                   | TT                              | AA                 | AA               | INTERGENIC      |               |                    |                    |
| SNP_74208_A_10738 | NW_004515938.1 | scaffold477 | 10738                   | GG                              | AA                 | AA               | INTERGENIC      |               |                    |                    |
| SNP_74209_A_10766 | NW_004515938.1 | scaffold477 | 10766                   | CC                              | GG                 | GG               | INTERGENIC      |               |                    |                    |
| SNP_74210_A_10822 | NW_004515938.1 | scaffold477 | 10822                   | TT                              | AA                 | AA               | INTERGENIC      |               |                    |                    |
| SNP_74211_A_10839 | NW_004515938.1 | scaffold477 | 10839                   | TT                              | AA                 | AA               | INTERGENIC      |               |                    |                    |
| SNP_74212_A_11193 | NW_004515938.1 | scaffold477 | 11193                   | GG                              | AA                 | AA               | INTERGENIC      |               |                    |                    |
| SNP_74213_A_11248 | NW_004515938.1 | scaffold477 | 11248                   | AA                              | TT                 | TT               | INTERGENIC      |               |                    |                    |
| SNP_74215_A_11634 | NW_004515938.1 | scaffold477 | 11634                   | AA                              | GG                 | GG               | INTERGENIC      |               |                    |                    |
| SNP_74216_A_11713 | NW_004515938.1 | scaffold477 | 11713                   | GG                              | AA                 | AA               | INTERGENIC      |               |                    |                    |
| SNP_74217_A_11738 | NW_004515938.1 | scaffold477 | 11738                   | AA                              | TT                 | TT               | INTERGENIC      |               |                    |                    |
| SNP_74218_A_11795 | NW_004515938.1 | scaffold477 | 11795                   | AA                              | GG                 | GG               | INTERGENIC      |               |                    |                    |
| SNP_74219_A_11830 | NW_004515938.1 | scaffold477 | 11830                   | AA                              | GG                 | GG               | INTERGENIC      |               |                    |                    |
| SNP_74220_A_11850 | NW_004515938.1 | scaffold477 | 11850                   | CC                              | GG                 | GG               | INTERGENIC      |               |                    |                    |
| SNP_74221_A_11855 | NW_004515938.1 | scaffold477 | 11855                   | GG                              | AA                 | AA               | INTERGENIC      |               |                    |                    |
| SNP_74222_A_11954 | NW_004515938.1 | scaffold477 | 11954                   | TT                              | AA                 | AA               | INTERGENIC      |               |                    |                    |
| SNP_74223_A_11983 | NW_004515938.1 | scaffold477 | 11983                   | GG                              | AA                 | AA               | INTERGENIC      |               |                    |                    |
| SNP_74224_A_11985 | NW_004515938.1 | scaffold477 | 11985                   | TT                              | CC                 | CC               | INTERGENIC      |               |                    |                    |
| SNP_74225_A_12074 | NW_004515938.1 | scaffold477 | 12074                   | CC                              | GG                 | GG               | INTERGENIC      |               |                    |                    |
| SNP_74226_A_12208 | NW_004515938.1 | scaffold477 | 12208                   | AA                              | CC                 | CC               | INTERGENIC      |               |                    |                    |
| SNP_74227_A_12225 | NW_004515938.1 | scaffold477 | 12225                   | TT                              | CC                 | CC               | INTERGENIC      |               |                    |                    |
| SNP_74228_A_12276 | NW_004515938.1 | scaffold477 | 12276                   | GG                              | CC                 | CC               | INTERGENIC      |               |                    |                    |
| SNP_74229_A_12390 | NW_004515938.1 | scaffold477 | 12390                   | GG                              | AA                 | AA               | INTERGENIC      |               |                    |                    |

| SNPs IDs          | Chromosome IDs | Chromosomes | Physical positions (bp) | CDC Frontier (Reference genome) | (Pusa 1103 & HPNB) | (ILWC 46 & LPNB) | Sequence genome | Components of | Gene accession IDs | Putative functions |
|-------------------|----------------|-------------|-------------------------|---------------------------------|--------------------|------------------|-----------------|---------------|--------------------|--------------------|
| SNP_74230_A_12543 | NW_004515938.1 | scaffold477 | 12543                   | GG                              | CC                 | CC               | INTERGENIC      |               |                    |                    |
| SNP_74231_A_12648 | NW_004515938.1 | scaffold477 | 12648                   | CC                              | AA                 | AA               | INTERGENIC      |               |                    |                    |
| SNP_74232_A_12664 | NW_004515938.1 | scaffold477 | 12664                   | CC                              | TT                 | TT               | INTERGENIC      |               |                    |                    |
| SNP_74233_A_12822 | NW_004515938.1 | scaffold477 | 12822                   | CC                              | AA                 | AA               | INTERGENIC      |               |                    |                    |
| SNP_74234_A_13004 | NW_004515938.1 | scaffold477 | 13004                   | GG                              | TT                 | TT               | INTERGENIC      |               |                    |                    |
| SNP_74235_A_13502 | NW_004515938.1 | scaffold477 | 13502                   | CC                              | GG                 | GG               | INTERGENIC      |               |                    |                    |
| SNP_74236_A_13532 | NW_004515938.1 | scaffold477 | 13532                   | GG                              | TT                 | TT               | INTERGENIC      |               |                    |                    |
| SNP_74237_A_14584 | NW_004515938.1 | scaffold477 | 14584                   | AA                              | GG                 | GG               | INTERGENIC      |               |                    |                    |
| SNP_74238_A_14779 | NW_004515938.1 | scaffold477 | 14779                   | AA                              | TT                 | TT               | INTERGENIC      |               |                    |                    |
| SNP_74239_A_14780 | NW_004515938.1 | scaffold477 | 14780                   | AA                              | GG                 | GG               | INTERGENIC      |               |                    |                    |
| SNP_74240_A_15351 | NW_004515938.1 | scaffold477 | 15351                   | CC                              | TT                 | TT               | INTERGENIC      |               |                    |                    |
| SNP_74241_A_15469 | NW_004515938.1 | scaffold477 | 15469                   | CC                              | AA                 | AA               | INTERGENIC      |               |                    |                    |
| SNP_74242_A_15667 | NW_004515938.1 | scaffold477 | 15667                   | CC                              | AA                 | AA               | INTERGENIC      |               |                    |                    |
| SNP_74243_A_15676 | NW_004515938.1 | scaffold477 | 15676                   | CC                              | TT                 | TT               | INTERGENIC      |               |                    |                    |
| SNP_74244_A_15892 | NW_004515938.1 | scaffold477 | 15892                   | GG                              | AA                 | AA               | INTERGENIC      |               |                    |                    |
| SNP_74245_A_16326 | NW_004515938.1 | scaffold477 | 16326                   | AA                              | GG                 | GG               | INTERGENIC      |               |                    |                    |
| SNP_74246_A_16335 | NW_004515938.1 | scaffold477 | 16335                   | TT                              | CC                 | CC               | INTERGENIC      |               |                    |                    |
| SNP_74247_A_16808 | NW_004515938.1 | scaffold477 | 16808                   | CC                              | TT                 | TT               | INTERGENIC      |               |                    |                    |
| SNP_74248_A_17127 | NW_004515938.1 | scaffold477 | 17127                   | GG                              | TT                 | TT               | INTERGENIC      |               |                    |                    |
| SNP_74249_A_17366 | NW_004515938.1 | scaffold477 | 17366                   | CC                              | AA                 | AA               | INTERGENIC      |               |                    |                    |
| SNP_74250_A_17370 | NW_004515938.1 | scaffold477 | 17370                   | AA                              | TT                 | TT               | INTERGENIC      |               |                    |                    |
| SNP_74251_A_17926 | NW_004515938.1 | scaffold477 | 17926                   | GG                              | AA                 | AA               | INTERGENIC      |               |                    |                    |

| SNPs IDs          | Chromosome IDs | Chromosomes | Physical positions (bp) | CDC Frontier (Reference genome) | (Pusa 1103 & HPNB) | (ILWC 46 & LPNB) | Sequence genome | Components of | Gene accession IDs | Putative functions |
|-------------------|----------------|-------------|-------------------------|---------------------------------|--------------------|------------------|-----------------|---------------|--------------------|--------------------|
| SNP_74252_A_19490 | NW_004515938.1 | scaffold477 | 19490                   | GG                              | AA                 | AA               | INTERGENIC      |               |                    |                    |
| SNP_74253_A_20125 | NW_004515938.1 | scaffold477 | 20125                   | TT                              | CC                 | CC               | INTERGENIC      |               |                    |                    |
| SNP_74254_A_20371 | NW_004515938.1 | scaffold477 | 20371                   | TT                              | GG                 | GG               | INTERGENIC      |               |                    |                    |
| SNP_74255_A_20448 | NW_004515938.1 | scaffold477 | 20448                   | TT                              | CC                 | CC               | INTERGENIC      |               |                    |                    |
| SNP_74256_A_20648 | NW_004515938.1 | scaffold477 | 20648                   | AA                              | GG                 | GG               | INTERGENIC      |               |                    |                    |
| SNP_74258_A_20997 | NW_004515938.1 | scaffold477 | 20997                   | TT                              | CC                 | CC               | INTERGENIC      |               |                    |                    |
| SNP_74259_A_21409 | NW_004515938.1 | scaffold477 | 21409                   | TT                              | CC                 | CC               | INTERGENIC      |               |                    |                    |
| SNP_74260_A_21438 | NW_004515938.1 | scaffold477 | 21438                   | AA                              | GG                 | GG               | INTERGENIC      |               |                    |                    |
| SNP_74261_A_21533 | NW_004515938.1 | scaffold477 | 21533                   | AA                              | CC                 | CC               | INTERGENIC      |               |                    |                    |
| SNP_74262_A_22472 | NW_004515938.1 | scaffold477 | 22472                   | TT                              | GG                 | GG               | INTERGENIC      |               |                    |                    |
| SNP_74263_A_22617 | NW_004515938.1 | scaffold477 | 22617                   | AA                              | GG                 | GG               | INTERGENIC      |               |                    |                    |
| SNP_74264_A_22639 | NW_004515938.1 | scaffold477 | 22639                   | GG                              | TT                 | TT               | INTERGENIC      |               |                    |                    |
| SNP_74265_A_22677 | NW_004515938.1 | scaffold477 | 22677                   | TT                              | CC                 | CC               | INTERGENIC      |               |                    |                    |
| SNP_74266_A_22692 | NW_004515938.1 | scaffold477 | 22692                   | TT                              | GG                 | GG               | INTERGENIC      |               |                    |                    |
| SNP_74267_A_22907 | NW_004515938.1 | scaffold477 | 22907                   | GG                              | AA                 | AA               | INTERGENIC      |               |                    |                    |
| SNP_74268_A_23335 | NW_004515938.1 | scaffold477 | 23335                   | AA                              | CC                 | CC               | INTERGENIC      |               |                    |                    |
| SNP_74269_A_23614 | NW_004515938.1 | scaffold477 | 23614                   | TT                              | CC                 | CC               | INTERGENIC      |               |                    |                    |
| SNP_74270_A_23729 | NW_004515938.1 | scaffold477 | 23729                   | GG                              | AA                 | AA               | INTERGENIC      |               |                    |                    |
| SNP_74271_A_28225 | NW_004515938.1 | scaffold477 | 28225                   | AA                              | CC                 | CC               | INTERGENIC      |               |                    |                    |
| SNP_74272_A_28254 | NW_004515938.1 | scaffold477 | 28254                   | CC                              | TT                 | TT               | INTERGENIC      |               |                    |                    |
| SNP_74274_A_28447 | NW_004515938.1 | scaffold477 | 28447                   | CC                              | TT                 | TT               | INTERGENIC      |               |                    |                    |
| SNP_74275_A_28779 | NW_004515938.1 | scaffold477 | 28779                   | GG                              | CC                 | CC               | INTERGENIC      |               |                    |                    |



| SNPs IDs          | Chromosome IDs | Chromosomes | Physical positions (bp) | CDC Frontier (Reference genome) | (Pusa 1103 & HPNB) | (ILWC 46 & LPNB) | Sequence genome | Components of | Gene accession IDs | Putative functions |
|-------------------|----------------|-------------|-------------------------|---------------------------------|--------------------|------------------|-----------------|---------------|--------------------|--------------------|
| SNP_74276_A_29182 | NW_004515938.1 | scaffold477 | 29182                   | AA                              | TT                 | TT               | INTERGENIC      |               |                    |                    |
| SNP_74277_A_29183 | NW_004515938.1 | scaffold477 | 29183                   | CC                              | TT                 | TT               | INTERGENIC      |               |                    |                    |
| SNP_74278_A_29399 | NW_004515938.1 | scaffold477 | 29399                   | AA                              | TT                 | TT               | INTERGENIC      |               |                    |                    |
| SNP_74279_A_30368 | NW_004515938.1 | scaffold477 | 30368                   | AA                              | GG                 | GG               | INTERGENIC      |               |                    |                    |
| SNP_74280_A_30824 | NW_004515938.1 | scaffold477 | 30824                   | CC                              | GG                 | GG               | INTERGENIC      |               |                    |                    |
| SNP_74281_A_31469 | NW_004515938.1 | scaffold477 | 31469                   | GG                              | TT                 | TT               | INTERGENIC      |               |                    |                    |
| SNP_74282_A_32151 | NW_004515938.1 | scaffold477 | 32151                   | TT                              | GG                 | GG               | INTERGENIC      |               |                    |                    |
| SNP_74283_A_32359 | NW_004515938.1 | scaffold477 | 32359                   | TT                              | CC                 | CC               | INTERGENIC      |               |                    |                    |
| SNP_74284_A_32466 | NW_004515938.1 | scaffold477 | 32466                   | GG                              | AA                 | AA               | INTERGENIC      |               |                    |                    |
| SNP_74285_A_33553 | NW_004515938.1 | scaffold477 | 33553                   | AA                              | TT                 | TT               | INTERGENIC      |               |                    |                    |
| SNP_74286_A_33649 | NW_004515938.1 | scaffold477 | 33649                   | TT                              | CC                 | CC               | INTERGENIC      |               |                    |                    |
| SNP_74287_A_33965 | NW_004515938.1 | scaffold477 | 33965                   | TT                              | CC                 | CC               | INTERGENIC      |               |                    |                    |
| SNP_74288_A_34349 | NW_004515938.1 | scaffold477 | 34349                   | TT                              | GG                 | GG               | INTERGENIC      |               |                    |                    |
| SNP_74289_A_34476 | NW_004515938.1 | scaffold477 | 34476                   | TT                              | GG                 | GG               | INTERGENIC      |               |                    |                    |
| SNP_74290_A_34558 | NW_004515938.1 | scaffold477 | 34558                   | AA                              | GG                 | GG               | INTERGENIC      |               |                    |                    |
| SNP_74291_A_35104 | NW_004515938.1 | scaffold477 | 35104                   | AA                              | CC                 | CC               | INTERGENIC      |               |                    |                    |
| SNP_74292_A_35106 | NW_004515938.1 | scaffold477 | 35106                   | AA                              | TT                 | TT               | INTERGENIC      |               |                    |                    |
| SNP_74293_A_35822 | NW_004515938.1 | scaffold477 | 35822                   | CC                              | TT                 | TT               | INTERGENIC      |               |                    |                    |
| SNP_74294_A_43429 | NW_004515938.1 | scaffold477 | 43429                   | CC                              | AA                 | AA               | INTERGENIC      |               |                    |                    |
| SNP_74295_A_43907 | NW_004515938.1 | scaffold477 | 43907                   | CC                              | TT                 | TT               | INTERGENIC      |               |                    |                    |
| SNP_74296_A_43934 | NW_004515938.1 | scaffold477 | 43934                   | TT                              | CC                 | CC               | INTERGENIC      |               |                    |                    |
| SNP_74297_A_44296 | NW_004515938.1 | scaffold477 | 44296                   | GG                              | TT                 | TT               | INTERGENIC      |               |                    |                    |

| SNPs IDs          | Chromosome IDs | Chromosomes | Physical positions (bp) | CDC Frontier (Reference genome) | (Pusa 1103 & HPNB) | (ILWC 46 & LPNB) | Sequence genome | Components of | Gene accession IDs | Putative functions |
|-------------------|----------------|-------------|-------------------------|---------------------------------|--------------------|------------------|-----------------|---------------|--------------------|--------------------|
| SNP_74298_A_44658 | NW_004515938.1 | scaffold477 | 44658                   | AA                              | CC                 | CC               | INTERGENIC      |               |                    |                    |
| SNP_74299_A_46488 | NW_004515938.1 | scaffold477 | 46488                   | CC                              | TT                 | TT               | INTERGENIC      |               |                    |                    |
| SNP_74301_A_46907 | NW_004515938.1 | scaffold477 | 46907                   | GG                              | AA                 | AA               | INTERGENIC      |               |                    |                    |
| SNP_74302_A_47168 | NW_004515938.1 | scaffold477 | 47168                   | AA                              | CC                 | CC               | INTERGENIC      |               |                    |                    |
| SNP_74303_A_47207 | NW_004515938.1 | scaffold477 | 47207                   | TT                              | CC                 | CC               | INTERGENIC      |               |                    |                    |
| SNP_74304_A_47414 | NW_004515938.1 | scaffold477 | 47414                   | TT                              | CC                 | CC               | INTERGENIC      |               |                    |                    |
| SNP_74305_A_47423 | NW_004515938.1 | scaffold477 | 47423                   | TT                              | AA                 | AA               | INTERGENIC      |               |                    |                    |
| SNP_74306_A_47442 | NW_004515938.1 | scaffold477 | 47442                   | AA                              | GG                 | GG               | INTERGENIC      |               |                    |                    |
| SNP_74307_A_47488 | NW_004515938.1 | scaffold477 | 47488                   | AA                              | TT                 | TT               | INTERGENIC      |               |                    |                    |
| SNP_74308_A_47566 | NW_004515938.1 | scaffold477 | 47566                   | TT                              | AA                 | AA               | INTERGENIC      |               |                    |                    |
| SNP_74309_A_47588 | NW_004515938.1 | scaffold477 | 47588                   | CC                              | AA                 | AA               | INTERGENIC      |               |                    |                    |
| SNP_74310_A_47626 | NW_004515938.1 | scaffold477 | 47626                   | CC                              | TT                 | TT               | INTERGENIC      |               |                    |                    |
| SNP_74311_A_47841 | NW_004515938.1 | scaffold477 | 47841                   | GG                              | AA                 | AA               | INTERGENIC      |               |                    |                    |
| SNP_74312_A_47865 | NW_004515938.1 | scaffold477 | 47865                   | TT                              | CC                 | CC               | INTERGENIC      |               |                    |                    |
| SNP_74313_A_47891 | NW_004515938.1 | scaffold477 | 47891                   | AA                              | GG                 | GG               | INTERGENIC      |               |                    |                    |
| SNP_74315_A_52358 | NW_004515938.1 | scaffold477 | 52358                   | AA                              | GG                 | GG               | INTERGENIC      |               |                    |                    |
| SNP_74316_A_52979 | NW_004515938.1 | scaffold477 | 52979                   | TT                              | AA                 | AA               | INTERGENIC      |               |                    |                    |
| SNP_74317_A_53082 | NW_004515938.1 | scaffold477 | 53082                   | AA                              | CC                 | CC               | INTERGENIC      |               |                    |                    |
| SNP_74318_A_53456 | NW_004515938.1 | scaffold477 | 53456                   | AA                              | GG                 | GG               | INTERGENIC      |               |                    |                    |
| SNP_74319_A_53517 | NW_004515938.1 | scaffold477 | 53517                   | CC                              | TT                 | TT               | INTERGENIC      |               |                    |                    |
| SNP_74320_A_53526 | NW_004515938.1 | scaffold477 | 53526                   | GG                              | AA                 | AA               | INTERGENIC      |               |                    |                    |
| SNP_74321_A_55110 | NW_004515938.1 | scaffold477 | 55110                   | AA                              | GG                 | GG               | INTERGENIC      |               |                    |                    |

| SNPs IDs          | Chromosome IDs | Chromosomes | Physical positions (bp) | CDC Frontier (Reference genome) | (Pusa 1103 & HPNB) | (ILWC 46 & LPNB) | Sequence Components of genome | Gene accession IDs | Putative functions           |
|-------------------|----------------|-------------|-------------------------|---------------------------------|--------------------|------------------|-------------------------------|--------------------|------------------------------|
| SNP_74322_A_55129 | NW_004515938.1 | scaffold477 | 55129                   | GG                              | AA                 | AA               | INTERGENIC                    |                    |                              |
| SNP_74323_A_55248 | NW_004515938.1 | scaffold477 | 55248                   | AA                              | GG                 | GG               | INTERGENIC                    |                    |                              |
| SNP_74324_A_55386 | NW_004515938.1 | scaffold477 | 55386                   | TT                              | CC                 | CC               | INTERGENIC                    |                    |                              |
| SNP_74325_A_55449 | NW_004515938.1 | scaffold477 | 55449                   | TT                              | CC                 | CC               | INTERGENIC                    |                    |                              |
| SNP_74326_A_55728 | NW_004515938.1 | scaffold477 | 55728                   | AA                              | GG                 | GG               | INTERGENIC                    |                    |                              |
| SNP_74327_A_55871 | NW_004515938.1 | scaffold477 | 55871                   | TT                              | CC                 | CC               | INTERGENIC                    |                    |                              |
| SNP_74328_A_55911 | NW_004515938.1 | scaffold477 | 55911                   | AA                              | GG                 | GG               | INTERGENIC                    |                    |                              |
| SNP_74329_A_55994 | NW_004515938.1 | scaffold477 | 55994                   | GG                              | AA                 | AA               | INTERGENIC                    |                    |                              |
| SNP_74330_A_56733 | NW_004515938.1 | scaffold477 | 56733                   | TT                              | CC                 | CC               | INTERGENIC                    |                    |                              |
| SNP_74331_A_57038 | NW_004515938.1 | scaffold477 | 57038                   | TT                              | CC                 | CC               | INTERGENIC                    |                    |                              |
| SNP_74332_A_59192 | NW_004515938.1 | scaffold477 | 59192                   | CC                              | AA                 | AA               | INTERGENIC                    |                    |                              |
| SNP_74333_A_61880 | NW_004515938.1 | scaffold477 | 61880                   | CC                              | TT                 | TT               | URR                           | 101510130          | uncharacterized LOC101510130 |
| SNP_74334_A_62439 | NW_004515938.1 | scaffold477 | 62439                   | CC                              | AA                 | AA               | URR                           | 101510130          | uncharacterized LOC101510130 |
| SNP_74335_A_62474 | NW_004515938.1 | scaffold477 | 62474                   | AA                              | TT                 | TT               | URR                           | 101510130          | uncharacterized LOC101510130 |
| SNP_74336_A_62526 | NW_004515938.1 | scaffold477 | 62526                   | GG                              | TT                 | TT               | URR                           | 101510130          | uncharacterized LOC101510130 |
| SNP_74337_A_65338 | NW_004515938.1 | scaffold477 | 65338                   | GG                              | AA                 | AA               | INTERGENIC                    |                    |                              |
| SNP_74338_A_65356 | NW_004515938.1 | scaffold477 | 65356                   | TT                              | AA                 | AA               | INTERGENIC                    |                    |                              |
| SNP_74339_A_65436 | NW_004515938.1 | scaffold477 | 65436                   | TT                              | GG                 | GG               | INTERGENIC                    |                    |                              |
| SNP_74340_A_65455 | NW_004515938.1 | scaffold477 | 65455                   | AA                              | GG                 | GG               | INTERGENIC                    |                    |                              |
| SNP_74341_A_2591  | NW_004515940.1 | scaffold479 | 2591                    | AA                              | TT                 | TT               | INTERGENIC                    |                    |                              |
| SNP_74342_A_6980  | NW_004515940.1 | scaffold479 | 6980                    | AA                              | GG                 | GG               | INTERGENIC                    |                    |                              |
| SNP_74343_A_7123  | NW_004515940.1 | scaffold479 | 7123                    | TT                              | AA                 | AA               | INTERGENIC                    |                    |                              |

| SNPs IDs          | Chromosome IDs | Chromosomes | Physical positions (bp) | CDC Frontier (Reference genome) | (Pusa 1103 & HPNB) | (ILWC 46 & LPNB) | Sequence genome | Components of | Gene accession IDs | Putative functions |
|-------------------|----------------|-------------|-------------------------|---------------------------------|--------------------|------------------|-----------------|---------------|--------------------|--------------------|
| SNP_74344_A_7487  | NW_004515940.1 | scaffold479 | 7487                    | GG                              | CC                 | CC               | INTERGENIC      |               |                    |                    |
| SNP_74346_A_7786  | NW_004515940.1 | scaffold479 | 7786                    | TT                              | CC                 | CC               | INTERGENIC      |               |                    |                    |
| SNP_74347_A_16477 | NW_004515940.1 | scaffold479 | 16477                   | TT                              | CC                 | CC               | INTERGENIC      |               |                    |                    |
| SNP_74348_A_16585 | NW_004515940.1 | scaffold479 | 16585                   | AA                              | GG                 | GG               | INTERGENIC      |               |                    |                    |
| SNP_74349_A_16599 | NW_004515940.1 | scaffold479 | 16599                   | CC                              | GG                 | GG               | INTERGENIC      |               |                    |                    |
| SNP_74350_A_16690 | NW_004515940.1 | scaffold479 | 16690                   | AA                              | GG                 | GG               | INTERGENIC      |               |                    |                    |
| SNP_74351_A_16741 | NW_004515940.1 | scaffold479 | 16741                   | AA                              | GG                 | GG               | INTERGENIC      |               |                    |                    |
| SNP_74352_A_16821 | NW_004515940.1 | scaffold479 | 16821                   | AA                              | GG                 | GG               | INTERGENIC      |               |                    |                    |
| SNP_74353_A_16933 | NW_004515940.1 | scaffold479 | 16933                   | AA                              | GG                 | GG               | INTERGENIC      |               |                    |                    |
| SNP_74354_A_17004 | NW_004515940.1 | scaffold479 | 17004                   | TT                              | AA                 | AA               | INTERGENIC      |               |                    |                    |
| SNP_74355_A_17005 | NW_004515940.1 | scaffold479 | 17005                   | AA                              | TT                 | TT               | INTERGENIC      |               |                    |                    |
| SNP_74356_A_17050 | NW_004515940.1 | scaffold479 | 17050                   | AA                              | CC                 | CC               | INTERGENIC      |               |                    |                    |
| SNP_74357_A_17077 | NW_004515940.1 | scaffold479 | 17077                   | GG                              | AA                 | AA               | INTERGENIC      |               |                    |                    |
| SNP_74358_A_17082 | NW_004515940.1 | scaffold479 | 17082                   | TT                              | GG                 | GG               | INTERGENIC      |               |                    |                    |
| SNP_74359_A_17644 | NW_004515940.1 | scaffold479 | 17644                   | AA                              | GG                 | GG               | INTERGENIC      |               |                    |                    |
| SNP_74360_A_17662 | NW_004515940.1 | scaffold479 | 17662                   | AA                              | TT                 | TT               | INTERGENIC      |               |                    |                    |
| SNP_74361_A_17673 | NW_004515940.1 | scaffold479 | 17673                   | AA                              | GG                 | GG               | INTERGENIC      |               |                    |                    |
| SNP_74362_A_17699 | NW_004515940.1 | scaffold479 | 17699                   | AA                              | GG                 | GG               | INTERGENIC      |               |                    |                    |
| SNP_74363_A_17802 | NW_004515940.1 | scaffold479 | 17802                   | GG                              | TT                 | TT               | INTERGENIC      |               |                    |                    |
| SNP_74364_A_17999 | NW_004515940.1 | scaffold479 | 17999                   | CC                              | TT                 | TT               | INTERGENIC      |               |                    |                    |
| SNP_74365_A_18046 | NW_004515940.1 | scaffold479 | 18046                   | TT                              | CC                 | CC               | INTERGENIC      |               |                    |                    |
| SNP_74366_A_18254 | NW_004515940.1 | scaffold479 | 18254                   | GG                              | AA                 | AA               | INTERGENIC      |               |                    |                    |

| SNPs IDs          | Chromosome IDs | Chromosomes | Physical positions (bp) | CDC Frontier (Reference genome) | (Pusa 1103 & HPNB) | (ILWC 46 & LPNB) | Sequence genome | Components of | Gene accession IDs | Putative functions |
|-------------------|----------------|-------------|-------------------------|---------------------------------|--------------------|------------------|-----------------|---------------|--------------------|--------------------|
| SNP_74367_A_18339 | NW_004515940.1 | scaffold479 | 18339                   | GG                              | TT                 | TT               | INTERGENIC      |               |                    |                    |
| SNP_74369_A_24109 | NW_004515940.1 | scaffold479 | 24109                   | CC                              | TT                 | TT               | INTERGENIC      |               |                    |                    |
| SNP_74370_A_26297 | NW_004515940.1 | scaffold479 | 26297                   | CC                              | AA                 | AA               | INTERGENIC      |               |                    |                    |
| SNP_74371_A_26303 | NW_004515940.1 | scaffold479 | 26303                   | GG                              | TT                 | TT               | INTERGENIC      |               |                    |                    |
| SNP_74372_A_31588 | NW_004515940.1 | scaffold479 | 31588                   | TT                              | AA                 | AA               | INTERGENIC      |               |                    |                    |
| SNP_74373_A_31592 | NW_004515940.1 | scaffold479 | 31592                   | GG                              | AA                 | AA               | INTERGENIC      |               |                    |                    |
| SNP_74374_A_31620 | NW_004515940.1 | scaffold479 | 31620                   | AA                              | TT                 | TT               | INTERGENIC      |               |                    |                    |
| SNP_74375_A_31935 | NW_004515940.1 | scaffold479 | 31935                   | AA                              | GG                 | GG               | INTERGENIC      |               |                    |                    |
| SNP_74376_A_35962 | NW_004515940.1 | scaffold479 | 35962                   | AA                              | TT                 | TT               | INTERGENIC      |               |                    |                    |
| SNP_74377_A_47360 | NW_004515940.1 | scaffold479 | 47360                   | TT                              | GG                 | GG               | INTERGENIC      |               |                    |                    |
| SNP_74378_A_47386 | NW_004515940.1 | scaffold479 | 47386                   | TT                              | CC                 | CC               | INTERGENIC      |               |                    |                    |
| SNP_74379_A_47390 | NW_004515940.1 | scaffold479 | 47390                   | AA                              | GG                 | GG               | INTERGENIC      |               |                    |                    |
| SNP_74380_A_47399 | NW_004515940.1 | scaffold479 | 47399                   | AA                              | TT                 | TT               | INTERGENIC      |               |                    |                    |
| SNP_74381_A_48735 | NW_004515940.1 | scaffold479 | 48735                   | TT                              | CC                 | CC               | INTERGENIC      |               |                    |                    |
| SNP_74382_A_48809 | NW_004515940.1 | scaffold479 | 48809                   | TT                              | CC                 | CC               | INTERGENIC      |               |                    |                    |
| SNP_74383_A_48930 | NW_004515940.1 | scaffold479 | 48930                   | GG                              | AA                 | AA               | INTERGENIC      |               |                    |                    |
| SNP_74384_A_48932 | NW_004515940.1 | scaffold479 | 48932                   | TT                              | GG                 | GG               | INTERGENIC      |               |                    |                    |
| SNP_74385_A_55097 | NW_004515940.1 | scaffold479 | 55097                   | CC                              | AA                 | AA               | INTERGENIC      |               |                    |                    |
| SNP_74386_A_55395 | NW_004515940.1 | scaffold479 | 55395                   | AA                              | TT                 | TT               | INTERGENIC      |               |                    |                    |
| SNP_74387_A_55401 | NW_004515940.1 | scaffold479 | 55401                   | TT                              | AA                 | AA               | INTERGENIC      |               |                    |                    |
| SNP_74388_A_55443 | NW_004515940.1 | scaffold479 | 55443                   | TT                              | GG                 | GG               | INTERGENIC      |               |                    |                    |
| SNP_74389_A_55445 | NW_004515940.1 | scaffold479 | 55445                   | TT                              | AA                 | AA               | INTERGENIC      |               |                    |                    |

| SNPs IDs           | Chromosome IDs | Chromosomes | Physical positions (bp) | CDC Frontier (Reference genome) | (Pusa 1103 & HPNB) | (ILWC 46 & LPNB) | Sequence genome | Components of | Gene accession IDs | Putative functions |
|--------------------|----------------|-------------|-------------------------|---------------------------------|--------------------|------------------|-----------------|---------------|--------------------|--------------------|
| SNP_74390_A_55455  | NW_004515940.1 | scaffold479 | 55455                   | TT                              | CC                 | CC               | INTERGENIC      |               |                    |                    |
| SNP_74391_A_55469  | NW_004515940.1 | scaffold479 | 55469                   | TT                              | CC                 | CC               | INTERGENIC      |               |                    |                    |
| SNP_74392_A_55470  | NW_004515940.1 | scaffold479 | 55470                   | GG                              | TT                 | TT               | INTERGENIC      |               |                    |                    |
| SNP_74393_A_55474  | NW_004515940.1 | scaffold479 | 55474                   | TT                              | CC                 | CC               | INTERGENIC      |               |                    |                    |
| SNP_74394_A_55533  | NW_004515940.1 | scaffold479 | 55533                   | TT                              | GG                 | GG               | INTERGENIC      |               |                    |                    |
| SNP_74395_A_55543  | NW_004515940.1 | scaffold479 | 55543                   | TT                              | GG                 | GG               | INTERGENIC      |               |                    |                    |
| SNP_74396_A_55582  | NW_004515940.1 | scaffold479 | 55582                   | AA                              | TT                 | TT               | INTERGENIC      |               |                    |                    |
| SNP_74397_A_55643  | NW_004515940.1 | scaffold479 | 55643                   | TT                              | GG                 | GG               | INTERGENIC      |               |                    |                    |
| SNP_74398_A_56624  | NW_004515940.1 | scaffold479 | 56624                   | TT                              | AA                 | AA               | INTERGENIC      |               |                    |                    |
| SNP_74399_A_79540  | NW_004515940.1 | scaffold479 | 79540                   | AA                              | TT                 | TT               | INTERGENIC      |               |                    |                    |
| SNP_74400_A_87565  | NW_004515940.1 | scaffold479 | 87565                   | AA                              | GG                 | GG               | INTERGENIC      |               |                    |                    |
| SNP_74401_A_87670  | NW_004515940.1 | scaffold479 | 87670                   | TT                              | CC                 | CC               | INTERGENIC      |               |                    |                    |
| SNP_74402_A_88323  | NW_004515940.1 | scaffold479 | 88323                   | TT                              | AA                 | AA               | INTERGENIC      |               |                    |                    |
| SNP_74403_A_108647 | NW_004515940.1 | scaffold479 | 108647                  | GG                              | TT                 | TT               | INTERGENIC      |               |                    |                    |
| SNP_74404_A_108970 | NW_004515940.1 | scaffold479 | 108970                  | TT                              | CC                 | CC               | INTERGENIC      |               |                    |                    |
| SNP_74405_A_109093 | NW_004515940.1 | scaffold479 | 109093                  | CC                              | TT                 | TT               | INTERGENIC      |               |                    |                    |
| SNP_74406_A_109098 | NW_004515940.1 | scaffold479 | 109098                  | TT                              | GG                 | GG               | INTERGENIC      |               |                    |                    |
| SNP_74407_A_109124 | NW_004515940.1 | scaffold479 | 109124                  | AA                              | CC                 | CC               | INTERGENIC      |               |                    |                    |
| SNP_74408_A_109126 | NW_004515940.1 | scaffold479 | 109126                  | AA                              | GG                 | GG               | INTERGENIC      |               |                    |                    |
| SNP_74409_A_110248 | NW_004515940.1 | scaffold479 | 110248                  | GG                              | AA                 | AA               | INTERGENIC      |               |                    |                    |
| SNP_74410_A_110261 | NW_004515940.1 | scaffold479 | 110261                  | CC                              | GG                 | GG               | INTERGENIC      |               |                    |                    |
| SNP_74411_A_110274 | NW_004515940.1 | scaffold479 | 110274                  | TT                              | CC                 | CC               | INTERGENIC      |               |                    |                    |

| SNPs IDs           | Chromosome IDs | Chromosomes | Physical positions (bp) | CDC Frontier (Reference genome) | (Pusa 1103 & HPNB) | (ILWC 46 & LPNB) | Sequence genome | Components of | Gene accession IDs | Putative functions |
|--------------------|----------------|-------------|-------------------------|---------------------------------|--------------------|------------------|-----------------|---------------|--------------------|--------------------|
| SNP_74412_A_117041 | NW_004515940.1 | scaffold479 | 117041                  | TT                              | GG                 | GG               | INTERGENIC      |               |                    |                    |
| SNP_74413_A_117693 | NW_004515940.1 | scaffold479 | 117693                  | TT                              | AA                 | AA               | INTERGENIC      |               |                    |                    |
| SNP_74414_A_121204 | NW_004515940.1 | scaffold479 | 121204                  | AA                              | TT                 | TT               | INTERGENIC      |               |                    |                    |
| SNP_74415_A_121997 | NW_004515940.1 | scaffold479 | 121997                  | TT                              | AA                 | AA               | INTERGENIC      |               |                    |                    |
| SNP_74416_A_122036 | NW_004515940.1 | scaffold479 | 122036                  | TT                              | CC                 | CC               | INTERGENIC      |               |                    |                    |
| SNP_74417_A_122037 | NW_004515940.1 | scaffold479 | 122037                  | TT                              | AA                 | AA               | INTERGENIC      |               |                    |                    |
| SNP_74418_A_125189 | NW_004515940.1 | scaffold479 | 125189                  | GG                              | CC                 | CC               | INTERGENIC      |               |                    |                    |
| SNP_74419_A_125396 | NW_004515940.1 | scaffold479 | 125396                  | CC                              | TT                 | TT               | INTERGENIC      |               |                    |                    |
| SNP_74421_A_125425 | NW_004515940.1 | scaffold479 | 125425                  | TT                              | AA                 | AA               | INTERGENIC      |               |                    |                    |
| SNP_74422_A_125573 | NW_004515940.1 | scaffold479 | 125573                  | TT                              | CC                 | CC               | INTERGENIC      |               |                    |                    |
| SNP_74423_A_125574 | NW_004515940.1 | scaffold479 | 125574                  | GG                              | AA                 | AA               | INTERGENIC      |               |                    |                    |
| SNP_74424_A_125578 | NW_004515940.1 | scaffold479 | 125578                  | TT                              | AA                 | AA               | INTERGENIC      |               |                    |                    |
| SNP_74425_A_125591 | NW_004515940.1 | scaffold479 | 125591                  | TT                              | CC                 | CC               | INTERGENIC      |               |                    |                    |
| SNP_74426_A_125640 | NW_004515940.1 | scaffold479 | 125640                  | AA                              | GG                 | GG               | INTERGENIC      |               |                    |                    |
| SNP_74427_A_125664 | NW_004515940.1 | scaffold479 | 125664                  | TT                              | CC                 | CC               | INTERGENIC      |               |                    |                    |
| SNP_74428_A_125682 | NW_004515940.1 | scaffold479 | 125682                  | GG                              | TT                 | TT               | INTERGENIC      |               |                    |                    |
| SNP_74429_A_125762 | NW_004515940.1 | scaffold479 | 125762                  | TT                              | CC                 | CC               | INTERGENIC      |               |                    |                    |
| SNP_74430_A_125771 | NW_004515940.1 | scaffold479 | 125771                  | GG                              | AA                 | AA               | INTERGENIC      |               |                    |                    |
| SNP_74431_A_125820 | NW_004515940.1 | scaffold479 | 125820                  | AA                              | TT                 | TT               | INTERGENIC      |               |                    |                    |
| SNP_74432_A_125831 | NW_004515940.1 | scaffold479 | 125831                  | TT                              | AA                 | AA               | INTERGENIC      |               |                    |                    |
| SNP_74433_A_125906 | NW_004515940.1 | scaffold479 | 125906                  | AA                              | CC                 | CC               | INTERGENIC      |               |                    |                    |
| SNP_74434_A_126038 | NW_004515940.1 | scaffold479 | 126038                  | AA                              | TT                 | TT               | INTERGENIC      |               |                    |                    |

| SNPs IDs           | Chromosome IDs | Chromosomes | Physical positions (bp) | CDC Frontier (Reference genome) | (Pusa 1103 & HPNB) | (ILWC 46 & LPNB) | Sequence genome | Components of | Gene accession IDs | Putative functions |
|--------------------|----------------|-------------|-------------------------|---------------------------------|--------------------|------------------|-----------------|---------------|--------------------|--------------------|
| SNP_74435_A_126076 | NW_004515940.1 | scaffold479 | 126076                  | TT                              | AA                 | AA               | INTERGENIC      |               |                    |                    |
| SNP_74436_A_130453 | NW_004515940.1 | scaffold479 | 130453                  | AA                              | GG                 | GG               | INTERGENIC      |               |                    |                    |
| SNP_74437_A_130461 | NW_004515940.1 | scaffold479 | 130461                  | AA                              | TT                 | TT               | INTERGENIC      |               |                    |                    |
| SNP_74438_A_130498 | NW_004515940.1 | scaffold479 | 130498                  | CC                              | TT                 | TT               | INTERGENIC      |               |                    |                    |
| SNP_74439_A_130607 | NW_004515940.1 | scaffold479 | 130607                  | TT                              | GG                 | GG               | INTERGENIC      |               |                    |                    |
| SNP_74440_A_130651 | NW_004515940.1 | scaffold479 | 130651                  | TT                              | AA                 | AA               | INTERGENIC      |               |                    |                    |
| SNP_74441_A_130715 | NW_004515940.1 | scaffold479 | 130715                  | TT                              | CC                 | CC               | INTERGENIC      |               |                    |                    |
| SNP_74442_A_130764 | NW_004515940.1 | scaffold479 | 130764                  | AA                              | TT                 | TT               | INTERGENIC      |               |                    |                    |
| SNP_74443_A_130956 | NW_004515940.1 | scaffold479 | 130956                  | AA                              | CC                 | CC               | INTERGENIC      |               |                    |                    |
| SNP_74444_A_130961 | NW_004515940.1 | scaffold479 | 130961                  | GG                              | AA                 | AA               | INTERGENIC      |               |                    |                    |
| SNP_74445_A_130969 | NW_004515940.1 | scaffold479 | 130969                  | AA                              | CC                 | CC               | INTERGENIC      |               |                    |                    |
| SNP_74446_A_130971 | NW_004515940.1 | scaffold479 | 130971                  | AA                              | GG                 | GG               | INTERGENIC      |               |                    |                    |
| SNP_74447_A_131012 | NW_004515940.1 | scaffold479 | 131012                  | AA                              | TT                 | TT               | INTERGENIC      |               |                    |                    |
| SNP_74448_A_139204 | NW_004515940.1 | scaffold479 | 139204                  | GG                              | TT                 | TT               | INTERGENIC      |               |                    |                    |
| SNP_74449_A_139218 | NW_004515940.1 | scaffold479 | 139218                  | AA                              | GG                 | GG               | INTERGENIC      |               |                    |                    |
| SNP_74450_A_139290 | NW_004515940.1 | scaffold479 | 139290                  | TT                              | CC                 | CC               | INTERGENIC      |               |                    |                    |
| SNP_74451_A_139345 | NW_004515940.1 | scaffold479 | 139345                  | TT                              | GG                 | GG               | INTERGENIC      |               |                    |                    |
| SNP_74452_A_143059 | NW_004515940.1 | scaffold479 | 143059                  | GG                              | AA                 | AA               | INTERGENIC      |               |                    |                    |
| SNP_74453_A_154718 | NW_004515940.1 | scaffold479 | 154718                  | GG                              | TT                 | TT               | INTERGENIC      |               |                    |                    |
| SNP_74454_A_154748 | NW_004515940.1 | scaffold479 | 154748                  | CC                              | TT                 | TT               | INTERGENIC      |               |                    |                    |
| SNP_74455_A_154771 | NW_004515940.1 | scaffold479 | 154771                  | AA                              | GG                 | GG               | INTERGENIC      |               |                    |                    |
| SNP_74456_A_154781 | NW_004515940.1 | scaffold479 | 154781                  | AA                              | TT                 | TT               | INTERGENIC      |               |                    |                    |



| SNPs IDs           | Chromosome IDs | Chromosomes | Physical positions (bp) | CDC Frontier (Reference genome) | (Pusa 1103 & HPNB) | (ILWC 46 & LPNB) | Sequence Components of genome | Gene accession IDs | Putative functions                       |
|--------------------|----------------|-------------|-------------------------|---------------------------------|--------------------|------------------|-------------------------------|--------------------|------------------------------------------|
| SNP_74457_A_154848 | NW_004515940.1 | scaffold479 | 154848                  | TT                              | CC                 | CC               | INTERGENIC                    |                    |                                          |
| SNP_74458_A_154951 | NW_004515940.1 | scaffold479 | 154951                  | CC                              | TT                 | TT               | INTERGENIC                    |                    |                                          |
| SNP_74459_A_154976 | NW_004515940.1 | scaffold479 | 154976                  | CC                              | GG                 | GG               | INTERGENIC                    |                    |                                          |
| SNP_74460_A_160016 | NW_004515940.1 | scaffold479 | 160016                  | CC                              | TT                 | TT               | INTERGENIC                    |                    |                                          |
| SNP_74461_A_20118  | NW_004515941.1 | scaffold480 | 20118                   | GG                              | CC                 | CC               | DRR                           | 101511109          | serine/threonine-protein kinase HT1-like |
| SNP_74462_A_20182  | NW_004515941.1 | scaffold480 | 20182                   | TT                              | CC                 | CC               | DRR                           | 101511109          | serine/threonine-protein kinase HT1-like |
| SNP_74463_A_20514  | NW_004515941.1 | scaffold480 | 20514                   | TT                              | CC                 | CC               | INTRON                        | 101511109          | serine/threonine-protein kinase HT1-like |
| SNP_74464_A_33645  | NW_004515941.1 | scaffold480 | 33645                   | TT                              | CC                 | CC               | INTERGENIC                    |                    |                                          |
| SNP_74465_A_33688  | NW_004515941.1 | scaffold480 | 33688                   | CC                              | AA                 | AA               | INTERGENIC                    |                    |                                          |
| SNP_74466_A_33724  | NW_004515941.1 | scaffold480 | 33724                   | CC                              | TT                 | TT               | INTERGENIC                    |                    |                                          |
| SNP_74467_A_33735  | NW_004515941.1 | scaffold480 | 33735                   | AA                              | CC                 | CC               | INTERGENIC                    |                    |                                          |
| SNP_74468_A_33762  | NW_004515941.1 | scaffold480 | 33762                   | AA                              | GG                 | GG               | INTERGENIC                    |                    |                                          |
| SNP_74469_A_34472  | NW_004515941.1 | scaffold480 | 34472                   | AA                              | GG                 | GG               | INTERGENIC                    |                    |                                          |
| SNP_74470_A_42075  | NW_004515941.1 | scaffold480 | 42075                   | AA                              | CC                 | CC               | INTERGENIC                    |                    |                                          |
| SNP_74471_A_43084  | NW_004515941.1 | scaffold480 | 43084                   | GG                              | AA                 | AA               | INTERGENIC                    |                    |                                          |
| SNP_74472_A_43093  | NW_004515941.1 | scaffold480 | 43093                   | AA                              | GG                 | GG               | INTERGENIC                    |                    |                                          |
| SNP_74474_A_43226  | NW_004515941.1 | scaffold480 | 43226                   | TT                              | CC                 | CC               | INTERGENIC                    |                    |                                          |
| SNP_74475_A_43416  | NW_004515941.1 | scaffold480 | 43416                   | GG                              | AA                 | AA               | INTERGENIC                    |                    |                                          |
| SNP_74476_A_43460  | NW_004515941.1 | scaffold480 | 43460                   | CC                              | TT                 | TT               | INTERGENIC                    |                    |                                          |
| SNP_74477_A_43461  | NW_004515941.1 | scaffold480 | 43461                   | TT                              | CC                 | CC               | INTERGENIC                    |                    |                                          |
| SNP_74478_A_43464  | NW_004515941.1 | scaffold480 | 43464                   | TT                              | GG                 | GG               | INTERGENIC                    |                    |                                          |
| SNP_74479_A_43542  | NW_004515941.1 | scaffold480 | 43542                   | AA                              | GG                 | GG               | INTERGENIC                    |                    |                                          |

| SNPs IDs           | Chromosome IDs | Chromosomes | Physical positions (bp) | CDC Frontier genome (Reference genome) | (Pusa 1103 & HPNB) | (ILWC 46 & LPNB) | Sequence genome | Components of | Gene accession IDs           | Putative functions |
|--------------------|----------------|-------------|-------------------------|----------------------------------------|--------------------|------------------|-----------------|---------------|------------------------------|--------------------|
| SNP_74480_A_43569  | NW_004515941.1 | scaffold480 | 43569                   | AA                                     | GG                 | GG               | INTERGENIC      |               |                              |                    |
| SNP_74481_A_43630  | NW_004515941.1 | scaffold480 | 43630                   | TT                                     | CC                 | CC               | INTERGENIC      |               |                              |                    |
| SNP_74482_A_43678  | NW_004515941.1 | scaffold480 | 43678                   | GG                                     | AA                 | AA               | INTERGENIC      |               |                              |                    |
| SNP_74485_A_13628  | NW_004515944.1 | scaffold484 | 13628                   | TT                                     | CC                 | CC               | INTERGENIC      |               |                              |                    |
| SNP_74486_A_15342  | NW_004515944.1 | scaffold484 | 15342                   | TT                                     | AA                 | AA               | INTERGENIC      |               |                              |                    |
| SNP_74487_A_15343  | NW_004515944.1 | scaffold484 | 15343                   | TT                                     | AA                 | AA               | INTERGENIC      |               |                              |                    |
| SNP_74488_A_15344  | NW_004515944.1 | scaffold484 | 15344                   | GG                                     | TT                 | TT               | INTERGENIC      |               |                              |                    |
| SNP_74489_A_15348  | NW_004515944.1 | scaffold484 | 15348                   | CC                                     | AA                 | AA               | INTERGENIC      |               |                              |                    |
| SNP_74490_A_15349  | NW_004515944.1 | scaffold484 | 15349                   | AA                                     | CC                 | CC               | INTERGENIC      |               |                              |                    |
| SNP_74491_A_27515  | NW_004515944.1 | scaffold484 | 27515                   | CC                                     | GG                 | GG               | INTERGENIC      |               |                              |                    |
| SNP_74492_A_27651  | NW_004515944.1 | scaffold484 | 27651                   | CC                                     | AA                 | AA               | INTERGENIC      |               |                              |                    |
| SNP_74493_A_27818  | NW_004515944.1 | scaffold484 | 27818                   | CC                                     | AA                 | AA               | INTERGENIC      |               |                              |                    |
| SNP_74494_A_27862  | NW_004515944.1 | scaffold484 | 27862                   | CC                                     | TT                 | TT               | INTERGENIC      |               |                              |                    |
| SNP_74495_A_27880  | NW_004515944.1 | scaffold484 | 27880                   | AA                                     | GG                 | GG               | INTERGENIC      |               |                              |                    |
| SNP_74496_A_34906  | NW_004515944.1 | scaffold484 | 34906                   | TT                                     | CC                 | CC               | INTERGENIC      |               |                              |                    |
| SNP_74497_A_96149  | NW_004515944.1 | scaffold484 | 96149                   | AA                                     | GG                 | GG               | INTERGENIC      |               |                              |                    |
| SNP_74498_A_96170  | NW_004515944.1 | scaffold484 | 96170                   | AA                                     | GG                 | GG               | INTERGENIC      |               |                              |                    |
| SNP_74499_A_96197  | NW_004515944.1 | scaffold484 | 96197                   | AA                                     | GG                 | GG               | INTERGENIC      |               |                              |                    |
| SNP_74500_A_136295 | NW_004515944.1 | scaffold484 | 136295                  | AA                                     | GG                 | GG               | INTERGENIC      |               |                              |                    |
| SNP_74502_A_209336 | NW_004515944.1 | scaffold484 | 209336                  | AA                                     | GG                 | GG               | DRR             | 101514878     | uncharacterized LOC101514878 |                    |
| SNP_74503_A_229801 | NW_004515944.1 | scaffold484 | 229801                  | AA                                     | CC                 | CC               | URR             | 101515205     | probable pectate lyase 4     |                    |
| SNP_74504_A_247010 | NW_004515944.1 | scaffold484 | 247010                  | GG                                     | TT                 | TT               | INTERGENIC      |               |                              |                    |

| SNPs IDs           | Chromosome IDs | Chromosomes | Physical positions (bp) | CDC Frontier genome (Reference genome) | (Pusa 1103 & HPNB) | (ILWC 46 & LPNB) | Sequence Components of genome | Gene accession IDs | Putative functions           |
|--------------------|----------------|-------------|-------------------------|----------------------------------------|--------------------|------------------|-------------------------------|--------------------|------------------------------|
| SNP_74505_A_253027 | NW_004515944.1 | scaffold484 | 253027                  | GG                                     | AA                 | AA               | INTERGENIC                    |                    |                              |
| SNP_74506_A_262783 | NW_004515944.1 | scaffold484 | 262783                  | TT                                     | CC                 | CC               | INTRON                        | 101492176          | Unknown function             |
| SNP_74507_A_275474 | NW_004515944.1 | scaffold484 | 275474                  | AA                                     | TT                 | TT               | INTRON                        | 101492176          | Unknown function             |
| SNP_74508_A_276158 | NW_004515944.1 | scaffold484 | 276158                  | CC                                     | TT                 | TT               | INTRON                        | 101492176          | Unknown function             |
| SNP_74509_A_276556 | NW_004515944.1 | scaffold484 | 276556                  | CC                                     | TT                 | TT               | SYNONYMOUS_CODING             | 101492176          | Unknown function             |
| SNP_74510_A_295734 | NW_004515944.1 | scaffold484 | 295734                  | CC                                     | TT                 | TT               | INTRON                        | 101492515          | Unknown function             |
| SNP_74511_A_296026 | NW_004515944.1 | scaffold484 | 296026                  | AA                                     | GG                 | GG               | INTRON                        | 101492515          | Unknown function             |
| SNP_74512_A_296070 | NW_004515944.1 | scaffold484 | 296070                  | GG                                     | CC                 | CC               | INTRON                        | 101492515          | Unknown function             |
| SNP_74513_A_298354 | NW_004515944.1 | scaffold484 | 298354                  | GG                                     | AA                 | AA               | INTRON                        | 101492515          | Unknown function             |
| SNP_74514_A_306675 | NW_004515944.1 | scaffold484 | 306675                  | TT                                     | AA                 | AA               | INTRON                        | 101492515          | Unknown function             |
| SNP_74515_A_329089 | NW_004515944.1 | scaffold484 | 329089                  | GG                                     | AA                 | AA               | INTERGENIC                    |                    |                              |
| SNP_74516_A_371913 | NW_004515944.1 | scaffold484 | 371913                  | CC                                     | TT                 | TT               | INTERGENIC                    |                    |                              |
| SNP_74517_A_371915 | NW_004515944.1 | scaffold484 | 371915                  | CC                                     | GG                 | GG               | INTERGENIC                    |                    |                              |
| SNP_74518_A_383483 | NW_004515944.1 | scaffold484 | 383483                  | AA                                     | GG                 | GG               | INTERGENIC                    |                    |                              |
| SNP_74519_A_394520 | NW_004515944.1 | scaffold484 | 394520                  | AA                                     | GG                 | GG               | INTRON                        | 101493498          | uncharacterized LOC101493498 |
| SNP_74520_A_394801 | NW_004515944.1 | scaffold484 | 394801                  | CC                                     | TT                 | TT               | INTRON                        | 101493498          | uncharacterized LOC101493498 |
| SNP_74521_A_394878 | NW_004515944.1 | scaffold484 | 394878                  | TT                                     | GG                 | GG               | INTRON                        | 101493498          | uncharacterized LOC101493498 |
| SNP_74522_A_394971 | NW_004515944.1 | scaffold484 | 394971                  | CC                                     | TT                 | TT               | INTRON                        | 101493498          | uncharacterized LOC101493498 |
| SNP_74525_A_452958 | NW_004515944.1 | scaffold484 | 452958                  | AA                                     | GG                 | GG               | INTERGENIC                    |                    |                              |
| SNP_74526_A_453061 | NW_004515944.1 | scaffold484 | 453061                  | AA                                     | GG                 | GG               | INTERGENIC                    |                    |                              |
| SNP_74528_A_453131 | NW_004515944.1 | scaffold484 | 453131                  | GG                                     | AA                 | AA               | INTERGENIC                    |                    |                              |
| SNP_74529_A_453217 | NW_004515944.1 | scaffold484 | 453217                  | AA                                     | GG                 | GG               | INTERGENIC                    |                    |                              |

| SNPs IDs           | Chromosome IDs | Chromosomes | Physical positions (bp) | CDC Frontier (Reference genome) | (Pusa 1103 & HPNB) | (ILWC 46 & LPNB) | Sequence genome | Components of | Gene accession IDs | Putative functions |
|--------------------|----------------|-------------|-------------------------|---------------------------------|--------------------|------------------|-----------------|---------------|--------------------|--------------------|
| SNP_74530_A_453335 | NW_004515944.1 | scaffold484 | 453335                  | AA                              | TT                 | TT               | INTERGENIC      |               |                    |                    |
| SNP_74531_A_453336 | NW_004515944.1 | scaffold484 | 453336                  | AA                              | GG                 | GG               | INTERGENIC      |               |                    |                    |
| SNP_74532_A_453406 | NW_004515944.1 | scaffold484 | 453406                  | AA                              | GG                 | GG               | INTERGENIC      |               |                    |                    |
| SNP_74533_A_458795 | NW_004515944.1 | scaffold484 | 458795                  | CC                              | TT                 | TT               | INTERGENIC      |               |                    |                    |
| SNP_74534_A_459722 | NW_004515944.1 | scaffold484 | 459722                  | AA                              | GG                 | GG               | INTERGENIC      |               |                    |                    |
| SNP_74535_A_484777 | NW_004515944.1 | scaffold484 | 484777                  | TT                              | GG                 | GG               | INTERGENIC      |               |                    |                    |
| SNP_74536_A_510117 | NW_004515944.1 | scaffold484 | 510117                  | AA                              | GG                 | GG               | INTERGENIC      |               |                    |                    |
| SNP_74537_A_516664 | NW_004515944.1 | scaffold484 | 516664                  | GG                              | AA                 | AA               | INTERGENIC      |               |                    |                    |
| SNP_74538_A_532302 | NW_004515944.1 | scaffold484 | 532302                  | GG                              | AA                 | AA               | INTERGENIC      |               |                    |                    |
| SNP_74540_A_578043 | NW_004515944.1 | scaffold484 | 578043                  | GG                              | TT                 | TT               | INTERGENIC      |               |                    |                    |
| SNP_74541_A_578139 | NW_004515944.1 | scaffold484 | 578139                  | CC                              | TT                 | TT               | INTERGENIC      |               |                    |                    |
| SNP_74542_A_578374 | NW_004515944.1 | scaffold484 | 578374                  | AA                              | GG                 | GG               | INTERGENIC      |               |                    |                    |
| SNP_74543_A_578384 | NW_004515944.1 | scaffold484 | 578384                  | TT                              | CC                 | CC               | INTERGENIC      |               |                    |                    |
| SNP_74544_A_578435 | NW_004515944.1 | scaffold484 | 578435                  | TT                              | GG                 | GG               | INTERGENIC      |               |                    |                    |
| SNP_74545_A_578447 | NW_004515944.1 | scaffold484 | 578447                  | AA                              | TT                 | TT               | INTERGENIC      |               |                    |                    |
| SNP_74546_A_587424 | NW_004515944.1 | scaffold484 | 587424                  | TT                              | GG                 | GG               | INTERGENIC      |               |                    |                    |
| SNP_74547_A_589810 | NW_004515944.1 | scaffold484 | 589810                  | CC                              | TT                 | TT               | INTERGENIC      |               |                    |                    |
| SNP_74548_A_590421 | NW_004515944.1 | scaffold484 | 590421                  | CC                              | TT                 | TT               | INTERGENIC      |               |                    |                    |
| SNP_74549_A_590473 | NW_004515944.1 | scaffold484 | 590473                  | AA                              | CC                 | CC               | INTERGENIC      |               |                    |                    |
| SNP_74550_A_608421 | NW_004515944.1 | scaffold484 | 608421                  | AA                              | TT                 | TT               | INTERGENIC      |               |                    |                    |
| SNP_74551_A_621903 | NW_004515944.1 | scaffold484 | 621903                  | CC                              | AA                 | AA               | INTERGENIC      |               |                    |                    |
| SNP_74552_A_627809 | NW_004515944.1 | scaffold484 | 627809                  | AA                              | GG                 | GG               | INTERGENIC      |               |                    |                    |

| SNPs IDs           | Chromosome IDs | Chromosomes | Physical positions (bp) | CDC Frontier genome (Reference genome) | (Pusa 1103 & HPNB) | (ILWC 46 & LPNB) | Sequence Components of genome | Gene accession IDs | Putative functions           |
|--------------------|----------------|-------------|-------------------------|----------------------------------------|--------------------|------------------|-------------------------------|--------------------|------------------------------|
| SNP_74553_A_632657 | NW_004515944.1 | scaffold484 | 632657                  | GG                                     | AA                 | AA               | INTERGENIC                    |                    |                              |
| SNP_74554_A_632668 | NW_004515944.1 | scaffold484 | 632668                  | GG                                     | AA                 | AA               | INTERGENIC                    |                    |                              |
| SNP_74555_A_641013 | NW_004515944.1 | scaffold484 | 641013                  | GG                                     | AA                 | AA               | DRR                           | 101495424          | uncharacterized LOC101495424 |
| SNP_74557_A_656897 | NW_004515944.1 | scaffold484 | 656897                  | TT                                     | GG                 | GG               | INTRON                        | 101495758          | Unknown function             |
| SNP_74558_A_704588 | NW_004515944.1 | scaffold484 | 704588                  | TT                                     | AA                 | AA               | INTERGENIC                    |                    |                              |
| SNP_74559_A_704603 | NW_004515944.1 | scaffold484 | 704603                  | AA                                     | CC                 | CC               | INTERGENIC                    |                    |                              |
| SNP_74560_A_704632 | NW_004515944.1 | scaffold484 | 704632                  | CC                                     | TT                 | TT               | INTERGENIC                    |                    |                              |
| SNP_74561_A_704641 | NW_004515944.1 | scaffold484 | 704641                  | CC                                     | TT                 | TT               | INTERGENIC                    |                    |                              |
| SNP_74562_A_704665 | NW_004515944.1 | scaffold484 | 704665                  | GG                                     | AA                 | AA               | INTERGENIC                    |                    |                              |
| SNP_74563_A_704673 | NW_004515944.1 | scaffold484 | 704673                  | AA                                     | CC                 | CC               | INTERGENIC                    |                    |                              |
| SNP_74564_A_704674 | NW_004515944.1 | scaffold484 | 704674                  | GG                                     | AA                 | AA               | INTERGENIC                    |                    |                              |
| SNP_74565_A_704869 | NW_004515944.1 | scaffold484 | 704869                  | AA                                     | GG                 | GG               | INTERGENIC                    |                    |                              |
| SNP_74566_A_704888 | NW_004515944.1 | scaffold484 | 704888                  | AA                                     | GG                 | GG               | INTERGENIC                    |                    |                              |
| SNP_74567_A_719723 | NW_004515944.1 | scaffold484 | 719723                  | CC                                     | TT                 | TT               | INTERGENIC                    |                    |                              |
| SNP_74568_A_719732 | NW_004515944.1 | scaffold484 | 719732                  | CC                                     | TT                 | TT               | INTERGENIC                    |                    |                              |
| SNP_74569_A_719748 | NW_004515944.1 | scaffold484 | 719748                  | AA                                     | GG                 | GG               | INTERGENIC                    |                    |                              |
| SNP_74570_A_736714 | NW_004515944.1 | scaffold484 | 736714                  | CC                                     | TT                 | TT               | INTERGENIC                    |                    |                              |
| SNP_74571_A_736756 | NW_004515944.1 | scaffold484 | 736756                  | AA                                     | GG                 | GG               | INTERGENIC                    |                    |                              |
| SNP_74572_A_736766 | NW_004515944.1 | scaffold484 | 736766                  | AA                                     | CC                 | CC               | INTERGENIC                    |                    |                              |
| SNP_74573_A_736770 | NW_004515944.1 | scaffold484 | 736770                  | AA                                     | GG                 | GG               | INTERGENIC                    |                    |                              |
| SNP_74574_A_736784 | NW_004515944.1 | scaffold484 | 736784                  | CC                                     | TT                 | TT               | INTERGENIC                    |                    |                              |
| SNP_74575_A_763677 | NW_004515944.1 | scaffold484 | 763677                  | AA                                     | GG                 | GG               | INTERGENIC                    |                    |                              |

| SNPs IDs           | Chromosome IDs | Chromosomes | Physical positions (bp) | CDC Frontier (Reference genome) | (Pusa 1103 & HPNB) | (ILWC 46 & LPNB) | Sequence Components of genome | Gene accession IDs | Putative functions                                       |
|--------------------|----------------|-------------|-------------------------|---------------------------------|--------------------|------------------|-------------------------------|--------------------|----------------------------------------------------------|
| SNP_74576_A_764082 | NW_004515944.1 | scaffold484 | 764082                  | AA                              | GG                 | GG               | INTERGENIC                    |                    |                                                          |
| SNP_74577_A_764092 | NW_004515944.1 | scaffold484 | 764092                  | AA                              | GG                 | GG               | INTERGENIC                    |                    |                                                          |
| SNP_74578_A_764106 | NW_004515944.1 | scaffold484 | 764106                  | AA                              | CC                 | CC               | INTERGENIC                    |                    |                                                          |
| SNP_74579_A_764112 | NW_004515944.1 | scaffold484 | 764112                  | AA                              | CC                 | CC               | INTERGENIC                    |                    |                                                          |
| SNP_74580_A_764115 | NW_004515944.1 | scaffold484 | 764115                  | TT                              | CC                 | CC               | INTERGENIC                    |                    |                                                          |
| SNP_74581_A_784415 | NW_004515944.1 | scaffold484 | 784415                  | AA                              | GG                 | GG               | INTRON                        | 101496079          | Unknown function                                         |
| SNP_74582_A_788477 | NW_004515944.1 | scaffold484 | 788477                  | GG                              | AA                 | AA               | INTERGENIC                    |                    |                                                          |
| SNP_74584_A_794125 | NW_004515944.1 | scaffold484 | 794125                  | AA                              | CC                 | CC               | INTERGENIC                    |                    |                                                          |
| SNP_74585_A_3628   | NW_004515945.1 | scaffold485 | 3628                    | GG                              | TT                 | TT               | INTERGENIC                    |                    |                                                          |
| SNP_74586_A_4413   | NW_004515945.1 | scaffold485 | 4413                    | GG                              | AA                 | AA               | INTERGENIC                    |                    |                                                          |
| SNP_74587_A_20627  | NW_004515945.1 | scaffold485 | 20627                   | AA                              | GG                 | GG               | DRR                           | 101496739          | anthranilate synthase beta subunit 2, chloroplastic-like |
| SNP_74588_A_92870  | NW_004515945.1 | scaffold485 | 92870                   | GG                              | AA                 | AA               | INTERGENIC                    |                    |                                                          |
| SNP_74589_A_92875  | NW_004515945.1 | scaffold485 | 92875                   | TT                              | AA                 | AA               | INTERGENIC                    |                    |                                                          |
| SNP_74590_A_92925  | NW_004515945.1 | scaffold485 | 92925                   | TT                              | GG                 | GG               | INTERGENIC                    |                    |                                                          |
| SNP_74591_A_121386 | NW_004515945.1 | scaffold485 | 121386                  | TT                              | CC                 | CC               | INTERGENIC                    |                    |                                                          |
| SNP_74592_A_131152 | NW_004515945.1 | scaffold485 | 131152                  | AA                              | GG                 | GG               | INTERGENIC                    |                    |                                                          |
| SNP_74594_A_148345 | NW_004515945.1 | scaffold485 | 148345                  | CC                              | TT                 | TT               | INTERGENIC                    |                    |                                                          |
| SNP_74595_A_165642 | NW_004515945.1 | scaffold485 | 165642                  | GG                              | AA                 | AA               | INTERGENIC                    |                    |                                                          |
| SNP_74596_A_165722 | NW_004515945.1 | scaffold485 | 165722                  | AA                              | GG                 | GG               | INTERGENIC                    |                    |                                                          |
| SNP_74597_A_165749 | NW_004515945.1 | scaffold485 | 165749                  | TT                              | GG                 | GG               | INTERGENIC                    |                    |                                                          |
| SNP_74598_A_165765 | NW_004515945.1 | scaffold485 | 165765                  | GG                              | AA                 | AA               | INTERGENIC                    |                    |                                                          |
| SNP_74599_A_165965 | NW_004515945.1 | scaffold485 | 165965                  | GG                              | AA                 | AA               | INTERGENIC                    |                    |                                                          |

| SNPs IDs           | Chromosome IDs | Chromosomes | Physical positions (bp) | CDC Frontier (Reference genome) | (Pusa 1103 & HPNB) | (ILWC 46 & LPNB) | Sequence genome | Components of | Gene accession IDs | Putative functions |
|--------------------|----------------|-------------|-------------------------|---------------------------------|--------------------|------------------|-----------------|---------------|--------------------|--------------------|
| SNP_74600_A_165967 | NW_004515945.1 | scaffold485 | 165967                  | AA                              | CC                 | CC               | INTERGENIC      |               |                    |                    |
| SNP_74601_A_166030 | NW_004515945.1 | scaffold485 | 166030                  | AA                              | TT                 | TT               | INTERGENIC      |               |                    |                    |
| SNP_74602_A_166031 | NW_004515945.1 | scaffold485 | 166031                  | AA                              | TT                 | TT               | INTERGENIC      |               |                    |                    |
| SNP_74603_A_9357   | NW_004515946.1 | scaffold486 | 9357                    | TT                              | CC                 | CC               | INTERGENIC      |               |                    |                    |
| SNP_74604_A_9399   | NW_004515946.1 | scaffold486 | 9399                    | GG                              | AA                 | AA               | INTERGENIC      |               |                    |                    |
| SNP_74605_A_9705   | NW_004515946.1 | scaffold486 | 9705                    | TT                              | AA                 | AA               | INTERGENIC      |               |                    |                    |
| SNP_74606_A_9746   | NW_004515946.1 | scaffold486 | 9746                    | CC                              | TT                 | TT               | INTERGENIC      |               |                    |                    |
| SNP_74607_A_9764   | NW_004515946.1 | scaffold486 | 9764                    | AA                              | GG                 | GG               | INTERGENIC      |               |                    |                    |
| SNP_74608_A_25883  | NW_004515946.1 | scaffold486 | 25883                   | GG                              | CC                 | CC               | INTERGENIC      |               |                    |                    |
| SNP_74609_A_26029  | NW_004515946.1 | scaffold486 | 26029                   | GG                              | TT                 | TT               | INTERGENIC      |               |                    |                    |
| SNP_74610_A_33364  | NW_004515946.1 | scaffold486 | 33364                   | TT                              | CC                 | CC               | INTERGENIC      |               |                    |                    |
| SNP_74611_A_45336  | NW_004515946.1 | scaffold486 | 45336                   | TT                              | CC                 | CC               | INTERGENIC      |               |                    |                    |
| SNP_74612_A_45607  | NW_004515946.1 | scaffold486 | 45607                   | GG                              | AA                 | AA               | INTERGENIC      |               |                    |                    |
| SNP_74613_A_64256  | NW_004515946.1 | scaffold486 | 64256                   | AA                              | TT                 | TT               | INTERGENIC      |               |                    |                    |
| SNP_74614_A_78831  | NW_004515946.1 | scaffold486 | 78831                   | GG                              | TT                 | TT               | INTERGENIC      |               |                    |                    |
| SNP_74615_A_88073  | NW_004515946.1 | scaffold486 | 88073                   | TT                              | CC                 | CC               | INTERGENIC      |               |                    |                    |
| SNP_74616_A_99521  | NW_004515946.1 | scaffold486 | 99521                   | GG                              | AA                 | AA               | INTERGENIC      |               |                    |                    |
| SNP_74617_A_102151 | NW_004515946.1 | scaffold486 | 102151                  | AA                              | GG                 | GG               | INTERGENIC      |               |                    |                    |
| SNP_74618_A_103616 | NW_004515946.1 | scaffold486 | 103616                  | TT                              | GG                 | GG               | INTERGENIC      |               |                    |                    |
| SNP_74619_A_103627 | NW_004515946.1 | scaffold486 | 103627                  | AA                              | GG                 | GG               | INTERGENIC      |               |                    |                    |
| SNP_74620_A_103993 | NW_004515946.1 | scaffold486 | 103993                  | AA                              | TT                 | TT               | INTERGENIC      |               |                    |                    |
| SNP_74621_A_103997 | NW_004515946.1 | scaffold486 | 103997                  | TT                              | GG                 | GG               | INTERGENIC      |               |                    |                    |

| SNPs IDs           | Chromosome IDs | Chromosomes | Physical positions (bp) | CDC Frontier (Reference genome) | (Pusa 1103 & HPNB) | (ILWC 46 & LPNB) | Sequence genome | Components of | Gene accession IDs | Putative functions |
|--------------------|----------------|-------------|-------------------------|---------------------------------|--------------------|------------------|-----------------|---------------|--------------------|--------------------|
| SNP_74622_A_109417 | NW_004515946.1 | scaffold486 | 109417                  | AA                              | CC                 | CC               | INTERGENIC      |               |                    |                    |
| SNP_74624_A_109453 | NW_004515946.1 | scaffold486 | 109453                  | AA                              | TT                 | TT               | INTERGENIC      |               |                    |                    |
| SNP_74625_A_109457 | NW_004515946.1 | scaffold486 | 109457                  | CC                              | AA                 | AA               | INTERGENIC      |               |                    |                    |
| SNP_74626_A_116444 | NW_004515946.1 | scaffold486 | 116444                  | AA                              | GG                 | GG               | INTERGENIC      |               |                    |                    |
| SNP_74627_A_116852 | NW_004515946.1 | scaffold486 | 116852                  | CC                              | TT                 | TT               | INTERGENIC      |               |                    |                    |
| SNP_74628_A_116859 | NW_004515946.1 | scaffold486 | 116859                  | CC                              | AA                 | AA               | INTERGENIC      |               |                    |                    |
| SNP_74629_A_118812 | NW_004515946.1 | scaffold486 | 118812                  | GG                              | TT                 | TT               | INTERGENIC      |               |                    |                    |
| SNP_74630_A_118828 | NW_004515946.1 | scaffold486 | 118828                  | GG                              | AA                 | AA               | INTERGENIC      |               |                    |                    |
| SNP_74631_A_119287 | NW_004515946.1 | scaffold486 | 119287                  | CC                              | TT                 | TT               | INTERGENIC      |               |                    |                    |
| SNP_74632_A_119302 | NW_004515946.1 | scaffold486 | 119302                  | AA                              | GG                 | GG               | INTERGENIC      |               |                    |                    |
| SNP_74633_A_128335 | NW_004515946.1 | scaffold486 | 128335                  | CC                              | TT                 | TT               | INTERGENIC      |               |                    |                    |
| SNP_74634_A_156511 | NW_004515946.1 | scaffold486 | 156511                  | AA                              | GG                 | GG               | INTERGENIC      |               |                    |                    |
| SNP_74635_A_156614 | NW_004515946.1 | scaffold486 | 156614                  | GG                              | CC                 | CC               | INTERGENIC      |               |                    |                    |
| SNP_74636_A_156629 | NW_004515946.1 | scaffold486 | 156629                  | CC                              | TT                 | TT               | INTERGENIC      |               |                    |                    |
| SNP_74637_A_156657 | NW_004515946.1 | scaffold486 | 156657                  | AA                              | TT                 | TT               | INTERGENIC      |               |                    |                    |
| SNP_74638_A_156659 | NW_004515946.1 | scaffold486 | 156659                  | TT                              | CC                 | CC               | INTERGENIC      |               |                    |                    |
| SNP_74639_A_156661 | NW_004515946.1 | scaffold486 | 156661                  | CC                              | TT                 | TT               | INTERGENIC      |               |                    |                    |
| SNP_74640_A_156890 | NW_004515946.1 | scaffold486 | 156890                  | TT                              | CC                 | CC               | INTERGENIC      |               |                    |                    |
| SNP_74641_A_188995 | NW_004515946.1 | scaffold486 | 188995                  | AA                              | CC                 | CC               | INTERGENIC      |               |                    |                    |
| SNP_74642_A_197035 | NW_004515946.1 | scaffold486 | 197035                  | CC                              | TT                 | TT               | INTERGENIC      |               |                    |                    |
| SNP_74643_A_197042 | NW_004515946.1 | scaffold486 | 197042                  | AA                              | TT                 | TT               | INTERGENIC      |               |                    |                    |
| SNP_74644_A_197341 | NW_004515946.1 | scaffold486 | 197341                  | AA                              | CC                 | CC               | INTERGENIC      |               |                    |                    |



| SNPs IDs           | Chromosome IDs | Chromosomes | Physical positions (bp) | CDC Frontier (Reference genome) | (Pusa 1103 & HPNB) | (ILWC 46 & LPNB) | Sequence genome | Components of | Gene accession IDs | Putative functions |
|--------------------|----------------|-------------|-------------------------|---------------------------------|--------------------|------------------|-----------------|---------------|--------------------|--------------------|
| SNP_74645_A_204489 | NW_004515946.1 | scaffold486 | 204489                  | AA                              | GG                 | GG               | INTERGENIC      |               |                    |                    |
| SNP_74646_A_206764 | NW_004515946.1 | scaffold486 | 206764                  | TT                              | AA                 | AA               | INTERGENIC      |               |                    |                    |
| SNP_74647_A_206821 | NW_004515946.1 | scaffold486 | 206821                  | CC                              | TT                 | TT               | INTERGENIC      |               |                    |                    |
| SNP_74648_A_209796 | NW_004515946.1 | scaffold486 | 209796                  | AA                              | CC                 | CC               | INTERGENIC      |               |                    |                    |
| SNP_74649_A_213880 | NW_004515946.1 | scaffold486 | 213880                  | AA                              | TT                 | TT               | INTERGENIC      |               |                    |                    |
| SNP_74650_A_1704   | NW_004515947.1 | scaffold487 | 1704                    | GG                              | CC                 | CC               | INTERGENIC      |               |                    |                    |
| SNP_74651_A_1740   | NW_004515947.1 | scaffold487 | 1740                    | TT                              | CC                 | CC               | INTERGENIC      |               |                    |                    |
| SNP_74652_A_1890   | NW_004515947.1 | scaffold487 | 1890                    | CC                              | TT                 | TT               | INTERGENIC      |               |                    |                    |
| SNP_74653_A_1899   | NW_004515947.1 | scaffold487 | 1899                    | GG                              | AA                 | AA               | INTERGENIC      |               |                    |                    |
| SNP_74654_A_1940   | NW_004515947.1 | scaffold487 | 1940                    | AA                              | GG                 | GG               | INTERGENIC      |               |                    |                    |
| SNP_74655_A_2096   | NW_004515947.1 | scaffold487 | 2096                    | GG                              | AA                 | AA               | INTERGENIC      |               |                    |                    |
| SNP_74656_A_2100   | NW_004515947.1 | scaffold487 | 2100                    | CC                              | TT                 | TT               | INTERGENIC      |               |                    |                    |
| SNP_74657_A_2130   | NW_004515947.1 | scaffold487 | 2130                    | AA                              | CC                 | CC               | INTERGENIC      |               |                    |                    |
| SNP_74658_A_2253   | NW_004515947.1 | scaffold487 | 2253                    | GG                              | AA                 | AA               | INTERGENIC      |               |                    |                    |
| SNP_74659_A_2302   | NW_004515947.1 | scaffold487 | 2302                    | TT                              | CC                 | CC               | INTERGENIC      |               |                    |                    |
| SNP_74660_A_2346   | NW_004515947.1 | scaffold487 | 2346                    | CC                              | AA                 | AA               | INTERGENIC      |               |                    |                    |
| SNP_74661_A_2425   | NW_004515947.1 | scaffold487 | 2425                    | TT                              | CC                 | CC               | INTERGENIC      |               |                    |                    |
| SNP_74662_A_10375  | NW_004515947.1 | scaffold487 | 10375                   | CC                              | TT                 | TT               | INTERGENIC      |               |                    |                    |
| SNP_74663_A_10429  | NW_004515947.1 | scaffold487 | 10429                   | TT                              | CC                 | CC               | INTERGENIC      |               |                    |                    |
| SNP_74664_A_10446  | NW_004515947.1 | scaffold487 | 10446                   | GG                              | AA                 | AA               | INTERGENIC      |               |                    |                    |
| SNP_74665_A_10549  | NW_004515947.1 | scaffold487 | 10549                   | AA                              | GG                 | GG               | INTERGENIC      |               |                    |                    |
| SNP_74666_A_31026  | NW_004515947.1 | scaffold487 | 31026                   | TT                              | CC                 | CC               | INTERGENIC      |               |                    |                    |

| SNPs IDs          | Chromosome IDs | Chromosomes | Physical positions (bp) | CDC Frontier (Reference genome) | (Pusa 1103 & HPNB) | (ILWC 46 & LPNB) | Sequence genome | Components of | Gene accession IDs | Putative functions |
|-------------------|----------------|-------------|-------------------------|---------------------------------|--------------------|------------------|-----------------|---------------|--------------------|--------------------|
| SNP_74667_A_37715 | NW_004515947.1 | scaffold487 | 37715                   | CC                              | AA                 | AA               | INTERGENIC      |               |                    |                    |
| SNP_74668_A_40423 | NW_004515947.1 | scaffold487 | 40423                   | TT                              | CC                 | CC               | INTERGENIC      |               |                    |                    |
| SNP_74669_A_40499 | NW_004515947.1 | scaffold487 | 40499                   | TT                              | AA                 | AA               | INTERGENIC      |               |                    |                    |
| SNP_74670_A_40627 | NW_004515947.1 | scaffold487 | 40627                   | TT                              | CC                 | CC               | INTERGENIC      |               |                    |                    |
| SNP_74671_A_40674 | NW_004515947.1 | scaffold487 | 40674                   | TT                              | CC                 | CC               | INTERGENIC      |               |                    |                    |
| SNP_74672_A_40691 | NW_004515947.1 | scaffold487 | 40691                   | CC                              | GG                 | GG               | INTERGENIC      |               |                    |                    |
| SNP_74673_A_40728 | NW_004515947.1 | scaffold487 | 40728                   | TT                              | AA                 | AA               | INTERGENIC      |               |                    |                    |
| SNP_74674_A_40861 | NW_004515947.1 | scaffold487 | 40861                   | AA                              | CC                 | CC               | INTERGENIC      |               |                    |                    |
| SNP_74675_A_40938 | NW_004515947.1 | scaffold487 | 40938                   | TT                              | CC                 | CC               | INTERGENIC      |               |                    |                    |
| SNP_74676_A_40960 | NW_004515947.1 | scaffold487 | 40960                   | CC                              | AA                 | AA               | INTERGENIC      |               |                    |                    |
| SNP_74677_A_40981 | NW_004515947.1 | scaffold487 | 40981                   | TT                              | CC                 | CC               | INTERGENIC      |               |                    |                    |
| SNP_74679_A_51310 | NW_004515947.1 | scaffold487 | 51310                   | GG                              | AA                 | AA               | INTERGENIC      |               |                    |                    |
| SNP_74680_A_61612 | NW_004515947.1 | scaffold487 | 61612                   | TT                              | GG                 | GG               | INTERGENIC      |               |                    |                    |
| SNP_74681_A_61666 | NW_004515947.1 | scaffold487 | 61666                   | GG                              | AA                 | AA               | INTERGENIC      |               |                    |                    |
| SNP_74682_A_61667 | NW_004515947.1 | scaffold487 | 61667                   | AA                              | GG                 | GG               | INTERGENIC      |               |                    |                    |
| SNP_74683_A_67440 | NW_004515947.1 | scaffold487 | 67440                   | TT                              | GG                 | GG               | INTERGENIC      |               |                    |                    |
| SNP_74684_A_67486 | NW_004515947.1 | scaffold487 | 67486                   | TT                              | CC                 | CC               | INTERGENIC      |               |                    |                    |
| SNP_74685_A_67539 | NW_004515947.1 | scaffold487 | 67539                   | AA                              | CC                 | CC               | INTERGENIC      |               |                    |                    |
| SNP_74686_A_73469 | NW_004515947.1 | scaffold487 | 73469                   | TT                              | AA                 | AA               | INTERGENIC      |               |                    |                    |
| SNP_74687_A_76655 | NW_004515947.1 | scaffold487 | 76655                   | TT                              | CC                 | CC               | INTERGENIC      |               |                    |                    |
| SNP_74688_A_80602 | NW_004515947.1 | scaffold487 | 80602                   | AA                              | GG                 | GG               | INTERGENIC      |               |                    |                    |
| SNP_74689_A_80604 | NW_004515947.1 | scaffold487 | 80604                   | CC                              | TT                 | TT               | INTERGENIC      |               |                    |                    |

| SNPs IDs          | Chromosome IDs | Chromosomes | Physical positions (bp) | CDC Frontier (Reference genome) | (Pusa 1103 & HPNB) | (ILWC 46 & LPNB) | Sequence genome | Components of | Gene accession IDs | Putative functions |
|-------------------|----------------|-------------|-------------------------|---------------------------------|--------------------|------------------|-----------------|---------------|--------------------|--------------------|
| SNP_74690_A_83690 | NW_004515947.1 | scaffold487 | 83690                   | CC                              | AA                 | AA               | INTERGENIC      |               |                    |                    |
| SNP_74691_A_83694 | NW_004515947.1 | scaffold487 | 83694                   | GG                              | AA                 | AA               | INTERGENIC      |               |                    |                    |
| SNP_74692_A_83699 | NW_004515947.1 | scaffold487 | 83699                   | GG                              | AA                 | AA               | INTERGENIC      |               |                    |                    |
| SNP_74693_A_83718 | NW_004515947.1 | scaffold487 | 83718                   | AA                              | TT                 | TT               | INTERGENIC      |               |                    |                    |
| SNP_74694_A_83728 | NW_004515947.1 | scaffold487 | 83728                   | CC                              | TT                 | TT               | INTERGENIC      |               |                    |                    |
| SNP_74695_A_83750 | NW_004515947.1 | scaffold487 | 83750                   | TT                              | GG                 | GG               | INTERGENIC      |               |                    |                    |
| SNP_74696_A_83754 | NW_004515947.1 | scaffold487 | 83754                   | CC                              | TT                 | TT               | INTERGENIC      |               |                    |                    |
| SNP_74697_A_84071 | NW_004515947.1 | scaffold487 | 84071                   | GG                              | TT                 | TT               | INTERGENIC      |               |                    |                    |
| SNP_74698_A_84110 | NW_004515947.1 | scaffold487 | 84110                   | GG                              | TT                 | TT               | INTERGENIC      |               |                    |                    |
| SNP_74700_A_364   | NW_004515950.1 | scaffold491 | 364                     | AA                              | CC                 | CC               | INTERGENIC      |               |                    |                    |
| SNP_74701_A_8756  | NW_004515950.1 | scaffold491 | 8756                    | AA                              | CC                 | CC               | INTERGENIC      |               |                    |                    |
| SNP_74702_A_8757  | NW_004515950.1 | scaffold491 | 8757                    | GG                              | CC                 | CC               | INTERGENIC      |               |                    |                    |
| SNP_74703_A_9036  | NW_004515950.1 | scaffold491 | 9036                    | TT                              | AA                 | AA               | INTERGENIC      |               |                    |                    |
| SNP_74704_A_9037  | NW_004515950.1 | scaffold491 | 9037                    | GG                              | AA                 | AA               | INTERGENIC      |               |                    |                    |
| SNP_74705_A_9053  | NW_004515950.1 | scaffold491 | 9053                    | TT                              | AA                 | AA               | INTERGENIC      |               |                    |                    |
| SNP_74706_A_9283  | NW_004515950.1 | scaffold491 | 9283                    | GG                              | CC                 | CC               | INTERGENIC      |               |                    |                    |
| SNP_74707_A_9529  | NW_004515950.1 | scaffold491 | 9529                    | GG                              | AA                 | AA               | INTERGENIC      |               |                    |                    |
| SNP_74708_A_11390 | NW_004515950.1 | scaffold491 | 11390                   | CC                              | AA                 | AA               | INTERGENIC      |               |                    |                    |
| SNP_74709_A_11412 | NW_004515950.1 | scaffold491 | 11412                   | AA                              | GG                 | GG               | INTERGENIC      |               |                    |                    |
| SNP_74710_A_11423 | NW_004515950.1 | scaffold491 | 11423                   | TT                              | CC                 | CC               | INTERGENIC      |               |                    |                    |
| SNP_74711_A_11727 | NW_004515950.1 | scaffold491 | 11727                   | CC                              | TT                 | TT               | INTERGENIC      |               |                    |                    |
| SNP_74712_A_11871 | NW_004515950.1 | scaffold491 | 11871                   | CC                              | AA                 | AA               | INTERGENIC      |               |                    |                    |

| SNPs IDs          | Chromosome IDs | Chromosomes | Physical positions (bp) | CDC Frontier genome (Reference genome) | (Pusa 1103 & HPNB) | (ILWC 46 & LPNB) | Sequence genome | Components of | Gene accession IDs | Putative functions |
|-------------------|----------------|-------------|-------------------------|----------------------------------------|--------------------|------------------|-----------------|---------------|--------------------|--------------------|
| SNP_74713_A_11904 | NW_004515950.1 | scaffold491 | 11904                   | TT                                     | CC                 | CC               | INTERGENIC      |               |                    |                    |
| SNP_74714_A_12517 | NW_004515950.1 | scaffold491 | 12517                   | AA                                     | GG                 | GG               | INTERGENIC      |               |                    |                    |
| SNP_74715_A_15831 | NW_004515950.1 | scaffold491 | 15831                   | GG                                     | AA                 | AA               | INTERGENIC      |               |                    |                    |
| SNP_74716_A_15867 | NW_004515950.1 | scaffold491 | 15867                   | AA                                     | GG                 | GG               | INTERGENIC      |               |                    |                    |
| SNP_74717_A_20298 | NW_004515950.1 | scaffold491 | 20298                   | TT                                     | CC                 | CC               | INTERGENIC      |               |                    |                    |
| SNP_74718_A_20308 | NW_004515950.1 | scaffold491 | 20308                   | GG                                     | AA                 | AA               | INTERGENIC      |               |                    |                    |
| SNP_74719_A_21389 | NW_004515950.1 | scaffold491 | 21389                   | TT                                     | CC                 | CC               | INTERGENIC      |               |                    |                    |
| SNP_74720_A_22549 | NW_004515950.1 | scaffold491 | 22549                   | TT                                     | CC                 | CC               | INTERGENIC      |               |                    |                    |
| SNP_74721_A_22654 | NW_004515950.1 | scaffold491 | 22654                   | AA                                     | GG                 | GG               | INTERGENIC      |               |                    |                    |
| SNP_74722_A_22657 | NW_004515950.1 | scaffold491 | 22657                   | GG                                     | TT                 | TT               | INTERGENIC      |               |                    |                    |
| SNP_74723_A_22728 | NW_004515950.1 | scaffold491 | 22728                   | TT                                     | AA                 | AA               | INTERGENIC      |               |                    |                    |
| SNP_74724_A_23339 | NW_004515950.1 | scaffold491 | 23339                   | AA                                     | GG                 | GG               | INTERGENIC      |               |                    |                    |
| SNP_74725_A_23629 | NW_004515950.1 | scaffold491 | 23629                   | CC                                     | TT                 | TT               | INTERGENIC      |               |                    |                    |
| SNP_74726_A_26631 | NW_004515950.1 | scaffold491 | 26631                   | AA                                     | GG                 | GG               | INTERGENIC      |               |                    |                    |
| SNP_74727_A_26923 | NW_004515950.1 | scaffold491 | 26923                   | GG                                     | CC                 | CC               | INTERGENIC      |               |                    |                    |
| SNP_74728_A_27043 | NW_004515950.1 | scaffold491 | 27043                   | AA                                     | CC                 | CC               | INTERGENIC      |               |                    |                    |
| SNP_74729_A_27330 | NW_004515950.1 | scaffold491 | 27330                   | AA                                     | TT                 | TT               | INTERGENIC      |               |                    |                    |
| SNP_74730_A_29093 | NW_004515950.1 | scaffold491 | 29093                   | CC                                     | GG                 | GG               | INTERGENIC      |               |                    |                    |
| SNP_74731_A_29174 | NW_004515950.1 | scaffold491 | 29174                   | AA                                     | GG                 | GG               | INTERGENIC      |               |                    |                    |
| SNP_74732_A_29330 | NW_004515950.1 | scaffold491 | 29330                   | AA                                     | GG                 | GG               | INTERGENIC      |               |                    |                    |
| SNP_74733_A_29389 | NW_004515950.1 | scaffold491 | 29389                   | CC                                     | GG                 | GG               | INTERGENIC      |               |                    |                    |
| SNP_74734_A_29492 | NW_004515950.1 | scaffold491 | 29492                   | AA                                     | GG                 | GG               | INTERGENIC      |               |                    |                    |

| SNPs IDs          | Chromosome IDs | Chromosomes | Physical positions (bp) | CDC Frontier (Reference genome) | (Pusa 1103 & HPNB) | (ILWC 46 & LPNB) | Sequence genome | Components of | Gene accession IDs | Putative functions |
|-------------------|----------------|-------------|-------------------------|---------------------------------|--------------------|------------------|-----------------|---------------|--------------------|--------------------|
| SNP_74735_A_519   | NW_004515951.1 | scaffold492 | 519                     | CC                              | AA                 | AA               | INTERGENIC      |               |                    |                    |
| SNP_74736_A_684   | NW_004515951.1 | scaffold492 | 684                     | CC                              | AA                 | AA               | INTERGENIC      |               |                    |                    |
| SNP_74737_A_737   | NW_004515951.1 | scaffold492 | 737                     | AA                              | GG                 | GG               | INTERGENIC      |               |                    |                    |
| SNP_74738_A_751   | NW_004515951.1 | scaffold492 | 751                     | CC                              | AA                 | AA               | INTERGENIC      |               |                    |                    |
| SNP_74739_A_914   | NW_004515951.1 | scaffold492 | 914                     | CC                              | AA                 | AA               | INTERGENIC      |               |                    |                    |
| SNP_74740_A_1195  | NW_004515951.1 | scaffold492 | 1195                    | GG                              | AA                 | AA               | INTERGENIC      |               |                    |                    |
| SNP_74741_A_1785  | NW_004515951.1 | scaffold492 | 1785                    | CC                              | AA                 | AA               | INTERGENIC      |               |                    |                    |
| SNP_74742_A_6158  | NW_004515951.1 | scaffold492 | 6158                    | TT                              | AA                 | AA               | INTERGENIC      |               |                    |                    |
| SNP_74743_A_15069 | NW_004515951.1 | scaffold492 | 15069                   | GG                              | TT                 | TT               | INTERGENIC      |               |                    |                    |
| SNP_74744_A_15083 | NW_004515951.1 | scaffold492 | 15083                   | GG                              | TT                 | TT               | INTERGENIC      |               |                    |                    |
| SNP_74745_A_15103 | NW_004515951.1 | scaffold492 | 15103                   | AA                              | TT                 | TT               | INTERGENIC      |               |                    |                    |
| SNP_74746_A_15115 | NW_004515951.1 | scaffold492 | 15115                   | GG                              | AA                 | AA               | INTERGENIC      |               |                    |                    |
| SNP_74747_A_15411 | NW_004515951.1 | scaffold492 | 15411                   | CC                              | TT                 | TT               | INTERGENIC      |               |                    |                    |
| SNP_74748_A_23536 | NW_004515951.1 | scaffold492 | 23536                   | CC                              | TT                 | TT               | INTERGENIC      |               |                    |                    |
| SNP_74749_A_23565 | NW_004515951.1 | scaffold492 | 23565                   | CC                              | GG                 | GG               | INTERGENIC      |               |                    |                    |
| SNP_74750_A_23849 | NW_004515951.1 | scaffold492 | 23849                   | CC                              | AA                 | AA               | INTERGENIC      |               |                    |                    |
| SNP_74751_A_23850 | NW_004515951.1 | scaffold492 | 23850                   | CC                              | GG                 | GG               | INTERGENIC      |               |                    |                    |
| SNP_74752_A_23856 | NW_004515951.1 | scaffold492 | 23856                   | AA                              | CC                 | CC               | INTERGENIC      |               |                    |                    |
| SNP_74753_A_23916 | NW_004515951.1 | scaffold492 | 23916                   | AA                              | TT                 | TT               | INTERGENIC      |               |                    |                    |
| SNP_74754_A_35256 | NW_004515951.1 | scaffold492 | 35256                   | GG                              | CC                 | CC               | INTERGENIC      |               |                    |                    |
| SNP_74755_A_35311 | NW_004515951.1 | scaffold492 | 35311                   | CC                              | AA                 | AA               | INTERGENIC      |               |                    |                    |
| SNP_74756_A_35638 | NW_004515951.1 | scaffold492 | 35638                   | GG                              | TT                 | TT               | INTERGENIC      |               |                    |                    |

| SNPs IDs          | Chromosome IDs | Chromosomes | Physical positions (bp) | CDC Frontier (Reference genome) | (Pusa 1103 & HPNB) | (ILWC 46 & LPNB) | Sequence Components of genome | Gene accession IDs | Putative functions |
|-------------------|----------------|-------------|-------------------------|---------------------------------|--------------------|------------------|-------------------------------|--------------------|--------------------|
| SNP_74757_A_35988 | NW_004515951.1 | scaffold492 | 35988                   | GG                              | TT                 | TT               | INTERGENIC                    |                    |                    |
| SNP_74758_A_36135 | NW_004515951.1 | scaffold492 | 36135                   | GG                              | CC                 | AA               | INTERGENIC                    |                    |                    |
| SNP_74759_A_36205 | NW_004515951.1 | scaffold492 | 36205                   | GG                              | AA                 | AA               | INTERGENIC                    |                    |                    |
| SNP_74760_A_36568 | NW_004515951.1 | scaffold492 | 36568                   | CC                              | TT                 | TT               | INTERGENIC                    |                    |                    |
| SNP_74761_A_36848 | NW_004515951.1 | scaffold492 | 36848                   | GG                              | TT                 | TT               | INTERGENIC                    |                    |                    |
| SNP_74762_A_36980 | NW_004515951.1 | scaffold492 | 36980                   | TT                              | GG                 | GG               | INTERGENIC                    |                    |                    |
| SNP_74763_A_36985 | NW_004515951.1 | scaffold492 | 36985                   | CC                              | TT                 | TT               | INTERGENIC                    |                    |                    |
| SNP_74765_A_45043 | NW_004515952.1 | scaffold493 | 45043                   | CC                              | TT                 | TT               | NON_SYNONYMOUS_CODING         | 101501990          | Unknown function   |
| SNP_74766_A_45083 | NW_004515952.1 | scaffold493 | 45083                   | TT                              | CC                 | CC               | NON_SYNONYMOUS_CODING         | 101501990          | Unknown function   |
| SNP_74767_A_45216 | NW_004515952.1 | scaffold493 | 45216                   | TT                              | CC                 | CC               | SYNONYMOUS_CODING             | 101501990          | Unknown function   |
| SNP_74768_A_47423 | NW_004515952.1 | scaffold493 | 47423                   | CC                              | TT                 | TT               | URR                           | 101501990          | Unknown function   |
| SNP_74769_A_47513 | NW_004515952.1 | scaffold493 | 47513                   | GG                              | AA                 | AA               | URR                           | 101501990          | Unknown function   |
| SNP_74770_A_47717 | NW_004515952.1 | scaffold493 | 47717                   | CC                              | TT                 | TT               | URR                           | 101501990          | Unknown function   |
| SNP_74771_A_47831 | NW_004515952.1 | scaffold493 | 47831                   | AA                              | GG                 | GG               | URR                           | 101501990          | Unknown function   |
| SNP_74772_A_50578 | NW_004515952.1 | scaffold493 | 50578                   | AA                              | GG                 | GG               | INTERGENIC                    |                    |                    |
| SNP_74773_A_57205 | NW_004515952.1 | scaffold493 | 57205                   | CC                              | AA                 | AA               | NON_SYNONYMOUS_CODING         | 101502319          | Unknown function   |
| SNP_74774_A_62028 | NW_004515952.1 | scaffold493 | 62028                   | AA                              | GG                 | GG               | INTERGENIC                    |                    |                    |
| SNP_74775_A_71003 | NW_004515952.1 | scaffold493 | 71003                   | TT                              | CC                 | CC               | INTERGENIC                    |                    |                    |
| SNP_74776_A_71013 | NW_004515952.1 | scaffold493 | 71013                   | CC                              | TT                 | TT               | INTERGENIC                    |                    |                    |
| SNP_74777_A_71497 | NW_004515952.1 | scaffold493 | 71497                   | TT                              | CC                 | CC               | INTERGENIC                    |                    |                    |
| SNP_74778_A_84504 | NW_004515952.1 | scaffold493 | 84504                   | TT                              | AA                 | AA               | INTERGENIC                    |                    |                    |
| SNP_74779_A_84546 | NW_004515952.1 | scaffold493 | 84546                   | TT                              | CC                 | CC               | INTERGENIC                    |                    |                    |

| SNPs IDs           | Chromosome IDs | Chromosomes | Physical positions (bp) | CDC Frontier (Reference genome) | (Pusa 1103 & HPNB) | (ILWC 46 & LPNB) | Sequence genome | Components of | Gene accession IDs | Putative functions |
|--------------------|----------------|-------------|-------------------------|---------------------------------|--------------------|------------------|-----------------|---------------|--------------------|--------------------|
| SNP_74780_A_84558  | NW_004515952.1 | scaffold493 | 84558                   | AA                              | TT                 | TT               | INTERGENIC      |               |                    |                    |
| SNP_74781_A_84588  | NW_004515952.1 | scaffold493 | 84588                   | AA                              | TT                 | TT               | INTERGENIC      |               |                    |                    |
| SNP_74782_A_86667  | NW_004515952.1 | scaffold493 | 86667                   | CC                              | TT                 | TT               | INTERGENIC      |               |                    |                    |
| SNP_74783_A_86677  | NW_004515952.1 | scaffold493 | 86677                   | AA                              | GG                 | GG               | INTERGENIC      |               |                    |                    |
| SNP_74784_A_87715  | NW_004515952.1 | scaffold493 | 87715                   | AA                              | CC                 | CC               | INTERGENIC      |               |                    |                    |
| SNP_74785_A_87921  | NW_004515952.1 | scaffold493 | 87921                   | TT                              | CC                 | CC               | INTERGENIC      |               |                    |                    |
| SNP_74786_A_87959  | NW_004515952.1 | scaffold493 | 87959                   | TT                              | CC                 | CC               | INTERGENIC      |               |                    |                    |
| SNP_74787_A_87961  | NW_004515952.1 | scaffold493 | 87961                   | AA                              | GG                 | GG               | INTERGENIC      |               |                    |                    |
| SNP_74788_A_87969  | NW_004515952.1 | scaffold493 | 87969                   | GG                              | CC                 | CC               | INTERGENIC      |               |                    |                    |
| SNP_74789_A_87998  | NW_004515952.1 | scaffold493 | 87998                   | AA                              | GG                 | GG               | INTERGENIC      |               |                    |                    |
| SNP_74790_A_88390  | NW_004515952.1 | scaffold493 | 88390                   | GG                              | AA                 | AA               | INTERGENIC      |               |                    |                    |
| SNP_74791_A_88480  | NW_004515952.1 | scaffold493 | 88480                   | AA                              | GG                 | GG               | INTERGENIC      |               |                    |                    |
| SNP_74792_A_88483  | NW_004515952.1 | scaffold493 | 88483                   | AA                              | GG                 | GG               | INTERGENIC      |               |                    |                    |
| SNP_74793_A_88503  | NW_004515952.1 | scaffold493 | 88503                   | CC                              | AA                 | AA               | INTERGENIC      |               |                    |                    |
| SNP_74794_A_88505  | NW_004515952.1 | scaffold493 | 88505                   | TT                              | AA                 | AA               | INTERGENIC      |               |                    |                    |
| SNP_74795_A_88517  | NW_004515952.1 | scaffold493 | 88517                   | AA                              | GG                 | GG               | INTERGENIC      |               |                    |                    |
| SNP_74796_A_93853  | NW_004515952.1 | scaffold493 | 93853                   | CC                              | TT                 | TT               | INTERGENIC      |               |                    |                    |
| SNP_74797_A_102736 | NW_004515952.1 | scaffold493 | 102736                  | TT                              | GG                 | GG               | INTERGENIC      |               |                    |                    |
| SNP_74798_A_124100 | NW_004515952.1 | scaffold493 | 124100                  | CC                              | TT                 | TT               | INTERGENIC      |               |                    |                    |
| SNP_74799_A_124120 | NW_004515952.1 | scaffold493 | 124120                  | CC                              | TT                 | TT               | INTERGENIC      |               |                    |                    |
| SNP_74800_A_124421 | NW_004515952.1 | scaffold493 | 124421                  | AA                              | GG                 | GG               | INTERGENIC      |               |                    |                    |
| SNP_74801_A_124463 | NW_004515952.1 | scaffold493 | 124463                  | TT                              | AA                 | AA               | INTERGENIC      |               |                    |                    |

| SNPs IDs           | Chromosome IDs | Chromosomes | Physical positions (bp) | CDC Frontier (Reference genome) | (Pusa 1103 & HPNB) | (ILWC 46 & LPNB) | Sequence genome | Components of | Gene accession IDs           | Putative functions |
|--------------------|----------------|-------------|-------------------------|---------------------------------|--------------------|------------------|-----------------|---------------|------------------------------|--------------------|
| SNP_74802_A_125061 | NW_004515952.1 | scaffold493 | 125061                  | TT                              | CC                 | CC               | INTERGENIC      |               |                              |                    |
| SNP_74803_A_125528 | NW_004515952.1 | scaffold493 | 125528                  | CC                              | TT                 | TT               | INTERGENIC      |               |                              |                    |
| SNP_74804_A_125663 | NW_004515952.1 | scaffold493 | 125663                  | TT                              | CC                 | CC               | INTERGENIC      |               |                              |                    |
| SNP_74805_A_138165 | NW_004515952.1 | scaffold493 | 138165                  | CC                              | GG                 | GG               | INTERGENIC      |               |                              |                    |
| SNP_74806_A_138177 | NW_004515952.1 | scaffold493 | 138177                  | GG                              | AA                 | AA               | INTERGENIC      |               |                              |                    |
| SNP_74807_A_138187 | NW_004515952.1 | scaffold493 | 138187                  | AA                              | GG                 | GG               | INTERGENIC      |               |                              |                    |
| SNP_74808_A_138241 | NW_004515952.1 | scaffold493 | 138241                  | AA                              | GG                 | GG               | INTERGENIC      |               |                              |                    |
| SNP_74809_A_138605 | NW_004515952.1 | scaffold493 | 138605                  | AA                              | CC                 | CC               | INTERGENIC      |               |                              |                    |
| SNP_74810_A_142513 | NW_004515952.1 | scaffold493 | 142513                  | AA                              | CC                 | CC               | INTERGENIC      |               |                              |                    |
| SNP_74811_A_142741 | NW_004515952.1 | scaffold493 | 142741                  | AA                              | CC                 | CC               | INTERGENIC      |               |                              |                    |
| SNP_74812_A_142759 | NW_004515952.1 | scaffold493 | 142759                  | CC                              | TT                 | TT               | INTERGENIC      |               |                              |                    |
| SNP_74813_A_142770 | NW_004515952.1 | scaffold493 | 142770                  | TT                              | CC                 | CC               | INTERGENIC      |               |                              |                    |
| SNP_74814_A_142792 | NW_004515952.1 | scaffold493 | 142792                  | AA                              | GG                 | GG               | INTERGENIC      |               |                              |                    |
| SNP_74815_A_142836 | NW_004515952.1 | scaffold493 | 142836                  | TT                              | AA                 | AA               | INTERGENIC      |               |                              |                    |
| SNP_74816_A_144384 | NW_004515952.1 | scaffold493 | 144384                  | AA                              | GG                 | GG               | INTERGENIC      |               |                              |                    |
| SNP_74818_A_184492 | NW_004515952.1 | scaffold493 | 184492                  | AA                              | GG                 | GG               | INTERGENIC      |               |                              |                    |
| SNP_74819_A_185476 | NW_004515952.1 | scaffold493 | 185476                  | TT                              | CC                 | CC               | INTERGENIC      |               |                              |                    |
| SNP_74820_A_185615 | NW_004515952.1 | scaffold493 | 185615                  | TT                              | CC                 | CC               | INTERGENIC      |               |                              |                    |
| SNP_74821_A_217771 | NW_004515952.1 | scaffold493 | 217771                  | AA                              | TT                 | TT               | URR             | 101504890     | uncharacterized LOC101504890 |                    |
| SNP_74823_A_222128 | NW_004515952.1 | scaffold493 | 222128                  | AA                              | GG                 | GG               | INTERGENIC      |               |                              |                    |
| SNP_74824_A_269140 | NW_004515952.1 | scaffold493 | 269140                  | CC                              | AA                 | AA               | INTERGENIC      |               |                              |                    |
| SNP_74825_A_293172 | NW_004515952.1 | scaffold493 | 293172                  | GG                              | TT                 | TT               | INTERGENIC      |               |                              |                    |



| SNPs IDs           | Chromosome IDs | Chromosomes | Physical positions (bp) | CDC Frontier (Reference genome) | (Pusa 1103 & HPNB) | (ILWC 46 & LPNB) | Sequence Components of genome | Gene accession IDs | Putative functions                                   |
|--------------------|----------------|-------------|-------------------------|---------------------------------|--------------------|------------------|-------------------------------|--------------------|------------------------------------------------------|
| SNP_74826_A_293443 | NW_004515952.1 | scaffold493 | 293443                  | CC                              | TT                 | TT               | INTERGENIC                    |                    |                                                      |
| SNP_74827_A_294172 | NW_004515952.1 | scaffold493 | 294172                  | AA                              | TT                 | TT               | INTERGENIC                    |                    |                                                      |
| SNP_74829_A_297073 | NW_004515952.1 | scaffold493 | 297073                  | TT                              | GG                 | GG               | INTERGENIC                    |                    |                                                      |
| SNP_74830_A_297332 | NW_004515952.1 | scaffold493 | 297332                  | TT                              | AA                 | AA               | INTERGENIC                    |                    |                                                      |
| SNP_74831_A_297334 | NW_004515952.1 | scaffold493 | 297334                  | AA                              | GG                 | GG               | INTERGENIC                    |                    |                                                      |
| SNP_74832_A_297749 | NW_004515952.1 | scaffold493 | 297749                  | CC                              | TT                 | TT               | INTERGENIC                    |                    |                                                      |
| SNP_74833_A_9720   | NW_004515953.1 | scaffold495 | 9720                    | TT                              | CC                 | CC               | INTERGENIC                    |                    |                                                      |
| SNP_74834_A_19639  | NW_004515953.1 | scaffold495 | 19639                   | GG                              | AA                 | AA               | INTERGENIC                    |                    |                                                      |
| SNP_74835_A_25991  | NW_004515953.1 | scaffold495 | 25991                   | AA                              | TT                 | TT               | INTERGENIC                    |                    |                                                      |
| SNP_74836_A_26654  | NW_004515953.1 | scaffold495 | 26654                   | CC                              | TT                 | TT               | INTERGENIC                    |                    |                                                      |
| SNP_74837_A_28694  | NW_004515953.1 | scaffold495 | 28694                   | TT                              | CC                 | CC               | INTERGENIC                    |                    |                                                      |
| SNP_74839_A_35255  | NW_004515953.1 | scaffold495 | 35255                   | CC                              | TT                 | TT               | INTERGENIC                    |                    |                                                      |
| SNP_74840_A_70474  | NW_004515953.1 | scaffold495 | 70474                   | AA                              | TT                 | TT               | INTERGENIC                    |                    |                                                      |
| SNP_74841_A_87827  | NW_004515953.1 | scaffold495 | 87827                   | AA                              | GG                 | GG               | DRR                           | 101505515          | uncharacterized LOC101505515                         |
| SNP_74842_A_97153  | NW_004515953.1 | scaffold495 | 97153                   | AA                              | CC                 | CC               | INTERGENIC                    |                    |                                                      |
| SNP_74843_A_97410  | NW_004515953.1 | scaffold495 | 97410                   | AA                              | GG                 | GG               | INTERGENIC                    |                    |                                                      |
| SNP_74844_A_112258 | NW_004515953.1 | scaffold495 | 112258                  | CC                              | TT                 | TT               | INTERGENIC                    |                    |                                                      |
| SNP_74845_A_119913 | NW_004515953.1 | scaffold495 | 119913                  | TT                              | CC                 | CC               | INTERGENIC                    |                    |                                                      |
| SNP_74846_A_125743 | NW_004515953.1 | scaffold495 | 125743                  | TT                              | AA                 | AA               | DRR                           | 101506074          | ethylene-responsive transcription factor RAP2-7-like |
| SNP_74848_A_126715 | NW_004515953.1 | scaffold495 | 126715                  | CC                              | TT                 | TT               | DRR                           | 101506074          | ethylene-responsive transcription factor RAP2-7-like |
| SNP_74849_A_132779 | NW_004515953.1 | scaffold495 | 132779                  | TT                              | AA                 | AA               | INTRON                        | 101506074          | ethylene-responsive transcription factor RAP2-7-like |
| SNP_74850_A_132838 | NW_004515953.1 | scaffold495 | 132838                  | TT                              | AA                 | AA               | INTRON                        | 101506074          | ethylene-responsive transcription factor RAP2-7-like |

| SNPs IDs           | Chromosome IDs | Chromosomes | Physical positions (bp) | CDC Frontier (Reference genome) | (Pusa 1103 & HPNB) | (ILWC 46 & LPNB) | Sequence Components of genome | Gene accession IDs | Putative functions                                   |
|--------------------|----------------|-------------|-------------------------|---------------------------------|--------------------|------------------|-------------------------------|--------------------|------------------------------------------------------|
| SNP_74851_A_132853 | NW_004515953.1 | scaffold495 | 132853                  | GG                              | TT                 | TT               | INTRON                        | 101506074          | ethylene-responsive transcription factor RAP2-7-like |
| SNP_74852_A_132886 | NW_004515953.1 | scaffold495 | 132886                  | CC                              | TT                 | TT               | INTRON                        | 101506074          | ethylene-responsive transcription factor RAP2-7-like |
| SNP_74853_A_132930 | NW_004515953.1 | scaffold495 | 132930                  | TT                              | CC                 | CC               | INTRON                        | 101506074          | ethylene-responsive transcription factor RAP2-7-like |
| SNP_74854_A_132975 | NW_004515953.1 | scaffold495 | 132975                  | CC                              | TT                 | TT               | INTRON                        | 101506074          | ethylene-responsive transcription factor RAP2-7-like |
| SNP_74855_A_133397 | NW_004515953.1 | scaffold495 | 133397                  | GG                              | TT                 | TT               | INTRON                        | 101506074          | ethylene-responsive transcription factor RAP2-7-like |
| SNP_74856_A_137702 | NW_004515953.1 | scaffold495 | 137702                  | AA                              | CC                 | CC               | INTERGENIC                    |                    |                                                      |
| SNP_74857_A_142398 | NW_004515953.1 | scaffold495 | 142398                  | GG                              | AA                 | AA               | INTERGENIC                    |                    |                                                      |
| SNP_74858_A_11517  | NW_004515954.1 | scaffold496 | 11517                   | CC                              | GG                 | GG               | INTERGENIC                    |                    |                                                      |
| SNP_74859_A_11555  | NW_004515954.1 | scaffold496 | 11555                   | AA                              | CC                 | CC               | INTERGENIC                    |                    |                                                      |
| SNP_74860_A_11565  | NW_004515954.1 | scaffold496 | 11565                   | AA                              | GG                 | GG               | INTERGENIC                    |                    |                                                      |
| SNP_74861_A_11591  | NW_004515954.1 | scaffold496 | 11591                   | AA                              | CC                 | CC               | INTERGENIC                    |                    |                                                      |
| SNP_74862_A_34215  | NW_004515954.1 | scaffold496 | 34215                   | AA                              | TT                 | TT               | INTERGENIC                    |                    |                                                      |
| SNP_74863_A_34270  | NW_004515954.1 | scaffold496 | 34270                   | CC                              | TT                 | TT               | INTERGENIC                    |                    |                                                      |
| SNP_74864_A_34430  | NW_004515954.1 | scaffold496 | 34430                   | AA                              | GG                 | GG               | INTERGENIC                    |                    |                                                      |
| SNP_74865_A_37435  | NW_004515954.1 | scaffold496 | 37435                   | TT                              | GG                 | GG               | INTERGENIC                    |                    |                                                      |
| SNP_74866_A_41951  | NW_004515954.1 | scaffold496 | 41951                   | AA                              | GG                 | GG               | INTERGENIC                    |                    |                                                      |
| SNP_74867_A_41959  | NW_004515954.1 | scaffold496 | 41959                   | TT                              | CC                 | CC               | INTERGENIC                    |                    |                                                      |
| SNP_74868_A_42139  | NW_004515954.1 | scaffold496 | 42139                   | AA                              | GG                 | GG               | INTERGENIC                    |                    |                                                      |
| SNP_74869_A_42147  | NW_004515954.1 | scaffold496 | 42147                   | AA                              | TT                 | TT               | INTERGENIC                    |                    |                                                      |
| SNP_74870_A_42246  | NW_004515954.1 | scaffold496 | 42246                   | TT                              | CC                 | CC               | INTERGENIC                    |                    |                                                      |
| SNP_74871_A_42338  | NW_004515954.1 | scaffold496 | 42338                   | AA                              | GG                 | GG               | INTERGENIC                    |                    |                                                      |
| SNP_74872_A_42406  | NW_004515954.1 | scaffold496 | 42406                   | CC                              | TT                 | TT               | INTERGENIC                    |                    |                                                      |

| SNPs IDs           | Chromosome IDs | Chromosomes | Physical positions (bp) | CDC Frontier (Reference genome) | (Pusa 1103 & HPNB) | (ILWC 46 & LPNB) | Sequence genome | Components of | Gene accession IDs | Putative functions |
|--------------------|----------------|-------------|-------------------------|---------------------------------|--------------------|------------------|-----------------|---------------|--------------------|--------------------|
| SNP_74873_A_42471  | NW_004515954.1 | scaffold496 | 42471                   | AA                              | CC                 | CC               | INTERGENIC      |               |                    |                    |
| SNP_74874_A_42490  | NW_004515954.1 | scaffold496 | 42490                   | AA                              | GG                 | GG               | INTERGENIC      |               |                    |                    |
| SNP_74875_A_42517  | NW_004515954.1 | scaffold496 | 42517                   | GG                              | CC                 | CC               | INTERGENIC      |               |                    |                    |
| SNP_74876_A_42524  | NW_004515954.1 | scaffold496 | 42524                   | GG                              | AA                 | AA               | INTERGENIC      |               |                    |                    |
| SNP_74877_A_42583  | NW_004515954.1 | scaffold496 | 42583                   | CC                              | TT                 | TT               | INTERGENIC      |               |                    |                    |
| SNP_74878_A_48930  | NW_004515954.1 | scaffold496 | 48930                   | GG                              | AA                 | AA               | INTERGENIC      |               |                    |                    |
| SNP_74879_A_49835  | NW_004515954.1 | scaffold496 | 49835                   | GG                              | TT                 | TT               | INTERGENIC      |               |                    |                    |
| SNP_74880_A_49838  | NW_004515954.1 | scaffold496 | 49838                   | AA                              | GG                 | GG               | INTERGENIC      |               |                    |                    |
| SNP_74882_A_55006  | NW_004515954.1 | scaffold496 | 55006                   | AA                              | GG                 | GG               | INTERGENIC      |               |                    |                    |
| SNP_74883_A_55055  | NW_004515954.1 | scaffold496 | 55055                   | AA                              | CC                 | TT               | INTERGENIC      |               |                    |                    |
| SNP_74884_A_56038  | NW_004515954.1 | scaffold496 | 56038                   | CC                              | GG                 | GG               | INTERGENIC      |               |                    |                    |
| SNP_74885_A_82759  | NW_004515954.1 | scaffold496 | 82759                   | GG                              | AA                 | AA               | INTERGENIC      |               |                    |                    |
| SNP_74886_A_83275  | NW_004515954.1 | scaffold496 | 83275                   | AA                              | TT                 | TT               | INTERGENIC      |               |                    |                    |
| SNP_74887_A_94270  | NW_004515954.1 | scaffold496 | 94270                   | TT                              | AA                 | AA               | INTERGENIC      |               |                    |                    |
| SNP_74888_A_101426 | NW_004515954.1 | scaffold496 | 101426                  | TT                              | GG                 | GG               | INTERGENIC      |               |                    |                    |
| SNP_74889_A_116443 | NW_004515954.1 | scaffold496 | 116443                  | TT                              | AA                 | AA               | INTERGENIC      |               |                    |                    |
| SNP_74890_A_116467 | NW_004515954.1 | scaffold496 | 116467                  | AA                              | TT                 | TT               | INTERGENIC      |               |                    |                    |
| SNP_74892_A_121465 | NW_004515954.1 | scaffold496 | 121465                  | CC                              | TT                 | TT               | INTERGENIC      |               |                    |                    |
| SNP_74893_A_121672 | NW_004515954.1 | scaffold496 | 121672                  | GG                              | CC                 | CC               | INTERGENIC      |               |                    |                    |
| SNP_74894_A_121680 | NW_004515954.1 | scaffold496 | 121680                  | CC                              | AA                 | AA               | INTERGENIC      |               |                    |                    |
| SNP_74895_A_122449 | NW_004515954.1 | scaffold496 | 122449                  | GG                              | AA                 | AA               | INTERGENIC      |               |                    |                    |
| SNP_74896_A_122467 | NW_004515954.1 | scaffold496 | 122467                  | AA                              | GG                 | GG               | INTERGENIC      |               |                    |                    |

| SNPs IDs           | Chromosome IDs | Chromosomes | Physical positions (bp) | CDC Frontier (Reference genome) | (Pusa 1103 & HPNB) | (ILWC 46 & LPNB) | Sequence genome | Components of | Gene accession IDs | Putative functions |
|--------------------|----------------|-------------|-------------------------|---------------------------------|--------------------|------------------|-----------------|---------------|--------------------|--------------------|
| SNP_74897_A_122482 | NW_004515954.1 | scaffold496 | 122482                  | GG                              | TT                 | TT               | INTERGENIC      |               |                    |                    |
| SNP_74898_A_122500 | NW_004515954.1 | scaffold496 | 122500                  | GG                              | TT                 | TT               | INTERGENIC      |               |                    |                    |
| SNP_74899_A_122720 | NW_004515954.1 | scaffold496 | 122720                  | CC                              | GG                 | GG               | INTERGENIC      |               |                    |                    |
| SNP_74900_A_123163 | NW_004515954.1 | scaffold496 | 123163                  | AA                              | GG                 | GG               | INTERGENIC      |               |                    |                    |
| SNP_74901_A_123948 | NW_004515954.1 | scaffold496 | 123948                  | AA                              | GG                 | GG               | INTERGENIC      |               |                    |                    |
| SNP_74902_A_124011 | NW_004515954.1 | scaffold496 | 124011                  | TT                              | CC                 | CC               | INTERGENIC      |               |                    |                    |
| SNP_74903_A_124197 | NW_004515954.1 | scaffold496 | 124197                  | TT                              | CC                 | CC               | INTERGENIC      |               |                    |                    |
| SNP_74904_A_124237 | NW_004515954.1 | scaffold496 | 124237                  | CC                              | TT                 | TT               | INTERGENIC      |               |                    |                    |
| SNP_74905_A_124258 | NW_004515954.1 | scaffold496 | 124258                  | CC                              | TT                 | TT               | INTERGENIC      |               |                    |                    |
| SNP_74906_A_124280 | NW_004515954.1 | scaffold496 | 124280                  | TT                              | AA                 | AA               | INTERGENIC      |               |                    |                    |
| SNP_74907_A_124281 | NW_004515954.1 | scaffold496 | 124281                  | TT                              | CC                 | CC               | INTERGENIC      |               |                    |                    |
| SNP_74908_A_124377 | NW_004515954.1 | scaffold496 | 124377                  | AA                              | GG                 | GG               | INTERGENIC      |               |                    |                    |
| SNP_74909_A_129166 | NW_004515954.1 | scaffold496 | 129166                  | CC                              | GG                 | GG               | INTERGENIC      |               |                    |                    |
| SNP_74910_A_129220 | NW_004515954.1 | scaffold496 | 129220                  | TT                              | GG                 | GG               | INTERGENIC      |               |                    |                    |
| SNP_74911_A_129416 | NW_004515954.1 | scaffold496 | 129416                  | GG                              | CC                 | CC               | INTERGENIC      |               |                    |                    |
| SNP_74912_A_129651 | NW_004515954.1 | scaffold496 | 129651                  | CC                              | GG                 | GG               | INTERGENIC      |               |                    |                    |
| SNP_74913_A_129678 | NW_004515954.1 | scaffold496 | 129678                  | AA                              | GG                 | GG               | INTERGENIC      |               |                    |                    |
| SNP_74914_A_144761 | NW_004515954.1 | scaffold496 | 144761                  | TT                              | CC                 | CC               | INTERGENIC      |               |                    |                    |
| SNP_74915_A_145132 | NW_004515954.1 | scaffold496 | 145132                  | CC                              | GG                 | GG               | INTERGENIC      |               |                    |                    |
| SNP_74916_A_145174 | NW_004515954.1 | scaffold496 | 145174                  | AA                              | GG                 | GG               | INTERGENIC      |               |                    |                    |
| SNP_74917_A_145194 | NW_004515954.1 | scaffold496 | 145194                  | AA                              | GG                 | GG               | INTERGENIC      |               |                    |                    |
| SNP_74918_A_166014 | NW_004515954.1 | scaffold496 | 166014                  | AA                              | GG                 | GG               | INTERGENIC      |               |                    |                    |

| SNPs IDs           | Chromosome IDs | Chromosomes | Physical positions (bp) | CDC Frontier (Reference genome) | (Pusa 1103 & HPNB) | (ILWC 46 & LPNB) | Sequence genome | Components of | Gene accession IDs | Putative functions |
|--------------------|----------------|-------------|-------------------------|---------------------------------|--------------------|------------------|-----------------|---------------|--------------------|--------------------|
| SNP_74919_A_184593 | NW_004515954.1 | scaffold496 | 184593                  | AA                              | TT                 | TT               | INTERGENIC      |               |                    |                    |
| SNP_74920_A_184641 | NW_004515954.1 | scaffold496 | 184641                  | TT                              | CC                 | CC               | INTERGENIC      |               |                    |                    |
| SNP_74921_A_184705 | NW_004515954.1 | scaffold496 | 184705                  | TT                              | AA                 | AA               | INTERGENIC      |               |                    |                    |
| SNP_74922_A_190768 | NW_004515954.1 | scaffold496 | 190768                  | TT                              | GG                 | GG               | INTERGENIC      |               |                    |                    |
| SNP_74923_A_190775 | NW_004515954.1 | scaffold496 | 190775                  | AA                              | GG                 | GG               | INTERGENIC      |               |                    |                    |
| SNP_74924_A_190837 | NW_004515954.1 | scaffold496 | 190837                  | CC                              | AA                 | AA               | INTERGENIC      |               |                    |                    |
| SNP_74925_A_191232 | NW_004515954.1 | scaffold496 | 191232                  | CC                              | GG                 | GG               | INTERGENIC      |               |                    |                    |
| SNP_74926_A_196781 | NW_004515954.1 | scaffold496 | 196781                  | GG                              | CC                 | CC               | INTERGENIC      |               |                    |                    |
| SNP_74927_A_197527 | NW_004515954.1 | scaffold496 | 197527                  | TT                              | CC                 | CC               | INTERGENIC      |               |                    |                    |
| SNP_74928_A_205287 | NW_004515954.1 | scaffold496 | 205287                  | TT                              | CC                 | CC               | INTERGENIC      |               |                    |                    |
| SNP_74930_A_217087 | NW_004515954.1 | scaffold496 | 217087                  | GG                              | AA                 | AA               | INTERGENIC      |               |                    |                    |
| SNP_74931_A_217090 | NW_004515954.1 | scaffold496 | 217090                  | AA                              | GG                 | GG               | INTERGENIC      |               |                    |                    |
| SNP_74932_A_219482 | NW_004515954.1 | scaffold496 | 219482                  | CC                              | TT                 | TT               | INTERGENIC      |               |                    |                    |
| SNP_74933_A_219548 | NW_004515954.1 | scaffold496 | 219548                  | AA                              | GG                 | GG               | INTERGENIC      |               |                    |                    |
| SNP_74934_A_221032 | NW_004515954.1 | scaffold496 | 221032                  | GG                              | AA                 | AA               | INTERGENIC      |               |                    |                    |
| SNP_74935_A_221193 | NW_004515954.1 | scaffold496 | 221193                  | GG                              | AA                 | AA               | INTERGENIC      |               |                    |                    |
| SNP_74936_A_227181 | NW_004515954.1 | scaffold496 | 227181                  | GG                              | CC                 | CC               | INTERGENIC      |               |                    |                    |
| SNP_74937_A_227190 | NW_004515954.1 | scaffold496 | 227190                  | GG                              | AA                 | AA               | INTERGENIC      |               |                    |                    |
| SNP_74938_A_227221 | NW_004515954.1 | scaffold496 | 227221                  | CC                              | TT                 | TT               | INTERGENIC      |               |                    |                    |
| SNP_74939_A_227286 | NW_004515954.1 | scaffold496 | 227286                  | GG                              | TT                 | TT               | INTERGENIC      |               |                    |                    |
| SNP_74940_A_228049 | NW_004515954.1 | scaffold496 | 228049                  | GG                              | AA                 | AA               | INTERGENIC      |               |                    |                    |
| SNP_74941_A_228102 | NW_004515954.1 | scaffold496 | 228102                  | TT                              | CC                 | CC               | INTERGENIC      |               |                    |                    |

| SNPs IDs           | Chromosome IDs | Chromosomes | Physical positions (bp) | CDC Frontier (Reference genome) | (Pusa 1103 & HPNB) | (ILWC 46 & LPNB) | Sequence genome | Components of | Gene accession IDs | Putative functions |
|--------------------|----------------|-------------|-------------------------|---------------------------------|--------------------|------------------|-----------------|---------------|--------------------|--------------------|
| SNP_74942_A_228399 | NW_004515954.1 | scaffold496 | 228399                  | TT                              | GG                 | GG               | INTERGENIC      |               |                    |                    |
| SNP_74943_A_228407 | NW_004515954.1 | scaffold496 | 228407                  | TT                              | CC                 | CC               | INTERGENIC      |               |                    |                    |
| SNP_74944_A_244566 | NW_004515954.1 | scaffold496 | 244566                  | TT                              | CC                 | CC               | INTERGENIC      |               |                    |                    |
| SNP_74945_A_244573 | NW_004515954.1 | scaffold496 | 244573                  | TT                              | AA                 | AA               | INTERGENIC      |               |                    |                    |
| SNP_74946_A_245960 | NW_004515954.1 | scaffold496 | 245960                  | GG                              | CC                 | CC               | INTERGENIC      |               |                    |                    |
| SNP_74947_A_245969 | NW_004515954.1 | scaffold496 | 245969                  | AA                              | GG                 | GG               | INTERGENIC      |               |                    |                    |
| SNP_74948_A_245979 | NW_004515954.1 | scaffold496 | 245979                  | TT                              | CC                 | CC               | INTERGENIC      |               |                    |                    |
| SNP_74949_A_264521 | NW_004515954.1 | scaffold496 | 264521                  | AA                              | GG                 | GG               | INTERGENIC      |               |                    |                    |
| SNP_74950_A_264933 | NW_004515954.1 | scaffold496 | 264933                  | GG                              | AA                 | AA               | INTERGENIC      |               |                    |                    |
| SNP_74951_A_44990  | NW_004515955.1 | scaffold497 | 44990                   | GG                              | TT                 | TT               | INTERGENIC      |               |                    |                    |
| SNP_74952_A_45102  | NW_004515955.1 | scaffold497 | 45102                   | TT                              | AA                 | AA               | INTERGENIC      |               |                    |                    |
| SNP_74953_A_45107  | NW_004515955.1 | scaffold497 | 45107                   | AA                              | TT                 | TT               | INTERGENIC      |               |                    |                    |
| SNP_74954_A_45156  | NW_004515955.1 | scaffold497 | 45156                   | TT                              | GG                 | GG               | INTERGENIC      |               |                    |                    |
| SNP_74956_A_47012  | NW_004515955.1 | scaffold497 | 47012                   | TT                              | GG                 | GG               | INTERGENIC      |               |                    |                    |
| SNP_74957_A_47015  | NW_004515955.1 | scaffold497 | 47015                   | GG                              | CC                 | CC               | INTERGENIC      |               |                    |                    |
| SNP_74958_A_62917  | NW_004515955.1 | scaffold497 | 62917                   | CC                              | GG                 | GG               | INTERGENIC      |               |                    |                    |
| SNP_74959_A_63033  | NW_004515955.1 | scaffold497 | 63033                   | TT                              | GG                 | GG               | INTERGENIC      |               |                    |                    |
| SNP_74960_A_63040  | NW_004515955.1 | scaffold497 | 63040                   | AA                              | GG                 | GG               | INTERGENIC      |               |                    |                    |
| SNP_74961_A_63054  | NW_004515955.1 | scaffold497 | 63054                   | TT                              | CC                 | CC               | INTERGENIC      |               |                    |                    |
| SNP_74962_A_63089  | NW_004515955.1 | scaffold497 | 63089                   | TT                              | CC                 | CC               | INTERGENIC      |               |                    |                    |
| SNP_74963_A_63107  | NW_004515955.1 | scaffold497 | 63107                   | GG                              | TT                 | TT               | INTERGENIC      |               |                    |                    |
| SNP_74964_A_63246  | NW_004515955.1 | scaffold497 | 63246                   | TT                              | GG                 | GG               | INTERGENIC      |               |                    |                    |

| SNPs IDs          | Chromosome IDs | Chromosomes | Physical positions (bp) | CDC Frontier (Reference genome) | (Pusa 1103 & HPNB) | (ILWC 46 & LPNB) | Sequence genome | Components of | Gene accession IDs | Putative functions |
|-------------------|----------------|-------------|-------------------------|---------------------------------|--------------------|------------------|-----------------|---------------|--------------------|--------------------|
| SNP_74965_A_63346 | NW_004515955.1 | scaffold497 | 63346                   | AA                              | GG                 | GG               | INTERGENIC      |               |                    |                    |
| SNP_74966_A_63920 | NW_004515955.1 | scaffold497 | 63920                   | TT                              | AA                 | AA               | INTERGENIC      |               |                    |                    |
| SNP_74967_A_64895 | NW_004515955.1 | scaffold497 | 64895                   | GG                              | TT                 | TT               | INTERGENIC      |               |                    |                    |
| SNP_74968_A_68003 | NW_004515955.1 | scaffold497 | 68003                   | AA                              | TT                 | TT               | INTERGENIC      |               |                    |                    |
| SNP_74969_A_68007 | NW_004515955.1 | scaffold497 | 68007                   | TT                              | CC                 | CC               | INTERGENIC      |               |                    |                    |
| SNP_74970_A_68039 | NW_004515955.1 | scaffold497 | 68039                   | GG                              | AA                 | AA               | INTERGENIC      |               |                    |                    |
| SNP_74971_A_69282 | NW_004515955.1 | scaffold497 | 69282                   | GG                              | AA                 | AA               | INTERGENIC      |               |                    |                    |
| SNP_74973_A_69332 | NW_004515955.1 | scaffold497 | 69332                   | TT                              | AA                 | AA               | INTERGENIC      |               |                    |                    |
| SNP_74974_A_69341 | NW_004515955.1 | scaffold497 | 69341                   | AA                              | TT                 | TT               | INTERGENIC      |               |                    |                    |
| SNP_74975_A_69659 | NW_004515955.1 | scaffold497 | 69659                   | AA                              | TT                 | TT               | INTERGENIC      |               |                    |                    |
| SNP_74976_A_69975 | NW_004515955.1 | scaffold497 | 69975                   | AA                              | GG                 | GG               | INTERGENIC      |               |                    |                    |
| SNP_74977_A_69976 | NW_004515955.1 | scaffold497 | 69976                   | AA                              | TT                 | TT               | INTERGENIC      |               |                    |                    |
| SNP_74978_A_69977 | NW_004515955.1 | scaffold497 | 69977                   | TT                              | AA                 | AA               | INTERGENIC      |               |                    |                    |
| SNP_74979_A_69980 | NW_004515955.1 | scaffold497 | 69980                   | CC                              | TT                 | TT               | INTERGENIC      |               |                    |                    |
| SNP_74982_A_72106 | NW_004515955.1 | scaffold497 | 72106                   | AA                              | GG                 | GG               | INTERGENIC      |               |                    |                    |
| SNP_74983_A_72107 | NW_004515955.1 | scaffold497 | 72107                   | GG                              | CC                 | CC               | INTERGENIC      |               |                    |                    |
| SNP_74984_A_72122 | NW_004515955.1 | scaffold497 | 72122                   | AA                              | CC                 | CC               | INTERGENIC      |               |                    |                    |
| SNP_74985_A_72153 | NW_004515955.1 | scaffold497 | 72153                   | AA                              | GG                 | GG               | INTERGENIC      |               |                    |                    |
| SNP_74986_A_72368 | NW_004515955.1 | scaffold497 | 72368                   | GG                              | CC                 | CC               | INTERGENIC      |               |                    |                    |
| SNP_74987_A_72390 | NW_004515955.1 | scaffold497 | 72390                   | TT                              | CC                 | CC               | INTERGENIC      |               |                    |                    |
| SNP_74988_A_72420 | NW_004515955.1 | scaffold497 | 72420                   | GG                              | TT                 | TT               | INTERGENIC      |               |                    |                    |
| SNP_74989_A_72497 | NW_004515955.1 | scaffold497 | 72497                   | GG                              | TT                 | TT               | INTERGENIC      |               |                    |                    |

| SNPs IDs          | Chromosome IDs | Chromosomes | Physical positions (bp) | CDC Frontier (Reference genome) | (Pusa 1103 & HPNB) | (ILWC 46 & LPNB) | Sequence genome | Components of | Gene accession IDs | Putative functions |
|-------------------|----------------|-------------|-------------------------|---------------------------------|--------------------|------------------|-----------------|---------------|--------------------|--------------------|
| SNP_74990_A_73428 | NW_004515955.1 | scaffold497 | 73428                   | AA                              | CC                 | CC               | INTERGENIC      |               |                    |                    |
| SNP_74991_A_73500 | NW_004515955.1 | scaffold497 | 73500                   | GG                              | AA                 | AA               | INTERGENIC      |               |                    |                    |
| SNP_74992_A_73528 | NW_004515955.1 | scaffold497 | 73528                   | AA                              | CC                 | CC               | INTERGENIC      |               |                    |                    |
| SNP_74993_A_73584 | NW_004515955.1 | scaffold497 | 73584                   | AA                              | CC                 | CC               | INTERGENIC      |               |                    |                    |
| SNP_74994_A_73632 | NW_004515955.1 | scaffold497 | 73632                   | AA                              | GG                 | GG               | INTERGENIC      |               |                    |                    |
| SNP_74995_A_73710 | NW_004515955.1 | scaffold497 | 73710                   | TT                              | CC                 | CC               | INTERGENIC      |               |                    |                    |
| SNP_74996_A_73744 | NW_004515955.1 | scaffold497 | 73744                   | GG                              | TT                 | TT               | INTERGENIC      |               |                    |                    |
| SNP_74997_A_73804 | NW_004515955.1 | scaffold497 | 73804                   | AA                              | GG                 | GG               | INTERGENIC      |               |                    |                    |
| SNP_74998_A_73831 | NW_004515955.1 | scaffold497 | 73831                   | GG                              | AA                 | AA               | INTERGENIC      |               |                    |                    |
| SNP_74999_A_73852 | NW_004515955.1 | scaffold497 | 73852                   | TT                              | GG                 | GG               | INTERGENIC      |               |                    |                    |
| SNP_75000_A_73909 | NW_004515955.1 | scaffold497 | 73909                   | AA                              | TT                 | TT               | INTERGENIC      |               |                    |                    |
| SNP_75001_A_73954 | NW_004515955.1 | scaffold497 | 73954                   | GG                              | TT                 | TT               | INTERGENIC      |               |                    |                    |
| SNP_75002_A_83068 | NW_004515955.1 | scaffold497 | 83068                   | AA                              | GG                 | GG               | INTERGENIC      |               |                    |                    |
| SNP_75003_A_83102 | NW_004515955.1 | scaffold497 | 83102                   | TT                              | CC                 | CC               | INTERGENIC      |               |                    |                    |
| SNP_75004_A_84438 | NW_004515955.1 | scaffold497 | 84438                   | AA                              | CC                 | CC               | INTERGENIC      |               |                    |                    |
| SNP_75005_A_84688 | NW_004515955.1 | scaffold497 | 84688                   | AA                              | CC                 | CC               | INTERGENIC      |               |                    |                    |
| SNP_75006_A_84776 | NW_004515955.1 | scaffold497 | 84776                   | TT                              | AA                 | AA               | INTERGENIC      |               |                    |                    |
| SNP_75007_A_85095 | NW_004515955.1 | scaffold497 | 85095                   | TT                              | AA                 | AA               | INTERGENIC      |               |                    |                    |
| SNP_75008_A_85225 | NW_004515955.1 | scaffold497 | 85225                   | AA                              | GG                 | GG               | INTERGENIC      |               |                    |                    |
| SNP_75009_A_88065 | NW_004515955.1 | scaffold497 | 88065                   | GG                              | AA                 | AA               | INTERGENIC      |               |                    |                    |
| SNP_75010_A_92143 | NW_004515955.1 | scaffold497 | 92143                   | TT                              | AA                 | AA               | INTERGENIC      |               |                    |                    |
| SNP_75011_A_92403 | NW_004515955.1 | scaffold497 | 92403                   | TT                              | CC                 | CC               | INTERGENIC      |               |                    |                    |



| SNPs IDs           | Chromosome IDs | Chromosomes | Physical positions (bp) | CDC Frontier (Reference genome) | (Pusa 1103 & HPNB) | (ILWC 46 & LPNB) | Sequence Components of genome | Gene accession IDs | Putative functions                |
|--------------------|----------------|-------------|-------------------------|---------------------------------|--------------------|------------------|-------------------------------|--------------------|-----------------------------------|
| SNP_75012_A_93457  | NW_004515955.1 | scaffold497 | 93457                   | TT                              | CC                 | CC               | INTERGENIC                    |                    |                                   |
| SNP_75013_A_94877  | NW_004515955.1 | scaffold497 | 94877                   | CC                              | TT                 | TT               | INTERGENIC                    |                    |                                   |
| SNP_75014_A_94907  | NW_004515955.1 | scaffold497 | 94907                   | TT                              | GG                 | GG               | INTERGENIC                    |                    |                                   |
| SNP_75015_A_95042  | NW_004515955.1 | scaffold497 | 95042                   | AA                              | TT                 | TT               | INTERGENIC                    |                    |                                   |
| SNP_75016_A_95048  | NW_004515955.1 | scaffold497 | 95048                   | TT                              | CC                 | CC               | INTERGENIC                    |                    |                                   |
| SNP_75017_A_95099  | NW_004515955.1 | scaffold497 | 95099                   | TT                              | GG                 | GG               | INTERGENIC                    |                    |                                   |
| SNP_75018_A_95177  | NW_004515955.1 | scaffold497 | 95177                   | TT                              | AA                 | AA               | INTERGENIC                    |                    |                                   |
| SNP_75019_A_95178  | NW_004515955.1 | scaffold497 | 95178                   | AA                              | GG                 | GG               | INTERGENIC                    |                    |                                   |
| SNP_75021_A_48803  | NW_004515956.1 | scaffold498 | 48803                   | AA                              | GG                 | GG               | INTERGENIC                    |                    |                                   |
| SNP_75022_A_48911  | NW_004515956.1 | scaffold498 | 48911                   | GG                              | AA                 | AA               | INTERGENIC                    |                    |                                   |
| SNP_75023_A_149330 | NW_004515956.1 | scaffold498 | 149330                  | CC                              | AA                 | AA               | INTERGENIC                    |                    |                                   |
| SNP_75024_A_152248 | NW_004515956.1 | scaffold498 | 152248                  | AA                              | GG                 | GG               | INTERGENIC                    |                    |                                   |
| SNP_75025_A_158609 | NW_004515956.1 | scaffold498 | 158609                  | GG                              | AA                 | AA               | URR                           | 101509494          | laccase-17-like                   |
| SNP_75026_A_178289 | NW_004515956.1 | scaffold498 | 178289                  | TT                              | CC                 | CC               | INTRON                        | 101510783          | vacuolar amino acid transporter 1 |
| SNP_75027_A_198625 | NW_004515956.1 | scaffold498 | 198625                  | TT                              | AA                 | AA               | INTERGENIC                    |                    |                                   |
| SNP_75028_A_198640 | NW_004515956.1 | scaffold498 | 198640                  | AA                              | TT                 | TT               | INTERGENIC                    |                    |                                   |
| SNP_75029_A_198652 | NW_004515956.1 | scaffold498 | 198652                  | GG                              | TT                 | TT               | INTERGENIC                    |                    |                                   |
| SNP_75030_A_198700 | NW_004515956.1 | scaffold498 | 198700                  | TT                              | AA                 | AA               | INTERGENIC                    |                    |                                   |
| SNP_75031_A_198703 | NW_004515956.1 | scaffold498 | 198703                  | CC                              | TT                 | TT               | INTERGENIC                    |                    |                                   |
| SNP_75032_A_198708 | NW_004515956.1 | scaffold498 | 198708                  | TT                              | GG                 | GG               | INTERGENIC                    |                    |                                   |
| SNP_75033_A_198809 | NW_004515956.1 | scaffold498 | 198809                  | AA                              | GG                 | GG               | INTERGENIC                    |                    |                                   |
| SNP_75034_A_198811 | NW_004515956.1 | scaffold498 | 198811                  | AA                              | GG                 | GG               | INTERGENIC                    |                    |                                   |

| SNPs IDs           | Chromosome IDs | Chromosomes | Physical positions (bp) | CDC Frontier (Reference genome) | (Pusa 1103 & HPNB) | (ILWC 46 & LPNB) | Sequence genome | Components of | Gene accession IDs | Putative functions |
|--------------------|----------------|-------------|-------------------------|---------------------------------|--------------------|------------------|-----------------|---------------|--------------------|--------------------|
| SNP_75035_A_199108 | NW_004515956.1 | scaffold498 | 199108                  | TT                              | CC                 | CC               | INTERGENIC      |               |                    |                    |
| SNP_75036_A_199174 | NW_004515956.1 | scaffold498 | 199174                  | TT                              | CC                 | CC               | INTERGENIC      |               |                    |                    |
| SNP_75037_A_199211 | NW_004515956.1 | scaffold498 | 199211                  | AA                              | GG                 | GG               | INTERGENIC      |               |                    |                    |
| SNP_75038_A_205121 | NW_004515956.1 | scaffold498 | 205121                  | GG                              | CC                 | CC               | INTERGENIC      |               |                    |                    |
| SNP_75039_A_205425 | NW_004515956.1 | scaffold498 | 205425                  | CC                              | TT                 | TT               | INTERGENIC      |               |                    |                    |
| SNP_75040_A_205619 | NW_004515956.1 | scaffold498 | 205619                  | GG                              | AA                 | AA               | INTERGENIC      |               |                    |                    |
| SNP_75041_A_205637 | NW_004515956.1 | scaffold498 | 205637                  | TT                              | CC                 | CC               | INTERGENIC      |               |                    |                    |
| SNP_75042_A_205803 | NW_004515956.1 | scaffold498 | 205803                  | AA                              | GG                 | GG               | INTERGENIC      |               |                    |                    |
| SNP_75043_A_205879 | NW_004515956.1 | scaffold498 | 205879                  | TT                              | CC                 | CC               | INTERGENIC      |               |                    |                    |
| SNP_75045_A_207013 | NW_004515956.1 | scaffold498 | 207013                  | GG                              | AA                 | AA               | INTERGENIC      |               |                    |                    |
| SNP_75047_A_212139 | NW_004515956.1 | scaffold498 | 212139                  | AA                              | GG                 | GG               | INTERGENIC      |               |                    |                    |
| SNP_75048_A_213294 | NW_004515956.1 | scaffold498 | 213294                  | CC                              | TT                 | TT               | INTERGENIC      |               |                    |                    |
| SNP_75049_A_213319 | NW_004515956.1 | scaffold498 | 213319                  | GG                              | AA                 | AA               | INTERGENIC      |               |                    |                    |
| SNP_75050_A_213430 | NW_004515956.1 | scaffold498 | 213430                  | AA                              | CC                 | CC               | INTERGENIC      |               |                    |                    |
| SNP_75051_A_213706 | NW_004515956.1 | scaffold498 | 213706                  | GG                              | TT                 | TT               | INTERGENIC      |               |                    |                    |
| SNP_75052_A_213900 | NW_004515956.1 | scaffold498 | 213900                  | TT                              | CC                 | CC               | INTERGENIC      |               |                    |                    |
| SNP_75053_A_213949 | NW_004515956.1 | scaffold498 | 213949                  | GG                              | AA                 | AA               | INTERGENIC      |               |                    |                    |
| SNP_75056_A_214320 | NW_004515956.1 | scaffold498 | 214320                  | CC                              | TT                 | TT               | INTERGENIC      |               |                    |                    |
| SNP_75057_A_214452 | NW_004515956.1 | scaffold498 | 214452                  | CC                              | TT                 | TT               | INTERGENIC      |               |                    |                    |
| SNP_75059_A_214627 | NW_004515956.1 | scaffold498 | 214627                  | GG                              | AA                 | AA               | INTERGENIC      |               |                    |                    |
| SNP_75060_A_214678 | NW_004515956.1 | scaffold498 | 214678                  | CC                              | AA                 | AA               | INTERGENIC      |               |                    |                    |
| SNP_75061_A_214742 | NW_004515956.1 | scaffold498 | 214742                  | TT                              | CC                 | CC               | INTERGENIC      |               |                    |                    |

| SNPs IDs           | Chromosome IDs | Chromosomes | Physical positions (bp) | CDC Frontier (Reference genome) | (Pusa 1103 & HPNB) | (ILWC 46 & LPNB) | Sequence genome | Components of | Gene accession IDs | Putative functions |
|--------------------|----------------|-------------|-------------------------|---------------------------------|--------------------|------------------|-----------------|---------------|--------------------|--------------------|
| SNP_75062_A_214827 | NW_004515956.1 | scaffold498 | 214827                  | AA                              | GG                 | GG               | INTERGENIC      |               |                    |                    |
| SNP_75063_A_214988 | NW_004515956.1 | scaffold498 | 214988                  | GG                              | CC                 | CC               | INTERGENIC      |               |                    |                    |
| SNP_75064_A_215037 | NW_004515956.1 | scaffold498 | 215037                  | AA                              | GG                 | GG               | INTERGENIC      |               |                    |                    |
| SNP_75065_A_215043 | NW_004515956.1 | scaffold498 | 215043                  | AA                              | GG                 | GG               | INTERGENIC      |               |                    |                    |
| SNP_75066_A_215101 | NW_004515956.1 | scaffold498 | 215101                  | AA                              | CC                 | CC               | INTERGENIC      |               |                    |                    |
| SNP_75067_A_215250 | NW_004515956.1 | scaffold498 | 215250                  | GG                              | AA                 | AA               | INTERGENIC      |               |                    |                    |
| SNP_75068_A_215258 | NW_004515956.1 | scaffold498 | 215258                  | CC                              | AA                 | AA               | INTERGENIC      |               |                    |                    |
| SNP_75069_A_215506 | NW_004515956.1 | scaffold498 | 215506                  | AA                              | GG                 | GG               | INTERGENIC      |               |                    |                    |
| SNP_75070_A_215521 | NW_004515956.1 | scaffold498 | 215521                  | AA                              | GG                 | GG               | INTERGENIC      |               |                    |                    |
| SNP_75071_A_215559 | NW_004515956.1 | scaffold498 | 215559                  | GG                              | AA                 | AA               | INTERGENIC      |               |                    |                    |
| SNP_75072_A_215825 | NW_004515956.1 | scaffold498 | 215825                  | CC                              | AA                 | AA               | INTERGENIC      |               |                    |                    |
| SNP_75073_A_215864 | NW_004515956.1 | scaffold498 | 215864                  | CC                              | TT                 | TT               | INTERGENIC      |               |                    |                    |
| SNP_75074_A_215878 | NW_004515956.1 | scaffold498 | 215878                  | AA                              | GG                 | GG               | INTERGENIC      |               |                    |                    |
| SNP_75075_A_215903 | NW_004515956.1 | scaffold498 | 215903                  | CC                              | GG                 | GG               | INTERGENIC      |               |                    |                    |
| SNP_75076_A_216067 | NW_004515956.1 | scaffold498 | 216067                  | CC                              | AA                 | AA               | INTERGENIC      |               |                    |                    |
| SNP_75077_A_216171 | NW_004515956.1 | scaffold498 | 216171                  | AA                              | GG                 | GG               | INTERGENIC      |               |                    |                    |
| SNP_75078_A_216254 | NW_004515956.1 | scaffold498 | 216254                  | TT                              | CC                 | CC               | INTERGENIC      |               |                    |                    |
| SNP_75079_A_216372 | NW_004515956.1 | scaffold498 | 216372                  | TT                              | AA                 | AA               | INTERGENIC      |               |                    |                    |
| SNP_75080_A_216375 | NW_004515956.1 | scaffold498 | 216375                  | GG                              | AA                 | AA               | INTERGENIC      |               |                    |                    |
| SNP_75081_A_216460 | NW_004515956.1 | scaffold498 | 216460                  | CC                              | TT                 | TT               | INTERGENIC      |               |                    |                    |
| SNP_75082_A_216634 | NW_004515956.1 | scaffold498 | 216634                  | AA                              | GG                 | GG               | INTERGENIC      |               |                    |                    |
| SNP_75083_A_216639 | NW_004515956.1 | scaffold498 | 216639                  | CC                              | TT                 | TT               | INTERGENIC      |               |                    |                    |

| SNPs IDs          | Chromosome IDs | Chromosomes | Physical positions (bp) | CDC Frontier (Reference genome) | (Pusa 1103 & HPNB) | (ILWC 46 & LPNB) | Sequence genome   | Components of | Gene accession IDs                           | Putative functions |
|-------------------|----------------|-------------|-------------------------|---------------------------------|--------------------|------------------|-------------------|---------------|----------------------------------------------|--------------------|
| SNP_75084_A_1199  | NW_004515958.1 | scaffold501 | 1199                    | CC                              | TT                 | TT               | INTERGENIC        |               |                                              |                    |
| SNP_75085_A_1207  | NW_004515958.1 | scaffold501 | 1207                    | CC                              | TT                 | TT               | INTERGENIC        |               |                                              |                    |
| SNP_75086_A_1861  | NW_004515958.1 | scaffold501 | 1861                    | TT                              | GG                 | GG               | INTERGENIC        |               |                                              |                    |
| SNP_75087_A_10953 | NW_004515958.1 | scaffold501 | 10953                   | CC                              | TT                 | TT               | INTERGENIC        |               |                                              |                    |
| SNP_75088_A_11018 | NW_004515958.1 | scaffold501 | 11018                   | AA                              | GG                 | GG               | INTERGENIC        |               |                                              |                    |
| SNP_75089_A_11045 | NW_004515958.1 | scaffold501 | 11045                   | GG                              | CC                 | CC               | INTERGENIC        |               |                                              |                    |
| SNP_75090_A_11050 | NW_004515958.1 | scaffold501 | 11050                   | AA                              | CC                 | CC               | INTERGENIC        |               |                                              |                    |
| SNP_75091_A_11055 | NW_004515958.1 | scaffold501 | 11055                   | TT                              | GG                 | GG               | INTERGENIC        |               |                                              |                    |
| SNP_75092_A_11159 | NW_004515958.1 | scaffold501 | 11159                   | CC                              | TT                 | TT               | INTERGENIC        |               |                                              |                    |
| SNP_75093_A_11395 | NW_004515958.1 | scaffold501 | 11395                   | GG                              | AA                 | AA               | INTERGENIC        |               |                                              |                    |
| SNP_75094_A_11497 | NW_004515958.1 | scaffold501 | 11497                   | AA                              | CC                 | CC               | INTERGENIC        |               |                                              |                    |
| SNP_75095_A_11584 | NW_004515958.1 | scaffold501 | 11584                   | AA                              | GG                 | GG               | INTERGENIC        |               |                                              |                    |
| SNP_75096_A_11653 | NW_004515958.1 | scaffold501 | 11653                   | GG                              | AA                 | AA               | INTERGENIC        |               |                                              |                    |
| SNP_75097_A_14191 | NW_004515958.1 | scaffold501 | 14191                   | AA                              | GG                 | GG               | INTERGENIC        |               |                                              |                    |
| SNP_75098_A_23137 | NW_004515958.1 | scaffold501 | 23137                   | AA                              | GG                 | GG               | INTERGENIC        |               |                                              |                    |
| SNP_75099_A_23169 | NW_004515958.1 | scaffold501 | 23169                   | AA                              | TT                 | TT               | INTERGENIC        |               |                                              |                    |
| SNP_75100_A_23178 | NW_004515958.1 | scaffold501 | 23178                   | TT                              | CC                 | CC               | INTERGENIC        |               |                                              |                    |
| SNP_75101_A_33617 | NW_004515958.1 | scaffold501 | 33617                   | TT                              | CC                 | CC               | INTERGENIC        |               |                                              |                    |
| SNP_75102_A_33914 | NW_004515958.1 | scaffold501 | 33914                   | AA                              | CC                 | CC               | INTERGENIC        |               |                                              |                    |
| SNP_75103_A_60602 | NW_004515958.1 | scaffold501 | 60602                   | TT                              | AA                 | AA               | INTERGENIC        |               |                                              |                    |
| SNP_75104_A_60881 | NW_004515958.1 | scaffold501 | 60881                   | CC                              | TT                 | TT               | INTERGENIC        |               |                                              |                    |
| SNP_75107_A_87760 | NW_004515958.1 | scaffold501 | 87760                   | TT                              | CC                 | CC               | SYNONYMOUS_CODING | 101511110     | PLASMODESMATA CALLOSE-BINDING PROTEIN 3-like |                    |

| SNPs IDs          | Chromosome IDs | Chromosomes | Physical positions (bp) | CDC Frontier (Reference genome) | (Pusa 1103 & HPNB) | (ILWC 46 & LPNB) | Sequence Components of genome | Gene accession IDs | Putative functions                           |
|-------------------|----------------|-------------|-------------------------|---------------------------------|--------------------|------------------|-------------------------------|--------------------|----------------------------------------------|
| SNP_75108_A_89042 | NW_004515958.1 | scaffold501 | 89042                   | AA                              | GG                 | GG               | URR                           | 101511110          | PLASMODESMATA CALLOSE-BINDING PROTEIN 3-like |
| SNP_75109_A_89233 | NW_004515958.1 | scaffold501 | 89233                   | GG                              | TT                 | TT               | URR                           | 101511110          | PLASMODESMATA CALLOSE-BINDING PROTEIN 3-like |
| SNP_75110_A_89244 | NW_004515958.1 | scaffold501 | 89244                   | TT                              | AA                 | AA               | URR                           | 101511110          | PLASMODESMATA CALLOSE-BINDING PROTEIN 3-like |
| SNP_75111_A_89296 | NW_004515958.1 | scaffold501 | 89296                   | TT                              | GG                 | GG               | URR                           | 101511110          | PLASMODESMATA CALLOSE-BINDING PROTEIN 3-like |
| SNP_75112_A_89313 | NW_004515958.1 | scaffold501 | 89313                   | TT                              | GG                 | GG               | URR                           | 101511110          | PLASMODESMATA CALLOSE-BINDING PROTEIN 3-like |
| SNP_75113_A_89405 | NW_004515958.1 | scaffold501 | 89405                   | TT                              | CC                 | CC               | URR                           | 101511110          | PLASMODESMATA CALLOSE-BINDING PROTEIN 3-like |
| SNP_75114_A_89432 | NW_004515958.1 | scaffold501 | 89432                   | CC                              | AA                 | AA               | URR                           | 101511110          | PLASMODESMATA CALLOSE-BINDING PROTEIN 3-like |
| SNP_75115_A_89455 | NW_004515958.1 | scaffold501 | 89455                   | GG                              | AA                 | AA               | URR                           | 101511110          | PLASMODESMATA CALLOSE-BINDING PROTEIN 3-like |
| SNP_75116_A_89604 | NW_004515958.1 | scaffold501 | 89604                   | CC                              | AA                 | AA               | URR                           | 101511110          | PLASMODESMATA CALLOSE-BINDING PROTEIN 3-like |
| SNP_75117_A_89658 | NW_004515958.1 | scaffold501 | 89658                   | AA                              | TT                 | TT               | URR                           | 101511110          | PLASMODESMATA CALLOSE-BINDING PROTEIN 3-like |
| SNP_75118_A_89724 | NW_004515958.1 | scaffold501 | 89724                   | TT                              | CC                 | CC               | URR                           | 101511110          | PLASMODESMATA CALLOSE-BINDING PROTEIN 3-like |
| SNP_75119_A_89818 | NW_004515958.1 | scaffold501 | 89818                   | CC                              | AA                 | AA               | URR                           | 101511110          | PLASMODESMATA CALLOSE-BINDING PROTEIN 3-like |
| SNP_75120_A_90097 | NW_004515958.1 | scaffold501 | 90097                   | TT                              | GG                 | GG               | URR                           | 101511110          | PLASMODESMATA CALLOSE-BINDING PROTEIN 3-like |
| SNP_75121_A_90110 | NW_004515958.1 | scaffold501 | 90110                   | AA                              | CC                 | CC               | URR                           | 101511110          | PLASMODESMATA CALLOSE-BINDING PROTEIN 3-like |
| SNP_75122_A_90135 | NW_004515958.1 | scaffold501 | 90135                   | AA                              | GG                 | GG               | URR                           | 101511110          | PLASMODESMATA CALLOSE-BINDING PROTEIN 3-like |
| SNP_75123_A_94083 | NW_004515958.1 | scaffold501 | 94083                   | CC                              | TT                 | TT               | INTERGENIC                    |                    |                                              |
| SNP_75124_A_94176 | NW_004515958.1 | scaffold501 | 94176                   | TT                              | GG                 | GG               | INTERGENIC                    |                    |                                              |
| SNP_75125_A_94220 | NW_004515958.1 | scaffold501 | 94220                   | TT                              | AA                 | AA               | INTERGENIC                    |                    |                                              |
| SNP_75126_A_94321 | NW_004515958.1 | scaffold501 | 94321                   | TT                              | CC                 | CC               | INTERGENIC                    |                    |                                              |
| SNP_75127_A_96732 | NW_004515958.1 | scaffold501 | 96732                   | AA                              | GG                 | GG               | INTERGENIC                    |                    |                                              |
| SNP_75128_A_96750 | NW_004515958.1 | scaffold501 | 96750                   | TT                              | GG                 | GG               | INTERGENIC                    |                    |                                              |
| SNP_75129_A_96823 | NW_004515958.1 | scaffold501 | 96823                   | AA                              | CC                 | CC               | INTERGENIC                    |                    |                                              |

| SNPs IDs           | Chromosome IDs | Chromosomes | Physical positions (bp) | CDC Frontier (Reference genome) | (Pusa 1103 & HPNB) | (ILWC 46 & LPNB) | Sequence genome | Components of | Gene accession IDs | Putative functions |
|--------------------|----------------|-------------|-------------------------|---------------------------------|--------------------|------------------|-----------------|---------------|--------------------|--------------------|
| SNP_75130_A_103872 | NW_004515958.1 | scaffold501 | 103872                  | CC                              | GG                 | GG               | INTERGENIC      |               |                    |                    |
| SNP_75131_A_103936 | NW_004515958.1 | scaffold501 | 103936                  | TT                              | AA                 | AA               | INTERGENIC      |               |                    |                    |
| SNP_75132_A_104067 | NW_004515958.1 | scaffold501 | 104067                  | GG                              | AA                 | AA               | INTERGENIC      |               |                    |                    |
| SNP_75133_A_104095 | NW_004515958.1 | scaffold501 | 104095                  | CC                              | AA                 | AA               | INTERGENIC      |               |                    |                    |
| SNP_75134_A_104103 | NW_004515958.1 | scaffold501 | 104103                  | TT                              | GG                 | GG               | INTERGENIC      |               |                    |                    |
| SNP_75135_A_104243 | NW_004515958.1 | scaffold501 | 104243                  | CC                              | GG                 | GG               | INTERGENIC      |               |                    |                    |
| SNP_75136_A_106665 | NW_004515958.1 | scaffold501 | 106665                  | TT                              | AA                 | AA               | INTERGENIC      |               |                    |                    |
| SNP_75137_A_110046 | NW_004515958.1 | scaffold501 | 110046                  | AA                              | GG                 | GG               | INTERGENIC      |               |                    |                    |
| SNP_75138_A_110370 | NW_004515958.1 | scaffold501 | 110370                  | CC                              | TT                 | TT               | INTERGENIC      |               |                    |                    |
| SNP_75139_A_110415 | NW_004515958.1 | scaffold501 | 110415                  | AA                              | GG                 | GG               | INTERGENIC      |               |                    |                    |
| SNP_75140_A_111682 | NW_004515958.1 | scaffold501 | 111682                  | AA                              | TT                 | TT               | INTERGENIC      |               |                    |                    |
| SNP_75141_A_111686 | NW_004515958.1 | scaffold501 | 111686                  | TT                              | CC                 | CC               | INTERGENIC      |               |                    |                    |
| SNP_75142_A_111999 | NW_004515958.1 | scaffold501 | 111999                  | AA                              | TT                 | TT               | INTERGENIC      |               |                    |                    |
| SNP_75143_A_115845 | NW_004515958.1 | scaffold501 | 115845                  | AA                              | TT                 | TT               | INTERGENIC      |               |                    |                    |
| SNP_75144_A_115855 | NW_004515958.1 | scaffold501 | 115855                  | GG                              | TT                 | TT               | INTERGENIC      |               |                    |                    |
| SNP_75145_A_116263 | NW_004515958.1 | scaffold501 | 116263                  | AA                              | GG                 | GG               | INTERGENIC      |               |                    |                    |
| SNP_75147_A_116532 | NW_004515958.1 | scaffold501 | 116532                  | TT                              | GG                 | GG               | INTERGENIC      |               |                    |                    |
| SNP_75148_A_117531 | NW_004515958.1 | scaffold501 | 117531                  | TT                              | CC                 | CC               | INTERGENIC      |               |                    |                    |
| SNP_75149_A_117552 | NW_004515958.1 | scaffold501 | 117552                  | CC                              | TT                 | TT               | INTERGENIC      |               |                    |                    |
| SNP_75150_A_117565 | NW_004515958.1 | scaffold501 | 117565                  | AA                              | TT                 | TT               | INTERGENIC      |               |                    |                    |
| SNP_75151_A_117571 | NW_004515958.1 | scaffold501 | 117571                  | CC                              | TT                 | TT               | INTERGENIC      |               |                    |                    |
| SNP_75152_A_117613 | NW_004515958.1 | scaffold501 | 117613                  | CC                              | AA                 | AA               | INTERGENIC      |               |                    |                    |

| SNPs IDs           | Chromosome IDs | Chromosomes | Physical positions (bp) | CDC Frontier (Reference genome) | (Pusa 1103 & HPNB) | (ILWC 46 & LPNB) | Sequence genome | Components of | Gene accession IDs | Putative functions |
|--------------------|----------------|-------------|-------------------------|---------------------------------|--------------------|------------------|-----------------|---------------|--------------------|--------------------|
| SNP_75153_A_117655 | NW_004515958.1 | scaffold501 | 117655                  | CC                              | AA                 | AA               | INTERGENIC      |               |                    |                    |
| SNP_75154_A_117668 | NW_004515958.1 | scaffold501 | 117668                  | CC                              | AA                 | AA               | INTERGENIC      |               |                    |                    |
| SNP_75155_A_117686 | NW_004515958.1 | scaffold501 | 117686                  | CC                              | TT                 | TT               | INTERGENIC      |               |                    |                    |
| SNP_75156_A_117702 | NW_004515958.1 | scaffold501 | 117702                  | CC                              | TT                 | TT               | INTERGENIC      |               |                    |                    |
| SNP_75157_A_117729 | NW_004515958.1 | scaffold501 | 117729                  | TT                              | CC                 | CC               | INTERGENIC      |               |                    |                    |
| SNP_75158_A_1294   | NW_004515959.1 | scaffold505 | 1294                    | TT                              | CC                 | CC               | INTERGENIC      |               |                    |                    |
| SNP_75159_A_1360   | NW_004515959.1 | scaffold505 | 1360                    | CC                              | AA                 | AA               | INTERGENIC      |               |                    |                    |
| SNP_75160_A_2875   | NW_004515959.1 | scaffold505 | 2875                    | AA                              | CC                 | CC               | INTERGENIC      |               |                    |                    |
| SNP_75161_A_3047   | NW_004515959.1 | scaffold505 | 3047                    | GG                              | TT                 | TT               | INTERGENIC      |               |                    |                    |
| SNP_75162_A_18996  | NW_004515959.1 | scaffold505 | 18996                   | TT                              | GG                 | GG               | INTERGENIC      |               |                    |                    |
| SNP_75163_A_20981  | NW_004515959.1 | scaffold505 | 20981                   | GG                              | TT                 | TT               | INTERGENIC      |               |                    |                    |
| SNP_75164_A_28004  | NW_004515959.1 | scaffold505 | 28004                   | AA                              | GG                 | GG               | INTERGENIC      |               |                    |                    |
| SNP_75165_A_29540  | NW_004515959.1 | scaffold505 | 29540                   | AA                              | TT                 | TT               | INTERGENIC      |               |                    |                    |
| SNP_75166_A_29546  | NW_004515959.1 | scaffold505 | 29546                   | AA                              | GG                 | GG               | INTERGENIC      |               |                    |                    |
| SNP_75167_A_29556  | NW_004515959.1 | scaffold505 | 29556                   | AA                              | TT                 | TT               | INTERGENIC      |               |                    |                    |
| SNP_75168_A_40623  | NW_004515959.1 | scaffold505 | 40623                   | CC                              | TT                 | TT               | INTERGENIC      |               |                    |                    |
| SNP_75169_A_41053  | NW_004515959.1 | scaffold505 | 41053                   | AA                              | GG                 | GG               | INTERGENIC      |               |                    |                    |
| SNP_75170_A_41108  | NW_004515959.1 | scaffold505 | 41108                   | AA                              | TT                 | TT               | INTERGENIC      |               |                    |                    |
| SNP_75171_A_41183  | NW_004515959.1 | scaffold505 | 41183                   | TT                              | GG                 | GG               | INTERGENIC      |               |                    |                    |
| SNP_75172_A_52062  | NW_004515959.1 | scaffold505 | 52062                   | AA                              | GG                 | GG               | INTERGENIC      |               |                    |                    |
| SNP_75173_A_52066  | NW_004515959.1 | scaffold505 | 52066                   | GG                              | TT                 | TT               | INTERGENIC      |               |                    |                    |
| SNP_75174_A_929    | NW_004515960.1 | scaffold506 | 929                     | TT                              | CC                 | CC               | INTERGENIC      |               |                    |                    |

| SNPs IDs          | Chromosome IDs | Chromosomes | Physical positions (bp) | CDC Frontier (Reference genome) | (Pusa 1103 & HPNB) | (ILWC 46 & LPNB) | Sequence genome | Components of | Gene accession IDs | Putative functions |
|-------------------|----------------|-------------|-------------------------|---------------------------------|--------------------|------------------|-----------------|---------------|--------------------|--------------------|
| SNP_75175_A_1424  | NW_004515960.1 | scaffold506 | 1424                    | TT                              | AA                 | AA               | INTERGENIC      |               |                    |                    |
| SNP_75176_A_1972  | NW_004515960.1 | scaffold506 | 1972                    | AA                              | TT                 | TT               | INTERGENIC      |               |                    |                    |
| SNP_75177_A_6452  | NW_004515960.1 | scaffold506 | 6452                    | CC                              | TT                 | TT               | INTERGENIC      |               |                    |                    |
| SNP_75178_A_6534  | NW_004515960.1 | scaffold506 | 6534                    | AA                              | GG                 | GG               | INTERGENIC      |               |                    |                    |
| SNP_75179_A_6739  | NW_004515960.1 | scaffold506 | 6739                    | CC                              | AA                 | AA               | INTERGENIC      |               |                    |                    |
| SNP_75180_A_6815  | NW_004515960.1 | scaffold506 | 6815                    | AA                              | TT                 | TT               | INTERGENIC      |               |                    |                    |
| SNP_75181_A_8571  | NW_004515960.1 | scaffold506 | 8571                    | CC                              | AA                 | AA               | INTERGENIC      |               |                    |                    |
| SNP_75182_A_8660  | NW_004515960.1 | scaffold506 | 8660                    | GG                              | AA                 | AA               | INTERGENIC      |               |                    |                    |
| SNP_75183_A_9020  | NW_004515960.1 | scaffold506 | 9020                    | AA                              | TT                 | TT               | INTERGENIC      |               |                    |                    |
| SNP_75184_A_9071  | NW_004515960.1 | scaffold506 | 9071                    | AA                              | GG                 | GG               | INTERGENIC      |               |                    |                    |
| SNP_75185_A_9897  | NW_004515960.1 | scaffold506 | 9897                    | GG                              | AA                 | AA               | INTERGENIC      |               |                    |                    |
| SNP_75186_A_10520 | NW_004515960.1 | scaffold506 | 10520                   | GG                              | AA                 | AA               | INTERGENIC      |               |                    |                    |
| SNP_75187_A_17676 | NW_004515960.1 | scaffold506 | 17676                   | TT                              | CC                 | CC               | INTERGENIC      |               |                    |                    |
| SNP_75188_A_17945 | NW_004515960.1 | scaffold506 | 17945                   | TT                              | AA                 | AA               | INTERGENIC      |               |                    |                    |
| SNP_75190_A_18397 | NW_004515960.1 | scaffold506 | 18397                   | AA                              | GG                 | GG               | INTERGENIC      |               |                    |                    |
| SNP_75191_A_18820 | NW_004515960.1 | scaffold506 | 18820                   | GG                              | TT                 | TT               | INTERGENIC      |               |                    |                    |
| SNP_75193_A_19149 | NW_004515960.1 | scaffold506 | 19149                   | GG                              | AA                 | AA               | INTERGENIC      |               |                    |                    |
| SNP_75194_A_19326 | NW_004515960.1 | scaffold506 | 19326                   | CC                              | TT                 | TT               | INTERGENIC      |               |                    |                    |
| SNP_75195_A_20581 | NW_004515960.1 | scaffold506 | 20581                   | CC                              | GG                 | GG               | INTERGENIC      |               |                    |                    |
| SNP_75196_A_23961 | NW_004515960.1 | scaffold506 | 23961                   | AA                              | CC                 | CC               | INTERGENIC      |               |                    |                    |
| SNP_75197_A_24323 | NW_004515960.1 | scaffold506 | 24323                   | CC                              | TT                 | TT               | INTERGENIC      |               |                    |                    |
| SNP_75198_A_24641 | NW_004515960.1 | scaffold506 | 24641                   | TT                              | AA                 | AA               | INTERGENIC      |               |                    |                    |



| SNPs IDs          | Chromosome IDs | Chromosomes | Physical positions (bp) | CDC Frontier (Reference genome) | (Pusa 1103 & HPNB) | (ILWC 46 & LPNB) | Sequence genome | Components of | Gene accession IDs | Putative functions |
|-------------------|----------------|-------------|-------------------------|---------------------------------|--------------------|------------------|-----------------|---------------|--------------------|--------------------|
| SNP_75199_A_25599 | NW_004515960.1 | scaffold506 | 25599                   | GG                              | CC                 | CC               | INTERGENIC      |               |                    |                    |
| SNP_75200_A_26658 | NW_004515960.1 | scaffold506 | 26658                   | GG                              | AA                 | AA               | INTERGENIC      |               |                    |                    |
| SNP_75201_A_26682 | NW_004515960.1 | scaffold506 | 26682                   | TT                              | CC                 | CC               | INTERGENIC      |               |                    |                    |
| SNP_75202_A_26983 | NW_004515960.1 | scaffold506 | 26983                   | TT                              | CC                 | CC               | INTERGENIC      |               |                    |                    |
| SNP_75203_A_27130 | NW_004515960.1 | scaffold506 | 27130                   | TT                              | CC                 | CC               | INTERGENIC      |               |                    |                    |
| SNP_75204_A_28144 | NW_004515960.1 | scaffold506 | 28144                   | GG                              | AA                 | AA               | INTERGENIC      |               |                    |                    |
| SNP_75205_A_28611 | NW_004515960.1 | scaffold506 | 28611                   | CC                              | TT                 | TT               | INTERGENIC      |               |                    |                    |
| SNP_75206_A_29546 | NW_004515960.1 | scaffold506 | 29546                   | CC                              | TT                 | TT               | INTERGENIC      |               |                    |                    |
| SNP_75207_A_29976 | NW_004515960.1 | scaffold506 | 29976                   | GG                              | TT                 | TT               | INTERGENIC      |               |                    |                    |
| SNP_75208_A_30225 | NW_004515960.1 | scaffold506 | 30225                   | CC                              | GG                 | GG               | INTERGENIC      |               |                    |                    |
| SNP_75209_A_30332 | NW_004515960.1 | scaffold506 | 30332                   | AA                              | GG                 | GG               | INTERGENIC      |               |                    |                    |
| SNP_75210_A_31189 | NW_004515960.1 | scaffold506 | 31189                   | GG                              | AA                 | AA               | INTERGENIC      |               |                    |                    |
| SNP_75211_A_33667 | NW_004515960.1 | scaffold506 | 33667                   | GG                              | AA                 | AA               | INTERGENIC      |               |                    |                    |
| SNP_75213_A_34451 | NW_004515960.1 | scaffold506 | 34451                   | AA                              | CC                 | CC               | INTERGENIC      |               |                    |                    |
| SNP_75214_A_35371 | NW_004515960.1 | scaffold506 | 35371                   | TT                              | AA                 | AA               | INTERGENIC      |               |                    |                    |
| SNP_75215_A_35372 | NW_004515960.1 | scaffold506 | 35372                   | AA                              | CC                 | CC               | INTERGENIC      |               |                    |                    |
| SNP_75216_A_36335 | NW_004515960.1 | scaffold506 | 36335                   | AA                              | GG                 | GG               | INTERGENIC      |               |                    |                    |
| SNP_75217_A_36875 | NW_004515960.1 | scaffold506 | 36875                   | TT                              | CC                 | CC               | INTERGENIC      |               |                    |                    |
| SNP_75218_A_36886 | NW_004515960.1 | scaffold506 | 36886                   | TT                              | AA                 | AA               | INTERGENIC      |               |                    |                    |
| SNP_75219_A_37335 | NW_004515960.1 | scaffold506 | 37335                   | CC                              | TT                 | TT               | INTERGENIC      |               |                    |                    |
| SNP_75220_A_39179 | NW_004515960.1 | scaffold506 | 39179                   | AA                              | TT                 | TT               | INTERGENIC      |               |                    |                    |
| SNP_75222_A_39702 | NW_004515960.1 | scaffold506 | 39702                   | CC                              | AA                 | AA               | INTERGENIC      |               |                    |                    |

| SNPs IDs           | Chromosome IDs | Chromosomes | Physical positions (bp) | CDC Frontier (Reference genome) | (Pusa 1103 & HPNB) | (ILWC 46 & LPNB) | Sequence genome | Components of | Gene accession IDs           | Putative functions |
|--------------------|----------------|-------------|-------------------------|---------------------------------|--------------------|------------------|-----------------|---------------|------------------------------|--------------------|
| SNP_75223_A_39764  | NW_004515960.1 | scaffold506 | 39764                   | CC                              | GG                 | GG               | INTERGENIC      |               |                              |                    |
| SNP_75224_A_39821  | NW_004515960.1 | scaffold506 | 39821                   | CC                              | AA                 | AA               | INTERGENIC      |               |                              |                    |
| SNP_75225_A_2296   | NW_004515961.1 | scaffold507 | 2296                    | AA                              | CC                 | CC               | INTERGENIC      |               |                              |                    |
| SNP_75226_A_2338   | NW_004515961.1 | scaffold507 | 2338                    | CC                              | AA                 | AA               | INTERGENIC      |               |                              |                    |
| SNP_75227_A_12228  | NW_004515961.1 | scaffold507 | 12228                   | CC                              | GG                 | GG               | INTERGENIC      |               |                              |                    |
| SNP_75228_A_12273  | NW_004515961.1 | scaffold507 | 12273                   | GG                              | CC                 | CC               | INTERGENIC      |               |                              |                    |
| SNP_75229_A_12548  | NW_004515961.1 | scaffold507 | 12548                   | TT                              | AA                 | AA               | INTERGENIC      |               |                              |                    |
| SNP_75230_A_12569  | NW_004515961.1 | scaffold507 | 12569                   | CC                              | TT                 | TT               | INTERGENIC      |               |                              |                    |
| SNP_75231_A_18736  | NW_004515961.1 | scaffold507 | 18736                   | TT                              | CC                 | CC               | INTERGENIC      |               |                              |                    |
| SNP_75232_A_13181  | NW_004515962.1 | scaffold509 | 13181                   | CC                              | TT                 | TT               | INTERGENIC      |               |                              |                    |
| SNP_75233_A_16466  | NW_004515962.1 | scaffold509 | 16466                   | AA                              | CC                 | CC               | INTERGENIC      |               |                              |                    |
| SNP_75234_A_19792  | NW_004515962.1 | scaffold509 | 19792                   | TT                              | GG                 | GG               | INTERGENIC      |               |                              |                    |
| SNP_75235_A_20241  | NW_004515962.1 | scaffold509 | 20241                   | CC                              | GG                 | GG               | INTERGENIC      |               |                              |                    |
| SNP_75236_A_20253  | NW_004515962.1 | scaffold509 | 20253                   | TT                              | CC                 | CC               | INTERGENIC      |               |                              |                    |
| SNP_75237_A_75725  | NW_004515962.1 | scaffold509 | 75725                   | AA                              | GG                 | GG               | URR             | 101511415     | uncharacterized LOC101511415 |                    |
| SNP_75238_A_77014  | NW_004515962.1 | scaffold509 | 77014                   | CC                              | TT                 | TT               | INTERGENIC      |               |                              |                    |
| SNP_75239_A_78050  | NW_004515962.1 | scaffold509 | 78050                   | AA                              | TT                 | TT               | INTERGENIC      |               |                              |                    |
| SNP_75240_A_78156  | NW_004515962.1 | scaffold509 | 78156                   | CC                              | TT                 | TT               | INTERGENIC      |               |                              |                    |
| SNP_75241_A_78411  | NW_004515962.1 | scaffold509 | 78411                   | GG                              | AA                 | AA               | INTERGENIC      |               |                              |                    |
| SNP_75242_A_78433  | NW_004515962.1 | scaffold509 | 78433                   | TT                              | CC                 | CC               | INTERGENIC      |               |                              |                    |
| SNP_75244_A_122404 | NW_004515962.1 | scaffold509 | 122404                  | TT                              | CC                 | CC               | INTERGENIC      |               |                              |                    |
| SNP_75245_A_128885 | NW_004515962.1 | scaffold509 | 128885                  | CC                              | TT                 | TT               | INTERGENIC      |               |                              |                    |

| SNPs IDs           | Chromosome IDs | Chromosomes | Physical positions (bp) | CDC Frontier (Reference genome) | (Pusa 1103 & HPNB) | (ILWC 46 & LPNB) | Sequence genome | Components of | Gene accession IDs | Putative functions |
|--------------------|----------------|-------------|-------------------------|---------------------------------|--------------------|------------------|-----------------|---------------|--------------------|--------------------|
| SNP_75246_A_157646 | NW_004515962.1 | scaffold509 | 157646                  | AA                              | GG                 | GG               | INTERGENIC      |               |                    |                    |
| SNP_75247_A_157967 | NW_004515962.1 | scaffold509 | 157967                  | AA                              | GG                 | GG               | INTERGENIC      |               |                    |                    |
| SNP_75248_A_158083 | NW_004515962.1 | scaffold509 | 158083                  | TT                              | AA                 | AA               | INTERGENIC      |               |                    |                    |
| SNP_75249_A_158088 | NW_004515962.1 | scaffold509 | 158088                  | GG                              | TT                 | TT               | INTERGENIC      |               |                    |                    |
| SNP_75251_A_170444 | NW_004515962.1 | scaffold509 | 170444                  | GG                              | AA                 | AA               | INTERGENIC      |               |                    |                    |
| SNP_75252_A_172651 | NW_004515962.1 | scaffold509 | 172651                  | CC                              | TT                 | TT               | INTERGENIC      |               |                    |                    |
| SNP_75253_A_173700 | NW_004515962.1 | scaffold509 | 173700                  | AA                              | GG                 | GG               | INTERGENIC      |               |                    |                    |
| SNP_75254_A_175515 | NW_004515962.1 | scaffold509 | 175515                  | TT                              | CC                 | CC               | INTERGENIC      |               |                    |                    |
| SNP_75255_A_175525 | NW_004515962.1 | scaffold509 | 175525                  | AA                              | GG                 | GG               | INTERGENIC      |               |                    |                    |
| SNP_75256_A_175575 | NW_004515962.1 | scaffold509 | 175575                  | CC                              | TT                 | TT               | INTERGENIC      |               |                    |                    |
| SNP_75257_A_179734 | NW_004515962.1 | scaffold509 | 179734                  | TT                              | CC                 | CC               | INTERGENIC      |               |                    |                    |
| SNP_75258_A_179886 | NW_004515962.1 | scaffold509 | 179886                  | CC                              | AA                 | AA               | INTERGENIC      |               |                    |                    |
| SNP_75259_A_179924 | NW_004515962.1 | scaffold509 | 179924                  | CC                              | TT                 | TT               | INTERGENIC      |               |                    |                    |
| SNP_75260_A_179945 | NW_004515962.1 | scaffold509 | 179945                  | TT                              | CC                 | CC               | INTERGENIC      |               |                    |                    |
| SNP_75261_A_180007 | NW_004515962.1 | scaffold509 | 180007                  | AA                              | CC                 | CC               | INTERGENIC      |               |                    |                    |
| SNP_75262_A_180085 | NW_004515962.1 | scaffold509 | 180085                  | CC                              | GG                 | GG               | INTERGENIC      |               |                    |                    |
| SNP_75263_A_180332 | NW_004515962.1 | scaffold509 | 180332                  | GG                              | TT                 | TT               | INTERGENIC      |               |                    |                    |
| SNP_75264_A_180347 | NW_004515962.1 | scaffold509 | 180347                  | GG                              | AA                 | AA               | INTERGENIC      |               |                    |                    |
| SNP_75265_A_180604 | NW_004515962.1 | scaffold509 | 180604                  | AA                              | TT                 | TT               | INTERGENIC      |               |                    |                    |
| SNP_75266_A_180711 | NW_004515962.1 | scaffold509 | 180711                  | TT                              | CC                 | CC               | INTERGENIC      |               |                    |                    |
| SNP_75267_A_188509 | NW_004515962.1 | scaffold509 | 188509                  | TT                              | GG                 | GG               | INTERGENIC      |               |                    |                    |
| SNP_75268_A_188731 | NW_004515962.1 | scaffold509 | 188731                  | GG                              | AA                 | AA               | INTERGENIC      |               |                    |                    |

| SNPs IDs           | Chromosome IDs | Chromosomes | Physical positions (bp) | CDC Frontier (Reference genome) | (Pusa 1103 & HPNB) | (ILWC 46 & LPNB) | Sequence genome | Components of | Gene accession IDs                | Putative functions |
|--------------------|----------------|-------------|-------------------------|---------------------------------|--------------------|------------------|-----------------|---------------|-----------------------------------|--------------------|
| SNP_75269_A_189040 | NW_004515962.1 | scaffold509 | 189040                  | AA                              | GG                 | GG               | INTERGENIC      |               |                                   |                    |
| SNP_75270_A_196589 | NW_004515962.1 | scaffold509 | 196589                  | TT                              | CC                 | CC               | INTERGENIC      |               |                                   |                    |
| SNP_75271_A_196592 | NW_004515962.1 | scaffold509 | 196592                  | AA                              | TT                 | TT               | INTERGENIC      |               |                                   |                    |
| SNP_75272_A_196595 | NW_004515962.1 | scaffold509 | 196595                  | CC                              | AA                 | AA               | INTERGENIC      |               |                                   |                    |
| SNP_75273_A_216983 | NW_004515962.1 | scaffold509 | 216983                  | AA                              | GG                 | GG               | INTERGENIC      |               |                                   |                    |
| SNP_75274_A_218924 | NW_004515962.1 | scaffold509 | 218924                  | CC                              | TT                 | TT               | INTERGENIC      |               |                                   |                    |
| SNP_75275_A_218925 | NW_004515962.1 | scaffold509 | 218925                  | GG                              | TT                 | TT               | INTERGENIC      |               |                                   |                    |
| SNP_75276_A_218929 | NW_004515962.1 | scaffold509 | 218929                  | TT                              | GG                 | GG               | INTERGENIC      |               |                                   |                    |
| SNP_75277_A_218931 | NW_004515962.1 | scaffold509 | 218931                  | CC                              | AA                 | AA               | INTERGENIC      |               |                                   |                    |
| SNP_75278_A_225063 | NW_004515962.1 | scaffold509 | 225063                  | CC                              | TT                 | TT               | INTERGENIC      |               |                                   |                    |
| SNP_75279_A_225203 | NW_004515962.1 | scaffold509 | 225203                  | AA                              | TT                 | TT               | INTERGENIC      |               |                                   |                    |
| SNP_75280_A_225204 | NW_004515962.1 | scaffold509 | 225204                  | AA                              | GG                 | GG               | INTERGENIC      |               |                                   |                    |
| SNP_75281_A_225206 | NW_004515962.1 | scaffold509 | 225206                  | CC                              | GG                 | GG               | INTERGENIC      |               |                                   |                    |
| SNP_75282_A_225215 | NW_004515962.1 | scaffold509 | 225215                  | CC                              | TT                 | TT               | INTERGENIC      |               |                                   |                    |
| SNP_75283_A_225219 | NW_004515962.1 | scaffold509 | 225219                  | TT                              | CC                 | CC               | INTERGENIC      |               |                                   |                    |
| SNP_75284_A_238733 | NW_004515962.1 | scaffold509 | 238733                  | TT                              | AA                 | AA               | INTERGENIC      |               |                                   |                    |
| SNP_75285_A_266717 | NW_004515962.1 | scaffold509 | 266717                  | TT                              | CC                 | CC               | INTRON          | 101512063     | stress response protein nst1-like |                    |
| SNP_75286_A_266778 | NW_004515962.1 | scaffold509 | 266778                  | GG                              | TT                 | TT               | INTRON          | 101512063     | stress response protein nst1-like |                    |
| SNP_75288_A_273475 | NW_004515962.1 | scaffold509 | 273475                  | AA                              | GG                 | GG               | INTRON          | 101512063     | stress response protein nst1-like |                    |
| SNP_75289_A_273859 | NW_004515962.1 | scaffold509 | 273859                  | TT                              | CC                 | CC               | INTRON          | 101512063     | stress response protein nst1-like |                    |
| SNP_75290_A_290251 | NW_004515962.1 | scaffold509 | 290251                  | TT                              | CC                 | CC               | INTERGENIC      |               |                                   |                    |
| SNP_75291_A_293516 | NW_004515962.1 | scaffold509 | 293516                  | CC                              | TT                 | TT               | INTERGENIC      |               |                                   |                    |

| SNPs IDs           | Chromosome IDs | Chromosomes | Physical positions (bp) | CDC Frontier (Reference genome) | (Pusa 1103 & HPNB) | (ILWC 46 & LPNB) | Sequence genome | Components of | Gene accession IDs | Putative functions |
|--------------------|----------------|-------------|-------------------------|---------------------------------|--------------------|------------------|-----------------|---------------|--------------------|--------------------|
| SNP_75292_A_303634 | NW_004515962.1 | scaffold509 | 303634                  | AA                              | GG                 | GG               | INTERGENIC      |               |                    |                    |
| SNP_75293_A_322214 | NW_004515962.1 | scaffold509 | 322214                  | GG                              | TT                 | TT               | INTERGENIC      |               |                    |                    |
| SNP_75294_A_14403  | NW_004515963.1 | scaffold510 | 14403                   | GG                              | TT                 | TT               | INTERGENIC      |               |                    |                    |
| SNP_75295_A_24282  | NW_004515963.1 | scaffold510 | 24282                   | GG                              | TT                 | TT               | INTERGENIC      |               |                    |                    |
| SNP_75296_A_24706  | NW_004515963.1 | scaffold510 | 24706                   | AA                              | GG                 | GG               | INTERGENIC      |               |                    |                    |
| SNP_75297_A_25091  | NW_004515963.1 | scaffold510 | 25091                   | TT                              | CC                 | CC               | INTERGENIC      |               |                    |                    |
| SNP_75298_A_25149  | NW_004515963.1 | scaffold510 | 25149                   | CC                              | TT                 | TT               | INTERGENIC      |               |                    |                    |
| SNP_75299_A_25590  | NW_004515963.1 | scaffold510 | 25590                   | GG                              | AA                 | AA               | INTERGENIC      |               |                    |                    |
| SNP_75300_A_25623  | NW_004515963.1 | scaffold510 | 25623                   | AA                              | CC                 | CC               | INTERGENIC      |               |                    |                    |
| SNP_75301_A_40371  | NW_004515963.1 | scaffold510 | 40371                   | AA                              | GG                 | GG               | INTERGENIC      |               |                    |                    |
| SNP_75302_A_40379  | NW_004515963.1 | scaffold510 | 40379                   | GG                              | TT                 | TT               | INTERGENIC      |               |                    |                    |
| SNP_75303_A_40946  | NW_004515963.1 | scaffold510 | 40946                   | AA                              | TT                 | TT               | INTERGENIC      |               |                    |                    |
| SNP_75304_A_41077  | NW_004515963.1 | scaffold510 | 41077                   | CC                              | TT                 | TT               | INTERGENIC      |               |                    |                    |
| SNP_75305_A_46994  | NW_004515963.1 | scaffold510 | 46994                   | GG                              | TT                 | TT               | INTERGENIC      |               |                    |                    |
| SNP_75306_A_48141  | NW_004515963.1 | scaffold510 | 48141                   | AA                              | TT                 | TT               | INTERGENIC      |               |                    |                    |
| SNP_75307_A_54982  | NW_004515963.1 | scaffold510 | 54982                   | TT                              | CC                 | CC               | INTERGENIC      |               |                    |                    |
| SNP_75308_A_54996  | NW_004515963.1 | scaffold510 | 54996                   | CC                              | TT                 | TT               | INTERGENIC      |               |                    |                    |
| SNP_75309_A_58998  | NW_004515963.1 | scaffold510 | 58998                   | TT                              | GG                 | GG               | INTERGENIC      |               |                    |                    |
| SNP_75310_A_59163  | NW_004515963.1 | scaffold510 | 59163                   | TT                              | CC                 | CC               | INTERGENIC      |               |                    |                    |
| SNP_75311_A_59192  | NW_004515963.1 | scaffold510 | 59192                   | CC                              | TT                 | TT               | INTERGENIC      |               |                    |                    |
| SNP_75312_A_66749  | NW_004515963.1 | scaffold510 | 66749                   | CC                              | AA                 | AA               | INTERGENIC      |               |                    |                    |
| SNP_75313_A_66783  | NW_004515963.1 | scaffold510 | 66783                   | CC                              | TT                 | TT               | INTERGENIC      |               |                    |                    |

| SNPs IDs          | Chromosome IDs | Chromosomes | Physical positions (bp) | CDC Frontier (Reference genome) | (Pusa 1103 & HPNB) | (ILWC 46 & LPNB) | Sequence genome | Components of | Gene accession IDs | Putative functions |
|-------------------|----------------|-------------|-------------------------|---------------------------------|--------------------|------------------|-----------------|---------------|--------------------|--------------------|
| SNP_75314_A_66808 | NW_004515963.1 | scaffold510 | 66808                   | GG                              | CC                 | CC               | INTERGENIC      |               |                    |                    |
| SNP_75315_A_79322 | NW_004515963.1 | scaffold510 | 79322                   | AA                              | GG                 | GG               | INTERGENIC      |               |                    |                    |
| SNP_75316_A_80368 | NW_004515963.1 | scaffold510 | 80368                   | CC                              | TT                 | TT               | INTERGENIC      |               |                    |                    |
| SNP_75317_A_80370 | NW_004515963.1 | scaffold510 | 80370                   | CC                              | TT                 | TT               | INTERGENIC      |               |                    |                    |
| SNP_75318_A_80383 | NW_004515963.1 | scaffold510 | 80383                   | TT                              | GG                 | GG               | INTERGENIC      |               |                    |                    |
| SNP_75319_A_80385 | NW_004515963.1 | scaffold510 | 80385                   | TT                              | GG                 | GG               | INTERGENIC      |               |                    |                    |
| SNP_75320_A_80389 | NW_004515963.1 | scaffold510 | 80389                   | TT                              | GG                 | GG               | INTERGENIC      |               |                    |                    |
| SNP_75321_A_80394 | NW_004515963.1 | scaffold510 | 80394                   | GG                              | TT                 | TT               | INTERGENIC      |               |                    |                    |
| SNP_75322_A_80417 | NW_004515963.1 | scaffold510 | 80417                   | CC                              | TT                 | TT               | INTERGENIC      |               |                    |                    |
| SNP_75323_A_80436 | NW_004515963.1 | scaffold510 | 80436                   | GG                              | TT                 | TT               | INTERGENIC      |               |                    |                    |
| SNP_75324_A_80469 | NW_004515963.1 | scaffold510 | 80469                   | AA                              | GG                 | GG               | INTERGENIC      |               |                    |                    |
| SNP_75325_A_80480 | NW_004515963.1 | scaffold510 | 80480                   | TT                              | GG                 | GG               | INTERGENIC      |               |                    |                    |
| SNP_75326_A_80662 | NW_004515963.1 | scaffold510 | 80662                   | CC                              | TT                 | TT               | INTERGENIC      |               |                    |                    |
| SNP_75327_A_81882 | NW_004515963.1 | scaffold510 | 81882                   | GG                              | TT                 | TT               | INTERGENIC      |               |                    |                    |
| SNP_75328_A_81901 | NW_004515963.1 | scaffold510 | 81901                   | TT                              | CC                 | CC               | INTERGENIC      |               |                    |                    |
| SNP_75329_A_81930 | NW_004515963.1 | scaffold510 | 81930                   | AA                              | TT                 | TT               | INTERGENIC      |               |                    |                    |
| SNP_75330_A_82134 | NW_004515963.1 | scaffold510 | 82134                   | AA                              | TT                 | TT               | INTERGENIC      |               |                    |                    |
| SNP_75331_A_85592 | NW_004515963.1 | scaffold510 | 85592                   | AA                              | CC                 | CC               | INTERGENIC      |               |                    |                    |
| SNP_75333_A_85666 | NW_004515963.1 | scaffold510 | 85666                   | CC                              | GG                 | GG               | INTERGENIC      |               |                    |                    |
| SNP_75334_A_85711 | NW_004515963.1 | scaffold510 | 85711                   | AA                              | GG                 | GG               | INTERGENIC      |               |                    |                    |
| SNP_75335_A_85718 | NW_004515963.1 | scaffold510 | 85718                   | AA                              | TT                 | TT               | INTERGENIC      |               |                    |                    |
| SNP_75336_A_85772 | NW_004515963.1 | scaffold510 | 85772                   | CC                              | GG                 | GG               | INTERGENIC      |               |                    |                    |

| SNPs IDs          | Chromosome IDs | Chromosomes | Physical positions (bp) | CDC Frontier (Reference genome) | (Pusa 1103 & HPNB) | (ILWC 46 & LPNB) | Sequence genome | Components of | Gene accession IDs | Putative functions |
|-------------------|----------------|-------------|-------------------------|---------------------------------|--------------------|------------------|-----------------|---------------|--------------------|--------------------|
| SNP_75337_A_85789 | NW_004515963.1 | scaffold510 | 85789                   | AA                              | CC                 | CC               | INTERGENIC      |               |                    |                    |
| SNP_75338_A_85831 | NW_004515963.1 | scaffold510 | 85831                   | CC                              | TT                 | TT               | INTERGENIC      |               |                    |                    |
| SNP_75339_A_85852 | NW_004515963.1 | scaffold510 | 85852                   | TT                              | CC                 | CC               | INTERGENIC      |               |                    |                    |
| SNP_75340_A_85867 | NW_004515963.1 | scaffold510 | 85867                   | CC                              | TT                 | TT               | INTERGENIC      |               |                    |                    |
| SNP_75341_A_85936 | NW_004515963.1 | scaffold510 | 85936                   | TT                              | AA                 | AA               | INTERGENIC      |               |                    |                    |
| SNP_75342_A_85937 | NW_004515963.1 | scaffold510 | 85937                   | AA                              | GG                 | GG               | INTERGENIC      |               |                    |                    |
| SNP_75343_A_85958 | NW_004515963.1 | scaffold510 | 85958                   | TT                              | CC                 | CC               | INTERGENIC      |               |                    |                    |
| SNP_75344_A_85967 | NW_004515963.1 | scaffold510 | 85967                   | GG                              | CC                 | CC               | INTERGENIC      |               |                    |                    |
| SNP_75345_A_85981 | NW_004515963.1 | scaffold510 | 85981                   | CC                              | AA                 | AA               | INTERGENIC      |               |                    |                    |
| SNP_75346_A_85987 | NW_004515963.1 | scaffold510 | 85987                   | CC                              | GG                 | GG               | INTERGENIC      |               |                    |                    |
| SNP_75347_A_86002 | NW_004515963.1 | scaffold510 | 86002                   | TT                              | GG                 | GG               | INTERGENIC      |               |                    |                    |
| SNP_75348_A_86027 | NW_004515963.1 | scaffold510 | 86027                   | CC                              | AA                 | AA               | INTERGENIC      |               |                    |                    |
| SNP_75349_A_86035 | NW_004515963.1 | scaffold510 | 86035                   | CC                              | GG                 | GG               | INTERGENIC      |               |                    |                    |
| SNP_75350_A_86036 | NW_004515963.1 | scaffold510 | 86036                   | TT                              | AA                 | AA               | INTERGENIC      |               |                    |                    |
| SNP_75351_A_86059 | NW_004515963.1 | scaffold510 | 86059                   | AA                              | GG                 | GG               | INTERGENIC      |               |                    |                    |
| SNP_75352_A_86062 | NW_004515963.1 | scaffold510 | 86062                   | TT                              | CC                 | CC               | INTERGENIC      |               |                    |                    |
| SNP_75353_A_86107 | NW_004515963.1 | scaffold510 | 86107                   | TT                              | GG                 | GG               | INTERGENIC      |               |                    |                    |
| SNP_75354_A_86113 | NW_004515963.1 | scaffold510 | 86113                   | AA                              | TT                 | TT               | INTERGENIC      |               |                    |                    |
| SNP_75355_A_86127 | NW_004515963.1 | scaffold510 | 86127                   | GG                              | TT                 | TT               | INTERGENIC      |               |                    |                    |
| SNP_75357_A_86203 | NW_004515963.1 | scaffold510 | 86203                   | CC                              | AA                 | AA               | INTERGENIC      |               |                    |                    |
| SNP_75358_A_86237 | NW_004515963.1 | scaffold510 | 86237                   | GG                              | TT                 | TT               | INTERGENIC      |               |                    |                    |
| SNP_75359_A_86327 | NW_004515963.1 | scaffold510 | 86327                   | TT                              | AA                 | AA               | INTERGENIC      |               |                    |                    |

| SNPs IDs           | Chromosome IDs | Chromosomes | Physical positions (bp) | CDC Frontier (Reference genome) | (Pusa 1103 & HPNB) | (ILWC 46 & LPNB) | Sequence Components of genome | Gene accession IDs | Putative functions                     |
|--------------------|----------------|-------------|-------------------------|---------------------------------|--------------------|------------------|-------------------------------|--------------------|----------------------------------------|
| SNP_75360_A_86335  | NW_004515963.1 | scaffold510 | 86335                   | AA                              | TT                 | TT               | INTERGENIC                    |                    |                                        |
| SNP_75361_A_86564  | NW_004515963.1 | scaffold510 | 86564                   | CC                              | TT                 | TT               | INTERGENIC                    |                    |                                        |
| SNP_75362_A_86858  | NW_004515963.1 | scaffold510 | 86858                   | TT                              | CC                 | CC               | INTERGENIC                    |                    |                                        |
| SNP_75363_A_90793  | NW_004515963.1 | scaffold510 | 90793                   | TT                              | GG                 | GG               | INTERGENIC                    |                    |                                        |
| SNP_75364_A_92176  | NW_004515963.1 | scaffold510 | 92176                   | TT                              | AA                 | AA               | INTERGENIC                    |                    |                                        |
| SNP_75365_A_3358   | NW_004515964.1 | scaffold511 | 3358                    | TT                              | CC                 | CC               | INTERGENIC                    |                    |                                        |
| SNP_75366_A_3393   | NW_004515964.1 | scaffold511 | 3393                    | AA                              | TT                 | TT               | INTERGENIC                    |                    |                                        |
| SNP_75367_A_3780   | NW_004515964.1 | scaffold511 | 3780                    | AA                              | CC                 | CC               | INTERGENIC                    |                    |                                        |
| SNP_75368_A_43002  | NW_004515964.1 | scaffold511 | 43002                   | CC                              | TT                 | TT               | INTERGENIC                    |                    |                                        |
| SNP_75369_A_43062  | NW_004515964.1 | scaffold511 | 43062                   | AA                              | CC                 | CC               | INTERGENIC                    |                    |                                        |
| SNP_75370_A_70317  | NW_004515964.1 | scaffold511 | 70317                   | CC                              | TT                 | TT               | INTERGENIC                    |                    |                                        |
| SNP_75371_A_80362  | NW_004515964.1 | scaffold511 | 80362                   | CC                              | AA                 | AA               | INTRON                        | 101512392          | uncharacterized protein At4g15545-like |
| SNP_75372_A_97205  | NW_004515964.1 | scaffold511 | 97205                   | CC                              | TT                 | TT               | INTERGENIC                    |                    |                                        |
| SNP_75373_A_97206  | NW_004515964.1 | scaffold511 | 97206                   | AA                              | GG                 | GG               | INTERGENIC                    |                    |                                        |
| SNP_75374_A_97464  | NW_004515964.1 | scaffold511 | 97464                   | TT                              | CC                 | CC               | INTERGENIC                    |                    |                                        |
| SNP_75375_A_97466  | NW_004515964.1 | scaffold511 | 97466                   | CC                              | TT                 | TT               | INTERGENIC                    |                    |                                        |
| SNP_75376_A_97481  | NW_004515964.1 | scaffold511 | 97481                   | AA                              | GG                 | GG               | INTERGENIC                    |                    |                                        |
| SNP_75377_A_97862  | NW_004515964.1 | scaffold511 | 97862                   | CC                              | AA                 | AA               | INTERGENIC                    |                    |                                        |
| SNP_75378_A_98130  | NW_004515964.1 | scaffold511 | 98130                   | TT                              | GG                 | GG               | INTERGENIC                    |                    |                                        |
| SNP_75381_A_119033 | NW_004515964.1 | scaffold511 | 119033                  | GG                              | AA                 | AA               | INTERGENIC                    |                    |                                        |
| SNP_75382_A_123204 | NW_004515964.1 | scaffold511 | 123204                  | AA                              | GG                 | GG               | INTERGENIC                    |                    |                                        |
| SNP_75383_A_148194 | NW_004515964.1 | scaffold511 | 148194                  | CC                              | GG                 | GG               | INTERGENIC                    |                    |                                        |



| SNPs IDs           | Chromosome IDs | Chromosomes | Physical positions (bp) | CDC Frontier (Reference genome) | (Pusa 1103 & HPNB) | (ILWC 46 & LPNB) | Sequence Components of genome | Gene accession IDs | Putative functions           |
|--------------------|----------------|-------------|-------------------------|---------------------------------|--------------------|------------------|-------------------------------|--------------------|------------------------------|
| SNP_75384_A_148217 | NW_004515964.1 | scaffold511 | 148217                  | AA                              | CC                 | CC               | INTERGENIC                    |                    |                              |
| SNP_75385_A_148233 | NW_004515964.1 | scaffold511 | 148233                  | CC                              | GG                 | GG               | INTERGENIC                    |                    |                              |
| SNP_75386_A_148246 | NW_004515964.1 | scaffold511 | 148246                  | CC                              | TT                 | TT               | INTERGENIC                    |                    |                              |
| SNP_75387_A_148278 | NW_004515964.1 | scaffold511 | 148278                  | TT                              | CC                 | CC               | INTERGENIC                    |                    |                              |
| SNP_75388_A_149578 | NW_004515964.1 | scaffold511 | 149578                  | TT                              | CC                 | CC               | INTERGENIC                    |                    |                              |
| SNP_75390_A_151836 | NW_004515964.1 | scaffold511 | 151836                  | CC                              | AA                 | AA               | INTERGENIC                    |                    |                              |
| SNP_75391_A_152199 | NW_004515964.1 | scaffold511 | 152199                  | CC                              | TT                 | TT               | INTERGENIC                    |                    |                              |
| SNP_75392_A_162697 | NW_004515964.1 | scaffold511 | 162697                  | CC                              | TT                 | TT               | INTERGENIC                    |                    |                              |
| SNP_75393_A_183557 | NW_004515964.1 | scaffold511 | 183557                  | AA                              | GG                 | GG               | DRR                           | 101514004          | uncharacterized LOC101514004 |
| SNP_75394_A_192867 | NW_004515964.1 | scaffold511 | 192867                  | TT                              | AA                 | AA               | INTERGENIC                    |                    |                              |
| SNP_75395_A_192912 | NW_004515964.1 | scaffold511 | 192912                  | AA                              | GG                 | GG               | INTERGENIC                    |                    |                              |
| SNP_75397_A_193141 | NW_004515964.1 | scaffold511 | 193141                  | AA                              | TT                 | TT               | INTERGENIC                    |                    |                              |
| SNP_75398_A_193179 | NW_004515964.1 | scaffold511 | 193179                  | TT                              | GG                 | GG               | INTERGENIC                    |                    |                              |
| SNP_75399_A_193242 | NW_004515964.1 | scaffold511 | 193242                  | CC                              | TT                 | TT               | INTERGENIC                    |                    |                              |
| SNP_75400_A_193286 | NW_004515964.1 | scaffold511 | 193286                  | GG                              | AA                 | AA               | INTERGENIC                    |                    |                              |
| SNP_75401_A_193308 | NW_004515964.1 | scaffold511 | 193308                  | TT                              | GG                 | GG               | INTERGENIC                    |                    |                              |
| SNP_75402_A_194369 | NW_004515964.1 | scaffold511 | 194369                  | CC                              | TT                 | TT               | INTERGENIC                    |                    |                              |
| SNP_75403_A_194402 | NW_004515964.1 | scaffold511 | 194402                  | TT                              | CC                 | CC               | INTERGENIC                    |                    |                              |
| SNP_75404_A_194423 | NW_004515964.1 | scaffold511 | 194423                  | TT                              | CC                 | CC               | INTERGENIC                    |                    |                              |
| SNP_75405_A_194443 | NW_004515964.1 | scaffold511 | 194443                  | AA                              | GG                 | GG               | INTRON                        | 101514341          | Unknown function             |
| SNP_75406_A_194475 | NW_004515964.1 | scaffold511 | 194475                  | TT                              | AA                 | AA               | INTRON                        | 101514341          | Unknown function             |
| SNP_75407_A_194479 | NW_004515964.1 | scaffold511 | 194479                  | TT                              | GG                 | GG               | INTRON                        | 101514341          | Unknown function             |

| SNPs IDs           | Chromosome IDs | Chromosomes | Physical positions (bp) | CDC Frontier (Reference genome) | (Pusa 1103 & HPNB) | (ILWC 46 & LPNB) | Sequence Components of genome | Gene accession IDs | Putative functions |
|--------------------|----------------|-------------|-------------------------|---------------------------------|--------------------|------------------|-------------------------------|--------------------|--------------------|
| SNP_75408_A_194504 | NW_004515964.1 | scaffold511 | 194504                  | AA                              | CC                 | CC               | INTRON                        | 101514341          | Unknown function   |
| SNP_75410_A_194633 | NW_004515964.1 | scaffold511 | 194633                  | AA                              | TT                 | TT               | INTRON                        | 101514341          | Unknown function   |
| SNP_75411_A_194660 | NW_004515964.1 | scaffold511 | 194660                  | TT                              | CC                 | CC               | INTRON                        | 101514341          | Unknown function   |
| SNP_75412_A_194830 | NW_004515964.1 | scaffold511 | 194830                  | CC                              | TT                 | TT               | INTRON                        | 101514341          | Unknown function   |
| SNP_75413_A_194860 | NW_004515964.1 | scaffold511 | 194860                  | GG                              | AA                 | AA               | INTRON                        | 101514341          | Unknown function   |
| SNP_75414_A_224513 | NW_004515964.1 | scaffold511 | 224513                  | GG                              | TT                 | TT               | INTERGENIC                    |                    |                    |
| SNP_75415_A_224528 | NW_004515964.1 | scaffold511 | 224528                  | TT                              | CC                 | CC               | INTERGENIC                    |                    |                    |
| SNP_75416_A_224531 | NW_004515964.1 | scaffold511 | 224531                  | CC                              | GG                 | GG               | INTERGENIC                    |                    |                    |
| SNP_75417_A_224625 | NW_004515964.1 | scaffold511 | 224625                  | AA                              | GG                 | GG               | INTERGENIC                    |                    |                    |
| SNP_75418_A_224659 | NW_004515964.1 | scaffold511 | 224659                  | AA                              | GG                 | GG               | INTERGENIC                    |                    |                    |
| SNP_75419_A_224977 | NW_004515964.1 | scaffold511 | 224977                  | AA                              | GG                 | GG               | INTERGENIC                    |                    |                    |
| SNP_75420_A_226416 | NW_004515964.1 | scaffold511 | 226416                  | AA                              | TT                 | TT               | INTERGENIC                    |                    |                    |
| SNP_75421_A_226687 | NW_004515964.1 | scaffold511 | 226687                  | TT                              | GG                 | GG               | INTERGENIC                    |                    |                    |
| SNP_75422_A_235758 | NW_004515964.1 | scaffold511 | 235758                  | AA                              | GG                 | GG               | INTERGENIC                    |                    |                    |
| SNP_75423_A_235949 | NW_004515964.1 | scaffold511 | 235949                  | AA                              | TT                 | TT               | INTERGENIC                    |                    |                    |
| SNP_75424_A_238799 | NW_004515964.1 | scaffold511 | 238799                  | AA                              | GG                 | GG               | INTERGENIC                    |                    |                    |
| SNP_75425_A_238809 | NW_004515964.1 | scaffold511 | 238809                  | TT                              | AA                 | AA               | INTERGENIC                    |                    |                    |
| SNP_75426_A_238810 | NW_004515964.1 | scaffold511 | 238810                  | TT                              | AA                 | AA               | INTERGENIC                    |                    |                    |
| SNP_75427_A_238828 | NW_004515964.1 | scaffold511 | 238828                  | CC                              | TT                 | TT               | INTERGENIC                    |                    |                    |
| SNP_75428_A_687    | NW_004515965.1 | scaffold512 | 687                     | AA                              | GG                 | GG               | INTERGENIC                    |                    |                    |
| SNP_75429_A_718    | NW_004515965.1 | scaffold512 | 718                     | TT                              | CC                 | CC               | INTERGENIC                    |                    |                    |
| SNP_75430_A_732    | NW_004515965.1 | scaffold512 | 732                     | TT                              | GG                 | GG               | INTERGENIC                    |                    |                    |

| SNPs IDs           | Chromosome IDs | Chromosomes | Physical positions (bp) | CDC Frontier (Reference genome) | (Pusa 1103 & HPNB) | (ILWC 46 & LPNB) | Sequence genome | Components of | Gene accession IDs | Putative functions |
|--------------------|----------------|-------------|-------------------------|---------------------------------|--------------------|------------------|-----------------|---------------|--------------------|--------------------|
| SNP_75431_A_931    | NW_004515965.1 | scaffold512 | 931                     | AA                              | TT                 | TT               | INTERGENIC      |               |                    |                    |
| SNP_75432_A_8212   | NW_004515965.1 | scaffold512 | 8212                    | TT                              | CC                 | CC               | INTERGENIC      |               |                    |                    |
| SNP_75433_A_9368   | NW_004515965.1 | scaffold512 | 9368                    | TT                              | AA                 | AA               | INTERGENIC      |               |                    |                    |
| SNP_75434_A_9452   | NW_004515965.1 | scaffold512 | 9452                    | TT                              | GG                 | GG               | INTERGENIC      |               |                    |                    |
| SNP_75435_A_21824  | NW_004515965.1 | scaffold512 | 21824                   | GG                              | CC                 | CC               | INTERGENIC      |               |                    |                    |
| SNP_75436_A_38943  | NW_004515965.1 | scaffold512 | 38943                   | CC                              | TT                 | TT               | INTERGENIC      |               |                    |                    |
| SNP_75437_A_83283  | NW_004515965.1 | scaffold512 | 83283                   | TT                              | GG                 | GG               | INTERGENIC      |               |                    |                    |
| SNP_75438_A_85227  | NW_004515965.1 | scaffold512 | 85227                   | AA                              | CC                 | CC               | INTERGENIC      |               |                    |                    |
| SNP_75439_A_85240  | NW_004515965.1 | scaffold512 | 85240                   | CC                              | TT                 | TT               | INTERGENIC      |               |                    |                    |
| SNP_75440_A_88803  | NW_004515965.1 | scaffold512 | 88803                   | CC                              | TT                 | TT               | INTERGENIC      |               |                    |                    |
| SNP_75441_A_89110  | NW_004515965.1 | scaffold512 | 89110                   | TT                              | AA                 | AA               | INTERGENIC      |               |                    |                    |
| SNP_75442_A_98599  | NW_004515965.1 | scaffold512 | 98599                   | AA                              | TT                 | TT               | INTERGENIC      |               |                    |                    |
| SNP_75443_A_98770  | NW_004515965.1 | scaffold512 | 98770                   | AA                              | TT                 | TT               | INTERGENIC      |               |                    |                    |
| SNP_75444_A_103490 | NW_004515965.1 | scaffold512 | 103490                  | GG                              | AA                 | AA               | INTERGENIC      |               |                    |                    |
| SNP_75446_A_105773 | NW_004515965.1 | scaffold512 | 105773                  | TT                              | GG                 | GG               | INTERGENIC      |               |                    |                    |
| SNP_75447_A_105811 | NW_004515965.1 | scaffold512 | 105811                  | TT                              | AA                 | AA               | INTERGENIC      |               |                    |                    |
| SNP_75448_A_107657 | NW_004515965.1 | scaffold512 | 107657                  | CC                              | TT                 | TT               | INTERGENIC      |               |                    |                    |
| SNP_75450_A_114504 | NW_004515965.1 | scaffold512 | 114504                  | AA                              | CC                 | CC               | INTERGENIC      |               |                    |                    |
| SNP_75451_A_115677 | NW_004515965.1 | scaffold512 | 115677                  | AA                              | TT                 | TT               | INTERGENIC      |               |                    |                    |
| SNP_75452_A_125966 | NW_004515965.1 | scaffold512 | 125966                  | AA                              | GG                 | GG               | INTERGENIC      |               |                    |                    |
| SNP_75453_A_126020 | NW_004515965.1 | scaffold512 | 126020                  | GG                              | AA                 | AA               | INTERGENIC      |               |                    |                    |
| SNP_75454_A_126032 | NW_004515965.1 | scaffold512 | 126032                  | TT                              | AA                 | AA               | INTERGENIC      |               |                    |                    |

| SNPs IDs           | Chromosome IDs | Chromosomes | Physical positions (bp) | CDC Frontier (Reference genome) | (Pusa 1103 & HPNB) | (ILWC 46 & LPNB) | Sequence genome | Components of | Gene accession IDs | Putative functions |
|--------------------|----------------|-------------|-------------------------|---------------------------------|--------------------|------------------|-----------------|---------------|--------------------|--------------------|
| SNP_75455_A_126056 | NW_004515965.1 | scaffold512 | 126056                  | GG                              | AA                 | AA               | INTERGENIC      |               |                    |                    |
| SNP_75456_A_126062 | NW_004515965.1 | scaffold512 | 126062                  | GG                              | AA                 | AA               | INTERGENIC      |               |                    |                    |
| SNP_75457_A_126068 | NW_004515965.1 | scaffold512 | 126068                  | CC                              | TT                 | TT               | INTERGENIC      |               |                    |                    |
| SNP_75458_A_126119 | NW_004515965.1 | scaffold512 | 126119                  | AA                              | CC                 | CC               | INTERGENIC      |               |                    |                    |
| SNP_75459_A_126125 | NW_004515965.1 | scaffold512 | 126125                  | TT                              | CC                 | CC               | INTERGENIC      |               |                    |                    |
| SNP_75460_A_126137 | NW_004515965.1 | scaffold512 | 126137                  | AA                              | CC                 | CC               | INTERGENIC      |               |                    |                    |
| SNP_75461_A_126149 | NW_004515965.1 | scaffold512 | 126149                  | TT                              | CC                 | CC               | INTERGENIC      |               |                    |                    |
| SNP_75462_A_126155 | NW_004515965.1 | scaffold512 | 126155                  | GG                              | TT                 | TT               | INTERGENIC      |               |                    |                    |
| SNP_75463_A_126167 | NW_004515965.1 | scaffold512 | 126167                  | AA                              | TT                 | TT               | INTERGENIC      |               |                    |                    |
| SNP_75464_A_126182 | NW_004515965.1 | scaffold512 | 126182                  | AA                              | TT                 | TT               | INTERGENIC      |               |                    |                    |
| SNP_75465_A_126230 | NW_004515965.1 | scaffold512 | 126230                  | GG                              | AA                 | AA               | INTERGENIC      |               |                    |                    |
| SNP_75466_A_126246 | NW_004515965.1 | scaffold512 | 126246                  | TT                              | CC                 | CC               | INTERGENIC      |               |                    |                    |
| SNP_75467_A_126249 | NW_004515965.1 | scaffold512 | 126249                  | GG                              | AA                 | AA               | INTERGENIC      |               |                    |                    |
| SNP_75468_A_126288 | NW_004515965.1 | scaffold512 | 126288                  | GG                              | AA                 | AA               | INTERGENIC      |               |                    |                    |
| SNP_75469_A_126320 | NW_004515965.1 | scaffold512 | 126320                  | GG                              | CC                 | CC               | INTERGENIC      |               |                    |                    |
| SNP_75470_A_126333 | NW_004515965.1 | scaffold512 | 126333                  | CC                              | TT                 | TT               | INTERGENIC      |               |                    |                    |
| SNP_75471_A_126348 | NW_004515965.1 | scaffold512 | 126348                  | TT                              | CC                 | CC               | INTERGENIC      |               |                    |                    |
| SNP_75472_A_126354 | NW_004515965.1 | scaffold512 | 126354                  | CC                              | TT                 | TT               | INTERGENIC      |               |                    |                    |
| SNP_75474_A_126367 | NW_004515965.1 | scaffold512 | 126367                  | AA                              | TT                 | TT               | INTERGENIC      |               |                    |                    |
| SNP_75475_A_126390 | NW_004515965.1 | scaffold512 | 126390                  | AA                              | GG                 | GG               | INTERGENIC      |               |                    |                    |
| SNP_75476_A_126446 | NW_004515965.1 | scaffold512 | 126446                  | AA                              | TT                 | TT               | INTERGENIC      |               |                    |                    |
| SNP_75477_A_126453 | NW_004515965.1 | scaffold512 | 126453                  | AA                              | GG                 | GG               | INTERGENIC      |               |                    |                    |

| SNPs IDs           | Chromosome IDs | Chromosomes | Physical positions (bp) | CDC Frontier (Reference genome) | (Pusa 1103 & HPNB) | (ILWC 46 & LPNB) | Sequence genome | Components of | Gene accession IDs | Putative functions |
|--------------------|----------------|-------------|-------------------------|---------------------------------|--------------------|------------------|-----------------|---------------|--------------------|--------------------|
| SNP_75478_A_131831 | NW_004515965.1 | scaffold512 | 131831                  | AA                              | GG                 | GG               | INTERGENIC      |               |                    |                    |
| SNP_75479_A_136290 | NW_004515965.1 | scaffold512 | 136290                  | AA                              | GG                 | GG               | INTERGENIC      |               |                    |                    |
| SNP_75480_A_137960 | NW_004515965.1 | scaffold512 | 137960                  | AA                              | TT                 | TT               | INTERGENIC      |               |                    |                    |
| SNP_75481_A_138167 | NW_004515965.1 | scaffold512 | 138167                  | AA                              | TT                 | TT               | INTERGENIC      |               |                    |                    |
| SNP_75482_A_138199 | NW_004515965.1 | scaffold512 | 138199                  | GG                              | CC                 | CC               | INTERGENIC      |               |                    |                    |
| SNP_75483_A_138399 | NW_004515965.1 | scaffold512 | 138399                  | TT                              | GG                 | GG               | INTERGENIC      |               |                    |                    |
| SNP_75484_A_138418 | NW_004515965.1 | scaffold512 | 138418                  | CC                              | AA                 | AA               | INTERGENIC      |               |                    |                    |
| SNP_75485_A_138428 | NW_004515965.1 | scaffold512 | 138428                  | AA                              | CC                 | CC               | INTERGENIC      |               |                    |                    |
| SNP_75486_A_138430 | NW_004515965.1 | scaffold512 | 138430                  | GG                              | AA                 | AA               | INTERGENIC      |               |                    |                    |
| SNP_75487_A_138432 | NW_004515965.1 | scaffold512 | 138432                  | AA                              | CC                 | CC               | INTERGENIC      |               |                    |                    |
| SNP_75488_A_138438 | NW_004515965.1 | scaffold512 | 138438                  | AA                              | TT                 | TT               | INTERGENIC      |               |                    |                    |
| SNP_75489_A_138441 | NW_004515965.1 | scaffold512 | 138441                  | AA                              | CC                 | CC               | INTERGENIC      |               |                    |                    |
| SNP_75490_A_138444 | NW_004515965.1 | scaffold512 | 138444                  | CC                              | GG                 | GG               | INTERGENIC      |               |                    |                    |
| SNP_75491_A_138498 | NW_004515965.1 | scaffold512 | 138498                  | AA                              | TT                 | TT               | INTERGENIC      |               |                    |                    |
| SNP_75492_A_138511 | NW_004515965.1 | scaffold512 | 138511                  | CC                              | TT                 | TT               | INTERGENIC      |               |                    |                    |
| SNP_75493_A_139628 | NW_004515965.1 | scaffold512 | 139628                  | GG                              | AA                 | AA               | INTERGENIC      |               |                    |                    |
| SNP_75494_A_139642 | NW_004515965.1 | scaffold512 | 139642                  | CC                              | GG                 | GG               | INTERGENIC      |               |                    |                    |
| SNP_75495_A_139703 | NW_004515965.1 | scaffold512 | 139703                  | GG                              | TT                 | TT               | INTERGENIC      |               |                    |                    |
| SNP_75496_A_139709 | NW_004515965.1 | scaffold512 | 139709                  | AA                              | GG                 | GG               | INTERGENIC      |               |                    |                    |
| SNP_75497_A_144889 | NW_004515965.1 | scaffold512 | 144889                  | CC                              | TT                 | TT               | INTERGENIC      |               |                    |                    |
| SNP_75498_A_144900 | NW_004515965.1 | scaffold512 | 144900                  | TT                              | GG                 | GG               | INTERGENIC      |               |                    |                    |
| SNP_75499_A_155565 | NW_004515965.1 | scaffold512 | 155565                  | GG                              | TT                 | TT               | INTERGENIC      |               |                    |                    |

| SNPs IDs           | Chromosome IDs | Chromosomes | Physical positions (bp) | CDC Frontier (Reference genome) | (Pusa 1103 & HPNB) | (ILWC 46 & LPNB) | Sequence genome | Components of | Gene accession IDs | Putative functions |
|--------------------|----------------|-------------|-------------------------|---------------------------------|--------------------|------------------|-----------------|---------------|--------------------|--------------------|
| SNP_75500_A_161678 | NW_004515965.1 | scaffold512 | 161678                  | TT                              | CC                 | CC               | INTERGENIC      |               |                    |                    |
| SNP_75501_A_162088 | NW_004515965.1 | scaffold512 | 162088                  | AA                              | GG                 | GG               | INTERGENIC      |               |                    |                    |
| SNP_75502_A_162215 | NW_004515965.1 | scaffold512 | 162215                  | AA                              | TT                 | TT               | INTERGENIC      |               |                    |                    |
| SNP_75503_A_162323 | NW_004515965.1 | scaffold512 | 162323                  | TT                              | AA                 | AA               | INTERGENIC      |               |                    |                    |
| SNP_75504_A_162349 | NW_004515965.1 | scaffold512 | 162349                  | GG                              | TT                 | TT               | INTERGENIC      |               |                    |                    |
| SNP_75505_A_162366 | NW_004515965.1 | scaffold512 | 162366                  | TT                              | AA                 | AA               | INTERGENIC      |               |                    |                    |
| SNP_75506_A_162392 | NW_004515965.1 | scaffold512 | 162392                  | GG                              | TT                 | TT               | INTERGENIC      |               |                    |                    |
| SNP_75507_A_163476 | NW_004515965.1 | scaffold512 | 163476                  | AA                              | GG                 | GG               | INTERGENIC      |               |                    |                    |
| SNP_75508_A_163477 | NW_004515965.1 | scaffold512 | 163477                  | GG                              | TT                 | TT               | INTERGENIC      |               |                    |                    |
| SNP_75509_A_166690 | NW_004515965.1 | scaffold512 | 166690                  | CC                              | AA                 | AA               | INTERGENIC      |               |                    |                    |
| SNP_75510_A_180334 | NW_004515965.1 | scaffold512 | 180334                  | CC                              | TT                 | TT               | INTERGENIC      |               |                    |                    |
| SNP_75511_A_180335 | NW_004515965.1 | scaffold512 | 180335                  | CC                              | AA                 | AA               | INTERGENIC      |               |                    |                    |
| SNP_75512_A_180366 | NW_004515965.1 | scaffold512 | 180366                  | GG                              | TT                 | TT               | INTERGENIC      |               |                    |                    |
| SNP_75513_A_180429 | NW_004515965.1 | scaffold512 | 180429                  | TT                              | CC                 | CC               | INTERGENIC      |               |                    |                    |
| SNP_75514_A_180645 | NW_004515965.1 | scaffold512 | 180645                  | AA                              | GG                 | GG               | INTERGENIC      |               |                    |                    |
| SNP_75515_A_202    | NW_004515966.1 | scaffold513 | 202                     | TT                              | CC                 | CC               | INTERGENIC      |               |                    |                    |
| SNP_75516_A_297    | NW_004515966.1 | scaffold513 | 297                     | AA                              | GG                 | GG               | INTERGENIC      |               |                    |                    |
| SNP_75517_A_299    | NW_004515966.1 | scaffold513 | 299                     | AA                              | CC                 | CC               | INTERGENIC      |               |                    |                    |
| SNP_75518_A_300    | NW_004515966.1 | scaffold513 | 300                     | AA                              | TT                 | TT               | INTERGENIC      |               |                    |                    |
| SNP_75519_A_584    | NW_004515966.1 | scaffold513 | 584                     | TT                              | CC                 | CC               | INTERGENIC      |               |                    |                    |
| SNP_75520_A_644    | NW_004515966.1 | scaffold513 | 644                     | AA                              | GG                 | GG               | INTERGENIC      |               |                    |                    |
| SNP_75521_A_7241   | NW_004515966.1 | scaffold513 | 7241                    | TT                              | CC                 | CC               | INTERGENIC      |               |                    |                    |

| SNPs IDs          | Chromosome IDs | Chromosomes | Physical positions (bp) | CDC Frontier (Reference genome) | (Pusa 1103 & HPNB) | (ILWC 46 & LPNB) | Sequence genome | Components of | Gene accession IDs | Putative functions |
|-------------------|----------------|-------------|-------------------------|---------------------------------|--------------------|------------------|-----------------|---------------|--------------------|--------------------|
| SNP_75522_A_7296  | NW_004515966.1 | scaffold513 | 7296                    | GG                              | AA                 | AA               | INTERGENIC      |               |                    |                    |
| SNP_75523_A_7752  | NW_004515966.1 | scaffold513 | 7752                    | AA                              | GG                 | GG               | INTERGENIC      |               |                    |                    |
| SNP_75524_A_16908 | NW_004515966.1 | scaffold513 | 16908                   | AA                              | GG                 | GG               | INTERGENIC      |               |                    |                    |
| SNP_75525_A_17096 | NW_004515966.1 | scaffold513 | 17096                   | CC                              | TT                 | TT               | INTERGENIC      |               |                    |                    |
| SNP_75526_A_17381 | NW_004515966.1 | scaffold513 | 17381                   | AA                              | GG                 | GG               | INTERGENIC      |               |                    |                    |
| SNP_75527_A_64    | NW_004515967.1 | scaffold515 | 64                      | AA                              | CC                 | CC               | INTERGENIC      |               |                    |                    |
| SNP_75528_A_82    | NW_004515967.1 | scaffold515 | 82                      | TT                              | CC                 | CC               | INTERGENIC      |               |                    |                    |
| SNP_75529_A_105   | NW_004515967.1 | scaffold515 | 105                     | TT                              | CC                 | CC               | INTERGENIC      |               |                    |                    |
| SNP_75531_A_177   | NW_004515967.1 | scaffold515 | 177                     | AA                              | GG                 | GG               | INTERGENIC      |               |                    |                    |
| SNP_75532_A_400   | NW_004515967.1 | scaffold515 | 400                     | CC                              | TT                 | TT               | INTERGENIC      |               |                    |                    |
| SNP_75533_A_408   | NW_004515967.1 | scaffold515 | 408                     | TT                              | CC                 | CC               | INTERGENIC      |               |                    |                    |
| SNP_75534_A_430   | NW_004515967.1 | scaffold515 | 430                     | AA                              | GG                 | GG               | INTERGENIC      |               |                    |                    |
| SNP_75535_A_523   | NW_004515967.1 | scaffold515 | 523                     | CC                              | AA                 | AA               | INTERGENIC      |               |                    |                    |
| SNP_75536_A_1081  | NW_004515967.1 | scaffold515 | 1081                    | AA                              | GG                 | GG               | INTERGENIC      |               |                    |                    |
| SNP_75537_A_1108  | NW_004515967.1 | scaffold515 | 1108                    | GG                              | AA                 | AA               | INTERGENIC      |               |                    |                    |
| SNP_75538_A_1132  | NW_004515967.1 | scaffold515 | 1132                    | AA                              | TT                 | TT               | INTERGENIC      |               |                    |                    |
| SNP_75539_A_1179  | NW_004515967.1 | scaffold515 | 1179                    | TT                              | AA                 | AA               | INTERGENIC      |               |                    |                    |
| SNP_75540_A_1187  | NW_004515967.1 | scaffold515 | 1187                    | CC                              | TT                 | TT               | INTERGENIC      |               |                    |                    |
| SNP_75541_A_1226  | NW_004515967.1 | scaffold515 | 1226                    | AA                              | GG                 | GG               | INTERGENIC      |               |                    |                    |
| SNP_75542_A_1373  | NW_004515967.1 | scaffold515 | 1373                    | GG                              | TT                 | TT               | INTERGENIC      |               |                    |                    |
| SNP_75543_A_1453  | NW_004515967.1 | scaffold515 | 1453                    | GG                              | AA                 | AA               | INTERGENIC      |               |                    |                    |
| SNP_75544_A_8625  | NW_004515967.1 | scaffold515 | 8625                    | CC                              | GG                 | GG               | INTERGENIC      |               |                    |                    |

| SNPs IDs         | Chromosome IDs | Chromosomes | Physical positions (bp) | CDC Frontier (Reference genome) | (Pusa 1103 & HPNB) | (ILWC 46 & LPNB) | Sequence genome | Components of | Gene accession IDs | Putative functions |
|------------------|----------------|-------------|-------------------------|---------------------------------|--------------------|------------------|-----------------|---------------|--------------------|--------------------|
| SNP_75545_A_8655 | NW_004515967.1 | scaffold515 | 8655                    | TT                              | GG                 | GG               | INTERGENIC      |               |                    |                    |
| SNP_75546_A_8665 | NW_004515967.1 | scaffold515 | 8665                    | TT                              | GG                 | GG               | INTERGENIC      |               |                    |                    |
| SNP_75547_A_8713 | NW_004515967.1 | scaffold515 | 8713                    | TT                              | GG                 | GG               | INTERGENIC      |               |                    |                    |
| SNP_75548_A_8747 | NW_004515967.1 | scaffold515 | 8747                    | TT                              | CC                 | CC               | INTERGENIC      |               |                    |                    |
| SNP_75549_A_8935 | NW_004515967.1 | scaffold515 | 8935                    | GG                              | CC                 | CC               | INTERGENIC      |               |                    |                    |
| SNP_75550_A_8987 | NW_004515967.1 | scaffold515 | 8987                    | TT                              | GG                 | GG               | INTERGENIC      |               |                    |                    |
| SNP_75551_A_9034 | NW_004515967.1 | scaffold515 | 9034                    | GG                              | TT                 | TT               | INTERGENIC      |               |                    |                    |
| SNP_75552_A_9036 | NW_004515967.1 | scaffold515 | 9036                    | CC                              | AA                 | AA               | INTERGENIC      |               |                    |                    |
| SNP_75553_A_9148 | NW_004515967.1 | scaffold515 | 9148                    | CC                              | AA                 | AA               | INTERGENIC      |               |                    |                    |
| SNP_75554_A_9153 | NW_004515967.1 | scaffold515 | 9153                    | GG                              | CC                 | CC               | INTERGENIC      |               |                    |                    |
| SNP_75555_A_9218 | NW_004515967.1 | scaffold515 | 9218                    | GG                              | AA                 | AA               | INTERGENIC      |               |                    |                    |
| SNP_75556_A_9266 | NW_004515967.1 | scaffold515 | 9266                    | CC                              | TT                 | TT               | INTERGENIC      |               |                    |                    |
| SNP_75557_A_9440 | NW_004515967.1 | scaffold515 | 9440                    | CC                              | TT                 | TT               | INTERGENIC      |               |                    |                    |
| SNP_75558_A_9524 | NW_004515967.1 | scaffold515 | 9524                    | AA                              | GG                 | GG               | INTERGENIC      |               |                    |                    |
| SNP_75559_A_9551 | NW_004515967.1 | scaffold515 | 9551                    | TT                              | CC                 | CC               | INTERGENIC      |               |                    |                    |
| SNP_75560_A_9592 | NW_004515967.1 | scaffold515 | 9592                    | TT                              | GG                 | GG               | INTERGENIC      |               |                    |                    |
| SNP_75561_A_9593 | NW_004515967.1 | scaffold515 | 9593                    | GG                              | AA                 | AA               | INTERGENIC      |               |                    |                    |
| SNP_75562_A_9609 | NW_004515967.1 | scaffold515 | 9609                    | TT                              | CC                 | CC               | INTERGENIC      |               |                    |                    |
| SNP_75563_A_9667 | NW_004515967.1 | scaffold515 | 9667                    | GG                              | CC                 | CC               | INTERGENIC      |               |                    |                    |
| SNP_75564_A_9716 | NW_004515967.1 | scaffold515 | 9716                    | AA                              | CC                 | CC               | INTERGENIC      |               |                    |                    |
| SNP_75565_A_9861 | NW_004515967.1 | scaffold515 | 9861                    | AA                              | GG                 | GG               | INTERGENIC      |               |                    |                    |
| SNP_75566_A_9985 | NW_004515967.1 | scaffold515 | 9985                    | GG                              | AA                 | AA               | INTERGENIC      |               |                    |                    |



| SNPs IDs          | Chromosome IDs | Chromosomes | Physical positions (bp) | CDC Frontier (Reference genome) | (Pusa 1103 & HPNB) | (ILWC 46 & LPNB) | Sequence genome | Components of | Gene accession IDs | Putative functions |
|-------------------|----------------|-------------|-------------------------|---------------------------------|--------------------|------------------|-----------------|---------------|--------------------|--------------------|
| SNP_75567_A_9998  | NW_004515967.1 | scaffold515 | 9998                    | CC                              | GG                 | GG               | INTERGENIC      |               |                    |                    |
| SNP_75568_A_10015 | NW_004515967.1 | scaffold515 | 10015                   | TT                              | AA                 | AA               | INTERGENIC      |               |                    |                    |
| SNP_75569_A_10099 | NW_004515967.1 | scaffold515 | 10099                   | TT                              | GG                 | GG               | INTERGENIC      |               |                    |                    |
| SNP_75570_A_10114 | NW_004515967.1 | scaffold515 | 10114                   | AA                              | GG                 | GG               | INTERGENIC      |               |                    |                    |
| SNP_75571_A_10264 | NW_004515967.1 | scaffold515 | 10264                   | CC                              | TT                 | TT               | INTERGENIC      |               |                    |                    |
| SNP_75572_A_10479 | NW_004515967.1 | scaffold515 | 10479                   | TT                              | GG                 | GG               | INTERGENIC      |               |                    |                    |
| SNP_75573_A_10535 | NW_004515967.1 | scaffold515 | 10535                   | GG                              | CC                 | CC               | INTERGENIC      |               |                    |                    |
| SNP_75574_A_10646 | NW_004515967.1 | scaffold515 | 10646                   | AA                              | TT                 | TT               | INTERGENIC      |               |                    |                    |
| SNP_75575_A_10677 | NW_004515967.1 | scaffold515 | 10677                   | AA                              | GG                 | GG               | INTERGENIC      |               |                    |                    |
| SNP_75576_A_10678 | NW_004515967.1 | scaffold515 | 10678                   | AA                              | TT                 | TT               | INTERGENIC      |               |                    |                    |
| SNP_75577_A_10723 | NW_004515967.1 | scaffold515 | 10723                   | GG                              | TT                 | TT               | INTERGENIC      |               |                    |                    |
| SNP_75578_A_10791 | NW_004515967.1 | scaffold515 | 10791                   | TT                              | CC                 | CC               | INTERGENIC      |               |                    |                    |
| SNP_75579_A_10812 | NW_004515967.1 | scaffold515 | 10812                   | GG                              | AA                 | AA               | INTERGENIC      |               |                    |                    |
| SNP_75580_A_10990 | NW_004515967.1 | scaffold515 | 10990                   | TT                              | CC                 | CC               | INTERGENIC      |               |                    |                    |
| SNP_75581_A_11016 | NW_004515967.1 | scaffold515 | 11016                   | CC                              | TT                 | TT               | INTERGENIC      |               |                    |                    |
| SNP_75582_A_11018 | NW_004515967.1 | scaffold515 | 11018                   | AA                              | TT                 | TT               | INTERGENIC      |               |                    |                    |
| SNP_75583_A_11069 | NW_004515967.1 | scaffold515 | 11069                   | TT                              | CC                 | CC               | INTERGENIC      |               |                    |                    |
| SNP_75584_A_11070 | NW_004515967.1 | scaffold515 | 11070                   | CC                              | GG                 | GG               | INTERGENIC      |               |                    |                    |
| SNP_75585_A_11980 | NW_004515967.1 | scaffold515 | 11980                   | GG                              | AA                 | AA               | INTERGENIC      |               |                    |                    |
| SNP_75586_A_12032 | NW_004515967.1 | scaffold515 | 12032                   | GG                              | AA                 | AA               | INTERGENIC      |               |                    |                    |
| SNP_75587_A_12206 | NW_004515967.1 | scaffold515 | 12206                   | TT                              | AA                 | AA               | INTERGENIC      |               |                    |                    |
| SNP_75588_A_12314 | NW_004515967.1 | scaffold515 | 12314                   | CC                              | TT                 | TT               | INTERGENIC      |               |                    |                    |

| SNPs IDs          | Chromosome IDs | Chromosomes | Physical positions (bp) | CDC Frontier (Reference genome) | (Pusa 1103 & HPNB) | (ILWC 46 & LPNB) | Sequence genome | Components of | Gene accession IDs | Putative functions |
|-------------------|----------------|-------------|-------------------------|---------------------------------|--------------------|------------------|-----------------|---------------|--------------------|--------------------|
| SNP_75589_A_12635 | NW_004515967.1 | scaffold515 | 12635                   | TT                              | CC                 | CC               | INTERGENIC      |               |                    |                    |
| SNP_75590_A_12687 | NW_004515967.1 | scaffold515 | 12687                   | CC                              | GG                 | GG               | INTERGENIC      |               |                    |                    |
| SNP_75591_A_12807 | NW_004515967.1 | scaffold515 | 12807                   | CC                              | AA                 | AA               | INTERGENIC      |               |                    |                    |
| SNP_75592_A_12819 | NW_004515967.1 | scaffold515 | 12819                   | AA                              | GG                 | GG               | INTERGENIC      |               |                    |                    |
| SNP_75593_A_12917 | NW_004515967.1 | scaffold515 | 12917                   | GG                              | TT                 | TT               | INTERGENIC      |               |                    |                    |
| SNP_75594_A_13044 | NW_004515967.1 | scaffold515 | 13044                   | TT                              | CC                 | CC               | INTERGENIC      |               |                    |                    |
| SNP_75595_A_15601 | NW_004515967.1 | scaffold515 | 15601                   | TT                              | GG                 | GG               | INTERGENIC      |               |                    |                    |
| SNP_75596_A_15623 | NW_004515967.1 | scaffold515 | 15623                   | GG                              | TT                 | TT               | INTERGENIC      |               |                    |                    |
| SNP_75597_A_15801 | NW_004515967.1 | scaffold515 | 15801                   | GG                              | AA                 | AA               | INTERGENIC      |               |                    |                    |
| SNP_75598_A_16006 | NW_004515967.1 | scaffold515 | 16006                   | TT                              | CC                 | CC               | INTERGENIC      |               |                    |                    |
| SNP_75599_A_16014 | NW_004515967.1 | scaffold515 | 16014                   | CC                              | TT                 | TT               | INTERGENIC      |               |                    |                    |
| SNP_75600_A_16176 | NW_004515967.1 | scaffold515 | 16176                   | GG                              | TT                 | TT               | INTERGENIC      |               |                    |                    |
| SNP_75602_A_19553 | NW_004515967.1 | scaffold515 | 19553                   | CC                              | TT                 | TT               | INTERGENIC      |               |                    |                    |
| SNP_75603_A_24307 | NW_004515967.1 | scaffold515 | 24307                   | CC                              | TT                 | TT               | INTERGENIC      |               |                    |                    |
| SNP_75604_A_24383 | NW_004515967.1 | scaffold515 | 24383                   | TT                              | AA                 | AA               | INTERGENIC      |               |                    |                    |
| SNP_75605_A_26038 | NW_004515967.1 | scaffold515 | 26038                   | CC                              | AA                 | AA               | INTERGENIC      |               |                    |                    |
| SNP_75606_A_26076 | NW_004515967.1 | scaffold515 | 26076                   | TT                              | AA                 | AA               | INTERGENIC      |               |                    |                    |
| SNP_75607_A_26189 | NW_004515967.1 | scaffold515 | 26189                   | CC                              | TT                 | TT               | INTERGENIC      |               |                    |                    |
| SNP_75608_A_26393 | NW_004515967.1 | scaffold515 | 26393                   | TT                              | CC                 | CC               | INTERGENIC      |               |                    |                    |
| SNP_75609_A_26454 | NW_004515967.1 | scaffold515 | 26454                   | TT                              | GG                 | GG               | INTERGENIC      |               |                    |                    |
| SNP_75610_A_26485 | NW_004515967.1 | scaffold515 | 26485                   | TT                              | CC                 | CC               | INTERGENIC      |               |                    |                    |
| SNP_75611_A_27274 | NW_004515967.1 | scaffold515 | 27274                   | TT                              | CC                 | CC               | INTERGENIC      |               |                    |                    |

| SNPs IDs          | Chromosome IDs | Chromosomes | Physical positions (bp) | CDC Frontier (Reference genome) | (Pusa 1103 & HPNB) | (ILWC 46 & LPNB) | Sequence genome | Components of | Gene accession IDs | Putative functions |
|-------------------|----------------|-------------|-------------------------|---------------------------------|--------------------|------------------|-----------------|---------------|--------------------|--------------------|
| SNP_75612_A_28305 | NW_004515967.1 | scaffold515 | 28305                   | TT                              | GG                 | GG               | INTERGENIC      |               |                    |                    |
| SNP_75613_A_28390 | NW_004515967.1 | scaffold515 | 28390                   | AA                              | GG                 | GG               | INTERGENIC      |               |                    |                    |
| SNP_75614_A_28423 | NW_004515967.1 | scaffold515 | 28423                   | AA                              | GG                 | GG               | INTERGENIC      |               |                    |                    |
| SNP_75615_A_28463 | NW_004515967.1 | scaffold515 | 28463                   | GG                              | AA                 | AA               | INTERGENIC      |               |                    |                    |
| SNP_75616_A_28678 | NW_004515967.1 | scaffold515 | 28678                   | TT                              | GG                 | GG               | INTERGENIC      |               |                    |                    |
| SNP_75617_A_28713 | NW_004515967.1 | scaffold515 | 28713                   | GG                              | AA                 | AA               | INTERGENIC      |               |                    |                    |
| SNP_75618_A_29043 | NW_004515967.1 | scaffold515 | 29043                   | AA                              | GG                 | GG               | INTERGENIC      |               |                    |                    |
| SNP_75619_A_29374 | NW_004515967.1 | scaffold515 | 29374                   | GG                              | CC                 | CC               | INTERGENIC      |               |                    |                    |
| SNP_75620_A_29495 | NW_004515967.1 | scaffold515 | 29495                   | TT                              | CC                 | CC               | INTERGENIC      |               |                    |                    |
| SNP_75621_A_29729 | NW_004515967.1 | scaffold515 | 29729                   | TT                              | CC                 | CC               | INTERGENIC      |               |                    |                    |
| SNP_75622_A_29736 | NW_004515967.1 | scaffold515 | 29736                   | CC                              | TT                 | TT               | INTERGENIC      |               |                    |                    |
| SNP_75623_A_29790 | NW_004515967.1 | scaffold515 | 29790                   | TT                              | CC                 | CC               | INTERGENIC      |               |                    |                    |
| SNP_75624_A_29969 | NW_004515967.1 | scaffold515 | 29969                   | AA                              | GG                 | GG               | INTERGENIC      |               |                    |                    |
| SNP_75625_A_30544 | NW_004515967.1 | scaffold515 | 30544                   | CC                              | AA                 | AA               | INTERGENIC      |               |                    |                    |
| SNP_75626_A_30578 | NW_004515967.1 | scaffold515 | 30578                   | GG                              | AA                 | AA               | INTERGENIC      |               |                    |                    |
| SNP_75627_A_30580 | NW_004515967.1 | scaffold515 | 30580                   | AA                              | CC                 | CC               | INTERGENIC      |               |                    |                    |
| SNP_75628_A_30587 | NW_004515967.1 | scaffold515 | 30587                   | GG                              | AA                 | AA               | INTERGENIC      |               |                    |                    |
| SNP_75629_A_30655 | NW_004515967.1 | scaffold515 | 30655                   | GG                              | AA                 | AA               | INTERGENIC      |               |                    |                    |
| SNP_75630_A_30684 | NW_004515967.1 | scaffold515 | 30684                   | TT                              | CC                 | CC               | INTERGENIC      |               |                    |                    |
| SNP_75631_A_30697 | NW_004515967.1 | scaffold515 | 30697                   | GG                              | CC                 | CC               | INTERGENIC      |               |                    |                    |
| SNP_75632_A_30708 | NW_004515967.1 | scaffold515 | 30708                   | GG                              | TT                 | TT               | INTERGENIC      |               |                    |                    |
| SNP_75633_A_30715 | NW_004515967.1 | scaffold515 | 30715                   | GG                              | TT                 | TT               | INTERGENIC      |               |                    |                    |

| SNPs IDs          | Chromosome IDs | Chromosomes | Physical positions (bp) | CDC Frontier (Reference genome) | (Pusa 1103 & HPNB) | (ILWC 46 & LPNB) | Sequence genome | Components of | Gene accession IDs | Putative functions |
|-------------------|----------------|-------------|-------------------------|---------------------------------|--------------------|------------------|-----------------|---------------|--------------------|--------------------|
| SNP_75634_A_30759 | NW_004515967.1 | scaffold515 | 30759                   | AA                              | GG                 | GG               | INTERGENIC      |               |                    |                    |
| SNP_75635_A_30788 | NW_004515967.1 | scaffold515 | 30788                   | AA                              | TT                 | TT               | INTERGENIC      |               |                    |                    |
| SNP_75636_A_30796 | NW_004515967.1 | scaffold515 | 30796                   | AA                              | CC                 | CC               | INTERGENIC      |               |                    |                    |
| SNP_75637_A_30799 | NW_004515967.1 | scaffold515 | 30799                   | CC                              | GG                 | GG               | INTERGENIC      |               |                    |                    |
| SNP_75638_A_30819 | NW_004515967.1 | scaffold515 | 30819                   | AA                              | TT                 | CC               | INTERGENIC      |               |                    |                    |
| SNP_75639_A_30868 | NW_004515967.1 | scaffold515 | 30868                   | AA                              | GG                 | GG               | INTERGENIC      |               |                    |                    |
| SNP_75640_A_30872 | NW_004515967.1 | scaffold515 | 30872                   | GG                              | TT                 | TT               | INTERGENIC      |               |                    |                    |
| SNP_75641_A_30882 | NW_004515967.1 | scaffold515 | 30882                   | AA                              | GG                 | GG               | INTERGENIC      |               |                    |                    |
| SNP_75642_A_30938 | NW_004515967.1 | scaffold515 | 30938                   | AA                              | GG                 | GG               | INTERGENIC      |               |                    |                    |
| SNP_75643_A_30994 | NW_004515967.1 | scaffold515 | 30994                   | TT                              | CC                 | CC               | INTERGENIC      |               |                    |                    |
| SNP_75644_A_31126 | NW_004515967.1 | scaffold515 | 31126                   | GG                              | AA                 | AA               | INTERGENIC      |               |                    |                    |
| SNP_75645_A_31237 | NW_004515967.1 | scaffold515 | 31237                   | GG                              | TT                 | TT               | INTERGENIC      |               |                    |                    |
| SNP_75646_A_31279 | NW_004515967.1 | scaffold515 | 31279                   | CC                              | TT                 | TT               | INTERGENIC      |               |                    |                    |
| SNP_75647_A_31314 | NW_004515967.1 | scaffold515 | 31314                   | CC                              | TT                 | TT               | INTERGENIC      |               |                    |                    |
| SNP_75648_A_31390 | NW_004515967.1 | scaffold515 | 31390                   | AA                              | GG                 | GG               | INTERGENIC      |               |                    |                    |
| SNP_75649_A_31531 | NW_004515967.1 | scaffold515 | 31531                   | AA                              | CC                 | CC               | INTERGENIC      |               |                    |                    |
| SNP_75650_A_31564 | NW_004515967.1 | scaffold515 | 31564                   | GG                              | CC                 | CC               | INTERGENIC      |               |                    |                    |
| SNP_75651_A_31671 | NW_004515967.1 | scaffold515 | 31671                   | AA                              | TT                 | TT               | INTERGENIC      |               |                    |                    |
| SNP_75652_A_31848 | NW_004515967.1 | scaffold515 | 31848                   | TT                              | CC                 | CC               | INTERGENIC      |               |                    |                    |
| SNP_75653_A_31865 | NW_004515967.1 | scaffold515 | 31865                   | CC                              | GG                 | GG               | INTERGENIC      |               |                    |                    |
| SNP_75654_A_31976 | NW_004515967.1 | scaffold515 | 31976                   | AA                              | GG                 | GG               | INTERGENIC      |               |                    |                    |
| SNP_75655_A_32272 | NW_004515967.1 | scaffold515 | 32272                   | AA                              | TT                 | TT               | INTERGENIC      |               |                    |                    |

| SNPs IDs          | Chromosome IDs | Chromosomes | Physical positions (bp) | CDC Frontier (Reference genome) | (Pusa 1103 & HPNB) | (ILWC 46 & LPNB) | Sequence genome | Components of | Gene accession IDs | Putative functions |
|-------------------|----------------|-------------|-------------------------|---------------------------------|--------------------|------------------|-----------------|---------------|--------------------|--------------------|
| SNP_75656_A_32483 | NW_004515967.1 | scaffold515 | 32483                   | TT                              | GG                 | GG               | INTERGENIC      |               |                    |                    |
| SNP_75657_A_32488 | NW_004515967.1 | scaffold515 | 32488                   | TT                              | CC                 | CC               | INTERGENIC      |               |                    |                    |
| SNP_75658_A_32632 | NW_004515967.1 | scaffold515 | 32632                   | TT                              | GG                 | GG               | INTERGENIC      |               |                    |                    |
| SNP_75659_A_32694 | NW_004515967.1 | scaffold515 | 32694                   | TT                              | GG                 | GG               | INTERGENIC      |               |                    |                    |
| SNP_75660_A_33093 | NW_004515967.1 | scaffold515 | 33093                   | AA                              | TT                 | TT               | INTERGENIC      |               |                    |                    |
| SNP_75661_A_33147 | NW_004515967.1 | scaffold515 | 33147                   | TT                              | CC                 | CC               | INTERGENIC      |               |                    |                    |
| SNP_75662_A_33155 | NW_004515967.1 | scaffold515 | 33155                   | AA                              | GG                 | GG               | INTERGENIC      |               |                    |                    |
| SNP_75663_A_33186 | NW_004515967.1 | scaffold515 | 33186                   | TT                              | CC                 | CC               | INTERGENIC      |               |                    |                    |
| SNP_75664_A_33216 | NW_004515967.1 | scaffold515 | 33216                   | TT                              | CC                 | CC               | INTERGENIC      |               |                    |                    |
| SNP_75665_A_33244 | NW_004515967.1 | scaffold515 | 33244                   | AA                              | GG                 | GG               | INTERGENIC      |               |                    |                    |
| SNP_75666_A_33320 | NW_004515967.1 | scaffold515 | 33320                   | GG                              | AA                 | AA               | INTERGENIC      |               |                    |                    |
| SNP_75667_A_33391 | NW_004515967.1 | scaffold515 | 33391                   | TT                              | CC                 | CC               | INTERGENIC      |               |                    |                    |
| SNP_75668_A_33397 | NW_004515967.1 | scaffold515 | 33397                   | AA                              | TT                 | TT               | INTERGENIC      |               |                    |                    |
| SNP_75669_A_33483 | NW_004515967.1 | scaffold515 | 33483                   | GG                              | AA                 | AA               | INTERGENIC      |               |                    |                    |
| SNP_75670_A_33953 | NW_004515967.1 | scaffold515 | 33953                   | TT                              | AA                 | AA               | INTERGENIC      |               |                    |                    |
| SNP_75671_A_33968 | NW_004515967.1 | scaffold515 | 33968                   | TT                              | CC                 | CC               | INTERGENIC      |               |                    |                    |
| SNP_75672_A_34131 | NW_004515967.1 | scaffold515 | 34131                   | CC                              | AA                 | AA               | INTERGENIC      |               |                    |                    |
| SNP_75673_A_34193 | NW_004515967.1 | scaffold515 | 34193                   | CC                              | TT                 | TT               | INTERGENIC      |               |                    |                    |
| SNP_75674_A_34300 | NW_004515967.1 | scaffold515 | 34300                   | GG                              | AA                 | AA               | INTERGENIC      |               |                    |                    |
| SNP_75675_A_34319 | NW_004515967.1 | scaffold515 | 34319                   | TT                              | CC                 | CC               | INTERGENIC      |               |                    |                    |
| SNP_75676_A_34368 | NW_004515967.1 | scaffold515 | 34368                   | TT                              | CC                 | CC               | INTERGENIC      |               |                    |                    |
| SNP_75677_A_34501 | NW_004515967.1 | scaffold515 | 34501                   | TT                              | GG                 | GG               | INTERGENIC      |               |                    |                    |

| SNPs IDs          | Chromosome IDs | Chromosomes | Physical positions (bp) | CDC Frontier (Reference genome) | (Pusa 1103 & HPNB) | (ILWC 46 & LPNB) | Sequence genome | Components of | Gene accession IDs | Putative functions |
|-------------------|----------------|-------------|-------------------------|---------------------------------|--------------------|------------------|-----------------|---------------|--------------------|--------------------|
| SNP_75678_A_34519 | NW_004515967.1 | scaffold515 | 34519                   | TT                              | CC                 | CC               | INTERGENIC      |               |                    |                    |
| SNP_75679_A_34603 | NW_004515967.1 | scaffold515 | 34603                   | CC                              | GG                 | GG               | INTERGENIC      |               |                    |                    |
| SNP_75680_A_34685 | NW_004515967.1 | scaffold515 | 34685                   | CC                              | AA                 | AA               | INTERGENIC      |               |                    |                    |
| SNP_75681_A_34722 | NW_004515967.1 | scaffold515 | 34722                   | TT                              | AA                 | AA               | INTERGENIC      |               |                    |                    |
| SNP_75682_A_36307 | NW_004515967.1 | scaffold515 | 36307                   | GG                              | AA                 | AA               | INTERGENIC      |               |                    |                    |
| SNP_75683_A_36527 | NW_004515967.1 | scaffold515 | 36527                   | TT                              | GG                 | GG               | INTERGENIC      |               |                    |                    |
| SNP_75684_A_36565 | NW_004515967.1 | scaffold515 | 36565                   | GG                              | TT                 | TT               | INTERGENIC      |               |                    |                    |
| SNP_75685_A_36587 | NW_004515967.1 | scaffold515 | 36587                   | TT                              | CC                 | CC               | INTERGENIC      |               |                    |                    |
| SNP_75686_A_36666 | NW_004515967.1 | scaffold515 | 36666                   | TT                              | CC                 | CC               | INTERGENIC      |               |                    |                    |
| SNP_75687_A_36670 | NW_004515967.1 | scaffold515 | 36670                   | TT                              | AA                 | AA               | INTERGENIC      |               |                    |                    |
| SNP_75688_A_36672 | NW_004515967.1 | scaffold515 | 36672                   | AA                              | TT                 | TT               | INTERGENIC      |               |                    |                    |
| SNP_75689_A_38600 | NW_004515967.1 | scaffold515 | 38600                   | GG                              | TT                 | TT               | INTERGENIC      |               |                    |                    |
| SNP_75690_A_38639 | NW_004515967.1 | scaffold515 | 38639                   | AA                              | CC                 | CC               | INTERGENIC      |               |                    |                    |
| SNP_75691_A_38887 | NW_004515967.1 | scaffold515 | 38887                   | AA                              | GG                 | GG               | INTERGENIC      |               |                    |                    |
| SNP_75692_A_38994 | NW_004515967.1 | scaffold515 | 38994                   | AA                              | TT                 | TT               | INTERGENIC      |               |                    |                    |
| SNP_75693_A_39160 | NW_004515967.1 | scaffold515 | 39160                   | GG                              | AA                 | AA               | INTERGENIC      |               |                    |                    |
| SNP_75694_A_39361 | NW_004515967.1 | scaffold515 | 39361                   | AA                              | TT                 | TT               | INTERGENIC      |               |                    |                    |
| SNP_75695_A_39488 | NW_004515967.1 | scaffold515 | 39488                   | TT                              | AA                 | AA               | INTERGENIC      |               |                    |                    |
| SNP_75696_A_39507 | NW_004515967.1 | scaffold515 | 39507                   | AA                              | CC                 | CC               | INTERGENIC      |               |                    |                    |
| SNP_75697_A_42056 | NW_004515967.1 | scaffold515 | 42056                   | TT                              | AA                 | AA               | INTERGENIC      |               |                    |                    |
| SNP_75698_A_42144 | NW_004515967.1 | scaffold515 | 42144                   | AA                              | TT                 | TT               | INTERGENIC      |               |                    |                    |
| SNP_75699_A_42569 | NW_004515967.1 | scaffold515 | 42569                   | CC                              | AA                 | AA               | INTERGENIC      |               |                    |                    |

| SNPs IDs          | Chromosome IDs | Chromosomes | Physical positions (bp) | CDC Frontier (Reference genome) | (Pusa 1103 & HPNB) | (ILWC 46 & LPNB) | Sequence genome | Components of | Gene accession IDs | Putative functions |
|-------------------|----------------|-------------|-------------------------|---------------------------------|--------------------|------------------|-----------------|---------------|--------------------|--------------------|
| SNP_75700_A_42749 | NW_004515967.1 | scaffold515 | 42749                   | AA                              | GG                 | GG               | INTERGENIC      |               |                    |                    |
| SNP_75702_A_42843 | NW_004515967.1 | scaffold515 | 42843                   | AA                              | GG                 | GG               | INTERGENIC      |               |                    |                    |
| SNP_75703_A_42851 | NW_004515967.1 | scaffold515 | 42851                   | TT                              | CC                 | CC               | INTERGENIC      |               |                    |                    |
| SNP_75704_A_42885 | NW_004515967.1 | scaffold515 | 42885                   | TT                              | CC                 | CC               | INTERGENIC      |               |                    |                    |
| SNP_75705_A_42968 | NW_004515967.1 | scaffold515 | 42968                   | TT                              | CC                 | CC               | INTERGENIC      |               |                    |                    |
| SNP_75706_A_42992 | NW_004515967.1 | scaffold515 | 42992                   | CC                              | TT                 | TT               | INTERGENIC      |               |                    |                    |
| SNP_75708_A_43058 | NW_004515967.1 | scaffold515 | 43058                   | GG                              | TT                 | TT               | INTERGENIC      |               |                    |                    |
| SNP_75709_A_43118 | NW_004515967.1 | scaffold515 | 43118                   | CC                              | TT                 | TT               | INTERGENIC      |               |                    |                    |
| SNP_75710_A_43131 | NW_004515967.1 | scaffold515 | 43131                   | CC                              | TT                 | TT               | INTERGENIC      |               |                    |                    |
| SNP_75711_A_43196 | NW_004515967.1 | scaffold515 | 43196                   | GG                              | TT                 | TT               | INTERGENIC      |               |                    |                    |
| SNP_75712_A_43271 | NW_004515967.1 | scaffold515 | 43271                   | TT                              | CC                 | CC               | INTERGENIC      |               |                    |                    |
| SNP_75713_A_43506 | NW_004515967.1 | scaffold515 | 43506                   | GG                              | AA                 | AA               | INTERGENIC      |               |                    |                    |
| SNP_75714_A_43581 | NW_004515967.1 | scaffold515 | 43581                   | TT                              | GG                 | GG               | INTERGENIC      |               |                    |                    |
| SNP_75715_A_43594 | NW_004515967.1 | scaffold515 | 43594                   | TT                              | CC                 | CC               | INTERGENIC      |               |                    |                    |
| SNP_75716_A_43636 | NW_004515967.1 | scaffold515 | 43636                   | CC                              | TT                 | TT               | INTERGENIC      |               |                    |                    |
| SNP_75717_A_43762 | NW_004515967.1 | scaffold515 | 43762                   | CC                              | TT                 | TT               | INTERGENIC      |               |                    |                    |
| SNP_75718_A_43769 | NW_004515967.1 | scaffold515 | 43769                   | TT                              | GG                 | GG               | INTERGENIC      |               |                    |                    |
| SNP_75719_A_44632 | NW_004515967.1 | scaffold515 | 44632                   | GG                              | TT                 | TT               | INTERGENIC      |               |                    |                    |
| SNP_75720_A_44640 | NW_004515967.1 | scaffold515 | 44640                   | AA                              | CC                 | CC               | INTERGENIC      |               |                    |                    |
| SNP_75721_A_44644 | NW_004515967.1 | scaffold515 | 44644                   | TT                              | CC                 | CC               | INTERGENIC      |               |                    |                    |
| SNP_75722_A_44692 | NW_004515967.1 | scaffold515 | 44692                   | GG                              | CC                 | CC               | INTERGENIC      |               |                    |                    |
| SNP_75723_A_44751 | NW_004515967.1 | scaffold515 | 44751                   | AA                              | TT                 | TT               | INTERGENIC      |               |                    |                    |

| SNPs IDs          | Chromosome IDs | Chromosomes | Physical positions (bp) | CDC Frontier (Reference genome) | (Pusa 1103 & HPNB) | (ILWC 46 & LPNB) | Sequence genome | Components of | Gene accession IDs | Putative functions |
|-------------------|----------------|-------------|-------------------------|---------------------------------|--------------------|------------------|-----------------|---------------|--------------------|--------------------|
| SNP_75724_A_44777 | NW_004515967.1 | scaffold515 | 44777                   | CC                              | TT                 | TT               | INTERGENIC      |               |                    |                    |
| SNP_75725_A_44779 | NW_004515967.1 | scaffold515 | 44779                   | AA                              | GG                 | GG               | INTERGENIC      |               |                    |                    |
| SNP_75726_A_44843 | NW_004515967.1 | scaffold515 | 44843                   | TT                              | CC                 | CC               | INTERGENIC      |               |                    |                    |
| SNP_75727_A_44961 | NW_004515967.1 | scaffold515 | 44961                   | AA                              | CC                 | CC               | INTERGENIC      |               |                    |                    |
| SNP_75728_A_45022 | NW_004515967.1 | scaffold515 | 45022                   | CC                              | TT                 | TT               | INTERGENIC      |               |                    |                    |
| SNP_75729_A_45033 | NW_004515967.1 | scaffold515 | 45033                   | GG                              | TT                 | TT               | INTERGENIC      |               |                    |                    |
| SNP_75730_A_45097 | NW_004515967.1 | scaffold515 | 45097                   | AA                              | TT                 | TT               | INTERGENIC      |               |                    |                    |
| SNP_75731_A_45126 | NW_004515967.1 | scaffold515 | 45126                   | TT                              | CC                 | CC               | INTERGENIC      |               |                    |                    |
| SNP_75732_A_45265 | NW_004515967.1 | scaffold515 | 45265                   | CC                              | GG                 | GG               | INTERGENIC      |               |                    |                    |
| SNP_75733_A_45408 | NW_004515967.1 | scaffold515 | 45408                   | CC                              | TT                 | TT               | INTERGENIC      |               |                    |                    |
| SNP_75734_A_45463 | NW_004515967.1 | scaffold515 | 45463                   | AA                              | GG                 | GG               | INTERGENIC      |               |                    |                    |
| SNP_75735_A_45476 | NW_004515967.1 | scaffold515 | 45476                   | GG                              | AA                 | AA               | INTERGENIC      |               |                    |                    |
| SNP_75736_A_45513 | NW_004515967.1 | scaffold515 | 45513                   | GG                              | AA                 | AA               | INTERGENIC      |               |                    |                    |
| SNP_75737_A_45545 | NW_004515967.1 | scaffold515 | 45545                   | AA                              | TT                 | TT               | INTERGENIC      |               |                    |                    |
| SNP_75738_A_45654 | NW_004515967.1 | scaffold515 | 45654                   | TT                              | CC                 | CC               | INTERGENIC      |               |                    |                    |
| SNP_75739_A_46020 | NW_004515967.1 | scaffold515 | 46020                   | GG                              | CC                 | CC               | INTERGENIC      |               |                    |                    |
| SNP_75740_A_46106 | NW_004515967.1 | scaffold515 | 46106                   | CC                              | AA                 | AA               | INTERGENIC      |               |                    |                    |
| SNP_75741_A_46114 | NW_004515967.1 | scaffold515 | 46114                   | AA                              | GG                 | GG               | INTERGENIC      |               |                    |                    |
| SNP_75742_A_46299 | NW_004515967.1 | scaffold515 | 46299                   | AA                              | CC                 | CC               | INTERGENIC      |               |                    |                    |
| SNP_75743_A_46332 | NW_004515967.1 | scaffold515 | 46332                   | TT                              | GG                 | GG               | INTERGENIC      |               |                    |                    |
| SNP_75744_A_46358 | NW_004515967.1 | scaffold515 | 46358                   | TT                              | CC                 | CC               | INTERGENIC      |               |                    |                    |
| SNP_75745_A_46374 | NW_004515967.1 | scaffold515 | 46374                   | AA                              | GG                 | GG               | INTERGENIC      |               |                    |                    |



| SNPs IDs          | Chromosome IDs | Chromosomes | Physical positions (bp) | CDC Frontier (Reference genome) | (Pusa 1103 & HPNB) | (ILWC 46 & LPNB) | Sequence genome | Components of | Gene accession IDs | Putative functions |
|-------------------|----------------|-------------|-------------------------|---------------------------------|--------------------|------------------|-----------------|---------------|--------------------|--------------------|
| SNP_75746_A_46398 | NW_004515967.1 | scaffold515 | 46398                   | TT                              | CC                 | CC               | INTERGENIC      |               |                    |                    |
| SNP_75747_A_46421 | NW_004515967.1 | scaffold515 | 46421                   | CC                              | AA                 | AA               | INTERGENIC      |               |                    |                    |
| SNP_75748_A_46452 | NW_004515967.1 | scaffold515 | 46452                   | CC                              | TT                 | TT               | INTERGENIC      |               |                    |                    |
| SNP_75749_A_46496 | NW_004515967.1 | scaffold515 | 46496                   | AA                              | CC                 | CC               | INTERGENIC      |               |                    |                    |
| SNP_75750_A_46861 | NW_004515967.1 | scaffold515 | 46861                   | CC                              | AA                 | AA               | INTERGENIC      |               |                    |                    |
| SNP_75751_A_47021 | NW_004515967.1 | scaffold515 | 47021                   | CC                              | GG                 | GG               | INTERGENIC      |               |                    |                    |
| SNP_75752_A_47326 | NW_004515967.1 | scaffold515 | 47326                   | TT                              | GG                 | GG               | INTERGENIC      |               |                    |                    |
| SNP_75753_A_47356 | NW_004515967.1 | scaffold515 | 47356                   | AA                              | GG                 | GG               | INTERGENIC      |               |                    |                    |
| SNP_75754_A_47430 | NW_004515967.1 | scaffold515 | 47430                   | GG                              | AA                 | AA               | INTERGENIC      |               |                    |                    |
| SNP_75755_A_47434 | NW_004515967.1 | scaffold515 | 47434                   | CC                              | GG                 | GG               | INTERGENIC      |               |                    |                    |
| SNP_75756_A_60210 | NW_004515967.1 | scaffold515 | 60210                   | CC                              | TT                 | TT               | INTERGENIC      |               |                    |                    |
| SNP_75757_A_61285 | NW_004515967.1 | scaffold515 | 61285                   | GG                              | AA                 | AA               | INTERGENIC      |               |                    |                    |
| SNP_75758_A_61521 | NW_004515967.1 | scaffold515 | 61521                   | GG                              | CC                 | CC               | INTERGENIC      |               |                    |                    |
| SNP_75759_A_61571 | NW_004515967.1 | scaffold515 | 61571                   | CC                              | TT                 | TT               | INTERGENIC      |               |                    |                    |
| SNP_75760_A_61578 | NW_004515967.1 | scaffold515 | 61578                   | TT                              | CC                 | CC               | INTERGENIC      |               |                    |                    |
| SNP_75761_A_61585 | NW_004515967.1 | scaffold515 | 61585                   | AA                              | CC                 | CC               | INTERGENIC      |               |                    |                    |
| SNP_75762_A_61624 | NW_004515967.1 | scaffold515 | 61624                   | TT                              | GG                 | GG               | INTERGENIC      |               |                    |                    |
| SNP_75763_A_61835 | NW_004515967.1 | scaffold515 | 61835                   | GG                              | AA                 | AA               | INTERGENIC      |               |                    |                    |
| SNP_75764_A_61917 | NW_004515967.1 | scaffold515 | 61917                   | CC                              | AA                 | AA               | INTERGENIC      |               |                    |                    |
| SNP_75765_A_61959 | NW_004515967.1 | scaffold515 | 61959                   | GG                              | TT                 | TT               | INTERGENIC      |               |                    |                    |
| SNP_75766_A_62034 | NW_004515967.1 | scaffold515 | 62034                   | AA                              | GG                 | GG               | INTERGENIC      |               |                    |                    |
| SNP_75767_A_62055 | NW_004515967.1 | scaffold515 | 62055                   | CC                              | TT                 | TT               | INTERGENIC      |               |                    |                    |

| SNPs IDs           | Chromosome IDs | Chromosomes | Physical positions (bp) | CDC Frontier (Reference genome) | (Pusa 1103 & HPNB) | (ILWC 46 & LPNB) | Sequence genome | Components of | Gene accession IDs | Putative functions |
|--------------------|----------------|-------------|-------------------------|---------------------------------|--------------------|------------------|-----------------|---------------|--------------------|--------------------|
| SNP_75768_A_62056  | NW_004515967.1 | scaffold515 | 62056                   | TT                              | CC                 | CC               | INTERGENIC      |               |                    |                    |
| SNP_75769_A_62138  | NW_004515967.1 | scaffold515 | 62138                   | AA                              | TT                 | TT               | INTERGENIC      |               |                    |                    |
| SNP_75770_A_62139  | NW_004515967.1 | scaffold515 | 62139                   | CC                              | TT                 | TT               | INTERGENIC      |               |                    |                    |
| SNP_75771_A_62152  | NW_004515967.1 | scaffold515 | 62152                   | GG                              | AA                 | AA               | INTERGENIC      |               |                    |                    |
| SNP_75772_A_62311  | NW_004515967.1 | scaffold515 | 62311                   | CC                              | GG                 | GG               | INTERGENIC      |               |                    |                    |
| SNP_75773_A_62354  | NW_004515967.1 | scaffold515 | 62354                   | AA                              | TT                 | TT               | INTERGENIC      |               |                    |                    |
| SNP_75774_A_62381  | NW_004515967.1 | scaffold515 | 62381                   | CC                              | GG                 | GG               | INTERGENIC      |               |                    |                    |
| SNP_75775_A_62457  | NW_004515967.1 | scaffold515 | 62457                   | CC                              | TT                 | TT               | INTERGENIC      |               |                    |                    |
| SNP_75776_A_72678  | NW_004515967.1 | scaffold515 | 72678                   | AA                              | CC                 | CC               | INTERGENIC      |               |                    |                    |
| SNP_75777_A_72680  | NW_004515967.1 | scaffold515 | 72680                   | GG                              | AA                 | AA               | INTERGENIC      |               |                    |                    |
| SNP_75778_A_72756  | NW_004515967.1 | scaffold515 | 72756                   | TT                              | CC                 | CC               | INTERGENIC      |               |                    |                    |
| SNP_75779_A_72786  | NW_004515967.1 | scaffold515 | 72786                   | AA                              | CC                 | CC               | INTERGENIC      |               |                    |                    |
| SNP_75780_A_72806  | NW_004515967.1 | scaffold515 | 72806                   | TT                              | CC                 | CC               | INTERGENIC      |               |                    |                    |
| SNP_75781_A_72843  | NW_004515967.1 | scaffold515 | 72843                   | TT                              | GG                 | GG               | INTERGENIC      |               |                    |                    |
| SNP_75782_A_73028  | NW_004515967.1 | scaffold515 | 73028                   | CC                              | TT                 | TT               | INTERGENIC      |               |                    |                    |
| SNP_75783_A_74881  | NW_004515967.1 | scaffold515 | 74881                   | GG                              | AA                 | AA               | INTERGENIC      |               |                    |                    |
| SNP_75784_A_82556  | NW_004515967.1 | scaffold515 | 82556                   | TT                              | CC                 | CC               | INTERGENIC      |               |                    |                    |
| SNP_75785_A_89350  | NW_004515967.1 | scaffold515 | 89350                   | AA                              | GG                 | GG               | INTERGENIC      |               |                    |                    |
| SNP_75786_A_90982  | NW_004515967.1 | scaffold515 | 90982                   | CC                              | AA                 | AA               | INTERGENIC      |               |                    |                    |
| SNP_75787_A_100466 | NW_004515967.1 | scaffold515 | 100466                  | AA                              | GG                 | GG               | INTERGENIC      |               |                    |                    |
| SNP_75788_A_108357 | NW_004515967.1 | scaffold515 | 108357                  | TT                              | CC                 | CC               | INTERGENIC      |               |                    |                    |
| SNP_75789_A_132468 | NW_004515967.1 | scaffold515 | 132468                  | CC                              | TT                 | TT               | INTERGENIC      |               |                    |                    |

| SNPs IDs           | Chromosome IDs | Chromosomes | Physical positions (bp) | CDC Frontier (Reference genome) | (Pusa 1103 & HPNB) | (ILWC 46 & LPNB) | Sequence genome | Components of | Gene accession IDs | Putative functions |
|--------------------|----------------|-------------|-------------------------|---------------------------------|--------------------|------------------|-----------------|---------------|--------------------|--------------------|
| SNP_75790_A_137280 | NW_004515967.1 | scaffold515 | 137280                  | GG                              | CC                 | CC               | INTERGENIC      |               |                    |                    |
| SNP_75791_A_160768 | NW_004515967.1 | scaffold515 | 160768                  | GG                              | AA                 | AA               | INTERGENIC      |               |                    |                    |
| SNP_75792_A_170604 | NW_004515967.1 | scaffold515 | 170604                  | AA                              | CC                 | CC               | INTERGENIC      |               |                    |                    |
| SNP_75793_A_171526 | NW_004515967.1 | scaffold515 | 171526                  | AA                              | GG                 | GG               | INTERGENIC      |               |                    |                    |
| SNP_75794_A_174920 | NW_004515967.1 | scaffold515 | 174920                  | GG                              | AA                 | AA               | INTERGENIC      |               |                    |                    |
| SNP_75795_A_174972 | NW_004515967.1 | scaffold515 | 174972                  | TT                              | GG                 | GG               | INTERGENIC      |               |                    |                    |
| SNP_75796_A_175278 | NW_004515967.1 | scaffold515 | 175278                  | GG                              | TT                 | TT               | INTERGENIC      |               |                    |                    |
| SNP_75797_A_187504 | NW_004515967.1 | scaffold515 | 187504                  | CC                              | AA                 | AA               | INTERGENIC      |               |                    |                    |
| SNP_75798_A_194615 | NW_004515967.1 | scaffold515 | 194615                  | CC                              | AA                 | AA               | INTERGENIC      |               |                    |                    |
| SNP_75799_A_194623 | NW_004515967.1 | scaffold515 | 194623                  | CC                              | GG                 | GG               | INTERGENIC      |               |                    |                    |
| SNP_75801_A_194689 | NW_004515967.1 | scaffold515 | 194689                  | AA                              | CC                 | CC               | INTERGENIC      |               |                    |                    |
| SNP_75802_A_194934 | NW_004515967.1 | scaffold515 | 194934                  | TT                              | GG                 | GG               | INTERGENIC      |               |                    |                    |
| SNP_75803_A_198071 | NW_004515967.1 | scaffold515 | 198071                  | TT                              | AA                 | AA               | INTERGENIC      |               |                    |                    |
| SNP_75804_A_198085 | NW_004515967.1 | scaffold515 | 198085                  | AA                              | GG                 | GG               | INTERGENIC      |               |                    |                    |
| SNP_75805_A_198405 | NW_004515967.1 | scaffold515 | 198405                  | AA                              | TT                 | TT               | INTERGENIC      |               |                    |                    |
| SNP_75806_A_198409 | NW_004515967.1 | scaffold515 | 198409                  | TT                              | CC                 | CC               | INTERGENIC      |               |                    |                    |
| SNP_75807_A_198437 | NW_004515967.1 | scaffold515 | 198437                  | AA                              | TT                 | TT               | INTERGENIC      |               |                    |                    |
| SNP_75808_A_198459 | NW_004515967.1 | scaffold515 | 198459                  | GG                              | AA                 | AA               | INTERGENIC      |               |                    |                    |
| SNP_75809_A_198476 | NW_004515967.1 | scaffold515 | 198476                  | TT                              | CC                 | CC               | INTERGENIC      |               |                    |                    |
| SNP_75810_A_198504 | NW_004515967.1 | scaffold515 | 198504                  | CC                              | TT                 | TT               | INTERGENIC      |               |                    |                    |
| SNP_75811_A_198988 | NW_004515967.1 | scaffold515 | 198988                  | TT                              | CC                 | CC               | INTERGENIC      |               |                    |                    |
| SNP_75812_A_198993 | NW_004515967.1 | scaffold515 | 198993                  | TT                              | CC                 | CC               | INTERGENIC      |               |                    |                    |

| SNPs IDs           | Chromosome IDs | Chromosomes | Physical positions (bp) | CDC Frontier (Reference genome) | (Pusa 1103 & HPNB) | (ILWC 46 & LPNB) | Sequence genome | Components of | Gene accession IDs | Putative functions |
|--------------------|----------------|-------------|-------------------------|---------------------------------|--------------------|------------------|-----------------|---------------|--------------------|--------------------|
| SNP_75813_A_199411 | NW_004515967.1 | scaffold515 | 199411                  | TT                              | AA                 | AA               | INTERGENIC      |               |                    |                    |
| SNP_75814_A_207019 | NW_004515967.1 | scaffold515 | 207019                  | CC                              | TT                 | TT               | INTERGENIC      |               |                    |                    |
| SNP_75815_A_208751 | NW_004515967.1 | scaffold515 | 208751                  | CC                              | TT                 | TT               | INTERGENIC      |               |                    |                    |
| SNP_75817_A_216714 | NW_004515967.1 | scaffold515 | 216714                  | GG                              | CC                 | CC               | INTERGENIC      |               |                    |                    |
| SNP_75818_A_216811 | NW_004515967.1 | scaffold515 | 216811                  | AA                              | GG                 | GG               | INTERGENIC      |               |                    |                    |
| SNP_75819_A_217073 | NW_004515967.1 | scaffold515 | 217073                  | GG                              | AA                 | AA               | INTERGENIC      |               |                    |                    |
| SNP_75820_A_233189 | NW_004515967.1 | scaffold515 | 233189                  | CC                              | TT                 | TT               | INTERGENIC      |               |                    |                    |
| SNP_75821_A_233283 | NW_004515967.1 | scaffold515 | 233283                  | TT                              | CC                 | CC               | INTERGENIC      |               |                    |                    |
| SNP_75822_A_234979 | NW_004515967.1 | scaffold515 | 234979                  | GG                              | AA                 | AA               | INTERGENIC      |               |                    |                    |
| SNP_75823_A_235325 | NW_004515967.1 | scaffold515 | 235325                  | TT                              | AA                 | AA               | INTERGENIC      |               |                    |                    |
| SNP_75824_A_235393 | NW_004515967.1 | scaffold515 | 235393                  | AA                              | TT                 | TT               | INTERGENIC      |               |                    |                    |
| SNP_75826_A_235439 | NW_004515967.1 | scaffold515 | 235439                  | AA                              | GG                 | GG               | INTERGENIC      |               |                    |                    |
| SNP_75827_A_235449 | NW_004515967.1 | scaffold515 | 235449                  | AA                              | CC                 | CC               | INTERGENIC      |               |                    |                    |
| SNP_75828_A_235534 | NW_004515967.1 | scaffold515 | 235534                  | GG                              | AA                 | AA               | INTERGENIC      |               |                    |                    |
| SNP_75829_A_242099 | NW_004515967.1 | scaffold515 | 242099                  | TT                              | CC                 | CC               | INTERGENIC      |               |                    |                    |
| SNP_75831_A_242331 | NW_004515967.1 | scaffold515 | 242331                  | AA                              | GG                 | GG               | INTERGENIC      |               |                    |                    |
| SNP_75832_A_242483 | NW_004515967.1 | scaffold515 | 242483                  | AA                              | CC                 | CC               | INTERGENIC      |               |                    |                    |
| SNP_75833_A_266007 | NW_004515967.1 | scaffold515 | 266007                  | GG                              | AA                 | AA               | INTERGENIC      |               |                    |                    |
| SNP_75834_A_266178 | NW_004515967.1 | scaffold515 | 266178                  | AA                              | TT                 | TT               | INTERGENIC      |               |                    |                    |
| SNP_75836_A_266468 | NW_004515967.1 | scaffold515 | 266468                  | GG                              | AA                 | AA               | INTERGENIC      |               |                    |                    |
| SNP_75837_A_272482 | NW_004515967.1 | scaffold515 | 272482                  | TT                              | CC                 | CC               | INTERGENIC      |               |                    |                    |
| SNP_75838_A_276985 | NW_004515967.1 | scaffold515 | 276985                  | GG                              | AA                 | AA               | INTERGENIC      |               |                    |                    |

| SNPs IDs           | Chromosome IDs | Chromosomes | Physical positions (bp) | CDC Frontier (Reference genome) | (Pusa 1103 & HPNB) | (ILWC 46 & LPNB) | Sequence genome | Components of | Gene accession IDs | Putative functions |
|--------------------|----------------|-------------|-------------------------|---------------------------------|--------------------|------------------|-----------------|---------------|--------------------|--------------------|
| SNP_75839_A_277054 | NW_004515967.1 | scaffold515 | 277054                  | AA                              | GG                 | GG               | INTERGENIC      |               |                    |                    |
| SNP_75840_A_277323 | NW_004515967.1 | scaffold515 | 277323                  | TT                              | GG                 | GG               | INTERGENIC      |               |                    |                    |
| SNP_75841_A_277374 | NW_004515967.1 | scaffold515 | 277374                  | AA                              | GG                 | GG               | INTERGENIC      |               |                    |                    |
| SNP_75842_A_277378 | NW_004515967.1 | scaffold515 | 277378                  | AA                              | CC                 | CC               | INTERGENIC      |               |                    |                    |
| SNP_75843_A_281074 | NW_004515967.1 | scaffold515 | 281074                  | CC                              | GG                 | GG               | INTERGENIC      |               |                    |                    |
| SNP_75844_A_281094 | NW_004515967.1 | scaffold515 | 281094                  | CC                              | AA                 | AA               | INTERGENIC      |               |                    |                    |
| SNP_75845_A_281490 | NW_004515967.1 | scaffold515 | 281490                  | CC                              | TT                 | TT               | INTERGENIC      |               |                    |                    |
| SNP_75846_A_368    | NW_004515968.1 | scaffold520 | 368                     | CC                              | TT                 | TT               | INTERGENIC      |               |                    |                    |
| SNP_75847_A_700    | NW_004515968.1 | scaffold520 | 700                     | CC                              | AA                 | AA               | INTERGENIC      |               |                    |                    |
| SNP_75848_A_738    | NW_004515968.1 | scaffold520 | 738                     | AA                              | GG                 | GG               | INTERGENIC      |               |                    |                    |
| SNP_75849_A_1022   | NW_004515968.1 | scaffold520 | 1022                    | TT                              | AA                 | AA               | INTERGENIC      |               |                    |                    |
| SNP_75850_A_21554  | NW_004515968.1 | scaffold520 | 21554                   | CC                              | TT                 | TT               | INTERGENIC      |               |                    |                    |
| SNP_75851_A_21600  | NW_004515968.1 | scaffold520 | 21600                   | CC                              | TT                 | TT               | INTERGENIC      |               |                    |                    |
| SNP_75852_A_21607  | NW_004515968.1 | scaffold520 | 21607                   | AA                              | TT                 | TT               | INTERGENIC      |               |                    |                    |
| SNP_75853_A_21619  | NW_004515968.1 | scaffold520 | 21619                   | AA                              | GG                 | GG               | INTERGENIC      |               |                    |                    |
| SNP_75854_A_21621  | NW_004515968.1 | scaffold520 | 21621                   | TT                              | GG                 | GG               | INTERGENIC      |               |                    |                    |
| SNP_75855_A_22039  | NW_004515968.1 | scaffold520 | 22039                   | CC                              | GG                 | GG               | INTERGENIC      |               |                    |                    |
| SNP_75856_A_22087  | NW_004515968.1 | scaffold520 | 22087                   | CC                              | TT                 | TT               | INTERGENIC      |               |                    |                    |
| SNP_75857_A_22194  | NW_004515968.1 | scaffold520 | 22194                   | AA                              | GG                 | GG               | INTERGENIC      |               |                    |                    |
| SNP_75858_A_26319  | NW_004515968.1 | scaffold520 | 26319                   | AA                              | GG                 | GG               | INTERGENIC      |               |                    |                    |
| SNP_75859_A_26320  | NW_004515968.1 | scaffold520 | 26320                   | AA                              | TT                 | TT               | INTERGENIC      |               |                    |                    |
| SNP_75860_A_33939  | NW_004515968.1 | scaffold520 | 33939                   | CC                              | GG                 | GG               | INTERGENIC      |               |                    |                    |

| SNPs IDs           | Chromosome IDs | Chromosomes | Physical positions (bp) | CDC Frontier (Reference genome) | (Pusa 1103 & HPNB) | (ILWC 46 & LPNB) | Sequence genome | Components of | Gene accession IDs | Putative functions |
|--------------------|----------------|-------------|-------------------------|---------------------------------|--------------------|------------------|-----------------|---------------|--------------------|--------------------|
| SNP_75861_A_33949  | NW_004515968.1 | scaffold520 | 33949                   | GG                              | AA                 | AA               | INTERGENIC      |               |                    |                    |
| SNP_75862_A_37545  | NW_004515968.1 | scaffold520 | 37545                   | AA                              | TT                 | TT               | INTERGENIC      |               |                    |                    |
| SNP_75863_A_60910  | NW_004515968.1 | scaffold520 | 60910                   | GG                              | TT                 | TT               | INTERGENIC      |               |                    |                    |
| SNP_75864_A_71973  | NW_004515968.1 | scaffold520 | 71973                   | AA                              | TT                 | TT               | INTERGENIC      |               |                    |                    |
| SNP_75865_A_77509  | NW_004515968.1 | scaffold520 | 77509                   | TT                              | CC                 | CC               | INTERGENIC      |               |                    |                    |
| SNP_75866_A_77524  | NW_004515968.1 | scaffold520 | 77524                   | TT                              | GG                 | GG               | INTERGENIC      |               |                    |                    |
| SNP_75867_A_78435  | NW_004515968.1 | scaffold520 | 78435                   | AA                              | TT                 | TT               | INTERGENIC      |               |                    |                    |
| SNP_75868_A_87436  | NW_004515968.1 | scaffold520 | 87436                   | TT                              | AA                 | AA               | INTERGENIC      |               |                    |                    |
| SNP_75869_A_105674 | NW_004515968.1 | scaffold520 | 105674                  | GG                              | AA                 | AA               | INTERGENIC      |               |                    |                    |
| SNP_75870_A_109209 | NW_004515968.1 | scaffold520 | 109209                  | CC                              | GG                 | GG               | INTERGENIC      |               |                    |                    |
| SNP_75871_A_109269 | NW_004515968.1 | scaffold520 | 109269                  | AA                              | CC                 | CC               | INTERGENIC      |               |                    |                    |
| SNP_75872_A_120236 | NW_004515968.1 | scaffold520 | 120236                  | TT                              | CC                 | CC               | INTERGENIC      |               |                    |                    |
| SNP_75873_A_120422 | NW_004515968.1 | scaffold520 | 120422                  | CC                              | TT                 | TT               | INTERGENIC      |               |                    |                    |
| SNP_75874_A_120436 | NW_004515968.1 | scaffold520 | 120436                  | TT                              | CC                 | CC               | INTERGENIC      |               |                    |                    |
| SNP_75875_A_120443 | NW_004515968.1 | scaffold520 | 120443                  | CC                              | GG                 | GG               | INTERGENIC      |               |                    |                    |
| SNP_75876_A_120504 | NW_004515968.1 | scaffold520 | 120504                  | AA                              | TT                 | TT               | INTERGENIC      |               |                    |                    |
| SNP_75877_A_120511 | NW_004515968.1 | scaffold520 | 120511                  | TT                              | CC                 | CC               | INTERGENIC      |               |                    |                    |
| SNP_75878_A_120517 | NW_004515968.1 | scaffold520 | 120517                  | TT                              | AA                 | AA               | INTERGENIC      |               |                    |                    |
| SNP_75879_A_120520 | NW_004515968.1 | scaffold520 | 120520                  | TT                              | CC                 | CC               | INTERGENIC      |               |                    |                    |
| SNP_75880_A_120547 | NW_004515968.1 | scaffold520 | 120547                  | AA                              | GG                 | GG               | INTERGENIC      |               |                    |                    |
| SNP_75881_A_120564 | NW_004515968.1 | scaffold520 | 120564                  | AA                              | TT                 | TT               | INTERGENIC      |               |                    |                    |
| SNP_75882_A_120577 | NW_004515968.1 | scaffold520 | 120577                  | GG                              | AA                 | AA               | INTERGENIC      |               |                    |                    |

| SNPs IDs           | Chromosome IDs | Chromosomes | Physical positions (bp) | CDC Frontier (Reference genome) | (Pusa 1103 & HPNB) | (ILWC 46 & LPNB) | Sequence Components of genome | Gene accession IDs | Putative functions           |
|--------------------|----------------|-------------|-------------------------|---------------------------------|--------------------|------------------|-------------------------------|--------------------|------------------------------|
| SNP_75884_A_129703 | NW_004515968.1 | scaffold520 | 129703                  | TT                              | AA                 | AA               | INTERGENIC                    |                    |                              |
| SNP_75885_A_142687 | NW_004515968.1 | scaffold520 | 142687                  | CC                              | TT                 | TT               | INTERGENIC                    |                    |                              |
| SNP_75886_A_142698 | NW_004515968.1 | scaffold520 | 142698                  | GG                              | AA                 | AA               | INTERGENIC                    |                    |                              |
| SNP_75887_A_142722 | NW_004515968.1 | scaffold520 | 142722                  | CC                              | AA                 | AA               | INTERGENIC                    |                    |                              |
| SNP_75888_A_142888 | NW_004515968.1 | scaffold520 | 142888                  | TT                              | CC                 | CC               | INTERGENIC                    |                    |                              |
| SNP_75889_A_142926 | NW_004515968.1 | scaffold520 | 142926                  | TT                              | CC                 | CC               | INTERGENIC                    |                    |                              |
| SNP_75890_A_142968 | NW_004515968.1 | scaffold520 | 142968                  | CC                              | TT                 | TT               | INTERGENIC                    |                    |                              |
| SNP_75891_A_142997 | NW_004515968.1 | scaffold520 | 142997                  | GG                              | AA                 | AA               | INTERGENIC                    |                    |                              |
| SNP_75892_A_143120 | NW_004515968.1 | scaffold520 | 143120                  | TT                              | CC                 | CC               | INTERGENIC                    |                    |                              |
| SNP_75894_A_143339 | NW_004515968.1 | scaffold520 | 143339                  | AA                              | GG                 | GG               | INTERGENIC                    |                    |                              |
| SNP_75895_A_143377 | NW_004515968.1 | scaffold520 | 143377                  | TT                              | CC                 | CC               | INTERGENIC                    |                    |                              |
| SNP_75896_A_143424 | NW_004515968.1 | scaffold520 | 143424                  | CC                              | GG                 | GG               | INTERGENIC                    |                    |                              |
| SNP_75897_A_160972 | NW_004515968.1 | scaffold520 | 160972                  | TT                              | GG                 | GG               | INTRON                        | 101515316          | uncharacterized LOC101515316 |
| SNP_75898_A_161119 | NW_004515968.1 | scaffold520 | 161119                  | AA                              | GG                 | GG               | NON_SYNONYMOUS_CODING         | 101515316          | uncharacterized LOC101515316 |
| SNP_75899_A_161449 | NW_004515968.1 | scaffold520 | 161449                  | GG                              | TT                 | TT               | URR                           | 101515316          | uncharacterized LOC101515316 |
| SNP_75900_A_161523 | NW_004515968.1 | scaffold520 | 161523                  | CC                              | TT                 | TT               | URR                           | 101515316          | uncharacterized LOC101515316 |
| SNP_75901_A_161551 | NW_004515968.1 | scaffold520 | 161551                  | CC                              | TT                 | TT               | URR                           | 101515316          | uncharacterized LOC101515316 |
| SNP_75902_A_161722 | NW_004515968.1 | scaffold520 | 161722                  | TT                              | CC                 | CC               | URR                           | 101515316          | uncharacterized LOC101515316 |
| SNP_75903_A_165763 | NW_004515968.1 | scaffold520 | 165763                  | GG                              | TT                 | TT               | INTERGENIC                    |                    |                              |
| SNP_75904_A_167828 | NW_004515968.1 | scaffold520 | 167828                  | AA                              | GG                 | GG               | INTERGENIC                    |                    |                              |
| SNP_75905_A_167957 | NW_004515968.1 | scaffold520 | 167957                  | AA                              | TT                 | TT               | INTERGENIC                    |                    |                              |
| SNP_75906_A_168084 | NW_004515968.1 | scaffold520 | 168084                  | TT                              | CC                 | CC               | INTERGENIC                    |                    |                              |

| SNPs IDs           | Chromosome IDs | Chromosomes | Physical positions (bp) | CDC Frontier genome (Reference genome) | (Pusa 1103 & HPNB) | (ILWC 46 & LPNB) | Sequence genome | Components of | Gene accession IDs | Putative functions |
|--------------------|----------------|-------------|-------------------------|----------------------------------------|--------------------|------------------|-----------------|---------------|--------------------|--------------------|
| SNP_75907_A_182237 | NW_004515968.1 | scaffold520 | 182237                  | GG                                     | AA                 | AA               | INTERGENIC      |               |                    |                    |
| SNP_75908_A_227738 | NW_004515968.1 | scaffold520 | 227738                  | GG                                     | AA                 | AA               | INTERGENIC      |               |                    |                    |
| SNP_75909_A_229860 | NW_004515968.1 | scaffold520 | 229860                  | AA                                     | GG                 | GG               | INTERGENIC      |               |                    |                    |
| SNP_75910_A_229870 | NW_004515968.1 | scaffold520 | 229870                  | AA                                     | CC                 | CC               | INTERGENIC      |               |                    |                    |
| SNP_75911_A_230799 | NW_004515968.1 | scaffold520 | 230799                  | AA                                     | GG                 | GG               | INTERGENIC      |               |                    |                    |
| SNP_75912_A_230800 | NW_004515968.1 | scaffold520 | 230800                  | CC                                     | TT                 | TT               | INTERGENIC      |               |                    |                    |
| SNP_75913_A_230820 | NW_004515968.1 | scaffold520 | 230820                  | AA                                     | TT                 | TT               | INTERGENIC      |               |                    |                    |
| SNP_75914_A_230828 | NW_004515968.1 | scaffold520 | 230828                  | GG                                     | AA                 | AA               | INTERGENIC      |               |                    |                    |
| SNP_75915_A_231856 | NW_004515968.1 | scaffold520 | 231856                  | GG                                     | AA                 | AA               | INTERGENIC      |               |                    |                    |
| SNP_75916_A_231930 | NW_004515968.1 | scaffold520 | 231930                  | CC                                     | GG                 | GG               | INTERGENIC      |               |                    |                    |
| SNP_75918_A_12632  | NW_004515969.1 | scaffold523 | 12632                   | CC                                     | AA                 | AA               | INTERGENIC      |               |                    |                    |
| SNP_75919_A_12844  | NW_004515969.1 | scaffold523 | 12844                   | GG                                     | AA                 | AA               | INTERGENIC      |               |                    |                    |
| SNP_75920_A_14235  | NW_004515969.1 | scaffold523 | 14235                   | AA                                     | GG                 | GG               | INTERGENIC      |               |                    |                    |
| SNP_75921_A_14290  | NW_004515969.1 | scaffold523 | 14290                   | CC                                     | TT                 | TT               | INTERGENIC      |               |                    |                    |
| SNP_75922_A_14300  | NW_004515969.1 | scaffold523 | 14300                   | CC                                     | AA                 | AA               | INTERGENIC      |               |                    |                    |
| SNP_75923_A_14539  | NW_004515969.1 | scaffold523 | 14539                   | TT                                     | CC                 | CC               | INTERGENIC      |               |                    |                    |
| SNP_75924_A_14560  | NW_004515969.1 | scaffold523 | 14560                   | AA                                     | CC                 | CC               | INTERGENIC      |               |                    |                    |
| SNP_75925_A_14604  | NW_004515969.1 | scaffold523 | 14604                   | TT                                     | CC                 | CC               | INTERGENIC      |               |                    |                    |
| SNP_75926_A_14606  | NW_004515969.1 | scaffold523 | 14606                   | AA                                     | CC                 | CC               | INTERGENIC      |               |                    |                    |
| SNP_75927_A_14753  | NW_004515969.1 | scaffold523 | 14753                   | GG                                     | AA                 | AA               | INTERGENIC      |               |                    |                    |
| SNP_75928_A_33153  | NW_004515971.1 | scaffold526 | 33153                   | GG                                     | AA                 | AA               | INTERGENIC      |               |                    |                    |
| SNP_75929_A_35637  | NW_004515971.1 | scaffold526 | 35637                   | GG                                     | TT                 | TT               | INTERGENIC      |               |                    |                    |



| SNPs IDs          | Chromosome IDs | Chromosomes | Physical positions (bp) | CDC Frontier (Reference genome) | (Pusa 1103 & HPNB) | (ILWC 46 & LPNB) | Sequence genome | Components of | Gene accession IDs | Putative functions |
|-------------------|----------------|-------------|-------------------------|---------------------------------|--------------------|------------------|-----------------|---------------|--------------------|--------------------|
| SNP_75930_A_45271 | NW_004515971.1 | scaffold526 | 45271                   | TT                              | CC                 | CC               | INTERGENIC      |               |                    |                    |
| SNP_75931_A_45319 | NW_004515971.1 | scaffold526 | 45319                   | CC                              | TT                 | TT               | INTERGENIC      |               |                    |                    |
| SNP_75932_A_46335 | NW_004515971.1 | scaffold526 | 46335                   | GG                              | CC                 | CC               | INTERGENIC      |               |                    |                    |
| SNP_75933_A_58805 | NW_004515971.1 | scaffold526 | 58805                   | TT                              | CC                 | CC               | INTERGENIC      |               |                    |                    |
| SNP_75934_A_58831 | NW_004515971.1 | scaffold526 | 58831                   | AA                              | TT                 | TT               | INTERGENIC      |               |                    |                    |
| SNP_75935_A_58848 | NW_004515971.1 | scaffold526 | 58848                   | AA                              | GG                 | GG               | INTERGENIC      |               |                    |                    |
| SNP_75936_A_58852 | NW_004515971.1 | scaffold526 | 58852                   | CC                              | GG                 | GG               | INTERGENIC      |               |                    |                    |
| SNP_75937_A_58882 | NW_004515971.1 | scaffold526 | 58882                   | AA                              | GG                 | GG               | INTERGENIC      |               |                    |                    |
| SNP_75938_A_58929 | NW_004515971.1 | scaffold526 | 58929                   | GG                              | AA                 | AA               | INTERGENIC      |               |                    |                    |
| SNP_75939_A_58933 | NW_004515971.1 | scaffold526 | 58933                   | TT                              | CC                 | CC               | INTERGENIC      |               |                    |                    |
| SNP_75940_A_58980 | NW_004515971.1 | scaffold526 | 58980                   | TT                              | AA                 | AA               | INTERGENIC      |               |                    |                    |
| SNP_75941_A_58984 | NW_004515971.1 | scaffold526 | 58984                   | AA                              | GG                 | GG               | INTERGENIC      |               |                    |                    |
| SNP_75942_A_59293 | NW_004515971.1 | scaffold526 | 59293                   | TT                              | CC                 | CC               | INTERGENIC      |               |                    |                    |
| SNP_75943_A_59347 | NW_004515971.1 | scaffold526 | 59347                   | AA                              | CC                 | CC               | INTERGENIC      |               |                    |                    |
| SNP_75944_A_59356 | NW_004515971.1 | scaffold526 | 59356                   | GG                              | AA                 | AA               | INTERGENIC      |               |                    |                    |
| SNP_75945_A_69738 | NW_004515971.1 | scaffold526 | 69738                   | CC                              | AA                 | AA               | INTERGENIC      |               |                    |                    |
| SNP_75946_A_70520 | NW_004515971.1 | scaffold526 | 70520                   | TT                              | AA                 | AA               | INTERGENIC      |               |                    |                    |
| SNP_75947_A_71791 | NW_004515971.1 | scaffold526 | 71791                   | AA                              | TT                 | TT               | INTERGENIC      |               |                    |                    |
| SNP_75949_A_76498 | NW_004515971.1 | scaffold526 | 76498                   | TT                              | CC                 | CC               | INTERGENIC      |               |                    |                    |
| SNP_75950_A_79756 | NW_004515971.1 | scaffold526 | 79756                   | CC                              | TT                 | TT               | INTERGENIC      |               |                    |                    |
| SNP_75951_A_84630 | NW_004515971.1 | scaffold526 | 84630                   | TT                              | AA                 | AA               | INTERGENIC      |               |                    |                    |
| SNP_75952_A_90867 | NW_004515971.1 | scaffold526 | 90867                   | CC                              | AA                 | AA               | INTERGENIC      |               |                    |                    |

| SNPs IDs           | Chromosome IDs | Chromosomes | Physical positions (bp) | CDC Frontier (Reference genome) | (Pusa 1103 & HPNB) | (ILWC 46 & LPNB) | Sequence genome | Components of | Gene accession IDs | Putative functions |
|--------------------|----------------|-------------|-------------------------|---------------------------------|--------------------|------------------|-----------------|---------------|--------------------|--------------------|
| SNP_75953_A_91115  | NW_004515971.1 | scaffold526 | 91115                   | GG                              | AA                 | AA               | INTERGENIC      |               |                    |                    |
| SNP_75954_A_91154  | NW_004515971.1 | scaffold526 | 91154                   | AA                              | TT                 | TT               | INTERGENIC      |               |                    |                    |
| SNP_75955_A_93003  | NW_004515971.1 | scaffold526 | 93003                   | AA                              | GG                 | GG               | INTERGENIC      |               |                    |                    |
| SNP_75956_A_93008  | NW_004515971.1 | scaffold526 | 93008                   | CC                              | GG                 | GG               | INTERGENIC      |               |                    |                    |
| SNP_75957_A_93011  | NW_004515971.1 | scaffold526 | 93011                   | AA                              | GG                 | GG               | INTERGENIC      |               |                    |                    |
| SNP_75958_A_93302  | NW_004515971.1 | scaffold526 | 93302                   | AA                              | CC                 | CC               | INTERGENIC      |               |                    |                    |
| SNP_75959_A_108022 | NW_004515971.1 | scaffold526 | 108022                  | AA                              | GG                 | GG               | INTERGENIC      |               |                    |                    |
| SNP_75960_A_108456 | NW_004515971.1 | scaffold526 | 108456                  | TT                              | CC                 | CC               | INTERGENIC      |               |                    |                    |
| SNP_75961_A_117995 | NW_004515971.1 | scaffold526 | 117995                  | GG                              | AA                 | AA               | INTERGENIC      |               |                    |                    |
| SNP_75962_A_127737 | NW_004515971.1 | scaffold526 | 127737                  | AA                              | GG                 | GG               | INTERGENIC      |               |                    |                    |
| SNP_75963_A_1267   | NW_004515972.1 | scaffold527 | 1267                    | AA                              | CC                 | CC               | INTERGENIC      |               |                    |                    |
| SNP_75964_A_1744   | NW_004515972.1 | scaffold527 | 1744                    | TT                              | CC                 | CC               | INTERGENIC      |               |                    |                    |
| SNP_75965_A_1850   | NW_004515972.1 | scaffold527 | 1850                    | CC                              | TT                 | TT               | INTERGENIC      |               |                    |                    |
| SNP_75966_A_1984   | NW_004515972.1 | scaffold527 | 1984                    | CC                              | AA                 | AA               | INTERGENIC      |               |                    |                    |
| SNP_75967_A_2041   | NW_004515972.1 | scaffold527 | 2041                    | GG                              | AA                 | AA               | INTERGENIC      |               |                    |                    |
| SNP_75968_A_2092   | NW_004515972.1 | scaffold527 | 2092                    | GG                              | AA                 | AA               | INTERGENIC      |               |                    |                    |
| SNP_75969_A_2104   | NW_004515972.1 | scaffold527 | 2104                    | TT                              | GG                 | GG               | INTERGENIC      |               |                    |                    |
| SNP_75970_A_2110   | NW_004515972.1 | scaffold527 | 2110                    | GG                              | AA                 | AA               | INTERGENIC      |               |                    |                    |
| SNP_75971_A_2145   | NW_004515972.1 | scaffold527 | 2145                    | AA                              | GG                 | GG               | INTERGENIC      |               |                    |                    |
| SNP_75972_A_2520   | NW_004515972.1 | scaffold527 | 2520                    | TT                              | GG                 | GG               | INTERGENIC      |               |                    |                    |
| SNP_75973_A_2549   | NW_004515972.1 | scaffold527 | 2549                    | TT                              | AA                 | AA               | INTERGENIC      |               |                    |                    |
| SNP_75974_A_2554   | NW_004515972.1 | scaffold527 | 2554                    | TT                              | CC                 | CC               | INTERGENIC      |               |                    |                    |

| SNPs IDs         | Chromosome IDs | Chromosomes | Physical positions (bp) | CDC Frontier (Reference genome) | (Pusa 1103 & HPNB) | (ILWC 46 & LPNB) | Sequence genome | Components of | Gene accession IDs | Putative functions |
|------------------|----------------|-------------|-------------------------|---------------------------------|--------------------|------------------|-----------------|---------------|--------------------|--------------------|
| SNP_75975_A_2688 | NW_004515972.1 | scaffold527 | 2688                    | GG                              | AA                 | AA               | INTERGENIC      |               |                    |                    |
| SNP_75976_A_2705 | NW_004515972.1 | scaffold527 | 2705                    | CC                              | TT                 | TT               | INTERGENIC      |               |                    |                    |
| SNP_75977_A_2781 | NW_004515972.1 | scaffold527 | 2781                    | GG                              | TT                 | TT               | INTERGENIC      |               |                    |                    |
| SNP_75978_A_2804 | NW_004515972.1 | scaffold527 | 2804                    | AA                              | CC                 | CC               | INTERGENIC      |               |                    |                    |
| SNP_75979_A_2869 | NW_004515972.1 | scaffold527 | 2869                    | TT                              | CC                 | CC               | INTERGENIC      |               |                    |                    |
| SNP_75980_A_2966 | NW_004515972.1 | scaffold527 | 2966                    | AA                              | CC                 | CC               | INTERGENIC      |               |                    |                    |
| SNP_75981_A_3166 | NW_004515972.1 | scaffold527 | 3166                    | CC                              | AA                 | AA               | INTERGENIC      |               |                    |                    |
| SNP_75982_A_3182 | NW_004515972.1 | scaffold527 | 3182                    | CC                              | TT                 | TT               | INTERGENIC      |               |                    |                    |
| SNP_75984_A_3225 | NW_004515972.1 | scaffold527 | 3225                    | AA                              | GG                 | GG               | INTERGENIC      |               |                    |                    |
| SNP_75985_A_3237 | NW_004515972.1 | scaffold527 | 3237                    | AA                              | GG                 | GG               | INTERGENIC      |               |                    |                    |
| SNP_75986_A_3356 | NW_004515972.1 | scaffold527 | 3356                    | CC                              | TT                 | TT               | INTERGENIC      |               |                    |                    |
| SNP_75987_A_3619 | NW_004515972.1 | scaffold527 | 3619                    | CC                              | TT                 | TT               | INTERGENIC      |               |                    |                    |
| SNP_75988_A_3621 | NW_004515972.1 | scaffold527 | 3621                    | TT                              | CC                 | CC               | INTERGENIC      |               |                    |                    |
| SNP_75989_A_3720 | NW_004515972.1 | scaffold527 | 3720                    | CC                              | TT                 | TT               | INTERGENIC      |               |                    |                    |
| SNP_75990_A_3816 | NW_004515972.1 | scaffold527 | 3816                    | TT                              | CC                 | CC               | INTERGENIC      |               |                    |                    |
| SNP_75991_A_3848 | NW_004515972.1 | scaffold527 | 3848                    | GG                              | AA                 | AA               | INTERGENIC      |               |                    |                    |
| SNP_75992_A_3976 | NW_004515972.1 | scaffold527 | 3976                    | CC                              | TT                 | TT               | INTERGENIC      |               |                    |                    |
| SNP_75993_A_4016 | NW_004515972.1 | scaffold527 | 4016                    | AA                              | CC                 | CC               | INTERGENIC      |               |                    |                    |
| SNP_75994_A_4077 | NW_004515972.1 | scaffold527 | 4077                    | AA                              | TT                 | TT               | INTERGENIC      |               |                    |                    |
| SNP_75995_A_4103 | NW_004515972.1 | scaffold527 | 4103                    | AA                              | CC                 | CC               | INTERGENIC      |               |                    |                    |
| SNP_75996_A_4121 | NW_004515972.1 | scaffold527 | 4121                    | TT                              | CC                 | CC               | INTERGENIC      |               |                    |                    |
| SNP_75997_A_4185 | NW_004515972.1 | scaffold527 | 4185                    | AA                              | CC                 | CC               | INTERGENIC      |               |                    |                    |

| SNPs IDs           | Chromosome IDs | Chromosomes | Physical positions (bp) | CDC Frontier (Reference genome) | (Pusa 1103 & HPNB) | (ILWC 46 & LPNB) | Sequence genome | Components of | Gene accession IDs | Putative functions |
|--------------------|----------------|-------------|-------------------------|---------------------------------|--------------------|------------------|-----------------|---------------|--------------------|--------------------|
| SNP_75998_A_4200   | NW_004515972.1 | scaffold527 | 4200                    | CC                              | TT                 | TT               | INTERGENIC      |               |                    |                    |
| SNP_75999_A_4224   | NW_004515972.1 | scaffold527 | 4224                    | TT                              | GG                 | GG               | INTERGENIC      |               |                    |                    |
| SNP_76000_A_4340   | NW_004515972.1 | scaffold527 | 4340                    | AA                              | CC                 | CC               | INTERGENIC      |               |                    |                    |
| SNP_76001_A_4364   | NW_004515972.1 | scaffold527 | 4364                    | CC                              | TT                 | TT               | INTERGENIC      |               |                    |                    |
| SNP_76002_A_4540   | NW_004515972.1 | scaffold527 | 4540                    | AA                              | TT                 | TT               | INTERGENIC      |               |                    |                    |
| SNP_76003_A_4557   | NW_004515972.1 | scaffold527 | 4557                    | GG                              | CC                 | CC               | INTERGENIC      |               |                    |                    |
| SNP_76004_A_4569   | NW_004515972.1 | scaffold527 | 4569                    | TT                              | CC                 | CC               | INTERGENIC      |               |                    |                    |
| SNP_76005_A_4717   | NW_004515972.1 | scaffold527 | 4717                    | TT                              | GG                 | GG               | INTERGENIC      |               |                    |                    |
| SNP_76006_A_4755   | NW_004515972.1 | scaffold527 | 4755                    | AA                              | GG                 | GG               | INTERGENIC      |               |                    |                    |
| SNP_76007_A_4772   | NW_004515972.1 | scaffold527 | 4772                    | TT                              | AA                 | AA               | INTERGENIC      |               |                    |                    |
| SNP_76009_A_4819   | NW_004515972.1 | scaffold527 | 4819                    | GG                              | AA                 | AA               | INTERGENIC      |               |                    |                    |
| SNP_76010_A_4835   | NW_004515972.1 | scaffold527 | 4835                    | AA                              | GG                 | GG               | INTERGENIC      |               |                    |                    |
| SNP_76011_A_4865   | NW_004515972.1 | scaffold527 | 4865                    | AA                              | TT                 | TT               | INTERGENIC      |               |                    |                    |
| SNP_76012_A_4866   | NW_004515972.1 | scaffold527 | 4866                    | GG                              | TT                 | TT               | INTERGENIC      |               |                    |                    |
| SNP_76013_A_4952   | NW_004515972.1 | scaffold527 | 4952                    | GG                              | TT                 | TT               | INTERGENIC      |               |                    |                    |
| SNP_76014_A_5068   | NW_004515972.1 | scaffold527 | 5068                    | TT                              | AA                 | AA               | INTERGENIC      |               |                    |                    |
| SNP_76016_A_67796  | NW_004515972.1 | scaffold527 | 67796                   | AA                              | GG                 | GG               | INTERGENIC      |               |                    |                    |
| SNP_76017_A_82442  | NW_004515972.1 | scaffold527 | 82442                   | TT                              | CC                 | CC               | INTERGENIC      |               |                    |                    |
| SNP_76019_A_119835 | NW_004515972.1 | scaffold527 | 119835                  | CC                              | TT                 | TT               | INTERGENIC      |               |                    |                    |
| SNP_76020_A_120441 | NW_004515972.1 | scaffold527 | 120441                  | AA                              | GG                 | GG               | INTERGENIC      |               |                    |                    |
| SNP_76021_A_120469 | NW_004515972.1 | scaffold527 | 120469                  | AA                              | GG                 | GG               | INTERGENIC      |               |                    |                    |
| SNP_76022_A_148655 | NW_004515972.1 | scaffold527 | 148655                  | AA                              | GG                 | GG               | INTERGENIC      |               |                    |                    |

| SNPs IDs           | Chromosome IDs | Chromosomes | Physical positions (bp) | CDC Frontier (Reference genome) | (Pusa 1103 & HPNB) | (ILWC 46 & LPNB) | Sequence Components of genome | Gene accession IDs | Putative functions                         |
|--------------------|----------------|-------------|-------------------------|---------------------------------|--------------------|------------------|-------------------------------|--------------------|--------------------------------------------|
| SNP_76023_A_148656 | NW_004515972.1 | scaffold527 | 148656                  | AA                              | GG                 | GG               | INTERGENIC                    |                    |                                            |
| SNP_76024_A_148703 | NW_004515972.1 | scaffold527 | 148703                  | AA                              | GG                 | GG               | INTERGENIC                    |                    |                                            |
| SNP_76025_A_148737 | NW_004515972.1 | scaffold527 | 148737                  | TT                              | CC                 | CC               | INTERGENIC                    |                    |                                            |
| SNP_76026_A_148757 | NW_004515972.1 | scaffold527 | 148757                  | GG                              | TT                 | TT               | INTERGENIC                    |                    |                                            |
| SNP_76027_A_148758 | NW_004515972.1 | scaffold527 | 148758                  | AA                              | TT                 | TT               | INTERGENIC                    |                    |                                            |
| SNP_76028_A_148778 | NW_004515972.1 | scaffold527 | 148778                  | CC                              | AA                 | AA               | INTERGENIC                    |                    |                                            |
| SNP_76029_A_29022  | NW_004515973.1 | scaffold528 | 29022                   | CC                              | GG                 | GG               | URR                           | 101492408          | Unknown function                           |
| SNP_76030_A_34513  | NW_004515973.1 | scaffold528 | 34513                   | CC                              | TT                 | TT               | INTERGENIC                    |                    |                                            |
| SNP_76031_A_46755  | NW_004515973.1 | scaffold528 | 46755                   | TT                              | AA                 | AA               | INTERGENIC                    |                    |                                            |
| SNP_76032_A_66234  | NW_004515973.1 | scaffold528 | 66234                   | AA                              | TT                 | TT               | INTERGENIC                    |                    |                                            |
| SNP_76034_A_104292 | NW_004515973.1 | scaffold528 | 104292                  | GG                              | TT                 | TT               | INTERGENIC                    |                    |                                            |
| SNP_76035_A_126566 | NW_004515973.1 | scaffold528 | 126566                  | AA                              | CC                 | CC               | DRR                           | 101493071          | Unknown function                           |
| SNP_76036_A_126710 | NW_004515973.1 | scaffold528 | 126710                  | TT                              | CC                 | CC               | DRR                           | 101493071          | Unknown function                           |
| SNP_76037_A_126728 | NW_004515973.1 | scaffold528 | 126728                  | TT                              | CC                 | CC               | DRR                           | 101493071          | Unknown function                           |
| SNP_76038_A_126954 | NW_004515973.1 | scaffold528 | 126954                  | CC                              | TT                 | TT               | DRR                           | 101493071          | Unknown function                           |
| SNP_76039_A_126956 | NW_004515973.1 | scaffold528 | 126956                  | AA                              | GG                 | GG               | DRR                           | 101493071          | Unknown function                           |
| SNP_76040_A_147798 | NW_004515973.1 | scaffold528 | 147798                  | CC                              | AA                 | AA               | INTERGENIC                    |                    |                                            |
| SNP_76041_A_160496 | NW_004515973.1 | scaffold528 | 160496                  | CC                              | AA                 | AA               | INTERGENIC                    |                    |                                            |
| SNP_76043_A_213872 | NW_004515973.1 | scaffold528 | 213872                  | AA                              | CC                 | CC               | INTERGENIC                    |                    |                                            |
| SNP_76044_A_215644 | NW_004515973.1 | scaffold528 | 215644                  | CC                              | TT                 | TT               | INTERGENIC                    |                    |                                            |
| SNP_76046_A_215715 | NW_004515973.1 | scaffold528 | 215715                  | CC                              | AA                 | AA               | INTERGENIC                    |                    |                                            |
| SNP_76048_A_241454 | NW_004515973.1 | scaffold528 | 241454                  | GG                              | AA                 | AA               | DRR                           | 101410592          | transfer RNA glutamic acid (anticodon CUC) |

| SNPs IDs           | Chromosome IDs | Chromosomes | Physical positions (bp) | CDC Frontier (Reference genome) | (Pusa 1103 & HPNB) | (ILWC 46 & LPNB) | Sequence genome | Components of | Gene accession IDs | Putative functions |
|--------------------|----------------|-------------|-------------------------|---------------------------------|--------------------|------------------|-----------------|---------------|--------------------|--------------------|
| SNP_76049_A_286270 | NW_004515973.1 | scaffold528 | 286270                  | GG                              | AA                 | AA               | INTERGENIC      |               |                    |                    |
| SNP_76050_A_287984 | NW_004515973.1 | scaffold528 | 287984                  | TT                              | GG                 | GG               | INTERGENIC      |               |                    |                    |
| SNP_76051_A_289591 | NW_004515973.1 | scaffold528 | 289591                  | TT                              | CC                 | CC               | INTERGENIC      |               |                    |                    |
| SNP_76052_A_293929 | NW_004515973.1 | scaffold528 | 293929                  | GG                              | AA                 | AA               | INTERGENIC      |               |                    |                    |
| SNP_76053_A_300203 | NW_004515973.1 | scaffold528 | 300203                  | TT                              | CC                 | CC               | INTERGENIC      |               |                    |                    |
| SNP_76054_A_304874 | NW_004515973.1 | scaffold528 | 304874                  | TT                              | AA                 | AA               | INTERGENIC      |               |                    |                    |
| SNP_76056_A_319849 | NW_004515973.1 | scaffold528 | 319849                  | AA                              | GG                 | GG               | INTERGENIC      |               |                    |                    |
| SNP_76057_A_329725 | NW_004515973.1 | scaffold528 | 329725                  | TT                              | GG                 | GG               | INTERGENIC      |               |                    |                    |
| SNP_76058_A_106    | NW_004515974.1 | scaffold530 | 106                     | GG                              | AA                 | AA               | INTERGENIC      |               |                    |                    |
| SNP_76059_A_111    | NW_004515974.1 | scaffold530 | 111                     | TT                              | GG                 | GG               | INTERGENIC      |               |                    |                    |
| SNP_76060_A_112    | NW_004515974.1 | scaffold530 | 112                     | AA                              | GG                 | GG               | INTERGENIC      |               |                    |                    |
| SNP_76061_A_159    | NW_004515974.1 | scaffold530 | 159                     | CC                              | GG                 | GG               | INTERGENIC      |               |                    |                    |
| SNP_76062_A_185    | NW_004515974.1 | scaffold530 | 185                     | CC                              | AA                 | AA               | INTERGENIC      |               |                    |                    |
| SNP_76063_A_330    | NW_004515974.1 | scaffold530 | 330                     | CC                              | TT                 | TT               | INTERGENIC      |               |                    |                    |
| SNP_76065_A_558    | NW_004515974.1 | scaffold530 | 558                     | TT                              | CC                 | CC               | INTERGENIC      |               |                    |                    |
| SNP_76066_A_609    | NW_004515974.1 | scaffold530 | 609                     | CC                              | AA                 | AA               | INTERGENIC      |               |                    |                    |
| SNP_76067_A_798    | NW_004515974.1 | scaffold530 | 798                     | TT                              | CC                 | CC               | INTERGENIC      |               |                    |                    |
| SNP_76069_A_4222   | NW_004515974.1 | scaffold530 | 4222                    | CC                              | GG                 | GG               | INTERGENIC      |               |                    |                    |
| SNP_76070_A_4229   | NW_004515974.1 | scaffold530 | 4229                    | TT                              | AA                 | AA               | INTERGENIC      |               |                    |                    |
| SNP_76071_A_4232   | NW_004515974.1 | scaffold530 | 4232                    | AA                              | CC                 | CC               | INTERGENIC      |               |                    |                    |
| SNP_76072_A_4245   | NW_004515974.1 | scaffold530 | 4245                    | GG                              | AA                 | AA               | INTERGENIC      |               |                    |                    |
| SNP_76073_A_4252   | NW_004515974.1 | scaffold530 | 4252                    | AA                              | CC                 | CC               | INTERGENIC      |               |                    |                    |

| SNPs IDs          | Chromosome IDs | Chromosomes | Physical positions (bp) | CDC Frontier (Reference genome) | (Pusa 1103 & HPNB) | (ILWC 46 & LPNB) | Sequence Components of genome | Gene accession IDs | Putative functions |
|-------------------|----------------|-------------|-------------------------|---------------------------------|--------------------|------------------|-------------------------------|--------------------|--------------------|
| SNP_76074_A_4269  | NW_004515974.1 | scaffold530 | 4269                    | GG                              | CC                 | CC               | INTERGENIC                    |                    |                    |
| SNP_76075_A_4282  | NW_004515974.1 | scaffold530 | 4282                    | GG                              | AA                 | AA               | INTERGENIC                    |                    |                    |
| SNP_76076_A_4297  | NW_004515974.1 | scaffold530 | 4297                    | CC                              | GG                 | GG               | INTERGENIC                    |                    |                    |
| SNP_76077_A_4310  | NW_004515974.1 | scaffold530 | 4310                    | TT                              | AA                 | AA               | INTERGENIC                    |                    |                    |
| SNP_76079_A_10684 | NW_004515974.1 | scaffold530 | 10684                   | GG                              | AA                 | AA               | DRR                           | 101494884          | Unknown function   |
| SNP_76080_A_10773 | NW_004515974.1 | scaffold530 | 10773                   | AA                              | GG                 | GG               | DRR                           | 101494884          | Unknown function   |
| SNP_76081_A_10942 | NW_004515974.1 | scaffold530 | 10942                   | TT                              | CC                 | CC               | DRR                           | 101494884          | Unknown function   |
| SNP_76082_A_11063 | NW_004515974.1 | scaffold530 | 11063                   | AA                              | CC                 | CC               | DRR                           | 101494884          | Unknown function   |
| SNP_76083_A_11337 | NW_004515974.1 | scaffold530 | 11337                   | TT                              | CC                 | CC               | INTRON                        | 101494884          | Unknown function   |
| SNP_76084_A_11421 | NW_004515974.1 | scaffold530 | 11421                   | GG                              | AA                 | AA               | INTRON                        | 101494884          | Unknown function   |
| SNP_76085_A_24851 | NW_004515974.1 | scaffold530 | 24851                   | CC                              | AA                 | AA               | INTRON                        | 101494884          | Unknown function   |
| SNP_76086_A_25188 | NW_004515974.1 | scaffold530 | 25188                   | CC                              | AA                 | AA               | INTRON                        | 101494884          | Unknown function   |
| SNP_76087_A_44525 | NW_004515974.1 | scaffold530 | 44525                   | TT                              | AA                 | AA               | INTERGENIC                    |                    |                    |
| SNP_76088_A_87054 | NW_004515974.1 | scaffold530 | 87054                   | TT                              | GG                 | GG               | INTERGENIC                    |                    |                    |
| SNP_76089_A_4781  | NW_004515975.1 | scaffold531 | 4781                    | TT                              | CC                 | CC               | INTERGENIC                    |                    |                    |
| SNP_76090_A_4802  | NW_004515975.1 | scaffold531 | 4802                    | TT                              | CC                 | CC               | INTERGENIC                    |                    |                    |
| SNP_76091_A_4817  | NW_004515975.1 | scaffold531 | 4817                    | AA                              | CC                 | CC               | INTERGENIC                    |                    |                    |
| SNP_76092_A_4845  | NW_004515975.1 | scaffold531 | 4845                    | AA                              | CC                 | CC               | INTERGENIC                    |                    |                    |
| SNP_76093_A_4866  | NW_004515975.1 | scaffold531 | 4866                    | TT                              | AA                 | AA               | INTERGENIC                    |                    |                    |
| SNP_76094_A_4877  | NW_004515975.1 | scaffold531 | 4877                    | GG                              | AA                 | AA               | INTERGENIC                    |                    |                    |
| SNP_76095_A_4889  | NW_004515975.1 | scaffold531 | 4889                    | AA                              | TT                 | TT               | INTERGENIC                    |                    |                    |
| SNP_76096_A_4890  | NW_004515975.1 | scaffold531 | 4890                    | TT                              | AA                 | AA               | INTERGENIC                    |                    |                    |

| SNPs IDs          | Chromosome IDs | Chromosomes | Physical positions (bp) | CDC Frontier (Reference genome) | (Pusa 1103 & HPNB) | (ILWC 46 & LPNB) | Sequence Components of genome | Gene accession IDs | Putative functions                     |
|-------------------|----------------|-------------|-------------------------|---------------------------------|--------------------|------------------|-------------------------------|--------------------|----------------------------------------|
| SNP_76097_A_5578  | NW_004515975.1 | scaffold531 | 5578                    | AA                              | CC                 | CC               | INTERGENIC                    |                    |                                        |
| SNP_76098_A_7631  | NW_004515975.1 | scaffold531 | 7631                    | AA                              | GG                 | GG               | INTERGENIC                    |                    |                                        |
| SNP_76099_A_7632  | NW_004515975.1 | scaffold531 | 7632                    | AA                              | CC                 | CC               | INTERGENIC                    |                    |                                        |
| SNP_76100_A_11868 | NW_004515975.1 | scaffold531 | 11868                   | AA                              | TT                 | TT               | INTRON                        | 101496510          | protein trichome birefringence-like 19 |
| SNP_76102_A_11926 | NW_004515975.1 | scaffold531 | 11926                   | CC                              | GG                 | GG               | INTRON                        | 101496510          | protein trichome birefringence-like 19 |
| SNP_76103_A_12206 | NW_004515975.1 | scaffold531 | 12206                   | AA                              | GG                 | GG               | INTRON                        | 101496510          | protein trichome birefringence-like 19 |
| SNP_76104_A_12295 | NW_004515975.1 | scaffold531 | 12295                   | CC                              | TT                 | TT               | INTRON                        | 101496510          | protein trichome birefringence-like 19 |
| SNP_76105_A_12601 | NW_004515975.1 | scaffold531 | 12601                   | GG                              | AA                 | AA               | INTRON                        | 101496510          | protein trichome birefringence-like 19 |
| SNP_76106_A_13207 | NW_004515975.1 | scaffold531 | 13207                   | CC                              | GG                 | GG               | NON_SYNONYMOUS_CODING         | 101496510          | protein trichome birefringence-like 19 |
| SNP_76107_A_13369 | NW_004515975.1 | scaffold531 | 13369                   | TT                              | AA                 | AA               | NON_SYNONYMOUS_CODING         | 101496510          | protein trichome birefringence-like 19 |
| SNP_76108_A_13379 | NW_004515975.1 | scaffold531 | 13379                   | TT                              | CC                 | CC               | NON_SYNONYMOUS_CODING         | 101496510          | protein trichome birefringence-like 19 |
| SNP_76109_A_13442 | NW_004515975.1 | scaffold531 | 13442                   | TT                              | CC                 | CC               | NON_SYNONYMOUS_CODING         | 101496510          | protein trichome birefringence-like 19 |
| SNP_76110_A_13508 | NW_004515975.1 | scaffold531 | 13508                   | GG                              | AA                 | AA               | NON_SYNONYMOUS_CODING         | 101496510          | protein trichome birefringence-like 19 |
| SNP_76111_A_13532 | NW_004515975.1 | scaffold531 | 13532                   | CC                              | AA                 | AA               | NON_SYNONYMOUS_CODING         | 101496510          | protein trichome birefringence-like 19 |
| SNP_76112_A_13579 | NW_004515975.1 | scaffold531 | 13579                   | GG                              | AA                 | AA               | SYNONYMOUS_CODING             | 101496510          | protein trichome birefringence-like 19 |
| SNP_76113_A_13660 | NW_004515975.1 | scaffold531 | 13660                   | TT                              | GG                 | GG               | SYNONYMOUS_CODING             | 101496510          | protein trichome birefringence-like 19 |
| SNP_76114_A_13664 | NW_004515975.1 | scaffold531 | 13664                   | TT                              | CC                 | CC               | NON_SYNONYMOUS_CODING         | 101496510          | protein trichome birefringence-like 19 |
| SNP_76115_A_56353 | NW_004515975.1 | scaffold531 | 56353                   | AA                              | GG                 | GG               | INTERGENIC                    |                    |                                        |
| SNP_76116_A_60075 | NW_004515975.1 | scaffold531 | 60075                   | AA                              | TT                 | TT               | INTERGENIC                    |                    |                                        |
| SNP_76118_A_92638 | NW_004515975.1 | scaffold531 | 92638                   | TT                              | CC                 | CC               | URR                           | 101497834          | uncharacterized LOC101497834           |
| SNP_76119_A_97269 | NW_004515975.1 | scaffold531 | 97269                   | AA                              | TT                 | TT               | INTERGENIC                    |                    |                                        |
| SNP_76120_A_97323 | NW_004515975.1 | scaffold531 | 97323                   | CC                              | TT                 | TT               | INTERGENIC                    |                    |                                        |



| SNPs IDs           | Chromosome IDs | Chromosomes | Physical positions (bp) | CDC Frontier (Reference genome) | (Pusa 1103 & HPNB) | (ILWC 46 & LPNB) | Sequence Components of genome | Gene accession IDs | Putative functions                |
|--------------------|----------------|-------------|-------------------------|---------------------------------|--------------------|------------------|-------------------------------|--------------------|-----------------------------------|
| SNP_76121_A_114700 | NW_004515975.1 | scaffold531 | 114700                  | GG                              | AA                 | AA               | URR                           | 101499351          | endo-1,3(4)-beta-glucanase 2-like |
| SNP_76122_A_114731 | NW_004515975.1 | scaffold531 | 114731                  | GG                              | AA                 | AA               | URR                           | 101499351          | endo-1,3(4)-beta-glucanase 2-like |
| SNP_76123_A_160242 | NW_004515975.1 | scaffold531 | 160242                  | TT                              | AA                 | AA               | INTERGENIC                    |                    |                                   |
| SNP_76124_A_163981 | NW_004515975.1 | scaffold531 | 163981                  | CC                              | TT                 | TT               | INTERGENIC                    |                    |                                   |
| SNP_76125_A_206309 | NW_004515975.1 | scaffold531 | 206309                  | CC                              | TT                 | TT               | INTERGENIC                    |                    |                                   |
| SNP_76126_A_206319 | NW_004515975.1 | scaffold531 | 206319                  | AA                              | TT                 | TT               | INTERGENIC                    |                    |                                   |
| SNP_76127_A_206338 | NW_004515975.1 | scaffold531 | 206338                  | CC                              | TT                 | TT               | INTERGENIC                    |                    |                                   |
| SNP_76128_A_206342 | NW_004515975.1 | scaffold531 | 206342                  | TT                              | AA                 | AA               | INTERGENIC                    |                    |                                   |
| SNP_76129_A_206362 | NW_004515975.1 | scaffold531 | 206362                  | AA                              | TT                 | TT               | INTERGENIC                    |                    |                                   |
| SNP_76130_A_206369 | NW_004515975.1 | scaffold531 | 206369                  | TT                              | AA                 | AA               | INTERGENIC                    |                    |                                   |
| SNP_76131_A_206454 | NW_004515975.1 | scaffold531 | 206454                  | AA                              | TT                 | TT               | INTERGENIC                    |                    |                                   |
| SNP_76132_A_206611 | NW_004515975.1 | scaffold531 | 206611                  | CC                              | TT                 | TT               | INTERGENIC                    |                    |                                   |
| SNP_76133_A_1798   | NW_004515976.1 | scaffold532 | 1798                    | TT                              | GG                 | GG               | INTERGENIC                    |                    |                                   |
| SNP_76134_A_1829   | NW_004515976.1 | scaffold532 | 1829                    | TT                              | CC                 | CC               | INTERGENIC                    |                    |                                   |
| SNP_76135_A_8904   | NW_004515977.1 | scaffold533 | 8904                    | AA                              | TT                 | TT               | INTERGENIC                    |                    |                                   |
| SNP_76136_A_8919   | NW_004515977.1 | scaffold533 | 8919                    | CC                              | GG                 | GG               | INTERGENIC                    |                    |                                   |
| SNP_76137_A_8927   | NW_004515977.1 | scaffold533 | 8927                    | CC                              | TT                 | TT               | INTERGENIC                    |                    |                                   |
| SNP_76138_A_8953   | NW_004515977.1 | scaffold533 | 8953                    | AA                              | CC                 | CC               | INTERGENIC                    |                    |                                   |
| SNP_76139_A_18552  | NW_004515977.1 | scaffold533 | 18552                   | GG                              | TT                 | TT               | INTERGENIC                    |                    |                                   |
| SNP_76140_A_18553  | NW_004515977.1 | scaffold533 | 18553                   | TT                              | GG                 | GG               | INTERGENIC                    |                    |                                   |
| SNP_76141_A_19634  | NW_004515977.1 | scaffold533 | 19634                   | AA                              | CC                 | CC               | INTERGENIC                    |                    |                                   |
| SNP_76142_A_24201  | NW_004515977.1 | scaffold533 | 24201                   | TT                              | AA                 | AA               | INTERGENIC                    |                    |                                   |

| SNPs IDs           | Chromosome IDs | Chromosomes | Physical positions (bp) | CDC Frontier (Reference genome) | (Pusa 1103 & HPNB) | (ILWC 46 & LPNB) | Sequence genome | Components of | Gene accession IDs           | Putative functions |
|--------------------|----------------|-------------|-------------------------|---------------------------------|--------------------|------------------|-----------------|---------------|------------------------------|--------------------|
| SNP_76143_A_13341  | NW_004515978.1 | scaffold535 | 13341                   | GG                              | AA                 | AA               | INTERGENIC      |               |                              |                    |
| SNP_76144_A_49823  | NW_004515978.1 | scaffold535 | 49823                   | AA                              | CC                 | CC               | INTERGENIC      |               |                              |                    |
| SNP_76145_A_68639  | NW_004515978.1 | scaffold535 | 68639                   | AA                              | CC                 | CC               | INTERGENIC      |               |                              |                    |
| SNP_76146_A_68938  | NW_004515978.1 | scaffold535 | 68938                   | AA                              | GG                 | GG               | INTERGENIC      |               |                              |                    |
| SNP_76147_A_68976  | NW_004515978.1 | scaffold535 | 68976                   | TT                              | GG                 | GG               | INTERGENIC      |               |                              |                    |
| SNP_76148_A_69069  | NW_004515978.1 | scaffold535 | 69069                   | CC                              | AA                 | AA               | INTERGENIC      |               |                              |                    |
| SNP_76149_A_69245  | NW_004515978.1 | scaffold535 | 69245                   | AA                              | GG                 | GG               | INTERGENIC      |               |                              |                    |
| SNP_76150_A_69249  | NW_004515978.1 | scaffold535 | 69249                   | TT                              | GG                 | GG               | INTERGENIC      |               |                              |                    |
| SNP_76151_A_69264  | NW_004515978.1 | scaffold535 | 69264                   | GG                              | AA                 | AA               | INTERGENIC      |               |                              |                    |
| SNP_76152_A_77819  | NW_004515978.1 | scaffold535 | 77819                   | CC                              | TT                 | TT               | INTERGENIC      |               |                              |                    |
| SNP_76154_A_125735 | NW_004515978.1 | scaffold535 | 125735                  | GG                              | AA                 | AA               | INTERGENIC      |               |                              |                    |
| SNP_76155_A_135694 | NW_004515978.1 | scaffold535 | 135694                  | CC                              | TT                 | TT               | INTERGENIC      |               |                              |                    |
| SNP_76156_A_170453 | NW_004515978.1 | scaffold535 | 170453                  | AA                              | CC                 | CC               | INTERGENIC      |               |                              |                    |
| SNP_76157_A_13085  | NW_004515980.1 | scaffold537 | 13085                   | AA                              | CC                 | CC               | INTERGENIC      |               |                              |                    |
| SNP_76158_A_31527  | NW_004515980.1 | scaffold537 | 31527                   | AA                              | GG                 | GG               | INTERGENIC      |               |                              |                    |
| SNP_76159_A_31885  | NW_004515980.1 | scaffold537 | 31885                   | TT                              | CC                 | CC               | INTERGENIC      |               |                              |                    |
| SNP_76160_A_35731  | NW_004515980.1 | scaffold537 | 35731                   | CC                              | GG                 | GG               | INTERGENIC      |               |                              |                    |
| SNP_76161_A_58790  | NW_004515980.1 | scaffold537 | 58790                   | AA                              | GG                 | GG               | INTRON          | 101509814     | uncharacterized LOC101509814 |                    |
| SNP_76162_A_58914  | NW_004515980.1 | scaffold537 | 58914                   | AA                              | GG                 | GG               | INTRON          | 101509814     | uncharacterized LOC101509814 |                    |
| SNP_76163_A_78641  | NW_004515980.1 | scaffold537 | 78641                   | AA                              | CC                 | CC               | INTRON          | 101509814     | uncharacterized LOC101509814 |                    |
| SNP_76164_A_78860  | NW_004515980.1 | scaffold537 | 78860                   | AA                              | GG                 | GG               | INTRON          | 101509814     | uncharacterized LOC101509814 |                    |
| SNP_76165_A_78877  | NW_004515980.1 | scaffold537 | 78877                   | AA                              | GG                 | GG               | INTRON          | 101509814     | uncharacterized LOC101509814 |                    |

| SNPs IDs           | Chromosome IDs | Chromosomes | Physical positions (bp) | CDC Frontier (Reference genome) | (Pusa 1103 & HPNB) | (ILWC 46 & LPNB) | Sequence Components of genome | Gene accession IDs | Putative functions           |
|--------------------|----------------|-------------|-------------------------|---------------------------------|--------------------|------------------|-------------------------------|--------------------|------------------------------|
| SNP_76166_A_78882  | NW_004515980.1 | scaffold537 | 78882                   | TT                              | AA                 | AA               | INTRON                        | 101509814          | uncharacterized LOC101509814 |
| SNP_76167_A_78904  | NW_004515980.1 | scaffold537 | 78904                   | AA                              | CC                 | CC               | INTRON                        | 101509814          | uncharacterized LOC101509814 |
| SNP_76168_A_78942  | NW_004515980.1 | scaffold537 | 78942                   | TT                              | CC                 | CC               | INTRON                        | 101509814          | uncharacterized LOC101509814 |
| SNP_76169_A_78972  | NW_004515980.1 | scaffold537 | 78972                   | AA                              | GG                 | GG               | INTRON                        | 101509814          | uncharacterized LOC101509814 |
| SNP_76170_A_78985  | NW_004515980.1 | scaffold537 | 78985                   | AA                              | CC                 | CC               | INTRON                        | 101509814          | uncharacterized LOC101509814 |
| SNP_76171_A_78986  | NW_004515980.1 | scaffold537 | 78986                   | AA                              | GG                 | GG               | INTRON                        | 101509814          | uncharacterized LOC101509814 |
| SNP_76172_A_78988  | NW_004515980.1 | scaffold537 | 78988                   | AA                              | CC                 | CC               | INTRON                        | 101509814          | uncharacterized LOC101509814 |
| SNP_76173_A_78996  | NW_004515980.1 | scaffold537 | 78996                   | AA                              | GG                 | GG               | INTRON                        | 101509814          | uncharacterized LOC101509814 |
| SNP_76174_A_79002  | NW_004515980.1 | scaffold537 | 79002                   | TT                              | GG                 | GG               | INTRON                        | 101509814          | uncharacterized LOC101509814 |
| SNP_76175_A_79006  | NW_004515980.1 | scaffold537 | 79006                   | TT                              | CC                 | CC               | INTRON                        | 101509814          | uncharacterized LOC101509814 |
| SNP_76176_A_82318  | NW_004515980.1 | scaffold537 | 82318                   | AA                              | TT                 | TT               | INTRON                        | 101509814          | uncharacterized LOC101509814 |
| SNP_76177_A_82430  | NW_004515980.1 | scaffold537 | 82430                   | AA                              | GG                 | GG               | INTRON                        | 101509814          | uncharacterized LOC101509814 |
| SNP_76178_A_84656  | NW_004515980.1 | scaffold537 | 84656                   | TT                              | AA                 | AA               | INTRON                        | 101509814          | uncharacterized LOC101509814 |
| SNP_76179_A_85150  | NW_004515980.1 | scaffold537 | 85150                   | TT                              | AA                 | AA               | INTRON                        | 101509814          | uncharacterized LOC101509814 |
| SNP_76180_A_85230  | NW_004515980.1 | scaffold537 | 85230                   | TT                              | GG                 | GG               | INTRON                        | 101509814          | uncharacterized LOC101509814 |
| SNP_76181_A_85258  | NW_004515980.1 | scaffold537 | 85258                   | CC                              | TT                 | TT               | INTRON                        | 101509814          | uncharacterized LOC101509814 |
| SNP_76182_A_85259  | NW_004515980.1 | scaffold537 | 85259                   | GG                              | AA                 | AA               | INTRON                        | 101509814          | uncharacterized LOC101509814 |
| SNP_76183_A_85308  | NW_004515980.1 | scaffold537 | 85308                   | TT                              | AA                 | AA               | INTRON                        | 101509814          | uncharacterized LOC101509814 |
| SNP_76184_A_85349  | NW_004515980.1 | scaffold537 | 85349                   | AA                              | GG                 | GG               | INTRON                        | 101509814          | uncharacterized LOC101509814 |
| SNP_76185_A_85692  | NW_004515980.1 | scaffold537 | 85692                   | AA                              | TT                 | TT               | INTRON                        | 101509814          | uncharacterized LOC101509814 |
| SNP_76186_A_212606 | NW_004515980.1 | scaffold537 | 212606                  | TT                              | AA                 | AA               | URR                           | 101507266          | expansin-B3                  |
| SNP_76187_A_231007 | NW_004515980.1 | scaffold537 | 231007                  | TT                              | CC                 | CC               | INTERGENIC                    |                    |                              |

| SNPs IDs           | Chromosome IDs | Chromosomes | Physical positions (bp) | CDC Frontier (Reference genome) | (Pusa 1103 & HPNB) | (ILWC 46 & LPNB) | Sequence Components of genome | Gene accession IDs | Putative functions                     |
|--------------------|----------------|-------------|-------------------------|---------------------------------|--------------------|------------------|-------------------------------|--------------------|----------------------------------------|
| SNP_76188_A_242889 | NW_004515980.1 | scaffold537 | 242889                  | CC                              | TT                 | TT               | INTERGENIC                    |                    |                                        |
| SNP_76189_A_270410 | NW_004515980.1 | scaffold537 | 270410                  | CC                              | TT                 | TT               | INTERGENIC                    |                    |                                        |
| SNP_76190_A_270642 | NW_004515980.1 | scaffold537 | 270642                  | CC                              | TT                 | TT               | INTERGENIC                    |                    |                                        |
| SNP_76191_A_270800 | NW_004515980.1 | scaffold537 | 270800                  | AA                              | GG                 | GG               | INTERGENIC                    |                    |                                        |
| SNP_76192_A_270925 | NW_004515980.1 | scaffold537 | 270925                  | CC                              | AA                 | AA               | INTERGENIC                    |                    |                                        |
| SNP_76193_A_271014 | NW_004515980.1 | scaffold537 | 271014                  | TT                              | GG                 | GG               | INTERGENIC                    |                    |                                        |
| SNP_76194_A_271058 | NW_004515980.1 | scaffold537 | 271058                  | AA                              | GG                 | GG               | INTERGENIC                    |                    |                                        |
| SNP_76195_A_271190 | NW_004515980.1 | scaffold537 | 271190                  | GG                              | TT                 | TT               | INTERGENIC                    |                    |                                        |
| SNP_76196_A_271207 | NW_004515980.1 | scaffold537 | 271207                  | CC                              | TT                 | TT               | INTERGENIC                    |                    |                                        |
| SNP_76197_A_19441  | NW_004515983.1 | scaffold543 | 19441                   | TT                              | CC                 | CC               | DRR                           | 101511004          | ABC transporter A family member 7-like |
| SNP_76198_A_19445  | NW_004515983.1 | scaffold543 | 19445                   | CC                              | TT                 | TT               | DRR                           | 101511004          | ABC transporter A family member 7-like |
| SNP_76199_A_20525  | NW_004515983.1 | scaffold543 | 20525                   | CC                              | TT                 | TT               | INTRON                        | 101511004          | ABC transporter A family member 7-like |
| SNP_76200_A_20526  | NW_004515983.1 | scaffold543 | 20526                   | TT                              | GG                 | GG               | INTRON                        | 101511004          | ABC transporter A family member 7-like |
| SNP_76201_A_20569  | NW_004515983.1 | scaffold543 | 20569                   | AA                              | TT                 | TT               | INTRON                        | 101511004          | ABC transporter A family member 7-like |
| SNP_76202_A_20577  | NW_004515983.1 | scaffold543 | 20577                   | AA                              | CC                 | CC               | INTRON                        | 101511004          | ABC transporter A family member 7-like |
| SNP_76203_A_20914  | NW_004515983.1 | scaffold543 | 20914                   | AA                              | TT                 | TT               | INTRON                        | 101511004          | ABC transporter A family member 7-like |
| SNP_76204_A_24081  | NW_004515983.1 | scaffold543 | 24081                   | AA                              | GG                 | GG               | URR                           | 101515412          | Unknown function                       |
| SNP_76205_A_27278  | NW_004515983.1 | scaffold543 | 27278                   | CC                              | TT                 | TT               | URR                           | 101510682          | uncharacterized LOC101510682           |
| SNP_76206_A_31226  | NW_004515983.1 | scaffold543 | 31226                   | AA                              | GG                 | GG               | INTERGENIC                    |                    |                                        |
| SNP_76207_A_31246  | NW_004515983.1 | scaffold543 | 31246                   | TT                              | GG                 | GG               | INTERGENIC                    |                    |                                        |
| SNP_76208_A_31255  | NW_004515983.1 | scaffold543 | 31255                   | AA                              | TT                 | TT               | INTERGENIC                    |                    |                                        |
| SNP_76209_A_31277  | NW_004515983.1 | scaffold543 | 31277                   | TT                              | CC                 | CC               | INTERGENIC                    |                    |                                        |

| SNPs IDs           | Chromosome IDs | Chromosomes | Physical positions (bp) | CDC Frontier (Reference genome) | (Pusa 1103 & HPNB) | (ILWC 46 & LPNB) | Sequence genome | Components of | Gene accession IDs | Putative functions |
|--------------------|----------------|-------------|-------------------------|---------------------------------|--------------------|------------------|-----------------|---------------|--------------------|--------------------|
| SNP_76210_A_31658  | NW_004515983.1 | scaffold543 | 31658                   | AA                              | CC                 | CC               | INTERGENIC      |               |                    |                    |
| SNP_76211_A_38570  | NW_004515983.1 | scaffold543 | 38570                   | TT                              | CC                 | CC               | INTERGENIC      |               |                    |                    |
| SNP_76212_A_68869  | NW_004515983.1 | scaffold543 | 68869                   | AA                              | CC                 | CC               | INTERGENIC      |               |                    |                    |
| SNP_76213_A_68884  | NW_004515983.1 | scaffold543 | 68884                   | TT                              | CC                 | CC               | INTERGENIC      |               |                    |                    |
| SNP_76214_A_68922  | NW_004515983.1 | scaffold543 | 68922                   | TT                              | GG                 | GG               | INTERGENIC      |               |                    |                    |
| SNP_76216_A_69038  | NW_004515983.1 | scaffold543 | 69038                   | AA                              | GG                 | GG               | INTERGENIC      |               |                    |                    |
| SNP_76218_A_100788 | NW_004515983.1 | scaffold543 | 100788                  | AA                              | GG                 | GG               | INTERGENIC      |               |                    |                    |
| SNP_76219_A_100806 | NW_004515983.1 | scaffold543 | 100806                  | CC                              | TT                 | TT               | INTERGENIC      |               |                    |                    |
| SNP_76221_A_148365 | NW_004515983.1 | scaffold543 | 148365                  | TT                              | CC                 | CC               | INTERGENIC      |               |                    |                    |
| SNP_76222_A_155217 | NW_004515983.1 | scaffold543 | 155217                  | GG                              | TT                 | TT               | INTERGENIC      |               |                    |                    |
| SNP_76223_A_160045 | NW_004515983.1 | scaffold543 | 160045                  | AA                              | GG                 | GG               | INTERGENIC      |               |                    |                    |
| SNP_76224_A_160418 | NW_004515983.1 | scaffold543 | 160418                  | CC                              | TT                 | TT               | INTERGENIC      |               |                    |                    |
| SNP_76225_A_187397 | NW_004515983.1 | scaffold543 | 187397                  | CC                              | TT                 | TT               | INTERGENIC      |               |                    |                    |
| SNP_76226_A_224124 | NW_004515983.1 | scaffold543 | 224124                  | TT                              | CC                 | CC               | INTERGENIC      |               |                    |                    |
| SNP_76227_A_224163 | NW_004515983.1 | scaffold543 | 224163                  | TT                              | AA                 | AA               | INTERGENIC      |               |                    |                    |
| SNP_76228_A_224450 | NW_004515983.1 | scaffold543 | 224450                  | TT                              | CC                 | CC               | INTERGENIC      |               |                    |                    |
| SNP_76229_A_224484 | NW_004515983.1 | scaffold543 | 224484                  | AA                              | GG                 | GG               | INTERGENIC      |               |                    |                    |
| SNP_76230_A_224497 | NW_004515983.1 | scaffold543 | 224497                  | CC                              | TT                 | TT               | INTERGENIC      |               |                    |                    |
| SNP_76232_A_224541 | NW_004515983.1 | scaffold543 | 224541                  | AA                              | GG                 | GG               | INTERGENIC      |               |                    |                    |
| SNP_76233_A_225582 | NW_004515983.1 | scaffold543 | 225582                  | GG                              | TT                 | TT               | INTERGENIC      |               |                    |                    |
| SNP_76234_A_225626 | NW_004515983.1 | scaffold543 | 225626                  | CC                              | GG                 | GG               | INTERGENIC      |               |                    |                    |
| SNP_76235_A_226069 | NW_004515983.1 | scaffold543 | 226069                  | AA                              | GG                 | GG               | INTERGENIC      |               |                    |                    |

| SNPs IDs           | Chromosome IDs | Chromosomes | Physical positions (bp) | CDC Frontier (Reference genome) | (Pusa 1103 & HPNB) | (ILWC 46 & LPNB) | Sequence genome | Components of | Gene accession IDs | Putative functions |
|--------------------|----------------|-------------|-------------------------|---------------------------------|--------------------|------------------|-----------------|---------------|--------------------|--------------------|
| SNP_76236_A_226076 | NW_004515983.1 | scaffold543 | 226076                  | AA                              | GG                 | GG               | INTERGENIC      |               |                    |                    |
| SNP_76237_A_226088 | NW_004515983.1 | scaffold543 | 226088                  | AA                              | TT                 | TT               | INTERGENIC      |               |                    |                    |
| SNP_76238_A_226091 | NW_004515983.1 | scaffold543 | 226091                  | CC                              | AA                 | AA               | INTERGENIC      |               |                    |                    |
| SNP_76239_A_226101 | NW_004515983.1 | scaffold543 | 226101                  | AA                              | GG                 | GG               | INTERGENIC      |               |                    |                    |
| SNP_76240_A_226115 | NW_004515983.1 | scaffold543 | 226115                  | AA                              | TT                 | TT               | INTERGENIC      |               |                    |                    |
| SNP_76241_A_226130 | NW_004515983.1 | scaffold543 | 226130                  | TT                              | AA                 | AA               | INTERGENIC      |               |                    |                    |
| SNP_76242_A_226152 | NW_004515983.1 | scaffold543 | 226152                  | TT                              | GG                 | GG               | INTERGENIC      |               |                    |                    |
| SNP_76243_A_226178 | NW_004515983.1 | scaffold543 | 226178                  | GG                              | AA                 | AA               | INTERGENIC      |               |                    |                    |
| SNP_76244_A_226205 | NW_004515983.1 | scaffold543 | 226205                  | CC                              | TT                 | TT               | INTERGENIC      |               |                    |                    |
| SNP_76245_A_226295 | NW_004515983.1 | scaffold543 | 226295                  | AA                              | GG                 | GG               | INTERGENIC      |               |                    |                    |
| SNP_76246_A_226447 | NW_004515983.1 | scaffold543 | 226447                  | TT                              | CC                 | CC               | INTERGENIC      |               |                    |                    |
| SNP_76247_A_226579 | NW_004515983.1 | scaffold543 | 226579                  | TT                              | CC                 | CC               | INTERGENIC      |               |                    |                    |
| SNP_76248_A_226604 | NW_004515983.1 | scaffold543 | 226604                  | GG                              | AA                 | AA               | INTERGENIC      |               |                    |                    |
| SNP_76249_A_229455 | NW_004515983.1 | scaffold543 | 229455                  | GG                              | AA                 | AA               | INTERGENIC      |               |                    |                    |
| SNP_76251_A_229617 | NW_004515983.1 | scaffold543 | 229617                  | AA                              | CC                 | CC               | INTERGENIC      |               |                    |                    |
| SNP_76252_A_229661 | NW_004515983.1 | scaffold543 | 229661                  | GG                              | AA                 | AA               | INTERGENIC      |               |                    |                    |
| SNP_76253_A_229662 | NW_004515983.1 | scaffold543 | 229662                  | AA                              | TT                 | TT               | INTERGENIC      |               |                    |                    |
| SNP_76254_A_229664 | NW_004515983.1 | scaffold543 | 229664                  | TT                              | CC                 | CC               | INTERGENIC      |               |                    |                    |
| SNP_76255_A_229811 | NW_004515983.1 | scaffold543 | 229811                  | AA                              | TT                 | TT               | INTERGENIC      |               |                    |                    |
| SNP_76256_A_242893 | NW_004515983.1 | scaffold543 | 242893                  | TT                              | GG                 | GG               | INTERGENIC      |               |                    |                    |
| SNP_76257_A_242960 | NW_004515983.1 | scaffold543 | 242960                  | GG                              | AA                 | AA               | INTERGENIC      |               |                    |                    |
| SNP_76258_A_243070 | NW_004515983.1 | scaffold543 | 243070                  | AA                              | CC                 | CC               | INTERGENIC      |               |                    |                    |

| SNPs IDs           | Chromosome IDs | Chromosomes | Physical positions (bp) | CDC Frontier (Reference genome) | (Pusa 1103 & HPNB) | (ILWC 46 & LPNB) | Sequence Components of genome | Gene accession IDs | Putative functions           |
|--------------------|----------------|-------------|-------------------------|---------------------------------|--------------------|------------------|-------------------------------|--------------------|------------------------------|
| SNP_76259_A_243140 | NW_004515983.1 | scaffold543 | 243140                  | TT                              | CC                 | CC               | INTERGENIC                    |                    |                              |
| SNP_76260_A_243189 | NW_004515983.1 | scaffold543 | 243189                  | AA                              | GG                 | GG               | INTERGENIC                    |                    |                              |
| SNP_76261_A_243275 | NW_004515983.1 | scaffold543 | 243275                  | TT                              | CC                 | CC               | INTERGENIC                    |                    |                              |
| SNP_76262_A_243313 | NW_004515983.1 | scaffold543 | 243313                  | AA                              | GG                 | GG               | INTERGENIC                    |                    |                              |
| SNP_76263_A_243402 | NW_004515983.1 | scaffold543 | 243402                  | GG                              | AA                 | AA               | INTERGENIC                    |                    |                              |
| SNP_76264_A_243414 | NW_004515983.1 | scaffold543 | 243414                  | TT                              | CC                 | CC               | INTERGENIC                    |                    |                              |
| SNP_76265_A_244019 | NW_004515983.1 | scaffold543 | 244019                  | GG                              | AA                 | AA               | INTERGENIC                    |                    |                              |
| SNP_76266_A_244034 | NW_004515983.1 | scaffold543 | 244034                  | GG                              | AA                 | AA               | INTERGENIC                    |                    |                              |
| SNP_76267_A_244046 | NW_004515983.1 | scaffold543 | 244046                  | GG                              | CC                 | CC               | INTERGENIC                    |                    |                              |
| SNP_76268_A_244047 | NW_004515983.1 | scaffold543 | 244047                  | TT                              | CC                 | CC               | INTERGENIC                    |                    |                              |
| SNP_76269_A_281969 | NW_004515983.1 | scaffold543 | 281969                  | GG                              | AA                 | AA               | INTRON                        | 101514763          | uncharacterized LOC101514763 |
| SNP_76270_A_299476 | NW_004515983.1 | scaffold543 | 299476                  | AA                              | GG                 | GG               | INTERGENIC                    |                    |                              |
| SNP_76271_A_3683   | NW_004515984.1 | scaffold544 | 3683                    | AA                              | CC                 | CC               | INTERGENIC                    |                    |                              |
| SNP_76272_A_6761   | NW_004515984.1 | scaffold544 | 6761                    | AA                              | CC                 | CC               | INTERGENIC                    |                    |                              |
| SNP_76273_A_7148   | NW_004515984.1 | scaffold544 | 7148                    | AA                              | CC                 | CC               | INTERGENIC                    |                    |                              |
| SNP_76274_A_7171   | NW_004515984.1 | scaffold544 | 7171                    | GG                              | CC                 | CC               | INTERGENIC                    |                    |                              |
| SNP_76275_A_7197   | NW_004515984.1 | scaffold544 | 7197                    | AA                              | GG                 | GG               | INTERGENIC                    |                    |                              |
| SNP_76276_A_8213   | NW_004515984.1 | scaffold544 | 8213                    | TT                              | GG                 | GG               | INTERGENIC                    |                    |                              |
| SNP_76277_A_11334  | NW_004515984.1 | scaffold544 | 11334                   | TT                              | AA                 | AA               | INTERGENIC                    |                    |                              |
| SNP_76278_A_14312  | NW_004515984.1 | scaffold544 | 14312                   | GG                              | AA                 | AA               | INTERGENIC                    |                    |                              |
| SNP_76279_A_14325  | NW_004515984.1 | scaffold544 | 14325                   | TT                              | CC                 | CC               | INTERGENIC                    |                    |                              |
| SNP_76280_A_16442  | NW_004515984.1 | scaffold544 | 16442                   | TT                              | GG                 | GG               | INTERGENIC                    |                    |                              |

| SNPs IDs          | Chromosome IDs | Chromosomes | Physical positions (bp) | CDC Frontier (Reference genome) | (Pusa 1103 & HPNB) | (ILWC 46 & LPNB) | Sequence genome | Components of | Gene accession IDs | Putative functions |
|-------------------|----------------|-------------|-------------------------|---------------------------------|--------------------|------------------|-----------------|---------------|--------------------|--------------------|
| SNP_76281_A_16453 | NW_004515984.1 | scaffold544 | 16453                   | TT                              | CC                 | CC               | INTERGENIC      |               |                    |                    |
| SNP_76282_A_18432 | NW_004515984.1 | scaffold544 | 18432                   | GG                              | AA                 | AA               | INTERGENIC      |               |                    |                    |
| SNP_76283_A_18778 | NW_004515984.1 | scaffold544 | 18778                   | CC                              | TT                 | TT               | INTERGENIC      |               |                    |                    |
| SNP_76284_A_19226 | NW_004515984.1 | scaffold544 | 19226                   | GG                              | AA                 | AA               | INTERGENIC      |               |                    |                    |
| SNP_76285_A_21995 | NW_004515984.1 | scaffold544 | 21995                   | TT                              | CC                 | CC               | INTERGENIC      |               |                    |                    |
| SNP_76286_A_22703 | NW_004515984.1 | scaffold544 | 22703                   | AA                              | TT                 | TT               | INTERGENIC      |               |                    |                    |
| SNP_76287_A_34725 | NW_004515984.1 | scaffold544 | 34725                   | CC                              | AA                 | AA               | INTERGENIC      |               |                    |                    |
| SNP_76290_A_46973 | NW_004515984.1 | scaffold544 | 46973                   | AA                              | CC                 | CC               | INTERGENIC      |               |                    |                    |
| SNP_76291_A_47175 | NW_004515984.1 | scaffold544 | 47175                   | GG                              | CC                 | CC               | INTERGENIC      |               |                    |                    |
| SNP_76292_A_48452 | NW_004515984.1 | scaffold544 | 48452                   | AA                              | CC                 | CC               | INTERGENIC      |               |                    |                    |
| SNP_76293_A_48540 | NW_004515984.1 | scaffold544 | 48540                   | TT                              | CC                 | CC               | INTERGENIC      |               |                    |                    |
| SNP_76294_A_50724 | NW_004515984.1 | scaffold544 | 50724                   | TT                              | AA                 | AA               | INTERGENIC      |               |                    |                    |
| SNP_76295_A_50913 | NW_004515984.1 | scaffold544 | 50913                   | CC                              | GG                 | GG               | INTERGENIC      |               |                    |                    |
| SNP_76296_A_51277 | NW_004515984.1 | scaffold544 | 51277                   | TT                              | GG                 | GG               | INTERGENIC      |               |                    |                    |
| SNP_76297_A_51302 | NW_004515984.1 | scaffold544 | 51302                   | AA                              | GG                 | GG               | INTERGENIC      |               |                    |                    |
| SNP_76298_A_51359 | NW_004515984.1 | scaffold544 | 51359                   | TT                              | GG                 | GG               | INTERGENIC      |               |                    |                    |
| SNP_76299_A_51395 | NW_004515984.1 | scaffold544 | 51395                   | GG                              | CC                 | CC               | INTERGENIC      |               |                    |                    |
| SNP_76300_A_51456 | NW_004515984.1 | scaffold544 | 51456                   | CC                              | TT                 | TT               | INTERGENIC      |               |                    |                    |
| SNP_76301_A_51732 | NW_004515984.1 | scaffold544 | 51732                   | GG                              | AA                 | AA               | INTERGENIC      |               |                    |                    |
| SNP_76302_A_51782 | NW_004515984.1 | scaffold544 | 51782                   | GG                              | AA                 | AA               | INTERGENIC      |               |                    |                    |
| SNP_76303_A_51878 | NW_004515984.1 | scaffold544 | 51878                   | AA                              | TT                 | TT               | INTERGENIC      |               |                    |                    |
| SNP_76304_A_51973 | NW_004515984.1 | scaffold544 | 51973                   | GG                              | CC                 | CC               | INTERGENIC      |               |                    |                    |



| SNPs IDs          | Chromosome IDs | Chromosomes | Physical positions (bp) | CDC Frontier (Reference genome) | (Pusa 1103 & HPNB) | (ILWC 46 & LPNB) | Sequence genome | Components of | Gene accession IDs | Putative functions |
|-------------------|----------------|-------------|-------------------------|---------------------------------|--------------------|------------------|-----------------|---------------|--------------------|--------------------|
| SNP_76305_A_52482 | NW_004515984.1 | scaffold544 | 52482                   | GG                              | CC                 | CC               | INTERGENIC      |               |                    |                    |
| SNP_76306_A_52750 | NW_004515984.1 | scaffold544 | 52750                   | TT                              | GG                 | GG               | INTERGENIC      |               |                    |                    |
| SNP_76307_A_52872 | NW_004515984.1 | scaffold544 | 52872                   | TT                              | CC                 | CC               | INTERGENIC      |               |                    |                    |
| SNP_76308_A_52913 | NW_004515984.1 | scaffold544 | 52913                   | TT                              | CC                 | CC               | INTERGENIC      |               |                    |                    |
| SNP_76309_A_53016 | NW_004515984.1 | scaffold544 | 53016                   | AA                              | GG                 | GG               | INTERGENIC      |               |                    |                    |
| SNP_76310_A_53141 | NW_004515984.1 | scaffold544 | 53141                   | TT                              | GG                 | GG               | INTERGENIC      |               |                    |                    |
| SNP_76311_A_53972 | NW_004515984.1 | scaffold544 | 53972                   | TT                              | CC                 | CC               | INTERGENIC      |               |                    |                    |
| SNP_76312_A_55066 | NW_004515984.1 | scaffold544 | 55066                   | AA                              | TT                 | TT               | INTERGENIC      |               |                    |                    |
| SNP_76313_A_55067 | NW_004515984.1 | scaffold544 | 55067                   | AA                              | TT                 | TT               | INTERGENIC      |               |                    |                    |
| SNP_76314_A_56072 | NW_004515984.1 | scaffold544 | 56072                   | GG                              | AA                 | AA               | INTERGENIC      |               |                    |                    |
| SNP_76315_A_56745 | NW_004515984.1 | scaffold544 | 56745                   | AA                              | CC                 | CC               | INTERGENIC      |               |                    |                    |
| SNP_76316_A_56763 | NW_004515984.1 | scaffold544 | 56763                   | TT                              | CC                 | CC               | INTERGENIC      |               |                    |                    |
| SNP_76317_A_56783 | NW_004515984.1 | scaffold544 | 56783                   | GG                              | TT                 | TT               | INTERGENIC      |               |                    |                    |
| SNP_76318_A_56827 | NW_004515984.1 | scaffold544 | 56827                   | GG                              | AA                 | AA               | INTERGENIC      |               |                    |                    |
| SNP_76319_A_56868 | NW_004515984.1 | scaffold544 | 56868                   | TT                              | AA                 | AA               | INTERGENIC      |               |                    |                    |
| SNP_76320_A_57046 | NW_004515984.1 | scaffold544 | 57046                   | TT                              | AA                 | AA               | INTERGENIC      |               |                    |                    |
| SNP_76321_A_57187 | NW_004515984.1 | scaffold544 | 57187                   | AA                              | CC                 | CC               | INTERGENIC      |               |                    |                    |
| SNP_76322_A_58444 | NW_004515984.1 | scaffold544 | 58444                   | TT                              | CC                 | CC               | INTERGENIC      |               |                    |                    |
| SNP_76323_A_58647 | NW_004515984.1 | scaffold544 | 58647                   | AA                              | TT                 | TT               | INTERGENIC      |               |                    |                    |
| SNP_76324_A_58769 | NW_004515984.1 | scaffold544 | 58769                   | TT                              | AA                 | AA               | INTERGENIC      |               |                    |                    |
| SNP_76326_A_59836 | NW_004515984.1 | scaffold544 | 59836                   | CC                              | GG                 | GG               | INTERGENIC      |               |                    |                    |
| SNP_76327_A_59955 | NW_004515984.1 | scaffold544 | 59955                   | TT                              | AA                 | AA               | INTERGENIC      |               |                    |                    |

| SNPs IDs          | Chromosome IDs | Chromosomes | Physical positions (bp) | CDC Frontier (Reference genome) | (Pusa 1103 & HPNB) | (ILWC 46 & LPNB) | Sequence genome | Components of | Gene accession IDs | Putative functions |
|-------------------|----------------|-------------|-------------------------|---------------------------------|--------------------|------------------|-----------------|---------------|--------------------|--------------------|
| SNP_76328_A_60152 | NW_004515984.1 | scaffold544 | 60152                   | GG                              | AA                 | AA               | INTERGENIC      |               |                    |                    |
| SNP_76329_A_60264 | NW_004515984.1 | scaffold544 | 60264                   | AA                              | GG                 | GG               | INTERGENIC      |               |                    |                    |
| SNP_76330_A_60497 | NW_004515984.1 | scaffold544 | 60497                   | GG                              | AA                 | AA               | INTERGENIC      |               |                    |                    |
| SNP_76331_A_60568 | NW_004515984.1 | scaffold544 | 60568                   | AA                              | GG                 | GG               | INTERGENIC      |               |                    |                    |
| SNP_76332_A_60651 | NW_004515984.1 | scaffold544 | 60651                   | TT                              | AA                 | AA               | INTERGENIC      |               |                    |                    |
| SNP_76333_A_60703 | NW_004515984.1 | scaffold544 | 60703                   | AA                              | GG                 | GG               | INTERGENIC      |               |                    |                    |
| SNP_76334_A_60913 | NW_004515984.1 | scaffold544 | 60913                   | CC                              | GG                 | GG               | INTERGENIC      |               |                    |                    |
| SNP_76335_A_61062 | NW_004515984.1 | scaffold544 | 61062                   | AA                              | GG                 | GG               | INTERGENIC      |               |                    |                    |
| SNP_76336_A_61167 | NW_004515984.1 | scaffold544 | 61167                   | GG                              | TT                 | TT               | INTERGENIC      |               |                    |                    |
| SNP_76338_A_61403 | NW_004515984.1 | scaffold544 | 61403                   | AA                              | GG                 | GG               | INTERGENIC      |               |                    |                    |
| SNP_76339_A_61422 | NW_004515984.1 | scaffold544 | 61422                   | AA                              | TT                 | TT               | INTERGENIC      |               |                    |                    |
| SNP_76340_A_61558 | NW_004515984.1 | scaffold544 | 61558                   | TT                              | GG                 | GG               | INTERGENIC      |               |                    |                    |
| SNP_76341_A_61611 | NW_004515984.1 | scaffold544 | 61611                   | AA                              | GG                 | GG               | INTERGENIC      |               |                    |                    |
| SNP_76342_A_62600 | NW_004515984.1 | scaffold544 | 62600                   | AA                              | TT                 | TT               | INTERGENIC      |               |                    |                    |
| SNP_76343_A_63057 | NW_004515984.1 | scaffold544 | 63057                   | TT                              | AA                 | AA               | INTERGENIC      |               |                    |                    |
| SNP_76344_A_63062 | NW_004515984.1 | scaffold544 | 63062                   | TT                              | GG                 | GG               | INTERGENIC      |               |                    |                    |
| SNP_76345_A_63114 | NW_004515984.1 | scaffold544 | 63114                   | AA                              | GG                 | GG               | INTERGENIC      |               |                    |                    |
| SNP_76346_A_63186 | NW_004515984.1 | scaffold544 | 63186                   | AA                              | CC                 | CC               | INTERGENIC      |               |                    |                    |
| SNP_76347_A_63190 | NW_004515984.1 | scaffold544 | 63190                   | AA                              | GG                 | GG               | INTERGENIC      |               |                    |                    |
| SNP_76348_A_63331 | NW_004515984.1 | scaffold544 | 63331                   | AA                              | GG                 | GG               | INTERGENIC      |               |                    |                    |
| SNP_76350_A_63397 | NW_004515984.1 | scaffold544 | 63397                   | AA                              | GG                 | GG               | INTERGENIC      |               |                    |                    |
| SNP_76351_A_66564 | NW_004515984.1 | scaffold544 | 66564                   | CC                              | AA                 | AA               | INTERGENIC      |               |                    |                    |

| SNPs IDs          | Chromosome IDs | Chromosomes | Physical positions (bp) | CDC Frontier (Reference genome) | (Pusa 1103 & HPNB) | (ILWC 46 & LPNB) | Sequence genome | Components of | Gene accession IDs | Putative functions |
|-------------------|----------------|-------------|-------------------------|---------------------------------|--------------------|------------------|-----------------|---------------|--------------------|--------------------|
| SNP_76352_A_66609 | NW_004515984.1 | scaffold544 | 66609                   | TT                              | AA                 | AA               | INTERGENIC      |               |                    |                    |
| SNP_76354_A_67016 | NW_004515984.1 | scaffold544 | 67016                   | TT                              | AA                 | AA               | INTERGENIC      |               |                    |                    |
| SNP_76355_A_67020 | NW_004515984.1 | scaffold544 | 67020                   | AA                              | GG                 | GG               | INTERGENIC      |               |                    |                    |
| SNP_76356_A_67556 | NW_004515984.1 | scaffold544 | 67556                   | GG                              | CC                 | CC               | INTERGENIC      |               |                    |                    |
| SNP_76357_A_67681 | NW_004515984.1 | scaffold544 | 67681                   | TT                              | GG                 | GG               | INTERGENIC      |               |                    |                    |
| SNP_76358_A_67746 | NW_004515984.1 | scaffold544 | 67746                   | CC                              | AA                 | AA               | INTERGENIC      |               |                    |                    |
| SNP_76359_A_67844 | NW_004515984.1 | scaffold544 | 67844                   | TT                              | CC                 | CC               | INTERGENIC      |               |                    |                    |
| SNP_76360_A_67994 | NW_004515984.1 | scaffold544 | 67994                   | CC                              | AA                 | AA               | INTERGENIC      |               |                    |                    |
| SNP_76361_A_69139 | NW_004515984.1 | scaffold544 | 69139                   | CC                              | GG                 | GG               | INTERGENIC      |               |                    |                    |
| SNP_76362_A_69653 | NW_004515984.1 | scaffold544 | 69653                   | TT                              | AA                 | AA               | INTERGENIC      |               |                    |                    |
| SNP_76363_A_69765 | NW_004515984.1 | scaffold544 | 69765                   | CC                              | TT                 | TT               | INTERGENIC      |               |                    |                    |
| SNP_76364_A_70337 | NW_004515984.1 | scaffold544 | 70337                   | TT                              | AA                 | AA               | INTERGENIC      |               |                    |                    |
| SNP_76366_A_70446 | NW_004515984.1 | scaffold544 | 70446                   | TT                              | AA                 | AA               | INTERGENIC      |               |                    |                    |
| SNP_76367_A_70561 | NW_004515984.1 | scaffold544 | 70561                   | TT                              | GG                 | GG               | INTERGENIC      |               |                    |                    |
| SNP_76368_A_70568 | NW_004515984.1 | scaffold544 | 70568                   | CC                              | AA                 | AA               | INTERGENIC      |               |                    |                    |
| SNP_76369_A_70597 | NW_004515984.1 | scaffold544 | 70597                   | GG                              | CC                 | CC               | INTERGENIC      |               |                    |                    |
| SNP_76370_A_76575 | NW_004515984.1 | scaffold544 | 76575                   | AA                              | TT                 | TT               | INTERGENIC      |               |                    |                    |
| SNP_76371_A_76629 | NW_004515984.1 | scaffold544 | 76629                   | TT                              | GG                 | GG               | INTERGENIC      |               |                    |                    |
| SNP_76372_A_76648 | NW_004515984.1 | scaffold544 | 76648                   | TT                              | GG                 | GG               | INTERGENIC      |               |                    |                    |
| SNP_76373_A_76701 | NW_004515984.1 | scaffold544 | 76701                   | TT                              | CC                 | CC               | INTERGENIC      |               |                    |                    |
| SNP_76374_A_77345 | NW_004515984.1 | scaffold544 | 77345                   | TT                              | AA                 | AA               | INTERGENIC      |               |                    |                    |
| SNP_76375_A_81671 | NW_004515984.1 | scaffold544 | 81671                   | AA                              | GG                 | GG               | INTERGENIC      |               |                    |                    |

| SNPs IDs          | Chromosome IDs | Chromosomes | Physical positions (bp) | CDC Frontier (Reference genome) | (Pusa 1103 & HPNB) | (ILWC 46 & LPNB) | Sequence genome | Components of | Gene accession IDs | Putative functions |
|-------------------|----------------|-------------|-------------------------|---------------------------------|--------------------|------------------|-----------------|---------------|--------------------|--------------------|
| SNP_76376_A_81732 | NW_004515984.1 | scaffold544 | 81732                   | TT                              | AA                 | AA               | INTERGENIC      |               |                    |                    |
| SNP_76377_A_81749 | NW_004515984.1 | scaffold544 | 81749                   | TT                              | AA                 | AA               | INTERGENIC      |               |                    |                    |
| SNP_76378_A_82305 | NW_004515984.1 | scaffold544 | 82305                   | CC                              | AA                 | AA               | INTERGENIC      |               |                    |                    |
| SNP_76380_A_82836 | NW_004515984.1 | scaffold544 | 82836                   | TT                              | CC                 | CC               | INTERGENIC      |               |                    |                    |
| SNP_76381_A_84031 | NW_004515984.1 | scaffold544 | 84031                   | AA                              | GG                 | GG               | INTERGENIC      |               |                    |                    |
| SNP_76382_A_84138 | NW_004515984.1 | scaffold544 | 84138                   | CC                              | TT                 | TT               | INTERGENIC      |               |                    |                    |
| SNP_76383_A_84622 | NW_004515984.1 | scaffold544 | 84622                   | GG                              | AA                 | AA               | INTERGENIC      |               |                    |                    |
| SNP_76384_A_84815 | NW_004515984.1 | scaffold544 | 84815                   | GG                              | AA                 | AA               | INTERGENIC      |               |                    |                    |
| SNP_76385_A_85326 | NW_004515984.1 | scaffold544 | 85326                   | GG                              | AA                 | AA               | INTERGENIC      |               |                    |                    |
| SNP_76386_A_85538 | NW_004515984.1 | scaffold544 | 85538                   | AA                              | CC                 | CC               | INTERGENIC      |               |                    |                    |
| SNP_76387_A_86007 | NW_004515984.1 | scaffold544 | 86007                   | GG                              | CC                 | CC               | INTERGENIC      |               |                    |                    |
| SNP_76388_A_86498 | NW_004515984.1 | scaffold544 | 86498                   | TT                              | GG                 | GG               | INTERGENIC      |               |                    |                    |
| SNP_76389_A_86816 | NW_004515984.1 | scaffold544 | 86816                   | TT                              | CC                 | CC               | INTERGENIC      |               |                    |                    |
| SNP_76390_A_87367 | NW_004515984.1 | scaffold544 | 87367                   | TT                              | CC                 | CC               | INTERGENIC      |               |                    |                    |
| SNP_76391_A_88599 | NW_004515984.1 | scaffold544 | 88599                   | AA                              | GG                 | GG               | INTERGENIC      |               |                    |                    |
| SNP_76392_A_91036 | NW_004515984.1 | scaffold544 | 91036                   | AA                              | GG                 | GG               | INTERGENIC      |               |                    |                    |
| SNP_76393_A_91039 | NW_004515984.1 | scaffold544 | 91039                   | AA                              | CC                 | CC               | INTERGENIC      |               |                    |                    |
| SNP_76394_A_91042 | NW_004515984.1 | scaffold544 | 91042                   | CC                              | TT                 | TT               | INTERGENIC      |               |                    |                    |
| SNP_76395_A_91048 | NW_004515984.1 | scaffold544 | 91048                   | AA                              | GG                 | GG               | INTERGENIC      |               |                    |                    |
| SNP_76396_A_96372 | NW_004515984.1 | scaffold544 | 96372                   | AA                              | TT                 | TT               | INTERGENIC      |               |                    |                    |
| SNP_76397_A_96496 | NW_004515984.1 | scaffold544 | 96496                   | TT                              | GG                 | GG               | INTERGENIC      |               |                    |                    |
| SNP_76398_A_96504 | NW_004515984.1 | scaffold544 | 96504                   | TT                              | CC                 | CC               | INTERGENIC      |               |                    |                    |

| SNPs IDs           | Chromosome IDs | Chromosomes | Physical positions (bp) | CDC Frontier (Reference genome) | (Pusa 1103 & HPNB) | (ILWC 46 & LPNB) | Sequence genome | Components of | Gene accession IDs | Putative functions |
|--------------------|----------------|-------------|-------------------------|---------------------------------|--------------------|------------------|-----------------|---------------|--------------------|--------------------|
| SNP_76399_A_96507  | NW_004515984.1 | scaffold544 | 96507                   | TT                              | AA                 | AA               | INTERGENIC      |               |                    |                    |
| SNP_76400_A_96568  | NW_004515984.1 | scaffold544 | 96568                   | TT                              | AA                 | AA               | INTERGENIC      |               |                    |                    |
| SNP_76401_A_96570  | NW_004515984.1 | scaffold544 | 96570                   | CC                              | AA                 | AA               | INTERGENIC      |               |                    |                    |
| SNP_76402_A_99885  | NW_004515984.1 | scaffold544 | 99885                   | TT                              | AA                 | AA               | INTERGENIC      |               |                    |                    |
| SNP_76403_A_101153 | NW_004515984.1 | scaffold544 | 101153                  | CC                              | TT                 | TT               | INTERGENIC      |               |                    |                    |
| SNP_76404_A_104921 | NW_004515984.1 | scaffold544 | 104921                  | AA                              | GG                 | GG               | INTERGENIC      |               |                    |                    |
| SNP_76406_A_105687 | NW_004515984.1 | scaffold544 | 105687                  | GG                              | AA                 | AA               | INTERGENIC      |               |                    |                    |
| SNP_76407_A_105804 | NW_004515984.1 | scaffold544 | 105804                  | AA                              | CC                 | CC               | INTERGENIC      |               |                    |                    |
| SNP_76408_A_107005 | NW_004515984.1 | scaffold544 | 107005                  | AA                              | GG                 | GG               | INTERGENIC      |               |                    |                    |
| SNP_76409_A_111076 | NW_004515984.1 | scaffold544 | 111076                  | CC                              | AA                 | AA               | INTERGENIC      |               |                    |                    |
| SNP_76410_A_123360 | NW_004515984.1 | scaffold544 | 123360                  | GG                              | AA                 | AA               | INTERGENIC      |               |                    |                    |
| SNP_76411_A_123479 | NW_004515984.1 | scaffold544 | 123479                  | TT                              | AA                 | AA               | INTERGENIC      |               |                    |                    |
| SNP_76412_A_123502 | NW_004515984.1 | scaffold544 | 123502                  | AA                              | CC                 | CC               | INTERGENIC      |               |                    |                    |
| SNP_76413_A_123510 | NW_004515984.1 | scaffold544 | 123510                  | GG                              | AA                 | AA               | INTERGENIC      |               |                    |                    |
| SNP_76414_A_123519 | NW_004515984.1 | scaffold544 | 123519                  | AA                              | CC                 | CC               | INTERGENIC      |               |                    |                    |
| SNP_76415_A_123991 | NW_004515984.1 | scaffold544 | 123991                  | CC                              | TT                 | TT               | INTERGENIC      |               |                    |                    |
| SNP_76416_A_124217 | NW_004515984.1 | scaffold544 | 124217                  | AA                              | GG                 | GG               | INTERGENIC      |               |                    |                    |
| SNP_76417_A_124218 | NW_004515984.1 | scaffold544 | 124218                  | AA                              | CC                 | CC               | INTERGENIC      |               |                    |                    |
| SNP_76418_A_124231 | NW_004515984.1 | scaffold544 | 124231                  | AA                              | TT                 | TT               | INTERGENIC      |               |                    |                    |
| SNP_76420_A_125394 | NW_004515984.1 | scaffold544 | 125394                  | CC                              | TT                 | TT               | INTERGENIC      |               |                    |                    |
| SNP_76421_A_125589 | NW_004515984.1 | scaffold544 | 125589                  | AA                              | GG                 | GG               | INTERGENIC      |               |                    |                    |
| SNP_76422_A_125591 | NW_004515984.1 | scaffold544 | 125591                  | AA                              | GG                 | GG               | INTERGENIC      |               |                    |                    |

| SNPs IDs           | Chromosome IDs | Chromosomes | Physical positions (bp) | CDC Frontier (Reference genome) | (Pusa 1103 & HPNB) | (ILWC 46 & LPNB) | Sequence genome | Components of | Gene accession IDs | Putative functions |
|--------------------|----------------|-------------|-------------------------|---------------------------------|--------------------|------------------|-----------------|---------------|--------------------|--------------------|
| SNP_76423_A_125593 | NW_004515984.1 | scaffold544 | 125593                  | AA                              | GG                 | GG               | INTERGENIC      |               |                    |                    |
| SNP_76424_A_125594 | NW_004515984.1 | scaffold544 | 125594                  | TT                              | GG                 | GG               | INTERGENIC      |               |                    |                    |
| SNP_76425_A_125609 | NW_004515984.1 | scaffold544 | 125609                  | TT                              | AA                 | AA               | INTERGENIC      |               |                    |                    |
| SNP_76426_A_125694 | NW_004515984.1 | scaffold544 | 125694                  | AA                              | GG                 | GG               | INTERGENIC      |               |                    |                    |
| SNP_76427_A_125707 | NW_004515984.1 | scaffold544 | 125707                  | GG                              | TT                 | TT               | INTERGENIC      |               |                    |                    |
| SNP_76428_A_125923 | NW_004515984.1 | scaffold544 | 125923                  | AA                              | GG                 | GG               | INTERGENIC      |               |                    |                    |
| SNP_76429_A_125978 | NW_004515984.1 | scaffold544 | 125978                  | AA                              | GG                 | GG               | INTERGENIC      |               |                    |                    |
| SNP_76430_A_126028 | NW_004515984.1 | scaffold544 | 126028                  | GG                              | AA                 | AA               | INTERGENIC      |               |                    |                    |
| SNP_76431_A_126032 | NW_004515984.1 | scaffold544 | 126032                  | GG                              | TT                 | TT               | INTERGENIC      |               |                    |                    |
| SNP_76432_A_126139 | NW_004515984.1 | scaffold544 | 126139                  | GG                              | AA                 | AA               | INTERGENIC      |               |                    |                    |
| SNP_76433_A_126197 | NW_004515984.1 | scaffold544 | 126197                  | CC                              | TT                 | TT               | INTERGENIC      |               |                    |                    |
| SNP_76434_A_126207 | NW_004515984.1 | scaffold544 | 126207                  | GG                              | CC                 | CC               | INTERGENIC      |               |                    |                    |
| SNP_76435_A_126373 | NW_004515984.1 | scaffold544 | 126373                  | CC                              | GG                 | GG               | INTERGENIC      |               |                    |                    |
| SNP_76436_A_128362 | NW_004515984.1 | scaffold544 | 128362                  | TT                              | AA                 | AA               | INTERGENIC      |               |                    |                    |
| SNP_76437_A_130552 | NW_004515984.1 | scaffold544 | 130552                  | TT                              | AA                 | AA               | INTERGENIC      |               |                    |                    |
| SNP_76438_A_130684 | NW_004515984.1 | scaffold544 | 130684                  | CC                              | TT                 | TT               | INTERGENIC      |               |                    |                    |
| SNP_76439_A_131412 | NW_004515984.1 | scaffold544 | 131412                  | GG                              | AA                 | AA               | INTERGENIC      |               |                    |                    |
| SNP_76440_A_132856 | NW_004515984.1 | scaffold544 | 132856                  | AA                              | CC                 | CC               | INTERGENIC      |               |                    |                    |
| SNP_76441_A_132953 | NW_004515984.1 | scaffold544 | 132953                  | GG                              | CC                 | CC               | INTERGENIC      |               |                    |                    |
| SNP_76442_A_134609 | NW_004515984.1 | scaffold544 | 134609                  | AA                              | CC                 | CC               | INTERGENIC      |               |                    |                    |
| SNP_76445_A_146173 | NW_004515984.1 | scaffold544 | 146173                  | AA                              | GG                 | GG               | INTERGENIC      |               |                    |                    |
| SNP_76447_A_167471 | NW_004515984.1 | scaffold544 | 167471                  | CC                              | TT                 | TT               | INTERGENIC      |               |                    |                    |

| SNPs IDs           | Chromosome IDs | Chromosomes | Physical positions (bp) | CDC Frontier (Reference genome) | (Pusa 1103 & HPNB) | (ILWC 46 & LPNB) | Sequence genome | Components of | Gene accession IDs | Putative functions |
|--------------------|----------------|-------------|-------------------------|---------------------------------|--------------------|------------------|-----------------|---------------|--------------------|--------------------|
| SNP_76448_A_167853 | NW_004515984.1 | scaffold544 | 167853                  | GG                              | AA                 | AA               | INTERGENIC      |               |                    |                    |
| SNP_76449_A_167855 | NW_004515984.1 | scaffold544 | 167855                  | CC                              | AA                 | AA               | INTERGENIC      |               |                    |                    |
| SNP_76450_A_168192 | NW_004515984.1 | scaffold544 | 168192                  | AA                              | GG                 | GG               | INTERGENIC      |               |                    |                    |
| SNP_76451_A_169856 | NW_004515984.1 | scaffold544 | 169856                  | CC                              | TT                 | TT               | INTERGENIC      |               |                    |                    |
| SNP_76452_A_176787 | NW_004515984.1 | scaffold544 | 176787                  | CC                              | TT                 | TT               | INTERGENIC      |               |                    |                    |
| SNP_76453_A_176879 | NW_004515984.1 | scaffold544 | 176879                  | GG                              | CC                 | CC               | INTERGENIC      |               |                    |                    |
| SNP_76454_A_177055 | NW_004515984.1 | scaffold544 | 177055                  | AA                              | GG                 | GG               | INTERGENIC      |               |                    |                    |
| SNP_76455_A_177090 | NW_004515984.1 | scaffold544 | 177090                  | AA                              | TT                 | TT               | INTERGENIC      |               |                    |                    |
| SNP_76456_A_180869 | NW_004515984.1 | scaffold544 | 180869                  | TT                              | CC                 | CC               | INTERGENIC      |               |                    |                    |
| SNP_76457_A_180900 | NW_004515984.1 | scaffold544 | 180900                  | TT                              | CC                 | CC               | INTERGENIC      |               |                    |                    |
| SNP_76458_A_180926 | NW_004515984.1 | scaffold544 | 180926                  | TT                              | AA                 | AA               | INTERGENIC      |               |                    |                    |
| SNP_76459_A_181184 | NW_004515984.1 | scaffold544 | 181184                  | CC                              | AA                 | AA               | INTERGENIC      |               |                    |                    |
| SNP_76460_A_181190 | NW_004515984.1 | scaffold544 | 181190                  | CC                              | TT                 | TT               | INTERGENIC      |               |                    |                    |
| SNP_76461_A_181200 | NW_004515984.1 | scaffold544 | 181200                  | CC                              | GG                 | GG               | INTERGENIC      |               |                    |                    |
| SNP_76462_A_181201 | NW_004515984.1 | scaffold544 | 181201                  | CC                              | TT                 | TT               | INTERGENIC      |               |                    |                    |
| SNP_76463_A_181226 | NW_004515984.1 | scaffold544 | 181226                  | GG                              | AA                 | AA               | INTERGENIC      |               |                    |                    |
| SNP_76464_A_181230 | NW_004515984.1 | scaffold544 | 181230                  | CC                              | TT                 | TT               | INTERGENIC      |               |                    |                    |
| SNP_76465_A_181260 | NW_004515984.1 | scaffold544 | 181260                  | CC                              | TT                 | TT               | INTERGENIC      |               |                    |                    |
| SNP_76466_A_181318 | NW_004515984.1 | scaffold544 | 181318                  | TT                              | CC                 | CC               | INTERGENIC      |               |                    |                    |
| SNP_76467_A_181945 | NW_004515984.1 | scaffold544 | 181945                  | AA                              | TT                 | TT               | INTERGENIC      |               |                    |                    |
| SNP_76468_A_182054 | NW_004515984.1 | scaffold544 | 182054                  | GG                              | AA                 | AA               | INTERGENIC      |               |                    |                    |
| SNP_76469_A_182089 | NW_004515984.1 | scaffold544 | 182089                  | GG                              | AA                 | AA               | INTERGENIC      |               |                    |                    |

| SNPs IDs           | Chromosome IDs | Chromosomes | Physical positions (bp) | CDC Frontier (Reference genome) | (Pusa 1103 & HPNB) | (ILWC 46 & LPNB) | Sequence genome | Components of | Gene accession IDs | Putative functions |
|--------------------|----------------|-------------|-------------------------|---------------------------------|--------------------|------------------|-----------------|---------------|--------------------|--------------------|
| SNP_76470_A_190171 | NW_004515984.1 | scaffold544 | 190171                  | TT                              | CC                 | CC               | INTERGENIC      |               |                    |                    |
| SNP_76471_A_193582 | NW_004515984.1 | scaffold544 | 193582                  | AA                              | GG                 | GG               | INTERGENIC      |               |                    |                    |
| SNP_76472_A_193786 | NW_004515984.1 | scaffold544 | 193786                  | GG                              | TT                 | TT               | INTERGENIC      |               |                    |                    |
| SNP_76473_A_194879 | NW_004515984.1 | scaffold544 | 194879                  | AA                              | TT                 | TT               | INTERGENIC      |               |                    |                    |
| SNP_76474_A_195078 | NW_004515984.1 | scaffold544 | 195078                  | AA                              | GG                 | GG               | INTERGENIC      |               |                    |                    |
| SNP_76475_A_195351 | NW_004515984.1 | scaffold544 | 195351                  | CC                              | GG                 | GG               | INTERGENIC      |               |                    |                    |
| SNP_76476_A_196248 | NW_004515984.1 | scaffold544 | 196248                  | AA                              | CC                 | CC               | INTERGENIC      |               |                    |                    |
| SNP_76477_A_206229 | NW_004515984.1 | scaffold544 | 206229                  | AA                              | CC                 | CC               | INTERGENIC      |               |                    |                    |
| SNP_76478_A_208890 | NW_004515984.1 | scaffold544 | 208890                  | CC                              | TT                 | TT               | INTERGENIC      |               |                    |                    |
| SNP_76479_A_211161 | NW_004515984.1 | scaffold544 | 211161                  | AA                              | TT                 | TT               | INTERGENIC      |               |                    |                    |
| SNP_76480_A_211638 | NW_004515984.1 | scaffold544 | 211638                  | GG                              | AA                 | AA               | INTERGENIC      |               |                    |                    |
| SNP_76481_A_211896 | NW_004515984.1 | scaffold544 | 211896                  | GG                              | CC                 | CC               | INTERGENIC      |               |                    |                    |
| SNP_76482_A_212349 | NW_004515984.1 | scaffold544 | 212349                  | AA                              | TT                 | TT               | INTERGENIC      |               |                    |                    |
| SNP_76483_A_214295 | NW_004515984.1 | scaffold544 | 214295                  | GG                              | AA                 | AA               | INTERGENIC      |               |                    |                    |
| SNP_76484_A_214311 | NW_004515984.1 | scaffold544 | 214311                  | CC                              | TT                 | TT               | INTERGENIC      |               |                    |                    |
| SNP_76485_A_214535 | NW_004515984.1 | scaffold544 | 214535                  | AA                              | CC                 | CC               | INTERGENIC      |               |                    |                    |
| SNP_76486_A_218230 | NW_004515984.1 | scaffold544 | 218230                  | AA                              | TT                 | TT               | INTERGENIC      |               |                    |                    |
| SNP_76487_A_228197 | NW_004515984.1 | scaffold544 | 228197                  | CC                              | TT                 | TT               | INTERGENIC      |               |                    |                    |
| SNP_76488_A_228598 | NW_004515984.1 | scaffold544 | 228598                  | AA                              | GG                 | GG               | INTERGENIC      |               |                    |                    |
| SNP_76489_A_232338 | NW_004515984.1 | scaffold544 | 232338                  | CC                              | GG                 | GG               | INTERGENIC      |               |                    |                    |
| SNP_76490_A_233916 | NW_004515984.1 | scaffold544 | 233916                  | AA                              | CC                 | CC               | INTERGENIC      |               |                    |                    |
| SNP_76491_A_234094 | NW_004515984.1 | scaffold544 | 234094                  | CC                              | TT                 | TT               | INTERGENIC      |               |                    |                    |



| SNPs IDs           | Chromosome IDs | Chromosomes | Physical positions (bp) | CDC Frontier genome (Reference genome) | (Pusa 1103 & HPNB) | (ILWC 46 & LPNB) | Sequence genome | Components of | Gene accession IDs | Putative functions |
|--------------------|----------------|-------------|-------------------------|----------------------------------------|--------------------|------------------|-----------------|---------------|--------------------|--------------------|
| SNP_76492_A_236076 | NW_004515984.1 | scaffold544 | 236076                  | AA                                     | GG                 | GG               | INTERGENIC      |               |                    |                    |
| SNP_76493_A_236419 | NW_004515984.1 | scaffold544 | 236419                  | GG                                     | TT                 | TT               | INTERGENIC      |               |                    |                    |
| SNP_76495_A_238091 | NW_004515984.1 | scaffold544 | 238091                  | TT                                     | CC                 | CC               | INTERGENIC      |               |                    |                    |
| SNP_76496_A_238477 | NW_004515984.1 | scaffold544 | 238477                  | CC                                     | TT                 | TT               | INTERGENIC      |               |                    |                    |
| SNP_76497_A_238909 | NW_004515984.1 | scaffold544 | 238909                  | AA                                     | CC                 | CC               | INTERGENIC      |               |                    |                    |
| SNP_76498_A_239373 | NW_004515984.1 | scaffold544 | 239373                  | CC                                     | GG                 | GG               | INTERGENIC      |               |                    |                    |
| SNP_76499_A_244178 | NW_004515984.1 | scaffold544 | 244178                  | GG                                     | AA                 | AA               | INTERGENIC      |               |                    |                    |
| SNP_76500_A_244412 | NW_004515984.1 | scaffold544 | 244412                  | TT                                     | CC                 | CC               | INTERGENIC      |               |                    |                    |
| SNP_76501_A_247025 | NW_004515984.1 | scaffold544 | 247025                  | CC                                     | TT                 | TT               | INTERGENIC      |               |                    |                    |
| SNP_76502_A_248219 | NW_004515984.1 | scaffold544 | 248219                  | CC                                     | TT                 | TT               | INTERGENIC      |               |                    |                    |
| SNP_76503_A_248484 | NW_004515984.1 | scaffold544 | 248484                  | TT                                     | AA                 | AA               | INTERGENIC      |               |                    |                    |
| SNP_76504_A_248542 | NW_004515984.1 | scaffold544 | 248542                  | GG                                     | AA                 | AA               | INTERGENIC      |               |                    |                    |
| SNP_76505_A_248555 | NW_004515984.1 | scaffold544 | 248555                  | TT                                     | CC                 | CC               | INTERGENIC      |               |                    |                    |
| SNP_76506_A_248741 | NW_004515984.1 | scaffold544 | 248741                  | GG                                     | AA                 | AA               | INTERGENIC      |               |                    |                    |
| SNP_76507_A_258837 | NW_004515984.1 | scaffold544 | 258837                  | AA                                     | GG                 | GG               | INTERGENIC      |               |                    |                    |
| SNP_76508_A_261847 | NW_004515984.1 | scaffold544 | 261847                  | CC                                     | TT                 | TT               | INTERGENIC      |               |                    |                    |
| SNP_76509_A_265141 | NW_004515984.1 | scaffold544 | 265141                  | TT                                     | CC                 | CC               | INTRON          | 101489171     | Unknown function   |                    |
| SNP_76510_A_265494 | NW_004515984.1 | scaffold544 | 265494                  | GG                                     | AA                 | AA               | URR             | 101489171     | Unknown function   |                    |
| SNP_76511_A_269320 | NW_004515984.1 | scaffold544 | 269320                  | AA                                     | GG                 | GG               | INTERGENIC      |               |                    |                    |
| SNP_76512_A_278139 | NW_004515984.1 | scaffold544 | 278139                  | GG                                     | AA                 | AA               | INTERGENIC      |               |                    |                    |
| SNP_76513_A_278349 | NW_004515984.1 | scaffold544 | 278349                  | TT                                     | CC                 | CC               | INTERGENIC      |               |                    |                    |
| SNP_76514_A_278630 | NW_004515984.1 | scaffold544 | 278630                  | CC                                     | GG                 | GG               | INTERGENIC      |               |                    |                    |

| SNPs IDs           | Chromosome IDs | Chromosomes | Physical positions (bp) | CDC Frontier (Reference genome) | (Pusa 1103 & HPNB) | (ILWC 46 & LPNB) | Sequence genome | Components of | Gene accession IDs | Putative functions |
|--------------------|----------------|-------------|-------------------------|---------------------------------|--------------------|------------------|-----------------|---------------|--------------------|--------------------|
| SNP_76515_A_286710 | NW_004515984.1 | scaffold544 | 286710                  | GG                              | TT                 | TT               | INTERGENIC      |               |                    |                    |
| SNP_76516_A_286833 | NW_004515984.1 | scaffold544 | 286833                  | TT                              | CC                 | CC               | INTERGENIC      |               |                    |                    |
| SNP_76517_A_287378 | NW_004515984.1 | scaffold544 | 287378                  | GG                              | TT                 | TT               | INTERGENIC      |               |                    |                    |
| SNP_76518_A_287417 | NW_004515984.1 | scaffold544 | 287417                  | GG                              | CC                 | CC               | INTERGENIC      |               |                    |                    |
| SNP_76519_A_287425 | NW_004515984.1 | scaffold544 | 287425                  | CC                              | TT                 | TT               | INTERGENIC      |               |                    |                    |
| SNP_76520_A_287527 | NW_004515984.1 | scaffold544 | 287527                  | CC                              | AA                 | AA               | INTERGENIC      |               |                    |                    |
| SNP_76521_A_313058 | NW_004515984.1 | scaffold544 | 313058                  | AA                              | TT                 | TT               | INTERGENIC      |               |                    |                    |
| SNP_76522_A_315557 | NW_004515984.1 | scaffold544 | 315557                  | TT                              | GG                 | GG               | INTERGENIC      |               |                    |                    |
| SNP_76523_A_315997 | NW_004515984.1 | scaffold544 | 315997                  | TT                              | CC                 | CC               | INTERGENIC      |               |                    |                    |
| SNP_76524_A_316512 | NW_004515984.1 | scaffold544 | 316512                  | CC                              | AA                 | AA               | INTERGENIC      |               |                    |                    |
| SNP_76525_A_318317 | NW_004515984.1 | scaffold544 | 318317                  | GG                              | AA                 | AA               | INTERGENIC      |               |                    |                    |
| SNP_76526_A_318338 | NW_004515984.1 | scaffold544 | 318338                  | AA                              | CC                 | CC               | INTERGENIC      |               |                    |                    |
| SNP_76527_A_318832 | NW_004515984.1 | scaffold544 | 318832                  | AA                              | CC                 | CC               | INTERGENIC      |               |                    |                    |
| SNP_76528_A_322569 | NW_004515984.1 | scaffold544 | 322569                  | GG                              | CC                 | CC               | INTERGENIC      |               |                    |                    |
| SNP_76529_A_327192 | NW_004515984.1 | scaffold544 | 327192                  | CC                              | TT                 | TT               | INTERGENIC      |               |                    |                    |
| SNP_76530_A_327790 | NW_004515984.1 | scaffold544 | 327790                  | TT                              | CC                 | CC               | INTERGENIC      |               |                    |                    |
| SNP_76531_A_329179 | NW_004515984.1 | scaffold544 | 329179                  | GG                              | TT                 | TT               | INTERGENIC      |               |                    |                    |
| SNP_76532_A_330797 | NW_004515984.1 | scaffold544 | 330797                  | AA                              | GG                 | GG               | INTERGENIC      |               |                    |                    |
| SNP_76533_A_333106 | NW_004515984.1 | scaffold544 | 333106                  | TT                              | GG                 | GG               | INTERGENIC      |               |                    |                    |
| SNP_76534_A_338581 | NW_004515984.1 | scaffold544 | 338581                  | CC                              | GG                 | GG               | INTERGENIC      |               |                    |                    |
| SNP_76536_A_11131  | NW_004515985.1 | scaffold545 | 11131                   | CC                              | AA                 | AA               | INTERGENIC      |               |                    |                    |
| SNP_76537_A_11191  | NW_004515985.1 | scaffold545 | 11191                   | CC                              | AA                 | AA               | INTERGENIC      |               |                    |                    |

| SNPs IDs           | Chromosome IDs | Chromosomes | Physical positions (bp) | CDC Frontier (Reference genome) | (Pusa 1103 & HPNB) | (ILWC 46 & LPNB) | Sequence Components of genome | Gene accession IDs | Putative functions               |
|--------------------|----------------|-------------|-------------------------|---------------------------------|--------------------|------------------|-------------------------------|--------------------|----------------------------------|
| SNP_76538_A_11444  | NW_004515985.1 | scaffold545 | 11444                   | GG                              | AA                 | AA               | INTERGENIC                    |                    |                                  |
| SNP_76539_A_11453  | NW_004515985.1 | scaffold545 | 11453                   | TT                              | CC                 | CC               | INTERGENIC                    |                    |                                  |
| SNP_76540_A_11462  | NW_004515985.1 | scaffold545 | 11462                   | AA                              | GG                 | GG               | INTERGENIC                    |                    |                                  |
| SNP_76541_A_11485  | NW_004515985.1 | scaffold545 | 11485                   | AA                              | CC                 | CC               | INTERGENIC                    |                    |                                  |
| SNP_76542_A_11549  | NW_004515985.1 | scaffold545 | 11549                   | TT                              | CC                 | CC               | INTERGENIC                    |                    |                                  |
| SNP_76543_A_11552  | NW_004515985.1 | scaffold545 | 11552                   | CC                              | TT                 | TT               | INTERGENIC                    |                    |                                  |
| SNP_76544_A_11568  | NW_004515985.1 | scaffold545 | 11568                   | AA                              | GG                 | GG               | INTERGENIC                    |                    |                                  |
| SNP_76545_A_11732  | NW_004515985.1 | scaffold545 | 11732                   | TT                              | GG                 | GG               | INTERGENIC                    |                    |                                  |
| SNP_76546_A_12395  | NW_004515985.1 | scaffold545 | 12395                   | AA                              | GG                 | GG               | INTERGENIC                    |                    |                                  |
| SNP_76547_A_12944  | NW_004515985.1 | scaffold545 | 12944                   | TT                              | CC                 | CC               | INTERGENIC                    |                    |                                  |
| SNP_76548_A_56244  | NW_004515985.1 | scaffold545 | 56244                   | AA                              | GG                 | GG               | DRR                           | 101493934          | Werner Syndrome-like exonuclease |
| SNP_76549_A_56248  | NW_004515985.1 | scaffold545 | 56248                   | TT                              | CC                 | CC               | DRR                           | 101493934          | Werner Syndrome-like exonuclease |
| SNP_76551_A_155804 | NW_004515985.1 | scaffold545 | 155804                  | TT                              | CC                 | CC               | INTERGENIC                    |                    |                                  |
| SNP_76552_A_171753 | NW_004515985.1 | scaffold545 | 171753                  | GG                              | AA                 | AA               | INTERGENIC                    |                    |                                  |
| SNP_76553_A_183747 | NW_004515985.1 | scaffold545 | 183747                  | GG                              | TT                 | TT               | INTERGENIC                    |                    |                                  |
| SNP_76554_A_183768 | NW_004515985.1 | scaffold545 | 183768                  | TT                              | CC                 | CC               | INTERGENIC                    |                    |                                  |
| SNP_76555_A_183948 | NW_004515985.1 | scaffold545 | 183948                  | CC                              | AA                 | AA               | INTERGENIC                    |                    |                                  |
| SNP_76556_A_183954 | NW_004515985.1 | scaffold545 | 183954                  | CC                              | TT                 | TT               | INTERGENIC                    |                    |                                  |
| SNP_76558_A_192272 | NW_004515985.1 | scaffold545 | 192272                  | AA                              | GG                 | GG               | INTERGENIC                    |                    |                                  |
| SNP_76559_A_192709 | NW_004515985.1 | scaffold545 | 192709                  | AA                              | TT                 | TT               | INTERGENIC                    |                    |                                  |
| SNP_76561_A_197496 | NW_004515985.1 | scaffold545 | 197496                  | AA                              | TT                 | TT               | INTERGENIC                    |                    |                                  |
| SNP_76562_A_207866 | NW_004515985.1 | scaffold545 | 207866                  | TT                              | CC                 | CC               | INTERGENIC                    |                    |                                  |

| SNPs IDs           | Chromosome IDs | Chromosomes | Physical positions (bp) | CDC Frontier (Reference genome) | (Pusa 1103 & HPNB) | (ILWC 46 & LPNB) | Sequence Components of genome | Gene accession IDs | Putative functions                      |
|--------------------|----------------|-------------|-------------------------|---------------------------------|--------------------|------------------|-------------------------------|--------------------|-----------------------------------------|
| SNP_76563_A_256956 | NW_004515985.1 | scaffold545 | 256956                  | AA                              | CC                 | CC               | SYNONYMOUS_CODING             | 101495529          | alpha-amylase/subtilisin inhibitor-like |
| SNP_76564_A_279466 | NW_004515985.1 | scaffold545 | 279466                  | CC                              | TT                 | TT               | INTERGENIC                    |                    |                                         |
| SNP_76565_A_279505 | NW_004515985.1 | scaffold545 | 279505                  | AA                              | GG                 | GG               | INTERGENIC                    |                    |                                         |
| SNP_76566_A_279530 | NW_004515985.1 | scaffold545 | 279530                  | GG                              | AA                 | AA               | INTERGENIC                    |                    |                                         |
| SNP_76567_A_279532 | NW_004515985.1 | scaffold545 | 279532                  | GG                              | AA                 | AA               | INTERGENIC                    |                    |                                         |
| SNP_76568_A_279739 | NW_004515985.1 | scaffold545 | 279739                  | TT                              | CC                 | CC               | INTERGENIC                    |                    |                                         |
| SNP_76569_A_279759 | NW_004515985.1 | scaffold545 | 279759                  | TT                              | CC                 | CC               | INTERGENIC                    |                    |                                         |
| SNP_76570_A_279775 | NW_004515985.1 | scaffold545 | 279775                  | AA                              | GG                 | GG               | INTERGENIC                    |                    |                                         |
| SNP_76571_A_281233 | NW_004515985.1 | scaffold545 | 281233                  | GG                              | AA                 | AA               | INTERGENIC                    |                    |                                         |
| SNP_76572_A_281268 | NW_004515985.1 | scaffold545 | 281268                  | TT                              | CC                 | CC               | INTERGENIC                    |                    |                                         |
| SNP_76573_A_4557   | NW_004515986.1 | scaffold546 | 4557                    | GG                              | CC                 | CC               | INTERGENIC                    |                    |                                         |
| SNP_76574_A_4713   | NW_004515986.1 | scaffold546 | 4713                    | TT                              | GG                 | GG               | INTERGENIC                    |                    |                                         |
| SNP_76575_A_9427   | NW_004515986.1 | scaffold546 | 9427                    | AA                              | GG                 | GG               | INTERGENIC                    |                    |                                         |
| SNP_76576_A_14288  | NW_004515986.1 | scaffold546 | 14288                   | AA                              | GG                 | GG               | INTERGENIC                    |                    |                                         |
| SNP_76577_A_16856  | NW_004515986.1 | scaffold546 | 16856                   | TT                              | GG                 | GG               | INTERGENIC                    |                    |                                         |
| SNP_76578_A_40614  | NW_004515986.1 | scaffold546 | 40614                   | AA                              | TT                 | TT               | INTERGENIC                    |                    |                                         |
| SNP_76579_A_40623  | NW_004515986.1 | scaffold546 | 40623                   | TT                              | AA                 | AA               | INTERGENIC                    |                    |                                         |
| SNP_76580_A_54156  | NW_004515986.1 | scaffold546 | 54156                   | CC                              | TT                 | TT               | INTERGENIC                    |                    |                                         |
| SNP_76581_A_55229  | NW_004515986.1 | scaffold546 | 55229                   | TT                              | GG                 | GG               | INTERGENIC                    |                    |                                         |
| SNP_76582_A_55273  | NW_004515986.1 | scaffold546 | 55273                   | CC                              | GG                 | GG               | INTERGENIC                    |                    |                                         |
| SNP_76583_A_55274  | NW_004515986.1 | scaffold546 | 55274                   | CC                              | TT                 | TT               | INTERGENIC                    |                    |                                         |
| SNP_76584_A_55304  | NW_004515986.1 | scaffold546 | 55304                   | GG                              | AA                 | AA               | INTERGENIC                    |                    |                                         |

| SNPs IDs          | Chromosome IDs | Chromosomes | Physical positions (bp) | CDC Frontier (Reference genome) | (Pusa 1103 & HPNB) | (ILWC 46 & LPNB) | Sequence genome | Components of | Gene accession IDs | Putative functions |
|-------------------|----------------|-------------|-------------------------|---------------------------------|--------------------|------------------|-----------------|---------------|--------------------|--------------------|
| SNP_76585_A_55305 | NW_004515986.1 | scaffold546 | 55305                   | TT                              | AA                 | AA               | INTERGENIC      |               |                    |                    |
| SNP_76586_A_55337 | NW_004515986.1 | scaffold546 | 55337                   | CC                              | GG                 | GG               | INTERGENIC      |               |                    |                    |
| SNP_76587_A_55511 | NW_004515986.1 | scaffold546 | 55511                   | CC                              | GG                 | GG               | INTERGENIC      |               |                    |                    |
| SNP_76588_A_55544 | NW_004515986.1 | scaffold546 | 55544                   | AA                              | TT                 | TT               | INTERGENIC      |               |                    |                    |
| SNP_76589_A_55548 | NW_004515986.1 | scaffold546 | 55548                   | AA                              | TT                 | TT               | INTERGENIC      |               |                    |                    |
| SNP_76590_A_55690 | NW_004515986.1 | scaffold546 | 55690                   | GG                              | TT                 | TT               | INTERGENIC      |               |                    |                    |
| SNP_76591_A_55708 | NW_004515986.1 | scaffold546 | 55708                   | AA                              | TT                 | TT               | INTERGENIC      |               |                    |                    |
| SNP_76592_A_55709 | NW_004515986.1 | scaffold546 | 55709                   | AA                              | CC                 | CC               | INTERGENIC      |               |                    |                    |
| SNP_76593_A_55713 | NW_004515986.1 | scaffold546 | 55713                   | GG                              | CC                 | CC               | INTERGENIC      |               |                    |                    |
| SNP_76594_A_55811 | NW_004515986.1 | scaffold546 | 55811                   | GG                              | AA                 | AA               | INTERGENIC      |               |                    |                    |
| SNP_76595_A_55963 | NW_004515986.1 | scaffold546 | 55963                   | AA                              | CC                 | CC               | INTERGENIC      |               |                    |                    |
| SNP_76596_A_55995 | NW_004515986.1 | scaffold546 | 55995                   | TT                              | AA                 | AA               | INTERGENIC      |               |                    |                    |
| SNP_76597_A_55998 | NW_004515986.1 | scaffold546 | 55998                   | GG                              | TT                 | TT               | INTERGENIC      |               |                    |                    |
| SNP_76598_A_67231 | NW_004515986.1 | scaffold546 | 67231                   | GG                              | AA                 | AA               | INTERGENIC      |               |                    |                    |
| SNP_76599_A_67687 | NW_004515986.1 | scaffold546 | 67687                   | TT                              | AA                 | AA               | INTERGENIC      |               |                    |                    |
| SNP_76600_A_67865 | NW_004515986.1 | scaffold546 | 67865                   | AA                              | TT                 | TT               | INTERGENIC      |               |                    |                    |
| SNP_76601_A_67893 | NW_004515986.1 | scaffold546 | 67893                   | GG                              | TT                 | TT               | INTERGENIC      |               |                    |                    |
| SNP_76603_A_72689 | NW_004515986.1 | scaffold546 | 72689                   | CC                              | TT                 | TT               | INTERGENIC      |               |                    |                    |
| SNP_76604_A_72822 | NW_004515986.1 | scaffold546 | 72822                   | TT                              | CC                 | CC               | INTERGENIC      |               |                    |                    |
| SNP_76605_A_72887 | NW_004515986.1 | scaffold546 | 72887                   | GG                              | CC                 | CC               | INTERGENIC      |               |                    |                    |
| SNP_76606_A_73043 | NW_004515986.1 | scaffold546 | 73043                   | GG                              | AA                 | AA               | INTERGENIC      |               |                    |                    |
| SNP_76607_A_73066 | NW_004515986.1 | scaffold546 | 73066                   | GG                              | TT                 | TT               | INTERGENIC      |               |                    |                    |

| SNPs IDs          | Chromosome IDs | Chromosomes | Physical positions (bp) | CDC Frontier (Reference genome) | (Pusa 1103 & HPNB) | (ILWC 46 & LPNB) | Sequence genome | Components of | Gene accession IDs | Putative functions |
|-------------------|----------------|-------------|-------------------------|---------------------------------|--------------------|------------------|-----------------|---------------|--------------------|--------------------|
| SNP_76608_A_73067 | NW_004515986.1 | scaffold546 | 73067                   | GG                              | AA                 | AA               | INTERGENIC      |               |                    |                    |
| SNP_76609_A_73453 | NW_004515986.1 | scaffold546 | 73453                   | TT                              | CC                 | CC               | INTERGENIC      |               |                    |                    |
| SNP_76610_A_82176 | NW_004515986.1 | scaffold546 | 82176                   | TT                              | CC                 | CC               | INTERGENIC      |               |                    |                    |
| SNP_76611_A_83210 | NW_004515986.1 | scaffold546 | 83210                   | AA                              | GG                 | GG               | INTERGENIC      |               |                    |                    |
| SNP_76612_A_83211 | NW_004515986.1 | scaffold546 | 83211                   | TT                              | GG                 | GG               | INTERGENIC      |               |                    |                    |
| SNP_76613_A_84482 | NW_004515986.1 | scaffold546 | 84482                   | GG                              | AA                 | AA               | INTERGENIC      |               |                    |                    |
| SNP_76614_A_84535 | NW_004515986.1 | scaffold546 | 84535                   | TT                              | GG                 | GG               | INTERGENIC      |               |                    |                    |
| SNP_76615_A_84779 | NW_004515986.1 | scaffold546 | 84779                   | CC                              | TT                 | TT               | INTERGENIC      |               |                    |                    |
| SNP_76616_A_85053 | NW_004515986.1 | scaffold546 | 85053                   | GG                              | AA                 | AA               | INTERGENIC      |               |                    |                    |
| SNP_76617_A_85101 | NW_004515986.1 | scaffold546 | 85101                   | AA                              | GG                 | GG               | INTERGENIC      |               |                    |                    |
| SNP_76618_A_85864 | NW_004515986.1 | scaffold546 | 85864                   | GG                              | AA                 | AA               | INTERGENIC      |               |                    |                    |
| SNP_76619_A_86210 | NW_004515986.1 | scaffold546 | 86210                   | TT                              | GG                 | GG               | INTERGENIC      |               |                    |                    |
| SNP_76620_A_86491 | NW_004515986.1 | scaffold546 | 86491                   | TT                              | CC                 | CC               | INTERGENIC      |               |                    |                    |
| SNP_76621_A_86602 | NW_004515986.1 | scaffold546 | 86602                   | TT                              | CC                 | CC               | INTERGENIC      |               |                    |                    |
| SNP_76622_A_86604 | NW_004515986.1 | scaffold546 | 86604                   | GG                              | AA                 | AA               | INTERGENIC      |               |                    |                    |
| SNP_76623_A_86658 | NW_004515986.1 | scaffold546 | 86658                   | AA                              | CC                 | CC               | INTERGENIC      |               |                    |                    |
| SNP_76624_A_86789 | NW_004515986.1 | scaffold546 | 86789                   | CC                              | TT                 | TT               | INTERGENIC      |               |                    |                    |
| SNP_76625_A_86869 | NW_004515986.1 | scaffold546 | 86869                   | TT                              | CC                 | CC               | INTERGENIC      |               |                    |                    |
| SNP_76626_A_86999 | NW_004515986.1 | scaffold546 | 86999                   | AA                              | CC                 | CC               | INTERGENIC      |               |                    |                    |
| SNP_76627_A_87161 | NW_004515986.1 | scaffold546 | 87161                   | TT                              | CC                 | CC               | INTERGENIC      |               |                    |                    |
| SNP_76628_A_87184 | NW_004515986.1 | scaffold546 | 87184                   | AA                              | GG                 | GG               | INTERGENIC      |               |                    |                    |
| SNP_76629_A_87186 | NW_004515986.1 | scaffold546 | 87186                   | TT                              | GG                 | GG               | INTERGENIC      |               |                    |                    |

| SNPs IDs          | Chromosome IDs | Chromosomes | Physical positions (bp) | CDC Frontier (Reference genome) | (Pusa 1103 & HPNB) | (ILWC 46 & LPNB) | Sequence genome | Components of | Gene accession IDs | Putative functions |
|-------------------|----------------|-------------|-------------------------|---------------------------------|--------------------|------------------|-----------------|---------------|--------------------|--------------------|
| SNP_76630_A_87385 | NW_004515986.1 | scaffold546 | 87385                   | TT                              | CC                 | CC               | INTERGENIC      |               |                    |                    |
| SNP_76631_A_1779  | NW_004515987.1 | scaffold547 | 1779                    | AA                              | GG                 | GG               | INTERGENIC      |               |                    |                    |
| SNP_76632_A_1804  | NW_004515987.1 | scaffold547 | 1804                    | AA                              | GG                 | GG               | INTERGENIC      |               |                    |                    |
| SNP_76633_A_1815  | NW_004515987.1 | scaffold547 | 1815                    | TT                              | CC                 | CC               | INTERGENIC      |               |                    |                    |
| SNP_76634_A_1870  | NW_004515987.1 | scaffold547 | 1870                    | TT                              | CC                 | CC               | INTERGENIC      |               |                    |                    |
| SNP_76635_A_1924  | NW_004515987.1 | scaffold547 | 1924                    | TT                              | CC                 | CC               | INTERGENIC      |               |                    |                    |
| SNP_76636_A_1946  | NW_004515987.1 | scaffold547 | 1946                    | CC                              | TT                 | TT               | INTERGENIC      |               |                    |                    |
| SNP_76637_A_2013  | NW_004515987.1 | scaffold547 | 2013                    | TT                              | AA                 | AA               | INTERGENIC      |               |                    |                    |
| SNP_76638_A_2045  | NW_004515987.1 | scaffold547 | 2045                    | GG                              | AA                 | AA               | INTERGENIC      |               |                    |                    |
| SNP_76639_A_2061  | NW_004515987.1 | scaffold547 | 2061                    | TT                              | CC                 | CC               | INTERGENIC      |               |                    |                    |
| SNP_76640_A_6587  | NW_004515987.1 | scaffold547 | 6587                    | TT                              | GG                 | GG               | INTERGENIC      |               |                    |                    |
| SNP_76641_A_7583  | NW_004515987.1 | scaffold547 | 7583                    | CC                              | TT                 | TT               | INTERGENIC      |               |                    |                    |
| SNP_76642_A_11427 | NW_004515987.1 | scaffold547 | 11427                   | GG                              | AA                 | AA               | INTERGENIC      |               |                    |                    |
| SNP_76643_A_11452 | NW_004515987.1 | scaffold547 | 11452                   | AA                              | GG                 | GG               | INTERGENIC      |               |                    |                    |
| SNP_76644_A_11528 | NW_004515987.1 | scaffold547 | 11528                   | AA                              | GG                 | GG               | INTERGENIC      |               |                    |                    |
| SNP_76645_A_12477 | NW_004515987.1 | scaffold547 | 12477                   | AA                              | CC                 | CC               | INTERGENIC      |               |                    |                    |
| SNP_76646_A_12505 | NW_004515987.1 | scaffold547 | 12505                   | CC                              | TT                 | TT               | INTERGENIC      |               |                    |                    |
| SNP_76647_A_12534 | NW_004515987.1 | scaffold547 | 12534                   | AA                              | TT                 | TT               | INTERGENIC      |               |                    |                    |
| SNP_76648_A_12620 | NW_004515987.1 | scaffold547 | 12620                   | TT                              | GG                 | GG               | INTERGENIC      |               |                    |                    |
| SNP_76649_A_12622 | NW_004515987.1 | scaffold547 | 12622                   | AA                              | TT                 | TT               | INTERGENIC      |               |                    |                    |
| SNP_76650_A_12732 | NW_004515987.1 | scaffold547 | 12732                   | GG                              | CC                 | CC               | INTERGENIC      |               |                    |                    |
| SNP_76651_A_12815 | NW_004515987.1 | scaffold547 | 12815                   | TT                              | CC                 | CC               | INTERGENIC      |               |                    |                    |

| SNPs IDs          | Chromosome IDs | Chromosomes | Physical positions (bp) | CDC Frontier (Reference genome) | (Pusa 1103 & HPNB) | (ILWC 46 & LPNB) | Sequence genome | Components of | Gene accession IDs | Putative functions |
|-------------------|----------------|-------------|-------------------------|---------------------------------|--------------------|------------------|-----------------|---------------|--------------------|--------------------|
| SNP_76652_A_12865 | NW_004515987.1 | scaffold547 | 12865                   | AA                              | GG                 | GG               | INTERGENIC      |               |                    |                    |
| SNP_76653_A_12879 | NW_004515987.1 | scaffold547 | 12879                   | AA                              | TT                 | TT               | INTERGENIC      |               |                    |                    |
| SNP_76654_A_13615 | NW_004515987.1 | scaffold547 | 13615                   | AA                              | CC                 | CC               | INTERGENIC      |               |                    |                    |
| SNP_76655_A_13659 | NW_004515987.1 | scaffold547 | 13659                   | TT                              | CC                 | CC               | INTERGENIC      |               |                    |                    |
| SNP_76656_A_13690 | NW_004515987.1 | scaffold547 | 13690                   | TT                              | GG                 | GG               | INTERGENIC      |               |                    |                    |
| SNP_76657_A_13968 | NW_004515987.1 | scaffold547 | 13968                   | TT                              | AA                 | AA               | INTERGENIC      |               |                    |                    |
| SNP_76658_A_14138 | NW_004515987.1 | scaffold547 | 14138                   | GG                              | TT                 | TT               | INTERGENIC      |               |                    |                    |
| SNP_76659_A_21037 | NW_004515987.1 | scaffold547 | 21037                   | TT                              | CC                 | CC               | INTERGENIC      |               |                    |                    |
| SNP_76660_A_27404 | NW_004515987.1 | scaffold547 | 27404                   | CC                              | AA                 | AA               | INTERGENIC      |               |                    |                    |
| SNP_76661_A_28173 | NW_004515987.1 | scaffold547 | 28173                   | TT                              | AA                 | AA               | INTERGENIC      |               |                    |                    |
| SNP_76662_A_32186 | NW_004515987.1 | scaffold547 | 32186                   | GG                              | AA                 | AA               | INTERGENIC      |               |                    |                    |
| SNP_76663_A_46651 | NW_004515987.1 | scaffold547 | 46651                   | TT                              | GG                 | GG               | INTERGENIC      |               |                    |                    |
| SNP_76664_A_46658 | NW_004515987.1 | scaffold547 | 46658                   | AA                              | CC                 | CC               | INTERGENIC      |               |                    |                    |
| SNP_76665_A_48867 | NW_004515987.1 | scaffold547 | 48867                   | CC                              | AA                 | AA               | INTERGENIC      |               |                    |                    |
| SNP_76666_A_70611 | NW_004515987.1 | scaffold547 | 70611                   | CC                              | TT                 | TT               | INTERGENIC      |               |                    |                    |
| SNP_76667_A_74383 | NW_004515987.1 | scaffold547 | 74383                   | TT                              | CC                 | CC               | INTERGENIC      |               |                    |                    |
| SNP_76668_A_74791 | NW_004515987.1 | scaffold547 | 74791                   | CC                              | TT                 | TT               | INTERGENIC      |               |                    |                    |
| SNP_76669_A_74799 | NW_004515987.1 | scaffold547 | 74799                   | TT                              | CC                 | CC               | INTERGENIC      |               |                    |                    |
| SNP_76670_A_78160 | NW_004515987.1 | scaffold547 | 78160                   | CC                              | AA                 | AA               | INTERGENIC      |               |                    |                    |
| SNP_76671_A_78188 | NW_004515987.1 | scaffold547 | 78188                   | TT                              | CC                 | CC               | INTERGENIC      |               |                    |                    |
| SNP_76672_A_82183 | NW_004515987.1 | scaffold547 | 82183                   | CC                              | TT                 | TT               | INTERGENIC      |               |                    |                    |
| SNP_76673_A_82187 | NW_004515987.1 | scaffold547 | 82187                   | CC                              | TT                 | TT               | INTERGENIC      |               |                    |                    |



| SNPs IDs          | Chromosome IDs | Chromosomes | Physical positions (bp) | CDC Frontier (Reference genome) | (Pusa 1103 & HPNB) | (ILWC 46 & LPNB) | Sequence genome | Components of | Gene accession IDs | Putative functions |
|-------------------|----------------|-------------|-------------------------|---------------------------------|--------------------|------------------|-----------------|---------------|--------------------|--------------------|
| SNP_76674_A_82237 | NW_004515987.1 | scaffold547 | 82237                   | AA                              | TT                 | TT               | INTERGENIC      |               |                    |                    |
| SNP_76675_A_82239 | NW_004515987.1 | scaffold547 | 82239                   | GG                              | TT                 | TT               | INTERGENIC      |               |                    |                    |
| SNP_76676_A_82500 | NW_004515987.1 | scaffold547 | 82500                   | GG                              | AA                 | AA               | INTERGENIC      |               |                    |                    |
| SNP_76677_A_83682 | NW_004515987.1 | scaffold547 | 83682                   | CC                              | TT                 | TT               | INTERGENIC      |               |                    |                    |
| SNP_76678_A_84203 | NW_004515987.1 | scaffold547 | 84203                   | GG                              | AA                 | AA               | INTERGENIC      |               |                    |                    |
| SNP_76679_A_84317 | NW_004515987.1 | scaffold547 | 84317                   | AA                              | GG                 | GG               | INTERGENIC      |               |                    |                    |
| SNP_76680_A_95835 | NW_004515987.1 | scaffold547 | 95835                   | TT                              | CC                 | CC               | INTERGENIC      |               |                    |                    |
| SNP_76681_A_95927 | NW_004515987.1 | scaffold547 | 95927                   | AA                              | GG                 | GG               | INTERGENIC      |               |                    |                    |
| SNP_76682_A_96532 | NW_004515987.1 | scaffold547 | 96532                   | CC                              | GG                 | GG               | INTERGENIC      |               |                    |                    |
| SNP_76683_A_96537 | NW_004515987.1 | scaffold547 | 96537                   | TT                              | CC                 | CC               | INTERGENIC      |               |                    |                    |
| SNP_76684_A_96766 | NW_004515987.1 | scaffold547 | 96766                   | TT                              | CC                 | CC               | INTERGENIC      |               |                    |                    |
| SNP_76685_A_96815 | NW_004515987.1 | scaffold547 | 96815                   | CC                              | TT                 | TT               | INTERGENIC      |               |                    |                    |
| SNP_76686_A_96918 | NW_004515987.1 | scaffold547 | 96918                   | TT                              | AA                 | AA               | INTERGENIC      |               |                    |                    |
| SNP_76687_A_96930 | NW_004515987.1 | scaffold547 | 96930                   | TT                              | AA                 | AA               | INTERGENIC      |               |                    |                    |
| SNP_76688_A_96947 | NW_004515987.1 | scaffold547 | 96947                   | GG                              | AA                 | AA               | INTERGENIC      |               |                    |                    |
| SNP_76689_A_96972 | NW_004515987.1 | scaffold547 | 96972                   | CC                              | TT                 | TT               | INTERGENIC      |               |                    |                    |
| SNP_76691_A_97047 | NW_004515987.1 | scaffold547 | 97047                   | AA                              | GG                 | GG               | INTERGENIC      |               |                    |                    |
| SNP_76692_A_97058 | NW_004515987.1 | scaffold547 | 97058                   | AA                              | CC                 | CC               | INTERGENIC      |               |                    |                    |
| SNP_76693_A_97082 | NW_004515987.1 | scaffold547 | 97082                   | GG                              | AA                 | AA               | INTERGENIC      |               |                    |                    |
| SNP_76694_A_97162 | NW_004515987.1 | scaffold547 | 97162                   | AA                              | TT                 | TT               | INTERGENIC      |               |                    |                    |
| SNP_76695_A_97306 | NW_004515987.1 | scaffold547 | 97306                   | GG                              | AA                 | AA               | INTERGENIC      |               |                    |                    |
| SNP_76696_A_97688 | NW_004515987.1 | scaffold547 | 97688                   | AA                              | TT                 | TT               | INTERGENIC      |               |                    |                    |

| SNPs IDs           | Chromosome IDs | Chromosomes | Physical positions (bp) | CDC Frontier (Reference genome) | (Pusa 1103 & HPNB) | (ILWC 46 & LPNB) | Sequence genome | Components of | Gene accession IDs | Putative functions |
|--------------------|----------------|-------------|-------------------------|---------------------------------|--------------------|------------------|-----------------|---------------|--------------------|--------------------|
| SNP_76697_A_97720  | NW_004515987.1 | scaffold547 | 97720                   | CC                              | TT                 | TT               | INTERGENIC      |               |                    |                    |
| SNP_76698_A_104532 | NW_004515987.1 | scaffold547 | 104532                  | TT                              | CC                 | CC               | INTERGENIC      |               |                    |                    |
| SNP_76699_A_114788 | NW_004515987.1 | scaffold547 | 114788                  | TT                              | AA                 | AA               | INTERGENIC      |               |                    |                    |
| SNP_76700_A_114803 | NW_004515987.1 | scaffold547 | 114803                  | AA                              | CC                 | CC               | INTERGENIC      |               |                    |                    |
| SNP_76701_A_114834 | NW_004515987.1 | scaffold547 | 114834                  | AA                              | GG                 | GG               | INTERGENIC      |               |                    |                    |
| SNP_76702_A_115023 | NW_004515987.1 | scaffold547 | 115023                  | TT                              | AA                 | AA               | INTERGENIC      |               |                    |                    |
| SNP_76703_A_115111 | NW_004515987.1 | scaffold547 | 115111                  | GG                              | AA                 | AA               | INTERGENIC      |               |                    |                    |
| SNP_76704_A_122556 | NW_004515987.1 | scaffold547 | 122556                  | TT                              | CC                 | CC               | INTERGENIC      |               |                    |                    |
| SNP_76705_A_122587 | NW_004515987.1 | scaffold547 | 122587                  | AA                              | GG                 | GG               | INTERGENIC      |               |                    |                    |
| SNP_76706_A_124881 | NW_004515987.1 | scaffold547 | 124881                  | TT                              | CC                 | CC               | INTERGENIC      |               |                    |                    |
| SNP_76707_A_128726 | NW_004515987.1 | scaffold547 | 128726                  | AA                              | TT                 | TT               | INTERGENIC      |               |                    |                    |
| SNP_76708_A_135975 | NW_004515987.1 | scaffold547 | 135975                  | CC                              | TT                 | TT               | INTERGENIC      |               |                    |                    |
| SNP_76709_A_138196 | NW_004515987.1 | scaffold547 | 138196                  | TT                              | CC                 | CC               | INTERGENIC      |               |                    |                    |
| SNP_76710_A_139112 | NW_004515987.1 | scaffold547 | 139112                  | CC                              | AA                 | AA               | INTERGENIC      |               |                    |                    |
| SNP_76711_A_147817 | NW_004515987.1 | scaffold547 | 147817                  | GG                              | TT                 | TT               | INTERGENIC      |               |                    |                    |
| SNP_76712_A_153334 | NW_004515987.1 | scaffold547 | 153334                  | AA                              | GG                 | GG               | INTERGENIC      |               |                    |                    |
| SNP_76713_A_155875 | NW_004515987.1 | scaffold547 | 155875                  | TT                              | GG                 | GG               | INTERGENIC      |               |                    |                    |
| SNP_76714_A_155882 | NW_004515987.1 | scaffold547 | 155882                  | TT                              | GG                 | GG               | INTERGENIC      |               |                    |                    |
| SNP_76716_A_155947 | NW_004515987.1 | scaffold547 | 155947                  | AA                              | TT                 | TT               | INTERGENIC      |               |                    |                    |
| SNP_76718_A_164668 | NW_004515987.1 | scaffold547 | 164668                  | TT                              | CC                 | CC               | INTERGENIC      |               |                    |                    |
| SNP_76719_A_164680 | NW_004515987.1 | scaffold547 | 164680                  | AA                              | CC                 | CC               | INTERGENIC      |               |                    |                    |
| SNP_76720_A_164682 | NW_004515987.1 | scaffold547 | 164682                  | AA                              | GG                 | GG               | INTERGENIC      |               |                    |                    |

| SNPs IDs           | Chromosome IDs | Chromosomes | Physical positions (bp) | CDC Frontier (Reference genome) | (Pusa 1103 & HPNB) | (ILWC 46 & LPNB) | Sequence genome | Components of | Gene accession IDs | Putative functions |
|--------------------|----------------|-------------|-------------------------|---------------------------------|--------------------|------------------|-----------------|---------------|--------------------|--------------------|
| SNP_76721_A_164704 | NW_004515987.1 | scaffold547 | 164704                  | GG                              | AA                 | AA               | INTERGENIC      |               |                    |                    |
| SNP_76722_A_165329 | NW_004515987.1 | scaffold547 | 165329                  | CC                              | TT                 | TT               | INTERGENIC      |               |                    |                    |
| SNP_76723_A_168254 | NW_004515987.1 | scaffold547 | 168254                  | TT                              | CC                 | CC               | INTERGENIC      |               |                    |                    |
| SNP_76724_A_168300 | NW_004515987.1 | scaffold547 | 168300                  | CC                              | TT                 | TT               | INTERGENIC      |               |                    |                    |
| SNP_76725_A_185609 | NW_004515987.1 | scaffold547 | 185609                  | TT                              | AA                 | AA               | INTERGENIC      |               |                    |                    |
| SNP_76726_A_9114   | NW_004515988.1 | scaffold548 | 9114                    | AA                              | GG                 | GG               | INTERGENIC      |               |                    |                    |
| SNP_76727_A_73288  | NW_004515988.1 | scaffold548 | 73288                   | CC                              | TT                 | TT               | INTERGENIC      |               |                    |                    |
| SNP_76728_A_114796 | NW_004515988.1 | scaffold548 | 114796                  | GG                              | CC                 | CC               | INTERGENIC      |               |                    |                    |
| SNP_76730_A_157621 | NW_004515988.1 | scaffold548 | 157621                  | AA                              | GG                 | GG               | INTERGENIC      |               |                    |                    |
| SNP_76731_A_157646 | NW_004515988.1 | scaffold548 | 157646                  | CC                              | TT                 | TT               | INTERGENIC      |               |                    |                    |
| SNP_76732_A_160152 | NW_004515988.1 | scaffold548 | 160152                  | AA                              | TT                 | TT               | INTERGENIC      |               |                    |                    |
| SNP_76733_A_169463 | NW_004515988.1 | scaffold548 | 169463                  | AA                              | GG                 | GG               | INTERGENIC      |               |                    |                    |
| SNP_76734_A_169878 | NW_004515988.1 | scaffold548 | 169878                  | AA                              | CC                 | CC               | INTERGENIC      |               |                    |                    |
| SNP_76735_A_169945 | NW_004515988.1 | scaffold548 | 169945                  | TT                              | AA                 | AA               | INTERGENIC      |               |                    |                    |
| SNP_76736_A_169952 | NW_004515988.1 | scaffold548 | 169952                  | AA                              | GG                 | GG               | INTERGENIC      |               |                    |                    |
| SNP_76737_A_169953 | NW_004515988.1 | scaffold548 | 169953                  | TT                              | CC                 | CC               | INTERGENIC      |               |                    |                    |
| SNP_76738_A_169986 | NW_004515988.1 | scaffold548 | 169986                  | TT                              | CC                 | CC               | INTERGENIC      |               |                    |                    |
| SNP_76739_A_177559 | NW_004515988.1 | scaffold548 | 177559                  | TT                              | CC                 | CC               | INTERGENIC      |               |                    |                    |
| SNP_76740_A_196404 | NW_004515988.1 | scaffold548 | 196404                  | TT                              | CC                 | CC               | INTERGENIC      |               |                    |                    |
| SNP_76741_A_199365 | NW_004515988.1 | scaffold548 | 199365                  | GG                              | TT                 | TT               | INTERGENIC      |               |                    |                    |
| SNP_76743_A_212614 | NW_004515988.1 | scaffold548 | 212614                  | GG                              | AA                 | AA               | INTERGENIC      |               |                    |                    |
| SNP_76744_A_213008 | NW_004515988.1 | scaffold548 | 213008                  | GG                              | AA                 | AA               | INTERGENIC      |               |                    |                    |

| SNPs IDs           | Chromosome IDs | Chromosomes | Physical positions (bp) | CDC Frontier (Reference genome) | (Pusa 1103 & HPNB) | (ILWC 46 & LPNB) | Sequence Components of genome | Gene accession IDs | Putative functions           |
|--------------------|----------------|-------------|-------------------------|---------------------------------|--------------------|------------------|-------------------------------|--------------------|------------------------------|
| SNP_76745_A_233092 | NW_004515988.1 | scaffold548 | 233092                  | GG                              | AA                 | AA               | INTERGENIC                    |                    |                              |
| SNP_76747_A_245406 | NW_004515988.1 | scaffold548 | 245406                  | TT                              | CC                 | CC               | INTERGENIC                    |                    |                              |
| SNP_76748_A_245409 | NW_004515988.1 | scaffold548 | 245409                  | TT                              | GG                 | GG               | INTERGENIC                    |                    |                              |
| SNP_76749_A_245543 | NW_004515988.1 | scaffold548 | 245543                  | AA                              | GG                 | GG               | INTERGENIC                    |                    |                              |
| SNP_76750_A_274265 | NW_004515988.1 | scaffold548 | 274265                  | GG                              | AA                 | AA               | INTERGENIC                    |                    |                              |
| SNP_76751_A_274281 | NW_004515988.1 | scaffold548 | 274281                  | GG                              | CC                 | CC               | INTERGENIC                    |                    |                              |
| SNP_76752_A_315424 | NW_004515988.1 | scaffold548 | 315424                  | AA                              | GG                 | GG               | INTERGENIC                    |                    |                              |
| SNP_76753_A_322703 | NW_004515988.1 | scaffold548 | 322703                  | TT                              | CC                 | CC               | INTERGENIC                    |                    |                              |
| SNP_76754_A_329814 | NW_004515988.1 | scaffold548 | 329814                  | AA                              | GG                 | GG               | INTERGENIC                    |                    |                              |
| SNP_76755_A_342795 | NW_004515988.1 | scaffold548 | 342795                  | GG                              | AA                 | AA               | INTERGENIC                    |                    |                              |
| SNP_76756_A_342802 | NW_004515988.1 | scaffold548 | 342802                  | AA                              | GG                 | GG               | INTERGENIC                    |                    |                              |
| SNP_76757_A_342829 | NW_004515988.1 | scaffold548 | 342829                  | CC                              | TT                 | TT               | INTERGENIC                    |                    |                              |
| SNP_76758_A_342830 | NW_004515988.1 | scaffold548 | 342830                  | AA                              | GG                 | GG               | INTERGENIC                    |                    |                              |
| SNP_76759_A_384003 | NW_004515988.1 | scaffold548 | 384003                  | CC                              | TT                 | TT               | INTERGENIC                    |                    |                              |
| SNP_76760_A_384072 | NW_004515988.1 | scaffold548 | 384072                  | TT                              | CC                 | CC               | INTERGENIC                    |                    |                              |
| SNP_76761_A_434996 | NW_004515988.1 | scaffold548 | 434996                  | AA                              | GG                 | GG               | INTRON                        | 101501468          | uncharacterized LOC101501468 |
| SNP_76762_A_435018 | NW_004515988.1 | scaffold548 | 435018                  | TT                              | CC                 | CC               | INTRON                        | 101501468          | uncharacterized LOC101501468 |
| SNP_76763_A_435025 | NW_004515988.1 | scaffold548 | 435025                  | CC                              | AA                 | AA               | INTRON                        | 101501468          | uncharacterized LOC101501468 |
| SNP_76764_A_480522 | NW_004515988.1 | scaffold548 | 480522                  | TT                              | CC                 | CC               | INTERGENIC                    |                    |                              |
| SNP_76765_A_480808 | NW_004515988.1 | scaffold548 | 480808                  | CC                              | GG                 | GG               | INTERGENIC                    |                    |                              |
| SNP_76766_A_480817 | NW_004515988.1 | scaffold548 | 480817                  | TT                              | GG                 | GG               | INTERGENIC                    |                    |                              |
| SNP_76767_A_480880 | NW_004515988.1 | scaffold548 | 480880                  | TT                              | CC                 | CC               | INTERGENIC                    |                    |                              |

| SNPs IDs           | Chromosome IDs | Chromosomes | Physical positions (bp) | CDC Frontier (Reference genome) | (Pusa 1103 & HPNB) | (ILWC 46 & LPNB) | Sequence genome | Components of | Gene accession IDs | Putative functions |
|--------------------|----------------|-------------|-------------------------|---------------------------------|--------------------|------------------|-----------------|---------------|--------------------|--------------------|
| SNP_76768_A_480890 | NW_004515988.1 | scaffold548 | 480890                  | AA                              | GG                 | GG               | INTERGENIC      |               |                    |                    |
| SNP_76769_A_480937 | NW_004515988.1 | scaffold548 | 480937                  | CC                              | TT                 | TT               | INTERGENIC      |               |                    |                    |
| SNP_76770_A_480967 | NW_004515988.1 | scaffold548 | 480967                  | TT                              | GG                 | GG               | INTERGENIC      |               |                    |                    |
| SNP_76771_A_481366 | NW_004515988.1 | scaffold548 | 481366                  | TT                              | CC                 | CC               | INTERGENIC      |               |                    |                    |
| SNP_76772_A_490585 | NW_004515988.1 | scaffold548 | 490585                  | TT                              | CC                 | CC               | INTERGENIC      |               |                    |                    |
| SNP_76773_A_490604 | NW_004515988.1 | scaffold548 | 490604                  | CC                              | TT                 | TT               | INTERGENIC      |               |                    |                    |
| SNP_76774_A_490610 | NW_004515988.1 | scaffold548 | 490610                  | AA                              | GG                 | GG               | INTERGENIC      |               |                    |                    |
| SNP_76775_A_490615 | NW_004515988.1 | scaffold548 | 490615                  | AA                              | TT                 | TT               | INTERGENIC      |               |                    |                    |
| SNP_76776_A_491177 | NW_004515988.1 | scaffold548 | 491177                  | CC                              | TT                 | TT               | INTERGENIC      |               |                    |                    |
| SNP_76777_A_491250 | NW_004515988.1 | scaffold548 | 491250                  | TT                              | CC                 | CC               | INTERGENIC      |               |                    |                    |
| SNP_76778_A_491515 | NW_004515988.1 | scaffold548 | 491515                  | CC                              | TT                 | TT               | INTERGENIC      |               |                    |                    |
| SNP_76780_A_553169 | NW_004515988.1 | scaffold548 | 553169                  | TT                              | GG                 | GG               | INTERGENIC      |               |                    |                    |
| SNP_76782_A_593474 | NW_004515988.1 | scaffold548 | 593474                  | CC                              | TT                 | TT               | INTERGENIC      |               |                    |                    |
| SNP_76783_A_593542 | NW_004515988.1 | scaffold548 | 593542                  | TT                              | CC                 | CC               | INTERGENIC      |               |                    |                    |
| SNP_76784_A_612109 | NW_004515988.1 | scaffold548 | 612109                  | GG                              | AA                 | AA               | INTERGENIC      |               |                    |                    |
| SNP_76785_A_612116 | NW_004515988.1 | scaffold548 | 612116                  | AA                              | TT                 | TT               | INTERGENIC      |               |                    |                    |
| SNP_76786_A_612118 | NW_004515988.1 | scaffold548 | 612118                  | CC                              | TT                 | TT               | INTERGENIC      |               |                    |                    |
| SNP_76787_A_612469 | NW_004515988.1 | scaffold548 | 612469                  | AA                              | TT                 | TT               | INTERGENIC      |               |                    |                    |
| SNP_76788_A_612477 | NW_004515988.1 | scaffold548 | 612477                  | GG                              | TT                 | TT               | INTERGENIC      |               |                    |                    |
| SNP_76790_A_612730 | NW_004515988.1 | scaffold548 | 612730                  | AA                              | GG                 | GG               | INTERGENIC      |               |                    |                    |
| SNP_76791_A_612732 | NW_004515988.1 | scaffold548 | 612732                  | CC                              | TT                 | TT               | INTERGENIC      |               |                    |                    |
| SNP_76792_A_612858 | NW_004515988.1 | scaffold548 | 612858                  | AA                              | TT                 | TT               | INTERGENIC      |               |                    |                    |

| SNPs IDs           | Chromosome IDs | Chromosomes | Physical positions (bp) | CDC Frontier (Reference genome) | (Pusa 1103 & HPNB) | (ILWC 46 & LPNB) | Sequence genome | Components of | Gene accession IDs | Putative functions |
|--------------------|----------------|-------------|-------------------------|---------------------------------|--------------------|------------------|-----------------|---------------|--------------------|--------------------|
| SNP_76793_A_616385 | NW_004515988.1 | scaffold548 | 616385                  | AA                              | GG                 | GG               | INTERGENIC      |               |                    |                    |
| SNP_76794_A_616410 | NW_004515988.1 | scaffold548 | 616410                  | TT                              | CC                 | CC               | INTERGENIC      |               |                    |                    |
| SNP_76795_A_616454 | NW_004515988.1 | scaffold548 | 616454                  | AA                              | GG                 | GG               | INTERGENIC      |               |                    |                    |
| SNP_76796_A_616814 | NW_004515988.1 | scaffold548 | 616814                  | AA                              | GG                 | GG               | INTERGENIC      |               |                    |                    |
| SNP_76797_A_616848 | NW_004515988.1 | scaffold548 | 616848                  | TT                              | GG                 | GG               | INTERGENIC      |               |                    |                    |
| SNP_76798_A_616891 | NW_004515988.1 | scaffold548 | 616891                  | AA                              | GG                 | GG               | INTERGENIC      |               |                    |                    |
| SNP_76799_A_616936 | NW_004515988.1 | scaffold548 | 616936                  | GG                              | AA                 | AA               | INTERGENIC      |               |                    |                    |
| SNP_76800_A_635749 | NW_004515988.1 | scaffold548 | 635749                  | TT                              | CC                 | CC               | INTERGENIC      |               |                    |                    |
| SNP_76801_A_683415 | NW_004515988.1 | scaffold548 | 683415                  | TT                              | CC                 | CC               | INTERGENIC      |               |                    |                    |
| SNP_76802_A_683794 | NW_004515988.1 | scaffold548 | 683794                  | TT                              | CC                 | CC               | INTERGENIC      |               |                    |                    |
| SNP_76804_A_685590 | NW_004515988.1 | scaffold548 | 685590                  | AA                              | GG                 | GG               | INTERGENIC      |               |                    |                    |
| SNP_76806_A_38331  | NW_004515989.1 | scaffold549 | 38331                   | CC                              | AA                 | AA               | INTERGENIC      |               |                    |                    |
| SNP_76807_A_38459  | NW_004515989.1 | scaffold549 | 38459                   | GG                              | TT                 | TT               | INTERGENIC      |               |                    |                    |
| SNP_76808_A_38503  | NW_004515989.1 | scaffold549 | 38503                   | TT                              | AA                 | AA               | INTERGENIC      |               |                    |                    |
| SNP_76809_A_38505  | NW_004515989.1 | scaffold549 | 38505                   | AA                              | TT                 | TT               | INTERGENIC      |               |                    |                    |
| SNP_76810_A_38522  | NW_004515989.1 | scaffold549 | 38522                   | CC                              | TT                 | TT               | INTERGENIC      |               |                    |                    |
| SNP_76812_A_41636  | NW_004515989.1 | scaffold549 | 41636                   | CC                              | GG                 | GG               | INTERGENIC      |               |                    |                    |
| SNP_76814_A_44649  | NW_004515989.1 | scaffold549 | 44649                   | AA                              | GG                 | GG               | INTERGENIC      |               |                    |                    |
| SNP_76815_A_45179  | NW_004515989.1 | scaffold549 | 45179                   | AA                              | GG                 | GG               | INTERGENIC      |               |                    |                    |
| SNP_76816_A_51491  | NW_004515989.1 | scaffold549 | 51491                   | CC                              | TT                 | TT               | INTERGENIC      |               |                    |                    |
| SNP_76817_A_51503  | NW_004515989.1 | scaffold549 | 51503                   | TT                              | GG                 | GG               | INTERGENIC      |               |                    |                    |
| SNP_76818_A_51509  | NW_004515989.1 | scaffold549 | 51509                   | CC                              | AA                 | AA               | INTERGENIC      |               |                    |                    |

| SNPs IDs          | Chromosome IDs | Chromosomes | Physical positions (bp) | CDC Frontier (Reference genome) | (Pusa 1103 & HPNB) | (ILWC 46 & LPNB) | Sequence genome | Components of | Gene accession IDs | Putative functions |
|-------------------|----------------|-------------|-------------------------|---------------------------------|--------------------|------------------|-----------------|---------------|--------------------|--------------------|
| SNP_76819_A_51740 | NW_004515989.1 | scaffold549 | 51740                   | TT                              | CC                 | CC               | INTERGENIC      |               |                    |                    |
| SNP_76820_A_51770 | NW_004515989.1 | scaffold549 | 51770                   | AA                              | GG                 | GG               | INTERGENIC      |               |                    |                    |
| SNP_76821_A_57754 | NW_004515989.1 | scaffold549 | 57754                   | GG                              | CC                 | CC               | INTERGENIC      |               |                    |                    |
| SNP_76822_A_58079 | NW_004515989.1 | scaffold549 | 58079                   | AA                              | GG                 | GG               | INTERGENIC      |               |                    |                    |
| SNP_76823_A_58089 | NW_004515989.1 | scaffold549 | 58089                   | TT                              | AA                 | AA               | INTERGENIC      |               |                    |                    |
| SNP_76825_A_61962 | NW_004515989.1 | scaffold549 | 61962                   | AA                              | TT                 | TT               | INTERGENIC      |               |                    |                    |
| SNP_76826_A_62025 | NW_004515989.1 | scaffold549 | 62025                   | AA                              | GG                 | GG               | INTERGENIC      |               |                    |                    |
| SNP_76827_A_62072 | NW_004515989.1 | scaffold549 | 62072                   | CC                              | TT                 | TT               | INTERGENIC      |               |                    |                    |
| SNP_76828_A_2383  | NW_004515991.1 | scaffold553 | 2383                    | TT                              | CC                 | CC               | INTERGENIC      |               |                    |                    |
| SNP_76831_A_2966  | NW_004515991.1 | scaffold553 | 2966                    | TT                              | GG                 | GG               | INTERGENIC      |               |                    |                    |
| SNP_76832_A_3244  | NW_004515991.1 | scaffold553 | 3244                    | AA                              | CC                 | CC               | INTERGENIC      |               |                    |                    |
| SNP_76833_A_3408  | NW_004515991.1 | scaffold553 | 3408                    | TT                              | GG                 | GG               | INTERGENIC      |               |                    |                    |
| SNP_76834_A_3477  | NW_004515991.1 | scaffold553 | 3477                    | TT                              | AA                 | AA               | INTERGENIC      |               |                    |                    |
| SNP_76835_A_3496  | NW_004515991.1 | scaffold553 | 3496                    | CC                              | AA                 | AA               | INTERGENIC      |               |                    |                    |
| SNP_76836_A_3947  | NW_004515991.1 | scaffold553 | 3947                    | CC                              | AA                 | AA               | INTERGENIC      |               |                    |                    |
| SNP_76837_A_4936  | NW_004515991.1 | scaffold553 | 4936                    | AA                              | CC                 | CC               | INTERGENIC      |               |                    |                    |
| SNP_76838_A_4974  | NW_004515991.1 | scaffold553 | 4974                    | AA                              | CC                 | CC               | INTERGENIC      |               |                    |                    |
| SNP_76839_A_5037  | NW_004515991.1 | scaffold553 | 5037                    | CC                              | AA                 | AA               | INTERGENIC      |               |                    |                    |
| SNP_76840_A_5146  | NW_004515991.1 | scaffold553 | 5146                    | TT                              | CC                 | CC               | INTERGENIC      |               |                    |                    |
| SNP_76841_A_5220  | NW_004515991.1 | scaffold553 | 5220                    | TT                              | GG                 | GG               | INTERGENIC      |               |                    |                    |
| SNP_76842_A_5224  | NW_004515991.1 | scaffold553 | 5224                    | GG                              | AA                 | AA               | INTERGENIC      |               |                    |                    |
| SNP_76843_A_24823 | NW_004515991.1 | scaffold553 | 24823                   | TT                              | GG                 | GG               | INTERGENIC      |               |                    |                    |

| SNPs IDs          | Chromosome IDs | Chromosomes | Physical positions (bp) | CDC Frontier (Reference genome) | (Pusa 1103 & HPNB) | (ILWC 46 & LPNB) | Sequence genome | Components of | Gene accession IDs | Putative functions |
|-------------------|----------------|-------------|-------------------------|---------------------------------|--------------------|------------------|-----------------|---------------|--------------------|--------------------|
| SNP_76844_A_24846 | NW_004515991.1 | scaffold553 | 24846                   | AA                              | GG                 | GG               | INTERGENIC      |               |                    |                    |
| SNP_76845_A_25109 | NW_004515991.1 | scaffold553 | 25109                   | TT                              | CC                 | CC               | INTERGENIC      |               |                    |                    |
| SNP_76846_A_33524 | NW_004515991.1 | scaffold553 | 33524                   | AA                              | GG                 | GG               | INTERGENIC      |               |                    |                    |
| SNP_76847_A_33527 | NW_004515991.1 | scaffold553 | 33527                   | GG                              | AA                 | AA               | INTERGENIC      |               |                    |                    |
| SNP_76848_A_33534 | NW_004515991.1 | scaffold553 | 33534                   | AA                              | GG                 | GG               | INTERGENIC      |               |                    |                    |
| SNP_76849_A_33537 | NW_004515991.1 | scaffold553 | 33537                   | TT                              | GG                 | GG               | INTERGENIC      |               |                    |                    |
| SNP_76850_A_33542 | NW_004515991.1 | scaffold553 | 33542                   | TT                              | CC                 | CC               | INTERGENIC      |               |                    |                    |
| SNP_76851_A_33575 | NW_004515991.1 | scaffold553 | 33575                   | GG                              | AA                 | AA               | INTERGENIC      |               |                    |                    |
| SNP_76852_A_33596 | NW_004515991.1 | scaffold553 | 33596                   | CC                              | TT                 | TT               | INTERGENIC      |               |                    |                    |
| SNP_76853_A_33617 | NW_004515991.1 | scaffold553 | 33617                   | GG                              | AA                 | AA               | INTERGENIC      |               |                    |                    |
| SNP_76854_A_33618 | NW_004515991.1 | scaffold553 | 33618                   | CC                              | TT                 | TT               | INTERGENIC      |               |                    |                    |
| SNP_76855_A_33659 | NW_004515991.1 | scaffold553 | 33659                   | AA                              | TT                 | TT               | INTERGENIC      |               |                    |                    |
| SNP_76856_A_44020 | NW_004515991.1 | scaffold553 | 44020                   | CC                              | TT                 | TT               | INTERGENIC      |               |                    |                    |
| SNP_76857_A_52622 | NW_004515991.1 | scaffold553 | 52622                   | AA                              | TT                 | TT               | INTERGENIC      |               |                    |                    |
| SNP_76858_A_69797 | NW_004515991.1 | scaffold553 | 69797                   | CC                              | TT                 | TT               | INTERGENIC      |               |                    |                    |
| SNP_76859_A_69798 | NW_004515991.1 | scaffold553 | 69798                   | AA                              | GG                 | GG               | INTERGENIC      |               |                    |                    |
| SNP_76860_A_69824 | NW_004515991.1 | scaffold553 | 69824                   | GG                              | AA                 | AA               | INTERGENIC      |               |                    |                    |
| SNP_76861_A_91760 | NW_004515991.1 | scaffold553 | 91760                   | GG                              | AA                 | AA               | INTERGENIC      |               |                    |                    |
| SNP_76862_A_92367 | NW_004515991.1 | scaffold553 | 92367                   | GG                              | AA                 | AA               | INTERGENIC      |               |                    |                    |
| SNP_76863_A_92469 | NW_004515991.1 | scaffold553 | 92469                   | TT                              | GG                 | GG               | INTERGENIC      |               |                    |                    |
| SNP_76864_A_92506 | NW_004515991.1 | scaffold553 | 92506                   | GG                              | CC                 | CC               | INTERGENIC      |               |                    |                    |
| SNP_76865_A_92548 | NW_004515991.1 | scaffold553 | 92548                   | AA                              | GG                 | GG               | INTERGENIC      |               |                    |                    |



| SNPs IDs           | Chromosome IDs | Chromosomes | Physical positions (bp) | CDC Frontier genome (Reference genome) | (Pusa 1103 & HPNB) | (ILWC 46 & LPNB) | Sequence genome | Components of | Gene accession IDs                                    | Putative functions |
|--------------------|----------------|-------------|-------------------------|----------------------------------------|--------------------|------------------|-----------------|---------------|-------------------------------------------------------|--------------------|
| SNP_76866_A_92598  | NW_004515991.1 | scaffold553 | 92598                   | AA                                     | GG                 | GG               | INTERGENIC      |               |                                                       |                    |
| SNP_76867_A_92610  | NW_004515991.1 | scaffold553 | 92610                   | CC                                     | TT                 | TT               | INTERGENIC      |               |                                                       |                    |
| SNP_76868_A_92856  | NW_004515991.1 | scaffold553 | 92856                   | AA                                     | GG                 | GG               | INTERGENIC      |               |                                                       |                    |
| SNP_76869_A_92867  | NW_004515991.1 | scaffold553 | 92867                   | TT                                     | CC                 | CC               | INTERGENIC      |               |                                                       |                    |
| SNP_76870_A_93006  | NW_004515991.1 | scaffold553 | 93006                   | GG                                     | TT                 | TT               | INTERGENIC      |               |                                                       |                    |
| SNP_76871_A_126872 | NW_004515991.1 | scaffold553 | 126872                  | TT                                     | AA                 | AA               | INTERGENIC      |               |                                                       |                    |
| SNP_76872_A_164129 | NW_004515991.1 | scaffold553 | 164129                  | CC                                     | TT                 | TT               | INTERGENIC      |               |                                                       |                    |
| SNP_76873_A_198147 | NW_004515991.1 | scaffold553 | 198147                  | AA                                     | GG                 | GG               | INTERGENIC      |               |                                                       |                    |
| SNP_76874_A_201072 | NW_004515991.1 | scaffold553 | 201072                  | AA                                     | GG                 | GG               | INTERGENIC      |               |                                                       |                    |
| SNP_76875_A_201089 | NW_004515991.1 | scaffold553 | 201089                  | TT                                     | CC                 | CC               | INTERGENIC      |               |                                                       |                    |
| SNP_76876_A_325492 | NW_004515991.1 | scaffold553 | 325492                  | TT                                     | CC                 | CC               | INTRON          | 101503376     | structural maintenance of chromosomes protein 6A-like |                    |
| SNP_76878_A_325602 | NW_004515991.1 | scaffold553 | 325602                  | CC                                     | GG                 | GG               | INTRON          | 101503376     | structural maintenance of chromosomes protein 6A-like |                    |
| SNP_76879_A_386557 | NW_004515991.1 | scaffold553 | 386557                  | TT                                     | CC                 | CC               | INTRON          | 101511854     | zinc finger protein ZAT4-like                         |                    |
| SNP_76880_A_386558 | NW_004515991.1 | scaffold553 | 386558                  | CC                                     | AA                 | AA               | INTRON          | 101511854     | zinc finger protein ZAT4-like                         |                    |
| SNP_76881_A_388873 | NW_004515991.1 | scaffold553 | 388873                  | TT                                     | CC                 | CC               | INTRON          | 101511854     | zinc finger protein ZAT4-like                         |                    |
| SNP_76882_A_388877 | NW_004515991.1 | scaffold553 | 388877                  | AA                                     | GG                 | GG               | INTRON          | 101511854     | zinc finger protein ZAT4-like                         |                    |
| SNP_76883_A_403340 | NW_004515991.1 | scaffold553 | 403340                  | TT                                     | AA                 | AA               | INTRON          | 101511854     | zinc finger protein ZAT4-like                         |                    |
| SNP_76884_A_403346 | NW_004515991.1 | scaffold553 | 403346                  | TT                                     | GG                 | GG               | INTRON          | 101511854     | zinc finger protein ZAT4-like                         |                    |
| SNP_76885_A_403389 | NW_004515991.1 | scaffold553 | 403389                  | AA                                     | CC                 | CC               | INTRON          | 101511854     | zinc finger protein ZAT4-like                         |                    |
| SNP_76886_A_403416 | NW_004515991.1 | scaffold553 | 403416                  | GG                                     | AA                 | AA               | INTRON          | 101511854     | zinc finger protein ZAT4-like                         |                    |
| SNP_76887_A_437916 | NW_004515991.1 | scaffold553 | 437916                  | CC                                     | TT                 | TT               | INTERGENIC      |               |                                                       |                    |
| SNP_76888_A_464305 | NW_004515991.1 | scaffold553 | 464305                  | GG                                     | TT                 | TT               | INTERGENIC      |               |                                                       |                    |

| SNPs IDs           | Chromosome IDs | Chromosomes | Physical positions (bp) | CDC Frontier (Reference genome) | (Pusa 1103 & HPNB) | (ILWC 46 & LPNB) | Sequence genome | Components of | Gene accession IDs | Putative functions |
|--------------------|----------------|-------------|-------------------------|---------------------------------|--------------------|------------------|-----------------|---------------|--------------------|--------------------|
| SNP_76889_A_475948 | NW_004515991.1 | scaffold553 | 475948                  | TT                              | CC                 | CC               | INTERGENIC      |               |                    |                    |
| SNP_76890_A_475975 | NW_004515991.1 | scaffold553 | 475975                  | CC                              | TT                 | TT               | INTERGENIC      |               |                    |                    |
| SNP_76891_A_476193 | NW_004515991.1 | scaffold553 | 476193                  | AA                              | GG                 | GG               | INTERGENIC      |               |                    |                    |
| SNP_76892_A_476239 | NW_004515991.1 | scaffold553 | 476239                  | TT                              | CC                 | CC               | INTERGENIC      |               |                    |                    |
| SNP_76893_A_476352 | NW_004515991.1 | scaffold553 | 476352                  | AA                              | CC                 | CC               | INTERGENIC      |               |                    |                    |
| SNP_76894_A_476385 | NW_004515991.1 | scaffold553 | 476385                  | AA                              | TT                 | TT               | INTERGENIC      |               |                    |                    |
| SNP_76895_A_476386 | NW_004515991.1 | scaffold553 | 476386                  | AA                              | CC                 | CC               | INTERGENIC      |               |                    |                    |
| SNP_76896_A_476553 | NW_004515991.1 | scaffold553 | 476553                  | AA                              | GG                 | GG               | INTERGENIC      |               |                    |                    |
| SNP_76897_A_476704 | NW_004515991.1 | scaffold553 | 476704                  | TT                              | CC                 | CC               | INTERGENIC      |               |                    |                    |
| SNP_76898_A_476889 | NW_004515991.1 | scaffold553 | 476889                  | AA                              | GG                 | GG               | INTERGENIC      |               |                    |                    |
| SNP_76899_A_480177 | NW_004515991.1 | scaffold553 | 480177                  | GG                              | AA                 | AA               | INTERGENIC      |               |                    |                    |
| SNP_76900_A_480236 | NW_004515991.1 | scaffold553 | 480236                  | AA                              | GG                 | GG               | INTERGENIC      |               |                    |                    |
| SNP_76901_A_480270 | NW_004515991.1 | scaffold553 | 480270                  | AA                              | GG                 | GG               | INTERGENIC      |               |                    |                    |
| SNP_76902_A_515452 | NW_004515991.1 | scaffold553 | 515452                  | AA                              | GG                 | GG               | INTERGENIC      |               |                    |                    |
| SNP_76903_A_527036 | NW_004515991.1 | scaffold553 | 527036                  | TT                              | CC                 | CC               | INTERGENIC      |               |                    |                    |
| SNP_76904_A_583102 | NW_004515991.1 | scaffold553 | 583102                  | TT                              | CC                 | CC               | INTERGENIC      |               |                    |                    |
| SNP_76905_A_583173 | NW_004515991.1 | scaffold553 | 583173                  | AA                              | GG                 | GG               | INTERGENIC      |               |                    |                    |
| SNP_76906_A_583454 | NW_004515991.1 | scaffold553 | 583454                  | TT                              | GG                 | GG               | INTERGENIC      |               |                    |                    |
| SNP_76908_A_583476 | NW_004515991.1 | scaffold553 | 583476                  | AA                              | CC                 | CC               | INTERGENIC      |               |                    |                    |
| SNP_76909_A_592157 | NW_004515991.1 | scaffold553 | 592157                  | GG                              | AA                 | AA               | INTERGENIC      |               |                    |                    |
| SNP_76910_A_692983 | NW_004515991.1 | scaffold553 | 692983                  | AA                              | TT                 | TT               | INTERGENIC      |               |                    |                    |
| SNP_76911_A_723238 | NW_004515991.1 | scaffold553 | 723238                  | CC                              | AA                 | AA               | INTERGENIC      |               |                    |                    |

| SNPs IDs           | Chromosome IDs | Chromosomes | Physical positions (bp) | CDC Frontier (Reference genome) | (Pusa 1103 & HPNB) | (ILWC 46 & LPNB) | Sequence Components of genome | Gene accession IDs | Putative functions                  |
|--------------------|----------------|-------------|-------------------------|---------------------------------|--------------------|------------------|-------------------------------|--------------------|-------------------------------------|
| SNP_76912_A_75525  | NW_004515991.1 | scaffold553 | 75525                   | AA                              | GG                 | GG               | INTERGENIC                    |                    |                                     |
| SNP_76913_A_766770 | NW_004515991.1 | scaffold553 | 766770                  | AA                              | GG                 | GG               | INTERGENIC                    |                    |                                     |
| SNP_76914_A_766771 | NW_004515991.1 | scaffold553 | 766771                  | GG                              | CC                 | CC               | INTERGENIC                    |                    |                                     |
| SNP_76915_A_766984 | NW_004515991.1 | scaffold553 | 766984                  | TT                              | CC                 | CC               | INTERGENIC                    |                    |                                     |
| SNP_76916_A_766985 | NW_004515991.1 | scaffold553 | 766985                  | CC                              | TT                 | TT               | INTERGENIC                    |                    |                                     |
| SNP_76917_A_766986 | NW_004515991.1 | scaffold553 | 766986                  | CC                              | TT                 | TT               | INTERGENIC                    |                    |                                     |
| SNP_76918_A_779157 | NW_004515991.1 | scaffold553 | 779157                  | AA                              | GG                 | GG               | INTRON                        | 101508958          | agamous-like MADS-box protein AGL12 |
| SNP_76919_A_790908 | NW_004515991.1 | scaffold553 | 790908                  | GG                              | AA                 | AA               | INTERGENIC                    |                    |                                     |
| SNP_76920_A_801916 | NW_004515991.1 | scaffold553 | 801916                  | GG                              | AA                 | AA               | INTERGENIC                    |                    |                                     |
| SNP_76921_A_812439 | NW_004515991.1 | scaffold553 | 812439                  | AA                              | TT                 | TT               | INTERGENIC                    |                    |                                     |
| SNP_76922_A_823502 | NW_004515991.1 | scaffold553 | 823502                  | CC                              | TT                 | TT               | INTERGENIC                    |                    |                                     |
| SNP_76923_A_839443 | NW_004515991.1 | scaffold553 | 839443                  | AA                              | CC                 | CC               | INTERGENIC                    |                    |                                     |
| SNP_76924_A_839460 | NW_004515991.1 | scaffold553 | 839460                  | TT                              | CC                 | CC               | INTERGENIC                    |                    |                                     |
| SNP_76925_A_841264 | NW_004515991.1 | scaffold553 | 841264                  | TT                              | CC                 | CC               | INTERGENIC                    |                    |                                     |
| SNP_76926_A_842101 | NW_004515991.1 | scaffold553 | 842101                  | AA                              | GG                 | GG               | INTERGENIC                    |                    |                                     |
| SNP_76927_A_842146 | NW_004515991.1 | scaffold553 | 842146                  | CC                              | AA                 | AA               | INTERGENIC                    |                    |                                     |
| SNP_76928_A_842152 | NW_004515991.1 | scaffold553 | 842152                  | TT                              | CC                 | CC               | INTERGENIC                    |                    |                                     |
| SNP_76929_A_842197 | NW_004515991.1 | scaffold553 | 842197                  | TT                              | CC                 | CC               | INTERGENIC                    |                    |                                     |
| SNP_76930_A_842215 | NW_004515991.1 | scaffold553 | 842215                  | GG                              | CC                 | CC               | INTERGENIC                    |                    |                                     |
| SNP_76931_A_843188 | NW_004515991.1 | scaffold553 | 843188                  | GG                              | AA                 | AA               | INTERGENIC                    |                    |                                     |
| SNP_76933_A_871861 | NW_004515991.1 | scaffold553 | 871861                  | AA                              | CC                 | CC               | INTERGENIC                    |                    |                                     |
| SNP_76934_A_915219 | NW_004515991.1 | scaffold553 | 915219                  | CC                              | TT                 | TT               | INTERGENIC                    |                    |                                     |

| SNPs IDs           | Chromosome IDs | Chromosomes | Physical positions (bp) | CDC Frontier (Reference genome) | (Pusa 1103 & HPNB) | (ILWC 46 & LPNB) | Sequence genome | Components of | Gene accession IDs | Putative functions |
|--------------------|----------------|-------------|-------------------------|---------------------------------|--------------------|------------------|-----------------|---------------|--------------------|--------------------|
| SNP_76935_A_947333 | NW_004515991.1 | scaffold553 | 947333                  | CC                              | TT                 | TT               | INTERGENIC      |               |                    |                    |
| SNP_76936_A_824    | NW_004515992.1 | scaffold556 | 824                     | TT                              | AA                 | AA               | INTERGENIC      |               |                    |                    |
| SNP_76937_A_863    | NW_004515992.1 | scaffold556 | 863                     | TT                              | AA                 | AA               | INTERGENIC      |               |                    |                    |
| SNP_76938_A_885    | NW_004515992.1 | scaffold556 | 885                     | TT                              | CC                 | CC               | INTERGENIC      |               |                    |                    |
| SNP_76939_A_905    | NW_004515992.1 | scaffold556 | 905                     | AA                              | CC                 | CC               | INTERGENIC      |               |                    |                    |
| SNP_76940_A_948    | NW_004515992.1 | scaffold556 | 948                     | AA                              | TT                 | TT               | INTERGENIC      |               |                    |                    |
| SNP_76941_A_960    | NW_004515992.1 | scaffold556 | 960                     | TT                              | GG                 | GG               | INTERGENIC      |               |                    |                    |
| SNP_76942_A_1059   | NW_004515992.1 | scaffold556 | 1059                    | TT                              | AA                 | AA               | INTERGENIC      |               |                    |                    |
| SNP_76943_A_1105   | NW_004515992.1 | scaffold556 | 1105                    | CC                              | GG                 | GG               | INTERGENIC      |               |                    |                    |
| SNP_76944_A_1109   | NW_004515992.1 | scaffold556 | 1109                    | GG                              | TT                 | TT               | INTERGENIC      |               |                    |                    |
| SNP_76945_A_1120   | NW_004515992.1 | scaffold556 | 1120                    | TT                              | GG                 | GG               | INTERGENIC      |               |                    |                    |
| SNP_76946_A_1123   | NW_004515992.1 | scaffold556 | 1123                    | AA                              | GG                 | GG               | INTERGENIC      |               |                    |                    |
| SNP_76947_A_1129   | NW_004515992.1 | scaffold556 | 1129                    | TT                              | GG                 | GG               | INTERGENIC      |               |                    |                    |
| SNP_76948_A_1182   | NW_004515992.1 | scaffold556 | 1182                    | AA                              | TT                 | TT               | INTERGENIC      |               |                    |                    |
| SNP_76949_A_1199   | NW_004515992.1 | scaffold556 | 1199                    | GG                              | AA                 | AA               | INTERGENIC      |               |                    |                    |
| SNP_76950_A_1290   | NW_004515992.1 | scaffold556 | 1290                    | AA                              | GG                 | GG               | INTERGENIC      |               |                    |                    |
| SNP_76951_A_1666   | NW_004515992.1 | scaffold556 | 1666                    | GG                              | TT                 | TT               | INTERGENIC      |               |                    |                    |
| SNP_76952_A_1784   | NW_004515992.1 | scaffold556 | 1784                    | AA                              | GG                 | GG               | INTERGENIC      |               |                    |                    |
| SNP_76954_A_1810   | NW_004515992.1 | scaffold556 | 1810                    | TT                              | CC                 | CC               | INTERGENIC      |               |                    |                    |
| SNP_76955_A_1821   | NW_004515992.1 | scaffold556 | 1821                    | CC                              | GG                 | GG               | INTERGENIC      |               |                    |                    |
| SNP_76956_A_1951   | NW_004515992.1 | scaffold556 | 1951                    | TT                              | AA                 | AA               | INTERGENIC      |               |                    |                    |
| SNP_76957_A_2614   | NW_004515992.1 | scaffold556 | 2614                    | GG                              | CC                 | CC               | INTERGENIC      |               |                    |                    |

| SNPs IDs          | Chromosome IDs | Chromosomes | Physical positions (bp) | CDC Frontier (Reference genome) | (Pusa 1103 & HPNB) | (ILWC 46 & LPNB) | Sequence Components of genome | Gene accession IDs | Putative functions                         |
|-------------------|----------------|-------------|-------------------------|---------------------------------|--------------------|------------------|-------------------------------|--------------------|--------------------------------------------|
| SNP_76958_A_2901  | NW_004515992.1 | scaffold556 | 2901                    | AA                              | TT                 | TT               | INTERGENIC                    |                    |                                            |
| SNP_76959_A_2931  | NW_004515992.1 | scaffold556 | 2931                    | AA                              | TT                 | TT               | INTERGENIC                    |                    |                                            |
| SNP_76960_A_2934  | NW_004515992.1 | scaffold556 | 2934                    | TT                              | GG                 | GG               | INTERGENIC                    |                    |                                            |
| SNP_76961_A_2946  | NW_004515992.1 | scaffold556 | 2946                    | TT                              | AA                 | AA               | INTERGENIC                    |                    |                                            |
| SNP_76962_A_3010  | NW_004515992.1 | scaffold556 | 3010                    | TT                              | CC                 | CC               | INTERGENIC                    |                    |                                            |
| SNP_76963_A_3041  | NW_004515992.1 | scaffold556 | 3041                    | CC                              | TT                 | TT               | INTERGENIC                    |                    |                                            |
| SNP_76964_A_3153  | NW_004515992.1 | scaffold556 | 3153                    | TT                              | CC                 | CC               | INTERGENIC                    |                    |                                            |
| SNP_76965_A_3171  | NW_004515992.1 | scaffold556 | 3171                    | TT                              | GG                 | GG               | INTERGENIC                    |                    |                                            |
| SNP_76966_A_3292  | NW_004515992.1 | scaffold556 | 3292                    | GG                              | CC                 | CC               | INTERGENIC                    |                    |                                            |
| SNP_76967_A_3368  | NW_004515992.1 | scaffold556 | 3368                    | AA                              | TT                 | TT               | INTERGENIC                    |                    |                                            |
| SNP_76968_A_3369  | NW_004515992.1 | scaffold556 | 3369                    | TT                              | GG                 | GG               | INTERGENIC                    |                    |                                            |
| SNP_76969_A_3689  | NW_004515992.1 | scaffold556 | 3689                    | AA                              | TT                 | TT               | INTERGENIC                    |                    |                                            |
| SNP_76970_A_5217  | NW_004515993.1 | scaffold557 | 5217                    | AA                              | CC                 | CC               | INTERGENIC                    |                    |                                            |
| SNP_76971_A_5261  | NW_004515993.1 | scaffold557 | 5261                    | CC                              | TT                 | TT               | INTERGENIC                    |                    |                                            |
| SNP_76972_A_1929  | NW_004515994.1 | scaffold558 | 1929                    | TT                              | CC                 | CC               | INTERGENIC                    |                    |                                            |
| SNP_76973_A_28639 | NW_004515995.1 | scaffold559 | 28639                   | AA                              | GG                 | GG               | INTERGENIC                    |                    |                                            |
| SNP_76974_A_35249 | NW_004515995.1 | scaffold559 | 35249                   | CC                              | TT                 | TT               | INTERGENIC                    |                    |                                            |
| SNP_76975_A_35294 | NW_004515995.1 | scaffold559 | 35294                   | CC                              | TT                 | TT               | INTERGENIC                    |                    |                                            |
| SNP_76976_A_42670 | NW_004515995.1 | scaffold559 | 42670                   | TT                              | AA                 | AA               | INTERGENIC                    |                    |                                            |
| SNP_76977_A_51767 | NW_004515995.1 | scaffold559 | 51767                   | TT                              | GG                 | GG               | INTRON                        | 101513140          | pleiotropic drug resistance protein 1-like |
| SNP_76978_A_61714 | NW_004515995.1 | scaffold559 | 61714                   | GG                              | CC                 | CC               | INTERGENIC                    |                    |                                            |
| SNP_76979_A_61748 | NW_004515995.1 | scaffold559 | 61748                   | CC                              | GG                 | GG               | INTERGENIC                    |                    |                                            |

| SNPs IDs          | Chromosome IDs | Chromosomes | Physical positions (bp) | CDC Frontier (Reference genome) | (Pusa 1103 & HPNB) | (ILWC 46 & LPNB) | Sequence genome | Components of | Gene accession IDs | Putative functions |
|-------------------|----------------|-------------|-------------------------|---------------------------------|--------------------|------------------|-----------------|---------------|--------------------|--------------------|
| SNP_76980_A_61992 | NW_004515995.1 | scaffold559 | 61992                   | AA                              | TT                 | TT               | INTERGENIC      |               |                    |                    |
| SNP_76981_A_62011 | NW_004515995.1 | scaffold559 | 62011                   | CC                              | TT                 | TT               | INTERGENIC      |               |                    |                    |
| SNP_76982_A_62534 | NW_004515995.1 | scaffold559 | 62534                   | TT                              | AA                 | AA               | INTERGENIC      |               |                    |                    |
| SNP_76983_A_62672 | NW_004515995.1 | scaffold559 | 62672                   | TT                              | CC                 | CC               | INTERGENIC      |               |                    |                    |
| SNP_76984_A_62680 | NW_004515995.1 | scaffold559 | 62680                   | GG                              | AA                 | AA               | INTERGENIC      |               |                    |                    |
| SNP_76985_A_62694 | NW_004515995.1 | scaffold559 | 62694                   | TT                              | AA                 | AA               | INTERGENIC      |               |                    |                    |
| SNP_76986_A_62701 | NW_004515995.1 | scaffold559 | 62701                   | CC                              | TT                 | TT               | INTERGENIC      |               |                    |                    |
| SNP_76987_A_62751 | NW_004515995.1 | scaffold559 | 62751                   | AA                              | TT                 | TT               | INTERGENIC      |               |                    |                    |
| SNP_76988_A_62758 | NW_004515995.1 | scaffold559 | 62758                   | GG                              | TT                 | TT               | INTERGENIC      |               |                    |                    |
| SNP_76989_A_62794 | NW_004515995.1 | scaffold559 | 62794                   | TT                              | AA                 | AA               | INTERGENIC      |               |                    |                    |
| SNP_76990_A_62813 | NW_004515995.1 | scaffold559 | 62813                   | GG                              | CC                 | CC               | INTERGENIC      |               |                    |                    |
| SNP_76991_A_62831 | NW_004515995.1 | scaffold559 | 62831                   | GG                              | AA                 | AA               | INTERGENIC      |               |                    |                    |
| SNP_76992_A_62848 | NW_004515995.1 | scaffold559 | 62848                   | GG                              | AA                 | AA               | INTERGENIC      |               |                    |                    |
| SNP_76993_A_62854 | NW_004515995.1 | scaffold559 | 62854                   | TT                              | CC                 | CC               | INTERGENIC      |               |                    |                    |
| SNP_76994_A_62899 | NW_004515995.1 | scaffold559 | 62899                   | TT                              | AA                 | AA               | INTERGENIC      |               |                    |                    |
| SNP_76995_A_62916 | NW_004515995.1 | scaffold559 | 62916                   | GG                              | TT                 | TT               | INTERGENIC      |               |                    |                    |
| SNP_76996_A_62928 | NW_004515995.1 | scaffold559 | 62928                   | CC                              | TT                 | TT               | INTERGENIC      |               |                    |                    |
| SNP_76997_A_62932 | NW_004515995.1 | scaffold559 | 62932                   | GG                              | TT                 | TT               | INTERGENIC      |               |                    |                    |
| SNP_76998_A_62938 | NW_004515995.1 | scaffold559 | 62938                   | GG                              | TT                 | TT               | INTERGENIC      |               |                    |                    |
| SNP_76999_A_62999 | NW_004515995.1 | scaffold559 | 62999                   | AA                              | GG                 | GG               | INTERGENIC      |               |                    |                    |
| SNP_77000_A_63013 | NW_004515995.1 | scaffold559 | 63013                   | GG                              | TT                 | TT               | INTERGENIC      |               |                    |                    |
| SNP_77001_A_63017 | NW_004515995.1 | scaffold559 | 63017                   | GG                              | AA                 | AA               | INTERGENIC      |               |                    |                    |

| SNPs IDs           | Chromosome IDs | Chromosomes | Physical positions (bp) | CDC Frontier (Reference genome) | (Pusa 1103 & HPNB) | (ILWC 46 & LPNB) | Sequence genome | Components of | Gene accession IDs | Putative functions |
|--------------------|----------------|-------------|-------------------------|---------------------------------|--------------------|------------------|-----------------|---------------|--------------------|--------------------|
| SNP_77002_A_63032  | NW_004515995.1 | scaffold559 | 63032                   | TT                              | CC                 | CC               | INTERGENIC      |               |                    |                    |
| SNP_77003_A_75088  | NW_004515995.1 | scaffold559 | 75088                   | AA                              | CC                 | CC               | INTERGENIC      |               |                    |                    |
| SNP_77004_A_75131  | NW_004515995.1 | scaffold559 | 75131                   | AA                              | TT                 | TT               | INTERGENIC      |               |                    |                    |
| SNP_77005_A_92847  | NW_004515995.1 | scaffold559 | 92847                   | AA                              | CC                 | CC               | INTERGENIC      |               |                    |                    |
| SNP_77006_A_92848  | NW_004515995.1 | scaffold559 | 92848                   | GG                              | TT                 | TT               | INTERGENIC      |               |                    |                    |
| SNP_77007_A_92887  | NW_004515995.1 | scaffold559 | 92887                   | TT                              | AA                 | AA               | INTERGENIC      |               |                    |                    |
| SNP_77008_A_4649   | NW_004515996.1 | scaffold560 | 4649                    | AA                              | GG                 | GG               | INTERGENIC      |               |                    |                    |
| SNP_77009_A_16255  | NW_004515996.1 | scaffold560 | 16255                   | CC                              | TT                 | TT               | INTERGENIC      |               |                    |                    |
| SNP_77010_A_16560  | NW_004515996.1 | scaffold560 | 16560                   | CC                              | TT                 | TT               | INTERGENIC      |               |                    |                    |
| SNP_77011_A_16582  | NW_004515996.1 | scaffold560 | 16582                   | GG                              | TT                 | TT               | INTERGENIC      |               |                    |                    |
| SNP_77012_A_16589  | NW_004515996.1 | scaffold560 | 16589                   | TT                              | CC                 | CC               | INTERGENIC      |               |                    |                    |
| SNP_77013_A_20504  | NW_004515996.1 | scaffold560 | 20504                   | GG                              | AA                 | AA               | INTERGENIC      |               |                    |                    |
| SNP_77014_A_28821  | NW_004515996.1 | scaffold560 | 28821                   | CC                              | AA                 | AA               | INTERGENIC      |               |                    |                    |
| SNP_77016_A_33848  | NW_004515996.1 | scaffold560 | 33848                   | TT                              | CC                 | CC               | INTERGENIC      |               |                    |                    |
| SNP_77017_A_69131  | NW_004515996.1 | scaffold560 | 69131                   | GG                              | AA                 | AA               | INTERGENIC      |               |                    |                    |
| SNP_77018_A_117523 | NW_004515996.1 | scaffold560 | 117523                  | TT                              | CC                 | CC               | INTERGENIC      |               |                    |                    |
| SNP_77019_A_117529 | NW_004515996.1 | scaffold560 | 117529                  | CC                              | TT                 | TT               | INTERGENIC      |               |                    |                    |
| SNP_77020_A_117532 | NW_004515996.1 | scaffold560 | 117532                  | CC                              | TT                 | TT               | INTERGENIC      |               |                    |                    |
| SNP_77021_A_117535 | NW_004515996.1 | scaffold560 | 117535                  | GG                              | AA                 | AA               | INTERGENIC      |               |                    |                    |
| SNP_77022_A_117593 | NW_004515996.1 | scaffold560 | 117593                  | TT                              | CC                 | CC               | INTERGENIC      |               |                    |                    |
| SNP_77023_A_117596 | NW_004515996.1 | scaffold560 | 117596                  | GG                              | AA                 | AA               | INTERGENIC      |               |                    |                    |
| SNP_77024_A_117598 | NW_004515996.1 | scaffold560 | 117598                  | GG                              | TT                 | TT               | INTERGENIC      |               |                    |                    |

| SNPs IDs           | Chromosome IDs | Chromosomes | Physical positions (bp) | CDC Frontier (Reference genome) | (Pusa 1103 & HPNB) | (ILWC 46 & LPNB) | Sequence Components of genome | Gene accession IDs | Putative functions           |
|--------------------|----------------|-------------|-------------------------|---------------------------------|--------------------|------------------|-------------------------------|--------------------|------------------------------|
| SNP_77025_A_117601 | NW_004515996.1 | scaffold560 | 117601                  | TT                              | GG                 | GG               | INTERGENIC                    |                    |                              |
| SNP_77026_A_117613 | NW_004515996.1 | scaffold560 | 117613                  | TT                              | CC                 | CC               | INTERGENIC                    |                    |                              |
| SNP_77027_A_117628 | NW_004515996.1 | scaffold560 | 117628                  | AA                              | GG                 | GG               | INTERGENIC                    |                    |                              |
| SNP_77028_A_129767 | NW_004515996.1 | scaffold560 | 129767                  | TT                              | AA                 | AA               | INTERGENIC                    |                    |                              |
| SNP_77029_A_132126 | NW_004515996.1 | scaffold560 | 132126                  | AA                              | TT                 | TT               | INTERGENIC                    |                    |                              |
| SNP_77031_A_160479 | NW_004515996.1 | scaffold560 | 160479                  | AA                              | TT                 | TT               | INTERGENIC                    |                    |                              |
| SNP_77032_A_160510 | NW_004515996.1 | scaffold560 | 160510                  | TT                              | CC                 | CC               | INTERGENIC                    |                    |                              |
| SNP_77033_A_160637 | NW_004515996.1 | scaffold560 | 160637                  | CC                              | TT                 | TT               | INTERGENIC                    |                    |                              |
| SNP_77034_A_160692 | NW_004515996.1 | scaffold560 | 160692                  | TT                              | AA                 | AA               | INTERGENIC                    |                    |                              |
| SNP_77036_A_160895 | NW_004515996.1 | scaffold560 | 160895                  | TT                              | CC                 | CC               | INTERGENIC                    |                    |                              |
| SNP_77037_A_10452  | NW_004515997.1 | scaffold561 | 10452                   | TT                              | GG                 | GG               | INTERGENIC                    |                    |                              |
| SNP_77038_A_10464  | NW_004515997.1 | scaffold561 | 10464                   | GG                              | AA                 | AA               | INTERGENIC                    |                    |                              |
| SNP_77039_A_22246  | NW_004515997.1 | scaffold561 | 22246                   | GG                              | AA                 | AA               | INTERGENIC                    |                    |                              |
| SNP_77040_A_25045  | NW_004515997.1 | scaffold561 | 25045                   | CC                              | AA                 | AA               | DRR                           | 101514005          | uncharacterized LOC101514005 |
| SNP_77041_A_25167  | NW_004515997.1 | scaffold561 | 25167                   | TT                              | CC                 | CC               | DRR                           | 101514005          | uncharacterized LOC101514005 |
| SNP_77042_A_25168  | NW_004515997.1 | scaffold561 | 25168                   | CC                              | TT                 | TT               | DRR                           | 101514005          | uncharacterized LOC101514005 |
| SNP_77043_A_25380  | NW_004515997.1 | scaffold561 | 25380                   | AA                              | CC                 | CC               | DRR                           | 101514005          | uncharacterized LOC101514005 |
| SNP_77045_A_28735  | NW_004515997.1 | scaffold561 | 28735                   | AA                              | TT                 | TT               | URR                           | 101514005          | uncharacterized LOC101514005 |
| SNP_77046_A_28894  | NW_004515997.1 | scaffold561 | 28894                   | AA                              | GG                 | GG               | URR                           | 101514005          | uncharacterized LOC101514005 |
| SNP_77047_A_28962  | NW_004515997.1 | scaffold561 | 28962                   | TT                              | GG                 | GG               | URR                           | 101514005          | uncharacterized LOC101514005 |
| SNP_77048_A_31365  | NW_004515997.1 | scaffold561 | 31365                   | TT                              | AA                 | AA               | INTERGENIC                    |                    |                              |
| SNP_77049_A_31648  | NW_004515997.1 | scaffold561 | 31648                   | AA                              | GG                 | GG               | INTERGENIC                    |                    |                              |



| SNPs IDs           | Chromosome IDs | Chromosomes | Physical positions (bp) | CDC Frontier (Reference genome) | (Pusa 1103 & HPNB) | (ILWC 46 & LPNB) | Sequence Components of genome | Gene accession IDs | Putative functions                               |
|--------------------|----------------|-------------|-------------------------|---------------------------------|--------------------|------------------|-------------------------------|--------------------|--------------------------------------------------|
| SNP_77050_A_31653  | NW_004515997.1 | scaffold561 | 31653                   | AA                              | CC                 | CC               | INTERGENIC                    |                    |                                                  |
| SNP_77051_A_31802  | NW_004515997.1 | scaffold561 | 31802                   | AA                              | GG                 | GG               | INTERGENIC                    |                    |                                                  |
| SNP_77052_A_33329  | NW_004515997.1 | scaffold561 | 33329                   | CC                              | AA                 | AA               | DRR                           | 101513775          | myosin tail region-interacting protein MT11-like |
| SNP_77053_A_39425  | NW_004515997.1 | scaffold561 | 39425                   | CC                              | TT                 | TT               | DRR                           | 101514552          | uncharacterized LOC101514552                     |
| SNP_77054_A_39519  | NW_004515997.1 | scaffold561 | 39519                   | CC                              | TT                 | TT               | DRR                           | 101514552          | uncharacterized LOC101514552                     |
| SNP_77055_A_39759  | NW_004515997.1 | scaffold561 | 39759                   | AA                              | GG                 | GG               | URR                           | 101489603          | Unknown function                                 |
| SNP_77056_A_39764  | NW_004515997.1 | scaffold561 | 39764                   | AA                              | GG                 | GG               | URR                           | 101489603          | Unknown function                                 |
| SNP_77057_A_84205  | NW_004515997.1 | scaffold561 | 84205                   | GG                              | TT                 | TT               | INTERGENIC                    |                    |                                                  |
| SNP_77058_A_84566  | NW_004515997.1 | scaffold561 | 84566                   | GG                              | TT                 | TT               | INTERGENIC                    |                    |                                                  |
| SNP_77059_A_90774  | NW_004515997.1 | scaffold561 | 90774                   | TT                              | CC                 | CC               | INTRON                        | 101490577          | steroid 5-alpha-reductase DET2                   |
| SNP_77060_A_176940 | NW_004515997.1 | scaffold561 | 176940                  | TT                              | CC                 | CC               | INTERGENIC                    |                    |                                                  |
| SNP_77061_A_183380 | NW_004515997.1 | scaffold561 | 183380                  | TT                              | AA                 | AA               | INTERGENIC                    |                    |                                                  |
| SNP_77063_A_78983  | NW_004515998.1 | scaffold562 | 78983                   | CC                              | TT                 | TT               | INTERGENIC                    |                    |                                                  |
| SNP_77064_A_79946  | NW_004515998.1 | scaffold562 | 79946                   | TT                              | CC                 | CC               | INTERGENIC                    |                    |                                                  |
| SNP_77065_A_82871  | NW_004515998.1 | scaffold562 | 82871                   | AA                              | TT                 | TT               | INTERGENIC                    |                    |                                                  |
| SNP_77066_A_125295 | NW_004515998.1 | scaffold562 | 125295                  | AA                              | TT                 | TT               | INTERGENIC                    |                    |                                                  |
| SNP_77067_A_148388 | NW_004515998.1 | scaffold562 | 148388                  | CC                              | TT                 | TT               | INTERGENIC                    |                    |                                                  |
| SNP_77068_A_158478 | NW_004515998.1 | scaffold562 | 158478                  | AA                              | GG                 | GG               | DRR                           | 101492632          | non-specific lipid-transfer protein 1-like       |
| SNP_77069_A_174132 | NW_004515998.1 | scaffold562 | 174132                  | CC                              | GG                 | GG               | INTERGENIC                    |                    |                                                  |
| SNP_77070_A_197475 | NW_004515998.1 | scaffold562 | 197475                  | TT                              | CC                 | CC               | INTERGENIC                    |                    |                                                  |
| SNP_77071_A_214321 | NW_004515998.1 | scaffold562 | 214321                  | TT                              | CC                 | CC               | INTERGENIC                    |                    |                                                  |
| SNP_77072_A_214323 | NW_004515998.1 | scaffold562 | 214323                  | TT                              | CC                 | CC               | INTERGENIC                    |                    |                                                  |

| SNPs IDs           | Chromosome IDs | Chromosomes | Physical positions (bp) | CDC Frontier genome (Reference genome) | (Pusa 1103 & HPNB) | (ILWC 46 & LPNB) | Sequence genome | Components of | Gene accession IDs | Putative functions |
|--------------------|----------------|-------------|-------------------------|----------------------------------------|--------------------|------------------|-----------------|---------------|--------------------|--------------------|
| SNP_77073_A_214330 | NW_004515998.1 | scaffold562 | 214330                  | CC                                     | AA                 | AA               | INTERGENIC      |               |                    |                    |
| SNP_77074_A_214404 | NW_004515998.1 | scaffold562 | 214404                  | GG                                     | CC                 | CC               | INTERGENIC      |               |                    |                    |
| SNP_77075_A_214429 | NW_004515998.1 | scaffold562 | 214429                  | AA                                     | GG                 | GG               | INTERGENIC      |               |                    |                    |
| SNP_77076_A_219407 | NW_004515998.1 | scaffold562 | 219407                  | TT                                     | CC                 | CC               | INTERGENIC      |               |                    |                    |
| SNP_77077_A_219459 | NW_004515998.1 | scaffold562 | 219459                  | TT                                     | CC                 | CC               | INTERGENIC      |               |                    |                    |
| SNP_77078_A_219483 | NW_004515998.1 | scaffold562 | 219483                  | TT                                     | CC                 | CC               | INTERGENIC      |               |                    |                    |
| SNP_77079_A_219802 | NW_004515998.1 | scaffold562 | 219802                  | GG                                     | TT                 | TT               | INTERGENIC      |               |                    |                    |
| SNP_77080_A_221452 | NW_004515998.1 | scaffold562 | 221452                  | TT                                     | CC                 | CC               | INTERGENIC      |               |                    |                    |
| SNP_77081_A_221482 | NW_004515998.1 | scaffold562 | 221482                  | CC                                     | TT                 | TT               | INTERGENIC      |               |                    |                    |
| SNP_77082_A_221777 | NW_004515998.1 | scaffold562 | 221777                  | AA                                     | GG                 | GG               | INTERGENIC      |               |                    |                    |
| SNP_77083_A_240790 | NW_004515998.1 | scaffold562 | 240790                  | GG                                     | AA                 | AA               | INTERGENIC      |               |                    |                    |
| SNP_77084_A_254083 | NW_004515998.1 | scaffold562 | 254083                  | CC                                     | AA                 | AA               | INTERGENIC      |               |                    |                    |
| SNP_77085_A_256797 | NW_004515998.1 | scaffold562 | 256797                  | CC                                     | TT                 | TT               | INTERGENIC      |               |                    |                    |
| SNP_77086_A_256813 | NW_004515998.1 | scaffold562 | 256813                  | TT                                     | CC                 | CC               | INTERGENIC      |               |                    |                    |
| SNP_77087_A_256878 | NW_004515998.1 | scaffold562 | 256878                  | TT                                     | CC                 | CC               | INTERGENIC      |               |                    |                    |
| SNP_77088_A_256881 | NW_004515998.1 | scaffold562 | 256881                  | CC                                     | TT                 | TT               | INTERGENIC      |               |                    |                    |
| SNP_77089_A_256902 | NW_004515998.1 | scaffold562 | 256902                  | TT                                     | AA                 | AA               | INTERGENIC      |               |                    |                    |
| SNP_77090_A_256912 | NW_004515998.1 | scaffold562 | 256912                  | TT                                     | CC                 | CC               | INTERGENIC      |               |                    |                    |
| SNP_77091_A_257031 | NW_004515998.1 | scaffold562 | 257031                  | GG                                     | TT                 | TT               | INTERGENIC      |               |                    |                    |
| SNP_77092_A_257085 | NW_004515998.1 | scaffold562 | 257085                  | CC                                     | TT                 | TT               | INTERGENIC      |               |                    |                    |
| SNP_77093_A_257105 | NW_004515998.1 | scaffold562 | 257105                  | GG                                     | AA                 | AA               | INTERGENIC      |               |                    |                    |
| SNP_77094_A_257244 | NW_004515998.1 | scaffold562 | 257244                  | TT                                     | AA                 | AA               | INTERGENIC      |               |                    |                    |

| SNPs IDs           | Chromosome IDs | Chromosomes | Physical positions (bp) | CDC Frontier (Reference genome) | (Pusa 1103 & HPNB) | (ILWC 46 & LPNB) | Sequence genome | Components of | Gene accession IDs                            | Putative functions |
|--------------------|----------------|-------------|-------------------------|---------------------------------|--------------------|------------------|-----------------|---------------|-----------------------------------------------|--------------------|
| SNP_77095_A_257288 | NW_004515998.1 | scaffold562 | 257288                  | GG                              | CC                 | CC               | INTERGENIC      |               |                                               |                    |
| SNP_77096_A_257318 | NW_004515998.1 | scaffold562 | 257318                  | CC                              | GG                 | GG               | INTERGENIC      |               |                                               |                    |
| SNP_77097_A_257340 | NW_004515998.1 | scaffold562 | 257340                  | GG                              | AA                 | AA               | INTERGENIC      |               |                                               |                    |
| SNP_77098_A_257367 | NW_004515998.1 | scaffold562 | 257367                  | CC                              | AA                 | AA               | INTERGENIC      |               |                                               |                    |
| SNP_77099_A_291577 | NW_004515998.1 | scaffold562 | 291577                  | AA                              | GG                 | GG               | URR             | 101495530     | delta-1-pyrroline-5-carboxylate synthase-like |                    |
| SNP_77100_A_294446 | NW_004515998.1 | scaffold562 | 294446                  | TT                              | CC                 | CC               | INTERGENIC      |               |                                               |                    |
| SNP_77101_A_294845 | NW_004515998.1 | scaffold562 | 294845                  | AA                              | TT                 | TT               | INTERGENIC      |               |                                               |                    |
| SNP_77102_A_294940 | NW_004515998.1 | scaffold562 | 294940                  | CC                              | TT                 | TT               | INTERGENIC      |               |                                               |                    |
| SNP_77103_A_335933 | NW_004515998.1 | scaffold562 | 335933                  | GG                              | AA                 | AA               | INTERGENIC      |               |                                               |                    |
| SNP_77104_A_8991   | NW_004515999.1 | scaffold563 | 8991                    | CC                              | AA                 | AA               | INTERGENIC      |               |                                               |                    |
| SNP_77105_A_9086   | NW_004515999.1 | scaffold563 | 9086                    | AA                              | GG                 | GG               | INTERGENIC      |               |                                               |                    |
| SNP_77106_A_9111   | NW_004515999.1 | scaffold563 | 9111                    | AA                              | GG                 | GG               | INTERGENIC      |               |                                               |                    |
| SNP_77107_A_18515  | NW_004515999.1 | scaffold563 | 18515                   | GG                              | AA                 | AA               | INTERGENIC      |               |                                               |                    |
| SNP_77108_A_18821  | NW_004515999.1 | scaffold563 | 18821                   | CC                              | TT                 | TT               | INTERGENIC      |               |                                               |                    |
| SNP_77109_A_22750  | NW_004515999.1 | scaffold563 | 22750                   | AA                              | CC                 | CC               | INTERGENIC      |               |                                               |                    |
| SNP_77110_A_22789  | NW_004515999.1 | scaffold563 | 22789                   | TT                              | CC                 | CC               | INTERGENIC      |               |                                               |                    |
| SNP_77111_A_22842  | NW_004515999.1 | scaffold563 | 22842                   | CC                              | TT                 | TT               | INTERGENIC      |               |                                               |                    |
| SNP_77112_A_22870  | NW_004515999.1 | scaffold563 | 22870                   | TT                              | AA                 | AA               | INTERGENIC      |               |                                               |                    |
| SNP_77113_A_23031  | NW_004515999.1 | scaffold563 | 23031                   | AA                              | TT                 | TT               | INTERGENIC      |               |                                               |                    |
| SNP_77114_A_23054  | NW_004515999.1 | scaffold563 | 23054                   | AA                              | GG                 | GG               | INTERGENIC      |               |                                               |                    |
| SNP_77115_A_23059  | NW_004515999.1 | scaffold563 | 23059                   | TT                              | CC                 | CC               | INTERGENIC      |               |                                               |                    |
| SNP_77116_A_23150  | NW_004515999.1 | scaffold563 | 23150                   | CC                              | AA                 | AA               | INTERGENIC      |               |                                               |                    |

| SNPs IDs          | Chromosome IDs | Chromosomes | Physical positions (bp) | CDC Frontier (Reference genome) | (Pusa 1103 & HPNB) | (ILWC 46 & LPNB) | Sequence genome | Components of | Gene accession IDs | Putative functions |
|-------------------|----------------|-------------|-------------------------|---------------------------------|--------------------|------------------|-----------------|---------------|--------------------|--------------------|
| SNP_77117_A_23171 | NW_004515999.1 | scaffold563 | 23171                   | CC                              | AA                 | AA               | INTERGENIC      |               |                    |                    |
| SNP_77118_A_23554 | NW_004515999.1 | scaffold563 | 23554                   | GG                              | AA                 | AA               | INTERGENIC      |               |                    |                    |
| SNP_77119_A_2239  | NW_004516000.1 | scaffold564 | 2239                    | TT                              | CC                 | CC               | INTERGENIC      |               |                    |                    |
| SNP_77120_A_2620  | NW_004516000.1 | scaffold564 | 2620                    | AA                              | TT                 | TT               | INTERGENIC      |               |                    |                    |
| SNP_77122_A_3207  | NW_004516000.1 | scaffold564 | 3207                    | GG                              | AA                 | AA               | INTERGENIC      |               |                    |                    |
| SNP_77123_A_3267  | NW_004516000.1 | scaffold564 | 3267                    | GG                              | AA                 | AA               | INTERGENIC      |               |                    |                    |
| SNP_77124_A_3279  | NW_004516000.1 | scaffold564 | 3279                    | TT                              | CC                 | CC               | INTERGENIC      |               |                    |                    |
| SNP_77125_A_3332  | NW_004516000.1 | scaffold564 | 3332                    | TT                              | CC                 | CC               | INTERGENIC      |               |                    |                    |
| SNP_77126_A_3347  | NW_004516000.1 | scaffold564 | 3347                    | AA                              | GG                 | GG               | INTERGENIC      |               |                    |                    |
| SNP_77127_A_3390  | NW_004516000.1 | scaffold564 | 3390                    | AA                              | GG                 | GG               | INTERGENIC      |               |                    |                    |
| SNP_77128_A_3449  | NW_004516000.1 | scaffold564 | 3449                    | TT                              | GG                 | GG               | INTERGENIC      |               |                    |                    |
| SNP_77129_A_3468  | NW_004516000.1 | scaffold564 | 3468                    | TT                              | CC                 | CC               | INTERGENIC      |               |                    |                    |
| SNP_77130_A_3469  | NW_004516000.1 | scaffold564 | 3469                    | CC                              | TT                 | TT               | INTERGENIC      |               |                    |                    |
| SNP_77131_A_3541  | NW_004516000.1 | scaffold564 | 3541                    | CC                              | GG                 | GG               | INTERGENIC      |               |                    |                    |
| SNP_77132_A_3658  | NW_004516000.1 | scaffold564 | 3658                    | AA                              | GG                 | GG               | INTERGENIC      |               |                    |                    |
| SNP_77133_A_3722  | NW_004516000.1 | scaffold564 | 3722                    | AA                              | GG                 | GG               | INTERGENIC      |               |                    |                    |
| SNP_77134_A_3770  | NW_004516000.1 | scaffold564 | 3770                    | CC                              | TT                 | TT               | INTERGENIC      |               |                    |                    |
| SNP_77135_A_3943  | NW_004516000.1 | scaffold564 | 3943                    | GG                              | CC                 | CC               | INTERGENIC      |               |                    |                    |
| SNP_77136_A_3991  | NW_004516000.1 | scaffold564 | 3991                    | AA                              | CC                 | CC               | INTERGENIC      |               |                    |                    |
| SNP_77137_A_4137  | NW_004516000.1 | scaffold564 | 4137                    | TT                              | CC                 | CC               | INTERGENIC      |               |                    |                    |
| SNP_77138_A_4188  | NW_004516000.1 | scaffold564 | 4188                    | GG                              | CC                 | CC               | INTERGENIC      |               |                    |                    |
| SNP_77139_A_4193  | NW_004516000.1 | scaffold564 | 4193                    | TT                              | CC                 | CC               | INTERGENIC      |               |                    |                    |

| SNPs IDs         | Chromosome IDs | Chromosomes | Physical positions (bp) | CDC Frontier (Reference genome) | (Pusa 1103 & HPNB) | (ILWC 46 & LPNB) | Sequence genome | Components of | Gene accession IDs | Putative functions |
|------------------|----------------|-------------|-------------------------|---------------------------------|--------------------|------------------|-----------------|---------------|--------------------|--------------------|
| SNP_77140_A_4820 | NW_004516000.1 | scaffold564 | 4820                    | GG                              | AA                 | AA               | INTERGENIC      |               |                    |                    |
| SNP_77141_A_4873 | NW_004516000.1 | scaffold564 | 4873                    | AA                              | GG                 | GG               | INTERGENIC      |               |                    |                    |
| SNP_77142_A_4940 | NW_004516000.1 | scaffold564 | 4940                    | AA                              | TT                 | TT               | INTERGENIC      |               |                    |                    |
| SNP_77143_A_5069 | NW_004516000.1 | scaffold564 | 5069                    | AA                              | CC                 | CC               | INTERGENIC      |               |                    |                    |
| SNP_77144_A_5084 | NW_004516000.1 | scaffold564 | 5084                    | CC                              | TT                 | TT               | INTERGENIC      |               |                    |                    |
| SNP_77145_A_5104 | NW_004516000.1 | scaffold564 | 5104                    | TT                              | AA                 | AA               | INTERGENIC      |               |                    |                    |
| SNP_77146_A_5105 | NW_004516000.1 | scaffold564 | 5105                    | TT                              | AA                 | AA               | INTERGENIC      |               |                    |                    |
| SNP_77147_A_5108 | NW_004516000.1 | scaffold564 | 5108                    | TT                              | CC                 | CC               | INTERGENIC      |               |                    |                    |
| SNP_77148_A_5127 | NW_004516000.1 | scaffold564 | 5127                    | TT                              | AA                 | AA               | INTERGENIC      |               |                    |                    |
| SNP_77149_A_5186 | NW_004516000.1 | scaffold564 | 5186                    | CC                              | TT                 | TT               | INTERGENIC      |               |                    |                    |
| SNP_77151_A_5299 | NW_004516000.1 | scaffold564 | 5299                    | AA                              | TT                 | TT               | INTERGENIC      |               |                    |                    |
| SNP_77152_A_5314 | NW_004516000.1 | scaffold564 | 5314                    | AA                              | CC                 | CC               | INTERGENIC      |               |                    |                    |
| SNP_77153_A_5401 | NW_004516000.1 | scaffold564 | 5401                    | GG                              | TT                 | TT               | INTERGENIC      |               |                    |                    |
| SNP_77154_A_5451 | NW_004516000.1 | scaffold564 | 5451                    | TT                              | CC                 | CC               | INTERGENIC      |               |                    |                    |
| SNP_77155_A_5539 | NW_004516000.1 | scaffold564 | 5539                    | GG                              | AA                 | AA               | INTERGENIC      |               |                    |                    |
| SNP_77156_A_5758 | NW_004516000.1 | scaffold564 | 5758                    | AA                              | GG                 | GG               | INTERGENIC      |               |                    |                    |
| SNP_77157_A_5850 | NW_004516000.1 | scaffold564 | 5850                    | TT                              | CC                 | CC               | INTERGENIC      |               |                    |                    |
| SNP_77158_A_7199 | NW_004516000.1 | scaffold564 | 7199                    | AA                              | TT                 | TT               | INTERGENIC      |               |                    |                    |
| SNP_77159_A_7237 | NW_004516000.1 | scaffold564 | 7237                    | AA                              | GG                 | GG               | INTERGENIC      |               |                    |                    |
| SNP_77160_A_7275 | NW_004516000.1 | scaffold564 | 7275                    | TT                              | CC                 | CC               | INTERGENIC      |               |                    |                    |
| SNP_77161_A_7367 | NW_004516000.1 | scaffold564 | 7367                    | GG                              | AA                 | AA               | INTERGENIC      |               |                    |                    |
| SNP_77162_A_7384 | NW_004516000.1 | scaffold564 | 7384                    | AA                              | CC                 | CC               | INTERGENIC      |               |                    |                    |

| SNPs IDs          | Chromosome IDs | Chromosomes | Physical positions (bp) | CDC Frontier (Reference genome) | (Pusa 1103 & HPNB) | (ILWC 46 & LPNB) | Sequence genome | Components of | Gene accession IDs | Putative functions |
|-------------------|----------------|-------------|-------------------------|---------------------------------|--------------------|------------------|-----------------|---------------|--------------------|--------------------|
| SNP_77163_A_7402  | NW_004516000.1 | scaffold564 | 7402                    | TT                              | CC                 | CC               | INTERGENIC      |               |                    |                    |
| SNP_77164_A_7447  | NW_004516000.1 | scaffold564 | 7447                    | AA                              | GG                 | GG               | INTERGENIC      |               |                    |                    |
| SNP_77165_A_7562  | NW_004516000.1 | scaffold564 | 7562                    | CC                              | TT                 | TT               | INTERGENIC      |               |                    |                    |
| SNP_77166_A_8223  | NW_004516000.1 | scaffold564 | 8223                    | TT                              | CC                 | CC               | INTERGENIC      |               |                    |                    |
| SNP_77167_A_8228  | NW_004516000.1 | scaffold564 | 8228                    | GG                              | AA                 | AA               | INTERGENIC      |               |                    |                    |
| SNP_77168_A_8270  | NW_004516000.1 | scaffold564 | 8270                    | AA                              | GG                 | GG               | INTERGENIC      |               |                    |                    |
| SNP_77170_A_8416  | NW_004516000.1 | scaffold564 | 8416                    | CC                              | AA                 | AA               | INTERGENIC      |               |                    |                    |
| SNP_77171_A_8417  | NW_004516000.1 | scaffold564 | 8417                    | AA                              | CC                 | CC               | INTERGENIC      |               |                    |                    |
| SNP_77172_A_8541  | NW_004516000.1 | scaffold564 | 8541                    | AA                              | TT                 | TT               | INTERGENIC      |               |                    |                    |
| SNP_77173_A_8545  | NW_004516000.1 | scaffold564 | 8545                    | AA                              | CC                 | CC               | INTERGENIC      |               |                    |                    |
| SNP_77174_A_8568  | NW_004516000.1 | scaffold564 | 8568                    | TT                              | CC                 | CC               | INTERGENIC      |               |                    |                    |
| SNP_77175_A_9057  | NW_004516000.1 | scaffold564 | 9057                    | CC                              | TT                 | TT               | INTERGENIC      |               |                    |                    |
| SNP_77176_A_10285 | NW_004516000.1 | scaffold564 | 10285                   | AA                              | GG                 | GG               | INTERGENIC      |               |                    |                    |
| SNP_77177_A_10339 | NW_004516000.1 | scaffold564 | 10339                   | TT                              | CC                 | CC               | INTERGENIC      |               |                    |                    |
| SNP_77178_A_10341 | NW_004516000.1 | scaffold564 | 10341                   | GG                              | AA                 | AA               | INTERGENIC      |               |                    |                    |
| SNP_77179_A_10391 | NW_004516000.1 | scaffold564 | 10391                   | TT                              | GG                 | GG               | INTERGENIC      |               |                    |                    |
| SNP_77180_A_10437 | NW_004516000.1 | scaffold564 | 10437                   | TT                              | CC                 | CC               | INTERGENIC      |               |                    |                    |
| SNP_77181_A_10516 | NW_004516000.1 | scaffold564 | 10516                   | AA                              | GG                 | GG               | INTERGENIC      |               |                    |                    |
| SNP_77182_A_10519 | NW_004516000.1 | scaffold564 | 10519                   | GG                              | TT                 | TT               | INTERGENIC      |               |                    |                    |
| SNP_77183_A_10546 | NW_004516000.1 | scaffold564 | 10546                   | GG                              | AA                 | AA               | INTERGENIC      |               |                    |                    |
| SNP_77184_A_10819 | NW_004516000.1 | scaffold564 | 10819                   | GG                              | AA                 | AA               | INTERGENIC      |               |                    |                    |
| SNP_77185_A_10885 | NW_004516000.1 | scaffold564 | 10885                   | CC                              | TT                 | TT               | INTERGENIC      |               |                    |                    |

| SNPs IDs          | Chromosome IDs | Chromosomes | Physical positions (bp) | CDC Frontier (Reference genome) | (Pusa 1103 & HPNB) | (ILWC 46 & LPNB) | Sequence genome | Components of | Gene accession IDs | Putative functions |
|-------------------|----------------|-------------|-------------------------|---------------------------------|--------------------|------------------|-----------------|---------------|--------------------|--------------------|
| SNP_77186_A_11067 | NW_004516000.1 | scaffold564 | 11067                   | GG                              | CC                 | CC               | INTERGENIC      |               |                    |                    |
| SNP_77187_A_11095 | NW_004516000.1 | scaffold564 | 11095                   | AA                              | CC                 | CC               | INTERGENIC      |               |                    |                    |
| SNP_77188_A_11161 | NW_004516000.1 | scaffold564 | 11161                   | CC                              | TT                 | TT               | INTERGENIC      |               |                    |                    |
| SNP_77189_A_11342 | NW_004516000.1 | scaffold564 | 11342                   | GG                              | AA                 | AA               | INTERGENIC      |               |                    |                    |
| SNP_77190_A_11347 | NW_004516000.1 | scaffold564 | 11347                   | GG                              | TT                 | TT               | INTERGENIC      |               |                    |                    |
| SNP_77191_A_11730 | NW_004516000.1 | scaffold564 | 11730                   | GG                              | CC                 | CC               | INTERGENIC      |               |                    |                    |
| SNP_77192_A_12317 | NW_004516000.1 | scaffold564 | 12317                   | CC                              | TT                 | TT               | INTERGENIC      |               |                    |                    |
| SNP_77193_A_12770 | NW_004516000.1 | scaffold564 | 12770                   | TT                              | GG                 | GG               | INTERGENIC      |               |                    |                    |
| SNP_77194_A_12831 | NW_004516000.1 | scaffold564 | 12831                   | AA                              | CC                 | CC               | INTERGENIC      |               |                    |                    |
| SNP_77195_A_12928 | NW_004516000.1 | scaffold564 | 12928                   | AA                              | GG                 | GG               | INTERGENIC      |               |                    |                    |
| SNP_77196_A_13521 | NW_004516000.1 | scaffold564 | 13521                   | TT                              | CC                 | CC               | INTERGENIC      |               |                    |                    |
| SNP_77197_A_13580 | NW_004516000.1 | scaffold564 | 13580                   | AA                              | GG                 | GG               | INTERGENIC      |               |                    |                    |
| SNP_77199_A_13934 | NW_004516000.1 | scaffold564 | 13934                   | TT                              | AA                 | AA               | INTERGENIC      |               |                    |                    |
| SNP_77200_A_14553 | NW_004516000.1 | scaffold564 | 14553                   | TT                              | AA                 | AA               | INTERGENIC      |               |                    |                    |
| SNP_77201_A_14575 | NW_004516000.1 | scaffold564 | 14575                   | TT                              | GG                 | GG               | INTERGENIC      |               |                    |                    |
| SNP_77203_A_15186 | NW_004516000.1 | scaffold564 | 15186                   | CC                              | GG                 | GG               | INTERGENIC      |               |                    |                    |
| SNP_77205_A_15264 | NW_004516000.1 | scaffold564 | 15264                   | TT                              | CC                 | CC               | INTERGENIC      |               |                    |                    |
| SNP_77206_A_15450 | NW_004516000.1 | scaffold564 | 15450                   | AA                              | TT                 | TT               | INTERGENIC      |               |                    |                    |
| SNP_77207_A_23687 | NW_004516000.1 | scaffold564 | 23687                   | AA                              | GG                 | GG               | INTERGENIC      |               |                    |                    |
| SNP_77208_A_24131 | NW_004516000.1 | scaffold564 | 24131                   | CC                              | TT                 | TT               | INTERGENIC      |               |                    |                    |
| SNP_77209_A_24167 | NW_004516000.1 | scaffold564 | 24167                   | TT                              | CC                 | CC               | INTERGENIC      |               |                    |                    |
| SNP_77210_A_24297 | NW_004516000.1 | scaffold564 | 24297                   | AA                              | GG                 | GG               | INTERGENIC      |               |                    |                    |

| SNPs IDs          | Chromosome IDs | Chromosomes | Physical positions (bp) | CDC Frontier (Reference genome) | (Pusa 1103 & HPNB) | (ILWC 46 & LPNB) | Sequence genome | Components of | Gene accession IDs | Putative functions |
|-------------------|----------------|-------------|-------------------------|---------------------------------|--------------------|------------------|-----------------|---------------|--------------------|--------------------|
| SNP_77211_A_25890 | NW_004516000.1 | scaffold564 | 25890                   | GG                              | AA                 | AA               | INTERGENIC      |               |                    |                    |
| SNP_77212_A_25896 | NW_004516000.1 | scaffold564 | 25896                   | TT                              | GG                 | GG               | INTERGENIC      |               |                    |                    |
| SNP_77215_A_26166 | NW_004516000.1 | scaffold564 | 26166                   | GG                              | AA                 | AA               | INTERGENIC      |               |                    |                    |
| SNP_77216_A_26212 | NW_004516000.1 | scaffold564 | 26212                   | GG                              | AA                 | AA               | INTERGENIC      |               |                    |                    |
| SNP_77217_A_26247 | NW_004516000.1 | scaffold564 | 26247                   | TT                              | AA                 | AA               | INTERGENIC      |               |                    |                    |
| SNP_77218_A_26249 | NW_004516000.1 | scaffold564 | 26249                   | AA                              | TT                 | TT               | INTERGENIC      |               |                    |                    |
| SNP_77219_A_26444 | NW_004516000.1 | scaffold564 | 26444                   | AA                              | TT                 | TT               | INTERGENIC      |               |                    |                    |
| SNP_77220_A_26457 | NW_004516000.1 | scaffold564 | 26457                   | GG                              | TT                 | TT               | INTERGENIC      |               |                    |                    |
| SNP_77221_A_26504 | NW_004516000.1 | scaffold564 | 26504                   | CC                              | TT                 | TT               | INTERGENIC      |               |                    |                    |
| SNP_77222_A_26518 | NW_004516000.1 | scaffold564 | 26518                   | TT                              | AA                 | AA               | INTERGENIC      |               |                    |                    |
| SNP_77223_A_30076 | NW_004516000.1 | scaffold564 | 30076                   | GG                              | AA                 | AA               | INTERGENIC      |               |                    |                    |
| SNP_77224_A_30151 | NW_004516000.1 | scaffold564 | 30151                   | TT                              | CC                 | CC               | INTERGENIC      |               |                    |                    |
| SNP_77225_A_3775  | NW_004516002.1 | scaffold568 | 3775                    | CC                              | GG                 | GG               | INTERGENIC      |               |                    |                    |
| SNP_77226_A_4022  | NW_004516002.1 | scaffold568 | 4022                    | CC                              | TT                 | TT               | INTERGENIC      |               |                    |                    |
| SNP_77227_A_4046  | NW_004516002.1 | scaffold568 | 4046                    | AA                              | GG                 | GG               | INTERGENIC      |               |                    |                    |
| SNP_77228_A_4170  | NW_004516002.1 | scaffold568 | 4170                    | TT                              | CC                 | CC               | INTERGENIC      |               |                    |                    |
| SNP_77229_A_4463  | NW_004516002.1 | scaffold568 | 4463                    | TT                              | AA                 | AA               | INTERGENIC      |               |                    |                    |
| SNP_77230_A_4671  | NW_004516002.1 | scaffold568 | 4671                    | CC                              | GG                 | GG               | INTERGENIC      |               |                    |                    |
| SNP_77232_A_6664  | NW_004516002.1 | scaffold568 | 6664                    | AA                              | GG                 | GG               | INTERGENIC      |               |                    |                    |
| SNP_77233_A_6665  | NW_004516002.1 | scaffold568 | 6665                    | TT                              | AA                 | AA               | INTERGENIC      |               |                    |                    |
| SNP_77234_A_6873  | NW_004516002.1 | scaffold568 | 6873                    | GG                              | CC                 | CC               | INTERGENIC      |               |                    |                    |
| SNP_77235_A_7135  | NW_004516002.1 | scaffold568 | 7135                    | CC                              | TT                 | TT               | INTERGENIC      |               |                    |                    |



| SNPs IDs          | Chromosome IDs | Chromosomes | Physical positions (bp) | CDC Frontier (Reference genome) | (Pusa 1103 & HPNB) | (ILWC 46 & LPNB) | Sequence genome | Components of | Gene accession IDs | Putative functions |
|-------------------|----------------|-------------|-------------------------|---------------------------------|--------------------|------------------|-----------------|---------------|--------------------|--------------------|
| SNP_77236_A_9591  | NW_004516002.1 | scaffold568 | 9591                    | CC                              | AA                 | AA               | INTERGENIC      |               |                    |                    |
| SNP_77237_A_9631  | NW_004516002.1 | scaffold568 | 9631                    | GG                              | AA                 | AA               | INTERGENIC      |               |                    |                    |
| SNP_77238_A_17602 | NW_004516002.1 | scaffold568 | 17602                   | GG                              | CC                 | CC               | INTERGENIC      |               |                    |                    |
| SNP_77239_A_17607 | NW_004516002.1 | scaffold568 | 17607                   | CC                              | AA                 | AA               | INTERGENIC      |               |                    |                    |
| SNP_77240_A_18292 | NW_004516002.1 | scaffold568 | 18292                   | AA                              | TT                 | TT               | INTERGENIC      |               |                    |                    |
| SNP_77241_A_19486 | NW_004516002.1 | scaffold568 | 19486                   | CC                              | GG                 | GG               | INTERGENIC      |               |                    |                    |
| SNP_77242_A_19797 | NW_004516002.1 | scaffold568 | 19797                   | AA                              | TT                 | TT               | INTERGENIC      |               |                    |                    |
| SNP_77243_A_28773 | NW_004516002.1 | scaffold568 | 28773                   | AA                              | GG                 | GG               | INTERGENIC      |               |                    |                    |
| SNP_77244_A_31896 | NW_004516002.1 | scaffold568 | 31896                   | CC                              | TT                 | TT               | INTERGENIC      |               |                    |                    |
| SNP_77245_A_31924 | NW_004516002.1 | scaffold568 | 31924                   | AA                              | GG                 | GG               | INTERGENIC      |               |                    |                    |
| SNP_77246_A_31985 | NW_004516002.1 | scaffold568 | 31985                   | CC                              | GG                 | GG               | INTERGENIC      |               |                    |                    |
| SNP_77247_A_32216 | NW_004516002.1 | scaffold568 | 32216                   | GG                              | CC                 | CC               | INTERGENIC      |               |                    |                    |
| SNP_77248_A_32237 | NW_004516002.1 | scaffold568 | 32237                   | GG                              | AA                 | AA               | INTERGENIC      |               |                    |                    |
| SNP_77249_A_32371 | NW_004516002.1 | scaffold568 | 32371                   | TT                              | CC                 | CC               | INTERGENIC      |               |                    |                    |
| SNP_77250_A_32406 | NW_004516002.1 | scaffold568 | 32406                   | GG                              | TT                 | TT               | INTERGENIC      |               |                    |                    |
| SNP_77251_A_32407 | NW_004516002.1 | scaffold568 | 32407                   | TT                              | AA                 | AA               | INTERGENIC      |               |                    |                    |
| SNP_77252_A_32658 | NW_004516002.1 | scaffold568 | 32658                   | TT                              | AA                 | AA               | INTERGENIC      |               |                    |                    |
| SNP_77253_A_32680 | NW_004516002.1 | scaffold568 | 32680                   | TT                              | CC                 | CC               | INTERGENIC      |               |                    |                    |
| SNP_77254_A_34505 | NW_004516002.1 | scaffold568 | 34505                   | CC                              | GG                 | GG               | INTERGENIC      |               |                    |                    |
| SNP_77255_A_34506 | NW_004516002.1 | scaffold568 | 34506                   | AA                              | GG                 | GG               | INTERGENIC      |               |                    |                    |
| SNP_77256_A_34730 | NW_004516002.1 | scaffold568 | 34730                   | AA                              | GG                 | GG               | INTERGENIC      |               |                    |                    |
| SNP_77257_A_34740 | NW_004516002.1 | scaffold568 | 34740                   | GG                              | CC                 | CC               | INTERGENIC      |               |                    |                    |

| SNPs IDs          | Chromosome IDs | Chromosomes | Physical positions (bp) | CDC Frontier (Reference genome) | (Pusa 1103 & HPNB) | (ILWC 46 & LPNB) | Sequence genome | Components of | Gene accession IDs | Putative functions |
|-------------------|----------------|-------------|-------------------------|---------------------------------|--------------------|------------------|-----------------|---------------|--------------------|--------------------|
| SNP_77258_A_34875 | NW_004516002.1 | scaffold568 | 34875                   | AA                              | GG                 | GG               | INTERGENIC      |               |                    |                    |
| SNP_77259_A_34881 | NW_004516002.1 | scaffold568 | 34881                   | AA                              | CC                 | CC               | INTERGENIC      |               |                    |                    |
| SNP_77260_A_36198 | NW_004516002.1 | scaffold568 | 36198                   | AA                              | TT                 | TT               | INTERGENIC      |               |                    |                    |
| SNP_77261_A_36266 | NW_004516002.1 | scaffold568 | 36266                   | TT                              | GG                 | GG               | INTERGENIC      |               |                    |                    |
| SNP_77262_A_36289 | NW_004516002.1 | scaffold568 | 36289                   | CC                              | GG                 | GG               | INTERGENIC      |               |                    |                    |
| SNP_77263_A_36520 | NW_004516002.1 | scaffold568 | 36520                   | AA                              | TT                 | TT               | INTERGENIC      |               |                    |                    |
| SNP_77264_A_36583 | NW_004516002.1 | scaffold568 | 36583                   | GG                              | AA                 | AA               | INTERGENIC      |               |                    |                    |
| SNP_77265_A_36997 | NW_004516002.1 | scaffold568 | 36997                   | TT                              | CC                 | CC               | INTERGENIC      |               |                    |                    |
| SNP_77266_A_37295 | NW_004516002.1 | scaffold568 | 37295                   | TT                              | CC                 | CC               | INTERGENIC      |               |                    |                    |
| SNP_77267_A_37313 | NW_004516002.1 | scaffold568 | 37313                   | AA                              | TT                 | TT               | INTERGENIC      |               |                    |                    |
| SNP_77268_A_37328 | NW_004516002.1 | scaffold568 | 37328                   | TT                              | CC                 | CC               | INTERGENIC      |               |                    |                    |
| SNP_77269_A_37357 | NW_004516002.1 | scaffold568 | 37357                   | GG                              | CC                 | CC               | INTERGENIC      |               |                    |                    |
| SNP_77270_A_37852 | NW_004516002.1 | scaffold568 | 37852                   | GG                              | CC                 | CC               | INTERGENIC      |               |                    |                    |
| SNP_77271_A_38028 | NW_004516002.1 | scaffold568 | 38028                   | TT                              | AA                 | AA               | INTERGENIC      |               |                    |                    |
| SNP_77272_A_844   | NW_004516004.1 | scaffold571 | 844                     | TT                              | AA                 | AA               | INTERGENIC      |               |                    |                    |
| SNP_77273_A_958   | NW_004516004.1 | scaffold571 | 958                     | AA                              | GG                 | GG               | INTERGENIC      |               |                    |                    |
| SNP_77274_A_11988 | NW_004516004.1 | scaffold571 | 11988                   | AA                              | CC                 | CC               | INTERGENIC      |               |                    |                    |
| SNP_77275_A_12038 | NW_004516004.1 | scaffold571 | 12038                   | AA                              | GG                 | GG               | INTERGENIC      |               |                    |                    |
| SNP_77276_A_12085 | NW_004516004.1 | scaffold571 | 12085                   | TT                              | CC                 | CC               | INTERGENIC      |               |                    |                    |
| SNP_77277_A_12096 | NW_004516004.1 | scaffold571 | 12096                   | CC                              | AA                 | AA               | INTERGENIC      |               |                    |                    |
| SNP_77278_A_12201 | NW_004516004.1 | scaffold571 | 12201                   | CC                              | TT                 | TT               | INTERGENIC      |               |                    |                    |
| SNP_77279_A_12235 | NW_004516004.1 | scaffold571 | 12235                   | CC                              | AA                 | AA               | INTERGENIC      |               |                    |                    |

| SNPs IDs          | Chromosome IDs | Chromosomes | Physical positions (bp) | CDC Frontier (Reference genome) | (Pusa 1103 & HPNB) | (ILWC 46 & LPNB) | Sequence Components of genome | Gene accession IDs | Putative functions                                    |
|-------------------|----------------|-------------|-------------------------|---------------------------------|--------------------|------------------|-------------------------------|--------------------|-------------------------------------------------------|
| SNP_77280_A_12431 | NW_004516004.1 | scaffold571 | 12431                   | CC                              | TT                 | TT               | INTERGENIC                    |                    |                                                       |
| SNP_77281_A_18072 | NW_004516004.1 | scaffold571 | 18072                   | AA                              | TT                 | TT               | URR                           | 101496511          | probable serine/threonine-protein kinase DDB_G0267514 |
| SNP_77282_A_18095 | NW_004516004.1 | scaffold571 | 18095                   | GG                              | TT                 | TT               | URR                           | 101496511          | probable serine/threonine-protein kinase DDB_G0267514 |
| SNP_77283_A_18118 | NW_004516004.1 | scaffold571 | 18118                   | GG                              | AA                 | AA               | URR                           | 101496511          | probable serine/threonine-protein kinase DDB_G0267514 |
| SNP_77285_A_18182 | NW_004516004.1 | scaffold571 | 18182                   | CC                              | TT                 | TT               | URR                           | 101496511          | probable serine/threonine-protein kinase DDB_G0267514 |
| SNP_77286_A_18302 | NW_004516004.1 | scaffold571 | 18302                   | CC                              | TT                 | TT               | URR                           | 101496511          | probable serine/threonine-protein kinase DDB_G0267514 |
| SNP_77287_A_18371 | NW_004516004.1 | scaffold571 | 18371                   | AA                              | TT                 | TT               | URR                           | 101496511          | probable serine/threonine-protein kinase DDB_G0267514 |
| SNP_77288_A_18518 | NW_004516004.1 | scaffold571 | 18518                   | AA                              | TT                 | TT               | URR                           | 101496511          | probable serine/threonine-protein kinase DDB_G0267514 |
| SNP_77289_A_26933 | NW_004516004.1 | scaffold571 | 26933                   | AA                              | GG                 | GG               | INTERGENIC                    |                    |                                                       |
| SNP_77290_A_31157 | NW_004516004.1 | scaffold571 | 31157                   | CC                              | TT                 | TT               | INTERGENIC                    |                    |                                                       |
| SNP_77291_A_31167 | NW_004516004.1 | scaffold571 | 31167                   | TT                              | AA                 | AA               | INTERGENIC                    |                    |                                                       |
| SNP_77292_A_31199 | NW_004516004.1 | scaffold571 | 31199                   | GG                              | TT                 | TT               | INTERGENIC                    |                    |                                                       |
| SNP_77293_A_31450 | NW_004516004.1 | scaffold571 | 31450                   | GG                              | CC                 | CC               | INTERGENIC                    |                    |                                                       |
| SNP_77294_A_31457 | NW_004516004.1 | scaffold571 | 31457                   | TT                              | CC                 | CC               | INTERGENIC                    |                    |                                                       |
| SNP_77295_A_31477 | NW_004516004.1 | scaffold571 | 31477                   | TT                              | CC                 | CC               | INTERGENIC                    |                    |                                                       |
| SNP_77296_A_31487 | NW_004516004.1 | scaffold571 | 31487                   | TT                              | AA                 | AA               | INTERGENIC                    |                    |                                                       |
| SNP_77297_A_31500 | NW_004516004.1 | scaffold571 | 31500                   | GG                              | AA                 | AA               | INTERGENIC                    |                    |                                                       |
| SNP_77298_A_31531 | NW_004516004.1 | scaffold571 | 31531                   | TT                              | GG                 | GG               | INTERGENIC                    |                    |                                                       |
| SNP_77299_A_32335 | NW_004516004.1 | scaffold571 | 32335                   | TT                              | CC                 | CC               | INTERGENIC                    |                    |                                                       |
| SNP_77300_A_33628 | NW_004516004.1 | scaffold571 | 33628                   | AA                              | CC                 | CC               | DRR                           | 101496844          | Unknown function                                      |
| SNP_77301_A_37916 | NW_004516004.1 | scaffold571 | 37916                   | CC                              | TT                 | TT               | INTERGENIC                    |                    |                                                       |
| SNP_77302_A_40323 | NW_004516004.1 | scaffold571 | 40323                   | AA                              | GG                 | GG               | INTERGENIC                    |                    |                                                       |

| SNPs IDs          | Chromosome IDs | Chromosomes | Physical positions (bp) | CDC Frontier (Reference genome) | (Pusa 1103 & HPNB) | (ILWC 46 & LPNB) | Sequence genome | Components of | Gene accession IDs | Putative functions |
|-------------------|----------------|-------------|-------------------------|---------------------------------|--------------------|------------------|-----------------|---------------|--------------------|--------------------|
| SNP_77303_A_40583 | NW_004516004.1 | scaffold571 | 40583                   | GG                              | AA                 | AA               | INTERGENIC      |               |                    |                    |
| SNP_77304_A_40624 | NW_004516004.1 | scaffold571 | 40624                   | TT                              | GG                 | GG               | INTERGENIC      |               |                    |                    |
| SNP_77305_A_40626 | NW_004516004.1 | scaffold571 | 40626                   | GG                              | CC                 | CC               | INTERGENIC      |               |                    |                    |
| SNP_77306_A_40778 | NW_004516004.1 | scaffold571 | 40778                   | TT                              | CC                 | CC               | INTERGENIC      |               |                    |                    |
| SNP_77307_A_40780 | NW_004516004.1 | scaffold571 | 40780                   | AA                              | GG                 | GG               | INTERGENIC      |               |                    |                    |
| SNP_77308_A_40786 | NW_004516004.1 | scaffold571 | 40786                   | GG                              | AA                 | AA               | INTERGENIC      |               |                    |                    |
| SNP_77309_A_40825 | NW_004516004.1 | scaffold571 | 40825                   | GG                              | TT                 | TT               | INTERGENIC      |               |                    |                    |
| SNP_77310_A_40922 | NW_004516004.1 | scaffold571 | 40922                   | AA                              | GG                 | GG               | INTERGENIC      |               |                    |                    |
| SNP_77311_A_41058 | NW_004516004.1 | scaffold571 | 41058                   | TT                              | AA                 | AA               | INTERGENIC      |               |                    |                    |
| SNP_77312_A_41171 | NW_004516004.1 | scaffold571 | 41171                   | CC                              | TT                 | TT               | INTERGENIC      |               |                    |                    |
| SNP_77313_A_41226 | NW_004516004.1 | scaffold571 | 41226                   | GG                              | AA                 | AA               | INTERGENIC      |               |                    |                    |
| SNP_77315_A_41244 | NW_004516004.1 | scaffold571 | 41244                   | GG                              | TT                 | TT               | INTERGENIC      |               |                    |                    |
| SNP_77316_A_47642 | NW_004516004.1 | scaffold571 | 47642                   | CC                              | AA                 | AA               | INTERGENIC      |               |                    |                    |
| SNP_77317_A_47887 | NW_004516004.1 | scaffold571 | 47887                   | AA                              | TT                 | TT               | INTERGENIC      |               |                    |                    |
| SNP_77318_A_53858 | NW_004516004.1 | scaffold571 | 53858                   | GG                              | TT                 | TT               | INTERGENIC      |               |                    |                    |
| SNP_77320_A_54226 | NW_004516004.1 | scaffold571 | 54226                   | AA                              | TT                 | TT               | INTERGENIC      |               |                    |                    |
| SNP_77321_A_61566 | NW_004516004.1 | scaffold571 | 61566                   | CC                              | TT                 | TT               | INTERGENIC      |               |                    |                    |
| SNP_77322_A_61567 | NW_004516004.1 | scaffold571 | 61567                   | AA                              | GG                 | GG               | INTERGENIC      |               |                    |                    |
| SNP_77323_A_61634 | NW_004516004.1 | scaffold571 | 61634                   | TT                              | CC                 | CC               | INTERGENIC      |               |                    |                    |
| SNP_77324_A_62782 | NW_004516004.1 | scaffold571 | 62782                   | CC                              | TT                 | TT               | INTERGENIC      |               |                    |                    |
| SNP_77325_A_62950 | NW_004516004.1 | scaffold571 | 62950                   | TT                              | GG                 | GG               | INTERGENIC      |               |                    |                    |
| SNP_77326_A_69120 | NW_004516004.1 | scaffold571 | 69120                   | GG                              | TT                 | TT               | INTERGENIC      |               |                    |                    |

| SNPs IDs           | Chromosome IDs | Chromosomes | Physical positions (bp) | CDC Frontier (Reference genome) | (Pusa 1103 & HPNB) | (ILWC 46 & LPNB) | Sequence genome | Components of | Gene accession IDs | Putative functions |
|--------------------|----------------|-------------|-------------------------|---------------------------------|--------------------|------------------|-----------------|---------------|--------------------|--------------------|
| SNP_77327_A_104314 | NW_004516004.1 | scaffold571 | 104314                  | TT                              | GG                 | GG               | INTERGENIC      |               |                    |                    |
| SNP_77328_A_104322 | NW_004516004.1 | scaffold571 | 104322                  | TT                              | CC                 | CC               | INTERGENIC      |               |                    |                    |
| SNP_77329_A_104392 | NW_004516004.1 | scaffold571 | 104392                  | AA                              | GG                 | GG               | INTERGENIC      |               |                    |                    |
| SNP_77330_A_107012 | NW_004516004.1 | scaffold571 | 107012                  | CC                              | AA                 | AA               | INTERGENIC      |               |                    |                    |
| SNP_77331_A_1091   | NW_004516005.1 | scaffold572 | 1091                    | AA                              | TT                 | TT               | INTERGENIC      |               |                    |                    |
| SNP_77332_A_695    | NW_004516006.1 | scaffold573 | 695                     | AA                              | GG                 | GG               | INTERGENIC      |               |                    |                    |
| SNP_77333_A_32327  | NW_004516007.1 | scaffold574 | 32327                   | GG                              | TT                 | TT               | INTERGENIC      |               |                    |                    |
| SNP_77334_A_33376  | NW_004516007.1 | scaffold574 | 33376                   | TT                              | CC                 | CC               | INTERGENIC      |               |                    |                    |
| SNP_77335_A_42262  | NW_004516007.1 | scaffold574 | 42262                   | GG                              | AA                 | AA               | INTERGENIC      |               |                    |                    |
| SNP_77336_A_42679  | NW_004516007.1 | scaffold574 | 42679                   | CC                              | TT                 | TT               | INTERGENIC      |               |                    |                    |
| SNP_77337_A_43886  | NW_004516007.1 | scaffold574 | 43886                   | TT                              | AA                 | AA               | INTERGENIC      |               |                    |                    |
| SNP_77339_A_80195  | NW_004516007.1 | scaffold574 | 80195                   | AA                              | GG                 | GG               | INTERGENIC      |               |                    |                    |
| SNP_77340_A_93740  | NW_004516007.1 | scaffold574 | 93740                   | GG                              | TT                 | TT               | INTERGENIC      |               |                    |                    |
| SNP_77341_A_93823  | NW_004516007.1 | scaffold574 | 93823                   | AA                              | TT                 | TT               | INTERGENIC      |               |                    |                    |
| SNP_77342_A_94506  | NW_004516007.1 | scaffold574 | 94506                   | AA                              | GG                 | GG               | INTERGENIC      |               |                    |                    |
| SNP_77343_A_94518  | NW_004516007.1 | scaffold574 | 94518                   | AA                              | GG                 | GG               | INTERGENIC      |               |                    |                    |
| SNP_77344_A_94519  | NW_004516007.1 | scaffold574 | 94519                   | CC                              | TT                 | TT               | INTERGENIC      |               |                    |                    |
| SNP_77345_A_94530  | NW_004516007.1 | scaffold574 | 94530                   | GG                              | TT                 | TT               | INTERGENIC      |               |                    |                    |
| SNP_77346_A_94532  | NW_004516007.1 | scaffold574 | 94532                   | TT                              | AA                 | AA               | INTERGENIC      |               |                    |                    |
| SNP_77347_A_47286  | NW_004516008.1 | scaffold575 | 47286                   | TT                              | CC                 | CC               | INTERGENIC      |               |                    |                    |
| SNP_77348_A_47707  | NW_004516008.1 | scaffold575 | 47707                   | AA                              | GG                 | GG               | INTERGENIC      |               |                    |                    |
| SNP_77349_A_65002  | NW_004516008.1 | scaffold575 | 65002                   | GG                              | AA                 | AA               | INTERGENIC      |               |                    |                    |

| SNPs IDs          | Chromosome IDs | Chromosomes | Physical positions (bp) | CDC Frontier (Reference genome) | (Pusa 1103 & HPNB) | (ILWC 46 & LPNB) | Sequence genome | Components of | Gene accession IDs | Putative functions |
|-------------------|----------------|-------------|-------------------------|---------------------------------|--------------------|------------------|-----------------|---------------|--------------------|--------------------|
| SNP_77350_A_65101 | NW_004516008.1 | scaffold575 | 65101                   | GG                              | TT                 | TT               | INTERGENIC      |               |                    |                    |
| SNP_77352_A_65182 | NW_004516008.1 | scaffold575 | 65182                   | TT                              | GG                 | GG               | INTERGENIC      |               |                    |                    |
| SNP_77353_A_65237 | NW_004516008.1 | scaffold575 | 65237                   | TT                              | GG                 | GG               | INTERGENIC      |               |                    |                    |
| SNP_77354_A_65246 | NW_004516008.1 | scaffold575 | 65246                   | TT                              | CC                 | CC               | INTERGENIC      |               |                    |                    |
| SNP_77355_A_65375 | NW_004516008.1 | scaffold575 | 65375                   | AA                              | GG                 | GG               | INTERGENIC      |               |                    |                    |
| SNP_77356_A_65442 | NW_004516008.1 | scaffold575 | 65442                   | GG                              | AA                 | AA               | INTERGENIC      |               |                    |                    |
| SNP_77357_A_65466 | NW_004516008.1 | scaffold575 | 65466                   | TT                              | GG                 | GG               | INTERGENIC      |               |                    |                    |
| SNP_77358_A_65563 | NW_004516008.1 | scaffold575 | 65563                   | GG                              | AA                 | AA               | INTERGENIC      |               |                    |                    |
| SNP_77359_A_65696 | NW_004516008.1 | scaffold575 | 65696                   | CC                              | AA                 | AA               | INTERGENIC      |               |                    |                    |
| SNP_77360_A_65784 | NW_004516008.1 | scaffold575 | 65784                   | CC                              | TT                 | TT               | INTERGENIC      |               |                    |                    |
| SNP_77361_A_65842 | NW_004516008.1 | scaffold575 | 65842                   | AA                              | CC                 | CC               | INTERGENIC      |               |                    |                    |
| SNP_77362_A_65847 | NW_004516008.1 | scaffold575 | 65847                   | TT                              | GG                 | GG               | INTERGENIC      |               |                    |                    |
| SNP_77363_A_65882 | NW_004516008.1 | scaffold575 | 65882                   | TT                              | CC                 | CC               | INTERGENIC      |               |                    |                    |
| SNP_77364_A_65973 | NW_004516008.1 | scaffold575 | 65973                   | CC                              | AA                 | AA               | INTERGENIC      |               |                    |                    |
| SNP_77365_A_65992 | NW_004516008.1 | scaffold575 | 65992                   | AA                              | CC                 | CC               | INTERGENIC      |               |                    |                    |
| SNP_77366_A_66388 | NW_004516008.1 | scaffold575 | 66388                   | CC                              | TT                 | TT               | INTERGENIC      |               |                    |                    |
| SNP_77367_A_66415 | NW_004516008.1 | scaffold575 | 66415                   | AA                              | CC                 | CC               | INTERGENIC      |               |                    |                    |
| SNP_77368_A_66450 | NW_004516008.1 | scaffold575 | 66450                   | AA                              | CC                 | CC               | INTERGENIC      |               |                    |                    |
| SNP_77369_A_66494 | NW_004516008.1 | scaffold575 | 66494                   | CC                              | TT                 | TT               | INTERGENIC      |               |                    |                    |
| SNP_77370_A_66529 | NW_004516008.1 | scaffold575 | 66529                   | TT                              | GG                 | GG               | INTERGENIC      |               |                    |                    |
| SNP_77371_A_66624 | NW_004516008.1 | scaffold575 | 66624                   | AA                              | GG                 | GG               | INTERGENIC      |               |                    |                    |
| SNP_77372_A_66626 | NW_004516008.1 | scaffold575 | 66626                   | TT                              | GG                 | GG               | INTERGENIC      |               |                    |                    |

| SNPs IDs          | Chromosome IDs | Chromosomes | Physical positions (bp) | CDC Frontier (Reference genome) | (Pusa 1103 & HPNB) | (ILWC 46 & LPNB) | Sequence genome | Components of | Gene accession IDs | Putative functions |
|-------------------|----------------|-------------|-------------------------|---------------------------------|--------------------|------------------|-----------------|---------------|--------------------|--------------------|
| SNP_77373_A_66644 | NW_004516008.1 | scaffold575 | 66644                   | CC                              | TT                 | TT               | INTERGENIC      |               |                    |                    |
| SNP_77374_A_66685 | NW_004516008.1 | scaffold575 | 66685                   | GG                              | AA                 | AA               | INTERGENIC      |               |                    |                    |
| SNP_77375_A_66697 | NW_004516008.1 | scaffold575 | 66697                   | TT                              | CC                 | CC               | INTERGENIC      |               |                    |                    |
| SNP_77376_A_66729 | NW_004516008.1 | scaffold575 | 66729                   | AA                              | GG                 | GG               | INTERGENIC      |               |                    |                    |
| SNP_77377_A_66764 | NW_004516008.1 | scaffold575 | 66764                   | TT                              | CC                 | CC               | INTERGENIC      |               |                    |                    |
| SNP_77378_A_66775 | NW_004516008.1 | scaffold575 | 66775                   | AA                              | GG                 | GG               | INTERGENIC      |               |                    |                    |
| SNP_77380_A_66864 | NW_004516008.1 | scaffold575 | 66864                   | GG                              | AA                 | AA               | INTERGENIC      |               |                    |                    |
| SNP_77382_A_67047 | NW_004516008.1 | scaffold575 | 67047                   | TT                              | GG                 | GG               | INTERGENIC      |               |                    |                    |
| SNP_77383_A_67296 | NW_004516008.1 | scaffold575 | 67296                   | GG                              | TT                 | TT               | INTERGENIC      |               |                    |                    |
| SNP_77384_A_67333 | NW_004516008.1 | scaffold575 | 67333                   | GG                              | TT                 | TT               | INTERGENIC      |               |                    |                    |
| SNP_77385_A_67363 | NW_004516008.1 | scaffold575 | 67363                   | AA                              | GG                 | GG               | INTERGENIC      |               |                    |                    |
| SNP_77386_A_67375 | NW_004516008.1 | scaffold575 | 67375                   | AA                              | GG                 | GG               | INTERGENIC      |               |                    |                    |
| SNP_77387_A_67636 | NW_004516008.1 | scaffold575 | 67636                   | TT                              | GG                 | GG               | INTERGENIC      |               |                    |                    |
| SNP_77388_A_67637 | NW_004516008.1 | scaffold575 | 67637                   | GG                              | AA                 | AA               | INTERGENIC      |               |                    |                    |
| SNP_77389_A_67724 | NW_004516008.1 | scaffold575 | 67724                   | CC                              | TT                 | TT               | INTERGENIC      |               |                    |                    |
| SNP_77390_A_67751 | NW_004516008.1 | scaffold575 | 67751                   | TT                              | AA                 | AA               | INTERGENIC      |               |                    |                    |
| SNP_77391_A_67766 | NW_004516008.1 | scaffold575 | 67766                   | AA                              | GG                 | GG               | INTERGENIC      |               |                    |                    |
| SNP_77392_A_67790 | NW_004516008.1 | scaffold575 | 67790                   | AA                              | GG                 | GG               | INTERGENIC      |               |                    |                    |
| SNP_77394_A_67889 | NW_004516008.1 | scaffold575 | 67889                   | TT                              | GG                 | CC               | INTERGENIC      |               |                    |                    |
| SNP_77395_A_67932 | NW_004516008.1 | scaffold575 | 67932                   | TT                              | CC                 | CC               | INTERGENIC      |               |                    |                    |
| SNP_77396_A_67973 | NW_004516008.1 | scaffold575 | 67973                   | AA                              | GG                 | GG               | INTERGENIC      |               |                    |                    |
| SNP_77397_A_68015 | NW_004516008.1 | scaffold575 | 68015                   | CC                              | AA                 | AA               | INTERGENIC      |               |                    |                    |

| SNPs IDs          | Chromosome IDs | Chromosomes | Physical positions (bp) | CDC Frontier (Reference genome) | (Pusa 1103 & HPNB) | (ILWC 46 & LPNB) | Sequence genome | Components of | Gene accession IDs | Putative functions |
|-------------------|----------------|-------------|-------------------------|---------------------------------|--------------------|------------------|-----------------|---------------|--------------------|--------------------|
| SNP_77398_A_68048 | NW_004516008.1 | scaffold575 | 68048                   | CC                              | AA                 | AA               | INTERGENIC      |               |                    |                    |
| SNP_77399_A_68062 | NW_004516008.1 | scaffold575 | 68062                   | AA                              | GG                 | GG               | INTERGENIC      |               |                    |                    |
| SNP_77400_A_68063 | NW_004516008.1 | scaffold575 | 68063                   | AA                              | GG                 | GG               | INTERGENIC      |               |                    |                    |
| SNP_77401_A_68088 | NW_004516008.1 | scaffold575 | 68088                   | TT                              | AA                 | AA               | INTERGENIC      |               |                    |                    |
| SNP_77402_A_68105 | NW_004516008.1 | scaffold575 | 68105                   | AA                              | TT                 | TT               | INTERGENIC      |               |                    |                    |
| SNP_77403_A_69569 | NW_004516008.1 | scaffold575 | 69569                   | CC                              | TT                 | TT               | INTERGENIC      |               |                    |                    |
| SNP_77404_A_69584 | NW_004516008.1 | scaffold575 | 69584                   | AA                              | CC                 | CC               | INTERGENIC      |               |                    |                    |
| SNP_77405_A_71470 | NW_004516008.1 | scaffold575 | 71470                   | CC                              | TT                 | TT               | INTERGENIC      |               |                    |                    |
| SNP_77406_A_71592 | NW_004516008.1 | scaffold575 | 71592                   | CC                              | TT                 | TT               | INTERGENIC      |               |                    |                    |
| SNP_77407_A_71665 | NW_004516008.1 | scaffold575 | 71665                   | GG                              | AA                 | AA               | INTERGENIC      |               |                    |                    |
| SNP_77408_A_73662 | NW_004516008.1 | scaffold575 | 73662                   | CC                              | TT                 | TT               | INTERGENIC      |               |                    |                    |
| SNP_77409_A_73677 | NW_004516008.1 | scaffold575 | 73677                   | CC                              | AA                 | AA               | INTERGENIC      |               |                    |                    |
| SNP_77410_A_73992 | NW_004516008.1 | scaffold575 | 73992                   | TT                              | CC                 | CC               | INTERGENIC      |               |                    |                    |
| SNP_77411_A_82372 | NW_004516008.1 | scaffold575 | 82372                   | GG                              | AA                 | AA               | INTERGENIC      |               |                    |                    |
| SNP_77412_A_82540 | NW_004516008.1 | scaffold575 | 82540                   | GG                              | AA                 | AA               | INTERGENIC      |               |                    |                    |
| SNP_77414_A_82643 | NW_004516008.1 | scaffold575 | 82643                   | AA                              | GG                 | GG               | INTERGENIC      |               |                    |                    |
| SNP_77415_A_82655 | NW_004516008.1 | scaffold575 | 82655                   | CC                              | TT                 | TT               | INTERGENIC      |               |                    |                    |
| SNP_77416_A_82667 | NW_004516008.1 | scaffold575 | 82667                   | AA                              | GG                 | GG               | INTERGENIC      |               |                    |                    |
| SNP_77417_A_82772 | NW_004516008.1 | scaffold575 | 82772                   | AA                              | GG                 | GG               | INTERGENIC      |               |                    |                    |
| SNP_77418_A_82776 | NW_004516008.1 | scaffold575 | 82776                   | CC                              | GG                 | GG               | INTERGENIC      |               |                    |                    |
| SNP_77419_A_82882 | NW_004516008.1 | scaffold575 | 82882                   | TT                              | GG                 | GG               | INTERGENIC      |               |                    |                    |
| SNP_77420_A_82973 | NW_004516008.1 | scaffold575 | 82973                   | AA                              | TT                 | TT               | INTERGENIC      |               |                    |                    |



| SNPs IDs          | Chromosome IDs | Chromosomes | Physical positions (bp) | CDC Frontier (Reference genome) | (Pusa 1103 & HPNB) | (ILWC 46 & LPNB) | Sequence Components of genome | Gene accession IDs | Putative functions                                     |
|-------------------|----------------|-------------|-------------------------|---------------------------------|--------------------|------------------|-------------------------------|--------------------|--------------------------------------------------------|
| SNP_77421_A_83080 | NW_004516008.1 | scaffold575 | 83080                   | AA                              | GG                 | GG               | INTERGENIC                    |                    |                                                        |
| SNP_77422_A_83081 | NW_004516008.1 | scaffold575 | 83081                   | AA                              | GG                 | GG               | INTERGENIC                    |                    |                                                        |
| SNP_77423_A_84943 | NW_004516008.1 | scaffold575 | 84943                   | GG                              | AA                 | AA               | DRR                           | 101410595          | transfer RNA tryptophan (anticodon CCA)                |
| SNP_77424_A_89711 | NW_004516008.1 | scaffold575 | 89711                   | GG                              | TT                 | TT               | INTERGENIC                    |                    |                                                        |
| SNP_77425_A_89883 | NW_004516008.1 | scaffold575 | 89883                   | TT                              | GG                 | GG               | INTERGENIC                    |                    |                                                        |
| SNP_77426_A_89903 | NW_004516008.1 | scaffold575 | 89903                   | TT                              | AA                 | AA               | INTERGENIC                    |                    |                                                        |
| SNP_77428_A_89974 | NW_004516008.1 | scaffold575 | 89974                   | CC                              | TT                 | TT               | INTERGENIC                    |                    |                                                        |
| SNP_77429_A_90084 | NW_004516008.1 | scaffold575 | 90084                   | GG                              | AA                 | AA               | INTERGENIC                    |                    |                                                        |
| SNP_77430_A_90115 | NW_004516008.1 | scaffold575 | 90115                   | TT                              | GG                 | GG               | INTERGENIC                    |                    |                                                        |
| SNP_77431_A_90151 | NW_004516008.1 | scaffold575 | 90151                   | TT                              | CC                 | CC               | INTERGENIC                    |                    |                                                        |
| SNP_77433_A_90491 | NW_004516008.1 | scaffold575 | 90491                   | TT                              | CC                 | CC               | INTERGENIC                    |                    |                                                        |
| SNP_77434_A_90926 | NW_004516008.1 | scaffold575 | 90926                   | GG                              | AA                 | AA               | URR                           | 101498828          | ABC transporter B family member 26, chloroplastic-like |
| SNP_77435_A_90959 | NW_004516008.1 | scaffold575 | 90959                   | TT                              | AA                 | AA               | URR                           | 101498828          | ABC transporter B family member 26, chloroplastic-like |
| SNP_77437_A_91159 | NW_004516008.1 | scaffold575 | 91159                   | GG                              | AA                 | AA               | URR                           | 101498828          | ABC transporter B family member 26, chloroplastic-like |
| SNP_77438_A_91197 | NW_004516008.1 | scaffold575 | 91197                   | GG                              | AA                 | AA               | URR                           | 101498828          | ABC transporter B family member 26, chloroplastic-like |
| SNP_77439_A_91247 | NW_004516008.1 | scaffold575 | 91247                   | TT                              | AA                 | AA               | URR                           | 101498828          | ABC transporter B family member 26, chloroplastic-like |
| SNP_77440_A_91253 | NW_004516008.1 | scaffold575 | 91253                   | CC                              | AA                 | AA               | URR                           | 101498828          | ABC transporter B family member 26, chloroplastic-like |
| SNP_77441_A_92155 | NW_004516008.1 | scaffold575 | 92155                   | AA                              | GG                 | GG               | URR                           | 101498828          | ABC transporter B family member 26, chloroplastic-like |
| SNP_77442_A_92157 | NW_004516008.1 | scaffold575 | 92157                   | AA                              | GG                 | GG               | URR                           | 101498828          | ABC transporter B family member 26, chloroplastic-like |
| SNP_77443_A_92163 | NW_004516008.1 | scaffold575 | 92163                   | TT                              | GG                 | GG               | URR                           | 101498828          | ABC transporter B family member 26, chloroplastic-like |
| SNP_77444_A_92184 | NW_004516008.1 | scaffold575 | 92184                   | GG                              | CC                 | CC               | URR                           | 101498828          | ABC transporter B family member 26, chloroplastic-like |
| SNP_77445_A_92187 | NW_004516008.1 | scaffold575 | 92187                   | CC                              | AA                 | AA               | URR                           | 101498828          | ABC transporter B family member 26, chloroplastic-like |

| SNPs IDs          | Chromosome IDs | Chromosomes | Physical positions (bp) | CDC Frontier (Reference genome) | (Pusa 1103 & HPNB) | (ILWC 46 & LPNB) | Sequence Components of genome | Gene accession IDs | Putative functions                                     |
|-------------------|----------------|-------------|-------------------------|---------------------------------|--------------------|------------------|-------------------------------|--------------------|--------------------------------------------------------|
| SNP_77446_A_92202 | NW_004516008.1 | scaffold575 | 92202                   | TT                              | CC                 | CC               | URR                           | 101498828          | ABC transporter B family member 26, chloroplastic-like |
| SNP_77447_A_92211 | NW_004516008.1 | scaffold575 | 92211                   | GG                              | AA                 | AA               | URR                           | 101498828          | ABC transporter B family member 26, chloroplastic-like |
| SNP_77448_A_92748 | NW_004516008.1 | scaffold575 | 92748                   | TT                              | GG                 | GG               | URR                           | 101498828          | ABC transporter B family member 26, chloroplastic-like |
| SNP_77449_A_92798 | NW_004516008.1 | scaffold575 | 92798                   | AA                              | TT                 | TT               | INTERGENIC                    |                    |                                                        |
| SNP_77450_A_92804 | NW_004516008.1 | scaffold575 | 92804                   | TT                              | CC                 | CC               | INTERGENIC                    |                    |                                                        |
| SNP_77451_A_92840 | NW_004516008.1 | scaffold575 | 92840                   | TT                              | CC                 | CC               | INTERGENIC                    |                    |                                                        |
| SNP_77452_A_92864 | NW_004516008.1 | scaffold575 | 92864                   | TT                              | GG                 | GG               | INTERGENIC                    |                    |                                                        |
| SNP_77453_A_92999 | NW_004516008.1 | scaffold575 | 92999                   | TT                              | CC                 | CC               | INTERGENIC                    |                    |                                                        |
| SNP_77454_A_93030 | NW_004516008.1 | scaffold575 | 93030                   | AA                              | GG                 | GG               | INTERGENIC                    |                    |                                                        |
| SNP_77455_A_96353 | NW_004516008.1 | scaffold575 | 96353                   | CC                              | TT                 | TT               | INTERGENIC                    |                    |                                                        |
| SNP_77456_A_96361 | NW_004516008.1 | scaffold575 | 96361                   | CC                              | TT                 | TT               | INTERGENIC                    |                    |                                                        |
| SNP_77457_A_96366 | NW_004516008.1 | scaffold575 | 96366                   | GG                              | AA                 | AA               | INTERGENIC                    |                    |                                                        |
| SNP_77458_A_96400 | NW_004516008.1 | scaffold575 | 96400                   | GG                              | AA                 | AA               | INTERGENIC                    |                    |                                                        |
| SNP_77459_A_96430 | NW_004516008.1 | scaffold575 | 96430                   | CC                              | AA                 | AA               | INTERGENIC                    |                    |                                                        |
| SNP_77460_A_96561 | NW_004516008.1 | scaffold575 | 96561                   | AA                              | CC                 | CC               | INTERGENIC                    |                    |                                                        |
| SNP_77461_A_98447 | NW_004516008.1 | scaffold575 | 98447                   | GG                              | AA                 | AA               | INTERGENIC                    |                    |                                                        |
| SNP_77462_A_98481 | NW_004516008.1 | scaffold575 | 98481                   | AA                              | GG                 | GG               | INTERGENIC                    |                    |                                                        |
| SNP_77463_A_98491 | NW_004516008.1 | scaffold575 | 98491                   | GG                              | AA                 | AA               | INTERGENIC                    |                    |                                                        |
| SNP_77464_A_98557 | NW_004516008.1 | scaffold575 | 98557                   | CC                              | TT                 | TT               | INTERGENIC                    |                    |                                                        |
| SNP_77465_A_98560 | NW_004516008.1 | scaffold575 | 98560                   | GG                              | TT                 | TT               | INTERGENIC                    |                    |                                                        |
| SNP_77466_A_98598 | NW_004516008.1 | scaffold575 | 98598                   | TT                              | GG                 | GG               | INTERGENIC                    |                    |                                                        |
| SNP_77467_A_98610 | NW_004516008.1 | scaffold575 | 98610                   | AA                              | GG                 | GG               | INTERGENIC                    |                    |                                                        |

| SNPs IDs          | Chromosome IDs | Chromosomes | Physical positions (bp) | CDC Frontier (Reference genome) | (Pusa 1103 & HPNB) | (ILWC 46 & LPNB) | Sequence genome | Components of | Gene accession IDs | Putative functions |
|-------------------|----------------|-------------|-------------------------|---------------------------------|--------------------|------------------|-----------------|---------------|--------------------|--------------------|
| SNP_77468_A_98734 | NW_004516008.1 | scaffold575 | 98734                   | GG                              | AA                 | AA               | INTERGENIC      |               |                    |                    |
| SNP_77469_A_98754 | NW_004516008.1 | scaffold575 | 98754                   | AA                              | GG                 | GG               | INTERGENIC      |               |                    |                    |
| SNP_77471_A_98888 | NW_004516008.1 | scaffold575 | 98888                   | AA                              | TT                 | TT               | INTERGENIC      |               |                    |                    |
| SNP_77472_A_98901 | NW_004516008.1 | scaffold575 | 98901                   | AA                              | GG                 | GG               | INTERGENIC      |               |                    |                    |
| SNP_77473_A_98910 | NW_004516008.1 | scaffold575 | 98910                   | TT                              | GG                 | GG               | INTERGENIC      |               |                    |                    |
| SNP_77474_A_99040 | NW_004516008.1 | scaffold575 | 99040                   | AA                              | GG                 | GG               | INTERGENIC      |               |                    |                    |
| SNP_77475_A_99070 | NW_004516008.1 | scaffold575 | 99070                   | TT                              | CC                 | CC               | INTERGENIC      |               |                    |                    |
| SNP_77476_A_99119 | NW_004516008.1 | scaffold575 | 99119                   | TT                              | AA                 | AA               | INTERGENIC      |               |                    |                    |
| SNP_77477_A_99120 | NW_004516008.1 | scaffold575 | 99120                   | TT                              | GG                 | GG               | INTERGENIC      |               |                    |                    |
| SNP_77478_A_99124 | NW_004516008.1 | scaffold575 | 99124                   | AA                              | CC                 | CC               | INTERGENIC      |               |                    |                    |
| SNP_77479_A_99129 | NW_004516008.1 | scaffold575 | 99129                   | TT                              | CC                 | CC               | INTERGENIC      |               |                    |                    |
| SNP_77480_A_99133 | NW_004516008.1 | scaffold575 | 99133                   | CC                              | TT                 | TT               | INTERGENIC      |               |                    |                    |
| SNP_77481_A_99155 | NW_004516008.1 | scaffold575 | 99155                   | TT                              | CC                 | CC               | INTERGENIC      |               |                    |                    |
| SNP_77482_A_99173 | NW_004516008.1 | scaffold575 | 99173                   | TT                              | CC                 | CC               | INTERGENIC      |               |                    |                    |
| SNP_77484_A_99205 | NW_004516008.1 | scaffold575 | 99205                   | AA                              | GG                 | GG               | INTERGENIC      |               |                    |                    |
| SNP_77485_A_99320 | NW_004516008.1 | scaffold575 | 99320                   | AA                              | GG                 | GG               | INTERGENIC      |               |                    |                    |
| SNP_77486_A_99375 | NW_004516008.1 | scaffold575 | 99375                   | AA                              | GG                 | GG               | INTERGENIC      |               |                    |                    |
| SNP_77487_A_99381 | NW_004516008.1 | scaffold575 | 99381                   | CC                              | TT                 | TT               | INTERGENIC      |               |                    |                    |
| SNP_77488_A_99481 | NW_004516008.1 | scaffold575 | 99481                   | GG                              | TT                 | TT               | INTERGENIC      |               |                    |                    |
| SNP_77489_A_99668 | NW_004516008.1 | scaffold575 | 99668                   | TT                              | CC                 | CC               | INTERGENIC      |               |                    |                    |
| SNP_77490_A_99728 | NW_004516008.1 | scaffold575 | 99728                   | AA                              | GG                 | GG               | INTERGENIC      |               |                    |                    |
| SNP_77491_A_99762 | NW_004516008.1 | scaffold575 | 99762                   | GG                              | CC                 | CC               | INTERGENIC      |               |                    |                    |

| SNPs IDs           | Chromosome IDs | Chromosomes | Physical positions (bp) | CDC Frontier (Reference genome) | (Pusa 1103 & HPNB) | (ILWC 46 & LPNB) | Sequence genome | Components of | Gene accession IDs | Putative functions |
|--------------------|----------------|-------------|-------------------------|---------------------------------|--------------------|------------------|-----------------|---------------|--------------------|--------------------|
| SNP_77492_A_99766  | NW_004516008.1 | scaffold575 | 99766                   | TT                              | CC                 | CC               | INTERGENIC      |               |                    |                    |
| SNP_77493_A_99809  | NW_004516008.1 | scaffold575 | 99809                   | AA                              | GG                 | GG               | INTERGENIC      |               |                    |                    |
| SNP_77494_A_99810  | NW_004516008.1 | scaffold575 | 99810                   | AA                              | GG                 | GG               | INTERGENIC      |               |                    |                    |
| SNP_77495_A_99825  | NW_004516008.1 | scaffold575 | 99825                   | AA                              | GG                 | GG               | INTERGENIC      |               |                    |                    |
| SNP_77496_A_99867  | NW_004516008.1 | scaffold575 | 99867                   | GG                              | AA                 | AA               | INTERGENIC      |               |                    |                    |
| SNP_77497_A_99882  | NW_004516008.1 | scaffold575 | 99882                   | AA                              | CC                 | CC               | INTERGENIC      |               |                    |                    |
| SNP_77498_A_99924  | NW_004516008.1 | scaffold575 | 99924                   | TT                              | GG                 | GG               | INTERGENIC      |               |                    |                    |
| SNP_77499_A_99925  | NW_004516008.1 | scaffold575 | 99925                   | AA                              | CC                 | CC               | INTERGENIC      |               |                    |                    |
| SNP_77500_A_99955  | NW_004516008.1 | scaffold575 | 99955                   | CC                              | TT                 | TT               | INTERGENIC      |               |                    |                    |
| SNP_77501_A_99959  | NW_004516008.1 | scaffold575 | 99959                   | AA                              | GG                 | GG               | INTERGENIC      |               |                    |                    |
| SNP_77502_A_99980  | NW_004516008.1 | scaffold575 | 99980                   | TT                              | AA                 | AA               | INTERGENIC      |               |                    |                    |
| SNP_77503_A_100001 | NW_004516008.1 | scaffold575 | 100001                  | AA                              | CC                 | CC               | INTERGENIC      |               |                    |                    |
| SNP_77504_A_100023 | NW_004516008.1 | scaffold575 | 100023                  | AA                              | GG                 | GG               | INTERGENIC      |               |                    |                    |
| SNP_77505_A_100064 | NW_004516008.1 | scaffold575 | 100064                  | CC                              | TT                 | TT               | INTERGENIC      |               |                    |                    |
| SNP_77506_A_100070 | NW_004516008.1 | scaffold575 | 100070                  | CC                              | GG                 | GG               | INTERGENIC      |               |                    |                    |
| SNP_77507_A_100097 | NW_004516008.1 | scaffold575 | 100097                  | TT                              | CC                 | CC               | INTERGENIC      |               |                    |                    |
| SNP_77508_A_100175 | NW_004516008.1 | scaffold575 | 100175                  | AA                              | GG                 | GG               | INTERGENIC      |               |                    |                    |
| SNP_77509_A_100191 | NW_004516008.1 | scaffold575 | 100191                  | AA                              | CC                 | CC               | INTERGENIC      |               |                    |                    |
| SNP_77510_A_100197 | NW_004516008.1 | scaffold575 | 100197                  | TT                              | CC                 | CC               | INTERGENIC      |               |                    |                    |
| SNP_77511_A_100200 | NW_004516008.1 | scaffold575 | 100200                  | AA                              | GG                 | GG               | INTERGENIC      |               |                    |                    |
| SNP_77512_A_100227 | NW_004516008.1 | scaffold575 | 100227                  | CC                              | AA                 | AA               | INTERGENIC      |               |                    |                    |
| SNP_77513_A_100278 | NW_004516008.1 | scaffold575 | 100278                  | AA                              | CC                 | CC               | INTERGENIC      |               |                    |                    |

| SNPs IDs           | Chromosome IDs | Chromosomes | Physical positions (bp) | CDC Frontier (Reference genome) | (Pusa 1103 & HPNB) | (ILWC 46 & LPNB) | Sequence genome | Components of | Gene accession IDs | Putative functions |
|--------------------|----------------|-------------|-------------------------|---------------------------------|--------------------|------------------|-----------------|---------------|--------------------|--------------------|
| SNP_77514_A_100297 | NW_004516008.1 | scaffold575 | 100297                  | AA                              | CC                 | CC               | INTERGENIC      |               |                    |                    |
| SNP_77515_A_100353 | NW_004516008.1 | scaffold575 | 100353                  | TT                              | GG                 | GG               | INTERGENIC      |               |                    |                    |
| SNP_77516_A_100391 | NW_004516008.1 | scaffold575 | 100391                  | AA                              | CC                 | CC               | INTERGENIC      |               |                    |                    |
| SNP_77517_A_100481 | NW_004516008.1 | scaffold575 | 100481                  | TT                              | CC                 | CC               | INTERGENIC      |               |                    |                    |
| SNP_77518_A_100551 | NW_004516008.1 | scaffold575 | 100551                  | TT                              | CC                 | CC               | INTERGENIC      |               |                    |                    |
| SNP_77519_A_100576 | NW_004516008.1 | scaffold575 | 100576                  | GG                              | AA                 | AA               | INTERGENIC      |               |                    |                    |
| SNP_77520_A_100603 | NW_004516008.1 | scaffold575 | 100603                  | AA                              | GG                 | GG               | INTERGENIC      |               |                    |                    |
| SNP_77521_A_100611 | NW_004516008.1 | scaffold575 | 100611                  | TT                              | GG                 | GG               | INTERGENIC      |               |                    |                    |
| SNP_77522_A_100619 | NW_004516008.1 | scaffold575 | 100619                  | TT                              | GG                 | GG               | INTERGENIC      |               |                    |                    |
| SNP_77523_A_100632 | NW_004516008.1 | scaffold575 | 100632                  | AA                              | GG                 | GG               | INTERGENIC      |               |                    |                    |
| SNP_77524_A_100639 | NW_004516008.1 | scaffold575 | 100639                  | AA                              | GG                 | GG               | INTERGENIC      |               |                    |                    |
| SNP_77525_A_100648 | NW_004516008.1 | scaffold575 | 100648                  | AA                              | GG                 | GG               | INTERGENIC      |               |                    |                    |
| SNP_77526_A_100709 | NW_004516008.1 | scaffold575 | 100709                  | CC                              | AA                 | AA               | INTERGENIC      |               |                    |                    |
| SNP_77527_A_100983 | NW_004516008.1 | scaffold575 | 100983                  | AA                              | GG                 | GG               | INTERGENIC      |               |                    |                    |
| SNP_77528_A_101000 | NW_004516008.1 | scaffold575 | 101000                  | AA                              | CC                 | CC               | INTERGENIC      |               |                    |                    |
| SNP_77529_A_101011 | NW_004516008.1 | scaffold575 | 101011                  | AA                              | GG                 | GG               | INTERGENIC      |               |                    |                    |
| SNP_77530_A_101032 | NW_004516008.1 | scaffold575 | 101032                  | TT                              | CC                 | CC               | INTERGENIC      |               |                    |                    |
| SNP_77531_A_101056 | NW_004516008.1 | scaffold575 | 101056                  | TT                              | AA                 | AA               | INTERGENIC      |               |                    |                    |
| SNP_77532_A_101129 | NW_004516008.1 | scaffold575 | 101129                  | AA                              | CC                 | CC               | INTERGENIC      |               |                    |                    |
| SNP_77533_A_101132 | NW_004516008.1 | scaffold575 | 101132                  | GG                              | CC                 | CC               | INTERGENIC      |               |                    |                    |
| SNP_77534_A_101175 | NW_004516008.1 | scaffold575 | 101175                  | AA                              | GG                 | GG               | INTERGENIC      |               |                    |                    |
| SNP_77535_A_101180 | NW_004516008.1 | scaffold575 | 101180                  | AA                              | CC                 | CC               | INTERGENIC      |               |                    |                    |

| SNPs IDs           | Chromosome IDs | Chromosomes | Physical positions (bp) | CDC Frontier (Reference genome) | (Pusa 1103 & HPNB) | (ILWC 46 & LPNB) | Sequence genome | Components of | Gene accession IDs | Putative functions |
|--------------------|----------------|-------------|-------------------------|---------------------------------|--------------------|------------------|-----------------|---------------|--------------------|--------------------|
| SNP_77536_A_101188 | NW_004516008.1 | scaffold575 | 101188                  | AA                              | GG                 | GG               | INTERGENIC      |               |                    |                    |
| SNP_77537_A_101340 | NW_004516008.1 | scaffold575 | 101340                  | TT                              | CC                 | CC               | INTERGENIC      |               |                    |                    |
| SNP_77538_A_101439 | NW_004516008.1 | scaffold575 | 101439                  | AA                              | GG                 | GG               | INTERGENIC      |               |                    |                    |
| SNP_77539_A_101443 | NW_004516008.1 | scaffold575 | 101443                  | CC                              | TT                 | TT               | INTERGENIC      |               |                    |                    |
| SNP_77540_A_101492 | NW_004516008.1 | scaffold575 | 101492                  | AA                              | CC                 | CC               | INTERGENIC      |               |                    |                    |
| SNP_77541_A_101530 | NW_004516008.1 | scaffold575 | 101530                  | AA                              | CC                 | CC               | INTERGENIC      |               |                    |                    |
| SNP_77542_A_101539 | NW_004516008.1 | scaffold575 | 101539                  | TT                              | CC                 | CC               | INTERGENIC      |               |                    |                    |
| SNP_77543_A_101540 | NW_004516008.1 | scaffold575 | 101540                  | TT                              | GG                 | GG               | INTERGENIC      |               |                    |                    |
| SNP_77544_A_101544 | NW_004516008.1 | scaffold575 | 101544                  | AA                              | GG                 | GG               | INTERGENIC      |               |                    |                    |
| SNP_77545_A_101546 | NW_004516008.1 | scaffold575 | 101546                  | AA                              | GG                 | GG               | INTERGENIC      |               |                    |                    |
| SNP_77546_A_101565 | NW_004516008.1 | scaffold575 | 101565                  | TT                              | AA                 | AA               | INTERGENIC      |               |                    |                    |
| SNP_77547_A_101586 | NW_004516008.1 | scaffold575 | 101586                  | AA                              | GG                 | GG               | INTERGENIC      |               |                    |                    |
| SNP_77548_A_101595 | NW_004516008.1 | scaffold575 | 101595                  | GG                              | CC                 | CC               | INTERGENIC      |               |                    |                    |
| SNP_77549_A_101598 | NW_004516008.1 | scaffold575 | 101598                  | TT                              | CC                 | CC               | INTERGENIC      |               |                    |                    |
| SNP_77550_A_101640 | NW_004516008.1 | scaffold575 | 101640                  | AA                              | GG                 | GG               | INTERGENIC      |               |                    |                    |
| SNP_77551_A_101643 | NW_004516008.1 | scaffold575 | 101643                  | TT                              | GG                 | GG               | INTERGENIC      |               |                    |                    |
| SNP_77552_A_101654 | NW_004516008.1 | scaffold575 | 101654                  | AA                              | GG                 | GG               | INTERGENIC      |               |                    |                    |
| SNP_77553_A_101711 | NW_004516008.1 | scaffold575 | 101711                  | AA                              | CC                 | CC               | INTERGENIC      |               |                    |                    |
| SNP_77554_A_101718 | NW_004516008.1 | scaffold575 | 101718                  | TT                              | CC                 | CC               | INTERGENIC      |               |                    |                    |
| SNP_77555_A_101737 | NW_004516008.1 | scaffold575 | 101737                  | TT                              | GG                 | GG               | INTERGENIC      |               |                    |                    |
| SNP_77556_A_101744 | NW_004516008.1 | scaffold575 | 101744                  | AA                              | GG                 | GG               | INTERGENIC      |               |                    |                    |
| SNP_77557_A_101755 | NW_004516008.1 | scaffold575 | 101755                  | TT                              | CC                 | CC               | INTERGENIC      |               |                    |                    |

| SNPs IDs           | Chromosome IDs | Chromosomes | Physical positions (bp) | CDC Frontier (Reference genome) | (Pusa 1103 & HPNB) | (ILWC 46 & LPNB) | Sequence genome | Components of | Gene accession IDs | Putative functions |
|--------------------|----------------|-------------|-------------------------|---------------------------------|--------------------|------------------|-----------------|---------------|--------------------|--------------------|
| SNP_77558_A_101760 | NW_004516008.1 | scaffold575 | 101760                  | TT                              | CC                 | CC               | INTERGENIC      |               |                    |                    |
| SNP_77559_A_101836 | NW_004516008.1 | scaffold575 | 101836                  | TT                              | CC                 | CC               | INTERGENIC      |               |                    |                    |
| SNP_77560_A_101851 | NW_004516008.1 | scaffold575 | 101851                  | AA                              | GG                 | GG               | INTERGENIC      |               |                    |                    |
| SNP_77561_A_101899 | NW_004516008.1 | scaffold575 | 101899                  | AA                              | GG                 | GG               | INTERGENIC      |               |                    |                    |
| SNP_77562_A_102097 | NW_004516008.1 | scaffold575 | 102097                  | TT                              | CC                 | CC               | INTERGENIC      |               |                    |                    |
| SNP_77563_A_102108 | NW_004516008.1 | scaffold575 | 102108                  | TT                              | GG                 | GG               | INTERGENIC      |               |                    |                    |
| SNP_77564_A_102122 | NW_004516008.1 | scaffold575 | 102122                  | GG                              | AA                 | AA               | INTERGENIC      |               |                    |                    |
| SNP_77565_A_102155 | NW_004516008.1 | scaffold575 | 102155                  | GG                              | CC                 | CC               | INTERGENIC      |               |                    |                    |
| SNP_77566_A_102204 | NW_004516008.1 | scaffold575 | 102204                  | TT                              | GG                 | GG               | INTERGENIC      |               |                    |                    |
| SNP_77567_A_102213 | NW_004516008.1 | scaffold575 | 102213                  | AA                              | GG                 | GG               | INTERGENIC      |               |                    |                    |
| SNP_77568_A_102904 | NW_004516008.1 | scaffold575 | 102904                  | AA                              | GG                 | GG               | INTERGENIC      |               |                    |                    |
| SNP_77569_A_102908 | NW_004516008.1 | scaffold575 | 102908                  | TT                              | CC                 | CC               | INTERGENIC      |               |                    |                    |
| SNP_77570_A_102922 | NW_004516008.1 | scaffold575 | 102922                  | AA                              | GG                 | GG               | INTERGENIC      |               |                    |                    |
| SNP_77571_A_103116 | NW_004516008.1 | scaffold575 | 103116                  | AA                              | CC                 | CC               | INTERGENIC      |               |                    |                    |
| SNP_77572_A_103125 | NW_004516008.1 | scaffold575 | 103125                  | CC                              | TT                 | TT               | INTERGENIC      |               |                    |                    |
| SNP_77573_A_103144 | NW_004516008.1 | scaffold575 | 103144                  | AA                              | TT                 | TT               | INTERGENIC      |               |                    |                    |
| SNP_77574_A_103153 | NW_004516008.1 | scaffold575 | 103153                  | AA                              | GG                 | GG               | INTERGENIC      |               |                    |                    |
| SNP_77575_A_103194 | NW_004516008.1 | scaffold575 | 103194                  | TT                              | CC                 | CC               | INTERGENIC      |               |                    |                    |
| SNP_77576_A_103196 | NW_004516008.1 | scaffold575 | 103196                  | AA                              | TT                 | TT               | INTERGENIC      |               |                    |                    |
| SNP_77577_A_103197 | NW_004516008.1 | scaffold575 | 103197                  | TT                              | CC                 | CC               | INTERGENIC      |               |                    |                    |
| SNP_77578_A_103227 | NW_004516008.1 | scaffold575 | 103227                  | AA                              | GG                 | GG               | INTERGENIC      |               |                    |                    |
| SNP_77580_A_103301 | NW_004516008.1 | scaffold575 | 103301                  | TT                              | CC                 | CC               | INTERGENIC      |               |                    |                    |

| SNPs IDs           | Chromosome IDs | Chromosomes | Physical positions (bp) | CDC Frontier (Reference genome) | (Pusa 1103 & HPNB) | (ILWC 46 & LPNB) | Sequence Components of genome | Gene accession IDs | Putative functions |
|--------------------|----------------|-------------|-------------------------|---------------------------------|--------------------|------------------|-------------------------------|--------------------|--------------------|
| SNP_77581_A_103428 | NW_004516008.1 | scaffold575 | 103428                  | AA                              | CC                 | CC               | INTERGENIC                    |                    |                    |
| SNP_77582_A_103456 | NW_004516008.1 | scaffold575 | 103456                  | TT                              | CC                 | CC               | INTERGENIC                    |                    |                    |
| SNP_77583_A_103457 | NW_004516008.1 | scaffold575 | 103457                  | AA                              | GG                 | GG               | INTERGENIC                    |                    |                    |
| SNP_77584_A_103565 | NW_004516008.1 | scaffold575 | 103565                  | AA                              | GG                 | GG               | INTERGENIC                    |                    |                    |
| SNP_77585_A_103567 | NW_004516008.1 | scaffold575 | 103567                  | CC                              | TT                 | TT               | INTERGENIC                    |                    |                    |
| SNP_77586_A_103629 | NW_004516008.1 | scaffold575 | 103629                  | TT                              | CC                 | CC               | INTERGENIC                    |                    |                    |
| SNP_77588_A_103696 | NW_004516008.1 | scaffold575 | 103696                  | TT                              | CC                 | CC               | INTERGENIC                    |                    |                    |
| SNP_77589_A_103706 | NW_004516008.1 | scaffold575 | 103706                  | GG                              | TT                 | TT               | INTERGENIC                    |                    |                    |
| SNP_77590_A_103708 | NW_004516008.1 | scaffold575 | 103708                  | AA                              | CC                 | CC               | INTERGENIC                    |                    |                    |
| SNP_77591_A_103711 | NW_004516008.1 | scaffold575 | 103711                  | TT                              | CC                 | CC               | INTERGENIC                    |                    |                    |
| SNP_77592_A_103750 | NW_004516008.1 | scaffold575 | 103750                  | AA                              | GG                 | GG               | INTERGENIC                    |                    |                    |
| SNP_77593_A_103799 | NW_004516008.1 | scaffold575 | 103799                  | TT                              | GG                 | GG               | INTERGENIC                    |                    |                    |
| SNP_77595_A_103825 | NW_004516008.1 | scaffold575 | 103825                  | TT                              | GG                 | GG               | INTERGENIC                    |                    |                    |
| SNP_77596_A_104015 | NW_004516008.1 | scaffold575 | 104015                  | AA                              | GG                 | GG               | INTERGENIC                    |                    |                    |
| SNP_77597_A_104035 | NW_004516008.1 | scaffold575 | 104035                  | TT                              | CC                 | CC               | INTERGENIC                    |                    |                    |
| SNP_77598_A_104076 | NW_004516008.1 | scaffold575 | 104076                  | TT                              | CC                 | CC               | INTERGENIC                    |                    |                    |
| SNP_77599_A_104170 | NW_004516008.1 | scaffold575 | 104170                  | TT                              | CC                 | CC               | INTERGENIC                    |                    |                    |
| SNP_77600_A_104196 | NW_004516008.1 | scaffold575 | 104196                  | TT                              | CC                 | CC               | DRR                           | 101499147          | Unknown function   |
| SNP_77601_A_104337 | NW_004516008.1 | scaffold575 | 104337                  | AA                              | CC                 | CC               | DRR                           | 101499147          | Unknown function   |
| SNP_77602_A_104355 | NW_004516008.1 | scaffold575 | 104355                  | TT                              | GG                 | GG               | DRR                           | 101499147          | Unknown function   |
| SNP_77603_A_104372 | NW_004516008.1 | scaffold575 | 104372                  | TT                              | CC                 | CC               | DRR                           | 101499147          | Unknown function   |
| SNP_77604_A_104384 | NW_004516008.1 | scaffold575 | 104384                  | AA                              | GG                 | GG               | DRR                           | 101499147          | Unknown function   |



| SNPs IDs           | Chromosome IDs | Chromosomes | Physical positions (bp) | CDC Frontier (Reference genome) | (Pusa 1103 & HPNB) | (ILWC 46 & LPNB) | Sequence Components of genome | Gene accession IDs | Putative functions |
|--------------------|----------------|-------------|-------------------------|---------------------------------|--------------------|------------------|-------------------------------|--------------------|--------------------|
| SNP_77605_A_104398 | NW_004516008.1 | scaffold575 | 104398                  | CC                              | TT                 | TT               | DRR                           | 101499147          | Unknown function   |
| SNP_77606_A_104417 | NW_004516008.1 | scaffold575 | 104417                  | AA                              | GG                 | GG               | DRR                           | 101499147          | Unknown function   |
| SNP_77607_A_104437 | NW_004516008.1 | scaffold575 | 104437                  | AA                              | CC                 | CC               | DRR                           | 101499147          | Unknown function   |
| SNP_77608_A_104441 | NW_004516008.1 | scaffold575 | 104441                  | AA                              | GG                 | GG               | DRR                           | 101499147          | Unknown function   |
| SNP_77609_A_104456 | NW_004516008.1 | scaffold575 | 104456                  | AA                              | CC                 | CC               | DRR                           | 101499147          | Unknown function   |
| SNP_77610_A_106305 | NW_004516008.1 | scaffold575 | 106305                  | TT                              | CC                 | CC               | URR                           | 101499147          | Unknown function   |
| SNP_77611_A_106335 | NW_004516008.1 | scaffold575 | 106335                  | AA                              | GG                 | GG               | URR                           | 101499147          | Unknown function   |
| SNP_77612_A_107143 | NW_004516008.1 | scaffold575 | 107143                  | AA                              | CC                 | CC               | URR                           | 101499147          | Unknown function   |
| SNP_77613_A_109689 | NW_004516008.1 | scaffold575 | 109689                  | GG                              | TT                 | TT               | INTERGENIC                    |                    |                    |
| SNP_77614_A_109787 | NW_004516008.1 | scaffold575 | 109787                  | CC                              | TT                 | TT               | INTERGENIC                    |                    |                    |
| SNP_77615_A_109890 | NW_004516008.1 | scaffold575 | 109890                  | TT                              | AA                 | AA               | INTERGENIC                    |                    |                    |
| SNP_77616_A_109941 | NW_004516008.1 | scaffold575 | 109941                  | TT                              | CC                 | CC               | INTERGENIC                    |                    |                    |
| SNP_77617_A_109949 | NW_004516008.1 | scaffold575 | 109949                  | TT                              | GG                 | GG               | INTERGENIC                    |                    |                    |
| SNP_77618_A_109969 | NW_004516008.1 | scaffold575 | 109969                  | AA                              | TT                 | TT               | INTERGENIC                    |                    |                    |
| SNP_77619_A_109987 | NW_004516008.1 | scaffold575 | 109987                  | CC                              | TT                 | TT               | INTERGENIC                    |                    |                    |
| SNP_77620_A_110006 | NW_004516008.1 | scaffold575 | 110006                  | CC                              | AA                 | AA               | INTERGENIC                    |                    |                    |
| SNP_77621_A_110068 | NW_004516008.1 | scaffold575 | 110068                  | AA                              | CC                 | CC               | INTERGENIC                    |                    |                    |
| SNP_77622_A_110156 | NW_004516008.1 | scaffold575 | 110156                  | TT                              | CC                 | CC               | INTERGENIC                    |                    |                    |
| SNP_77623_A_110229 | NW_004516008.1 | scaffold575 | 110229                  | CC                              | TT                 | TT               | INTERGENIC                    |                    |                    |
| SNP_77624_A_110239 | NW_004516008.1 | scaffold575 | 110239                  | TT                              | CC                 | CC               | INTERGENIC                    |                    |                    |
| SNP_77625_A_110242 | NW_004516008.1 | scaffold575 | 110242                  | TT                              | CC                 | CC               | INTERGENIC                    |                    |                    |
| SNP_77626_A_110280 | NW_004516008.1 | scaffold575 | 110280                  | AA                              | CC                 | CC               | INTERGENIC                    |                    |                    |

| SNPs IDs           | Chromosome IDs | Chromosomes | Physical positions (bp) | CDC Frontier (Reference genome) | (Pusa 1103 & HPNB) | (ILWC 46 & LPNB) | Sequence genome | Components of | Gene accession IDs | Putative functions |
|--------------------|----------------|-------------|-------------------------|---------------------------------|--------------------|------------------|-----------------|---------------|--------------------|--------------------|
| SNP_77627_A_110308 | NW_004516008.1 | scaffold575 | 110308                  | AA                              | CC                 | CC               | INTERGENIC      |               |                    |                    |
| SNP_77628_A_110362 | NW_004516008.1 | scaffold575 | 110362                  | AA                              | GG                 | GG               | INTERGENIC      |               |                    |                    |
| SNP_77629_A_110442 | NW_004516008.1 | scaffold575 | 110442                  | AA                              | CC                 | CC               | INTERGENIC      |               |                    |                    |
| SNP_77630_A_110466 | NW_004516008.1 | scaffold575 | 110466                  | AA                              | CC                 | CC               | INTERGENIC      |               |                    |                    |
| SNP_77631_A_110481 | NW_004516008.1 | scaffold575 | 110481                  | AA                              | GG                 | GG               | INTERGENIC      |               |                    |                    |
| SNP_77632_A_110505 | NW_004516008.1 | scaffold575 | 110505                  | TT                              | GG                 | GG               | INTERGENIC      |               |                    |                    |
| SNP_77634_A_110519 | NW_004516008.1 | scaffold575 | 110519                  | TT                              | CC                 | CC               | INTERGENIC      |               |                    |                    |
| SNP_77635_A_110521 | NW_004516008.1 | scaffold575 | 110521                  | TT                              | AA                 | AA               | INTERGENIC      |               |                    |                    |
| SNP_77636_A_110581 | NW_004516008.1 | scaffold575 | 110581                  | AA                              | CC                 | CC               | INTERGENIC      |               |                    |                    |
| SNP_77637_A_110605 | NW_004516008.1 | scaffold575 | 110605                  | AA                              | CC                 | CC               | INTERGENIC      |               |                    |                    |
| SNP_77638_A_110620 | NW_004516008.1 | scaffold575 | 110620                  | AA                              | GG                 | GG               | INTERGENIC      |               |                    |                    |
| SNP_77639_A_110644 | NW_004516008.1 | scaffold575 | 110644                  | TT                              | GG                 | GG               | INTERGENIC      |               |                    |                    |
| SNP_77640_A_110660 | NW_004516008.1 | scaffold575 | 110660                  | TT                              | CC                 | CC               | INTERGENIC      |               |                    |                    |
| SNP_77641_A_110663 | NW_004516008.1 | scaffold575 | 110663                  | TT                              | CC                 | CC               | INTERGENIC      |               |                    |                    |
| SNP_77642_A_110753 | NW_004516008.1 | scaffold575 | 110753                  | AA                              | GG                 | GG               | INTERGENIC      |               |                    |                    |
| SNP_77643_A_110759 | NW_004516008.1 | scaffold575 | 110759                  | TT                              | CC                 | CC               | INTERGENIC      |               |                    |                    |
| SNP_77644_A_110765 | NW_004516008.1 | scaffold575 | 110765                  | TT                              | CC                 | CC               | INTERGENIC      |               |                    |                    |
| SNP_77645_A_110772 | NW_004516008.1 | scaffold575 | 110772                  | TT                              | GG                 | GG               | INTERGENIC      |               |                    |                    |
| SNP_77646_A_110830 | NW_004516008.1 | scaffold575 | 110830                  | TT                              | AA                 | AA               | INTERGENIC      |               |                    |                    |
| SNP_77647_A_110886 | NW_004516008.1 | scaffold575 | 110886                  | TT                              | CC                 | CC               | INTERGENIC      |               |                    |                    |
| SNP_77648_A_110910 | NW_004516008.1 | scaffold575 | 110910                  | TT                              | CC                 | CC               | INTERGENIC      |               |                    |                    |
| SNP_77649_A_110920 | NW_004516008.1 | scaffold575 | 110920                  | CC                              | GG                 | GG               | INTERGENIC      |               |                    |                    |

| SNPs IDs           | Chromosome IDs | Chromosomes | Physical positions (bp) | CDC Frontier (Reference genome) | (Pusa 1103 & HPNB) | (ILWC 46 & LPNB) | Sequence genome | Components of | Gene accession IDs | Putative functions |
|--------------------|----------------|-------------|-------------------------|---------------------------------|--------------------|------------------|-----------------|---------------|--------------------|--------------------|
| SNP_77650_A_110949 | NW_004516008.1 | scaffold575 | 110949                  | CC                              | TT                 | TT               | INTERGENIC      |               |                    |                    |
| SNP_77651_A_111000 | NW_004516008.1 | scaffold575 | 111000                  | TT                              | CC                 | CC               | INTERGENIC      |               |                    |                    |
| SNP_77652_A_111030 | NW_004516008.1 | scaffold575 | 111030                  | TT                              | CC                 | CC               | INTERGENIC      |               |                    |                    |
| SNP_77653_A_111035 | NW_004516008.1 | scaffold575 | 111035                  | TT                              | CC                 | CC               | INTERGENIC      |               |                    |                    |
| SNP_77654_A_111056 | NW_004516008.1 | scaffold575 | 111056                  | AA                              | GG                 | GG               | INTERGENIC      |               |                    |                    |
| SNP_77655_A_111135 | NW_004516008.1 | scaffold575 | 111135                  | AA                              | GG                 | GG               | INTERGENIC      |               |                    |                    |
| SNP_77656_A_111178 | NW_004516008.1 | scaffold575 | 111178                  | CC                              | AA                 | AA               | INTERGENIC      |               |                    |                    |
| SNP_77657_A_111188 | NW_004516008.1 | scaffold575 | 111188                  | TT                              | CC                 | CC               | INTERGENIC      |               |                    |                    |
| SNP_77658_A_111193 | NW_004516008.1 | scaffold575 | 111193                  | AA                              | GG                 | GG               | INTERGENIC      |               |                    |                    |
| SNP_77659_A_111203 | NW_004516008.1 | scaffold575 | 111203                  | AA                              | GG                 | GG               | INTERGENIC      |               |                    |                    |
| SNP_77660_A_111205 | NW_004516008.1 | scaffold575 | 111205                  | AA                              | GG                 | GG               | INTERGENIC      |               |                    |                    |
| SNP_77661_A_111235 | NW_004516008.1 | scaffold575 | 111235                  | GG                              | TT                 | TT               | INTERGENIC      |               |                    |                    |
| SNP_77662_A_111239 | NW_004516008.1 | scaffold575 | 111239                  | TT                              | CC                 | CC               | INTERGENIC      |               |                    |                    |
| SNP_77663_A_111240 | NW_004516008.1 | scaffold575 | 111240                  | TT                              | CC                 | CC               | INTERGENIC      |               |                    |                    |
| SNP_77664_A_111295 | NW_004516008.1 | scaffold575 | 111295                  | TT                              | CC                 | CC               | INTERGENIC      |               |                    |                    |
| SNP_77665_A_111313 | NW_004516008.1 | scaffold575 | 111313                  | GG                              | CC                 | CC               | INTERGENIC      |               |                    |                    |
| SNP_77666_A_111338 | NW_004516008.1 | scaffold575 | 111338                  | AA                              | CC                 | CC               | INTERGENIC      |               |                    |                    |
| SNP_77667_A_111354 | NW_004516008.1 | scaffold575 | 111354                  | GG                              | AA                 | AA               | INTERGENIC      |               |                    |                    |
| SNP_77668_A_111356 | NW_004516008.1 | scaffold575 | 111356                  | TT                              | GG                 | GG               | INTERGENIC      |               |                    |                    |
| SNP_77669_A_111381 | NW_004516008.1 | scaffold575 | 111381                  | GG                              | AA                 | AA               | INTERGENIC      |               |                    |                    |
| SNP_77670_A_111396 | NW_004516008.1 | scaffold575 | 111396                  | AA                              | GG                 | GG               | INTERGENIC      |               |                    |                    |
| SNP_77671_A_111408 | NW_004516008.1 | scaffold575 | 111408                  | TT                              | CC                 | CC               | INTERGENIC      |               |                    |                    |

| SNPs IDs           | Chromosome IDs | Chromosomes | Physical positions (bp) | CDC Frontier (Reference genome) | (Pusa 1103 & HPNB) | (ILWC 46 & LPNB) | Sequence genome | Components of | Gene accession IDs | Putative functions |
|--------------------|----------------|-------------|-------------------------|---------------------------------|--------------------|------------------|-----------------|---------------|--------------------|--------------------|
| SNP_77672_A_111507 | NW_004516008.1 | scaffold575 | 111507                  | TT                              | AA                 | AA               | INTERGENIC      |               |                    |                    |
| SNP_77673_A_111513 | NW_004516008.1 | scaffold575 | 111513                  | AA                              | CC                 | CC               | INTERGENIC      |               |                    |                    |
| SNP_77674_A_111527 | NW_004516008.1 | scaffold575 | 111527                  | GG                              | CC                 | CC               | INTERGENIC      |               |                    |                    |
| SNP_77675_A_111556 | NW_004516008.1 | scaffold575 | 111556                  | CC                              | TT                 | TT               | INTERGENIC      |               |                    |                    |
| SNP_77676_A_111586 | NW_004516008.1 | scaffold575 | 111586                  | AA                              | GG                 | GG               | INTERGENIC      |               |                    |                    |
| SNP_77678_A_111698 | NW_004516008.1 | scaffold575 | 111698                  | AA                              | GG                 | GG               | INTERGENIC      |               |                    |                    |
| SNP_77679_A_111725 | NW_004516008.1 | scaffold575 | 111725                  | TT                              | CC                 | CC               | INTERGENIC      |               |                    |                    |
| SNP_77680_A_111743 | NW_004516008.1 | scaffold575 | 111743                  | AA                              | CC                 | CC               | INTERGENIC      |               |                    |                    |
| SNP_77681_A_111796 | NW_004516008.1 | scaffold575 | 111796                  | TT                              | AA                 | AA               | INTERGENIC      |               |                    |                    |
| SNP_77682_A_111831 | NW_004516008.1 | scaffold575 | 111831                  | TT                              | CC                 | CC               | INTERGENIC      |               |                    |                    |
| SNP_77683_A_111856 | NW_004516008.1 | scaffold575 | 111856                  | TT                              | GG                 | GG               | INTERGENIC      |               |                    |                    |
| SNP_77684_A_111861 | NW_004516008.1 | scaffold575 | 111861                  | AA                              | GG                 | GG               | INTERGENIC      |               |                    |                    |
| SNP_77685_A_111875 | NW_004516008.1 | scaffold575 | 111875                  | AA                              | GG                 | GG               | INTERGENIC      |               |                    |                    |
| SNP_77686_A_111907 | NW_004516008.1 | scaffold575 | 111907                  | AA                              | GG                 | GG               | INTERGENIC      |               |                    |                    |
| SNP_77687_A_111923 | NW_004516008.1 | scaffold575 | 111923                  | CC                              | GG                 | GG               | INTERGENIC      |               |                    |                    |
| SNP_77688_A_111945 | NW_004516008.1 | scaffold575 | 111945                  | AA                              | GG                 | GG               | INTERGENIC      |               |                    |                    |
| SNP_77689_A_111950 | NW_004516008.1 | scaffold575 | 111950                  | TT                              | CC                 | CC               | INTERGENIC      |               |                    |                    |
| SNP_77690_A_111999 | NW_004516008.1 | scaffold575 | 111999                  | TT                              | CC                 | CC               | INTERGENIC      |               |                    |                    |
| SNP_77691_A_112004 | NW_004516008.1 | scaffold575 | 112004                  | AA                              | CC                 | CC               | INTERGENIC      |               |                    |                    |
| SNP_77692_A_112060 | NW_004516008.1 | scaffold575 | 112060                  | TT                              | CC                 | CC               | INTERGENIC      |               |                    |                    |
| SNP_77693_A_112145 | NW_004516008.1 | scaffold575 | 112145                  | AA                              | CC                 | CC               | INTERGENIC      |               |                    |                    |
| SNP_77694_A_112166 | NW_004516008.1 | scaffold575 | 112166                  | AA                              | GG                 | GG               | INTERGENIC      |               |                    |                    |

| SNPs IDs           | Chromosome IDs | Chromosomes | Physical positions (bp) | CDC Frontier (Reference genome) | (Pusa 1103 & HPNB) | (ILWC 46 & LPNB) | Sequence genome | Components of | Gene accession IDs | Putative functions |
|--------------------|----------------|-------------|-------------------------|---------------------------------|--------------------|------------------|-----------------|---------------|--------------------|--------------------|
| SNP_77695_A_112172 | NW_004516008.1 | scaffold575 | 112172                  | TT                              | GG                 | GG               | INTERGENIC      |               |                    |                    |
| SNP_77696_A_112198 | NW_004516008.1 | scaffold575 | 112198                  | AA                              | GG                 | GG               | INTERGENIC      |               |                    |                    |
| SNP_77697_A_112212 | NW_004516008.1 | scaffold575 | 112212                  | TT                              | GG                 | GG               | INTERGENIC      |               |                    |                    |
| SNP_77698_A_112326 | NW_004516008.1 | scaffold575 | 112326                  | CC                              | TT                 | TT               | INTERGENIC      |               |                    |                    |
| SNP_77699_A_112328 | NW_004516008.1 | scaffold575 | 112328                  | TT                              | GG                 | GG               | INTERGENIC      |               |                    |                    |
| SNP_77700_A_112341 | NW_004516008.1 | scaffold575 | 112341                  | TT                              | CC                 | CC               | INTERGENIC      |               |                    |                    |
| SNP_77701_A_112365 | NW_004516008.1 | scaffold575 | 112365                  | CC                              | TT                 | TT               | INTERGENIC      |               |                    |                    |
| SNP_77702_A_112383 | NW_004516008.1 | scaffold575 | 112383                  | AA                              | GG                 | GG               | INTERGENIC      |               |                    |                    |
| SNP_77703_A_112400 | NW_004516008.1 | scaffold575 | 112400                  | CC                              | AA                 | AA               | INTERGENIC      |               |                    |                    |
| SNP_77704_A_112424 | NW_004516008.1 | scaffold575 | 112424                  | AA                              | GG                 | GG               | INTERGENIC      |               |                    |                    |
| SNP_77705_A_112451 | NW_004516008.1 | scaffold575 | 112451                  | GG                              | AA                 | AA               | INTERGENIC      |               |                    |                    |
| SNP_77706_A_112523 | NW_004516008.1 | scaffold575 | 112523                  | TT                              | CC                 | CC               | INTERGENIC      |               |                    |                    |
| SNP_77707_A_112535 | NW_004516008.1 | scaffold575 | 112535                  | TT                              | CC                 | CC               | INTERGENIC      |               |                    |                    |
| SNP_77708_A_112557 | NW_004516008.1 | scaffold575 | 112557                  | AA                              | CC                 | CC               | INTERGENIC      |               |                    |                    |
| SNP_77709_A_112589 | NW_004516008.1 | scaffold575 | 112589                  | TT                              | CC                 | CC               | INTERGENIC      |               |                    |                    |
| SNP_77710_A_112618 | NW_004516008.1 | scaffold575 | 112618                  | CC                              | TT                 | TT               | INTERGENIC      |               |                    |                    |
| SNP_77711_A_112629 | NW_004516008.1 | scaffold575 | 112629                  | TT                              | CC                 | CC               | INTERGENIC      |               |                    |                    |
| SNP_77712_A_112725 | NW_004516008.1 | scaffold575 | 112725                  | CC                              | AA                 | AA               | INTERGENIC      |               |                    |                    |
| SNP_77713_A_112751 | NW_004516008.1 | scaffold575 | 112751                  | TT                              | AA                 | AA               | INTERGENIC      |               |                    |                    |
| SNP_77714_A_112848 | NW_004516008.1 | scaffold575 | 112848                  | CC                              | GG                 | GG               | INTERGENIC      |               |                    |                    |
| SNP_77715_A_112865 | NW_004516008.1 | scaffold575 | 112865                  | TT                              | CC                 | CC               | INTERGENIC      |               |                    |                    |
| SNP_77716_A_112869 | NW_004516008.1 | scaffold575 | 112869                  | GG                              | AA                 | AA               | INTERGENIC      |               |                    |                    |

| SNPs IDs           | Chromosome IDs | Chromosomes | Physical positions (bp) | CDC Frontier (Reference genome) | (Pusa 1103 & HPNB) | (ILWC 46 & LPNB) | Sequence genome | Components of | Gene accession IDs | Putative functions |
|--------------------|----------------|-------------|-------------------------|---------------------------------|--------------------|------------------|-----------------|---------------|--------------------|--------------------|
| SNP_77717_A_113131 | NW_004516008.1 | scaffold575 | 113131                  | GG                              | AA                 | AA               | INTERGENIC      |               |                    |                    |
| SNP_77718_A_113132 | NW_004516008.1 | scaffold575 | 113132                  | CC                              | TT                 | TT               | INTERGENIC      |               |                    |                    |
| SNP_77719_A_113134 | NW_004516008.1 | scaffold575 | 113134                  | AA                              | GG                 | GG               | INTERGENIC      |               |                    |                    |
| SNP_77720_A_113141 | NW_004516008.1 | scaffold575 | 113141                  | GG                              | AA                 | AA               | INTERGENIC      |               |                    |                    |
| SNP_77721_A_113147 | NW_004516008.1 | scaffold575 | 113147                  | AA                              | GG                 | GG               | INTERGENIC      |               |                    |                    |
| SNP_77722_A_113215 | NW_004516008.1 | scaffold575 | 113215                  | AA                              | GG                 | GG               | INTERGENIC      |               |                    |                    |
| SNP_77726_A_113944 | NW_004516008.1 | scaffold575 | 113944                  | AA                              | GG                 | GG               | INTERGENIC      |               |                    |                    |
| SNP_77727_A_113961 | NW_004516008.1 | scaffold575 | 113961                  | TT                              | GG                 | GG               | INTERGENIC      |               |                    |                    |
| SNP_77728_A_113971 | NW_004516008.1 | scaffold575 | 113971                  | TT                              | GG                 | GG               | INTERGENIC      |               |                    |                    |
| SNP_77729_A_113977 | NW_004516008.1 | scaffold575 | 113977                  | GG                              | CC                 | CC               | INTERGENIC      |               |                    |                    |
| SNP_77730_A_114004 | NW_004516008.1 | scaffold575 | 114004                  | TT                              | GG                 | GG               | INTERGENIC      |               |                    |                    |
| SNP_77731_A_114022 | NW_004516008.1 | scaffold575 | 114022                  | AA                              | GG                 | GG               | INTERGENIC      |               |                    |                    |
| SNP_77732_A_114148 | NW_004516008.1 | scaffold575 | 114148                  | AA                              | GG                 | GG               | INTERGENIC      |               |                    |                    |
| SNP_77733_A_114200 | NW_004516008.1 | scaffold575 | 114200                  | TT                              | CC                 | CC               | INTERGENIC      |               |                    |                    |
| SNP_77734_A_114231 | NW_004516008.1 | scaffold575 | 114231                  | TT                              | CC                 | CC               | INTERGENIC      |               |                    |                    |
| SNP_77735_A_114275 | NW_004516008.1 | scaffold575 | 114275                  | TT                              | CC                 | CC               | INTERGENIC      |               |                    |                    |
| SNP_77736_A_114285 | NW_004516008.1 | scaffold575 | 114285                  | GG                              | TT                 | TT               | INTERGENIC      |               |                    |                    |
| SNP_77737_A_114314 | NW_004516008.1 | scaffold575 | 114314                  | TT                              | GG                 | GG               | INTERGENIC      |               |                    |                    |
| SNP_77738_A_114341 | NW_004516008.1 | scaffold575 | 114341                  | AA                              | GG                 | GG               | INTERGENIC      |               |                    |                    |
| SNP_77739_A_114356 | NW_004516008.1 | scaffold575 | 114356                  | AA                              | CC                 | CC               | INTERGENIC      |               |                    |                    |
| SNP_77740_A_114403 | NW_004516008.1 | scaffold575 | 114403                  | TT                              | CC                 | CC               | INTERGENIC      |               |                    |                    |
| SNP_77741_A_114419 | NW_004516008.1 | scaffold575 | 114419                  | AA                              | GG                 | GG               | INTERGENIC      |               |                    |                    |

| SNPs IDs           | Chromosome IDs | Chromosomes | Physical positions (bp) | CDC Frontier (Reference genome) | (Pusa 1103 & HPNB) | (ILWC 46 & LPNB) | Sequence Components of genome | Gene accession IDs | Putative functions |
|--------------------|----------------|-------------|-------------------------|---------------------------------|--------------------|------------------|-------------------------------|--------------------|--------------------|
| SNP_77742_A_114425 | NW_004516008.1 | scaffold575 | 114425                  | AA                              | GG                 | GG               | INTERGENIC                    |                    |                    |
| SNP_77743_A_114751 | NW_004516008.1 | scaffold575 | 114751                  | AA                              | CC                 | CC               | INTERGENIC                    |                    |                    |
| SNP_77744_A_114798 | NW_004516008.1 | scaffold575 | 114798                  | TT                              | CC                 | CC               | INTERGENIC                    |                    |                    |
| SNP_77745_A_114814 | NW_004516008.1 | scaffold575 | 114814                  | AA                              | GG                 | GG               | INTERGENIC                    |                    |                    |
| SNP_77746_A_114820 | NW_004516008.1 | scaffold575 | 114820                  | AA                              | GG                 | GG               | INTERGENIC                    |                    |                    |
| SNP_77747_A_114882 | NW_004516008.1 | scaffold575 | 114882                  | CC                              | TT                 | TT               | INTERGENIC                    |                    |                    |
| SNP_77748_A_114919 | NW_004516008.1 | scaffold575 | 114919                  | AA                              | GG                 | GG               | DRR                           | 101499468          | Unknown function   |
| SNP_77749_A_114937 | NW_004516008.1 | scaffold575 | 114937                  | TT                              | CC                 | CC               | DRR                           | 101499468          | Unknown function   |
| SNP_77750_A_115113 | NW_004516008.1 | scaffold575 | 115113                  | AA                              | CC                 | CC               | DRR                           | 101499468          | Unknown function   |
| SNP_77751_A_115117 | NW_004516008.1 | scaffold575 | 115117                  | AA                              | GG                 | GG               | DRR                           | 101499468          | Unknown function   |
| SNP_77752_A_115163 | NW_004516008.1 | scaffold575 | 115163                  | TT                              | AA                 | AA               | DRR                           | 101499468          | Unknown function   |
| SNP_77753_A_115171 | NW_004516008.1 | scaffold575 | 115171                  | AA                              | GG                 | GG               | DRR                           | 101499468          | Unknown function   |
| SNP_77754_A_115239 | NW_004516008.1 | scaffold575 | 115239                  | AA                              | GG                 | GG               | DRR                           | 101499468          | Unknown function   |
| SNP_77755_A_115250 | NW_004516008.1 | scaffold575 | 115250                  | AA                              | GG                 | GG               | DRR                           | 101499468          | Unknown function   |
| SNP_77756_A_115255 | NW_004516008.1 | scaffold575 | 115255                  | TT                              | CC                 | CC               | DRR                           | 101499468          | Unknown function   |
| SNP_77757_A_115269 | NW_004516008.1 | scaffold575 | 115269                  | TT                              | CC                 | CC               | DRR                           | 101499468          | Unknown function   |
| SNP_77758_A_115273 | NW_004516008.1 | scaffold575 | 115273                  | AA                              | GG                 | GG               | DRR                           | 101499468          | Unknown function   |
| SNP_77759_A_115298 | NW_004516008.1 | scaffold575 | 115298                  | TT                              | GG                 | GG               | DRR                           | 101499468          | Unknown function   |
| SNP_77760_A_115608 | NW_004516008.1 | scaffold575 | 115608                  | AA                              | GG                 | GG               | DRR                           | 101499468          | Unknown function   |
| SNP_77761_A_115675 | NW_004516008.1 | scaffold575 | 115675                  | AA                              | GG                 | GG               | DRR                           | 101499468          | Unknown function   |
| SNP_77762_A_115693 | NW_004516008.1 | scaffold575 | 115693                  | TT                              | GG                 | GG               | DRR                           | 101499468          | Unknown function   |
| SNP_77763_A_115727 | NW_004516008.1 | scaffold575 | 115727                  | TT                              | AA                 | AA               | DRR                           | 101499468          | Unknown function   |

| SNPs IDs           | Chromosome IDs | Chromosomes | Physical positions (bp) | CDC Frontier (Reference genome) | (Pusa 1103 & HPNB) | (ILWC 46 & LPNB) | Sequence Components of genome | Gene accession IDs | Putative functions |
|--------------------|----------------|-------------|-------------------------|---------------------------------|--------------------|------------------|-------------------------------|--------------------|--------------------|
| SNP_77764_A_115766 | NW_004516008.1 | scaffold575 | 115766                  | TT                              | GG                 | GG               | DRR                           | 101499468          | Unknown function   |
| SNP_77765_A_115770 | NW_004516008.1 | scaffold575 | 115770                  | TT                              | CC                 | CC               | DRR                           | 101499468          | Unknown function   |
| SNP_77766_A_115787 | NW_004516008.1 | scaffold575 | 115787                  | GG                              | TT                 | TT               | DRR                           | 101499468          | Unknown function   |
| SNP_77767_A_115836 | NW_004516008.1 | scaffold575 | 115836                  | TT                              | CC                 | CC               | DRR                           | 101499468          | Unknown function   |
| SNP_77768_A_115844 | NW_004516008.1 | scaffold575 | 115844                  | TT                              | GG                 | GG               | DRR                           | 101499468          | Unknown function   |
| SNP_77769_A_115868 | NW_004516008.1 | scaffold575 | 115868                  | CC                              | TT                 | TT               | DRR                           | 101499468          | Unknown function   |
| SNP_77770_A_115874 | NW_004516008.1 | scaffold575 | 115874                  | TT                              | CC                 | CC               | DRR                           | 101499468          | Unknown function   |
| SNP_77771_A_115940 | NW_004516008.1 | scaffold575 | 115940                  | TT                              | CC                 | CC               | INTERGENIC                    |                    |                    |
| SNP_77772_A_115990 | NW_004516008.1 | scaffold575 | 115990                  | AA                              | TT                 | TT               | INTERGENIC                    |                    |                    |
| SNP_77773_A_116019 | NW_004516008.1 | scaffold575 | 116019                  | AA                              | CC                 | CC               | INTERGENIC                    |                    |                    |
| SNP_77774_A_116070 | NW_004516008.1 | scaffold575 | 116070                  | AA                              | GG                 | GG               | INTERGENIC                    |                    |                    |
| SNP_77775_A_116086 | NW_004516008.1 | scaffold575 | 116086                  | AA                              | CC                 | CC               | INTERGENIC                    |                    |                    |
| SNP_77776_A_116139 | NW_004516008.1 | scaffold575 | 116139                  | CC                              | TT                 | TT               | INTERGENIC                    |                    |                    |
| SNP_77777_A_116157 | NW_004516008.1 | scaffold575 | 116157                  | AA                              | GG                 | GG               | INTERGENIC                    |                    |                    |
| SNP_77778_A_116228 | NW_004516008.1 | scaffold575 | 116228                  | TT                              | GG                 | GG               | INTERGENIC                    |                    |                    |
| SNP_77779_A_116236 | NW_004516008.1 | scaffold575 | 116236                  | AA                              | TT                 | TT               | INTERGENIC                    |                    |                    |
| SNP_77780_A_116260 | NW_004516008.1 | scaffold575 | 116260                  | CC                              | GG                 | GG               | INTERGENIC                    |                    |                    |
| SNP_77781_A_116320 | NW_004516008.1 | scaffold575 | 116320                  | TT                              | GG                 | GG               | INTERGENIC                    |                    |                    |
| SNP_77782_A_116364 | NW_004516008.1 | scaffold575 | 116364                  | TT                              | CC                 | CC               | INTERGENIC                    |                    |                    |
| SNP_77783_A_116365 | NW_004516008.1 | scaffold575 | 116365                  | AA                              | GG                 | GG               | INTERGENIC                    |                    |                    |
| SNP_77784_A_116381 | NW_004516008.1 | scaffold575 | 116381                  | AA                              | GG                 | GG               | INTERGENIC                    |                    |                    |
| SNP_77785_A_116391 | NW_004516008.1 | scaffold575 | 116391                  | CC                              | TT                 | TT               | INTERGENIC                    |                    |                    |



| SNPs IDs           | Chromosome IDs | Chromosomes | Physical positions (bp) | CDC Frontier (Reference genome) | (Pusa 1103 & HPNB) | (ILWC 46 & LPNB) | Sequence Components of genome | Gene accession IDs | Putative functions |
|--------------------|----------------|-------------|-------------------------|---------------------------------|--------------------|------------------|-------------------------------|--------------------|--------------------|
| SNP_77786_A_116432 | NW_004516008.1 | scaffold575 | 116432                  | TT                              | AA                 | AA               | INTERGENIC                    |                    |                    |
| SNP_77787_A_116451 | NW_004516008.1 | scaffold575 | 116451                  | AA                              | GG                 | GG               | INTERGENIC                    |                    |                    |
| SNP_77788_A_116466 | NW_004516008.1 | scaffold575 | 116466                  | AA                              | CC                 | CC               | INTERGENIC                    |                    |                    |
| SNP_77789_A_116467 | NW_004516008.1 | scaffold575 | 116467                  | CC                              | AA                 | AA               | INTERGENIC                    |                    |                    |
| SNP_77790_A_116499 | NW_004516008.1 | scaffold575 | 116499                  | CC                              | AA                 | AA               | INTERGENIC                    |                    |                    |
| SNP_77791_A_116500 | NW_004516008.1 | scaffold575 | 116500                  | TT                              | GG                 | GG               | INTERGENIC                    |                    |                    |
| SNP_77792_A_116502 | NW_004516008.1 | scaffold575 | 116502                  | CC                              | TT                 | TT               | INTERGENIC                    |                    |                    |
| SNP_77793_A_116508 | NW_004516008.1 | scaffold575 | 116508                  | TT                              | CC                 | CC               | INTERGENIC                    |                    |                    |
| SNP_77794_A_116509 | NW_004516008.1 | scaffold575 | 116509                  | TT                              | CC                 | CC               | INTERGENIC                    |                    |                    |
| SNP_77795_A_116846 | NW_004516008.1 | scaffold575 | 116846                  | TT                              | CC                 | CC               | INTERGENIC                    |                    |                    |
| SNP_77796_A_116864 | NW_004516008.1 | scaffold575 | 116864                  | TT                              | CC                 | CC               | INTERGENIC                    |                    |                    |
| SNP_77797_A_116879 | NW_004516008.1 | scaffold575 | 116879                  | CC                              | TT                 | TT               | INTERGENIC                    |                    |                    |
| SNP_77798_A_116880 | NW_004516008.1 | scaffold575 | 116880                  | AA                              | GG                 | GG               | INTERGENIC                    |                    |                    |
| SNP_77799_A_116925 | NW_004516008.1 | scaffold575 | 116925                  | AA                              | GG                 | GG               | INTERGENIC                    |                    |                    |
| SNP_77800_A_116957 | NW_004516008.1 | scaffold575 | 116957                  | AA                              | CC                 | CC               | INTERGENIC                    |                    |                    |
| SNP_77801_A_116972 | NW_004516008.1 | scaffold575 | 116972                  | AA                              | TT                 | TT               | INTERGENIC                    |                    |                    |
| SNP_77802_A_116978 | NW_004516008.1 | scaffold575 | 116978                  | TT                              | CC                 | CC               | INTERGENIC                    |                    |                    |
| SNP_77803_A_116989 | NW_004516008.1 | scaffold575 | 116989                  | TT                              | GG                 | GG               | URR                           | 101499468          | Unknown function   |
| SNP_77804_A_117063 | NW_004516008.1 | scaffold575 | 117063                  | AA                              | GG                 | GG               | URR                           | 101499468          | Unknown function   |
| SNP_77805_A_117080 | NW_004516008.1 | scaffold575 | 117080                  | TT                              | CC                 | CC               | URR                           | 101499468          | Unknown function   |
| SNP_77806_A_117098 | NW_004516008.1 | scaffold575 | 117098                  | CC                              | TT                 | TT               | URR                           | 101499468          | Unknown function   |
| SNP_77807_A_117144 | NW_004516008.1 | scaffold575 | 117144                  | AA                              | GG                 | GG               | URR                           | 101499468          | Unknown function   |

| SNPs IDs           | Chromosome IDs | Chromosomes | Physical positions (bp) | CDC Frontier (Reference genome) | (Pusa 1103 & HPNB) | (ILWC 46 & LPNB) | Sequence Components of genome | Gene accession IDs | Putative functions |
|--------------------|----------------|-------------|-------------------------|---------------------------------|--------------------|------------------|-------------------------------|--------------------|--------------------|
| SNP_77808_A_117167 | NW_004516008.1 | scaffold575 | 117167                  | TT                              | CC                 | CC               | URR                           | 101499468          | Unknown function   |
| SNP_77809_A_117186 | NW_004516008.1 | scaffold575 | 117186                  | AA                              | GG                 | GG               | URR                           | 101499468          | Unknown function   |
| SNP_77810_A_117187 | NW_004516008.1 | scaffold575 | 117187                  | AA                              | TT                 | TT               | URR                           | 101499468          | Unknown function   |
| SNP_77811_A_117213 | NW_004516008.1 | scaffold575 | 117213                  | AA                              | GG                 | GG               | URR                           | 101499468          | Unknown function   |
| SNP_77812_A_117221 | NW_004516008.1 | scaffold575 | 117221                  | AA                              | GG                 | GG               | URR                           | 101499468          | Unknown function   |
| SNP_77813_A_117249 | NW_004516008.1 | scaffold575 | 117249                  | CC                              | TT                 | TT               | URR                           | 101499468          | Unknown function   |
| SNP_77814_A_117282 | NW_004516008.1 | scaffold575 | 117282                  | AA                              | CC                 | CC               | URR                           | 101499468          | Unknown function   |
| SNP_77815_A_117305 | NW_004516008.1 | scaffold575 | 117305                  | GG                              | AA                 | AA               | URR                           | 101499468          | Unknown function   |
| SNP_77816_A_117333 | NW_004516008.1 | scaffold575 | 117333                  | AA                              | GG                 | GG               | URR                           | 101499468          | Unknown function   |
| SNP_77817_A_117338 | NW_004516008.1 | scaffold575 | 117338                  | TT                              | CC                 | CC               | URR                           | 101499468          | Unknown function   |
| SNP_77818_A_117357 | NW_004516008.1 | scaffold575 | 117357                  | CC                              | TT                 | TT               | URR                           | 101499468          | Unknown function   |
| SNP_77819_A_117379 | NW_004516008.1 | scaffold575 | 117379                  | TT                              | AA                 | AA               | URR                           | 101499468          | Unknown function   |
| SNP_77820_A_117386 | NW_004516008.1 | scaffold575 | 117386                  | AA                              | GG                 | GG               | URR                           | 101499468          | Unknown function   |
| SNP_77821_A_117399 | NW_004516008.1 | scaffold575 | 117399                  | AA                              | GG                 | GG               | URR                           | 101499468          | Unknown function   |
| SNP_77822_A_117424 | NW_004516008.1 | scaffold575 | 117424                  | AA                              | TT                 | TT               | URR                           | 101499468          | Unknown function   |
| SNP_77823_A_117437 | NW_004516008.1 | scaffold575 | 117437                  | TT                              | CC                 | CC               | URR                           | 101499468          | Unknown function   |
| SNP_77824_A_117466 | NW_004516008.1 | scaffold575 | 117466                  | TT                              | GG                 | GG               | URR                           | 101499468          | Unknown function   |
| SNP_77825_A_117475 | NW_004516008.1 | scaffold575 | 117475                  | TT                              | GG                 | GG               | URR                           | 101499468          | Unknown function   |
| SNP_77826_A_117532 | NW_004516008.1 | scaffold575 | 117532                  | AA                              | GG                 | GG               | URR                           | 101499468          | Unknown function   |
| SNP_77827_A_117603 | NW_004516008.1 | scaffold575 | 117603                  | GG                              | AA                 | AA               | URR                           | 101499468          | Unknown function   |
| SNP_77828_A_117616 | NW_004516008.1 | scaffold575 | 117616                  | AA                              | GG                 | GG               | URR                           | 101499468          | Unknown function   |
| SNP_77829_A_117628 | NW_004516008.1 | scaffold575 | 117628                  | TT                              | GG                 | GG               | URR                           | 101499468          | Unknown function   |

| SNPs IDs           | Chromosome IDs | Chromosomes | Physical positions (bp) | CDC Frontier (Reference genome) | (Pusa 1103 & HPNB) | (ILWC 46 & LPNB) | Sequence Components of genome | Gene accession IDs | Putative functions |
|--------------------|----------------|-------------|-------------------------|---------------------------------|--------------------|------------------|-------------------------------|--------------------|--------------------|
| SNP_77830_A_117692 | NW_004516008.1 | scaffold575 | 117692                  | AA                              | CC                 | CC               | URR                           | 101499468          | Unknown function   |
| SNP_77831_A_117701 | NW_004516008.1 | scaffold575 | 117701                  | TT                              | CC                 | CC               | URR                           | 101499468          | Unknown function   |
| SNP_77832_A_117720 | NW_004516008.1 | scaffold575 | 117720                  | AA                              | CC                 | CC               | URR                           | 101499468          | Unknown function   |
| SNP_77833_A_117732 | NW_004516008.1 | scaffold575 | 117732                  | TT                              | GG                 | GG               | URR                           | 101499468          | Unknown function   |
| SNP_77834_A_117752 | NW_004516008.1 | scaffold575 | 117752                  | TT                              | CC                 | CC               | URR                           | 101499468          | Unknown function   |
| SNP_77835_A_117763 | NW_004516008.1 | scaffold575 | 117763                  | TT                              | CC                 | CC               | URR                           | 101499468          | Unknown function   |
| SNP_77836_A_117775 | NW_004516008.1 | scaffold575 | 117775                  | AA                              | TT                 | TT               | URR                           | 101499468          | Unknown function   |
| SNP_77837_A_117834 | NW_004516008.1 | scaffold575 | 117834                  | TT                              | CC                 | CC               | URR                           | 101499468          | Unknown function   |
| SNP_77838_A_117865 | NW_004516008.1 | scaffold575 | 117865                  | TT                              | GG                 | GG               | URR                           | 101499468          | Unknown function   |
| SNP_77839_A_117900 | NW_004516008.1 | scaffold575 | 117900                  | AA                              | GG                 | GG               | URR                           | 101499468          | Unknown function   |
| SNP_77840_A_117911 | NW_004516008.1 | scaffold575 | 117911                  | AA                              | GG                 | GG               | URR                           | 101499468          | Unknown function   |
| SNP_77841_A_117964 | NW_004516008.1 | scaffold575 | 117964                  | AA                              | CC                 | CC               | URR                           | 101499468          | Unknown function   |
| SNP_77842_A_117999 | NW_004516008.1 | scaffold575 | 117999                  | AA                              | CC                 | CC               | URR                           | 101499468          | Unknown function   |
| SNP_77843_A_118014 | NW_004516008.1 | scaffold575 | 118014                  | AA                              | GG                 | GG               | URR                           | 101499468          | Unknown function   |
| SNP_77844_A_118141 | NW_004516008.1 | scaffold575 | 118141                  | AA                              | GG                 | GG               | URR                           | 101499468          | Unknown function   |
| SNP_77845_A_118153 | NW_004516008.1 | scaffold575 | 118153                  | TT                              | CC                 | CC               | URR                           | 101499468          | Unknown function   |
| SNP_77846_A_118180 | NW_004516008.1 | scaffold575 | 118180                  | AA                              | GG                 | GG               | URR                           | 101499468          | Unknown function   |
| SNP_77847_A_118188 | NW_004516008.1 | scaffold575 | 118188                  | AA                              | GG                 | GG               | URR                           | 101499468          | Unknown function   |
| SNP_77848_A_118338 | NW_004516008.1 | scaffold575 | 118338                  | TT                              | CC                 | CC               | URR                           | 101499468          | Unknown function   |
| SNP_77849_A_118525 | NW_004516008.1 | scaffold575 | 118525                  | AA                              | GG                 | GG               | URR                           | 101499468          | Unknown function   |
| SNP_77850_A_119951 | NW_004516008.1 | scaffold575 | 119951                  | AA                              | GG                 | GG               | DRR                           | 101499770          | Unknown function   |
| SNP_77851_A_120111 | NW_004516008.1 | scaffold575 | 120111                  | AA                              | GG                 | GG               | DRR                           | 101499770          | Unknown function   |

| SNPs IDs           | Chromosome IDs | Chromosomes | Physical positions (bp) | CDC Frontier (Reference genome) | (Pusa 1103 & HPNB) | (ILWC 46 & LPNB) | Sequence Components of genome | Gene accession IDs | Putative functions |
|--------------------|----------------|-------------|-------------------------|---------------------------------|--------------------|------------------|-------------------------------|--------------------|--------------------|
| SNP_77852_A_120139 | NW_004516008.1 | scaffold575 | 120139                  | TT                              | CC                 | CC               | DRR                           | 101499770          | Unknown function   |
| SNP_77853_A_120184 | NW_004516008.1 | scaffold575 | 120184                  | AA                              | GG                 | GG               | DRR                           | 101499770          | Unknown function   |
| SNP_77854_A_120187 | NW_004516008.1 | scaffold575 | 120187                  | TT                              | GG                 | GG               | DRR                           | 101499770          | Unknown function   |
| SNP_77855_A_120201 | NW_004516008.1 | scaffold575 | 120201                  | AA                              | CC                 | CC               | DRR                           | 101499770          | Unknown function   |
| SNP_77856_A_120203 | NW_004516008.1 | scaffold575 | 120203                  | TT                              | CC                 | CC               | DRR                           | 101499770          | Unknown function   |
| SNP_77857_A_120270 | NW_004516008.1 | scaffold575 | 120270                  | AA                              | CC                 | CC               | NON_SYNONYMOUS_CODING         | 101499770          | Unknown function   |
| SNP_77858_A_120501 | NW_004516008.1 | scaffold575 | 120501                  | TT                              | CC                 | CC               | NON_SYNONYMOUS_CODING         | 101499770          | Unknown function   |
| SNP_77859_A_121595 | NW_004516008.1 | scaffold575 | 121595                  | GG                              | AA                 | AA               | URR                           | 101499770          | Unknown function   |
| SNP_77860_A_121613 | NW_004516008.1 | scaffold575 | 121613                  | TT                              | CC                 | CC               | URR                           | 101499770          | Unknown function   |
| SNP_77861_A_121624 | NW_004516008.1 | scaffold575 | 121624                  | GG                              | AA                 | AA               | URR                           | 101499770          | Unknown function   |
| SNP_77862_A_121689 | NW_004516008.1 | scaffold575 | 121689                  | CC                              | AA                 | AA               | URR                           | 101499770          | Unknown function   |
| SNP_77863_A_121717 | NW_004516008.1 | scaffold575 | 121717                  | CC                              | TT                 | TT               | URR                           | 101499770          | Unknown function   |
| SNP_77864_A_121728 | NW_004516008.1 | scaffold575 | 121728                  | AA                              | GG                 | GG               | URR                           | 101499770          | Unknown function   |
| SNP_77865_A_121741 | NW_004516008.1 | scaffold575 | 121741                  | GG                              | AA                 | AA               | URR                           | 101499770          | Unknown function   |
| SNP_77866_A_121867 | NW_004516008.1 | scaffold575 | 121867                  | GG                              | TT                 | TT               | URR                           | 101499770          | Unknown function   |
| SNP_77867_A_121874 | NW_004516008.1 | scaffold575 | 121874                  | TT                              | CC                 | CC               | URR                           | 101499770          | Unknown function   |
| SNP_77868_A_121879 | NW_004516008.1 | scaffold575 | 121879                  | CC                              | TT                 | TT               | URR                           | 101499770          | Unknown function   |
| SNP_77869_A_121910 | NW_004516008.1 | scaffold575 | 121910                  | CC                              | AA                 | AA               | URR                           | 101499770          | Unknown function   |
| SNP_77870_A_121914 | NW_004516008.1 | scaffold575 | 121914                  | TT                              | CC                 | CC               | URR                           | 101499770          | Unknown function   |
| SNP_77871_A_121963 | NW_004516008.1 | scaffold575 | 121963                  | TT                              | AA                 | AA               | URR                           | 101499770          | Unknown function   |
| SNP_77872_A_122019 | NW_004516008.1 | scaffold575 | 122019                  | AA                              | GG                 | GG               | URR                           | 101499770          | Unknown function   |
| SNP_77873_A_122056 | NW_004516008.1 | scaffold575 | 122056                  | AA                              | CC                 | CC               | URR                           | 101499770          | Unknown function   |

| SNPs IDs           | Chromosome IDs | Chromosomes | Physical positions (bp) | CDC Frontier (Reference genome) | (Pusa 1103 & HPNB) | (ILWC 46 & LPNB) | Sequence Components of genome | Gene accession IDs | Putative functions |
|--------------------|----------------|-------------|-------------------------|---------------------------------|--------------------|------------------|-------------------------------|--------------------|--------------------|
| SNP_77874_A_122059 | NW_004516008.1 | scaffold575 | 122059                  | TT                              | CC                 | CC               | URR                           | 101499770          | Unknown function   |
| SNP_77875_A_122061 | NW_004516008.1 | scaffold575 | 122061                  | TT                              | CC                 | CC               | URR                           | 101499770          | Unknown function   |
| SNP_77876_A_122067 | NW_004516008.1 | scaffold575 | 122067                  | TT                              | GG                 | GG               | URR                           | 101499770          | Unknown function   |
| SNP_77877_A_122081 | NW_004516008.1 | scaffold575 | 122081                  | GG                              | CC                 | CC               | URR                           | 101499770          | Unknown function   |
| SNP_77878_A_122102 | NW_004516008.1 | scaffold575 | 122102                  | AA                              | GG                 | GG               | URR                           | 101499770          | Unknown function   |
| SNP_77879_A_122121 | NW_004516008.1 | scaffold575 | 122121                  | TT                              | CC                 | CC               | URR                           | 101499770          | Unknown function   |
| SNP_77880_A_122179 | NW_004516008.1 | scaffold575 | 122179                  | TT                              | GG                 | GG               | URR                           | 101499770          | Unknown function   |
| SNP_77881_A_122366 | NW_004516008.1 | scaffold575 | 122366                  | AA                              | GG                 | GG               | URR                           | 101499770          | Unknown function   |
| SNP_77882_A_122368 | NW_004516008.1 | scaffold575 | 122368                  | TT                              | CC                 | CC               | URR                           | 101499770          | Unknown function   |
| SNP_77883_A_122409 | NW_004516008.1 | scaffold575 | 122409                  | TT                              | CC                 | CC               | URR                           | 101499770          | Unknown function   |
| SNP_77884_A_122473 | NW_004516008.1 | scaffold575 | 122473                  | GG                              | CC                 | CC               | URR                           | 101499770          | Unknown function   |
| SNP_77885_A_122480 | NW_004516008.1 | scaffold575 | 122480                  | TT                              | CC                 | CC               | URR                           | 101499770          | Unknown function   |
| SNP_77886_A_122487 | NW_004516008.1 | scaffold575 | 122487                  | AA                              | GG                 | GG               | URR                           | 101499770          | Unknown function   |
| SNP_77887_A_122518 | NW_004516008.1 | scaffold575 | 122518                  | AA                              | CC                 | CC               | URR                           | 101499770          | Unknown function   |
| SNP_77888_A_122574 | NW_004516008.1 | scaffold575 | 122574                  | TT                              | GG                 | GG               | URR                           | 101499770          | Unknown function   |
| SNP_77889_A_124053 | NW_004516008.1 | scaffold575 | 124053                  | CC                              | AA                 | AA               | INTERGENIC                    |                    |                    |
| SNP_77890_A_125217 | NW_004516008.1 | scaffold575 | 125217                  | TT                              | AA                 | AA               | INTERGENIC                    |                    |                    |
| SNP_77891_A_125245 | NW_004516008.1 | scaffold575 | 125245                  | TT                              | CC                 | CC               | INTERGENIC                    |                    |                    |
| SNP_77892_A_125299 | NW_004516008.1 | scaffold575 | 125299                  | AA                              | GG                 | GG               | INTERGENIC                    |                    |                    |
| SNP_77893_A_125301 | NW_004516008.1 | scaffold575 | 125301                  | GG                              | TT                 | TT               | INTERGENIC                    |                    |                    |
| SNP_77894_A_125327 | NW_004516008.1 | scaffold575 | 125327                  | AA                              | GG                 | GG               | INTERGENIC                    |                    |                    |
| SNP_77895_A_125368 | NW_004516008.1 | scaffold575 | 125368                  | GG                              | AA                 | AA               | INTERGENIC                    |                    |                    |

| SNPs IDs           | Chromosome IDs | Chromosomes | Physical positions (bp) | CDC Frontier (Reference genome) | (Pusa 1103 & HPNB) | (ILWC 46 & LPNB) | Sequence genome | Components of | Gene accession IDs | Putative functions |
|--------------------|----------------|-------------|-------------------------|---------------------------------|--------------------|------------------|-----------------|---------------|--------------------|--------------------|
| SNP_77896_A_125384 | NW_004516008.1 | scaffold575 | 125384                  | TT                              | CC                 | CC               | INTERGENIC      |               |                    |                    |
| SNP_77897_A_125400 | NW_004516008.1 | scaffold575 | 125400                  | TT                              | CC                 | CC               | INTERGENIC      |               |                    |                    |
| SNP_77898_A_125413 | NW_004516008.1 | scaffold575 | 125413                  | AA                              | GG                 | GG               | INTERGENIC      |               |                    |                    |
| SNP_77899_A_125448 | NW_004516008.1 | scaffold575 | 125448                  | AA                              | GG                 | GG               | INTERGENIC      |               |                    |                    |
| SNP_77900_A_125449 | NW_004516008.1 | scaffold575 | 125449                  | TT                              | GG                 | GG               | INTERGENIC      |               |                    |                    |
| SNP_77901_A_125466 | NW_004516008.1 | scaffold575 | 125466                  | AA                              | TT                 | TT               | INTERGENIC      |               |                    |                    |
| SNP_77902_A_125492 | NW_004516008.1 | scaffold575 | 125492                  | TT                              | CC                 | CC               | INTERGENIC      |               |                    |                    |
| SNP_77903_A_125518 | NW_004516008.1 | scaffold575 | 125518                  | TT                              | CC                 | CC               | INTERGENIC      |               |                    |                    |
| SNP_77904_A_125519 | NW_004516008.1 | scaffold575 | 125519                  | TT                              | CC                 | CC               | INTERGENIC      |               |                    |                    |
| SNP_77905_A_125531 | NW_004516008.1 | scaffold575 | 125531                  | AA                              | GG                 | GG               | INTERGENIC      |               |                    |                    |
| SNP_77906_A_125543 | NW_004516008.1 | scaffold575 | 125543                  | GG                              | CC                 | CC               | INTERGENIC      |               |                    |                    |
| SNP_77907_A_125553 | NW_004516008.1 | scaffold575 | 125553                  | TT                              | CC                 | CC               | INTERGENIC      |               |                    |                    |
| SNP_77908_A_125561 | NW_004516008.1 | scaffold575 | 125561                  | AA                              | GG                 | GG               | INTERGENIC      |               |                    |                    |
| SNP_77909_A_125582 | NW_004516008.1 | scaffold575 | 125582                  | AA                              | GG                 | GG               | INTERGENIC      |               |                    |                    |
| SNP_77910_A_125599 | NW_004516008.1 | scaffold575 | 125599                  | TT                              | CC                 | CC               | INTERGENIC      |               |                    |                    |
| SNP_77911_A_125604 | NW_004516008.1 | scaffold575 | 125604                  | AA                              | GG                 | GG               | INTERGENIC      |               |                    |                    |
| SNP_77912_A_125612 | NW_004516008.1 | scaffold575 | 125612                  | TT                              | GG                 | GG               | INTERGENIC      |               |                    |                    |
| SNP_77913_A_125654 | NW_004516008.1 | scaffold575 | 125654                  | TT                              | CC                 | CC               | INTERGENIC      |               |                    |                    |
| SNP_77914_A_125684 | NW_004516008.1 | scaffold575 | 125684                  | TT                              | CC                 | CC               | INTERGENIC      |               |                    |                    |
| SNP_77915_A_125742 | NW_004516008.1 | scaffold575 | 125742                  | TT                              | CC                 | CC               | INTERGENIC      |               |                    |                    |
| SNP_77916_A_125748 | NW_004516008.1 | scaffold575 | 125748                  | CC                              | TT                 | TT               | INTERGENIC      |               |                    |                    |
| SNP_77917_A_125760 | NW_004516008.1 | scaffold575 | 125760                  | AA                              | GG                 | GG               | INTERGENIC      |               |                    |                    |

| SNPs IDs           | Chromosome IDs | Chromosomes | Physical positions (bp) | CDC Frontier (Reference genome) | (Pusa 1103 & HPNB) | (ILWC 46 & LPNB) | Sequence genome | Components of | Gene accession IDs | Putative functions |
|--------------------|----------------|-------------|-------------------------|---------------------------------|--------------------|------------------|-----------------|---------------|--------------------|--------------------|
| SNP_77918_A_125762 | NW_004516008.1 | scaffold575 | 125762                  | AA                              | GG                 | GG               | INTERGENIC      |               |                    |                    |
| SNP_77919_A_125802 | NW_004516008.1 | scaffold575 | 125802                  | CC                              | TT                 | TT               | INTERGENIC      |               |                    |                    |
| SNP_77920_A_125841 | NW_004516008.1 | scaffold575 | 125841                  | TT                              | CC                 | CC               | INTERGENIC      |               |                    |                    |
| SNP_77921_A_125866 | NW_004516008.1 | scaffold575 | 125866                  | TT                              | GG                 | GG               | INTERGENIC      |               |                    |                    |
| SNP_77922_A_125876 | NW_004516008.1 | scaffold575 | 125876                  | TT                              | CC                 | CC               | INTERGENIC      |               |                    |                    |
| SNP_77923_A_125905 | NW_004516008.1 | scaffold575 | 125905                  | AA                              | GG                 | GG               | INTERGENIC      |               |                    |                    |
| SNP_77925_A_125914 | NW_004516008.1 | scaffold575 | 125914                  | AA                              | GG                 | GG               | INTERGENIC      |               |                    |                    |
| SNP_77926_A_125985 | NW_004516008.1 | scaffold575 | 125985                  | AA                              | GG                 | GG               | INTERGENIC      |               |                    |                    |
| SNP_77928_A_126000 | NW_004516008.1 | scaffold575 | 126000                  | AA                              | GG                 | GG               | INTERGENIC      |               |                    |                    |
| SNP_77929_A_126042 | NW_004516008.1 | scaffold575 | 126042                  | AA                              | CC                 | CC               | INTERGENIC      |               |                    |                    |
| SNP_77930_A_126053 | NW_004516008.1 | scaffold575 | 126053                  | GG                              | TT                 | TT               | INTERGENIC      |               |                    |                    |
| SNP_77931_A_126058 | NW_004516008.1 | scaffold575 | 126058                  | CC                              | TT                 | TT               | INTERGENIC      |               |                    |                    |
| SNP_77932_A_126118 | NW_004516008.1 | scaffold575 | 126118                  | TT                              | CC                 | CC               | INTERGENIC      |               |                    |                    |
| SNP_77933_A_126155 | NW_004516008.1 | scaffold575 | 126155                  | TT                              | CC                 | CC               | INTERGENIC      |               |                    |                    |
| SNP_77934_A_126164 | NW_004516008.1 | scaffold575 | 126164                  | CC                              | GG                 | GG               | INTERGENIC      |               |                    |                    |
| SNP_77935_A_126175 | NW_004516008.1 | scaffold575 | 126175                  | GG                              | AA                 | AA               | INTERGENIC      |               |                    |                    |
| SNP_77936_A_126255 | NW_004516008.1 | scaffold575 | 126255                  | TT                              | CC                 | CC               | INTERGENIC      |               |                    |                    |
| SNP_77937_A_126258 | NW_004516008.1 | scaffold575 | 126258                  | AA                              | TT                 | TT               | INTERGENIC      |               |                    |                    |
| SNP_77938_A_126260 | NW_004516008.1 | scaffold575 | 126260                  | TT                              | GG                 | GG               | INTERGENIC      |               |                    |                    |
| SNP_77939_A_126345 | NW_004516008.1 | scaffold575 | 126345                  | TT                              | CC                 | CC               | INTERGENIC      |               |                    |                    |
| SNP_77940_A_126379 | NW_004516008.1 | scaffold575 | 126379                  | TT                              | CC                 | CC               | INTERGENIC      |               |                    |                    |
| SNP_77941_A_126393 | NW_004516008.1 | scaffold575 | 126393                  | AA                              | GG                 | GG               | INTERGENIC      |               |                    |                    |

| SNPs IDs           | Chromosome IDs | Chromosomes | Physical positions (bp) | CDC Frontier (Reference genome) | (Pusa 1103 & HPNB) | (ILWC 46 & LPNB) | Sequence genome | Components of | Gene accession IDs | Putative functions |
|--------------------|----------------|-------------|-------------------------|---------------------------------|--------------------|------------------|-----------------|---------------|--------------------|--------------------|
| SNP_77942_A_126407 | NW_004516008.1 | scaffold575 | 126407                  | TT                              | CC                 | CC               | INTERGENIC      |               |                    |                    |
| SNP_77943_A_126409 | NW_004516008.1 | scaffold575 | 126409                  | GG                              | AA                 | AA               | INTERGENIC      |               |                    |                    |
| SNP_77944_A_126517 | NW_004516008.1 | scaffold575 | 126517                  | TT                              | CC                 | CC               | INTERGENIC      |               |                    |                    |
| SNP_77945_A_126518 | NW_004516008.1 | scaffold575 | 126518                  | TT                              | CC                 | CC               | INTERGENIC      |               |                    |                    |
| SNP_77946_A_126549 | NW_004516008.1 | scaffold575 | 126549                  | AA                              | CC                 | CC               | INTERGENIC      |               |                    |                    |
| SNP_77947_A_126582 | NW_004516008.1 | scaffold575 | 126582                  | AA                              | GG                 | GG               | INTERGENIC      |               |                    |                    |
| SNP_77948_A_126604 | NW_004516008.1 | scaffold575 | 126604                  | GG                              | TT                 | TT               | INTERGENIC      |               |                    |                    |
| SNP_77949_A_126609 | NW_004516008.1 | scaffold575 | 126609                  | TT                              | CC                 | CC               | INTERGENIC      |               |                    |                    |
| SNP_77950_A_126651 | NW_004516008.1 | scaffold575 | 126651                  | TT                              | GG                 | GG               | INTERGENIC      |               |                    |                    |
| SNP_77951_A_126718 | NW_004516008.1 | scaffold575 | 126718                  | TT                              | AA                 | AA               | INTERGENIC      |               |                    |                    |
| SNP_77952_A_126759 | NW_004516008.1 | scaffold575 | 126759                  | GG                              | AA                 | AA               | INTERGENIC      |               |                    |                    |
| SNP_77953_A_126803 | NW_004516008.1 | scaffold575 | 126803                  | AA                              | GG                 | GG               | INTERGENIC      |               |                    |                    |
| SNP_77954_A_126809 | NW_004516008.1 | scaffold575 | 126809                  | AA                              | GG                 | GG               | INTERGENIC      |               |                    |                    |
| SNP_77955_A_126816 | NW_004516008.1 | scaffold575 | 126816                  | AA                              | CC                 | CC               | INTERGENIC      |               |                    |                    |
| SNP_77956_A_126819 | NW_004516008.1 | scaffold575 | 126819                  | AA                              | GG                 | GG               | INTERGENIC      |               |                    |                    |
| SNP_77957_A_126846 | NW_004516008.1 | scaffold575 | 126846                  | AA                              | GG                 | GG               | INTERGENIC      |               |                    |                    |
| SNP_77958_A_126860 | NW_004516008.1 | scaffold575 | 126860                  | TT                              | CC                 | CC               | INTERGENIC      |               |                    |                    |
| SNP_77959_A_126875 | NW_004516008.1 | scaffold575 | 126875                  | TT                              | CC                 | CC               | INTERGENIC      |               |                    |                    |
| SNP_77960_A_126882 | NW_004516008.1 | scaffold575 | 126882                  | TT                              | GG                 | GG               | INTERGENIC      |               |                    |                    |
| SNP_77961_A_126886 | NW_004516008.1 | scaffold575 | 126886                  | AA                              | GG                 | GG               | INTERGENIC      |               |                    |                    |
| SNP_77962_A_126937 | NW_004516008.1 | scaffold575 | 126937                  | AA                              | CC                 | CC               | INTERGENIC      |               |                    |                    |
| SNP_77963_A_127005 | NW_004516008.1 | scaffold575 | 127005                  | AA                              | CC                 | CC               | INTERGENIC      |               |                    |                    |



| SNPs IDs           | Chromosome IDs | Chromosomes | Physical positions (bp) | CDC Frontier (Reference genome) | (Pusa 1103 & HPNB) | (ILWC 46 & LPNB) | Sequence genome | Components of | Gene accession IDs | Putative functions |
|--------------------|----------------|-------------|-------------------------|---------------------------------|--------------------|------------------|-----------------|---------------|--------------------|--------------------|
| SNP_77964_A_127027 | NW_004516008.1 | scaffold575 | 127027                  | TT                              | CC                 | CC               | INTERGENIC      |               |                    |                    |
| SNP_77965_A_127030 | NW_004516008.1 | scaffold575 | 127030                  | AA                              | GG                 | GG               | INTERGENIC      |               |                    |                    |
| SNP_77966_A_127031 | NW_004516008.1 | scaffold575 | 127031                  | AA                              | CC                 | CC               | INTERGENIC      |               |                    |                    |
| SNP_77967_A_127077 | NW_004516008.1 | scaffold575 | 127077                  | AA                              | GG                 | GG               | INTERGENIC      |               |                    |                    |
| SNP_77968_A_127135 | NW_004516008.1 | scaffold575 | 127135                  | TT                              | AA                 | AA               | INTERGENIC      |               |                    |                    |
| SNP_77969_A_127291 | NW_004516008.1 | scaffold575 | 127291                  | AA                              | GG                 | GG               | INTERGENIC      |               |                    |                    |
| SNP_77970_A_131225 | NW_004516008.1 | scaffold575 | 131225                  | AA                              | GG                 | GG               | INTERGENIC      |               |                    |                    |
| SNP_77971_A_8143   | NW_004516009.1 | scaffold577 | 8143                    | TT                              | CC                 | CC               | INTERGENIC      |               |                    |                    |
| SNP_77972_A_8154   | NW_004516009.1 | scaffold577 | 8154                    | AA                              | GG                 | GG               | INTERGENIC      |               |                    |                    |
| SNP_77973_A_8565   | NW_004516009.1 | scaffold577 | 8565                    | GG                              | AA                 | AA               | INTERGENIC      |               |                    |                    |
| SNP_77974_A_16818  | NW_004516009.1 | scaffold577 | 16818                   | AA                              | GG                 | GG               | INTERGENIC      |               |                    |                    |
| SNP_77975_A_26690  | NW_004516009.1 | scaffold577 | 26690                   | GG                              | CC                 | CC               | INTERGENIC      |               |                    |                    |
| SNP_77976_A_26858  | NW_004516009.1 | scaffold577 | 26858                   | CC                              | AA                 | AA               | INTERGENIC      |               |                    |                    |
| SNP_77977_A_35253  | NW_004516009.1 | scaffold577 | 35253                   | TT                              | CC                 | CC               | INTERGENIC      |               |                    |                    |
| SNP_77978_A_35307  | NW_004516009.1 | scaffold577 | 35307                   | AA                              | CC                 | CC               | INTERGENIC      |               |                    |                    |
| SNP_77979_A_35342  | NW_004516009.1 | scaffold577 | 35342                   | TT                              | AA                 | AA               | INTERGENIC      |               |                    |                    |
| SNP_77980_A_41037  | NW_004516009.1 | scaffold577 | 41037                   | AA                              | TT                 | TT               | INTERGENIC      |               |                    |                    |
| SNP_77981_A_41147  | NW_004516009.1 | scaffold577 | 41147                   | CC                              | TT                 | TT               | INTERGENIC      |               |                    |                    |
| SNP_77982_A_41529  | NW_004516009.1 | scaffold577 | 41529                   | CC                              | TT                 | TT               | INTERGENIC      |               |                    |                    |
| SNP_77983_A_41531  | NW_004516009.1 | scaffold577 | 41531                   | AA                              | GG                 | GG               | INTERGENIC      |               |                    |                    |
| SNP_77984_A_41532  | NW_004516009.1 | scaffold577 | 41532                   | GG                              | TT                 | TT               | INTERGENIC      |               |                    |                    |
| SNP_77985_A_41533  | NW_004516009.1 | scaffold577 | 41533                   | CC                              | GG                 | GG               | INTERGENIC      |               |                    |                    |

| SNPs IDs          | Chromosome IDs | Chromosomes | Physical positions (bp) | CDC Frontier (Reference genome) | (Pusa 1103 & HPNB) | (ILWC 46 & LPNB) | Sequence genome | Components of | Gene accession IDs | Putative functions |
|-------------------|----------------|-------------|-------------------------|---------------------------------|--------------------|------------------|-----------------|---------------|--------------------|--------------------|
| SNP_77986_A_41549 | NW_004516009.1 | scaffold577 | 41549                   | TT                              | GG                 | GG               | INTERGENIC      |               |                    |                    |
| SNP_77987_A_41559 | NW_004516009.1 | scaffold577 | 41559                   | TT                              | CC                 | CC               | INTERGENIC      |               |                    |                    |
| SNP_77988_A_41660 | NW_004516009.1 | scaffold577 | 41660                   | CC                              | AA                 | AA               | INTERGENIC      |               |                    |                    |
| SNP_77989_A_41901 | NW_004516009.1 | scaffold577 | 41901                   | AA                              | GG                 | GG               | INTERGENIC      |               |                    |                    |
| SNP_77990_A_42220 | NW_004516009.1 | scaffold577 | 42220                   | GG                              | AA                 | AA               | INTERGENIC      |               |                    |                    |
| SNP_77991_A_42253 | NW_004516009.1 | scaffold577 | 42253                   | GG                              | AA                 | AA               | INTERGENIC      |               |                    |                    |
| SNP_77992_A_42270 | NW_004516009.1 | scaffold577 | 42270                   | TT                              | GG                 | GG               | INTERGENIC      |               |                    |                    |
| SNP_77993_A_42366 | NW_004516009.1 | scaffold577 | 42366                   | TT                              | CC                 | CC               | INTERGENIC      |               |                    |                    |
| SNP_77994_A_42415 | NW_004516009.1 | scaffold577 | 42415                   | GG                              | CC                 | CC               | INTERGENIC      |               |                    |                    |
| SNP_77995_A_42596 | NW_004516009.1 | scaffold577 | 42596                   | AA                              | GG                 | GG               | INTERGENIC      |               |                    |                    |
| SNP_77996_A_47365 | NW_004516009.1 | scaffold577 | 47365                   | CC                              | GG                 | GG               | INTERGENIC      |               |                    |                    |
| SNP_77997_A_55294 | NW_004516009.1 | scaffold577 | 55294                   | AA                              | GG                 | GG               | INTERGENIC      |               |                    |                    |
| SNP_77998_A_55646 | NW_004516009.1 | scaffold577 | 55646                   | CC                              | AA                 | AA               | INTERGENIC      |               |                    |                    |
| SNP_77999_A_56043 | NW_004516009.1 | scaffold577 | 56043                   | AA                              | TT                 | TT               | INTERGENIC      |               |                    |                    |
| SNP_78000_A_56089 | NW_004516009.1 | scaffold577 | 56089                   | CC                              | AA                 | AA               | INTERGENIC      |               |                    |                    |
| SNP_78001_A_64752 | NW_004516009.1 | scaffold577 | 64752                   | TT                              | GG                 | GG               | INTERGENIC      |               |                    |                    |
| SNP_78002_A_64924 | NW_004516009.1 | scaffold577 | 64924                   | CC                              | GG                 | GG               | INTERGENIC      |               |                    |                    |
| SNP_78003_A_64957 | NW_004516009.1 | scaffold577 | 64957                   | CC                              | GG                 | GG               | INTERGENIC      |               |                    |                    |
| SNP_78004_A_65037 | NW_004516009.1 | scaffold577 | 65037                   | AA                              | GG                 | GG               | INTERGENIC      |               |                    |                    |
| SNP_78005_A_65134 | NW_004516009.1 | scaffold577 | 65134                   | GG                              | CC                 | CC               | INTERGENIC      |               |                    |                    |
| SNP_78006_A_65199 | NW_004516009.1 | scaffold577 | 65199                   | GG                              | AA                 | AA               | INTERGENIC      |               |                    |                    |
| SNP_78007_A_66005 | NW_004516009.1 | scaffold577 | 66005                   | AA                              | GG                 | GG               | INTERGENIC      |               |                    |                    |

| SNPs IDs           | Chromosome IDs | Chromosomes | Physical positions (bp) | CDC Frontier (Reference genome) | (Pusa 1103 & HPNB) | (ILWC 46 & LPNB) | Sequence genome | Components of | Gene accession IDs | Putative functions |
|--------------------|----------------|-------------|-------------------------|---------------------------------|--------------------|------------------|-----------------|---------------|--------------------|--------------------|
| SNP_78008_A_69695  | NW_004516009.1 | scaffold577 | 69695                   | CC                              | AA                 | AA               | INTERGENIC      |               |                    |                    |
| SNP_78009_A_69949  | NW_004516009.1 | scaffold577 | 69949                   | TT                              | CC                 | CC               | INTERGENIC      |               |                    |                    |
| SNP_78010_A_69974  | NW_004516009.1 | scaffold577 | 69974                   | CC                              | TT                 | TT               | INTERGENIC      |               |                    |                    |
| SNP_78011_A_70004  | NW_004516009.1 | scaffold577 | 70004                   | AA                              | CC                 | CC               | INTERGENIC      |               |                    |                    |
| SNP_78012_A_70745  | NW_004516009.1 | scaffold577 | 70745                   | CC                              | AA                 | AA               | INTERGENIC      |               |                    |                    |
| SNP_78013_A_70769  | NW_004516009.1 | scaffold577 | 70769                   | AA                              | GG                 | GG               | INTERGENIC      |               |                    |                    |
| SNP_78014_A_74646  | NW_004516009.1 | scaffold577 | 74646                   | AA                              | CC                 | CC               | INTERGENIC      |               |                    |                    |
| SNP_78015_A_74665  | NW_004516009.1 | scaffold577 | 74665                   | GG                              | AA                 | AA               | INTERGENIC      |               |                    |                    |
| SNP_78016_A_81697  | NW_004516009.1 | scaffold577 | 81697                   | CC                              | TT                 | TT               | INTERGENIC      |               |                    |                    |
| SNP_78017_A_84337  | NW_004516009.1 | scaffold577 | 84337                   | AA                              | TT                 | TT               | INTERGENIC      |               |                    |                    |
| SNP_78018_A_106212 | NW_004516009.1 | scaffold577 | 106212                  | TT                              | CC                 | CC               | INTERGENIC      |               |                    |                    |
| SNP_78019_A_106273 | NW_004516009.1 | scaffold577 | 106273                  | CC                              | TT                 | TT               | INTERGENIC      |               |                    |                    |
| SNP_78020_A_106801 | NW_004516009.1 | scaffold577 | 106801                  | CC                              | TT                 | TT               | INTERGENIC      |               |                    |                    |
| SNP_78021_A_111520 | NW_004516009.1 | scaffold577 | 111520                  | AA                              | TT                 | TT               | INTERGENIC      |               |                    |                    |
| SNP_78022_A_111830 | NW_004516009.1 | scaffold577 | 111830                  | TT                              | CC                 | CC               | INTERGENIC      |               |                    |                    |
| SNP_78023_A_111883 | NW_004516009.1 | scaffold577 | 111883                  | GG                              | AA                 | AA               | INTERGENIC      |               |                    |                    |
| SNP_78024_A_111894 | NW_004516009.1 | scaffold577 | 111894                  | AA                              | GG                 | GG               | INTERGENIC      |               |                    |                    |
| SNP_78025_A_121452 | NW_004516009.1 | scaffold577 | 121452                  | CC                              | AA                 | AA               | INTERGENIC      |               |                    |                    |
| SNP_78026_A_121615 | NW_004516009.1 | scaffold577 | 121615                  | AA                              | GG                 | GG               | INTERGENIC      |               |                    |                    |
| SNP_78027_A_121858 | NW_004516009.1 | scaffold577 | 121858                  | GG                              | AA                 | AA               | INTERGENIC      |               |                    |                    |
| SNP_78028_A_2392   | NW_004516010.1 | scaffold578 | 2392                    | TT                              | CC                 | CC               | INTERGENIC      |               |                    |                    |
| SNP_78029_A_2461   | NW_004516010.1 | scaffold578 | 2461                    | AA                              | GG                 | GG               | INTERGENIC      |               |                    |                    |

| SNPs IDs          | Chromosome IDs | Chromosomes | Physical positions (bp) | CDC Frontier (Reference genome) | (Pusa 1103 & HPNB) | (ILWC 46 & LPNB) | Sequence genome | Components of | Gene accession IDs | Putative functions |
|-------------------|----------------|-------------|-------------------------|---------------------------------|--------------------|------------------|-----------------|---------------|--------------------|--------------------|
| SNP_78030_A_2569  | NW_004516010.1 | scaffold578 | 2569                    | TT                              | CC                 | CC               | INTERGENIC      |               |                    |                    |
| SNP_78031_A_2737  | NW_004516010.1 | scaffold578 | 2737                    | TT                              | CC                 | CC               | INTERGENIC      |               |                    |                    |
| SNP_78032_A_3852  | NW_004516010.1 | scaffold578 | 3852                    | CC                              | AA                 | AA               | INTERGENIC      |               |                    |                    |
| SNP_78033_A_4286  | NW_004516010.1 | scaffold578 | 4286                    | CC                              | AA                 | AA               | INTERGENIC      |               |                    |                    |
| SNP_78034_A_7959  | NW_004516010.1 | scaffold578 | 7959                    | AA                              | GG                 | GG               | INTERGENIC      |               |                    |                    |
| SNP_78035_A_8073  | NW_004516010.1 | scaffold578 | 8073                    | TT                              | GG                 | GG               | INTERGENIC      |               |                    |                    |
| SNP_78036_A_11329 | NW_004516010.1 | scaffold578 | 11329                   | GG                              | TT                 | TT               | INTERGENIC      |               |                    |                    |
| SNP_78037_A_11396 | NW_004516010.1 | scaffold578 | 11396                   | TT                              | CC                 | CC               | INTERGENIC      |               |                    |                    |
| SNP_78038_A_11607 | NW_004516010.1 | scaffold578 | 11607                   | GG                              | AA                 | AA               | INTERGENIC      |               |                    |                    |
| SNP_78040_A_11716 | NW_004516010.1 | scaffold578 | 11716                   | GG                              | CC                 | CC               | INTERGENIC      |               |                    |                    |
| SNP_78041_A_11747 | NW_004516010.1 | scaffold578 | 11747                   | TT                              | AA                 | AA               | INTERGENIC      |               |                    |                    |
| SNP_78042_A_11775 | NW_004516010.1 | scaffold578 | 11775                   | TT                              | GG                 | GG               | INTERGENIC      |               |                    |                    |
| SNP_78043_A_11782 | NW_004516010.1 | scaffold578 | 11782                   | CC                              | TT                 | TT               | INTERGENIC      |               |                    |                    |
| SNP_78044_A_19761 | NW_004516010.1 | scaffold578 | 19761                   | GG                              | AA                 | AA               | INTERGENIC      |               |                    |                    |
| SNP_78045_A_19768 | NW_004516010.1 | scaffold578 | 19768                   | GG                              | CC                 | CC               | INTERGENIC      |               |                    |                    |
| SNP_78046_A_19783 | NW_004516010.1 | scaffold578 | 19783                   | AA                              | TT                 | TT               | INTERGENIC      |               |                    |                    |
| SNP_78047_A_19922 | NW_004516010.1 | scaffold578 | 19922                   | CC                              | GG                 | GG               | INTERGENIC      |               |                    |                    |
| SNP_78048_A_19926 | NW_004516010.1 | scaffold578 | 19926                   | AA                              | GG                 | GG               | INTERGENIC      |               |                    |                    |
| SNP_78049_A_19932 | NW_004516010.1 | scaffold578 | 19932                   | AA                              | CC                 | CC               | INTERGENIC      |               |                    |                    |
| SNP_78050_A_19967 | NW_004516010.1 | scaffold578 | 19967                   | CC                              | TT                 | TT               | INTERGENIC      |               |                    |                    |
| SNP_78051_A_19971 | NW_004516010.1 | scaffold578 | 19971                   | GG                              | AA                 | AA               | INTERGENIC      |               |                    |                    |
| SNP_78052_A_20015 | NW_004516010.1 | scaffold578 | 20015                   | TT                              | CC                 | CC               | INTERGENIC      |               |                    |                    |

| SNPs IDs          | Chromosome IDs | Chromosomes | Physical positions (bp) | CDC Frontier (Reference genome) | (Pusa 1103 & HPNB) | (ILWC 46 & LPNB) | Sequence genome | Components of | Gene accession IDs | Putative functions |
|-------------------|----------------|-------------|-------------------------|---------------------------------|--------------------|------------------|-----------------|---------------|--------------------|--------------------|
| SNP_78053_A_20038 | NW_004516010.1 | scaffold578 | 20038                   | GG                              | AA                 | AA               | INTERGENIC      |               |                    |                    |
| SNP_78054_A_20039 | NW_004516010.1 | scaffold578 | 20039                   | AA                              | GG                 | GG               | INTERGENIC      |               |                    |                    |
| SNP_78055_A_20112 | NW_004516010.1 | scaffold578 | 20112                   | GG                              | AA                 | AA               | INTERGENIC      |               |                    |                    |
| SNP_78056_A_20170 | NW_004516010.1 | scaffold578 | 20170                   | GG                              | AA                 | AA               | INTERGENIC      |               |                    |                    |
| SNP_78057_A_20208 | NW_004516010.1 | scaffold578 | 20208                   | GG                              | AA                 | AA               | INTERGENIC      |               |                    |                    |
| SNP_78058_A_20225 | NW_004516010.1 | scaffold578 | 20225                   | GG                              | AA                 | AA               | INTERGENIC      |               |                    |                    |
| SNP_78059_A_20263 | NW_004516010.1 | scaffold578 | 20263                   | TT                              | GG                 | GG               | INTERGENIC      |               |                    |                    |
| SNP_78060_A_20267 | NW_004516010.1 | scaffold578 | 20267                   | TT                              | CC                 | CC               | INTERGENIC      |               |                    |                    |
| SNP_78061_A_20524 | NW_004516010.1 | scaffold578 | 20524                   | GG                              | TT                 | TT               | INTERGENIC      |               |                    |                    |
| SNP_78062_A_20598 | NW_004516010.1 | scaffold578 | 20598                   | CC                              | AA                 | AA               | INTERGENIC      |               |                    |                    |
| SNP_78063_A_20754 | NW_004516010.1 | scaffold578 | 20754                   | AA                              | TT                 | TT               | INTERGENIC      |               |                    |                    |
| SNP_78064_A_20945 | NW_004516010.1 | scaffold578 | 20945                   | AA                              | GG                 | GG               | INTERGENIC      |               |                    |                    |
| SNP_78065_A_20967 | NW_004516010.1 | scaffold578 | 20967                   | CC                              | GG                 | GG               | INTERGENIC      |               |                    |                    |
| SNP_78066_A_26670 | NW_004516010.1 | scaffold578 | 26670                   | TT                              | CC                 | CC               | INTERGENIC      |               |                    |                    |
| SNP_78067_A_33455 | NW_004516010.1 | scaffold578 | 33455                   | CC                              | TT                 | TT               | INTERGENIC      |               |                    |                    |
| SNP_78068_A_33482 | NW_004516010.1 | scaffold578 | 33482                   | TT                              | CC                 | CC               | INTERGENIC      |               |                    |                    |
| SNP_78069_A_33501 | NW_004516010.1 | scaffold578 | 33501                   | AA                              | GG                 | GG               | INTERGENIC      |               |                    |                    |
| SNP_78070_A_37144 | NW_004516010.1 | scaffold578 | 37144                   | AA                              | GG                 | GG               | INTERGENIC      |               |                    |                    |
| SNP_78071_A_37331 | NW_004516010.1 | scaffold578 | 37331                   | AA                              | CC                 | CC               | INTERGENIC      |               |                    |                    |
| SNP_78072_A_37332 | NW_004516010.1 | scaffold578 | 37332                   | AA                              | CC                 | CC               | INTERGENIC      |               |                    |                    |
| SNP_78073_A_37455 | NW_004516010.1 | scaffold578 | 37455                   | CC                              | TT                 | TT               | INTERGENIC      |               |                    |                    |
| SNP_78074_A_37495 | NW_004516010.1 | scaffold578 | 37495                   | GG                              | AA                 | AA               | INTERGENIC      |               |                    |                    |

| SNPs IDs          | Chromosome IDs | Chromosomes | Physical positions (bp) | CDC Frontier (Reference genome) | (Pusa 1103 & HPNB) | (ILWC 46 & LPNB) | Sequence genome | Components of | Gene accession IDs | Putative functions |
|-------------------|----------------|-------------|-------------------------|---------------------------------|--------------------|------------------|-----------------|---------------|--------------------|--------------------|
| SNP_78075_A_37809 | NW_004516010.1 | scaffold578 | 37809                   | TT                              | GG                 | GG               | INTERGENIC      |               |                    |                    |
| SNP_78076_A_37816 | NW_004516010.1 | scaffold578 | 37816                   | AA                              | TT                 | TT               | INTERGENIC      |               |                    |                    |
| SNP_78077_A_37887 | NW_004516010.1 | scaffold578 | 37887                   | CC                              | GG                 | GG               | INTERGENIC      |               |                    |                    |
| SNP_78080_A_53696 | NW_004516010.1 | scaffold578 | 53696                   | TT                              | CC                 | CC               | INTERGENIC      |               |                    |                    |
| SNP_78081_A_63652 | NW_004516010.1 | scaffold578 | 63652                   | GG                              | AA                 | AA               | INTERGENIC      |               |                    |                    |
| SNP_78082_A_63670 | NW_004516010.1 | scaffold578 | 63670                   | TT                              | GG                 | GG               | INTERGENIC      |               |                    |                    |
| SNP_78083_A_63919 | NW_004516010.1 | scaffold578 | 63919                   | AA                              | GG                 | GG               | INTERGENIC      |               |                    |                    |
| SNP_78084_A_63922 | NW_004516010.1 | scaffold578 | 63922                   | CC                              | AA                 | AA               | INTERGENIC      |               |                    |                    |
| SNP_78085_A_1057  | NW_004516012.1 | scaffold582 | 1057                    | AA                              | TT                 | TT               | INTERGENIC      |               |                    |                    |
| SNP_78086_A_1150  | NW_004516012.1 | scaffold582 | 1150                    | AA                              | CC                 | CC               | INTERGENIC      |               |                    |                    |
| SNP_78087_A_1177  | NW_004516012.1 | scaffold582 | 1177                    | TT                              | CC                 | CC               | INTERGENIC      |               |                    |                    |
| SNP_78088_A_1196  | NW_004516012.1 | scaffold582 | 1196                    | GG                              | AA                 | AA               | INTERGENIC      |               |                    |                    |
| SNP_78089_A_12593 | NW_004516012.1 | scaffold582 | 12593                   | TT                              | GG                 | GG               | INTERGENIC      |               |                    |                    |
| SNP_78090_A_13337 | NW_004516012.1 | scaffold582 | 13337                   | AA                              | GG                 | GG               | INTERGENIC      |               |                    |                    |
| SNP_78091_A_13517 | NW_004516012.1 | scaffold582 | 13517                   | TT                              | CC                 | CC               | INTERGENIC      |               |                    |                    |
| SNP_78092_A_13526 | NW_004516012.1 | scaffold582 | 13526                   | AA                              | GG                 | GG               | INTERGENIC      |               |                    |                    |
| SNP_78093_A_13535 | NW_004516012.1 | scaffold582 | 13535                   | TT                              | CC                 | CC               | INTERGENIC      |               |                    |                    |
| SNP_78094_A_13556 | NW_004516012.1 | scaffold582 | 13556                   | GG                              | AA                 | AA               | INTERGENIC      |               |                    |                    |
| SNP_78095_A_16327 | NW_004516012.1 | scaffold582 | 16327                   | TT                              | CC                 | CC               | INTERGENIC      |               |                    |                    |
| SNP_78096_A_16347 | NW_004516012.1 | scaffold582 | 16347                   | AA                              | CC                 | CC               | INTERGENIC      |               |                    |                    |
| SNP_78097_A_24078 | NW_004516012.1 | scaffold582 | 24078                   | TT                              | GG                 | GG               | INTERGENIC      |               |                    |                    |
| SNP_78098_A_24185 | NW_004516012.1 | scaffold582 | 24185                   | GG                              | TT                 | TT               | INTERGENIC      |               |                    |                    |

| SNPs IDs          | Chromosome IDs | Chromosomes | Physical positions (bp) | CDC Frontier (Reference genome) | (Pusa 1103 & HPNB) | (ILWC 46 & LPNB) | Sequence genome | Components of | Gene accession IDs | Putative functions |
|-------------------|----------------|-------------|-------------------------|---------------------------------|--------------------|------------------|-----------------|---------------|--------------------|--------------------|
| SNP_78099_A_24201 | NW_004516012.1 | scaffold582 | 24201                   | AA                              | GG                 | GG               | INTERGENIC      |               |                    |                    |
| SNP_78100_A_24937 | NW_004516012.1 | scaffold582 | 24937                   | AA                              | TT                 | TT               | INTERGENIC      |               |                    |                    |
| SNP_78101_A_24965 | NW_004516012.1 | scaffold582 | 24965                   | GG                              | CC                 | CC               | INTERGENIC      |               |                    |                    |
| SNP_78102_A_25068 | NW_004516012.1 | scaffold582 | 25068                   | CC                              | TT                 | TT               | INTERGENIC      |               |                    |                    |
| SNP_78103_A_25209 | NW_004516012.1 | scaffold582 | 25209                   | CC                              | TT                 | TT               | INTERGENIC      |               |                    |                    |
| SNP_78104_A_25212 | NW_004516012.1 | scaffold582 | 25212                   | AA                              | TT                 | TT               | INTERGENIC      |               |                    |                    |
| SNP_78105_A_29954 | NW_004516012.1 | scaffold582 | 29954                   | AA                              | GG                 | GG               | INTERGENIC      |               |                    |                    |
| SNP_78106_A_30387 | NW_004516012.1 | scaffold582 | 30387                   | CC                              | GG                 | GG               | INTERGENIC      |               |                    |                    |
| SNP_78107_A_30448 | NW_004516012.1 | scaffold582 | 30448                   | AA                              | CC                 | CC               | INTERGENIC      |               |                    |                    |
| SNP_78108_A_30515 | NW_004516012.1 | scaffold582 | 30515                   | CC                              | GG                 | GG               | INTERGENIC      |               |                    |                    |
| SNP_78109_A_30568 | NW_004516012.1 | scaffold582 | 30568                   | CC                              | TT                 | TT               | INTERGENIC      |               |                    |                    |
| SNP_78110_A_30690 | NW_004516012.1 | scaffold582 | 30690                   | AA                              | TT                 | TT               | INTERGENIC      |               |                    |                    |
| SNP_78111_A_377   | NW_004516013.1 | scaffold583 | 377                     | AA                              | GG                 | GG               | INTERGENIC      |               |                    |                    |
| SNP_78112_A_378   | NW_004516013.1 | scaffold583 | 378                     | AA                              | TT                 | TT               | INTERGENIC      |               |                    |                    |
| SNP_78113_A_472   | NW_004516013.1 | scaffold583 | 472                     | AA                              | CC                 | CC               | INTERGENIC      |               |                    |                    |
| SNP_78114_A_478   | NW_004516013.1 | scaffold583 | 478                     | CC                              | TT                 | TT               | INTERGENIC      |               |                    |                    |
| SNP_78115_A_639   | NW_004516013.1 | scaffold583 | 639                     | AA                              | GG                 | GG               | INTERGENIC      |               |                    |                    |
| SNP_78116_A_3956  | NW_004516013.1 | scaffold583 | 3956                    | TT                              | AA                 | AA               | INTERGENIC      |               |                    |                    |
| SNP_78117_A_4097  | NW_004516013.1 | scaffold583 | 4097                    | AA                              | GG                 | GG               | INTERGENIC      |               |                    |                    |
| SNP_78119_A_4168  | NW_004516013.1 | scaffold583 | 4168                    | AA                              | CC                 | CC               | INTERGENIC      |               |                    |                    |
| SNP_78120_A_4187  | NW_004516013.1 | scaffold583 | 4187                    | GG                              | AA                 | AA               | INTERGENIC      |               |                    |                    |
| SNP_78121_A_4326  | NW_004516013.1 | scaffold583 | 4326                    | AA                              | GG                 | GG               | INTERGENIC      |               |                    |                    |

| SNPs IDs          | Chromosome IDs | Chromosomes | Physical positions (bp) | CDC Frontier (Reference genome) | (Pusa 1103 & HPNB) | (ILWC 46 & LPNB) | Sequence genome | Components of | Gene accession IDs | Putative functions |
|-------------------|----------------|-------------|-------------------------|---------------------------------|--------------------|------------------|-----------------|---------------|--------------------|--------------------|
| SNP_78122_A_4330  | NW_004516013.1 | scaffold583 | 4330                    | TT                              | CC                 | CC               | INTERGENIC      |               |                    |                    |
| SNP_78123_A_4342  | NW_004516013.1 | scaffold583 | 4342                    | GG                              | TT                 | TT               | INTERGENIC      |               |                    |                    |
| SNP_78124_A_4348  | NW_004516013.1 | scaffold583 | 4348                    | TT                              | CC                 | CC               | INTERGENIC      |               |                    |                    |
| SNP_78125_A_4369  | NW_004516013.1 | scaffold583 | 4369                    | TT                              | GG                 | GG               | INTERGENIC      |               |                    |                    |
| SNP_78126_A_4400  | NW_004516013.1 | scaffold583 | 4400                    | TT                              | CC                 | CC               | INTERGENIC      |               |                    |                    |
| SNP_78127_A_4458  | NW_004516013.1 | scaffold583 | 4458                    | AA                              | TT                 | TT               | INTERGENIC      |               |                    |                    |
| SNP_78128_A_11110 | NW_004516013.1 | scaffold583 | 11110                   | CC                              | GG                 | GG               | INTERGENIC      |               |                    |                    |
| SNP_78129_A_11263 | NW_004516013.1 | scaffold583 | 11263                   | TT                              | CC                 | CC               | INTERGENIC      |               |                    |                    |
| SNP_78130_A_11289 | NW_004516013.1 | scaffold583 | 11289                   | GG                              | AA                 | AA               | INTERGENIC      |               |                    |                    |
| SNP_78131_A_11300 | NW_004516013.1 | scaffold583 | 11300                   | TT                              | CC                 | CC               | INTERGENIC      |               |                    |                    |
| SNP_78132_A_11302 | NW_004516013.1 | scaffold583 | 11302                   | AA                              | GG                 | GG               | INTERGENIC      |               |                    |                    |
| SNP_78133_A_11382 | NW_004516013.1 | scaffold583 | 11382                   | AA                              | GG                 | GG               | INTERGENIC      |               |                    |                    |
| SNP_78134_A_11390 | NW_004516013.1 | scaffold583 | 11390                   | CC                              | TT                 | TT               | INTERGENIC      |               |                    |                    |
| SNP_78135_A_11410 | NW_004516013.1 | scaffold583 | 11410                   | GG                              | AA                 | AA               | INTERGENIC      |               |                    |                    |
| SNP_78136_A_11447 | NW_004516013.1 | scaffold583 | 11447                   | CC                              | TT                 | TT               | INTERGENIC      |               |                    |                    |
| SNP_78137_A_11465 | NW_004516013.1 | scaffold583 | 11465                   | CC                              | TT                 | TT               | INTERGENIC      |               |                    |                    |
| SNP_78138_A_11612 | NW_004516013.1 | scaffold583 | 11612                   | TT                              | CC                 | CC               | INTERGENIC      |               |                    |                    |
| SNP_78139_A_11955 | NW_004516013.1 | scaffold583 | 11955                   | AA                              | TT                 | TT               | INTERGENIC      |               |                    |                    |
| SNP_78140_A_17355 | NW_004516013.1 | scaffold583 | 17355                   | TT                              | CC                 | CC               | INTERGENIC      |               |                    |                    |
| SNP_78141_A_22786 | NW_004516013.1 | scaffold583 | 22786                   | AA                              | TT                 | TT               | INTERGENIC      |               |                    |                    |
| SNP_78142_A_26301 | NW_004516013.1 | scaffold583 | 26301                   | GG                              | TT                 | TT               | INTERGENIC      |               |                    |                    |
| SNP_78143_A_45978 | NW_004516013.1 | scaffold583 | 45978                   | TT                              | CC                 | CC               | INTERGENIC      |               |                    |                    |



| SNPs IDs           | Chromosome IDs | Chromosomes | Physical positions (bp) | CDC Frontier (Reference genome) | (Pusa 1103 & HPNB) | (ILWC 46 & LPNB) | Sequence genome | Components of | Gene accession IDs | Putative functions |
|--------------------|----------------|-------------|-------------------------|---------------------------------|--------------------|------------------|-----------------|---------------|--------------------|--------------------|
| SNP_78144_A_45993  | NW_004516013.1 | scaffold583 | 45993                   | AA                              | GG                 | GG               | INTERGENIC      |               |                    |                    |
| SNP_78145_A_45994  | NW_004516013.1 | scaffold583 | 45994                   | GG                              | AA                 | AA               | INTERGENIC      |               |                    |                    |
| SNP_78146_A_46068  | NW_004516013.1 | scaffold583 | 46068                   | TT                              | CC                 | CC               | INTERGENIC      |               |                    |                    |
| SNP_78147_A_46086  | NW_004516013.1 | scaffold583 | 46086                   | CC                              | TT                 | TT               | INTERGENIC      |               |                    |                    |
| SNP_78148_A_46093  | NW_004516013.1 | scaffold583 | 46093                   | GG                              | CC                 | CC               | INTERGENIC      |               |                    |                    |
| SNP_78149_A_46121  | NW_004516013.1 | scaffold583 | 46121                   | AA                              | TT                 | TT               | INTERGENIC      |               |                    |                    |
| SNP_78150_A_46328  | NW_004516013.1 | scaffold583 | 46328                   | TT                              | AA                 | AA               | INTERGENIC      |               |                    |                    |
| SNP_78151_A_46360  | NW_004516013.1 | scaffold583 | 46360                   | AA                              | TT                 | TT               | INTERGENIC      |               |                    |                    |
| SNP_78152_A_46405  | NW_004516013.1 | scaffold583 | 46405                   | TT                              | AA                 | AA               | INTERGENIC      |               |                    |                    |
| SNP_78153_A_46457  | NW_004516013.1 | scaffold583 | 46457                   | TT                              | AA                 | AA               | INTERGENIC      |               |                    |                    |
| SNP_78154_A_47871  | NW_004516013.1 | scaffold583 | 47871                   | TT                              | GG                 | GG               | INTERGENIC      |               |                    |                    |
| SNP_78155_A_47886  | NW_004516013.1 | scaffold583 | 47886                   | GG                              | TT                 | TT               | INTERGENIC      |               |                    |                    |
| SNP_78156_A_47902  | NW_004516013.1 | scaffold583 | 47902                   | TT                              | GG                 | GG               | INTERGENIC      |               |                    |                    |
| SNP_78157_A_47928  | NW_004516013.1 | scaffold583 | 47928                   | CC                              | TT                 | TT               | INTERGENIC      |               |                    |                    |
| SNP_78158_A_72339  | NW_004516013.1 | scaffold583 | 72339                   | CC                              | TT                 | TT               | INTERGENIC      |               |                    |                    |
| SNP_78159_A_80974  | NW_004516013.1 | scaffold583 | 80974                   | GG                              | AA                 | AA               | INTERGENIC      |               |                    |                    |
| SNP_78160_A_89623  | NW_004516013.1 | scaffold583 | 89623                   | CC                              | TT                 | TT               | INTERGENIC      |               |                    |                    |
| SNP_78161_A_89711  | NW_004516013.1 | scaffold583 | 89711                   | GG                              | TT                 | TT               | INTERGENIC      |               |                    |                    |
| SNP_78162_A_105765 | NW_004516013.1 | scaffold583 | 105765                  | GG                              | AA                 | AA               | INTERGENIC      |               |                    |                    |
| SNP_78163_A_106183 | NW_004516013.1 | scaffold583 | 106183                  | AA                              | GG                 | GG               | INTERGENIC      |               |                    |                    |
| SNP_78164_A_106192 | NW_004516013.1 | scaffold583 | 106192                  | TT                              | AA                 | AA               | INTERGENIC      |               |                    |                    |
| SNP_78165_A_106347 | NW_004516013.1 | scaffold583 | 106347                  | AA                              | CC                 | CC               | INTERGENIC      |               |                    |                    |

| SNPs IDs           | Chromosome IDs | Chromosomes | Physical positions (bp) | CDC Frontier genome (Reference genome) | (Pusa 1103 & HPNB) | (ILWC 46 & LPNB) | Sequence genome | Components of | Gene accession IDs | Putative functions |
|--------------------|----------------|-------------|-------------------------|----------------------------------------|--------------------|------------------|-----------------|---------------|--------------------|--------------------|
| SNP_78167_A_136418 | NW_004516013.1 | scaffold583 | 136418                  | AA                                     | GG                 | GG               | INTERGENIC      |               |                    |                    |
| SNP_78168_A_136470 | NW_004516013.1 | scaffold583 | 136470                  | TT                                     | AA                 | AA               | INTERGENIC      |               |                    |                    |
| SNP_78169_A_136761 | NW_004516013.1 | scaffold583 | 136761                  | TT                                     | GG                 | GG               | INTERGENIC      |               |                    |                    |
| SNP_78170_A_136769 | NW_004516013.1 | scaffold583 | 136769                  | GG                                     | AA                 | AA               | INTERGENIC      |               |                    |                    |
| SNP_78171_A_136787 | NW_004516013.1 | scaffold583 | 136787                  | GG                                     | AA                 | AA               | INTERGENIC      |               |                    |                    |
| SNP_78172_A_136853 | NW_004516013.1 | scaffold583 | 136853                  | AA                                     | GG                 | GG               | INTERGENIC      |               |                    |                    |
| SNP_78173_A_146856 | NW_004516013.1 | scaffold583 | 146856                  | TT                                     | AA                 | AA               | INTERGENIC      |               |                    |                    |
| SNP_78174_A_146878 | NW_004516013.1 | scaffold583 | 146878                  | TT                                     | CC                 | CC               | INTERGENIC      |               |                    |                    |
| SNP_78175_A_147245 | NW_004516013.1 | scaffold583 | 147245                  | CC                                     | TT                 | TT               | INTERGENIC      |               |                    |                    |
| SNP_78176_A_147509 | NW_004516013.1 | scaffold583 | 147509                  | GG                                     | TT                 | TT               | INTERGENIC      |               |                    |                    |
| SNP_78177_A_147552 | NW_004516013.1 | scaffold583 | 147552                  | AA                                     | TT                 | TT               | INTERGENIC      |               |                    |                    |
| SNP_78178_A_147858 | NW_004516013.1 | scaffold583 | 147858                  | CC                                     | TT                 | TT               | INTERGENIC      |               |                    |                    |
| SNP_78180_A_168848 | NW_004516013.1 | scaffold583 | 168848                  | AA                                     | TT                 | TT               | INTERGENIC      |               |                    |                    |
| SNP_78181_A_168854 | NW_004516013.1 | scaffold583 | 168854                  | CC                                     | GG                 | GG               | INTERGENIC      |               |                    |                    |
| SNP_78182_A_168884 | NW_004516013.1 | scaffold583 | 168884                  | CC                                     | GG                 | GG               | INTERGENIC      |               |                    |                    |
| SNP_78183_A_168955 | NW_004516013.1 | scaffold583 | 168955                  | AA                                     | GG                 | GG               | INTERGENIC      |               |                    |                    |
| SNP_78184_A_168961 | NW_004516013.1 | scaffold583 | 168961                  | TT                                     | AA                 | AA               | INTERGENIC      |               |                    |                    |
| SNP_78185_A_169779 | NW_004516013.1 | scaffold583 | 169779                  | AA                                     | GG                 | GG               | INTERGENIC      |               |                    |                    |
| SNP_78186_A_169825 | NW_004516013.1 | scaffold583 | 169825                  | TT                                     | CC                 | CC               | INTERGENIC      |               |                    |                    |
| SNP_78187_A_170016 | NW_004516013.1 | scaffold583 | 170016                  | AA                                     | GG                 | GG               | INTERGENIC      |               |                    |                    |
| SNP_78188_A_170031 | NW_004516013.1 | scaffold583 | 170031                  | AA                                     | TT                 | TT               | INTERGENIC      |               |                    |                    |
| SNP_78189_A_518    | NW_004516014.1 | scaffold584 | 518                     | GG                                     | AA                 | AA               | INTERGENIC      |               |                    |                    |

| SNPs IDs           | Chromosome IDs | Chromosomes | Physical positions (bp) | CDC Frontier (Reference genome) | (Pusa 1103 & HPNB) | (ILWC 46 & LPNB) | Sequence genome | Components of | Gene accession IDs | Putative functions |
|--------------------|----------------|-------------|-------------------------|---------------------------------|--------------------|------------------|-----------------|---------------|--------------------|--------------------|
| SNP_78190_A_972    | NW_004516014.1 | scaffold584 | 972                     | AA                              | CC                 | CC               | INTERGENIC      |               |                    |                    |
| SNP_78191_A_2975   | NW_004516014.1 | scaffold584 | 2975                    | AA                              | GG                 | GG               | INTERGENIC      |               |                    |                    |
| SNP_78192_A_7875   | NW_004516014.1 | scaffold584 | 7875                    | AA                              | GG                 | GG               | INTERGENIC      |               |                    |                    |
| SNP_78193_A_11792  | NW_004516014.1 | scaffold584 | 11792                   | AA                              | GG                 | GG               | INTERGENIC      |               |                    |                    |
| SNP_78194_A_11993  | NW_004516014.1 | scaffold584 | 11993                   | TT                              | CC                 | CC               | INTERGENIC      |               |                    |                    |
| SNP_78195_A_12014  | NW_004516014.1 | scaffold584 | 12014                   | CC                              | AA                 | AA               | INTERGENIC      |               |                    |                    |
| SNP_78196_A_12030  | NW_004516014.1 | scaffold584 | 12030                   | GG                              | CC                 | CC               | INTERGENIC      |               |                    |                    |
| SNP_78197_A_12046  | NW_004516014.1 | scaffold584 | 12046                   | TT                              | AA                 | AA               | INTERGENIC      |               |                    |                    |
| SNP_78198_A_12047  | NW_004516014.1 | scaffold584 | 12047                   | AA                              | GG                 | GG               | INTERGENIC      |               |                    |                    |
| SNP_78199_A_12048  | NW_004516014.1 | scaffold584 | 12048                   | AA                              | GG                 | GG               | INTERGENIC      |               |                    |                    |
| SNP_78200_A_12102  | NW_004516014.1 | scaffold584 | 12102                   | GG                              | TT                 | TT               | INTERGENIC      |               |                    |                    |
| SNP_78201_A_12193  | NW_004516014.1 | scaffold584 | 12193                   | AA                              | GG                 | GG               | INTERGENIC      |               |                    |                    |
| SNP_78202_A_12257  | NW_004516014.1 | scaffold584 | 12257                   | CC                              | AA                 | AA               | INTERGENIC      |               |                    |                    |
| SNP_78203_A_12261  | NW_004516014.1 | scaffold584 | 12261                   | AA                              | CC                 | CC               | INTERGENIC      |               |                    |                    |
| SNP_78204_A_12285  | NW_004516014.1 | scaffold584 | 12285                   | AA                              | GG                 | GG               | INTERGENIC      |               |                    |                    |
| SNP_78205_A_12289  | NW_004516014.1 | scaffold584 | 12289                   | CC                              | AA                 | AA               | INTERGENIC      |               |                    |                    |
| SNP_78206_A_82330  | NW_004516014.1 | scaffold584 | 82330                   | AA                              | CC                 | CC               | INTERGENIC      |               |                    |                    |
| SNP_78207_A_119767 | NW_004516014.1 | scaffold584 | 119767                  | AA                              | TT                 | TT               | INTERGENIC      |               |                    |                    |
| SNP_78208_A_120430 | NW_004516014.1 | scaffold584 | 120430                  | TT                              | CC                 | CC               | INTERGENIC      |               |                    |                    |
| SNP_78209_A_120469 | NW_004516014.1 | scaffold584 | 120469                  | CC                              | AA                 | AA               | INTERGENIC      |               |                    |                    |
| SNP_78210_A_129139 | NW_004516014.1 | scaffold584 | 129139                  | GG                              | TT                 | TT               | INTERGENIC      |               |                    |                    |
| SNP_78211_A_129166 | NW_004516014.1 | scaffold584 | 129166                  | AA                              | GG                 | GG               | INTERGENIC      |               |                    |                    |

| SNPs IDs           | Chromosome IDs | Chromosomes | Physical positions (bp) | CDC Frontier (Reference genome) | (Pusa 1103 & HPNB) | (ILWC 46 & LPNB) | Sequence genome | Components of | Gene accession IDs | Putative functions |
|--------------------|----------------|-------------|-------------------------|---------------------------------|--------------------|------------------|-----------------|---------------|--------------------|--------------------|
| SNP_78212_A_136328 | NW_004516014.1 | scaffold584 | 136328                  | AA                              | GG                 | GG               | INTERGENIC      |               |                    |                    |
| SNP_78213_A_136401 | NW_004516014.1 | scaffold584 | 136401                  | TT                              | CC                 | CC               | INTERGENIC      |               |                    |                    |
| SNP_78214_A_144347 | NW_004516014.1 | scaffold584 | 144347                  | CC                              | AA                 | AA               | INTERGENIC      |               |                    |                    |
| SNP_78215_A_144354 | NW_004516014.1 | scaffold584 | 144354                  | TT                              | CC                 | CC               | INTERGENIC      |               |                    |                    |
| SNP_78216_A_144374 | NW_004516014.1 | scaffold584 | 144374                  | TT                              | AA                 | AA               | INTERGENIC      |               |                    |                    |
| SNP_78217_A_144515 | NW_004516014.1 | scaffold584 | 144515                  | AA                              | TT                 | TT               | INTERGENIC      |               |                    |                    |
| SNP_78218_A_144881 | NW_004516014.1 | scaffold584 | 144881                  | CC                              | TT                 | TT               | INTERGENIC      |               |                    |                    |
| SNP_78219_A_222793 | NW_004516014.1 | scaffold584 | 222793                  | AA                              | GG                 | GG               | INTERGENIC      |               |                    |                    |
| SNP_78220_A_223883 | NW_004516014.1 | scaffold584 | 223883                  | TT                              | GG                 | GG               | INTERGENIC      |               |                    |                    |
| SNP_78221_A_223904 | NW_004516014.1 | scaffold584 | 223904                  | TT                              | CC                 | CC               | INTERGENIC      |               |                    |                    |
| SNP_78222_A_223913 | NW_004516014.1 | scaffold584 | 223913                  | TT                              | AA                 | AA               | INTERGENIC      |               |                    |                    |
| SNP_78223_A_223915 | NW_004516014.1 | scaffold584 | 223915                  | AA                              | GG                 | GG               | INTERGENIC      |               |                    |                    |
| SNP_78224_A_223936 | NW_004516014.1 | scaffold584 | 223936                  | CC                              | TT                 | TT               | INTERGENIC      |               |                    |                    |
| SNP_78225_A_224305 | NW_004516014.1 | scaffold584 | 224305                  | TT                              | CC                 | CC               | INTERGENIC      |               |                    |                    |
| SNP_78227_A_247661 | NW_004516014.1 | scaffold584 | 247661                  | AA                              | TT                 | TT               | INTERGENIC      |               |                    |                    |
| SNP_78228_A_249436 | NW_004516014.1 | scaffold584 | 249436                  | TT                              | AA                 | AA               | INTERGENIC      |               |                    |                    |
| SNP_78229_A_272803 | NW_004516014.1 | scaffold584 | 272803                  | GG                              | TT                 | TT               | INTERGENIC      |               |                    |                    |
| SNP_78230_A_272857 | NW_004516014.1 | scaffold584 | 272857                  | TT                              | GG                 | GG               | INTERGENIC      |               |                    |                    |
| SNP_78231_A_276681 | NW_004516014.1 | scaffold584 | 276681                  | TT                              | AA                 | AA               | INTERGENIC      |               |                    |                    |
| SNP_78232_A_296349 | NW_004516014.1 | scaffold584 | 296349                  | TT                              | AA                 | AA               | INTERGENIC      |               |                    |                    |
| SNP_78233_A_296446 | NW_004516014.1 | scaffold584 | 296446                  | AA                              | TT                 | TT               | INTERGENIC      |               |                    |                    |
| SNP_78234_A_320762 | NW_004516014.1 | scaffold584 | 320762                  | AA                              | GG                 | GG               | INTERGENIC      |               |                    |                    |

| SNPs IDs           | Chromosome IDs | Chromosomes | Physical positions (bp) | CDC Frontier (Reference genome) | (Pusa 1103 & HPNB) | (ILWC 46 & LPNB) | Sequence genome | Components of | Gene accession IDs | Putative functions |
|--------------------|----------------|-------------|-------------------------|---------------------------------|--------------------|------------------|-----------------|---------------|--------------------|--------------------|
| SNP_78235_A_332636 | NW_004516014.1 | scaffold584 | 332636                  | CC                              | TT                 | TT               | INTERGENIC      |               |                    |                    |
| SNP_78236_A_332703 | NW_004516014.1 | scaffold584 | 332703                  | TT                              | GG                 | GG               | INTERGENIC      |               |                    |                    |
| SNP_78237_A_335770 | NW_004516014.1 | scaffold584 | 335770                  | CC                              | GG                 | GG               | INTERGENIC      |               |                    |                    |
| SNP_78238_A_6940   | NW_004516016.1 | scaffold586 | 6940                    | AA                              | GG                 | GG               | INTERGENIC      |               |                    |                    |
| SNP_78239_A_6941   | NW_004516016.1 | scaffold586 | 6941                    | GG                              | TT                 | TT               | INTERGENIC      |               |                    |                    |
| SNP_78240_A_7144   | NW_004516016.1 | scaffold586 | 7144                    | CC                              | TT                 | TT               | INTERGENIC      |               |                    |                    |
| SNP_78241_A_7259   | NW_004516016.1 | scaffold586 | 7259                    | GG                              | TT                 | TT               | INTERGENIC      |               |                    |                    |
| SNP_78242_A_7327   | NW_004516016.1 | scaffold586 | 7327                    | CC                              | GG                 | GG               | INTERGENIC      |               |                    |                    |
| SNP_78243_A_7356   | NW_004516016.1 | scaffold586 | 7356                    | AA                              | TT                 | TT               | INTERGENIC      |               |                    |                    |
| SNP_78244_A_7693   | NW_004516016.1 | scaffold586 | 7693                    | CC                              | GG                 | GG               | INTERGENIC      |               |                    |                    |
| SNP_78245_A_7700   | NW_004516016.1 | scaffold586 | 7700                    | GG                              | CC                 | CC               | INTERGENIC      |               |                    |                    |
| SNP_78246_A_7707   | NW_004516016.1 | scaffold586 | 7707                    | TT                              | CC                 | CC               | INTERGENIC      |               |                    |                    |
| SNP_78247_A_7709   | NW_004516016.1 | scaffold586 | 7709                    | AA                              | CC                 | CC               | INTERGENIC      |               |                    |                    |
| SNP_78248_A_7749   | NW_004516016.1 | scaffold586 | 7749                    | AA                              | GG                 | GG               | INTERGENIC      |               |                    |                    |
| SNP_78249_A_20696  | NW_004516016.1 | scaffold586 | 20696                   | AA                              | GG                 | GG               | INTERGENIC      |               |                    |                    |
| SNP_78250_A_21653  | NW_004516016.1 | scaffold586 | 21653                   | CC                              | GG                 | GG               | INTERGENIC      |               |                    |                    |
| SNP_78251_A_21757  | NW_004516016.1 | scaffold586 | 21757                   | CC                              | TT                 | TT               | INTERGENIC      |               |                    |                    |
| SNP_78252_A_21892  | NW_004516016.1 | scaffold586 | 21892                   | GG                              | AA                 | AA               | INTERGENIC      |               |                    |                    |
| SNP_78253_A_21904  | NW_004516016.1 | scaffold586 | 21904                   | CC                              | TT                 | TT               | INTERGENIC      |               |                    |                    |
| SNP_78254_A_21909  | NW_004516016.1 | scaffold586 | 21909                   | GG                              | AA                 | AA               | INTERGENIC      |               |                    |                    |
| SNP_78255_A_21967  | NW_004516016.1 | scaffold586 | 21967                   | GG                              | AA                 | AA               | INTERGENIC      |               |                    |                    |
| SNP_78256_A_21976  | NW_004516016.1 | scaffold586 | 21976                   | GG                              | AA                 | AA               | INTERGENIC      |               |                    |                    |

| SNPs IDs          | Chromosome IDs | Chromosomes | Physical positions (bp) | CDC Frontier (Reference genome) | (Pusa 1103 & HPNB) | (ILWC 46 & LPNB) | Sequence genome | Components of | Gene accession IDs | Putative functions |
|-------------------|----------------|-------------|-------------------------|---------------------------------|--------------------|------------------|-----------------|---------------|--------------------|--------------------|
| SNP_78257_A_21981 | NW_004516016.1 | scaffold586 | 21981                   | TT                              | AA                 | AA               | INTERGENIC      |               |                    |                    |
| SNP_78258_A_22320 | NW_004516016.1 | scaffold586 | 22320                   | TT                              | CC                 | CC               | INTERGENIC      |               |                    |                    |
| SNP_78259_A_22324 | NW_004516016.1 | scaffold586 | 22324                   | TT                              | CC                 | CC               | INTERGENIC      |               |                    |                    |
| SNP_78260_A_22796 | NW_004516016.1 | scaffold586 | 22796                   | CC                              | TT                 | TT               | INTERGENIC      |               |                    |                    |
| SNP_78261_A_22802 | NW_004516016.1 | scaffold586 | 22802                   | CC                              | AA                 | AA               | INTERGENIC      |               |                    |                    |
| SNP_78262_A_22848 | NW_004516016.1 | scaffold586 | 22848                   | GG                              | AA                 | AA               | INTERGENIC      |               |                    |                    |
| SNP_78263_A_22922 | NW_004516016.1 | scaffold586 | 22922                   | TT                              | GG                 | GG               | INTERGENIC      |               |                    |                    |
| SNP_78264_A_23007 | NW_004516016.1 | scaffold586 | 23007                   | CC                              | TT                 | TT               | INTERGENIC      |               |                    |                    |
| SNP_78265_A_23468 | NW_004516016.1 | scaffold586 | 23468                   | CC                              | GG                 | GG               | INTERGENIC      |               |                    |                    |
| SNP_78266_A_815   | NW_004516017.1 | scaffold587 | 815                     | GG                              | AA                 | AA               | INTERGENIC      |               |                    |                    |
| SNP_78267_A_979   | NW_004516017.1 | scaffold587 | 979                     | AA                              | GG                 | GG               | INTERGENIC      |               |                    |                    |
| SNP_78268_A_4192  | NW_004516017.1 | scaffold587 | 4192                    | CC                              | TT                 | TT               | INTERGENIC      |               |                    |                    |
| SNP_78269_A_4222  | NW_004516017.1 | scaffold587 | 4222                    | AA                              | TT                 | TT               | INTERGENIC      |               |                    |                    |
| SNP_78270_A_4454  | NW_004516017.1 | scaffold587 | 4454                    | AA                              | GG                 | GG               | INTERGENIC      |               |                    |                    |
| SNP_78271_A_4573  | NW_004516017.1 | scaffold587 | 4573                    | TT                              | CC                 | CC               | INTERGENIC      |               |                    |                    |
| SNP_78272_A_4576  | NW_004516017.1 | scaffold587 | 4576                    | TT                              | AA                 | AA               | INTERGENIC      |               |                    |                    |
| SNP_78273_A_4850  | NW_004516017.1 | scaffold587 | 4850                    | TT                              | CC                 | CC               | INTERGENIC      |               |                    |                    |
| SNP_78274_A_5049  | NW_004516017.1 | scaffold587 | 5049                    | AA                              | GG                 | GG               | INTERGENIC      |               |                    |                    |
| SNP_78275_A_5119  | NW_004516017.1 | scaffold587 | 5119                    | AA                              | GG                 | GG               | INTERGENIC      |               |                    |                    |
| SNP_78276_A_5226  | NW_004516017.1 | scaffold587 | 5226                    | AA                              | GG                 | GG               | INTERGENIC      |               |                    |                    |
| SNP_78277_A_5262  | NW_004516017.1 | scaffold587 | 5262                    | CC                              | AA                 | AA               | INTERGENIC      |               |                    |                    |
| SNP_78278_A_5304  | NW_004516017.1 | scaffold587 | 5304                    | GG                              | AA                 | AA               | INTERGENIC      |               |                    |                    |

| SNPs IDs          | Chromosome IDs | Chromosomes | Physical positions (bp) | CDC Frontier (Reference genome) | (Pusa 1103 & HPNB) | (ILWC 46 & LPNB) | Sequence genome | Components of | Gene accession IDs | Putative functions |
|-------------------|----------------|-------------|-------------------------|---------------------------------|--------------------|------------------|-----------------|---------------|--------------------|--------------------|
| SNP_78279_A_6825  | NW_004516017.1 | scaffold587 | 6825                    | CC                              | GG                 | GG               | INTERGENIC      |               |                    |                    |
| SNP_78280_A_7630  | NW_004516017.1 | scaffold587 | 7630                    | AA                              | TT                 | TT               | INTERGENIC      |               |                    |                    |
| SNP_78281_A_7983  | NW_004516017.1 | scaffold587 | 7983                    | GG                              | AA                 | AA               | INTERGENIC      |               |                    |                    |
| SNP_78282_A_8069  | NW_004516017.1 | scaffold587 | 8069                    | TT                              | AA                 | AA               | INTERGENIC      |               |                    |                    |
| SNP_78283_A_8111  | NW_004516017.1 | scaffold587 | 8111                    | AA                              | TT                 | TT               | INTERGENIC      |               |                    |                    |
| SNP_78284_A_8173  | NW_004516017.1 | scaffold587 | 8173                    | CC                              | AA                 | AA               | INTERGENIC      |               |                    |                    |
| SNP_78285_A_9032  | NW_004516017.1 | scaffold587 | 9032                    | AA                              | TT                 | TT               | INTERGENIC      |               |                    |                    |
| SNP_78286_A_9034  | NW_004516017.1 | scaffold587 | 9034                    | AA                              | CC                 | CC               | INTERGENIC      |               |                    |                    |
| SNP_78287_A_9077  | NW_004516017.1 | scaffold587 | 9077                    | AA                              | GG                 | GG               | INTERGENIC      |               |                    |                    |
| SNP_78288_A_9078  | NW_004516017.1 | scaffold587 | 9078                    | GG                              | TT                 | TT               | INTERGENIC      |               |                    |                    |
| SNP_78289_A_9126  | NW_004516017.1 | scaffold587 | 9126                    | GG                              | AA                 | AA               | INTERGENIC      |               |                    |                    |
| SNP_78290_A_9137  | NW_004516017.1 | scaffold587 | 9137                    | GG                              | TT                 | TT               | INTERGENIC      |               |                    |                    |
| SNP_78291_A_9332  | NW_004516017.1 | scaffold587 | 9332                    | AA                              | TT                 | TT               | INTERGENIC      |               |                    |                    |
| SNP_78292_A_9749  | NW_004516017.1 | scaffold587 | 9749                    | TT                              | AA                 | AA               | INTERGENIC      |               |                    |                    |
| SNP_78293_A_10103 | NW_004516017.1 | scaffold587 | 10103                   | GG                              | AA                 | AA               | INTERGENIC      |               |                    |                    |
| SNP_78294_A_10106 | NW_004516017.1 | scaffold587 | 10106                   | CC                              | AA                 | AA               | INTERGENIC      |               |                    |                    |
| SNP_78295_A_10213 | NW_004516017.1 | scaffold587 | 10213                   | AA                              | GG                 | GG               | INTERGENIC      |               |                    |                    |
| SNP_78296_A_10266 | NW_004516017.1 | scaffold587 | 10266                   | TT                              | CC                 | CC               | INTERGENIC      |               |                    |                    |
| SNP_78297_A_10286 | NW_004516017.1 | scaffold587 | 10286                   | GG                              | AA                 | AA               | INTERGENIC      |               |                    |                    |
| SNP_78298_A_10330 | NW_004516017.1 | scaffold587 | 10330                   | AA                              | CC                 | CC               | INTERGENIC      |               |                    |                    |
| SNP_78299_A_10652 | NW_004516017.1 | scaffold587 | 10652                   | AA                              | CC                 | CC               | INTERGENIC      |               |                    |                    |
| SNP_78300_A_10677 | NW_004516017.1 | scaffold587 | 10677                   | TT                              | AA                 | AA               | INTERGENIC      |               |                    |                    |

| SNPs IDs          | Chromosome IDs | Chromosomes | Physical positions (bp) | CDC Frontier (Reference genome) | (Pusa 1103 & HPNB) | (ILWC 46 & LPNB) | Sequence genome | Components of | Gene accession IDs | Putative functions |
|-------------------|----------------|-------------|-------------------------|---------------------------------|--------------------|------------------|-----------------|---------------|--------------------|--------------------|
| SNP_78301_A_10998 | NW_004516017.1 | scaffold587 | 10998                   | TT                              | CC                 | CC               | INTERGENIC      |               |                    |                    |
| SNP_78302_A_13173 | NW_004516017.1 | scaffold587 | 13173                   | GG                              | TT                 | TT               | INTERGENIC      |               |                    |                    |
| SNP_78303_A_13487 | NW_004516017.1 | scaffold587 | 13487                   | AA                              | GG                 | GG               | INTERGENIC      |               |                    |                    |
| SNP_78304_A_13539 | NW_004516017.1 | scaffold587 | 13539                   | TT                              | GG                 | GG               | INTERGENIC      |               |                    |                    |
| SNP_78305_A_13949 | NW_004516017.1 | scaffold587 | 13949                   | TT                              | AA                 | AA               | INTERGENIC      |               |                    |                    |
| SNP_78306_A_15050 | NW_004516017.1 | scaffold587 | 15050                   | TT                              | AA                 | AA               | INTERGENIC      |               |                    |                    |
| SNP_78307_A_15223 | NW_004516017.1 | scaffold587 | 15223                   | AA                              | CC                 | CC               | INTERGENIC      |               |                    |                    |
| SNP_78308_A_15224 | NW_004516017.1 | scaffold587 | 15224                   | AA                              | TT                 | TT               | INTERGENIC      |               |                    |                    |
| SNP_78309_A_15431 | NW_004516017.1 | scaffold587 | 15431                   | AA                              | CC                 | CC               | INTERGENIC      |               |                    |                    |
| SNP_78310_A_15996 | NW_004516017.1 | scaffold587 | 15996                   | GG                              | AA                 | AA               | INTERGENIC      |               |                    |                    |
| SNP_78311_A_16027 | NW_004516017.1 | scaffold587 | 16027                   | CC                              | GG                 | GG               | INTERGENIC      |               |                    |                    |
| SNP_78312_A_16091 | NW_004516017.1 | scaffold587 | 16091                   | GG                              | AA                 | AA               | INTERGENIC      |               |                    |                    |
| SNP_78313_A_16096 | NW_004516017.1 | scaffold587 | 16096                   | TT                              | CC                 | CC               | INTERGENIC      |               |                    |                    |
| SNP_78314_A_16143 | NW_004516017.1 | scaffold587 | 16143                   | TT                              | GG                 | GG               | INTERGENIC      |               |                    |                    |
| SNP_78315_A_16218 | NW_004516017.1 | scaffold587 | 16218                   | TT                              | CC                 | CC               | INTERGENIC      |               |                    |                    |
| SNP_78316_A_16290 | NW_004516017.1 | scaffold587 | 16290                   | CC                              | AA                 | AA               | INTERGENIC      |               |                    |                    |
| SNP_78317_A_16362 | NW_004516017.1 | scaffold587 | 16362                   | AA                              | CC                 | CC               | INTERGENIC      |               |                    |                    |
| SNP_78318_A_16495 | NW_004516017.1 | scaffold587 | 16495                   | CC                              | GG                 | GG               | INTERGENIC      |               |                    |                    |
| SNP_78319_A_16525 | NW_004516017.1 | scaffold587 | 16525                   | AA                              | CC                 | CC               | INTERGENIC      |               |                    |                    |
| SNP_78320_A_16662 | NW_004516017.1 | scaffold587 | 16662                   | TT                              | CC                 | CC               | INTERGENIC      |               |                    |                    |
| SNP_78321_A_16754 | NW_004516017.1 | scaffold587 | 16754                   | TT                              | AA                 | AA               | INTERGENIC      |               |                    |                    |
| SNP_78322_A_16766 | NW_004516017.1 | scaffold587 | 16766                   | TT                              | CC                 | CC               | INTERGENIC      |               |                    |                    |



| SNPs IDs          | Chromosome IDs | Chromosomes | Physical positions (bp) | CDC Frontier (Reference genome) | (Pusa 1103 & HPNB) | (ILWC 46 & LPNB) | Sequence genome | Components of | Gene accession IDs | Putative functions |
|-------------------|----------------|-------------|-------------------------|---------------------------------|--------------------|------------------|-----------------|---------------|--------------------|--------------------|
| SNP_78323_A_16792 | NW_004516017.1 | scaffold587 | 16792                   | TT                              | CC                 | CC               | INTERGENIC      |               |                    |                    |
| SNP_78324_A_17131 | NW_004516017.1 | scaffold587 | 17131                   | TT                              | CC                 | CC               | INTERGENIC      |               |                    |                    |
| SNP_78325_A_17150 | NW_004516017.1 | scaffold587 | 17150                   | CC                              | TT                 | TT               | INTERGENIC      |               |                    |                    |
| SNP_78326_A_17334 | NW_004516017.1 | scaffold587 | 17334                   | GG                              | TT                 | TT               | INTERGENIC      |               |                    |                    |
| SNP_78327_A_17462 | NW_004516017.1 | scaffold587 | 17462                   | CC                              | TT                 | TT               | INTERGENIC      |               |                    |                    |
| SNP_78328_A_17515 | NW_004516017.1 | scaffold587 | 17515                   | GG                              | AA                 | AA               | INTERGENIC      |               |                    |                    |
| SNP_78329_A_17537 | NW_004516017.1 | scaffold587 | 17537                   | TT                              | GG                 | GG               | INTERGENIC      |               |                    |                    |
| SNP_78330_A_17570 | NW_004516017.1 | scaffold587 | 17570                   | AA                              | CC                 | CC               | INTERGENIC      |               |                    |                    |
| SNP_78331_A_17591 | NW_004516017.1 | scaffold587 | 17591                   | CC                              | TT                 | TT               | INTERGENIC      |               |                    |                    |
| SNP_78332_A_17603 | NW_004516017.1 | scaffold587 | 17603                   | CC                              | TT                 | TT               | INTERGENIC      |               |                    |                    |
| SNP_78333_A_17625 | NW_004516017.1 | scaffold587 | 17625                   | AA                              | GG                 | GG               | INTERGENIC      |               |                    |                    |
| SNP_78334_A_17965 | NW_004516017.1 | scaffold587 | 17965                   | CC                              | GG                 | GG               | INTERGENIC      |               |                    |                    |
| SNP_78335_A_18045 | NW_004516017.1 | scaffold587 | 18045                   | GG                              | TT                 | TT               | INTERGENIC      |               |                    |                    |
| SNP_78336_A_18046 | NW_004516017.1 | scaffold587 | 18046                   | AA                              | GG                 | GG               | INTERGENIC      |               |                    |                    |
| SNP_78338_A_19432 | NW_004516017.1 | scaffold587 | 19432                   | CC                              | AA                 | AA               | INTERGENIC      |               |                    |                    |
| SNP_78339_A_19638 | NW_004516017.1 | scaffold587 | 19638                   | AA                              | CC                 | CC               | INTERGENIC      |               |                    |                    |
| SNP_78340_A_19755 | NW_004516017.1 | scaffold587 | 19755                   | CC                              | TT                 | TT               | INTERGENIC      |               |                    |                    |
| SNP_78341_A_19757 | NW_004516017.1 | scaffold587 | 19757                   | AA                              | GG                 | GG               | INTERGENIC      |               |                    |                    |
| SNP_78342_A_19841 | NW_004516017.1 | scaffold587 | 19841                   | AA                              | GG                 | GG               | INTERGENIC      |               |                    |                    |
| SNP_78343_A_19854 | NW_004516017.1 | scaffold587 | 19854                   | GG                              | AA                 | AA               | INTERGENIC      |               |                    |                    |
| SNP_78344_A_19930 | NW_004516017.1 | scaffold587 | 19930                   | TT                              | GG                 | GG               | INTERGENIC      |               |                    |                    |
| SNP_78345_A_22406 | NW_004516017.1 | scaffold587 | 22406                   | TT                              | CC                 | CC               | INTERGENIC      |               |                    |                    |

| SNPs IDs          | Chromosome IDs | Chromosomes | Physical positions (bp) | CDC Frontier (Reference genome) | (Pusa 1103 & HPNB) | (ILWC 46 & LPNB) | Sequence genome | Components of | Gene accession IDs | Putative functions |
|-------------------|----------------|-------------|-------------------------|---------------------------------|--------------------|------------------|-----------------|---------------|--------------------|--------------------|
| SNP_78346_A_22408 | NW_004516017.1 | scaffold587 | 22408                   | AA                              | GG                 | GG               | INTERGENIC      |               |                    |                    |
| SNP_78347_A_22430 | NW_004516017.1 | scaffold587 | 22430                   | GG                              | TT                 | TT               | INTERGENIC      |               |                    |                    |
| SNP_78348_A_22442 | NW_004516017.1 | scaffold587 | 22442                   | GG                              | AA                 | AA               | INTERGENIC      |               |                    |                    |
| SNP_78349_A_22486 | NW_004516017.1 | scaffold587 | 22486                   | CC                              | TT                 | TT               | INTERGENIC      |               |                    |                    |
| SNP_78350_A_22508 | NW_004516017.1 | scaffold587 | 22508                   | AA                              | TT                 | TT               | INTERGENIC      |               |                    |                    |
| SNP_78351_A_22519 | NW_004516017.1 | scaffold587 | 22519                   | GG                              | TT                 | TT               | INTERGENIC      |               |                    |                    |
| SNP_78352_A_22611 | NW_004516017.1 | scaffold587 | 22611                   | AA                              | GG                 | GG               | INTERGENIC      |               |                    |                    |
| SNP_78353_A_22699 | NW_004516017.1 | scaffold587 | 22699                   | TT                              | GG                 | GG               | INTERGENIC      |               |                    |                    |
| SNP_78354_A_22718 | NW_004516017.1 | scaffold587 | 22718                   | TT                              | GG                 | GG               | INTERGENIC      |               |                    |                    |
| SNP_78355_A_22726 | NW_004516017.1 | scaffold587 | 22726                   | AA                              | GG                 | GG               | INTERGENIC      |               |                    |                    |
| SNP_78356_A_22820 | NW_004516017.1 | scaffold587 | 22820                   | GG                              | AA                 | AA               | INTERGENIC      |               |                    |                    |
| SNP_78357_A_22821 | NW_004516017.1 | scaffold587 | 22821                   | GG                              | AA                 | AA               | INTERGENIC      |               |                    |                    |
| SNP_78358_A_22837 | NW_004516017.1 | scaffold587 | 22837                   | CC                              | TT                 | TT               | INTERGENIC      |               |                    |                    |
| SNP_78359_A_22846 | NW_004516017.1 | scaffold587 | 22846                   | AA                              | TT                 | TT               | INTERGENIC      |               |                    |                    |
| SNP_78360_A_22934 | NW_004516017.1 | scaffold587 | 22934                   | GG                              | AA                 | AA               | INTERGENIC      |               |                    |                    |
| SNP_78362_A_27767 | NW_004516017.1 | scaffold587 | 27767                   | AA                              | GG                 | GG               | INTERGENIC      |               |                    |                    |
| SNP_78363_A_28052 | NW_004516017.1 | scaffold587 | 28052                   | AA                              | CC                 | CC               | INTERGENIC      |               |                    |                    |
| SNP_78364_A_28385 | NW_004516017.1 | scaffold587 | 28385                   | AA                              | GG                 | GG               | INTERGENIC      |               |                    |                    |
| SNP_78365_A_29465 | NW_004516017.1 | scaffold587 | 29465                   | AA                              | GG                 | GG               | INTERGENIC      |               |                    |                    |
| SNP_78366_A_29489 | NW_004516017.1 | scaffold587 | 29489                   | AA                              | GG                 | GG               | INTERGENIC      |               |                    |                    |
| SNP_78367_A_29823 | NW_004516017.1 | scaffold587 | 29823                   | TT                              | CC                 | CC               | INTERGENIC      |               |                    |                    |
| SNP_78368_A_29857 | NW_004516017.1 | scaffold587 | 29857                   | AA                              | GG                 | GG               | INTERGENIC      |               |                    |                    |

| SNPs IDs          | Chromosome IDs | Chromosomes | Physical positions (bp) | CDC Frontier (Reference genome) | (Pusa 1103 & HPNB) | (ILWC 46 & LPNB) | Sequence genome | Components of | Gene accession IDs | Putative functions |
|-------------------|----------------|-------------|-------------------------|---------------------------------|--------------------|------------------|-----------------|---------------|--------------------|--------------------|
| SNP_78369_A_30994 | NW_004516017.1 | scaffold587 | 30994                   | CC                              | GG                 | GG               | INTERGENIC      |               |                    |                    |
| SNP_78370_A_31024 | NW_004516017.1 | scaffold587 | 31024                   | AA                              | GG                 | GG               | INTERGENIC      |               |                    |                    |
| SNP_78371_A_31073 | NW_004516017.1 | scaffold587 | 31073                   | CC                              | TT                 | TT               | INTERGENIC      |               |                    |                    |
| SNP_78372_A_31128 | NW_004516017.1 | scaffold587 | 31128                   | AA                              | TT                 | TT               | INTERGENIC      |               |                    |                    |
| SNP_78373_A_31130 | NW_004516017.1 | scaffold587 | 31130                   | AA                              | CC                 | CC               | INTERGENIC      |               |                    |                    |
| SNP_78374_A_31149 | NW_004516017.1 | scaffold587 | 31149                   | AA                              | GG                 | GG               | INTERGENIC      |               |                    |                    |
| SNP_78375_A_31637 | NW_004516017.1 | scaffold587 | 31637                   | AA                              | TT                 | TT               | INTERGENIC      |               |                    |                    |
| SNP_78376_A_31828 | NW_004516017.1 | scaffold587 | 31828                   | AA                              | TT                 | TT               | INTERGENIC      |               |                    |                    |
| SNP_78377_A_31885 | NW_004516017.1 | scaffold587 | 31885                   | CC                              | TT                 | TT               | INTERGENIC      |               |                    |                    |
| SNP_78378_A_31894 | NW_004516017.1 | scaffold587 | 31894                   | CC                              | GG                 | GG               | INTERGENIC      |               |                    |                    |
| SNP_78379_A_31972 | NW_004516017.1 | scaffold587 | 31972                   | TT                              | GG                 | GG               | INTERGENIC      |               |                    |                    |
| SNP_78380_A_32018 | NW_004516017.1 | scaffold587 | 32018                   | TT                              | CC                 | CC               | INTERGENIC      |               |                    |                    |
| SNP_78381_A_35309 | NW_004516017.1 | scaffold587 | 35309                   | CC                              | GG                 | GG               | INTERGENIC      |               |                    |                    |
| SNP_78382_A_35401 | NW_004516017.1 | scaffold587 | 35401                   | TT                              | GG                 | GG               | INTERGENIC      |               |                    |                    |
| SNP_78383_A_35403 | NW_004516017.1 | scaffold587 | 35403                   | TT                              | GG                 | GG               | INTERGENIC      |               |                    |                    |
| SNP_78384_A_36549 | NW_004516017.1 | scaffold587 | 36549                   | TT                              | CC                 | CC               | INTERGENIC      |               |                    |                    |
| SNP_78385_A_36854 | NW_004516017.1 | scaffold587 | 36854                   | GG                              | AA                 | AA               | INTERGENIC      |               |                    |                    |
| SNP_78386_A_36904 | NW_004516017.1 | scaffold587 | 36904                   | AA                              | GG                 | GG               | INTERGENIC      |               |                    |                    |
| SNP_78387_A_37157 | NW_004516017.1 | scaffold587 | 37157                   | GG                              | AA                 | AA               | INTERGENIC      |               |                    |                    |
| SNP_78388_A_38683 | NW_004516017.1 | scaffold587 | 38683                   | AA                              | GG                 | GG               | INTERGENIC      |               |                    |                    |
| SNP_78389_A_38703 | NW_004516017.1 | scaffold587 | 38703                   | TT                              | GG                 | GG               | INTERGENIC      |               |                    |                    |
| SNP_78390_A_38744 | NW_004516017.1 | scaffold587 | 38744                   | AA                              | GG                 | GG               | INTERGENIC      |               |                    |                    |

| SNPs IDs          | Chromosome IDs | Chromosomes | Physical positions (bp) | CDC Frontier (Reference genome) | (Pusa 1103 & HPNB) | (ILWC 46 & LPNB) | Sequence genome | Components of | Gene accession IDs | Putative functions |
|-------------------|----------------|-------------|-------------------------|---------------------------------|--------------------|------------------|-----------------|---------------|--------------------|--------------------|
| SNP_78391_A_38894 | NW_004516017.1 | scaffold587 | 38894                   | AA                              | GG                 | GG               | INTERGENIC      |               |                    |                    |
| SNP_78392_A_38935 | NW_004516017.1 | scaffold587 | 38935                   | AA                              | GG                 | GG               | INTERGENIC      |               |                    |                    |
| SNP_78393_A_38987 | NW_004516017.1 | scaffold587 | 38987                   | GG                              | AA                 | AA               | INTERGENIC      |               |                    |                    |
| SNP_78394_A_38990 | NW_004516017.1 | scaffold587 | 38990                   | GG                              | CC                 | CC               | INTERGENIC      |               |                    |                    |
| SNP_78395_A_39028 | NW_004516017.1 | scaffold587 | 39028                   | AA                              | GG                 | GG               | INTERGENIC      |               |                    |                    |
| SNP_78396_A_39056 | NW_004516017.1 | scaffold587 | 39056                   | GG                              | CC                 | CC               | INTERGENIC      |               |                    |                    |
| SNP_78397_A_40532 | NW_004516017.1 | scaffold587 | 40532                   | CC                              | GG                 | GG               | INTERGENIC      |               |                    |                    |
| SNP_78398_A_40553 | NW_004516017.1 | scaffold587 | 40553                   | AA                              | GG                 | GG               | INTERGENIC      |               |                    |                    |
| SNP_78399_A_40712 | NW_004516017.1 | scaffold587 | 40712                   | AA                              | CC                 | CC               | INTERGENIC      |               |                    |                    |
| SNP_78400_A_40772 | NW_004516017.1 | scaffold587 | 40772                   | GG                              | AA                 | AA               | INTERGENIC      |               |                    |                    |
| SNP_78401_A_40813 | NW_004516017.1 | scaffold587 | 40813                   | TT                              | CC                 | CC               | INTERGENIC      |               |                    |                    |
| SNP_78402_A_40836 | NW_004516017.1 | scaffold587 | 40836                   | AA                              | GG                 | GG               | INTERGENIC      |               |                    |                    |
| SNP_78403_A_40990 | NW_004516017.1 | scaffold587 | 40990                   | GG                              | TT                 | TT               | INTERGENIC      |               |                    |                    |
| SNP_78404_A_41073 | NW_004516017.1 | scaffold587 | 41073                   | AA                              | GG                 | GG               | INTERGENIC      |               |                    |                    |
| SNP_78405_A_41177 | NW_004516017.1 | scaffold587 | 41177                   | AA                              | GG                 | GG               | INTERGENIC      |               |                    |                    |
| SNP_78406_A_41214 | NW_004516017.1 | scaffold587 | 41214                   | CC                              | TT                 | TT               | INTERGENIC      |               |                    |                    |
| SNP_78407_A_41215 | NW_004516017.1 | scaffold587 | 41215                   | GG                              | AA                 | AA               | INTERGENIC      |               |                    |                    |
| SNP_78408_A_43021 | NW_004516017.1 | scaffold587 | 43021                   | CC                              | TT                 | TT               | INTERGENIC      |               |                    |                    |
| SNP_78409_A_45288 | NW_004516017.1 | scaffold587 | 45288                   | TT                              | AA                 | AA               | INTERGENIC      |               |                    |                    |
| SNP_78410_A_45303 | NW_004516017.1 | scaffold587 | 45303                   | AA                              | GG                 | GG               | INTERGENIC      |               |                    |                    |
| SNP_78411_A_45357 | NW_004516017.1 | scaffold587 | 45357                   | TT                              | AA                 | AA               | INTERGENIC      |               |                    |                    |
| SNP_78412_A_45359 | NW_004516017.1 | scaffold587 | 45359                   | AA                              | GG                 | GG               | INTERGENIC      |               |                    |                    |

| SNPs IDs          | Chromosome IDs | Chromosomes | Physical positions (bp) | CDC Frontier (Reference genome) | (Pusa 1103 & HPNB) | (ILWC 46 & LPNB) | Sequence genome | Components of | Gene accession IDs | Putative functions |
|-------------------|----------------|-------------|-------------------------|---------------------------------|--------------------|------------------|-----------------|---------------|--------------------|--------------------|
| SNP_78413_A_45362 | NW_004516017.1 | scaffold587 | 45362                   | GG                              | CC                 | CC               | INTERGENIC      |               |                    |                    |
| SNP_78414_A_45406 | NW_004516017.1 | scaffold587 | 45406                   | TT                              | AA                 | AA               | INTERGENIC      |               |                    |                    |
| SNP_78415_A_45657 | NW_004516017.1 | scaffold587 | 45657                   | CC                              | TT                 | TT               | INTERGENIC      |               |                    |                    |
| SNP_78416_A_45663 | NW_004516017.1 | scaffold587 | 45663                   | GG                              | TT                 | TT               | INTERGENIC      |               |                    |                    |
| SNP_78417_A_47166 | NW_004516017.1 | scaffold587 | 47166                   | CC                              | TT                 | TT               | INTERGENIC      |               |                    |                    |
| SNP_78418_A_47168 | NW_004516017.1 | scaffold587 | 47168                   | CC                              | TT                 | TT               | INTERGENIC      |               |                    |                    |
| SNP_78419_A_47277 | NW_004516017.1 | scaffold587 | 47277                   | AA                              | GG                 | GG               | INTERGENIC      |               |                    |                    |
| SNP_78420_A_47295 | NW_004516017.1 | scaffold587 | 47295                   | CC                              | AA                 | AA               | INTERGENIC      |               |                    |                    |
| SNP_78421_A_47306 | NW_004516017.1 | scaffold587 | 47306                   | TT                              | CC                 | CC               | INTERGENIC      |               |                    |                    |
| SNP_78422_A_47321 | NW_004516017.1 | scaffold587 | 47321                   | TT                              | CC                 | CC               | INTERGENIC      |               |                    |                    |
| SNP_78423_A_47325 | NW_004516017.1 | scaffold587 | 47325                   | TT                              | GG                 | GG               | INTERGENIC      |               |                    |                    |
| SNP_78424_A_47339 | NW_004516017.1 | scaffold587 | 47339                   | AA                              | CC                 | CC               | INTERGENIC      |               |                    |                    |
| SNP_78425_A_47340 | NW_004516017.1 | scaffold587 | 47340                   | TT                              | CC                 | CC               | INTERGENIC      |               |                    |                    |
| SNP_78426_A_47526 | NW_004516017.1 | scaffold587 | 47526                   | AA                              | CC                 | CC               | INTERGENIC      |               |                    |                    |
| SNP_78427_A_47569 | NW_004516017.1 | scaffold587 | 47569                   | AA                              | GG                 | GG               | INTERGENIC      |               |                    |                    |
| SNP_78428_A_47666 | NW_004516017.1 | scaffold587 | 47666                   | TT                              | AA                 | AA               | INTERGENIC      |               |                    |                    |
| SNP_78429_A_48604 | NW_004516017.1 | scaffold587 | 48604                   | GG                              | CC                 | CC               | INTERGENIC      |               |                    |                    |
| SNP_78430_A_48693 | NW_004516017.1 | scaffold587 | 48693                   | TT                              | CC                 | CC               | INTERGENIC      |               |                    |                    |
| SNP_78431_A_48852 | NW_004516017.1 | scaffold587 | 48852                   | AA                              | GG                 | GG               | INTERGENIC      |               |                    |                    |
| SNP_78432_A_48865 | NW_004516017.1 | scaffold587 | 48865                   | AA                              | TT                 | TT               | INTERGENIC      |               |                    |                    |
| SNP_78433_A_48943 | NW_004516017.1 | scaffold587 | 48943                   | GG                              | CC                 | CC               | INTERGENIC      |               |                    |                    |
| SNP_78434_A_49341 | NW_004516017.1 | scaffold587 | 49341                   | CC                              | TT                 | TT               | INTERGENIC      |               |                    |                    |

| SNPs IDs          | Chromosome IDs | Chromosomes | Physical positions (bp) | CDC Frontier genome (Reference genome) | (Pusa 1103 & HPNB) | (ILWC 46 & LPNB) | Sequence genome | Components of | Gene accession IDs | Putative functions |
|-------------------|----------------|-------------|-------------------------|----------------------------------------|--------------------|------------------|-----------------|---------------|--------------------|--------------------|
| SNP_78435_A_49368 | NW_004516017.1 | scaffold587 | 49368                   | AA                                     | GG                 | GG               | INTERGENIC      |               |                    |                    |
| SNP_78436_A_49564 | NW_004516017.1 | scaffold587 | 49564                   | GG                                     | AA                 | AA               | INTERGENIC      |               |                    |                    |
| SNP_78437_A_49576 | NW_004516017.1 | scaffold587 | 49576                   | TT                                     | CC                 | CC               | INTERGENIC      |               |                    |                    |
| SNP_78438_A_50507 | NW_004516017.1 | scaffold587 | 50507                   | TT                                     | GG                 | GG               | INTERGENIC      |               |                    |                    |
| SNP_78439_A_50512 | NW_004516017.1 | scaffold587 | 50512                   | GG                                     | AA                 | AA               | INTERGENIC      |               |                    |                    |
| SNP_78440_A_50590 | NW_004516017.1 | scaffold587 | 50590                   | GG                                     | AA                 | AA               | INTERGENIC      |               |                    |                    |
| SNP_78441_A_50673 | NW_004516017.1 | scaffold587 | 50673                   | AA                                     | GG                 | GG               | INTERGENIC      |               |                    |                    |
| SNP_78442_A_50710 | NW_004516017.1 | scaffold587 | 50710                   | AA                                     | GG                 | GG               | INTERGENIC      |               |                    |                    |
| SNP_78443_A_50760 | NW_004516017.1 | scaffold587 | 50760                   | AA                                     | GG                 | GG               | INTERGENIC      |               |                    |                    |
| SNP_78444_A_50763 | NW_004516017.1 | scaffold587 | 50763                   | GG                                     | AA                 | AA               | INTERGENIC      |               |                    |                    |
| SNP_78445_A_50771 | NW_004516017.1 | scaffold587 | 50771                   | GG                                     | AA                 | AA               | INTERGENIC      |               |                    |                    |
| SNP_78447_A_50929 | NW_004516017.1 | scaffold587 | 50929                   | TT                                     | GG                 | GG               | INTERGENIC      |               |                    |                    |
| SNP_78448_A_50966 | NW_004516017.1 | scaffold587 | 50966                   | CC                                     | TT                 | TT               | INTERGENIC      |               |                    |                    |
| SNP_78449_A_50984 | NW_004516017.1 | scaffold587 | 50984                   | AA                                     | GG                 | GG               | INTERGENIC      |               |                    |                    |
| SNP_78451_A_51095 | NW_004516017.1 | scaffold587 | 51095                   | AA                                     | GG                 | GG               | INTERGENIC      |               |                    |                    |
| SNP_78452_A_51181 | NW_004516017.1 | scaffold587 | 51181                   | TT                                     | CC                 | CC               | INTERGENIC      |               |                    |                    |
| SNP_78453_A_51213 | NW_004516017.1 | scaffold587 | 51213                   | GG                                     | AA                 | AA               | INTERGENIC      |               |                    |                    |
| SNP_78454_A_51258 | NW_004516017.1 | scaffold587 | 51258                   | AA                                     | GG                 | GG               | INTERGENIC      |               |                    |                    |
| SNP_78455_A_52638 | NW_004516017.1 | scaffold587 | 52638                   | GG                                     | AA                 | AA               | INTERGENIC      |               |                    |                    |
| SNP_78456_A_52660 | NW_004516017.1 | scaffold587 | 52660                   | AA                                     | GG                 | GG               | INTERGENIC      |               |                    |                    |
| SNP_78457_A_52749 | NW_004516017.1 | scaffold587 | 52749                   | CC                                     | AA                 | AA               | INTERGENIC      |               |                    |                    |
| SNP_78458_A_52826 | NW_004516017.1 | scaffold587 | 52826                   | AA                                     | GG                 | GG               | INTERGENIC      |               |                    |                    |

| SNPs IDs          | Chromosome IDs | Chromosomes | Physical positions (bp) | CDC Frontier (Reference genome) | (Pusa 1103 & HPNB) | (ILWC 46 & LPNB) | Sequence genome | Components of | Gene accession IDs | Putative functions |
|-------------------|----------------|-------------|-------------------------|---------------------------------|--------------------|------------------|-----------------|---------------|--------------------|--------------------|
| SNP_78459_A_52871 | NW_004516017.1 | scaffold587 | 52871                   | CC                              | TT                 | TT               | INTERGENIC      |               |                    |                    |
| SNP_78460_A_53010 | NW_004516017.1 | scaffold587 | 53010                   | TT                              | CC                 | CC               | INTERGENIC      |               |                    |                    |
| SNP_78462_A_53152 | NW_004516017.1 | scaffold587 | 53152                   | CC                              | TT                 | TT               | INTERGENIC      |               |                    |                    |
| SNP_78463_A_53548 | NW_004516017.1 | scaffold587 | 53548                   | AA                              | GG                 | GG               | INTERGENIC      |               |                    |                    |
| SNP_78464_A_53581 | NW_004516017.1 | scaffold587 | 53581                   | AA                              | GG                 | GG               | INTERGENIC      |               |                    |                    |
| SNP_78465_A_53585 | NW_004516017.1 | scaffold587 | 53585                   | CC                              | TT                 | TT               | INTERGENIC      |               |                    |                    |
| SNP_78466_A_53587 | NW_004516017.1 | scaffold587 | 53587                   | AA                              | GG                 | GG               | INTERGENIC      |               |                    |                    |
| SNP_78467_A_53589 | NW_004516017.1 | scaffold587 | 53589                   | AA                              | CC                 | CC               | INTERGENIC      |               |                    |                    |
| SNP_78468_A_53624 | NW_004516017.1 | scaffold587 | 53624                   | AA                              | CC                 | CC               | INTERGENIC      |               |                    |                    |
| SNP_78469_A_53664 | NW_004516017.1 | scaffold587 | 53664                   | CC                              | TT                 | TT               | INTERGENIC      |               |                    |                    |
| SNP_78470_A_53669 | NW_004516017.1 | scaffold587 | 53669                   | AA                              | GG                 | GG               | INTERGENIC      |               |                    |                    |
| SNP_78471_A_53697 | NW_004516017.1 | scaffold587 | 53697                   | CC                              | AA                 | AA               | INTERGENIC      |               |                    |                    |
| SNP_78472_A_53705 | NW_004516017.1 | scaffold587 | 53705                   | GG                              | AA                 | AA               | INTERGENIC      |               |                    |                    |
| SNP_78473_A_53925 | NW_004516017.1 | scaffold587 | 53925                   | AA                              | CC                 | CC               | INTERGENIC      |               |                    |                    |
| SNP_78474_A_53968 | NW_004516017.1 | scaffold587 | 53968                   | AA                              | GG                 | GG               | INTERGENIC      |               |                    |                    |
| SNP_78475_A_54005 | NW_004516017.1 | scaffold587 | 54005                   | TT                              | GG                 | GG               | INTERGENIC      |               |                    |                    |
| SNP_78476_A_54330 | NW_004516017.1 | scaffold587 | 54330                   | CC                              | TT                 | TT               | INTERGENIC      |               |                    |                    |
| SNP_78477_A_54331 | NW_004516017.1 | scaffold587 | 54331                   | TT                              | CC                 | CC               | INTERGENIC      |               |                    |                    |
| SNP_78478_A_54359 | NW_004516017.1 | scaffold587 | 54359                   | AA                              | GG                 | GG               | INTERGENIC      |               |                    |                    |
| SNP_78479_A_54376 | NW_004516017.1 | scaffold587 | 54376                   | TT                              | AA                 | AA               | INTERGENIC      |               |                    |                    |
| SNP_78480_A_54594 | NW_004516017.1 | scaffold587 | 54594                   | AA                              | GG                 | GG               | INTERGENIC      |               |                    |                    |
| SNP_78481_A_54635 | NW_004516017.1 | scaffold587 | 54635                   | TT                              | CC                 | CC               | INTERGENIC      |               |                    |                    |

| SNPs IDs          | Chromosome IDs | Chromosomes | Physical positions (bp) | CDC Frontier (Reference genome) | (Pusa 1103 & HPNB) | (ILWC 46 & LPNB) | Sequence genome | Components of | Gene accession IDs | Putative functions |
|-------------------|----------------|-------------|-------------------------|---------------------------------|--------------------|------------------|-----------------|---------------|--------------------|--------------------|
| SNP_78482_A_54685 | NW_004516017.1 | scaffold587 | 54685                   | TT                              | CC                 | CC               | INTERGENIC      |               |                    |                    |
| SNP_78484_A_54955 | NW_004516017.1 | scaffold587 | 54955                   | AA                              | TT                 | TT               | INTERGENIC      |               |                    |                    |
| SNP_78485_A_55015 | NW_004516017.1 | scaffold587 | 55015                   | GG                              | AA                 | AA               | INTERGENIC      |               |                    |                    |
| SNP_78486_A_55223 | NW_004516017.1 | scaffold587 | 55223                   | GG                              | TT                 | TT               | INTERGENIC      |               |                    |                    |
| SNP_78487_A_55260 | NW_004516017.1 | scaffold587 | 55260                   | GG                              | AA                 | AA               | INTERGENIC      |               |                    |                    |
| SNP_78488_A_55435 | NW_004516017.1 | scaffold587 | 55435                   | GG                              | TT                 | TT               | INTERGENIC      |               |                    |                    |
| SNP_78489_A_55525 | NW_004516017.1 | scaffold587 | 55525                   | CC                              | GG                 | GG               | INTERGENIC      |               |                    |                    |
| SNP_78491_A_55613 | NW_004516017.1 | scaffold587 | 55613                   | AA                              | GG                 | GG               | INTERGENIC      |               |                    |                    |
| SNP_78492_A_55645 | NW_004516017.1 | scaffold587 | 55645                   | TT                              | GG                 | GG               | INTERGENIC      |               |                    |                    |
| SNP_78493_A_55671 | NW_004516017.1 | scaffold587 | 55671                   | CC                              | TT                 | TT               | INTERGENIC      |               |                    |                    |
| SNP_78494_A_55747 | NW_004516017.1 | scaffold587 | 55747                   | CC                              | TT                 | TT               | INTERGENIC      |               |                    |                    |
| SNP_78495_A_55963 | NW_004516017.1 | scaffold587 | 55963                   | AA                              | GG                 | GG               | INTERGENIC      |               |                    |                    |
| SNP_78496_A_56042 | NW_004516017.1 | scaffold587 | 56042                   | GG                              | AA                 | AA               | INTERGENIC      |               |                    |                    |
| SNP_78498_A_61439 | NW_004516017.1 | scaffold587 | 61439                   | AA                              | TT                 | TT               | INTERGENIC      |               |                    |                    |
| SNP_78499_A_70337 | NW_004516017.1 | scaffold587 | 70337                   | GG                              | CC                 | CC               | INTERGENIC      |               |                    |                    |
| SNP_78501_A_70658 | NW_004516017.1 | scaffold587 | 70658                   | CC                              | GG                 | GG               | INTERGENIC      |               |                    |                    |
| SNP_78502_A_70681 | NW_004516017.1 | scaffold587 | 70681                   | CC                              | GG                 | GG               | INTERGENIC      |               |                    |                    |
| SNP_78503_A_70978 | NW_004516017.1 | scaffold587 | 70978                   | AA                              | GG                 | GG               | INTERGENIC      |               |                    |                    |
| SNP_78504_A_71203 | NW_004516017.1 | scaffold587 | 71203                   | TT                              | CC                 | CC               | INTERGENIC      |               |                    |                    |
| SNP_78505_A_7769  | NW_004516018.1 | scaffold588 | 7769                    | AA                              | GG                 | GG               | INTERGENIC      |               |                    |                    |
| SNP_78506_A_7778  | NW_004516018.1 | scaffold588 | 7778                    | CC                              | GG                 | GG               | INTERGENIC      |               |                    |                    |
| SNP_78507_A_13809 | NW_004516018.1 | scaffold588 | 13809                   | AA                              | TT                 | TT               | INTERGENIC      |               |                    |                    |



| SNPs IDs          | Chromosome IDs | Chromosomes | Physical positions (bp) | CDC Frontier (Reference genome) | (Pusa 1103 & HPNB) | (ILWC 46 & LPNB) | Sequence genome | Components of | Gene accession IDs | Putative functions |
|-------------------|----------------|-------------|-------------------------|---------------------------------|--------------------|------------------|-----------------|---------------|--------------------|--------------------|
| SNP_78508_A_13927 | NW_004516018.1 | scaffold588 | 13927                   | CC                              | GG                 | GG               | INTERGENIC      |               |                    |                    |
| SNP_78509_A_14337 | NW_004516018.1 | scaffold588 | 14337                   | AA                              | GG                 | GG               | INTERGENIC      |               |                    |                    |
| SNP_78510_A_14381 | NW_004516018.1 | scaffold588 | 14381                   | CC                              | GG                 | GG               | INTERGENIC      |               |                    |                    |
| SNP_78511_A_14415 | NW_004516018.1 | scaffold588 | 14415                   | CC                              | TT                 | TT               | INTERGENIC      |               |                    |                    |
| SNP_78512_A_14436 | NW_004516018.1 | scaffold588 | 14436                   | CC                              | GG                 | GG               | INTERGENIC      |               |                    |                    |
| SNP_78513_A_14474 | NW_004516018.1 | scaffold588 | 14474                   | TT                              | CC                 | CC               | INTERGENIC      |               |                    |                    |
| SNP_78514_A_14482 | NW_004516018.1 | scaffold588 | 14482                   | TT                              | GG                 | GG               | INTERGENIC      |               |                    |                    |
| SNP_78515_A_14983 | NW_004516018.1 | scaffold588 | 14983                   | GG                              | AA                 | AA               | INTERGENIC      |               |                    |                    |
| SNP_78516_A_29526 | NW_004516019.1 | scaffold589 | 29526                   | AA                              | CC                 | CC               | INTERGENIC      |               |                    |                    |
| SNP_78517_A_33318 | NW_004516019.1 | scaffold589 | 33318                   | AA                              | GG                 | GG               | INTERGENIC      |               |                    |                    |
| SNP_78518_A_49302 | NW_004516019.1 | scaffold589 | 49302                   | AA                              | TT                 | TT               | INTERGENIC      |               |                    |                    |
| SNP_78519_A_49414 | NW_004516019.1 | scaffold589 | 49414                   | AA                              | TT                 | TT               | INTERGENIC      |               |                    |                    |
| SNP_78520_A_49439 | NW_004516019.1 | scaffold589 | 49439                   | TT                              | CC                 | CC               | INTERGENIC      |               |                    |                    |
| SNP_78521_A_49516 | NW_004516019.1 | scaffold589 | 49516                   | AA                              | GG                 | GG               | INTERGENIC      |               |                    |                    |
| SNP_78522_A_51327 | NW_004516019.1 | scaffold589 | 51327                   | TT                              | AA                 | AA               | INTERGENIC      |               |                    |                    |
| SNP_78524_A_65197 | NW_004516019.1 | scaffold589 | 65197                   | CC                              | TT                 | TT               | INTERGENIC      |               |                    |                    |
| SNP_78525_A_65221 | NW_004516019.1 | scaffold589 | 65221                   | AA                              | TT                 | TT               | INTERGENIC      |               |                    |                    |
| SNP_78526_A_65440 | NW_004516019.1 | scaffold589 | 65440                   | CC                              | TT                 | TT               | INTERGENIC      |               |                    |                    |
| SNP_78527_A_80202 | NW_004516019.1 | scaffold589 | 80202                   | TT                              | CC                 | CC               | INTERGENIC      |               |                    |                    |
| SNP_78528_A_80222 | NW_004516019.1 | scaffold589 | 80222                   | AA                              | GG                 | GG               | INTERGENIC      |               |                    |                    |
| SNP_78529_A_80228 | NW_004516019.1 | scaffold589 | 80228                   | AA                              | GG                 | GG               | INTERGENIC      |               |                    |                    |
| SNP_78530_A_80251 | NW_004516019.1 | scaffold589 | 80251                   | TT                              | CC                 | CC               | INTERGENIC      |               |                    |                    |

| SNPs IDs           | Chromosome IDs | Chromosomes | Physical positions (bp) | CDC Frontier (Reference genome) | (Pusa 1103 & HPNB) | (ILWC 46 & LPNB) | Sequence genome | Components of | Gene accession IDs | Putative functions |
|--------------------|----------------|-------------|-------------------------|---------------------------------|--------------------|------------------|-----------------|---------------|--------------------|--------------------|
| SNP_78531_A_80279  | NW_004516019.1 | scaffold589 | 80279                   | AA                              | CC                 | CC               | INTERGENIC      |               |                    |                    |
| SNP_78532_A_82063  | NW_004516019.1 | scaffold589 | 82063                   | TT                              | CC                 | CC               | INTERGENIC      |               |                    |                    |
| SNP_78533_A_82671  | NW_004516019.1 | scaffold589 | 82671                   | TT                              | CC                 | CC               | INTERGENIC      |               |                    |                    |
| SNP_78534_A_82684  | NW_004516019.1 | scaffold589 | 82684                   | TT                              | CC                 | CC               | INTERGENIC      |               |                    |                    |
| SNP_78535_A_83283  | NW_004516019.1 | scaffold589 | 83283                   | AA                              | GG                 | GG               | INTERGENIC      |               |                    |                    |
| SNP_78536_A_83467  | NW_004516019.1 | scaffold589 | 83467                   | GG                              | AA                 | AA               | INTERGENIC      |               |                    |                    |
| SNP_78537_A_83474  | NW_004516019.1 | scaffold589 | 83474                   | TT                              | CC                 | CC               | INTERGENIC      |               |                    |                    |
| SNP_78539_A_83500  | NW_004516019.1 | scaffold589 | 83500                   | AA                              | GG                 | GG               | INTERGENIC      |               |                    |                    |
| SNP_78540_A_83554  | NW_004516019.1 | scaffold589 | 83554                   | TT                              | CC                 | CC               | INTERGENIC      |               |                    |                    |
| SNP_78541_A_83599  | NW_004516019.1 | scaffold589 | 83599                   | CC                              | TT                 | TT               | INTERGENIC      |               |                    |                    |
| SNP_78542_A_83640  | NW_004516019.1 | scaffold589 | 83640                   | AA                              | CC                 | CC               | INTERGENIC      |               |                    |                    |
| SNP_78543_A_83656  | NW_004516019.1 | scaffold589 | 83656                   | AA                              | TT                 | TT               | INTERGENIC      |               |                    |                    |
| SNP_78544_A_83665  | NW_004516019.1 | scaffold589 | 83665                   | TT                              | AA                 | AA               | INTERGENIC      |               |                    |                    |
| SNP_78545_A_100673 | NW_004516019.1 | scaffold589 | 100673                  | TT                              | AA                 | AA               | INTERGENIC      |               |                    |                    |
| SNP_78546_A_100827 | NW_004516019.1 | scaffold589 | 100827                  | GG                              | TT                 | TT               | INTERGENIC      |               |                    |                    |
| SNP_78547_A_100831 | NW_004516019.1 | scaffold589 | 100831                  | CC                              | TT                 | TT               | INTERGENIC      |               |                    |                    |
| SNP_78548_A_127981 | NW_004516019.1 | scaffold589 | 127981                  | AA                              | TT                 | TT               | INTERGENIC      |               |                    |                    |
| SNP_78549_A_128139 | NW_004516019.1 | scaffold589 | 128139                  | CC                              | AA                 | AA               | INTERGENIC      |               |                    |                    |
| SNP_78550_A_138690 | NW_004516019.1 | scaffold589 | 138690                  | CC                              | TT                 | TT               | INTERGENIC      |               |                    |                    |
| SNP_78551_A_142875 | NW_004516019.1 | scaffold589 | 142875                  | AA                              | GG                 | GG               | INTERGENIC      |               |                    |                    |
| SNP_78553_A_180626 | NW_004516019.1 | scaffold589 | 180626                  | CC                              | TT                 | TT               | INTERGENIC      |               |                    |                    |
| SNP_78554_A_208939 | NW_004516019.1 | scaffold589 | 208939                  | AA                              | CC                 | CC               | INTERGENIC      |               |                    |                    |

| SNPs IDs           | Chromosome IDs | Chromosomes | Physical positions (bp) | CDC Frontier (Reference genome) | (Pusa 1103 & HPNB) | (ILWC 46 & LPNB) | Sequence genome | Components of | Gene accession IDs | Putative functions |
|--------------------|----------------|-------------|-------------------------|---------------------------------|--------------------|------------------|-----------------|---------------|--------------------|--------------------|
| SNP_78555_A_208971 | NW_004516019.1 | scaffold589 | 208971                  | TT                              | CC                 | CC               | INTERGENIC      |               |                    |                    |
| SNP_78556_A_209355 | NW_004516019.1 | scaffold589 | 209355                  | TT                              | GG                 | GG               | INTERGENIC      |               |                    |                    |
| SNP_78557_A_231445 | NW_004516019.1 | scaffold589 | 231445                  | CC                              | TT                 | TT               | INTERGENIC      |               |                    |                    |
| SNP_78558_A_238888 | NW_004516019.1 | scaffold589 | 238888                  | CC                              | TT                 | TT               | INTERGENIC      |               |                    |                    |
| SNP_78559_A_245152 | NW_004516019.1 | scaffold589 | 245152                  | CC                              | TT                 | TT               | INTERGENIC      |               |                    |                    |
| SNP_78560_A_245214 | NW_004516019.1 | scaffold589 | 245214                  | CC                              | TT                 | TT               | INTERGENIC      |               |                    |                    |
| SNP_78561_A_245223 | NW_004516019.1 | scaffold589 | 245223                  | TT                              | AA                 | AA               | INTERGENIC      |               |                    |                    |
| SNP_78562_A_245278 | NW_004516019.1 | scaffold589 | 245278                  | CC                              | AA                 | AA               | INTERGENIC      |               |                    |                    |
| SNP_78563_A_245382 | NW_004516019.1 | scaffold589 | 245382                  | CC                              | TT                 | TT               | INTERGENIC      |               |                    |                    |
| SNP_78564_A_245390 | NW_004516019.1 | scaffold589 | 245390                  | AA                              | GG                 | GG               | INTERGENIC      |               |                    |                    |
| SNP_78565_A_245429 | NW_004516019.1 | scaffold589 | 245429                  | AA                              | GG                 | GG               | INTERGENIC      |               |                    |                    |
| SNP_78566_A_245457 | NW_004516019.1 | scaffold589 | 245457                  | TT                              | CC                 | CC               | INTERGENIC      |               |                    |                    |
| SNP_78567_A_245494 | NW_004516019.1 | scaffold589 | 245494                  | GG                              | AA                 | AA               | INTERGENIC      |               |                    |                    |
| SNP_78568_A_245544 | NW_004516019.1 | scaffold589 | 245544                  | AA                              | GG                 | GG               | INTERGENIC      |               |                    |                    |
| SNP_78569_A_245587 | NW_004516019.1 | scaffold589 | 245587                  | AA                              | GG                 | GG               | INTERGENIC      |               |                    |                    |
| SNP_78570_A_245594 | NW_004516019.1 | scaffold589 | 245594                  | AA                              | GG                 | GG               | INTERGENIC      |               |                    |                    |
| SNP_78571_A_271967 | NW_004516019.1 | scaffold589 | 271967                  | AA                              | GG                 | GG               | INTERGENIC      |               |                    |                    |
| SNP_78572_A_292758 | NW_004516019.1 | scaffold589 | 292758                  | GG                              | TT                 | TT               | INTERGENIC      |               |                    |                    |
| SNP_78573_A_292841 | NW_004516019.1 | scaffold589 | 292841                  | GG                              | AA                 | AA               | INTERGENIC      |               |                    |                    |
| SNP_78574_A_304889 | NW_004516019.1 | scaffold589 | 304889                  | TT                              | GG                 | GG               | INTERGENIC      |               |                    |                    |
| SNP_78575_A_304901 | NW_004516019.1 | scaffold589 | 304901                  | TT                              | CC                 | CC               | INTERGENIC      |               |                    |                    |
| SNP_78576_A_309088 | NW_004516019.1 | scaffold589 | 309088                  | TT                              | AA                 | AA               | INTERGENIC      |               |                    |                    |

| SNPs IDs           | Chromosome IDs | Chromosomes | Physical positions (bp) | CDC Frontier (Reference genome) | (Pusa 1103 & HPNB) | (ILWC 46 & LPNB) | Sequence Components of genome | Gene accession IDs | Putative functions                          |
|--------------------|----------------|-------------|-------------------------|---------------------------------|--------------------|------------------|-------------------------------|--------------------|---------------------------------------------|
| SNP_78578_A_322923 | NW_004516019.1 | scaffold589 | 322923                  | CC                              | GG                 | GG               | INTERGENIC                    |                    |                                             |
| SNP_78579_A_323153 | NW_004516019.1 | scaffold589 | 323153                  | AA                              | GG                 | GG               | INTERGENIC                    |                    |                                             |
| SNP_78580_A_323323 | NW_004516019.1 | scaffold589 | 323323                  | GG                              | AA                 | AA               | INTERGENIC                    |                    |                                             |
| SNP_78581_A_323440 | NW_004516019.1 | scaffold589 | 323440                  | TT                              | CC                 | CC               | INTERGENIC                    |                    |                                             |
| SNP_78582_A_323527 | NW_004516019.1 | scaffold589 | 323527                  | TT                              | AA                 | AA               | INTERGENIC                    |                    |                                             |
| SNP_78583_A_323537 | NW_004516019.1 | scaffold589 | 323537                  | CC                              | GG                 | GG               | INTERGENIC                    |                    |                                             |
| SNP_78587_A_3600   | NW_004516020.1 | scaffold590 | 3600                    | AA                              | CC                 | CC               | INTRON                        | 101505517          | aquaporin NIP6-1-like                       |
| SNP_78588_A_3643   | NW_004516020.1 | scaffold590 | 3643                    | TT                              | CC                 | CC               | INTRON                        | 101505517          | aquaporin NIP6-1-like                       |
| SNP_78589_A_3646   | NW_004516020.1 | scaffold590 | 3646                    | TT                              | AA                 | AA               | INTRON                        | 101505517          | aquaporin NIP6-1-like                       |
| SNP_78590_A_3723   | NW_004516020.1 | scaffold590 | 3723                    | GG                              | AA                 | AA               | INTRON                        | 101505517          | aquaporin NIP6-1-like                       |
| SNP_78591_A_3737   | NW_004516020.1 | scaffold590 | 3737                    | GG                              | AA                 | AA               | INTRON                        | 101505517          | aquaporin NIP6-1-like                       |
| SNP_78592_A_3771   | NW_004516020.1 | scaffold590 | 3771                    | GG                              | AA                 | AA               | INTRON                        | 101505517          | aquaporin NIP6-1-like                       |
| SNP_78593_A_3784   | NW_004516020.1 | scaffold590 | 3784                    | GG                              | TT                 | TT               | INTRON                        | 101505517          | aquaporin NIP6-1-like                       |
| SNP_78594_A_3786   | NW_004516020.1 | scaffold590 | 3786                    | CC                              | AA                 | AA               | INTRON                        | 101505517          | aquaporin NIP6-1-like                       |
| SNP_78595_A_5321   | NW_004516020.1 | scaffold590 | 5321                    | TT                              | CC                 | CC               | INTRON                        | 101505517          | aquaporin NIP6-1-like                       |
| SNP_78596_A_14109  | NW_004516020.1 | scaffold590 | 14109                   | AA                              | CC                 | CC               | INTERGENIC                    |                    |                                             |
| SNP_78597_A_16816  | NW_004516020.1 | scaffold590 | 16816                   | AA                              | CC                 | CC               | URR                           | 101503377          | Golgi SNAP receptor complex member 1-1-like |
| SNP_78598_A_16887  | NW_004516020.1 | scaffold590 | 16887                   | CC                              | AA                 | AA               | URR                           | 101503377          | Golgi SNAP receptor complex member 1-1-like |
| SNP_78599_A_19016  | NW_004516020.1 | scaffold590 | 19016                   | TT                              | CC                 | CC               | DRR                           | 101505850          | aquaporin NIP6-1-like                       |
| SNP_78600_A_19173  | NW_004516020.1 | scaffold590 | 19173                   | TT                              | CC                 | CC               | DRR                           | 101505850          | aquaporin NIP6-1-like                       |
| SNP_78602_A_19347  | NW_004516020.1 | scaffold590 | 19347                   | TT                              | GG                 | GG               | INTERGENIC                    |                    |                                             |
| SNP_78603_A_19399  | NW_004516020.1 | scaffold590 | 19399                   | GG                              | AA                 | AA               | INTERGENIC                    |                    |                                             |

| SNPs IDs           | Chromosome IDs | Chromosomes | Physical positions (bp) | CDC Frontier (Reference genome) | (Pusa 1103 & HPNB) | (ILWC 46 & LPNB) | Sequence Components of genome | Gene accession IDs | Putative functions           |
|--------------------|----------------|-------------|-------------------------|---------------------------------|--------------------|------------------|-------------------------------|--------------------|------------------------------|
| SNP_78604_A_19440  | NW_004516020.1 | scaffold590 | 19440                   | TT                              | CC                 | CC               | INTERGENIC                    |                    |                              |
| SNP_78605_A_19443  | NW_004516020.1 | scaffold590 | 19443                   | AA                              | CC                 | CC               | INTERGENIC                    |                    |                              |
| SNP_78607_A_19480  | NW_004516020.1 | scaffold590 | 19480                   | AA                              | TT                 | TT               | INTERGENIC                    |                    |                              |
| SNP_78608_A_19552  | NW_004516020.1 | scaffold590 | 19552                   | AA                              | GG                 | GG               | INTERGENIC                    |                    |                              |
| SNP_78609_A_19619  | NW_004516020.1 | scaffold590 | 19619                   | AA                              | CC                 | CC               | INTERGENIC                    |                    |                              |
| SNP_78610_A_47021  | NW_004516020.1 | scaffold590 | 47021                   | TT                              | CC                 | CC               | INTERGENIC                    |                    |                              |
| SNP_78612_A_103211 | NW_004516020.1 | scaffold590 | 103211                  | CC                              | TT                 | TT               | INTERGENIC                    |                    |                              |
| SNP_78613_A_106353 | NW_004516020.1 | scaffold590 | 106353                  | GG                              | AA                 | AA               | INTERGENIC                    |                    |                              |
| SNP_78614_A_114957 | NW_004516020.1 | scaffold590 | 114957                  | AA                              | CC                 | CC               | INTERGENIC                    |                    |                              |
| SNP_78615_A_115913 | NW_004516020.1 | scaffold590 | 115913                  | TT                              | CC                 | CC               | DRR                           | 101506172          | uncharacterized LOC101506172 |
| SNP_78616_A_115960 | NW_004516020.1 | scaffold590 | 115960                  | TT                              | CC                 | CC               | DRR                           | 101506172          | uncharacterized LOC101506172 |
| SNP_78617_A_115961 | NW_004516020.1 | scaffold590 | 115961                  | GG                              | AA                 | AA               | DRR                           | 101506172          | uncharacterized LOC101506172 |
| SNP_78618_A_116247 | NW_004516020.1 | scaffold590 | 116247                  | TT                              | CC                 | CC               | DRR                           | 101506172          | uncharacterized LOC101506172 |
| SNP_78619_A_146201 | NW_004516020.1 | scaffold590 | 146201                  | AA                              | GG                 | GG               | INTERGENIC                    |                    |                              |
| SNP_78620_A_146205 | NW_004516020.1 | scaffold590 | 146205                  | GG                              | AA                 | AA               | INTERGENIC                    |                    |                              |
| SNP_78621_A_146207 | NW_004516020.1 | scaffold590 | 146207                  | GG                              | AA                 | AA               | INTERGENIC                    |                    |                              |
| SNP_78622_A_146208 | NW_004516020.1 | scaffold590 | 146208                  | TT                              | CC                 | CC               | INTERGENIC                    |                    |                              |
| SNP_78623_A_146211 | NW_004516020.1 | scaffold590 | 146211                  | CC                              | TT                 | TT               | INTERGENIC                    |                    |                              |
| SNP_78624_A_175763 | NW_004516020.1 | scaffold590 | 175763                  | TT                              | CC                 | CC               | INTERGENIC                    |                    |                              |
| SNP_78625_A_203324 | NW_004516020.1 | scaffold590 | 203324                  | AA                              | TT                 | TT               | INTERGENIC                    |                    |                              |
| SNP_78626_A_220754 | NW_004516020.1 | scaffold590 | 220754                  | TT                              | CC                 | CC               | INTERGENIC                    |                    |                              |
| SNP_78627_A_220760 | NW_004516020.1 | scaffold590 | 220760                  | TT                              | CC                 | CC               | INTERGENIC                    |                    |                              |

| SNPs IDs           | Chromosome IDs | Chromosomes | Physical positions (bp) | CDC Frontier (Reference genome) | (Pusa 1103 & HPNB) | (ILWC 46 & LPNB) | Sequence genome | Components of | Gene accession IDs | Putative functions |
|--------------------|----------------|-------------|-------------------------|---------------------------------|--------------------|------------------|-----------------|---------------|--------------------|--------------------|
| SNP_78628_A_220809 | NW_004516020.1 | scaffold590 | 220809                  | AA                              | GG                 | GG               | INTERGENIC      |               |                    |                    |
| SNP_78629_A_221001 | NW_004516020.1 | scaffold590 | 221001                  | CC                              | TT                 | TT               | INTERGENIC      |               |                    |                    |
| SNP_78630_A_221007 | NW_004516020.1 | scaffold590 | 221007                  | AA                              | GG                 | GG               | INTERGENIC      |               |                    |                    |
| SNP_78631_A_221011 | NW_004516020.1 | scaffold590 | 221011                  | TT                              | CC                 | CC               | INTERGENIC      |               |                    |                    |
| SNP_78632_A_222058 | NW_004516020.1 | scaffold590 | 222058                  | TT                              | CC                 | CC               | INTERGENIC      |               |                    |                    |
| SNP_78633_A_222064 | NW_004516020.1 | scaffold590 | 222064                  | GG                              | AA                 | AA               | INTERGENIC      |               |                    |                    |
| SNP_78634_A_222220 | NW_004516020.1 | scaffold590 | 222220                  | TT                              | CC                 | CC               | INTERGENIC      |               |                    |                    |
| SNP_78635_A_222265 | NW_004516020.1 | scaffold590 | 222265                  | CC                              | TT                 | TT               | INTERGENIC      |               |                    |                    |
| SNP_78636_A_222418 | NW_004516020.1 | scaffold590 | 222418                  | CC                              | TT                 | TT               | INTERGENIC      |               |                    |                    |
| SNP_78637_A_222421 | NW_004516020.1 | scaffold590 | 222421                  | TT                              | CC                 | CC               | INTERGENIC      |               |                    |                    |
| SNP_78638_A_222439 | NW_004516020.1 | scaffold590 | 222439                  | AA                              | TT                 | TT               | INTERGENIC      |               |                    |                    |
| SNP_78639_A_222451 | NW_004516020.1 | scaffold590 | 222451                  | AA                              | TT                 | TT               | INTERGENIC      |               |                    |                    |
| SNP_78640_A_222457 | NW_004516020.1 | scaffold590 | 222457                  | AA                              | GG                 | GG               | INTERGENIC      |               |                    |                    |
| SNP_78641_A_222474 | NW_004516020.1 | scaffold590 | 222474                  | CC                              | TT                 | TT               | INTERGENIC      |               |                    |                    |
| SNP_78642_A_222514 | NW_004516020.1 | scaffold590 | 222514                  | CC                              | TT                 | TT               | INTERGENIC      |               |                    |                    |
| SNP_78643_A_222516 | NW_004516020.1 | scaffold590 | 222516                  | AA                              | TT                 | TT               | INTERGENIC      |               |                    |                    |
| SNP_78644_A_222532 | NW_004516020.1 | scaffold590 | 222532                  | TT                              | AA                 | AA               | INTERGENIC      |               |                    |                    |
| SNP_78645_A_222567 | NW_004516020.1 | scaffold590 | 222567                  | AA                              | TT                 | TT               | INTERGENIC      |               |                    |                    |
| SNP_78646_A_222681 | NW_004516020.1 | scaffold590 | 222681                  | TT                              | GG                 | GG               | INTERGENIC      |               |                    |                    |
| SNP_78647_A_231455 | NW_004516020.1 | scaffold590 | 231455                  | GG                              | AA                 | AA               | INTERGENIC      |               |                    |                    |
| SNP_78648_A_235489 | NW_004516020.1 | scaffold590 | 235489                  | GG                              | AA                 | AA               | INTERGENIC      |               |                    |                    |
| SNP_78649_A_235575 | NW_004516020.1 | scaffold590 | 235575                  | GG                              | AA                 | AA               | INTERGENIC      |               |                    |                    |

| SNPs IDs           | Chromosome IDs | Chromosomes | Physical positions (bp) | CDC Frontier (Reference genome) | (Pusa 1103 & HPNB) | (ILWC 46 & LPNB) | Sequence genome | Components of | Gene accession IDs | Putative functions |
|--------------------|----------------|-------------|-------------------------|---------------------------------|--------------------|------------------|-----------------|---------------|--------------------|--------------------|
| SNP_78650_A_266484 | NW_004516020.1 | scaffold590 | 266484                  | CC                              | TT                 | TT               | INTERGENIC      |               |                    |                    |
| SNP_78651_A_266512 | NW_004516020.1 | scaffold590 | 266512                  | AA                              | TT                 | TT               | INTERGENIC      |               |                    |                    |
| SNP_78652_A_295295 | NW_004516020.1 | scaffold590 | 295295                  | GG                              | TT                 | TT               | INTERGENIC      |               |                    |                    |
| SNP_78653_A_8148   | NW_004516022.1 | scaffold592 | 8148                    | TT                              | CC                 | CC               | INTERGENIC      |               |                    |                    |
| SNP_78654_A_8174   | NW_004516022.1 | scaffold592 | 8174                    | AA                              | GG                 | GG               | INTERGENIC      |               |                    |                    |
| SNP_78655_A_8245   | NW_004516022.1 | scaffold592 | 8245                    | CC                              | GG                 | GG               | INTERGENIC      |               |                    |                    |
| SNP_78656_A_8425   | NW_004516022.1 | scaffold592 | 8425                    | GG                              | AA                 | AA               | INTERGENIC      |               |                    |                    |
| SNP_78657_A_8548   | NW_004516022.1 | scaffold592 | 8548                    | CC                              | GG                 | GG               | INTERGENIC      |               |                    |                    |
| SNP_78658_A_8575   | NW_004516022.1 | scaffold592 | 8575                    | TT                              | CC                 | CC               | INTERGENIC      |               |                    |                    |
| SNP_78659_A_8578   | NW_004516022.1 | scaffold592 | 8578                    | TT                              | CC                 | CC               | INTERGENIC      |               |                    |                    |
| SNP_78660_A_8707   | NW_004516022.1 | scaffold592 | 8707                    | AA                              | TT                 | TT               | INTERGENIC      |               |                    |                    |
| SNP_78661_A_8816   | NW_004516022.1 | scaffold592 | 8816                    | CC                              | TT                 | TT               | INTERGENIC      |               |                    |                    |
| SNP_78662_A_8891   | NW_004516022.1 | scaffold592 | 8891                    | CC                              | TT                 | TT               | INTERGENIC      |               |                    |                    |
| SNP_78663_A_8964   | NW_004516022.1 | scaffold592 | 8964                    | GG                              | TT                 | TT               | INTERGENIC      |               |                    |                    |
| SNP_78664_A_10312  | NW_004516022.1 | scaffold592 | 10312                   | AA                              | TT                 | TT               | INTERGENIC      |               |                    |                    |
| SNP_78665_A_10383  | NW_004516022.1 | scaffold592 | 10383                   | AA                              | CC                 | CC               | INTERGENIC      |               |                    |                    |
| SNP_78666_A_10384  | NW_004516022.1 | scaffold592 | 10384                   | CC                              | AA                 | AA               | INTERGENIC      |               |                    |                    |
| SNP_78667_A_10683  | NW_004516022.1 | scaffold592 | 10683                   | TT                              | GG                 | GG               | INTERGENIC      |               |                    |                    |
| SNP_78668_A_16012  | NW_004516022.1 | scaffold592 | 16012                   | CC                              | GG                 | GG               | INTERGENIC      |               |                    |                    |
| SNP_78670_A_16940  | NW_004516022.1 | scaffold592 | 16940                   | CC                              | TT                 | TT               | INTERGENIC      |               |                    |                    |
| SNP_78671_A_16964  | NW_004516022.1 | scaffold592 | 16964                   | GG                              | TT                 | TT               | INTERGENIC      |               |                    |                    |
| SNP_78672_A_17939  | NW_004516022.1 | scaffold592 | 17939                   | TT                              | CC                 | CC               | INTERGENIC      |               |                    |                    |

| SNPs IDs          | Chromosome IDs | Chromosomes | Physical positions (bp) | CDC Frontier (Reference genome) | (Pusa 1103 & HPNB) | (ILWC 46 & LPNB) | Sequence genome | Components of | Gene accession IDs | Putative functions |
|-------------------|----------------|-------------|-------------------------|---------------------------------|--------------------|------------------|-----------------|---------------|--------------------|--------------------|
| SNP_78673_A_18212 | NW_004516022.1 | scaffold592 | 18212                   | GG                              | AA                 | AA               | INTERGENIC      |               |                    |                    |
| SNP_78675_A_20295 | NW_004516022.1 | scaffold592 | 20295                   | CC                              | AA                 | AA               | INTERGENIC      |               |                    |                    |
| SNP_78676_A_20768 | NW_004516022.1 | scaffold592 | 20768                   | GG                              | AA                 | AA               | INTERGENIC      |               |                    |                    |
| SNP_78677_A_20780 | NW_004516022.1 | scaffold592 | 20780                   | AA                              | TT                 | TT               | INTERGENIC      |               |                    |                    |
| SNP_78678_A_20790 | NW_004516022.1 | scaffold592 | 20790                   | TT                              | CC                 | CC               | INTERGENIC      |               |                    |                    |
| SNP_78679_A_20795 | NW_004516022.1 | scaffold592 | 20795                   | TT                              | AA                 | AA               | INTERGENIC      |               |                    |                    |
| SNP_78680_A_20796 | NW_004516022.1 | scaffold592 | 20796                   | GG                              | CC                 | CC               | INTERGENIC      |               |                    |                    |
| SNP_78682_A_21636 | NW_004516022.1 | scaffold592 | 21636                   | GG                              | CC                 | CC               | INTERGENIC      |               |                    |                    |
| SNP_78683_A_21698 | NW_004516022.1 | scaffold592 | 21698                   | GG                              | AA                 | AA               | INTERGENIC      |               |                    |                    |
| SNP_78684_A_21705 | NW_004516022.1 | scaffold592 | 21705                   | TT                              | GG                 | GG               | INTERGENIC      |               |                    |                    |
| SNP_78685_A_22788 | NW_004516022.1 | scaffold592 | 22788                   | TT                              | AA                 | AA               | INTERGENIC      |               |                    |                    |
| SNP_78686_A_23086 | NW_004516022.1 | scaffold592 | 23086                   | CC                              | TT                 | TT               | INTERGENIC      |               |                    |                    |
| SNP_78687_A_23091 | NW_004516022.1 | scaffold592 | 23091                   | GG                              | TT                 | TT               | INTERGENIC      |               |                    |                    |
| SNP_78688_A_38443 | NW_004516022.1 | scaffold592 | 38443                   | AA                              | GG                 | GG               | INTERGENIC      |               |                    |                    |
| SNP_78689_A_42427 | NW_004516022.1 | scaffold592 | 42427                   | CC                              | TT                 | TT               | INTERGENIC      |               |                    |                    |
| SNP_78691_A_10609 | NW_004516023.1 | scaffold593 | 10609                   | CC                              | TT                 | TT               | INTERGENIC      |               |                    |                    |
| SNP_78692_A_10638 | NW_004516023.1 | scaffold593 | 10638                   | CC                              | TT                 | TT               | INTERGENIC      |               |                    |                    |
| SNP_78693_A_10641 | NW_004516023.1 | scaffold593 | 10641                   | GG                              | AA                 | AA               | INTERGENIC      |               |                    |                    |
| SNP_78694_A_20041 | NW_004516023.1 | scaffold593 | 20041                   | GG                              | AA                 | AA               | INTERGENIC      |               |                    |                    |
| SNP_78695_A_26961 | NW_004516023.1 | scaffold593 | 26961                   | CC                              | TT                 | TT               | INTERGENIC      |               |                    |                    |
| SNP_78696_A_31677 | NW_004516023.1 | scaffold593 | 31677                   | GG                              | AA                 | AA               | INTERGENIC      |               |                    |                    |
| SNP_78697_A_45027 | NW_004516023.1 | scaffold593 | 45027                   | AA                              | TT                 | TT               | INTERGENIC      |               |                    |                    |



| SNPs IDs           | Chromosome IDs | Chromosomes | Physical positions (bp) | CDC Frontier (Reference genome) | (Pusa 1103 & HPNB) | (ILWC 46 & LPNB) | Sequence genome | Components of | Gene accession IDs | Putative functions |
|--------------------|----------------|-------------|-------------------------|---------------------------------|--------------------|------------------|-----------------|---------------|--------------------|--------------------|
| SNP_78698_A_49932  | NW_004516023.1 | scaffold593 | 49932                   | CC                              | AA                 | AA               | INTERGENIC      |               |                    |                    |
| SNP_78699_A_60203  | NW_004516023.1 | scaffold593 | 60203                   | GG                              | AA                 | AA               | INTERGENIC      |               |                    |                    |
| SNP_78701_A_134749 | NW_004516023.1 | scaffold593 | 134749                  | AA                              | GG                 | GG               | INTERGENIC      |               |                    |                    |
| SNP_78703_A_182163 | NW_004516023.1 | scaffold593 | 182163                  | TT                              | CC                 | CC               | INTERGENIC      |               |                    |                    |
| SNP_78704_A_186391 | NW_004516023.1 | scaffold593 | 186391                  | GG                              | AA                 | AA               | INTERGENIC      |               |                    |                    |
| SNP_78705_A_187944 | NW_004516023.1 | scaffold593 | 187944                  | TT                              | CC                 | CC               | INTERGENIC      |               |                    |                    |
| SNP_78707_A_192585 | NW_004516023.1 | scaffold593 | 192585                  | AA                              | GG                 | GG               | INTERGENIC      |               |                    |                    |
| SNP_78708_A_194935 | NW_004516023.1 | scaffold593 | 194935                  | AA                              | GG                 | GG               | INTERGENIC      |               |                    |                    |
| SNP_78709_A_194946 | NW_004516023.1 | scaffold593 | 194946                  | CC                              | TT                 | TT               | INTERGENIC      |               |                    |                    |
| SNP_78710_A_195246 | NW_004516023.1 | scaffold593 | 195246                  | GG                              | AA                 | AA               | INTERGENIC      |               |                    |                    |
| SNP_78711_A_195257 | NW_004516023.1 | scaffold593 | 195257                  | GG                              | AA                 | AA               | INTERGENIC      |               |                    |                    |
| SNP_78712_A_195258 | NW_004516023.1 | scaffold593 | 195258                  | CC                              | TT                 | TT               | INTERGENIC      |               |                    |                    |
| SNP_78713_A_208876 | NW_004516023.1 | scaffold593 | 208876                  | TT                              | GG                 | GG               | INTERGENIC      |               |                    |                    |
| SNP_78714_A_208927 | NW_004516023.1 | scaffold593 | 208927                  | TT                              | CC                 | CC               | INTERGENIC      |               |                    |                    |
| SNP_78715_A_208960 | NW_004516023.1 | scaffold593 | 208960                  | CC                              | TT                 | TT               | INTERGENIC      |               |                    |                    |
| SNP_78716_A_208980 | NW_004516023.1 | scaffold593 | 208980                  | GG                              | CC                 | CC               | INTERGENIC      |               |                    |                    |
| SNP_78717_A_209018 | NW_004516023.1 | scaffold593 | 209018                  | AA                              | TT                 | TT               | INTERGENIC      |               |                    |                    |
| SNP_78718_A_209024 | NW_004516023.1 | scaffold593 | 209024                  | TT                              | CC                 | CC               | INTERGENIC      |               |                    |                    |
| SNP_78719_A_209043 | NW_004516023.1 | scaffold593 | 209043                  | TT                              | CC                 | CC               | INTERGENIC      |               |                    |                    |
| SNP_78720_A_209056 | NW_004516023.1 | scaffold593 | 209056                  | CC                              | AA                 | AA               | INTERGENIC      |               |                    |                    |
| SNP_78721_A_209065 | NW_004516023.1 | scaffold593 | 209065                  | CC                              | AA                 | AA               | INTERGENIC      |               |                    |                    |
| SNP_78722_A_209071 | NW_004516023.1 | scaffold593 | 209071                  | CC                              | AA                 | AA               | INTERGENIC      |               |                    |                    |

| SNPs IDs           | Chromosome IDs | Chromosomes | Physical positions (bp) | CDC Frontier genome (Reference genome) | (Pusa 1103 & HPNB) | (ILWC 46 & LPNB) | Sequence Components of genome | Gene accession IDs | Putative functions                   |
|--------------------|----------------|-------------|-------------------------|----------------------------------------|--------------------|------------------|-------------------------------|--------------------|--------------------------------------|
| SNP_78723_A_209093 | NW_004516023.1 | scaffold593 | 209093                  | GG                                     | AA                 | AA               | INTERGENIC                    |                    |                                      |
| SNP_78724_A_209096 | NW_004516023.1 | scaffold593 | 209096                  | AA                                     | GG                 | GG               | INTERGENIC                    |                    |                                      |
| SNP_78725_A_209100 | NW_004516023.1 | scaffold593 | 209100                  | TT                                     | CC                 | CC               | INTERGENIC                    |                    |                                      |
| SNP_78726_A_209102 | NW_004516023.1 | scaffold593 | 209102                  | GG                                     | AA                 | AA               | INTERGENIC                    |                    |                                      |
| SNP_78727_A_209121 | NW_004516023.1 | scaffold593 | 209121                  | CC                                     | AA                 | AA               | INTERGENIC                    |                    |                                      |
| SNP_78728_A_209211 | NW_004516023.1 | scaffold593 | 209211                  | CC                                     | TT                 | TT               | INTERGENIC                    |                    |                                      |
| SNP_78729_A_209326 | NW_004516023.1 | scaffold593 | 209326                  | AA                                     | TT                 | TT               | INTERGENIC                    |                    |                                      |
| SNP_78730_A_209366 | NW_004516023.1 | scaffold593 | 209366                  | GG                                     | AA                 | AA               | DRR                           | 101508436          | probable polygalacturonase At3g15720 |
| SNP_78731_A_209368 | NW_004516023.1 | scaffold593 | 209368                  | AA                                     | GG                 | GG               | DRR                           | 101508436          | probable polygalacturonase At3g15720 |
| SNP_78732_A_209463 | NW_004516023.1 | scaffold593 | 209463                  | GG                                     | AA                 | AA               | DRR                           | 101508436          | probable polygalacturonase At3g15720 |
| SNP_78734_A_209483 | NW_004516023.1 | scaffold593 | 209483                  | CC                                     | TT                 | TT               | DRR                           | 101508436          | probable polygalacturonase At3g15720 |
| SNP_78735_A_209509 | NW_004516023.1 | scaffold593 | 209509                  | CC                                     | AA                 | AA               | DRR                           | 101508436          | probable polygalacturonase At3g15720 |
| SNP_78736_A_209513 | NW_004516023.1 | scaffold593 | 209513                  | TT                                     | GG                 | GG               | DRR                           | 101508436          | probable polygalacturonase At3g15720 |
| SNP_78737_A_209551 | NW_004516023.1 | scaffold593 | 209551                  | AA                                     | TT                 | TT               | DRR                           | 101508436          | probable polygalacturonase At3g15720 |
| SNP_78738_A_209608 | NW_004516023.1 | scaffold593 | 209608                  | GG                                     | AA                 | AA               | DRR                           | 101508436          | probable polygalacturonase At3g15720 |
| SNP_78739_A_209633 | NW_004516023.1 | scaffold593 | 209633                  | CC                                     | AA                 | AA               | DRR                           | 101508436          | probable polygalacturonase At3g15720 |
| SNP_78740_A_209661 | NW_004516023.1 | scaffold593 | 209661                  | TT                                     | CC                 | CC               | DRR                           | 101508436          | probable polygalacturonase At3g15720 |
| SNP_78742_A_209718 | NW_004516023.1 | scaffold593 | 209718                  | TT                                     | CC                 | CC               | DRR                           | 101508436          | probable polygalacturonase At3g15720 |
| SNP_78743_A_209735 | NW_004516023.1 | scaffold593 | 209735                  | AA                                     | CC                 | CC               | DRR                           | 101508436          | probable polygalacturonase At3g15720 |
| SNP_78744_A_209927 | NW_004516023.1 | scaffold593 | 209927                  | GG                                     | AA                 | AA               | DRR                           | 101508436          | probable polygalacturonase At3g15720 |
| SNP_78745_A_209934 | NW_004516023.1 | scaffold593 | 209934                  | AA                                     | TT                 | TT               | DRR                           | 101508436          | probable polygalacturonase At3g15720 |
| SNP_78746_A_209936 | NW_004516023.1 | scaffold593 | 209936                  | GG                                     | AA                 | AA               | DRR                           | 101508436          | probable polygalacturonase At3g15720 |

| SNPs IDs           | Chromosome IDs | Chromosomes | Physical positions (bp) | CDC Frontier (Reference genome) | (Pusa 1103 & HPNB) | (ILWC 46 & LPNB) | Sequence Components of genome | Gene accession IDs | Putative functions                   |
|--------------------|----------------|-------------|-------------------------|---------------------------------|--------------------|------------------|-------------------------------|--------------------|--------------------------------------|
| SNP_78747_A_209974 | NW_004516023.1 | scaffold593 | 209974                  | GG                              | AA                 | AA               | DRR                           | 101508436          | probable polygalacturonase At3g15720 |
| SNP_78748_A_210112 | NW_004516023.1 | scaffold593 | 210112                  | AA                              | GG                 | GG               | DRR                           | 101508436          | probable polygalacturonase At3g15720 |
| SNP_78749_A_210127 | NW_004516023.1 | scaffold593 | 210127                  | CC                              | TT                 | TT               | DRR                           | 101508436          | probable polygalacturonase At3g15720 |
| SNP_78750_A_210149 | NW_004516023.1 | scaffold593 | 210149                  | AA                              | GG                 | GG               | DRR                           | 101508436          | probable polygalacturonase At3g15720 |
| SNP_78751_A_210156 | NW_004516023.1 | scaffold593 | 210156                  | CC                              | TT                 | TT               | DRR                           | 101508436          | probable polygalacturonase At3g15720 |
| SNP_78752_A_210192 | NW_004516023.1 | scaffold593 | 210192                  | TT                              | AA                 | AA               | DRR                           | 101508436          | probable polygalacturonase At3g15720 |
| SNP_78753_A_210203 | NW_004516023.1 | scaffold593 | 210203                  | CC                              | AA                 | AA               | DRR                           | 101508436          | probable polygalacturonase At3g15720 |
| SNP_78754_A_210217 | NW_004516023.1 | scaffold593 | 210217                  | CC                              | AA                 | AA               | DRR                           | 101508436          | probable polygalacturonase At3g15720 |
| SNP_78755_A_210235 | NW_004516023.1 | scaffold593 | 210235                  | AA                              | GG                 | GG               | DRR                           | 101508436          | probable polygalacturonase At3g15720 |
| SNP_78756_A_210290 | NW_004516023.1 | scaffold593 | 210290                  | GG                              | CC                 | CC               | DRR                           | 101508436          | probable polygalacturonase At3g15720 |
| SNP_78757_A_210315 | NW_004516023.1 | scaffold593 | 210315                  | GG                              | CC                 | CC               | DRR                           | 101508436          | probable polygalacturonase At3g15720 |
| SNP_78758_A_210347 | NW_004516023.1 | scaffold593 | 210347                  | AA                              | GG                 | GG               | DRR                           | 101508436          | probable polygalacturonase At3g15720 |
| SNP_78759_A_210642 | NW_004516023.1 | scaffold593 | 210642                  | AA                              | CC                 | CC               | INTRON                        | 101508436          | probable polygalacturonase At3g15720 |
| SNP_78760_A_211606 | NW_004516023.1 | scaffold593 | 211606                  | TT                              | AA                 | AA               | URR                           | 101508436          | probable polygalacturonase At3g15720 |
| SNP_78761_A_211609 | NW_004516023.1 | scaffold593 | 211609                  | CC                              | TT                 | TT               | URR                           | 101508436          | probable polygalacturonase At3g15720 |
| SNP_78763_A_64     | NW_004516027.1 | scaffold597 | 64                      | AA                              | GG                 | GG               | INTERGENIC                    |                    |                                      |
| SNP_78764_A_6921   | NW_004516028.1 | scaffold598 | 6921                    | TT                              | AA                 | AA               | INTERGENIC                    |                    |                                      |
| SNP_78765_A_7384   | NW_004516028.1 | scaffold598 | 7384                    | GG                              | TT                 | TT               | INTERGENIC                    |                    |                                      |
| SNP_78766_A_21761  | NW_004516028.1 | scaffold598 | 21761                   | CC                              | TT                 | TT               | INTERGENIC                    |                    |                                      |
| SNP_78767_A_21895  | NW_004516028.1 | scaffold598 | 21895                   | AA                              | TT                 | TT               | INTERGENIC                    |                    |                                      |
| SNP_78768_A_21968  | NW_004516028.1 | scaffold598 | 21968                   | GG                              | TT                 | TT               | INTERGENIC                    |                    |                                      |
| SNP_78769_A_21991  | NW_004516028.1 | scaffold598 | 21991                   | CC                              | TT                 | TT               | INTERGENIC                    |                    |                                      |

| SNPs IDs           | Chromosome IDs | Chromosomes | Physical positions (bp) | CDC Frontier (Reference genome) | (Pusa 1103 & HPNB) | (ILWC 46 & LPNB) | Sequence genome | Components of | Gene accession IDs          | Putative functions |
|--------------------|----------------|-------------|-------------------------|---------------------------------|--------------------|------------------|-----------------|---------------|-----------------------------|--------------------|
| SNP_78770_A_21993  | NW_004516028.1 | scaffold598 | 21993                   | TT                              | AA                 | AA               | INTERGENIC      |               |                             |                    |
| SNP_78771_A_22032  | NW_004516028.1 | scaffold598 | 22032                   | CC                              | TT                 | TT               | INTERGENIC      |               |                             |                    |
| SNP_78772_A_22039  | NW_004516028.1 | scaffold598 | 22039                   | AA                              | CC                 | CC               | INTERGENIC      |               |                             |                    |
| SNP_78773_A_22041  | NW_004516028.1 | scaffold598 | 22041                   | CC                              | AA                 | AA               | INTERGENIC      |               |                             |                    |
| SNP_78774_A_22045  | NW_004516028.1 | scaffold598 | 22045                   | AA                              | TT                 | TT               | INTERGENIC      |               |                             |                    |
| SNP_78775_A_22129  | NW_004516028.1 | scaffold598 | 22129                   | GG                              | TT                 | TT               | INTERGENIC      |               |                             |                    |
| SNP_78776_A_29943  | NW_004516028.1 | scaffold598 | 29943                   | GG                              | AA                 | AA               | INTERGENIC      |               |                             |                    |
| SNP_78777_A_37042  | NW_004516028.1 | scaffold598 | 37042                   | AA                              | GG                 | GG               | INTERGENIC      |               |                             |                    |
| SNP_78778_A_38202  | NW_004516028.1 | scaffold598 | 38202                   | GG                              | AA                 | AA               | INTERGENIC      |               |                             |                    |
| SNP_78779_A_46374  | NW_004516028.1 | scaffold598 | 46374                   | AA                              | GG                 | GG               | INTERGENIC      |               |                             |                    |
| SNP_78780_A_74060  | NW_004516028.1 | scaffold598 | 74060                   | AA                              | TT                 | TT               | INTERGENIC      |               |                             |                    |
| SNP_78781_A_84135  | NW_004516028.1 | scaffold598 | 84135                   | TT                              | AA                 | AA               | INTERGENIC      |               |                             |                    |
| SNP_78782_A_93357  | NW_004516028.1 | scaffold598 | 93357                   | GG                              | CC                 | CC               | INTERGENIC      |               |                             |                    |
| SNP_78783_A_125584 | NW_004516028.1 | scaffold598 | 125584                  | TT                              | CC                 | CC               | INTERGENIC      |               |                             |                    |
| SNP_78784_A_126025 | NW_004516028.1 | scaffold598 | 126025                  | CC                              | TT                 | TT               | INTERGENIC      |               |                             |                    |
| SNP_78785_A_126078 | NW_004516028.1 | scaffold598 | 126078                  | TT                              | CC                 | CC               | INTERGENIC      |               |                             |                    |
| SNP_78786_A_126090 | NW_004516028.1 | scaffold598 | 126090                  | AA                              | TT                 | TT               | INTERGENIC      |               |                             |                    |
| SNP_78787_A_126091 | NW_004516028.1 | scaffold598 | 126091                  | TT                              | AA                 | AA               | INTERGENIC      |               |                             |                    |
| SNP_78788_A_126104 | NW_004516028.1 | scaffold598 | 126104                  | CC                              | AA                 | AA               | INTERGENIC      |               |                             |                    |
| SNP_78791_A_131902 | NW_004516028.1 | scaffold598 | 131902                  | GG                              | CC                 | CC               | DRR             | 101509590     | triacylglycerol lipase SDP1 |                    |
| SNP_78792_A_155929 | NW_004516028.1 | scaffold598 | 155929                  | GG                              | AA                 | AA               | INTERGENIC      |               |                             |                    |
| SNP_78793_A_158574 | NW_004516028.1 | scaffold598 | 158574                  | AA                              | GG                 | GG               | INTERGENIC      |               |                             |                    |

| SNPs IDs           | Chromosome IDs | Chromosomes | Physical positions (bp) | CDC Frontier (Reference genome) | (Pusa 1103 & HPNB) | (ILWC 46 & LPNB) | Sequence Components of genome | Gene accession IDs | Putative functions               |
|--------------------|----------------|-------------|-------------------------|---------------------------------|--------------------|------------------|-------------------------------|--------------------|----------------------------------|
| SNP_78795_A_183575 | NW_004516028.1 | scaffold598 | 183575                  | GG                              | AA                 | AA               | INTERGENIC                    |                    |                                  |
| SNP_78796_A_188999 | NW_004516028.1 | scaffold598 | 188999                  | AA                              | GG                 | GG               | INTERGENIC                    |                    |                                  |
| SNP_78797_A_223649 | NW_004516028.1 | scaffold598 | 223649                  | TT                              | CC                 | CC               | INTERGENIC                    |                    |                                  |
| SNP_78798_A_231232 | NW_004516028.1 | scaffold598 | 231232                  | CC                              | TT                 | TT               | INTERGENIC                    |                    |                                  |
| SNP_78799_A_231246 | NW_004516028.1 | scaffold598 | 231246                  | AA                              | TT                 | TT               | INTERGENIC                    |                    |                                  |
| SNP_78800_A_231288 | NW_004516028.1 | scaffold598 | 231288                  | TT                              | CC                 | CC               | INTERGENIC                    |                    |                                  |
| SNP_78801_A_231380 | NW_004516028.1 | scaffold598 | 231380                  | AA                              | GG                 | GG               | INTERGENIC                    |                    |                                  |
| SNP_78802_A_231454 | NW_004516028.1 | scaffold598 | 231454                  | AA                              | CC                 | CC               | INTERGENIC                    |                    |                                  |
| SNP_78803_A_231473 | NW_004516028.1 | scaffold598 | 231473                  | TT                              | AA                 | AA               | INTERGENIC                    |                    |                                  |
| SNP_78804_A_232505 | NW_004516028.1 | scaffold598 | 232505                  | AA                              | TT                 | TT               | INTERGENIC                    |                    |                                  |
| SNP_78806_A_236900 | NW_004516028.1 | scaffold598 | 236900                  | AA                              | GG                 | GG               | INTERGENIC                    |                    |                                  |
| SNP_78807_A_245326 | NW_004516028.1 | scaffold598 | 245326                  | AA                              | TT                 | TT               | INTERGENIC                    |                    |                                  |
| SNP_78808_A_245415 | NW_004516028.1 | scaffold598 | 245415                  | TT                              | CC                 | CC               | INTERGENIC                    |                    |                                  |
| SNP_78809_A_271340 | NW_004516028.1 | scaffold598 | 271340                  | GG                              | AA                 | AA               | INTERGENIC                    |                    |                                  |
| SNP_78810_A_302579 | NW_004516028.1 | scaffold598 | 302579                  | AA                              | TT                 | TT               | URR                           | 101510237          | probable F-box protein At5g04010 |
| SNP_78811_A_303396 | NW_004516028.1 | scaffold598 | 303396                  | TT                              | CC                 | CC               | INTERGENIC                    |                    |                                  |
| SNP_78812_A_304295 | NW_004516028.1 | scaffold598 | 304295                  | GG                              | CC                 | CC               | INTERGENIC                    |                    |                                  |
| SNP_78814_A_315335 | NW_004516028.1 | scaffold598 | 315335                  | GG                              | CC                 | CC               | URR                           | 101510571          | RNA-binding protein 12-like      |
| SNP_78815_A_315355 | NW_004516028.1 | scaffold598 | 315355                  | AA                              | TT                 | TT               | URR                           | 101510571          | RNA-binding protein 12-like      |
| SNP_78816_A_315375 | NW_004516028.1 | scaffold598 | 315375                  | TT                              | GG                 | GG               | URR                           | 101510571          | RNA-binding protein 12-like      |
| SNP_78817_A_316004 | NW_004516028.1 | scaffold598 | 316004                  | CC                              | AA                 | AA               | DRR                           | 101514879          | uncharacterized LOC101514879     |
| SNP_78819_A_353169 | NW_004516028.1 | scaffold598 | 353169                  | CC                              | TT                 | TT               | INTERGENIC                    |                    |                                  |

| SNPs IDs           | Chromosome IDs | Chromosomes | Physical positions (bp) | CDC Frontier (Reference genome) | (Pusa 1103 & HPNB) | (ILWC 46 & LPNB) | Sequence Components of genome | Gene accession IDs | Putative functions           |
|--------------------|----------------|-------------|-------------------------|---------------------------------|--------------------|------------------|-------------------------------|--------------------|------------------------------|
| SNP_78820_A_356272 | NW_004516028.1 | scaffold598 | 356272                  | AA                              | CC                 | CC               | INTERGENIC                    |                    |                              |
| SNP_78821_A_364195 | NW_004516028.1 | scaffold598 | 364195                  | CC                              | TT                 | TT               | INTERGENIC                    |                    |                              |
| SNP_78822_A_368138 | NW_004516028.1 | scaffold598 | 368138                  | AA                              | GG                 | GG               | DRR                           | 101488279          | uncharacterized LOC101488279 |
| SNP_78823_A_368297 | NW_004516028.1 | scaffold598 | 368297                  | CC                              | AA                 | AA               | DRR                           | 101488279          | uncharacterized LOC101488279 |
| SNP_78824_A_368309 | NW_004516028.1 | scaffold598 | 368309                  | GG                              | AA                 | AA               | DRR                           | 101488279          | uncharacterized LOC101488279 |
| SNP_78825_A_368317 | NW_004516028.1 | scaffold598 | 368317                  | AA                              | CC                 | CC               | DRR                           | 101488279          | uncharacterized LOC101488279 |
| SNP_78827_A_392724 | NW_004516028.1 | scaffold598 | 392724                  | CC                              | AA                 | AA               | INTERGENIC                    |                    |                              |
| SNP_78828_A_401706 | NW_004516028.1 | scaffold598 | 401706                  | GG                              | AA                 | AA               | INTERGENIC                    |                    |                              |
| SNP_78829_A_402617 | NW_004516028.1 | scaffold598 | 402617                  | TT                              | CC                 | CC               | INTERGENIC                    |                    |                              |
| SNP_78830_A_402638 | NW_004516028.1 | scaffold598 | 402638                  | TT                              | CC                 | CC               | INTERGENIC                    |                    |                              |
| SNP_78831_A_405457 | NW_004516028.1 | scaffold598 | 405457                  | GG                              | CC                 | CC               | INTERGENIC                    |                    |                              |
| SNP_78832_A_434225 | NW_004516028.1 | scaffold598 | 434225                  | GG                              | AA                 | AA               | INTERGENIC                    |                    |                              |
| SNP_78833_A_445378 | NW_004516028.1 | scaffold598 | 445378                  | TT                              | CC                 | CC               | INTERGENIC                    |                    |                              |
| SNP_78834_A_446309 | NW_004516028.1 | scaffold598 | 446309                  | CC                              | TT                 | TT               | INTERGENIC                    |                    |                              |
| SNP_78835_A_449415 | NW_004516028.1 | scaffold598 | 449415                  | AA                              | TT                 | TT               | INTERGENIC                    |                    |                              |
| SNP_78836_A_455163 | NW_004516028.1 | scaffold598 | 455163                  | AA                              | TT                 | TT               | INTERGENIC                    |                    |                              |
| SNP_78837_A_455166 | NW_004516028.1 | scaffold598 | 455166                  | TT                              | AA                 | AA               | INTERGENIC                    |                    |                              |
| SNP_78838_A_455172 | NW_004516028.1 | scaffold598 | 455172                  | AA                              | GG                 | GG               | INTERGENIC                    |                    |                              |
| SNP_78839_A_455307 | NW_004516028.1 | scaffold598 | 455307                  | TT                              | AA                 | AA               | INTERGENIC                    |                    |                              |
| SNP_78840_A_455427 | NW_004516028.1 | scaffold598 | 455427                  | AA                              | TT                 | TT               | INTERGENIC                    |                    |                              |
| SNP_78841_A_455433 | NW_004516028.1 | scaffold598 | 455433                  | TT                              | CC                 | CC               | INTERGENIC                    |                    |                              |
| SNP_78842_A_455445 | NW_004516028.1 | scaffold598 | 455445                  | TT                              | CC                 | CC               | INTERGENIC                    |                    |                              |

| SNPs IDs           | Chromosome IDs | Chromosomes | Physical positions (bp) | CDC Frontier (Reference genome) | (Pusa 1103 & HPNB) | (ILWC 46 & LPNB) | Sequence genome | Components of | Gene accession IDs | Putative functions |
|--------------------|----------------|-------------|-------------------------|---------------------------------|--------------------|------------------|-----------------|---------------|--------------------|--------------------|
| SNP_78843_A_455457 | NW_004516028.1 | scaffold598 | 455457                  | CC                              | TT                 | TT               | INTERGENIC      |               |                    |                    |
| SNP_78844_A_455460 | NW_004516028.1 | scaffold598 | 455460                  | AA                              | CC                 | CC               | INTERGENIC      |               |                    |                    |
| SNP_78845_A_455511 | NW_004516028.1 | scaffold598 | 455511                  | AA                              | GG                 | GG               | INTERGENIC      |               |                    |                    |
| SNP_78846_A_456712 | NW_004516028.1 | scaffold598 | 456712                  | CC                              | TT                 | TT               | INTERGENIC      |               |                    |                    |
| SNP_78847_A_458027 | NW_004516028.1 | scaffold598 | 458027                  | GG                              | AA                 | AA               | INTERGENIC      |               |                    |                    |
| SNP_78848_A_459198 | NW_004516028.1 | scaffold598 | 459198                  | GG                              | AA                 | AA               | INTERGENIC      |               |                    |                    |
| SNP_78849_A_472624 | NW_004516028.1 | scaffold598 | 472624                  | GG                              | TT                 | TT               | INTERGENIC      |               |                    |                    |
| SNP_78850_A_476107 | NW_004516028.1 | scaffold598 | 476107                  | AA                              | TT                 | TT               | INTERGENIC      |               |                    |                    |
| SNP_78852_A_478492 | NW_004516028.1 | scaffold598 | 478492                  | TT                              | CC                 | CC               | INTERGENIC      |               |                    |                    |
| SNP_78853_A_484270 | NW_004516028.1 | scaffold598 | 484270                  | AA                              | GG                 | GG               | INTERGENIC      |               |                    |                    |
| SNP_78854_A_535715 | NW_004516028.1 | scaffold598 | 535715                  | TT                              | CC                 | CC               | INTERGENIC      |               |                    |                    |
| SNP_78855_A_549212 | NW_004516028.1 | scaffold598 | 549212                  | TT                              | CC                 | CC               | INTERGENIC      |               |                    |                    |
| SNP_78856_A_553177 | NW_004516028.1 | scaffold598 | 553177                  | CC                              | TT                 | TT               | INTERGENIC      |               |                    |                    |
| SNP_78857_A_561325 | NW_004516028.1 | scaffold598 | 561325                  | TT                              | AA                 | AA               | INTERGENIC      |               |                    |                    |
| SNP_78859_A_563965 | NW_004516028.1 | scaffold598 | 563965                  | TT                              | CC                 | CC               | INTERGENIC      |               |                    |                    |
| SNP_78860_A_565308 | NW_004516028.1 | scaffold598 | 565308                  | CC                              | TT                 | TT               | INTERGENIC      |               |                    |                    |
| SNP_78861_A_565340 | NW_004516028.1 | scaffold598 | 565340                  | GG                              | AA                 | AA               | INTERGENIC      |               |                    |                    |
| SNP_78862_A_568491 | NW_004516028.1 | scaffold598 | 568491                  | TT                              | CC                 | CC               | INTERGENIC      |               |                    |                    |
| SNP_78864_A_5441   | NW_004516029.1 | scaffold599 | 5441                    | CC                              | TT                 | TT               | INTERGENIC      |               |                    |                    |
| SNP_78865_A_6790   | NW_004516029.1 | scaffold599 | 6790                    | AA                              | TT                 | TT               | INTERGENIC      |               |                    |                    |
| SNP_78866_A_6874   | NW_004516029.1 | scaffold599 | 6874                    | AA                              | TT                 | TT               | INTERGENIC      |               |                    |                    |
| SNP_78867_A_6876   | NW_004516029.1 | scaffold599 | 6876                    | AA                              | GG                 | GG               | INTERGENIC      |               |                    |                    |

| SNPs IDs          | Chromosome IDs | Chromosomes | Physical positions (bp) | CDC Frontier (Reference genome) | (Pusa 1103 & HPNB) | (ILWC 46 & LPNB) | Sequence genome | Components of | Gene accession IDs | Putative functions |
|-------------------|----------------|-------------|-------------------------|---------------------------------|--------------------|------------------|-----------------|---------------|--------------------|--------------------|
| SNP_78868_A_7248  | NW_004516029.1 | scaffold599 | 7248                    | GG                              | TT                 | TT               | INTERGENIC      |               |                    |                    |
| SNP_78869_A_7260  | NW_004516029.1 | scaffold599 | 7260                    | GG                              | AA                 | AA               | INTERGENIC      |               |                    |                    |
| SNP_78870_A_7281  | NW_004516029.1 | scaffold599 | 7281                    | AA                              | TT                 | TT               | INTERGENIC      |               |                    |                    |
| SNP_78871_A_7971  | NW_004516029.1 | scaffold599 | 7971                    | CC                              | GG                 | GG               | INTERGENIC      |               |                    |                    |
| SNP_78872_A_9658  | NW_004516029.1 | scaffold599 | 9658                    | TT                              | CC                 | CC               | INTERGENIC      |               |                    |                    |
| SNP_78873_A_9749  | NW_004516029.1 | scaffold599 | 9749                    | CC                              | AA                 | AA               | INTERGENIC      |               |                    |                    |
| SNP_78874_A_9980  | NW_004516029.1 | scaffold599 | 9980                    | CC                              | AA                 | AA               | INTERGENIC      |               |                    |                    |
| SNP_78875_A_9983  | NW_004516029.1 | scaffold599 | 9983                    | CC                              | TT                 | TT               | INTERGENIC      |               |                    |                    |
| SNP_78876_A_10084 | NW_004516029.1 | scaffold599 | 10084                   | TT                              | AA                 | AA               | INTERGENIC      |               |                    |                    |
| SNP_78877_A_10097 | NW_004516029.1 | scaffold599 | 10097                   | GG                              | AA                 | AA               | INTERGENIC      |               |                    |                    |
| SNP_78878_A_10167 | NW_004516029.1 | scaffold599 | 10167                   | CC                              | GG                 | GG               | INTERGENIC      |               |                    |                    |
| SNP_78879_A_10170 | NW_004516029.1 | scaffold599 | 10170                   | GG                              | CC                 | CC               | INTERGENIC      |               |                    |                    |
| SNP_78880_A_10251 | NW_004516029.1 | scaffold599 | 10251                   | CC                              | TT                 | TT               | INTERGENIC      |               |                    |                    |
| SNP_78881_A_10262 | NW_004516029.1 | scaffold599 | 10262                   | TT                              | AA                 | AA               | INTERGENIC      |               |                    |                    |
| SNP_78882_A_10731 | NW_004516029.1 | scaffold599 | 10731                   | GG                              | AA                 | AA               | INTERGENIC      |               |                    |                    |
| SNP_78883_A_11125 | NW_004516029.1 | scaffold599 | 11125                   | GG                              | AA                 | AA               | INTERGENIC      |               |                    |                    |
| SNP_78884_A_12968 | NW_004516029.1 | scaffold599 | 12968                   | CC                              | TT                 | TT               | INTERGENIC      |               |                    |                    |
| SNP_78885_A_22365 | NW_004516029.1 | scaffold599 | 22365                   | TT                              | CC                 | CC               | INTERGENIC      |               |                    |                    |
| SNP_78886_A_23825 | NW_004516029.1 | scaffold599 | 23825                   | GG                              | AA                 | AA               | INTERGENIC      |               |                    |                    |
| SNP_78887_A_24656 | NW_004516029.1 | scaffold599 | 24656                   | CC                              | AA                 | AA               | INTERGENIC      |               |                    |                    |
| SNP_78888_A_26776 | NW_004516029.1 | scaffold599 | 26776                   | AA                              | CC                 | CC               | INTERGENIC      |               |                    |                    |
| SNP_78889_A_29021 | NW_004516029.1 | scaffold599 | 29021                   | CC                              | AA                 | AA               | INTERGENIC      |               |                    |                    |



| SNPs IDs          | Chromosome IDs | Chromosomes | Physical positions (bp) | CDC Frontier (Reference genome) | (Pusa 1103 & HPNB) | (ILWC 46 & LPNB) | Sequence genome | Components of | Gene accession IDs | Putative functions |
|-------------------|----------------|-------------|-------------------------|---------------------------------|--------------------|------------------|-----------------|---------------|--------------------|--------------------|
| SNP_78890_A_29267 | NW_004516029.1 | scaffold599 | 29267                   | CC                              | AA                 | AA               | INTERGENIC      |               |                    |                    |
| SNP_78891_A_39283 | NW_004516029.1 | scaffold599 | 39283                   | AA                              | GG                 | GG               | INTERGENIC      |               |                    |                    |
| SNP_78892_A_39395 | NW_004516029.1 | scaffold599 | 39395                   | AA                              | TT                 | TT               | INTERGENIC      |               |                    |                    |
| SNP_78893_A_39423 | NW_004516029.1 | scaffold599 | 39423                   | AA                              | TT                 | TT               | INTERGENIC      |               |                    |                    |
| SNP_78894_A_39424 | NW_004516029.1 | scaffold599 | 39424                   | TT                              | GG                 | GG               | INTERGENIC      |               |                    |                    |
| SNP_78895_A_39441 | NW_004516029.1 | scaffold599 | 39441                   | AA                              | GG                 | GG               | INTERGENIC      |               |                    |                    |
| SNP_78896_A_40452 | NW_004516029.1 | scaffold599 | 40452                   | AA                              | GG                 | GG               | INTERGENIC      |               |                    |                    |
| SNP_78897_A_48042 | NW_004516029.1 | scaffold599 | 48042                   | GG                              | CC                 | CC               | INTERGENIC      |               |                    |                    |
| SNP_78898_A_51081 | NW_004516029.1 | scaffold599 | 51081                   | TT                              | CC                 | CC               | INTERGENIC      |               |                    |                    |
| SNP_78899_A_51090 | NW_004516029.1 | scaffold599 | 51090                   | GG                              | AA                 | AA               | INTERGENIC      |               |                    |                    |
| SNP_78900_A_54441 | NW_004516029.1 | scaffold599 | 54441                   | TT                              | CC                 | CC               | INTERGENIC      |               |                    |                    |
| SNP_78902_A_5951  | NW_004516029.1 | scaffold599 | 5951                    | TT                              | CC                 | CC               | INTERGENIC      |               |                    |                    |
| SNP_78903_A_56239 | NW_004516029.1 | scaffold599 | 56239                   | CC                              | AA                 | AA               | INTERGENIC      |               |                    |                    |
| SNP_78904_A_56457 | NW_004516029.1 | scaffold599 | 56457                   | AA                              | GG                 | GG               | INTERGENIC      |               |                    |                    |
| SNP_78905_A_57011 | NW_004516029.1 | scaffold599 | 57011                   | GG                              | AA                 | AA               | INTERGENIC      |               |                    |                    |
| SNP_78906_A_57016 | NW_004516029.1 | scaffold599 | 57016                   | TT                              | CC                 | CC               | INTERGENIC      |               |                    |                    |
| SNP_78907_A_57025 | NW_004516029.1 | scaffold599 | 57025                   | AA                              | GG                 | GG               | INTERGENIC      |               |                    |                    |
| SNP_78908_A_57027 | NW_004516029.1 | scaffold599 | 57027                   | TT                              | CC                 | CC               | INTERGENIC      |               |                    |                    |
| SNP_78909_A_57069 | NW_004516029.1 | scaffold599 | 57069                   | AA                              | GG                 | GG               | INTERGENIC      |               |                    |                    |
| SNP_78910_A_57072 | NW_004516029.1 | scaffold599 | 57072                   | CC                              | GG                 | GG               | INTERGENIC      |               |                    |                    |
| SNP_78911_A_57155 | NW_004516029.1 | scaffold599 | 57155                   | CC                              | GG                 | GG               | INTERGENIC      |               |                    |                    |
| SNP_78913_A_57422 | NW_004516029.1 | scaffold599 | 57422                   | GG                              | AA                 | AA               | INTERGENIC      |               |                    |                    |

| SNPs IDs           | Chromosome IDs | Chromosomes | Physical positions (bp) | CDC Frontier (Reference genome) | (Pusa 1103 & HPNB) | (ILWC 46 & LPNB) | Sequence Components of genome | Gene accession IDs | Putative functions           |
|--------------------|----------------|-------------|-------------------------|---------------------------------|--------------------|------------------|-------------------------------|--------------------|------------------------------|
| SNP_78914_A_57584  | NW_004516029.1 | scaffold599 | 57584                   | CC                              | GG                 | GG               | INTERGENIC                    |                    |                              |
| SNP_78915_A_58380  | NW_004516029.1 | scaffold599 | 58380                   | GG                              | TT                 | TT               | INTERGENIC                    |                    |                              |
| SNP_78916_A_58576  | NW_004516029.1 | scaffold599 | 58576                   | GG                              | AA                 | AA               | INTERGENIC                    |                    |                              |
| SNP_78918_A_58902  | NW_004516029.1 | scaffold599 | 58902                   | TT                              | GG                 | GG               | INTERGENIC                    |                    |                              |
| SNP_78919_A_59085  | NW_004516029.1 | scaffold599 | 59085                   | TT                              | AA                 | AA               | INTERGENIC                    |                    |                              |
| SNP_78920_A_59544  | NW_004516029.1 | scaffold599 | 59544                   | CC                              | GG                 | GG               | INTERGENIC                    |                    |                              |
| SNP_78921_A_76243  | NW_004516029.1 | scaffold599 | 76243                   | GG                              | AA                 | AA               | INTERGENIC                    |                    |                              |
| SNP_78922_A_76553  | NW_004516029.1 | scaffold599 | 76553                   | CC                              | AA                 | AA               | INTERGENIC                    |                    |                              |
| SNP_78923_A_76783  | NW_004516029.1 | scaffold599 | 76783                   | AA                              | CC                 | CC               | INTERGENIC                    |                    |                              |
| SNP_78924_A_85889  | NW_004516029.1 | scaffold599 | 85889                   | TT                              | GG                 | GG               | INTERGENIC                    |                    |                              |
| SNP_78926_A_93010  | NW_004516029.1 | scaffold599 | 93010                   | GG                              | AA                 | AA               | INTERGENIC                    |                    |                              |
| SNP_78928_A_94367  | NW_004516029.1 | scaffold599 | 94367                   | AA                              | TT                 | TT               | INTERGENIC                    |                    |                              |
| SNP_78929_A_97103  | NW_004516029.1 | scaffold599 | 97103                   | CC                              | TT                 | TT               | INTERGENIC                    |                    |                              |
| SNP_78930_A_98867  | NW_004516029.1 | scaffold599 | 98867                   | CC                              | TT                 | TT               | INTERGENIC                    |                    |                              |
| SNP_78931_A_98905  | NW_004516029.1 | scaffold599 | 98905                   | GG                              | AA                 | AA               | INTERGENIC                    |                    |                              |
| SNP_78932_A_103023 | NW_004516029.1 | scaffold599 | 103023                  | AA                              | GG                 | GG               | INTRON                        | 101491432          | uncharacterized LOC101491432 |
| SNP_78933_A_103271 | NW_004516029.1 | scaffold599 | 103271                  | TT                              | CC                 | CC               | INTRON                        | 101491432          | uncharacterized LOC101491432 |
| SNP_78934_A_103885 | NW_004516029.1 | scaffold599 | 103885                  | CC                              | TT                 | TT               | NON_SYNONYMOUS_CODING         | 101491432          | uncharacterized LOC101491432 |
| SNP_78935_A_104003 | NW_004516029.1 | scaffold599 | 104003                  | CC                              | AA                 | AA               | NON_SYNONYMOUS_CODING         | 101491432          | uncharacterized LOC101491432 |
| SNP_78936_A_109985 | NW_004516029.1 | scaffold599 | 109985                  | GG                              | AA                 | AA               | INTERGENIC                    |                    |                              |
| SNP_78937_A_113200 | NW_004516029.1 | scaffold599 | 113200                  | AA                              | GG                 | GG               | INTERGENIC                    |                    |                              |
| SNP_78939_A_120579 | NW_004516029.1 | scaffold599 | 120579                  | AA                              | GG                 | GG               | INTERGENIC                    |                    |                              |

| SNPs IDs           | Chromosome IDs | Chromosomes | Physical positions (bp) | CDC Frontier (Reference genome) | (Pusa 1103 & HPNB) | (ILWC 46 & LPNB) | Sequence genome | Components of | Gene accession IDs | Putative functions                    |
|--------------------|----------------|-------------|-------------------------|---------------------------------|--------------------|------------------|-----------------|---------------|--------------------|---------------------------------------|
| SNP_78941_A_132152 | NW_004516029.1 | scaffold599 | 132152                  | AA                              | TT                 | TT               | DRR             |               | 101489926          | probable acetyltransferase NATA1-like |
| SNP_78942_A_132154 | NW_004516029.1 | scaffold599 | 132154                  | TT                              | GG                 | GG               | DRR             |               | 101489926          | probable acetyltransferase NATA1-like |
| SNP_78943_A_153175 | NW_004516029.1 | scaffold599 | 153175                  | AA                              | GG                 | GG               | INTERGENIC      |               |                    |                                       |
| SNP_78944_A_153212 | NW_004516029.1 | scaffold599 | 153212                  | TT                              | CC                 | CC               | INTERGENIC      |               |                    |                                       |
| SNP_78945_A_160269 | NW_004516029.1 | scaffold599 | 160269                  | TT                              | CC                 | CC               | INTERGENIC      |               |                    |                                       |
| SNP_78946_A_169637 | NW_004516029.1 | scaffold599 | 169637                  | GG                              | AA                 | AA               | INTERGENIC      |               |                    |                                       |
| SNP_78947_A_172384 | NW_004516029.1 | scaffold599 | 172384                  | TT                              | CC                 | CC               | INTERGENIC      |               |                    |                                       |
| SNP_78948_A_183021 | NW_004516029.1 | scaffold599 | 183021                  | GG                              | AA                 | AA               | INTERGENIC      |               |                    |                                       |
| SNP_78949_A_183024 | NW_004516029.1 | scaffold599 | 183024                  | GG                              | CC                 | CC               | INTERGENIC      |               |                    |                                       |
| SNP_78951_A_188113 | NW_004516029.1 | scaffold599 | 188113                  | AA                              | GG                 | GG               | INTERGENIC      |               |                    |                                       |
| SNP_78952_A_189765 | NW_004516029.1 | scaffold599 | 189765                  | GG                              | AA                 | AA               | INTERGENIC      |               |                    |                                       |
| SNP_78953_A_195344 | NW_004516029.1 | scaffold599 | 195344                  | TT                              | CC                 | CC               | INTERGENIC      |               |                    |                                       |
| SNP_78954_A_196382 | NW_004516029.1 | scaffold599 | 196382                  | CC                              | TT                 | TT               | INTERGENIC      |               |                    |                                       |
| SNP_78955_A_203057 | NW_004516029.1 | scaffold599 | 203057                  | AA                              | TT                 | TT               | INTERGENIC      |               |                    |                                       |
| SNP_78956_A_203062 | NW_004516029.1 | scaffold599 | 203062                  | TT                              | AA                 | AA               | INTERGENIC      |               |                    |                                       |
| SNP_78957_A_203063 | NW_004516029.1 | scaffold599 | 203063                  | CC                              | TT                 | TT               | INTERGENIC      |               |                    |                                       |
| SNP_78958_A_205142 | NW_004516029.1 | scaffold599 | 205142                  | GG                              | AA                 | AA               | INTERGENIC      |               |                    |                                       |
| SNP_78959_A_208871 | NW_004516029.1 | scaffold599 | 208871                  | GG                              | AA                 | AA               | INTERGENIC      |               |                    |                                       |
| SNP_78960_A_212029 | NW_004516029.1 | scaffold599 | 212029                  | GG                              | AA                 | AA               | INTERGENIC      |               |                    |                                       |
| SNP_78961_A_240964 | NW_004516029.1 | scaffold599 | 240964                  | GG                              | TT                 | TT               | INTERGENIC      |               |                    |                                       |
| SNP_78962_A_242472 | NW_004516029.1 | scaffold599 | 242472                  | CC                              | TT                 | TT               | DRR             |               | 101491745          | Unknown function                      |
| SNP_78963_A_242834 | NW_004516029.1 | scaffold599 | 242834                  | AA                              | GG                 | GG               | DRR             |               | 101491745          | Unknown function                      |

| SNPs IDs           | Chromosome IDs | Chromosomes | Physical positions (bp) | CDC Frontier (Reference genome) | (Pusa 1103 & HPNB) | (ILWC 46 & LPNB) | Sequence Components of genome | Gene accession IDs | Putative functions           |
|--------------------|----------------|-------------|-------------------------|---------------------------------|--------------------|------------------|-------------------------------|--------------------|------------------------------|
| SNP_78964_A_242955 | NW_004516029.1 | scaffold599 | 242955                  | AA                              | TT                 | TT               | DRR                           | 101491745          | Unknown function             |
| SNP_78965_A_247046 | NW_004516029.1 | scaffold599 | 247046                  | TT                              | CC                 | CC               | INTERGENIC                    |                    |                              |
| SNP_78966_A_249557 | NW_004516029.1 | scaffold599 | 249557                  | TT                              | AA                 | AA               | INTERGENIC                    |                    |                              |
| SNP_78967_A_255862 | NW_004516029.1 | scaffold599 | 255862                  | AA                              | TT                 | TT               | DRR                           | 101490467          | uncharacterized LOC101490467 |
| SNP_78968_A_265656 | NW_004516029.1 | scaffold599 | 265656                  | AA                              | CC                 | CC               | INTERGENIC                    |                    |                              |
| SNP_78969_A_279334 | NW_004516029.1 | scaffold599 | 279334                  | AA                              | CC                 | CC               | INTERGENIC                    |                    |                              |
| SNP_78970_A_281690 | NW_004516029.1 | scaffold599 | 281690                  | GG                              | AA                 | AA               | INTERGENIC                    |                    |                              |
| SNP_78972_A_284600 | NW_004516029.1 | scaffold599 | 284600                  | AA                              | TT                 | TT               | INTERGENIC                    |                    |                              |
| SNP_78973_A_284637 | NW_004516029.1 | scaffold599 | 284637                  | CC                              | TT                 | TT               | INTERGENIC                    |                    |                              |
| SNP_78975_A_284709 | NW_004516029.1 | scaffold599 | 284709                  | CC                              | TT                 | TT               | INTERGENIC                    |                    |                              |
| SNP_78976_A_284956 | NW_004516029.1 | scaffold599 | 284956                  | AA                              | GG                 | GG               | INTERGENIC                    |                    |                              |
| SNP_78977_A_285955 | NW_004516029.1 | scaffold599 | 285955                  | TT                              | GG                 | GG               | INTERGENIC                    |                    |                              |
| SNP_78978_A_286324 | NW_004516029.1 | scaffold599 | 286324                  | GG                              | CC                 | CC               | DRR                           | 101490792          | TPD1 protein homolog 1-like  |
| SNP_78980_A_286894 | NW_004516029.1 | scaffold599 | 286894                  | AA                              | GG                 | GG               | DRR                           | 101490792          | TPD1 protein homolog 1-like  |
| SNP_78981_A_286982 | NW_004516029.1 | scaffold599 | 286982                  | CC                              | AA                 | AA               | DRR                           | 101490792          | TPD1 protein homolog 1-like  |
| SNP_78982_A_287177 | NW_004516029.1 | scaffold599 | 287177                  | CC                              | AA                 | AA               | DRR                           | 101490792          | TPD1 protein homolog 1-like  |
| SNP_78984_A_288938 | NW_004516029.1 | scaffold599 | 288938                  | TT                              | CC                 | CC               | URR                           | 101490792          | TPD1 protein homolog 1-like  |
| SNP_78985_A_291347 | NW_004516029.1 | scaffold599 | 291347                  | GG                              | AA                 | AA               | INTERGENIC                    |                    |                              |
| SNP_78987_A_291775 | NW_004516029.1 | scaffold599 | 291775                  | AA                              | GG                 | GG               | INTERGENIC                    |                    |                              |
| SNP_78988_A_292547 | NW_004516029.1 | scaffold599 | 292547                  | AA                              | GG                 | GG               | INTERGENIC                    |                    |                              |
| SNP_78989_A_292976 | NW_004516029.1 | scaffold599 | 292976                  | AA                              | GG                 | GG               | INTERGENIC                    |                    |                              |
| SNP_78990_A_293519 | NW_004516029.1 | scaffold599 | 293519                  | TT                              | CC                 | CC               | INTERGENIC                    |                    |                              |

| SNPs IDs           | Chromosome IDs | Chromosomes | Physical positions (bp) | CDC Frontier (Reference genome) | (Pusa 1103 & HPNB) | (ILWC 46 & LPNB) | Sequence genome | Components of | Gene accession IDs | Putative functions |
|--------------------|----------------|-------------|-------------------------|---------------------------------|--------------------|------------------|-----------------|---------------|--------------------|--------------------|
| SNP_78991_A_293976 | NW_004516029.1 | scaffold599 | 293976                  | TT                              | AA                 | AA               | INTERGENIC      |               |                    |                    |
| SNP_78992_A_294511 | NW_004516029.1 | scaffold599 | 294511                  | TT                              | CC                 | CC               | INTERGENIC      |               |                    |                    |
| SNP_78993_A_294826 | NW_004516029.1 | scaffold599 | 294826                  | CC                              | TT                 | TT               | INTERGENIC      |               |                    |                    |
| SNP_78994_A_295464 | NW_004516029.1 | scaffold599 | 295464                  | TT                              | CC                 | CC               | INTERGENIC      |               |                    |                    |
| SNP_78995_A_296753 | NW_004516029.1 | scaffold599 | 296753                  | GG                              | AA                 | AA               | INTERGENIC      |               |                    |                    |
| SNP_78996_A_296785 | NW_004516029.1 | scaffold599 | 296785                  | AA                              | GG                 | GG               | INTERGENIC      |               |                    |                    |
| SNP_78997_A_296851 | NW_004516029.1 | scaffold599 | 296851                  | CC                              | TT                 | TT               | INTERGENIC      |               |                    |                    |
| SNP_78998_A_297509 | NW_004516029.1 | scaffold599 | 297509                  | AA                              | CC                 | CC               | INTERGENIC      |               |                    |                    |
| SNP_78999_A_299195 | NW_004516029.1 | scaffold599 | 299195                  | TT                              | CC                 | CC               | INTERGENIC      |               |                    |                    |
| SNP_79000_A_299395 | NW_004516029.1 | scaffold599 | 299395                  | AA                              | GG                 | GG               | INTERGENIC      |               |                    |                    |
| SNP_79001_A_300980 | NW_004516029.1 | scaffold599 | 300980                  | CC                              | TT                 | TT               | INTERGENIC      |               |                    |                    |
| SNP_79002_A_302211 | NW_004516029.1 | scaffold599 | 302211                  | TT                              | CC                 | CC               | INTERGENIC      |               |                    |                    |
| SNP_79003_A_302989 | NW_004516029.1 | scaffold599 | 302989                  | GG                              | TT                 | TT               | INTERGENIC      |               |                    |                    |
| SNP_79004_A_303328 | NW_004516029.1 | scaffold599 | 303328                  | TT                              | CC                 | CC               | INTERGENIC      |               |                    |                    |
| SNP_79005_A_305581 | NW_004516029.1 | scaffold599 | 305581                  | GG                              | AA                 | AA               | INTERGENIC      |               |                    |                    |
| SNP_79006_A_306296 | NW_004516029.1 | scaffold599 | 306296                  | AA                              | GG                 | GG               | INTERGENIC      |               |                    |                    |
| SNP_79007_A_306304 | NW_004516029.1 | scaffold599 | 306304                  | GG                              | TT                 | TT               | INTERGENIC      |               |                    |                    |
| SNP_79008_A_306387 | NW_004516029.1 | scaffold599 | 306387                  | AA                              | TT                 | TT               | INTERGENIC      |               |                    |                    |
| SNP_79009_A_306533 | NW_004516029.1 | scaffold599 | 306533                  | CC                              | TT                 | TT               | INTERGENIC      |               |                    |                    |
| SNP_79010_A_306761 | NW_004516029.1 | scaffold599 | 306761                  | CC                              | TT                 | TT               | INTERGENIC      |               |                    |                    |
| SNP_79011_A_306774 | NW_004516029.1 | scaffold599 | 306774                  | TT                              | GG                 | GG               | INTERGENIC      |               |                    |                    |
| SNP_79015_A_308421 | NW_004516029.1 | scaffold599 | 308421                  | GG                              | TT                 | TT               | DRR             | 101492741     | Unknown function   |                    |

| SNPs IDs           | Chromosome IDs | Chromosomes | Physical positions (bp) | CDC Frontier (Reference genome) | (Pusa 1103 & HPNB) | (ILWC 46 & LPNB) | Sequence Components of genome | Gene accession IDs | Putative functions |
|--------------------|----------------|-------------|-------------------------|---------------------------------|--------------------|------------------|-------------------------------|--------------------|--------------------|
| SNP_79016_A_308834 | NW_004516029.1 | scaffold599 | 308834                  | AA                              | TT                 | TT               | DRR                           | 101492741          | Unknown function   |
| SNP_79017_A_310940 | NW_004516029.1 | scaffold599 | 310940                  | GG                              | AA                 | AA               | URR                           | 101492741          | Unknown function   |
| SNP_79018_A_311421 | NW_004516029.1 | scaffold599 | 311421                  | AA                              | TT                 | TT               | INTERGENIC                    |                    |                    |
| SNP_79020_A_314472 | NW_004516029.1 | scaffold599 | 314472                  | TT                              | CC                 | CC               | INTERGENIC                    |                    |                    |
| SNP_79021_A_315058 | NW_004516029.1 | scaffold599 | 315058                  | TT                              | AA                 | AA               | INTERGENIC                    |                    |                    |
| SNP_79022_A_315699 | NW_004516029.1 | scaffold599 | 315699                  | TT                              | GG                 | GG               | INTERGENIC                    |                    |                    |
| SNP_79023_A_315792 | NW_004516029.1 | scaffold599 | 315792                  | AA                              | GG                 | GG               | INTERGENIC                    |                    |                    |
| SNP_79024_A_315815 | NW_004516029.1 | scaffold599 | 315815                  | AA                              | GG                 | GG               | INTERGENIC                    |                    |                    |
| SNP_79025_A_316144 | NW_004516029.1 | scaffold599 | 316144                  | AA                              | CC                 | CC               | INTERGENIC                    |                    |                    |
| SNP_79026_A_316717 | NW_004516029.1 | scaffold599 | 316717                  | AA                              | GG                 | GG               | INTERGENIC                    |                    |                    |
| SNP_79027_A_316791 | NW_004516029.1 | scaffold599 | 316791                  | CC                              | TT                 | TT               | INTERGENIC                    |                    |                    |
| SNP_79028_A_317261 | NW_004516029.1 | scaffold599 | 317261                  | GG                              | AA                 | AA               | INTERGENIC                    |                    |                    |
| SNP_79029_A_317444 | NW_004516029.1 | scaffold599 | 317444                  | AA                              | TT                 | TT               | INTERGENIC                    |                    |                    |
| SNP_79030_A_318533 | NW_004516029.1 | scaffold599 | 318533                  | CC                              | TT                 | TT               | INTERGENIC                    |                    |                    |
| SNP_79031_A_320166 | NW_004516029.1 | scaffold599 | 320166                  | AA                              | CC                 | CC               | INTERGENIC                    |                    |                    |
| SNP_79032_A_320224 | NW_004516029.1 | scaffold599 | 320224                  | CC                              | AA                 | AA               | INTERGENIC                    |                    |                    |
| SNP_79033_A_320413 | NW_004516029.1 | scaffold599 | 320413                  | TT                              | CC                 | CC               | INTERGENIC                    |                    |                    |
| SNP_79034_A_320834 | NW_004516029.1 | scaffold599 | 320834                  | TT                              | AA                 | AA               | INTERGENIC                    |                    |                    |
| SNP_79036_A_321909 | NW_004516029.1 | scaffold599 | 321909                  | AA                              | GG                 | GG               | INTERGENIC                    |                    |                    |
| SNP_79038_A_323209 | NW_004516029.1 | scaffold599 | 323209                  | GG                              | AA                 | AA               | DRR                           | 101493072          | Unknown function   |
| SNP_79040_A_324397 | NW_004516029.1 | scaffold599 | 324397                  | GG                              | AA                 | AA               | URR                           | 101493072          | Unknown function   |
| SNP_79041_A_324549 | NW_004516029.1 | scaffold599 | 324549                  | GG                              | TT                 | TT               | URR                           | 101493072          | Unknown function   |

| SNPs IDs           | Chromosome IDs | Chromosomes | Physical positions (bp) | CDC Frontier (Reference genome) | (Pusa 1103 & HPNB) | (ILWC 46 & LPNB) | Sequence Components of genome | Gene accession IDs | Putative functions           |
|--------------------|----------------|-------------|-------------------------|---------------------------------|--------------------|------------------|-------------------------------|--------------------|------------------------------|
| SNP_79042_A_327319 | NW_004516029.1 | scaffold599 | 327319                  | CC                              | TT                 | TT               | INTERGENIC                    |                    |                              |
| SNP_79043_A_327605 | NW_004516029.1 | scaffold599 | 327605                  | TT                              | CC                 | CC               | INTERGENIC                    |                    |                              |
| SNP_79044_A_329046 | NW_004516029.1 | scaffold599 | 329046                  | GG                              | AA                 | AA               | INTERGENIC                    |                    |                              |
| SNP_79045_A_329145 | NW_004516029.1 | scaffold599 | 329145                  | TT                              | CC                 | CC               | INTERGENIC                    |                    |                              |
| SNP_79046_A_329222 | NW_004516029.1 | scaffold599 | 329222                  | AA                              | TT                 | TT               | INTERGENIC                    |                    |                              |
| SNP_79048_A_329444 | NW_004516029.1 | scaffold599 | 329444                  | CC                              | AA                 | AA               | INTERGENIC                    |                    |                              |
| SNP_79049_A_330142 | NW_004516029.1 | scaffold599 | 330142                  | CC                              | TT                 | TT               | INTERGENIC                    |                    |                              |
| SNP_79051_A_330489 | NW_004516029.1 | scaffold599 | 330489                  | AA                              | TT                 | TT               | INTERGENIC                    |                    |                              |
| SNP_79052_A_330602 | NW_004516029.1 | scaffold599 | 330602                  | TT                              | CC                 | CC               | INTERGENIC                    |                    |                              |
| SNP_79053_A_331001 | NW_004516029.1 | scaffold599 | 331001                  | GG                              | AA                 | AA               | INTERGENIC                    |                    |                              |
| SNP_79054_A_331507 | NW_004516029.1 | scaffold599 | 331507                  | TT                              | GG                 | GG               | INTERGENIC                    |                    |                              |
| SNP_79055_A_331711 | NW_004516029.1 | scaffold599 | 331711                  | GG                              | AA                 | AA               | INTERGENIC                    |                    |                              |
| SNP_79056_A_333481 | NW_004516029.1 | scaffold599 | 333481                  | CC                              | TT                 | TT               | DRR                           | 101493397          | uncharacterized LOC101493397 |
| SNP_79057_A_333522 | NW_004516029.1 | scaffold599 | 333522                  | CC                              | TT                 | TT               | DRR                           | 101493397          | uncharacterized LOC101493397 |
| SNP_79058_A_335120 | NW_004516029.1 | scaffold599 | 335120                  | AA                              | GG                 | GG               | INTRON                        | 101493397          | uncharacterized LOC101493397 |
| SNP_79059_A_335187 | NW_004516029.1 | scaffold599 | 335187                  | TT                              | GG                 | GG               | INTRON                        | 101493397          | uncharacterized LOC101493397 |
| SNP_79061_A_337164 | NW_004516029.1 | scaffold599 | 337164                  | CC                              | AA                 | AA               | INTRON                        | 101493397          | uncharacterized LOC101493397 |
| SNP_79062_A_337307 | NW_004516029.1 | scaffold599 | 337307                  | TT                              | CC                 | CC               | INTRON                        | 101493397          | uncharacterized LOC101493397 |
| SNP_79063_A_338098 | NW_004516029.1 | scaffold599 | 338098                  | GG                              | AA                 | AA               | INTRON                        | 101493397          | uncharacterized LOC101493397 |
| SNP_79065_A_338964 | NW_004516029.1 | scaffold599 | 338964                  | AA                              | TT                 | TT               | INTRON                        | 101493397          | uncharacterized LOC101493397 |
| SNP_79066_A_339234 | NW_004516029.1 | scaffold599 | 339234                  | TT                              | AA                 | AA               | INTRON                        | 101493397          | uncharacterized LOC101493397 |
| SNP_79068_A_350983 | NW_004516029.1 | scaffold599 | 350983                  | CC                              | TT                 | TT               | INTRON                        | 101493397          | uncharacterized LOC101493397 |

| SNPs IDs           | Chromosome IDs | Chromosomes | Physical positions (bp) | CDC Frontier (Reference genome) | (Pusa 1103 & HPNB) | (ILWC 46 & LPNB) | Sequence Components of genome | Gene accession IDs | Putative functions           |
|--------------------|----------------|-------------|-------------------------|---------------------------------|--------------------|------------------|-------------------------------|--------------------|------------------------------|
| SNP_79069_A_351567 | NW_004516029.1 | scaffold599 | 351567                  | GG                              | AA                 | AA               | INTRON                        | 101493397          | uncharacterized LOC101493397 |
| SNP_79070_A_352302 | NW_004516029.1 | scaffold599 | 352302                  | AA                              | CC                 | CC               | INTRON                        | 101493397          | uncharacterized LOC101493397 |
| SNP_79071_A_352801 | NW_004516029.1 | scaffold599 | 352801                  | CC                              | TT                 | TT               | NON_SYNONYMOUS_CODING         | 101493397          | uncharacterized LOC101493397 |
| SNP_79073_A_353375 | NW_004516029.1 | scaffold599 | 353375                  | CC                              | TT                 | TT               | URR                           | 101493397          | uncharacterized LOC101493397 |
| SNP_79074_A_354269 | NW_004516029.1 | scaffold599 | 354269                  | TT                              | AA                 | AA               | URR                           | 101493397          | uncharacterized LOC101493397 |
| SNP_79075_A_355547 | NW_004516029.1 | scaffold599 | 355547                  | CC                              | GG                 | GG               | INTERGENIC                    |                    |                              |
| SNP_79076_A_355853 | NW_004516029.1 | scaffold599 | 355853                  | AA                              | GG                 | GG               | INTERGENIC                    |                    |                              |
| SNP_79077_A_356119 | NW_004516029.1 | scaffold599 | 356119                  | GG                              | AA                 | AA               | INTERGENIC                    |                    |                              |
| SNP_79078_A_356963 | NW_004516029.1 | scaffold599 | 356963                  | GG                              | CC                 | CC               | INTERGENIC                    |                    |                              |
| SNP_79079_A_357475 | NW_004516029.1 | scaffold599 | 357475                  | GG                              | AA                 | AA               | INTERGENIC                    |                    |                              |
| SNP_79080_A_358458 | NW_004516029.1 | scaffold599 | 358458                  | AA                              | TT                 | TT               | INTERGENIC                    |                    |                              |
| SNP_79081_A_358497 | NW_004516029.1 | scaffold599 | 358497                  | AA                              | TT                 | TT               | INTERGENIC                    |                    |                              |
| SNP_79082_A_358637 | NW_004516029.1 | scaffold599 | 358637                  | TT                              | CC                 | CC               | INTERGENIC                    |                    |                              |
| SNP_79083_A_358713 | NW_004516029.1 | scaffold599 | 358713                  | AA                              | TT                 | TT               | INTERGENIC                    |                    |                              |
| SNP_79085_A_359630 | NW_004516029.1 | scaffold599 | 359630                  | TT                              | AA                 | AA               | DRR                           | 101493721          | uncharacterized LOC101493721 |
| SNP_79086_A_359746 | NW_004516029.1 | scaffold599 | 359746                  | GG                              | TT                 | TT               | DRR                           | 101493721          | uncharacterized LOC101493721 |
| SNP_79087_A_360478 | NW_004516029.1 | scaffold599 | 360478                  | TT                              | GG                 | GG               | URR                           | 101493721          | uncharacterized LOC101493721 |
| SNP_79088_A_361301 | NW_004516029.1 | scaffold599 | 361301                  | CC                              | TT                 | TT               | URR                           | 101493721          | uncharacterized LOC101493721 |
| SNP_79090_A_363515 | NW_004516029.1 | scaffold599 | 363515                  | TT                              | CC                 | CC               | INTERGENIC                    |                    |                              |
| SNP_79091_A_365964 | NW_004516029.1 | scaffold599 | 365964                  | AA                              | TT                 | TT               | INTERGENIC                    |                    |                              |
| SNP_79093_A_367760 | NW_004516029.1 | scaffold599 | 367760                  | TT                              | CC                 | CC               | INTERGENIC                    |                    |                              |
| SNP_79094_A_368147 | NW_004516029.1 | scaffold599 | 368147                  | AA                              | CC                 | CC               | INTERGENIC                    |                    |                              |



| SNPs IDs           | Chromosome IDs | Chromosomes | Physical positions (bp) | CDC Frontier (Reference genome) | (Pusa 1103 & HPNB) | (ILWC 46 & LPNB) | Sequence genome | Components of | Gene accession IDs | Putative functions |
|--------------------|----------------|-------------|-------------------------|---------------------------------|--------------------|------------------|-----------------|---------------|--------------------|--------------------|
| SNP_79095_A_368888 | NW_004516029.1 | scaffold599 | 368888                  | GG                              | CC                 | CC               | INTERGENIC      |               |                    |                    |
| SNP_79096_A_369108 | NW_004516029.1 | scaffold599 | 369108                  | GG                              | AA                 | AA               | INTERGENIC      |               |                    |                    |
| SNP_79097_A_369158 | NW_004516029.1 | scaffold599 | 369158                  | CC                              | TT                 | TT               | INTERGENIC      |               |                    |                    |
| SNP_79098_A_369198 | NW_004516029.1 | scaffold599 | 369198                  | GG                              | AA                 | AA               | INTERGENIC      |               |                    |                    |
| SNP_79099_A_369270 | NW_004516029.1 | scaffold599 | 369270                  | AA                              | TT                 | TT               | INTERGENIC      |               |                    |                    |
| SNP_79100_A_369371 | NW_004516029.1 | scaffold599 | 369371                  | TT                              | CC                 | CC               | INTERGENIC      |               |                    |                    |
| SNP_79101_A_369439 | NW_004516029.1 | scaffold599 | 369439                  | TT                              | CC                 | CC               | INTERGENIC      |               |                    |                    |
| SNP_79102_A_369440 | NW_004516029.1 | scaffold599 | 369440                  | GG                              | AA                 | AA               | INTERGENIC      |               |                    |                    |
| SNP_79103_A_369469 | NW_004516029.1 | scaffold599 | 369469                  | GG                              | AA                 | AA               | INTERGENIC      |               |                    |                    |
| SNP_79104_A_369513 | NW_004516029.1 | scaffold599 | 369513                  | CC                              | TT                 | TT               | INTERGENIC      |               |                    |                    |
| SNP_79105_A_369557 | NW_004516029.1 | scaffold599 | 369557                  | CC                              | AA                 | AA               | INTERGENIC      |               |                    |                    |
| SNP_79106_A_369565 | NW_004516029.1 | scaffold599 | 369565                  | CC                              | TT                 | TT               | INTERGENIC      |               |                    |                    |
| SNP_79108_A_369611 | NW_004516029.1 | scaffold599 | 369611                  | CC                              | TT                 | TT               | INTERGENIC      |               |                    |                    |
| SNP_79109_A_369763 | NW_004516029.1 | scaffold599 | 369763                  | AA                              | GG                 | GG               | INTERGENIC      |               |                    |                    |
| SNP_79110_A_369809 | NW_004516029.1 | scaffold599 | 369809                  | TT                              | CC                 | CC               | INTERGENIC      |               |                    |                    |
| SNP_79111_A_369959 | NW_004516029.1 | scaffold599 | 369959                  | GG                              | TT                 | TT               | INTERGENIC      |               |                    |                    |
| SNP_79113_A_372305 | NW_004516029.1 | scaffold599 | 372305                  | AA                              | TT                 | TT               | INTERGENIC      |               |                    |                    |
| SNP_79114_A_373318 | NW_004516029.1 | scaffold599 | 373318                  | AA                              | GG                 | GG               | INTERGENIC      |               |                    |                    |
| SNP_79115_A_373573 | NW_004516029.1 | scaffold599 | 373573                  | TT                              | AA                 | AA               | INTERGENIC      |               |                    |                    |
| SNP_79117_A_374269 | NW_004516029.1 | scaffold599 | 374269                  | TT                              | CC                 | CC               | INTERGENIC      |               |                    |                    |
| SNP_79118_A_375401 | NW_004516029.1 | scaffold599 | 375401                  | CC                              | TT                 | TT               | INTERGENIC      |               |                    |                    |
| SNP_79119_A_375501 | NW_004516029.1 | scaffold599 | 375501                  | AA                              | GG                 | GG               | INTERGENIC      |               |                    |                    |

| SNPs IDs           | Chromosome IDs | Chromosomes | Physical positions (bp) | CDC Frontier (Reference genome) | (Pusa 1103 & HPNB) | (ILWC 46 & LPNB) | Sequence Components of genome | Gene accession IDs | Putative functions           |
|--------------------|----------------|-------------|-------------------------|---------------------------------|--------------------|------------------|-------------------------------|--------------------|------------------------------|
| SNP_79120_A_375740 | NW_004516029.1 | scaffold599 | 375740                  | CC                              | TT                 | TT               | INTERGENIC                    |                    |                              |
| SNP_79121_A_385265 | NW_004516029.1 | scaffold599 | 385265                  | TT                              | AA                 | AA               | INTRON                        | 101494042          | uncharacterized LOC101494042 |
| SNP_79123_A_385378 | NW_004516029.1 | scaffold599 | 385378                  | GG                              | CC                 | CC               | NON_SYNONYMOUS_CODING         | 101494042          | uncharacterized LOC101494042 |
| SNP_79124_A_385392 | NW_004516029.1 | scaffold599 | 385392                  | GG                              | AA                 | AA               | NON_SYNONYMOUS_CODING         | 101494042          | uncharacterized LOC101494042 |
| SNP_79125_A_385413 | NW_004516029.1 | scaffold599 | 385413                  | CC                              | TT                 | TT               | NON_SYNONYMOUS_CODING         | 101494042          | uncharacterized LOC101494042 |
| SNP_79126_A_386616 | NW_004516029.1 | scaffold599 | 386616                  | TT                              | GG                 | GG               | URR                           | 101494042          | uncharacterized LOC101494042 |
| SNP_79127_A_386801 | NW_004516029.1 | scaffold599 | 386801                  | TT                              | CC                 | CC               | URR                           | 101494042          | uncharacterized LOC101494042 |
| SNP_79128_A_387537 | NW_004516029.1 | scaffold599 | 387537                  | TT                              | AA                 | AA               | URR                           | 101494042          | uncharacterized LOC101494042 |
| SNP_79129_A_387627 | NW_004516029.1 | scaffold599 | 387627                  | TT                              | GG                 | GG               | URR                           | 101494042          | uncharacterized LOC101494042 |
| SNP_79130_A_387677 | NW_004516029.1 | scaffold599 | 387677                  | GG                              | AA                 | AA               | URR                           | 101494042          | uncharacterized LOC101494042 |
| SNP_79131_A_387765 | NW_004516029.1 | scaffold599 | 387765                  | AA                              | GG                 | GG               | INTERGENIC                    |                    |                              |
| SNP_79132_A_387769 | NW_004516029.1 | scaffold599 | 387769                  | TT                              | AA                 | AA               | INTERGENIC                    |                    |                              |
| SNP_79133_A_387855 | NW_004516029.1 | scaffold599 | 387855                  | GG                              | TT                 | TT               | INTERGENIC                    |                    |                              |
| SNP_79134_A_389558 | NW_004516029.1 | scaffold599 | 389558                  | TT                              | CC                 | CC               | INTERGENIC                    |                    |                              |
| SNP_79135_A_390843 | NW_004516029.1 | scaffold599 | 390843                  | TT                              | CC                 | CC               | INTERGENIC                    |                    |                              |
| SNP_79136_A_391315 | NW_004516029.1 | scaffold599 | 391315                  | GG                              | AA                 | AA               | INTERGENIC                    |                    |                              |
| SNP_79138_A_391899 | NW_004516029.1 | scaffold599 | 391899                  | GG                              | TT                 | TT               | INTERGENIC                    |                    |                              |
| SNP_79139_A_392773 | NW_004516029.1 | scaffold599 | 392773                  | AA                              | TT                 | TT               | DRR                           | 101494354          | uncharacterized LOC101494354 |
| SNP_79140_A_393849 | NW_004516029.1 | scaffold599 | 393849                  | TT                              | CC                 | CC               | URR                           | 101494354          | uncharacterized LOC101494354 |
| SNP_79141_A_394426 | NW_004516029.1 | scaffold599 | 394426                  | CC                              | TT                 | TT               | URR                           | 101494354          | uncharacterized LOC101494354 |
| SNP_79142_A_394637 | NW_004516029.1 | scaffold599 | 394637                  | AA                              | CC                 | CC               | URR                           | 101494354          | uncharacterized LOC101494354 |
| SNP_79143_A_394704 | NW_004516029.1 | scaffold599 | 394704                  | TT                              | GG                 | GG               | URR                           | 101494354          | uncharacterized LOC101494354 |

| SNPs IDs           | Chromosome IDs | Chromosomes | Physical positions (bp) | CDC Frontier (Reference genome) | (Pusa 1103 & HPNB) | (ILWC 46 & LPNB) | Sequence Components of genome | Gene accession IDs | Putative functions           |
|--------------------|----------------|-------------|-------------------------|---------------------------------|--------------------|------------------|-------------------------------|--------------------|------------------------------|
| SNP_79144_A_395121 | NW_004516029.1 | scaffold599 | 395121                  | TT                              | CC                 | CC               | URR                           | 101494354          | uncharacterized LOC101494354 |
| SNP_79145_A_396581 | NW_004516029.1 | scaffold599 | 396581                  | GG                              | AA                 | AA               | INTERGENIC                    |                    |                              |
| SNP_79146_A_396664 | NW_004516029.1 | scaffold599 | 396664                  | AA                              | TT                 | TT               | INTERGENIC                    |                    |                              |
| SNP_79147_A_398416 | NW_004516029.1 | scaffold599 | 398416                  | TT                              | CC                 | CC               | INTERGENIC                    |                    |                              |
| SNP_79148_A_398919 | NW_004516029.1 | scaffold599 | 398919                  | AA                              | GG                 | GG               | INTERGENIC                    |                    |                              |
| SNP_79149_A_401886 | NW_004516029.1 | scaffold599 | 401886                  | GG                              | AA                 | AA               | INTERGENIC                    |                    |                              |
| SNP_79150_A_401890 | NW_004516029.1 | scaffold599 | 401890                  | TT                              | GG                 | GG               | INTERGENIC                    |                    |                              |
| SNP_79151_A_402042 | NW_004516029.1 | scaffold599 | 402042                  | AA                              | GG                 | GG               | INTERGENIC                    |                    |                              |
| SNP_79152_A_402481 | NW_004516029.1 | scaffold599 | 402481                  | TT                              | GG                 | GG               | INTERGENIC                    |                    |                              |
| SNP_79153_A_402756 | NW_004516029.1 | scaffold599 | 402756                  | CC                              | TT                 | TT               | INTERGENIC                    |                    |                              |
| SNP_79154_A_403129 | NW_004516029.1 | scaffold599 | 403129                  | TT                              | GG                 | GG               | INTERGENIC                    |                    |                              |
| SNP_79155_A_403260 | NW_004516029.1 | scaffold599 | 403260                  | GG                              | TT                 | TT               | INTERGENIC                    |                    |                              |
| SNP_79156_A_403447 | NW_004516029.1 | scaffold599 | 403447                  | AA                              | TT                 | TT               | INTERGENIC                    |                    |                              |
| SNP_79158_A_404158 | NW_004516029.1 | scaffold599 | 404158                  | CC                              | AA                 | AA               | INTERGENIC                    |                    |                              |
| SNP_79159_A_404253 | NW_004516029.1 | scaffold599 | 404253                  | AA                              | CC                 | CC               | INTERGENIC                    |                    |                              |
| SNP_79161_A_405310 | NW_004516029.1 | scaffold599 | 405310                  | AA                              | GG                 | GG               | INTERGENIC                    |                    |                              |
| SNP_79162_A_406095 | NW_004516029.1 | scaffold599 | 406095                  | CC                              | TT                 | TT               | INTERGENIC                    |                    |                              |
| SNP_79164_A_406789 | NW_004516029.1 | scaffold599 | 406789                  | CC                              | TT                 | TT               | INTERGENIC                    |                    |                              |
| SNP_79165_A_407602 | NW_004516029.1 | scaffold599 | 407602                  | CC                              | TT                 | TT               | INTERGENIC                    |                    |                              |
| SNP_79166_A_407684 | NW_004516029.1 | scaffold599 | 407684                  | AA                              | GG                 | GG               | INTERGENIC                    |                    |                              |
| SNP_79167_A_409570 | NW_004516029.1 | scaffold599 | 409570                  | TT                              | GG                 | GG               | INTERGENIC                    |                    |                              |
| SNP_79168_A_409572 | NW_004516029.1 | scaffold599 | 409572                  | CC                              | AA                 | AA               | INTERGENIC                    |                    |                              |

| SNPs IDs           | Chromosome IDs | Chromosomes | Physical positions (bp) | CDC Frontier (Reference genome) | (Pusa 1103 & HPNB) | (ILWC 46 & LPNB) | Sequence Components of genome | Gene accession IDs | Putative functions              |
|--------------------|----------------|-------------|-------------------------|---------------------------------|--------------------|------------------|-------------------------------|--------------------|---------------------------------|
| SNP_79170_A_410095 | NW_004516029.1 | scaffold599 | 410095                  | CC                              | AA                 | AA               | INTERGENIC                    |                    |                                 |
| SNP_79171_A_410238 | NW_004516029.1 | scaffold599 | 410238                  | AA                              | CC                 | CC               | INTERGENIC                    |                    |                                 |
| SNP_79172_A_412300 | NW_004516029.1 | scaffold599 | 412300                  | GG                              | AA                 | AA               | INTERGENIC                    |                    |                                 |
| SNP_79173_A_29524  | NW_004516030.1 | scaffold601 | 29524                   | AA                              | CC                 | CC               | INTERGENIC                    |                    |                                 |
| SNP_79174_A_38557  | NW_004516030.1 | scaffold601 | 38557                   | TT                              | CC                 | CC               | URR                           | 101494983          | protein GLUTAMINE DUMPER 5-like |
| SNP_79176_A_52366  | NW_004516030.1 | scaffold601 | 52366                   | TT                              | GG                 | GG               | URR                           | 101495309          | Unknown function                |
| SNP_79177_A_52378  | NW_004516030.1 | scaffold601 | 52378                   | TT                              | CC                 | CC               | URR                           | 101495309          | Unknown function                |
| SNP_79178_A_52415  | NW_004516030.1 | scaffold601 | 52415                   | TT                              | GG                 | GG               | URR                           | 101495309          | Unknown function                |
| SNP_79179_A_52433  | NW_004516030.1 | scaffold601 | 52433                   | GG                              | CC                 | CC               | URR                           | 101495309          | Unknown function                |
| SNP_79180_A_52763  | NW_004516030.1 | scaffold601 | 52763                   | AA                              | GG                 | GG               | URR                           | 101495309          | Unknown function                |
| SNP_79181_A_93730  | NW_004516030.1 | scaffold601 | 93730                   | TT                              | AA                 | AA               | INTRON                        | 101496296          | uncharacterized LOC101496296    |
| SNP_79182_A_100719 | NW_004516030.1 | scaffold601 | 100719                  | TT                              | GG                 | GG               | INTERGENIC                    |                    |                                 |
| SNP_79183_A_110275 | NW_004516030.1 | scaffold601 | 110275                  | TT                              | CC                 | CC               | INTERGENIC                    |                    |                                 |
| SNP_79184_A_110300 | NW_004516030.1 | scaffold601 | 110300                  | AA                              | GG                 | GG               | INTERGENIC                    |                    |                                 |
| SNP_79185_A_110312 | NW_004516030.1 | scaffold601 | 110312                  | TT                              | CC                 | CC               | INTERGENIC                    |                    |                                 |
| SNP_79186_A_110318 | NW_004516030.1 | scaffold601 | 110318                  | AA                              | GG                 | GG               | INTERGENIC                    |                    |                                 |
| SNP_79187_A_110706 | NW_004516030.1 | scaffold601 | 110706                  | GG                              | AA                 | AA               | INTERGENIC                    |                    |                                 |
| SNP_79188_A_125673 | NW_004516030.1 | scaffold601 | 125673                  | CC                              | TT                 | TT               | INTERGENIC                    |                    |                                 |
| SNP_79189_A_147231 | NW_004516030.1 | scaffold601 | 147231                  | TT                              | CC                 | CC               | INTERGENIC                    |                    |                                 |
| SNP_79190_A_147296 | NW_004516030.1 | scaffold601 | 147296                  | AA                              | GG                 | GG               | INTERGENIC                    |                    |                                 |
| SNP_79191_A_1268   | NW_004516031.1 | scaffold602 | 1268                    | AA                              | GG                 | GG               | INTERGENIC                    |                    |                                 |
| SNP_79192_A_3233   | NW_004516032.1 | scaffold604 | 3233                    | CC                              | TT                 | TT               | URR                           | 101496625          | uncharacterized LOC101496625    |

| SNPs IDs          | Chromosome IDs | Chromosomes | Physical positions (bp) | CDC Frontier (Reference genome) | (Pusa 1103 & HPNB) | (ILWC 46 & LPNB) | Sequence Components of genome | Gene accession IDs | Putative functions |
|-------------------|----------------|-------------|-------------------------|---------------------------------|--------------------|------------------|-------------------------------|--------------------|--------------------|
| SNP_79193_A_7835  | NW_004516032.1 | scaffold604 | 7835                    | GG                              | AA                 | AA               | URR                           | 101496944          | Unknown function   |
| SNP_79194_A_8150  | NW_004516032.1 | scaffold604 | 8150                    | AA                              | TT                 | TT               | INTERGENIC                    |                    |                    |
| SNP_79195_A_8167  | NW_004516032.1 | scaffold604 | 8167                    | CC                              | AA                 | AA               | INTERGENIC                    |                    |                    |
| SNP_79196_A_8190  | NW_004516032.1 | scaffold604 | 8190                    | AA                              | GG                 | GG               | INTERGENIC                    |                    |                    |
| SNP_79197_A_8490  | NW_004516032.1 | scaffold604 | 8490                    | GG                              | AA                 | AA               | INTERGENIC                    |                    |                    |
| SNP_79198_A_9040  | NW_004516032.1 | scaffold604 | 9040                    | CC                              | AA                 | AA               | INTERGENIC                    |                    |                    |
| SNP_79199_A_9237  | NW_004516032.1 | scaffold604 | 9237                    | TT                              | CC                 | CC               | INTERGENIC                    |                    |                    |
| SNP_79200_A_9290  | NW_004516032.1 | scaffold604 | 9290                    | AA                              | GG                 | GG               | INTERGENIC                    |                    |                    |
| SNP_79201_A_9698  | NW_004516032.1 | scaffold604 | 9698                    | GG                              | AA                 | AA               | INTERGENIC                    |                    |                    |
| SNP_79204_A_14647 | NW_004516032.1 | scaffold604 | 14647                   | AA                              | GG                 | GG               | INTERGENIC                    |                    |                    |
| SNP_79205_A_15113 | NW_004516032.1 | scaffold604 | 15113                   | AA                              | GG                 | GG               | INTERGENIC                    |                    |                    |
| SNP_79206_A_15186 | NW_004516032.1 | scaffold604 | 15186                   | AA                              | TT                 | TT               | INTERGENIC                    |                    |                    |
| SNP_79207_A_15857 | NW_004516032.1 | scaffold604 | 15857                   | CC                              | TT                 | TT               | INTERGENIC                    |                    |                    |
| SNP_79208_A_15863 | NW_004516032.1 | scaffold604 | 15863                   | GG                              | TT                 | TT               | INTERGENIC                    |                    |                    |
| SNP_79209_A_15866 | NW_004516032.1 | scaffold604 | 15866                   | AA                              | TT                 | TT               | INTERGENIC                    |                    |                    |
| SNP_79210_A_16641 | NW_004516032.1 | scaffold604 | 16641                   | AA                              | CC                 | CC               | INTERGENIC                    |                    |                    |
| SNP_79211_A_16830 | NW_004516032.1 | scaffold604 | 16830                   | TT                              | CC                 | CC               | INTERGENIC                    |                    |                    |
| SNP_79212_A_16910 | NW_004516032.1 | scaffold604 | 16910                   | TT                              | CC                 | CC               | INTERGENIC                    |                    |                    |
| SNP_79214_A_19179 | NW_004516032.1 | scaffold604 | 19179                   | AA                              | GG                 | GG               | INTERGENIC                    |                    |                    |
| SNP_79215_A_19581 | NW_004516032.1 | scaffold604 | 19581                   | TT                              | CC                 | CC               | INTERGENIC                    |                    |                    |
| SNP_79216_A_19620 | NW_004516032.1 | scaffold604 | 19620                   | AA                              | GG                 | GG               | INTERGENIC                    |                    |                    |
| SNP_79217_A_22650 | NW_004516032.1 | scaffold604 | 22650                   | CC                              | GG                 | GG               | INTERGENIC                    |                    |                    |

| SNPs IDs          | Chromosome IDs | Chromosomes | Physical positions (bp) | CDC Frontier (Reference genome) | (Pusa 1103 & HPNB) | (ILWC 46 & LPNB) | Sequence Components of genome | Gene accession IDs | Putative functions                   |
|-------------------|----------------|-------------|-------------------------|---------------------------------|--------------------|------------------|-------------------------------|--------------------|--------------------------------------|
| SNP_79218_A_29319 | NW_004516032.1 | scaffold604 | 29319                   | CC                              | AA                 | AA               | INTERGENIC                    |                    |                                      |
| SNP_79219_A_38290 | NW_004516032.1 | scaffold604 | 38290                   | AA                              | TT                 | TT               | INTERGENIC                    |                    |                                      |
| SNP_79221_A_62123 | NW_004516032.1 | scaffold604 | 62123                   | CC                              | TT                 | TT               | INTERGENIC                    |                    |                                      |
| SNP_79222_A_64256 | NW_004516032.1 | scaffold604 | 64256                   | CC                              | GG                 | GG               | INTERGENIC                    |                    |                                      |
| SNP_79223_A_64306 | NW_004516032.1 | scaffold604 | 64306                   | CC                              | AA                 | AA               | INTERGENIC                    |                    |                                      |
| SNP_79225_A_72039 | NW_004516032.1 | scaffold604 | 72039                   | GG                              | AA                 | AA               | NON_SYNONYMOUS_CODING         | 101497274          | Unknown function                     |
| SNP_79226_A_80173 | NW_004516032.1 | scaffold604 | 80173                   | CC                              | TT                 | TT               | INTERGENIC                    |                    |                                      |
| SNP_79227_A_5761  | NW_004516033.1 | scaffold605 | 5761                    | AA                              | GG                 | GG               | DRR                           | 101497599          | receptor-like protein kinase FERONIA |
| SNP_79228_A_19031 | NW_004516033.1 | scaffold605 | 19031                   | TT                              | CC                 | CC               | NON_SYNONYMOUS_CODING         | 101497599          | receptor-like protein kinase FERONIA |
| SNP_79229_A_19056 | NW_004516033.1 | scaffold605 | 19056                   | CC                              | TT                 | TT               | SYNONYMOUS_CODING             | 101497599          | receptor-like protein kinase FERONIA |
| SNP_79230_A_19460 | NW_004516033.1 | scaffold605 | 19460                   | GG                              | AA                 | AA               | URR                           | 101497599          | receptor-like protein kinase FERONIA |
| SNP_79231_A_19574 | NW_004516033.1 | scaffold605 | 19574                   | GG                              | AA                 | AA               | URR                           | 101497599          | receptor-like protein kinase FERONIA |
| SNP_79232_A_24781 | NW_004516033.1 | scaffold605 | 24781                   | TT                              | CC                 | CC               | INTERGENIC                    |                    |                                      |
| SNP_79233_A_29010 | NW_004516033.1 | scaffold605 | 29010                   | AA                              | GG                 | GG               | INTERGENIC                    |                    |                                      |
| SNP_79234_A_71320 | NW_004516033.1 | scaffold605 | 71320                   | TT                              | AA                 | AA               | INTERGENIC                    |                    |                                      |
| SNP_79235_A_71324 | NW_004516033.1 | scaffold605 | 71324                   | CC                              | AA                 | AA               | INTERGENIC                    |                    |                                      |
| SNP_79236_A_72421 | NW_004516033.1 | scaffold605 | 72421                   | AA                              | GG                 | GG               | INTERGENIC                    |                    |                                      |
| SNP_79237_A_81897 | NW_004516033.1 | scaffold605 | 81897                   | CC                              | AA                 | AA               | INTERGENIC                    |                    |                                      |
| SNP_79238_A_6428  | NW_004516036.1 | scaffold611 | 6428                    | TT                              | CC                 | CC               | INTERGENIC                    |                    |                                      |
| SNP_79239_A_6738  | NW_004516036.1 | scaffold611 | 6738                    | TT                              | AA                 | AA               | INTERGENIC                    |                    |                                      |
| SNP_79240_A_6763  | NW_004516036.1 | scaffold611 | 6763                    | GG                              | AA                 | AA               | INTERGENIC                    |                    |                                      |
| SNP_79241_A_2119  | NW_004516037.1 | scaffold612 | 2119                    | CC                              | TT                 | TT               | INTERGENIC                    |                    |                                      |

| SNPs IDs          | Chromosome IDs | Chromosomes | Physical positions (bp) | CDC Frontier (Reference genome) | (Pusa 1103 & HPNB) | (ILWC 46 & LPNB) | Sequence genome | Components of | Gene accession IDs | Putative functions |
|-------------------|----------------|-------------|-------------------------|---------------------------------|--------------------|------------------|-----------------|---------------|--------------------|--------------------|
| SNP_79242_A_2121  | NW_004516037.1 | scaffold612 | 2121                    | CC                              | GG                 | GG               | INTERGENIC      |               |                    |                    |
| SNP_79243_A_2130  | NW_004516037.1 | scaffold612 | 2130                    | TT                              | AA                 | AA               | INTERGENIC      |               |                    |                    |
| SNP_79244_A_2979  | NW_004516037.1 | scaffold612 | 2979                    | CC                              | AA                 | AA               | INTERGENIC      |               |                    |                    |
| SNP_79245_A_3022  | NW_004516037.1 | scaffold612 | 3022                    | TT                              | AA                 | AA               | INTERGENIC      |               |                    |                    |
| SNP_79246_A_3040  | NW_004516037.1 | scaffold612 | 3040                    | CC                              | TT                 | TT               | INTERGENIC      |               |                    |                    |
| SNP_79248_A_3120  | NW_004516037.1 | scaffold612 | 3120                    | CC                              | GG                 | GG               | INTERGENIC      |               |                    |                    |
| SNP_79249_A_3429  | NW_004516037.1 | scaffold612 | 3429                    | AA                              | TT                 | TT               | INTERGENIC      |               |                    |                    |
| SNP_79250_A_3512  | NW_004516037.1 | scaffold612 | 3512                    | TT                              | GG                 | GG               | INTERGENIC      |               |                    |                    |
| SNP_79251_A_17439 | NW_004516037.1 | scaffold612 | 17439                   | AA                              | TT                 | TT               | INTERGENIC      |               |                    |                    |
| SNP_79252_A_17756 | NW_004516037.1 | scaffold612 | 17756                   | AA                              | GG                 | GG               | INTERGENIC      |               |                    |                    |
| SNP_79253_A_17944 | NW_004516037.1 | scaffold612 | 17944                   | GG                              | TT                 | TT               | INTERGENIC      |               |                    |                    |
| SNP_79254_A_17952 | NW_004516037.1 | scaffold612 | 17952                   | TT                              | AA                 | AA               | INTERGENIC      |               |                    |                    |
| SNP_79255_A_22047 | NW_004516037.1 | scaffold612 | 22047                   | CC                              | TT                 | TT               | INTERGENIC      |               |                    |                    |
| SNP_79256_A_22674 | NW_004516037.1 | scaffold612 | 22674                   | GG                              | CC                 | CC               | INTERGENIC      |               |                    |                    |
| SNP_79257_A_22779 | NW_004516037.1 | scaffold612 | 22779                   | TT                              | GG                 | GG               | INTERGENIC      |               |                    |                    |
| SNP_79258_A_22786 | NW_004516037.1 | scaffold612 | 22786                   | GG                              | TT                 | TT               | INTERGENIC      |               |                    |                    |
| SNP_79259_A_22970 | NW_004516037.1 | scaffold612 | 22970                   | AA                              | CC                 | CC               | INTERGENIC      |               |                    |                    |
| SNP_79260_A_23159 | NW_004516037.1 | scaffold612 | 23159                   | CC                              | GG                 | GG               | INTERGENIC      |               |                    |                    |
| SNP_79261_A_24822 | NW_004516037.1 | scaffold612 | 24822                   | CC                              | TT                 | TT               | INTERGENIC      |               |                    |                    |
| SNP_79262_A_25277 | NW_004516037.1 | scaffold612 | 25277                   | GG                              | AA                 | AA               | INTERGENIC      |               |                    |                    |
| SNP_79263_A_25591 | NW_004516037.1 | scaffold612 | 25591                   | GG                              | AA                 | AA               | INTERGENIC      |               |                    |                    |
| SNP_79264_A_25749 | NW_004516037.1 | scaffold612 | 25749                   | AA                              | GG                 | GG               | INTERGENIC      |               |                    |                    |

| SNPs IDs          | Chromosome IDs | Chromosomes | Physical positions (bp) | CDC Frontier (Reference genome) | (Pusa 1103 & HPNB) | (ILWC 46 & LPNB) | Sequence genome | Components of | Gene accession IDs | Putative functions |
|-------------------|----------------|-------------|-------------------------|---------------------------------|--------------------|------------------|-----------------|---------------|--------------------|--------------------|
| SNP_79265_A_26703 | NW_004516037.1 | scaffold612 | 26703                   | TT                              | CC                 | CC               | INTERGENIC      |               |                    |                    |
| SNP_79266_A_26704 | NW_004516037.1 | scaffold612 | 26704                   | GG                              | AA                 | AA               | INTERGENIC      |               |                    |                    |
| SNP_79267_A_28238 | NW_004516037.1 | scaffold612 | 28238                   | AA                              | GG                 | GG               | INTERGENIC      |               |                    |                    |
| SNP_79268_A_28455 | NW_004516037.1 | scaffold612 | 28455                   | GG                              | AA                 | AA               | INTERGENIC      |               |                    |                    |
| SNP_79269_A_28543 | NW_004516037.1 | scaffold612 | 28543                   | CC                              | TT                 | TT               | INTERGENIC      |               |                    |                    |
| SNP_79271_A_28609 | NW_004516037.1 | scaffold612 | 28609                   | TT                              | CC                 | CC               | INTERGENIC      |               |                    |                    |
| SNP_79272_A_28678 | NW_004516037.1 | scaffold612 | 28678                   | AA                              | CC                 | CC               | INTERGENIC      |               |                    |                    |
| SNP_79273_A_28742 | NW_004516037.1 | scaffold612 | 28742                   | AA                              | GG                 | GG               | INTERGENIC      |               |                    |                    |
| SNP_79274_A_28852 | NW_004516037.1 | scaffold612 | 28852                   | AA                              | GG                 | GG               | INTERGENIC      |               |                    |                    |
| SNP_79275_A_28927 | NW_004516037.1 | scaffold612 | 28927                   | AA                              | CC                 | CC               | INTERGENIC      |               |                    |                    |
| SNP_79276_A_29090 | NW_004516037.1 | scaffold612 | 29090                   | GG                              | AA                 | AA               | INTERGENIC      |               |                    |                    |
| SNP_79277_A_29390 | NW_004516037.1 | scaffold612 | 29390                   | AA                              | GG                 | GG               | INTERGENIC      |               |                    |                    |
| SNP_79278_A_29412 | NW_004516037.1 | scaffold612 | 29412                   | CC                              | GG                 | GG               | INTERGENIC      |               |                    |                    |
| SNP_79279_A_30254 | NW_004516037.1 | scaffold612 | 30254                   | TT                              | CC                 | CC               | INTERGENIC      |               |                    |                    |
| SNP_79281_A_38732 | NW_004516037.1 | scaffold612 | 38732                   | CC                              | TT                 | TT               | INTERGENIC      |               |                    |                    |
| SNP_79282_A_38960 | NW_004516037.1 | scaffold612 | 38960                   | GG                              | CC                 | CC               | INTERGENIC      |               |                    |                    |
| SNP_79283_A_38973 | NW_004516037.1 | scaffold612 | 38973                   | AA                              | TT                 | TT               | INTERGENIC      |               |                    |                    |
| SNP_79284_A_44714 | NW_004516037.1 | scaffold612 | 44714                   | AA                              | TT                 | TT               | INTERGENIC      |               |                    |                    |
| SNP_79285_A_13517 | NW_004516038.1 | scaffold613 | 13517                   | CC                              | AA                 | AA               | INTERGENIC      |               |                    |                    |
| SNP_79286_A_13843 | NW_004516038.1 | scaffold613 | 13843                   | AA                              | CC                 | CC               | INTERGENIC      |               |                    |                    |
| SNP_79287_A_13848 | NW_004516038.1 | scaffold613 | 13848                   | GG                              | TT                 | TT               | INTERGENIC      |               |                    |                    |
| SNP_79288_A_13889 | NW_004516038.1 | scaffold613 | 13889                   | CC                              | TT                 | TT               | INTERGENIC      |               |                    |                    |



| SNPs IDs          | Chromosome IDs | Chromosomes | Physical positions (bp) | CDC Frontier (Reference genome) | (Pusa 1103 & HPNB) | (ILWC 46 & LPNB) | Sequence genome | Components of | Gene accession IDs | Putative functions |
|-------------------|----------------|-------------|-------------------------|---------------------------------|--------------------|------------------|-----------------|---------------|--------------------|--------------------|
| SNP_79289_A_13899 | NW_004516038.1 | scaffold613 | 13899                   | TT                              | CC                 | CC               | INTERGENIC      |               |                    |                    |
| SNP_79290_A_24694 | NW_004516038.1 | scaffold613 | 24694                   | GG                              | AA                 | AA               | INTERGENIC      |               |                    |                    |
| SNP_79291_A_78545 | NW_004516038.1 | scaffold613 | 78545                   | GG                              | AA                 | AA               | INTERGENIC      |               |                    |                    |
| SNP_79292_A_78600 | NW_004516038.1 | scaffold613 | 78600                   | AA                              | TT                 | TT               | INTERGENIC      |               |                    |                    |
| SNP_79294_A_79484 | NW_004516038.1 | scaffold613 | 79484                   | GG                              | AA                 | AA               | INTERGENIC      |               |                    |                    |
| SNP_79295_A_79801 | NW_004516038.1 | scaffold613 | 79801                   | TT                              | CC                 | CC               | INTERGENIC      |               |                    |                    |
| SNP_79296_A_1031  | NW_004516041.1 | scaffold617 | 1031                    | TT                              | AA                 | AA               | INTERGENIC      |               |                    |                    |
| SNP_79297_A_1092  | NW_004516041.1 | scaffold617 | 1092                    | TT                              | GG                 | GG               | INTERGENIC      |               |                    |                    |
| SNP_79298_A_1261  | NW_004516041.1 | scaffold617 | 1261                    | AA                              | GG                 | GG               | INTERGENIC      |               |                    |                    |
| SNP_79299_A_1498  | NW_004516041.1 | scaffold617 | 1498                    | CC                              | TT                 | TT               | INTERGENIC      |               |                    |                    |
| SNP_79300_A_1975  | NW_004516041.1 | scaffold617 | 1975                    | CC                              | AA                 | AA               | INTERGENIC      |               |                    |                    |
| SNP_79301_A_1991  | NW_004516041.1 | scaffold617 | 1991                    | TT                              | GG                 | GG               | INTERGENIC      |               |                    |                    |
| SNP_79302_A_8565  | NW_004516041.1 | scaffold617 | 8565                    | CC                              | TT                 | TT               | INTERGENIC      |               |                    |                    |
| SNP_79303_A_8680  | NW_004516041.1 | scaffold617 | 8680                    | AA                              | TT                 | TT               | INTERGENIC      |               |                    |                    |
| SNP_79304_A_8702  | NW_004516041.1 | scaffold617 | 8702                    | TT                              | CC                 | CC               | INTERGENIC      |               |                    |                    |
| SNP_79305_A_8775  | NW_004516041.1 | scaffold617 | 8775                    | TT                              | AA                 | AA               | INTERGENIC      |               |                    |                    |
| SNP_79306_A_8847  | NW_004516041.1 | scaffold617 | 8847                    | GG                              | AA                 | AA               | INTERGENIC      |               |                    |                    |
| SNP_79307_A_8859  | NW_004516041.1 | scaffold617 | 8859                    | TT                              | GG                 | GG               | INTERGENIC      |               |                    |                    |
| SNP_79308_A_8869  | NW_004516041.1 | scaffold617 | 8869                    | CC                              | AA                 | AA               | INTERGENIC      |               |                    |                    |
| SNP_79309_A_8876  | NW_004516041.1 | scaffold617 | 8876                    | AA                              | CC                 | CC               | INTERGENIC      |               |                    |                    |
| SNP_79310_A_8901  | NW_004516041.1 | scaffold617 | 8901                    | CC                              | AA                 | TT               | INTERGENIC      |               |                    |                    |
| SNP_79311_A_8984  | NW_004516041.1 | scaffold617 | 8984                    | AA                              | GG                 | GG               | INTERGENIC      |               |                    |                    |

| SNPs IDs          | Chromosome IDs | Chromosomes | Physical positions (bp) | CDC Frontier (Reference genome) | (Pusa 1103 & HPNB) | (ILWC 46 & LPNB) | Sequence genome | Components of | Gene accession IDs | Putative functions |
|-------------------|----------------|-------------|-------------------------|---------------------------------|--------------------|------------------|-----------------|---------------|--------------------|--------------------|
| SNP_79312_A_9010  | NW_004516041.1 | scaffold617 | 9010                    | AA                              | CC                 | CC               | INTERGENIC      |               |                    |                    |
| SNP_79313_A_9042  | NW_004516041.1 | scaffold617 | 9042                    | GG                              | AA                 | AA               | INTERGENIC      |               |                    |                    |
| SNP_79314_A_9054  | NW_004516041.1 | scaffold617 | 9054                    | TT                              | AA                 | AA               | INTERGENIC      |               |                    |                    |
| SNP_79315_A_9181  | NW_004516041.1 | scaffold617 | 9181                    | GG                              | CC                 | CC               | INTERGENIC      |               |                    |                    |
| SNP_79316_A_1173  | NW_004516042.1 | scaffold618 | 1173                    | AA                              | TT                 | TT               | INTERGENIC      |               |                    |                    |
| SNP_79317_A_1292  | NW_004516042.1 | scaffold618 | 1292                    | GG                              | AA                 | AA               | INTERGENIC      |               |                    |                    |
| SNP_79319_A_13249 | NW_004516042.1 | scaffold618 | 13249                   | CC                              | AA                 | AA               | INTERGENIC      |               |                    |                    |
| SNP_79320_A_13613 | NW_004516042.1 | scaffold618 | 13613                   | GG                              | CC                 | CC               | INTERGENIC      |               |                    |                    |
| SNP_79321_A_14219 | NW_004516042.1 | scaffold618 | 14219                   | GG                              | AA                 | AA               | INTERGENIC      |               |                    |                    |
| SNP_79322_A_14227 | NW_004516042.1 | scaffold618 | 14227                   | GG                              | AA                 | AA               | INTERGENIC      |               |                    |                    |
| SNP_79324_A_55176 | NW_004516042.1 | scaffold618 | 55176                   | AA                              | CC                 | CC               | INTERGENIC      |               |                    |                    |
| SNP_79325_A_55232 | NW_004516042.1 | scaffold618 | 55232                   | AA                              | GG                 | GG               | INTERGENIC      |               |                    |                    |
| SNP_79326_A_55237 | NW_004516042.1 | scaffold618 | 55237                   | AA                              | GG                 | GG               | INTERGENIC      |               |                    |                    |
| SNP_79327_A_58937 | NW_004516042.1 | scaffold618 | 58937                   | AA                              | TT                 | TT               | INTERGENIC      |               |                    |                    |
| SNP_79328_A_58954 | NW_004516042.1 | scaffold618 | 58954                   | TT                              | CC                 | CC               | INTERGENIC      |               |                    |                    |
| SNP_79329_A_58973 | NW_004516042.1 | scaffold618 | 58973                   | TT                              | CC                 | CC               | INTERGENIC      |               |                    |                    |
| SNP_79330_A_59084 | NW_004516042.1 | scaffold618 | 59084                   | GG                              | AA                 | AA               | INTERGENIC      |               |                    |                    |
| SNP_79331_A_59130 | NW_004516042.1 | scaffold618 | 59130                   | CC                              | AA                 | AA               | INTERGENIC      |               |                    |                    |
| SNP_79332_A_59434 | NW_004516042.1 | scaffold618 | 59434                   | AA                              | TT                 | TT               | INTERGENIC      |               |                    |                    |
| SNP_79333_A_59435 | NW_004516042.1 | scaffold618 | 59435                   | CC                              | GG                 | GG               | INTERGENIC      |               |                    |                    |
| SNP_79334_A_59502 | NW_004516042.1 | scaffold618 | 59502                   | TT                              | CC                 | CC               | INTERGENIC      |               |                    |                    |
| SNP_79335_A_59506 | NW_004516042.1 | scaffold618 | 59506                   | TT                              | CC                 | CC               | INTERGENIC      |               |                    |                    |

| SNPs IDs           | Chromosome IDs | Chromosomes | Physical positions (bp) | CDC Frontier (Reference genome) | (Pusa 1103 & HPNB) | (ILWC 46 & LPNB) | Sequence genome | Components of | Gene accession IDs | Putative functions |
|--------------------|----------------|-------------|-------------------------|---------------------------------|--------------------|------------------|-----------------|---------------|--------------------|--------------------|
| SNP_79336_A_59559  | NW_004516042.1 | scaffold618 | 59559                   | AA                              | GG                 | GG               | INTERGENIC      |               |                    |                    |
| SNP_79337_A_60608  | NW_004516042.1 | scaffold618 | 60608                   | TT                              | CC                 | CC               | INTERGENIC      |               |                    |                    |
| SNP_79338_A_86264  | NW_004516042.1 | scaffold618 | 86264                   | TT                              | CC                 | CC               | INTERGENIC      |               |                    |                    |
| SNP_79339_A_147066 | NW_004516042.1 | scaffold618 | 147066                  | TT                              | GG                 | GG               | INTERGENIC      |               |                    |                    |
| SNP_79340_A_147069 | NW_004516042.1 | scaffold618 | 147069                  | GG                              | AA                 | AA               | INTERGENIC      |               |                    |                    |
| SNP_79341_A_147454 | NW_004516042.1 | scaffold618 | 147454                  | AA                              | GG                 | GG               | INTERGENIC      |               |                    |                    |
| SNP_79342_A_147474 | NW_004516042.1 | scaffold618 | 147474                  | GG                              | AA                 | AA               | INTERGENIC      |               |                    |                    |
| SNP_79343_A_147489 | NW_004516042.1 | scaffold618 | 147489                  | AA                              | GG                 | GG               | INTERGENIC      |               |                    |                    |
| SNP_79344_A_147492 | NW_004516042.1 | scaffold618 | 147492                  | AA                              | TT                 | TT               | INTERGENIC      |               |                    |                    |
| SNP_79345_A_147535 | NW_004516042.1 | scaffold618 | 147535                  | TT                              | GG                 | GG               | INTERGENIC      |               |                    |                    |
| SNP_79347_A_216313 | NW_004516042.1 | scaffold618 | 216313                  | TT                              | CC                 | CC               | INTERGENIC      |               |                    |                    |
| SNP_79348_A_216482 | NW_004516042.1 | scaffold618 | 216482                  | GG                              | TT                 | TT               | INTERGENIC      |               |                    |                    |
| SNP_79349_A_216624 | NW_004516042.1 | scaffold618 | 216624                  | GG                              | TT                 | TT               | INTERGENIC      |               |                    |                    |
| SNP_79350_A_216646 | NW_004516042.1 | scaffold618 | 216646                  | AA                              | GG                 | GG               | INTERGENIC      |               |                    |                    |
| SNP_79351_A_218321 | NW_004516042.1 | scaffold618 | 218321                  | GG                              | AA                 | AA               | INTERGENIC      |               |                    |                    |
| SNP_79352_A_46871  | NW_004516043.1 | scaffold619 | 46871                   | AA                              | CC                 | CC               | INTERGENIC      |               |                    |                    |
| SNP_79353_A_47128  | NW_004516043.1 | scaffold619 | 47128                   | GG                              | CC                 | CC               | INTERGENIC      |               |                    |                    |
| SNP_79354_A_47140  | NW_004516043.1 | scaffold619 | 47140                   | AA                              | CC                 | CC               | INTERGENIC      |               |                    |                    |
| SNP_79355_A_88     | NW_004516044.1 | scaffold620 | 88                      | AA                              | TT                 | TT               | INTERGENIC      |               |                    |                    |
| SNP_79356_A_2499   | NW_004516045.1 | scaffold622 | 2499                    | AA                              | GG                 | GG               | INTERGENIC      |               |                    |                    |
| SNP_79357_A_7544   | NW_004516045.1 | scaffold622 | 7544                    | AA                              | GG                 | GG               | INTERGENIC      |               |                    |                    |
| SNP_79358_A_7739   | NW_004516045.1 | scaffold622 | 7739                    | TT                              | GG                 | GG               | INTERGENIC      |               |                    |                    |

| SNPs IDs          | Chromosome IDs | Chromosomes | Physical positions (bp) | CDC Frontier genome (Reference genome) | (Pusa 1103 & HPNB) | (ILWC 46 & LPNB) | Sequence genome | Components of | Gene accession IDs | Putative functions |
|-------------------|----------------|-------------|-------------------------|----------------------------------------|--------------------|------------------|-----------------|---------------|--------------------|--------------------|
| SNP_79359_A_8150  | NW_004516045.1 | scaffold622 | 8150                    | CC                                     | TT                 | TT               | INTERGENIC      |               |                    |                    |
| SNP_79360_A_8163  | NW_004516045.1 | scaffold622 | 8163                    | GG                                     | TT                 | TT               | INTERGENIC      |               |                    |                    |
| SNP_79361_A_8165  | NW_004516045.1 | scaffold622 | 8165                    | AA                                     | TT                 | TT               | INTERGENIC      |               |                    |                    |
| SNP_79362_A_8572  | NW_004516045.1 | scaffold622 | 8572                    | TT                                     | AA                 | AA               | INTERGENIC      |               |                    |                    |
| SNP_79363_A_8597  | NW_004516045.1 | scaffold622 | 8597                    | TT                                     | GG                 | GG               | INTERGENIC      |               |                    |                    |
| SNP_79364_A_8636  | NW_004516045.1 | scaffold622 | 8636                    | CC                                     | AA                 | AA               | INTERGENIC      |               |                    |                    |
| SNP_79365_A_9806  | NW_004516045.1 | scaffold622 | 9806                    | TT                                     | GG                 | GG               | INTERGENIC      |               |                    |                    |
| SNP_79366_A_9826  | NW_004516045.1 | scaffold622 | 9826                    | AA                                     | GG                 | GG               | INTERGENIC      |               |                    |                    |
| SNP_79368_A_10481 | NW_004516045.1 | scaffold622 | 10481                   | GG                                     | CC                 | CC               | INTERGENIC      |               |                    |                    |
| SNP_79369_A_10496 | NW_004516045.1 | scaffold622 | 10496                   | CC                                     | TT                 | TT               | INTERGENIC      |               |                    |                    |
| SNP_79370_A_10552 | NW_004516045.1 | scaffold622 | 10552                   | CC                                     | GG                 | GG               | INTERGENIC      |               |                    |                    |
| SNP_79371_A_10763 | NW_004516045.1 | scaffold622 | 10763                   | CC                                     | AA                 | AA               | INTERGENIC      |               |                    |                    |
| SNP_79372_A_10835 | NW_004516045.1 | scaffold622 | 10835                   | TT                                     | AA                 | AA               | INTERGENIC      |               |                    |                    |
| SNP_79374_A_20974 | NW_004516045.1 | scaffold622 | 20974                   | TT                                     | CC                 | CC               | INTERGENIC      |               |                    |                    |
| SNP_79375_A_20984 | NW_004516045.1 | scaffold622 | 20984                   | AA                                     | GG                 | GG               | INTERGENIC      |               |                    |                    |
| SNP_79376_A_23185 | NW_004516045.1 | scaffold622 | 23185                   | AA                                     | GG                 | GG               | INTERGENIC      |               |                    |                    |
| SNP_79377_A_23478 | NW_004516045.1 | scaffold622 | 23478                   | AA                                     | CC                 | CC               | INTERGENIC      |               |                    |                    |
| SNP_79378_A_24165 | NW_004516045.1 | scaffold622 | 24165                   | GG                                     | AA                 | AA               | INTERGENIC      |               |                    |                    |
| SNP_79379_A_24317 | NW_004516045.1 | scaffold622 | 24317                   | GG                                     | TT                 | TT               | INTERGENIC      |               |                    |                    |
| SNP_79380_A_24598 | NW_004516045.1 | scaffold622 | 24598                   | AA                                     | GG                 | GG               | INTERGENIC      |               |                    |                    |
| SNP_79381_A_24639 | NW_004516045.1 | scaffold622 | 24639                   | GG                                     | CC                 | CC               | INTERGENIC      |               |                    |                    |
| SNP_79382_A_24737 | NW_004516045.1 | scaffold622 | 24737                   | AA                                     | GG                 | GG               | INTERGENIC      |               |                    |                    |

| SNPs IDs          | Chromosome IDs | Chromosomes | Physical positions (bp) | CDC Frontier (Reference genome) | (Pusa 1103 & HPNB) | (ILWC 46 & LPNB) | Sequence genome | Components of | Gene accession IDs | Putative functions |
|-------------------|----------------|-------------|-------------------------|---------------------------------|--------------------|------------------|-----------------|---------------|--------------------|--------------------|
| SNP_79383_A_24745 | NW_004516045.1 | scaffold622 | 24745                   | AA                              | CC                 | CC               | INTERGENIC      |               |                    |                    |
| SNP_79384_A_24827 | NW_004516045.1 | scaffold622 | 24827                   | GG                              | TT                 | TT               | INTERGENIC      |               |                    |                    |
| SNP_79385_A_24928 | NW_004516045.1 | scaffold622 | 24928                   | AA                              | TT                 | TT               | INTERGENIC      |               |                    |                    |
| SNP_79386_A_24930 | NW_004516045.1 | scaffold622 | 24930                   | AA                              | GG                 | GG               | INTERGENIC      |               |                    |                    |
| SNP_79387_A_25331 | NW_004516045.1 | scaffold622 | 25331                   | TT                              | AA                 | AA               | INTERGENIC      |               |                    |                    |
| SNP_79388_A_25698 | NW_004516045.1 | scaffold622 | 25698                   | GG                              | TT                 | TT               | INTERGENIC      |               |                    |                    |
| SNP_79389_A_26069 | NW_004516045.1 | scaffold622 | 26069                   | AA                              | GG                 | GG               | INTERGENIC      |               |                    |                    |
| SNP_79390_A_26375 | NW_004516045.1 | scaffold622 | 26375                   | TT                              | AA                 | AA               | INTERGENIC      |               |                    |                    |
| SNP_79391_A_26605 | NW_004516045.1 | scaffold622 | 26605                   | CC                              | AA                 | AA               | INTERGENIC      |               |                    |                    |
| SNP_79392_A_26613 | NW_004516045.1 | scaffold622 | 26613                   | CC                              | TT                 | TT               | INTERGENIC      |               |                    |                    |
| SNP_79394_A_30918 | NW_004516045.1 | scaffold622 | 30918                   | TT                              | CC                 | CC               | INTERGENIC      |               |                    |                    |
| SNP_79395_A_31042 | NW_004516045.1 | scaffold622 | 31042                   | TT                              | GG                 | GG               | INTERGENIC      |               |                    |                    |
| SNP_79396_A_31199 | NW_004516045.1 | scaffold622 | 31199                   | GG                              | CC                 | CC               | INTERGENIC      |               |                    |                    |
| SNP_79397_A_31288 | NW_004516045.1 | scaffold622 | 31288                   | CC                              | AA                 | AA               | INTERGENIC      |               |                    |                    |
| SNP_79398_A_31309 | NW_004516045.1 | scaffold622 | 31309                   | TT                              | GG                 | GG               | INTERGENIC      |               |                    |                    |
| SNP_79399_A_31322 | NW_004516045.1 | scaffold622 | 31322                   | TT                              | AA                 | AA               | INTERGENIC      |               |                    |                    |
| SNP_79400_A_35293 | NW_004516045.1 | scaffold622 | 35293                   | GG                              | CC                 | CC               | INTERGENIC      |               |                    |                    |
| SNP_79401_A_35296 | NW_004516045.1 | scaffold622 | 35296                   | TT                              | CC                 | CC               | INTERGENIC      |               |                    |                    |
| SNP_79402_A_35325 | NW_004516045.1 | scaffold622 | 35325                   | TT                              | AA                 | AA               | INTERGENIC      |               |                    |                    |
| SNP_79403_A_35823 | NW_004516045.1 | scaffold622 | 35823                   | TT                              | CC                 | CC               | INTERGENIC      |               |                    |                    |
| SNP_79404_A_35894 | NW_004516045.1 | scaffold622 | 35894                   | AA                              | CC                 | CC               | INTERGENIC      |               |                    |                    |
| SNP_79405_A_35984 | NW_004516045.1 | scaffold622 | 35984                   | CC                              | TT                 | TT               | INTERGENIC      |               |                    |                    |

| SNPs IDs          | Chromosome IDs | Chromosomes | Physical positions (bp) | CDC Frontier (Reference genome) | (Pusa 1103 & HPNB) | (ILWC 46 & LPNB) | Sequence genome | Components of | Gene accession IDs | Putative functions |
|-------------------|----------------|-------------|-------------------------|---------------------------------|--------------------|------------------|-----------------|---------------|--------------------|--------------------|
| SNP_79406_A_36082 | NW_004516045.1 | scaffold622 | 36082                   | CC                              | GG                 | GG               | INTERGENIC      |               |                    |                    |
| SNP_79407_A_36091 | NW_004516045.1 | scaffold622 | 36091                   | AA                              | TT                 | TT               | INTERGENIC      |               |                    |                    |
| SNP_79408_A_36138 | NW_004516045.1 | scaffold622 | 36138                   | GG                              | TT                 | TT               | INTERGENIC      |               |                    |                    |
| SNP_79409_A_36278 | NW_004516045.1 | scaffold622 | 36278                   | GG                              | CC                 | CC               | INTERGENIC      |               |                    |                    |
| SNP_79410_A_36621 | NW_004516045.1 | scaffold622 | 36621                   | GG                              | AA                 | AA               | INTERGENIC      |               |                    |                    |
| SNP_79412_A_38962 | NW_004516045.1 | scaffold622 | 38962                   | AA                              | GG                 | GG               | INTERGENIC      |               |                    |                    |
| SNP_79413_A_41363 | NW_004516045.1 | scaffold622 | 41363                   | GG                              | AA                 | AA               | INTERGENIC      |               |                    |                    |
| SNP_79414_A_41460 | NW_004516045.1 | scaffold622 | 41460                   | AA                              | GG                 | GG               | INTERGENIC      |               |                    |                    |
| SNP_79416_A_44506 | NW_004516045.1 | scaffold622 | 44506                   | TT                              | AA                 | AA               | INTERGENIC      |               |                    |                    |
| SNP_79417_A_45308 | NW_004516045.1 | scaffold622 | 45308                   | TT                              | CC                 | CC               | INTERGENIC      |               |                    |                    |
| SNP_79418_A_45948 | NW_004516045.1 | scaffold622 | 45948                   | TT                              | AA                 | AA               | INTERGENIC      |               |                    |                    |
| SNP_79421_A_48012 | NW_004516045.1 | scaffold622 | 48012                   | TT                              | AA                 | AA               | INTERGENIC      |               |                    |                    |
| SNP_79422_A_48048 | NW_004516045.1 | scaffold622 | 48048                   | CC                              | GG                 | GG               | INTERGENIC      |               |                    |                    |
| SNP_79423_A_48306 | NW_004516045.1 | scaffold622 | 48306                   | TT                              | AA                 | AA               | INTERGENIC      |               |                    |                    |
| SNP_79424_A_48851 | NW_004516045.1 | scaffold622 | 48851                   | TT                              | AA                 | AA               | INTERGENIC      |               |                    |                    |
| SNP_79425_A_48910 | NW_004516045.1 | scaffold622 | 48910                   | CC                              | AA                 | AA               | INTERGENIC      |               |                    |                    |
| SNP_79426_A_48925 | NW_004516045.1 | scaffold622 | 48925                   | CC                              | AA                 | AA               | INTERGENIC      |               |                    |                    |
| SNP_79427_A_56408 | NW_004516045.1 | scaffold622 | 56408                   | AA                              | TT                 | TT               | INTERGENIC      |               |                    |                    |
| SNP_79428_A_56577 | NW_004516045.1 | scaffold622 | 56577                   | AA                              | CC                 | CC               | INTERGENIC      |               |                    |                    |
| SNP_79429_A_56846 | NW_004516045.1 | scaffold622 | 56846                   | CC                              | TT                 | TT               | INTERGENIC      |               |                    |                    |
| SNP_79430_A_56869 | NW_004516045.1 | scaffold622 | 56869                   | CC                              | GG                 | GG               | INTERGENIC      |               |                    |                    |
| SNP_79431_A_57087 | NW_004516045.1 | scaffold622 | 57087                   | AA                              | TT                 | TT               | INTERGENIC      |               |                    |                    |

| SNPs IDs          | Chromosome IDs | Chromosomes | Physical positions (bp) | CDC Frontier (Reference genome) | (Pusa 1103 & HPNB) | (ILWC 46 & LPNB) | Sequence genome | Components of | Gene accession IDs | Putative functions |
|-------------------|----------------|-------------|-------------------------|---------------------------------|--------------------|------------------|-----------------|---------------|--------------------|--------------------|
| SNP_79432_A_57101 | NW_004516045.1 | scaffold622 | 57101                   | CC                              | GG                 | GG               | INTERGENIC      |               |                    |                    |
| SNP_79433_A_59774 | NW_004516045.1 | scaffold622 | 59774                   | TT                              | AA                 | AA               | INTERGENIC      |               |                    |                    |
| SNP_79434_A_59813 | NW_004516045.1 | scaffold622 | 59813                   | CC                              | AA                 | AA               | INTERGENIC      |               |                    |                    |
| SNP_79435_A_61628 | NW_004516045.1 | scaffold622 | 61628                   | TT                              | CC                 | CC               | INTERGENIC      |               |                    |                    |
| SNP_79436_A_61629 | NW_004516045.1 | scaffold622 | 61629                   | GG                              | TT                 | TT               | INTERGENIC      |               |                    |                    |
| SNP_79437_A_61637 | NW_004516045.1 | scaffold622 | 61637                   | CC                              | TT                 | TT               | INTERGENIC      |               |                    |                    |
| SNP_79438_A_61698 | NW_004516045.1 | scaffold622 | 61698                   | CC                              | TT                 | TT               | INTERGENIC      |               |                    |                    |
| SNP_79440_A_63863 | NW_004516045.1 | scaffold622 | 63863                   | AA                              | GG                 | GG               | INTERGENIC      |               |                    |                    |
| SNP_79441_A_63889 | NW_004516045.1 | scaffold622 | 63889                   | GG                              | AA                 | AA               | INTERGENIC      |               |                    |                    |
| SNP_79442_A_64090 | NW_004516045.1 | scaffold622 | 64090                   | AA                              | GG                 | GG               | INTERGENIC      |               |                    |                    |
| SNP_79443_A_64352 | NW_004516045.1 | scaffold622 | 64352                   | GG                              | CC                 | CC               | INTERGENIC      |               |                    |                    |
| SNP_79444_A_64439 | NW_004516045.1 | scaffold622 | 64439                   | GG                              | CC                 | CC               | INTERGENIC      |               |                    |                    |
| SNP_79445_A_66379 | NW_004516045.1 | scaffold622 | 66379                   | CC                              | AA                 | AA               | INTERGENIC      |               |                    |                    |
| SNP_79446_A_67898 | NW_004516045.1 | scaffold622 | 67898                   | CC                              | TT                 | TT               | INTERGENIC      |               |                    |                    |
| SNP_79447_A_68551 | NW_004516045.1 | scaffold622 | 68551                   | TT                              | AA                 | AA               | INTERGENIC      |               |                    |                    |
| SNP_79448_A_68627 | NW_004516045.1 | scaffold622 | 68627                   | TT                              | CC                 | CC               | INTERGENIC      |               |                    |                    |
| SNP_79449_A_68912 | NW_004516045.1 | scaffold622 | 68912                   | AA                              | TT                 | TT               | INTERGENIC      |               |                    |                    |
| SNP_79450_A_69329 | NW_004516045.1 | scaffold622 | 69329                   | GG                              | CC                 | CC               | INTERGENIC      |               |                    |                    |
| SNP_79451_A_71732 | NW_004516045.1 | scaffold622 | 71732                   | AA                              | GG                 | GG               | INTERGENIC      |               |                    |                    |
| SNP_79452_A_72180 | NW_004516045.1 | scaffold622 | 72180                   | AA                              | CC                 | CC               | INTERGENIC      |               |                    |                    |
| SNP_79453_A_72181 | NW_004516045.1 | scaffold622 | 72181                   | CC                              | TT                 | TT               | INTERGENIC      |               |                    |                    |
| SNP_79454_A_72306 | NW_004516045.1 | scaffold622 | 72306                   | AA                              | GG                 | GG               | INTERGENIC      |               |                    |                    |

| SNPs IDs          | Chromosome IDs | Chromosomes | Physical positions (bp) | CDC Frontier (Reference genome) | (Pusa 1103 & HPNB) | (ILWC 46 & LPNB) | Sequence genome | Components of | Gene accession IDs | Putative functions |
|-------------------|----------------|-------------|-------------------------|---------------------------------|--------------------|------------------|-----------------|---------------|--------------------|--------------------|
| SNP_79455_A_73322 | NW_004516045.1 | scaffold622 | 73322                   | CC                              | AA                 | AA               | INTERGENIC      |               |                    |                    |
| SNP_79456_A_73350 | NW_004516045.1 | scaffold622 | 73350                   | AA                              | GG                 | GG               | INTERGENIC      |               |                    |                    |
| SNP_79457_A_73721 | NW_004516045.1 | scaffold622 | 73721                   | CC                              | GG                 | GG               | INTERGENIC      |               |                    |                    |
| SNP_79458_A_75769 | NW_004516045.1 | scaffold622 | 75769                   | GG                              | AA                 | AA               | INTERGENIC      |               |                    |                    |
| SNP_79459_A_75996 | NW_004516045.1 | scaffold622 | 75996                   | TT                              | AA                 | AA               | INTERGENIC      |               |                    |                    |
| SNP_79460_A_76030 | NW_004516045.1 | scaffold622 | 76030                   | CC                              | TT                 | TT               | INTERGENIC      |               |                    |                    |
| SNP_79461_A_81839 | NW_004516045.1 | scaffold622 | 81839                   | TT                              | AA                 | AA               | INTERGENIC      |               |                    |                    |
| SNP_79462_A_82014 | NW_004516045.1 | scaffold622 | 82014                   | CC                              | GG                 | GG               | INTERGENIC      |               |                    |                    |
| SNP_79463_A_83659 | NW_004516045.1 | scaffold622 | 83659                   | CC                              | TT                 | TT               | INTERGENIC      |               |                    |                    |
| SNP_79464_A_84185 | NW_004516045.1 | scaffold622 | 84185                   | AA                              | TT                 | TT               | INTERGENIC      |               |                    |                    |
| SNP_79465_A_84260 | NW_004516045.1 | scaffold622 | 84260                   | TT                              | GG                 | GG               | INTERGENIC      |               |                    |                    |
| SNP_79466_A_84647 | NW_004516045.1 | scaffold622 | 84647                   | TT                              | AA                 | AA               | INTERGENIC      |               |                    |                    |
| SNP_79467_A_84689 | NW_004516045.1 | scaffold622 | 84689                   | TT                              | CC                 | CC               | INTERGENIC      |               |                    |                    |
| SNP_79468_A_86287 | NW_004516045.1 | scaffold622 | 86287                   | AA                              | GG                 | GG               | INTERGENIC      |               |                    |                    |
| SNP_79469_A_87311 | NW_004516045.1 | scaffold622 | 87311                   | AA                              | TT                 | TT               | INTERGENIC      |               |                    |                    |
| SNP_79470_A_88873 | NW_004516045.1 | scaffold622 | 88873                   | TT                              | AA                 | AA               | INTERGENIC      |               |                    |                    |
| SNP_79471_A_89090 | NW_004516045.1 | scaffold622 | 89090                   | TT                              | GG                 | GG               | INTERGENIC      |               |                    |                    |
| SNP_79472_A_89658 | NW_004516045.1 | scaffold622 | 89658                   | AA                              | TT                 | TT               | INTERGENIC      |               |                    |                    |
| SNP_79473_A_10415 | NW_004516047.1 | scaffold624 | 10415                   | AA                              | CC                 | CC               | INTERGENIC      |               |                    |                    |
| SNP_79474_A_58238 | NW_004516047.1 | scaffold624 | 58238                   | TT                              | CC                 | CC               | INTERGENIC      |               |                    |                    |
| SNP_79475_A_66983 | NW_004516047.1 | scaffold624 | 66983                   | AA                              | GG                 | GG               | INTERGENIC      |               |                    |                    |
| SNP_79476_A_68386 | NW_004516047.1 | scaffold624 | 68386                   | TT                              | AA                 | AA               | INTERGENIC      |               |                    |                    |



| SNPs IDs           | Chromosome IDs | Chromosomes | Physical positions (bp) | CDC Frontier (Reference genome) | (Pusa 1103 & HPNB) | (ILWC 46 & LPNB) | Sequence Components of genome | Gene accession IDs | Putative functions           |
|--------------------|----------------|-------------|-------------------------|---------------------------------|--------------------|------------------|-------------------------------|--------------------|------------------------------|
| SNP_79477_A_68481  | NW_004516047.1 | scaffold624 | 68481                   | TT                              | CC                 | CC               | INTERGENIC                    |                    |                              |
| SNP_79478_A_69913  | NW_004516047.1 | scaffold624 | 69913                   | GG                              | TT                 | TT               | DRR                           | 101500940          | uncharacterized LOC101500940 |
| SNP_79479_A_70232  | NW_004516047.1 | scaffold624 | 70232                   | AA                              | CC                 | CC               | DRR                           | 101500940          | uncharacterized LOC101500940 |
| SNP_79480_A_112337 | NW_004516047.1 | scaffold624 | 112337                  | GG                              | AA                 | AA               | INTERGENIC                    |                    |                              |
| SNP_79481_A_112419 | NW_004516047.1 | scaffold624 | 112419                  | GG                              | AA                 | AA               | INTERGENIC                    |                    |                              |
| SNP_79482_A_112523 | NW_004516047.1 | scaffold624 | 112523                  | AA                              | GG                 | GG               | INTERGENIC                    |                    |                              |
| SNP_79483_A_112596 | NW_004516047.1 | scaffold624 | 112596                  | CC                              | TT                 | TT               | INTERGENIC                    |                    |                              |
| SNP_79484_A_124625 | NW_004516047.1 | scaffold624 | 124625                  | TT                              | AA                 | AA               | INTRON                        | id203662           | Unknown function             |
| SNP_79485_A_136886 | NW_004516047.1 | scaffold624 | 136886                  | GG                              | CC                 | CC               | INTERGENIC                    |                    |                              |
| SNP_79486_A_136887 | NW_004516047.1 | scaffold624 | 136887                  | AA                              | CC                 | CC               | INTERGENIC                    |                    |                              |
| SNP_79487_A_136904 | NW_004516047.1 | scaffold624 | 136904                  | CC                              | TT                 | TT               | INTERGENIC                    |                    |                              |
| SNP_79488_A_149069 | NW_004516047.1 | scaffold624 | 149069                  | CC                              | TT                 | TT               | INTERGENIC                    |                    |                              |
| SNP_79489_A_171955 | NW_004516047.1 | scaffold624 | 171955                  | CC                              | GG                 | GG               | INTERGENIC                    |                    |                              |
| SNP_79490_A_171966 | NW_004516047.1 | scaffold624 | 171966                  | AA                              | GG                 | GG               | INTERGENIC                    |                    |                              |
| SNP_79491_A_171969 | NW_004516047.1 | scaffold624 | 171969                  | GG                              | AA                 | AA               | INTERGENIC                    |                    |                              |
| SNP_79492_A_171988 | NW_004516047.1 | scaffold624 | 171988                  | TT                              | GG                 | GG               | INTERGENIC                    |                    |                              |
| SNP_79493_A_171996 | NW_004516047.1 | scaffold624 | 171996                  | CC                              | AA                 | AA               | INTERGENIC                    |                    |                              |
| SNP_79494_A_187688 | NW_004516047.1 | scaffold624 | 187688                  | GG                              | AA                 | AA               | INTERGENIC                    |                    |                              |
| SNP_79495_A_187702 | NW_004516047.1 | scaffold624 | 187702                  | TT                              | CC                 | CC               | INTERGENIC                    |                    |                              |
| SNP_79496_A_188070 | NW_004516047.1 | scaffold624 | 188070                  | GG                              | AA                 | AA               | INTERGENIC                    |                    |                              |
| SNP_79497_A_188162 | NW_004516047.1 | scaffold624 | 188162                  | GG                              | AA                 | AA               | INTERGENIC                    |                    |                              |
| SNP_79498_A_188201 | NW_004516047.1 | scaffold624 | 188201                  | GG                              | AA                 | AA               | INTERGENIC                    |                    |                              |

| SNPs IDs           | Chromosome IDs | Chromosomes | Physical positions (bp) | CDC Frontier (Reference genome) | (Pusa 1103 & HPNB) | (ILWC 46 & LPNB) | Sequence Components of genome | Gene accession IDs | Putative functions                                   |
|--------------------|----------------|-------------|-------------------------|---------------------------------|--------------------|------------------|-------------------------------|--------------------|------------------------------------------------------|
| SNP_79499_A_188267 | NW_004516047.1 | scaffold624 | 188267                  | CC                              | TT                 | TT               | INTERGENIC                    |                    |                                                      |
| SNP_79500_A_188285 | NW_004516047.1 | scaffold624 | 188285                  | TT                              | CC                 | CC               | INTERGENIC                    |                    |                                                      |
| SNP_79501_A_240657 | NW_004516047.1 | scaffold624 | 240657                  | CC                              | TT                 | TT               | INTRON                        | 101502632          | DNA replication ATP-dependent helicase/nuclease DNA2 |
| SNP_79502_A_254971 | NW_004516047.1 | scaffold624 | 254971                  | GG                              | AA                 | AA               | URR                           | 101502632          | DNA replication ATP-dependent helicase/nuclease DNA2 |
| SNP_79503_A_255402 | NW_004516047.1 | scaffold624 | 255402                  | AA                              | GG                 | GG               | URR                           | 101502632          | DNA replication ATP-dependent helicase/nuclease DNA2 |
| SNP_79504_A_255452 | NW_004516047.1 | scaffold624 | 255452                  | AA                              | GG                 | GG               | URR                           | 101502632          | DNA replication ATP-dependent helicase/nuclease DNA2 |
| SNP_79505_A_255835 | NW_004516047.1 | scaffold624 | 255835                  | CC                              | AA                 | AA               | URR                           | 101502632          | DNA replication ATP-dependent helicase/nuclease DNA2 |
| SNP_79506_A_256625 | NW_004516047.1 | scaffold624 | 256625                  | GG                              | AA                 | AA               | NON_SYNONYMOUS_CODING         | 101502951          | Unknown function                                     |
| SNP_79507_A_265764 | NW_004516047.1 | scaffold624 | 265764                  | TT                              | GG                 | GG               | INTRON                        | 101502951          | Unknown function                                     |
| SNP_79508_A_307920 | NW_004516047.1 | scaffold624 | 307920                  | AA                              | CC                 | CC               | INTERGENIC                    |                    |                                                      |
| SNP_79509_A_310390 | NW_004516047.1 | scaffold624 | 310390                  | AA                              | TT                 | TT               | INTERGENIC                    |                    |                                                      |
| SNP_79510_A_5455   | NW_004516049.1 | scaffold626 | 5455                    | TT                              | AA                 | AA               | INTERGENIC                    |                    |                                                      |
| SNP_79511_A_5489   | NW_004516049.1 | scaffold626 | 5489                    | AA                              | TT                 | TT               | INTERGENIC                    |                    |                                                      |
| SNP_79512_A_6009   | NW_004516049.1 | scaffold626 | 6009                    | AA                              | GG                 | GG               | INTERGENIC                    |                    |                                                      |
| SNP_79513_A_6165   | NW_004516049.1 | scaffold626 | 6165                    | AA                              | GG                 | GG               | INTERGENIC                    |                    |                                                      |
| SNP_79514_A_6481   | NW_004516049.1 | scaffold626 | 6481                    | TT                              | CC                 | CC               | INTERGENIC                    |                    |                                                      |
| SNP_79515_A_6543   | NW_004516049.1 | scaffold626 | 6543                    | AA                              | GG                 | GG               | INTERGENIC                    |                    |                                                      |
| SNP_79516_A_18188  | NW_004516049.1 | scaffold626 | 18188                   | TT                              | CC                 | CC               | INTERGENIC                    |                    |                                                      |
| SNP_79517_A_18222  | NW_004516049.1 | scaffold626 | 18222                   | GG                              | AA                 | AA               | INTERGENIC                    |                    |                                                      |
| SNP_79518_A_18237  | NW_004516049.1 | scaffold626 | 18237                   | TT                              | AA                 | AA               | INTERGENIC                    |                    |                                                      |
| SNP_79519_A_18602  | NW_004516049.1 | scaffold626 | 18602                   | TT                              | CC                 | CC               | INTERGENIC                    |                    |                                                      |
| SNP_79520_A_23815  | NW_004516049.1 | scaffold626 | 23815                   | TT                              | CC                 | CC               | INTERGENIC                    |                    |                                                      |

| SNPs IDs           | Chromosome IDs | Chromosomes | Physical positions (bp) | CDC Frontier (Reference genome) | (Pusa 1103 & HPNB) | (ILWC 46 & LPNB) | Sequence genome | Components of | Gene accession IDs | Putative functions |
|--------------------|----------------|-------------|-------------------------|---------------------------------|--------------------|------------------|-----------------|---------------|--------------------|--------------------|
| SNP_79521_A_23952  | NW_004516049.1 | scaffold626 | 23952                   | AA                              | CC                 | CC               | INTERGENIC      |               |                    |                    |
| SNP_79522_A_27884  | NW_004516049.1 | scaffold626 | 27884                   | TT                              | GG                 | GG               | INTERGENIC      |               |                    |                    |
| SNP_79523_A_48653  | NW_004516049.1 | scaffold626 | 48653                   | GG                              | TT                 | TT               | INTERGENIC      |               |                    |                    |
| SNP_79524_A_55846  | NW_004516049.1 | scaffold626 | 55846                   | GG                              | AA                 | AA               | INTERGENIC      |               |                    |                    |
| SNP_79525_A_55852  | NW_004516049.1 | scaffold626 | 55852                   | AA                              | GG                 | GG               | INTERGENIC      |               |                    |                    |
| SNP_79527_A_70263  | NW_004516049.1 | scaffold626 | 70263                   | TT                              | GG                 | GG               | INTERGENIC      |               |                    |                    |
| SNP_79528_A_82117  | NW_004516049.1 | scaffold626 | 82117                   | GG                              | TT                 | TT               | INTERGENIC      |               |                    |                    |
| SNP_79529_A_85568  | NW_004516049.1 | scaffold626 | 85568                   | CC                              | GG                 | GG               | INTERGENIC      |               |                    |                    |
| SNP_79530_A_91525  | NW_004516049.1 | scaffold626 | 91525                   | TT                              | AA                 | AA               | INTERGENIC      |               |                    |                    |
| SNP_79531_A_94448  | NW_004516049.1 | scaffold626 | 94448                   | TT                              | GG                 | GG               | INTERGENIC      |               |                    |                    |
| SNP_79533_A_99336  | NW_004516049.1 | scaffold626 | 99336                   | CC                              | GG                 | GG               | INTERGENIC      |               |                    |                    |
| SNP_79534_A_105853 | NW_004516049.1 | scaffold626 | 105853                  | GG                              | AA                 | AA               | INTERGENIC      |               |                    |                    |
| SNP_79535_A_117847 | NW_004516049.1 | scaffold626 | 117847                  | AA                              | CC                 | CC               | INTERGENIC      |               |                    |                    |
| SNP_79536_A_117858 | NW_004516049.1 | scaffold626 | 117858                  | TT                              | GG                 | GG               | INTERGENIC      |               |                    |                    |
| SNP_79537_A_118127 | NW_004516049.1 | scaffold626 | 118127                  | GG                              | AA                 | AA               | INTERGENIC      |               |                    |                    |
| SNP_79538_A_119154 | NW_004516049.1 | scaffold626 | 119154                  | CC                              | TT                 | TT               | INTERGENIC      |               |                    |                    |
| SNP_79539_A_135674 | NW_004516049.1 | scaffold626 | 135674                  | AA                              | TT                 | TT               | INTERGENIC      |               |                    |                    |
| SNP_79540_A_135675 | NW_004516049.1 | scaffold626 | 135675                  | TT                              | GG                 | GG               | INTERGENIC      |               |                    |                    |
| SNP_79541_A_135677 | NW_004516049.1 | scaffold626 | 135677                  | GG                              | AA                 | AA               | INTERGENIC      |               |                    |                    |
| SNP_79542_A_135717 | NW_004516049.1 | scaffold626 | 135717                  | GG                              | AA                 | AA               | INTERGENIC      |               |                    |                    |
| SNP_79543_A_136024 | NW_004516049.1 | scaffold626 | 136024                  | GG                              | AA                 | AA               | INTERGENIC      |               |                    |                    |
| SNP_79544_A_136854 | NW_004516049.1 | scaffold626 | 136854                  | TT                              | AA                 | AA               | INTERGENIC      |               |                    |                    |

| SNPs IDs           | Chromosome IDs | Chromosomes | Physical positions (bp) | CDC Frontier (Reference genome) | (Pusa 1103 & HPNB) | (ILWC 46 & LPNB) | Sequence genome | Components of | Gene accession IDs           | Putative functions |
|--------------------|----------------|-------------|-------------------------|---------------------------------|--------------------|------------------|-----------------|---------------|------------------------------|--------------------|
| SNP_79545_A_172204 | NW_004516049.1 | scaffold626 | 172204                  | AA                              | GG                 | GG               | INTERGENIC      |               |                              |                    |
| SNP_79546_A_172623 | NW_004516049.1 | scaffold626 | 172623                  | GG                              | AA                 | AA               | INTERGENIC      |               |                              |                    |
| SNP_79547_A_172713 | NW_004516049.1 | scaffold626 | 172713                  | CC                              | TT                 | TT               | INTERGENIC      |               |                              |                    |
| SNP_79549_A_172789 | NW_004516049.1 | scaffold626 | 172789                  | AA                              | GG                 | GG               | INTERGENIC      |               |                              |                    |
| SNP_79550_A_173228 | NW_004516049.1 | scaffold626 | 173228                  | AA                              | CC                 | CC               | INTERGENIC      |               |                              |                    |
| SNP_79551_A_174140 | NW_004516049.1 | scaffold626 | 174140                  | GG                              | TT                 | TT               | INTERGENIC      |               |                              |                    |
| SNP_79552_A_194131 | NW_004516049.1 | scaffold626 | 194131                  | GG                              | TT                 | TT               | INTERGENIC      |               |                              |                    |
| SNP_79553_A_202285 | NW_004516049.1 | scaffold626 | 202285                  | TT                              | CC                 | CC               | INTERGENIC      |               |                              |                    |
| SNP_79554_A_202449 | NW_004516049.1 | scaffold626 | 202449                  | GG                              | AA                 | AA               | INTERGENIC      |               |                              |                    |
| SNP_79555_A_205568 | NW_004516049.1 | scaffold626 | 205568                  | CC                              | TT                 | TT               | INTERGENIC      |               |                              |                    |
| SNP_79556_A_205711 | NW_004516049.1 | scaffold626 | 205711                  | AA                              | GG                 | GG               | INTERGENIC      |               |                              |                    |
| SNP_79557_A_205715 | NW_004516049.1 | scaffold626 | 205715                  | AA                              | TT                 | TT               | INTERGENIC      |               |                              |                    |
| SNP_79558_A_208774 | NW_004516049.1 | scaffold626 | 208774                  | TT                              | AA                 | AA               | INTERGENIC      |               |                              |                    |
| SNP_79559_A_209302 | NW_004516049.1 | scaffold626 | 209302                  | TT                              | CC                 | CC               | INTERGENIC      |               |                              |                    |
| SNP_79560_A_209418 | NW_004516049.1 | scaffold626 | 209418                  | CC                              | AA                 | AA               | INTERGENIC      |               |                              |                    |
| SNP_79561_A_209560 | NW_004516049.1 | scaffold626 | 209560                  | CC                              | TT                 | TT               | INTERGENIC      |               |                              |                    |
| SNP_79562_A_209618 | NW_004516049.1 | scaffold626 | 209618                  | GG                              | AA                 | AA               | INTERGENIC      |               |                              |                    |
| SNP_79563_A_209828 | NW_004516049.1 | scaffold626 | 209828                  | GG                              | TT                 | TT               | DRR             | 101503926     | uncharacterized LOC101503926 |                    |
| SNP_79564_A_210182 | NW_004516049.1 | scaffold626 | 210182                  | AA                              | GG                 | GG               | DRR             | 101503926     | uncharacterized LOC101503926 |                    |
| SNP_79565_A_210183 | NW_004516049.1 | scaffold626 | 210183                  | TT                              | AA                 | AA               | DRR             | 101503926     | uncharacterized LOC101503926 |                    |
| SNP_79566_A_210254 | NW_004516049.1 | scaffold626 | 210254                  | AA                              | CC                 | CC               | DRR             | 101503926     | uncharacterized LOC101503926 |                    |
| SNP_79567_A_210509 | NW_004516049.1 | scaffold626 | 210509                  | CC                              | TT                 | TT               | DRR             | 101503926     | uncharacterized LOC101503926 |                    |

| SNPs IDs           | Chromosome IDs | Chromosomes | Physical positions (bp) | CDC Frontier (Reference genome) | (Pusa 1103 & HPNB) | (ILWC 46 & LPNB) | Sequence Components of genome | Gene accession IDs | Putative functions           |
|--------------------|----------------|-------------|-------------------------|---------------------------------|--------------------|------------------|-------------------------------|--------------------|------------------------------|
| SNP_79568_A_210759 | NW_004516049.1 | scaffold626 | 210759                  | CC                              | TT                 | TT               | NON_SYNONYMOUS_CODING         | 101503926          | uncharacterized LOC101503926 |
| SNP_79569_A_212943 | NW_004516049.1 | scaffold626 | 212943                  | GG                              | CC                 | CC               | URR                           | 101503926          | uncharacterized LOC101503926 |
| SNP_79570_A_213029 | NW_004516049.1 | scaffold626 | 213029                  | AA                              | GG                 | GG               | URR                           | 101503926          | uncharacterized LOC101503926 |
| SNP_79571_A_213230 | NW_004516049.1 | scaffold626 | 213230                  | AA                              | CC                 | CC               | INTERGENIC                    |                    |                              |
| SNP_79572_A_213316 | NW_004516049.1 | scaffold626 | 213316                  | AA                              | CC                 | CC               | INTERGENIC                    |                    |                              |
| SNP_79573_A_214921 | NW_004516049.1 | scaffold626 | 214921                  | CC                              | TT                 | TT               | INTERGENIC                    |                    |                              |
| SNP_79574_A_218715 | NW_004516049.1 | scaffold626 | 218715                  | TT                              | CC                 | CC               | INTERGENIC                    |                    |                              |
| SNP_79575_A_218871 | NW_004516049.1 | scaffold626 | 218871                  | TT                              | CC                 | CC               | INTERGENIC                    |                    |                              |
| SNP_79577_A_219303 | NW_004516049.1 | scaffold626 | 219303                  | TT                              | GG                 | GG               | INTERGENIC                    |                    |                              |
| SNP_79578_A_219444 | NW_004516049.1 | scaffold626 | 219444                  | TT                              | AA                 | AA               | INTERGENIC                    |                    |                              |
| SNP_79579_A_219481 | NW_004516049.1 | scaffold626 | 219481                  | AA                              | GG                 | GG               | INTERGENIC                    |                    |                              |
| SNP_79580_A_219544 | NW_004516049.1 | scaffold626 | 219544                  | TT                              | AA                 | AA               | INTERGENIC                    |                    |                              |
| SNP_79581_A_219547 | NW_004516049.1 | scaffold626 | 219547                  | AA                              | TT                 | TT               | INTERGENIC                    |                    |                              |
| SNP_79582_A_219578 | NW_004516049.1 | scaffold626 | 219578                  | TT                              | CC                 | CC               | INTERGENIC                    |                    |                              |
| SNP_79583_A_219791 | NW_004516049.1 | scaffold626 | 219791                  | AA                              | GG                 | GG               | INTERGENIC                    |                    |                              |
| SNP_79584_A_220110 | NW_004516049.1 | scaffold626 | 220110                  | TT                              | CC                 | CC               | INTERGENIC                    |                    |                              |
| SNP_79585_A_220181 | NW_004516049.1 | scaffold626 | 220181                  | TT                              | CC                 | CC               | INTERGENIC                    |                    |                              |
| SNP_79586_A_220250 | NW_004516049.1 | scaffold626 | 220250                  | GG                              | TT                 | TT               | INTERGENIC                    |                    |                              |
| SNP_79587_A_220467 | NW_004516049.1 | scaffold626 | 220467                  | CC                              | TT                 | TT               | INTERGENIC                    |                    |                              |
| SNP_79588_A_220789 | NW_004516049.1 | scaffold626 | 220789                  | TT                              | CC                 | CC               | INTERGENIC                    |                    |                              |
| SNP_79589_A_222190 | NW_004516049.1 | scaffold626 | 222190                  | GG                              | AA                 | AA               | INTERGENIC                    |                    |                              |
| SNP_79590_A_222214 | NW_004516049.1 | scaffold626 | 222214                  | TT                              | CC                 | CC               | INTERGENIC                    |                    |                              |

| SNPs IDs           | Chromosome IDs | Chromosomes | Physical positions (bp) | CDC Frontier (Reference genome) | (Pusa 1103 & HPNB) | (ILWC 46 & LPNB) | Sequence genome | Components of | Gene accession IDs | Putative functions |
|--------------------|----------------|-------------|-------------------------|---------------------------------|--------------------|------------------|-----------------|---------------|--------------------|--------------------|
| SNP_79591_A_224450 | NW_004516049.1 | scaffold626 | 224450                  | CC                              | TT                 | TT               | INTERGENIC      |               |                    |                    |
| SNP_79592_A_224469 | NW_004516049.1 | scaffold626 | 224469                  | GG                              | TT                 | TT               | INTERGENIC      |               |                    |                    |
| SNP_79593_A_224482 | NW_004516049.1 | scaffold626 | 224482                  | TT                              | GG                 | GG               | INTERGENIC      |               |                    |                    |
| SNP_79594_A_224627 | NW_004516049.1 | scaffold626 | 224627                  | TT                              | CC                 | CC               | INTERGENIC      |               |                    |                    |
| SNP_79595_A_224630 | NW_004516049.1 | scaffold626 | 224630                  | AA                              | CC                 | CC               | INTERGENIC      |               |                    |                    |
| SNP_79596_A_224662 | NW_004516049.1 | scaffold626 | 224662                  | TT                              | AA                 | AA               | INTERGENIC      |               |                    |                    |
| SNP_79597_A_224670 | NW_004516049.1 | scaffold626 | 224670                  | CC                              | TT                 | TT               | INTERGENIC      |               |                    |                    |
| SNP_79598_A_224768 | NW_004516049.1 | scaffold626 | 224768                  | AA                              | TT                 | TT               | INTERGENIC      |               |                    |                    |
| SNP_79599_A_224794 | NW_004516049.1 | scaffold626 | 224794                  | GG                              | AA                 | AA               | INTERGENIC      |               |                    |                    |
| SNP_79600_A_224803 | NW_004516049.1 | scaffold626 | 224803                  | AA                              | GG                 | GG               | INTERGENIC      |               |                    |                    |
| SNP_79601_A_224944 | NW_004516049.1 | scaffold626 | 224944                  | TT                              | CC                 | CC               | INTERGENIC      |               |                    |                    |
| SNP_79602_A_224957 | NW_004516049.1 | scaffold626 | 224957                  | AA                              | GG                 | GG               | INTERGENIC      |               |                    |                    |
| SNP_79604_A_225211 | NW_004516049.1 | scaffold626 | 225211                  | GG                              | AA                 | AA               | INTERGENIC      |               |                    |                    |
| SNP_79605_A_225250 | NW_004516049.1 | scaffold626 | 225250                  | CC                              | TT                 | TT               | INTERGENIC      |               |                    |                    |
| SNP_79606_A_225356 | NW_004516049.1 | scaffold626 | 225356                  | AA                              | GG                 | GG               | INTERGENIC      |               |                    |                    |
| SNP_79607_A_225532 | NW_004516049.1 | scaffold626 | 225532                  | CC                              | TT                 | TT               | INTERGENIC      |               |                    |                    |
| SNP_79608_A_225604 | NW_004516049.1 | scaffold626 | 225604                  | CC                              | AA                 | AA               | INTERGENIC      |               |                    |                    |
| SNP_79609_A_225696 | NW_004516049.1 | scaffold626 | 225696                  | AA                              | GG                 | GG               | INTERGENIC      |               |                    |                    |
| SNP_79610_A_227538 | NW_004516049.1 | scaffold626 | 227538                  | AA                              | CC                 | CC               | INTERGENIC      |               |                    |                    |
| SNP_79611_A_227607 | NW_004516049.1 | scaffold626 | 227607                  | GG                              | AA                 | AA               | INTERGENIC      |               |                    |                    |
| SNP_79612_A_227875 | NW_004516049.1 | scaffold626 | 227875                  | GG                              | CC                 | CC               | INTERGENIC      |               |                    |                    |
| SNP_79613_A_227909 | NW_004516049.1 | scaffold626 | 227909                  | CC                              | AA                 | AA               | INTERGENIC      |               |                    |                    |

| SNPs IDs           | Chromosome IDs | Chromosomes | Physical positions (bp) | CDC Frontier (Reference genome) | (Pusa 1103 & HPNB) | (ILWC 46 & LPNB) | Sequence genome       | Components of | Gene accession IDs | Putative functions           |
|--------------------|----------------|-------------|-------------------------|---------------------------------|--------------------|------------------|-----------------------|---------------|--------------------|------------------------------|
| SNP_79614_A_227921 | NW_004516049.1 | scaffold626 | 227921                  | GG                              | AA                 | AA               | INTERGENIC            |               |                    |                              |
| SNP_79615_A_227964 | NW_004516049.1 | scaffold626 | 227964                  | AA                              | TT                 | TT               | INTERGENIC            |               |                    |                              |
| SNP_79616_A_228029 | NW_004516049.1 | scaffold626 | 228029                  | CC                              | AA                 | AA               | INTERGENIC            |               |                    |                              |
| SNP_79617_A_228046 | NW_004516049.1 | scaffold626 | 228046                  | TT                              | CC                 | CC               | INTERGENIC            |               |                    |                              |
| SNP_79618_A_228096 | NW_004516049.1 | scaffold626 | 228096                  | TT                              | AA                 | AA               | INTERGENIC            |               |                    |                              |
| SNP_79619_A_228112 | NW_004516049.1 | scaffold626 | 228112                  | TT                              | CC                 | CC               | INTERGENIC            |               |                    |                              |
| SNP_79620_A_228535 | NW_004516049.1 | scaffold626 | 228535                  | TT                              | GG                 | GG               | INTERGENIC            |               |                    |                              |
| SNP_79621_A_228614 | NW_004516049.1 | scaffold626 | 228614                  | GG                              | AA                 | AA               | INTERGENIC            |               |                    |                              |
| SNP_79622_A_228746 | NW_004516049.1 | scaffold626 | 228746                  | CC                              | AA                 | AA               | INTERGENIC            |               |                    |                              |
| SNP_79623_A_228749 | NW_004516049.1 | scaffold626 | 228749                  | TT                              | AA                 | AA               | INTERGENIC            |               |                    |                              |
| SNP_79624_A_228972 | NW_004516049.1 | scaffold626 | 228972                  | GG                              | AA                 | AA               | INTERGENIC            |               |                    |                              |
| SNP_79625_A_229059 | NW_004516049.1 | scaffold626 | 229059                  | CC                              | AA                 | AA               | INTERGENIC            |               |                    |                              |
| SNP_79626_A_229268 | NW_004516049.1 | scaffold626 | 229268                  | CC                              | TT                 | TT               | INTERGENIC            |               |                    |                              |
| SNP_79627_A_229381 | NW_004516049.1 | scaffold626 | 229381                  | GG                              | AA                 | AA               | INTERGENIC            |               |                    |                              |
| SNP_79630_A_231836 | NW_004516049.1 | scaffold626 | 231836                  | GG                              | CC                 | CC               | NON_SYNONYMOUS_CODING | 101504244     |                    | uncharacterized LOC101504244 |
| SNP_79631_A_233303 | NW_004516049.1 | scaffold626 | 233303                  | CC                              | TT                 | TT               | SYNONYMOUS_CODING     | 101504244     |                    | uncharacterized LOC101504244 |
| SNP_79632_A_235372 | NW_004516049.1 | scaffold626 | 235372                  | CC                              | AA                 | AA               | URR                   | 101504244     |                    | uncharacterized LOC101504244 |
| SNP_79633_A_235647 | NW_004516049.1 | scaffold626 | 235647                  | TT                              | CC                 | CC               | INTERGENIC            |               |                    |                              |
| SNP_79634_A_235895 | NW_004516049.1 | scaffold626 | 235895                  | TT                              | CC                 | CC               | INTERGENIC            |               |                    |                              |
| SNP_79635_A_236055 | NW_004516049.1 | scaffold626 | 236055                  | TT                              | AA                 | AA               | INTERGENIC            |               |                    |                              |
| SNP_79637_A_236232 | NW_004516049.1 | scaffold626 | 236232                  | CC                              | GG                 | GG               | INTERGENIC            |               |                    |                              |
| SNP_79638_A_236233 | NW_004516049.1 | scaffold626 | 236233                  | TT                              | AA                 | AA               | INTERGENIC            |               |                    |                              |

| SNPs IDs           | Chromosome IDs | Chromosomes | Physical positions (bp) | CDC Frontier (Reference genome) | (Pusa 1103 & HPNB) | (ILWC 46 & LPNB) | Sequence genome | Components of | Gene accession IDs | Putative functions |
|--------------------|----------------|-------------|-------------------------|---------------------------------|--------------------|------------------|-----------------|---------------|--------------------|--------------------|
| SNP_79639_A_236236 | NW_004516049.1 | scaffold626 | 236236                  | TT                              | AA                 | AA               | INTERGENIC      |               |                    |                    |
| SNP_79640_A_236240 | NW_004516049.1 | scaffold626 | 236240                  | CC                              | GG                 | GG               | INTERGENIC      |               |                    |                    |
| SNP_79641_A_236243 | NW_004516049.1 | scaffold626 | 236243                  | AA                              | CC                 | CC               | INTERGENIC      |               |                    |                    |
| SNP_79642_A_236437 | NW_004516049.1 | scaffold626 | 236437                  | CC                              | TT                 | TT               | INTERGENIC      |               |                    |                    |
| SNP_79643_A_236458 | NW_004516049.1 | scaffold626 | 236458                  | GG                              | AA                 | AA               | INTERGENIC      |               |                    |                    |
| SNP_79644_A_236623 | NW_004516049.1 | scaffold626 | 236623                  | CC                              | TT                 | TT               | INTERGENIC      |               |                    |                    |
| SNP_79645_A_236711 | NW_004516049.1 | scaffold626 | 236711                  | TT                              | GG                 | GG               | INTERGENIC      |               |                    |                    |
| SNP_79646_A_236763 | NW_004516049.1 | scaffold626 | 236763                  | TT                              | CC                 | CC               | INTERGENIC      |               |                    |                    |
| SNP_79648_A_236956 | NW_004516049.1 | scaffold626 | 236956                  | CC                              | GG                 | GG               | INTERGENIC      |               |                    |                    |
| SNP_79649_A_236994 | NW_004516049.1 | scaffold626 | 236994                  | TT                              | GG                 | GG               | INTERGENIC      |               |                    |                    |
| SNP_79650_A_237099 | NW_004516049.1 | scaffold626 | 237099                  | TT                              | AA                 | AA               | INTERGENIC      |               |                    |                    |
| SNP_79651_A_237112 | NW_004516049.1 | scaffold626 | 237112                  | GG                              | CC                 | CC               | INTERGENIC      |               |                    |                    |
| SNP_79652_A_237145 | NW_004516049.1 | scaffold626 | 237145                  | CC                              | GG                 | GG               | INTERGENIC      |               |                    |                    |
| SNP_79653_A_237290 | NW_004516049.1 | scaffold626 | 237290                  | TT                              | CC                 | CC               | INTERGENIC      |               |                    |                    |
| SNP_79654_A_237397 | NW_004516049.1 | scaffold626 | 237397                  | GG                              | AA                 | AA               | INTERGENIC      |               |                    |                    |
| SNP_79655_A_237490 | NW_004516049.1 | scaffold626 | 237490                  | AA                              | GG                 | GG               | INTERGENIC      |               |                    |                    |
| SNP_79656_A_237632 | NW_004516049.1 | scaffold626 | 237632                  | CC                              | TT                 | TT               | INTERGENIC      |               |                    |                    |
| SNP_79657_A_237875 | NW_004516049.1 | scaffold626 | 237875                  | TT                              | GG                 | GG               | INTERGENIC      |               |                    |                    |
| SNP_79658_A_237882 | NW_004516049.1 | scaffold626 | 237882                  | TT                              | AA                 | AA               | INTERGENIC      |               |                    |                    |
| SNP_79659_A_237962 | NW_004516049.1 | scaffold626 | 237962                  | AA                              | GG                 | GG               | INTERGENIC      |               |                    |                    |
| SNP_79660_A_238225 | NW_004516049.1 | scaffold626 | 238225                  | CC                              | TT                 | TT               | INTERGENIC      |               |                    |                    |
| SNP_79661_A_238287 | NW_004516049.1 | scaffold626 | 238287                  | AA                              | CC                 | CC               | INTERGENIC      |               |                    |                    |



| SNPs IDs           | Chromosome IDs | Chromosomes | Physical positions (bp) | CDC Frontier (Reference genome) | (Pusa 1103 & HPNB) | (ILWC 46 & LPNB) | Sequence genome | Components of | Gene accession IDs | Putative functions |
|--------------------|----------------|-------------|-------------------------|---------------------------------|--------------------|------------------|-----------------|---------------|--------------------|--------------------|
| SNP_79662_A_238331 | NW_004516049.1 | scaffold626 | 238331                  | TT                              | CC                 | CC               | INTERGENIC      |               |                    |                    |
| SNP_79664_A_240442 | NW_004516049.1 | scaffold626 | 240442                  | AA                              | GG                 | GG               | INTERGENIC      |               |                    |                    |
| SNP_79665_A_240458 | NW_004516049.1 | scaffold626 | 240458                  | CC                              | TT                 | TT               | INTERGENIC      |               |                    |                    |
| SNP_79666_A_240883 | NW_004516049.1 | scaffold626 | 240883                  | GG                              | TT                 | TT               | INTERGENIC      |               |                    |                    |
| SNP_79667_A_240912 | NW_004516049.1 | scaffold626 | 240912                  | TT                              | CC                 | CC               | INTERGENIC      |               |                    |                    |
| SNP_79668_A_240914 | NW_004516049.1 | scaffold626 | 240914                  | TT                              | AA                 | AA               | INTERGENIC      |               |                    |                    |
| SNP_79669_A_240989 | NW_004516049.1 | scaffold626 | 240989                  | TT                              | AA                 | AA               | INTERGENIC      |               |                    |                    |
| SNP_79670_A_241252 | NW_004516049.1 | scaffold626 | 241252                  | TT                              | GG                 | GG               | INTERGENIC      |               |                    |                    |
| SNP_79671_A_241881 | NW_004516049.1 | scaffold626 | 241881                  | TT                              | GG                 | GG               | INTERGENIC      |               |                    |                    |
| SNP_79672_A_242072 | NW_004516049.1 | scaffold626 | 242072                  | AA                              | CC                 | CC               | INTERGENIC      |               |                    |                    |
| SNP_79674_A_254286 | NW_004516049.1 | scaffold626 | 254286                  | AA                              | TT                 | TT               | INTERGENIC      |               |                    |                    |
| SNP_79675_A_254549 | NW_004516049.1 | scaffold626 | 254549                  | TT                              | CC                 | CC               | INTERGENIC      |               |                    |                    |
| SNP_79676_A_254710 | NW_004516049.1 | scaffold626 | 254710                  | CC                              | AA                 | AA               | INTERGENIC      |               |                    |                    |
| SNP_79677_A_255213 | NW_004516049.1 | scaffold626 | 255213                  | AA                              | GG                 | GG               | INTERGENIC      |               |                    |                    |
| SNP_79678_A_255268 | NW_004516049.1 | scaffold626 | 255268                  | AA                              | TT                 | TT               | INTERGENIC      |               |                    |                    |
| SNP_79679_A_256281 | NW_004516049.1 | scaffold626 | 256281                  | TT                              | CC                 | CC               | INTERGENIC      |               |                    |                    |
| SNP_79680_A_257215 | NW_004516049.1 | scaffold626 | 257215                  | CC                              | GG                 | GG               | INTERGENIC      |               |                    |                    |
| SNP_79681_A_257397 | NW_004516049.1 | scaffold626 | 257397                  | AA                              | TT                 | TT               | INTERGENIC      |               |                    |                    |
| SNP_79682_A_257428 | NW_004516049.1 | scaffold626 | 257428                  | CC                              | TT                 | TT               | INTERGENIC      |               |                    |                    |
| SNP_79683_A_257787 | NW_004516049.1 | scaffold626 | 257787                  | GG                              | CC                 | CC               | INTERGENIC      |               |                    |                    |
| SNP_79684_A_257791 | NW_004516049.1 | scaffold626 | 257791                  | CC                              | TT                 | TT               | INTERGENIC      |               |                    |                    |
| SNP_79685_A_257876 | NW_004516049.1 | scaffold626 | 257876                  | TT                              | CC                 | CC               | INTERGENIC      |               |                    |                    |

| SNPs IDs           | Chromosome IDs | Chromosomes | Physical positions (bp) | CDC Frontier (Reference genome) | (Pusa 1103 & HPNB) | (ILWC 46 & LPNB) | Sequence genome | Components of | Gene accession IDs | Putative functions |
|--------------------|----------------|-------------|-------------------------|---------------------------------|--------------------|------------------|-----------------|---------------|--------------------|--------------------|
| SNP_79686_A_257908 | NW_004516049.1 | scaffold626 | 257908                  | TT                              | CC                 | CC               | INTERGENIC      |               |                    |                    |
| SNP_79687_A_257928 | NW_004516049.1 | scaffold626 | 257928                  | GG                              | AA                 | AA               | INTERGENIC      |               |                    |                    |
| SNP_79688_A_257943 | NW_004516049.1 | scaffold626 | 257943                  | CC                              | TT                 | TT               | INTERGENIC      |               |                    |                    |
| SNP_79689_A_258030 | NW_004516049.1 | scaffold626 | 258030                  | GG                              | CC                 | CC               | INTERGENIC      |               |                    |                    |
| SNP_79690_A_258032 | NW_004516049.1 | scaffold626 | 258032                  | TT                              | GG                 | GG               | INTERGENIC      |               |                    |                    |
| SNP_79691_A_258080 | NW_004516049.1 | scaffold626 | 258080                  | CC                              | TT                 | TT               | INTERGENIC      |               |                    |                    |
| SNP_79693_A_258136 | NW_004516049.1 | scaffold626 | 258136                  | AA                              | TT                 | TT               | INTERGENIC      |               |                    |                    |
| SNP_79694_A_258223 | NW_004516049.1 | scaffold626 | 258223                  | GG                              | TT                 | TT               | INTERGENIC      |               |                    |                    |
| SNP_79695_A_258376 | NW_004516049.1 | scaffold626 | 258376                  | AA                              | GG                 | GG               | INTERGENIC      |               |                    |                    |
| SNP_79696_A_259187 | NW_004516049.1 | scaffold626 | 259187                  | CC                              | AA                 | AA               | INTERGENIC      |               |                    |                    |
| SNP_79697_A_259342 | NW_004516049.1 | scaffold626 | 259342                  | AA                              | TT                 | TT               | INTERGENIC      |               |                    |                    |
| SNP_79698_A_259754 | NW_004516049.1 | scaffold626 | 259754                  | TT                              | GG                 | GG               | INTERGENIC      |               |                    |                    |
| SNP_79699_A_260310 | NW_004516049.1 | scaffold626 | 260310                  | AA                              | TT                 | TT               | INTERGENIC      |               |                    |                    |
| SNP_79700_A_260437 | NW_004516049.1 | scaffold626 | 260437                  | GG                              | CC                 | CC               | INTERGENIC      |               |                    |                    |
| SNP_79701_A_260651 | NW_004516049.1 | scaffold626 | 260651                  | TT                              | CC                 | CC               | INTERGENIC      |               |                    |                    |
| SNP_79702_A_260744 | NW_004516049.1 | scaffold626 | 260744                  | AA                              | GG                 | GG               | INTERGENIC      |               |                    |                    |
| SNP_79703_A_260947 | NW_004516049.1 | scaffold626 | 260947                  | CC                              | TT                 | TT               | INTERGENIC      |               |                    |                    |
| SNP_79704_A_260974 | NW_004516049.1 | scaffold626 | 260974                  | GG                              | AA                 | AA               | INTERGENIC      |               |                    |                    |
| SNP_79705_A_261054 | NW_004516049.1 | scaffold626 | 261054                  | TT                              | AA                 | AA               | INTERGENIC      |               |                    |                    |
| SNP_79706_A_261093 | NW_004516049.1 | scaffold626 | 261093                  | CC                              | TT                 | TT               | INTERGENIC      |               |                    |                    |
| SNP_79708_A_268265 | NW_004516049.1 | scaffold626 | 268265                  | GG                              | TT                 | TT               | INTERGENIC      |               |                    |                    |
| SNP_79709_A_268477 | NW_004516049.1 | scaffold626 | 268477                  | AA                              | GG                 | GG               | INTERGENIC      |               |                    |                    |

| SNPs IDs           | Chromosome IDs | Chromosomes | Physical positions (bp) | CDC Frontier (Reference genome) | (Pusa 1103 & HPNB) | (ILWC 46 & LPNB) | Sequence genome | Components of | Gene accession IDs | Putative functions |
|--------------------|----------------|-------------|-------------------------|---------------------------------|--------------------|------------------|-----------------|---------------|--------------------|--------------------|
| SNP_79710_A_270224 | NW_004516049.1 | scaffold626 | 270224                  | TT                              | AA                 | AA               | INTERGENIC      |               |                    |                    |
| SNP_79711_A_270302 | NW_004516049.1 | scaffold626 | 270302                  | GG                              | TT                 | TT               | INTERGENIC      |               |                    |                    |
| SNP_79712_A_270420 | NW_004516049.1 | scaffold626 | 270420                  | CC                              | AA                 | AA               | INTERGENIC      |               |                    |                    |
| SNP_79713_A_270450 | NW_004516049.1 | scaffold626 | 270450                  | GG                              | AA                 | AA               | INTERGENIC      |               |                    |                    |
| SNP_79714_A_270475 | NW_004516049.1 | scaffold626 | 270475                  | GG                              | CC                 | CC               | INTERGENIC      |               |                    |                    |
| SNP_79715_A_270530 | NW_004516049.1 | scaffold626 | 270530                  | CC                              | TT                 | TT               | INTERGENIC      |               |                    |                    |
| SNP_79716_A_270544 | NW_004516049.1 | scaffold626 | 270544                  | GG                              | AA                 | AA               | INTERGENIC      |               |                    |                    |
| SNP_79717_A_270568 | NW_004516049.1 | scaffold626 | 270568                  | AA                              | GG                 | GG               | INTERGENIC      |               |                    |                    |
| SNP_79718_A_270613 | NW_004516049.1 | scaffold626 | 270613                  | TT                              | AA                 | AA               | INTERGENIC      |               |                    |                    |
| SNP_79719_A_270614 | NW_004516049.1 | scaffold626 | 270614                  | AA                              | TT                 | TT               | INTERGENIC      |               |                    |                    |
| SNP_79720_A_270760 | NW_004516049.1 | scaffold626 | 270760                  | TT                              | GG                 | GG               | INTERGENIC      |               |                    |                    |
| SNP_79721_A_270972 | NW_004516049.1 | scaffold626 | 270972                  | TT                              | GG                 | GG               | INTERGENIC      |               |                    |                    |
| SNP_79722_A_271736 | NW_004516049.1 | scaffold626 | 271736                  | CC                              | GG                 | GG               | INTERGENIC      |               |                    |                    |
| SNP_79723_A_272096 | NW_004516049.1 | scaffold626 | 272096                  | TT                              | CC                 | CC               | INTERGENIC      |               |                    |                    |
| SNP_79724_A_272144 | NW_004516049.1 | scaffold626 | 272144                  | GG                              | CC                 | CC               | INTERGENIC      |               |                    |                    |
| SNP_79725_A_274146 | NW_004516049.1 | scaffold626 | 274146                  | TT                              | CC                 | CC               | INTERGENIC      |               |                    |                    |
| SNP_79726_A_274173 | NW_004516049.1 | scaffold626 | 274173                  | AA                              | GG                 | GG               | INTERGENIC      |               |                    |                    |
| SNP_79727_A_274268 | NW_004516049.1 | scaffold626 | 274268                  | TT                              | GG                 | GG               | INTERGENIC      |               |                    |                    |
| SNP_79728_A_274282 | NW_004516049.1 | scaffold626 | 274282                  | TT                              | CC                 | CC               | INTERGENIC      |               |                    |                    |
| SNP_79729_A_274936 | NW_004516049.1 | scaffold626 | 274936                  | AA                              | GG                 | GG               | INTERGENIC      |               |                    |                    |
| SNP_79730_A_275088 | NW_004516049.1 | scaffold626 | 275088                  | TT                              | CC                 | CC               | INTERGENIC      |               |                    |                    |
| SNP_79731_A_275132 | NW_004516049.1 | scaffold626 | 275132                  | TT                              | AA                 | AA               | INTERGENIC      |               |                    |                    |

| SNPs IDs           | Chromosome IDs | Chromosomes | Physical positions (bp) | CDC Frontier (Reference genome) | (Pusa 1103 & HPNB) | (ILWC 46 & LPNB) | Sequence genome | Components of | Gene accession IDs | Putative functions |
|--------------------|----------------|-------------|-------------------------|---------------------------------|--------------------|------------------|-----------------|---------------|--------------------|--------------------|
| SNP_79732_A_275139 | NW_004516049.1 | scaffold626 | 275139                  | TT                              | AA                 | AA               | INTERGENIC      |               |                    |                    |
| SNP_79733_A_275234 | NW_004516049.1 | scaffold626 | 275234                  | TT                              | AA                 | AA               | INTERGENIC      |               |                    |                    |
| SNP_79734_A_275393 | NW_004516049.1 | scaffold626 | 275393                  | GG                              | AA                 | AA               | INTERGENIC      |               |                    |                    |
| SNP_79735_A_275484 | NW_004516049.1 | scaffold626 | 275484                  | GG                              | AA                 | AA               | INTERGENIC      |               |                    |                    |
| SNP_79736_A_275494 | NW_004516049.1 | scaffold626 | 275494                  | TT                              | GG                 | GG               | INTERGENIC      |               |                    |                    |
| SNP_79737_A_275521 | NW_004516049.1 | scaffold626 | 275521                  | AA                              | GG                 | GG               | INTERGENIC      |               |                    |                    |
| SNP_79738_A_275719 | NW_004516049.1 | scaffold626 | 275719                  | AA                              | GG                 | GG               | INTERGENIC      |               |                    |                    |
| SNP_79739_A_275745 | NW_004516049.1 | scaffold626 | 275745                  | AA                              | GG                 | GG               | INTERGENIC      |               |                    |                    |
| SNP_79740_A_276028 | NW_004516049.1 | scaffold626 | 276028                  | AA                              | TT                 | TT               | INTERGENIC      |               |                    |                    |
| SNP_79741_A_280877 | NW_004516049.1 | scaffold626 | 280877                  | GG                              | AA                 | AA               | INTERGENIC      |               |                    |                    |
| SNP_79742_A_280915 | NW_004516049.1 | scaffold626 | 280915                  | TT                              | AA                 | AA               | INTERGENIC      |               |                    |                    |
| SNP_79743_A_281026 | NW_004516049.1 | scaffold626 | 281026                  | GG                              | AA                 | AA               | INTERGENIC      |               |                    |                    |
| SNP_79744_A_281247 | NW_004516049.1 | scaffold626 | 281247                  | AA                              | GG                 | GG               | INTERGENIC      |               |                    |                    |
| SNP_79745_A_281429 | NW_004516049.1 | scaffold626 | 281429                  | GG                              | AA                 | AA               | INTERGENIC      |               |                    |                    |
| SNP_79746_A_281570 | NW_004516049.1 | scaffold626 | 281570                  | AA                              | TT                 | TT               | INTERGENIC      |               |                    |                    |
| SNP_79747_A_281623 | NW_004516049.1 | scaffold626 | 281623                  | TT                              | AA                 | AA               | INTERGENIC      |               |                    |                    |
| SNP_79748_A_281636 | NW_004516049.1 | scaffold626 | 281636                  | AA                              | GG                 | GG               | INTERGENIC      |               |                    |                    |
| SNP_79749_A_281761 | NW_004516049.1 | scaffold626 | 281761                  | AA                              | TT                 | TT               | INTERGENIC      |               |                    |                    |
| SNP_79750_A_281898 | NW_004516049.1 | scaffold626 | 281898                  | CC                              | GG                 | GG               | INTERGENIC      |               |                    |                    |
| SNP_79751_A_281914 | NW_004516049.1 | scaffold626 | 281914                  | AA                              | GG                 | GG               | INTERGENIC      |               |                    |                    |
| SNP_79752_A_282452 | NW_004516049.1 | scaffold626 | 282452                  | TT                              | GG                 | GG               | INTERGENIC      |               |                    |                    |
| SNP_79753_A_282476 | NW_004516049.1 | scaffold626 | 282476                  | CC                              | AA                 | AA               | INTERGENIC      |               |                    |                    |

| SNPs IDs           | Chromosome IDs | Chromosomes | Physical positions (bp) | CDC Frontier (Reference genome) | (Pusa 1103 & HPNB) | (ILWC 46 & LPNB) | Sequence genome | Components of | Gene accession IDs | Putative functions |
|--------------------|----------------|-------------|-------------------------|---------------------------------|--------------------|------------------|-----------------|---------------|--------------------|--------------------|
| SNP_79754_A_283121 | NW_004516049.1 | scaffold626 | 283121                  | AA                              | TT                 | TT               | INTERGENIC      |               |                    |                    |
| SNP_79755_A_285446 | NW_004516049.1 | scaffold626 | 285446                  | GG                              | CC                 | CC               | INTERGENIC      |               |                    |                    |
| SNP_79756_A_291610 | NW_004516049.1 | scaffold626 | 291610                  | CC                              | TT                 | TT               | INTERGENIC      |               |                    |                    |
| SNP_79757_A_296059 | NW_004516049.1 | scaffold626 | 296059                  | CC                              | TT                 | TT               | INTERGENIC      |               |                    |                    |
| SNP_79758_A_296083 | NW_004516049.1 | scaffold626 | 296083                  | CC                              | TT                 | TT               | INTERGENIC      |               |                    |                    |
| SNP_79759_A_296095 | NW_004516049.1 | scaffold626 | 296095                  | CC                              | TT                 | TT               | INTERGENIC      |               |                    |                    |
| SNP_79760_A_296160 | NW_004516049.1 | scaffold626 | 296160                  | TT                              | GG                 | GG               | INTERGENIC      |               |                    |                    |
| SNP_79761_A_296310 | NW_004516049.1 | scaffold626 | 296310                  | TT                              | AA                 | AA               | INTERGENIC      |               |                    |                    |
| SNP_79762_A_296396 | NW_004516049.1 | scaffold626 | 296396                  | TT                              | CC                 | CC               | INTERGENIC      |               |                    |                    |
| SNP_79763_A_296401 | NW_004516049.1 | scaffold626 | 296401                  | GG                              | AA                 | AA               | INTERGENIC      |               |                    |                    |
| SNP_79764_A_296405 | NW_004516049.1 | scaffold626 | 296405                  | GG                              | AA                 | AA               | INTERGENIC      |               |                    |                    |
| SNP_79765_A_299455 | NW_004516049.1 | scaffold626 | 299455                  | TT                              | CC                 | CC               | INTERGENIC      |               |                    |                    |
| SNP_79766_A_302569 | NW_004516049.1 | scaffold626 | 302569                  | CC                              | TT                 | TT               | INTERGENIC      |               |                    |                    |
| SNP_79767_A_331462 | NW_004516049.1 | scaffold626 | 331462                  | TT                              | AA                 | AA               | INTERGENIC      |               |                    |                    |
| SNP_79769_A_340581 | NW_004516049.1 | scaffold626 | 340581                  | CC                              | TT                 | TT               | INTERGENIC      |               |                    |                    |
| SNP_79770_A_347589 | NW_004516049.1 | scaffold626 | 347589                  | CC                              | TT                 | TT               | INTERGENIC      |               |                    |                    |
| SNP_79771_A_351725 | NW_004516049.1 | scaffold626 | 351725                  | TT                              | CC                 | CC               | INTERGENIC      |               |                    |                    |
| SNP_79772_A_351764 | NW_004516049.1 | scaffold626 | 351764                  | GG                              | AA                 | AA               | INTERGENIC      |               |                    |                    |
| SNP_79773_A_351781 | NW_004516049.1 | scaffold626 | 351781                  | GG                              | AA                 | AA               | INTERGENIC      |               |                    |                    |
| SNP_79774_A_351808 | NW_004516049.1 | scaffold626 | 351808                  | CC                              | AA                 | AA               | INTERGENIC      |               |                    |                    |
| SNP_79775_A_352112 | NW_004516049.1 | scaffold626 | 352112                  | CC                              | TT                 | TT               | INTERGENIC      |               |                    |                    |
| SNP_79776_A_357394 | NW_004516049.1 | scaffold626 | 357394                  | AA                              | CC                 | CC               | INTERGENIC      |               |                    |                    |

| SNPs IDs           | Chromosome IDs | Chromosomes | Physical positions (bp) | CDC Frontier (Reference genome) | (Pusa 1103 & HPNB) | (ILWC 46 & LPNB) | Sequence genome | Components of | Gene accession IDs | Putative functions |
|--------------------|----------------|-------------|-------------------------|---------------------------------|--------------------|------------------|-----------------|---------------|--------------------|--------------------|
| SNP_79777_A_357406 | NW_004516049.1 | scaffold626 | 357406                  | AA                              | TT                 | TT               | INTERGENIC      |               |                    |                    |
| SNP_79778_A_368053 | NW_004516049.1 | scaffold626 | 368053                  | GG                              | TT                 | TT               | INTERGENIC      |               |                    |                    |
| SNP_79779_A_371186 | NW_004516049.1 | scaffold626 | 371186                  | AA                              | GG                 | GG               | INTERGENIC      |               |                    |                    |
| SNP_79780_A_371611 | NW_004516049.1 | scaffold626 | 371611                  | GG                              | TT                 | TT               | INTERGENIC      |               |                    |                    |
| SNP_79782_A_376745 | NW_004516049.1 | scaffold626 | 376745                  | GG                              | TT                 | TT               | INTERGENIC      |               |                    |                    |
| SNP_79783_A_376749 | NW_004516049.1 | scaffold626 | 376749                  | AA                              | TT                 | TT               | INTERGENIC      |               |                    |                    |
| SNP_79784_A_376825 | NW_004516049.1 | scaffold626 | 376825                  | TT                              | AA                 | AA               | INTERGENIC      |               |                    |                    |
| SNP_79785_A_385976 | NW_004516049.1 | scaffold626 | 385976                  | CC                              | GG                 | GG               | INTERGENIC      |               |                    |                    |
| SNP_79786_A_386051 | NW_004516049.1 | scaffold626 | 386051                  | AA                              | CC                 | CC               | INTERGENIC      |               |                    |                    |
| SNP_79787_A_386058 | NW_004516049.1 | scaffold626 | 386058                  | TT                              | CC                 | CC               | INTERGENIC      |               |                    |                    |
| SNP_79788_A_386096 | NW_004516049.1 | scaffold626 | 386096                  | TT                              | CC                 | CC               | INTERGENIC      |               |                    |                    |
| SNP_79789_A_386307 | NW_004516049.1 | scaffold626 | 386307                  | TT                              | CC                 | CC               | INTERGENIC      |               |                    |                    |
| SNP_79790_A_386312 | NW_004516049.1 | scaffold626 | 386312                  | TT                              | AA                 | AA               | INTERGENIC      |               |                    |                    |
| SNP_79791_A_386374 | NW_004516049.1 | scaffold626 | 386374                  | AA                              | GG                 | GG               | INTERGENIC      |               |                    |                    |
| SNP_79792_A_387876 | NW_004516049.1 | scaffold626 | 387876                  | GG                              | AA                 | AA               | INTERGENIC      |               |                    |                    |
| SNP_79794_A_387925 | NW_004516049.1 | scaffold626 | 387925                  | TT                              | AA                 | AA               | INTERGENIC      |               |                    |                    |
| SNP_79795_A_388151 | NW_004516049.1 | scaffold626 | 388151                  | TT                              | AA                 | AA               | INTERGENIC      |               |                    |                    |
| SNP_79796_A_388211 | NW_004516049.1 | scaffold626 | 388211                  | CC                              | GG                 | GG               | INTERGENIC      |               |                    |                    |
| SNP_79797_A_388212 | NW_004516049.1 | scaffold626 | 388212                  | AA                              | GG                 | GG               | INTERGENIC      |               |                    |                    |
| SNP_79798_A_388253 | NW_004516049.1 | scaffold626 | 388253                  | AA                              | TT                 | TT               | INTERGENIC      |               |                    |                    |
| SNP_79799_A_388256 | NW_004516049.1 | scaffold626 | 388256                  | AA                              | TT                 | TT               | INTERGENIC      |               |                    |                    |
| SNP_79800_A_388453 | NW_004516049.1 | scaffold626 | 388453                  | AA                              | CC                 | CC               | INTERGENIC      |               |                    |                    |

| SNPs IDs           | Chromosome IDs | Chromosomes | Physical positions (bp) | CDC Frontier (Reference genome) | (Pusa 1103 & HPNB) | (ILWC 46 & LPNB) | Sequence genome | Components of | Gene accession IDs | Putative functions |
|--------------------|----------------|-------------|-------------------------|---------------------------------|--------------------|------------------|-----------------|---------------|--------------------|--------------------|
| SNP_79801_A_388458 | NW_004516049.1 | scaffold626 | 388458                  | GG                              | AA                 | AA               | INTERGENIC      |               |                    |                    |
| SNP_79802_A_400492 | NW_004516049.1 | scaffold626 | 400492                  | CC                              | TT                 | TT               | INTERGENIC      |               |                    |                    |
| SNP_79803_A_420631 | NW_004516049.1 | scaffold626 | 420631                  | CC                              | GG                 | GG               | INTERGENIC      |               |                    |                    |
| SNP_79804_A_420636 | NW_004516049.1 | scaffold626 | 420636                  | CC                              | TT                 | TT               | INTERGENIC      |               |                    |                    |
| SNP_79805_A_420740 | NW_004516049.1 | scaffold626 | 420740                  | AA                              | GG                 | GG               | INTERGENIC      |               |                    |                    |
| SNP_79806_A_424212 | NW_004516049.1 | scaffold626 | 424212                  | AA                              | GG                 | GG               | INTERGENIC      |               |                    |                    |
| SNP_79807_A_424519 | NW_004516049.1 | scaffold626 | 424519                  | TT                              | CC                 | CC               | INTERGENIC      |               |                    |                    |
| SNP_79808_A_424547 | NW_004516049.1 | scaffold626 | 424547                  | AA                              | GG                 | GG               | INTERGENIC      |               |                    |                    |
| SNP_79809_A_434228 | NW_004516049.1 | scaffold626 | 434228                  | AA                              | CC                 | CC               | INTERGENIC      |               |                    |                    |
| SNP_79810_A_435781 | NW_004516049.1 | scaffold626 | 435781                  | AA                              | CC                 | CC               | INTERGENIC      |               |                    |                    |
| SNP_79811_A_435805 | NW_004516049.1 | scaffold626 | 435805                  | AA                              | GG                 | GG               | INTERGENIC      |               |                    |                    |
| SNP_79812_A_449934 | NW_004516049.1 | scaffold626 | 449934                  | AA                              | CC                 | CC               | INTERGENIC      |               |                    |                    |
| SNP_79813_A_451642 | NW_004516049.1 | scaffold626 | 451642                  | CC                              | TT                 | TT               | INTERGENIC      |               |                    |                    |
| SNP_79814_A_451660 | NW_004516049.1 | scaffold626 | 451660                  | CC                              | GG                 | GG               | INTERGENIC      |               |                    |                    |
| SNP_79815_A_451724 | NW_004516049.1 | scaffold626 | 451724                  | GG                              | CC                 | CC               | INTERGENIC      |               |                    |                    |
| SNP_79816_A_451807 | NW_004516049.1 | scaffold626 | 451807                  | GG                              | AA                 | AA               | INTERGENIC      |               |                    |                    |
| SNP_79817_A_451929 | NW_004516049.1 | scaffold626 | 451929                  | AA                              | TT                 | TT               | INTERGENIC      |               |                    |                    |
| SNP_79818_A_451936 | NW_004516049.1 | scaffold626 | 451936                  | GG                              | TT                 | TT               | INTERGENIC      |               |                    |                    |
| SNP_79819_A_452078 | NW_004516049.1 | scaffold626 | 452078                  | CC                              | GG                 | GG               | INTERGENIC      |               |                    |                    |
| SNP_79820_A_452145 | NW_004516049.1 | scaffold626 | 452145                  | TT                              | CC                 | CC               | INTERGENIC      |               |                    |                    |
| SNP_79821_A_452379 | NW_004516049.1 | scaffold626 | 452379                  | TT                              | AA                 | AA               | INTERGENIC      |               |                    |                    |
| SNP_79822_A_452390 | NW_004516049.1 | scaffold626 | 452390                  | CC                              | TT                 | TT               | INTERGENIC      |               |                    |                    |

| SNPs IDs           | Chromosome IDs | Chromosomes | Physical positions (bp) | CDC Frontier (Reference genome) | (Pusa 1103 & HPNB) | (ILWC 46 & LPNB) | Sequence genome | Components of | Gene accession IDs | Putative functions |
|--------------------|----------------|-------------|-------------------------|---------------------------------|--------------------|------------------|-----------------|---------------|--------------------|--------------------|
| SNP_79823_A_452401 | NW_004516049.1 | scaffold626 | 452401                  | TT                              | GG                 | GG               | INTERGENIC      |               |                    |                    |
| SNP_79825_A_452853 | NW_004516049.1 | scaffold626 | 452853                  | GG                              | AA                 | AA               | INTERGENIC      |               |                    |                    |
| SNP_79826_A_453066 | NW_004516049.1 | scaffold626 | 453066                  | AA                              | GG                 | GG               | INTERGENIC      |               |                    |                    |
| SNP_79827_A_453456 | NW_004516049.1 | scaffold626 | 453456                  | CC                              | TT                 | TT               | INTERGENIC      |               |                    |                    |
| SNP_79828_A_453615 | NW_004516049.1 | scaffold626 | 453615                  | CC                              | TT                 | TT               | INTERGENIC      |               |                    |                    |
| SNP_79829_A_453658 | NW_004516049.1 | scaffold626 | 453658                  | CC                              | TT                 | TT               | INTERGENIC      |               |                    |                    |
| SNP_79830_A_453711 | NW_004516049.1 | scaffold626 | 453711                  | GG                              | AA                 | AA               | INTERGENIC      |               |                    |                    |
| SNP_79831_A_453753 | NW_004516049.1 | scaffold626 | 453753                  | CC                              | TT                 | TT               | INTERGENIC      |               |                    |                    |
| SNP_79832_A_453761 | NW_004516049.1 | scaffold626 | 453761                  | GG                              | AA                 | AA               | INTERGENIC      |               |                    |                    |
| SNP_79833_A_453811 | NW_004516049.1 | scaffold626 | 453811                  | TT                              | CC                 | CC               | INTERGENIC      |               |                    |                    |
| SNP_79834_A_453854 | NW_004516049.1 | scaffold626 | 453854                  | GG                              | TT                 | TT               | INTERGENIC      |               |                    |                    |
| SNP_79835_A_453936 | NW_004516049.1 | scaffold626 | 453936                  | AA                              | TT                 | TT               | INTERGENIC      |               |                    |                    |
| SNP_79836_A_453997 | NW_004516049.1 | scaffold626 | 453997                  | CC                              | GG                 | GG               | INTERGENIC      |               |                    |                    |
| SNP_79837_A_454100 | NW_004516049.1 | scaffold626 | 454100                  | GG                              | CC                 | CC               | INTERGENIC      |               |                    |                    |
| SNP_79838_A_454113 | NW_004516049.1 | scaffold626 | 454113                  | CC                              | TT                 | TT               | INTERGENIC      |               |                    |                    |
| SNP_79839_A_454170 | NW_004516049.1 | scaffold626 | 454170                  | AA                              | GG                 | GG               | INTERGENIC      |               |                    |                    |
| SNP_79840_A_454224 | NW_004516049.1 | scaffold626 | 454224                  | AA                              | GG                 | GG               | INTERGENIC      |               |                    |                    |
| SNP_79841_A_454264 | NW_004516049.1 | scaffold626 | 454264                  | AA                              | TT                 | TT               | INTERGENIC      |               |                    |                    |
| SNP_79842_A_454430 | NW_004516049.1 | scaffold626 | 454430                  | AA                              | TT                 | TT               | INTERGENIC      |               |                    |                    |
| SNP_79843_A_460544 | NW_004516049.1 | scaffold626 | 460544                  | TT                              | AA                 | AA               | INTERGENIC      |               |                    |                    |
| SNP_79844_A_460620 | NW_004516049.1 | scaffold626 | 460620                  | GG                              | CC                 | CC               | INTERGENIC      |               |                    |                    |
| SNP_79845_A_460657 | NW_004516049.1 | scaffold626 | 460657                  | GG                              | AA                 | AA               | INTERGENIC      |               |                    |                    |



| SNPs IDs           | Chromosome IDs | Chromosomes | Physical positions (bp) | CDC Frontier (Reference genome) | (Pusa 1103 & HPNB) | (ILWC 46 & LPNB) | Sequence genome | Components of | Gene accession IDs | Putative functions |
|--------------------|----------------|-------------|-------------------------|---------------------------------|--------------------|------------------|-----------------|---------------|--------------------|--------------------|
| SNP_79846_A_460715 | NW_004516049.1 | scaffold626 | 460715                  | CC                              | TT                 | TT               | INTERGENIC      |               |                    |                    |
| SNP_79847_A_460717 | NW_004516049.1 | scaffold626 | 460717                  | GG                              | CC                 | CC               | INTERGENIC      |               |                    |                    |
| SNP_79848_A_461051 | NW_004516049.1 | scaffold626 | 461051                  | TT                              | AA                 | AA               | INTERGENIC      |               |                    |                    |
| SNP_79849_A_461107 | NW_004516049.1 | scaffold626 | 461107                  | GG                              | TT                 | TT               | INTERGENIC      |               |                    |                    |
| SNP_79850_A_461120 | NW_004516049.1 | scaffold626 | 461120                  | CC                              | GG                 | GG               | INTERGENIC      |               |                    |                    |
| SNP_79851_A_461629 | NW_004516049.1 | scaffold626 | 461629                  | TT                              | CC                 | CC               | INTERGENIC      |               |                    |                    |
| SNP_79852_A_461763 | NW_004516049.1 | scaffold626 | 461763                  | AA                              | CC                 | CC               | INTERGENIC      |               |                    |                    |
| SNP_79853_A_462036 | NW_004516049.1 | scaffold626 | 462036                  | TT                              | CC                 | CC               | INTERGENIC      |               |                    |                    |
| SNP_79854_A_463270 | NW_004516049.1 | scaffold626 | 463270                  | TT                              | AA                 | AA               | INTERGENIC      |               |                    |                    |
| SNP_79855_A_463272 | NW_004516049.1 | scaffold626 | 463272                  | TT                              | AA                 | AA               | INTERGENIC      |               |                    |                    |
| SNP_79856_A_463306 | NW_004516049.1 | scaffold626 | 463306                  | TT                              | GG                 | GG               | INTERGENIC      |               |                    |                    |
| SNP_79857_A_463450 | NW_004516049.1 | scaffold626 | 463450                  | GG                              | TT                 | TT               | INTERGENIC      |               |                    |                    |
| SNP_79858_A_463459 | NW_004516049.1 | scaffold626 | 463459                  | GG                              | AA                 | AA               | INTERGENIC      |               |                    |                    |
| SNP_79859_A_463581 | NW_004516049.1 | scaffold626 | 463581                  | GG                              | TT                 | TT               | INTERGENIC      |               |                    |                    |
| SNP_79860_A_463656 | NW_004516049.1 | scaffold626 | 463656                  | AA                              | CC                 | CC               | INTERGENIC      |               |                    |                    |
| SNP_79861_A_463724 | NW_004516049.1 | scaffold626 | 463724                  | TT                              | AA                 | AA               | INTERGENIC      |               |                    |                    |
| SNP_79862_A_463757 | NW_004516049.1 | scaffold626 | 463757                  | CC                              | TT                 | TT               | INTERGENIC      |               |                    |                    |
| SNP_79863_A_463829 | NW_004516049.1 | scaffold626 | 463829                  | GG                              | AA                 | AA               | INTERGENIC      |               |                    |                    |
| SNP_79864_A_463845 | NW_004516049.1 | scaffold626 | 463845                  | AA                              | GG                 | GG               | INTERGENIC      |               |                    |                    |
| SNP_79865_A_463930 | NW_004516049.1 | scaffold626 | 463930                  | AA                              | GG                 | GG               | INTERGENIC      |               |                    |                    |
| SNP_79866_A_464081 | NW_004516049.1 | scaffold626 | 464081                  | TT                              | CC                 | CC               | INTERGENIC      |               |                    |                    |
| SNP_79867_A_464088 | NW_004516049.1 | scaffold626 | 464088                  | CC                              | TT                 | TT               | INTERGENIC      |               |                    |                    |

| SNPs IDs           | Chromosome IDs | Chromosomes | Physical positions (bp) | CDC Frontier (Reference genome) | (Pusa 1103 & HPNB) | (ILWC 46 & LPNB) | Sequence genome | Components of | Gene accession IDs | Putative functions |
|--------------------|----------------|-------------|-------------------------|---------------------------------|--------------------|------------------|-----------------|---------------|--------------------|--------------------|
| SNP_79868_A_464195 | NW_004516049.1 | scaffold626 | 464195                  | GG                              | AA                 | AA               | INTERGENIC      |               |                    |                    |
| SNP_79869_A_464307 | NW_004516049.1 | scaffold626 | 464307                  | GG                              | TT                 | TT               | INTERGENIC      |               |                    |                    |
| SNP_79870_A_464499 | NW_004516049.1 | scaffold626 | 464499                  | AA                              | CC                 | CC               | INTERGENIC      |               |                    |                    |
| SNP_79871_A_464595 | NW_004516049.1 | scaffold626 | 464595                  | GG                              | CC                 | CC               | INTERGENIC      |               |                    |                    |
| SNP_79873_A_464698 | NW_004516049.1 | scaffold626 | 464698                  | CC                              | TT                 | TT               | INTERGENIC      |               |                    |                    |
| SNP_79874_A_465011 | NW_004516049.1 | scaffold626 | 465011                  | TT                              | GG                 | GG               | INTERGENIC      |               |                    |                    |
| SNP_79875_A_465303 | NW_004516049.1 | scaffold626 | 465303                  | TT                              | CC                 | CC               | INTERGENIC      |               |                    |                    |
| SNP_79876_A_465312 | NW_004516049.1 | scaffold626 | 465312                  | CC                              | TT                 | TT               | INTERGENIC      |               |                    |                    |
| SNP_79878_A_467499 | NW_004516049.1 | scaffold626 | 467499                  | AA                              | GG                 | GG               | INTERGENIC      |               |                    |                    |
| SNP_79879_A_475333 | NW_004516049.1 | scaffold626 | 475333                  | TT                              | CC                 | CC               | INTERGENIC      |               |                    |                    |
| SNP_79880_A_475473 | NW_004516049.1 | scaffold626 | 475473                  | AA                              | GG                 | GG               | INTERGENIC      |               |                    |                    |
| SNP_79881_A_475517 | NW_004516049.1 | scaffold626 | 475517                  | CC                              | TT                 | TT               | INTERGENIC      |               |                    |                    |
| SNP_79882_A_475973 | NW_004516049.1 | scaffold626 | 475973                  | AA                              | CC                 | CC               | INTERGENIC      |               |                    |                    |
| SNP_79883_A_475988 | NW_004516049.1 | scaffold626 | 475988                  | AA                              | GG                 | GG               | INTERGENIC      |               |                    |                    |
| SNP_79884_A_475991 | NW_004516049.1 | scaffold626 | 475991                  | GG                              | AA                 | AA               | INTERGENIC      |               |                    |                    |
| SNP_79885_A_476016 | NW_004516049.1 | scaffold626 | 476016                  | CC                              | TT                 | TT               | INTERGENIC      |               |                    |                    |
| SNP_79886_A_476018 | NW_004516049.1 | scaffold626 | 476018                  | CC                              | TT                 | TT               | INTERGENIC      |               |                    |                    |
| SNP_79887_A_476020 | NW_004516049.1 | scaffold626 | 476020                  | GG                              | TT                 | TT               | INTERGENIC      |               |                    |                    |
| SNP_79888_A_476413 | NW_004516049.1 | scaffold626 | 476413                  | TT                              | CC                 | CC               | INTERGENIC      |               |                    |                    |
| SNP_79889_A_477279 | NW_004516049.1 | scaffold626 | 477279                  | TT                              | AA                 | AA               | INTERGENIC      |               |                    |                    |
| SNP_79890_A_477437 | NW_004516049.1 | scaffold626 | 477437                  | CC                              | TT                 | TT               | INTERGENIC      |               |                    |                    |
| SNP_79891_A_477617 | NW_004516049.1 | scaffold626 | 477617                  | TT                              | CC                 | CC               | INTERGENIC      |               |                    |                    |

| SNPs IDs           | Chromosome IDs | Chromosomes | Physical positions (bp) | CDC Frontier (Reference genome) | (Pusa 1103 & HPNB) | (ILWC 46 & LPNB) | Sequence genome | Components of | Gene accession IDs | Putative functions |
|--------------------|----------------|-------------|-------------------------|---------------------------------|--------------------|------------------|-----------------|---------------|--------------------|--------------------|
| SNP_79892_A_477987 | NW_004516049.1 | scaffold626 | 477987                  | TT                              | GG                 | GG               | INTERGENIC      |               |                    |                    |
| SNP_79893_A_478906 | NW_004516049.1 | scaffold626 | 478906                  | TT                              | GG                 | GG               | INTERGENIC      |               |                    |                    |
| SNP_79894_A_479546 | NW_004516049.1 | scaffold626 | 479546                  | AA                              | GG                 | GG               | INTERGENIC      |               |                    |                    |
| SNP_79895_A_479915 | NW_004516049.1 | scaffold626 | 479915                  | AA                              | GG                 | GG               | INTERGENIC      |               |                    |                    |
| SNP_79896_A_479947 | NW_004516049.1 | scaffold626 | 479947                  | TT                              | CC                 | CC               | INTERGENIC      |               |                    |                    |
| SNP_79897_A_480045 | NW_004516049.1 | scaffold626 | 480045                  | AA                              | GG                 | GG               | INTERGENIC      |               |                    |                    |
| SNP_79898_A_480075 | NW_004516049.1 | scaffold626 | 480075                  | CC                              | AA                 | AA               | INTERGENIC      |               |                    |                    |
| SNP_79899_A_480120 | NW_004516049.1 | scaffold626 | 480120                  | CC                              | TT                 | TT               | INTERGENIC      |               |                    |                    |
| SNP_79900_A_480279 | NW_004516049.1 | scaffold626 | 480279                  | GG                              | AA                 | AA               | INTERGENIC      |               |                    |                    |
| SNP_79901_A_480397 | NW_004516049.1 | scaffold626 | 480397                  | CC                              | TT                 | TT               | INTERGENIC      |               |                    |                    |
| SNP_79902_A_480618 | NW_004516049.1 | scaffold626 | 480618                  | AA                              | TT                 | TT               | INTERGENIC      |               |                    |                    |
| SNP_79903_A_480760 | NW_004516049.1 | scaffold626 | 480760                  | TT                              | CC                 | CC               | INTERGENIC      |               |                    |                    |
| SNP_79904_A_480783 | NW_004516049.1 | scaffold626 | 480783                  | AA                              | GG                 | GG               | INTERGENIC      |               |                    |                    |
| SNP_79905_A_480881 | NW_004516049.1 | scaffold626 | 480881                  | CC                              | TT                 | TT               | INTERGENIC      |               |                    |                    |
| SNP_79906_A_480953 | NW_004516049.1 | scaffold626 | 480953                  | CC                              | GG                 | GG               | INTERGENIC      |               |                    |                    |
| SNP_79907_A_480967 | NW_004516049.1 | scaffold626 | 480967                  | TT                              | CC                 | CC               | INTERGENIC      |               |                    |                    |
| SNP_79908_A_483102 | NW_004516049.1 | scaffold626 | 483102                  | AA                              | TT                 | TT               | INTERGENIC      |               |                    |                    |
| SNP_79909_A_483314 | NW_004516049.1 | scaffold626 | 483314                  | GG                              | AA                 | AA               | INTERGENIC      |               |                    |                    |
| SNP_79910_A_483322 | NW_004516049.1 | scaffold626 | 483322                  | CC                              | TT                 | TT               | INTERGENIC      |               |                    |                    |
| SNP_79911_A_483365 | NW_004516049.1 | scaffold626 | 483365                  | TT                              | AA                 | AA               | INTERGENIC      |               |                    |                    |
| SNP_79912_A_483431 | NW_004516049.1 | scaffold626 | 483431                  | AA                              | CC                 | CC               | INTERGENIC      |               |                    |                    |
| SNP_79913_A_483525 | NW_004516049.1 | scaffold626 | 483525                  | GG                              | CC                 | CC               | INTERGENIC      |               |                    |                    |

| SNPs IDs           | Chromosome IDs | Chromosomes | Physical positions (bp) | CDC Frontier (Reference genome) | (Pusa 1103 & HPNB) | (ILWC 46 & LPNB) | Sequence genome | Components of | Gene accession IDs | Putative functions |
|--------------------|----------------|-------------|-------------------------|---------------------------------|--------------------|------------------|-----------------|---------------|--------------------|--------------------|
| SNP_79914_A_483580 | NW_004516049.1 | scaffold626 | 483580                  | AA                              | CC                 | CC               | INTERGENIC      |               |                    |                    |
| SNP_79915_A_483689 | NW_004516049.1 | scaffold626 | 483689                  | TT                              | GG                 | GG               | INTERGENIC      |               |                    |                    |
| SNP_79916_A_483829 | NW_004516049.1 | scaffold626 | 483829                  | CC                              | AA                 | AA               | INTERGENIC      |               |                    |                    |
| SNP_79917_A_483942 | NW_004516049.1 | scaffold626 | 483942                  | AA                              | GG                 | GG               | INTERGENIC      |               |                    |                    |
| SNP_79918_A_483957 | NW_004516049.1 | scaffold626 | 483957                  | GG                              | AA                 | AA               | INTERGENIC      |               |                    |                    |
| SNP_79919_A_484010 | NW_004516049.1 | scaffold626 | 484010                  | CC                              | TT                 | TT               | INTERGENIC      |               |                    |                    |
| SNP_79920_A_484032 | NW_004516049.1 | scaffold626 | 484032                  | AA                              | GG                 | GG               | INTERGENIC      |               |                    |                    |
| SNP_79921_A_484233 | NW_004516049.1 | scaffold626 | 484233                  | GG                              | AA                 | AA               | INTERGENIC      |               |                    |                    |
| SNP_79922_A_484305 | NW_004516049.1 | scaffold626 | 484305                  | GG                              | AA                 | AA               | INTERGENIC      |               |                    |                    |
| SNP_79923_A_484431 | NW_004516049.1 | scaffold626 | 484431                  | AA                              | GG                 | GG               | INTERGENIC      |               |                    |                    |
| SNP_79924_A_484743 | NW_004516049.1 | scaffold626 | 484743                  | TT                              | GG                 | GG               | INTERGENIC      |               |                    |                    |
| SNP_79925_A_484839 | NW_004516049.1 | scaffold626 | 484839                  | TT                              | AA                 | AA               | INTERGENIC      |               |                    |                    |
| SNP_79926_A_484851 | NW_004516049.1 | scaffold626 | 484851                  | CC                              | AA                 | AA               | INTERGENIC      |               |                    |                    |
| SNP_79927_A_484915 | NW_004516049.1 | scaffold626 | 484915                  | CC                              | TT                 | TT               | INTERGENIC      |               |                    |                    |
| SNP_79928_A_484923 | NW_004516049.1 | scaffold626 | 484923                  | CC                              | AA                 | AA               | INTERGENIC      |               |                    |                    |
| SNP_79929_A_484945 | NW_004516049.1 | scaffold626 | 484945                  | GG                              | TT                 | TT               | INTERGENIC      |               |                    |                    |
| SNP_79930_A_484951 | NW_004516049.1 | scaffold626 | 484951                  | GG                              | TT                 | TT               | INTERGENIC      |               |                    |                    |
| SNP_79931_A_485063 | NW_004516049.1 | scaffold626 | 485063                  | CC                              | AA                 | AA               | INTERGENIC      |               |                    |                    |
| SNP_79932_A_485183 | NW_004516049.1 | scaffold626 | 485183                  | GG                              | TT                 | TT               | INTERGENIC      |               |                    |                    |
| SNP_79933_A_485256 | NW_004516049.1 | scaffold626 | 485256                  | CC                              | TT                 | TT               | INTERGENIC      |               |                    |                    |
| SNP_79934_A_485496 | NW_004516049.1 | scaffold626 | 485496                  | GG                              | TT                 | TT               | INTERGENIC      |               |                    |                    |
| SNP_79935_A_486056 | NW_004516049.1 | scaffold626 | 486056                  | AA                              | GG                 | GG               | INTERGENIC      |               |                    |                    |

| SNPs IDs           | Chromosome IDs | Chromosomes | Physical positions (bp) | CDC Frontier (Reference genome) | (Pusa 1103 & HPNB) | (ILWC 46 & LPNB) | Sequence genome | Components of | Gene accession IDs | Putative functions |
|--------------------|----------------|-------------|-------------------------|---------------------------------|--------------------|------------------|-----------------|---------------|--------------------|--------------------|
| SNP_79937_A_487625 | NW_004516049.1 | scaffold626 | 487625                  | CC                              | AA                 | AA               | INTERGENIC      |               |                    |                    |
| SNP_79938_A_487804 | NW_004516049.1 | scaffold626 | 487804                  | TT                              | CC                 | CC               | INTERGENIC      |               |                    |                    |
| SNP_79939_A_488496 | NW_004516049.1 | scaffold626 | 488496                  | TT                              | CC                 | CC               | INTERGENIC      |               |                    |                    |
| SNP_79940_A_488507 | NW_004516049.1 | scaffold626 | 488507                  | AA                              | TT                 | TT               | INTERGENIC      |               |                    |                    |
| SNP_79941_A_488893 | NW_004516049.1 | scaffold626 | 488893                  | AA                              | TT                 | TT               | INTERGENIC      |               |                    |                    |
| SNP_79942_A_490135 | NW_004516049.1 | scaffold626 | 490135                  | TT                              | AA                 | AA               | INTERGENIC      |               |                    |                    |
| SNP_79943_A_503109 | NW_004516049.1 | scaffold626 | 503109                  | TT                              | GG                 | GG               | INTERGENIC      |               |                    |                    |
| SNP_79944_A_504533 | NW_004516049.1 | scaffold626 | 504533                  | GG                              | AA                 | AA               | INTERGENIC      |               |                    |                    |
| SNP_79946_A_504936 | NW_004516049.1 | scaffold626 | 504936                  | AA                              | GG                 | GG               | INTERGENIC      |               |                    |                    |
| SNP_79947_A_505160 | NW_004516049.1 | scaffold626 | 505160                  | AA                              | TT                 | TT               | INTERGENIC      |               |                    |                    |
| SNP_79948_A_505273 | NW_004516049.1 | scaffold626 | 505273                  | GG                              | CC                 | CC               | INTERGENIC      |               |                    |                    |
| SNP_79949_A_505334 | NW_004516049.1 | scaffold626 | 505334                  | AA                              | GG                 | GG               | INTERGENIC      |               |                    |                    |
| SNP_79950_A_505404 | NW_004516049.1 | scaffold626 | 505404                  | GG                              | TT                 | TT               | INTERGENIC      |               |                    |                    |
| SNP_79951_A_505694 | NW_004516049.1 | scaffold626 | 505694                  | CC                              | TT                 | TT               | INTERGENIC      |               |                    |                    |
| SNP_79952_A_506358 | NW_004516049.1 | scaffold626 | 506358                  | GG                              | TT                 | TT               | INTERGENIC      |               |                    |                    |
| SNP_79953_A_507326 | NW_004516049.1 | scaffold626 | 507326                  | AA                              | TT                 | TT               | INTERGENIC      |               |                    |                    |
| SNP_79954_A_507403 | NW_004516049.1 | scaffold626 | 507403                  | TT                              | CC                 | CC               | INTERGENIC      |               |                    |                    |
| SNP_79955_A_507468 | NW_004516049.1 | scaffold626 | 507468                  | CC                              | TT                 | TT               | INTERGENIC      |               |                    |                    |
| SNP_79956_A_509850 | NW_004516049.1 | scaffold626 | 509850                  | TT                              | GG                 | GG               | INTERGENIC      |               |                    |                    |
| SNP_79957_A_509952 | NW_004516049.1 | scaffold626 | 509952                  | GG                              | AA                 | AA               | INTERGENIC      |               |                    |                    |
| SNP_79958_A_510117 | NW_004516049.1 | scaffold626 | 510117                  | GG                              | AA                 | AA               | INTERGENIC      |               |                    |                    |
| SNP_79959_A_510164 | NW_004516049.1 | scaffold626 | 510164                  | CC                              | GG                 | GG               | INTERGENIC      |               |                    |                    |

| SNPs IDs           | Chromosome IDs | Chromosomes | Physical positions (bp) | CDC Frontier (Reference genome) | (Pusa 1103 & HPNB) | (ILWC 46 & LPNB) | Sequence genome | Components of | Gene accession IDs | Putative functions |
|--------------------|----------------|-------------|-------------------------|---------------------------------|--------------------|------------------|-----------------|---------------|--------------------|--------------------|
| SNP_79960_A_510280 | NW_004516049.1 | scaffold626 | 510280                  | TT                              | CC                 | CC               | INTERGENIC      |               |                    |                    |
| SNP_79961_A_510476 | NW_004516049.1 | scaffold626 | 510476                  | GG                              | AA                 | AA               | INTERGENIC      |               |                    |                    |
| SNP_79963_A_512674 | NW_004516049.1 | scaffold626 | 512674                  | CC                              | TT                 | TT               | INTERGENIC      |               |                    |                    |
| SNP_79965_A_515605 | NW_004516049.1 | scaffold626 | 515605                  | AA                              | CC                 | CC               | INTERGENIC      |               |                    |                    |
| SNP_79966_A_515662 | NW_004516049.1 | scaffold626 | 515662                  | TT                              | CC                 | CC               | INTERGENIC      |               |                    |                    |
| SNP_79967_A_515666 | NW_004516049.1 | scaffold626 | 515666                  | AA                              | GG                 | GG               | INTERGENIC      |               |                    |                    |
| SNP_79968_A_516219 | NW_004516049.1 | scaffold626 | 516219                  | GG                              | TT                 | TT               | INTERGENIC      |               |                    |                    |
| SNP_79969_A_517125 | NW_004516049.1 | scaffold626 | 517125                  | GG                              | AA                 | AA               | INTERGENIC      |               |                    |                    |
| SNP_79970_A_517291 | NW_004516049.1 | scaffold626 | 517291                  | AA                              | GG                 | GG               | INTERGENIC      |               |                    |                    |
| SNP_79971_A_517406 | NW_004516049.1 | scaffold626 | 517406                  | GG                              | AA                 | AA               | INTERGENIC      |               |                    |                    |
| SNP_79972_A_519189 | NW_004516049.1 | scaffold626 | 519189                  | CC                              | AA                 | AA               | INTERGENIC      |               |                    |                    |
| SNP_79973_A_519221 | NW_004516049.1 | scaffold626 | 519221                  | AA                              | CC                 | CC               | INTERGENIC      |               |                    |                    |
| SNP_79974_A_519227 | NW_004516049.1 | scaffold626 | 519227                  | CC                              | GG                 | GG               | INTERGENIC      |               |                    |                    |
| SNP_79975_A_519347 | NW_004516049.1 | scaffold626 | 519347                  | GG                              | TT                 | TT               | INTERGENIC      |               |                    |                    |
| SNP_79976_A_519351 | NW_004516049.1 | scaffold626 | 519351                  | CC                              | GG                 | GG               | INTERGENIC      |               |                    |                    |
| SNP_79977_A_519409 | NW_004516049.1 | scaffold626 | 519409                  | GG                              | TT                 | TT               | INTERGENIC      |               |                    |                    |
| SNP_79978_A_519428 | NW_004516049.1 | scaffold626 | 519428                  | TT                              | CC                 | CC               | INTERGENIC      |               |                    |                    |
| SNP_79979_A_519529 | NW_004516049.1 | scaffold626 | 519529                  | CC                              | GG                 | GG               | INTERGENIC      |               |                    |                    |
| SNP_79980_A_519541 | NW_004516049.1 | scaffold626 | 519541                  | AA                              | CC                 | CC               | INTERGENIC      |               |                    |                    |
| SNP_79981_A_519574 | NW_004516049.1 | scaffold626 | 519574                  | AA                              | CC                 | CC               | INTERGENIC      |               |                    |                    |
| SNP_79982_A_519603 | NW_004516049.1 | scaffold626 | 519603                  | TT                              | AA                 | AA               | INTERGENIC      |               |                    |                    |
| SNP_79983_A_520284 | NW_004516049.1 | scaffold626 | 520284                  | TT                              | CC                 | CC               | INTERGENIC      |               |                    |                    |

| SNPs IDs           | Chromosome IDs | Chromosomes | Physical positions (bp) | CDC Frontier (Reference genome) | (Pusa 1103 & HPNB) | (ILWC 46 & LPNB) | Sequence genome | Components of | Gene accession IDs | Putative functions |
|--------------------|----------------|-------------|-------------------------|---------------------------------|--------------------|------------------|-----------------|---------------|--------------------|--------------------|
| SNP_79984_A_520321 | NW_004516049.1 | scaffold626 | 520321                  | TT                              | AA                 | AA               | INTERGENIC      |               |                    |                    |
| SNP_79986_A_520696 | NW_004516049.1 | scaffold626 | 520696                  | TT                              | CC                 | CC               | INTERGENIC      |               |                    |                    |
| SNP_79987_A_521180 | NW_004516049.1 | scaffold626 | 521180                  | GG                              | AA                 | AA               | INTERGENIC      |               |                    |                    |
| SNP_79988_A_521632 | NW_004516049.1 | scaffold626 | 521632                  | GG                              | TT                 | TT               | INTERGENIC      |               |                    |                    |
| SNP_79989_A_521923 | NW_004516049.1 | scaffold626 | 521923                  | GG                              | AA                 | AA               | INTERGENIC      |               |                    |                    |
| SNP_79990_A_521935 | NW_004516049.1 | scaffold626 | 521935                  | GG                              | AA                 | AA               | INTERGENIC      |               |                    |                    |
| SNP_79991_A_522349 | NW_004516049.1 | scaffold626 | 522349                  | GG                              | TT                 | TT               | INTERGENIC      |               |                    |                    |
| SNP_79993_A_522445 | NW_004516049.1 | scaffold626 | 522445                  | GG                              | AA                 | AA               | INTERGENIC      |               |                    |                    |
| SNP_79994_A_522797 | NW_004516049.1 | scaffold626 | 522797                  | AA                              | GG                 | GG               | INTERGENIC      |               |                    |                    |
| SNP_79995_A_522798 | NW_004516049.1 | scaffold626 | 522798                  | GG                              | AA                 | AA               | INTERGENIC      |               |                    |                    |
| SNP_79996_A_522832 | NW_004516049.1 | scaffold626 | 522832                  | AA                              | TT                 | TT               | INTERGENIC      |               |                    |                    |
| SNP_79997_A_522834 | NW_004516049.1 | scaffold626 | 522834                  | GG                              | CC                 | CC               | INTERGENIC      |               |                    |                    |
| SNP_79998_A_522970 | NW_004516049.1 | scaffold626 | 522970                  | TT                              | GG                 | GG               | INTERGENIC      |               |                    |                    |
| SNP_79999_A_522994 | NW_004516049.1 | scaffold626 | 522994                  | TT                              | CC                 | CC               | INTERGENIC      |               |                    |                    |
| SNP_80000_A_523098 | NW_004516049.1 | scaffold626 | 523098                  | TT                              | AA                 | AA               | INTERGENIC      |               |                    |                    |
| SNP_80001_A_524134 | NW_004516049.1 | scaffold626 | 524134                  | TT                              | GG                 | GG               | INTERGENIC      |               |                    |                    |
| SNP_80002_A_524202 | NW_004516049.1 | scaffold626 | 524202                  | CC                              | TT                 | TT               | INTERGENIC      |               |                    |                    |
| SNP_80003_A_524231 | NW_004516049.1 | scaffold626 | 524231                  | TT                              | CC                 | CC               | INTERGENIC      |               |                    |                    |
| SNP_80004_A_524239 | NW_004516049.1 | scaffold626 | 524239                  | AA                              | TT                 | TT               | INTERGENIC      |               |                    |                    |
| SNP_80005_A_524287 | NW_004516049.1 | scaffold626 | 524287                  | AA                              | GG                 | GG               | INTERGENIC      |               |                    |                    |
| SNP_80006_A_524312 | NW_004516049.1 | scaffold626 | 524312                  | CC                              | TT                 | TT               | INTERGENIC      |               |                    |                    |
| SNP_80007_A_524347 | NW_004516049.1 | scaffold626 | 524347                  | TT                              | AA                 | AA               | INTERGENIC      |               |                    |                    |

| SNPs IDs           | Chromosome IDs | Chromosomes | Physical positions (bp) | CDC Frontier (Reference genome) | (Pusa 1103 & HPNB) | (ILWC 46 & LPNB) | Sequence genome | Components of | Gene accession IDs | Putative functions |
|--------------------|----------------|-------------|-------------------------|---------------------------------|--------------------|------------------|-----------------|---------------|--------------------|--------------------|
| SNP_80008_A_524364 | NW_004516049.1 | scaffold626 | 524364                  | TT                              | CC                 | CC               | INTERGENIC      |               |                    |                    |
| SNP_80009_A_524495 | NW_004516049.1 | scaffold626 | 524495                  | TT                              | CC                 | CC               | INTERGENIC      |               |                    |                    |
| SNP_80010_A_524512 | NW_004516049.1 | scaffold626 | 524512                  | GG                              | AA                 | AA               | INTERGENIC      |               |                    |                    |
| SNP_80011_A_524559 | NW_004516049.1 | scaffold626 | 524559                  | GG                              | TT                 | TT               | INTERGENIC      |               |                    |                    |
| SNP_80013_A_525668 | NW_004516049.1 | scaffold626 | 525668                  | AA                              | TT                 | TT               | INTERGENIC      |               |                    |                    |
| SNP_80014_A_525673 | NW_004516049.1 | scaffold626 | 525673                  | CC                              | TT                 | TT               | INTERGENIC      |               |                    |                    |
| SNP_80015_A_525691 | NW_004516049.1 | scaffold626 | 525691                  | GG                              | AA                 | AA               | INTERGENIC      |               |                    |                    |
| SNP_80016_A_525736 | NW_004516049.1 | scaffold626 | 525736                  | GG                              | TT                 | TT               | INTERGENIC      |               |                    |                    |
| SNP_80017_A_525765 | NW_004516049.1 | scaffold626 | 525765                  | TT                              | CC                 | CC               | INTERGENIC      |               |                    |                    |
| SNP_80018_A_525891 | NW_004516049.1 | scaffold626 | 525891                  | TT                              | GG                 | GG               | INTERGENIC      |               |                    |                    |
| SNP_80019_A_525951 | NW_004516049.1 | scaffold626 | 525951                  | CC                              | AA                 | AA               | INTERGENIC      |               |                    |                    |
| SNP_80020_A_525952 | NW_004516049.1 | scaffold626 | 525952                  | GG                              | TT                 | TT               | INTERGENIC      |               |                    |                    |
| SNP_80021_A_525999 | NW_004516049.1 | scaffold626 | 525999                  | TT                              | GG                 | GG               | INTERGENIC      |               |                    |                    |
| SNP_80022_A_526239 | NW_004516049.1 | scaffold626 | 526239                  | TT                              | GG                 | GG               | INTERGENIC      |               |                    |                    |
| SNP_80023_A_526836 | NW_004516049.1 | scaffold626 | 526836                  | TT                              | CC                 | CC               | INTERGENIC      |               |                    |                    |
| SNP_80024_A_526862 | NW_004516049.1 | scaffold626 | 526862                  | TT                              | AA                 | AA               | INTERGENIC      |               |                    |                    |
| SNP_80025_A_526867 | NW_004516049.1 | scaffold626 | 526867                  | GG                              | AA                 | AA               | INTERGENIC      |               |                    |                    |
| SNP_80026_A_526925 | NW_004516049.1 | scaffold626 | 526925                  | AA                              | TT                 | TT               | INTERGENIC      |               |                    |                    |
| SNP_80027_A_526952 | NW_004516049.1 | scaffold626 | 526952                  | AA                              | TT                 | TT               | INTERGENIC      |               |                    |                    |
| SNP_80028_A_527079 | NW_004516049.1 | scaffold626 | 527079                  | AA                              | GG                 | GG               | INTERGENIC      |               |                    |                    |
| SNP_80029_A_527228 | NW_004516049.1 | scaffold626 | 527228                  | TT                              | GG                 | GG               | INTERGENIC      |               |                    |                    |
| SNP_80030_A_527231 | NW_004516049.1 | scaffold626 | 527231                  | GG                              | AA                 | AA               | INTERGENIC      |               |                    |                    |



| SNPs IDs           | Chromosome IDs | Chromosomes | Physical positions (bp) | CDC Frontier (Reference genome) | (Pusa 1103 & HPNB) | (ILWC 46 & LPNB) | Sequence genome | Components of | Gene accession IDs | Putative functions |
|--------------------|----------------|-------------|-------------------------|---------------------------------|--------------------|------------------|-----------------|---------------|--------------------|--------------------|
| SNP_80031_A_527236 | NW_004516049.1 | scaffold626 | 527236                  | AA                              | CC                 | CC               | INTERGENIC      |               |                    |                    |
| SNP_80032_A_527238 | NW_004516049.1 | scaffold626 | 527238                  | AA                              | GG                 | GG               | INTERGENIC      |               |                    |                    |
| SNP_80033_A_527320 | NW_004516049.1 | scaffold626 | 527320                  | AA                              | CC                 | CC               | INTERGENIC      |               |                    |                    |
| SNP_80034_A_527363 | NW_004516049.1 | scaffold626 | 527363                  | CC                              | TT                 | TT               | INTERGENIC      |               |                    |                    |
| SNP_80035_A_527365 | NW_004516049.1 | scaffold626 | 527365                  | TT                              | CC                 | CC               | INTERGENIC      |               |                    |                    |
| SNP_80036_A_529956 | NW_004516049.1 | scaffold626 | 529956                  | TT                              | GG                 | GG               | INTERGENIC      |               |                    |                    |
| SNP_80037_A_530127 | NW_004516049.1 | scaffold626 | 530127                  | AA                              | GG                 | GG               | INTERGENIC      |               |                    |                    |
| SNP_80038_A_531150 | NW_004516049.1 | scaffold626 | 531150                  | AA                              | GG                 | GG               | INTERGENIC      |               |                    |                    |
| SNP_80039_A_531195 | NW_004516049.1 | scaffold626 | 531195                  | CC                              | TT                 | TT               | INTERGENIC      |               |                    |                    |
| SNP_80040_A_531200 | NW_004516049.1 | scaffold626 | 531200                  | CC                              | AA                 | AA               | INTERGENIC      |               |                    |                    |
| SNP_80041_A_531319 | NW_004516049.1 | scaffold626 | 531319                  | CC                              | AA                 | AA               | INTERGENIC      |               |                    |                    |
| SNP_80042_A_531329 | NW_004516049.1 | scaffold626 | 531329                  | AA                              | GG                 | GG               | INTERGENIC      |               |                    |                    |
| SNP_80043_A_531421 | NW_004516049.1 | scaffold626 | 531421                  | CC                              | TT                 | TT               | INTERGENIC      |               |                    |                    |
| SNP_80044_A_531422 | NW_004516049.1 | scaffold626 | 531422                  | AA                              | GG                 | GG               | INTERGENIC      |               |                    |                    |
| SNP_80045_A_532666 | NW_004516049.1 | scaffold626 | 532666                  | CC                              | TT                 | TT               | INTERGENIC      |               |                    |                    |
| SNP_80046_A_533551 | NW_004516049.1 | scaffold626 | 533551                  | TT                              | AA                 | AA               | INTERGENIC      |               |                    |                    |
| SNP_80047_A_533605 | NW_004516049.1 | scaffold626 | 533605                  | CC                              | GG                 | GG               | INTERGENIC      |               |                    |                    |
| SNP_80048_A_542978 | NW_004516049.1 | scaffold626 | 542978                  | CC                              | TT                 | TT               | INTERGENIC      |               |                    |                    |
| SNP_80049_A_542980 | NW_004516049.1 | scaffold626 | 542980                  | GG                              | CC                 | CC               | INTERGENIC      |               |                    |                    |
| SNP_80050_A_543266 | NW_004516049.1 | scaffold626 | 543266                  | CC                              | GG                 | GG               | INTERGENIC      |               |                    |                    |
| SNP_80051_A_544565 | NW_004516049.1 | scaffold626 | 544565                  | CC                              | GG                 | GG               | INTERGENIC      |               |                    |                    |
| SNP_80052_A_545930 | NW_004516049.1 | scaffold626 | 545930                  | CC                              | TT                 | TT               | INTERGENIC      |               |                    |                    |

| SNPs IDs           | Chromosome IDs | Chromosomes | Physical positions (bp) | CDC Frontier (Reference genome) | (Pusa 1103 & HPNB) | (ILWC 46 & LPNB) | Sequence genome | Components of | Gene accession IDs | Putative functions |
|--------------------|----------------|-------------|-------------------------|---------------------------------|--------------------|------------------|-----------------|---------------|--------------------|--------------------|
| SNP_80053_A_545995 | NW_004516049.1 | scaffold626 | 545995                  | AA                              | GG                 | GG               | INTERGENIC      |               |                    |                    |
| SNP_80054_A_546207 | NW_004516049.1 | scaffold626 | 546207                  | AA                              | TT                 | TT               | INTERGENIC      |               |                    |                    |
| SNP_80055_A_546576 | NW_004516049.1 | scaffold626 | 546576                  | CC                              | AA                 | AA               | INTERGENIC      |               |                    |                    |
| SNP_80056_A_549736 | NW_004516049.1 | scaffold626 | 549736                  | AA                              | GG                 | GG               | INTERGENIC      |               |                    |                    |
| SNP_80057_A_549855 | NW_004516049.1 | scaffold626 | 549855                  | CC                              | TT                 | TT               | INTERGENIC      |               |                    |                    |
| SNP_80058_A_549996 | NW_004516049.1 | scaffold626 | 549996                  | AA                              | GG                 | GG               | INTERGENIC      |               |                    |                    |
| SNP_80059_A_550000 | NW_004516049.1 | scaffold626 | 550000                  | AA                              | GG                 | GG               | INTERGENIC      |               |                    |                    |
| SNP_80060_A_550076 | NW_004516049.1 | scaffold626 | 550076                  | AA                              | GG                 | GG               | INTERGENIC      |               |                    |                    |
| SNP_80061_A_550209 | NW_004516049.1 | scaffold626 | 550209                  | TT                              | GG                 | GG               | INTERGENIC      |               |                    |                    |
| SNP_80062_A_550217 | NW_004516049.1 | scaffold626 | 550217                  | CC                              | TT                 | TT               | INTERGENIC      |               |                    |                    |
| SNP_80063_A_550269 | NW_004516049.1 | scaffold626 | 550269                  | GG                              | TT                 | TT               | INTERGENIC      |               |                    |                    |
| SNP_80064_A_550338 | NW_004516049.1 | scaffold626 | 550338                  | TT                              | GG                 | GG               | INTERGENIC      |               |                    |                    |
| SNP_80065_A_551601 | NW_004516049.1 | scaffold626 | 551601                  | TT                              | CC                 | CC               | INTERGENIC      |               |                    |                    |
| SNP_80066_A_551912 | NW_004516049.1 | scaffold626 | 551912                  | TT                              | CC                 | CC               | INTERGENIC      |               |                    |                    |
| SNP_80067_A_551983 | NW_004516049.1 | scaffold626 | 551983                  | TT                              | CC                 | CC               | INTERGENIC      |               |                    |                    |
| SNP_80068_A_552001 | NW_004516049.1 | scaffold626 | 552001                  | AA                              | CC                 | CC               | INTERGENIC      |               |                    |                    |
| SNP_80069_A_552029 | NW_004516049.1 | scaffold626 | 552029                  | TT                              | CC                 | CC               | INTERGENIC      |               |                    |                    |
| SNP_80070_A_552064 | NW_004516049.1 | scaffold626 | 552064                  | AA                              | GG                 | GG               | INTERGENIC      |               |                    |                    |
| SNP_80071_A_552209 | NW_004516049.1 | scaffold626 | 552209                  | GG                              | CC                 | CC               | INTERGENIC      |               |                    |                    |
| SNP_80072_A_552275 | NW_004516049.1 | scaffold626 | 552275                  | TT                              | CC                 | CC               | INTERGENIC      |               |                    |                    |
| SNP_80073_A_552316 | NW_004516049.1 | scaffold626 | 552316                  | GG                              | TT                 | TT               | INTERGENIC      |               |                    |                    |
| SNP_80074_A_552361 | NW_004516049.1 | scaffold626 | 552361                  | AA                              | TT                 | TT               | INTERGENIC      |               |                    |                    |

| SNPs IDs           | Chromosome IDs | Chromosomes | Physical positions (bp) | CDC Frontier (Reference genome) | (Pusa 1103 & HPNB) | (ILWC 46 & LPNB) | Sequence genome | Components of | Gene accession IDs | Putative functions |
|--------------------|----------------|-------------|-------------------------|---------------------------------|--------------------|------------------|-----------------|---------------|--------------------|--------------------|
| SNP_80075_A_552537 | NW_004516049.1 | scaffold626 | 552537                  | CC                              | GG                 | GG               | INTERGENIC      |               |                    |                    |
| SNP_80076_A_552547 | NW_004516049.1 | scaffold626 | 552547                  | GG                              | CC                 | CC               | INTERGENIC      |               |                    |                    |
| SNP_80077_A_552572 | NW_004516049.1 | scaffold626 | 552572                  | AA                              | CC                 | CC               | INTERGENIC      |               |                    |                    |
| SNP_80078_A_552578 | NW_004516049.1 | scaffold626 | 552578                  | TT                              | GG                 | GG               | INTERGENIC      |               |                    |                    |
| SNP_80079_A_553158 | NW_004516049.1 | scaffold626 | 553158                  | GG                              | CC                 | CC               | INTERGENIC      |               |                    |                    |
| SNP_80081_A_553311 | NW_004516049.1 | scaffold626 | 553311                  | TT                              | CC                 | CC               | INTERGENIC      |               |                    |                    |
| SNP_80082_A_553673 | NW_004516049.1 | scaffold626 | 553673                  | AA                              | GG                 | GG               | INTERGENIC      |               |                    |                    |
| SNP_80083_A_554561 | NW_004516049.1 | scaffold626 | 554561                  | CC                              | TT                 | TT               | INTERGENIC      |               |                    |                    |
| SNP_80084_A_554661 | NW_004516049.1 | scaffold626 | 554661                  | GG                              | AA                 | AA               | INTERGENIC      |               |                    |                    |
| SNP_80086_A_554748 | NW_004516049.1 | scaffold626 | 554748                  | TT                              | CC                 | CC               | INTERGENIC      |               |                    |                    |
| SNP_80087_A_554867 | NW_004516049.1 | scaffold626 | 554867                  | CC                              | TT                 | TT               | INTERGENIC      |               |                    |                    |
| SNP_80088_A_555043 | NW_004516049.1 | scaffold626 | 555043                  | GG                              | AA                 | AA               | INTERGENIC      |               |                    |                    |
| SNP_80089_A_555108 | NW_004516049.1 | scaffold626 | 555108                  | TT                              | GG                 | GG               | INTERGENIC      |               |                    |                    |
| SNP_80090_A_556521 | NW_004516049.1 | scaffold626 | 556521                  | AA                              | GG                 | GG               | INTERGENIC      |               |                    |                    |
| SNP_80091_A_558827 | NW_004516049.1 | scaffold626 | 558827                  | GG                              | AA                 | AA               | INTERGENIC      |               |                    |                    |
| SNP_80092_A_558920 | NW_004516049.1 | scaffold626 | 558920                  | TT                              | AA                 | AA               | INTERGENIC      |               |                    |                    |
| SNP_80093_A_559159 | NW_004516049.1 | scaffold626 | 559159                  | TT                              | AA                 | AA               | INTERGENIC      |               |                    |                    |
| SNP_80094_A_559167 | NW_004516049.1 | scaffold626 | 559167                  | TT                              | CC                 | CC               | INTERGENIC      |               |                    |                    |
| SNP_80095_A_559222 | NW_004516049.1 | scaffold626 | 559222                  | TT                              | GG                 | GG               | INTERGENIC      |               |                    |                    |
| SNP_80096_A_559315 | NW_004516049.1 | scaffold626 | 559315                  | TT                              | GG                 | GG               | INTERGENIC      |               |                    |                    |
| SNP_80097_A_559566 | NW_004516049.1 | scaffold626 | 559566                  | CC                              | TT                 | TT               | INTERGENIC      |               |                    |                    |
| SNP_80098_A_561295 | NW_004516049.1 | scaffold626 | 561295                  | AA                              | GG                 | GG               | INTERGENIC      |               |                    |                    |

| SNPs IDs           | Chromosome IDs | Chromosomes | Physical positions (bp) | CDC Frontier (Reference genome) | (Pusa 1103 & HPNB) | (ILWC 46 & LPNB) | Sequence genome | Components of | Gene accession IDs | Putative functions |
|--------------------|----------------|-------------|-------------------------|---------------------------------|--------------------|------------------|-----------------|---------------|--------------------|--------------------|
| SNP_80099_A_561348 | NW_004516049.1 | scaffold626 | 561348                  | TT                              | AA                 | AA               | INTERGENIC      |               |                    |                    |
| SNP_80100_A_561371 | NW_004516049.1 | scaffold626 | 561371                  | AA                              | GG                 | GG               | INTERGENIC      |               |                    |                    |
| SNP_80101_A_561382 | NW_004516049.1 | scaffold626 | 561382                  | AA                              | TT                 | TT               | INTERGENIC      |               |                    |                    |
| SNP_80102_A_561474 | NW_004516049.1 | scaffold626 | 561474                  | GG                              | CC                 | CC               | INTERGENIC      |               |                    |                    |
| SNP_80103_A_561537 | NW_004516049.1 | scaffold626 | 561537                  | CC                              | TT                 | TT               | INTERGENIC      |               |                    |                    |
| SNP_80104_A_561584 | NW_004516049.1 | scaffold626 | 561584                  | TT                              | CC                 | CC               | INTERGENIC      |               |                    |                    |
| SNP_80105_A_561747 | NW_004516049.1 | scaffold626 | 561747                  | GG                              | TT                 | TT               | INTERGENIC      |               |                    |                    |
| SNP_80106_A_561794 | NW_004516049.1 | scaffold626 | 561794                  | CC                              | TT                 | TT               | INTERGENIC      |               |                    |                    |
| SNP_80107_A_561847 | NW_004516049.1 | scaffold626 | 561847                  | TT                              | CC                 | CC               | INTERGENIC      |               |                    |                    |
| SNP_80108_A_561868 | NW_004516049.1 | scaffold626 | 561868                  | GG                              | AA                 | AA               | INTERGENIC      |               |                    |                    |
| SNP_80109_A_561906 | NW_004516049.1 | scaffold626 | 561906                  | TT                              | CC                 | CC               | INTERGENIC      |               |                    |                    |
| SNP_80110_A_561934 | NW_004516049.1 | scaffold626 | 561934                  | CC                              | GG                 | GG               | INTERGENIC      |               |                    |                    |
| SNP_80111_A_562035 | NW_004516049.1 | scaffold626 | 562035                  | TT                              | GG                 | GG               | INTERGENIC      |               |                    |                    |
| SNP_80112_A_562159 | NW_004516049.1 | scaffold626 | 562159                  | AA                              | GG                 | GG               | INTERGENIC      |               |                    |                    |
| SNP_80113_A_568646 | NW_004516049.1 | scaffold626 | 568646                  | AA                              | GG                 | GG               | INTERGENIC      |               |                    |                    |
| SNP_80114_A_571653 | NW_004516049.1 | scaffold626 | 571653                  | TT                              | CC                 | CC               | INTERGENIC      |               |                    |                    |
| SNP_80115_A_571980 | NW_004516049.1 | scaffold626 | 571980                  | AA                              | GG                 | GG               | INTERGENIC      |               |                    |                    |
| SNP_80116_A_572307 | NW_004516049.1 | scaffold626 | 572307                  | TT                              | GG                 | GG               | INTERGENIC      |               |                    |                    |
| SNP_80117_A_572498 | NW_004516049.1 | scaffold626 | 572498                  | CC                              | AA                 | AA               | INTERGENIC      |               |                    |                    |
| SNP_80118_A_573058 | NW_004516049.1 | scaffold626 | 573058                  | TT                              | CC                 | CC               | INTERGENIC      |               |                    |                    |
| SNP_80119_A_573348 | NW_004516049.1 | scaffold626 | 573348                  | GG                              | CC                 | CC               | INTERGENIC      |               |                    |                    |
| SNP_80120_A_573357 | NW_004516049.1 | scaffold626 | 573357                  | CC                              | AA                 | AA               | INTERGENIC      |               |                    |                    |

| SNPs IDs           | Chromosome IDs | Chromosomes | Physical positions (bp) | CDC Frontier (Reference genome) | (Pusa 1103 & HPNB) | (ILWC 46 & LPNB) | Sequence genome | Components of | Gene accession IDs | Putative functions |
|--------------------|----------------|-------------|-------------------------|---------------------------------|--------------------|------------------|-----------------|---------------|--------------------|--------------------|
| SNP_80121_A_575002 | NW_004516049.1 | scaffold626 | 575002                  | GG                              | TT                 | TT               | INTERGENIC      |               |                    |                    |
| SNP_80122_A_576218 | NW_004516049.1 | scaffold626 | 576218                  | TT                              | GG                 | GG               | INTERGENIC      |               |                    |                    |
| SNP_80123_A_576441 | NW_004516049.1 | scaffold626 | 576441                  | GG                              | AA                 | AA               | INTERGENIC      |               |                    |                    |
| SNP_80124_A_576538 | NW_004516049.1 | scaffold626 | 576538                  | CC                              | GG                 | GG               | INTERGENIC      |               |                    |                    |
| SNP_80125_A_580385 | NW_004516049.1 | scaffold626 | 580385                  | GG                              | AA                 | AA               | INTERGENIC      |               |                    |                    |
| SNP_80126_A_580410 | NW_004516049.1 | scaffold626 | 580410                  | AA                              | GG                 | GG               | INTERGENIC      |               |                    |                    |
| SNP_80127_A_580995 | NW_004516049.1 | scaffold626 | 580995                  | CC                              | TT                 | TT               | INTERGENIC      |               |                    |                    |
| SNP_80128_A_581811 | NW_004516049.1 | scaffold626 | 581811                  | CC                              | TT                 | TT               | INTERGENIC      |               |                    |                    |
| SNP_80129_A_581835 | NW_004516049.1 | scaffold626 | 581835                  | GG                              | AA                 | AA               | INTERGENIC      |               |                    |                    |
| SNP_80130_A_589019 | NW_004516049.1 | scaffold626 | 589019                  | TT                              | CC                 | CC               | INTERGENIC      |               |                    |                    |
| SNP_80131_A_589763 | NW_004516049.1 | scaffold626 | 589763                  | TT                              | AA                 | AA               | INTERGENIC      |               |                    |                    |
| SNP_80132_A_590089 | NW_004516049.1 | scaffold626 | 590089                  | TT                              | AA                 | AA               | INTERGENIC      |               |                    |                    |
| SNP_80133_A_590445 | NW_004516049.1 | scaffold626 | 590445                  | CC                              | TT                 | TT               | INTERGENIC      |               |                    |                    |
| SNP_80134_A_590448 | NW_004516049.1 | scaffold626 | 590448                  | AA                              | GG                 | GG               | INTERGENIC      |               |                    |                    |
| SNP_80135_A_590917 | NW_004516049.1 | scaffold626 | 590917                  | TT                              | CC                 | CC               | INTERGENIC      |               |                    |                    |
| SNP_80136_A_593306 | NW_004516049.1 | scaffold626 | 593306                  | TT                              | AA                 | AA               | INTERGENIC      |               |                    |                    |
| SNP_80137_A_593541 | NW_004516049.1 | scaffold626 | 593541                  | CC                              | TT                 | TT               | INTERGENIC      |               |                    |                    |
| SNP_80138_A_605816 | NW_004516049.1 | scaffold626 | 605816                  | AA                              | GG                 | GG               | INTERGENIC      |               |                    |                    |
| SNP_80139_A_610475 | NW_004516049.1 | scaffold626 | 610475                  | TT                              | GG                 | GG               | INTERGENIC      |               |                    |                    |
| SNP_80140_A_627409 | NW_004516049.1 | scaffold626 | 627409                  | GG                              | AA                 | AA               | INTERGENIC      |               |                    |                    |
| SNP_80141_A_630895 | NW_004516049.1 | scaffold626 | 630895                  | AA                              | TT                 | TT               | INTERGENIC      |               |                    |                    |
| SNP_80142_A_631288 | NW_004516049.1 | scaffold626 | 631288                  | TT                              | AA                 | AA               | INTERGENIC      |               |                    |                    |

| SNPs IDs           | Chromosome IDs | Chromosomes | Physical positions (bp) | CDC Frontier (Reference genome) | (Pusa 1103 & HPNB) | (ILWC 46 & LPNB) | Sequence Components of genome | Gene accession IDs | Putative functions           |
|--------------------|----------------|-------------|-------------------------|---------------------------------|--------------------|------------------|-------------------------------|--------------------|------------------------------|
| SNP_80143_A_631365 | NW_004516049.1 | scaffold626 | 631365                  | AA                              | TT                 | TT               | INTERGENIC                    |                    |                              |
| SNP_80145_A_634522 | NW_004516049.1 | scaffold626 | 634522                  | AA                              | CC                 | CC               | INTERGENIC                    |                    |                              |
| SNP_80146_A_634523 | NW_004516049.1 | scaffold626 | 634523                  | AA                              | CC                 | CC               | INTERGENIC                    |                    |                              |
| SNP_80148_A_3133   | NW_004516050.1 | scaffold627 | 3133                    | TT                              | AA                 | AA               | INTERGENIC                    |                    |                              |
| SNP_80149_A_43478  | NW_004516050.1 | scaffold627 | 43478                   | AA                              | GG                 | GG               | INTERGENIC                    |                    |                              |
| SNP_80150_A_43481  | NW_004516050.1 | scaffold627 | 43481                   | AA                              | GG                 | GG               | INTERGENIC                    |                    |                              |
| SNP_80151_A_45807  | NW_004516050.1 | scaffold627 | 45807                   | TT                              | CC                 | CC               | INTRON                        | 101504894          | uncharacterized LOC101504894 |
| SNP_80152_A_45812  | NW_004516050.1 | scaffold627 | 45812                   | GG                              | TT                 | TT               | INTRON                        | 101504894          | uncharacterized LOC101504894 |
| SNP_80153_A_60833  | NW_004516050.1 | scaffold627 | 60833                   | TT                              | CC                 | CC               | INTERGENIC                    |                    |                              |
| SNP_80154_A_60960  | NW_004516050.1 | scaffold627 | 60960                   | CC                              | AA                 | AA               | INTERGENIC                    |                    |                              |
| SNP_80155_A_60962  | NW_004516050.1 | scaffold627 | 60962                   | AA                              | CC                 | CC               | INTERGENIC                    |                    |                              |
| SNP_80156_A_61020  | NW_004516050.1 | scaffold627 | 61020                   | GG                              | AA                 | AA               | INTERGENIC                    |                    |                              |
| SNP_80157_A_61050  | NW_004516050.1 | scaffold627 | 61050                   | TT                              | CC                 | CC               | INTERGENIC                    |                    |                              |
| SNP_80158_A_61074  | NW_004516050.1 | scaffold627 | 61074                   | TT                              | CC                 | CC               | INTERGENIC                    |                    |                              |
| SNP_80159_A_61263  | NW_004516050.1 | scaffold627 | 61263                   | AA                              | GG                 | GG               | INTERGENIC                    |                    |                              |
| SNP_80160_A_64560  | NW_004516050.1 | scaffold627 | 64560                   | GG                              | AA                 | AA               | INTERGENIC                    |                    |                              |
| SNP_80161_A_66277  | NW_004516050.1 | scaffold627 | 66277                   | GG                              | TT                 | TT               | INTERGENIC                    |                    |                              |
| SNP_80162_A_66356  | NW_004516050.1 | scaffold627 | 66356                   | AA                              | GG                 | GG               | INTERGENIC                    |                    |                              |
| SNP_80163_A_92678  | NW_004516050.1 | scaffold627 | 92678                   | AA                              | GG                 | GG               | INTERGENIC                    |                    |                              |
| SNP_80164_A_92726  | NW_004516050.1 | scaffold627 | 92726                   | TT                              | AA                 | AA               | INTERGENIC                    |                    |                              |
| SNP_80165_A_92729  | NW_004516050.1 | scaffold627 | 92729                   | CC                              | AA                 | AA               | INTERGENIC                    |                    |                              |
| SNP_80166_A_5121   | NW_004516051.1 | scaffold629 | 5121                    | GG                              | TT                 | TT               | INTERGENIC                    |                    |                              |

| SNPs IDs          | Chromosome IDs | Chromosomes | Physical positions (bp) | CDC Frontier (Reference genome) | (Pusa 1103 & HPNB) | (ILWC 46 & LPNB) | Sequence genome | Components of | Gene accession IDs | Putative functions |
|-------------------|----------------|-------------|-------------------------|---------------------------------|--------------------|------------------|-----------------|---------------|--------------------|--------------------|
| SNP_80168_A_12648 | NW_004516051.1 | scaffold629 | 12648                   | TT                              | AA                 | AA               | INTERGENIC      |               |                    |                    |
| SNP_80169_A_12657 | NW_004516051.1 | scaffold629 | 12657                   | TT                              | GG                 | GG               | INTERGENIC      |               |                    |                    |
| SNP_80170_A_14576 | NW_004516051.1 | scaffold629 | 14576                   | TT                              | CC                 | CC               | INTERGENIC      |               |                    |                    |
| SNP_80171_A_14944 | NW_004516051.1 | scaffold629 | 14944                   | AA                              | TT                 | TT               | INTERGENIC      |               |                    |                    |
| SNP_80172_A_15007 | NW_004516051.1 | scaffold629 | 15007                   | TT                              | AA                 | AA               | INTERGENIC      |               |                    |                    |
| SNP_80173_A_15303 | NW_004516051.1 | scaffold629 | 15303                   | TT                              | CC                 | CC               | INTERGENIC      |               |                    |                    |
| SNP_80174_A_39727 | NW_004516051.1 | scaffold629 | 39727                   | TT                              | CC                 | CC               | INTERGENIC      |               |                    |                    |
| SNP_80175_A_39997 | NW_004516051.1 | scaffold629 | 39997                   | AA                              | CC                 | CC               | INTERGENIC      |               |                    |                    |
| SNP_80176_A_56764 | NW_004516051.1 | scaffold629 | 56764                   | TT                              | CC                 | CC               | INTERGENIC      |               |                    |                    |
| SNP_80177_A_56914 | NW_004516051.1 | scaffold629 | 56914                   | AA                              | GG                 | GG               | INTERGENIC      |               |                    |                    |
| SNP_80178_A_58340 | NW_004516051.1 | scaffold629 | 58340                   | TT                              | CC                 | CC               | INTERGENIC      |               |                    |                    |
| SNP_80179_A_58373 | NW_004516051.1 | scaffold629 | 58373                   | AA                              | GG                 | GG               | INTERGENIC      |               |                    |                    |
| SNP_80180_A_58376 | NW_004516051.1 | scaffold629 | 58376                   | AA                              | GG                 | GG               | INTERGENIC      |               |                    |                    |
| SNP_80181_A_58394 | NW_004516051.1 | scaffold629 | 58394                   | AA                              | CC                 | CC               | INTERGENIC      |               |                    |                    |
| SNP_80182_A_86071 | NW_004516051.1 | scaffold629 | 86071                   | AA                              | GG                 | GG               | INTERGENIC      |               |                    |                    |
| SNP_80183_A_86079 | NW_004516051.1 | scaffold629 | 86079                   | TT                              | AA                 | AA               | INTERGENIC      |               |                    |                    |
| SNP_80184_A_86091 | NW_004516051.1 | scaffold629 | 86091                   | TT                              | AA                 | AA               | INTERGENIC      |               |                    |                    |
| SNP_80185_A_1024  | NW_004516052.1 | scaffold631 | 1024                    | CC                              | GG                 | GG               | INTERGENIC      |               |                    |                    |
| SNP_80186_A_1378  | NW_004516052.1 | scaffold631 | 1378                    | CC                              | TT                 | TT               | INTERGENIC      |               |                    |                    |
| SNP_80187_A_11969 | NW_004516052.1 | scaffold631 | 11969                   | CC                              | TT                 | TT               | INTERGENIC      |               |                    |                    |
| SNP_80188_A_11986 | NW_004516052.1 | scaffold631 | 11986                   | AA                              | TT                 | TT               | INTERGENIC      |               |                    |                    |
| SNP_80189_A_22416 | NW_004516052.1 | scaffold631 | 22416                   | AA                              | CC                 | CC               | INTERGENIC      |               |                    |                    |

| SNPs IDs          | Chromosome IDs | Chromosomes | Physical positions (bp) | CDC Frontier (Reference genome) | (Pusa 1103 & HPNB) | (ILWC 46 & LPNB) | Sequence genome | Components of | Gene accession IDs | Putative functions |
|-------------------|----------------|-------------|-------------------------|---------------------------------|--------------------|------------------|-----------------|---------------|--------------------|--------------------|
| SNP_80190_A_22518 | NW_004516052.1 | scaffold631 | 22518                   | GG                              | TT                 | TT               | INTERGENIC      |               |                    |                    |
| SNP_80191_A_22729 | NW_004516052.1 | scaffold631 | 22729                   | TT                              | GG                 | GG               | INTERGENIC      |               |                    |                    |
| SNP_80192_A_22767 | NW_004516052.1 | scaffold631 | 22767                   | TT                              | CC                 | CC               | INTERGENIC      |               |                    |                    |
| SNP_80193_A_47320 | NW_004516052.1 | scaffold631 | 47320                   | GG                              | AA                 | AA               | INTERGENIC      |               |                    |                    |
| SNP_80194_A_52968 | NW_004516052.1 | scaffold631 | 52968                   | TT                              | CC                 | CC               | INTERGENIC      |               |                    |                    |
| SNP_80195_A_53770 | NW_004516052.1 | scaffold631 | 53770                   | CC                              | AA                 | AA               | INTERGENIC      |               |                    |                    |
| SNP_80196_A_58607 | NW_004516052.1 | scaffold631 | 58607                   | GG                              | CC                 | CC               | INTERGENIC      |               |                    |                    |
| SNP_80197_A_67613 | NW_004516052.1 | scaffold631 | 67613                   | TT                              | AA                 | AA               | INTERGENIC      |               |                    |                    |
| SNP_80198_A_67771 | NW_004516052.1 | scaffold631 | 67771                   | TT                              | CC                 | CC               | INTERGENIC      |               |                    |                    |
| SNP_80199_A_67777 | NW_004516052.1 | scaffold631 | 67777                   | TT                              | AA                 | AA               | INTERGENIC      |               |                    |                    |
| SNP_80200_A_67849 | NW_004516052.1 | scaffold631 | 67849                   | AA                              | TT                 | TT               | INTERGENIC      |               |                    |                    |
| SNP_80201_A_67914 | NW_004516052.1 | scaffold631 | 67914                   | CC                              | TT                 | TT               | INTERGENIC      |               |                    |                    |
| SNP_80202_A_67992 | NW_004516052.1 | scaffold631 | 67992                   | GG                              | TT                 | TT               | INTERGENIC      |               |                    |                    |
| SNP_80203_A_68188 | NW_004516052.1 | scaffold631 | 68188                   | AA                              | TT                 | TT               | INTERGENIC      |               |                    |                    |
| SNP_80204_A_68191 | NW_004516052.1 | scaffold631 | 68191                   | GG                              | TT                 | TT               | INTERGENIC      |               |                    |                    |
| SNP_80205_A_68193 | NW_004516052.1 | scaffold631 | 68193                   | TT                              | CC                 | CC               | INTERGENIC      |               |                    |                    |
| SNP_80206_A_68404 | NW_004516052.1 | scaffold631 | 68404                   | AA                              | TT                 | TT               | INTERGENIC      |               |                    |                    |
| SNP_80207_A_68606 | NW_004516052.1 | scaffold631 | 68606                   | CC                              | TT                 | TT               | INTERGENIC      |               |                    |                    |
| SNP_80208_A_68641 | NW_004516052.1 | scaffold631 | 68641                   | GG                              | AA                 | AA               | INTERGENIC      |               |                    |                    |
| SNP_80209_A_68725 | NW_004516052.1 | scaffold631 | 68725                   | CC                              | TT                 | TT               | INTERGENIC      |               |                    |                    |
| SNP_80210_A_69218 | NW_004516052.1 | scaffold631 | 69218                   | AA                              | TT                 | TT               | INTERGENIC      |               |                    |                    |
| SNP_80211_A_69333 | NW_004516052.1 | scaffold631 | 69333                   | GG                              | CC                 | CC               | INTERGENIC      |               |                    |                    |



| SNPs IDs          | Chromosome IDs | Chromosomes | Physical positions (bp) | CDC Frontier (Reference genome) | (Pusa 1103 & HPNB) | (ILWC 46 & LPNB) | Sequence genome | Components of | Gene accession IDs | Putative functions |
|-------------------|----------------|-------------|-------------------------|---------------------------------|--------------------|------------------|-----------------|---------------|--------------------|--------------------|
| SNP_80212_A_70574 | NW_004516052.1 | scaffold631 | 70574                   | TT                              | CC                 | CC               | INTERGENIC      |               |                    |                    |
| SNP_80213_A_70886 | NW_004516052.1 | scaffold631 | 70886                   | GG                              | AA                 | AA               | INTERGENIC      |               |                    |                    |
| SNP_80214_A_74265 | NW_004516052.1 | scaffold631 | 74265                   | TT                              | CC                 | CC               | INTERGENIC      |               |                    |                    |
| SNP_80215_A_74473 | NW_004516052.1 | scaffold631 | 74473                   | GG                              | TT                 | TT               | INTERGENIC      |               |                    |                    |
| SNP_80216_A_74479 | NW_004516052.1 | scaffold631 | 74479                   | TT                              | GG                 | GG               | INTERGENIC      |               |                    |                    |
| SNP_80217_A_74719 | NW_004516052.1 | scaffold631 | 74719                   | AA                              | TT                 | TT               | INTERGENIC      |               |                    |                    |
| SNP_80218_A_75022 | NW_004516052.1 | scaffold631 | 75022                   | AA                              | TT                 | TT               | INTERGENIC      |               |                    |                    |
| SNP_80219_A_75261 | NW_004516052.1 | scaffold631 | 75261                   | GG                              | AA                 | AA               | INTERGENIC      |               |                    |                    |
| SNP_80220_A_75381 | NW_004516052.1 | scaffold631 | 75381                   | AA                              | CC                 | CC               | INTERGENIC      |               |                    |                    |
| SNP_80221_A_423   | NW_004516053.1 | scaffold632 | 423                     | GG                              | CC                 | CC               | INTERGENIC      |               |                    |                    |
| SNP_80222_A_426   | NW_004516053.1 | scaffold632 | 426                     | CC                              | AA                 | AA               | INTERGENIC      |               |                    |                    |
| SNP_80223_A_435   | NW_004516053.1 | scaffold632 | 435                     | AA                              | TT                 | TT               | INTERGENIC      |               |                    |                    |
| SNP_80224_A_449   | NW_004516053.1 | scaffold632 | 449                     | GG                              | AA                 | AA               | INTERGENIC      |               |                    |                    |
| SNP_80225_A_453   | NW_004516053.1 | scaffold632 | 453                     | AA                              | GG                 | GG               | INTERGENIC      |               |                    |                    |
| SNP_80226_A_543   | NW_004516053.1 | scaffold632 | 543                     | TT                              | CC                 | CC               | INTERGENIC      |               |                    |                    |
| SNP_80227_A_546   | NW_004516053.1 | scaffold632 | 546                     | GG                              | TT                 | TT               | INTERGENIC      |               |                    |                    |
| SNP_80228_A_2830  | NW_004516053.1 | scaffold632 | 2830                    | TT                              | GG                 | GG               | INTERGENIC      |               |                    |                    |
| SNP_80229_A_10131 | NW_004516053.1 | scaffold632 | 10131                   | AA                              | GG                 | GG               | INTERGENIC      |               |                    |                    |
| SNP_80230_A_10140 | NW_004516053.1 | scaffold632 | 10140                   | GG                              | TT                 | TT               | INTERGENIC      |               |                    |                    |
| SNP_80231_A_10411 | NW_004516053.1 | scaffold632 | 10411                   | CC                              | AA                 | AA               | INTERGENIC      |               |                    |                    |
| SNP_80232_A_17819 | NW_004516053.1 | scaffold632 | 17819                   | AA                              | TT                 | TT               | INTERGENIC      |               |                    |                    |
| SNP_80233_A_17837 | NW_004516053.1 | scaffold632 | 17837                   | AA                              | TT                 | TT               | INTERGENIC      |               |                    |                    |

| SNPs IDs           | Chromosome IDs | Chromosomes | Physical positions (bp) | CDC Frontier (Reference genome) | (Pusa 1103 & HPNB) | (ILWC 46 & LPNB) | Sequence genome | Components of | Gene accession IDs | Putative functions |
|--------------------|----------------|-------------|-------------------------|---------------------------------|--------------------|------------------|-----------------|---------------|--------------------|--------------------|
| SNP_80234_A_17855  | NW_004516053.1 | scaffold632 | 17855                   | TT                              | AA                 | AA               | INTERGENIC      |               |                    |                    |
| SNP_80235_A_17859  | NW_004516053.1 | scaffold632 | 17859                   | TT                              | CC                 | CC               | INTERGENIC      |               |                    |                    |
| SNP_80236_A_17861  | NW_004516053.1 | scaffold632 | 17861                   | TT                              | CC                 | CC               | INTERGENIC      |               |                    |                    |
| SNP_80237_A_18149  | NW_004516053.1 | scaffold632 | 18149                   | AA                              | GG                 | GG               | INTERGENIC      |               |                    |                    |
| SNP_80238_A_371    | NW_004516054.1 | scaffold633 | 371                     | GG                              | AA                 | AA               | INTERGENIC      |               |                    |                    |
| SNP_80239_A_448    | NW_004516054.1 | scaffold633 | 448                     | AA                              | GG                 | GG               | INTERGENIC      |               |                    |                    |
| SNP_80240_A_711    | NW_004516054.1 | scaffold633 | 711                     | AA                              | TT                 | TT               | INTERGENIC      |               |                    |                    |
| SNP_80241_A_9621   | NW_004516057.1 | scaffold637 | 9621                    | CC                              | TT                 | TT               | INTERGENIC      |               |                    |                    |
| SNP_80242_A_9716   | NW_004516057.1 | scaffold637 | 9716                    | AA                              | CC                 | CC               | INTERGENIC      |               |                    |                    |
| SNP_80243_A_9727   | NW_004516057.1 | scaffold637 | 9727                    | AA                              | GG                 | GG               | INTERGENIC      |               |                    |                    |
| SNP_80244_A_9757   | NW_004516057.1 | scaffold637 | 9757                    | AA                              | GG                 | GG               | INTERGENIC      |               |                    |                    |
| SNP_80245_A_22972  | NW_004516057.1 | scaffold637 | 22972                   | GG                              | TT                 | TT               | INTERGENIC      |               |                    |                    |
| SNP_80246_A_29307  | NW_004516057.1 | scaffold637 | 29307                   | AA                              | GG                 | GG               | INTERGENIC      |               |                    |                    |
| SNP_80247_A_65591  | NW_004516057.1 | scaffold637 | 65591                   | TT                              | AA                 | AA               | INTERGENIC      |               |                    |                    |
| SNP_80249_A_123990 | NW_004516057.1 | scaffold637 | 123990                  | GG                              | AA                 | AA               | INTERGENIC      |               |                    |                    |
| SNP_80250_A_124007 | NW_004516057.1 | scaffold637 | 124007                  | TT                              | GG                 | GG               | INTERGENIC      |               |                    |                    |
| SNP_80251_A_124038 | NW_004516057.1 | scaffold637 | 124038                  | CC                              | AA                 | AA               | INTERGENIC      |               |                    |                    |
| SNP_80252_A_124041 | NW_004516057.1 | scaffold637 | 124041                  | GG                              | AA                 | AA               | INTERGENIC      |               |                    |                    |
| SNP_80253_A_124221 | NW_004516057.1 | scaffold637 | 124221                  | AA                              | CC                 | CC               | INTERGENIC      |               |                    |                    |
| SNP_80254_A_124701 | NW_004516057.1 | scaffold637 | 124701                  | TT                              | AA                 | AA               | INTERGENIC      |               |                    |                    |
| SNP_80255_A_128176 | NW_004516057.1 | scaffold637 | 128176                  | CC                              | TT                 | TT               | INTERGENIC      |               |                    |                    |
| SNP_80256_A_162644 | NW_004516057.1 | scaffold637 | 162644                  | AA                              | GG                 | GG               | INTERGENIC      |               |                    |                    |

| SNPs IDs           | Chromosome IDs | Chromosomes | Physical positions (bp) | CDC Frontier (Reference genome) | (Pusa 1103 & HPNB) | (ILWC 46 & LPNB) | Sequence genome | Components of | Gene accession IDs | Putative functions |
|--------------------|----------------|-------------|-------------------------|---------------------------------|--------------------|------------------|-----------------|---------------|--------------------|--------------------|
| SNP_80257_A_163116 | NW_004516057.1 | scaffold637 | 163116                  | TT                              | CC                 | CC               | INTERGENIC      |               |                    |                    |
| SNP_80258_A_163129 | NW_004516057.1 | scaffold637 | 163129                  | CC                              | TT                 | TT               | INTERGENIC      |               |                    |                    |
| SNP_80259_A_169935 | NW_004516057.1 | scaffold637 | 169935                  | AA                              | GG                 | GG               | INTERGENIC      |               |                    |                    |
| SNP_80260_A_191857 | NW_004516057.1 | scaffold637 | 191857                  | TT                              | CC                 | CC               | INTERGENIC      |               |                    |                    |
| SNP_80261_A_3597   | NW_004516058.1 | scaffold639 | 3597                    | AA                              | GG                 | GG               | INTERGENIC      |               |                    |                    |
| SNP_80262_A_4040   | NW_004516058.1 | scaffold639 | 4040                    | GG                              | AA                 | AA               | INTERGENIC      |               |                    |                    |
| SNP_80263_A_6694   | NW_004516058.1 | scaffold639 | 6694                    | AA                              | CC                 | CC               | INTERGENIC      |               |                    |                    |
| SNP_80264_A_6832   | NW_004516058.1 | scaffold639 | 6832                    | CC                              | TT                 | TT               | INTERGENIC      |               |                    |                    |
| SNP_80265_A_7013   | NW_004516058.1 | scaffold639 | 7013                    | GG                              | AA                 | AA               | INTERGENIC      |               |                    |                    |
| SNP_80266_A_7138   | NW_004516058.1 | scaffold639 | 7138                    | GG                              | CC                 | CC               | INTERGENIC      |               |                    |                    |
| SNP_80267_A_8677   | NW_004516058.1 | scaffold639 | 8677                    | TT                              | CC                 | CC               | INTERGENIC      |               |                    |                    |
| SNP_80268_A_9001   | NW_004516058.1 | scaffold639 | 9001                    | CC                              | TT                 | TT               | INTERGENIC      |               |                    |                    |
| SNP_80269_A_9083   | NW_004516058.1 | scaffold639 | 9083                    | CC                              | AA                 | AA               | INTERGENIC      |               |                    |                    |
| SNP_80270_A_9203   | NW_004516058.1 | scaffold639 | 9203                    | TT                              | AA                 | AA               | INTERGENIC      |               |                    |                    |
| SNP_80272_A_11928  | NW_004516058.1 | scaffold639 | 11928                   | GG                              | TT                 | TT               | INTERGENIC      |               |                    |                    |
| SNP_80273_A_11930  | NW_004516058.1 | scaffold639 | 11930                   | AA                              | CC                 | CC               | INTERGENIC      |               |                    |                    |
| SNP_80274_A_13390  | NW_004516058.1 | scaffold639 | 13390                   | AA                              | CC                 | CC               | INTERGENIC      |               |                    |                    |
| SNP_80275_A_18614  | NW_004516058.1 | scaffold639 | 18614                   | TT                              | AA                 | AA               | INTERGENIC      |               |                    |                    |
| SNP_80276_A_18694  | NW_004516058.1 | scaffold639 | 18694                   | TT                              | CC                 | CC               | INTERGENIC      |               |                    |                    |
| SNP_80277_A_18698  | NW_004516058.1 | scaffold639 | 18698                   | TT                              | GG                 | GG               | INTERGENIC      |               |                    |                    |
| SNP_80278_A_18908  | NW_004516058.1 | scaffold639 | 18908                   | AA                              | CC                 | CC               | INTERGENIC      |               |                    |                    |
| SNP_80279_A_18910  | NW_004516058.1 | scaffold639 | 18910                   | AA                              | TT                 | TT               | INTERGENIC      |               |                    |                    |

| SNPs IDs          | Chromosome IDs | Chromosomes | Physical positions (bp) | CDC Frontier (Reference genome) | (Pusa 1103 & HPNB) | (ILWC 46 & LPNB) | Sequence genome | Components of | Gene accession IDs | Putative functions |
|-------------------|----------------|-------------|-------------------------|---------------------------------|--------------------|------------------|-----------------|---------------|--------------------|--------------------|
| SNP_80280_A_18911 | NW_004516058.1 | scaffold639 | 18911                   | TT                              | GG                 | GG               | INTERGENIC      |               |                    |                    |
| SNP_80281_A_19066 | NW_004516058.1 | scaffold639 | 19066                   | TT                              | CC                 | CC               | INTERGENIC      |               |                    |                    |
| SNP_80283_A_26129 | NW_004516058.1 | scaffold639 | 26129                   | TT                              | GG                 | GG               | INTERGENIC      |               |                    |                    |
| SNP_80284_A_30067 | NW_004516058.1 | scaffold639 | 30067                   | CC                              | TT                 | TT               | INTERGENIC      |               |                    |                    |
| SNP_80285_A_33159 | NW_004516058.1 | scaffold639 | 33159                   | AA                              | TT                 | TT               | INTERGENIC      |               |                    |                    |
| SNP_80286_A_33195 | NW_004516058.1 | scaffold639 | 33195                   | TT                              | GG                 | GG               | INTERGENIC      |               |                    |                    |
| SNP_80287_A_34244 | NW_004516058.1 | scaffold639 | 34244                   | AA                              | TT                 | TT               | INTERGENIC      |               |                    |                    |
| SNP_80288_A_34264 | NW_004516058.1 | scaffold639 | 34264                   | TT                              | CC                 | CC               | INTERGENIC      |               |                    |                    |
| SNP_80289_A_35482 | NW_004516058.1 | scaffold639 | 35482                   | CC                              | TT                 | TT               | INTERGENIC      |               |                    |                    |
| SNP_80290_A_45749 | NW_004516058.1 | scaffold639 | 45749                   | GG                              | AA                 | AA               | INTERGENIC      |               |                    |                    |
| SNP_80291_A_49038 | NW_004516058.1 | scaffold639 | 49038                   | CC                              | TT                 | TT               | INTERGENIC      |               |                    |                    |
| SNP_80292_A_69808 | NW_004516058.1 | scaffold639 | 69808                   | GG                              | AA                 | AA               | INTERGENIC      |               |                    |                    |
| SNP_80293_A_69817 | NW_004516058.1 | scaffold639 | 69817                   | AA                              | GG                 | GG               | INTERGENIC      |               |                    |                    |
| SNP_80294_A_69833 | NW_004516058.1 | scaffold639 | 69833                   | GG                              | AA                 | AA               | INTERGENIC      |               |                    |                    |
| SNP_80295_A_70458 | NW_004516058.1 | scaffold639 | 70458                   | AA                              | TT                 | TT               | INTERGENIC      |               |                    |                    |
| SNP_80296_A_71970 | NW_004516058.1 | scaffold639 | 71970                   | GG                              | AA                 | AA               | INTERGENIC      |               |                    |                    |
| SNP_80297_A_73487 | NW_004516058.1 | scaffold639 | 73487                   | AA                              | CC                 | CC               | INTERGENIC      |               |                    |                    |
| SNP_80298_A_92121 | NW_004516058.1 | scaffold639 | 92121                   | GG                              | AA                 | AA               | INTERGENIC      |               |                    |                    |
| SNP_80299_A_92143 | NW_004516058.1 | scaffold639 | 92143                   | TT                              | CC                 | CC               | INTERGENIC      |               |                    |                    |
| SNP_80300_A_92453 | NW_004516058.1 | scaffold639 | 92453                   | TT                              | CC                 | CC               | INTERGENIC      |               |                    |                    |
| SNP_80301_A_92473 | NW_004516058.1 | scaffold639 | 92473                   | AA                              | CC                 | CC               | INTERGENIC      |               |                    |                    |
| SNP_80302_A_99982 | NW_004516058.1 | scaffold639 | 99982                   | AA                              | GG                 | GG               | INTERGENIC      |               |                    |                    |

| SNPs IDs           | Chromosome IDs | Chromosomes | Physical positions (bp) | CDC Frontier (Reference genome) | (Pusa 1103 & HPNB) | (ILWC 46 & LPNB) | Sequence genome | Components of | Gene accession IDs | Putative functions |
|--------------------|----------------|-------------|-------------------------|---------------------------------|--------------------|------------------|-----------------|---------------|--------------------|--------------------|
| SNP_80303_A_102581 | NW_004516058.1 | scaffold639 | 102581                  | GG                              | AA                 | AA               | INTERGENIC      |               |                    |                    |
| SNP_80304_A_102604 | NW_004516058.1 | scaffold639 | 102604                  | TT                              | CC                 | CC               | INTERGENIC      |               |                    |                    |
| SNP_80305_A_102613 | NW_004516058.1 | scaffold639 | 102613                  | GG                              | AA                 | AA               | INTERGENIC      |               |                    |                    |
| SNP_80306_A_102631 | NW_004516058.1 | scaffold639 | 102631                  | TT                              | AA                 | AA               | INTERGENIC      |               |                    |                    |
| SNP_80307_A_102651 | NW_004516058.1 | scaffold639 | 102651                  | GG                              | TT                 | TT               | INTERGENIC      |               |                    |                    |
| SNP_80308_A_102672 | NW_004516058.1 | scaffold639 | 102672                  | AA                              | CC                 | CC               | INTERGENIC      |               |                    |                    |
| SNP_80309_A_102675 | NW_004516058.1 | scaffold639 | 102675                  | AA                              | GG                 | GG               | INTERGENIC      |               |                    |                    |
| SNP_80310_A_102685 | NW_004516058.1 | scaffold639 | 102685                  | GG                              | AA                 | AA               | INTERGENIC      |               |                    |                    |
| SNP_80312_A_104990 | NW_004516058.1 | scaffold639 | 104990                  | GG                              | CC                 | CC               | INTERGENIC      |               |                    |                    |
| SNP_80313_A_113576 | NW_004516058.1 | scaffold639 | 113576                  | AA                              | GG                 | GG               | INTERGENIC      |               |                    |                    |
| SNP_80314_A_113773 | NW_004516058.1 | scaffold639 | 113773                  | GG                              | AA                 | AA               | INTERGENIC      |               |                    |                    |
| SNP_80315_A_113937 | NW_004516058.1 | scaffold639 | 113937                  | GG                              | AA                 | AA               | INTERGENIC      |               |                    |                    |
| SNP_80316_A_113949 | NW_004516058.1 | scaffold639 | 113949                  | CC                              | TT                 | TT               | INTERGENIC      |               |                    |                    |
| SNP_80317_A_114341 | NW_004516058.1 | scaffold639 | 114341                  | AA                              | CC                 | CC               | INTERGENIC      |               |                    |                    |
| SNP_80318_A_114346 | NW_004516058.1 | scaffold639 | 114346                  | GG                              | TT                 | TT               | INTERGENIC      |               |                    |                    |
| SNP_80319_A_114430 | NW_004516058.1 | scaffold639 | 114430                  | GG                              | TT                 | TT               | INTERGENIC      |               |                    |                    |
| SNP_80320_A_114506 | NW_004516058.1 | scaffold639 | 114506                  | GG                              | AA                 | AA               | INTERGENIC      |               |                    |                    |
| SNP_80321_A_114518 | NW_004516058.1 | scaffold639 | 114518                  | AA                              | TT                 | TT               | INTERGENIC      |               |                    |                    |
| SNP_80322_A_119953 | NW_004516058.1 | scaffold639 | 119953                  | CC                              | TT                 | TT               | INTERGENIC      |               |                    |                    |
| SNP_80323_A_119961 | NW_004516058.1 | scaffold639 | 119961                  | GG                              | AA                 | AA               | INTERGENIC      |               |                    |                    |
| SNP_80324_A_119967 | NW_004516058.1 | scaffold639 | 119967                  | AA                              | GG                 | GG               | INTERGENIC      |               |                    |                    |
| SNP_80325_A_120038 | NW_004516058.1 | scaffold639 | 120038                  | AA                              | CC                 | CC               | INTERGENIC      |               |                    |                    |

| SNPs IDs           | Chromosome IDs | Chromosomes | Physical positions (bp) | CDC Frontier (Reference genome) | (Pusa 1103 & HPNB) | (ILWC 46 & LPNB) | Sequence genome | Components of | Gene accession IDs           | Putative functions |
|--------------------|----------------|-------------|-------------------------|---------------------------------|--------------------|------------------|-----------------|---------------|------------------------------|--------------------|
| SNP_80326_A_120191 | NW_004516058.1 | scaffold639 | 120191                  | AA                              | GG                 | GG               | INTERGENIC      |               |                              |                    |
| SNP_80327_A_163169 | NW_004516058.1 | scaffold639 | 163169                  | GG                              | TT                 | TT               | INTERGENIC      |               |                              |                    |
| SNP_80328_A_172448 | NW_004516058.1 | scaffold639 | 172448                  | CC                              | AA                 | AA               | INTERGENIC      |               |                              |                    |
| SNP_80329_A_172790 | NW_004516058.1 | scaffold639 | 172790                  | AA                              | CC                 | CC               | INTERGENIC      |               |                              |                    |
| SNP_80330_A_172871 | NW_004516058.1 | scaffold639 | 172871                  | GG                              | TT                 | TT               | INTERGENIC      |               |                              |                    |
| SNP_80331_A_172940 | NW_004516058.1 | scaffold639 | 172940                  | CC                              | TT                 | TT               | INTERGENIC      |               |                              |                    |
| SNP_80332_A_172944 | NW_004516058.1 | scaffold639 | 172944                  | TT                              | CC                 | CC               | INTERGENIC      |               |                              |                    |
| SNP_80334_A_172958 | NW_004516058.1 | scaffold639 | 172958                  | GG                              | AA                 | AA               | INTERGENIC      |               |                              |                    |
| SNP_80335_A_173112 | NW_004516058.1 | scaffold639 | 173112                  | GG                              | AA                 | AA               | INTERGENIC      |               |                              |                    |
| SNP_80336_A_173306 | NW_004516058.1 | scaffold639 | 173306                  | AA                              | TT                 | TT               | INTERGENIC      |               |                              |                    |
| SNP_80337_A_173341 | NW_004516058.1 | scaffold639 | 173341                  | TT                              | CC                 | CC               | INTERGENIC      |               |                              |                    |
| SNP_80338_A_173389 | NW_004516058.1 | scaffold639 | 173389                  | CC                              | TT                 | TT               | INTERGENIC      |               |                              |                    |
| SNP_80339_A_182220 | NW_004516058.1 | scaffold639 | 182220                  | AA                              | TT                 | TT               | INTERGENIC      |               |                              |                    |
| SNP_80340_A_183114 | NW_004516058.1 | scaffold639 | 183114                  | CC                              | AA                 | AA               | INTERGENIC      |               |                              |                    |
| SNP_80341_A_183320 | NW_004516058.1 | scaffold639 | 183320                  | AA                              | GG                 | GG               | INTERGENIC      |               |                              |                    |
| SNP_80342_A_183335 | NW_004516058.1 | scaffold639 | 183335                  | TT                              | CC                 | CC               | INTERGENIC      |               |                              |                    |
| SNP_80343_A_184318 | NW_004516058.1 | scaffold639 | 184318                  | TT                              | GG                 | GG               | INTERGENIC      |               |                              |                    |
| SNP_80344_A_3364   | NW_004516059.1 | scaffold641 | 3364                    | GG                              | TT                 | TT               | INTERGENIC      |               |                              |                    |
| SNP_80345_A_8153   | NW_004516059.1 | scaffold641 | 8153                    | AA                              | GG                 | GG               | INTERGENIC      |               |                              |                    |
| SNP_80346_A_8171   | NW_004516059.1 | scaffold641 | 8171                    | AA                              | TT                 | TT               | INTERGENIC      |               |                              |                    |
| SNP_80347_A_9413   | NW_004516059.1 | scaffold641 | 9413                    | AA                              | TT                 | TT               | INTERGENIC      |               |                              |                    |
| SNP_80348_A_3186   | NW_004516060.1 | scaffold642 | 3186                    | GG                              | CC                 | CC               | DRR             | 101490144     | uncharacterized LOC101490144 |                    |

| SNPs IDs           | Chromosome IDs | Chromosomes | Physical positions (bp) | CDC Frontier genome (Reference genome) | (Pusa 1103 & HPNB) | (ILWC 46 & LPNB) | Sequence Components of genome | Gene accession IDs | Putative functions           |
|--------------------|----------------|-------------|-------------------------|----------------------------------------|--------------------|------------------|-------------------------------|--------------------|------------------------------|
| SNP_80349_A_35582  | NW_004516060.1 | scaffold642 | 35582                   | CC                                     | AA                 | AA               | INTERGENIC                    |                    |                              |
| SNP_80351_A_62496  | NW_004516060.1 | scaffold642 | 62496                   | CC                                     | AA                 | AA               | INTERGENIC                    |                    |                              |
| SNP_80352_A_62804  | NW_004516060.1 | scaffold642 | 62804                   | GG                                     | CC                 | CC               | INTERGENIC                    |                    |                              |
| SNP_80355_A_86953  | NW_004516060.1 | scaffold642 | 86953                   | GG                                     | TT                 | TT               | DRR                           | 101490468          | uncharacterized LOC101490468 |
| SNP_80356_A_147894 | NW_004516060.1 | scaffold642 | 147894                  | AA                                     | GG                 | GG               | URR                           | 101509816          | Unknown function             |
| SNP_80357_A_154140 | NW_004516060.1 | scaffold642 | 154140                  | AA                                     | CC                 | CC               | INTERGENIC                    |                    |                              |
| SNP_80358_A_154158 | NW_004516060.1 | scaffold642 | 154158                  | TT                                     | CC                 | CC               | INTERGENIC                    |                    |                              |
| SNP_80359_A_169795 | NW_004516060.1 | scaffold642 | 169795                  | GG                                     | AA                 | AA               | INTERGENIC                    |                    |                              |
| SNP_80361_A_178970 | NW_004516060.1 | scaffold642 | 178970                  | GG                                     | TT                 | TT               | DRR                           | 101491118          | uncharacterized LOC101491118 |
| SNP_80362_A_178971 | NW_004516060.1 | scaffold642 | 178971                  | CC                                     | TT                 | TT               | DRR                           | 101491118          | uncharacterized LOC101491118 |
| SNP_80363_A_179018 | NW_004516060.1 | scaffold642 | 179018                  | AA                                     | GG                 | GG               | DRR                           | 101491118          | uncharacterized LOC101491118 |
| SNP_80364_A_179278 | NW_004516060.1 | scaffold642 | 179278                  | CC                                     | GG                 | GG               | DRR                           | 101491118          | uncharacterized LOC101491118 |
| SNP_80365_A_179309 | NW_004516060.1 | scaffold642 | 179309                  | GG                                     | AA                 | AA               | DRR                           | 101491118          | uncharacterized LOC101491118 |
| SNP_80366_A_179314 | NW_004516060.1 | scaffold642 | 179314                  | AA                                     | TT                 | TT               | DRR                           | 101491118          | uncharacterized LOC101491118 |
| SNP_80367_A_181964 | NW_004516060.1 | scaffold642 | 181964                  | TT                                     | GG                 | GG               | SYNONYMOUS_CODING             | 101491118          | uncharacterized LOC101491118 |
| SNP_80368_A_187244 | NW_004516060.1 | scaffold642 | 187244                  | GG                                     | TT                 | TT               | INTRON                        | 101491118          | uncharacterized LOC101491118 |
| SNP_80369_A_195398 | NW_004516060.1 | scaffold642 | 195398                  | TT                                     | GG                 | GG               | URR                           | 101491118          | uncharacterized LOC101491118 |
| SNP_80370_A_205242 | NW_004516060.1 | scaffold642 | 205242                  | GG                                     | TT                 | TT               | INTERGENIC                    |                    |                              |
| SNP_80371_A_205307 | NW_004516060.1 | scaffold642 | 205307                  | AA                                     | TT                 | TT               | INTERGENIC                    |                    |                              |
| SNP_80372_A_222711 | NW_004516060.1 | scaffold642 | 222711                  | TT                                     | CC                 | CC               | INTERGENIC                    |                    |                              |
| SNP_80373_A_283887 | NW_004516060.1 | scaffold642 | 283887                  | GG                                     | AA                 | AA               | INTERGENIC                    |                    |                              |
| SNP_80375_A_327102 | NW_004516060.1 | scaffold642 | 327102                  | TT                                     | CC                 | CC               | INTERGENIC                    |                    |                              |

| SNPs IDs           | Chromosome IDs | Chromosomes | Physical positions (bp) | CDC Frontier (Reference genome) | (Pusa 1103 & HPNB) | (ILWC 46 & LPNB) | Sequence genome       | Components of | Gene accession IDs                  | Putative functions |
|--------------------|----------------|-------------|-------------------------|---------------------------------|--------------------|------------------|-----------------------|---------------|-------------------------------------|--------------------|
| SNP_80376_A_331500 | NW_004516060.1 | scaffold642 | 331500                  | CC                              | AA                 | AA               | INTERGENIC            |               |                                     |                    |
| SNP_80377_A_334143 | NW_004516060.1 | scaffold642 | 334143                  | CC                              | AA                 | AA               | INTERGENIC            |               |                                     |                    |
| SNP_80378_A_334160 | NW_004516060.1 | scaffold642 | 334160                  | TT                              | AA                 | AA               | INTERGENIC            |               |                                     |                    |
| SNP_80379_A_334166 | NW_004516060.1 | scaffold642 | 334166                  | TT                              | AA                 | AA               | INTERGENIC            |               |                                     |                    |
| SNP_80380_A_334208 | NW_004516060.1 | scaffold642 | 334208                  | GG                              | AA                 | AA               | INTERGENIC            |               |                                     |                    |
| SNP_80381_A_334500 | NW_004516060.1 | scaffold642 | 334500                  | AA                              | GG                 | GG               | INTERGENIC            |               |                                     |                    |
| SNP_80382_A_334606 | NW_004516060.1 | scaffold642 | 334606                  | GG                              | AA                 | AA               | INTERGENIC            |               |                                     |                    |
| SNP_80383_A_337459 | NW_004516060.1 | scaffold642 | 337459                  | AA                              | GG                 | GG               | INTERGENIC            |               |                                     |                    |
| SNP_80384_A_337907 | NW_004516060.1 | scaffold642 | 337907                  | GG                              | TT                 | TT               | INTERGENIC            |               |                                     |                    |
| SNP_80385_A_338478 | NW_004516060.1 | scaffold642 | 338478                  | AA                              | GG                 | GG               | INTERGENIC            |               |                                     |                    |
| SNP_80386_A_352133 | NW_004516060.1 | scaffold642 | 352133                  | CC                              | GG                 | GG               | INTERGENIC            |               |                                     |                    |
| SNP_80387_A_363253 | NW_004516060.1 | scaffold642 | 363253                  | TT                              | CC                 | CC               | INTERGENIC            |               |                                     |                    |
| SNP_80388_A_363279 | NW_004516060.1 | scaffold642 | 363279                  | AA                              | GG                 | GG               | INTERGENIC            |               |                                     |                    |
| SNP_80389_A_363310 | NW_004516060.1 | scaffold642 | 363310                  | CC                              | AA                 | AA               | INTERGENIC            |               |                                     |                    |
| SNP_80390_A_363312 | NW_004516060.1 | scaffold642 | 363312                  | AA                              | GG                 | GG               | INTERGENIC            |               |                                     |                    |
| SNP_80391_A_372682 | NW_004516060.1 | scaffold642 | 372682                  | CC                              | AA                 | AA               | INTERGENIC            |               |                                     |                    |
| SNP_80392_A_378557 | NW_004516060.1 | scaffold642 | 378557                  | AA                              | TT                 | TT               | INTRON                | 101512620     | uncharacterized LOC101512620        |                    |
| SNP_80393_A_402795 | NW_004516060.1 | scaffold642 | 402795                  | CC                              | TT                 | TT               | INTERGENIC            |               |                                     |                    |
| SNP_80395_A_432642 | NW_004516060.1 | scaffold642 | 432642                  | AA                              | GG                 | GG               | DRR                   | 101513254     | GDSL esterase/lipase At5g45910-like |                    |
| SNP_80396_A_432722 | NW_004516060.1 | scaffold642 | 432722                  | CC                              | TT                 | TT               | NON_SYNONYMOUS_CODING | 101513254     | GDSL esterase/lipase At5g45910-like |                    |
| SNP_80397_A_432916 | NW_004516060.1 | scaffold642 | 432916                  | CC                              | TT                 | TT               | STOP_GAINED           | 101513254     | GDSL esterase/lipase At5g45910-like |                    |
| SNP_80398_A_436165 | NW_004516060.1 | scaffold642 | 436165                  | GG                              | TT                 | TT               | INTERGENIC            |               |                                     |                    |



| SNPs IDs           | Chromosome IDs | Chromosomes | Physical positions (bp) | CDC Frontier (Reference genome) | (Pusa 1103 & HPNB) | (ILWC 46 & LPNB) | Sequence genome | Components of | Gene accession IDs | Putative functions |
|--------------------|----------------|-------------|-------------------------|---------------------------------|--------------------|------------------|-----------------|---------------|--------------------|--------------------|
| SNP_80400_A_502809 | NW_004516060.1 | scaffold642 | 502809                  | AA                              | TT                 | TT               | INTERGENIC      |               |                    |                    |
| SNP_80401_A_507832 | NW_004516060.1 | scaffold642 | 507832                  | AA                              | TT                 | TT               | INTERGENIC      |               |                    |                    |
| SNP_80402_A_533725 | NW_004516060.1 | scaffold642 | 533725                  | AA                              | GG                 | GG               | INTERGENIC      |               |                    |                    |
| SNP_80403_A_640693 | NW_004516060.1 | scaffold642 | 640693                  | GG                              | AA                 | AA               | INTERGENIC      |               |                    |                    |
| SNP_80404_A_640715 | NW_004516060.1 | scaffold642 | 640715                  | CC                              | TT                 | TT               | INTERGENIC      |               |                    |                    |
| SNP_80405_A_640917 | NW_004516060.1 | scaffold642 | 640917                  | AA                              | GG                 | GG               | INTERGENIC      |               |                    |                    |
| SNP_80406_A_645870 | NW_004516060.1 | scaffold642 | 645870                  | TT                              | GG                 | GG               | INTERGENIC      |               |                    |                    |
| SNP_80407_A_677924 | NW_004516060.1 | scaffold642 | 677924                  | TT                              | CC                 | CC               | INTERGENIC      |               |                    |                    |
| SNP_80408_A_686183 | NW_004516060.1 | scaffold642 | 686183                  | GG                              | AA                 | AA               | INTERGENIC      |               |                    |                    |
| SNP_80409_A_695586 | NW_004516060.1 | scaffold642 | 695586                  | CC                              | TT                 | TT               | URR             | 101494663     | Unknown function   |                    |
| SNP_80410_A_703391 | NW_004516060.1 | scaffold642 | 703391                  | CC                              | TT                 | TT               | INTERGENIC      |               |                    |                    |
| SNP_80411_A_31174  | NW_004516061.1 | scaffold643 | 31174                   | GG                              | AA                 | AA               | INTERGENIC      |               |                    |                    |
| SNP_80412_A_47598  | NW_004516061.1 | scaffold643 | 47598                   | GG                              | AA                 | AA               | INTERGENIC      |               |                    |                    |
| SNP_80413_A_56524  | NW_004516061.1 | scaffold643 | 56524                   | GG                              | AA                 | AA               | INTERGENIC      |               |                    |                    |
| SNP_80414_A_61616  | NW_004516061.1 | scaffold643 | 61616                   | CC                              | TT                 | TT               | INTERGENIC      |               |                    |                    |
| SNP_80415_A_69101  | NW_004516061.1 | scaffold643 | 69101                   | TT                              | CC                 | CC               | INTERGENIC      |               |                    |                    |
| SNP_80416_A_71169  | NW_004516061.1 | scaffold643 | 71169                   | GG                              | AA                 | AA               | INTERGENIC      |               |                    |                    |
| SNP_80417_A_71182  | NW_004516061.1 | scaffold643 | 71182                   | CC                              | TT                 | TT               | INTERGENIC      |               |                    |                    |
| SNP_80418_A_71258  | NW_004516061.1 | scaffold643 | 71258                   | GG                              | AA                 | AA               | INTERGENIC      |               |                    |                    |
| SNP_80419_A_71269  | NW_004516061.1 | scaffold643 | 71269                   | TT                              | CC                 | CC               | INTERGENIC      |               |                    |                    |
| SNP_80420_A_71308  | NW_004516061.1 | scaffold643 | 71308                   | TT                              | CC                 | CC               | INTERGENIC      |               |                    |                    |
| SNP_80421_A_71315  | NW_004516061.1 | scaffold643 | 71315                   | TT                              | CC                 | CC               | INTERGENIC      |               |                    |                    |

| SNPs IDs          | Chromosome IDs | Chromosomes | Physical positions (bp) | CDC Frontier (Reference genome) | (Pusa 1103 & HPNB) | (ILWC 46 & LPNB) | Sequence genome | Components of | Gene accession IDs | Putative functions |
|-------------------|----------------|-------------|-------------------------|---------------------------------|--------------------|------------------|-----------------|---------------|--------------------|--------------------|
| SNP_80422_A_71349 | NW_004516061.1 | scaffold643 | 71349                   | AA                              | GG                 | GG               | INTERGENIC      |               |                    |                    |
| SNP_80423_A_71374 | NW_004516061.1 | scaffold643 | 71374                   | GG                              | AA                 | AA               | INTERGENIC      |               |                    |                    |
| SNP_80424_A_71572 | NW_004516061.1 | scaffold643 | 71572                   | CC                              | TT                 | TT               | INTERGENIC      |               |                    |                    |
| SNP_80425_A_71621 | NW_004516061.1 | scaffold643 | 71621                   | AA                              | CC                 | CC               | INTERGENIC      |               |                    |                    |
| SNP_80426_A_71635 | NW_004516061.1 | scaffold643 | 71635                   | GG                              | AA                 | AA               | INTERGENIC      |               |                    |                    |
| SNP_80427_A_71671 | NW_004516061.1 | scaffold643 | 71671                   | TT                              | CC                 | CC               | INTERGENIC      |               |                    |                    |
| SNP_80428_A_23942 | NW_004516062.1 | scaffold645 | 23942                   | TT                              | GG                 | GG               | INTERGENIC      |               |                    |                    |
| SNP_80429_A_23943 | NW_004516062.1 | scaffold645 | 23943                   | GG                              | TT                 | TT               | INTERGENIC      |               |                    |                    |
| SNP_80430_A_23966 | NW_004516062.1 | scaffold645 | 23966                   | GG                              | TT                 | TT               | INTERGENIC      |               |                    |                    |
| SNP_80431_A_71892 | NW_004516062.1 | scaffold645 | 71892                   | AA                              | GG                 | GG               | INTERGENIC      |               |                    |                    |
| SNP_80432_A_71961 | NW_004516062.1 | scaffold645 | 71961                   | AA                              | TT                 | TT               | INTERGENIC      |               |                    |                    |
| SNP_80433_A_71968 | NW_004516062.1 | scaffold645 | 71968                   | CC                              | TT                 | TT               | INTERGENIC      |               |                    |                    |
| SNP_80434_A_72033 | NW_004516062.1 | scaffold645 | 72033                   | AA                              | GG                 | GG               | INTERGENIC      |               |                    |                    |
| SNP_80435_A_72129 | NW_004516062.1 | scaffold645 | 72129                   | TT                              | AA                 | AA               | INTERGENIC      |               |                    |                    |
| SNP_80436_A_72138 | NW_004516062.1 | scaffold645 | 72138                   | GG                              | AA                 | AA               | INTERGENIC      |               |                    |                    |
| SNP_80437_A_72210 | NW_004516062.1 | scaffold645 | 72210                   | TT                              | GG                 | GG               | INTERGENIC      |               |                    |                    |
| SNP_80438_A_73193 | NW_004516062.1 | scaffold645 | 73193                   | GG                              | AA                 | AA               | INTERGENIC      |               |                    |                    |
| SNP_80439_A_73247 | NW_004516062.1 | scaffold645 | 73247                   | AA                              | CC                 | CC               | INTERGENIC      |               |                    |                    |
| SNP_80440_A_73285 | NW_004516062.1 | scaffold645 | 73285                   | AA                              | GG                 | GG               | INTERGENIC      |               |                    |                    |
| SNP_80441_A_73501 | NW_004516062.1 | scaffold645 | 73501                   | TT                              | CC                 | CC               | INTERGENIC      |               |                    |                    |
| SNP_80442_A_73505 | NW_004516062.1 | scaffold645 | 73505                   | AA                              | GG                 | GG               | INTERGENIC      |               |                    |                    |
| SNP_80443_A_73590 | NW_004516062.1 | scaffold645 | 73590                   | CC                              | TT                 | TT               | INTERGENIC      |               |                    |                    |

| SNPs IDs           | Chromosome IDs | Chromosomes | Physical positions (bp) | CDC Frontier (Reference genome) | (Pusa 1103 & HPNB) | (ILWC 46 & LPNB) | Sequence genome | Components of | Gene accession IDs | Putative functions |
|--------------------|----------------|-------------|-------------------------|---------------------------------|--------------------|------------------|-----------------|---------------|--------------------|--------------------|
| SNP_80444_A_73698  | NW_004516062.1 | scaffold645 | 73698                   | AA                              | GG                 | GG               | INTERGENIC      |               |                    |                    |
| SNP_80445_A_73726  | NW_004516062.1 | scaffold645 | 73726                   | GG                              | AA                 | AA               | INTERGENIC      |               |                    |                    |
| SNP_80446_A_73731  | NW_004516062.1 | scaffold645 | 73731                   | CC                              | AA                 | AA               | INTERGENIC      |               |                    |                    |
| SNP_80447_A_73739  | NW_004516062.1 | scaffold645 | 73739                   | GG                              | TT                 | TT               | INTERGENIC      |               |                    |                    |
| SNP_80448_A_73864  | NW_004516062.1 | scaffold645 | 73864                   | AA                              | CC                 | CC               | INTERGENIC      |               |                    |                    |
| SNP_80451_A_74046  | NW_004516062.1 | scaffold645 | 74046                   | GG                              | AA                 | AA               | INTERGENIC      |               |                    |                    |
| SNP_80452_A_93810  | NW_004516062.1 | scaffold645 | 93810                   | AA                              | CC                 | CC               | INTERGENIC      |               |                    |                    |
| SNP_80454_A_93977  | NW_004516062.1 | scaffold645 | 93977                   | TT                              | CC                 | CC               | INTERGENIC      |               |                    |                    |
| SNP_80455_A_93998  | NW_004516062.1 | scaffold645 | 93998                   | TT                              | CC                 | CC               | INTERGENIC      |               |                    |                    |
| SNP_80456_A_94012  | NW_004516062.1 | scaffold645 | 94012                   | AA                              | TT                 | TT               | INTERGENIC      |               |                    |                    |
| SNP_80457_A_94360  | NW_004516062.1 | scaffold645 | 94360                   | GG                              | TT                 | TT               | INTERGENIC      |               |                    |                    |
| SNP_80458_A_98532  | NW_004516062.1 | scaffold645 | 98532                   | AA                              | GG                 | GG               | INTERGENIC      |               |                    |                    |
| SNP_80459_A_98835  | NW_004516062.1 | scaffold645 | 98835                   | TT                              | CC                 | CC               | INTERGENIC      |               |                    |                    |
| SNP_80460_A_98862  | NW_004516062.1 | scaffold645 | 98862                   | TT                              | GG                 | GG               | INTERGENIC      |               |                    |                    |
| SNP_80461_A_98863  | NW_004516062.1 | scaffold645 | 98863                   | AA                              | TT                 | TT               | INTERGENIC      |               |                    |                    |
| SNP_80462_A_167307 | NW_004516062.1 | scaffold645 | 167307                  | TT                              | GG                 | GG               | INTERGENIC      |               |                    |                    |
| SNP_80463_A_179620 | NW_004516062.1 | scaffold645 | 179620                  | GG                              | AA                 | AA               | INTERGENIC      |               |                    |                    |
| SNP_80464_A_192667 | NW_004516062.1 | scaffold645 | 192667                  | AA                              | GG                 | GG               | INTERGENIC      |               |                    |                    |
| SNP_80465_A_192780 | NW_004516062.1 | scaffold645 | 192780                  | GG                              | TT                 | TT               | INTERGENIC      |               |                    |                    |
| SNP_80466_A_192798 | NW_004516062.1 | scaffold645 | 192798                  | GG                              | CC                 | CC               | INTERGENIC      |               |                    |                    |
| SNP_80467_A_192815 | NW_004516062.1 | scaffold645 | 192815                  | CC                              | TT                 | TT               | INTERGENIC      |               |                    |                    |
| SNP_80468_A_192825 | NW_004516062.1 | scaffold645 | 192825                  | TT                              | CC                 | CC               | INTERGENIC      |               |                    |                    |

| SNPs IDs           | Chromosome IDs | Chromosomes | Physical positions (bp) | CDC Frontier (Reference genome) | (Pusa 1103 & HPNB) | (ILWC 46 & LPNB) | Sequence genome | Components of | Gene accession IDs | Putative functions |
|--------------------|----------------|-------------|-------------------------|---------------------------------|--------------------|------------------|-----------------|---------------|--------------------|--------------------|
| SNP_80469_A_200674 | NW_004516062.1 | scaffold645 | 200674                  | CC                              | TT                 | TT               | INTERGENIC      |               |                    |                    |
| SNP_80470_A_225897 | NW_004516062.1 | scaffold645 | 225897                  | AA                              | TT                 | TT               | INTERGENIC      |               |                    |                    |
| SNP_80471_A_225902 | NW_004516062.1 | scaffold645 | 225902                  | AA                              | GG                 | GG               | INTERGENIC      |               |                    |                    |
| SNP_80473_A_279931 | NW_004516062.1 | scaffold645 | 279931                  | AA                              | TT                 | TT               | INTERGENIC      |               |                    |                    |
| SNP_80474_A_279935 | NW_004516062.1 | scaffold645 | 279935                  | CC                              | TT                 | TT               | INTERGENIC      |               |                    |                    |
| SNP_80475_A_280515 | NW_004516062.1 | scaffold645 | 280515                  | AA                              | TT                 | TT               | INTERGENIC      |               |                    |                    |
| SNP_80476_A_285583 | NW_004516062.1 | scaffold645 | 285583                  | CC                              | AA                 | AA               | INTERGENIC      |               |                    |                    |
| SNP_80477_A_285625 | NW_004516062.1 | scaffold645 | 285625                  | AA                              | GG                 | GG               | INTERGENIC      |               |                    |                    |
| SNP_80478_A_286415 | NW_004516062.1 | scaffold645 | 286415                  | AA                              | GG                 | GG               | INTERGENIC      |               |                    |                    |
| SNP_80479_A_286980 | NW_004516062.1 | scaffold645 | 286980                  | TT                              | CC                 | CC               | INTERGENIC      |               |                    |                    |
| SNP_80480_A_287061 | NW_004516062.1 | scaffold645 | 287061                  | TT                              | GG                 | GG               | INTERGENIC      |               |                    |                    |
| SNP_80481_A_287067 | NW_004516062.1 | scaffold645 | 287067                  | AA                              | GG                 | GG               | INTERGENIC      |               |                    |                    |
| SNP_80482_A_287103 | NW_004516062.1 | scaffold645 | 287103                  | TT                              | AA                 | AA               | INTERGENIC      |               |                    |                    |
| SNP_80483_A_287294 | NW_004516062.1 | scaffold645 | 287294                  | AA                              | TT                 | TT               | INTERGENIC      |               |                    |                    |
| SNP_80484_A_287312 | NW_004516062.1 | scaffold645 | 287312                  | AA                              | CC                 | CC               | INTERGENIC      |               |                    |                    |
| SNP_80485_A_287317 | NW_004516062.1 | scaffold645 | 287317                  | GG                              | CC                 | CC               | INTERGENIC      |               |                    |                    |
| SNP_80486_A_287380 | NW_004516062.1 | scaffold645 | 287380                  | AA                              | CC                 | CC               | INTERGENIC      |               |                    |                    |
| SNP_80487_A_287464 | NW_004516062.1 | scaffold645 | 287464                  | CC                              | AA                 | AA               | INTERGENIC      |               |                    |                    |
| SNP_80488_A_287465 | NW_004516062.1 | scaffold645 | 287465                  | AA                              | TT                 | TT               | INTERGENIC      |               |                    |                    |
| SNP_80489_A_287603 | NW_004516062.1 | scaffold645 | 287603                  | TT                              | AA                 | AA               | INTERGENIC      |               |                    |                    |
| SNP_80490_A_287651 | NW_004516062.1 | scaffold645 | 287651                  | CC                              | TT                 | TT               | INTERGENIC      |               |                    |                    |
| SNP_80491_A_287698 | NW_004516062.1 | scaffold645 | 287698                  | CC                              | TT                 | AA               | INTERGENIC      |               |                    |                    |

| SNPs IDs           | Chromosome IDs | Chromosomes | Physical positions (bp) | CDC Frontier (Reference genome) | (Pusa 1103 & HPNB) | (ILWC 46 & LPNB) | Sequence genome | Components of | Gene accession IDs | Putative functions |
|--------------------|----------------|-------------|-------------------------|---------------------------------|--------------------|------------------|-----------------|---------------|--------------------|--------------------|
| SNP_80492_A_288303 | NW_004516062.1 | scaffold645 | 288303                  | GG                              | TT                 | TT               | INTERGENIC      |               |                    |                    |
| SNP_80493_A_289421 | NW_004516062.1 | scaffold645 | 289421                  | GG                              | CC                 | CC               | INTERGENIC      |               |                    |                    |
| SNP_80494_A_289515 | NW_004516062.1 | scaffold645 | 289515                  | GG                              | AA                 | AA               | INTERGENIC      |               |                    |                    |
| SNP_80495_A_289958 | NW_004516062.1 | scaffold645 | 289958                  | TT                              | AA                 | AA               | INTERGENIC      |               |                    |                    |
| SNP_80496_A_290062 | NW_004516062.1 | scaffold645 | 290062                  | AA                              | GG                 | GG               | INTERGENIC      |               |                    |                    |
| SNP_80497_A_299449 | NW_004516062.1 | scaffold645 | 299449                  | CC                              | TT                 | TT               | INTERGENIC      |               |                    |                    |
| SNP_80498_A_301221 | NW_004516062.1 | scaffold645 | 301221                  | AA                              | GG                 | GG               | INTERGENIC      |               |                    |                    |
| SNP_80499_A_302641 | NW_004516062.1 | scaffold645 | 302641                  | TT                              | CC                 | CC               | INTERGENIC      |               |                    |                    |
| SNP_80500_A_634    | NW_004516064.1 | scaffold647 | 634                     | TT                              | CC                 | CC               | INTERGENIC      |               |                    |                    |
| SNP_80501_A_723    | NW_004516064.1 | scaffold647 | 723                     | GG                              | CC                 | CC               | INTERGENIC      |               |                    |                    |
| SNP_80502_A_752    | NW_004516064.1 | scaffold647 | 752                     | CC                              | TT                 | TT               | INTERGENIC      |               |                    |                    |
| SNP_80503_A_984    | NW_004516064.1 | scaffold647 | 984                     | TT                              | GG                 | GG               | INTERGENIC      |               |                    |                    |
| SNP_80504_A_1032   | NW_004516064.1 | scaffold647 | 1032                    | CC                              | GG                 | GG               | INTERGENIC      |               |                    |                    |
| SNP_80505_A_1047   | NW_004516064.1 | scaffold647 | 1047                    | TT                              | CC                 | CC               | INTERGENIC      |               |                    |                    |
| SNP_80506_A_7367   | NW_004516064.1 | scaffold647 | 7367                    | TT                              | AA                 | AA               | INTERGENIC      |               |                    |                    |
| SNP_80507_A_7403   | NW_004516064.1 | scaffold647 | 7403                    | AA                              | CC                 | CC               | INTERGENIC      |               |                    |                    |
| SNP_80508_A_7466   | NW_004516064.1 | scaffold647 | 7466                    | TT                              | CC                 | CC               | INTERGENIC      |               |                    |                    |
| SNP_80509_A_7574   | NW_004516064.1 | scaffold647 | 7574                    | AA                              | GG                 | GG               | INTERGENIC      |               |                    |                    |
| SNP_80510_A_7637   | NW_004516064.1 | scaffold647 | 7637                    | AA                              | GG                 | GG               | INTERGENIC      |               |                    |                    |
| SNP_80511_A_7674   | NW_004516064.1 | scaffold647 | 7674                    | GG                              | AA                 | AA               | INTERGENIC      |               |                    |                    |
| SNP_80512_A_7677   | NW_004516064.1 | scaffold647 | 7677                    | TT                              | CC                 | CC               | INTERGENIC      |               |                    |                    |
| SNP_80513_A_15626  | NW_004516064.1 | scaffold647 | 15626                   | CC                              | AA                 | AA               | INTERGENIC      |               |                    |                    |

| SNPs IDs          | Chromosome IDs | Chromosomes | Physical positions (bp) | CDC Frontier genome (Reference genome) | (Pusa 1103 & HPNB) | (ILWC 46 & LPNB) | Sequence genome | Components of | Gene accession IDs | Putative functions |
|-------------------|----------------|-------------|-------------------------|----------------------------------------|--------------------|------------------|-----------------|---------------|--------------------|--------------------|
| SNP_80514_A_15918 | NW_004516064.1 | scaffold647 | 15918                   | GG                                     | AA                 | AA               | INTERGENIC      |               |                    |                    |
| SNP_80515_A_16372 | NW_004516064.1 | scaffold647 | 16372                   | GG                                     | TT                 | TT               | INTERGENIC      |               |                    |                    |
| SNP_80516_A_20859 | NW_004516064.1 | scaffold647 | 20859                   | AA                                     | GG                 | GG               | INTERGENIC      |               |                    |                    |
| SNP_80517_A_21420 | NW_004516064.1 | scaffold647 | 21420                   | AA                                     | GG                 | GG               | INTERGENIC      |               |                    |                    |
| SNP_80518_A_21456 | NW_004516064.1 | scaffold647 | 21456                   | GG                                     | AA                 | AA               | INTERGENIC      |               |                    |                    |
| SNP_80519_A_29848 | NW_004516064.1 | scaffold647 | 29848                   | GG                                     | CC                 | CC               | INTERGENIC      |               |                    |                    |
| SNP_80520_A_29985 | NW_004516064.1 | scaffold647 | 29985                   | AA                                     | CC                 | CC               | INTERGENIC      |               |                    |                    |
| SNP_80521_A_29986 | NW_004516064.1 | scaffold647 | 29986                   | TT                                     | AA                 | AA               | INTERGENIC      |               |                    |                    |
| SNP_80522_A_29987 | NW_004516064.1 | scaffold647 | 29987                   | AA                                     | GG                 | GG               | INTERGENIC      |               |                    |                    |
| SNP_80523_A_30125 | NW_004516064.1 | scaffold647 | 30125                   | GG                                     | TT                 | TT               | INTERGENIC      |               |                    |                    |
| SNP_80524_A_30151 | NW_004516064.1 | scaffold647 | 30151                   | TT                                     | CC                 | CC               | INTERGENIC      |               |                    |                    |
| SNP_80525_A_40439 | NW_004516064.1 | scaffold647 | 40439                   | GG                                     | CC                 | CC               | INTERGENIC      |               |                    |                    |
| SNP_80526_A_40442 | NW_004516064.1 | scaffold647 | 40442                   | GG                                     | AA                 | AA               | INTERGENIC      |               |                    |                    |
| SNP_80527_A_40763 | NW_004516064.1 | scaffold647 | 40763                   | AA                                     | GG                 | GG               | INTERGENIC      |               |                    |                    |
| SNP_80528_A_46921 | NW_004516064.1 | scaffold647 | 46921                   | CC                                     | TT                 | TT               | INTERGENIC      |               |                    |                    |
| SNP_80529_A_47232 | NW_004516064.1 | scaffold647 | 47232                   | GG                                     | AA                 | AA               | INTERGENIC      |               |                    |                    |
| SNP_80530_A_47268 | NW_004516064.1 | scaffold647 | 47268                   | AA                                     | TT                 | TT               | INTERGENIC      |               |                    |                    |
| SNP_80531_A_49945 | NW_004516064.1 | scaffold647 | 49945                   | TT                                     | CC                 | CC               | INTERGENIC      |               |                    |                    |
| SNP_80532_A_67924 | NW_004516064.1 | scaffold647 | 67924                   | GG                                     | AA                 | AA               | INTERGENIC      |               |                    |                    |
| SNP_80533_A_68006 | NW_004516064.1 | scaffold647 | 68006                   | CC                                     | TT                 | TT               | INTERGENIC      |               |                    |                    |
| SNP_80534_A_71274 | NW_004516064.1 | scaffold647 | 71274                   | TT                                     | CC                 | CC               | INTERGENIC      |               |                    |                    |
| SNP_80535_A_71691 | NW_004516064.1 | scaffold647 | 71691                   | TT                                     | CC                 | CC               | INTERGENIC      |               |                    |                    |

| SNPs IDs           | Chromosome IDs | Chromosomes | Physical positions (bp) | CDC Frontier (Reference genome) | (Pusa 1103 & HPNB) | (ILWC 46 & LPNB) | Sequence genome | Components of | Gene accession IDs | Putative functions |
|--------------------|----------------|-------------|-------------------------|---------------------------------|--------------------|------------------|-----------------|---------------|--------------------|--------------------|
| SNP_80536_A_71764  | NW_004516064.1 | scaffold647 | 71764                   | AA                              | CC                 | CC               | INTERGENIC      |               |                    |                    |
| SNP_80537_A_71827  | NW_004516064.1 | scaffold647 | 71827                   | TT                              | GG                 | GG               | INTERGENIC      |               |                    |                    |
| SNP_80538_A_71870  | NW_004516064.1 | scaffold647 | 71870                   | GG                              | TT                 | TT               | INTERGENIC      |               |                    |                    |
| SNP_80539_A_72976  | NW_004516064.1 | scaffold647 | 72976                   | TT                              | GG                 | GG               | INTERGENIC      |               |                    |                    |
| SNP_80540_A_72977  | NW_004516064.1 | scaffold647 | 72977                   | GG                              | AA                 | AA               | INTERGENIC      |               |                    |                    |
| SNP_80541_A_73794  | NW_004516064.1 | scaffold647 | 73794                   | TT                              | AA                 | AA               | INTERGENIC      |               |                    |                    |
| SNP_80542_A_86815  | NW_004516064.1 | scaffold647 | 86815                   | TT                              | CC                 | CC               | INTERGENIC      |               |                    |                    |
| SNP_80543_A_100353 | NW_004516064.1 | scaffold647 | 100353                  | GG                              | AA                 | AA               | INTERGENIC      |               |                    |                    |
| SNP_80544_A_132964 | NW_004516064.1 | scaffold647 | 132964                  | CC                              | TT                 | TT               | INTERGENIC      |               |                    |                    |
| SNP_80545_A_162341 | NW_004516064.1 | scaffold647 | 162341                  | AA                              | GG                 | GG               | INTERGENIC      |               |                    |                    |
| SNP_80546_A_162391 | NW_004516064.1 | scaffold647 | 162391                  | AA                              | GG                 | GG               | INTERGENIC      |               |                    |                    |
| SNP_80547_A_169186 | NW_004516064.1 | scaffold647 | 169186                  | TT                              | AA                 | AA               | INTERGENIC      |               |                    |                    |
| SNP_80548_A_189861 | NW_004516064.1 | scaffold647 | 189861                  | TT                              | CC                 | CC               | INTERGENIC      |               |                    |                    |
| SNP_80549_A_192943 | NW_004516064.1 | scaffold647 | 192943                  | CC                              | GG                 | GG               | INTERGENIC      |               |                    |                    |
| SNP_80550_A_192947 | NW_004516064.1 | scaffold647 | 192947                  | CC                              | TT                 | TT               | INTERGENIC      |               |                    |                    |
| SNP_80551_A_193238 | NW_004516064.1 | scaffold647 | 193238                  | TT                              | AA                 | AA               | INTERGENIC      |               |                    |                    |
| SNP_80552_A_193239 | NW_004516064.1 | scaffold647 | 193239                  | GG                              | AA                 | AA               | INTERGENIC      |               |                    |                    |
| SNP_80553_A_200337 | NW_004516064.1 | scaffold647 | 200337                  | GG                              | TT                 | TT               | INTERGENIC      |               |                    |                    |
| SNP_80555_A_200862 | NW_004516064.1 | scaffold647 | 200862                  | AA                              | GG                 | GG               | INTERGENIC      |               |                    |                    |
| SNP_80556_A_201328 | NW_004516064.1 | scaffold647 | 201328                  | GG                              | AA                 | AA               | INTERGENIC      |               |                    |                    |
| SNP_80557_A_201519 | NW_004516064.1 | scaffold647 | 201519                  | AA                              | TT                 | TT               | INTERGENIC      |               |                    |                    |
| SNP_80558_A_201749 | NW_004516064.1 | scaffold647 | 201749                  | AA                              | TT                 | TT               | INTERGENIC      |               |                    |                    |

| SNPs IDs           | Chromosome IDs | Chromosomes | Physical positions (bp) | CDC Frontier (Reference genome) | (Pusa 1103 & HPNB) | (ILWC 46 & LPNB) | Sequence genome | Components of | Gene accession IDs | Putative functions |
|--------------------|----------------|-------------|-------------------------|---------------------------------|--------------------|------------------|-----------------|---------------|--------------------|--------------------|
| SNP_80560_A_201781 | NW_004516064.1 | scaffold647 | 201781                  | AA                              | GG                 | GG               | INTERGENIC      |               |                    |                    |
| SNP_80561_A_201786 | NW_004516064.1 | scaffold647 | 201786                  | GG                              | AA                 | AA               | INTERGENIC      |               |                    |                    |
| SNP_80562_A_201789 | NW_004516064.1 | scaffold647 | 201789                  | CC                              | TT                 | TT               | INTERGENIC      |               |                    |                    |
| SNP_80563_A_201798 | NW_004516064.1 | scaffold647 | 201798                  | GG                              | AA                 | AA               | INTERGENIC      |               |                    |                    |
| SNP_80564_A_201850 | NW_004516064.1 | scaffold647 | 201850                  | TT                              | GG                 | GG               | INTERGENIC      |               |                    |                    |
| SNP_80565_A_212415 | NW_004516064.1 | scaffold647 | 212415                  | TT                              | CC                 | CC               | INTERGENIC      |               |                    |                    |
| SNP_80566_A_212569 | NW_004516064.1 | scaffold647 | 212569                  | TT                              | CC                 | CC               | INTERGENIC      |               |                    |                    |
| SNP_80567_A_212627 | NW_004516064.1 | scaffold647 | 212627                  | TT                              | GG                 | GG               | INTERGENIC      |               |                    |                    |
| SNP_80568_A_212699 | NW_004516064.1 | scaffold647 | 212699                  | AA                              | GG                 | GG               | INTERGENIC      |               |                    |                    |
| SNP_80569_A_212735 | NW_004516064.1 | scaffold647 | 212735                  | TT                              | CC                 | CC               | INTERGENIC      |               |                    |                    |
| SNP_80570_A_212800 | NW_004516064.1 | scaffold647 | 212800                  | CC                              | TT                 | TT               | INTERGENIC      |               |                    |                    |
| SNP_80571_A_464    | NW_004516065.1 | scaffold648 | 464                     | GG                              | AA                 | AA               | INTERGENIC      |               |                    |                    |
| SNP_80572_A_526    | NW_004516065.1 | scaffold648 | 526                     | GG                              | TT                 | TT               | INTERGENIC      |               |                    |                    |
| SNP_80573_A_730    | NW_004516065.1 | scaffold648 | 730                     | AA                              | CC                 | CC               | INTERGENIC      |               |                    |                    |
| SNP_80574_A_904    | NW_004516065.1 | scaffold648 | 904                     | CC                              | TT                 | TT               | INTERGENIC      |               |                    |                    |
| SNP_80575_A_1319   | NW_004516065.1 | scaffold648 | 1319                    | GG                              | AA                 | AA               | INTERGENIC      |               |                    |                    |
| SNP_80576_A_1337   | NW_004516065.1 | scaffold648 | 1337                    | TT                              | AA                 | AA               | INTERGENIC      |               |                    |                    |
| SNP_80577_A_1563   | NW_004516065.1 | scaffold648 | 1563                    | CC                              | AA                 | AA               | INTERGENIC      |               |                    |                    |
| SNP_80578_A_1843   | NW_004516065.1 | scaffold648 | 1843                    | AA                              | TT                 | TT               | INTERGENIC      |               |                    |                    |
| SNP_80579_A_4257   | NW_004516065.1 | scaffold648 | 4257                    | TT                              | GG                 | GG               | INTERGENIC      |               |                    |                    |
| SNP_80580_A_4294   | NW_004516065.1 | scaffold648 | 4294                    | AA                              | GG                 | GG               | INTERGENIC      |               |                    |                    |
| SNP_80581_A_33555  | NW_004516065.1 | scaffold648 | 33555                   | TT                              | GG                 | GG               | INTERGENIC      |               |                    |                    |



| SNPs IDs           | Chromosome IDs | Chromosomes | Physical positions (bp) | CDC Frontier (Reference genome) | (Pusa 1103 & HPNB) | (ILWC 46 & LPNB) | Sequence genome | Components of | Gene accession IDs                                        | Putative functions |
|--------------------|----------------|-------------|-------------------------|---------------------------------|--------------------|------------------|-----------------|---------------|-----------------------------------------------------------|--------------------|
| SNP_80582_A_2230   | NW_004516067.1 | scaffold651 | 2230                    | TT                              | CC                 | CC               | INTERGENIC      |               |                                                           |                    |
| SNP_80583_A_2529   | NW_004516067.1 | scaffold651 | 2529                    | TT                              | GG                 | GG               | INTERGENIC      |               |                                                           |                    |
| SNP_80584_A_4919   | NW_004516067.1 | scaffold651 | 4919                    | TT                              | AA                 | AA               | INTERGENIC      |               |                                                           |                    |
| SNP_80585_A_4994   | NW_004516067.1 | scaffold651 | 4994                    | GG                              | TT                 | TT               | INTERGENIC      |               |                                                           |                    |
| SNP_80587_A_5000   | NW_004516067.1 | scaffold651 | 5000                    | GG                              | AA                 | AA               | INTERGENIC      |               |                                                           |                    |
| SNP_80588_A_7595   | NW_004516067.1 | scaffold651 | 7595                    | AA                              | CC                 | CC               | INTERGENIC      |               |                                                           |                    |
| SNP_80589_A_7721   | NW_004516067.1 | scaffold651 | 7721                    | GG                              | TT                 | TT               | INTERGENIC      |               |                                                           |                    |
| SNP_80590_A_7780   | NW_004516067.1 | scaffold651 | 7780                    | TT                              | AA                 | AA               | INTERGENIC      |               |                                                           |                    |
| SNP_80591_A_7843   | NW_004516067.1 | scaffold651 | 7843                    | TT                              | AA                 | AA               | INTERGENIC      |               |                                                           |                    |
| SNP_80592_A_7917   | NW_004516067.1 | scaffold651 | 7917                    | TT                              | GG                 | GG               | INTERGENIC      |               |                                                           |                    |
| SNP_80593_A_38999  | NW_004516067.1 | scaffold651 | 38999                   | GG                              | TT                 | TT               | INTERGENIC      |               |                                                           |                    |
| SNP_80594_A_42283  | NW_004516067.1 | scaffold651 | 42283                   | GG                              | AA                 | AA               | INTERGENIC      |               |                                                           |                    |
| SNP_80595_A_58910  | NW_004516067.1 | scaffold651 | 58910                   | GG                              | CC                 | CC               | INTERGENIC      |               |                                                           |                    |
| SNP_80596_A_58942  | NW_004516067.1 | scaffold651 | 58942                   | AA                              | GG                 | GG               | INTERGENIC      |               |                                                           |                    |
| SNP_80597_A_58958  | NW_004516067.1 | scaffold651 | 58958                   | TT                              | CC                 | CC               | INTERGENIC      |               |                                                           |                    |
| SNP_80598_A_58969  | NW_004516067.1 | scaffold651 | 58969                   | AA                              | TT                 | TT               | INTERGENIC      |               |                                                           |                    |
| SNP_80600_A_200800 | NW_004516069.1 | scaffold653 | 200800                  | AA                              | GG                 | GG               | URR             | 101506392     | histidinol-phosphate aminotransferase, chloroplastic-like |                    |
| SNP_80601_A_200803 | NW_004516069.1 | scaffold653 | 200803                  | CC                              | AA                 | AA               | URR             | 101506392     | histidinol-phosphate aminotransferase, chloroplastic-like |                    |
| SNP_80602_A_200811 | NW_004516069.1 | scaffold653 | 200811                  | CC                              | TT                 | TT               | URR             | 101506392     | histidinol-phosphate aminotransferase, chloroplastic-like |                    |
| SNP_80603_A_200821 | NW_004516069.1 | scaffold653 | 200821                  | GG                              | AA                 | AA               | URR             | 101506392     | histidinol-phosphate aminotransferase, chloroplastic-like |                    |
| SNP_80604_A_200837 | NW_004516069.1 | scaffold653 | 200837                  | AA                              | GG                 | GG               | URR             | 101506392     | histidinol-phosphate aminotransferase, chloroplastic-like |                    |
| SNP_80605_A_200859 | NW_004516069.1 | scaffold653 | 200859                  | CC                              | TT                 | TT               | URR             | 101506392     | histidinol-phosphate aminotransferase, chloroplastic-like |                    |

| SNPs IDs           | Chromosome IDs | Chromosomes | Physical positions (bp) | CDC Frontier (Reference genome) | (Pusa 1103 & HPNB) | (ILWC 46 & LPNB) | Sequence Components of genome | Gene accession IDs | Putative functions                                        |
|--------------------|----------------|-------------|-------------------------|---------------------------------|--------------------|------------------|-------------------------------|--------------------|-----------------------------------------------------------|
| SNP_80606_A_200882 | NW_004516069.1 | scaffold653 | 200882                  | AA                              | GG                 | GG               | URR                           | 101506392          | histidinol-phosphate aminotransferase, chloroplastic-like |
| SNP_80607_A_201064 | NW_004516069.1 | scaffold653 | 201064                  | CC                              | TT                 | TT               | URR                           | 101506392          | histidinol-phosphate aminotransferase, chloroplastic-like |
| SNP_80608_A_908    | NW_004516070.1 | scaffold654 | 908                     | AA                              | GG                 | GG               | INTERGENIC                    |                    |                                                           |
| SNP_80609_A_977    | NW_004516070.1 | scaffold654 | 977                     | AA                              | TT                 | TT               | INTERGENIC                    |                    |                                                           |
| SNP_80610_A_1393   | NW_004516070.1 | scaffold654 | 1393                    | TT                              | CC                 | CC               | INTERGENIC                    |                    |                                                           |
| SNP_80612_A_1399   | NW_004516070.1 | scaffold654 | 1399                    | CC                              | TT                 | TT               | INTERGENIC                    |                    |                                                           |
| SNP_80613_A_8675   | NW_004516070.1 | scaffold654 | 8675                    | GG                              | TT                 | TT               | INTERGENIC                    |                    |                                                           |
| SNP_80614_A_48177  | NW_004516070.1 | scaffold654 | 48177                   | CC                              | GG                 | GG               | INTERGENIC                    |                    |                                                           |
| SNP_80616_A_26611  | NW_004516075.1 | scaffold661 | 26611                   | GG                              | AA                 | AA               | DRR                           | 101509498          | uncharacterized LOC101509498                              |
| SNP_80617_A_85102  | NW_004516075.1 | scaffold661 | 85102                   | TT                              | GG                 | GG               | INTERGENIC                    |                    |                                                           |
| SNP_80618_A_85111  | NW_004516075.1 | scaffold661 | 85111                   | CC                              | TT                 | TT               | INTERGENIC                    |                    |                                                           |
| SNP_80619_A_105994 | NW_004516075.1 | scaffold661 | 105994                  | GG                              | AA                 | AA               | INTERGENIC                    |                    |                                                           |
| SNP_80620_A_133164 | NW_004516075.1 | scaffold661 | 133164                  | AA                              | GG                 | GG               | INTERGENIC                    |                    |                                                           |
| SNP_80621_A_135277 | NW_004516075.1 | scaffold661 | 135277                  | AA                              | GG                 | GG               | INTERGENIC                    |                    |                                                           |
| SNP_80622_A_135295 | NW_004516075.1 | scaffold661 | 135295                  | CC                              | TT                 | TT               | INTERGENIC                    |                    |                                                           |
| SNP_80623_A_135317 | NW_004516075.1 | scaffold661 | 135317                  | TT                              | CC                 | CC               | INTERGENIC                    |                    |                                                           |
| SNP_80624_A_157574 | NW_004516075.1 | scaffold661 | 157574                  | TT                              | GG                 | GG               | INTERGENIC                    |                    |                                                           |
| SNP_80625_A_157666 | NW_004516075.1 | scaffold661 | 157666                  | TT                              | CC                 | CC               | INTERGENIC                    |                    |                                                           |
| SNP_80626_A_175748 | NW_004516075.1 | scaffold661 | 175748                  | GG                              | AA                 | AA               | INTERGENIC                    |                    |                                                           |
| SNP_80627_A_175752 | NW_004516075.1 | scaffold661 | 175752                  | CC                              | TT                 | TT               | INTERGENIC                    |                    |                                                           |
| SNP_80628_A_176159 | NW_004516075.1 | scaffold661 | 176159                  | TT                              | CC                 | CC               | INTERGENIC                    |                    |                                                           |
| SNP_80629_A_176198 | NW_004516075.1 | scaffold661 | 176198                  | TT                              | CC                 | CC               | INTERGENIC                    |                    |                                                           |

| SNPs IDs           | Chromosome IDs | Chromosomes | Physical positions (bp) | CDC Frontier (Reference genome) | (Pusa 1103 & HPNB) | (ILWC 46 & LPNB) | Sequence genome | Components of | Gene accession IDs | Putative functions |
|--------------------|----------------|-------------|-------------------------|---------------------------------|--------------------|------------------|-----------------|---------------|--------------------|--------------------|
| SNP_80630_A_176213 | NW_004516075.1 | scaffold661 | 176213                  | AA                              | GG                 | GG               | INTERGENIC      |               |                    |                    |
| SNP_80631_A_177243 | NW_004516075.1 | scaffold661 | 177243                  | AA                              | CC                 | CC               | INTERGENIC      |               |                    |                    |
| SNP_80632_A_177248 | NW_004516075.1 | scaffold661 | 177248                  | GG                              | AA                 | AA               | INTERGENIC      |               |                    |                    |
| SNP_80633_A_177850 | NW_004516075.1 | scaffold661 | 177850                  | AA                              | CC                 | CC               | INTERGENIC      |               |                    |                    |
| SNP_80634_A_177854 | NW_004516075.1 | scaffold661 | 177854                  | CC                              | TT                 | TT               | INTERGENIC      |               |                    |                    |
| SNP_80636_A_195553 | NW_004516075.1 | scaffold661 | 195553                  | TT                              | GG                 | GG               | INTERGENIC      |               |                    |                    |
| SNP_80637_A_195606 | NW_004516075.1 | scaffold661 | 195606                  | AA                              | GG                 | GG               | INTERGENIC      |               |                    |                    |
| SNP_80638_A_250207 | NW_004516075.1 | scaffold661 | 250207                  | TT                              | GG                 | GG               | INTERGENIC      |               |                    |                    |
| SNP_80640_A_272172 | NW_004516075.1 | scaffold661 | 272172                  | CC                              | TT                 | TT               | INTERGENIC      |               |                    |                    |
| SNP_80641_A_272173 | NW_004516075.1 | scaffold661 | 272173                  | CC                              | TT                 | TT               | INTERGENIC      |               |                    |                    |
| SNP_80642_A_272443 | NW_004516075.1 | scaffold661 | 272443                  | TT                              | CC                 | CC               | INTERGENIC      |               |                    |                    |
| SNP_80643_A_272642 | NW_004516075.1 | scaffold661 | 272642                  | GG                              | AA                 | AA               | INTERGENIC      |               |                    |                    |
| SNP_80644_A_277025 | NW_004516075.1 | scaffold661 | 277025                  | TT                              | CC                 | CC               | INTERGENIC      |               |                    |                    |
| SNP_80645_A_277381 | NW_004516075.1 | scaffold661 | 277381                  | GG                              | AA                 | AA               | INTERGENIC      |               |                    |                    |
| SNP_80646_A_277384 | NW_004516075.1 | scaffold661 | 277384                  | GG                              | CC                 | CC               | INTERGENIC      |               |                    |                    |
| SNP_80647_A_277465 | NW_004516075.1 | scaffold661 | 277465                  | TT                              | CC                 | CC               | INTERGENIC      |               |                    |                    |
| SNP_80648_A_277489 | NW_004516075.1 | scaffold661 | 277489                  | AA                              | GG                 | GG               | INTERGENIC      |               |                    |                    |
| SNP_80649_A_305791 | NW_004516075.1 | scaffold661 | 305791                  | CC                              | AA                 | AA               | INTERGENIC      |               |                    |                    |
| SNP_80650_A_326902 | NW_004516075.1 | scaffold661 | 326902                  | TT                              | CC                 | CC               | INTERGENIC      |               |                    |                    |
| SNP_80651_A_327232 | NW_004516075.1 | scaffold661 | 327232                  | AA                              | GG                 | GG               | INTERGENIC      |               |                    |                    |
| SNP_80652_A_327304 | NW_004516075.1 | scaffold661 | 327304                  | TT                              | CC                 | CC               | INTERGENIC      |               |                    |                    |
| SNP_80653_A_327335 | NW_004516075.1 | scaffold661 | 327335                  | TT                              | GG                 | GG               | INTERGENIC      |               |                    |                    |

| SNPs IDs           | Chromosome IDs | Chromosomes | Physical positions (bp) | CDC Frontier (Reference genome) | (Pusa 1103 & HPNB) | (ILWC 46 & LPNB) | Sequence genome | Components of | Gene accession IDs | Putative functions |
|--------------------|----------------|-------------|-------------------------|---------------------------------|--------------------|------------------|-----------------|---------------|--------------------|--------------------|
| SNP_80654_A_340391 | NW_004516075.1 | scaffold661 | 340391                  | CC                              | TT                 | TT               | INTERGENIC      |               |                    |                    |
| SNP_80655_A_340394 | NW_004516075.1 | scaffold661 | 340394                  | TT                              | AA                 | AA               | INTERGENIC      |               |                    |                    |
| SNP_80656_A_340519 | NW_004516075.1 | scaffold661 | 340519                  | AA                              | GG                 | GG               | INTERGENIC      |               |                    |                    |
| SNP_80657_A_340644 | NW_004516075.1 | scaffold661 | 340644                  | AA                              | GG                 | GG               | INTERGENIC      |               |                    |                    |
| SNP_80658_A_340852 | NW_004516075.1 | scaffold661 | 340852                  | AA                              | TT                 | TT               | INTERGENIC      |               |                    |                    |
| SNP_80659_A_429484 | NW_004516075.1 | scaffold661 | 429484                  | AA                              | CC                 | CC               | INTERGENIC      |               |                    |                    |
| SNP_80660_A_429506 | NW_004516075.1 | scaffold661 | 429506                  | TT                              | GG                 | GG               | INTERGENIC      |               |                    |                    |
| SNP_80661_A_430237 | NW_004516075.1 | scaffold661 | 430237                  | TT                              | CC                 | CC               | INTERGENIC      |               |                    |                    |
| SNP_80662_A_445458 | NW_004516075.1 | scaffold661 | 445458                  | CC                              | TT                 | TT               | INTERGENIC      |               |                    |                    |
| SNP_80663_A_445924 | NW_004516075.1 | scaffold661 | 445924                  | GG                              | AA                 | AA               | INTERGENIC      |               |                    |                    |
| SNP_80664_A_474435 | NW_004516075.1 | scaffold661 | 474435                  | AA                              | CC                 | CC               | INTERGENIC      |               |                    |                    |
| SNP_80665_A_474486 | NW_004516075.1 | scaffold661 | 474486                  | GG                              | CC                 | CC               | INTERGENIC      |               |                    |                    |
| SNP_80667_A_476869 | NW_004516075.1 | scaffold661 | 476869                  | AA                              | GG                 | GG               | INTERGENIC      |               |                    |                    |
| SNP_80668_A_480531 | NW_004516075.1 | scaffold661 | 480531                  | AA                              | GG                 | GG               | INTERGENIC      |               |                    |                    |
| SNP_80669_A_480809 | NW_004516075.1 | scaffold661 | 480809                  | AA                              | CC                 | CC               | INTERGENIC      |               |                    |                    |
| SNP_80670_A_481907 | NW_004516075.1 | scaffold661 | 481907                  | AA                              | TT                 | TT               | INTERGENIC      |               |                    |                    |
| SNP_80671_A_481908 | NW_004516075.1 | scaffold661 | 481908                  | TT                              | GG                 | GG               | INTERGENIC      |               |                    |                    |
| SNP_80672_A_482203 | NW_004516075.1 | scaffold661 | 482203                  | TT                              | CC                 | CC               | INTERGENIC      |               |                    |                    |
| SNP_80673_A_482213 | NW_004516075.1 | scaffold661 | 482213                  | CC                              | TT                 | TT               | INTERGENIC      |               |                    |                    |
| SNP_80674_A_482255 | NW_004516075.1 | scaffold661 | 482255                  | TT                              | CC                 | CC               | INTERGENIC      |               |                    |                    |
| SNP_80675_A_482439 | NW_004516075.1 | scaffold661 | 482439                  | GG                              | AA                 | AA               | INTERGENIC      |               |                    |                    |
| SNP_80676_A_482444 | NW_004516075.1 | scaffold661 | 482444                  | AA                              | GG                 | GG               | INTERGENIC      |               |                    |                    |

| SNPs IDs           | Chromosome IDs | Chromosomes | Physical positions (bp) | CDC Frontier (Reference genome) | (Pusa 1103 & HPNB) | (ILWC 46 & LPNB) | Sequence Components of genome | Gene accession IDs | Putative functions           |
|--------------------|----------------|-------------|-------------------------|---------------------------------|--------------------|------------------|-------------------------------|--------------------|------------------------------|
| SNP_80678_A_597627 | NW_004516075.1 | scaffold661 | 597627                  | TT                              | CC                 | CC               | INTERGENIC                    |                    |                              |
| SNP_80679_A_632368 | NW_004516075.1 | scaffold661 | 632368                  | TT                              | CC                 | CC               | URR                           | 101508959          | uncharacterized LOC101508959 |
| SNP_80680_A_632373 | NW_004516075.1 | scaffold661 | 632373                  | TT                              | CC                 | CC               | URR                           | 101508959          | uncharacterized LOC101508959 |
| SNP_80681_A_671780 | NW_004516075.1 | scaffold661 | 671780                  | CC                              | TT                 | TT               | INTERGENIC                    |                    |                              |
| SNP_80682_A_671783 | NW_004516075.1 | scaffold661 | 671783                  | AA                              | GG                 | GG               | INTERGENIC                    |                    |                              |
| SNP_80683_A_671798 | NW_004516075.1 | scaffold661 | 671798                  | TT                              | CC                 | CC               | INTERGENIC                    |                    |                              |
| SNP_80684_A_671801 | NW_004516075.1 | scaffold661 | 671801                  | AA                              | GG                 | GG               | INTERGENIC                    |                    |                              |
| SNP_80685_A_671837 | NW_004516075.1 | scaffold661 | 671837                  | CC                              | GG                 | GG               | INTERGENIC                    |                    |                              |
| SNP_80686_A_671869 | NW_004516075.1 | scaffold661 | 671869                  | AA                              | GG                 | GG               | INTERGENIC                    |                    |                              |
| SNP_80687_A_671871 | NW_004516075.1 | scaffold661 | 671871                  | CC                              | TT                 | TT               | INTERGENIC                    |                    |                              |
| SNP_80688_A_672147 | NW_004516075.1 | scaffold661 | 672147                  | GG                              | AA                 | AA               | INTERGENIC                    |                    |                              |
| SNP_80689_A_687476 | NW_004516075.1 | scaffold661 | 687476                  | AA                              | CC                 | CC               | INTERGENIC                    |                    |                              |
| SNP_80690_A_707856 | NW_004516075.1 | scaffold661 | 707856                  | AA                              | GG                 | GG               | DRR                           | 101514006          | Unknown function             |
| SNP_80691_A_725026 | NW_004516075.1 | scaffold661 | 725026                  | TT                              | GG                 | GG               | INTERGENIC                    |                    |                              |
| SNP_80692_A_725078 | NW_004516075.1 | scaffold661 | 725078                  | AA                              | TT                 | TT               | INTERGENIC                    |                    |                              |
| SNP_80693_A_726471 | NW_004516075.1 | scaffold661 | 726471                  | GG                              | AA                 | AA               | INTERGENIC                    |                    |                              |
| SNP_80694_A_727191 | NW_004516075.1 | scaffold661 | 727191                  | GG                              | TT                 | TT               | INTERGENIC                    |                    |                              |
| SNP_80695_A_727225 | NW_004516075.1 | scaffold661 | 727225                  | CC                              | GG                 | GG               | INTERGENIC                    |                    |                              |
| SNP_80696_A_727245 | NW_004516075.1 | scaffold661 | 727245                  | TT                              | CC                 | CC               | INTERGENIC                    |                    |                              |
| SNP_80697_A_727526 | NW_004516075.1 | scaffold661 | 727526                  | GG                              | CC                 | CC               | INTERGENIC                    |                    |                              |
| SNP_80698_A_754304 | NW_004516075.1 | scaffold661 | 754304                  | CC                              | AA                 | AA               | INTERGENIC                    |                    |                              |
| SNP_80699_A_16699  | NW_004516076.1 | scaffold662 | 16699                   | GG                              | AA                 | AA               | INTERGENIC                    |                    |                              |

| SNPs IDs           | Chromosome IDs | Chromosomes | Physical positions (bp) | CDC Frontier (Reference genome) | (Pusa 1103 & HPNB) | (ILWC 46 & LPNB) | Sequence Components of genome | Gene accession IDs | Putative functions                   |
|--------------------|----------------|-------------|-------------------------|---------------------------------|--------------------|------------------|-------------------------------|--------------------|--------------------------------------|
| SNP_80700_A_16702  | NW_004516076.1 | scaffold662 | 16702                   | TT                              | CC                 | CC               | INTERGENIC                    |                    |                                      |
| SNP_80701_A_16788  | NW_004516076.1 | scaffold662 | 16788                   | TT                              | CC                 | CC               | INTERGENIC                    |                    |                                      |
| SNP_80702_A_18628  | NW_004516076.1 | scaffold662 | 18628                   | GG                              | AA                 | AA               | SYNONYMOUS_CODING             | 101514992          | uncharacterized LOC101514992         |
| SNP_80703_A_26678  | NW_004516076.1 | scaffold662 | 26678                   | TT                              | CC                 | CC               | INTERGENIC                    |                    |                                      |
| SNP_80704_A_98556  | NW_004516076.1 | scaffold662 | 98556                   | AA                              | TT                 | TT               | INTERGENIC                    |                    |                                      |
| SNP_80705_A_98940  | NW_004516076.1 | scaffold662 | 98940                   | GG                              | AA                 | AA               | INTERGENIC                    |                    |                                      |
| SNP_80706_A_108135 | NW_004516076.1 | scaffold662 | 108135                  | CC                              | TT                 | TT               | INTERGENIC                    |                    |                                      |
| SNP_80707_A_110616 | NW_004516076.1 | scaffold662 | 110616                  | CC                              | TT                 | TT               | INTERGENIC                    |                    |                                      |
| SNP_80708_A_22897  | NW_004516077.1 | scaffold663 | 22897                   | CC                              | AA                 | AA               | URR                           | 101488725          | rRNA-processing protein FCF1 homolog |
| SNP_80709_A_23178  | NW_004516077.1 | scaffold663 | 23178                   | AA                              | GG                 | GG               | URR                           | 101488725          | rRNA-processing protein FCF1 homolog |
| SNP_80710_A_23212  | NW_004516077.1 | scaffold663 | 23212                   | AA                              | GG                 | GG               | URR                           | 101488725          | rRNA-processing protein FCF1 homolog |
| SNP_80711_A_23573  | NW_004516077.1 | scaffold663 | 23573                   | AA                              | GG                 | GG               | URR                           | 101488725          | rRNA-processing protein FCF1 homolog |
| SNP_80712_A_48126  | NW_004516077.1 | scaffold663 | 48126                   | CC                              | TT                 | TT               | INTERGENIC                    |                    |                                      |
| SNP_80713_A_48896  | NW_004516077.1 | scaffold663 | 48896                   | GG                              | TT                 | TT               | INTERGENIC                    |                    |                                      |
| SNP_80714_A_55318  | NW_004516077.1 | scaffold663 | 55318                   | CC                              | AA                 | AA               | INTERGENIC                    |                    |                                      |
| SNP_80715_A_63517  | NW_004516077.1 | scaffold663 | 63517                   | CC                              | GG                 | GG               | INTERGENIC                    |                    |                                      |
| SNP_80716_A_63658  | NW_004516077.1 | scaffold663 | 63658                   | CC                              | TT                 | TT               | INTERGENIC                    |                    |                                      |
| SNP_80717_A_63855  | NW_004516077.1 | scaffold663 | 63855                   | AA                              | GG                 | GG               | INTERGENIC                    |                    |                                      |
| SNP_80718_A_63901  | NW_004516077.1 | scaffold663 | 63901                   | GG                              | TT                 | TT               | INTERGENIC                    |                    |                                      |
| SNP_80719_A_86192  | NW_004516077.1 | scaffold663 | 86192                   | TT                              | CC                 | CC               | INTERGENIC                    |                    |                                      |
| SNP_80720_A_108293 | NW_004516077.1 | scaffold663 | 108293                  | TT                              | CC                 | CC               | INTERGENIC                    |                    |                                      |
| SNP_80721_A_108294 | NW_004516077.1 | scaffold663 | 108294                  | GG                              | AA                 | AA               | INTERGENIC                    |                    |                                      |

| SNPs IDs           | Chromosome IDs | Chromosomes | Physical positions (bp) | CDC Frontier (Reference genome) | (Pusa 1103 & HPNB) | (ILWC 46 & LPNB) | Sequence genome | Components of | Gene accession IDs | Putative functions |
|--------------------|----------------|-------------|-------------------------|---------------------------------|--------------------|------------------|-----------------|---------------|--------------------|--------------------|
| SNP_80722_A_109036 | NW_004516077.1 | scaffold663 | 109036                  | GG                              | AA                 | AA               | INTERGENIC      |               |                    |                    |
| SNP_80723_A_109081 | NW_004516077.1 | scaffold663 | 109081                  | TT                              | AA                 | AA               | INTERGENIC      |               |                    |                    |
| SNP_80724_A_109083 | NW_004516077.1 | scaffold663 | 109083                  | GG                              | TT                 | TT               | INTERGENIC      |               |                    |                    |
| SNP_80725_A_109089 | NW_004516077.1 | scaffold663 | 109089                  | CC                              | GG                 | GG               | INTERGENIC      |               |                    |                    |
| SNP_80726_A_109096 | NW_004516077.1 | scaffold663 | 109096                  | AA                              | TT                 | TT               | INTERGENIC      |               |                    |                    |
| SNP_80727_A_109098 | NW_004516077.1 | scaffold663 | 109098                  | TT                              | GG                 | GG               | INTERGENIC      |               |                    |                    |
| SNP_80728_A_109114 | NW_004516077.1 | scaffold663 | 109114                  | GG                              | AA                 | AA               | INTERGENIC      |               |                    |                    |
| SNP_80729_A_109129 | NW_004516077.1 | scaffold663 | 109129                  | TT                              | GG                 | GG               | INTERGENIC      |               |                    |                    |
| SNP_80730_A_109174 | NW_004516077.1 | scaffold663 | 109174                  | AA                              | CC                 | CC               | INTERGENIC      |               |                    |                    |
| SNP_80731_A_109192 | NW_004516077.1 | scaffold663 | 109192                  | TT                              | CC                 | CC               | INTERGENIC      |               |                    |                    |
| SNP_80732_A_109198 | NW_004516077.1 | scaffold663 | 109198                  | CC                              | TT                 | TT               | INTERGENIC      |               |                    |                    |
| SNP_80733_A_109207 | NW_004516077.1 | scaffold663 | 109207                  | GG                              | AA                 | AA               | INTERGENIC      |               |                    |                    |
| SNP_80734_A_109247 | NW_004516077.1 | scaffold663 | 109247                  | TT                              | AA                 | AA               | INTERGENIC      |               |                    |                    |
| SNP_80735_A_109271 | NW_004516077.1 | scaffold663 | 109271                  | GG                              | AA                 | AA               | INTERGENIC      |               |                    |                    |
| SNP_80736_A_109283 | NW_004516077.1 | scaffold663 | 109283                  | GG                              | AA                 | AA               | INTERGENIC      |               |                    |                    |
| SNP_80737_A_166937 | NW_004516077.1 | scaffold663 | 166937                  | AA                              | TT                 | TT               | INTERGENIC      |               |                    |                    |
| SNP_80738_A_167137 | NW_004516077.1 | scaffold663 | 167137                  | AA                              | GG                 | GG               | INTERGENIC      |               |                    |                    |
| SNP_80739_A_442    | NW_004516079.1 | scaffold665 | 442                     | AA                              | GG                 | GG               | INTERGENIC      |               |                    |                    |
| SNP_80740_A_3448   | NW_004516079.1 | scaffold665 | 3448                    | TT                              | CC                 | CC               | INTERGENIC      |               |                    |                    |
| SNP_80741_A_16187  | NW_004516079.1 | scaffold665 | 16187                   | GG                              | AA                 | AA               | INTERGENIC      |               |                    |                    |
| SNP_80742_A_16435  | NW_004516079.1 | scaffold665 | 16435                   | TT                              | CC                 | CC               | INTERGENIC      |               |                    |                    |
| SNP_80743_A_16750  | NW_004516079.1 | scaffold665 | 16750                   | AA                              | CC                 | CC               | INTERGENIC      |               |                    |                    |

| SNPs IDs           | Chromosome IDs | Chromosomes | Physical positions (bp) | CDC Frontier (Reference genome) | (Pusa 1103 & HPNB) | (ILWC 46 & LPNB) | Sequence genome | Components of | Gene accession IDs | Putative functions |
|--------------------|----------------|-------------|-------------------------|---------------------------------|--------------------|------------------|-----------------|---------------|--------------------|--------------------|
| SNP_80744_A_17547  | NW_004516079.1 | scaffold665 | 17547                   | CC                              | GG                 | GG               | INTERGENIC      |               |                    |                    |
| SNP_80745_A_17603  | NW_004516079.1 | scaffold665 | 17603                   | GG                              | AA                 | AA               | INTERGENIC      |               |                    |                    |
| SNP_80746_A_85     | NW_004516080.1 | scaffold666 | 85                      | TT                              | CC                 | CC               | INTERGENIC      |               |                    |                    |
| SNP_80747_A_11276  | NW_004516080.1 | scaffold666 | 11276                   | GG                              | CC                 | CC               | INTERGENIC      |               |                    |                    |
| SNP_80748_A_2369   | NW_004516081.1 | scaffold667 | 2369                    | AA                              | TT                 | TT               | INTERGENIC      |               |                    |                    |
| SNP_80749_A_2534   | NW_004516081.1 | scaffold667 | 2534                    | AA                              | TT                 | TT               | INTERGENIC      |               |                    |                    |
| SNP_80750_A_2567   | NW_004516081.1 | scaffold667 | 2567                    | GG                              | CC                 | CC               | INTERGENIC      |               |                    |                    |
| SNP_80751_A_2767   | NW_004516081.1 | scaffold667 | 2767                    | CC                              | TT                 | TT               | INTERGENIC      |               |                    |                    |
| SNP_80752_A_2834   | NW_004516081.1 | scaffold667 | 2834                    | TT                              | GG                 | GG               | INTERGENIC      |               |                    |                    |
| SNP_80753_A_2871   | NW_004516081.1 | scaffold667 | 2871                    | CC                              | TT                 | TT               | INTERGENIC      |               |                    |                    |
| SNP_80754_A_527    | NW_004516082.1 | scaffold668 | 527                     | GG                              | CC                 | CC               | INTERGENIC      |               |                    |                    |
| SNP_80755_A_1462   | NW_004516083.1 | scaffold669 | 1462                    | AA                              | GG                 | GG               | INTERGENIC      |               |                    |                    |
| SNP_80756_A_6488   | NW_004516084.1 | scaffold670 | 6488                    | AA                              | CC                 | CC               | INTERGENIC      |               |                    |                    |
| SNP_80757_A_17522  | NW_004516084.1 | scaffold670 | 17522                   | GG                              | AA                 | AA               | INTERGENIC      |               |                    |                    |
| SNP_80758_A_17772  | NW_004516084.1 | scaffold670 | 17772                   | TT                              | CC                 | CC               | INTERGENIC      |               |                    |                    |
| SNP_80759_A_17797  | NW_004516084.1 | scaffold670 | 17797                   | CC                              | AA                 | AA               | INTERGENIC      |               |                    |                    |
| SNP_80760_A_46673  | NW_004516084.1 | scaffold670 | 46673                   | CC                              | TT                 | TT               | INTERGENIC      |               |                    |                    |
| SNP_80762_A_68793  | NW_004516084.1 | scaffold670 | 68793                   | GG                              | AA                 | AA               | INTERGENIC      |               |                    |                    |
| SNP_80763_A_72186  | NW_004516084.1 | scaffold670 | 72186                   | TT                              | CC                 | CC               | INTERGENIC      |               |                    |                    |
| SNP_80764_A_78505  | NW_004516084.1 | scaffold670 | 78505                   | CC                              | GG                 | GG               | INTERGENIC      |               |                    |                    |
| SNP_80765_A_78528  | NW_004516084.1 | scaffold670 | 78528                   | TT                              | CC                 | CC               | INTERGENIC      |               |                    |                    |
| SNP_80766_A_104026 | NW_004516084.1 | scaffold670 | 104026                  | CC                              | TT                 | TT               | INTERGENIC      |               |                    |                    |



| SNPs IDs           | Chromosome IDs | Chromosomes | Physical positions (bp) | CDC Frontier (Reference genome) | (Pusa 1103 & HPNB) | (ILWC 46 & LPNB) | Sequence genome | Components of | Gene accession IDs | Putative functions |
|--------------------|----------------|-------------|-------------------------|---------------------------------|--------------------|------------------|-----------------|---------------|--------------------|--------------------|
| SNP_80767_A_104132 | NW_004516084.1 | scaffold670 | 104132                  | AA                              | TT                 | TT               | INTERGENIC      |               |                    |                    |
| SNP_80768_A_104222 | NW_004516084.1 | scaffold670 | 104222                  | TT                              | CC                 | CC               | INTERGENIC      |               |                    |                    |
| SNP_80769_A_108729 | NW_004516084.1 | scaffold670 | 108729                  | TT                              | CC                 | CC               | INTERGENIC      |               |                    |                    |
| SNP_80770_A_116278 | NW_004516084.1 | scaffold670 | 116278                  | CC                              | TT                 | TT               | INTERGENIC      |               |                    |                    |
| SNP_80771_A_127887 | NW_004516084.1 | scaffold670 | 127887                  | TT                              | AA                 | AA               | INTERGENIC      |               |                    |                    |
| SNP_80772_A_127907 | NW_004516084.1 | scaffold670 | 127907                  | AA                              | GG                 | GG               | INTERGENIC      |               |                    |                    |
| SNP_80773_A_128919 | NW_004516084.1 | scaffold670 | 128919                  | AA                              | GG                 | GG               | INTERGENIC      |               |                    |                    |
| SNP_80775_A_129502 | NW_004516084.1 | scaffold670 | 129502                  | TT                              | AA                 | AA               | INTERGENIC      |               |                    |                    |
| SNP_80776_A_129577 | NW_004516084.1 | scaffold670 | 129577                  | AA                              | GG                 | GG               | INTERGENIC      |               |                    |                    |
| SNP_80777_A_129616 | NW_004516084.1 | scaffold670 | 129616                  | AA                              | TT                 | TT               | INTERGENIC      |               |                    |                    |
| SNP_80778_A_129899 | NW_004516084.1 | scaffold670 | 129899                  | AA                              | GG                 | GG               | INTERGENIC      |               |                    |                    |
| SNP_80779_A_131022 | NW_004516084.1 | scaffold670 | 131022                  | GG                              | TT                 | TT               | INTERGENIC      |               |                    |                    |
| SNP_80780_A_133611 | NW_004516084.1 | scaffold670 | 133611                  | AA                              | CC                 | CC               | INTERGENIC      |               |                    |                    |
| SNP_80781_A_154042 | NW_004516084.1 | scaffold670 | 154042                  | GG                              | CC                 | CC               | INTERGENIC      |               |                    |                    |
| SNP_80782_A_154094 | NW_004516084.1 | scaffold670 | 154094                  | AA                              | CC                 | CC               | INTERGENIC      |               |                    |                    |
| SNP_80783_A_156628 | NW_004516084.1 | scaffold670 | 156628                  | GG                              | TT                 | TT               | INTERGENIC      |               |                    |                    |
| SNP_80784_A_156646 | NW_004516084.1 | scaffold670 | 156646                  | CC                              | AA                 | AA               | INTERGENIC      |               |                    |                    |
| SNP_80785_A_156651 | NW_004516084.1 | scaffold670 | 156651                  | CC                              | GG                 | GG               | INTERGENIC      |               |                    |                    |
| SNP_80786_A_156658 | NW_004516084.1 | scaffold670 | 156658                  | TT                              | CC                 | CC               | INTERGENIC      |               |                    |                    |
| SNP_80787_A_156664 | NW_004516084.1 | scaffold670 | 156664                  | TT                              | CC                 | CC               | INTERGENIC      |               |                    |                    |
| SNP_80788_A_163212 | NW_004516084.1 | scaffold670 | 163212                  | TT                              | CC                 | CC               | INTERGENIC      |               |                    |                    |
| SNP_80789_A_163229 | NW_004516084.1 | scaffold670 | 163229                  | CC                              | GG                 | GG               | INTERGENIC      |               |                    |                    |

| SNPs IDs           | Chromosome IDs | Chromosomes | Physical positions (bp) | CDC Frontier (Reference genome) | (Pusa 1103 & HPNB) | (ILWC 46 & LPNB) | Sequence genome | Components of | Gene accession IDs | Putative functions |
|--------------------|----------------|-------------|-------------------------|---------------------------------|--------------------|------------------|-----------------|---------------|--------------------|--------------------|
| SNP_80790_A_163423 | NW_004516084.1 | scaffold670 | 163423                  | CC                              | TT                 | TT               | INTERGENIC      |               |                    |                    |
| SNP_80791_A_163727 | NW_004516084.1 | scaffold670 | 163727                  | TT                              | AA                 | AA               | INTERGENIC      |               |                    |                    |
| SNP_80792_A_163773 | NW_004516084.1 | scaffold670 | 163773                  | GG                              | AA                 | AA               | INTERGENIC      |               |                    |                    |
| SNP_80793_A_163793 | NW_004516084.1 | scaffold670 | 163793                  | AA                              | GG                 | GG               | INTERGENIC      |               |                    |                    |
| SNP_80795_A_164686 | NW_004516084.1 | scaffold670 | 164686                  | TT                              | CC                 | CC               | INTERGENIC      |               |                    |                    |
| SNP_80797_A_186373 | NW_004516084.1 | scaffold670 | 186373                  | CC                              | TT                 | TT               | INTERGENIC      |               |                    |                    |
| SNP_80799_A_187103 | NW_004516084.1 | scaffold670 | 187103                  | TT                              | CC                 | CC               | INTERGENIC      |               |                    |                    |
| SNP_80800_A_194947 | NW_004516084.1 | scaffold670 | 194947                  | AA                              | GG                 | GG               | INTERGENIC      |               |                    |                    |
| SNP_80801_A_194953 | NW_004516084.1 | scaffold670 | 194953                  | AA                              | GG                 | GG               | INTERGENIC      |               |                    |                    |
| SNP_80802_A_194954 | NW_004516084.1 | scaffold670 | 194954                  | AA                              | GG                 | GG               | INTERGENIC      |               |                    |                    |
| SNP_80803_A_194997 | NW_004516084.1 | scaffold670 | 194997                  | TT                              | GG                 | GG               | INTERGENIC      |               |                    |                    |
| SNP_80804_A_195270 | NW_004516084.1 | scaffold670 | 195270                  | AA                              | GG                 | GG               | INTERGENIC      |               |                    |                    |
| SNP_80805_A_197738 | NW_004516084.1 | scaffold670 | 197738                  | GG                              | AA                 | AA               | INTERGENIC      |               |                    |                    |
| SNP_80807_A_197842 | NW_004516084.1 | scaffold670 | 197842                  | TT                              | AA                 | AA               | INTERGENIC      |               |                    |                    |
| SNP_80809_A_198151 | NW_004516084.1 | scaffold670 | 198151                  | TT                              | CC                 | CC               | INTERGENIC      |               |                    |                    |
| SNP_80810_A_201204 | NW_004516084.1 | scaffold670 | 201204                  | TT                              | CC                 | CC               | INTERGENIC      |               |                    |                    |
| SNP_80811_A_201295 | NW_004516084.1 | scaffold670 | 201295                  | TT                              | CC                 | CC               | INTERGENIC      |               |                    |                    |
| SNP_80812_A_202373 | NW_004516084.1 | scaffold670 | 202373                  | TT                              | AA                 | AA               | INTERGENIC      |               |                    |                    |
| SNP_80813_A_202390 | NW_004516084.1 | scaffold670 | 202390                  | AA                              | TT                 | TT               | INTERGENIC      |               |                    |                    |
| SNP_80814_A_202395 | NW_004516084.1 | scaffold670 | 202395                  | CC                              | AA                 | TT               | INTERGENIC      |               |                    |                    |
| SNP_80815_A_202401 | NW_004516084.1 | scaffold670 | 202401                  | AA                              | CC                 | CC               | INTERGENIC      |               |                    |                    |
| SNP_80816_A_205080 | NW_004516084.1 | scaffold670 | 205080                  | TT                              | GG                 | GG               | INTERGENIC      |               |                    |                    |

| SNPs IDs           | Chromosome IDs | Chromosomes | Physical positions (bp) | CDC Frontier (Reference genome) | (Pusa 1103 & HPNB) | (ILWC 46 & LPNB) | Sequence genome | Components of | Gene accession IDs | Putative functions |
|--------------------|----------------|-------------|-------------------------|---------------------------------|--------------------|------------------|-----------------|---------------|--------------------|--------------------|
| SNP_80819_A_227956 | NW_004516084.1 | scaffold670 | 227956                  | GG                              | AA                 | AA               | INTERGENIC      |               |                    |                    |
| SNP_80820_A_227981 | NW_004516084.1 | scaffold670 | 227981                  | TT                              | AA                 | AA               | INTERGENIC      |               |                    |                    |
| SNP_80821_A_230694 | NW_004516084.1 | scaffold670 | 230694                  | TT                              | GG                 | GG               | INTERGENIC      |               |                    |                    |
| SNP_80822_A_232391 | NW_004516084.1 | scaffold670 | 232391                  | AA                              | CC                 | CC               | INTERGENIC      |               |                    |                    |
| SNP_80823_A_232599 | NW_004516084.1 | scaffold670 | 232599                  | TT                              | CC                 | CC               | INTERGENIC      |               |                    |                    |
| SNP_80824_A_232795 | NW_004516084.1 | scaffold670 | 232795                  | AA                              | GG                 | GG               | INTERGENIC      |               |                    |                    |
| SNP_80825_A_263386 | NW_004516084.1 | scaffold670 | 263386                  | TT                              | CC                 | CC               | INTERGENIC      |               |                    |                    |
| SNP_80826_A_264026 | NW_004516084.1 | scaffold670 | 264026                  | GG                              | AA                 | AA               | INTERGENIC      |               |                    |                    |
| SNP_80827_A_264052 | NW_004516084.1 | scaffold670 | 264052                  | TT                              | AA                 | AA               | INTERGENIC      |               |                    |                    |
| SNP_80829_A_93340  | NW_004516085.1 | scaffold672 | 93340                   | GG                              | AA                 | AA               | INTERGENIC      |               |                    |                    |
| SNP_80830_A_93882  | NW_004516085.1 | scaffold672 | 93882                   | CC                              | GG                 | GG               | INTERGENIC      |               |                    |                    |
| SNP_80831_A_95207  | NW_004516085.1 | scaffold672 | 95207                   | GG                              | TT                 | TT               | INTERGENIC      |               |                    |                    |
| SNP_80832_A_95295  | NW_004516085.1 | scaffold672 | 95295                   | GG                              | AA                 | AA               | INTERGENIC      |               |                    |                    |
| SNP_80833_A_95315  | NW_004516085.1 | scaffold672 | 95315                   | TT                              | CC                 | CC               | INTERGENIC      |               |                    |                    |
| SNP_80834_A_101807 | NW_004516085.1 | scaffold672 | 101807                  | TT                              | CC                 | CC               | INTERGENIC      |               |                    |                    |
| SNP_80835_A_101942 | NW_004516085.1 | scaffold672 | 101942                  | AA                              | CC                 | CC               | INTERGENIC      |               |                    |                    |
| SNP_80836_A_102137 | NW_004516085.1 | scaffold672 | 102137                  | TT                              | CC                 | CC               | INTERGENIC      |               |                    |                    |
| SNP_80837_A_102446 | NW_004516085.1 | scaffold672 | 102446                  | TT                              | CC                 | CC               | INTERGENIC      |               |                    |                    |
| SNP_80838_A_102736 | NW_004516085.1 | scaffold672 | 102736                  | CC                              | TT                 | TT               | INTERGENIC      |               |                    |                    |
| SNP_80839_A_102739 | NW_004516085.1 | scaffold672 | 102739                  | GG                              | AA                 | AA               | INTERGENIC      |               |                    |                    |
| SNP_80840_A_104213 | NW_004516085.1 | scaffold672 | 104213                  | AA                              | CC                 | CC               | INTERGENIC      |               |                    |                    |
| SNP_80841_A_111030 | NW_004516085.1 | scaffold672 | 111030                  | CC                              | TT                 | TT               | INTERGENIC      |               |                    |                    |

| SNPs IDs           | Chromosome IDs | Chromosomes | Physical positions (bp) | CDC Frontier (Reference genome) | (Pusa 1103 & HPNB) | (ILWC 46 & LPNB) | Sequence genome | Components of | Gene accession IDs | Putative functions |
|--------------------|----------------|-------------|-------------------------|---------------------------------|--------------------|------------------|-----------------|---------------|--------------------|--------------------|
| SNP_80842_A_111405 | NW_004516085.1 | scaffold672 | 111405                  | AA                              | GG                 | GG               | INTERGENIC      |               |                    |                    |
| SNP_80843_A_111429 | NW_004516085.1 | scaffold672 | 111429                  | CC                              | TT                 | TT               | INTERGENIC      |               |                    |                    |
| SNP_80844_A_154022 | NW_004516085.1 | scaffold672 | 154022                  | CC                              | AA                 | AA               | INTERGENIC      |               |                    |                    |
| SNP_80845_A_161674 | NW_004516085.1 | scaffold672 | 161674                  | TT                              | GG                 | GG               | INTERGENIC      |               |                    |                    |
| SNP_80846_A_167959 | NW_004516085.1 | scaffold672 | 167959                  | TT                              | AA                 | AA               | INTERGENIC      |               |                    |                    |
| SNP_80847_A_182981 | NW_004516085.1 | scaffold672 | 182981                  | AA                              | GG                 | GG               | INTERGENIC      |               |                    |                    |
| SNP_80848_A_191941 | NW_004516085.1 | scaffold672 | 191941                  | CC                              | TT                 | TT               | INTERGENIC      |               |                    |                    |
| SNP_80849_A_192085 | NW_004516085.1 | scaffold672 | 192085                  | AA                              | GG                 | GG               | INTERGENIC      |               |                    |                    |
| SNP_80850_A_193580 | NW_004516085.1 | scaffold672 | 193580                  | AA                              | GG                 | GG               | INTERGENIC      |               |                    |                    |
| SNP_80852_A_215815 | NW_004516085.1 | scaffold672 | 215815                  | AA                              | GG                 | GG               | INTERGENIC      |               |                    |                    |
| SNP_80853_A_217281 | NW_004516085.1 | scaffold672 | 217281                  | TT                              | AA                 | AA               | INTERGENIC      |               |                    |                    |
| SNP_80854_A_231863 | NW_004516085.1 | scaffold672 | 231863                  | CC                              | AA                 | AA               | INTERGENIC      |               |                    |                    |
| SNP_80855_A_4734   | NW_004516086.1 | scaffold673 | 4734                    | AA                              | TT                 | TT               | INTERGENIC      |               |                    |                    |
| SNP_80856_A_17303  | NW_004516086.1 | scaffold673 | 17303                   | TT                              | CC                 | CC               | INTERGENIC      |               |                    |                    |
| SNP_80857_A_17686  | NW_004516086.1 | scaffold673 | 17686                   | AA                              | TT                 | TT               | INTERGENIC      |               |                    |                    |
| SNP_80858_A_1972   | NW_004516087.1 | scaffold674 | 1972                    | TT                              | CC                 | CC               | INTERGENIC      |               |                    |                    |
| SNP_80859_A_1994   | NW_004516087.1 | scaffold674 | 1994                    | CC                              | AA                 | AA               | INTERGENIC      |               |                    |                    |
| SNP_80860_A_7988   | NW_004516087.1 | scaffold674 | 7988                    | TT                              | CC                 | CC               | INTERGENIC      |               |                    |                    |
| SNP_80861_A_13122  | NW_004516087.1 | scaffold674 | 13122                   | AA                              | GG                 | GG               | INTERGENIC      |               |                    |                    |
| SNP_80862_A_18545  | NW_004516087.1 | scaffold674 | 18545                   | TT                              | CC                 | CC               | INTERGENIC      |               |                    |                    |
| SNP_80864_A_18553  | NW_004516087.1 | scaffold674 | 18553                   | TT                              | CC                 | CC               | INTERGENIC      |               |                    |                    |
| SNP_80865_A_18557  | NW_004516087.1 | scaffold674 | 18557                   | AA                              | GG                 | GG               | INTERGENIC      |               |                    |                    |

| SNPs IDs          | Chromosome IDs | Chromosomes | Physical positions (bp) | CDC Frontier (Reference genome) | (Pusa 1103 & HPNB) | (ILWC 46 & LPNB) | Sequence genome   | Components of | Gene accession IDs           | Putative functions |
|-------------------|----------------|-------------|-------------------------|---------------------------------|--------------------|------------------|-------------------|---------------|------------------------------|--------------------|
| SNP_80866_A_18569 | NW_004516087.1 | scaffold674 | 18569                   | TT                              | GG                 | GG               | INTERGENIC        |               |                              |                    |
| SNP_80867_A_18602 | NW_004516087.1 | scaffold674 | 18602                   | GG                              | AA                 | AA               | INTERGENIC        |               |                              |                    |
| SNP_80868_A_18603 | NW_004516087.1 | scaffold674 | 18603                   | GG                              | AA                 | AA               | INTERGENIC        |               |                              |                    |
| SNP_80869_A_18611 | NW_004516087.1 | scaffold674 | 18611                   | CC                              | TT                 | TT               | INTERGENIC        |               |                              |                    |
| SNP_80870_A_18614 | NW_004516087.1 | scaffold674 | 18614                   | AA                              | TT                 | TT               | INTERGENIC        |               |                              |                    |
| SNP_80871_A_18626 | NW_004516087.1 | scaffold674 | 18626                   | AA                              | GG                 | GG               | INTERGENIC        |               |                              |                    |
| SNP_80872_A_18631 | NW_004516087.1 | scaffold674 | 18631                   | AA                              | GG                 | GG               | INTERGENIC        |               |                              |                    |
| SNP_80873_A_18645 | NW_004516087.1 | scaffold674 | 18645                   | AA                              | GG                 | GG               | INTERGENIC        |               |                              |                    |
| SNP_80874_A_18654 | NW_004516087.1 | scaffold674 | 18654                   | TT                              | CC                 | CC               | INTERGENIC        |               |                              |                    |
| SNP_80875_A_18659 | NW_004516087.1 | scaffold674 | 18659                   | AA                              | GG                 | GG               | INTERGENIC        |               |                              |                    |
| SNP_80876_A_18686 | NW_004516087.1 | scaffold674 | 18686                   | AA                              | GG                 | GG               | INTERGENIC        |               |                              |                    |
| SNP_80877_A_18695 | NW_004516087.1 | scaffold674 | 18695                   | AA                              | GG                 | GG               | INTERGENIC        |               |                              |                    |
| SNP_80878_A_18703 | NW_004516087.1 | scaffold674 | 18703                   | TT                              | CC                 | CC               | INTERGENIC        |               |                              |                    |
| SNP_80879_A_18707 | NW_004516087.1 | scaffold674 | 18707                   | TT                              | CC                 | CC               | INTERGENIC        |               |                              |                    |
| SNP_80880_A_22778 | NW_004516087.1 | scaffold674 | 22778                   | TT                              | AA                 | AA               | INTERGENIC        |               |                              |                    |
| SNP_80881_A_32231 | NW_004516087.1 | scaffold674 | 32231                   | GG                              | AA                 | AA               | INTERGENIC        |               |                              |                    |
| SNP_80882_A_32418 | NW_004516087.1 | scaffold674 | 32418                   | TT                              | CC                 | CC               | INTERGENIC        |               |                              |                    |
| SNP_80883_A_32454 | NW_004516087.1 | scaffold674 | 32454                   | AA                              | GG                 | GG               | INTERGENIC        |               |                              |                    |
| SNP_80884_A_42769 | NW_004516087.1 | scaffold674 | 42769                   | AA                              | GG                 | GG               | INTERGENIC        |               |                              |                    |
| SNP_80885_A_44355 | NW_004516087.1 | scaffold674 | 44355                   | TT                              | CC                 | CC               | SYNONYMOUS_CODING | id204305      | Unknown function             |                    |
| SNP_80886_A_45029 | NW_004516087.1 | scaffold674 | 45029                   | AA                              | GG                 | GG               | INTRON            | id204305      | Unknown function             |                    |
| SNP_80887_A_47652 | NW_004516087.1 | scaffold674 | 47652                   | TT                              | CC                 | CC               | URR               | 101491329     | uncharacterized LOC101491329 |                    |

| SNPs IDs           | Chromosome IDs | Chromosomes | Physical positions (bp) | CDC Frontier genome (Reference genome) | (Pusa 1103 & HPNB) | (ILWC 46 & LPNB) | Sequence Components of genome | Gene accession IDs | Putative functions                  |
|--------------------|----------------|-------------|-------------------------|----------------------------------------|--------------------|------------------|-------------------------------|--------------------|-------------------------------------|
| SNP_80888_A_63686  | NW_004516087.1 | scaffold674 | 63686                   | TT                                     | AA                 | AA               | INTERGENIC                    |                    |                                     |
| SNP_80889_A_63687  | NW_004516087.1 | scaffold674 | 63687                   | GG                                     | TT                 | TT               | INTERGENIC                    |                    |                                     |
| SNP_80890_A_71977  | NW_004516087.1 | scaffold674 | 71977                   | AA                                     | CC                 | CC               | DRR                           | 101496742          | zinc finger MYM-type protein 1-like |
| SNP_80891_A_76927  | NW_004516087.1 | scaffold674 | 76927                   | AA                                     | CC                 | CC               | INTERGENIC                    |                    |                                     |
| SNP_80893_A_87139  | NW_004516087.1 | scaffold674 | 87139                   | TT                                     | CC                 | CC               | INTERGENIC                    |                    |                                     |
| SNP_80894_A_87145  | NW_004516087.1 | scaffold674 | 87145                   | TT                                     | CC                 | CC               | INTERGENIC                    |                    |                                     |
| SNP_80895_A_87170  | NW_004516087.1 | scaffold674 | 87170                   | AA                                     | GG                 | GG               | INTERGENIC                    |                    |                                     |
| SNP_80896_A_87173  | NW_004516087.1 | scaffold674 | 87173                   | TT                                     | CC                 | CC               | INTERGENIC                    |                    |                                     |
| SNP_80897_A_87416  | NW_004516087.1 | scaffold674 | 87416                   | GG                                     | AA                 | AA               | INTERGENIC                    |                    |                                     |
| SNP_80898_A_87449  | NW_004516087.1 | scaffold674 | 87449                   | CC                                     | TT                 | TT               | INTERGENIC                    |                    |                                     |
| SNP_80899_A_95620  | NW_004516087.1 | scaffold674 | 95620                   | TT                                     | CC                 | CC               | DRR                           | 101491538          | uncharacterized LOC101491538        |
| SNP_80900_A_96780  | NW_004516087.1 | scaffold674 | 96780                   | GG                                     | TT                 | TT               | STOP_GAINED                   | id204311           | Unknown function                    |
| SNP_80901_A_96825  | NW_004516087.1 | scaffold674 | 96825                   | GG                                     | AA                 | AA               | INTRON                        | id204311           | Unknown function                    |
| SNP_80902_A_96829  | NW_004516087.1 | scaffold674 | 96829                   | AA                                     | GG                 | GG               | INTRON                        | id204311           | Unknown function                    |
| SNP_80903_A_100575 | NW_004516087.1 | scaffold674 | 100575                  | AA                                     | GG                 | GG               | INTRON                        | 101497049          | uncharacterized LOC101497049        |
| SNP_80904_A_107176 | NW_004516087.1 | scaffold674 | 107176                  | GG                                     | AA                 | AA               | INTERGENIC                    |                    |                                     |
| SNP_80905_A_124269 | NW_004516087.1 | scaffold674 | 124269                  | AA                                     | GG                 | GG               | INTERGENIC                    |                    |                                     |
| SNP_80906_A_131026 | NW_004516087.1 | scaffold674 | 131026                  | AA                                     | GG                 | GG               | INTRON                        | 101492069          | uncharacterized LOC101492069        |
| SNP_80908_A_131835 | NW_004516087.1 | scaffold674 | 131835                  | AA                                     | GG                 | GG               | INTRON                        | 101492069          | uncharacterized LOC101492069        |
| SNP_80909_A_132944 | NW_004516087.1 | scaffold674 | 132944                  | GG                                     | AA                 | AA               | INTRON                        | 101492069          | uncharacterized LOC101492069        |
| SNP_80910_A_139386 | NW_004516087.1 | scaffold674 | 139386                  | CC                                     | TT                 | TT               | URR                           | 101492069          | uncharacterized LOC101492069        |
| SNP_80911_A_140953 | NW_004516087.1 | scaffold674 | 140953                  | TT                                     | AA                 | AA               | DRR                           | 101497384          | uncharacterized LOC101497384        |

| SNPs IDs           | Chromosome IDs | Chromosomes | Physical positions (bp) | CDC Frontier (Reference genome) | (Pusa 1103 & HPNB) | (ILWC 46 & LPNB) | Sequence Components of genome | Gene accession IDs | Putative functions           |
|--------------------|----------------|-------------|-------------------------|---------------------------------|--------------------|------------------|-------------------------------|--------------------|------------------------------|
| SNP_80912_A_150775 | NW_004516087.1 | scaffold674 | 150775                  | TT                              | AA                 | AA               | INTERGENIC                    |                    |                              |
| SNP_80913_A_150776 | NW_004516087.1 | scaffold674 | 150776                  | TT                              | AA                 | AA               | INTERGENIC                    |                    |                              |
| SNP_80914_A_178151 | NW_004516087.1 | scaffold674 | 178151                  | GG                              | CC                 | CC               | URR                           | 101498038          | uncharacterized LOC101498038 |
| SNP_80915_A_179704 | NW_004516087.1 | scaffold674 | 179704                  | TT                              | CC                 | CC               | INTERGENIC                    |                    |                              |
| SNP_80916_A_181270 | NW_004516087.1 | scaffold674 | 181270                  | TT                              | AA                 | AA               | INTERGENIC                    |                    |                              |
| SNP_80917_A_181558 | NW_004516087.1 | scaffold674 | 181558                  | GG                              | AA                 | AA               | INTERGENIC                    |                    |                              |
| SNP_80918_A_181561 | NW_004516087.1 | scaffold674 | 181561                  | GG                              | AA                 | AA               | INTERGENIC                    |                    |                              |
| SNP_80920_A_181754 | NW_004516087.1 | scaffold674 | 181754                  | TT                              | CC                 | CC               | INTERGENIC                    |                    |                              |
| SNP_80921_A_181837 | NW_004516087.1 | scaffold674 | 181837                  | CC                              | GG                 | GG               | INTERGENIC                    |                    |                              |
| SNP_80922_A_187044 | NW_004516087.1 | scaffold674 | 187044                  | AA                              | GG                 | GG               | INTERGENIC                    |                    |                              |
| SNP_80923_A_187117 | NW_004516087.1 | scaffold674 | 187117                  | TT                              | GG                 | GG               | INTERGENIC                    |                    |                              |
| SNP_80924_A_195965 | NW_004516087.1 | scaffold674 | 195965                  | AA                              | GG                 | GG               | INTERGENIC                    |                    |                              |
| SNP_80925_A_198702 | NW_004516087.1 | scaffold674 | 198702                  | TT                              | GG                 | GG               | INTERGENIC                    |                    |                              |
| SNP_80926_A_201989 | NW_004516087.1 | scaffold674 | 201989                  | AA                              | GG                 | GG               | INTERGENIC                    |                    |                              |
| SNP_80927_A_215021 | NW_004516087.1 | scaffold674 | 215021                  | AA                              | GG                 | GG               | INTERGENIC                    |                    |                              |
| SNP_80928_A_219128 | NW_004516087.1 | scaffold674 | 219128                  | GG                              | AA                 | AA               | INTERGENIC                    |                    |                              |
| SNP_80929_A_219972 | NW_004516087.1 | scaffold674 | 219972                  | GG                              | AA                 | AA               | INTERGENIC                    |                    |                              |
| SNP_80930_A_221205 | NW_004516087.1 | scaffold674 | 221205                  | TT                              | CC                 | CC               | INTERGENIC                    |                    |                              |
| SNP_80931_A_224776 | NW_004516087.1 | scaffold674 | 224776                  | AA                              | GG                 | GG               | INTERGENIC                    |                    |                              |
| SNP_80933_A_229584 | NW_004516087.1 | scaffold674 | 229584                  | AA                              | TT                 | TT               | INTERGENIC                    |                    |                              |
| SNP_80934_A_231530 | NW_004516087.1 | scaffold674 | 231530                  | GG                              | AA                 | AA               | INTERGENIC                    |                    |                              |
| SNP_80936_A_237964 | NW_004516087.1 | scaffold674 | 237964                  | AA                              | GG                 | GG               | INTERGENIC                    |                    |                              |

| SNPs IDs           | Chromosome IDs | Chromosomes | Physical positions (bp) | CDC Frontier (Reference genome) | (Pusa 1103 & HPNB) | (ILWC 46 & LPNB) | Sequence Components of genome | Gene accession IDs | Putative functions                     |
|--------------------|----------------|-------------|-------------------------|---------------------------------|--------------------|------------------|-------------------------------|--------------------|----------------------------------------|
| SNP_80937_A_243105 | NW_004516087.1 | scaffold674 | 243105                  | CC                              | AA                 | AA               | INTERGENIC                    |                    |                                        |
| SNP_80938_A_243672 | NW_004516087.1 | scaffold674 | 243672                  | TT                              | CC                 | CC               | INTERGENIC                    |                    |                                        |
| SNP_80939_A_247673 | NW_004516087.1 | scaffold674 | 247673                  | GG                              | CC                 | CC               | INTERGENIC                    |                    |                                        |
| SNP_80941_A_250220 | NW_004516087.1 | scaffold674 | 250220                  | AA                              | GG                 | GG               | INTERGENIC                    |                    |                                        |
| SNP_80942_A_257299 | NW_004516087.1 | scaffold674 | 257299                  | TT                              | AA                 | AA               | INTERGENIC                    |                    |                                        |
| SNP_80943_A_260965 | NW_004516087.1 | scaffold674 | 260965                  | GG                              | AA                 | AA               | INTERGENIC                    |                    |                                        |
| SNP_80945_A_264848 | NW_004516087.1 | scaffold674 | 264848                  | GG                              | TT                 | TT               | INTRON                        | 101493074          | vacuolar amino acid transporter 1-like |
| SNP_80946_A_270266 | NW_004516087.1 | scaffold674 | 270266                  | CC                              | AA                 | AA               | INTRON                        | 101493074          | vacuolar amino acid transporter 1-like |
| SNP_80947_A_280782 | NW_004516087.1 | scaffold674 | 280782                  | CC                              | TT                 | TT               | INTERGENIC                    |                    |                                        |
| SNP_80948_A_291060 | NW_004516087.1 | scaffold674 | 291060                  | CC                              | TT                 | TT               | INTERGENIC                    |                    |                                        |
| SNP_80949_A_291218 | NW_004516087.1 | scaffold674 | 291218                  | TT                              | AA                 | AA               | INTERGENIC                    |                    |                                        |
| SNP_80950_A_293317 | NW_004516087.1 | scaffold674 | 293317                  | AA                              | GG                 | GG               | INTERGENIC                    |                    |                                        |
| SNP_80951_A_310164 | NW_004516087.1 | scaffold674 | 310164                  | TT                              | AA                 | AA               | INTERGENIC                    |                    |                                        |
| SNP_80952_A_312408 | NW_004516087.1 | scaffold674 | 312408                  | TT                              | CC                 | CC               | DRR                           | 101493400          | thioredoxin-like 3-2, chloroplastic    |
| SNP_80954_A_316532 | NW_004516087.1 | scaffold674 | 316532                  | CC                              | TT                 | TT               | INTRON                        | 101493400          | thioredoxin-like 3-2, chloroplastic    |
| SNP_80955_A_319654 | NW_004516087.1 | scaffold674 | 319654                  | CC                              | TT                 | TT               | INTRON                        | 101493400          | thioredoxin-like 3-2, chloroplastic    |
| SNP_80956_A_339680 | NW_004516087.1 | scaffold674 | 339680                  | CC                              | TT                 | TT               | INTERGENIC                    |                    |                                        |
| SNP_80958_A_363679 | NW_004516087.1 | scaffold674 | 363679                  | GG                              | CC                 | CC               | INTERGENIC                    |                    |                                        |
| SNP_80959_A_369743 | NW_004516087.1 | scaffold674 | 369743                  | CC                              | TT                 | TT               | INTERGENIC                    |                    |                                        |
| SNP_80960_A_369797 | NW_004516087.1 | scaffold674 | 369797                  | TT                              | CC                 | CC               | INTERGENIC                    |                    |                                        |
| SNP_80961_A_372015 | NW_004516087.1 | scaffold674 | 372015                  | AA                              | GG                 | GG               | INTERGENIC                    |                    |                                        |
| SNP_80962_A_373198 | NW_004516087.1 | scaffold674 | 373198                  | CC                              | TT                 | TT               | INTERGENIC                    |                    |                                        |



| SNPs IDs           | Chromosome IDs | Chromosomes | Physical positions (bp) | CDC Frontier (Reference genome) | (Pusa 1103 & HPNB) | (ILWC 46 & LPNB) | Sequence genome | Components of | Gene accession IDs | Putative functions |
|--------------------|----------------|-------------|-------------------------|---------------------------------|--------------------|------------------|-----------------|---------------|--------------------|--------------------|
| SNP_80963_A_377802 | NW_004516087.1 | scaffold674 | 377802                  | TT                              | CC                 | CC               | INTERGENIC      |               |                    |                    |
| SNP_80964_A_378816 | NW_004516087.1 | scaffold674 | 378816                  | CC                              | AA                 | AA               | INTERGENIC      |               |                    |                    |
| SNP_80965_A_392142 | NW_004516087.1 | scaffold674 | 392142                  | CC                              | TT                 | TT               | INTERGENIC      |               |                    |                    |
| SNP_80968_A_396773 | NW_004516087.1 | scaffold674 | 396773                  | AA                              | GG                 | GG               | INTERGENIC      |               |                    |                    |
| SNP_80970_A_400863 | NW_004516087.1 | scaffold674 | 400863                  | TT                              | CC                 | CC               | INTERGENIC      |               |                    |                    |
| SNP_80971_A_400881 | NW_004516087.1 | scaffold674 | 400881                  | AA                              | GG                 | GG               | INTERGENIC      |               |                    |                    |
| SNP_80972_A_400882 | NW_004516087.1 | scaffold674 | 400882                  | TT                              | CC                 | CC               | INTERGENIC      |               |                    |                    |
| SNP_80973_A_401149 | NW_004516087.1 | scaffold674 | 401149                  | TT                              | CC                 | CC               | INTERGENIC      |               |                    |                    |
| SNP_80974_A_401155 | NW_004516087.1 | scaffold674 | 401155                  | CC                              | TT                 | TT               | INTERGENIC      |               |                    |                    |
| SNP_80975_A_401161 | NW_004516087.1 | scaffold674 | 401161                  | AA                              | TT                 | TT               | INTERGENIC      |               |                    |                    |
| SNP_80976_A_401328 | NW_004516087.1 | scaffold674 | 401328                  | CC                              | AA                 | AA               | INTERGENIC      |               |                    |                    |
| SNP_80977_A_401330 | NW_004516087.1 | scaffold674 | 401330                  | AA                              | CC                 | CC               | INTERGENIC      |               |                    |                    |
| SNP_80978_A_401338 | NW_004516087.1 | scaffold674 | 401338                  | TT                              | GG                 | GG               | INTERGENIC      |               |                    |                    |
| SNP_80979_A_401343 | NW_004516087.1 | scaffold674 | 401343                  | CC                              | AA                 | AA               | INTERGENIC      |               |                    |                    |
| SNP_80980_A_401414 | NW_004516087.1 | scaffold674 | 401414                  | GG                              | TT                 | TT               | INTERGENIC      |               |                    |                    |
| SNP_80981_A_401430 | NW_004516087.1 | scaffold674 | 401430                  | AA                              | GG                 | GG               | INTERGENIC      |               |                    |                    |
| SNP_80983_A_401523 | NW_004516087.1 | scaffold674 | 401523                  | GG                              | TT                 | TT               | INTERGENIC      |               |                    |                    |
| SNP_80985_A_405016 | NW_004516087.1 | scaffold674 | 405016                  | CC                              | AA                 | AA               | INTERGENIC      |               |                    |                    |
| SNP_80986_A_405064 | NW_004516087.1 | scaffold674 | 405064                  | AA                              | TT                 | TT               | INTERGENIC      |               |                    |                    |
| SNP_80987_A_405077 | NW_004516087.1 | scaffold674 | 405077                  | AA                              | GG                 | GG               | INTERGENIC      |               |                    |                    |
| SNP_80988_A_410882 | NW_004516087.1 | scaffold674 | 410882                  | AA                              | TT                 | TT               | INTERGENIC      |               |                    |                    |
| SNP_80989_A_416132 | NW_004516087.1 | scaffold674 | 416132                  | TT                              | CC                 | CC               | INTERGENIC      |               |                    |                    |

| SNPs IDs           | Chromosome IDs | Chromosomes | Physical positions (bp) | CDC Frontier (Reference genome) | (Pusa 1103 & HPNB) | (ILWC 46 & LPNB) | Sequence Components of genome | Gene accession IDs | Putative functions                                            |
|--------------------|----------------|-------------|-------------------------|---------------------------------|--------------------|------------------|-------------------------------|--------------------|---------------------------------------------------------------|
| SNP_80990_A_426112 | NW_004516087.1 | scaffold674 | 426112                  | GG                              | AA                 | AA               | INTERGENIC                    |                    |                                                               |
| SNP_80991_A_426127 | NW_004516087.1 | scaffold674 | 426127                  | AA                              | TT                 | TT               | INTERGENIC                    |                    |                                                               |
| SNP_80992_A_426701 | NW_004516087.1 | scaffold674 | 426701                  | AA                              | GG                 | GG               | INTERGENIC                    |                    |                                                               |
| SNP_80993_A_430466 | NW_004516087.1 | scaffold674 | 430466                  | TT                              | GG                 | GG               | INTERGENIC                    |                    |                                                               |
| SNP_80994_A_431269 | NW_004516087.1 | scaffold674 | 431269                  | GG                              | TT                 | TT               | INTERGENIC                    |                    |                                                               |
| SNP_80995_A_431925 | NW_004516087.1 | scaffold674 | 431925                  | CC                              | TT                 | TT               | INTERGENIC                    |                    |                                                               |
| SNP_81000_A_446890 | NW_004516087.1 | scaffold674 | 446890                  | CC                              | GG                 | GG               | INTERGENIC                    |                    |                                                               |
| SNP_81001_A_459548 | NW_004516087.1 | scaffold674 | 459548                  | TT                              | CC                 | CC               | INTRON                        | 101499352          | topless-related protein 4-like                                |
| SNP_81002_A_467056 | NW_004516087.1 | scaffold674 | 467056                  | TT                              | CC                 | CC               | INTERGENIC                    |                    |                                                               |
| SNP_81004_A_468811 | NW_004516087.1 | scaffold674 | 468811                  | GG                              | AA                 | AA               | INTERGENIC                    |                    |                                                               |
| SNP_81006_A_477977 | NW_004516087.1 | scaffold674 | 477977                  | TT                              | GG                 | GG               | INTERGENIC                    |                    |                                                               |
| SNP_81007_A_480184 | NW_004516087.1 | scaffold674 | 480184                  | CC                              | TT                 | TT               | INTERGENIC                    |                    |                                                               |
| SNP_81008_A_500787 | NW_004516087.1 | scaffold674 | 500787                  | TT                              | CC                 | CC               | INTRON                        | 101494768          | probable sodium/metabolite cotransporter BASS4, chloroplastic |
| SNP_81009_A_500799 | NW_004516087.1 | scaffold674 | 500799                  | AA                              | TT                 | TT               | INTRON                        | 101494768          | probable sodium/metabolite cotransporter BASS4, chloroplastic |
| SNP_81010_A_501688 | NW_004516087.1 | scaffold674 | 501688                  | GG                              | CC                 | CC               | INTRON                        | 101494768          | probable sodium/metabolite cotransporter BASS4, chloroplastic |
| SNP_81011_A_502968 | NW_004516087.1 | scaffold674 | 502968                  | TT                              | CC                 | CC               | INTRON                        | 101494768          | probable sodium/metabolite cotransporter BASS4, chloroplastic |
| SNP_81013_A_533405 | NW_004516087.1 | scaffold674 | 533405                  | GG                              | CC                 | CC               | INTERGENIC                    |                    |                                                               |
| SNP_81014_A_538749 | NW_004516087.1 | scaffold674 | 538749                  | GG                              | AA                 | AA               | INTERGENIC                    |                    |                                                               |
| SNP_81015_A_542702 | NW_004516087.1 | scaffold674 | 542702                  | AA                              | CC                 | CC               | INTERGENIC                    |                    |                                                               |
| SNP_81016_A_546615 | NW_004516087.1 | scaffold674 | 546615                  | AA                              | GG                 | GG               | INTERGENIC                    |                    |                                                               |
| SNP_81017_A_551525 | NW_004516087.1 | scaffold674 | 551525                  | GG                              | AA                 | AA               | INTERGENIC                    |                    |                                                               |
| SNP_81018_A_554910 | NW_004516087.1 | scaffold674 | 554910                  | GG                              | TT                 | TT               | INTERGENIC                    |                    |                                                               |

| SNPs IDs           | Chromosome IDs | Chromosomes | Physical positions (bp) | CDC Frontier (Reference genome) | (Pusa 1103 & HPNB) | (ILWC 46 & LPNB) | Sequence Components of genome | Gene accession IDs | Putative functions           |
|--------------------|----------------|-------------|-------------------------|---------------------------------|--------------------|------------------|-------------------------------|--------------------|------------------------------|
| SNP_81020_A_587463 | NW_004516087.1 | scaffold674 | 587463                  | AA                              | TT                 | TT               | INTERGENIC                    |                    |                              |
| SNP_81021_A_591685 | NW_004516087.1 | scaffold674 | 591685                  | CC                              | TT                 | TT               | INTERGENIC                    |                    |                              |
| SNP_81022_A_594433 | NW_004516087.1 | scaffold674 | 594433                  | TT                              | CC                 | CC               | DRR                           | 101500318          | uncharacterized LOC101500318 |
| SNP_81023_A_604516 | NW_004516087.1 | scaffold674 | 604516                  | AA                              | GG                 | GG               | DRR                           | 101495099          | bZIP transcription factor 60 |
| SNP_81025_A_617727 | NW_004516087.1 | scaffold674 | 617727                  | CC                              | TT                 | TT               | INTERGENIC                    |                    |                              |
| SNP_81026_A_621435 | NW_004516087.1 | scaffold674 | 621435                  | TT                              | AA                 | AA               | INTERGENIC                    |                    |                              |
| SNP_81027_A_622221 | NW_004516087.1 | scaffold674 | 622221                  | TT                              | GG                 | GG               | INTERGENIC                    |                    |                              |
| SNP_81028_A_624934 | NW_004516087.1 | scaffold674 | 624934                  | GG                              | AA                 | AA               | INTERGENIC                    |                    |                              |
| SNP_81029_A_628195 | NW_004516087.1 | scaffold674 | 628195                  | TT                              | AA                 | AA               | INTERGENIC                    |                    |                              |
| SNP_81030_A_640600 | NW_004516087.1 | scaffold674 | 640600                  | CC                              | TT                 | TT               | URR                           | 101495429          | condensin complex subunit 1  |
| SNP_81031_A_645156 | NW_004516087.1 | scaffold674 | 645156                  | CC                              | TT                 | TT               | INTERGENIC                    |                    |                              |
| SNP_81032_A_649289 | NW_004516087.1 | scaffold674 | 649289                  | AA                              | GG                 | GG               | INTERGENIC                    |                    |                              |
| SNP_81033_A_651571 | NW_004516087.1 | scaffold674 | 651571                  | TT                              | GG                 | GG               | INTERGENIC                    |                    |                              |
| SNP_81034_A_657580 | NW_004516087.1 | scaffold674 | 657580                  | AA                              | GG                 | GG               | INTERGENIC                    |                    |                              |
| SNP_81035_A_657869 | NW_004516087.1 | scaffold674 | 657869                  | TT                              | GG                 | GG               | INTERGENIC                    |                    |                              |
| SNP_81036_A_659212 | NW_004516087.1 | scaffold674 | 659212                  | AA                              | GG                 | GG               | INTERGENIC                    |                    |                              |
| SNP_81037_A_664574 | NW_004516087.1 | scaffold674 | 664574                  | AA                              | GG                 | GG               | INTERGENIC                    |                    |                              |
| SNP_81038_A_665772 | NW_004516087.1 | scaffold674 | 665772                  | CC                              | TT                 | TT               | INTERGENIC                    |                    |                              |
| SNP_81039_A_668184 | NW_004516087.1 | scaffold674 | 668184                  | TT                              | CC                 | CC               | INTERGENIC                    |                    |                              |
| SNP_81040_A_672865 | NW_004516087.1 | scaffold674 | 672865                  | CC                              | AA                 | AA               | INTERGENIC                    |                    |                              |
| SNP_81041_A_690327 | NW_004516087.1 | scaffold674 | 690327                  | CC                              | TT                 | TT               | INTERGENIC                    |                    |                              |
| SNP_81042_A_703028 | NW_004516087.1 | scaffold674 | 703028                  | CC                              | TT                 | TT               | INTERGENIC                    |                    |                              |

| SNPs IDs           | Chromosome IDs | Chromosomes | Physical positions (bp) | CDC Frontier (Reference genome) | (Pusa 1103 & HPNB) | (ILWC 46 & LPNB) | Sequence Components of genome | Gene accession IDs | Putative functions                    |
|--------------------|----------------|-------------|-------------------------|---------------------------------|--------------------|------------------|-------------------------------|--------------------|---------------------------------------|
| SNP_81043_A_703029 | NW_004516087.1 | scaffold674 | 703029                  | CC                              | TT                 | TT               | INTERGENIC                    |                    |                                       |
| SNP_81044_A_703062 | NW_004516087.1 | scaffold674 | 703062                  | GG                              | CC                 | CC               | INTERGENIC                    |                    |                                       |
| SNP_81045_A_704835 | NW_004516087.1 | scaffold674 | 704835                  | TT                              | CC                 | CC               | INTERGENIC                    |                    |                                       |
| SNP_81048_A_712080 | NW_004516087.1 | scaffold674 | 712080                  | AA                              | TT                 | TT               | INTERGENIC                    |                    |                                       |
| SNP_81049_A_724175 | NW_004516087.1 | scaffold674 | 724175                  | CC                              | AA                 | AA               | INTERGENIC                    |                    |                                       |
| SNP_81050_A_734179 | NW_004516087.1 | scaffold674 | 734179                  | AA                              | GG                 | GG               | INTERGENIC                    |                    |                                       |
| SNP_81051_A_734878 | NW_004516087.1 | scaffold674 | 734878                  | GG                              | AA                 | AA               | INTERGENIC                    |                    |                                       |
| SNP_81052_A_745843 | NW_004516087.1 | scaffold674 | 745843                  | CC                              | TT                 | TT               | INTERGENIC                    |                    |                                       |
| SNP_81053_A_758291 | NW_004516087.1 | scaffold674 | 758291                  | AA                              | GG                 | GG               | INTERGENIC                    |                    |                                       |
| SNP_81054_A_758461 | NW_004516087.1 | scaffold674 | 758461                  | GG                              | AA                 | AA               | INTERGENIC                    |                    |                                       |
| SNP_81055_A_763195 | NW_004516087.1 | scaffold674 | 763195                  | AA                              | TT                 | TT               | INTERGENIC                    |                    |                                       |
| SNP_81056_A_763196 | NW_004516087.1 | scaffold674 | 763196                  | AA                              | CC                 | CC               | INTERGENIC                    |                    |                                       |
| SNP_81057_A_763753 | NW_004516087.1 | scaffold674 | 763753                  | TT                              | CC                 | CC               | INTERGENIC                    |                    |                                       |
| SNP_81059_A_783802 | NW_004516087.1 | scaffold674 | 783802                  | TT                              | CC                 | CC               | INTERGENIC                    |                    |                                       |
| SNP_81060_A_788777 | NW_004516087.1 | scaffold674 | 788777                  | GG                              | AA                 | AA               | INTERGENIC                    |                    |                                       |
| SNP_81061_A_793392 | NW_004516087.1 | scaffold674 | 793392                  | TT                              | AA                 | AA               | INTERGENIC                    |                    |                                       |
| SNP_81062_A_802308 | NW_004516087.1 | scaffold674 | 802308                  | CC                              | AA                 | AA               | INTERGENIC                    |                    |                                       |
| SNP_81063_A_823333 | NW_004516087.1 | scaffold674 | 823333                  | CC                              | TT                 | TT               | INTRON                        | 101495762          | cystathionine beta-lyase, chloroplast |
| SNP_81064_A_827159 | NW_004516087.1 | scaffold674 | 827159                  | AA                              | GG                 | GG               | INTRON                        | 101495762          | cystathionine beta-lyase, chloroplast |
| SNP_81065_A_829548 | NW_004516087.1 | scaffold674 | 829548                  | CC                              | AA                 | AA               | INTRON                        | 101495762          | cystathionine beta-lyase, chloroplast |
| SNP_81066_A_829590 | NW_004516087.1 | scaffold674 | 829590                  | AA                              | GG                 | GG               | INTRON                        | 101495762          | cystathionine beta-lyase, chloroplast |
| SNP_81067_A_829682 | NW_004516087.1 | scaffold674 | 829682                  | TT                              | GG                 | GG               | INTRON                        | 101495762          | cystathionine beta-lyase, chloroplast |

| SNPs IDs           | Chromosome IDs | Chromosomes | Physical positions (bp) | CDC Frontier (Reference genome) | (Pusa 1103 & HPNB) | (ILWC 46 & LPNB) | Sequence Components of genome | Gene accession IDs | Putative functions                     |
|--------------------|----------------|-------------|-------------------------|---------------------------------|--------------------|------------------|-------------------------------|--------------------|----------------------------------------|
| SNP_81068_A_829909 | NW_004516087.1 | scaffold674 | 829909                  | TT                              | CC                 | CC               | INTRON                        | 101495762          | cystathionine beta-lyase, chloroplatic |
| SNP_81069_A_829918 | NW_004516087.1 | scaffold674 | 829918                  | CC                              | TT                 | TT               | INTRON                        | 101495762          | cystathionine beta-lyase, chloroplatic |
| SNP_81070_A_829971 | NW_004516087.1 | scaffold674 | 829971                  | AA                              | GG                 | GG               | INTRON                        | 101495762          | cystathionine beta-lyase, chloroplatic |
| SNP_81071_A_830023 | NW_004516087.1 | scaffold674 | 830023                  | TT                              | CC                 | CC               | INTRON                        | 101495762          | cystathionine beta-lyase, chloroplatic |
| SNP_81072_A_830025 | NW_004516087.1 | scaffold674 | 830025                  | CC                              | AA                 | AA               | INTRON                        | 101495762          | cystathionine beta-lyase, chloroplatic |
| SNP_81074_A_842070 | NW_004516087.1 | scaffold674 | 842070                  | CC                              | TT                 | TT               | INTERGENIC                    |                    |                                        |
| SNP_81075_A_842370 | NW_004516087.1 | scaffold674 | 842370                  | CC                              | TT                 | TT               | INTERGENIC                    |                    |                                        |
| SNP_81076_A_842845 | NW_004516087.1 | scaffold674 | 842845                  | CC                              | GG                 | GG               | INTERGENIC                    |                    |                                        |
| SNP_81077_A_842934 | NW_004516087.1 | scaffold674 | 842934                  | TT                              | GG                 | GG               | INTERGENIC                    |                    |                                        |
| SNP_81078_A_843199 | NW_004516087.1 | scaffold674 | 843199                  | TT                              | GG                 | GG               | INTERGENIC                    |                    |                                        |
| SNP_81079_A_843201 | NW_004516087.1 | scaffold674 | 843201                  | TT                              | CC                 | CC               | INTERGENIC                    |                    |                                        |
| SNP_81080_A_843280 | NW_004516087.1 | scaffold674 | 843280                  | TT                              | CC                 | CC               | INTERGENIC                    |                    |                                        |
| SNP_81081_A_843281 | NW_004516087.1 | scaffold674 | 843281                  | AA                              | TT                 | TT               | INTERGENIC                    |                    |                                        |
| SNP_81083_A_843851 | NW_004516087.1 | scaffold674 | 843851                  | CC                              | TT                 | TT               | INTERGENIC                    |                    |                                        |
| SNP_81084_A_843892 | NW_004516087.1 | scaffold674 | 843892                  | CC                              | TT                 | TT               | INTERGENIC                    |                    |                                        |
| SNP_81085_A_851867 | NW_004516087.1 | scaffold674 | 851867                  | GG                              | AA                 | AA               | INTERGENIC                    |                    |                                        |
| SNP_81086_A_856002 | NW_004516087.1 | scaffold674 | 856002                  | GG                              | AA                 | AA               | INTERGENIC                    |                    |                                        |
| SNP_81088_A_869828 | NW_004516087.1 | scaffold674 | 869828                  | CC                              | AA                 | AA               | INTERGENIC                    |                    |                                        |
| SNP_81089_A_870990 | NW_004516087.1 | scaffold674 | 870990                  | CC                              | AA                 | AA               | INTERGENIC                    |                    |                                        |
| SNP_81090_A_887726 | NW_004516087.1 | scaffold674 | 887726                  | TT                              | CC                 | CC               | INTERGENIC                    |                    |                                        |
| SNP_81091_A_888054 | NW_004516087.1 | scaffold674 | 888054                  | AA                              | TT                 | TT               | INTERGENIC                    |                    |                                        |
| SNP_81092_A_890243 | NW_004516087.1 | scaffold674 | 890243                  | GG                              | AA                 | AA               | INTERGENIC                    |                    |                                        |

| SNPs IDs           | Chromosome IDs | Chromosomes | Physical positions (bp) | CDC Frontier (Reference genome) | (Pusa 1103 & HPNB) | (ILWC 46 & LPNB) | Sequence genome | Components of | Gene accession IDs | Putative functions |
|--------------------|----------------|-------------|-------------------------|---------------------------------|--------------------|------------------|-----------------|---------------|--------------------|--------------------|
| SNP_81093_A_890244 | NW_004516087.1 | scaffold674 | 890244                  | TT                              | AA                 | AA               | INTERGENIC      |               |                    |                    |
| SNP_81094_A_890613 | NW_004516087.1 | scaffold674 | 890613                  | CC                              | TT                 | TT               | INTERGENIC      |               |                    |                    |
| SNP_81095_A_890650 | NW_004516087.1 | scaffold674 | 890650                  | TT                              | CC                 | CC               | INTERGENIC      |               |                    |                    |
| SNP_81096_A_890824 | NW_004516087.1 | scaffold674 | 890824                  | GG                              | AA                 | AA               | INTERGENIC      |               |                    |                    |
| SNP_81097_A_891327 | NW_004516087.1 | scaffold674 | 891327                  | AA                              | GG                 | GG               | INTERGENIC      |               |                    |                    |
| SNP_81098_A_891400 | NW_004516087.1 | scaffold674 | 891400                  | CC                              | TT                 | TT               | INTERGENIC      |               |                    |                    |
| SNP_81099_A_891415 | NW_004516087.1 | scaffold674 | 891415                  | AA                              | TT                 | TT               | INTERGENIC      |               |                    |                    |
| SNP_81100_A_891483 | NW_004516087.1 | scaffold674 | 891483                  | AA                              | TT                 | TT               | INTERGENIC      |               |                    |                    |
| SNP_81101_A_891585 | NW_004516087.1 | scaffold674 | 891585                  | AA                              | TT                 | TT               | INTERGENIC      |               |                    |                    |
| SNP_81102_A_897769 | NW_004516087.1 | scaffold674 | 897769                  | TT                              | AA                 | AA               | INTERGENIC      |               |                    |                    |
| SNP_81103_A_898231 | NW_004516087.1 | scaffold674 | 898231                  | GG                              | CC                 | CC               | INTERGENIC      |               |                    |                    |
| SNP_81104_A_898331 | NW_004516087.1 | scaffold674 | 898331                  | CC                              | TT                 | TT               | INTERGENIC      |               |                    |                    |
| SNP_81105_A_898578 | NW_004516087.1 | scaffold674 | 898578                  | CC                              | TT                 | TT               | INTERGENIC      |               |                    |                    |
| SNP_81106_A_301    | NW_004516088.1 | scaffold675 | 301                     | TT                              | CC                 | CC               | INTERGENIC      |               |                    |                    |
| SNP_81107_A_526    | NW_004516088.1 | scaffold675 | 526                     | GG                              | TT                 | TT               | INTERGENIC      |               |                    |                    |
| SNP_81108_A_15215  | NW_004516088.1 | scaffold675 | 15215                   | TT                              | CC                 | CC               | INTERGENIC      |               |                    |                    |
| SNP_81109_A_15365  | NW_004516088.1 | scaffold675 | 15365                   | CC                              | TT                 | TT               | INTERGENIC      |               |                    |                    |
| SNP_81110_A_15366  | NW_004516088.1 | scaffold675 | 15366                   | AA                              | GG                 | GG               | INTERGENIC      |               |                    |                    |
| SNP_81111_A_15451  | NW_004516088.1 | scaffold675 | 15451                   | GG                              | TT                 | TT               | INTERGENIC      |               |                    |                    |
| SNP_81112_A_15708  | NW_004516088.1 | scaffold675 | 15708                   | TT                              | CC                 | CC               | INTERGENIC      |               |                    |                    |
| SNP_81113_A_15717  | NW_004516088.1 | scaffold675 | 15717                   | TT                              | AA                 | AA               | INTERGENIC      |               |                    |                    |
| SNP_81114_A_15722  | NW_004516088.1 | scaffold675 | 15722                   | GG                              | CC                 | CC               | INTERGENIC      |               |                    |                    |

| SNPs IDs           | Chromosome IDs | Chromosomes | Physical positions (bp) | CDC Frontier (Reference genome) | (Pusa 1103 & HPNB) | (ILWC 46 & LPNB) | Sequence genome | Components of | Gene accession IDs | Putative functions |
|--------------------|----------------|-------------|-------------------------|---------------------------------|--------------------|------------------|-----------------|---------------|--------------------|--------------------|
| SNP_81115_A_20284  | NW_004516088.1 | scaffold675 | 20284                   | AA                              | GG                 | GG               | INTERGENIC      |               |                    |                    |
| SNP_81116_A_20342  | NW_004516088.1 | scaffold675 | 20342                   | TT                              | GG                 | GG               | INTERGENIC      |               |                    |                    |
| SNP_81117_A_20343  | NW_004516088.1 | scaffold675 | 20343                   | AA                              | GG                 | GG               | INTERGENIC      |               |                    |                    |
| SNP_81118_A_60650  | NW_004516088.1 | scaffold675 | 60650                   | AA                              | CC                 | CC               | INTERGENIC      |               |                    |                    |
| SNP_81120_A_60940  | NW_004516088.1 | scaffold675 | 60940                   | CC                              | TT                 | TT               | INTERGENIC      |               |                    |                    |
| SNP_81121_A_60951  | NW_004516088.1 | scaffold675 | 60951                   | TT                              | CC                 | CC               | INTERGENIC      |               |                    |                    |
| SNP_81122_A_75369  | NW_004516088.1 | scaffold675 | 75369                   | AA                              | GG                 | GG               | INTERGENIC      |               |                    |                    |
| SNP_81123_A_81615  | NW_004516088.1 | scaffold675 | 81615                   | CC                              | TT                 | TT               | INTERGENIC      |               |                    |                    |
| SNP_81126_A_82138  | NW_004516088.1 | scaffold675 | 82138                   | CC                              | TT                 | TT               | INTERGENIC      |               |                    |                    |
| SNP_81128_A_89675  | NW_004516088.1 | scaffold675 | 89675                   | TT                              | GG                 | GG               | INTERGENIC      |               |                    |                    |
| SNP_81129_A_89697  | NW_004516088.1 | scaffold675 | 89697                   | TT                              | GG                 | GG               | INTERGENIC      |               |                    |                    |
| SNP_81130_A_90075  | NW_004516088.1 | scaffold675 | 90075                   | CC                              | TT                 | TT               | INTERGENIC      |               |                    |                    |
| SNP_81131_A_126133 | NW_004516088.1 | scaffold675 | 126133                  | CC                              | TT                 | TT               | INTERGENIC      |               |                    |                    |
| SNP_81132_A_148180 | NW_004516088.1 | scaffold675 | 148180                  | CC                              | TT                 | TT               | INTERGENIC      |               |                    |                    |
| SNP_81133_A_14121  | NW_004516089.1 | scaffold676 | 14121                   | TT                              | CC                 | CC               | INTERGENIC      |               |                    |                    |
| SNP_81134_A_14252  | NW_004516089.1 | scaffold676 | 14252                   | CC                              | TT                 | TT               | INTERGENIC      |               |                    |                    |
| SNP_81135_A_14401  | NW_004516089.1 | scaffold676 | 14401                   | AA                              | GG                 | GG               | INTERGENIC      |               |                    |                    |
| SNP_81136_A_14505  | NW_004516089.1 | scaffold676 | 14505                   | GG                              | AA                 | AA               | INTERGENIC      |               |                    |                    |
| SNP_81137_A_14525  | NW_004516089.1 | scaffold676 | 14525                   | AA                              | GG                 | GG               | INTERGENIC      |               |                    |                    |
| SNP_81138_A_19218  | NW_004516089.1 | scaffold676 | 19218                   | CC                              | TT                 | TT               | INTERGENIC      |               |                    |                    |
| SNP_81139_A_19428  | NW_004516089.1 | scaffold676 | 19428                   | GG                              | AA                 | AA               | INTERGENIC      |               |                    |                    |
| SNP_81140_A_20142  | NW_004516089.1 | scaffold676 | 20142                   | CC                              | AA                 | AA               | INTERGENIC      |               |                    |                    |

| SNPs IDs          | Chromosome IDs | Chromosomes | Physical positions (bp) | CDC Frontier (Reference genome) | (Pusa 1103 & HPNB) | (ILWC 46 & LPNB) | Sequence genome | Components of | Gene accession IDs | Putative functions |
|-------------------|----------------|-------------|-------------------------|---------------------------------|--------------------|------------------|-----------------|---------------|--------------------|--------------------|
| SNP_81141_A_20153 | NW_004516089.1 | scaffold676 | 20153                   | CC                              | TT                 | TT               | INTERGENIC      |               |                    |                    |
| SNP_81142_A_20175 | NW_004516089.1 | scaffold676 | 20175                   | TT                              | AA                 | AA               | INTERGENIC      |               |                    |                    |
| SNP_81143_A_27043 | NW_004516089.1 | scaffold676 | 27043                   | AA                              | GG                 | GG               | INTERGENIC      |               |                    |                    |
| SNP_81144_A_27053 | NW_004516089.1 | scaffold676 | 27053                   | CC                              | AA                 | AA               | INTERGENIC      |               |                    |                    |
| SNP_81145_A_50115 | NW_004516089.1 | scaffold676 | 50115                   | GG                              | TT                 | TT               | INTERGENIC      |               |                    |                    |
| SNP_81146_A_50143 | NW_004516089.1 | scaffold676 | 50143                   | AA                              | CC                 | GG               | INTERGENIC      |               |                    |                    |
| SNP_81147_A_50159 | NW_004516089.1 | scaffold676 | 50159                   | GG                              | CC                 | CC               | INTERGENIC      |               |                    |                    |
| SNP_81148_A_50430 | NW_004516089.1 | scaffold676 | 50430                   | AA                              | CC                 | CC               | INTERGENIC      |               |                    |                    |
| SNP_81149_A_50434 | NW_004516089.1 | scaffold676 | 50434                   | TT                              | CC                 | CC               | INTERGENIC      |               |                    |                    |
| SNP_81150_A_50457 | NW_004516089.1 | scaffold676 | 50457                   | CC                              | GG                 | GG               | INTERGENIC      |               |                    |                    |
| SNP_81151_A_50579 | NW_004516089.1 | scaffold676 | 50579                   | TT                              | CC                 | CC               | INTERGENIC      |               |                    |                    |
| SNP_81152_A_50601 | NW_004516089.1 | scaffold676 | 50601                   | TT                              | GG                 | GG               | INTERGENIC      |               |                    |                    |
| SNP_81153_A_50621 | NW_004516089.1 | scaffold676 | 50621                   | GG                              | CC                 | CC               | INTERGENIC      |               |                    |                    |
| SNP_81154_A_50752 | NW_004516089.1 | scaffold676 | 50752                   | CC                              | GG                 | GG               | INTERGENIC      |               |                    |                    |
| SNP_81155_A_51045 | NW_004516089.1 | scaffold676 | 51045                   | AA                              | GG                 | GG               | INTERGENIC      |               |                    |                    |
| SNP_81156_A_52763 | NW_004516089.1 | scaffold676 | 52763                   | TT                              | AA                 | AA               | INTERGENIC      |               |                    |                    |
| SNP_81157_A_52772 | NW_004516089.1 | scaffold676 | 52772                   | AA                              | CC                 | CC               | INTERGENIC      |               |                    |                    |
| SNP_81158_A_53102 | NW_004516089.1 | scaffold676 | 53102                   | GG                              | AA                 | AA               | INTERGENIC      |               |                    |                    |
| SNP_81159_A_53105 | NW_004516089.1 | scaffold676 | 53105                   | CC                              | TT                 | TT               | INTERGENIC      |               |                    |                    |
| SNP_81160_A_54821 | NW_004516089.1 | scaffold676 | 54821                   | AA                              | GG                 | GG               | INTERGENIC      |               |                    |                    |
| SNP_81161_A_55404 | NW_004516089.1 | scaffold676 | 55404                   | CC                              | AA                 | AA               | INTERGENIC      |               |                    |                    |
| SNP_81162_A_55408 | NW_004516089.1 | scaffold676 | 55408                   | AA                              | TT                 | TT               | INTERGENIC      |               |                    |                    |



| SNPs IDs          | Chromosome IDs | Chromosomes | Physical positions (bp) | CDC Frontier (Reference genome) | (Pusa 1103 & HPNB) | (ILWC 46 & LPNB) | Sequence genome | Components of | Gene accession IDs | Putative functions |
|-------------------|----------------|-------------|-------------------------|---------------------------------|--------------------|------------------|-----------------|---------------|--------------------|--------------------|
| SNP_81163_A_55774 | NW_004516089.1 | scaffold676 | 55774                   | TT                              | GG                 | GG               | INTERGENIC      |               |                    |                    |
| SNP_81164_A_56144 | NW_004516089.1 | scaffold676 | 56144                   | CC                              | TT                 | TT               | INTERGENIC      |               |                    |                    |
| SNP_81165_A_56173 | NW_004516089.1 | scaffold676 | 56173                   | GG                              | TT                 | TT               | INTERGENIC      |               |                    |                    |
| SNP_81166_A_56315 | NW_004516089.1 | scaffold676 | 56315                   | GG                              | AA                 | AA               | INTERGENIC      |               |                    |                    |
| SNP_81167_A_56323 | NW_004516089.1 | scaffold676 | 56323                   | AA                              | GG                 | GG               | INTERGENIC      |               |                    |                    |
| SNP_81168_A_56448 | NW_004516089.1 | scaffold676 | 56448                   | GG                              | CC                 | CC               | INTERGENIC      |               |                    |                    |
| SNP_81169_A_56554 | NW_004516089.1 | scaffold676 | 56554                   | TT                              | AA                 | AA               | INTERGENIC      |               |                    |                    |
| SNP_81170_A_56637 | NW_004516089.1 | scaffold676 | 56637                   | TT                              | GG                 | GG               | INTERGENIC      |               |                    |                    |
| SNP_81171_A_56696 | NW_004516089.1 | scaffold676 | 56696                   | GG                              | AA                 | AA               | INTERGENIC      |               |                    |                    |
| SNP_81172_A_56702 | NW_004516089.1 | scaffold676 | 56702                   | TT                              | CC                 | CC               | INTERGENIC      |               |                    |                    |
| SNP_81173_A_56754 | NW_004516089.1 | scaffold676 | 56754                   | AA                              | GG                 | GG               | INTERGENIC      |               |                    |                    |
| SNP_81174_A_56857 | NW_004516089.1 | scaffold676 | 56857                   | AA                              | TT                 | TT               | INTERGENIC      |               |                    |                    |
| SNP_81175_A_64160 | NW_004516089.1 | scaffold676 | 64160                   | TT                              | CC                 | CC               | INTERGENIC      |               |                    |                    |
| SNP_81176_A_64254 | NW_004516089.1 | scaffold676 | 64254                   | CC                              | TT                 | TT               | INTERGENIC      |               |                    |                    |
| SNP_81177_A_64258 | NW_004516089.1 | scaffold676 | 64258                   | AA                              | GG                 | GG               | INTERGENIC      |               |                    |                    |
| SNP_81178_A_64302 | NW_004516089.1 | scaffold676 | 64302                   | GG                              | AA                 | AA               | INTERGENIC      |               |                    |                    |
| SNP_81179_A_67170 | NW_004516089.1 | scaffold676 | 67170                   | AA                              | GG                 | GG               | INTERGENIC      |               |                    |                    |
| SNP_81180_A_67206 | NW_004516089.1 | scaffold676 | 67206                   | CC                              | AA                 | AA               | INTERGENIC      |               |                    |                    |
| SNP_81181_A_67213 | NW_004516089.1 | scaffold676 | 67213                   | GG                              | AA                 | AA               | INTERGENIC      |               |                    |                    |
| SNP_81182_A_68638 | NW_004516089.1 | scaffold676 | 68638                   | AA                              | TT                 | TT               | INTERGENIC      |               |                    |                    |
| SNP_81183_A_68745 | NW_004516089.1 | scaffold676 | 68745                   | CC                              | TT                 | TT               | INTERGENIC      |               |                    |                    |
| SNP_81184_A_68760 | NW_004516089.1 | scaffold676 | 68760                   | TT                              | CC                 | CC               | INTERGENIC      |               |                    |                    |

| SNPs IDs          | Chromosome IDs | Chromosomes | Physical positions (bp) | CDC Frontier (Reference genome) | (Pusa 1103 & HPNB) | (ILWC 46 & LPNB) | Sequence genome | Components of | Gene accession IDs | Putative functions |
|-------------------|----------------|-------------|-------------------------|---------------------------------|--------------------|------------------|-----------------|---------------|--------------------|--------------------|
| SNP_81185_A_68802 | NW_004516089.1 | scaffold676 | 68802                   | AA                              | GG                 | GG               | INTERGENIC      |               |                    |                    |
| SNP_81186_A_69211 | NW_004516089.1 | scaffold676 | 69211                   | GG                              | AA                 | AA               | INTERGENIC      |               |                    |                    |
| SNP_81187_A_69679 | NW_004516089.1 | scaffold676 | 69679                   | AA                              | GG                 | GG               | INTERGENIC      |               |                    |                    |
| SNP_81188_A_69936 | NW_004516089.1 | scaffold676 | 69936                   | CC                              | TT                 | TT               | INTERGENIC      |               |                    |                    |
| SNP_81189_A_71273 | NW_004516089.1 | scaffold676 | 71273                   | AA                              | GG                 | GG               | INTERGENIC      |               |                    |                    |
| SNP_81190_A_72626 | NW_004516089.1 | scaffold676 | 72626                   | CC                              | TT                 | TT               | INTERGENIC      |               |                    |                    |
| SNP_81191_A_72781 | NW_004516089.1 | scaffold676 | 72781                   | AA                              | TT                 | TT               | INTERGENIC      |               |                    |                    |
| SNP_81192_A_72801 | NW_004516089.1 | scaffold676 | 72801                   | GG                              | AA                 | AA               | INTERGENIC      |               |                    |                    |
| SNP_81193_A_73187 | NW_004516089.1 | scaffold676 | 73187                   | CC                              | TT                 | TT               | INTERGENIC      |               |                    |                    |
| SNP_81194_A_73695 | NW_004516089.1 | scaffold676 | 73695                   | GG                              | AA                 | AA               | INTERGENIC      |               |                    |                    |
| SNP_81195_A_73763 | NW_004516089.1 | scaffold676 | 73763                   | TT                              | CC                 | CC               | INTERGENIC      |               |                    |                    |
| SNP_81196_A_73830 | NW_004516089.1 | scaffold676 | 73830                   | GG                              | AA                 | AA               | INTERGENIC      |               |                    |                    |
| SNP_81197_A_73926 | NW_004516089.1 | scaffold676 | 73926                   | TT                              | CC                 | CC               | INTERGENIC      |               |                    |                    |
| SNP_81198_A_74148 | NW_004516089.1 | scaffold676 | 74148                   | TT                              | AA                 | AA               | INTERGENIC      |               |                    |                    |
| SNP_81199_A_74241 | NW_004516089.1 | scaffold676 | 74241                   | GG                              | AA                 | AA               | INTERGENIC      |               |                    |                    |
| SNP_81200_A_74337 | NW_004516089.1 | scaffold676 | 74337                   | GG                              | TT                 | TT               | INTERGENIC      |               |                    |                    |
| SNP_81201_A_74550 | NW_004516089.1 | scaffold676 | 74550                   | AA                              | GG                 | GG               | INTERGENIC      |               |                    |                    |
| SNP_81202_A_74568 | NW_004516089.1 | scaffold676 | 74568                   | GG                              | AA                 | AA               | INTERGENIC      |               |                    |                    |
| SNP_81203_A_74591 | NW_004516089.1 | scaffold676 | 74591                   | CC                              | AA                 | AA               | INTERGENIC      |               |                    |                    |
| SNP_81204_A_74826 | NW_004516089.1 | scaffold676 | 74826                   | AA                              | GG                 | GG               | INTERGENIC      |               |                    |                    |
| SNP_81205_A_77614 | NW_004516089.1 | scaffold676 | 77614                   | GG                              | CC                 | CC               | INTERGENIC      |               |                    |                    |
| SNP_81206_A_77642 | NW_004516089.1 | scaffold676 | 77642                   | GG                              | AA                 | AA               | INTERGENIC      |               |                    |                    |

| SNPs IDs          | Chromosome IDs | Chromosomes | Physical positions (bp) | CDC Frontier (Reference genome) | (Pusa 1103 & HPNB) | (ILWC 46 & LPNB) | Sequence genome | Components of | Gene accession IDs | Putative functions |
|-------------------|----------------|-------------|-------------------------|---------------------------------|--------------------|------------------|-----------------|---------------|--------------------|--------------------|
| SNP_81207_A_77733 | NW_004516089.1 | scaffold676 | 77733                   | CC                              | AA                 | AA               | INTERGENIC      |               |                    |                    |
| SNP_81208_A_77776 | NW_004516089.1 | scaffold676 | 77776                   | CC                              | GG                 | GG               | INTERGENIC      |               |                    |                    |
| SNP_81209_A_78006 | NW_004516089.1 | scaffold676 | 78006                   | CC                              | AA                 | AA               | INTERGENIC      |               |                    |                    |
| SNP_81210_A_78015 | NW_004516089.1 | scaffold676 | 78015                   | TT                              | CC                 | CC               | INTERGENIC      |               |                    |                    |
| SNP_81211_A_78061 | NW_004516089.1 | scaffold676 | 78061                   | GG                              | AA                 | AA               | INTERGENIC      |               |                    |                    |
| SNP_81212_A_78078 | NW_004516089.1 | scaffold676 | 78078                   | AA                              | GG                 | GG               | INTERGENIC      |               |                    |                    |
| SNP_81213_A_79622 | NW_004516089.1 | scaffold676 | 79622                   | AA                              | GG                 | GG               | INTERGENIC      |               |                    |                    |
| SNP_81214_A_83992 | NW_004516089.1 | scaffold676 | 83992                   | AA                              | GG                 | GG               | INTERGENIC      |               |                    |                    |
| SNP_81215_A_84058 | NW_004516089.1 | scaffold676 | 84058                   | CC                              | TT                 | TT               | INTERGENIC      |               |                    |                    |
| SNP_81217_A_84091 | NW_004516089.1 | scaffold676 | 84091                   | GG                              | CC                 | CC               | INTERGENIC      |               |                    |                    |
| SNP_81218_A_84140 | NW_004516089.1 | scaffold676 | 84140                   | TT                              | CC                 | CC               | INTERGENIC      |               |                    |                    |
| SNP_81219_A_84311 | NW_004516089.1 | scaffold676 | 84311                   | GG                              | AA                 | AA               | INTERGENIC      |               |                    |                    |
| SNP_81220_A_84313 | NW_004516089.1 | scaffold676 | 84313                   | CC                              | AA                 | AA               | INTERGENIC      |               |                    |                    |
| SNP_81221_A_84373 | NW_004516089.1 | scaffold676 | 84373                   | AA                              | GG                 | GG               | INTERGENIC      |               |                    |                    |
| SNP_81222_A_84427 | NW_004516089.1 | scaffold676 | 84427                   | GG                              | CC                 | CC               | INTERGENIC      |               |                    |                    |
| SNP_81223_A_84428 | NW_004516089.1 | scaffold676 | 84428                   | TT                              | AA                 | AA               | INTERGENIC      |               |                    |                    |
| SNP_81224_A_84495 | NW_004516089.1 | scaffold676 | 84495                   | GG                              | AA                 | AA               | INTERGENIC      |               |                    |                    |
| SNP_81226_A_84582 | NW_004516089.1 | scaffold676 | 84582                   | AA                              | CC                 | CC               | INTERGENIC      |               |                    |                    |
| SNP_81227_A_85299 | NW_004516089.1 | scaffold676 | 85299                   | CC                              | AA                 | AA               | INTERGENIC      |               |                    |                    |
| SNP_81228_A_85310 | NW_004516089.1 | scaffold676 | 85310                   | TT                              | CC                 | CC               | INTERGENIC      |               |                    |                    |
| SNP_81229_A_85319 | NW_004516089.1 | scaffold676 | 85319                   | GG                              | AA                 | AA               | INTERGENIC      |               |                    |                    |
| SNP_81230_A_85380 | NW_004516089.1 | scaffold676 | 85380                   | AA                              | CC                 | CC               | INTERGENIC      |               |                    |                    |

| SNPs IDs          | Chromosome IDs | Chromosomes | Physical positions (bp) | CDC Frontier (Reference genome) | (Pusa 1103 & HPNB) | (ILWC 46 & LPNB) | Sequence genome | Components of | Gene accession IDs | Putative functions |
|-------------------|----------------|-------------|-------------------------|---------------------------------|--------------------|------------------|-----------------|---------------|--------------------|--------------------|
| SNP_81231_A_85407 | NW_004516089.1 | scaffold676 | 85407                   | CC                              | TT                 | TT               | INTERGENIC      |               |                    |                    |
| SNP_81232_A_85470 | NW_004516089.1 | scaffold676 | 85470                   | TT                              | GG                 | GG               | INTERGENIC      |               |                    |                    |
| SNP_81233_A_85506 | NW_004516089.1 | scaffold676 | 85506                   | GG                              | AA                 | AA               | INTERGENIC      |               |                    |                    |
| SNP_81234_A_85527 | NW_004516089.1 | scaffold676 | 85527                   | CC                              | TT                 | TT               | INTERGENIC      |               |                    |                    |
| SNP_81235_A_85594 | NW_004516089.1 | scaffold676 | 85594                   | AA                              | TT                 | TT               | INTERGENIC      |               |                    |                    |
| SNP_81236_A_85641 | NW_004516089.1 | scaffold676 | 85641                   | TT                              | CC                 | CC               | INTERGENIC      |               |                    |                    |
| SNP_81237_A_85646 | NW_004516089.1 | scaffold676 | 85646                   | AA                              | TT                 | TT               | INTERGENIC      |               |                    |                    |
| SNP_81238_A_86880 | NW_004516089.1 | scaffold676 | 86880                   | AA                              | GG                 | GG               | INTERGENIC      |               |                    |                    |
| SNP_81239_A_86971 | NW_004516089.1 | scaffold676 | 86971                   | AA                              | CC                 | CC               | INTERGENIC      |               |                    |                    |
| SNP_81240_A_87390 | NW_004516089.1 | scaffold676 | 87390                   | AA                              | GG                 | GG               | INTERGENIC      |               |                    |                    |
| SNP_81241_A_89389 | NW_004516089.1 | scaffold676 | 89389                   | GG                              | AA                 | AA               | INTERGENIC      |               |                    |                    |
| SNP_81242_A_89615 | NW_004516089.1 | scaffold676 | 89615                   | AA                              | CC                 | CC               | INTERGENIC      |               |                    |                    |
| SNP_81243_A_90124 | NW_004516089.1 | scaffold676 | 90124                   | GG                              | AA                 | AA               | INTERGENIC      |               |                    |                    |
| SNP_81244_A_90195 | NW_004516089.1 | scaffold676 | 90195                   | AA                              | TT                 | TT               | INTERGENIC      |               |                    |                    |
| SNP_81245_A_90196 | NW_004516089.1 | scaffold676 | 90196                   | TT                              | AA                 | AA               | INTERGENIC      |               |                    |                    |
| SNP_81246_A_90214 | NW_004516089.1 | scaffold676 | 90214                   | AA                              | GG                 | GG               | INTERGENIC      |               |                    |                    |
| SNP_81247_A_90832 | NW_004516089.1 | scaffold676 | 90832                   | AA                              | TT                 | TT               | INTERGENIC      |               |                    |                    |
| SNP_81248_A_91499 | NW_004516089.1 | scaffold676 | 91499                   | AA                              | TT                 | TT               | INTERGENIC      |               |                    |                    |
| SNP_81249_A_91788 | NW_004516089.1 | scaffold676 | 91788                   | AA                              | TT                 | TT               | INTERGENIC      |               |                    |                    |
| SNP_81250_A_93151 | NW_004516089.1 | scaffold676 | 93151                   | AA                              | TT                 | TT               | INTERGENIC      |               |                    |                    |
| SNP_81251_A_93154 | NW_004516089.1 | scaffold676 | 93154                   | CC                              | TT                 | TT               | INTERGENIC      |               |                    |                    |
| SNP_81252_A_93160 | NW_004516089.1 | scaffold676 | 93160                   | CC                              | TT                 | TT               | INTERGENIC      |               |                    |                    |

| SNPs IDs           | Chromosome IDs | Chromosomes | Physical positions (bp) | CDC Frontier (Reference genome) | (Pusa 1103 & HPNB) | (ILWC 46 & LPNB) | Sequence genome | Components of | Gene accession IDs | Putative functions |
|--------------------|----------------|-------------|-------------------------|---------------------------------|--------------------|------------------|-----------------|---------------|--------------------|--------------------|
| SNP_81253_A_93619  | NW_004516089.1 | scaffold676 | 93619                   | AA                              | GG                 | GG               | INTERGENIC      |               |                    |                    |
| SNP_81254_A_93785  | NW_004516089.1 | scaffold676 | 93785                   | AA                              | GG                 | GG               | INTERGENIC      |               |                    |                    |
| SNP_81255_A_93795  | NW_004516089.1 | scaffold676 | 93795                   | CC                              | TT                 | TT               | INTERGENIC      |               |                    |                    |
| SNP_81256_A_93812  | NW_004516089.1 | scaffold676 | 93812                   | GG                              | TT                 | TT               | INTERGENIC      |               |                    |                    |
| SNP_81257_A_94066  | NW_004516089.1 | scaffold676 | 94066                   | AA                              | GG                 | GG               | INTERGENIC      |               |                    |                    |
| SNP_81258_A_94067  | NW_004516089.1 | scaffold676 | 94067                   | AA                              | TT                 | TT               | INTERGENIC      |               |                    |                    |
| SNP_81259_A_101053 | NW_004516089.1 | scaffold676 | 101053                  | TT                              | CC                 | CC               | INTERGENIC      |               |                    |                    |
| SNP_81260_A_101212 | NW_004516089.1 | scaffold676 | 101212                  | CC                              | TT                 | TT               | INTERGENIC      |               |                    |                    |
| SNP_81261_A_101249 | NW_004516089.1 | scaffold676 | 101249                  | TT                              | CC                 | CC               | INTERGENIC      |               |                    |                    |
| SNP_81262_A_101282 | NW_004516089.1 | scaffold676 | 101282                  | TT                              | CC                 | CC               | INTERGENIC      |               |                    |                    |
| SNP_81263_A_101485 | NW_004516089.1 | scaffold676 | 101485                  | GG                              | AA                 | AA               | INTERGENIC      |               |                    |                    |
| SNP_81264_A_101530 | NW_004516089.1 | scaffold676 | 101530                  | TT                              | CC                 | CC               | INTERGENIC      |               |                    |                    |
| SNP_81265_A_101549 | NW_004516089.1 | scaffold676 | 101549                  | CC                              | AA                 | AA               | INTERGENIC      |               |                    |                    |
| SNP_81266_A_101599 | NW_004516089.1 | scaffold676 | 101599                  | CC                              | TT                 | TT               | INTERGENIC      |               |                    |                    |
| SNP_81267_A_101601 | NW_004516089.1 | scaffold676 | 101601                  | AA                              | GG                 | GG               | INTERGENIC      |               |                    |                    |
| SNP_81268_A_101607 | NW_004516089.1 | scaffold676 | 101607                  | CC                              | GG                 | GG               | INTERGENIC      |               |                    |                    |
| SNP_81269_A_102370 | NW_004516089.1 | scaffold676 | 102370                  | TT                              | GG                 | GG               | INTERGENIC      |               |                    |                    |
| SNP_81270_A_102470 | NW_004516089.1 | scaffold676 | 102470                  | TT                              | CC                 | CC               | INTERGENIC      |               |                    |                    |
| SNP_81271_A_102483 | NW_004516089.1 | scaffold676 | 102483                  | GG                              | AA                 | AA               | INTERGENIC      |               |                    |                    |
| SNP_81273_A_104264 | NW_004516089.1 | scaffold676 | 104264                  | GG                              | CC                 | CC               | INTERGENIC      |               |                    |                    |
| SNP_81274_A_104286 | NW_004516089.1 | scaffold676 | 104286                  | TT                              | CC                 | CC               | INTERGENIC      |               |                    |                    |
| SNP_81275_A_104291 | NW_004516089.1 | scaffold676 | 104291                  | AA                              | TT                 | TT               | INTERGENIC      |               |                    |                    |

| SNPs IDs           | Chromosome IDs | Chromosomes | Physical positions (bp) | CDC Frontier (Reference genome) | (Pusa 1103 & HPNB) | (ILWC 46 & LPNB) | Sequence genome | Components of | Gene accession IDs | Putative functions |
|--------------------|----------------|-------------|-------------------------|---------------------------------|--------------------|------------------|-----------------|---------------|--------------------|--------------------|
| SNP_81276_A_104293 | NW_004516089.1 | scaffold676 | 104293                  | TT                              | AA                 | AA               | INTERGENIC      |               |                    |                    |
| SNP_81278_A_105336 | NW_004516089.1 | scaffold676 | 105336                  | TT                              | CC                 | CC               | INTERGENIC      |               |                    |                    |
| SNP_81279_A_105370 | NW_004516089.1 | scaffold676 | 105370                  | TT                              | CC                 | CC               | INTERGENIC      |               |                    |                    |
| SNP_81280_A_105376 | NW_004516089.1 | scaffold676 | 105376                  | TT                              | CC                 | CC               | INTERGENIC      |               |                    |                    |
| SNP_81281_A_105403 | NW_004516089.1 | scaffold676 | 105403                  | TT                              | GG                 | GG               | INTERGENIC      |               |                    |                    |
| SNP_81282_A_109201 | NW_004516089.1 | scaffold676 | 109201                  | CC                              | GG                 | GG               | INTERGENIC      |               |                    |                    |
| SNP_81283_A_110322 | NW_004516089.1 | scaffold676 | 110322                  | CC                              | AA                 | AA               | INTERGENIC      |               |                    |                    |
| SNP_81284_A_110581 | NW_004516089.1 | scaffold676 | 110581                  | AA                              | GG                 | GG               | INTERGENIC      |               |                    |                    |
| SNP_81285_A_110607 | NW_004516089.1 | scaffold676 | 110607                  | GG                              | TT                 | TT               | INTERGENIC      |               |                    |                    |
| SNP_81286_A_112662 | NW_004516089.1 | scaffold676 | 112662                  | TT                              | CC                 | CC               | INTERGENIC      |               |                    |                    |
| SNP_81287_A_112703 | NW_004516089.1 | scaffold676 | 112703                  | CC                              | AA                 | AA               | INTERGENIC      |               |                    |                    |
| SNP_81288_A_113042 | NW_004516089.1 | scaffold676 | 113042                  | AA                              | CC                 | CC               | INTERGENIC      |               |                    |                    |
| SNP_81289_A_113043 | NW_004516089.1 | scaffold676 | 113043                  | TT                              | CC                 | CC               | INTERGENIC      |               |                    |                    |
| SNP_81290_A_119921 | NW_004516089.1 | scaffold676 | 119921                  | TT                              | GG                 | GG               | INTERGENIC      |               |                    |                    |
| SNP_81291_A_121261 | NW_004516089.1 | scaffold676 | 121261                  | AA                              | TT                 | TT               | INTERGENIC      |               |                    |                    |
| SNP_81292_A_134645 | NW_004516089.1 | scaffold676 | 134645                  | GG                              | TT                 | TT               | INTERGENIC      |               |                    |                    |
| SNP_81293_A_136176 | NW_004516089.1 | scaffold676 | 136176                  | AA                              | GG                 | GG               | INTERGENIC      |               |                    |                    |
| SNP_81294_A_137008 | NW_004516089.1 | scaffold676 | 137008                  | AA                              | GG                 | GG               | INTERGENIC      |               |                    |                    |
| SNP_81295_A_137048 | NW_004516089.1 | scaffold676 | 137048                  | AA                              | TT                 | TT               | INTERGENIC      |               |                    |                    |
| SNP_81296_A_137119 | NW_004516089.1 | scaffold676 | 137119                  | TT                              | CC                 | CC               | INTERGENIC      |               |                    |                    |
| SNP_81297_A_137324 | NW_004516089.1 | scaffold676 | 137324                  | AA                              | GG                 | GG               | INTERGENIC      |               |                    |                    |
| SNP_81298_A_137329 | NW_004516089.1 | scaffold676 | 137329                  | AA                              | TT                 | TT               | INTERGENIC      |               |                    |                    |

| SNPs IDs           | Chromosome IDs | Chromosomes | Physical positions (bp) | CDC Frontier (Reference genome) | (Pusa 1103 & HPNB) | (ILWC 46 & LPNB) | Sequence genome | Components of | Gene accession IDs | Putative functions |
|--------------------|----------------|-------------|-------------------------|---------------------------------|--------------------|------------------|-----------------|---------------|--------------------|--------------------|
| SNP_81299_A_137330 | NW_004516089.1 | scaffold676 | 137330                  | CC                              | AA                 | AA               | INTERGENIC      |               |                    |                    |
| SNP_81300_A_137416 | NW_004516089.1 | scaffold676 | 137416                  | AA                              | GG                 | GG               | INTERGENIC      |               |                    |                    |
| SNP_81301_A_137440 | NW_004516089.1 | scaffold676 | 137440                  | AA                              | TT                 | TT               | INTERGENIC      |               |                    |                    |
| SNP_81302_A_138668 | NW_004516089.1 | scaffold676 | 138668                  | CC                              | GG                 | GG               | INTERGENIC      |               |                    |                    |
| SNP_81303_A_149226 | NW_004516089.1 | scaffold676 | 149226                  | TT                              | GG                 | GG               | INTERGENIC      |               |                    |                    |
| SNP_81304_A_149236 | NW_004516089.1 | scaffold676 | 149236                  | CC                              | AA                 | AA               | INTERGENIC      |               |                    |                    |
| SNP_81305_A_149267 | NW_004516089.1 | scaffold676 | 149267                  | AA                              | TT                 | TT               | INTERGENIC      |               |                    |                    |
| SNP_81306_A_149367 | NW_004516089.1 | scaffold676 | 149367                  | GG                              | AA                 | AA               | INTERGENIC      |               |                    |                    |
| SNP_81307_A_149434 | NW_004516089.1 | scaffold676 | 149434                  | AA                              | GG                 | GG               | INTERGENIC      |               |                    |                    |
| SNP_81309_A_151856 | NW_004516089.1 | scaffold676 | 151856                  | AA                              | GG                 | GG               | INTERGENIC      |               |                    |                    |
| SNP_81310_A_151885 | NW_004516089.1 | scaffold676 | 151885                  | CC                              | AA                 | AA               | INTERGENIC      |               |                    |                    |
| SNP_81311_A_151948 | NW_004516089.1 | scaffold676 | 151948                  | GG                              | AA                 | AA               | INTERGENIC      |               |                    |                    |
| SNP_81312_A_152014 | NW_004516089.1 | scaffold676 | 152014                  | TT                              | AA                 | AA               | INTERGENIC      |               |                    |                    |
| SNP_81313_A_152074 | NW_004516089.1 | scaffold676 | 152074                  | TT                              | CC                 | CC               | INTERGENIC      |               |                    |                    |
| SNP_81314_A_157969 | NW_004516089.1 | scaffold676 | 157969                  | AA                              | CC                 | CC               | INTERGENIC      |               |                    |                    |
| SNP_81315_A_158137 | NW_004516089.1 | scaffold676 | 158137                  | TT                              | AA                 | AA               | INTERGENIC      |               |                    |                    |
| SNP_81316_A_158435 | NW_004516089.1 | scaffold676 | 158435                  | GG                              | CC                 | CC               | INTERGENIC      |               |                    |                    |
| SNP_81317_A_158689 | NW_004516089.1 | scaffold676 | 158689                  | TT                              | CC                 | CC               | INTERGENIC      |               |                    |                    |
| SNP_81318_A_161921 | NW_004516089.1 | scaffold676 | 161921                  | CC                              | TT                 | TT               | INTERGENIC      |               |                    |                    |
| SNP_81319_A_161942 | NW_004516089.1 | scaffold676 | 161942                  | TT                              | CC                 | CC               | INTERGENIC      |               |                    |                    |
| SNP_81320_A_161954 | NW_004516089.1 | scaffold676 | 161954                  | TT                              | AA                 | AA               | INTERGENIC      |               |                    |                    |
| SNP_81321_A_2151   | NW_004516090.1 | scaffold677 | 2151                    | AA                              | GG                 | GG               | INTERGENIC      |               |                    |                    |

| SNPs IDs          | Chromosome IDs | Chromosomes | Physical positions (bp) | CDC Frontier (Reference genome) | (Pusa 1103 & HPNB) | (ILWC 46 & LPNB) | Sequence genome | Components of | Gene accession IDs | Putative functions |
|-------------------|----------------|-------------|-------------------------|---------------------------------|--------------------|------------------|-----------------|---------------|--------------------|--------------------|
| SNP_81322_A_1284  | NW_004516091.1 | scaffold678 | 1284                    | GG                              | AA                 | AA               | INTERGENIC      |               |                    |                    |
| SNP_81323_A_8682  | NW_004516091.1 | scaffold678 | 8682                    | GG                              | CC                 | CC               | INTERGENIC      |               |                    |                    |
| SNP_81324_A_12414 | NW_004516091.1 | scaffold678 | 12414                   | TT                              | AA                 | AA               | INTERGENIC      |               |                    |                    |
| SNP_81325_A_12424 | NW_004516091.1 | scaffold678 | 12424                   | GG                              | AA                 | AA               | INTERGENIC      |               |                    |                    |
| SNP_81326_A_12451 | NW_004516091.1 | scaffold678 | 12451                   | AA                              | TT                 | TT               | INTERGENIC      |               |                    |                    |
| SNP_81327_A_12476 | NW_004516091.1 | scaffold678 | 12476                   | TT                              | AA                 | AA               | INTERGENIC      |               |                    |                    |
| SNP_81328_A_12738 | NW_004516091.1 | scaffold678 | 12738                   | AA                              | CC                 | CC               | INTERGENIC      |               |                    |                    |
| SNP_81329_A_12768 | NW_004516091.1 | scaffold678 | 12768                   | AA                              | CC                 | CC               | INTERGENIC      |               |                    |                    |
| SNP_81331_A_12842 | NW_004516091.1 | scaffold678 | 12842                   | TT                              | CC                 | CC               | INTERGENIC      |               |                    |                    |
| SNP_81333_A_15238 | NW_004516091.1 | scaffold678 | 15238                   | CC                              | TT                 | TT               | INTERGENIC      |               |                    |                    |
| SNP_81334_A_21920 | NW_004516091.1 | scaffold678 | 21920                   | AA                              | TT                 | TT               | INTERGENIC      |               |                    |                    |
| SNP_81335_A_25927 | NW_004516091.1 | scaffold678 | 25927                   | TT                              | GG                 | GG               | INTERGENIC      |               |                    |                    |
| SNP_81336_A_28765 | NW_004516091.1 | scaffold678 | 28765                   | AA                              | GG                 | GG               | INTERGENIC      |               |                    |                    |
| SNP_81337_A_39277 | NW_004516091.1 | scaffold678 | 39277                   | AA                              | GG                 | GG               | INTERGENIC      |               |                    |                    |
| SNP_81338_A_39285 | NW_004516091.1 | scaffold678 | 39285                   | CC                              | TT                 | TT               | INTERGENIC      |               |                    |                    |
| SNP_81339_A_39297 | NW_004516091.1 | scaffold678 | 39297                   | AA                              | TT                 | TT               | INTERGENIC      |               |                    |                    |
| SNP_81340_A_39415 | NW_004516091.1 | scaffold678 | 39415                   | GG                              | AA                 | AA               | INTERGENIC      |               |                    |                    |
| SNP_81341_A_39507 | NW_004516091.1 | scaffold678 | 39507                   | AA                              | GG                 | GG               | INTERGENIC      |               |                    |                    |
| SNP_81342_A_39552 | NW_004516091.1 | scaffold678 | 39552                   | GG                              | AA                 | AA               | INTERGENIC      |               |                    |                    |
| SNP_81343_A_39565 | NW_004516091.1 | scaffold678 | 39565                   | CC                              | TT                 | TT               | INTERGENIC      |               |                    |                    |
| SNP_81344_A_39571 | NW_004516091.1 | scaffold678 | 39571                   | GG                              | AA                 | AA               | INTERGENIC      |               |                    |                    |
| SNP_81345_A_39572 | NW_004516091.1 | scaffold678 | 39572                   | CC                              | GG                 | TT               | INTERGENIC      |               |                    |                    |



| SNPs IDs          | Chromosome IDs | Chromosomes | Physical positions (bp) | CDC Frontier (Reference genome) | (Pusa 1103 & HPNB) | (ILWC 46 & LPNB) | Sequence genome | Components of | Gene accession IDs | Putative functions |
|-------------------|----------------|-------------|-------------------------|---------------------------------|--------------------|------------------|-----------------|---------------|--------------------|--------------------|
| SNP_81346_A_39595 | NW_004516091.1 | scaffold678 | 39595                   | CC                              | AA                 | AA               | INTERGENIC      |               |                    |                    |
| SNP_81347_A_39612 | NW_004516091.1 | scaffold678 | 39612                   | CC                              | AA                 | AA               | INTERGENIC      |               |                    |                    |
| SNP_81348_A_39627 | NW_004516091.1 | scaffold678 | 39627                   | TT                              | GG                 | GG               | INTERGENIC      |               |                    |                    |
| SNP_81349_A_39632 | NW_004516091.1 | scaffold678 | 39632                   | AA                              | TT                 | TT               | INTERGENIC      |               |                    |                    |
| SNP_81350_A_39643 | NW_004516091.1 | scaffold678 | 39643                   | GG                              | TT                 | TT               | INTERGENIC      |               |                    |                    |
| SNP_81351_A_39719 | NW_004516091.1 | scaffold678 | 39719                   | CC                              | AA                 | AA               | INTERGENIC      |               |                    |                    |
| SNP_81352_A_39729 | NW_004516091.1 | scaffold678 | 39729                   | AA                              | GG                 | GG               | INTERGENIC      |               |                    |                    |
| SNP_81354_A_39843 | NW_004516091.1 | scaffold678 | 39843                   | GG                              | AA                 | AA               | INTERGENIC      |               |                    |                    |
| SNP_81355_A_39860 | NW_004516091.1 | scaffold678 | 39860                   | CC                              | TT                 | TT               | INTERGENIC      |               |                    |                    |
| SNP_81357_A_40897 | NW_004516091.1 | scaffold678 | 40897                   | TT                              | CC                 | CC               | INTERGENIC      |               |                    |                    |
| SNP_81358_A_40993 | NW_004516091.1 | scaffold678 | 40993                   | TT                              | CC                 | CC               | INTERGENIC      |               |                    |                    |
| SNP_81360_A_41024 | NW_004516091.1 | scaffold678 | 41024                   | AA                              | CC                 | CC               | INTERGENIC      |               |                    |                    |
| SNP_81361_A_41059 | NW_004516091.1 | scaffold678 | 41059                   | AA                              | TT                 | TT               | INTERGENIC      |               |                    |                    |
| SNP_81363_A_41124 | NW_004516091.1 | scaffold678 | 41124                   | AA                              | TT                 | TT               | INTERGENIC      |               |                    |                    |
| SNP_81364_A_41129 | NW_004516091.1 | scaffold678 | 41129                   | AA                              | GG                 | GG               | INTERGENIC      |               |                    |                    |
| SNP_81365_A_41215 | NW_004516091.1 | scaffold678 | 41215                   | GG                              | CC                 | CC               | INTERGENIC      |               |                    |                    |
| SNP_81366_A_41269 | NW_004516091.1 | scaffold678 | 41269                   | AA                              | TT                 | TT               | INTERGENIC      |               |                    |                    |
| SNP_81367_A_41323 | NW_004516091.1 | scaffold678 | 41323                   | GG                              | AA                 | AA               | INTERGENIC      |               |                    |                    |
| SNP_81368_A_42352 | NW_004516091.1 | scaffold678 | 42352                   | GG                              | AA                 | AA               | INTERGENIC      |               |                    |                    |
| SNP_81369_A_42356 | NW_004516091.1 | scaffold678 | 42356                   | TT                              | AA                 | AA               | INTERGENIC      |               |                    |                    |
| SNP_81370_A_42370 | NW_004516091.1 | scaffold678 | 42370                   | CC                              | AA                 | AA               | INTERGENIC      |               |                    |                    |
| SNP_81372_A_42476 | NW_004516091.1 | scaffold678 | 42476                   | AA                              | CC                 | CC               | INTERGENIC      |               |                    |                    |

| SNPs IDs           | Chromosome IDs | Chromosomes | Physical positions (bp) | CDC Frontier (Reference genome) | (Pusa 1103 & HPNB) | (ILWC 46 & LPNB) | Sequence Components of genome | Gene accession IDs | Putative functions           |
|--------------------|----------------|-------------|-------------------------|---------------------------------|--------------------|------------------|-------------------------------|--------------------|------------------------------|
| SNP_81373_A_42533  | NW_004516091.1 | scaffold678 | 42533                   | TT                              | CC                 | CC               | INTERGENIC                    |                    |                              |
| SNP_81374_A_42704  | NW_004516091.1 | scaffold678 | 42704                   | TT                              | AA                 | AA               | INTERGENIC                    |                    |                              |
| SNP_81375_A_49378  | NW_004516091.1 | scaffold678 | 49378                   | CC                              | TT                 | TT               | INTERGENIC                    |                    |                              |
| SNP_81376_A_69701  | NW_004516091.1 | scaffold678 | 69701                   | CC                              | AA                 | AA               | INTERGENIC                    |                    |                              |
| SNP_81378_A_76790  | NW_004516091.1 | scaffold678 | 76790                   | AA                              | GG                 | GG               | INTERGENIC                    |                    |                              |
| SNP_81379_A_85509  | NW_004516091.1 | scaffold678 | 85509                   | AA                              | GG                 | GG               | INTERGENIC                    |                    |                              |
| SNP_81380_A_93793  | NW_004516091.1 | scaffold678 | 93793                   | GG                              | AA                 | AA               | INTERGENIC                    |                    |                              |
| SNP_81381_A_108274 | NW_004516091.1 | scaffold678 | 108274                  | AA                              | GG                 | GG               | INTERGENIC                    |                    |                              |
| SNP_81382_A_111192 | NW_004516091.1 | scaffold678 | 111192                  | GG                              | TT                 | TT               | INTERGENIC                    |                    |                              |
| SNP_81383_A_112617 | NW_004516091.1 | scaffold678 | 112617                  | TT                              | AA                 | AA               | INTERGENIC                    |                    |                              |
| SNP_81384_A_112904 | NW_004516091.1 | scaffold678 | 112904                  | AA                              | GG                 | GG               | INTERGENIC                    |                    |                              |
| SNP_81385_A_113486 | NW_004516091.1 | scaffold678 | 113486                  | GG                              | AA                 | AA               | INTERGENIC                    |                    |                              |
| SNP_81386_A_118119 | NW_004516091.1 | scaffold678 | 118119                  | CC                              | TT                 | TT               | URR                           | 101503488          | uncharacterized LOC101503488 |
| SNP_81387_A_119849 | NW_004516091.1 | scaffold678 | 119849                  | GG                              | AA                 | AA               | INTERGENIC                    |                    |                              |
| SNP_81388_A_120535 | NW_004516091.1 | scaffold678 | 120535                  | CC                              | TT                 | TT               | INTERGENIC                    |                    |                              |
| SNP_81389_A_120536 | NW_004516091.1 | scaffold678 | 120536                  | AA                              | GG                 | GG               | INTERGENIC                    |                    |                              |
| SNP_81390_A_120541 | NW_004516091.1 | scaffold678 | 120541                  | TT                              | CC                 | CC               | INTERGENIC                    |                    |                              |
| SNP_81391_A_127572 | NW_004516091.1 | scaffold678 | 127572                  | AA                              | GG                 | GG               | INTERGENIC                    |                    |                              |
| SNP_81392_A_127573 | NW_004516091.1 | scaffold678 | 127573                  | GG                              | AA                 | AA               | INTERGENIC                    |                    |                              |
| SNP_81393_A_127588 | NW_004516091.1 | scaffold678 | 127588                  | GG                              | AA                 | AA               | INTERGENIC                    |                    |                              |
| SNP_81394_A_127622 | NW_004516091.1 | scaffold678 | 127622                  | AA                              | GG                 | GG               | INTERGENIC                    |                    |                              |
| SNP_81395_A_4523   | NW_004516093.1 | scaffold681 | 4523                    | AA                              | GG                 | GG               | INTRON                        | 101504142          | Unknown function             |

| SNPs IDs           | Chromosome IDs | Chromosomes | Physical positions (bp) | CDC Frontier (Reference genome) | (Pusa 1103 & HPNB) | (ILWC 46 & LPNB) | Sequence genome       | Components of | Gene accession IDs | Putative functions |
|--------------------|----------------|-------------|-------------------------|---------------------------------|--------------------|------------------|-----------------------|---------------|--------------------|--------------------|
| SNP_81396_A_11748  | NW_004516093.1 | scaffold681 | 11748                   | TT                              | CC                 | CC               | INTERGENIC            |               |                    |                    |
| SNP_81397_A_12141  | NW_004516093.1 | scaffold681 | 12141                   | TT                              | CC                 | CC               | INTERGENIC            |               |                    |                    |
| SNP_81398_A_48207  | NW_004516093.1 | scaffold681 | 48207                   | TT                              | GG                 | GG               | INTERGENIC            |               |                    |                    |
| SNP_81399_A_50098  | NW_004516093.1 | scaffold681 | 50098                   | TT                              | CC                 | CC               | INTERGENIC            |               |                    |                    |
| SNP_81400_A_51604  | NW_004516093.1 | scaffold681 | 51604                   | AA                              | GG                 | GG               | INTERGENIC            |               |                    |                    |
| SNP_81401_A_9405   | NW_004516094.1 | scaffold682 | 9405                    | AA                              | CC                 | CC               | INTERGENIC            |               |                    |                    |
| SNP_81402_A_9781   | NW_004516094.1 | scaffold682 | 9781                    | TT                              | GG                 | GG               | INTERGENIC            |               |                    |                    |
| SNP_81403_A_11167  | NW_004516094.1 | scaffold682 | 11167                   | TT                              | AA                 | AA               | INTERGENIC            |               |                    |                    |
| SNP_81404_A_11205  | NW_004516094.1 | scaffold682 | 11205                   | CC                              | AA                 | AA               | INTERGENIC            |               |                    |                    |
| SNP_81405_A_18614  | NW_004516094.1 | scaffold682 | 18614                   | CC                              | TT                 | TT               | INTERGENIC            |               |                    |                    |
| SNP_81406_A_23654  | NW_004516094.1 | scaffold682 | 23654                   | CC                              | TT                 | TT               | INTERGENIC            |               |                    |                    |
| SNP_81407_A_24268  | NW_004516094.1 | scaffold682 | 24268                   | CC                              | TT                 | TT               | INTERGENIC            |               |                    |                    |
| SNP_81408_A_77940  | NW_004516094.1 | scaffold682 | 77940                   | TT                              | CC                 | CC               | INTERGENIC            |               |                    |                    |
| SNP_81409_A_77945  | NW_004516094.1 | scaffold682 | 77945                   | TT                              | GG                 | GG               | INTERGENIC            |               |                    |                    |
| SNP_81410_A_78414  | NW_004516094.1 | scaffold682 | 78414                   | CC                              | TT                 | TT               | INTERGENIC            |               |                    |                    |
| SNP_81411_A_78632  | NW_004516094.1 | scaffold682 | 78632                   | GG                              | AA                 | AA               | INTERGENIC            |               |                    |                    |
| SNP_81412_A_78682  | NW_004516094.1 | scaffold682 | 78682                   | TT                              | AA                 | AA               | INTERGENIC            |               |                    |                    |
| SNP_81413_A_82838  | NW_004516094.1 | scaffold682 | 82838                   | TT                              | GG                 | GG               | INTERGENIC            |               |                    |                    |
| SNP_81414_A_82855  | NW_004516094.1 | scaffold682 | 82855                   | AA                              | GG                 | GG               | INTERGENIC            |               |                    |                    |
| SNP_81415_A_134678 | NW_004516094.1 | scaffold682 | 134678                  | GG                              | AA                 | AA               | INTERGENIC            |               |                    |                    |
| SNP_81416_A_182726 | NW_004516094.1 | scaffold682 | 182726                  | TT                              | AA                 | AA               | NON_SYNONYMOUS_CODING | 101508844     |                    | Unknown function   |
| SNP_81417_A_182729 | NW_004516094.1 | scaffold682 | 182729                  | TT                              | GG                 | GG               | NON_SYNONYMOUS_CODING | 101508844     |                    | Unknown function   |

| SNPs IDs           | Chromosome IDs | Chromosomes | Physical positions (bp) | CDC Frontier (Reference genome) | (Pusa 1103 & HPNB) | (ILWC 46 & LPNB) | Sequence genome | Components of | Gene accession IDs | Putative functions |
|--------------------|----------------|-------------|-------------------------|---------------------------------|--------------------|------------------|-----------------|---------------|--------------------|--------------------|
| SNP_81419_A_208669 | NW_004516094.1 | scaffold682 | 208669                  | CC                              | AA                 | AA               | INTERGENIC      |               |                    |                    |
| SNP_81420_A_208974 | NW_004516094.1 | scaffold682 | 208974                  | GG                              | AA                 | AA               | INTERGENIC      |               |                    |                    |
| SNP_81421_A_220216 | NW_004516094.1 | scaffold682 | 220216                  | CC                              | AA                 | AA               | INTERGENIC      |               |                    |                    |
| SNP_81422_A_220250 | NW_004516094.1 | scaffold682 | 220250                  | TT                              | CC                 | CC               | INTERGENIC      |               |                    |                    |
| SNP_81423_A_220265 | NW_004516094.1 | scaffold682 | 220265                  | TT                              | GG                 | GG               | INTERGENIC      |               |                    |                    |
| SNP_81424_A_220270 | NW_004516094.1 | scaffold682 | 220270                  | AA                              | GG                 | GG               | INTERGENIC      |               |                    |                    |
| SNP_81425_A_220447 | NW_004516094.1 | scaffold682 | 220447                  | AA                              | GG                 | GG               | INTERGENIC      |               |                    |                    |
| SNP_81426_A_223500 | NW_004516094.1 | scaffold682 | 223500                  | TT                              | AA                 | AA               | INTERGENIC      |               |                    |                    |
| SNP_81427_A_225030 | NW_004516094.1 | scaffold682 | 225030                  | CC                              | AA                 | AA               | INTERGENIC      |               |                    |                    |
| SNP_81428_A_225036 | NW_004516094.1 | scaffold682 | 225036                  | GG                              | TT                 | TT               | INTERGENIC      |               |                    |                    |
| SNP_81429_A_225150 | NW_004516094.1 | scaffold682 | 225150                  | TT                              | CC                 | CC               | INTERGENIC      |               |                    |                    |
| SNP_81430_A_225669 | NW_004516094.1 | scaffold682 | 225669                  | TT                              | AA                 | AA               | INTERGENIC      |               |                    |                    |
| SNP_81431_A_232219 | NW_004516094.1 | scaffold682 | 232219                  | GG                              | TT                 | TT               | INTERGENIC      |               |                    |                    |
| SNP_81432_A_232501 | NW_004516094.1 | scaffold682 | 232501                  | TT                              | CC                 | CC               | INTERGENIC      |               |                    |                    |
| SNP_81433_A_232512 | NW_004516094.1 | scaffold682 | 232512                  | CC                              | AA                 | AA               | INTERGENIC      |               |                    |                    |
| SNP_81434_A_239113 | NW_004516094.1 | scaffold682 | 239113                  | GG                              | CC                 | CC               | INTERGENIC      |               |                    |                    |
| SNP_81435_A_239256 | NW_004516094.1 | scaffold682 | 239256                  | TT                              | CC                 | CC               | INTERGENIC      |               |                    |                    |
| SNP_81437_A_239342 | NW_004516094.1 | scaffold682 | 239342                  | TT                              | CC                 | CC               | INTERGENIC      |               |                    |                    |
| SNP_81438_A_239547 | NW_004516094.1 | scaffold682 | 239547                  | CC                              | TT                 | TT               | INTERGENIC      |               |                    |                    |
| SNP_81439_A_239601 | NW_004516094.1 | scaffold682 | 239601                  | GG                              | AA                 | AA               | INTERGENIC      |               |                    |                    |
| SNP_81440_A_240641 | NW_004516094.1 | scaffold682 | 240641                  | CC                              | GG                 | GG               | INTERGENIC      |               |                    |                    |
| SNP_81441_A_240843 | NW_004516094.1 | scaffold682 | 240843                  | AA                              | GG                 | GG               | INTERGENIC      |               |                    |                    |

| SNPs IDs           | Chromosome IDs | Chromosomes | Physical positions (bp) | CDC Frontier (Reference genome) | (Pusa 1103 & HPNB) | (ILWC 46 & LPNB) | Sequence genome | Components of | Gene accession IDs | Putative functions |
|--------------------|----------------|-------------|-------------------------|---------------------------------|--------------------|------------------|-----------------|---------------|--------------------|--------------------|
| SNP_81442_A_240901 | NW_004516094.1 | scaffold682 | 240901                  | AA                              | GG                 | GG               | INTERGENIC      |               |                    |                    |
| SNP_81443_A_240932 | NW_004516094.1 | scaffold682 | 240932                  | AA                              | GG                 | GG               | INTERGENIC      |               |                    |                    |
| SNP_81444_A_240943 | NW_004516094.1 | scaffold682 | 240943                  | GG                              | AA                 | AA               | INTERGENIC      |               |                    |                    |
| SNP_81445_A_240952 | NW_004516094.1 | scaffold682 | 240952                  | TT                              | CC                 | CC               | INTERGENIC      |               |                    |                    |
| SNP_81446_A_240953 | NW_004516094.1 | scaffold682 | 240953                  | AA                              | CC                 | CC               | INTERGENIC      |               |                    |                    |
| SNP_81447_A_240973 | NW_004516094.1 | scaffold682 | 240973                  | TT                              | AA                 | AA               | INTERGENIC      |               |                    |                    |
| SNP_81448_A_240987 | NW_004516094.1 | scaffold682 | 240987                  | TT                              | GG                 | GG               | INTERGENIC      |               |                    |                    |
| SNP_81449_A_240997 | NW_004516094.1 | scaffold682 | 240997                  | CC                              | AA                 | AA               | INTERGENIC      |               |                    |                    |
| SNP_81450_A_241038 | NW_004516094.1 | scaffold682 | 241038                  | CC                              | TT                 | TT               | INTERGENIC      |               |                    |                    |
| SNP_81451_A_241058 | NW_004516094.1 | scaffold682 | 241058                  | GG                              | AA                 | AA               | INTERGENIC      |               |                    |                    |
| SNP_81452_A_241085 | NW_004516094.1 | scaffold682 | 241085                  | AA                              | TT                 | TT               | INTERGENIC      |               |                    |                    |
| SNP_81453_A_241117 | NW_004516094.1 | scaffold682 | 241117                  | TT                              | GG                 | GG               | INTERGENIC      |               |                    |                    |
| SNP_81454_A_252676 | NW_004516094.1 | scaffold682 | 252676                  | TT                              | GG                 | GG               | INTERGENIC      |               |                    |                    |
| SNP_81456_A_272380 | NW_004516094.1 | scaffold682 | 272380                  | AA                              | GG                 | GG               | INTERGENIC      |               |                    |                    |
| SNP_81458_A_347951 | NW_004516094.1 | scaffold682 | 347951                  | TT                              | CC                 | CC               | INTERGENIC      |               |                    |                    |
| SNP_81459_A_347962 | NW_004516094.1 | scaffold682 | 347962                  | AA                              | GG                 | GG               | INTERGENIC      |               |                    |                    |
| SNP_81460_A_365422 | NW_004516094.1 | scaffold682 | 365422                  | GG                              | AA                 | AA               | INTERGENIC      |               |                    |                    |
| SNP_81461_A_369549 | NW_004516094.1 | scaffold682 | 369549                  | GG                              | AA                 | AA               | INTERGENIC      |               |                    |                    |
| SNP_81462_A_369799 | NW_004516094.1 | scaffold682 | 369799                  | AA                              | TT                 | TT               | INTERGENIC      |               |                    |                    |
| SNP_81463_A_373682 | NW_004516094.1 | scaffold682 | 373682                  | GG                              | TT                 | TT               | INTERGENIC      |               |                    |                    |
| SNP_81464_A_374913 | NW_004516094.1 | scaffold682 | 374913                  | TT                              | CC                 | CC               | INTERGENIC      |               |                    |                    |
| SNP_81465_A_374974 | NW_004516094.1 | scaffold682 | 374974                  | CC                              | TT                 | TT               | INTERGENIC      |               |                    |                    |

| SNPs IDs           | Chromosome IDs | Chromosomes | Physical positions (bp) | CDC Frontier (Reference genome) | (Pusa 1103 & HPNB) | (ILWC 46 & LPNB) | Sequence genome | Components of | Gene accession IDs | Putative functions |
|--------------------|----------------|-------------|-------------------------|---------------------------------|--------------------|------------------|-----------------|---------------|--------------------|--------------------|
| SNP_81466_A_375045 | NW_004516094.1 | scaffold682 | 375045                  | GG                              | AA                 | AA               | INTERGENIC      |               |                    |                    |
| SNP_81467_A_375089 | NW_004516094.1 | scaffold682 | 375089                  | AA                              | GG                 | GG               | INTERGENIC      |               |                    |                    |
| SNP_81469_A_375206 | NW_004516094.1 | scaffold682 | 375206                  | GG                              | AA                 | AA               | INTERGENIC      |               |                    |                    |
| SNP_81470_A_432869 | NW_004516094.1 | scaffold682 | 432869                  | TT                              | CC                 | CC               | INTERGENIC      |               |                    |                    |
| SNP_81471_A_444102 | NW_004516094.1 | scaffold682 | 444102                  | CC                              | TT                 | TT               | INTERGENIC      |               |                    |                    |
| SNP_81472_A_463012 | NW_004516094.1 | scaffold682 | 463012                  | AA                              | TT                 | TT               | INTERGENIC      |               |                    |                    |
| SNP_81473_A_463057 | NW_004516094.1 | scaffold682 | 463057                  | TT                              | CC                 | CC               | INTERGENIC      |               |                    |                    |
| SNP_81474_A_463135 | NW_004516094.1 | scaffold682 | 463135                  | TT                              | CC                 | CC               | INTERGENIC      |               |                    |                    |
| SNP_81475_A_463168 | NW_004516094.1 | scaffold682 | 463168                  | AA                              | GG                 | GG               | INTERGENIC      |               |                    |                    |
| SNP_81476_A_463180 | NW_004516094.1 | scaffold682 | 463180                  | TT                              | CC                 | CC               | INTERGENIC      |               |                    |                    |
| SNP_81477_A_463189 | NW_004516094.1 | scaffold682 | 463189                  | TT                              | CC                 | CC               | INTERGENIC      |               |                    |                    |
| SNP_81478_A_463216 | NW_004516094.1 | scaffold682 | 463216                  | TT                              | CC                 | CC               | INTERGENIC      |               |                    |                    |
| SNP_81479_A_463249 | NW_004516094.1 | scaffold682 | 463249                  | TT                              | CC                 | CC               | INTERGENIC      |               |                    |                    |
| SNP_81480_A_463261 | NW_004516094.1 | scaffold682 | 463261                  | TT                              | AA                 | AA               | INTERGENIC      |               |                    |                    |
| SNP_81481_A_463264 | NW_004516094.1 | scaffold682 | 463264                  | GG                              | AA                 | AA               | INTERGENIC      |               |                    |                    |
| SNP_81482_A_463273 | NW_004516094.1 | scaffold682 | 463273                  | CC                              | TT                 | TT               | INTERGENIC      |               |                    |                    |
| SNP_81483_A_463297 | NW_004516094.1 | scaffold682 | 463297                  | AA                              | GG                 | GG               | INTERGENIC      |               |                    |                    |
| SNP_81484_A_466973 | NW_004516094.1 | scaffold682 | 466973                  | TT                              | CC                 | CC               | INTERGENIC      |               |                    |                    |
| SNP_81485_A_468067 | NW_004516094.1 | scaffold682 | 468067                  | AA                              | TT                 | TT               | INTERGENIC      |               |                    |                    |
| SNP_81486_A_468082 | NW_004516094.1 | scaffold682 | 468082                  | CC                              | TT                 | TT               | INTERGENIC      |               |                    |                    |
| SNP_81487_A_498473 | NW_004516094.1 | scaffold682 | 498473                  | TT                              | CC                 | CC               | INTERGENIC      |               |                    |                    |
| SNP_81488_A_498546 | NW_004516094.1 | scaffold682 | 498546                  | GG                              | AA                 | AA               | INTERGENIC      |               |                    |                    |

| SNPs IDs           | Chromosome IDs | Chromosomes | Physical positions (bp) | CDC Frontier (Reference genome) | (Pusa 1103 & HPNB) | (ILWC 46 & LPNB) | Sequence Components of genome | Gene accession IDs | Putative functions                                   |
|--------------------|----------------|-------------|-------------------------|---------------------------------|--------------------|------------------|-------------------------------|--------------------|------------------------------------------------------|
| SNP_81489_A_506149 | NW_004516094.1 | scaffold682 | 506149                  | CC                              | GG                 | GG               | INTERGENIC                    |                    |                                                      |
| SNP_81490_A_506158 | NW_004516094.1 | scaffold682 | 506158                  | CC                              | AA                 | AA               | INTERGENIC                    |                    |                                                      |
| SNP_81492_A_510343 | NW_004516094.1 | scaffold682 | 510343                  | TT                              | CC                 | CC               | INTERGENIC                    |                    |                                                      |
| SNP_81493_A_518826 | NW_004516094.1 | scaffold682 | 518826                  | GG                              | TT                 | TT               | INTERGENIC                    |                    |                                                      |
| SNP_81494_A_524563 | NW_004516094.1 | scaffold682 | 524563                  | AA                              | GG                 | GG               | INTERGENIC                    |                    |                                                      |
| SNP_81495_A_524576 | NW_004516094.1 | scaffold682 | 524576                  | GG                              | AA                 | AA               | INTERGENIC                    |                    |                                                      |
| SNP_81496_A_524611 | NW_004516094.1 | scaffold682 | 524611                  | TT                              | CC                 | CC               | INTERGENIC                    |                    |                                                      |
| SNP_81497_A_525737 | NW_004516094.1 | scaffold682 | 525737                  | AA                              | GG                 | GG               | INTERGENIC                    |                    |                                                      |
| SNP_81498_A_525770 | NW_004516094.1 | scaffold682 | 525770                  | AA                              | CC                 | CC               | INTERGENIC                    |                    |                                                      |
| SNP_81499_A_525831 | NW_004516094.1 | scaffold682 | 525831                  | GG                              | AA                 | AA               | INTERGENIC                    |                    |                                                      |
| SNP_81500_A_526564 | NW_004516094.1 | scaffold682 | 526564                  | AA                              | CC                 | CC               | INTERGENIC                    |                    |                                                      |
| SNP_81501_A_526903 | NW_004516094.1 | scaffold682 | 526903                  | TT                              | GG                 | GG               | INTERGENIC                    |                    |                                                      |
| SNP_81502_A_526935 | NW_004516094.1 | scaffold682 | 526935                  | GG                              | AA                 | AA               | INTERGENIC                    |                    |                                                      |
| SNP_81503_A_526976 | NW_004516094.1 | scaffold682 | 526976                  | AA                              | GG                 | GG               | INTERGENIC                    |                    |                                                      |
| SNP_81504_A_526998 | NW_004516094.1 | scaffold682 | 526998                  | AA                              | GG                 | GG               | INTERGENIC                    |                    |                                                      |
| SNP_81505_A_527001 | NW_004516094.1 | scaffold682 | 527001                  | TT                              | AA                 | AA               | INTERGENIC                    |                    |                                                      |
| SNP_81506_A_527028 | NW_004516094.1 | scaffold682 | 527028                  | CC                              | TT                 | TT               | INTERGENIC                    |                    |                                                      |
| SNP_81507_A_527030 | NW_004516094.1 | scaffold682 | 527030                  | GG                              | TT                 | TT               | INTERGENIC                    |                    |                                                      |
| SNP_81508_A_527037 | NW_004516094.1 | scaffold682 | 527037                  | AA                              | GG                 | GG               | INTERGENIC                    |                    |                                                      |
| SNP_81509_A_536213 | NW_004516094.1 | scaffold682 | 536213                  | TT                              | CC                 | CC               | INTERGENIC                    |                    |                                                      |
| SNP_81510_A_539823 | NW_004516094.1 | scaffold682 | 539823                  | GG                              | AA                 | AA               | INTRON                        | 101507269          | vacuolar protein sorting-associated protein 13A-like |
| SNP_81511_A_539838 | NW_004516094.1 | scaffold682 | 539838                  | AA                              | TT                 | TT               | INTRON                        | 101507269          | vacuolar protein sorting-associated protein 13A-like |

| SNPs IDs           | Chromosome IDs | Chromosomes | Physical positions (bp) | CDC Frontier (Reference genome) | (Pusa 1103 & HPNB) | (ILWC 46 & LPNB) | Sequence Components of genome | Gene accession IDs | Putative functions                                   |
|--------------------|----------------|-------------|-------------------------|---------------------------------|--------------------|------------------|-------------------------------|--------------------|------------------------------------------------------|
| SNP_81512_A_539839 | NW_004516094.1 | scaffold682 | 539839                  | GG                              | TT                 | TT               | INTRON                        | 101507269          | vacuolar protein sorting-associated protein 13A-like |
| SNP_81513_A_539849 | NW_004516094.1 | scaffold682 | 539849                  | TT                              | CC                 | CC               | INTRON                        | 101507269          | vacuolar protein sorting-associated protein 13A-like |
| SNP_81515_A_539945 | NW_004516094.1 | scaffold682 | 539945                  | GG                              | TT                 | TT               | INTRON                        | 101507269          | vacuolar protein sorting-associated protein 13A-like |
| SNP_81516_A_539961 | NW_004516094.1 | scaffold682 | 539961                  | AA                              | CC                 | CC               | INTRON                        | 101507269          | vacuolar protein sorting-associated protein 13A-like |
| SNP_81517_A_539983 | NW_004516094.1 | scaffold682 | 539983                  | AA                              | GG                 | GG               | INTRON                        | 101507269          | vacuolar protein sorting-associated protein 13A-like |
| SNP_81518_A_540071 | NW_004516094.1 | scaffold682 | 540071                  | CC                              | TT                 | TT               | INTRON                        | 101507269          | vacuolar protein sorting-associated protein 13A-like |
| SNP_81519_A_540093 | NW_004516094.1 | scaffold682 | 540093                  | AA                              | GG                 | GG               | INTRON                        | 101507269          | vacuolar protein sorting-associated protein 13A-like |
| SNP_81520_A_540126 | NW_004516094.1 | scaffold682 | 540126                  | GG                              | AA                 | AA               | INTRON                        | 101507269          | vacuolar protein sorting-associated protein 13A-like |
| SNP_81521_A_540141 | NW_004516094.1 | scaffold682 | 540141                  | TT                              | CC                 | CC               | INTRON                        | 101507269          | vacuolar protein sorting-associated protein 13A-like |
| SNP_81522_A_540168 | NW_004516094.1 | scaffold682 | 540168                  | CC                              | TT                 | TT               | INTRON                        | 101507269          | vacuolar protein sorting-associated protein 13A-like |
| SNP_81523_A_540210 | NW_004516094.1 | scaffold682 | 540210                  | AA                              | CC                 | CC               | INTRON                        | 101507269          | vacuolar protein sorting-associated protein 13A-like |
| SNP_81524_A_540221 | NW_004516094.1 | scaffold682 | 540221                  | AA                              | GG                 | GG               | INTRON                        | 101507269          | vacuolar protein sorting-associated protein 13A-like |
| SNP_81525_A_540319 | NW_004516094.1 | scaffold682 | 540319                  | GG                              | AA                 | AA               | INTRON                        | 101507269          | vacuolar protein sorting-associated protein 13A-like |
| SNP_81526_A_540388 | NW_004516094.1 | scaffold682 | 540388                  | CC                              | AA                 | AA               | INTRON                        | 101507269          | vacuolar protein sorting-associated protein 13A-like |
| SNP_81528_A_540476 | NW_004516094.1 | scaffold682 | 540476                  | TT                              | GG                 | GG               | INTRON                        | 101507269          | vacuolar protein sorting-associated protein 13A-like |
| SNP_81529_A_540483 | NW_004516094.1 | scaffold682 | 540483                  | TT                              | AA                 | AA               | INTRON                        | 101507269          | vacuolar protein sorting-associated protein 13A-like |
| SNP_81530_A_540491 | NW_004516094.1 | scaffold682 | 540491                  | GG                              | AA                 | AA               | INTRON                        | 101507269          | vacuolar protein sorting-associated protein 13A-like |
| SNP_81531_A_540569 | NW_004516094.1 | scaffold682 | 540569                  | GG                              | CC                 | CC               | INTRON                        | 101507269          | vacuolar protein sorting-associated protein 13A-like |
| SNP_81532_A_540587 | NW_004516094.1 | scaffold682 | 540587                  | TT                              | CC                 | CC               | INTRON                        | 101507269          | vacuolar protein sorting-associated protein 13A-like |
| SNP_81533_A_540634 | NW_004516094.1 | scaffold682 | 540634                  | TT                              | AA                 | AA               | INTRON                        | 101507269          | vacuolar protein sorting-associated protein 13A-like |
| SNP_81535_A_540841 | NW_004516094.1 | scaffold682 | 540841                  | TT                              | GG                 | GG               | INTRON                        | 101507269          | vacuolar protein sorting-associated protein 13A-like |
| SNP_81537_A_540851 | NW_004516094.1 | scaffold682 | 540851                  | AA                              | GG                 | GG               | INTRON                        | 101507269          | vacuolar protein sorting-associated protein 13A-like |



| SNPs IDs           | Chromosome IDs | Chromosomes | Physical positions (bp) | CDC Frontier genome (Reference genome) | (Pusa 1103 & HPNB) | (ILWC 46 & LPNB) | Sequence Components of genome | Gene accession IDs | Putative functions                                   |
|--------------------|----------------|-------------|-------------------------|----------------------------------------|--------------------|------------------|-------------------------------|--------------------|------------------------------------------------------|
| SNP_81538_A_540864 | NW_004516094.1 | scaffold682 | 540864                  | GG                                     | AA                 | AA               | INTRON                        | 101507269          | vacuolar protein sorting-associated protein 13A-like |
| SNP_81539_A_540897 | NW_004516094.1 | scaffold682 | 540897                  | GG                                     | AA                 | AA               | INTRON                        | 101507269          | vacuolar protein sorting-associated protein 13A-like |
| SNP_81540_A_540920 | NW_004516094.1 | scaffold682 | 540920                  | TT                                     | GG                 | GG               | INTRON                        | 101507269          | vacuolar protein sorting-associated protein 13A-like |
| SNP_81541_A_540930 | NW_004516094.1 | scaffold682 | 540930                  | CC                                     | TT                 | TT               | INTRON                        | 101507269          | vacuolar protein sorting-associated protein 13A-like |
| SNP_81542_A_541079 | NW_004516094.1 | scaffold682 | 541079                  | AA                                     | GG                 | GG               | INTRON                        | 101507269          | vacuolar protein sorting-associated protein 13A-like |
| SNP_81543_A_541106 | NW_004516094.1 | scaffold682 | 541106                  | TT                                     | CC                 | CC               | INTRON                        | 101507269          | vacuolar protein sorting-associated protein 13A-like |
| SNP_81544_A_541112 | NW_004516094.1 | scaffold682 | 541112                  | AA                                     | TT                 | TT               | INTRON                        | 101507269          | vacuolar protein sorting-associated protein 13A-like |
| SNP_81545_A_541114 | NW_004516094.1 | scaffold682 | 541114                  | TT                                     | CC                 | CC               | INTRON                        | 101507269          | vacuolar protein sorting-associated protein 13A-like |
| SNP_81546_A_541153 | NW_004516094.1 | scaffold682 | 541153                  | GG                                     | AA                 | AA               | INTRON                        | 101507269          | vacuolar protein sorting-associated protein 13A-like |
| SNP_81547_A_541187 | NW_004516094.1 | scaffold682 | 541187                  | TT                                     | CC                 | CC               | INTRON                        | 101507269          | vacuolar protein sorting-associated protein 13A-like |
| SNP_81548_A_541213 | NW_004516094.1 | scaffold682 | 541213                  | CC                                     | TT                 | TT               | INTRON                        | 101507269          | vacuolar protein sorting-associated protein 13A-like |
| SNP_81549_A_541270 | NW_004516094.1 | scaffold682 | 541270                  | TT                                     | AA                 | AA               | INTRON                        | 101507269          | vacuolar protein sorting-associated protein 13A-like |
| SNP_81550_A_541362 | NW_004516094.1 | scaffold682 | 541362                  | GG                                     | CC                 | CC               | INTRON                        | 101507269          | vacuolar protein sorting-associated protein 13A-like |
| SNP_81551_A_541439 | NW_004516094.1 | scaffold682 | 541439                  | AA                                     | TT                 | TT               | INTRON                        | 101507269          | vacuolar protein sorting-associated protein 13A-like |
| SNP_81552_A_541441 | NW_004516094.1 | scaffold682 | 541441                  | AA                                     | CC                 | CC               | INTRON                        | 101507269          | vacuolar protein sorting-associated protein 13A-like |
| SNP_81553_A_541473 | NW_004516094.1 | scaffold682 | 541473                  | GG                                     | AA                 | AA               | INTRON                        | 101507269          | vacuolar protein sorting-associated protein 13A-like |
| SNP_81554_A_541499 | NW_004516094.1 | scaffold682 | 541499                  | GG                                     | AA                 | AA               | INTRON                        | 101507269          | vacuolar protein sorting-associated protein 13A-like |
| SNP_81555_A_541505 | NW_004516094.1 | scaffold682 | 541505                  | TT                                     | GG                 | GG               | INTRON                        | 101507269          | vacuolar protein sorting-associated protein 13A-like |
| SNP_81556_A_541532 | NW_004516094.1 | scaffold682 | 541532                  | CC                                     | TT                 | TT               | INTRON                        | 101507269          | vacuolar protein sorting-associated protein 13A-like |
| SNP_81557_A_541556 | NW_004516094.1 | scaffold682 | 541556                  | AA                                     | CC                 | CC               | INTRON                        | 101507269          | vacuolar protein sorting-associated protein 13A-like |
| SNP_81558_A_541591 | NW_004516094.1 | scaffold682 | 541591                  | TT                                     | AA                 | AA               | INTRON                        | 101507269          | vacuolar protein sorting-associated protein 13A-like |
| SNP_81559_A_541624 | NW_004516094.1 | scaffold682 | 541624                  | GG                                     | AA                 | AA               | INTRON                        | 101507269          | vacuolar protein sorting-associated protein 13A-like |

| SNPs IDs           | Chromosome IDs | Chromosomes | Physical positions (bp) | CDC Frontier (Reference genome) | (Pusa 1103 & HPNB) | (ILWC 46 & LPNB) | Sequence Components of genome | Gene accession IDs | Putative functions                                   |
|--------------------|----------------|-------------|-------------------------|---------------------------------|--------------------|------------------|-------------------------------|--------------------|------------------------------------------------------|
| SNP_81560_A_541629 | NW_004516094.1 | scaffold682 | 541629                  | AA                              | CC                 | CC               | INTRON                        | 101507269          | vacuolar protein sorting-associated protein 13A-like |
| SNP_81561_A_541678 | NW_004516094.1 | scaffold682 | 541678                  | AA                              | GG                 | GG               | INTRON                        | 101507269          | vacuolar protein sorting-associated protein 13A-like |
| SNP_81562_A_541684 | NW_004516094.1 | scaffold682 | 541684                  | GG                              | CC                 | CC               | INTRON                        | 101507269          | vacuolar protein sorting-associated protein 13A-like |
| SNP_81563_A_541696 | NW_004516094.1 | scaffold682 | 541696                  | GG                              | AA                 | AA               | INTRON                        | 101507269          | vacuolar protein sorting-associated protein 13A-like |
| SNP_81564_A_541712 | NW_004516094.1 | scaffold682 | 541712                  | GG                              | CC                 | CC               | INTRON                        | 101507269          | vacuolar protein sorting-associated protein 13A-like |
| SNP_81565_A_541730 | NW_004516094.1 | scaffold682 | 541730                  | AA                              | GG                 | GG               | INTRON                        | 101507269          | vacuolar protein sorting-associated protein 13A-like |
| SNP_81566_A_541750 | NW_004516094.1 | scaffold682 | 541750                  | AA                              | CC                 | CC               | INTRON                        | 101507269          | vacuolar protein sorting-associated protein 13A-like |
| SNP_81567_A_541752 | NW_004516094.1 | scaffold682 | 541752                  | TT                              | CC                 | CC               | INTRON                        | 101507269          | vacuolar protein sorting-associated protein 13A-like |
| SNP_81568_A_541787 | NW_004516094.1 | scaffold682 | 541787                  | GG                              | AA                 | AA               | INTRON                        | 101507269          | vacuolar protein sorting-associated protein 13A-like |
| SNP_81569_A_541840 | NW_004516094.1 | scaffold682 | 541840                  | GG                              | AA                 | AA               | INTRON                        | 101507269          | vacuolar protein sorting-associated protein 13A-like |
| SNP_81570_A_541912 | NW_004516094.1 | scaffold682 | 541912                  | CC                              | GG                 | GG               | INTRON                        | 101507269          | vacuolar protein sorting-associated protein 13A-like |
| SNP_81571_A_541994 | NW_004516094.1 | scaffold682 | 541994                  | TT                              | AA                 | AA               | INTRON                        | 101507269          | vacuolar protein sorting-associated protein 13A-like |
| SNP_81572_A_542027 | NW_004516094.1 | scaffold682 | 542027                  | TT                              | CC                 | CC               | INTRON                        | 101507269          | vacuolar protein sorting-associated protein 13A-like |
| SNP_81573_A_542039 | NW_004516094.1 | scaffold682 | 542039                  | GG                              | AA                 | AA               | INTRON                        | 101507269          | vacuolar protein sorting-associated protein 13A-like |
| SNP_81575_A_712    | NW_004516095.1 | scaffold683 | 712                     | GG                              | CC                 | CC               | INTERGENIC                    |                    |                                                      |
| SNP_81576_A_5883   | NW_004516095.1 | scaffold683 | 5883                    | TT                              | CC                 | CC               | INTERGENIC                    |                    |                                                      |
| SNP_81577_A_15737  | NW_004516095.1 | scaffold683 | 15737                   | TT                              | CC                 | CC               | INTERGENIC                    |                    |                                                      |
| SNP_81578_A_15758  | NW_004516095.1 | scaffold683 | 15758                   | CC                              | AA                 | AA               | INTERGENIC                    |                    |                                                      |
| SNP_81579_A_15985  | NW_004516095.1 | scaffold683 | 15985                   | AA                              | TT                 | TT               | INTERGENIC                    |                    |                                                      |
| SNP_81580_A_20404  | NW_004516095.1 | scaffold683 | 20404                   | TT                              | CC                 | CC               | INTERGENIC                    |                    |                                                      |
| SNP_81581_A_20409  | NW_004516095.1 | scaffold683 | 20409                   | AA                              | CC                 | CC               | INTERGENIC                    |                    |                                                      |
| SNP_81582_A_20479  | NW_004516095.1 | scaffold683 | 20479                   | GG                              | AA                 | AA               | INTERGENIC                    |                    |                                                      |

| SNPs IDs          | Chromosome IDs | Chromosomes | Physical positions (bp) | CDC Frontier (Reference genome) | (Pusa 1103 & HPNB) | (ILWC 46 & LPNB) | Sequence genome | Components of | Gene accession IDs | Putative functions |
|-------------------|----------------|-------------|-------------------------|---------------------------------|--------------------|------------------|-----------------|---------------|--------------------|--------------------|
| SNP_81583_A_20501 | NW_004516095.1 | scaffold683 | 20501                   | TT                              | CC                 | CC               | INTERGENIC      |               |                    |                    |
| SNP_81584_A_20505 | NW_004516095.1 | scaffold683 | 20505                   | TT                              | GG                 | GG               | INTERGENIC      |               |                    |                    |
| SNP_81585_A_20536 | NW_004516095.1 | scaffold683 | 20536                   | TT                              | GG                 | GG               | INTERGENIC      |               |                    |                    |
| SNP_81586_A_20543 | NW_004516095.1 | scaffold683 | 20543                   | CC                              | GG                 | GG               | INTERGENIC      |               |                    |                    |
| SNP_81587_A_20566 | NW_004516095.1 | scaffold683 | 20566                   | TT                              | CC                 | CC               | INTERGENIC      |               |                    |                    |
| SNP_81588_A_20585 | NW_004516095.1 | scaffold683 | 20585                   | GG                              | AA                 | AA               | INTERGENIC      |               |                    |                    |
| SNP_81589_A_20651 | NW_004516095.1 | scaffold683 | 20651                   | GG                              | TT                 | TT               | INTERGENIC      |               |                    |                    |
| SNP_81590_A_20673 | NW_004516095.1 | scaffold683 | 20673                   | TT                              | AA                 | AA               | INTERGENIC      |               |                    |                    |
| SNP_81592_A_20705 | NW_004516095.1 | scaffold683 | 20705                   | CC                              | GG                 | GG               | INTERGENIC      |               |                    |                    |
| SNP_81593_A_20739 | NW_004516095.1 | scaffold683 | 20739                   | AA                              | TT                 | TT               | INTERGENIC      |               |                    |                    |
| SNP_81594_A_20781 | NW_004516095.1 | scaffold683 | 20781                   | AA                              | GG                 | GG               | INTERGENIC      |               |                    |                    |
| SNP_81595_A_20812 | NW_004516095.1 | scaffold683 | 20812                   | TT                              | GG                 | GG               | INTERGENIC      |               |                    |                    |
| SNP_81596_A_20817 | NW_004516095.1 | scaffold683 | 20817                   | TT                              | CC                 | CC               | INTERGENIC      |               |                    |                    |
| SNP_81597_A_20943 | NW_004516095.1 | scaffold683 | 20943                   | GG                              | TT                 | TT               | INTERGENIC      |               |                    |                    |
| SNP_81598_A_20958 | NW_004516095.1 | scaffold683 | 20958                   | CC                              | TT                 | TT               | INTERGENIC      |               |                    |                    |
| SNP_81599_A_21010 | NW_004516095.1 | scaffold683 | 21010                   | TT                              | CC                 | CC               | INTERGENIC      |               |                    |                    |
| SNP_81600_A_25188 | NW_004516095.1 | scaffold683 | 25188                   | GG                              | TT                 | TT               | INTERGENIC      |               |                    |                    |
| SNP_81601_A_25350 | NW_004516095.1 | scaffold683 | 25350                   | AA                              | TT                 | TT               | INTERGENIC      |               |                    |                    |
| SNP_81603_A_25467 | NW_004516095.1 | scaffold683 | 25467                   | CC                              | TT                 | TT               | INTERGENIC      |               |                    |                    |
| SNP_81604_A_25514 | NW_004516095.1 | scaffold683 | 25514                   | TT                              | CC                 | CC               | INTERGENIC      |               |                    |                    |
| SNP_81605_A_25523 | NW_004516095.1 | scaffold683 | 25523                   | TT                              | AA                 | AA               | INTERGENIC      |               |                    |                    |
| SNP_81606_A_25556 | NW_004516095.1 | scaffold683 | 25556                   | CC                              | TT                 | TT               | INTERGENIC      |               |                    |                    |

| SNPs IDs          | Chromosome IDs | Chromosomes | Physical positions (bp) | CDC Frontier (Reference genome) | (Pusa 1103 & HPNB) | (ILWC 46 & LPNB) | Sequence genome | Components of | Gene accession IDs | Putative functions |
|-------------------|----------------|-------------|-------------------------|---------------------------------|--------------------|------------------|-----------------|---------------|--------------------|--------------------|
| SNP_81607_A_25558 | NW_004516095.1 | scaffold683 | 25558                   | AA                              | GG                 | GG               | INTERGENIC      |               |                    |                    |
| SNP_81608_A_25559 | NW_004516095.1 | scaffold683 | 25559                   | GG                              | AA                 | AA               | INTERGENIC      |               |                    |                    |
| SNP_81609_A_25882 | NW_004516095.1 | scaffold683 | 25882                   | AA                              | GG                 | GG               | INTERGENIC      |               |                    |                    |
| SNP_81610_A_26178 | NW_004516095.1 | scaffold683 | 26178                   | AA                              | TT                 | TT               | INTERGENIC      |               |                    |                    |
| SNP_81611_A_26194 | NW_004516095.1 | scaffold683 | 26194                   | TT                              | GG                 | GG               | INTERGENIC      |               |                    |                    |
| SNP_81612_A_26217 | NW_004516095.1 | scaffold683 | 26217                   | AA                              | CC                 | CC               | INTERGENIC      |               |                    |                    |
| SNP_81613_A_26238 | NW_004516095.1 | scaffold683 | 26238                   | AA                              | TT                 | TT               | INTERGENIC      |               |                    |                    |
| SNP_81614_A_26247 | NW_004516095.1 | scaffold683 | 26247                   | TT                              | AA                 | AA               | INTERGENIC      |               |                    |                    |
| SNP_81615_A_3403  | NW_004516096.1 | scaffold684 | 3403                    | TT                              | CC                 | CC               | INTERGENIC      |               |                    |                    |
| SNP_81616_A_3409  | NW_004516096.1 | scaffold684 | 3409                    | AA                              | GG                 | GG               | INTERGENIC      |               |                    |                    |
| SNP_81617_A_3443  | NW_004516096.1 | scaffold684 | 3443                    | AA                              | GG                 | GG               | INTERGENIC      |               |                    |                    |
| SNP_81618_A_4704  | NW_004516096.1 | scaffold684 | 4704                    | AA                              | GG                 | GG               | INTERGENIC      |               |                    |                    |
| SNP_81619_A_4880  | NW_004516096.1 | scaffold684 | 4880                    | TT                              | AA                 | AA               | INTERGENIC      |               |                    |                    |
| SNP_81620_A_5158  | NW_004516096.1 | scaffold684 | 5158                    | TT                              | CC                 | CC               | INTERGENIC      |               |                    |                    |
| SNP_81621_A_6954  | NW_004516096.1 | scaffold684 | 6954                    | GG                              | AA                 | AA               | INTERGENIC      |               |                    |                    |
| SNP_81622_A_19225 | NW_004516096.1 | scaffold684 | 19225                   | AA                              | GG                 | GG               | INTERGENIC      |               |                    |                    |
| SNP_81623_A_44241 | NW_004516096.1 | scaffold684 | 44241                   | TT                              | CC                 | CC               | INTERGENIC      |               |                    |                    |
| SNP_81624_A_48352 | NW_004516096.1 | scaffold684 | 48352                   | CC                              | GG                 | GG               | INTERGENIC      |               |                    |                    |
| SNP_81625_A_48386 | NW_004516096.1 | scaffold684 | 48386                   | TT                              | GG                 | GG               | INTERGENIC      |               |                    |                    |
| SNP_81626_A_48643 | NW_004516096.1 | scaffold684 | 48643                   | GG                              | AA                 | AA               | INTERGENIC      |               |                    |                    |
| SNP_81627_A_48665 | NW_004516096.1 | scaffold684 | 48665                   | CC                              | AA                 | AA               | INTERGENIC      |               |                    |                    |
| SNP_81628_A_48666 | NW_004516096.1 | scaffold684 | 48666                   | CC                              | AA                 | AA               | INTERGENIC      |               |                    |                    |

| SNPs IDs          | Chromosome IDs | Chromosomes | Physical positions (bp) | CDC Frontier (Reference genome) | (Pusa 1103 & HPNB) | (ILWC 46 & LPNB) | Sequence genome | Components of | Gene accession IDs | Putative functions |
|-------------------|----------------|-------------|-------------------------|---------------------------------|--------------------|------------------|-----------------|---------------|--------------------|--------------------|
| SNP_81629_A_72115 | NW_004516096.1 | scaffold684 | 72115                   | CC                              | TT                 | TT               | INTERGENIC      |               |                    |                    |
| SNP_81630_A_94438 | NW_004516096.1 | scaffold684 | 94438                   | TT                              | CC                 | CC               | INTERGENIC      |               |                    |                    |
| SNP_81631_A_81    | NW_004516098.1 | scaffold686 | 81                      | GG                              | AA                 | AA               | INTERGENIC      |               |                    |                    |
| SNP_81632_A_171   | NW_004516098.1 | scaffold686 | 171                     | GG                              | AA                 | AA               | INTERGENIC      |               |                    |                    |
| SNP_81633_A_458   | NW_004516098.1 | scaffold686 | 458                     | GG                              | AA                 | AA               | INTERGENIC      |               |                    |                    |
| SNP_81634_A_618   | NW_004516098.1 | scaffold686 | 618                     | TT                              | AA                 | AA               | INTERGENIC      |               |                    |                    |
| SNP_81635_A_740   | NW_004516098.1 | scaffold686 | 740                     | TT                              | AA                 | AA               | INTERGENIC      |               |                    |                    |
| SNP_81636_A_751   | NW_004516098.1 | scaffold686 | 751                     | CC                              | TT                 | TT               | INTERGENIC      |               |                    |                    |
| SNP_81637_A_769   | NW_004516098.1 | scaffold686 | 769                     | AA                              | CC                 | CC               | INTERGENIC      |               |                    |                    |
| SNP_81638_A_772   | NW_004516098.1 | scaffold686 | 772                     | AA                              | TT                 | TT               | INTERGENIC      |               |                    |                    |
| SNP_81639_A_783   | NW_004516098.1 | scaffold686 | 783                     | AA                              | GG                 | GG               | INTERGENIC      |               |                    |                    |
| SNP_81640_A_789   | NW_004516098.1 | scaffold686 | 789                     | CC                              | TT                 | TT               | INTERGENIC      |               |                    |                    |
| SNP_81641_A_25746 | NW_004516098.1 | scaffold686 | 25746                   | CC                              | GG                 | GG               | INTERGENIC      |               |                    |                    |
| SNP_81642_A_60020 | NW_004516098.1 | scaffold686 | 60020                   | TT                              | CC                 | CC               | INTERGENIC      |               |                    |                    |
| SNP_81643_A_60025 | NW_004516098.1 | scaffold686 | 60025                   | CC                              | TT                 | TT               | INTERGENIC      |               |                    |                    |
| SNP_81644_A_60345 | NW_004516098.1 | scaffold686 | 60345                   | AA                              | TT                 | TT               | INTERGENIC      |               |                    |                    |
| SNP_81645_A_74289 | NW_004516098.1 | scaffold686 | 74289                   | TT                              | CC                 | CC               | INTERGENIC      |               |                    |                    |
| SNP_81646_A_79547 | NW_004516098.1 | scaffold686 | 79547                   | TT                              | GG                 | GG               | INTERGENIC      |               |                    |                    |
| SNP_81647_A_85596 | NW_004516098.1 | scaffold686 | 85596                   | AA                              | CC                 | CC               | INTERGENIC      |               |                    |                    |
| SNP_81648_A_90729 | NW_004516098.1 | scaffold686 | 90729                   | GG                              | TT                 | TT               | INTERGENIC      |               |                    |                    |
| SNP_81649_A_90755 | NW_004516098.1 | scaffold686 | 90755                   | AA                              | GG                 | GG               | INTERGENIC      |               |                    |                    |
| SNP_81650_A_90831 | NW_004516098.1 | scaffold686 | 90831                   | AA                              | GG                 | GG               | INTERGENIC      |               |                    |                    |

| SNPs IDs           | Chromosome IDs | Chromosomes | Physical positions (bp) | CDC Frontier (Reference genome) | (Pusa 1103 & HPNB) | (ILWC 46 & LPNB) | Sequence genome | Components of | Gene accession IDs | Putative functions |
|--------------------|----------------|-------------|-------------------------|---------------------------------|--------------------|------------------|-----------------|---------------|--------------------|--------------------|
| SNP_81651_A_91078  | NW_004516098.1 | scaffold686 | 91078                   | TT                              | AA                 | AA               | INTERGENIC      |               |                    |                    |
| SNP_81652_A_91092  | NW_004516098.1 | scaffold686 | 91092                   | TT                              | CC                 | CC               | INTERGENIC      |               |                    |                    |
| SNP_81653_A_91129  | NW_004516098.1 | scaffold686 | 91129                   | CC                              | TT                 | TT               | INTERGENIC      |               |                    |                    |
| SNP_81654_A_91211  | NW_004516098.1 | scaffold686 | 91211                   | AA                              | TT                 | TT               | INTERGENIC      |               |                    |                    |
| SNP_81655_A_97553  | NW_004516098.1 | scaffold686 | 97553                   | GG                              | AA                 | AA               | INTERGENIC      |               |                    |                    |
| SNP_81656_A_98291  | NW_004516098.1 | scaffold686 | 98291                   | AA                              | CC                 | CC               | INTERGENIC      |               |                    |                    |
| SNP_81657_A_108158 | NW_004516098.1 | scaffold686 | 108158                  | CC                              | GG                 | GG               | INTERGENIC      |               |                    |                    |
| SNP_81658_A_108353 | NW_004516098.1 | scaffold686 | 108353                  | CC                              | TT                 | TT               | INTERGENIC      |               |                    |                    |
| SNP_81659_A_108784 | NW_004516098.1 | scaffold686 | 108784                  | GG                              | AA                 | AA               | INTERGENIC      |               |                    |                    |
| SNP_81660_A_108924 | NW_004516098.1 | scaffold686 | 108924                  | AA                              | TT                 | TT               | INTERGENIC      |               |                    |                    |
| SNP_81662_A_111876 | NW_004516098.1 | scaffold686 | 111876                  | CC                              | TT                 | TT               | INTERGENIC      |               |                    |                    |
| SNP_81663_A_111924 | NW_004516098.1 | scaffold686 | 111924                  | GG                              | AA                 | AA               | INTERGENIC      |               |                    |                    |
| SNP_81664_A_111936 | NW_004516098.1 | scaffold686 | 111936                  | GG                              | AA                 | AA               | INTERGENIC      |               |                    |                    |
| SNP_81665_A_112355 | NW_004516098.1 | scaffold686 | 112355                  | CC                              | AA                 | AA               | INTERGENIC      |               |                    |                    |
| SNP_81666_A_112398 | NW_004516098.1 | scaffold686 | 112398                  | AA                              | GG                 | GG               | INTERGENIC      |               |                    |                    |
| SNP_81668_A_138491 | NW_004516098.1 | scaffold686 | 138491                  | GG                              | AA                 | AA               | INTERGENIC      |               |                    |                    |
| SNP_81671_A_177848 | NW_004516098.1 | scaffold686 | 177848                  | CC                              | TT                 | TT               | INTERGENIC      |               |                    |                    |
| SNP_81672_A_177896 | NW_004516098.1 | scaffold686 | 177896                  | AA                              | GG                 | GG               | INTERGENIC      |               |                    |                    |
| SNP_81673_A_180087 | NW_004516098.1 | scaffold686 | 180087                  | AA                              | CC                 | CC               | INTERGENIC      |               |                    |                    |
| SNP_81674_A_181199 | NW_004516098.1 | scaffold686 | 181199                  | TT                              | CC                 | CC               | INTERGENIC      |               |                    |                    |
| SNP_81675_A_182141 | NW_004516098.1 | scaffold686 | 182141                  | CC                              | TT                 | TT               | INTERGENIC      |               |                    |                    |
| SNP_81678_A_183542 | NW_004516098.1 | scaffold686 | 183542                  | TT                              | CC                 | CC               | INTERGENIC      |               |                    |                    |

| SNPs IDs           | Chromosome IDs | Chromosomes | Physical positions (bp) | CDC Frontier (Reference genome) | (Pusa 1103 & HPNB) | (ILWC 46 & LPNB) | Sequence genome | Components of | Gene accession IDs | Putative functions |
|--------------------|----------------|-------------|-------------------------|---------------------------------|--------------------|------------------|-----------------|---------------|--------------------|--------------------|
| SNP_81679_A_183720 | NW_004516098.1 | scaffold686 | 183720                  | GG                              | TT                 | TT               | INTERGENIC      |               |                    |                    |
| SNP_81681_A_186124 | NW_004516098.1 | scaffold686 | 186124                  | GG                              | CC                 | CC               | INTERGENIC      |               |                    |                    |
| SNP_81682_A_186196 | NW_004516098.1 | scaffold686 | 186196                  | GG                              | AA                 | AA               | INTERGENIC      |               |                    |                    |
| SNP_81683_A_186280 | NW_004516098.1 | scaffold686 | 186280                  | TT                              | GG                 | GG               | INTERGENIC      |               |                    |                    |
| SNP_81684_A_186482 | NW_004516098.1 | scaffold686 | 186482                  | GG                              | TT                 | TT               | INTERGENIC      |               |                    |                    |
| SNP_81685_A_216016 | NW_004516098.1 | scaffold686 | 216016                  | AA                              | GG                 | GG               | INTERGENIC      |               |                    |                    |
| SNP_81686_A_216040 | NW_004516098.1 | scaffold686 | 216040                  | CC                              | TT                 | TT               | INTERGENIC      |               |                    |                    |
| SNP_81687_A_216049 | NW_004516098.1 | scaffold686 | 216049                  | TT                              | CC                 | CC               | INTERGENIC      |               |                    |                    |
| SNP_81688_A_216054 | NW_004516098.1 | scaffold686 | 216054                  | GG                              | AA                 | AA               | INTERGENIC      |               |                    |                    |
| SNP_81689_A_216094 | NW_004516098.1 | scaffold686 | 216094                  | CC                              | TT                 | TT               | INTERGENIC      |               |                    |                    |
| SNP_81690_A_216099 | NW_004516098.1 | scaffold686 | 216099                  | TT                              | CC                 | CC               | INTERGENIC      |               |                    |                    |
| SNP_81691_A_216105 | NW_004516098.1 | scaffold686 | 216105                  | TT                              | CC                 | CC               | INTERGENIC      |               |                    |                    |
| SNP_81692_A_216106 | NW_004516098.1 | scaffold686 | 216106                  | GG                              | AA                 | AA               | INTERGENIC      |               |                    |                    |
| SNP_81694_A_216121 | NW_004516098.1 | scaffold686 | 216121                  | AA                              | GG                 | GG               | INTERGENIC      |               |                    |                    |
| SNP_81695_A_216139 | NW_004516098.1 | scaffold686 | 216139                  | GG                              | AA                 | AA               | INTERGENIC      |               |                    |                    |
| SNP_81696_A_216177 | NW_004516098.1 | scaffold686 | 216177                  | AA                              | GG                 | GG               | INTERGENIC      |               |                    |                    |
| SNP_81697_A_216180 | NW_004516098.1 | scaffold686 | 216180                  | AA                              | TT                 | TT               | INTERGENIC      |               |                    |                    |
| SNP_81698_A_216202 | NW_004516098.1 | scaffold686 | 216202                  | TT                              | AA                 | AA               | INTERGENIC      |               |                    |                    |
| SNP_81699_A_216231 | NW_004516098.1 | scaffold686 | 216231                  | AA                              | GG                 | GG               | INTERGENIC      |               |                    |                    |
| SNP_81701_A_216244 | NW_004516098.1 | scaffold686 | 216244                  | CC                              | TT                 | TT               | INTERGENIC      |               |                    |                    |
| SNP_81702_A_216271 | NW_004516098.1 | scaffold686 | 216271                  | CC                              | TT                 | TT               | INTERGENIC      |               |                    |                    |
| SNP_81703_A_216273 | NW_004516098.1 | scaffold686 | 216273                  | TT                              | CC                 | CC               | INTERGENIC      |               |                    |                    |

| SNPs IDs           | Chromosome IDs | Chromosomes | Physical positions (bp) | CDC Frontier (Reference genome) | (Pusa 1103 & HPNB) | (ILWC 46 & LPNB) | Sequence genome | Components of | Gene accession IDs | Putative functions |
|--------------------|----------------|-------------|-------------------------|---------------------------------|--------------------|------------------|-----------------|---------------|--------------------|--------------------|
| SNP_81704_A_216275 | NW_004516098.1 | scaffold686 | 216275                  | CC                              | AA                 | AA               | INTERGENIC      |               |                    |                    |
| SNP_81705_A_220971 | NW_004516098.1 | scaffold686 | 220971                  | GG                              | AA                 | AA               | INTERGENIC      |               |                    |                    |
| SNP_81706_A_223469 | NW_004516098.1 | scaffold686 | 223469                  | AA                              | TT                 | TT               | INTERGENIC      |               |                    |                    |
| SNP_81707_A_223750 | NW_004516098.1 | scaffold686 | 223750                  | TT                              | GG                 | GG               | INTERGENIC      |               |                    |                    |
| SNP_81708_A_223753 | NW_004516098.1 | scaffold686 | 223753                  | AA                              | GG                 | GG               | INTERGENIC      |               |                    |                    |
| SNP_81709_A_223773 | NW_004516098.1 | scaffold686 | 223773                  | CC                              | TT                 | TT               | INTERGENIC      |               |                    |                    |
| SNP_81710_A_223790 | NW_004516098.1 | scaffold686 | 223790                  | GG                              | TT                 | TT               | INTERGENIC      |               |                    |                    |
| SNP_81711_A_223801 | NW_004516098.1 | scaffold686 | 223801                  | CC                              | TT                 | TT               | INTERGENIC      |               |                    |                    |
| SNP_81712_A_229622 | NW_004516098.1 | scaffold686 | 229622                  | CC                              | TT                 | TT               | INTERGENIC      |               |                    |                    |
| SNP_81713_A_229628 | NW_004516098.1 | scaffold686 | 229628                  | AA                              | GG                 | GG               | INTERGENIC      |               |                    |                    |
| SNP_81714_A_229652 | NW_004516098.1 | scaffold686 | 229652                  | TT                              | CC                 | CC               | INTERGENIC      |               |                    |                    |
| SNP_81715_A_249798 | NW_004516098.1 | scaffold686 | 249798                  | GG                              | AA                 | AA               | INTERGENIC      |               |                    |                    |
| SNP_81717_A_2434   | NW_004516099.1 | scaffold688 | 2434                    | GG                              | TT                 | TT               | INTERGENIC      |               |                    |                    |
| SNP_81718_A_2646   | NW_004516099.1 | scaffold688 | 2646                    | AA                              | TT                 | TT               | INTERGENIC      |               |                    |                    |
| SNP_81719_A_2678   | NW_004516099.1 | scaffold688 | 2678                    | AA                              | TT                 | TT               | INTERGENIC      |               |                    |                    |
| SNP_81720_A_2732   | NW_004516099.1 | scaffold688 | 2732                    | AA                              | GG                 | GG               | INTERGENIC      |               |                    |                    |
| SNP_81721_A_2967   | NW_004516099.1 | scaffold688 | 2967                    | GG                              | AA                 | AA               | INTERGENIC      |               |                    |                    |
| SNP_81722_A_3001   | NW_004516099.1 | scaffold688 | 3001                    | TT                              | AA                 | AA               | INTERGENIC      |               |                    |                    |
| SNP_81723_A_3058   | NW_004516099.1 | scaffold688 | 3058                    | CC                              | GG                 | GG               | INTERGENIC      |               |                    |                    |
| SNP_81724_A_1670   | NW_004516101.1 | scaffold690 | 1670                    | TT                              | CC                 | CC               | INTERGENIC      |               |                    |                    |
| SNP_81725_A_50539  | NW_004516102.1 | scaffold692 | 50539                   | CC                              | TT                 | TT               | INTERGENIC      |               |                    |                    |
| SNP_81726_A_50639  | NW_004516102.1 | scaffold692 | 50639                   | AA                              | TT                 | TT               | INTERGENIC      |               |                    |                    |



| SNPs IDs          | Chromosome IDs | Chromosomes | Physical positions (bp) | CDC Frontier (Reference genome) | (Pusa 1103 & HPNB) | (ILWC 46 & LPNB) | Sequence genome | Components of | Gene accession IDs | Putative functions |
|-------------------|----------------|-------------|-------------------------|---------------------------------|--------------------|------------------|-----------------|---------------|--------------------|--------------------|
| SNP_81727_A_50821 | NW_004516102.1 | scaffold692 | 50821                   | AA                              | CC                 | CC               | INTERGENIC      |               |                    |                    |
| SNP_81728_A_50839 | NW_004516102.1 | scaffold692 | 50839                   | AA                              | TT                 | TT               | INTERGENIC      |               |                    |                    |
| SNP_81730_A_68902 | NW_004516102.1 | scaffold692 | 68902                   | GG                              | AA                 | AA               | INTERGENIC      |               |                    |                    |
| SNP_81731_A_83698 | NW_004516102.1 | scaffold692 | 83698                   | CC                              | TT                 | TT               | INTERGENIC      |               |                    |                    |
| SNP_81732_A_83956 | NW_004516102.1 | scaffold692 | 83956                   | GG                              | TT                 | TT               | INTERGENIC      |               |                    |                    |
| SNP_81733_A_1752  | NW_004516103.1 | scaffold693 | 1752                    | TT                              | CC                 | CC               | INTERGENIC      |               |                    |                    |
| SNP_81734_A_97    | NW_004516104.1 | scaffold694 | 97                      | GG                              | TT                 | TT               | INTERGENIC      |               |                    |                    |
| SNP_81735_A_270   | NW_004516104.1 | scaffold694 | 270                     | GG                              | AA                 | AA               | INTERGENIC      |               |                    |                    |
| SNP_81736_A_305   | NW_004516104.1 | scaffold694 | 305                     | AA                              | TT                 | TT               | INTERGENIC      |               |                    |                    |
| SNP_81737_A_307   | NW_004516104.1 | scaffold694 | 307                     | TT                              | CC                 | CC               | INTERGENIC      |               |                    |                    |
| SNP_81738_A_312   | NW_004516104.1 | scaffold694 | 312                     | CC                              | TT                 | TT               | INTERGENIC      |               |                    |                    |
| SNP_81739_A_338   | NW_004516104.1 | scaffold694 | 338                     | GG                              | AA                 | AA               | INTERGENIC      |               |                    |                    |
| SNP_81740_A_401   | NW_004516104.1 | scaffold694 | 401                     | GG                              | AA                 | AA               | INTERGENIC      |               |                    |                    |
| SNP_81741_A_420   | NW_004516104.1 | scaffold694 | 420                     | TT                              | CC                 | CC               | INTERGENIC      |               |                    |                    |
| SNP_81742_A_438   | NW_004516104.1 | scaffold694 | 438                     | GG                              | CC                 | CC               | INTERGENIC      |               |                    |                    |
| SNP_81743_A_454   | NW_004516104.1 | scaffold694 | 454                     | TT                              | CC                 | CC               | INTERGENIC      |               |                    |                    |
| SNP_81744_A_501   | NW_004516104.1 | scaffold694 | 501                     | TT                              | GG                 | GG               | INTERGENIC      |               |                    |                    |
| SNP_81745_A_505   | NW_004516104.1 | scaffold694 | 505                     | AA                              | GG                 | GG               | INTERGENIC      |               |                    |                    |
| SNP_81746_A_2038  | NW_004516104.1 | scaffold694 | 2038                    | TT                              | CC                 | CC               | INTERGENIC      |               |                    |                    |
| SNP_81747_A_2086  | NW_004516104.1 | scaffold694 | 2086                    | CC                              | TT                 | TT               | INTERGENIC      |               |                    |                    |
| SNP_81748_A_4674  | NW_004516104.1 | scaffold694 | 4674                    | TT                              | CC                 | CC               | INTERGENIC      |               |                    |                    |
| SNP_81749_A_4682  | NW_004516104.1 | scaffold694 | 4682                    | TT                              | AA                 | AA               | INTERGENIC      |               |                    |                    |

| SNPs IDs         | Chromosome IDs | Chromosomes | Physical positions (bp) | CDC Frontier (Reference genome) | (Pusa 1103 & HPNB) | (ILWC 46 & LPNB) | Sequence genome | Components of | Gene accession IDs | Putative functions |
|------------------|----------------|-------------|-------------------------|---------------------------------|--------------------|------------------|-----------------|---------------|--------------------|--------------------|
| SNP_81750_A_4865 | NW_004516104.1 | scaffold694 | 4865                    | AA                              | GG                 | GG               | INTERGENIC      |               |                    |                    |
| SNP_81751_A_7147 | NW_004516104.1 | scaffold694 | 7147                    | CC                              | TT                 | TT               | INTERGENIC      |               |                    |                    |
| SNP_81752_A_7182 | NW_004516104.1 | scaffold694 | 7182                    | CC                              | GG                 | GG               | INTERGENIC      |               |                    |                    |
| SNP_81753_A_7233 | NW_004516104.1 | scaffold694 | 7233                    | TT                              | CC                 | CC               | INTERGENIC      |               |                    |                    |
| SNP_81754_A_7280 | NW_004516104.1 | scaffold694 | 7280                    | AA                              | CC                 | CC               | INTERGENIC      |               |                    |                    |
| SNP_81755_A_7282 | NW_004516104.1 | scaffold694 | 7282                    | CC                              | AA                 | AA               | INTERGENIC      |               |                    |                    |
| SNP_81756_A_7296 | NW_004516104.1 | scaffold694 | 7296                    | GG                              | AA                 | AA               | INTERGENIC      |               |                    |                    |
| SNP_81757_A_7371 | NW_004516104.1 | scaffold694 | 7371                    | TT                              | AA                 | AA               | INTERGENIC      |               |                    |                    |
| SNP_81758_A_7392 | NW_004516104.1 | scaffold694 | 7392                    | AA                              | TT                 | TT               | INTERGENIC      |               |                    |                    |
| SNP_81759_A_7397 | NW_004516104.1 | scaffold694 | 7397                    | GG                              | AA                 | AA               | INTERGENIC      |               |                    |                    |
| SNP_81760_A_7415 | NW_004516104.1 | scaffold694 | 7415                    | CC                              | TT                 | TT               | INTERGENIC      |               |                    |                    |
| SNP_81761_A_7451 | NW_004516104.1 | scaffold694 | 7451                    | GG                              | AA                 | AA               | INTERGENIC      |               |                    |                    |
| SNP_81762_A_7459 | NW_004516104.1 | scaffold694 | 7459                    | GG                              | AA                 | AA               | INTERGENIC      |               |                    |                    |
| SNP_81763_A_7470 | NW_004516104.1 | scaffold694 | 7470                    | TT                              | CC                 | CC               | INTERGENIC      |               |                    |                    |
| SNP_81764_A_7477 | NW_004516104.1 | scaffold694 | 7477                    | TT                              | CC                 | CC               | INTERGENIC      |               |                    |                    |
| SNP_81765_A_7478 | NW_004516104.1 | scaffold694 | 7478                    | CC                              | TT                 | TT               | INTERGENIC      |               |                    |                    |
| SNP_81766_A_7550 | NW_004516104.1 | scaffold694 | 7550                    | AA                              | CC                 | CC               | INTERGENIC      |               |                    |                    |
| SNP_81767_A_7582 | NW_004516104.1 | scaffold694 | 7582                    | AA                              | GG                 | GG               | INTERGENIC      |               |                    |                    |
| SNP_81768_A_7660 | NW_004516104.1 | scaffold694 | 7660                    | TT                              | CC                 | CC               | INTERGENIC      |               |                    |                    |
| SNP_81769_A_7684 | NW_004516104.1 | scaffold694 | 7684                    | AA                              | GG                 | GG               | INTERGENIC      |               |                    |                    |
| SNP_81770_A_7698 | NW_004516104.1 | scaffold694 | 7698                    | TT                              | CC                 | CC               | INTERGENIC      |               |                    |                    |
| SNP_81771_A_7714 | NW_004516104.1 | scaffold694 | 7714                    | CC                              | TT                 | TT               | INTERGENIC      |               |                    |                    |

| SNPs IDs         | Chromosome IDs | Chromosomes | Physical positions (bp) | CDC Frontier (Reference genome) | (Pusa 1103 & HPNB) | (ILWC 46 & LPNB) | Sequence genome | Components of | Gene accession IDs | Putative functions |
|------------------|----------------|-------------|-------------------------|---------------------------------|--------------------|------------------|-----------------|---------------|--------------------|--------------------|
| SNP_81772_A_7727 | NW_004516104.1 | scaffold694 | 7727                    | CC                              | TT                 | TT               | INTERGENIC      |               |                    |                    |
| SNP_81773_A_7761 | NW_004516104.1 | scaffold694 | 7761                    | GG                              | CC                 | CC               | INTERGENIC      |               |                    |                    |
| SNP_81774_A_7842 | NW_004516104.1 | scaffold694 | 7842                    | GG                              | TT                 | TT               | INTERGENIC      |               |                    |                    |
| SNP_81775_A_7846 | NW_004516104.1 | scaffold694 | 7846                    | GG                              | AA                 | AA               | INTERGENIC      |               |                    |                    |
| SNP_81776_A_8074 | NW_004516104.1 | scaffold694 | 8074                    | GG                              | AA                 | AA               | INTERGENIC      |               |                    |                    |
| SNP_81777_A_8588 | NW_004516104.1 | scaffold694 | 8588                    | AA                              | TT                 | TT               | INTERGENIC      |               |                    |                    |
| SNP_81778_A_9002 | NW_004516104.1 | scaffold694 | 9002                    | GG                              | AA                 | AA               | INTERGENIC      |               |                    |                    |
| SNP_81779_A_9010 | NW_004516104.1 | scaffold694 | 9010                    | TT                              | CC                 | CC               | INTERGENIC      |               |                    |                    |
| SNP_81780_A_9038 | NW_004516104.1 | scaffold694 | 9038                    | GG                              | AA                 | AA               | INTERGENIC      |               |                    |                    |
| SNP_81781_A_9054 | NW_004516104.1 | scaffold694 | 9054                    | AA                              | TT                 | TT               | INTERGENIC      |               |                    |                    |
| SNP_81782_A_9120 | NW_004516104.1 | scaffold694 | 9120                    | AA                              | GG                 | GG               | INTERGENIC      |               |                    |                    |
| SNP_81783_A_9123 | NW_004516104.1 | scaffold694 | 9123                    | GG                              | TT                 | TT               | INTERGENIC      |               |                    |                    |
| SNP_81784_A_9136 | NW_004516104.1 | scaffold694 | 9136                    | AA                              | GG                 | GG               | INTERGENIC      |               |                    |                    |
| SNP_81785_A_9196 | NW_004516104.1 | scaffold694 | 9196                    | CC                              | TT                 | TT               | INTERGENIC      |               |                    |                    |
| SNP_81786_A_9269 | NW_004516104.1 | scaffold694 | 9269                    | GG                              | TT                 | TT               | INTERGENIC      |               |                    |                    |
| SNP_81787_A_9468 | NW_004516104.1 | scaffold694 | 9468                    | CC                              | TT                 | TT               | INTERGENIC      |               |                    |                    |
| SNP_81788_A_9596 | NW_004516104.1 | scaffold694 | 9596                    | TT                              | AA                 | AA               | INTERGENIC      |               |                    |                    |
| SNP_81789_A_9645 | NW_004516104.1 | scaffold694 | 9645                    | TT                              | CC                 | CC               | INTERGENIC      |               |                    |                    |
| SNP_81790_A_64   | NW_004516105.1 | scaffold695 | 64                      | TT                              | CC                 | CC               | INTERGENIC      |               |                    |                    |
| SNP_81791_A_80   | NW_004516105.1 | scaffold695 | 80                      | GG                              | AA                 | AA               | INTERGENIC      |               |                    |                    |
| SNP_81792_A_82   | NW_004516105.1 | scaffold695 | 82                      | CC                              | TT                 | TT               | INTERGENIC      |               |                    |                    |
| SNP_81793_A_84   | NW_004516105.1 | scaffold695 | 84                      | GG                              | CC                 | CC               | INTERGENIC      |               |                    |                    |

| SNPs IDs          | Chromosome IDs | Chromosomes | Physical positions (bp) | CDC Frontier (Reference genome) | (Pusa 1103 & HPNB) | (ILWC 46 & LPNB) | Sequence genome | Components of | Gene accession IDs | Putative functions |
|-------------------|----------------|-------------|-------------------------|---------------------------------|--------------------|------------------|-----------------|---------------|--------------------|--------------------|
| SNP_81794_A_98    | NW_004516105.1 | scaffold695 | 98                      | GG                              | AA                 | AA               | INTERGENIC      |               |                    |                    |
| SNP_81795_A_102   | NW_004516105.1 | scaffold695 | 102                     | GG                              | CC                 | CC               | INTERGENIC      |               |                    |                    |
| SNP_81796_A_372   | NW_004516105.1 | scaffold695 | 372                     | GG                              | CC                 | CC               | INTERGENIC      |               |                    |                    |
| SNP_81797_A_423   | NW_004516105.1 | scaffold695 | 423                     | TT                              | GG                 | GG               | INTERGENIC      |               |                    |                    |
| SNP_81798_A_853   | NW_004516105.1 | scaffold695 | 853                     | AA                              | CC                 | CC               | INTERGENIC      |               |                    |                    |
| SNP_81799_A_854   | NW_004516105.1 | scaffold695 | 854                     | TT                              | GG                 | GG               | INTERGENIC      |               |                    |                    |
| SNP_81800_A_1201  | NW_004516105.1 | scaffold695 | 1201                    | TT                              | CC                 | CC               | INTERGENIC      |               |                    |                    |
| SNP_81801_A_2076  | NW_004516106.1 | scaffold696 | 2076                    | TT                              | CC                 | CC               | INTERGENIC      |               |                    |                    |
| SNP_81802_A_4597  | NW_004516106.1 | scaffold696 | 4597                    | AA                              | GG                 | GG               | INTERGENIC      |               |                    |                    |
| SNP_81803_A_4611  | NW_004516106.1 | scaffold696 | 4611                    | CC                              | GG                 | GG               | INTERGENIC      |               |                    |                    |
| SNP_81804_A_6295  | NW_004516106.1 | scaffold696 | 6295                    | CC                              | TT                 | TT               | INTERGENIC      |               |                    |                    |
| SNP_81805_A_12342 | NW_004516106.1 | scaffold696 | 12342                   | AA                              | GG                 | GG               | INTERGENIC      |               |                    |                    |
| SNP_81806_A_12705 | NW_004516106.1 | scaffold696 | 12705                   | CC                              | TT                 | TT               | INTERGENIC      |               |                    |                    |
| SNP_81807_A_12802 | NW_004516106.1 | scaffold696 | 12802                   | GG                              | AA                 | AA               | INTERGENIC      |               |                    |                    |
| SNP_81808_A_12836 | NW_004516106.1 | scaffold696 | 12836                   | TT                              | AA                 | AA               | INTERGENIC      |               |                    |                    |
| SNP_81809_A_12845 | NW_004516106.1 | scaffold696 | 12845                   | AA                              | GG                 | GG               | INTERGENIC      |               |                    |                    |
| SNP_81810_A_12875 | NW_004516106.1 | scaffold696 | 12875                   | TT                              | CC                 | CC               | INTERGENIC      |               |                    |                    |
| SNP_81811_A_12888 | NW_004516106.1 | scaffold696 | 12888                   | TT                              | CC                 | CC               | INTERGENIC      |               |                    |                    |
| SNP_81812_A_12919 | NW_004516106.1 | scaffold696 | 12919                   | TT                              | CC                 | CC               | INTERGENIC      |               |                    |                    |
| SNP_81813_A_12982 | NW_004516106.1 | scaffold696 | 12982                   | AA                              | GG                 | GG               | INTERGENIC      |               |                    |                    |
| SNP_81814_A_13080 | NW_004516106.1 | scaffold696 | 13080                   | CC                              | AA                 | AA               | INTERGENIC      |               |                    |                    |
| SNP_81815_A_13395 | NW_004516106.1 | scaffold696 | 13395                   | GG                              | TT                 | TT               | INTERGENIC      |               |                    |                    |

| SNPs IDs          | Chromosome IDs | Chromosomes | Physical positions (bp) | CDC Frontier (Reference genome) | (Pusa 1103 & HPNB) | (ILWC 46 & LPNB) | Sequence genome | Components of | Gene accession IDs | Putative functions |
|-------------------|----------------|-------------|-------------------------|---------------------------------|--------------------|------------------|-----------------|---------------|--------------------|--------------------|
| SNP_81816_A_13423 | NW_004516106.1 | scaffold696 | 13423                   | TT                              | CC                 | CC               | INTERGENIC      |               |                    |                    |
| SNP_81817_A_13498 | NW_004516106.1 | scaffold696 | 13498                   | TT                              | CC                 | CC               | INTERGENIC      |               |                    |                    |
| SNP_81818_A_13557 | NW_004516106.1 | scaffold696 | 13557                   | TT                              | CC                 | CC               | INTERGENIC      |               |                    |                    |
| SNP_81819_A_13995 | NW_004516106.1 | scaffold696 | 13995                   | AA                              | CC                 | CC               | INTERGENIC      |               |                    |                    |
| SNP_81820_A_14044 | NW_004516106.1 | scaffold696 | 14044                   | CC                              | TT                 | TT               | INTERGENIC      |               |                    |                    |
| SNP_81821_A_14054 | NW_004516106.1 | scaffold696 | 14054                   | AA                              | CC                 | CC               | INTERGENIC      |               |                    |                    |
| SNP_81822_A_23404 | NW_004516106.1 | scaffold696 | 23404                   | TT                              | CC                 | CC               | INTERGENIC      |               |                    |                    |
| SNP_81823_A_25932 | NW_004516106.1 | scaffold696 | 25932                   | TT                              | AA                 | AA               | INTERGENIC      |               |                    |                    |
| SNP_81824_A_25969 | NW_004516106.1 | scaffold696 | 25969                   | GG                              | CC                 | CC               | INTERGENIC      |               |                    |                    |
| SNP_81825_A_25983 | NW_004516106.1 | scaffold696 | 25983                   | AA                              | TT                 | TT               | INTERGENIC      |               |                    |                    |
| SNP_81826_A_27898 | NW_004516106.1 | scaffold696 | 27898                   | GG                              | TT                 | TT               | INTERGENIC      |               |                    |                    |
| SNP_81827_A_27900 | NW_004516106.1 | scaffold696 | 27900                   | AA                              | GG                 | GG               | INTERGENIC      |               |                    |                    |
| SNP_81828_A_27901 | NW_004516106.1 | scaffold696 | 27901                   | GG                              | TT                 | TT               | INTERGENIC      |               |                    |                    |
| SNP_81829_A_28092 | NW_004516106.1 | scaffold696 | 28092                   | AA                              | TT                 | TT               | INTERGENIC      |               |                    |                    |
| SNP_81830_A_28588 | NW_004516106.1 | scaffold696 | 28588                   | CC                              | AA                 | AA               | INTERGENIC      |               |                    |                    |
| SNP_81831_A_29020 | NW_004516106.1 | scaffold696 | 29020                   | TT                              | CC                 | CC               | INTERGENIC      |               |                    |                    |
| SNP_81832_A_29128 | NW_004516106.1 | scaffold696 | 29128                   | GG                              | AA                 | AA               | INTERGENIC      |               |                    |                    |
| SNP_81833_A_29172 | NW_004516106.1 | scaffold696 | 29172                   | AA                              | GG                 | GG               | INTERGENIC      |               |                    |                    |
| SNP_81834_A_29179 | NW_004516106.1 | scaffold696 | 29179                   | GG                              | AA                 | AA               | INTERGENIC      |               |                    |                    |
| SNP_81835_A_29180 | NW_004516106.1 | scaffold696 | 29180                   | GG                              | AA                 | AA               | INTERGENIC      |               |                    |                    |
| SNP_81836_A_29186 | NW_004516106.1 | scaffold696 | 29186                   | GG                              | AA                 | AA               | INTERGENIC      |               |                    |                    |
| SNP_81837_A_33009 | NW_004516106.1 | scaffold696 | 33009                   | TT                              | GG                 | GG               | INTERGENIC      |               |                    |                    |

| SNPs IDs           | Chromosome IDs | Chromosomes | Physical positions (bp) | CDC Frontier (Reference genome) | (Pusa 1103 & HPNB) | (ILWC 46 & LPNB) | Sequence genome   | Components of | Gene accession IDs          | Putative functions |
|--------------------|----------------|-------------|-------------------------|---------------------------------|--------------------|------------------|-------------------|---------------|-----------------------------|--------------------|
| SNP_81838_A_33055  | NW_004516106.1 | scaffold696 | 33055                   | AA                              | GG                 | GG               | INTERGENIC        |               |                             |                    |
| SNP_81839_A_33096  | NW_004516106.1 | scaffold696 | 33096                   | AA                              | GG                 | GG               | INTERGENIC        |               |                             |                    |
| SNP_81840_A_33463  | NW_004516106.1 | scaffold696 | 33463                   | GG                              | AA                 | AA               | INTERGENIC        |               |                             |                    |
| SNP_81841_A_33604  | NW_004516106.1 | scaffold696 | 33604                   | TT                              | CC                 | CC               | INTERGENIC        |               |                             |                    |
| SNP_81843_A_39892  | NW_004516106.1 | scaffold696 | 39892                   | GG                              | CC                 | CC               | INTERGENIC        |               |                             |                    |
| SNP_81845_A_43243  | NW_004516106.1 | scaffold696 | 43243                   | AA                              | TT                 | TT               | INTERGENIC        |               |                             |                    |
| SNP_81846_A_43310  | NW_004516106.1 | scaffold696 | 43310                   | TT                              | CC                 | CC               | INTERGENIC        |               |                             |                    |
| SNP_81847_A_43325  | NW_004516106.1 | scaffold696 | 43325                   | CC                              | TT                 | TT               | INTERGENIC        |               |                             |                    |
| SNP_81848_A_43355  | NW_004516106.1 | scaffold696 | 43355                   | CC                              | TT                 | TT               | INTERGENIC        |               |                             |                    |
| SNP_81849_A_43439  | NW_004516106.1 | scaffold696 | 43439                   | GG                              | TT                 | TT               | INTERGENIC        |               |                             |                    |
| SNP_81850_A_43491  | NW_004516106.1 | scaffold696 | 43491                   | AA                              | GG                 | GG               | INTERGENIC        |               |                             |                    |
| SNP_81851_A_43506  | NW_004516106.1 | scaffold696 | 43506                   | AA                              | GG                 | GG               | INTERGENIC        |               |                             |                    |
| SNP_81852_A_43546  | NW_004516106.1 | scaffold696 | 43546                   | TT                              | CC                 | CC               | INTERGENIC        |               |                             |                    |
| SNP_81853_A_51729  | NW_004516106.1 | scaffold696 | 51729                   | AA                              | CC                 | CC               | DRR               | 101513674     | probable terpene synthase 2 |                    |
| SNP_81854_A_52232  | NW_004516106.1 | scaffold696 | 52232                   | TT                              | CC                 | CC               | INTRON            | 101513674     | probable terpene synthase 2 |                    |
| SNP_81855_A_52306  | NW_004516106.1 | scaffold696 | 52306                   | GG                              | AA                 | AA               | INTRON            | 101513674     | probable terpene synthase 2 |                    |
| SNP_81857_A_52353  | NW_004516106.1 | scaffold696 | 52353                   | GG                              | AA                 | AA               | INTRON            | 101513674     | probable terpene synthase 2 |                    |
| SNP_81858_A_52376  | NW_004516106.1 | scaffold696 | 52376                   | CC                              | TT                 | TT               | INTRON            | 101513674     | probable terpene synthase 2 |                    |
| SNP_81860_A_53971  | NW_004516106.1 | scaffold696 | 53971                   | CC                              | TT                 | TT               | SYNONYMOUS_CODING | 101513674     | probable terpene synthase 2 |                    |
| SNP_81861_A_179385 | NW_004516106.1 | scaffold696 | 179385                  | AA                              | CC                 | CC               | INTERGENIC        |               |                             |                    |
| SNP_81862_A_179605 | NW_004516106.1 | scaffold696 | 179605                  | TT                              | CC                 | CC               | INTERGENIC        |               |                             |                    |
| SNP_81863_A_1173   | NW_004516108.1 | scaffold702 | 1173                    | AA                              | GG                 | GG               | INTERGENIC        |               |                             |                    |

| SNPs IDs          | Chromosome IDs | Chromosomes | Physical positions (bp) | CDC Frontier (Reference genome) | (Pusa 1103 & HPNB) | (ILWC 46 & LPNB) | Sequence Components of genome | Gene accession IDs | Putative functions           |
|-------------------|----------------|-------------|-------------------------|---------------------------------|--------------------|------------------|-------------------------------|--------------------|------------------------------|
| SNP_81864_A_1259  | NW_004516108.1 | scaffold702 | 1259                    | TT                              | CC                 | CC               | INTERGENIC                    |                    |                              |
| SNP_81865_A_7119  | NW_004516108.1 | scaffold702 | 7119                    | GG                              | AA                 | AA               | INTERGENIC                    |                    |                              |
| SNP_81866_A_9144  | NW_004516108.1 | scaffold702 | 9144                    | TT                              | CC                 | CC               | INTERGENIC                    |                    |                              |
| SNP_81867_A_9371  | NW_004516108.1 | scaffold702 | 9371                    | TT                              | CC                 | CC               | INTERGENIC                    |                    |                              |
| SNP_81868_A_9467  | NW_004516108.1 | scaffold702 | 9467                    | AA                              | GG                 | GG               | INTERGENIC                    |                    |                              |
| SNP_81869_A_13954 | NW_004516108.1 | scaffold702 | 13954                   | CC                              | TT                 | TT               | INTERGENIC                    |                    |                              |
| SNP_81870_A_19284 | NW_004516108.1 | scaffold702 | 19284                   | TT                              | CC                 | CC               | INTERGENIC                    |                    |                              |
| SNP_81871_A_19287 | NW_004516108.1 | scaffold702 | 19287                   | AA                              | GG                 | GG               | INTERGENIC                    |                    |                              |
| SNP_81872_A_19295 | NW_004516108.1 | scaffold702 | 19295                   | CC                              | TT                 | TT               | INTERGENIC                    |                    |                              |
| SNP_81873_A_19300 | NW_004516108.1 | scaffold702 | 19300                   | TT                              | CC                 | CC               | INTERGENIC                    |                    |                              |
| SNP_81874_A_19589 | NW_004516108.1 | scaffold702 | 19589                   | GG                              | AA                 | AA               | INTERGENIC                    |                    |                              |
| SNP_81875_A_25112 | NW_004516108.1 | scaffold702 | 25112                   | AA                              | GG                 | GG               | INTRON                        | 101514993          | uncharacterized LOC101514993 |
| SNP_81876_A_36601 | NW_004516108.1 | scaffold702 | 36601                   | TT                              | GG                 | GG               | INTERGENIC                    |                    |                              |
| SNP_81877_A_37257 | NW_004516108.1 | scaffold702 | 37257                   | GG                              | AA                 | AA               | INTERGENIC                    |                    |                              |
| SNP_81878_A_41139 | NW_004516108.1 | scaffold702 | 41139                   | AA                              | GG                 | GG               | INTERGENIC                    |                    |                              |
| SNP_81879_A_49863 | NW_004516108.1 | scaffold702 | 49863                   | GG                              | AA                 | AA               | INTERGENIC                    |                    |                              |
| SNP_81881_A_52987 | NW_004516108.1 | scaffold702 | 52987                   | AA                              | GG                 | GG               | INTERGENIC                    |                    |                              |
| SNP_81882_A_52991 | NW_004516108.1 | scaffold702 | 52991                   | AA                              | GG                 | GG               | INTERGENIC                    |                    |                              |
| SNP_81883_A_53003 | NW_004516108.1 | scaffold702 | 53003                   | AA                              | GG                 | GG               | INTERGENIC                    |                    |                              |
| SNP_81885_A_61400 | NW_004516108.1 | scaffold702 | 61400                   | CC                              | TT                 | TT               | INTERGENIC                    |                    |                              |
| SNP_81886_A_65824 | NW_004516108.1 | scaffold702 | 65824                   | TT                              | GG                 | GG               | INTERGENIC                    |                    |                              |
| SNP_81887_A_69265 | NW_004516108.1 | scaffold702 | 69265                   | TT                              | GG                 | GG               | INTERGENIC                    |                    |                              |

| SNPs IDs           | Chromosome IDs | Chromosomes | Physical positions (bp) | CDC Frontier (Reference genome) | (Pusa 1103 & HPNB) | (ILWC 46 & LPNB) | Sequence Components of genome | Gene accession IDs | Putative functions           |
|--------------------|----------------|-------------|-------------------------|---------------------------------|--------------------|------------------|-------------------------------|--------------------|------------------------------|
| SNP_81888_A_72338  | NW_004516108.1 | scaffold702 | 72338                   | CC                              | TT                 | TT               | INTERGENIC                    |                    |                              |
| SNP_81889_A_73196  | NW_004516108.1 | scaffold702 | 73196                   | CC                              | TT                 | TT               | INTERGENIC                    |                    |                              |
| SNP_81890_A_75700  | NW_004516108.1 | scaffold702 | 75700                   | GG                              | AA                 | AA               | INTERGENIC                    |                    |                              |
| SNP_81891_A_80772  | NW_004516108.1 | scaffold702 | 80772                   | CC                              | TT                 | TT               | INTERGENIC                    |                    |                              |
| SNP_81893_A_99706  | NW_004516108.1 | scaffold702 | 99706                   | TT                              | CC                 | CC               | INTERGENIC                    |                    |                              |
| SNP_81894_A_99778  | NW_004516108.1 | scaffold702 | 99778                   | AA                              | GG                 | GG               | INTERGENIC                    |                    |                              |
| SNP_81895_A_105285 | NW_004516108.1 | scaffold702 | 105285                  | CC                              | TT                 | TT               | INTERGENIC                    |                    |                              |
| SNP_81896_A_106338 | NW_004516108.1 | scaffold702 | 106338                  | TT                              | GG                 | GG               | INTERGENIC                    |                    |                              |
| SNP_81898_A_114803 | NW_004516108.1 | scaffold702 | 114803                  | TT                              | CC                 | CC               | INTRON                        | 101488957          | uncharacterized LOC101488957 |
| SNP_81899_A_122018 | NW_004516108.1 | scaffold702 | 122018                  | AA                              | GG                 | GG               | INTERGENIC                    |                    |                              |
| SNP_81900_A_124789 | NW_004516108.1 | scaffold702 | 124789                  | AA                              | CC                 | CC               | INTERGENIC                    |                    |                              |
| SNP_81901_A_126806 | NW_004516108.1 | scaffold702 | 126806                  | GG                              | AA                 | AA               | INTERGENIC                    |                    |                              |
| SNP_81902_A_150260 | NW_004516108.1 | scaffold702 | 150260                  | TT                              | AA                 | AA               | INTERGENIC                    |                    |                              |
| SNP_81903_A_150468 | NW_004516108.1 | scaffold702 | 150468                  | TT                              | CC                 | CC               | INTERGENIC                    |                    |                              |
| SNP_81904_A_153109 | NW_004516108.1 | scaffold702 | 153109                  | TT                              | CC                 | CC               | INTERGENIC                    |                    |                              |
| SNP_81906_A_174457 | NW_004516108.1 | scaffold702 | 174457                  | AA                              | GG                 | GG               | INTRON                        | 101489283          | Unknown function             |
| SNP_81908_A_185113 | NW_004516108.1 | scaffold702 | 185113                  | CC                              | AA                 | AA               | INTERGENIC                    |                    |                              |
| SNP_81909_A_187836 | NW_004516108.1 | scaffold702 | 187836                  | CC                              | TT                 | TT               | INTERGENIC                    |                    |                              |
| SNP_81910_A_190441 | NW_004516108.1 | scaffold702 | 190441                  | TT                              | AA                 | AA               | INTERGENIC                    |                    |                              |
| SNP_81911_A_190570 | NW_004516108.1 | scaffold702 | 190570                  | TT                              | GG                 | GG               | INTERGENIC                    |                    |                              |
| SNP_81912_A_194038 | NW_004516108.1 | scaffold702 | 194038                  | AA                              | GG                 | GG               | INTERGENIC                    |                    |                              |
| SNP_81913_A_194451 | NW_004516108.1 | scaffold702 | 194451                  | AA                              | TT                 | TT               | INTERGENIC                    |                    |                              |



| SNPs IDs           | Chromosome IDs | Chromosomes | Physical positions (bp) | CDC Frontier (Reference genome) | (Pusa 1103 & HPNB) | (ILWC 46 & LPNB) | Sequence Components of genome | Gene accession IDs | Putative functions                                        |
|--------------------|----------------|-------------|-------------------------|---------------------------------|--------------------|------------------|-------------------------------|--------------------|-----------------------------------------------------------|
| SNP_81914_A_194456 | NW_004516108.1 | scaffold702 | 194456                  | AA                              | TT                 | TT               | INTERGENIC                    |                    |                                                           |
| SNP_81915_A_205479 | NW_004516108.1 | scaffold702 | 205479                  | AA                              | CC                 | CC               | INTERGENIC                    |                    |                                                           |
| SNP_81916_A_205923 | NW_004516108.1 | scaffold702 | 205923                  | CC                              | AA                 | AA               | INTERGENIC                    |                    |                                                           |
| SNP_81918_A_217722 | NW_004516108.1 | scaffold702 | 217722                  | CC                              | TT                 | TT               | INTERGENIC                    |                    |                                                           |
| SNP_81919_A_219037 | NW_004516108.1 | scaffold702 | 219037                  | CC                              | GG                 | GG               | INTERGENIC                    |                    |                                                           |
| SNP_81920_A_219039 | NW_004516108.1 | scaffold702 | 219039                  | TT                              | CC                 | CC               | INTERGENIC                    |                    |                                                           |
| SNP_81921_A_219078 | NW_004516108.1 | scaffold702 | 219078                  | TT                              | GG                 | GG               | INTERGENIC                    |                    |                                                           |
| SNP_81922_A_219388 | NW_004516108.1 | scaffold702 | 219388                  | CC                              | TT                 | TT               | INTERGENIC                    |                    |                                                           |
| SNP_81924_A_226215 | NW_004516108.1 | scaffold702 | 226215                  | TT                              | CC                 | CC               | INTERGENIC                    |                    |                                                           |
| SNP_81925_A_231218 | NW_004516108.1 | scaffold702 | 231218                  | CC                              | TT                 | TT               | DRR                           | 101489927          | anthranilate synthase alpha subunit 1, chloroplastic-like |
| SNP_81926_A_239658 | NW_004516108.1 | scaffold702 | 239658                  | AA                              | GG                 | GG               | INTERGENIC                    |                    |                                                           |
| SNP_81928_A_248954 | NW_004516108.1 | scaffold702 | 248954                  | GG                              | AA                 | AA               | URR                           | 101515530          | magnesium transporter MRS2-2-like                         |
| SNP_81929_A_250431 | NW_004516108.1 | scaffold702 | 250431                  | GG                              | AA                 | AA               | INTERGENIC                    |                    |                                                           |
| SNP_81930_A_250532 | NW_004516108.1 | scaffold702 | 250532                  | AA                              | GG                 | GG               | INTERGENIC                    |                    |                                                           |
| SNP_81931_A_253830 | NW_004516108.1 | scaffold702 | 253830                  | CC                              | TT                 | TT               | INTERGENIC                    |                    |                                                           |
| SNP_81932_A_254059 | NW_004516108.1 | scaffold702 | 254059                  | AA                              | TT                 | TT               | INTERGENIC                    |                    |                                                           |
| SNP_81933_A_254221 | NW_004516108.1 | scaffold702 | 254221                  | AA                              | GG                 | GG               | INTERGENIC                    |                    |                                                           |
| SNP_81935_A_255305 | NW_004516108.1 | scaffold702 | 255305                  | CC                              | TT                 | TT               | INTERGENIC                    |                    |                                                           |
| SNP_81936_A_255400 | NW_004516108.1 | scaffold702 | 255400                  | GG                              | AA                 | AA               | INTERGENIC                    |                    |                                                           |
| SNP_81937_A_255406 | NW_004516108.1 | scaffold702 | 255406                  | GG                              | AA                 | AA               | INTERGENIC                    |                    |                                                           |
| SNP_81938_A_255920 | NW_004516108.1 | scaffold702 | 255920                  | GG                              | AA                 | AA               | INTERGENIC                    |                    |                                                           |
| SNP_81939_A_256365 | NW_004516108.1 | scaffold702 | 256365                  | TT                              | AA                 | AA               | INTERGENIC                    |                    |                                                           |

| SNPs IDs           | Chromosome IDs | Chromosomes | Physical positions (bp) | CDC Frontier (Reference genome) | (Pusa 1103 & HPNB) | (ILWC 46 & LPNB) | Sequence genome | Components of | Gene accession IDs | Putative functions |
|--------------------|----------------|-------------|-------------------------|---------------------------------|--------------------|------------------|-----------------|---------------|--------------------|--------------------|
| SNP_81940_A_258298 | NW_004516108.1 | scaffold702 | 258298                  | GG                              | CC                 | CC               | INTERGENIC      |               |                    |                    |
| SNP_81941_A_258436 | NW_004516108.1 | scaffold702 | 258436                  | CC                              | AA                 | AA               | INTERGENIC      |               |                    |                    |
| SNP_81942_A_258620 | NW_004516108.1 | scaffold702 | 258620                  | GG                              | AA                 | AA               | INTERGENIC      |               |                    |                    |
| SNP_81943_A_259298 | NW_004516108.1 | scaffold702 | 259298                  | CC                              | AA                 | AA               | INTERGENIC      |               |                    |                    |
| SNP_81944_A_259302 | NW_004516108.1 | scaffold702 | 259302                  | TT                              | GG                 | GG               | INTERGENIC      |               |                    |                    |
| SNP_81945_A_262119 | NW_004516108.1 | scaffold702 | 262119                  | CC                              | AA                 | AA               | INTERGENIC      |               |                    |                    |
| SNP_81946_A_262381 | NW_004516108.1 | scaffold702 | 262381                  | TT                              | AA                 | AA               | INTERGENIC      |               |                    |                    |
| SNP_81947_A_262430 | NW_004516108.1 | scaffold702 | 262430                  | CC                              | TT                 | TT               | INTERGENIC      |               |                    |                    |
| SNP_81948_A_262432 | NW_004516108.1 | scaffold702 | 262432                  | TT                              | AA                 | AA               | INTERGENIC      |               |                    |                    |
| SNP_81949_A_262463 | NW_004516108.1 | scaffold702 | 262463                  | TT                              | GG                 | GG               | INTERGENIC      |               |                    |                    |
| SNP_81950_A_262487 | NW_004516108.1 | scaffold702 | 262487                  | CC                              | TT                 | TT               | INTERGENIC      |               |                    |                    |
| SNP_81951_A_262563 | NW_004516108.1 | scaffold702 | 262563                  | AA                              | CC                 | CC               | INTERGENIC      |               |                    |                    |
| SNP_81952_A_262749 | NW_004516108.1 | scaffold702 | 262749                  | AA                              | GG                 | GG               | INTERGENIC      |               |                    |                    |
| SNP_81953_A_262771 | NW_004516108.1 | scaffold702 | 262771                  | CC                              | TT                 | TT               | INTERGENIC      |               |                    |                    |
| SNP_81954_A_262775 | NW_004516108.1 | scaffold702 | 262775                  | AA                              | GG                 | GG               | INTERGENIC      |               |                    |                    |
| SNP_81955_A_262837 | NW_004516108.1 | scaffold702 | 262837                  | TT                              | CC                 | CC               | INTERGENIC      |               |                    |                    |
| SNP_81956_A_263028 | NW_004516108.1 | scaffold702 | 263028                  | TT                              | AA                 | AA               | INTERGENIC      |               |                    |                    |
| SNP_81957_A_263031 | NW_004516108.1 | scaffold702 | 263031                  | CC                              | TT                 | TT               | INTERGENIC      |               |                    |                    |
| SNP_81958_A_263052 | NW_004516108.1 | scaffold702 | 263052                  | AA                              | TT                 | TT               | INTERGENIC      |               |                    |                    |
| SNP_81959_A_263063 | NW_004516108.1 | scaffold702 | 263063                  | TT                              | CC                 | CC               | INTERGENIC      |               |                    |                    |
| SNP_81960_A_263701 | NW_004516108.1 | scaffold702 | 263701                  | TT                              | CC                 | CC               | INTERGENIC      |               |                    |                    |
| SNP_81961_A_263745 | NW_004516108.1 | scaffold702 | 263745                  | AA                              | GG                 | GG               | INTERGENIC      |               |                    |                    |

| SNPs IDs           | Chromosome IDs | Chromosomes | Physical positions (bp) | CDC Frontier (Reference genome) | (Pusa 1103 & HPNB) | (ILWC 46 & LPNB) | Sequence genome | Components of | Gene accession IDs | Putative functions |
|--------------------|----------------|-------------|-------------------------|---------------------------------|--------------------|------------------|-----------------|---------------|--------------------|--------------------|
| SNP_81962_A_263807 | NW_004516108.1 | scaffold702 | 263807                  | AA                              | CC                 | CC               | INTERGENIC      |               |                    |                    |
| SNP_81963_A_263925 | NW_004516108.1 | scaffold702 | 263925                  | CC                              | AA                 | AA               | INTERGENIC      |               |                    |                    |
| SNP_81964_A_272214 | NW_004516108.1 | scaffold702 | 272214                  | TT                              | GG                 | GG               | INTERGENIC      |               |                    |                    |
| SNP_81966_A_273213 | NW_004516108.1 | scaffold702 | 273213                  | AA                              | TT                 | TT               | INTERGENIC      |               |                    |                    |
| SNP_81967_A_273813 | NW_004516108.1 | scaffold702 | 273813                  | AA                              | GG                 | GG               | INTERGENIC      |               |                    |                    |
| SNP_81968_A_275041 | NW_004516108.1 | scaffold702 | 275041                  | GG                              | AA                 | AA               | INTERGENIC      |               |                    |                    |
| SNP_81970_A_278590 | NW_004516108.1 | scaffold702 | 278590                  | AA                              | TT                 | TT               | INTERGENIC      |               |                    |                    |
| SNP_81971_A_278955 | NW_004516108.1 | scaffold702 | 278955                  | GG                              | AA                 | AA               | INTERGENIC      |               |                    |                    |
| SNP_81972_A_279780 | NW_004516108.1 | scaffold702 | 279780                  | CC                              | AA                 | AA               | INTERGENIC      |               |                    |                    |
| SNP_81973_A_279852 | NW_004516108.1 | scaffold702 | 279852                  | GG                              | AA                 | AA               | INTERGENIC      |               |                    |                    |
| SNP_81974_A_280287 | NW_004516108.1 | scaffold702 | 280287                  | TT                              | CC                 | CC               | INTERGENIC      |               |                    |                    |
| SNP_81975_A_280308 | NW_004516108.1 | scaffold702 | 280308                  | CC                              | AA                 | AA               | INTERGENIC      |               |                    |                    |
| SNP_81976_A_281869 | NW_004516108.1 | scaffold702 | 281869                  | TT                              | AA                 | AA               | INTERGENIC      |               |                    |                    |
| SNP_81977_A_284382 | NW_004516108.1 | scaffold702 | 284382                  | CC                              | GG                 | GG               | INTERGENIC      |               |                    |                    |
| SNP_81978_A_284444 | NW_004516108.1 | scaffold702 | 284444                  | GG                              | AA                 | AA               | INTERGENIC      |               |                    |                    |
| SNP_81979_A_288180 | NW_004516108.1 | scaffold702 | 288180                  | GG                              | TT                 | TT               | INTERGENIC      |               |                    |                    |
| SNP_81980_A_290052 | NW_004516108.1 | scaffold702 | 290052                  | TT                              | GG                 | GG               | INTERGENIC      |               |                    |                    |
| SNP_81981_A_294312 | NW_004516108.1 | scaffold702 | 294312                  | GG                              | AA                 | AA               | INTERGENIC      |               |                    |                    |
| SNP_81982_A_301631 | NW_004516108.1 | scaffold702 | 301631                  | CC                              | AA                 | AA               | INTERGENIC      |               |                    |                    |
| SNP_81983_A_2925   | NW_004516109.1 | scaffold705 | 2925                    | GG                              | AA                 | AA               | INTERGENIC      |               |                    |                    |
| SNP_81984_A_3422   | NW_004516109.1 | scaffold705 | 3422                    | AA                              | GG                 | GG               | INTERGENIC      |               |                    |                    |
| SNP_81985_A_5520   | NW_004516109.1 | scaffold705 | 5520                    | CC                              | TT                 | TT               | INTERGENIC      |               |                    |                    |

| SNPs IDs          | Chromosome IDs | Chromosomes | Physical positions (bp) | CDC Frontier (Reference genome) | (Pusa 1103 & HPNB) | (ILWC 46 & LPNB) | Sequence genome | Components of | Gene accession IDs | Putative functions |
|-------------------|----------------|-------------|-------------------------|---------------------------------|--------------------|------------------|-----------------|---------------|--------------------|--------------------|
| SNP_81986_A_5538  | NW_004516109.1 | scaffold705 | 5538                    | AA                              | TT                 | TT               | INTERGENIC      |               |                    |                    |
| SNP_81987_A_6325  | NW_004516109.1 | scaffold705 | 6325                    | TT                              | CC                 | CC               | INTERGENIC      |               |                    |                    |
| SNP_81988_A_6413  | NW_004516109.1 | scaffold705 | 6413                    | AA                              | TT                 | TT               | INTERGENIC      |               |                    |                    |
| SNP_81989_A_6417  | NW_004516109.1 | scaffold705 | 6417                    | TT                              | AA                 | AA               | INTERGENIC      |               |                    |                    |
| SNP_81990_A_6496  | NW_004516109.1 | scaffold705 | 6496                    | TT                              | CC                 | CC               | INTERGENIC      |               |                    |                    |
| SNP_81991_A_11516 | NW_004516109.1 | scaffold705 | 11516                   | CC                              | TT                 | TT               | INTERGENIC      |               |                    |                    |
| SNP_81992_A_11782 | NW_004516109.1 | scaffold705 | 11782                   | TT                              | CC                 | CC               | INTERGENIC      |               |                    |                    |
| SNP_81993_A_12833 | NW_004516109.1 | scaffold705 | 12833                   | GG                              | AA                 | AA               | INTERGENIC      |               |                    |                    |
| SNP_81994_A_12893 | NW_004516109.1 | scaffold705 | 12893                   | TT                              | AA                 | AA               | INTERGENIC      |               |                    |                    |
| SNP_81995_A_12900 | NW_004516109.1 | scaffold705 | 12900                   | AA                              | GG                 | GG               | INTERGENIC      |               |                    |                    |
| SNP_81996_A_13907 | NW_004516109.1 | scaffold705 | 13907                   | AA                              | GG                 | GG               | INTERGENIC      |               |                    |                    |
| SNP_81997_A_15127 | NW_004516109.1 | scaffold705 | 15127                   | CC                              | AA                 | AA               | INTERGENIC      |               |                    |                    |
| SNP_81998_A_16308 | NW_004516109.1 | scaffold705 | 16308                   | TT                              | CC                 | CC               | INTERGENIC      |               |                    |                    |
| SNP_81999_A_16516 | NW_004516109.1 | scaffold705 | 16516                   | CC                              | GG                 | GG               | INTERGENIC      |               |                    |                    |
| SNP_82000_A_16586 | NW_004516109.1 | scaffold705 | 16586                   | GG                              | TT                 | TT               | INTERGENIC      |               |                    |                    |
| SNP_82001_A_16625 | NW_004516109.1 | scaffold705 | 16625                   | CC                              | TT                 | TT               | INTERGENIC      |               |                    |                    |
| SNP_82002_A_16627 | NW_004516109.1 | scaffold705 | 16627                   | CC                              | TT                 | TT               | INTERGENIC      |               |                    |                    |
| SNP_82003_A_16655 | NW_004516109.1 | scaffold705 | 16655                   | GG                              | AA                 | AA               | INTERGENIC      |               |                    |                    |
| SNP_82004_A_16775 | NW_004516109.1 | scaffold705 | 16775                   | GG                              | TT                 | TT               | INTERGENIC      |               |                    |                    |
| SNP_82005_A_16845 | NW_004516109.1 | scaffold705 | 16845                   | GG                              | CC                 | CC               | INTERGENIC      |               |                    |                    |
| SNP_82006_A_16860 | NW_004516109.1 | scaffold705 | 16860                   | TT                              | CC                 | CC               | INTERGENIC      |               |                    |                    |
| SNP_82007_A_16891 | NW_004516109.1 | scaffold705 | 16891                   | GG                              | TT                 | TT               | INTERGENIC      |               |                    |                    |

| SNPs IDs          | Chromosome IDs | Chromosomes | Physical positions (bp) | CDC Frontier (Reference genome) | (Pusa 1103 & HPNB) | (ILWC 46 & LPNB) | Sequence genome | Components of | Gene accession IDs | Putative functions |
|-------------------|----------------|-------------|-------------------------|---------------------------------|--------------------|------------------|-----------------|---------------|--------------------|--------------------|
| SNP_82009_A_17218 | NW_004516109.1 | scaffold705 | 17218                   | GG                              | AA                 | AA               | INTERGENIC      |               |                    |                    |
| SNP_82010_A_20351 | NW_004516109.1 | scaffold705 | 20351                   | GG                              | AA                 | AA               | INTERGENIC      |               |                    |                    |
| SNP_82011_A_25152 | NW_004516109.1 | scaffold705 | 25152                   | GG                              | AA                 | AA               | INTERGENIC      |               |                    |                    |
| SNP_82012_A_25174 | NW_004516109.1 | scaffold705 | 25174                   | AA                              | GG                 | GG               | INTERGENIC      |               |                    |                    |
| SNP_82013_A_25263 | NW_004516109.1 | scaffold705 | 25263                   | CC                              | GG                 | GG               | INTERGENIC      |               |                    |                    |
| SNP_82014_A_25270 | NW_004516109.1 | scaffold705 | 25270                   | CC                              | GG                 | GG               | INTERGENIC      |               |                    |                    |
| SNP_82015_A_25335 | NW_004516109.1 | scaffold705 | 25335                   | GG                              | AA                 | AA               | INTERGENIC      |               |                    |                    |
| SNP_82016_A_25336 | NW_004516109.1 | scaffold705 | 25336                   | CC                              | TT                 | TT               | INTERGENIC      |               |                    |                    |
| SNP_82017_A_25377 | NW_004516109.1 | scaffold705 | 25377                   | CC                              | TT                 | TT               | INTERGENIC      |               |                    |                    |
| SNP_82018_A_25556 | NW_004516109.1 | scaffold705 | 25556                   | TT                              | CC                 | CC               | INTERGENIC      |               |                    |                    |
| SNP_82019_A_25589 | NW_004516109.1 | scaffold705 | 25589                   | TT                              | GG                 | GG               | INTERGENIC      |               |                    |                    |
| SNP_82020_A_25746 | NW_004516109.1 | scaffold705 | 25746                   | AA                              | GG                 | GG               | INTERGENIC      |               |                    |                    |
| SNP_82021_A_29648 | NW_004516109.1 | scaffold705 | 29648                   | GG                              | CC                 | CC               | INTERGENIC      |               |                    |                    |
| SNP_82022_A_29900 | NW_004516109.1 | scaffold705 | 29900                   | TT                              | AA                 | AA               | INTERGENIC      |               |                    |                    |
| SNP_82023_A_29957 | NW_004516109.1 | scaffold705 | 29957                   | GG                              | AA                 | AA               | INTERGENIC      |               |                    |                    |
| SNP_82024_A_30307 | NW_004516109.1 | scaffold705 | 30307                   | AA                              | GG                 | GG               | INTERGENIC      |               |                    |                    |
| SNP_82025_A_30556 | NW_004516109.1 | scaffold705 | 30556                   | CC                              | TT                 | TT               | INTERGENIC      |               |                    |                    |
| SNP_82027_A_33886 | NW_004516109.1 | scaffold705 | 33886                   | TT                              | CC                 | CC               | INTERGENIC      |               |                    |                    |
| SNP_82028_A_34316 | NW_004516109.1 | scaffold705 | 34316                   | TT                              | CC                 | CC               | INTERGENIC      |               |                    |                    |
| SNP_82029_A_34448 | NW_004516109.1 | scaffold705 | 34448                   | CC                              | GG                 | GG               | INTERGENIC      |               |                    |                    |
| SNP_82030_A_34712 | NW_004516109.1 | scaffold705 | 34712                   | TT                              | AA                 | AA               | INTERGENIC      |               |                    |                    |
| SNP_82031_A_34836 | NW_004516109.1 | scaffold705 | 34836                   | GG                              | AA                 | AA               | INTERGENIC      |               |                    |                    |

| SNPs IDs          | Chromosome IDs | Chromosomes | Physical positions (bp) | CDC Frontier (Reference genome) | (Pusa 1103 & HPNB) | (ILWC 46 & LPNB) | Sequence genome | Components of | Gene accession IDs | Putative functions |
|-------------------|----------------|-------------|-------------------------|---------------------------------|--------------------|------------------|-----------------|---------------|--------------------|--------------------|
| SNP_82032_A_34980 | NW_004516109.1 | scaffold705 | 34980                   | CC                              | TT                 | TT               | INTERGENIC      |               |                    |                    |
| SNP_82033_A_34996 | NW_004516109.1 | scaffold705 | 34996                   | AA                              | CC                 | CC               | INTERGENIC      |               |                    |                    |
| SNP_82034_A_34999 | NW_004516109.1 | scaffold705 | 34999                   | TT                              | CC                 | CC               | INTERGENIC      |               |                    |                    |
| SNP_82035_A_35020 | NW_004516109.1 | scaffold705 | 35020                   | TT                              | CC                 | CC               | INTERGENIC      |               |                    |                    |
| SNP_82036_A_35099 | NW_004516109.1 | scaffold705 | 35099                   | TT                              | AA                 | AA               | INTERGENIC      |               |                    |                    |
| SNP_82037_A_35197 | NW_004516109.1 | scaffold705 | 35197                   | AA                              | CC                 | CC               | INTERGENIC      |               |                    |                    |
| SNP_82038_A_35431 | NW_004516109.1 | scaffold705 | 35431                   | GG                              | AA                 | AA               | INTERGENIC      |               |                    |                    |
| SNP_82039_A_44631 | NW_004516109.1 | scaffold705 | 44631                   | GG                              | AA                 | AA               | INTERGENIC      |               |                    |                    |
| SNP_82040_A_44697 | NW_004516109.1 | scaffold705 | 44697                   | TT                              | GG                 | GG               | INTERGENIC      |               |                    |                    |
| SNP_82041_A_45154 | NW_004516109.1 | scaffold705 | 45154                   | TT                              | AA                 | AA               | INTERGENIC      |               |                    |                    |
| SNP_82043_A_45283 | NW_004516109.1 | scaffold705 | 45283                   | GG                              | AA                 | AA               | INTERGENIC      |               |                    |                    |
| SNP_82044_A_45332 | NW_004516109.1 | scaffold705 | 45332                   | CC                              | TT                 | TT               | INTERGENIC      |               |                    |                    |
| SNP_82045_A_45350 | NW_004516109.1 | scaffold705 | 45350                   | AA                              | GG                 | GG               | INTERGENIC      |               |                    |                    |
| SNP_82046_A_45368 | NW_004516109.1 | scaffold705 | 45368                   | AA                              | TT                 | TT               | INTERGENIC      |               |                    |                    |
| SNP_82047_A_45746 | NW_004516109.1 | scaffold705 | 45746                   | GG                              | AA                 | AA               | INTERGENIC      |               |                    |                    |
| SNP_82048_A_45900 | NW_004516109.1 | scaffold705 | 45900                   | AA                              | GG                 | GG               | INTERGENIC      |               |                    |                    |
| SNP_82049_A_45901 | NW_004516109.1 | scaffold705 | 45901                   | GG                              | AA                 | AA               | INTERGENIC      |               |                    |                    |
| SNP_82050_A_47958 | NW_004516109.1 | scaffold705 | 47958                   | GG                              | TT                 | TT               | INTERGENIC      |               |                    |                    |
| SNP_82051_A_50018 | NW_004516109.1 | scaffold705 | 50018                   | AA                              | GG                 | GG               | INTERGENIC      |               |                    |                    |
| SNP_82052_A_50500 | NW_004516109.1 | scaffold705 | 50500                   | GG                              | AA                 | AA               | INTERGENIC      |               |                    |                    |
| SNP_82053_A_55964 | NW_004516109.1 | scaffold705 | 55964                   | GG                              | TT                 | TT               | INTERGENIC      |               |                    |                    |
| SNP_82054_A_56034 | NW_004516109.1 | scaffold705 | 56034                   | AA                              | GG                 | GG               | INTERGENIC      |               |                    |                    |

| SNPs IDs          | Chromosome IDs | Chromosomes | Physical positions (bp) | CDC Frontier (Reference genome) | (Pusa 1103 & HPNB) | (ILWC 46 & LPNB) | Sequence genome | Components of | Gene accession IDs           | Putative functions |
|-------------------|----------------|-------------|-------------------------|---------------------------------|--------------------|------------------|-----------------|---------------|------------------------------|--------------------|
| SNP_82055_A_56154 | NW_004516109.1 | scaffold705 | 56154                   | CC                              | TT                 | TT               | INTERGENIC      |               |                              |                    |
| SNP_82056_A_56155 | NW_004516109.1 | scaffold705 | 56155                   | TT                              | AA                 | AA               | INTERGENIC      |               |                              |                    |
| SNP_82057_A_56256 | NW_004516109.1 | scaffold705 | 56256                   | AA                              | TT                 | TT               | INTERGENIC      |               |                              |                    |
| SNP_82058_A_56262 | NW_004516109.1 | scaffold705 | 56262                   | CC                              | AA                 | AA               | INTERGENIC      |               |                              |                    |
| SNP_82059_A_56568 | NW_004516109.1 | scaffold705 | 56568                   | GG                              | AA                 | AA               | INTERGENIC      |               |                              |                    |
| SNP_82060_A_64956 | NW_004516109.1 | scaffold705 | 64956                   | CC                              | TT                 | TT               | INTERGENIC      |               |                              |                    |
| SNP_82061_A_64958 | NW_004516109.1 | scaffold705 | 64958                   | CC                              | AA                 | AA               | INTERGENIC      |               |                              |                    |
| SNP_82062_A_1002  | NW_004516110.1 | scaffold707 | 1002                    | GG                              | AA                 | AA               | INTERGENIC      |               |                              |                    |
| SNP_82063_A_1502  | NW_004516110.1 | scaffold707 | 1502                    | AA                              | GG                 | GG               | INTERGENIC      |               |                              |                    |
| SNP_82064_A_5120  | NW_004516110.1 | scaffold707 | 5120                    | GG                              | AA                 | AA               | INTERGENIC      |               |                              |                    |
| SNP_82065_A_5500  | NW_004516110.1 | scaffold707 | 5500                    | CC                              | TT                 | TT               | INTERGENIC      |               |                              |                    |
| SNP_82066_A_5550  | NW_004516110.1 | scaffold707 | 5550                    | AA                              | GG                 | GG               | INTERGENIC      |               |                              |                    |
| SNP_82067_A_10694 | NW_004516110.1 | scaffold707 | 10694                   | TT                              | CC                 | CC               | INTERGENIC      |               |                              |                    |
| SNP_82068_A_24736 | NW_004516110.1 | scaffold707 | 24736                   | CC                              | AA                 | AA               | INTRON          | 101491435     | uncharacterized LOC101491435 |                    |
| SNP_82069_A_24757 | NW_004516110.1 | scaffold707 | 24757                   | GG                              | CC                 | CC               | INTRON          | 101491435     | uncharacterized LOC101491435 |                    |
| SNP_82070_A_25205 | NW_004516110.1 | scaffold707 | 25205                   | AA                              | GG                 | GG               | INTRON          | 101491435     | uncharacterized LOC101491435 |                    |
| SNP_82071_A_25211 | NW_004516110.1 | scaffold707 | 25211                   | TT                              | CC                 | CC               | INTRON          | 101491435     | uncharacterized LOC101491435 |                    |
| SNP_82072_A_25233 | NW_004516110.1 | scaffold707 | 25233                   | TT                              | AA                 | AA               | INTRON          | 101491435     | uncharacterized LOC101491435 |                    |
| SNP_82073_A_25289 | NW_004516110.1 | scaffold707 | 25289                   | TT                              | CC                 | CC               | INTRON          | 101491435     | uncharacterized LOC101491435 |                    |
| SNP_82075_A_25365 | NW_004516110.1 | scaffold707 | 25365                   | TT                              | GG                 | GG               | INTRON          | 101491435     | uncharacterized LOC101491435 |                    |
| SNP_82076_A_28070 | NW_004516110.1 | scaffold707 | 28070                   | GG                              | AA                 | AA               | INTRON          | 101491435     | uncharacterized LOC101491435 |                    |
| SNP_82077_A_28127 | NW_004516110.1 | scaffold707 | 28127                   | AA                              | GG                 | GG               | INTRON          | 101491435     | uncharacterized LOC101491435 |                    |

| SNPs IDs          | Chromosome IDs | Chromosomes | Physical positions (bp) | CDC Frontier (Reference genome) | (Pusa 1103 & HPNB) | (ILWC 46 & LPNB) | Sequence Components of genome | Gene accession IDs | Putative functions                 |
|-------------------|----------------|-------------|-------------------------|---------------------------------|--------------------|------------------|-------------------------------|--------------------|------------------------------------|
| SNP_82078_A_29739 | NW_004516110.1 | scaffold707 | 29739                   | GG                              | AA                 | AA               | INTRON                        | 101491435          | uncharacterized LOC101491435       |
| SNP_82079_A_49371 | NW_004516110.1 | scaffold707 | 49371                   | AA                              | GG                 | GG               | URR                           | 101490899          | cytosolic sulfotransferase 15-like |
| SNP_82080_A_51950 | NW_004516110.1 | scaffold707 | 51950                   | GG                              | AA                 | AA               | INTERGENIC                    |                    |                                    |
| SNP_82081_A_53272 | NW_004516110.1 | scaffold707 | 53272                   | TT                              | CC                 | CC               | INTERGENIC                    |                    |                                    |
| SNP_82082_A_55126 | NW_004516110.1 | scaffold707 | 55126                   | TT                              | CC                 | CC               | INTERGENIC                    |                    |                                    |
| SNP_82083_A_55550 | NW_004516110.1 | scaffold707 | 55550                   | AA                              | CC                 | CC               | INTERGENIC                    |                    |                                    |
| SNP_82084_A_55580 | NW_004516110.1 | scaffold707 | 55580                   | AA                              | GG                 | GG               | INTERGENIC                    |                    |                                    |
| SNP_82086_A_62879 | NW_004516110.1 | scaffold707 | 62879                   | AA                              | GG                 | GG               | INTERGENIC                    |                    |                                    |
| SNP_82087_A_66685 | NW_004516110.1 | scaffold707 | 66685                   | GG                              | AA                 | AA               | INTERGENIC                    |                    |                                    |
| SNP_82088_A_66710 | NW_004516110.1 | scaffold707 | 66710                   | TT                              | GG                 | GG               | INTERGENIC                    |                    |                                    |
| SNP_82089_A_68345 | NW_004516110.1 | scaffold707 | 68345                   | TT                              | CC                 | CC               | INTERGENIC                    |                    |                                    |
| SNP_82090_A_68818 | NW_004516110.1 | scaffold707 | 68818                   | AA                              | CC                 | CC               | INTERGENIC                    |                    |                                    |
| SNP_82092_A_70524 | NW_004516110.1 | scaffold707 | 70524                   | AA                              | CC                 | CC               | INTERGENIC                    |                    |                                    |
| SNP_82093_A_72938 | NW_004516110.1 | scaffold707 | 72938                   | TT                              | CC                 | CC               | INTERGENIC                    |                    |                                    |
| SNP_82094_A_82788 | NW_004516110.1 | scaffold707 | 82788                   | CC                              | AA                 | AA               | INTERGENIC                    |                    |                                    |
| SNP_82095_A_82824 | NW_004516110.1 | scaffold707 | 82824                   | TT                              | AA                 | GG               | INTERGENIC                    |                    |                                    |
| SNP_82096_A_83160 | NW_004516110.1 | scaffold707 | 83160                   | AA                              | CC                 | CC               | INTERGENIC                    |                    |                                    |
| SNP_82097_A_83183 | NW_004516110.1 | scaffold707 | 83183                   | CC                              | AA                 | AA               | INTERGENIC                    |                    |                                    |
| SNP_82099_A_85808 | NW_004516110.1 | scaffold707 | 85808                   | CC                              | TT                 | TT               | INTERGENIC                    |                    |                                    |
| SNP_82100_A_85816 | NW_004516110.1 | scaffold707 | 85816                   | CC                              | TT                 | TT               | INTERGENIC                    |                    |                                    |
| SNP_82101_A_85886 | NW_004516110.1 | scaffold707 | 85886                   | AA                              | GG                 | GG               | INTERGENIC                    |                    |                                    |
| SNP_82102_A_85937 | NW_004516110.1 | scaffold707 | 85937                   | AA                              | GG                 | GG               | INTERGENIC                    |                    |                                    |



| SNPs IDs           | Chromosome IDs | Chromosomes | Physical positions (bp) | CDC Frontier (Reference genome) | (Pusa 1103 & HPNB) | (ILWC 46 & LPNB) | Sequence genome | Components of | Gene accession IDs | Putative functions |
|--------------------|----------------|-------------|-------------------------|---------------------------------|--------------------|------------------|-----------------|---------------|--------------------|--------------------|
| SNP_82103_A_85945  | NW_004516110.1 | scaffold707 | 85945                   | TT                              | AA                 | AA               | INTERGENIC      |               |                    |                    |
| SNP_82105_A_86152  | NW_004516110.1 | scaffold707 | 86152                   | AA                              | GG                 | GG               | INTERGENIC      |               |                    |                    |
| SNP_82106_A_86157  | NW_004516110.1 | scaffold707 | 86157                   | AA                              | GG                 | GG               | INTERGENIC      |               |                    |                    |
| SNP_82107_A_86170  | NW_004516110.1 | scaffold707 | 86170                   | TT                              | CC                 | CC               | INTERGENIC      |               |                    |                    |
| SNP_82109_A_115647 | NW_004516110.1 | scaffold707 | 115647                  | AA                              | GG                 | GG               | INTERGENIC      |               |                    |                    |
| SNP_82110_A_115666 | NW_004516110.1 | scaffold707 | 115666                  | GG                              | TT                 | TT               | INTERGENIC      |               |                    |                    |
| SNP_82111_A_121560 | NW_004516110.1 | scaffold707 | 121560                  | AA                              | GG                 | GG               | INTERGENIC      |               |                    |                    |
| SNP_82112_A_121701 | NW_004516110.1 | scaffold707 | 121701                  | TT                              | GG                 | GG               | INTERGENIC      |               |                    |                    |
| SNP_82113_A_121707 | NW_004516110.1 | scaffold707 | 121707                  | CC                              | TT                 | TT               | INTERGENIC      |               |                    |                    |
| SNP_82114_A_121931 | NW_004516110.1 | scaffold707 | 121931                  | AA                              | CC                 | CC               | INTERGENIC      |               |                    |                    |
| SNP_82115_A_10927  | NW_004516111.1 | scaffold708 | 10927                   | TT                              | CC                 | CC               | INTERGENIC      |               |                    |                    |
| SNP_82116_A_10998  | NW_004516111.1 | scaffold708 | 10998                   | CC                              | AA                 | AA               | INTERGENIC      |               |                    |                    |
| SNP_82117_A_11014  | NW_004516111.1 | scaffold708 | 11014                   | TT                              | CC                 | CC               | INTERGENIC      |               |                    |                    |
| SNP_82118_A_11020  | NW_004516111.1 | scaffold708 | 11020                   | GG                              | AA                 | AA               | INTERGENIC      |               |                    |                    |
| SNP_82119_A_11137  | NW_004516111.1 | scaffold708 | 11137                   | GG                              | AA                 | AA               | INTERGENIC      |               |                    |                    |
| SNP_82120_A_11155  | NW_004516111.1 | scaffold708 | 11155                   | AA                              | GG                 | GG               | INTERGENIC      |               |                    |                    |
| SNP_82121_A_11200  | NW_004516111.1 | scaffold708 | 11200                   | TT                              | AA                 | AA               | INTERGENIC      |               |                    |                    |
| SNP_82122_A_11229  | NW_004516111.1 | scaffold708 | 11229                   | AA                              | GG                 | GG               | INTERGENIC      |               |                    |                    |
| SNP_82123_A_11230  | NW_004516111.1 | scaffold708 | 11230                   | CC                              | AA                 | AA               | INTERGENIC      |               |                    |                    |
| SNP_82124_A_11242  | NW_004516111.1 | scaffold708 | 11242                   | CC                              | TT                 | TT               | INTERGENIC      |               |                    |                    |
| SNP_82125_A_11263  | NW_004516111.1 | scaffold708 | 11263                   | TT                              | CC                 | CC               | INTERGENIC      |               |                    |                    |
| SNP_82126_A_11269  | NW_004516111.1 | scaffold708 | 11269                   | CC                              | TT                 | TT               | INTERGENIC      |               |                    |                    |

| SNPs IDs          | Chromosome IDs | Chromosomes | Physical positions (bp) | CDC Frontier (Reference genome) | (Pusa 1103 & HPNB) | (ILWC 46 & LPNB) | Sequence genome | Components of | Gene accession IDs | Putative functions |
|-------------------|----------------|-------------|-------------------------|---------------------------------|--------------------|------------------|-----------------|---------------|--------------------|--------------------|
| SNP_82127_A_11271 | NW_004516111.1 | scaffold708 | 11271                   | TT                              | CC                 | CC               | INTERGENIC      |               |                    |                    |
| SNP_82128_A_11273 | NW_004516111.1 | scaffold708 | 11273                   | CC                              | AA                 | AA               | INTERGENIC      |               |                    |                    |
| SNP_82129_A_11287 | NW_004516111.1 | scaffold708 | 11287                   | CC                              | TT                 | TT               | INTERGENIC      |               |                    |                    |
| SNP_82130_A_12438 | NW_004516111.1 | scaffold708 | 12438                   | TT                              | GG                 | GG               | INTERGENIC      |               |                    |                    |
| SNP_82131_A_12452 | NW_004516111.1 | scaffold708 | 12452                   | AA                              | CC                 | CC               | INTERGENIC      |               |                    |                    |
| SNP_82132_A_12482 | NW_004516111.1 | scaffold708 | 12482                   | CC                              | TT                 | TT               | INTERGENIC      |               |                    |                    |
| SNP_82133_A_12563 | NW_004516111.1 | scaffold708 | 12563                   | GG                              | AA                 | AA               | INTERGENIC      |               |                    |                    |
| SNP_82134_A_12884 | NW_004516111.1 | scaffold708 | 12884                   | AA                              | GG                 | GG               | INTERGENIC      |               |                    |                    |
| SNP_82135_A_12904 | NW_004516111.1 | scaffold708 | 12904                   | TT                              | CC                 | CC               | INTERGENIC      |               |                    |                    |
| SNP_82136_A_12968 | NW_004516111.1 | scaffold708 | 12968                   | AA                              | CC                 | CC               | INTERGENIC      |               |                    |                    |
| SNP_82137_A_12991 | NW_004516111.1 | scaffold708 | 12991                   | AA                              | CC                 | CC               | INTERGENIC      |               |                    |                    |
| SNP_82138_A_13003 | NW_004516111.1 | scaffold708 | 13003                   | TT                              | CC                 | CC               | INTERGENIC      |               |                    |                    |
| SNP_82139_A_13107 | NW_004516111.1 | scaffold708 | 13107                   | AA                              | GG                 | GG               | INTERGENIC      |               |                    |                    |
| SNP_82140_A_13117 | NW_004516111.1 | scaffold708 | 13117                   | AA                              | CC                 | CC               | INTERGENIC      |               |                    |                    |
| SNP_82141_A_13119 | NW_004516111.1 | scaffold708 | 13119                   | TT                              | AA                 | AA               | INTERGENIC      |               |                    |                    |
| SNP_82142_A_13145 | NW_004516111.1 | scaffold708 | 13145                   | GG                              | AA                 | AA               | INTERGENIC      |               |                    |                    |
| SNP_82143_A_13172 | NW_004516111.1 | scaffold708 | 13172                   | AA                              | GG                 | GG               | INTERGENIC      |               |                    |                    |
| SNP_82144_A_16900 | NW_004516111.1 | scaffold708 | 16900                   | AA                              | GG                 | GG               | INTERGENIC      |               |                    |                    |
| SNP_82145_A_16908 | NW_004516111.1 | scaffold708 | 16908                   | GG                              | AA                 | AA               | INTERGENIC      |               |                    |                    |
| SNP_82146_A_44009 | NW_004516111.1 | scaffold708 | 44009                   | GG                              | CC                 | CC               | INTERGENIC      |               |                    |                    |
| SNP_82147_A_44012 | NW_004516111.1 | scaffold708 | 44012                   | CC                              | GG                 | GG               | INTERGENIC      |               |                    |                    |
| SNP_82148_A_44313 | NW_004516111.1 | scaffold708 | 44313                   | AA                              | CC                 | CC               | INTERGENIC      |               |                    |                    |

| SNPs IDs          | Chromosome IDs | Chromosomes | Physical positions (bp) | CDC Frontier (Reference genome) | (Pusa 1103 & HPNB) | (ILWC 46 & LPNB) | Sequence genome | Components of | Gene accession IDs | Putative functions |
|-------------------|----------------|-------------|-------------------------|---------------------------------|--------------------|------------------|-----------------|---------------|--------------------|--------------------|
| SNP_82149_A_50137 | NW_004516111.1 | scaffold708 | 50137                   | TT                              | CC                 | CC               | INTERGENIC      |               |                    |                    |
| SNP_82150_A_50234 | NW_004516111.1 | scaffold708 | 50234                   | TT                              | CC                 | CC               | INTERGENIC      |               |                    |                    |
| SNP_82151_A_1971  | NW_004516112.1 | scaffold709 | 1971                    | TT                              | AA                 | AA               | INTERGENIC      |               |                    |                    |
| SNP_82152_A_2009  | NW_004516112.1 | scaffold709 | 2009                    | AA                              | TT                 | TT               | INTERGENIC      |               |                    |                    |
| SNP_82153_A_2014  | NW_004516112.1 | scaffold709 | 2014                    | AA                              | GG                 | GG               | INTERGENIC      |               |                    |                    |
| SNP_82154_A_2046  | NW_004516112.1 | scaffold709 | 2046                    | AA                              | TT                 | TT               | INTERGENIC      |               |                    |                    |
| SNP_82155_A_2188  | NW_004516112.1 | scaffold709 | 2188                    | AA                              | GG                 | GG               | INTERGENIC      |               |                    |                    |
| SNP_82156_A_2189  | NW_004516112.1 | scaffold709 | 2189                    | TT                              | CC                 | CC               | INTERGENIC      |               |                    |                    |
| SNP_82157_A_2243  | NW_004516112.1 | scaffold709 | 2243                    | AA                              | GG                 | GG               | INTERGENIC      |               |                    |                    |
| SNP_82158_A_2285  | NW_004516112.1 | scaffold709 | 2285                    | AA                              | GG                 | GG               | INTERGENIC      |               |                    |                    |
| SNP_82159_A_2291  | NW_004516112.1 | scaffold709 | 2291                    | AA                              | GG                 | GG               | INTERGENIC      |               |                    |                    |
| SNP_82160_A_2293  | NW_004516112.1 | scaffold709 | 2293                    | CC                              | GG                 | GG               | INTERGENIC      |               |                    |                    |
| SNP_82161_A_2331  | NW_004516112.1 | scaffold709 | 2331                    | TT                              | CC                 | CC               | INTERGENIC      |               |                    |                    |
| SNP_82162_A_2342  | NW_004516112.1 | scaffold709 | 2342                    | AA                              | GG                 | GG               | INTERGENIC      |               |                    |                    |
| SNP_82163_A_4004  | NW_004516112.1 | scaffold709 | 4004                    | TT                              | GG                 | GG               | INTERGENIC      |               |                    |                    |
| SNP_82165_A_7064  | NW_004516112.1 | scaffold709 | 7064                    | AA                              | GG                 | GG               | INTERGENIC      |               |                    |                    |
| SNP_82166_A_7082  | NW_004516112.1 | scaffold709 | 7082                    | TT                              | AA                 | AA               | INTERGENIC      |               |                    |                    |
| SNP_82167_A_7154  | NW_004516112.1 | scaffold709 | 7154                    | AA                              | TT                 | TT               | INTERGENIC      |               |                    |                    |
| SNP_82168_A_7309  | NW_004516112.1 | scaffold709 | 7309                    | GG                              | CC                 | CC               | INTERGENIC      |               |                    |                    |
| SNP_82169_A_7356  | NW_004516112.1 | scaffold709 | 7356                    | GG                              | AA                 | AA               | INTERGENIC      |               |                    |                    |
| SNP_82170_A_7395  | NW_004516112.1 | scaffold709 | 7395                    | CC                              | TT                 | TT               | INTERGENIC      |               |                    |                    |
| SNP_82171_A_7399  | NW_004516112.1 | scaffold709 | 7399                    | GG                              | AA                 | AA               | INTERGENIC      |               |                    |                    |

| SNPs IDs           | Chromosome IDs | Chromosomes | Physical positions (bp) | CDC Frontier (Reference genome) | (Pusa 1103 & HPNB) | (ILWC 46 & LPNB) | Sequence genome | Components of | Gene accession IDs                                        | Putative functions |
|--------------------|----------------|-------------|-------------------------|---------------------------------|--------------------|------------------|-----------------|---------------|-----------------------------------------------------------|--------------------|
| SNP_82172_A_7414   | NW_004516112.1 | scaffold709 | 7414                    | TT                              | GG                 | GG               | INTERGENIC      |               |                                                           |                    |
| SNP_82173_A_7421   | NW_004516112.1 | scaffold709 | 7421                    | GG                              | TT                 | TT               | INTERGENIC      |               |                                                           |                    |
| SNP_82174_A_7528   | NW_004516112.1 | scaffold709 | 7528                    | GG                              | TT                 | TT               | INTERGENIC      |               |                                                           |                    |
| SNP_82175_A_7542   | NW_004516112.1 | scaffold709 | 7542                    | CC                              | TT                 | TT               | INTERGENIC      |               |                                                           |                    |
| SNP_82176_A_7588   | NW_004516112.1 | scaffold709 | 7588                    | GG                              | TT                 | TT               | INTERGENIC      |               |                                                           |                    |
| SNP_82177_A_7726   | NW_004516112.1 | scaffold709 | 7726                    | GG                              | AA                 | AA               | INTERGENIC      |               |                                                           |                    |
| SNP_82178_A_7780   | NW_004516112.1 | scaffold709 | 7780                    | GG                              | AA                 | AA               | INTERGENIC      |               |                                                           |                    |
| SNP_82179_A_7799   | NW_004516112.1 | scaffold709 | 7799                    | CC                              | TT                 | TT               | INTERGENIC      |               |                                                           |                    |
| SNP_82180_A_11192  | NW_004516113.1 | scaffold711 | 11192                   | TT                              | GG                 | GG               | INTERGENIC      |               |                                                           |                    |
| SNP_82181_A_28916  | NW_004516113.1 | scaffold711 | 28916                   | TT                              | AA                 | AA               | URR             | 101492070     | mitochondrial outer membrane protein porin of 36 kDa-like |                    |
| SNP_82182_A_36031  | NW_004516113.1 | scaffold711 | 36031                   | AA                              | CC                 | CC               | INTERGENIC      |               |                                                           |                    |
| SNP_82183_A_36064  | NW_004516113.1 | scaffold711 | 36064                   | CC                              | TT                 | TT               | INTERGENIC      |               |                                                           |                    |
| SNP_82184_A_36085  | NW_004516113.1 | scaffold711 | 36085                   | GG                              | AA                 | AA               | INTERGENIC      |               |                                                           |                    |
| SNP_82185_A_36115  | NW_004516113.1 | scaffold711 | 36115                   | CC                              | TT                 | TT               | INTERGENIC      |               |                                                           |                    |
| SNP_82186_A_36313  | NW_004516113.1 | scaffold711 | 36313                   | GG                              | AA                 | AA               | INTERGENIC      |               |                                                           |                    |
| SNP_82187_A_36337  | NW_004516113.1 | scaffold711 | 36337                   | CC                              | AA                 | AA               | INTERGENIC      |               |                                                           |                    |
| SNP_82188_A_36349  | NW_004516113.1 | scaffold711 | 36349                   | CC                              | TT                 | TT               | INTERGENIC      |               |                                                           |                    |
| SNP_82189_A_36440  | NW_004516113.1 | scaffold711 | 36440                   | AA                              | GG                 | GG               | INTERGENIC      |               |                                                           |                    |
| SNP_82190_A_50960  | NW_004516113.1 | scaffold711 | 50960                   | GG                              | TT                 | TT               | INTERGENIC      |               |                                                           |                    |
| SNP_82191_A_102897 | NW_004516113.1 | scaffold711 | 102897                  | GG                              | AA                 | AA               | INTERGENIC      |               |                                                           |                    |
| SNP_82192_A_116823 | NW_004516113.1 | scaffold711 | 116823                  | CC                              | TT                 | TT               | INTERGENIC      |               |                                                           |                    |
| SNP_82193_A_171186 | NW_004516113.1 | scaffold711 | 171186                  | TT                              | GG                 | GG               | INTERGENIC      |               |                                                           |                    |

| SNPs IDs           | Chromosome IDs | Chromosomes | Physical positions (bp) | CDC Frontier (Reference genome) | (Pusa 1103 & HPNB) | (ILWC 46 & LPNB) | Sequence genome | Components of | Gene accession IDs | Putative functions |
|--------------------|----------------|-------------|-------------------------|---------------------------------|--------------------|------------------|-----------------|---------------|--------------------|--------------------|
| SNP_82194_A_184170 | NW_004516113.1 | scaffold711 | 184170                  | AA                              | GG                 | GG               | INTERGENIC      |               |                    |                    |
| SNP_82198_A_218488 | NW_004516113.1 | scaffold711 | 218488                  | AA                              | TT                 | TT               | INTERGENIC      |               |                    |                    |
| SNP_82199_A_218617 | NW_004516113.1 | scaffold711 | 218617                  | AA                              | CC                 | CC               | INTERGENIC      |               |                    |                    |
| SNP_82200_A_218787 | NW_004516113.1 | scaffold711 | 218787                  | CC                              | TT                 | TT               | INTERGENIC      |               |                    |                    |
| SNP_82201_A_230014 | NW_004516113.1 | scaffold711 | 230014                  | AA                              | TT                 | TT               | INTERGENIC      |               |                    |                    |
| SNP_82202_A_4191   | NW_004516114.1 | scaffold712 | 4191                    | GG                              | AA                 | AA               | INTERGENIC      |               |                    |                    |
| SNP_82203_A_5271   | NW_004516114.1 | scaffold712 | 5271                    | TT                              | CC                 | CC               | INTERGENIC      |               |                    |                    |
| SNP_82204_A_7810   | NW_004516114.1 | scaffold712 | 7810                    | TT                              | CC                 | CC               | INTERGENIC      |               |                    |                    |
| SNP_82205_A_1234   | NW_004516115.1 | scaffold715 | 1234                    | AA                              | GG                 | GG               | INTERGENIC      |               |                    |                    |
| SNP_82206_A_1288   | NW_004516115.1 | scaffold715 | 1288                    | TT                              | AA                 | AA               | INTERGENIC      |               |                    |                    |
| SNP_82207_A_5483   | NW_004516115.1 | scaffold715 | 5483                    | CC                              | TT                 | TT               | INTERGENIC      |               |                    |                    |
| SNP_82208_A_5514   | NW_004516115.1 | scaffold715 | 5514                    | GG                              | AA                 | AA               | INTERGENIC      |               |                    |                    |
| SNP_82209_A_5314   | NW_004516116.1 | scaffold716 | 5314                    | CC                              | AA                 | AA               | INTERGENIC      |               |                    |                    |
| SNP_82210_A_13508  | NW_004516116.1 | scaffold716 | 13508                   | AA                              | TT                 | TT               | INTERGENIC      |               |                    |                    |
| SNP_82211_A_23279  | NW_004516116.1 | scaffold716 | 23279                   | GG                              | AA                 | AA               | INTERGENIC      |               |                    |                    |
| SNP_82212_A_23454  | NW_004516116.1 | scaffold716 | 23454                   | GG                              | AA                 | AA               | INTERGENIC      |               |                    |                    |
| SNP_82213_A_23467  | NW_004516116.1 | scaffold716 | 23467                   | TT                              | AA                 | AA               | INTERGENIC      |               |                    |                    |
| SNP_82214_A_23580  | NW_004516116.1 | scaffold716 | 23580                   | AA                              | GG                 | GG               | INTERGENIC      |               |                    |                    |
| SNP_82215_A_23622  | NW_004516116.1 | scaffold716 | 23622                   | AA                              | GG                 | GG               | INTERGENIC      |               |                    |                    |
| SNP_82216_A_23755  | NW_004516116.1 | scaffold716 | 23755                   | TT                              | CC                 | CC               | INTERGENIC      |               |                    |                    |
| SNP_82217_A_23764  | NW_004516116.1 | scaffold716 | 23764                   | AA                              | TT                 | TT               | INTERGENIC      |               |                    |                    |
| SNP_82218_A_46053  | NW_004516116.1 | scaffold716 | 46053                   | AA                              | TT                 | TT               | INTERGENIC      |               |                    |                    |

| SNPs IDs           | Chromosome IDs | Chromosomes | Physical positions (bp) | CDC Frontier (Reference genome) | (Pusa 1103 & HPNB) | (ILWC 46 & LPNB) | Sequence genome   | Components of | Gene accession IDs                                    | Putative functions |
|--------------------|----------------|-------------|-------------------------|---------------------------------|--------------------|------------------|-------------------|---------------|-------------------------------------------------------|--------------------|
| SNP_82219_A_46419  | NW_004516116.1 | scaffold716 | 46419                   | TT                              | AA                 | AA               | INTERGENIC        |               |                                                       |                    |
| SNP_82220_A_64436  | NW_004516116.1 | scaffold716 | 64436                   | AA                              | CC                 | CC               | INTERGENIC        |               |                                                       |                    |
| SNP_82221_A_66199  | NW_004516116.1 | scaffold716 | 66199                   | CC                              | TT                 | TT               | INTERGENIC        |               |                                                       |                    |
| SNP_82222_A_66201  | NW_004516116.1 | scaffold716 | 66201                   | AA                              | GG                 | GG               | INTERGENIC        |               |                                                       |                    |
| SNP_82223_A_66206  | NW_004516116.1 | scaffold716 | 66206                   | AA                              | GG                 | GG               | INTERGENIC        |               |                                                       |                    |
| SNP_82224_A_66358  | NW_004516116.1 | scaffold716 | 66358                   | AA                              | GG                 | GG               | INTERGENIC        |               |                                                       |                    |
| SNP_82225_A_66457  | NW_004516116.1 | scaffold716 | 66457                   | CC                              | AA                 | AA               | INTERGENIC        |               |                                                       |                    |
| SNP_82227_A_116851 | NW_004516116.1 | scaffold716 | 116851                  | TT                              | CC                 | CC               | INTERGENIC        |               |                                                       |                    |
| SNP_82228_A_117783 | NW_004516116.1 | scaffold716 | 117783                  | TT                              | CC                 | CC               | INTERGENIC        |               |                                                       |                    |
| SNP_82229_A_117794 | NW_004516116.1 | scaffold716 | 117794                  | TT                              | CC                 | CC               | INTERGENIC        |               |                                                       |                    |
| SNP_82230_A_117848 | NW_004516116.1 | scaffold716 | 117848                  | AA                              | GG                 | GG               | INTERGENIC        |               |                                                       |                    |
| SNP_82231_A_117855 | NW_004516116.1 | scaffold716 | 117855                  | TT                              | CC                 | CC               | INTERGENIC        |               |                                                       |                    |
| SNP_82232_A_117864 | NW_004516116.1 | scaffold716 | 117864                  | GG                              | CC                 | CC               | INTERGENIC        |               |                                                       |                    |
| SNP_82233_A_117868 | NW_004516116.1 | scaffold716 | 117868                  | GG                              | AA                 | AA               | INTERGENIC        |               |                                                       |                    |
| SNP_82234_A_117890 | NW_004516116.1 | scaffold716 | 117890                  | TT                              | CC                 | CC               | INTERGENIC        |               |                                                       |                    |
| SNP_82235_A_117956 | NW_004516116.1 | scaffold716 | 117956                  | TT                              | CC                 | CC               | INTERGENIC        |               |                                                       |                    |
| SNP_82236_A_119722 | NW_004516116.1 | scaffold716 | 119722                  | AA                              | TT                 | TT               | INTERGENIC        |               |                                                       |                    |
| SNP_82237_A_119740 | NW_004516116.1 | scaffold716 | 119740                  | GG                              | AA                 | AA               | INTERGENIC        |               |                                                       |                    |
| SNP_82238_A_119749 | NW_004516116.1 | scaffold716 | 119749                  | GG                              | AA                 | AA               | INTERGENIC        |               |                                                       |                    |
| SNP_82239_A_131595 | NW_004516116.1 | scaffold716 | 131595                  | CC                              | TT                 | TT               | INTRON            | 101496084     | leucine-rich repeat receptor-like protein kinase PXC2 |                    |
| SNP_82241_A_136311 | NW_004516116.1 | scaffold716 | 136311                  | GG                              | AA                 | AA               | SYNONYMOUS_CODING | 101496084     | leucine-rich repeat receptor-like protein kinase PXC2 |                    |
| SNP_82243_A_164942 | NW_004516116.1 | scaffold716 | 164942                  | GG                              | AA                 | AA               | INTERGENIC        |               |                                                       |                    |

| SNPs IDs           | Chromosome IDs | Chromosomes | Physical positions (bp) | CDC Frontier (Reference genome) | (Pusa 1103 & HPNB) | (ILWC 46 & LPNB) | Sequence genome | Components of | Gene accession IDs           | Putative functions |
|--------------------|----------------|-------------|-------------------------|---------------------------------|--------------------|------------------|-----------------|---------------|------------------------------|--------------------|
| SNP_82244_A_168556 | NW_004516116.1 | scaffold716 | 168556                  | GG                              | CC                 | CC               | INTERGENIC      |               |                              |                    |
| SNP_82245_A_174128 | NW_004516116.1 | scaffold716 | 174128                  | AA                              | GG                 | GG               | INTERGENIC      |               |                              |                    |
| SNP_82246_A_181428 | NW_004516116.1 | scaffold716 | 181428                  | AA                              | TT                 | TT               | INTERGENIC      |               |                              |                    |
| SNP_82247_A_181435 | NW_004516116.1 | scaffold716 | 181435                  | TT                              | CC                 | CC               | INTERGENIC      |               |                              |                    |
| SNP_82248_A_181438 | NW_004516116.1 | scaffold716 | 181438                  | AA                              | TT                 | TT               | INTERGENIC      |               |                              |                    |
| SNP_82249_A_181450 | NW_004516116.1 | scaffold716 | 181450                  | GG                              | TT                 | TT               | INTERGENIC      |               |                              |                    |
| SNP_82250_A_181453 | NW_004516116.1 | scaffold716 | 181453                  | AA                              | CC                 | CC               | INTERGENIC      |               |                              |                    |
| SNP_82251_A_183276 | NW_004516116.1 | scaffold716 | 183276                  | CC                              | TT                 | TT               | INTERGENIC      |               |                              |                    |
| SNP_82252_A_187106 | NW_004516116.1 | scaffold716 | 187106                  | TT                              | CC                 | CC               | INTERGENIC      |               |                              |                    |
| SNP_82254_A_191163 | NW_004516116.1 | scaffold716 | 191163                  | CC                              | AA                 | AA               | INTERGENIC      |               |                              |                    |
| SNP_82255_A_192635 | NW_004516116.1 | scaffold716 | 192635                  | GG                              | AA                 | AA               | INTERGENIC      |               |                              |                    |
| SNP_82257_A_201175 | NW_004516116.1 | scaffold716 | 201175                  | AA                              | GG                 | GG               | INTERGENIC      |               |                              |                    |
| SNP_82258_A_201604 | NW_004516116.1 | scaffold716 | 201604                  | GG                              | AA                 | AA               | INTERGENIC      |               |                              |                    |
| SNP_82259_A_202821 | NW_004516116.1 | scaffold716 | 202821                  | TT                              | GG                 | GG               | INTERGENIC      |               |                              |                    |
| SNP_82260_A_219826 | NW_004516116.1 | scaffold716 | 219826                  | TT                              | GG                 | GG               | INTERGENIC      |               |                              |                    |
| SNP_82261_A_226643 | NW_004516116.1 | scaffold716 | 226643                  | GG                              | AA                 | AA               | INTERGENIC      |               |                              |                    |
| SNP_82262_A_228761 | NW_004516116.1 | scaffold716 | 228761                  | AA                              | GG                 | GG               | INTERGENIC      |               |                              |                    |
| SNP_82263_A_244471 | NW_004516116.1 | scaffold716 | 244471                  | CC                              | TT                 | TT               | DRR             | 101497718     | uncharacterized LOC101497718 |                    |
| SNP_82264_A_247838 | NW_004516116.1 | scaffold716 | 247838                  | AA                              | GG                 | GG               | URR             | 101497718     | uncharacterized LOC101497718 |                    |
| SNP_82265_A_248082 | NW_004516116.1 | scaffold716 | 248082                  | TT                              | GG                 | GG               | URR             | 101497718     | uncharacterized LOC101497718 |                    |
| SNP_82266_A_248084 | NW_004516116.1 | scaffold716 | 248084                  | CC                              | TT                 | TT               | URR             | 101497718     | uncharacterized LOC101497718 |                    |
| SNP_82268_A_248115 | NW_004516116.1 | scaffold716 | 248115                  | AA                              | GG                 | GG               | URR             | 101497718     | uncharacterized LOC101497718 |                    |

| SNPs IDs           | Chromosome IDs | Chromosomes | Physical positions (bp) | CDC Frontier (Reference genome) | (Pusa 1103 & HPNB) | (ILWC 46 & LPNB) | Sequence Components of genome | Gene accession IDs | Putative functions           |
|--------------------|----------------|-------------|-------------------------|---------------------------------|--------------------|------------------|-------------------------------|--------------------|------------------------------|
| SNP_82269_A_248119 | NW_004516116.1 | scaffold716 | 248119                  | CC                              | TT                 | TT               | URR                           | 101497718          | uncharacterized LOC101497718 |
| SNP_82270_A_248147 | NW_004516116.1 | scaffold716 | 248147                  | CC                              | TT                 | TT               | URR                           | 101497718          | uncharacterized LOC101497718 |
| SNP_82271_A_248150 | NW_004516116.1 | scaffold716 | 248150                  | CC                              | AA                 | AA               | URR                           | 101497718          | uncharacterized LOC101497718 |
| SNP_82272_A_248284 | NW_004516116.1 | scaffold716 | 248284                  | AA                              | CC                 | CC               | URR                           | 101497718          | uncharacterized LOC101497718 |
| SNP_82273_A_263466 | NW_004516116.1 | scaffold716 | 263466                  | GG                              | TT                 | TT               | INTERGENIC                    |                    |                              |
| SNP_82274_A_263547 | NW_004516116.1 | scaffold716 | 263547                  | TT                              | CC                 | CC               | INTERGENIC                    |                    |                              |
| SNP_82275_A_263587 | NW_004516116.1 | scaffold716 | 263587                  | TT                              | GG                 | GG               | INTERGENIC                    |                    |                              |
| SNP_82276_A_263621 | NW_004516116.1 | scaffold716 | 263621                  | TT                              | CC                 | CC               | INTERGENIC                    |                    |                              |
| SNP_82277_A_263629 | NW_004516116.1 | scaffold716 | 263629                  | TT                              | AA                 | AA               | INTERGENIC                    |                    |                              |
| SNP_82278_A_263670 | NW_004516116.1 | scaffold716 | 263670                  | GG                              | AA                 | AA               | INTERGENIC                    |                    |                              |
| SNP_82279_A_263739 | NW_004516116.1 | scaffold716 | 263739                  | CC                              | TT                 | TT               | INTERGENIC                    |                    |                              |
| SNP_82280_A_263740 | NW_004516116.1 | scaffold716 | 263740                  | AA                              | GG                 | GG               | INTERGENIC                    |                    |                              |
| SNP_82281_A_273095 | NW_004516116.1 | scaffold716 | 273095                  | CC                              | AA                 | AA               | INTERGENIC                    |                    |                              |
| SNP_82282_A_295417 | NW_004516116.1 | scaffold716 | 295417                  | CC                              | TT                 | TT               | INTERGENIC                    |                    |                              |
| SNP_82283_A_315032 | NW_004516116.1 | scaffold716 | 315032                  | AA                              | GG                 | GG               | INTERGENIC                    |                    |                              |
| SNP_82284_A_378929 | NW_004516116.1 | scaffold716 | 378929                  | AA                              | GG                 | GG               | INTERGENIC                    |                    |                              |
| SNP_82285_A_397208 | NW_004516116.1 | scaffold716 | 397208                  | TT                              | CC                 | CC               | INTERGENIC                    |                    |                              |
| SNP_82286_A_397276 | NW_004516116.1 | scaffold716 | 397276                  | TT                              | GG                 | GG               | INTERGENIC                    |                    |                              |
| SNP_82287_A_397361 | NW_004516116.1 | scaffold716 | 397361                  | GG                              | TT                 | TT               | INTERGENIC                    |                    |                              |
| SNP_82288_A_397561 | NW_004516116.1 | scaffold716 | 397561                  | TT                              | AA                 | AA               | INTERGENIC                    |                    |                              |
| SNP_82289_A_397562 | NW_004516116.1 | scaffold716 | 397562                  | AA                              | TT                 | TT               | INTERGENIC                    |                    |                              |
| SNP_82290_A_397601 | NW_004516116.1 | scaffold716 | 397601                  | CC                              | TT                 | TT               | INTERGENIC                    |                    |                              |



| SNPs IDs           | Chromosome IDs | Chromosomes | Physical positions (bp) | CDC Frontier (Reference genome) | (Pusa 1103 & HPNB) | (ILWC 46 & LPNB) | Sequence genome | Components of | Gene accession IDs | Putative functions |
|--------------------|----------------|-------------|-------------------------|---------------------------------|--------------------|------------------|-----------------|---------------|--------------------|--------------------|
| SNP_82291_A_397603 | NW_004516116.1 | scaffold716 | 397603                  | GG                              | CC                 | CC               | INTERGENIC      |               |                    |                    |
| SNP_82292_A_397608 | NW_004516116.1 | scaffold716 | 397608                  | GG                              | TT                 | TT               | INTERGENIC      |               |                    |                    |
| SNP_82293_A_397611 | NW_004516116.1 | scaffold716 | 397611                  | GG                              | AA                 | AA               | INTERGENIC      |               |                    |                    |
| SNP_82294_A_397640 | NW_004516116.1 | scaffold716 | 397640                  | TT                              | CC                 | CC               | INTERGENIC      |               |                    |                    |
| SNP_82295_A_397641 | NW_004516116.1 | scaffold716 | 397641                  | TT                              | CC                 | CC               | INTERGENIC      |               |                    |                    |
| SNP_82296_A_397659 | NW_004516116.1 | scaffold716 | 397659                  | AA                              | GG                 | GG               | INTERGENIC      |               |                    |                    |
| SNP_82297_A_397676 | NW_004516116.1 | scaffold716 | 397676                  | AA                              | TT                 | TT               | INTERGENIC      |               |                    |                    |
| SNP_82298_A_397774 | NW_004516116.1 | scaffold716 | 397774                  | TT                              | CC                 | CC               | INTERGENIC      |               |                    |                    |
| SNP_82299_A_397823 | NW_004516116.1 | scaffold716 | 397823                  | TT                              | CC                 | CC               | INTERGENIC      |               |                    |                    |
| SNP_82300_A_397824 | NW_004516116.1 | scaffold716 | 397824                  | AA                              | GG                 | GG               | INTERGENIC      |               |                    |                    |
| SNP_82301_A_2862   | NW_004516117.1 | scaffold717 | 2862                    | AA                              | GG                 | GG               | INTERGENIC      |               |                    |                    |
| SNP_82302_A_2871   | NW_004516117.1 | scaffold717 | 2871                    | CC                              | GG                 | GG               | INTERGENIC      |               |                    |                    |
| SNP_82303_A_2872   | NW_004516117.1 | scaffold717 | 2872                    | CC                              | AA                 | AA               | INTERGENIC      |               |                    |                    |
| SNP_82304_A_2874   | NW_004516117.1 | scaffold717 | 2874                    | TT                              | AA                 | AA               | INTERGENIC      |               |                    |                    |
| SNP_82305_A_3998   | NW_004516117.1 | scaffold717 | 3998                    | CC                              | AA                 | AA               | INTERGENIC      |               |                    |                    |
| SNP_82306_A_4144   | NW_004516117.1 | scaffold717 | 4144                    | TT                              | AA                 | AA               | INTERGENIC      |               |                    |                    |
| SNP_82307_A_2324   | NW_004516118.1 | scaffold719 | 2324                    | TT                              | CC                 | CC               | INTERGENIC      |               |                    |                    |
| SNP_82308_A_2405   | NW_004516118.1 | scaffold719 | 2405                    | TT                              | CC                 | CC               | INTERGENIC      |               |                    |                    |
| SNP_82309_A_9750   | NW_004516118.1 | scaffold719 | 9750                    | AA                              | GG                 | GG               | INTERGENIC      |               |                    |                    |
| SNP_82310_A_9873   | NW_004516118.1 | scaffold719 | 9873                    | GG                              | TT                 | TT               | INTERGENIC      |               |                    |                    |
| SNP_82311_A_9936   | NW_004516118.1 | scaffold719 | 9936                    | AA                              | TT                 | TT               | INTERGENIC      |               |                    |                    |
| SNP_82312_A_9937   | NW_004516118.1 | scaffold719 | 9937                    | TT                              | AA                 | AA               | INTERGENIC      |               |                    |                    |

| SNPs IDs          | Chromosome IDs | Chromosomes | Physical positions (bp) | CDC Frontier (Reference genome) | (Pusa 1103 & HPNB) | (ILWC 46 & LPNB) | Sequence genome | Components of | Gene accession IDs | Putative functions |
|-------------------|----------------|-------------|-------------------------|---------------------------------|--------------------|------------------|-----------------|---------------|--------------------|--------------------|
| SNP_82313_A_10035 | NW_004516118.1 | scaffold719 | 10035                   | GG                              | AA                 | AA               | INTERGENIC      |               |                    |                    |
| SNP_82314_A_10038 | NW_004516118.1 | scaffold719 | 10038                   | AA                              | TT                 | TT               | INTERGENIC      |               |                    |                    |
| SNP_82315_A_12135 | NW_004516118.1 | scaffold719 | 12135                   | GG                              | TT                 | TT               | INTERGENIC      |               |                    |                    |
| SNP_82316_A_12139 | NW_004516118.1 | scaffold719 | 12139                   | TT                              | GG                 | GG               | INTERGENIC      |               |                    |                    |
| SNP_82317_A_12164 | NW_004516118.1 | scaffold719 | 12164                   | CC                              | AA                 | AA               | INTERGENIC      |               |                    |                    |
| SNP_82318_A_12204 | NW_004516118.1 | scaffold719 | 12204                   | TT                              | AA                 | AA               | INTERGENIC      |               |                    |                    |
| SNP_82319_A_12446 | NW_004516118.1 | scaffold719 | 12446                   | AA                              | GG                 | GG               | INTERGENIC      |               |                    |                    |
| SNP_82320_A_12488 | NW_004516118.1 | scaffold719 | 12488                   | GG                              | AA                 | AA               | INTERGENIC      |               |                    |                    |
| SNP_82321_A_12495 | NW_004516118.1 | scaffold719 | 12495                   | TT                              | GG                 | GG               | INTERGENIC      |               |                    |                    |
| SNP_82322_A_12498 | NW_004516118.1 | scaffold719 | 12498                   | AA                              | GG                 | GG               | INTERGENIC      |               |                    |                    |
| SNP_82323_A_12499 | NW_004516118.1 | scaffold719 | 12499                   | TT                              | CC                 | CC               | INTERGENIC      |               |                    |                    |
| SNP_82324_A_12519 | NW_004516118.1 | scaffold719 | 12519                   | AA                              | CC                 | CC               | INTERGENIC      |               |                    |                    |
| SNP_82325_A_12577 | NW_004516118.1 | scaffold719 | 12577                   | TT                              | CC                 | CC               | INTERGENIC      |               |                    |                    |
| SNP_82326_A_12656 | NW_004516118.1 | scaffold719 | 12656                   | AA                              | GG                 | GG               | INTERGENIC      |               |                    |                    |
| SNP_82327_A_14450 | NW_004516118.1 | scaffold719 | 14450                   | TT                              | CC                 | CC               | INTERGENIC      |               |                    |                    |
| SNP_82328_A_14756 | NW_004516118.1 | scaffold719 | 14756                   | AA                              | GG                 | GG               | INTERGENIC      |               |                    |                    |
| SNP_82329_A_14849 | NW_004516118.1 | scaffold719 | 14849                   | GG                              | AA                 | AA               | INTERGENIC      |               |                    |                    |
| SNP_82330_A_14922 | NW_004516118.1 | scaffold719 | 14922                   | GG                              | TT                 | TT               | INTERGENIC      |               |                    |                    |
| SNP_82331_A_14924 | NW_004516118.1 | scaffold719 | 14924                   | TT                              | GG                 | GG               | INTERGENIC      |               |                    |                    |
| SNP_82332_A_28308 | NW_004516118.1 | scaffold719 | 28308                   | GG                              | AA                 | AA               | INTERGENIC      |               |                    |                    |
| SNP_82333_A_32264 | NW_004516118.1 | scaffold719 | 32264                   | AA                              | CC                 | CC               | INTERGENIC      |               |                    |                    |
| SNP_82334_A_41821 | NW_004516118.1 | scaffold719 | 41821                   | CC                              | GG                 | GG               | INTERGENIC      |               |                    |                    |

| SNPs IDs           | Chromosome IDs | Chromosomes | Physical positions (bp) | CDC Frontier (Reference genome) | (Pusa 1103 & HPNB) | (ILWC 46 & LPNB) | Sequence genome | Components of | Gene accession IDs | Putative functions |
|--------------------|----------------|-------------|-------------------------|---------------------------------|--------------------|------------------|-----------------|---------------|--------------------|--------------------|
| SNP_82335_A_44995  | NW_004516118.1 | scaffold719 | 44995                   | CC                              | GG                 | GG               | INTERGENIC      |               |                    |                    |
| SNP_82336_A_48471  | NW_004516118.1 | scaffold719 | 48471                   | CC                              | TT                 | TT               | INTERGENIC      |               |                    |                    |
| SNP_82337_A_54082  | NW_004516118.1 | scaffold719 | 54082                   | TT                              | CC                 | CC               | INTERGENIC      |               |                    |                    |
| SNP_82338_A_85036  | NW_004516118.1 | scaffold719 | 85036                   | GG                              | TT                 | TT               | INTERGENIC      |               |                    |                    |
| SNP_82339_A_85082  | NW_004516118.1 | scaffold719 | 85082                   | CC                              | TT                 | TT               | INTERGENIC      |               |                    |                    |
| SNP_82340_A_85091  | NW_004516118.1 | scaffold719 | 85091                   | TT                              | AA                 | AA               | INTERGENIC      |               |                    |                    |
| SNP_82341_A_85107  | NW_004516118.1 | scaffold719 | 85107                   | TT                              | CC                 | CC               | INTERGENIC      |               |                    |                    |
| SNP_82342_A_85291  | NW_004516118.1 | scaffold719 | 85291                   | GG                              | AA                 | AA               | INTERGENIC      |               |                    |                    |
| SNP_82343_A_98414  | NW_004516118.1 | scaffold719 | 98414                   | AA                              | TT                 | TT               | INTERGENIC      |               |                    |                    |
| SNP_82344_A_101210 | NW_004516118.1 | scaffold719 | 101210                  | AA                              | GG                 | GG               | INTERGENIC      |               |                    |                    |
| SNP_82345_A_108775 | NW_004516118.1 | scaffold719 | 108775                  | TT                              | GG                 | GG               | INTERGENIC      |               |                    |                    |
| SNP_82346_A_108776 | NW_004516118.1 | scaffold719 | 108776                  | GG                              | TT                 | TT               | INTERGENIC      |               |                    |                    |
| SNP_82347_A_108780 | NW_004516118.1 | scaffold719 | 108780                  | GG                              | AA                 | AA               | INTERGENIC      |               |                    |                    |
| SNP_82348_A_108799 | NW_004516118.1 | scaffold719 | 108799                  | GG                              | AA                 | AA               | INTERGENIC      |               |                    |                    |
| SNP_82349_A_108837 | NW_004516118.1 | scaffold719 | 108837                  | CC                              | TT                 | TT               | INTERGENIC      |               |                    |                    |
| SNP_82350_A_108847 | NW_004516118.1 | scaffold719 | 108847                  | AA                              | GG                 | GG               | INTERGENIC      |               |                    |                    |
| SNP_82351_A_108858 | NW_004516118.1 | scaffold719 | 108858                  | AA                              | GG                 | GG               | INTERGENIC      |               |                    |                    |
| SNP_82352_A_108891 | NW_004516118.1 | scaffold719 | 108891                  | AA                              | TT                 | TT               | INTERGENIC      |               |                    |                    |
| SNP_82353_A_108893 | NW_004516118.1 | scaffold719 | 108893                  | AA                              | GG                 | GG               | INTERGENIC      |               |                    |                    |
| SNP_82354_A_108894 | NW_004516118.1 | scaffold719 | 108894                  | CC                              | TT                 | TT               | INTERGENIC      |               |                    |                    |
| SNP_82355_A_110496 | NW_004516118.1 | scaffold719 | 110496                  | AA                              | GG                 | GG               | INTERGENIC      |               |                    |                    |
| SNP_82356_A_110755 | NW_004516118.1 | scaffold719 | 110755                  | AA                              | TT                 | TT               | INTERGENIC      |               |                    |                    |

| SNPs IDs           | Chromosome IDs | Chromosomes | Physical positions (bp) | CDC Frontier (Reference genome) | (Pusa 1103 & HPNB) | (ILWC 46 & LPNB) | Sequence genome | Components of | Gene accession IDs | Putative functions |
|--------------------|----------------|-------------|-------------------------|---------------------------------|--------------------|------------------|-----------------|---------------|--------------------|--------------------|
| SNP_82357_A_111051 | NW_004516118.1 | scaffold719 | 111051                  | CC                              | TT                 | TT               | INTERGENIC      |               |                    |                    |
| SNP_82358_A_114589 | NW_004516118.1 | scaffold719 | 114589                  | GG                              | TT                 | TT               | INTERGENIC      |               |                    |                    |
| SNP_82359_A_114590 | NW_004516118.1 | scaffold719 | 114590                  | GG                              | AA                 | AA               | INTERGENIC      |               |                    |                    |
| SNP_82360_A_114592 | NW_004516118.1 | scaffold719 | 114592                  | GG                              | AA                 | AA               | INTERGENIC      |               |                    |                    |
| SNP_82361_A_114597 | NW_004516118.1 | scaffold719 | 114597                  | CC                              | AA                 | AA               | INTERGENIC      |               |                    |                    |
| SNP_82362_A_114603 | NW_004516118.1 | scaffold719 | 114603                  | GG                              | TT                 | TT               | INTERGENIC      |               |                    |                    |
| SNP_82363_A_123432 | NW_004516118.1 | scaffold719 | 123432                  | TT                              | CC                 | CC               | INTERGENIC      |               |                    |                    |
| SNP_82364_A_123491 | NW_004516118.1 | scaffold719 | 123491                  | CC                              | GG                 | GG               | INTERGENIC      |               |                    |                    |
| SNP_82365_A_123492 | NW_004516118.1 | scaffold719 | 123492                  | TT                              | CC                 | CC               | INTERGENIC      |               |                    |                    |
| SNP_82366_A_123532 | NW_004516118.1 | scaffold719 | 123532                  | TT                              | AA                 | AA               | INTERGENIC      |               |                    |                    |
| SNP_82367_A_123584 | NW_004516118.1 | scaffold719 | 123584                  | AA                              | TT                 | TT               | INTERGENIC      |               |                    |                    |
| SNP_82368_A_123702 | NW_004516118.1 | scaffold719 | 123702                  | AA                              | GG                 | GG               | INTERGENIC      |               |                    |                    |
| SNP_82369_A_123714 | NW_004516118.1 | scaffold719 | 123714                  | TT                              | GG                 | GG               | INTERGENIC      |               |                    |                    |
| SNP_82371_A_123770 | NW_004516118.1 | scaffold719 | 123770                  | CC                              | AA                 | AA               | INTERGENIC      |               |                    |                    |
| SNP_82372_A_123785 | NW_004516118.1 | scaffold719 | 123785                  | AA                              | TT                 | TT               | INTERGENIC      |               |                    |                    |
| SNP_82373_A_124737 | NW_004516118.1 | scaffold719 | 124737                  | TT                              | CC                 | CC               | INTERGENIC      |               |                    |                    |
| SNP_82374_A_125171 | NW_004516118.1 | scaffold719 | 125171                  | TT                              | AA                 | AA               | INTERGENIC      |               |                    |                    |
| SNP_82375_A_128526 | NW_004516118.1 | scaffold719 | 128526                  | TT                              | CC                 | CC               | INTERGENIC      |               |                    |                    |
| SNP_82376_A_128594 | NW_004516118.1 | scaffold719 | 128594                  | TT                              | CC                 | CC               | INTERGENIC      |               |                    |                    |
| SNP_82377_A_128616 | NW_004516118.1 | scaffold719 | 128616                  | AA                              | TT                 | TT               | INTERGENIC      |               |                    |                    |
| SNP_82379_A_961    | NW_004516119.1 | scaffold720 | 961                     | CC                              | TT                 | TT               | INTERGENIC      |               |                    |                    |
| SNP_82380_A_963    | NW_004516119.1 | scaffold720 | 963                     | AA                              | GG                 | GG               | INTERGENIC      |               |                    |                    |

| SNPs IDs           | Chromosome IDs | Chromosomes | Physical positions (bp) | CDC Frontier (Reference genome) | (Pusa 1103 & HPNB) | (ILWC 46 & LPNB) | Sequence genome | Components of | Gene accession IDs | Putative functions |
|--------------------|----------------|-------------|-------------------------|---------------------------------|--------------------|------------------|-----------------|---------------|--------------------|--------------------|
| SNP_82381_A_1025   | NW_004516119.1 | scaffold720 | 1025                    | AA                              | CC                 | CC               | INTERGENIC      |               |                    |                    |
| SNP_82382_A_1026   | NW_004516119.1 | scaffold720 | 1026                    | AA                              | GG                 | GG               | INTERGENIC      |               |                    |                    |
| SNP_82383_A_1277   | NW_004516119.1 | scaffold720 | 1277                    | TT                              | AA                 | AA               | INTERGENIC      |               |                    |                    |
| SNP_82384_A_1314   | NW_004516119.1 | scaffold720 | 1314                    | AA                              | TT                 | TT               | INTERGENIC      |               |                    |                    |
| SNP_82385_A_1371   | NW_004516119.1 | scaffold720 | 1371                    | CC                              | TT                 | TT               | INTERGENIC      |               |                    |                    |
| SNP_82386_A_18790  | NW_004516119.1 | scaffold720 | 18790                   | TT                              | AA                 | AA               | INTERGENIC      |               |                    |                    |
| SNP_82387_A_18875  | NW_004516119.1 | scaffold720 | 18875                   | TT                              | GG                 | GG               | INTERGENIC      |               |                    |                    |
| SNP_82388_A_18985  | NW_004516119.1 | scaffold720 | 18985                   | GG                              | CC                 | CC               | INTERGENIC      |               |                    |                    |
| SNP_82389_A_77408  | NW_004516119.1 | scaffold720 | 77408                   | TT                              | AA                 | AA               | INTERGENIC      |               |                    |                    |
| SNP_82390_A_211338 | NW_004516119.1 | scaffold720 | 211338                  | AA                              | GG                 | GG               | INTERGENIC      |               |                    |                    |
| SNP_82391_A_221334 | NW_004516119.1 | scaffold720 | 221334                  | TT                              | CC                 | CC               | INTERGENIC      |               |                    |                    |
| SNP_82392_A_221336 | NW_004516119.1 | scaffold720 | 221336                  | GG                              | TT                 | TT               | INTERGENIC      |               |                    |                    |
| SNP_82393_A_222510 | NW_004516119.1 | scaffold720 | 222510                  | CC                              | TT                 | TT               | INTERGENIC      |               |                    |                    |
| SNP_82394_A_223283 | NW_004516119.1 | scaffold720 | 223283                  | AA                              | TT                 | TT               | INTERGENIC      |               |                    |                    |
| SNP_82395_A_223302 | NW_004516119.1 | scaffold720 | 223302                  | TT                              | CC                 | CC               | INTERGENIC      |               |                    |                    |
| SNP_82396_A_223315 | NW_004516119.1 | scaffold720 | 223315                  | AA                              | CC                 | CC               | INTERGENIC      |               |                    |                    |
| SNP_82397_A_252570 | NW_004516119.1 | scaffold720 | 252570                  | AA                              | GG                 | GG               | INTERGENIC      |               |                    |                    |
| SNP_82398_A_289537 | NW_004516119.1 | scaffold720 | 289537                  | TT                              | CC                 | CC               | INTERGENIC      |               |                    |                    |
| SNP_82399_A_296689 | NW_004516119.1 | scaffold720 | 296689                  | TT                              | AA                 | AA               | INTERGENIC      |               |                    |                    |
| SNP_82400_A_296865 | NW_004516119.1 | scaffold720 | 296865                  | AA                              | GG                 | GG               | INTERGENIC      |               |                    |                    |
| SNP_82401_A_296871 | NW_004516119.1 | scaffold720 | 296871                  | TT                              | GG                 | GG               | INTERGENIC      |               |                    |                    |
| SNP_82402_A_297034 | NW_004516119.1 | scaffold720 | 297034                  | CC                              | AA                 | AA               | INTERGENIC      |               |                    |                    |

| SNPs IDs           | Chromosome IDs | Chromosomes | Physical positions (bp) | CDC Frontier (Reference genome) | (Pusa 1103 & HPNB) | (ILWC 46 & LPNB) | Sequence genome | Components of | Gene accession IDs | Putative functions |
|--------------------|----------------|-------------|-------------------------|---------------------------------|--------------------|------------------|-----------------|---------------|--------------------|--------------------|
| SNP_82403_A_297071 | NW_004516119.1 | scaffold720 | 297071                  | TT                              | CC                 | CC               | INTERGENIC      |               |                    |                    |
| SNP_82404_A_297195 | NW_004516119.1 | scaffold720 | 297195                  | AA                              | GG                 | GG               | INTERGENIC      |               |                    |                    |
| SNP_82405_A_297250 | NW_004516119.1 | scaffold720 | 297250                  | AA                              | CC                 | CC               | INTERGENIC      |               |                    |                    |
| SNP_82406_A_297258 | NW_004516119.1 | scaffold720 | 297258                  | CC                              | TT                 | TT               | INTERGENIC      |               |                    |                    |
| SNP_82407_A_297268 | NW_004516119.1 | scaffold720 | 297268                  | AA                              | GG                 | GG               | INTERGENIC      |               |                    |                    |
| SNP_82408_A_297281 | NW_004516119.1 | scaffold720 | 297281                  | GG                              | AA                 | AA               | INTERGENIC      |               |                    |                    |
| SNP_82409_A_297341 | NW_004516119.1 | scaffold720 | 297341                  | AA                              | CC                 | CC               | INTERGENIC      |               |                    |                    |
| SNP_82410_A_297342 | NW_004516119.1 | scaffold720 | 297342                  | GG                              | AA                 | AA               | INTERGENIC      |               |                    |                    |
| SNP_82411_A_297452 | NW_004516119.1 | scaffold720 | 297452                  | CC                              | TT                 | TT               | INTERGENIC      |               |                    |                    |
| SNP_82412_A_297522 | NW_004516119.1 | scaffold720 | 297522                  | AA                              | CC                 | CC               | INTERGENIC      |               |                    |                    |
| SNP_82413_A_297529 | NW_004516119.1 | scaffold720 | 297529                  | AA                              | GG                 | GG               | INTERGENIC      |               |                    |                    |
| SNP_82414_A_297652 | NW_004516119.1 | scaffold720 | 297652                  | GG                              | AA                 | AA               | INTERGENIC      |               |                    |                    |
| SNP_82415_A_297690 | NW_004516119.1 | scaffold720 | 297690                  | GG                              | AA                 | AA               | INTERGENIC      |               |                    |                    |
| SNP_82416_A_297729 | NW_004516119.1 | scaffold720 | 297729                  | CC                              | AA                 | AA               | INTERGENIC      |               |                    |                    |
| SNP_82417_A_297747 | NW_004516119.1 | scaffold720 | 297747                  | AA                              | GG                 | GG               | INTERGENIC      |               |                    |                    |
| SNP_82418_A_297797 | NW_004516119.1 | scaffold720 | 297797                  | AA                              | CC                 | CC               | INTERGENIC      |               |                    |                    |
| SNP_82419_A_297886 | NW_004516119.1 | scaffold720 | 297886                  | TT                              | GG                 | GG               | INTERGENIC      |               |                    |                    |
| SNP_82420_A_298216 | NW_004516119.1 | scaffold720 | 298216                  | GG                              | AA                 | AA               | INTERGENIC      |               |                    |                    |
| SNP_82421_A_298283 | NW_004516119.1 | scaffold720 | 298283                  | TT                              | CC                 | CC               | INTERGENIC      |               |                    |                    |
| SNP_82422_A_299038 | NW_004516119.1 | scaffold720 | 299038                  | GG                              | TT                 | TT               | INTERGENIC      |               |                    |                    |
| SNP_82423_A_299056 | NW_004516119.1 | scaffold720 | 299056                  | TT                              | CC                 | CC               | INTERGENIC      |               |                    |                    |
| SNP_82424_A_302556 | NW_004516119.1 | scaffold720 | 302556                  | CC                              | TT                 | TT               | INTERGENIC      |               |                    |                    |

| SNPs IDs           | Chromosome IDs | Chromosomes | Physical positions (bp) | CDC Frontier (Reference genome) | (Pusa 1103 & HPNB) | (ILWC 46 & LPNB) | Sequence genome | Components of | Gene accession IDs | Putative functions |
|--------------------|----------------|-------------|-------------------------|---------------------------------|--------------------|------------------|-----------------|---------------|--------------------|--------------------|
| SNP_82425_A_327324 | NW_004516119.1 | scaffold720 | 327324                  | CC                              | GG                 | GG               | INTERGENIC      |               |                    |                    |
| SNP_82426_A_327341 | NW_004516119.1 | scaffold720 | 327341                  | GG                              | AA                 | AA               | INTERGENIC      |               |                    |                    |
| SNP_82427_A_327372 | NW_004516119.1 | scaffold720 | 327372                  | CC                              | TT                 | TT               | INTERGENIC      |               |                    |                    |
| SNP_82428_A_329815 | NW_004516119.1 | scaffold720 | 329815                  | AA                              | GG                 | GG               | INTERGENIC      |               |                    |                    |
| SNP_82429_A_329831 | NW_004516119.1 | scaffold720 | 329831                  | GG                              | TT                 | TT               | INTERGENIC      |               |                    |                    |
| SNP_82430_A_329851 | NW_004516119.1 | scaffold720 | 329851                  | TT                              | AA                 | AA               | INTERGENIC      |               |                    |                    |
| SNP_82431_A_330206 | NW_004516119.1 | scaffold720 | 330206                  | TT                              | CC                 | CC               | INTERGENIC      |               |                    |                    |
| SNP_82432_A_330297 | NW_004516119.1 | scaffold720 | 330297                  | CC                              | AA                 | AA               | INTERGENIC      |               |                    |                    |
| SNP_82433_A_330346 | NW_004516119.1 | scaffold720 | 330346                  | TT                              | AA                 | AA               | INTERGENIC      |               |                    |                    |
| SNP_82434_A_330373 | NW_004516119.1 | scaffold720 | 330373                  | CC                              | AA                 | AA               | INTERGENIC      |               |                    |                    |
| SNP_82435_A_330841 | NW_004516119.1 | scaffold720 | 330841                  | CC                              | GG                 | GG               | INTERGENIC      |               |                    |                    |
| SNP_82436_A_330900 | NW_004516119.1 | scaffold720 | 330900                  | AA                              | GG                 | GG               | INTERGENIC      |               |                    |                    |
| SNP_82437_A_330903 | NW_004516119.1 | scaffold720 | 330903                  | GG                              | TT                 | TT               | INTERGENIC      |               |                    |                    |
| SNP_82438_A_330926 | NW_004516119.1 | scaffold720 | 330926                  | TT                              | AA                 | AA               | INTERGENIC      |               |                    |                    |
| SNP_82439_A_331016 | NW_004516119.1 | scaffold720 | 331016                  | GG                              | TT                 | TT               | INTERGENIC      |               |                    |                    |
| SNP_82440_A_331170 | NW_004516119.1 | scaffold720 | 331170                  | CC                              | TT                 | TT               | INTERGENIC      |               |                    |                    |
| SNP_82441_A_331171 | NW_004516119.1 | scaffold720 | 331171                  | AA                              | GG                 | GG               | INTERGENIC      |               |                    |                    |
| SNP_82442_A_331172 | NW_004516119.1 | scaffold720 | 331172                  | GG                              | AA                 | AA               | INTERGENIC      |               |                    |                    |
| SNP_82443_A_333005 | NW_004516119.1 | scaffold720 | 333005                  | TT                              | CC                 | CC               | INTERGENIC      |               |                    |                    |
| SNP_82444_A_333020 | NW_004516119.1 | scaffold720 | 333020                  | CC                              | TT                 | TT               | INTERGENIC      |               |                    |                    |
| SNP_82445_A_333026 | NW_004516119.1 | scaffold720 | 333026                  | GG                              | AA                 | AA               | INTERGENIC      |               |                    |                    |
| SNP_82446_A_333055 | NW_004516119.1 | scaffold720 | 333055                  | CC                              | GG                 | GG               | INTERGENIC      |               |                    |                    |

| SNPs IDs           | Chromosome IDs | Chromosomes | Physical positions (bp) | CDC Frontier (Reference genome) | (Pusa 1103 & HPNB) | (ILWC 46 & LPNB) | Sequence genome | Components of | Gene accession IDs | Putative functions |
|--------------------|----------------|-------------|-------------------------|---------------------------------|--------------------|------------------|-----------------|---------------|--------------------|--------------------|
| SNP_82447_A_333062 | NW_004516119.1 | scaffold720 | 333062                  | GG                              | CC                 | CC               | INTERGENIC      |               |                    |                    |
| SNP_82448_A_333312 | NW_004516119.1 | scaffold720 | 333312                  | GG                              | TT                 | TT               | INTERGENIC      |               |                    |                    |
| SNP_82449_A_333578 | NW_004516119.1 | scaffold720 | 333578                  | GG                              | TT                 | TT               | INTERGENIC      |               |                    |                    |
| SNP_82450_A_333608 | NW_004516119.1 | scaffold720 | 333608                  | GG                              | AA                 | AA               | INTERGENIC      |               |                    |                    |
| SNP_82451_A_333618 | NW_004516119.1 | scaffold720 | 333618                  | CC                              | AA                 | AA               | INTERGENIC      |               |                    |                    |
| SNP_82452_A_336807 | NW_004516119.1 | scaffold720 | 336807                  | AA                              | GG                 | GG               | INTERGENIC      |               |                    |                    |
| SNP_82453_A_336812 | NW_004516119.1 | scaffold720 | 336812                  | TT                              | GG                 | GG               | INTERGENIC      |               |                    |                    |
| SNP_82454_A_337076 | NW_004516119.1 | scaffold720 | 337076                  | AA                              | TT                 | TT               | INTERGENIC      |               |                    |                    |
| SNP_82455_A_337210 | NW_004516119.1 | scaffold720 | 337210                  | CC                              | TT                 | TT               | INTERGENIC      |               |                    |                    |
| SNP_82456_A_337332 | NW_004516119.1 | scaffold720 | 337332                  | AA                              | CC                 | CC               | INTERGENIC      |               |                    |                    |
| SNP_82457_A_337391 | NW_004516119.1 | scaffold720 | 337391                  | TT                              | CC                 | CC               | INTERGENIC      |               |                    |                    |
| SNP_82458_A_337456 | NW_004516119.1 | scaffold720 | 337456                  | AA                              | GG                 | GG               | INTERGENIC      |               |                    |                    |
| SNP_82459_A_337607 | NW_004516119.1 | scaffold720 | 337607                  | AA                              | TT                 | TT               | INTERGENIC      |               |                    |                    |
| SNP_82460_A_337691 | NW_004516119.1 | scaffold720 | 337691                  | AA                              | CC                 | CC               | INTERGENIC      |               |                    |                    |
| SNP_82461_A_338153 | NW_004516119.1 | scaffold720 | 338153                  | AA                              | GG                 | GG               | INTERGENIC      |               |                    |                    |
| SNP_82462_A_338192 | NW_004516119.1 | scaffold720 | 338192                  | TT                              | GG                 | GG               | INTERGENIC      |               |                    |                    |
| SNP_82463_A_342120 | NW_004516119.1 | scaffold720 | 342120                  | AA                              | GG                 | GG               | INTERGENIC      |               |                    |                    |
| SNP_82464_A_342300 | NW_004516119.1 | scaffold720 | 342300                  | GG                              | AA                 | AA               | INTERGENIC      |               |                    |                    |
| SNP_82465_A_344763 | NW_004516119.1 | scaffold720 | 344763                  | TT                              | AA                 | AA               | INTERGENIC      |               |                    |                    |
| SNP_82466_A_344828 | NW_004516119.1 | scaffold720 | 344828                  | GG                              | AA                 | AA               | INTERGENIC      |               |                    |                    |
| SNP_82467_A_344858 | NW_004516119.1 | scaffold720 | 344858                  | GG                              | CC                 | CC               | INTERGENIC      |               |                    |                    |
| SNP_82468_A_345052 | NW_004516119.1 | scaffold720 | 345052                  | TT                              | AA                 | AA               | INTERGENIC      |               |                    |                    |



| SNPs IDs           | Chromosome IDs | Chromosomes | Physical positions (bp) | CDC Frontier (Reference genome) | (Pusa 1103 & HPNB) | (ILWC 46 & LPNB) | Sequence Components of genome | Gene accession IDs | Putative functions           |
|--------------------|----------------|-------------|-------------------------|---------------------------------|--------------------|------------------|-------------------------------|--------------------|------------------------------|
| SNP_82469_A_345138 | NW_004516119.1 | scaffold720 | 345138                  | GG                              | TT                 | TT               | INTERGENIC                    |                    |                              |
| SNP_82470_A_345201 | NW_004516119.1 | scaffold720 | 345201                  | TT                              | CC                 | CC               | INTERGENIC                    |                    |                              |
| SNP_82471_A_345202 | NW_004516119.1 | scaffold720 | 345202                  | AA                              | GG                 | GG               | INTERGENIC                    |                    |                              |
| SNP_82472_A_345389 | NW_004516119.1 | scaffold720 | 345389                  | TT                              | CC                 | CC               | INTERGENIC                    |                    |                              |
| SNP_82473_A_353796 | NW_004516119.1 | scaffold720 | 353796                  | TT                              | CC                 | CC               | INTERGENIC                    |                    |                              |
| SNP_82474_A_362943 | NW_004516119.1 | scaffold720 | 362943                  | AA                              | GG                 | GG               | INTERGENIC                    |                    |                              |
| SNP_82475_A_365920 | NW_004516119.1 | scaffold720 | 365920                  | TT                              | AA                 | AA               | INTRON                        | 101500732          | Unknown function             |
| SNP_82476_A_365943 | NW_004516119.1 | scaffold720 | 365943                  | AA                              | GG                 | GG               | INTRON                        | 101500732          | Unknown function             |
| SNP_82477_A_365971 | NW_004516119.1 | scaffold720 | 365971                  | TT                              | CC                 | CC               | INTRON                        | 101500732          | Unknown function             |
| SNP_82478_A_370011 | NW_004516119.1 | scaffold720 | 370011                  | GG                              | TT                 | TT               | DRR                           | 101499563          | uncharacterized LOC101499563 |
| SNP_82479_A_370028 | NW_004516119.1 | scaffold720 | 370028                  | GG                              | AA                 | AA               | DRR                           | 101499563          | uncharacterized LOC101499563 |
| SNP_82480_A_370067 | NW_004516119.1 | scaffold720 | 370067                  | AA                              | TT                 | TT               | DRR                           | 101499563          | uncharacterized LOC101499563 |
| SNP_82481_A_370070 | NW_004516119.1 | scaffold720 | 370070                  | AA                              | GG                 | GG               | DRR                           | 101499563          | uncharacterized LOC101499563 |
| SNP_82482_A_370137 | NW_004516119.1 | scaffold720 | 370137                  | TT                              | CC                 | CC               | DRR                           | 101499563          | uncharacterized LOC101499563 |
| SNP_82483_A_370223 | NW_004516119.1 | scaffold720 | 370223                  | GG                              | AA                 | AA               | DRR                           | 101499563          | uncharacterized LOC101499563 |
| SNP_82484_A_370224 | NW_004516119.1 | scaffold720 | 370224                  | AA                              | GG                 | GG               | DRR                           | 101499563          | uncharacterized LOC101499563 |
| SNP_82485_A_370229 | NW_004516119.1 | scaffold720 | 370229                  | AA                              | CC                 | CC               | DRR                           | 101499563          | uncharacterized LOC101499563 |
| SNP_82486_A_370297 | NW_004516119.1 | scaffold720 | 370297                  | CC                              | TT                 | TT               | DRR                           | 101499563          | uncharacterized LOC101499563 |
| SNP_82487_A_370374 | NW_004516119.1 | scaffold720 | 370374                  | TT                              | CC                 | CC               | URR                           | 101500732          | Unknown function             |
| SNP_82488_A_370465 | NW_004516119.1 | scaffold720 | 370465                  | TT                              | AA                 | AA               | URR                           | 101500732          | Unknown function             |
| SNP_82489_A_370559 | NW_004516119.1 | scaffold720 | 370559                  | GG                              | CC                 | CC               | URR                           | 101500732          | Unknown function             |
| SNP_82490_A_370639 | NW_004516119.1 | scaffold720 | 370639                  | TT                              | AA                 | AA               | URR                           | 101500732          | Unknown function             |

| SNPs IDs           | Chromosome IDs | Chromosomes | Physical positions (bp) | CDC Frontier (Reference genome) | (Pusa 1103 & HPNB) | (ILWC 46 & LPNB) | Sequence Components of genome | Gene accession IDs | Putative functions           |
|--------------------|----------------|-------------|-------------------------|---------------------------------|--------------------|------------------|-------------------------------|--------------------|------------------------------|
| SNP_82491_A_370725 | NW_004516119.1 | scaffold720 | 370725                  | AA                              | GG                 | GG               | URR                           | 101500732          | Unknown function             |
| SNP_82492_A_370814 | NW_004516119.1 | scaffold720 | 370814                  | GG                              | AA                 | AA               | URR                           | 101500732          | Unknown function             |
| SNP_82493_A_370924 | NW_004516119.1 | scaffold720 | 370924                  | CC                              | AA                 | AA               | URR                           | 101500732          | Unknown function             |
| SNP_82494_A_371463 | NW_004516119.1 | scaffold720 | 371463                  | AA                              | TT                 | TT               | URR                           | 101500732          | Unknown function             |
| SNP_82495_A_371609 | NW_004516119.1 | scaffold720 | 371609                  | TT                              | CC                 | CC               | INTRON                        | id204863           | Unknown function             |
| SNP_82496_A_371637 | NW_004516119.1 | scaffold720 | 371637                  | GG                              | AA                 | AA               | INTRON                        | id204863           | Unknown function             |
| SNP_82497_A_371886 | NW_004516119.1 | scaffold720 | 371886                  | GG                              | AA                 | AA               | URR                           | 101499563          | uncharacterized LOC101499563 |
| SNP_82499_A_15672  | NW_004516120.1 | scaffold721 | 15672                   | TT                              | AA                 | AA               | INTERGENIC                    |                    |                              |
| SNP_82501_A_77608  | NW_004516120.1 | scaffold721 | 77608                   | TT                              | CC                 | CC               | INTERGENIC                    |                    |                              |
| SNP_82502_A_79040  | NW_004516120.1 | scaffold721 | 79040                   | TT                              | AA                 | AA               | INTERGENIC                    |                    |                              |
| SNP_82503_A_80744  | NW_004516120.1 | scaffold721 | 80744                   | CC                              | TT                 | TT               | INTERGENIC                    |                    |                              |
| SNP_82504_A_80760  | NW_004516120.1 | scaffold721 | 80760                   | CC                              | TT                 | TT               | INTERGENIC                    |                    |                              |
| SNP_82505_A_80765  | NW_004516120.1 | scaffold721 | 80765                   | GG                              | AA                 | AA               | INTERGENIC                    |                    |                              |
| SNP_82506_A_81630  | NW_004516120.1 | scaffold721 | 81630                   | AA                              | GG                 | GG               | INTERGENIC                    |                    |                              |
| SNP_82507_A_106828 | NW_004516120.1 | scaffold721 | 106828                  | AA                              | CC                 | CC               | INTERGENIC                    |                    |                              |
| SNP_82508_A_106864 | NW_004516120.1 | scaffold721 | 106864                  | TT                              | CC                 | CC               | INTERGENIC                    |                    |                              |
| SNP_82509_A_106875 | NW_004516120.1 | scaffold721 | 106875                  | TT                              | AA                 | AA               | INTERGENIC                    |                    |                              |
| SNP_82510_A_106882 | NW_004516120.1 | scaffold721 | 106882                  | TT                              | CC                 | CC               | INTERGENIC                    |                    |                              |
| SNP_82511_A_106909 | NW_004516120.1 | scaffold721 | 106909                  | GG                              | AA                 | AA               | INTERGENIC                    |                    |                              |
| SNP_82512_A_107367 | NW_004516120.1 | scaffold721 | 107367                  | GG                              | AA                 | AA               | INTERGENIC                    |                    |                              |
| SNP_82513_A_107401 | NW_004516120.1 | scaffold721 | 107401                  | GG                              | AA                 | AA               | INTERGENIC                    |                    |                              |
| SNP_82514_A_111133 | NW_004516120.1 | scaffold721 | 111133                  | AA                              | GG                 | GG               | INTERGENIC                    |                    |                              |

| SNPs IDs           | Chromosome IDs | Chromosomes | Physical positions (bp) | CDC Frontier (Reference genome) | (Pusa 1103 & HPNB) | (ILWC 46 & LPNB) | Sequence genome | Components of | Gene accession IDs                | Putative functions |
|--------------------|----------------|-------------|-------------------------|---------------------------------|--------------------|------------------|-----------------|---------------|-----------------------------------|--------------------|
| SNP_82515_A_111143 | NW_004516120.1 | scaffold721 | 111143                  | TT                              | GG                 | GG               | INTERGENIC      |               |                                   |                    |
| SNP_82516_A_161285 | NW_004516120.1 | scaffold721 | 161285                  | GG                              | TT                 | TT               | INTERGENIC      |               |                                   |                    |
| SNP_82517_A_163637 | NW_004516120.1 | scaffold721 | 163637                  | TT                              | CC                 | CC               | INTERGENIC      |               |                                   |                    |
| SNP_82518_A_163638 | NW_004516120.1 | scaffold721 | 163638                  | TT                              | CC                 | CC               | INTERGENIC      |               |                                   |                    |
| SNP_82519_A_183436 | NW_004516120.1 | scaffold721 | 183436                  | CC                              | TT                 | TT               | INTERGENIC      |               |                                   |                    |
| SNP_82520_A_187782 | NW_004516120.1 | scaffold721 | 187782                  | CC                              | GG                 | GG               | INTERGENIC      |               |                                   |                    |
| SNP_82521_A_190489 | NW_004516120.1 | scaffold721 | 190489                  | AA                              | GG                 | GG               | INTERGENIC      |               |                                   |                    |
| SNP_82522_A_190492 | NW_004516120.1 | scaffold721 | 190492                  | AA                              | GG                 | GG               | INTERGENIC      |               |                                   |                    |
| SNP_82523_A_190695 | NW_004516120.1 | scaffold721 | 190695                  | TT                              | CC                 | CC               | INTERGENIC      |               |                                   |                    |
| SNP_82524_A_191042 | NW_004516120.1 | scaffold721 | 191042                  | TT                              | AA                 | AA               | INTERGENIC      |               |                                   |                    |
| SNP_82525_A_191055 | NW_004516120.1 | scaffold721 | 191055                  | TT                              | GG                 | GG               | INTERGENIC      |               |                                   |                    |
| SNP_82527_A_1314   | NW_004516121.1 | scaffold723 | 1314                    | TT                              | CC                 | CC               | INTERGENIC      |               |                                   |                    |
| SNP_82528_A_10731  | NW_004516121.1 | scaffold723 | 10731                   | AA                              | GG                 | GG               | INTERGENIC      |               |                                   |                    |
| SNP_82529_A_10788  | NW_004516121.1 | scaffold723 | 10788                   | AA                              | CC                 | CC               | INTERGENIC      |               |                                   |                    |
| SNP_82530_A_10791  | NW_004516121.1 | scaffold723 | 10791                   | GG                              | CC                 | CC               | INTERGENIC      |               |                                   |                    |
| SNP_82531_A_10803  | NW_004516121.1 | scaffold723 | 10803                   | TT                              | GG                 | GG               | INTERGENIC      |               |                                   |                    |
| SNP_82532_A_10845  | NW_004516121.1 | scaffold723 | 10845                   | CC                              | AA                 | AA               | INTERGENIC      |               |                                   |                    |
| SNP_82533_A_57243  | NW_004516122.1 | scaffold724 | 57243                   | TT                              | GG                 | GG               | INTERGENIC      |               |                                   |                    |
| SNP_82534_A_91988  | NW_004516122.1 | scaffold724 | 91988                   | TT                              | CC                 | CC               | INTRON          | 101503827     | uncharacterized LOC101503827      |                    |
| SNP_82535_A_92008  | NW_004516122.1 | scaffold724 | 92008                   | TT                              | CC                 | CC               | INTRON          | 101503827     | uncharacterized LOC101503827      |                    |
| SNP_82536_A_92027  | NW_004516122.1 | scaffold724 | 92027                   | TT                              | CC                 | CC               | INTRON          | 101503827     | uncharacterized LOC101503827      |                    |
| SNP_82537_A_99614  | NW_004516122.1 | scaffold724 | 99614                   | TT                              | CC                 | CC               | DRR             | 101501892     | (+)-neomenthol dehydrogenase-like |                    |

| SNPs IDs           | Chromosome IDs | Chromosomes | Physical positions (bp) | CDC Frontier genome (Reference genome) | (Pusa 1103 & HPNB) | (ILWC 46 & LPNB) | Sequence Components of genome | Gene accession IDs | Putative functions                |
|--------------------|----------------|-------------|-------------------------|----------------------------------------|--------------------|------------------|-------------------------------|--------------------|-----------------------------------|
| SNP_82538_A_99654  | NW_004516122.1 | scaffold724 | 99654                   | AA                                     | TT                 | TT               | DRR                           | 101501892          | (+)-neomenthol dehydrogenase-like |
| SNP_82539_A_99720  | NW_004516122.1 | scaffold724 | 99720                   | TT                                     | AA                 | AA               | DRR                           | 101501892          | (+)-neomenthol dehydrogenase-like |
| SNP_82540_A_99758  | NW_004516122.1 | scaffold724 | 99758                   | TT                                     | GG                 | GG               | DRR                           | 101501892          | (+)-neomenthol dehydrogenase-like |
| SNP_82541_A_100070 | NW_004516122.1 | scaffold724 | 100070                  | GG                                     | AA                 | AA               | DRR                           | 101501892          | (+)-neomenthol dehydrogenase-like |
| SNP_82544_A_100270 | NW_004516122.1 | scaffold724 | 100270                  | TT                                     | AA                 | AA               | DRR                           | 101501892          | (+)-neomenthol dehydrogenase-like |
| SNP_82546_A_100364 | NW_004516122.1 | scaffold724 | 100364                  | CC                                     | GG                 | GG               | DRR                           | 101501892          | (+)-neomenthol dehydrogenase-like |
| SNP_82547_A_100430 | NW_004516122.1 | scaffold724 | 100430                  | TT                                     | CC                 | CC               | DRR                           | 101501892          | (+)-neomenthol dehydrogenase-like |
| SNP_82548_A_100443 | NW_004516122.1 | scaffold724 | 100443                  | AA                                     | GG                 | GG               | DRR                           | 101501892          | (+)-neomenthol dehydrogenase-like |
| SNP_82549_A_100456 | NW_004516122.1 | scaffold724 | 100456                  | AA                                     | CC                 | CC               | DRR                           | 101501892          | (+)-neomenthol dehydrogenase-like |
| SNP_82550_A_100461 | NW_004516122.1 | scaffold724 | 100461                  | AA                                     | TT                 | TT               | DRR                           | 101501892          | (+)-neomenthol dehydrogenase-like |
| SNP_82552_A_101011 | NW_004516122.1 | scaffold724 | 101011                  | CC                                     | TT                 | TT               | SYNONYMOUS_CODING             | 101501892          | (+)-neomenthol dehydrogenase-like |
| SNP_82553_A_101189 | NW_004516122.1 | scaffold724 | 101189                  | TT                                     | CC                 | CC               | SYNONYMOUS_CODING             | 101501892          | (+)-neomenthol dehydrogenase-like |
| SNP_82554_A_103720 | NW_004516122.1 | scaffold724 | 103720                  | AA                                     | CC                 | CC               | URR                           | 101501892          | (+)-neomenthol dehydrogenase-like |
| SNP_82555_A_108596 | NW_004516122.1 | scaffold724 | 108596                  | TT                                     | AA                 | AA               | INTERGENIC                    |                    |                                   |
| SNP_82556_A_112415 | NW_004516122.1 | scaffold724 | 112415                  | CC                                     | TT                 | TT               | INTRON                        | 101504143          | (+)-neomenthol dehydrogenase-like |
| SNP_82557_A_112451 | NW_004516122.1 | scaffold724 | 112451                  | CC                                     | TT                 | TT               | INTRON                        | 101504143          | (+)-neomenthol dehydrogenase-like |
| SNP_82558_A_126302 | NW_004516122.1 | scaffold724 | 126302                  | CC                                     | TT                 | TT               | URR                           | 101504143          | (+)-neomenthol dehydrogenase-like |
| SNP_82559_A_126346 | NW_004516122.1 | scaffold724 | 126346                  | AA                                     | CC                 | CC               | URR                           | 101504143          | (+)-neomenthol dehydrogenase-like |
| SNP_82560_A_126354 | NW_004516122.1 | scaffold724 | 126354                  | CC                                     | TT                 | TT               | URR                           | 101504143          | (+)-neomenthol dehydrogenase-like |
| SNP_82561_A_126458 | NW_004516122.1 | scaffold724 | 126458                  | TT                                     | CC                 | CC               | URR                           | 101504143          | (+)-neomenthol dehydrogenase-like |
| SNP_82562_A_126732 | NW_004516122.1 | scaffold724 | 126732                  | TT                                     | CC                 | CC               | URR                           | 101504143          | (+)-neomenthol dehydrogenase-like |
| SNP_82563_A_126733 | NW_004516122.1 | scaffold724 | 126733                  | CC                                     | TT                 | TT               | URR                           | 101504143          | (+)-neomenthol dehydrogenase-like |

| SNPs IDs           | Chromosome IDs | Chromosomes | Physical positions (bp) | CDC Frontier (Reference genome) | (Pusa 1103 & HPNB) | (ILWC 46 & LPNB) | Sequence Components of genome | Gene accession IDs | Putative functions                                       |
|--------------------|----------------|-------------|-------------------------|---------------------------------|--------------------|------------------|-------------------------------|--------------------|----------------------------------------------------------|
| SNP_82566_A_126992 | NW_004516122.1 | scaffold724 | 126992                  | CC                              | TT                 | TT               | URR                           | 101504143          | (+)-neomenthol dehydrogenase-like                        |
| SNP_82566_A_127017 | NW_004516122.1 | scaffold724 | 127017                  | CC                              | AA                 | AA               | URR                           | 101504143          | (+)-neomenthol dehydrogenase-like                        |
| SNP_82567_A_127280 | NW_004516122.1 | scaffold724 | 127280                  | CC                              | TT                 | TT               | INTERGENIC                    |                    |                                                          |
| SNP_82568_A_127526 | NW_004516122.1 | scaffold724 | 127526                  | GG                              | AA                 | AA               | INTERGENIC                    |                    |                                                          |
| SNP_82569_A_94     | NW_004516123.1 | scaffold725 | 94                      | AA                              | GG                 | GG               | INTERGENIC                    |                    |                                                          |
| SNP_82570_A_98     | NW_004516123.1 | scaffold725 | 98                      | AA                              | GG                 | GG               | INTERGENIC                    |                    |                                                          |
| SNP_82571_A_191    | NW_004516123.1 | scaffold725 | 191                     | AA                              | GG                 | GG               | INTERGENIC                    |                    |                                                          |
| SNP_82572_A_922    | NW_004516123.1 | scaffold725 | 922                     | GG                              | AA                 | AA               | INTERGENIC                    |                    |                                                          |
| SNP_82573_A_923    | NW_004516123.1 | scaffold725 | 923                     | AA                              | TT                 | TT               | INTERGENIC                    |                    |                                                          |
| SNP_82574_A_1568   | NW_004516124.1 | scaffold728 | 1568                    | TT                              | GG                 | GG               | INTERGENIC                    |                    |                                                          |
| SNP_82575_A_1573   | NW_004516124.1 | scaffold728 | 1573                    | TT                              | AA                 | AA               | INTERGENIC                    |                    |                                                          |
| SNP_82576_A_17175  | NW_004516124.1 | scaffold728 | 17175                   | TT                              | CC                 | CC               | INTERGENIC                    |                    |                                                          |
| SNP_82578_A_20344  | NW_004516124.1 | scaffold728 | 20344                   | AA                              | TT                 | TT               | INTERGENIC                    |                    |                                                          |
| SNP_82579_A_40657  | NW_004516124.1 | scaffold728 | 40657                   | CC                              | AA                 | AA               | INTRON                        | 101505521          | 1-aminocyclopropane-1-carboxylate oxidase homolog 1-like |
| SNP_82580_A_42145  | NW_004516124.1 | scaffold728 | 42145                   | CC                              | GG                 | GG               | INTRON                        | 101505521          | 1-aminocyclopropane-1-carboxylate oxidase homolog 1-like |
| SNP_82581_A_42583  | NW_004516124.1 | scaffold728 | 42583                   | CC                              | AA                 | AA               | INTRON                        | 101505521          | 1-aminocyclopropane-1-carboxylate oxidase homolog 1-like |
| SNP_82582_A_42741  | NW_004516124.1 | scaffold728 | 42741                   | AA                              | TT                 | TT               | INTRON                        | 101505521          | 1-aminocyclopropane-1-carboxylate oxidase homolog 1-like |
| SNP_82583_A_42866  | NW_004516124.1 | scaffold728 | 42866                   | GG                              | AA                 | AA               | INTRON                        | 101505521          | 1-aminocyclopropane-1-carboxylate oxidase homolog 1-like |
| SNP_82584_A_42883  | NW_004516124.1 | scaffold728 | 42883                   | CC                              | TT                 | TT               | INTRON                        | 101505521          | 1-aminocyclopropane-1-carboxylate oxidase homolog 1-like |
| SNP_82585_A_42921  | NW_004516124.1 | scaffold728 | 42921                   | TT                              | CC                 | CC               | INTRON                        | 101505521          | 1-aminocyclopropane-1-carboxylate oxidase homolog 1-like |
| SNP_82586_A_42971  | NW_004516124.1 | scaffold728 | 42971                   | TT                              | CC                 | CC               | INTRON                        | 101505521          | 1-aminocyclopropane-1-carboxylate oxidase homolog 1-like |
| SNP_82587_A_42974  | NW_004516124.1 | scaffold728 | 42974                   | TT                              | CC                 | CC               | INTRON                        | 101505521          | 1-aminocyclopropane-1-carboxylate oxidase homolog 1-like |

| SNPs IDs           | Chromosome IDs | Chromosomes | Physical positions (bp) | CDC Frontier (Reference genome) | (Pusa 1103 & HPNB) | (ILWC 46 & LPNB) | Sequence Components of genome | Gene accession IDs | Putative functions                                       |
|--------------------|----------------|-------------|-------------------------|---------------------------------|--------------------|------------------|-------------------------------|--------------------|----------------------------------------------------------|
| SNP_82588_A_43271  | NW_004516124.1 | scaffold728 | 43271                   | GG                              | TT                 | TT               | INTRON                        | 101505521          | 1-aminocyclopropane-1-carboxylate oxidase homolog 1-like |
| SNP_82589_A_43279  | NW_004516124.1 | scaffold728 | 43279                   | GG                              | CC                 | CC               | INTRON                        | 101505521          | 1-aminocyclopropane-1-carboxylate oxidase homolog 1-like |
| SNP_82591_A_43728  | NW_004516124.1 | scaffold728 | 43728                   | TT                              | CC                 | CC               | INTRON                        | 101505521          | 1-aminocyclopropane-1-carboxylate oxidase homolog 1-like |
| SNP_82592_A_811    | NW_004516125.1 | scaffold731 | 811                     | AA                              | GG                 | GG               | INTERGENIC                    |                    |                                                          |
| SNP_82593_A_825    | NW_004516125.1 | scaffold731 | 825                     | GG                              | TT                 | TT               | INTERGENIC                    |                    |                                                          |
| SNP_82594_A_26434  | NW_004516125.1 | scaffold731 | 26434                   | TT                              | CC                 | CC               | URR                           | 101512707          | ATP-dependent DNA helicase PIF1-like                     |
| SNP_82595_A_27127  | NW_004516125.1 | scaffold731 | 27127                   | AA                              | TT                 | TT               | INTERGENIC                    |                    |                                                          |
| SNP_82596_A_27384  | NW_004516125.1 | scaffold731 | 27384                   | TT                              | CC                 | CC               | INTERGENIC                    |                    |                                                          |
| SNP_82597_A_49047  | NW_004516125.1 | scaffold731 | 49047                   | TT                              | AA                 | AA               | INTERGENIC                    |                    |                                                          |
| SNP_82598_A_49264  | NW_004516125.1 | scaffold731 | 49264                   | CC                              | TT                 | TT               | INTERGENIC                    |                    |                                                          |
| SNP_82599_A_49483  | NW_004516125.1 | scaffold731 | 49483                   | AA                              | GG                 | GG               | INTERGENIC                    |                    |                                                          |
| SNP_82600_A_49519  | NW_004516125.1 | scaffold731 | 49519                   | TT                              | CC                 | CC               | INTERGENIC                    |                    |                                                          |
| SNP_82601_A_49569  | NW_004516125.1 | scaffold731 | 49569                   | GG                              | TT                 | TT               | INTERGENIC                    |                    |                                                          |
| SNP_82602_A_49573  | NW_004516125.1 | scaffold731 | 49573                   | CC                              | TT                 | TT               | INTERGENIC                    |                    |                                                          |
| SNP_82603_A_49595  | NW_004516125.1 | scaffold731 | 49595                   | GG                              | AA                 | AA               | INTERGENIC                    |                    |                                                          |
| SNP_82604_A_49596  | NW_004516125.1 | scaffold731 | 49596                   | TT                              | GG                 | GG               | INTERGENIC                    |                    |                                                          |
| SNP_82605_A_49610  | NW_004516125.1 | scaffold731 | 49610                   | AA                              | GG                 | GG               | INTERGENIC                    |                    |                                                          |
| SNP_82607_A_94777  | NW_004516125.1 | scaffold731 | 94777                   | TT                              | CC                 | CC               | INTERGENIC                    |                    |                                                          |
| SNP_82608_A_102778 | NW_004516125.1 | scaffold731 | 102778                  | TT                              | GG                 | GG               | INTERGENIC                    |                    |                                                          |
| SNP_82609_A_104675 | NW_004516125.1 | scaffold731 | 104675                  | CC                              | TT                 | TT               | INTERGENIC                    |                    |                                                          |
| SNP_82610_A_109784 | NW_004516125.1 | scaffold731 | 109784                  | AA                              | GG                 | GG               | INTERGENIC                    |                    |                                                          |
| SNP_82611_A_135531 | NW_004516125.1 | scaffold731 | 135531                  | TT                              | GG                 | GG               | INTERGENIC                    |                    |                                                          |

| SNPs IDs           | Chromosome IDs | Chromosomes | Physical positions (bp) | CDC Frontier (Reference genome) | (Pusa 1103 & HPNB) | (ILWC 46 & LPNB) | Sequence genome | Components of | Gene accession IDs | Putative functions |
|--------------------|----------------|-------------|-------------------------|---------------------------------|--------------------|------------------|-----------------|---------------|--------------------|--------------------|
| SNP_82612_A_135753 | NW_004516125.1 | scaffold731 | 135753                  | TT                              | CC                 | CC               | INTERGENIC      |               |                    |                    |
| SNP_82613_A_135868 | NW_004516125.1 | scaffold731 | 135868                  | CC                              | TT                 | TT               | INTERGENIC      |               |                    |                    |
| SNP_82614_A_135875 | NW_004516125.1 | scaffold731 | 135875                  | CC                              | GG                 | GG               | INTERGENIC      |               |                    |                    |
| SNP_82615_A_135967 | NW_004516125.1 | scaffold731 | 135967                  | GG                              | AA                 | AA               | INTERGENIC      |               |                    |                    |
| SNP_82616_A_136301 | NW_004516125.1 | scaffold731 | 136301                  | AA                              | TT                 | TT               | INTERGENIC      |               |                    |                    |
| SNP_82617_A_139554 | NW_004516125.1 | scaffold731 | 139554                  | TT                              | CC                 | CC               | INTERGENIC      |               |                    |                    |
| SNP_82618_A_144341 | NW_004516125.1 | scaffold731 | 144341                  | CC                              | TT                 | TT               | INTERGENIC      |               |                    |                    |
| SNP_82619_A_145761 | NW_004516125.1 | scaffold731 | 145761                  | AA                              | GG                 | GG               | INTERGENIC      |               |                    |                    |
| SNP_82620_A_145765 | NW_004516125.1 | scaffold731 | 145765                  | CC                              | TT                 | TT               | INTERGENIC      |               |                    |                    |
| SNP_82621_A_170040 | NW_004516125.1 | scaffold731 | 170040                  | TT                              | CC                 | CC               | INTERGENIC      |               |                    |                    |
| SNP_82622_A_170935 | NW_004516125.1 | scaffold731 | 170935                  | CC                              | TT                 | TT               | INTERGENIC      |               |                    |                    |
| SNP_82623_A_184324 | NW_004516125.1 | scaffold731 | 184324                  | TT                              | GG                 | GG               | INTERGENIC      |               |                    |                    |
| SNP_82624_A_205482 | NW_004516125.1 | scaffold731 | 205482                  | CC                              | GG                 | TT               | INTERGENIC      |               |                    |                    |
| SNP_82625_A_206069 | NW_004516125.1 | scaffold731 | 206069                  | GG                              | AA                 | AA               | INTERGENIC      |               |                    |                    |
| SNP_82626_A_214453 | NW_004516125.1 | scaffold731 | 214453                  | TT                              | GG                 | GG               | INTERGENIC      |               |                    |                    |
| SNP_82627_A_259148 | NW_004516125.1 | scaffold731 | 259148                  | AA                              | GG                 | GG               | INTERGENIC      |               |                    |                    |
| SNP_82629_A_286048 | NW_004516125.1 | scaffold731 | 286048                  | AA                              | TT                 | TT               | INTERGENIC      |               |                    |                    |
| SNP_82630_A_293425 | NW_004516125.1 | scaffold731 | 293425                  | TT                              | AA                 | AA               | INTERGENIC      |               |                    |                    |
| SNP_82631_A_300660 | NW_004516125.1 | scaffold731 | 300660                  | CC                              | TT                 | TT               | INTERGENIC      |               |                    |                    |
| SNP_82632_A_300679 | NW_004516125.1 | scaffold731 | 300679                  | TT                              | CC                 | CC               | INTERGENIC      |               |                    |                    |
| SNP_82633_A_300990 | NW_004516125.1 | scaffold731 | 300990                  | AA                              | GG                 | GG               | INTERGENIC      |               |                    |                    |
| SNP_82634_A_310900 | NW_004516125.1 | scaffold731 | 310900                  | TT                              | CC                 | CC               | URR             | 101507488     | Unknown function   |                    |

| SNPs IDs           | Chromosome IDs | Chromosomes | Physical positions (bp) | CDC Frontier (Reference genome) | (Pusa 1103 & HPNB) | (ILWC 46 & LPNB) | Sequence Components of genome | Gene accession IDs | Putative functions                      |
|--------------------|----------------|-------------|-------------------------|---------------------------------|--------------------|------------------|-------------------------------|--------------------|-----------------------------------------|
| SNP_82635_A_311089 | NW_004516125.1 | scaffold731 | 311089                  | CC                              | GG                 | GG               | URR                           | 101507488          | Unknown function                        |
| SNP_82636_A_313056 | NW_004516125.1 | scaffold731 | 313056                  | GG                              | AA                 | AA               | DRR                           | 101506834          | ribosomal protein L36                   |
| SNP_82637_A_313093 | NW_004516125.1 | scaffold731 | 313093                  | AA                              | GG                 | GG               | DRR                           | 101506834          | ribosomal protein L36                   |
| SNP_82638_A_315344 | NW_004516125.1 | scaffold731 | 315344                  | TT                              | CC                 | CC               | URR                           | 101506834          | ribosomal protein L36                   |
| SNP_82639_A_315563 | NW_004516125.1 | scaffold731 | 315563                  | TT                              | CC                 | CC               | URR                           | 101506834          | ribosomal protein L36                   |
| SNP_82640_A_315575 | NW_004516125.1 | scaffold731 | 315575                  | GG                              | TT                 | TT               | URR                           | 101506834          | ribosomal protein L36                   |
| SNP_82641_A_315859 | NW_004516125.1 | scaffold731 | 315859                  | CC                              | AA                 | AA               | URR                           | 101506834          | ribosomal protein L36                   |
| SNP_82643_A_315913 | NW_004516125.1 | scaffold731 | 315913                  | GG                              | AA                 | AA               | URR                           | 101506834          | ribosomal protein L36                   |
| SNP_82644_A_315925 | NW_004516125.1 | scaffold731 | 315925                  | TT                              | GG                 | GG               | URR                           | 101506834          | ribosomal protein L36                   |
| SNP_82645_A_315953 | NW_004516125.1 | scaffold731 | 315953                  | TT                              | GG                 | GG               | URR                           | 101506834          | ribosomal protein L36                   |
| SNP_82646_A_315987 | NW_004516125.1 | scaffold731 | 315987                  | GG                              | AA                 | AA               | URR                           | 101506834          | ribosomal protein L36                   |
| SNP_82647_A_322323 | NW_004516125.1 | scaffold731 | 322323                  | GG                              | TT                 | TT               | DRR                           | 101410558          | transfer RNA methionine (anticodon CAU) |
| SNP_82649_A_322855 | NW_004516125.1 | scaffold731 | 322855                  | TT                              | CC                 | CC               | DRR                           | 101410558          | transfer RNA methionine (anticodon CAU) |
| SNP_82651_A_323252 | NW_004516125.1 | scaffold731 | 323252                  | TT                              | AA                 | AA               | URR                           | 101410558          | transfer RNA methionine (anticodon CAU) |
| SNP_82654_A_335021 | NW_004516125.1 | scaffold731 | 335021                  | AA                              | GG                 | GG               | URR                           | 101410560          | transfer RNA valine (anticodon GAC)     |
| SNP_82655_A_335072 | NW_004516125.1 | scaffold731 | 335072                  | GG                              | TT                 | TT               | URR                           | 101410560          | transfer RNA valine (anticodon GAC)     |
| SNP_82656_A_339423 | NW_004516125.1 | scaffold731 | 339423                  | GG                              | AA                 | AA               | URR                           | 101515319          | Unknown function                        |
| SNP_82657_A_340744 | NW_004516125.1 | scaffold731 | 340744                  | TT                              | CC                 | CC               | URR                           | 101515319          | Unknown function                        |
| SNP_82658_A_340893 | NW_004516125.1 | scaffold731 | 340893                  | TT                              | GG                 | GG               | URR                           | 101515319          | Unknown function                        |
| SNP_82659_A_340986 | NW_004516125.1 | scaffold731 | 340986                  | TT                              | AA                 | AA               | URR                           | 101515319          | Unknown function                        |
| SNP_82660_A_341071 | NW_004516125.1 | scaffold731 | 341071                  | TT                              | CC                 | CC               | URR                           | 101515319          | Unknown function                        |
| SNP_82661_A_341144 | NW_004516125.1 | scaffold731 | 341144                  | GG                              | CC                 | CC               | URR                           | 101515319          | Unknown function                        |



| SNPs IDs           | Chromosome IDs | Chromosomes | Physical positions (bp) | CDC Frontier (Reference genome) | (Pusa 1103 & HPNB) | (ILWC 46 & LPNB) | Sequence Components of genome | Gene accession IDs | Putative functions                    |
|--------------------|----------------|-------------|-------------------------|---------------------------------|--------------------|------------------|-------------------------------|--------------------|---------------------------------------|
| SNP_82662_A_342062 | NW_004516125.1 | scaffold731 | 342062                  | TT                              | CC                 | CC               | INTERGENIC                    |                    |                                       |
| SNP_82663_A_342074 | NW_004516125.1 | scaffold731 | 342074                  | AA                              | GG                 | GG               | INTERGENIC                    |                    |                                       |
| SNP_82665_A_343859 | NW_004516125.1 | scaffold731 | 343859                  | CC                              | TT                 | TT               | INTERGENIC                    |                    |                                       |
| SNP_82666_A_343901 | NW_004516125.1 | scaffold731 | 343901                  | GG                              | TT                 | TT               | INTERGENIC                    |                    |                                       |
| SNP_82667_A_347792 | NW_004516125.1 | scaffold731 | 347792                  | CC                              | TT                 | TT               | INTERGENIC                    |                    |                                       |
| SNP_82668_A_347904 | NW_004516125.1 | scaffold731 | 347904                  | CC                              | GG                 | GG               | INTERGENIC                    |                    |                                       |
| SNP_82669_A_347918 | NW_004516125.1 | scaffold731 | 347918                  | TT                              | AA                 | AA               | INTERGENIC                    |                    |                                       |
| SNP_82670_A_347940 | NW_004516125.1 | scaffold731 | 347940                  | GG                              | AA                 | AA               | INTERGENIC                    |                    |                                       |
| SNP_82671_A_347944 | NW_004516125.1 | scaffold731 | 347944                  | GG                              | AA                 | AA               | INTERGENIC                    |                    |                                       |
| SNP_82672_A_348098 | NW_004516125.1 | scaffold731 | 348098                  | TT                              | CC                 | CC               | INTERGENIC                    |                    |                                       |
| SNP_82675_A_360195 | NW_004516125.1 | scaffold731 | 360195                  | AA                              | GG                 | GG               | URR                           | 101410560          | transfer RNA valine (anticodon GAC)   |
| SNP_82676_A_361202 | NW_004516125.1 | scaffold731 | 361202                  | TT                              | CC                 | CC               | DRR                           | 101410560          | transfer RNA valine (anticodon GAC)   |
| SNP_82677_A_361553 | NW_004516125.1 | scaffold731 | 361553                  | CC                              | AA                 | AA               | URR                           | 101410560          | transfer RNA valine (anticodon GAC)   |
| SNP_82679_A_361626 | NW_004516125.1 | scaffold731 | 361626                  | GG                              | TT                 | TT               | URR                           | 101410560          | transfer RNA valine (anticodon GAC)   |
| SNP_82680_A_361644 | NW_004516125.1 | scaffold731 | 361644                  | TT                              | AA                 | AA               | URR                           | 101410560          | transfer RNA valine (anticodon GAC)   |
| SNP_82681_A_361786 | NW_004516125.1 | scaffold731 | 361786                  | TT                              | GG                 | GG               | URR                           | 101410560          | transfer RNA valine (anticodon GAC)   |
| SNP_82682_A_361818 | NW_004516125.1 | scaffold731 | 361818                  | TT                              | CC                 | CC               | URR                           | 101410560          | transfer RNA valine (anticodon GAC)   |
| SNP_82683_A_361834 | NW_004516125.1 | scaffold731 | 361834                  | AA                              | GG                 | GG               | URR                           | 101410560          | transfer RNA valine (anticodon GAC)   |
| SNP_82684_A_365663 | NW_004516125.1 | scaffold731 | 365663                  | CC                              | AA                 | AA               | DRR                           | 101510897          | chloroplast envelope membrane protein |
| SNP_82685_A_366011 | NW_004516125.1 | scaffold731 | 366011                  | TT                              | CC                 | CC               | DRR                           | 101510897          | chloroplast envelope membrane protein |
| SNP_82686_A_366051 | NW_004516125.1 | scaffold731 | 366051                  | TT                              | CC                 | CC               | DRR                           | 101510897          | chloroplast envelope membrane protein |
| SNP_82688_A_366126 | NW_004516125.1 | scaffold731 | 366126                  | GG                              | CC                 | CC               | DRR                           | 101510897          | chloroplast envelope membrane protein |

| SNPs IDs           | Chromosome IDs | Chromosomes | Physical positions (bp) | CDC Frontier (Reference genome) | (Pusa 1103 & HPNB) | (ILWC 46 & LPNB) | Sequence Components of genome | Gene accession IDs | Putative functions                    |
|--------------------|----------------|-------------|-------------------------|---------------------------------|--------------------|------------------|-------------------------------|--------------------|---------------------------------------|
| SNP_82689_A_366156 | NW_004516125.1 | scaffold731 | 366156                  | AA                              | GG                 | GG               | DRR                           | 101510897          | chloroplast envelope membrane protein |
| SNP_82690_A_369529 | NW_004516125.1 | scaffold731 | 369529                  | GG                              | AA                 | AA               | DRR                           | 101410596          | transfer RNA arginine (anticodon ACG) |
| SNP_82691_A_369646 | NW_004516125.1 | scaffold731 | 369646                  | TT                              | CC                 | CC               | DRR                           | 101511210          | uncharacterized LOC101511210          |
| SNP_82692_A_369674 | NW_004516125.1 | scaffold731 | 369674                  | AA                              | GG                 | GG               | DRR                           | 101511210          | uncharacterized LOC101511210          |
| SNP_82693_A_369686 | NW_004516125.1 | scaffold731 | 369686                  | CC                              | TT                 | TT               | DRR                           | 101511210          | uncharacterized LOC101511210          |
| SNP_82694_A_369696 | NW_004516125.1 | scaffold731 | 369696                  | TT                              | CC                 | CC               | DRR                           | 101511210          | uncharacterized LOC101511210          |
| SNP_82695_A_369697 | NW_004516125.1 | scaffold731 | 369697                  | TT                              | CC                 | CC               | DRR                           | 101511210          | uncharacterized LOC101511210          |
| SNP_82696_A_369725 | NW_004516125.1 | scaffold731 | 369725                  | AA                              | GG                 | GG               | DRR                           | 101511210          | uncharacterized LOC101511210          |
| SNP_82697_A_369729 | NW_004516125.1 | scaffold731 | 369729                  | AA                              | CC                 | CC               | DRR                           | 101511210          | uncharacterized LOC101511210          |
| SNP_82703_A_14069  | NW_004516127.1 | scaffold735 | 14069                   | CC                              | TT                 | TT               | INTERGENIC                    |                    |                                       |
| SNP_82704_A_14071  | NW_004516127.1 | scaffold735 | 14071                   | GG                              | TT                 | TT               | INTERGENIC                    |                    |                                       |
| SNP_82705_A_14092  | NW_004516127.1 | scaffold735 | 14092                   | CC                              | AA                 | AA               | INTERGENIC                    |                    |                                       |
| SNP_82706_A_15560  | NW_004516127.1 | scaffold735 | 15560                   | TT                              | CC                 | CC               | INTERGENIC                    |                    |                                       |
| SNP_82708_A_54578  | NW_004516127.1 | scaffold735 | 54578                   | AA                              | CC                 | CC               | INTERGENIC                    |                    |                                       |
| SNP_82709_A_54601  | NW_004516127.1 | scaffold735 | 54601                   | TT                              | CC                 | CC               | INTERGENIC                    |                    |                                       |
| SNP_82710_A_54607  | NW_004516127.1 | scaffold735 | 54607                   | CC                              | AA                 | AA               | INTERGENIC                    |                    |                                       |
| SNP_82711_A_71629  | NW_004516127.1 | scaffold735 | 71629                   | TT                              | CC                 | CC               | INTERGENIC                    |                    |                                       |
| SNP_82712_A_152695 | NW_004516127.1 | scaffold735 | 152695                  | TT                              | CC                 | CC               | DRR                           | 101490796          | cytokinin dehydrogenase 6-like        |
| SNP_82713_A_186893 | NW_004516127.1 | scaffold735 | 186893                  | TT                              | CC                 | CC               | INTERGENIC                    |                    |                                       |
| SNP_82714_A_187007 | NW_004516127.1 | scaffold735 | 187007                  | AA                              | TT                 | TT               | INTERGENIC                    |                    |                                       |
| SNP_82715_A_187103 | NW_004516127.1 | scaffold735 | 187103                  | AA                              | GG                 | GG               | INTERGENIC                    |                    |                                       |
| SNP_82716_A_187182 | NW_004516127.1 | scaffold735 | 187182                  | CC                              | TT                 | TT               | INTERGENIC                    |                    |                                       |

| SNPs IDs           | Chromosome IDs | Chromosomes | Physical positions (bp) | CDC Frontier (Reference genome) | (Pusa 1103 & HPNB) | (ILWC 46 & LPNB) | Sequence genome | Components of | Gene accession IDs | Putative functions |
|--------------------|----------------|-------------|-------------------------|---------------------------------|--------------------|------------------|-----------------|---------------|--------------------|--------------------|
| SNP_82717_A_187196 | NW_004516127.1 | scaffold735 | 187196                  | CC                              | TT                 | TT               | INTERGENIC      |               |                    |                    |
| SNP_82718_A_187213 | NW_004516127.1 | scaffold735 | 187213                  | GG                              | AA                 | AA               | INTERGENIC      |               |                    |                    |
| SNP_82720_A_193843 | NW_004516127.1 | scaffold735 | 193843                  | CC                              | TT                 | TT               | INTERGENIC      |               |                    |                    |
| SNP_82721_A_221986 | NW_004516127.1 | scaffold735 | 221986                  | CC                              | GG                 | GG               | INTERGENIC      |               |                    |                    |
| SNP_82722_A_1166   | NW_004516128.1 | scaffold736 | 1166                    | CC                              | TT                 | TT               | INTERGENIC      |               |                    |                    |
| SNP_82723_A_5939   | NW_004516128.1 | scaffold736 | 5939                    | CC                              | GG                 | GG               | INTERGENIC      |               |                    |                    |
| SNP_82724_A_5950   | NW_004516128.1 | scaffold736 | 5950                    | TT                              | CC                 | CC               | INTERGENIC      |               |                    |                    |
| SNP_82725_A_5956   | NW_004516128.1 | scaffold736 | 5956                    | TT                              | GG                 | GG               | INTERGENIC      |               |                    |                    |
| SNP_82726_A_286    | NW_004516130.1 | scaffold738 | 286                     | TT                              | CC                 | CC               | INTERGENIC      |               |                    |                    |
| SNP_82727_A_331    | NW_004516130.1 | scaffold738 | 331                     | AA                              | TT                 | TT               | INTERGENIC      |               |                    |                    |
| SNP_82728_A_442    | NW_004516130.1 | scaffold738 | 442                     | CC                              | TT                 | TT               | INTERGENIC      |               |                    |                    |
| SNP_82729_A_474    | NW_004516130.1 | scaffold738 | 474                     | GG                              | TT                 | TT               | INTERGENIC      |               |                    |                    |
| SNP_82730_A_578    | NW_004516130.1 | scaffold738 | 578                     | AA                              | GG                 | GG               | INTERGENIC      |               |                    |                    |
| SNP_82732_A_655    | NW_004516130.1 | scaffold738 | 655                     | GG                              | AA                 | AA               | INTERGENIC      |               |                    |                    |
| SNP_82733_A_881    | NW_004516130.1 | scaffold738 | 881                     | AA                              | TT                 | TT               | INTERGENIC      |               |                    |                    |
| SNP_82734_A_895    | NW_004516130.1 | scaffold738 | 895                     | GG                              | TT                 | TT               | INTERGENIC      |               |                    |                    |
| SNP_82735_A_899    | NW_004516130.1 | scaffold738 | 899                     | AA                              | CC                 | CC               | INTERGENIC      |               |                    |                    |
| SNP_82736_A_980    | NW_004516130.1 | scaffold738 | 980                     | TT                              | CC                 | CC               | INTERGENIC      |               |                    |                    |
| SNP_82737_A_1010   | NW_004516130.1 | scaffold738 | 1010                    | CC                              | AA                 | AA               | INTERGENIC      |               |                    |                    |
| SNP_82738_A_1078   | NW_004516130.1 | scaffold738 | 1078                    | GG                              | CC                 | CC               | INTERGENIC      |               |                    |                    |
| SNP_82739_A_1289   | NW_004516130.1 | scaffold738 | 1289                    | CC                              | TT                 | TT               | INTERGENIC      |               |                    |                    |
| SNP_82740_A_1338   | NW_004516130.1 | scaffold738 | 1338                    | TT                              | GG                 | GG               | INTERGENIC      |               |                    |                    |

| SNPs IDs         | Chromosome IDs | Chromosomes | Physical positions (bp) | CDC Frontier (Reference genome) | (Pusa 1103 & HPNB) | (ILWC 46 & LPNB) | Sequence genome | Components of | Gene accession IDs | Putative functions |
|------------------|----------------|-------------|-------------------------|---------------------------------|--------------------|------------------|-----------------|---------------|--------------------|--------------------|
| SNP_82741_A_1387 | NW_004516130.1 | scaffold738 | 1387                    | CC                              | TT                 | TT               | INTERGENIC      |               |                    |                    |
| SNP_82742_A_1586 | NW_004516130.1 | scaffold738 | 1586                    | GG                              | AA                 | AA               | INTERGENIC      |               |                    |                    |
| SNP_82743_A_1759 | NW_004516130.1 | scaffold738 | 1759                    | GG                              | AA                 | AA               | INTERGENIC      |               |                    |                    |
| SNP_82744_A_2043 | NW_004516130.1 | scaffold738 | 2043                    | TT                              | CC                 | CC               | INTERGENIC      |               |                    |                    |
| SNP_82745_A_2120 | NW_004516130.1 | scaffold738 | 2120                    | GG                              | CC                 | CC               | INTERGENIC      |               |                    |                    |
| SNP_82747_A_2358 | NW_004516130.1 | scaffold738 | 2358                    | AA                              | GG                 | GG               | INTERGENIC      |               |                    |                    |
| SNP_82748_A_2400 | NW_004516130.1 | scaffold738 | 2400                    | TT                              | CC                 | CC               | INTERGENIC      |               |                    |                    |
| SNP_82749_A_2421 | NW_004516130.1 | scaffold738 | 2421                    | AA                              | CC                 | CC               | INTERGENIC      |               |                    |                    |
| SNP_82750_A_2470 | NW_004516130.1 | scaffold738 | 2470                    | GG                              | AA                 | AA               | INTERGENIC      |               |                    |                    |
| SNP_82751_A_2498 | NW_004516130.1 | scaffold738 | 2498                    | TT                              | CC                 | CC               | INTERGENIC      |               |                    |                    |
| SNP_82752_A_4569 | NW_004516130.1 | scaffold738 | 4569                    | TT                              | CC                 | CC               | INTERGENIC      |               |                    |                    |
| SNP_82753_A_4601 | NW_004516130.1 | scaffold738 | 4601                    | CC                              | TT                 | TT               | INTERGENIC      |               |                    |                    |
| SNP_82754_A_4846 | NW_004516130.1 | scaffold738 | 4846                    | AA                              | GG                 | GG               | INTERGENIC      |               |                    |                    |
| SNP_82755_A_4901 | NW_004516130.1 | scaffold738 | 4901                    | CC                              | TT                 | TT               | INTERGENIC      |               |                    |                    |
| SNP_82756_A_4924 | NW_004516130.1 | scaffold738 | 4924                    | AA                              | GG                 | GG               | INTERGENIC      |               |                    |                    |
| SNP_82757_A_4928 | NW_004516130.1 | scaffold738 | 4928                    | CC                              | AA                 | AA               | INTERGENIC      |               |                    |                    |
| SNP_82758_A_5045 | NW_004516130.1 | scaffold738 | 5045                    | TT                              | GG                 | GG               | INTERGENIC      |               |                    |                    |
| SNP_82760_A_5458 | NW_004516130.1 | scaffold738 | 5458                    | CC                              | TT                 | TT               | INTERGENIC      |               |                    |                    |
| SNP_82761_A_5581 | NW_004516130.1 | scaffold738 | 5581                    | TT                              | CC                 | CC               | INTERGENIC      |               |                    |                    |
| SNP_82762_A_5803 | NW_004516130.1 | scaffold738 | 5803                    | GG                              | AA                 | AA               | INTERGENIC      |               |                    |                    |
| SNP_82763_A_6266 | NW_004516130.1 | scaffold738 | 6266                    | TT                              | GG                 | GG               | INTERGENIC      |               |                    |                    |
| SNP_82764_A_7106 | NW_004516130.1 | scaffold738 | 7106                    | CC                              | GG                 | GG               | INTERGENIC      |               |                    |                    |

| SNPs IDs          | Chromosome IDs | Chromosomes | Physical positions (bp) | CDC Frontier (Reference genome) | (Pusa 1103 & HPNB) | (ILWC 46 & LPNB) | Sequence genome | Components of | Gene accession IDs | Putative functions |
|-------------------|----------------|-------------|-------------------------|---------------------------------|--------------------|------------------|-----------------|---------------|--------------------|--------------------|
| SNP_82765_A_7218  | NW_004516130.1 | scaffold738 | 7218                    | TT                              | GG                 | GG               | INTERGENIC      |               |                    |                    |
| SNP_82766_A_7273  | NW_004516130.1 | scaffold738 | 7273                    | AA                              | TT                 | TT               | INTERGENIC      |               |                    |                    |
| SNP_82767_A_7284  | NW_004516130.1 | scaffold738 | 7284                    | AA                              | GG                 | GG               | INTERGENIC      |               |                    |                    |
| SNP_82768_A_7331  | NW_004516130.1 | scaffold738 | 7331                    | CC                              | TT                 | TT               | INTERGENIC      |               |                    |                    |
| SNP_82769_A_7381  | NW_004516130.1 | scaffold738 | 7381                    | TT                              | CC                 | CC               | INTERGENIC      |               |                    |                    |
| SNP_82770_A_8708  | NW_004516130.1 | scaffold738 | 8708                    | CC                              | TT                 | TT               | INTERGENIC      |               |                    |                    |
| SNP_82771_A_8760  | NW_004516130.1 | scaffold738 | 8760                    | CC                              | GG                 | GG               | INTERGENIC      |               |                    |                    |
| SNP_82772_A_8877  | NW_004516130.1 | scaffold738 | 8877                    | TT                              | CC                 | CC               | INTERGENIC      |               |                    |                    |
| SNP_82773_A_8878  | NW_004516130.1 | scaffold738 | 8878                    | CC                              | TT                 | TT               | INTERGENIC      |               |                    |                    |
| SNP_82774_A_9158  | NW_004516130.1 | scaffold738 | 9158                    | TT                              | AA                 | AA               | INTERGENIC      |               |                    |                    |
| SNP_82775_A_9247  | NW_004516130.1 | scaffold738 | 9247                    | TT                              | CC                 | CC               | INTERGENIC      |               |                    |                    |
| SNP_82776_A_9265  | NW_004516130.1 | scaffold738 | 9265                    | AA                              | CC                 | CC               | INTERGENIC      |               |                    |                    |
| SNP_82777_A_9296  | NW_004516130.1 | scaffold738 | 9296                    | CC                              | TT                 | TT               | INTERGENIC      |               |                    |                    |
| SNP_82778_A_9299  | NW_004516130.1 | scaffold738 | 9299                    | AA                              | GG                 | GG               | INTERGENIC      |               |                    |                    |
| SNP_82779_A_9423  | NW_004516130.1 | scaffold738 | 9423                    | GG                              | CC                 | CC               | INTERGENIC      |               |                    |                    |
| SNP_82780_A_10646 | NW_004516130.1 | scaffold738 | 10646                   | TT                              | CC                 | CC               | INTERGENIC      |               |                    |                    |
| SNP_82782_A_10786 | NW_004516130.1 | scaffold738 | 10786                   | AA                              | GG                 | GG               | INTERGENIC      |               |                    |                    |
| SNP_82783_A_10825 | NW_004516130.1 | scaffold738 | 10825                   | AA                              | GG                 | GG               | INTERGENIC      |               |                    |                    |
| SNP_82784_A_10826 | NW_004516130.1 | scaffold738 | 10826                   | AA                              | GG                 | GG               | INTERGENIC      |               |                    |                    |
| SNP_82785_A_10840 | NW_004516130.1 | scaffold738 | 10840                   | AA                              | GG                 | GG               | INTERGENIC      |               |                    |                    |
| SNP_82786_A_10846 | NW_004516130.1 | scaffold738 | 10846                   | TT                              | AA                 | AA               | INTERGENIC      |               |                    |                    |
| SNP_82787_A_10851 | NW_004516130.1 | scaffold738 | 10851                   | CC                              | TT                 | TT               | INTERGENIC      |               |                    |                    |

| SNPs IDs          | Chromosome IDs | Chromosomes | Physical positions (bp) | CDC Frontier (Reference genome) | (Pusa 1103 & HPNB) | (ILWC 46 & LPNB) | Sequence genome | Components of | Gene accession IDs | Putative functions |
|-------------------|----------------|-------------|-------------------------|---------------------------------|--------------------|------------------|-----------------|---------------|--------------------|--------------------|
| SNP_82788_A_11373 | NW_004516138.1 | scaffold738 | 11373                   | TT                              | GG                 | GG               | INTERGENIC      |               |                    |                    |
| SNP_82791_A_1711  | NW_004516138.1 | scaffold749 | 1711                    | TT                              | AA                 | AA               | INTERGENIC      |               |                    |                    |
| SNP_82792_A_2169  | NW_004516138.1 | scaffold749 | 2169                    | CC                              | TT                 | TT               | INTERGENIC      |               |                    |                    |
| SNP_82793_A_4266  | NW_004516138.1 | scaffold749 | 4266                    | CC                              | TT                 | TT               | INTERGENIC      |               |                    |                    |
| SNP_82794_A_4270  | NW_004516138.1 | scaffold749 | 4270                    | TT                              | GG                 | GG               | INTERGENIC      |               |                    |                    |
| SNP_82795_A_4339  | NW_004516138.1 | scaffold749 | 4339                    | TT                              | CC                 | CC               | INTERGENIC      |               |                    |                    |
| SNP_82796_A_4438  | NW_004516138.1 | scaffold749 | 4438                    | AA                              | TT                 | TT               | INTERGENIC      |               |                    |                    |
| SNP_82797_A_4516  | NW_004516138.1 | scaffold749 | 4516                    | TT                              | GG                 | GG               | INTERGENIC      |               |                    |                    |
| SNP_82798_A_4701  | NW_004516138.1 | scaffold749 | 4701                    | GG                              | AA                 | AA               | INTERGENIC      |               |                    |                    |
| SNP_82799_A_4720  | NW_004516138.1 | scaffold749 | 4720                    | CC                              | TT                 | TT               | INTERGENIC      |               |                    |                    |
| SNP_82800_A_4746  | NW_004516138.1 | scaffold749 | 4746                    | TT                              | CC                 | CC               | INTERGENIC      |               |                    |                    |
| SNP_82801_A_4779  | NW_004516138.1 | scaffold749 | 4779                    | CC                              | TT                 | TT               | INTERGENIC      |               |                    |                    |
| SNP_82802_A_4842  | NW_004516138.1 | scaffold749 | 4842                    | AA                              | TT                 | TT               | INTERGENIC      |               |                    |                    |
| SNP_82803_A_9167  | NW_004516138.1 | scaffold749 | 9167                    | TT                              | GG                 | GG               | INTERGENIC      |               |                    |                    |
| SNP_82804_A_13821 | NW_004516138.1 | scaffold749 | 13821                   | AA                              | GG                 | GG               | INTERGENIC      |               |                    |                    |
| SNP_82805_A_13903 | NW_004516138.1 | scaffold749 | 13903                   | CC                              | TT                 | TT               | INTERGENIC      |               |                    |                    |
| SNP_82806_A_13919 | NW_004516138.1 | scaffold749 | 13919                   | GG                              | AA                 | AA               | INTERGENIC      |               |                    |                    |
| SNP_82807_A_13961 | NW_004516138.1 | scaffold749 | 13961                   | TT                              | CC                 | CC               | INTERGENIC      |               |                    |                    |
| SNP_82808_A_13962 | NW_004516138.1 | scaffold749 | 13962                   | TT                              | AA                 | AA               | INTERGENIC      |               |                    |                    |
| SNP_82809_A_14036 | NW_004516138.1 | scaffold749 | 14036                   | AA                              | TT                 | TT               | INTERGENIC      |               |                    |                    |
| SNP_82810_A_14124 | NW_004516138.1 | scaffold749 | 14124                   | AA                              | GG                 | GG               | INTERGENIC      |               |                    |                    |
| SNP_82811_A_14131 | NW_004516138.1 | scaffold749 | 14131                   | AA                              | GG                 | GG               | INTERGENIC      |               |                    |                    |

| SNPs IDs          | Chromosome IDs | Chromosomes | Physical positions (bp) | CDC Frontier (Reference genome) | (Pusa 1103 & HPNB) | (ILWC 46 & LPNB) | Sequence genome | Components of | Gene accession IDs | Putative functions |
|-------------------|----------------|-------------|-------------------------|---------------------------------|--------------------|------------------|-----------------|---------------|--------------------|--------------------|
| SNP_82812_A_14194 | NW_004516138.1 | scaffold749 | 14194                   | TT                              | AA                 | AA               | INTERGENIC      |               |                    |                    |
| SNP_82813_A_14203 | NW_004516138.1 | scaffold749 | 14203                   | GG                              | AA                 | AA               | INTERGENIC      |               |                    |                    |
| SNP_82814_A_14236 | NW_004516138.1 | scaffold749 | 14236                   | GG                              | AA                 | AA               | INTERGENIC      |               |                    |                    |
| SNP_82815_A_14283 | NW_004516138.1 | scaffold749 | 14283                   | TT                              | GG                 | GG               | INTERGENIC      |               |                    |                    |
| SNP_82816_A_14324 | NW_004516138.1 | scaffold749 | 14324                   | CC                              | TT                 | TT               | INTERGENIC      |               |                    |                    |
| SNP_82817_A_14385 | NW_004516138.1 | scaffold749 | 14385                   | TT                              | GG                 | GG               | INTERGENIC      |               |                    |                    |
| SNP_82818_A_14565 | NW_004516138.1 | scaffold749 | 14565                   | AA                              | TT                 | TT               | INTERGENIC      |               |                    |                    |
| SNP_82819_A_14625 | NW_004516138.1 | scaffold749 | 14625                   | GG                              | CC                 | CC               | INTERGENIC      |               |                    |                    |
| SNP_82820_A_15150 | NW_004516138.1 | scaffold749 | 15150                   | CC                              | GG                 | GG               | INTERGENIC      |               |                    |                    |
| SNP_82821_A_16414 | NW_004516138.1 | scaffold749 | 16414                   | TT                              | GG                 | GG               | INTERGENIC      |               |                    |                    |
| SNP_82822_A_29741 | NW_004516138.1 | scaffold749 | 29741                   | AA                              | TT                 | TT               | INTERGENIC      |               |                    |                    |
| SNP_82823_A_30024 | NW_004516138.1 | scaffold749 | 30024                   | TT                              | GG                 | GG               | INTERGENIC      |               |                    |                    |
| SNP_82824_A_30133 | NW_004516138.1 | scaffold749 | 30133                   | AA                              | TT                 | TT               | INTERGENIC      |               |                    |                    |
| SNP_82825_A_30266 | NW_004516138.1 | scaffold749 | 30266                   | TT                              | GG                 | GG               | INTERGENIC      |               |                    |                    |
| SNP_82826_A_30273 | NW_004516138.1 | scaffold749 | 30273                   | TT                              | GG                 | GG               | INTERGENIC      |               |                    |                    |
| SNP_82827_A_30278 | NW_004516138.1 | scaffold749 | 30278                   | GG                              | CC                 | CC               | INTERGENIC      |               |                    |                    |
| SNP_82828_A_30280 | NW_004516138.1 | scaffold749 | 30280                   | TT                              | GG                 | GG               | INTERGENIC      |               |                    |                    |
| SNP_82829_A_30287 | NW_004516138.1 | scaffold749 | 30287                   | TT                              | GG                 | GG               | INTERGENIC      |               |                    |                    |
| SNP_82830_A_30294 | NW_004516138.1 | scaffold749 | 30294                   | TT                              | GG                 | GG               | INTERGENIC      |               |                    |                    |
| SNP_82831_A_30696 | NW_004516138.1 | scaffold749 | 30696                   | AA                              | GG                 | GG               | INTERGENIC      |               |                    |                    |
| SNP_82832_A_30722 | NW_004516138.1 | scaffold749 | 30722                   | TT                              | GG                 | GG               | INTERGENIC      |               |                    |                    |
| SNP_82833_A_30755 | NW_004516138.1 | scaffold749 | 30755                   | AA                              | TT                 | TT               | INTERGENIC      |               |                    |                    |

| SNPs IDs          | Chromosome IDs | Chromosomes | Physical positions (bp) | CDC Frontier (Reference genome) | (Pusa 1103 & HPNB) | (ILWC 46 & LPNB) | Sequence genome | Components of | Gene accession IDs | Putative functions |
|-------------------|----------------|-------------|-------------------------|---------------------------------|--------------------|------------------|-----------------|---------------|--------------------|--------------------|
| SNP_82834_A_36662 | NW_004516138.1 | scaffold749 | 36662                   | GG                              | AA                 | AA               | INTERGENIC      |               |                    |                    |
| SNP_82835_A_38244 | NW_004516138.1 | scaffold749 | 38244                   | TT                              | AA                 | AA               | INTERGENIC      |               |                    |                    |
| SNP_82836_A_52355 | NW_004516138.1 | scaffold749 | 52355                   | GG                              | AA                 | AA               | INTERGENIC      |               |                    |                    |
| SNP_82837_A_52808 | NW_004516138.1 | scaffold749 | 52808                   | GG                              | TT                 | TT               | INTERGENIC      |               |                    |                    |
| SNP_82838_A_59436 | NW_004516138.1 | scaffold749 | 59436                   | CC                              | GG                 | GG               | INTERGENIC      |               |                    |                    |
| SNP_82839_A_59557 | NW_004516138.1 | scaffold749 | 59557                   | TT                              | GG                 | GG               | INTERGENIC      |               |                    |                    |
| SNP_82840_A_59673 | NW_004516138.1 | scaffold749 | 59673                   | TT                              | AA                 | AA               | INTERGENIC      |               |                    |                    |
| SNP_82841_A_59792 | NW_004516138.1 | scaffold749 | 59792                   | AA                              | CC                 | CC               | INTERGENIC      |               |                    |                    |
| SNP_82842_A_59862 | NW_004516138.1 | scaffold749 | 59862                   | TT                              | GG                 | GG               | INTERGENIC      |               |                    |                    |
| SNP_82843_A_60063 | NW_004516138.1 | scaffold749 | 60063                   | GG                              | AA                 | AA               | INTERGENIC      |               |                    |                    |
| SNP_82844_A_61388 | NW_004516138.1 | scaffold749 | 61388                   | CC                              | TT                 | TT               | INTERGENIC      |               |                    |                    |
| SNP_82845_A_1054  | NW_004516139.1 | scaffold750 | 1054                    | GG                              | AA                 | AA               | INTERGENIC      |               |                    |                    |
| SNP_82846_A_1068  | NW_004516139.1 | scaffold750 | 1068                    | AA                              | CC                 | CC               | INTERGENIC      |               |                    |                    |
| SNP_82847_A_19557 | NW_004516139.1 | scaffold750 | 19557                   | TT                              | GG                 | GG               | INTERGENIC      |               |                    |                    |
| SNP_82848_A_19796 | NW_004516139.1 | scaffold750 | 19796                   | TT                              | CC                 | CC               | INTERGENIC      |               |                    |                    |
| SNP_82849_A_19806 | NW_004516139.1 | scaffold750 | 19806                   | GG                              | TT                 | TT               | INTERGENIC      |               |                    |                    |
| SNP_82850_A_20154 | NW_004516139.1 | scaffold750 | 20154                   | TT                              | CC                 | CC               | INTERGENIC      |               |                    |                    |
| SNP_82851_A_30379 | NW_004516139.1 | scaffold750 | 30379                   | GG                              | AA                 | AA               | INTERGENIC      |               |                    |                    |
| SNP_82852_A_30574 | NW_004516139.1 | scaffold750 | 30574                   | TT                              | CC                 | CC               | INTERGENIC      |               |                    |                    |
| SNP_82853_A_30633 | NW_004516139.1 | scaffold750 | 30633                   | GG                              | AA                 | AA               | INTERGENIC      |               |                    |                    |
| SNP_82854_A_30637 | NW_004516139.1 | scaffold750 | 30637                   | AA                              | TT                 | TT               | INTERGENIC      |               |                    |                    |
| SNP_82855_A_30677 | NW_004516139.1 | scaffold750 | 30677                   | TT                              | CC                 | CC               | INTERGENIC      |               |                    |                    |



| SNPs IDs          | Chromosome IDs | Chromosomes | Physical positions (bp) | CDC Frontier (Reference genome) | (Pusa 1103 & HPNB) | (ILWC 46 & LPNB) | Sequence genome | Components of | Gene accession IDs | Putative functions |
|-------------------|----------------|-------------|-------------------------|---------------------------------|--------------------|------------------|-----------------|---------------|--------------------|--------------------|
| SNP_82856_A_30750 | NW_004516139.1 | scaffold750 | 30750                   | CC                              | AA                 | AA               | INTERGENIC      |               |                    |                    |
| SNP_82857_A_30844 | NW_004516139.1 | scaffold750 | 30844                   | AA                              | TT                 | TT               | INTERGENIC      |               |                    |                    |
| SNP_82858_A_30987 | NW_004516139.1 | scaffold750 | 30987                   | CC                              | GG                 | GG               | INTERGENIC      |               |                    |                    |
| SNP_82859_A_31003 | NW_004516139.1 | scaffold750 | 31003                   | GG                              | AA                 | AA               | INTERGENIC      |               |                    |                    |
| SNP_82860_A_31014 | NW_004516139.1 | scaffold750 | 31014                   | TT                              | GG                 | GG               | INTERGENIC      |               |                    |                    |
| SNP_82861_A_31069 | NW_004516139.1 | scaffold750 | 31069                   | CC                              | TT                 | TT               | INTERGENIC      |               |                    |                    |
| SNP_82862_A_31086 | NW_004516139.1 | scaffold750 | 31086                   | TT                              | CC                 | CC               | INTERGENIC      |               |                    |                    |
| SNP_82863_A_31126 | NW_004516139.1 | scaffold750 | 31126                   | AA                              | GG                 | GG               | INTERGENIC      |               |                    |                    |
| SNP_82864_A_31752 | NW_004516139.1 | scaffold750 | 31752                   | CC                              | AA                 | AA               | INTERGENIC      |               |                    |                    |
| SNP_82865_A_31756 | NW_004516139.1 | scaffold750 | 31756                   | TT                              | CC                 | CC               | INTERGENIC      |               |                    |                    |
| SNP_82866_A_31797 | NW_004516139.1 | scaffold750 | 31797                   | TT                              | CC                 | CC               | INTERGENIC      |               |                    |                    |
| SNP_82867_A_31817 | NW_004516139.1 | scaffold750 | 31817                   | AA                              | TT                 | TT               | INTERGENIC      |               |                    |                    |
| SNP_82869_A_31965 | NW_004516139.1 | scaffold750 | 31965                   | GG                              | AA                 | AA               | INTERGENIC      |               |                    |                    |
| SNP_82870_A_32114 | NW_004516139.1 | scaffold750 | 32114                   | AA                              | TT                 | TT               | INTERGENIC      |               |                    |                    |
| SNP_82871_A_32139 | NW_004516139.1 | scaffold750 | 32139                   | CC                              | TT                 | TT               | INTERGENIC      |               |                    |                    |
| SNP_82872_A_32347 | NW_004516139.1 | scaffold750 | 32347                   | TT                              | AA                 | AA               | INTERGENIC      |               |                    |                    |
| SNP_82873_A_32349 | NW_004516139.1 | scaffold750 | 32349                   | TT                              | AA                 | AA               | INTERGENIC      |               |                    |                    |
| SNP_82874_A_32355 | NW_004516139.1 | scaffold750 | 32355                   | TT                              | GG                 | GG               | INTERGENIC      |               |                    |                    |
| SNP_82875_A_32369 | NW_004516139.1 | scaffold750 | 32369                   | AA                              | CC                 | CC               | INTERGENIC      |               |                    |                    |
| SNP_82876_A_32425 | NW_004516139.1 | scaffold750 | 32425                   | TT                              | CC                 | CC               | INTERGENIC      |               |                    |                    |
| SNP_82878_A_32550 | NW_004516139.1 | scaffold750 | 32550                   | TT                              | GG                 | GG               | INTERGENIC      |               |                    |                    |
| SNP_82879_A_32583 | NW_004516139.1 | scaffold750 | 32583                   | TT                              | AA                 | AA               | INTERGENIC      |               |                    |                    |

| SNPs IDs          | Chromosome IDs | Chromosomes | Physical positions (bp) | CDC Frontier (Reference genome) | (Pusa 1103 & HPNB) | (ILWC 46 & LPNB) | Sequence genome | Components of | Gene accession IDs | Putative functions |
|-------------------|----------------|-------------|-------------------------|---------------------------------|--------------------|------------------|-----------------|---------------|--------------------|--------------------|
| SNP_82880_A_32607 | NW_004516139.1 | scaffold750 | 32607                   | AA                              | GG                 | GG               | INTERGENIC      |               |                    |                    |
| SNP_82881_A_32649 | NW_004516139.1 | scaffold750 | 32649                   | CC                              | GG                 | GG               | INTERGENIC      |               |                    |                    |
| SNP_82882_A_32769 | NW_004516139.1 | scaffold750 | 32769                   | TT                              | GG                 | GG               | INTERGENIC      |               |                    |                    |
| SNP_82883_A_32795 | NW_004516139.1 | scaffold750 | 32795                   | AA                              | TT                 | TT               | INTERGENIC      |               |                    |                    |
| SNP_82884_A_33007 | NW_004516139.1 | scaffold750 | 33007                   | TT                              | GG                 | GG               | INTERGENIC      |               |                    |                    |
| SNP_82885_A_33068 | NW_004516139.1 | scaffold750 | 33068                   | GG                              | TT                 | TT               | INTERGENIC      |               |                    |                    |
| SNP_82886_A_33106 | NW_004516139.1 | scaffold750 | 33106                   | AA                              | CC                 | CC               | INTERGENIC      |               |                    |                    |
| SNP_82887_A_33205 | NW_004516139.1 | scaffold750 | 33205                   | GG                              | AA                 | AA               | INTERGENIC      |               |                    |                    |
| SNP_82888_A_33229 | NW_004516139.1 | scaffold750 | 33229                   | AA                              | GG                 | GG               | INTERGENIC      |               |                    |                    |
| SNP_82889_A_33330 | NW_004516139.1 | scaffold750 | 33330                   | GG                              | TT                 | TT               | INTERGENIC      |               |                    |                    |
| SNP_82890_A_33333 | NW_004516139.1 | scaffold750 | 33333                   | TT                              | CC                 | CC               | INTERGENIC      |               |                    |                    |
| SNP_82891_A_33335 | NW_004516139.1 | scaffold750 | 33335                   | TT                              | AA                 | AA               | INTERGENIC      |               |                    |                    |
| SNP_82892_A_33336 | NW_004516139.1 | scaffold750 | 33336                   | TT                              | AA                 | AA               | INTERGENIC      |               |                    |                    |
| SNP_82893_A_33337 | NW_004516139.1 | scaffold750 | 33337                   | TT                              | AA                 | AA               | INTERGENIC      |               |                    |                    |
| SNP_82894_A_33352 | NW_004516139.1 | scaffold750 | 33352                   | AA                              | GG                 | GG               | INTERGENIC      |               |                    |                    |
| SNP_82895_A_33356 | NW_004516139.1 | scaffold750 | 33356                   | AA                              | TT                 | TT               | INTERGENIC      |               |                    |                    |
| SNP_82896_A_33393 | NW_004516139.1 | scaffold750 | 33393                   | AA                              | GG                 | GG               | INTERGENIC      |               |                    |                    |
| SNP_82897_A_33602 | NW_004516139.1 | scaffold750 | 33602                   | CC                              | TT                 | TT               | INTERGENIC      |               |                    |                    |
| SNP_82898_A_33646 | NW_004516139.1 | scaffold750 | 33646                   | TT                              | CC                 | CC               | INTERGENIC      |               |                    |                    |
| SNP_82899_A_33667 | NW_004516139.1 | scaffold750 | 33667                   | GG                              | AA                 | AA               | INTERGENIC      |               |                    |                    |
| SNP_82900_A_33760 | NW_004516139.1 | scaffold750 | 33760                   | GG                              | CC                 | CC               | INTERGENIC      |               |                    |                    |
| SNP_82901_A_33823 | NW_004516139.1 | scaffold750 | 33823                   | GG                              | CC                 | CC               | INTERGENIC      |               |                    |                    |

| SNPs IDs          | Chromosome IDs | Chromosomes | Physical positions (bp) | CDC Frontier (Reference genome) | (Pusa 1103 & HPNB) | (ILWC 46 & LPNB) | Sequence genome | Components of | Gene accession IDs | Putative functions |
|-------------------|----------------|-------------|-------------------------|---------------------------------|--------------------|------------------|-----------------|---------------|--------------------|--------------------|
| SNP_82902_A_34018 | NW_004516139.1 | scaffold750 | 34018                   | GG                              | AA                 | AA               | INTERGENIC      |               |                    |                    |
| SNP_82903_A_34023 | NW_004516139.1 | scaffold750 | 34023                   | TT                              | CC                 | CC               | INTERGENIC      |               |                    |                    |
| SNP_82904_A_34065 | NW_004516139.1 | scaffold750 | 34065                   | AA                              | GG                 | GG               | INTERGENIC      |               |                    |                    |
| SNP_82905_A_34117 | NW_004516139.1 | scaffold750 | 34117                   | CC                              | AA                 | AA               | INTERGENIC      |               |                    |                    |
| SNP_82906_A_34187 | NW_004516139.1 | scaffold750 | 34187                   | GG                              | AA                 | AA               | INTERGENIC      |               |                    |                    |
| SNP_82907_A_34264 | NW_004516139.1 | scaffold750 | 34264                   | TT                              | GG                 | GG               | INTERGENIC      |               |                    |                    |
| SNP_82908_A_34357 | NW_004516139.1 | scaffold750 | 34357                   | GG                              | TT                 | TT               | INTERGENIC      |               |                    |                    |
| SNP_82909_A_34489 | NW_004516139.1 | scaffold750 | 34489                   | AA                              | GG                 | GG               | INTERGENIC      |               |                    |                    |
| SNP_82910_A_34576 | NW_004516139.1 | scaffold750 | 34576                   | CC                              | TT                 | TT               | INTERGENIC      |               |                    |                    |
| SNP_82911_A_34628 | NW_004516139.1 | scaffold750 | 34628                   | GG                              | AA                 | AA               | INTERGENIC      |               |                    |                    |
| SNP_82912_A_34650 | NW_004516139.1 | scaffold750 | 34650                   | GG                              | AA                 | AA               | INTERGENIC      |               |                    |                    |
| SNP_82913_A_34685 | NW_004516139.1 | scaffold750 | 34685                   | GG                              | AA                 | AA               | INTERGENIC      |               |                    |                    |
| SNP_82914_A_34754 | NW_004516139.1 | scaffold750 | 34754                   | TT                              | AA                 | AA               | INTERGENIC      |               |                    |                    |
| SNP_82915_A_34787 | NW_004516139.1 | scaffold750 | 34787                   | TT                              | CC                 | CC               | INTERGENIC      |               |                    |                    |
| SNP_82916_A_34792 | NW_004516139.1 | scaffold750 | 34792                   | CC                              | TT                 | TT               | INTERGENIC      |               |                    |                    |
| SNP_82917_A_34955 | NW_004516139.1 | scaffold750 | 34955                   | TT                              | CC                 | CC               | INTERGENIC      |               |                    |                    |
| SNP_82918_A_34966 | NW_004516139.1 | scaffold750 | 34966                   | CC                              | GG                 | GG               | INTERGENIC      |               |                    |                    |
| SNP_82919_A_34985 | NW_004516139.1 | scaffold750 | 34985                   | GG                              | AA                 | AA               | INTERGENIC      |               |                    |                    |
| SNP_82920_A_34987 | NW_004516139.1 | scaffold750 | 34987                   | TT                              | CC                 | CC               | INTERGENIC      |               |                    |                    |
| SNP_82921_A_34998 | NW_004516139.1 | scaffold750 | 34998                   | AA                              | GG                 | GG               | INTERGENIC      |               |                    |                    |
| SNP_82922_A_35039 | NW_004516139.1 | scaffold750 | 35039                   | AA                              | GG                 | GG               | INTERGENIC      |               |                    |                    |
| SNP_82923_A_35045 | NW_004516139.1 | scaffold750 | 35045                   | GG                              | TT                 | TT               | INTERGENIC      |               |                    |                    |

| SNPs IDs          | Chromosome IDs | Chromosomes | Physical positions (bp) | CDC Frontier (Reference genome) | (Pusa 1103 & HPNB) | (ILWC 46 & LPNB) | Sequence genome | Components of | Gene accession IDs | Putative functions |
|-------------------|----------------|-------------|-------------------------|---------------------------------|--------------------|------------------|-----------------|---------------|--------------------|--------------------|
| SNP_82924_A_35052 | NW_004516139.1 | scaffold750 | 35052                   | CC                              | GG                 | GG               | INTERGENIC      |               |                    |                    |
| SNP_82925_A_35061 | NW_004516139.1 | scaffold750 | 35061                   | CC                              | TT                 | TT               | INTERGENIC      |               |                    |                    |
| SNP_82926_A_35093 | NW_004516139.1 | scaffold750 | 35093                   | TT                              | AA                 | AA               | INTERGENIC      |               |                    |                    |
| SNP_82927_A_35125 | NW_004516139.1 | scaffold750 | 35125                   | AA                              | TT                 | TT               | INTERGENIC      |               |                    |                    |
| SNP_82928_A_35147 | NW_004516139.1 | scaffold750 | 35147                   | TT                              | CC                 | CC               | INTERGENIC      |               |                    |                    |
| SNP_82929_A_35153 | NW_004516139.1 | scaffold750 | 35153                   | AA                              | CC                 | CC               | INTERGENIC      |               |                    |                    |
| SNP_82930_A_35229 | NW_004516139.1 | scaffold750 | 35229                   | AA                              | GG                 | GG               | INTERGENIC      |               |                    |                    |
| SNP_82931_A_35247 | NW_004516139.1 | scaffold750 | 35247                   | GG                              | AA                 | AA               | INTERGENIC      |               |                    |                    |
| SNP_82932_A_35282 | NW_004516139.1 | scaffold750 | 35282                   | GG                              | CC                 | CC               | INTERGENIC      |               |                    |                    |
| SNP_82933_A_36732 | NW_004516139.1 | scaffold750 | 36732                   | CC                              | TT                 | TT               | INTERGENIC      |               |                    |                    |
| SNP_82934_A_36796 | NW_004516139.1 | scaffold750 | 36796                   | TT                              | CC                 | CC               | INTERGENIC      |               |                    |                    |
| SNP_82935_A_36845 | NW_004516139.1 | scaffold750 | 36845                   | AA                              | GG                 | GG               | INTERGENIC      |               |                    |                    |
| SNP_82936_A_37008 | NW_004516139.1 | scaffold750 | 37008                   | AA                              | TT                 | TT               | INTERGENIC      |               |                    |                    |
| SNP_82937_A_37036 | NW_004516139.1 | scaffold750 | 37036                   | AA                              | GG                 | GG               | INTERGENIC      |               |                    |                    |
| SNP_82938_A_37051 | NW_004516139.1 | scaffold750 | 37051                   | AA                              | GG                 | GG               | INTERGENIC      |               |                    |                    |
| SNP_82939_A_37062 | NW_004516139.1 | scaffold750 | 37062                   | GG                              | TT                 | TT               | INTERGENIC      |               |                    |                    |
| SNP_82940_A_37106 | NW_004516139.1 | scaffold750 | 37106                   | AA                              | GG                 | GG               | INTERGENIC      |               |                    |                    |
| SNP_82941_A_37158 | NW_004516139.1 | scaffold750 | 37158                   | TT                              | GG                 | GG               | INTERGENIC      |               |                    |                    |
| SNP_82942_A_37232 | NW_004516139.1 | scaffold750 | 37232                   | GG                              | AA                 | AA               | INTERGENIC      |               |                    |                    |
| SNP_82943_A_37273 | NW_004516139.1 | scaffold750 | 37273                   | AA                              | GG                 | GG               | INTERGENIC      |               |                    |                    |
| SNP_82944_A_37339 | NW_004516139.1 | scaffold750 | 37339                   | GG                              | AA                 | AA               | INTERGENIC      |               |                    |                    |
| SNP_82945_A_37392 | NW_004516139.1 | scaffold750 | 37392                   | GG                              | AA                 | AA               | INTERGENIC      |               |                    |                    |

| SNPs IDs          | Chromosome IDs | Chromosomes | Physical positions (bp) | CDC Frontier (Reference genome) | (Pusa 1103 & HPNB) | (ILWC 46 & LPNB) | Sequence genome | Components of | Gene accession IDs | Putative functions |
|-------------------|----------------|-------------|-------------------------|---------------------------------|--------------------|------------------|-----------------|---------------|--------------------|--------------------|
| SNP_82946_A_37399 | NW_004516139.1 | scaffold750 | 37399                   | TT                              | CC                 | CC               | INTERGENIC      |               |                    |                    |
| SNP_82947_A_37401 | NW_004516139.1 | scaffold750 | 37401                   | GG                              | AA                 | AA               | INTERGENIC      |               |                    |                    |
| SNP_82948_A_37593 | NW_004516139.1 | scaffold750 | 37593                   | AA                              | TT                 | TT               | INTERGENIC      |               |                    |                    |
| SNP_82949_A_37599 | NW_004516139.1 | scaffold750 | 37599                   | TT                              | CC                 | CC               | INTERGENIC      |               |                    |                    |
| SNP_82950_A_37600 | NW_004516139.1 | scaffold750 | 37600                   | GG                              | TT                 | TT               | INTERGENIC      |               |                    |                    |
| SNP_82951_A_37601 | NW_004516139.1 | scaffold750 | 37601                   | TT                              | CC                 | CC               | INTERGENIC      |               |                    |                    |
| SNP_82952_A_37602 | NW_004516139.1 | scaffold750 | 37602                   | CC                              | TT                 | TT               | INTERGENIC      |               |                    |                    |
| SNP_82953_A_37649 | NW_004516139.1 | scaffold750 | 37649                   | AA                              | CC                 | CC               | INTERGENIC      |               |                    |                    |
| SNP_82954_A_37727 | NW_004516139.1 | scaffold750 | 37727                   | GG                              | TT                 | TT               | INTERGENIC      |               |                    |                    |
| SNP_82955_A_37751 | NW_004516139.1 | scaffold750 | 37751                   | TT                              | CC                 | CC               | INTERGENIC      |               |                    |                    |
| SNP_82956_A_37757 | NW_004516139.1 | scaffold750 | 37757                   | GG                              | CC                 | CC               | INTERGENIC      |               |                    |                    |
| SNP_82957_A_37926 | NW_004516139.1 | scaffold750 | 37926                   | GG                              | AA                 | AA               | INTERGENIC      |               |                    |                    |
| SNP_82958_A_37994 | NW_004516139.1 | scaffold750 | 37994                   | CC                              | TT                 | TT               | INTERGENIC      |               |                    |                    |
| SNP_82959_A_38014 | NW_004516139.1 | scaffold750 | 38014                   | GG                              | AA                 | AA               | INTERGENIC      |               |                    |                    |
| SNP_82960_A_38098 | NW_004516139.1 | scaffold750 | 38098                   | CC                              | TT                 | TT               | INTERGENIC      |               |                    |                    |
| SNP_82961_A_38204 | NW_004516139.1 | scaffold750 | 38204                   | CC                              | TT                 | TT               | INTERGENIC      |               |                    |                    |
| SNP_82962_A_38374 | NW_004516139.1 | scaffold750 | 38374                   | AA                              | GG                 | GG               | INTERGENIC      |               |                    |                    |
| SNP_82963_A_38431 | NW_004516139.1 | scaffold750 | 38431                   | GG                              | TT                 | TT               | INTERGENIC      |               |                    |                    |
| SNP_82964_A_38462 | NW_004516139.1 | scaffold750 | 38462                   | AA                              | TT                 | TT               | INTERGENIC      |               |                    |                    |
| SNP_82965_A_38496 | NW_004516139.1 | scaffold750 | 38496                   | TT                              | AA                 | AA               | INTERGENIC      |               |                    |                    |
| SNP_82966_A_38573 | NW_004516139.1 | scaffold750 | 38573                   | GG                              | TT                 | TT               | INTERGENIC      |               |                    |                    |
| SNP_82967_A_38648 | NW_004516139.1 | scaffold750 | 38648                   | TT                              | CC                 | CC               | INTERGENIC      |               |                    |                    |

| SNPs IDs          | Chromosome IDs | Chromosomes | Physical positions (bp) | CDC Frontier (Reference genome) | (Pusa 1103 & HPNB) | (ILWC 46 & LPNB) | Sequence genome | Components of | Gene accession IDs | Putative functions |
|-------------------|----------------|-------------|-------------------------|---------------------------------|--------------------|------------------|-----------------|---------------|--------------------|--------------------|
| SNP_82968_A_38663 | NW_004516139.1 | scaffold750 | 38663                   | GG                              | TT                 | TT               | INTERGENIC      |               |                    |                    |
| SNP_82969_A_38666 | NW_004516139.1 | scaffold750 | 38666                   | GG                              | AA                 | AA               | INTERGENIC      |               |                    |                    |
| SNP_82970_A_38757 | NW_004516139.1 | scaffold750 | 38757                   | TT                              | AA                 | AA               | INTERGENIC      |               |                    |                    |
| SNP_82971_A_38839 | NW_004516139.1 | scaffold750 | 38839                   | AA                              | CC                 | CC               | INTERGENIC      |               |                    |                    |
| SNP_82972_A_38932 | NW_004516139.1 | scaffold750 | 38932                   | AA                              | CC                 | CC               | INTERGENIC      |               |                    |                    |
| SNP_82973_A_38934 | NW_004516139.1 | scaffold750 | 38934                   | GG                              | TT                 | TT               | INTERGENIC      |               |                    |                    |
| SNP_82975_A_39195 | NW_004516139.1 | scaffold750 | 39195                   | TT                              | AA                 | AA               | INTERGENIC      |               |                    |                    |
| SNP_82976_A_39201 | NW_004516139.1 | scaffold750 | 39201                   | AA                              | CC                 | CC               | INTERGENIC      |               |                    |                    |
| SNP_82977_A_39214 | NW_004516139.1 | scaffold750 | 39214                   | TT                              | CC                 | CC               | INTERGENIC      |               |                    |                    |
| SNP_82978_A_39224 | NW_004516139.1 | scaffold750 | 39224                   | AA                              | TT                 | TT               | INTERGENIC      |               |                    |                    |
| SNP_82979_A_39263 | NW_004516139.1 | scaffold750 | 39263                   | TT                              | CC                 | CC               | INTERGENIC      |               |                    |                    |
| SNP_82980_A_39270 | NW_004516139.1 | scaffold750 | 39270                   | CC                              | GG                 | GG               | INTERGENIC      |               |                    |                    |
| SNP_82981_A_39296 | NW_004516139.1 | scaffold750 | 39296                   | GG                              | TT                 | TT               | INTERGENIC      |               |                    |                    |
| SNP_82982_A_39304 | NW_004516139.1 | scaffold750 | 39304                   | CC                              | AA                 | AA               | INTERGENIC      |               |                    |                    |
| SNP_82983_A_39714 | NW_004516139.1 | scaffold750 | 39714                   | GG                              | TT                 | TT               | INTERGENIC      |               |                    |                    |
| SNP_82984_A_44526 | NW_004516139.1 | scaffold750 | 44526                   | GG                              | AA                 | AA               | INTERGENIC      |               |                    |                    |
| SNP_82985_A_49333 | NW_004516139.1 | scaffold750 | 49333                   | TT                              | CC                 | CC               | INTERGENIC      |               |                    |                    |
| SNP_82986_A_58238 | NW_004516139.1 | scaffold750 | 58238                   | CC                              | GG                 | GG               | INTERGENIC      |               |                    |                    |
| SNP_82987_A_58243 | NW_004516139.1 | scaffold750 | 58243                   | GG                              | CC                 | CC               | INTERGENIC      |               |                    |                    |
| SNP_82988_A_58248 | NW_004516139.1 | scaffold750 | 58248                   | TT                              | CC                 | CC               | INTERGENIC      |               |                    |                    |
| SNP_82989_A_58435 | NW_004516139.1 | scaffold750 | 58435                   | AA                              | TT                 | TT               | INTERGENIC      |               |                    |                    |
| SNP_82990_A_58447 | NW_004516139.1 | scaffold750 | 58447                   | GG                              | CC                 | CC               | INTERGENIC      |               |                    |                    |

| SNPs IDs          | Chromosome IDs | Chromosomes | Physical positions (bp) | CDC Frontier (Reference genome) | (Pusa 1103 & HPNB) | (ILWC 46 & LPNB) | Sequence genome | Components of | Gene accession IDs | Putative functions |
|-------------------|----------------|-------------|-------------------------|---------------------------------|--------------------|------------------|-----------------|---------------|--------------------|--------------------|
| SNP_82991_A_58526 | NW_004516139.1 | scaffold750 | 58526                   | CC                              | GG                 | GG               | INTERGENIC      |               |                    |                    |
| SNP_82992_A_58541 | NW_004516139.1 | scaffold750 | 58541                   | GG                              | AA                 | AA               | INTERGENIC      |               |                    |                    |
| SNP_82993_A_58668 | NW_004516139.1 | scaffold750 | 58668                   | GG                              | AA                 | AA               | INTERGENIC      |               |                    |                    |
| SNP_82995_A_58726 | NW_004516139.1 | scaffold750 | 58726                   | AA                              | GG                 | GG               | INTERGENIC      |               |                    |                    |
| SNP_82996_A_58887 | NW_004516139.1 | scaffold750 | 58887                   | TT                              | GG                 | GG               | INTERGENIC      |               |                    |                    |
| SNP_82997_A_58906 | NW_004516139.1 | scaffold750 | 58906                   | TT                              | CC                 | CC               | INTERGENIC      |               |                    |                    |
| SNP_82998_A_58973 | NW_004516139.1 | scaffold750 | 58973                   | GG                              | TT                 | TT               | INTERGENIC      |               |                    |                    |
| SNP_83000_A_59118 | NW_004516139.1 | scaffold750 | 59118                   | CC                              | GG                 | GG               | INTERGENIC      |               |                    |                    |
| SNP_83001_A_59203 | NW_004516139.1 | scaffold750 | 59203                   | GG                              | AA                 | AA               | INTERGENIC      |               |                    |                    |
| SNP_83003_A_59314 | NW_004516139.1 | scaffold750 | 59314                   | TT                              | AA                 | AA               | INTERGENIC      |               |                    |                    |
| SNP_83004_A_59385 | NW_004516139.1 | scaffold750 | 59385                   | AA                              | CC                 | CC               | INTERGENIC      |               |                    |                    |
| SNP_83005_A_59530 | NW_004516139.1 | scaffold750 | 59530                   | GG                              | TT                 | TT               | INTERGENIC      |               |                    |                    |
| SNP_83006_A_59590 | NW_004516139.1 | scaffold750 | 59590                   | AA                              | TT                 | TT               | INTERGENIC      |               |                    |                    |
| SNP_83007_A_59877 | NW_004516139.1 | scaffold750 | 59877                   | GG                              | TT                 | TT               | INTERGENIC      |               |                    |                    |
| SNP_83008_A_59917 | NW_004516139.1 | scaffold750 | 59917                   | TT                              | AA                 | AA               | INTERGENIC      |               |                    |                    |
| SNP_83009_A_59973 | NW_004516139.1 | scaffold750 | 59973                   | CC                              | GG                 | GG               | INTERGENIC      |               |                    |                    |
| SNP_83010_A_60010 | NW_004516139.1 | scaffold750 | 60010                   | GG                              | TT                 | TT               | INTERGENIC      |               |                    |                    |
| SNP_83011_A_60028 | NW_004516139.1 | scaffold750 | 60028                   | CC                              | TT                 | TT               | INTERGENIC      |               |                    |                    |
| SNP_83012_A_60131 | NW_004516139.1 | scaffold750 | 60131                   | GG                              | TT                 | TT               | INTERGENIC      |               |                    |                    |
| SNP_83013_A_60161 | NW_004516139.1 | scaffold750 | 60161                   | CC                              | TT                 | TT               | INTERGENIC      |               |                    |                    |
| SNP_83014_A_60175 | NW_004516139.1 | scaffold750 | 60175                   | AA                              | TT                 | TT               | INTERGENIC      |               |                    |                    |
| SNP_83015_A_60192 | NW_004516139.1 | scaffold750 | 60192                   | GG                              | AA                 | AA               | INTERGENIC      |               |                    |                    |

| SNPs IDs           | Chromosome IDs | Chromosomes | Physical positions (bp) | CDC Frontier (Reference genome) | (Pusa 1103 & HPNB) | (ILWC 46 & LPNB) | Sequence genome | Components of | Gene accession IDs | Putative functions |
|--------------------|----------------|-------------|-------------------------|---------------------------------|--------------------|------------------|-----------------|---------------|--------------------|--------------------|
| SNP_83016_A_60199  | NW_004516139.1 | scaffold750 | 60199                   | AA                              | GG                 | GG               | INTERGENIC      |               |                    |                    |
| SNP_83017_A_60516  | NW_004516139.1 | scaffold750 | 60516                   | TT                              | AA                 | AA               | INTERGENIC      |               |                    |                    |
| SNP_83018_A_66794  | NW_004516139.1 | scaffold750 | 66794                   | TT                              | AA                 | AA               | INTERGENIC      |               |                    |                    |
| SNP_83019_A_83457  | NW_004516139.1 | scaffold750 | 83457                   | CC                              | AA                 | AA               | INTERGENIC      |               |                    |                    |
| SNP_83021_A_95184  | NW_004516139.1 | scaffold750 | 95184                   | CC                              | TT                 | TT               | INTERGENIC      |               |                    |                    |
| SNP_83022_A_106550 | NW_004516139.1 | scaffold750 | 106550                  | AA                              | CC                 | CC               | INTERGENIC      |               |                    |                    |
| SNP_83024_A_147791 | NW_004516139.1 | scaffold750 | 147791                  | AA                              | CC                 | CC               | INTERGENIC      |               |                    |                    |
| SNP_83025_A_158900 | NW_004516139.1 | scaffold750 | 158900                  | CC                              | TT                 | TT               | INTERGENIC      |               |                    |                    |
| SNP_83026_A_158903 | NW_004516139.1 | scaffold750 | 158903                  | GG                              | AA                 | AA               | INTERGENIC      |               |                    |                    |
| SNP_83027_A_158932 | NW_004516139.1 | scaffold750 | 158932                  | TT                              | GG                 | GG               | INTERGENIC      |               |                    |                    |
| SNP_83028_A_185253 | NW_004516139.1 | scaffold750 | 185253                  | AA                              | CC                 | CC               | INTERGENIC      |               |                    |                    |
| SNP_83029_A_185265 | NW_004516139.1 | scaffold750 | 185265                  | AA                              | TT                 | TT               | INTERGENIC      |               |                    |                    |
| SNP_83030_A_185298 | NW_004516139.1 | scaffold750 | 185298                  | TT                              | CC                 | CC               | INTERGENIC      |               |                    |                    |
| SNP_83031_A_190499 | NW_004516139.1 | scaffold750 | 190499                  | TT                              | CC                 | CC               | INTERGENIC      |               |                    |                    |
| SNP_83032_A_190518 | NW_004516139.1 | scaffold750 | 190518                  | AA                              | TT                 | TT               | INTERGENIC      |               |                    |                    |
| SNP_83033_A_190521 | NW_004516139.1 | scaffold750 | 190521                  | AA                              | GG                 | GG               | INTERGENIC      |               |                    |                    |
| SNP_83034_A_190522 | NW_004516139.1 | scaffold750 | 190522                  | TT                              | GG                 | GG               | INTERGENIC      |               |                    |                    |
| SNP_83035_A_221724 | NW_004516139.1 | scaffold750 | 221724                  | AA                              | GG                 | GG               | INTERGENIC      |               |                    |                    |
| SNP_83036_A_227819 | NW_004516139.1 | scaffold750 | 227819                  | GG                              | AA                 | AA               | INTERGENIC      |               |                    |                    |
| SNP_83037_A_228517 | NW_004516139.1 | scaffold750 | 228517                  | GG                              | AA                 | AA               | INTERGENIC      |               |                    |                    |
| SNP_83038_A_232707 | NW_004516139.1 | scaffold750 | 232707                  | TT                              | AA                 | AA               | INTERGENIC      |               |                    |                    |
| SNP_83039_A_232835 | NW_004516139.1 | scaffold750 | 232835                  | AA                              | TT                 | TT               | INTERGENIC      |               |                    |                    |



| SNPs IDs           | Chromosome IDs | Chromosomes | Physical positions (bp) | CDC Frontier (Reference genome) | (Pusa 1103 & HPNB) | (ILWC 46 & LPNB) | Sequence genome | Components of | Gene accession IDs | Putative functions |
|--------------------|----------------|-------------|-------------------------|---------------------------------|--------------------|------------------|-----------------|---------------|--------------------|--------------------|
| SNP_83040_A_243052 | NW_004516139.1 | scaffold750 | 243052                  | GG                              | AA                 | AA               | INTERGENIC      |               |                    |                    |
| SNP_83041_A_244761 | NW_004516139.1 | scaffold750 | 244761                  | AA                              | TT                 | TT               | INTERGENIC      |               |                    |                    |
| SNP_83042_A_245636 | NW_004516139.1 | scaffold750 | 245636                  | GG                              | AA                 | AA               | INTERGENIC      |               |                    |                    |
| SNP_83044_A_248429 | NW_004516139.1 | scaffold750 | 248429                  | GG                              | TT                 | TT               | INTERGENIC      |               |                    |                    |
| SNP_83045_A_254570 | NW_004516139.1 | scaffold750 | 254570                  | GG                              | AA                 | AA               | INTERGENIC      |               |                    |                    |
| SNP_83046_A_257102 | NW_004516139.1 | scaffold750 | 257102                  | AA                              | GG                 | GG               | INTERGENIC      |               |                    |                    |
| SNP_83047_A_263973 | NW_004516139.1 | scaffold750 | 263973                  | TT                              | AA                 | AA               | INTERGENIC      |               |                    |                    |
| SNP_83048_A_264215 | NW_004516139.1 | scaffold750 | 264215                  | CC                              | TT                 | TT               | INTERGENIC      |               |                    |                    |
| SNP_83049_A_264235 | NW_004516139.1 | scaffold750 | 264235                  | TT                              | CC                 | CC               | INTERGENIC      |               |                    |                    |
| SNP_83050_A_264283 | NW_004516139.1 | scaffold750 | 264283                  | GG                              | CC                 | CC               | INTERGENIC      |               |                    |                    |
| SNP_83051_A_266247 | NW_004516139.1 | scaffold750 | 266247                  | GG                              | AA                 | AA               | INTERGENIC      |               |                    |                    |
| SNP_83052_A_266268 | NW_004516139.1 | scaffold750 | 266268                  | TT                              | CC                 | CC               | INTERGENIC      |               |                    |                    |
| SNP_83053_A_266314 | NW_004516139.1 | scaffold750 | 266314                  | GG                              | AA                 | AA               | INTERGENIC      |               |                    |                    |
| SNP_83054_A_267480 | NW_004516139.1 | scaffold750 | 267480                  | AA                              | TT                 | TT               | INTERGENIC      |               |                    |                    |
| SNP_83055_A_268861 | NW_004516139.1 | scaffold750 | 268861                  | TT                              | CC                 | CC               | INTERGENIC      |               |                    |                    |
| SNP_83056_A_272007 | NW_004516139.1 | scaffold750 | 272007                  | CC                              | TT                 | TT               | INTERGENIC      |               |                    |                    |
| SNP_83057_A_272048 | NW_004516139.1 | scaffold750 | 272048                  | TT                              | AA                 | AA               | INTERGENIC      |               |                    |                    |
| SNP_83058_A_278789 | NW_004516139.1 | scaffold750 | 278789                  | TT                              | CC                 | CC               | INTERGENIC      |               |                    |                    |
| SNP_83059_A_279344 | NW_004516139.1 | scaffold750 | 279344                  | TT                              | AA                 | AA               | INTERGENIC      |               |                    |                    |
| SNP_83060_A_279352 | NW_004516139.1 | scaffold750 | 279352                  | TT                              | CC                 | CC               | INTERGENIC      |               |                    |                    |
| SNP_83061_A_279665 | NW_004516139.1 | scaffold750 | 279665                  | CC                              | TT                 | TT               | INTERGENIC      |               |                    |                    |
| SNP_83062_A_279670 | NW_004516139.1 | scaffold750 | 279670                  | AA                              | GG                 | GG               | INTERGENIC      |               |                    |                    |

| SNPs IDs           | Chromosome IDs | Chromosomes | Physical positions (bp) | CDC Frontier (Reference genome) | (Pusa 1103 & HPNB) | (ILWC 46 & LPNB) | Sequence genome | Components of | Gene accession IDs | Putative functions |
|--------------------|----------------|-------------|-------------------------|---------------------------------|--------------------|------------------|-----------------|---------------|--------------------|--------------------|
| SNP_83063_A_279683 | NW_004516139.1 | scaffold750 | 279683                  | CC                              | TT                 | TT               | INTERGENIC      |               |                    |                    |
| SNP_83064_A_301888 | NW_004516139.1 | scaffold750 | 301888                  | CC                              | AA                 | AA               | INTERGENIC      |               |                    |                    |
| SNP_83065_A_313683 | NW_004516139.1 | scaffold750 | 313683                  | AA                              | CC                 | CC               | INTERGENIC      |               |                    |                    |
| SNP_83067_A_337716 | NW_004516139.1 | scaffold750 | 337716                  | GG                              | CC                 | CC               | INTERGENIC      |               |                    |                    |
| SNP_83068_A_347970 | NW_004516139.1 | scaffold750 | 347970                  | CC                              | TT                 | TT               | INTERGENIC      |               |                    |                    |
| SNP_83069_A_348026 | NW_004516139.1 | scaffold750 | 348026                  | AA                              | GG                 | GG               | INTERGENIC      |               |                    |                    |
| SNP_83070_A_348237 | NW_004516139.1 | scaffold750 | 348237                  | TT                              | AA                 | AA               | INTERGENIC      |               |                    |                    |
| SNP_83071_A_348287 | NW_004516139.1 | scaffold750 | 348287                  | CC                              | TT                 | TT               | INTERGENIC      |               |                    |                    |
| SNP_83072_A_348345 | NW_004516139.1 | scaffold750 | 348345                  | AA                              | GG                 | GG               | INTERGENIC      |               |                    |                    |
| SNP_83073_A_360252 | NW_004516139.1 | scaffold750 | 360252                  | CC                              | TT                 | TT               | INTERGENIC      |               |                    |                    |
| SNP_83075_A_360503 | NW_004516139.1 | scaffold750 | 360503                  | TT                              | CC                 | CC               | INTERGENIC      |               |                    |                    |
| SNP_83076_A_360521 | NW_004516139.1 | scaffold750 | 360521                  | AA                              | TT                 | TT               | INTERGENIC      |               |                    |                    |
| SNP_83077_A_360544 | NW_004516139.1 | scaffold750 | 360544                  | AA                              | TT                 | TT               | INTERGENIC      |               |                    |                    |
| SNP_83078_A_360560 | NW_004516139.1 | scaffold750 | 360560                  | AA                              | CC                 | CC               | INTERGENIC      |               |                    |                    |
| SNP_83079_A_362273 | NW_004516139.1 | scaffold750 | 362273                  | CC                              | GG                 | GG               | INTERGENIC      |               |                    |                    |
| SNP_83080_A_362293 | NW_004516139.1 | scaffold750 | 362293                  | TT                              | GG                 | GG               | INTERGENIC      |               |                    |                    |
| SNP_83081_A_362295 | NW_004516139.1 | scaffold750 | 362295                  | TT                              | AA                 | AA               | INTERGENIC      |               |                    |                    |
| SNP_83082_A_362321 | NW_004516139.1 | scaffold750 | 362321                  | TT                              | AA                 | AA               | INTERGENIC      |               |                    |                    |
| SNP_83083_A_362349 | NW_004516139.1 | scaffold750 | 362349                  | CC                              | TT                 | TT               | INTERGENIC      |               |                    |                    |
| SNP_83085_A_17280  | NW_004516140.1 | scaffold752 | 17280                   | CC                              | TT                 | TT               | INTERGENIC      |               |                    |                    |
| SNP_83086_A_38793  | NW_004516140.1 | scaffold752 | 38793                   | TT                              | CC                 | CC               | INTERGENIC      |               |                    |                    |
| SNP_83088_A_50188  | NW_004516140.1 | scaffold752 | 50188                   | GG                              | AA                 | AA               | INTERGENIC      |               |                    |                    |

| SNPs IDs           | Chromosome IDs | Chromosomes | Physical positions (bp) | CDC Frontier (Reference genome) | (Pusa 1103 & HPNB) | (ILWC 46 & LPNB) | Sequence Components of genome | Gene accession IDs | Putative functions           |
|--------------------|----------------|-------------|-------------------------|---------------------------------|--------------------|------------------|-------------------------------|--------------------|------------------------------|
| SNP_83089_A_50482  | NW_004516140.1 | scaffold752 | 50482                   | AA                              | GG                 | GG               | INTERGENIC                    |                    |                              |
| SNP_83090_A_50503  | NW_004516140.1 | scaffold752 | 50503                   | TT                              | CC                 | CC               | INTERGENIC                    |                    |                              |
| SNP_83091_A_50611  | NW_004516140.1 | scaffold752 | 50611                   | AA                              | CC                 | CC               | INTERGENIC                    |                    |                              |
| SNP_83092_A_55342  | NW_004516140.1 | scaffold752 | 55342                   | CC                              | TT                 | TT               | INTERGENIC                    |                    |                              |
| SNP_83093_A_99166  | NW_004516140.1 | scaffold752 | 99166                   | GG                              | AA                 | AA               | INTERGENIC                    |                    |                              |
| SNP_83094_A_99199  | NW_004516140.1 | scaffold752 | 99199                   | AA                              | GG                 | GG               | INTERGENIC                    |                    |                              |
| SNP_83095_A_113213 | NW_004516140.1 | scaffold752 | 113213                  | AA                              | CC                 | CC               | INTERGENIC                    |                    |                              |
| SNP_83097_A_137834 | NW_004516140.1 | scaffold752 | 137834                  | TT                              | CC                 | CC               | INTERGENIC                    |                    |                              |
| SNP_83098_A_137842 | NW_004516140.1 | scaffold752 | 137842                  | AA                              | GG                 | GG               | INTERGENIC                    |                    |                              |
| SNP_83099_A_137905 | NW_004516140.1 | scaffold752 | 137905                  | AA                              | CC                 | CC               | INTERGENIC                    |                    |                              |
| SNP_83100_A_137990 | NW_004516140.1 | scaffold752 | 137990                  | AA                              | GG                 | GG               | INTERGENIC                    |                    |                              |
| SNP_83101_A_138021 | NW_004516140.1 | scaffold752 | 138021                  | AA                              | GG                 | GG               | INTERGENIC                    |                    |                              |
| SNP_83102_A_138208 | NW_004516140.1 | scaffold752 | 138208                  | TT                              | CC                 | CC               | INTERGENIC                    |                    |                              |
| SNP_83103_A_149709 | NW_004516140.1 | scaffold752 | 149709                  | TT                              | AA                 | AA               | DRR                           | 101492745          | uncharacterized LOC101492745 |
| SNP_83104_A_150442 | NW_004516140.1 | scaffold752 | 150442                  | AA                              | GG                 | GG               | DRR                           | 101492745          | uncharacterized LOC101492745 |
| SNP_83105_A_150640 | NW_004516140.1 | scaffold752 | 150640                  | AA                              | GG                 | GG               | DRR                           | 101492745          | uncharacterized LOC101492745 |
| SNP_83106_A_152249 | NW_004516140.1 | scaffold752 | 152249                  | TT                              | AA                 | AA               | INTRON                        | id205067           | Unknown function             |
| SNP_83107_A_152518 | NW_004516140.1 | scaffold752 | 152518                  | AA                              | CC                 | CC               | INTRON                        | id205067           | Unknown function             |
| SNP_83108_A_152615 | NW_004516140.1 | scaffold752 | 152615                  | TT                              | CC                 | CC               | INTRON                        | id205067           | Unknown function             |
| SNP_83109_A_190918 | NW_004516140.1 | scaffold752 | 190918                  | CC                              | TT                 | TT               | INTERGENIC                    |                    |                              |
| SNP_83110_A_209668 | NW_004516140.1 | scaffold752 | 209668                  | AA                              | TT                 | TT               | INTERGENIC                    |                    |                              |
| SNP_83111_A_209954 | NW_004516140.1 | scaffold752 | 209954                  | GG                              | AA                 | AA               | INTERGENIC                    |                    |                              |

| SNPs IDs           | Chromosome IDs | Chromosomes | Physical positions (bp) | CDC Frontier (Reference genome) | (Pusa 1103 & HPNB) | (ILWC 46 & LPNB) | Sequence genome | Components of | Gene accession IDs | Putative functions |
|--------------------|----------------|-------------|-------------------------|---------------------------------|--------------------|------------------|-----------------|---------------|--------------------|--------------------|
| SNP_83112_A_209976 | NW_004516140.1 | scaffold752 | 209976                  | AA                              | GG                 | GG               | INTERGENIC      |               |                    |                    |
| SNP_83113_A_209988 | NW_004516140.1 | scaffold752 | 209988                  | TT                              | CC                 | CC               | INTERGENIC      |               |                    |                    |
| SNP_83114_A_212078 | NW_004516140.1 | scaffold752 | 212078                  | AA                              | GG                 | GG               | INTERGENIC      |               |                    |                    |
| SNP_83116_A_228245 | NW_004516140.1 | scaffold752 | 228245                  | GG                              | TT                 | TT               | INTERGENIC      |               |                    |                    |
| SNP_83117_A_231148 | NW_004516140.1 | scaffold752 | 231148                  | AA                              | CC                 | CC               | INTERGENIC      |               |                    |                    |
| SNP_83118_A_231149 | NW_004516140.1 | scaffold752 | 231149                  | CC                              | TT                 | TT               | INTERGENIC      |               |                    |                    |
| SNP_83119_A_231210 | NW_004516140.1 | scaffold752 | 231210                  | GG                              | CC                 | CC               | INTERGENIC      |               |                    |                    |
| SNP_83120_A_231220 | NW_004516140.1 | scaffold752 | 231220                  | AA                              | GG                 | GG               | INTERGENIC      |               |                    |                    |
| SNP_83121_A_231238 | NW_004516140.1 | scaffold752 | 231238                  | GG                              | AA                 | AA               | INTERGENIC      |               |                    |                    |
| SNP_83122_A_231259 | NW_004516140.1 | scaffold752 | 231259                  | AA                              | GG                 | GG               | INTERGENIC      |               |                    |                    |
| SNP_83123_A_231264 | NW_004516140.1 | scaffold752 | 231264                  | AA                              | GG                 | GG               | INTERGENIC      |               |                    |                    |
| SNP_83124_A_231289 | NW_004516140.1 | scaffold752 | 231289                  | TT                              | CC                 | CC               | INTERGENIC      |               |                    |                    |
| SNP_83125_A_231298 | NW_004516140.1 | scaffold752 | 231298                  | CC                              | TT                 | TT               | INTERGENIC      |               |                    |                    |
| SNP_83126_A_231458 | NW_004516140.1 | scaffold752 | 231458                  | TT                              | CC                 | CC               | INTERGENIC      |               |                    |                    |
| SNP_83127_A_231467 | NW_004516140.1 | scaffold752 | 231467                  | GG                              | AA                 | AA               | INTERGENIC      |               |                    |                    |
| SNP_83128_A_231477 | NW_004516140.1 | scaffold752 | 231477                  | CC                              | TT                 | TT               | INTERGENIC      |               |                    |                    |
| SNP_83129_A_231484 | NW_004516140.1 | scaffold752 | 231484                  | AA                              | CC                 | CC               | INTERGENIC      |               |                    |                    |
| SNP_83130_A_231499 | NW_004516140.1 | scaffold752 | 231499                  | TT                              | GG                 | GG               | INTERGENIC      |               |                    |                    |
| SNP_83131_A_231500 | NW_004516140.1 | scaffold752 | 231500                  | AA                              | GG                 | GG               | INTERGENIC      |               |                    |                    |
| SNP_83132_A_231509 | NW_004516140.1 | scaffold752 | 231509                  | GG                              | AA                 | AA               | INTERGENIC      |               |                    |                    |
| SNP_83133_A_231542 | NW_004516140.1 | scaffold752 | 231542                  | GG                              | AA                 | AA               | INTERGENIC      |               |                    |                    |
| SNP_83134_A_231554 | NW_004516140.1 | scaffold752 | 231554                  | AA                              | GG                 | GG               | INTERGENIC      |               |                    |                    |

| SNPs IDs           | Chromosome IDs | Chromosomes | Physical positions (bp) | CDC Frontier (Reference genome) | (Pusa 1103 & HPNB) | (ILWC 46 & LPNB) | Sequence Components of genome | Gene accession IDs | Putative functions           |
|--------------------|----------------|-------------|-------------------------|---------------------------------|--------------------|------------------|-------------------------------|--------------------|------------------------------|
| SNP_83135_A_232447 | NW_004516140.1 | scaffold752 | 232447                  | GG                              | TT                 | TT               | INTERGENIC                    |                    |                              |
| SNP_83136_A_232448 | NW_004516140.1 | scaffold752 | 232448                  | GG                              | TT                 | TT               | INTERGENIC                    |                    |                              |
| SNP_83138_A_269644 | NW_004516140.1 | scaffold752 | 269644                  | AA                              | CC                 | CC               | INTERGENIC                    |                    |                              |
| SNP_83139_A_269712 | NW_004516140.1 | scaffold752 | 269712                  | AA                              | GG                 | GG               | INTERGENIC                    |                    |                              |
| SNP_83140_A_289250 | NW_004516140.1 | scaffold752 | 289250                  | TT                              | AA                 | AA               | INTERGENIC                    |                    |                              |
| SNP_83141_A_293949 | NW_004516140.1 | scaffold752 | 293949                  | GG                              | AA                 | AA               | URR                           | 101495102          | uncharacterized LOC101495102 |
| SNP_83142_A_326476 | NW_004516140.1 | scaffold752 | 326476                  | AA                              | GG                 | GG               | INTERGENIC                    |                    |                              |
| SNP_83143_A_385760 | NW_004516140.1 | scaffold752 | 385760                  | CC                              | TT                 | TT               | INTERGENIC                    |                    |                              |
| SNP_83144_A_412715 | NW_004516140.1 | scaffold752 | 412715                  | AA                              | CC                 | CC               | INTERGENIC                    |                    |                              |
| SNP_83145_A_451242 | NW_004516140.1 | scaffold752 | 451242                  | TT                              | CC                 | CC               | INTERGENIC                    |                    |                              |
| SNP_83146_A_456958 | NW_004516140.1 | scaffold752 | 456958                  | GG                              | CC                 | CC               | INTERGENIC                    |                    |                              |
| SNP_83147_A_486149 | NW_004516140.1 | scaffold752 | 486149                  | CC                              | AA                 | AA               | INTRON                        | 101493619          | DNA repair protein UVH3      |
| SNP_83148_A_486158 | NW_004516140.1 | scaffold752 | 486158                  | CC                              | TT                 | TT               | INTRON                        | 101493619          | DNA repair protein UVH3      |
| SNP_83149_A_505082 | NW_004516140.1 | scaffold752 | 505082                  | GG                              | CC                 | CC               | INTERGENIC                    |                    |                              |
| SNP_83150_A_505096 | NW_004516140.1 | scaffold752 | 505096                  | CC                              | TT                 | TT               | INTERGENIC                    |                    |                              |
| SNP_83152_A_505290 | NW_004516140.1 | scaffold752 | 505290                  | AA                              | GG                 | GG               | INTERGENIC                    |                    |                              |
| SNP_83153_A_505333 | NW_004516140.1 | scaffold752 | 505333                  | AA                              | TT                 | TT               | INTERGENIC                    |                    |                              |
| SNP_83154_A_73645  | NW_004516141.1 | scaffold753 | 73645                   | TT                              | CC                 | CC               | INTERGENIC                    |                    |                              |
| SNP_83155_A_84387  | NW_004516141.1 | scaffold753 | 84387                   | AA                              | CC                 | CC               | INTERGENIC                    |                    |                              |
| SNP_83156_A_84403  | NW_004516141.1 | scaffold753 | 84403                   | AA                              | GG                 | GG               | INTERGENIC                    |                    |                              |
| SNP_83157_A_84406  | NW_004516141.1 | scaffold753 | 84406                   | TT                              | CC                 | CC               | INTERGENIC                    |                    |                              |
| SNP_83158_A_123070 | NW_004516141.1 | scaffold753 | 123070                  | CC                              | TT                 | TT               | INTERGENIC                    |                    |                              |

| SNPs IDs           | Chromosome IDs | Chromosomes | Physical positions (bp) | CDC Frontier (Reference genome) | (Pusa 1103 & HPNB) | (ILWC 46 & LPNB) | Sequence Components of genome | Gene accession IDs | Putative functions                      |
|--------------------|----------------|-------------|-------------------------|---------------------------------|--------------------|------------------|-------------------------------|--------------------|-----------------------------------------|
| SNP_83159_A_123085 | NW_004516141.1 | scaffold753 | 123085                  | GG                              | AA                 | AA               | INTERGENIC                    |                    |                                         |
| SNP_83160_A_123100 | NW_004516141.1 | scaffold753 | 123100                  | TT                              | CC                 | CC               | INTERGENIC                    |                    |                                         |
| SNP_83161_A_124240 | NW_004516141.1 | scaffold753 | 124240                  | GG                              | AA                 | AA               | INTERGENIC                    |                    |                                         |
| SNP_83162_A_150068 | NW_004516141.1 | scaffold753 | 150068                  | AA                              | TT                 | TT               | INTRON                        | 101498377          | (Z)-3-hexen-1-ol acetyltransferase-like |
| SNP_83163_A_150759 | NW_004516141.1 | scaffold753 | 150759                  | AA                              | GG                 | GG               | SYNONYMOUS_CODING             | 101498377          | (Z)-3-hexen-1-ol acetyltransferase-like |
| SNP_83164_A_151133 | NW_004516141.1 | scaffold753 | 151133                  | CC                              | TT                 | TT               | URR                           | 101498377          | (Z)-3-hexen-1-ol acetyltransferase-like |
| SNP_83166_A_223568 | NW_004516141.1 | scaffold753 | 223568                  | AA                              | GG                 | GG               | INTERGENIC                    |                    |                                         |
| SNP_83167_A_228758 | NW_004516141.1 | scaffold753 | 228758                  | TT                              | CC                 | CC               | INTERGENIC                    |                    |                                         |
| SNP_83168_A_228834 | NW_004516141.1 | scaffold753 | 228834                  | AA                              | GG                 | GG               | INTERGENIC                    |                    |                                         |
| SNP_83169_A_228884 | NW_004516141.1 | scaffold753 | 228884                  | TT                              | CC                 | CC               | INTERGENIC                    |                    |                                         |
| SNP_83170_A_327302 | NW_004516141.1 | scaffold753 | 327302                  | AA                              | GG                 | GG               | INTERGENIC                    |                    |                                         |
| SNP_83172_A_15354  | NW_004516142.1 | scaffold754 | 15354                   | AA                              | GG                 | GG               | INTERGENIC                    |                    |                                         |
| SNP_83173_A_25243  | NW_004516142.1 | scaffold754 | 25243                   | CC                              | AA                 | AA               | INTERGENIC                    |                    |                                         |
| SNP_83174_A_15319  | NW_004516144.1 | scaffold757 | 15319                   | TT                              | CC                 | CC               | INTERGENIC                    |                    |                                         |
| SNP_83175_A_29801  | NW_004516144.1 | scaffold757 | 29801                   | TT                              | CC                 | CC               | INTERGENIC                    |                    |                                         |
| SNP_83176_A_39270  | NW_004516144.1 | scaffold757 | 39270                   | TT                              | AA                 | AA               | INTERGENIC                    |                    |                                         |
| SNP_83177_A_72617  | NW_004516144.1 | scaffold757 | 72617                   | GG                              | AA                 | AA               | INTERGENIC                    |                    |                                         |
| SNP_83178_A_72799  | NW_004516144.1 | scaffold757 | 72799                   | TT                              | GG                 | GG               | INTERGENIC                    |                    |                                         |
| SNP_83179_A_72922  | NW_004516144.1 | scaffold757 | 72922                   | TT                              | CC                 | CC               | INTERGENIC                    |                    |                                         |
| SNP_83180_A_72928  | NW_004516144.1 | scaffold757 | 72928                   | GG                              | AA                 | AA               | INTERGENIC                    |                    |                                         |
| SNP_83181_A_72937  | NW_004516144.1 | scaffold757 | 72937                   | GG                              | AA                 | AA               | INTERGENIC                    |                    |                                         |
| SNP_83182_A_73089  | NW_004516144.1 | scaffold757 | 73089                   | TT                              | AA                 | AA               | INTERGENIC                    |                    |                                         |

| SNPs IDs          | Chromosome IDs | Chromosomes | Physical positions (bp) | CDC Frontier (Reference genome) | (Pusa 1103 & HPNB) | (ILWC 46 & LPNB) | Sequence genome | Components of | Gene accession IDs | Putative functions |
|-------------------|----------------|-------------|-------------------------|---------------------------------|--------------------|------------------|-----------------|---------------|--------------------|--------------------|
| SNP_83183_A_73122 | NW_004516144.1 | scaffold757 | 73122                   | AA                              | GG                 | GG               | INTERGENIC      |               |                    |                    |
| SNP_83184_A_73123 | NW_004516144.1 | scaffold757 | 73123                   | AA                              | GG                 | GG               | INTERGENIC      |               |                    |                    |
| SNP_83185_A_2130  | NW_004516145.1 | scaffold758 | 2130                    | TT                              | CC                 | CC               | INTERGENIC      |               |                    |                    |
| SNP_83186_A_11072 | NW_004516145.1 | scaffold758 | 11072                   | GG                              | TT                 | TT               | INTERGENIC      |               |                    |                    |
| SNP_83187_A_11096 | NW_004516145.1 | scaffold758 | 11096                   | GG                              | TT                 | TT               | INTERGENIC      |               |                    |                    |
| SNP_83188_A_12604 | NW_004516145.1 | scaffold758 | 12604                   | AA                              | GG                 | GG               | INTERGENIC      |               |                    |                    |
| SNP_83189_A_12973 | NW_004516145.1 | scaffold758 | 12973                   | CC                              | TT                 | TT               | INTERGENIC      |               |                    |                    |
| SNP_83190_A_12975 | NW_004516145.1 | scaffold758 | 12975                   | GG                              | AA                 | AA               | INTERGENIC      |               |                    |                    |
| SNP_83192_A_16503 | NW_004516145.1 | scaffold758 | 16503                   | AA                              | GG                 | GG               | INTERGENIC      |               |                    |                    |
| SNP_83193_A_19559 | NW_004516145.1 | scaffold758 | 19559                   | TT                              | GG                 | GG               | INTERGENIC      |               |                    |                    |
| SNP_83194_A_22095 | NW_004516145.1 | scaffold758 | 22095                   | TT                              | AA                 | AA               | INTERGENIC      |               |                    |                    |
| SNP_83195_A_22101 | NW_004516145.1 | scaffold758 | 22101                   | GG                              | AA                 | AA               | INTERGENIC      |               |                    |                    |
| SNP_83196_A_22121 | NW_004516145.1 | scaffold758 | 22121                   | AA                              | TT                 | TT               | INTERGENIC      |               |                    |                    |
| SNP_83197_A_22122 | NW_004516145.1 | scaffold758 | 22122                   | CC                              | AA                 | AA               | INTERGENIC      |               |                    |                    |
| SNP_83198_A_22138 | NW_004516145.1 | scaffold758 | 22138                   | GG                              | AA                 | AA               | INTERGENIC      |               |                    |                    |
| SNP_83199_A_22272 | NW_004516145.1 | scaffold758 | 22272                   | TT                              | CC                 | CC               | INTERGENIC      |               |                    |                    |
| SNP_83200_A_22273 | NW_004516145.1 | scaffold758 | 22273                   | AA                              | GG                 | GG               | INTERGENIC      |               |                    |                    |
| SNP_83201_A_22297 | NW_004516145.1 | scaffold758 | 22297                   | CC                              | AA                 | AA               | INTERGENIC      |               |                    |                    |
| SNP_83202_A_22320 | NW_004516145.1 | scaffold758 | 22320                   | CC                              | TT                 | TT               | INTERGENIC      |               |                    |                    |
| SNP_83203_A_22331 | NW_004516145.1 | scaffold758 | 22331                   | AA                              | GG                 | GG               | INTERGENIC      |               |                    |                    |
| SNP_83204_A_22356 | NW_004516145.1 | scaffold758 | 22356                   | TT                              | CC                 | CC               | INTERGENIC      |               |                    |                    |
| SNP_83205_A_22392 | NW_004516145.1 | scaffold758 | 22392                   | CC                              | TT                 | TT               | INTERGENIC      |               |                    |                    |

| SNPs IDs           | Chromosome IDs | Chromosomes | Physical positions (bp) | CDC Frontier (Reference genome) | (Pusa 1103 & HPNB) | (ILWC 46 & LPNB) | Sequence Components of genome | Gene accession IDs | Putative functions |
|--------------------|----------------|-------------|-------------------------|---------------------------------|--------------------|------------------|-------------------------------|--------------------|--------------------|
| SNP_83206_A_22606  | NW_004516145.1 | scaffold758 | 22606                   | TT                              | CC                 | CC               | INTERGENIC                    |                    |                    |
| SNP_83207_A_22623  | NW_004516145.1 | scaffold758 | 22623                   | TT                              | CC                 | CC               | INTERGENIC                    |                    |                    |
| SNP_83208_A_22627  | NW_004516145.1 | scaffold758 | 22627                   | AA                              | CC                 | CC               | INTERGENIC                    |                    |                    |
| SNP_83209_A_22631  | NW_004516145.1 | scaffold758 | 22631                   | AA                              | GG                 | GG               | INTERGENIC                    |                    |                    |
| SNP_83210_A_22637  | NW_004516145.1 | scaffold758 | 22637                   | GG                              | TT                 | TT               | INTERGENIC                    |                    |                    |
| SNP_83212_A_60470  | NW_004516145.1 | scaffold758 | 60470                   | AA                              | GG                 | GG               | SYNONYMOUS_CODING             | 101499245          | Unknown function   |
| SNP_83213_A_60523  | NW_004516145.1 | scaffold758 | 60523                   | CC                              | TT                 | TT               | NON_SYNONYMOUS_CODING         | 101499245          | Unknown function   |
| SNP_83214_A_60537  | NW_004516145.1 | scaffold758 | 60537                   | GG                              | AA                 | AA               | NON_SYNONYMOUS_CODING         | 101499245          | Unknown function   |
| SNP_83215_A_80878  | NW_004516145.1 | scaffold758 | 80878                   | GG                              | AA                 | AA               | INTERGENIC                    |                    |                    |
| SNP_83216_A_116246 | NW_004516145.1 | scaffold758 | 116246                  | AA                              | TT                 | TT               | INTERGENIC                    |                    |                    |
| SNP_83217_A_116265 | NW_004516145.1 | scaffold758 | 116265                  | GG                              | AA                 | AA               | INTERGENIC                    |                    |                    |
| SNP_83219_A_116324 | NW_004516145.1 | scaffold758 | 116324                  | TT                              | CC                 | CC               | INTERGENIC                    |                    |                    |
| SNP_83220_A_116460 | NW_004516145.1 | scaffold758 | 116460                  | GG                              | AA                 | AA               | INTERGENIC                    |                    |                    |
| SNP_83221_A_116491 | NW_004516145.1 | scaffold758 | 116491                  | AA                              | GG                 | GG               | INTERGENIC                    |                    |                    |
| SNP_83222_A_116805 | NW_004516145.1 | scaffold758 | 116805                  | AA                              | TT                 | TT               | INTERGENIC                    |                    |                    |
| SNP_83223_A_117783 | NW_004516145.1 | scaffold758 | 117783                  | AA                              | TT                 | TT               | INTERGENIC                    |                    |                    |
| SNP_83224_A_119733 | NW_004516145.1 | scaffold758 | 119733                  | CC                              | AA                 | AA               | INTERGENIC                    |                    |                    |
| SNP_83225_A_120004 | NW_004516145.1 | scaffold758 | 120004                  | AA                              | GG                 | GG               | INTERGENIC                    |                    |                    |
| SNP_83226_A_120047 | NW_004516145.1 | scaffold758 | 120047                  | TT                              | CC                 | CC               | INTERGENIC                    |                    |                    |
| SNP_83227_A_120057 | NW_004516145.1 | scaffold758 | 120057                  | AA                              | GG                 | GG               | INTERGENIC                    |                    |                    |
| SNP_83228_A_3313   | NW_004516146.1 | scaffold759 | 3313                    | AA                              | TT                 | TT               | INTERGENIC                    |                    |                    |
| SNP_83229_A_3682   | NW_004516146.1 | scaffold759 | 3682                    | GG                              | CC                 | CC               | INTERGENIC                    |                    |                    |



| SNPs IDs         | Chromosome IDs | Chromosomes | Physical positions (bp) | CDC Frontier (Reference genome) | (Pusa 1103 & HPNB) | (ILWC 46 & LPNB) | Sequence genome | Components of | Gene accession IDs | Putative functions |
|------------------|----------------|-------------|-------------------------|---------------------------------|--------------------|------------------|-----------------|---------------|--------------------|--------------------|
| SNP_83230_A_3683 | NW_004516146.1 | scaffold759 | 3683                    | CC                              | GG                 | GG               | INTERGENIC      |               |                    |                    |
| SNP_83231_A_3728 | NW_004516146.1 | scaffold759 | 3728                    | GG                              | AA                 | AA               | INTERGENIC      |               |                    |                    |
| SNP_83232_A_6089 | NW_004516146.1 | scaffold759 | 6089                    | TT                              | CC                 | CC               | INTERGENIC      |               |                    |                    |
| SNP_83233_A_6113 | NW_004516146.1 | scaffold759 | 6113                    | TT                              | GG                 | GG               | INTERGENIC      |               |                    |                    |
| SNP_83234_A_6120 | NW_004516146.1 | scaffold759 | 6120                    | CC                              | TT                 | TT               | INTERGENIC      |               |                    |                    |
| SNP_83235_A_6122 | NW_004516146.1 | scaffold759 | 6122                    | CC                              | TT                 | TT               | INTERGENIC      |               |                    |                    |
| SNP_83236_A_6128 | NW_004516146.1 | scaffold759 | 6128                    | TT                              | CC                 | CC               | INTERGENIC      |               |                    |                    |
| SNP_83237_A_6164 | NW_004516146.1 | scaffold759 | 6164                    | TT                              | CC                 | CC               | INTERGENIC      |               |                    |                    |
| SNP_83238_A_6193 | NW_004516146.1 | scaffold759 | 6193                    | AA                              | CC                 | CC               | INTERGENIC      |               |                    |                    |
| SNP_83239_A_6444 | NW_004516146.1 | scaffold759 | 6444                    | GG                              | AA                 | AA               | INTERGENIC      |               |                    |                    |
| SNP_83240_A_6450 | NW_004516146.1 | scaffold759 | 6450                    | AA                              | GG                 | GG               | INTERGENIC      |               |                    |                    |
| SNP_83241_A_6458 | NW_004516146.1 | scaffold759 | 6458                    | GG                              | TT                 | TT               | INTERGENIC      |               |                    |                    |
| SNP_83242_A_6921 | NW_004516146.1 | scaffold759 | 6921                    | TT                              | CC                 | CC               | INTERGENIC      |               |                    |                    |
| SNP_83243_A_6943 | NW_004516146.1 | scaffold759 | 6943                    | TT                              | CC                 | CC               | INTERGENIC      |               |                    |                    |
| SNP_83244_A_6991 | NW_004516146.1 | scaffold759 | 6991                    | AA                              | GG                 | GG               | INTERGENIC      |               |                    |                    |
| SNP_83245_A_6998 | NW_004516146.1 | scaffold759 | 6998                    | GG                              | AA                 | AA               | INTERGENIC      |               |                    |                    |
| SNP_83246_A_7066 | NW_004516146.1 | scaffold759 | 7066                    | AA                              | CC                 | CC               | INTERGENIC      |               |                    |                    |
| SNP_83247_A_7071 | NW_004516146.1 | scaffold759 | 7071                    | GG                              | AA                 | AA               | INTERGENIC      |               |                    |                    |
| SNP_83248_A_7099 | NW_004516146.1 | scaffold759 | 7099                    | TT                              | CC                 | CC               | INTERGENIC      |               |                    |                    |
| SNP_83249_A_7261 | NW_004516146.1 | scaffold759 | 7261                    | GG                              | AA                 | AA               | INTERGENIC      |               |                    |                    |
| SNP_83250_A_7297 | NW_004516146.1 | scaffold759 | 7297                    | TT                              | CC                 | CC               | INTERGENIC      |               |                    |                    |
| SNP_83251_A_7336 | NW_004516146.1 | scaffold759 | 7336                    | TT                              | CC                 | CC               | INTERGENIC      |               |                    |                    |

| SNPs IDs           | Chromosome IDs | Chromosomes | Physical positions (bp) | CDC Frontier (Reference genome) | (Pusa 1103 & HPNB) | (ILWC 46 & LPNB) | Sequence genome | Components of | Gene accession IDs | Putative functions |
|--------------------|----------------|-------------|-------------------------|---------------------------------|--------------------|------------------|-----------------|---------------|--------------------|--------------------|
| SNP_83252_A_7369   | NW_004516146.1 | scaffold759 | 7369                    | GG                              | AA                 | AA               | INTERGENIC      |               |                    |                    |
| SNP_83254_A_77203  | NW_004516146.1 | scaffold759 | 77203                   | AA                              | TT                 | TT               | INTERGENIC      |               |                    |                    |
| SNP_83255_A_77482  | NW_004516146.1 | scaffold759 | 77482                   | GG                              | AA                 | AA               | INTERGENIC      |               |                    |                    |
| SNP_83256_A_77497  | NW_004516146.1 | scaffold759 | 77497                   | GG                              | AA                 | AA               | INTERGENIC      |               |                    |                    |
| SNP_83257_A_128171 | NW_004516146.1 | scaffold759 | 128171                  | AA                              | TT                 | TT               | INTERGENIC      |               |                    |                    |
| SNP_83258_A_138567 | NW_004516146.1 | scaffold759 | 138567                  | TT                              | GG                 | GG               | INTERGENIC      |               |                    |                    |
| SNP_83259_A_138600 | NW_004516146.1 | scaffold759 | 138600                  | AA                              | GG                 | GG               | INTERGENIC      |               |                    |                    |
| SNP_83260_A_144978 | NW_004516146.1 | scaffold759 | 144978                  | CC                              | TT                 | TT               | INTERGENIC      |               |                    |                    |
| SNP_83261_A_145030 | NW_004516146.1 | scaffold759 | 145030                  | GG                              | TT                 | TT               | INTERGENIC      |               |                    |                    |
| SNP_83262_A_145422 | NW_004516146.1 | scaffold759 | 145422                  | TT                              | CC                 | CC               | INTERGENIC      |               |                    |                    |
| SNP_83263_A_160009 | NW_004516146.1 | scaffold759 | 160009                  | GG                              | TT                 | TT               | INTERGENIC      |               |                    |                    |
| SNP_83264_A_160044 | NW_004516146.1 | scaffold759 | 160044                  | AA                              | GG                 | GG               | INTERGENIC      |               |                    |                    |
| SNP_83265_A_160072 | NW_004516146.1 | scaffold759 | 160072                  | GG                              | TT                 | TT               | INTERGENIC      |               |                    |                    |
| SNP_83266_A_160349 | NW_004516146.1 | scaffold759 | 160349                  | GG                              | CC                 | CC               | INTERGENIC      |               |                    |                    |
| SNP_83267_A_160398 | NW_004516146.1 | scaffold759 | 160398                  | TT                              | GG                 | GG               | INTERGENIC      |               |                    |                    |
| SNP_83268_A_160401 | NW_004516146.1 | scaffold759 | 160401                  | TT                              | CC                 | CC               | INTERGENIC      |               |                    |                    |
| SNP_83269_A_8630   | NW_004516147.1 | scaffold760 | 8630                    | GG                              | AA                 | AA               | INTERGENIC      |               |                    |                    |
| SNP_83270_A_8683   | NW_004516147.1 | scaffold760 | 8683                    | CC                              | GG                 | GG               | INTERGENIC      |               |                    |                    |
| SNP_83271_A_8968   | NW_004516147.1 | scaffold760 | 8968                    | GG                              | CC                 | CC               | INTERGENIC      |               |                    |                    |
| SNP_83272_A_8992   | NW_004516147.1 | scaffold760 | 8992                    | GG                              | AA                 | AA               | INTERGENIC      |               |                    |                    |
| SNP_83273_A_13033  | NW_004516147.1 | scaffold760 | 13033                   | GG                              | AA                 | AA               | INTERGENIC      |               |                    |                    |
| SNP_83274_A_13074  | NW_004516147.1 | scaffold760 | 13074                   | AA                              | GG                 | GG               | INTERGENIC      |               |                    |                    |

| SNPs IDs           | Chromosome IDs | Chromosomes | Physical positions (bp) | CDC Frontier (Reference genome) | (Pusa 1103 & HPNB) | (ILWC 46 & LPNB) | Sequence genome | Components of | Gene accession IDs           | Putative functions |
|--------------------|----------------|-------------|-------------------------|---------------------------------|--------------------|------------------|-----------------|---------------|------------------------------|--------------------|
| SNP_83275_A_13091  | NW_004516147.1 | scaffold760 | 13091                   | GG                              | AA                 | AA               | INTERGENIC      |               |                              |                    |
| SNP_83276_A_13235  | NW_004516147.1 | scaffold760 | 13235                   | CC                              | TT                 | TT               | INTERGENIC      |               |                              |                    |
| SNP_83277_A_13342  | NW_004516147.1 | scaffold760 | 13342                   | CC                              | TT                 | TT               | INTERGENIC      |               |                              |                    |
| SNP_83278_A_13378  | NW_004516147.1 | scaffold760 | 13378                   | GG                              | TT                 | TT               | INTERGENIC      |               |                              |                    |
| SNP_83279_A_13402  | NW_004516147.1 | scaffold760 | 13402                   | CC                              | GG                 | GG               | INTERGENIC      |               |                              |                    |
| SNP_83280_A_15252  | NW_004516147.1 | scaffold760 | 15252                   | AA                              | TT                 | TT               | INTERGENIC      |               |                              |                    |
| SNP_83281_A_16047  | NW_004516147.1 | scaffold760 | 16047                   | CC                              | TT                 | TT               | INTERGENIC      |               |                              |                    |
| SNP_83282_A_16056  | NW_004516147.1 | scaffold760 | 16056                   | GG                              | TT                 | TT               | INTERGENIC      |               |                              |                    |
| SNP_83283_A_16076  | NW_004516147.1 | scaffold760 | 16076                   | CC                              | GG                 | GG               | INTERGENIC      |               |                              |                    |
| SNP_83284_A_16151  | NW_004516147.1 | scaffold760 | 16151                   | CC                              | TT                 | TT               | INTERGENIC      |               |                              |                    |
| SNP_83285_A_16193  | NW_004516147.1 | scaffold760 | 16193                   | CC                              | TT                 | TT               | INTERGENIC      |               |                              |                    |
| SNP_83286_A_3199   | NW_004516151.1 | scaffold766 | 3199                    | GG                              | AA                 | AA               | INTERGENIC      |               |                              |                    |
| SNP_83287_A_4924   | NW_004516151.1 | scaffold766 | 4924                    | TT                              | AA                 | AA               | INTERGENIC      |               |                              |                    |
| SNP_83288_A_4925   | NW_004516151.1 | scaffold766 | 4925                    | TT                              | CC                 | CC               | INTERGENIC      |               |                              |                    |
| SNP_83289_A_4994   | NW_004516151.1 | scaffold766 | 4994                    | TT                              | CC                 | CC               | INTERGENIC      |               |                              |                    |
| SNP_83290_A_5010   | NW_004516151.1 | scaffold766 | 5010                    | CC                              | AA                 | AA               | INTERGENIC      |               |                              |                    |
| SNP_83291_A_5473   | NW_004516151.1 | scaffold766 | 5473                    | AA                              | TT                 | TT               | INTERGENIC      |               |                              |                    |
| SNP_83292_A_27448  | NW_004516151.1 | scaffold766 | 27448                   | TT                              | CC                 | CC               | INTERGENIC      |               |                              |                    |
| SNP_83293_A_28901  | NW_004516151.1 | scaffold766 | 28901                   | GG                              | TT                 | TT               | INTERGENIC      |               |                              |                    |
| SNP_83295_A_144781 | NW_004516151.1 | scaffold766 | 144781                  | GG                              | AA                 | AA               | URR             | 101500833     | uncharacterized LOC101500833 |                    |
| SNP_83298_A_188772 | NW_004516151.1 | scaffold766 | 188772                  | TT                              | AA                 | AA               | INTERGENIC      |               |                              |                    |
| SNP_83299_A_188795 | NW_004516151.1 | scaffold766 | 188795                  | GG                              | AA                 | AA               | INTERGENIC      |               |                              |                    |

| SNPs IDs           | Chromosome IDs | Chromosomes | Physical positions (bp) | CDC Frontier (Reference genome) | (Pusa 1103 & HPNB) | (ILWC 46 & LPNB) | Sequence Components of genome | Gene accession IDs | Putative functions           |
|--------------------|----------------|-------------|-------------------------|---------------------------------|--------------------|------------------|-------------------------------|--------------------|------------------------------|
| SNP_83300_A_188800 | NW_004516151.1 | scaffold766 | 188800                  | GG                              | AA                 | AA               | INTERGENIC                    |                    |                              |
| SNP_83302_A_195941 | NW_004516151.1 | scaffold766 | 195941                  | TT                              | CC                 | CC               | URR                           | 101499564          | uncharacterized LOC101499564 |
| SNP_83303_A_213719 | NW_004516151.1 | scaffold766 | 213719                  | CC                              | TT                 | TT               | INTERGENIC                    |                    |                              |
| SNP_83304_A_214790 | NW_004516151.1 | scaffold766 | 214790                  | AA                              | CC                 | CC               | INTERGENIC                    |                    |                              |
| SNP_83305_A_214932 | NW_004516151.1 | scaffold766 | 214932                  | GG                              | AA                 | AA               | INTERGENIC                    |                    |                              |
| SNP_83306_A_214947 | NW_004516151.1 | scaffold766 | 214947                  | GG                              | TT                 | TT               | INTERGENIC                    |                    |                              |
| SNP_83307_A_214957 | NW_004516151.1 | scaffold766 | 214957                  | TT                              | CC                 | CC               | INTERGENIC                    |                    |                              |
| SNP_83308_A_243046 | NW_004516151.1 | scaffold766 | 243046                  | TT                              | GG                 | GG               | INTERGENIC                    |                    |                              |
| SNP_83309_A_243503 | NW_004516151.1 | scaffold766 | 243503                  | AA                              | TT                 | TT               | INTERGENIC                    |                    |                              |
| SNP_83310_A_243954 | NW_004516151.1 | scaffold766 | 243954                  | GG                              | AA                 | AA               | INTERGENIC                    |                    |                              |
| SNP_83311_A_264754 | NW_004516151.1 | scaffold766 | 264754                  | GG                              | AA                 | AA               | INTERGENIC                    |                    |                              |
| SNP_83312_A_273061 | NW_004516151.1 | scaffold766 | 273061                  | TT                              | CC                 | CC               | INTERGENIC                    |                    |                              |
| SNP_83313_A_273169 | NW_004516151.1 | scaffold766 | 273169                  | CC                              | TT                 | TT               | INTERGENIC                    |                    |                              |
| SNP_83314_A_273232 | NW_004516151.1 | scaffold766 | 273232                  | GG                              | AA                 | AA               | INTERGENIC                    |                    |                              |
| SNP_83315_A_273354 | NW_004516151.1 | scaffold766 | 273354                  | AA                              | TT                 | TT               | INTERGENIC                    |                    |                              |
| SNP_83316_A_36     | NW_004516153.1 | scaffold768 | 36                      | CC                              | AA                 | AA               | INTERGENIC                    |                    |                              |
| SNP_83317_A_57     | NW_004516153.1 | scaffold768 | 57                      | GG                              | TT                 | TT               | INTERGENIC                    |                    |                              |
| SNP_83318_A_64     | NW_004516153.1 | scaffold768 | 64                      | TT                              | AA                 | AA               | INTERGENIC                    |                    |                              |
| SNP_83319_A_76     | NW_004516153.1 | scaffold768 | 76                      | GG                              | AA                 | AA               | INTERGENIC                    |                    |                              |
| SNP_83320_A_208    | NW_004516153.1 | scaffold768 | 208                     | TT                              | AA                 | AA               | INTERGENIC                    |                    |                              |
| SNP_83321_A_251    | NW_004516153.1 | scaffold768 | 251                     | AA                              | GG                 | GG               | INTERGENIC                    |                    |                              |
| SNP_83322_A_256    | NW_004516153.1 | scaffold768 | 256                     | AA                              | TT                 | TT               | INTERGENIC                    |                    |                              |

| SNPs IDs         | Chromosome IDs | Chromosomes | Physical positions (bp) | CDC Frontier (Reference genome) | (Pusa 1103 & HPNB) | (ILWC 46 & LPNB) | Sequence genome | Components of | Gene accession IDs | Putative functions |
|------------------|----------------|-------------|-------------------------|---------------------------------|--------------------|------------------|-----------------|---------------|--------------------|--------------------|
| SNP_83323_A_425  | NW_004516153.1 | scaffold768 | 425                     | GG                              | AA                 | AA               | INTERGENIC      |               |                    |                    |
| SNP_83324_A_478  | NW_004516153.1 | scaffold768 | 478                     | TT                              | CC                 | CC               | INTERGENIC      |               |                    |                    |
| SNP_83325_A_525  | NW_004516153.1 | scaffold768 | 525                     | CC                              | GG                 | GG               | INTERGENIC      |               |                    |                    |
| SNP_83327_A_618  | NW_004516153.1 | scaffold768 | 618                     | CC                              | AA                 | AA               | INTERGENIC      |               |                    |                    |
| SNP_83328_A_765  | NW_004516153.1 | scaffold768 | 765                     | GG                              | AA                 | AA               | INTERGENIC      |               |                    |                    |
| SNP_83329_A_894  | NW_004516153.1 | scaffold768 | 894                     | AA                              | GG                 | GG               | INTERGENIC      |               |                    |                    |
| SNP_83330_A_1007 | NW_004516153.1 | scaffold768 | 1007                    | TT                              | AA                 | AA               | INTERGENIC      |               |                    |                    |
| SNP_83331_A_1018 | NW_004516153.1 | scaffold768 | 1018                    | AA                              | TT                 | TT               | INTERGENIC      |               |                    |                    |
| SNP_83333_A_64   | NW_004516154.1 | scaffold769 | 64                      | GG                              | TT                 | TT               | INTERGENIC      |               |                    |                    |
| SNP_83334_A_81   | NW_004516154.1 | scaffold769 | 81                      | AA                              | TT                 | TT               | INTERGENIC      |               |                    |                    |
| SNP_83336_A_177  | NW_004516154.1 | scaffold769 | 177                     | GG                              | TT                 | TT               | INTERGENIC      |               |                    |                    |
| SNP_83337_A_209  | NW_004516154.1 | scaffold769 | 209                     | AA                              | GG                 | GG               | INTERGENIC      |               |                    |                    |
| SNP_83338_A_359  | NW_004516154.1 | scaffold769 | 359                     | AA                              | TT                 | TT               | INTERGENIC      |               |                    |                    |
| SNP_83339_A_429  | NW_004516154.1 | scaffold769 | 429                     | TT                              | AA                 | AA               | INTERGENIC      |               |                    |                    |
| SNP_83340_A_542  | NW_004516154.1 | scaffold769 | 542                     | TT                              | GG                 | GG               | INTERGENIC      |               |                    |                    |
| SNP_83341_A_930  | NW_004516154.1 | scaffold769 | 930                     | TT                              | GG                 | GG               | INTERGENIC      |               |                    |                    |
| SNP_83343_A_1476 | NW_004516154.1 | scaffold769 | 1476                    | GG                              | AA                 | AA               | INTERGENIC      |               |                    |                    |
| SNP_83344_A_1618 | NW_004516154.1 | scaffold769 | 1618                    | TT                              | AA                 | AA               | INTERGENIC      |               |                    |                    |
| SNP_83345_A_1681 | NW_004516154.1 | scaffold769 | 1681                    | AA                              | TT                 | TT               | INTERGENIC      |               |                    |                    |
| SNP_83346_A_1808 | NW_004516154.1 | scaffold769 | 1808                    | TT                              | GG                 | GG               | INTERGENIC      |               |                    |                    |
| SNP_83347_A_1878 | NW_004516154.1 | scaffold769 | 1878                    | GG                              | AA                 | AA               | INTERGENIC      |               |                    |                    |
| SNP_83349_A_2824 | NW_004516154.1 | scaffold769 | 2824                    | CC                              | GG                 | GG               | INTERGENIC      |               |                    |                    |

| SNPs IDs           | Chromosome IDs | Chromosomes | Physical positions (bp) | CDC Frontier (Reference genome) | (Pusa 1103 & HPNB) | (ILWC 46 & LPNB) | Sequence Components of genome | Gene accession IDs | Putative functions           |
|--------------------|----------------|-------------|-------------------------|---------------------------------|--------------------|------------------|-------------------------------|--------------------|------------------------------|
| SNP_83350_A_2918   | NW_004516154.1 | scaffold769 | 2918                    | AA                              | GG                 | GG               | INTERGENIC                    |                    |                              |
| SNP_83351_A_2921   | NW_004516154.1 | scaffold769 | 2921                    | GG                              | CC                 | CC               | INTERGENIC                    |                    |                              |
| SNP_83352_A_3050   | NW_004516154.1 | scaffold769 | 3050                    | GG                              | TT                 | TT               | INTERGENIC                    |                    |                              |
| SNP_83355_A_3523   | NW_004516154.1 | scaffold769 | 3523                    | CC                              | AA                 | AA               | INTERGENIC                    |                    |                              |
| SNP_83358_A_7962   | NW_004516154.1 | scaffold769 | 7962                    | AA                              | TT                 | TT               | INTERGENIC                    |                    |                              |
| SNP_83359_A_7970   | NW_004516154.1 | scaffold769 | 7970                    | AA                              | GG                 | GG               | INTERGENIC                    |                    |                              |
| SNP_83361_A_27304  | NW_004516154.1 | scaffold769 | 27304                   | AA                              | GG                 | GG               | INTERGENIC                    |                    |                              |
| SNP_83362_A_27360  | NW_004516154.1 | scaffold769 | 27360                   | GG                              | TT                 | TT               | INTERGENIC                    |                    |                              |
| SNP_83364_A_28914  | NW_004516154.1 | scaffold769 | 28914                   | AA                              | GG                 | GG               | INTERGENIC                    |                    |                              |
| SNP_83365_A_28958  | NW_004516154.1 | scaffold769 | 28958                   | CC                              | TT                 | TT               | INTERGENIC                    |                    |                              |
| SNP_83366_A_29244  | NW_004516154.1 | scaffold769 | 29244                   | AA                              | CC                 | CC               | INTERGENIC                    |                    |                              |
| SNP_83368_A_29473  | NW_004516154.1 | scaffold769 | 29473                   | AA                              | GG                 | GG               | INTERGENIC                    |                    |                              |
| SNP_83369_A_29828  | NW_004516154.1 | scaffold769 | 29828                   | AA                              | GG                 | GG               | INTERGENIC                    |                    |                              |
| SNP_83370_A_82803  | NW_004516154.1 | scaffold769 | 82803                   | AA                              | CC                 | CC               | NON_SYNONYMOUS_CODING         | 101504044          | uncharacterized LOC101504044 |
| SNP_83371_A_105527 | NW_004516154.1 | scaffold769 | 105527                  | CC                              | AA                 | AA               | INTERGENIC                    |                    |                              |
| SNP_83372_A_108568 | NW_004516154.1 | scaffold769 | 108568                  | GG                              | TT                 | TT               | INTERGENIC                    |                    |                              |
| SNP_83373_A_109743 | NW_004516154.1 | scaffold769 | 109743                  | TT                              | GG                 | GG               | INTERGENIC                    |                    |                              |
| SNP_83374_A_116612 | NW_004516154.1 | scaffold769 | 116612                  | GG                              | AA                 | AA               | INTERGENIC                    |                    |                              |
| SNP_83375_A_116641 | NW_004516154.1 | scaffold769 | 116641                  | AA                              | CC                 | CC               | INTERGENIC                    |                    |                              |
| SNP_83376_A_116677 | NW_004516154.1 | scaffold769 | 116677                  | AA                              | TT                 | TT               | INTERGENIC                    |                    |                              |
| SNP_83377_A_116715 | NW_004516154.1 | scaffold769 | 116715                  | TT                              | AA                 | AA               | INTERGENIC                    |                    |                              |
| SNP_83378_A_116778 | NW_004516154.1 | scaffold769 | 116778                  | GG                              | AA                 | AA               | INTERGENIC                    |                    |                              |

| SNPs IDs           | Chromosome IDs | Chromosomes | Physical positions (bp) | CDC Frontier (Reference genome) | (Pusa 1103 & HPNB) | (ILWC 46 & LPNB) | Sequence genome | Components of | Gene accession IDs | Putative functions |
|--------------------|----------------|-------------|-------------------------|---------------------------------|--------------------|------------------|-----------------|---------------|--------------------|--------------------|
| SNP_83379_A_117141 | NW_004516154.1 | scaffold769 | 117141                  | TT                              | CC                 | CC               | INTERGENIC      |               |                    |                    |
| SNP_83380_A_314    | NW_004516155.1 | scaffold771 | 314                     | AA                              | GG                 | GG               | INTERGENIC      |               |                    |                    |
| SNP_83381_A_405    | NW_004516155.1 | scaffold771 | 405                     | TT                              | CC                 | CC               | INTERGENIC      |               |                    |                    |
| SNP_83382_A_36412  | NW_004516155.1 | scaffold771 | 36412                   | TT                              | CC                 | CC               | INTERGENIC      |               |                    |                    |
| SNP_83383_A_54766  | NW_004516155.1 | scaffold771 | 54766                   | AA                              | GG                 | GG               | INTERGENIC      |               |                    |                    |
| SNP_83384_A_58320  | NW_004516155.1 | scaffold771 | 58320                   | TT                              | CC                 | CC               | INTERGENIC      |               |                    |                    |
| SNP_83385_A_58335  | NW_004516155.1 | scaffold771 | 58335                   | GG                              | AA                 | AA               | INTERGENIC      |               |                    |                    |
| SNP_83386_A_58336  | NW_004516155.1 | scaffold771 | 58336                   | GG                              | CC                 | CC               | INTERGENIC      |               |                    |                    |
| SNP_83387_A_58344  | NW_004516155.1 | scaffold771 | 58344                   | AA                              | TT                 | TT               | INTERGENIC      |               |                    |                    |
| SNP_83388_A_66411  | NW_004516155.1 | scaffold771 | 66411                   | TT                              | CC                 | CC               | INTERGENIC      |               |                    |                    |
| SNP_83389_A_69254  | NW_004516155.1 | scaffold771 | 69254                   | AA                              | GG                 | GG               | INTERGENIC      |               |                    |                    |
| SNP_83390_A_7562   | NW_004516156.1 | scaffold772 | 7562                    | CC                              | TT                 | TT               | INTERGENIC      |               |                    |                    |
| SNP_83391_A_7582   | NW_004516156.1 | scaffold772 | 7582                    | CC                              | TT                 | TT               | INTERGENIC      |               |                    |                    |
| SNP_83392_A_7821   | NW_004516156.1 | scaffold772 | 7821                    | AA                              | TT                 | TT               | INTERGENIC      |               |                    |                    |
| SNP_83393_A_8420   | NW_004516156.1 | scaffold772 | 8420                    | CC                              | TT                 | TT               | INTERGENIC      |               |                    |                    |
| SNP_83394_A_8627   | NW_004516156.1 | scaffold772 | 8627                    | CC                              | TT                 | TT               | INTERGENIC      |               |                    |                    |
| SNP_83395_A_9106   | NW_004516156.1 | scaffold772 | 9106                    | GG                              | AA                 | AA               | INTERGENIC      |               |                    |                    |
| SNP_83396_A_9191   | NW_004516156.1 | scaffold772 | 9191                    | AA                              | TT                 | TT               | INTERGENIC      |               |                    |                    |
| SNP_83397_A_11443  | NW_004516156.1 | scaffold772 | 11443                   | CC                              | AA                 | AA               | INTERGENIC      |               |                    |                    |
| SNP_83399_A_12163  | NW_004516156.1 | scaffold772 | 12163                   | GG                              | TT                 | TT               | INTERGENIC      |               |                    |                    |
| SNP_83400_A_13363  | NW_004516156.1 | scaffold772 | 13363                   | AA                              | GG                 | GG               | INTERGENIC      |               |                    |                    |
| SNP_83401_A_17416  | NW_004516156.1 | scaffold772 | 17416                   | TT                              | CC                 | CC               | INTERGENIC      |               |                    |                    |

| SNPs IDs           | Chromosome IDs | Chromosomes | Physical positions (bp) | CDC Frontier (Reference genome) | (Pusa 1103 & HPNB) | (ILWC 46 & LPNB) | Sequence Components of genome | Gene accession IDs | Putative functions |
|--------------------|----------------|-------------|-------------------------|---------------------------------|--------------------|------------------|-------------------------------|--------------------|--------------------|
| SNP_83402_A_17418  | NW_004516156.1 | scaffold772 | 17418                   | GG                              | AA                 | AA               | INTERGENIC                    |                    |                    |
| SNP_83403_A_18060  | NW_004516156.1 | scaffold772 | 18060                   | TT                              | CC                 | CC               | INTERGENIC                    |                    |                    |
| SNP_83404_A_18178  | NW_004516156.1 | scaffold772 | 18178                   | TT                              | CC                 | CC               | INTERGENIC                    |                    |                    |
| SNP_83405_A_18186  | NW_004516156.1 | scaffold772 | 18186                   | TT                              | CC                 | CC               | INTERGENIC                    |                    |                    |
| SNP_83406_A_18197  | NW_004516156.1 | scaffold772 | 18197                   | AA                              | GG                 | GG               | INTERGENIC                    |                    |                    |
| SNP_83407_A_18204  | NW_004516156.1 | scaffold772 | 18204                   | CC                              | TT                 | TT               | INTERGENIC                    |                    |                    |
| SNP_83408_A_18345  | NW_004516156.1 | scaffold772 | 18345                   | AA                              | GG                 | GG               | INTERGENIC                    |                    |                    |
| SNP_83409_A_18467  | NW_004516156.1 | scaffold772 | 18467                   | AA                              | GG                 | GG               | INTERGENIC                    |                    |                    |
| SNP_83410_A_18642  | NW_004516156.1 | scaffold772 | 18642                   | AA                              | CC                 | CC               | INTERGENIC                    |                    |                    |
| SNP_83411_A_18734  | NW_004516156.1 | scaffold772 | 18734                   | CC                              | TT                 | TT               | INTERGENIC                    |                    |                    |
| SNP_83412_A_21199  | NW_004516156.1 | scaffold772 | 21199                   | AA                              | GG                 | GG               | INTERGENIC                    |                    |                    |
| SNP_83413_A_21201  | NW_004516156.1 | scaffold772 | 21201                   | TT                              | AA                 | AA               | INTERGENIC                    |                    |                    |
| SNP_83414_A_33826  | NW_004516156.1 | scaffold772 | 33826                   | TT                              | CC                 | CC               | INTERGENIC                    |                    |                    |
| SNP_83416_A_76402  | NW_004516156.1 | scaffold772 | 76402                   | GG                              | AA                 | AA               | INTERGENIC                    |                    |                    |
| SNP_83417_A_78890  | NW_004516156.1 | scaffold772 | 78890                   | AA                              | GG                 | GG               | INTERGENIC                    |                    |                    |
| SNP_83418_A_80858  | NW_004516156.1 | scaffold772 | 80858                   | TT                              | AA                 | AA               | INTERGENIC                    |                    |                    |
| SNP_83419_A_107214 | NW_004516156.1 | scaffold772 | 107214                  | GG                              | AA                 | AA               | INTERGENIC                    |                    |                    |
| SNP_83420_A_112798 | NW_004516156.1 | scaffold772 | 112798                  | TT                              | GG                 | GG               | INTERGENIC                    |                    |                    |
| SNP_83421_A_137315 | NW_004516156.1 | scaffold772 | 137315                  | TT                              | AA                 | AA               | STOP_LOST                     | 101506504          | Unknown function   |
| SNP_83422_A_139302 | NW_004516156.1 | scaffold772 | 139302                  | TT                              | AA                 | AA               | URR                           | 101506504          | Unknown function   |
| SNP_83423_A_139480 | NW_004516156.1 | scaffold772 | 139480                  | TT                              | CC                 | CC               | INTERGENIC                    |                    |                    |
| SNP_83425_A_140792 | NW_004516156.1 | scaffold772 | 140792                  | CC                              | GG                 | GG               | INTERGENIC                    |                    |                    |



| SNPs IDs           | Chromosome IDs | Chromosomes | Physical positions (bp) | CDC Frontier (Reference genome) | (Pusa 1103 & HPNB) | (ILWC 46 & LPNB) | Sequence genome | Components of | Gene accession IDs | Putative functions |
|--------------------|----------------|-------------|-------------------------|---------------------------------|--------------------|------------------|-----------------|---------------|--------------------|--------------------|
| SNP_83426_A_143572 | NW_004516156.1 | scaffold772 | 143572                  | CC                              | TT                 | TT               | INTERGENIC      |               |                    |                    |
| SNP_83427_A_149118 | NW_004516156.1 | scaffold772 | 149118                  | TT                              | AA                 | AA               | INTERGENIC      |               |                    |                    |
| SNP_83428_A_164711 | NW_004516156.1 | scaffold772 | 164711                  | AA                              | TT                 | TT               | INTERGENIC      |               |                    |                    |
| SNP_83429_A_164712 | NW_004516156.1 | scaffold772 | 164712                  | TT                              | AA                 | AA               | INTERGENIC      |               |                    |                    |
| SNP_83430_A_164714 | NW_004516156.1 | scaffold772 | 164714                  | GG                              | TT                 | TT               | INTERGENIC      |               |                    |                    |
| SNP_83431_A_164721 | NW_004516156.1 | scaffold772 | 164721                  | CC                              | TT                 | TT               | INTERGENIC      |               |                    |                    |
| SNP_83432_A_196447 | NW_004516156.1 | scaffold772 | 196447                  | AA                              | CC                 | CC               | INTERGENIC      |               |                    |                    |
| SNP_83433_A_205833 | NW_004516156.1 | scaffold772 | 205833                  | TT                              | GG                 | GG               | INTERGENIC      |               |                    |                    |
| SNP_83434_A_205846 | NW_004516156.1 | scaffold772 | 205846                  | TT                              | CC                 | CC               | INTERGENIC      |               |                    |                    |
| SNP_83435_A_209875 | NW_004516156.1 | scaffold772 | 209875                  | AA                              | GG                 | GG               | INTERGENIC      |               |                    |                    |
| SNP_83436_A_211395 | NW_004516156.1 | scaffold772 | 211395                  | GG                              | AA                 | AA               | INTERGENIC      |               |                    |                    |
| SNP_83437_A_211480 | NW_004516156.1 | scaffold772 | 211480                  | AA                              | CC                 | CC               | INTERGENIC      |               |                    |                    |
| SNP_83438_A_211497 | NW_004516156.1 | scaffold772 | 211497                  | AA                              | GG                 | GG               | INTERGENIC      |               |                    |                    |
| SNP_83439_A_213540 | NW_004516156.1 | scaffold772 | 213540                  | AA                              | GG                 | GG               | INTERGENIC      |               |                    |                    |
| SNP_83440_A_213547 | NW_004516156.1 | scaffold772 | 213547                  | TT                              | CC                 | CC               | INTERGENIC      |               |                    |                    |
| SNP_83441_A_213601 | NW_004516156.1 | scaffold772 | 213601                  | TT                              | CC                 | CC               | INTERGENIC      |               |                    |                    |
| SNP_83442_A_213631 | NW_004516156.1 | scaffold772 | 213631                  | TT                              | CC                 | CC               | INTERGENIC      |               |                    |                    |
| SNP_83444_A_213670 | NW_004516156.1 | scaffold772 | 213670                  | GG                              | AA                 | AA               | INTERGENIC      |               |                    |                    |
| SNP_83445_A_213730 | NW_004516156.1 | scaffold772 | 213730                  | GG                              | AA                 | AA               | INTERGENIC      |               |                    |                    |
| SNP_83446_A_213740 | NW_004516156.1 | scaffold772 | 213740                  | AA                              | TT                 | TT               | INTERGENIC      |               |                    |                    |
| SNP_83447_A_213744 | NW_004516156.1 | scaffold772 | 213744                  | AA                              | CC                 | CC               | INTERGENIC      |               |                    |                    |
| SNP_83448_A_213851 | NW_004516156.1 | scaffold772 | 213851                  | GG                              | TT                 | TT               | INTERGENIC      |               |                    |                    |

| SNPs IDs           | Chromosome IDs | Chromosomes | Physical positions (bp) | CDC Frontier (Reference genome) | (Pusa 1103 & HPNB) | (ILWC 46 & LPNB) | Sequence genome | Components of | Gene accession IDs | Putative functions |
|--------------------|----------------|-------------|-------------------------|---------------------------------|--------------------|------------------|-----------------|---------------|--------------------|--------------------|
| SNP_83449_A_213948 | NW_004516156.1 | scaffold772 | 213948                  | GG                              | TT                 | TT               | INTERGENIC      |               |                    |                    |
| SNP_83452_A_17272  | NW_004516157.1 | scaffold774 | 17272                   | TT                              | AA                 | AA               | INTERGENIC      |               |                    |                    |
| SNP_83453_A_17325  | NW_004516157.1 | scaffold774 | 17325                   | TT                              | AA                 | AA               | INTERGENIC      |               |                    |                    |
| SNP_83454_A_22448  | NW_004516157.1 | scaffold774 | 22448                   | AA                              | CC                 | CC               | INTERGENIC      |               |                    |                    |
| SNP_83455_A_22786  | NW_004516157.1 | scaffold774 | 22786                   | AA                              | TT                 | TT               | INTERGENIC      |               |                    |                    |
| SNP_83456_A_800    | NW_004516158.1 | scaffold775 | 800                     | CC                              | TT                 | TT               | INTERGENIC      |               |                    |                    |
| SNP_83457_A_818    | NW_004516158.1 | scaffold775 | 818                     | CC                              | TT                 | TT               | INTERGENIC      |               |                    |                    |
| SNP_83458_A_829    | NW_004516158.1 | scaffold775 | 829                     | AA                              | GG                 | GG               | INTERGENIC      |               |                    |                    |
| SNP_83459_A_1168   | NW_004516158.1 | scaffold775 | 1168                    | TT                              | CC                 | CC               | INTERGENIC      |               |                    |                    |
| SNP_83460_A_12987  | NW_004516158.1 | scaffold775 | 12987                   | CC                              | GG                 | GG               | INTERGENIC      |               |                    |                    |
| SNP_83461_A_13209  | NW_004516158.1 | scaffold775 | 13209                   | CC                              | TT                 | TT               | INTERGENIC      |               |                    |                    |
| SNP_83462_A_16769  | NW_004516158.1 | scaffold775 | 16769                   | GG                              | TT                 | TT               | INTERGENIC      |               |                    |                    |
| SNP_83463_A_16785  | NW_004516158.1 | scaffold775 | 16785                   | CC                              | TT                 | TT               | INTERGENIC      |               |                    |                    |
| SNP_83465_A_16791  | NW_004516158.1 | scaffold775 | 16791                   | GG                              | AA                 | AA               | INTERGENIC      |               |                    |                    |
| SNP_83466_A_16796  | NW_004516158.1 | scaffold775 | 16796                   | AA                              | GG                 | GG               | INTERGENIC      |               |                    |                    |
| SNP_83467_A_45852  | NW_004516158.1 | scaffold775 | 45852                   | CC                              | GG                 | GG               | INTERGENIC      |               |                    |                    |
| SNP_83468_A_71797  | NW_004516158.1 | scaffold775 | 71797                   | AA                              | GG                 | GG               | INTRON          | id205266      | Unknown function   |                    |
| SNP_83469_A_101450 | NW_004516158.1 | scaffold775 | 101450                  | CC                              | TT                 | TT               | INTERGENIC      |               |                    |                    |
| SNP_83472_A_223424 | NW_004516158.1 | scaffold775 | 223424                  | TT                              | CC                 | CC               | INTERGENIC      |               |                    |                    |
| SNP_83473_A_223453 | NW_004516158.1 | scaffold775 | 223453                  | AA                              | GG                 | GG               | INTERGENIC      |               |                    |                    |
| SNP_83474_A_223459 | NW_004516158.1 | scaffold775 | 223459                  | GG                              | AA                 | AA               | INTERGENIC      |               |                    |                    |
| SNP_83475_A_223469 | NW_004516158.1 | scaffold775 | 223469                  | TT                              | CC                 | CC               | INTERGENIC      |               |                    |                    |

| SNPs IDs           | Chromosome IDs | Chromosomes | Physical positions (bp) | CDC Frontier (Reference genome) | (Pusa 1103 & HPNB) | (ILWC 46 & LPNB) | Sequence genome | Components of | Gene accession IDs | Putative functions |
|--------------------|----------------|-------------|-------------------------|---------------------------------|--------------------|------------------|-----------------|---------------|--------------------|--------------------|
| SNP_83476_A_223495 | NW_004516158.1 | scaffold775 | 223495                  | GG                              | AA                 | AA               | INTERGENIC      |               |                    |                    |
| SNP_83477_A_223552 | NW_004516158.1 | scaffold775 | 223552                  | TT                              | GG                 | GG               | INTERGENIC      |               |                    |                    |
| SNP_83478_A_223570 | NW_004516158.1 | scaffold775 | 223570                  | GG                              | AA                 | AA               | INTERGENIC      |               |                    |                    |
| SNP_83479_A_225820 | NW_004516158.1 | scaffold775 | 225820                  | AA                              | GG                 | GG               | INTERGENIC      |               |                    |                    |
| SNP_83480_A_226149 | NW_004516158.1 | scaffold775 | 226149                  | AA                              | CC                 | CC               | INTERGENIC      |               |                    |                    |
| SNP_83481_A_233752 | NW_004516158.1 | scaffold775 | 233752                  | CC                              | AA                 | AA               | INTERGENIC      |               |                    |                    |
| SNP_83482_A_237241 | NW_004516158.1 | scaffold775 | 237241                  | TT                              | GG                 | GG               | INTERGENIC      |               |                    |                    |
| SNP_83483_A_237252 | NW_004516158.1 | scaffold775 | 237252                  | AA                              | CC                 | CC               | INTERGENIC      |               |                    |                    |
| SNP_83484_A_237259 | NW_004516158.1 | scaffold775 | 237259                  | GG                              | AA                 | AA               | INTERGENIC      |               |                    |                    |
| SNP_83485_A_237260 | NW_004516158.1 | scaffold775 | 237260                  | AA                              | CC                 | CC               | INTERGENIC      |               |                    |                    |
| SNP_83486_A_237281 | NW_004516158.1 | scaffold775 | 237281                  | AA                              | GG                 | GG               | INTERGENIC      |               |                    |                    |
| SNP_83487_A_237299 | NW_004516158.1 | scaffold775 | 237299                  | TT                              | CC                 | CC               | INTERGENIC      |               |                    |                    |
| SNP_83488_A_241754 | NW_004516158.1 | scaffold775 | 241754                  | TT                              | CC                 | CC               | INTERGENIC      |               |                    |                    |
| SNP_83489_A_267227 | NW_004516158.1 | scaffold775 | 267227                  | CC                              | TT                 | TT               | INTERGENIC      |               |                    |                    |
| SNP_83490_A_267415 | NW_004516158.1 | scaffold775 | 267415                  | CC                              | AA                 | AA               | INTERGENIC      |               |                    |                    |
| SNP_83491_A_267485 | NW_004516158.1 | scaffold775 | 267485                  | TT                              | CC                 | CC               | INTERGENIC      |               |                    |                    |
| SNP_83492_A_267509 | NW_004516158.1 | scaffold775 | 267509                  | TT                              | CC                 | CC               | INTERGENIC      |               |                    |                    |
| SNP_83493_A_267629 | NW_004516158.1 | scaffold775 | 267629                  | AA                              | TT                 | TT               | INTERGENIC      |               |                    |                    |
| SNP_83494_A_288570 | NW_004516158.1 | scaffold775 | 288570                  | AA                              | GG                 | GG               | INTERGENIC      |               |                    |                    |
| SNP_83495_A_303548 | NW_004516158.1 | scaffold775 | 303548                  | CC                              | AA                 | AA               | INTERGENIC      |               |                    |                    |
| SNP_83496_A_303923 | NW_004516158.1 | scaffold775 | 303923                  | TT                              | CC                 | CC               | INTERGENIC      |               |                    |                    |
| SNP_83497_A_334214 | NW_004516158.1 | scaffold775 | 334214                  | TT                              | CC                 | CC               | INTERGENIC      |               |                    |                    |

| SNPs IDs           | Chromosome IDs | Chromosomes | Physical positions (bp) | CDC Frontier (Reference genome) | (Pusa 1103 & HPNB) | (ILWC 46 & LPNB) | Sequence Components of genome | Gene accession IDs | Putative functions           |
|--------------------|----------------|-------------|-------------------------|---------------------------------|--------------------|------------------|-------------------------------|--------------------|------------------------------|
| SNP_83499_A_335636 | NW_004516158.1 | scaffold775 | 335636                  | GG                              | TT                 | TT               | INTERGENIC                    |                    |                              |
| SNP_83500_A_358819 | NW_004516158.1 | scaffold775 | 358819                  | CC                              | GG                 | GG               | INTERGENIC                    |                    |                              |
| SNP_83501_A_381393 | NW_004516158.1 | scaffold775 | 381393                  | TT                              | CC                 | CC               | INTERGENIC                    |                    |                              |
| SNP_83502_A_381652 | NW_004516158.1 | scaffold775 | 381652                  | AA                              | CC                 | CC               | INTERGENIC                    |                    |                              |
| SNP_83503_A_383443 | NW_004516158.1 | scaffold775 | 383443                  | AA                              | GG                 | GG               | INTERGENIC                    |                    |                              |
| SNP_83504_A_383624 | NW_004516158.1 | scaffold775 | 383624                  | AA                              | GG                 | GG               | INTERGENIC                    |                    |                              |
| SNP_83505_A_383628 | NW_004516158.1 | scaffold775 | 383628                  | GG                              | AA                 | AA               | INTERGENIC                    |                    |                              |
| SNP_83506_A_383653 | NW_004516158.1 | scaffold775 | 383653                  | CC                              | TT                 | TT               | INTERGENIC                    |                    |                              |
| SNP_83507_A_383664 | NW_004516158.1 | scaffold775 | 383664                  | TT                              | CC                 | CC               | INTERGENIC                    |                    |                              |
| SNP_83508_A_383680 | NW_004516158.1 | scaffold775 | 383680                  | TT                              | CC                 | CC               | INTERGENIC                    |                    |                              |
| SNP_83510_A_424938 | NW_004516158.1 | scaffold775 | 424938                  | TT                              | GG                 | GG               | INTERGENIC                    |                    |                              |
| SNP_83511_A_441004 | NW_004516158.1 | scaffold775 | 441004                  | AA                              | GG                 | GG               | DRR                           | 101508016          | uncharacterized LOC101508016 |
| SNP_83512_A_441349 | NW_004516158.1 | scaffold775 | 441349                  | GG                              | AA                 | AA               | DRR                           | 101508016          | uncharacterized LOC101508016 |
| SNP_83514_A_446940 | NW_004516158.1 | scaffold775 | 446940                  | TT                              | AA                 | AA               | DRR                           | 101508209          | pectinesterase 2-like        |
| SNP_83515_A_447641 | NW_004516158.1 | scaffold775 | 447641                  | TT                              | CC                 | CC               | SYNONYMOUS_CODING             | 101508209          | pectinesterase 2-like        |
| SNP_83516_A_448317 | NW_004516158.1 | scaffold775 | 448317                  | GG                              | AA                 | AA               | NON_SYNONYMOUS_CODING         | 101508209          | pectinesterase 2-like        |
| SNP_83517_A_448361 | NW_004516158.1 | scaffold775 | 448361                  | TT                              | CC                 | CC               | SYNONYMOUS_CODING             | 101508209          | pectinesterase 2-like        |
| SNP_83518_A_449388 | NW_004516158.1 | scaffold775 | 449388                  | CC                              | TT                 | TT               | URR                           | 101508209          | pectinesterase 2-like        |
| SNP_83520_A_449872 | NW_004516158.1 | scaffold775 | 449872                  | CC                              | TT                 | TT               | URR                           | 101508209          | pectinesterase 2-like        |
| SNP_83521_A_450019 | NW_004516158.1 | scaffold775 | 450019                  | AA                              | CC                 | CC               | URR                           | 101508209          | pectinesterase 2-like        |
| SNP_83522_A_450142 | NW_004516158.1 | scaffold775 | 450142                  | GG                              | AA                 | AA               | URR                           | 101508209          | pectinesterase 2-like        |
| SNP_83524_A_450548 | NW_004516158.1 | scaffold775 | 450548                  | TT                              | CC                 | CC               | URR                           | 101508209          | pectinesterase 2-like        |

| SNPs IDs           | Chromosome IDs | Chromosomes | Physical positions (bp) | CDC Frontier (Reference genome) | (Pusa 1103 & HPNB) | (ILWC 46 & LPNB) | Sequence genome | Components of | Gene accession IDs | Putative functions |
|--------------------|----------------|-------------|-------------------------|---------------------------------|--------------------|------------------|-----------------|---------------|--------------------|--------------------|
| SNP_83525_A_473727 | NW_004516158.1 | scaffold775 | 473727                  | GG                              | AA                 | AA               | INTERGENIC      |               |                    |                    |
| SNP_83526_A_473810 | NW_004516158.1 | scaffold775 | 473810                  | TT                              | CC                 | CC               | INTERGENIC      |               |                    |                    |
| SNP_83527_A_473930 | NW_004516158.1 | scaffold775 | 473930                  | TT                              | GG                 | GG               | INTERGENIC      |               |                    |                    |
| SNP_83528_A_475697 | NW_004516158.1 | scaffold775 | 475697                  | AA                              | GG                 | GG               | INTERGENIC      |               |                    |                    |
| SNP_83529_A_475724 | NW_004516158.1 | scaffold775 | 475724                  | CC                              | GG                 | GG               | INTERGENIC      |               |                    |                    |
| SNP_83530_A_476026 | NW_004516158.1 | scaffold775 | 476026                  | AA                              | CC                 | CC               | INTERGENIC      |               |                    |                    |
| SNP_83531_A_476139 | NW_004516158.1 | scaffold775 | 476139                  | TT                              | CC                 | CC               | INTERGENIC      |               |                    |                    |
| SNP_83532_A_476181 | NW_004516158.1 | scaffold775 | 476181                  | CC                              | TT                 | TT               | INTERGENIC      |               |                    |                    |
| SNP_83533_A_476189 | NW_004516158.1 | scaffold775 | 476189                  | TT                              | CC                 | CC               | INTERGENIC      |               |                    |                    |
| SNP_83534_A_476389 | NW_004516158.1 | scaffold775 | 476389                  | GG                              | AA                 | AA               | INTERGENIC      |               |                    |                    |
| SNP_83535_A_481798 | NW_004516158.1 | scaffold775 | 481798                  | CC                              | AA                 | AA               | INTERGENIC      |               |                    |                    |
| SNP_83536_A_483657 | NW_004516158.1 | scaffold775 | 483657                  | CC                              | TT                 | TT               | INTERGENIC      |               |                    |                    |
| SNP_83537_A_483709 | NW_004516158.1 | scaffold775 | 483709                  | GG                              | AA                 | AA               | INTERGENIC      |               |                    |                    |
| SNP_83538_A_483715 | NW_004516158.1 | scaffold775 | 483715                  | GG                              | AA                 | AA               | INTERGENIC      |               |                    |                    |
| SNP_83539_A_484848 | NW_004516158.1 | scaffold775 | 484848                  | AA                              | CC                 | CC               | INTERGENIC      |               |                    |                    |
| SNP_83540_A_21969  | NW_004516159.1 | scaffold776 | 21969                   | AA                              | GG                 | GG               | INTERGENIC      |               |                    |                    |
| SNP_83541_A_23649  | NW_004516159.1 | scaffold776 | 23649                   | AA                              | TT                 | TT               | INTERGENIC      |               |                    |                    |
| SNP_83542_A_27223  | NW_004516159.1 | scaffold776 | 27223                   | TT                              | CC                 | CC               | INTERGENIC      |               |                    |                    |
| SNP_83543_A_71725  | NW_004516159.1 | scaffold776 | 71725                   | AA                              | GG                 | GG               | INTERGENIC      |               |                    |                    |
| SNP_83544_A_72024  | NW_004516159.1 | scaffold776 | 72024                   | TT                              | AA                 | AA               | INTERGENIC      |               |                    |                    |
| SNP_83546_A_115075 | NW_004516159.1 | scaffold776 | 115075                  | TT                              | CC                 | CC               | INTERGENIC      |               |                    |                    |
| SNP_83547_A_144216 | NW_004516159.1 | scaffold776 | 144216                  | CC                              | TT                 | TT               | INTRON          | 101512067     | Unknown function   |                    |

| SNPs IDs           | Chromosome IDs | Chromosomes | Physical positions (bp) | CDC Frontier (Reference genome) | (Pusa 1103 & HPNB) | (ILWC 46 & LPNB) | Sequence Components of genome | Gene accession IDs | Putative functions                     |
|--------------------|----------------|-------------|-------------------------|---------------------------------|--------------------|------------------|-------------------------------|--------------------|----------------------------------------|
| SNP_83548_A_144217 | NW_004516159.1 | scaffold776 | 144217                  | TT                              | AA                 | AA               | INTRON                        | 101512067          | Unknown function                       |
| SNP_83549_A_156114 | NW_004516159.1 | scaffold776 | 156114                  | AA                              | GG                 | GG               | INTERGENIC                    |                    |                                        |
| SNP_83550_A_177745 | NW_004516159.1 | scaffold776 | 177745                  | CC                              | TT                 | TT               | INTRON                        | 101512394          | eukaryotic initiation factor 4A-8-like |
| SNP_83551_A_177944 | NW_004516159.1 | scaffold776 | 177944                  | TT                              | GG                 | GG               | INTRON                        | 101512394          | eukaryotic initiation factor 4A-8-like |
| SNP_83552_A_182156 | NW_004516159.1 | scaffold776 | 182156                  | CC                              | TT                 | TT               | URR                           | 101512394          | eukaryotic initiation factor 4A-8-like |
| SNP_83553_A_209125 | NW_004516159.1 | scaffold776 | 209125                  | GG                              | TT                 | TT               | INTRON                        | 101513031          | uncharacterized LOC101513031           |
| SNP_83554_A_218793 | NW_004516159.1 | scaffold776 | 218793                  | TT                              | GG                 | GG               | SYNONYMOUS_CODING             | 101513031          | uncharacterized LOC101513031           |
| SNP_83555_A_218816 | NW_004516159.1 | scaffold776 | 218816                  | AA                              | GG                 | GG               | NON_SYNONYMOUS_CODING         | 101513031          | uncharacterized LOC101513031           |
| SNP_83556_A_218836 | NW_004516159.1 | scaffold776 | 218836                  | CC                              | GG                 | GG               | NON_SYNONYMOUS_CODING         | 101513031          | uncharacterized LOC101513031           |
| SNP_83557_A_218898 | NW_004516159.1 | scaffold776 | 218898                  | GG                              | AA                 | AA               | SYNONYMOUS_CODING             | 101513031          | uncharacterized LOC101513031           |
| SNP_83558_A_218909 | NW_004516159.1 | scaffold776 | 218909                  | AA                              | GG                 | GG               | NON_SYNONYMOUS_CODING         | 101513031          | uncharacterized LOC101513031           |
| SNP_83559_A_219010 | NW_004516159.1 | scaffold776 | 219010                  | TT                              | GG                 | GG               | NON_SYNONYMOUS_CODING         | 101513031          | uncharacterized LOC101513031           |
| SNP_83560_A_219019 | NW_004516159.1 | scaffold776 | 219019                  | GG                              | CC                 | CC               | NON_SYNONYMOUS_CODING         | 101513031          | uncharacterized LOC101513031           |
| SNP_83561_A_219212 | NW_004516159.1 | scaffold776 | 219212                  | AA                              | GG                 | GG               | NON_SYNONYMOUS_CODING         | 101513031          | uncharacterized LOC101513031           |
| SNP_83562_A_219344 | NW_004516159.1 | scaffold776 | 219344                  | TT                              | GG                 | GG               | NON_SYNONYMOUS_CODING         | 101513031          | uncharacterized LOC101513031           |
| SNP_83563_A_219358 | NW_004516159.1 | scaffold776 | 219358                  | CC                              | AA                 | AA               | NON_SYNONYMOUS_CODING         | 101513031          | uncharacterized LOC101513031           |
| SNP_83564_A_219368 | NW_004516159.1 | scaffold776 | 219368                  | TT                              | CC                 | CC               | NON_SYNONYMOUS_CODING         | 101513031          | uncharacterized LOC101513031           |
| SNP_83565_A_219938 | NW_004516159.1 | scaffold776 | 219938                  | AA                              | GG                 | GG               | NON_SYNONYMOUS_CODING         | 101513031          | uncharacterized LOC101513031           |
| SNP_83566_A_220308 | NW_004516159.1 | scaffold776 | 220308                  | AA                              | CC                 | CC               | URR                           | 101513031          | uncharacterized LOC101513031           |
| SNP_83567_A_220309 | NW_004516159.1 | scaffold776 | 220309                  | TT                              | GG                 | GG               | URR                           | 101513031          | uncharacterized LOC101513031           |
| SNP_83568_A_220318 | NW_004516159.1 | scaffold776 | 220318                  | TT                              | GG                 | GG               | URR                           | 101513031          | uncharacterized LOC101513031           |
| SNP_83570_A_241939 | NW_004516159.1 | scaffold776 | 241939                  | TT                              | AA                 | AA               | URR                           | 101513356          | uncharacterized LOC101513356           |

| SNPs IDs          | Chromosome IDs | Chromosomes | Physical positions (bp) | CDC Frontier (Reference genome) | (Pusa 1103 & HPNB) | (ILWC 46 & LPNB) | Sequence genome | Components of | Gene accession IDs | Putative functions |
|-------------------|----------------|-------------|-------------------------|---------------------------------|--------------------|------------------|-----------------|---------------|--------------------|--------------------|
| SNP_83571_A_572   | NW_004516160.1 | scaffold778 | 572                     | GG                              | AA                 | AA               | INTERGENIC      |               |                    |                    |
| SNP_83572_A_943   | NW_004516161.1 | scaffold779 | 943                     | TT                              | AA                 | AA               | INTERGENIC      |               |                    |                    |
| SNP_83573_A_994   | NW_004516161.1 | scaffold779 | 994                     | CC                              | AA                 | AA               | INTERGENIC      |               |                    |                    |
| SNP_83574_A_1087  | NW_004516161.1 | scaffold779 | 1087                    | AA                              | CC                 | CC               | INTERGENIC      |               |                    |                    |
| SNP_83575_A_1211  | NW_004516161.1 | scaffold779 | 1211                    | AA                              | GG                 | GG               | INTERGENIC      |               |                    |                    |
| SNP_83576_A_1339  | NW_004516161.1 | scaffold779 | 1339                    | TT                              | AA                 | AA               | INTERGENIC      |               |                    |                    |
| SNP_83577_A_1345  | NW_004516161.1 | scaffold779 | 1345                    | TT                              | CC                 | CC               | INTERGENIC      |               |                    |                    |
| SNP_83578_A_1412  | NW_004516161.1 | scaffold779 | 1412                    | AA                              | GG                 | GG               | INTERGENIC      |               |                    |                    |
| SNP_83579_A_1417  | NW_004516161.1 | scaffold779 | 1417                    | AA                              | GG                 | GG               | INTERGENIC      |               |                    |                    |
| SNP_83580_A_1425  | NW_004516161.1 | scaffold779 | 1425                    | TT                              | AA                 | AA               | INTERGENIC      |               |                    |                    |
| SNP_83581_A_1462  | NW_004516161.1 | scaffold779 | 1462                    | TT                              | AA                 | AA               | INTERGENIC      |               |                    |                    |
| SNP_83582_A_1569  | NW_004516161.1 | scaffold779 | 1569                    | GG                              | AA                 | AA               | INTERGENIC      |               |                    |                    |
| SNP_83583_A_1607  | NW_004516161.1 | scaffold779 | 1607                    | CC                              | TT                 | TT               | INTERGENIC      |               |                    |                    |
| SNP_83584_A_1635  | NW_004516161.1 | scaffold779 | 1635                    | TT                              | AA                 | AA               | INTERGENIC      |               |                    |                    |
| SNP_83585_A_1724  | NW_004516161.1 | scaffold779 | 1724                    | TT                              | GG                 | GG               | INTERGENIC      |               |                    |                    |
| SNP_83586_A_1744  | NW_004516161.1 | scaffold779 | 1744                    | CC                              | GG                 | GG               | INTERGENIC      |               |                    |                    |
| SNP_83587_A_1762  | NW_004516161.1 | scaffold779 | 1762                    | AA                              | GG                 | GG               | INTERGENIC      |               |                    |                    |
| SNP_83588_A_6191  | NW_004516161.1 | scaffold779 | 6191                    | AA                              | GG                 | GG               | INTERGENIC      |               |                    |                    |
| SNP_83589_A_6202  | NW_004516161.1 | scaffold779 | 6202                    | CC                              | TT                 | TT               | INTERGENIC      |               |                    |                    |
| SNP_83590_A_8325  | NW_004516161.1 | scaffold779 | 8325                    | GG                              | AA                 | AA               | INTERGENIC      |               |                    |                    |
| SNP_83591_A_14273 | NW_004516161.1 | scaffold779 | 14273                   | CC                              | TT                 | TT               | INTERGENIC      |               |                    |                    |
| SNP_83592_A_3652  | NW_004516162.1 | scaffold781 | 3652                    | TT                              | AA                 | AA               | INTERGENIC      |               |                    |                    |

| SNPs IDs           | Chromosome IDs | Chromosomes | Physical positions (bp) | CDC Frontier (Reference genome) | (Pusa 1103 & HPNB) | (ILWC 46 & LPNB) | Sequence genome | Components of | Gene accession IDs | Putative functions |
|--------------------|----------------|-------------|-------------------------|---------------------------------|--------------------|------------------|-----------------|---------------|--------------------|--------------------|
| SNP_83593_A_30409  | NW_004516162.1 | scaffold781 | 30409                   | CC                              | TT                 | TT               | INTERGENIC      |               |                    |                    |
| SNP_83594_A_30708  | NW_004516162.1 | scaffold781 | 30708                   | TT                              | CC                 | CC               | INTERGENIC      |               |                    |                    |
| SNP_83595_A_48     | NW_004516164.1 | scaffold783 | 48                      | AA                              | GG                 | GG               | INTERGENIC      |               |                    |                    |
| SNP_83597_A_98     | NW_004516164.1 | scaffold783 | 98                      | GG                              | AA                 | AA               | INTERGENIC      |               |                    |                    |
| SNP_83598_A_39701  | NW_004516164.1 | scaffold783 | 39701                   | GG                              | TT                 | TT               | INTERGENIC      |               |                    |                    |
| SNP_83599_A_81886  | NW_004516164.1 | scaffold783 | 81886                   | CC                              | AA                 | AA               | INTERGENIC      |               |                    |                    |
| SNP_83600_A_95479  | NW_004516164.1 | scaffold783 | 95479                   | TT                              | CC                 | CC               | INTERGENIC      |               |                    |                    |
| SNP_83601_A_99089  | NW_004516164.1 | scaffold783 | 99089                   | AA                              | GG                 | GG               | INTERGENIC      |               |                    |                    |
| SNP_83603_A_99107  | NW_004516164.1 | scaffold783 | 99107                   | TT                              | CC                 | CC               | INTERGENIC      |               |                    |                    |
| SNP_83604_A_104675 | NW_004516164.1 | scaffold783 | 104675                  | GG                              | TT                 | TT               | INTERGENIC      |               |                    |                    |
| SNP_83605_A_104742 | NW_004516164.1 | scaffold783 | 104742                  | CC                              | AA                 | AA               | INTERGENIC      |               |                    |                    |
| SNP_83606_A_104787 | NW_004516164.1 | scaffold783 | 104787                  | CC                              | TT                 | TT               | INTERGENIC      |               |                    |                    |
| SNP_83607_A_104887 | NW_004516164.1 | scaffold783 | 104887                  | GG                              | AA                 | AA               | INTERGENIC      |               |                    |                    |
| SNP_83608_A_114251 | NW_004516164.1 | scaffold783 | 114251                  | TT                              | CC                 | CC               | INTERGENIC      |               |                    |                    |
| SNP_83609_A_120578 | NW_004516164.1 | scaffold783 | 120578                  | GG                              | TT                 | TT               | INTERGENIC      |               |                    |                    |
| SNP_83610_A_128543 | NW_004516164.1 | scaffold783 | 128543                  | TT                              | GG                 | GG               | INTERGENIC      |               |                    |                    |
| SNP_83611_A_128545 | NW_004516164.1 | scaffold783 | 128545                  | TT                              | GG                 | GG               | INTERGENIC      |               |                    |                    |
| SNP_83612_A_128921 | NW_004516164.1 | scaffold783 | 128921                  | TT                              | GG                 | GG               | INTERGENIC      |               |                    |                    |
| SNP_83613_A_131688 | NW_004516164.1 | scaffold783 | 131688                  | GG                              | CC                 | CC               | INTERGENIC      |               |                    |                    |
| SNP_83614_A_145657 | NW_004516164.1 | scaffold783 | 145657                  | TT                              | CC                 | CC               | INTERGENIC      |               |                    |                    |
| SNP_83616_A_179954 | NW_004516164.1 | scaffold783 | 179954                  | TT                              | CC                 | CC               | INTERGENIC      |               |                    |                    |
| SNP_83617_A_180001 | NW_004516164.1 | scaffold783 | 180001                  | AA                              | GG                 | GG               | INTERGENIC      |               |                    |                    |



| SNPs IDs           | Chromosome IDs | Chromosomes | Physical positions (bp) | CDC Frontier (Reference genome) | (Pusa 1103 & HPNB) | (ILWC 46 & LPNB) | Sequence genome | Components of | Gene accession IDs | Putative functions |
|--------------------|----------------|-------------|-------------------------|---------------------------------|--------------------|------------------|-----------------|---------------|--------------------|--------------------|
| SNP_83618_A_180057 | NW_004516164.1 | scaffold783 | 180057                  | GG                              | TT                 | TT               | INTERGENIC      |               |                    |                    |
| SNP_83619_A_208156 | NW_004516164.1 | scaffold783 | 208156                  | GG                              | TT                 | TT               | INTERGENIC      |               |                    |                    |
| SNP_83620_A_208203 | NW_004516164.1 | scaffold783 | 208203                  | AA                              | GG                 | GG               | INTERGENIC      |               |                    |                    |
| SNP_83621_A_208324 | NW_004516164.1 | scaffold783 | 208324                  | TT                              | CC                 | CC               | INTERGENIC      |               |                    |                    |
| SNP_83622_A_208485 | NW_004516164.1 | scaffold783 | 208485                  | TT                              | CC                 | CC               | INTERGENIC      |               |                    |                    |
| SNP_83623_A_208488 | NW_004516164.1 | scaffold783 | 208488                  | GG                              | AA                 | AA               | INTERGENIC      |               |                    |                    |
| SNP_83624_A_208557 | NW_004516164.1 | scaffold783 | 208557                  | CC                              | TT                 | TT               | INTERGENIC      |               |                    |                    |
| SNP_83625_A_208563 | NW_004516164.1 | scaffold783 | 208563                  | GG                              | AA                 | AA               | INTERGENIC      |               |                    |                    |
| SNP_83626_A_208608 | NW_004516164.1 | scaffold783 | 208608                  | CC                              | TT                 | TT               | INTERGENIC      |               |                    |                    |
| SNP_83627_A_222218 | NW_004516164.1 | scaffold783 | 222218                  | CC                              | GG                 | GG               | INTERGENIC      |               |                    |                    |
| SNP_83628_A_222542 | NW_004516164.1 | scaffold783 | 222542                  | CC                              | TT                 | TT               | INTERGENIC      |               |                    |                    |
| SNP_83629_A_222551 | NW_004516164.1 | scaffold783 | 222551                  | TT                              | GG                 | GG               | INTERGENIC      |               |                    |                    |
| SNP_83630_A_244725 | NW_004516164.1 | scaffold783 | 244725                  | TT                              | CC                 | CC               | INTERGENIC      |               |                    |                    |
| SNP_83631_A_272104 | NW_004516164.1 | scaffold783 | 272104                  | CC                              | TT                 | TT               | INTERGENIC      |               |                    |                    |
| SNP_83632_A_2969   | NW_004516168.1 | scaffold787 | 2969                    | AA                              | CC                 | CC               | INTERGENIC      |               |                    |                    |
| SNP_83633_A_9754   | NW_004516168.1 | scaffold787 | 9754                    | CC                              | AA                 | AA               | INTERGENIC      |               |                    |                    |
| SNP_83634_A_10220  | NW_004516168.1 | scaffold787 | 10220                   | TT                              | CC                 | CC               | INTERGENIC      |               |                    |                    |
| SNP_83635_A_12755  | NW_004516168.1 | scaffold787 | 12755                   | AA                              | GG                 | GG               | INTERGENIC      |               |                    |                    |
| SNP_83636_A_16663  | NW_004516168.1 | scaffold787 | 16663                   | AA                              | GG                 | GG               | INTERGENIC      |               |                    |                    |
| SNP_83637_A_16721  | NW_004516168.1 | scaffold787 | 16721                   | TT                              | GG                 | GG               | INTERGENIC      |               |                    |                    |
| SNP_83638_A_19368  | NW_004516168.1 | scaffold787 | 19368                   | TT                              | CC                 | CC               | INTERGENIC      |               |                    |                    |
| SNP_83639_A_24758  | NW_004516168.1 | scaffold787 | 24758                   | TT                              | GG                 | GG               | INTERGENIC      |               |                    |                    |

| SNPs IDs          | Chromosome IDs | Chromosomes | Physical positions (bp) | CDC Frontier genome (Reference genome) | (Pusa 1103 & HPNB) | (ILWC 46 & LPNB) | Sequence genome | Components of | Gene accession IDs | Putative functions |
|-------------------|----------------|-------------|-------------------------|----------------------------------------|--------------------|------------------|-----------------|---------------|--------------------|--------------------|
| SNP_83640_A_24873 | NW_004516168.1 | scaffold787 | 24873                   | CC                                     | TT                 | TT               | INTERGENIC      |               |                    |                    |
| SNP_83641_A_24973 | NW_004516168.1 | scaffold787 | 24973                   | TT                                     | GG                 | GG               | INTERGENIC      |               |                    |                    |
| SNP_83642_A_25048 | NW_004516168.1 | scaffold787 | 25048                   | TT                                     | CC                 | CC               | INTERGENIC      |               |                    |                    |
| SNP_83643_A_25059 | NW_004516168.1 | scaffold787 | 25059                   | CC                                     | AA                 | AA               | INTERGENIC      |               |                    |                    |
| SNP_83644_A_25116 | NW_004516168.1 | scaffold787 | 25116                   | GG                                     | CC                 | CC               | INTERGENIC      |               |                    |                    |
| SNP_83645_A_28839 | NW_004516168.1 | scaffold787 | 28839                   | CC                                     | AA                 | AA               | INTERGENIC      |               |                    |                    |
| SNP_83646_A_29017 | NW_004516168.1 | scaffold787 | 29017                   | TT                                     | GG                 | GG               | INTERGENIC      |               |                    |                    |
| SNP_83647_A_31073 | NW_004516168.1 | scaffold787 | 31073                   | AA                                     | TT                 | TT               | INTERGENIC      |               |                    |                    |
| SNP_83648_A_33106 | NW_004516168.1 | scaffold787 | 33106                   | TT                                     | AA                 | AA               | INTERGENIC      |               |                    |                    |
| SNP_83649_A_34808 | NW_004516168.1 | scaffold787 | 34808                   | TT                                     | CC                 | CC               | INTERGENIC      |               |                    |                    |
| SNP_83650_A_35509 | NW_004516168.1 | scaffold787 | 35509                   | TT                                     | AA                 | AA               | INTERGENIC      |               |                    |                    |
| SNP_83651_A_38269 | NW_004516168.1 | scaffold787 | 38269                   | GG                                     | TT                 | TT               | INTERGENIC      |               |                    |                    |
| SNP_83652_A_43856 | NW_004516168.1 | scaffold787 | 43856                   | AA                                     | CC                 | CC               | INTERGENIC      |               |                    |                    |
| SNP_83653_A_57332 | NW_004516168.1 | scaffold787 | 57332                   | TT                                     | AA                 | AA               | INTERGENIC      |               |                    |                    |
| SNP_83654_A_57333 | NW_004516168.1 | scaffold787 | 57333                   | TT                                     | CC                 | CC               | INTERGENIC      |               |                    |                    |
| SNP_83655_A_58625 | NW_004516168.1 | scaffold787 | 58625                   | AA                                     | GG                 | GG               | INTERGENIC      |               |                    |                    |
| SNP_83656_A_58689 | NW_004516168.1 | scaffold787 | 58689                   | AA                                     | TT                 | TT               | INTERGENIC      |               |                    |                    |
| SNP_83657_A_58765 | NW_004516168.1 | scaffold787 | 58765                   | CC                                     | TT                 | TT               | INTERGENIC      |               |                    |                    |
| SNP_83658_A_61593 | NW_004516168.1 | scaffold787 | 61593                   | AA                                     | TT                 | TT               | INTERGENIC      |               |                    |                    |
| SNP_83659_A_61876 | NW_004516168.1 | scaffold787 | 61876                   | TT                                     | GG                 | GG               | INTERGENIC      |               |                    |                    |
| SNP_83660_A_65650 | NW_004516168.1 | scaffold787 | 65650                   | AA                                     | GG                 | GG               | INTERGENIC      |               |                    |                    |
| SNP_83661_A_66269 | NW_004516168.1 | scaffold787 | 66269                   | TT                                     | CC                 | CC               | INTERGENIC      |               |                    |                    |

| SNPs IDs          | Chromosome IDs | Chromosomes | Physical positions (bp) | CDC Frontier (Reference genome) | (Pusa 1103 & HPNB) | (ILWC 46 & LPNB) | Sequence genome | Components of | Gene accession IDs | Putative functions |
|-------------------|----------------|-------------|-------------------------|---------------------------------|--------------------|------------------|-----------------|---------------|--------------------|--------------------|
| SNP_83662_A_66354 | NW_004516168.1 | scaffold787 | 66354                   | AA                              | CC                 | CC               | INTERGENIC      |               |                    |                    |
| SNP_83663_A_69211 | NW_004516168.1 | scaffold787 | 69211                   | GG                              | CC                 | CC               | INTERGENIC      |               |                    |                    |
| SNP_83664_A_70346 | NW_004516168.1 | scaffold787 | 70346                   | TT                              | CC                 | CC               | INTERGENIC      |               |                    |                    |
| SNP_83665_A_70373 | NW_004516168.1 | scaffold787 | 70373                   | AA                              | GG                 | GG               | INTERGENIC      |               |                    |                    |
| SNP_83666_A_71858 | NW_004516168.1 | scaffold787 | 71858                   | AA                              | GG                 | GG               | INTERGENIC      |               |                    |                    |
| SNP_83667_A_72914 | NW_004516168.1 | scaffold787 | 72914                   | TT                              | GG                 | GG               | INTERGENIC      |               |                    |                    |
| SNP_83668_A_75920 | NW_004516168.1 | scaffold787 | 75920                   | TT                              | AA                 | AA               | INTERGENIC      |               |                    |                    |
| SNP_83669_A_77529 | NW_004516168.1 | scaffold787 | 77529                   | CC                              | GG                 | GG               | INTERGENIC      |               |                    |                    |
| SNP_83670_A_78990 | NW_004516168.1 | scaffold787 | 78990                   | AA                              | CC                 | CC               | INTERGENIC      |               |                    |                    |
| SNP_83671_A_79191 | NW_004516168.1 | scaffold787 | 79191                   | TT                              | CC                 | CC               | INTERGENIC      |               |                    |                    |
| SNP_83672_A_79280 | NW_004516168.1 | scaffold787 | 79280                   | TT                              | GG                 | GG               | INTERGENIC      |               |                    |                    |
| SNP_83673_A_79281 | NW_004516168.1 | scaffold787 | 79281                   | TT                              | GG                 | GG               | INTERGENIC      |               |                    |                    |
| SNP_83674_A_79286 | NW_004516168.1 | scaffold787 | 79286                   | AA                              | GG                 | GG               | INTERGENIC      |               |                    |                    |
| SNP_83675_A_79301 | NW_004516168.1 | scaffold787 | 79301                   | AA                              | CC                 | CC               | INTERGENIC      |               |                    |                    |
| SNP_83676_A_79306 | NW_004516168.1 | scaffold787 | 79306                   | GG                              | CC                 | CC               | INTERGENIC      |               |                    |                    |
| SNP_83677_A_79317 | NW_004516168.1 | scaffold787 | 79317                   | GG                              | AA                 | AA               | INTERGENIC      |               |                    |                    |
| SNP_83678_A_79322 | NW_004516168.1 | scaffold787 | 79322                   | TT                              | CC                 | CC               | INTERGENIC      |               |                    |                    |
| SNP_83679_A_79357 | NW_004516168.1 | scaffold787 | 79357                   | TT                              | GG                 | GG               | INTERGENIC      |               |                    |                    |
| SNP_83680_A_79396 | NW_004516168.1 | scaffold787 | 79396                   | TT                              | GG                 | GG               | INTERGENIC      |               |                    |                    |
| SNP_83681_A_87069 | NW_004516168.1 | scaffold787 | 87069                   | AA                              | GG                 | GG               | INTERGENIC      |               |                    |                    |
| SNP_83682_A_87186 | NW_004516168.1 | scaffold787 | 87186                   | CC                              | TT                 | TT               | INTERGENIC      |               |                    |                    |
| SNP_83683_A_87263 | NW_004516168.1 | scaffold787 | 87263                   | CC                              | AA                 | AA               | INTERGENIC      |               |                    |                    |

| SNPs IDs           | Chromosome IDs | Chromosomes | Physical positions (bp) | CDC Frontier (Reference genome) | (Pusa 1103 & HPNB) | (ILWC 46 & LPNB) | Sequence genome | Components of | Gene accession IDs | Putative functions |
|--------------------|----------------|-------------|-------------------------|---------------------------------|--------------------|------------------|-----------------|---------------|--------------------|--------------------|
| SNP_83684_A_89601  | NW_004516168.1 | scaffold787 | 89601                   | GG                              | AA                 | AA               | INTERGENIC      |               |                    |                    |
| SNP_83686_A_92839  | NW_004516168.1 | scaffold787 | 92839                   | GG                              | AA                 | AA               | INTERGENIC      |               |                    |                    |
| SNP_83687_A_96433  | NW_004516168.1 | scaffold787 | 96433                   | AA                              | GG                 | GG               | INTERGENIC      |               |                    |                    |
| SNP_83688_A_104880 | NW_004516168.1 | scaffold787 | 104880                  | AA                              | GG                 | GG               | INTERGENIC      |               |                    |                    |
| SNP_83689_A_104922 | NW_004516168.1 | scaffold787 | 104922                  | AA                              | CC                 | CC               | INTERGENIC      |               |                    |                    |
| SNP_83690_A_113380 | NW_004516168.1 | scaffold787 | 113380                  | AA                              | TT                 | TT               | INTERGENIC      |               |                    |                    |
| SNP_83691_A_113812 | NW_004516168.1 | scaffold787 | 113812                  | GG                              | CC                 | CC               | INTERGENIC      |               |                    |                    |
| SNP_83692_A_114197 | NW_004516168.1 | scaffold787 | 114197                  | GG                              | TT                 | TT               | INTERGENIC      |               |                    |                    |
| SNP_83693_A_117186 | NW_004516168.1 | scaffold787 | 117186                  | TT                              | GG                 | GG               | INTERGENIC      |               |                    |                    |
| SNP_83695_A_136497 | NW_004516168.1 | scaffold787 | 136497                  | AA                              | TT                 | TT               | INTERGENIC      |               |                    |                    |
| SNP_83696_A_140851 | NW_004516168.1 | scaffold787 | 140851                  | GG                              | AA                 | AA               | INTERGENIC      |               |                    |                    |
| SNP_83697_A_146493 | NW_004516168.1 | scaffold787 | 146493                  | AA                              | GG                 | GG               | INTERGENIC      |               |                    |                    |
| SNP_83698_A_149473 | NW_004516168.1 | scaffold787 | 149473                  | AA                              | GG                 | GG               | INTERGENIC      |               |                    |                    |
| SNP_83700_A_149833 | NW_004516168.1 | scaffold787 | 149833                  | GG                              | AA                 | AA               | INTERGENIC      |               |                    |                    |
| SNP_83701_A_150249 | NW_004516168.1 | scaffold787 | 150249                  | CC                              | TT                 | TT               | INTERGENIC      |               |                    |                    |
| SNP_83702_A_152223 | NW_004516168.1 | scaffold787 | 152223                  | TT                              | CC                 | CC               | INTERGENIC      |               |                    |                    |
| SNP_83705_A_284308 | NW_004516168.1 | scaffold787 | 284308                  | GG                              | AA                 | AA               | INTERGENIC      |               |                    |                    |
| SNP_83707_A_290887 | NW_004516168.1 | scaffold787 | 290887                  | AA                              | GG                 | GG               | INTERGENIC      |               |                    |                    |
| SNP_83708_A_294321 | NW_004516168.1 | scaffold787 | 294321                  | GG                              | TT                 | TT               | INTERGENIC      |               |                    |                    |
| SNP_83709_A_299479 | NW_004516168.1 | scaffold787 | 299479                  | CC                              | AA                 | AA               | INTERGENIC      |               |                    |                    |
| SNP_83710_A_305766 | NW_004516168.1 | scaffold787 | 305766                  | AA                              | GG                 | GG               | INTERGENIC      |               |                    |                    |
| SNP_83711_A_306989 | NW_004516168.1 | scaffold787 | 306989                  | TT                              | CC                 | CC               | INTERGENIC      |               |                    |                    |

| SNPs IDs           | Chromosome IDs | Chromosomes | Physical positions (bp) | CDC Frontier (Reference genome) | (Pusa 1103 & HPNB) | (ILWC 46 & LPNB) | Sequence Components of genome | Gene accession IDs | Putative functions                           |
|--------------------|----------------|-------------|-------------------------|---------------------------------|--------------------|------------------|-------------------------------|--------------------|----------------------------------------------|
| SNP_83712_A_309234 | NW_004516168.1 | scaffold787 | 309234                  | CC                              | TT                 | TT               | INTERGENIC                    |                    |                                              |
| SNP_83713_A_312849 | NW_004516168.1 | scaffold787 | 312849                  | CC                              | TT                 | TT               | INTERGENIC                    |                    |                                              |
| SNP_83714_A_320152 | NW_004516168.1 | scaffold787 | 320152                  | GG                              | TT                 | TT               | INTERGENIC                    |                    |                                              |
| SNP_83715_A_320153 | NW_004516168.1 | scaffold787 | 320153                  | GG                              | AA                 | AA               | INTERGENIC                    |                    |                                              |
| SNP_83716_A_320522 | NW_004516168.1 | scaffold787 | 320522                  | AA                              | GG                 | GG               | INTERGENIC                    |                    |                                              |
| SNP_83717_A_320587 | NW_004516168.1 | scaffold787 | 320587                  | TT                              | CC                 | CC               | INTERGENIC                    |                    |                                              |
| SNP_83719_A_339367 | NW_004516168.1 | scaffold787 | 339367                  | TT                              | GG                 | GG               | INTERGENIC                    |                    |                                              |
| SNP_83720_A_343569 | NW_004516168.1 | scaffold787 | 343569                  | CC                              | TT                 | TT               | DRR                           | 101488729          | heme oxygenase 1, chloroplastic-like         |
| SNP_83722_A_350852 | NW_004516168.1 | scaffold787 | 350852                  | TT                              | AA                 | AA               | DRR                           | 101489821          | Unknown function                             |
| SNP_83723_A_353656 | NW_004516168.1 | scaffold787 | 353656                  | AA                              | GG                 | GG               | INTERGENIC                    |                    |                                              |
| SNP_83724_A_355096 | NW_004516168.1 | scaffold787 | 355096                  | GG                              | TT                 | TT               | URR                           | 101489821          | Unknown function                             |
| SNP_83725_A_356436 | NW_004516168.1 | scaffold787 | 356436                  | CC                              | TT                 | TT               | INTERGENIC                    |                    |                                              |
| SNP_83726_A_361931 | NW_004516168.1 | scaffold787 | 361931                  | GG                              | AA                 | AA               | INTERGENIC                    |                    |                                              |
| SNP_83727_A_369608 | NW_004516168.1 | scaffold787 | 369608                  | TT                              | GG                 | GG               | INTERGENIC                    |                    |                                              |
| SNP_83728_A_369650 | NW_004516168.1 | scaffold787 | 369650                  | CC                              | GG                 | GG               | INTERGENIC                    |                    |                                              |
| SNP_83729_A_397437 | NW_004516168.1 | scaffold787 | 397437                  | TT                              | GG                 | GG               | URR                           | 101490797          | guanine nucleotide-binding protein-like NSN1 |
| SNP_83730_A_399113 | NW_004516168.1 | scaffold787 | 399113                  | TT                              | AA                 | AA               | INTERGENIC                    |                    |                                              |
| SNP_83731_A_399371 | NW_004516168.1 | scaffold787 | 399371                  | TT                              | CC                 | CC               | INTERGENIC                    |                    |                                              |
| SNP_83732_A_405354 | NW_004516168.1 | scaffold787 | 405354                  | AA                              | TT                 | TT               | INTERGENIC                    |                    |                                              |
| SNP_83733_A_407104 | NW_004516168.1 | scaffold787 | 407104                  | TT                              | AA                 | AA               | INTERGENIC                    |                    |                                              |
| SNP_83735_A_437019 | NW_004516168.1 | scaffold787 | 437019                  | CC                              | AA                 | AA               | INTERGENIC                    |                    |                                              |
| SNP_83737_A_438664 | NW_004516168.1 | scaffold787 | 438664                  | CC                              | AA                 | AA               | INTERGENIC                    |                    |                                              |

| SNPs IDs           | Chromosome IDs | Chromosomes | Physical positions (bp) | CDC Frontier (Reference genome) | (Pusa 1103 & HPNB) | (ILWC 46 & LPNB) | Sequence genome | Components of | Gene accession IDs | Putative functions |
|--------------------|----------------|-------------|-------------------------|---------------------------------|--------------------|------------------|-----------------|---------------|--------------------|--------------------|
| SNP_83738_A_449193 | NW_004516168.1 | scaffold787 | 449193                  | AA                              | CC                 | CC               | INTERGENIC      |               |                    |                    |
| SNP_83739_A_460119 | NW_004516168.1 | scaffold787 | 460119                  | AA                              | GG                 | GG               | INTERGENIC      |               |                    |                    |
| SNP_83740_A_460259 | NW_004516168.1 | scaffold787 | 460259                  | TT                              | CC                 | CC               | INTERGENIC      |               |                    |                    |
| SNP_83741_A_460367 | NW_004516168.1 | scaffold787 | 460367                  | AA                              | TT                 | TT               | INTERGENIC      |               |                    |                    |
| SNP_83742_A_460406 | NW_004516168.1 | scaffold787 | 460406                  | GG                              | AA                 | AA               | INTERGENIC      |               |                    |                    |
| SNP_83743_A_460579 | NW_004516168.1 | scaffold787 | 460579                  | TT                              | CC                 | CC               | INTERGENIC      |               |                    |                    |
| SNP_83745_A_466544 | NW_004516168.1 | scaffold787 | 466544                  | AA                              | TT                 | TT               | INTERGENIC      |               |                    |                    |
| SNP_83746_A_470220 | NW_004516168.1 | scaffold787 | 470220                  | GG                              | AA                 | AA               | INTERGENIC      |               |                    |                    |
| SNP_83747_A_472913 | NW_004516168.1 | scaffold787 | 472913                  | GG                              | TT                 | TT               | INTERGENIC      |               |                    |                    |
| SNP_83749_A_472996 | NW_004516168.1 | scaffold787 | 472996                  | GG                              | TT                 | TT               | INTERGENIC      |               |                    |                    |
| SNP_83750_A_473367 | NW_004516168.1 | scaffold787 | 473367                  | CC                              | TT                 | TT               | INTERGENIC      |               |                    |                    |
| SNP_83751_A_13761  | NW_004516169.1 | scaffold789 | 13761                   | TT                              | GG                 | GG               | INTERGENIC      |               |                    |                    |
| SNP_83752_A_13771  | NW_004516169.1 | scaffold789 | 13771                   | TT                              | CC                 | CC               | INTERGENIC      |               |                    |                    |
| SNP_83753_A_13833  | NW_004516169.1 | scaffold789 | 13833                   | AA                              | GG                 | GG               | INTERGENIC      |               |                    |                    |
| SNP_83754_A_13847  | NW_004516169.1 | scaffold789 | 13847                   | GG                              | AA                 | AA               | INTERGENIC      |               |                    |                    |
| SNP_83755_A_14248  | NW_004516169.1 | scaffold789 | 14248                   | GG                              | AA                 | AA               | INTERGENIC      |               |                    |                    |
| SNP_83756_A_17237  | NW_004516169.1 | scaffold789 | 17237                   | GG                              | AA                 | AA               | INTERGENIC      |               |                    |                    |
| SNP_83757_A_17574  | NW_004516169.1 | scaffold789 | 17574                   | AA                              | GG                 | GG               | INTERGENIC      |               |                    |                    |
| SNP_83758_A_17599  | NW_004516169.1 | scaffold789 | 17599                   | TT                              | CC                 | CC               | INTERGENIC      |               |                    |                    |
| SNP_83759_A_17601  | NW_004516169.1 | scaffold789 | 17601                   | TT                              | CC                 | CC               | INTERGENIC      |               |                    |                    |
| SNP_83760_A_17643  | NW_004516169.1 | scaffold789 | 17643                   | CC                              | GG                 | GG               | INTERGENIC      |               |                    |                    |
| SNP_83761_A_17652  | NW_004516169.1 | scaffold789 | 17652                   | TT                              | GG                 | GG               | INTERGENIC      |               |                    |                    |

| SNPs IDs           | Chromosome IDs | Chromosomes | Physical positions (bp) | CDC Frontier (Reference genome) | (Pusa 1103 & HPNB) | (ILWC 46 & LPNB) | Sequence genome | Components of | Gene accession IDs           | Putative functions |
|--------------------|----------------|-------------|-------------------------|---------------------------------|--------------------|------------------|-----------------|---------------|------------------------------|--------------------|
| SNP_83762_A_26824  | NW_004516169.1 | scaffold789 | 26824                   | AA                              | GG                 | GG               | INTERGENIC      |               |                              |                    |
| SNP_83763_A_26825  | NW_004516169.1 | scaffold789 | 26825                   | GG                              | TT                 | TT               | INTERGENIC      |               |                              |                    |
| SNP_83764_A_26855  | NW_004516169.1 | scaffold789 | 26855                   | TT                              | GG                 | GG               | INTERGENIC      |               |                              |                    |
| SNP_83765_A_35039  | NW_004516169.1 | scaffold789 | 35039                   | TT                              | AA                 | AA               | INTERGENIC      |               |                              |                    |
| SNP_83766_A_35040  | NW_004516169.1 | scaffold789 | 35040                   | TT                              | CC                 | CC               | INTERGENIC      |               |                              |                    |
| SNP_83767_A_57961  | NW_004516169.1 | scaffold789 | 57961                   | AA                              | TT                 | TT               | INTERGENIC      |               |                              |                    |
| SNP_83768_A_62884  | NW_004516169.1 | scaffold789 | 62884                   | TT                              | AA                 | AA               | INTERGENIC      |               |                              |                    |
| SNP_83769_A_62993  | NW_004516169.1 | scaffold789 | 62993                   | TT                              | AA                 | AA               | INTERGENIC      |               |                              |                    |
| SNP_83770_A_62994  | NW_004516169.1 | scaffold789 | 62994                   | CC                              | TT                 | TT               | INTERGENIC      |               |                              |                    |
| SNP_83771_A_63474  | NW_004516169.1 | scaffold789 | 63474                   | CC                              | TT                 | TT               | INTERGENIC      |               |                              |                    |
| SNP_83772_A_63485  | NW_004516169.1 | scaffold789 | 63485                   | TT                              | AA                 | AA               | INTERGENIC      |               |                              |                    |
| SNP_83773_A_1369   | NW_004516170.1 | scaffold793 | 1369                    | AA                              | CC                 | CC               | INTERGENIC      |               |                              |                    |
| SNP_83774_A_39105  | NW_004516170.1 | scaffold793 | 39105                   | TT                              | AA                 | AA               | INTERGENIC      |               |                              |                    |
| SNP_83775_A_39145  | NW_004516170.1 | scaffold793 | 39145                   | CC                              | TT                 | TT               | INTERGENIC      |               |                              |                    |
| SNP_83776_A_39298  | NW_004516170.1 | scaffold793 | 39298                   | AA                              | GG                 | GG               | INTERGENIC      |               |                              |                    |
| SNP_83777_A_39305  | NW_004516170.1 | scaffold793 | 39305                   | CC                              | TT                 | TT               | INTERGENIC      |               |                              |                    |
| SNP_83779_A_58802  | NW_004516170.1 | scaffold793 | 58802                   | GG                              | AA                 | AA               | URR             | 101492413     | uncharacterized LOC101492413 |                    |
| SNP_83780_A_103841 | NW_004516170.1 | scaffold793 | 103841                  | TT                              | AA                 | AA               | INTERGENIC      |               |                              |                    |
| SNP_83782_A_127085 | NW_004516170.1 | scaffold793 | 127085                  | TT                              | AA                 | AA               | INTERGENIC      |               |                              |                    |
| SNP_83783_A_127110 | NW_004516170.1 | scaffold793 | 127110                  | TT                              | CC                 | CC               | INTERGENIC      |               |                              |                    |
| SNP_83784_A_127559 | NW_004516170.1 | scaffold793 | 127559                  | CC                              | TT                 | TT               | INTERGENIC      |               |                              |                    |
| SNP_83785_A_128215 | NW_004516170.1 | scaffold793 | 128215                  | GG                              | AA                 | AA               | INTERGENIC      |               |                              |                    |

| SNPs IDs           | Chromosome IDs | Chromosomes | Physical positions (bp) | CDC Frontier (Reference genome) | (Pusa 1103 & HPNB) | (ILWC 46 & LPNB) | Sequence genome | Components of | Gene accession IDs | Putative functions |
|--------------------|----------------|-------------|-------------------------|---------------------------------|--------------------|------------------|-----------------|---------------|--------------------|--------------------|
| SNP_83786_A_128327 | NW_004516170.1 | scaffold793 | 128327                  | GG                              | CC                 | CC               | INTERGENIC      |               |                    |                    |
| SNP_83787_A_128331 | NW_004516170.1 | scaffold793 | 128331                  | AA                              | GG                 | GG               | INTERGENIC      |               |                    |                    |
| SNP_83788_A_128386 | NW_004516170.1 | scaffold793 | 128386                  | TT                              | CC                 | CC               | INTERGENIC      |               |                    |                    |
| SNP_83790_A_158298 | NW_004516170.1 | scaffold793 | 158298                  | AA                              | GG                 | GG               | INTERGENIC      |               |                    |                    |
| SNP_83791_A_178633 | NW_004516170.1 | scaffold793 | 178633                  | TT                              | CC                 | CC               | INTERGENIC      |               |                    |                    |
| SNP_83792_A_192634 | NW_004516170.1 | scaffold793 | 192634                  | CC                              | TT                 | TT               | INTERGENIC      |               |                    |                    |
| SNP_83793_A_192820 | NW_004516170.1 | scaffold793 | 192820                  | GG                              | AA                 | AA               | INTERGENIC      |               |                    |                    |
| SNP_83794_A_193158 | NW_004516170.1 | scaffold793 | 193158                  | TT                              | CC                 | CC               | INTERGENIC      |               |                    |                    |
| SNP_83795_A_194289 | NW_004516170.1 | scaffold793 | 194289                  | TT                              | CC                 | CC               | INTERGENIC      |               |                    |                    |
| SNP_83796_A_194294 | NW_004516170.1 | scaffold793 | 194294                  | AA                              | TT                 | TT               | INTERGENIC      |               |                    |                    |
| SNP_83797_A_194301 | NW_004516170.1 | scaffold793 | 194301                  | TT                              | CC                 | CC               | INTERGENIC      |               |                    |                    |
| SNP_83799_A_248509 | NW_004516170.1 | scaffold793 | 248509                  | CC                              | GG                 | GG               | INTERGENIC      |               |                    |                    |
| SNP_83800_A_67536  | NW_004516171.1 | scaffold794 | 67536                   | TT                              | CC                 | CC               | INTERGENIC      |               |                    |                    |
| SNP_83801_A_79649  | NW_004516171.1 | scaffold794 | 79649                   | TT                              | CC                 | CC               | INTERGENIC      |               |                    |                    |
| SNP_83802_A_81639  | NW_004516171.1 | scaffold794 | 81639                   | GG                              | AA                 | AA               | INTERGENIC      |               |                    |                    |
| SNP_83803_A_137243 | NW_004516171.1 | scaffold794 | 137243                  | AA                              | CC                 | CC               | INTERGENIC      |               |                    |                    |
| SNP_83804_A_137276 | NW_004516171.1 | scaffold794 | 137276                  | AA                              | GG                 | GG               | INTERGENIC      |               |                    |                    |
| SNP_83805_A_137778 | NW_004516171.1 | scaffold794 | 137778                  | TT                              | CC                 | CC               | INTERGENIC      |               |                    |                    |
| SNP_83806_A_137917 | NW_004516171.1 | scaffold794 | 137917                  | CC                              | TT                 | TT               | INTERGENIC      |               |                    |                    |
| SNP_83807_A_137943 | NW_004516171.1 | scaffold794 | 137943                  | TT                              | CC                 | CC               | INTERGENIC      |               |                    |                    |
| SNP_83808_A_138050 | NW_004516171.1 | scaffold794 | 138050                  | CC                              | TT                 | TT               | INTERGENIC      |               |                    |                    |
| SNP_83809_A_138064 | NW_004516171.1 | scaffold794 | 138064                  | GG                              | CC                 | CC               | INTERGENIC      |               |                    |                    |



| SNPs IDs           | Chromosome IDs | Chromosomes | Physical positions (bp) | CDC Frontier (Reference genome) | (Pusa 1103 & HPNB) | (ILWC 46 & LPNB) | Sequence genome | Components of | Gene accession IDs | Putative functions |
|--------------------|----------------|-------------|-------------------------|---------------------------------|--------------------|------------------|-----------------|---------------|--------------------|--------------------|
| SNP_83810_A_138126 | NW_004516171.1 | scaffold794 | 138126                  | GG                              | AA                 | AA               | INTERGENIC      |               |                    |                    |
| SNP_83812_A_138149 | NW_004516171.1 | scaffold794 | 138149                  | GG                              | AA                 | AA               | INTERGENIC      |               |                    |                    |
| SNP_83813_A_138195 | NW_004516171.1 | scaffold794 | 138195                  | TT                              | CC                 | CC               | INTERGENIC      |               |                    |                    |
| SNP_83814_A_138281 | NW_004516171.1 | scaffold794 | 138281                  | TT                              | CC                 | CC               | INTERGENIC      |               |                    |                    |
| SNP_83815_A_138338 | NW_004516171.1 | scaffold794 | 138338                  | TT                              | CC                 | CC               | INTERGENIC      |               |                    |                    |
| SNP_83816_A_138367 | NW_004516171.1 | scaffold794 | 138367                  | GG                              | AA                 | AA               | INTERGENIC      |               |                    |                    |
| SNP_83817_A_138370 | NW_004516171.1 | scaffold794 | 138370                  | GG                              | AA                 | AA               | INTERGENIC      |               |                    |                    |
| SNP_83818_A_138502 | NW_004516171.1 | scaffold794 | 138502                  | TT                              | GG                 | GG               | INTERGENIC      |               |                    |                    |
| SNP_83819_A_138532 | NW_004516171.1 | scaffold794 | 138532                  | CC                              | TT                 | TT               | INTERGENIC      |               |                    |                    |
| SNP_83820_A_138548 | NW_004516171.1 | scaffold794 | 138548                  | CC                              | TT                 | TT               | INTERGENIC      |               |                    |                    |
| SNP_83821_A_138587 | NW_004516171.1 | scaffold794 | 138587                  | GG                              | TT                 | TT               | INTERGENIC      |               |                    |                    |
| SNP_83822_A_138611 | NW_004516171.1 | scaffold794 | 138611                  | AA                              | TT                 | TT               | INTERGENIC      |               |                    |                    |
| SNP_83823_A_168960 | NW_004516171.1 | scaffold794 | 168960                  | AA                              | GG                 | GG               | INTERGENIC      |               |                    |                    |
| SNP_83824_A_168977 | NW_004516171.1 | scaffold794 | 168977                  | CC                              | TT                 | TT               | INTERGENIC      |               |                    |                    |
| SNP_83825_A_169062 | NW_004516171.1 | scaffold794 | 169062                  | TT                              | AA                 | AA               | INTERGENIC      |               |                    |                    |
| SNP_83826_A_169354 | NW_004516171.1 | scaffold794 | 169354                  | AA                              | CC                 | CC               | INTERGENIC      |               |                    |                    |
| SNP_83827_A_169376 | NW_004516171.1 | scaffold794 | 169376                  | AA                              | CC                 | CC               | INTERGENIC      |               |                    |                    |
| SNP_83828_A_169415 | NW_004516171.1 | scaffold794 | 169415                  | GG                              | TT                 | TT               | INTERGENIC      |               |                    |                    |
| SNP_83829_A_194866 | NW_004516171.1 | scaffold794 | 194866                  | CC                              | TT                 | TT               | INTERGENIC      |               |                    |                    |
| SNP_83830_A_194868 | NW_004516171.1 | scaffold794 | 194868                  | TT                              | GG                 | GG               | INTERGENIC      |               |                    |                    |
| SNP_83831_A_194916 | NW_004516171.1 | scaffold794 | 194916                  | AA                              | TT                 | TT               | INTERGENIC      |               |                    |                    |
| SNP_83832_A_195005 | NW_004516171.1 | scaffold794 | 195005                  | GG                              | CC                 | CC               | INTERGENIC      |               |                    |                    |

| SNPs IDs           | Chromosome IDs | Chromosomes | Physical positions (bp) | CDC Frontier (Reference genome) | (Pusa 1103 & HPNB) | (ILWC 46 & LPNB) | Sequence genome | Components of | Gene accession IDs | Putative functions |
|--------------------|----------------|-------------|-------------------------|---------------------------------|--------------------|------------------|-----------------|---------------|--------------------|--------------------|
| SNP_83833_A_197018 | NW_004516171.1 | scaffold794 | 197018                  | TT                              | GG                 | GG               | INTERGENIC      |               |                    |                    |
| SNP_83834_A_222103 | NW_004516171.1 | scaffold794 | 222103                  | AA                              | CC                 | CC               | INTERGENIC      |               |                    |                    |
| SNP_83835_A_231910 | NW_004516171.1 | scaffold794 | 231910                  | CC                              | TT                 | TT               | INTERGENIC      |               |                    |                    |
| SNP_83836_A_243067 | NW_004516171.1 | scaffold794 | 243067                  | AA                              | GG                 | GG               | INTERGENIC      |               |                    |                    |
| SNP_83837_A_243264 | NW_004516171.1 | scaffold794 | 243264                  | TT                              | AA                 | AA               | INTERGENIC      |               |                    |                    |
| SNP_83838_A_243412 | NW_004516171.1 | scaffold794 | 243412                  | GG                              | TT                 | TT               | INTERGENIC      |               |                    |                    |
| SNP_83839_A_243417 | NW_004516171.1 | scaffold794 | 243417                  | GG                              | TT                 | TT               | INTERGENIC      |               |                    |                    |
| SNP_83840_A_243514 | NW_004516171.1 | scaffold794 | 243514                  | TT                              | GG                 | GG               | INTERGENIC      |               |                    |                    |
| SNP_83841_A_243814 | NW_004516171.1 | scaffold794 | 243814                  | AA                              | GG                 | GG               | INTERGENIC      |               |                    |                    |
| SNP_83842_A_245462 | NW_004516171.1 | scaffold794 | 245462                  | GG                              | CC                 | CC               | INTERGENIC      |               |                    |                    |
| SNP_83843_A_245539 | NW_004516171.1 | scaffold794 | 245539                  | TT                              | GG                 | GG               | INTERGENIC      |               |                    |                    |
| SNP_83844_A_245696 | NW_004516171.1 | scaffold794 | 245696                  | TT                              | CC                 | CC               | INTERGENIC      |               |                    |                    |
| SNP_83845_A_245698 | NW_004516171.1 | scaffold794 | 245698                  | CC                              | AA                 | AA               | INTERGENIC      |               |                    |                    |
| SNP_83846_A_245859 | NW_004516171.1 | scaffold794 | 245859                  | CC                              | AA                 | AA               | INTERGENIC      |               |                    |                    |
| SNP_83847_A_245902 | NW_004516171.1 | scaffold794 | 245902                  | GG                              | AA                 | AA               | INTERGENIC      |               |                    |                    |
| SNP_83848_A_245989 | NW_004516171.1 | scaffold794 | 245989                  | AA                              | TT                 | TT               | INTERGENIC      |               |                    |                    |
| SNP_83849_A_246022 | NW_004516171.1 | scaffold794 | 246022                  | CC                              | TT                 | TT               | INTERGENIC      |               |                    |                    |
| SNP_83850_A_246052 | NW_004516171.1 | scaffold794 | 246052                  | GG                              | AA                 | AA               | INTERGENIC      |               |                    |                    |
| SNP_83851_A_7292   | NW_004516173.1 | scaffold796 | 7292                    | CC                              | TT                 | TT               | INTERGENIC      |               |                    |                    |
| SNP_83852_A_7407   | NW_004516173.1 | scaffold796 | 7407                    | TT                              | GG                 | GG               | INTERGENIC      |               |                    |                    |
| SNP_83854_A_7536   | NW_004516173.1 | scaffold796 | 7536                    | TT                              | CC                 | CC               | INTERGENIC      |               |                    |                    |
| SNP_83855_A_11471  | NW_004516173.1 | scaffold796 | 11471                   | CC                              | TT                 | TT               | INTERGENIC      |               |                    |                    |

| SNPs IDs          | Chromosome IDs | Chromosomes | Physical positions (bp) | CDC Frontier (Reference genome) | (Pusa 1103 & HPNB) | (ILWC 46 & LPNB) | Sequence genome | Components of | Gene accession IDs | Putative functions |
|-------------------|----------------|-------------|-------------------------|---------------------------------|--------------------|------------------|-----------------|---------------|--------------------|--------------------|
| SNP_83856_A_17749 | NW_004516173.1 | scaffold796 | 17749                   | AA                              | TT                 | TT               | INTERGENIC      |               |                    |                    |
| SNP_83858_A_28038 | NW_004516173.1 | scaffold796 | 28038                   | AA                              | GG                 | GG               | INTERGENIC      |               |                    |                    |
| SNP_83860_A_33749 | NW_004516173.1 | scaffold796 | 33749                   | GG                              | AA                 | AA               | INTERGENIC      |               |                    |                    |
| SNP_83861_A_14797 | NW_004516174.1 | scaffold797 | 14797                   | AA                              | TT                 | TT               | INTERGENIC      |               |                    |                    |
| SNP_83862_A_14925 | NW_004516174.1 | scaffold797 | 14925                   | GG                              | AA                 | AA               | INTERGENIC      |               |                    |                    |
| SNP_83863_A_14969 | NW_004516174.1 | scaffold797 | 14969                   | AA                              | GG                 | GG               | INTERGENIC      |               |                    |                    |
| SNP_83865_A_16081 | NW_004516174.1 | scaffold797 | 16081                   | CC                              | TT                 | TT               | INTERGENIC      |               |                    |                    |
| SNP_83866_A_16116 | NW_004516174.1 | scaffold797 | 16116                   | TT                              | CC                 | CC               | INTERGENIC      |               |                    |                    |
| SNP_83867_A_16138 | NW_004516174.1 | scaffold797 | 16138                   | AA                              | GG                 | GG               | INTERGENIC      |               |                    |                    |
| SNP_83868_A_52852 | NW_004516174.1 | scaffold797 | 52852                   | TT                              | CC                 | CC               | INTERGENIC      |               |                    |                    |
| SNP_83869_A_53626 | NW_004516174.1 | scaffold797 | 53626                   | CC                              | AA                 | AA               | INTERGENIC      |               |                    |                    |
| SNP_83870_A_53639 | NW_004516174.1 | scaffold797 | 53639                   | CC                              | AA                 | AA               | INTERGENIC      |               |                    |                    |
| SNP_83871_A_53714 | NW_004516174.1 | scaffold797 | 53714                   | TT                              | AA                 | AA               | INTERGENIC      |               |                    |                    |
| SNP_83872_A_53717 | NW_004516174.1 | scaffold797 | 53717                   | GG                              | CC                 | CC               | INTERGENIC      |               |                    |                    |
| SNP_83873_A_53721 | NW_004516174.1 | scaffold797 | 53721                   | CC                              | GG                 | GG               | INTERGENIC      |               |                    |                    |
| SNP_83874_A_53904 | NW_004516174.1 | scaffold797 | 53904                   | GG                              | CC                 | CC               | INTERGENIC      |               |                    |                    |
| SNP_83875_A_53911 | NW_004516174.1 | scaffold797 | 53911                   | TT                              | GG                 | GG               | INTERGENIC      |               |                    |                    |
| SNP_83876_A_54008 | NW_004516174.1 | scaffold797 | 54008                   | AA                              | GG                 | GG               | INTERGENIC      |               |                    |                    |
| SNP_83877_A_54019 | NW_004516174.1 | scaffold797 | 54019                   | AA                              | TT                 | TT               | INTERGENIC      |               |                    |                    |
| SNP_83878_A_58204 | NW_004516174.1 | scaffold797 | 58204                   | TT                              | CC                 | CC               | INTERGENIC      |               |                    |                    |
| SNP_83879_A_1308  | NW_004516175.1 | scaffold798 | 1308                    | GG                              | TT                 | TT               | INTERGENIC      |               |                    |                    |
| SNP_83880_A_1309  | NW_004516175.1 | scaffold798 | 1309                    | TT                              | CC                 | CC               | INTERGENIC      |               |                    |                    |

| SNPs IDs          | Chromosome IDs | Chromosomes | Physical positions (bp) | CDC Frontier (Reference genome) | (Pusa 1103 & HPNB) | (ILWC 46 & LPNB) | Sequence Components of genome | Gene accession IDs | Putative functions           |
|-------------------|----------------|-------------|-------------------------|---------------------------------|--------------------|------------------|-------------------------------|--------------------|------------------------------|
| SNP_83881_A_1328  | NW_004516175.1 | scaffold798 | 1328                    | CC                              | AA                 | AA               | INTERGENIC                    |                    |                              |
| SNP_83882_A_1338  | NW_004516175.1 | scaffold798 | 1338                    | CC                              | TT                 | TT               | INTERGENIC                    |                    |                              |
| SNP_83883_A_1346  | NW_004516175.1 | scaffold798 | 1346                    | AA                              | CC                 | CC               | INTERGENIC                    |                    |                              |
| SNP_83884_A_1353  | NW_004516175.1 | scaffold798 | 1353                    | AA                              | CC                 | CC               | INTERGENIC                    |                    |                              |
| SNP_83885_A_7851  | NW_004516175.1 | scaffold798 | 7851                    | CC                              | TT                 | TT               | INTERGENIC                    |                    |                              |
| SNP_83886_A_16567 | NW_004516175.1 | scaffold798 | 16567                   | AA                              | GG                 | GG               | INTERGENIC                    |                    |                              |
| SNP_83887_A_16568 | NW_004516175.1 | scaffold798 | 16568                   | TT                              | GG                 | GG               | INTERGENIC                    |                    |                              |
| SNP_83889_A_17278 | NW_004516175.1 | scaffold798 | 17278                   | CC                              | TT                 | TT               | INTERGENIC                    |                    |                              |
| SNP_83890_A_17310 | NW_004516175.1 | scaffold798 | 17310                   | TT                              | CC                 | CC               | INTERGENIC                    |                    |                              |
| SNP_83891_A_29525 | NW_004516175.1 | scaffold798 | 29525                   | CC                              | TT                 | TT               | INTERGENIC                    |                    |                              |
| SNP_83892_A_32223 | NW_004516175.1 | scaffold798 | 32223                   | GG                              | AA                 | AA               | INTERGENIC                    |                    |                              |
| SNP_83893_A_32244 | NW_004516175.1 | scaffold798 | 32244                   | TT                              | CC                 | CC               | INTERGENIC                    |                    |                              |
| SNP_83894_A_34876 | NW_004516175.1 | scaffold798 | 34876                   | TT                              | AA                 | AA               | INTERGENIC                    |                    |                              |
| SNP_83895_A_54240 | NW_004516175.1 | scaffold798 | 54240                   | CC                              | AA                 | AA               | INTERGENIC                    |                    |                              |
| SNP_83896_A_54245 | NW_004516175.1 | scaffold798 | 54245                   | TT                              | GG                 | GG               | INTERGENIC                    |                    |                              |
| SNP_83897_A_58270 | NW_004516175.1 | scaffold798 | 58270                   | AA                              | TT                 | TT               | INTERGENIC                    |                    |                              |
| SNP_83898_A_60497 | NW_004516175.1 | scaffold798 | 60497                   | CC                              | TT                 | TT               | INTERGENIC                    |                    |                              |
| SNP_83899_A_63967 | NW_004516175.1 | scaffold798 | 63967                   | AA                              | GG                 | GG               | INTERGENIC                    |                    |                              |
| SNP_83900_A_4345  | NW_004516178.1 | scaffold801 | 4345                    | GG                              | TT                 | TT               | INTERGENIC                    |                    |                              |
| SNP_83903_A_11479 | NW_004516178.1 | scaffold801 | 11479                   | TT                              | CC                 | CC               | INTERGENIC                    |                    |                              |
| SNP_83904_A_13169 | NW_004516178.1 | scaffold801 | 13169                   | CC                              | TT                 | TT               | DRR                           | 101496630          | uncharacterized LOC101496630 |
| SNP_83905_A_13247 | NW_004516178.1 | scaffold801 | 13247                   | TT                              | CC                 | CC               | DRR                           | 101496630          | uncharacterized LOC101496630 |

| SNPs IDs          | Chromosome IDs | Chromosomes | Physical positions (bp) | CDC Frontier (Reference genome) | (Pusa 1103 & HPNB) | (ILWC 46 & LPNB) | Sequence genome       | Components of | Gene accession IDs           | Putative functions |
|-------------------|----------------|-------------|-------------------------|---------------------------------|--------------------|------------------|-----------------------|---------------|------------------------------|--------------------|
| SNP_83906_A_24468 | NW_004516178.1 | scaffold801 | 24468                   | AA                              | CC                 | CC               | INTERGENIC            |               |                              |                    |
| SNP_83907_A_32223 | NW_004516178.1 | scaffold801 | 32223                   | TT                              | CC                 | CC               | INTERGENIC            |               |                              |                    |
| SNP_83908_A_32886 | NW_004516178.1 | scaffold801 | 32886                   | GG                              | TT                 | TT               | INTERGENIC            |               |                              |                    |
| SNP_83909_A_33955 | NW_004516178.1 | scaffold801 | 33955                   | AA                              | TT                 | TT               | INTERGENIC            |               |                              |                    |
| SNP_83910_A_34133 | NW_004516178.1 | scaffold801 | 34133                   | AA                              | GG                 | GG               | INTERGENIC            |               |                              |                    |
| SNP_83911_A_38195 | NW_004516178.1 | scaffold801 | 38195                   | AA                              | GG                 | GG               | INTERGENIC            |               |                              |                    |
| SNP_83912_A_38208 | NW_004516178.1 | scaffold801 | 38208                   | GG                              | AA                 | AA               | INTERGENIC            |               |                              |                    |
| SNP_83913_A_38221 | NW_004516178.1 | scaffold801 | 38221                   | AA                              | GG                 | GG               | INTERGENIC            |               |                              |                    |
| SNP_83914_A_38327 | NW_004516178.1 | scaffold801 | 38327                   | AA                              | TT                 | TT               | INTERGENIC            |               |                              |                    |
| SNP_83915_A_38350 | NW_004516178.1 | scaffold801 | 38350                   | AA                              | GG                 | GG               | INTERGENIC            |               |                              |                    |
| SNP_83916_A_38375 | NW_004516178.1 | scaffold801 | 38375                   | CC                              | TT                 | TT               | INTERGENIC            |               |                              |                    |
| SNP_83918_A_45148 | NW_004516178.1 | scaffold801 | 45148                   | GG                              | AA                 | AA               | DRR                   | 101496949     | uncharacterized LOC101496949 |                    |
| SNP_83919_A_45839 | NW_004516178.1 | scaffold801 | 45839                   | CC                              | TT                 | TT               | NON_SYNONYMOUS_CODING | 101496949     | uncharacterized LOC101496949 |                    |
| SNP_83920_A_48071 | NW_004516178.1 | scaffold801 | 48071                   | TT                              | CC                 | CC               | INTERGENIC            |               |                              |                    |
| SNP_83921_A_48157 | NW_004516178.1 | scaffold801 | 48157                   | AA                              | GG                 | GG               | INTERGENIC            |               |                              |                    |
| SNP_83922_A_56461 | NW_004516178.1 | scaffold801 | 56461                   | TT                              | CC                 | CC               | INTERGENIC            |               |                              |                    |
| SNP_83923_A_65333 | NW_004516178.1 | scaffold801 | 65333                   | AA                              | CC                 | CC               | INTRON                | 101495103     | serine carboxypeptidase-like |                    |
| SNP_83924_A_79210 | NW_004516178.1 | scaffold801 | 79210                   | CC                              | TT                 | TT               | INTERGENIC            |               |                              |                    |
| SNP_83925_A_81847 | NW_004516178.1 | scaffold801 | 81847                   | TT                              | CC                 | CC               | INTERGENIC            |               |                              |                    |
| SNP_83926_A_83757 | NW_004516178.1 | scaffold801 | 83757                   | CC                              | TT                 | TT               | INTERGENIC            |               |                              |                    |
| SNP_83927_A_91759 | NW_004516178.1 | scaffold801 | 91759                   | TT                              | GG                 | GG               | INTERGENIC            |               |                              |                    |
| SNP_83928_A_95496 | NW_004516178.1 | scaffold801 | 95496                   | AA                              | TT                 | TT               | INTERGENIC            |               |                              |                    |

| SNPs IDs           | Chromosome IDs | Chromosomes | Physical positions (bp) | CDC Frontier (Reference genome) | (Pusa 1103 & HPNB) | (ILWC 46 & LPNB) | Sequence Components of genome | Gene accession IDs | Putative functions               |
|--------------------|----------------|-------------|-------------------------|---------------------------------|--------------------|------------------|-------------------------------|--------------------|----------------------------------|
| SNP_83929_A_95875  | NW_004516178.1 | scaffold801 | 95875                   | TT                              | CC                 | CC               | INTERGENIC                    |                    |                                  |
| SNP_83930_A_96046  | NW_004516178.1 | scaffold801 | 96046                   | TT                              | CC                 | CC               | INTERGENIC                    |                    |                                  |
| SNP_83931_A_96885  | NW_004516178.1 | scaffold801 | 96885                   | TT                              | CC                 | CC               | INTERGENIC                    |                    |                                  |
| SNP_83932_A_96968  | NW_004516178.1 | scaffold801 | 96968                   | AA                              | GG                 | GG               | INTERGENIC                    |                    |                                  |
| SNP_83933_A_97019  | NW_004516178.1 | scaffold801 | 97019                   | CC                              | TT                 | TT               | INTERGENIC                    |                    |                                  |
| SNP_83934_A_97116  | NW_004516178.1 | scaffold801 | 97116                   | TT                              | CC                 | CC               | INTERGENIC                    |                    |                                  |
| SNP_83936_A_112051 | NW_004516178.1 | scaffold801 | 112051                  | GG                              | AA                 | AA               | URR                           | 101495433          | uncharacterized LOC101495433     |
| SNP_83937_A_112618 | NW_004516178.1 | scaffold801 | 112618                  | GG                              | AA                 | AA               | URR                           | 101495433          | uncharacterized LOC101495433     |
| SNP_83938_A_112906 | NW_004516178.1 | scaffold801 | 112906                  | CC                              | TT                 | TT               | URR                           | 101495433          | uncharacterized LOC101495433     |
| SNP_83940_A_124319 | NW_004516178.1 | scaffold801 | 124319                  | CC                              | TT                 | TT               | INTERGENIC                    |                    |                                  |
| SNP_83941_A_139137 | NW_004516178.1 | scaffold801 | 139137                  | AA                              | GG                 | GG               | INTERGENIC                    |                    |                                  |
| SNP_83942_A_151134 | NW_004516178.1 | scaffold801 | 151134                  | AA                              | GG                 | GG               | INTERGENIC                    |                    |                                  |
| SNP_83944_A_157290 | NW_004516178.1 | scaffold801 | 157290                  | TT                              | CC                 | CC               | URR                           | 101495963          | uncharacterized LOC101495963     |
| SNP_83945_A_160504 | NW_004516178.1 | scaffold801 | 160504                  | GG                              | TT                 | TT               | INTERGENIC                    |                    |                                  |
| SNP_83947_A_161464 | NW_004516178.1 | scaffold801 | 161464                  | TT                              | AA                 | AA               | INTERGENIC                    |                    |                                  |
| SNP_83948_A_173991 | NW_004516178.1 | scaffold801 | 173991                  | TT                              | CC                 | CC               | INTERGENIC                    |                    |                                  |
| SNP_83949_A_175139 | NW_004516178.1 | scaffold801 | 175139                  | TT                              | GG                 | GG               | INTERGENIC                    |                    |                                  |
| SNP_83951_A_192081 | NW_004516178.1 | scaffold801 | 192081                  | GG                              | AA                 | AA               | INTERGENIC                    |                    |                                  |
| SNP_83953_A_200756 | NW_004516178.1 | scaffold801 | 200756                  | CC                              | AA                 | AA               | INTERGENIC                    |                    |                                  |
| SNP_83954_A_201926 | NW_004516178.1 | scaffold801 | 201926                  | CC                              | TT                 | TT               | INTERGENIC                    |                    |                                  |
| SNP_83956_A_210805 | NW_004516178.1 | scaffold801 | 210805                  | CC                              | TT                 | TT               | INTERGENIC                    |                    |                                  |
| SNP_83957_A_219764 | NW_004516178.1 | scaffold801 | 219764                  | CC                              | TT                 | TT               | URR                           | 101496298          | protein cornichon homolog 1-like |

| SNPs IDs           | Chromosome IDs | Chromosomes | Physical positions (bp) | CDC Frontier (Reference genome) | (Pusa 1103 & HPNB) | (ILWC 46 & LPNB) | Sequence genome | Components of | Gene accession IDs | Putative functions |
|--------------------|----------------|-------------|-------------------------|---------------------------------|--------------------|------------------|-----------------|---------------|--------------------|--------------------|
| SNP_83958_A_256706 | NW_004516178.1 | scaffold801 | 256706                  | CC                              | TT                 | TT               | INTERGENIC      |               |                    |                    |
| SNP_83959_A_260855 | NW_004516178.1 | scaffold801 | 260855                  | CC                              | AA                 | AA               | INTERGENIC      |               |                    |                    |
| SNP_83961_A_465    | NW_004516179.1 | scaffold802 | 465                     | CC                              | AA                 | AA               | INTERGENIC      |               |                    |                    |
| SNP_83962_A_920    | NW_004516179.1 | scaffold802 | 920                     | TT                              | GG                 | GG               | INTERGENIC      |               |                    |                    |
| SNP_83963_A_1081   | NW_004516179.1 | scaffold802 | 1081                    | GG                              | TT                 | TT               | INTERGENIC      |               |                    |                    |
| SNP_83964_A_39039  | NW_004516180.1 | scaffold803 | 39039                   | CC                              | TT                 | TT               | INTERGENIC      |               |                    |                    |
| SNP_83965_A_39080  | NW_004516180.1 | scaffold803 | 39080                   | CC                              | TT                 | TT               | INTERGENIC      |               |                    |                    |
| SNP_83966_A_39253  | NW_004516180.1 | scaffold803 | 39253                   | CC                              | AA                 | AA               | INTERGENIC      |               |                    |                    |
| SNP_83967_A_39257  | NW_004516180.1 | scaffold803 | 39257                   | TT                              | CC                 | CC               | INTERGENIC      |               |                    |                    |
| SNP_83968_A_568    | NW_004516181.1 | scaffold806 | 568                     | CC                              | TT                 | TT               | INTERGENIC      |               |                    |                    |
| SNP_83969_A_899    | NW_004516181.1 | scaffold806 | 899                     | AA                              | TT                 | TT               | INTERGENIC      |               |                    |                    |
| SNP_83970_A_926    | NW_004516181.1 | scaffold806 | 926                     | AA                              | GG                 | GG               | INTERGENIC      |               |                    |                    |
| SNP_83971_A_1204   | NW_004516181.1 | scaffold806 | 1204                    | CC                              | TT                 | TT               | INTERGENIC      |               |                    |                    |
| SNP_83972_A_14638  | NW_004516181.1 | scaffold806 | 14638                   | TT                              | GG                 | GG               | INTERGENIC      |               |                    |                    |
| SNP_83973_A_14687  | NW_004516181.1 | scaffold806 | 14687                   | CC                              | TT                 | TT               | INTERGENIC      |               |                    |                    |
| SNP_83974_A_19771  | NW_004516181.1 | scaffold806 | 19771                   | TT                              | CC                 | CC               | INTERGENIC      |               |                    |                    |
| SNP_83976_A_37513  | NW_004516181.1 | scaffold806 | 37513                   | AA                              | GG                 | GG               | INTERGENIC      |               |                    |                    |
| SNP_83977_A_40982  | NW_004516181.1 | scaffold806 | 40982                   | CC                              | TT                 | TT               | INTERGENIC      |               |                    |                    |
| SNP_83978_A_41103  | NW_004516181.1 | scaffold806 | 41103                   | AA                              | CC                 | CC               | INTERGENIC      |               |                    |                    |
| SNP_83979_A_45394  | NW_004516181.1 | scaffold806 | 45394                   | TT                              | CC                 | CC               | INTERGENIC      |               |                    |                    |
| SNP_83980_A_46473  | NW_004516181.1 | scaffold806 | 46473                   | CC                              | TT                 | TT               | INTERGENIC      |               |                    |                    |
| SNP_83981_A_49116  | NW_004516181.1 | scaffold806 | 49116                   | AA                              | GG                 | GG               | INTERGENIC      |               |                    |                    |

| SNPs IDs           | Chromosome IDs | Chromosomes | Physical positions (bp) | CDC Frontier (Reference genome) | (Pusa 1103 & HPNB) | (ILWC 46 & LPNB) | Sequence genome | Components of | Gene accession IDs | Putative functions |
|--------------------|----------------|-------------|-------------------------|---------------------------------|--------------------|------------------|-----------------|---------------|--------------------|--------------------|
| SNP_83982_A_49222  | NW_004516181.1 | scaffold806 | 49222                   | GG                              | TT                 | TT               | INTERGENIC      |               |                    |                    |
| SNP_83983_A_53997  | NW_004516181.1 | scaffold806 | 53997                   | GG                              | AA                 | AA               | INTERGENIC      |               |                    |                    |
| SNP_83984_A_54989  | NW_004516181.1 | scaffold806 | 54989                   | GG                              | TT                 | TT               | INTERGENIC      |               |                    |                    |
| SNP_83985_A_81506  | NW_004516181.1 | scaffold806 | 81506                   | AA                              | GG                 | GG               | INTERGENIC      |               |                    |                    |
| SNP_83986_A_81519  | NW_004516181.1 | scaffold806 | 81519                   | TT                              | CC                 | CC               | INTERGENIC      |               |                    |                    |
| SNP_83988_A_81718  | NW_004516181.1 | scaffold806 | 81718                   | CC                              | TT                 | TT               | INTERGENIC      |               |                    |                    |
| SNP_83989_A_81790  | NW_004516181.1 | scaffold806 | 81790                   | TT                              | CC                 | CC               | INTERGENIC      |               |                    |                    |
| SNP_83990_A_81968  | NW_004516181.1 | scaffold806 | 81968                   | TT                              | CC                 | CC               | INTERGENIC      |               |                    |                    |
| SNP_83991_A_81974  | NW_004516181.1 | scaffold806 | 81974                   | CC                              | AA                 | AA               | INTERGENIC      |               |                    |                    |
| SNP_83992_A_94527  | NW_004516181.1 | scaffold806 | 94527                   | CC                              | AA                 | AA               | INTERGENIC      |               |                    |                    |
| SNP_83993_A_95455  | NW_004516181.1 | scaffold806 | 95455                   | CC                              | AA                 | AA               | INTERGENIC      |               |                    |                    |
| SNP_83994_A_95470  | NW_004516181.1 | scaffold806 | 95470                   | AA                              | GG                 | GG               | INTERGENIC      |               |                    |                    |
| SNP_83995_A_95538  | NW_004516181.1 | scaffold806 | 95538                   | CC                              | TT                 | TT               | INTERGENIC      |               |                    |                    |
| SNP_83996_A_96463  | NW_004516181.1 | scaffold806 | 96463                   | GG                              | CC                 | CC               | INTERGENIC      |               |                    |                    |
| SNP_83997_A_96513  | NW_004516181.1 | scaffold806 | 96513                   | GG                              | AA                 | AA               | INTERGENIC      |               |                    |                    |
| SNP_83998_A_97398  | NW_004516181.1 | scaffold806 | 97398                   | CC                              | TT                 | TT               | INTERGENIC      |               |                    |                    |
| SNP_83999_A_98770  | NW_004516181.1 | scaffold806 | 98770                   | AA                              | GG                 | GG               | INTERGENIC      |               |                    |                    |
| SNP_84000_A_98773  | NW_004516181.1 | scaffold806 | 98773                   | AA                              | GG                 | GG               | INTERGENIC      |               |                    |                    |
| SNP_84001_A_103416 | NW_004516181.1 | scaffold806 | 103416                  | CC                              | TT                 | TT               | INTERGENIC      |               |                    |                    |
| SNP_84002_A_103448 | NW_004516181.1 | scaffold806 | 103448                  | AA                              | CC                 | CC               | INTERGENIC      |               |                    |                    |
| SNP_84003_A_104112 | NW_004516181.1 | scaffold806 | 104112                  | AA                              | GG                 | GG               | INTERGENIC      |               |                    |                    |
| SNP_84004_A_130852 | NW_004516181.1 | scaffold806 | 130852                  | AA                              | GG                 | GG               | INTERGENIC      |               |                    |                    |



| SNPs IDs           | Chromosome IDs | Chromosomes | Physical positions (bp) | CDC Frontier (Reference genome) | (Pusa 1103 & HPNB) | (ILWC 46 & LPNB) | Sequence genome | Components of | Gene accession IDs | Putative functions |
|--------------------|----------------|-------------|-------------------------|---------------------------------|--------------------|------------------|-----------------|---------------|--------------------|--------------------|
| SNP_84005_A_131464 | NW_004516181.1 | scaffold806 | 131464                  | TT                              | CC                 | CC               | INTERGENIC      |               |                    |                    |
| SNP_84006_A_131501 | NW_004516181.1 | scaffold806 | 131501                  | TT                              | GG                 | GG               | INTERGENIC      |               |                    |                    |
| SNP_84007_A_131513 | NW_004516181.1 | scaffold806 | 131513                  | AA                              | GG                 | GG               | INTERGENIC      |               |                    |                    |
| SNP_84008_A_131537 | NW_004516181.1 | scaffold806 | 131537                  | TT                              | AA                 | AA               | INTERGENIC      |               |                    |                    |
| SNP_84009_A_131583 | NW_004516181.1 | scaffold806 | 131583                  | TT                              | GG                 | GG               | INTERGENIC      |               |                    |                    |
| SNP_84010_A_131624 | NW_004516181.1 | scaffold806 | 131624                  | TT                              | CC                 | CC               | INTERGENIC      |               |                    |                    |
| SNP_84011_A_131704 | NW_004516181.1 | scaffold806 | 131704                  | CC                              | TT                 | TT               | INTERGENIC      |               |                    |                    |
| SNP_84012_A_131899 | NW_004516181.1 | scaffold806 | 131899                  | TT                              | CC                 | CC               | INTERGENIC      |               |                    |                    |
| SNP_84013_A_131964 | NW_004516181.1 | scaffold806 | 131964                  | GG                              | TT                 | TT               | INTERGENIC      |               |                    |                    |
| SNP_84014_A_131971 | NW_004516181.1 | scaffold806 | 131971                  | TT                              | CC                 | CC               | INTERGENIC      |               |                    |                    |
| SNP_84015_A_131980 | NW_004516181.1 | scaffold806 | 131980                  | AA                              | CC                 | CC               | INTERGENIC      |               |                    |                    |
| SNP_84016_A_133344 | NW_004516181.1 | scaffold806 | 133344                  | TT                              | CC                 | CC               | INTERGENIC      |               |                    |                    |
| SNP_84017_A_133353 | NW_004516181.1 | scaffold806 | 133353                  | TT                              | CC                 | CC               | INTERGENIC      |               |                    |                    |
| SNP_84018_A_133542 | NW_004516181.1 | scaffold806 | 133542                  | TT                              | CC                 | CC               | INTERGENIC      |               |                    |                    |
| SNP_84019_A_133547 | NW_004516181.1 | scaffold806 | 133547                  | CC                              | TT                 | TT               | INTERGENIC      |               |                    |                    |
| SNP_84020_A_133628 | NW_004516181.1 | scaffold806 | 133628                  | AA                              | GG                 | GG               | INTERGENIC      |               |                    |                    |
| SNP_84021_A_133641 | NW_004516181.1 | scaffold806 | 133641                  | TT                              | AA                 | AA               | INTERGENIC      |               |                    |                    |
| SNP_84022_A_133665 | NW_004516181.1 | scaffold806 | 133665                  | CC                              | TT                 | TT               | INTERGENIC      |               |                    |                    |
| SNP_84023_A_133719 | NW_004516181.1 | scaffold806 | 133719                  | CC                              | TT                 | TT               | INTERGENIC      |               |                    |                    |
| SNP_84024_A_3407   | NW_004516182.1 | scaffold808 | 3407                    | GG                              | AA                 | AA               | INTERGENIC      |               |                    |                    |
| SNP_84025_A_4960   | NW_004516182.1 | scaffold808 | 4960                    | TT                              | GG                 | GG               | INTERGENIC      |               |                    |                    |
| SNP_84026_A_4992   | NW_004516182.1 | scaffold808 | 4992                    | GG                              | AA                 | AA               | INTERGENIC      |               |                    |                    |

| SNPs IDs           | Chromosome IDs | Chromosomes | Physical positions (bp) | CDC Frontier (Reference genome) | (Pusa 1103 & HPNB) | (ILWC 46 & LPNB) | Sequence Components of genome | Gene accession IDs | Putative functions                                   |
|--------------------|----------------|-------------|-------------------------|---------------------------------|--------------------|------------------|-------------------------------|--------------------|------------------------------------------------------|
| SNP_84027_A_5010   | NW_004516182.1 | scaffold808 | 5010                    | GG                              | AA                 | AA               | INTERGENIC                    |                    |                                                      |
| SNP_84028_A_5019   | NW_004516182.1 | scaffold808 | 5019                    | CC                              | TT                 | TT               | INTERGENIC                    |                    |                                                      |
| SNP_84029_A_5085   | NW_004516182.1 | scaffold808 | 5085                    | GG                              | AA                 | AA               | INTERGENIC                    |                    |                                                      |
| SNP_84030_A_5109   | NW_004516182.1 | scaffold808 | 5109                    | AA                              | GG                 | GG               | INTERGENIC                    |                    |                                                      |
| SNP_84031_A_5139   | NW_004516182.1 | scaffold808 | 5139                    | CC                              | TT                 | TT               | INTERGENIC                    |                    |                                                      |
| SNP_84032_A_3774   | NW_004516183.1 | scaffold809 | 3774                    | TT                              | CC                 | CC               | INTERGENIC                    |                    |                                                      |
| SNP_84033_A_56785  | NW_004516183.1 | scaffold809 | 56785                   | AA                              | TT                 | TT               | INTERGENIC                    |                    |                                                      |
| SNP_84034_A_65711  | NW_004516183.1 | scaffold809 | 65711                   | AA                              | GG                 | GG               | INTERGENIC                    |                    |                                                      |
| SNP_84035_A_70705  | NW_004516183.1 | scaffold809 | 70705                   | TT                              | CC                 | CC               | DRR                           | 101498922          | Unknown function                                     |
| SNP_84036_A_89518  | NW_004516183.1 | scaffold809 | 89518                   | CC                              | TT                 | TT               | URR                           | 101499246          | uncharacterized LOC101499246                         |
| SNP_84037_A_100100 | NW_004516183.1 | scaffold809 | 100100                  | CC                              | AA                 | AA               | URR                           | 101499565          | DNA mismatch repair protein MSH1, mitochondrial-like |
| SNP_84038_A_100400 | NW_004516183.1 | scaffold809 | 100400                  | CC                              | AA                 | AA               | URR                           | 101499565          | DNA mismatch repair protein MSH1, mitochondrial-like |
| SNP_84039_A_108498 | NW_004516183.1 | scaffold809 | 108498                  | CC                              | AA                 | AA               | INTERGENIC                    |                    |                                                      |
| SNP_84040_A_112349 | NW_004516183.1 | scaffold809 | 112349                  | GG                              | TT                 | TT               | INTERGENIC                    |                    |                                                      |
| SNP_84041_A_115075 | NW_004516183.1 | scaffold809 | 115075                  | TT                              | CC                 | CC               | INTERGENIC                    |                    |                                                      |
| SNP_84042_A_115165 | NW_004516183.1 | scaffold809 | 115165                  | TT                              | CC                 | CC               | INTERGENIC                    |                    |                                                      |
| SNP_84043_A_115391 | NW_004516183.1 | scaffold809 | 115391                  | TT                              | AA                 | AA               | INTERGENIC                    |                    |                                                      |
| SNP_84044_A_115422 | NW_004516183.1 | scaffold809 | 115422                  | AA                              | GG                 | GG               | INTERGENIC                    |                    |                                                      |
| SNP_84045_A_115479 | NW_004516183.1 | scaffold809 | 115479                  | AA                              | GG                 | GG               | INTERGENIC                    |                    |                                                      |
| SNP_84046_A_115916 | NW_004516183.1 | scaffold809 | 115916                  | CC                              | AA                 | AA               | INTERGENIC                    |                    |                                                      |
| SNP_84047_A_133028 | NW_004516183.1 | scaffold809 | 133028                  | AA                              | TT                 | TT               | INTERGENIC                    |                    |                                                      |
| SNP_84048_A_140710 | NW_004516183.1 | scaffold809 | 140710                  | AA                              | TT                 | TT               | INTERGENIC                    |                    |                                                      |

| SNPs IDs           | Chromosome IDs | Chromosomes | Physical positions (bp) | CDC Frontier (Reference genome) | (Pusa 1103 & HPNB) | (ILWC 46 & LPNB) | Sequence Components of genome | Gene accession IDs | Putative functions           |
|--------------------|----------------|-------------|-------------------------|---------------------------------|--------------------|------------------|-------------------------------|--------------------|------------------------------|
| SNP_84049_A_143004 | NW_004516183.1 | scaffold809 | 143004                  | GG                              | TT                 | TT               | INTERGENIC                    |                    |                              |
| SNP_84050_A_148035 | NW_004516183.1 | scaffold809 | 148035                  | TT                              | CC                 | CC               | INTERGENIC                    |                    |                              |
| SNP_84052_A_86567  | NW_004516184.1 | scaffold811 | 86567                   | TT                              | CC                 | CC               | INTRON                        | 101501162          | uncharacterized LOC101501162 |
| SNP_84053_A_86579  | NW_004516184.1 | scaffold811 | 86579                   | AA                              | GG                 | GG               | INTRON                        | 101501162          | uncharacterized LOC101501162 |
| SNP_84054_A_86637  | NW_004516184.1 | scaffold811 | 86637                   | AA                              | GG                 | GG               | INTRON                        | 101501162          | uncharacterized LOC101501162 |
| SNP_84055_A_112271 | NW_004516184.1 | scaffold811 | 112271                  | CC                              | GG                 | GG               | INTRON                        | 101501162          | uncharacterized LOC101501162 |
| SNP_84056_A_112300 | NW_004516184.1 | scaffold811 | 112300                  | AA                              | GG                 | GG               | INTRON                        | 101501162          | uncharacterized LOC101501162 |
| SNP_84057_A_112320 | NW_004516184.1 | scaffold811 | 112320                  | TT                              | AA                 | AA               | INTRON                        | 101501162          | uncharacterized LOC101501162 |
| SNP_84058_A_112325 | NW_004516184.1 | scaffold811 | 112325                  | CC                              | AA                 | AA               | INTRON                        | 101501162          | uncharacterized LOC101501162 |
| SNP_84059_A_112356 | NW_004516184.1 | scaffold811 | 112356                  | GG                              | AA                 | AA               | INTRON                        | 101501162          | uncharacterized LOC101501162 |
| SNP_84060_A_112359 | NW_004516184.1 | scaffold811 | 112359                  | GG                              | AA                 | AA               | INTRON                        | 101501162          | uncharacterized LOC101501162 |
| SNP_84061_A_127678 | NW_004516184.1 | scaffold811 | 127678                  | GG                              | TT                 | TT               | INTERGENIC                    |                    |                              |
| SNP_84062_A_127755 | NW_004516184.1 | scaffold811 | 127755                  | CC                              | TT                 | TT               | INTERGENIC                    |                    |                              |
| SNP_84063_A_128021 | NW_004516184.1 | scaffold811 | 128021                  | TT                              | CC                 | CC               | INTERGENIC                    |                    |                              |
| SNP_84064_A_128046 | NW_004516184.1 | scaffold811 | 128046                  | GG                              | AA                 | AA               | INTERGENIC                    |                    |                              |
| SNP_84065_A_128069 | NW_004516184.1 | scaffold811 | 128069                  | TT                              | CC                 | CC               | INTERGENIC                    |                    |                              |
| SNP_84066_A_128119 | NW_004516184.1 | scaffold811 | 128119                  | TT                              | AA                 | AA               | INTERGENIC                    |                    |                              |
| SNP_84068_A_159648 | NW_004516184.1 | scaffold811 | 159648                  | AA                              | GG                 | GG               | INTERGENIC                    |                    |                              |
| SNP_84069_A_184285 | NW_004516184.1 | scaffold811 | 184285                  | CC                              | TT                 | TT               | INTERGENIC                    |                    |                              |
| SNP_84070_A_184402 | NW_004516184.1 | scaffold811 | 184402                  | GG                              | AA                 | AA               | INTERGENIC                    |                    |                              |
| SNP_84071_A_184682 | NW_004516184.1 | scaffold811 | 184682                  | AA                              | GG                 | GG               | INTERGENIC                    |                    |                              |
| SNP_84072_A_184698 | NW_004516184.1 | scaffold811 | 184698                  | CC                              | TT                 | TT               | INTERGENIC                    |                    |                              |

| SNPs IDs           | Chromosome IDs | Chromosomes | Physical positions (bp) | CDC Frontier (Reference genome) | (Pusa 1103 & HPNB) | (ILWC 46 & LPNB) | Sequence genome | Components of | Gene accession IDs | Putative functions |
|--------------------|----------------|-------------|-------------------------|---------------------------------|--------------------|------------------|-----------------|---------------|--------------------|--------------------|
| SNP_84073_A_184705 | NW_004516184.1 | scaffold811 | 184705                  | CC                              | TT                 | TT               | INTERGENIC      |               |                    |                    |
| SNP_84074_A_184706 | NW_004516184.1 | scaffold811 | 184706                  | AA                              | TT                 | TT               | INTERGENIC      |               |                    |                    |
| SNP_84075_A_184708 | NW_004516184.1 | scaffold811 | 184708                  | TT                              | CC                 | CC               | INTERGENIC      |               |                    |                    |
| SNP_84076_A_195440 | NW_004516184.1 | scaffold811 | 195440                  | AA                              | TT                 | TT               | INTERGENIC      |               |                    |                    |
| SNP_84077_A_203838 | NW_004516184.1 | scaffold811 | 203838                  | GG                              | CC                 | CC               | INTERGENIC      |               |                    |                    |
| SNP_84078_A_228856 | NW_004516184.1 | scaffold811 | 228856                  | TT                              | AA                 | AA               | INTERGENIC      |               |                    |                    |
| SNP_84079_A_228882 | NW_004516184.1 | scaffold811 | 228882                  | TT                              | GG                 | GG               | INTERGENIC      |               |                    |                    |
| SNP_84082_A_245216 | NW_004516184.1 | scaffold811 | 245216                  | AA                              | GG                 | GG               | INTERGENIC      |               |                    |                    |
| SNP_84083_A_251686 | NW_004516184.1 | scaffold811 | 251686                  | CC                              | GG                 | GG               | INTERGENIC      |               |                    |                    |
| SNP_84084_A_251698 | NW_004516184.1 | scaffold811 | 251698                  | GG                              | TT                 | TT               | INTERGENIC      |               |                    |                    |
| SNP_84085_A_251714 | NW_004516184.1 | scaffold811 | 251714                  | GG                              | AA                 | AA               | INTERGENIC      |               |                    |                    |
| SNP_84086_A_258308 | NW_004516184.1 | scaffold811 | 258308                  | CC                              | AA                 | AA               | INTERGENIC      |               |                    |                    |
| SNP_84087_A_276664 | NW_004516184.1 | scaffold811 | 276664                  | CC                              | AA                 | AA               | INTERGENIC      |               |                    |                    |
| SNP_84088_A_279069 | NW_004516184.1 | scaffold811 | 279069                  | CC                              | AA                 | AA               | INTERGENIC      |               |                    |                    |
| SNP_84089_A_286812 | NW_004516184.1 | scaffold811 | 286812                  | TT                              | CC                 | CC               | INTERGENIC      |               |                    |                    |
| SNP_84090_A_294996 | NW_004516184.1 | scaffold811 | 294996                  | TT                              | GG                 | GG               | INTERGENIC      |               |                    |                    |
| SNP_84091_A_314928 | NW_004516184.1 | scaffold811 | 314928                  | GG                              | TT                 | TT               | INTERGENIC      |               |                    |                    |
| SNP_84092_A_45224  | NW_004516185.1 | scaffold812 | 45224                   | CC                              | TT                 | TT               | INTERGENIC      |               |                    |                    |
| SNP_84093_A_52478  | NW_004516185.1 | scaffold812 | 52478                   | AA                              | GG                 | GG               | INTERGENIC      |               |                    |                    |
| SNP_84094_A_61452  | NW_004516185.1 | scaffold812 | 61452                   | CC                              | TT                 | TT               | INTERGENIC      |               |                    |                    |
| SNP_84095_A_66503  | NW_004516185.1 | scaffold812 | 66503                   | AA                              | GG                 | GG               | INTERGENIC      |               |                    |                    |
| SNP_84096_A_82117  | NW_004516185.1 | scaffold812 | 82117                   | CC                              | TT                 | TT               | INTERGENIC      |               |                    |                    |

| SNPs IDs           | Chromosome IDs | Chromosomes | Physical positions (bp) | CDC Frontier (Reference genome) | (Pusa 1103 & HPNB) | (ILWC 46 & LPNB) | Sequence Components of genome | Gene accession IDs | Putative functions           |
|--------------------|----------------|-------------|-------------------------|---------------------------------|--------------------|------------------|-------------------------------|--------------------|------------------------------|
| SNP_84097_A_82414  | NW_004516185.1 | scaffold812 | 82414                   | TT                              | GG                 | GG               | INTERGENIC                    |                    |                              |
| SNP_84098_A_92159  | NW_004516185.1 | scaffold812 | 92159                   | AA                              | TT                 | TT               | INTERGENIC                    |                    |                              |
| SNP_84099_A_95432  | NW_004516185.1 | scaffold812 | 95432                   | CC                              | AA                 | AA               | INTERGENIC                    |                    |                              |
| SNP_84100_A_95447  | NW_004516185.1 | scaffold812 | 95447                   | TT                              | CC                 | CC               | INTERGENIC                    |                    |                              |
| SNP_84101_A_105308 | NW_004516185.1 | scaffold812 | 105308                  | CC                              | TT                 | TT               | INTERGENIC                    |                    |                              |
| SNP_84102_A_106741 | NW_004516185.1 | scaffold812 | 106741                  | AA                              | GG                 | GG               | INTERGENIC                    |                    |                              |
| SNP_84103_A_106759 | NW_004516185.1 | scaffold812 | 106759                  | TT                              | GG                 | GG               | INTERGENIC                    |                    |                              |
| SNP_84104_A_106784 | NW_004516185.1 | scaffold812 | 106784                  | AA                              | TT                 | TT               | INTERGENIC                    |                    |                              |
| SNP_84105_A_106866 | NW_004516185.1 | scaffold812 | 106866                  | GG                              | TT                 | TT               | INTERGENIC                    |                    |                              |
| SNP_84106_A_106872 | NW_004516185.1 | scaffold812 | 106872                  | TT                              | GG                 | GG               | INTERGENIC                    |                    |                              |
| SNP_84107_A_187425 | NW_004516185.1 | scaffold812 | 187425                  | GG                              | AA                 | AA               | INTERGENIC                    |                    |                              |
| SNP_84108_A_191736 | NW_004516185.1 | scaffold812 | 191736                  | AA                              | GG                 | GG               | INTRON                        | 101504581          | uncharacterized LOC101504581 |
| SNP_84109_A_202462 | NW_004516185.1 | scaffold812 | 202462                  | AA                              | GG                 | GG               | URR                           | 101504581          | uncharacterized LOC101504581 |
| SNP_84110_A_207032 | NW_004516185.1 | scaffold812 | 207032                  | GG                              | AA                 | AA               | INTRON                        | 101508327          | Unknown function             |
| SNP_84111_A_211242 | NW_004516185.1 | scaffold812 | 211242                  | CC                              | AA                 | AA               | INTRON                        | 101508327          | Unknown function             |
| SNP_84112_A_212099 | NW_004516185.1 | scaffold812 | 212099                  | CC                              | TT                 | TT               | URR                           | 101508327          | Unknown function             |
| SNP_84113_A_212124 | NW_004516185.1 | scaffold812 | 212124                  | CC                              | TT                 | TT               | URR                           | 101508327          | Unknown function             |
| SNP_84114_A_215173 | NW_004516185.1 | scaffold812 | 215173                  | GG                              | AA                 | AA               | INTERGENIC                    |                    |                              |
| SNP_84117_A_216868 | NW_004516185.1 | scaffold812 | 216868                  | CC                              | TT                 | TT               | INTERGENIC                    |                    |                              |
| SNP_84118_A_228433 | NW_004516185.1 | scaffold812 | 228433                  | TT                              | AA                 | AA               | INTERGENIC                    |                    |                              |
| SNP_84120_A_229249 | NW_004516185.1 | scaffold812 | 229249                  | GG                              | AA                 | AA               | INTERGENIC                    |                    |                              |
| SNP_84122_A_257430 | NW_004516185.1 | scaffold812 | 257430                  | AA                              | CC                 | CC               | INTERGENIC                    |                    |                              |

| SNPs IDs           | Chromosome IDs | Chromosomes | Physical positions (bp) | CDC Frontier (Reference genome) | (Pusa 1103 & HPNB) | (ILWC 46 & LPNB) | Sequence Components of genome | Gene accession IDs | Putative functions          |
|--------------------|----------------|-------------|-------------------------|---------------------------------|--------------------|------------------|-------------------------------|--------------------|-----------------------------|
| SNP_84123_A_259722 | NW_004516185.1 | scaffold812 | 259722                  | TT                              | CC                 | CC               | INTERGENIC                    |                    |                             |
| SNP_84124_A_263260 | NW_004516185.1 | scaffold812 | 263260                  | AA                              | GG                 | GG               | INTERGENIC                    |                    |                             |
| SNP_84125_A_265270 | NW_004516185.1 | scaffold812 | 265270                  | AA                              | GG                 | GG               | INTERGENIC                    |                    |                             |
| SNP_84126_A_268658 | NW_004516185.1 | scaffold812 | 268658                  | CC                              | TT                 | TT               | INTERGENIC                    |                    |                             |
| SNP_84127_A_275842 | NW_004516185.1 | scaffold812 | 275842                  | AA                              | GG                 | GG               | INTERGENIC                    |                    |                             |
| SNP_84128_A_279210 | NW_004516185.1 | scaffold812 | 279210                  | AA                              | GG                 | GG               | DRR                           | 101505855          | geraniol 8-hydroxylase-like |
| SNP_84129_A_283601 | NW_004516185.1 | scaffold812 | 283601                  | GG                              | TT                 | TT               | URR                           | 101505855          | geraniol 8-hydroxylase-like |
| SNP_84131_A_286619 | NW_004516185.1 | scaffold812 | 286619                  | AA                              | TT                 | TT               | INTERGENIC                    |                    |                             |
| SNP_84132_A_286644 | NW_004516185.1 | scaffold812 | 286644                  | AA                              | TT                 | TT               | INTERGENIC                    |                    |                             |
| SNP_84133_A_286648 | NW_004516185.1 | scaffold812 | 286648                  | AA                              | TT                 | TT               | INTERGENIC                    |                    |                             |
| SNP_84134_A_297465 | NW_004516185.1 | scaffold812 | 297465                  | GG                              | AA                 | AA               | INTERGENIC                    |                    |                             |
| SNP_84135_A_304425 | NW_004516185.1 | scaffold812 | 304425                  | CC                              | GG                 | GG               | INTERGENIC                    |                    |                             |
| SNP_84136_A_311472 | NW_004516185.1 | scaffold812 | 311472                  | TT                              | CC                 | CC               | INTERGENIC                    |                    |                             |
| SNP_84138_A_320337 | NW_004516185.1 | scaffold812 | 320337                  | TT                              | GG                 | GG               | INTERGENIC                    |                    |                             |
| SNP_84141_A_354063 | NW_004516185.1 | scaffold812 | 354063                  | GG                              | AA                 | AA               | INTERGENIC                    |                    |                             |
| SNP_84143_A_358497 | NW_004516185.1 | scaffold812 | 358497                  | TT                              | CC                 | CC               | INTERGENIC                    |                    |                             |
| SNP_84144_A_372140 | NW_004516185.1 | scaffold812 | 372140                  | GG                              | AA                 | AA               | INTERGENIC                    |                    |                             |
| SNP_84145_A_374054 | NW_004516185.1 | scaffold812 | 374054                  | CC                              | TT                 | TT               | INTERGENIC                    |                    |                             |
| SNP_84146_A_378719 | NW_004516185.1 | scaffold812 | 378719                  | GG                              | TT                 | TT               | INTERGENIC                    |                    |                             |
| SNP_84148_A_403114 | NW_004516185.1 | scaffold812 | 403114                  | TT                              | CC                 | CC               | URR                           | 101506175          | nucleolar protein 10        |
| SNP_84149_A_403124 | NW_004516185.1 | scaffold812 | 403124                  | GG                              | AA                 | AA               | URR                           | 101506175          | nucleolar protein 10        |
| SNP_84151_A_416529 | NW_004516185.1 | scaffold812 | 416529                  | TT                              | CC                 | CC               | INTERGENIC                    |                    |                             |

| SNPs IDs           | Chromosome IDs | Chromosomes | Physical positions (bp) | CDC Frontier (Reference genome) | (Pusa 1103 & HPNB) | (ILWC 46 & LPNB) | Sequence genome | Components of | Gene accession IDs | Putative functions |
|--------------------|----------------|-------------|-------------------------|---------------------------------|--------------------|------------------|-----------------|---------------|--------------------|--------------------|
| SNP_84152_A_416921 | NW_004516185.1 | scaffold812 | 416921                  | TT                              | AA                 | AA               | INTERGENIC      |               |                    |                    |
| SNP_84153_A_428168 | NW_004516185.1 | scaffold812 | 428168                  | CC                              | AA                 | AA               | INTERGENIC      |               |                    |                    |
| SNP_84154_A_446072 | NW_004516185.1 | scaffold812 | 446072                  | AA                              | GG                 | GG               | INTERGENIC      |               |                    |                    |
| SNP_84155_A_453621 | NW_004516185.1 | scaffold812 | 453621                  | AA                              | GG                 | GG               | INTERGENIC      |               |                    |                    |
| SNP_84156_A_464553 | NW_004516185.1 | scaffold812 | 464553                  | GG                              | AA                 | AA               | INTERGENIC      |               |                    |                    |
| SNP_84157_A_470770 | NW_004516185.1 | scaffold812 | 470770                  | AA                              | GG                 | GG               | INTERGENIC      |               |                    |                    |
| SNP_84158_A_484496 | NW_004516185.1 | scaffold812 | 484496                  | GG                              | AA                 | AA               | INTERGENIC      |               |                    |                    |
| SNP_84159_A_486981 | NW_004516185.1 | scaffold812 | 486981                  | GG                              | CC                 | CC               | INTERGENIC      |               |                    |                    |
| SNP_84160_A_487058 | NW_004516185.1 | scaffold812 | 487058                  | TT                              | CC                 | CC               | INTERGENIC      |               |                    |                    |
| SNP_84161_A_487068 | NW_004516185.1 | scaffold812 | 487068                  | TT                              | CC                 | CC               | INTERGENIC      |               |                    |                    |
| SNP_84162_A_487152 | NW_004516185.1 | scaffold812 | 487152                  | AA                              | TT                 | TT               | INTERGENIC      |               |                    |                    |
| SNP_84164_A_487354 | NW_004516185.1 | scaffold812 | 487354                  | AA                              | GG                 | GG               | INTERGENIC      |               |                    |                    |
| SNP_84165_A_487375 | NW_004516185.1 | scaffold812 | 487375                  | TT                              | AA                 | AA               | INTERGENIC      |               |                    |                    |
| SNP_84166_A_487403 | NW_004516185.1 | scaffold812 | 487403                  | GG                              | AA                 | AA               | INTERGENIC      |               |                    |                    |
| SNP_84167_A_515370 | NW_004516185.1 | scaffold812 | 515370                  | AA                              | GG                 | GG               | INTRON          | 101510574     | Unknown function   |                    |
| SNP_84168_A_525899 | NW_004516185.1 | scaffold812 | 525899                  | CC                              | TT                 | TT               | DRR             | 101510898     | Unknown function   |                    |
| SNP_84169_A_525952 | NW_004516185.1 | scaffold812 | 525952                  | TT                              | AA                 | AA               | DRR             | 101510898     | Unknown function   |                    |
| SNP_84170_A_525993 | NW_004516185.1 | scaffold812 | 525993                  | CC                              | TT                 | TT               | DRR             | 101510898     | Unknown function   |                    |
| SNP_84171_A_526012 | NW_004516185.1 | scaffold812 | 526012                  | TT                              | CC                 | CC               | DRR             | 101510898     | Unknown function   |                    |
| SNP_84173_A_526260 | NW_004516185.1 | scaffold812 | 526260                  | AA                              | TT                 | TT               | DRR             | 101510898     | Unknown function   |                    |
| SNP_84174_A_530388 | NW_004516185.1 | scaffold812 | 530388                  | AA                              | CC                 | CC               | INTERGENIC      |               |                    |                    |
| SNP_84175_A_530737 | NW_004516185.1 | scaffold812 | 530737                  | CC                              | AA                 | AA               | INTERGENIC      |               |                    |                    |

| SNPs IDs           | Chromosome IDs | Chromosomes | Physical positions (bp) | CDC Frontier (Reference genome) | (Pusa 1103 & HPNB) | (ILWC 46 & LPNB) | Sequence Components of genome | Gene accession IDs | Putative functions           |
|--------------------|----------------|-------------|-------------------------|---------------------------------|--------------------|------------------|-------------------------------|--------------------|------------------------------|
| SNP_84176_A_535588 | NW_004516185.1 | scaffold812 | 535588                  | TT                              | GG                 | GG               | URR                           | 101506505          | uncharacterized LOC101506505 |
| SNP_84177_A_548873 | NW_004516185.1 | scaffold812 | 548873                  | CC                              | TT                 | TT               | INTERGENIC                    |                    |                              |
| SNP_84178_A_548963 | NW_004516185.1 | scaffold812 | 548963                  | GG                              | TT                 | TT               | INTERGENIC                    |                    |                              |
| SNP_84179_A_549740 | NW_004516185.1 | scaffold812 | 549740                  | AA                              | GG                 | GG               | INTERGENIC                    |                    |                              |
| SNP_84180_A_549789 | NW_004516185.1 | scaffold812 | 549789                  | AA                              | TT                 | TT               | INTERGENIC                    |                    |                              |
| SNP_84181_A_552402 | NW_004516185.1 | scaffold812 | 552402                  | TT                              | CC                 | CC               | INTERGENIC                    |                    |                              |
| SNP_84182_A_557487 | NW_004516185.1 | scaffold812 | 557487                  | TT                              | AA                 | AA               | INTERGENIC                    |                    |                              |
| SNP_84183_A_3075   | NW_004516186.1 | scaffold814 | 3075                    | TT                              | GG                 | GG               | INTERGENIC                    |                    |                              |
| SNP_84184_A_3321   | NW_004516186.1 | scaffold814 | 3321                    | TT                              | AA                 | AA               | INTERGENIC                    |                    |                              |
| SNP_84185_A_3510   | NW_004516186.1 | scaffold814 | 3510                    | GG                              | TT                 | TT               | INTERGENIC                    |                    |                              |
| SNP_84186_A_28721  | NW_004516186.1 | scaffold814 | 28721                   | CC                              | TT                 | TT               | INTERGENIC                    |                    |                              |
| SNP_84187_A_35602  | NW_004516186.1 | scaffold814 | 35602                   | CC                              | TT                 | TT               | INTERGENIC                    |                    |                              |
| SNP_84188_A_38503  | NW_004516186.1 | scaffold814 | 38503                   | CC                              | GG                 | GG               | INTERGENIC                    |                    |                              |
| SNP_84189_A_39853  | NW_004516186.1 | scaffold814 | 39853                   | TT                              | CC                 | CC               | INTERGENIC                    |                    |                              |
| SNP_84190_A_39946  | NW_004516186.1 | scaffold814 | 39946                   | TT                              | CC                 | CC               | INTERGENIC                    |                    |                              |
| SNP_84191_A_40146  | NW_004516186.1 | scaffold814 | 40146                   | CC                              | TT                 | TT               | INTERGENIC                    |                    |                              |
| SNP_84192_A_40181  | NW_004516186.1 | scaffold814 | 40181                   | CC                              | TT                 | TT               | INTERGENIC                    |                    |                              |
| SNP_84193_A_40204  | NW_004516186.1 | scaffold814 | 40204                   | GG                              | AA                 | AA               | INTERGENIC                    |                    |                              |
| SNP_84194_A_41116  | NW_004516186.1 | scaffold814 | 41116                   | TT                              | CC                 | CC               | INTERGENIC                    |                    |                              |
| SNP_84195_A_41240  | NW_004516186.1 | scaffold814 | 41240                   | AA                              | CC                 | CC               | INTERGENIC                    |                    |                              |
| SNP_84196_A_41241  | NW_004516186.1 | scaffold814 | 41241                   | GG                              | CC                 | CC               | INTERGENIC                    |                    |                              |
| SNP_84197_A_41290  | NW_004516186.1 | scaffold814 | 41290                   | AA                              | TT                 | TT               | INTERGENIC                    |                    |                              |



| SNPs IDs          | Chromosome IDs | Chromosomes | Physical positions (bp) | CDC Frontier (Reference genome) | (Pusa 1103 & HPNB) | (ILWC 46 & LPNB) | Sequence genome | Components of | Gene accession IDs | Putative functions |
|-------------------|----------------|-------------|-------------------------|---------------------------------|--------------------|------------------|-----------------|---------------|--------------------|--------------------|
| SNP_84198_A_41351 | NW_004516186.1 | scaffold814 | 41351                   | GG                              | AA                 | AA               | INTERGENIC      |               |                    |                    |
| SNP_84199_A_41594 | NW_004516186.1 | scaffold814 | 41594                   | AA                              | TT                 | TT               | INTERGENIC      |               |                    |                    |
| SNP_84200_A_42425 | NW_004516186.1 | scaffold814 | 42425                   | TT                              | CC                 | CC               | INTERGENIC      |               |                    |                    |
| SNP_84201_A_42719 | NW_004516186.1 | scaffold814 | 42719                   | CC                              | TT                 | TT               | INTERGENIC      |               |                    |                    |
| SNP_84202_A_46422 | NW_004516186.1 | scaffold814 | 46422                   | TT                              | GG                 | GG               | INTERGENIC      |               |                    |                    |
| SNP_84203_A_46718 | NW_004516186.1 | scaffold814 | 46718                   | GG                              | CC                 | CC               | INTERGENIC      |               |                    |                    |
| SNP_84204_A_46790 | NW_004516186.1 | scaffold814 | 46790                   | AA                              | TT                 | TT               | INTERGENIC      |               |                    |                    |
| SNP_84205_A_4710  | NW_004516188.1 | scaffold817 | 4710                    | TT                              | CC                 | CC               | INTERGENIC      |               |                    |                    |
| SNP_84206_A_4711  | NW_004516188.1 | scaffold817 | 4711                    | GG                              | AA                 | AA               | INTERGENIC      |               |                    |                    |
| SNP_84207_A_4736  | NW_004516188.1 | scaffold817 | 4736                    | AA                              | GG                 | GG               | INTERGENIC      |               |                    |                    |
| SNP_84208_A_5351  | NW_004516188.1 | scaffold817 | 5351                    | CC                              | GG                 | GG               | INTERGENIC      |               |                    |                    |
| SNP_84209_A_6927  | NW_004516188.1 | scaffold817 | 6927                    | CC                              | TT                 | TT               | INTERGENIC      |               |                    |                    |
| SNP_84210_A_6962  | NW_004516188.1 | scaffold817 | 6962                    | GG                              | AA                 | AA               | INTERGENIC      |               |                    |                    |
| SNP_84211_A_13533 | NW_004516188.1 | scaffold817 | 13533                   | AA                              | GG                 | GG               | INTERGENIC      |               |                    |                    |
| SNP_84212_A_13546 | NW_004516188.1 | scaffold817 | 13546                   | TT                              | CC                 | CC               | INTERGENIC      |               |                    |                    |
| SNP_84213_A_626   | NW_004516190.1 | scaffold819 | 626                     | TT                              | AA                 | AA               | INTERGENIC      |               |                    |                    |
| SNP_84214_A_13626 | NW_004516191.1 | scaffold820 | 13626                   | TT                              | CC                 | CC               | INTERGENIC      |               |                    |                    |
| SNP_84216_A_15736 | NW_004516191.1 | scaffold820 | 15736                   | AA                              | TT                 | TT               | INTERGENIC      |               |                    |                    |
| SNP_84217_A_15984 | NW_004516191.1 | scaffold820 | 15984                   | TT                              | CC                 | CC               | INTERGENIC      |               |                    |                    |
| SNP_84218_A_16377 | NW_004516191.1 | scaffold820 | 16377                   | GG                              | AA                 | AA               | INTERGENIC      |               |                    |                    |
| SNP_84219_A_16386 | NW_004516191.1 | scaffold820 | 16386                   | AA                              | TT                 | TT               | INTERGENIC      |               |                    |                    |
| SNP_84220_A_16398 | NW_004516191.1 | scaffold820 | 16398                   | CC                              | TT                 | TT               | INTERGENIC      |               |                    |                    |

| SNPs IDs          | Chromosome IDs | Chromosomes | Physical positions (bp) | CDC Frontier (Reference genome) | (Pusa 1103 & HPNB) | (ILWC 46 & LPNB) | Sequence genome | Components of | Gene accession IDs | Putative functions |
|-------------------|----------------|-------------|-------------------------|---------------------------------|--------------------|------------------|-----------------|---------------|--------------------|--------------------|
| SNP_84221_A_16405 | NW_004516191.1 | scaffold820 | 16405                   | CC                              | GG                 | GG               | INTERGENIC      |               |                    |                    |
| SNP_84222_A_16430 | NW_004516191.1 | scaffold820 | 16430                   | TT                              | GG                 | GG               | INTERGENIC      |               |                    |                    |
| SNP_84223_A_22105 | NW_004516191.1 | scaffold820 | 22105                   | GG                              | AA                 | AA               | INTERGENIC      |               |                    |                    |
| SNP_84224_A_25599 | NW_004516191.1 | scaffold820 | 25599                   | CC                              | TT                 | TT               | INTERGENIC      |               |                    |                    |
| SNP_84225_A_30402 | NW_004516191.1 | scaffold820 | 30402                   | CC                              | GG                 | GG               | INTERGENIC      |               |                    |                    |
| SNP_84226_A_30417 | NW_004516191.1 | scaffold820 | 30417                   | GG                              | AA                 | AA               | INTERGENIC      |               |                    |                    |
| SNP_84227_A_31875 | NW_004516191.1 | scaffold820 | 31875                   | GG                              | AA                 | AA               | INTERGENIC      |               |                    |                    |
| SNP_84228_A_37445 | NW_004516191.1 | scaffold820 | 37445                   | AA                              | CC                 | CC               | INTERGENIC      |               |                    |                    |
| SNP_84229_A_37486 | NW_004516191.1 | scaffold820 | 37486                   | TT                              | CC                 | CC               | INTERGENIC      |               |                    |                    |
| SNP_84230_A_37490 | NW_004516191.1 | scaffold820 | 37490                   | GG                              | AA                 | AA               | INTERGENIC      |               |                    |                    |
| SNP_84231_A_37494 | NW_004516191.1 | scaffold820 | 37494                   | TT                              | AA                 | AA               | INTERGENIC      |               |                    |                    |
| SNP_84232_A_39739 | NW_004516191.1 | scaffold820 | 39739                   | TT                              | CC                 | CC               | INTERGENIC      |               |                    |                    |
| SNP_84233_A_16034 | NW_004516194.1 | scaffold823 | 16034                   | AA                              | TT                 | TT               | INTERGENIC      |               |                    |                    |
| SNP_84234_A_22758 | NW_004516194.1 | scaffold823 | 22758                   | TT                              | GG                 | GG               | INTERGENIC      |               |                    |                    |
| SNP_84235_A_24535 | NW_004516194.1 | scaffold823 | 24535                   | CC                              | GG                 | GG               | INTERGENIC      |               |                    |                    |
| SNP_84236_A_24547 | NW_004516194.1 | scaffold823 | 24547                   | AA                              | CC                 | CC               | INTERGENIC      |               |                    |                    |
| SNP_84237_A_24618 | NW_004516194.1 | scaffold823 | 24618                   | AA                              | GG                 | GG               | INTERGENIC      |               |                    |                    |
| SNP_84238_A_24744 | NW_004516194.1 | scaffold823 | 24744                   | TT                              | AA                 | AA               | INTERGENIC      |               |                    |                    |
| SNP_84239_A_24746 | NW_004516194.1 | scaffold823 | 24746                   | AA                              | GG                 | GG               | INTERGENIC      |               |                    |                    |
| SNP_84240_A_28092 | NW_004516194.1 | scaffold823 | 28092                   | CC                              | TT                 | TT               | INTERGENIC      |               |                    |                    |
| SNP_84241_A_28296 | NW_004516194.1 | scaffold823 | 28296                   | TT                              | CC                 | CC               | INTERGENIC      |               |                    |                    |
| SNP_84242_A_28344 | NW_004516194.1 | scaffold823 | 28344                   | AA                              | CC                 | CC               | INTERGENIC      |               |                    |                    |

| SNPs IDs          | Chromosome IDs | Chromosomes | Physical positions (bp) | CDC Frontier (Reference genome) | (Pusa 1103 & HPNB) | (ILWC 46 & LPNB) | Sequence genome | Components of | Gene accession IDs | Putative functions |
|-------------------|----------------|-------------|-------------------------|---------------------------------|--------------------|------------------|-----------------|---------------|--------------------|--------------------|
| SNP_84243_A_28358 | NW_004516194.1 | scaffold823 | 28358                   | TT                              | CC                 | CC               | INTERGENIC      |               |                    |                    |
| SNP_84244_A_28360 | NW_004516194.1 | scaffold823 | 28360                   | CC                              | TT                 | TT               | INTERGENIC      |               |                    |                    |
| SNP_84245_A_28386 | NW_004516194.1 | scaffold823 | 28386                   | CC                              | TT                 | TT               | INTERGENIC      |               |                    |                    |
| SNP_84246_A_28439 | NW_004516194.1 | scaffold823 | 28439                   | CC                              | AA                 | AA               | INTERGENIC      |               |                    |                    |
| SNP_84247_A_28464 | NW_004516194.1 | scaffold823 | 28464                   | CC                              | AA                 | AA               | INTERGENIC      |               |                    |                    |
| SNP_84248_A_28507 | NW_004516194.1 | scaffold823 | 28507                   | TT                              | CC                 | CC               | INTERGENIC      |               |                    |                    |
| SNP_84249_A_28509 | NW_004516194.1 | scaffold823 | 28509                   | AA                              | GG                 | GG               | INTERGENIC      |               |                    |                    |
| SNP_84250_A_28514 | NW_004516194.1 | scaffold823 | 28514                   | TT                              | CC                 | CC               | INTERGENIC      |               |                    |                    |
| SNP_84251_A_28661 | NW_004516194.1 | scaffold823 | 28661                   | TT                              | GG                 | GG               | INTERGENIC      |               |                    |                    |
| SNP_84252_A_28682 | NW_004516194.1 | scaffold823 | 28682                   | CC                              | AA                 | AA               | INTERGENIC      |               |                    |                    |
| SNP_84253_A_28717 | NW_004516194.1 | scaffold823 | 28717                   | GG                              | TT                 | TT               | INTERGENIC      |               |                    |                    |
| SNP_84254_A_28769 | NW_004516194.1 | scaffold823 | 28769                   | GG                              | CC                 | CC               | INTERGENIC      |               |                    |                    |
| SNP_84255_A_47910 | NW_004516194.1 | scaffold823 | 47910                   | TT                              | CC                 | CC               | INTERGENIC      |               |                    |                    |
| SNP_84256_A_48128 | NW_004516194.1 | scaffold823 | 48128                   | TT                              | CC                 | CC               | INTERGENIC      |               |                    |                    |
| SNP_84257_A_48156 | NW_004516194.1 | scaffold823 | 48156                   | TT                              | CC                 | CC               | INTERGENIC      |               |                    |                    |
| SNP_84258_A_48208 | NW_004516194.1 | scaffold823 | 48208                   | AA                              | TT                 | TT               | INTERGENIC      |               |                    |                    |
| SNP_84259_A_48216 | NW_004516194.1 | scaffold823 | 48216                   | AA                              | CC                 | CC               | INTERGENIC      |               |                    |                    |
| SNP_84260_A_48497 | NW_004516194.1 | scaffold823 | 48497                   | CC                              | TT                 | TT               | INTERGENIC      |               |                    |                    |
| SNP_84261_A_49731 | NW_004516194.1 | scaffold823 | 49731                   | CC                              | TT                 | TT               | INTERGENIC      |               |                    |                    |
| SNP_84262_A_49958 | NW_004516194.1 | scaffold823 | 49958                   | TT                              | CC                 | CC               | INTERGENIC      |               |                    |                    |
| SNP_84263_A_49976 | NW_004516194.1 | scaffold823 | 49976                   | AA                              | GG                 | GG               | INTERGENIC      |               |                    |                    |
| SNP_84264_A_49984 | NW_004516194.1 | scaffold823 | 49984                   | CC                              | TT                 | TT               | INTERGENIC      |               |                    |                    |

| SNPs IDs          | Chromosome IDs | Chromosomes | Physical positions (bp) | CDC Frontier (Reference genome) | (Pusa 1103 & HPNB) | (ILWC 46 & LPNB) | Sequence genome | Components of | Gene accession IDs | Putative functions |
|-------------------|----------------|-------------|-------------------------|---------------------------------|--------------------|------------------|-----------------|---------------|--------------------|--------------------|
| SNP_84266_A_53989 | NW_004516194.1 | scaffold823 | 53989                   | TT                              | CC                 | CC               | INTERGENIC      |               |                    |                    |
| SNP_84267_A_58544 | NW_004516194.1 | scaffold823 | 58544                   | CC                              | TT                 | TT               | INTERGENIC      |               |                    |                    |
| SNP_84268_A_60166 | NW_004516194.1 | scaffold823 | 60166                   | TT                              | CC                 | CC               | INTERGENIC      |               |                    |                    |
| SNP_84269_A_60461 | NW_004516194.1 | scaffold823 | 60461                   | TT                              | CC                 | CC               | INTERGENIC      |               |                    |                    |
| SNP_84270_A_60481 | NW_004516194.1 | scaffold823 | 60481                   | TT                              | CC                 | CC               | INTERGENIC      |               |                    |                    |
| SNP_84271_A_60509 | NW_004516194.1 | scaffold823 | 60509                   | TT                              | AA                 | AA               | INTERGENIC      |               |                    |                    |
| SNP_84272_A_61969 | NW_004516194.1 | scaffold823 | 61969                   | CC                              | TT                 | TT               | INTERGENIC      |               |                    |                    |
| SNP_84273_A_62011 | NW_004516194.1 | scaffold823 | 62011                   | TT                              | AA                 | AA               | INTERGENIC      |               |                    |                    |
| SNP_84274_A_62073 | NW_004516194.1 | scaffold823 | 62073                   | AA                              | GG                 | GG               | INTERGENIC      |               |                    |                    |
| SNP_84275_A_62138 | NW_004516194.1 | scaffold823 | 62138                   | CC                              | TT                 | TT               | INTERGENIC      |               |                    |                    |
| SNP_84276_A_62412 | NW_004516194.1 | scaffold823 | 62412                   | CC                              | TT                 | TT               | INTERGENIC      |               |                    |                    |
| SNP_84277_A_62675 | NW_004516194.1 | scaffold823 | 62675                   | CC                              | TT                 | TT               | INTERGENIC      |               |                    |                    |
| SNP_84278_A_62839 | NW_004516194.1 | scaffold823 | 62839                   | AA                              | GG                 | GG               | INTERGENIC      |               |                    |                    |
| SNP_84279_A_62933 | NW_004516194.1 | scaffold823 | 62933                   | TT                              | CC                 | CC               | INTERGENIC      |               |                    |                    |
| SNP_84280_A_63126 | NW_004516194.1 | scaffold823 | 63126                   | TT                              | CC                 | CC               | INTERGENIC      |               |                    |                    |
| SNP_84281_A_63320 | NW_004516194.1 | scaffold823 | 63320                   | CC                              | GG                 | GG               | INTERGENIC      |               |                    |                    |
| SNP_84282_A_63541 | NW_004516194.1 | scaffold823 | 63541                   | TT                              | AA                 | AA               | INTERGENIC      |               |                    |                    |
| SNP_84283_A_63544 | NW_004516194.1 | scaffold823 | 63544                   | GG                              | AA                 | AA               | INTERGENIC      |               |                    |                    |
| SNP_84284_A_63740 | NW_004516194.1 | scaffold823 | 63740                   | TT                              | CC                 | CC               | INTERGENIC      |               |                    |                    |
| SNP_84286_A_6345  | NW_004516195.1 | scaffold824 | 6345                    | CC                              | AA                 | AA               | INTERGENIC      |               |                    |                    |
| SNP_84287_A_7112  | NW_004516195.1 | scaffold824 | 7112                    | AA                              | TT                 | TT               | INTERGENIC      |               |                    |                    |
| SNP_84288_A_7219  | NW_004516195.1 | scaffold824 | 7219                    | AA                              | GG                 | GG               | INTERGENIC      |               |                    |                    |

| SNPs IDs          | Chromosome IDs | Chromosomes | Physical positions (bp) | CDC Frontier (Reference genome) | (Pusa 1103 & HPNB) | (ILWC 46 & LPNB) | Sequence genome | Components of | Gene accession IDs | Putative functions |
|-------------------|----------------|-------------|-------------------------|---------------------------------|--------------------|------------------|-----------------|---------------|--------------------|--------------------|
| SNP_84289_A_7224  | NW_004516195.1 | scaffold824 | 7224                    | GG                              | TT                 | TT               | INTERGENIC      |               |                    |                    |
| SNP_84290_A_7281  | NW_004516195.1 | scaffold824 | 7281                    | AA                              | TT                 | TT               | INTERGENIC      |               |                    |                    |
| SNP_84291_A_7289  | NW_004516195.1 | scaffold824 | 7289                    | GG                              | TT                 | TT               | INTERGENIC      |               |                    |                    |
| SNP_84292_A_7316  | NW_004516195.1 | scaffold824 | 7316                    | GG                              | TT                 | TT               | INTERGENIC      |               |                    |                    |
| SNP_84293_A_7460  | NW_004516195.1 | scaffold824 | 7460                    | CC                              | TT                 | TT               | INTERGENIC      |               |                    |                    |
| SNP_84294_A_7652  | NW_004516195.1 | scaffold824 | 7652                    | TT                              | CC                 | CC               | INTERGENIC      |               |                    |                    |
| SNP_84295_A_7659  | NW_004516195.1 | scaffold824 | 7659                    | TT                              | CC                 | CC               | INTERGENIC      |               |                    |                    |
| SNP_84296_A_11781 | NW_004516195.1 | scaffold824 | 11781                   | CC                              | TT                 | TT               | INTERGENIC      |               |                    |                    |
| SNP_84297_A_11788 | NW_004516195.1 | scaffold824 | 11788                   | GG                              | AA                 | AA               | INTERGENIC      |               |                    |                    |
| SNP_84298_A_11822 | NW_004516195.1 | scaffold824 | 11822                   | AA                              | TT                 | TT               | INTERGENIC      |               |                    |                    |
| SNP_84299_A_12002 | NW_004516195.1 | scaffold824 | 12002                   | CC                              | TT                 | TT               | INTERGENIC      |               |                    |                    |
| SNP_84300_A_12013 | NW_004516195.1 | scaffold824 | 12013                   | AA                              | GG                 | GG               | INTERGENIC      |               |                    |                    |
| SNP_84301_A_20632 | NW_004516195.1 | scaffold824 | 20632                   | AA                              | TT                 | TT               | INTERGENIC      |               |                    |                    |
| SNP_84302_A_20920 | NW_004516195.1 | scaffold824 | 20920                   | AA                              | TT                 | TT               | INTERGENIC      |               |                    |                    |
| SNP_84303_A_21226 | NW_004516195.1 | scaffold824 | 21226                   | CC                              | TT                 | TT               | INTERGENIC      |               |                    |                    |
| SNP_84304_A_21302 | NW_004516195.1 | scaffold824 | 21302                   | TT                              | GG                 | GG               | INTERGENIC      |               |                    |                    |
| SNP_84306_A_21351 | NW_004516195.1 | scaffold824 | 21351                   | TT                              | CC                 | CC               | INTERGENIC      |               |                    |                    |
| SNP_84307_A_4464  | NW_004516196.1 | scaffold825 | 4464                    | AA                              | GG                 | GG               | INTERGENIC      |               |                    |                    |
| SNP_84308_A_5147  | NW_004516198.1 | scaffold829 | 5147                    | CC                              | TT                 | TT               | INTERGENIC      |               |                    |                    |
| SNP_84309_A_5381  | NW_004516198.1 | scaffold829 | 5381                    | GG                              | AA                 | AA               | INTERGENIC      |               |                    |                    |
| SNP_84310_A_8049  | NW_004516198.1 | scaffold829 | 8049                    | GG                              | AA                 | AA               | INTERGENIC      |               |                    |                    |
| SNP_84311_A_8357  | NW_004516198.1 | scaffold829 | 8357                    | GG                              | TT                 | TT               | INTERGENIC      |               |                    |                    |

| SNPs IDs          | Chromosome IDs | Chromosomes | Physical positions (bp) | CDC Frontier (Reference genome) | (Pusa 1103 & HPNB) | (ILWC 46 & LPNB) | Sequence genome | Components of | Gene accession IDs | Putative functions |
|-------------------|----------------|-------------|-------------------------|---------------------------------|--------------------|------------------|-----------------|---------------|--------------------|--------------------|
| SNP_84312_A_8378  | NW_004516198.1 | scaffold829 | 8378                    | GG                              | AA                 | AA               | INTERGENIC      |               |                    |                    |
| SNP_84313_A_8409  | NW_004516198.1 | scaffold829 | 8409                    | CC                              | TT                 | TT               | INTERGENIC      |               |                    |                    |
| SNP_84314_A_8671  | NW_004516198.1 | scaffold829 | 8671                    | TT                              | CC                 | CC               | INTERGENIC      |               |                    |                    |
| SNP_84315_A_8680  | NW_004516198.1 | scaffold829 | 8680                    | TT                              | CC                 | CC               | INTERGENIC      |               |                    |                    |
| SNP_84316_A_8749  | NW_004516198.1 | scaffold829 | 8749                    | GG                              | AA                 | AA               | INTERGENIC      |               |                    |                    |
| SNP_84317_A_8783  | NW_004516198.1 | scaffold829 | 8783                    | CC                              | TT                 | TT               | INTERGENIC      |               |                    |                    |
| SNP_84318_A_8845  | NW_004516198.1 | scaffold829 | 8845                    | CC                              | TT                 | TT               | INTERGENIC      |               |                    |                    |
| SNP_84319_A_8935  | NW_004516198.1 | scaffold829 | 8935                    | GG                              | CC                 | CC               | INTERGENIC      |               |                    |                    |
| SNP_84320_A_8976  | NW_004516198.1 | scaffold829 | 8976                    | AA                              | CC                 | CC               | INTERGENIC      |               |                    |                    |
| SNP_84321_A_9026  | NW_004516198.1 | scaffold829 | 9026                    | AA                              | CC                 | CC               | INTERGENIC      |               |                    |                    |
| SNP_84322_A_9041  | NW_004516198.1 | scaffold829 | 9041                    | AA                              | GG                 | GG               | INTERGENIC      |               |                    |                    |
| SNP_84323_A_9045  | NW_004516198.1 | scaffold829 | 9045                    | CC                              | GG                 | GG               | INTERGENIC      |               |                    |                    |
| SNP_84324_A_9145  | NW_004516198.1 | scaffold829 | 9145                    | GG                              | CC                 | CC               | INTERGENIC      |               |                    |                    |
| SNP_84325_A_9148  | NW_004516198.1 | scaffold829 | 9148                    | AA                              | GG                 | GG               | INTERGENIC      |               |                    |                    |
| SNP_84326_A_9151  | NW_004516198.1 | scaffold829 | 9151                    | TT                              | AA                 | AA               | INTERGENIC      |               |                    |                    |
| SNP_84327_A_9256  | NW_004516198.1 | scaffold829 | 9256                    | TT                              | CC                 | CC               | INTERGENIC      |               |                    |                    |
| SNP_84328_A_9263  | NW_004516198.1 | scaffold829 | 9263                    | AA                              | GG                 | GG               | INTERGENIC      |               |                    |                    |
| SNP_84329_A_9287  | NW_004516198.1 | scaffold829 | 9287                    | AA                              | GG                 | GG               | INTERGENIC      |               |                    |                    |
| SNP_84330_A_9850  | NW_004516198.1 | scaffold829 | 9850                    | CC                              | TT                 | TT               | INTERGENIC      |               |                    |                    |
| SNP_84331_A_10773 | NW_004516198.1 | scaffold829 | 10773                   | TT                              | GG                 | GG               | INTERGENIC      |               |                    |                    |
| SNP_84332_A_10779 | NW_004516198.1 | scaffold829 | 10779                   | TT                              | GG                 | GG               | INTERGENIC      |               |                    |                    |
| SNP_84333_A_10818 | NW_004516198.1 | scaffold829 | 10818                   | CC                              | TT                 | TT               | INTERGENIC      |               |                    |                    |

| SNPs IDs          | Chromosome IDs | Chromosomes | Physical positions (bp) | CDC Frontier (Reference genome) | (Pusa 1103 & HPNB) | (ILWC 46 & LPNB) | Sequence genome | Components of | Gene accession IDs | Putative functions |
|-------------------|----------------|-------------|-------------------------|---------------------------------|--------------------|------------------|-----------------|---------------|--------------------|--------------------|
| SNP_84334_A_10904 | NW_004516198.1 | scaffold829 | 10904                   | TT                              | AA                 | AA               | INTERGENIC      |               |                    |                    |
| SNP_84336_A_11096 | NW_004516198.1 | scaffold829 | 11096                   | GG                              | AA                 | AA               | INTERGENIC      |               |                    |                    |
| SNP_84337_A_11253 | NW_004516198.1 | scaffold829 | 11253                   | TT                              | GG                 | GG               | INTERGENIC      |               |                    |                    |
| SNP_84338_A_12295 | NW_004516198.1 | scaffold829 | 12295                   | TT                              | AA                 | AA               | INTERGENIC      |               |                    |                    |
| SNP_84340_A_12529 | NW_004516198.1 | scaffold829 | 12529                   | TT                              | GG                 | GG               | INTERGENIC      |               |                    |                    |
| SNP_84341_A_12630 | NW_004516198.1 | scaffold829 | 12630                   | TT                              | AA                 | AA               | INTERGENIC      |               |                    |                    |
| SNP_84342_A_12702 | NW_004516198.1 | scaffold829 | 12702                   | CC                              | TT                 | TT               | INTERGENIC      |               |                    |                    |
| SNP_84343_A_16417 | NW_004516198.1 | scaffold829 | 16417                   | TT                              | CC                 | CC               | INTERGENIC      |               |                    |                    |
| SNP_84344_A_23932 | NW_004516199.1 | scaffold831 | 23932                   | CC                              | TT                 | TT               | INTERGENIC      |               |                    |                    |
| SNP_84345_A_35005 | NW_004516199.1 | scaffold831 | 35005                   | TT                              | AA                 | AA               | INTERGENIC      |               |                    |                    |
| SNP_84346_A_43625 | NW_004516199.1 | scaffold831 | 43625                   | AA                              | TT                 | TT               | INTERGENIC      |               |                    |                    |
| SNP_84347_A_43912 | NW_004516199.1 | scaffold831 | 43912                   | TT                              | GG                 | GG               | INTERGENIC      |               |                    |                    |
| SNP_84348_A_49765 | NW_004516199.1 | scaffold831 | 49765                   | CC                              | AA                 | AA               | INTERGENIC      |               |                    |                    |
| SNP_84350_A_56896 | NW_004516199.1 | scaffold831 | 56896                   | TT                              | AA                 | AA               | INTERGENIC      |               |                    |                    |
| SNP_84351_A_56906 | NW_004516199.1 | scaffold831 | 56906                   | CC                              | AA                 | AA               | INTERGENIC      |               |                    |                    |
| SNP_84352_A_56920 | NW_004516199.1 | scaffold831 | 56920                   | CC                              | GG                 | GG               | INTERGENIC      |               |                    |                    |
| SNP_84353_A_58936 | NW_004516199.1 | scaffold831 | 58936                   | TT                              | GG                 | GG               | INTERGENIC      |               |                    |                    |
| SNP_84354_A_59314 | NW_004516199.1 | scaffold831 | 59314                   | AA                              | GG                 | GG               | INTERGENIC      |               |                    |                    |
| SNP_84355_A_59325 | NW_004516199.1 | scaffold831 | 59325                   | CC                              | GG                 | GG               | INTERGENIC      |               |                    |                    |
| SNP_84356_A_61854 | NW_004516199.1 | scaffold831 | 61854                   | TT                              | GG                 | GG               | INTERGENIC      |               |                    |                    |
| SNP_84357_A_61880 | NW_004516199.1 | scaffold831 | 61880                   | AA                              | GG                 | GG               | INTERGENIC      |               |                    |                    |
| SNP_84358_A_86638 | NW_004516199.1 | scaffold831 | 86638                   | AA                              | GG                 | GG               | INTERGENIC      |               |                    |                    |

| SNPs IDs          | Chromosome IDs | Chromosomes | Physical positions (bp) | CDC Frontier (Reference genome) | (Pusa 1103 & HPNB) | (ILWC 46 & LPNB) | Sequence genome | Components of | Gene accession IDs | Putative functions |
|-------------------|----------------|-------------|-------------------------|---------------------------------|--------------------|------------------|-----------------|---------------|--------------------|--------------------|
| SNP_84359_A_826   | NW_004516200.1 | scaffold833 | 826                     | CC                              | TT                 | TT               | INTERGENIC      |               |                    |                    |
| SNP_84360_A_14082 | NW_004516200.1 | scaffold833 | 14082                   | AA                              | GG                 | GG               | INTERGENIC      |               |                    |                    |
| SNP_84361_A_17684 | NW_004516200.1 | scaffold833 | 17684                   | AA                              | GG                 | GG               | INTERGENIC      |               |                    |                    |
| SNP_84362_A_17976 | NW_004516200.1 | scaffold833 | 17976                   | TT                              | CC                 | CC               | INTERGENIC      |               |                    |                    |
| SNP_84363_A_18071 | NW_004516200.1 | scaffold833 | 18071                   | AA                              | GG                 | GG               | INTERGENIC      |               |                    |                    |
| SNP_84364_A_18452 | NW_004516200.1 | scaffold833 | 18452                   | AA                              | CC                 | CC               | INTERGENIC      |               |                    |                    |
| SNP_84365_A_546   | NW_004516205.1 | scaffold840 | 546                     | GG                              | AA                 | AA               | INTERGENIC      |               |                    |                    |
| SNP_84366_A_548   | NW_004516205.1 | scaffold840 | 548                     | TT                              | GG                 | GG               | INTERGENIC      |               |                    |                    |
| SNP_84367_A_64    | NW_004516206.1 | scaffold841 | 64                      | AA                              | GG                 | GG               | INTERGENIC      |               |                    |                    |
| SNP_84368_A_65    | NW_004516206.1 | scaffold841 | 65                      | CC                              | TT                 | TT               | INTERGENIC      |               |                    |                    |
| SNP_84369_A_140   | NW_004516206.1 | scaffold841 | 140                     | TT                              | GG                 | GG               | INTERGENIC      |               |                    |                    |
| SNP_84370_A_200   | NW_004516206.1 | scaffold841 | 200                     | TT                              | CC                 | CC               | INTERGENIC      |               |                    |                    |
| SNP_84371_A_209   | NW_004516206.1 | scaffold841 | 209                     | AA                              | TT                 | TT               | INTERGENIC      |               |                    |                    |
| SNP_84373_A_351   | NW_004516206.1 | scaffold841 | 351                     | AA                              | GG                 | GG               | INTERGENIC      |               |                    |                    |
| SNP_84374_A_428   | NW_004516206.1 | scaffold841 | 428                     | GG                              | TT                 | TT               | INTERGENIC      |               |                    |                    |
| SNP_84376_A_541   | NW_004516206.1 | scaffold841 | 541                     | CC                              | TT                 | TT               | INTERGENIC      |               |                    |                    |
| SNP_84377_A_576   | NW_004516206.1 | scaffold841 | 576                     | TT                              | AA                 | AA               | INTERGENIC      |               |                    |                    |
| SNP_84378_A_578   | NW_004516206.1 | scaffold841 | 578                     | CC                              | AA                 | AA               | INTERGENIC      |               |                    |                    |
| SNP_84379_A_581   | NW_004516206.1 | scaffold841 | 581                     | GG                              | AA                 | AA               | INTERGENIC      |               |                    |                    |
| SNP_84380_A_871   | NW_004516206.1 | scaffold841 | 871                     | GG                              | AA                 | AA               | INTERGENIC      |               |                    |                    |
| SNP_84381_A_2323  | NW_004516206.1 | scaffold841 | 2323                    | AA                              | TT                 | TT               | INTERGENIC      |               |                    |                    |
| SNP_84382_A_2709  | NW_004516206.1 | scaffold841 | 2709                    | GG                              | AA                 | TT               | INTERGENIC      |               |                    |                    |



| SNPs IDs          | Chromosome IDs | Chromosomes | Physical positions (bp) | CDC Frontier (Reference genome) | (Pusa 1103 & HPNB) | (ILWC 46 & LPNB) | Sequence genome | Components of | Gene accession IDs | Putative functions |
|-------------------|----------------|-------------|-------------------------|---------------------------------|--------------------|------------------|-----------------|---------------|--------------------|--------------------|
| SNP_84383_A_2860  | NW_004516206.1 | scaffold841 | 2860                    | CC                              | TT                 | TT               | INTERGENIC      |               |                    |                    |
| SNP_84384_A_3123  | NW_004516206.1 | scaffold841 | 3123                    | GG                              | AA                 | AA               | INTERGENIC      |               |                    |                    |
| SNP_84385_A_3365  | NW_004516206.1 | scaffold841 | 3365                    | GG                              | AA                 | AA               | INTERGENIC      |               |                    |                    |
| SNP_84386_A_3498  | NW_004516206.1 | scaffold841 | 3498                    | TT                              | CC                 | CC               | INTERGENIC      |               |                    |                    |
| SNP_84387_A_36185 | NW_004516206.1 | scaffold841 | 36185                   | TT                              | CC                 | CC               | INTERGENIC      |               |                    |                    |
| SNP_84388_A_37647 | NW_004516206.1 | scaffold841 | 37647                   | CC                              | GG                 | GG               | INTERGENIC      |               |                    |                    |
| SNP_84389_A_3678  | NW_004516207.1 | scaffold842 | 3678                    | GG                              | CC                 | CC               | INTERGENIC      |               |                    |                    |
| SNP_84390_A_4026  | NW_004516207.1 | scaffold842 | 4026                    | GG                              | AA                 | AA               | INTERGENIC      |               |                    |                    |
| SNP_84391_A_7274  | NW_004516207.1 | scaffold842 | 7274                    | TT                              | AA                 | AA               | INTERGENIC      |               |                    |                    |
| SNP_84392_A_20345 | NW_004516207.1 | scaffold842 | 20345                   | TT                              | AA                 | AA               | INTERGENIC      |               |                    |                    |
| SNP_84393_A_20347 | NW_004516207.1 | scaffold842 | 20347                   | AA                              | GG                 | GG               | INTERGENIC      |               |                    |                    |
| SNP_84394_A_20356 | NW_004516207.1 | scaffold842 | 20356                   | TT                              | GG                 | GG               | INTERGENIC      |               |                    |                    |
| SNP_84395_A_20371 | NW_004516207.1 | scaffold842 | 20371                   | AA                              | GG                 | GG               | INTERGENIC      |               |                    |                    |
| SNP_84396_A_20546 | NW_004516207.1 | scaffold842 | 20546                   | GG                              | TT                 | TT               | INTERGENIC      |               |                    |                    |
| SNP_84397_A_20547 | NW_004516207.1 | scaffold842 | 20547                   | GG                              | AA                 | AA               | INTERGENIC      |               |                    |                    |
| SNP_84398_A_20559 | NW_004516207.1 | scaffold842 | 20559                   | GG                              | CC                 | CC               | INTERGENIC      |               |                    |                    |
| SNP_84399_A_20584 | NW_004516207.1 | scaffold842 | 20584                   | GG                              | CC                 | CC               | INTERGENIC      |               |                    |                    |
| SNP_84401_A_20664 | NW_004516207.1 | scaffold842 | 20664                   | GG                              | TT                 | TT               | INTERGENIC      |               |                    |                    |
| SNP_84402_A_20736 | NW_004516207.1 | scaffold842 | 20736                   | AA                              | GG                 | GG               | INTERGENIC      |               |                    |                    |
| SNP_84403_A_20755 | NW_004516207.1 | scaffold842 | 20755                   | TT                              | GG                 | GG               | INTERGENIC      |               |                    |                    |
| SNP_84404_A_20845 | NW_004516207.1 | scaffold842 | 20845                   | GG                              | AA                 | AA               | INTERGENIC      |               |                    |                    |
| SNP_84405_A_29925 | NW_004516207.1 | scaffold842 | 29925                   | CC                              | AA                 | AA               | INTERGENIC      |               |                    |                    |

| SNPs IDs          | Chromosome IDs | Chromosomes | Physical positions (bp) | CDC Frontier (Reference genome) | (Pusa 1103 & HPNB) | (ILWC 46 & LPNB) | Sequence genome | Components of | Gene accession IDs | Putative functions |
|-------------------|----------------|-------------|-------------------------|---------------------------------|--------------------|------------------|-----------------|---------------|--------------------|--------------------|
| SNP_84407_A_34513 | NW_004516207.1 | scaffold842 | 34513                   | GG                              | AA                 | AA               | INTERGENIC      |               |                    |                    |
| SNP_84408_A_39509 | NW_004516207.1 | scaffold842 | 39509                   | AA                              | CC                 | CC               | INTERGENIC      |               |                    |                    |
| SNP_84409_A_39862 | NW_004516207.1 | scaffold842 | 39862                   | TT                              | CC                 | CC               | INTERGENIC      |               |                    |                    |
| SNP_84410_A_1747  | NW_004516208.1 | scaffold843 | 1747                    | CC                              | TT                 | TT               | INTERGENIC      |               |                    |                    |
| SNP_84411_A_1798  | NW_004516208.1 | scaffold843 | 1798                    | CC                              | GG                 | GG               | INTERGENIC      |               |                    |                    |
| SNP_84412_A_1817  | NW_004516208.1 | scaffold843 | 1817                    | CC                              | TT                 | TT               | INTERGENIC      |               |                    |                    |
| SNP_84413_A_2484  | NW_004516208.1 | scaffold843 | 2484                    | GG                              | AA                 | AA               | INTERGENIC      |               |                    |                    |
| SNP_84414_A_2530  | NW_004516208.1 | scaffold843 | 2530                    | TT                              | CC                 | CC               | INTERGENIC      |               |                    |                    |
| SNP_84415_A_2633  | NW_004516208.1 | scaffold843 | 2633                    | AA                              | GG                 | GG               | INTERGENIC      |               |                    |                    |
| SNP_84416_A_2945  | NW_004516208.1 | scaffold843 | 2945                    | CC                              | AA                 | AA               | INTERGENIC      |               |                    |                    |
| SNP_84417_A_3505  | NW_004516208.1 | scaffold843 | 3505                    | GG                              | AA                 | AA               | INTERGENIC      |               |                    |                    |
| SNP_84418_A_4155  | NW_004516208.1 | scaffold843 | 4155                    | TT                              | AA                 | AA               | INTERGENIC      |               |                    |                    |
| SNP_84420_A_4449  | NW_004516208.1 | scaffold843 | 4449                    | TT                              | CC                 | CC               | INTERGENIC      |               |                    |                    |
| SNP_84421_A_4480  | NW_004516208.1 | scaffold843 | 4480                    | AA                              | CC                 | CC               | INTERGENIC      |               |                    |                    |
| SNP_84422_A_4565  | NW_004516208.1 | scaffold843 | 4565                    | AA                              | TT                 | TT               | INTERGENIC      |               |                    |                    |
| SNP_84423_A_4632  | NW_004516208.1 | scaffold843 | 4632                    | TT                              | AA                 | AA               | INTERGENIC      |               |                    |                    |
| SNP_84424_A_6160  | NW_004516208.1 | scaffold843 | 6160                    | TT                              | AA                 | AA               | INTERGENIC      |               |                    |                    |
| SNP_84429_A_16958 | NW_004516210.1 | scaffold845 | 16958                   | GG                              | AA                 | AA               | INTERGENIC      |               |                    |                    |
| SNP_84430_A_17963 | NW_004516210.1 | scaffold845 | 17963                   | GG                              | CC                 | CC               | INTERGENIC      |               |                    |                    |
| SNP_84431_A_18530 | NW_004516210.1 | scaffold845 | 18530                   | TT                              | GG                 | GG               | INTERGENIC      |               |                    |                    |
| SNP_84432_A_18531 | NW_004516210.1 | scaffold845 | 18531                   | CC                              | AA                 | AA               | INTERGENIC      |               |                    |                    |
| SNP_84433_A_18532 | NW_004516210.1 | scaffold845 | 18532                   | TT                              | CC                 | CC               | INTERGENIC      |               |                    |                    |

| SNPs IDs          | Chromosome IDs | Chromosomes | Physical positions (bp) | CDC Frontier (Reference genome) | (Pusa 1103 & HPNB) | (ILWC 46 & LPNB) | Sequence genome | Components of | Gene accession IDs               | Putative functions |
|-------------------|----------------|-------------|-------------------------|---------------------------------|--------------------|------------------|-----------------|---------------|----------------------------------|--------------------|
| SNP_84434_A_18554 | NW_004516210.1 | scaffold845 | 18554                   | GG                              | AA                 | AA               | INTERGENIC      |               |                                  |                    |
| SNP_84435_A_18766 | NW_004516210.1 | scaffold845 | 18766                   | GG                              | TT                 | TT               | INTERGENIC      |               |                                  |                    |
| SNP_84436_A_18780 | NW_004516210.1 | scaffold845 | 18780                   | CC                              | TT                 | TT               | INTERGENIC      |               |                                  |                    |
| SNP_84437_A_19279 | NW_004516210.1 | scaffold845 | 19279                   | TT                              | CC                 | CC               | INTERGENIC      |               |                                  |                    |
| SNP_84438_A_19285 | NW_004516210.1 | scaffold845 | 19285                   | CC                              | TT                 | TT               | INTERGENIC      |               |                                  |                    |
| SNP_84439_A_19851 | NW_004516210.1 | scaffold845 | 19851                   | CC                              | AA                 | AA               | INTERGENIC      |               |                                  |                    |
| SNP_84440_A_23311 | NW_004516210.1 | scaffold845 | 23311                   | AA                              | CC                 | CC               | INTERGENIC      |               |                                  |                    |
| SNP_84441_A_23521 | NW_004516210.1 | scaffold845 | 23521                   | AA                              | TT                 | TT               | INTERGENIC      |               |                                  |                    |
| SNP_84442_A_23523 | NW_004516210.1 | scaffold845 | 23523                   | CC                              | GG                 | GG               | INTERGENIC      |               |                                  |                    |
| SNP_84444_A_23573 | NW_004516210.1 | scaffold845 | 23573                   | TT                              | GG                 | GG               | INTERGENIC      |               |                                  |                    |
| SNP_84445_A_25536 | NW_004516210.1 | scaffold845 | 25536                   | TT                              | AA                 | AA               | INTERGENIC      |               |                                  |                    |
| SNP_84446_A_25540 | NW_004516210.1 | scaffold845 | 25540                   | AA                              | CC                 | CC               | INTERGENIC      |               |                                  |                    |
| SNP_84447_A_25566 | NW_004516210.1 | scaffold845 | 25566                   | GG                              | TT                 | TT               | INTERGENIC      |               |                                  |                    |
| SNP_84448_A_27812 | NW_004516210.1 | scaffold845 | 27812                   | GG                              | CC                 | CC               | DRR             | 101513357     | transcription factor bHLH57-like |                    |
| SNP_84449_A_28483 | NW_004516210.1 | scaffold845 | 28483                   | TT                              | CC                 | CC               | INTRON          | 101513357     | transcription factor bHLH57-like |                    |
| SNP_84450_A_28520 | NW_004516210.1 | scaffold845 | 28520                   | AA                              | CC                 | CC               | INTRON          | 101513357     | transcription factor bHLH57-like |                    |
| SNP_84451_A_28525 | NW_004516210.1 | scaffold845 | 28525                   | TT                              | AA                 | AA               | INTRON          | 101513357     | transcription factor bHLH57-like |                    |
| SNP_84452_A_28528 | NW_004516210.1 | scaffold845 | 28528                   | AA                              | GG                 | GG               | INTRON          | 101513357     | transcription factor bHLH57-like |                    |
| SNP_84454_A_28566 | NW_004516210.1 | scaffold845 | 28566                   | GG                              | TT                 | TT               | INTRON          | 101513357     | transcription factor bHLH57-like |                    |
| SNP_84455_A_31721 | NW_004516210.1 | scaffold845 | 31721                   | TT                              | AA                 | AA               | URR             | 101513357     | transcription factor bHLH57-like |                    |
| SNP_84456_A_31891 | NW_004516210.1 | scaffold845 | 31891                   | CC                              | TT                 | TT               | URR             | 101513357     | transcription factor bHLH57-like |                    |
| SNP_84458_A_31959 | NW_004516210.1 | scaffold845 | 31959                   | TT                              | CC                 | CC               | URR             | 101513357     | transcription factor bHLH57-like |                    |

| SNPs IDs          | Chromosome IDs | Chromosomes | Physical positions (bp) | CDC Frontier (Reference genome) | (Pusa 1103 & HPNB) | (ILWC 46 & LPNB) | Sequence Components of genome | Gene accession IDs | Putative functions               |
|-------------------|----------------|-------------|-------------------------|---------------------------------|--------------------|------------------|-------------------------------|--------------------|----------------------------------|
| SNP_84459_A_31961 | NW_004516210.1 | scaffold845 | 31961                   | GG                              | CC                 | CC               | URR                           | 101513357          | transcription factor bHLH57-like |
| SNP_84460_A_32003 | NW_004516210.1 | scaffold845 | 32003                   | AA                              | CC                 | CC               | URR                           | 101513357          | transcription factor bHLH57-like |
| SNP_84461_A_32027 | NW_004516210.1 | scaffold845 | 32027                   | AA                              | TT                 | TT               | URR                           | 101513357          | transcription factor bHLH57-like |
| SNP_84463_A_39122 | NW_004516210.1 | scaffold845 | 39122                   | GG                              | TT                 | TT               | INTERGENIC                    |                    |                                  |
| SNP_84465_A_39902 | NW_004516210.1 | scaffold845 | 39902                   | CC                              | AA                 | AA               | INTERGENIC                    |                    |                                  |
| SNP_84466_A_39907 | NW_004516210.1 | scaffold845 | 39907                   | AA                              | TT                 | TT               | INTERGENIC                    |                    |                                  |
| SNP_84467_A_40281 | NW_004516210.1 | scaffold845 | 40281                   | TT                              | CC                 | CC               | INTERGENIC                    |                    |                                  |
| SNP_84468_A_40305 | NW_004516210.1 | scaffold845 | 40305                   | GG                              | CC                 | CC               | INTERGENIC                    |                    |                                  |
| SNP_84469_A_40370 | NW_004516210.1 | scaffold845 | 40370                   | AA                              | GG                 | GG               | INTERGENIC                    |                    |                                  |
| SNP_84470_A_48005 | NW_004516210.1 | scaffold845 | 48005                   | AA                              | GG                 | GG               | URR                           | 101513677          | metal tolerance protein 1-like   |
| SNP_84471_A_48013 | NW_004516210.1 | scaffold845 | 48013                   | AA                              | TT                 | TT               | URR                           | 101513677          | metal tolerance protein 1-like   |
| SNP_84472_A_48137 | NW_004516210.1 | scaffold845 | 48137                   | CC                              | AA                 | AA               | URR                           | 101513677          | metal tolerance protein 1-like   |
| SNP_84473_A_48399 | NW_004516210.1 | scaffold845 | 48399                   | CC                              | TT                 | TT               | URR                           | 101513677          | metal tolerance protein 1-like   |
| SNP_84474_A_48712 | NW_004516210.1 | scaffold845 | 48712                   | AA                              | GG                 | GG               | URR                           | 101513677          | metal tolerance protein 1-like   |
| SNP_84475_A_48930 | NW_004516210.1 | scaffold845 | 48930                   | AA                              | GG                 | GG               | URR                           | 101513677          | metal tolerance protein 1-like   |
| SNP_84476_A_49192 | NW_004516210.1 | scaffold845 | 49192                   | AA                              | TT                 | TT               | URR                           | 101513677          | metal tolerance protein 1-like   |
| SNP_84477_A_52385 | NW_004516210.1 | scaffold845 | 52385                   | CC                              | TT                 | TT               | INTERGENIC                    |                    |                                  |
| SNP_84478_A_52421 | NW_004516210.1 | scaffold845 | 52421                   | GG                              | AA                 | AA               | INTERGENIC                    |                    |                                  |
| SNP_84479_A_52444 | NW_004516210.1 | scaffold845 | 52444                   | TT                              | GG                 | GG               | INTERGENIC                    |                    |                                  |
| SNP_84480_A_59390 | NW_004516210.1 | scaffold845 | 59390                   | CC                              | TT                 | TT               | INTERGENIC                    |                    |                                  |
| SNP_84481_A_59775 | NW_004516210.1 | scaffold845 | 59775                   | GG                              | AA                 | AA               | INTERGENIC                    |                    |                                  |
| SNP_84482_A_60451 | NW_004516210.1 | scaffold845 | 60451                   | TT                              | AA                 | AA               | INTERGENIC                    |                    |                                  |

| SNPs IDs          | Chromosome IDs | Chromosomes | Physical positions (bp) | CDC Frontier (Reference genome) | (Pusa 1103 & HPNB) | (ILWC 46 & LPNB) | Sequence genome | Components of | Gene accession IDs | Putative functions |
|-------------------|----------------|-------------|-------------------------|---------------------------------|--------------------|------------------|-----------------|---------------|--------------------|--------------------|
| SNP_84483_A_60456 | NW_004516210.1 | scaffold845 | 60456                   | TT                              | CC                 | CC               | INTERGENIC      |               |                    |                    |
| SNP_84485_A_64516 | NW_004516210.1 | scaffold845 | 64516                   | AA                              | CC                 | CC               | INTERGENIC      |               |                    |                    |
| SNP_84486_A_64539 | NW_004516210.1 | scaffold845 | 64539                   | CC                              | AA                 | AA               | INTERGENIC      |               |                    |                    |
| SNP_84487_A_69761 | NW_004516210.1 | scaffold845 | 69761                   | AA                              | GG                 | GG               | INTERGENIC      |               |                    |                    |
| SNP_84489_A_70057 | NW_004516210.1 | scaffold845 | 70057                   | AA                              | GG                 | GG               | INTERGENIC      |               |                    |                    |
| SNP_84490_A_70073 | NW_004516210.1 | scaffold845 | 70073                   | CC                              | TT                 | TT               | INTERGENIC      |               |                    |                    |
| SNP_84491_A_70220 | NW_004516210.1 | scaffold845 | 70220                   | AA                              | TT                 | TT               | INTERGENIC      |               |                    |                    |
| SNP_84492_A_75476 | NW_004516210.1 | scaffold845 | 75476                   | CC                              | TT                 | TT               | INTERGENIC      |               |                    |                    |
| SNP_84493_A_76848 | NW_004516210.1 | scaffold845 | 76848                   | AA                              | CC                 | CC               | INTERGENIC      |               |                    |                    |
| SNP_84494_A_76911 | NW_004516210.1 | scaffold845 | 76911                   | GG                              | AA                 | AA               | INTERGENIC      |               |                    |                    |
| SNP_84495_A_81663 | NW_004516210.1 | scaffold845 | 81663                   | CC                              | TT                 | TT               | INTERGENIC      |               |                    |                    |
| SNP_84496_A_81791 | NW_004516210.1 | scaffold845 | 81791                   | TT                              | CC                 | CC               | INTERGENIC      |               |                    |                    |
| SNP_84498_A_81969 | NW_004516210.1 | scaffold845 | 81969                   | CC                              | TT                 | TT               | INTERGENIC      |               |                    |                    |
| SNP_84499_A_81990 | NW_004516210.1 | scaffold845 | 81990                   | AA                              | GG                 | GG               | INTERGENIC      |               |                    |                    |
| SNP_84500_A_82013 | NW_004516210.1 | scaffold845 | 82013                   | TT                              | GG                 | GG               | INTERGENIC      |               |                    |                    |
| SNP_84501_A_82147 | NW_004516210.1 | scaffold845 | 82147                   | TT                              | GG                 | GG               | INTERGENIC      |               |                    |                    |
| SNP_84502_A_82176 | NW_004516210.1 | scaffold845 | 82176                   | CC                              | TT                 | TT               | INTERGENIC      |               |                    |                    |
| SNP_84503_A_82259 | NW_004516210.1 | scaffold845 | 82259                   | TT                              | CC                 | CC               | INTERGENIC      |               |                    |                    |
| SNP_84504_A_82272 | NW_004516210.1 | scaffold845 | 82272                   | GG                              | CC                 | CC               | INTERGENIC      |               |                    |                    |
| SNP_84505_A_82333 | NW_004516210.1 | scaffold845 | 82333                   | TT                              | CC                 | CC               | INTERGENIC      |               |                    |                    |
| SNP_84506_A_82337 | NW_004516210.1 | scaffold845 | 82337                   | AA                              | TT                 | TT               | INTERGENIC      |               |                    |                    |
| SNP_84507_A_82510 | NW_004516210.1 | scaffold845 | 82510                   | CC                              | AA                 | AA               | INTERGENIC      |               |                    |                    |

| SNPs IDs           | Chromosome IDs | Chromosomes | Physical positions (bp) | CDC Frontier genome (Reference genome) | (Pusa 1103 & HPNB) | (ILWC 46 & LPNB) | Sequence Components of genome | Gene accession IDs | Putative functions                           |
|--------------------|----------------|-------------|-------------------------|----------------------------------------|--------------------|------------------|-------------------------------|--------------------|----------------------------------------------|
| SNP_84508_A_82519  | NW_004516210.1 | scaffold845 | 82519                   | GG                                     | AA                 | AA               | INTERGENIC                    |                    |                                              |
| SNP_84509_A_84545  | NW_004516210.1 | scaffold845 | 84545                   | TT                                     | GG                 | GG               | INTERGENIC                    |                    |                                              |
| SNP_84510_A_85250  | NW_004516210.1 | scaffold845 | 85250                   | AA                                     | TT                 | TT               | INTERGENIC                    |                    |                                              |
| SNP_84511_A_85453  | NW_004516210.1 | scaffold845 | 85453                   | GG                                     | CC                 | CC               | INTERGENIC                    |                    |                                              |
| SNP_84512_A_87550  | NW_004516210.1 | scaffold845 | 87550                   | TT                                     | CC                 | CC               | INTERGENIC                    |                    |                                              |
| SNP_84513_A_87565  | NW_004516210.1 | scaffold845 | 87565                   | TT                                     | AA                 | AA               | INTERGENIC                    |                    |                                              |
| SNP_84514_A_87869  | NW_004516210.1 | scaffold845 | 87869                   | TT                                     | GG                 | GG               | INTERGENIC                    |                    |                                              |
| SNP_84515_A_88026  | NW_004516210.1 | scaffold845 | 88026                   | GG                                     | AA                 | AA               | INTERGENIC                    |                    |                                              |
| SNP_84516_A_94816  | NW_004516210.1 | scaffold845 | 94816                   | AA                                     | GG                 | GG               | INTERGENIC                    |                    |                                              |
| SNP_84517_A_100380 | NW_004516210.1 | scaffold845 | 100380                  | GG                                     | AA                 | AA               | INTERGENIC                    |                    |                                              |
| SNP_84518_A_100399 | NW_004516210.1 | scaffold845 | 100399                  | AA                                     | GG                 | GG               | INTERGENIC                    |                    |                                              |
| SNP_84519_A_100414 | NW_004516210.1 | scaffold845 | 100414                  | AA                                     | GG                 | GG               | INTERGENIC                    |                    |                                              |
| SNP_84520_A_100466 | NW_004516210.1 | scaffold845 | 100466                  | CC                                     | TT                 | TT               | INTERGENIC                    |                    |                                              |
| SNP_84521_A_100474 | NW_004516210.1 | scaffold845 | 100474                  | CC                                     | AA                 | AA               | INTERGENIC                    |                    |                                              |
| SNP_84522_A_100568 | NW_004516210.1 | scaffold845 | 100568                  | TT                                     | GG                 | GG               | INTERGENIC                    |                    |                                              |
| SNP_84523_A_100578 | NW_004516210.1 | scaffold845 | 100578                  | CC                                     | TT                 | TT               | INTERGENIC                    |                    |                                              |
| SNP_84524_A_100646 | NW_004516210.1 | scaffold845 | 100646                  | TT                                     | CC                 | CC               | INTERGENIC                    |                    |                                              |
| SNP_84525_A_100879 | NW_004516210.1 | scaffold845 | 100879                  | CC                                     | TT                 | TT               | INTERGENIC                    |                    |                                              |
| SNP_84526_A_100936 | NW_004516210.1 | scaffold845 | 100936                  | TT                                     | AA                 | AA               | INTERGENIC                    |                    |                                              |
| SNP_84527_A_101068 | NW_004516210.1 | scaffold845 | 101068                  | CC                                     | TT                 | TT               | DRR                           | 101491015          | 28 kDa ribonucleoprotein, chloroplastic-like |
| SNP_84529_A_101199 | NW_004516210.1 | scaffold845 | 101199                  | AA                                     | GG                 | GG               | DRR                           | 101491015          | 28 kDa ribonucleoprotein, chloroplastic-like |
| SNP_84530_A_101290 | NW_004516210.1 | scaffold845 | 101290                  | GG                                     | AA                 | AA               | DRR                           | 101491015          | 28 kDa ribonucleoprotein, chloroplastic-like |

| SNPs IDs           | Chromosome IDs | Chromosomes | Physical positions (bp) | CDC Frontier (Reference genome) | (Pusa 1103 & HPNB) | (ILWC 46 & LPNB) | Sequence genome | Components of | Gene accession IDs | Putative functions                           |
|--------------------|----------------|-------------|-------------------------|---------------------------------|--------------------|------------------|-----------------|---------------|--------------------|----------------------------------------------|
| SNP_84531_A_101347 | NW_004516210.1 | scaffold845 | 101347                  | GG                              | AA                 | AA               | DRR             |               | 101491015          | 28 kDa ribonucleoprotein, chloroplastic-like |
| SNP_84532_A_101705 | NW_004516210.1 | scaffold845 | 101705                  | TT                              | CC                 | CC               | DRR             |               | 101491015          | 28 kDa ribonucleoprotein, chloroplastic-like |
| SNP_84533_A_101723 | NW_004516210.1 | scaffold845 | 101723                  | CC                              | TT                 | TT               | DRR             |               | 101491015          | 28 kDa ribonucleoprotein, chloroplastic-like |
| SNP_84534_A_102032 | NW_004516210.1 | scaffold845 | 102032                  | GG                              | CC                 | CC               | DRR             |               | 101491015          | 28 kDa ribonucleoprotein, chloroplastic-like |
| SNP_84535_A_102151 | NW_004516210.1 | scaffold845 | 102151                  | GG                              | AA                 | AA               | INTRON          |               | 101491015          | 28 kDa ribonucleoprotein, chloroplastic-like |
| SNP_84538_A_102579 | NW_004516210.1 | scaffold845 | 102579                  | AA                              | GG                 | GG               | INTRON          |               | 101491015          | 28 kDa ribonucleoprotein, chloroplastic-like |
| SNP_84539_A_102712 | NW_004516210.1 | scaffold845 | 102712                  | CC                              | GG                 | GG               | INTRON          |               | 101491015          | 28 kDa ribonucleoprotein, chloroplastic-like |
| SNP_84540_A_102818 | NW_004516210.1 | scaffold845 | 102818                  | AA                              | TT                 | TT               | INTRON          |               | 101491015          | 28 kDa ribonucleoprotein, chloroplastic-like |
| SNP_84541_A_102990 | NW_004516210.1 | scaffold845 | 102990                  | GG                              | AA                 | AA               | INTRON          |               | 101491015          | 28 kDa ribonucleoprotein, chloroplastic-like |
| SNP_84543_A_103276 | NW_004516210.1 | scaffold845 | 103276                  | TT                              | CC                 | CC               | INTRON          |               | 101491015          | 28 kDa ribonucleoprotein, chloroplastic-like |
| SNP_84544_A_103583 | NW_004516210.1 | scaffold845 | 103583                  | CC                              | TT                 | TT               | INTRON          |               | 101491015          | 28 kDa ribonucleoprotein, chloroplastic-like |
| SNP_84545_A_103676 | NW_004516210.1 | scaffold845 | 103676                  | TT                              | AA                 | AA               | INTRON          |               | 101491015          | 28 kDa ribonucleoprotein, chloroplastic-like |
| SNP_84546_A_103708 | NW_004516210.1 | scaffold845 | 103708                  | GG                              | AA                 | AA               | STOP_GAINED     |               | 101491015          | 28 kDa ribonucleoprotein, chloroplastic-like |
| SNP_84547_A_103863 | NW_004516210.1 | scaffold845 | 103863                  | CC                              | AA                 | AA               | INTRON          |               | 101491015          | 28 kDa ribonucleoprotein, chloroplastic-like |
| SNP_84549_A_103935 | NW_004516210.1 | scaffold845 | 103935                  | AA                              | CC                 | CC               | INTRON          |               | 101491015          | 28 kDa ribonucleoprotein, chloroplastic-like |
| SNP_84550_A_103963 | NW_004516210.1 | scaffold845 | 103963                  | TT                              | CC                 | CC               | INTRON          |               | 101491015          | 28 kDa ribonucleoprotein, chloroplastic-like |
| SNP_84551_A_103986 | NW_004516210.1 | scaffold845 | 103986                  | GG                              | AA                 | AA               | INTRON          |               | 101491015          | 28 kDa ribonucleoprotein, chloroplastic-like |
| SNP_84552_A_104138 | NW_004516210.1 | scaffold845 | 104138                  | AA                              | GG                 | GG               | INTRON          |               | 101491015          | 28 kDa ribonucleoprotein, chloroplastic-like |
| SNP_84553_A_104144 | NW_004516210.1 | scaffold845 | 104144                  | TT                              | GG                 | GG               | INTRON          |               | 101491015          | 28 kDa ribonucleoprotein, chloroplastic-like |
| SNP_84554_A_104159 | NW_004516210.1 | scaffold845 | 104159                  | CC                              | TT                 | TT               | INTRON          |               | 101491015          | 28 kDa ribonucleoprotein, chloroplastic-like |
| SNP_84555_A_104191 | NW_004516210.1 | scaffold845 | 104191                  | CC                              | TT                 | TT               | INTRON          |               | 101491015          | 28 kDa ribonucleoprotein, chloroplastic-like |
| SNP_84556_A_104345 | NW_004516210.1 | scaffold845 | 104345                  | CC                              | TT                 | TT               | INTRON          |               | 101491015          | 28 kDa ribonucleoprotein, chloroplastic-like |

| SNPs IDs           | Chromosome IDs | Chromosomes | Physical positions (bp) | CDC Frontier (Reference genome) | (Pusa 1103 & HPNB) | (ILWC 46 & LPNB) | Sequence Components of genome | Gene accession IDs | Putative functions                                                      |
|--------------------|----------------|-------------|-------------------------|---------------------------------|--------------------|------------------|-------------------------------|--------------------|-------------------------------------------------------------------------|
| SNP_84557_A_104370 | NW_004516210.1 | scaffold845 | 104370                  | AA                              | GG                 | GG               | INTRON                        | 101491015          | 28 kDa ribonucleoprotein, chloroplastic-like                            |
| SNP_84558_A_104534 | NW_004516210.1 | scaffold845 | 104534                  | TT                              | GG                 | GG               | INTRON                        | 101491015          | 28 kDa ribonucleoprotein, chloroplastic-like                            |
| SNP_84559_A_106078 | NW_004516210.1 | scaffold845 | 106078                  | CC                              | TT                 | TT               | URR                           | 101491015          | 28 kDa ribonucleoprotein, chloroplastic-like                            |
| SNP_84560_A_106176 | NW_004516210.1 | scaffold845 | 106176                  | GG                              | TT                 | TT               | URR                           | 101491015          | 28 kDa ribonucleoprotein, chloroplastic-like                            |
| SNP_84561_A_106222 | NW_004516210.1 | scaffold845 | 106222                  | AA                              | GG                 | GG               | URR                           | 101491015          | 28 kDa ribonucleoprotein, chloroplastic-like                            |
| SNP_84562_A_106470 | NW_004516210.1 | scaffold845 | 106470                  | TT                              | AA                 | AA               | URR                           | 101491015          | 28 kDa ribonucleoprotein, chloroplastic-like                            |
| SNP_84563_A_109972 | NW_004516210.1 | scaffold845 | 109972                  | AA                              | GG                 | GG               | INTERGENIC                    |                    |                                                                         |
| SNP_84565_A_116840 | NW_004516210.1 | scaffold845 | 116840                  | GG                              | AA                 | AA               | INTERGENIC                    |                    |                                                                         |
| SNP_84566_A_116911 | NW_004516210.1 | scaffold845 | 116911                  | TT                              | AA                 | AA               | INTERGENIC                    |                    |                                                                         |
| SNP_84567_A_116925 | NW_004516210.1 | scaffold845 | 116925                  | TT                              | CC                 | CC               | INTERGENIC                    |                    |                                                                         |
| SNP_84568_A_120668 | NW_004516210.1 | scaffold845 | 120668                  | TT                              | GG                 | GG               | INTERGENIC                    |                    |                                                                         |
| SNP_84569_A_120684 | NW_004516210.1 | scaffold845 | 120684                  | GG                              | TT                 | TT               | INTERGENIC                    |                    |                                                                         |
| SNP_84570_A_129566 | NW_004516210.1 | scaffold845 | 129566                  | AA                              | CC                 | CC               | INTRON                        | 101514768          | pyruvate dehydrogenase E1 component subunit alpha-3, chloroplastic-like |
| SNP_84572_A_132794 | NW_004516210.1 | scaffold845 | 132794                  | GG                              | TT                 | TT               | URR                           | 101514768          | pyruvate dehydrogenase E1 component subunit alpha-3, chloroplastic-like |
| SNP_84574_A_133157 | NW_004516210.1 | scaffold845 | 133157                  | AA                              | GG                 | GG               | INTERGENIC                    |                    |                                                                         |
| SNP_84575_A_133165 | NW_004516210.1 | scaffold845 | 133165                  | GG                              | TT                 | TT               | INTERGENIC                    |                    |                                                                         |
| SNP_84578_A_135728 | NW_004516210.1 | scaffold845 | 135728                  | CC                              | TT                 | TT               | URR                           | 101410594          | transfer RNA cysteine (anticodon GCA)                                   |
| SNP_84579_A_138050 | NW_004516210.1 | scaffold845 | 138050                  | AA                              | GG                 | GG               | INTERGENIC                    |                    |                                                                         |
| SNP_84580_A_138081 | NW_004516210.1 | scaffold845 | 138081                  | CC                              | AA                 | AA               | INTERGENIC                    |                    |                                                                         |
| SNP_84581_A_138808 | NW_004516210.1 | scaffold845 | 138808                  | AA                              | GG                 | GG               | INTERGENIC                    |                    |                                                                         |
| SNP_84582_A_140810 | NW_004516210.1 | scaffold845 | 140810                  | CC                              | TT                 | TT               | SYNONYMOUS_CODING             | 101515093          | vacuolar protein sorting-associated protein 8 homolog                   |
| SNP_84584_A_142755 | NW_004516210.1 | scaffold845 | 142755                  | AA                              | GG                 | GG               | INTRON                        | 101515093          | vacuolar protein sorting-associated protein 8 homolog                   |



| SNPs IDs           | Chromosome IDs | Chromosomes | Physical positions (bp) | CDC Frontier (Reference genome) | (Pusa 1103 & HPNB) | (ILWC 46 & LPNB) | Sequence Components of genome | Gene accession IDs | Putative functions                                               |
|--------------------|----------------|-------------|-------------------------|---------------------------------|--------------------|------------------|-------------------------------|--------------------|------------------------------------------------------------------|
| SNP_84585_A_145990 | NW_004516210.1 | scaffold845 | 145990                  | AA                              | TT                 | TT               | URR                           | 101515093          | vacuolar protein sorting-associated protein 8 homolog            |
| SNP_84586_A_146829 | NW_004516210.1 | scaffold845 | 146829                  | AA                              | GG                 | GG               | URR                           | 101515093          | vacuolar protein sorting-associated protein 8 homolog            |
| SNP_84587_A_148397 | NW_004516210.1 | scaffold845 | 148397                  | TT                              | AA                 | AA               | INTERGENIC                    |                    |                                                                  |
| SNP_84588_A_149478 | NW_004516210.1 | scaffold845 | 149478                  | GG                              | AA                 | AA               | INTERGENIC                    |                    |                                                                  |
| SNP_84589_A_149518 | NW_004516210.1 | scaffold845 | 149518                  | AA                              | GG                 | GG               | INTERGENIC                    |                    |                                                                  |
| SNP_84591_A_151425 | NW_004516210.1 | scaffold845 | 151425                  | AA                              | GG                 | GG               | INTERGENIC                    |                    |                                                                  |
| SNP_84592_A_151559 | NW_004516210.1 | scaffold845 | 151559                  | TT                              | CC                 | CC               | DRR                           | 101515416          | granule-bound starch synthase 1, chloroplastic/amyloplastic-like |
| SNP_84593_A_152034 | NW_004516210.1 | scaffold845 | 152034                  | GG                              | AA                 | AA               | DRR                           | 101515416          | granule-bound starch synthase 1, chloroplastic/amyloplastic-like |
| SNP_84595_A_160376 | NW_004516210.1 | scaffold845 | 160376                  | GG                              | AA                 | AA               | URR                           | 101515750          | 60S acidic ribosomal protein P1-2-like                           |
| SNP_84596_A_160392 | NW_004516210.1 | scaffold845 | 160392                  | GG                              | AA                 | AA               | URR                           | 101515750          | 60S acidic ribosomal protein P1-2-like                           |
| SNP_84597_A_161187 | NW_004516210.1 | scaffold845 | 161187                  | GG                              | AA                 | AA               | URR                           | 101515750          | 60S acidic ribosomal protein P1-2-like                           |
| SNP_84598_A_162853 | NW_004516210.1 | scaffold845 | 162853                  | AA                              | GG                 | GG               | INTERGENIC                    |                    |                                                                  |
| SNP_84599_A_163122 | NW_004516210.1 | scaffold845 | 163122                  | CC                              | TT                 | TT               | INTERGENIC                    |                    |                                                                  |
| SNP_84602_A_171691 | NW_004516210.1 | scaffold845 | 171691                  | TT                              | GG                 | GG               | INTERGENIC                    |                    |                                                                  |
| SNP_84604_A_175238 | NW_004516210.1 | scaffold845 | 175238                  | GG                              | TT                 | TT               | DRR                           | 101488730          | uncharacterized LOC101488730                                     |
| SNP_84605_A_176128 | NW_004516210.1 | scaffold845 | 176128                  | TT                              | GG                 | GG               | SYNONYMOUS_CODING             | 101488730          | uncharacterized LOC101488730                                     |
| SNP_84607_A_230609 | NW_004516210.1 | scaffold845 | 230609                  | GG                              | TT                 | TT               | INTERGENIC                    |                    |                                                                  |
| SNP_84608_A_230998 | NW_004516210.1 | scaffold845 | 230998                  | CC                              | GG                 | GG               | INTERGENIC                    |                    |                                                                  |
| SNP_84609_A_231000 | NW_004516210.1 | scaffold845 | 231000                  | TT                              | GG                 | GG               | INTERGENIC                    |                    |                                                                  |
| SNP_84610_A_245481 | NW_004516210.1 | scaffold845 | 245481                  | CC                              | AA                 | AA               | INTERGENIC                    |                    |                                                                  |
| SNP_84611_A_246275 | NW_004516210.1 | scaffold845 | 246275                  | AA                              | GG                 | GG               | INTERGENIC                    |                    |                                                                  |
| SNP_84612_A_255902 | NW_004516210.1 | scaffold845 | 255902                  | GG                              | AA                 | AA               | INTERGENIC                    |                    |                                                                  |

| SNPs IDs           | Chromosome IDs | Chromosomes | Physical positions (bp) | CDC Frontier genome (Reference genome) | (Pusa 1103 & HPNB) | (ILWC 46 & LPNB) | Sequence Components of genome | Gene accession IDs | Putative functions       |
|--------------------|----------------|-------------|-------------------------|----------------------------------------|--------------------|------------------|-------------------------------|--------------------|--------------------------|
| SNP_84613_A_266194 | NW_004516210.1 | scaffold845 | 266194                  | CC                                     | TT                 | TT               | INTERGENIC                    |                    |                          |
| SNP_84614_A_266217 | NW_004516210.1 | scaffold845 | 266217                  | TT                                     | CC                 | CC               | INTERGENIC                    |                    |                          |
| SNP_84615_A_266232 | NW_004516210.1 | scaffold845 | 266232                  | AA                                     | GG                 | GG               | INTERGENIC                    |                    |                          |
| SNP_84616_A_326288 | NW_004516210.1 | scaffold845 | 326288                  | AA                                     | CC                 | CC               | INTERGENIC                    |                    |                          |
| SNP_84617_A_330030 | NW_004516210.1 | scaffold845 | 330030                  | CC                                     | TT                 | TT               | INTERGENIC                    |                    |                          |
| SNP_84618_A_330092 | NW_004516210.1 | scaffold845 | 330092                  | AA                                     | GG                 | GG               | INTERGENIC                    |                    |                          |
| SNP_84619_A_331886 | NW_004516210.1 | scaffold845 | 331886                  | AA                                     | GG                 | GG               | INTERGENIC                    |                    |                          |
| SNP_84621_A_331991 | NW_004516210.1 | scaffold845 | 331991                  | CC                                     | GG                 | GG               | INTERGENIC                    |                    |                          |
| SNP_84622_A_332243 | NW_004516210.1 | scaffold845 | 332243                  | GG                                     | CC                 | CC               | INTERGENIC                    |                    |                          |
| SNP_84623_A_347639 | NW_004516210.1 | scaffold845 | 347639                  | AA                                     | GG                 | GG               | INTERGENIC                    |                    |                          |
| SNP_84625_A_375540 | NW_004516210.1 | scaffold845 | 375540                  | AA                                     | TT                 | TT               | URR                           | 101490698          | protein IQ-DOMAIN 1-like |
| SNP_84626_A_384624 | NW_004516210.1 | scaffold845 | 384624                  | GG                                     | AA                 | AA               | INTERGENIC                    |                    |                          |
| SNP_84627_A_31623  | NW_004516211.1 | scaffold847 | 31623                   | TT                                     | CC                 | CC               | INTERGENIC                    |                    |                          |
| SNP_84628_A_31632  | NW_004516211.1 | scaffold847 | 31632                   | TT                                     | CC                 | CC               | INTERGENIC                    |                    |                          |
| SNP_84629_A_31792  | NW_004516211.1 | scaffold847 | 31792                   | TT                                     | CC                 | CC               | INTERGENIC                    |                    |                          |
| SNP_84630_A_32094  | NW_004516211.1 | scaffold847 | 32094                   | GG                                     | AA                 | AA               | INTERGENIC                    |                    |                          |
| SNP_84631_A_32495  | NW_004516211.1 | scaffold847 | 32495                   | AA                                     | GG                 | GG               | INTERGENIC                    |                    |                          |
| SNP_84632_A_72062  | NW_004516211.1 | scaffold847 | 72062                   | AA                                     | CC                 | CC               | INTERGENIC                    |                    |                          |
| SNP_84633_A_75571  | NW_004516211.1 | scaffold847 | 75571                   | TT                                     | CC                 | CC               | INTERGENIC                    |                    |                          |
| SNP_84634_A_75629  | NW_004516211.1 | scaffold847 | 75629                   | GG                                     | AA                 | AA               | INTERGENIC                    |                    |                          |
| SNP_84635_A_75721  | NW_004516211.1 | scaffold847 | 75721                   | TT                                     | CC                 | CC               | INTERGENIC                    |                    |                          |
| SNP_84636_A_75762  | NW_004516211.1 | scaffold847 | 75762                   | CC                                     | TT                 | TT               | INTERGENIC                    |                    |                          |

| SNPs IDs           | Chromosome IDs | Chromosomes | Physical positions (bp) | CDC Frontier (Reference genome) | (Pusa 1103 & HPNB) | (ILWC 46 & LPNB) | Sequence genome | Components of | Gene accession IDs | Putative functions |
|--------------------|----------------|-------------|-------------------------|---------------------------------|--------------------|------------------|-----------------|---------------|--------------------|--------------------|
| SNP_84637_A_75977  | NW_004516211.1 | scaffold847 | 75977                   | TT                              | CC                 | CC               | INTERGENIC      |               |                    |                    |
| SNP_84638_A_76016  | NW_004516211.1 | scaffold847 | 76016                   | GG                              | AA                 | AA               | INTERGENIC      |               |                    |                    |
| SNP_84639_A_76109  | NW_004516211.1 | scaffold847 | 76109                   | CC                              | TT                 | TT               | INTERGENIC      |               |                    |                    |
| SNP_84640_A_82561  | NW_004516211.1 | scaffold847 | 82561                   | TT                              | CC                 | CC               | INTERGENIC      |               |                    |                    |
| SNP_84642_A_121173 | NW_004516211.1 | scaffold847 | 121173                  | TT                              | AA                 | AA               | INTERGENIC      |               |                    |                    |
| SNP_84643_A_123084 | NW_004516211.1 | scaffold847 | 123084                  | GG                              | AA                 | AA               | INTERGENIC      |               |                    |                    |
| SNP_84644_A_129906 | NW_004516211.1 | scaffold847 | 129906                  | AA                              | GG                 | GG               | INTERGENIC      |               |                    |                    |
| SNP_84645_A_130463 | NW_004516211.1 | scaffold847 | 130463                  | CC                              | TT                 | TT               | INTERGENIC      |               |                    |                    |
| SNP_84646_A_145576 | NW_004516211.1 | scaffold847 | 145576                  | GG                              | TT                 | TT               | INTERGENIC      |               |                    |                    |
| SNP_84647_A_244617 | NW_004516211.1 | scaffold847 | 244617                  | GG                              | AA                 | AA               | INTERGENIC      |               |                    |                    |
| SNP_84648_A_244901 | NW_004516211.1 | scaffold847 | 244901                  | TT                              | GG                 | GG               | INTERGENIC      |               |                    |                    |
| SNP_84649_A_281626 | NW_004516211.1 | scaffold847 | 281626                  | CC                              | AA                 | AA               | INTERGENIC      |               |                    |                    |
| SNP_84650_A_289404 | NW_004516211.1 | scaffold847 | 289404                  | AA                              | CC                 | CC               | INTERGENIC      |               |                    |                    |
| SNP_84651_A_302482 | NW_004516211.1 | scaffold847 | 302482                  | AA                              | GG                 | GG               | INTERGENIC      |               |                    |                    |
| SNP_84653_A_303083 | NW_004516211.1 | scaffold847 | 303083                  | TT                              | AA                 | AA               | INTERGENIC      |               |                    |                    |
| SNP_84654_A_303093 | NW_004516211.1 | scaffold847 | 303093                  | TT                              | GG                 | GG               | INTERGENIC      |               |                    |                    |
| SNP_84656_A_6400   | NW_004516212.1 | scaffold848 | 6400                    | AA                              | GG                 | GG               | INTERGENIC      |               |                    |                    |
| SNP_84657_A_6410   | NW_004516212.1 | scaffold848 | 6410                    | CC                              | AA                 | AA               | INTERGENIC      |               |                    |                    |
| SNP_84658_A_6458   | NW_004516212.1 | scaffold848 | 6458                    | AA                              | GG                 | GG               | INTERGENIC      |               |                    |                    |
| SNP_84659_A_23760  | NW_004516212.1 | scaffold848 | 23760                   | GG                              | AA                 | AA               | INTERGENIC      |               |                    |                    |
| SNP_84660_A_23771  | NW_004516212.1 | scaffold848 | 23771                   | TT                              | GG                 | GG               | INTERGENIC      |               |                    |                    |
| SNP_84661_A_23811  | NW_004516212.1 | scaffold848 | 23811                   | AA                              | TT                 | TT               | INTERGENIC      |               |                    |                    |

| SNPs IDs           | Chromosome IDs | Chromosomes | Physical positions (bp) | CDC Frontier (Reference genome) | (Pusa 1103 & HPNB) | (ILWC 46 & LPNB) | Sequence Components of genome | Gene accession IDs | Putative functions           |
|--------------------|----------------|-------------|-------------------------|---------------------------------|--------------------|------------------|-------------------------------|--------------------|------------------------------|
| SNP_84662_A_23934  | NW_004516212.1 | scaffold848 | 23934                   | AA                              | TT                 | TT               | INTERGENIC                    |                    |                              |
| SNP_84663_A_23937  | NW_004516212.1 | scaffold848 | 23937                   | CC                              | TT                 | TT               | INTERGENIC                    |                    |                              |
| SNP_84664_A_24094  | NW_004516212.1 | scaffold848 | 24094                   | CC                              | TT                 | TT               | INTERGENIC                    |                    |                              |
| SNP_84665_A_24201  | NW_004516212.1 | scaffold848 | 24201                   | TT                              | CC                 | CC               | INTERGENIC                    |                    |                              |
| SNP_84666_A_64050  | NW_004516212.1 | scaffold848 | 64050                   | GG                              | CC                 | CC               | INTERGENIC                    |                    |                              |
| SNP_84668_A_126918 | NW_004516212.1 | scaffold848 | 126918                  | GG                              | AA                 | AA               | DRR                           | 101497173          | uncharacterized LOC101497173 |
| SNP_84669_A_180712 | NW_004516212.1 | scaffold848 | 180712                  | TT                              | CC                 | CC               | INTERGENIC                    |                    |                              |
| SNP_84670_A_180726 | NW_004516212.1 | scaffold848 | 180726                  | AA                              | CC                 | CC               | INTERGENIC                    |                    |                              |
| SNP_84671_A_180739 | NW_004516212.1 | scaffold848 | 180739                  | AA                              | TT                 | TT               | INTERGENIC                    |                    |                              |
| SNP_84673_A_1204   | NW_004516213.1 | scaffold850 | 1204                    | GG                              | AA                 | AA               | INTERGENIC                    |                    |                              |
| SNP_84674_A_1830   | NW_004516213.1 | scaffold850 | 1830                    | GG                              | TT                 | TT               | INTERGENIC                    |                    |                              |
| SNP_84675_A_6239   | NW_004516215.1 | scaffold853 | 6239                    | TT                              | CC                 | CC               | INTERGENIC                    |                    |                              |
| SNP_84676_A_5529   | NW_004516216.1 | scaffold854 | 5529                    | CC                              | TT                 | TT               | INTERGENIC                    |                    |                              |
| SNP_84678_A_17397  | NW_004516217.1 | scaffold855 | 17397                   | CC                              | TT                 | TT               | INTERGENIC                    |                    |                              |
| SNP_84679_A_27078  | NW_004516217.1 | scaffold855 | 27078                   | TT                              | CC                 | CC               | INTERGENIC                    |                    |                              |
| SNP_84681_A_31043  | NW_004516217.1 | scaffold855 | 31043                   | AA                              | GG                 | GG               | INTERGENIC                    |                    |                              |
| SNP_84682_A_31066  | NW_004516217.1 | scaffold855 | 31066                   | TT                              | CC                 | CC               | INTERGENIC                    |                    |                              |
| SNP_84683_A_31084  | NW_004516217.1 | scaffold855 | 31084                   | GG                              | CC                 | CC               | INTERGENIC                    |                    |                              |
| SNP_84684_A_31111  | NW_004516217.1 | scaffold855 | 31111                   | CC                              | TT                 | TT               | INTERGENIC                    |                    |                              |
| SNP_84685_A_31124  | NW_004516217.1 | scaffold855 | 31124                   | GG                              | TT                 | TT               | INTERGENIC                    |                    |                              |
| SNP_84686_A_31143  | NW_004516217.1 | scaffold855 | 31143                   | AA                              | GG                 | GG               | INTERGENIC                    |                    |                              |
| SNP_84688_A_31223  | NW_004516217.1 | scaffold855 | 31223                   | TT                              | CC                 | CC               | INTERGENIC                    |                    |                              |

| SNPs IDs          | Chromosome IDs | Chromosomes | Physical positions (bp) | CDC Frontier (Reference genome) | (Pusa 1103 & HPNB) | (ILWC 46 & LPNB) | Sequence genome | Components of | Gene accession IDs | Putative functions |
|-------------------|----------------|-------------|-------------------------|---------------------------------|--------------------|------------------|-----------------|---------------|--------------------|--------------------|
| SNP_84689_A_31228 | NW_004516217.1 | scaffold855 | 31228                   | CC                              | TT                 | TT               | INTERGENIC      |               |                    |                    |
| SNP_84690_A_31264 | NW_004516217.1 | scaffold855 | 31264                   | GG                              | CC                 | CC               | INTERGENIC      |               |                    |                    |
| SNP_84691_A_31272 | NW_004516217.1 | scaffold855 | 31272                   | CC                              | TT                 | TT               | INTERGENIC      |               |                    |                    |
| SNP_84692_A_31289 | NW_004516217.1 | scaffold855 | 31289                   | AA                              | GG                 | GG               | INTERGENIC      |               |                    |                    |
| SNP_84693_A_31304 | NW_004516217.1 | scaffold855 | 31304                   | AA                              | CC                 | CC               | INTERGENIC      |               |                    |                    |
| SNP_84694_A_31335 | NW_004516217.1 | scaffold855 | 31335                   | CC                              | TT                 | TT               | INTERGENIC      |               |                    |                    |
| SNP_84695_A_31367 | NW_004516217.1 | scaffold855 | 31367                   | AA                              | GG                 | GG               | INTERGENIC      |               |                    |                    |
| SNP_84697_A_31486 | NW_004516217.1 | scaffold855 | 31486                   | TT                              | CC                 | CC               | INTERGENIC      |               |                    |                    |
| SNP_84699_A_31533 | NW_004516217.1 | scaffold855 | 31533                   | CC                              | TT                 | TT               | INTERGENIC      |               |                    |                    |
| SNP_84700_A_31555 | NW_004516217.1 | scaffold855 | 31555                   | TT                              | CC                 | CC               | INTERGENIC      |               |                    |                    |
| SNP_84701_A_31696 | NW_004516217.1 | scaffold855 | 31696                   | GG                              | TT                 | TT               | INTERGENIC      |               |                    |                    |
| SNP_84702_A_31753 | NW_004516217.1 | scaffold855 | 31753                   | GG                              | TT                 | TT               | INTERGENIC      |               |                    |                    |
| SNP_84703_A_31810 | NW_004516217.1 | scaffold855 | 31810                   | TT                              | AA                 | AA               | INTERGENIC      |               |                    |                    |
| SNP_84704_A_31947 | NW_004516217.1 | scaffold855 | 31947                   | AA                              | TT                 | TT               | INTERGENIC      |               |                    |                    |
| SNP_84705_A_32000 | NW_004516217.1 | scaffold855 | 32000                   | AA                              | TT                 | TT               | INTERGENIC      |               |                    |                    |
| SNP_84706_A_32002 | NW_004516217.1 | scaffold855 | 32002                   | AA                              | GG                 | GG               | INTERGENIC      |               |                    |                    |
| SNP_84707_A_38545 | NW_004516217.1 | scaffold855 | 38545                   | CC                              | TT                 | TT               | INTERGENIC      |               |                    |                    |
| SNP_84708_A_8518  | NW_004516219.1 | scaffold857 | 8518                    | AA                              | CC                 | CC               | INTERGENIC      |               |                    |                    |
| SNP_84709_A_24221 | NW_004516219.1 | scaffold857 | 24221                   | GG                              | AA                 | AA               | INTERGENIC      |               |                    |                    |
| SNP_84711_A_24528 | NW_004516219.1 | scaffold857 | 24528                   | AA                              | GG                 | GG               | INTERGENIC      |               |                    |                    |
| SNP_84712_A_26553 | NW_004516219.1 | scaffold857 | 26553                   | AA                              | GG                 | GG               | INTERGENIC      |               |                    |                    |
| SNP_84714_A_26613 | NW_004516219.1 | scaffold857 | 26613                   | TT                              | AA                 | AA               | INTERGENIC      |               |                    |                    |

| SNPs IDs          | Chromosome IDs | Chromosomes | Physical positions (bp) | CDC Frontier (Reference genome) | (Pusa 1103 & HPNB) | (ILWC 46 & LPNB) | Sequence genome | Components of | Gene accession IDs | Putative functions |
|-------------------|----------------|-------------|-------------------------|---------------------------------|--------------------|------------------|-----------------|---------------|--------------------|--------------------|
| SNP_84715_A_26794 | NW_004516219.1 | scaffold857 | 26794                   | TT                              | CC                 | CC               | INTERGENIC      |               |                    |                    |
| SNP_84716_A_26818 | NW_004516219.1 | scaffold857 | 26818                   | CC                              | TT                 | TT               | INTERGENIC      |               |                    |                    |
| SNP_84717_A_26827 | NW_004516219.1 | scaffold857 | 26827                   | TT                              | CC                 | CC               | INTERGENIC      |               |                    |                    |
| SNP_84718_A_26928 | NW_004516219.1 | scaffold857 | 26928                   | TT                              | GG                 | GG               | INTERGENIC      |               |                    |                    |
| SNP_84719_A_27081 | NW_004516219.1 | scaffold857 | 27081                   | TT                              | GG                 | GG               | INTERGENIC      |               |                    |                    |
| SNP_84720_A_26063 | NW_004516221.1 | scaffold859 | 26063                   | CC                              | AA                 | AA               | INTERGENIC      |               |                    |                    |
| SNP_84721_A_26131 | NW_004516221.1 | scaffold859 | 26131                   | AA                              | GG                 | GG               | INTERGENIC      |               |                    |                    |
| SNP_84722_A_27231 | NW_004516221.1 | scaffold859 | 27231                   | TT                              | CC                 | CC               | INTERGENIC      |               |                    |                    |
| SNP_84723_A_27516 | NW_004516221.1 | scaffold859 | 27516                   | AA                              | GG                 | GG               | INTERGENIC      |               |                    |                    |
| SNP_84724_A_63280 | NW_004516221.1 | scaffold859 | 63280                   | GG                              | AA                 | AA               | INTERGENIC      |               |                    |                    |
| SNP_84725_A_63281 | NW_004516221.1 | scaffold859 | 63281                   | AA                              | TT                 | TT               | INTERGENIC      |               |                    |                    |
| SNP_84726_A_63573 | NW_004516221.1 | scaffold859 | 63573                   | AA                              | GG                 | GG               | INTERGENIC      |               |                    |                    |
| SNP_84727_A_85673 | NW_004516221.1 | scaffold859 | 85673                   | GG                              | AA                 | AA               | INTERGENIC      |               |                    |                    |
| SNP_84728_A_3588  | NW_004516222.1 | scaffold860 | 3588                    | TT                              | CC                 | CC               | INTERGENIC      |               |                    |                    |
| SNP_84729_A_4197  | NW_004516222.1 | scaffold860 | 4197                    | GG                              | CC                 | CC               | INTERGENIC      |               |                    |                    |
| SNP_84730_A_4446  | NW_004516222.1 | scaffold860 | 4446                    | CC                              | TT                 | TT               | INTERGENIC      |               |                    |                    |
| SNP_84731_A_3159  | NW_004516223.1 | scaffold861 | 3159                    | AA                              | TT                 | TT               | INTERGENIC      |               |                    |                    |
| SNP_84732_A_170   | NW_004516224.1 | scaffold862 | 170                     | AA                              | GG                 | GG               | INTERGENIC      |               |                    |                    |
| SNP_84733_A_196   | NW_004516224.1 | scaffold862 | 196                     | CC                              | TT                 | TT               | INTERGENIC      |               |                    |                    |
| SNP_84734_A_264   | NW_004516224.1 | scaffold862 | 264                     | AA                              | CC                 | CC               | INTERGENIC      |               |                    |                    |
| SNP_84735_A_309   | NW_004516224.1 | scaffold862 | 309                     | AA                              | GG                 | GG               | INTERGENIC      |               |                    |                    |
| SNP_84736_A_517   | NW_004516224.1 | scaffold862 | 517                     | CC                              | AA                 | AA               | INTERGENIC      |               |                    |                    |

| SNPs IDs          | Chromosome IDs | Chromosomes | Physical positions (bp) | CDC Frontier (Reference genome) | (Pusa 1103 & HPNB) | (ILWC 46 & LPNB) | Sequence genome | Components of | Gene accession IDs | Putative functions |
|-------------------|----------------|-------------|-------------------------|---------------------------------|--------------------|------------------|-----------------|---------------|--------------------|--------------------|
| SNP_84737_A_547   | NW_004516224.1 | scaffold862 | 547                     | CC                              | AA                 | AA               | INTERGENIC      |               |                    |                    |
| SNP_84738_A_18673 | NW_004516224.1 | scaffold862 | 18673                   | GG                              | AA                 | AA               | INTERGENIC      |               |                    |                    |
| SNP_84739_A_19163 | NW_004516224.1 | scaffold862 | 19163                   | CC                              | TT                 | TT               | INTERGENIC      |               |                    |                    |
| SNP_84740_A_22638 | NW_004516224.1 | scaffold862 | 22638                   | CC                              | AA                 | AA               | INTERGENIC      |               |                    |                    |
| SNP_84741_A_22699 | NW_004516224.1 | scaffold862 | 22699                   | AA                              | GG                 | GG               | INTERGENIC      |               |                    |                    |
| SNP_84742_A_22726 | NW_004516224.1 | scaffold862 | 22726                   | AA                              | TT                 | TT               | INTERGENIC      |               |                    |                    |
| SNP_84743_A_22787 | NW_004516224.1 | scaffold862 | 22787                   | AA                              | CC                 | CC               | INTERGENIC      |               |                    |                    |
| SNP_84744_A_22862 | NW_004516224.1 | scaffold862 | 22862                   | AA                              | GG                 | GG               | INTERGENIC      |               |                    |                    |
| SNP_84745_A_23160 | NW_004516224.1 | scaffold862 | 23160                   | GG                              | AA                 | AA               | INTERGENIC      |               |                    |                    |
| SNP_84746_A_28926 | NW_004516224.1 | scaffold862 | 28926                   | AA                              | GG                 | GG               | INTERGENIC      |               |                    |                    |
| SNP_84747_A_28933 | NW_004516224.1 | scaffold862 | 28933                   | GG                              | AA                 | AA               | INTERGENIC      |               |                    |                    |
| SNP_84748_A_28992 | NW_004516224.1 | scaffold862 | 28992                   | AA                              | CC                 | CC               | INTERGENIC      |               |                    |                    |
| SNP_84749_A_29004 | NW_004516224.1 | scaffold862 | 29004                   | TT                              | CC                 | CC               | INTERGENIC      |               |                    |                    |
| SNP_84750_A_29013 | NW_004516224.1 | scaffold862 | 29013                   | GG                              | TT                 | TT               | INTERGENIC      |               |                    |                    |
| SNP_84751_A_29141 | NW_004516224.1 | scaffold862 | 29141                   | TT                              | CC                 | CC               | INTERGENIC      |               |                    |                    |
| SNP_84752_A_29169 | NW_004516224.1 | scaffold862 | 29169                   | AA                              | GG                 | GG               | INTERGENIC      |               |                    |                    |
| SNP_84753_A_29186 | NW_004516224.1 | scaffold862 | 29186                   | AA                              | CC                 | CC               | INTERGENIC      |               |                    |                    |
| SNP_84754_A_29191 | NW_004516224.1 | scaffold862 | 29191                   | CC                              | AA                 | AA               | INTERGENIC      |               |                    |                    |
| SNP_84755_A_32551 | NW_004516224.1 | scaffold862 | 32551                   | AA                              | GG                 | GG               | INTERGENIC      |               |                    |                    |
| SNP_84756_A_32580 | NW_004516224.1 | scaffold862 | 32580                   | TT                              | CC                 | CC               | INTERGENIC      |               |                    |                    |
| SNP_84757_A_32617 | NW_004516224.1 | scaffold862 | 32617                   | CC                              | TT                 | TT               | INTERGENIC      |               |                    |                    |
| SNP_84758_A_32980 | NW_004516224.1 | scaffold862 | 32980                   | CC                              | TT                 | TT               | INTERGENIC      |               |                    |                    |

| SNPs IDs          | Chromosome IDs | Chromosomes | Physical positions (bp) | CDC Frontier (Reference genome) | (Pusa 1103 & HPNB) | (ILWC 46 & LPNB) | Sequence genome | Components of | Gene accession IDs | Putative functions |
|-------------------|----------------|-------------|-------------------------|---------------------------------|--------------------|------------------|-----------------|---------------|--------------------|--------------------|
| SNP_84759_A_34603 | NW_004516224.1 | scaffold862 | 34603                   | CC                              | TT                 | TT               | INTERGENIC      |               |                    |                    |
| SNP_84760_A_34615 | NW_004516224.1 | scaffold862 | 34615                   | AA                              | TT                 | TT               | INTERGENIC      |               |                    |                    |
| SNP_84761_A_34787 | NW_004516224.1 | scaffold862 | 34787                   | GG                              | TT                 | TT               | INTERGENIC      |               |                    |                    |
| SNP_84762_A_35019 | NW_004516224.1 | scaffold862 | 35019                   | TT                              | GG                 | GG               | INTERGENIC      |               |                    |                    |
| SNP_84763_A_35026 | NW_004516224.1 | scaffold862 | 35026                   | AA                              | GG                 | GG               | INTERGENIC      |               |                    |                    |
| SNP_84764_A_35030 | NW_004516224.1 | scaffold862 | 35030                   | GG                              | TT                 | TT               | INTERGENIC      |               |                    |                    |
| SNP_84765_A_35059 | NW_004516224.1 | scaffold862 | 35059                   | TT                              | CC                 | CC               | INTERGENIC      |               |                    |                    |
| SNP_84766_A_35372 | NW_004516224.1 | scaffold862 | 35372                   | TT                              | GG                 | GG               | INTERGENIC      |               |                    |                    |
| SNP_84767_A_35940 | NW_004516224.1 | scaffold862 | 35940                   | AA                              | GG                 | GG               | INTERGENIC      |               |                    |                    |
| SNP_84768_A_36318 | NW_004516224.1 | scaffold862 | 36318                   | GG                              | AA                 | AA               | INTERGENIC      |               |                    |                    |
| SNP_84769_A_36344 | NW_004516224.1 | scaffold862 | 36344                   | GG                              | CC                 | CC               | INTERGENIC      |               |                    |                    |
| SNP_84770_A_41723 | NW_004516224.1 | scaffold862 | 41723                   | CC                              | TT                 | TT               | INTERGENIC      |               |                    |                    |
| SNP_84771_A_41724 | NW_004516224.1 | scaffold862 | 41724                   | AA                              | CC                 | CC               | INTERGENIC      |               |                    |                    |
| SNP_84772_A_41726 | NW_004516224.1 | scaffold862 | 41726                   | GG                              | AA                 | AA               | INTERGENIC      |               |                    |                    |
| SNP_84773_A_41767 | NW_004516224.1 | scaffold862 | 41767                   | GG                              | CC                 | CC               | INTERGENIC      |               |                    |                    |
| SNP_84774_A_41801 | NW_004516224.1 | scaffold862 | 41801                   | AA                              | GG                 | GG               | INTERGENIC      |               |                    |                    |
| SNP_84775_A_44289 | NW_004516224.1 | scaffold862 | 44289                   | TT                              | GG                 | GG               | INTERGENIC      |               |                    |                    |
| SNP_84776_A_44306 | NW_004516224.1 | scaffold862 | 44306                   | CC                              | AA                 | AA               | INTERGENIC      |               |                    |                    |
| SNP_84777_A_44308 | NW_004516224.1 | scaffold862 | 44308                   | TT                              | CC                 | CC               | INTERGENIC      |               |                    |                    |
| SNP_84778_A_44403 | NW_004516224.1 | scaffold862 | 44403                   | TT                              | AA                 | AA               | INTERGENIC      |               |                    |                    |
| SNP_84779_A_44508 | NW_004516224.1 | scaffold862 | 44508                   | TT                              | AA                 | AA               | INTERGENIC      |               |                    |                    |
| SNP_84780_A_44556 | NW_004516224.1 | scaffold862 | 44556                   | AA                              | GG                 | GG               | INTERGENIC      |               |                    |                    |



| SNPs IDs          | Chromosome IDs | Chromosomes | Physical positions (bp) | CDC Frontier (Reference genome) | (Pusa 1103 & HPNB) | (ILWC 46 & LPNB) | Sequence genome | Components of | Gene accession IDs | Putative functions |
|-------------------|----------------|-------------|-------------------------|---------------------------------|--------------------|------------------|-----------------|---------------|--------------------|--------------------|
| SNP_84781_A_44562 | NW_004516224.1 | scaffold862 | 44562                   | CC                              | TT                 | TT               | INTERGENIC      |               |                    |                    |
| SNP_84782_A_44570 | NW_004516224.1 | scaffold862 | 44570                   | GG                              | AA                 | AA               | INTERGENIC      |               |                    |                    |
| SNP_84783_A_44659 | NW_004516224.1 | scaffold862 | 44659                   | GG                              | AA                 | AA               | INTERGENIC      |               |                    |                    |
| SNP_84784_A_48873 | NW_004516224.1 | scaffold862 | 48873                   | GG                              | AA                 | AA               | INTERGENIC      |               |                    |                    |
| SNP_84785_A_48875 | NW_004516224.1 | scaffold862 | 48875                   | AA                              | GG                 | GG               | INTERGENIC      |               |                    |                    |
| SNP_84786_A_48916 | NW_004516224.1 | scaffold862 | 48916                   | AA                              | CC                 | CC               | INTERGENIC      |               |                    |                    |
| SNP_84787_A_50958 | NW_004516224.1 | scaffold862 | 50958                   | TT                              | GG                 | GG               | INTERGENIC      |               |                    |                    |
| SNP_84788_A_51305 | NW_004516224.1 | scaffold862 | 51305                   | TT                              | AA                 | AA               | INTERGENIC      |               |                    |                    |
| SNP_84789_A_51410 | NW_004516224.1 | scaffold862 | 51410                   | AA                              | GG                 | GG               | INTERGENIC      |               |                    |                    |
| SNP_84790_A_51631 | NW_004516224.1 | scaffold862 | 51631                   | GG                              | AA                 | AA               | INTERGENIC      |               |                    |                    |
| SNP_84791_A_51741 | NW_004516224.1 | scaffold862 | 51741                   | GG                              | CC                 | CC               | INTERGENIC      |               |                    |                    |
| SNP_84792_A_55727 | NW_004516224.1 | scaffold862 | 55727                   | TT                              | CC                 | CC               | INTERGENIC      |               |                    |                    |
| SNP_84793_A_55754 | NW_004516224.1 | scaffold862 | 55754                   | TT                              | CC                 | CC               | INTERGENIC      |               |                    |                    |
| SNP_84794_A_57077 | NW_004516224.1 | scaffold862 | 57077                   | AA                              | GG                 | GG               | INTERGENIC      |               |                    |                    |
| SNP_84795_A_57409 | NW_004516224.1 | scaffold862 | 57409                   | AA                              | GG                 | GG               | INTERGENIC      |               |                    |                    |
| SNP_84796_A_57456 | NW_004516224.1 | scaffold862 | 57456                   | TT                              | CC                 | CC               | INTERGENIC      |               |                    |                    |
| SNP_84797_A_59897 | NW_004516224.1 | scaffold862 | 59897                   | GG                              | CC                 | CC               | INTERGENIC      |               |                    |                    |
| SNP_84798_A_59898 | NW_004516224.1 | scaffold862 | 59898                   | TT                              | GG                 | GG               | INTERGENIC      |               |                    |                    |
| SNP_84799_A_60085 | NW_004516224.1 | scaffold862 | 60085                   | AA                              | CC                 | CC               | INTERGENIC      |               |                    |                    |
| SNP_84800_A_60100 | NW_004516224.1 | scaffold862 | 60100                   | GG                              | TT                 | TT               | INTERGENIC      |               |                    |                    |
| SNP_84801_A_60101 | NW_004516224.1 | scaffold862 | 60101                   | AA                              | GG                 | GG               | INTERGENIC      |               |                    |                    |
| SNP_84802_A_60121 | NW_004516224.1 | scaffold862 | 60121                   | TT                              | GG                 | GG               | INTERGENIC      |               |                    |                    |

| SNPs IDs           | Chromosome IDs | Chromosomes | Physical positions (bp) | CDC Frontier (Reference genome) | (Pusa 1103 & HPNB) | (ILWC 46 & LPNB) | Sequence genome | Components of | Gene accession IDs | Putative functions |
|--------------------|----------------|-------------|-------------------------|---------------------------------|--------------------|------------------|-----------------|---------------|--------------------|--------------------|
| SNP_84803_A_60350  | NW_004516224.1 | scaffold862 | 60350                   | GG                              | AA                 | AA               | INTERGENIC      |               |                    |                    |
| SNP_84804_A_60362  | NW_004516224.1 | scaffold862 | 60362                   | AA                              | TT                 | TT               | INTERGENIC      |               |                    |                    |
| SNP_84805_A_40294  | NW_004516226.1 | scaffold864 | 40294                   | CC                              | TT                 | TT               | INTERGENIC      |               |                    |                    |
| SNP_84806_A_40679  | NW_004516226.1 | scaffold864 | 40679                   | AA                              | GG                 | GG               | INTERGENIC      |               |                    |                    |
| SNP_84807_A_40686  | NW_004516226.1 | scaffold864 | 40686                   | TT                              | AA                 | AA               | INTERGENIC      |               |                    |                    |
| SNP_84808_A_55531  | NW_004516226.1 | scaffold864 | 55531                   | GG                              | AA                 | AA               | INTERGENIC      |               |                    |                    |
| SNP_84809_A_71608  | NW_004516226.1 | scaffold864 | 71608                   | CC                              | AA                 | AA               | INTERGENIC      |               |                    |                    |
| SNP_84810_A_71686  | NW_004516226.1 | scaffold864 | 71686                   | CC                              | TT                 | TT               | INTERGENIC      |               |                    |                    |
| SNP_84811_A_77029  | NW_004516226.1 | scaffold864 | 77029                   | CC                              | TT                 | TT               | INTERGENIC      |               |                    |                    |
| SNP_84812_A_77063  | NW_004516226.1 | scaffold864 | 77063                   | GG                              | TT                 | TT               | INTERGENIC      |               |                    |                    |
| SNP_84813_A_77319  | NW_004516226.1 | scaffold864 | 77319                   | AA                              | GG                 | GG               | INTERGENIC      |               |                    |                    |
| SNP_84814_A_77667  | NW_004516226.1 | scaffold864 | 77667                   | CC                              | TT                 | TT               | INTERGENIC      |               |                    |                    |
| SNP_84815_A_77760  | NW_004516226.1 | scaffold864 | 77760                   | AA                              | TT                 | TT               | INTERGENIC      |               |                    |                    |
| SNP_84816_A_77812  | NW_004516226.1 | scaffold864 | 77812                   | CC                              | TT                 | TT               | INTERGENIC      |               |                    |                    |
| SNP_84817_A_96187  | NW_004516226.1 | scaffold864 | 96187                   | TT                              | CC                 | CC               | INTERGENIC      |               |                    |                    |
| SNP_84818_A_105759 | NW_004516226.1 | scaffold864 | 105759                  | CC                              | AA                 | AA               | INTERGENIC      |               |                    |                    |
| SNP_84819_A_105801 | NW_004516226.1 | scaffold864 | 105801                  | CC                              | TT                 | TT               | INTERGENIC      |               |                    |                    |
| SNP_84820_A_105810 | NW_004516226.1 | scaffold864 | 105810                  | CC                              | TT                 | TT               | INTERGENIC      |               |                    |                    |
| SNP_84821_A_136880 | NW_004516226.1 | scaffold864 | 136880                  | TT                              | AA                 | AA               | INTERGENIC      |               |                    |                    |
| SNP_84822_A_168637 | NW_004516226.1 | scaffold864 | 168637                  | TT                              | CC                 | CC               | INTERGENIC      |               |                    |                    |
| SNP_84823_A_168665 | NW_004516226.1 | scaffold864 | 168665                  | GG                              | TT                 | TT               | INTERGENIC      |               |                    |                    |
| SNP_84824_A_168762 | NW_004516226.1 | scaffold864 | 168762                  | GG                              | CC                 | CC               | INTERGENIC      |               |                    |                    |

| SNPs IDs           | Chromosome IDs | Chromosomes | Physical positions (bp) | CDC Frontier (Reference genome) | (Pusa 1103 & HPNB) | (ILWC 46 & LPNB) | Sequence genome | Components of | Gene accession IDs | Putative functions |
|--------------------|----------------|-------------|-------------------------|---------------------------------|--------------------|------------------|-----------------|---------------|--------------------|--------------------|
| SNP_84825_A_181594 | NW_004516226.1 | scaffold864 | 181594                  | TT                              | CC                 | CC               | INTERGENIC      |               |                    |                    |
| SNP_84826_A_213201 | NW_004516226.1 | scaffold864 | 213201                  | AA                              | GG                 | GG               | INTERGENIC      |               |                    |                    |
| SNP_84828_A_240989 | NW_004516226.1 | scaffold864 | 240989                  | GG                              | AA                 | AA               | INTERGENIC      |               |                    |                    |
| SNP_84830_A_248243 | NW_004516226.1 | scaffold864 | 248243                  | AA                              | CC                 | CC               | INTERGENIC      |               |                    |                    |
| SNP_84831_A_248259 | NW_004516226.1 | scaffold864 | 248259                  | TT                              | AA                 | AA               | INTERGENIC      |               |                    |                    |
| SNP_84832_A_248269 | NW_004516226.1 | scaffold864 | 248269                  | AA                              | GG                 | GG               | INTERGENIC      |               |                    |                    |
| SNP_84833_A_248468 | NW_004516226.1 | scaffold864 | 248468                  | GG                              | AA                 | AA               | INTERGENIC      |               |                    |                    |
| SNP_84834_A_248686 | NW_004516226.1 | scaffold864 | 248686                  | AA                              | CC                 | CC               | INTERGENIC      |               |                    |                    |
| SNP_84835_A_248707 | NW_004516226.1 | scaffold864 | 248707                  | TT                              | CC                 | CC               | INTERGENIC      |               |                    |                    |
| SNP_84836_A_281188 | NW_004516226.1 | scaffold864 | 281188                  | GG                              | TT                 | TT               | INTERGENIC      |               |                    |                    |
| SNP_84837_A_290626 | NW_004516226.1 | scaffold864 | 290626                  | AA                              | GG                 | GG               | INTERGENIC      |               |                    |                    |
| SNP_84838_A_290641 | NW_004516226.1 | scaffold864 | 290641                  | TT                              | CC                 | CC               | INTERGENIC      |               |                    |                    |
| SNP_84839_A_290958 | NW_004516226.1 | scaffold864 | 290958                  | CC                              | TT                 | TT               | INTERGENIC      |               |                    |                    |
| SNP_84840_A_290969 | NW_004516226.1 | scaffold864 | 290969                  | TT                              | CC                 | CC               | INTERGENIC      |               |                    |                    |
| SNP_84841_A_291033 | NW_004516226.1 | scaffold864 | 291033                  | AA                              | GG                 | GG               | INTERGENIC      |               |                    |                    |
| SNP_84842_A_291045 | NW_004516226.1 | scaffold864 | 291045                  | GG                              | AA                 | AA               | INTERGENIC      |               |                    |                    |
| SNP_84843_A_291053 | NW_004516226.1 | scaffold864 | 291053                  | AA                              | GG                 | GG               | INTERGENIC      |               |                    |                    |
| SNP_84844_A_291061 | NW_004516226.1 | scaffold864 | 291061                  | AA                              | GG                 | GG               | INTERGENIC      |               |                    |                    |
| SNP_84845_A_291161 | NW_004516226.1 | scaffold864 | 291161                  | AA                              | TT                 | TT               | INTERGENIC      |               |                    |                    |
| SNP_84847_A_323875 | NW_004516226.1 | scaffold864 | 323875                  | TT                              | CC                 | CC               | INTERGENIC      |               |                    |                    |
| SNP_84848_A_1282   | NW_004516227.1 | scaffold865 | 1282                    | TT                              | CC                 | CC               | INTERGENIC      |               |                    |                    |
| SNP_84849_A_7452   | NW_004516227.1 | scaffold865 | 7452                    | GG                              | CC                 | CC               | INTERGENIC      |               |                    |                    |

| SNPs IDs           | Chromosome IDs | Chromosomes | Physical positions (bp) | CDC Frontier (Reference genome) | (Pusa 1103 & HPNB) | (ILWC 46 & LPNB) | Sequence Components of genome | Gene accession IDs | Putative functions           |
|--------------------|----------------|-------------|-------------------------|---------------------------------|--------------------|------------------|-------------------------------|--------------------|------------------------------|
| SNP_84850_A_7502   | NW_004516227.1 | scaffold865 | 7502                    | GG                              | TT                 | TT               | INTERGENIC                    |                    |                              |
| SNP_84851_A_11867  | NW_004516227.1 | scaffold865 | 11867                   | AA                              | GG                 | GG               | INTERGENIC                    |                    |                              |
| SNP_84852_A_11915  | NW_004516227.1 | scaffold865 | 11915                   | CC                              | TT                 | TT               | INTERGENIC                    |                    |                              |
| SNP_84853_A_27799  | NW_004516228.1 | scaffold866 | 27799                   | TT                              | CC                 | CC               | INTERGENIC                    |                    |                              |
| SNP_84855_A_28873  | NW_004516228.1 | scaffold866 | 28873                   | AA                              | GG                 | GG               | INTERGENIC                    |                    |                              |
| SNP_84856_A_28888  | NW_004516228.1 | scaffold866 | 28888                   | GG                              | AA                 | AA               | INTERGENIC                    |                    |                              |
| SNP_84857_A_35960  | NW_004516228.1 | scaffold866 | 35960                   | GG                              | AA                 | AA               | INTERGENIC                    |                    |                              |
| SNP_84860_A_37142  | NW_004516228.1 | scaffold866 | 37142                   | TT                              | AA                 | AA               | INTERGENIC                    |                    |                              |
| SNP_84861_A_63642  | NW_004516228.1 | scaffold866 | 63642                   | CC                              | TT                 | TT               | INTRON                        | 101505760          | uncharacterized LOC101505760 |
| SNP_84862_A_87556  | NW_004516228.1 | scaffold866 | 87556                   | AA                              | GG                 | GG               | INTERGENIC                    |                    |                              |
| SNP_84863_A_142412 | NW_004516228.1 | scaffold866 | 142412                  | GG                              | AA                 | AA               | INTERGENIC                    |                    |                              |
| SNP_84864_A_142415 | NW_004516228.1 | scaffold866 | 142415                  | TT                              | CC                 | CC               | INTERGENIC                    |                    |                              |
| SNP_84865_A_142445 | NW_004516228.1 | scaffold866 | 142445                  | GG                              | TT                 | TT               | INTERGENIC                    |                    |                              |
| SNP_84866_A_142464 | NW_004516228.1 | scaffold866 | 142464                  | TT                              | CC                 | CC               | INTERGENIC                    |                    |                              |
| SNP_84867_A_142472 | NW_004516228.1 | scaffold866 | 142472                  | GG                              | CC                 | CC               | INTERGENIC                    |                    |                              |
| SNP_84868_A_142781 | NW_004516228.1 | scaffold866 | 142781                  | TT                              | CC                 | CC               | INTERGENIC                    |                    |                              |
| SNP_84869_A_142806 | NW_004516228.1 | scaffold866 | 142806                  | TT                              | AA                 | AA               | INTERGENIC                    |                    |                              |
| SNP_84870_A_142858 | NW_004516228.1 | scaffold866 | 142858                  | AA                              | GG                 | GG               | INTERGENIC                    |                    |                              |
| SNP_84871_A_142894 | NW_004516228.1 | scaffold866 | 142894                  | GG                              | TT                 | TT               | INTERGENIC                    |                    |                              |
| SNP_84872_A_142895 | NW_004516228.1 | scaffold866 | 142895                  | TT                              | CC                 | CC               | INTERGENIC                    |                    |                              |
| SNP_84874_A_143013 | NW_004516228.1 | scaffold866 | 143013                  | CC                              | GG                 | GG               | INTERGENIC                    |                    |                              |
| SNP_84875_A_210309 | NW_004516228.1 | scaffold866 | 210309                  | AA                              | GG                 | GG               | INTERGENIC                    |                    |                              |

| SNPs IDs          | Chromosome IDs | Chromosomes | Physical positions (bp) | CDC Frontier (Reference genome) | (Pusa 1103 & HPNB) | (ILWC 46 & LPNB) | Sequence genome | Components of | Gene accession IDs | Putative functions |
|-------------------|----------------|-------------|-------------------------|---------------------------------|--------------------|------------------|-----------------|---------------|--------------------|--------------------|
| SNP_84876_A_5781  | NW_004516229.1 | scaffold868 | 5781                    | CC                              | TT                 | TT               | INTERGENIC      |               |                    |                    |
| SNP_84877_A_5804  | NW_004516229.1 | scaffold868 | 5804                    | GG                              | AA                 | AA               | INTERGENIC      |               |                    |                    |
| SNP_84878_A_21585 | NW_004516229.1 | scaffold868 | 21585                   | GG                              | AA                 | AA               | INTERGENIC      |               |                    |                    |
| SNP_84879_A_22215 | NW_004516229.1 | scaffold868 | 22215                   | TT                              | CC                 | CC               | INTERGENIC      |               |                    |                    |
| SNP_84880_A_22363 | NW_004516229.1 | scaffold868 | 22363                   | AA                              | TT                 | TT               | INTERGENIC      |               |                    |                    |
| SNP_84881_A_24868 | NW_004516229.1 | scaffold868 | 24868                   | CC                              | TT                 | TT               | INTERGENIC      |               |                    |                    |
| SNP_84882_A_24873 | NW_004516229.1 | scaffold868 | 24873                   | GG                              | CC                 | CC               | INTERGENIC      |               |                    |                    |
| SNP_84883_A_25542 | NW_004516229.1 | scaffold868 | 25542                   | AA                              | GG                 | GG               | INTERGENIC      |               |                    |                    |
| SNP_84884_A_27228 | NW_004516229.1 | scaffold868 | 27228                   | AA                              | TT                 | TT               | INTERGENIC      |               |                    |                    |
| SNP_84885_A_27362 | NW_004516229.1 | scaffold868 | 27362                   | AA                              | TT                 | TT               | INTERGENIC      |               |                    |                    |
| SNP_84886_A_27721 | NW_004516229.1 | scaffold868 | 27721                   | CC                              | AA                 | AA               | INTERGENIC      |               |                    |                    |
| SNP_84887_A_28505 | NW_004516229.1 | scaffold868 | 28505                   | TT                              | CC                 | CC               | INTERGENIC      |               |                    |                    |
| SNP_84888_A_30365 | NW_004516229.1 | scaffold868 | 30365                   | CC                              | TT                 | TT               | INTERGENIC      |               |                    |                    |
| SNP_84889_A_30381 | NW_004516229.1 | scaffold868 | 30381                   | AA                              | GG                 | GG               | INTERGENIC      |               |                    |                    |
| SNP_84890_A_30423 | NW_004516229.1 | scaffold868 | 30423                   | AA                              | TT                 | TT               | INTERGENIC      |               |                    |                    |
| SNP_84891_A_30433 | NW_004516229.1 | scaffold868 | 30433                   | TT                              | CC                 | CC               | INTERGENIC      |               |                    |                    |
| SNP_84892_A_30469 | NW_004516229.1 | scaffold868 | 30469                   | CC                              | TT                 | TT               | INTERGENIC      |               |                    |                    |
| SNP_84893_A_30591 | NW_004516229.1 | scaffold868 | 30591                   | AA                              | GG                 | GG               | INTERGENIC      |               |                    |                    |
| SNP_84894_A_30655 | NW_004516229.1 | scaffold868 | 30655                   | CC                              | GG                 | GG               | INTERGENIC      |               |                    |                    |
| SNP_84895_A_30672 | NW_004516229.1 | scaffold868 | 30672                   | TT                              | CC                 | CC               | INTERGENIC      |               |                    |                    |
| SNP_84897_A_31621 | NW_004516229.1 | scaffold868 | 31621                   | CC                              | GG                 | GG               | INTERGENIC      |               |                    |                    |
| SNP_84898_A_46681 | NW_004516229.1 | scaffold868 | 46681                   | TT                              | CC                 | CC               | INTERGENIC      |               |                    |                    |

| SNPs IDs          | Chromosome IDs | Chromosomes | Physical positions (bp) | CDC Frontier (Reference genome) | (Pusa 1103 & HPNB) | (ILWC 46 & LPNB) | Sequence genome | Components of | Gene accession IDs | Putative functions |
|-------------------|----------------|-------------|-------------------------|---------------------------------|--------------------|------------------|-----------------|---------------|--------------------|--------------------|
| SNP_84899_A_46922 | NW_004516229.1 | scaffold868 | 46922                   | AA                              | TT                 | TT               | INTERGENIC      |               |                    |                    |
| SNP_84900_A_46964 | NW_004516229.1 | scaffold868 | 46964                   | AA                              | GG                 | GG               | INTERGENIC      |               |                    |                    |
| SNP_84901_A_47014 | NW_004516229.1 | scaffold868 | 47014                   | CC                              | TT                 | TT               | INTERGENIC      |               |                    |                    |
| SNP_84902_A_47037 | NW_004516229.1 | scaffold868 | 47037                   | AA                              | CC                 | CC               | INTERGENIC      |               |                    |                    |
| SNP_84903_A_47067 | NW_004516229.1 | scaffold868 | 47067                   | CC                              | GG                 | GG               | INTERGENIC      |               |                    |                    |
| SNP_84904_A_47119 | NW_004516229.1 | scaffold868 | 47119                   | TT                              | GG                 | GG               | INTERGENIC      |               |                    |                    |
| SNP_84905_A_47120 | NW_004516229.1 | scaffold868 | 47120                   | TT                              | CC                 | CC               | INTERGENIC      |               |                    |                    |
| SNP_84906_A_47163 | NW_004516229.1 | scaffold868 | 47163                   | GG                              | AA                 | AA               | INTERGENIC      |               |                    |                    |
| SNP_84907_A_47260 | NW_004516229.1 | scaffold868 | 47260                   | CC                              | AA                 | AA               | INTERGENIC      |               |                    |                    |
| SNP_84908_A_47263 | NW_004516229.1 | scaffold868 | 47263                   | GG                              | AA                 | AA               | INTERGENIC      |               |                    |                    |
| SNP_84909_A_47317 | NW_004516229.1 | scaffold868 | 47317                   | AA                              | CC                 | CC               | INTERGENIC      |               |                    |                    |
| SNP_84910_A_47353 | NW_004516229.1 | scaffold868 | 47353                   | TT                              | CC                 | CC               | INTERGENIC      |               |                    |                    |
| SNP_84911_A_47392 | NW_004516229.1 | scaffold868 | 47392                   | CC                              | AA                 | AA               | INTERGENIC      |               |                    |                    |
| SNP_84912_A_47398 | NW_004516229.1 | scaffold868 | 47398                   | GG                              | AA                 | AA               | INTERGENIC      |               |                    |                    |
| SNP_84913_A_47439 | NW_004516229.1 | scaffold868 | 47439                   | AA                              | TT                 | TT               | INTERGENIC      |               |                    |                    |
| SNP_84914_A_47463 | NW_004516229.1 | scaffold868 | 47463                   | GG                              | AA                 | AA               | INTERGENIC      |               |                    |                    |
| SNP_84915_A_47503 | NW_004516229.1 | scaffold868 | 47503                   | AA                              | CC                 | CC               | INTERGENIC      |               |                    |                    |
| SNP_84916_A_47505 | NW_004516229.1 | scaffold868 | 47505                   | CC                              | AA                 | AA               | INTERGENIC      |               |                    |                    |
| SNP_84917_A_47524 | NW_004516229.1 | scaffold868 | 47524                   | TT                              | AA                 | AA               | INTERGENIC      |               |                    |                    |
| SNP_84918_A_47598 | NW_004516229.1 | scaffold868 | 47598                   | GG                              | TT                 | TT               | INTERGENIC      |               |                    |                    |
| SNP_84919_A_47623 | NW_004516229.1 | scaffold868 | 47623                   | AA                              | TT                 | TT               | INTERGENIC      |               |                    |                    |
| SNP_84920_A_47699 | NW_004516229.1 | scaffold868 | 47699                   | AA                              | GG                 | GG               | INTERGENIC      |               |                    |                    |

| SNPs IDs          | Chromosome IDs | Chromosomes | Physical positions (bp) | CDC Frontier (Reference genome) | (Pusa 1103 & HPNB) | (ILWC 46 & LPNB) | Sequence Components of genome | Gene accession IDs | Putative functions |
|-------------------|----------------|-------------|-------------------------|---------------------------------|--------------------|------------------|-------------------------------|--------------------|--------------------|
| SNP_84921_A_47789 | NW_004516229.1 | scaffold868 | 47789                   | AA                              | CC                 | CC               | INTERGENIC                    |                    |                    |
| SNP_84922_A_47835 | NW_004516229.1 | scaffold868 | 47835                   | AA                              | GG                 | GG               | INTERGENIC                    |                    |                    |
| SNP_84923_A_47856 | NW_004516229.1 | scaffold868 | 47856                   | CC                              | TT                 | TT               | INTERGENIC                    |                    |                    |
| SNP_84924_A_47917 | NW_004516229.1 | scaffold868 | 47917                   | TT                              | AA                 | AA               | INTERGENIC                    |                    |                    |
| SNP_84925_A_47978 | NW_004516229.1 | scaffold868 | 47978                   | AA                              | GG                 | GG               | INTERGENIC                    |                    |                    |
| SNP_84926_A_55762 | NW_004516229.1 | scaffold868 | 55762                   | CC                              | TT                 | TT               | INTERGENIC                    |                    |                    |
| SNP_84927_A_70599 | NW_004516229.1 | scaffold868 | 70599                   | TT                              | AA                 | AA               | INTERGENIC                    |                    |                    |
| SNP_84929_A_17369 | NW_004516230.1 | scaffold869 | 17369                   | AA                              | CC                 | CC               | INTRON                        | 101507689          | Unknown function   |
| SNP_84930_A_23136 | NW_004516230.1 | scaffold869 | 23136                   | CC                              | AA                 | AA               | URR                           | 101507689          | Unknown function   |
| SNP_84931_A_28728 | NW_004516230.1 | scaffold869 | 28728                   | TT                              | AA                 | AA               | INTERGENIC                    |                    |                    |
| SNP_84933_A_57663 | NW_004516230.1 | scaffold869 | 57663                   | TT                              | GG                 | GG               | INTERGENIC                    |                    |                    |
| SNP_84934_A_59802 | NW_004516230.1 | scaffold869 | 59802                   | CC                              | GG                 | GG               | INTERGENIC                    |                    |                    |
| SNP_84935_A_69213 | NW_004516230.1 | scaffold869 | 69213                   | TT                              | CC                 | CC               | INTERGENIC                    |                    |                    |
| SNP_84936_A_73155 | NW_004516230.1 | scaffold869 | 73155                   | GG                              | CC                 | CC               | INTERGENIC                    |                    |                    |
| SNP_84937_A_73192 | NW_004516230.1 | scaffold869 | 73192                   | GG                              | AA                 | AA               | INTERGENIC                    |                    |                    |
| SNP_84938_A_73229 | NW_004516230.1 | scaffold869 | 73229                   | CC                              | TT                 | TT               | INTERGENIC                    |                    |                    |
| SNP_84939_A_73272 | NW_004516230.1 | scaffold869 | 73272                   | GG                              | AA                 | AA               | INTERGENIC                    |                    |                    |
| SNP_84940_A_83954 | NW_004516230.1 | scaffold869 | 83954                   | CC                              | AA                 | AA               | INTERGENIC                    |                    |                    |
| SNP_84941_A_84291 | NW_004516230.1 | scaffold869 | 84291                   | AA                              | GG                 | GG               | INTERGENIC                    |                    |                    |
| SNP_84942_A_90341 | NW_004516230.1 | scaffold869 | 90341                   | GG                              | AA                 | AA               | INTERGENIC                    |                    |                    |
| SNP_84943_A_96692 | NW_004516230.1 | scaffold869 | 96692                   | TT                              | CC                 | CC               | INTERGENIC                    |                    |                    |
| SNP_84944_A_96716 | NW_004516230.1 | scaffold869 | 96716                   | AA                              | GG                 | GG               | INTERGENIC                    |                    |                    |

| SNPs IDs           | Chromosome IDs | Chromosomes | Physical positions (bp) | CDC Frontier (Reference genome) | (Pusa 1103 & HPNB) | (ILWC 46 & LPNB) | Sequence genome | Components of | Gene accession IDs | Putative functions |
|--------------------|----------------|-------------|-------------------------|---------------------------------|--------------------|------------------|-----------------|---------------|--------------------|--------------------|
| SNP_84945_A_97029  | NW_004516230.1 | scaffold869 | 97029                   | CC                              | TT                 | TT               | INTERGENIC      |               |                    |                    |
| SNP_84946_A_111994 | NW_004516230.1 | scaffold869 | 111994                  | TT                              | AA                 | AA               | INTERGENIC      |               |                    |                    |
| SNP_84947_A_111996 | NW_004516230.1 | scaffold869 | 111996                  | CC                              | TT                 | TT               | INTERGENIC      |               |                    |                    |
| SNP_84948_A_114898 | NW_004516230.1 | scaffold869 | 114898                  | TT                              | CC                 | CC               | INTERGENIC      |               |                    |                    |
| SNP_84949_A_121644 | NW_004516230.1 | scaffold869 | 121644                  | AA                              | GG                 | GG               | INTERGENIC      |               |                    |                    |
| SNP_84951_A_141601 | NW_004516230.1 | scaffold869 | 141601                  | CC                              | TT                 | TT               | INTERGENIC      |               |                    |                    |
| SNP_84952_A_151619 | NW_004516230.1 | scaffold869 | 151619                  | TT                              | CC                 | CC               | INTERGENIC      |               |                    |                    |
| SNP_84953_A_151634 | NW_004516230.1 | scaffold869 | 151634                  | AA                              | GG                 | GG               | INTERGENIC      |               |                    |                    |
| SNP_84954_A_151638 | NW_004516230.1 | scaffold869 | 151638                  | AA                              | GG                 | GG               | INTERGENIC      |               |                    |                    |
| SNP_84955_A_151664 | NW_004516230.1 | scaffold869 | 151664                  | CC                              | AA                 | AA               | INTERGENIC      |               |                    |                    |
| SNP_84956_A_151678 | NW_004516230.1 | scaffold869 | 151678                  | TT                              | AA                 | AA               | INTERGENIC      |               |                    |                    |
| SNP_84957_A_151693 | NW_004516230.1 | scaffold869 | 151693                  | TT                              | CC                 | CC               | INTERGENIC      |               |                    |                    |
| SNP_84958_A_1668   | NW_004516231.1 | scaffold870 | 1668                    | AA                              | CC                 | CC               | INTERGENIC      |               |                    |                    |
| SNP_84959_A_1934   | NW_004516231.1 | scaffold870 | 1934                    | TT                              | CC                 | CC               | INTERGENIC      |               |                    |                    |
| SNP_84960_A_11459  | NW_004516231.1 | scaffold870 | 11459                   | AA                              | TT                 | TT               | INTERGENIC      |               |                    |                    |
| SNP_84962_A_43175  | NW_004516231.1 | scaffold870 | 43175                   | CC                              | AA                 | AA               | INTERGENIC      |               |                    |                    |
| SNP_84963_A_43449  | NW_004516231.1 | scaffold870 | 43449                   | AA                              | GG                 | GG               | INTERGENIC      |               |                    |                    |
| SNP_84964_A_58199  | NW_004516231.1 | scaffold870 | 58199                   | AA                              | CC                 | CC               | INTERGENIC      |               |                    |                    |
| SNP_84965_A_58507  | NW_004516231.1 | scaffold870 | 58507                   | AA                              | CC                 | CC               | INTERGENIC      |               |                    |                    |
| SNP_84966_A_73436  | NW_004516231.1 | scaffold870 | 73436                   | TT                              | AA                 | AA               | INTERGENIC      |               |                    |                    |
| SNP_84967_A_73802  | NW_004516231.1 | scaffold870 | 73802                   | AA                              | TT                 | TT               | INTERGENIC      |               |                    |                    |
| SNP_84968_A_76763  | NW_004516231.1 | scaffold870 | 76763                   | AA                              | TT                 | TT               | INTERGENIC      |               |                    |                    |



| SNPs IDs           | Chromosome IDs | Chromosomes | Physical positions (bp) | CDC Frontier (Reference genome) | (Pusa 1103 & HPNB) | (ILWC 46 & LPNB) | Sequence genome | Components of | Gene accession IDs | Putative functions |
|--------------------|----------------|-------------|-------------------------|---------------------------------|--------------------|------------------|-----------------|---------------|--------------------|--------------------|
| SNP_84969_A_76953  | NW_004516231.1 | scaffold870 | 76953                   | TT                              | AA                 | AA               | INTERGENIC      |               |                    |                    |
| SNP_84970_A_82167  | NW_004516231.1 | scaffold870 | 82167                   | AA                              | TT                 | TT               | INTERGENIC      |               |                    |                    |
| SNP_84971_A_82179  | NW_004516231.1 | scaffold870 | 82179                   | TT                              | AA                 | AA               | INTERGENIC      |               |                    |                    |
| SNP_84974_A_82477  | NW_004516231.1 | scaffold870 | 82477                   | CC                              | TT                 | TT               | INTERGENIC      |               |                    |                    |
| SNP_84975_A_82489  | NW_004516231.1 | scaffold870 | 82489                   | GG                              | AA                 | AA               | INTERGENIC      |               |                    |                    |
| SNP_84976_A_82638  | NW_004516231.1 | scaffold870 | 82638                   | AA                              | GG                 | GG               | INTERGENIC      |               |                    |                    |
| SNP_84977_A_82663  | NW_004516231.1 | scaffold870 | 82663                   | GG                              | AA                 | AA               | INTERGENIC      |               |                    |                    |
| SNP_84978_A_82672  | NW_004516231.1 | scaffold870 | 82672                   | GG                              | TT                 | TT               | INTERGENIC      |               |                    |                    |
| SNP_84979_A_82680  | NW_004516231.1 | scaffold870 | 82680                   | CC                              | TT                 | TT               | INTERGENIC      |               |                    |                    |
| SNP_84980_A_1131   | NW_004516232.1 | scaffold872 | 1131                    | AA                              | TT                 | TT               | INTERGENIC      |               |                    |                    |
| SNP_84981_A_1253   | NW_004516232.1 | scaffold872 | 1253                    | TT                              | AA                 | AA               | INTERGENIC      |               |                    |                    |
| SNP_84982_A_5472   | NW_004516232.1 | scaffold872 | 5472                    | GG                              | TT                 | TT               | INTERGENIC      |               |                    |                    |
| SNP_84983_A_5590   | NW_004516232.1 | scaffold872 | 5590                    | AA                              | GG                 | GG               | INTERGENIC      |               |                    |                    |
| SNP_84984_A_17350  | NW_004516232.1 | scaffold872 | 17350                   | TT                              | AA                 | AA               | INTERGENIC      |               |                    |                    |
| SNP_84985_A_132    | NW_004516233.1 | scaffold873 | 132                     | TT                              | CC                 | CC               | INTERGENIC      |               |                    |                    |
| SNP_84986_A_182    | NW_004516233.1 | scaffold873 | 182                     | GG                              | CC                 | CC               | INTERGENIC      |               |                    |                    |
| SNP_84987_A_229    | NW_004516233.1 | scaffold873 | 229                     | CC                              | GG                 | GG               | INTERGENIC      |               |                    |                    |
| SNP_84988_A_266    | NW_004516233.1 | scaffold873 | 266                     | TT                              | GG                 | GG               | INTERGENIC      |               |                    |                    |
| SNP_84989_A_287    | NW_004516233.1 | scaffold873 | 287                     | AA                              | GG                 | GG               | INTERGENIC      |               |                    |                    |
| SNP_84990_A_320    | NW_004516233.1 | scaffold873 | 320                     | TT                              | CC                 | CC               | INTERGENIC      |               |                    |                    |
| SNP_84991_A_477    | NW_004516233.1 | scaffold873 | 477                     | TT                              | GG                 | GG               | INTERGENIC      |               |                    |                    |
| SNP_84993_A_194373 | NW_004516233.1 | scaffold873 | 194373                  | TT                              | AA                 | AA               | INTERGENIC      |               |                    |                    |

| SNPs IDs           | Chromosome IDs | Chromosomes | Physical positions (bp) | CDC Frontier (Reference genome) | (Pusa 1103 & HPNB) | (ILWC 46 & LPNB) | Sequence Components of genome | Gene accession IDs | Putative functions           |
|--------------------|----------------|-------------|-------------------------|---------------------------------|--------------------|------------------|-------------------------------|--------------------|------------------------------|
| SNP_84995_A_241951 | NW_004516233.1 | scaffold873 | 241951                  | AA                              | GG                 | GG               | INTERGENIC                    |                    |                              |
| SNP_84996_A_242693 | NW_004516233.1 | scaffold873 | 242693                  | TT                              | CC                 | CC               | INTERGENIC                    |                    |                              |
| SNP_84997_A_242788 | NW_004516233.1 | scaffold873 | 242788                  | CC                              | TT                 | AA               | INTERGENIC                    |                    |                              |
| SNP_84998_A_242811 | NW_004516233.1 | scaffold873 | 242811                  | GG                              | AA                 | AA               | INTERGENIC                    |                    |                              |
| SNP_84999_A_262924 | NW_004516233.1 | scaffold873 | 262924                  | TT                              | AA                 | AA               | INTERGENIC                    |                    |                              |
| SNP_85000_A_262954 | NW_004516233.1 | scaffold873 | 262954                  | TT                              | AA                 | AA               | INTERGENIC                    |                    |                              |
| SNP_85002_A_286864 | NW_004516233.1 | scaffold873 | 286864                  | CC                              | TT                 | TT               | INTERGENIC                    |                    |                              |
| SNP_85003_A_287357 | NW_004516233.1 | scaffold873 | 287357                  | TT                              | CC                 | CC               | INTERGENIC                    |                    |                              |
| SNP_85005_A_312239 | NW_004516233.1 | scaffold873 | 312239                  | GG                              | AA                 | AA               | INTERGENIC                    |                    |                              |
| SNP_85006_A_315155 | NW_004516233.1 | scaffold873 | 315155                  | TT                              | GG                 | GG               | INTERGENIC                    |                    |                              |
| SNP_85007_A_318677 | NW_004516233.1 | scaffold873 | 318677                  | AA                              | CC                 | CC               | INTERGENIC                    |                    |                              |
| SNP_85008_A_334567 | NW_004516233.1 | scaffold873 | 334567                  | AA                              | CC                 | CC               | INTERGENIC                    |                    |                              |
| SNP_85009_A_344805 | NW_004516233.1 | scaffold873 | 344805                  | AA                              | GG                 | GG               | INTERGENIC                    |                    |                              |
| SNP_85010_A_344827 | NW_004516233.1 | scaffold873 | 344827                  | AA                              | CC                 | CC               | INTERGENIC                    |                    |                              |
| SNP_85011_A_344960 | NW_004516233.1 | scaffold873 | 344960                  | AA                              | GG                 | GG               | INTERGENIC                    |                    |                              |
| SNP_85012_A_345178 | NW_004516233.1 | scaffold873 | 345178                  | AA                              | CC                 | CC               | INTERGENIC                    |                    |                              |
| SNP_85013_A_345278 | NW_004516233.1 | scaffold873 | 345278                  | TT                              | AA                 | AA               | INTERGENIC                    |                    |                              |
| SNP_85014_A_25472  | NW_004516234.1 | scaffold875 | 25472                   | GG                              | AA                 | AA               | INTERGENIC                    |                    |                              |
| SNP_85015_A_69478  | NW_004516234.1 | scaffold875 | 69478                   | CC                              | TT                 | TT               | NON_SYNONYMOUS_CODING         | 101489286          | uncharacterized LOC101489286 |
| SNP_85016_A_74938  | NW_004516234.1 | scaffold875 | 74938                   | GG                              | AA                 | AA               | INTERGENIC                    |                    |                              |
| SNP_85017_A_104869 | NW_004516234.1 | scaffold875 | 104869                  | GG                              | AA                 | AA               | INTERGENIC                    |                    |                              |
| SNP_85018_A_107957 | NW_004516234.1 | scaffold875 | 107957                  | CC                              | TT                 | TT               | INTERGENIC                    |                    |                              |

| SNPs IDs           | Chromosome IDs | Chromosomes | Physical positions (bp) | CDC Frontier (Reference genome) | (Pusa 1103 & HPNB) | (ILWC 46 & LPNB) | Sequence genome | Components of | Gene accession IDs | Putative functions |
|--------------------|----------------|-------------|-------------------------|---------------------------------|--------------------|------------------|-----------------|---------------|--------------------|--------------------|
| SNP_85019_A_108160 | NW_004516234.1 | scaffold875 | 108160                  | AA                              | GG                 | GG               | INTERGENIC      |               |                    |                    |
| SNP_85020_A_108210 | NW_004516234.1 | scaffold875 | 108210                  | AA                              | GG                 | GG               | INTERGENIC      |               |                    |                    |
| SNP_85021_A_108216 | NW_004516234.1 | scaffold875 | 108216                  | TT                              | CC                 | CC               | INTERGENIC      |               |                    |                    |
| SNP_85022_A_108229 | NW_004516234.1 | scaffold875 | 108229                  | CC                              | TT                 | TT               | INTERGENIC      |               |                    |                    |
| SNP_85023_A_108344 | NW_004516234.1 | scaffold875 | 108344                  | AA                              | TT                 | TT               | INTERGENIC      |               |                    |                    |
| SNP_85024_A_108407 | NW_004516234.1 | scaffold875 | 108407                  | TT                              | GG                 | GG               | INTERGENIC      |               |                    |                    |
| SNP_85025_A_108429 | NW_004516234.1 | scaffold875 | 108429                  | CC                              | TT                 | TT               | INTERGENIC      |               |                    |                    |
| SNP_85026_A_3766   | NW_004516235.1 | scaffold876 | 3766                    | GG                              | AA                 | AA               | INTERGENIC      |               |                    |                    |
| SNP_85028_A_3929   | NW_004516235.1 | scaffold876 | 3929                    | CC                              | TT                 | TT               | INTERGENIC      |               |                    |                    |
| SNP_85030_A_5373   | NW_004516235.1 | scaffold876 | 5373                    | CC                              | AA                 | AA               | INTERGENIC      |               |                    |                    |
| SNP_85031_A_10543  | NW_004516235.1 | scaffold876 | 10543                   | AA                              | GG                 | GG               | INTERGENIC      |               |                    |                    |
| SNP_85032_A_26054  | NW_004516235.1 | scaffold876 | 26054                   | AA                              | GG                 | GG               | INTERGENIC      |               |                    |                    |
| SNP_85033_A_34006  | NW_004516235.1 | scaffold876 | 34006                   | AA                              | CC                 | CC               | INTERGENIC      |               |                    |                    |
| SNP_85035_A_45322  | NW_004516235.1 | scaffold876 | 45322                   | AA                              | GG                 | GG               | INTERGENIC      |               |                    |                    |
| SNP_85036_A_52903  | NW_004516235.1 | scaffold876 | 52903                   | GG                              | AA                 | AA               | INTERGENIC      |               |                    |                    |
| SNP_85037_A_53521  | NW_004516235.1 | scaffold876 | 53521                   | CC                              | TT                 | TT               | INTERGENIC      |               |                    |                    |
| SNP_85038_A_59893  | NW_004516235.1 | scaffold876 | 59893                   | AA                              | TT                 | TT               | INTERGENIC      |               |                    |                    |
| SNP_85039_A_59900  | NW_004516235.1 | scaffold876 | 59900                   | CC                              | TT                 | TT               | INTERGENIC      |               |                    |                    |
| SNP_85041_A_65361  | NW_004516235.1 | scaffold876 | 65361                   | TT                              | AA                 | AA               | INTERGENIC      |               |                    |                    |
| SNP_85042_A_65408  | NW_004516235.1 | scaffold876 | 65408                   | TT                              | CC                 | CC               | INTERGENIC      |               |                    |                    |
| SNP_85043_A_65459  | NW_004516235.1 | scaffold876 | 65459                   | TT                              | CC                 | CC               | INTERGENIC      |               |                    |                    |
| SNP_85044_A_66909  | NW_004516235.1 | scaffold876 | 66909                   | GG                              | TT                 | TT               | INTERGENIC      |               |                    |                    |

| SNPs IDs           | Chromosome IDs | Chromosomes | Physical positions (bp) | CDC Frontier (Reference genome) | (Pusa 1103 & HPNB) | (ILWC 46 & LPNB) | Sequence Components of genome | Gene accession IDs | Putative functions                         |
|--------------------|----------------|-------------|-------------------------|---------------------------------|--------------------|------------------|-------------------------------|--------------------|--------------------------------------------|
| SNP_85045_A_80458  | NW_004516235.1 | scaffold876 | 80458                   | CC                              | TT                 | TT               | INTERGENIC                    |                    |                                            |
| SNP_85046_A_84656  | NW_004516235.1 | scaffold876 | 84656                   | CC                              | GG                 | GG               | INTERGENIC                    |                    |                                            |
| SNP_85047_A_152094 | NW_004516235.1 | scaffold876 | 152094                  | TT                              | CC                 | CC               | INTRON                        | 101489931          | poly(rC)-binding protein 1-like            |
| SNP_85048_A_152169 | NW_004516235.1 | scaffold876 | 152169                  | CC                              | AA                 | AA               | INTRON                        | 101489931          | poly(rC)-binding protein 1-like            |
| SNP_85049_A_152172 | NW_004516235.1 | scaffold876 | 152172                  | AA                              | GG                 | GG               | INTRON                        | 101489931          | poly(rC)-binding protein 1-like            |
| SNP_85050_A_152211 | NW_004516235.1 | scaffold876 | 152211                  | GG                              | AA                 | AA               | INTRON                        | 101489931          | poly(rC)-binding protein 1-like            |
| SNP_85051_A_155088 | NW_004516235.1 | scaffold876 | 155088                  | TT                              | CC                 | CC               | INTERGENIC                    |                    |                                            |
| SNP_85052_A_159306 | NW_004516235.1 | scaffold876 | 159306                  | AA                              | GG                 | GG               | DRR                           | 101490264          | two-component response regulator ARR9-like |
| SNP_85053_A_159307 | NW_004516235.1 | scaffold876 | 159307                  | AA                              | TT                 | TT               | DRR                           | 101490264          | two-component response regulator ARR9-like |
| SNP_85055_A_258302 | NW_004516235.1 | scaffold876 | 258302                  | TT                              | AA                 | AA               | INTERGENIC                    |                    |                                            |
| SNP_85056_A_280167 | NW_004516235.1 | scaffold876 | 280167                  | AA                              | GG                 | GG               | INTRON                        | 101492074          | zinc finger MYM-type protein 1-like        |
| SNP_85057_A_302114 | NW_004516235.1 | scaffold876 | 302114                  | CC                              | TT                 | TT               | INTERGENIC                    |                    |                                            |
| SNP_85058_A_302590 | NW_004516235.1 | scaffold876 | 302590                  | CC                              | TT                 | TT               | INTERGENIC                    |                    |                                            |
| SNP_85059_A_306648 | NW_004516235.1 | scaffold876 | 306648                  | GG                              | TT                 | TT               | INTERGENIC                    |                    |                                            |
| SNP_85060_A_339839 | NW_004516235.1 | scaffold876 | 339839                  | CC                              | TT                 | TT               | INTERGENIC                    |                    |                                            |
| SNP_85061_A_355356 | NW_004516235.1 | scaffold876 | 355356                  | TT                              | GG                 | GG               | INTERGENIC                    |                    |                                            |
| SNP_85062_A_355376 | NW_004516235.1 | scaffold876 | 355376                  | CC                              | GG                 | GG               | INTERGENIC                    |                    |                                            |
| SNP_85063_A_369429 | NW_004516235.1 | scaffold876 | 369429                  | CC                              | TT                 | TT               | INTERGENIC                    |                    |                                            |
| SNP_85064_A_369454 | NW_004516235.1 | scaffold876 | 369454                  | AA                              | GG                 | GG               | INTERGENIC                    |                    |                                            |
| SNP_85065_A_369587 | NW_004516235.1 | scaffold876 | 369587                  | TT                              | CC                 | CC               | INTERGENIC                    |                    |                                            |
| SNP_85066_A_369862 | NW_004516235.1 | scaffold876 | 369862                  | AA                              | GG                 | GG               | INTERGENIC                    |                    |                                            |
| SNP_85067_A_369881 | NW_004516235.1 | scaffold876 | 369881                  | CC                              | AA                 | AA               | INTERGENIC                    |                    |                                            |

| SNPs IDs           | Chromosome IDs | Chromosomes | Physical positions (bp) | CDC Frontier (Reference genome) | (Pusa 1103 & HPNB) | (ILWC 46 & LPNB) | Sequence genome | Components of | Gene accession IDs | Putative functions |
|--------------------|----------------|-------------|-------------------------|---------------------------------|--------------------|------------------|-----------------|---------------|--------------------|--------------------|
| SNP_85068_A_369888 | NW_004516235.1 | scaffold876 | 369888                  | AA                              | CC                 | CC               | INTERGENIC      |               |                    |                    |
| SNP_85069_A_370931 | NW_004516235.1 | scaffold876 | 370931                  | CC                              | TT                 | TT               | DRR             | 101493078     | Unknown function   |                    |
| SNP_85070_A_392448 | NW_004516235.1 | scaffold876 | 392448                  | TT                              | CC                 | CC               | INTERGENIC      |               |                    |                    |
| SNP_85071_A_392479 | NW_004516235.1 | scaffold876 | 392479                  | AA                              | GG                 | GG               | INTERGENIC      |               |                    |                    |
| SNP_85072_A_392521 | NW_004516235.1 | scaffold876 | 392521                  | TT                              | CC                 | CC               | INTERGENIC      |               |                    |                    |
| SNP_85073_A_392524 | NW_004516235.1 | scaffold876 | 392524                  | TT                              | CC                 | CC               | INTERGENIC      |               |                    |                    |
| SNP_85074_A_392660 | NW_004516235.1 | scaffold876 | 392660                  | CC                              | TT                 | TT               | INTERGENIC      |               |                    |                    |
| SNP_85075_A_397291 | NW_004516235.1 | scaffold876 | 397291                  | AA                              | GG                 | GG               | INTERGENIC      |               |                    |                    |
| SNP_85076_A_397525 | NW_004516235.1 | scaffold876 | 397525                  | TT                              | CC                 | CC               | INTERGENIC      |               |                    |                    |
| SNP_85077_A_432529 | NW_004516235.1 | scaffold876 | 432529                  | AA                              | GG                 | GG               | INTERGENIC      |               |                    |                    |
| SNP_85078_A_437719 | NW_004516235.1 | scaffold876 | 437719                  | TT                              | CC                 | CC               | INTERGENIC      |               |                    |                    |
| SNP_85079_A_437740 | NW_004516235.1 | scaffold876 | 437740                  | AA                              | GG                 | GG               | INTERGENIC      |               |                    |                    |
| SNP_85080_A_438733 | NW_004516235.1 | scaffold876 | 438733                  | TT                              | CC                 | CC               | INTERGENIC      |               |                    |                    |
| SNP_85081_A_438747 | NW_004516235.1 | scaffold876 | 438747                  | TT                              | CC                 | CC               | INTERGENIC      |               |                    |                    |
| SNP_85082_A_442430 | NW_004516235.1 | scaffold876 | 442430                  | AA                              | GG                 | GG               | INTERGENIC      |               |                    |                    |
| SNP_85083_A_442654 | NW_004516235.1 | scaffold876 | 442654                  | TT                              | CC                 | CC               | INTERGENIC      |               |                    |                    |
| SNP_85084_A_442757 | NW_004516235.1 | scaffold876 | 442757                  | TT                              | CC                 | CC               | INTERGENIC      |               |                    |                    |
| SNP_85085_A_442806 | NW_004516235.1 | scaffold876 | 442806                  | CC                              | GG                 | GG               | INTERGENIC      |               |                    |                    |
| SNP_85086_A_442933 | NW_004516235.1 | scaffold876 | 442933                  | TT                              | AA                 | AA               | INTERGENIC      |               |                    |                    |
| SNP_85087_A_443144 | NW_004516235.1 | scaffold876 | 443144                  | GG                              | AA                 | AA               | INTERGENIC      |               |                    |                    |
| SNP_85088_A_443147 | NW_004516235.1 | scaffold876 | 443147                  | CC                              | TT                 | TT               | INTERGENIC      |               |                    |                    |
| SNP_85089_A_443148 | NW_004516235.1 | scaffold876 | 443148                  | GG                              | AA                 | AA               | INTERGENIC      |               |                    |                    |

| SNPs IDs           | Chromosome IDs | Chromosomes | Physical positions (bp) | CDC Frontier (Reference genome) | (Pusa 1103 & HPNB) | (ILWC 46 & LPNB) | Sequence genome | Components of | Gene accession IDs | Putative functions |
|--------------------|----------------|-------------|-------------------------|---------------------------------|--------------------|------------------|-----------------|---------------|--------------------|--------------------|
| SNP_85090_A_443334 | NW_004516235.1 | scaffold876 | 443334                  | CC                              | GG                 | GG               | INTERGENIC      |               |                    |                    |
| SNP_85091_A_443341 | NW_004516235.1 | scaffold876 | 443341                  | CC                              | AA                 | AA               | INTERGENIC      |               |                    |                    |
| SNP_85092_A_446410 | NW_004516235.1 | scaffold876 | 446410                  | AA                              | CC                 | CC               | INTERGENIC      |               |                    |                    |
| SNP_85093_A_446445 | NW_004516235.1 | scaffold876 | 446445                  | CC                              | AA                 | AA               | INTERGENIC      |               |                    |                    |
| SNP_85094_A_446689 | NW_004516235.1 | scaffold876 | 446689                  | AA                              | CC                 | CC               | INTERGENIC      |               |                    |                    |
| SNP_85095_A_446699 | NW_004516235.1 | scaffold876 | 446699                  | TT                              | CC                 | CC               | INTERGENIC      |               |                    |                    |
| SNP_85096_A_446701 | NW_004516235.1 | scaffold876 | 446701                  | GG                              | TT                 | TT               | INTERGENIC      |               |                    |                    |
| SNP_85097_A_446720 | NW_004516235.1 | scaffold876 | 446720                  | AA                              | TT                 | TT               | INTERGENIC      |               |                    |                    |
| SNP_85098_A_447681 | NW_004516235.1 | scaffold876 | 447681                  | GG                              | AA                 | AA               | INTERGENIC      |               |                    |                    |
| SNP_85099_A_453010 | NW_004516235.1 | scaffold876 | 453010                  | TT                              | AA                 | AA               | INTERGENIC      |               |                    |                    |
| SNP_85100_A_453031 | NW_004516235.1 | scaffold876 | 453031                  | GG                              | AA                 | AA               | INTERGENIC      |               |                    |                    |
| SNP_85101_A_457409 | NW_004516235.1 | scaffold876 | 457409                  | AA                              | CC                 | CC               | INTERGENIC      |               |                    |                    |
| SNP_85102_A_476064 | NW_004516235.1 | scaffold876 | 476064                  | AA                              | GG                 | GG               | INTERGENIC      |               |                    |                    |
| SNP_85103_A_501522 | NW_004516235.1 | scaffold876 | 501522                  | AA                              | GG                 | GG               | INTERGENIC      |               |                    |                    |
| SNP_85104_A_507655 | NW_004516235.1 | scaffold876 | 507655                  | CC                              | TT                 | TT               | INTERGENIC      |               |                    |                    |
| SNP_85105_A_509548 | NW_004516235.1 | scaffold876 | 509548                  | AA                              | GG                 | GG               | INTERGENIC      |               |                    |                    |
| SNP_85106_A_509788 | NW_004516235.1 | scaffold876 | 509788                  | CC                              | TT                 | TT               | INTERGENIC      |               |                    |                    |
| SNP_85107_A_509824 | NW_004516235.1 | scaffold876 | 509824                  | CC                              | TT                 | TT               | INTERGENIC      |               |                    |                    |
| SNP_85108_A_509866 | NW_004516235.1 | scaffold876 | 509866                  | AA                              | GG                 | GG               | INTERGENIC      |               |                    |                    |
| SNP_85109_A_519496 | NW_004516235.1 | scaffold876 | 519496                  | AA                              | GG                 | GG               | INTERGENIC      |               |                    |                    |
| SNP_85110_A_519803 | NW_004516235.1 | scaffold876 | 519803                  | CC                              | GG                 | GG               | INTERGENIC      |               |                    |                    |
| SNP_85111_A_534894 | NW_004516235.1 | scaffold876 | 534894                  | GG                              | TT                 | TT               | INTERGENIC      |               |                    |                    |

| SNPs IDs           | Chromosome IDs | Chromosomes | Physical positions (bp) | CDC Frontier (Reference genome) | (Pusa 1103 & HPNB) | (ILWC 46 & LPNB) | Sequence genome | Components of | Gene accession IDs | Putative functions |
|--------------------|----------------|-------------|-------------------------|---------------------------------|--------------------|------------------|-----------------|---------------|--------------------|--------------------|
| SNP_85112_A_556601 | NW_004516235.1 | scaffold876 | 556601                  | TT                              | GG                 | GG               | INTERGENIC      |               |                    |                    |
| SNP_85113_A_556620 | NW_004516235.1 | scaffold876 | 556620                  | CC                              | AA                 | AA               | INTERGENIC      |               |                    |                    |
| SNP_85114_A_556631 | NW_004516235.1 | scaffold876 | 556631                  | AA                              | GG                 | GG               | INTERGENIC      |               |                    |                    |
| SNP_85115_A_556663 | NW_004516235.1 | scaffold876 | 556663                  | TT                              | GG                 | GG               | INTERGENIC      |               |                    |                    |
| SNP_85116_A_556671 | NW_004516235.1 | scaffold876 | 556671                  | AA                              | GG                 | GG               | INTERGENIC      |               |                    |                    |
| SNP_85117_A_556690 | NW_004516235.1 | scaffold876 | 556690                  | AA                              | GG                 | GG               | INTERGENIC      |               |                    |                    |
| SNP_85118_A_563237 | NW_004516235.1 | scaffold876 | 563237                  | AA                              | GG                 | GG               | INTERGENIC      |               |                    |                    |
| SNP_85119_A_563413 | NW_004516235.1 | scaffold876 | 563413                  | AA                              | GG                 | GG               | INTERGENIC      |               |                    |                    |
| SNP_85120_A_563613 | NW_004516235.1 | scaffold876 | 563613                  | CC                              | TT                 | TT               | INTERGENIC      |               |                    |                    |
| SNP_85121_A_573001 | NW_004516235.1 | scaffold876 | 573001                  | GG                              | AA                 | AA               | INTERGENIC      |               |                    |                    |
| SNP_85123_A_575207 | NW_004516235.1 | scaffold876 | 575207                  | AA                              | GG                 | GG               | INTERGENIC      |               |                    |                    |
| SNP_85124_A_575236 | NW_004516235.1 | scaffold876 | 575236                  | AA                              | CC                 | CC               | INTERGENIC      |               |                    |                    |
| SNP_85125_A_575343 | NW_004516235.1 | scaffold876 | 575343                  | GG                              | AA                 | AA               | INTERGENIC      |               |                    |                    |
| SNP_85126_A_575494 | NW_004516235.1 | scaffold876 | 575494                  | CC                              | AA                 | AA               | INTERGENIC      |               |                    |                    |
| SNP_85127_A_575503 | NW_004516235.1 | scaffold876 | 575503                  | GG                              | AA                 | AA               | INTERGENIC      |               |                    |                    |
| SNP_85128_A_575537 | NW_004516235.1 | scaffold876 | 575537                  | AA                              | GG                 | GG               | INTERGENIC      |               |                    |                    |
| SNP_85129_A_607882 | NW_004516235.1 | scaffold876 | 607882                  | AA                              | TT                 | TT               | INTERGENIC      |               |                    |                    |
| SNP_85130_A_608176 | NW_004516235.1 | scaffold876 | 608176                  | CC                              | TT                 | TT               | INTERGENIC      |               |                    |                    |
| SNP_85131_A_614069 | NW_004516235.1 | scaffold876 | 614069                  | TT                              | CC                 | CC               | INTERGENIC      |               |                    |                    |
| SNP_85132_A_617064 | NW_004516235.1 | scaffold876 | 617064                  | TT                              | CC                 | CC               | INTERGENIC      |               |                    |                    |
| SNP_85134_A_622737 | NW_004516235.1 | scaffold876 | 622737                  | GG                              | AA                 | AA               | INTERGENIC      |               |                    |                    |
| SNP_85135_A_622820 | NW_004516235.1 | scaffold876 | 622820                  | GG                              | AA                 | AA               | INTERGENIC      |               |                    |                    |

| SNPs IDs          | Chromosome IDs | Chromosomes | Physical positions (bp) | CDC Frontier genome (Reference genome) | (Pusa 1103 & HPNB) | (ILWC 46 & LPNB) | Sequence Components of genome | Gene accession IDs | Putative functions                     |
|-------------------|----------------|-------------|-------------------------|----------------------------------------|--------------------|------------------|-------------------------------|--------------------|----------------------------------------|
| SNP_85136_A_235   | NW_004516236.1 | scaffold877 | 235                     | AA                                     | GG                 | GG               | INTERGENIC                    |                    |                                        |
| SNP_85137_A_279   | NW_004516236.1 | scaffold877 | 279                     | GG                                     | CC                 | CC               | INTERGENIC                    |                    |                                        |
| SNP_85138_A_692   | NW_004516236.1 | scaffold877 | 692                     | TT                                     | CC                 | CC               | INTERGENIC                    |                    |                                        |
| SNP_85139_A_2565  | NW_004516236.1 | scaffold877 | 2565                    | AA                                     | GG                 | GG               | INTERGENIC                    |                    |                                        |
| SNP_85140_A_2566  | NW_004516236.1 | scaffold877 | 2566                    | GG                                     | CC                 | CC               | INTERGENIC                    |                    |                                        |
| SNP_85141_A_3376  | NW_004516236.1 | scaffold877 | 3376                    | CC                                     | GG                 | GG               | INTERGENIC                    |                    |                                        |
| SNP_85142_A_10711 | NW_004516236.1 | scaffold877 | 10711                   | AA                                     | CC                 | CC               | URR                           | 101493404          | uridine 5'-monophosphate synthase-like |
| SNP_85143_A_10783 | NW_004516236.1 | scaffold877 | 10783                   | AA                                     | GG                 | GG               | URR                           | 101493404          | uridine 5'-monophosphate synthase-like |
| SNP_85145_A_10925 | NW_004516236.1 | scaffold877 | 10925                   | TT                                     | CC                 | CC               | URR                           | 101493404          | uridine 5'-monophosphate synthase-like |
| SNP_85146_A_11050 | NW_004516236.1 | scaffold877 | 11050                   | AA                                     | GG                 | GG               | URR                           | 101493404          | uridine 5'-monophosphate synthase-like |
| SNP_85147_A_11332 | NW_004516236.1 | scaffold877 | 11332                   | AA                                     | GG                 | GG               | URR                           | 101493404          | uridine 5'-monophosphate synthase-like |
| SNP_85148_A_11432 | NW_004516236.1 | scaffold877 | 11432                   | CC                                     | TT                 | TT               | URR                           | 101493404          | uridine 5'-monophosphate synthase-like |
| SNP_85149_A_11470 | NW_004516236.1 | scaffold877 | 11470                   | GG                                     | TT                 | TT               | URR                           | 101493404          | uridine 5'-monophosphate synthase-like |
| SNP_85150_A_11532 | NW_004516236.1 | scaffold877 | 11532                   | AA                                     | TT                 | TT               | URR                           | 101493404          | uridine 5'-monophosphate synthase-like |
| SNP_85151_A_11692 | NW_004516236.1 | scaffold877 | 11692                   | AA                                     | TT                 | TT               | URR                           | 101493404          | uridine 5'-monophosphate synthase-like |
| SNP_85152_A_11927 | NW_004516236.1 | scaffold877 | 11927                   | TT                                     | CC                 | CC               | URR                           | 101493404          | uridine 5'-monophosphate synthase-like |
| SNP_85153_A_12748 | NW_004516236.1 | scaffold877 | 12748                   | GG                                     | AA                 | AA               | INTERGENIC                    |                    |                                        |
| SNP_85154_A_14530 | NW_004516236.1 | scaffold877 | 14530                   | AA                                     | GG                 | GG               | INTERGENIC                    |                    |                                        |
| SNP_85155_A_14692 | NW_004516236.1 | scaffold877 | 14692                   | TT                                     | GG                 | GG               | INTERGENIC                    |                    |                                        |
| SNP_85157_A_14906 | NW_004516236.1 | scaffold877 | 14906                   | TT                                     | AA                 | AA               | INTERGENIC                    |                    |                                        |
| SNP_85158_A_14908 | NW_004516236.1 | scaffold877 | 14908                   | TT                                     | AA                 | AA               | INTERGENIC                    |                    |                                        |
| SNP_85159_A_16839 | NW_004516236.1 | scaffold877 | 16839                   | TT                                     | GG                 | GG               | INTERGENIC                    |                    |                                        |



| SNPs IDs          | Chromosome IDs | Chromosomes | Physical positions (bp) | CDC Frontier (Reference genome) | (Pusa 1103 & HPNB) | (ILWC 46 & LPNB) | Sequence Components of genome | Gene accession IDs | Putative functions |
|-------------------|----------------|-------------|-------------------------|---------------------------------|--------------------|------------------|-------------------------------|--------------------|--------------------|
| SNP_85160_A_16884 | NW_004516236.1 | scaffold877 | 16884                   | AA                              | GG                 | GG               | INTERGENIC                    |                    |                    |
| SNP_85161_A_17392 | NW_004516236.1 | scaffold877 | 17392                   | AA                              | GG                 | GG               | INTERGENIC                    |                    |                    |
| SNP_85162_A_17525 | NW_004516236.1 | scaffold877 | 17525                   | AA                              | CC                 | CC               | INTERGENIC                    |                    |                    |
| SNP_85163_A_7719  | NW_004516237.1 | scaffold878 | 7719                    | TT                              | AA                 | AA               | INTERGENIC                    |                    |                    |
| SNP_85164_A_14119 | NW_004516237.1 | scaffold878 | 14119                   | AA                              | GG                 | GG               | URR                           | 101493725          | Unknown function   |
| SNP_85165_A_14212 | NW_004516237.1 | scaffold878 | 14212                   | TT                              | CC                 | CC               | URR                           | 101493725          | Unknown function   |
| SNP_85166_A_14214 | NW_004516237.1 | scaffold878 | 14214                   | GG                              | TT                 | TT               | URR                           | 101493725          | Unknown function   |
| SNP_85167_A_25208 | NW_004516237.1 | scaffold878 | 25208                   | AA                              | GG                 | GG               | INTERGENIC                    |                    |                    |
| SNP_85168_A_25236 | NW_004516237.1 | scaffold878 | 25236                   | GG                              | AA                 | AA               | INTERGENIC                    |                    |                    |
| SNP_85169_A_25265 | NW_004516237.1 | scaffold878 | 25265                   | GG                              | AA                 | AA               | INTERGENIC                    |                    |                    |
| SNP_85170_A_25466 | NW_004516237.1 | scaffold878 | 25466                   | CC                              | TT                 | TT               | INTERGENIC                    |                    |                    |
| SNP_85171_A_25822 | NW_004516237.1 | scaffold878 | 25822                   | TT                              | CC                 | CC               | INTERGENIC                    |                    |                    |
| SNP_85172_A_43087 | NW_004516237.1 | scaffold878 | 43087                   | CC                              | AA                 | AA               | INTERGENIC                    |                    |                    |
| SNP_85173_A_43135 | NW_004516237.1 | scaffold878 | 43135                   | AA                              | TT                 | TT               | INTERGENIC                    |                    |                    |
| SNP_85174_A_43383 | NW_004516237.1 | scaffold878 | 43383                   | TT                              | GG                 | GG               | INTERGENIC                    |                    |                    |
| SNP_85175_A_43555 | NW_004516237.1 | scaffold878 | 43555                   | CC                              | GG                 | GG               | INTERGENIC                    |                    |                    |
| SNP_85176_A_74934 | NW_004516237.1 | scaffold878 | 74934                   | CC                              | TT                 | TT               | INTERGENIC                    |                    |                    |
| SNP_85177_A_75018 | NW_004516237.1 | scaffold878 | 75018                   | GG                              | AA                 | AA               | INTERGENIC                    |                    |                    |
| SNP_85178_A_75028 | NW_004516237.1 | scaffold878 | 75028                   | TT                              | CC                 | CC               | INTERGENIC                    |                    |                    |
| SNP_85179_A_75052 | NW_004516237.1 | scaffold878 | 75052                   | CC                              | GG                 | GG               | INTERGENIC                    |                    |                    |
| SNP_85180_A_75063 | NW_004516237.1 | scaffold878 | 75063                   | CC                              | TT                 | TT               | INTERGENIC                    |                    |                    |
| SNP_85181_A_75076 | NW_004516237.1 | scaffold878 | 75076                   | AA                              | GG                 | GG               | INTERGENIC                    |                    |                    |

| SNPs IDs           | Chromosome IDs | Chromosomes | Physical positions (bp) | CDC Frontier (Reference genome) | (Pusa 1103 & HPNB) | (ILWC 46 & LPNB) | Sequence Components of genome | Gene accession IDs | Putative functions           |
|--------------------|----------------|-------------|-------------------------|---------------------------------|--------------------|------------------|-------------------------------|--------------------|------------------------------|
| SNP_85182_A_75281  | NW_004516237.1 | scaffold878 | 75281                   | AA                              | GG                 | GG               | INTERGENIC                    |                    |                              |
| SNP_85183_A_75337  | NW_004516237.1 | scaffold878 | 75337                   | CC                              | TT                 | TT               | INTERGENIC                    |                    |                              |
| SNP_85184_A_75364  | NW_004516237.1 | scaffold878 | 75364                   | GG                              | AA                 | AA               | INTERGENIC                    |                    |                              |
| SNP_85185_A_82782  | NW_004516237.1 | scaffold878 | 82782                   | TT                              | AA                 | AA               | INTERGENIC                    |                    |                              |
| SNP_85186_A_118300 | NW_004516237.1 | scaffold878 | 118300                  | GG                              | AA                 | AA               | URR                           | 101494667          | uncharacterized LOC101494667 |
| SNP_85187_A_118340 | NW_004516237.1 | scaffold878 | 118340                  | CC                              | TT                 | TT               | URR                           | 101494667          | uncharacterized LOC101494667 |
| SNP_85188_A_118565 | NW_004516237.1 | scaffold878 | 118565                  | AA                              | GG                 | GG               | URR                           | 101494667          | uncharacterized LOC101494667 |
| SNP_85189_A_118604 | NW_004516237.1 | scaffold878 | 118604                  | CC                              | TT                 | TT               | URR                           | 101494667          | uncharacterized LOC101494667 |
| SNP_85190_A_118608 | NW_004516237.1 | scaffold878 | 118608                  | CC                              | AA                 | AA               | URR                           | 101494667          | uncharacterized LOC101494667 |
| SNP_85191_A_118682 | NW_004516237.1 | scaffold878 | 118682                  | CC                              | TT                 | TT               | URR                           | 101494667          | uncharacterized LOC101494667 |
| SNP_85192_A_118833 | NW_004516237.1 | scaffold878 | 118833                  | GG                              | AA                 | AA               | URR                           | 101494667          | uncharacterized LOC101494667 |
| SNP_85193_A_118839 | NW_004516237.1 | scaffold878 | 118839                  | TT                              | CC                 | CC               | URR                           | 101494667          | uncharacterized LOC101494667 |
| SNP_85194_A_118846 | NW_004516237.1 | scaffold878 | 118846                  | AA                              | GG                 | GG               | URR                           | 101494667          | uncharacterized LOC101494667 |
| SNP_85195_A_118897 | NW_004516237.1 | scaffold878 | 118897                  | CC                              | AA                 | AA               | URR                           | 101494667          | uncharacterized LOC101494667 |
| SNP_85196_A_118957 | NW_004516237.1 | scaffold878 | 118957                  | AA                              | TT                 | TT               | URR                           | 101494667          | uncharacterized LOC101494667 |
| SNP_85197_A_119045 | NW_004516237.1 | scaffold878 | 119045                  | GG                              | TT                 | TT               | URR                           | 101494667          | uncharacterized LOC101494667 |
| SNP_85198_A_119168 | NW_004516237.1 | scaffold878 | 119168                  | GG                              | AA                 | AA               | URR                           | 101494667          | uncharacterized LOC101494667 |
| SNP_85199_A_119265 | NW_004516237.1 | scaffold878 | 119265                  | AA                              | GG                 | GG               | URR                           | 101494667          | uncharacterized LOC101494667 |
| SNP_85200_A_119267 | NW_004516237.1 | scaffold878 | 119267                  | AA                              | TT                 | TT               | URR                           | 101494667          | uncharacterized LOC101494667 |
| SNP_85201_A_121482 | NW_004516237.1 | scaffold878 | 121482                  | TT                              | CC                 | CC               | NON_SYNONYMOUS_CODING         | 101494987          | uncharacterized LOC101494987 |
| SNP_85202_A_5351   | NW_004516239.1 | scaffold882 | 5351                    | GG                              | AA                 | AA               | INTERGENIC                    |                    |                              |
| SNP_85203_A_5362   | NW_004516239.1 | scaffold882 | 5362                    | AA                              | GG                 | GG               | INTERGENIC                    |                    |                              |

| SNPs IDs           | Chromosome IDs | Chromosomes | Physical positions (bp) | CDC Frontier (Reference genome) | (Pusa 1103 & HPNB) | (ILWC 46 & LPNB) | Sequence Components of genome | Gene accession IDs | Putative functions           |
|--------------------|----------------|-------------|-------------------------|---------------------------------|--------------------|------------------|-------------------------------|--------------------|------------------------------|
| SNP_85204_A_65982  | NW_004516239.1 | scaffold882 | 65982                   | CC                              | TT                 | TT               | INTERGENIC                    |                    |                              |
| SNP_85206_A_70563  | NW_004516239.1 | scaffold882 | 70563                   | GG                              | AA                 | AA               | INTERGENIC                    |                    |                              |
| SNP_85207_A_70602  | NW_004516239.1 | scaffold882 | 70602                   | CC                              | TT                 | TT               | INTERGENIC                    |                    |                              |
| SNP_85208_A_70616  | NW_004516239.1 | scaffold882 | 70616                   | TT                              | CC                 | CC               | INTERGENIC                    |                    |                              |
| SNP_85209_A_70645  | NW_004516239.1 | scaffold882 | 70645                   | CC                              | AA                 | AA               | INTERGENIC                    |                    |                              |
| SNP_85210_A_70652  | NW_004516239.1 | scaffold882 | 70652                   | CC                              | TT                 | TT               | INTERGENIC                    |                    |                              |
| SNP_85211_A_70663  | NW_004516239.1 | scaffold882 | 70663                   | TT                              | CC                 | CC               | INTERGENIC                    |                    |                              |
| SNP_85212_A_81077  | NW_004516239.1 | scaffold882 | 81077                   | TT                              | AA                 | AA               | NON_SYNONYMOUS_CODING         | 101499043          | uncharacterized LOC101499043 |
| SNP_85213_A_81254  | NW_004516239.1 | scaffold882 | 81254                   | CC                              | AA                 | AA               | NON_SYNONYMOUS_CODING         | 101499043          | uncharacterized LOC101499043 |
| SNP_85214_A_100388 | NW_004516239.1 | scaffold882 | 100388                  | GG                              | AA                 | AA               | INTRON                        | 101499043          | uncharacterized LOC101499043 |
| SNP_85215_A_100415 | NW_004516239.1 | scaffold882 | 100415                  | CC                              | TT                 | TT               | INTRON                        | 101499043          | uncharacterized LOC101499043 |
| SNP_85216_A_100422 | NW_004516239.1 | scaffold882 | 100422                  | AA                              | CC                 | CC               | INTRON                        | 101499043          | uncharacterized LOC101499043 |
| SNP_85217_A_100486 | NW_004516239.1 | scaffold882 | 100486                  | CC                              | TT                 | TT               | INTRON                        | 101499043          | uncharacterized LOC101499043 |
| SNP_85218_A_100551 | NW_004516239.1 | scaffold882 | 100551                  | TT                              | CC                 | CC               | INTRON                        | 101499043          | uncharacterized LOC101499043 |
| SNP_85219_A_100555 | NW_004516239.1 | scaffold882 | 100555                  | AA                              | TT                 | TT               | INTRON                        | 101499043          | uncharacterized LOC101499043 |
| SNP_85220_A_100823 | NW_004516239.1 | scaffold882 | 100823                  | GG                              | AA                 | AA               | INTRON                        | 101499043          | uncharacterized LOC101499043 |
| SNP_85221_A_100833 | NW_004516239.1 | scaffold882 | 100833                  | CC                              | TT                 | TT               | INTRON                        | 101499043          | uncharacterized LOC101499043 |
| SNP_85222_A_100873 | NW_004516239.1 | scaffold882 | 100873                  | TT                              | CC                 | CC               | INTRON                        | 101499043          | uncharacterized LOC101499043 |
| SNP_85223_A_213836 | NW_004516239.1 | scaffold882 | 213836                  | CC                              | GG                 | GG               | INTERGENIC                    |                    |                              |
| SNP_85224_A_224158 | NW_004516239.1 | scaffold882 | 224158                  | CC                              | TT                 | TT               | INTERGENIC                    |                    |                              |
| SNP_85225_A_266278 | NW_004516239.1 | scaffold882 | 266278                  | AA                              | CC                 | CC               | INTERGENIC                    |                    |                              |
| SNP_85226_A_300172 | NW_004516239.1 | scaffold882 | 300172                  | CC                              | GG                 | GG               | INTERGENIC                    |                    |                              |

| SNPs IDs           | Chromosome IDs | Chromosomes | Physical positions (bp) | CDC Frontier (Reference genome) | (Pusa 1103 & HPNB) | (ILWC 46 & LPNB) | Sequence Components of genome | Gene accession IDs | Putative functions                            |
|--------------------|----------------|-------------|-------------------------|---------------------------------|--------------------|------------------|-------------------------------|--------------------|-----------------------------------------------|
| SNP_85230_A_347238 | NW_004516239.1 | scaffold882 | 347238                  | GG                              | CC                 | CC               | INTERGENIC                    |                    |                                               |
| SNP_85231_A_347249 | NW_004516239.1 | scaffold882 | 347249                  | TT                              | GG                 | GG               | INTERGENIC                    |                    |                                               |
| SNP_85232_A_347290 | NW_004516239.1 | scaffold882 | 347290                  | AA                              | TT                 | TT               | INTERGENIC                    |                    |                                               |
| SNP_85233_A_347413 | NW_004516239.1 | scaffold882 | 347413                  | CC                              | TT                 | TT               | INTERGENIC                    |                    |                                               |
| SNP_85234_A_347595 | NW_004516239.1 | scaffold882 | 347595                  | CC                              | TT                 | TT               | INTERGENIC                    |                    |                                               |
| SNP_85235_A_383971 | NW_004516239.1 | scaffold882 | 383971                  | GG                              | AA                 | AA               | INTERGENIC                    |                    |                                               |
| SNP_85236_A_389470 | NW_004516239.1 | scaffold882 | 389470                  | AA                              | GG                 | GG               | INTERGENIC                    |                    |                                               |
| SNP_85237_A_389477 | NW_004516239.1 | scaffold882 | 389477                  | GG                              | TT                 | TT               | INTERGENIC                    |                    |                                               |
| SNP_85238_A_389521 | NW_004516239.1 | scaffold882 | 389521                  | CC                              | TT                 | TT               | INTERGENIC                    |                    |                                               |
| SNP_85239_A_389524 | NW_004516239.1 | scaffold882 | 389524                  | CC                              | GG                 | GG               | INTERGENIC                    |                    |                                               |
| SNP_85240_A_426790 | NW_004516239.1 | scaffold882 | 426790                  | GG                              | AA                 | AA               | DRR                           | 101500943          | putative uncharacterized protein DDB_G0290521 |
| SNP_85241_A_427232 | NW_004516239.1 | scaffold882 | 427232                  | GG                              | AA                 | AA               | DRR                           | 101500943          | putative uncharacterized protein DDB_G0290521 |
| SNP_85242_A_428115 | NW_004516239.1 | scaffold882 | 428115                  | CC                              | TT                 | TT               | NON_SYNONYMOUS_CODING         | 101500943          | putative uncharacterized protein DDB_G0290521 |
| SNP_85243_A_428187 | NW_004516239.1 | scaffold882 | 428187                  | TT                              | CC                 | CC               | NON_SYNONYMOUS_CODING         | 101500943          | putative uncharacterized protein DDB_G0290521 |
| SNP_85244_A_428512 | NW_004516239.1 | scaffold882 | 428512                  | AA                              | GG                 | GG               | URR                           | 101500943          | putative uncharacterized protein DDB_G0290521 |
| SNP_85245_A_428861 | NW_004516239.1 | scaffold882 | 428861                  | AA                              | GG                 | GG               | URR                           | 101500943          | putative uncharacterized protein DDB_G0290521 |
| SNP_85246_A_429605 | NW_004516239.1 | scaffold882 | 429605                  | CC                              | GG                 | GG               | URR                           | 101500943          | putative uncharacterized protein DDB_G0290521 |
| SNP_85247_A_429815 | NW_004516239.1 | scaffold882 | 429815                  | GG                              | AA                 | AA               | URR                           | 101500943          | putative uncharacterized protein DDB_G0290521 |
| SNP_85248_A_430625 | NW_004516239.1 | scaffold882 | 430625                  | GG                              | CC                 | CC               | INTERGENIC                    |                    |                                               |
| SNP_85249_A_430701 | NW_004516239.1 | scaffold882 | 430701                  | CC                              | GG                 | GG               | INTERGENIC                    |                    |                                               |
| SNP_85250_A_431694 | NW_004516239.1 | scaffold882 | 431694                  | CC                              | GG                 | GG               | INTERGENIC                    |                    |                                               |
| SNP_85251_A_431971 | NW_004516239.1 | scaffold882 | 431971                  | GG                              | TT                 | TT               | INTERGENIC                    |                    |                                               |

| SNPs IDs           | Chromosome IDs | Chromosomes | Physical positions (bp) | CDC Frontier (Reference genome) | (Pusa 1103 & HPNB) | (ILWC 46 & LPNB) | Sequence Components of genome | Gene accession IDs | Putative functions |
|--------------------|----------------|-------------|-------------------------|---------------------------------|--------------------|------------------|-------------------------------|--------------------|--------------------|
| SNP_85252_A_432226 | NW_004516239.1 | scaffold882 | 432226                  | TT                              | GG                 | GG               | INTERGENIC                    |                    |                    |
| SNP_85253_A_432229 | NW_004516239.1 | scaffold882 | 432229                  | GG                              | TT                 | TT               | INTERGENIC                    |                    |                    |
| SNP_85254_A_434547 | NW_004516239.1 | scaffold882 | 434547                  | TT                              | GG                 | GG               | INTERGENIC                    |                    |                    |
| SNP_85255_A_436494 | NW_004516239.1 | scaffold882 | 436494                  | GG                              | CC                 | CC               | INTERGENIC                    |                    |                    |
| SNP_85256_A_436497 | NW_004516239.1 | scaffold882 | 436497                  | AA                              | GG                 | GG               | INTERGENIC                    |                    |                    |
| SNP_85258_A_437604 | NW_004516239.1 | scaffold882 | 437604                  | CC                              | TT                 | TT               | INTERGENIC                    |                    |                    |
| SNP_85259_A_438431 | NW_004516239.1 | scaffold882 | 438431                  | CC                              | TT                 | TT               | INTERGENIC                    |                    |                    |
| SNP_85260_A_438647 | NW_004516239.1 | scaffold882 | 438647                  | TT                              | CC                 | CC               | INTERGENIC                    |                    |                    |
| SNP_85261_A_439019 | NW_004516239.1 | scaffold882 | 439019                  | AA                              | GG                 | GG               | INTERGENIC                    |                    |                    |
| SNP_85263_A_446972 | NW_004516239.1 | scaffold882 | 446972                  | CC                              | AA                 | AA               | INTERGENIC                    |                    |                    |
| SNP_85264_A_447929 | NW_004516239.1 | scaffold882 | 447929                  | GG                              | TT                 | TT               | INTERGENIC                    |                    |                    |
| SNP_85265_A_448346 | NW_004516239.1 | scaffold882 | 448346                  | GG                              | TT                 | TT               | INTERGENIC                    |                    |                    |
| SNP_85266_A_448717 | NW_004516239.1 | scaffold882 | 448717                  | GG                              | AA                 | AA               | INTERGENIC                    |                    |                    |
| SNP_85267_A_450561 | NW_004516239.1 | scaffold882 | 450561                  | AA                              | GG                 | GG               | INTERGENIC                    |                    |                    |
| SNP_85269_A_517441 | NW_004516239.1 | scaffold882 | 517441                  | TT                              | CC                 | CC               | INTRON                        | 101501268          | Unknown function   |
| SNP_85270_A_517442 | NW_004516239.1 | scaffold882 | 517442                  | AA                              | CC                 | CC               | INTRON                        | 101501268          | Unknown function   |
| SNP_85271_A_517453 | NW_004516239.1 | scaffold882 | 517453                  | GG                              | TT                 | TT               | INTRON                        | 101501268          | Unknown function   |
| SNP_85272_A_523007 | NW_004516239.1 | scaffold882 | 523007                  | CC                              | TT                 | TT               | SYNONYMOUS_CODING             | 101501268          | Unknown function   |
| SNP_85273_A_523371 | NW_004516239.1 | scaffold882 | 523371                  | AA                              | GG                 | GG               | INTRON                        | 101501268          | Unknown function   |
| SNP_85274_A_523449 | NW_004516239.1 | scaffold882 | 523449                  | TT                              | CC                 | CC               | INTRON                        | 101501268          | Unknown function   |
| SNP_85275_A_523478 | NW_004516239.1 | scaffold882 | 523478                  | AA                              | GG                 | GG               | NON_SYNONYMOUS_CODING         | 101501268          | Unknown function   |
| SNP_85276_A_523493 | NW_004516239.1 | scaffold882 | 523493                  | AA                              | GG                 | GG               | NON_SYNONYMOUS_CODING         | 101501268          | Unknown function   |

| SNPs IDs           | Chromosome IDs | Chromosomes | Physical positions (bp) | CDC Frontier (Reference genome) | (Pusa 1103 & HPNB) | (ILWC 46 & LPNB) | Sequence Components of genome | Gene accession IDs | Putative functions                          |
|--------------------|----------------|-------------|-------------------------|---------------------------------|--------------------|------------------|-------------------------------|--------------------|---------------------------------------------|
| SNP_85277_A_523500 | NW_004516239.1 | scaffold882 | 523500                  | AA                              | GG                 | GG               | SYNONYMOUS_CODING             | 101501268          | Unknown function                            |
| SNP_85278_A_526163 | NW_004516239.1 | scaffold882 | 526163                  | AA                              | CC                 | CC               | INTRON                        | 101501268          | Unknown function                            |
| SNP_85279_A_526173 | NW_004516239.1 | scaffold882 | 526173                  | CC                              | TT                 | TT               | INTRON                        | 101501268          | Unknown function                            |
| SNP_85280_A_567597 | NW_004516239.1 | scaffold882 | 567597                  | GG                              | AA                 | AA               | INTERGENIC                    |                    |                                             |
| SNP_85281_A_570077 | NW_004516239.1 | scaffold882 | 570077                  | CC                              | TT                 | TT               | DRR                           | 101501895          | F-box/FBD/LRR-repeat protein At4g26340-like |
| SNP_85282_A_584580 | NW_004516239.1 | scaffold882 | 584580                  | GG                              | CC                 | CC               | INTERGENIC                    |                    |                                             |
| SNP_85283_A_584586 | NW_004516239.1 | scaffold882 | 584586                  | TT                              | CC                 | CC               | INTERGENIC                    |                    |                                             |
| SNP_85284_A_584604 | NW_004516239.1 | scaffold882 | 584604                  | AA                              | GG                 | GG               | INTERGENIC                    |                    |                                             |
| SNP_85285_A_585117 | NW_004516239.1 | scaffold882 | 585117                  | AA                              | GG                 | GG               | INTERGENIC                    |                    |                                             |
| SNP_85286_A_607467 | NW_004516239.1 | scaffold882 | 607467                  | AA                              | GG                 | GG               | INTRON                        | 101502222          | Unknown function                            |
| SNP_85287_A_607494 | NW_004516239.1 | scaffold882 | 607494                  | CC                              | TT                 | TT               | INTRON                        | 101502222          | Unknown function                            |
| SNP_85288_A_607506 | NW_004516239.1 | scaffold882 | 607506                  | TT                              | CC                 | CC               | INTRON                        | 101502222          | Unknown function                            |
| SNP_85289_A_607533 | NW_004516239.1 | scaffold882 | 607533                  | AA                              | GG                 | GG               | INTRON                        | 101502222          | Unknown function                            |
| SNP_85290_A_607562 | NW_004516239.1 | scaffold882 | 607562                  | TT                              | CC                 | CC               | INTRON                        | 101502222          | Unknown function                            |
| SNP_85291_A_607783 | NW_004516239.1 | scaffold882 | 607783                  | TT                              | CC                 | CC               | NON_SYNONYMOUS_CODING         | 101502222          | Unknown function                            |
| SNP_85292_A_607789 | NW_004516239.1 | scaffold882 | 607789                  | AA                              | GG                 | GG               | NON_SYNONYMOUS_CODING         | 101502222          | Unknown function                            |
| SNP_85293_A_607888 | NW_004516239.1 | scaffold882 | 607888                  | TT                              | GG                 | GG               | NON_SYNONYMOUS_CODING         | 101502222          | Unknown function                            |
| SNP_85294_A_608868 | NW_004516239.1 | scaffold882 | 608868                  | CC                              | TT                 | TT               | SYNONYMOUS_CODING             | 101502222          | Unknown function                            |
| SNP_85295_A_608874 | NW_004516239.1 | scaffold882 | 608874                  | GG                              | AA                 | AA               | SYNONYMOUS_CODING             | 101502222          | Unknown function                            |
| SNP_85296_A_608904 | NW_004516239.1 | scaffold882 | 608904                  | CC                              | TT                 | TT               | SYNONYMOUS_CODING             | 101502222          | Unknown function                            |
| SNP_85297_A_608912 | NW_004516239.1 | scaffold882 | 608912                  | TT                              | CC                 | CC               | NON_SYNONYMOUS_CODING         | 101502222          | Unknown function                            |
| SNP_85299_A_12216  | NW_004516241.1 | scaffold884 | 12216                   | AA                              | CC                 | CC               | INTERGENIC                    |                    |                                             |

| SNPs IDs           | Chromosome IDs | Chromosomes | Physical positions (bp) | CDC Frontier (Reference genome) | (Pusa 1103 & HPNB) | (ILWC 46 & LPNB) | Sequence genome | Components of | Gene accession IDs | Putative functions |
|--------------------|----------------|-------------|-------------------------|---------------------------------|--------------------|------------------|-----------------|---------------|--------------------|--------------------|
| SNP_85300_A_34498  | NW_004516241.1 | scaffold884 | 34498                   | TT                              | AA                 | AA               | INTERGENIC      |               |                    |                    |
| SNP_85301_A_42931  | NW_004516241.1 | scaffold884 | 42931                   | TT                              | GG                 | GG               | INTERGENIC      |               |                    |                    |
| SNP_85302_A_42932  | NW_004516241.1 | scaffold884 | 42932                   | TT                              | GG                 | GG               | INTERGENIC      |               |                    |                    |
| SNP_85303_A_52525  | NW_004516241.1 | scaffold884 | 52525                   | TT                              | GG                 | GG               | INTERGENIC      |               |                    |                    |
| SNP_85304_A_82938  | NW_004516241.1 | scaffold884 | 82938                   | CC                              | TT                 | TT               | INTERGENIC      |               |                    |                    |
| SNP_85305_A_135329 | NW_004516241.1 | scaffold884 | 135329                  | GG                              | AA                 | AA               | INTERGENIC      |               |                    |                    |
| SNP_85306_A_157815 | NW_004516241.1 | scaffold884 | 157815                  | AA                              | CC                 | CC               | INTERGENIC      |               |                    |                    |
| SNP_85307_A_474    | NW_004516242.1 | scaffold886 | 474                     | GG                              | TT                 | TT               | INTERGENIC      |               |                    |                    |
| SNP_85308_A_487    | NW_004516242.1 | scaffold886 | 487                     | CC                              | TT                 | TT               | INTERGENIC      |               |                    |                    |
| SNP_85309_A_57163  | NW_004516242.1 | scaffold886 | 57163                   | CC                              | AA                 | AA               | INTERGENIC      |               |                    |                    |
| SNP_85310_A_57174  | NW_004516242.1 | scaffold886 | 57174                   | GG                              | TT                 | TT               | INTERGENIC      |               |                    |                    |
| SNP_85311_A_57179  | NW_004516242.1 | scaffold886 | 57179                   | GG                              | AA                 | AA               | INTERGENIC      |               |                    |                    |
| SNP_85312_A_135468 | NW_004516242.1 | scaffold886 | 135468                  | CC                              | TT                 | TT               | INTERGENIC      |               |                    |                    |
| SNP_85313_A_151209 | NW_004516242.1 | scaffold886 | 151209                  | GG                              | AA                 | AA               | INTERGENIC      |               |                    |                    |
| SNP_85315_A_151317 | NW_004516242.1 | scaffold886 | 151317                  | TT                              | GG                 | GG               | INTERGENIC      |               |                    |                    |
| SNP_85316_A_151384 | NW_004516242.1 | scaffold886 | 151384                  | TT                              | CC                 | CC               | INTERGENIC      |               |                    |                    |
| SNP_85317_A_151410 | NW_004516242.1 | scaffold886 | 151410                  | CC                              | AA                 | AA               | INTERGENIC      |               |                    |                    |
| SNP_85319_A_151479 | NW_004516242.1 | scaffold886 | 151479                  | TT                              | GG                 | GG               | INTERGENIC      |               |                    |                    |
| SNP_85320_A_151519 | NW_004516242.1 | scaffold886 | 151519                  | CC                              | TT                 | TT               | INTERGENIC      |               |                    |                    |
| SNP_85321_A_151520 | NW_004516242.1 | scaffold886 | 151520                  | AA                              | GG                 | GG               | INTERGENIC      |               |                    |                    |
| SNP_85322_A_151532 | NW_004516242.1 | scaffold886 | 151532                  | CC                              | TT                 | TT               | INTERGENIC      |               |                    |                    |
| SNP_85323_A_151591 | NW_004516242.1 | scaffold886 | 151591                  | GG                              | AA                 | AA               | INTERGENIC      |               |                    |                    |

| SNPs IDs           | Chromosome IDs | Chromosomes | Physical positions (bp) | CDC Frontier (Reference genome) | (Pusa 1103 & HPNB) | (ILWC 46 & LPNB) | Sequence genome | Components of | Gene accession IDs | Putative functions |
|--------------------|----------------|-------------|-------------------------|---------------------------------|--------------------|------------------|-----------------|---------------|--------------------|--------------------|
| SNP_85324_A_151652 | NW_004516242.1 | scaffold886 | 151652                  | AA                              | TT                 | TT               | INTERGENIC      |               |                    |                    |
| SNP_85325_A_153081 | NW_004516242.1 | scaffold886 | 153081                  | GG                              | AA                 | AA               | INTERGENIC      |               |                    |                    |
| SNP_85326_A_153201 | NW_004516242.1 | scaffold886 | 153201                  | GG                              | AA                 | AA               | INTERGENIC      |               |                    |                    |
| SNP_85327_A_153205 | NW_004516242.1 | scaffold886 | 153205                  | CC                              | TT                 | TT               | INTERGENIC      |               |                    |                    |
| SNP_85328_A_153550 | NW_004516242.1 | scaffold886 | 153550                  | CC                              | AA                 | AA               | INTERGENIC      |               |                    |                    |
| SNP_85329_A_153616 | NW_004516242.1 | scaffold886 | 153616                  | CC                              | AA                 | AA               | INTERGENIC      |               |                    |                    |
| SNP_85330_A_154414 | NW_004516242.1 | scaffold886 | 154414                  | CC                              | TT                 | TT               | INTERGENIC      |               |                    |                    |
| SNP_85331_A_154467 | NW_004516242.1 | scaffold886 | 154467                  | CC                              | AA                 | AA               | INTERGENIC      |               |                    |                    |
| SNP_85332_A_154475 | NW_004516242.1 | scaffold886 | 154475                  | AA                              | TT                 | TT               | INTERGENIC      |               |                    |                    |
| SNP_85333_A_154541 | NW_004516242.1 | scaffold886 | 154541                  | CC                              | GG                 | GG               | INTERGENIC      |               |                    |                    |
| SNP_85334_A_154569 | NW_004516242.1 | scaffold886 | 154569                  | TT                              | GG                 | GG               | INTERGENIC      |               |                    |                    |
| SNP_85335_A_154725 | NW_004516242.1 | scaffold886 | 154725                  | CC                              | AA                 | AA               | INTERGENIC      |               |                    |                    |
| SNP_85336_A_154752 | NW_004516242.1 | scaffold886 | 154752                  | CC                              | TT                 | TT               | INTERGENIC      |               |                    |                    |
| SNP_85337_A_154756 | NW_004516242.1 | scaffold886 | 154756                  | AA                              | CC                 | CC               | INTERGENIC      |               |                    |                    |
| SNP_85338_A_154777 | NW_004516242.1 | scaffold886 | 154777                  | TT                              | CC                 | CC               | INTERGENIC      |               |                    |                    |
| SNP_85339_A_154781 | NW_004516242.1 | scaffold886 | 154781                  | TT                              | AA                 | AA               | INTERGENIC      |               |                    |                    |
| SNP_85340_A_154789 | NW_004516242.1 | scaffold886 | 154789                  | AA                              | TT                 | TT               | INTERGENIC      |               |                    |                    |
| SNP_85341_A_154793 | NW_004516242.1 | scaffold886 | 154793                  | CC                              | AA                 | AA               | INTERGENIC      |               |                    |                    |
| SNP_85342_A_154829 | NW_004516242.1 | scaffold886 | 154829                  | GG                              | TT                 | TT               | INTERGENIC      |               |                    |                    |
| SNP_85343_A_154841 | NW_004516242.1 | scaffold886 | 154841                  | GG                              | TT                 | TT               | INTERGENIC      |               |                    |                    |
| SNP_85344_A_160581 | NW_004516242.1 | scaffold886 | 160581                  | TT                              | CC                 | CC               | INTERGENIC      |               |                    |                    |
| SNP_85345_A_160851 | NW_004516242.1 | scaffold886 | 160851                  | CC                              | TT                 | TT               | INTERGENIC      |               |                    |                    |



| SNPs IDs           | Chromosome IDs | Chromosomes   | Physical positions (bp) | CDC Frontier (Reference genome) | (Pusa 1103 & HPNB) | (ILWC 46 & LPNB) | Sequence genome | Components of | Gene accession IDs | Putative functions |
|--------------------|----------------|---------------|-------------------------|---------------------------------|--------------------|------------------|-----------------|---------------|--------------------|--------------------|
| SNP_85346_A_160988 | NW_004516242.1 | scaffold886   | 160988                  | TT                              | GG                 | GG               | INTERGENIC      |               |                    |                    |
| SNP_85347_A_160999 | NW_004516242.1 | scaffold886   | 160999                  | CC                              | TT                 | TT               | INTERGENIC      |               |                    |                    |
| SNP_85348_A_161031 | NW_004516242.1 | scaffold886   | 161031                  | CC                              | GG                 | GG               | INTERGENIC      |               |                    |                    |
| SNP_85349_A_161401 | NW_004516242.1 | scaffold886   | 161401                  | TT                              | CC                 | CC               | INTERGENIC      |               |                    |                    |
| SNP_85350_A_164430 | NW_004516242.1 | scaffold886   | 164430                  | AA                              | CC                 | CC               | INTERGENIC      |               |                    |                    |
| SNP_85352_A_165092 | NW_004516242.1 | scaffold886   | 165092                  | TT                              | CC                 | CC               | INTERGENIC      |               |                    |                    |
| SNP_85353_A_165113 | NW_004516242.1 | scaffold886   | 165113                  | AA                              | GG                 | GG               | INTERGENIC      |               |                    |                    |
| SNP_85354_A_171232 | NW_004516242.1 | scaffold886   | 171232                  | TT                              | GG                 | GG               | INTERGENIC      |               |                    |                    |
| SNP_85355_A_171284 | NW_004516242.1 | scaffold886   | 171284                  | TT                              | CC                 | CC               | INTERGENIC      |               |                    |                    |
| SNP_85356_A_171292 | NW_004516242.1 | scaffold886   | 171292                  | AA                              | TT                 | TT               | INTERGENIC      |               |                    |                    |
| SNP_85357_A_171293 | NW_004516242.1 | scaffold886   | 171293                  | TT                              | AA                 | AA               | INTERGENIC      |               |                    |                    |
| SNP_85358_A_172416 | NW_004516242.1 | scaffold886   | 172416                  | AA                              | GG                 | GG               | INTERGENIC      |               |                    |                    |
| SNP_85359_A_172480 | NW_004516242.1 | scaffold886   | 172480                  | GG                              | TT                 | TT               | INTERGENIC      |               |                    |                    |
| SNP_85360_A_172524 | NW_004516242.1 | scaffold886   | 172524                  | CC                              | AA                 | AA               | INTERGENIC      |               |                    |                    |
| SNP_85361_A_172540 | NW_004516242.1 | scaffold886   | 172540                  | TT                              | AA                 | AA               | INTERGENIC      |               |                    |                    |
| SNP_85363_A_172906 | NW_004516242.1 | scaffold886   | 172906                  | AA                              | GG                 | GG               | INTERGENIC      |               |                    |                    |
| SNP_85364_A_172919 | NW_004516242.1 | scaffold886   | 172919                  | TT                              | CC                 | CC               | INTERGENIC      |               |                    |                    |
| SNP_85366_A_69906  | NW_004516243.1 | scaffold887_1 | 69906                   | AA                              | GG                 | GG               | INTERGENIC      |               |                    |                    |
| SNP_85367_A_69923  | NW_004516243.1 | scaffold887_1 | 69923                   | TT                              | CC                 | CC               | INTERGENIC      |               |                    |                    |
| SNP_85368_A_69924  | NW_004516243.1 | scaffold887_1 | 69924                   | CC                              | TT                 | TT               | INTERGENIC      |               |                    |                    |
| SNP_85369_A_69944  | NW_004516243.1 | scaffold887_1 | 69944                   | TT                              | CC                 | CC               | INTERGENIC      |               |                    |                    |
| SNP_85370_A_70025  | NW_004516243.1 | scaffold887_1 | 70025                   | AA                              | CC                 | CC               | INTERGENIC      |               |                    |                    |

| SNPs IDs           | Chromosome IDs | Chromosomes   | Physical positions (bp) | CDC Frontier (Reference genome) | (Pusa 1103 & HPNB) | (ILWC 46 & LPNB) | Sequence genome       | Components of | Gene accession IDs | Putative functions |
|--------------------|----------------|---------------|-------------------------|---------------------------------|--------------------|------------------|-----------------------|---------------|--------------------|--------------------|
| SNP_85371_A_70033  | NW_004516243.1 | scaffold887_1 | 70033                   | AA                              | GG                 | GG               | INTERGENIC            |               |                    |                    |
| SNP_85372_A_70077  | NW_004516243.1 | scaffold887_1 | 70077                   | AA                              | CC                 | CC               | INTERGENIC            |               |                    |                    |
| SNP_85373_A_70102  | NW_004516243.1 | scaffold887_1 | 70102                   | AA                              | GG                 | GG               | INTERGENIC            |               |                    |                    |
| SNP_85374_A_70108  | NW_004516243.1 | scaffold887_1 | 70108                   | AA                              | GG                 | GG               | INTERGENIC            |               |                    |                    |
| SNP_85375_A_70138  | NW_004516243.1 | scaffold887_1 | 70138                   | TT                              | AA                 | AA               | INTERGENIC            |               |                    |                    |
| SNP_85376_A_70161  | NW_004516243.1 | scaffold887_1 | 70161                   | GG                              | AA                 | AA               | INTERGENIC            |               |                    |                    |
| SNP_85377_A_70164  | NW_004516243.1 | scaffold887_1 | 70164                   | AA                              | CC                 | CC               | INTERGENIC            |               |                    |                    |
| SNP_85378_A_70184  | NW_004516243.1 | scaffold887_1 | 70184                   | AA                              | CC                 | CC               | INTERGENIC            |               |                    |                    |
| SNP_85379_A_70214  | NW_004516243.1 | scaffold887_1 | 70214                   | AA                              | GG                 | GG               | INTERGENIC            |               |                    |                    |
| SNP_85380_A_70238  | NW_004516243.1 | scaffold887_1 | 70238                   | TT                              | CC                 | CC               | INTERGENIC            |               |                    |                    |
| SNP_85381_A_70246  | NW_004516243.1 | scaffold887_1 | 70246                   | GG                              | AA                 | AA               | INTERGENIC            |               |                    |                    |
| SNP_85382_A_70263  | NW_004516243.1 | scaffold887_1 | 70263                   | AA                              | CC                 | CC               | INTERGENIC            |               |                    |                    |
| SNP_85383_A_94206  | NW_004516243.1 | scaffold887_1 | 94206                   | TT                              | CC                 | CC               | INTERGENIC            |               |                    |                    |
| SNP_85384_A_163665 | NW_004516243.1 | scaffold887_1 | 163665                  | AA                              | GG                 | GG               | NON_SYNONYMOUS_CODING | 101508330     |                    | cyclin-C1-2-like   |
| SNP_85386_A_200800 | NW_004516243.1 | scaffold887_1 | 200800                  | AA                              | GG                 | GG               | INTERGENIC            |               |                    |                    |
| SNP_85387_A_200911 | NW_004516243.1 | scaffold887_1 | 200911                  | TT                              | GG                 | GG               | INTERGENIC            |               |                    |                    |
| SNP_85388_A_200956 | NW_004516243.1 | scaffold887_1 | 200956                  | CC                              | GG                 | GG               | INTERGENIC            |               |                    |                    |
| SNP_85389_A_200985 | NW_004516243.1 | scaffold887_1 | 200985                  | AA                              | CC                 | CC               | INTERGENIC            |               |                    |                    |
| SNP_85390_A_200994 | NW_004516243.1 | scaffold887_1 | 200994                  | CC                              | TT                 | TT               | INTERGENIC            |               |                    |                    |
| SNP_85391_A_200996 | NW_004516243.1 | scaffold887_1 | 200996                  | AA                              | GG                 | GG               | INTERGENIC            |               |                    |                    |
| SNP_85392_A_201178 | NW_004516243.1 | scaffold887_1 | 201178                  | AA                              | GG                 | GG               | INTERGENIC            |               |                    |                    |
| SNP_85393_A_201187 | NW_004516243.1 | scaffold887_1 | 201187                  | TT                              | CC                 | CC               | INTERGENIC            |               |                    |                    |

| SNPs IDs           | Chromosome IDs | Chromosomes   | Physical positions (bp) | CDC Frontier genome (Reference genome) | (Pusa 1103 & HPNB) | (ILWC 46 & LPNB) | Sequence Components of genome | Gene accession IDs | Putative functions                                                      |
|--------------------|----------------|---------------|-------------------------|----------------------------------------|--------------------|------------------|-------------------------------|--------------------|-------------------------------------------------------------------------|
| SNP_85395_A_208139 | NW_004516243.1 | scaffold887_1 | 208139                  | AA                                     | TT                 | TT               | INTERGENIC                    |                    |                                                                         |
| SNP_85396_A_208144 | NW_004516243.1 | scaffold887_1 | 208144                  | TT                                     | AA                 | AA               | INTERGENIC                    |                    |                                                                         |
| SNP_85397_A_208145 | NW_004516243.1 | scaffold887_1 | 208145                  | TT                                     | CC                 | CC               | INTERGENIC                    |                    |                                                                         |
| SNP_85398_A_208146 | NW_004516243.1 | scaffold887_1 | 208146                  | TT                                     | AA                 | AA               | INTERGENIC                    |                    |                                                                         |
| SNP_85399_A_208299 | NW_004516243.1 | scaffold887_1 | 208299                  | AA                                     | GG                 | GG               | INTERGENIC                    |                    |                                                                         |
| SNP_85400_A_208480 | NW_004516243.1 | scaffold887_1 | 208480                  | AA                                     | GG                 | GG               | INTERGENIC                    |                    |                                                                         |
| SNP_85401_A_208572 | NW_004516243.1 | scaffold887_1 | 208572                  | GG                                     | AA                 | AA               | INTERGENIC                    |                    |                                                                         |
| SNP_85403_A_246200 | NW_004516243.1 | scaffold887_1 | 246200                  | AA                                     | GG                 | GG               | INTERGENIC                    |                    |                                                                         |
| SNP_85404_A_247358 | NW_004516243.1 | scaffold887_1 | 247358                  | AA                                     | GG                 | GG               | INTERGENIC                    |                    |                                                                         |
| SNP_85405_A_258472 | NW_004516243.1 | scaffold887_1 | 258472                  | CC                                     | TT                 | TT               | NON_SYNONYMOUS_CODING         | 101512173          | G-type lectin S-receptor-like serine/threonine-protein kinase At1g11330 |
| SNP_85406_A_258541 | NW_004516243.1 | scaffold887_1 | 258541                  | GG                                     | CC                 | CC               | NON_SYNONYMOUS_CODING         | 101512173          | G-type lectin S-receptor-like serine/threonine-protein kinase At1g11330 |
| SNP_85407_A_258546 | NW_004516243.1 | scaffold887_1 | 258546                  | CC                                     | AA                 | AA               | NON_SYNONYMOUS_CODING         | 101512173          | G-type lectin S-receptor-like serine/threonine-protein kinase At1g11330 |
| SNP_85408_A_258571 | NW_004516243.1 | scaffold887_1 | 258571                  | TT                                     | CC                 | CC               | NON_SYNONYMOUS_CODING         | 101512173          | G-type lectin S-receptor-like serine/threonine-protein kinase At1g11330 |
| SNP_85409_A_258784 | NW_004516243.1 | scaffold887_1 | 258784                  | AA                                     | TT                 | TT               | SYNONYMOUS_CODING             | 101512173          | G-type lectin S-receptor-like serine/threonine-protein kinase At1g11330 |
| SNP_85410_A_64     | NW_004516245.1 | scaffold890   | 64                      | AA                                     | CC                 | CC               | INTERGENIC                    |                    |                                                                         |
| SNP_85411_A_65     | NW_004516245.1 | scaffold890   | 65                      | AA                                     | GG                 | GG               | INTERGENIC                    |                    |                                                                         |
| SNP_85412_A_266    | NW_004516245.1 | scaffold890   | 266                     | GG                                     | CC                 | CC               | INTERGENIC                    |                    |                                                                         |
| SNP_85413_A_308    | NW_004516245.1 | scaffold890   | 308                     | GG                                     | AA                 | AA               | INTERGENIC                    |                    |                                                                         |
| SNP_85414_A_414    | NW_004516245.1 | scaffold890   | 414                     | CC                                     | TT                 | TT               | INTERGENIC                    |                    |                                                                         |
| SNP_85415_A_415    | NW_004516245.1 | scaffold890   | 415                     | AA                                     | GG                 | GG               | INTERGENIC                    |                    |                                                                         |
| SNP_85416_A_430    | NW_004516245.1 | scaffold890   | 430                     | AA                                     | TT                 | TT               | INTERGENIC                    |                    |                                                                         |
| SNP_85417_A_470    | NW_004516245.1 | scaffold890   | 470                     | GG                                     | AA                 | AA               | INTERGENIC                    |                    |                                                                         |

| SNPs IDs          | Chromosome IDs | Chromosomes | Physical positions (bp) | CDC Frontier (Reference genome) | (Pusa 1103 & HPNB) | (ILWC 46 & LPNB) | Sequence Components of genome | Gene accession IDs | Putative functions              |
|-------------------|----------------|-------------|-------------------------|---------------------------------|--------------------|------------------|-------------------------------|--------------------|---------------------------------|
| SNP_85418_A_482   | NW_004516245.1 | scaffold890 | 482                     | AA                              | GG                 | GG               | INTERGENIC                    |                    |                                 |
| SNP_85419_A_538   | NW_004516245.1 | scaffold890 | 538                     | AA                              | TT                 | TT               | INTERGENIC                    |                    |                                 |
| SNP_85420_A_546   | NW_004516245.1 | scaffold890 | 546                     | TT                              | AA                 | AA               | INTERGENIC                    |                    |                                 |
| SNP_85421_A_653   | NW_004516245.1 | scaffold890 | 653                     | AA                              | CC                 | CC               | INTERGENIC                    |                    |                                 |
| SNP_85422_A_705   | NW_004516245.1 | scaffold890 | 705                     | AA                              | GG                 | GG               | INTERGENIC                    |                    |                                 |
| SNP_85423_A_826   | NW_004516245.1 | scaffold890 | 826                     | AA                              | TT                 | TT               | INTERGENIC                    |                    |                                 |
| SNP_85424_A_872   | NW_004516245.1 | scaffold890 | 872                     | GG                              | AA                 | AA               | INTERGENIC                    |                    |                                 |
| SNP_85426_A_1326  | NW_004516245.1 | scaffold890 | 1326                    | AA                              | TT                 | TT               | INTERGENIC                    |                    |                                 |
| SNP_85427_A_5788  | NW_004516247.1 | scaffold892 | 5788                    | AA                              | TT                 | TT               | INTERGENIC                    |                    |                                 |
| SNP_85428_A_5818  | NW_004516247.1 | scaffold892 | 5818                    | GG                              | TT                 | TT               | INTERGENIC                    |                    |                                 |
| SNP_85429_A_6008  | NW_004516247.1 | scaffold892 | 6008                    | CC                              | TT                 | TT               | INTERGENIC                    |                    |                                 |
| SNP_85430_A_6325  | NW_004516247.1 | scaffold892 | 6325                    | AA                              | TT                 | TT               | INTERGENIC                    |                    |                                 |
| SNP_85431_A_6439  | NW_004516247.1 | scaffold892 | 6439                    | GG                              | AA                 | AA               | INTERGENIC                    |                    |                                 |
| SNP_85432_A_6559  | NW_004516247.1 | scaffold892 | 6559                    | AA                              | GG                 | GG               | INTERGENIC                    |                    |                                 |
| SNP_85433_A_24948 | NW_004516247.1 | scaffold892 | 24948                   | GG                              | AA                 | AA               | SYNONYMOUS_CODING             | 101512814          | sugar transport protein 10-like |
| SNP_85434_A_24982 | NW_004516247.1 | scaffold892 | 24982                   | CC                              | TT                 | TT               | SYNONYMOUS_CODING             | 101512814          | sugar transport protein 10-like |
| SNP_85435_A_24986 | NW_004516247.1 | scaffold892 | 24986                   | GG                              | AA                 | AA               | NON_SYNONYMOUS_CODING         | 101512814          | sugar transport protein 10-like |
| SNP_85436_A_25182 | NW_004516247.1 | scaffold892 | 25182                   | TT                              | AA                 | AA               | INTRON                        | 101512814          | sugar transport protein 10-like |
| SNP_85437_A_25207 | NW_004516247.1 | scaffold892 | 25207                   | GG                              | AA                 | AA               | INTRON                        | 101512814          | sugar transport protein 10-like |
| SNP_85438_A_25209 | NW_004516247.1 | scaffold892 | 25209                   | TT                              | CC                 | CC               | INTRON                        | 101512814          | sugar transport protein 10-like |
| SNP_85439_A_25260 | NW_004516247.1 | scaffold892 | 25260                   | TT                              | GG                 | GG               | INTRON                        | 101512814          | sugar transport protein 10-like |
| SNP_85440_A_25272 | NW_004516247.1 | scaffold892 | 25272                   | AA                              | GG                 | GG               | INTRON                        | 101512814          | sugar transport protein 10-like |

| SNPs IDs          | Chromosome IDs | Chromosomes | Physical positions (bp) | CDC Frontier (Reference genome) | (Pusa 1103 & HPNB) | (ILWC 46 & LPNB) | Sequence Components of genome | Gene accession IDs | Putative functions              |
|-------------------|----------------|-------------|-------------------------|---------------------------------|--------------------|------------------|-------------------------------|--------------------|---------------------------------|
| SNP_85441_A_25325 | NW_004516247.1 | scaffold892 | 25325                   | TT                              | CC                 | CC               | INTRON                        | 101512814          | sugar transport protein 10-like |
| SNP_85442_A_26350 | NW_004516247.1 | scaffold892 | 26350                   | TT                              | CC                 | CC               | URR                           | 101512814          | sugar transport protein 10-like |
| SNP_85443_A_26357 | NW_004516247.1 | scaffold892 | 26357                   | GG                              | CC                 | CC               | URR                           | 101512814          | sugar transport protein 10-like |
| SNP_85444_A_26483 | NW_004516247.1 | scaffold892 | 26483                   | AA                              | TT                 | TT               | URR                           | 101512814          | sugar transport protein 10-like |
| SNP_85445_A_26493 | NW_004516247.1 | scaffold892 | 26493                   | AA                              | CC                 | CC               | URR                           | 101512814          | sugar transport protein 10-like |
| SNP_85446_A_26500 | NW_004516247.1 | scaffold892 | 26500                   | TT                              | AA                 | AA               | URR                           | 101512814          | sugar transport protein 10-like |
| SNP_85448_A_26640 | NW_004516247.1 | scaffold892 | 26640                   | CC                              | TT                 | TT               | URR                           | 101512814          | sugar transport protein 10-like |
| SNP_85449_A_26678 | NW_004516247.1 | scaffold892 | 26678                   | GG                              | TT                 | TT               | URR                           | 101512814          | sugar transport protein 10-like |
| SNP_85450_A_26679 | NW_004516247.1 | scaffold892 | 26679                   | AA                              | TT                 | TT               | URR                           | 101512814          | sugar transport protein 10-like |
| SNP_85452_A_26725 | NW_004516247.1 | scaffold892 | 26725                   | CC                              | AA                 | AA               | URR                           | 101512814          | sugar transport protein 10-like |
| SNP_85453_A_26800 | NW_004516247.1 | scaffold892 | 26800                   | TT                              | AA                 | AA               | URR                           | 101512814          | sugar transport protein 10-like |
| SNP_85454_A_26856 | NW_004516247.1 | scaffold892 | 26856                   | TT                              | GG                 | GG               | URR                           | 101512814          | sugar transport protein 10-like |
| SNP_85455_A_26871 | NW_004516247.1 | scaffold892 | 26871                   | TT                              | CC                 | CC               | URR                           | 101512814          | sugar transport protein 10-like |
| SNP_85456_A_26890 | NW_004516247.1 | scaffold892 | 26890                   | CC                              | TT                 | TT               | URR                           | 101512814          | sugar transport protein 10-like |
| SNP_85457_A_26964 | NW_004516247.1 | scaffold892 | 26964                   | CC                              | GG                 | GG               | URR                           | 101512814          | sugar transport protein 10-like |
| SNP_85458_A_26975 | NW_004516247.1 | scaffold892 | 26975                   | GG                              | AA                 | AA               | URR                           | 101512814          | sugar transport protein 10-like |
| SNP_85459_A_27181 | NW_004516247.1 | scaffold892 | 27181                   | TT                              | GG                 | GG               | URR                           | 101512814          | sugar transport protein 10-like |
| SNP_85460_A_27270 | NW_004516247.1 | scaffold892 | 27270                   | TT                              | CC                 | CC               | URR                           | 101512814          | sugar transport protein 10-like |
| SNP_85461_A_27315 | NW_004516247.1 | scaffold892 | 27315                   | TT                              | GG                 | GG               | URR                           | 101512814          | sugar transport protein 10-like |
| SNP_85462_A_27376 | NW_004516247.1 | scaffold892 | 27376                   | CC                              | TT                 | TT               | URR                           | 101512814          | sugar transport protein 10-like |
| SNP_85463_A_27389 | NW_004516247.1 | scaffold892 | 27389                   | TT                              | AA                 | AA               | URR                           | 101512814          | sugar transport protein 10-like |
| SNP_85464_A_27431 | NW_004516247.1 | scaffold892 | 27431                   | AA                              | CC                 | CC               | URR                           | 101512814          | sugar transport protein 10-like |

| SNPs IDs          | Chromosome IDs | Chromosomes | Physical positions (bp) | CDC Frontier (Reference genome) | (Pusa 1103 & HPNB) | (ILWC 46 & LPNB) | Sequence Components of genome | Gene accession IDs | Putative functions              |
|-------------------|----------------|-------------|-------------------------|---------------------------------|--------------------|------------------|-------------------------------|--------------------|---------------------------------|
| SNP_85465_A_27491 | NW_004516247.1 | scaffold892 | 27491                   | CC                              | GG                 | GG               | URR                           | 101512814          | sugar transport protein 10-like |
| SNP_85466_A_27603 | NW_004516247.1 | scaffold892 | 27603                   | AA                              | TT                 | TT               | URR                           | 101512814          | sugar transport protein 10-like |
| SNP_85467_A_27605 | NW_004516247.1 | scaffold892 | 27605                   | CC                              | TT                 | TT               | URR                           | 101512814          | sugar transport protein 10-like |
| SNP_85468_A_27680 | NW_004516247.1 | scaffold892 | 27680                   | AA                              | GG                 | GG               | URR                           | 101512814          | sugar transport protein 10-like |
| SNP_85469_A_27719 | NW_004516247.1 | scaffold892 | 27719                   | AA                              | TT                 | TT               | URR                           | 101512814          | sugar transport protein 10-like |
| SNP_85470_A_28128 | NW_004516247.1 | scaffold892 | 28128                   | GG                              | TT                 | TT               | INTERGENIC                    |                    |                                 |
| SNP_85471_A_28212 | NW_004516247.1 | scaffold892 | 28212                   | TT                              | AA                 | AA               | INTERGENIC                    |                    |                                 |
| SNP_85472_A_28262 | NW_004516247.1 | scaffold892 | 28262                   | TT                              | CC                 | CC               | INTERGENIC                    |                    |                                 |
| SNP_85473_A_28419 | NW_004516247.1 | scaffold892 | 28419                   | TT                              | CC                 | CC               | INTERGENIC                    |                    |                                 |
| SNP_85475_A_29952 | NW_004516247.1 | scaffold892 | 29952                   | GG                              | AA                 | AA               | INTERGENIC                    |                    |                                 |
| SNP_85476_A_30275 | NW_004516247.1 | scaffold892 | 30275                   | AA                              | TT                 | TT               | INTERGENIC                    |                    |                                 |
| SNP_85477_A_30331 | NW_004516247.1 | scaffold892 | 30331                   | TT                              | CC                 | CC               | INTERGENIC                    |                    |                                 |
| SNP_85478_A_30377 | NW_004516247.1 | scaffold892 | 30377                   | AA                              | GG                 | GG               | INTERGENIC                    |                    |                                 |
| SNP_85479_A_30395 | NW_004516247.1 | scaffold892 | 30395                   | AA                              | TT                 | TT               | INTERGENIC                    |                    |                                 |
| SNP_85480_A_32554 | NW_004516247.1 | scaffold892 | 32554                   | TT                              | CC                 | CC               | INTERGENIC                    |                    |                                 |
| SNP_85481_A_32627 | NW_004516247.1 | scaffold892 | 32627                   | CC                              | AA                 | AA               | INTERGENIC                    |                    |                                 |
| SNP_85482_A_32663 | NW_004516247.1 | scaffold892 | 32663                   | TT                              | AA                 | AA               | INTERGENIC                    |                    |                                 |
| SNP_85483_A_32700 | NW_004516247.1 | scaffold892 | 32700                   | GG                              | AA                 | AA               | INTERGENIC                    |                    |                                 |
| SNP_85484_A_32752 | NW_004516247.1 | scaffold892 | 32752                   | TT                              | GG                 | GG               | INTERGENIC                    |                    |                                 |
| SNP_85485_A_32804 | NW_004516247.1 | scaffold892 | 32804                   | TT                              | GG                 | GG               | INTERGENIC                    |                    |                                 |
| SNP_85486_A_32884 | NW_004516247.1 | scaffold892 | 32884                   | TT                              | AA                 | AA               | INTERGENIC                    |                    |                                 |
| SNP_85487_A_32939 | NW_004516247.1 | scaffold892 | 32939                   | TT                              | CC                 | CC               | INTERGENIC                    |                    |                                 |

| SNPs IDs          | Chromosome IDs | Chromosomes | Physical positions (bp) | CDC Frontier (Reference genome) | (Pusa 1103 & HPNB) | (ILWC 46 & LPNB) | Sequence genome | Components of | Gene accession IDs             | Putative functions |
|-------------------|----------------|-------------|-------------------------|---------------------------------|--------------------|------------------|-----------------|---------------|--------------------------------|--------------------|
| SNP_85488_A_32969 | NW_004516247.1 | scaffold892 | 32969                   | TT                              | GG                 | GG               | INTERGENIC      |               |                                |                    |
| SNP_85489_A_32976 | NW_004516247.1 | scaffold892 | 32976                   | GG                              | AA                 | AA               | INTERGENIC      |               |                                |                    |
| SNP_85490_A_33008 | NW_004516247.1 | scaffold892 | 33008                   | CC                              | TT                 | TT               | INTERGENIC      |               |                                |                    |
| SNP_85491_A_33015 | NW_004516247.1 | scaffold892 | 33015                   | TT                              | CC                 | CC               | INTERGENIC      |               |                                |                    |
| SNP_85492_A_33017 | NW_004516247.1 | scaffold892 | 33017                   | AA                              | CC                 | CC               | INTERGENIC      |               |                                |                    |
| SNP_85493_A_33068 | NW_004516247.1 | scaffold892 | 33068                   | GG                              | CC                 | CC               | INTERGENIC      |               |                                |                    |
| SNP_85494_A_33137 | NW_004516247.1 | scaffold892 | 33137                   | TT                              | GG                 | GG               | INTERGENIC      |               |                                |                    |
| SNP_85495_A_33159 | NW_004516247.1 | scaffold892 | 33159                   | TT                              | AA                 | AA               | INTERGENIC      |               |                                |                    |
| SNP_85496_A_33161 | NW_004516247.1 | scaffold892 | 33161                   | TT                              | GG                 | GG               | INTERGENIC      |               |                                |                    |
| SNP_85497_A_33178 | NW_004516247.1 | scaffold892 | 33178                   | TT                              | CC                 | CC               | INTERGENIC      |               |                                |                    |
| SNP_85498_A_33192 | NW_004516247.1 | scaffold892 | 33192                   | AA                              | GG                 | GG               | INTERGENIC      |               |                                |                    |
| SNP_85499_A_33216 | NW_004516247.1 | scaffold892 | 33216                   | GG                              | AA                 | AA               | INTERGENIC      |               |                                |                    |
| SNP_85500_A_33217 | NW_004516247.1 | scaffold892 | 33217                   | GG                              | TT                 | TT               | INTERGENIC      |               |                                |                    |
| SNP_85501_A_33261 | NW_004516247.1 | scaffold892 | 33261                   | TT                              | CC                 | CC               | INTERGENIC      |               |                                |                    |
| SNP_85502_A_33295 | NW_004516247.1 | scaffold892 | 33295                   | GG                              | AA                 | AA               | INTERGENIC      |               |                                |                    |
| SNP_85503_A_33310 | NW_004516247.1 | scaffold892 | 33310                   | TT                              | CC                 | CC               | INTERGENIC      |               |                                |                    |
| SNP_85504_A_33391 | NW_004516247.1 | scaffold892 | 33391                   | TT                              | AA                 | AA               | INTERGENIC      |               |                                |                    |
| SNP_85505_A_33539 | NW_004516247.1 | scaffold892 | 33539                   | TT                              | CC                 | CC               | INTERGENIC      |               |                                |                    |
| SNP_85508_A_33888 | NW_004516247.1 | scaffold892 | 33888                   | CC                              | TT                 | TT               | INTERGENIC      |               |                                |                    |
| SNP_85509_A_33923 | NW_004516247.1 | scaffold892 | 33923                   | CC                              | TT                 | TT               | INTERGENIC      |               |                                |                    |
| SNP_85510_A_34187 | NW_004516247.1 | scaffold892 | 34187                   | GG                              | TT                 | TT               | DRR             | 101513144     | sugar transport protein 4-like |                    |
| SNP_85511_A_34244 | NW_004516247.1 | scaffold892 | 34244                   | AA                              | TT                 | TT               | DRR             | 101513144     | sugar transport protein 4-like |                    |

| SNPs IDs          | Chromosome IDs | Chromosomes | Physical positions (bp) | CDC Frontier (Reference genome) | (Pusa 1103 & HPNB) | (ILWC 46 & LPNB) | Sequence Components of genome | Gene accession IDs | Putative functions             |
|-------------------|----------------|-------------|-------------------------|---------------------------------|--------------------|------------------|-------------------------------|--------------------|--------------------------------|
| SNP_85512_A_34329 | NW_004516247.1 | scaffold892 | 34329                   | TT                              | CC                 | CC               | DRR                           | 101513144          | sugar transport protein 4-like |
| SNP_85513_A_34412 | NW_004516247.1 | scaffold892 | 34412                   | GG                              | AA                 | AA               | DRR                           | 101513144          | sugar transport protein 4-like |
| SNP_85514_A_34435 | NW_004516247.1 | scaffold892 | 34435                   | TT                              | GG                 | GG               | DRR                           | 101513144          | sugar transport protein 4-like |
| SNP_85515_A_34570 | NW_004516247.1 | scaffold892 | 34570                   | TT                              | CC                 | CC               | DRR                           | 101513144          | sugar transport protein 4-like |
| SNP_85516_A_34581 | NW_004516247.1 | scaffold892 | 34581                   | AA                              | GG                 | GG               | DRR                           | 101513144          | sugar transport protein 4-like |
| SNP_85517_A_34588 | NW_004516247.1 | scaffold892 | 34588                   | GG                              | CC                 | CC               | DRR                           | 101513144          | sugar transport protein 4-like |
| SNP_85518_A_34615 | NW_004516247.1 | scaffold892 | 34615                   | AA                              | GG                 | GG               | DRR                           | 101513144          | sugar transport protein 4-like |
| SNP_85519_A_34630 | NW_004516247.1 | scaffold892 | 34630                   | TT                              | AA                 | AA               | DRR                           | 101513144          | sugar transport protein 4-like |
| SNP_85520_A_34702 | NW_004516247.1 | scaffold892 | 34702                   | CC                              | TT                 | TT               | DRR                           | 101513144          | sugar transport protein 4-like |
| SNP_85521_A_34703 | NW_004516247.1 | scaffold892 | 34703                   | CC                              | TT                 | TT               | DRR                           | 101513144          | sugar transport protein 4-like |
| SNP_85522_A_35109 | NW_004516247.1 | scaffold892 | 35109                   | AA                              | CC                 | CC               | DRR                           | 101513144          | sugar transport protein 4-like |
| SNP_85523_A_35219 | NW_004516247.1 | scaffold892 | 35219                   | GG                              | AA                 | AA               | SYNONYMOUS_CODING             | 101513144          | sugar transport protein 4-like |
| SNP_85524_A_35222 | NW_004516247.1 | scaffold892 | 35222                   | CC                              | AA                 | AA               | NON_SYNONYMOUS_CODING         | 101513144          | sugar transport protein 4-like |
| SNP_85525_A_36821 | NW_004516247.1 | scaffold892 | 36821                   | GG                              | AA                 | AA               | URR                           | 101513144          | sugar transport protein 4-like |
| SNP_85526_A_37080 | NW_004516247.1 | scaffold892 | 37080                   | CC                              | GG                 | GG               | URR                           | 101513144          | sugar transport protein 4-like |
| SNP_85527_A_37265 | NW_004516247.1 | scaffold892 | 37265                   | GG                              | AA                 | AA               | URR                           | 101513144          | sugar transport protein 4-like |
| SNP_85528_A_38045 | NW_004516247.1 | scaffold892 | 38045                   | GG                              | TT                 | TT               | INTERGENIC                    |                    |                                |
| SNP_85529_A_38060 | NW_004516247.1 | scaffold892 | 38060                   | TT                              | AA                 | AA               | INTERGENIC                    |                    |                                |
| SNP_85531_A_38496 | NW_004516247.1 | scaffold892 | 38496                   | CC                              | TT                 | TT               | INTERGENIC                    |                    |                                |
| SNP_85532_A_38793 | NW_004516247.1 | scaffold892 | 38793                   | TT                              | CC                 | CC               | INTERGENIC                    |                    |                                |
| SNP_85533_A_38942 | NW_004516247.1 | scaffold892 | 38942                   | TT                              | GG                 | GG               | INTERGENIC                    |                    |                                |
| SNP_85534_A_40471 | NW_004516247.1 | scaffold892 | 40471                   | TT                              | CC                 | CC               | INTERGENIC                    |                    |                                |



| SNPs IDs          | Chromosome IDs | Chromosomes | Physical positions (bp) | CDC Frontier (Reference genome) | (Pusa 1103 & HPNB) | (ILWC 46 & LPNB) | Sequence genome | Components of | Gene accession IDs | Putative functions |
|-------------------|----------------|-------------|-------------------------|---------------------------------|--------------------|------------------|-----------------|---------------|--------------------|--------------------|
| SNP_85535_A_40713 | NW_004516247.1 | scaffold892 | 40713                   | TT                              | AA                 | AA               | INTERGENIC      |               |                    |                    |
| SNP_85536_A_42514 | NW_004516247.1 | scaffold892 | 42514                   | AA                              | GG                 | GG               | INTERGENIC      |               |                    |                    |
| SNP_85538_A_44009 | NW_004516247.1 | scaffold892 | 44009                   | TT                              | CC                 | CC               | INTERGENIC      |               |                    |                    |
| SNP_85539_A_44197 | NW_004516247.1 | scaffold892 | 44197                   | AA                              | TT                 | TT               | INTERGENIC      |               |                    |                    |
| SNP_85541_A_44478 | NW_004516247.1 | scaffold892 | 44478                   | AA                              | GG                 | GG               | INTERGENIC      |               |                    |                    |
| SNP_85542_A_46301 | NW_004516247.1 | scaffold892 | 46301                   | TT                              | GG                 | GG               | INTERGENIC      |               |                    |                    |
| SNP_85543_A_46668 | NW_004516247.1 | scaffold892 | 46668                   | TT                              | CC                 | CC               | INTERGENIC      |               |                    |                    |
| SNP_85544_A_50685 | NW_004516247.1 | scaffold892 | 50685                   | AA                              | GG                 | GG               | INTERGENIC      |               |                    |                    |
| SNP_85546_A_59657 | NW_004516247.1 | scaffold892 | 59657                   | CC                              | TT                 | TT               | INTERGENIC      |               |                    |                    |
| SNP_85548_A_60741 | NW_004516247.1 | scaffold892 | 60741                   | AA                              | GG                 | GG               | INTERGENIC      |               |                    |                    |
| SNP_85549_A_1353  | NW_004516248.1 | scaffold893 | 1353                    | GG                              | AA                 | AA               | INTERGENIC      |               |                    |                    |
| SNP_85550_A_1552  | NW_004516248.1 | scaffold893 | 1552                    | CC                              | TT                 | TT               | INTERGENIC      |               |                    |                    |
| SNP_85551_A_1633  | NW_004516248.1 | scaffold893 | 1633                    | AA                              | TT                 | CC               | INTERGENIC      |               |                    |                    |
| SNP_85552_A_1634  | NW_004516248.1 | scaffold893 | 1634                    | AA                              | GG                 | GG               | INTERGENIC      |               |                    |                    |
| SNP_85553_A_1637  | NW_004516248.1 | scaffold893 | 1637                    | AA                              | GG                 | GG               | INTERGENIC      |               |                    |                    |
| SNP_85554_A_1849  | NW_004516248.1 | scaffold893 | 1849                    | AA                              | TT                 | TT               | INTERGENIC      |               |                    |                    |
| SNP_85555_A_1862  | NW_004516248.1 | scaffold893 | 1862                    | TT                              | CC                 | CC               | INTERGENIC      |               |                    |                    |
| SNP_85556_A_1872  | NW_004516248.1 | scaffold893 | 1872                    | TT                              | AA                 | AA               | INTERGENIC      |               |                    |                    |
| SNP_85557_A_1884  | NW_004516248.1 | scaffold893 | 1884                    | GG                              | AA                 | AA               | INTERGENIC      |               |                    |                    |
| SNP_85558_A_1894  | NW_004516248.1 | scaffold893 | 1894                    | TT                              | CC                 | CC               | INTERGENIC      |               |                    |                    |
| SNP_85559_A_2222  | NW_004516248.1 | scaffold893 | 2222                    | GG                              | AA                 | AA               | INTERGENIC      |               |                    |                    |
| SNP_85560_A_2247  | NW_004516248.1 | scaffold893 | 2247                    | TT                              | GG                 | GG               | INTERGENIC      |               |                    |                    |

| SNPs IDs           | Chromosome IDs | Chromosomes | Physical positions (bp) | CDC Frontier genome (Reference genome) | (Pusa 1103 & HPNB) | (ILWC 46 & LPNB) | Sequence genome | Components of | Gene accession IDs                                                        | Putative functions |
|--------------------|----------------|-------------|-------------------------|----------------------------------------|--------------------|------------------|-----------------|---------------|---------------------------------------------------------------------------|--------------------|
| SNP_85561_A_2328   | NW_004516248.1 | scaffold893 | 2328                    | AA                                     | GG                 | GG               | INTERGENIC      |               |                                                                           |                    |
| SNP_85562_A_2349   | NW_004516248.1 | scaffold893 | 2349                    | CC                                     | TT                 | TT               | INTERGENIC      |               |                                                                           |                    |
| SNP_85563_A_2361   | NW_004516248.1 | scaffold893 | 2361                    | GG                                     | TT                 | TT               | INTERGENIC      |               |                                                                           |                    |
| SNP_85564_A_2367   | NW_004516248.1 | scaffold893 | 2367                    | AA                                     | CC                 | CC               | INTERGENIC      |               |                                                                           |                    |
| SNP_85565_A_2377   | NW_004516248.1 | scaffold893 | 2377                    | TT                                     | CC                 | CC               | INTERGENIC      |               |                                                                           |                    |
| SNP_85566_A_2380   | NW_004516248.1 | scaffold893 | 2380                    | CC                                     | TT                 | TT               | INTERGENIC      |               |                                                                           |                    |
| SNP_85567_A_2426   | NW_004516248.1 | scaffold893 | 2426                    | AA                                     | GG                 | GG               | INTERGENIC      |               |                                                                           |                    |
| SNP_85568_A_2427   | NW_004516248.1 | scaffold893 | 2427                    | TT                                     | CC                 | CC               | INTERGENIC      |               |                                                                           |                    |
| SNP_85569_A_2434   | NW_004516248.1 | scaffold893 | 2434                    | TT                                     | CC                 | CC               | INTERGENIC      |               |                                                                           |                    |
| SNP_85570_A_2459   | NW_004516248.1 | scaffold893 | 2459                    | TT                                     | CC                 | CC               | INTERGENIC      |               |                                                                           |                    |
| SNP_85572_A_9816   | NW_004516248.1 | scaffold893 | 9816                    | CC                                     | AA                 | AA               | INTERGENIC      |               |                                                                           |                    |
| SNP_85573_A_10322  | NW_004516248.1 | scaffold893 | 10322                   | AA                                     | CC                 | CC               | INTERGENIC      |               |                                                                           |                    |
| SNP_85574_A_10326  | NW_004516248.1 | scaffold893 | 10326                   | GG                                     | AA                 | AA               | INTERGENIC      |               |                                                                           |                    |
| SNP_85575_A_10861  | NW_004516248.1 | scaffold893 | 10861                   | AA                                     | GG                 | GG               | INTERGENIC      |               |                                                                           |                    |
| SNP_85577_A_20500  | NW_004516248.1 | scaffold893 | 20500                   | CC                                     | TT                 | TT               | INTERGENIC      |               |                                                                           |                    |
| SNP_85578_A_21039  | NW_004516248.1 | scaffold893 | 21039                   | AA                                     | TT                 | TT               | INTERGENIC      |               |                                                                           |                    |
| SNP_85579_A_21040  | NW_004516248.1 | scaffold893 | 21040                   | GG                                     | TT                 | TT               | INTERGENIC      |               |                                                                           |                    |
| SNP_85580_A_21131  | NW_004516248.1 | scaffold893 | 21131                   | GG                                     | AA                 | AA               | INTERGENIC      |               |                                                                           |                    |
| SNP_85581_A_73854  | NW_004516250.1 | scaffold895 | 73854                   | GG                                     | AA                 | AA               | INTERGENIC      |               |                                                                           |                    |
| SNP_85582_A_83689  | NW_004516250.1 | scaffold895 | 83689                   | TT                                     | CC                 | CC               | URR             | 101515322     | beta-glucosidase 12-like                                                  |                    |
| SNP_85584_A_107670 | NW_004516250.1 | scaffold895 | 107670                  | GG                                     | TT                 | TT               | INTRON          | 101489175     | pentatricopeptide repeat-containing protein At3g22470, mitochondrial-like |                    |
| SNP_85585_A_107768 | NW_004516250.1 | scaffold895 | 107768                  | AA                                     | GG                 | GG               | INTRON          | 101489175     | pentatricopeptide repeat-containing protein At3g22470, mitochondrial-like |                    |

| SNPs IDs           | Chromosome IDs | Chromosomes | Physical positions (bp) | CDC Frontier (Reference genome) | (Pusa 1103 & HPNB) | (ILWC 46 & LPNB) | Sequence Components of genome | Gene accession IDs | Putative functions                                                        |
|--------------------|----------------|-------------|-------------------------|---------------------------------|--------------------|------------------|-------------------------------|--------------------|---------------------------------------------------------------------------|
| SNP_85586_A_110097 | NW_004516250.1 | scaffold895 | 110097                  | TT                              | GG                 | GG               | URR                           | 101488960          | uncharacterized LOC101488960                                              |
| SNP_85587_A_115870 | NW_004516250.1 | scaffold895 | 115870                  | CC                              | AA                 | AA               | URR                           | 101489175          | pentatricopeptide repeat-containing protein At3g22470, mitochondrial-like |
| SNP_85588_A_115874 | NW_004516250.1 | scaffold895 | 115874                  | GG                              | TT                 | TT               | URR                           | 101489175          | pentatricopeptide repeat-containing protein At3g22470, mitochondrial-like |
| SNP_85589_A_115888 | NW_004516250.1 | scaffold895 | 115888                  | TT                              | AA                 | AA               | URR                           | 101489175          | pentatricopeptide repeat-containing protein At3g22470, mitochondrial-like |
| SNP_85590_A_127149 | NW_004516250.1 | scaffold895 | 127149                  | CC                              | TT                 | TT               | INTERGENIC                    |                    |                                                                           |
| SNP_85591_A_145841 | NW_004516250.1 | scaffold895 | 145841                  | GG                              | TT                 | TT               | INTERGENIC                    |                    |                                                                           |
| SNP_85592_A_3139   | NW_004516251.1 | scaffold896 | 3139                    | GG                              | CC                 | CC               | INTERGENIC                    |                    |                                                                           |
| SNP_85595_A_14484  | NW_004516251.1 | scaffold896 | 14484                   | CC                              | TT                 | TT               | INTERGENIC                    |                    |                                                                           |
| SNP_85596_A_14512  | NW_004516251.1 | scaffold896 | 14512                   | AA                              | GG                 | GG               | INTERGENIC                    |                    |                                                                           |
| SNP_85597_A_14514  | NW_004516251.1 | scaffold896 | 14514                   | TT                              | AA                 | AA               | INTERGENIC                    |                    |                                                                           |
| SNP_85598_A_14622  | NW_004516251.1 | scaffold896 | 14622                   | TT                              | CC                 | CC               | INTERGENIC                    |                    |                                                                           |
| SNP_85599_A_14625  | NW_004516251.1 | scaffold896 | 14625                   | TT                              | CC                 | CC               | INTERGENIC                    |                    |                                                                           |
| SNP_85601_A_14687  | NW_004516251.1 | scaffold896 | 14687                   | TT                              | CC                 | CC               | INTERGENIC                    |                    |                                                                           |
| SNP_85602_A_14691  | NW_004516251.1 | scaffold896 | 14691                   | TT                              | CC                 | CC               | INTERGENIC                    |                    |                                                                           |
| SNP_85603_A_14722  | NW_004516251.1 | scaffold896 | 14722                   | TT                              | CC                 | CC               | INTERGENIC                    |                    |                                                                           |
| SNP_85604_A_14800  | NW_004516251.1 | scaffold896 | 14800                   | CC                              | TT                 | TT               | INTERGENIC                    |                    |                                                                           |
| SNP_85605_A_14807  | NW_004516251.1 | scaffold896 | 14807                   | TT                              | CC                 | CC               | INTERGENIC                    |                    |                                                                           |
| SNP_85606_A_14817  | NW_004516251.1 | scaffold896 | 14817                   | CC                              | GG                 | GG               | INTERGENIC                    |                    |                                                                           |
| SNP_85607_A_15566  | NW_004516251.1 | scaffold896 | 15566                   | CC                              | TT                 | TT               | INTERGENIC                    |                    |                                                                           |
| SNP_85608_A_15580  | NW_004516251.1 | scaffold896 | 15580                   | GG                              | AA                 | AA               | INTERGENIC                    |                    |                                                                           |
| SNP_85609_A_15584  | NW_004516251.1 | scaffold896 | 15584                   | GG                              | AA                 | AA               | INTERGENIC                    |                    |                                                                           |
| SNP_85610_A_15604  | NW_004516251.1 | scaffold896 | 15604                   | TT                              | CC                 | CC               | INTERGENIC                    |                    |                                                                           |

| SNPs IDs          | Chromosome IDs | Chromosomes | Physical positions (bp) | CDC Frontier (Reference genome) | (Pusa 1103 & HPNB) | (ILWC 46 & LPNB) | Sequence genome | Components of | Gene accession IDs | Putative functions |
|-------------------|----------------|-------------|-------------------------|---------------------------------|--------------------|------------------|-----------------|---------------|--------------------|--------------------|
| SNP_85611_A_15614 | NW_004516251.1 | scaffold896 | 15614                   | TT                              | CC                 | CC               | INTERGENIC      |               |                    |                    |
| SNP_85612_A_15665 | NW_004516251.1 | scaffold896 | 15665                   | CC                              | AA                 | AA               | INTERGENIC      |               |                    |                    |
| SNP_85613_A_15676 | NW_004516251.1 | scaffold896 | 15676                   | AA                              | GG                 | GG               | INTERGENIC      |               |                    |                    |
| SNP_85614_A_15700 | NW_004516251.1 | scaffold896 | 15700                   | TT                              | CC                 | CC               | INTERGENIC      |               |                    |                    |
| SNP_85615_A_15731 | NW_004516251.1 | scaffold896 | 15731                   | AA                              | GG                 | GG               | INTERGENIC      |               |                    |                    |
| SNP_85616_A_22192 | NW_004516251.1 | scaffold896 | 22192                   | TT                              | GG                 | GG               | INTERGENIC      |               |                    |                    |
| SNP_85617_A_22197 | NW_004516251.1 | scaffold896 | 22197                   | AA                              | TT                 | TT               | INTERGENIC      |               |                    |                    |
| SNP_85618_A_22546 | NW_004516251.1 | scaffold896 | 22546                   | AA                              | GG                 | GG               | INTERGENIC      |               |                    |                    |
| SNP_85619_A_22549 | NW_004516251.1 | scaffold896 | 22549                   | CC                              | GG                 | GG               | INTERGENIC      |               |                    |                    |
| SNP_85620_A_22584 | NW_004516251.1 | scaffold896 | 22584                   | GG                              | TT                 | TT               | INTERGENIC      |               |                    |                    |
| SNP_85621_A_38176 | NW_004516251.1 | scaffold896 | 38176                   | AA                              | CC                 | CC               | INTERGENIC      |               |                    |                    |
| SNP_85623_A_49258 | NW_004516251.1 | scaffold896 | 49258                   | AA                              | CC                 | CC               | INTERGENIC      |               |                    |                    |
| SNP_85624_A_49260 | NW_004516251.1 | scaffold896 | 49260                   | AA                              | GG                 | GG               | INTERGENIC      |               |                    |                    |
| SNP_85625_A_49261 | NW_004516251.1 | scaffold896 | 49261                   | TT                              | AA                 | AA               | INTERGENIC      |               |                    |                    |
| SNP_85626_A_49274 | NW_004516251.1 | scaffold896 | 49274                   | GG                              | TT                 | TT               | INTERGENIC      |               |                    |                    |
| SNP_85627_A_57359 | NW_004516251.1 | scaffold896 | 57359                   | TT                              | CC                 | CC               | INTERGENIC      |               |                    |                    |
| SNP_85628_A_57360 | NW_004516251.1 | scaffold896 | 57360                   | AA                              | CC                 | CC               | INTERGENIC      |               |                    |                    |
| SNP_85629_A_57362 | NW_004516251.1 | scaffold896 | 57362                   | AA                              | TT                 | TT               | INTERGENIC      |               |                    |                    |
| SNP_85630_A_57367 | NW_004516251.1 | scaffold896 | 57367                   | GG                              | AA                 | AA               | INTERGENIC      |               |                    |                    |
| SNP_85631_A_57376 | NW_004516251.1 | scaffold896 | 57376                   | TT                              | AA                 | AA               | INTERGENIC      |               |                    |                    |
| SNP_85632_A_58906 | NW_004516251.1 | scaffold896 | 58906                   | GG                              | TT                 | TT               | INTERGENIC      |               |                    |                    |
| SNP_85633_A_63054 | NW_004516251.1 | scaffold896 | 63054                   | GG                              | AA                 | AA               | INTERGENIC      |               |                    |                    |

| SNPs IDs          | Chromosome IDs | Chromosomes | Physical positions (bp) | CDC Frontier (Reference genome) | (Pusa 1103 & HPNB) | (ILWC 46 & LPNB) | Sequence genome | Components of | Gene accession IDs | Putative functions |
|-------------------|----------------|-------------|-------------------------|---------------------------------|--------------------|------------------|-----------------|---------------|--------------------|--------------------|
| SNP_85634_A_63390 | NW_004516251.1 | scaffold896 | 63390                   | CC                              | TT                 | TT               | INTERGENIC      |               |                    |                    |
| SNP_85635_A_63655 | NW_004516251.1 | scaffold896 | 63655                   | CC                              | TT                 | TT               | INTERGENIC      |               |                    |                    |
| SNP_85637_A_27653 | NW_004516253.1 | scaffold898 | 27653                   | TT                              | CC                 | CC               | INTERGENIC      |               |                    |                    |
| SNP_85639_A_27677 | NW_004516253.1 | scaffold898 | 27677                   | CC                              | TT                 | TT               | INTERGENIC      |               |                    |                    |
| SNP_85640_A_248   | NW_004516255.1 | scaffold900 | 248                     | TT                              | CC                 | CC               | INTERGENIC      |               |                    |                    |
| SNP_85642_A_13444 | NW_004516255.1 | scaffold900 | 13444                   | CC                              | TT                 | TT               | INTERGENIC      |               |                    |                    |
| SNP_85643_A_13499 | NW_004516255.1 | scaffold900 | 13499                   | TT                              | AA                 | AA               | INTERGENIC      |               |                    |                    |
| SNP_85644_A_13529 | NW_004516255.1 | scaffold900 | 13529                   | GG                              | AA                 | AA               | INTERGENIC      |               |                    |                    |
| SNP_85645_A_13761 | NW_004516255.1 | scaffold900 | 13761                   | AA                              | TT                 | TT               | INTERGENIC      |               |                    |                    |
| SNP_85646_A_13785 | NW_004516255.1 | scaffold900 | 13785                   | CC                              | TT                 | TT               | INTERGENIC      |               |                    |                    |
| SNP_85647_A_13786 | NW_004516255.1 | scaffold900 | 13786                   | CC                              | TT                 | TT               | INTERGENIC      |               |                    |                    |
| SNP_85648_A_13795 | NW_004516255.1 | scaffold900 | 13795                   | GG                              | AA                 | AA               | INTERGENIC      |               |                    |                    |
| SNP_85649_A_13812 | NW_004516255.1 | scaffold900 | 13812                   | AA                              | CC                 | CC               | INTERGENIC      |               |                    |                    |
| SNP_85650_A_14880 | NW_004516255.1 | scaffold900 | 14880                   | TT                              | CC                 | CC               | INTERGENIC      |               |                    |                    |
| SNP_85651_A_15031 | NW_004516255.1 | scaffold900 | 15031                   | GG                              | CC                 | CC               | INTERGENIC      |               |                    |                    |
| SNP_85652_A_22681 | NW_004516255.1 | scaffold900 | 22681                   | TT                              | CC                 | CC               | INTERGENIC      |               |                    |                    |
| SNP_85653_A_29357 | NW_004516255.1 | scaffold900 | 29357                   | TT                              | CC                 | CC               | INTERGENIC      |               |                    |                    |
| SNP_85654_A_29495 | NW_004516255.1 | scaffold900 | 29495                   | GG                              | AA                 | AA               | INTERGENIC      |               |                    |                    |
| SNP_85655_A_29543 | NW_004516255.1 | scaffold900 | 29543                   | TT                              | AA                 | AA               | INTERGENIC      |               |                    |                    |
| SNP_85656_A_29604 | NW_004516255.1 | scaffold900 | 29604                   | CC                              | TT                 | TT               | INTERGENIC      |               |                    |                    |
| SNP_85657_A_29633 | NW_004516255.1 | scaffold900 | 29633                   | GG                              | TT                 | TT               | INTERGENIC      |               |                    |                    |
| SNP_85658_A_29648 | NW_004516255.1 | scaffold900 | 29648                   | CC                              | TT                 | TT               | INTERGENIC      |               |                    |                    |

| SNPs IDs          | Chromosome IDs | Chromosomes | Physical positions (bp) | CDC Frontier (Reference genome) | (Pusa 1103 & HPNB) | (ILWC 46 & LPNB) | Sequence genome | Components of | Gene accession IDs | Putative functions |
|-------------------|----------------|-------------|-------------------------|---------------------------------|--------------------|------------------|-----------------|---------------|--------------------|--------------------|
| SNP_85659_A_29667 | NW_004516255.1 | scaffold900 | 29667                   | TT                              | CC                 | CC               | INTERGENIC      |               |                    |                    |
| SNP_85660_A_36557 | NW_004516255.1 | scaffold900 | 36557                   | CC                              | GG                 | GG               | INTERGENIC      |               |                    |                    |
| SNP_85661_A_36680 | NW_004516255.1 | scaffold900 | 36680                   | AA                              | TT                 | TT               | INTERGENIC      |               |                    |                    |
| SNP_85662_A_36681 | NW_004516255.1 | scaffold900 | 36681                   | CC                              | TT                 | TT               | INTERGENIC      |               |                    |                    |
| SNP_85663_A_36889 | NW_004516255.1 | scaffold900 | 36889                   | TT                              | CC                 | CC               | INTERGENIC      |               |                    |                    |
| SNP_85664_A_36924 | NW_004516255.1 | scaffold900 | 36924                   | GG                              | AA                 | AA               | INTERGENIC      |               |                    |                    |
| SNP_85665_A_36968 | NW_004516255.1 | scaffold900 | 36968                   | AA                              | CC                 | CC               | INTERGENIC      |               |                    |                    |
| SNP_85666_A_36971 | NW_004516255.1 | scaffold900 | 36971                   | GG                              | TT                 | TT               | INTERGENIC      |               |                    |                    |
| SNP_85667_A_36981 | NW_004516255.1 | scaffold900 | 36981                   | TT                              | AA                 | AA               | INTERGENIC      |               |                    |                    |
| SNP_85668_A_37025 | NW_004516255.1 | scaffold900 | 37025                   | GG                              | CC                 | CC               | INTERGENIC      |               |                    |                    |
| SNP_85669_A_39140 | NW_004516255.1 | scaffold900 | 39140                   | TT                              | CC                 | CC               | INTERGENIC      |               |                    |                    |
| SNP_85670_A_41397 | NW_004516255.1 | scaffold900 | 41397                   | TT                              | GG                 | GG               | INTERGENIC      |               |                    |                    |
| SNP_85671_A_41421 | NW_004516255.1 | scaffold900 | 41421                   | TT                              | CC                 | CC               | INTERGENIC      |               |                    |                    |
| SNP_85672_A_41442 | NW_004516255.1 | scaffold900 | 41442                   | CC                              | TT                 | TT               | INTERGENIC      |               |                    |                    |
| SNP_85673_A_41496 | NW_004516255.1 | scaffold900 | 41496                   | AA                              | CC                 | CC               | INTERGENIC      |               |                    |                    |
| SNP_85674_A_41527 | NW_004516255.1 | scaffold900 | 41527                   | TT                              | AA                 | AA               | INTERGENIC      |               |                    |                    |
| SNP_85675_A_41576 | NW_004516255.1 | scaffold900 | 41576                   | GG                              | TT                 | TT               | INTERGENIC      |               |                    |                    |
| SNP_85676_A_41616 | NW_004516255.1 | scaffold900 | 41616                   | TT                              | CC                 | CC               | INTERGENIC      |               |                    |                    |
| SNP_85677_A_41666 | NW_004516255.1 | scaffold900 | 41666                   | GG                              | CC                 | CC               | INTERGENIC      |               |                    |                    |
| SNP_85678_A_41714 | NW_004516255.1 | scaffold900 | 41714                   | GG                              | CC                 | CC               | INTERGENIC      |               |                    |                    |
| SNP_85679_A_41768 | NW_004516255.1 | scaffold900 | 41768                   | TT                              | AA                 | AA               | INTERGENIC      |               |                    |                    |
| SNP_85680_A_41789 | NW_004516255.1 | scaffold900 | 41789                   | TT                              | CC                 | CC               | INTERGENIC      |               |                    |                    |

| SNPs IDs          | Chromosome IDs | Chromosomes | Physical positions (bp) | CDC Frontier (Reference genome) | (Pusa 1103 & HPNB) | (ILWC 46 & LPNB) | Sequence genome | Components of | Gene accession IDs | Putative functions |
|-------------------|----------------|-------------|-------------------------|---------------------------------|--------------------|------------------|-----------------|---------------|--------------------|--------------------|
| SNP_85681_A_41821 | NW_004516255.1 | scaffold900 | 41821                   | TT                              | GG                 | GG               | INTERGENIC      |               |                    |                    |
| SNP_85682_A_42089 | NW_004516255.1 | scaffold900 | 42089                   | CC                              | TT                 | TT               | INTERGENIC      |               |                    |                    |
| SNP_85683_A_42130 | NW_004516255.1 | scaffold900 | 42130                   | GG                              | CC                 | CC               | INTERGENIC      |               |                    |                    |
| SNP_85684_A_42138 | NW_004516255.1 | scaffold900 | 42138                   | AA                              | GG                 | GG               | INTERGENIC      |               |                    |                    |
| SNP_85685_A_42183 | NW_004516255.1 | scaffold900 | 42183                   | TT                              | CC                 | CC               | INTERGENIC      |               |                    |                    |
| SNP_85686_A_42285 | NW_004516255.1 | scaffold900 | 42285                   | TT                              | AA                 | AA               | INTERGENIC      |               |                    |                    |
| SNP_85687_A_42349 | NW_004516255.1 | scaffold900 | 42349                   | TT                              | AA                 | AA               | INTERGENIC      |               |                    |                    |
| SNP_85688_A_42419 | NW_004516255.1 | scaffold900 | 42419                   | GG                              | TT                 | TT               | INTERGENIC      |               |                    |                    |
| SNP_85689_A_42432 | NW_004516255.1 | scaffold900 | 42432                   | AA                              | TT                 | TT               | INTERGENIC      |               |                    |                    |
| SNP_85690_A_42536 | NW_004516255.1 | scaffold900 | 42536                   | AA                              | GG                 | GG               | INTERGENIC      |               |                    |                    |
| SNP_85691_A_42537 | NW_004516255.1 | scaffold900 | 42537                   | GG                              | TT                 | TT               | INTERGENIC      |               |                    |                    |
| SNP_85692_A_42732 | NW_004516255.1 | scaffold900 | 42732                   | CC                              | TT                 | TT               | INTERGENIC      |               |                    |                    |
| SNP_85693_A_42734 | NW_004516255.1 | scaffold900 | 42734                   | GG                              | TT                 | TT               | INTERGENIC      |               |                    |                    |
| SNP_85694_A_42786 | NW_004516255.1 | scaffold900 | 42786                   | CC                              | GG                 | GG               | INTERGENIC      |               |                    |                    |
| SNP_85695_A_42901 | NW_004516255.1 | scaffold900 | 42901                   | TT                              | AA                 | AA               | INTERGENIC      |               |                    |                    |
| SNP_85696_A_42989 | NW_004516255.1 | scaffold900 | 42989                   | GG                              | CC                 | CC               | INTERGENIC      |               |                    |                    |
| SNP_85697_A_43377 | NW_004516255.1 | scaffold900 | 43377                   | GG                              | TT                 | TT               | INTERGENIC      |               |                    |                    |
| SNP_85698_A_45462 | NW_004516255.1 | scaffold900 | 45462                   | TT                              | AA                 | AA               | INTERGENIC      |               |                    |                    |
| SNP_85699_A_45463 | NW_004516255.1 | scaffold900 | 45463                   | GG                              | AA                 | AA               | INTERGENIC      |               |                    |                    |
| SNP_85700_A_45533 | NW_004516255.1 | scaffold900 | 45533                   | TT                              | GG                 | GG               | INTERGENIC      |               |                    |                    |
| SNP_85701_A_46918 | NW_004516255.1 | scaffold900 | 46918                   | GG                              | TT                 | TT               | INTERGENIC      |               |                    |                    |
| SNP_85702_A_46989 | NW_004516255.1 | scaffold900 | 46989                   | CC                              | TT                 | TT               | INTERGENIC      |               |                    |                    |

| SNPs IDs          | Chromosome IDs | Chromosomes | Physical positions (bp) | CDC Frontier (Reference genome) | (Pusa 1103 & HPNB) | (ILWC 46 & LPNB) | Sequence genome | Components of | Gene accession IDs | Putative functions |
|-------------------|----------------|-------------|-------------------------|---------------------------------|--------------------|------------------|-----------------|---------------|--------------------|--------------------|
| SNP_85703_A_47149 | NW_004516255.1 | scaffold900 | 47149                   | TT                              | CC                 | CC               | INTERGENIC      |               |                    |                    |
| SNP_85704_A_47193 | NW_004516255.1 | scaffold900 | 47193                   | CC                              | GG                 | GG               | INTERGENIC      |               |                    |                    |
| SNP_85705_A_47407 | NW_004516255.1 | scaffold900 | 47407                   | GG                              | AA                 | AA               | INTERGENIC      |               |                    |                    |
| SNP_85706_A_47428 | NW_004516255.1 | scaffold900 | 47428                   | CC                              | TT                 | TT               | INTERGENIC      |               |                    |                    |
| SNP_85707_A_47430 | NW_004516255.1 | scaffold900 | 47430                   | AA                              | TT                 | TT               | INTERGENIC      |               |                    |                    |
| SNP_85708_A_47441 | NW_004516255.1 | scaffold900 | 47441                   | AA                              | CC                 | CC               | INTERGENIC      |               |                    |                    |
| SNP_85709_A_47672 | NW_004516255.1 | scaffold900 | 47672                   | AA                              | CC                 | CC               | INTERGENIC      |               |                    |                    |
| SNP_85710_A_47889 | NW_004516255.1 | scaffold900 | 47889                   | TT                              | CC                 | CC               | INTERGENIC      |               |                    |                    |
| SNP_85711_A_50194 | NW_004516255.1 | scaffold900 | 50194                   | CC                              | TT                 | TT               | INTERGENIC      |               |                    |                    |
| SNP_85712_A_50907 | NW_004516255.1 | scaffold900 | 50907                   | TT                              | AA                 | AA               | INTERGENIC      |               |                    |                    |
| SNP_85713_A_51241 | NW_004516255.1 | scaffold900 | 51241                   | TT                              | CC                 | CC               | INTERGENIC      |               |                    |                    |
| SNP_85714_A_51320 | NW_004516255.1 | scaffold900 | 51320                   | CC                              | TT                 | TT               | INTERGENIC      |               |                    |                    |
| SNP_85715_A_19857 | NW_004516256.1 | scaffold901 | 19857                   | CC                              | TT                 | TT               | INTERGENIC      |               |                    |                    |
| SNP_85716_A_20250 | NW_004516256.1 | scaffold901 | 20250                   | GG                              | CC                 | CC               | INTERGENIC      |               |                    |                    |
| SNP_85717_A_20258 | NW_004516256.1 | scaffold901 | 20258                   | GG                              | AA                 | AA               | INTERGENIC      |               |                    |                    |
| SNP_85718_A_20278 | NW_004516256.1 | scaffold901 | 20278                   | AA                              | GG                 | GG               | INTERGENIC      |               |                    |                    |
| SNP_85719_A_23845 | NW_004516256.1 | scaffold901 | 23845                   | TT                              | AA                 | AA               | INTERGENIC      |               |                    |                    |
| SNP_85720_A_23882 | NW_004516256.1 | scaffold901 | 23882                   | AA                              | GG                 | GG               | INTERGENIC      |               |                    |                    |
| SNP_85721_A_23901 | NW_004516256.1 | scaffold901 | 23901                   | AA                              | GG                 | GG               | INTERGENIC      |               |                    |                    |
| SNP_85722_A_23912 | NW_004516256.1 | scaffold901 | 23912                   | TT                              | AA                 | AA               | INTERGENIC      |               |                    |                    |
| SNP_85723_A_23928 | NW_004516256.1 | scaffold901 | 23928                   | TT                              | AA                 | AA               | INTERGENIC      |               |                    |                    |
| SNP_85724_A_23948 | NW_004516256.1 | scaffold901 | 23948                   | GG                              | AA                 | AA               | INTERGENIC      |               |                    |                    |



| SNPs IDs           | Chromosome IDs | Chromosomes | Physical positions (bp) | CDC Frontier (Reference genome) | (Pusa 1103 & HPNB) | (ILWC 46 & LPNB) | Sequence genome | Components of | Gene accession IDs | Putative functions |
|--------------------|----------------|-------------|-------------------------|---------------------------------|--------------------|------------------|-----------------|---------------|--------------------|--------------------|
| SNP_85725_A_23950  | NW_004516256.1 | scaffold901 | 23950                   | TT                              | CC                 | CC               | INTERGENIC      |               |                    |                    |
| SNP_85726_A_28769  | NW_004516256.1 | scaffold901 | 28769                   | AA                              | GG                 | GG               | INTERGENIC      |               |                    |                    |
| SNP_85727_A_46297  | NW_004516256.1 | scaffold901 | 46297                   | GG                              | AA                 | AA               | INTERGENIC      |               |                    |                    |
| SNP_85728_A_46303  | NW_004516256.1 | scaffold901 | 46303                   | TT                              | CC                 | CC               | INTERGENIC      |               |                    |                    |
| SNP_85729_A_46352  | NW_004516256.1 | scaffold901 | 46352                   | GG                              | AA                 | AA               | INTERGENIC      |               |                    |                    |
| SNP_85730_A_69537  | NW_004516256.1 | scaffold901 | 69537                   | TT                              | CC                 | CC               | INTERGENIC      |               |                    |                    |
| SNP_85731_A_70509  | NW_004516256.1 | scaffold901 | 70509                   | GG                              | TT                 | TT               | DRR             | 101492965     | Unknown function   |                    |
| SNP_85732_A_112983 | NW_004516256.1 | scaffold901 | 112983                  | GG                              | TT                 | TT               | INTERGENIC      |               |                    |                    |
| SNP_85733_A_120971 | NW_004516256.1 | scaffold901 | 120971                  | TT                              | GG                 | GG               | INTERGENIC      |               |                    |                    |
| SNP_85734_A_143121 | NW_004516256.1 | scaffold901 | 143121                  | AA                              | GG                 | GG               | INTERGENIC      |               |                    |                    |
| SNP_85735_A_143124 | NW_004516256.1 | scaffold901 | 143124                  | CC                              | TT                 | TT               | INTERGENIC      |               |                    |                    |
| SNP_85736_A_183101 | NW_004516256.1 | scaffold901 | 183101                  | CC                              | TT                 | TT               | INTERGENIC      |               |                    |                    |
| SNP_85737_A_199331 | NW_004516256.1 | scaffold901 | 199331                  | AA                              | TT                 | TT               | INTERGENIC      |               |                    |                    |
| SNP_85738_A_199363 | NW_004516256.1 | scaffold901 | 199363                  | AA                              | GG                 | GG               | INTERGENIC      |               |                    |                    |
| SNP_85739_A_199430 | NW_004516256.1 | scaffold901 | 199430                  | CC                              | GG                 | GG               | INTERGENIC      |               |                    |                    |
| SNP_85740_A_199741 | NW_004516256.1 | scaffold901 | 199741                  | CC                              | AA                 | AA               | INTERGENIC      |               |                    |                    |
| SNP_85741_A_199742 | NW_004516256.1 | scaffold901 | 199742                  | TT                              | CC                 | CC               | INTERGENIC      |               |                    |                    |
| SNP_85742_A_221877 | NW_004516256.1 | scaffold901 | 221877                  | AA                              | GG                 | GG               | INTERGENIC      |               |                    |                    |
| SNP_85743_A_229453 | NW_004516256.1 | scaffold901 | 229453                  | CC                              | TT                 | TT               | INTERGENIC      |               |                    |                    |
| SNP_85745_A_233559 | NW_004516256.1 | scaffold901 | 233559                  | TT                              | AA                 | AA               | INTERGENIC      |               |                    |                    |
| SNP_85746_A_233560 | NW_004516256.1 | scaffold901 | 233560                  | GG                              | TT                 | TT               | INTERGENIC      |               |                    |                    |
| SNP_85747_A_236041 | NW_004516256.1 | scaffold901 | 236041                  | GG                              | AA                 | AA               | INTERGENIC      |               |                    |                    |

| SNPs IDs          | Chromosome IDs | Chromosomes | Physical positions (bp) | CDC Frontier (Reference genome) | (Pusa 1103 & HPNB) | (ILWC 46 & LPNB) | Sequence genome | Components of | Gene accession IDs | Putative functions |
|-------------------|----------------|-------------|-------------------------|---------------------------------|--------------------|------------------|-----------------|---------------|--------------------|--------------------|
| SNP_85748_A_325   | NW_004516258.1 | scaffold904 | 325                     | CC                              | TT                 | TT               | INTERGENIC      |               |                    |                    |
| SNP_85749_A_9848  | NW_004516258.1 | scaffold904 | 9848                    | TT                              | CC                 | CC               | INTERGENIC      |               |                    |                    |
| SNP_85750_A_11632 | NW_004516258.1 | scaffold904 | 11632                   | CC                              | TT                 | TT               | INTERGENIC      |               |                    |                    |
| SNP_85751_A_11648 | NW_004516258.1 | scaffold904 | 11648                   | TT                              | GG                 | GG               | INTERGENIC      |               |                    |                    |
| SNP_85752_A_11685 | NW_004516258.1 | scaffold904 | 11685                   | TT                              | AA                 | AA               | INTERGENIC      |               |                    |                    |
| SNP_85753_A_13149 | NW_004516258.1 | scaffold904 | 13149                   | AA                              | TT                 | TT               | INTERGENIC      |               |                    |                    |
| SNP_85755_A_14539 | NW_004516258.1 | scaffold904 | 14539                   | AA                              | GG                 | GG               | INTERGENIC      |               |                    |                    |
| SNP_85756_A_16716 | NW_004516258.1 | scaffold904 | 16716                   | TT                              | CC                 | CC               | INTERGENIC      |               |                    |                    |
| SNP_85757_A_16760 | NW_004516258.1 | scaffold904 | 16760                   | TT                              | CC                 | CC               | INTERGENIC      |               |                    |                    |
| SNP_85758_A_16761 | NW_004516258.1 | scaffold904 | 16761                   | AA                              | CC                 | CC               | INTERGENIC      |               |                    |                    |
| SNP_85759_A_20351 | NW_004516258.1 | scaffold904 | 20351                   | TT                              | AA                 | AA               | INTERGENIC      |               |                    |                    |
| SNP_85760_A_11057 | NW_004516261.1 | scaffold908 | 11057                   | TT                              | AA                 | AA               | INTERGENIC      |               |                    |                    |
| SNP_85761_A_11060 | NW_004516261.1 | scaffold908 | 11060                   | CC                              | TT                 | TT               | INTERGENIC      |               |                    |                    |
| SNP_85762_A_11112 | NW_004516261.1 | scaffold908 | 11112                   | AA                              | GG                 | GG               | INTERGENIC      |               |                    |                    |
| SNP_85763_A_11153 | NW_004516261.1 | scaffold908 | 11153                   | CC                              | TT                 | TT               | INTERGENIC      |               |                    |                    |
| SNP_85764_A_11338 | NW_004516261.1 | scaffold908 | 11338                   | TT                              | CC                 | CC               | INTERGENIC      |               |                    |                    |
| SNP_85765_A_11341 | NW_004516261.1 | scaffold908 | 11341                   | CC                              | TT                 | TT               | INTERGENIC      |               |                    |                    |
| SNP_85766_A_11358 | NW_004516261.1 | scaffold908 | 11358                   | TT                              | CC                 | CC               | INTERGENIC      |               |                    |                    |
| SNP_85767_A_11373 | NW_004516261.1 | scaffold908 | 11373                   | CC                              | AA                 | AA               | INTERGENIC      |               |                    |                    |
| SNP_85768_A_11419 | NW_004516261.1 | scaffold908 | 11419                   | CC                              | TT                 | TT               | INTERGENIC      |               |                    |                    |
| SNP_85769_A_17865 | NW_004516261.1 | scaffold908 | 17865                   | AA                              | GG                 | GG               | INTERGENIC      |               |                    |                    |
| SNP_85770_A_18227 | NW_004516261.1 | scaffold908 | 18227                   | GG                              | AA                 | AA               | INTERGENIC      |               |                    |                    |

| SNPs IDs          | Chromosome IDs | Chromosomes | Physical positions (bp) | CDC Frontier (Reference genome) | (Pusa 1103 & HPNB) | (ILWC 46 & LPNB) | Sequence genome | Components of | Gene accession IDs | Putative functions |
|-------------------|----------------|-------------|-------------------------|---------------------------------|--------------------|------------------|-----------------|---------------|--------------------|--------------------|
| SNP_85771_A_18233 | NW_004516261.1 | scaffold908 | 18233                   | TT                              | AA                 | AA               | INTERGENIC      |               |                    |                    |
| SNP_85772_A_18235 | NW_004516261.1 | scaffold908 | 18235                   | GG                              | AA                 | AA               | INTERGENIC      |               |                    |                    |
| SNP_85773_A_18643 | NW_004516261.1 | scaffold908 | 18643                   | GG                              | CC                 | CC               | INTERGENIC      |               |                    |                    |
| SNP_85774_A_18766 | NW_004516261.1 | scaffold908 | 18766                   | AA                              | GG                 | GG               | INTERGENIC      |               |                    |                    |
| SNP_85775_A_30029 | NW_004516261.1 | scaffold908 | 30029                   | AA                              | GG                 | GG               | INTERGENIC      |               |                    |                    |
| SNP_85776_A_31232 | NW_004516261.1 | scaffold908 | 31232                   | AA                              | GG                 | GG               | INTERGENIC      |               |                    |                    |
| SNP_85777_A_31267 | NW_004516261.1 | scaffold908 | 31267                   | CC                              | TT                 | TT               | INTERGENIC      |               |                    |                    |
| SNP_85778_A_31388 | NW_004516261.1 | scaffold908 | 31388                   | CC                              | TT                 | TT               | INTERGENIC      |               |                    |                    |
| SNP_85779_A_31403 | NW_004516261.1 | scaffold908 | 31403                   | GG                              | TT                 | TT               | INTERGENIC      |               |                    |                    |
| SNP_85780_A_37881 | NW_004516261.1 | scaffold908 | 37881                   | AA                              | GG                 | GG               | INTERGENIC      |               |                    |                    |
| SNP_85781_A_37889 | NW_004516261.1 | scaffold908 | 37889                   | AA                              | GG                 | GG               | INTERGENIC      |               |                    |                    |
| SNP_85782_A_41004 | NW_004516261.1 | scaffold908 | 41004                   | TT                              | AA                 | AA               | INTERGENIC      |               |                    |                    |
| SNP_85783_A_41207 | NW_004516261.1 | scaffold908 | 41207                   | TT                              | CC                 | CC               | INTERGENIC      |               |                    |                    |
| SNP_85784_A_1630  | NW_004516262.1 | scaffold909 | 1630                    | AA                              | GG                 | GG               | INTERGENIC      |               |                    |                    |
| SNP_85785_A_1711  | NW_004516262.1 | scaffold909 | 1711                    | CC                              | TT                 | TT               | INTERGENIC      |               |                    |                    |
| SNP_85786_A_3824  | NW_004516262.1 | scaffold909 | 3824                    | AA                              | TT                 | TT               | INTERGENIC      |               |                    |                    |
| SNP_85787_A_3889  | NW_004516262.1 | scaffold909 | 3889                    | CC                              | AA                 | AA               | INTERGENIC      |               |                    |                    |
| SNP_85788_A_4540  | NW_004516262.1 | scaffold909 | 4540                    | TT                              | GG                 | GG               | INTERGENIC      |               |                    |                    |
| SNP_85789_A_5135  | NW_004516262.1 | scaffold909 | 5135                    | TT                              | AA                 | AA               | INTERGENIC      |               |                    |                    |
| SNP_85790_A_5199  | NW_004516262.1 | scaffold909 | 5199                    | AA                              | GG                 | GG               | INTERGENIC      |               |                    |                    |
| SNP_85791_A_5269  | NW_004516262.1 | scaffold909 | 5269                    | CC                              | TT                 | TT               | INTERGENIC      |               |                    |                    |
| SNP_85792_A_5287  | NW_004516262.1 | scaffold909 | 5287                    | GG                              | AA                 | AA               | INTERGENIC      |               |                    |                    |

| SNPs IDs         | Chromosome IDs | Chromosomes | Physical positions (bp) | CDC Frontier (Reference genome) | (Pusa 1103 & HPNB) | (ILWC 46 & LPNB) | Sequence genome | Components of | Gene accession IDs | Putative functions |
|------------------|----------------|-------------|-------------------------|---------------------------------|--------------------|------------------|-----------------|---------------|--------------------|--------------------|
| SNP_85793_A_5649 | NW_004516262.1 | scaffold909 | 5649                    | CC                              | TT                 | TT               | INTERGENIC      |               |                    |                    |
| SNP_85794_A_5847 | NW_004516262.1 | scaffold909 | 5847                    | GG                              | AA                 | AA               | INTERGENIC      |               |                    |                    |
| SNP_85795_A_5848 | NW_004516262.1 | scaffold909 | 5848                    | AA                              | CC                 | CC               | INTERGENIC      |               |                    |                    |
| SNP_85796_A_5884 | NW_004516262.1 | scaffold909 | 5884                    | CC                              | TT                 | TT               | INTERGENIC      |               |                    |                    |
| SNP_85797_A_6162 | NW_004516262.1 | scaffold909 | 6162                    | TT                              | CC                 | CC               | INTERGENIC      |               |                    |                    |
| SNP_85798_A_6397 | NW_004516262.1 | scaffold909 | 6397                    | TT                              | CC                 | CC               | INTERGENIC      |               |                    |                    |
| SNP_85799_A_6652 | NW_004516262.1 | scaffold909 | 6652                    | AA                              | TT                 | TT               | INTERGENIC      |               |                    |                    |
| SNP_85801_A_6855 | NW_004516262.1 | scaffold909 | 6855                    | CC                              | TT                 | TT               | INTERGENIC      |               |                    |                    |
| SNP_85802_A_6925 | NW_004516262.1 | scaffold909 | 6925                    | TT                              | CC                 | CC               | INTERGENIC      |               |                    |                    |
| SNP_85803_A_6999 | NW_004516262.1 | scaffold909 | 6999                    | AA                              | CC                 | CC               | INTERGENIC      |               |                    |                    |
| SNP_85804_A_8135 | NW_004516262.1 | scaffold909 | 8135                    | TT                              | CC                 | CC               | INTERGENIC      |               |                    |                    |
| SNP_85805_A_8162 | NW_004516262.1 | scaffold909 | 8162                    | AA                              | TT                 | TT               | INTERGENIC      |               |                    |                    |
| SNP_85806_A_8185 | NW_004516262.1 | scaffold909 | 8185                    | GG                              | TT                 | TT               | INTERGENIC      |               |                    |                    |
| SNP_85807_A_8187 | NW_004516262.1 | scaffold909 | 8187                    | CC                              | TT                 | TT               | INTERGENIC      |               |                    |                    |
| SNP_85808_A_8213 | NW_004516262.1 | scaffold909 | 8213                    | TT                              | GG                 | GG               | INTERGENIC      |               |                    |                    |
| SNP_85809_A_8229 | NW_004516262.1 | scaffold909 | 8229                    | AA                              | GG                 | GG               | INTERGENIC      |               |                    |                    |
| SNP_85810_A_8302 | NW_004516262.1 | scaffold909 | 8302                    | AA                              | GG                 | GG               | INTERGENIC      |               |                    |                    |
| SNP_85811_A_8304 | NW_004516262.1 | scaffold909 | 8304                    | GG                              | AA                 | AA               | INTERGENIC      |               |                    |                    |
| SNP_85812_A_8354 | NW_004516262.1 | scaffold909 | 8354                    | AA                              | CC                 | CC               | INTERGENIC      |               |                    |                    |
| SNP_85813_A_8358 | NW_004516262.1 | scaffold909 | 8358                    | AA                              | GG                 | GG               | INTERGENIC      |               |                    |                    |
| SNP_85814_A_8607 | NW_004516262.1 | scaffold909 | 8607                    | TT                              | GG                 | GG               | INTERGENIC      |               |                    |                    |
| SNP_85815_A_8612 | NW_004516262.1 | scaffold909 | 8612                    | CC                              | AA                 | AA               | INTERGENIC      |               |                    |                    |

| SNPs IDs          | Chromosome IDs | Chromosomes | Physical positions (bp) | CDC Frontier (Reference genome) | (Pusa 1103 & HPNB) | (ILWC 46 & LPNB) | Sequence genome | Components of | Gene accession IDs | Putative functions |
|-------------------|----------------|-------------|-------------------------|---------------------------------|--------------------|------------------|-----------------|---------------|--------------------|--------------------|
| SNP_85816_A_8621  | NW_004516262.1 | scaffold909 | 8621                    | GG                              | AA                 | AA               | INTERGENIC      |               |                    |                    |
| SNP_85817_A_8643  | NW_004516262.1 | scaffold909 | 8643                    | AA                              | GG                 | GG               | INTERGENIC      |               |                    |                    |
| SNP_85818_A_8676  | NW_004516262.1 | scaffold909 | 8676                    | AA                              | GG                 | GG               | INTERGENIC      |               |                    |                    |
| SNP_85819_A_8685  | NW_004516262.1 | scaffold909 | 8685                    | GG                              | AA                 | AA               | INTERGENIC      |               |                    |                    |
| SNP_85820_A_8711  | NW_004516262.1 | scaffold909 | 8711                    | AA                              | TT                 | TT               | INTERGENIC      |               |                    |                    |
| SNP_85821_A_8715  | NW_004516262.1 | scaffold909 | 8715                    | AA                              | GG                 | GG               | INTERGENIC      |               |                    |                    |
| SNP_85822_A_8723  | NW_004516262.1 | scaffold909 | 8723                    | TT                              | GG                 | GG               | INTERGENIC      |               |                    |                    |
| SNP_85823_A_8726  | NW_004516262.1 | scaffold909 | 8726                    | AA                              | GG                 | GG               | INTERGENIC      |               |                    |                    |
| SNP_85824_A_8743  | NW_004516262.1 | scaffold909 | 8743                    | AA                              | GG                 | GG               | INTERGENIC      |               |                    |                    |
| SNP_85825_A_10232 | NW_004516262.1 | scaffold909 | 10232                   | TT                              | AA                 | AA               | INTERGENIC      |               |                    |                    |
| SNP_85826_A_10256 | NW_004516262.1 | scaffold909 | 10256                   | CC                              | TT                 | TT               | INTERGENIC      |               |                    |                    |
| SNP_85827_A_10306 | NW_004516262.1 | scaffold909 | 10306                   | CC                              | TT                 | TT               | INTERGENIC      |               |                    |                    |
| SNP_85828_A_10307 | NW_004516262.1 | scaffold909 | 10307                   | AA                              | GG                 | GG               | INTERGENIC      |               |                    |                    |
| SNP_85829_A_10407 | NW_004516262.1 | scaffold909 | 10407                   | AA                              | CC                 | CC               | INTERGENIC      |               |                    |                    |
| SNP_85830_A_10418 | NW_004516262.1 | scaffold909 | 10418                   | GG                              | AA                 | AA               | INTERGENIC      |               |                    |                    |
| SNP_85831_A_10508 | NW_004516262.1 | scaffold909 | 10508                   | TT                              | CC                 | CC               | INTERGENIC      |               |                    |                    |
| SNP_85832_A_10510 | NW_004516262.1 | scaffold909 | 10510                   | CC                              | GG                 | GG               | INTERGENIC      |               |                    |                    |
| SNP_85833_A_10722 | NW_004516262.1 | scaffold909 | 10722                   | GG                              | AA                 | AA               | INTERGENIC      |               |                    |                    |
| SNP_85834_A_11067 | NW_004516262.1 | scaffold909 | 11067                   | TT                              | AA                 | AA               | INTERGENIC      |               |                    |                    |
| SNP_85835_A_11793 | NW_004516262.1 | scaffold909 | 11793                   | GG                              | AA                 | AA               | INTERGENIC      |               |                    |                    |
| SNP_85836_A_16153 | NW_004516262.1 | scaffold909 | 16153                   | TT                              | CC                 | CC               | INTERGENIC      |               |                    |                    |
| SNP_85837_A_16244 | NW_004516262.1 | scaffold909 | 16244                   | AA                              | TT                 | TT               | INTERGENIC      |               |                    |                    |

| SNPs IDs          | Chromosome IDs | Chromosomes | Physical positions (bp) | CDC Frontier (Reference genome) | (Pusa 1103 & HPNB) | (ILWC 46 & LPNB) | Sequence Components of genome | Gene accession IDs | Putative functions |
|-------------------|----------------|-------------|-------------------------|---------------------------------|--------------------|------------------|-------------------------------|--------------------|--------------------|
| SNP_85838_A_17079 | NW_004516262.1 | scaffold909 | 17079                   | TT                              | CC                 | CC               | INTERGENIC                    |                    |                    |
| SNP_85839_A_17088 | NW_004516262.1 | scaffold909 | 17088                   | AA                              | CC                 | CC               | INTERGENIC                    |                    |                    |
| SNP_85840_A_18281 | NW_004516262.1 | scaffold909 | 18281                   | AA                              | GG                 | GG               | INTERGENIC                    |                    |                    |
| SNP_85841_A_18300 | NW_004516262.1 | scaffold909 | 18300                   | CC                              | TT                 | TT               | INTERGENIC                    |                    |                    |
| SNP_85842_A_18335 | NW_004516262.1 | scaffold909 | 18335                   | CC                              | TT                 | TT               | INTERGENIC                    |                    |                    |
| SNP_85843_A_18365 | NW_004516262.1 | scaffold909 | 18365                   | CC                              | GG                 | GG               | INTERGENIC                    |                    |                    |
| SNP_85844_A_18445 | NW_004516262.1 | scaffold909 | 18445                   | CC                              | TT                 | TT               | INTERGENIC                    |                    |                    |
| SNP_85845_A_18453 | NW_004516262.1 | scaffold909 | 18453                   | TT                              | CC                 | CC               | INTERGENIC                    |                    |                    |
| SNP_85846_A_18541 | NW_004516262.1 | scaffold909 | 18541                   | TT                              | GG                 | GG               | INTERGENIC                    |                    |                    |
| SNP_85848_A_21779 | NW_004516262.1 | scaffold909 | 21779                   | GG                              | AA                 | AA               | DRR                           | 101493621          | Unknown function   |
| SNP_85849_A_21902 | NW_004516262.1 | scaffold909 | 21902                   | CC                              | GG                 | GG               | DRR                           | 101493621          | Unknown function   |
| SNP_85850_A_22110 | NW_004516262.1 | scaffold909 | 22110                   | AA                              | GG                 | GG               | DRR                           | 101493621          | Unknown function   |
| SNP_85851_A_22481 | NW_004516262.1 | scaffold909 | 22481                   | AA                              | TT                 | TT               | DRR                           | 101493621          | Unknown function   |
| SNP_85852_A_23494 | NW_004516262.1 | scaffold909 | 23494                   | GG                              | TT                 | TT               | INTRON                        | 101493621          | Unknown function   |
| SNP_85853_A_23924 | NW_004516262.1 | scaffold909 | 23924                   | AA                              | GG                 | GG               | INTRON                        | 101493621          | Unknown function   |
| SNP_85854_A_23990 | NW_004516262.1 | scaffold909 | 23990                   | AA                              | GG                 | GG               | INTRON                        | 101493621          | Unknown function   |
| SNP_85855_A_24797 | NW_004516262.1 | scaffold909 | 24797                   | GG                              | AA                 | AA               | NON_SYNONYMOUS_CODING         | 101493621          | Unknown function   |
| SNP_85856_A_26216 | NW_004516262.1 | scaffold909 | 26216                   | AA                              | GG                 | GG               | URR                           | 101493621          | Unknown function   |
| SNP_85857_A_26313 | NW_004516262.1 | scaffold909 | 26313                   | CC                              | GG                 | GG               | URR                           | 101493621          | Unknown function   |
| SNP_85858_A_26331 | NW_004516262.1 | scaffold909 | 26331                   | GG                              | AA                 | AA               | URR                           | 101493621          | Unknown function   |
| SNP_85859_A_26541 | NW_004516262.1 | scaffold909 | 26541                   | TT                              | CC                 | CC               | URR                           | 101493621          | Unknown function   |
| SNP_85860_A_26705 | NW_004516262.1 | scaffold909 | 26705                   | AA                              | CC                 | CC               | URR                           | 101493621          | Unknown function   |

| SNPs IDs          | Chromosome IDs | Chromosomes | Physical positions (bp) | CDC Frontier (Reference genome) | (Pusa 1103 & HPNB) | (ILWC 46 & LPNB) | Sequence genome | Components of | Gene accession IDs | Putative functions |
|-------------------|----------------|-------------|-------------------------|---------------------------------|--------------------|------------------|-----------------|---------------|--------------------|--------------------|
| SNP_85861_A_26997 | NW_004516262.1 | scaffold909 | 26997                   | GG                              | AA                 | AA               | INTERGENIC      |               |                    |                    |
| SNP_85862_A_27095 | NW_004516262.1 | scaffold909 | 27095                   | TT                              | CC                 | CC               | INTERGENIC      |               |                    |                    |
| SNP_85863_A_27202 | NW_004516262.1 | scaffold909 | 27202                   | GG                              | AA                 | AA               | INTERGENIC      |               |                    |                    |
| SNP_85864_A_27214 | NW_004516262.1 | scaffold909 | 27214                   | AA                              | GG                 | GG               | INTERGENIC      |               |                    |                    |
| SNP_85865_A_27216 | NW_004516262.1 | scaffold909 | 27216                   | TT                              | CC                 | CC               | INTERGENIC      |               |                    |                    |
| SNP_85866_A_27243 | NW_004516262.1 | scaffold909 | 27243                   | AA                              | CC                 | CC               | INTERGENIC      |               |                    |                    |
| SNP_85867_A_27397 | NW_004516262.1 | scaffold909 | 27397                   | AA                              | GG                 | GG               | INTERGENIC      |               |                    |                    |
| SNP_85868_A_27586 | NW_004516262.1 | scaffold909 | 27586                   | CC                              | TT                 | TT               | INTERGENIC      |               |                    |                    |
| SNP_85869_A_27640 | NW_004516262.1 | scaffold909 | 27640                   | CC                              | TT                 | TT               | INTERGENIC      |               |                    |                    |
| SNP_85870_A_27648 | NW_004516262.1 | scaffold909 | 27648                   | TT                              | AA                 | AA               | INTERGENIC      |               |                    |                    |
| SNP_85871_A_28105 | NW_004516262.1 | scaffold909 | 28105                   | TT                              | AA                 | AA               | INTERGENIC      |               |                    |                    |
| SNP_85872_A_29173 | NW_004516262.1 | scaffold909 | 29173                   | AA                              | GG                 | GG               | INTERGENIC      |               |                    |                    |
| SNP_85873_A_35547 | NW_004516262.1 | scaffold909 | 35547                   | CC                              | TT                 | TT               | INTERGENIC      |               |                    |                    |
| SNP_85874_A_35861 | NW_004516262.1 | scaffold909 | 35861                   | GG                              | AA                 | AA               | INTERGENIC      |               |                    |                    |
| SNP_85875_A_36043 | NW_004516262.1 | scaffold909 | 36043                   | AA                              | TT                 | TT               | INTERGENIC      |               |                    |                    |
| SNP_85876_A_36110 | NW_004516262.1 | scaffold909 | 36110                   | AA                              | GG                 | GG               | INTERGENIC      |               |                    |                    |
| SNP_85877_A_44341 | NW_004516262.1 | scaffold909 | 44341                   | GG                              | AA                 | AA               | INTERGENIC      |               |                    |                    |
| SNP_85878_A_44360 | NW_004516262.1 | scaffold909 | 44360                   | CC                              | TT                 | TT               | INTERGENIC      |               |                    |                    |
| SNP_85880_A_53620 | NW_004516262.1 | scaffold909 | 53620                   | AA                              | GG                 | GG               | INTERGENIC      |               |                    |                    |
| SNP_85881_A_54000 | NW_004516262.1 | scaffold909 | 54000                   | TT                              | CC                 | CC               | INTERGENIC      |               |                    |                    |
| SNP_85882_A_54103 | NW_004516262.1 | scaffold909 | 54103                   | GG                              | TT                 | TT               | INTERGENIC      |               |                    |                    |
| SNP_85883_A_54146 | NW_004516262.1 | scaffold909 | 54146                   | CC                              | TT                 | TT               | INTERGENIC      |               |                    |                    |

| SNPs IDs           | Chromosome IDs | Chromosomes | Physical positions (bp) | CDC Frontier (Reference genome) | (Pusa 1103 & HPNB) | (ILWC 46 & LPNB) | Sequence Components of genome | Gene accession IDs | Putative functions                     |
|--------------------|----------------|-------------|-------------------------|---------------------------------|--------------------|------------------|-------------------------------|--------------------|----------------------------------------|
| SNP_85884_A_54224  | NW_004516262.1 | scaffold909 | 54224                   | CC                              | TT                 | TT               | INTERGENIC                    |                    |                                        |
| SNP_85885_A_3938   | NW_004516263.1 | scaffold910 | 3938                    | TT                              | CC                 | CC               | INTERGENIC                    |                    |                                        |
| SNP_85886_A_4410   | NW_004516263.1 | scaffold910 | 4410                    | CC                              | AA                 | AA               | INTERGENIC                    |                    |                                        |
| SNP_85887_A_8557   | NW_004516263.1 | scaffold910 | 8557                    | CC                              | TT                 | TT               | INTRON                        | 101493938          | protein trichome birefringence-like 32 |
| SNP_85888_A_8620   | NW_004516263.1 | scaffold910 | 8620                    | AA                              | GG                 | GG               | INTRON                        | 101493938          | protein trichome birefringence-like 32 |
| SNP_85889_A_13793  | NW_004516264.1 | scaffold913 | 13793                   | CC                              | TT                 | TT               | DRR                           | 101494264          | protein TRANSPARENT TESTA 12-like      |
| SNP_85890_A_112445 | NW_004516264.1 | scaffold913 | 112445                  | AA                              | GG                 | GG               | INTERGENIC                    |                    |                                        |
| SNP_85891_A_132029 | NW_004516264.1 | scaffold913 | 132029                  | CC                              | AA                 | AA               | INTERGENIC                    |                    |                                        |
| SNP_85892_A_139074 | NW_004516264.1 | scaffold913 | 139074                  | TT                              | GG                 | GG               | URR                           | 101499975          | putative F-box protein At3g16210       |
| SNP_85893_A_139166 | NW_004516264.1 | scaffold913 | 139166                  | AA                              | GG                 | GG               | URR                           | 101499975          | putative F-box protein At3g16210       |
| SNP_85894_A_139831 | NW_004516264.1 | scaffold913 | 139831                  | CC                              | TT                 | TT               | URR                           | 101499975          | putative F-box protein At3g16210       |
| SNP_85895_A_139860 | NW_004516264.1 | scaffold913 | 139860                  | AA                              | GG                 | GG               | URR                           | 101499975          | putative F-box protein At3g16210       |
| SNP_85896_A_140587 | NW_004516264.1 | scaffold913 | 140587                  | TT                              | CC                 | CC               | INTERGENIC                    |                    |                                        |
| SNP_85897_A_140658 | NW_004516264.1 | scaffold913 | 140658                  | GG                              | AA                 | AA               | INTERGENIC                    |                    |                                        |
| SNP_85899_A_140861 | NW_004516264.1 | scaffold913 | 140861                  | AA                              | GG                 | GG               | INTERGENIC                    |                    |                                        |
| SNP_85900_A_140863 | NW_004516264.1 | scaffold913 | 140863                  | GG                              | AA                 | AA               | INTERGENIC                    |                    |                                        |
| SNP_85901_A_140908 | NW_004516264.1 | scaffold913 | 140908                  | GG                              | AA                 | AA               | INTERGENIC                    |                    |                                        |
| SNP_85902_A_140925 | NW_004516264.1 | scaffold913 | 140925                  | GG                              | AA                 | AA               | INTERGENIC                    |                    |                                        |
| SNP_85903_A_140931 | NW_004516264.1 | scaffold913 | 140931                  | GG                              | AA                 | AA               | INTERGENIC                    |                    |                                        |
| SNP_85904_A_140989 | NW_004516264.1 | scaffold913 | 140989                  | AA                              | GG                 | GG               | INTERGENIC                    |                    |                                        |
| SNP_85905_A_141018 | NW_004516264.1 | scaffold913 | 141018                  | GG                              | AA                 | AA               | INTERGENIC                    |                    |                                        |
| SNP_85906_A_141045 | NW_004516264.1 | scaffold913 | 141045                  | AA                              | TT                 | TT               | INTERGENIC                    |                    |                                        |



| SNPs IDs           | Chromosome IDs | Chromosomes | Physical positions (bp) | CDC Frontier (Reference genome) | (Pusa 1103 & HPNB) | (ILWC 46 & LPNB) | Sequence genome | Components of | Gene accession IDs | Putative functions |
|--------------------|----------------|-------------|-------------------------|---------------------------------|--------------------|------------------|-----------------|---------------|--------------------|--------------------|
| SNP_85907_A_141049 | NW_004516264.1 | scaffold913 | 141049                  | AA                              | TT                 | TT               | INTERGENIC      |               |                    |                    |
| SNP_85908_A_141101 | NW_004516264.1 | scaffold913 | 141101                  | AA                              | GG                 | GG               | INTERGENIC      |               |                    |                    |
| SNP_85909_A_141103 | NW_004516264.1 | scaffold913 | 141103                  | CC                              | TT                 | TT               | INTERGENIC      |               |                    |                    |
| SNP_85910_A_141134 | NW_004516264.1 | scaffold913 | 141134                  | TT                              | AA                 | AA               | INTERGENIC      |               |                    |                    |
| SNP_85911_A_141147 | NW_004516264.1 | scaffold913 | 141147                  | TT                              | AA                 | AA               | INTERGENIC      |               |                    |                    |
| SNP_85912_A_141154 | NW_004516264.1 | scaffold913 | 141154                  | GG                              | AA                 | AA               | INTERGENIC      |               |                    |                    |
| SNP_85913_A_141171 | NW_004516264.1 | scaffold913 | 141171                  | AA                              | GG                 | GG               | INTERGENIC      |               |                    |                    |
| SNP_85914_A_141192 | NW_004516264.1 | scaffold913 | 141192                  | TT                              | CC                 | CC               | INTERGENIC      |               |                    |                    |
| SNP_85915_A_141263 | NW_004516264.1 | scaffold913 | 141263                  | CC                              | GG                 | GG               | INTERGENIC      |               |                    |                    |
| SNP_85916_A_141271 | NW_004516264.1 | scaffold913 | 141271                  | AA                              | GG                 | GG               | INTERGENIC      |               |                    |                    |
| SNP_85917_A_143824 | NW_004516264.1 | scaffold913 | 143824                  | AA                              | GG                 | GG               | INTERGENIC      |               |                    |                    |
| SNP_85918_A_145308 | NW_004516264.1 | scaffold913 | 145308                  | TT                              | CC                 | CC               | INTERGENIC      |               |                    |                    |
| SNP_85919_A_145314 | NW_004516264.1 | scaffold913 | 145314                  | GG                              | TT                 | TT               | INTERGENIC      |               |                    |                    |
| SNP_85920_A_145607 | NW_004516264.1 | scaffold913 | 145607                  | GG                              | AA                 | AA               | INTERGENIC      |               |                    |                    |
| SNP_85922_A_201974 | NW_004516264.1 | scaffold913 | 201974                  | TT                              | AA                 | AA               | INTERGENIC      |               |                    |                    |
| SNP_85923_A_204476 | NW_004516264.1 | scaffold913 | 204476                  | GG                              | AA                 | AA               | INTERGENIC      |               |                    |                    |
| SNP_85924_A_209262 | NW_004516264.1 | scaffold913 | 209262                  | AA                              | TT                 | TT               | URR             | 101500323     | Unknown function   |                    |
| SNP_85925_A_221954 | NW_004516264.1 | scaffold913 | 221954                  | TT                              | CC                 | CC               | INTERGENIC      |               |                    |                    |
| SNP_85926_A_226835 | NW_004516264.1 | scaffold913 | 226835                  | TT                              | CC                 | CC               | INTERGENIC      |               |                    |                    |
| SNP_85927_A_227366 | NW_004516264.1 | scaffold913 | 227366                  | GG                              | AA                 | AA               | INTERGENIC      |               |                    |                    |
| SNP_85928_A_229350 | NW_004516264.1 | scaffold913 | 229350                  | GG                              | AA                 | AA               | INTERGENIC      |               |                    |                    |
| SNP_85929_A_249337 | NW_004516264.1 | scaffold913 | 249337                  | TT                              | AA                 | AA               | INTERGENIC      |               |                    |                    |

| SNPs IDs           | Chromosome IDs | Chromosomes | Physical positions (bp) | CDC Frontier (Reference genome) | (Pusa 1103 & HPNB) | (ILWC 46 & LPNB) | Sequence Components of genome | Gene accession IDs | Putative functions           |
|--------------------|----------------|-------------|-------------------------|---------------------------------|--------------------|------------------|-------------------------------|--------------------|------------------------------|
| SNP_85930_A_251456 | NW_004516264.1 | scaffold913 | 251456                  | GG                              | CC                 | CC               | INTERGENIC                    |                    |                              |
| SNP_85931_A_251775 | NW_004516264.1 | scaffold913 | 251775                  | GG                              | AA                 | AA               | INTERGENIC                    |                    |                              |
| SNP_85932_A_251781 | NW_004516264.1 | scaffold913 | 251781                  | AA                              | GG                 | GG               | INTERGENIC                    |                    |                              |
| SNP_85933_A_251868 | NW_004516264.1 | scaffold913 | 251868                  | CC                              | TT                 | TT               | DRR                           | 101496950          | uncharacterized LOC101496950 |
| SNP_85934_A_251874 | NW_004516264.1 | scaffold913 | 251874                  | AA                              | TT                 | TT               | DRR                           | 101496950          | uncharacterized LOC101496950 |
| SNP_85937_A_252036 | NW_004516264.1 | scaffold913 | 252036                  | AA                              | GG                 | GG               | DRR                           | 101496950          | uncharacterized LOC101496950 |
| SNP_85939_A_276128 | NW_004516264.1 | scaffold913 | 276128                  | AA                              | GG                 | GG               | URR                           | 101497280          | uncharacterized LOC101497280 |
| SNP_85941_A_283248 | NW_004516264.1 | scaffold913 | 283248                  | AA                              | TT                 | TT               | INTERGENIC                    |                    |                              |
| SNP_85942_A_283469 | NW_004516264.1 | scaffold913 | 283469                  | AA                              | GG                 | GG               | INTERGENIC                    |                    |                              |
| SNP_85943_A_304700 | NW_004516264.1 | scaffold913 | 304700                  | TT                              | CC                 | CC               | INTERGENIC                    |                    |                              |
| SNP_85944_A_304705 | NW_004516264.1 | scaffold913 | 304705                  | AA                              | GG                 | GG               | INTERGENIC                    |                    |                              |
| SNP_85945_A_304706 | NW_004516264.1 | scaffold913 | 304706                  | TT                              | CC                 | CC               | INTERGENIC                    |                    |                              |
| SNP_85946_A_306476 | NW_004516264.1 | scaffold913 | 306476                  | AA                              | TT                 | TT               | INTERGENIC                    |                    |                              |
| SNP_85947_A_310132 | NW_004516264.1 | scaffold913 | 310132                  | TT                              | CC                 | CC               | INTERGENIC                    |                    |                              |
| SNP_85948_A_310138 | NW_004516264.1 | scaffold913 | 310138                  | CC                              | GG                 | GG               | INTERGENIC                    |                    |                              |
| SNP_85949_A_310156 | NW_004516264.1 | scaffold913 | 310156                  | GG                              | AA                 | AA               | INTERGENIC                    |                    |                              |
| SNP_85950_A_310310 | NW_004516264.1 | scaffold913 | 310310                  | AA                              | GG                 | GG               | INTERGENIC                    |                    |                              |
| SNP_85951_A_318800 | NW_004516264.1 | scaffold913 | 318800                  | GG                              | TT                 | TT               | INTRON                        | 101501585          | Unknown function             |
| SNP_85952_A_318813 | NW_004516264.1 | scaffold913 | 318813                  | CC                              | AA                 | AA               | INTRON                        | 101501585          | Unknown function             |
| SNP_85953_A_318878 | NW_004516264.1 | scaffold913 | 318878                  | CC                              | AA                 | AA               | INTRON                        | 101501585          | Unknown function             |
| SNP_85954_A_320640 | NW_004516264.1 | scaffold913 | 320640                  | AA                              | CC                 | CC               | INTRON                        | 101501585          | Unknown function             |
| SNP_85955_A_321030 | NW_004516264.1 | scaffold913 | 321030                  | GG                              | TT                 | TT               | NON_SYNONYMOUS_CODING         | 101501585          | Unknown function             |

| SNPs IDs           | Chromosome IDs | Chromosomes | Physical positions (bp) | CDC Frontier (Reference genome) | (Pusa 1103 & HPNB) | (ILWC 46 & LPNB) | Sequence Components of genome | Gene accession IDs | Putative functions                  |
|--------------------|----------------|-------------|-------------------------|---------------------------------|--------------------|------------------|-------------------------------|--------------------|-------------------------------------|
| SNP_85956_A_4947   | NW_004516265.1 | scaffold914 | 4947                    | TT                              | CC                 | CC               | INTERGENIC                    |                    |                                     |
| SNP_85957_A_8530   | NW_004516265.1 | scaffold914 | 8530                    | CC                              | TT                 | TT               | INTERGENIC                    |                    |                                     |
| SNP_85958_A_20717  | NW_004516265.1 | scaffold914 | 20717                   | AA                              | TT                 | TT               | URR                           | 101505205          | basic 7S globulin 2-like            |
| SNP_85959_A_20738  | NW_004516265.1 | scaffold914 | 20738                   | AA                              | GG                 | GG               | URR                           | 101505205          | basic 7S globulin 2-like            |
| SNP_85960_A_20806  | NW_004516265.1 | scaffold914 | 20806                   | TT                              | GG                 | GG               | URR                           | 101505205          | basic 7S globulin 2-like            |
| SNP_85961_A_21011  | NW_004516265.1 | scaffold914 | 21011                   | AA                              | CC                 | CC               | INTERGENIC                    |                    |                                     |
| SNP_85962_A_21033  | NW_004516265.1 | scaffold914 | 21033                   | TT                              | GG                 | GG               | INTERGENIC                    |                    |                                     |
| SNP_85963_A_21041  | NW_004516265.1 | scaffold914 | 21041                   | TT                              | CC                 | CC               | INTERGENIC                    |                    |                                     |
| SNP_85964_A_21043  | NW_004516265.1 | scaffold914 | 21043                   | TT                              | CC                 | CC               | INTERGENIC                    |                    |                                     |
| SNP_85965_A_21055  | NW_004516265.1 | scaffold914 | 21055                   | GG                              | AA                 | AA               | INTERGENIC                    |                    |                                     |
| SNP_85966_A_27865  | NW_004516265.1 | scaffold914 | 27865                   | TT                              | GG                 | GG               | INTERGENIC                    |                    |                                     |
| SNP_85967_A_31424  | NW_004516265.1 | scaffold914 | 31424                   | AA                              | GG                 | GG               | INTERGENIC                    |                    |                                     |
| SNP_85968_A_31748  | NW_004516265.1 | scaffold914 | 31748                   | AA                              | GG                 | GG               | INTERGENIC                    |                    |                                     |
| SNP_85969_A_31754  | NW_004516265.1 | scaffold914 | 31754                   | GG                              | AA                 | AA               | INTERGENIC                    |                    |                                     |
| SNP_85970_A_31763  | NW_004516265.1 | scaffold914 | 31763                   | AA                              | CC                 | CC               | INTERGENIC                    |                    |                                     |
| SNP_85971_A_32509  | NW_004516265.1 | scaffold914 | 32509                   | CC                              | AA                 | AA               | INTERGENIC                    |                    |                                     |
| SNP_85972_A_39458  | NW_004516265.1 | scaffold914 | 39458                   | TT                              | CC                 | CC               | URR                           | 101505527          | basic 7S globulin 2-like            |
| SNP_85973_A_108725 | NW_004516265.1 | scaffold914 | 108725                  | TT                              | CC                 | CC               | DRR                           | 101505858          | uncharacterized LOC101505858        |
| SNP_85974_A_122169 | NW_004516265.1 | scaffold914 | 122169                  | GG                              | AA                 | AA               | INTERGENIC                    |                    |                                     |
| SNP_85975_A_131504 | NW_004516265.1 | scaffold914 | 131504                  | CC                              | TT                 | TT               | INTERGENIC                    |                    |                                     |
| SNP_85976_A_139848 | NW_004516265.1 | scaffold914 | 139848                  | TT                              | CC                 | CC               | INTERGENIC                    |                    |                                     |
| SNP_85977_A_180    | NW_004516266.1 | scaffold916 | 180                     | GG                              | AA                 | AA               | DRR                           | 101514670          | sucrose transport protein SUC8-like |

| SNPs IDs         | Chromosome IDs | Chromosomes | Physical positions (bp) | CDC Frontier (Reference genome) | (Pusa 1103 & HPNB) | (ILWC 46 & LPNB) | Sequence Components of genome | Gene accession IDs | Putative functions                  |
|------------------|----------------|-------------|-------------------------|---------------------------------|--------------------|------------------|-------------------------------|--------------------|-------------------------------------|
| SNP_85979_A_425  | NW_004516266.1 | scaffold916 | 425                     | TT                              | CC                 | CC               | URR                           | 101514670          | sucrose transport protein SUC8-like |
| SNP_85980_A_594  | NW_004516266.1 | scaffold916 | 594                     | GG                              | AA                 | AA               | SYNONYMOUS_CODING             | 101514670          | sucrose transport protein SUC8-like |
| SNP_85981_A_708  | NW_004516266.1 | scaffold916 | 708                     | TT                              | CC                 | CC               | SYNONYMOUS_CODING             | 101514670          | sucrose transport protein SUC8-like |
| SNP_85982_A_2178 | NW_004516266.1 | scaffold916 | 2178                    | AA                              | GG                 | GG               | INTRON                        | 101514670          | sucrose transport protein SUC8-like |
| SNP_85983_A_3203 | NW_004516266.1 | scaffold916 | 3203                    | GG                              | TT                 | TT               | INTRON                        | 101514670          | sucrose transport protein SUC8-like |
| SNP_85985_A_3962 | NW_004516266.1 | scaffold916 | 3962                    | GG                              | AA                 | AA               | INTRON                        | 101514670          | sucrose transport protein SUC8-like |
| SNP_85986_A_4026 | NW_004516266.1 | scaffold916 | 4026                    | CC                              | GG                 | GG               | INTRON                        | 101514670          | sucrose transport protein SUC8-like |
| SNP_85987_A_4188 | NW_004516266.1 | scaffold916 | 4188                    | CC                              | TT                 | TT               | INTRON                        | 101514670          | sucrose transport protein SUC8-like |
| SNP_85988_A_4225 | NW_004516266.1 | scaffold916 | 4225                    | GG                              | AA                 | AA               | INTRON                        | 101514670          | sucrose transport protein SUC8-like |
| SNP_85989_A_4266 | NW_004516266.1 | scaffold916 | 4266                    | AA                              | GG                 | GG               | INTRON                        | 101514670          | sucrose transport protein SUC8-like |
| SNP_85991_A_4440 | NW_004516266.1 | scaffold916 | 4440                    | GG                              | TT                 | TT               | INTRON                        | 101514670          | sucrose transport protein SUC8-like |
| SNP_85993_A_4582 | NW_004516266.1 | scaffold916 | 4582                    | TT                              | CC                 | CC               | INTRON                        | 101514670          | sucrose transport protein SUC8-like |
| SNP_85994_A_4671 | NW_004516266.1 | scaffold916 | 4671                    | CC                              | TT                 | TT               | INTRON                        | 101514670          | sucrose transport protein SUC8-like |
| SNP_85995_A_4710 | NW_004516266.1 | scaffold916 | 4710                    | TT                              | GG                 | GG               | INTRON                        | 101514670          | sucrose transport protein SUC8-like |
| SNP_85996_A_4719 | NW_004516266.1 | scaffold916 | 4719                    | GG                              | AA                 | AA               | INTRON                        | 101514670          | sucrose transport protein SUC8-like |
| SNP_85999_A_4908 | NW_004516266.1 | scaffold916 | 4908                    | GG                              | AA                 | AA               | INTRON                        | 101514670          | sucrose transport protein SUC8-like |
| SNP_86000_A_4935 | NW_004516266.1 | scaffold916 | 4935                    | AA                              | GG                 | GG               | INTRON                        | 101514670          | sucrose transport protein SUC8-like |
| SNP_86001_A_5095 | NW_004516266.1 | scaffold916 | 5095                    | CC                              | TT                 | TT               | INTRON                        | 101514670          | sucrose transport protein SUC8-like |
| SNP_86002_A_5162 | NW_004516266.1 | scaffold916 | 5162                    | GG                              | CC                 | CC               | INTRON                        | 101514670          | sucrose transport protein SUC8-like |
| SNP_86004_A_5353 | NW_004516266.1 | scaffold916 | 5353                    | CC                              | TT                 | TT               | INTRON                        | 101514670          | sucrose transport protein SUC8-like |
| SNP_86005_A_5387 | NW_004516266.1 | scaffold916 | 5387                    | AA                              | GG                 | GG               | INTRON                        | 101514670          | sucrose transport protein SUC8-like |
| SNP_86006_A_7592 | NW_004516266.1 | scaffold916 | 7592                    | TT                              | GG                 | GG               | INTRON                        | 101514670          | sucrose transport protein SUC8-like |

| SNPs IDs         | Chromosome IDs | Chromosomes | Physical positions (bp) | CDC Frontier (Reference genome) | (Pusa 1103 & HPNB) | (ILWC 46 & LPNB) | Sequence genome | Components of | Gene accession IDs | Putative functions                  |
|------------------|----------------|-------------|-------------------------|---------------------------------|--------------------|------------------|-----------------|---------------|--------------------|-------------------------------------|
| SNP_86007_A_7634 | NW_004516266.1 | scaffold916 | 7634                    | AA                              | GG                 | GG               | INTRON          |               | 101514670          | sucrose transport protein SUC8-like |
| SNP_86008_A_7636 | NW_004516266.1 | scaffold916 | 7636                    | TT                              | AA                 | AA               | INTRON          |               | 101514670          | sucrose transport protein SUC8-like |
| SNP_86009_A_7654 | NW_004516266.1 | scaffold916 | 7654                    | CC                              | AA                 | AA               | INTRON          |               | 101514670          | sucrose transport protein SUC8-like |
| SNP_86010_A_7675 | NW_004516266.1 | scaffold916 | 7675                    | TT                              | CC                 | CC               | INTRON          |               | 101514670          | sucrose transport protein SUC8-like |
| SNP_86011_A_7680 | NW_004516266.1 | scaffold916 | 7680                    | AA                              | TT                 | TT               | INTRON          |               | 101514670          | sucrose transport protein SUC8-like |
| SNP_86012_A_7744 | NW_004516266.1 | scaffold916 | 7744                    | TT                              | AA                 | AA               | INTRON          |               | 101514670          | sucrose transport protein SUC8-like |
| SNP_86014_A_7834 | NW_004516266.1 | scaffold916 | 7834                    | AA                              | GG                 | GG               | INTRON          |               | 101514670          | sucrose transport protein SUC8-like |
| SNP_86015_A_7938 | NW_004516266.1 | scaffold916 | 7938                    | AA                              | GG                 | GG               | INTRON          |               | 101514670          | sucrose transport protein SUC8-like |
| SNP_86016_A_8073 | NW_004516266.1 | scaffold916 | 8073                    | CC                              | AA                 | AA               | INTRON          |               | 101514670          | sucrose transport protein SUC8-like |
| SNP_86017_A_8105 | NW_004516266.1 | scaffold916 | 8105                    | CC                              | TT                 | TT               | INTRON          |               | 101514670          | sucrose transport protein SUC8-like |
| SNP_86018_A_8176 | NW_004516266.1 | scaffold916 | 8176                    | CC                              | TT                 | TT               | INTRON          |               | 101514670          | sucrose transport protein SUC8-like |
| SNP_86021_A_8323 | NW_004516266.1 | scaffold916 | 8323                    | GG                              | AA                 | AA               | INTRON          |               | 101514670          | sucrose transport protein SUC8-like |
| SNP_86022_A_8349 | NW_004516266.1 | scaffold916 | 8349                    | GG                              | AA                 | AA               | INTRON          |               | 101514670          | sucrose transport protein SUC8-like |
| SNP_86023_A_8432 | NW_004516266.1 | scaffold916 | 8432                    | TT                              | CC                 | CC               | INTRON          |               | 101514670          | sucrose transport protein SUC8-like |
| SNP_86024_A_8434 | NW_004516266.1 | scaffold916 | 8434                    | CC                              | TT                 | TT               | INTRON          |               | 101514670          | sucrose transport protein SUC8-like |
| SNP_86025_A_8441 | NW_004516266.1 | scaffold916 | 8441                    | GG                              | AA                 | AA               | INTRON          |               | 101514670          | sucrose transport protein SUC8-like |
| SNP_86026_A_8464 | NW_004516266.1 | scaffold916 | 8464                    | CC                              | TT                 | TT               | INTRON          |               | 101514670          | sucrose transport protein SUC8-like |
| SNP_86027_A_8520 | NW_004516266.1 | scaffold916 | 8520                    | CC                              | GG                 | GG               | INTRON          |               | 101514670          | sucrose transport protein SUC8-like |
| SNP_86028_A_8535 | NW_004516266.1 | scaffold916 | 8535                    | AA                              | TT                 | TT               | INTRON          |               | 101514670          | sucrose transport protein SUC8-like |
| SNP_86029_A_8538 | NW_004516266.1 | scaffold916 | 8538                    | TT                              | AA                 | AA               | INTRON          |               | 101514670          | sucrose transport protein SUC8-like |
| SNP_86030_A_8568 | NW_004516266.1 | scaffold916 | 8568                    | TT                              | CC                 | CC               | INTRON          |               | 101514670          | sucrose transport protein SUC8-like |
| SNP_86031_A_8570 | NW_004516266.1 | scaffold916 | 8570                    | GG                              | AA                 | AA               | INTRON          |               | 101514670          | sucrose transport protein SUC8-like |

| SNPs IDs         | Chromosome IDs | Chromosomes | Physical positions (bp) | CDC Frontier (Reference genome) | (Pusa 1103 & HPNB) | (ILWC 46 & LPNB) | Sequence Components of genome | Gene accession IDs | Putative functions                  |
|------------------|----------------|-------------|-------------------------|---------------------------------|--------------------|------------------|-------------------------------|--------------------|-------------------------------------|
| SNP_86032_A_8580 | NW_004516266.1 | scaffold916 | 8580                    | TT                              | AA                 | AA               | INTRON                        | 101514670          | sucrose transport protein SUC8-like |
| SNP_86033_A_8583 | NW_004516266.1 | scaffold916 | 8583                    | TT                              | CC                 | CC               | INTRON                        | 101514670          | sucrose transport protein SUC8-like |
| SNP_86034_A_8591 | NW_004516266.1 | scaffold916 | 8591                    | AA                              | CC                 | CC               | INTRON                        | 101514670          | sucrose transport protein SUC8-like |
| SNP_86035_A_8605 | NW_004516266.1 | scaffold916 | 8605                    | TT                              | AA                 | AA               | INTRON                        | 101514670          | sucrose transport protein SUC8-like |
| SNP_86036_A_8608 | NW_004516266.1 | scaffold916 | 8608                    | TT                              | AA                 | AA               | INTRON                        | 101514670          | sucrose transport protein SUC8-like |
| SNP_86037_A_8684 | NW_004516266.1 | scaffold916 | 8684                    | CC                              | TT                 | TT               | INTRON                        | 101514670          | sucrose transport protein SUC8-like |
| SNP_86038_A_8713 | NW_004516266.1 | scaffold916 | 8713                    | TT                              | CC                 | CC               | INTRON                        | 101514670          | sucrose transport protein SUC8-like |
| SNP_86039_A_8725 | NW_004516266.1 | scaffold916 | 8725                    | AA                              | TT                 | TT               | INTRON                        | 101514670          | sucrose transport protein SUC8-like |
| SNP_86040_A_8800 | NW_004516266.1 | scaffold916 | 8800                    | CC                              | AA                 | AA               | INTRON                        | 101514670          | sucrose transport protein SUC8-like |
| SNP_86041_A_8802 | NW_004516266.1 | scaffold916 | 8802                    | CC                              | TT                 | TT               | INTRON                        | 101514670          | sucrose transport protein SUC8-like |
| SNP_86042_A_8806 | NW_004516266.1 | scaffold916 | 8806                    | GG                              | AA                 | AA               | INTRON                        | 101514670          | sucrose transport protein SUC8-like |
| SNP_86043_A_8819 | NW_004516266.1 | scaffold916 | 8819                    | CC                              | GG                 | GG               | INTRON                        | 101514670          | sucrose transport protein SUC8-like |
| SNP_86044_A_8820 | NW_004516266.1 | scaffold916 | 8820                    | AA                              | GG                 | GG               | INTRON                        | 101514670          | sucrose transport protein SUC8-like |
| SNP_86045_A_8827 | NW_004516266.1 | scaffold916 | 8827                    | GG                              | AA                 | AA               | INTRON                        | 101514670          | sucrose transport protein SUC8-like |
| SNP_86046_A_8833 | NW_004516266.1 | scaffold916 | 8833                    | GG                              | TT                 | TT               | INTRON                        | 101514670          | sucrose transport protein SUC8-like |
| SNP_86047_A_8919 | NW_004516266.1 | scaffold916 | 8919                    | CC                              | TT                 | TT               | INTRON                        | 101514670          | sucrose transport protein SUC8-like |
| SNP_86048_A_8977 | NW_004516266.1 | scaffold916 | 8977                    | CC                              | AA                 | AA               | INTRON                        | 101514670          | sucrose transport protein SUC8-like |
| SNP_86049_A_8979 | NW_004516266.1 | scaffold916 | 8979                    | AA                              | CC                 | CC               | INTRON                        | 101514670          | sucrose transport protein SUC8-like |
| SNP_86050_A_8982 | NW_004516266.1 | scaffold916 | 8982                    | AA                              | TT                 | TT               | INTRON                        | 101514670          | sucrose transport protein SUC8-like |
| SNP_86051_A_9100 | NW_004516266.1 | scaffold916 | 9100                    | GG                              | CC                 | CC               | INTRON                        | 101514670          | sucrose transport protein SUC8-like |
| SNP_86053_A_9433 | NW_004516266.1 | scaffold916 | 9433                    | CC                              | TT                 | TT               | INTRON                        | 101514670          | sucrose transport protein SUC8-like |
| SNP_86054_A_9470 | NW_004516266.1 | scaffold916 | 9470                    | TT                              | CC                 | CC               | INTRON                        | 101514670          | sucrose transport protein SUC8-like |

| SNPs IDs           | Chromosome IDs | Chromosomes | Physical positions (bp) | CDC Frontier (Reference genome) | (Pusa 1103 & HPNB) | (ILWC 46 & LPNB) | Sequence Components of genome | Gene accession IDs | Putative functions                  |
|--------------------|----------------|-------------|-------------------------|---------------------------------|--------------------|------------------|-------------------------------|--------------------|-------------------------------------|
| SNP_86056_A_9538   | NW_004516266.1 | scaffold916 | 9538                    | AA                              | CC                 | CC               | INTRON                        | 101514670          | sucrose transport protein SUC8-like |
| SNP_86057_A_9554   | NW_004516266.1 | scaffold916 | 9554                    | TT                              | CC                 | CC               | INTRON                        | 101514670          | sucrose transport protein SUC8-like |
| SNP_86058_A_9593   | NW_004516266.1 | scaffold916 | 9593                    | AA                              | GG                 | GG               | INTRON                        | 101514670          | sucrose transport protein SUC8-like |
| SNP_86059_A_9621   | NW_004516266.1 | scaffold916 | 9621                    | AA                              | GG                 | GG               | INTRON                        | 101514670          | sucrose transport protein SUC8-like |
| SNP_86060_A_9638   | NW_004516266.1 | scaffold916 | 9638                    | TT                              | CC                 | CC               | INTRON                        | 101514670          | sucrose transport protein SUC8-like |
| SNP_86061_A_9700   | NW_004516266.1 | scaffold916 | 9700                    | CC                              | TT                 | TT               | INTRON                        | 101514670          | sucrose transport protein SUC8-like |
| SNP_86062_A_9708   | NW_004516266.1 | scaffold916 | 9708                    | AA                              | GG                 | GG               | INTRON                        | 101514670          | sucrose transport protein SUC8-like |
| SNP_86063_A_9760   | NW_004516266.1 | scaffold916 | 9760                    | GG                              | AA                 | AA               | INTRON                        | 101514670          | sucrose transport protein SUC8-like |
| SNP_86064_A_9862   | NW_004516266.1 | scaffold916 | 9862                    | TT                              | CC                 | CC               | INTRON                        | 101514670          | sucrose transport protein SUC8-like |
| SNP_86065_A_9881   | NW_004516266.1 | scaffold916 | 9881                    | TT                              | CC                 | CC               | INTRON                        | 101514670          | sucrose transport protein SUC8-like |
| SNP_86066_A_9882   | NW_004516266.1 | scaffold916 | 9882                    | TT                              | CC                 | CC               | INTRON                        | 101514670          | sucrose transport protein SUC8-like |
| SNP_86069_A_10038  | NW_004516266.1 | scaffold916 | 10038                   | TT                              | AA                 | AA               | INTRON                        | 101514670          | sucrose transport protein SUC8-like |
| SNP_86071_A_10098  | NW_004516266.1 | scaffold916 | 10098                   | CC                              | TT                 | TT               | INTRON                        | 101514670          | sucrose transport protein SUC8-like |
| SNP_86073_A_10115  | NW_004516266.1 | scaffold916 | 10115                   | TT                              | CC                 | CC               | INTRON                        | 101514670          | sucrose transport protein SUC8-like |
| SNP_86074_A_10137  | NW_004516266.1 | scaffold916 | 10137                   | GG                              | AA                 | AA               | INTRON                        | 101514670          | sucrose transport protein SUC8-like |
| SNP_86075_A_18676  | NW_004516266.1 | scaffold916 | 18676                   | AA                              | CC                 | CC               | INTRON                        | 101514670          | sucrose transport protein SUC8-like |
| SNP_86076_A_18961  | NW_004516266.1 | scaffold916 | 18961                   | AA                              | GG                 | GG               | INTRON                        | 101514670          | sucrose transport protein SUC8-like |
| SNP_86077_A_19199  | NW_004516266.1 | scaffold916 | 19199                   | AA                              | GG                 | GG               | INTRON                        | 101514670          | sucrose transport protein SUC8-like |
| SNP_86078_A_19208  | NW_004516266.1 | scaffold916 | 19208                   | TT                              | CC                 | CC               | INTRON                        | 101514670          | sucrose transport protein SUC8-like |
| SNP_86079_A_19211  | NW_004516266.1 | scaffold916 | 19211                   | TT                              | CC                 | CC               | INTRON                        | 101514670          | sucrose transport protein SUC8-like |
| SNP_86080_A_19217  | NW_004516266.1 | scaffold916 | 19217                   | GG                              | TT                 | TT               | INTRON                        | 101514670          | sucrose transport protein SUC8-like |
| SNP_86081_A_101127 | NW_004516266.1 | scaffold916 | 101127                  | GG                              | TT                 | TT               | INTERGENIC                    |                    |                                     |

| SNPs IDs           | Chromosome IDs | Chromosomes | Physical positions (bp) | CDC Frontier (Reference genome) | (Pusa 1103 & HPNB) | (ILWC 46 & LPNB) | Sequence genome | Components of | Gene accession IDs | Putative functions |
|--------------------|----------------|-------------|-------------------------|---------------------------------|--------------------|------------------|-----------------|---------------|--------------------|--------------------|
| SNP_86082_A_101459 | NW_004516266.1 | scaffold916 | 101459                  | TT                              | AA                 | AA               | INTERGENIC      |               |                    |                    |
| SNP_86083_A_101861 | NW_004516266.1 | scaffold916 | 101861                  | TT                              | AA                 | AA               | INTERGENIC      |               |                    |                    |
| SNP_86084_A_105262 | NW_004516266.1 | scaffold916 | 105262                  | TT                              | AA                 | AA               | INTERGENIC      |               |                    |                    |
| SNP_86085_A_105293 | NW_004516266.1 | scaffold916 | 105293                  | TT                              | CC                 | CC               | INTERGENIC      |               |                    |                    |
| SNP_86086_A_108155 | NW_004516266.1 | scaffold916 | 108155                  | GG                              | AA                 | AA               | INTERGENIC      |               |                    |                    |
| SNP_86087_A_108169 | NW_004516266.1 | scaffold916 | 108169                  | CC                              | AA                 | AA               | INTERGENIC      |               |                    |                    |
| SNP_86088_A_111188 | NW_004516266.1 | scaffold916 | 111188                  | TT                              | AA                 | AA               | INTERGENIC      |               |                    |                    |
| SNP_86089_A_115184 | NW_004516266.1 | scaffold916 | 115184                  | AA                              | GG                 | GG               | INTERGENIC      |               |                    |                    |
| SNP_86090_A_117863 | NW_004516266.1 | scaffold916 | 117863                  | CC                              | AA                 | AA               | INTERGENIC      |               |                    |                    |
| SNP_86091_A_117954 | NW_004516266.1 | scaffold916 | 117954                  | TT                              | AA                 | AA               | INTERGENIC      |               |                    |                    |
| SNP_86092_A_118125 | NW_004516266.1 | scaffold916 | 118125                  | TT                              | GG                 | GG               | INTERGENIC      |               |                    |                    |
| SNP_86093_A_118151 | NW_004516266.1 | scaffold916 | 118151                  | TT                              | AA                 | AA               | INTERGENIC      |               |                    |                    |
| SNP_86094_A_118326 | NW_004516266.1 | scaffold916 | 118326                  | CC                              | TT                 | TT               | INTERGENIC      |               |                    |                    |
| SNP_86096_A_166276 | NW_004516266.1 | scaffold916 | 166276                  | TT                              | GG                 | GG               | INTERGENIC      |               |                    |                    |
| SNP_86097_A_166277 | NW_004516266.1 | scaffold916 | 166277                  | AA                              | GG                 | GG               | INTERGENIC      |               |                    |                    |
| SNP_86098_A_166294 | NW_004516266.1 | scaffold916 | 166294                  | CC                              | TT                 | TT               | INTERGENIC      |               |                    |                    |
| SNP_86099_A_166341 | NW_004516266.1 | scaffold916 | 166341                  | CC                              | TT                 | TT               | INTERGENIC      |               |                    |                    |
| SNP_86100_A_166399 | NW_004516266.1 | scaffold916 | 166399                  | TT                              | GG                 | GG               | INTERGENIC      |               |                    |                    |
| SNP_86101_A_177566 | NW_004516266.1 | scaffold916 | 177566                  | CC                              | AA                 | AA               | INTERGENIC      |               |                    |                    |
| SNP_86102_A_180943 | NW_004516266.1 | scaffold916 | 180943                  | AA                              | GG                 | GG               | INTERGENIC      |               |                    |                    |
| SNP_86103_A_186982 | NW_004516266.1 | scaffold916 | 186982                  | CC                              | TT                 | TT               | INTERGENIC      |               |                    |                    |
| SNP_86104_A_189532 | NW_004516266.1 | scaffold916 | 189532                  | GG                              | CC                 | CC               | INTERGENIC      |               |                    |                    |



| SNPs IDs           | Chromosome IDs | Chromosomes | Physical positions (bp) | CDC Frontier (Reference genome) | (Pusa 1103 & HPNB) | (ILWC 46 & LPNB) | Sequence Components of genome | Gene accession IDs | Putative functions                      |
|--------------------|----------------|-------------|-------------------------|---------------------------------|--------------------|------------------|-------------------------------|--------------------|-----------------------------------------|
| SNP_86106_A_282444 | NW_004516266.1 | scaffold916 | 282444                  | AA                              | CC                 | CC               | INTERGENIC                    |                    |                                         |
| SNP_86107_A_284079 | NW_004516266.1 | scaffold916 | 284079                  | CC                              | AA                 | AA               | INTERGENIC                    |                    |                                         |
| SNP_86108_A_322632 | NW_004516266.1 | scaffold916 | 322632                  | AA                              | CC                 | CC               | INTERGENIC                    |                    |                                         |
| SNP_86110_A_408044 | NW_004516266.1 | scaffold916 | 408044                  | GG                              | CC                 | CC               | INTRON                        | 101510033          | ABC transporter C family member 10-like |
| SNP_86112_A_543843 | NW_004516266.1 | scaffold916 | 543843                  | GG                              | AA                 | AA               | INTERGENIC                    |                    |                                         |
| SNP_86113_A_12650  | NW_004516268.1 | scaffold918 | 12650                   | TT                              | CC                 | CC               | INTERGENIC                    |                    |                                         |
| SNP_86114_A_13914  | NW_004516268.1 | scaffold918 | 13914                   | TT                              | CC                 | CC               | INTERGENIC                    |                    |                                         |
| SNP_86115_A_13926  | NW_004516268.1 | scaffold918 | 13926                   | TT                              | AA                 | AA               | INTERGENIC                    |                    |                                         |
| SNP_86116_A_13947  | NW_004516268.1 | scaffold918 | 13947                   | GG                              | AA                 | AA               | INTERGENIC                    |                    |                                         |
| SNP_86117_A_14269  | NW_004516268.1 | scaffold918 | 14269                   | TT                              | CC                 | CC               | INTERGENIC                    |                    |                                         |
| SNP_86118_A_33844  | NW_004516268.1 | scaffold918 | 33844                   | AA                              | GG                 | GG               | INTERGENIC                    |                    |                                         |
| SNP_86119_A_33864  | NW_004516268.1 | scaffold918 | 33864                   | AA                              | TT                 | TT               | INTERGENIC                    |                    |                                         |
| SNP_86120_A_36635  | NW_004516268.1 | scaffold918 | 36635                   | TT                              | CC                 | CC               | INTERGENIC                    |                    |                                         |
| SNP_86121_A_39728  | NW_004516268.1 | scaffold918 | 39728                   | TT                              | AA                 | AA               | INTERGENIC                    |                    |                                         |
| SNP_86122_A_49211  | NW_004516268.1 | scaffold918 | 49211                   | AA                              | CC                 | CC               | INTERGENIC                    |                    |                                         |
| SNP_86123_A_49268  | NW_004516268.1 | scaffold918 | 49268                   | GG                              | AA                 | AA               | INTERGENIC                    |                    |                                         |
| SNP_86125_A_49319  | NW_004516268.1 | scaffold918 | 49319                   | AA                              | CC                 | CC               | INTERGENIC                    |                    |                                         |
| SNP_86126_A_8273   | NW_004516269.1 | scaffold919 | 8273                    | CC                              | TT                 | TT               | INTERGENIC                    |                    |                                         |
| SNP_86127_A_9693   | NW_004516269.1 | scaffold919 | 9693                    | TT                              | GG                 | GG               | INTERGENIC                    |                    |                                         |
| SNP_86128_A_12976  | NW_004516269.1 | scaffold919 | 12976                   | TT                              | AA                 | AA               | INTERGENIC                    |                    |                                         |
| SNP_86129_A_12982  | NW_004516269.1 | scaffold919 | 12982                   | AA                              | GG                 | GG               | INTERGENIC                    |                    |                                         |
| SNP_86130_A_12996  | NW_004516269.1 | scaffold919 | 12996                   | AA                              | GG                 | GG               | INTERGENIC                    |                    |                                         |

| SNPs IDs           | Chromosome IDs | Chromosomes | Physical positions (bp) | CDC Frontier (Reference genome) | (Pusa 1103 & HPNB) | (ILWC 46 & LPNB) | Sequence Components of genome | Gene accession IDs | Putative functions           |
|--------------------|----------------|-------------|-------------------------|---------------------------------|--------------------|------------------|-------------------------------|--------------------|------------------------------|
| SNP_86131_A_13003  | NW_004516269.1 | scaffold919 | 13003                   | AA                              | GG                 | GG               | INTERGENIC                    |                    |                              |
| SNP_86132_A_13008  | NW_004516269.1 | scaffold919 | 13008                   | AA                              | GG                 | GG               | INTERGENIC                    |                    |                              |
| SNP_86133_A_13365  | NW_004516269.1 | scaffold919 | 13365                   | GG                              | AA                 | AA               | INTERGENIC                    |                    |                              |
| SNP_86134_A_13410  | NW_004516269.1 | scaffold919 | 13410                   | TT                              | CC                 | CC               | INTERGENIC                    |                    |                              |
| SNP_86135_A_13416  | NW_004516269.1 | scaffold919 | 13416                   | AA                              | TT                 | TT               | INTERGENIC                    |                    |                              |
| SNP_86137_A_14694  | NW_004516269.1 | scaffold919 | 14694                   | CC                              | AA                 | AA               | INTERGENIC                    |                    |                              |
| SNP_86139_A_73713  | NW_004516269.1 | scaffold919 | 73713                   | CC                              | AA                 | AA               | INTRON                        | 101494360          | uncharacterized LOC101494360 |
| SNP_86140_A_73745  | NW_004516269.1 | scaffold919 | 73745                   | AA                              | GG                 | GG               | INTRON                        | 101494360          | uncharacterized LOC101494360 |
| SNP_86141_A_73753  | NW_004516269.1 | scaffold919 | 73753                   | CC                              | TT                 | TT               | INTRON                        | 101494360          | uncharacterized LOC101494360 |
| SNP_86143_A_85131  | NW_004516269.1 | scaffold919 | 85131                   | CC                              | TT                 | TT               | INTERGENIC                    |                    |                              |
| SNP_86144_A_85150  | NW_004516269.1 | scaffold919 | 85150                   | GG                              | AA                 | AA               | INTERGENIC                    |                    |                              |
| SNP_86145_A_94141  | NW_004516269.1 | scaffold919 | 94141                   | AA                              | TT                 | TT               | INTERGENIC                    |                    |                              |
| SNP_86146_A_94142  | NW_004516269.1 | scaffold919 | 94142                   | TT                              | GG                 | GG               | INTERGENIC                    |                    |                              |
| SNP_86147_A_94425  | NW_004516269.1 | scaffold919 | 94425                   | AA                              | GG                 | GG               | INTERGENIC                    |                    |                              |
| SNP_86148_A_97912  | NW_004516269.1 | scaffold919 | 97912                   | TT                              | CC                 | CC               | INTERGENIC                    |                    |                              |
| SNP_86149_A_102467 | NW_004516269.1 | scaffold919 | 102467                  | CC                              | AA                 | AA               | INTERGENIC                    |                    |                              |
| SNP_86150_A_102473 | NW_004516269.1 | scaffold919 | 102473                  | GG                              | AA                 | AA               | INTERGENIC                    |                    |                              |
| SNP_86151_A_102474 | NW_004516269.1 | scaffold919 | 102474                  | AA                              | GG                 | GG               | INTERGENIC                    |                    |                              |
| SNP_86152_A_113504 | NW_004516269.1 | scaffold919 | 113504                  | CC                              | AA                 | AA               | INTERGENIC                    |                    |                              |
| SNP_86153_A_114007 | NW_004516269.1 | scaffold919 | 114007                  | AA                              | GG                 | GG               | INTERGENIC                    |                    |                              |
| SNP_86154_A_114021 | NW_004516269.1 | scaffold919 | 114021                  | TT                              | CC                 | CC               | INTERGENIC                    |                    |                              |
| SNP_86155_A_114034 | NW_004516269.1 | scaffold919 | 114034                  | TT                              | AA                 | AA               | INTERGENIC                    |                    |                              |

| SNPs IDs           | Chromosome IDs | Chromosomes | Physical positions (bp) | CDC Frontier (Reference genome) | (Pusa 1103 & HPNB) | (ILWC 46 & LPNB) | Sequence genome | Components of | Gene accession IDs | Putative functions |
|--------------------|----------------|-------------|-------------------------|---------------------------------|--------------------|------------------|-----------------|---------------|--------------------|--------------------|
| SNP_86156_A_114410 | NW_004516269.1 | scaffold919 | 114410                  | AA                              | GG                 | GG               | INTERGENIC      |               |                    |                    |
| SNP_86157_A_114659 | NW_004516269.1 | scaffold919 | 114659                  | AA                              | GG                 | GG               | INTERGENIC      |               |                    |                    |
| SNP_86158_A_114664 | NW_004516269.1 | scaffold919 | 114664                  | AA                              | GG                 | GG               | INTERGENIC      |               |                    |                    |
| SNP_86159_A_114684 | NW_004516269.1 | scaffold919 | 114684                  | GG                              | AA                 | AA               | INTERGENIC      |               |                    |                    |
| SNP_86160_A_115023 | NW_004516269.1 | scaffold919 | 115023                  | GG                              | AA                 | AA               | INTERGENIC      |               |                    |                    |
| SNP_86161_A_115057 | NW_004516269.1 | scaffold919 | 115057                  | CC                              | TT                 | TT               | INTERGENIC      |               |                    |                    |
| SNP_86162_A_115127 | NW_004516269.1 | scaffold919 | 115127                  | TT                              | CC                 | CC               | INTERGENIC      |               |                    |                    |
| SNP_86163_A_115139 | NW_004516269.1 | scaffold919 | 115139                  | TT                              | GG                 | GG               | INTERGENIC      |               |                    |                    |
| SNP_86164_A_115180 | NW_004516269.1 | scaffold919 | 115180                  | GG                              | TT                 | TT               | INTERGENIC      |               |                    |                    |
| SNP_86165_A_116592 | NW_004516269.1 | scaffold919 | 116592                  | AA                              | GG                 | GG               | INTERGENIC      |               |                    |                    |
| SNP_86166_A_151618 | NW_004516269.1 | scaffold919 | 151618                  | TT                              | CC                 | CC               | INTERGENIC      |               |                    |                    |
| SNP_86167_A_151642 | NW_004516269.1 | scaffold919 | 151642                  | AA                              | GG                 | GG               | INTERGENIC      |               |                    |                    |
| SNP_86168_A_183216 | NW_004516269.1 | scaffold919 | 183216                  | GG                              | AA                 | AA               | INTERGENIC      |               |                    |                    |
| SNP_86170_A_183458 | NW_004516269.1 | scaffold919 | 183458                  | AA                              | CC                 | CC               | INTERGENIC      |               |                    |                    |
| SNP_86171_A_183495 | NW_004516269.1 | scaffold919 | 183495                  | CC                              | TT                 | TT               | INTERGENIC      |               |                    |                    |
| SNP_86172_A_183509 | NW_004516269.1 | scaffold919 | 183509                  | TT                              | CC                 | CC               | INTERGENIC      |               |                    |                    |
| SNP_86173_A_183514 | NW_004516269.1 | scaffold919 | 183514                  | AA                              | GG                 | GG               | INTERGENIC      |               |                    |                    |
| SNP_86174_A_183543 | NW_004516269.1 | scaffold919 | 183543                  | GG                              | AA                 | AA               | INTERGENIC      |               |                    |                    |
| SNP_86175_A_183549 | NW_004516269.1 | scaffold919 | 183549                  | CC                              | TT                 | TT               | INTERGENIC      |               |                    |                    |
| SNP_86176_A_183566 | NW_004516269.1 | scaffold919 | 183566                  | TT                              | AA                 | AA               | INTERGENIC      |               |                    |                    |
| SNP_86177_A_183606 | NW_004516269.1 | scaffold919 | 183606                  | AA                              | GG                 | GG               | INTERGENIC      |               |                    |                    |
| SNP_86179_A_186250 | NW_004516269.1 | scaffold919 | 186250                  | CC                              | TT                 | TT               | INTERGENIC      |               |                    |                    |

| SNPs IDs           | Chromosome IDs | Chromosomes | Physical positions (bp) | CDC Frontier (Reference genome) | (Pusa 1103 & HPNB) | (ILWC 46 & LPNB) | Sequence genome | Components of | Gene accession IDs | Putative functions |
|--------------------|----------------|-------------|-------------------------|---------------------------------|--------------------|------------------|-----------------|---------------|--------------------|--------------------|
| SNP_86180_A_186261 | NW_004516269.1 | scaffold919 | 186261                  | AA                              | TT                 | TT               | INTERGENIC      |               |                    |                    |
| SNP_86181_A_186288 | NW_004516269.1 | scaffold919 | 186288                  | TT                              | AA                 | AA               | INTERGENIC      |               |                    |                    |
| SNP_86182_A_186303 | NW_004516269.1 | scaffold919 | 186303                  | TT                              | AA                 | AA               | INTERGENIC      |               |                    |                    |
| SNP_86183_A_186321 | NW_004516269.1 | scaffold919 | 186321                  | TT                              | AA                 | AA               | INTERGENIC      |               |                    |                    |
| SNP_86184_A_186333 | NW_004516269.1 | scaffold919 | 186333                  | TT                              | AA                 | AA               | INTERGENIC      |               |                    |                    |
| SNP_86185_A_186337 | NW_004516269.1 | scaffold919 | 186337                  | GG                              | AA                 | AA               | INTERGENIC      |               |                    |                    |
| SNP_86186_A_186532 | NW_004516269.1 | scaffold919 | 186532                  | TT                              | CC                 | CC               | INTERGENIC      |               |                    |                    |
| SNP_86187_A_186535 | NW_004516269.1 | scaffold919 | 186535                  | GG                              | AA                 | AA               | INTERGENIC      |               |                    |                    |
| SNP_86188_A_186554 | NW_004516269.1 | scaffold919 | 186554                  | GG                              | AA                 | AA               | INTERGENIC      |               |                    |                    |
| SNP_86189_A_186562 | NW_004516269.1 | scaffold919 | 186562                  | AA                              | GG                 | GG               | INTERGENIC      |               |                    |                    |
| SNP_86190_A_186608 | NW_004516269.1 | scaffold919 | 186608                  | CC                              | AA                 | AA               | INTERGENIC      |               |                    |                    |
| SNP_86191_A_186668 | NW_004516269.1 | scaffold919 | 186668                  | AA                              | GG                 | GG               | INTERGENIC      |               |                    |                    |
| SNP_86192_A_187093 | NW_004516269.1 | scaffold919 | 187093                  | TT                              | CC                 | CC               | INTERGENIC      |               |                    |                    |
| SNP_86193_A_187170 | NW_004516269.1 | scaffold919 | 187170                  | CC                              | TT                 | TT               | INTERGENIC      |               |                    |                    |
| SNP_86194_A_187203 | NW_004516269.1 | scaffold919 | 187203                  | TT                              | CC                 | CC               | INTERGENIC      |               |                    |                    |
| SNP_86195_A_188597 | NW_004516269.1 | scaffold919 | 188597                  | GG                              | AA                 | AA               | INTERGENIC      |               |                    |                    |
| SNP_86196_A_188999 | NW_004516269.1 | scaffold919 | 188999                  | CC                              | GG                 | GG               | INTERGENIC      |               |                    |                    |
| SNP_86197_A_189032 | NW_004516269.1 | scaffold919 | 189032                  | CC                              | TT                 | TT               | INTERGENIC      |               |                    |                    |
| SNP_86198_A_189097 | NW_004516269.1 | scaffold919 | 189097                  | AA                              | TT                 | TT               | INTERGENIC      |               |                    |                    |
| SNP_86199_A_190192 | NW_004516269.1 | scaffold919 | 190192                  | TT                              | CC                 | CC               | INTERGENIC      |               |                    |                    |
| SNP_86200_A_190204 | NW_004516269.1 | scaffold919 | 190204                  | AA                              | GG                 | GG               | INTERGENIC      |               |                    |                    |
| SNP_86201_A_193432 | NW_004516269.1 | scaffold919 | 193432                  | GG                              | AA                 | AA               | INTERGENIC      |               |                    |                    |

| SNPs IDs           | Chromosome IDs | Chromosomes | Physical positions (bp) | CDC Frontier (Reference genome) | (Pusa 1103 & HPNB) | (ILWC 46 & LPNB) | Sequence genome | Components of | Gene accession IDs           | Putative functions |
|--------------------|----------------|-------------|-------------------------|---------------------------------|--------------------|------------------|-----------------|---------------|------------------------------|--------------------|
| SNP_86202_A_193756 | NW_004516269.1 | scaffold919 | 193756                  | TT                              | AA                 | AA               | INTERGENIC      |               |                              |                    |
| SNP_86203_A_194083 | NW_004516269.1 | scaffold919 | 194083                  | AA                              | GG                 | GG               | INTERGENIC      |               |                              |                    |
| SNP_86204_A_194117 | NW_004516269.1 | scaffold919 | 194117                  | TT                              | AA                 | AA               | INTERGENIC      |               |                              |                    |
| SNP_86205_A_194706 | NW_004516269.1 | scaffold919 | 194706                  | CC                              | TT                 | TT               | INTERGENIC      |               |                              |                    |
| SNP_86206_A_240131 | NW_004516269.1 | scaffold919 | 240131                  | AA                              | GG                 | GG               | INTERGENIC      |               |                              |                    |
| SNP_86207_A_254236 | NW_004516269.1 | scaffold919 | 254236                  | AA                              | GG                 | GG               | INTERGENIC      |               |                              |                    |
| SNP_86208_A_254243 | NW_004516269.1 | scaffold919 | 254243                  | GG                              | AA                 | AA               | INTERGENIC      |               |                              |                    |
| SNP_86209_A_301768 | NW_004516269.1 | scaffold919 | 301768                  | AA                              | TT                 | TT               | INTERGENIC      |               |                              |                    |
| SNP_86210_A_301804 | NW_004516269.1 | scaffold919 | 301804                  | CC                              | AA                 | AA               | INTERGENIC      |               |                              |                    |
| SNP_86211_A_301928 | NW_004516269.1 | scaffold919 | 301928                  | GG                              | AA                 | AA               | INTERGENIC      |               |                              |                    |
| SNP_86212_A_301945 | NW_004516269.1 | scaffold919 | 301945                  | CC                              | TT                 | TT               | INTERGENIC      |               |                              |                    |
| SNP_86213_A_303677 | NW_004516269.1 | scaffold919 | 303677                  | GG                              | AA                 | AA               | INTERGENIC      |               |                              |                    |
| SNP_86214_A_304180 | NW_004516269.1 | scaffold919 | 304180                  | CC                              | AA                 | AA               | INTERGENIC      |               |                              |                    |
| SNP_86215_A_353428 | NW_004516269.1 | scaffold919 | 353428                  | TT                              | AA                 | AA               | INTERGENIC      |               |                              |                    |
| SNP_86216_A_416582 | NW_004516269.1 | scaffold919 | 416582                  | AA                              | CC                 | CC               | INTERGENIC      |               |                              |                    |
| SNP_86217_A_443950 | NW_004516269.1 | scaffold919 | 443950                  | TT                              | GG                 | GG               | URR             | 101491652     | uncharacterized LOC101491652 |                    |
| SNP_86218_A_488893 | NW_004516269.1 | scaffold919 | 488893                  | AA                              | TT                 | TT               | INTRON          | 101496632     | Unknown function             |                    |
| SNP_86219_A_505016 | NW_004516269.1 | scaffold919 | 505016                  | CC                              | TT                 | TT               | INTRON          | 101496632     | Unknown function             |                    |
| SNP_86220_A_528765 | NW_004516269.1 | scaffold919 | 528765                  | TT                              | CC                 | CC               | INTRON          | 101496632     | Unknown function             |                    |
| SNP_86221_A_572830 | NW_004516269.1 | scaffold919 | 572830                  | GG                              | AA                 | AA               | INTERGENIC      |               |                              |                    |
| SNP_86222_A_573056 | NW_004516269.1 | scaffold919 | 573056                  | TT                              | GG                 | GG               | INTERGENIC      |               |                              |                    |
| SNP_86223_A_573071 | NW_004516269.1 | scaffold919 | 573071                  | GG                              | AA                 | AA               | INTERGENIC      |               |                              |                    |

| SNPs IDs           | Chromosome IDs | Chromosomes | Physical positions (bp) | CDC Frontier (Reference genome) | (Pusa 1103 & HPNB) | (ILWC 46 & LPNB) | Sequence genome | Components of | Gene accession IDs | Putative functions |
|--------------------|----------------|-------------|-------------------------|---------------------------------|--------------------|------------------|-----------------|---------------|--------------------|--------------------|
| SNP_86224_A_573108 | NW_004516269.1 | scaffold919 | 573108                  | AA                              | TT                 | TT               | INTERGENIC      |               |                    |                    |
| SNP_86225_A_573118 | NW_004516269.1 | scaffold919 | 573118                  | TT                              | CC                 | CC               | INTERGENIC      |               |                    |                    |
| SNP_86226_A_573122 | NW_004516269.1 | scaffold919 | 573122                  | GG                              | TT                 | TT               | INTERGENIC      |               |                    |                    |
| SNP_86227_A_573127 | NW_004516269.1 | scaffold919 | 573127                  | AA                              | TT                 | TT               | INTERGENIC      |               |                    |                    |
| SNP_86228_A_573160 | NW_004516269.1 | scaffold919 | 573160                  | AA                              | TT                 | TT               | INTERGENIC      |               |                    |                    |
| SNP_86229_A_573177 | NW_004516269.1 | scaffold919 | 573177                  | TT                              | CC                 | CC               | INTERGENIC      |               |                    |                    |
| SNP_86230_A_573183 | NW_004516269.1 | scaffold919 | 573183                  | AA                              | GG                 | GG               | INTERGENIC      |               |                    |                    |
| SNP_86231_A_573199 | NW_004516269.1 | scaffold919 | 573199                  | TT                              | CC                 | CC               | INTERGENIC      |               |                    |                    |
| SNP_86232_A_585795 | NW_004516269.1 | scaffold919 | 585795                  | AA                              | GG                 | GG               | INTERGENIC      |               |                    |                    |
| SNP_86233_A_589657 | NW_004516269.1 | scaffold919 | 589657                  | TT                              | AA                 | AA               | INTERGENIC      |               |                    |                    |
| SNP_86234_A_589907 | NW_004516269.1 | scaffold919 | 589907                  | TT                              | AA                 | AA               | INTERGENIC      |               |                    |                    |
| SNP_86235_A_597936 | NW_004516269.1 | scaffold919 | 597936                  | AA                              | GG                 | GG               | INTERGENIC      |               |                    |                    |
| SNP_86236_A_598458 | NW_004516269.1 | scaffold919 | 598458                  | AA                              | GG                 | GG               | INTERGENIC      |               |                    |                    |
| SNP_86237_A_635203 | NW_004516269.1 | scaffold919 | 635203                  | TT                              | CC                 | CC               | INTERGENIC      |               |                    |                    |
| SNP_86238_A_646069 | NW_004516269.1 | scaffold919 | 646069                  | GG                              | AA                 | AA               | INTERGENIC      |               |                    |                    |
| SNP_86239_A_673244 | NW_004516269.1 | scaffold919 | 673244                  | TT                              | CC                 | CC               | INTERGENIC      |               |                    |                    |
| SNP_86240_A_673293 | NW_004516269.1 | scaffold919 | 673293                  | TT                              | CC                 | CC               | INTERGENIC      |               |                    |                    |
| SNP_86242_A_718829 | NW_004516269.1 | scaffold919 | 718829                  | AA                              | GG                 | GG               | INTERGENIC      |               |                    |                    |
| SNP_86243_A_724477 | NW_004516269.1 | scaffold919 | 724477                  | CC                              | TT                 | TT               | INTERGENIC      |               |                    |                    |
| SNP_86244_A_724492 | NW_004516269.1 | scaffold919 | 724492                  | AA                              | TT                 | TT               | INTERGENIC      |               |                    |                    |
| SNP_86245_A_724501 | NW_004516269.1 | scaffold919 | 724501                  | CC                              | TT                 | TT               | INTERGENIC      |               |                    |                    |
| SNP_86246_A_2943   | NW_004516271.1 | scaffold922 | 2943                    | AA                              | GG                 | GG               | INTERGENIC      |               |                    |                    |

| SNPs IDs           | Chromosome IDs | Chromosomes | Physical positions (bp) | CDC Frontier (Reference genome) | (Pusa 1103 & HPNB) | (ILWC 46 & LPNB) | Sequence Components of genome | Gene accession IDs | Putative functions                        |
|--------------------|----------------|-------------|-------------------------|---------------------------------|--------------------|------------------|-------------------------------|--------------------|-------------------------------------------|
| SNP_86247_A_21483  | NW_004516271.1 | scaffold922 | 21483                   | AA                              | GG                 | GG               | INTERGENIC                    |                    |                                           |
| SNP_86248_A_21489  | NW_004516271.1 | scaffold922 | 21489                   | AA                              | GG                 | GG               | INTERGENIC                    |                    |                                           |
| SNP_86249_A_21514  | NW_004516271.1 | scaffold922 | 21514                   | TT                              | CC                 | CC               | INTERGENIC                    |                    |                                           |
| SNP_86250_A_21765  | NW_004516271.1 | scaffold922 | 21765                   | TT                              | CC                 | CC               | INTERGENIC                    |                    |                                           |
| SNP_86251_A_40629  | NW_004516271.1 | scaffold922 | 40629                   | AA                              | CC                 | CC               | INTERGENIC                    |                    |                                           |
| SNP_86252_A_40852  | NW_004516271.1 | scaffold922 | 40852                   | AA                              | GG                 | GG               | INTERGENIC                    |                    |                                           |
| SNP_86253_A_41033  | NW_004516271.1 | scaffold922 | 41033                   | AA                              | GG                 | GG               | INTERGENIC                    |                    |                                           |
| SNP_86254_A_41035  | NW_004516271.1 | scaffold922 | 41035                   | TT                              | CC                 | CC               | INTERGENIC                    |                    |                                           |
| SNP_86256_A_78561  | NW_004516271.1 | scaffold922 | 78561                   | TT                              | CC                 | CC               | INTERGENIC                    |                    |                                           |
| SNP_86257_A_93852  | NW_004516271.1 | scaffold922 | 93852                   | TT                              | AA                 | AA               | INTRON                        | 101497281          | nuclear pore complex protein NUP205       |
| SNP_86258_A_24106  | NW_004516272.1 | scaffold924 | 24106                   | TT                              | AA                 | AA               | INTERGENIC                    |                    |                                           |
| SNP_86259_A_56803  | NW_004516272.1 | scaffold924 | 56803                   | AA                              | CC                 | CC               | INTERGENIC                    |                    |                                           |
| SNP_86260_A_81135  | NW_004516272.1 | scaffold924 | 81135                   | TT                              | CC                 | CC               | INTERGENIC                    |                    |                                           |
| SNP_86261_A_81137  | NW_004516272.1 | scaffold924 | 81137                   | CC                              | TT                 | TT               | INTERGENIC                    |                    |                                           |
| SNP_86262_A_96693  | NW_004516272.1 | scaffold924 | 96693                   | AA                              | GG                 | GG               | INTERGENIC                    |                    |                                           |
| SNP_86263_A_97051  | NW_004516272.1 | scaffold924 | 97051                   | AA                              | GG                 | GG               | INTERGENIC                    |                    |                                           |
| SNP_86264_A_122063 | NW_004516272.1 | scaffold924 | 122063                  | CC                              | TT                 | TT               | INTERGENIC                    |                    |                                           |
| SNP_86265_A_122104 | NW_004516272.1 | scaffold924 | 122104                  | CC                              | AA                 | AA               | INTERGENIC                    |                    |                                           |
| SNP_86266_A_122226 | NW_004516272.1 | scaffold924 | 122226                  | GG                              | AA                 | AA               | INTERGENIC                    |                    |                                           |
| SNP_86267_A_122477 | NW_004516272.1 | scaffold924 | 122477                  | AA                              | GG                 | GG               | INTERGENIC                    |                    |                                           |
| SNP_86269_A_219621 | NW_004516272.1 | scaffold924 | 219621                  | AA                              | CC                 | CC               | NON_SYNONYMOUS_CODING         | 101499668          | isoflavone 7-O-glucosyltransferase 1-like |
| SNP_86270_A_219624 | NW_004516272.1 | scaffold924 | 219624                  | TT                              | AA                 | AA               | NON_SYNONYMOUS_CODING         | 101499668          | isoflavone 7-O-glucosyltransferase 1-like |

| SNPs IDs           | Chromosome IDs | Chromosomes | Physical positions (bp) | CDC Frontier (Reference genome) | (Pusa 1103 & HPNB) | (ILWC 46 & LPNB) | Sequence Components of genome | Gene accession IDs | Putative functions                        |
|--------------------|----------------|-------------|-------------------------|---------------------------------|--------------------|------------------|-------------------------------|--------------------|-------------------------------------------|
| SNP_86271_A_219669 | NW_004516272.1 | scaffold924 | 219669                  | TT                              | AA                 | AA               | NON_SYNONYMOUS_CODING         | 101499668          | isoflavone 7-O-glucosyltransferase 1-like |
| SNP_86272_A_225852 | NW_004516272.1 | scaffold924 | 225852                  | TT                              | CC                 | CC               | INTERGENIC                    |                    |                                           |
| SNP_86273_A_265681 | NW_004516272.1 | scaffold924 | 265681                  | GG                              | TT                 | TT               | INTERGENIC                    |                    |                                           |
| SNP_86274_A_265805 | NW_004516272.1 | scaffold924 | 265805                  | TT                              | GG                 | GG               | INTERGENIC                    |                    |                                           |
| SNP_86275_A_265931 | NW_004516272.1 | scaffold924 | 265931                  | AA                              | GG                 | GG               | INTERGENIC                    |                    |                                           |
| SNP_86276_A_265975 | NW_004516272.1 | scaffold924 | 265975                  | TT                              | CC                 | CC               | INTERGENIC                    |                    |                                           |
| SNP_86277_A_265985 | NW_004516272.1 | scaffold924 | 265985                  | TT                              | CC                 | CC               | INTERGENIC                    |                    |                                           |
| SNP_86278_A_266026 | NW_004516272.1 | scaffold924 | 266026                  | CC                              | TT                 | TT               | INTERGENIC                    |                    |                                           |
| SNP_86279_A_266075 | NW_004516272.1 | scaffold924 | 266075                  | TT                              | CC                 | CC               | INTERGENIC                    |                    |                                           |
| SNP_86280_A_266089 | NW_004516272.1 | scaffold924 | 266089                  | GG                              | TT                 | TT               | INTERGENIC                    |                    |                                           |
| SNP_86281_A_266104 | NW_004516272.1 | scaffold924 | 266104                  | TT                              | CC                 | CC               | INTERGENIC                    |                    |                                           |
| SNP_86282_A_266122 | NW_004516272.1 | scaffold924 | 266122                  | CC                              | TT                 | TT               | INTERGENIC                    |                    |                                           |
| SNP_86283_A_266167 | NW_004516272.1 | scaffold924 | 266167                  | GG                              | AA                 | AA               | INTERGENIC                    |                    |                                           |
| SNP_86284_A_266474 | NW_004516272.1 | scaffold924 | 266474                  | TT                              | CC                 | CC               | INTERGENIC                    |                    |                                           |
| SNP_86286_A_389    | NW_004516274.1 | scaffold929 | 389                     | AA                              | GG                 | GG               | INTERGENIC                    |                    |                                           |
| SNP_86287_A_683    | NW_004516274.1 | scaffold929 | 683                     | AA                              | GG                 | GG               | INTERGENIC                    |                    |                                           |
| SNP_86288_A_8109   | NW_004516274.1 | scaffold929 | 8109                    | AA                              | GG                 | GG               | INTERGENIC                    |                    |                                           |
| SNP_86289_A_8284   | NW_004516274.1 | scaffold929 | 8284                    | TT                              | CC                 | CC               | INTERGENIC                    |                    |                                           |
| SNP_86290_A_10050  | NW_004516274.1 | scaffold929 | 10050                   | TT                              | CC                 | CC               | INTERGENIC                    |                    |                                           |
| SNP_86291_A_10220  | NW_004516274.1 | scaffold929 | 10220                   | CC                              | TT                 | TT               | INTERGENIC                    |                    |                                           |
| SNP_86292_A_10228  | NW_004516274.1 | scaffold929 | 10228                   | AA                              | GG                 | GG               | INTERGENIC                    |                    |                                           |
| SNP_86293_A_10260  | NW_004516274.1 | scaffold929 | 10260                   | TT                              | AA                 | AA               | INTERGENIC                    |                    |                                           |



| SNPs IDs          | Chromosome IDs | Chromosomes | Physical positions (bp) | CDC Frontier (Reference genome) | (Pusa 1103 & HPNB) | (ILWC 46 & LPNB) | Sequence genome | Components of | Gene accession IDs | Putative functions |
|-------------------|----------------|-------------|-------------------------|---------------------------------|--------------------|------------------|-----------------|---------------|--------------------|--------------------|
| SNP_86294_A_10970 | NW_004516274.1 | scaffold929 | 10970                   | AA                              | GG                 | GG               | INTERGENIC      |               |                    |                    |
| SNP_86295_A_10999 | NW_004516274.1 | scaffold929 | 10999                   | TT                              | CC                 | CC               | INTERGENIC      |               |                    |                    |
| SNP_86296_A_11066 | NW_004516274.1 | scaffold929 | 11066                   | GG                              | CC                 | CC               | INTERGENIC      |               |                    |                    |
| SNP_86297_A_11243 | NW_004516274.1 | scaffold929 | 11243                   | AA                              | GG                 | GG               | INTERGENIC      |               |                    |                    |
| SNP_86298_A_11244 | NW_004516274.1 | scaffold929 | 11244                   | CC                              | AA                 | AA               | INTERGENIC      |               |                    |                    |
| SNP_86299_A_11276 | NW_004516274.1 | scaffold929 | 11276                   | AA                              | GG                 | GG               | INTERGENIC      |               |                    |                    |
| SNP_86300_A_11304 | NW_004516274.1 | scaffold929 | 11304                   | TT                              | CC                 | CC               | INTERGENIC      |               |                    |                    |
| SNP_86301_A_15676 | NW_004516274.1 | scaffold929 | 15676                   | TT                              | CC                 | CC               | INTERGENIC      |               |                    |                    |
| SNP_86302_A_15688 | NW_004516274.1 | scaffold929 | 15688                   | AA                              | CC                 | CC               | INTERGENIC      |               |                    |                    |
| SNP_86303_A_15750 | NW_004516274.1 | scaffold929 | 15750                   | TT                              | CC                 | CC               | INTERGENIC      |               |                    |                    |
| SNP_86304_A_15921 | NW_004516274.1 | scaffold929 | 15921                   | GG                              | CC                 | CC               | INTERGENIC      |               |                    |                    |
| SNP_86305_A_16031 | NW_004516274.1 | scaffold929 | 16031                   | GG                              | TT                 | TT               | INTERGENIC      |               |                    |                    |
| SNP_86306_A_16263 | NW_004516274.1 | scaffold929 | 16263                   | AA                              | TT                 | TT               | INTERGENIC      |               |                    |                    |
| SNP_86307_A_16514 | NW_004516274.1 | scaffold929 | 16514                   | AA                              | GG                 | GG               | INTERGENIC      |               |                    |                    |
| SNP_86308_A_16546 | NW_004516274.1 | scaffold929 | 16546                   | CC                              | TT                 | TT               | INTERGENIC      |               |                    |                    |
| SNP_86309_A_16593 | NW_004516274.1 | scaffold929 | 16593                   | CC                              | TT                 | TT               | INTERGENIC      |               |                    |                    |
| SNP_86310_A_16670 | NW_004516274.1 | scaffold929 | 16670                   | CC                              | AA                 | AA               | INTERGENIC      |               |                    |                    |
| SNP_86312_A_17297 | NW_004516274.1 | scaffold929 | 17297                   | CC                              | TT                 | TT               | INTERGENIC      |               |                    |                    |
| SNP_86313_A_17349 | NW_004516274.1 | scaffold929 | 17349                   | GG                              | AA                 | AA               | INTERGENIC      |               |                    |                    |
| SNP_86314_A_17364 | NW_004516274.1 | scaffold929 | 17364                   | GG                              | TT                 | TT               | INTERGENIC      |               |                    |                    |
| SNP_86315_A_17429 | NW_004516274.1 | scaffold929 | 17429                   | CC                              | TT                 | TT               | INTERGENIC      |               |                    |                    |
| SNP_86316_A_17446 | NW_004516274.1 | scaffold929 | 17446                   | CC                              | TT                 | TT               | INTERGENIC      |               |                    |                    |

| SNPs IDs           | Chromosome IDs | Chromosomes | Physical positions (bp) | CDC Frontier (Reference genome) | (Pusa 1103 & HPNB) | (ILWC 46 & LPNB) | Sequence genome | Components of | Gene accession IDs | Putative functions |
|--------------------|----------------|-------------|-------------------------|---------------------------------|--------------------|------------------|-----------------|---------------|--------------------|--------------------|
| SNP_86318_A_20978  | NW_004516274.1 | scaffold929 | 20978                   | AA                              | GG                 | GG               | INTERGENIC      |               |                    |                    |
| SNP_86319_A_21121  | NW_004516274.1 | scaffold929 | 21121                   | GG                              | AA                 | AA               | INTERGENIC      |               |                    |                    |
| SNP_86320_A_21184  | NW_004516274.1 | scaffold929 | 21184                   | TT                              | CC                 | CC               | INTERGENIC      |               |                    |                    |
| SNP_86321_A_44895  | NW_004516276.1 | scaffold931 | 44895                   | TT                              | CC                 | CC               | INTERGENIC      |               |                    |                    |
| SNP_86322_A_65176  | NW_004516276.1 | scaffold931 | 65176                   | AA                              | TT                 | TT               | INTERGENIC      |               |                    |                    |
| SNP_86323_A_65878  | NW_004516276.1 | scaffold931 | 65878                   | AA                              | CC                 | CC               | INTERGENIC      |               |                    |                    |
| SNP_86324_A_97993  | NW_004516276.1 | scaffold931 | 97993                   | CC                              | AA                 | AA               | INTERGENIC      |               |                    |                    |
| SNP_86326_A_101273 | NW_004516276.1 | scaffold931 | 101273                  | AA                              | GG                 | GG               | INTERGENIC      |               |                    |                    |
| SNP_86327_A_102796 | NW_004516276.1 | scaffold931 | 102796                  | CC                              | TT                 | TT               | INTERGENIC      |               |                    |                    |
| SNP_86328_A_102838 | NW_004516276.1 | scaffold931 | 102838                  | TT                              | AA                 | AA               | INTERGENIC      |               |                    |                    |
| SNP_86329_A_103010 | NW_004516276.1 | scaffold931 | 103010                  | TT                              | AA                 | AA               | INTERGENIC      |               |                    |                    |
| SNP_86330_A_103055 | NW_004516276.1 | scaffold931 | 103055                  | GG                              | AA                 | AA               | INTERGENIC      |               |                    |                    |
| SNP_86331_A_103058 | NW_004516276.1 | scaffold931 | 103058                  | TT                              | GG                 | GG               | INTERGENIC      |               |                    |                    |
| SNP_86332_A_103064 | NW_004516276.1 | scaffold931 | 103064                  | AA                              | GG                 | GG               | INTERGENIC      |               |                    |                    |
| SNP_86333_A_103075 | NW_004516276.1 | scaffold931 | 103075                  | AA                              | GG                 | GG               | INTERGENIC      |               |                    |                    |
| SNP_86334_A_103340 | NW_004516276.1 | scaffold931 | 103340                  | AA                              | GG                 | GG               | INTERGENIC      |               |                    |                    |
| SNP_86335_A_103658 | NW_004516276.1 | scaffold931 | 103658                  | GG                              | CC                 | CC               | INTERGENIC      |               |                    |                    |
| SNP_86336_A_105151 | NW_004516276.1 | scaffold931 | 105151                  | CC                              | GG                 | GG               | INTERGENIC      |               |                    |                    |
| SNP_86337_A_105488 | NW_004516276.1 | scaffold931 | 105488                  | CC                              | TT                 | TT               | INTERGENIC      |               |                    |                    |
| SNP_86338_A_108919 | NW_004516276.1 | scaffold931 | 108919                  | GG                              | CC                 | CC               | INTERGENIC      |               |                    |                    |
| SNP_86339_A_108983 | NW_004516276.1 | scaffold931 | 108983                  | AA                              | TT                 | TT               | INTERGENIC      |               |                    |                    |
| SNP_86340_A_112291 | NW_004516276.1 | scaffold931 | 112291                  | TT                              | AA                 | AA               | INTERGENIC      |               |                    |                    |

| SNPs IDs           | Chromosome IDs | Chromosomes | Physical positions (bp) | CDC Frontier (Reference genome) | (Pusa 1103 & HPNB) | (ILWC 46 & LPNB) | Sequence genome | Components of | Gene accession IDs | Putative functions |
|--------------------|----------------|-------------|-------------------------|---------------------------------|--------------------|------------------|-----------------|---------------|--------------------|--------------------|
| SNP_86341_A_112322 | NW_004516276.1 | scaffold931 | 112322                  | TT                              | CC                 | CC               | INTERGENIC      |               |                    |                    |
| SNP_86342_A_112328 | NW_004516276.1 | scaffold931 | 112328                  | TT                              | CC                 | CC               | INTERGENIC      |               |                    |                    |
| SNP_86343_A_112368 | NW_004516276.1 | scaffold931 | 112368                  | CC                              | TT                 | TT               | INTERGENIC      |               |                    |                    |
| SNP_86344_A_112372 | NW_004516276.1 | scaffold931 | 112372                  | AA                              | CC                 | CC               | INTERGENIC      |               |                    |                    |
| SNP_86345_A_112419 | NW_004516276.1 | scaffold931 | 112419                  | GG                              | AA                 | AA               | INTERGENIC      |               |                    |                    |
| SNP_86346_A_112535 | NW_004516276.1 | scaffold931 | 112535                  | CC                              | AA                 | AA               | INTERGENIC      |               |                    |                    |
| SNP_86347_A_112548 | NW_004516276.1 | scaffold931 | 112548                  | GG                              | TT                 | TT               | INTERGENIC      |               |                    |                    |
| SNP_86348_A_112569 | NW_004516276.1 | scaffold931 | 112569                  | AA                              | CC                 | CC               | INTERGENIC      |               |                    |                    |
| SNP_86349_A_112603 | NW_004516276.1 | scaffold931 | 112603                  | AA                              | TT                 | TT               | INTERGENIC      |               |                    |                    |
| SNP_86350_A_112772 | NW_004516276.1 | scaffold931 | 112772                  | TT                              | AA                 | AA               | INTERGENIC      |               |                    |                    |
| SNP_86351_A_112805 | NW_004516276.1 | scaffold931 | 112805                  | CC                              | TT                 | TT               | INTERGENIC      |               |                    |                    |
| SNP_86352_A_112835 | NW_004516276.1 | scaffold931 | 112835                  | TT                              | CC                 | CC               | INTERGENIC      |               |                    |                    |
| SNP_86353_A_113968 | NW_004516276.1 | scaffold931 | 113968                  | GG                              | CC                 | CC               | INTERGENIC      |               |                    |                    |
| SNP_86354_A_114199 | NW_004516276.1 | scaffold931 | 114199                  | TT                              | GG                 | GG               | INTERGENIC      |               |                    |                    |
| SNP_86355_A_114411 | NW_004516276.1 | scaffold931 | 114411                  | AA                              | TT                 | TT               | INTERGENIC      |               |                    |                    |
| SNP_86356_A_115528 | NW_004516276.1 | scaffold931 | 115528                  | TT                              | GG                 | GG               | INTERGENIC      |               |                    |                    |
| SNP_86357_A_115808 | NW_004516276.1 | scaffold931 | 115808                  | CC                              | TT                 | TT               | INTERGENIC      |               |                    |                    |
| SNP_86358_A_115831 | NW_004516276.1 | scaffold931 | 115831                  | CC                              | TT                 | TT               | INTERGENIC      |               |                    |                    |
| SNP_86359_A_115848 | NW_004516276.1 | scaffold931 | 115848                  | GG                              | TT                 | TT               | INTERGENIC      |               |                    |                    |
| SNP_86360_A_115872 | NW_004516276.1 | scaffold931 | 115872                  | GG                              | AA                 | AA               | INTERGENIC      |               |                    |                    |
| SNP_86361_A_115983 | NW_004516276.1 | scaffold931 | 115983                  | TT                              | CC                 | CC               | INTERGENIC      |               |                    |                    |
| SNP_86362_A_116063 | NW_004516276.1 | scaffold931 | 116063                  | AA                              | GG                 | GG               | INTERGENIC      |               |                    |                    |

| SNPs IDs           | Chromosome IDs | Chromosomes | Physical positions (bp) | CDC Frontier (Reference genome) | (Pusa 1103 & HPNB) | (ILWC 46 & LPNB) | Sequence genome | Components of | Gene accession IDs | Putative functions |
|--------------------|----------------|-------------|-------------------------|---------------------------------|--------------------|------------------|-----------------|---------------|--------------------|--------------------|
| SNP_86363_A_116107 | NW_004516276.1 | scaffold931 | 116107                  | GG                              | AA                 | AA               | INTERGENIC      |               |                    |                    |
| SNP_86364_A_116160 | NW_004516276.1 | scaffold931 | 116160                  | TT                              | GG                 | GG               | INTERGENIC      |               |                    |                    |
| SNP_86365_A_116277 | NW_004516276.1 | scaffold931 | 116277                  | GG                              | AA                 | AA               | INTERGENIC      |               |                    |                    |
| SNP_86367_A_116394 | NW_004516276.1 | scaffold931 | 116394                  | CC                              | TT                 | TT               | INTERGENIC      |               |                    |                    |
| SNP_86369_A_116449 | NW_004516276.1 | scaffold931 | 116449                  | CC                              | GG                 | GG               | INTERGENIC      |               |                    |                    |
| SNP_86371_A_117051 | NW_004516276.1 | scaffold931 | 117051                  | AA                              | CC                 | CC               | INTERGENIC      |               |                    |                    |
| SNP_86373_A_117138 | NW_004516276.1 | scaffold931 | 117138                  | CC                              | GG                 | GG               | INTERGENIC      |               |                    |                    |
| SNP_86374_A_117293 | NW_004516276.1 | scaffold931 | 117293                  | AA                              | GG                 | GG               | INTERGENIC      |               |                    |                    |
| SNP_86375_A_117304 | NW_004516276.1 | scaffold931 | 117304                  | TT                              | GG                 | GG               | INTERGENIC      |               |                    |                    |
| SNP_86376_A_117429 | NW_004516276.1 | scaffold931 | 117429                  | CC                              | GG                 | GG               | INTERGENIC      |               |                    |                    |
| SNP_86377_A_117441 | NW_004516276.1 | scaffold931 | 117441                  | GG                              | AA                 | AA               | INTERGENIC      |               |                    |                    |
| SNP_86378_A_117442 | NW_004516276.1 | scaffold931 | 117442                  | TT                              | CC                 | CC               | INTERGENIC      |               |                    |                    |
| SNP_86379_A_117450 | NW_004516276.1 | scaffold931 | 117450                  | AA                              | TT                 | TT               | INTERGENIC      |               |                    |                    |
| SNP_86380_A_117484 | NW_004516276.1 | scaffold931 | 117484                  | GG                              | AA                 | AA               | INTERGENIC      |               |                    |                    |
| SNP_86381_A_117502 | NW_004516276.1 | scaffold931 | 117502                  | CC                              | TT                 | TT               | INTERGENIC      |               |                    |                    |
| SNP_86382_A_117510 | NW_004516276.1 | scaffold931 | 117510                  | TT                              | AA                 | AA               | INTERGENIC      |               |                    |                    |
| SNP_86383_A_117547 | NW_004516276.1 | scaffold931 | 117547                  | CC                              | AA                 | AA               | INTERGENIC      |               |                    |                    |
| SNP_86384_A_117553 | NW_004516276.1 | scaffold931 | 117553                  | GG                              | TT                 | TT               | INTERGENIC      |               |                    |                    |
| SNP_86385_A_117712 | NW_004516276.1 | scaffold931 | 117712                  | GG                              | AA                 | AA               | INTERGENIC      |               |                    |                    |
| SNP_86386_A_117726 | NW_004516276.1 | scaffold931 | 117726                  | GG                              | CC                 | CC               | INTERGENIC      |               |                    |                    |
| SNP_86387_A_117727 | NW_004516276.1 | scaffold931 | 117727                  | TT                              | AA                 | AA               | INTERGENIC      |               |                    |                    |
| SNP_86388_A_117771 | NW_004516276.1 | scaffold931 | 117771                  | GG                              | AA                 | AA               | INTERGENIC      |               |                    |                    |

| SNPs IDs           | Chromosome IDs | Chromosomes | Physical positions (bp) | CDC Frontier (Reference genome) | (Pusa 1103 & HPNB) | (ILWC 46 & LPNB) | Sequence genome | Components of | Gene accession IDs | Putative functions |
|--------------------|----------------|-------------|-------------------------|---------------------------------|--------------------|------------------|-----------------|---------------|--------------------|--------------------|
| SNP_86389_A_117776 | NW_004516276.1 | scaffold931 | 117776                  | AA                              | GG                 | GG               | INTERGENIC      |               |                    |                    |
| SNP_86391_A_118368 | NW_004516276.1 | scaffold931 | 118368                  | CC                              | AA                 | AA               | INTERGENIC      |               |                    |                    |
| SNP_86392_A_118459 | NW_004516276.1 | scaffold931 | 118459                  | CC                              | TT                 | TT               | INTERGENIC      |               |                    |                    |
| SNP_86393_A_118600 | NW_004516276.1 | scaffold931 | 118600                  | GG                              | AA                 | AA               | INTERGENIC      |               |                    |                    |
| SNP_86394_A_118641 | NW_004516276.1 | scaffold931 | 118641                  | GG                              | TT                 | TT               | INTERGENIC      |               |                    |                    |
| SNP_86395_A_125061 | NW_004516276.1 | scaffold931 | 125061                  | TT                              | CC                 | CC               | INTERGENIC      |               |                    |                    |
| SNP_86396_A_125129 | NW_004516276.1 | scaffold931 | 125129                  | CC                              | TT                 | TT               | INTERGENIC      |               |                    |                    |
| SNP_86397_A_125352 | NW_004516276.1 | scaffold931 | 125352                  | AA                              | GG                 | GG               | INTERGENIC      |               |                    |                    |
| SNP_86398_A_125391 | NW_004516276.1 | scaffold931 | 125391                  | TT                              | AA                 | AA               | INTERGENIC      |               |                    |                    |
| SNP_86399_A_125415 | NW_004516276.1 | scaffold931 | 125415                  | GG                              | AA                 | AA               | INTERGENIC      |               |                    |                    |
| SNP_86400_A_125416 | NW_004516276.1 | scaffold931 | 125416                  | TT                              | CC                 | CC               | INTERGENIC      |               |                    |                    |
| SNP_86401_A_125429 | NW_004516276.1 | scaffold931 | 125429                  | CC                              | AA                 | AA               | INTERGENIC      |               |                    |                    |
| SNP_86402_A_125464 | NW_004516276.1 | scaffold931 | 125464                  | AA                              | GG                 | GG               | INTERGENIC      |               |                    |                    |
| SNP_86403_A_125660 | NW_004516276.1 | scaffold931 | 125660                  | AA                              | GG                 | GG               | INTERGENIC      |               |                    |                    |
| SNP_86404_A_125665 | NW_004516276.1 | scaffold931 | 125665                  | GG                              | AA                 | AA               | INTERGENIC      |               |                    |                    |
| SNP_86405_A_144819 | NW_004516276.1 | scaffold931 | 144819                  | AA                              | GG                 | GG               | INTERGENIC      |               |                    |                    |
| SNP_86406_A_152307 | NW_004516276.1 | scaffold931 | 152307                  | AA                              | GG                 | GG               | INTERGENIC      |               |                    |                    |
| SNP_86407_A_152621 | NW_004516276.1 | scaffold931 | 152621                  | CC                              | GG                 | GG               | INTERGENIC      |               |                    |                    |
| SNP_86408_A_152664 | NW_004516276.1 | scaffold931 | 152664                  | GG                              | AA                 | AA               | INTERGENIC      |               |                    |                    |
| SNP_86409_A_152694 | NW_004516276.1 | scaffold931 | 152694                  | CC                              | TT                 | TT               | INTERGENIC      |               |                    |                    |
| SNP_86410_A_152845 | NW_004516276.1 | scaffold931 | 152845                  | TT                              | CC                 | CC               | INTERGENIC      |               |                    |                    |
| SNP_86411_A_152864 | NW_004516276.1 | scaffold931 | 152864                  | AA                              | TT                 | TT               | INTERGENIC      |               |                    |                    |

| SNPs IDs           | Chromosome IDs | Chromosomes | Physical positions (bp) | CDC Frontier (Reference genome) | (Pusa 1103 & HPNB) | (ILWC 46 & LPNB) | Sequence genome | Components of | Gene accession IDs | Putative functions |
|--------------------|----------------|-------------|-------------------------|---------------------------------|--------------------|------------------|-----------------|---------------|--------------------|--------------------|
| SNP_86412_A_152871 | NW_004516276.1 | scaffold931 | 152871                  | CC                              | TT                 | TT               | INTERGENIC      |               |                    |                    |
| SNP_86413_A_152991 | NW_004516276.1 | scaffold931 | 152991                  | AA                              | GG                 | GG               | INTERGENIC      |               |                    |                    |
| SNP_86414_A_152998 | NW_004516276.1 | scaffold931 | 152998                  | AA                              | GG                 | GG               | INTERGENIC      |               |                    |                    |
| SNP_86415_A_153003 | NW_004516276.1 | scaffold931 | 153003                  | GG                              | TT                 | TT               | INTERGENIC      |               |                    |                    |
| SNP_86416_A_154963 | NW_004516276.1 | scaffold931 | 154963                  | CC                              | TT                 | TT               | INTERGENIC      |               |                    |                    |
| SNP_86417_A_154972 | NW_004516276.1 | scaffold931 | 154972                  | CC                              | GG                 | GG               | INTERGENIC      |               |                    |                    |
| SNP_86418_A_156449 | NW_004516276.1 | scaffold931 | 156449                  | TT                              | CC                 | CC               | INTERGENIC      |               |                    |                    |
| SNP_86419_A_156453 | NW_004516276.1 | scaffold931 | 156453                  | AA                              | CC                 | CC               | INTERGENIC      |               |                    |                    |
| SNP_86420_A_156486 | NW_004516276.1 | scaffold931 | 156486                  | AA                              | GG                 | GG               | INTERGENIC      |               |                    |                    |
| SNP_86421_A_165480 | NW_004516276.1 | scaffold931 | 165480                  | CC                              | TT                 | TT               | INTERGENIC      |               |                    |                    |
| SNP_86422_A_166074 | NW_004516276.1 | scaffold931 | 166074                  | TT                              | CC                 | CC               | INTERGENIC      |               |                    |                    |
| SNP_86423_A_167037 | NW_004516276.1 | scaffold931 | 167037                  | GG                              | TT                 | TT               | INTERGENIC      |               |                    |                    |
| SNP_86424_A_179733 | NW_004516276.1 | scaffold931 | 179733                  | AA                              | TT                 | TT               | INTERGENIC      |               |                    |                    |
| SNP_86425_A_179978 | NW_004516276.1 | scaffold931 | 179978                  | CC                              | TT                 | TT               | INTERGENIC      |               |                    |                    |
| SNP_86426_A_180018 | NW_004516276.1 | scaffold931 | 180018                  | TT                              | CC                 | CC               | INTERGENIC      |               |                    |                    |
| SNP_86427_A_180088 | NW_004516276.1 | scaffold931 | 180088                  | AA                              | CC                 | CC               | INTERGENIC      |               |                    |                    |
| SNP_86428_A_180260 | NW_004516276.1 | scaffold931 | 180260                  | AA                              | TT                 | TT               | INTERGENIC      |               |                    |                    |
| SNP_86430_A_180614 | NW_004516276.1 | scaffold931 | 180614                  | AA                              | GG                 | GG               | INTERGENIC      |               |                    |                    |
| SNP_86431_A_180647 | NW_004516276.1 | scaffold931 | 180647                  | CC                              | AA                 | AA               | INTERGENIC      |               |                    |                    |
| SNP_86432_A_180668 | NW_004516276.1 | scaffold931 | 180668                  | TT                              | GG                 | GG               | INTERGENIC      |               |                    |                    |
| SNP_86433_A_180707 | NW_004516276.1 | scaffold931 | 180707                  | AA                              | GG                 | GG               | INTERGENIC      |               |                    |                    |
| SNP_86434_A_180851 | NW_004516276.1 | scaffold931 | 180851                  | TT                              | AA                 | AA               | INTERGENIC      |               |                    |                    |

| SNPs IDs           | Chromosome IDs | Chromosomes | Physical positions (bp) | CDC Frontier (Reference genome) | (Pusa 1103 & HPNB) | (ILWC 46 & LPNB) | Sequence genome | Components of | Gene accession IDs | Putative functions |
|--------------------|----------------|-------------|-------------------------|---------------------------------|--------------------|------------------|-----------------|---------------|--------------------|--------------------|
| SNP_86435_A_181118 | NW_004516276.1 | scaffold931 | 181118                  | TT                              | AA                 | AA               | INTERGENIC      |               |                    |                    |
| SNP_86436_A_181236 | NW_004516276.1 | scaffold931 | 181236                  | TT                              | AA                 | AA               | INTERGENIC      |               |                    |                    |
| SNP_86438_A_181336 | NW_004516276.1 | scaffold931 | 181336                  | CC                              | TT                 | TT               | INTERGENIC      |               |                    |                    |
| SNP_86439_A_181431 | NW_004516276.1 | scaffold931 | 181431                  | CC                              | AA                 | AA               | INTERGENIC      |               |                    |                    |
| SNP_86441_A_181510 | NW_004516276.1 | scaffold931 | 181510                  | TT                              | AA                 | AA               | INTERGENIC      |               |                    |                    |
| SNP_86442_A_181633 | NW_004516276.1 | scaffold931 | 181633                  | GG                              | AA                 | AA               | INTERGENIC      |               |                    |                    |
| SNP_86443_A_181846 | NW_004516276.1 | scaffold931 | 181846                  | TT                              | GG                 | GG               | INTERGENIC      |               |                    |                    |
| SNP_86444_A_190803 | NW_004516276.1 | scaffold931 | 190803                  | GG                              | AA                 | AA               | INTERGENIC      |               |                    |                    |
| SNP_86445_A_191312 | NW_004516276.1 | scaffold931 | 191312                  | CC                              | GG                 | GG               | INTERGENIC      |               |                    |                    |
| SNP_86446_A_197196 | NW_004516276.1 | scaffold931 | 197196                  | TT                              | CC                 | CC               | INTERGENIC      |               |                    |                    |
| SNP_86447_A_202123 | NW_004516276.1 | scaffold931 | 202123                  | AA                              | TT                 | TT               | INTERGENIC      |               |                    |                    |
| SNP_86448_A_202349 | NW_004516276.1 | scaffold931 | 202349                  | AA                              | GG                 | GG               | INTERGENIC      |               |                    |                    |
| SNP_86449_A_202529 | NW_004516276.1 | scaffold931 | 202529                  | AA                              | CC                 | CC               | INTERGENIC      |               |                    |                    |
| SNP_86450_A_202535 | NW_004516276.1 | scaffold931 | 202535                  | TT                              | AA                 | AA               | INTERGENIC      |               |                    |                    |
| SNP_86451_A_218192 | NW_004516276.1 | scaffold931 | 218192                  | CC                              | TT                 | TT               | INTERGENIC      |               |                    |                    |
| SNP_86452_A_240682 | NW_004516276.1 | scaffold931 | 240682                  | TT                              | CC                 | CC               | INTERGENIC      |               |                    |                    |
| SNP_86453_A_240756 | NW_004516276.1 | scaffold931 | 240756                  | TT                              | AA                 | AA               | INTERGENIC      |               |                    |                    |
| SNP_86454_A_241204 | NW_004516276.1 | scaffold931 | 241204                  | GG                              | TT                 | TT               | INTERGENIC      |               |                    |                    |
| SNP_86455_A_243186 | NW_004516276.1 | scaffold931 | 243186                  | AA                              | GG                 | GG               | INTERGENIC      |               |                    |                    |
| SNP_86456_A_244389 | NW_004516276.1 | scaffold931 | 244389                  | CC                              | AA                 | AA               | INTERGENIC      |               |                    |                    |
| SNP_86458_A_244661 | NW_004516276.1 | scaffold931 | 244661                  | GG                              | AA                 | AA               | INTERGENIC      |               |                    |                    |
| SNP_86460_A_247616 | NW_004516276.1 | scaffold931 | 247616                  | CC                              | TT                 | TT               | INTERGENIC      |               |                    |                    |

| SNPs IDs           | Chromosome IDs | Chromosomes | Physical positions (bp) | CDC Frontier (Reference genome) | (Pusa 1103 & HPNB) | (ILWC 46 & LPNB) | Sequence genome       | Components of | Gene accession IDs | Putative functions |
|--------------------|----------------|-------------|-------------------------|---------------------------------|--------------------|------------------|-----------------------|---------------|--------------------|--------------------|
| SNP_86461_A_247624 | NW_004516276.1 | scaffold931 | 247624                  | TT                              | AA                 | AA               | INTERGENIC            |               |                    |                    |
| SNP_86462_A_248215 | NW_004516276.1 | scaffold931 | 248215                  | AA                              | TT                 | TT               | INTERGENIC            |               |                    |                    |
| SNP_86463_A_249533 | NW_004516276.1 | scaffold931 | 249533                  | GG                              | TT                 | TT               | INTERGENIC            |               |                    |                    |
| SNP_86464_A_249706 | NW_004516276.1 | scaffold931 | 249706                  | TT                              | GG                 | GG               | INTERGENIC            |               |                    |                    |
| SNP_86465_A_249823 | NW_004516276.1 | scaffold931 | 249823                  | GG                              | AA                 | AA               | INTERGENIC            |               |                    |                    |
| SNP_86466_A_250067 | NW_004516276.1 | scaffold931 | 250067                  | TT                              | AA                 | AA               | INTERGENIC            |               |                    |                    |
| SNP_86468_A_250561 | NW_004516276.1 | scaffold931 | 250561                  | GG                              | AA                 | AA               | INTERGENIC            |               |                    |                    |
| SNP_86469_A_250591 | NW_004516276.1 | scaffold931 | 250591                  | TT                              | CC                 | CC               | INTERGENIC            |               |                    |                    |
| SNP_86471_A_1784   | NW_004516277.1 | scaffold933 | 1784                    | CC                              | TT                 | TT               | INTERGENIC            |               |                    |                    |
| SNP_86472_A_1936   | NW_004516277.1 | scaffold933 | 1936                    | TT                              | CC                 | CC               | INTERGENIC            |               |                    |                    |
| SNP_86473_A_2531   | NW_004516277.1 | scaffold933 | 2531                    | TT                              | CC                 | CC               | INTERGENIC            |               |                    |                    |
| SNP_86474_A_3037   | NW_004516277.1 | scaffold933 | 3037                    | AA                              | GG                 | GG               | INTERGENIC            |               |                    |                    |
| SNP_86476_A_3670   | NW_004516277.1 | scaffold933 | 3670                    | CC                              | TT                 | TT               | INTERGENIC            |               |                    |                    |
| SNP_86477_A_3865   | NW_004516277.1 | scaffold933 | 3865                    | TT                              | AA                 | AA               | DRR                   | 101505005     | Unknown function   |                    |
| SNP_86478_A_3918   | NW_004516277.1 | scaffold933 | 3918                    | AA                              | GG                 | GG               | DRR                   | 101505005     | Unknown function   |                    |
| SNP_86479_A_3944   | NW_004516277.1 | scaffold933 | 3944                    | GG                              | AA                 | AA               | DRR                   | 101505005     | Unknown function   |                    |
| SNP_86481_A_4600   | NW_004516277.1 | scaffold933 | 4600                    | TT                              | GG                 | GG               | DRR                   | 101505005     | Unknown function   |                    |
| SNP_86482_A_4617   | NW_004516277.1 | scaffold933 | 4617                    | TT                              | CC                 | CC               | DRR                   | 101505005     | Unknown function   |                    |
| SNP_86483_A_4788   | NW_004516277.1 | scaffold933 | 4788                    | AA                              | CC                 | CC               | NON_SYNONYMOUS_CODING | 101505005     | Unknown function   |                    |
| SNP_86484_A_4794   | NW_004516277.1 | scaffold933 | 4794                    | GG                              | AA                 | AA               | NON_SYNONYMOUS_CODING | 101505005     | Unknown function   |                    |
| SNP_86485_A_4832   | NW_004516277.1 | scaffold933 | 4832                    | GG                              | AA                 | AA               | SYNONYMOUS_CODING     | 101505005     | Unknown function   |                    |
| SNP_86486_A_4924   | NW_004516277.1 | scaffold933 | 4924                    | AA                              | TT                 | TT               | NON_SYNONYMOUS_CODING | 101505005     | Unknown function   |                    |



| SNPs IDs           | Chromosome IDs | Chromosomes | Physical positions (bp) | CDC Frontier (Reference genome) | (Pusa 1103 & HPNB) | (ILWC 46 & LPNB) | Sequence Components of genome | Gene accession IDs | Putative functions           |
|--------------------|----------------|-------------|-------------------------|---------------------------------|--------------------|------------------|-------------------------------|--------------------|------------------------------|
| SNP_86487_A_5016   | NW_004516277.1 | scaffold933 | 5016                    | GG                              | AA                 | AA               | NON_SYNONYMOUS_CODING         | 101505005          | Unknown function             |
| SNP_86488_A_5836   | NW_004516277.1 | scaffold933 | 5836                    | CC                              | AA                 | AA               | URR                           | 101505005          | Unknown function             |
| SNP_86489_A_3331   | NW_004516278.1 | scaffold934 | 3331                    | GG                              | AA                 | AA               | INTERGENIC                    |                    |                              |
| SNP_86490_A_3652   | NW_004516278.1 | scaffold934 | 3652                    | AA                              | TT                 | TT               | INTERGENIC                    |                    |                              |
| SNP_86491_A_25583  | NW_004516279.1 | scaffold937 | 25583                   | CC                              | AA                 | AA               | INTRON                        | 101508333          | Unknown function             |
| SNP_86492_A_25605  | NW_004516279.1 | scaffold937 | 25605                   | GG                              | TT                 | TT               | INTRON                        | 101508333          | Unknown function             |
| SNP_86493_A_28186  | NW_004516279.1 | scaffold937 | 28186                   | GG                              | AA                 | AA               | NON_SYNONYMOUS_CODING         | 101508333          | Unknown function             |
| SNP_86494_A_75315  | NW_004516279.1 | scaffold937 | 75315                   | CC                              | TT                 | TT               | INTERGENIC                    |                    |                              |
| SNP_86495_A_80897  | NW_004516279.1 | scaffold937 | 80897                   | TT                              | CC                 | CC               | INTERGENIC                    |                    |                              |
| SNP_86496_A_133823 | NW_004516279.1 | scaffold937 | 133823                  | CC                              | GG                 | GG               | INTRON                        | 101506839          | uncharacterized LOC101506839 |
| SNP_86497_A_158184 | NW_004516279.1 | scaffold937 | 158184                  | GG                              | AA                 | AA               | INTERGENIC                    |                    |                              |
| SNP_86498_A_165361 | NW_004516279.1 | scaffold937 | 165361                  | TT                              | GG                 | GG               | INTERGENIC                    |                    |                              |
| SNP_86499_A_165371 | NW_004516279.1 | scaffold937 | 165371                  | TT                              | CC                 | CC               | INTERGENIC                    |                    |                              |
| SNP_86500_A_165414 | NW_004516279.1 | scaffold937 | 165414                  | AA                              | GG                 | GG               | INTERGENIC                    |                    |                              |
| SNP_86501_A_165722 | NW_004516279.1 | scaffold937 | 165722                  | GG                              | AA                 | AA               | INTERGENIC                    |                    |                              |
| SNP_86502_A_166941 | NW_004516279.1 | scaffold937 | 166941                  | TT                              | AA                 | AA               | INTERGENIC                    |                    |                              |
| SNP_86503_A_166968 | NW_004516279.1 | scaffold937 | 166968                  | GG                              | TT                 | TT               | INTERGENIC                    |                    |                              |
| SNP_86504_A_185175 | NW_004516279.1 | scaffold937 | 185175                  | GG                              | AA                 | AA               | INTERGENIC                    |                    |                              |
| SNP_86505_A_189368 | NW_004516279.1 | scaffold937 | 189368                  | AA                              | TT                 | TT               | INTERGENIC                    |                    |                              |
| SNP_86506_A_207201 | NW_004516279.1 | scaffold937 | 207201                  | GG                              | AA                 | AA               | INTERGENIC                    |                    |                              |
| SNP_86507_A_207207 | NW_004516279.1 | scaffold937 | 207207                  | CC                              | TT                 | TT               | INTERGENIC                    |                    |                              |
| SNP_86508_A_207230 | NW_004516279.1 | scaffold937 | 207230                  | GG                              | AA                 | AA               | INTERGENIC                    |                    |                              |

| SNPs IDs           | Chromosome IDs | Chromosomes | Physical positions (bp) | CDC Frontier (Reference genome) | (Pusa 1103 & HPNB) | (ILWC 46 & LPNB) | Sequence genome | Components of | Gene accession IDs | Putative functions |
|--------------------|----------------|-------------|-------------------------|---------------------------------|--------------------|------------------|-----------------|---------------|--------------------|--------------------|
| SNP_86509_A_207249 | NW_004516279.1 | scaffold937 | 207249                  | GG                              | AA                 | AA               | INTERGENIC      |               |                    |                    |
| SNP_86510_A_207264 | NW_004516279.1 | scaffold937 | 207264                  | AA                              | CC                 | CC               | INTERGENIC      |               |                    |                    |
| SNP_86511_A_207280 | NW_004516279.1 | scaffold937 | 207280                  | CC                              | TT                 | TT               | INTERGENIC      |               |                    |                    |
| SNP_86512_A_207307 | NW_004516279.1 | scaffold937 | 207307                  | CC                              | TT                 | TT               | INTERGENIC      |               |                    |                    |
| SNP_86513_A_207497 | NW_004516279.1 | scaffold937 | 207497                  | GG                              | AA                 | AA               | INTERGENIC      |               |                    |                    |
| SNP_86514_A_207507 | NW_004516279.1 | scaffold937 | 207507                  | CC                              | TT                 | TT               | INTERGENIC      |               |                    |                    |
| SNP_86515_A_207563 | NW_004516279.1 | scaffold937 | 207563                  | CC                              | GG                 | GG               | INTERGENIC      |               |                    |                    |
| SNP_86516_A_207817 | NW_004516279.1 | scaffold937 | 207817                  | AA                              | CC                 | CC               | INTERGENIC      |               |                    |                    |
| SNP_86517_A_207819 | NW_004516279.1 | scaffold937 | 207819                  | CC                              | TT                 | TT               | INTERGENIC      |               |                    |                    |
| SNP_86518_A_699    | NW_004516281.1 | scaffold939 | 699                     | GG                              | TT                 | TT               | INTERGENIC      |               |                    |                    |
| SNP_86519_A_934    | NW_004516281.1 | scaffold939 | 934                     | TT                              | GG                 | GG               | INTERGENIC      |               |                    |                    |
| SNP_86520_A_978    | NW_004516281.1 | scaffold939 | 978                     | CC                              | TT                 | TT               | INTERGENIC      |               |                    |                    |
| SNP_86522_A_1233   | NW_004516281.1 | scaffold939 | 1233                    | AA                              | TT                 | TT               | INTERGENIC      |               |                    |                    |
| SNP_86523_A_1290   | NW_004516281.1 | scaffold939 | 1290                    | CC                              | TT                 | TT               | INTERGENIC      |               |                    |                    |
| SNP_86524_A_1306   | NW_004516281.1 | scaffold939 | 1306                    | AA                              | GG                 | GG               | INTERGENIC      |               |                    |                    |
| SNP_86525_A_1313   | NW_004516281.1 | scaffold939 | 1313                    | CC                              | TT                 | TT               | INTERGENIC      |               |                    |                    |
| SNP_86526_A_42851  | NW_004516283.1 | scaffold943 | 42851                   | TT                              | CC                 | CC               | INTERGENIC      |               |                    |                    |
| SNP_86527_A_42873  | NW_004516283.1 | scaffold943 | 42873                   | GG                              | AA                 | AA               | INTERGENIC      |               |                    |                    |
| SNP_86528_A_42915  | NW_004516283.1 | scaffold943 | 42915                   | AA                              | TT                 | TT               | INTERGENIC      |               |                    |                    |
| SNP_86530_A_42920  | NW_004516283.1 | scaffold943 | 42920                   | CC                              | AA                 | AA               | INTERGENIC      |               |                    |                    |
| SNP_86531_A_42930  | NW_004516283.1 | scaffold943 | 42930                   | AA                              | TT                 | TT               | INTERGENIC      |               |                    |                    |
| SNP_86532_A_42938  | NW_004516283.1 | scaffold943 | 42938                   | TT                              | AA                 | AA               | INTERGENIC      |               |                    |                    |

| SNPs IDs           | Chromosome IDs | Chromosomes | Physical positions (bp) | CDC Frontier (Reference genome) | (Pusa 1103 & HPNB) | (ILWC 46 & LPNB) | Sequence genome | Components of | Gene accession IDs | Putative functions |
|--------------------|----------------|-------------|-------------------------|---------------------------------|--------------------|------------------|-----------------|---------------|--------------------|--------------------|
| SNP_86533_A_42983  | NW_004516283.1 | scaffold943 | 42983                   | TT                              | GG                 | GG               | INTERGENIC      |               |                    |                    |
| SNP_86534_A_43000  | NW_004516283.1 | scaffold943 | 43000                   | TT                              | CC                 | CC               | INTERGENIC      |               |                    |                    |
| SNP_86535_A_43097  | NW_004516283.1 | scaffold943 | 43097                   | CC                              | TT                 | TT               | INTERGENIC      |               |                    |                    |
| SNP_86537_A_144498 | NW_004516283.1 | scaffold943 | 144498                  | AA                              | TT                 | TT               | INTERGENIC      |               |                    |                    |
| SNP_86538_A_144500 | NW_004516283.1 | scaffold943 | 144500                  | TT                              | AA                 | AA               | INTERGENIC      |               |                    |                    |
| SNP_86539_A_162835 | NW_004516283.1 | scaffold943 | 162835                  | TT                              | CC                 | CC               | INTERGENIC      |               |                    |                    |
| SNP_86540_A_162848 | NW_004516283.1 | scaffold943 | 162848                  | GG                              | TT                 | TT               | INTERGENIC      |               |                    |                    |
| SNP_86541_A_163031 | NW_004516283.1 | scaffold943 | 163031                  | CC                              | AA                 | AA               | INTERGENIC      |               |                    |                    |
| SNP_86543_A_163086 | NW_004516283.1 | scaffold943 | 163086                  | AA                              | TT                 | TT               | INTERGENIC      |               |                    |                    |
| SNP_86544_A_163406 | NW_004516283.1 | scaffold943 | 163406                  | TT                              | CC                 | CC               | INTERGENIC      |               |                    |                    |
| SNP_86545_A_165619 | NW_004516283.1 | scaffold943 | 165619                  | TT                              | CC                 | CC               | INTERGENIC      |               |                    |                    |
| SNP_86546_A_235876 | NW_004516283.1 | scaffold943 | 235876                  | TT                              | AA                 | AA               | INTERGENIC      |               |                    |                    |
| SNP_86547_A_263317 | NW_004516283.1 | scaffold943 | 263317                  | CC                              | TT                 | TT               | INTERGENIC      |               |                    |                    |
| SNP_86548_A_264121 | NW_004516283.1 | scaffold943 | 264121                  | GG                              | AA                 | AA               | INTERGENIC      |               |                    |                    |
| SNP_86549_A_265675 | NW_004516283.1 | scaffold943 | 265675                  | AA                              | GG                 | GG               | INTERGENIC      |               |                    |                    |
| SNP_86550_A_267676 | NW_004516283.1 | scaffold943 | 267676                  | TT                              | CC                 | CC               | INTERGENIC      |               |                    |                    |
| SNP_86551_A_267728 | NW_004516283.1 | scaffold943 | 267728                  | GG                              | CC                 | CC               | INTERGENIC      |               |                    |                    |
| SNP_86553_A_226    | NW_004516284.1 | scaffold944 | 226                     | GG                              | AA                 | AA               | INTERGENIC      |               |                    |                    |
| SNP_86554_A_296    | NW_004516284.1 | scaffold944 | 296                     | GG                              | AA                 | AA               | INTERGENIC      |               |                    |                    |
| SNP_86555_A_521    | NW_004516284.1 | scaffold944 | 521                     | GG                              | AA                 | AA               | INTERGENIC      |               |                    |                    |
| SNP_86556_A_528    | NW_004516284.1 | scaffold944 | 528                     | TT                              | CC                 | CC               | INTERGENIC      |               |                    |                    |
| SNP_86557_A_610    | NW_004516284.1 | scaffold944 | 610                     | AA                              | GG                 | GG               | INTERGENIC      |               |                    |                    |

| SNPs IDs         | Chromosome IDs | Chromosomes | Physical positions (bp) | CDC Frontier (Reference genome) | (Pusa 1103 & HPNB) | (ILWC 46 & LPNB) | Sequence genome | Components of | Gene accession IDs | Putative functions |
|------------------|----------------|-------------|-------------------------|---------------------------------|--------------------|------------------|-----------------|---------------|--------------------|--------------------|
| SNP_86559_A_703  | NW_004516284.1 | scaffold944 | 703                     | CC                              | AA                 | AA               | INTERGENIC      |               |                    |                    |
| SNP_86560_A_752  | NW_004516284.1 | scaffold944 | 752                     | CC                              | GG                 | GG               | INTERGENIC      |               |                    |                    |
| SNP_86561_A_803  | NW_004516284.1 | scaffold944 | 803                     | GG                              | AA                 | AA               | INTERGENIC      |               |                    |                    |
| SNP_86562_A_879  | NW_004516284.1 | scaffold944 | 879                     | GG                              | TT                 | TT               | INTERGENIC      |               |                    |                    |
| SNP_86563_A_1405 | NW_004516284.1 | scaffold944 | 1405                    | CC                              | TT                 | TT               | INTERGENIC      |               |                    |                    |
| SNP_86564_A_1518 | NW_004516284.1 | scaffold944 | 1518                    | TT                              | CC                 | CC               | INTERGENIC      |               |                    |                    |
| SNP_86565_A_1724 | NW_004516284.1 | scaffold944 | 1724                    | TT                              | CC                 | CC               | INTERGENIC      |               |                    |                    |
| SNP_86566_A_1725 | NW_004516284.1 | scaffold944 | 1725                    | GG                              | TT                 | TT               | INTERGENIC      |               |                    |                    |
| SNP_86567_A_1733 | NW_004516284.1 | scaffold944 | 1733                    | AA                              | GG                 | GG               | INTERGENIC      |               |                    |                    |
| SNP_86568_A_1849 | NW_004516284.1 | scaffold944 | 1849                    | AA                              | GG                 | GG               | INTERGENIC      |               |                    |                    |
| SNP_86569_A_2104 | NW_004516284.1 | scaffold944 | 2104                    | CC                              | GG                 | GG               | INTERGENIC      |               |                    |                    |
| SNP_86570_A_2352 | NW_004516284.1 | scaffold944 | 2352                    | TT                              | AA                 | AA               | INTERGENIC      |               |                    |                    |
| SNP_86572_A_2442 | NW_004516284.1 | scaffold944 | 2442                    | AA                              | GG                 | GG               | INTERGENIC      |               |                    |                    |
| SNP_86574_A_2587 | NW_004516284.1 | scaffold944 | 2587                    | CC                              | TT                 | TT               | INTERGENIC      |               |                    |                    |
| SNP_86575_A_2732 | NW_004516284.1 | scaffold944 | 2732                    | AA                              | TT                 | TT               | INTERGENIC      |               |                    |                    |
| SNP_86576_A_2868 | NW_004516284.1 | scaffold944 | 2868                    | GG                              | CC                 | CC               | INTERGENIC      |               |                    |                    |
| SNP_86579_A_3330 | NW_004516284.1 | scaffold944 | 3330                    | GG                              | AA                 | AA               | INTERGENIC      |               |                    |                    |
| SNP_86581_A_3358 | NW_004516284.1 | scaffold944 | 3358                    | TT                              | CC                 | CC               | INTERGENIC      |               |                    |                    |
| SNP_86582_A_3461 | NW_004516284.1 | scaffold944 | 3461                    | CC                              | GG                 | GG               | INTERGENIC      |               |                    |                    |
| SNP_86583_A_3636 | NW_004516284.1 | scaffold944 | 3636                    | GG                              | AA                 | AA               | INTERGENIC      |               |                    |                    |
| SNP_86584_A_2212 | NW_004516285.1 | scaffold945 | 2212                    | CC                              | GG                 | GG               | INTERGENIC      |               |                    |                    |
| SNP_86586_A_2539 | NW_004516285.1 | scaffold945 | 2539                    | AA                              | GG                 | GG               | INTERGENIC      |               |                    |                    |

| SNPs IDs         | Chromosome IDs | Chromosomes | Physical positions (bp) | CDC Frontier (Reference genome) | (Pusa 1103 & HPNB) | (ILWC 46 & LPNB) | Sequence genome | Components of | Gene accession IDs           | Putative functions |
|------------------|----------------|-------------|-------------------------|---------------------------------|--------------------|------------------|-----------------|---------------|------------------------------|--------------------|
| SNP_86587_A_2549 | NW_004516285.1 | scaffold945 | 2549                    | CC                              | TT                 | TT               | INTERGENIC      |               |                              |                    |
| SNP_86588_A_2556 | NW_004516285.1 | scaffold945 | 2556                    | CC                              | AA                 | AA               | INTERGENIC      |               |                              |                    |
| SNP_86589_A_64   | NW_004516287.1 | scaffold948 | 64                      | CC                              | TT                 | TT               | INTERGENIC      |               |                              |                    |
| SNP_86590_A_80   | NW_004516287.1 | scaffold948 | 80                      | CC                              | AA                 | AA               | INTERGENIC      |               |                              |                    |
| SNP_86591_A_94   | NW_004516287.1 | scaffold948 | 94                      | AA                              | GG                 | GG               | INTERGENIC      |               |                              |                    |
| SNP_86592_A_120  | NW_004516287.1 | scaffold948 | 120                     | AA                              | GG                 | GG               | INTERGENIC      |               |                              |                    |
| SNP_86593_A_182  | NW_004516287.1 | scaffold948 | 182                     | AA                              | CC                 | CC               | INTERGENIC      |               |                              |                    |
| SNP_86594_A_295  | NW_004516287.1 | scaffold948 | 295                     | AA                              | CC                 | CC               | INTERGENIC      |               |                              |                    |
| SNP_86595_A_429  | NW_004516287.1 | scaffold948 | 429                     | CC                              | AA                 | AA               | INTERGENIC      |               |                              |                    |
| SNP_86596_A_504  | NW_004516287.1 | scaffold948 | 504                     | GG                              | AA                 | AA               | INTERGENIC      |               |                              |                    |
| SNP_86597_A_506  | NW_004516287.1 | scaffold948 | 506                     | CC                              | AA                 | AA               | INTERGENIC      |               |                              |                    |
| SNP_86598_A_533  | NW_004516287.1 | scaffold948 | 533                     | TT                              | CC                 | CC               | INTERGENIC      |               |                              |                    |
| SNP_86599_A_576  | NW_004516287.1 | scaffold948 | 576                     | CC                              | AA                 | AA               | INTERGENIC      |               |                              |                    |
| SNP_86600_A_593  | NW_004516287.1 | scaffold948 | 593                     | CC                              | AA                 | AA               | INTERGENIC      |               |                              |                    |
| SNP_86601_A_750  | NW_004516287.1 | scaffold948 | 750                     | GG                              | CC                 | CC               | INTERGENIC      |               |                              |                    |
| SNP_86602_A_809  | NW_004516287.1 | scaffold948 | 809                     | GG                              | AA                 | AA               | INTERGENIC      |               |                              |                    |
| SNP_86603_A_892  | NW_004516287.1 | scaffold948 | 892                     | CC                              | AA                 | AA               | INTERGENIC      |               |                              |                    |
| SNP_86604_A_893  | NW_004516287.1 | scaffold948 | 893                     | TT                              | GG                 | GG               | INTERGENIC      |               |                              |                    |
| SNP_86605_A_1183 | NW_004516287.1 | scaffold948 | 1183                    | GG                              | CC                 | CC               | INTERGENIC      |               |                              |                    |
| SNP_86606_A_1239 | NW_004516287.1 | scaffold948 | 1239                    | TT                              | AA                 | AA               | INTERGENIC      |               |                              |                    |
| SNP_86607_A_1473 | NW_004516287.1 | scaffold948 | 1473                    | GG                              | AA                 | AA               | DRR             | 101510901     | uncharacterized LOC101510901 |                    |
| SNP_86608_A_1652 | NW_004516287.1 | scaffold948 | 1652                    | CC                              | GG                 | GG               | DRR             | 101510901     | uncharacterized LOC101510901 |                    |

| SNPs IDs           | Chromosome IDs | Chromosomes | Physical positions (bp) | CDC Frontier (Reference genome) | (Pusa 1103 & HPNB) | (ILWC 46 & LPNB) | Sequence Components of genome | Gene accession IDs | Putative functions           |
|--------------------|----------------|-------------|-------------------------|---------------------------------|--------------------|------------------|-------------------------------|--------------------|------------------------------|
| SNP_86609_A_1772   | NW_004516287.1 | scaffold948 | 1772                    | CC                              | AA                 | AA               | DRR                           | 101510901          | uncharacterized LOC101510901 |
| SNP_86610_A_1786   | NW_004516287.1 | scaffold948 | 1786                    | AA                              | GG                 | GG               | DRR                           | 101510901          | uncharacterized LOC101510901 |
| SNP_86611_A_1821   | NW_004516287.1 | scaffold948 | 1821                    | TT                              | GG                 | GG               | DRR                           | 101510901          | uncharacterized LOC101510901 |
| SNP_86612_A_23147  | NW_004516287.1 | scaffold948 | 23147                   | CC                              | TT                 | TT               | URR                           | 101510901          | uncharacterized LOC101510901 |
| SNP_86613_A_30684  | NW_004516287.1 | scaffold948 | 30684                   | GG                              | AA                 | AA               | INTERGENIC                    |                    |                              |
| SNP_86614_A_52358  | NW_004516287.1 | scaffold948 | 52358                   | AA                              | GG                 | GG               | INTERGENIC                    |                    |                              |
| SNP_86615_A_52522  | NW_004516287.1 | scaffold948 | 52522                   | GG                              | AA                 | AA               | INTERGENIC                    |                    |                              |
| SNP_86616_A_52531  | NW_004516287.1 | scaffold948 | 52531                   | TT                              | AA                 | AA               | INTERGENIC                    |                    |                              |
| SNP_86617_A_52759  | NW_004516287.1 | scaffold948 | 52759                   | TT                              | CC                 | CC               | INTERGENIC                    |                    |                              |
| SNP_86618_A_52975  | NW_004516287.1 | scaffold948 | 52975                   | TT                              | CC                 | CC               | INTERGENIC                    |                    |                              |
| SNP_86619_A_52981  | NW_004516287.1 | scaffold948 | 52981                   | GG                              | AA                 | AA               | INTERGENIC                    |                    |                              |
| SNP_86620_A_53033  | NW_004516287.1 | scaffold948 | 53033                   | GG                              | AA                 | AA               | INTERGENIC                    |                    |                              |
| SNP_86621_A_53050  | NW_004516287.1 | scaffold948 | 53050                   | AA                              | GG                 | GG               | INTERGENIC                    |                    |                              |
| SNP_86622_A_59122  | NW_004516287.1 | scaffold948 | 59122                   | CC                              | TT                 | TT               | INTERGENIC                    |                    |                              |
| SNP_86623_A_67115  | NW_004516287.1 | scaffold948 | 67115                   | GG                              | AA                 | AA               | INTERGENIC                    |                    |                              |
| SNP_86624_A_69141  | NW_004516287.1 | scaffold948 | 69141                   | TT                              | AA                 | AA               | INTERGENIC                    |                    |                              |
| SNP_86627_A_147675 | NW_004516287.1 | scaffold948 | 147675                  | GG                              | TT                 | TT               | INTERGENIC                    |                    |                              |
| SNP_86628_A_148163 | NW_004516287.1 | scaffold948 | 148163                  | CC                              | TT                 | TT               | INTERGENIC                    |                    |                              |
| SNP_86629_A_148297 | NW_004516287.1 | scaffold948 | 148297                  | TT                              | GG                 | GG               | INTERGENIC                    |                    |                              |
| SNP_86630_A_148334 | NW_004516287.1 | scaffold948 | 148334                  | CC                              | TT                 | TT               | INTERGENIC                    |                    |                              |
| SNP_86631_A_148364 | NW_004516287.1 | scaffold948 | 148364                  | CC                              | TT                 | TT               | INTERGENIC                    |                    |                              |
| SNP_86632_A_148368 | NW_004516287.1 | scaffold948 | 148368                  | AA                              | GG                 | GG               | INTERGENIC                    |                    |                              |

| SNPs IDs           | Chromosome IDs | Chromosomes | Physical positions (bp) | CDC Frontier (Reference genome) | (Pusa 1103 & HPNB) | (ILWC 46 & LPNB) | Sequence Components of genome | Gene accession IDs | Putative functions |
|--------------------|----------------|-------------|-------------------------|---------------------------------|--------------------|------------------|-------------------------------|--------------------|--------------------|
| SNP_86633_A_148435 | NW_004516287.1 | scaffold948 | 148435                  | GG                              | CC                 | CC               | INTERGENIC                    |                    |                    |
| SNP_86634_A_154260 | NW_004516287.1 | scaffold948 | 154260                  | TT                              | CC                 | CC               | INTERGENIC                    |                    |                    |
| SNP_86635_A_161577 | NW_004516287.1 | scaffold948 | 161577                  | AA                              | GG                 | GG               | INTERGENIC                    |                    |                    |
| SNP_86636_A_180093 | NW_004516287.1 | scaffold948 | 180093                  | CC                              | GG                 | GG               | INTERGENIC                    |                    |                    |
| SNP_86637_A_180113 | NW_004516287.1 | scaffold948 | 180113                  | TT                              | GG                 | GG               | INTERGENIC                    |                    |                    |
| SNP_86638_A_180263 | NW_004516287.1 | scaffold948 | 180263                  | GG                              | AA                 | AA               | INTERGENIC                    |                    |                    |
| SNP_86639_A_180330 | NW_004516287.1 | scaffold948 | 180330                  | GG                              | AA                 | AA               | INTERGENIC                    |                    |                    |
| SNP_86640_A_189441 | NW_004516287.1 | scaffold948 | 189441                  | AA                              | TT                 | TT               | INTERGENIC                    |                    |                    |
| SNP_86641_A_189448 | NW_004516287.1 | scaffold948 | 189448                  | CC                              | TT                 | TT               | INTERGENIC                    |                    |                    |
| SNP_86642_A_189455 | NW_004516287.1 | scaffold948 | 189455                  | AA                              | GG                 | GG               | INTERGENIC                    |                    |                    |
| SNP_86643_A_189459 | NW_004516287.1 | scaffold948 | 189459                  | TT                              | GG                 | GG               | INTERGENIC                    |                    |                    |
| SNP_86644_A_3625   | NW_004516288.1 | scaffold949 | 3625                    | GG                              | AA                 | AA               | SYNONYMOUS_CODING             | 101513778          | Unknown function   |
| SNP_86645_A_3708   | NW_004516288.1 | scaffold949 | 3708                    | AA                              | GG                 | GG               | NON_SYNONYMOUS_CODING         | 101513778          | Unknown function   |
| SNP_86647_A_3850   | NW_004516288.1 | scaffold949 | 3850                    | TT                              | CC                 | CC               | DRR                           | 101513778          | Unknown function   |
| SNP_86648_A_3934   | NW_004516288.1 | scaffold949 | 3934                    | CC                              | TT                 | TT               | DRR                           | 101513778          | Unknown function   |
| SNP_86649_A_3950   | NW_004516288.1 | scaffold949 | 3950                    | AA                              | TT                 | TT               | DRR                           | 101513778          | Unknown function   |
| SNP_86650_A_3983   | NW_004516288.1 | scaffold949 | 3983                    | AA                              | TT                 | TT               | URR                           | 101513778          | Unknown function   |
| SNP_86651_A_4041   | NW_004516288.1 | scaffold949 | 4041                    | CC                              | TT                 | TT               | URR                           | 101513778          | Unknown function   |
| SNP_86652_A_4043   | NW_004516288.1 | scaffold949 | 4043                    | AA                              | GG                 | GG               | URR                           | 101513778          | Unknown function   |
| SNP_86653_A_12386  | NW_004516288.1 | scaffold949 | 12386                   | CC                              | TT                 | TT               | INTERGENIC                    |                    |                    |
| SNP_86654_A_12401  | NW_004516288.1 | scaffold949 | 12401                   | TT                              | GG                 | GG               | INTERGENIC                    |                    |                    |
| SNP_86655_A_12416  | NW_004516288.1 | scaffold949 | 12416                   | CC                              | TT                 | TT               | INTERGENIC                    |                    |                    |

| SNPs IDs          | Chromosome IDs | Chromosomes | Physical positions (bp) | CDC Frontier (Reference genome) | (Pusa 1103 & HPNB) | (ILWC 46 & LPNB) | Sequence genome | Components of | Gene accession IDs | Putative functions |
|-------------------|----------------|-------------|-------------------------|---------------------------------|--------------------|------------------|-----------------|---------------|--------------------|--------------------|
| SNP_86657_A_26186 | NW_004516288.1 | scaffold949 | 26186                   | GG                              | TT                 | TT               | INTERGENIC      |               |                    |                    |
| SNP_86658_A_26293 | NW_004516288.1 | scaffold949 | 26293                   | CC                              | TT                 | TT               | INTERGENIC      |               |                    |                    |
| SNP_86659_A_26295 | NW_004516288.1 | scaffold949 | 26295                   | CC                              | TT                 | TT               | INTERGENIC      |               |                    |                    |
| SNP_86660_A_26299 | NW_004516288.1 | scaffold949 | 26299                   | CC                              | TT                 | TT               | INTERGENIC      |               |                    |                    |
| SNP_86661_A_26403 | NW_004516288.1 | scaffold949 | 26403                   | TT                              | CC                 | CC               | INTERGENIC      |               |                    |                    |
| SNP_86662_A_26457 | NW_004516288.1 | scaffold949 | 26457                   | GG                              | TT                 | TT               | INTERGENIC      |               |                    |                    |
| SNP_86663_A_26528 | NW_004516288.1 | scaffold949 | 26528                   | TT                              | AA                 | AA               | INTERGENIC      |               |                    |                    |
| SNP_86664_A_26529 | NW_004516288.1 | scaffold949 | 26529                   | GG                              | TT                 | TT               | INTERGENIC      |               |                    |                    |
| SNP_86666_A_26627 | NW_004516288.1 | scaffold949 | 26627                   | AA                              | GG                 | GG               | INTERGENIC      |               |                    |                    |
| SNP_86667_A_26629 | NW_004516288.1 | scaffold949 | 26629                   | TT                              | GG                 | GG               | INTERGENIC      |               |                    |                    |
| SNP_86668_A_26630 | NW_004516288.1 | scaffold949 | 26630                   | AA                              | TT                 | TT               | INTERGENIC      |               |                    |                    |
| SNP_86669_A_26696 | NW_004516288.1 | scaffold949 | 26696                   | GG                              | CC                 | CC               | INTERGENIC      |               |                    |                    |
| SNP_86670_A_26718 | NW_004516288.1 | scaffold949 | 26718                   | CC                              | GG                 | GG               | INTERGENIC      |               |                    |                    |
| SNP_86671_A_26728 | NW_004516288.1 | scaffold949 | 26728                   | GG                              | AA                 | AA               | INTERGENIC      |               |                    |                    |
| SNP_86672_A_26752 | NW_004516288.1 | scaffold949 | 26752                   | CC                              | TT                 | TT               | INTERGENIC      |               |                    |                    |
| SNP_86673_A_26792 | NW_004516288.1 | scaffold949 | 26792                   | AA                              | TT                 | TT               | INTERGENIC      |               |                    |                    |
| SNP_86674_A_26794 | NW_004516288.1 | scaffold949 | 26794                   | AA                              | TT                 | TT               | INTERGENIC      |               |                    |                    |
| SNP_86675_A_26801 | NW_004516288.1 | scaffold949 | 26801                   | TT                              | CC                 | CC               | INTERGENIC      |               |                    |                    |
| SNP_86676_A_26882 | NW_004516288.1 | scaffold949 | 26882                   | TT                              | AA                 | AA               | INTERGENIC      |               |                    |                    |
| SNP_86677_A_26904 | NW_004516288.1 | scaffold949 | 26904                   | AA                              | CC                 | CC               | INTERGENIC      |               |                    |                    |
| SNP_86678_A_27106 | NW_004516288.1 | scaffold949 | 27106                   | CC                              | AA                 | AA               | INTERGENIC      |               |                    |                    |
| SNP_86679_A_27136 | NW_004516288.1 | scaffold949 | 27136                   | TT                              | CC                 | CC               | INTERGENIC      |               |                    |                    |



| SNPs IDs           | Chromosome IDs | Chromosomes | Physical positions (bp) | CDC Frontier (Reference genome) | (Pusa 1103 & HPNB) | (ILWC 46 & LPNB) | Sequence genome | Components of | Gene accession IDs | Putative functions |
|--------------------|----------------|-------------|-------------------------|---------------------------------|--------------------|------------------|-----------------|---------------|--------------------|--------------------|
| SNP_86680_A_27143  | NW_004516288.1 | scaffold949 | 27143                   | CC                              | TT                 | TT               | INTERGENIC      |               |                    |                    |
| SNP_86681_A_72153  | NW_004516288.1 | scaffold949 | 72153                   | AA                              | CC                 | CC               | INTERGENIC      |               |                    |                    |
| SNP_86682_A_86261  | NW_004516288.1 | scaffold949 | 86261                   | GG                              | AA                 | AA               | INTERGENIC      |               |                    |                    |
| SNP_86683_A_88331  | NW_004516288.1 | scaffold949 | 88331                   | GG                              | TT                 | TT               | INTERGENIC      |               |                    |                    |
| SNP_86684_A_88339  | NW_004516288.1 | scaffold949 | 88339                   | TT                              | GG                 | GG               | INTERGENIC      |               |                    |                    |
| SNP_86685_A_88374  | NW_004516288.1 | scaffold949 | 88374                   | GG                              | TT                 | TT               | INTERGENIC      |               |                    |                    |
| SNP_86686_A_88394  | NW_004516288.1 | scaffold949 | 88394                   | GG                              | AA                 | AA               | INTERGENIC      |               |                    |                    |
| SNP_86687_A_102195 | NW_004516288.1 | scaffold949 | 102195                  | AA                              | GG                 | GG               | INTERGENIC      |               |                    |                    |
| SNP_86688_A_102261 | NW_004516288.1 | scaffold949 | 102261                  | AA                              | GG                 | GG               | INTERGENIC      |               |                    |                    |
| SNP_86689_A_103608 | NW_004516288.1 | scaffold949 | 103608                  | TT                              | AA                 | AA               | INTERGENIC      |               |                    |                    |
| SNP_86690_A_103646 | NW_004516288.1 | scaffold949 | 103646                  | AA                              | TT                 | TT               | INTERGENIC      |               |                    |                    |
| SNP_86691_A_103659 | NW_004516288.1 | scaffold949 | 103659                  | CC                              | GG                 | GG               | INTERGENIC      |               |                    |                    |
| SNP_86692_A_103851 | NW_004516288.1 | scaffold949 | 103851                  | CC                              | AA                 | AA               | INTERGENIC      |               |                    |                    |
| SNP_86693_A_103868 | NW_004516288.1 | scaffold949 | 103868                  | CC                              | TT                 | TT               | INTERGENIC      |               |                    |                    |
| SNP_86694_A_103875 | NW_004516288.1 | scaffold949 | 103875                  | TT                              | GG                 | GG               | INTERGENIC      |               |                    |                    |
| SNP_86695_A_103977 | NW_004516288.1 | scaffold949 | 103977                  | TT                              | AA                 | AA               | INTERGENIC      |               |                    |                    |
| SNP_86696_A_104095 | NW_004516288.1 | scaffold949 | 104095                  | CC                              | TT                 | TT               | INTERGENIC      |               |                    |                    |
| SNP_86697_A_104196 | NW_004516288.1 | scaffold949 | 104196                  | GG                              | TT                 | TT               | INTERGENIC      |               |                    |                    |
| SNP_86698_A_104362 | NW_004516288.1 | scaffold949 | 104362                  | TT                              | AA                 | AA               | INTERGENIC      |               |                    |                    |
| SNP_86699_A_104638 | NW_004516288.1 | scaffold949 | 104638                  | GG                              | AA                 | AA               | INTERGENIC      |               |                    |                    |
| SNP_86700_A_105373 | NW_004516288.1 | scaffold949 | 105373                  | AA                              | TT                 | TT               | INTERGENIC      |               |                    |                    |
| SNP_86701_A_105411 | NW_004516288.1 | scaffold949 | 105411                  | AA                              | CC                 | CC               | INTERGENIC      |               |                    |                    |

| SNPs IDs           | Chromosome IDs | Chromosomes | Physical positions (bp) | CDC Frontier (Reference genome) | (Pusa 1103 & HPNB) | (ILWC 46 & LPNB) | Sequence genome | Components of | Gene accession IDs | Putative functions |
|--------------------|----------------|-------------|-------------------------|---------------------------------|--------------------|------------------|-----------------|---------------|--------------------|--------------------|
| SNP_86702_A_105415 | NW_004516288.1 | scaffold949 | 105415                  | TT                              | AA                 | AA               | INTERGENIC      |               |                    |                    |
| SNP_86703_A_112328 | NW_004516288.1 | scaffold949 | 112328                  | TT                              | CC                 | CC               | INTERGENIC      |               |                    |                    |
| SNP_86704_A_114098 | NW_004516288.1 | scaffold949 | 114098                  | AA                              | GG                 | GG               | INTERGENIC      |               |                    |                    |
| SNP_86705_A_114486 | NW_004516288.1 | scaffold949 | 114486                  | TT                              | AA                 | AA               | INTERGENIC      |               |                    |                    |
| SNP_86706_A_117660 | NW_004516288.1 | scaffold949 | 117660                  | CC                              | AA                 | AA               | INTERGENIC      |               |                    |                    |
| SNP_86707_A_132017 | NW_004516288.1 | scaffold949 | 132017                  | AA                              | TT                 | TT               | INTERGENIC      |               |                    |                    |
| SNP_86708_A_142322 | NW_004516288.1 | scaffold949 | 142322                  | GG                              | AA                 | AA               | INTERGENIC      |               |                    |                    |
| SNP_86709_A_142335 | NW_004516288.1 | scaffold949 | 142335                  | AA                              | TT                 | TT               | INTERGENIC      |               |                    |                    |
| SNP_86710_A_142352 | NW_004516288.1 | scaffold949 | 142352                  | AA                              | TT                 | TT               | INTERGENIC      |               |                    |                    |
| SNP_86711_A_142368 | NW_004516288.1 | scaffold949 | 142368                  | TT                              | AA                 | AA               | INTERGENIC      |               |                    |                    |
| SNP_86712_A_142369 | NW_004516288.1 | scaffold949 | 142369                  | AA                              | TT                 | TT               | INTERGENIC      |               |                    |                    |
| SNP_86713_A_142386 | NW_004516288.1 | scaffold949 | 142386                  | AA                              | TT                 | TT               | INTERGENIC      |               |                    |                    |
| SNP_86714_A_142400 | NW_004516288.1 | scaffold949 | 142400                  | TT                              | CC                 | CC               | INTERGENIC      |               |                    |                    |
| SNP_86715_A_142535 | NW_004516288.1 | scaffold949 | 142535                  | GG                              | AA                 | AA               | INTERGENIC      |               |                    |                    |
| SNP_86716_A_142546 | NW_004516288.1 | scaffold949 | 142546                  | GG                              | AA                 | AA               | INTERGENIC      |               |                    |                    |
| SNP_86717_A_142559 | NW_004516288.1 | scaffold949 | 142559                  | CC                              | TT                 | TT               | INTERGENIC      |               |                    |                    |
| SNP_86718_A_142562 | NW_004516288.1 | scaffold949 | 142562                  | CC                              | TT                 | TT               | INTERGENIC      |               |                    |                    |
| SNP_86719_A_142581 | NW_004516288.1 | scaffold949 | 142581                  | AA                              | TT                 | TT               | INTERGENIC      |               |                    |                    |
| SNP_86720_A_142616 | NW_004516288.1 | scaffold949 | 142616                  | TT                              | CC                 | CC               | INTERGENIC      |               |                    |                    |
| SNP_86721_A_597    | NW_004516289.1 | scaffold950 | 597                     | CC                              | TT                 | TT               | INTERGENIC      |               |                    |                    |
| SNP_86722_A_727    | NW_004516289.1 | scaffold950 | 727                     | TT                              | AA                 | AA               | INTERGENIC      |               |                    |                    |
| SNP_86723_A_868    | NW_004516289.1 | scaffold950 | 868                     | TT                              | GG                 | GG               | INTERGENIC      |               |                    |                    |

| SNPs IDs         | Chromosome IDs | Chromosomes | Physical positions (bp) | CDC Frontier (Reference genome) | (Pusa 1103 & HPNB) | (ILWC 46 & LPNB) | Sequence genome | Components of | Gene accession IDs | Putative functions |
|------------------|----------------|-------------|-------------------------|---------------------------------|--------------------|------------------|-----------------|---------------|--------------------|--------------------|
| SNP_86724_A_1335 | NW_004516289.1 | scaffold950 | 1335                    | AA                              | TT                 | TT               | INTERGENIC      |               |                    |                    |
| SNP_86725_A_1394 | NW_004516289.1 | scaffold950 | 1394                    | TT                              | GG                 | GG               | INTERGENIC      |               |                    |                    |
| SNP_86726_A_1545 | NW_004516289.1 | scaffold950 | 1545                    | AA                              | GG                 | GG               | INTERGENIC      |               |                    |                    |
| SNP_86727_A_1546 | NW_004516289.1 | scaffold950 | 1546                    | GG                              | TT                 | TT               | INTERGENIC      |               |                    |                    |
| SNP_86728_A_1776 | NW_004516289.1 | scaffold950 | 1776                    | GG                              | AA                 | AA               | INTERGENIC      |               |                    |                    |
| SNP_86729_A_1845 | NW_004516289.1 | scaffold950 | 1845                    | AA                              | GG                 | GG               | INTERGENIC      |               |                    |                    |
| SNP_86730_A_1923 | NW_004516289.1 | scaffold950 | 1923                    | AA                              | GG                 | GG               | INTERGENIC      |               |                    |                    |
| SNP_86731_A_1945 | NW_004516289.1 | scaffold950 | 1945                    | GG                              | TT                 | TT               | INTERGENIC      |               |                    |                    |
| SNP_86732_A_2047 | NW_004516289.1 | scaffold950 | 2047                    | AA                              | GG                 | GG               | INTERGENIC      |               |                    |                    |
| SNP_86733_A_2093 | NW_004516289.1 | scaffold950 | 2093                    | GG                              | AA                 | AA               | INTERGENIC      |               |                    |                    |
| SNP_86734_A_2203 | NW_004516289.1 | scaffold950 | 2203                    | CC                              | GG                 | GG               | INTERGENIC      |               |                    |                    |
| SNP_86735_A_2234 | NW_004516289.1 | scaffold950 | 2234                    | GG                              | AA                 | AA               | INTERGENIC      |               |                    |                    |
| SNP_86736_A_2252 | NW_004516289.1 | scaffold950 | 2252                    | AA                              | TT                 | TT               | INTERGENIC      |               |                    |                    |
| SNP_86737_A_2323 | NW_004516289.1 | scaffold950 | 2323                    | AA                              | GG                 | GG               | INTERGENIC      |               |                    |                    |
| SNP_86738_A_2335 | NW_004516289.1 | scaffold950 | 2335                    | AA                              | GG                 | GG               | INTERGENIC      |               |                    |                    |
| SNP_86739_A_2355 | NW_004516289.1 | scaffold950 | 2355                    | AA                              | CC                 | CC               | INTERGENIC      |               |                    |                    |
| SNP_86740_A_2373 | NW_004516289.1 | scaffold950 | 2373                    | AA                              | GG                 | GG               | INTERGENIC      |               |                    |                    |
| SNP_86741_A_2411 | NW_004516289.1 | scaffold950 | 2411                    | TT                              | CC                 | CC               | INTERGENIC      |               |                    |                    |
| SNP_86742_A_2500 | NW_004516289.1 | scaffold950 | 2500                    | AA                              | GG                 | GG               | INTERGENIC      |               |                    |                    |
| SNP_86743_A_3540 | NW_004516289.1 | scaffold950 | 3540                    | GG                              | AA                 | AA               | INTERGENIC      |               |                    |                    |
| SNP_86744_A_3569 | NW_004516289.1 | scaffold950 | 3569                    | AA                              | GG                 | GG               | INTERGENIC      |               |                    |                    |
| SNP_86745_A_3626 | NW_004516289.1 | scaffold950 | 3626                    | CC                              | TT                 | TT               | INTERGENIC      |               |                    |                    |

| SNPs IDs          | Chromosome IDs | Chromosomes | Physical positions (bp) | CDC Frontier (Reference genome) | (Pusa 1103 & HPNB) | (ILWC 46 & LPNB) | Sequence genome | Components of | Gene accession IDs | Putative functions |
|-------------------|----------------|-------------|-------------------------|---------------------------------|--------------------|------------------|-----------------|---------------|--------------------|--------------------|
| SNP_86746_A_3632  | NW_004516289.1 | scaffold950 | 3632                    | TT                              | GG                 | GG               | INTERGENIC      |               |                    |                    |
| SNP_86747_A_3699  | NW_004516289.1 | scaffold950 | 3699                    | GG                              | TT                 | TT               | INTERGENIC      |               |                    |                    |
| SNP_86748_A_3798  | NW_004516289.1 | scaffold950 | 3798                    | AA                              | GG                 | GG               | INTERGENIC      |               |                    |                    |
| SNP_86749_A_3929  | NW_004516289.1 | scaffold950 | 3929                    | AA                              | CC                 | CC               | INTERGENIC      |               |                    |                    |
| SNP_86750_A_4008  | NW_004516289.1 | scaffold950 | 4008                    | TT                              | CC                 | CC               | INTERGENIC      |               |                    |                    |
| SNP_86751_A_6618  | NW_004516289.1 | scaffold950 | 6618                    | AA                              | GG                 | GG               | INTERGENIC      |               |                    |                    |
| SNP_86752_A_17799 | NW_004516289.1 | scaffold950 | 17799                   | GG                              | TT                 | TT               | INTERGENIC      |               |                    |                    |
| SNP_86753_A_17904 | NW_004516289.1 | scaffold950 | 17904                   | GG                              | AA                 | AA               | INTERGENIC      |               |                    |                    |
| SNP_86754_A_17959 | NW_004516289.1 | scaffold950 | 17959                   | GG                              | CC                 | CC               | INTERGENIC      |               |                    |                    |
| SNP_86755_A_29328 | NW_004516289.1 | scaffold950 | 29328                   | AA                              | CC                 | CC               | INTERGENIC      |               |                    |                    |
| SNP_86756_A_35203 | NW_004516289.1 | scaffold950 | 35203                   | TT                              | CC                 | CC               | INTERGENIC      |               |                    |                    |
| SNP_86757_A_18888 | NW_004516290.1 | scaffold951 | 18888                   | AA                              | CC                 | CC               | INTERGENIC      |               |                    |                    |
| SNP_86758_A_18889 | NW_004516290.1 | scaffold951 | 18889                   | GG                              | AA                 | AA               | INTERGENIC      |               |                    |                    |
| SNP_86759_A_39336 | NW_004516290.1 | scaffold951 | 39336                   | AA                              | CC                 | CC               | INTERGENIC      |               |                    |                    |
| SNP_86760_A_17167 | NW_004516291.1 | scaffold952 | 17167                   | GG                              | TT                 | TT               | INTERGENIC      |               |                    |                    |
| SNP_86761_A_18262 | NW_004516291.1 | scaffold952 | 18262                   | CC                              | TT                 | TT               | INTERGENIC      |               |                    |                    |
| SNP_86762_A_18671 | NW_004516291.1 | scaffold952 | 18671                   | CC                              | TT                 | TT               | INTERGENIC      |               |                    |                    |
| SNP_86763_A_19019 | NW_004516291.1 | scaffold952 | 19019                   | TT                              | GG                 | GG               | INTERGENIC      |               |                    |                    |
| SNP_86764_A_19068 | NW_004516291.1 | scaffold952 | 19068                   | CC                              | TT                 | TT               | INTERGENIC      |               |                    |                    |
| SNP_86765_A_19321 | NW_004516291.1 | scaffold952 | 19321                   | GG                              | CC                 | CC               | INTERGENIC      |               |                    |                    |
| SNP_86766_A_19336 | NW_004516291.1 | scaffold952 | 19336                   | AA                              | GG                 | GG               | INTERGENIC      |               |                    |                    |
| SNP_86767_A_19398 | NW_004516291.1 | scaffold952 | 19398                   | CC                              | TT                 | TT               | INTERGENIC      |               |                    |                    |

| SNPs IDs          | Chromosome IDs | Chromosomes | Physical positions (bp) | CDC Frontier (Reference genome) | (Pusa 1103 & HPNB) | (ILWC 46 & LPNB) | Sequence Components of genome | Gene accession IDs | Putative functions           |
|-------------------|----------------|-------------|-------------------------|---------------------------------|--------------------|------------------|-------------------------------|--------------------|------------------------------|
| SNP_86768_A_27824 | NW_004516291.1 | scaffold952 | 27824                   | AA                              | GG                 | GG               | INTERGENIC                    |                    |                              |
| SNP_86769_A_27842 | NW_004516291.1 | scaffold952 | 27842                   | CC                              | TT                 | TT               | INTERGENIC                    |                    |                              |
| SNP_86770_A_27843 | NW_004516291.1 | scaffold952 | 27843                   | AA                              | TT                 | TT               | INTERGENIC                    |                    |                              |
| SNP_86771_A_27888 | NW_004516291.1 | scaffold952 | 27888                   | AA                              | CC                 | CC               | INTERGENIC                    |                    |                              |
| SNP_86772_A_27889 | NW_004516291.1 | scaffold952 | 27889                   | CC                              | AA                 | AA               | INTERGENIC                    |                    |                              |
| SNP_86773_A_27890 | NW_004516291.1 | scaffold952 | 27890                   | AA                              | GG                 | GG               | INTERGENIC                    |                    |                              |
| SNP_86774_A_27891 | NW_004516291.1 | scaffold952 | 27891                   | CC                              | TT                 | TT               | INTERGENIC                    |                    |                              |
| SNP_86775_A_27908 | NW_004516291.1 | scaffold952 | 27908                   | CC                              | TT                 | TT               | INTERGENIC                    |                    |                              |
| SNP_86776_A_27915 | NW_004516291.1 | scaffold952 | 27915                   | AA                              | GG                 | GG               | INTERGENIC                    |                    |                              |
| SNP_86777_A_27925 | NW_004516291.1 | scaffold952 | 27925                   | GG                              | TT                 | TT               | INTERGENIC                    |                    |                              |
| SNP_86778_A_27926 | NW_004516291.1 | scaffold952 | 27926                   | TT                              | CC                 | CC               | INTERGENIC                    |                    |                              |
| SNP_86779_A_41822 | NW_004516291.1 | scaffold952 | 41822                   | GG                              | AA                 | AA               | INTRON                        | 101514770          | uncharacterized LOC101514770 |
| SNP_86780_A_42196 | NW_004516291.1 | scaffold952 | 42196                   | TT                              | CC                 | CC               | INTRON                        | 101514770          | uncharacterized LOC101514770 |
| SNP_86781_A_560   | NW_004516292.1 | scaffold953 | 560                     | TT                              | AA                 | AA               | INTERGENIC                    |                    |                              |
| SNP_86782_A_581   | NW_004516292.1 | scaffold953 | 581                     | TT                              | CC                 | CC               | INTERGENIC                    |                    |                              |
| SNP_86783_A_660   | NW_004516292.1 | scaffold953 | 660                     | GG                              | AA                 | AA               | INTERGENIC                    |                    |                              |
| SNP_86784_A_705   | NW_004516292.1 | scaffold953 | 705                     | CC                              | GG                 | GG               | INTERGENIC                    |                    |                              |
| SNP_86785_A_7721  | NW_004516292.1 | scaffold953 | 7721                    | CC                              | TT                 | TT               | INTERGENIC                    |                    |                              |
| SNP_86786_A_11864 | NW_004516292.1 | scaffold953 | 11864                   | AA                              | CC                 | CC               | INTERGENIC                    |                    |                              |
| SNP_86788_A_17889 | NW_004516292.1 | scaffold953 | 17889                   | GG                              | AA                 | AA               | INTERGENIC                    |                    |                              |
| SNP_86789_A_18323 | NW_004516292.1 | scaffold953 | 18323                   | AA                              | GG                 | GG               | INTERGENIC                    |                    |                              |
| SNP_86790_A_19412 | NW_004516292.1 | scaffold953 | 19412                   | CC                              | GG                 | GG               | INTERGENIC                    |                    |                              |

| SNPs IDs          | Chromosome IDs | Chromosomes | Physical positions (bp) | CDC Frontier (Reference genome) | (Pusa 1103 & HPNB) | (ILWC 46 & LPNB) | Sequence Components of genome | Gene accession IDs | Putative functions           |
|-------------------|----------------|-------------|-------------------------|---------------------------------|--------------------|------------------|-------------------------------|--------------------|------------------------------|
| SNP_86791_A_24067 | NW_004516292.1 | scaffold953 | 24067                   | GG                              | TT                 | TT               | STOP_GAINED                   | 101515751          | uncharacterized LOC101515751 |
| SNP_86792_A_25285 | NW_004516292.1 | scaffold953 | 25285                   | GG                              | CC                 | CC               | INTRON                        | 101515751          | uncharacterized LOC101515751 |
| SNP_86793_A_29714 | NW_004516292.1 | scaffold953 | 29714                   | CC                              | TT                 | TT               | URR                           | 101515751          | uncharacterized LOC101515751 |
| SNP_86794_A_29751 | NW_004516292.1 | scaffold953 | 29751                   | AA                              | CC                 | CC               | URR                           | 101515751          | uncharacterized LOC101515751 |
| SNP_86795_A_29780 | NW_004516292.1 | scaffold953 | 29780                   | TT                              | CC                 | CC               | URR                           | 101515751          | uncharacterized LOC101515751 |
| SNP_86796_A_29867 | NW_004516292.1 | scaffold953 | 29867                   | GG                              | AA                 | AA               | URR                           | 101515751          | uncharacterized LOC101515751 |
| SNP_86797_A_29934 | NW_004516292.1 | scaffold953 | 29934                   | TT                              | CC                 | CC               | URR                           | 101515751          | uncharacterized LOC101515751 |
| SNP_86798_A_30035 | NW_004516292.1 | scaffold953 | 30035                   | GG                              | AA                 | AA               | URR                           | 101515751          | uncharacterized LOC101515751 |
| SNP_86799_A_30116 | NW_004516292.1 | scaffold953 | 30116                   | TT                              | GG                 | GG               | URR                           | 101515751          | uncharacterized LOC101515751 |
| SNP_86800_A_30154 | NW_004516292.1 | scaffold953 | 30154                   | CC                              | TT                 | TT               | URR                           | 101515751          | uncharacterized LOC101515751 |
| SNP_86801_A_30156 | NW_004516292.1 | scaffold953 | 30156                   | AA                              | GG                 | GG               | URR                           | 101515751          | uncharacterized LOC101515751 |
| SNP_86802_A_31817 | NW_004516292.1 | scaffold953 | 31817                   | CC                              | TT                 | TT               | URR                           | 101488511          | Unknown function             |
| SNP_86803_A_31873 | NW_004516292.1 | scaffold953 | 31873                   | AA                              | GG                 | GG               | URR                           | 101488511          | Unknown function             |
| SNP_86804_A_33219 | NW_004516292.1 | scaffold953 | 33219                   | CC                              | GG                 | GG               | INTERGENIC                    |                    |                              |
| SNP_86805_A_34026 | NW_004516292.1 | scaffold953 | 34026                   | TT                              | AA                 | AA               | INTERGENIC                    |                    |                              |
| SNP_86806_A_34122 | NW_004516292.1 | scaffold953 | 34122                   | GG                              | CC                 | CC               | INTERGENIC                    |                    |                              |
| SNP_86807_A_35361 | NW_004516292.1 | scaffold953 | 35361                   | TT                              | AA                 | AA               | INTERGENIC                    |                    |                              |
| SNP_86808_A_35890 | NW_004516292.1 | scaffold953 | 35890                   | CC                              | GG                 | GG               | INTERGENIC                    |                    |                              |
| SNP_86810_A_37129 | NW_004516292.1 | scaffold953 | 37129                   | GG                              | AA                 | AA               | INTERGENIC                    |                    |                              |
| SNP_86811_A_37898 | NW_004516292.1 | scaffold953 | 37898                   | CC                              | TT                 | TT               | INTERGENIC                    |                    |                              |
| SNP_86812_A_38226 | NW_004516292.1 | scaffold953 | 38226                   | TT                              | AA                 | AA               | INTERGENIC                    |                    |                              |
| SNP_86813_A_38228 | NW_004516292.1 | scaffold953 | 38228                   | GG                              | AA                 | AA               | INTERGENIC                    |                    |                              |

| SNPs IDs          | Chromosome IDs | Chromosomes | Physical positions (bp) | CDC Frontier (Reference genome) | (Pusa 1103 & HPNB) | (ILWC 46 & LPNB) | Sequence Components of genome | Gene accession IDs | Putative functions |
|-------------------|----------------|-------------|-------------------------|---------------------------------|--------------------|------------------|-------------------------------|--------------------|--------------------|
| SNP_86815_A_40473 | NW_004516292.1 | scaffold953 | 40473                   | AA                              | TT                 | TT               | INTERGENIC                    |                    |                    |
| SNP_86816_A_44171 | NW_004516292.1 | scaffold953 | 44171                   | GG                              | AA                 | AA               | INTERGENIC                    |                    |                    |
| SNP_86819_A_46675 | NW_004516292.1 | scaffold953 | 46675                   | TT                              | CC                 | CC               | INTERGENIC                    |                    |                    |
| SNP_86820_A_52215 | NW_004516292.1 | scaffold953 | 52215                   | TT                              | CC                 | CC               | INTERGENIC                    |                    |                    |
| SNP_86821_A_53238 | NW_004516292.1 | scaffold953 | 53238                   | CC                              | TT                 | TT               | INTERGENIC                    |                    |                    |
| SNP_86822_A_53530 | NW_004516292.1 | scaffold953 | 53530                   | TT                              | CC                 | CC               | INTERGENIC                    |                    |                    |
| SNP_86823_A_53608 | NW_004516292.1 | scaffold953 | 53608                   | TT                              | CC                 | CC               | INTERGENIC                    |                    |                    |
| SNP_86824_A_58063 | NW_004516292.1 | scaffold953 | 58063                   | GG                              | TT                 | TT               | INTERGENIC                    |                    |                    |
| SNP_86825_A_60219 | NW_004516292.1 | scaffold953 | 60219                   | TT                              | AA                 | AA               | INTERGENIC                    |                    |                    |
| SNP_86827_A_64721 | NW_004516292.1 | scaffold953 | 64721                   | TT                              | CC                 | CC               | INTERGENIC                    |                    |                    |
| SNP_86828_A_65173 | NW_004516292.1 | scaffold953 | 65173                   | AA                              | GG                 | GG               | INTERGENIC                    |                    |                    |
| SNP_86829_A_65358 | NW_004516292.1 | scaffold953 | 65358                   | GG                              | AA                 | AA               | INTERGENIC                    |                    |                    |
| SNP_86830_A_69376 | NW_004516292.1 | scaffold953 | 69376                   | GG                              | AA                 | AA               | INTERGENIC                    |                    |                    |
| SNP_86832_A_69782 | NW_004516292.1 | scaffold953 | 69782                   | CC                              | AA                 | AA               | INTERGENIC                    |                    |                    |
| SNP_86833_A_70804 | NW_004516292.1 | scaffold953 | 70804                   | CC                              | TT                 | TT               | INTERGENIC                    |                    |                    |
| SNP_86834_A_71083 | NW_004516292.1 | scaffold953 | 71083                   | AA                              | CC                 | CC               | INTERGENIC                    |                    |                    |
| SNP_86835_A_74822 | NW_004516292.1 | scaffold953 | 74822                   | TT                              | CC                 | CC               | URR                           | 101515095          | Unknown function   |
| SNP_86839_A_79939 | NW_004516292.1 | scaffold953 | 79939                   | CC                              | GG                 | GG               | INTERGENIC                    |                    |                    |
| SNP_86840_A_82922 | NW_004516292.1 | scaffold953 | 82922                   | TT                              | CC                 | CC               | INTERGENIC                    |                    |                    |
| SNP_86841_A_83525 | NW_004516292.1 | scaffold953 | 83525                   | TT                              | GG                 | GG               | INTERGENIC                    |                    |                    |
| SNP_86842_A_85871 | NW_004516292.1 | scaffold953 | 85871                   | CC                              | TT                 | TT               | INTERGENIC                    |                    |                    |
| SNP_86843_A_86890 | NW_004516292.1 | scaffold953 | 86890                   | GG                              | TT                 | TT               | INTERGENIC                    |                    |                    |

| SNPs IDs           | Chromosome IDs | Chromosomes | Physical positions (bp) | CDC Frontier (Reference genome) | (Pusa 1103 & HPNB) | (ILWC 46 & LPNB) | Sequence genome | Components of | Gene accession IDs | Putative functions |
|--------------------|----------------|-------------|-------------------------|---------------------------------|--------------------|------------------|-----------------|---------------|--------------------|--------------------|
| SNP_86844_A_89505  | NW_004516292.1 | scaffold953 | 89505                   | GG                              | AA                 | AA               | INTERGENIC      |               |                    |                    |
| SNP_86845_A_94308  | NW_004516292.1 | scaffold953 | 94308                   | AA                              | GG                 | GG               | INTERGENIC      |               |                    |                    |
| SNP_86846_A_94327  | NW_004516292.1 | scaffold953 | 94327                   | AA                              | TT                 | TT               | INTERGENIC      |               |                    |                    |
| SNP_86847_A_96170  | NW_004516292.1 | scaffold953 | 96170                   | CC                              | GG                 | GG               | INTERGENIC      |               |                    |                    |
| SNP_86848_A_97889  | NW_004516292.1 | scaffold953 | 97889                   | CC                              | TT                 | TT               | INTERGENIC      |               |                    |                    |
| SNP_86849_A_104963 | NW_004516292.1 | scaffold953 | 104963                  | AA                              | GG                 | GG               | INTERGENIC      |               |                    |                    |
| SNP_86850_A_105387 | NW_004516292.1 | scaffold953 | 105387                  | AA                              | CC                 | CC               | INTERGENIC      |               |                    |                    |
| SNP_86851_A_105429 | NW_004516292.1 | scaffold953 | 105429                  | CC                              | TT                 | TT               | INTERGENIC      |               |                    |                    |
| SNP_86852_A_106288 | NW_004516292.1 | scaffold953 | 106288                  | CC                              | AA                 | AA               | INTERGENIC      |               |                    |                    |
| SNP_86853_A_111190 | NW_004516292.1 | scaffold953 | 111190                  | AA                              | GG                 | GG               | INTERGENIC      |               |                    |                    |
| SNP_86854_A_111461 | NW_004516292.1 | scaffold953 | 111461                  | GG                              | CC                 | CC               | INTERGENIC      |               |                    |                    |
| SNP_86855_A_111468 | NW_004516292.1 | scaffold953 | 111468                  | AA                              | GG                 | GG               | INTERGENIC      |               |                    |                    |
| SNP_86856_A_111649 | NW_004516292.1 | scaffold953 | 111649                  | TT                              | GG                 | GG               | INTERGENIC      |               |                    |                    |
| SNP_86857_A_112893 | NW_004516292.1 | scaffold953 | 112893                  | CC                              | TT                 | TT               | INTERGENIC      |               |                    |                    |
| SNP_86858_A_119086 | NW_004516292.1 | scaffold953 | 119086                  | CC                              | TT                 | TT               | INTERGENIC      |               |                    |                    |
| SNP_86859_A_119197 | NW_004516292.1 | scaffold953 | 119197                  | AA                              | GG                 | GG               | INTERGENIC      |               |                    |                    |
| SNP_86860_A_119329 | NW_004516292.1 | scaffold953 | 119329                  | TT                              | GG                 | GG               | INTERGENIC      |               |                    |                    |
| SNP_86861_A_123091 | NW_004516292.1 | scaffold953 | 123091                  | GG                              | TT                 | TT               | INTERGENIC      |               |                    |                    |
| SNP_86862_A_123400 | NW_004516292.1 | scaffold953 | 123400                  | GG                              | AA                 | AA               | INTERGENIC      |               |                    |                    |
| SNP_86863_A_124582 | NW_004516292.1 | scaffold953 | 124582                  | GG                              | TT                 | TT               | INTERGENIC      |               |                    |                    |
| SNP_86865_A_138993 | NW_004516292.1 | scaffold953 | 138993                  | CC                              | TT                 | TT               | INTERGENIC      |               |                    |                    |
| SNP_86866_A_141999 | NW_004516292.1 | scaffold953 | 141999                  | TT                              | GG                 | GG               | INTERGENIC      |               |                    |                    |



| SNPs IDs           | Chromosome IDs | Chromosomes | Physical positions (bp) | CDC Frontier genome (Reference genome) | (Pusa 1103 & HPNB) | (ILWC 46 & LPNB) | Sequence genome | Components of | Gene accession IDs | Putative functions |
|--------------------|----------------|-------------|-------------------------|----------------------------------------|--------------------|------------------|-----------------|---------------|--------------------|--------------------|
| SNP_86868_A_142495 | NW_004516292.1 | scaffold953 | 142495                  | AA                                     | TT                 | TT               | INTERGENIC      |               |                    |                    |
| SNP_86869_A_149141 | NW_004516292.1 | scaffold953 | 149141                  | GG                                     | AA                 | AA               | INTERGENIC      |               |                    |                    |
| SNP_86870_A_153618 | NW_004516292.1 | scaffold953 | 153618                  | GG                                     | AA                 | AA               | INTERGENIC      |               |                    |                    |
| SNP_86872_A_313    | NW_004516293.1 | scaffold954 | 313                     | TT                                     | AA                 | AA               | INTERGENIC      |               |                    |                    |
| SNP_86873_A_522    | NW_004516293.1 | scaffold954 | 522                     | AA                                     | TT                 | TT               | INTERGENIC      |               |                    |                    |
| SNP_86875_A_3873   | NW_004516293.1 | scaffold954 | 3873                    | TT                                     | CC                 | CC               | INTERGENIC      |               |                    |                    |
| SNP_86876_A_19890  | NW_004516293.1 | scaffold954 | 19890                   | TT                                     | AA                 | AA               | INTERGENIC      |               |                    |                    |
| SNP_86877_A_22489  | NW_004516293.1 | scaffold954 | 22489                   | GG                                     | AA                 | AA               | INTERGENIC      |               |                    |                    |
| SNP_86878_A_23606  | NW_004516293.1 | scaffold954 | 23606                   | AA                                     | GG                 | GG               | INTERGENIC      |               |                    |                    |
| SNP_86879_A_23695  | NW_004516293.1 | scaffold954 | 23695                   | AA                                     | CC                 | CC               | INTERGENIC      |               |                    |                    |
| SNP_86880_A_24258  | NW_004516293.1 | scaffold954 | 24258                   | TT                                     | CC                 | CC               | INTERGENIC      |               |                    |                    |
| SNP_86881_A_25537  | NW_004516293.1 | scaffold954 | 25537                   | GG                                     | AA                 | AA               | INTERGENIC      |               |                    |                    |
| SNP_86882_A_25550  | NW_004516293.1 | scaffold954 | 25550                   | AA                                     | TT                 | TT               | INTERGENIC      |               |                    |                    |
| SNP_86883_A_27855  | NW_004516293.1 | scaffold954 | 27855                   | GG                                     | CC                 | CC               | INTERGENIC      |               |                    |                    |
| SNP_86884_A_28410  | NW_004516293.1 | scaffold954 | 28410                   | GG                                     | AA                 | AA               | INTERGENIC      |               |                    |                    |
| SNP_86885_A_28421  | NW_004516293.1 | scaffold954 | 28421                   | GG                                     | AA                 | AA               | INTERGENIC      |               |                    |                    |
| SNP_86886_A_28429  | NW_004516293.1 | scaffold954 | 28429                   | AA                                     | TT                 | TT               | INTERGENIC      |               |                    |                    |
| SNP_86887_A_28476  | NW_004516293.1 | scaffold954 | 28476                   | TT                                     | CC                 | CC               | INTERGENIC      |               |                    |                    |
| SNP_86888_A_28487  | NW_004516293.1 | scaffold954 | 28487                   | AA                                     | TT                 | TT               | INTERGENIC      |               |                    |                    |
| SNP_86889_A_28496  | NW_004516293.1 | scaffold954 | 28496                   | GG                                     | AA                 | AA               | INTERGENIC      |               |                    |                    |
| SNP_86890_A_28626  | NW_004516293.1 | scaffold954 | 28626                   | AA                                     | TT                 | TT               | INTERGENIC      |               |                    |                    |
| SNP_86891_A_28673  | NW_004516293.1 | scaffold954 | 28673                   | TT                                     | CC                 | CC               | INTERGENIC      |               |                    |                    |

| SNPs IDs          | Chromosome IDs | Chromosomes | Physical positions (bp) | CDC Frontier (Reference genome) | (Pusa 1103 & HPNB) | (ILWC 46 & LPNB) | Sequence genome | Components of | Gene accession IDs | Putative functions |
|-------------------|----------------|-------------|-------------------------|---------------------------------|--------------------|------------------|-----------------|---------------|--------------------|--------------------|
| SNP_86892_A_28689 | NW_004516293.1 | scaffold954 | 28689                   | GG                              | AA                 | AA               | INTERGENIC      |               |                    |                    |
| SNP_86893_A_28871 | NW_004516293.1 | scaffold954 | 28871                   | AA                              | GG                 | GG               | INTERGENIC      |               |                    |                    |
| SNP_86894_A_28916 | NW_004516293.1 | scaffold954 | 28916                   | TT                              | CC                 | CC               | INTERGENIC      |               |                    |                    |
| SNP_86895_A_28947 | NW_004516293.1 | scaffold954 | 28947                   | TT                              | CC                 | CC               | INTERGENIC      |               |                    |                    |
| SNP_86896_A_29431 | NW_004516293.1 | scaffold954 | 29431                   | GG                              | AA                 | AA               | INTERGENIC      |               |                    |                    |
| SNP_86897_A_29438 | NW_004516293.1 | scaffold954 | 29438                   | AA                              | CC                 | CC               | INTERGENIC      |               |                    |                    |
| SNP_86898_A_30305 | NW_004516293.1 | scaffold954 | 30305                   | TT                              | CC                 | CC               | INTERGENIC      |               |                    |                    |
| SNP_86899_A_30439 | NW_004516293.1 | scaffold954 | 30439                   | AA                              | GG                 | GG               | INTERGENIC      |               |                    |                    |
| SNP_86900_A_31503 | NW_004516293.1 | scaffold954 | 31503                   | GG                              | AA                 | AA               | INTERGENIC      |               |                    |                    |
| SNP_86901_A_31530 | NW_004516293.1 | scaffold954 | 31530                   | TT                              | AA                 | AA               | INTERGENIC      |               |                    |                    |
| SNP_86902_A_36284 | NW_004516293.1 | scaffold954 | 36284                   | AA                              | GG                 | GG               | INTERGENIC      |               |                    |                    |
| SNP_86903_A_36590 | NW_004516293.1 | scaffold954 | 36590                   | GG                              | TT                 | TT               | INTERGENIC      |               |                    |                    |
| SNP_86904_A_37887 | NW_004516293.1 | scaffold954 | 37887                   | AA                              | GG                 | GG               | INTERGENIC      |               |                    |                    |
| SNP_86905_A_38028 | NW_004516293.1 | scaffold954 | 38028                   | AA                              | TT                 | TT               | INTERGENIC      |               |                    |                    |
| SNP_86906_A_39195 | NW_004516293.1 | scaffold954 | 39195                   | TT                              | GG                 | GG               | INTERGENIC      |               |                    |                    |
| SNP_86907_A_39207 | NW_004516293.1 | scaffold954 | 39207                   | GG                              | AA                 | AA               | INTERGENIC      |               |                    |                    |
| SNP_86908_A_39234 | NW_004516293.1 | scaffold954 | 39234                   | GG                              | AA                 | AA               | INTERGENIC      |               |                    |                    |
| SNP_86909_A_39279 | NW_004516293.1 | scaffold954 | 39279                   | TT                              | GG                 | GG               | INTERGENIC      |               |                    |                    |
| SNP_86910_A_39361 | NW_004516293.1 | scaffold954 | 39361                   | CC                              | GG                 | GG               | INTERGENIC      |               |                    |                    |
| SNP_86911_A_39602 | NW_004516293.1 | scaffold954 | 39602                   | AA                              | GG                 | GG               | INTERGENIC      |               |                    |                    |
| SNP_86912_A_39606 | NW_004516293.1 | scaffold954 | 39606                   | GG                              | AA                 | AA               | INTERGENIC      |               |                    |                    |
| SNP_86913_A_39708 | NW_004516293.1 | scaffold954 | 39708                   | GG                              | TT                 | TT               | INTERGENIC      |               |                    |                    |

| SNPs IDs          | Chromosome IDs | Chromosomes | Physical positions (bp) | CDC Frontier (Reference genome) | (Pusa 1103 & HPNB) | (ILWC 46 & LPNB) | Sequence genome | Components of | Gene accession IDs | Putative functions |
|-------------------|----------------|-------------|-------------------------|---------------------------------|--------------------|------------------|-----------------|---------------|--------------------|--------------------|
| SNP_86914_A_45071 | NW_004516293.1 | scaffold954 | 45071                   | GG                              | AA                 | AA               | INTERGENIC      |               |                    |                    |
| SNP_86915_A_45189 | NW_004516293.1 | scaffold954 | 45189                   | TT                              | CC                 | CC               | INTERGENIC      |               |                    |                    |
| SNP_86916_A_45372 | NW_004516293.1 | scaffold954 | 45372                   | AA                              | GG                 | GG               | INTERGENIC      |               |                    |                    |
| SNP_86917_A_415   | NW_004516295.1 | scaffold956 | 415                     | GG                              | TT                 | TT               | INTERGENIC      |               |                    |                    |
| SNP_86918_A_1043  | NW_004516295.1 | scaffold956 | 1043                    | GG                              | AA                 | AA               | INTERGENIC      |               |                    |                    |
| SNP_86919_A_4250  | NW_004516295.1 | scaffold956 | 4250                    | TT                              | CC                 | CC               | INTERGENIC      |               |                    |                    |
| SNP_86920_A_4483  | NW_004516295.1 | scaffold956 | 4483                    | TT                              | GG                 | GG               | INTERGENIC      |               |                    |                    |
| SNP_86921_A_4503  | NW_004516295.1 | scaffold956 | 4503                    | GG                              | CC                 | CC               | INTERGENIC      |               |                    |                    |
| SNP_86922_A_4561  | NW_004516295.1 | scaffold956 | 4561                    | CC                              | TT                 | TT               | INTERGENIC      |               |                    |                    |
| SNP_86923_A_4652  | NW_004516295.1 | scaffold956 | 4652                    | TT                              | AA                 | AA               | INTERGENIC      |               |                    |                    |
| SNP_86924_A_5883  | NW_004516295.1 | scaffold956 | 5883                    | AA                              | TT                 | TT               | INTERGENIC      |               |                    |                    |
| SNP_86925_A_5966  | NW_004516295.1 | scaffold956 | 5966                    | TT                              | AA                 | AA               | INTERGENIC      |               |                    |                    |
| SNP_86927_A_6020  | NW_004516295.1 | scaffold956 | 6020                    | CC                              | TT                 | TT               | INTERGENIC      |               |                    |                    |
| SNP_86928_A_6027  | NW_004516295.1 | scaffold956 | 6027                    | GG                              | CC                 | CC               | INTERGENIC      |               |                    |                    |
| SNP_86929_A_6239  | NW_004516295.1 | scaffold956 | 6239                    | AA                              | GG                 | GG               | INTERGENIC      |               |                    |                    |
| SNP_86930_A_6276  | NW_004516295.1 | scaffold956 | 6276                    | TT                              | CC                 | CC               | INTERGENIC      |               |                    |                    |
| SNP_86931_A_7384  | NW_004516295.1 | scaffold956 | 7384                    | AA                              | CC                 | CC               | INTERGENIC      |               |                    |                    |
| SNP_86932_A_7517  | NW_004516295.1 | scaffold956 | 7517                    | TT                              | CC                 | CC               | INTERGENIC      |               |                    |                    |
| SNP_86933_A_7518  | NW_004516295.1 | scaffold956 | 7518                    | TT                              | CC                 | CC               | INTERGENIC      |               |                    |                    |
| SNP_86934_A_7697  | NW_004516295.1 | scaffold956 | 7697                    | AA                              | GG                 | GG               | INTERGENIC      |               |                    |                    |
| SNP_86935_A_7855  | NW_004516295.1 | scaffold956 | 7855                    | CC                              | TT                 | TT               | INTERGENIC      |               |                    |                    |
| SNP_86936_A_9830  | NW_004516295.1 | scaffold956 | 9830                    | AA                              | GG                 | GG               | INTERGENIC      |               |                    |                    |

| SNPs IDs          | Chromosome IDs | Chromosomes | Physical positions (bp) | CDC Frontier (Reference genome) | (Pusa 1103 & HPNB) | (ILWC 46 & LPNB) | Sequence genome | Components of | Gene accession IDs | Putative functions |
|-------------------|----------------|-------------|-------------------------|---------------------------------|--------------------|------------------|-----------------|---------------|--------------------|--------------------|
| SNP_86937_A_9978  | NW_004516295.1 | scaffold956 | 9978                    | GG                              | AA                 | AA               | INTERGENIC      |               |                    |                    |
| SNP_86938_A_12286 | NW_004516295.1 | scaffold956 | 12286                   | TT                              | AA                 | AA               | INTERGENIC      |               |                    |                    |
| SNP_86939_A_12288 | NW_004516295.1 | scaffold956 | 12288                   | AA                              | TT                 | TT               | INTERGENIC      |               |                    |                    |
| SNP_86940_A_12344 | NW_004516295.1 | scaffold956 | 12344                   | CC                              | GG                 | GG               | INTERGENIC      |               |                    |                    |
| SNP_86941_A_12415 | NW_004516295.1 | scaffold956 | 12415                   | GG                              | AA                 | AA               | INTERGENIC      |               |                    |                    |
| SNP_86942_A_12465 | NW_004516295.1 | scaffold956 | 12465                   | TT                              | GG                 | GG               | INTERGENIC      |               |                    |                    |
| SNP_86943_A_12601 | NW_004516295.1 | scaffold956 | 12601                   | TT                              | CC                 | CC               | INTERGENIC      |               |                    |                    |
| SNP_86944_A_12611 | NW_004516295.1 | scaffold956 | 12611                   | AA                              | CC                 | CC               | INTERGENIC      |               |                    |                    |
| SNP_86945_A_12617 | NW_004516295.1 | scaffold956 | 12617                   | CC                              | TT                 | TT               | INTERGENIC      |               |                    |                    |
| SNP_86946_A_12700 | NW_004516295.1 | scaffold956 | 12700                   | TT                              | CC                 | CC               | INTERGENIC      |               |                    |                    |
| SNP_86947_A_14374 | NW_004516295.1 | scaffold956 | 14374                   | AA                              | TT                 | TT               | INTERGENIC      |               |                    |                    |
| SNP_86948_A_14391 | NW_004516295.1 | scaffold956 | 14391                   | GG                              | AA                 | AA               | INTERGENIC      |               |                    |                    |
| SNP_86949_A_14673 | NW_004516295.1 | scaffold956 | 14673                   | TT                              | AA                 | AA               | INTERGENIC      |               |                    |                    |
| SNP_86950_A_14689 | NW_004516295.1 | scaffold956 | 14689                   | AA                              | TT                 | TT               | INTERGENIC      |               |                    |                    |
| SNP_86951_A_18365 | NW_004516295.1 | scaffold956 | 18365                   | TT                              | GG                 | GG               | INTERGENIC      |               |                    |                    |
| SNP_86952_A_18446 | NW_004516295.1 | scaffold956 | 18446                   | TT                              | CC                 | CC               | INTERGENIC      |               |                    |                    |
| SNP_86953_A_18730 | NW_004516295.1 | scaffold956 | 18730                   | TT                              | CC                 | CC               | INTERGENIC      |               |                    |                    |
| SNP_86954_A_18972 | NW_004516295.1 | scaffold956 | 18972                   | TT                              | CC                 | CC               | INTERGENIC      |               |                    |                    |
| SNP_86955_A_19023 | NW_004516295.1 | scaffold956 | 19023                   | CC                              | TT                 | TT               | INTERGENIC      |               |                    |                    |
| SNP_86956_A_19121 | NW_004516295.1 | scaffold956 | 19121                   | CC                              | AA                 | AA               | INTERGENIC      |               |                    |                    |
| SNP_86957_A_19255 | NW_004516295.1 | scaffold956 | 19255                   | TT                              | AA                 | AA               | INTERGENIC      |               |                    |                    |
| SNP_86958_A_19324 | NW_004516295.1 | scaffold956 | 19324                   | CC                              | TT                 | TT               | INTERGENIC      |               |                    |                    |

| SNPs IDs          | Chromosome IDs | Chromosomes | Physical positions (bp) | CDC Frontier (Reference genome) | (Pusa 1103 & HPNB) | (ILWC 46 & LPNB) | Sequence genome | Components of | Gene accession IDs | Putative functions |
|-------------------|----------------|-------------|-------------------------|---------------------------------|--------------------|------------------|-----------------|---------------|--------------------|--------------------|
| SNP_86961_A_3723  | NW_004516297.1 | scaffold958 | 3723                    | GG                              | CC                 | CC               | INTERGENIC      |               |                    |                    |
| SNP_86962_A_4249  | NW_004516297.1 | scaffold958 | 4249                    | CC                              | TT                 | TT               | INTERGENIC      |               |                    |                    |
| SNP_86963_A_3885  | NW_004516298.1 | scaffold959 | 3885                    | AA                              | TT                 | TT               | INTERGENIC      |               |                    |                    |
| SNP_86964_A_3963  | NW_004516298.1 | scaffold959 | 3963                    | CC                              | AA                 | AA               | INTERGENIC      |               |                    |                    |
| SNP_86965_A_4288  | NW_004516298.1 | scaffold959 | 4288                    | TT                              | CC                 | CC               | INTERGENIC      |               |                    |                    |
| SNP_86966_A_7948  | NW_004516298.1 | scaffold959 | 7948                    | AA                              | CC                 | CC               | INTERGENIC      |               |                    |                    |
| SNP_86967_A_8016  | NW_004516298.1 | scaffold959 | 8016                    | GG                              | AA                 | AA               | INTERGENIC      |               |                    |                    |
| SNP_86968_A_8022  | NW_004516298.1 | scaffold959 | 8022                    | CC                              | AA                 | AA               | INTERGENIC      |               |                    |                    |
| SNP_86969_A_8040  | NW_004516298.1 | scaffold959 | 8040                    | TT                              | CC                 | CC               | INTERGENIC      |               |                    |                    |
| SNP_86970_A_10571 | NW_004516298.1 | scaffold959 | 10571                   | AA                              | GG                 | GG               | INTERGENIC      |               |                    |                    |
| SNP_86971_A_10580 | NW_004516298.1 | scaffold959 | 10580                   | GG                              | AA                 | AA               | INTERGENIC      |               |                    |                    |
| SNP_86972_A_10613 | NW_004516298.1 | scaffold959 | 10613                   | CC                              | TT                 | TT               | INTERGENIC      |               |                    |                    |
| SNP_86973_A_10644 | NW_004516298.1 | scaffold959 | 10644                   | CC                              | TT                 | TT               | INTERGENIC      |               |                    |                    |
| SNP_86974_A_10664 | NW_004516298.1 | scaffold959 | 10664                   | AA                              | CC                 | CC               | INTERGENIC      |               |                    |                    |
| SNP_86975_A_20448 | NW_004516298.1 | scaffold959 | 20448                   | GG                              | AA                 | AA               | INTERGENIC      |               |                    |                    |
| SNP_86976_A_20802 | NW_004516298.1 | scaffold959 | 20802                   | TT                              | AA                 | AA               | INTERGENIC      |               |                    |                    |
| SNP_86977_A_20836 | NW_004516298.1 | scaffold959 | 20836                   | AA                              | CC                 | CC               | INTERGENIC      |               |                    |                    |
| SNP_86978_A_20882 | NW_004516298.1 | scaffold959 | 20882                   | TT                              | GG                 | GG               | INTERGENIC      |               |                    |                    |
| SNP_86979_A_20958 | NW_004516298.1 | scaffold959 | 20958                   | GG                              | CC                 | CC               | INTERGENIC      |               |                    |                    |
| SNP_86980_A_21285 | NW_004516298.1 | scaffold959 | 21285                   | CC                              | AA                 | AA               | INTERGENIC      |               |                    |                    |
| SNP_86981_A_47608 | NW_004516298.1 | scaffold959 | 47608                   | CC                              | TT                 | TT               | INTERGENIC      |               |                    |                    |
| SNP_86982_A_47639 | NW_004516298.1 | scaffold959 | 47639                   | AA                              | GG                 | GG               | INTERGENIC      |               |                    |                    |

| SNPs IDs           | Chromosome IDs | Chromosomes | Physical positions (bp) | CDC Frontier (Reference genome) | (Pusa 1103 & HPNB) | (ILWC 46 & LPNB) | Sequence genome | Components of | Gene accession IDs | Putative functions |
|--------------------|----------------|-------------|-------------------------|---------------------------------|--------------------|------------------|-----------------|---------------|--------------------|--------------------|
| SNP_86983_A_57572  | NW_004516298.1 | scaffold959 | 57572                   | AA                              | TT                 | TT               | INTERGENIC      |               |                    |                    |
| SNP_86984_A_57591  | NW_004516298.1 | scaffold959 | 57591                   | CC                              | TT                 | TT               | INTERGENIC      |               |                    |                    |
| SNP_86986_A_57788  | NW_004516298.1 | scaffold959 | 57788                   | TT                              | AA                 | AA               | INTERGENIC      |               |                    |                    |
| SNP_86987_A_57810  | NW_004516298.1 | scaffold959 | 57810                   | GG                              | TT                 | TT               | INTERGENIC      |               |                    |                    |
| SNP_86988_A_57928  | NW_004516298.1 | scaffold959 | 57928                   | AA                              | GG                 | GG               | INTERGENIC      |               |                    |                    |
| SNP_86989_A_58306  | NW_004516298.1 | scaffold959 | 58306                   | AA                              | TT                 | TT               | INTERGENIC      |               |                    |                    |
| SNP_86990_A_4054   | NW_004516299.1 | scaffold960 | 4054                    | CC                              | TT                 | TT               | INTERGENIC      |               |                    |                    |
| SNP_86991_A_8103   | NW_004516299.1 | scaffold960 | 8103                    | AA                              | GG                 | GG               | INTERGENIC      |               |                    |                    |
| SNP_86992_A_20750  | NW_004516299.1 | scaffold960 | 20750                   | TT                              | GG                 | GG               | INTERGENIC      |               |                    |                    |
| SNP_86994_A_20802  | NW_004516299.1 | scaffold960 | 20802                   | TT                              | CC                 | CC               | INTERGENIC      |               |                    |                    |
| SNP_86995_A_68109  | NW_004516299.1 | scaffold960 | 68109                   | CC                              | TT                 | TT               | INTERGENIC      |               |                    |                    |
| SNP_86996_A_68135  | NW_004516299.1 | scaffold960 | 68135                   | TT                              | GG                 | GG               | INTERGENIC      |               |                    |                    |
| SNP_86997_A_68216  | NW_004516299.1 | scaffold960 | 68216                   | TT                              | GG                 | GG               | INTERGENIC      |               |                    |                    |
| SNP_86998_A_68318  | NW_004516299.1 | scaffold960 | 68318                   | AA                              | GG                 | GG               | INTERGENIC      |               |                    |                    |
| SNP_86999_A_117371 | NW_004516299.1 | scaffold960 | 117371                  | TT                              | AA                 | AA               | INTERGENIC      |               |                    |                    |
| SNP_87000_A_126413 | NW_004516299.1 | scaffold960 | 126413                  | AA                              | GG                 | GG               | INTERGENIC      |               |                    |                    |
| SNP_87001_A_126416 | NW_004516299.1 | scaffold960 | 126416                  | GG                              | AA                 | AA               | INTERGENIC      |               |                    |                    |
| SNP_87002_A_126524 | NW_004516299.1 | scaffold960 | 126524                  | AA                              | TT                 | TT               | INTERGENIC      |               |                    |                    |
| SNP_87003_A_159074 | NW_004516299.1 | scaffold960 | 159074                  | TT                              | CC                 | CC               | INTERGENIC      |               |                    |                    |
| SNP_87004_A_162259 | NW_004516299.1 | scaffold960 | 162259                  | AA                              | GG                 | GG               | INTERGENIC      |               |                    |                    |
| SNP_87005_A_162272 | NW_004516299.1 | scaffold960 | 162272                  | TT                              | GG                 | GG               | INTERGENIC      |               |                    |                    |
| SNP_87006_A_162285 | NW_004516299.1 | scaffold960 | 162285                  | TT                              | CC                 | CC               | INTERGENIC      |               |                    |                    |

| SNPs IDs           | Chromosome IDs | Chromosomes | Physical positions (bp) | CDC Frontier (Reference genome) | (Pusa 1103 & HPNB) | (ILWC 46 & LPNB) | Sequence genome | Components of | Gene accession IDs | Putative functions |
|--------------------|----------------|-------------|-------------------------|---------------------------------|--------------------|------------------|-----------------|---------------|--------------------|--------------------|
| SNP_87007_A_162321 | NW_004516299.1 | scaffold960 | 162321                  | TT                              | CC                 | CC               | INTERGENIC      |               |                    |                    |
| SNP_87008_A_162411 | NW_004516299.1 | scaffold960 | 162411                  | TT                              | CC                 | CC               | INTERGENIC      |               |                    |                    |
| SNP_87009_A_162433 | NW_004516299.1 | scaffold960 | 162433                  | AA                              | GG                 | GG               | INTERGENIC      |               |                    |                    |
| SNP_87010_A_162438 | NW_004516299.1 | scaffold960 | 162438                  | TT                              | CC                 | CC               | INTERGENIC      |               |                    |                    |
| SNP_87011_A_162439 | NW_004516299.1 | scaffold960 | 162439                  | AA                              | GG                 | GG               | INTERGENIC      |               |                    |                    |
| SNP_87012_A_163252 | NW_004516299.1 | scaffold960 | 163252                  | TT                              | GG                 | GG               | INTERGENIC      |               |                    |                    |
| SNP_87013_A_3810   | NW_004516300.1 | scaffold962 | 3810                    | CC                              | TT                 | TT               | INTERGENIC      |               |                    |                    |
| SNP_87014_A_14003  | NW_004516300.1 | scaffold962 | 14003                   | CC                              | AA                 | AA               | INTERGENIC      |               |                    |                    |
| SNP_87015_A_16588  | NW_004516300.1 | scaffold962 | 16588                   | GG                              | AA                 | AA               | INTERGENIC      |               |                    |                    |
| SNP_87016_A_33390  | NW_004516300.1 | scaffold962 | 33390                   | GG                              | AA                 | AA               | INTERGENIC      |               |                    |                    |
| SNP_87017_A_33423  | NW_004516300.1 | scaffold962 | 33423                   | CC                              | GG                 | GG               | INTERGENIC      |               |                    |                    |
| SNP_87018_A_33425  | NW_004516300.1 | scaffold962 | 33425                   | CC                              | GG                 | GG               | INTERGENIC      |               |                    |                    |
| SNP_87019_A_39152  | NW_004516300.1 | scaffold962 | 39152                   | TT                              | GG                 | GG               | INTERGENIC      |               |                    |                    |
| SNP_87020_A_61208  | NW_004516300.1 | scaffold962 | 61208                   | AA                              | CC                 | CC               | INTERGENIC      |               |                    |                    |
| SNP_87021_A_110749 | NW_004516300.1 | scaffold962 | 110749                  | AA                              | GG                 | GG               | INTERGENIC      |               |                    |                    |
| SNP_87022_A_110999 | NW_004516300.1 | scaffold962 | 110999                  | TT                              | CC                 | CC               | INTERGENIC      |               |                    |                    |
| SNP_87023_A_111028 | NW_004516300.1 | scaffold962 | 111028                  | TT                              | CC                 | CC               | INTERGENIC      |               |                    |                    |
| SNP_87024_A_125629 | NW_004516300.1 | scaffold962 | 125629                  | TT                              | AA                 | AA               | INTERGENIC      |               |                    |                    |
| SNP_87025_A_148976 | NW_004516300.1 | scaffold962 | 148976                  | CC                              | TT                 | TT               | INTERGENIC      |               |                    |                    |
| SNP_87026_A_149242 | NW_004516300.1 | scaffold962 | 149242                  | AA                              | GG                 | GG               | INTERGENIC      |               |                    |                    |
| SNP_87027_A_149257 | NW_004516300.1 | scaffold962 | 149257                  | TT                              | CC                 | CC               | INTERGENIC      |               |                    |                    |
| SNP_87029_A_160775 | NW_004516300.1 | scaffold962 | 160775                  | GG                              | TT                 | TT               | INTERGENIC      |               |                    |                    |

| SNPs IDs           | Chromosome IDs | Chromosomes | Physical positions (bp) | CDC Frontier (Reference genome) | (Pusa 1103 & HPNB) | (ILWC 46 & LPNB) | Sequence genome | Components of | Gene accession IDs | Putative functions |
|--------------------|----------------|-------------|-------------------------|---------------------------------|--------------------|------------------|-----------------|---------------|--------------------|--------------------|
| SNP_87030_A_161004 | NW_004516300.1 | scaffold962 | 161004                  | TT                              | CC                 | CC               | INTERGENIC      |               |                    |                    |
| SNP_87031_A_161065 | NW_004516300.1 | scaffold962 | 161065                  | AA                              | TT                 | TT               | INTERGENIC      |               |                    |                    |
| SNP_87032_A_161113 | NW_004516300.1 | scaffold962 | 161113                  | TT                              | CC                 | CC               | INTERGENIC      |               |                    |                    |
| SNP_87033_A_161116 | NW_004516300.1 | scaffold962 | 161116                  | TT                              | CC                 | CC               | INTERGENIC      |               |                    |                    |
| SNP_87034_A_164204 | NW_004516300.1 | scaffold962 | 164204                  | TT                              | GG                 | GG               | INTERGENIC      |               |                    |                    |
| SNP_87035_A_172574 | NW_004516300.1 | scaffold962 | 172574                  | AA                              | TT                 | TT               | INTERGENIC      |               |                    |                    |
| SNP_87036_A_196033 | NW_004516300.1 | scaffold962 | 196033                  | CC                              | TT                 | TT               | INTERGENIC      |               |                    |                    |
| SNP_87037_A_203082 | NW_004516300.1 | scaffold962 | 203082                  | AA                              | TT                 | TT               | INTERGENIC      |               |                    |                    |
| SNP_87038_A_209298 | NW_004516300.1 | scaffold962 | 209298                  | CC                              | TT                 | TT               | INTERGENIC      |               |                    |                    |
| SNP_87040_A_218517 | NW_004516300.1 | scaffold962 | 218517                  | GG                              | CC                 | CC               | INTERGENIC      |               |                    |                    |
| SNP_87041_A_276    | NW_004516301.1 | scaffold963 | 276                     | GG                              | AA                 | AA               | INTERGENIC      |               |                    |                    |
| SNP_87042_A_3501   | NW_004516301.1 | scaffold963 | 3501                    | AA                              | GG                 | GG               | INTERGENIC      |               |                    |                    |
| SNP_87043_A_3741   | NW_004516301.1 | scaffold963 | 3741                    | TT                              | GG                 | GG               | INTERGENIC      |               |                    |                    |
| SNP_87044_A_3759   | NW_004516301.1 | scaffold963 | 3759                    | TT                              | GG                 | GG               | INTERGENIC      |               |                    |                    |
| SNP_87045_A_3878   | NW_004516301.1 | scaffold963 | 3878                    | GG                              | AA                 | AA               | INTERGENIC      |               |                    |                    |
| SNP_87046_A_4299   | NW_004516301.1 | scaffold963 | 4299                    | GG                              | AA                 | AA               | INTERGENIC      |               |                    |                    |
| SNP_87047_A_4320   | NW_004516301.1 | scaffold963 | 4320                    | CC                              | AA                 | AA               | INTERGENIC      |               |                    |                    |
| SNP_87048_A_4449   | NW_004516301.1 | scaffold963 | 4449                    | CC                              | TT                 | TT               | INTERGENIC      |               |                    |                    |
| SNP_87049_A_5273   | NW_004516301.1 | scaffold963 | 5273                    | AA                              | CC                 | CC               | INTERGENIC      |               |                    |                    |
| SNP_87050_A_5278   | NW_004516301.1 | scaffold963 | 5278                    | AA                              | CC                 | CC               | INTERGENIC      |               |                    |                    |
| SNP_87051_A_5285   | NW_004516301.1 | scaffold963 | 5285                    | AA                              | TT                 | TT               | INTERGENIC      |               |                    |                    |
| SNP_87052_A_5324   | NW_004516301.1 | scaffold963 | 5324                    | AA                              | TT                 | TT               | INTERGENIC      |               |                    |                    |



| SNPs IDs         | Chromosome IDs | Chromosomes | Physical positions (bp) | CDC Frontier (Reference genome) | (Pusa 1103 & HPNB) | (ILWC 46 & LPNB) | Sequence genome | Components of | Gene accession IDs | Putative functions |
|------------------|----------------|-------------|-------------------------|---------------------------------|--------------------|------------------|-----------------|---------------|--------------------|--------------------|
| SNP_87053_A_5344 | NW_004516301.1 | scaffold963 | 5344                    | TT                              | CC                 | CC               | INTERGENIC      |               |                    |                    |
| SNP_87054_A_5350 | NW_004516301.1 | scaffold963 | 5350                    | AA                              | GG                 | GG               | INTERGENIC      |               |                    |                    |
| SNP_87055_A_5389 | NW_004516301.1 | scaffold963 | 5389                    | AA                              | GG                 | GG               | INTERGENIC      |               |                    |                    |
| SNP_87056_A_5401 | NW_004516301.1 | scaffold963 | 5401                    | GG                              | CC                 | CC               | INTERGENIC      |               |                    |                    |
| SNP_87057_A_5414 | NW_004516301.1 | scaffold963 | 5414                    | AA                              | GG                 | GG               | INTERGENIC      |               |                    |                    |
| SNP_87058_A_5444 | NW_004516301.1 | scaffold963 | 5444                    | TT                              | GG                 | GG               | INTERGENIC      |               |                    |                    |
| SNP_87059_A_5446 | NW_004516301.1 | scaffold963 | 5446                    | TT                              | AA                 | AA               | INTERGENIC      |               |                    |                    |
| SNP_87060_A_5475 | NW_004516301.1 | scaffold963 | 5475                    | AA                              | GG                 | GG               | INTERGENIC      |               |                    |                    |
| SNP_87061_A_5478 | NW_004516301.1 | scaffold963 | 5478                    | AA                              | GG                 | GG               | INTERGENIC      |               |                    |                    |
| SNP_87062_A_5830 | NW_004516301.1 | scaffold963 | 5830                    | TT                              | CC                 | CC               | INTERGENIC      |               |                    |                    |
| SNP_87063_A_5904 | NW_004516301.1 | scaffold963 | 5904                    | AA                              | CC                 | CC               | INTERGENIC      |               |                    |                    |
| SNP_87064_A_5914 | NW_004516301.1 | scaffold963 | 5914                    | GG                              | AA                 | AA               | INTERGENIC      |               |                    |                    |
| SNP_87065_A_5997 | NW_004516301.1 | scaffold963 | 5997                    | CC                              | TT                 | TT               | INTERGENIC      |               |                    |                    |
| SNP_87066_A_6029 | NW_004516301.1 | scaffold963 | 6029                    | CC                              | GG                 | GG               | INTERGENIC      |               |                    |                    |
| SNP_87067_A_6084 | NW_004516301.1 | scaffold963 | 6084                    | TT                              | CC                 | CC               | INTERGENIC      |               |                    |                    |
| SNP_87068_A_6130 | NW_004516301.1 | scaffold963 | 6130                    | GG                              | AA                 | AA               | INTERGENIC      |               |                    |                    |
| SNP_87069_A_6282 | NW_004516301.1 | scaffold963 | 6282                    | AA                              | TT                 | TT               | INTERGENIC      |               |                    |                    |
| SNP_87070_A_6294 | NW_004516301.1 | scaffold963 | 6294                    | TT                              | CC                 | CC               | INTERGENIC      |               |                    |                    |
| SNP_87071_A_6320 | NW_004516301.1 | scaffold963 | 6320                    | AA                              | GG                 | GG               | INTERGENIC      |               |                    |                    |
| SNP_87072_A_6374 | NW_004516301.1 | scaffold963 | 6374                    | AA                              | GG                 | GG               | INTERGENIC      |               |                    |                    |
| SNP_87073_A_6406 | NW_004516301.1 | scaffold963 | 6406                    | TT                              | AA                 | AA               | INTERGENIC      |               |                    |                    |
| SNP_87074_A_6416 | NW_004516301.1 | scaffold963 | 6416                    | CC                              | AA                 | AA               | INTERGENIC      |               |                    |                    |

| SNPs IDs          | Chromosome IDs | Chromosomes | Physical positions (bp) | CDC Frontier (Reference genome) | (Pusa 1103 & HPNB) | (ILWC 46 & LPNB) | Sequence Components of genome | Gene accession IDs | Putative functions           |
|-------------------|----------------|-------------|-------------------------|---------------------------------|--------------------|------------------|-------------------------------|--------------------|------------------------------|
| SNP_87075_A_6421  | NW_004516301.1 | scaffold963 | 6421                    | TT                              | AA                 | AA               | INTERGENIC                    |                    |                              |
| SNP_87076_A_6440  | NW_004516301.1 | scaffold963 | 6440                    | CC                              | TT                 | TT               | INTERGENIC                    |                    |                              |
| SNP_87077_A_6458  | NW_004516301.1 | scaffold963 | 6458                    | CC                              | TT                 | TT               | INTERGENIC                    |                    |                              |
| SNP_87078_A_6496  | NW_004516301.1 | scaffold963 | 6496                    | GG                              | CC                 | CC               | INTERGENIC                    |                    |                              |
| SNP_87079_A_6561  | NW_004516301.1 | scaffold963 | 6561                    | TT                              | AA                 | AA               | INTERGENIC                    |                    |                              |
| SNP_87080_A_6724  | NW_004516301.1 | scaffold963 | 6724                    | CC                              | TT                 | TT               | INTERGENIC                    |                    |                              |
| SNP_87081_A_7216  | NW_004516301.1 | scaffold963 | 7216                    | AA                              | GG                 | GG               | INTERGENIC                    |                    |                              |
| SNP_87082_A_7265  | NW_004516301.1 | scaffold963 | 7265                    | TT                              | CC                 | CC               | INTERGENIC                    |                    |                              |
| SNP_87083_A_17266 | NW_004516301.1 | scaffold963 | 17266                   | GG                              | TT                 | TT               | INTERGENIC                    |                    |                              |
| SNP_87084_A_17292 | NW_004516301.1 | scaffold963 | 17292                   | AA                              | TT                 | TT               | INTERGENIC                    |                    |                              |
| SNP_87086_A_49084 | NW_004516301.1 | scaffold963 | 49084                   | TT                              | GG                 | GG               | URR                           | 101491653          | uncharacterized LOC101491653 |
| SNP_87087_A_50041 | NW_004516301.1 | scaffold963 | 50041                   | AA                              | GG                 | GG               | INTERGENIC                    |                    |                              |
| SNP_87088_A_51941 | NW_004516301.1 | scaffold963 | 51941                   | GG                              | AA                 | AA               | INTERGENIC                    |                    |                              |
| SNP_87089_A_51949 | NW_004516301.1 | scaffold963 | 51949                   | AA                              | CC                 | CC               | INTERGENIC                    |                    |                              |
| SNP_87090_A_62381 | NW_004516301.1 | scaffold963 | 62381                   | GG                              | AA                 | AA               | INTERGENIC                    |                    |                              |
| SNP_87091_A_89645 | NW_004516301.1 | scaffold963 | 89645                   | CC                              | GG                 | GG               | INTERGENIC                    |                    |                              |
| SNP_87092_A_89755 | NW_004516301.1 | scaffold963 | 89755                   | TT                              | CC                 | CC               | INTERGENIC                    |                    |                              |
| SNP_87093_A_90012 | NW_004516301.1 | scaffold963 | 90012                   | TT                              | CC                 | CC               | INTERGENIC                    |                    |                              |
| SNP_87094_A_90381 | NW_004516301.1 | scaffold963 | 90381                   | AA                              | CC                 | CC               | INTERGENIC                    |                    |                              |
| SNP_87095_A_91926 | NW_004516301.1 | scaffold963 | 91926                   | AA                              | TT                 | TT               | INTERGENIC                    |                    |                              |
| SNP_87096_A_92348 | NW_004516301.1 | scaffold963 | 92348                   | TT                              | CC                 | CC               | INTERGENIC                    |                    |                              |
| SNP_87097_A_92362 | NW_004516301.1 | scaffold963 | 92362                   | GG                              | CC                 | CC               | INTERGENIC                    |                    |                              |

| SNPs IDs          | Chromosome IDs | Chromosomes | Physical positions (bp) | CDC Frontier (Reference genome) | (Pusa 1103 & HPNB) | (ILWC 46 & LPNB) | Sequence genome | Components of | Gene accession IDs | Putative functions |
|-------------------|----------------|-------------|-------------------------|---------------------------------|--------------------|------------------|-----------------|---------------|--------------------|--------------------|
| SNP_87098_A_92441 | NW_004516301.1 | scaffold963 | 92441                   | AA                              | CC                 | CC               | INTERGENIC      |               |                    |                    |
| SNP_87099_A_93611 | NW_004516301.1 | scaffold963 | 93611                   | CC                              | AA                 | AA               | INTERGENIC      |               |                    |                    |
| SNP_87100_A_93618 | NW_004516301.1 | scaffold963 | 93618                   | TT                              | CC                 | CC               | INTERGENIC      |               |                    |                    |
| SNP_87101_A_93619 | NW_004516301.1 | scaffold963 | 93619                   | AA                              | GG                 | GG               | INTERGENIC      |               |                    |                    |
| SNP_87103_A_93716 | NW_004516301.1 | scaffold963 | 93716                   | TT                              | CC                 | CC               | INTERGENIC      |               |                    |                    |
| SNP_87104_A_93728 | NW_004516301.1 | scaffold963 | 93728                   | TT                              | GG                 | GG               | INTERGENIC      |               |                    |                    |
| SNP_87105_A_93730 | NW_004516301.1 | scaffold963 | 93730                   | CC                              | AA                 | AA               | INTERGENIC      |               |                    |                    |
| SNP_87106_A_93744 | NW_004516301.1 | scaffold963 | 93744                   | GG                              | AA                 | AA               | INTERGENIC      |               |                    |                    |
| SNP_87107_A_93749 | NW_004516301.1 | scaffold963 | 93749                   | GG                              | AA                 | AA               | INTERGENIC      |               |                    |                    |
| SNP_87108_A_515   | NW_004516302.1 | scaffold964 | 515                     | GG                              | TT                 | TT               | INTERGENIC      |               |                    |                    |
| SNP_87109_A_680   | NW_004516302.1 | scaffold964 | 680                     | AA                              | TT                 | TT               | INTERGENIC      |               |                    |                    |
| SNP_87110_A_891   | NW_004516302.1 | scaffold964 | 891                     | CC                              | TT                 | TT               | INTERGENIC      |               |                    |                    |
| SNP_87111_A_5153  | NW_004516302.1 | scaffold964 | 5153                    | AA                              | GG                 | GG               | INTERGENIC      |               |                    |                    |
| SNP_87112_A_5452  | NW_004516302.1 | scaffold964 | 5452                    | TT                              | GG                 | GG               | INTERGENIC      |               |                    |                    |
| SNP_87113_A_5812  | NW_004516302.1 | scaffold964 | 5812                    | TT                              | CC                 | CC               | INTERGENIC      |               |                    |                    |
| SNP_87114_A_5920  | NW_004516302.1 | scaffold964 | 5920                    | CC                              | TT                 | TT               | INTERGENIC      |               |                    |                    |
| SNP_87115_A_6784  | NW_004516302.1 | scaffold964 | 6784                    | AA                              | CC                 | CC               | INTERGENIC      |               |                    |                    |
| SNP_87116_A_9624  | NW_004516302.1 | scaffold964 | 9624                    | GG                              | CC                 | CC               | INTERGENIC      |               |                    |                    |
| SNP_87117_A_10101 | NW_004516302.1 | scaffold964 | 10101                   | CC                              | TT                 | TT               | INTERGENIC      |               |                    |                    |
| SNP_87118_A_12435 | NW_004516302.1 | scaffold964 | 12435                   | TT                              | AA                 | AA               | INTERGENIC      |               |                    |                    |
| SNP_87119_A_12475 | NW_004516302.1 | scaffold964 | 12475                   | CC                              | TT                 | TT               | INTERGENIC      |               |                    |                    |
| SNP_87120_A_12570 | NW_004516302.1 | scaffold964 | 12570                   | TT                              | AA                 | AA               | INTERGENIC      |               |                    |                    |

| SNPs IDs          | Chromosome IDs | Chromosomes | Physical positions (bp) | CDC Frontier (Reference genome) | (Pusa 1103 & HPNB) | (ILWC 46 & LPNB) | Sequence genome | Components of | Gene accession IDs | Putative functions |
|-------------------|----------------|-------------|-------------------------|---------------------------------|--------------------|------------------|-----------------|---------------|--------------------|--------------------|
| SNP_87121_A_12586 | NW_004516302.1 | scaffold964 | 12586                   | TT                              | AA                 | AA               | INTERGENIC      |               |                    |                    |
| SNP_87122_A_12615 | NW_004516302.1 | scaffold964 | 12615                   | CC                              | AA                 | AA               | INTERGENIC      |               |                    |                    |
| SNP_87123_A_12643 | NW_004516302.1 | scaffold964 | 12643                   | AA                              | GG                 | GG               | INTERGENIC      |               |                    |                    |
| SNP_87124_A_12659 | NW_004516302.1 | scaffold964 | 12659                   | TT                              | CC                 | CC               | INTERGENIC      |               |                    |                    |
| SNP_87125_A_12688 | NW_004516302.1 | scaffold964 | 12688                   | TT                              | AA                 | AA               | INTERGENIC      |               |                    |                    |
| SNP_87126_A_12764 | NW_004516302.1 | scaffold964 | 12764                   | AA                              | CC                 | CC               | INTERGENIC      |               |                    |                    |
| SNP_87127_A_12787 | NW_004516302.1 | scaffold964 | 12787                   | AA                              | GG                 | GG               | INTERGENIC      |               |                    |                    |
| SNP_87128_A_12810 | NW_004516302.1 | scaffold964 | 12810                   | TT                              | CC                 | CC               | INTERGENIC      |               |                    |                    |
| SNP_87129_A_13573 | NW_004516302.1 | scaffold964 | 13573                   | AA                              | CC                 | CC               | INTERGENIC      |               |                    |                    |
| SNP_87130_A_18161 | NW_004516302.1 | scaffold964 | 18161                   | AA                              | GG                 | GG               | INTERGENIC      |               |                    |                    |
| SNP_87131_A_32122 | NW_004516302.1 | scaffold964 | 32122                   | AA                              | CC                 | CC               | INTERGENIC      |               |                    |                    |
| SNP_87132_A_45675 | NW_004516302.1 | scaffold964 | 45675                   | TT                              | AA                 | AA               | INTERGENIC      |               |                    |                    |
| SNP_87133_A_45808 | NW_004516302.1 | scaffold964 | 45808                   | CC                              | AA                 | AA               | INTERGENIC      |               |                    |                    |
| SNP_87134_A_45869 | NW_004516302.1 | scaffold964 | 45869                   | CC                              | TT                 | TT               | INTERGENIC      |               |                    |                    |
| SNP_87135_A_45892 | NW_004516302.1 | scaffold964 | 45892                   | TT                              | GG                 | GG               | INTERGENIC      |               |                    |                    |
| SNP_87136_A_45933 | NW_004516302.1 | scaffold964 | 45933                   | TT                              | AA                 | AA               | INTERGENIC      |               |                    |                    |
| SNP_87137_A_54140 | NW_004516302.1 | scaffold964 | 54140                   | CC                              | TT                 | TT               | INTERGENIC      |               |                    |                    |
| SNP_87138_A_54279 | NW_004516302.1 | scaffold964 | 54279                   | CC                              | GG                 | GG               | INTERGENIC      |               |                    |                    |
| SNP_87139_A_60809 | NW_004516302.1 | scaffold964 | 60809                   | TT                              | CC                 | CC               | INTERGENIC      |               |                    |                    |
| SNP_87140_A_61755 | NW_004516302.1 | scaffold964 | 61755                   | TT                              | CC                 | CC               | INTERGENIC      |               |                    |                    |
| SNP_87141_A_62698 | NW_004516302.1 | scaffold964 | 62698                   | GG                              | TT                 | TT               | INTERGENIC      |               |                    |                    |
| SNP_87142_A_62833 | NW_004516302.1 | scaffold964 | 62833                   | CC                              | TT                 | TT               | INTERGENIC      |               |                    |                    |

| SNPs IDs          | Chromosome IDs | Chromosomes | Physical positions (bp) | CDC Frontier (Reference genome) | (Pusa 1103 & HPNB) | (ILWC 46 & LPNB) | Sequence genome | Components of | Gene accession IDs | Putative functions |
|-------------------|----------------|-------------|-------------------------|---------------------------------|--------------------|------------------|-----------------|---------------|--------------------|--------------------|
| SNP_87143_A_62834 | NW_004516302.1 | scaffold964 | 62834                   | GG                              | AA                 | AA               | INTERGENIC      |               |                    |                    |
| SNP_87144_A_74446 | NW_004516302.1 | scaffold964 | 74446                   | TT                              | CC                 | CC               | INTERGENIC      |               |                    |                    |
| SNP_87145_A_74453 | NW_004516302.1 | scaffold964 | 74453                   | AA                              | CC                 | CC               | INTERGENIC      |               |                    |                    |
| SNP_87147_A_83354 | NW_004516302.1 | scaffold964 | 83354                   | AA                              | GG                 | GG               | INTERGENIC      |               |                    |                    |
| SNP_87148_A_84910 | NW_004516302.1 | scaffold964 | 84910                   | TT                              | CC                 | CC               | INTERGENIC      |               |                    |                    |
| SNP_87149_A_84913 | NW_004516302.1 | scaffold964 | 84913                   | TT                              | CC                 | CC               | INTERGENIC      |               |                    |                    |
| SNP_87150_A_687   | NW_004516305.1 | scaffold968 | 687                     | AA                              | GG                 | GG               | INTERGENIC      |               |                    |                    |
| SNP_87151_A_979   | NW_004516306.1 | scaffold969 | 979                     | AA                              | TT                 | TT               | INTERGENIC      |               |                    |                    |
| SNP_87152_A_1366  | NW_004516306.1 | scaffold969 | 1366                    | CC                              | AA                 | AA               | INTERGENIC      |               |                    |                    |
| SNP_87153_A_1519  | NW_004516306.1 | scaffold969 | 1519                    | AA                              | GG                 | GG               | INTERGENIC      |               |                    |                    |
| SNP_87154_A_342   | NW_004516307.1 | scaffold971 | 342                     | CC                              | TT                 | TT               | INTERGENIC      |               |                    |                    |
| SNP_87155_A_495   | NW_004516307.1 | scaffold971 | 495                     | AA                              | TT                 | TT               | INTERGENIC      |               |                    |                    |
| SNP_87156_A_514   | NW_004516307.1 | scaffold971 | 514                     | AA                              | GG                 | GG               | INTERGENIC      |               |                    |                    |
| SNP_87157_A_521   | NW_004516307.1 | scaffold971 | 521                     | GG                              | AA                 | AA               | INTERGENIC      |               |                    |                    |
| SNP_87158_A_527   | NW_004516307.1 | scaffold971 | 527                     | TT                              | AA                 | AA               | INTERGENIC      |               |                    |                    |
| SNP_87159_A_573   | NW_004516307.1 | scaffold971 | 573                     | GG                              | AA                 | AA               | INTERGENIC      |               |                    |                    |
| SNP_87160_A_678   | NW_004516307.1 | scaffold971 | 678                     | TT                              | CC                 | CC               | INTERGENIC      |               |                    |                    |
| SNP_87161_A_1124  | NW_004516307.1 | scaffold971 | 1124                    | TT                              | CC                 | CC               | INTERGENIC      |               |                    |                    |
| SNP_87162_A_3217  | NW_004516307.1 | scaffold971 | 3217                    | TT                              | AA                 | AA               | INTERGENIC      |               |                    |                    |
| SNP_87163_A_3513  | NW_004516307.1 | scaffold971 | 3513                    | GG                              | AA                 | AA               | INTERGENIC      |               |                    |                    |
| SNP_87164_A_3517  | NW_004516307.1 | scaffold971 | 3517                    | TT                              | AA                 | AA               | INTERGENIC      |               |                    |                    |
| SNP_87165_A_3528  | NW_004516307.1 | scaffold971 | 3528                    | TT                              | AA                 | AA               | INTERGENIC      |               |                    |                    |

| SNPs IDs          | Chromosome IDs | Chromosomes | Physical positions (bp) | CDC Frontier (Reference genome) | (Pusa 1103 & HPNB) | (ILWC 46 & LPNB) | Sequence genome | Components of | Gene accession IDs | Putative functions |
|-------------------|----------------|-------------|-------------------------|---------------------------------|--------------------|------------------|-----------------|---------------|--------------------|--------------------|
| SNP_87166_A_3539  | NW_004516307.1 | scaffold971 | 3539                    | AA                              | TT                 | TT               | INTERGENIC      |               |                    |                    |
| SNP_87167_A_3634  | NW_004516307.1 | scaffold971 | 3634                    | CC                              | AA                 | AA               | INTERGENIC      |               |                    |                    |
| SNP_87168_A_3700  | NW_004516307.1 | scaffold971 | 3700                    | AA                              | CC                 | CC               | INTERGENIC      |               |                    |                    |
| SNP_87169_A_3780  | NW_004516307.1 | scaffold971 | 3780                    | GG                              | AA                 | AA               | INTERGENIC      |               |                    |                    |
| SNP_87170_A_3991  | NW_004516307.1 | scaffold971 | 3991                    | GG                              | AA                 | AA               | INTERGENIC      |               |                    |                    |
| SNP_87171_A_4019  | NW_004516307.1 | scaffold971 | 4019                    | AA                              | GG                 | GG               | INTERGENIC      |               |                    |                    |
| SNP_87172_A_5177  | NW_004516307.1 | scaffold971 | 5177                    | GG                              | AA                 | AA               | INTERGENIC      |               |                    |                    |
| SNP_87173_A_5192  | NW_004516307.1 | scaffold971 | 5192                    | GG                              | CC                 | CC               | INTERGENIC      |               |                    |                    |
| SNP_87174_A_7699  | NW_004516307.1 | scaffold971 | 7699                    | GG                              | TT                 | TT               | INTERGENIC      |               |                    |                    |
| SNP_87175_A_9518  | NW_004516307.1 | scaffold971 | 9518                    | TT                              | CC                 | CC               | INTERGENIC      |               |                    |                    |
| SNP_87176_A_12174 | NW_004516307.1 | scaffold971 | 12174                   | GG                              | TT                 | TT               | INTERGENIC      |               |                    |                    |
| SNP_87177_A_13522 | NW_004516307.1 | scaffold971 | 13522                   | AA                              | GG                 | GG               | INTERGENIC      |               |                    |                    |
| SNP_87178_A_13945 | NW_004516307.1 | scaffold971 | 13945                   | AA                              | TT                 | TT               | INTERGENIC      |               |                    |                    |
| SNP_87179_A_14591 | NW_004516307.1 | scaffold971 | 14591                   | GG                              | AA                 | AA               | INTERGENIC      |               |                    |                    |
| SNP_87180_A_12878 | NW_004516308.1 | scaffold972 | 12878                   | AA                              | GG                 | GG               | INTERGENIC      |               |                    |                    |
| SNP_87181_A_12939 | NW_004516308.1 | scaffold972 | 12939                   | AA                              | CC                 | CC               | INTERGENIC      |               |                    |                    |
| SNP_87182_A_3317  | NW_004516309.1 | scaffold973 | 3317                    | CC                              | AA                 | AA               | INTERGENIC      |               |                    |                    |
| SNP_87183_A_3367  | NW_004516309.1 | scaffold973 | 3367                    | AA                              | GG                 | GG               | INTERGENIC      |               |                    |                    |
| SNP_87184_A_3408  | NW_004516309.1 | scaffold973 | 3408                    | TT                              | AA                 | AA               | INTERGENIC      |               |                    |                    |
| SNP_87185_A_3608  | NW_004516309.1 | scaffold973 | 3608                    | AA                              | GG                 | GG               | INTERGENIC      |               |                    |                    |
| SNP_87186_A_3696  | NW_004516309.1 | scaffold973 | 3696                    | GG                              | AA                 | AA               | INTERGENIC      |               |                    |                    |
| SNP_87187_A_3894  | NW_004516309.1 | scaffold973 | 3894                    | TT                              | GG                 | GG               | INTERGENIC      |               |                    |                    |

| SNPs IDs          | Chromosome IDs | Chromosomes | Physical positions (bp) | CDC Frontier (Reference genome) | (Pusa 1103 & HPNB) | (ILWC 46 & LPNB) | Sequence genome | Components of | Gene accession IDs | Putative functions |
|-------------------|----------------|-------------|-------------------------|---------------------------------|--------------------|------------------|-----------------|---------------|--------------------|--------------------|
| SNP_87188_A_4195  | NW_004516309.1 | scaffold973 | 4195                    | AA                              | GG                 | GG               | INTERGENIC      |               |                    |                    |
| SNP_87189_A_4448  | NW_004516309.1 | scaffold973 | 4448                    | TT                              | CC                 | CC               | INTERGENIC      |               |                    |                    |
| SNP_87190_A_4559  | NW_004516309.1 | scaffold973 | 4559                    | TT                              | GG                 | GG               | INTERGENIC      |               |                    |                    |
| SNP_87191_A_3463  | NW_004516310.1 | scaffold974 | 3463                    | GG                              | TT                 | TT               | INTERGENIC      |               |                    |                    |
| SNP_87192_A_3470  | NW_004516310.1 | scaffold974 | 3470                    | GG                              | CC                 | CC               | INTERGENIC      |               |                    |                    |
| SNP_87193_A_3491  | NW_004516310.1 | scaffold974 | 3491                    | CC                              | TT                 | TT               | INTERGENIC      |               |                    |                    |
| SNP_87194_A_3843  | NW_004516310.1 | scaffold974 | 3843                    | TT                              | AA                 | AA               | INTERGENIC      |               |                    |                    |
| SNP_87195_A_3844  | NW_004516310.1 | scaffold974 | 3844                    | GG                              | TT                 | TT               | INTERGENIC      |               |                    |                    |
| SNP_87196_A_5153  | NW_004516310.1 | scaffold974 | 5153                    | TT                              | AA                 | AA               | INTERGENIC      |               |                    |                    |
| SNP_87197_A_24695 | NW_004516310.1 | scaffold974 | 24695                   | TT                              | CC                 | CC               | INTERGENIC      |               |                    |                    |
| SNP_87198_A_33900 | NW_004516310.1 | scaffold974 | 33900                   | AA                              | GG                 | GG               | INTERGENIC      |               |                    |                    |
| SNP_87199_A_33932 | NW_004516310.1 | scaffold974 | 33932                   | TT                              | CC                 | CC               | INTERGENIC      |               |                    |                    |
| SNP_87200_A_33948 | NW_004516310.1 | scaffold974 | 33948                   | AA                              | GG                 | GG               | INTERGENIC      |               |                    |                    |
| SNP_87201_A_34240 | NW_004516310.1 | scaffold974 | 34240                   | AA                              | GG                 | GG               | INTERGENIC      |               |                    |                    |
| SNP_87202_A_34280 | NW_004516310.1 | scaffold974 | 34280                   | TT                              | CC                 | CC               | INTERGENIC      |               |                    |                    |
| SNP_87203_A_394   | NW_004516311.1 | scaffold977 | 394                     | CC                              | AA                 | AA               | INTERGENIC      |               |                    |                    |
| SNP_87204_A_4515  | NW_004516311.1 | scaffold977 | 4515                    | AA                              | GG                 | GG               | INTERGENIC      |               |                    |                    |
| SNP_87205_A_4572  | NW_004516311.1 | scaffold977 | 4572                    | TT                              | CC                 | CC               | INTERGENIC      |               |                    |                    |
| SNP_87206_A_4734  | NW_004516311.1 | scaffold977 | 4734                    | CC                              | TT                 | TT               | INTERGENIC      |               |                    |                    |
| SNP_87208_A_4765  | NW_004516311.1 | scaffold977 | 4765                    | TT                              | GG                 | GG               | INTERGENIC      |               |                    |                    |
| SNP_87209_A_4769  | NW_004516311.1 | scaffold977 | 4769                    | TT                              | GG                 | GG               | INTERGENIC      |               |                    |                    |
| SNP_87210_A_4840  | NW_004516311.1 | scaffold977 | 4840                    | CC                              | GG                 | GG               | INTERGENIC      |               |                    |                    |

| SNPs IDs          | Chromosome IDs | Chromosomes | Physical positions (bp) | CDC Frontier (Reference genome) | (Pusa 1103 & HPNB) | (ILWC 46 & LPNB) | Sequence genome | Components of | Gene accession IDs | Putative functions |
|-------------------|----------------|-------------|-------------------------|---------------------------------|--------------------|------------------|-----------------|---------------|--------------------|--------------------|
| SNP_87211_A_5081  | NW_004516311.1 | scaffold977 | 5081                    | TT                              | CC                 | CC               | INTERGENIC      |               |                    |                    |
| SNP_87212_A_5128  | NW_004516311.1 | scaffold977 | 5128                    | AA                              | TT                 | TT               | INTERGENIC      |               |                    |                    |
| SNP_87213_A_5168  | NW_004516311.1 | scaffold977 | 5168                    | TT                              | AA                 | AA               | INTERGENIC      |               |                    |                    |
| SNP_87214_A_5231  | NW_004516311.1 | scaffold977 | 5231                    | TT                              | AA                 | AA               | INTERGENIC      |               |                    |                    |
| SNP_87215_A_6201  | NW_004516311.1 | scaffold977 | 6201                    | GG                              | AA                 | AA               | INTERGENIC      |               |                    |                    |
| SNP_87216_A_6210  | NW_004516311.1 | scaffold977 | 6210                    | GG                              | TT                 | TT               | INTERGENIC      |               |                    |                    |
| SNP_87217_A_6230  | NW_004516311.1 | scaffold977 | 6230                    | AA                              | CC                 | CC               | INTERGENIC      |               |                    |                    |
| SNP_87218_A_6231  | NW_004516311.1 | scaffold977 | 6231                    | CC                              | GG                 | GG               | INTERGENIC      |               |                    |                    |
| SNP_87219_A_6485  | NW_004516311.1 | scaffold977 | 6485                    | GG                              | AA                 | AA               | INTERGENIC      |               |                    |                    |
| SNP_87220_A_6534  | NW_004516311.1 | scaffold977 | 6534                    | CC                              | TT                 | TT               | INTERGENIC      |               |                    |                    |
| SNP_87221_A_6569  | NW_004516311.1 | scaffold977 | 6569                    | CC                              | TT                 | TT               | INTERGENIC      |               |                    |                    |
| SNP_87222_A_6666  | NW_004516311.1 | scaffold977 | 6666                    | TT                              | AA                 | AA               | INTERGENIC      |               |                    |                    |
| SNP_87223_A_6773  | NW_004516311.1 | scaffold977 | 6773                    | CC                              | AA                 | AA               | INTERGENIC      |               |                    |                    |
| SNP_87224_A_6787  | NW_004516311.1 | scaffold977 | 6787                    | TT                              | GG                 | GG               | INTERGENIC      |               |                    |                    |
| SNP_87225_A_6835  | NW_004516311.1 | scaffold977 | 6835                    | AA                              | GG                 | GG               | INTERGENIC      |               |                    |                    |
| SNP_87226_A_6849  | NW_004516311.1 | scaffold977 | 6849                    | TT                              | AA                 | AA               | INTERGENIC      |               |                    |                    |
| SNP_87228_A_2610  | NW_004516313.1 | scaffold981 | 2610                    | TT                              | AA                 | AA               | INTERGENIC      |               |                    |                    |
| SNP_87230_A_10022 | NW_004516313.1 | scaffold981 | 10022                   | TT                              | CC                 | CC               | INTERGENIC      |               |                    |                    |
| SNP_87231_A_10135 | NW_004516313.1 | scaffold981 | 10135                   | AA                              | GG                 | GG               | INTERGENIC      |               |                    |                    |
| SNP_87234_A_11060 | NW_004516313.1 | scaffold981 | 11060                   | CC                              | AA                 | AA               | INTERGENIC      |               |                    |                    |
| SNP_87235_A_11074 | NW_004516313.1 | scaffold981 | 11074                   | TT                              | CC                 | CC               | INTERGENIC      |               |                    |                    |
| SNP_87236_A_11098 | NW_004516313.1 | scaffold981 | 11098                   | GG                              | AA                 | AA               | INTERGENIC      |               |                    |                    |



| SNPs IDs          | Chromosome IDs | Chromosomes | Physical positions (bp) | CDC Frontier (Reference genome) | (Pusa 1103 & HPNB) | (ILWC 46 & LPNB) | Sequence Components of genome | Gene accession IDs | Putative functions                   |
|-------------------|----------------|-------------|-------------------------|---------------------------------|--------------------|------------------|-------------------------------|--------------------|--------------------------------------|
| SNP_87237_A_13620 | NW_004516313.1 | scaffold981 | 13620                   | AA                              | GG                 | GG               | INTERGENIC                    |                    |                                      |
| SNP_87238_A_18681 | NW_004516313.1 | scaffold981 | 18681                   | TT                              | CC                 | CC               | INTRON                        | 101492522          | 60S acidic ribosomal protein P1-like |
| SNP_87239_A_19643 | NW_004516313.1 | scaffold981 | 19643                   | TT                              | CC                 | CC               | INTRON                        | 101492522          | 60S acidic ribosomal protein P1-like |
| SNP_87240_A_43253 | NW_004516313.1 | scaffold981 | 43253                   | GG                              | CC                 | CC               | INTRON                        | 101492522          | 60S acidic ribosomal protein P1-like |
| SNP_87241_A_49714 | NW_004516313.1 | scaffold981 | 49714                   | TT                              | CC                 | CC               | INTRON                        | 101492522          | 60S acidic ribosomal protein P1-like |
| SNP_87242_A_49726 | NW_004516313.1 | scaffold981 | 49726                   | TT                              | AA                 | AA               | INTRON                        | 101492522          | 60S acidic ribosomal protein P1-like |
| SNP_87243_A_49735 | NW_004516313.1 | scaffold981 | 49735                   | CC                              | GG                 | GG               | INTRON                        | 101492522          | 60S acidic ribosomal protein P1-like |
| SNP_87244_A_49777 | NW_004516313.1 | scaffold981 | 49777                   | TT                              | CC                 | CC               | INTRON                        | 101492522          | 60S acidic ribosomal protein P1-like |
| SNP_87245_A_49824 | NW_004516313.1 | scaffold981 | 49824                   | CC                              | AA                 | AA               | INTRON                        | 101492522          | 60S acidic ribosomal protein P1-like |
| SNP_87246_A_49926 | NW_004516313.1 | scaffold981 | 49926                   | TT                              | AA                 | AA               | INTRON                        | 101492522          | 60S acidic ribosomal protein P1-like |
| SNP_87247_A_53849 | NW_004516313.1 | scaffold981 | 53849                   | GG                              | AA                 | AA               | INTRON                        | 101492522          | 60S acidic ribosomal protein P1-like |
| SNP_87248_A_53948 | NW_004516313.1 | scaffold981 | 53948                   | GG                              | TT                 | TT               | INTRON                        | 101492522          | 60S acidic ribosomal protein P1-like |
| SNP_87249_A_68908 | NW_004516313.1 | scaffold981 | 68908                   | TT                              | CC                 | CC               | INTERGENIC                    |                    |                                      |
| SNP_87250_A_69007 | NW_004516313.1 | scaffold981 | 69007                   | AA                              | GG                 | GG               | INTERGENIC                    |                    |                                      |
| SNP_87251_A_69010 | NW_004516313.1 | scaffold981 | 69010                   | CC                              | TT                 | TT               | INTERGENIC                    |                    |                                      |
| SNP_87252_A_69018 | NW_004516313.1 | scaffold981 | 69018                   | GG                              | AA                 | AA               | INTERGENIC                    |                    |                                      |
| SNP_87253_A_69022 | NW_004516313.1 | scaffold981 | 69022                   | AA                              | GG                 | GG               | INTERGENIC                    |                    |                                      |
| SNP_87254_A_69024 | NW_004516313.1 | scaffold981 | 69024                   | AA                              | TT                 | TT               | INTERGENIC                    |                    |                                      |
| SNP_87255_A_71340 | NW_004516313.1 | scaffold981 | 71340                   | TT                              | GG                 | GG               | INTERGENIC                    |                    |                                      |
| SNP_87256_A_77882 | NW_004516313.1 | scaffold981 | 77882                   | TT                              | CC                 | CC               | INTERGENIC                    |                    |                                      |
| SNP_87257_A_78041 | NW_004516313.1 | scaffold981 | 78041                   | AA                              | CC                 | CC               | INTERGENIC                    |                    |                                      |
| SNP_87258_A_78049 | NW_004516313.1 | scaffold981 | 78049                   | AA                              | GG                 | GG               | INTERGENIC                    |                    |                                      |

| SNPs IDs          | Chromosome IDs | Chromosomes | Physical positions (bp) | CDC Frontier (Reference genome) | (Pusa 1103 & HPNB) | (ILWC 46 & LPNB) | Sequence Components of genome | Gene accession IDs | Putative functions           |
|-------------------|----------------|-------------|-------------------------|---------------------------------|--------------------|------------------|-------------------------------|--------------------|------------------------------|
| SNP_87259_A_78111 | NW_004516313.1 | scaffold981 | 78111                   | AA                              | TT                 | TT               | INTERGENIC                    |                    |                              |
| SNP_87260_A_78112 | NW_004516313.1 | scaffold981 | 78112                   | TT                              | CC                 | CC               | INTERGENIC                    |                    |                              |
| SNP_87261_A_78332 | NW_004516313.1 | scaffold981 | 78332                   | AA                              | CC                 | CC               | INTERGENIC                    |                    |                              |
| SNP_87262_A_78396 | NW_004516313.1 | scaffold981 | 78396                   | TT                              | CC                 | CC               | INTERGENIC                    |                    |                              |
| SNP_87263_A_78643 | NW_004516313.1 | scaffold981 | 78643                   | AA                              | GG                 | GG               | INTERGENIC                    |                    |                              |
| SNP_87264_A_78647 | NW_004516313.1 | scaffold981 | 78647                   | AA                              | CC                 | CC               | INTERGENIC                    |                    |                              |
| SNP_87265_A_78704 | NW_004516313.1 | scaffold981 | 78704                   | TT                              | CC                 | CC               | INTERGENIC                    |                    |                              |
| SNP_87266_A_79028 | NW_004516313.1 | scaffold981 | 79028                   | AA                              | GG                 | GG               | INTERGENIC                    |                    |                              |
| SNP_87267_A_79320 | NW_004516313.1 | scaffold981 | 79320                   | AA                              | GG                 | GG               | INTERGENIC                    |                    |                              |
| SNP_87268_A_79335 | NW_004516313.1 | scaffold981 | 79335                   | CC                              | TT                 | TT               | INTERGENIC                    |                    |                              |
| SNP_87269_A_79359 | NW_004516313.1 | scaffold981 | 79359                   | AA                              | GG                 | GG               | INTERGENIC                    |                    |                              |
| SNP_87270_A_79361 | NW_004516313.1 | scaffold981 | 79361                   | AA                              | GG                 | GG               | INTERGENIC                    |                    |                              |
| SNP_87272_A_84237 | NW_004516313.1 | scaffold981 | 84237                   | TT                              | AA                 | AA               | URR                           | 101492297          | uncharacterized LOC101492297 |
| SNP_87273_A_84238 | NW_004516313.1 | scaffold981 | 84238                   | AA                              | TT                 | TT               | URR                           | 101492297          | uncharacterized LOC101492297 |
| SNP_87274_A_84314 | NW_004516313.1 | scaffold981 | 84314                   | AA                              | CC                 | CC               | URR                           | 101492297          | uncharacterized LOC101492297 |
| SNP_87276_A_84541 | NW_004516313.1 | scaffold981 | 84541                   | GG                              | AA                 | AA               | URR                           | 101492297          | uncharacterized LOC101492297 |
| SNP_87277_A_496   | NW_004516314.1 | scaffold982 | 496                     | CC                              | GG                 | GG               | INTERGENIC                    |                    |                              |
| SNP_87279_A_1210  | NW_004516314.1 | scaffold982 | 1210                    | CC                              | TT                 | TT               | INTERGENIC                    |                    |                              |
| SNP_87280_A_1212  | NW_004516314.1 | scaffold982 | 1212                    | AA                              | GG                 | GG               | INTERGENIC                    |                    |                              |
| SNP_87281_A_1250  | NW_004516314.1 | scaffold982 | 1250                    | CC                              | AA                 | AA               | INTERGENIC                    |                    |                              |
| SNP_87283_A_1319  | NW_004516314.1 | scaffold982 | 1319                    | CC                              | AA                 | AA               | INTERGENIC                    |                    |                              |
| SNP_87285_A_2819  | NW_004516314.1 | scaffold982 | 2819                    | TT                              | AA                 | AA               | INTERGENIC                    |                    |                              |

| SNPs IDs          | Chromosome IDs | Chromosomes | Physical positions (bp) | CDC Frontier genome (Reference genome) | (Pusa 1103 & HPNB) | (ILWC 46 & LPNB) | Sequence genome       | Components of | Gene accession IDs | Putative functions |
|-------------------|----------------|-------------|-------------------------|----------------------------------------|--------------------|------------------|-----------------------|---------------|--------------------|--------------------|
| SNP_87286_A_2902  | NW_004516314.1 | scaffold982 | 2902                    | TT                                     | CC                 | CC               | INTERGENIC            |               |                    |                    |
| SNP_87287_A_3346  | NW_004516314.1 | scaffold982 | 3346                    | AA                                     | GG                 | GG               | INTERGENIC            |               |                    |                    |
| SNP_87288_A_4843  | NW_004516314.1 | scaffold982 | 4843                    | TT                                     | AA                 | AA               | INTERGENIC            |               |                    |                    |
| SNP_87289_A_4938  | NW_004516314.1 | scaffold982 | 4938                    | GG                                     | AA                 | AA               | INTERGENIC            |               |                    |                    |
| SNP_87290_A_5464  | NW_004516314.1 | scaffold982 | 5464                    | TT                                     | AA                 | AA               | INTERGENIC            |               |                    |                    |
| SNP_87291_A_5533  | NW_004516314.1 | scaffold982 | 5533                    | TT                                     | CC                 | CC               | INTERGENIC            |               |                    |                    |
| SNP_87292_A_6010  | NW_004516314.1 | scaffold982 | 6010                    | GG                                     | TT                 | TT               | INTERGENIC            |               |                    |                    |
| SNP_87293_A_6312  | NW_004516314.1 | scaffold982 | 6312                    | TT                                     | AA                 | AA               | INTERGENIC            |               |                    |                    |
| SNP_87294_A_7346  | NW_004516314.1 | scaffold982 | 7346                    | AA                                     | TT                 | TT               | INTERGENIC            |               |                    |                    |
| SNP_87295_A_7783  | NW_004516314.1 | scaffold982 | 7783                    | TT                                     | AA                 | AA               | INTERGENIC            |               |                    |                    |
| SNP_87296_A_7813  | NW_004516314.1 | scaffold982 | 7813                    | GG                                     | AA                 | AA               | INTERGENIC            |               |                    |                    |
| SNP_87297_A_7816  | NW_004516314.1 | scaffold982 | 7816                    | CC                                     | TT                 | TT               | INTERGENIC            |               |                    |                    |
| SNP_87298_A_7949  | NW_004516314.1 | scaffold982 | 7949                    | CC                                     | TT                 | TT               | INTERGENIC            |               |                    |                    |
| SNP_87299_A_9319  | NW_004516314.1 | scaffold982 | 9319                    | TT                                     | GG                 | GG               | INTERGENIC            |               |                    |                    |
| SNP_87300_A_9742  | NW_004516314.1 | scaffold982 | 9742                    | TT                                     | CC                 | CC               | INTERGENIC            |               |                    |                    |
| SNP_87302_A_14553 | NW_004516314.1 | scaffold982 | 14553                   | GG                                     | CC                 | CC               | NON_SYNONYMOUS_CODING | 101492852     | cucumis-in-like    |                    |
| SNP_87303_A_14774 | NW_004516314.1 | scaffold982 | 14774                   | GG                                     | TT                 | TT               | URR                   | 101492852     | cucumis-in-like    |                    |
| SNP_87304_A_14806 | NW_004516314.1 | scaffold982 | 14806                   | TT                                     | AA                 | AA               | URR                   | 101492852     | cucumis-in-like    |                    |
| SNP_87305_A_14809 | NW_004516314.1 | scaffold982 | 14809                   | CC                                     | AA                 | AA               | URR                   | 101492852     | cucumis-in-like    |                    |
| SNP_87307_A_15022 | NW_004516314.1 | scaffold982 | 15022                   | TT                                     | CC                 | CC               | URR                   | 101492852     | cucumis-in-like    |                    |
| SNP_87308_A_15039 | NW_004516314.1 | scaffold982 | 15039                   | AA                                     | GG                 | GG               | URR                   | 101492852     | cucumis-in-like    |                    |
| SNP_87309_A_15057 | NW_004516314.1 | scaffold982 | 15057                   | GG                                     | AA                 | AA               | URR                   | 101492852     | cucumis-in-like    |                    |

| SNPs IDs          | Chromosome IDs | Chromosomes | Physical positions (bp) | CDC Frontier (Reference genome) | (Pusa 1103 & HPNB) | (ILWC 46 & LPNB) | Sequence Components of genome | Gene accession IDs | Putative functions   |
|-------------------|----------------|-------------|-------------------------|---------------------------------|--------------------|------------------|-------------------------------|--------------------|----------------------|
| SNP_87310_A_15194 | NW_004516314.1 | scaffold982 | 15194                   | AA                              | GG                 | GG               | URR                           | 101492852          | cucumis-in-like      |
| SNP_87311_A_15213 | NW_004516314.1 | scaffold982 | 15213                   | CC                              | AA                 | TT               | URR                           | 101492852          | cucumis-in-like      |
| SNP_87312_A_15505 | NW_004516314.1 | scaffold982 | 15505                   | GG                              | AA                 | AA               | URR                           | 101492852          | cucumis-in-like      |
| SNP_87313_A_15661 | NW_004516314.1 | scaffold982 | 15661                   | TT                              | CC                 | CC               | URR                           | 101492852          | cucumis-in-like      |
| SNP_87314_A_15693 | NW_004516314.1 | scaffold982 | 15693                   | TT                              | GG                 | GG               | URR                           | 101492852          | cucumis-in-like      |
| SNP_87315_A_15701 | NW_004516314.1 | scaffold982 | 15701                   | CC                              | AA                 | AA               | URR                           | 101492852          | cucumis-in-like      |
| SNP_87316_A_1019  | NW_004516315.1 | scaffold983 | 1019                    | TT                              | GG                 | GG               | INTERGENIC                    |                    |                      |
| SNP_87317_A_33249 | NW_004516315.1 | scaffold983 | 33249                   | AA                              | GG                 | GG               | INTERGENIC                    |                    |                      |
| SNP_87318_A_33259 | NW_004516315.1 | scaffold983 | 33259                   | AA                              | GG                 | GG               | INTERGENIC                    |                    |                      |
| SNP_87321_A_33288 | NW_004516315.1 | scaffold983 | 33288                   | AA                              | TT                 | TT               | INTERGENIC                    |                    |                      |
| SNP_87322_A_33289 | NW_004516315.1 | scaffold983 | 33289                   | GG                              | AA                 | AA               | INTERGENIC                    |                    |                      |
| SNP_87323_A_33338 | NW_004516315.1 | scaffold983 | 33338                   | CC                              | TT                 | TT               | INTERGENIC                    |                    |                      |
| SNP_87324_A_33343 | NW_004516315.1 | scaffold983 | 33343                   | TT                              | GG                 | GG               | INTERGENIC                    |                    |                      |
| SNP_87325_A_33355 | NW_004516315.1 | scaffold983 | 33355                   | GG                              | AA                 | AA               | INTERGENIC                    |                    |                      |
| SNP_87326_A_33358 | NW_004516315.1 | scaffold983 | 33358                   | TT                              | CC                 | CC               | INTERGENIC                    |                    |                      |
| SNP_87328_A_72947 | NW_004516315.1 | scaffold983 | 72947                   | CC                              | TT                 | TT               | INTRON                        | 101494048          | SKP1-like protein 21 |
| SNP_87329_A_72955 | NW_004516315.1 | scaffold983 | 72955                   | CC                              | TT                 | TT               | INTRON                        | 101494048          | SKP1-like protein 21 |
| SNP_87330_A_76816 | NW_004516315.1 | scaffold983 | 76816                   | TT                              | CC                 | CC               | INTERGENIC                    |                    |                      |
| SNP_87331_A_88016 | NW_004516315.1 | scaffold983 | 88016                   | GG                              | AA                 | AA               | INTERGENIC                    |                    |                      |
| SNP_87332_A_88174 | NW_004516315.1 | scaffold983 | 88174                   | GG                              | CC                 | CC               | INTERGENIC                    |                    |                      |
| SNP_87334_A_88254 | NW_004516315.1 | scaffold983 | 88254                   | TT                              | CC                 | CC               | INTERGENIC                    |                    |                      |
| SNP_87335_A_88296 | NW_004516315.1 | scaffold983 | 88296                   | CC                              | TT                 | TT               | INTERGENIC                    |                    |                      |

| SNPs IDs           | Chromosome IDs | Chromosomes | Physical positions (bp) | CDC Frontier (Reference genome) | (Pusa 1103 & HPNB) | (ILWC 46 & LPNB) | Sequence genome | Components of | Gene accession IDs | Putative functions |
|--------------------|----------------|-------------|-------------------------|---------------------------------|--------------------|------------------|-----------------|---------------|--------------------|--------------------|
| SNP_87336_A_88343  | NW_004516315.1 | scaffold983 | 88343                   | CC                              | TT                 | TT               | INTERGENIC      |               |                    |                    |
| SNP_87337_A_88349  | NW_004516315.1 | scaffold983 | 88349                   | GG                              | AA                 | AA               | INTERGENIC      |               |                    |                    |
| SNP_87340_A_88683  | NW_004516315.1 | scaffold983 | 88683                   | TT                              | AA                 | AA               | INTERGENIC      |               |                    |                    |
| SNP_87341_A_113999 | NW_004516315.1 | scaffold983 | 113999                  | CC                              | AA                 | AA               | INTERGENIC      |               |                    |                    |
| SNP_87342_A_114002 | NW_004516315.1 | scaffold983 | 114002                  | AA                              | GG                 | GG               | INTERGENIC      |               |                    |                    |
| SNP_87343_A_114023 | NW_004516315.1 | scaffold983 | 114023                  | CC                              | TT                 | TT               | INTERGENIC      |               |                    |                    |
| SNP_87344_A_114029 | NW_004516315.1 | scaffold983 | 114029                  | TT                              | AA                 | AA               | INTERGENIC      |               |                    |                    |
| SNP_87345_A_128776 | NW_004516315.1 | scaffold983 | 128776                  | GG                              | TT                 | TT               | INTERGENIC      |               |                    |                    |
| SNP_87347_A_129500 | NW_004516315.1 | scaffold983 | 129500                  | TT                              | AA                 | AA               | INTERGENIC      |               |                    |                    |
| SNP_87348_A_129501 | NW_004516315.1 | scaffold983 | 129501                  | CC                              | AA                 | AA               | INTERGENIC      |               |                    |                    |
| SNP_87349_A_129519 | NW_004516315.1 | scaffold983 | 129519                  | GG                              | TT                 | TT               | INTERGENIC      |               |                    |                    |
| SNP_87350_A_141413 | NW_004516315.1 | scaffold983 | 141413                  | TT                              | GG                 | GG               | INTERGENIC      |               |                    |                    |
| SNP_87353_A_169346 | NW_004516315.1 | scaffold983 | 169346                  | TT                              | CC                 | CC               | INTERGENIC      |               |                    |                    |
| SNP_87354_A_169466 | NW_004516315.1 | scaffold983 | 169466                  | GG                              | AA                 | AA               | INTERGENIC      |               |                    |                    |
| SNP_87355_A_169601 | NW_004516315.1 | scaffold983 | 169601                  | AA                              | CC                 | CC               | INTERGENIC      |               |                    |                    |
| SNP_87356_A_169618 | NW_004516315.1 | scaffold983 | 169618                  | CC                              | TT                 | TT               | INTERGENIC      |               |                    |                    |
| SNP_87357_A_171689 | NW_004516315.1 | scaffold983 | 171689                  | AA                              | CC                 | CC               | INTERGENIC      |               |                    |                    |
| SNP_87358_A_174279 | NW_004516315.1 | scaffold983 | 174279                  | AA                              | GG                 | GG               | INTERGENIC      |               |                    |                    |
| SNP_87359_A_174407 | NW_004516315.1 | scaffold983 | 174407                  | TT                              | CC                 | CC               | INTERGENIC      |               |                    |                    |
| SNP_87360_A_174421 | NW_004516315.1 | scaffold983 | 174421                  | TT                              | CC                 | CC               | INTERGENIC      |               |                    |                    |
| SNP_87361_A_174446 | NW_004516315.1 | scaffold983 | 174446                  | CC                              | GG                 | GG               | INTERGENIC      |               |                    |                    |
| SNP_87362_A_174522 | NW_004516315.1 | scaffold983 | 174522                  | CC                              | AA                 | AA               | INTERGENIC      |               |                    |                    |

| SNPs IDs           | Chromosome IDs | Chromosomes | Physical positions (bp) | CDC Frontier (Reference genome) | (Pusa 1103 & HPNB) | (ILWC 46 & LPNB) | Sequence genome | Components of | Gene accession IDs                                 | Putative functions |
|--------------------|----------------|-------------|-------------------------|---------------------------------|--------------------|------------------|-----------------|---------------|----------------------------------------------------|--------------------|
| SNP_87363_A_174632 | NW_004516315.1 | scaffold983 | 174632                  | AA                              | TT                 | TT               | INTERGENIC      |               |                                                    |                    |
| SNP_87364_A_174633 | NW_004516315.1 | scaffold983 | 174633                  | TT                              | AA                 | AA               | INTERGENIC      |               |                                                    |                    |
| SNP_87365_A_178770 | NW_004516315.1 | scaffold983 | 178770                  | TT                              | CC                 | CC               | INTERGENIC      |               |                                                    |                    |
| SNP_87366_A_178779 | NW_004516315.1 | scaffold983 | 178779                  | AA                              | GG                 | GG               | INTERGENIC      |               |                                                    |                    |
| SNP_87367_A_178790 | NW_004516315.1 | scaffold983 | 178790                  | TT                              | CC                 | CC               | INTERGENIC      |               |                                                    |                    |
| SNP_87368_A_180031 | NW_004516315.1 | scaffold983 | 180031                  | CC                              | AA                 | AA               | INTERGENIC      |               |                                                    |                    |
| SNP_87369_A_219802 | NW_004516315.1 | scaffold983 | 219802                  | TT                              | CC                 | CC               | INTERGENIC      |               |                                                    |                    |
| SNP_87370_A_241551 | NW_004516315.1 | scaffold983 | 241551                  | AA                              | TT                 | TT               | URR             | 101493406     | general transcription factor 3C polypeptide 5-like |                    |
| SNP_87371_A_254924 | NW_004516315.1 | scaffold983 | 254924                  | CC                              | TT                 | TT               | INTERGENIC      |               |                                                    |                    |
| SNP_87372_A_255047 | NW_004516315.1 | scaffold983 | 255047                  | AA                              | GG                 | GG               | INTERGENIC      |               |                                                    |                    |
| SNP_87373_A_255170 | NW_004516315.1 | scaffold983 | 255170                  | AA                              | GG                 | GG               | INTERGENIC      |               |                                                    |                    |
| SNP_87376_A_287403 | NW_004516315.1 | scaffold983 | 287403                  | TT                              | AA                 | AA               | INTERGENIC      |               |                                                    |                    |
| SNP_87377_A_287716 | NW_004516315.1 | scaffold983 | 287716                  | AA                              | CC                 | CC               | INTERGENIC      |               |                                                    |                    |
| SNP_87378_A_287755 | NW_004516315.1 | scaffold983 | 287755                  | GG                              | TT                 | TT               | INTERGENIC      |               |                                                    |                    |
| SNP_87379_A_287771 | NW_004516315.1 | scaffold983 | 287771                  | TT                              | CC                 | CC               | INTERGENIC      |               |                                                    |                    |
| SNP_87380_A_287785 | NW_004516315.1 | scaffold983 | 287785                  | TT                              | CC                 | CC               | INTERGENIC      |               |                                                    |                    |
| SNP_87381_A_287997 | NW_004516315.1 | scaffold983 | 287997                  | AA                              | TT                 | TT               | INTERGENIC      |               |                                                    |                    |
| SNP_87382_A_288036 | NW_004516315.1 | scaffold983 | 288036                  | AA                              | CC                 | CC               | INTERGENIC      |               |                                                    |                    |
| SNP_87383_A_293022 | NW_004516315.1 | scaffold983 | 293022                  | GG                              | AA                 | AA               | INTERGENIC      |               |                                                    |                    |
| SNP_87384_A_356743 | NW_004516315.1 | scaffold983 | 356743                  | TT                              | CC                 | CC               | INTERGENIC      |               |                                                    |                    |
| SNP_87385_A_356753 | NW_004516315.1 | scaffold983 | 356753                  | GG                              | AA                 | AA               | INTERGENIC      |               |                                                    |                    |
| SNP_87386_A_356785 | NW_004516315.1 | scaffold983 | 356785                  | AA                              | TT                 | TT               | INTERGENIC      |               |                                                    |                    |

| SNPs IDs          | Chromosome IDs | Chromosomes | Physical positions (bp) | CDC Frontier (Reference genome) | (Pusa 1103 & HPNB) | (ILWC 46 & LPNB) | Sequence Components of genome | Gene accession IDs | Putative functions |
|-------------------|----------------|-------------|-------------------------|---------------------------------|--------------------|------------------|-------------------------------|--------------------|--------------------|
| SNP_87387_A_1314  | NW_004516316.1 | scaffold984 | 1314                    | AA                              | GG                 | GG               | INTERGENIC                    |                    |                    |
| SNP_87388_A_1375  | NW_004516316.1 | scaffold984 | 1375                    | TT                              | CC                 | CC               | INTERGENIC                    |                    |                    |
| SNP_87389_A_1435  | NW_004516316.1 | scaffold984 | 1435                    | AA                              | CC                 | CC               | INTERGENIC                    |                    |                    |
| SNP_87390_A_1455  | NW_004516316.1 | scaffold984 | 1455                    | GG                              | TT                 | TT               | INTERGENIC                    |                    |                    |
| SNP_87391_A_2759  | NW_004516316.1 | scaffold984 | 2759                    | AA                              | TT                 | TT               | INTERGENIC                    |                    |                    |
| SNP_87392_A_5717  | NW_004516316.1 | scaffold984 | 5717                    | AA                              | TT                 | TT               | NON_SYNONYMOUS_CODING         | 101495314          | Unknown function   |
| SNP_87393_A_13700 | NW_004516316.1 | scaffold984 | 13700                   | CC                              | AA                 | AA               | INTRON                        | 101495314          | Unknown function   |
| SNP_87394_A_33665 | NW_004516316.1 | scaffold984 | 33665                   | TT                              | CC                 | CC               | INTRON                        | 101495314          | Unknown function   |
| SNP_87395_A_36131 | NW_004516316.1 | scaffold984 | 36131                   | GG                              | AA                 | AA               | INTRON                        | 101495314          | Unknown function   |
| SNP_87396_A_36187 | NW_004516316.1 | scaffold984 | 36187                   | GG                              | AA                 | AA               | INTRON                        | 101495314          | Unknown function   |
| SNP_87398_A_56547 | NW_004516316.1 | scaffold984 | 56547                   | AA                              | CC                 | CC               | INTRON                        | 101495314          | Unknown function   |
| SNP_87399_A_58357 | NW_004516316.1 | scaffold984 | 58357                   | CC                              | GG                 | GG               | INTRON                        | 101495314          | Unknown function   |
| SNP_87400_A_66216 | NW_004516316.1 | scaffold984 | 66216                   | CC                              | TT                 | TT               | INTRON                        | 101495314          | Unknown function   |
| SNP_87401_A_66328 | NW_004516316.1 | scaffold984 | 66328                   | TT                              | CC                 | CC               | INTRON                        | 101495314          | Unknown function   |
| SNP_87402_A_66659 | NW_004516316.1 | scaffold984 | 66659                   | AA                              | GG                 | GG               | INTRON                        | 101495314          | Unknown function   |
| SNP_87403_A_66719 | NW_004516316.1 | scaffold984 | 66719                   | TT                              | GG                 | GG               | INTRON                        | 101495314          | Unknown function   |
| SNP_87404_A_66933 | NW_004516316.1 | scaffold984 | 66933                   | CC                              | TT                 | TT               | INTRON                        | 101495314          | Unknown function   |
| SNP_87405_A_67034 | NW_004516316.1 | scaffold984 | 67034                   | GG                              | AA                 | AA               | INTRON                        | 101495314          | Unknown function   |
| SNP_87406_A_67037 | NW_004516316.1 | scaffold984 | 67037                   | GG                              | AA                 | AA               | INTRON                        | 101495314          | Unknown function   |
| SNP_87407_A_67043 | NW_004516316.1 | scaffold984 | 67043                   | TT                              | CC                 | CC               | INTRON                        | 101495314          | Unknown function   |
| SNP_87408_A_73241 | NW_004516316.1 | scaffold984 | 73241                   | TT                              | GG                 | GG               | INTRON                        | 101495638          | Unknown function   |
| SNP_87409_A_77778 | NW_004516316.1 | scaffold984 | 77778                   | TT                              | AA                 | AA               | INTRON                        | 101495638          | Unknown function   |

| SNPs IDs           | Chromosome IDs | Chromosomes | Physical positions (bp) | CDC Frontier genome (Reference genome) | (Pusa 1103 & HPNB) | (ILWC 46 & LPNB) | Sequence Components of genome | Gene accession IDs | Putative functions |
|--------------------|----------------|-------------|-------------------------|----------------------------------------|--------------------|------------------|-------------------------------|--------------------|--------------------|
| SNP_87410_A_78016  | NW_004516316.1 | scaffold984 | 78016                   | GG                                     | TT                 | TT               | INTRON                        | 101495638          | Unknown function   |
| SNP_87411_A_78163  | NW_004516316.1 | scaffold984 | 78163                   | AA                                     | TT                 | TT               | INTRON                        | 101495638          | Unknown function   |
| SNP_87412_A_78164  | NW_004516316.1 | scaffold984 | 78164                   | TT                                     | GG                 | GG               | INTRON                        | 101495638          | Unknown function   |
| SNP_87413_A_78174  | NW_004516316.1 | scaffold984 | 78174                   | CC                                     | AA                 | AA               | INTRON                        | 101495638          | Unknown function   |
| SNP_87414_A_78179  | NW_004516316.1 | scaffold984 | 78179                   | TT                                     | CC                 | CC               | INTRON                        | 101495638          | Unknown function   |
| SNP_87415_A_87754  | NW_004516316.1 | scaffold984 | 87754                   | TT                                     | AA                 | AA               | INTRON                        | 101495638          | Unknown function   |
| SNP_87416_A_88095  | NW_004516316.1 | scaffold984 | 88095                   | TT                                     | CC                 | CC               | INTRON                        | 101495638          | Unknown function   |
| SNP_87417_A_92176  | NW_004516316.1 | scaffold984 | 92176                   | TT                                     | CC                 | CC               | INTRON                        | 101495638          | Unknown function   |
| SNP_87418_A_92328  | NW_004516316.1 | scaffold984 | 92328                   | CC                                     | TT                 | TT               | INTRON                        | 101495638          | Unknown function   |
| SNP_87419_A_94216  | NW_004516316.1 | scaffold984 | 94216                   | GG                                     | AA                 | AA               | INTRON                        | 101495638          | Unknown function   |
| SNP_87420_A_94446  | NW_004516316.1 | scaffold984 | 94446                   | CC                                     | AA                 | AA               | INTRON                        | 101495638          | Unknown function   |
| SNP_87421_A_94456  | NW_004516316.1 | scaffold984 | 94456                   | CC                                     | TT                 | TT               | INTRON                        | 101495638          | Unknown function   |
| SNP_87422_A_94506  | NW_004516316.1 | scaffold984 | 94506                   | CC                                     | GG                 | GG               | INTRON                        | 101495638          | Unknown function   |
| SNP_87423_A_98942  | NW_004516316.1 | scaffold984 | 98942                   | AA                                     | CC                 | CC               | INTRON                        | 101495638          | Unknown function   |
| SNP_87424_A_105049 | NW_004516316.1 | scaffold984 | 105049                  | CC                                     | TT                 | TT               | INTRON                        | 101495638          | Unknown function   |
| SNP_87425_A_116581 | NW_004516316.1 | scaffold984 | 116581                  | CC                                     | TT                 | TT               | INTRON                        | 101495638          | Unknown function   |
| SNP_87426_A_118548 | NW_004516316.1 | scaffold984 | 118548                  | GG                                     | AA                 | AA               | INTRON                        | 101495638          | Unknown function   |
| SNP_87427_A_128354 | NW_004516316.1 | scaffold984 | 128354                  | TT                                     | GG                 | GG               | INTRON                        | 101495638          | Unknown function   |
| SNP_87428_A_129668 | NW_004516316.1 | scaffold984 | 129668                  | CC                                     | TT                 | TT               | INTRON                        | 101495638          | Unknown function   |
| SNP_87429_A_130886 | NW_004516316.1 | scaffold984 | 130886                  | AA                                     | TT                 | TT               | INTRON                        | 101495638          | Unknown function   |
| SNP_87430_A_132634 | NW_004516316.1 | scaffold984 | 132634                  | TT                                     | CC                 | CC               | INTRON                        | 101495638          | Unknown function   |
| SNP_87431_A_132637 | NW_004516316.1 | scaffold984 | 132637                  | AA                                     | GG                 | GG               | INTRON                        | 101495638          | Unknown function   |



| SNPs IDs           | Chromosome IDs | Chromosomes | Physical positions (bp) | CDC Frontier (Reference genome) | (Pusa 1103 & HPNB) | (ILWC 46 & LPNB) | Sequence Components of genome | Gene accession IDs | Putative functions |
|--------------------|----------------|-------------|-------------------------|---------------------------------|--------------------|------------------|-------------------------------|--------------------|--------------------|
| SNP_87433_A_157531 | NW_004516316.1 | scaffold984 | 157531                  | CC                              | TT                 | TT               | SYNONYMOUS_CODING             | 101495638          | Unknown function   |
| SNP_87434_A_158610 | NW_004516316.1 | scaffold984 | 158610                  | GG                              | AA                 | AA               | URR                           | 101495638          | Unknown function   |
| SNP_87435_A_160527 | NW_004516316.1 | scaffold984 | 160527                  | AA                              | TT                 | TT               | INTERGENIC                    |                    |                    |
| SNP_87436_A_160528 | NW_004516316.1 | scaffold984 | 160528                  | TT                              | GG                 | GG               | INTERGENIC                    |                    |                    |
| SNP_87437_A_160560 | NW_004516316.1 | scaffold984 | 160560                  | CC                              | TT                 | TT               | INTERGENIC                    |                    |                    |
| SNP_87438_A_2644   | NW_004516317.1 | scaffold986 | 2644                    | CC                              | AA                 | AA               | INTERGENIC                    |                    |                    |
| SNP_87439_A_2913   | NW_004516317.1 | scaffold986 | 2913                    | AA                              | GG                 | GG               | INTERGENIC                    |                    |                    |
| SNP_87440_A_8140   | NW_004516317.1 | scaffold986 | 8140                    | GG                              | AA                 | AA               | INTERGENIC                    |                    |                    |
| SNP_87441_A_16851  | NW_004516317.1 | scaffold986 | 16851                   | TT                              | AA                 | AA               | INTERGENIC                    |                    |                    |
| SNP_87442_A_16875  | NW_004516317.1 | scaffold986 | 16875                   | CC                              | TT                 | TT               | INTERGENIC                    |                    |                    |
| SNP_87443_A_16878  | NW_004516317.1 | scaffold986 | 16878                   | GG                              | AA                 | AA               | INTERGENIC                    |                    |                    |
| SNP_87444_A_16879  | NW_004516317.1 | scaffold986 | 16879                   | TT                              | AA                 | AA               | INTERGENIC                    |                    |                    |
| SNP_87445_A_16899  | NW_004516317.1 | scaffold986 | 16899                   | AA                              | GG                 | GG               | INTERGENIC                    |                    |                    |
| SNP_87446_A_16932  | NW_004516317.1 | scaffold986 | 16932                   | GG                              | AA                 | AA               | INTERGENIC                    |                    |                    |
| SNP_87447_A_16979  | NW_004516317.1 | scaffold986 | 16979                   | TT                              | CC                 | CC               | INTERGENIC                    |                    |                    |
| SNP_87448_A_16984  | NW_004516317.1 | scaffold986 | 16984                   | CC                              | AA                 | AA               | INTERGENIC                    |                    |                    |
| SNP_87449_A_17016  | NW_004516317.1 | scaffold986 | 17016                   | TT                              | CC                 | CC               | INTERGENIC                    |                    |                    |
| SNP_87450_A_17033  | NW_004516317.1 | scaffold986 | 17033                   | CC                              | TT                 | TT               | INTERGENIC                    |                    |                    |
| SNP_87451_A_17147  | NW_004516317.1 | scaffold986 | 17147                   | TT                              | CC                 | CC               | INTERGENIC                    |                    |                    |
| SNP_87452_A_17148  | NW_004516317.1 | scaffold986 | 17148                   | GG                              | AA                 | AA               | INTERGENIC                    |                    |                    |
| SNP_87453_A_17204  | NW_004516317.1 | scaffold986 | 17204                   | AA                              | CC                 | CC               | INTERGENIC                    |                    |                    |
| SNP_87454_A_23039  | NW_004516317.1 | scaffold986 | 23039                   | TT                              | CC                 | CC               | INTERGENIC                    |                    |                    |

| SNPs IDs          | Chromosome IDs | Chromosomes | Physical positions (bp) | CDC Frontier (Reference genome) | (Pusa 1103 & HPNB) | (ILWC 46 & LPNB) | Sequence genome | Components of | Gene accession IDs | Putative functions |
|-------------------|----------------|-------------|-------------------------|---------------------------------|--------------------|------------------|-----------------|---------------|--------------------|--------------------|
| SNP_87455_A_23650 | NW_004516317.1 | scaffold986 | 23650                   | TT                              | GG                 | GG               | INTERGENIC      |               |                    |                    |
| SNP_87456_A_23662 | NW_004516317.1 | scaffold986 | 23662                   | CC                              | AA                 | AA               | INTERGENIC      |               |                    |                    |
| SNP_87457_A_23670 | NW_004516317.1 | scaffold986 | 23670                   | GG                              | AA                 | AA               | INTERGENIC      |               |                    |                    |
| SNP_87458_A_23698 | NW_004516317.1 | scaffold986 | 23698                   | AA                              | GG                 | GG               | INTERGENIC      |               |                    |                    |
| SNP_87459_A_26961 | NW_004516317.1 | scaffold986 | 26961                   | TT                              | GG                 | GG               | INTERGENIC      |               |                    |                    |
| SNP_87460_A_27999 | NW_004516317.1 | scaffold986 | 27999                   | AA                              | CC                 | CC               | INTERGENIC      |               |                    |                    |
| SNP_87461_A_32724 | NW_004516317.1 | scaffold986 | 32724                   | CC                              | TT                 | TT               | INTERGENIC      |               |                    |                    |
| SNP_87463_A_32731 | NW_004516317.1 | scaffold986 | 32731                   | AA                              | GG                 | GG               | INTERGENIC      |               |                    |                    |
| SNP_87464_A_39080 | NW_004516317.1 | scaffold986 | 39080                   | CC                              | AA                 | AA               | INTERGENIC      |               |                    |                    |
| SNP_87465_A_39123 | NW_004516317.1 | scaffold986 | 39123                   | GG                              | AA                 | AA               | INTERGENIC      |               |                    |                    |
| SNP_87466_A_39146 | NW_004516317.1 | scaffold986 | 39146                   | TT                              | CC                 | CC               | INTERGENIC      |               |                    |                    |
| SNP_87467_A_39387 | NW_004516317.1 | scaffold986 | 39387                   | GG                              | AA                 | AA               | INTERGENIC      |               |                    |                    |
| SNP_87468_A_39427 | NW_004516317.1 | scaffold986 | 39427                   | AA                              | GG                 | GG               | INTERGENIC      |               |                    |                    |
| SNP_87469_A_39725 | NW_004516317.1 | scaffold986 | 39725                   | TT                              | GG                 | GG               | INTERGENIC      |               |                    |                    |
| SNP_87471_A_9630  | NW_004516318.1 | scaffold991 | 9630                    | TT                              | CC                 | CC               | INTERGENIC      |               |                    |                    |
| SNP_87472_A_9646  | NW_004516318.1 | scaffold991 | 9646                    | TT                              | CC                 | CC               | INTERGENIC      |               |                    |                    |
| SNP_87473_A_12716 | NW_004516318.1 | scaffold991 | 12716                   | TT                              | GG                 | GG               | INTERGENIC      |               |                    |                    |
| SNP_87474_A_8072  | NW_004516319.1 | scaffold992 | 8072                    | AA                              | TT                 | TT               | INTERGENIC      |               |                    |                    |
| SNP_87475_A_8073  | NW_004516319.1 | scaffold992 | 8073                    | AA                              | TT                 | TT               | INTERGENIC      |               |                    |                    |
| SNP_87476_A_24683 | NW_004516319.1 | scaffold992 | 24683                   | TT                              | AA                 | AA               | INTERGENIC      |               |                    |                    |
| SNP_87477_A_26783 | NW_004516319.1 | scaffold992 | 26783                   | CC                              | AA                 | AA               | INTERGENIC      |               |                    |                    |
| SNP_87478_A_27197 | NW_004516319.1 | scaffold992 | 27197                   | AA                              | TT                 | TT               | INTERGENIC      |               |                    |                    |

| SNPs IDs          | Chromosome IDs | Chromosomes | Physical positions (bp) | CDC Frontier (Reference genome) | (Pusa 1103 & HPNB) | (ILWC 46 & LPNB) | Sequence genome | Components of | Gene accession IDs | Putative functions |
|-------------------|----------------|-------------|-------------------------|---------------------------------|--------------------|------------------|-----------------|---------------|--------------------|--------------------|
| SNP_87479_A_32767 | NW_004516319.1 | scaffold992 | 32767                   | CC                              | TT                 | TT               | INTERGENIC      |               |                    |                    |
| SNP_87480_A_33062 | NW_004516319.1 | scaffold992 | 33062                   | AA                              | GG                 | GG               | INTERGENIC      |               |                    |                    |
| SNP_87481_A_33126 | NW_004516319.1 | scaffold992 | 33126                   | TT                              | CC                 | CC               | INTERGENIC      |               |                    |                    |
| SNP_87482_A_33147 | NW_004516319.1 | scaffold992 | 33147                   | AA                              | GG                 | GG               | INTERGENIC      |               |                    |                    |
| SNP_87484_A_36760 | NW_004516319.1 | scaffold992 | 36760                   | GG                              | TT                 | TT               | INTERGENIC      |               |                    |                    |
| SNP_87486_A_37561 | NW_004516319.1 | scaffold992 | 37561                   | GG                              | TT                 | TT               | INTERGENIC      |               |                    |                    |
| SNP_87488_A_37851 | NW_004516319.1 | scaffold992 | 37851                   | CC                              | TT                 | TT               | INTERGENIC      |               |                    |                    |
| SNP_87489_A_37913 | NW_004516319.1 | scaffold992 | 37913                   | CC                              | AA                 | AA               | INTERGENIC      |               |                    |                    |
| SNP_87490_A_37915 | NW_004516319.1 | scaffold992 | 37915                   | AA                              | CC                 | CC               | INTERGENIC      |               |                    |                    |
| SNP_87491_A_39897 | NW_004516319.1 | scaffold992 | 39897                   | CC                              | AA                 | AA               | INTERGENIC      |               |                    |                    |
| SNP_87492_A_40064 | NW_004516319.1 | scaffold992 | 40064                   | CC                              | GG                 | GG               | INTERGENIC      |               |                    |                    |
| SNP_87493_A_40336 | NW_004516319.1 | scaffold992 | 40336                   | CC                              | GG                 | GG               | INTERGENIC      |               |                    |                    |
| SNP_87494_A_40379 | NW_004516319.1 | scaffold992 | 40379                   | AA                              | GG                 | GG               | INTERGENIC      |               |                    |                    |
| SNP_87495_A_40387 | NW_004516319.1 | scaffold992 | 40387                   | AA                              | CC                 | CC               | INTERGENIC      |               |                    |                    |
| SNP_87496_A_40401 | NW_004516319.1 | scaffold992 | 40401                   | AA                              | TT                 | TT               | INTERGENIC      |               |                    |                    |
| SNP_87497_A_40411 | NW_004516319.1 | scaffold992 | 40411                   | TT                              | GG                 | GG               | INTERGENIC      |               |                    |                    |
| SNP_87498_A_40434 | NW_004516319.1 | scaffold992 | 40434                   | GG                              | CC                 | CC               | INTERGENIC      |               |                    |                    |
| SNP_87499_A_40468 | NW_004516319.1 | scaffold992 | 40468                   | GG                              | TT                 | TT               | INTERGENIC      |               |                    |                    |
| SNP_87501_A_40566 | NW_004516319.1 | scaffold992 | 40566                   | CC                              | GG                 | GG               | INTERGENIC      |               |                    |                    |
| SNP_87502_A_40617 | NW_004516319.1 | scaffold992 | 40617                   | AA                              | GG                 | GG               | INTERGENIC      |               |                    |                    |
| SNP_87503_A_40695 | NW_004516319.1 | scaffold992 | 40695                   | AA                              | GG                 | GG               | INTERGENIC      |               |                    |                    |
| SNP_87504_A_40725 | NW_004516319.1 | scaffold992 | 40725                   | GG                              | AA                 | AA               | INTERGENIC      |               |                    |                    |

| SNPs IDs          | Chromosome IDs | Chromosomes | Physical positions (bp) | CDC Frontier (Reference genome) | (Pusa 1103 & HPNB) | (ILWC 46 & LPNB) | Sequence genome | Components of | Gene accession IDs | Putative functions |
|-------------------|----------------|-------------|-------------------------|---------------------------------|--------------------|------------------|-----------------|---------------|--------------------|--------------------|
| SNP_87505_A_40738 | NW_004516319.1 | scaffold992 | 40738                   | AA                              | TT                 | TT               | INTERGENIC      |               |                    |                    |
| SNP_87506_A_41411 | NW_004516319.1 | scaffold992 | 41411                   | GG                              | AA                 | AA               | INTERGENIC      |               |                    |                    |
| SNP_87507_A_41456 | NW_004516319.1 | scaffold992 | 41456                   | TT                              | AA                 | AA               | INTERGENIC      |               |                    |                    |
| SNP_87508_A_41745 | NW_004516319.1 | scaffold992 | 41745                   | GG                              | AA                 | AA               | INTERGENIC      |               |                    |                    |
| SNP_87509_A_41746 | NW_004516319.1 | scaffold992 | 41746                   | GG                              | TT                 | TT               | INTERGENIC      |               |                    |                    |
| SNP_87510_A_41816 | NW_004516319.1 | scaffold992 | 41816                   | TT                              | AA                 | AA               | INTERGENIC      |               |                    |                    |
| SNP_87511_A_41909 | NW_004516319.1 | scaffold992 | 41909                   | GG                              | AA                 | AA               | INTERGENIC      |               |                    |                    |
| SNP_87512_A_41924 | NW_004516319.1 | scaffold992 | 41924                   | TT                              | AA                 | AA               | INTERGENIC      |               |                    |                    |
| SNP_87514_A_42061 | NW_004516319.1 | scaffold992 | 42061                   | AA                              | GG                 | GG               | INTERGENIC      |               |                    |                    |
| SNP_87515_A_42074 | NW_004516319.1 | scaffold992 | 42074                   | AA                              | GG                 | GG               | INTERGENIC      |               |                    |                    |
| SNP_87517_A_42140 | NW_004516319.1 | scaffold992 | 42140                   | CC                              | TT                 | TT               | INTERGENIC      |               |                    |                    |
| SNP_87518_A_42240 | NW_004516319.1 | scaffold992 | 42240                   | CC                              | GG                 | GG               | INTERGENIC      |               |                    |                    |
| SNP_87520_A_42349 | NW_004516319.1 | scaffold992 | 42349                   | CC                              | TT                 | TT               | INTERGENIC      |               |                    |                    |
| SNP_87521_A_42353 | NW_004516319.1 | scaffold992 | 42353                   | CC                              | AA                 | AA               | INTERGENIC      |               |                    |                    |
| SNP_87522_A_42379 | NW_004516319.1 | scaffold992 | 42379                   | CC                              | AA                 | AA               | INTERGENIC      |               |                    |                    |
| SNP_87523_A_42406 | NW_004516319.1 | scaffold992 | 42406                   | TT                              | CC                 | CC               | INTERGENIC      |               |                    |                    |
| SNP_87524_A_42505 | NW_004516319.1 | scaffold992 | 42505                   | GG                              | AA                 | AA               | INTERGENIC      |               |                    |                    |
| SNP_87525_A_42543 | NW_004516319.1 | scaffold992 | 42543                   | AA                              | TT                 | TT               | INTERGENIC      |               |                    |                    |
| SNP_87526_A_42549 | NW_004516319.1 | scaffold992 | 42549                   | TT                              | GG                 | GG               | INTERGENIC      |               |                    |                    |
| SNP_87527_A_44867 | NW_004516319.1 | scaffold992 | 44867                   | GG                              | CC                 | CC               | INTERGENIC      |               |                    |                    |
| SNP_87528_A_44946 | NW_004516319.1 | scaffold992 | 44946                   | GG                              | AA                 | AA               | INTERGENIC      |               |                    |                    |
| SNP_87530_A_47917 | NW_004516319.1 | scaffold992 | 47917                   | GG                              | CC                 | CC               | INTERGENIC      |               |                    |                    |

| SNPs IDs           | Chromosome IDs | Chromosomes | Physical positions (bp) | CDC Frontier genome (Reference genome) | (Pusa 1103 & HPNB) | (ILWC 46 & LPNB) | Sequence Components of genome | Gene accession IDs | Putative functions                   |
|--------------------|----------------|-------------|-------------------------|----------------------------------------|--------------------|------------------|-------------------------------|--------------------|--------------------------------------|
| SNP_87531_A_48486  | NW_004516319.1 | scaffold992 | 48486                   | CC                                     | TT                 | TT               | INTERGENIC                    |                    |                                      |
| SNP_87532_A_48531  | NW_004516319.1 | scaffold992 | 48531                   | GG                                     | AA                 | AA               | INTERGENIC                    |                    |                                      |
| SNP_87533_A_49467  | NW_004516319.1 | scaffold992 | 49467                   | AA                                     | CC                 | CC               | INTERGENIC                    |                    |                                      |
| SNP_87534_A_49520  | NW_004516319.1 | scaffold992 | 49520                   | CC                                     | AA                 | AA               | INTERGENIC                    |                    |                                      |
| SNP_87535_A_49525  | NW_004516319.1 | scaffold992 | 49525                   | TT                                     | CC                 | CC               | INTERGENIC                    |                    |                                      |
| SNP_87536_A_49601  | NW_004516319.1 | scaffold992 | 49601                   | GG                                     | TT                 | TT               | INTERGENIC                    |                    |                                      |
| SNP_87537_A_730    | NW_004516320.1 | scaffold993 | 730                     | AA                                     | GG                 | GG               | INTERGENIC                    |                    |                                      |
| SNP_87538_A_1500   | NW_004516320.1 | scaffold993 | 1500                    | AA                                     | CC                 | CC               | INTERGENIC                    |                    |                                      |
| SNP_87539_A_1567   | NW_004516320.1 | scaffold993 | 1567                    | AA                                     | CC                 | CC               | INTERGENIC                    |                    |                                      |
| SNP_87542_A_87538  | NW_004516321.1 | scaffold996 | 87538                   | CC                                     | TT                 | TT               | URR                           | 101496633          | uncharacterized LOC101496633         |
| SNP_87544_A_87701  | NW_004516321.1 | scaffold996 | 87701                   | AA                                     | GG                 | GG               | URR                           | 101496633          | uncharacterized LOC101496633         |
| SNP_87545_A_87890  | NW_004516321.1 | scaffold996 | 87890                   | AA                                     | CC                 | CC               | URR                           | 101496633          | uncharacterized LOC101496633         |
| SNP_87546_A_88226  | NW_004516321.1 | scaffold996 | 88226                   | GG                                     | AA                 | AA               | URR                           | 101496633          | uncharacterized LOC101496633         |
| SNP_87547_A_88425  | NW_004516321.1 | scaffold996 | 88425                   | CC                                     | GG                 | GG               | URR                           | 101496633          | uncharacterized LOC101496633         |
| SNP_87548_A_88738  | NW_004516321.1 | scaffold996 | 88738                   | AA                                     | TT                 | TT               | URR                           | 101496633          | uncharacterized LOC101496633         |
| SNP_87549_A_89585  | NW_004516321.1 | scaffold996 | 89585                   | CC                                     | TT                 | TT               | INTERGENIC                    |                    |                                      |
| SNP_87550_A_89672  | NW_004516321.1 | scaffold996 | 89672                   | GG                                     | AA                 | AA               | DRR                           | 101410553          | transfer RNA leucine (anticodon UAG) |
| SNP_87552_A_142973 | NW_004516321.1 | scaffold996 | 142973                  | GG                                     | CC                 | CC               | URR                           | 101498589          | Unknown function                     |
| SNP_87554_A_178799 | NW_004516321.1 | scaffold996 | 178799                  | GG                                     | AA                 | AA               | INTERGENIC                    |                    |                                      |
| SNP_87555_A_179765 | NW_004516321.1 | scaffold996 | 179765                  | GG                                     | AA                 | AA               | INTERGENIC                    |                    |                                      |
| SNP_87556_A_180351 | NW_004516321.1 | scaffold996 | 180351                  | GG                                     | TT                 | TT               | INTERGENIC                    |                    |                                      |
| SNP_87557_A_180420 | NW_004516321.1 | scaffold996 | 180420                  | TT                                     | CC                 | CC               | INTERGENIC                    |                    |                                      |

| SNPs IDs           | Chromosome IDs | Chromosomes | Physical positions (bp) | CDC Frontier (Reference genome) | (Pusa 1103 & HPNB) | (ILWC 46 & LPNB) | Sequence genome | Components of | Gene accession IDs | Putative functions |
|--------------------|----------------|-------------|-------------------------|---------------------------------|--------------------|------------------|-----------------|---------------|--------------------|--------------------|
| SNP_87558_A_180426 | NW_004516321.1 | scaffold996 | 180426                  | CC                              | TT                 | TT               | INTERGENIC      |               |                    |                    |
| SNP_87559_A_192448 | NW_004516321.1 | scaffold996 | 192448                  | TT                              | GG                 | GG               | INTERGENIC      |               |                    |                    |
| SNP_87560_A_192462 | NW_004516321.1 | scaffold996 | 192462                  | AA                              | GG                 | GG               | INTERGENIC      |               |                    |                    |
| SNP_87561_A_192770 | NW_004516321.1 | scaffold996 | 192770                  | GG                              | TT                 | TT               | INTERGENIC      |               |                    |                    |
| SNP_87562_A_192778 | NW_004516321.1 | scaffold996 | 192778                  | TT                              | AA                 | AA               | INTERGENIC      |               |                    |                    |
| SNP_87563_A_192779 | NW_004516321.1 | scaffold996 | 192779                  | CC                              | TT                 | TT               | INTERGENIC      |               |                    |                    |
| SNP_87564_A_192789 | NW_004516321.1 | scaffold996 | 192789                  | GG                              | AA                 | AA               | INTERGENIC      |               |                    |                    |
| SNP_87565_A_192833 | NW_004516321.1 | scaffold996 | 192833                  | AA                              | GG                 | GG               | INTERGENIC      |               |                    |                    |
| SNP_87566_A_192835 | NW_004516321.1 | scaffold996 | 192835                  | AA                              | GG                 | GG               | INTERGENIC      |               |                    |                    |
| SNP_87567_A_193181 | NW_004516321.1 | scaffold996 | 193181                  | TT                              | GG                 | GG               | INTERGENIC      |               |                    |                    |
| SNP_87568_A_199473 | NW_004516321.1 | scaffold996 | 199473                  | CC                              | AA                 | AA               | INTERGENIC      |               |                    |                    |
| SNP_87569_A_199493 | NW_004516321.1 | scaffold996 | 199493                  | AA                              | TT                 | TT               | INTERGENIC      |               |                    |                    |
| SNP_87570_A_200969 | NW_004516321.1 | scaffold996 | 200969                  | TT                              | GG                 | GG               | INTERGENIC      |               |                    |                    |
| SNP_87571_A_201045 | NW_004516321.1 | scaffold996 | 201045                  | GG                              | AA                 | AA               | INTERGENIC      |               |                    |                    |
| SNP_87572_A_202118 | NW_004516321.1 | scaffold996 | 202118                  | TT                              | GG                 | GG               | INTERGENIC      |               |                    |                    |
| SNP_87573_A_202604 | NW_004516321.1 | scaffold996 | 202604                  | GG                              | TT                 | TT               | INTERGENIC      |               |                    |                    |
| SNP_87575_A_2907   | NW_004516322.1 | scaffold997 | 2907                    | GG                              | TT                 | TT               | INTERGENIC      |               |                    |                    |
| SNP_87576_A_2979   | NW_004516322.1 | scaffold997 | 2979                    | AA                              | GG                 | GG               | INTERGENIC      |               |                    |                    |
| SNP_87577_A_3015   | NW_004516322.1 | scaffold997 | 3015                    | GG                              | AA                 | AA               | INTERGENIC      |               |                    |                    |
| SNP_87578_A_3018   | NW_004516322.1 | scaffold997 | 3018                    | GG                              | AA                 | AA               | INTERGENIC      |               |                    |                    |
| SNP_87579_A_3025   | NW_004516322.1 | scaffold997 | 3025                    | AA                              | GG                 | GG               | INTERGENIC      |               |                    |                    |
| SNP_87580_A_3030   | NW_004516322.1 | scaffold997 | 3030                    | GG                              | AA                 | AA               | INTERGENIC      |               |                    |                    |

| SNPs IDs          | Chromosome IDs | Chromosomes | Physical positions (bp) | CDC Frontier (Reference genome) | (Pusa 1103 & HPNB) | (ILWC 46 & LPNB) | Sequence genome | Components of | Gene accession IDs | Putative functions |
|-------------------|----------------|-------------|-------------------------|---------------------------------|--------------------|------------------|-----------------|---------------|--------------------|--------------------|
| SNP_87582_A_3110  | NW_004516322.1 | scaffold997 | 3110                    | TT                              | CC                 | CC               | INTERGENIC      |               |                    |                    |
| SNP_87583_A_3137  | NW_004516322.1 | scaffold997 | 3137                    | GG                              | TT                 | TT               | INTERGENIC      |               |                    |                    |
| SNP_87584_A_3145  | NW_004516322.1 | scaffold997 | 3145                    | TT                              | CC                 | CC               | INTERGENIC      |               |                    |                    |
| SNP_87585_A_3212  | NW_004516322.1 | scaffold997 | 3212                    | AA                              | GG                 | GG               | INTERGENIC      |               |                    |                    |
| SNP_87586_A_3266  | NW_004516322.1 | scaffold997 | 3266                    | CC                              | AA                 | AA               | INTERGENIC      |               |                    |                    |
| SNP_87587_A_12185 | NW_004516322.1 | scaffold997 | 12185                   | AA                              | TT                 | TT               | INTERGENIC      |               |                    |                    |
| SNP_87588_A_12208 | NW_004516322.1 | scaffold997 | 12208                   | TT                              | AA                 | AA               | INTERGENIC      |               |                    |                    |
| SNP_87589_A_12239 | NW_004516322.1 | scaffold997 | 12239                   | AA                              | GG                 | GG               | INTERGENIC      |               |                    |                    |
| SNP_87590_A_12247 | NW_004516322.1 | scaffold997 | 12247                   | CC                              | TT                 | TT               | INTERGENIC      |               |                    |                    |
| SNP_87591_A_12642 | NW_004516322.1 | scaffold997 | 12642                   | AA                              | GG                 | GG               | INTERGENIC      |               |                    |                    |
| SNP_87592_A_12671 | NW_004516322.1 | scaffold997 | 12671                   | TT                              | AA                 | AA               | INTERGENIC      |               |                    |                    |
| SNP_87594_A_12785 | NW_004516322.1 | scaffold997 | 12785                   | AA                              | CC                 | CC               | INTERGENIC      |               |                    |                    |
| SNP_87595_A_13494 | NW_004516322.1 | scaffold997 | 13494                   | AA                              | GG                 | GG               | INTERGENIC      |               |                    |                    |
| SNP_87596_A_13913 | NW_004516322.1 | scaffold997 | 13913                   | AA                              | GG                 | GG               | INTERGENIC      |               |                    |                    |
| SNP_87597_A_20205 | NW_004516322.1 | scaffold997 | 20205                   | GG                              | TT                 | TT               | INTERGENIC      |               |                    |                    |
| SNP_87598_A_20676 | NW_004516322.1 | scaffold997 | 20676                   | TT                              | CC                 | CC               | INTERGENIC      |               |                    |                    |
| SNP_87599_A_5576  | NW_004516324.1 | scaffold999 | 5576                    | GG                              | TT                 | TT               | INTERGENIC      |               |                    |                    |
| SNP_87600_A_5577  | NW_004516324.1 | scaffold999 | 5577                    | AA                              | GG                 | GG               | INTERGENIC      |               |                    |                    |
| SNP_87601_A_69680 | NW_004516324.1 | scaffold999 | 69680                   | GG                              | AA                 | AA               | INTERGENIC      |               |                    |                    |
| SNP_87602_A_69745 | NW_004516324.1 | scaffold999 | 69745                   | TT                              | AA                 | AA               | INTERGENIC      |               |                    |                    |
| SNP_87603_A_69825 | NW_004516324.1 | scaffold999 | 69825                   | TT                              | CC                 | CC               | INTERGENIC      |               |                    |                    |
| SNP_87604_A_69840 | NW_004516324.1 | scaffold999 | 69840                   | AA                              | GG                 | GG               | INTERGENIC      |               |                    |                    |

| SNPs IDs           | Chromosome IDs | Chromosomes | Physical positions (bp) | CDC Frontier (Reference genome) | (Pusa 1103 & HPNB) | (ILWC 46 & LPNB) | Sequence genome | Components of | Gene accession IDs | Putative functions |
|--------------------|----------------|-------------|-------------------------|---------------------------------|--------------------|------------------|-----------------|---------------|--------------------|--------------------|
| SNP_87605_A_69857  | NW_004516324.1 | scaffold999 | 69857                   | TT                              | CC                 | CC               | INTERGENIC      |               |                    |                    |
| SNP_87606_A_69858  | NW_004516324.1 | scaffold999 | 69858                   | TT                              | CC                 | CC               | INTERGENIC      |               |                    |                    |
| SNP_87607_A_69905  | NW_004516324.1 | scaffold999 | 69905                   | GG                              | CC                 | CC               | INTERGENIC      |               |                    |                    |
| SNP_87608_A_69991  | NW_004516324.1 | scaffold999 | 69991                   | TT                              | AA                 | AA               | INTERGENIC      |               |                    |                    |
| SNP_87609_A_69996  | NW_004516324.1 | scaffold999 | 69996                   | GG                              | AA                 | AA               | INTERGENIC      |               |                    |                    |
| SNP_87610_A_70197  | NW_004516324.1 | scaffold999 | 70197                   | TT                              | GG                 | GG               | INTERGENIC      |               |                    |                    |
| SNP_87611_A_70398  | NW_004516324.1 | scaffold999 | 70398                   | AA                              | GG                 | GG               | INTERGENIC      |               |                    |                    |
| SNP_87612_A_74697  | NW_004516324.1 | scaffold999 | 74697                   | AA                              | GG                 | GG               | INTERGENIC      |               |                    |                    |
| SNP_87613_A_74763  | NW_004516324.1 | scaffold999 | 74763                   | AA                              | CC                 | CC               | INTERGENIC      |               |                    |                    |
| SNP_87615_A_82948  | NW_004516324.1 | scaffold999 | 82948                   | AA                              | GG                 | GG               | URR             | 101500422     | Unknown function   |                    |
| SNP_87616_A_98332  | NW_004516324.1 | scaffold999 | 98332                   | CC                              | AA                 | AA               | INTERGENIC      |               |                    |                    |
| SNP_87617_A_115645 | NW_004516324.1 | scaffold999 | 115645                  | CC                              | AA                 | AA               | INTERGENIC      |               |                    |                    |
| SNP_87619_A_130282 | NW_004516324.1 | scaffold999 | 130282                  | AA                              | GG                 | GG               | INTERGENIC      |               |                    |                    |
| SNP_87620_A_130314 | NW_004516324.1 | scaffold999 | 130314                  | AA                              | TT                 | TT               | INTERGENIC      |               |                    |                    |
| SNP_87621_A_130323 | NW_004516324.1 | scaffold999 | 130323                  | AA                              | CC                 | CC               | INTERGENIC      |               |                    |                    |
| SNP_87622_A_130329 | NW_004516324.1 | scaffold999 | 130329                  | GG                              | AA                 | AA               | INTERGENIC      |               |                    |                    |
| SNP_87624_A_130412 | NW_004516324.1 | scaffold999 | 130412                  | CC                              | TT                 | TT               | INTERGENIC      |               |                    |                    |
| SNP_87625_A_130564 | NW_004516324.1 | scaffold999 | 130564                  | GG                              | AA                 | AA               | INTERGENIC      |               |                    |                    |
| SNP_87627_A_130633 | NW_004516324.1 | scaffold999 | 130633                  | CC                              | TT                 | TT               | INTERGENIC      |               |                    |                    |
| SNP_87628_A_132934 | NW_004516324.1 | scaffold999 | 132934                  | CC                              | TT                 | TT               | INTERGENIC      |               |                    |                    |
| SNP_87629_A_134390 | NW_004516324.1 | scaffold999 | 134390                  | TT                              | CC                 | CC               | INTERGENIC      |               |                    |                    |
| SNP_87630_A_148285 | NW_004516324.1 | scaffold999 | 148285                  | AA                              | CC                 | CC               | INTERGENIC      |               |                    |                    |



| SNPs IDs           | Chromosome IDs | Chromosomes  | Physical positions (bp) | CDC Frontier genome (Reference genome) | (Pusa 1103 & HPNB) | (ILWC 46 & LPNB) | Sequence Components of genome | Gene accession IDs | Putative functions                    |
|--------------------|----------------|--------------|-------------------------|----------------------------------------|--------------------|------------------|-------------------------------|--------------------|---------------------------------------|
| SNP_87631_A_149238 | NW_004516324.1 | scaffold999  | 149238                  | CC                                     | TT                 | TT               | INTERGENIC                    |                    |                                       |
| SNP_87632_A_151734 | NW_004516324.1 | scaffold999  | 151734                  | GG                                     | AA                 | AA               | INTERGENIC                    |                    |                                       |
| SNP_87633_A_153530 | NW_004516324.1 | scaffold999  | 153530                  | TT                                     | CC                 | CC               | INTERGENIC                    |                    |                                       |
| SNP_87634_A_156047 | NW_004516324.1 | scaffold999  | 156047                  | TT                                     | CC                 | CC               | INTERGENIC                    |                    |                                       |
| SNP_87635_A_156076 | NW_004516324.1 | scaffold999  | 156076                  | AA                                     | GG                 | GG               | INTERGENIC                    |                    |                                       |
| SNP_87636_A_9664   | NW_004516326.1 | scaffold1003 | 9664                    | TT                                     | CC                 | CC               | DRR                           | 101501042          | deacetoxyvindoline 4-hydroxylase-like |
| SNP_87637_A_12870  | NW_004516326.1 | scaffold1003 | 12870                   | AA                                     | GG                 | GG               | URR                           | 101501042          | deacetoxyvindoline 4-hydroxylase-like |
| SNP_87638_A_12981  | NW_004516326.1 | scaffold1003 | 12981                   | GG                                     | CC                 | CC               | URR                           | 101501042          | deacetoxyvindoline 4-hydroxylase-like |
| SNP_87639_A_13049  | NW_004516326.1 | scaffold1003 | 13049                   | TT                                     | CC                 | CC               | URR                           | 101501042          | deacetoxyvindoline 4-hydroxylase-like |
| SNP_87640_A_13196  | NW_004516326.1 | scaffold1003 | 13196                   | AA                                     | GG                 | GG               | URR                           | 101501042          | deacetoxyvindoline 4-hydroxylase-like |
| SNP_87641_A_13541  | NW_004516326.1 | scaffold1003 | 13541                   | AA                                     | GG                 | GG               | URR                           | 101501042          | deacetoxyvindoline 4-hydroxylase-like |
| SNP_87642_A_13565  | NW_004516326.1 | scaffold1003 | 13565                   | CC                                     | TT                 | TT               | URR                           | 101501042          | deacetoxyvindoline 4-hydroxylase-like |
| SNP_87644_A_13662  | NW_004516326.1 | scaffold1003 | 13662                   | AA                                     | CC                 | CC               | URR                           | 101501042          | deacetoxyvindoline 4-hydroxylase-like |
| SNP_87645_A_13668  | NW_004516326.1 | scaffold1003 | 13668                   | TT                                     | AA                 | AA               | URR                           | 101501042          | deacetoxyvindoline 4-hydroxylase-like |
| SNP_87646_A_13886  | NW_004516326.1 | scaffold1003 | 13886                   | AA                                     | GG                 | GG               | URR                           | 101501042          | deacetoxyvindoline 4-hydroxylase-like |
| SNP_87647_A_13894  | NW_004516326.1 | scaffold1003 | 13894                   | GG                                     | CC                 | CC               | URR                           | 101501042          | deacetoxyvindoline 4-hydroxylase-like |
| SNP_87648_A_14066  | NW_004516326.1 | scaffold1003 | 14066                   | CC                                     | AA                 | AA               | URR                           | 101501042          | deacetoxyvindoline 4-hydroxylase-like |
| SNP_87649_A_14134  | NW_004516326.1 | scaffold1003 | 14134                   | CC                                     | GG                 | GG               | URR                           | 101501042          | deacetoxyvindoline 4-hydroxylase-like |
| SNP_87650_A_14146  | NW_004516326.1 | scaffold1003 | 14146                   | CC                                     | AA                 | AA               | URR                           | 101501042          | deacetoxyvindoline 4-hydroxylase-like |
| SNP_87651_A_14223  | NW_004516326.1 | scaffold1003 | 14223                   | TT                                     | CC                 | CC               | INTERGENIC                    |                    |                                       |
| SNP_87652_A_14559  | NW_004516326.1 | scaffold1003 | 14559                   | CC                                     | AA                 | AA               | INTERGENIC                    |                    |                                       |
| SNP_87653_A_14981  | NW_004516326.1 | scaffold1003 | 14981                   | GG                                     | AA                 | AA               | INTERGENIC                    |                    |                                       |

| SNPs IDs           | Chromosome IDs | Chromosomes  | Physical positions (bp) | CDC Frontier (Reference genome) | (Pusa 1103 & HPNB) | (ILWC 46 & LPNB) | Sequence Components of genome | Gene accession IDs | Putative functions |
|--------------------|----------------|--------------|-------------------------|---------------------------------|--------------------|------------------|-------------------------------|--------------------|--------------------|
| SNP_87654_A_15771  | NW_004516326.1 | scaffold1003 | 15771                   | TT                              | AA                 | AA               | INTERGENIC                    |                    |                    |
| SNP_87655_A_41321  | NW_004516326.1 | scaffold1003 | 41321                   | AA                              | GG                 | GG               | INTERGENIC                    |                    |                    |
| SNP_87658_A_41558  | NW_004516326.1 | scaffold1003 | 41558                   | TT                              | CC                 | CC               | INTERGENIC                    |                    |                    |
| SNP_87659_A_41614  | NW_004516326.1 | scaffold1003 | 41614                   | GG                              | AA                 | AA               | INTERGENIC                    |                    |                    |
| SNP_87660_A_40363  | NW_004516329.1 | scaffold1006 | 40363                   | GG                              | AA                 | AA               | NON_SYNONYMOUS_CODING         | 101501678          | Unknown function   |
| SNP_87661_A_40388  | NW_004516329.1 | scaffold1006 | 40388                   | TT                              | AA                 | AA               | NON_SYNONYMOUS_CODING         | 101501678          | Unknown function   |
| SNP_87662_A_44621  | NW_004516329.1 | scaffold1006 | 44621                   | AA                              | GG                 | GG               | URR                           | 101501678          | Unknown function   |
| SNP_87663_A_62388  | NW_004516329.1 | scaffold1006 | 62388                   | TT                              | AA                 | AA               | INTERGENIC                    |                    |                    |
| SNP_87664_A_62436  | NW_004516329.1 | scaffold1006 | 62436                   | AA                              | GG                 | GG               | INTERGENIC                    |                    |                    |
| SNP_87665_A_65884  | NW_004516329.1 | scaffold1006 | 65884                   | GG                              | AA                 | AA               | INTERGENIC                    |                    |                    |
| SNP_87666_A_92868  | NW_004516329.1 | scaffold1006 | 92868                   | GG                              | CC                 | CC               | INTERGENIC                    |                    |                    |
| SNP_87667_A_92869  | NW_004516329.1 | scaffold1006 | 92869                   | TT                              | GG                 | GG               | INTERGENIC                    |                    |                    |
| SNP_87668_A_109438 | NW_004516329.1 | scaffold1006 | 109438                  | TT                              | AA                 | AA               | INTERGENIC                    |                    |                    |
| SNP_87669_A_109441 | NW_004516329.1 | scaffold1006 | 109441                  | CC                              | AA                 | AA               | INTERGENIC                    |                    |                    |
| SNP_87671_A_109503 | NW_004516329.1 | scaffold1006 | 109503                  | GG                              | AA                 | AA               | INTERGENIC                    |                    |                    |
| SNP_87672_A_109658 | NW_004516329.1 | scaffold1006 | 109658                  | TT                              | CC                 | CC               | INTERGENIC                    |                    |                    |
| SNP_87673_A_109708 | NW_004516329.1 | scaffold1006 | 109708                  | CC                              | TT                 | TT               | INTERGENIC                    |                    |                    |
| SNP_87674_A_109793 | NW_004516329.1 | scaffold1006 | 109793                  | CC                              | TT                 | TT               | INTERGENIC                    |                    |                    |
| SNP_87675_A_109794 | NW_004516329.1 | scaffold1006 | 109794                  | AA                              | TT                 | TT               | INTERGENIC                    |                    |                    |
| SNP_87676_A_109836 | NW_004516329.1 | scaffold1006 | 109836                  | GG                              | AA                 | AA               | INTERGENIC                    |                    |                    |
| SNP_87677_A_109878 | NW_004516329.1 | scaffold1006 | 109878                  | TT                              | GG                 | GG               | INTERGENIC                    |                    |                    |
| SNP_87678_A_109912 | NW_004516329.1 | scaffold1006 | 109912                  | CC                              | TT                 | TT               | INTERGENIC                    |                    |                    |

| SNPs IDs           | Chromosome IDs | Chromosomes  | Physical positions (bp) | CDC Frontier (Reference genome) | (Pusa 1103 & HPNB) | (ILWC 46 & LPNB) | Sequence Components of genome | Gene accession IDs | Putative functions            |
|--------------------|----------------|--------------|-------------------------|---------------------------------|--------------------|------------------|-------------------------------|--------------------|-------------------------------|
| SNP_87679_A_126249 | NW_004516329.1 | scaffold1006 | 126249                  | TT                              | CC                 | CC               | INTRON                        | 101492184          | TMV resistance protein N-like |
| SNP_87680_A_126255 | NW_004516329.1 | scaffold1006 | 126255                  | CC                              | AA                 | AA               | INTRON                        | 101492184          | TMV resistance protein N-like |
| SNP_87681_A_126274 | NW_004516329.1 | scaffold1006 | 126274                  | TT                              | AA                 | AA               | INTRON                        | 101492184          | TMV resistance protein N-like |
| SNP_87682_A_126420 | NW_004516329.1 | scaffold1006 | 126420                  | CC                              | TT                 | TT               | INTRON                        | 101492184          | TMV resistance protein N-like |
| SNP_87683_A_126545 | NW_004516329.1 | scaffold1006 | 126545                  | TT                              | CC                 | CC               | INTRON                        | 101492184          | TMV resistance protein N-like |
| SNP_87684_A_126547 | NW_004516329.1 | scaffold1006 | 126547                  | GG                              | CC                 | CC               | INTRON                        | 101492184          | TMV resistance protein N-like |
| SNP_87685_A_126641 | NW_004516329.1 | scaffold1006 | 126641                  | TT                              | CC                 | CC               | INTRON                        | 101492184          | TMV resistance protein N-like |
| SNP_87686_A_126840 | NW_004516329.1 | scaffold1006 | 126840                  | CC                              | TT                 | TT               | INTRON                        | 101492184          | TMV resistance protein N-like |
| SNP_87687_A_127083 | NW_004516329.1 | scaffold1006 | 127083                  | CC                              | TT                 | TT               | INTRON                        | 101492184          | TMV resistance protein N-like |
| SNP_87688_A_127476 | NW_004516329.1 | scaffold1006 | 127476                  | TT                              | CC                 | CC               | INTRON                        | 101492184          | TMV resistance protein N-like |
| SNP_87689_A_127567 | NW_004516329.1 | scaffold1006 | 127567                  | AA                              | GG                 | GG               | INTRON                        | 101492184          | TMV resistance protein N-like |
| SNP_87690_A_127569 | NW_004516329.1 | scaffold1006 | 127569                  | AA                              | GG                 | GG               | INTRON                        | 101492184          | TMV resistance protein N-like |
| SNP_87691_A_127639 | NW_004516329.1 | scaffold1006 | 127639                  | GG                              | AA                 | AA               | INTRON                        | 101492184          | TMV resistance protein N-like |
| SNP_87692_A_127705 | NW_004516329.1 | scaffold1006 | 127705                  | CC                              | TT                 | TT               | INTRON                        | 101492184          | TMV resistance protein N-like |
| SNP_87693_A_127829 | NW_004516329.1 | scaffold1006 | 127829                  | GG                              | TT                 | TT               | INTRON                        | 101492184          | TMV resistance protein N-like |
| SNP_87694_A_127846 | NW_004516329.1 | scaffold1006 | 127846                  | AA                              | TT                 | TT               | INTRON                        | 101492184          | TMV resistance protein N-like |
| SNP_87695_A_127911 | NW_004516329.1 | scaffold1006 | 127911                  | TT                              | CC                 | CC               | INTRON                        | 101492184          | TMV resistance protein N-like |
| SNP_87696_A_127971 | NW_004516329.1 | scaffold1006 | 127971                  | CC                              | AA                 | AA               | INTRON                        | 101492184          | TMV resistance protein N-like |
| SNP_87697_A_128096 | NW_004516329.1 | scaffold1006 | 128096                  | GG                              | TT                 | TT               | INTRON                        | 101492184          | TMV resistance protein N-like |
| SNP_87698_A_128106 | NW_004516329.1 | scaffold1006 | 128106                  | GG                              | TT                 | TT               | INTRON                        | 101492184          | TMV resistance protein N-like |
| SNP_87699_A_156043 | NW_004516329.1 | scaffold1006 | 156043                  | GG                              | AA                 | AA               | INTERGENIC                    |                    |                               |
| SNP_87700_A_162183 | NW_004516329.1 | scaffold1006 | 162183                  | CC                              | TT                 | TT               | INTERGENIC                    |                    |                               |

| SNPs IDs           | Chromosome IDs | Chromosomes  | Physical positions (bp) | CDC Frontier (Reference genome) | (Pusa 1103 & HPNB) | (ILWC 46 & LPNB) | Sequence Components of genome | Gene accession IDs | Putative functions            |
|--------------------|----------------|--------------|-------------------------|---------------------------------|--------------------|------------------|-------------------------------|--------------------|-------------------------------|
| SNP_87701_A_162222 | NW_004516329.1 | scaffold1006 | 162222                  | TT                              | CC                 | CC               | INTERGENIC                    |                    |                               |
| SNP_87702_A_165176 | NW_004516329.1 | scaffold1006 | 165176                  | CC                              | TT                 | TT               | INTERGENIC                    |                    |                               |
| SNP_87703_A_165211 | NW_004516329.1 | scaffold1006 | 165211                  | TT                              | AA                 | AA               | INTERGENIC                    |                    |                               |
| SNP_87704_A_165406 | NW_004516329.1 | scaffold1006 | 165406                  | AA                              | CC                 | CC               | INTERGENIC                    |                    |                               |
| SNP_87705_A_165451 | NW_004516329.1 | scaffold1006 | 165451                  | CC                              | TT                 | TT               | INTERGENIC                    |                    |                               |
| SNP_87706_A_165479 | NW_004516329.1 | scaffold1006 | 165479                  | TT                              | CC                 | CC               | INTERGENIC                    |                    |                               |
| SNP_87707_A_196949 | NW_004516329.1 | scaffold1006 | 196949                  | TT                              | GG                 | GG               | DRR                           | 101493186          | Unknown function              |
| SNP_87708_A_196950 | NW_004516329.1 | scaffold1006 | 196950                  | AA                              | GG                 | GG               | DRR                           | 101493186          | Unknown function              |
| SNP_87709_A_196996 | NW_004516329.1 | scaffold1006 | 196996                  | TT                              | CC                 | CC               | DRR                           | 101493186          | Unknown function              |
| SNP_87711_A_299835 | NW_004516329.1 | scaffold1006 | 299835                  | AA                              | GG                 | GG               | INTERGENIC                    |                    |                               |
| SNP_87712_A_324054 | NW_004516329.1 | scaffold1006 | 324054                  | GG                              | AA                 | AA               | INTERGENIC                    |                    |                               |
| SNP_87713_A_336141 | NW_004516329.1 | scaffold1006 | 336141                  | GG                              | TT                 | TT               | DRR                           | 101508440          | beta-amylase 1, chloroplastic |
| SNP_87714_A_400007 | NW_004516329.1 | scaffold1006 | 400007                  | CC                              | AA                 | AA               | INTERGENIC                    |                    |                               |
| SNP_87716_A_407883 | NW_004516329.1 | scaffold1006 | 407883                  | TT                              | CC                 | CC               | INTERGENIC                    |                    |                               |
| SNP_87717_A_413812 | NW_004516329.1 | scaffold1006 | 413812                  | CC                              | GG                 | GG               | INTERGENIC                    |                    |                               |
| SNP_87718_A_419106 | NW_004516329.1 | scaffold1006 | 419106                  | CC                              | TT                 | TT               | INTERGENIC                    |                    |                               |
| SNP_87719_A_448330 | NW_004516329.1 | scaffold1006 | 448330                  | AA                              | GG                 | GG               | INTERGENIC                    |                    |                               |
| SNP_87720_A_484085 | NW_004516329.1 | scaffold1006 | 484085                  | CC                              | TT                 | TT               | INTERGENIC                    |                    |                               |
| SNP_87722_A_558904 | NW_004516329.1 | scaffold1006 | 558904                  | AA                              | CC                 | CC               | INTERGENIC                    |                    |                               |
| SNP_87723_A_559403 | NW_004516329.1 | scaffold1006 | 559403                  | AA                              | GG                 | GG               | INTERGENIC                    |                    |                               |
| SNP_87724_A_559480 | NW_004516329.1 | scaffold1006 | 559480                  | GG                              | TT                 | TT               | INTERGENIC                    |                    |                               |
| SNP_87725_A_567575 | NW_004516329.1 | scaffold1006 | 567575                  | CC                              | TT                 | TT               | INTERGENIC                    |                    |                               |

| SNPs IDs           | Chromosome IDs | Chromosomes  | Physical positions (bp) | CDC Frontier (Reference genome) | (Pusa 1103 & HPNB) | (ILWC 46 & LPNB) | Sequence Components of genome | Gene accession IDs | Putative functions           |
|--------------------|----------------|--------------|-------------------------|---------------------------------|--------------------|------------------|-------------------------------|--------------------|------------------------------|
| SNP_87726_A_567867 | NW_004516329.1 | scaffold1006 | 567867                  | TT                              | CC                 | CC               | INTERGENIC                    |                    |                              |
| SNP_87727_A_567906 | NW_004516329.1 | scaffold1006 | 567906                  | AA                              | GG                 | GG               | INTERGENIC                    |                    |                              |
| SNP_87728_A_567972 | NW_004516329.1 | scaffold1006 | 567972                  | GG                              | AA                 | AA               | INTERGENIC                    |                    |                              |
| SNP_87729_A_578296 | NW_004516329.1 | scaffold1006 | 578296                  | TT                              | CC                 | CC               | DRR                           | 101494775          | uncharacterized LOC101494775 |
| SNP_87730_A_578298 | NW_004516329.1 | scaffold1006 | 578298                  | AA                              | TT                 | TT               | DRR                           | 101494775          | uncharacterized LOC101494775 |
| SNP_87731_A_578299 | NW_004516329.1 | scaffold1006 | 578299                  | TT                              | CC                 | CC               | DRR                           | 101494775          | uncharacterized LOC101494775 |
| SNP_87732_A_578359 | NW_004516329.1 | scaffold1006 | 578359                  | GG                              | AA                 | AA               | DRR                           | 101494775          | uncharacterized LOC101494775 |
| SNP_87733_A_578512 | NW_004516329.1 | scaffold1006 | 578512                  | GG                              | CC                 | CC               | DRR                           | 101494775          | uncharacterized LOC101494775 |
| SNP_87734_A_578610 | NW_004516329.1 | scaffold1006 | 578610                  | GG                              | AA                 | AA               | DRR                           | 101494775          | uncharacterized LOC101494775 |
| SNP_87735_A_578655 | NW_004516329.1 | scaffold1006 | 578655                  | GG                              | AA                 | AA               | DRR                           | 101494775          | uncharacterized LOC101494775 |
| SNP_87736_A_583340 | NW_004516329.1 | scaffold1006 | 583340                  | GG                              | AA                 | AA               | DRR                           | 101495108          | early nodulin-55-1-like      |
| SNP_87737_A_583386 | NW_004516329.1 | scaffold1006 | 583386                  | TT                              | AA                 | AA               | DRR                           | 101495108          | early nodulin-55-1-like      |
| SNP_87738_A_583389 | NW_004516329.1 | scaffold1006 | 583389                  | CC                              | GG                 | GG               | DRR                           | 101495108          | early nodulin-55-1-like      |
| SNP_87741_A_667489 | NW_004516329.1 | scaffold1006 | 667489                  | TT                              | CC                 | CC               | INTRON                        | 101490903          | DNA-binding protein RHL1     |
| SNP_87742_A_683409 | NW_004516329.1 | scaffold1006 | 683409                  | GG                              | AA                 | AA               | INTERGENIC                    |                    |                              |
| SNP_87743_A_1434   | NW_004516331.1 | scaffold1008 | 1434                    | AA                              | GG                 | GG               | INTERGENIC                    |                    |                              |
| SNP_87744_A_12134  | NW_004516331.1 | scaffold1008 | 12134                   | CC                              | TT                 | TT               | INTERGENIC                    |                    |                              |
| SNP_87745_A_12186  | NW_004516331.1 | scaffold1008 | 12186                   | CC                              | GG                 | GG               | INTERGENIC                    |                    |                              |
| SNP_87746_A_12327  | NW_004516331.1 | scaffold1008 | 12327                   | AA                              | GG                 | GG               | INTERGENIC                    |                    |                              |
| SNP_87747_A_12349  | NW_004516331.1 | scaffold1008 | 12349                   | TT                              | CC                 | CC               | INTERGENIC                    |                    |                              |
| SNP_87748_A_12419  | NW_004516331.1 | scaffold1008 | 12419                   | CC                              | GG                 | GG               | INTERGENIC                    |                    |                              |
| SNP_87749_A_12584  | NW_004516331.1 | scaffold1008 | 12584                   | TT                              | CC                 | CC               | INTERGENIC                    |                    |                              |

| SNPs IDs          | Chromosome IDs | Chromosomes  | Physical positions (bp) | CDC Frontier (Reference genome) | (Pusa 1103 & HPNB) | (ILWC 46 & LPNB) | Sequence genome | Components of | Gene accession IDs | Putative functions |
|-------------------|----------------|--------------|-------------------------|---------------------------------|--------------------|------------------|-----------------|---------------|--------------------|--------------------|
| SNP_87750_A_12626 | NW_004516331.1 | scaffold1008 | 12626                   | TT                              | GG                 | GG               | INTERGENIC      |               |                    |                    |
| SNP_87752_A_12723 | NW_004516331.1 | scaffold1008 | 12723                   | AA                              | GG                 | GG               | INTERGENIC      |               |                    |                    |
| SNP_87754_A_13172 | NW_004516331.1 | scaffold1008 | 13172                   | AA                              | GG                 | GG               | INTERGENIC      |               |                    |                    |
| SNP_87755_A_13314 | NW_004516331.1 | scaffold1008 | 13314                   | GG                              | AA                 | AA               | INTERGENIC      |               |                    |                    |
| SNP_87756_A_13398 | NW_004516331.1 | scaffold1008 | 13398                   | TT                              | AA                 | AA               | INTERGENIC      |               |                    |                    |
| SNP_87757_A_13414 | NW_004516331.1 | scaffold1008 | 13414                   | TT                              | CC                 | CC               | INTERGENIC      |               |                    |                    |
| SNP_87758_A_13415 | NW_004516331.1 | scaffold1008 | 13415                   | AA                              | TT                 | TT               | INTERGENIC      |               |                    |                    |
| SNP_87759_A_13422 | NW_004516331.1 | scaffold1008 | 13422                   | GG                              | AA                 | AA               | INTERGENIC      |               |                    |                    |
| SNP_87760_A_13428 | NW_004516331.1 | scaffold1008 | 13428                   | CC                              | AA                 | AA               | INTERGENIC      |               |                    |                    |
| SNP_87761_A_13433 | NW_004516331.1 | scaffold1008 | 13433                   | TT                              | CC                 | CC               | INTERGENIC      |               |                    |                    |
| SNP_87762_A_13436 | NW_004516331.1 | scaffold1008 | 13436                   | GG                              | TT                 | TT               | INTERGENIC      |               |                    |                    |
| SNP_87763_A_14646 | NW_004516331.1 | scaffold1008 | 14646                   | TT                              | CC                 | CC               | INTERGENIC      |               |                    |                    |
| SNP_87764_A_14667 | NW_004516331.1 | scaffold1008 | 14667                   | CC                              | TT                 | TT               | INTERGENIC      |               |                    |                    |
| SNP_87765_A_14738 | NW_004516331.1 | scaffold1008 | 14738                   | TT                              | CC                 | CC               | INTERGENIC      |               |                    |                    |
| SNP_87766_A_14816 | NW_004516331.1 | scaffold1008 | 14816                   | AA                              | GG                 | GG               | INTERGENIC      |               |                    |                    |
| SNP_87767_A_14836 | NW_004516331.1 | scaffold1008 | 14836                   | AA                              | TT                 | TT               | INTERGENIC      |               |                    |                    |
| SNP_87768_A_15051 | NW_004516331.1 | scaffold1008 | 15051                   | TT                              | GG                 | GG               | INTERGENIC      |               |                    |                    |
| SNP_87769_A_20374 | NW_004516331.1 | scaffold1008 | 20374                   | TT                              | CC                 | CC               | INTERGENIC      |               |                    |                    |
| SNP_87771_A_22997 | NW_004516331.1 | scaffold1008 | 22997                   | AA                              | GG                 | GG               | INTERGENIC      |               |                    |                    |
| SNP_87772_A_23023 | NW_004516331.1 | scaffold1008 | 23023                   | TT                              | GG                 | GG               | INTERGENIC      |               |                    |                    |
| SNP_87773_A_39867 | NW_004516331.1 | scaffold1008 | 39867                   | CC                              | AA                 | AA               | INTERGENIC      |               |                    |                    |
| SNP_87774_A_39883 | NW_004516331.1 | scaffold1008 | 39883                   | CC                              | AA                 | AA               | INTERGENIC      |               |                    |                    |

| SNPs IDs          | Chromosome IDs | Chromosomes  | Physical positions (bp) | CDC Frontier (Reference genome) | (Pusa 1103 & HPNB) | (ILWC 46 & LPNB) | Sequence genome | Components of | Gene accession IDs | Putative functions |
|-------------------|----------------|--------------|-------------------------|---------------------------------|--------------------|------------------|-----------------|---------------|--------------------|--------------------|
| SNP_87775_A_42259 | NW_004516331.1 | scaffold1008 | 42259                   | GG                              | AA                 | AA               | INTERGENIC      |               |                    |                    |
| SNP_87776_A_42269 | NW_004516331.1 | scaffold1008 | 42269                   | GG                              | AA                 | AA               | INTERGENIC      |               |                    |                    |
| SNP_87777_A_42303 | NW_004516331.1 | scaffold1008 | 42303                   | AA                              | CC                 | CC               | INTERGENIC      |               |                    |                    |
| SNP_87778_A_42331 | NW_004516331.1 | scaffold1008 | 42331                   | TT                              | CC                 | CC               | INTERGENIC      |               |                    |                    |
| SNP_87779_A_42459 | NW_004516331.1 | scaffold1008 | 42459                   | TT                              | CC                 | CC               | INTERGENIC      |               |                    |                    |
| SNP_87780_A_42506 | NW_004516331.1 | scaffold1008 | 42506                   | AA                              | CC                 | CC               | INTERGENIC      |               |                    |                    |
| SNP_87782_A_42661 | NW_004516331.1 | scaffold1008 | 42661                   | CC                              | TT                 | TT               | INTERGENIC      |               |                    |                    |
| SNP_87784_A_54397 | NW_004516331.1 | scaffold1008 | 54397                   | GG                              | CC                 | CC               | INTERGENIC      |               |                    |                    |
| SNP_87785_A_54398 | NW_004516331.1 | scaffold1008 | 54398                   | CC                              | TT                 | TT               | INTERGENIC      |               |                    |                    |
| SNP_87786_A_61671 | NW_004516331.1 | scaffold1008 | 61671                   | AA                              | TT                 | TT               | INTERGENIC      |               |                    |                    |
| SNP_87787_A_61681 | NW_004516331.1 | scaffold1008 | 61681                   | CC                              | AA                 | AA               | INTERGENIC      |               |                    |                    |
| SNP_87788_A_61852 | NW_004516331.1 | scaffold1008 | 61852                   | TT                              | CC                 | CC               | INTERGENIC      |               |                    |                    |
| SNP_87789_A_61882 | NW_004516331.1 | scaffold1008 | 61882                   | GG                              | AA                 | AA               | INTERGENIC      |               |                    |                    |
| SNP_87790_A_61891 | NW_004516331.1 | scaffold1008 | 61891                   | GG                              | AA                 | AA               | INTERGENIC      |               |                    |                    |
| SNP_87791_A_61912 | NW_004516331.1 | scaffold1008 | 61912                   | GG                              | TT                 | TT               | INTERGENIC      |               |                    |                    |
| SNP_87792_A_62025 | NW_004516331.1 | scaffold1008 | 62025                   | TT                              | CC                 | CC               | INTERGENIC      |               |                    |                    |
| SNP_87793_A_62043 | NW_004516331.1 | scaffold1008 | 62043                   | CC                              | AA                 | AA               | INTERGENIC      |               |                    |                    |
| SNP_87794_A_62058 | NW_004516331.1 | scaffold1008 | 62058                   | AA                              | GG                 | GG               | INTERGENIC      |               |                    |                    |
| SNP_87795_A_62077 | NW_004516331.1 | scaffold1008 | 62077                   | GG                              | AA                 | AA               | INTERGENIC      |               |                    |                    |
| SNP_87796_A_62100 | NW_004516331.1 | scaffold1008 | 62100                   | TT                              | CC                 | CC               | INTERGENIC      |               |                    |                    |
| SNP_87797_A_80685 | NW_004516331.1 | scaffold1008 | 80685                   | CC                              | TT                 | TT               | INTERGENIC      |               |                    |                    |
| SNP_87798_A_85780 | NW_004516331.1 | scaffold1008 | 85780                   | CC                              | AA                 | AA               | INTERGENIC      |               |                    |                    |

| SNPs IDs           | Chromosome IDs | Chromosomes  | Physical positions (bp) | CDC Frontier (Reference genome) | (Pusa 1103 & HPNB) | (ILWC 46 & LPNB) | Sequence Components of genome | Gene accession IDs | Putative functions           |
|--------------------|----------------|--------------|-------------------------|---------------------------------|--------------------|------------------|-------------------------------|--------------------|------------------------------|
| SNP_87800_A_843    | NW_004516333.1 | scaffold1010 | 843                     | TT                              | CC                 | CC               | INTERGENIC                    |                    |                              |
| SNP_87801_A_21078  | NW_004516333.1 | scaffold1010 | 21078                   | AA                              | GG                 | GG               | INTERGENIC                    |                    |                              |
| SNP_87803_A_21093  | NW_004516333.1 | scaffold1010 | 21093                   | AA                              | GG                 | GG               | INTERGENIC                    |                    |                              |
| SNP_87804_A_40817  | NW_004516333.1 | scaffold1010 | 40817                   | AA                              | GG                 | GG               | INTRON                        | 101497176          | uncharacterized LOC101497176 |
| SNP_87805_A_52771  | NW_004516333.1 | scaffold1010 | 52771                   | TT                              | AA                 | AA               | INTERGENIC                    |                    |                              |
| SNP_87806_A_52805  | NW_004516333.1 | scaffold1010 | 52805                   | TT                              | CC                 | CC               | INTERGENIC                    |                    |                              |
| SNP_87807_A_94310  | NW_004516333.1 | scaffold1010 | 94310                   | AA                              | GG                 | GG               | INTERGENIC                    |                    |                              |
| SNP_87808_A_94314  | NW_004516333.1 | scaffold1010 | 94314                   | GG                              | AA                 | AA               | INTERGENIC                    |                    |                              |
| SNP_87809_A_111983 | NW_004516333.1 | scaffold1010 | 111983                  | AA                              | CC                 | CC               | INTERGENIC                    |                    |                              |
| SNP_87810_A_117031 | NW_004516333.1 | scaffold1010 | 117031                  | AA                              | GG                 | GG               | URR                           | 101495967          | Unknown function             |
| SNP_87811_A_117032 | NW_004516333.1 | scaffold1010 | 117032                  | TT                              | CC                 | CC               | URR                           | 101495967          | Unknown function             |
| SNP_87812_A_135160 | NW_004516333.1 | scaffold1010 | 135160                  | CC                              | GG                 | GG               | URR                           | 101496516          | uncharacterized LOC101496516 |
| SNP_87813_A_154863 | NW_004516333.1 | scaffold1010 | 154863                  | GG                              | AA                 | AA               | INTERGENIC                    |                    |                              |
| SNP_87814_A_155352 | NW_004516333.1 | scaffold1010 | 155352                  | GG                              | AA                 | AA               | INTERGENIC                    |                    |                              |
| SNP_87815_A_155393 | NW_004516333.1 | scaffold1010 | 155393                  | GG                              | AA                 | AA               | INTERGENIC                    |                    |                              |
| SNP_87817_A_158198 | NW_004516333.1 | scaffold1010 | 158198                  | AA                              | CC                 | CC               | INTERGENIC                    |                    |                              |
| SNP_87818_A_160806 | NW_004516333.1 | scaffold1010 | 160806                  | GG                              | AA                 | AA               | INTERGENIC                    |                    |                              |
| SNP_87819_A_161249 | NW_004516333.1 | scaffold1010 | 161249                  | AA                              | GG                 | GG               | INTERGENIC                    |                    |                              |
| SNP_87820_A_25156  | NW_004516335.1 | scaffold1013 | 25156                   | TT                              | CC                 | CC               | INTERGENIC                    |                    |                              |
| SNP_87822_A_61008  | NW_004516335.1 | scaffold1013 | 61008                   | AA                              | TT                 | TT               | INTERGENIC                    |                    |                              |
| SNP_87823_A_61242  | NW_004516335.1 | scaffold1013 | 61242                   | GG                              | TT                 | TT               | INTERGENIC                    |                    |                              |
| SNP_87824_A_64633  | NW_004516335.1 | scaffold1013 | 64633                   | CC                              | AA                 | AA               | INTERGENIC                    |                    |                              |



| SNPs IDs          | Chromosome IDs | Chromosomes  | Physical positions (bp) | CDC Frontier (Reference genome) | (Pusa 1103 & HPNB) | (ILWC 46 & LPNB) | Sequence genome | Components of | Gene accession IDs | Putative functions |
|-------------------|----------------|--------------|-------------------------|---------------------------------|--------------------|------------------|-----------------|---------------|--------------------|--------------------|
| SNP_87825_A_66528 | NW_004516335.1 | scaffold1013 | 66528                   | TT                              | CC                 | CC               | INTERGENIC      |               |                    |                    |
| SNP_87826_A_70154 | NW_004516335.1 | scaffold1013 | 70154                   | AA                              | GG                 | GG               | INTERGENIC      |               |                    |                    |
| SNP_87827_A_9643  | NW_004516337.1 | scaffold1017 | 9643                    | TT                              | CC                 | CC               | INTERGENIC      |               |                    |                    |
| SNP_87828_A_9893  | NW_004516337.1 | scaffold1017 | 9893                    | GG                              | CC                 | CC               | INTERGENIC      |               |                    |                    |
| SNP_87830_A_12790 | NW_004516337.1 | scaffold1017 | 12790                   | GG                              | AA                 | AA               | INTERGENIC      |               |                    |                    |
| SNP_87832_A_12879 | NW_004516337.1 | scaffold1017 | 12879                   | GG                              | CC                 | CC               | INTERGENIC      |               |                    |                    |
| SNP_87833_A_12929 | NW_004516337.1 | scaffold1017 | 12929                   | CC                              | AA                 | AA               | INTERGENIC      |               |                    |                    |
| SNP_87834_A_12931 | NW_004516337.1 | scaffold1017 | 12931                   | TT                              | CC                 | CC               | INTERGENIC      |               |                    |                    |
| SNP_87835_A_13050 | NW_004516337.1 | scaffold1017 | 13050                   | GG                              | CC                 | CC               | INTERGENIC      |               |                    |                    |
| SNP_87836_A_13051 | NW_004516337.1 | scaffold1017 | 13051                   | CC                              | TT                 | TT               | INTERGENIC      |               |                    |                    |
| SNP_87837_A_13067 | NW_004516337.1 | scaffold1017 | 13067                   | TT                              | CC                 | CC               | INTERGENIC      |               |                    |                    |
| SNP_87838_A_13129 | NW_004516337.1 | scaffold1017 | 13129                   | TT                              | GG                 | GG               | INTERGENIC      |               |                    |                    |
| SNP_87839_A_13136 | NW_004516337.1 | scaffold1017 | 13136                   | AA                              | TT                 | TT               | INTERGENIC      |               |                    |                    |
| SNP_87840_A_13143 | NW_004516337.1 | scaffold1017 | 13143                   | CC                              | TT                 | TT               | INTERGENIC      |               |                    |                    |
| SNP_87841_A_13312 | NW_004516337.1 | scaffold1017 | 13312                   | TT                              | CC                 | CC               | INTERGENIC      |               |                    |                    |
| SNP_87842_A_13323 | NW_004516337.1 | scaffold1017 | 13323                   | AA                              | GG                 | GG               | INTERGENIC      |               |                    |                    |
| SNP_87843_A_13449 | NW_004516337.1 | scaffold1017 | 13449                   | GG                              | AA                 | AA               | INTERGENIC      |               |                    |                    |
| SNP_87844_A_13532 | NW_004516337.1 | scaffold1017 | 13532                   | AA                              | CC                 | CC               | INTERGENIC      |               |                    |                    |
| SNP_87845_A_13603 | NW_004516337.1 | scaffold1017 | 13603                   | GG                              | CC                 | CC               | INTERGENIC      |               |                    |                    |
| SNP_87846_A_13634 | NW_004516337.1 | scaffold1017 | 13634                   | TT                              | AA                 | AA               | INTERGENIC      |               |                    |                    |
| SNP_87847_A_13704 | NW_004516337.1 | scaffold1017 | 13704                   | GG                              | AA                 | AA               | INTERGENIC      |               |                    |                    |
| SNP_87848_A_13776 | NW_004516337.1 | scaffold1017 | 13776                   | GG                              | CC                 | CC               | INTERGENIC      |               |                    |                    |

| SNPs IDs          | Chromosome IDs | Chromosomes  | Physical positions (bp) | CDC Frontier genome (Reference genome) | (Pusa 1103 & HPNB) | (ILWC 46 & LPNB) | Sequence genome | Components of | Gene accession IDs | Putative functions |
|-------------------|----------------|--------------|-------------------------|----------------------------------------|--------------------|------------------|-----------------|---------------|--------------------|--------------------|
| SNP_87849_A_13811 | NW_004516337.1 | scaffold1017 | 13811                   | CC                                     | TT                 | TT               | INTERGENIC      |               |                    |                    |
| SNP_87850_A_13984 | NW_004516337.1 | scaffold1017 | 13984                   | TT                                     | CC                 | CC               | INTERGENIC      |               |                    |                    |
| SNP_87851_A_14007 | NW_004516337.1 | scaffold1017 | 14007                   | CC                                     | TT                 | TT               | INTERGENIC      |               |                    |                    |
| SNP_87852_A_14036 | NW_004516337.1 | scaffold1017 | 14036                   | TT                                     | CC                 | CC               | INTERGENIC      |               |                    |                    |
| SNP_87853_A_14067 | NW_004516337.1 | scaffold1017 | 14067                   | CC                                     | TT                 | TT               | INTERGENIC      |               |                    |                    |
| SNP_87854_A_14106 | NW_004516337.1 | scaffold1017 | 14106                   | TT                                     | CC                 | CC               | INTERGENIC      |               |                    |                    |
| SNP_87855_A_14142 | NW_004516337.1 | scaffold1017 | 14142                   | CC                                     | TT                 | TT               | INTERGENIC      |               |                    |                    |
| SNP_87856_A_14232 | NW_004516337.1 | scaffold1017 | 14232                   | AA                                     | CC                 | CC               | INTERGENIC      |               |                    |                    |
| SNP_87857_A_14252 | NW_004516337.1 | scaffold1017 | 14252                   | AA                                     | GG                 | GG               | INTERGENIC      |               |                    |                    |
| SNP_87858_A_14266 | NW_004516337.1 | scaffold1017 | 14266                   | AA                                     | GG                 | GG               | INTERGENIC      |               |                    |                    |
| SNP_87859_A_14272 | NW_004516337.1 | scaffold1017 | 14272                   | GG                                     | AA                 | AA               | INTERGENIC      |               |                    |                    |
| SNP_87860_A_14304 | NW_004516337.1 | scaffold1017 | 14304                   | TT                                     | CC                 | CC               | INTERGENIC      |               |                    |                    |
| SNP_87861_A_14351 | NW_004516337.1 | scaffold1017 | 14351                   | GG                                     | AA                 | AA               | INTERGENIC      |               |                    |                    |
| SNP_87862_A_14373 | NW_004516337.1 | scaffold1017 | 14373                   | AA                                     | GG                 | GG               | INTERGENIC      |               |                    |                    |
| SNP_87863_A_14396 | NW_004516337.1 | scaffold1017 | 14396                   | CC                                     | AA                 | AA               | INTERGENIC      |               |                    |                    |
| SNP_87864_A_14417 | NW_004516337.1 | scaffold1017 | 14417                   | CC                                     | TT                 | TT               | INTERGENIC      |               |                    |                    |
| SNP_87865_A_14429 | NW_004516337.1 | scaffold1017 | 14429                   | CC                                     | TT                 | TT               | INTERGENIC      |               |                    |                    |
| SNP_87866_A_19303 | NW_004516337.1 | scaffold1017 | 19303                   | CC                                     | AA                 | AA               | INTERGENIC      |               |                    |                    |
| SNP_87867_A_19413 | NW_004516337.1 | scaffold1017 | 19413                   | GG                                     | AA                 | AA               | INTERGENIC      |               |                    |                    |
| SNP_87868_A_19440 | NW_004516337.1 | scaffold1017 | 19440                   | TT                                     | CC                 | CC               | INTERGENIC      |               |                    |                    |
| SNP_87869_A_19557 | NW_004516337.1 | scaffold1017 | 19557                   | TT                                     | GG                 | GG               | INTERGENIC      |               |                    |                    |
| SNP_87870_A_19577 | NW_004516337.1 | scaffold1017 | 19577                   | TT                                     | GG                 | GG               | INTERGENIC      |               |                    |                    |

| SNPs IDs          | Chromosome IDs | Chromosomes  | Physical positions (bp) | CDC Frontier (Reference genome) | (Pusa 1103 & HPNB) | (ILWC 46 & LPNB) | Sequence genome | Components of | Gene accession IDs | Putative functions |
|-------------------|----------------|--------------|-------------------------|---------------------------------|--------------------|------------------|-----------------|---------------|--------------------|--------------------|
| SNP_87871_A_19621 | NW_004516337.1 | scaffold1017 | 19621                   | TT                              | CC                 | CC               | INTERGENIC      |               |                    |                    |
| SNP_87872_A_19623 | NW_004516337.1 | scaffold1017 | 19623                   | GG                              | AA                 | AA               | INTERGENIC      |               |                    |                    |
| SNP_87873_A_19642 | NW_004516337.1 | scaffold1017 | 19642                   | CC                              | AA                 | AA               | INTERGENIC      |               |                    |                    |
| SNP_87874_A_19717 | NW_004516337.1 | scaffold1017 | 19717                   | CC                              | AA                 | AA               | INTERGENIC      |               |                    |                    |
| SNP_87875_A_19925 | NW_004516337.1 | scaffold1017 | 19925                   | AA                              | CC                 | CC               | INTERGENIC      |               |                    |                    |
| SNP_87876_A_20525 | NW_004516337.1 | scaffold1017 | 20525                   | TT                              | AA                 | AA               | INTERGENIC      |               |                    |                    |
| SNP_87877_A_20846 | NW_004516337.1 | scaffold1017 | 20846                   | AA                              | TT                 | TT               | INTERGENIC      |               |                    |                    |
| SNP_87878_A_20912 | NW_004516337.1 | scaffold1017 | 20912                   | AA                              | CC                 | CC               | INTERGENIC      |               |                    |                    |
| SNP_87879_A_21046 | NW_004516337.1 | scaffold1017 | 21046                   | TT                              | CC                 | CC               | INTERGENIC      |               |                    |                    |
| SNP_87880_A_27209 | NW_004516337.1 | scaffold1017 | 27209                   | CC                              | TT                 | TT               | INTERGENIC      |               |                    |                    |
| SNP_87881_A_27213 | NW_004516337.1 | scaffold1017 | 27213                   | TT                              | CC                 | CC               | INTERGENIC      |               |                    |                    |
| SNP_87882_A_27959 | NW_004516337.1 | scaffold1017 | 27959                   | CC                              | AA                 | AA               | INTERGENIC      |               |                    |                    |
| SNP_87883_A_27976 | NW_004516337.1 | scaffold1017 | 27976                   | TT                              | CC                 | CC               | INTERGENIC      |               |                    |                    |
| SNP_87884_A_28022 | NW_004516337.1 | scaffold1017 | 28022                   | GG                              | AA                 | AA               | INTERGENIC      |               |                    |                    |
| SNP_87885_A_28300 | NW_004516337.1 | scaffold1017 | 28300                   | TT                              | CC                 | CC               | INTERGENIC      |               |                    |                    |
| SNP_87886_A_28439 | NW_004516337.1 | scaffold1017 | 28439                   | TT                              | CC                 | CC               | INTERGENIC      |               |                    |                    |
| SNP_87887_A_28478 | NW_004516337.1 | scaffold1017 | 28478                   | GG                              | AA                 | AA               | INTERGENIC      |               |                    |                    |
| SNP_87888_A_29649 | NW_004516337.1 | scaffold1017 | 29649                   | CC                              | GG                 | GG               | INTERGENIC      |               |                    |                    |
| SNP_87889_A_29722 | NW_004516337.1 | scaffold1017 | 29722                   | CC                              | TT                 | TT               | INTERGENIC      |               |                    |                    |
| SNP_87890_A_29731 | NW_004516337.1 | scaffold1017 | 29731                   | GG                              | TT                 | TT               | INTERGENIC      |               |                    |                    |
| SNP_87891_A_29737 | NW_004516337.1 | scaffold1017 | 29737                   | AA                              | GG                 | GG               | INTERGENIC      |               |                    |                    |
| SNP_87892_A_30015 | NW_004516337.1 | scaffold1017 | 30015                   | AA                              | GG                 | GG               | INTERGENIC      |               |                    |                    |

| SNPs IDs          | Chromosome IDs | Chromosomes  | Physical positions (bp) | CDC Frontier (Reference genome) | (Pusa 1103 & HPNB) | (ILWC 46 & LPNB) | Sequence genome | Components of | Gene accession IDs | Putative functions |
|-------------------|----------------|--------------|-------------------------|---------------------------------|--------------------|------------------|-----------------|---------------|--------------------|--------------------|
| SNP_87893_A_30025 | NW_004516337.1 | scaffold1017 | 30025                   | AA                              | CC                 | CC               | INTERGENIC      |               |                    |                    |
| SNP_87894_A_30070 | NW_004516337.1 | scaffold1017 | 30070                   | AA                              | CC                 | CC               | INTERGENIC      |               |                    |                    |
| SNP_87895_A_30094 | NW_004516337.1 | scaffold1017 | 30094                   | AA                              | TT                 | TT               | INTERGENIC      |               |                    |                    |
| SNP_87896_A_30320 | NW_004516337.1 | scaffold1017 | 30320                   | CC                              | GG                 | GG               | INTERGENIC      |               |                    |                    |
| SNP_87897_A_31579 | NW_004516337.1 | scaffold1017 | 31579                   | TT                              | CC                 | CC               | INTERGENIC      |               |                    |                    |
| SNP_87898_A_32303 | NW_004516337.1 | scaffold1017 | 32303                   | TT                              | GG                 | GG               | INTERGENIC      |               |                    |                    |
| SNP_87899_A_32306 | NW_004516337.1 | scaffold1017 | 32306                   | CC                              | TT                 | TT               | INTERGENIC      |               |                    |                    |
| SNP_87900_A_32319 | NW_004516337.1 | scaffold1017 | 32319                   | CC                              | AA                 | AA               | INTERGENIC      |               |                    |                    |
| SNP_87901_A_32499 | NW_004516337.1 | scaffold1017 | 32499                   | TT                              | CC                 | CC               | INTERGENIC      |               |                    |                    |
| SNP_87902_A_32500 | NW_004516337.1 | scaffold1017 | 32500                   | AA                              | GG                 | GG               | INTERGENIC      |               |                    |                    |
| SNP_87903_A_32501 | NW_004516337.1 | scaffold1017 | 32501                   | AA                              | TT                 | TT               | INTERGENIC      |               |                    |                    |
| SNP_87904_A_32658 | NW_004516337.1 | scaffold1017 | 32658                   | AA                              | GG                 | GG               | INTERGENIC      |               |                    |                    |
| SNP_87905_A_32713 | NW_004516337.1 | scaffold1017 | 32713                   | TT                              | CC                 | CC               | INTERGENIC      |               |                    |                    |
| SNP_87906_A_38563 | NW_004516337.1 | scaffold1017 | 38563                   | CC                              | AA                 | AA               | INTERGENIC      |               |                    |                    |
| SNP_87908_A_38729 | NW_004516337.1 | scaffold1017 | 38729                   | TT                              | AA                 | AA               | INTERGENIC      |               |                    |                    |
| SNP_87909_A_42609 | NW_004516337.1 | scaffold1017 | 42609                   | CC                              | TT                 | TT               | INTERGENIC      |               |                    |                    |
| SNP_87910_A_42773 | NW_004516337.1 | scaffold1017 | 42773                   | AA                              | TT                 | TT               | INTERGENIC      |               |                    |                    |
| SNP_87911_A_43400 | NW_004516337.1 | scaffold1017 | 43400                   | GG                              | TT                 | TT               | INTERGENIC      |               |                    |                    |
| SNP_87912_A_43450 | NW_004516337.1 | scaffold1017 | 43450                   | CC                              | TT                 | TT               | INTERGENIC      |               |                    |                    |
| SNP_87913_A_43514 | NW_004516337.1 | scaffold1017 | 43514                   | CC                              | TT                 | TT               | INTERGENIC      |               |                    |                    |
| SNP_87914_A_43517 | NW_004516337.1 | scaffold1017 | 43517                   | CC                              | TT                 | TT               | INTERGENIC      |               |                    |                    |
| SNP_87915_A_43557 | NW_004516337.1 | scaffold1017 | 43557                   | CC                              | GG                 | GG               | INTERGENIC      |               |                    |                    |

| SNPs IDs           | Chromosome IDs | Chromosomes  | Physical positions (bp) | CDC Frontier (Reference genome) | (Pusa 1103 & HPNB) | (ILWC 46 & LPNB) | Sequence genome | Components of | Gene accession IDs           | Putative functions |
|--------------------|----------------|--------------|-------------------------|---------------------------------|--------------------|------------------|-----------------|---------------|------------------------------|--------------------|
| SNP_87916_A_50337  | NW_004516337.1 | scaffold1017 | 50337                   | AA                              | GG                 | GG               | INTERGENIC      |               |                              |                    |
| SNP_87917_A_50381  | NW_004516337.1 | scaffold1017 | 50381                   | CC                              | TT                 | TT               | INTERGENIC      |               |                              |                    |
| SNP_87918_A_1402   | NW_004516338.1 | scaffold1020 | 1402                    | AA                              | GG                 | GG               | INTERGENIC      |               |                              |                    |
| SNP_87919_A_1572   | NW_004516338.1 | scaffold1020 | 1572                    | AA                              | GG                 | GG               | INTERGENIC      |               |                              |                    |
| SNP_87920_A_1623   | NW_004516338.1 | scaffold1020 | 1623                    | AA                              | GG                 | GG               | INTERGENIC      |               |                              |                    |
| SNP_87921_A_1813   | NW_004516338.1 | scaffold1020 | 1813                    | GG                              | AA                 | AA               | INTERGENIC      |               |                              |                    |
| SNP_87922_A_2008   | NW_004516338.1 | scaffold1020 | 2008                    | TT                              | CC                 | CC               | INTERGENIC      |               |                              |                    |
| SNP_87923_A_16333  | NW_004516338.1 | scaffold1020 | 16333                   | AA                              | CC                 | CC               | INTERGENIC      |               |                              |                    |
| SNP_87924_A_27920  | NW_004516338.1 | scaffold1020 | 27920                   | GG                              | AA                 | AA               | INTERGENIC      |               |                              |                    |
| SNP_87925_A_52421  | NW_004516338.1 | scaffold1020 | 52421                   | TT                              | CC                 | CC               | INTERGENIC      |               |                              |                    |
| SNP_87926_A_54220  | NW_004516338.1 | scaffold1020 | 54220                   | CC                              | TT                 | TT               | INTERGENIC      |               |                              |                    |
| SNP_87927_A_91580  | NW_004516338.1 | scaffold1020 | 91580                   | AA                              | CC                 | CC               | INTERGENIC      |               |                              |                    |
| SNP_87928_A_118406 | NW_004516338.1 | scaffold1020 | 118406                  | CC                              | TT                 | TT               | DRR             | 101499475     | uncharacterized LOC101499475 |                    |
| SNP_87929_A_120809 | NW_004516338.1 | scaffold1020 | 120809                  | AA                              | GG                 | GG               | INTERGENIC      |               |                              |                    |
| SNP_87930_A_120837 | NW_004516338.1 | scaffold1020 | 120837                  | GG                              | TT                 | TT               | INTERGENIC      |               |                              |                    |
| SNP_87931_A_120852 | NW_004516338.1 | scaffold1020 | 120852                  | GG                              | AA                 | AA               | INTERGENIC      |               |                              |                    |
| SNP_87932_A_121205 | NW_004516338.1 | scaffold1020 | 121205                  | TT                              | CC                 | CC               | INTERGENIC      |               |                              |                    |
| SNP_87933_A_122038 | NW_004516338.1 | scaffold1020 | 122038                  | CC                              | GG                 | GG               | INTERGENIC      |               |                              |                    |
| SNP_87934_A_125600 | NW_004516338.1 | scaffold1020 | 125600                  | TT                              | CC                 | CC               | INTERGENIC      |               |                              |                    |
| SNP_87935_A_125635 | NW_004516338.1 | scaffold1020 | 125635                  | TT                              | CC                 | CC               | INTERGENIC      |               |                              |                    |
| SNP_87936_A_127807 | NW_004516338.1 | scaffold1020 | 127807                  | TT                              | CC                 | CC               | INTERGENIC      |               |                              |                    |
| SNP_87937_A_127815 | NW_004516338.1 | scaffold1020 | 127815                  | TT                              | CC                 | CC               | INTERGENIC      |               |                              |                    |

| SNPs IDs           | Chromosome IDs | Chromosomes  | Physical positions (bp) | CDC Frontier (Reference genome) | (Pusa 1103 & HPNB) | (ILWC 46 & LPNB) | Sequence genome | Components of | Gene accession IDs | Putative functions |
|--------------------|----------------|--------------|-------------------------|---------------------------------|--------------------|------------------|-----------------|---------------|--------------------|--------------------|
| SNP_87938_A_127824 | NW_004516338.1 | scaffold1020 | 127824                  | AA                              | CC                 | CC               | INTERGENIC      |               |                    |                    |
| SNP_87939_A_127825 | NW_004516338.1 | scaffold1020 | 127825                  | TT                              | CC                 | CC               | INTERGENIC      |               |                    |                    |
| SNP_87940_A_127843 | NW_004516338.1 | scaffold1020 | 127843                  | TT                              | CC                 | CC               | INTERGENIC      |               |                    |                    |
| SNP_87941_A_127855 | NW_004516338.1 | scaffold1020 | 127855                  | CC                              | TT                 | TT               | INTERGENIC      |               |                    |                    |
| SNP_87942_A_127864 | NW_004516338.1 | scaffold1020 | 127864                  | GG                              | AA                 | AA               | INTERGENIC      |               |                    |                    |
| SNP_87943_A_127877 | NW_004516338.1 | scaffold1020 | 127877                  | CC                              | TT                 | TT               | INTERGENIC      |               |                    |                    |
| SNP_87944_A_127879 | NW_004516338.1 | scaffold1020 | 127879                  | TT                              | AA                 | AA               | INTERGENIC      |               |                    |                    |
| SNP_87945_A_127894 | NW_004516338.1 | scaffold1020 | 127894                  | TT                              | CC                 | CC               | INTERGENIC      |               |                    |                    |
| SNP_87946_A_136516 | NW_004516338.1 | scaffold1020 | 136516                  | CC                              | TT                 | TT               | INTERGENIC      |               |                    |                    |
| SNP_87947_A_158475 | NW_004516338.1 | scaffold1020 | 158475                  | CC                              | AA                 | AA               | INTERGENIC      |               |                    |                    |
| SNP_87948_A_158518 | NW_004516338.1 | scaffold1020 | 158518                  | GG                              | AA                 | AA               | INTERGENIC      |               |                    |                    |
| SNP_87949_A_158822 | NW_004516338.1 | scaffold1020 | 158822                  | CC                              | TT                 | TT               | INTERGENIC      |               |                    |                    |
| SNP_87950_A_175261 | NW_004516338.1 | scaffold1020 | 175261                  | TT                              | CC                 | CC               | INTERGENIC      |               |                    |                    |
| SNP_87951_A_177098 | NW_004516338.1 | scaffold1020 | 177098                  | CC                              | AA                 | AA               | INTERGENIC      |               |                    |                    |
| SNP_87952_A_177202 | NW_004516338.1 | scaffold1020 | 177202                  | GG                              | TT                 | TT               | INTERGENIC      |               |                    |                    |
| SNP_87953_A_177536 | NW_004516338.1 | scaffold1020 | 177536                  | TT                              | CC                 | CC               | INTERGENIC      |               |                    |                    |
| SNP_87954_A_177553 | NW_004516338.1 | scaffold1020 | 177553                  | AA                              | GG                 | GG               | INTERGENIC      |               |                    |                    |
| SNP_87955_A_182887 | NW_004516338.1 | scaffold1020 | 182887                  | CC                              | TT                 | TT               | INTERGENIC      |               |                    |                    |
| SNP_87956_A_197123 | NW_004516338.1 | scaffold1020 | 197123                  | AA                              | GG                 | GG               | INTERGENIC      |               |                    |                    |
| SNP_87957_A_197155 | NW_004516338.1 | scaffold1020 | 197155                  | GG                              | AA                 | AA               | INTERGENIC      |               |                    |                    |
| SNP_87958_A_197166 | NW_004516338.1 | scaffold1020 | 197166                  | GG                              | AA                 | AA               | INTERGENIC      |               |                    |                    |
| SNP_87960_A_197550 | NW_004516338.1 | scaffold1020 | 197550                  | AA                              | TT                 | TT               | INTERGENIC      |               |                    |                    |

| SNPs IDs           | Chromosome IDs | Chromosomes  | Physical positions (bp) | CDC Frontier (Reference genome) | (Pusa 1103 & HPNB) | (ILWC 46 & LPNB) | Sequence genome | Components of | Gene accession IDs | Putative functions |
|--------------------|----------------|--------------|-------------------------|---------------------------------|--------------------|------------------|-----------------|---------------|--------------------|--------------------|
| SNP_87961_A_209062 | NW_004516338.1 | scaffold1020 | 209062                  | GG                              | AA                 | AA               | INTERGENIC      |               |                    |                    |
| SNP_87962_A_226374 | NW_004516338.1 | scaffold1020 | 226374                  | AA                              | GG                 | GG               | INTERGENIC      |               |                    |                    |
| SNP_87964_A_241822 | NW_004516338.1 | scaffold1020 | 241822                  | AA                              | TT                 | TT               | INTERGENIC      |               |                    |                    |
| SNP_87965_A_246890 | NW_004516338.1 | scaffold1020 | 246890                  | CC                              | TT                 | TT               | INTERGENIC      |               |                    |                    |
| SNP_87966_A_247280 | NW_004516338.1 | scaffold1020 | 247280                  | GG                              | AA                 | AA               | INTERGENIC      |               |                    |                    |
| SNP_87967_A_273260 | NW_004516338.1 | scaffold1020 | 273260                  | TT                              | AA                 | AA               | INTERGENIC      |               |                    |                    |
| SNP_87968_A_275614 | NW_004516338.1 | scaffold1020 | 275614                  | CC                              | GG                 | GG               | INTERGENIC      |               |                    |                    |
| SNP_87969_A_290193 | NW_004516338.1 | scaffold1020 | 290193                  | AA                              | GG                 | GG               | INTERGENIC      |               |                    |                    |
| SNP_87970_A_298265 | NW_004516338.1 | scaffold1020 | 298265                  | AA                              | CC                 | CC               | INTERGENIC      |               |                    |                    |
| SNP_87971_A_318656 | NW_004516338.1 | scaffold1020 | 318656                  | CC                              | TT                 | TT               | INTERGENIC      |               |                    |                    |
| SNP_87972_A_325848 | NW_004516338.1 | scaffold1020 | 325848                  | AA                              | GG                 | GG               | INTERGENIC      |               |                    |                    |
| SNP_87973_A_325853 | NW_004516338.1 | scaffold1020 | 325853                  | TT                              | CC                 | CC               | INTERGENIC      |               |                    |                    |
| SNP_87974_A_325866 | NW_004516338.1 | scaffold1020 | 325866                  | AA                              | TT                 | TT               | INTERGENIC      |               |                    |                    |
| SNP_87975_A_325970 | NW_004516338.1 | scaffold1020 | 325970                  | TT                              | GG                 | GG               | INTERGENIC      |               |                    |                    |
| SNP_87976_A_325976 | NW_004516338.1 | scaffold1020 | 325976                  | CC                              | TT                 | TT               | INTERGENIC      |               |                    |                    |
| SNP_87977_A_326224 | NW_004516338.1 | scaffold1020 | 326224                  | AA                              | GG                 | GG               | INTERGENIC      |               |                    |                    |
| SNP_87978_A_19815  | NW_004516343.1 | scaffold1027 | 19815                   | TT                              | CC                 | CC               | INTERGENIC      |               |                    |                    |
| SNP_87979_A_19836  | NW_004516343.1 | scaffold1027 | 19836                   | CC                              | GG                 | GG               | INTERGENIC      |               |                    |                    |
| SNP_87980_A_19846  | NW_004516343.1 | scaffold1027 | 19846                   | AA                              | TT                 | TT               | INTERGENIC      |               |                    |                    |
| SNP_87981_A_46492  | NW_004516343.1 | scaffold1027 | 46492                   | CC                              | TT                 | TT               | INTERGENIC      |               |                    |                    |
| SNP_87982_A_61296  | NW_004516343.1 | scaffold1027 | 61296                   | AA                              | GG                 | GG               | INTERGENIC      |               |                    |                    |
| SNP_87983_A_77928  | NW_004516343.1 | scaffold1027 | 77928                   | TT                              | CC                 | CC               | INTERGENIC      |               |                    |                    |

| SNPs IDs           | Chromosome IDs | Chromosomes  | Physical positions (bp) | CDC Frontier (Reference genome) | (Pusa 1103 & HPNB) | (ILWC 46 & LPNB) | Sequence genome | Components of | Gene accession IDs | Putative functions |
|--------------------|----------------|--------------|-------------------------|---------------------------------|--------------------|------------------|-----------------|---------------|--------------------|--------------------|
| SNP_87984_A_77974  | NW_004516343.1 | scaffold1027 | 77974                   | TT                              | GG                 | GG               | INTERGENIC      |               |                    |                    |
| SNP_87985_A_99230  | NW_004516343.1 | scaffold1027 | 99230                   | GG                              | AA                 | AA               | INTERGENIC      |               |                    |                    |
| SNP_87986_A_109895 | NW_004516343.1 | scaffold1027 | 109895                  | AA                              | GG                 | GG               | INTERGENIC      |               |                    |                    |
| SNP_87987_A_148413 | NW_004516343.1 | scaffold1027 | 148413                  | CC                              | TT                 | TT               | INTERGENIC      |               |                    |                    |
| SNP_87988_A_148470 | NW_004516343.1 | scaffold1027 | 148470                  | GG                              | AA                 | AA               | INTERGENIC      |               |                    |                    |
| SNP_87989_A_148527 | NW_004516343.1 | scaffold1027 | 148527                  | CC                              | TT                 | TT               | INTERGENIC      |               |                    |                    |
| SNP_87990_A_148551 | NW_004516343.1 | scaffold1027 | 148551                  | GG                              | AA                 | AA               | INTERGENIC      |               |                    |                    |
| SNP_87991_A_148590 | NW_004516343.1 | scaffold1027 | 148590                  | CC                              | TT                 | TT               | INTERGENIC      |               |                    |                    |
| SNP_87992_A_148700 | NW_004516343.1 | scaffold1027 | 148700                  | TT                              | CC                 | CC               | INTERGENIC      |               |                    |                    |
| SNP_87993_A_148728 | NW_004516343.1 | scaffold1027 | 148728                  | TT                              | CC                 | CC               | INTERGENIC      |               |                    |                    |
| SNP_87994_A_148744 | NW_004516343.1 | scaffold1027 | 148744                  | AA                              | GG                 | GG               | INTERGENIC      |               |                    |                    |
| SNP_87995_A_148781 | NW_004516343.1 | scaffold1027 | 148781                  | GG                              | AA                 | AA               | INTERGENIC      |               |                    |                    |
| SNP_87996_A_148787 | NW_004516343.1 | scaffold1027 | 148787                  | TT                              | CC                 | CC               | INTERGENIC      |               |                    |                    |
| SNP_87997_A_148790 | NW_004516343.1 | scaffold1027 | 148790                  | TT                              | CC                 | CC               | INTERGENIC      |               |                    |                    |
| SNP_87998_A_148791 | NW_004516343.1 | scaffold1027 | 148791                  | AA                              | CC                 | CC               | INTERGENIC      |               |                    |                    |
| SNP_87999_A_148889 | NW_004516343.1 | scaffold1027 | 148889                  | GG                              | AA                 | AA               | INTERGENIC      |               |                    |                    |
| SNP_88000_A_148934 | NW_004516343.1 | scaffold1027 | 148934                  | AA                              | GG                 | GG               | INTERGENIC      |               |                    |                    |
| SNP_88001_A_148958 | NW_004516343.1 | scaffold1027 | 148958                  | AA                              | GG                 | GG               | INTERGENIC      |               |                    |                    |
| SNP_88002_A_148970 | NW_004516343.1 | scaffold1027 | 148970                  | TT                              | CC                 | CC               | INTERGENIC      |               |                    |                    |
| SNP_88003_A_149006 | NW_004516343.1 | scaffold1027 | 149006                  | GG                              | AA                 | AA               | INTERGENIC      |               |                    |                    |
| SNP_88004_A_149021 | NW_004516343.1 | scaffold1027 | 149021                  | CC                              | TT                 | TT               | INTERGENIC      |               |                    |                    |
| SNP_88005_A_149045 | NW_004516343.1 | scaffold1027 | 149045                  | TT                              | CC                 | CC               | INTERGENIC      |               |                    |                    |



| SNPs IDs           | Chromosome IDs | Chromosomes  | Physical positions (bp) | CDC Frontier (Reference genome) | (Pusa 1103 & HPNB) | (ILWC 46 & LPNB) | Sequence genome | Components of | Gene accession IDs | Putative functions |
|--------------------|----------------|--------------|-------------------------|---------------------------------|--------------------|------------------|-----------------|---------------|--------------------|--------------------|
| SNP_88006_A_149054 | NW_004516343.1 | scaffold1027 | 149054                  | TT                              | CC                 | CC               | INTERGENIC      |               |                    |                    |
| SNP_88008_A_191355 | NW_004516343.1 | scaffold1027 | 191355                  | AA                              | GG                 | GG               | INTERGENIC      |               |                    |                    |
| SNP_88009_A_191377 | NW_004516343.1 | scaffold1027 | 191377                  | TT                              | CC                 | CC               | INTERGENIC      |               |                    |                    |
| SNP_88010_A_193129 | NW_004516343.1 | scaffold1027 | 193129                  | TT                              | CC                 | CC               | INTERGENIC      |               |                    |                    |
| SNP_88013_A_204254 | NW_004516343.1 | scaffold1027 | 204254                  | CC                              | AA                 | AA               | INTERGENIC      |               |                    |                    |
| SNP_88014_A_204275 | NW_004516343.1 | scaffold1027 | 204275                  | CC                              | TT                 | TT               | INTERGENIC      |               |                    |                    |
| SNP_88015_A_204284 | NW_004516343.1 | scaffold1027 | 204284                  | CC                              | TT                 | TT               | INTERGENIC      |               |                    |                    |
| SNP_88016_A_204321 | NW_004516343.1 | scaffold1027 | 204321                  | AA                              | GG                 | GG               | INTERGENIC      |               |                    |                    |
| SNP_88017_A_204406 | NW_004516343.1 | scaffold1027 | 204406                  | CC                              | AA                 | AA               | INTERGENIC      |               |                    |                    |
| SNP_88018_A_204464 | NW_004516343.1 | scaffold1027 | 204464                  | AA                              | GG                 | GG               | INTERGENIC      |               |                    |                    |
| SNP_88019_A_210810 | NW_004516343.1 | scaffold1027 | 210810                  | CC                              | TT                 | TT               | INTERGENIC      |               |                    |                    |
| SNP_88020_A_210981 | NW_004516343.1 | scaffold1027 | 210981                  | TT                              | GG                 | GG               | INTERGENIC      |               |                    |                    |
| SNP_88021_A_210990 | NW_004516343.1 | scaffold1027 | 210990                  | GG                              | AA                 | AA               | INTERGENIC      |               |                    |                    |
| SNP_88022_A_210991 | NW_004516343.1 | scaffold1027 | 210991                  | AA                              | TT                 | TT               | INTERGENIC      |               |                    |                    |
| SNP_88023_A_210993 | NW_004516343.1 | scaffold1027 | 210993                  | TT                              | CC                 | CC               | INTERGENIC      |               |                    |                    |
| SNP_88024_A_212761 | NW_004516343.1 | scaffold1027 | 212761                  | TT                              | CC                 | CC               | INTERGENIC      |               |                    |                    |
| SNP_88025_A_226676 | NW_004516343.1 | scaffold1027 | 226676                  | TT                              | GG                 | GG               | INTERGENIC      |               |                    |                    |
| SNP_88026_A_228953 | NW_004516343.1 | scaffold1027 | 228953                  | AA                              | GG                 | GG               | INTERGENIC      |               |                    |                    |
| SNP_88027_A_113    | NW_004516344.1 | scaffold1029 | 113                     | GG                              | AA                 | AA               | INTERGENIC      |               |                    |                    |
| SNP_88028_A_171    | NW_004516344.1 | scaffold1029 | 171                     | TT                              | CC                 | CC               | INTERGENIC      |               |                    |                    |
| SNP_88029_A_182    | NW_004516344.1 | scaffold1029 | 182                     | AA                              | GG                 | GG               | INTERGENIC      |               |                    |                    |
| SNP_88030_A_15167  | NW_004516344.1 | scaffold1029 | 15167                   | GG                              | AA                 | AA               | INTERGENIC      |               |                    |                    |

| SNPs IDs           | Chromosome IDs | Chromosomes  | Physical positions (bp) | CDC Frontier (Reference genome) | (Pusa 1103 & HPNB) | (ILWC 46 & LPNB) | Sequence genome | Components of | Gene accession IDs | Putative functions |
|--------------------|----------------|--------------|-------------------------|---------------------------------|--------------------|------------------|-----------------|---------------|--------------------|--------------------|
| SNP_88031_A_18575  | NW_004516344.1 | scaffold1029 | 18575                   | GG                              | AA                 | AA               | INTERGENIC      |               |                    |                    |
| SNP_88032_A_57495  | NW_004516344.1 | scaffold1029 | 57495                   | AA                              | GG                 | GG               | INTERGENIC      |               |                    |                    |
| SNP_88033_A_62021  | NW_004516344.1 | scaffold1029 | 62021                   | AA                              | GG                 | GG               | INTERGENIC      |               |                    |                    |
| SNP_88034_A_110264 | NW_004516344.1 | scaffold1029 | 110264                  | TT                              | CC                 | CC               | INTERGENIC      |               |                    |                    |
| SNP_88035_A_110318 | NW_004516344.1 | scaffold1029 | 110318                  | GG                              | TT                 | TT               | INTERGENIC      |               |                    |                    |
| SNP_88036_A_110375 | NW_004516344.1 | scaffold1029 | 110375                  | AA                              | GG                 | GG               | INTERGENIC      |               |                    |                    |
| SNP_88037_A_110433 | NW_004516344.1 | scaffold1029 | 110433                  | AA                              | GG                 | GG               | INTERGENIC      |               |                    |                    |
| SNP_88038_A_110631 | NW_004516344.1 | scaffold1029 | 110631                  | CC                              | TT                 | TT               | INTERGENIC      |               |                    |                    |
| SNP_88039_A_110707 | NW_004516344.1 | scaffold1029 | 110707                  | AA                              | GG                 | GG               | INTERGENIC      |               |                    |                    |
| SNP_88040_A_114168 | NW_004516344.1 | scaffold1029 | 114168                  | GG                              | AA                 | AA               | INTERGENIC      |               |                    |                    |
| SNP_88041_A_114380 | NW_004516344.1 | scaffold1029 | 114380                  | AA                              | GG                 | GG               | INTERGENIC      |               |                    |                    |
| SNP_88042_A_130726 | NW_004516344.1 | scaffold1029 | 130726                  | AA                              | GG                 | GG               | INTERGENIC      |               |                    |                    |
| SNP_88043_A_149860 | NW_004516344.1 | scaffold1029 | 149860                  | CC                              | TT                 | TT               | INTERGENIC      |               |                    |                    |
| SNP_88044_A_150162 | NW_004516344.1 | scaffold1029 | 150162                  | AA                              | GG                 | GG               | INTERGENIC      |               |                    |                    |
| SNP_88045_A_17240  | NW_004516345.1 | scaffold1032 | 17240                   | AA                              | GG                 | GG               | INTERGENIC      |               |                    |                    |
| SNP_88046_A_17242  | NW_004516345.1 | scaffold1032 | 17242                   | TT                              | GG                 | GG               | INTERGENIC      |               |                    |                    |
| SNP_88047_A_25355  | NW_004516345.1 | scaffold1032 | 25355                   | TT                              | AA                 | AA               | INTERGENIC      |               |                    |                    |
| SNP_88048_A_25356  | NW_004516345.1 | scaffold1032 | 25356                   | TT                              | CC                 | CC               | INTERGENIC      |               |                    |                    |
| SNP_88049_A_1209   | NW_004516347.1 | scaffold1034 | 1209                    | AA                              | TT                 | TT               | INTERGENIC      |               |                    |                    |
| SNP_88050_A_1243   | NW_004516347.1 | scaffold1034 | 1243                    | TT                              | CC                 | CC               | INTERGENIC      |               |                    |                    |
| SNP_88051_A_1244   | NW_004516347.1 | scaffold1034 | 1244                    | CC                              | TT                 | TT               | INTERGENIC      |               |                    |                    |
| SNP_88052_A_1245   | NW_004516347.1 | scaffold1034 | 1245                    | AA                              | GG                 | GG               | INTERGENIC      |               |                    |                    |

| SNPs IDs          | Chromosome IDs | Chromosomes  | Physical positions (bp) | CDC Frontier (Reference genome) | (Pusa 1103 & HPNB) | (ILWC 46 & LPNB) | Sequence genome | Components of | Gene accession IDs | Putative functions |
|-------------------|----------------|--------------|-------------------------|---------------------------------|--------------------|------------------|-----------------|---------------|--------------------|--------------------|
| SNP_88053_A_1266  | NW_004516347.1 | scaffold1034 | 1266                    | GG                              | AA                 | AA               | INTERGENIC      |               |                    |                    |
| SNP_88054_A_3295  | NW_004516347.1 | scaffold1034 | 3295                    | GG                              | AA                 | AA               | INTERGENIC      |               |                    |                    |
| SNP_88055_A_7397  | NW_004516347.1 | scaffold1034 | 7397                    | CC                              | AA                 | AA               | INTERGENIC      |               |                    |                    |
| SNP_88056_A_8941  | NW_004516347.1 | scaffold1034 | 8941                    | CC                              | TT                 | TT               | INTERGENIC      |               |                    |                    |
| SNP_88057_A_9192  | NW_004516347.1 | scaffold1034 | 9192                    | GG                              | AA                 | AA               | INTERGENIC      |               |                    |                    |
| SNP_88058_A_9204  | NW_004516347.1 | scaffold1034 | 9204                    | GG                              | AA                 | AA               | INTERGENIC      |               |                    |                    |
| SNP_88059_A_9291  | NW_004516347.1 | scaffold1034 | 9291                    | CC                              | TT                 | TT               | INTERGENIC      |               |                    |                    |
| SNP_88060_A_13977 | NW_004516347.1 | scaffold1034 | 13977                   | CC                              | TT                 | TT               | INTERGENIC      |               |                    |                    |
| SNP_88061_A_24785 | NW_004516347.1 | scaffold1034 | 24785                   | GG                              | AA                 | AA               | INTERGENIC      |               |                    |                    |
| SNP_88062_A_29606 | NW_004516347.1 | scaffold1034 | 29606                   | AA                              | CC                 | CC               | INTERGENIC      |               |                    |                    |
| SNP_88063_A_35119 | NW_004516347.1 | scaffold1034 | 35119                   | AA                              | GG                 | GG               | INTERGENIC      |               |                    |                    |
| SNP_88064_A_37561 | NW_004516347.1 | scaffold1034 | 37561                   | AA                              | GG                 | GG               | INTERGENIC      |               |                    |                    |
| SNP_88065_A_39469 | NW_004516347.1 | scaffold1034 | 39469                   | TT                              | AA                 | AA               | INTERGENIC      |               |                    |                    |
| SNP_88066_A_39755 | NW_004516347.1 | scaffold1034 | 39755                   | TT                              | CC                 | CC               | INTERGENIC      |               |                    |                    |
| SNP_88067_A_39785 | NW_004516347.1 | scaffold1034 | 39785                   | TT                              | GG                 | GG               | INTERGENIC      |               |                    |                    |
| SNP_88068_A_40918 | NW_004516347.1 | scaffold1034 | 40918                   | AA                              | GG                 | GG               | INTERGENIC      |               |                    |                    |
| SNP_88069_A_46722 | NW_004516347.1 | scaffold1034 | 46722                   | TT                              | CC                 | CC               | INTERGENIC      |               |                    |                    |
| SNP_88070_A_51736 | NW_004516347.1 | scaffold1034 | 51736                   | TT                              | CC                 | CC               | INTERGENIC      |               |                    |                    |
| SNP_88071_A_55181 | NW_004516347.1 | scaffold1034 | 55181                   | GG                              | AA                 | AA               | INTERGENIC      |               |                    |                    |
| SNP_88072_A_60710 | NW_004516347.1 | scaffold1034 | 60710                   | AA                              | GG                 | GG               | INTERGENIC      |               |                    |                    |
| SNP_88073_A_60732 | NW_004516347.1 | scaffold1034 | 60732                   | AA                              | CC                 | CC               | INTERGENIC      |               |                    |                    |
| SNP_88074_A_66497 | NW_004516347.1 | scaffold1034 | 66497                   | AA                              | CC                 | CC               | INTERGENIC      |               |                    |                    |

| SNPs IDs          | Chromosome IDs | Chromosomes  | Physical positions (bp) | CDC Frontier (Reference genome) | (Pusa 1103 & HPNB) | (ILWC 46 & LPNB) | Sequence genome | Components of | Gene accession IDs | Putative functions |
|-------------------|----------------|--------------|-------------------------|---------------------------------|--------------------|------------------|-----------------|---------------|--------------------|--------------------|
| SNP_88075_A_74000 | NW_004516347.1 | scaffold1034 | 74000                   | AA                              | CC                 | CC               | INTERGENIC      |               |                    |                    |
| SNP_88076_A_74029 | NW_004516347.1 | scaffold1034 | 74029                   | TT                              | GG                 | GG               | INTERGENIC      |               |                    |                    |
| SNP_88077_A_74065 | NW_004516347.1 | scaffold1034 | 74065                   | GG                              | AA                 | AA               | INTERGENIC      |               |                    |                    |
| SNP_88078_A_74106 | NW_004516347.1 | scaffold1034 | 74106                   | TT                              | AA                 | AA               | INTERGENIC      |               |                    |                    |
| SNP_88079_A_76770 | NW_004516347.1 | scaffold1034 | 76770                   | TT                              | AA                 | AA               | INTERGENIC      |               |                    |                    |
| SNP_88080_A_81649 | NW_004516347.1 | scaffold1034 | 81649                   | GG                              | AA                 | AA               | INTERGENIC      |               |                    |                    |
| SNP_88081_A_821   | NW_004516348.1 | scaffold1035 | 821                     | CC                              | TT                 | TT               | INTERGENIC      |               |                    |                    |
| SNP_88082_A_947   | NW_004516348.1 | scaffold1035 | 947                     | TT                              | GG                 | GG               | INTERGENIC      |               |                    |                    |
| SNP_88083_A_1158  | NW_004516348.1 | scaffold1035 | 1158                    | GG                              | AA                 | AA               | INTERGENIC      |               |                    |                    |
| SNP_88084_A_1586  | NW_004516348.1 | scaffold1035 | 1586                    | GG                              | CC                 | CC               | INTERGENIC      |               |                    |                    |
| SNP_88085_A_1846  | NW_004516348.1 | scaffold1035 | 1846                    | TT                              | GG                 | GG               | INTERGENIC      |               |                    |                    |
| SNP_88086_A_9995  | NW_004516349.1 | scaffold1036 | 9995                    | CC                              | AA                 | AA               | INTERGENIC      |               |                    |                    |
| SNP_88087_A_10361 | NW_004516349.1 | scaffold1036 | 10361                   | GG                              | CC                 | CC               | INTERGENIC      |               |                    |                    |
| SNP_88088_A_10713 | NW_004516349.1 | scaffold1036 | 10713                   | AA                              | CC                 | CC               | INTERGENIC      |               |                    |                    |
| SNP_88089_A_24702 | NW_004516349.1 | scaffold1036 | 24702                   | GG                              | TT                 | TT               | INTERGENIC      |               |                    |                    |
| SNP_88090_A_27550 | NW_004516349.1 | scaffold1036 | 27550                   | CC                              | GG                 | GG               | INTERGENIC      |               |                    |                    |
| SNP_88091_A_33484 | NW_004516349.1 | scaffold1036 | 33484                   | TT                              | AA                 | AA               | INTERGENIC      |               |                    |                    |
| SNP_88092_A_39485 | NW_004516349.1 | scaffold1036 | 39485                   | CC                              | AA                 | AA               | INTERGENIC      |               |                    |                    |
| SNP_88093_A_43779 | NW_004516349.1 | scaffold1036 | 43779                   | AA                              | CC                 | CC               | INTERGENIC      |               |                    |                    |
| SNP_88094_A_45715 | NW_004516349.1 | scaffold1036 | 45715                   | CC                              | AA                 | AA               | INTERGENIC      |               |                    |                    |
| SNP_88095_A_46011 | NW_004516349.1 | scaffold1036 | 46011                   | CC                              | GG                 | GG               | INTERGENIC      |               |                    |                    |
| SNP_88096_A_46079 | NW_004516349.1 | scaffold1036 | 46079                   | TT                              | CC                 | CC               | INTERGENIC      |               |                    |                    |

| SNPs IDs          | Chromosome IDs | Chromosomes  | Physical positions (bp) | CDC Frontier (Reference genome) | (Pusa 1103 & HPNB) | (ILWC 46 & LPNB) | Sequence genome | Components of | Gene accession IDs | Putative functions |
|-------------------|----------------|--------------|-------------------------|---------------------------------|--------------------|------------------|-----------------|---------------|--------------------|--------------------|
| SNP_88097_A_46111 | NW_004516349.1 | scaffold1036 | 46111                   | AA                              | GG                 | GG               | INTERGENIC      |               |                    |                    |
| SNP_88098_A_46114 | NW_004516349.1 | scaffold1036 | 46114                   | TT                              | CC                 | CC               | INTERGENIC      |               |                    |                    |
| SNP_88099_A_46160 | NW_004516349.1 | scaffold1036 | 46160                   | GG                              | TT                 | TT               | INTERGENIC      |               |                    |                    |
| SNP_88100_A_46238 | NW_004516349.1 | scaffold1036 | 46238                   | AA                              | GG                 | GG               | INTERGENIC      |               |                    |                    |
| SNP_88101_A_46329 | NW_004516349.1 | scaffold1036 | 46329                   | TT                              | GG                 | GG               | INTERGENIC      |               |                    |                    |
| SNP_88102_A_60496 | NW_004516349.1 | scaffold1036 | 60496                   | TT                              | AA                 | AA               | INTERGENIC      |               |                    |                    |
| SNP_88103_A_60515 | NW_004516349.1 | scaffold1036 | 60515                   | AA                              | TT                 | TT               | INTERGENIC      |               |                    |                    |
| SNP_88104_A_60574 | NW_004516349.1 | scaffold1036 | 60574                   | TT                              | AA                 | AA               | INTERGENIC      |               |                    |                    |
| SNP_88105_A_61174 | NW_004516349.1 | scaffold1036 | 61174                   | TT                              | GG                 | GG               | INTERGENIC      |               |                    |                    |
| SNP_88106_A_75472 | NW_004516349.1 | scaffold1036 | 75472                   | CC                              | TT                 | TT               | INTERGENIC      |               |                    |                    |
| SNP_88107_A_77470 | NW_004516349.1 | scaffold1036 | 77470                   | CC                              | TT                 | TT               | INTERGENIC      |               |                    |                    |
| SNP_88108_A_77493 | NW_004516349.1 | scaffold1036 | 77493                   | AA                              | GG                 | GG               | INTERGENIC      |               |                    |                    |
| SNP_88109_A_77547 | NW_004516349.1 | scaffold1036 | 77547                   | CC                              | TT                 | TT               | INTERGENIC      |               |                    |                    |
| SNP_88110_A_77595 | NW_004516349.1 | scaffold1036 | 77595                   | TT                              | AA                 | AA               | INTERGENIC      |               |                    |                    |
| SNP_88111_A_85263 | NW_004516349.1 | scaffold1036 | 85263                   | AA                              | GG                 | GG               | INTERGENIC      |               |                    |                    |
| SNP_88112_A_86778 | NW_004516349.1 | scaffold1036 | 86778                   | AA                              | CC                 | CC               | INTERGENIC      |               |                    |                    |
| SNP_88113_A_87142 | NW_004516349.1 | scaffold1036 | 87142                   | CC                              | GG                 | GG               | INTERGENIC      |               |                    |                    |
| SNP_88114_A_87595 | NW_004516349.1 | scaffold1036 | 87595                   | TT                              | AA                 | AA               | INTERGENIC      |               |                    |                    |
| SNP_88115_A_89086 | NW_004516349.1 | scaffold1036 | 89086                   | TT                              | CC                 | CC               | INTERGENIC      |               |                    |                    |
| SNP_88116_A_89097 | NW_004516349.1 | scaffold1036 | 89097                   | GG                              | CC                 | CC               | INTERGENIC      |               |                    |                    |
| SNP_88117_A_94063 | NW_004516349.1 | scaffold1036 | 94063                   | AA                              | TT                 | TT               | INTERGENIC      |               |                    |                    |
| SNP_88118_A_94067 | NW_004516349.1 | scaffold1036 | 94067                   | GG                              | CC                 | CC               | INTERGENIC      |               |                    |                    |

| SNPs IDs           | Chromosome IDs | Chromosomes  | Physical positions (bp) | CDC Frontier (Reference genome) | (Pusa 1103 & HPNB) | (ILWC 46 & LPNB) | Sequence genome | Components of | Gene accession IDs | Putative functions |
|--------------------|----------------|--------------|-------------------------|---------------------------------|--------------------|------------------|-----------------|---------------|--------------------|--------------------|
| SNP_88119_A_94291  | NW_004516349.1 | scaffold1036 | 94291                   | AA                              | CC                 | CC               | INTERGENIC      |               |                    |                    |
| SNP_88120_A_98365  | NW_004516349.1 | scaffold1036 | 98365                   | TT                              | AA                 | AA               | INTERGENIC      |               |                    |                    |
| SNP_88121_A_99716  | NW_004516349.1 | scaffold1036 | 99716                   | TT                              | CC                 | CC               | INTERGENIC      |               |                    |                    |
| SNP_88122_A_99770  | NW_004516349.1 | scaffold1036 | 99770                   | GG                              | TT                 | TT               | INTERGENIC      |               |                    |                    |
| SNP_88123_A_99786  | NW_004516349.1 | scaffold1036 | 99786                   | TT                              | CC                 | CC               | INTERGENIC      |               |                    |                    |
| SNP_88124_A_100067 | NW_004516349.1 | scaffold1036 | 100067                  | AA                              | TT                 | TT               | INTERGENIC      |               |                    |                    |
| SNP_88125_A_100170 | NW_004516349.1 | scaffold1036 | 100170                  | AA                              | CC                 | CC               | INTERGENIC      |               |                    |                    |
| SNP_88126_A_102283 | NW_004516349.1 | scaffold1036 | 102283                  | GG                              | AA                 | AA               | INTERGENIC      |               |                    |                    |
| SNP_88127_A_102609 | NW_004516349.1 | scaffold1036 | 102609                  | TT                              | AA                 | AA               | INTERGENIC      |               |                    |                    |
| SNP_88128_A_102655 | NW_004516349.1 | scaffold1036 | 102655                  | GG                              | AA                 | AA               | INTERGENIC      |               |                    |                    |
| SNP_88129_A_102786 | NW_004516349.1 | scaffold1036 | 102786                  | AA                              | TT                 | TT               | INTERGENIC      |               |                    |                    |
| SNP_88130_A_102956 | NW_004516349.1 | scaffold1036 | 102956                  | TT                              | GG                 | GG               | INTERGENIC      |               |                    |                    |
| SNP_88131_A_102961 | NW_004516349.1 | scaffold1036 | 102961                  | AA                              | GG                 | GG               | INTERGENIC      |               |                    |                    |
| SNP_88132_A_103024 | NW_004516349.1 | scaffold1036 | 103024                  | TT                              | GG                 | GG               | INTERGENIC      |               |                    |                    |
| SNP_88133_A_103080 | NW_004516349.1 | scaffold1036 | 103080                  | TT                              | CC                 | CC               | INTERGENIC      |               |                    |                    |
| SNP_88134_A_103139 | NW_004516349.1 | scaffold1036 | 103139                  | GG                              | TT                 | TT               | INTERGENIC      |               |                    |                    |
| SNP_88135_A_127023 | NW_004516349.1 | scaffold1036 | 127023                  | GG                              | CC                 | CC               | INTERGENIC      |               |                    |                    |
| SNP_88136_A_139687 | NW_004516349.1 | scaffold1036 | 139687                  | GG                              | TT                 | TT               | INTERGENIC      |               |                    |                    |
| SNP_88137_A_157238 | NW_004516349.1 | scaffold1036 | 157238                  | GG                              | AA                 | AA               | INTERGENIC      |               |                    |                    |
| SNP_88138_A_169539 | NW_004516349.1 | scaffold1036 | 169539                  | CC                              | AA                 | AA               | INTERGENIC      |               |                    |                    |
| SNP_88139_A_169653 | NW_004516349.1 | scaffold1036 | 169653                  | TT                              | AA                 | AA               | INTERGENIC      |               |                    |                    |
| SNP_88140_A_170438 | NW_004516349.1 | scaffold1036 | 170438                  | TT                              | AA                 | AA               | INTERGENIC      |               |                    |                    |

| SNPs IDs           | Chromosome IDs | Chromosomes  | Physical positions (bp) | CDC Frontier (Reference genome) | (Pusa 1103 & HPNB) | (ILWC 46 & LPNB) | Sequence genome | Components of | Gene accession IDs | Putative functions |
|--------------------|----------------|--------------|-------------------------|---------------------------------|--------------------|------------------|-----------------|---------------|--------------------|--------------------|
| SNP_88141_A_187881 | NW_004516349.1 | scaffold1036 | 187881                  | TT                              | GG                 | GG               | INTERGENIC      |               |                    |                    |
| SNP_88142_A_204756 | NW_004516349.1 | scaffold1036 | 204756                  | GG                              | AA                 | AA               | INTERGENIC      |               |                    |                    |
| SNP_88143_A_204973 | NW_004516349.1 | scaffold1036 | 204973                  | AA                              | TT                 | TT               | INTERGENIC      |               |                    |                    |
| SNP_88145_A_205080 | NW_004516349.1 | scaffold1036 | 205080                  | TT                              | CC                 | CC               | INTERGENIC      |               |                    |                    |
| SNP_88146_A_225292 | NW_004516349.1 | scaffold1036 | 225292                  | GG                              | TT                 | TT               | INTERGENIC      |               |                    |                    |
| SNP_88147_A_225368 | NW_004516349.1 | scaffold1036 | 225368                  | AA                              | CC                 | CC               | INTERGENIC      |               |                    |                    |
| SNP_88148_A_225621 | NW_004516349.1 | scaffold1036 | 225621                  | TT                              | CC                 | CC               | INTERGENIC      |               |                    |                    |
| SNP_88149_A_233260 | NW_004516349.1 | scaffold1036 | 233260                  | CC                              | AA                 | AA               | INTERGENIC      |               |                    |                    |
| SNP_88150_A_233272 | NW_004516349.1 | scaffold1036 | 233272                  | TT                              | AA                 | AA               | INTERGENIC      |               |                    |                    |
| SNP_88151_A_236063 | NW_004516349.1 | scaffold1036 | 236063                  | AA                              | TT                 | TT               | INTERGENIC      |               |                    |                    |
| SNP_88152_A_236437 | NW_004516349.1 | scaffold1036 | 236437                  | TT                              | GG                 | GG               | INTERGENIC      |               |                    |                    |
| SNP_88153_A_236704 | NW_004516349.1 | scaffold1036 | 236704                  | TT                              | AA                 | AA               | INTERGENIC      |               |                    |                    |
| SNP_88154_A_236705 | NW_004516349.1 | scaffold1036 | 236705                  | TT                              | CC                 | CC               | INTERGENIC      |               |                    |                    |
| SNP_88155_A_120    | NW_004516350.1 | scaffold1038 | 120                     | AA                              | GG                 | GG               | INTERGENIC      |               |                    |                    |
| SNP_88156_A_273    | NW_004516350.1 | scaffold1038 | 273                     | TT                              | GG                 | GG               | INTERGENIC      |               |                    |                    |
| SNP_88157_A_345    | NW_004516350.1 | scaffold1038 | 345                     | TT                              | CC                 | CC               | INTERGENIC      |               |                    |                    |
| SNP_88158_A_387    | NW_004516350.1 | scaffold1038 | 387                     | AA                              | CC                 | CC               | INTERGENIC      |               |                    |                    |
| SNP_88159_A_554    | NW_004516350.1 | scaffold1038 | 554                     | AA                              | GG                 | GG               | INTERGENIC      |               |                    |                    |
| SNP_88160_A_589    | NW_004516350.1 | scaffold1038 | 589                     | TT                              | AA                 | AA               | INTERGENIC      |               |                    |                    |
| SNP_88161_A_650    | NW_004516350.1 | scaffold1038 | 650                     | AA                              | TT                 | TT               | INTERGENIC      |               |                    |                    |
| SNP_88163_A_1346   | NW_004516350.1 | scaffold1038 | 1346                    | AA                              | GG                 | GG               | INTERGENIC      |               |                    |                    |
| SNP_88164_A_1634   | NW_004516350.1 | scaffold1038 | 1634                    | GG                              | TT                 | TT               | INTERGENIC      |               |                    |                    |

| SNPs IDs         | Chromosome IDs | Chromosomes  | Physical positions (bp) | CDC Frontier (Reference genome) | (Pusa 1103 & HPNB) | (ILWC 46 & LPNB) | Sequence genome | Components of | Gene accession IDs | Putative functions |
|------------------|----------------|--------------|-------------------------|---------------------------------|--------------------|------------------|-----------------|---------------|--------------------|--------------------|
| SNP_88165_A_1664 | NW_004516350.1 | scaffold1038 | 1664                    | TT                              | GG                 | GG               | INTERGENIC      |               |                    |                    |
| SNP_88166_A_1683 | NW_004516350.1 | scaffold1038 | 1683                    | TT                              | CC                 | CC               | INTERGENIC      |               |                    |                    |
| SNP_88167_A_1699 | NW_004516350.1 | scaffold1038 | 1699                    | CC                              | TT                 | TT               | INTERGENIC      |               |                    |                    |
| SNP_88168_A_2017 | NW_004516350.1 | scaffold1038 | 2017                    | AA                              | TT                 | TT               | INTERGENIC      |               |                    |                    |
| SNP_88169_A_2025 | NW_004516350.1 | scaffold1038 | 2025                    | TT                              | AA                 | AA               | INTERGENIC      |               |                    |                    |
| SNP_88170_A_2134 | NW_004516350.1 | scaffold1038 | 2134                    | CC                              | AA                 | AA               | INTERGENIC      |               |                    |                    |
| SNP_88171_A_2227 | NW_004516350.1 | scaffold1038 | 2227                    | AA                              | TT                 | TT               | INTERGENIC      |               |                    |                    |
| SNP_88172_A_2566 | NW_004516350.1 | scaffold1038 | 2566                    | CC                              | TT                 | TT               | INTERGENIC      |               |                    |                    |
| SNP_88173_A_2772 | NW_004516350.1 | scaffold1038 | 2772                    | GG                              | AA                 | AA               | INTERGENIC      |               |                    |                    |
| SNP_88174_A_2997 | NW_004516351.1 | scaffold1039 | 2997                    | AA                              | GG                 | GG               | INTERGENIC      |               |                    |                    |
| SNP_88175_A_3052 | NW_004516351.1 | scaffold1039 | 3052                    | CC                              | TT                 | TT               | INTERGENIC      |               |                    |                    |
| SNP_88177_A_3282 | NW_004516351.1 | scaffold1039 | 3282                    | GG                              | AA                 | AA               | INTERGENIC      |               |                    |                    |
| SNP_88178_A_3804 | NW_004516351.1 | scaffold1039 | 3804                    | CC                              | TT                 | TT               | INTERGENIC      |               |                    |                    |
| SNP_88179_A_3939 | NW_004516351.1 | scaffold1039 | 3939                    | AA                              | GG                 | GG               | INTERGENIC      |               |                    |                    |
| SNP_88180_A_4084 | NW_004516351.1 | scaffold1039 | 4084                    | AA                              | GG                 | GG               | INTERGENIC      |               |                    |                    |
| SNP_88181_A_4245 | NW_004516351.1 | scaffold1039 | 4245                    | TT                              | GG                 | GG               | INTERGENIC      |               |                    |                    |
| SNP_88182_A_4257 | NW_004516351.1 | scaffold1039 | 4257                    | TT                              | CC                 | CC               | INTERGENIC      |               |                    |                    |
| SNP_88183_A_4293 | NW_004516351.1 | scaffold1039 | 4293                    | AA                              | TT                 | TT               | INTERGENIC      |               |                    |                    |
| SNP_88184_A_4336 | NW_004516351.1 | scaffold1039 | 4336                    | TT                              | CC                 | CC               | INTERGENIC      |               |                    |                    |
| SNP_88185_A_4339 | NW_004516351.1 | scaffold1039 | 4339                    | AA                              | TT                 | TT               | INTERGENIC      |               |                    |                    |
| SNP_88186_A_4374 | NW_004516351.1 | scaffold1039 | 4374                    | CC                              | TT                 | TT               | INTERGENIC      |               |                    |                    |
| SNP_88187_A_4498 | NW_004516351.1 | scaffold1039 | 4498                    | AA                              | GG                 | GG               | INTERGENIC      |               |                    |                    |



| SNPs IDs          | Chromosome IDs | Chromosomes  | Physical positions (bp) | CDC Frontier (Reference genome) | (Pusa 1103 & HPNB) | (ILWC 46 & LPNB) | Sequence Components of genome | Gene accession IDs | Putative functions |
|-------------------|----------------|--------------|-------------------------|---------------------------------|--------------------|------------------|-------------------------------|--------------------|--------------------|
| SNP_88188_A_4760  | NW_004516351.1 | scaffold1039 | 4760                    | TT                              | CC                 | CC               | INTERGENIC                    |                    |                    |
| SNP_88189_A_10391 | NW_004516351.1 | scaffold1039 | 10391                   | TT                              | CC                 | CC               | INTERGENIC                    |                    |                    |
| SNP_88190_A_10428 | NW_004516351.1 | scaffold1039 | 10428                   | AA                              | GG                 | GG               | INTERGENIC                    |                    |                    |
| SNP_88191_A_10447 | NW_004516351.1 | scaffold1039 | 10447                   | GG                              | AA                 | AA               | INTERGENIC                    |                    |                    |
| SNP_88192_A_10519 | NW_004516351.1 | scaffold1039 | 10519                   | TT                              | CC                 | CC               | INTERGENIC                    |                    |                    |
| SNP_88193_A_12795 | NW_004516351.1 | scaffold1039 | 12795                   | CC                              | AA                 | AA               | INTERGENIC                    |                    |                    |
| SNP_88194_A_31904 | NW_004516351.1 | scaffold1039 | 31904                   | AA                              | GG                 | GG               | INTERGENIC                    |                    |                    |
| SNP_88195_A_32145 | NW_004516351.1 | scaffold1039 | 32145                   | GG                              | AA                 | AA               | INTERGENIC                    |                    |                    |
| SNP_88196_A_32243 | NW_004516351.1 | scaffold1039 | 32243                   | GG                              | AA                 | AA               | INTERGENIC                    |                    |                    |
| SNP_88197_A_32298 | NW_004516351.1 | scaffold1039 | 32298                   | AA                              | CC                 | CC               | INTERGENIC                    |                    |                    |
| SNP_88198_A_32408 | NW_004516351.1 | scaffold1039 | 32408                   | TT                              | CC                 | CC               | INTERGENIC                    |                    |                    |
| SNP_88199_A_32546 | NW_004516351.1 | scaffold1039 | 32546                   | CC                              | GG                 | GG               | INTERGENIC                    |                    |                    |
| SNP_88201_A_40132 | NW_004516351.1 | scaffold1039 | 40132                   | CC                              | TT                 | TT               | INTERGENIC                    |                    |                    |
| SNP_88202_A_40163 | NW_004516351.1 | scaffold1039 | 40163                   | AA                              | GG                 | GG               | INTERGENIC                    |                    |                    |
| SNP_88203_A_40168 | NW_004516351.1 | scaffold1039 | 40168                   | AA                              | GG                 | GG               | INTERGENIC                    |                    |                    |
| SNP_88204_A_40208 | NW_004516351.1 | scaffold1039 | 40208                   | AA                              | GG                 | GG               | INTERGENIC                    |                    |                    |
| SNP_88205_A_40288 | NW_004516351.1 | scaffold1039 | 40288                   | CC                              | TT                 | TT               | INTERGENIC                    |                    |                    |
| SNP_88206_A_40309 | NW_004516351.1 | scaffold1039 | 40309                   | AA                              | GG                 | GG               | INTERGENIC                    |                    |                    |
| SNP_88207_A_40425 | NW_004516351.1 | scaffold1039 | 40425                   | AA                              | GG                 | GG               | INTERGENIC                    |                    |                    |
| SNP_88208_A_40497 | NW_004516351.1 | scaffold1039 | 40497                   | GG                              | AA                 | AA               | INTERGENIC                    |                    |                    |
| SNP_88209_A_40917 | NW_004516351.1 | scaffold1039 | 40917                   | CC                              | TT                 | TT               | INTERGENIC                    |                    |                    |
| SNP_88210_A_40920 | NW_004516351.1 | scaffold1039 | 40920                   | AA                              | GG                 | GG               | INTERGENIC                    |                    |                    |

| SNPs IDs          | Chromosome IDs | Chromosomes  | Physical positions (bp) | CDC Frontier (Reference genome) | (Pusa 1103 & HPNB) | (ILWC 46 & LPNB) | Sequence genome | Components of | Gene accession IDs | Putative functions |
|-------------------|----------------|--------------|-------------------------|---------------------------------|--------------------|------------------|-----------------|---------------|--------------------|--------------------|
| SNP_88211_A_41124 | NW_004516351.1 | scaffold1039 | 41124                   | CC                              | AA                 | AA               | INTERGENIC      |               |                    |                    |
| SNP_88212_A_41262 | NW_004516351.1 | scaffold1039 | 41262                   | TT                              | CC                 | CC               | INTERGENIC      |               |                    |                    |
| SNP_88213_A_41392 | NW_004516351.1 | scaffold1039 | 41392                   | AA                              | GG                 | GG               | INTERGENIC      |               |                    |                    |
| SNP_88214_A_41396 | NW_004516351.1 | scaffold1039 | 41396                   | GG                              | AA                 | AA               | INTERGENIC      |               |                    |                    |
| SNP_88215_A_41476 | NW_004516351.1 | scaffold1039 | 41476                   | CC                              | TT                 | TT               | INTERGENIC      |               |                    |                    |
| SNP_88217_A_42146 | NW_004516351.1 | scaffold1039 | 42146                   | TT                              | CC                 | CC               | INTERGENIC      |               |                    |                    |
| SNP_88218_A_43699 | NW_004516351.1 | scaffold1039 | 43699                   | GG                              | AA                 | AA               | INTERGENIC      |               |                    |                    |
| SNP_88219_A_43704 | NW_004516351.1 | scaffold1039 | 43704                   | AA                              | TT                 | TT               | INTERGENIC      |               |                    |                    |
| SNP_88220_A_43740 | NW_004516351.1 | scaffold1039 | 43740                   | TT                              | GG                 | GG               | INTERGENIC      |               |                    |                    |
| SNP_88221_A_43900 | NW_004516351.1 | scaffold1039 | 43900                   | CC                              | TT                 | TT               | INTERGENIC      |               |                    |                    |
| SNP_88222_A_44082 | NW_004516351.1 | scaffold1039 | 44082                   | TT                              | CC                 | CC               | INTERGENIC      |               |                    |                    |
| SNP_88223_A_44148 | NW_004516351.1 | scaffold1039 | 44148                   | TT                              | CC                 | CC               | INTERGENIC      |               |                    |                    |
| SNP_88224_A_44730 | NW_004516351.1 | scaffold1039 | 44730                   | GG                              | AA                 | AA               | INTERGENIC      |               |                    |                    |
| SNP_88225_A_44736 | NW_004516351.1 | scaffold1039 | 44736                   | TT                              | CC                 | CC               | INTERGENIC      |               |                    |                    |
| SNP_88226_A_44824 | NW_004516351.1 | scaffold1039 | 44824                   | CC                              | TT                 | TT               | INTERGENIC      |               |                    |                    |
| SNP_88227_A_44916 | NW_004516351.1 | scaffold1039 | 44916                   | AA                              | TT                 | TT               | INTERGENIC      |               |                    |                    |
| SNP_88228_A_44950 | NW_004516351.1 | scaffold1039 | 44950                   | TT                              | CC                 | CC               | INTERGENIC      |               |                    |                    |
| SNP_88229_A_45027 | NW_004516351.1 | scaffold1039 | 45027                   | GG                              | AA                 | AA               | INTERGENIC      |               |                    |                    |
| SNP_88230_A_45256 | NW_004516351.1 | scaffold1039 | 45256                   | TT                              | GG                 | GG               | INTERGENIC      |               |                    |                    |
| SNP_88231_A_45260 | NW_004516351.1 | scaffold1039 | 45260                   | AA                              | TT                 | TT               | INTERGENIC      |               |                    |                    |
| SNP_88232_A_45344 | NW_004516351.1 | scaffold1039 | 45344                   | TT                              | AA                 | AA               | INTERGENIC      |               |                    |                    |
| SNP_88233_A_45357 | NW_004516351.1 | scaffold1039 | 45357                   | CC                              | TT                 | TT               | INTERGENIC      |               |                    |                    |

| SNPs IDs          | Chromosome IDs | Chromosomes  | Physical positions (bp) | CDC Frontier (Reference genome) | (Pusa 1103 & HPNB) | (ILWC 46 & LPNB) | Sequence genome | Components of | Gene accession IDs | Putative functions |
|-------------------|----------------|--------------|-------------------------|---------------------------------|--------------------|------------------|-----------------|---------------|--------------------|--------------------|
| SNP_88234_A_45501 | NW_004516351.1 | scaffold1039 | 45501                   | AA                              | GG                 | GG               | INTERGENIC      |               |                    |                    |
| SNP_88235_A_45545 | NW_004516351.1 | scaffold1039 | 45545                   | CC                              | TT                 | TT               | INTERGENIC      |               |                    |                    |
| SNP_88236_A_45604 | NW_004516351.1 | scaffold1039 | 45604                   | CC                              | TT                 | TT               | INTERGENIC      |               |                    |                    |
| SNP_88237_A_45966 | NW_004516351.1 | scaffold1039 | 45966                   | TT                              | GG                 | GG               | INTERGENIC      |               |                    |                    |
| SNP_88238_A_46003 | NW_004516351.1 | scaffold1039 | 46003                   | AA                              | TT                 | TT               | INTERGENIC      |               |                    |                    |
| SNP_88239_A_46028 | NW_004516351.1 | scaffold1039 | 46028                   | TT                              | CC                 | CC               | INTERGENIC      |               |                    |                    |
| SNP_88240_A_46104 | NW_004516351.1 | scaffold1039 | 46104                   | GG                              | AA                 | AA               | INTERGENIC      |               |                    |                    |
| SNP_88241_A_46147 | NW_004516351.1 | scaffold1039 | 46147                   | AA                              | TT                 | TT               | INTERGENIC      |               |                    |                    |
| SNP_88242_A_46239 | NW_004516351.1 | scaffold1039 | 46239                   | CC                              | GG                 | GG               | INTERGENIC      |               |                    |                    |
| SNP_88243_A_46301 | NW_004516351.1 | scaffold1039 | 46301                   | TT                              | AA                 | AA               | INTERGENIC      |               |                    |                    |
| SNP_88244_A_46306 | NW_004516351.1 | scaffold1039 | 46306                   | AA                              | TT                 | TT               | INTERGENIC      |               |                    |                    |
| SNP_88245_A_47415 | NW_004516351.1 | scaffold1039 | 47415                   | GG                              | AA                 | AA               | INTERGENIC      |               |                    |                    |
| SNP_88246_A_47418 | NW_004516351.1 | scaffold1039 | 47418                   | AA                              | GG                 | GG               | INTERGENIC      |               |                    |                    |
| SNP_88247_A_47429 | NW_004516351.1 | scaffold1039 | 47429                   | CC                              | GG                 | GG               | INTERGENIC      |               |                    |                    |
| SNP_88248_A_47488 | NW_004516351.1 | scaffold1039 | 47488                   | TT                              | CC                 | CC               | INTERGENIC      |               |                    |                    |
| SNP_88249_A_47715 | NW_004516351.1 | scaffold1039 | 47715                   | GG                              | AA                 | AA               | INTERGENIC      |               |                    |                    |
| SNP_88250_A_47724 | NW_004516351.1 | scaffold1039 | 47724                   | AA                              | GG                 | GG               | INTERGENIC      |               |                    |                    |
| SNP_88251_A_47762 | NW_004516351.1 | scaffold1039 | 47762                   | GG                              | AA                 | AA               | INTERGENIC      |               |                    |                    |
| SNP_88252_A_47824 | NW_004516351.1 | scaffold1039 | 47824                   | CC                              | TT                 | TT               | INTERGENIC      |               |                    |                    |
| SNP_88253_A_47860 | NW_004516351.1 | scaffold1039 | 47860                   | CC                              | TT                 | TT               | INTERGENIC      |               |                    |                    |
| SNP_88254_A_47947 | NW_004516351.1 | scaffold1039 | 47947                   | AA                              | GG                 | GG               | INTERGENIC      |               |                    |                    |
| SNP_88255_A_47973 | NW_004516351.1 | scaffold1039 | 47973                   | GG                              | AA                 | AA               | INTERGENIC      |               |                    |                    |

| SNPs IDs          | Chromosome IDs | Chromosomes  | Physical positions (bp) | CDC Frontier (Reference genome) | (Pusa 1103 & HPNB) | (ILWC 46 & LPNB) | Sequence genome | Components of | Gene accession IDs | Putative functions |
|-------------------|----------------|--------------|-------------------------|---------------------------------|--------------------|------------------|-----------------|---------------|--------------------|--------------------|
| SNP_88257_A_48030 | NW_004516351.1 | scaffold1039 | 48030                   | CC                              | TT                 | TT               | INTERGENIC      |               |                    |                    |
| SNP_88258_A_48036 | NW_004516351.1 | scaffold1039 | 48036                   | CC                              | TT                 | TT               | INTERGENIC      |               |                    |                    |
| SNP_88259_A_48039 | NW_004516351.1 | scaffold1039 | 48039                   | TT                              | CC                 | CC               | INTERGENIC      |               |                    |                    |
| SNP_88260_A_48046 | NW_004516351.1 | scaffold1039 | 48046                   | CC                              | TT                 | TT               | INTERGENIC      |               |                    |                    |
| SNP_88261_A_48056 | NW_004516351.1 | scaffold1039 | 48056                   | GG                              | TT                 | TT               | INTERGENIC      |               |                    |                    |
| SNP_88262_A_48057 | NW_004516351.1 | scaffold1039 | 48057                   | AA                              | GG                 | GG               | INTERGENIC      |               |                    |                    |
| SNP_88263_A_48073 | NW_004516351.1 | scaffold1039 | 48073                   | GG                              | AA                 | AA               | INTERGENIC      |               |                    |                    |
| SNP_88264_A_48081 | NW_004516351.1 | scaffold1039 | 48081                   | TT                              | GG                 | GG               | INTERGENIC      |               |                    |                    |
| SNP_88265_A_48114 | NW_004516351.1 | scaffold1039 | 48114                   | TT                              | GG                 | GG               | INTERGENIC      |               |                    |                    |
| SNP_88266_A_48153 | NW_004516351.1 | scaffold1039 | 48153                   | GG                              | AA                 | AA               | INTERGENIC      |               |                    |                    |
| SNP_88267_A_48159 | NW_004516351.1 | scaffold1039 | 48159                   | CC                              | AA                 | AA               | INTERGENIC      |               |                    |                    |
| SNP_88268_A_48206 | NW_004516351.1 | scaffold1039 | 48206                   | TT                              | AA                 | AA               | INTERGENIC      |               |                    |                    |
| SNP_88269_A_48222 | NW_004516351.1 | scaffold1039 | 48222                   | GG                              | AA                 | AA               | INTERGENIC      |               |                    |                    |
| SNP_88270_A_48249 | NW_004516351.1 | scaffold1039 | 48249                   | CC                              | TT                 | TT               | INTERGENIC      |               |                    |                    |
| SNP_88271_A_48355 | NW_004516351.1 | scaffold1039 | 48355                   | TT                              | CC                 | CC               | INTERGENIC      |               |                    |                    |
| SNP_88272_A_48382 | NW_004516351.1 | scaffold1039 | 48382                   | AA                              | CC                 | CC               | INTERGENIC      |               |                    |                    |
| SNP_88273_A_48404 | NW_004516351.1 | scaffold1039 | 48404                   | GG                              | AA                 | AA               | INTERGENIC      |               |                    |                    |
| SNP_88274_A_48507 | NW_004516351.1 | scaffold1039 | 48507                   | AA                              | TT                 | TT               | INTERGENIC      |               |                    |                    |
| SNP_88275_A_48579 | NW_004516351.1 | scaffold1039 | 48579                   | CC                              | AA                 | AA               | INTERGENIC      |               |                    |                    |
| SNP_88277_A_48985 | NW_004516351.1 | scaffold1039 | 48985                   | AA                              | GG                 | GG               | INTERGENIC      |               |                    |                    |
| SNP_88278_A_48993 | NW_004516351.1 | scaffold1039 | 48993                   | TT                              | GG                 | GG               | INTERGENIC      |               |                    |                    |
| SNP_88279_A_49165 | NW_004516351.1 | scaffold1039 | 49165                   | AA                              | TT                 | TT               | INTERGENIC      |               |                    |                    |

| SNPs IDs          | Chromosome IDs | Chromosomes  | Physical positions (bp) | CDC Frontier (Reference genome) | (Pusa 1103 & HPNB) | (ILWC 46 & LPNB) | Sequence genome | Components of | Gene accession IDs | Putative functions |
|-------------------|----------------|--------------|-------------------------|---------------------------------|--------------------|------------------|-----------------|---------------|--------------------|--------------------|
| SNP_88280_A_49177 | NW_004516351.1 | scaffold1039 | 49177                   | AA                              | CC                 | CC               | INTERGENIC      |               |                    |                    |
| SNP_88281_A_49220 | NW_004516351.1 | scaffold1039 | 49220                   | GG                              | TT                 | TT               | INTERGENIC      |               |                    |                    |
| SNP_88282_A_49293 | NW_004516351.1 | scaffold1039 | 49293                   | TT                              | CC                 | CC               | INTERGENIC      |               |                    |                    |
| SNP_88283_A_49724 | NW_004516351.1 | scaffold1039 | 49724                   | TT                              | CC                 | CC               | INTERGENIC      |               |                    |                    |
| SNP_88284_A_49736 | NW_004516351.1 | scaffold1039 | 49736                   | CC                              | GG                 | GG               | INTERGENIC      |               |                    |                    |
| SNP_88285_A_49807 | NW_004516351.1 | scaffold1039 | 49807                   | AA                              | CC                 | CC               | INTERGENIC      |               |                    |                    |
| SNP_88286_A_51033 | NW_004516351.1 | scaffold1039 | 51033                   | CC                              | TT                 | TT               | INTERGENIC      |               |                    |                    |
| SNP_88287_A_51161 | NW_004516351.1 | scaffold1039 | 51161                   | TT                              | AA                 | AA               | INTERGENIC      |               |                    |                    |
| SNP_88288_A_51248 | NW_004516351.1 | scaffold1039 | 51248                   | TT                              | CC                 | CC               | INTERGENIC      |               |                    |                    |
| SNP_88289_A_51264 | NW_004516351.1 | scaffold1039 | 51264                   | CC                              | TT                 | TT               | INTERGENIC      |               |                    |                    |
| SNP_88290_A_51304 | NW_004516351.1 | scaffold1039 | 51304                   | GG                              | AA                 | AA               | INTERGENIC      |               |                    |                    |
| SNP_88291_A_54156 | NW_004516351.1 | scaffold1039 | 54156                   | AA                              | GG                 | GG               | INTERGENIC      |               |                    |                    |
| SNP_88292_A_54285 | NW_004516351.1 | scaffold1039 | 54285                   | AA                              | GG                 | GG               | INTERGENIC      |               |                    |                    |
| SNP_88293_A_54354 | NW_004516351.1 | scaffold1039 | 54354                   | GG                              | AA                 | AA               | INTERGENIC      |               |                    |                    |
| SNP_88294_A_54380 | NW_004516351.1 | scaffold1039 | 54380                   | AA                              | GG                 | GG               | INTERGENIC      |               |                    |                    |
| SNP_88295_A_54395 | NW_004516351.1 | scaffold1039 | 54395                   | AA                              | GG                 | GG               | INTERGENIC      |               |                    |                    |
| SNP_88296_A_54401 | NW_004516351.1 | scaffold1039 | 54401                   | TT                              | CC                 | CC               | INTERGENIC      |               |                    |                    |
| SNP_88297_A_54440 | NW_004516351.1 | scaffold1039 | 54440                   | CC                              | TT                 | TT               | INTERGENIC      |               |                    |                    |
| SNP_88298_A_54516 | NW_004516351.1 | scaffold1039 | 54516                   | AA                              | GG                 | GG               | INTERGENIC      |               |                    |                    |
| SNP_88299_A_54539 | NW_004516351.1 | scaffold1039 | 54539                   | GG                              | AA                 | AA               | INTERGENIC      |               |                    |                    |
| SNP_88300_A_54630 | NW_004516351.1 | scaffold1039 | 54630                   | GG                              | TT                 | TT               | INTERGENIC      |               |                    |                    |
| SNP_88301_A_54637 | NW_004516351.1 | scaffold1039 | 54637                   | AA                              | GG                 | GG               | INTERGENIC      |               |                    |                    |

| SNPs IDs          | Chromosome IDs | Chromosomes  | Physical positions (bp) | CDC Frontier (Reference genome) | (Pusa 1103 & HPNB) | (ILWC 46 & LPNB) | Sequence genome | Components of | Gene accession IDs | Putative functions |
|-------------------|----------------|--------------|-------------------------|---------------------------------|--------------------|------------------|-----------------|---------------|--------------------|--------------------|
| SNP_88302_A_54714 | NW_004516351.1 | scaffold1039 | 54714                   | GG                              | AA                 | AA               | INTERGENIC      |               |                    |                    |
| SNP_88303_A_54887 | NW_004516351.1 | scaffold1039 | 54887                   | TT                              | CC                 | CC               | INTERGENIC      |               |                    |                    |
| SNP_88304_A_54913 | NW_004516351.1 | scaffold1039 | 54913                   | CC                              | TT                 | TT               | INTERGENIC      |               |                    |                    |
| SNP_88305_A_54953 | NW_004516351.1 | scaffold1039 | 54953                   | TT                              | GG                 | GG               | INTERGENIC      |               |                    |                    |
| SNP_88306_A_55005 | NW_004516351.1 | scaffold1039 | 55005                   | CC                              | GG                 | GG               | INTERGENIC      |               |                    |                    |
| SNP_88307_A_55270 | NW_004516351.1 | scaffold1039 | 55270                   | TT                              | CC                 | CC               | INTERGENIC      |               |                    |                    |
| SNP_88308_A_55314 | NW_004516351.1 | scaffold1039 | 55314                   | TT                              | GG                 | GG               | INTERGENIC      |               |                    |                    |
| SNP_88309_A_55358 | NW_004516351.1 | scaffold1039 | 55358                   | CC                              | TT                 | TT               | INTERGENIC      |               |                    |                    |
| SNP_88310_A_57592 | NW_004516351.1 | scaffold1039 | 57592                   | GG                              | AA                 | AA               | INTERGENIC      |               |                    |                    |
| SNP_88311_A_57596 | NW_004516351.1 | scaffold1039 | 57596                   | GG                              | AA                 | AA               | INTERGENIC      |               |                    |                    |
| SNP_88312_A_57621 | NW_004516351.1 | scaffold1039 | 57621                   | TT                              | CC                 | CC               | INTERGENIC      |               |                    |                    |
| SNP_88313_A_57632 | NW_004516351.1 | scaffold1039 | 57632                   | CC                              | TT                 | TT               | INTERGENIC      |               |                    |                    |
| SNP_88314_A_57638 | NW_004516351.1 | scaffold1039 | 57638                   | GG                              | TT                 | TT               | INTERGENIC      |               |                    |                    |
| SNP_88315_A_57640 | NW_004516351.1 | scaffold1039 | 57640                   | TT                              | GG                 | GG               | INTERGENIC      |               |                    |                    |
| SNP_88316_A_57642 | NW_004516351.1 | scaffold1039 | 57642                   | CC                              | GG                 | GG               | INTERGENIC      |               |                    |                    |
| SNP_88317_A_57646 | NW_004516351.1 | scaffold1039 | 57646                   | AA                              | GG                 | GG               | INTERGENIC      |               |                    |                    |
| SNP_88318_A_57691 | NW_004516351.1 | scaffold1039 | 57691                   | TT                              | CC                 | CC               | INTERGENIC      |               |                    |                    |
| SNP_88319_A_57723 | NW_004516351.1 | scaffold1039 | 57723                   | GG                              | AA                 | AA               | INTERGENIC      |               |                    |                    |
| SNP_88320_A_57725 | NW_004516351.1 | scaffold1039 | 57725                   | TT                              | CC                 | CC               | INTERGENIC      |               |                    |                    |
| SNP_88321_A_57822 | NW_004516351.1 | scaffold1039 | 57822                   | TT                              | AA                 | AA               | INTERGENIC      |               |                    |                    |
| SNP_88322_A_57840 | NW_004516351.1 | scaffold1039 | 57840                   | GG                              | CC                 | CC               | INTERGENIC      |               |                    |                    |
| SNP_88323_A_57947 | NW_004516351.1 | scaffold1039 | 57947                   | TT                              | CC                 | CC               | INTERGENIC      |               |                    |                    |

| SNPs IDs          | Chromosome IDs | Chromosomes  | Physical positions (bp) | CDC Frontier (Reference genome) | (Pusa 1103 & HPNB) | (ILWC 46 & LPNB) | Sequence genome | Components of | Gene accession IDs | Putative functions |
|-------------------|----------------|--------------|-------------------------|---------------------------------|--------------------|------------------|-----------------|---------------|--------------------|--------------------|
| SNP_88324_A_57964 | NW_004516351.1 | scaffold1039 | 57964                   | AA                              | GG                 | GG               | INTERGENIC      |               |                    |                    |
| SNP_88325_A_58132 | NW_004516351.1 | scaffold1039 | 58132                   | TT                              | CC                 | CC               | INTERGENIC      |               |                    |                    |
| SNP_88326_A_58146 | NW_004516351.1 | scaffold1039 | 58146                   | CC                              | AA                 | AA               | INTERGENIC      |               |                    |                    |
| SNP_88327_A_58160 | NW_004516351.1 | scaffold1039 | 58160                   | GG                              | AA                 | AA               | INTERGENIC      |               |                    |                    |
| SNP_88328_A_58165 | NW_004516351.1 | scaffold1039 | 58165                   | GG                              | AA                 | AA               | INTERGENIC      |               |                    |                    |
| SNP_88329_A_58462 | NW_004516351.1 | scaffold1039 | 58462                   | TT                              | CC                 | CC               | INTERGENIC      |               |                    |                    |
| SNP_88330_A_58825 | NW_004516351.1 | scaffold1039 | 58825                   | CC                              | AA                 | AA               | INTERGENIC      |               |                    |                    |
| SNP_88331_A_58837 | NW_004516351.1 | scaffold1039 | 58837                   | TT                              | CC                 | CC               | INTERGENIC      |               |                    |                    |
| SNP_88332_A_58859 | NW_004516351.1 | scaffold1039 | 58859                   | TT                              | AA                 | AA               | INTERGENIC      |               |                    |                    |
| SNP_88333_A_58959 | NW_004516351.1 | scaffold1039 | 58959                   | CC                              | AA                 | AA               | INTERGENIC      |               |                    |                    |
| SNP_88334_A_58967 | NW_004516351.1 | scaffold1039 | 58967                   | AA                              | GG                 | GG               | INTERGENIC      |               |                    |                    |
| SNP_88335_A_58977 | NW_004516351.1 | scaffold1039 | 58977                   | CC                              | TT                 | TT               | INTERGENIC      |               |                    |                    |
| SNP_88336_A_58995 | NW_004516351.1 | scaffold1039 | 58995                   | GG                              | AA                 | AA               | INTERGENIC      |               |                    |                    |
| SNP_88337_A_59031 | NW_004516351.1 | scaffold1039 | 59031                   | GG                              | TT                 | TT               | INTERGENIC      |               |                    |                    |
| SNP_88338_A_59040 | NW_004516351.1 | scaffold1039 | 59040                   | AA                              | TT                 | TT               | INTERGENIC      |               |                    |                    |
| SNP_88339_A_59216 | NW_004516351.1 | scaffold1039 | 59216                   | AA                              | CC                 | CC               | INTERGENIC      |               |                    |                    |
| SNP_88341_A_59436 | NW_004516351.1 | scaffold1039 | 59436                   | GG                              | AA                 | AA               | INTERGENIC      |               |                    |                    |
| SNP_88342_A_59554 | NW_004516351.1 | scaffold1039 | 59554                   | GG                              | CC                 | CC               | INTERGENIC      |               |                    |                    |
| SNP_88343_A_59855 | NW_004516351.1 | scaffold1039 | 59855                   | GG                              | AA                 | AA               | INTERGENIC      |               |                    |                    |
| SNP_88344_A_59907 | NW_004516351.1 | scaffold1039 | 59907                   | GG                              | AA                 | AA               | INTERGENIC      |               |                    |                    |
| SNP_88345_A_63473 | NW_004516351.1 | scaffold1039 | 63473                   | AA                              | TT                 | TT               | INTERGENIC      |               |                    |                    |
| SNP_88346_A_63541 | NW_004516351.1 | scaffold1039 | 63541                   | GG                              | CC                 | CC               | INTERGENIC      |               |                    |                    |

| SNPs IDs          | Chromosome IDs | Chromosomes  | Physical positions (bp) | CDC Frontier (Reference genome) | (Pusa 1103 & HPNB) | (ILWC 46 & LPNB) | Sequence genome | Components of | Gene accession IDs | Putative functions |
|-------------------|----------------|--------------|-------------------------|---------------------------------|--------------------|------------------|-----------------|---------------|--------------------|--------------------|
| SNP_88347_A_63552 | NW_004516351.1 | scaffold1039 | 63552                   | TT                              | CC                 | CC               | INTERGENIC      |               |                    |                    |
| SNP_88348_A_63608 | NW_004516351.1 | scaffold1039 | 63608                   | CC                              | TT                 | TT               | INTERGENIC      |               |                    |                    |
| SNP_88349_A_63690 | NW_004516351.1 | scaffold1039 | 63690                   | AA                              | GG                 | GG               | INTERGENIC      |               |                    |                    |
| SNP_88350_A_14608 | NW_004516352.1 | scaffold1041 | 14608                   | AA                              | GG                 | GG               | INTERGENIC      |               |                    |                    |
| SNP_88352_A_12261 | NW_004516353.1 | scaffold1043 | 12261                   | GG                              | CC                 | CC               | INTERGENIC      |               |                    |                    |
| SNP_88353_A_12276 | NW_004516353.1 | scaffold1043 | 12276                   | AA                              | GG                 | GG               | INTERGENIC      |               |                    |                    |
| SNP_88354_A_12279 | NW_004516353.1 | scaffold1043 | 12279                   | GG                              | CC                 | CC               | INTERGENIC      |               |                    |                    |
| SNP_88355_A_12291 | NW_004516353.1 | scaffold1043 | 12291                   | TT                              | CC                 | CC               | INTERGENIC      |               |                    |                    |
| SNP_88356_A_14655 | NW_004516353.1 | scaffold1043 | 14655                   | AA                              | GG                 | GG               | INTERGENIC      |               |                    |                    |
| SNP_88357_A_14665 | NW_004516353.1 | scaffold1043 | 14665                   | TT                              | GG                 | GG               | INTERGENIC      |               |                    |                    |
| SNP_88358_A_14734 | NW_004516353.1 | scaffold1043 | 14734                   | TT                              | GG                 | GG               | INTERGENIC      |               |                    |                    |
| SNP_88359_A_14846 | NW_004516353.1 | scaffold1043 | 14846                   | TT                              | CC                 | CC               | INTERGENIC      |               |                    |                    |
| SNP_88360_A_14866 | NW_004516353.1 | scaffold1043 | 14866                   | AA                              | CC                 | CC               | INTERGENIC      |               |                    |                    |
| SNP_88361_A_15082 | NW_004516353.1 | scaffold1043 | 15082                   | AA                              | GG                 | GG               | INTERGENIC      |               |                    |                    |
| SNP_88362_A_15116 | NW_004516353.1 | scaffold1043 | 15116                   | TT                              | CC                 | CC               | INTERGENIC      |               |                    |                    |
| SNP_88363_A_15237 | NW_004516353.1 | scaffold1043 | 15237                   | AA                              | GG                 | GG               | INTERGENIC      |               |                    |                    |
| SNP_88364_A_15238 | NW_004516353.1 | scaffold1043 | 15238                   | AA                              | GG                 | GG               | INTERGENIC      |               |                    |                    |
| SNP_88365_A_32862 | NW_004516353.1 | scaffold1043 | 32862                   | AA                              | GG                 | GG               | INTERGENIC      |               |                    |                    |
| SNP_88366_A_32913 | NW_004516353.1 | scaffold1043 | 32913                   | AA                              | TT                 | TT               | INTERGENIC      |               |                    |                    |
| SNP_88367_A_32932 | NW_004516353.1 | scaffold1043 | 32932                   | TT                              | AA                 | AA               | INTERGENIC      |               |                    |                    |
| SNP_88368_A_32939 | NW_004516353.1 | scaffold1043 | 32939                   | AA                              | CC                 | CC               | INTERGENIC      |               |                    |                    |
| SNP_88369_A_32961 | NW_004516353.1 | scaffold1043 | 32961                   | CC                              | AA                 | AA               | INTERGENIC      |               |                    |                    |



| SNPs IDs          | Chromosome IDs | Chromosomes  | Physical positions (bp) | CDC Frontier genome (Reference genome) | (Pusa 1103 & HPNB) | (ILWC 46 & LPNB) | Sequence genome | Components of | Gene accession IDs           | Putative functions |
|-------------------|----------------|--------------|-------------------------|----------------------------------------|--------------------|------------------|-----------------|---------------|------------------------------|--------------------|
| SNP_88370_A_32971 | NW_004516353.1 | scaffold1043 | 32971                   | CC                                     | AA                 | AA               | INTERGENIC      |               |                              |                    |
| SNP_88371_A_32990 | NW_004516353.1 | scaffold1043 | 32990                   | CC                                     | TT                 | TT               | INTERGENIC      |               |                              |                    |
| SNP_88372_A_33002 | NW_004516353.1 | scaffold1043 | 33002                   | GG                                     | AA                 | AA               | INTERGENIC      |               |                              |                    |
| SNP_88373_A_33016 | NW_004516353.1 | scaffold1043 | 33016                   | CC                                     | TT                 | TT               | INTERGENIC      |               |                              |                    |
| SNP_88374_A_33028 | NW_004516353.1 | scaffold1043 | 33028                   | TT                                     | AA                 | AA               | INTERGENIC      |               |                              |                    |
| SNP_88375_A_33043 | NW_004516353.1 | scaffold1043 | 33043                   | AA                                     | GG                 | GG               | INTERGENIC      |               |                              |                    |
| SNP_88376_A_33047 | NW_004516353.1 | scaffold1043 | 33047                   | GG                                     | TT                 | TT               | INTERGENIC      |               |                              |                    |
| SNP_88377_A_39377 | NW_004516353.1 | scaffold1043 | 39377                   | GG                                     | AA                 | AA               | INTERGENIC      |               |                              |                    |
| SNP_88378_A_39503 | NW_004516353.1 | scaffold1043 | 39503                   | GG                                     | AA                 | AA               | INTERGENIC      |               |                              |                    |
| SNP_88379_A_39528 | NW_004516353.1 | scaffold1043 | 39528                   | CC                                     | TT                 | TT               | INTERGENIC      |               |                              |                    |
| SNP_88380_A_46745 | NW_004516353.1 | scaffold1043 | 46745                   | TT                                     | GG                 | GG               | INTERGENIC      |               |                              |                    |
| SNP_88381_A_47416 | NW_004516353.1 | scaffold1043 | 47416                   | CC                                     | TT                 | TT               | INTERGENIC      |               |                              |                    |
| SNP_88382_A_55560 | NW_004516353.1 | scaffold1043 | 55560                   | TT                                     | CC                 | CC               | URR             | 101503496     | metalloendoproteinase 1-like |                    |
| SNP_88383_A_55584 | NW_004516353.1 | scaffold1043 | 55584                   | TT                                     | AA                 | AA               | URR             | 101503496     | metalloendoproteinase 1-like |                    |
| SNP_88384_A_62963 | NW_004516353.1 | scaffold1043 | 62963                   | TT                                     | CC                 | CC               | INTERGENIC      |               |                              |                    |
| SNP_88385_A_63085 | NW_004516353.1 | scaffold1043 | 63085                   | TT                                     | CC                 | CC               | INTERGENIC      |               |                              |                    |
| SNP_88386_A_72293 | NW_004516353.1 | scaffold1043 | 72293                   | TT                                     | CC                 | CC               | INTERGENIC      |               |                              |                    |
| SNP_88387_A_72534 | NW_004516353.1 | scaffold1043 | 72534                   | TT                                     | CC                 | CC               | INTERGENIC      |               |                              |                    |
| SNP_88389_A_72596 | NW_004516353.1 | scaffold1043 | 72596                   | TT                                     | GG                 | GG               | INTERGENIC      |               |                              |                    |
| SNP_88390_A_76155 | NW_004516353.1 | scaffold1043 | 76155                   | AA                                     | TT                 | TT               | INTERGENIC      |               |                              |                    |
| SNP_88391_A_76266 | NW_004516353.1 | scaffold1043 | 76266                   | GG                                     | AA                 | AA               | INTERGENIC      |               |                              |                    |
| SNP_88392_A_89797 | NW_004516353.1 | scaffold1043 | 89797                   | TT                                     | CC                 | CC               | INTERGENIC      |               |                              |                    |

| SNPs IDs          | Chromosome IDs | Chromosomes  | Physical positions (bp) | CDC Frontier (Reference genome) | (Pusa 1103 & HPNB) | (ILWC 46 & LPNB) | Sequence genome | Components of | Gene accession IDs | Putative functions |
|-------------------|----------------|--------------|-------------------------|---------------------------------|--------------------|------------------|-----------------|---------------|--------------------|--------------------|
| SNP_88393_A_89901 | NW_004516353.1 | scaffold1043 | 89901                   | TT                              | CC                 | CC               | INTERGENIC      |               |                    |                    |
| SNP_88394_A_696   | NW_004516354.1 | scaffold1044 | 696                     | AA                              | TT                 | TT               | INTERGENIC      |               |                    |                    |
| SNP_88395_A_872   | NW_004516354.1 | scaffold1044 | 872                     | GG                              | TT                 | TT               | INTERGENIC      |               |                    |                    |
| SNP_88396_A_1084  | NW_004516354.1 | scaffold1044 | 1084                    | TT                              | CC                 | CC               | INTERGENIC      |               |                    |                    |
| SNP_88397_A_4852  | NW_004516354.1 | scaffold1044 | 4852                    | CC                              | AA                 | AA               | INTERGENIC      |               |                    |                    |
| SNP_88398_A_4929  | NW_004516354.1 | scaffold1044 | 4929                    | TT                              | CC                 | CC               | INTERGENIC      |               |                    |                    |
| SNP_88399_A_4937  | NW_004516354.1 | scaffold1044 | 4937                    | AA                              | TT                 | TT               | INTERGENIC      |               |                    |                    |
| SNP_88400_A_4959  | NW_004516354.1 | scaffold1044 | 4959                    | TT                              | AA                 | AA               | INTERGENIC      |               |                    |                    |
| SNP_88401_A_11866 | NW_004516354.1 | scaffold1044 | 11866                   | TT                              | CC                 | CC               | INTERGENIC      |               |                    |                    |
| SNP_88402_A_14040 | NW_004516354.1 | scaffold1044 | 14040                   | CC                              | TT                 | TT               | INTERGENIC      |               |                    |                    |
| SNP_88403_A_16842 | NW_004516354.1 | scaffold1044 | 16842                   | CC                              | TT                 | TT               | INTERGENIC      |               |                    |                    |
| SNP_88404_A_16844 | NW_004516354.1 | scaffold1044 | 16844                   | AA                              | GG                 | GG               | INTERGENIC      |               |                    |                    |
| SNP_88405_A_16874 | NW_004516354.1 | scaffold1044 | 16874                   | TT                              | CC                 | CC               | INTERGENIC      |               |                    |                    |
| SNP_88407_A_17271 | NW_004516354.1 | scaffold1044 | 17271                   | CC                              | GG                 | GG               | INTERGENIC      |               |                    |                    |
| SNP_88408_A_17275 | NW_004516354.1 | scaffold1044 | 17275                   | AA                              | TT                 | TT               | INTERGENIC      |               |                    |                    |
| SNP_88409_A_21618 | NW_004516354.1 | scaffold1044 | 21618                   | CC                              | GG                 | GG               | INTERGENIC      |               |                    |                    |
| SNP_88411_A_23894 | NW_004516354.1 | scaffold1044 | 23894                   | AA                              | TT                 | TT               | INTERGENIC      |               |                    |                    |
| SNP_88412_A_26865 | NW_004516354.1 | scaffold1044 | 26865                   | AA                              | TT                 | TT               | INTERGENIC      |               |                    |                    |
| SNP_88413_A_27233 | NW_004516354.1 | scaffold1044 | 27233                   | CC                              | GG                 | GG               | INTERGENIC      |               |                    |                    |
| SNP_88414_A_31581 | NW_004516354.1 | scaffold1044 | 31581                   | TT                              | GG                 | GG               | INTERGENIC      |               |                    |                    |
| SNP_88415_A_34634 | NW_004516354.1 | scaffold1044 | 34634                   | AA                              | GG                 | GG               | INTERGENIC      |               |                    |                    |
| SNP_88417_A_35656 | NW_004516355.1 | scaffold1045 | 35656                   | TT                              | GG                 | GG               | INTERGENIC      |               |                    |                    |

| SNPs IDs          | Chromosome IDs | Chromosomes  | Physical positions (bp) | CDC Frontier (Reference genome) | (Pusa 1103 & HPNB) | (ILWC 46 & LPNB) | Sequence genome | Components of | Gene accession IDs | Putative functions |
|-------------------|----------------|--------------|-------------------------|---------------------------------|--------------------|------------------|-----------------|---------------|--------------------|--------------------|
| SNP_88418_A_35754 | NW_004516355.1 | scaffold1045 | 35754                   | TT                              | CC                 | CC               | INTERGENIC      |               |                    |                    |
| SNP_88419_A_35968 | NW_004516355.1 | scaffold1045 | 35968                   | CC                              | TT                 | TT               | INTERGENIC      |               |                    |                    |
| SNP_88420_A_35971 | NW_004516355.1 | scaffold1045 | 35971                   | GG                              | AA                 | AA               | INTERGENIC      |               |                    |                    |
| SNP_88421_A_36000 | NW_004516355.1 | scaffold1045 | 36000                   | CC                              | TT                 | TT               | INTERGENIC      |               |                    |                    |
| SNP_88422_A_36101 | NW_004516355.1 | scaffold1045 | 36101                   | TT                              | CC                 | CC               | INTERGENIC      |               |                    |                    |
| SNP_88423_A_36149 | NW_004516355.1 | scaffold1045 | 36149                   | TT                              | CC                 | CC               | INTERGENIC      |               |                    |                    |
| SNP_88424_A_36160 | NW_004516355.1 | scaffold1045 | 36160                   | GG                              | CC                 | CC               | INTERGENIC      |               |                    |                    |
| SNP_88425_A_36191 | NW_004516355.1 | scaffold1045 | 36191                   | AA                              | TT                 | TT               | INTERGENIC      |               |                    |                    |
| SNP_88426_A_480   | NW_004516356.1 | scaffold1046 | 480                     | CC                              | GG                 | GG               | INTERGENIC      |               |                    |                    |
| SNP_88427_A_561   | NW_004516356.1 | scaffold1046 | 561                     | AA                              | GG                 | GG               | INTERGENIC      |               |                    |                    |
| SNP_88428_A_775   | NW_004516356.1 | scaffold1046 | 775                     | CC                              | TT                 | TT               | INTERGENIC      |               |                    |                    |
| SNP_88429_A_832   | NW_004516356.1 | scaffold1046 | 832                     | CC                              | TT                 | TT               | INTERGENIC      |               |                    |                    |
| SNP_88430_A_2480  | NW_004516356.1 | scaffold1046 | 2480                    | AA                              | GG                 | GG               | INTERGENIC      |               |                    |                    |
| SNP_88431_A_3080  | NW_004516356.1 | scaffold1046 | 3080                    | TT                              | AA                 | AA               | INTERGENIC      |               |                    |                    |
| SNP_88432_A_3469  | NW_004516356.1 | scaffold1046 | 3469                    | CC                              | TT                 | TT               | INTERGENIC      |               |                    |                    |
| SNP_88433_A_4047  | NW_004516356.1 | scaffold1046 | 4047                    | AA                              | GG                 | GG               | INTERGENIC      |               |                    |                    |
| SNP_88434_A_4232  | NW_004516356.1 | scaffold1046 | 4232                    | CC                              | TT                 | TT               | INTERGENIC      |               |                    |                    |
| SNP_88435_A_4936  | NW_004516356.1 | scaffold1046 | 4936                    | GG                              | AA                 | AA               | INTERGENIC      |               |                    |                    |
| SNP_88437_A_5054  | NW_004516356.1 | scaffold1046 | 5054                    | CC                              | AA                 | AA               | INTERGENIC      |               |                    |                    |
| SNP_88438_A_6070  | NW_004516356.1 | scaffold1046 | 6070                    | GG                              | TT                 | TT               | INTERGENIC      |               |                    |                    |
| SNP_88440_A_8661  | NW_004516356.1 | scaffold1046 | 8661                    | CC                              | AA                 | AA               | INTERGENIC      |               |                    |                    |
| SNP_88441_A_8949  | NW_004516356.1 | scaffold1046 | 8949                    | CC                              | TT                 | TT               | INTERGENIC      |               |                    |                    |

| SNPs IDs          | Chromosome IDs | Chromosomes  | Physical positions (bp) | CDC Frontier (Reference genome) | (Pusa 1103 & HPNB) | (ILWC 46 & LPNB) | Sequence genome | Components of | Gene accession IDs | Putative functions |
|-------------------|----------------|--------------|-------------------------|---------------------------------|--------------------|------------------|-----------------|---------------|--------------------|--------------------|
| SNP_88442_A_9036  | NW_004516356.1 | scaffold1046 | 9036                    | TT                              | GG                 | GG               | INTERGENIC      |               |                    |                    |
| SNP_88443_A_9044  | NW_004516356.1 | scaffold1046 | 9044                    | TT                              | GG                 | GG               | INTERGENIC      |               |                    |                    |
| SNP_88444_A_9148  | NW_004516356.1 | scaffold1046 | 9148                    | GG                              | AA                 | AA               | INTERGENIC      |               |                    |                    |
| SNP_88445_A_9236  | NW_004516356.1 | scaffold1046 | 9236                    | CC                              | AA                 | AA               | INTERGENIC      |               |                    |                    |
| SNP_88446_A_9424  | NW_004516356.1 | scaffold1046 | 9424                    | CC                              | TT                 | TT               | INTERGENIC      |               |                    |                    |
| SNP_88447_A_9847  | NW_004516356.1 | scaffold1046 | 9847                    | TT                              | CC                 | CC               | INTERGENIC      |               |                    |                    |
| SNP_88448_A_9962  | NW_004516356.1 | scaffold1046 | 9962                    | AA                              | CC                 | CC               | INTERGENIC      |               |                    |                    |
| SNP_88449_A_10097 | NW_004516356.1 | scaffold1046 | 10097                   | CC                              | TT                 | TT               | INTERGENIC      |               |                    |                    |
| SNP_88450_A_10137 | NW_004516356.1 | scaffold1046 | 10137                   | TT                              | GG                 | GG               | INTERGENIC      |               |                    |                    |
| SNP_88451_A_10326 | NW_004516356.1 | scaffold1046 | 10326                   | AA                              | GG                 | GG               | INTERGENIC      |               |                    |                    |
| SNP_88452_A_10566 | NW_004516356.1 | scaffold1046 | 10566                   | AA                              | CC                 | CC               | INTERGENIC      |               |                    |                    |
| SNP_88453_A_10623 | NW_004516356.1 | scaffold1046 | 10623                   | TT                              | GG                 | GG               | INTERGENIC      |               |                    |                    |
| SNP_88454_A_10694 | NW_004516356.1 | scaffold1046 | 10694                   | CC                              | GG                 | GG               | INTERGENIC      |               |                    |                    |
| SNP_88455_A_10750 | NW_004516356.1 | scaffold1046 | 10750                   | AA                              | TT                 | TT               | INTERGENIC      |               |                    |                    |
| SNP_88456_A_10879 | NW_004516356.1 | scaffold1046 | 10879                   | TT                              | AA                 | AA               | INTERGENIC      |               |                    |                    |
| SNP_88457_A_11040 | NW_004516356.1 | scaffold1046 | 11040                   | AA                              | TT                 | TT               | INTERGENIC      |               |                    |                    |
| SNP_88458_A_11079 | NW_004516356.1 | scaffold1046 | 11079                   | AA                              | GG                 | GG               | INTERGENIC      |               |                    |                    |
| SNP_88459_A_11097 | NW_004516356.1 | scaffold1046 | 11097                   | GG                              | AA                 | AA               | INTERGENIC      |               |                    |                    |
| SNP_88460_A_11333 | NW_004516356.1 | scaffold1046 | 11333                   | CC                              | TT                 | TT               | INTERGENIC      |               |                    |                    |
| SNP_88461_A_11365 | NW_004516356.1 | scaffold1046 | 11365                   | CC                              | TT                 | TT               | INTERGENIC      |               |                    |                    |
| SNP_88463_A_11392 | NW_004516356.1 | scaffold1046 | 11392                   | CC                              | TT                 | TT               | INTERGENIC      |               |                    |                    |
| SNP_88464_A_11400 | NW_004516356.1 | scaffold1046 | 11400                   | TT                              | GG                 | GG               | INTERGENIC      |               |                    |                    |

| SNPs IDs          | Chromosome IDs | Chromosomes  | Physical positions (bp) | CDC Frontier (Reference genome) | (Pusa 1103 & HPNB) | (ILWC 46 & LPNB) | Sequence genome | Components of | Gene accession IDs | Putative functions |
|-------------------|----------------|--------------|-------------------------|---------------------------------|--------------------|------------------|-----------------|---------------|--------------------|--------------------|
| SNP_88465_A_11419 | NW_004516356.1 | scaffold1046 | 11419                   | TT                              | GG                 | GG               | INTERGENIC      |               |                    |                    |
| SNP_88466_A_11618 | NW_004516356.1 | scaffold1046 | 11618                   | GG                              | AA                 | AA               | INTERGENIC      |               |                    |                    |
| SNP_88467_A_11809 | NW_004516356.1 | scaffold1046 | 11809                   | AA                              | CC                 | CC               | INTERGENIC      |               |                    |                    |
| SNP_88468_A_11827 | NW_004516356.1 | scaffold1046 | 11827                   | AA                              | CC                 | CC               | INTERGENIC      |               |                    |                    |
| SNP_88469_A_11844 | NW_004516356.1 | scaffold1046 | 11844                   | AA                              | GG                 | GG               | INTERGENIC      |               |                    |                    |
| SNP_88470_A_11895 | NW_004516356.1 | scaffold1046 | 11895                   | AA                              | CC                 | CC               | INTERGENIC      |               |                    |                    |
| SNP_88471_A_11956 | NW_004516356.1 | scaffold1046 | 11956                   | AA                              | CC                 | CC               | INTERGENIC      |               |                    |                    |
| SNP_88472_A_12032 | NW_004516356.1 | scaffold1046 | 12032                   | CC                              | TT                 | TT               | INTERGENIC      |               |                    |                    |
| SNP_88473_A_12063 | NW_004516356.1 | scaffold1046 | 12063                   | AA                              | CC                 | CC               | INTERGENIC      |               |                    |                    |
| SNP_88474_A_12093 | NW_004516356.1 | scaffold1046 | 12093                   | CC                              | GG                 | GG               | INTERGENIC      |               |                    |                    |
| SNP_88475_A_12132 | NW_004516356.1 | scaffold1046 | 12132                   | CC                              | GG                 | GG               | INTERGENIC      |               |                    |                    |
| SNP_88476_A_12203 | NW_004516356.1 | scaffold1046 | 12203                   | GG                              | TT                 | TT               | INTERGENIC      |               |                    |                    |
| SNP_88477_A_12302 | NW_004516356.1 | scaffold1046 | 12302                   | CC                              | GG                 | GG               | INTERGENIC      |               |                    |                    |
| SNP_88478_A_12413 | NW_004516356.1 | scaffold1046 | 12413                   | CC                              | AA                 | AA               | INTERGENIC      |               |                    |                    |
| SNP_88479_A_12468 | NW_004516356.1 | scaffold1046 | 12468                   | GG                              | AA                 | AA               | INTERGENIC      |               |                    |                    |
| SNP_88480_A_12892 | NW_004516356.1 | scaffold1046 | 12892                   | TT                              | GG                 | GG               | INTERGENIC      |               |                    |                    |
| SNP_88481_A_13095 | NW_004516356.1 | scaffold1046 | 13095                   | TT                              | CC                 | CC               | INTERGENIC      |               |                    |                    |
| SNP_88482_A_14621 | NW_004516356.1 | scaffold1046 | 14621                   | GG                              | TT                 | TT               | INTERGENIC      |               |                    |                    |
| SNP_88483_A_15413 | NW_004516356.1 | scaffold1046 | 15413                   | GG                              | TT                 | TT               | INTERGENIC      |               |                    |                    |
| SNP_88484_A_15419 | NW_004516356.1 | scaffold1046 | 15419                   | CC                              | GG                 | GG               | INTERGENIC      |               |                    |                    |
| SNP_88485_A_15592 | NW_004516356.1 | scaffold1046 | 15592                   | GG                              | TT                 | TT               | INTERGENIC      |               |                    |                    |
| SNP_88486_A_15717 | NW_004516356.1 | scaffold1046 | 15717                   | TT                              | AA                 | AA               | INTERGENIC      |               |                    |                    |

| SNPs IDs          | Chromosome IDs | Chromosomes  | Physical positions (bp) | CDC Frontier (Reference genome) | (Pusa 1103 & HPNB) | (ILWC 46 & LPNB) | Sequence genome | Components of | Gene accession IDs         | Putative functions |
|-------------------|----------------|--------------|-------------------------|---------------------------------|--------------------|------------------|-----------------|---------------|----------------------------|--------------------|
| SNP_88487_A_15733 | NW_004516356.1 | scaffold1046 | 15733                   | GG                              | CC                 | CC               | INTERGENIC      |               |                            |                    |
| SNP_88489_A_17065 | NW_004516356.1 | scaffold1046 | 17065                   | TT                              | CC                 | CC               | INTERGENIC      |               |                            |                    |
| SNP_88490_A_17097 | NW_004516356.1 | scaffold1046 | 17097                   | CC                              | AA                 | AA               | INTERGENIC      |               |                            |                    |
| SNP_88491_A_17354 | NW_004516356.1 | scaffold1046 | 17354                   | AA                              | TT                 | TT               | INTERGENIC      |               |                            |                    |
| SNP_88492_A_17527 | NW_004516356.1 | scaffold1046 | 17527                   | AA                              | CC                 | CC               | INTERGENIC      |               |                            |                    |
| SNP_88494_A_18073 | NW_004516356.1 | scaffold1046 | 18073                   | GG                              | TT                 | TT               | INTERGENIC      |               |                            |                    |
| SNP_88495_A_18194 | NW_004516356.1 | scaffold1046 | 18194                   | TT                              | AA                 | AA               | INTERGENIC      |               |                            |                    |
| SNP_88496_A_19446 | NW_004516356.1 | scaffold1046 | 19446                   | TT                              | CC                 | CC               | INTERGENIC      |               |                            |                    |
| SNP_88497_A_19448 | NW_004516356.1 | scaffold1046 | 19448                   | GG                              | AA                 | AA               | INTERGENIC      |               |                            |                    |
| SNP_88498_A_19546 | NW_004516356.1 | scaffold1046 | 19546                   | AA                              | CC                 | CC               | INTERGENIC      |               |                            |                    |
| SNP_88499_A_19685 | NW_004516356.1 | scaffold1046 | 19685                   | AA                              | GG                 | GG               | INTERGENIC      |               |                            |                    |
| SNP_88500_A_19737 | NW_004516356.1 | scaffold1046 | 19737                   | AA                              | GG                 | GG               | INTERGENIC      |               |                            |                    |
| SNP_88501_A_20185 | NW_004516356.1 | scaffold1046 | 20185                   | GG                              | AA                 | AA               | INTERGENIC      |               |                            |                    |
| SNP_88503_A_20545 | NW_004516356.1 | scaffold1046 | 20545                   | CC                              | AA                 | AA               | INTERGENIC      |               |                            |                    |
| SNP_88504_A_20593 | NW_004516356.1 | scaffold1046 | 20593                   | AA                              | TT                 | TT               | INTERGENIC      |               |                            |                    |
| SNP_88506_A_21843 | NW_004516356.1 | scaffold1046 | 21843                   | CC                              | GG                 | GG               | INTERGENIC      |               |                            |                    |
| SNP_88507_A_22190 | NW_004516356.1 | scaffold1046 | 22190                   | AA                              | GG                 | GG               | INTERGENIC      |               |                            |                    |
| SNP_88508_A_22706 | NW_004516356.1 | scaffold1046 | 22706                   | CC                              | TT                 | TT               | INTERGENIC      |               |                            |                    |
| SNP_88509_A_30325 | NW_004516356.1 | scaffold1046 | 30325                   | TT                              | AA                 | AA               | INTERGENIC      |               |                            |                    |
| SNP_88510_A_31927 | NW_004516356.1 | scaffold1046 | 31927                   | AA                              | GG                 | GG               | INTERGENIC      |               |                            |                    |
| SNP_88511_A_32340 | NW_004516356.1 | scaffold1046 | 32340                   | AA                              | TT                 | TT               | INTERGENIC      |               |                            |                    |
| SNP_88512_A_5073  | NW_004516357.1 | scaffold1047 | 5073                    | AA                              | TT                 | TT               | INTRON          | 101503832     | cytochrome P450 714C2-like |                    |

| SNPs IDs          | Chromosome IDs | Chromosomes  | Physical positions (bp) | CDC Frontier (Reference genome) | (Pusa 1103 & HPNB) | (ILWC 46 & LPNB) | Sequence Components of genome | Gene accession IDs | Putative functions                               |
|-------------------|----------------|--------------|-------------------------|---------------------------------|--------------------|------------------|-------------------------------|--------------------|--------------------------------------------------|
| SNP_88513_A_5150  | NW_004516357.1 | scaffold1047 | 5150                    | GG                              | TT                 | TT               | INTRON                        | 101503832          | cytochrome P450 714C2-like                       |
| SNP_88514_A_5187  | NW_004516357.1 | scaffold1047 | 5187                    | GG                              | AA                 | AA               | INTRON                        | 101503832          | cytochrome P450 714C2-like                       |
| SNP_88515_A_5518  | NW_004516357.1 | scaffold1047 | 5518                    | GG                              | AA                 | AA               | INTRON                        | 101503832          | cytochrome P450 714C2-like                       |
| SNP_88516_A_7749  | NW_004516357.1 | scaffold1047 | 7749                    | AA                              | GG                 | GG               | URR                           | 101503832          | cytochrome P450 714C2-like                       |
| SNP_88517_A_16785 | NW_004516357.1 | scaffold1047 | 16785                   | TT                              | CC                 | CC               | INTERGENIC                    |                    |                                                  |
| SNP_88518_A_19396 | NW_004516357.1 | scaffold1047 | 19396                   | TT                              | CC                 | CC               | INTRON                        | 101496188          | beta-fructofuranosidase, cell wall isozyme-like  |
| SNP_88519_A_24505 | NW_004516357.1 | scaffold1047 | 24505                   | AA                              | TT                 | TT               | URR                           | 101496188          | beta-fructofuranosidase, cell wall isozyme-like  |
| SNP_88520_A_27944 | NW_004516357.1 | scaffold1047 | 27944                   | GG                              | AA                 | AA               | INTERGENIC                    |                    |                                                  |
| SNP_88521_A_35192 | NW_004516357.1 | scaffold1047 | 35192                   | AA                              | GG                 | GG               | INTERGENIC                    |                    |                                                  |
| SNP_88522_A_36101 | NW_004516357.1 | scaffold1047 | 36101                   | GG                              | AA                 | AA               | INTERGENIC                    |                    |                                                  |
| SNP_88523_A_39190 | NW_004516357.1 | scaffold1047 | 39190                   | AA                              | GG                 | GG               | INTERGENIC                    |                    |                                                  |
| SNP_88525_A_45217 | NW_004516357.1 | scaffold1047 | 45217                   | TT                              | AA                 | AA               | INTERGENIC                    |                    |                                                  |
| SNP_88526_A_45513 | NW_004516357.1 | scaffold1047 | 45513                   | AA                              | GG                 | GG               | INTERGENIC                    |                    |                                                  |
| SNP_88527_A_49668 | NW_004516357.1 | scaffold1047 | 49668                   | CC                              | TT                 | TT               | INTRON                        | 101504469          | phosphatidylinositol 4-phosphate 5-kinase 9-like |
| SNP_88528_A_50862 | NW_004516357.1 | scaffold1047 | 50862                   | CC                              | TT                 | TT               | INTERGENIC                    |                    |                                                  |
| SNP_88529_A_51246 | NW_004516357.1 | scaffold1047 | 51246                   | AA                              | TT                 | TT               | INTERGENIC                    |                    |                                                  |
| SNP_88530_A_55857 | NW_004516357.1 | scaffold1047 | 55857                   | TT                              | GG                 | GG               | INTERGENIC                    |                    |                                                  |
| SNP_88531_A_57515 | NW_004516357.1 | scaffold1047 | 57515                   | TT                              | CC                 | CC               | INTRON                        | 101504789          | beta-fructofuranosidase, cell wall isozyme-like  |
| SNP_88533_A_69053 | NW_004516357.1 | scaffold1047 | 69053                   | CC                              | TT                 | TT               | INTRON                        | 101505762          | actin-related protein 4                          |
| SNP_88534_A_70502 | NW_004516357.1 | scaffold1047 | 70502                   | AA                              | TT                 | TT               | INTRON                        | 101505762          | actin-related protein 4                          |
| SNP_88535_A_71106 | NW_004516357.1 | scaffold1047 | 71106                   | GG                              | TT                 | TT               | INTRON                        | 101505762          | actin-related protein 4                          |
| SNP_88536_A_72550 | NW_004516357.1 | scaffold1047 | 72550                   | TT                              | GG                 | GG               | INTRON                        | 101505762          | actin-related protein 4                          |

| SNPs IDs           | Chromosome IDs | Chromosomes  | Physical positions (bp) | CDC Frontier (Reference genome) | (Pusa 1103 & HPNB) | (ILWC 46 & LPNB) | Sequence Components of genome | Gene accession IDs | Putative functions                                                 |
|--------------------|----------------|--------------|-------------------------|---------------------------------|--------------------|------------------|-------------------------------|--------------------|--------------------------------------------------------------------|
| SNP_88537_A_72962  | NW_004516357.1 | scaffold1047 | 72962                   | TT                              | CC                 | CC               | INTRON                        | 101505762          | actin-related protein 4                                            |
| SNP_88539_A_73951  | NW_004516357.1 | scaffold1047 | 73951                   | AA                              | CC                 | CC               | URR                           | 101505762          | actin-related protein 4                                            |
| SNP_88540_A_74999  | NW_004516357.1 | scaffold1047 | 74999                   | GG                              | TT                 | TT               | DRR                           | 101496518          | uncharacterized protein At1g28695-like                             |
| SNP_88541_A_81193  | NW_004516357.1 | scaffold1047 | 81193                   | AA                              | GG                 | GG               | URR                           | 101496518          | uncharacterized protein At1g28695-like                             |
| SNP_88542_A_82112  | NW_004516357.1 | scaffold1047 | 82112                   | TT                              | AA                 | AA               | INTERGENIC                    |                    |                                                                    |
| SNP_88544_A_95592  | NW_004516357.1 | scaffold1047 | 95592                   | TT                              | CC                 | CC               | URR                           | 101506289          | nucleolin                                                          |
| SNP_88545_A_96369  | NW_004516357.1 | scaffold1047 | 96369                   | AA                              | GG                 | GG               | URR                           | 101506289          | nucleolin                                                          |
| SNP_88546_A_96988  | NW_004516357.1 | scaffold1047 | 96988                   | CC                              | AA                 | AA               | INTERGENIC                    |                    |                                                                    |
| SNP_88547_A_97002  | NW_004516357.1 | scaffold1047 | 97002                   | AA                              | TT                 | TT               | INTERGENIC                    |                    |                                                                    |
| SNP_88548_A_97580  | NW_004516357.1 | scaffold1047 | 97580                   | TT                              | CC                 | CC               | INTERGENIC                    |                    |                                                                    |
| SNP_88549_A_100788 | NW_004516357.1 | scaffold1047 | 100788                  | GG                              | CC                 | CC               | URR                           | 101506841          | cyclin-U4-1-like                                                   |
| SNP_88550_A_102477 | NW_004516357.1 | scaffold1047 | 102477                  | GG                              | AA                 | AA               | URR                           | 101506841          | cyclin-U4-1-like                                                   |
| SNP_88551_A_103407 | NW_004516357.1 | scaffold1047 | 103407                  | CC                              | TT                 | TT               | INTERGENIC                    |                    |                                                                    |
| SNP_88553_A_138110 | NW_004516357.1 | scaffold1047 | 138110                  | CC                              | TT                 | TT               | INTRON                        | 101509278          | dol-P-Man:Man(7)GlcNAc(2)-PP-Dol mannosyltransferase<br>alpha-1,6- |
| SNP_88554_A_175424 | NW_004516357.1 | scaffold1047 | 175424                  | AA                              | GG                 | GG               | INTERGENIC                    |                    |                                                                    |
| SNP_88555_A_256398 | NW_004516357.1 | scaffold1047 | 256398                  | AA                              | TT                 | TT               | URR                           | 101512507          | probable serine/threonine-protein kinase cdc7                      |
| SNP_88556_A_264010 | NW_004516357.1 | scaffold1047 | 264010                  | CC                              | TT                 | TT               | INTERGENIC                    |                    |                                                                    |
| SNP_88557_A_281047 | NW_004516357.1 | scaffold1047 | 281047                  | CC                              | GG                 | GG               | INTERGENIC                    |                    |                                                                    |
| SNP_88560_A_325119 | NW_004516357.1 | scaffold1047 | 325119                  | AA                              | GG                 | GG               | INTRON                        | 101513470          | uclacyanin-2-like                                                  |
| SNP_88561_A_360607 | NW_004516357.1 | scaffold1047 | 360607                  | TT                              | CC                 | CC               | URR                           | 101514998          | plasminogen activator inhibitor 1 RNA-binding protein-like         |
| SNP_88562_A_383449 | NW_004516357.1 | scaffold1047 | 383449                  | AA                              | TT                 | TT               | INTERGENIC                    |                    |                                                                    |
| SNP_88563_A_385785 | NW_004516357.1 | scaffold1047 | 385785                  | GG                              | AA                 | AA               | INTERGENIC                    |                    |                                                                    |



| SNPs IDs           | Chromosome IDs | Chromosomes  | Physical positions (bp) | CDC Frontier (Reference genome) | (Pusa 1103 & HPNB) | (ILWC 46 & LPNB) | Sequence Components of genome | Gene accession IDs | Putative functions                    |
|--------------------|----------------|--------------|-------------------------|---------------------------------|--------------------|------------------|-------------------------------|--------------------|---------------------------------------|
| SNP_88564_A_385813 | NW_004516357.1 | scaffold1047 | 385813                  | GG                              | AA                 | AA               | INTERGENIC                    |                    |                                       |
| SNP_88565_A_385818 | NW_004516357.1 | scaffold1047 | 385818                  | GG                              | AA                 | AA               | INTERGENIC                    |                    |                                       |
| SNP_88566_A_385831 | NW_004516357.1 | scaffold1047 | 385831                  | CC                              | GG                 | GG               | INTERGENIC                    |                    |                                       |
| SNP_88567_A_385837 | NW_004516357.1 | scaffold1047 | 385837                  | TT                              | GG                 | GG               | INTERGENIC                    |                    |                                       |
| SNP_88568_A_386057 | NW_004516357.1 | scaffold1047 | 386057                  | TT                              | AA                 | AA               | INTERGENIC                    |                    |                                       |
| SNP_88569_A_386927 | NW_004516357.1 | scaffold1047 | 386927                  | CC                              | TT                 | TT               | INTERGENIC                    |                    |                                       |
| SNP_88570_A_399895 | NW_004516357.1 | scaffold1047 | 399895                  | CC                              | TT                 | TT               | URR                           | 101488616          | uncharacterized LOC101488616          |
| SNP_88572_A_419821 | NW_004516357.1 | scaffold1047 | 419821                  | GG                              | TT                 | TT               | INTERGENIC                    |                    |                                       |
| SNP_88573_A_419898 | NW_004516357.1 | scaffold1047 | 419898                  | GG                              | AA                 | AA               | INTERGENIC                    |                    |                                       |
| SNP_88574_A_419919 | NW_004516357.1 | scaffold1047 | 419919                  | GG                              | AA                 | AA               | INTERGENIC                    |                    |                                       |
| SNP_88575_A_454659 | NW_004516357.1 | scaffold1047 | 454659                  | CC                              | AA                 | AA               | INTERGENIC                    |                    |                                       |
| SNP_88577_A_503170 | NW_004516357.1 | scaffold1047 | 503170                  | AA                              | GG                 | GG               | INTERGENIC                    |                    |                                       |
| SNP_88578_A_503407 | NW_004516357.1 | scaffold1047 | 503407                  | AA                              | GG                 | GG               | INTERGENIC                    |                    |                                       |
| SNP_88579_A_509269 | NW_004516357.1 | scaffold1047 | 509269                  | CC                              | TT                 | TT               | INTERGENIC                    |                    |                                       |
| SNP_88581_A_552766 | NW_004516357.1 | scaffold1047 | 552766                  | GG                              | AA                 | AA               | URR                           | 101494364          | hydroquinone glucosyltransferase-like |
| SNP_88582_A_569410 | NW_004516357.1 | scaffold1047 | 569410                  | TT                              | CC                 | CC               | INTERGENIC                    |                    |                                       |
| SNP_88583_A_591910 | NW_004516357.1 | scaffold1047 | 591910                  | CC                              | GG                 | GG               | INTRON                        | 101495860          | actin-related protein 4-like          |
| SNP_88584_A_595002 | NW_004516357.1 | scaffold1047 | 595002                  | CC                              | TT                 | TT               | INTRON                        | 101495860          | actin-related protein 4-like          |
| SNP_88585_A_595055 | NW_004516357.1 | scaffold1047 | 595055                  | GG                              | AA                 | AA               | INTRON                        | 101495860          | actin-related protein 4-like          |
| SNP_88587_A_147    | NW_004516358.1 | scaffold1048 | 147                     | AA                              | GG                 | GG               | INTERGENIC                    |                    |                                       |
| SNP_88589_A_1728   | NW_004516359.1 | scaffold1049 | 1728                    | CC                              | TT                 | TT               | INTERGENIC                    |                    |                                       |
| SNP_88590_A_1733   | NW_004516359.1 | scaffold1049 | 1733                    | TT                              | CC                 | CC               | INTERGENIC                    |                    |                                       |

| SNPs IDs           | Chromosome IDs | Chromosomes  | Physical positions (bp) | CDC Frontier (Reference genome) | (Pusa 1103 & HPNB) | (ILWC 46 & LPNB) | Sequence Components of genome | Gene accession IDs | Putative functions |
|--------------------|----------------|--------------|-------------------------|---------------------------------|--------------------|------------------|-------------------------------|--------------------|--------------------|
| SNP_88591_A_1736   | NW_004516359.1 | scaffold1049 | 1736                    | GG                              | TT                 | TT               | INTERGENIC                    |                    |                    |
| SNP_88592_A_1744   | NW_004516359.1 | scaffold1049 | 1744                    | AA                              | GG                 | GG               | INTERGENIC                    |                    |                    |
| SNP_88593_A_34557  | NW_004516359.1 | scaffold1049 | 34557                   | TT                              | CC                 | CC               | INTERGENIC                    |                    |                    |
| SNP_88594_A_34562  | NW_004516359.1 | scaffold1049 | 34562                   | TT                              | CC                 | CC               | INTERGENIC                    |                    |                    |
| SNP_88595_A_73015  | NW_004516359.1 | scaffold1049 | 73015                   | CC                              | TT                 | TT               | INTERGENIC                    |                    |                    |
| SNP_88596_A_74752  | NW_004516359.1 | scaffold1049 | 74752                   | AA                              | GG                 | GG               | INTERGENIC                    |                    |                    |
| SNP_88598_A_93233  | NW_004516359.1 | scaffold1049 | 93233                   | CC                              | GG                 | GG               | INTERGENIC                    |                    |                    |
| SNP_88599_A_99703  | NW_004516359.1 | scaffold1049 | 99703                   | TT                              | GG                 | GG               | INTERGENIC                    |                    |                    |
| SNP_88600_A_99936  | NW_004516359.1 | scaffold1049 | 99936                   | TT                              | AA                 | AA               | INTERGENIC                    |                    |                    |
| SNP_88601_A_110915 | NW_004516359.1 | scaffold1049 | 110915                  | GG                              | TT                 | TT               | INTRON                        | 101499978          | Unknown function   |
| SNP_88602_A_110943 | NW_004516359.1 | scaffold1049 | 110943                  | TT                              | CC                 | CC               | INTRON                        | 101499978          | Unknown function   |
| SNP_88603_A_110979 | NW_004516359.1 | scaffold1049 | 110979                  | AA                              | CC                 | CC               | INTRON                        | 101499978          | Unknown function   |
| SNP_88604_A_111182 | NW_004516359.1 | scaffold1049 | 111182                  | TT                              | CC                 | CC               | INTRON                        | 101499978          | Unknown function   |
| SNP_88605_A_111247 | NW_004516359.1 | scaffold1049 | 111247                  | AA                              | GG                 | GG               | SYNONYMOUS_CODING             | 101499978          | Unknown function   |
| SNP_88606_A_127969 | NW_004516359.1 | scaffold1049 | 127969                  | TT                              | GG                 | GG               | INTERGENIC                    |                    |                    |
| SNP_88607_A_127987 | NW_004516359.1 | scaffold1049 | 127987                  | AA                              | GG                 | GG               | INTERGENIC                    |                    |                    |
| SNP_88608_A_127988 | NW_004516359.1 | scaffold1049 | 127988                  | CC                              | GG                 | GG               | INTERGENIC                    |                    |                    |
| SNP_88609_A_128098 | NW_004516359.1 | scaffold1049 | 128098                  | AA                              | GG                 | GG               | INTERGENIC                    |                    |                    |
| SNP_88610_A_128253 | NW_004516359.1 | scaffold1049 | 128253                  | TT                              | CC                 | CC               | INTERGENIC                    |                    |                    |
| SNP_88611_A_128270 | NW_004516359.1 | scaffold1049 | 128270                  | AA                              | GG                 | GG               | INTERGENIC                    |                    |                    |
| SNP_88612_A_128298 | NW_004516359.1 | scaffold1049 | 128298                  | GG                              | CC                 | CC               | INTERGENIC                    |                    |                    |
| SNP_88613_A_128466 | NW_004516359.1 | scaffold1049 | 128466                  | TT                              | CC                 | CC               | INTERGENIC                    |                    |                    |

| SNPs IDs           | Chromosome IDs | Chromosomes  | Physical positions (bp) | CDC Frontier (Reference genome) | (Pusa 1103 & HPNB) | (ILWC 46 & LPNB) | Sequence Components of genome | Gene accession IDs | Putative functions |
|--------------------|----------------|--------------|-------------------------|---------------------------------|--------------------|------------------|-------------------------------|--------------------|--------------------|
| SNP_88614_A_128475 | NW_004516359.1 | scaffold1049 | 128475                  | GG                              | AA                 | AA               | INTERGENIC                    |                    |                    |
| SNP_88615_A_128487 | NW_004516359.1 | scaffold1049 | 128487                  | AA                              | GG                 | GG               | INTERGENIC                    |                    |                    |
| SNP_88616_A_128580 | NW_004516359.1 | scaffold1049 | 128580                  | AA                              | GG                 | GG               | INTERGENIC                    |                    |                    |
| SNP_88617_A_128587 | NW_004516359.1 | scaffold1049 | 128587                  | CC                              | TT                 | TT               | INTERGENIC                    |                    |                    |
| SNP_88618_A_160072 | NW_004516359.1 | scaffold1049 | 160072                  | TT                              | AA                 | AA               | INTERGENIC                    |                    |                    |
| SNP_88619_A_185136 | NW_004516359.1 | scaffold1049 | 185136                  | GG                              | AA                 | AA               | INTERGENIC                    |                    |                    |
| SNP_88620_A_195016 | NW_004516359.1 | scaffold1049 | 195016                  | AA                              | GG                 | GG               | INTERGENIC                    |                    |                    |
| SNP_88621_A_240392 | NW_004516359.1 | scaffold1049 | 240392                  | CC                              | TT                 | TT               | INTERGENIC                    |                    |                    |
| SNP_88622_A_262408 | NW_004516359.1 | scaffold1049 | 262408                  | AA                              | GG                 | GG               | INTRON                        | 101500948          | Unknown function   |
| SNP_88623_A_277314 | NW_004516359.1 | scaffold1049 | 277314                  | AA                              | GG                 | GG               | INTERGENIC                    |                    |                    |
| SNP_88624_A_277334 | NW_004516359.1 | scaffold1049 | 277334                  | TT                              | CC                 | CC               | INTERGENIC                    |                    |                    |
| SNP_88625_A_293701 | NW_004516359.1 | scaffold1049 | 293701                  | TT                              | AA                 | AA               | INTERGENIC                    |                    |                    |
| SNP_88627_A_13200  | NW_004516360.1 | scaffold1050 | 13200                   | CC                              | TT                 | TT               | INTERGENIC                    |                    |                    |
| SNP_88628_A_13211  | NW_004516360.1 | scaffold1050 | 13211                   | AA                              | GG                 | GG               | INTERGENIC                    |                    |                    |
| SNP_88629_A_13226  | NW_004516360.1 | scaffold1050 | 13226                   | CC                              | TT                 | TT               | INTERGENIC                    |                    |                    |
| SNP_88630_A_13574  | NW_004516360.1 | scaffold1050 | 13574                   | TT                              | AA                 | AA               | INTERGENIC                    |                    |                    |
| SNP_88631_A_60978  | NW_004516360.1 | scaffold1050 | 60978                   | TT                              | CC                 | CC               | INTERGENIC                    |                    |                    |
| SNP_88632_A_94493  | NW_004516360.1 | scaffold1050 | 94493                   | TT                              | CC                 | CC               | INTRON                        | 101502956          | Unknown function   |
| SNP_88633_A_97708  | NW_004516360.1 | scaffold1050 | 97708                   | GG                              | AA                 | AA               | INTRON                        | 101502956          | Unknown function   |
| SNP_88634_A_246568 | NW_004516360.1 | scaffold1050 | 246568                  | AA                              | GG                 | GG               | INTERGENIC                    |                    |                    |
| SNP_88635_A_249853 | NW_004516360.1 | scaffold1050 | 249853                  | TT                              | CC                 | CC               | INTERGENIC                    |                    |                    |
| SNP_88636_A_249892 | NW_004516360.1 | scaffold1050 | 249892                  | TT                              | AA                 | AA               | INTERGENIC                    |                    |                    |

| SNPs IDs           | Chromosome IDs | Chromosomes  | Physical positions (bp) | CDC Frontier (Reference genome) | (Pusa 1103 & HPNB) | (ILWC 46 & LPNB) | Sequence genome | Components of | Gene accession IDs | Putative functions |
|--------------------|----------------|--------------|-------------------------|---------------------------------|--------------------|------------------|-----------------|---------------|--------------------|--------------------|
| SNP_88637_A_249906 | NW_004516360.1 | scaffold1050 | 249906                  | TT                              | GG                 | GG               | INTERGENIC      |               |                    |                    |
| SNP_88638_A_249923 | NW_004516360.1 | scaffold1050 | 249923                  | TT                              | CC                 | CC               | INTERGENIC      |               |                    |                    |
| SNP_88640_A_2146   | NW_004516361.1 | scaffold1051 | 2146                    | AA                              | TT                 | TT               | INTERGENIC      |               |                    |                    |
| SNP_88641_A_2302   | NW_004516361.1 | scaffold1051 | 2302                    | TT                              | GG                 | GG               | INTERGENIC      |               |                    |                    |
| SNP_88642_A_13632  | NW_004516361.1 | scaffold1051 | 13632                   | GG                              | CC                 | CC               | INTERGENIC      |               |                    |                    |
| SNP_88643_A_13712  | NW_004516361.1 | scaffold1051 | 13712                   | TT                              | CC                 | CC               | INTERGENIC      |               |                    |                    |
| SNP_88644_A_13827  | NW_004516361.1 | scaffold1051 | 13827                   | CC                              | TT                 | TT               | INTERGENIC      |               |                    |                    |
| SNP_88645_A_13833  | NW_004516361.1 | scaffold1051 | 13833                   | TT                              | AA                 | AA               | INTERGENIC      |               |                    |                    |
| SNP_88646_A_13872  | NW_004516361.1 | scaffold1051 | 13872                   | TT                              | CC                 | CC               | INTERGENIC      |               |                    |                    |
| SNP_88647_A_13878  | NW_004516361.1 | scaffold1051 | 13878                   | TT                              | CC                 | CC               | INTERGENIC      |               |                    |                    |
| SNP_88648_A_13985  | NW_004516361.1 | scaffold1051 | 13985                   | CC                              | TT                 | TT               | INTERGENIC      |               |                    |                    |
| SNP_88649_A_14011  | NW_004516361.1 | scaffold1051 | 14011                   | GG                              | AA                 | AA               | INTERGENIC      |               |                    |                    |
| SNP_88650_A_14051  | NW_004516361.1 | scaffold1051 | 14051                   | GG                              | TT                 | TT               | INTERGENIC      |               |                    |                    |
| SNP_88651_A_14268  | NW_004516361.1 | scaffold1051 | 14268                   | TT                              | CC                 | CC               | INTERGENIC      |               |                    |                    |
| SNP_88652_A_24673  | NW_004516361.1 | scaffold1051 | 24673                   | AA                              | CC                 | CC               | INTERGENIC      |               |                    |                    |
| SNP_88653_A_25610  | NW_004516361.1 | scaffold1051 | 25610                   | CC                              | TT                 | TT               | INTERGENIC      |               |                    |                    |
| SNP_88654_A_29122  | NW_004516361.1 | scaffold1051 | 29122                   | AA                              | TT                 | TT               | INTERGENIC      |               |                    |                    |
| SNP_88655_A_30559  | NW_004516361.1 | scaffold1051 | 30559                   | AA                              | GG                 | GG               | INTERGENIC      |               |                    |                    |
| SNP_88656_A_30560  | NW_004516361.1 | scaffold1051 | 30560                   | AA                              | GG                 | GG               | INTERGENIC      |               |                    |                    |
| SNP_88657_A_44875  | NW_004516361.1 | scaffold1051 | 44875                   | CC                              | TT                 | TT               | INTERGENIC      |               |                    |                    |
| SNP_88658_A_48651  | NW_004516361.1 | scaffold1051 | 48651                   | CC                              | TT                 | TT               | INTERGENIC      |               |                    |                    |
| SNP_88659_A_49066  | NW_004516361.1 | scaffold1051 | 49066                   | GG                              | TT                 | TT               | INTERGENIC      |               |                    |                    |

| SNPs IDs          | Chromosome IDs | Chromosomes  | Physical positions (bp) | CDC Frontier (Reference genome) | (Pusa 1103 & HPNB) | (ILWC 46 & LPNB) | Sequence genome | Components of | Gene accession IDs | Putative functions |
|-------------------|----------------|--------------|-------------------------|---------------------------------|--------------------|------------------|-----------------|---------------|--------------------|--------------------|
| SNP_88660_A_50378 | NW_004516361.1 | scaffold1051 | 50378                   | GG                              | CC                 | CC               | INTERGENIC      |               |                    |                    |
| SNP_88661_A_73789 | NW_004516361.1 | scaffold1051 | 73789                   | TT                              | GG                 | GG               | INTERGENIC      |               |                    |                    |
| SNP_88662_A_77136 | NW_004516361.1 | scaffold1051 | 77136                   | AA                              | CC                 | CC               | INTERGENIC      |               |                    |                    |
| SNP_88663_A_10419 | NW_004516362.1 | scaffold1052 | 10419                   | GG                              | AA                 | AA               | INTERGENIC      |               |                    |                    |
| SNP_88664_A_10432 | NW_004516362.1 | scaffold1052 | 10432                   | CC                              | TT                 | TT               | INTERGENIC      |               |                    |                    |
| SNP_88665_A_10445 | NW_004516362.1 | scaffold1052 | 10445                   | GG                              | AA                 | AA               | INTERGENIC      |               |                    |                    |
| SNP_88666_A_11357 | NW_004516362.1 | scaffold1052 | 11357                   | TT                              | CC                 | CC               | INTERGENIC      |               |                    |                    |
| SNP_88668_A_11470 | NW_004516362.1 | scaffold1052 | 11470                   | TT                              | CC                 | CC               | INTERGENIC      |               |                    |                    |
| SNP_88669_A_14630 | NW_004516362.1 | scaffold1052 | 14630                   | CC                              | TT                 | TT               | INTERGENIC      |               |                    |                    |
| SNP_88670_A_14738 | NW_004516362.1 | scaffold1052 | 14738                   | GG                              | AA                 | AA               | INTERGENIC      |               |                    |                    |
| SNP_88671_A_16224 | NW_004516362.1 | scaffold1052 | 16224                   | TT                              | CC                 | CC               | INTERGENIC      |               |                    |                    |
| SNP_88673_A_16417 | NW_004516362.1 | scaffold1052 | 16417                   | TT                              | AA                 | AA               | INTERGENIC      |               |                    |                    |
| SNP_88675_A_16519 | NW_004516362.1 | scaffold1052 | 16519                   | AA                              | GG                 | GG               | INTERGENIC      |               |                    |                    |
| SNP_88676_A_16590 | NW_004516362.1 | scaffold1052 | 16590                   | TT                              | CC                 | CC               | INTERGENIC      |               |                    |                    |
| SNP_88677_A_17539 | NW_004516362.1 | scaffold1052 | 17539                   | AA                              | GG                 | GG               | INTERGENIC      |               |                    |                    |
| SNP_88678_A_17679 | NW_004516362.1 | scaffold1052 | 17679                   | AA                              | CC                 | CC               | INTERGENIC      |               |                    |                    |
| SNP_88679_A_17822 | NW_004516362.1 | scaffold1052 | 17822                   | CC                              | TT                 | TT               | INTERGENIC      |               |                    |                    |
| SNP_88680_A_18013 | NW_004516362.1 | scaffold1052 | 18013                   | CC                              | TT                 | TT               | INTERGENIC      |               |                    |                    |
| SNP_88682_A_22797 | NW_004516362.1 | scaffold1052 | 22797                   | GG                              | AA                 | AA               | INTERGENIC      |               |                    |                    |
| SNP_88683_A_41218 | NW_004516362.1 | scaffold1052 | 41218                   | GG                              | AA                 | AA               | INTERGENIC      |               |                    |                    |
| SNP_88685_A_50284 | NW_004516362.1 | scaffold1052 | 50284                   | AA                              | TT                 | TT               | INTERGENIC      |               |                    |                    |
| SNP_88686_A_50306 | NW_004516362.1 | scaffold1052 | 50306                   | CC                              | AA                 | AA               | INTERGENIC      |               |                    |                    |

| SNPs IDs          | Chromosome IDs | Chromosomes  | Physical positions (bp) | CDC Frontier (Reference genome) | (Pusa 1103 & HPNB) | (ILWC 46 & LPNB) | Sequence genome | Components of | Gene accession IDs | Putative functions |
|-------------------|----------------|--------------|-------------------------|---------------------------------|--------------------|------------------|-----------------|---------------|--------------------|--------------------|
| SNP_88687_A_50489 | NW_004516362.1 | scaffold1052 | 50489                   | CC                              | TT                 | TT               | INTERGENIC      |               |                    |                    |
| SNP_88688_A_50876 | NW_004516362.1 | scaffold1052 | 50876                   | AA                              | TT                 | TT               | INTERGENIC      |               |                    |                    |
| SNP_88689_A_50881 | NW_004516362.1 | scaffold1052 | 50881                   | TT                              | AA                 | AA               | INTERGENIC      |               |                    |                    |
| SNP_88691_A_53622 | NW_004516362.1 | scaffold1052 | 53622                   | CC                              | TT                 | TT               | INTERGENIC      |               |                    |                    |
| SNP_88692_A_55183 | NW_004516362.1 | scaffold1052 | 55183                   | GG                              | TT                 | TT               | INTERGENIC      |               |                    |                    |
| SNP_88693_A_55381 | NW_004516362.1 | scaffold1052 | 55381                   | GG                              | AA                 | AA               | INTERGENIC      |               |                    |                    |
| SNP_88694_A_57847 | NW_004516362.1 | scaffold1052 | 57847                   | TT                              | CC                 | CC               | INTERGENIC      |               |                    |                    |
| SNP_88695_A_60626 | NW_004516362.1 | scaffold1052 | 60626                   | GG                              | TT                 | TT               | INTERGENIC      |               |                    |                    |
| SNP_88696_A_65457 | NW_004516362.1 | scaffold1052 | 65457                   | TT                              | AA                 | AA               | INTERGENIC      |               |                    |                    |
| SNP_88697_A_66043 | NW_004516362.1 | scaffold1052 | 66043                   | GG                              | AA                 | AA               | INTERGENIC      |               |                    |                    |
| SNP_88698_A_66070 | NW_004516362.1 | scaffold1052 | 66070                   | GG                              | CC                 | CC               | INTERGENIC      |               |                    |                    |
| SNP_88699_A_67409 | NW_004516362.1 | scaffold1052 | 67409                   | GG                              | CC                 | CC               | INTERGENIC      |               |                    |                    |
| SNP_88700_A_67432 | NW_004516362.1 | scaffold1052 | 67432                   | CC                              | TT                 | TT               | INTERGENIC      |               |                    |                    |
| SNP_88701_A_71783 | NW_004516362.1 | scaffold1052 | 71783                   | TT                              | AA                 | AA               | INTERGENIC      |               |                    |                    |
| SNP_88702_A_77643 | NW_004516362.1 | scaffold1052 | 77643                   | GG                              | AA                 | CC               | INTERGENIC      |               |                    |                    |
| SNP_88703_A_78250 | NW_004516362.1 | scaffold1052 | 78250                   | GG                              | AA                 | AA               | INTERGENIC      |               |                    |                    |
| SNP_88704_A_81871 | NW_004516362.1 | scaffold1052 | 81871                   | AA                              | GG                 | GG               | INTERGENIC      |               |                    |                    |
| SNP_88705_A_84478 | NW_004516362.1 | scaffold1052 | 84478                   | CC                              | GG                 | GG               | INTERGENIC      |               |                    |                    |
| SNP_88706_A_88561 | NW_004516362.1 | scaffold1052 | 88561                   | GG                              | AA                 | AA               | INTERGENIC      |               |                    |                    |
| SNP_88707_A_88579 | NW_004516362.1 | scaffold1052 | 88579                   | TT                              | GG                 | GG               | INTERGENIC      |               |                    |                    |
| SNP_88708_A_88622 | NW_004516362.1 | scaffold1052 | 88622                   | TT                              | AA                 | AA               | INTERGENIC      |               |                    |                    |
| SNP_88709_A_88623 | NW_004516362.1 | scaffold1052 | 88623                   | TT                              | GG                 | GG               | INTERGENIC      |               |                    |                    |

| SNPs IDs           | Chromosome IDs | Chromosomes  | Physical positions (bp) | CDC Frontier genome (Reference genome) | (Pusa 1103 & HPNB) | (ILWC 46 & LPNB) | Sequence Components of genome | Gene accession IDs | Putative functions |
|--------------------|----------------|--------------|-------------------------|----------------------------------------|--------------------|------------------|-------------------------------|--------------------|--------------------|
| SNP_88711_A_96181  | NW_004516362.1 | scaffold1052 | 96181                   | CC                                     | TT                 | TT               | INTERGENIC                    |                    |                    |
| SNP_88712_A_104272 | NW_004516362.1 | scaffold1052 | 104272                  | GG                                     | AA                 | AA               | INTERGENIC                    |                    |                    |
| SNP_88713_A_104716 | NW_004516362.1 | scaffold1052 | 104716                  | TT                                     | AA                 | AA               | INTERGENIC                    |                    |                    |
| SNP_88714_A_105155 | NW_004516362.1 | scaffold1052 | 105155                  | CC                                     | AA                 | AA               | INTERGENIC                    |                    |                    |
| SNP_88715_A_116532 | NW_004516362.1 | scaffold1052 | 116532                  | CC                                     | TT                 | TT               | INTERGENIC                    |                    |                    |
| SNP_88717_A_129443 | NW_004516362.1 | scaffold1052 | 129443                  | GG                                     | AA                 | AA               | INTERGENIC                    |                    |                    |
| SNP_88718_A_129943 | NW_004516362.1 | scaffold1052 | 129943                  | AA                                     | GG                 | GG               | INTERGENIC                    |                    |                    |
| SNP_88719_A_133251 | NW_004516362.1 | scaffold1052 | 133251                  | TT                                     | CC                 | CC               | INTERGENIC                    |                    |                    |
| SNP_88720_A_133254 | NW_004516362.1 | scaffold1052 | 133254                  | TT                                     | CC                 | CC               | INTERGENIC                    |                    |                    |
| SNP_88721_A_133431 | NW_004516362.1 | scaffold1052 | 133431                  | CC                                     | TT                 | TT               | INTERGENIC                    |                    |                    |
| SNP_88722_A_134536 | NW_004516362.1 | scaffold1052 | 134536                  | GG                                     | CC                 | CC               | INTERGENIC                    |                    |                    |
| SNP_88723_A_141106 | NW_004516362.1 | scaffold1052 | 141106                  | GG                                     | TT                 | TT               | INTERGENIC                    |                    |                    |
| SNP_88725_A_152661 | NW_004516362.1 | scaffold1052 | 152661                  | AA                                     | TT                 | TT               | INTRON                        | 101505106          | Unknown function   |
| SNP_88726_A_160067 | NW_004516362.1 | scaffold1052 | 160067                  | CC                                     | TT                 | TT               | URR                           | 101505106          | Unknown function   |
| SNP_88727_A_171247 | NW_004516362.1 | scaffold1052 | 171247                  | AA                                     | GG                 | GG               | INTERGENIC                    |                    |                    |
| SNP_88728_A_171398 | NW_004516362.1 | scaffold1052 | 171398                  | GG                                     | CC                 | CC               | INTERGENIC                    |                    |                    |
| SNP_88729_A_171525 | NW_004516362.1 | scaffold1052 | 171525                  | GG                                     | AA                 | AA               | INTERGENIC                    |                    |                    |
| SNP_88730_A_171537 | NW_004516362.1 | scaffold1052 | 171537                  | GG                                     | AA                 | AA               | INTERGENIC                    |                    |                    |
| SNP_88731_A_171611 | NW_004516362.1 | scaffold1052 | 171611                  | AA                                     | TT                 | TT               | INTERGENIC                    |                    |                    |
| SNP_88732_A_173499 | NW_004516362.1 | scaffold1052 | 173499                  | GG                                     | AA                 | AA               | INTERGENIC                    |                    |                    |
| SNP_88733_A_175076 | NW_004516362.1 | scaffold1052 | 175076                  | TT                                     | AA                 | AA               | INTERGENIC                    |                    |                    |
| SNP_88734_A_186367 | NW_004516362.1 | scaffold1052 | 186367                  | CC                                     | TT                 | TT               | INTERGENIC                    |                    |                    |

| SNPs IDs           | Chromosome IDs | Chromosomes  | Physical positions (bp) | CDC Frontier (Reference genome) | (Pusa 1103 & HPNB) | (ILWC 46 & LPNB) | Sequence Components of genome | Gene accession IDs | Putative functions |
|--------------------|----------------|--------------|-------------------------|---------------------------------|--------------------|------------------|-------------------------------|--------------------|--------------------|
| SNP_88735_A_186541 | NW_004516362.1 | scaffold1052 | 186541                  | GG                              | CC                 | CC               | INTERGENIC                    |                    |                    |
| SNP_88736_A_186885 | NW_004516362.1 | scaffold1052 | 186885                  | TT                              | CC                 | CC               | INTERGENIC                    |                    |                    |
| SNP_88738_A_189457 | NW_004516362.1 | scaffold1052 | 189457                  | TT                              | GG                 | GG               | INTERGENIC                    |                    |                    |
| SNP_88739_A_190219 | NW_004516362.1 | scaffold1052 | 190219                  | AA                              | TT                 | TT               | INTERGENIC                    |                    |                    |
| SNP_88740_A_190220 | NW_004516362.1 | scaffold1052 | 190220                  | AA                              | GG                 | GG               | INTERGENIC                    |                    |                    |
| SNP_88741_A_200662 | NW_004516362.1 | scaffold1052 | 200662                  | AA                              | TT                 | TT               | INTERGENIC                    |                    |                    |
| SNP_88742_A_204032 | NW_004516362.1 | scaffold1052 | 204032                  | GG                              | TT                 | TT               | INTERGENIC                    |                    |                    |
| SNP_88743_A_215612 | NW_004516362.1 | scaffold1052 | 215612                  | AA                              | GG                 | GG               | INTERGENIC                    |                    |                    |
| SNP_88744_A_215753 | NW_004516362.1 | scaffold1052 | 215753                  | CC                              | GG                 | GG               | INTERGENIC                    |                    |                    |
| SNP_88745_A_216136 | NW_004516362.1 | scaffold1052 | 216136                  | CC                              | TT                 | TT               | INTERGENIC                    |                    |                    |
| SNP_88746_A_216147 | NW_004516362.1 | scaffold1052 | 216147                  | CC                              | TT                 | TT               | INTERGENIC                    |                    |                    |
| SNP_88747_A_216178 | NW_004516362.1 | scaffold1052 | 216178                  | TT                              | CC                 | CC               | INTERGENIC                    |                    |                    |
| SNP_88748_A_216182 | NW_004516362.1 | scaffold1052 | 216182                  | AA                              | GG                 | GG               | INTERGENIC                    |                    |                    |
| SNP_88750_A_225128 | NW_004516362.1 | scaffold1052 | 225128                  | CC                              | TT                 | TT               | INTERGENIC                    |                    |                    |
| SNP_88751_A_226392 | NW_004516362.1 | scaffold1052 | 226392                  | TT                              | CC                 | CC               | INTERGENIC                    |                    |                    |
| SNP_88752_A_233182 | NW_004516362.1 | scaffold1052 | 233182                  | CC                              | TT                 | TT               | INTERGENIC                    |                    |                    |
| SNP_88753_A_233245 | NW_004516362.1 | scaffold1052 | 233245                  | CC                              | TT                 | TT               | INTERGENIC                    |                    |                    |
| SNP_88754_A_233482 | NW_004516362.1 | scaffold1052 | 233482                  | AA                              | GG                 | GG               | INTERGENIC                    |                    |                    |
| SNP_88755_A_233513 | NW_004516362.1 | scaffold1052 | 233513                  | CC                              | TT                 | TT               | INTERGENIC                    |                    |                    |
| SNP_88756_A_252443 | NW_004516362.1 | scaffold1052 | 252443                  | TT                              | AA                 | AA               | INTERGENIC                    |                    |                    |
| SNP_88757_A_252446 | NW_004516362.1 | scaffold1052 | 252446                  | TT                              | CC                 | CC               | INTERGENIC                    |                    |                    |
| SNP_88758_A_260015 | NW_004516362.1 | scaffold1052 | 260015                  | AA                              | GG                 | GG               | URR                           | 101505763          | Unknown function   |



| SNPs IDs           | Chromosome IDs | Chromosomes  | Physical positions (bp) | CDC Frontier (Reference genome) | (Pusa 1103 & HPNB) | (ILWC 46 & LPNB) | Sequence Components of genome | Gene accession IDs | Putative functions |
|--------------------|----------------|--------------|-------------------------|---------------------------------|--------------------|------------------|-------------------------------|--------------------|--------------------|
| SNP_88759_A_260148 | NW_004516362.1 | scaffold1052 | 260148                  | CC                              | TT                 | TT               | URR                           | 101505763          | Unknown function   |
| SNP_88760_A_264873 | NW_004516362.1 | scaffold1052 | 264873                  | GG                              | AA                 | AA               | NON_SYNONYMOUS_CODING         | id209279           | Unknown function   |
| SNP_88761_A_268665 | NW_004516362.1 | scaffold1052 | 268665                  | TT                              | CC                 | CC               | INTERGENIC                    |                    |                    |
| SNP_88762_A_278328 | NW_004516362.1 | scaffold1052 | 278328                  | AA                              | GG                 | GG               | INTERGENIC                    |                    |                    |
| SNP_88763_A_278526 | NW_004516362.1 | scaffold1052 | 278526                  | TT                              | CC                 | CC               | INTERGENIC                    |                    |                    |
| SNP_88764_A_280525 | NW_004516362.1 | scaffold1052 | 280525                  | AA                              | GG                 | GG               | INTERGENIC                    |                    |                    |
| SNP_88765_A_282008 | NW_004516362.1 | scaffold1052 | 282008                  | CC                              | TT                 | TT               | INTERGENIC                    |                    |                    |
| SNP_88766_A_290485 | NW_004516362.1 | scaffold1052 | 290485                  | GG                              | AA                 | AA               | INTERGENIC                    |                    |                    |
| SNP_88767_A_291727 | NW_004516362.1 | scaffold1052 | 291727                  | GG                              | AA                 | AA               | INTERGENIC                    |                    |                    |
| SNP_88768_A_294348 | NW_004516362.1 | scaffold1052 | 294348                  | GG                              | AA                 | AA               | INTERGENIC                    |                    |                    |
| SNP_88769_A_295377 | NW_004516362.1 | scaffold1052 | 295377                  | TT                              | AA                 | AA               | INTERGENIC                    |                    |                    |
| SNP_88770_A_295444 | NW_004516362.1 | scaffold1052 | 295444                  | CC                              | AA                 | AA               | INTERGENIC                    |                    |                    |
| SNP_88771_A_303207 | NW_004516362.1 | scaffold1052 | 303207                  | AA                              | TT                 | TT               | INTERGENIC                    |                    |                    |
| SNP_88772_A_303304 | NW_004516362.1 | scaffold1052 | 303304                  | TT                              | CC                 | CC               | INTERGENIC                    |                    |                    |
| SNP_88773_A_329997 | NW_004516362.1 | scaffold1052 | 329997                  | CC                              | AA                 | AA               | INTERGENIC                    |                    |                    |
| SNP_88774_A_330938 | NW_004516362.1 | scaffold1052 | 330938                  | TT                              | CC                 | CC               | INTERGENIC                    |                    |                    |
| SNP_88775_A_336981 | NW_004516362.1 | scaffold1052 | 336981                  | AA                              | GG                 | GG               | INTERGENIC                    |                    |                    |
| SNP_88776_A_337031 | NW_004516362.1 | scaffold1052 | 337031                  | TT                              | CC                 | CC               | INTERGENIC                    |                    |                    |
| SNP_88777_A_338698 | NW_004516362.1 | scaffold1052 | 338698                  | TT                              | CC                 | CC               | INTERGENIC                    |                    |                    |
| SNP_88778_A_339766 | NW_004516362.1 | scaffold1052 | 339766                  | CC                              | AA                 | AA               | INTERGENIC                    |                    |                    |
| SNP_88779_A_339779 | NW_004516362.1 | scaffold1052 | 339779                  | AA                              | TT                 | TT               | INTERGENIC                    |                    |                    |
| SNP_88780_A_13279  | NW_004516364.1 | scaffold1055 | 13279                   | TT                              | CC                 | CC               | INTERGENIC                    |                    |                    |

| SNPs IDs           | Chromosome IDs | Chromosomes  | Physical positions (bp) | CDC Frontier (Reference genome) | (Pusa 1103 & HPNB) | (ILWC 46 & LPNB) | Sequence Components of genome | Gene accession IDs | Putative functions                  |
|--------------------|----------------|--------------|-------------------------|---------------------------------|--------------------|------------------|-------------------------------|--------------------|-------------------------------------|
| SNP_88781_A_13286  | NW_004516364.1 | scaffold1055 | 13286                   | TT                              | CC                 | CC               | INTERGENIC                    |                    |                                     |
| SNP_88782_A_13335  | NW_004516364.1 | scaffold1055 | 13335                   | AA                              | CC                 | CC               | INTERGENIC                    |                    |                                     |
| SNP_88783_A_13957  | NW_004516364.1 | scaffold1055 | 13957                   | TT                              | AA                 | AA               | INTERGENIC                    |                    |                                     |
| SNP_88784_A_14938  | NW_004516364.1 | scaffold1055 | 14938                   | AA                              | GG                 | GG               | INTERGENIC                    |                    |                                     |
| SNP_88785_A_16209  | NW_004516364.1 | scaffold1055 | 16209                   | GG                              | AA                 | AA               | INTERGENIC                    |                    |                                     |
| SNP_88786_A_16843  | NW_004516364.1 | scaffold1055 | 16843                   | AA                              | GG                 | GG               | INTERGENIC                    |                    |                                     |
| SNP_88788_A_49628  | NW_004516364.1 | scaffold1055 | 49628                   | GG                              | TT                 | TT               | INTRON                        | 101507065          | GDSL esterase/lipase At5g45910-like |
| SNP_88789_A_50947  | NW_004516364.1 | scaffold1055 | 50947                   | GG                              | AA                 | AA               | INTRON                        | 101507065          | GDSL esterase/lipase At5g45910-like |
| SNP_88790_A_56120  | NW_004516364.1 | scaffold1055 | 56120                   | AA                              | GG                 | GG               | INTRON                        | 101507065          | GDSL esterase/lipase At5g45910-like |
| SNP_88791_A_56148  | NW_004516364.1 | scaffold1055 | 56148                   | AA                              | TT                 | TT               | INTRON                        | 101507065          | GDSL esterase/lipase At5g45910-like |
| SNP_88794_A_56414  | NW_004516364.1 | scaffold1055 | 56414                   | TT                              | CC                 | CC               | INTRON                        | 101507065          | GDSL esterase/lipase At5g45910-like |
| SNP_88795_A_56437  | NW_004516364.1 | scaffold1055 | 56437                   | TT                              | GG                 | GG               | INTRON                        | 101507065          | GDSL esterase/lipase At5g45910-like |
| SNP_88796_A_56512  | NW_004516364.1 | scaffold1055 | 56512                   | AA                              | GG                 | GG               | INTRON                        | 101507065          | GDSL esterase/lipase At5g45910-like |
| SNP_88797_A_56513  | NW_004516364.1 | scaffold1055 | 56513                   | AA                              | GG                 | GG               | INTRON                        | 101507065          | GDSL esterase/lipase At5g45910-like |
| SNP_88798_A_56600  | NW_004516364.1 | scaffold1055 | 56600                   | GG                              | TT                 | TT               | INTRON                        | 101507065          | GDSL esterase/lipase At5g45910-like |
| SNP_88799_A_105658 | NW_004516364.1 | scaffold1055 | 105658                  | GG                              | AA                 | AA               | INTERGENIC                    |                    |                                     |
| SNP_88800_A_118567 | NW_004516364.1 | scaffold1055 | 118567                  | AA                              | GG                 | GG               | INTERGENIC                    |                    |                                     |
| SNP_88801_A_118577 | NW_004516364.1 | scaffold1055 | 118577                  | TT                              | CC                 | CC               | INTERGENIC                    |                    |                                     |
| SNP_88802_A_121116 | NW_004516364.1 | scaffold1055 | 121116                  | CC                              | TT                 | TT               | INTERGENIC                    |                    |                                     |
| SNP_88803_A_121155 | NW_004516364.1 | scaffold1055 | 121155                  | AA                              | GG                 | GG               | INTERGENIC                    |                    |                                     |
| SNP_88804_A_122906 | NW_004516364.1 | scaffold1055 | 122906                  | GG                              | CC                 | CC               | INTERGENIC                    |                    |                                     |
| SNP_88805_A_122911 | NW_004516364.1 | scaffold1055 | 122911                  | TT                              | AA                 | AA               | INTERGENIC                    |                    |                                     |

| SNPs IDs           | Chromosome IDs | Chromosomes  | Physical positions (bp) | CDC Frontier (Reference genome) | (Pusa 1103 & HPNB) | (ILWC 46 & LPNB) | Sequence Components of genome | Gene accession IDs | Putative functions                  |
|--------------------|----------------|--------------|-------------------------|---------------------------------|--------------------|------------------|-------------------------------|--------------------|-------------------------------------|
| SNP_88806_A_122970 | NW_004516364.1 | scaffold1055 | 122970                  | GG                              | TT                 | TT               | INTERGENIC                    |                    |                                     |
| SNP_88807_A_129012 | NW_004516364.1 | scaffold1055 | 129012                  | TT                              | CC                 | CC               | INTERGENIC                    |                    |                                     |
| SNP_88808_A_134651 | NW_004516364.1 | scaffold1055 | 134651                  | CC                              | GG                 | GG               | INTERGENIC                    |                    |                                     |
| SNP_88809_A_137852 | NW_004516364.1 | scaffold1055 | 137852                  | AA                              | GG                 | GG               | INTERGENIC                    |                    |                                     |
| SNP_88810_A_142473 | NW_004516364.1 | scaffold1055 | 142473                  | TT                              | CC                 | CC               | INTERGENIC                    |                    |                                     |
| SNP_88811_A_142679 | NW_004516364.1 | scaffold1055 | 142679                  | CC                              | TT                 | TT               | INTERGENIC                    |                    |                                     |
| SNP_88812_A_142714 | NW_004516364.1 | scaffold1055 | 142714                  | GG                              | TT                 | TT               | INTERGENIC                    |                    |                                     |
| SNP_88813_A_142802 | NW_004516364.1 | scaffold1055 | 142802                  | AA                              | GG                 | GG               | INTERGENIC                    |                    |                                     |
| SNP_88816_A_172207 | NW_004516364.1 | scaffold1055 | 172207                  | TT                              | CC                 | CC               | INTERGENIC                    |                    |                                     |
| SNP_88817_A_172552 | NW_004516364.1 | scaffold1055 | 172552                  | CC                              | AA                 | AA               | INTERGENIC                    |                    |                                     |
| SNP_88818_A_172584 | NW_004516364.1 | scaffold1055 | 172584                  | AA                              | GG                 | GG               | INTERGENIC                    |                    |                                     |
| SNP_88819_A_198301 | NW_004516364.1 | scaffold1055 | 198301                  | GG                              | TT                 | TT               | INTERGENIC                    |                    |                                     |
| SNP_88821_A_198386 | NW_004516364.1 | scaffold1055 | 198386                  | GG                              | AA                 | AA               | INTERGENIC                    |                    |                                     |
| SNP_88822_A_198407 | NW_004516364.1 | scaffold1055 | 198407                  | TT                              | AA                 | AA               | INTERGENIC                    |                    |                                     |
| SNP_88823_A_198413 | NW_004516364.1 | scaffold1055 | 198413                  | CC                              | TT                 | TT               | INTERGENIC                    |                    |                                     |
| SNP_88824_A_198416 | NW_004516364.1 | scaffold1055 | 198416                  | GG                              | AA                 | AA               | INTERGENIC                    |                    |                                     |
| SNP_88825_A_198429 | NW_004516364.1 | scaffold1055 | 198429                  | CC                              | TT                 | TT               | INTERGENIC                    |                    |                                     |
| SNP_88826_A_198436 | NW_004516364.1 | scaffold1055 | 198436                  | TT                              | CC                 | CC               | INTERGENIC                    |                    |                                     |
| SNP_88827_A_198451 | NW_004516364.1 | scaffold1055 | 198451                  | CC                              | TT                 | TT               | INTERGENIC                    |                    |                                     |
| SNP_88828_A_201167 | NW_004516364.1 | scaffold1055 | 201167                  | CC                              | TT                 | TT               | INTERGENIC                    |                    |                                     |
| SNP_88829_A_201198 | NW_004516364.1 | scaffold1055 | 201198                  | TT                              | CC                 | CC               | INTERGENIC                    |                    |                                     |
| SNP_88830_A_205825 | NW_004516364.1 | scaffold1055 | 205825                  | CC                              | TT                 | TT               | INTRON                        | 101509503          | GDSL esterase/lipase At5g45910-like |

| SNPs IDs           | Chromosome IDs | Chromosomes  | Physical positions (bp) | CDC Frontier (Reference genome) | (Pusa 1103 & HPNB) | (ILWC 46 & LPNB) | Sequence Components of genome | Gene accession IDs | Putative functions |
|--------------------|----------------|--------------|-------------------------|---------------------------------|--------------------|------------------|-------------------------------|--------------------|--------------------|
| SNP_88832_A_213482 | NW_004516364.1 | scaffold1055 | 213482                  | TT                              | CC                 | CC               | INTERGENIC                    |                    |                    |
| SNP_88833_A_213514 | NW_004516364.1 | scaffold1055 | 213514                  | AA                              | TT                 | TT               | INTERGENIC                    |                    |                    |
| SNP_88834_A_218173 | NW_004516364.1 | scaffold1055 | 218173                  | TT                              | CC                 | CC               | INTERGENIC                    |                    |                    |
| SNP_88835_A_218223 | NW_004516364.1 | scaffold1055 | 218223                  | CC                              | TT                 | TT               | INTERGENIC                    |                    |                    |
| SNP_88836_A_280528 | NW_004516364.1 | scaffold1055 | 280528                  | TT                              | AA                 | AA               | INTERGENIC                    |                    |                    |
| SNP_88837_A_290341 | NW_004516364.1 | scaffold1055 | 290341                  | TT                              | GG                 | GG               | INTERGENIC                    |                    |                    |
| SNP_88838_A_290342 | NW_004516364.1 | scaffold1055 | 290342                  | TT                              | GG                 | GG               | INTERGENIC                    |                    |                    |
| SNP_88839_A_318220 | NW_004516364.1 | scaffold1055 | 318220                  | GG                              | TT                 | TT               | NON_SYNONYMOUS_CODING         | 101509824          | cucumis-in-like    |
| SNP_88840_A_318328 | NW_004516364.1 | scaffold1055 | 318328                  | AA                              | CC                 | CC               | INTRON                        | 101509824          | cucumis-in-like    |
| SNP_88841_A_318393 | NW_004516364.1 | scaffold1055 | 318393                  | TT                              | AA                 | AA               | NON_SYNONYMOUS_CODING         | 101509824          | cucumis-in-like    |
| SNP_88842_A_318433 | NW_004516364.1 | scaffold1055 | 318433                  | AA                              | GG                 | GG               | NON_SYNONYMOUS_CODING         | 101509824          | cucumis-in-like    |
| SNP_88843_A_318722 | NW_004516364.1 | scaffold1055 | 318722                  | GG                              | AA                 | AA               | INTRON                        | 101509824          | cucumis-in-like    |
| SNP_88844_A_318737 | NW_004516364.1 | scaffold1055 | 318737                  | TT                              | AA                 | AA               | INTRON                        | 101509824          | cucumis-in-like    |
| SNP_88845_A_319404 | NW_004516364.1 | scaffold1055 | 319404                  | AA                              | GG                 | GG               | NON_SYNONYMOUS_CODING         | 101509824          | cucumis-in-like    |
| SNP_88846_A_335468 | NW_004516364.1 | scaffold1055 | 335468                  | CC                              | TT                 | TT               | INTERGENIC                    |                    |                    |
| SNP_88847_A_339287 | NW_004516364.1 | scaffold1055 | 339287                  | AA                              | TT                 | TT               | INTERGENIC                    |                    |                    |
| SNP_88849_A_339340 | NW_004516364.1 | scaffold1055 | 339340                  | TT                              | AA                 | AA               | INTERGENIC                    |                    |                    |
| SNP_88850_A_339412 | NW_004516364.1 | scaffold1055 | 339412                  | TT                              | AA                 | AA               | INTERGENIC                    |                    |                    |
| SNP_88851_A_339413 | NW_004516364.1 | scaffold1055 | 339413                  | TT                              | GG                 | GG               | INTERGENIC                    |                    |                    |
| SNP_88852_A_339470 | NW_004516364.1 | scaffold1055 | 339470                  | AA                              | GG                 | GG               | INTERGENIC                    |                    |                    |
| SNP_88853_A_339510 | NW_004516364.1 | scaffold1055 | 339510                  | TT                              | GG                 | GG               | INTERGENIC                    |                    |                    |
| SNP_88854_A_339562 | NW_004516364.1 | scaffold1055 | 339562                  | GG                              | AA                 | AA               | INTERGENIC                    |                    |                    |

| SNPs IDs           | Chromosome IDs | Chromosomes  | Physical positions (bp) | CDC Frontier (Reference genome) | (Pusa 1103 & HPNB) | (ILWC 46 & LPNB) | Sequence genome | Components of | Gene accession IDs | Putative functions |
|--------------------|----------------|--------------|-------------------------|---------------------------------|--------------------|------------------|-----------------|---------------|--------------------|--------------------|
| SNP_88855_A_339590 | NW_004516364.1 | scaffold1055 | 339590                  | CC                              | TT                 | TT               | INTERGENIC      |               |                    |                    |
| SNP_88856_A_339619 | NW_004516364.1 | scaffold1055 | 339619                  | GG                              | AA                 | AA               | INTERGENIC      |               |                    |                    |
| SNP_88857_A_339624 | NW_004516364.1 | scaffold1055 | 339624                  | AA                              | GG                 | GG               | INTERGENIC      |               |                    |                    |
| SNP_88858_A_339717 | NW_004516364.1 | scaffold1055 | 339717                  | TT                              | AA                 | AA               | INTERGENIC      |               |                    |                    |
| SNP_88859_A_339744 | NW_004516364.1 | scaffold1055 | 339744                  | CC                              | TT                 | TT               | INTERGENIC      |               |                    |                    |
| SNP_88860_A_339752 | NW_004516364.1 | scaffold1055 | 339752                  | CC                              | TT                 | TT               | INTERGENIC      |               |                    |                    |
| SNP_88861_A_339776 | NW_004516364.1 | scaffold1055 | 339776                  | AA                              | GG                 | GG               | INTERGENIC      |               |                    |                    |
| SNP_88862_A_339786 | NW_004516364.1 | scaffold1055 | 339786                  | GG                              | AA                 | AA               | INTERGENIC      |               |                    |                    |
| SNP_88863_A_339812 | NW_004516364.1 | scaffold1055 | 339812                  | AA                              | GG                 | GG               | INTERGENIC      |               |                    |                    |
| SNP_88864_A_339831 | NW_004516364.1 | scaffold1055 | 339831                  | TT                              | AA                 | AA               | INTERGENIC      |               |                    |                    |
| SNP_88865_A_339851 | NW_004516364.1 | scaffold1055 | 339851                  | AA                              | GG                 | GG               | INTERGENIC      |               |                    |                    |
| SNP_88866_A_339872 | NW_004516364.1 | scaffold1055 | 339872                  | GG                              | AA                 | AA               | INTERGENIC      |               |                    |                    |
| SNP_88867_A_339932 | NW_004516364.1 | scaffold1055 | 339932                  | AA                              | TT                 | TT               | INTERGENIC      |               |                    |                    |
| SNP_88868_A_340005 | NW_004516364.1 | scaffold1055 | 340005                  | TT                              | GG                 | GG               | INTERGENIC      |               |                    |                    |
| SNP_88870_A_340108 | NW_004516364.1 | scaffold1055 | 340108                  | TT                              | AA                 | AA               | INTERGENIC      |               |                    |                    |
| SNP_88871_A_340136 | NW_004516364.1 | scaffold1055 | 340136                  | AA                              | GG                 | GG               | INTERGENIC      |               |                    |                    |
| SNP_88872_A_340138 | NW_004516364.1 | scaffold1055 | 340138                  | CC                              | TT                 | TT               | INTERGENIC      |               |                    |                    |
| SNP_88873_A_340172 | NW_004516364.1 | scaffold1055 | 340172                  | CC                              | TT                 | TT               | INTERGENIC      |               |                    |                    |
| SNP_88874_A_340328 | NW_004516364.1 | scaffold1055 | 340328                  | GG                              | AA                 | AA               | INTERGENIC      |               |                    |                    |
| SNP_88875_A_340329 | NW_004516364.1 | scaffold1055 | 340329                  | AA                              | TT                 | TT               | INTERGENIC      |               |                    |                    |
| SNP_88876_A_340355 | NW_004516364.1 | scaffold1055 | 340355                  | AA                              | CC                 | CC               | INTERGENIC      |               |                    |                    |
| SNP_88877_A_340393 | NW_004516364.1 | scaffold1055 | 340393                  | CC                              | TT                 | TT               | INTERGENIC      |               |                    |                    |

| SNPs IDs           | Chromosome IDs | Chromosomes  | Physical positions (bp) | CDC Frontier (Reference genome) | (Pusa 1103 & HPNB) | (ILWC 46 & LPNB) | Sequence genome | Components of | Gene accession IDs | Putative functions |
|--------------------|----------------|--------------|-------------------------|---------------------------------|--------------------|------------------|-----------------|---------------|--------------------|--------------------|
| SNP_88878_A_340397 | NW_004516364.1 | scaffold1055 | 340397                  | AA                              | GG                 | GG               | INTERGENIC      |               |                    |                    |
| SNP_88880_A_340545 | NW_004516364.1 | scaffold1055 | 340545                  | TT                              | CC                 | CC               | INTERGENIC      |               |                    |                    |
| SNP_88881_A_340581 | NW_004516364.1 | scaffold1055 | 340581                  | TT                              | CC                 | CC               | INTERGENIC      |               |                    |                    |
| SNP_88882_A_340602 | NW_004516364.1 | scaffold1055 | 340602                  | TT                              | CC                 | CC               | INTERGENIC      |               |                    |                    |
| SNP_88884_A_340743 | NW_004516364.1 | scaffold1055 | 340743                  | TT                              | AA                 | AA               | INTERGENIC      |               |                    |                    |
| SNP_88885_A_340774 | NW_004516364.1 | scaffold1055 | 340774                  | TT                              | GG                 | GG               | INTERGENIC      |               |                    |                    |
| SNP_88886_A_340786 | NW_004516364.1 | scaffold1055 | 340786                  | AA                              | GG                 | GG               | INTERGENIC      |               |                    |                    |
| SNP_88887_A_340824 | NW_004516364.1 | scaffold1055 | 340824                  | TT                              | CC                 | CC               | INTERGENIC      |               |                    |                    |
| SNP_88888_A_340841 | NW_004516364.1 | scaffold1055 | 340841                  | TT                              | CC                 | CC               | INTERGENIC      |               |                    |                    |
| SNP_88889_A_340847 | NW_004516364.1 | scaffold1055 | 340847                  | CC                              | TT                 | TT               | INTERGENIC      |               |                    |                    |
| SNP_88890_A_341143 | NW_004516364.1 | scaffold1055 | 341143                  | AA                              | GG                 | GG               | INTERGENIC      |               |                    |                    |
| SNP_88891_A_341159 | NW_004516364.1 | scaffold1055 | 341159                  | CC                              | TT                 | TT               | INTERGENIC      |               |                    |                    |
| SNP_88892_A_341181 | NW_004516364.1 | scaffold1055 | 341181                  | GG                              | AA                 | AA               | INTERGENIC      |               |                    |                    |
| SNP_88893_A_341198 | NW_004516364.1 | scaffold1055 | 341198                  | TT                              | CC                 | CC               | INTERGENIC      |               |                    |                    |
| SNP_88894_A_341207 | NW_004516364.1 | scaffold1055 | 341207                  | GG                              | TT                 | TT               | INTERGENIC      |               |                    |                    |
| SNP_88895_A_341251 | NW_004516364.1 | scaffold1055 | 341251                  | AA                              | GG                 | GG               | INTERGENIC      |               |                    |                    |
| SNP_88896_A_341288 | NW_004516364.1 | scaffold1055 | 341288                  | TT                              | CC                 | CC               | INTERGENIC      |               |                    |                    |
| SNP_88897_A_341298 | NW_004516364.1 | scaffold1055 | 341298                  | TT                              | AA                 | AA               | INTERGENIC      |               |                    |                    |
| SNP_88898_A_341323 | NW_004516364.1 | scaffold1055 | 341323                  | GG                              | AA                 | AA               | INTERGENIC      |               |                    |                    |
| SNP_88899_A_3678   | NW_004516365.1 | scaffold1056 | 3678                    | AA                              | GG                 | GG               | INTERGENIC      |               |                    |                    |
| SNP_88900_A_3734   | NW_004516365.1 | scaffold1056 | 3734                    | AA                              | TT                 | TT               | INTERGENIC      |               |                    |                    |
| SNP_88901_A_15371  | NW_004516365.1 | scaffold1056 | 15371                   | TT                              | AA                 | AA               | INTERGENIC      |               |                    |                    |

| SNPs IDs           | Chromosome IDs | Chromosomes  | Physical positions (bp) | CDC Frontier (Reference genome) | (Pusa 1103 & HPNB) | (ILWC 46 & LPNB) | Sequence Components of genome | Gene accession IDs | Putative functions |
|--------------------|----------------|--------------|-------------------------|---------------------------------|--------------------|------------------|-------------------------------|--------------------|--------------------|
| SNP_88902_A_23308  | NW_004516365.1 | scaffold1056 | 23308                   | AA                              | CC                 | CC               | NON_SYNONYMOUS_CODING         | 101511008          | Unknown function   |
| SNP_88903_A_27173  | NW_004516365.1 | scaffold1056 | 27173                   | AA                              | GG                 | GG               | NON_SYNONYMOUS_CODING         | 101511008          | Unknown function   |
| SNP_88904_A_68045  | NW_004516365.1 | scaffold1056 | 68045                   | GG                              | TT                 | TT               | INTERGENIC                    |                    |                    |
| SNP_88907_A_126901 | NW_004516365.1 | scaffold1056 | 126901                  | CC                              | TT                 | TT               | INTERGENIC                    |                    |                    |
| SNP_88908_A_127552 | NW_004516365.1 | scaffold1056 | 127552                  | AA                              | TT                 | TT               | INTERGENIC                    |                    |                    |
| SNP_88909_A_127554 | NW_004516365.1 | scaffold1056 | 127554                  | CC                              | AA                 | AA               | INTERGENIC                    |                    |                    |
| SNP_88910_A_128944 | NW_004516365.1 | scaffold1056 | 128944                  | TT                              | AA                 | AA               | INTERGENIC                    |                    |                    |
| SNP_88911_A_129342 | NW_004516365.1 | scaffold1056 | 129342                  | CC                              | TT                 | TT               | INTERGENIC                    |                    |                    |
| SNP_88912_A_133896 | NW_004516365.1 | scaffold1056 | 133896                  | GG                              | AA                 | AA               | INTERGENIC                    |                    |                    |
| SNP_88917_A_160105 | NW_004516365.1 | scaffold1056 | 160105                  | CC                              | TT                 | TT               | INTERGENIC                    |                    |                    |
| SNP_88918_A_1993   | NW_004516368.1 | scaffold1059 | 1993                    | TT                              | GG                 | GG               | INTERGENIC                    |                    |                    |
| SNP_88919_A_511    | NW_004516369.1 | scaffold1060 | 511                     | CC                              | TT                 | TT               | INTERGENIC                    |                    |                    |
| SNP_88920_A_567    | NW_004516369.1 | scaffold1060 | 567                     | AA                              | GG                 | GG               | INTERGENIC                    |                    |                    |
| SNP_88922_A_641    | NW_004516369.1 | scaffold1060 | 641                     | GG                              | AA                 | AA               | INTERGENIC                    |                    |                    |
| SNP_88923_A_671    | NW_004516369.1 | scaffold1060 | 671                     | TT                              | CC                 | CC               | INTERGENIC                    |                    |                    |
| SNP_88924_A_724    | NW_004516369.1 | scaffold1060 | 724                     | TT                              | CC                 | CC               | INTERGENIC                    |                    |                    |
| SNP_88925_A_725    | NW_004516369.1 | scaffold1060 | 725                     | CC                              | TT                 | TT               | INTERGENIC                    |                    |                    |
| SNP_88926_A_731    | NW_004516369.1 | scaffold1060 | 731                     | TT                              | CC                 | CC               | INTERGENIC                    |                    |                    |
| SNP_88927_A_732    | NW_004516369.1 | scaffold1060 | 732                     | CC                              | TT                 | TT               | INTERGENIC                    |                    |                    |
| SNP_88928_A_809    | NW_004516369.1 | scaffold1060 | 809                     | TT                              | AA                 | AA               | INTERGENIC                    |                    |                    |
| SNP_88929_A_810    | NW_004516369.1 | scaffold1060 | 810                     | CC                              | AA                 | AA               | INTERGENIC                    |                    |                    |
| SNP_88930_A_821    | NW_004516369.1 | scaffold1060 | 821                     | TT                              | CC                 | CC               | INTERGENIC                    |                    |                    |

| SNPs IDs           | Chromosome IDs | Chromosomes  | Physical positions (bp) | CDC Frontier (Reference genome) | (Pusa 1103 & HPNB) | (ILWC 46 & LPNB) | Sequence Components of genome | Gene accession IDs | Putative functions                   |
|--------------------|----------------|--------------|-------------------------|---------------------------------|--------------------|------------------|-------------------------------|--------------------|--------------------------------------|
| SNP_88931_A_856    | NW_004516369.1 | scaffold1060 | 856                     | AA                              | GG                 | GG               | INTERGENIC                    |                    |                                      |
| SNP_88932_A_922    | NW_004516369.1 | scaffold1060 | 922                     | GG                              | TT                 | TT               | INTERGENIC                    |                    |                                      |
| SNP_88933_A_958    | NW_004516369.1 | scaffold1060 | 958                     | CC                              | TT                 | TT               | INTERGENIC                    |                    |                                      |
| SNP_88934_A_1115   | NW_004516369.1 | scaffold1060 | 1115                    | GG                              | CC                 | CC               | INTERGENIC                    |                    |                                      |
| SNP_88936_A_24468  | NW_004516369.1 | scaffold1060 | 24468                   | AA                              | TT                 | TT               | URR                           | 101512626          | aspartokinase 2, chloroplastic-like  |
| SNP_88937_A_24471  | NW_004516369.1 | scaffold1060 | 24471                   | AA                              | CC                 | CC               | URR                           | 101512626          | aspartokinase 2, chloroplastic-like  |
| SNP_88938_A_33274  | NW_004516369.1 | scaffold1060 | 33274                   | GG                              | AA                 | AA               | INTERGENIC                    |                    |                                      |
| SNP_88939_A_33333  | NW_004516369.1 | scaffold1060 | 33333                   | GG                              | AA                 | AA               | INTERGENIC                    |                    |                                      |
| SNP_88941_A_141826 | NW_004516369.1 | scaffold1060 | 141826                  | GG                              | TT                 | TT               | URR                           | 101488961          | protein FAR1-RELATED SEQUENCE 5-like |
| SNP_88942_A_169809 | NW_004516369.1 | scaffold1060 | 169809                  | GG                              | TT                 | TT               | INTERGENIC                    |                    |                                      |
| SNP_88943_A_169878 | NW_004516369.1 | scaffold1060 | 169878                  | GG                              | CC                 | CC               | INTERGENIC                    |                    |                                      |
| SNP_88944_A_170054 | NW_004516369.1 | scaffold1060 | 170054                  | TT                              | CC                 | CC               | INTERGENIC                    |                    |                                      |
| SNP_88945_A_170224 | NW_004516369.1 | scaffold1060 | 170224                  | GG                              | TT                 | TT               | INTERGENIC                    |                    |                                      |
| SNP_88946_A_170228 | NW_004516369.1 | scaffold1060 | 170228                  | TT                              | GG                 | GG               | INTERGENIC                    |                    |                                      |
| SNP_88947_A_170252 | NW_004516369.1 | scaffold1060 | 170252                  | CC                              | AA                 | AA               | INTERGENIC                    |                    |                                      |
| SNP_88948_A_170273 | NW_004516369.1 | scaffold1060 | 170273                  | GG                              | AA                 | AA               | INTERGENIC                    |                    |                                      |
| SNP_88949_A_170344 | NW_004516369.1 | scaffold1060 | 170344                  | AA                              | GG                 | GG               | INTERGENIC                    |                    |                                      |
| SNP_88950_A_170347 | NW_004516369.1 | scaffold1060 | 170347                  | TT                              | CC                 | CC               | INTERGENIC                    |                    |                                      |
| SNP_88951_A_170398 | NW_004516369.1 | scaffold1060 | 170398                  | CC                              | TT                 | TT               | INTERGENIC                    |                    |                                      |
| SNP_88952_A_170469 | NW_004516369.1 | scaffold1060 | 170469                  | AA                              | GG                 | GG               | INTERGENIC                    |                    |                                      |
| SNP_88953_A_170480 | NW_004516369.1 | scaffold1060 | 170480                  | AA                              | GG                 | GG               | INTERGENIC                    |                    |                                      |
| SNP_88954_A_170533 | NW_004516369.1 | scaffold1060 | 170533                  | AA                              | CC                 | CC               | INTERGENIC                    |                    |                                      |



| SNPs IDs           | Chromosome IDs | Chromosomes  | Physical positions (bp) | CDC Frontier (Reference genome) | (Pusa 1103 & HPNB) | (ILWC 46 & LPNB) | Sequence Components of genome | Gene accession IDs | Putative functions                                                                   |
|--------------------|----------------|--------------|-------------------------|---------------------------------|--------------------|------------------|-------------------------------|--------------------|--------------------------------------------------------------------------------------|
| SNP_88955_A_340008 | NW_004516369.1 | scaffold1060 | 340008                  | GG                              | AA                 | AA               | INTERGENIC                    |                    |                                                                                      |
| SNP_88956_A_346747 | NW_004516369.1 | scaffold1060 | 346747                  | AA                              | GG                 | GG               | INTERGENIC                    |                    |                                                                                      |
| SNP_88958_A_378946 | NW_004516369.1 | scaffold1060 | 378946                  | CC                              | TT                 | TT               | INTERGENIC                    |                    |                                                                                      |
| SNP_88959_A_389439 | NW_004516369.1 | scaffold1060 | 389439                  | TT                              | CC                 | CC               | INTRON                        | 101492526          | probable leucine-rich repeat receptor-like serine/threonine-protein kinase At3g14840 |
| SNP_88960_A_389524 | NW_004516369.1 | scaffold1060 | 389524                  | TT                              | CC                 | CC               | INTRON                        | 101492526          | probable leucine-rich repeat receptor-like serine/threonine-protein kinase At3g14840 |
| SNP_88962_A_400380 | NW_004516369.1 | scaffold1060 | 400380                  | AA                              | TT                 | TT               | DRR                           | 101515214          | isoflavone 7-O-glucosyltransferase 1-like                                            |
| SNP_88963_A_450045 | NW_004516369.1 | scaffold1060 | 450045                  | TT                              | AA                 | AA               | INTERGENIC                    |                    |                                                                                      |
| SNP_88964_A_1909   | NW_004516370.1 | scaffold1061 | 1909                    | TT                              | CC                 | CC               | INTERGENIC                    |                    |                                                                                      |
| SNP_88965_A_2014   | NW_004516370.1 | scaffold1061 | 2014                    | CC                              | GG                 | GG               | INTERGENIC                    |                    |                                                                                      |
| SNP_88966_A_2015   | NW_004516370.1 | scaffold1061 | 2015                    | CC                              | GG                 | GG               | INTERGENIC                    |                    |                                                                                      |
| SNP_88967_A_2069   | NW_004516370.1 | scaffold1061 | 2069                    | GG                              | AA                 | AA               | INTERGENIC                    |                    |                                                                                      |
| SNP_88968_A_2355   | NW_004516370.1 | scaffold1061 | 2355                    | AA                              | GG                 | GG               | INTERGENIC                    |                    |                                                                                      |
| SNP_88969_A_4292   | NW_004516370.1 | scaffold1061 | 4292                    | TT                              | CC                 | CC               | INTERGENIC                    |                    |                                                                                      |
| SNP_88970_A_4295   | NW_004516370.1 | scaffold1061 | 4295                    | AA                              | GG                 | GG               | INTERGENIC                    |                    |                                                                                      |
| SNP_88971_A_6096   | NW_004516370.1 | scaffold1061 | 6096                    | AA                              | GG                 | GG               | INTERGENIC                    |                    |                                                                                      |
| SNP_88972_A_6356   | NW_004516370.1 | scaffold1061 | 6356                    | AA                              | CC                 | CC               | INTERGENIC                    |                    |                                                                                      |
| SNP_88973_A_9573   | NW_004516370.1 | scaffold1061 | 9573                    | GG                              | AA                 | AA               | INTERGENIC                    |                    |                                                                                      |
| SNP_88974_A_9644   | NW_004516370.1 | scaffold1061 | 9644                    | TT                              | GG                 | GG               | INTERGENIC                    |                    |                                                                                      |
| SNP_88975_A_11488  | NW_004516370.1 | scaffold1061 | 11488                   | AA                              | TT                 | TT               | INTERGENIC                    |                    |                                                                                      |
| SNP_88976_A_11530  | NW_004516370.1 | scaffold1061 | 11530                   | TT                              | CC                 | CC               | INTERGENIC                    |                    |                                                                                      |
| SNP_88977_A_11550  | NW_004516370.1 | scaffold1061 | 11550                   | GG                              | CC                 | CC               | INTERGENIC                    |                    |                                                                                      |
| SNP_88978_A_11681  | NW_004516370.1 | scaffold1061 | 11681                   | AA                              | GG                 | GG               | INTERGENIC                    |                    |                                                                                      |

| SNPs IDs          | Chromosome IDs | Chromosomes  | Physical positions (bp) | CDC Frontier (Reference genome) | (Pusa 1103 & HPNB) | (ILWC 46 & LPNB) | Sequence genome | Components of | Gene accession IDs | Putative functions |
|-------------------|----------------|--------------|-------------------------|---------------------------------|--------------------|------------------|-----------------|---------------|--------------------|--------------------|
| SNP_88979_A_11686 | NW_004516370.1 | scaffold1061 | 11686                   | CC                              | TT                 | TT               | INTERGENIC      |               |                    |                    |
| SNP_88980_A_11745 | NW_004516370.1 | scaffold1061 | 11745                   | GG                              | AA                 | AA               | INTERGENIC      |               |                    |                    |
| SNP_88981_A_12072 | NW_004516370.1 | scaffold1061 | 12072                   | CC                              | TT                 | TT               | INTERGENIC      |               |                    |                    |
| SNP_88982_A_20892 | NW_004516370.1 | scaffold1061 | 20892                   | GG                              | AA                 | AA               | INTERGENIC      |               |                    |                    |
| SNP_88983_A_20910 | NW_004516370.1 | scaffold1061 | 20910                   | TT                              | CC                 | CC               | INTERGENIC      |               |                    |                    |
| SNP_88986_A_27636 | NW_004516370.1 | scaffold1061 | 27636                   | CC                              | TT                 | TT               | INTERGENIC      |               |                    |                    |
| SNP_88988_A_28578 | NW_004516370.1 | scaffold1061 | 28578                   | AA                              | GG                 | GG               | INTERGENIC      |               |                    |                    |
| SNP_88989_A_28605 | NW_004516370.1 | scaffold1061 | 28605                   | GG                              | AA                 | AA               | INTERGENIC      |               |                    |                    |
| SNP_88990_A_28606 | NW_004516370.1 | scaffold1061 | 28606                   | TT                              | AA                 | AA               | INTERGENIC      |               |                    |                    |
| SNP_88991_A_28624 | NW_004516370.1 | scaffold1061 | 28624                   | TT                              | CC                 | CC               | INTERGENIC      |               |                    |                    |
| SNP_88992_A_28829 | NW_004516370.1 | scaffold1061 | 28829                   | TT                              | GG                 | GG               | INTERGENIC      |               |                    |                    |
| SNP_88993_A_28859 | NW_004516370.1 | scaffold1061 | 28859                   | CC                              | AA                 | AA               | INTERGENIC      |               |                    |                    |
| SNP_88994_A_31722 | NW_004516370.1 | scaffold1061 | 31722                   | TT                              | CC                 | CC               | INTERGENIC      |               |                    |                    |
| SNP_88995_A_31732 | NW_004516370.1 | scaffold1061 | 31732                   | CC                              | GG                 | GG               | INTERGENIC      |               |                    |                    |
| SNP_88996_A_31888 | NW_004516370.1 | scaffold1061 | 31888                   | TT                              | GG                 | GG               | INTERGENIC      |               |                    |                    |
| SNP_88997_A_31900 | NW_004516370.1 | scaffold1061 | 31900                   | GG                              | TT                 | TT               | INTERGENIC      |               |                    |                    |
| SNP_88998_A_32128 | NW_004516370.1 | scaffold1061 | 32128                   | TT                              | CC                 | CC               | INTERGENIC      |               |                    |                    |
| SNP_88999_A_32302 | NW_004516370.1 | scaffold1061 | 32302                   | AA                              | GG                 | GG               | INTERGENIC      |               |                    |                    |
| SNP_89000_A_32358 | NW_004516370.1 | scaffold1061 | 32358                   | TT                              | CC                 | CC               | INTERGENIC      |               |                    |                    |
| SNP_89001_A_32625 | NW_004516370.1 | scaffold1061 | 32625                   | TT                              | AA                 | AA               | INTERGENIC      |               |                    |                    |
| SNP_89002_A_32858 | NW_004516370.1 | scaffold1061 | 32858                   | AA                              | GG                 | GG               | INTERGENIC      |               |                    |                    |
| SNP_89004_A_32907 | NW_004516370.1 | scaffold1061 | 32907                   | GG                              | TT                 | TT               | INTERGENIC      |               |                    |                    |

| SNPs IDs          | Chromosome IDs | Chromosomes  | Physical positions (bp) | CDC Frontier (Reference genome) | (Pusa 1103 & HPNB) | (ILWC 46 & LPNB) | Sequence genome | Components of | Gene accession IDs | Putative functions |
|-------------------|----------------|--------------|-------------------------|---------------------------------|--------------------|------------------|-----------------|---------------|--------------------|--------------------|
| SNP_89005_A_32935 | NW_004516370.1 | scaffold1061 | 32935                   | TT                              | CC                 | CC               | INTERGENIC      |               |                    |                    |
| SNP_89006_A_32941 | NW_004516370.1 | scaffold1061 | 32941                   | AA                              | GG                 | GG               | INTERGENIC      |               |                    |                    |
| SNP_89007_A_32972 | NW_004516370.1 | scaffold1061 | 32972                   | TT                              | CC                 | CC               | INTERGENIC      |               |                    |                    |
| SNP_89008_A_32975 | NW_004516370.1 | scaffold1061 | 32975                   | TT                              | AA                 | AA               | INTERGENIC      |               |                    |                    |
| SNP_89009_A_33022 | NW_004516370.1 | scaffold1061 | 33022                   | TT                              | CC                 | CC               | INTERGENIC      |               |                    |                    |
| SNP_89010_A_33049 | NW_004516370.1 | scaffold1061 | 33049                   | GG                              | CC                 | CC               | INTERGENIC      |               |                    |                    |
| SNP_89011_A_33192 | NW_004516370.1 | scaffold1061 | 33192                   | AA                              | GG                 | GG               | INTERGENIC      |               |                    |                    |
| SNP_89012_A_33278 | NW_004516370.1 | scaffold1061 | 33278                   | TT                              | CC                 | CC               | INTERGENIC      |               |                    |                    |
| SNP_89013_A_33347 | NW_004516370.1 | scaffold1061 | 33347                   | AA                              | TT                 | TT               | INTERGENIC      |               |                    |                    |
| SNP_89014_A_33379 | NW_004516370.1 | scaffold1061 | 33379                   | AA                              | GG                 | GG               | INTERGENIC      |               |                    |                    |
| SNP_89015_A_36106 | NW_004516370.1 | scaffold1061 | 36106                   | AA                              | TT                 | TT               | INTERGENIC      |               |                    |                    |
| SNP_89016_A_36161 | NW_004516370.1 | scaffold1061 | 36161                   | CC                              | TT                 | TT               | INTERGENIC      |               |                    |                    |
| SNP_89017_A_36162 | NW_004516370.1 | scaffold1061 | 36162                   | TT                              | CC                 | CC               | INTERGENIC      |               |                    |                    |
| SNP_89018_A_36198 | NW_004516370.1 | scaffold1061 | 36198                   | CC                              | TT                 | TT               | INTERGENIC      |               |                    |                    |
| SNP_89019_A_36231 | NW_004516370.1 | scaffold1061 | 36231                   | TT                              | AA                 | AA               | INTERGENIC      |               |                    |                    |
| SNP_89020_A_36337 | NW_004516370.1 | scaffold1061 | 36337                   | GG                              | AA                 | AA               | INTERGENIC      |               |                    |                    |
| SNP_89021_A_36469 | NW_004516370.1 | scaffold1061 | 36469                   | GG                              | AA                 | AA               | INTERGENIC      |               |                    |                    |
| SNP_89022_A_36477 | NW_004516370.1 | scaffold1061 | 36477                   | TT                              | CC                 | CC               | INTERGENIC      |               |                    |                    |
| SNP_89023_A_36478 | NW_004516370.1 | scaffold1061 | 36478                   | GG                              | AA                 | AA               | INTERGENIC      |               |                    |                    |
| SNP_89024_A_36568 | NW_004516370.1 | scaffold1061 | 36568                   | CC                              | AA                 | AA               | INTERGENIC      |               |                    |                    |
| SNP_89025_A_36732 | NW_004516370.1 | scaffold1061 | 36732                   | CC                              | TT                 | TT               | INTERGENIC      |               |                    |                    |
| SNP_89026_A_39736 | NW_004516370.1 | scaffold1061 | 39736                   | AA                              | GG                 | GG               | INTERGENIC      |               |                    |                    |

| SNPs IDs          | Chromosome IDs | Chromosomes  | Physical positions (bp) | CDC Frontier (Reference genome) | (Pusa 1103 & HPNB) | (ILWC 46 & LPNB) | Sequence genome | Components of | Gene accession IDs | Putative functions |
|-------------------|----------------|--------------|-------------------------|---------------------------------|--------------------|------------------|-----------------|---------------|--------------------|--------------------|
| SNP_89027_A_39834 | NW_004516370.1 | scaffold1061 | 39834                   | TT                              | CC                 | CC               | INTERGENIC      |               |                    |                    |
| SNP_89028_A_39884 | NW_004516370.1 | scaffold1061 | 39884                   | AA                              | GG                 | GG               | INTERGENIC      |               |                    |                    |
| SNP_89029_A_39947 | NW_004516370.1 | scaffold1061 | 39947                   | GG                              | TT                 | TT               | INTERGENIC      |               |                    |                    |
| SNP_89030_A_40079 | NW_004516370.1 | scaffold1061 | 40079                   | TT                              | CC                 | CC               | INTERGENIC      |               |                    |                    |
| SNP_89031_A_41200 | NW_004516370.1 | scaffold1061 | 41200                   | AA                              | CC                 | CC               | INTERGENIC      |               |                    |                    |
| SNP_89032_A_42364 | NW_004516370.1 | scaffold1061 | 42364                   | TT                              | CC                 | CC               | INTERGENIC      |               |                    |                    |
| SNP_89033_A_46224 | NW_004516370.1 | scaffold1061 | 46224                   | AA                              | GG                 | GG               | INTERGENIC      |               |                    |                    |
| SNP_89034_A_46439 | NW_004516370.1 | scaffold1061 | 46439                   | GG                              | TT                 | TT               | INTERGENIC      |               |                    |                    |
| SNP_89035_A_49599 | NW_004516370.1 | scaffold1061 | 49599                   | CC                              | AA                 | AA               | INTERGENIC      |               |                    |                    |
| SNP_89036_A_49638 | NW_004516370.1 | scaffold1061 | 49638                   | AA                              | GG                 | GG               | INTERGENIC      |               |                    |                    |
| SNP_89037_A_49665 | NW_004516370.1 | scaffold1061 | 49665                   | GG                              | TT                 | TT               | INTERGENIC      |               |                    |                    |
| SNP_89038_A_49674 | NW_004516370.1 | scaffold1061 | 49674                   | AA                              | TT                 | TT               | INTERGENIC      |               |                    |                    |
| SNP_89039_A_49683 | NW_004516370.1 | scaffold1061 | 49683                   | AA                              | TT                 | TT               | INTERGENIC      |               |                    |                    |
| SNP_89041_A_49942 | NW_004516370.1 | scaffold1061 | 49942                   | GG                              | AA                 | AA               | INTERGENIC      |               |                    |                    |
| SNP_89042_A_51011 | NW_004516370.1 | scaffold1061 | 51011                   | CC                              | TT                 | TT               | INTERGENIC      |               |                    |                    |
| SNP_89043_A_51033 | NW_004516370.1 | scaffold1061 | 51033                   | CC                              | TT                 | TT               | INTERGENIC      |               |                    |                    |
| SNP_89044_A_51273 | NW_004516370.1 | scaffold1061 | 51273                   | CC                              | TT                 | TT               | INTERGENIC      |               |                    |                    |
| SNP_89045_A_51378 | NW_004516370.1 | scaffold1061 | 51378                   | TT                              | GG                 | GG               | INTERGENIC      |               |                    |                    |
| SNP_89046_A_51466 | NW_004516370.1 | scaffold1061 | 51466                   | AA                              | TT                 | TT               | INTERGENIC      |               |                    |                    |
| SNP_89047_A_51479 | NW_004516370.1 | scaffold1061 | 51479                   | CC                              | TT                 | TT               | INTERGENIC      |               |                    |                    |
| SNP_89048_A_51746 | NW_004516370.1 | scaffold1061 | 51746                   | TT                              | CC                 | CC               | INTERGENIC      |               |                    |                    |
| SNP_89049_A_52411 | NW_004516370.1 | scaffold1061 | 52411                   | AA                              | CC                 | CC               | INTERGENIC      |               |                    |                    |

| SNPs IDs          | Chromosome IDs | Chromosomes  | Physical positions (bp) | CDC Frontier (Reference genome) | (Pusa 1103 & HPNB) | (ILWC 46 & LPNB) | Sequence genome | Components of | Gene accession IDs | Putative functions |
|-------------------|----------------|--------------|-------------------------|---------------------------------|--------------------|------------------|-----------------|---------------|--------------------|--------------------|
| SNP_89050_A_60187 | NW_004516370.1 | scaffold1061 | 60187                   | TT                              | AA                 | AA               | INTERGENIC      |               |                    |                    |
| SNP_89051_A_62047 | NW_004516370.1 | scaffold1061 | 62047                   | CC                              | GG                 | GG               | INTERGENIC      |               |                    |                    |
| SNP_89052_A_63358 | NW_004516370.1 | scaffold1061 | 63358                   | AA                              | GG                 | GG               | INTERGENIC      |               |                    |                    |
| SNP_89053_A_64079 | NW_004516370.1 | scaffold1061 | 64079                   | GG                              | CC                 | CC               | INTERGENIC      |               |                    |                    |
| SNP_89054_A_64115 | NW_004516370.1 | scaffold1061 | 64115                   | GG                              | AA                 | AA               | INTERGENIC      |               |                    |                    |
| SNP_89055_A_64145 | NW_004516370.1 | scaffold1061 | 64145                   | AA                              | TT                 | TT               | INTERGENIC      |               |                    |                    |
| SNP_89056_A_64499 | NW_004516370.1 | scaffold1061 | 64499                   | TT                              | CC                 | CC               | INTERGENIC      |               |                    |                    |
| SNP_89057_A_65072 | NW_004516370.1 | scaffold1061 | 65072                   | CC                              | TT                 | TT               | INTERGENIC      |               |                    |                    |
| SNP_89058_A_67146 | NW_004516370.1 | scaffold1061 | 67146                   | GG                              | AA                 | AA               | INTERGENIC      |               |                    |                    |
| SNP_89059_A_67173 | NW_004516370.1 | scaffold1061 | 67173                   | AA                              | TT                 | TT               | INTERGENIC      |               |                    |                    |
| SNP_89060_A_67430 | NW_004516370.1 | scaffold1061 | 67430                   | GG                              | AA                 | AA               | INTERGENIC      |               |                    |                    |
| SNP_89061_A_67438 | NW_004516370.1 | scaffold1061 | 67438                   | GG                              | AA                 | AA               | INTERGENIC      |               |                    |                    |
| SNP_89062_A_67497 | NW_004516370.1 | scaffold1061 | 67497                   | CC                              | TT                 | TT               | INTERGENIC      |               |                    |                    |
| SNP_89063_A_67527 | NW_004516370.1 | scaffold1061 | 67527                   | CC                              | TT                 | TT               | INTERGENIC      |               |                    |                    |
| SNP_89064_A_67710 | NW_004516370.1 | scaffold1061 | 67710                   | TT                              | CC                 | CC               | INTERGENIC      |               |                    |                    |
| SNP_89065_A_67720 | NW_004516370.1 | scaffold1061 | 67720                   | GG                              | CC                 | CC               | INTERGENIC      |               |                    |                    |
| SNP_89066_A_67749 | NW_004516370.1 | scaffold1061 | 67749                   | GG                              | AA                 | AA               | INTERGENIC      |               |                    |                    |
| SNP_89067_A_70031 | NW_004516370.1 | scaffold1061 | 70031                   | AA                              | CC                 | CC               | INTERGENIC      |               |                    |                    |
| SNP_89068_A_70043 | NW_004516370.1 | scaffold1061 | 70043                   | AA                              | GG                 | GG               | INTERGENIC      |               |                    |                    |
| SNP_89069_A_70666 | NW_004516370.1 | scaffold1061 | 70666                   | CC                              | GG                 | GG               | INTERGENIC      |               |                    |                    |
| SNP_89070_A_70842 | NW_004516370.1 | scaffold1061 | 70842                   | TT                              | GG                 | GG               | INTERGENIC      |               |                    |                    |
| SNP_89071_A_70902 | NW_004516370.1 | scaffold1061 | 70902                   | AA                              | CC                 | CC               | INTERGENIC      |               |                    |                    |

| SNPs IDs          | Chromosome IDs | Chromosomes  | Physical positions (bp) | CDC Frontier (Reference genome) | (Pusa 1103 & HPNB) | (ILWC 46 & LPNB) | Sequence genome | Components of | Gene accession IDs | Putative functions |
|-------------------|----------------|--------------|-------------------------|---------------------------------|--------------------|------------------|-----------------|---------------|--------------------|--------------------|
| SNP_89072_A_70928 | NW_004516370.1 | scaffold1061 | 70928                   | AA                              | CC                 | CC               | INTERGENIC      |               |                    |                    |
| SNP_89073_A_70961 | NW_004516370.1 | scaffold1061 | 70961                   | AA                              | TT                 | TT               | INTERGENIC      |               |                    |                    |
| SNP_89074_A_71016 | NW_004516370.1 | scaffold1061 | 71016                   | CC                              | TT                 | TT               | INTERGENIC      |               |                    |                    |
| SNP_89075_A_71029 | NW_004516370.1 | scaffold1061 | 71029                   | AA                              | CC                 | CC               | INTERGENIC      |               |                    |                    |
| SNP_89076_A_71206 | NW_004516370.1 | scaffold1061 | 71206                   | AA                              | GG                 | GG               | INTERGENIC      |               |                    |                    |
| SNP_89077_A_71265 | NW_004516370.1 | scaffold1061 | 71265                   | TT                              | AA                 | AA               | INTERGENIC      |               |                    |                    |
| SNP_89078_A_71327 | NW_004516370.1 | scaffold1061 | 71327                   | GG                              | CC                 | CC               | INTERGENIC      |               |                    |                    |
| SNP_89079_A_71335 | NW_004516370.1 | scaffold1061 | 71335                   | AA                              | CC                 | CC               | INTERGENIC      |               |                    |                    |
| SNP_89080_A_71463 | NW_004516370.1 | scaffold1061 | 71463                   | CC                              | GG                 | GG               | INTERGENIC      |               |                    |                    |
| SNP_89081_A_71464 | NW_004516370.1 | scaffold1061 | 71464                   | AA                              | GG                 | GG               | INTERGENIC      |               |                    |                    |
| SNP_89082_A_71487 | NW_004516370.1 | scaffold1061 | 71487                   | TT                              | AA                 | AA               | INTERGENIC      |               |                    |                    |
| SNP_89083_A_71497 | NW_004516370.1 | scaffold1061 | 71497                   | AA                              | TT                 | TT               | INTERGENIC      |               |                    |                    |
| SNP_89084_A_71507 | NW_004516370.1 | scaffold1061 | 71507                   | GG                              | AA                 | AA               | INTERGENIC      |               |                    |                    |
| SNP_89085_A_71650 | NW_004516370.1 | scaffold1061 | 71650                   | TT                              | AA                 | AA               | INTERGENIC      |               |                    |                    |
| SNP_89086_A_71660 | NW_004516370.1 | scaffold1061 | 71660                   | AA                              | TT                 | TT               | INTERGENIC      |               |                    |                    |
| SNP_89087_A_71670 | NW_004516370.1 | scaffold1061 | 71670                   | GG                              | AA                 | AA               | INTERGENIC      |               |                    |                    |
| SNP_89088_A_71719 | NW_004516370.1 | scaffold1061 | 71719                   | GG                              | CC                 | CC               | INTERGENIC      |               |                    |                    |
| SNP_89089_A_71721 | NW_004516370.1 | scaffold1061 | 71721                   | GG                              | TT                 | TT               | INTERGENIC      |               |                    |                    |
| SNP_89090_A_72036 | NW_004516370.1 | scaffold1061 | 72036                   | TT                              | CC                 | CC               | INTERGENIC      |               |                    |                    |
| SNP_89091_A_72056 | NW_004516370.1 | scaffold1061 | 72056                   | GG                              | AA                 | AA               | INTERGENIC      |               |                    |                    |
| SNP_89092_A_72139 | NW_004516370.1 | scaffold1061 | 72139                   | CC                              | AA                 | AA               | INTERGENIC      |               |                    |                    |
| SNP_89093_A_72150 | NW_004516370.1 | scaffold1061 | 72150                   | CC                              | TT                 | TT               | INTERGENIC      |               |                    |                    |

| SNPs IDs          | Chromosome IDs | Chromosomes  | Physical positions (bp) | CDC Frontier (Reference genome) | (Pusa 1103 & HPNB) | (ILWC 46 & LPNB) | Sequence genome | Components of | Gene accession IDs | Putative functions |
|-------------------|----------------|--------------|-------------------------|---------------------------------|--------------------|------------------|-----------------|---------------|--------------------|--------------------|
| SNP_89094_A_72166 | NW_004516370.1 | scaffold1061 | 72166                   | TT                              | GG                 | GG               | INTERGENIC      |               |                    |                    |
| SNP_89095_A_72167 | NW_004516370.1 | scaffold1061 | 72167                   | GG                              | AA                 | AA               | INTERGENIC      |               |                    |                    |
| SNP_89096_A_72171 | NW_004516370.1 | scaffold1061 | 72171                   | TT                              | AA                 | AA               | INTERGENIC      |               |                    |                    |
| SNP_89097_A_72224 | NW_004516370.1 | scaffold1061 | 72224                   | AA                              | CC                 | CC               | INTERGENIC      |               |                    |                    |
| SNP_89098_A_72273 | NW_004516370.1 | scaffold1061 | 72273                   | AA                              | GG                 | GG               | INTERGENIC      |               |                    |                    |
| SNP_89099_A_72599 | NW_004516370.1 | scaffold1061 | 72599                   | AA                              | GG                 | GG               | INTERGENIC      |               |                    |                    |
| SNP_89100_A_72604 | NW_004516370.1 | scaffold1061 | 72604                   | CC                              | TT                 | TT               | INTERGENIC      |               |                    |                    |
| SNP_89101_A_72670 | NW_004516370.1 | scaffold1061 | 72670                   | GG                              | CC                 | CC               | INTERGENIC      |               |                    |                    |
| SNP_89102_A_72700 | NW_004516370.1 | scaffold1061 | 72700                   | CC                              | GG                 | GG               | INTERGENIC      |               |                    |                    |
| SNP_89103_A_72979 | NW_004516370.1 | scaffold1061 | 72979                   | AA                              | GG                 | GG               | INTERGENIC      |               |                    |                    |
| SNP_89104_A_73021 | NW_004516370.1 | scaffold1061 | 73021                   | TT                              | GG                 | GG               | INTERGENIC      |               |                    |                    |
| SNP_89105_A_73060 | NW_004516370.1 | scaffold1061 | 73060                   | CC                              | GG                 | GG               | INTERGENIC      |               |                    |                    |
| SNP_89106_A_73086 | NW_004516370.1 | scaffold1061 | 73086                   | TT                              | CC                 | CC               | INTERGENIC      |               |                    |                    |
| SNP_89107_A_73439 | NW_004516370.1 | scaffold1061 | 73439                   | CC                              | TT                 | TT               | INTERGENIC      |               |                    |                    |
| SNP_89108_A_74407 | NW_004516370.1 | scaffold1061 | 74407                   | CC                              | AA                 | AA               | INTERGENIC      |               |                    |                    |
| SNP_89109_A_74410 | NW_004516370.1 | scaffold1061 | 74410                   | TT                              | CC                 | CC               | INTERGENIC      |               |                    |                    |
| SNP_89110_A_74444 | NW_004516370.1 | scaffold1061 | 74444                   | AA                              | TT                 | TT               | INTERGENIC      |               |                    |                    |
| SNP_89111_A_74565 | NW_004516370.1 | scaffold1061 | 74565                   | GG                              | CC                 | CC               | INTERGENIC      |               |                    |                    |
| SNP_89112_A_74668 | NW_004516370.1 | scaffold1061 | 74668                   | TT                              | GG                 | GG               | INTERGENIC      |               |                    |                    |
| SNP_89113_A_74676 | NW_004516370.1 | scaffold1061 | 74676                   | TT                              | CC                 | CC               | INTERGENIC      |               |                    |                    |
| SNP_89114_A_74687 | NW_004516370.1 | scaffold1061 | 74687                   | GG                              | AA                 | AA               | INTERGENIC      |               |                    |                    |
| SNP_89115_A_74725 | NW_004516370.1 | scaffold1061 | 74725                   | CC                              | TT                 | TT               | INTERGENIC      |               |                    |                    |

| SNPs IDs          | Chromosome IDs | Chromosomes  | Physical positions (bp) | CDC Frontier (Reference genome) | (Pusa 1103 & HPNB) | (ILWC 46 & LPNB) | Sequence genome | Components of | Gene accession IDs | Putative functions |
|-------------------|----------------|--------------|-------------------------|---------------------------------|--------------------|------------------|-----------------|---------------|--------------------|--------------------|
| SNP_89116_A_74796 | NW_004516370.1 | scaffold1061 | 74796                   | GG                              | AA                 | AA               | INTERGENIC      |               |                    |                    |
| SNP_89117_A_74802 | NW_004516370.1 | scaffold1061 | 74802                   | GG                              | AA                 | AA               | INTERGENIC      |               |                    |                    |
| SNP_89118_A_74816 | NW_004516370.1 | scaffold1061 | 74816                   | TT                              | CC                 | CC               | INTERGENIC      |               |                    |                    |
| SNP_89119_A_74825 | NW_004516370.1 | scaffold1061 | 74825                   | CC                              | GG                 | GG               | INTERGENIC      |               |                    |                    |
| SNP_89120_A_74933 | NW_004516370.1 | scaffold1061 | 74933                   | TT                              | CC                 | CC               | INTERGENIC      |               |                    |                    |
| SNP_89121_A_74946 | NW_004516370.1 | scaffold1061 | 74946                   | TT                              | AA                 | AA               | INTERGENIC      |               |                    |                    |
| SNP_89122_A_74966 | NW_004516370.1 | scaffold1061 | 74966                   | AA                              | TT                 | TT               | INTERGENIC      |               |                    |                    |
| SNP_89123_A_75026 | NW_004516370.1 | scaffold1061 | 75026                   | GG                              | AA                 | AA               | INTERGENIC      |               |                    |                    |
| SNP_89124_A_75037 | NW_004516370.1 | scaffold1061 | 75037                   | CC                              | TT                 | TT               | INTERGENIC      |               |                    |                    |
| SNP_89125_A_75051 | NW_004516370.1 | scaffold1061 | 75051                   | TT                              | CC                 | CC               | INTERGENIC      |               |                    |                    |
| SNP_89126_A_75055 | NW_004516370.1 | scaffold1061 | 75055                   | CC                              | AA                 | AA               | INTERGENIC      |               |                    |                    |
| SNP_89127_A_75093 | NW_004516370.1 | scaffold1061 | 75093                   | CC                              | AA                 | AA               | INTERGENIC      |               |                    |                    |
| SNP_89128_A_75168 | NW_004516370.1 | scaffold1061 | 75168                   | CC                              | TT                 | TT               | INTERGENIC      |               |                    |                    |
| SNP_89129_A_75172 | NW_004516370.1 | scaffold1061 | 75172                   | TT                              | CC                 | CC               | INTERGENIC      |               |                    |                    |
| SNP_89130_A_75202 | NW_004516370.1 | scaffold1061 | 75202                   | AA                              | GG                 | GG               | INTERGENIC      |               |                    |                    |
| SNP_89131_A_75361 | NW_004516370.1 | scaffold1061 | 75361                   | AA                              | TT                 | TT               | INTERGENIC      |               |                    |                    |
| SNP_89132_A_75404 | NW_004516370.1 | scaffold1061 | 75404                   | TT                              | CC                 | CC               | INTERGENIC      |               |                    |                    |
| SNP_89133_A_75438 | NW_004516370.1 | scaffold1061 | 75438                   | TT                              | GG                 | GG               | INTERGENIC      |               |                    |                    |
| SNP_89134_A_75478 | NW_004516370.1 | scaffold1061 | 75478                   | CC                              | AA                 | AA               | INTERGENIC      |               |                    |                    |
| SNP_89135_A_75562 | NW_004516370.1 | scaffold1061 | 75562                   | CC                              | TT                 | TT               | INTERGENIC      |               |                    |                    |
| SNP_89136_A_75566 | NW_004516370.1 | scaffold1061 | 75566                   | AA                              | GG                 | GG               | INTERGENIC      |               |                    |                    |
| SNP_89138_A_77003 | NW_004516370.1 | scaffold1061 | 77003                   | TT                              | CC                 | CC               | INTERGENIC      |               |                    |                    |



| SNPs IDs           | Chromosome IDs | Chromosomes  | Physical positions (bp) | CDC Frontier (Reference genome) | (Pusa 1103 & HPNB) | (ILWC 46 & LPNB) | Sequence Components of genome | Gene accession IDs | Putative functions           |
|--------------------|----------------|--------------|-------------------------|---------------------------------|--------------------|------------------|-------------------------------|--------------------|------------------------------|
| SNP_89139_A_77066  | NW_004516370.1 | scaffold1061 | 77066                   | AA                              | CC                 | CC               | INTERGENIC                    |                    |                              |
| SNP_89140_A_77248  | NW_004516370.1 | scaffold1061 | 77248                   | AA                              | CC                 | CC               | INTERGENIC                    |                    |                              |
| SNP_89141_A_78219  | NW_004516370.1 | scaffold1061 | 78219                   | AA                              | CC                 | CC               | INTERGENIC                    |                    |                              |
| SNP_89142_A_78402  | NW_004516370.1 | scaffold1061 | 78402                   | CC                              | TT                 | TT               | INTERGENIC                    |                    |                              |
| SNP_89143_A_78410  | NW_004516370.1 | scaffold1061 | 78410                   | TT                              | CC                 | CC               | INTERGENIC                    |                    |                              |
| SNP_89144_A_78450  | NW_004516370.1 | scaffold1061 | 78450                   | CC                              | TT                 | TT               | INTERGENIC                    |                    |                              |
| SNP_89145_A_6225   | NW_004516372.1 | scaffold1065 | 6225                    | TT                              | CC                 | CC               | INTERGENIC                    |                    |                              |
| SNP_89146_A_6470   | NW_004516372.1 | scaffold1065 | 6470                    | AA                              | GG                 | GG               | INTERGENIC                    |                    |                              |
| SNP_89147_A_6475   | NW_004516372.1 | scaffold1065 | 6475                    | TT                              | AA                 | AA               | INTERGENIC                    |                    |                              |
| SNP_89148_A_6483   | NW_004516372.1 | scaffold1065 | 6483                    | TT                              | CC                 | CC               | INTERGENIC                    |                    |                              |
| SNP_89149_A_6793   | NW_004516372.1 | scaffold1065 | 6793                    | GG                              | TT                 | TT               | INTERGENIC                    |                    |                              |
| SNP_89150_A_6850   | NW_004516372.1 | scaffold1065 | 6850                    | CC                              | TT                 | TT               | INTERGENIC                    |                    |                              |
| SNP_89151_A_23552  | NW_004516372.1 | scaffold1065 | 23552                   | GG                              | TT                 | TT               | INTERGENIC                    |                    |                              |
| SNP_89152_A_42572  | NW_004516372.1 | scaffold1065 | 42572                   | GG                              | TT                 | TT               | INTRON                        | 101494365          | uncharacterized LOC101494365 |
| SNP_89153_A_95566  | NW_004516372.1 | scaffold1065 | 95566                   | TT                              | CC                 | CC               | INTERGENIC                    |                    |                              |
| SNP_89154_A_99804  | NW_004516372.1 | scaffold1065 | 99804                   | AA                              | TT                 | TT               | INTERGENIC                    |                    |                              |
| SNP_89155_A_99805  | NW_004516372.1 | scaffold1065 | 99805                   | AA                              | TT                 | TT               | INTERGENIC                    |                    |                              |
| SNP_89156_A_165252 | NW_004516372.1 | scaffold1065 | 165252                  | CC                              | AA                 | AA               | INTERGENIC                    |                    |                              |
| SNP_89157_A_165563 | NW_004516372.1 | scaffold1065 | 165563                  | CC                              | TT                 | TT               | INTERGENIC                    |                    |                              |
| SNP_89158_A_1097   | NW_004516373.1 | scaffold1066 | 1097                    | AA                              | GG                 | GG               | INTERGENIC                    |                    |                              |
| SNP_89159_A_764    | NW_004516374.1 | scaffold1067 | 764                     | TT                              | CC                 | CC               | INTERGENIC                    |                    |                              |
| SNP_89160_A_818    | NW_004516374.1 | scaffold1067 | 818                     | CC                              | AA                 | AA               | INTERGENIC                    |                    |                              |

| SNPs IDs          | Chromosome IDs | Chromosomes  | Physical positions (bp) | CDC Frontier (Reference genome) | (Pusa 1103 & HPNB) | (ILWC 46 & LPNB) | Sequence genome | Components of | Gene accession IDs | Putative functions |
|-------------------|----------------|--------------|-------------------------|---------------------------------|--------------------|------------------|-----------------|---------------|--------------------|--------------------|
| SNP_89161_A_819   | NW_004516374.1 | scaffold1067 | 819                     | AA                              | GG                 | GG               | INTERGENIC      |               |                    |                    |
| SNP_89162_A_927   | NW_004516374.1 | scaffold1067 | 927                     | TT                              | CC                 | CC               | INTERGENIC      |               |                    |                    |
| SNP_89163_A_1097  | NW_004516374.1 | scaffold1067 | 1097                    | CC                              | TT                 | TT               | INTERGENIC      |               |                    |                    |
| SNP_89164_A_1099  | NW_004516374.1 | scaffold1067 | 1099                    | AA                              | GG                 | GG               | INTERGENIC      |               |                    |                    |
| SNP_89165_A_1100  | NW_004516374.1 | scaffold1067 | 1100                    | CC                              | TT                 | TT               | INTERGENIC      |               |                    |                    |
| SNP_89166_A_1409  | NW_004516374.1 | scaffold1067 | 1409                    | AA                              | GG                 | GG               | INTERGENIC      |               |                    |                    |
| SNP_89167_A_1731  | NW_004516374.1 | scaffold1067 | 1731                    | CC                              | TT                 | TT               | INTERGENIC      |               |                    |                    |
| SNP_89168_A_1935  | NW_004516374.1 | scaffold1067 | 1935                    | CC                              | AA                 | AA               | INTERGENIC      |               |                    |                    |
| SNP_89169_A_2149  | NW_004516374.1 | scaffold1067 | 2149                    | GG                              | AA                 | AA               | INTERGENIC      |               |                    |                    |
| SNP_89170_A_16678 | NW_004516374.1 | scaffold1067 | 16678                   | GG                              | CC                 | CC               | INTERGENIC      |               |                    |                    |
| SNP_89171_A_18762 | NW_004516374.1 | scaffold1067 | 18762                   | AA                              | CC                 | CC               | INTERGENIC      |               |                    |                    |
| SNP_89172_A_18782 | NW_004516374.1 | scaffold1067 | 18782                   | GG                              | AA                 | AA               | INTERGENIC      |               |                    |                    |
| SNP_89173_A_18803 | NW_004516374.1 | scaffold1067 | 18803                   | TT                              | CC                 | CC               | INTERGENIC      |               |                    |                    |
| SNP_89174_A_18891 | NW_004516374.1 | scaffold1067 | 18891                   | GG                              | AA                 | AA               | INTERGENIC      |               |                    |                    |
| SNP_89175_A_18909 | NW_004516374.1 | scaffold1067 | 18909                   | TT                              | CC                 | CC               | INTERGENIC      |               |                    |                    |
| SNP_89176_A_18914 | NW_004516374.1 | scaffold1067 | 18914                   | GG                              | TT                 | TT               | INTERGENIC      |               |                    |                    |
| SNP_89177_A_19099 | NW_004516374.1 | scaffold1067 | 19099                   | TT                              | CC                 | CC               | INTERGENIC      |               |                    |                    |
| SNP_89178_A_19110 | NW_004516374.1 | scaffold1067 | 19110                   | CC                              | TT                 | TT               | INTERGENIC      |               |                    |                    |
| SNP_89179_A_19120 | NW_004516374.1 | scaffold1067 | 19120                   | AA                              | TT                 | TT               | INTERGENIC      |               |                    |                    |
| SNP_89180_A_19127 | NW_004516374.1 | scaffold1067 | 19127                   | GG                              | AA                 | AA               | INTERGENIC      |               |                    |                    |
| SNP_89181_A_20666 | NW_004516374.1 | scaffold1067 | 20666                   | CC                              | TT                 | TT               | INTERGENIC      |               |                    |                    |
| SNP_89182_A_20808 | NW_004516374.1 | scaffold1067 | 20808                   | GG                              | AA                 | AA               | INTERGENIC      |               |                    |                    |

| SNPs IDs           | Chromosome IDs | Chromosomes  | Physical positions (bp) | CDC Frontier (Reference genome) | (Pusa 1103 & HPNB) | (ILWC 46 & LPNB) | Sequence Components of genome | Gene accession IDs | Putative functions |
|--------------------|----------------|--------------|-------------------------|---------------------------------|--------------------|------------------|-------------------------------|--------------------|--------------------|
| SNP_89183_A_20813  | NW_004516374.1 | scaffold1067 | 20813                   | GG                              | TT                 | TT               | INTERGENIC                    |                    |                    |
| SNP_89184_A_69030  | NW_004516374.1 | scaffold1067 | 69030                   | CC                              | TT                 | TT               | INTERGENIC                    |                    |                    |
| SNP_89185_A_117886 | NW_004516374.1 | scaffold1067 | 117886                  | AA                              | CC                 | CC               | INTERGENIC                    |                    |                    |
| SNP_89186_A_117888 | NW_004516374.1 | scaffold1067 | 117888                  | AA                              | GG                 | GG               | INTERGENIC                    |                    |                    |
| SNP_89187_A_155326 | NW_004516374.1 | scaffold1067 | 155326                  | GG                              | CC                 | CC               | INTERGENIC                    |                    |                    |
| SNP_89188_A_188722 | NW_004516374.1 | scaffold1067 | 188722                  | CC                              | AA                 | AA               | INTERGENIC                    |                    |                    |
| SNP_89189_A_189058 | NW_004516374.1 | scaffold1067 | 189058                  | AA                              | TT                 | TT               | INTERGENIC                    |                    |                    |
| SNP_89190_A_190197 | NW_004516374.1 | scaffold1067 | 190197                  | GG                              | TT                 | TT               | INTERGENIC                    |                    |                    |
| SNP_89191_A_190205 | NW_004516374.1 | scaffold1067 | 190205                  | TT                              | GG                 | GG               | INTERGENIC                    |                    |                    |
| SNP_89192_A_190230 | NW_004516374.1 | scaffold1067 | 190230                  | AA                              | GG                 | GG               | INTERGENIC                    |                    |                    |
| SNP_89193_A_190253 | NW_004516374.1 | scaffold1067 | 190253                  | TT                              | CC                 | CC               | INTERGENIC                    |                    |                    |
| SNP_89194_A_190612 | NW_004516374.1 | scaffold1067 | 190612                  | GG                              | AA                 | AA               | INTERGENIC                    |                    |                    |
| SNP_89196_A_190869 | NW_004516374.1 | scaffold1067 | 190869                  | GG                              | AA                 | AA               | INTERGENIC                    |                    |                    |
| SNP_89197_A_191331 | NW_004516374.1 | scaffold1067 | 191331                  | AA                              | CC                 | CC               | INTERGENIC                    |                    |                    |
| SNP_89198_A_191334 | NW_004516374.1 | scaffold1067 | 191334                  | AA                              | GG                 | GG               | INTERGENIC                    |                    |                    |
| SNP_89199_A_191349 | NW_004516374.1 | scaffold1067 | 191349                  | TT                              | CC                 | CC               | INTERGENIC                    |                    |                    |
| SNP_89200_A_195980 | NW_004516374.1 | scaffold1067 | 195980                  | AA                              | TT                 | TT               | DRR                           | 101496746          | Unknown function   |
| SNP_89201_A_195996 | NW_004516374.1 | scaffold1067 | 195996                  | GG                              | TT                 | TT               | DRR                           | 101496746          | Unknown function   |
| SNP_89202_A_196147 | NW_004516374.1 | scaffold1067 | 196147                  | AA                              | GG                 | GG               | DRR                           | 101496746          | Unknown function   |
| SNP_89204_A_203031 | NW_004516374.1 | scaffold1067 | 203031                  | GG                              | CC                 | CC               | INTERGENIC                    |                    |                    |
| SNP_89205_A_203038 | NW_004516374.1 | scaffold1067 | 203038                  | GG                              | TT                 | TT               | INTERGENIC                    |                    |                    |
| SNP_89206_A_203042 | NW_004516374.1 | scaffold1067 | 203042                  | CC                              | TT                 | TT               | INTERGENIC                    |                    |                    |

| SNPs IDs           | Chromosome IDs | Chromosomes  | Physical positions (bp) | CDC Frontier (Reference genome) | (Pusa 1103 & HPNB) | (ILWC 46 & LPNB) | Sequence Components of genome | Gene accession IDs | Putative functions |
|--------------------|----------------|--------------|-------------------------|---------------------------------|--------------------|------------------|-------------------------------|--------------------|--------------------|
| SNP_89208_A_203049 | NW_004516374.1 | scaffold1067 | 203049                  | AA                              | GG                 | GG               | INTERGENIC                    |                    |                    |
| SNP_89209_A_203064 | NW_004516374.1 | scaffold1067 | 203064                  | AA                              | TT                 | TT               | INTERGENIC                    |                    |                    |
| SNP_89211_A_203221 | NW_004516374.1 | scaffold1067 | 203221                  | CC                              | TT                 | TT               | INTERGENIC                    |                    |                    |
| SNP_89212_A_206876 | NW_004516374.1 | scaffold1067 | 206876                  | CC                              | AA                 | AA               | INTERGENIC                    |                    |                    |
| SNP_89213_A_209167 | NW_004516374.1 | scaffold1067 | 209167                  | CC                              | TT                 | TT               | INTERGENIC                    |                    |                    |
| SNP_89214_A_214022 | NW_004516374.1 | scaffold1067 | 214022                  | TT                              | GG                 | GG               | DRR                           | 101497055          | Unknown function   |
| SNP_89215_A_214039 | NW_004516374.1 | scaffold1067 | 214039                  | TT                              | CC                 | CC               | DRR                           | 101497055          | Unknown function   |
| SNP_89216_A_214070 | NW_004516374.1 | scaffold1067 | 214070                  | TT                              | CC                 | CC               | DRR                           | 101497055          | Unknown function   |
| SNP_89217_A_214071 | NW_004516374.1 | scaffold1067 | 214071                  | AA                              | GG                 | GG               | DRR                           | 101497055          | Unknown function   |
| SNP_89218_A_214104 | NW_004516374.1 | scaffold1067 | 214104                  | TT                              | GG                 | GG               | DRR                           | 101497055          | Unknown function   |
| SNP_89219_A_214142 | NW_004516374.1 | scaffold1067 | 214142                  | TT                              | GG                 | GG               | DRR                           | 101497055          | Unknown function   |
| SNP_89220_A_214158 | NW_004516374.1 | scaffold1067 | 214158                  | GG                              | AA                 | AA               | DRR                           | 101497055          | Unknown function   |
| SNP_89221_A_214197 | NW_004516374.1 | scaffold1067 | 214197                  | TT                              | CC                 | CC               | DRR                           | 101497055          | Unknown function   |
| SNP_89222_A_214243 | NW_004516374.1 | scaffold1067 | 214243                  | TT                              | CC                 | CC               | DRR                           | 101497055          | Unknown function   |
| SNP_89223_A_214283 | NW_004516374.1 | scaffold1067 | 214283                  | TT                              | AA                 | AA               | DRR                           | 101497055          | Unknown function   |
| SNP_89224_A_214286 | NW_004516374.1 | scaffold1067 | 214286                  | AA                              | GG                 | GG               | DRR                           | 101497055          | Unknown function   |
| SNP_89225_A_214306 | NW_004516374.1 | scaffold1067 | 214306                  | TT                              | GG                 | GG               | DRR                           | 101497055          | Unknown function   |
| SNP_89226_A_214314 | NW_004516374.1 | scaffold1067 | 214314                  | TT                              | GG                 | GG               | DRR                           | 101497055          | Unknown function   |
| SNP_89228_A_214383 | NW_004516374.1 | scaffold1067 | 214383                  | CC                              | GG                 | GG               | DRR                           | 101497055          | Unknown function   |
| SNP_89229_A_214475 | NW_004516374.1 | scaffold1067 | 214475                  | CC                              | AA                 | AA               | DRR                           | 101497055          | Unknown function   |
| SNP_89230_A_222226 | NW_004516374.1 | scaffold1067 | 222226                  | TT                              | CC                 | CC               | INTRON                        | 101497055          | Unknown function   |
| SNP_89231_A_222290 | NW_004516374.1 | scaffold1067 | 222290                  | AA                              | TT                 | TT               | INTRON                        | 101497055          | Unknown function   |

| SNPs IDs           | Chromosome IDs | Chromosomes  | Physical positions (bp) | CDC Frontier (Reference genome) | (Pusa 1103 & HPNB) | (ILWC 46 & LPNB) | Sequence Components of genome | Gene accession IDs | Putative functions |
|--------------------|----------------|--------------|-------------------------|---------------------------------|--------------------|------------------|-------------------------------|--------------------|--------------------|
| SNP_89232_A_222305 | NW_004516374.1 | scaffold1067 | 222305                  | TT                              | GG                 | GG               | INTRON                        | 101497055          | Unknown function   |
| SNP_89233_A_222311 | NW_004516374.1 | scaffold1067 | 222311                  | AA                              | GG                 | GG               | INTRON                        | 101497055          | Unknown function   |
| SNP_89234_A_222332 | NW_004516374.1 | scaffold1067 | 222332                  | TT                              | CC                 | CC               | INTRON                        | 101497055          | Unknown function   |
| SNP_89235_A_222338 | NW_004516374.1 | scaffold1067 | 222338                  | CC                              | TT                 | TT               | INTRON                        | 101497055          | Unknown function   |
| SNP_89236_A_222362 | NW_004516374.1 | scaffold1067 | 222362                  | TT                              | CC                 | CC               | INTRON                        | 101497055          | Unknown function   |
| SNP_89237_A_222370 | NW_004516374.1 | scaffold1067 | 222370                  | GG                              | CC                 | CC               | INTRON                        | 101497055          | Unknown function   |
| SNP_89238_A_222391 | NW_004516374.1 | scaffold1067 | 222391                  | TT                              | GG                 | GG               | INTRON                        | 101497055          | Unknown function   |
| SNP_89239_A_222395 | NW_004516374.1 | scaffold1067 | 222395                  | TT                              | GG                 | GG               | INTRON                        | 101497055          | Unknown function   |
| SNP_89240_A_222396 | NW_004516374.1 | scaffold1067 | 222396                  | TT                              | CC                 | CC               | INTRON                        | 101497055          | Unknown function   |
| SNP_89241_A_222399 | NW_004516374.1 | scaffold1067 | 222399                  | TT                              | CC                 | CC               | INTRON                        | 101497055          | Unknown function   |
| SNP_89242_A_222402 | NW_004516374.1 | scaffold1067 | 222402                  | AA                              | GG                 | GG               | INTRON                        | 101497055          | Unknown function   |
| SNP_89243_A_222506 | NW_004516374.1 | scaffold1067 | 222506                  | TT                              | GG                 | GG               | INTRON                        | 101497055          | Unknown function   |
| SNP_89244_A_222568 | NW_004516374.1 | scaffold1067 | 222568                  | TT                              | GG                 | GG               | NON_SYNONYMOUS_CODING         | 101497055          | Unknown function   |
| SNP_89245_A_222574 | NW_004516374.1 | scaffold1067 | 222574                  | TT                              | CC                 | CC               | NON_SYNONYMOUS_CODING         | 101497055          | Unknown function   |
| SNP_89246_A_222584 | NW_004516374.1 | scaffold1067 | 222584                  | TT                              | CC                 | CC               | SYNONYMOUS_CODING             | 101497055          | Unknown function   |
| SNP_89247_A_222626 | NW_004516374.1 | scaffold1067 | 222626                  | TT                              | CC                 | CC               | SYNONYMOUS_CODING             | 101497055          | Unknown function   |
| SNP_89248_A_222628 | NW_004516374.1 | scaffold1067 | 222628                  | TT                              | GG                 | GG               | NON_SYNONYMOUS_CODING         | 101497055          | Unknown function   |
| SNP_89249_A_222652 | NW_004516374.1 | scaffold1067 | 222652                  | AA                              | GG                 | GG               | NON_SYNONYMOUS_CODING         | 101497055          | Unknown function   |
| SNP_89250_A_222872 | NW_004516374.1 | scaffold1067 | 222872                  | AA                              | GG                 | GG               | INTRON                        | 101497055          | Unknown function   |
| SNP_89252_A_230143 | NW_004516374.1 | scaffold1067 | 230143                  | TT                              | CC                 | CC               | INTRON                        | 101497055          | Unknown function   |
| SNP_89253_A_235117 | NW_004516374.1 | scaffold1067 | 235117                  | TT                              | GG                 | GG               | INTRON                        | 101497055          | Unknown function   |
| SNP_89254_A_235124 | NW_004516374.1 | scaffold1067 | 235124                  | TT                              | GG                 | GG               | INTRON                        | 101497055          | Unknown function   |

| SNPs IDs           | Chromosome IDs | Chromosomes  | Physical positions (bp) | CDC Frontier (Reference genome) | (Pusa 1103 & HPNB) | (ILWC 46 & LPNB) | Sequence Components of genome | Gene accession IDs | Putative functions |
|--------------------|----------------|--------------|-------------------------|---------------------------------|--------------------|------------------|-------------------------------|--------------------|--------------------|
| SNP_89255_A_235130 | NW_004516374.1 | scaffold1067 | 235130                  | GG                              | AA                 | AA               | INTRON                        | 101497055          | Unknown function   |
| SNP_89256_A_235166 | NW_004516374.1 | scaffold1067 | 235166                  | TT                              | CC                 | CC               | INTRON                        | 101497055          | Unknown function   |
| SNP_89257_A_235171 | NW_004516374.1 | scaffold1067 | 235171                  | TT                              | CC                 | CC               | INTRON                        | 101497055          | Unknown function   |
| SNP_89258_A_235173 | NW_004516374.1 | scaffold1067 | 235173                  | TT                              | CC                 | CC               | INTRON                        | 101497055          | Unknown function   |
| SNP_89259_A_235179 | NW_004516374.1 | scaffold1067 | 235179                  | CC                              | AA                 | AA               | INTRON                        | 101497055          | Unknown function   |
| SNP_89260_A_235247 | NW_004516374.1 | scaffold1067 | 235247                  | CC                              | AA                 | AA               | INTRON                        | 101497055          | Unknown function   |
| SNP_89261_A_235248 | NW_004516374.1 | scaffold1067 | 235248                  | TT                              | CC                 | CC               | INTRON                        | 101497055          | Unknown function   |
| SNP_89262_A_235264 | NW_004516374.1 | scaffold1067 | 235264                  | AA                              | CC                 | CC               | INTRON                        | 101497055          | Unknown function   |
| SNP_89263_A_235275 | NW_004516374.1 | scaffold1067 | 235275                  | AA                              | TT                 | TT               | INTRON                        | 101497055          | Unknown function   |
| SNP_89264_A_235279 | NW_004516374.1 | scaffold1067 | 235279                  | TT                              | CC                 | CC               | INTRON                        | 101497055          | Unknown function   |
| SNP_89265_A_235283 | NW_004516374.1 | scaffold1067 | 235283                  | TT                              | CC                 | CC               | INTRON                        | 101497055          | Unknown function   |
| SNP_89266_A_235291 | NW_004516374.1 | scaffold1067 | 235291                  | TT                              | AA                 | AA               | INTRON                        | 101497055          | Unknown function   |
| SNP_89267_A_235310 | NW_004516374.1 | scaffold1067 | 235310                  | AA                              | GG                 | GG               | INTRON                        | 101497055          | Unknown function   |
| SNP_89268_A_235319 | NW_004516374.1 | scaffold1067 | 235319                  | GG                              | AA                 | AA               | INTRON                        | 101497055          | Unknown function   |
| SNP_89269_A_235365 | NW_004516374.1 | scaffold1067 | 235365                  | TT                              | CC                 | CC               | INTRON                        | 101497055          | Unknown function   |
| SNP_89270_A_235372 | NW_004516374.1 | scaffold1067 | 235372                  | AA                              | GG                 | GG               | INTRON                        | 101497055          | Unknown function   |
| SNP_89271_A_235459 | NW_004516374.1 | scaffold1067 | 235459                  | AA                              | GG                 | GG               | INTRON                        | 101497055          | Unknown function   |
| SNP_89272_A_235463 | NW_004516374.1 | scaffold1067 | 235463                  | TT                              | GG                 | GG               | INTRON                        | 101497055          | Unknown function   |
| SNP_89273_A_235467 | NW_004516374.1 | scaffold1067 | 235467                  | TT                              | CC                 | CC               | INTRON                        | 101497055          | Unknown function   |
| SNP_89274_A_235487 | NW_004516374.1 | scaffold1067 | 235487                  | AA                              | GG                 | GG               | INTRON                        | 101497055          | Unknown function   |
| SNP_89275_A_235496 | NW_004516374.1 | scaffold1067 | 235496                  | AA                              | GG                 | GG               | INTRON                        | 101497055          | Unknown function   |
| SNP_89276_A_235501 | NW_004516374.1 | scaffold1067 | 235501                  | TT                              | CC                 | CC               | INTRON                        | 101497055          | Unknown function   |

| SNPs IDs           | Chromosome IDs | Chromosomes  | Physical positions (bp) | CDC Frontier (Reference genome) | (Pusa 1103 & HPNB) | (ILWC 46 & LPNB) | Sequence Components of genome | Gene accession IDs | Putative functions |
|--------------------|----------------|--------------|-------------------------|---------------------------------|--------------------|------------------|-------------------------------|--------------------|--------------------|
| SNP_89277_A_235554 | NW_004516374.1 | scaffold1067 | 235554                  | TT                              | AA                 | AA               | INTRON                        | 101497055          | Unknown function   |
| SNP_89278_A_235570 | NW_004516374.1 | scaffold1067 | 235570                  | AA                              | GG                 | GG               | INTRON                        | 101497055          | Unknown function   |
| SNP_89279_A_235595 | NW_004516374.1 | scaffold1067 | 235595                  | TT                              | CC                 | CC               | INTRON                        | 101497055          | Unknown function   |
| SNP_89280_A_235616 | NW_004516374.1 | scaffold1067 | 235616                  | TT                              | CC                 | CC               | INTRON                        | 101497055          | Unknown function   |
| SNP_89281_A_235664 | NW_004516374.1 | scaffold1067 | 235664                  | TT                              | CC                 | CC               | INTRON                        | 101497055          | Unknown function   |
| SNP_89282_A_235668 | NW_004516374.1 | scaffold1067 | 235668                  | GG                              | CC                 | CC               | INTRON                        | 101497055          | Unknown function   |
| SNP_89283_A_235681 | NW_004516374.1 | scaffold1067 | 235681                  | TT                              | CC                 | CC               | INTRON                        | 101497055          | Unknown function   |
| SNP_89284_A_235702 | NW_004516374.1 | scaffold1067 | 235702                  | TT                              | CC                 | CC               | INTRON                        | 101497055          | Unknown function   |
| SNP_89285_A_235728 | NW_004516374.1 | scaffold1067 | 235728                  | AA                              | GG                 | GG               | INTRON                        | 101497055          | Unknown function   |
| SNP_89286_A_235748 | NW_004516374.1 | scaffold1067 | 235748                  | CC                              | GG                 | GG               | INTRON                        | 101497055          | Unknown function   |
| SNP_89287_A_235771 | NW_004516374.1 | scaffold1067 | 235771                  | AA                              | CC                 | CC               | INTRON                        | 101497055          | Unknown function   |
| SNP_89288_A_235818 | NW_004516374.1 | scaffold1067 | 235818                  | AA                              | TT                 | TT               | INTRON                        | 101497055          | Unknown function   |
| SNP_89289_A_235830 | NW_004516374.1 | scaffold1067 | 235830                  | TT                              | CC                 | CC               | INTRON                        | 101497055          | Unknown function   |
| SNP_89290_A_235832 | NW_004516374.1 | scaffold1067 | 235832                  | TT                              | CC                 | CC               | INTRON                        | 101497055          | Unknown function   |
| SNP_89291_A_235852 | NW_004516374.1 | scaffold1067 | 235852                  | GG                              | CC                 | CC               | INTRON                        | 101497055          | Unknown function   |
| SNP_89292_A_235861 | NW_004516374.1 | scaffold1067 | 235861                  | TT                              | AA                 | AA               | INTRON                        | 101497055          | Unknown function   |
| SNP_89293_A_235882 | NW_004516374.1 | scaffold1067 | 235882                  | AA                              | CC                 | CC               | INTRON                        | 101497055          | Unknown function   |
| SNP_89294_A_235907 | NW_004516374.1 | scaffold1067 | 235907                  | TT                              | CC                 | CC               | INTRON                        | 101497055          | Unknown function   |
| SNP_89295_A_235918 | NW_004516374.1 | scaffold1067 | 235918                  | TT                              | CC                 | CC               | INTRON                        | 101497055          | Unknown function   |
| SNP_89296_A_235953 | NW_004516374.1 | scaffold1067 | 235953                  | TT                              | CC                 | CC               | INTRON                        | 101497055          | Unknown function   |
| SNP_89297_A_235954 | NW_004516374.1 | scaffold1067 | 235954                  | TT                              | GG                 | GG               | INTRON                        | 101497055          | Unknown function   |
| SNP_89298_A_235982 | NW_004516374.1 | scaffold1067 | 235982                  | TT                              | CC                 | CC               | INTRON                        | 101497055          | Unknown function   |

| SNPs IDs           | Chromosome IDs | Chromosomes  | Physical positions (bp) | CDC Frontier (Reference genome) | (Pusa 1103 & HPNB) | (ILWC 46 & LPNB) | Sequence Components of genome | Gene accession IDs | Putative functions |
|--------------------|----------------|--------------|-------------------------|---------------------------------|--------------------|------------------|-------------------------------|--------------------|--------------------|
| SNP_89299_A_235991 | NW_004516374.1 | scaffold1067 | 235991                  | AA                              | GG                 | GG               | INTRON                        | 101497055          | Unknown function   |
| SNP_89300_A_236026 | NW_004516374.1 | scaffold1067 | 236026                  | TT                              | AA                 | AA               | INTRON                        | 101497055          | Unknown function   |
| SNP_89301_A_236035 | NW_004516374.1 | scaffold1067 | 236035                  | TT                              | GG                 | GG               | INTRON                        | 101497055          | Unknown function   |
| SNP_89302_A_236058 | NW_004516374.1 | scaffold1067 | 236058                  | AA                              | GG                 | GG               | INTRON                        | 101497055          | Unknown function   |
| SNP_89303_A_236079 | NW_004516374.1 | scaffold1067 | 236079                  | AA                              | GG                 | GG               | INTRON                        | 101497055          | Unknown function   |
| SNP_89304_A_236134 | NW_004516374.1 | scaffold1067 | 236134                  | TT                              | CC                 | CC               | INTRON                        | 101497055          | Unknown function   |
| SNP_89305_A_236137 | NW_004516374.1 | scaffold1067 | 236137                  | TT                              | CC                 | CC               | INTRON                        | 101497055          | Unknown function   |
| SNP_89306_A_236198 | NW_004516374.1 | scaffold1067 | 236198                  | AA                              | GG                 | GG               | NON_SYNONYMOUS_CODING         | 101497055          | Unknown function   |
| SNP_89307_A_236209 | NW_004516374.1 | scaffold1067 | 236209                  | TT                              | CC                 | CC               | SYNONYMOUS_CODING             | 101497055          | Unknown function   |
| SNP_89308_A_236270 | NW_004516374.1 | scaffold1067 | 236270                  | TT                              | CC                 | CC               | SYNONYMOUS_CODING             | 101497055          | Unknown function   |
| SNP_89309_A_236320 | NW_004516374.1 | scaffold1067 | 236320                  | AA                              | GG                 | GG               | SYNONYMOUS_CODING             | 101497055          | Unknown function   |
| SNP_89310_A_236326 | NW_004516374.1 | scaffold1067 | 236326                  | TT                              | GG                 | GG               | SYNONYMOUS_CODING             | 101497055          | Unknown function   |
| SNP_89311_A_236416 | NW_004516374.1 | scaffold1067 | 236416                  | TT                              | GG                 | GG               | NON_SYNONYMOUS_CODING         | 101497055          | Unknown function   |
| SNP_89312_A_236419 | NW_004516374.1 | scaffold1067 | 236419                  | AA                              | GG                 | GG               | INTERGENIC                    |                    |                    |
| SNP_89313_A_236482 | NW_004516374.1 | scaffold1067 | 236482                  | TT                              | GG                 | GG               | INTERGENIC                    |                    |                    |
| SNP_89314_A_236503 | NW_004516374.1 | scaffold1067 | 236503                  | AA                              | CC                 | CC               | INTERGENIC                    |                    |                    |
| SNP_89315_A_236550 | NW_004516374.1 | scaffold1067 | 236550                  | AA                              | CC                 | CC               | INTERGENIC                    |                    |                    |
| SNP_89316_A_236574 | NW_004516374.1 | scaffold1067 | 236574                  | AA                              | GG                 | GG               | URR                           | 101497055          | Unknown function   |
| SNP_89317_A_236576 | NW_004516374.1 | scaffold1067 | 236576                  | AA                              | GG                 | GG               | URR                           | 101497055          | Unknown function   |
| SNP_89318_A_236584 | NW_004516374.1 | scaffold1067 | 236584                  | AA                              | GG                 | GG               | URR                           | 101497055          | Unknown function   |
| SNP_89319_A_236585 | NW_004516374.1 | scaffold1067 | 236585                  | TT                              | CC                 | CC               | URR                           | 101497055          | Unknown function   |
| SNP_89320_A_236597 | NW_004516374.1 | scaffold1067 | 236597                  | CC                              | AA                 | AA               | URR                           | 101497055          | Unknown function   |



| SNPs IDs           | Chromosome IDs | Chromosomes  | Physical positions (bp) | CDC Frontier (Reference genome) | (Pusa 1103 & HPNB) | (ILWC 46 & LPNB) | Sequence Components of genome | Gene accession IDs | Putative functions |
|--------------------|----------------|--------------|-------------------------|---------------------------------|--------------------|------------------|-------------------------------|--------------------|--------------------|
| SNP_89321_A_236612 | NW_004516374.1 | scaffold1067 | 236612                  | AA                              | GG                 | GG               | URR                           | 101497055          | Unknown function   |
| SNP_89322_A_236650 | NW_004516374.1 | scaffold1067 | 236650                  | AA                              | GG                 | GG               | URR                           | 101497055          | Unknown function   |
| SNP_89323_A_236657 | NW_004516374.1 | scaffold1067 | 236657                  | TT                              | CC                 | CC               | URR                           | 101497055          | Unknown function   |
| SNP_89324_A_236675 | NW_004516374.1 | scaffold1067 | 236675                  | TT                              | GG                 | GG               | URR                           | 101497055          | Unknown function   |
| SNP_89325_A_236690 | NW_004516374.1 | scaffold1067 | 236690                  | TT                              | GG                 | GG               | URR                           | 101497055          | Unknown function   |
| SNP_89326_A_236691 | NW_004516374.1 | scaffold1067 | 236691                  | AA                              | GG                 | GG               | URR                           | 101497055          | Unknown function   |
| SNP_89327_A_236713 | NW_004516374.1 | scaffold1067 | 236713                  | CC                              | TT                 | TT               | URR                           | 101497055          | Unknown function   |
| SNP_89328_A_236715 | NW_004516374.1 | scaffold1067 | 236715                  | TT                              | CC                 | CC               | URR                           | 101497055          | Unknown function   |
| SNP_89329_A_236727 | NW_004516374.1 | scaffold1067 | 236727                  | AA                              | CC                 | CC               | URR                           | 101497055          | Unknown function   |
| SNP_89330_A_236801 | NW_004516374.1 | scaffold1067 | 236801                  | AA                              | GG                 | GG               | URR                           | 101497055          | Unknown function   |
| SNP_89331_A_236804 | NW_004516374.1 | scaffold1067 | 236804                  | AA                              | GG                 | GG               | URR                           | 101497055          | Unknown function   |
| SNP_89332_A_236814 | NW_004516374.1 | scaffold1067 | 236814                  | GG                              | AA                 | AA               | URR                           | 101497055          | Unknown function   |
| SNP_89333_A_236834 | NW_004516374.1 | scaffold1067 | 236834                  | AA                              | CC                 | CC               | URR                           | 101497055          | Unknown function   |
| SNP_89334_A_236871 | NW_004516374.1 | scaffold1067 | 236871                  | TT                              | CC                 | CC               | URR                           | 101497055          | Unknown function   |
| SNP_89335_A_236903 | NW_004516374.1 | scaffold1067 | 236903                  | TT                              | CC                 | CC               | URR                           | 101497055          | Unknown function   |
| SNP_89336_A_236951 | NW_004516374.1 | scaffold1067 | 236951                  | CC                              | GG                 | GG               | URR                           | 101497055          | Unknown function   |
| SNP_89337_A_236952 | NW_004516374.1 | scaffold1067 | 236952                  | AA                              | TT                 | TT               | URR                           | 101497055          | Unknown function   |
| SNP_89338_A_236989 | NW_004516374.1 | scaffold1067 | 236989                  | CC                              | TT                 | TT               | URR                           | 101497055          | Unknown function   |
| SNP_89339_A_236992 | NW_004516374.1 | scaffold1067 | 236992                  | AA                              | GG                 | GG               | URR                           | 101497055          | Unknown function   |
| SNP_89340_A_237022 | NW_004516374.1 | scaffold1067 | 237022                  | TT                              | CC                 | CC               | URR                           | 101497055          | Unknown function   |
| SNP_89341_A_237055 | NW_004516374.1 | scaffold1067 | 237055                  | GG                              | TT                 | TT               | URR                           | 101497055          | Unknown function   |
| SNP_89342_A_237071 | NW_004516374.1 | scaffold1067 | 237071                  | AA                              | GG                 | GG               | URR                           | 101497055          | Unknown function   |

| SNPs IDs           | Chromosome IDs | Chromosomes  | Physical positions (bp) | CDC Frontier (Reference genome) | (Pusa 1103 & HPNB) | (ILWC 46 & LPNB) | Sequence Components of genome | Gene accession IDs | Putative functions |
|--------------------|----------------|--------------|-------------------------|---------------------------------|--------------------|------------------|-------------------------------|--------------------|--------------------|
| SNP_89343_A_237106 | NW_004516374.1 | scaffold1067 | 237106                  | TT                              | AA                 | AA               | URR                           | 101497055          | Unknown function   |
| SNP_89344_A_237109 | NW_004516374.1 | scaffold1067 | 237109                  | AA                              | CC                 | CC               | URR                           | 101497055          | Unknown function   |
| SNP_89345_A_237127 | NW_004516374.1 | scaffold1067 | 237127                  | AA                              | GG                 | GG               | URR                           | 101497055          | Unknown function   |
| SNP_89346_A_237152 | NW_004516374.1 | scaffold1067 | 237152                  | TT                              | AA                 | AA               | URR                           | 101497055          | Unknown function   |
| SNP_89347_A_237154 | NW_004516374.1 | scaffold1067 | 237154                  | AA                              | GG                 | GG               | URR                           | 101497055          | Unknown function   |
| SNP_89348_A_237188 | NW_004516374.1 | scaffold1067 | 237188                  | TT                              | CC                 | CC               | URR                           | 101497055          | Unknown function   |
| SNP_89349_A_237240 | NW_004516374.1 | scaffold1067 | 237240                  | TT                              | CC                 | CC               | URR                           | 101497055          | Unknown function   |
| SNP_89350_A_237269 | NW_004516374.1 | scaffold1067 | 237269                  | AA                              | CC                 | CC               | URR                           | 101497055          | Unknown function   |
| SNP_89351_A_237306 | NW_004516374.1 | scaffold1067 | 237306                  | AA                              | CC                 | CC               | URR                           | 101497055          | Unknown function   |
| SNP_89352_A_237311 | NW_004516374.1 | scaffold1067 | 237311                  | GG                              | AA                 | AA               | URR                           | 101497055          | Unknown function   |
| SNP_89353_A_237325 | NW_004516374.1 | scaffold1067 | 237325                  | TT                              | CC                 | CC               | URR                           | 101497055          | Unknown function   |
| SNP_89354_A_237334 | NW_004516374.1 | scaffold1067 | 237334                  | AA                              | GG                 | GG               | URR                           | 101497055          | Unknown function   |
| SNP_89355_A_237339 | NW_004516374.1 | scaffold1067 | 237339                  | TT                              | CC                 | CC               | URR                           | 101497055          | Unknown function   |
| SNP_89356_A_237340 | NW_004516374.1 | scaffold1067 | 237340                  | TT                              | AA                 | AA               | URR                           | 101497055          | Unknown function   |
| SNP_89357_A_237395 | NW_004516374.1 | scaffold1067 | 237395                  | GG                              | AA                 | AA               | URR                           | 101497055          | Unknown function   |
| SNP_89358_A_237506 | NW_004516374.1 | scaffold1067 | 237506                  | AA                              | GG                 | GG               | URR                           | 101497055          | Unknown function   |
| SNP_89359_A_237509 | NW_004516374.1 | scaffold1067 | 237509                  | AA                              | CC                 | CC               | URR                           | 101497055          | Unknown function   |
| SNP_89360_A_237510 | NW_004516374.1 | scaffold1067 | 237510                  | TT                              | CC                 | CC               | URR                           | 101497055          | Unknown function   |
| SNP_89361_A_237518 | NW_004516374.1 | scaffold1067 | 237518                  | AA                              | GG                 | GG               | URR                           | 101497055          | Unknown function   |
| SNP_89362_A_237528 | NW_004516374.1 | scaffold1067 | 237528                  | TT                              | AA                 | AA               | URR                           | 101497055          | Unknown function   |
| SNP_89363_A_237536 | NW_004516374.1 | scaffold1067 | 237536                  | TT                              | CC                 | CC               | URR                           | 101497055          | Unknown function   |
| SNP_89364_A_237537 | NW_004516374.1 | scaffold1067 | 237537                  | CC                              | TT                 | TT               | URR                           | 101497055          | Unknown function   |

| SNPs IDs           | Chromosome IDs | Chromosomes  | Physical positions (bp) | CDC Frontier (Reference genome) | (Pusa 1103 & HPNB) | (ILWC 46 & LPNB) | Sequence Components of genome | Gene accession IDs | Putative functions |
|--------------------|----------------|--------------|-------------------------|---------------------------------|--------------------|------------------|-------------------------------|--------------------|--------------------|
| SNP_89365_A_237569 | NW_004516374.1 | scaffold1067 | 237569                  | AA                              | GG                 | GG               | URR                           | 101497055          | Unknown function   |
| SNP_89366_A_237597 | NW_004516374.1 | scaffold1067 | 237597                  | AA                              | CC                 | CC               | URR                           | 101497055          | Unknown function   |
| SNP_89367_A_237637 | NW_004516374.1 | scaffold1067 | 237637                  | TT                              | CC                 | CC               | URR                           | 101497055          | Unknown function   |
| SNP_89368_A_237645 | NW_004516374.1 | scaffold1067 | 237645                  | TT                              | AA                 | AA               | URR                           | 101497055          | Unknown function   |
| SNP_89369_A_237655 | NW_004516374.1 | scaffold1067 | 237655                  | TT                              | CC                 | CC               | URR                           | 101497055          | Unknown function   |
| SNP_89370_A_237669 | NW_004516374.1 | scaffold1067 | 237669                  | TT                              | GG                 | GG               | URR                           | 101497055          | Unknown function   |
| SNP_89371_A_237701 | NW_004516374.1 | scaffold1067 | 237701                  | GG                              | TT                 | TT               | URR                           | 101497055          | Unknown function   |
| SNP_89372_A_237769 | NW_004516374.1 | scaffold1067 | 237769                  | AA                              | GG                 | GG               | URR                           | 101497055          | Unknown function   |
| SNP_89373_A_237789 | NW_004516374.1 | scaffold1067 | 237789                  | AA                              | GG                 | GG               | URR                           | 101497055          | Unknown function   |
| SNP_89374_A_237793 | NW_004516374.1 | scaffold1067 | 237793                  | AA                              | GG                 | GG               | URR                           | 101497055          | Unknown function   |
| SNP_89375_A_237871 | NW_004516374.1 | scaffold1067 | 237871                  | TT                              | CC                 | CC               | URR                           | 101497055          | Unknown function   |
| SNP_89376_A_237893 | NW_004516374.1 | scaffold1067 | 237893                  | AA                              | TT                 | TT               | URR                           | 101497055          | Unknown function   |
| SNP_89377_A_237948 | NW_004516374.1 | scaffold1067 | 237948                  | AA                              | GG                 | GG               | URR                           | 101497055          | Unknown function   |
| SNP_89378_A_238009 | NW_004516374.1 | scaffold1067 | 238009                  | TT                              | GG                 | GG               | URR                           | 101497055          | Unknown function   |
| SNP_89379_A_238078 | NW_004516374.1 | scaffold1067 | 238078                  | TT                              | GG                 | GG               | URR                           | 101497055          | Unknown function   |
| SNP_89380_A_238087 | NW_004516374.1 | scaffold1067 | 238087                  | CC                              | AA                 | AA               | URR                           | 101497055          | Unknown function   |
| SNP_89381_A_238139 | NW_004516374.1 | scaffold1067 | 238139                  | TT                              | CC                 | CC               | URR                           | 101497055          | Unknown function   |
| SNP_89382_A_238163 | NW_004516374.1 | scaffold1067 | 238163                  | CC                              | AA                 | AA               | URR                           | 101497055          | Unknown function   |
| SNP_89383_A_238208 | NW_004516374.1 | scaffold1067 | 238208                  | TT                              | AA                 | AA               | URR                           | 101497055          | Unknown function   |
| SNP_89384_A_238222 | NW_004516374.1 | scaffold1067 | 238222                  | CC                              | GG                 | GG               | URR                           | 101497055          | Unknown function   |
| SNP_89385_A_238238 | NW_004516374.1 | scaffold1067 | 238238                  | AA                              | CC                 | CC               | URR                           | 101497055          | Unknown function   |
| SNP_89386_A_238263 | NW_004516374.1 | scaffold1067 | 238263                  | AA                              | CC                 | CC               | URR                           | 101497055          | Unknown function   |

| SNPs IDs           | Chromosome IDs | Chromosomes  | Physical positions (bp) | CDC Frontier (Reference genome) | (Pusa 1103 & HPNB) | (ILWC 46 & LPNB) | Sequence Components of genome | Gene accession IDs | Putative functions |
|--------------------|----------------|--------------|-------------------------|---------------------------------|--------------------|------------------|-------------------------------|--------------------|--------------------|
| SNP_89387_A_238282 | NW_004516374.1 | scaffold1067 | 238282                  | AA                              | GG                 | GG               | URR                           | 101497055          | Unknown function   |
| SNP_89388_A_238324 | NW_004516374.1 | scaffold1067 | 238324                  | TT                              | CC                 | CC               | URR                           | 101497055          | Unknown function   |
| SNP_89389_A_238331 | NW_004516374.1 | scaffold1067 | 238331                  | AA                              | GG                 | GG               | URR                           | 101497055          | Unknown function   |
| SNP_89390_A_238411 | NW_004516374.1 | scaffold1067 | 238411                  | TT                              | GG                 | GG               | URR                           | 101497055          | Unknown function   |
| SNP_89391_A_238429 | NW_004516374.1 | scaffold1067 | 238429                  | TT                              | GG                 | GG               | URR                           | 101497055          | Unknown function   |
| SNP_89392_A_238442 | NW_004516374.1 | scaffold1067 | 238442                  | TT                              | CC                 | CC               | URR                           | 101497055          | Unknown function   |
| SNP_89393_A_238473 | NW_004516374.1 | scaffold1067 | 238473                  | CC                              | GG                 | GG               | URR                           | 101497055          | Unknown function   |
| SNP_89394_A_238546 | NW_004516374.1 | scaffold1067 | 238546                  | GG                              | AA                 | AA               | URR                           | 101497055          | Unknown function   |
| SNP_89395_A_238547 | NW_004516374.1 | scaffold1067 | 238547                  | TT                              | CC                 | CC               | URR                           | 101497055          | Unknown function   |
| SNP_89396_A_238576 | NW_004516374.1 | scaffold1067 | 238576                  | AA                              | GG                 | GG               | INTERGENIC                    |                    |                    |
| SNP_89397_A_238614 | NW_004516374.1 | scaffold1067 | 238614                  | AA                              | CC                 | CC               | INTERGENIC                    |                    |                    |
| SNP_89398_A_238944 | NW_004516374.1 | scaffold1067 | 238944                  | AA                              | CC                 | CC               | INTERGENIC                    |                    |                    |
| SNP_89399_A_238965 | NW_004516374.1 | scaffold1067 | 238965                  | CC                              | AA                 | AA               | INTERGENIC                    |                    |                    |
| SNP_89400_A_239002 | NW_004516374.1 | scaffold1067 | 239002                  | CC                              | AA                 | AA               | INTERGENIC                    |                    |                    |
| SNP_89401_A_239043 | NW_004516374.1 | scaffold1067 | 239043                  | TT                              | CC                 | CC               | INTERGENIC                    |                    |                    |
| SNP_89402_A_239045 | NW_004516374.1 | scaffold1067 | 239045                  | AA                              | GG                 | GG               | INTERGENIC                    |                    |                    |
| SNP_89403_A_239047 | NW_004516374.1 | scaffold1067 | 239047                  | CC                              | GG                 | GG               | INTERGENIC                    |                    |                    |
| SNP_89404_A_239064 | NW_004516374.1 | scaffold1067 | 239064                  | TT                              | CC                 | CC               | INTERGENIC                    |                    |                    |
| SNP_89405_A_239100 | NW_004516374.1 | scaffold1067 | 239100                  | TT                              | CC                 | CC               | INTERGENIC                    |                    |                    |
| SNP_89406_A_239150 | NW_004516374.1 | scaffold1067 | 239150                  | AA                              | CC                 | CC               | INTERGENIC                    |                    |                    |
| SNP_89407_A_239157 | NW_004516374.1 | scaffold1067 | 239157                  | CC                              | AA                 | AA               | INTERGENIC                    |                    |                    |
| SNP_89408_A_239234 | NW_004516374.1 | scaffold1067 | 239234                  | AA                              | CC                 | CC               | INTERGENIC                    |                    |                    |

| SNPs IDs           | Chromosome IDs | Chromosomes  | Physical positions (bp) | CDC Frontier (Reference genome) | (Pusa 1103 & HPNB) | (ILWC 46 & LPNB) | Sequence genome | Components of | Gene accession IDs | Putative functions |
|--------------------|----------------|--------------|-------------------------|---------------------------------|--------------------|------------------|-----------------|---------------|--------------------|--------------------|
| SNP_89409_A_239253 | NW_004516374.1 | scaffold1067 | 239253                  | TT                              | CC                 | CC               | INTERGENIC      |               |                    |                    |
| SNP_89410_A_239302 | NW_004516374.1 | scaffold1067 | 239302                  | TT                              | CC                 | CC               | INTERGENIC      |               |                    |                    |
| SNP_89411_A_239304 | NW_004516374.1 | scaffold1067 | 239304                  | TT                              | CC                 | CC               | INTERGENIC      |               |                    |                    |
| SNP_89412_A_239339 | NW_004516374.1 | scaffold1067 | 239339                  | TT                              | CC                 | CC               | INTERGENIC      |               |                    |                    |
| SNP_89413_A_239395 | NW_004516374.1 | scaffold1067 | 239395                  | TT                              | GG                 | GG               | INTERGENIC      |               |                    |                    |
| SNP_89414_A_239396 | NW_004516374.1 | scaffold1067 | 239396                  | AA                              | GG                 | GG               | INTERGENIC      |               |                    |                    |
| SNP_89415_A_239434 | NW_004516374.1 | scaffold1067 | 239434                  | GG                              | CC                 | CC               | INTERGENIC      |               |                    |                    |
| SNP_89416_A_239450 | NW_004516374.1 | scaffold1067 | 239450                  | AA                              | GG                 | GG               | INTERGENIC      |               |                    |                    |
| SNP_89417_A_239492 | NW_004516374.1 | scaffold1067 | 239492                  | AA                              | CC                 | CC               | INTERGENIC      |               |                    |                    |
| SNP_89418_A_239493 | NW_004516374.1 | scaffold1067 | 239493                  | AA                              | CC                 | CC               | INTERGENIC      |               |                    |                    |
| SNP_89419_A_239552 | NW_004516374.1 | scaffold1067 | 239552                  | TT                              | GG                 | GG               | INTERGENIC      |               |                    |                    |
| SNP_89420_A_239553 | NW_004516374.1 | scaffold1067 | 239553                  | TT                              | CC                 | CC               | INTERGENIC      |               |                    |                    |
| SNP_89421_A_239595 | NW_004516374.1 | scaffold1067 | 239595                  | TT                              | AA                 | AA               | INTERGENIC      |               |                    |                    |
| SNP_89422_A_239647 | NW_004516374.1 | scaffold1067 | 239647                  | TT                              | GG                 | GG               | INTERGENIC      |               |                    |                    |
| SNP_89423_A_239688 | NW_004516374.1 | scaffold1067 | 239688                  | TT                              | CC                 | CC               | INTERGENIC      |               |                    |                    |
| SNP_89424_A_239706 | NW_004516374.1 | scaffold1067 | 239706                  | AA                              | GG                 | GG               | INTERGENIC      |               |                    |                    |
| SNP_89425_A_239742 | NW_004516374.1 | scaffold1067 | 239742                  | AA                              | GG                 | GG               | INTERGENIC      |               |                    |                    |
| SNP_89426_A_239844 | NW_004516374.1 | scaffold1067 | 239844                  | TT                              | CC                 | CC               | INTERGENIC      |               |                    |                    |
| SNP_89427_A_239845 | NW_004516374.1 | scaffold1067 | 239845                  | TT                              | CC                 | CC               | INTERGENIC      |               |                    |                    |
| SNP_89428_A_239852 | NW_004516374.1 | scaffold1067 | 239852                  | AA                              | CC                 | CC               | INTERGENIC      |               |                    |                    |
| SNP_89429_A_239857 | NW_004516374.1 | scaffold1067 | 239857                  | AA                              | CC                 | CC               | INTERGENIC      |               |                    |                    |
| SNP_89430_A_239884 | NW_004516374.1 | scaffold1067 | 239884                  | GG                              | CC                 | CC               | INTERGENIC      |               |                    |                    |

| SNPs IDs           | Chromosome IDs | Chromosomes  | Physical positions (bp) | CDC Frontier (Reference genome) | (Pusa 1103 & HPNB) | (ILWC 46 & LPNB) | Sequence genome | Components of | Gene accession IDs | Putative functions |
|--------------------|----------------|--------------|-------------------------|---------------------------------|--------------------|------------------|-----------------|---------------|--------------------|--------------------|
| SNP_89431_A_239891 | NW_004516374.1 | scaffold1067 | 239891                  | TT                              | GG                 | GG               | INTERGENIC      |               |                    |                    |
| SNP_89432_A_239895 | NW_004516374.1 | scaffold1067 | 239895                  | AA                              | GG                 | GG               | INTERGENIC      |               |                    |                    |
| SNP_89433_A_239952 | NW_004516374.1 | scaffold1067 | 239952                  | AA                              | CC                 | CC               | INTERGENIC      |               |                    |                    |
| SNP_89434_A_240002 | NW_004516374.1 | scaffold1067 | 240002                  | CC                              | TT                 | TT               | INTERGENIC      |               |                    |                    |
| SNP_89435_A_240035 | NW_004516374.1 | scaffold1067 | 240035                  | TT                              | GG                 | GG               | INTERGENIC      |               |                    |                    |
| SNP_89436_A_240039 | NW_004516374.1 | scaffold1067 | 240039                  | GG                              | TT                 | TT               | INTERGENIC      |               |                    |                    |
| SNP_89437_A_240049 | NW_004516374.1 | scaffold1067 | 240049                  | TT                              | GG                 | GG               | INTERGENIC      |               |                    |                    |
| SNP_89438_A_240054 | NW_004516374.1 | scaffold1067 | 240054                  | TT                              | GG                 | GG               | INTERGENIC      |               |                    |                    |
| SNP_89439_A_240062 | NW_004516374.1 | scaffold1067 | 240062                  | TT                              | CC                 | CC               | INTERGENIC      |               |                    |                    |
| SNP_89440_A_240087 | NW_004516374.1 | scaffold1067 | 240087                  | TT                              | CC                 | CC               | INTERGENIC      |               |                    |                    |
| SNP_89441_A_240106 | NW_004516374.1 | scaffold1067 | 240106                  | AA                              | GG                 | GG               | INTERGENIC      |               |                    |                    |
| SNP_89442_A_240122 | NW_004516374.1 | scaffold1067 | 240122                  | AA                              | GG                 | GG               | INTERGENIC      |               |                    |                    |
| SNP_89443_A_240144 | NW_004516374.1 | scaffold1067 | 240144                  | TT                              | GG                 | GG               | INTERGENIC      |               |                    |                    |
| SNP_89444_A_240145 | NW_004516374.1 | scaffold1067 | 240145                  | TT                              | CC                 | CC               | INTERGENIC      |               |                    |                    |
| SNP_89445_A_240150 | NW_004516374.1 | scaffold1067 | 240150                  | TT                              | CC                 | CC               | INTERGENIC      |               |                    |                    |
| SNP_89446_A_240249 | NW_004516374.1 | scaffold1067 | 240249                  | TT                              | CC                 | CC               | DRR             | 101498385     | Unknown function   |                    |
| SNP_89447_A_240262 | NW_004516374.1 | scaffold1067 | 240262                  | AA                              | TT                 | TT               | DRR             | 101498385     | Unknown function   |                    |
| SNP_89448_A_240320 | NW_004516374.1 | scaffold1067 | 240320                  | AA                              | GG                 | GG               | DRR             | 101498385     | Unknown function   |                    |
| SNP_89449_A_240329 | NW_004516374.1 | scaffold1067 | 240329                  | AA                              | GG                 | GG               | DRR             | 101498385     | Unknown function   |                    |
| SNP_89450_A_240347 | NW_004516374.1 | scaffold1067 | 240347                  | TT                              | CC                 | CC               | DRR             | 101498385     | Unknown function   |                    |
| SNP_89451_A_240368 | NW_004516374.1 | scaffold1067 | 240368                  | TT                              | GG                 | GG               | DRR             | 101498385     | Unknown function   |                    |
| SNP_89452_A_240401 | NW_004516374.1 | scaffold1067 | 240401                  | TT                              | GG                 | GG               | DRR             | 101498385     | Unknown function   |                    |

| SNPs IDs           | Chromosome IDs | Chromosomes  | Physical positions (bp) | CDC Frontier (Reference genome) | (Pusa 1103 & HPNB) | (ILWC 46 & LPNB) | Sequence Components of genome | Gene accession IDs | Putative functions |
|--------------------|----------------|--------------|-------------------------|---------------------------------|--------------------|------------------|-------------------------------|--------------------|--------------------|
| SNP_89453_A_240412 | NW_004516374.1 | scaffold1067 | 240412                  | AA                              | GG                 | GG               | DRR                           | 101498385          | Unknown function   |
| SNP_89454_A_240468 | NW_004516374.1 | scaffold1067 | 240468                  | AA                              | GG                 | GG               | DRR                           | 101498385          | Unknown function   |
| SNP_89455_A_240483 | NW_004516374.1 | scaffold1067 | 240483                  | AA                              | GG                 | GG               | DRR                           | 101498385          | Unknown function   |
| SNP_89456_A_240513 | NW_004516374.1 | scaffold1067 | 240513                  | AA                              | GG                 | GG               | DRR                           | 101498385          | Unknown function   |
| SNP_89457_A_240521 | NW_004516374.1 | scaffold1067 | 240521                  | TT                              | CC                 | CC               | DRR                           | 101498385          | Unknown function   |
| SNP_89458_A_240527 | NW_004516374.1 | scaffold1067 | 240527                  | TT                              | CC                 | CC               | DRR                           | 101498385          | Unknown function   |
| SNP_89459_A_240539 | NW_004516374.1 | scaffold1067 | 240539                  | TT                              | CC                 | CC               | DRR                           | 101498385          | Unknown function   |
| SNP_89460_A_240575 | NW_004516374.1 | scaffold1067 | 240575                  | GG                              | TT                 | TT               | DRR                           | 101498385          | Unknown function   |
| SNP_89461_A_240588 | NW_004516374.1 | scaffold1067 | 240588                  | TT                              | GG                 | GG               | DRR                           | 101498385          | Unknown function   |
| SNP_89462_A_240607 | NW_004516374.1 | scaffold1067 | 240607                  | TT                              | GG                 | GG               | DRR                           | 101498385          | Unknown function   |
| SNP_89463_A_240640 | NW_004516374.1 | scaffold1067 | 240640                  | AA                              | GG                 | GG               | DRR                           | 101498385          | Unknown function   |
| SNP_89464_A_240647 | NW_004516374.1 | scaffold1067 | 240647                  | GG                              | AA                 | AA               | DRR                           | 101498385          | Unknown function   |
| SNP_89465_A_240658 | NW_004516374.1 | scaffold1067 | 240658                  | GG                              | CC                 | CC               | DRR                           | 101498385          | Unknown function   |
| SNP_89466_A_240688 | NW_004516374.1 | scaffold1067 | 240688                  | TT                              | CC                 | CC               | DRR                           | 101498385          | Unknown function   |
| SNP_89467_A_240704 | NW_004516374.1 | scaffold1067 | 240704                  | AA                              | GG                 | GG               | DRR                           | 101498385          | Unknown function   |
| SNP_89468_A_240718 | NW_004516374.1 | scaffold1067 | 240718                  | TT                              | CC                 | CC               | DRR                           | 101498385          | Unknown function   |
| SNP_89469_A_240749 | NW_004516374.1 | scaffold1067 | 240749                  | TT                              | AA                 | AA               | DRR                           | 101498385          | Unknown function   |
| SNP_89470_A_240779 | NW_004516374.1 | scaffold1067 | 240779                  | TT                              | CC                 | CC               | DRR                           | 101498385          | Unknown function   |
| SNP_89471_A_240790 | NW_004516374.1 | scaffold1067 | 240790                  | TT                              | CC                 | CC               | DRR                           | 101498385          | Unknown function   |
| SNP_89472_A_240856 | NW_004516374.1 | scaffold1067 | 240856                  | GG                              | CC                 | CC               | DRR                           | 101498385          | Unknown function   |
| SNP_89473_A_240862 | NW_004516374.1 | scaffold1067 | 240862                  | CC                              | AA                 | AA               | DRR                           | 101498385          | Unknown function   |
| SNP_89474_A_240869 | NW_004516374.1 | scaffold1067 | 240869                  | TT                              | CC                 | CC               | DRR                           | 101498385          | Unknown function   |

| SNPs IDs           | Chromosome IDs | Chromosomes  | Physical positions (bp) | CDC Frontier (Reference genome) | (Pusa 1103 & HPNB) | (ILWC 46 & LPNB) | Sequence Components of genome | Gene accession IDs | Putative functions |
|--------------------|----------------|--------------|-------------------------|---------------------------------|--------------------|------------------|-------------------------------|--------------------|--------------------|
| SNP_89475_A_240876 | NW_004516374.1 | scaffold1067 | 240876                  | TT                              | CC                 | CC               | DRR                           | 101498385          | Unknown function   |
| SNP_89476_A_240879 | NW_004516374.1 | scaffold1067 | 240879                  | TT                              | CC                 | CC               | DRR                           | 101498385          | Unknown function   |
| SNP_89477_A_240913 | NW_004516374.1 | scaffold1067 | 240913                  | TT                              | CC                 | CC               | DRR                           | 101498385          | Unknown function   |
| SNP_89478_A_240923 | NW_004516374.1 | scaffold1067 | 240923                  | AA                              | GG                 | GG               | DRR                           | 101498385          | Unknown function   |
| SNP_89479_A_241069 | NW_004516374.1 | scaffold1067 | 241069                  | AA                              | GG                 | GG               | DRR                           | 101498385          | Unknown function   |
| SNP_89480_A_241106 | NW_004516374.1 | scaffold1067 | 241106                  | TT                              | CC                 | CC               | DRR                           | 101498385          | Unknown function   |
| SNP_89481_A_241112 | NW_004516374.1 | scaffold1067 | 241112                  | AA                              | GG                 | GG               | DRR                           | 101498385          | Unknown function   |
| SNP_89482_A_241132 | NW_004516374.1 | scaffold1067 | 241132                  | TT                              | CC                 | CC               | DRR                           | 101498385          | Unknown function   |
| SNP_89483_A_241162 | NW_004516374.1 | scaffold1067 | 241162                  | TT                              | GG                 | GG               | DRR                           | 101498385          | Unknown function   |
| SNP_89484_A_241166 | NW_004516374.1 | scaffold1067 | 241166                  | CC                              | GG                 | GG               | DRR                           | 101498385          | Unknown function   |
| SNP_89485_A_241170 | NW_004516374.1 | scaffold1067 | 241170                  | TT                              | CC                 | CC               | DRR                           | 101498385          | Unknown function   |
| SNP_89486_A_241469 | NW_004516374.1 | scaffold1067 | 241469                  | CC                              | GG                 | GG               | INTERGENIC                    |                    |                    |
| SNP_89487_A_241522 | NW_004516374.1 | scaffold1067 | 241522                  | AA                              | TT                 | TT               | INTERGENIC                    |                    |                    |
| SNP_89488_A_241537 | NW_004516374.1 | scaffold1067 | 241537                  | GG                              | AA                 | AA               | INTERGENIC                    |                    |                    |
| SNP_89489_A_241539 | NW_004516374.1 | scaffold1067 | 241539                  | TT                              | GG                 | GG               | INTERGENIC                    |                    |                    |
| SNP_89490_A_241556 | NW_004516374.1 | scaffold1067 | 241556                  | AA                              | GG                 | GG               | INTERGENIC                    |                    |                    |
| SNP_89491_A_241789 | NW_004516374.1 | scaffold1067 | 241789                  | GG                              | TT                 | TT               | NON_SYNONYMOUS_CODING         | 101498385          | Unknown function   |
| SNP_89492_A_242762 | NW_004516374.1 | scaffold1067 | 242762                  | AA                              | CC                 | CC               | URR                           | 101498385          | Unknown function   |
| SNP_89493_A_242798 | NW_004516374.1 | scaffold1067 | 242798                  | TT                              | GG                 | GG               | URR                           | 101498385          | Unknown function   |
| SNP_89494_A_242876 | NW_004516374.1 | scaffold1067 | 242876                  | TT                              | CC                 | CC               | URR                           | 101498385          | Unknown function   |
| SNP_89495_A_242926 | NW_004516374.1 | scaffold1067 | 242926                  | AA                              | GG                 | GG               | URR                           | 101498385          | Unknown function   |
| SNP_89497_A_242983 | NW_004516374.1 | scaffold1067 | 242983                  | AA                              | GG                 | GG               | URR                           | 101498385          | Unknown function   |



| SNPs IDs           | Chromosome IDs | Chromosomes  | Physical positions (bp) | CDC Frontier (Reference genome) | (Pusa 1103 & HPNB) | (ILWC 46 & LPNB) | Sequence Components of genome | Gene accession IDs | Putative functions |
|--------------------|----------------|--------------|-------------------------|---------------------------------|--------------------|------------------|-------------------------------|--------------------|--------------------|
| SNP_89498_A_243023 | NW_004516374.1 | scaffold1067 | 243023                  | TT                              | CC                 | CC               | DRR                           | 101497391          | Unknown function   |
| SNP_89499_A_243176 | NW_004516374.1 | scaffold1067 | 243176                  | TT                              | GG                 | GG               | DRR                           | 101497391          | Unknown function   |
| SNP_89500_A_243228 | NW_004516374.1 | scaffold1067 | 243228                  | AA                              | GG                 | GG               | DRR                           | 101497391          | Unknown function   |
| SNP_89501_A_243306 | NW_004516374.1 | scaffold1067 | 243306                  | AA                              | CC                 | CC               | DRR                           | 101497391          | Unknown function   |
| SNP_89502_A_243315 | NW_004516374.1 | scaffold1067 | 243315                  | AA                              | GG                 | GG               | DRR                           | 101497391          | Unknown function   |
| SNP_89504_A_243352 | NW_004516374.1 | scaffold1067 | 243352                  | TT                              | GG                 | GG               | DRR                           | 101497391          | Unknown function   |
| SNP_89505_A_243363 | NW_004516374.1 | scaffold1067 | 243363                  | TT                              | GG                 | GG               | DRR                           | 101497391          | Unknown function   |
| SNP_89506_A_243464 | NW_004516374.1 | scaffold1067 | 243464                  | AA                              | GG                 | GG               | DRR                           | 101497391          | Unknown function   |
| SNP_89508_A_243574 | NW_004516374.1 | scaffold1067 | 243574                  | AA                              | CC                 | CC               | DRR                           | 101497391          | Unknown function   |
| SNP_89509_A_243598 | NW_004516374.1 | scaffold1067 | 243598                  | TT                              | CC                 | CC               | DRR                           | 101497391          | Unknown function   |
| SNP_89510_A_243659 | NW_004516374.1 | scaffold1067 | 243659                  | TT                              | CC                 | CC               | DRR                           | 101497391          | Unknown function   |
| SNP_89511_A_243718 | NW_004516374.1 | scaffold1067 | 243718                  | TT                              | CC                 | CC               | DRR                           | 101497391          | Unknown function   |
| SNP_89512_A_243768 | NW_004516374.1 | scaffold1067 | 243768                  | TT                              | GG                 | GG               | DRR                           | 101497391          | Unknown function   |
| SNP_89513_A_243790 | NW_004516374.1 | scaffold1067 | 243790                  | AA                              | GG                 | GG               | DRR                           | 101497391          | Unknown function   |
| SNP_89515_A_243821 | NW_004516374.1 | scaffold1067 | 243821                  | AA                              | GG                 | GG               | DRR                           | 101497391          | Unknown function   |
| SNP_89516_A_243866 | NW_004516374.1 | scaffold1067 | 243866                  | TT                              | GG                 | GG               | DRR                           | 101497391          | Unknown function   |
| SNP_89517_A_243917 | NW_004516374.1 | scaffold1067 | 243917                  | TT                              | CC                 | CC               | DRR                           | 101497391          | Unknown function   |
| SNP_89518_A_243943 | NW_004516374.1 | scaffold1067 | 243943                  | TT                              | CC                 | CC               | DRR                           | 101497391          | Unknown function   |
| SNP_89519_A_244015 | NW_004516374.1 | scaffold1067 | 244015                  | AA                              | GG                 | GG               | DRR                           | 101497391          | Unknown function   |
| SNP_89520_A_244037 | NW_004516374.1 | scaffold1067 | 244037                  | TT                              | GG                 | GG               | URR                           | 101498385          | Unknown function   |
| SNP_89521_A_244043 | NW_004516374.1 | scaffold1067 | 244043                  | AA                              | CC                 | CC               | URR                           | 101498385          | Unknown function   |
| SNP_89522_A_249213 | NW_004516374.1 | scaffold1067 | 249213                  | TT                              | GG                 | GG               | INTERGENIC                    |                    |                    |

| SNPs IDs           | Chromosome IDs | Chromosomes  | Physical positions (bp) | CDC Frontier (Reference genome) | (Pusa 1103 & HPNB) | (ILWC 46 & LPNB) | Sequence genome | Components of | Gene accession IDs | Putative functions |
|--------------------|----------------|--------------|-------------------------|---------------------------------|--------------------|------------------|-----------------|---------------|--------------------|--------------------|
| SNP_89523_A_249239 | NW_004516374.1 | scaffold1067 | 249239                  | TT                              | CC                 | CC               | INTERGENIC      |               |                    |                    |
| SNP_89524_A_249253 | NW_004516374.1 | scaffold1067 | 249253                  | CC                              | AA                 | AA               | INTERGENIC      |               |                    |                    |
| SNP_89525_A_249559 | NW_004516374.1 | scaffold1067 | 249559                  | AA                              | TT                 | TT               | INTERGENIC      |               |                    |                    |
| SNP_89526_A_249572 | NW_004516374.1 | scaffold1067 | 249572                  | TT                              | CC                 | CC               | INTERGENIC      |               |                    |                    |
| SNP_89527_A_249600 | NW_004516374.1 | scaffold1067 | 249600                  | GG                              | CC                 | CC               | INTERGENIC      |               |                    |                    |
| SNP_89528_A_249631 | NW_004516374.1 | scaffold1067 | 249631                  | AA                              | CC                 | CC               | INTERGENIC      |               |                    |                    |
| SNP_89529_A_249633 | NW_004516374.1 | scaffold1067 | 249633                  | TT                              | CC                 | CC               | INTERGENIC      |               |                    |                    |
| SNP_89530_A_249651 | NW_004516374.1 | scaffold1067 | 249651                  | AA                              | GG                 | GG               | INTERGENIC      |               |                    |                    |
| SNP_89531_A_249653 | NW_004516374.1 | scaffold1067 | 249653                  | TT                              | GG                 | GG               | INTERGENIC      |               |                    |                    |
| SNP_89532_A_249664 | NW_004516374.1 | scaffold1067 | 249664                  | AA                              | GG                 | GG               | INTERGENIC      |               |                    |                    |
| SNP_89533_A_249671 | NW_004516374.1 | scaffold1067 | 249671                  | CC                              | AA                 | AA               | INTERGENIC      |               |                    |                    |
| SNP_89534_A_263134 | NW_004516374.1 | scaffold1067 | 263134                  | AA                              | TT                 | TT               | INTERGENIC      |               |                    |                    |
| SNP_89535_A_263142 | NW_004516374.1 | scaffold1067 | 263142                  | TT                              | CC                 | CC               | INTERGENIC      |               |                    |                    |
| SNP_89536_A_263143 | NW_004516374.1 | scaffold1067 | 263143                  | AA                              | GG                 | GG               | INTERGENIC      |               |                    |                    |
| SNP_89537_A_263248 | NW_004516374.1 | scaffold1067 | 263248                  | TT                              | CC                 | CC               | INTERGENIC      |               |                    |                    |
| SNP_89538_A_263253 | NW_004516374.1 | scaffold1067 | 263253                  | GG                              | CC                 | CC               | INTERGENIC      |               |                    |                    |
| SNP_89539_A_263310 | NW_004516374.1 | scaffold1067 | 263310                  | TT                              | CC                 | CC               | INTERGENIC      |               |                    |                    |
| SNP_89540_A_263314 | NW_004516374.1 | scaffold1067 | 263314                  | TT                              | CC                 | CC               | INTERGENIC      |               |                    |                    |
| SNP_89541_A_263319 | NW_004516374.1 | scaffold1067 | 263319                  | AA                              | GG                 | GG               | INTERGENIC      |               |                    |                    |
| SNP_89542_A_263356 | NW_004516374.1 | scaffold1067 | 263356                  | AA                              | TT                 | TT               | INTERGENIC      |               |                    |                    |
| SNP_89543_A_263357 | NW_004516374.1 | scaffold1067 | 263357                  | TT                              | AA                 | AA               | INTERGENIC      |               |                    |                    |
| SNP_89544_A_263362 | NW_004516374.1 | scaffold1067 | 263362                  | CC                              | TT                 | TT               | INTERGENIC      |               |                    |                    |

| SNPs IDs           | Chromosome IDs | Chromosomes  | Physical positions (bp) | CDC Frontier (Reference genome) | (Pusa 1103 & HPNB) | (ILWC 46 & LPNB) | Sequence genome | Components of | Gene accession IDs | Putative functions |
|--------------------|----------------|--------------|-------------------------|---------------------------------|--------------------|------------------|-----------------|---------------|--------------------|--------------------|
| SNP_89545_A_263414 | NW_004516374.1 | scaffold1067 | 263414                  | CC                              | TT                 | TT               | INTERGENIC      |               |                    |                    |
| SNP_89546_A_263420 | NW_004516374.1 | scaffold1067 | 263420                  | TT                              | CC                 | CC               | INTERGENIC      |               |                    |                    |
| SNP_89548_A_263591 | NW_004516374.1 | scaffold1067 | 263591                  | AA                              | GG                 | GG               | INTERGENIC      |               |                    |                    |
| SNP_89549_A_263645 | NW_004516374.1 | scaffold1067 | 263645                  | TT                              | AA                 | AA               | INTERGENIC      |               |                    |                    |
| SNP_89550_A_263664 | NW_004516374.1 | scaffold1067 | 263664                  | AA                              | GG                 | GG               | INTERGENIC      |               |                    |                    |
| SNP_89551_A_263675 | NW_004516374.1 | scaffold1067 | 263675                  | AA                              | GG                 | GG               | INTERGENIC      |               |                    |                    |
| SNP_89552_A_263692 | NW_004516374.1 | scaffold1067 | 263692                  | CC                              | TT                 | TT               | INTERGENIC      |               |                    |                    |
| SNP_89553_A_263696 | NW_004516374.1 | scaffold1067 | 263696                  | TT                              | CC                 | CC               | INTERGENIC      |               |                    |                    |
| SNP_89554_A_263776 | NW_004516374.1 | scaffold1067 | 263776                  | TT                              | CC                 | CC               | INTERGENIC      |               |                    |                    |
| SNP_89555_A_263782 | NW_004516374.1 | scaffold1067 | 263782                  | TT                              | CC                 | CC               | INTERGENIC      |               |                    |                    |
| SNP_89556_A_263815 | NW_004516374.1 | scaffold1067 | 263815                  | AA                              | CC                 | CC               | INTERGENIC      |               |                    |                    |
| SNP_89557_A_263823 | NW_004516374.1 | scaffold1067 | 263823                  | AA                              | GG                 | GG               | INTERGENIC      |               |                    |                    |
| SNP_89558_A_263827 | NW_004516374.1 | scaffold1067 | 263827                  | TT                              | GG                 | GG               | INTERGENIC      |               |                    |                    |
| SNP_89559_A_263841 | NW_004516374.1 | scaffold1067 | 263841                  | AA                              | TT                 | TT               | INTERGENIC      |               |                    |                    |
| SNP_89560_A_263866 | NW_004516374.1 | scaffold1067 | 263866                  | TT                              | CC                 | CC               | INTERGENIC      |               |                    |                    |
| SNP_89561_A_263867 | NW_004516374.1 | scaffold1067 | 263867                  | AA                              | GG                 | GG               | INTERGENIC      |               |                    |                    |
| SNP_89562_A_263899 | NW_004516374.1 | scaffold1067 | 263899                  | GG                              | AA                 | AA               | INTERGENIC      |               |                    |                    |
| SNP_89563_A_265633 | NW_004516374.1 | scaffold1067 | 265633                  | TT                              | CC                 | CC               | INTERGENIC      |               |                    |                    |
| SNP_89564_A_265634 | NW_004516374.1 | scaffold1067 | 265634                  | AA                              | TT                 | TT               | INTERGENIC      |               |                    |                    |
| SNP_89565_A_265647 | NW_004516374.1 | scaffold1067 | 265647                  | TT                              | GG                 | GG               | INTERGENIC      |               |                    |                    |
| SNP_89566_A_265654 | NW_004516374.1 | scaffold1067 | 265654                  | TT                              | AA                 | AA               | INTERGENIC      |               |                    |                    |
| SNP_89567_A_265676 | NW_004516374.1 | scaffold1067 | 265676                  | TT                              | CC                 | CC               | INTERGENIC      |               |                    |                    |

| SNPs IDs           | Chromosome IDs | Chromosomes  | Physical positions (bp) | CDC Frontier (Reference genome) | (Pusa 1103 & HPNB) | (ILWC 46 & LPNB) | Sequence genome | Components of | Gene accession IDs | Putative functions |
|--------------------|----------------|--------------|-------------------------|---------------------------------|--------------------|------------------|-----------------|---------------|--------------------|--------------------|
| SNP_89568_A_265700 | NW_004516374.1 | scaffold1067 | 265700                  | TT                              | AA                 | AA               | INTERGENIC      |               |                    |                    |
| SNP_89569_A_265702 | NW_004516374.1 | scaffold1067 | 265702                  | AA                              | GG                 | GG               | INTERGENIC      |               |                    |                    |
| SNP_89570_A_265724 | NW_004516374.1 | scaffold1067 | 265724                  | AA                              | CC                 | CC               | INTERGENIC      |               |                    |                    |
| SNP_89571_A_265730 | NW_004516374.1 | scaffold1067 | 265730                  | TT                              | CC                 | CC               | INTERGENIC      |               |                    |                    |
| SNP_89572_A_265732 | NW_004516374.1 | scaffold1067 | 265732                  | AA                              | GG                 | GG               | INTERGENIC      |               |                    |                    |
| SNP_89573_A_265761 | NW_004516374.1 | scaffold1067 | 265761                  | TT                              | CC                 | CC               | INTERGENIC      |               |                    |                    |
| SNP_89574_A_265902 | NW_004516374.1 | scaffold1067 | 265902                  | TT                              | CC                 | CC               | INTERGENIC      |               |                    |                    |
| SNP_89575_A_266037 | NW_004516374.1 | scaffold1067 | 266037                  | AA                              | GG                 | GG               | INTERGENIC      |               |                    |                    |
| SNP_89577_A_266096 | NW_004516374.1 | scaffold1067 | 266096                  | AA                              | GG                 | GG               | INTERGENIC      |               |                    |                    |
| SNP_89578_A_269603 | NW_004516374.1 | scaffold1067 | 269603                  | TT                              | CC                 | CC               | INTERGENIC      |               |                    |                    |
| SNP_89579_A_269626 | NW_004516374.1 | scaffold1067 | 269626                  | TT                              | GG                 | GG               | INTERGENIC      |               |                    |                    |
| SNP_89580_A_1913   | NW_004516376.1 | scaffold1071 | 1913                    | GG                              | AA                 | AA               | INTERGENIC      |               |                    |                    |
| SNP_89581_A_1629   | NW_004516377.1 | scaffold1072 | 1629                    | GG                              | AA                 | AA               | INTERGENIC      |               |                    |                    |
| SNP_89583_A_1734   | NW_004516378.1 | scaffold1073 | 1734                    | GG                              | AA                 | AA               | INTERGENIC      |               |                    |                    |
| SNP_89584_A_20657  | NW_004516379.1 | scaffold1074 | 20657                   | CC                              | GG                 | GG               | INTERGENIC      |               |                    |                    |
| SNP_89585_A_20670  | NW_004516379.1 | scaffold1074 | 20670                   | AA                              | CC                 | CC               | INTERGENIC      |               |                    |                    |
| SNP_89586_A_503    | NW_004516380.1 | scaffold1076 | 503                     | TT                              | AA                 | AA               | INTERGENIC      |               |                    |                    |
| SNP_89587_A_7191   | NW_004516380.1 | scaffold1076 | 7191                    | GG                              | AA                 | AA               | INTERGENIC      |               |                    |                    |
| SNP_89588_A_7196   | NW_004516380.1 | scaffold1076 | 7196                    | GG                              | AA                 | AA               | INTERGENIC      |               |                    |                    |
| SNP_89589_A_7202   | NW_004516380.1 | scaffold1076 | 7202                    | TT                              | AA                 | AA               | INTERGENIC      |               |                    |                    |
| SNP_89590_A_7309   | NW_004516380.1 | scaffold1076 | 7309                    | TT                              | GG                 | GG               | INTERGENIC      |               |                    |                    |
| SNP_89591_A_10753  | NW_004516380.1 | scaffold1076 | 10753                   | AA                              | GG                 | GG               | INTERGENIC      |               |                    |                    |

| SNPs IDs          | Chromosome IDs | Chromosomes  | Physical positions (bp) | CDC Frontier (Reference genome) | (Pusa 1103 & HPNB) | (ILWC 46 & LPNB) | Sequence Components of genome | Gene accession IDs | Putative functions                                                           |
|-------------------|----------------|--------------|-------------------------|---------------------------------|--------------------|------------------|-------------------------------|--------------------|------------------------------------------------------------------------------|
| SNP_89592_A_10953 | NW_004516380.1 | scaffold1076 | 10953                   | CC                              | GG                 | GG               | INTERGENIC                    |                    |                                                                              |
| SNP_89593_A_10964 | NW_004516380.1 | scaffold1076 | 10964                   | GG                              | AA                 | AA               | INTERGENIC                    |                    |                                                                              |
| SNP_89594_A_11054 | NW_004516380.1 | scaffold1076 | 11054                   | GG                              | AA                 | AA               | INTERGENIC                    |                    |                                                                              |
| SNP_89595_A_11074 | NW_004516380.1 | scaffold1076 | 11074                   | GG                              | TT                 | TT               | INTERGENIC                    |                    |                                                                              |
| SNP_89596_A_23616 | NW_004516380.1 | scaffold1076 | 23616                   | AA                              | CC                 | CC               | INTERGENIC                    |                    |                                                                              |
| SNP_89597_A_23771 | NW_004516380.1 | scaffold1076 | 23771                   | TT                              | GG                 | GG               | INTERGENIC                    |                    |                                                                              |
| SNP_89598_A_24015 | NW_004516380.1 | scaffold1076 | 24015                   | AA                              | CC                 | CC               | INTERGENIC                    |                    |                                                                              |
| SNP_89599_A_33189 | NW_004516380.1 | scaffold1076 | 33189                   | GG                              | AA                 | AA               | INTERGENIC                    |                    |                                                                              |
| SNP_89600_A_33224 | NW_004516380.1 | scaffold1076 | 33224                   | TT                              | GG                 | GG               | INTERGENIC                    |                    |                                                                              |
| SNP_89601_A_38488 | NW_004516380.1 | scaffold1076 | 38488                   | AA                              | GG                 | GG               | INTERGENIC                    |                    |                                                                              |
| SNP_89602_A_5346  | NW_004516382.1 | scaffold1080 | 5346                    | GG                              | TT                 | TT               | INTERGENIC                    |                    |                                                                              |
| SNP_89603_A_5392  | NW_004516382.1 | scaffold1080 | 5392                    | AA                              | GG                 | GG               | INTERGENIC                    |                    |                                                                              |
| SNP_89604_A_5399  | NW_004516382.1 | scaffold1080 | 5399                    | GG                              | TT                 | TT               | INTERGENIC                    |                    |                                                                              |
| SNP_89605_A_6871  | NW_004516382.1 | scaffold1080 | 6871                    | CC                              | TT                 | TT               | INTERGENIC                    |                    |                                                                              |
| SNP_89606_A_7194  | NW_004516382.1 | scaffold1080 | 7194                    | GG                              | AA                 | AA               | INTERGENIC                    |                    |                                                                              |
| SNP_89607_A_26451 | NW_004516382.1 | scaffold1080 | 26451                   | GG                              | AA                 | AA               | INTERGENIC                    |                    |                                                                              |
| SNP_89608_A_32871 | NW_004516382.1 | scaffold1080 | 32871                   | AA                              | CC                 | CC               | INTERGENIC                    |                    |                                                                              |
| SNP_89609_A_20726 | NW_004516383.1 | scaffold1081 | 20726                   | AA                              | GG                 | GG               | INTRON                        | 101499361          | protoporphyrinogen oxidase, chloroplastic/mitochondrial                      |
| SNP_89611_A_43956 | NW_004516383.1 | scaffold1081 | 43956                   | AA                              | GG                 | GG               | INTERGENIC                    |                    |                                                                              |
| SNP_89612_A_61492 | NW_004516383.1 | scaffold1081 | 61492                   | AA                              | GG                 | GG               | INTRON                        | 101499671          | probable inactive leucine-rich repeat receptor-like protein kinase At3g03770 |
| SNP_89614_A_86134 | NW_004516383.1 | scaffold1081 | 86134                   | AA                              | GG                 | GG               | INTERGENIC                    |                    |                                                                              |
| SNP_89615_A_86148 | NW_004516383.1 | scaffold1081 | 86148                   | AA                              | GG                 | GG               | INTERGENIC                    |                    |                                                                              |

| SNPs IDs          | Chromosome IDs | Chromosomes  | Physical positions (bp) | CDC Frontier (Reference genome) | (Pusa 1103 & HPNB) | (ILWC 46 & LPNB) | Sequence genome | Components of | Gene accession IDs | Putative functions |
|-------------------|----------------|--------------|-------------------------|---------------------------------|--------------------|------------------|-----------------|---------------|--------------------|--------------------|
| SNP_89616_A_86157 | NW_004516383.1 | scaffold1081 | 86157                   | GG                              | AA                 | AA               | INTERGENIC      |               |                    |                    |
| SNP_89617_A_86179 | NW_004516383.1 | scaffold1081 | 86179                   | CC                              | TT                 | TT               | INTERGENIC      |               |                    |                    |
| SNP_89618_A_86218 | NW_004516383.1 | scaffold1081 | 86218                   | TT                              | GG                 | GG               | INTERGENIC      |               |                    |                    |
| SNP_89622_A_434   | NW_004516384.1 | scaffold1082 | 434                     | CC                              | AA                 | AA               | INTERGENIC      |               |                    |                    |
| SNP_89623_A_707   | NW_004516384.1 | scaffold1082 | 707                     | AA                              | TT                 | TT               | INTERGENIC      |               |                    |                    |
| SNP_89624_A_832   | NW_004516384.1 | scaffold1082 | 832                     | CC                              | TT                 | TT               | INTERGENIC      |               |                    |                    |
| SNP_89625_A_859   | NW_004516384.1 | scaffold1082 | 859                     | TT                              | CC                 | CC               | INTERGENIC      |               |                    |                    |
| SNP_89626_A_876   | NW_004516384.1 | scaffold1082 | 876                     | AA                              | GG                 | GG               | INTERGENIC      |               |                    |                    |
| SNP_89628_A_19794 | NW_004516384.1 | scaffold1082 | 19794                   | AA                              | TT                 | TT               | INTERGENIC      |               |                    |                    |
| SNP_89629_A_20012 | NW_004516384.1 | scaffold1082 | 20012                   | CC                              | AA                 | AA               | INTERGENIC      |               |                    |                    |
| SNP_89630_A_20062 | NW_004516384.1 | scaffold1082 | 20062                   | TT                              | GG                 | GG               | INTERGENIC      |               |                    |                    |
| SNP_89631_A_20870 | NW_004516384.1 | scaffold1082 | 20870                   | AA                              | TT                 | TT               | INTERGENIC      |               |                    |                    |
| SNP_89632_A_21009 | NW_004516384.1 | scaffold1082 | 21009                   | GG                              | CC                 | CC               | INTERGENIC      |               |                    |                    |
| SNP_89633_A_21096 | NW_004516384.1 | scaffold1082 | 21096                   | CC                              | GG                 | GG               | INTERGENIC      |               |                    |                    |
| SNP_89635_A_21238 | NW_004516384.1 | scaffold1082 | 21238                   | CC                              | AA                 | AA               | INTERGENIC      |               |                    |                    |
| SNP_89636_A_21240 | NW_004516384.1 | scaffold1082 | 21240                   | TT                              | CC                 | CC               | INTERGENIC      |               |                    |                    |
| SNP_89637_A_21350 | NW_004516384.1 | scaffold1082 | 21350                   | TT                              | CC                 | CC               | INTERGENIC      |               |                    |                    |
| SNP_89638_A_21354 | NW_004516384.1 | scaffold1082 | 21354                   | TT                              | AA                 | AA               | INTERGENIC      |               |                    |                    |
| SNP_89639_A_21356 | NW_004516384.1 | scaffold1082 | 21356                   | AA                              | TT                 | TT               | INTERGENIC      |               |                    |                    |
| SNP_89641_A_24505 | NW_004516384.1 | scaffold1082 | 24505                   | TT                              | CC                 | CC               | INTERGENIC      |               |                    |                    |
| SNP_89643_A_27036 | NW_004516384.1 | scaffold1082 | 27036                   | TT                              | CC                 | CC               | INTERGENIC      |               |                    |                    |
| SNP_89644_A_27410 | NW_004516384.1 | scaffold1082 | 27410                   | GG                              | AA                 | AA               | INTERGENIC      |               |                    |                    |

| SNPs IDs          | Chromosome IDs | Chromosomes  | Physical positions (bp) | CDC Frontier (Reference genome) | (Pusa 1103 & HPNB) | (ILWC 46 & LPNB) | Sequence genome | Components of | Gene accession IDs | Putative functions |
|-------------------|----------------|--------------|-------------------------|---------------------------------|--------------------|------------------|-----------------|---------------|--------------------|--------------------|
| SNP_89645_A_27597 | NW_004516384.1 | scaffold1082 | 27597                   | TT                              | AA                 | AA               | INTERGENIC      |               |                    |                    |
| SNP_89646_A_27630 | NW_004516384.1 | scaffold1082 | 27630                   | CC                              | TT                 | TT               | INTERGENIC      |               |                    |                    |
| SNP_89647_A_27783 | NW_004516384.1 | scaffold1082 | 27783                   | TT                              | CC                 | CC               | INTERGENIC      |               |                    |                    |
| SNP_89648_A_30885 | NW_004516384.1 | scaffold1082 | 30885                   | TT                              | AA                 | AA               | INTERGENIC      |               |                    |                    |
| SNP_89649_A_31928 | NW_004516384.1 | scaffold1082 | 31928                   | GG                              | CC                 | CC               | INTERGENIC      |               |                    |                    |
| SNP_89650_A_32966 | NW_004516384.1 | scaffold1082 | 32966                   | AA                              | CC                 | CC               | INTERGENIC      |               |                    |                    |
| SNP_89651_A_8889  | NW_004516385.1 | scaffold1083 | 8889                    | AA                              | CC                 | CC               | INTERGENIC      |               |                    |                    |
| SNP_89652_A_8898  | NW_004516385.1 | scaffold1083 | 8898                    | CC                              | TT                 | TT               | INTERGENIC      |               |                    |                    |
| SNP_89653_A_12705 | NW_004516385.1 | scaffold1083 | 12705                   | GG                              | AA                 | AA               | INTERGENIC      |               |                    |                    |
| SNP_89654_A_15278 | NW_004516385.1 | scaffold1083 | 15278                   | TT                              | CC                 | CC               | INTERGENIC      |               |                    |                    |
| SNP_89655_A_23192 | NW_004516385.1 | scaffold1083 | 23192                   | AA                              | CC                 | CC               | INTERGENIC      |               |                    |                    |
| SNP_89656_A_27304 | NW_004516385.1 | scaffold1083 | 27304                   | TT                              | GG                 | GG               | INTERGENIC      |               |                    |                    |
| SNP_89657_A_27349 | NW_004516385.1 | scaffold1083 | 27349                   | CC                              | TT                 | TT               | INTERGENIC      |               |                    |                    |
| SNP_89658_A_27363 | NW_004516385.1 | scaffold1083 | 27363                   | AA                              | GG                 | GG               | INTERGENIC      |               |                    |                    |
| SNP_89659_A_27386 | NW_004516385.1 | scaffold1083 | 27386                   | TT                              | CC                 | CC               | INTERGENIC      |               |                    |                    |
| SNP_89660_A_27390 | NW_004516385.1 | scaffold1083 | 27390                   | TT                              | CC                 | CC               | INTERGENIC      |               |                    |                    |
| SNP_89661_A_27474 | NW_004516385.1 | scaffold1083 | 27474                   | TT                              | GG                 | GG               | INTERGENIC      |               |                    |                    |
| SNP_89662_A_27516 | NW_004516385.1 | scaffold1083 | 27516                   | AA                              | GG                 | GG               | INTERGENIC      |               |                    |                    |
| SNP_89663_A_28096 | NW_004516385.1 | scaffold1083 | 28096                   | GG                              | AA                 | AA               | INTERGENIC      |               |                    |                    |
| SNP_89664_A_67845 | NW_004516385.1 | scaffold1083 | 67845                   | GG                              | TT                 | TT               | INTERGENIC      |               |                    |                    |
| SNP_89666_A_75307 | NW_004516385.1 | scaffold1083 | 75307                   | AA                              | TT                 | TT               | INTERGENIC      |               |                    |                    |
| SNP_89667_A_97158 | NW_004516385.1 | scaffold1083 | 97158                   | AA                              | GG                 | GG               | INTERGENIC      |               |                    |                    |

| SNPs IDs           | Chromosome IDs | Chromosomes  | Physical positions (bp) | CDC Frontier (Reference genome) | (Pusa 1103 & HPNB) | (ILWC 46 & LPNB) | Sequence genome | Components of | Gene accession IDs | Putative functions |
|--------------------|----------------|--------------|-------------------------|---------------------------------|--------------------|------------------|-----------------|---------------|--------------------|--------------------|
| SNP_89668_A_97496  | NW_004516385.1 | scaffold1083 | 97496                   | AA                              | GG                 | GG               | INTERGENIC      |               |                    |                    |
| SNP_89669_A_119889 | NW_004516385.1 | scaffold1083 | 119889                  | CC                              | GG                 | GG               | INTERGENIC      |               |                    |                    |
| SNP_89671_A_121970 | NW_004516385.1 | scaffold1083 | 121970                  | GG                              | TT                 | TT               | INTERGENIC      |               |                    |                    |
| SNP_89673_A_122113 | NW_004516385.1 | scaffold1083 | 122113                  | AA                              | GG                 | GG               | INTERGENIC      |               |                    |                    |
| SNP_89674_A_122137 | NW_004516385.1 | scaffold1083 | 122137                  | TT                              | CC                 | CC               | INTERGENIC      |               |                    |                    |
| SNP_89675_A_122170 | NW_004516385.1 | scaffold1083 | 122170                  | AA                              | CC                 | CC               | INTERGENIC      |               |                    |                    |
| SNP_89676_A_122171 | NW_004516385.1 | scaffold1083 | 122171                  | AA                              | GG                 | GG               | INTERGENIC      |               |                    |                    |
| SNP_89677_A_122240 | NW_004516385.1 | scaffold1083 | 122240                  | CC                              | TT                 | TT               | INTERGENIC      |               |                    |                    |
| SNP_89678_A_122279 | NW_004516385.1 | scaffold1083 | 122279                  | GG                              | CC                 | CC               | INTERGENIC      |               |                    |                    |
| SNP_89679_A_122294 | NW_004516385.1 | scaffold1083 | 122294                  | GG                              | AA                 | AA               | INTERGENIC      |               |                    |                    |
| SNP_89680_A_122309 | NW_004516385.1 | scaffold1083 | 122309                  | AA                              | TT                 | TT               | INTERGENIC      |               |                    |                    |
| SNP_89681_A_122362 | NW_004516385.1 | scaffold1083 | 122362                  | GG                              | AA                 | AA               | INTERGENIC      |               |                    |                    |
| SNP_89682_A_122365 | NW_004516385.1 | scaffold1083 | 122365                  | AA                              | GG                 | GG               | INTERGENIC      |               |                    |                    |
| SNP_89683_A_122479 | NW_004516385.1 | scaffold1083 | 122479                  | GG                              | CC                 | CC               | INTERGENIC      |               |                    |                    |
| SNP_89684_A_122485 | NW_004516385.1 | scaffold1083 | 122485                  | GG                              | TT                 | TT               | INTERGENIC      |               |                    |                    |
| SNP_89685_A_122558 | NW_004516385.1 | scaffold1083 | 122558                  | TT                              | AA                 | AA               | INTERGENIC      |               |                    |                    |
| SNP_89686_A_131824 | NW_004516385.1 | scaffold1083 | 131824                  | AA                              | TT                 | TT               | INTERGENIC      |               |                    |                    |
| SNP_89687_A_131828 | NW_004516385.1 | scaffold1083 | 131828                  | AA                              | TT                 | TT               | INTERGENIC      |               |                    |                    |
| SNP_89688_A_131843 | NW_004516385.1 | scaffold1083 | 131843                  | TT                              | CC                 | CC               | INTERGENIC      |               |                    |                    |
| SNP_89689_A_132242 | NW_004516385.1 | scaffold1083 | 132242                  | CC                              | AA                 | AA               | INTERGENIC      |               |                    |                    |
| SNP_89690_A_132268 | NW_004516385.1 | scaffold1083 | 132268                  | TT                              | AA                 | AA               | INTERGENIC      |               |                    |                    |
| SNP_89691_A_132504 | NW_004516385.1 | scaffold1083 | 132504                  | GG                              | TT                 | TT               | INTERGENIC      |               |                    |                    |



| SNPs IDs           | Chromosome IDs | Chromosomes  | Physical positions (bp) | CDC Frontier (Reference genome) | (Pusa 1103 & HPNB) | (ILWC 46 & LPNB) | Sequence genome | Components of | Gene accession IDs | Putative functions |
|--------------------|----------------|--------------|-------------------------|---------------------------------|--------------------|------------------|-----------------|---------------|--------------------|--------------------|
| SNP_89692_A_132657 | NW_004516385.1 | scaffold1083 | 132657                  | AA                              | TT                 | TT               | INTERGENIC      |               |                    |                    |
| SNP_89693_A_132668 | NW_004516385.1 | scaffold1083 | 132668                  | TT                              | CC                 | CC               | INTERGENIC      |               |                    |                    |
| SNP_89694_A_132669 | NW_004516385.1 | scaffold1083 | 132669                  | AA                              | TT                 | TT               | INTERGENIC      |               |                    |                    |
| SNP_89695_A_132781 | NW_004516385.1 | scaffold1083 | 132781                  | TT                              | AA                 | AA               | INTERGENIC      |               |                    |                    |
| SNP_89696_A_132944 | NW_004516385.1 | scaffold1083 | 132944                  | TT                              | AA                 | AA               | INTERGENIC      |               |                    |                    |
| SNP_89697_A_133074 | NW_004516385.1 | scaffold1083 | 133074                  | GG                              | TT                 | TT               | INTERGENIC      |               |                    |                    |
| SNP_89698_A_133678 | NW_004516385.1 | scaffold1083 | 133678                  | TT                              | CC                 | CC               | INTERGENIC      |               |                    |                    |
| SNP_89699_A_133754 | NW_004516385.1 | scaffold1083 | 133754                  | AA                              | CC                 | CC               | INTERGENIC      |               |                    |                    |
| SNP_89700_A_5810   | NW_004516386.1 | scaffold1084 | 5810                    | TT                              | GG                 | GG               | INTERGENIC      |               |                    |                    |
| SNP_89701_A_1114   | NW_004516387.1 | scaffold1085 | 1114                    | TT                              | AA                 | AA               | INTERGENIC      |               |                    |                    |
| SNP_89702_A_1161   | NW_004516387.1 | scaffold1085 | 1161                    | AA                              | CC                 | CC               | INTERGENIC      |               |                    |                    |
| SNP_89703_A_1162   | NW_004516387.1 | scaffold1085 | 1162                    | TT                              | CC                 | CC               | INTERGENIC      |               |                    |                    |
| SNP_89704_A_1180   | NW_004516387.1 | scaffold1085 | 1180                    | AA                              | GG                 | GG               | INTERGENIC      |               |                    |                    |
| SNP_89705_A_6563   | NW_004516389.1 | scaffold1087 | 6563                    | CC                              | TT                 | TT               | INTERGENIC      |               |                    |                    |
| SNP_89706_A_12247  | NW_004516389.1 | scaffold1087 | 12247                   | AA                              | GG                 | GG               | INTERGENIC      |               |                    |                    |
| SNP_89707_A_12262  | NW_004516389.1 | scaffold1087 | 12262                   | TT                              | GG                 | GG               | INTERGENIC      |               |                    |                    |
| SNP_89708_A_12271  | NW_004516389.1 | scaffold1087 | 12271                   | CC                              | TT                 | TT               | INTERGENIC      |               |                    |                    |
| SNP_89709_A_12318  | NW_004516389.1 | scaffold1087 | 12318                   | TT                              | CC                 | CC               | INTERGENIC      |               |                    |                    |
| SNP_89710_A_12360  | NW_004516389.1 | scaffold1087 | 12360                   | AA                              | GG                 | GG               | INTERGENIC      |               |                    |                    |
| SNP_89711_A_12386  | NW_004516389.1 | scaffold1087 | 12386                   | TT                              | GG                 | GG               | INTERGENIC      |               |                    |                    |
| SNP_89712_A_12420  | NW_004516389.1 | scaffold1087 | 12420                   | GG                              | AA                 | AA               | INTERGENIC      |               |                    |                    |
| SNP_89713_A_12421  | NW_004516389.1 | scaffold1087 | 12421                   | CC                              | TT                 | TT               | INTERGENIC      |               |                    |                    |

| SNPs IDs          | Chromosome IDs | Chromosomes  | Physical positions (bp) | CDC Frontier (Reference genome) | (Pusa 1103 & HPNB) | (ILWC 46 & LPNB) | Sequence genome | Components of | Gene accession IDs | Putative functions |
|-------------------|----------------|--------------|-------------------------|---------------------------------|--------------------|------------------|-----------------|---------------|--------------------|--------------------|
| SNP_89714_A_12451 | NW_004516389.1 | scaffold1087 | 12451                   | CC                              | TT                 | TT               | INTERGENIC      |               |                    |                    |
| SNP_89715_A_12525 | NW_004516389.1 | scaffold1087 | 12525                   | CC                              | TT                 | TT               | INTERGENIC      |               |                    |                    |
| SNP_89717_A_12704 | NW_004516389.1 | scaffold1087 | 12704                   | TT                              | CC                 | CC               | INTERGENIC      |               |                    |                    |
| SNP_89718_A_12707 | NW_004516389.1 | scaffold1087 | 12707                   | GG                              | AA                 | AA               | INTERGENIC      |               |                    |                    |
| SNP_89719_A_12708 | NW_004516389.1 | scaffold1087 | 12708                   | CC                              | GG                 | GG               | INTERGENIC      |               |                    |                    |
| SNP_89720_A_12738 | NW_004516389.1 | scaffold1087 | 12738                   | TT                              | AA                 | AA               | INTERGENIC      |               |                    |                    |
| SNP_89721_A_12874 | NW_004516389.1 | scaffold1087 | 12874                   | GG                              | AA                 | AA               | INTERGENIC      |               |                    |                    |
| SNP_89722_A_13031 | NW_004516389.1 | scaffold1087 | 13031                   | AA                              | GG                 | GG               | INTERGENIC      |               |                    |                    |
| SNP_89723_A_13032 | NW_004516389.1 | scaffold1087 | 13032                   | TT                              | CC                 | CC               | INTERGENIC      |               |                    |                    |
| SNP_89724_A_13038 | NW_004516389.1 | scaffold1087 | 13038                   | CC                              | TT                 | TT               | INTERGENIC      |               |                    |                    |
| SNP_89725_A_13068 | NW_004516389.1 | scaffold1087 | 13068                   | GG                              | CC                 | CC               | INTERGENIC      |               |                    |                    |
| SNP_89726_A_13141 | NW_004516389.1 | scaffold1087 | 13141                   | TT                              | AA                 | AA               | INTERGENIC      |               |                    |                    |
| SNP_89727_A_13146 | NW_004516389.1 | scaffold1087 | 13146                   | TT                              | CC                 | CC               | INTERGENIC      |               |                    |                    |
| SNP_89728_A_13172 | NW_004516389.1 | scaffold1087 | 13172                   | CC                              | TT                 | TT               | INTERGENIC      |               |                    |                    |
| SNP_89729_A_13246 | NW_004516389.1 | scaffold1087 | 13246                   | AA                              | GG                 | GG               | INTERGENIC      |               |                    |                    |
| SNP_89730_A_13276 | NW_004516389.1 | scaffold1087 | 13276                   | GG                              | AA                 | AA               | INTERGENIC      |               |                    |                    |
| SNP_89731_A_13306 | NW_004516389.1 | scaffold1087 | 13306                   | TT                              | CC                 | CC               | INTERGENIC      |               |                    |                    |
| SNP_89732_A_13321 | NW_004516389.1 | scaffold1087 | 13321                   | AA                              | TT                 | TT               | INTERGENIC      |               |                    |                    |
| SNP_89733_A_13368 | NW_004516389.1 | scaffold1087 | 13368                   | TT                              | CC                 | CC               | INTERGENIC      |               |                    |                    |
| SNP_89734_A_13386 | NW_004516389.1 | scaffold1087 | 13386                   | TT                              | AA                 | AA               | INTERGENIC      |               |                    |                    |
| SNP_89735_A_13402 | NW_004516389.1 | scaffold1087 | 13402                   | AA                              | GG                 | GG               | INTERGENIC      |               |                    |                    |
| SNP_89736_A_13461 | NW_004516389.1 | scaffold1087 | 13461                   | GG                              | AA                 | AA               | INTERGENIC      |               |                    |                    |

| SNPs IDs          | Chromosome IDs | Chromosomes  | Physical positions (bp) | CDC Frontier (Reference genome) | (Pusa 1103 & HPNB) | (ILWC 46 & LPNB) | Sequence Components of genome | Gene accession IDs | Putative functions         |
|-------------------|----------------|--------------|-------------------------|---------------------------------|--------------------|------------------|-------------------------------|--------------------|----------------------------|
| SNP_89738_A_13585 | NW_004516389.1 | scaffold1087 | 13585                   | TT                              | AA                 | AA               | INTERGENIC                    |                    |                            |
| SNP_89739_A_13646 | NW_004516389.1 | scaffold1087 | 13646                   | AA                              | GG                 | GG               | INTERGENIC                    |                    |                            |
| SNP_89740_A_13662 | NW_004516389.1 | scaffold1087 | 13662                   | AA                              | GG                 | GG               | INTERGENIC                    |                    |                            |
| SNP_89741_A_13807 | NW_004516389.1 | scaffold1087 | 13807                   | AA                              | GG                 | GG               | DRR                           | 101501588          | amino acid permease 6-like |
| SNP_89742_A_13867 | NW_004516389.1 | scaffold1087 | 13867                   | TT                              | CC                 | CC               | DRR                           | 101501588          | amino acid permease 6-like |
| SNP_89743_A_13868 | NW_004516389.1 | scaffold1087 | 13868                   | GG                              | AA                 | AA               | DRR                           | 101501588          | amino acid permease 6-like |
| SNP_89744_A_13931 | NW_004516389.1 | scaffold1087 | 13931                   | AA                              | CC                 | CC               | DRR                           | 101501588          | amino acid permease 6-like |
| SNP_89745_A_14073 | NW_004516389.1 | scaffold1087 | 14073                   | GG                              | AA                 | AA               | DRR                           | 101501588          | amino acid permease 6-like |
| SNP_89746_A_14082 | NW_004516389.1 | scaffold1087 | 14082                   | AA                              | GG                 | GG               | DRR                           | 101501588          | amino acid permease 6-like |
| SNP_89747_A_14086 | NW_004516389.1 | scaffold1087 | 14086                   | AA                              | TT                 | TT               | DRR                           | 101501588          | amino acid permease 6-like |
| SNP_89748_A_14142 | NW_004516389.1 | scaffold1087 | 14142                   | AA                              | TT                 | TT               | DRR                           | 101501588          | amino acid permease 6-like |
| SNP_89749_A_14291 | NW_004516389.1 | scaffold1087 | 14291                   | AA                              | TT                 | TT               | DRR                           | 101501588          | amino acid permease 6-like |
| SNP_89750_A_14373 | NW_004516389.1 | scaffold1087 | 14373                   | GG                              | AA                 | AA               | DRR                           | 101501588          | amino acid permease 6-like |
| SNP_89752_A_14411 | NW_004516389.1 | scaffold1087 | 14411                   | TT                              | CC                 | CC               | DRR                           | 101501588          | amino acid permease 6-like |
| SNP_89753_A_14523 | NW_004516389.1 | scaffold1087 | 14523                   | GG                              | TT                 | TT               | DRR                           | 101501588          | amino acid permease 6-like |
| SNP_89754_A_14567 | NW_004516389.1 | scaffold1087 | 14567                   | GG                              | AA                 | AA               | DRR                           | 101501588          | amino acid permease 6-like |
| SNP_89755_A_14724 | NW_004516389.1 | scaffold1087 | 14724                   | GG                              | AA                 | AA               | SYNONYMOUS_CODING             | 101501588          | amino acid permease 6-like |
| SNP_89756_A_14782 | NW_004516389.1 | scaffold1087 | 14782                   | TT                              | AA                 | AA               | NON_SYNONYMOUS_CODING         | 101501588          | amino acid permease 6-like |
| SNP_89757_A_14793 | NW_004516389.1 | scaffold1087 | 14793                   | CC                              | AA                 | AA               | SYNONYMOUS_CODING             | 101501588          | amino acid permease 6-like |
| SNP_89758_A_14796 | NW_004516389.1 | scaffold1087 | 14796                   | CC                              | TT                 | TT               | SYNONYMOUS_CODING             | 101501588          | amino acid permease 6-like |
| SNP_89759_A_14814 | NW_004516389.1 | scaffold1087 | 14814                   | TT                              | CC                 | CC               | SYNONYMOUS_CODING             | 101501588          | amino acid permease 6-like |
| SNP_89760_A_16489 | NW_004516389.1 | scaffold1087 | 16489                   | AA                              | GG                 | GG               | URR                           | 101501588          | amino acid permease 6-like |

| SNPs IDs           | Chromosome IDs | Chromosomes  | Physical positions (bp) | CDC Frontier (Reference genome) | (Pusa 1103 & HPNB) | (ILWC 46 & LPNB) | Sequence genome   | Components of | Gene accession IDs         | Putative functions |
|--------------------|----------------|--------------|-------------------------|---------------------------------|--------------------|------------------|-------------------|---------------|----------------------------|--------------------|
| SNP_89761_A_22796  | NW_004516389.1 | scaffold1087 | 22796                   | AA                              | GG                 | GG               | INTERGENIC        |               |                            |                    |
| SNP_89762_A_22797  | NW_004516389.1 | scaffold1087 | 22797                   | AA                              | GG                 | GG               | INTERGENIC        |               |                            |                    |
| SNP_89763_A_22851  | NW_004516389.1 | scaffold1087 | 22851                   | AA                              | GG                 | GG               | INTERGENIC        |               |                            |                    |
| SNP_89764_A_22889  | NW_004516389.1 | scaffold1087 | 22889                   | TT                              | CC                 | CC               | INTERGENIC        |               |                            |                    |
| SNP_89765_A_22935  | NW_004516389.1 | scaffold1087 | 22935                   | TT                              | CC                 | CC               | INTERGENIC        |               |                            |                    |
| SNP_89766_A_22938  | NW_004516389.1 | scaffold1087 | 22938                   | TT                              | AA                 | AA               | INTERGENIC        |               |                            |                    |
| SNP_89767_A_22976  | NW_004516389.1 | scaffold1087 | 22976                   | CC                              | TT                 | TT               | INTERGENIC        |               |                            |                    |
| SNP_89768_A_23005  | NW_004516389.1 | scaffold1087 | 23005                   | CC                              | TT                 | TT               | INTERGENIC        |               |                            |                    |
| SNP_89770_A_23096  | NW_004516389.1 | scaffold1087 | 23096                   | AA                              | TT                 | TT               | INTERGENIC        |               |                            |                    |
| SNP_89772_A_23242  | NW_004516389.1 | scaffold1087 | 23242                   | CC                              | TT                 | TT               | INTERGENIC        |               |                            |                    |
| SNP_89773_A_23320  | NW_004516389.1 | scaffold1087 | 23320                   | TT                              | CC                 | CC               | INTERGENIC        |               |                            |                    |
| SNP_89774_A_23335  | NW_004516389.1 | scaffold1087 | 23335                   | AA                              | GG                 | GG               | INTERGENIC        |               |                            |                    |
| SNP_89775_A_23528  | NW_004516389.1 | scaffold1087 | 23528                   | CC                              | TT                 | TT               | INTERGENIC        |               |                            |                    |
| SNP_89776_A_27855  | NW_004516389.1 | scaffold1087 | 27855                   | AA                              | CC                 | CC               | SYNONYMOUS_CODING | 101501898     | amino acid permease 6-like |                    |
| SNP_89777_A_28246  | NW_004516389.1 | scaffold1087 | 28246                   | AA                              | GG                 | GG               | URR               | 101501898     | amino acid permease 6-like |                    |
| SNP_89778_A_28489  | NW_004516389.1 | scaffold1087 | 28489                   | CC                              | AA                 | AA               | URR               | 101501898     | amino acid permease 6-like |                    |
| SNP_89779_A_28514  | NW_004516389.1 | scaffold1087 | 28514                   | TT                              | CC                 | CC               | URR               | 101501898     | amino acid permease 6-like |                    |
| SNP_89780_A_28521  | NW_004516389.1 | scaffold1087 | 28521                   | TT                              | CC                 | CC               | URR               | 101501898     | amino acid permease 6-like |                    |
| SNP_89781_A_28588  | NW_004516389.1 | scaffold1087 | 28588                   | CC                              | GG                 | GG               | URR               | 101501898     | amino acid permease 6-like |                    |
| SNP_89783_A_189631 | NW_004516390.1 | scaffold1089 | 189631                  | AA                              | TT                 | TT               | INTERGENIC        |               |                            |                    |
| SNP_89784_A_189892 | NW_004516390.1 | scaffold1089 | 189892                  | GG                              | AA                 | AA               | INTERGENIC        |               |                            |                    |
| SNP_89785_A_189931 | NW_004516390.1 | scaffold1089 | 189931                  | AA                              | GG                 | GG               | INTERGENIC        |               |                            |                    |

| SNPs IDs           | Chromosome IDs | Chromosomes  | Physical positions (bp) | CDC Frontier (Reference genome) | (Pusa 1103 & HPNB) | (ILWC 46 & LPNB) | Sequence genome | Components of | Gene accession IDs | Putative functions |
|--------------------|----------------|--------------|-------------------------|---------------------------------|--------------------|------------------|-----------------|---------------|--------------------|--------------------|
| SNP_89786_A_200955 | NW_004516390.1 | scaffold1089 | 200955                  | AA                              | CC                 | CC               | INTERGENIC      |               |                    |                    |
| SNP_89787_A_226996 | NW_004516390.1 | scaffold1089 | 226996                  | AA                              | GG                 | GG               | INTERGENIC      |               |                    |                    |
| SNP_89788_A_227007 | NW_004516390.1 | scaffold1089 | 227007                  | TT                              | GG                 | GG               | INTERGENIC      |               |                    |                    |
| SNP_89789_A_243907 | NW_004516390.1 | scaffold1089 | 243907                  | CC                              | TT                 | TT               | INTERGENIC      |               |                    |                    |
| SNP_89790_A_243935 | NW_004516390.1 | scaffold1089 | 243935                  | TT                              | CC                 | CC               | INTERGENIC      |               |                    |                    |
| SNP_89791_A_259108 | NW_004516390.1 | scaffold1089 | 259108                  | CC                              | TT                 | TT               | INTERGENIC      |               |                    |                    |
| SNP_89792_A_259569 | NW_004516390.1 | scaffold1089 | 259569                  | AA                              | GG                 | GG               | INTERGENIC      |               |                    |                    |
| SNP_89793_A_259828 | NW_004516390.1 | scaffold1089 | 259828                  | AA                              | GG                 | GG               | INTERGENIC      |               |                    |                    |
| SNP_89794_A_259872 | NW_004516390.1 | scaffold1089 | 259872                  | AA                              | GG                 | GG               | INTERGENIC      |               |                    |                    |
| SNP_89795_A_264859 | NW_004516390.1 | scaffold1089 | 264859                  | AA                              | CC                 | CC               | INTERGENIC      |               |                    |                    |
| SNP_89796_A_3343   | NW_004516393.1 | scaffold1092 | 3343                    | AA                              | CC                 | CC               | INTERGENIC      |               |                    |                    |
| SNP_89797_A_5991   | NW_004516393.1 | scaffold1092 | 5991                    | AA                              | GG                 | GG               | INTERGENIC      |               |                    |                    |
| SNP_89798_A_6038   | NW_004516393.1 | scaffold1092 | 6038                    | AA                              | GG                 | GG               | INTERGENIC      |               |                    |                    |
| SNP_89799_A_6060   | NW_004516393.1 | scaffold1092 | 6060                    | GG                              | TT                 | TT               | INTERGENIC      |               |                    |                    |
| SNP_89800_A_6286   | NW_004516393.1 | scaffold1092 | 6286                    | AA                              | TT                 | TT               | INTERGENIC      |               |                    |                    |
| SNP_89801_A_6911   | NW_004516393.1 | scaffold1092 | 6911                    | CC                              | GG                 | GG               | INTERGENIC      |               |                    |                    |
| SNP_89802_A_8785   | NW_004516393.1 | scaffold1092 | 8785                    | AA                              | TT                 | TT               | INTERGENIC      |               |                    |                    |
| SNP_89803_A_9264   | NW_004516393.1 | scaffold1092 | 9264                    | CC                              | GG                 | GG               | INTERGENIC      |               |                    |                    |
| SNP_89804_A_9582   | NW_004516393.1 | scaffold1092 | 9582                    | AA                              | GG                 | GG               | INTERGENIC      |               |                    |                    |
| SNP_89805_A_11202  | NW_004516393.1 | scaffold1092 | 11202                   | AA                              | CC                 | CC               | INTERGENIC      |               |                    |                    |
| SNP_89806_A_13428  | NW_004516393.1 | scaffold1092 | 13428                   | AA                              | TT                 | TT               | INTERGENIC      |               |                    |                    |
| SNP_89807_A_13429  | NW_004516393.1 | scaffold1092 | 13429                   | AA                              | CC                 | CC               | INTERGENIC      |               |                    |                    |

| SNPs IDs          | Chromosome IDs | Chromosomes  | Physical positions (bp) | CDC Frontier (Reference genome) | (Pusa 1103 & HPNB) | (ILWC 46 & LPNB) | Sequence genome | Components of | Gene accession IDs | Putative functions |
|-------------------|----------------|--------------|-------------------------|---------------------------------|--------------------|------------------|-----------------|---------------|--------------------|--------------------|
| SNP_89809_A_13605 | NW_004516393.1 | scaffold1092 | 13605                   | AA                              | TT                 | TT               | INTERGENIC      |               |                    |                    |
| SNP_89810_A_13797 | NW_004516393.1 | scaffold1092 | 13797                   | CC                              | TT                 | TT               | INTERGENIC      |               |                    |                    |
| SNP_89811_A_14729 | NW_004516393.1 | scaffold1092 | 14729                   | TT                              | CC                 | CC               | INTERGENIC      |               |                    |                    |
| SNP_89812_A_17467 | NW_004516393.1 | scaffold1092 | 17467                   | AA                              | CC                 | CC               | INTERGENIC      |               |                    |                    |
| SNP_89813_A_17788 | NW_004516393.1 | scaffold1092 | 17788                   | CC                              | TT                 | TT               | INTERGENIC      |               |                    |                    |
| SNP_89814_A_17789 | NW_004516393.1 | scaffold1092 | 17789                   | CC                              | AA                 | AA               | INTERGENIC      |               |                    |                    |
| SNP_89815_A_17905 | NW_004516393.1 | scaffold1092 | 17905                   | AA                              | CC                 | CC               | INTERGENIC      |               |                    |                    |
| SNP_89816_A_17909 | NW_004516393.1 | scaffold1092 | 17909                   | CC                              | AA                 | AA               | INTERGENIC      |               |                    |                    |
| SNP_89817_A_17926 | NW_004516393.1 | scaffold1092 | 17926                   | GG                              | AA                 | AA               | INTERGENIC      |               |                    |                    |
| SNP_89818_A_17984 | NW_004516393.1 | scaffold1092 | 17984                   | TT                              | CC                 | CC               | INTERGENIC      |               |                    |                    |
| SNP_89820_A_18184 | NW_004516393.1 | scaffold1092 | 18184                   | GG                              | TT                 | TT               | INTERGENIC      |               |                    |                    |
| SNP_89821_A_18875 | NW_004516393.1 | scaffold1092 | 18875                   | AA                              | GG                 | GG               | INTERGENIC      |               |                    |                    |
| SNP_89822_A_18946 | NW_004516393.1 | scaffold1092 | 18946                   | AA                              | GG                 | GG               | INTERGENIC      |               |                    |                    |
| SNP_89823_A_19137 | NW_004516393.1 | scaffold1092 | 19137                   | CC                              | TT                 | TT               | INTERGENIC      |               |                    |                    |
| SNP_89824_A_19275 | NW_004516393.1 | scaffold1092 | 19275                   | TT                              | GG                 | GG               | INTERGENIC      |               |                    |                    |
| SNP_89825_A_19303 | NW_004516393.1 | scaffold1092 | 19303                   | CC                              | AA                 | AA               | INTERGENIC      |               |                    |                    |
| SNP_89826_A_19307 | NW_004516393.1 | scaffold1092 | 19307                   | CC                              | AA                 | AA               | INTERGENIC      |               |                    |                    |
| SNP_89827_A_19339 | NW_004516393.1 | scaffold1092 | 19339                   | AA                              | TT                 | TT               | INTERGENIC      |               |                    |                    |
| SNP_89828_A_19432 | NW_004516393.1 | scaffold1092 | 19432                   | TT                              | CC                 | CC               | INTERGENIC      |               |                    |                    |
| SNP_89829_A_19440 | NW_004516393.1 | scaffold1092 | 19440                   | AA                              | TT                 | TT               | INTERGENIC      |               |                    |                    |
| SNP_89830_A_19467 | NW_004516393.1 | scaffold1092 | 19467                   | GG                              | TT                 | TT               | INTERGENIC      |               |                    |                    |
| SNP_89831_A_19513 | NW_004516393.1 | scaffold1092 | 19513                   | TT                              | CC                 | CC               | INTERGENIC      |               |                    |                    |

| SNPs IDs          | Chromosome IDs | Chromosomes  | Physical positions (bp) | CDC Frontier (Reference genome) | (Pusa 1103 & HPNB) | (ILWC 46 & LPNB) | Sequence genome | Components of | Gene accession IDs | Putative functions |
|-------------------|----------------|--------------|-------------------------|---------------------------------|--------------------|------------------|-----------------|---------------|--------------------|--------------------|
| SNP_89832_A_33854 | NW_004516393.1 | scaffold1092 | 33854                   | AA                              | GG                 | GG               | INTERGENIC      |               |                    |                    |
| SNP_89833_A_37104 | NW_004516393.1 | scaffold1092 | 37104                   | TT                              | CC                 | CC               | INTERGENIC      |               |                    |                    |
| SNP_89834_A_37422 | NW_004516393.1 | scaffold1092 | 37422                   | TT                              | CC                 | CC               | INTERGENIC      |               |                    |                    |
| SNP_89835_A_38007 | NW_004516393.1 | scaffold1092 | 38007                   | AA                              | CC                 | CC               | INTERGENIC      |               |                    |                    |
| SNP_89836_A_39109 | NW_004516393.1 | scaffold1092 | 39109                   | AA                              | GG                 | GG               | INTERGENIC      |               |                    |                    |
| SNP_89837_A_45963 | NW_004516393.1 | scaffold1092 | 45963                   | CC                              | TT                 | TT               | INTERGENIC      |               |                    |                    |
| SNP_89838_A_46083 | NW_004516393.1 | scaffold1092 | 46083                   | GG                              | TT                 | TT               | INTERGENIC      |               |                    |                    |
| SNP_89839_A_46100 | NW_004516393.1 | scaffold1092 | 46100                   | GG                              | AA                 | AA               | INTERGENIC      |               |                    |                    |
| SNP_89840_A_46868 | NW_004516393.1 | scaffold1092 | 46868                   | TT                              | GG                 | GG               | INTERGENIC      |               |                    |                    |
| SNP_89841_A_47075 | NW_004516393.1 | scaffold1092 | 47075                   | TT                              | CC                 | CC               | INTERGENIC      |               |                    |                    |
| SNP_89842_A_49342 | NW_004516393.1 | scaffold1092 | 49342                   | AA                              | GG                 | GG               | INTERGENIC      |               |                    |                    |
| SNP_89843_A_57447 | NW_004516393.1 | scaffold1092 | 57447                   | GG                              | CC                 | CC               | INTERGENIC      |               |                    |                    |
| SNP_89844_A_57488 | NW_004516393.1 | scaffold1092 | 57488                   | GG                              | TT                 | TT               | INTERGENIC      |               |                    |                    |
| SNP_89845_A_57514 | NW_004516393.1 | scaffold1092 | 57514                   | CC                              | TT                 | TT               | INTERGENIC      |               |                    |                    |
| SNP_89846_A_58203 | NW_004516393.1 | scaffold1092 | 58203                   | TT                              | GG                 | GG               | INTERGENIC      |               |                    |                    |
| SNP_89847_A_58398 | NW_004516393.1 | scaffold1092 | 58398                   | AA                              | TT                 | TT               | INTERGENIC      |               |                    |                    |
| SNP_89848_A_59477 | NW_004516393.1 | scaffold1092 | 59477                   | AA                              | GG                 | GG               | INTERGENIC      |               |                    |                    |
| SNP_89849_A_59774 | NW_004516393.1 | scaffold1092 | 59774                   | CC                              | GG                 | GG               | INTERGENIC      |               |                    |                    |
| SNP_89850_A_60966 | NW_004516393.1 | scaffold1092 | 60966                   | TT                              | GG                 | GG               | INTERGENIC      |               |                    |                    |
| SNP_89851_A_63982 | NW_004516393.1 | scaffold1092 | 63982                   | TT                              | GG                 | GG               | INTERGENIC      |               |                    |                    |
| SNP_89852_A_64390 | NW_004516393.1 | scaffold1092 | 64390                   | AA                              | GG                 | GG               | INTERGENIC      |               |                    |                    |
| SNP_89854_A_65434 | NW_004516393.1 | scaffold1092 | 65434                   | TT                              | AA                 | AA               | INTERGENIC      |               |                    |                    |

| SNPs IDs           | Chromosome IDs | Chromosomes  | Physical positions (bp) | CDC Frontier (Reference genome) | (Pusa 1103 & HPNB) | (ILWC 46 & LPNB) | Sequence genome | Components of | Gene accession IDs | Putative functions |
|--------------------|----------------|--------------|-------------------------|---------------------------------|--------------------|------------------|-----------------|---------------|--------------------|--------------------|
| SNP_89855_A_65502  | NW_004516393.1 | scaffold1092 | 65502                   | CC                              | GG                 | GG               | INTERGENIC      |               |                    |                    |
| SNP_89857_A_65965  | NW_004516393.1 | scaffold1092 | 65965                   | AA                              | GG                 | GG               | INTERGENIC      |               |                    |                    |
| SNP_89858_A_68199  | NW_004516393.1 | scaffold1092 | 68199                   | AA                              | GG                 | GG               | INTERGENIC      |               |                    |                    |
| SNP_89859_A_75400  | NW_004516393.1 | scaffold1092 | 75400                   | TT                              | AA                 | AA               | INTERGENIC      |               |                    |                    |
| SNP_89860_A_75920  | NW_004516393.1 | scaffold1092 | 75920                   | TT                              | CC                 | CC               | INTERGENIC      |               |                    |                    |
| SNP_89861_A_82408  | NW_004516393.1 | scaffold1092 | 82408                   | CC                              | AA                 | AA               | INTERGENIC      |               |                    |                    |
| SNP_89862_A_82800  | NW_004516393.1 | scaffold1092 | 82800                   | TT                              | AA                 | AA               | INTERGENIC      |               |                    |                    |
| SNP_89863_A_83772  | NW_004516393.1 | scaffold1092 | 83772                   | CC                              | GG                 | GG               | INTERGENIC      |               |                    |                    |
| SNP_89864_A_85605  | NW_004516393.1 | scaffold1092 | 85605                   | CC                              | TT                 | TT               | INTERGENIC      |               |                    |                    |
| SNP_89865_A_86754  | NW_004516393.1 | scaffold1092 | 86754                   | CC                              | TT                 | TT               | INTERGENIC      |               |                    |                    |
| SNP_89866_A_86779  | NW_004516393.1 | scaffold1092 | 86779                   | AA                              | GG                 | GG               | INTERGENIC      |               |                    |                    |
| SNP_89867_A_93837  | NW_004516393.1 | scaffold1092 | 93837                   | AA                              | GG                 | GG               | INTERGENIC      |               |                    |                    |
| SNP_89868_A_93987  | NW_004516393.1 | scaffold1092 | 93987                   | TT                              | GG                 | GG               | INTERGENIC      |               |                    |                    |
| SNP_89869_A_94523  | NW_004516393.1 | scaffold1092 | 94523                   | AA                              | TT                 | TT               | INTERGENIC      |               |                    |                    |
| SNP_89870_A_94742  | NW_004516393.1 | scaffold1092 | 94742                   | TT                              | AA                 | AA               | INTERGENIC      |               |                    |                    |
| SNP_89871_A_94859  | NW_004516393.1 | scaffold1092 | 94859                   | TT                              | GG                 | GG               | INTERGENIC      |               |                    |                    |
| SNP_89872_A_101503 | NW_004516393.1 | scaffold1092 | 101503                  | AA                              | TT                 | TT               | INTERGENIC      |               |                    |                    |
| SNP_89873_A_101994 | NW_004516393.1 | scaffold1092 | 101994                  | GG                              | AA                 | AA               | INTERGENIC      |               |                    |                    |
| SNP_89874_A_102020 | NW_004516393.1 | scaffold1092 | 102020                  | TT                              | AA                 | AA               | INTERGENIC      |               |                    |                    |
| SNP_89875_A_102320 | NW_004516393.1 | scaffold1092 | 102320                  | AA                              | TT                 | TT               | INTERGENIC      |               |                    |                    |
| SNP_89876_A_103118 | NW_004516393.1 | scaffold1092 | 103118                  | TT                              | AA                 | AA               | INTERGENIC      |               |                    |                    |
| SNP_89877_A_103452 | NW_004516393.1 | scaffold1092 | 103452                  | GG                              | CC                 | CC               | INTERGENIC      |               |                    |                    |



| SNPs IDs           | Chromosome IDs | Chromosomes  | Physical positions (bp) | CDC Frontier (Reference genome) | (Pusa 1103 & HPNB) | (ILWC 46 & LPNB) | Sequence genome | Components of | Gene accession IDs | Putative functions |
|--------------------|----------------|--------------|-------------------------|---------------------------------|--------------------|------------------|-----------------|---------------|--------------------|--------------------|
| SNP_89878_A_103453 | NW_004516393.1 | scaffold1092 | 103453                  | TT                              | AA                 | AA               | INTERGENIC      |               |                    |                    |
| SNP_89879_A_103662 | NW_004516393.1 | scaffold1092 | 103662                  | CC                              | GG                 | GG               | INTERGENIC      |               |                    |                    |
| SNP_89880_A_103728 | NW_004516393.1 | scaffold1092 | 103728                  | AA                              | TT                 | TT               | INTERGENIC      |               |                    |                    |
| SNP_89881_A_103820 | NW_004516393.1 | scaffold1092 | 103820                  | CC                              | TT                 | TT               | INTERGENIC      |               |                    |                    |
| SNP_89882_A_105067 | NW_004516393.1 | scaffold1092 | 105067                  | GG                              | AA                 | AA               | INTERGENIC      |               |                    |                    |
| SNP_89883_A_105122 | NW_004516393.1 | scaffold1092 | 105122                  | CC                              | AA                 | AA               | INTERGENIC      |               |                    |                    |
| SNP_89884_A_105563 | NW_004516393.1 | scaffold1092 | 105563                  | CC                              | GG                 | GG               | INTERGENIC      |               |                    |                    |
| SNP_89885_A_105600 | NW_004516393.1 | scaffold1092 | 105600                  | GG                              | TT                 | TT               | INTERGENIC      |               |                    |                    |
| SNP_89886_A_105661 | NW_004516393.1 | scaffold1092 | 105661                  | TT                              | CC                 | CC               | INTERGENIC      |               |                    |                    |
| SNP_89887_A_105776 | NW_004516393.1 | scaffold1092 | 105776                  | AA                              | CC                 | CC               | INTERGENIC      |               |                    |                    |
| SNP_89889_A_111019 | NW_004516393.1 | scaffold1092 | 111019                  | TT                              | CC                 | CC               | INTERGENIC      |               |                    |                    |
| SNP_89890_A_111916 | NW_004516393.1 | scaffold1092 | 111916                  | GG                              | CC                 | CC               | INTERGENIC      |               |                    |                    |
| SNP_89891_A_112051 | NW_004516393.1 | scaffold1092 | 112051                  | AA                              | CC                 | CC               | INTERGENIC      |               |                    |                    |
| SNP_89892_A_112103 | NW_004516393.1 | scaffold1092 | 112103                  | AA                              | TT                 | TT               | INTERGENIC      |               |                    |                    |
| SNP_89893_A_112150 | NW_004516393.1 | scaffold1092 | 112150                  | GG                              | CC                 | CC               | INTERGENIC      |               |                    |                    |
| SNP_89894_A_112211 | NW_004516393.1 | scaffold1092 | 112211                  | CC                              | TT                 | TT               | INTERGENIC      |               |                    |                    |
| SNP_89895_A_112222 | NW_004516393.1 | scaffold1092 | 112222                  | CC                              | GG                 | GG               | INTERGENIC      |               |                    |                    |
| SNP_89896_A_114047 | NW_004516393.1 | scaffold1092 | 114047                  | TT                              | CC                 | CC               | INTERGENIC      |               |                    |                    |
| SNP_89897_A_114050 | NW_004516393.1 | scaffold1092 | 114050                  | CC                              | AA                 | AA               | INTERGENIC      |               |                    |                    |
| SNP_89899_A_114182 | NW_004516393.1 | scaffold1092 | 114182                  | GG                              | CC                 | CC               | INTERGENIC      |               |                    |                    |
| SNP_89900_A_114349 | NW_004516393.1 | scaffold1092 | 114349                  | CC                              | AA                 | AA               | INTERGENIC      |               |                    |                    |
| SNP_89901_A_114479 | NW_004516393.1 | scaffold1092 | 114479                  | AA                              | GG                 | GG               | INTERGENIC      |               |                    |                    |

| SNPs IDs           | Chromosome IDs | Chromosomes  | Physical positions (bp) | CDC Frontier (Reference genome) | (Pusa 1103 & HPNB) | (ILWC 46 & LPNB) | Sequence genome | Components of | Gene accession IDs | Putative functions |
|--------------------|----------------|--------------|-------------------------|---------------------------------|--------------------|------------------|-----------------|---------------|--------------------|--------------------|
| SNP_89903_A_114582 | NW_004516393.1 | scaffold1092 | 114582                  | TT                              | CC                 | CC               | INTERGENIC      |               |                    |                    |
| SNP_89904_A_114652 | NW_004516393.1 | scaffold1092 | 114652                  | GG                              | CC                 | CC               | INTERGENIC      |               |                    |                    |
| SNP_89905_A_115197 | NW_004516393.1 | scaffold1092 | 115197                  | TT                              | GG                 | GG               | INTERGENIC      |               |                    |                    |
| SNP_89906_A_115215 | NW_004516393.1 | scaffold1092 | 115215                  | TT                              | AA                 | AA               | INTERGENIC      |               |                    |                    |
| SNP_89907_A_116820 | NW_004516393.1 | scaffold1092 | 116820                  | TT                              | AA                 | AA               | INTERGENIC      |               |                    |                    |
| SNP_89908_A_116829 | NW_004516393.1 | scaffold1092 | 116829                  | TT                              | GG                 | GG               | INTERGENIC      |               |                    |                    |
| SNP_89909_A_116851 | NW_004516393.1 | scaffold1092 | 116851                  | TT                              | AA                 | AA               | INTERGENIC      |               |                    |                    |
| SNP_89910_A_116879 | NW_004516393.1 | scaffold1092 | 116879                  | AA                              | TT                 | TT               | INTERGENIC      |               |                    |                    |
| SNP_89911_A_116995 | NW_004516393.1 | scaffold1092 | 116995                  | AA                              | GG                 | GG               | INTERGENIC      |               |                    |                    |
| SNP_89912_A_117145 | NW_004516393.1 | scaffold1092 | 117145                  | AA                              | TT                 | TT               | INTERGENIC      |               |                    |                    |
| SNP_89913_A_117259 | NW_004516393.1 | scaffold1092 | 117259                  | GG                              | AA                 | AA               | INTERGENIC      |               |                    |                    |
| SNP_89914_A_117391 | NW_004516393.1 | scaffold1092 | 117391                  | AA                              | TT                 | TT               | INTERGENIC      |               |                    |                    |
| SNP_89915_A_117408 | NW_004516393.1 | scaffold1092 | 117408                  | TT                              | AA                 | AA               | INTERGENIC      |               |                    |                    |
| SNP_89916_A_117589 | NW_004516393.1 | scaffold1092 | 117589                  | TT                              | AA                 | AA               | INTERGENIC      |               |                    |                    |
| SNP_89917_A_117793 | NW_004516393.1 | scaffold1092 | 117793                  | TT                              | GG                 | GG               | INTERGENIC      |               |                    |                    |
| SNP_89918_A_117841 | NW_004516393.1 | scaffold1092 | 117841                  | GG                              | AA                 | AA               | INTERGENIC      |               |                    |                    |
| SNP_89919_A_117986 | NW_004516393.1 | scaffold1092 | 117986                  | TT                              | CC                 | CC               | INTERGENIC      |               |                    |                    |
| SNP_89920_A_119137 | NW_004516393.1 | scaffold1092 | 119137                  | AA                              | TT                 | TT               | INTERGENIC      |               |                    |                    |
| SNP_89921_A_119240 | NW_004516393.1 | scaffold1092 | 119240                  | AA                              | CC                 | CC               | INTERGENIC      |               |                    |                    |
| SNP_89922_A_119243 | NW_004516393.1 | scaffold1092 | 119243                  | TT                              | AA                 | AA               | INTERGENIC      |               |                    |                    |
| SNP_89923_A_119387 | NW_004516393.1 | scaffold1092 | 119387                  | CC                              | TT                 | TT               | INTERGENIC      |               |                    |                    |
| SNP_89924_A_119450 | NW_004516393.1 | scaffold1092 | 119450                  | TT                              | AA                 | AA               | INTERGENIC      |               |                    |                    |

| SNPs IDs           | Chromosome IDs | Chromosomes  | Physical positions (bp) | CDC Frontier (Reference genome) | (Pusa 1103 & HPNB) | (ILWC 46 & LPNB) | Sequence genome | Components of | Gene accession IDs | Putative functions |
|--------------------|----------------|--------------|-------------------------|---------------------------------|--------------------|------------------|-----------------|---------------|--------------------|--------------------|
| SNP_89928_A_122096 | NW_004516393.1 | scaffold1092 | 122096                  | TT                              | AA                 | AA               | INTERGENIC      |               |                    |                    |
| SNP_89929_A_122112 | NW_004516393.1 | scaffold1092 | 122112                  | TT                              | AA                 | AA               | INTERGENIC      |               |                    |                    |
| SNP_89931_A_122298 | NW_004516393.1 | scaffold1092 | 122298                  | TT                              | GG                 | GG               | INTERGENIC      |               |                    |                    |
| SNP_89932_A_122415 | NW_004516393.1 | scaffold1092 | 122415                  | CC                              | GG                 | GG               | INTERGENIC      |               |                    |                    |
| SNP_89933_A_122423 | NW_004516393.1 | scaffold1092 | 122423                  | TT                              | CC                 | CC               | INTERGENIC      |               |                    |                    |
| SNP_89934_A_122474 | NW_004516393.1 | scaffold1092 | 122474                  | CC                              | AA                 | AA               | INTERGENIC      |               |                    |                    |
| SNP_89935_A_125742 | NW_004516393.1 | scaffold1092 | 125742                  | AA                              | TT                 | TT               | INTERGENIC      |               |                    |                    |
| SNP_89936_A_127843 | NW_004516393.1 | scaffold1092 | 127843                  | GG                              | TT                 | TT               | INTERGENIC      |               |                    |                    |
| SNP_89937_A_127930 | NW_004516393.1 | scaffold1092 | 127930                  | CC                              | TT                 | TT               | INTERGENIC      |               |                    |                    |
| SNP_89938_A_127977 | NW_004516393.1 | scaffold1092 | 127977                  | AA                              | TT                 | TT               | INTERGENIC      |               |                    |                    |
| SNP_89939_A_128061 | NW_004516393.1 | scaffold1092 | 128061                  | TT                              | CC                 | CC               | INTERGENIC      |               |                    |                    |
| SNP_89940_A_139135 | NW_004516393.1 | scaffold1092 | 139135                  | GG                              | AA                 | AA               | INTERGENIC      |               |                    |                    |
| SNP_89941_A_139166 | NW_004516393.1 | scaffold1092 | 139166                  | TT                              | AA                 | AA               | INTERGENIC      |               |                    |                    |
| SNP_89942_A_139264 | NW_004516393.1 | scaffold1092 | 139264                  | CC                              | TT                 | TT               | INTERGENIC      |               |                    |                    |
| SNP_89943_A_139279 | NW_004516393.1 | scaffold1092 | 139279                  | TT                              | AA                 | AA               | INTERGENIC      |               |                    |                    |
| SNP_89944_A_139339 | NW_004516393.1 | scaffold1092 | 139339                  | CC                              | TT                 | TT               | INTERGENIC      |               |                    |                    |
| SNP_89945_A_139478 | NW_004516393.1 | scaffold1092 | 139478                  | TT                              | CC                 | CC               | INTERGENIC      |               |                    |                    |
| SNP_89946_A_139571 | NW_004516393.1 | scaffold1092 | 139571                  | TT                              | GG                 | GG               | INTERGENIC      |               |                    |                    |
| SNP_89947_A_139581 | NW_004516393.1 | scaffold1092 | 139581                  | TT                              | GG                 | GG               | INTERGENIC      |               |                    |                    |
| SNP_89948_A_139743 | NW_004516393.1 | scaffold1092 | 139743                  | TT                              | CC                 | CC               | INTERGENIC      |               |                    |                    |
| SNP_89949_A_139748 | NW_004516393.1 | scaffold1092 | 139748                  | AA                              | GG                 | GG               | INTERGENIC      |               |                    |                    |
| SNP_89950_A_139869 | NW_004516393.1 | scaffold1092 | 139869                  | AA                              | CC                 | CC               | INTERGENIC      |               |                    |                    |

| SNPs IDs           | Chromosome IDs | Chromosomes  | Physical positions (bp) | CDC Frontier (Reference genome) | (Pusa 1103 & HPNB) | (ILWC 46 & LPNB) | Sequence genome | Components of | Gene accession IDs | Putative functions |
|--------------------|----------------|--------------|-------------------------|---------------------------------|--------------------|------------------|-----------------|---------------|--------------------|--------------------|
| SNP_89951_A_139870 | NW_004516393.1 | scaffold1092 | 139870                  | TT                              | GG                 | GG               | INTERGENIC      |               |                    |                    |
| SNP_89952_A_140420 | NW_004516393.1 | scaffold1092 | 140420                  | AA                              | GG                 | GG               | INTERGENIC      |               |                    |                    |
| SNP_89953_A_140827 | NW_004516393.1 | scaffold1092 | 140827                  | CC                              | AA                 | AA               | INTERGENIC      |               |                    |                    |
| SNP_89954_A_140875 | NW_004516393.1 | scaffold1092 | 140875                  | GG                              | AA                 | AA               | INTERGENIC      |               |                    |                    |
| SNP_89955_A_141015 | NW_004516393.1 | scaffold1092 | 141015                  | TT                              | AA                 | AA               | INTERGENIC      |               |                    |                    |
| SNP_89956_A_141044 | NW_004516393.1 | scaffold1092 | 141044                  | AA                              | GG                 | GG               | INTERGENIC      |               |                    |                    |
| SNP_89957_A_141168 | NW_004516393.1 | scaffold1092 | 141168                  | AA                              | CC                 | CC               | INTERGENIC      |               |                    |                    |
| SNP_89958_A_141332 | NW_004516393.1 | scaffold1092 | 141332                  | AA                              | TT                 | TT               | INTERGENIC      |               |                    |                    |
| SNP_89959_A_141405 | NW_004516393.1 | scaffold1092 | 141405                  | GG                              | AA                 | AA               | INTERGENIC      |               |                    |                    |
| SNP_89960_A_141674 | NW_004516393.1 | scaffold1092 | 141674                  | AA                              | TT                 | TT               | INTERGENIC      |               |                    |                    |
| SNP_89961_A_141849 | NW_004516393.1 | scaffold1092 | 141849                  | GG                              | AA                 | AA               | INTERGENIC      |               |                    |                    |
| SNP_89962_A_142155 | NW_004516393.1 | scaffold1092 | 142155                  | GG                              | TT                 | TT               | INTERGENIC      |               |                    |                    |
| SNP_89963_A_142465 | NW_004516393.1 | scaffold1092 | 142465                  | TT                              | CC                 | CC               | INTERGENIC      |               |                    |                    |
| SNP_89964_A_142620 | NW_004516393.1 | scaffold1092 | 142620                  | CC                              | TT                 | TT               | INTERGENIC      |               |                    |                    |
| SNP_89965_A_142757 | NW_004516393.1 | scaffold1092 | 142757                  | CC                              | TT                 | TT               | INTERGENIC      |               |                    |                    |
| SNP_89966_A_142772 | NW_004516393.1 | scaffold1092 | 142772                  | GG                              | CC                 | CC               | INTERGENIC      |               |                    |                    |
| SNP_89967_A_142965 | NW_004516393.1 | scaffold1092 | 142965                  | TT                              | AA                 | AA               | INTERGENIC      |               |                    |                    |
| SNP_89968_A_143004 | NW_004516393.1 | scaffold1092 | 143004                  | TT                              | CC                 | CC               | INTERGENIC      |               |                    |                    |
| SNP_89969_A_143067 | NW_004516393.1 | scaffold1092 | 143067                  | CC                              | TT                 | TT               | INTERGENIC      |               |                    |                    |
| SNP_89970_A_143105 | NW_004516393.1 | scaffold1092 | 143105                  | TT                              | CC                 | CC               | INTERGENIC      |               |                    |                    |
| SNP_89971_A_143221 | NW_004516393.1 | scaffold1092 | 143221                  | GG                              | AA                 | AA               | INTERGENIC      |               |                    |                    |
| SNP_89972_A_144122 | NW_004516393.1 | scaffold1092 | 144122                  | GG                              | CC                 | CC               | INTERGENIC      |               |                    |                    |

| SNPs IDs           | Chromosome IDs | Chromosomes  | Physical positions (bp) | CDC Frontier (Reference genome) | (Pusa 1103 & HPNB) | (ILWC 46 & LPNB) | Sequence genome | Components of | Gene accession IDs | Putative functions |
|--------------------|----------------|--------------|-------------------------|---------------------------------|--------------------|------------------|-----------------|---------------|--------------------|--------------------|
| SNP_89974_A_145399 | NW_004516393.1 | scaffold1092 | 145399                  | GG                              | TT                 | TT               | INTERGENIC      |               |                    |                    |
| SNP_89975_A_146395 | NW_004516393.1 | scaffold1092 | 146395                  | TT                              | CC                 | CC               | INTERGENIC      |               |                    |                    |
| SNP_89976_A_146429 | NW_004516393.1 | scaffold1092 | 146429                  | AA                              | GG                 | GG               | INTERGENIC      |               |                    |                    |
| SNP_89977_A_146717 | NW_004516393.1 | scaffold1092 | 146717                  | CC                              | TT                 | TT               | INTERGENIC      |               |                    |                    |
| SNP_89979_A_146836 | NW_004516393.1 | scaffold1092 | 146836                  | CC                              | TT                 | TT               | INTERGENIC      |               |                    |                    |
| SNP_89980_A_146976 | NW_004516393.1 | scaffold1092 | 146976                  | CC                              | AA                 | AA               | INTERGENIC      |               |                    |                    |
| SNP_89981_A_147094 | NW_004516393.1 | scaffold1092 | 147094                  | TT                              | GG                 | GG               | INTERGENIC      |               |                    |                    |
| SNP_89982_A_147132 | NW_004516393.1 | scaffold1092 | 147132                  | TT                              | AA                 | AA               | INTERGENIC      |               |                    |                    |
| SNP_89983_A_147193 | NW_004516393.1 | scaffold1092 | 147193                  | AA                              | TT                 | TT               | INTERGENIC      |               |                    |                    |
| SNP_89984_A_147552 | NW_004516393.1 | scaffold1092 | 147552                  | GG                              | TT                 | TT               | INTERGENIC      |               |                    |                    |
| SNP_89985_A_147714 | NW_004516393.1 | scaffold1092 | 147714                  | TT                              | AA                 | AA               | INTERGENIC      |               |                    |                    |
| SNP_89986_A_147794 | NW_004516393.1 | scaffold1092 | 147794                  | AA                              | TT                 | TT               | INTERGENIC      |               |                    |                    |
| SNP_89987_A_147801 | NW_004516393.1 | scaffold1092 | 147801                  | GG                              | AA                 | AA               | INTERGENIC      |               |                    |                    |
| SNP_89988_A_147947 | NW_004516393.1 | scaffold1092 | 147947                  | AA                              | TT                 | TT               | INTERGENIC      |               |                    |                    |
| SNP_89989_A_147968 | NW_004516393.1 | scaffold1092 | 147968                  | CC                              | GG                 | GG               | INTERGENIC      |               |                    |                    |
| SNP_89990_A_148400 | NW_004516393.1 | scaffold1092 | 148400                  | AA                              | TT                 | TT               | INTERGENIC      |               |                    |                    |
| SNP_89991_A_150679 | NW_004516393.1 | scaffold1092 | 150679                  | TT                              | AA                 | AA               | INTERGENIC      |               |                    |                    |
| SNP_89992_A_152103 | NW_004516393.1 | scaffold1092 | 152103                  | GG                              | AA                 | AA               | INTERGENIC      |               |                    |                    |
| SNP_89993_A_152603 | NW_004516393.1 | scaffold1092 | 152603                  | TT                              | CC                 | CC               | INTERGENIC      |               |                    |                    |
| SNP_89994_A_152766 | NW_004516393.1 | scaffold1092 | 152766                  | TT                              | AA                 | AA               | INTERGENIC      |               |                    |                    |
| SNP_89995_A_152982 | NW_004516393.1 | scaffold1092 | 152982                  | AA                              | CC                 | CC               | INTERGENIC      |               |                    |                    |
| SNP_89996_A_153181 | NW_004516393.1 | scaffold1092 | 153181                  | CC                              | TT                 | TT               | INTERGENIC      |               |                    |                    |

| SNPs IDs           | Chromosome IDs | Chromosomes  | Physical positions (bp) | CDC Frontier (Reference genome) | (Pusa 1103 & HPNB) | (ILWC 46 & LPNB) | Sequence Components of genome | Gene accession IDs | Putative functions                                                        |
|--------------------|----------------|--------------|-------------------------|---------------------------------|--------------------|------------------|-------------------------------|--------------------|---------------------------------------------------------------------------|
| SNP_89997_A_153503 | NW_004516393.1 | scaffold1092 | 153503                  | CC                              | GG                 | GG               | INTERGENIC                    |                    |                                                                           |
| SNP_89998_A_157506 | NW_004516393.1 | scaffold1092 | 157506                  | GG                              | CC                 | CC               | INTERGENIC                    |                    |                                                                           |
| SNP_89999_A_6147   | NW_004516394.1 | scaffold1095 | 6147                    | GG                              | AA                 | AA               | INTERGENIC                    |                    |                                                                           |
| SNP_90000_A_16814  | NW_004516394.1 | scaffold1095 | 16814                   | TT                              | GG                 | GG               | URR                           | 101506611          | pentatricopeptide repeat-containing protein At1g62930, chloroplastic-like |
| SNP_90001_A_18067  | NW_004516394.1 | scaffold1095 | 18067                   | CC                              | TT                 | TT               | INTERGENIC                    |                    |                                                                           |
| SNP_90002_A_18114  | NW_004516394.1 | scaffold1095 | 18114                   | TT                              | CC                 | CC               | INTERGENIC                    |                    |                                                                           |
| SNP_90003_A_18115  | NW_004516394.1 | scaffold1095 | 18115                   | GG                              | AA                 | AA               | INTERGENIC                    |                    |                                                                           |
| SNP_90004_A_38328  | NW_004516394.1 | scaffold1095 | 38328                   | CC                              | TT                 | TT               | INTERGENIC                    |                    |                                                                           |
| SNP_90005_A_38410  | NW_004516394.1 | scaffold1095 | 38410                   | CC                              | TT                 | TT               | INTERGENIC                    |                    |                                                                           |
| SNP_90006_A_38769  | NW_004516394.1 | scaffold1095 | 38769                   | AA                              | TT                 | TT               | INTERGENIC                    |                    |                                                                           |
| SNP_90007_A_3375   | NW_004516396.1 | scaffold1101 | 3375                    | TT                              | CC                 | CC               | INTERGENIC                    |                    |                                                                           |
| SNP_90008_A_3466   | NW_004516396.1 | scaffold1101 | 3466                    | AA                              | GG                 | GG               | INTERGENIC                    |                    |                                                                           |
| SNP_90009_A_3467   | NW_004516396.1 | scaffold1101 | 3467                    | AA                              | GG                 | GG               | INTERGENIC                    |                    |                                                                           |
| SNP_90011_A_3845   | NW_004516396.1 | scaffold1101 | 3845                    | CC                              | TT                 | TT               | INTERGENIC                    |                    |                                                                           |
| SNP_90013_A_3967   | NW_004516396.1 | scaffold1101 | 3967                    | CC                              | GG                 | GG               | INTERGENIC                    |                    |                                                                           |
| SNP_90014_A_3977   | NW_004516396.1 | scaffold1101 | 3977                    | GG                              | TT                 | TT               | INTERGENIC                    |                    |                                                                           |
| SNP_90015_A_3991   | NW_004516396.1 | scaffold1101 | 3991                    | CC                              | AA                 | AA               | INTERGENIC                    |                    |                                                                           |
| SNP_90016_A_4006   | NW_004516396.1 | scaffold1101 | 4006                    | AA                              | GG                 | GG               | INTERGENIC                    |                    |                                                                           |
| SNP_90017_A_4015   | NW_004516396.1 | scaffold1101 | 4015                    | TT                              | CC                 | CC               | INTERGENIC                    |                    |                                                                           |
| SNP_90018_A_4661   | NW_004516396.1 | scaffold1101 | 4661                    | GG                              | AA                 | AA               | INTERGENIC                    |                    |                                                                           |
| SNP_90019_A_24309  | NW_004516396.1 | scaffold1101 | 24309                   | TT                              | CC                 | CC               | INTERGENIC                    |                    |                                                                           |
| SNP_90020_A_5808   | NW_004516397.1 | scaffold1102 | 5808                    | TT                              | CC                 | CC               | INTERGENIC                    |                    |                                                                           |

| SNPs IDs           | Chromosome IDs | Chromosomes  | Physical positions (bp) | CDC Frontier (Reference genome) | (Pusa 1103 & HPNB) | (ILWC 46 & LPNB) | Sequence Components of genome | Gene accession IDs | Putative functions            |
|--------------------|----------------|--------------|-------------------------|---------------------------------|--------------------|------------------|-------------------------------|--------------------|-------------------------------|
| SNP_90022_A_7660   | NW_004516397.1 | scaffold1102 | 7660                    | TT                              | CC                 | CC               | INTERGENIC                    |                    |                               |
| SNP_90023_A_7729   | NW_004516397.1 | scaffold1102 | 7729                    | TT                              | CC                 | CC               | INTERGENIC                    |                    |                               |
| SNP_90024_A_11312  | NW_004516397.1 | scaffold1102 | 11312                   | AA                              | CC                 | CC               | INTERGENIC                    |                    |                               |
| SNP_90025_A_1869   | NW_004516398.1 | scaffold1103 | 1869                    | AA                              | GG                 | GG               | INTERGENIC                    |                    |                               |
| SNP_90026_A_4011   | NW_004516398.1 | scaffold1103 | 4011                    | TT                              | CC                 | CC               | INTERGENIC                    |                    |                               |
| SNP_90027_A_26532  | NW_004516398.1 | scaffold1103 | 26532                   | GG                              | AA                 | AA               | INTERGENIC                    |                    |                               |
| SNP_90028_A_75883  | NW_004516401.1 | scaffold1107 | 75883                   | AA                              | GG                 | GG               | INTERGENIC                    |                    |                               |
| SNP_90029_A_93946  | NW_004516401.1 | scaffold1107 | 93946                   | GG                              | TT                 | TT               | INTRON                        | id209683           | Unknown function              |
| SNP_90030_A_94046  | NW_004516401.1 | scaffold1107 | 94046                   | GG                              | TT                 | TT               | INTRON                        | id209683           | Unknown function              |
| SNP_90031_A_94067  | NW_004516401.1 | scaffold1107 | 94067                   | CC                              | AA                 | AA               | INTRON                        | id209683           | Unknown function              |
| SNP_90032_A_94153  | NW_004516401.1 | scaffold1107 | 94153                   | CC                              | AA                 | AA               | INTRON                        | id209683           | Unknown function              |
| SNP_90033_A_94160  | NW_004516401.1 | scaffold1107 | 94160                   | GG                              | TT                 | TT               | INTRON                        | id209683           | Unknown function              |
| SNP_90034_A_94203  | NW_004516401.1 | scaffold1107 | 94203                   | CC                              | AA                 | AA               | INTRON                        | id209683           | Unknown function              |
| SNP_90035_A_94205  | NW_004516401.1 | scaffold1107 | 94205                   | AA                              | GG                 | GG               | INTRON                        | id209683           | Unknown function              |
| SNP_90036_A_94216  | NW_004516401.1 | scaffold1107 | 94216                   | AA                              | CC                 | CC               | INTRON                        | id209683           | Unknown function              |
| SNP_90037_A_94241  | NW_004516401.1 | scaffold1107 | 94241                   | AA                              | TT                 | TT               | INTRON                        | id209683           | Unknown function              |
| SNP_90038_A_100305 | NW_004516401.1 | scaffold1107 | 100305                  | AA                              | TT                 | TT               | INTERGENIC                    |                    |                               |
| SNP_90039_A_843    | NW_004516402.1 | scaffold1108 | 843                     | GG                              | TT                 | TT               | INTERGENIC                    |                    |                               |
| SNP_90040_A_13461  | NW_004516403.1 | scaffold1109 | 13461                   | TT                              | AA                 | AA               | DRR                           | 101508850          | pectinesterase inhibitor-like |
| SNP_90041_A_13470  | NW_004516403.1 | scaffold1109 | 13470                   | AA                              | GG                 | GG               | DRR                           | 101508850          | pectinesterase inhibitor-like |
| SNP_90042_A_13479  | NW_004516403.1 | scaffold1109 | 13479                   | CC                              | TT                 | TT               | DRR                           | 101508850          | pectinesterase inhibitor-like |
| SNP_90043_A_13494  | NW_004516403.1 | scaffold1109 | 13494                   | GG                              | AA                 | AA               | NON_SYNONYMOUS_CODING         | 101508850          | pectinesterase inhibitor-like |

| SNPs IDs          | Chromosome IDs | Chromosomes  | Physical positions (bp) | CDC Frontier (Reference genome) | (Pusa 1103 & HPNB) | (ILWC 46 & LPNB) | Sequence Components of genome | Gene accession IDs | Putative functions                           |
|-------------------|----------------|--------------|-------------------------|---------------------------------|--------------------|------------------|-------------------------------|--------------------|----------------------------------------------|
| SNP_90044_A_13545 | NW_004516403.1 | scaffold1109 | 13545                   | CC                              | GG                 | GG               | NON_SYNONYMOUS_CODING         | 101508850          | pectinesterase inhibitor-like                |
| SNP_90045_A_13549 | NW_004516403.1 | scaffold1109 | 13549                   | AA                              | GG                 | GG               | SYNONYMOUS_CODING             | 101508850          | pectinesterase inhibitor-like                |
| SNP_90046_A_13552 | NW_004516403.1 | scaffold1109 | 13552                   | CC                              | TT                 | TT               | SYNONYMOUS_CODING             | 101508850          | pectinesterase inhibitor-like                |
| SNP_90047_A_13573 | NW_004516403.1 | scaffold1109 | 13573                   | AA                              | GG                 | GG               | SYNONYMOUS_CODING             | 101508850          | pectinesterase inhibitor-like                |
| SNP_90048_A_13584 | NW_004516403.1 | scaffold1109 | 13584                   | TT                              | GG                 | GG               | NON_SYNONYMOUS_CODING         | 101508850          | pectinesterase inhibitor-like                |
| SNP_90049_A_13593 | NW_004516403.1 | scaffold1109 | 13593                   | AA                              | GG                 | GG               | NON_SYNONYMOUS_CODING         | 101508850          | pectinesterase inhibitor-like                |
| SNP_90050_A_13615 | NW_004516403.1 | scaffold1109 | 13615                   | TT                              | AA                 | AA               | NON_SYNONYMOUS_CODING         | 101508850          | pectinesterase inhibitor-like                |
| SNP_90051_A_13627 | NW_004516403.1 | scaffold1109 | 13627                   | AA                              | CC                 | CC               | NON_SYNONYMOUS_CODING         | 101508850          | pectinesterase inhibitor-like                |
| SNP_90052_A_13635 | NW_004516403.1 | scaffold1109 | 13635                   | CC                              | AA                 | AA               | NON_SYNONYMOUS_CODING         | 101508850          | pectinesterase inhibitor-like                |
| SNP_90053_A_13658 | NW_004516403.1 | scaffold1109 | 13658                   | TT                              | CC                 | CC               | NON_SYNONYMOUS_CODING         | 101508850          | pectinesterase inhibitor-like                |
| SNP_90054_A_13692 | NW_004516403.1 | scaffold1109 | 13692                   | TT                              | CC                 | CC               | NON_SYNONYMOUS_CODING         | 101508850          | pectinesterase inhibitor-like                |
| SNP_90055_A_13714 | NW_004516403.1 | scaffold1109 | 13714                   | AA                              | TT                 | TT               | NON_SYNONYMOUS_CODING         | 101508850          | pectinesterase inhibitor-like                |
| SNP_90056_A_13733 | NW_004516403.1 | scaffold1109 | 13733                   | AA                              | GG                 | GG               | NON_SYNONYMOUS_CODING         | 101508850          | pectinesterase inhibitor-like                |
| SNP_90057_A_13812 | NW_004516403.1 | scaffold1109 | 13812                   | TT                              | GG                 | GG               | NON_SYNONYMOUS_CODING         | 101508850          | pectinesterase inhibitor-like                |
| SNP_90058_A_13819 | NW_004516403.1 | scaffold1109 | 13819                   | TT                              | GG                 | GG               | NON_SYNONYMOUS_CODING         | 101508850          | pectinesterase inhibitor-like                |
| SNP_90059_A_13916 | NW_004516403.1 | scaffold1109 | 13916                   | TT                              | GG                 | GG               | NON_SYNONYMOUS_CODING         | 101508850          | pectinesterase inhibitor-like                |
| SNP_90061_A_14045 | NW_004516403.1 | scaffold1109 | 14045                   | CC                              | TT                 | TT               | URR                           | 101508850          | pectinesterase inhibitor-like                |
| SNP_90063_A_14091 | NW_004516403.1 | scaffold1109 | 14091                   | GG                              | TT                 | TT               | URR                           | 101508850          | pectinesterase inhibitor-like                |
| SNP_90064_A_14122 | NW_004516403.1 | scaffold1109 | 14122                   | CC                              | TT                 | TT               | URR                           | 101508850          | pectinesterase inhibitor-like                |
| SNP_90065_A_14184 | NW_004516403.1 | scaffold1109 | 14184                   | TT                              | CC                 | CC               | URR                           | 101508850          | pectinesterase inhibitor-like                |
| SNP_90066_A_14191 | NW_004516403.1 | scaffold1109 | 14191                   | GG                              | AA                 | AA               | URR                           | 101508850          | pectinesterase inhibitor-like                |
| SNP_90067_A_43827 | NW_004516403.1 | scaffold1109 | 43827                   | TT                              | AA                 | AA               | URR                           | 101509504          | pectinesterase/pectinesterase inhibitor-like |



| SNPs IDs           | Chromosome IDs | Chromosomes  | Physical positions (bp) | CDC Frontier (Reference genome) | (Pusa 1103 & HPNB) | (ILWC 46 & LPNB) | Sequence genome | Components of | Gene accession IDs | Putative functions |
|--------------------|----------------|--------------|-------------------------|---------------------------------|--------------------|------------------|-----------------|---------------|--------------------|--------------------|
| SNP_90068_A_65469  | NW_004516403.1 | scaffold1109 | 65469                   | TT                              | CC                 | CC               | INTERGENIC      |               |                    |                    |
| SNP_90070_A_97696  | NW_004516403.1 | scaffold1109 | 97696                   | TT                              | GG                 | GG               | INTERGENIC      |               |                    |                    |
| SNP_90071_A_97767  | NW_004516403.1 | scaffold1109 | 97767                   | GG                              | AA                 | AA               | INTERGENIC      |               |                    |                    |
| SNP_90072_A_98234  | NW_004516403.1 | scaffold1109 | 98234                   | TT                              | GG                 | GG               | INTERGENIC      |               |                    |                    |
| SNP_90073_A_98246  | NW_004516403.1 | scaffold1109 | 98246                   | GG                              | AA                 | AA               | INTERGENIC      |               |                    |                    |
| SNP_90074_A_109162 | NW_004516403.1 | scaffold1109 | 109162                  | CC                              | GG                 | GG               | INTERGENIC      |               |                    |                    |
| SNP_90076_A_114282 | NW_004516403.1 | scaffold1109 | 114282                  | GG                              | AA                 | AA               | INTERGENIC      |               |                    |                    |
| SNP_90078_A_149884 | NW_004516403.1 | scaffold1109 | 149884                  | AA                              | CC                 | CC               | INTERGENIC      |               |                    |                    |
| SNP_90079_A_149906 | NW_004516403.1 | scaffold1109 | 149906                  | GG                              | CC                 | CC               | INTERGENIC      |               |                    |                    |
| SNP_90080_A_149908 | NW_004516403.1 | scaffold1109 | 149908                  | TT                              | CC                 | CC               | INTERGENIC      |               |                    |                    |
| SNP_90081_A_149957 | NW_004516403.1 | scaffold1109 | 149957                  | GG                              | AA                 | AA               | INTERGENIC      |               |                    |                    |
| SNP_90082_A_150138 | NW_004516403.1 | scaffold1109 | 150138                  | AA                              | TT                 | TT               | INTERGENIC      |               |                    |                    |
| SNP_90083_A_150145 | NW_004516403.1 | scaffold1109 | 150145                  | GG                              | TT                 | TT               | INTERGENIC      |               |                    |                    |
| SNP_90084_A_4286   | NW_004516405.1 | scaffold1111 | 4286                    | AA                              | CC                 | CC               | INTERGENIC      |               |                    |                    |
| SNP_90085_A_4686   | NW_004516405.1 | scaffold1111 | 4686                    | TT                              | CC                 | CC               | INTERGENIC      |               |                    |                    |
| SNP_90086_A_4845   | NW_004516405.1 | scaffold1111 | 4845                    | TT                              | CC                 | CC               | INTERGENIC      |               |                    |                    |
| SNP_90087_A_6187   | NW_004516405.1 | scaffold1111 | 6187                    | CC                              | TT                 | TT               | INTERGENIC      |               |                    |                    |
| SNP_90088_A_7564   | NW_004516405.1 | scaffold1111 | 7564                    | GG                              | CC                 | CC               | INTERGENIC      |               |                    |                    |
| SNP_90089_A_11273  | NW_004516405.1 | scaffold1111 | 11273                   | GG                              | AA                 | AA               | INTERGENIC      |               |                    |                    |
| SNP_90090_A_22129  | NW_004516405.1 | scaffold1111 | 22129                   | TT                              | GG                 | GG               | INTERGENIC      |               |                    |                    |
| SNP_90091_A_26710  | NW_004516405.1 | scaffold1111 | 26710                   | AA                              | GG                 | GG               | INTERGENIC      |               |                    |                    |
| SNP_90092_A_26723  | NW_004516405.1 | scaffold1111 | 26723                   | GG                              | AA                 | AA               | INTERGENIC      |               |                    |                    |

| SNPs IDs           | Chromosome IDs | Chromosomes  | Physical positions (bp) | CDC Frontier (Reference genome) | (Pusa 1103 & HPNB) | (ILWC 46 & LPNB) | Sequence genome | Components of | Gene accession IDs | Putative functions |
|--------------------|----------------|--------------|-------------------------|---------------------------------|--------------------|------------------|-----------------|---------------|--------------------|--------------------|
| SNP_90093_A_26726  | NW_004516405.1 | scaffold1111 | 26726                   | AA                              | GG                 | GG               | INTERGENIC      |               |                    |                    |
| SNP_90094_A_26736  | NW_004516405.1 | scaffold1111 | 26736                   | GG                              | TT                 | TT               | INTERGENIC      |               |                    |                    |
| SNP_90095_A_26977  | NW_004516405.1 | scaffold1111 | 26977                   | AA                              | TT                 | TT               | INTERGENIC      |               |                    |                    |
| SNP_90096_A_27869  | NW_004516405.1 | scaffold1111 | 27869                   | GG                              | CC                 | CC               | INTERGENIC      |               |                    |                    |
| SNP_90097_A_27941  | NW_004516405.1 | scaffold1111 | 27941                   | GG                              | TT                 | TT               | INTERGENIC      |               |                    |                    |
| SNP_90098_A_27970  | NW_004516405.1 | scaffold1111 | 27970                   | GG                              | AA                 | AA               | INTERGENIC      |               |                    |                    |
| SNP_90099_A_28155  | NW_004516405.1 | scaffold1111 | 28155                   | TT                              | CC                 | CC               | INTERGENIC      |               |                    |                    |
| SNP_90100_A_28260  | NW_004516405.1 | scaffold1111 | 28260                   | TT                              | CC                 | CC               | INTERGENIC      |               |                    |                    |
| SNP_90101_A_11500  | NW_004516406.1 | scaffold1113 | 11500                   | TT                              | AA                 | AA               | INTERGENIC      |               |                    |                    |
| SNP_90102_A_11537  | NW_004516406.1 | scaffold1113 | 11537                   | CC                              | TT                 | TT               | INTERGENIC      |               |                    |                    |
| SNP_90103_A_11540  | NW_004516406.1 | scaffold1113 | 11540                   | CC                              | AA                 | AA               | INTERGENIC      |               |                    |                    |
| SNP_90104_A_11632  | NW_004516406.1 | scaffold1113 | 11632                   | CC                              | TT                 | TT               | INTERGENIC      |               |                    |                    |
| SNP_90105_A_11712  | NW_004516406.1 | scaffold1113 | 11712                   | CC                              | TT                 | TT               | INTERGENIC      |               |                    |                    |
| SNP_90106_A_11714  | NW_004516406.1 | scaffold1113 | 11714                   | AA                              | CC                 | CC               | INTERGENIC      |               |                    |                    |
| SNP_90107_A_53605  | NW_004516407.1 | scaffold1114 | 53605                   | GG                              | AA                 | AA               | INTERGENIC      |               |                    |                    |
| SNP_90108_A_72037  | NW_004516407.1 | scaffold1114 | 72037                   | TT                              | GG                 | GG               | INTERGENIC      |               |                    |                    |
| SNP_90109_A_72089  | NW_004516407.1 | scaffold1114 | 72089                   | CC                              | AA                 | AA               | INTERGENIC      |               |                    |                    |
| SNP_90110_A_82160  | NW_004516407.1 | scaffold1114 | 82160                   | AA                              | TT                 | TT               | INTERGENIC      |               |                    |                    |
| SNP_90111_A_104534 | NW_004516407.1 | scaffold1114 | 104534                  | GG                              | AA                 | AA               | INTERGENIC      |               |                    |                    |
| SNP_90112_A_385    | NW_004516408.1 | scaffold1115 | 385                     | CC                              | GG                 | GG               | INTERGENIC      |               |                    |                    |
| SNP_90113_A_397    | NW_004516408.1 | scaffold1115 | 397                     | AA                              | CC                 | CC               | INTERGENIC      |               |                    |                    |
| SNP_90114_A_555    | NW_004516408.1 | scaffold1115 | 555                     | TT                              | GG                 | GG               | INTERGENIC      |               |                    |                    |

| SNPs IDs           | Chromosome IDs | Chromosomes   | Physical positions (bp) | CDC Frontier (Reference genome) | (Pusa 1103 & HPNB) | (ILWC 46 & LPNB) | Sequence genome | Components of | Gene accession IDs | Putative functions |
|--------------------|----------------|---------------|-------------------------|---------------------------------|--------------------|------------------|-----------------|---------------|--------------------|--------------------|
| SNP_90115_A_682    | NW_004516408.1 | scaffold11115 | 682                     | AA                              | TT                 | TT               | INTERGENIC      |               |                    |                    |
| SNP_90116_A_814    | NW_004516408.1 | scaffold11115 | 814                     | GG                              | AA                 | AA               | INTERGENIC      |               |                    |                    |
| SNP_90118_A_123431 | NW_004516408.1 | scaffold11115 | 123431                  | GG                              | CC                 | TT               | INTERGENIC      |               |                    |                    |
| SNP_90119_A_123491 | NW_004516408.1 | scaffold11115 | 123491                  | TT                              | GG                 | GG               | INTERGENIC      |               |                    |                    |
| SNP_90120_A_123570 | NW_004516408.1 | scaffold11115 | 123570                  | AA                              | GG                 | GG               | INTERGENIC      |               |                    |                    |
| SNP_90121_A_2820   | NW_004516409.1 | scaffold11116 | 2820                    | TT                              | CC                 | CC               | INTERGENIC      |               |                    |                    |
| SNP_90122_A_2860   | NW_004516409.1 | scaffold11116 | 2860                    | TT                              | CC                 | CC               | INTERGENIC      |               |                    |                    |
| SNP_90123_A_2879   | NW_004516409.1 | scaffold11116 | 2879                    | AA                              | GG                 | GG               | INTERGENIC      |               |                    |                    |
| SNP_90124_A_8034   | NW_004516409.1 | scaffold11116 | 8034                    | CC                              | GG                 | GG               | INTERGENIC      |               |                    |                    |
| SNP_90125_A_16216  | NW_004516409.1 | scaffold11116 | 16216                   | GG                              | AA                 | AA               | INTERGENIC      |               |                    |                    |
| SNP_90126_A_16329  | NW_004516409.1 | scaffold11116 | 16329                   | CC                              | TT                 | TT               | INTERGENIC      |               |                    |                    |
| SNP_90127_A_16351  | NW_004516409.1 | scaffold11116 | 16351                   | AA                              | GG                 | GG               | INTERGENIC      |               |                    |                    |
| SNP_90128_A_16356  | NW_004516409.1 | scaffold11116 | 16356                   | TT                              | AA                 | AA               | INTERGENIC      |               |                    |                    |
| SNP_90129_A_16619  | NW_004516409.1 | scaffold11116 | 16619                   | GG                              | AA                 | AA               | INTERGENIC      |               |                    |                    |
| SNP_90130_A_16654  | NW_004516409.1 | scaffold11116 | 16654                   | AA                              | GG                 | GG               | INTERGENIC      |               |                    |                    |
| SNP_90131_A_16678  | NW_004516409.1 | scaffold11116 | 16678                   | CC                              | TT                 | TT               | INTERGENIC      |               |                    |                    |
| SNP_90132_A_16687  | NW_004516409.1 | scaffold11116 | 16687                   | AA                              | TT                 | TT               | INTERGENIC      |               |                    |                    |
| SNP_90134_A_16759  | NW_004516409.1 | scaffold11116 | 16759                   | GG                              | AA                 | AA               | INTERGENIC      |               |                    |                    |
| SNP_90135_A_19312  | NW_004516409.1 | scaffold11116 | 19312                   | TT                              | AA                 | AA               | INTERGENIC      |               |                    |                    |
| SNP_90136_A_19350  | NW_004516409.1 | scaffold11116 | 19350                   | CC                              | TT                 | TT               | INTERGENIC      |               |                    |                    |
| SNP_90137_A_19623  | NW_004516409.1 | scaffold11116 | 19623                   | TT                              | CC                 | CC               | INTERGENIC      |               |                    |                    |
| SNP_90138_A_24287  | NW_004516409.1 | scaffold11116 | 24287                   | CC                              | TT                 | TT               | INTERGENIC      |               |                    |                    |

| SNPs IDs          | Chromosome IDs | Chromosomes   | Physical positions (bp) | CDC Frontier (Reference genome) | (Pusa 1103 & HPNB) | (ILWC 46 & LPNB) | Sequence genome | Components of | Gene accession IDs | Putative functions |
|-------------------|----------------|---------------|-------------------------|---------------------------------|--------------------|------------------|-----------------|---------------|--------------------|--------------------|
| SNP_90139_A_25273 | NW_004516409.1 | scaffold11116 | 25273                   | GG                              | AA                 | AA               | INTERGENIC      |               |                    |                    |
| SNP_90140_A_25299 | NW_004516409.1 | scaffold11116 | 25299                   | GG                              | AA                 | AA               | INTERGENIC      |               |                    |                    |
| SNP_90141_A_25645 | NW_004516409.1 | scaffold11116 | 25645                   | CC                              | TT                 | TT               | INTERGENIC      |               |                    |                    |
| SNP_90142_A_25709 | NW_004516409.1 | scaffold11116 | 25709                   | CC                              | AA                 | AA               | INTERGENIC      |               |                    |                    |
| SNP_90143_A_25737 | NW_004516409.1 | scaffold11116 | 25737                   | TT                              | CC                 | CC               | INTERGENIC      |               |                    |                    |
| SNP_90144_A_25755 | NW_004516409.1 | scaffold11116 | 25755                   | TT                              | CC                 | CC               | INTERGENIC      |               |                    |                    |
| SNP_90145_A_25757 | NW_004516409.1 | scaffold11116 | 25757                   | AA                              | GG                 | GG               | INTERGENIC      |               |                    |                    |
| SNP_90146_A_25773 | NW_004516409.1 | scaffold11116 | 25773                   | GG                              | AA                 | AA               | INTERGENIC      |               |                    |                    |
| SNP_90147_A_28320 | NW_004516409.1 | scaffold11116 | 28320                   | GG                              | AA                 | AA               | INTERGENIC      |               |                    |                    |
| SNP_90148_A_29050 | NW_004516409.1 | scaffold11116 | 29050                   | GG                              | CC                 | CC               | INTERGENIC      |               |                    |                    |
| SNP_90149_A_29278 | NW_004516409.1 | scaffold11116 | 29278                   | CC                              | TT                 | TT               | INTERGENIC      |               |                    |                    |
| SNP_90150_A_29349 | NW_004516409.1 | scaffold11116 | 29349                   | CC                              | GG                 | GG               | INTERGENIC      |               |                    |                    |
| SNP_90151_A_29405 | NW_004516409.1 | scaffold11116 | 29405                   | CC                              | TT                 | TT               | INTERGENIC      |               |                    |                    |
| SNP_90152_A_29798 | NW_004516409.1 | scaffold11116 | 29798                   | CC                              | TT                 | TT               | INTERGENIC      |               |                    |                    |
| SNP_90153_A_29800 | NW_004516409.1 | scaffold11116 | 29800                   | GG                              | TT                 | TT               | INTERGENIC      |               |                    |                    |
| SNP_90154_A_29890 | NW_004516409.1 | scaffold11116 | 29890                   | AA                              | CC                 | CC               | INTERGENIC      |               |                    |                    |
| SNP_90156_A_30086 | NW_004516409.1 | scaffold11116 | 30086                   | AA                              | CC                 | CC               | INTERGENIC      |               |                    |                    |
| SNP_90157_A_31161 | NW_004516409.1 | scaffold11116 | 31161                   | TT                              | GG                 | GG               | INTERGENIC      |               |                    |                    |
| SNP_90158_A_31433 | NW_004516409.1 | scaffold11116 | 31433                   | TT                              | CC                 | CC               | INTERGENIC      |               |                    |                    |
| SNP_90159_A_31530 | NW_004516409.1 | scaffold11116 | 31530                   | GG                              | AA                 | AA               | INTERGENIC      |               |                    |                    |
| SNP_90160_A_32461 | NW_004516409.1 | scaffold11116 | 32461                   | TT                              | AA                 | AA               | INTERGENIC      |               |                    |                    |
| SNP_90162_A_45098 | NW_004516409.1 | scaffold11116 | 45098                   | GG                              | AA                 | AA               | INTERGENIC      |               |                    |                    |

| SNPs IDs          | Chromosome IDs | Chromosomes   | Physical positions (bp) | CDC Frontier genome (Reference genome) | (Pusa 1103 & HPNB) | (ILWC 46 & LPNB) | Sequence genome | Components of | Gene accession IDs | Putative functions |
|-------------------|----------------|---------------|-------------------------|----------------------------------------|--------------------|------------------|-----------------|---------------|--------------------|--------------------|
| SNP_90163_A_59894 | NW_004516409.1 | scaffold11116 | 59894                   | GG                                     | AA                 | AA               | INTERGENIC      |               |                    |                    |
| SNP_90164_A_70670 | NW_004516409.1 | scaffold11116 | 70670                   | CC                                     | TT                 | TT               | INTERGENIC      |               |                    |                    |
| SNP_90165_A_70754 | NW_004516409.1 | scaffold11116 | 70754                   | CC                                     | TT                 | TT               | INTERGENIC      |               |                    |                    |
| SNP_90166_A_70760 | NW_004516409.1 | scaffold11116 | 70760                   | CC                                     | TT                 | TT               | INTERGENIC      |               |                    |                    |
| SNP_90168_A_70823 | NW_004516409.1 | scaffold11116 | 70823                   | AA                                     | GG                 | GG               | INTERGENIC      |               |                    |                    |
| SNP_90169_A_70842 | NW_004516409.1 | scaffold11116 | 70842                   | AA                                     | TT                 | TT               | INTERGENIC      |               |                    |                    |
| SNP_90170_A_70845 | NW_004516409.1 | scaffold11116 | 70845                   | TT                                     | CC                 | CC               | INTERGENIC      |               |                    |                    |
| SNP_90171_A_71018 | NW_004516409.1 | scaffold11116 | 71018                   | TT                                     | CC                 | CC               | INTERGENIC      |               |                    |                    |
| SNP_90172_A_71150 | NW_004516409.1 | scaffold11116 | 71150                   | AA                                     | GG                 | GG               | INTERGENIC      |               |                    |                    |
| SNP_90173_A_71918 | NW_004516409.1 | scaffold11116 | 71918                   | GG                                     | CC                 | CC               | INTERGENIC      |               |                    |                    |
| SNP_90174_A_73687 | NW_004516409.1 | scaffold11116 | 73687                   | CC                                     | AA                 | AA               | INTERGENIC      |               |                    |                    |
| SNP_90175_A_78051 | NW_004516409.1 | scaffold11116 | 78051                   | GG                                     | TT                 | TT               | INTERGENIC      |               |                    |                    |
| SNP_90176_A_78303 | NW_004516409.1 | scaffold11116 | 78303                   | TT                                     | GG                 | GG               | INTERGENIC      |               |                    |                    |
| SNP_90177_A_79206 | NW_004516409.1 | scaffold11116 | 79206                   | AA                                     | GG                 | GG               | INTERGENIC      |               |                    |                    |
| SNP_90178_A_79695 | NW_004516409.1 | scaffold11116 | 79695                   | CC                                     | TT                 | TT               | INTERGENIC      |               |                    |                    |
| SNP_90179_A_79706 | NW_004516409.1 | scaffold11116 | 79706                   | CC                                     | TT                 | TT               | INTERGENIC      |               |                    |                    |
| SNP_90180_A_94701 | NW_004516409.1 | scaffold11116 | 94701                   | TT                                     | CC                 | CC               | INTERGENIC      |               |                    |                    |
| SNP_90181_A_94717 | NW_004516409.1 | scaffold11116 | 94717                   | AA                                     | GG                 | GG               | INTERGENIC      |               |                    |                    |
| SNP_90182_A_94730 | NW_004516409.1 | scaffold11116 | 94730                   | TT                                     | GG                 | GG               | INTERGENIC      |               |                    |                    |
| SNP_90183_A_94816 | NW_004516409.1 | scaffold11116 | 94816                   | AA                                     | CC                 | CC               | INTERGENIC      |               |                    |                    |
| SNP_90184_A_94820 | NW_004516409.1 | scaffold11116 | 94820                   | GG                                     | AA                 | AA               | INTERGENIC      |               |                    |                    |
| SNP_90186_A_94983 | NW_004516409.1 | scaffold11116 | 94983                   | CC                                     | TT                 | TT               | INTERGENIC      |               |                    |                    |

| SNPs IDs           | Chromosome IDs | Chromosomes  | Physical positions (bp) | CDC Frontier (Reference genome) | (Pusa 1103 & HPNB) | (ILWC 46 & LPNB) | Sequence Components of genome | Gene accession IDs | Putative functions           |
|--------------------|----------------|--------------|-------------------------|---------------------------------|--------------------|------------------|-------------------------------|--------------------|------------------------------|
| SNP_90187_A_95008  | NW_004516409.1 | scaffold1116 | 95008                   | CC                              | TT                 | TT               | INTERGENIC                    |                    |                              |
| SNP_90188_A_118009 | NW_004516409.1 | scaffold1116 | 118009                  | TT                              | CC                 | CC               | INTERGENIC                    |                    |                              |
| SNP_90189_A_118307 | NW_004516409.1 | scaffold1116 | 118307                  | GG                              | CC                 | CC               | INTERGENIC                    |                    |                              |
| SNP_90190_A_118320 | NW_004516409.1 | scaffold1116 | 118320                  | TT                              | CC                 | CC               | INTERGENIC                    |                    |                              |
| SNP_90191_A_118412 | NW_004516409.1 | scaffold1116 | 118412                  | GG                              | CC                 | CC               | INTERGENIC                    |                    |                              |
| SNP_90192_A_118442 | NW_004516409.1 | scaffold1116 | 118442                  | AA                              | CC                 | CC               | INTERGENIC                    |                    |                              |
| SNP_90193_A_118649 | NW_004516409.1 | scaffold1116 | 118649                  | CC                              | TT                 | TT               | INTERGENIC                    |                    |                              |
| SNP_90194_A_120845 | NW_004516409.1 | scaffold1116 | 120845                  | GG                              | AA                 | AA               | INTERGENIC                    |                    |                              |
| SNP_90195_A_120868 | NW_004516409.1 | scaffold1116 | 120868                  | AA                              | GG                 | GG               | INTERGENIC                    |                    |                              |
| SNP_90196_A_122507 | NW_004516409.1 | scaffold1116 | 122507                  | CC                              | AA                 | AA               | INTERGENIC                    |                    |                              |
| SNP_90197_A_122560 | NW_004516409.1 | scaffold1116 | 122560                  | AA                              | GG                 | GG               | INTERGENIC                    |                    |                              |
| SNP_90198_A_122772 | NW_004516409.1 | scaffold1116 | 122772                  | GG                              | AA                 | AA               | INTERGENIC                    |                    |                              |
| SNP_90199_A_133784 | NW_004516409.1 | scaffold1116 | 133784                  | GG                              | AA                 | AA               | URR                           | 101489400          | uncharacterized LOC101489400 |
| SNP_90200_A_135371 | NW_004516409.1 | scaffold1116 | 135371                  | AA                              | GG                 | GG               | INTERGENIC                    |                    |                              |
| SNP_90201_A_136041 | NW_004516409.1 | scaffold1116 | 136041                  | TT                              | CC                 | CC               | INTERGENIC                    |                    |                              |
| SNP_90202_A_139296 | NW_004516409.1 | scaffold1116 | 139296                  | CC                              | TT                 | TT               | URR                           | 101489934          | Unknown function             |
| SNP_90203_A_141558 | NW_004516409.1 | scaffold1116 | 141558                  | TT                              | AA                 | AA               | INTERGENIC                    |                    |                              |
| SNP_90204_A_144836 | NW_004516409.1 | scaffold1116 | 144836                  | AA                              | GG                 | GG               | INTERGENIC                    |                    |                              |
| SNP_90205_A_144845 | NW_004516409.1 | scaffold1116 | 144845                  | AA                              | TT                 | TT               | INTERGENIC                    |                    |                              |
| SNP_90206_A_144854 | NW_004516409.1 | scaffold1116 | 144854                  | AA                              | GG                 | GG               | INTERGENIC                    |                    |                              |
| SNP_90207_A_144869 | NW_004516409.1 | scaffold1116 | 144869                  | TT                              | CC                 | CC               | INTERGENIC                    |                    |                              |
| SNP_90208_A_144987 | NW_004516409.1 | scaffold1116 | 144987                  | GG                              | AA                 | AA               | INTERGENIC                    |                    |                              |

| SNPs IDs           | Chromosome IDs | Chromosomes   | Physical positions (bp) | CDC Frontier (Reference genome) | (Pusa 1103 & HPNB) | (ILWC 46 & LPNB) | Sequence Components of genome | Gene accession IDs | Putative functions |
|--------------------|----------------|---------------|-------------------------|---------------------------------|--------------------|------------------|-------------------------------|--------------------|--------------------|
| SNP_90209_A_145037 | NW_004516409.1 | scaffold11116 | 145037                  | AA                              | CC                 | CC               | INTERGENIC                    |                    |                    |
| SNP_90210_A_1747   | NW_004516410.1 | scaffold11118 | 1747                    | GG                              | TT                 | TT               | NON_SYNONYMOUS_CODING         | id209822           | Unknown function   |
| SNP_90211_A_9174   | NW_004516410.1 | scaffold11118 | 9174                    | TT                              | AA                 | AA               | INTERGENIC                    |                    |                    |
| SNP_90212_A_9185   | NW_004516410.1 | scaffold11118 | 9185                    | AA                              | GG                 | GG               | INTERGENIC                    |                    |                    |
| SNP_90213_A_9556   | NW_004516410.1 | scaffold11118 | 9556                    | CC                              | TT                 | TT               | INTERGENIC                    |                    |                    |
| SNP_90214_A_9585   | NW_004516410.1 | scaffold11118 | 9585                    | TT                              | CC                 | CC               | INTERGENIC                    |                    |                    |
| SNP_90215_A_19003  | NW_004516410.1 | scaffold11118 | 19003                   | TT                              | CC                 | CC               | INTERGENIC                    |                    |                    |
| SNP_90216_A_24116  | NW_004516410.1 | scaffold11118 | 24116                   | CC                              | TT                 | TT               | INTERGENIC                    |                    |                    |
| SNP_90217_A_26185  | NW_004516410.1 | scaffold11118 | 26185                   | AA                              | GG                 | GG               | INTERGENIC                    |                    |                    |
| SNP_90218_A_26209  | NW_004516410.1 | scaffold11118 | 26209                   | TT                              | CC                 | CC               | INTERGENIC                    |                    |                    |
| SNP_90219_A_26230  | NW_004516410.1 | scaffold11118 | 26230                   | TT                              | AA                 | AA               | INTERGENIC                    |                    |                    |
| SNP_90220_A_26232  | NW_004516410.1 | scaffold11118 | 26232                   | AA                              | GG                 | GG               | INTERGENIC                    |                    |                    |
| SNP_90221_A_26239  | NW_004516410.1 | scaffold11118 | 26239                   | GG                              | AA                 | AA               | INTERGENIC                    |                    |                    |
| SNP_90222_A_26244  | NW_004516410.1 | scaffold11118 | 26244                   | AA                              | GG                 | GG               | INTERGENIC                    |                    |                    |
| SNP_90223_A_26357  | NW_004516410.1 | scaffold11118 | 26357                   | TT                              | CC                 | CC               | INTERGENIC                    |                    |                    |
| SNP_90224_A_26378  | NW_004516410.1 | scaffold11118 | 26378                   | AA                              | GG                 | GG               | INTERGENIC                    |                    |                    |
| SNP_90225_A_26383  | NW_004516410.1 | scaffold11118 | 26383                   | GG                              | AA                 | AA               | INTERGENIC                    |                    |                    |
| SNP_90226_A_30315  | NW_004516410.1 | scaffold11118 | 30315                   | CC                              | TT                 | TT               | INTERGENIC                    |                    |                    |
| SNP_90227_A_30369  | NW_004516410.1 | scaffold11118 | 30369                   | GG                              | AA                 | AA               | INTERGENIC                    |                    |                    |
| SNP_90228_A_30588  | NW_004516410.1 | scaffold11118 | 30588                   | TT                              | CC                 | CC               | INTERGENIC                    |                    |                    |
| SNP_90229_A_32507  | NW_004516410.1 | scaffold11118 | 32507                   | TT                              | CC                 | CC               | INTERGENIC                    |                    |                    |
| SNP_90230_A_33094  | NW_004516410.1 | scaffold11118 | 33094                   | GG                              | TT                 | TT               | INTERGENIC                    |                    |                    |

| SNPs IDs          | Chromosome IDs | Chromosomes  | Physical positions (bp) | CDC Frontier (Reference genome) | (Pusa 1103 & HPNB) | (ILWC 46 & LPNB) | Sequence genome | Components of | Gene accession IDs | Putative functions |
|-------------------|----------------|--------------|-------------------------|---------------------------------|--------------------|------------------|-----------------|---------------|--------------------|--------------------|
| SNP_90231_A_7594  | NW_004516411.1 | scaffold1120 | 7594                    | CC                              | TT                 | TT               | INTERGENIC      |               |                    |                    |
| SNP_90232_A_8007  | NW_004516411.1 | scaffold1120 | 8007                    | AA                              | TT                 | TT               | INTERGENIC      |               |                    |                    |
| SNP_90233_A_11088 | NW_004516411.1 | scaffold1120 | 11088                   | GG                              | AA                 | AA               | INTERGENIC      |               |                    |                    |
| SNP_90234_A_11098 | NW_004516411.1 | scaffold1120 | 11098                   | TT                              | CC                 | CC               | INTERGENIC      |               |                    |                    |
| SNP_90235_A_11133 | NW_004516411.1 | scaffold1120 | 11133                   | CC                              | TT                 | TT               | INTERGENIC      |               |                    |                    |
| SNP_90237_A_11179 | NW_004516411.1 | scaffold1120 | 11179                   | TT                              | CC                 | CC               | INTERGENIC      |               |                    |                    |
| SNP_90238_A_11189 | NW_004516411.1 | scaffold1120 | 11189                   | CC                              | AA                 | AA               | INTERGENIC      |               |                    |                    |
| SNP_90239_A_11295 | NW_004516411.1 | scaffold1120 | 11295                   | TT                              | CC                 | CC               | INTERGENIC      |               |                    |                    |
| SNP_90240_A_11345 | NW_004516411.1 | scaffold1120 | 11345                   | CC                              | TT                 | TT               | INTERGENIC      |               |                    |                    |
| SNP_90241_A_11408 | NW_004516411.1 | scaffold1120 | 11408                   | GG                              | AA                 | AA               | INTERGENIC      |               |                    |                    |
| SNP_90242_A_39638 | NW_004516411.1 | scaffold1120 | 39638                   | GG                              | AA                 | AA               | INTERGENIC      |               |                    |                    |
| SNP_90243_A_53261 | NW_004516411.1 | scaffold1120 | 53261                   | AA                              | GG                 | GG               | INTERGENIC      |               |                    |                    |
| SNP_90244_A_58376 | NW_004516411.1 | scaffold1120 | 58376                   | GG                              | AA                 | AA               | INTERGENIC      |               |                    |                    |
| SNP_90245_A_948   | NW_004516414.1 | scaffold1126 | 948                     | AA                              | TT                 | TT               | INTERGENIC      |               |                    |                    |
| SNP_90246_A_4277  | NW_004516414.1 | scaffold1126 | 4277                    | TT                              | AA                 | AA               | INTERGENIC      |               |                    |                    |
| SNP_90247_A_5710  | NW_004516414.1 | scaffold1126 | 5710                    | AA                              | GG                 | GG               | INTERGENIC      |               |                    |                    |
| SNP_90248_A_9903  | NW_004516414.1 | scaffold1126 | 9903                    | TT                              | GG                 | GG               | INTERGENIC      |               |                    |                    |
| SNP_90249_A_3628  | NW_004516416.1 | scaffold1128 | 3628                    | TT                              | CC                 | CC               | INTERGENIC      |               |                    |                    |
| SNP_90250_A_16934 | NW_004516416.1 | scaffold1128 | 16934                   | TT                              | AA                 | AA               | INTERGENIC      |               |                    |                    |
| SNP_90251_A_21151 | NW_004516416.1 | scaffold1128 | 21151                   | AA                              | GG                 | GG               | INTERGENIC      |               |                    |                    |
| SNP_90252_A_21167 | NW_004516416.1 | scaffold1128 | 21167                   | GG                              | AA                 | AA               | INTERGENIC      |               |                    |                    |
| SNP_90253_A_21526 | NW_004516416.1 | scaffold1128 | 21526                   | CC                              | TT                 | TT               | INTERGENIC      |               |                    |                    |



| SNPs IDs           | Chromosome IDs | Chromosomes  | Physical positions (bp) | CDC Frontier (Reference genome) | (Pusa 1103 & HPNB) | (ILWC 46 & LPNB) | Sequence Components of genome | Gene accession IDs | Putative functions                      |
|--------------------|----------------|--------------|-------------------------|---------------------------------|--------------------|------------------|-------------------------------|--------------------|-----------------------------------------|
| SNP_90255_A_28155  | NW_004516416.1 | scaffold1128 | 28155                   | TT                              | AA                 | AA               | INTERGENIC                    |                    |                                         |
| SNP_90258_A_58067  | NW_004516416.1 | scaffold1128 | 58067                   | GG                              | AA                 | AA               | INTERGENIC                    |                    |                                         |
| SNP_90259_A_58196  | NW_004516416.1 | scaffold1128 | 58196                   | GG                              | AA                 | AA               | INTERGENIC                    |                    |                                         |
| SNP_90260_A_62904  | NW_004516416.1 | scaffold1128 | 62904                   | CC                              | GG                 | GG               | URR                           | 101492635          | Unknown function                        |
| SNP_90261_A_73394  | NW_004516416.1 | scaffold1128 | 73394                   | GG                              | AA                 | AA               | INTERGENIC                    |                    |                                         |
| SNP_90262_A_83652  | NW_004516416.1 | scaffold1128 | 83652                   | TT                              | CC                 | CC               | INTERGENIC                    |                    |                                         |
| SNP_90263_A_99502  | NW_004516416.1 | scaffold1128 | 99502                   | TT                              | AA                 | AA               | INTRON                        | 101493301          | ABC transporter G family member 39-like |
| SNP_90264_A_99724  | NW_004516416.1 | scaffold1128 | 99724                   | GG                              | AA                 | AA               | INTRON                        | 101493301          | ABC transporter G family member 39-like |
| SNP_90265_A_123449 | NW_004516416.1 | scaffold1128 | 123449                  | TT                              | CC                 | CC               | INTERGENIC                    |                    |                                         |
| SNP_90266_A_123545 | NW_004516416.1 | scaffold1128 | 123545                  | AA                              | GG                 | GG               | INTERGENIC                    |                    |                                         |
| SNP_90267_A_126037 | NW_004516416.1 | scaffold1128 | 126037                  | CC                              | TT                 | TT               | INTERGENIC                    |                    |                                         |
| SNP_90268_A_146108 | NW_004516416.1 | scaffold1128 | 146108                  | CC                              | TT                 | TT               | INTERGENIC                    |                    |                                         |
| SNP_90269_A_147091 | NW_004516416.1 | scaffold1128 | 147091                  | TT                              | CC                 | CC               | INTERGENIC                    |                    |                                         |
| SNP_90271_A_152285 | NW_004516416.1 | scaffold1128 | 152285                  | CC                              | GG                 | GG               | INTERGENIC                    |                    |                                         |
| SNP_90272_A_156592 | NW_004516416.1 | scaffold1128 | 156592                  | GG                              | TT                 | TT               | INTERGENIC                    |                    |                                         |
| SNP_90273_A_190655 | NW_004516416.1 | scaffold1128 | 190655                  | GG                              | TT                 | TT               | INTERGENIC                    |                    |                                         |
| SNP_90275_A_219836 | NW_004516416.1 | scaffold1128 | 219836                  | AA                              | TT                 | TT               | INTERGENIC                    |                    |                                         |
| SNP_90276_A_229865 | NW_004516416.1 | scaffold1128 | 229865                  | CC                              | TT                 | TT               | INTERGENIC                    |                    |                                         |
| SNP_90277_A_230087 | NW_004516416.1 | scaffold1128 | 230087                  | TT                              | AA                 | AA               | INTERGENIC                    |                    |                                         |
| SNP_90278_A_230165 | NW_004516416.1 | scaffold1128 | 230165                  | AA                              | GG                 | GG               | INTERGENIC                    |                    |                                         |
| SNP_90279_A_230172 | NW_004516416.1 | scaffold1128 | 230172                  | TT                              | GG                 | GG               | INTERGENIC                    |                    |                                         |
| SNP_90280_A_230263 | NW_004516416.1 | scaffold1128 | 230263                  | GG                              | AA                 | AA               | INTERGENIC                    |                    |                                         |

| SNPs IDs           | Chromosome IDs | Chromosomes  | Physical positions (bp) | CDC Frontier (Reference genome) | (Pusa 1103 & HPNB) | (ILWC 46 & LPNB) | Sequence Components of genome | Gene accession IDs | Putative functions                         |
|--------------------|----------------|--------------|-------------------------|---------------------------------|--------------------|------------------|-------------------------------|--------------------|--------------------------------------------|
| SNP_90281_A_230277 | NW_004516416.1 | scaffold1128 | 230277                  | GG                              | TT                 | TT               | INTERGENIC                    |                    |                                            |
| SNP_90282_A_254254 | NW_004516416.1 | scaffold1128 | 254254                  | CC                              | TT                 | TT               | INTERGENIC                    |                    |                                            |
| SNP_90283_A_256142 | NW_004516416.1 | scaffold1128 | 256142                  | AA                              | GG                 | GG               | INTERGENIC                    |                    |                                            |
| SNP_90284_A_257700 | NW_004516416.1 | scaffold1128 | 257700                  | GG                              | AA                 | AA               | INTERGENIC                    |                    |                                            |
| SNP_90285_A_264903 | NW_004516416.1 | scaffold1128 | 264903                  | GG                              | AA                 | AA               | INTERGENIC                    |                    |                                            |
| SNP_90286_A_274978 | NW_004516416.1 | scaffold1128 | 274978                  | AA                              | GG                 | GG               | DRR                           | 101494575          | alkane hydroxylase MAH1-like               |
| SNP_90287_A_303079 | NW_004516416.1 | scaffold1128 | 303079                  | GG                              | AA                 | AA               | INTRON                        | 101491127          | pleiotropic drug resistance protein 2-like |
| SNP_90288_A_336755 | NW_004516416.1 | scaffold1128 | 336755                  | AA                              | GG                 | GG               | INTERGENIC                    |                    |                                            |
| SNP_90290_A_350939 | NW_004516416.1 | scaffold1128 | 350939                  | TT                              | CC                 | CC               | INTERGENIC                    |                    |                                            |
| SNP_90291_A_354492 | NW_004516416.1 | scaffold1128 | 354492                  | GG                              | AA                 | AA               | INTERGENIC                    |                    |                                            |
| SNP_90292_A_365234 | NW_004516416.1 | scaffold1128 | 365234                  | GG                              | TT                 | TT               | INTERGENIC                    |                    |                                            |
| SNP_90295_A_449230 | NW_004516416.1 | scaffold1128 | 449230                  | CC                              | AA                 | AA               | INTERGENIC                    |                    |                                            |
| SNP_90296_A_478249 | NW_004516416.1 | scaffold1128 | 478249                  | CC                              | TT                 | TT               | INTERGENIC                    |                    |                                            |
| SNP_90297_A_479704 | NW_004516416.1 | scaffold1128 | 479704                  | GG                              | AA                 | AA               | INTERGENIC                    |                    |                                            |
| SNP_90299_A_485484 | NW_004516416.1 | scaffold1128 | 485484                  | GG                              | AA                 | AA               | INTERGENIC                    |                    |                                            |
| SNP_90300_A_485840 | NW_004516416.1 | scaffold1128 | 485840                  | TT                              | AA                 | AA               | INTERGENIC                    |                    |                                            |
| SNP_90301_A_488722 | NW_004516416.1 | scaffold1128 | 488722                  | TT                              | CC                 | CC               | INTERGENIC                    |                    |                                            |
| SNP_90302_A_492291 | NW_004516416.1 | scaffold1128 | 492291                  | GG                              | AA                 | AA               | INTERGENIC                    |                    |                                            |
| SNP_90303_A_492339 | NW_004516416.1 | scaffold1128 | 492339                  | AA                              | GG                 | GG               | INTERGENIC                    |                    |                                            |
| SNP_90304_A_492855 | NW_004516416.1 | scaffold1128 | 492855                  | TT                              | CC                 | CC               | INTERGENIC                    |                    |                                            |
| SNP_90305_A_496364 | NW_004516416.1 | scaffold1128 | 496364                  | TT                              | CC                 | CC               | INTERGENIC                    |                    |                                            |
| SNP_90306_A_502842 | NW_004516416.1 | scaffold1128 | 502842                  | AA                              | CC                 | CC               | INTERGENIC                    |                    |                                            |

| SNPs IDs          | Chromosome IDs | Chromosomes  | Physical positions (bp) | CDC Frontier (Reference genome) | (Pusa 1103 & HPNB) | (ILWC 46 & LPNB) | Sequence Components of genome | Gene accession IDs | Putative functions              |
|-------------------|----------------|--------------|-------------------------|---------------------------------|--------------------|------------------|-------------------------------|--------------------|---------------------------------|
| SNP_90307_A_17582 | NW_004516418.1 | scaffold1131 | 17582                   | AA                              | TT                 | TT               | INTERGENIC                    |                    |                                 |
| SNP_90308_A_25975 | NW_004516418.1 | scaffold1131 | 25975                   | GG                              | TT                 | TT               | URR                           | 101498591          | transcription factor GTE12-like |
| SNP_90309_A_26343 | NW_004516418.1 | scaffold1131 | 26343                   | TT                              | CC                 | CC               | URR                           | 101498591          | transcription factor GTE12-like |
| SNP_90310_A_29755 | NW_004516418.1 | scaffold1131 | 29755                   | CC                              | TT                 | TT               | INTERGENIC                    |                    |                                 |
| SNP_90311_A_29814 | NW_004516418.1 | scaffold1131 | 29814                   | TT                              | CC                 | CC               | INTERGENIC                    |                    |                                 |
| SNP_90312_A_29848 | NW_004516418.1 | scaffold1131 | 29848                   | TT                              | CC                 | CC               | INTERGENIC                    |                    |                                 |
| SNP_90313_A_30110 | NW_004516418.1 | scaffold1131 | 30110                   | CC                              | AA                 | AA               | INTERGENIC                    |                    |                                 |
| SNP_90314_A_30136 | NW_004516418.1 | scaffold1131 | 30136                   | CC                              | GG                 | GG               | INTERGENIC                    |                    |                                 |
| SNP_90315_A_30154 | NW_004516418.1 | scaffold1131 | 30154                   | AA                              | GG                 | GG               | INTERGENIC                    |                    |                                 |
| SNP_90316_A_30175 | NW_004516418.1 | scaffold1131 | 30175                   | AA                              | GG                 | GG               | INTERGENIC                    |                    |                                 |
| SNP_90317_A_30179 | NW_004516418.1 | scaffold1131 | 30179                   | AA                              | GG                 | GG               | INTERGENIC                    |                    |                                 |
| SNP_90319_A_30294 | NW_004516418.1 | scaffold1131 | 30294                   | AA                              | CC                 | CC               | INTERGENIC                    |                    |                                 |
| SNP_90320_A_34828 | NW_004516418.1 | scaffold1131 | 34828                   | GG                              | AA                 | AA               | INTERGENIC                    |                    |                                 |
| SNP_90321_A_39163 | NW_004516418.1 | scaffold1131 | 39163                   | CC                              | TT                 | TT               | INTERGENIC                    |                    |                                 |
| SNP_90322_A_39220 | NW_004516418.1 | scaffold1131 | 39220                   | CC                              | TT                 | TT               | INTERGENIC                    |                    |                                 |
| SNP_90323_A_39221 | NW_004516418.1 | scaffold1131 | 39221                   | CC                              | TT                 | TT               | INTERGENIC                    |                    |                                 |
| SNP_90324_A_39268 | NW_004516418.1 | scaffold1131 | 39268                   | AA                              | GG                 | GG               | INTERGENIC                    |                    |                                 |
| SNP_90325_A_39277 | NW_004516418.1 | scaffold1131 | 39277                   | TT                              | CC                 | CC               | INTERGENIC                    |                    |                                 |
| SNP_90326_A_39370 | NW_004516418.1 | scaffold1131 | 39370                   | AA                              | GG                 | GG               | INTERGENIC                    |                    |                                 |
| SNP_90327_A_39462 | NW_004516418.1 | scaffold1131 | 39462                   | CC                              | TT                 | TT               | INTERGENIC                    |                    |                                 |
| SNP_90328_A_47595 | NW_004516418.1 | scaffold1131 | 47595                   | TT                              | CC                 | CC               | INTERGENIC                    |                    |                                 |
| SNP_90329_A_47954 | NW_004516418.1 | scaffold1131 | 47954                   | AA                              | GG                 | GG               | INTERGENIC                    |                    |                                 |

| SNPs IDs           | Chromosome IDs | Chromosomes  | Physical positions (bp) | CDC Frontier (Reference genome) | (Pusa 1103 & HPNB) | (ILWC 46 & LPNB) | Sequence Components of genome | Gene accession IDs | Putative functions              |
|--------------------|----------------|--------------|-------------------------|---------------------------------|--------------------|------------------|-------------------------------|--------------------|---------------------------------|
| SNP_90330_A_56333  | NW_004516418.1 | scaffold1131 | 56333                   | GG                              | AA                 | AA               | DRR                           | 101499248          | transcription factor GTE12-like |
| SNP_90331_A_56356  | NW_004516418.1 | scaffold1131 | 56356                   | AA                              | TT                 | TT               | DRR                           | 101499248          | transcription factor GTE12-like |
| SNP_90332_A_56357  | NW_004516418.1 | scaffold1131 | 56357                   | AA                              | CC                 | CC               | DRR                           | 101499248          | transcription factor GTE12-like |
| SNP_90333_A_56360  | NW_004516418.1 | scaffold1131 | 56360                   | GG                              | AA                 | AA               | DRR                           | 101499248          | transcription factor GTE12-like |
| SNP_90334_A_58820  | NW_004516418.1 | scaffold1131 | 58820                   | CC                              | TT                 | TT               | URR                           | 101499248          | transcription factor GTE12-like |
| SNP_90335_A_59198  | NW_004516418.1 | scaffold1131 | 59198                   | AA                              | TT                 | TT               | URR                           | 101499248          | transcription factor GTE12-like |
| SNP_90337_A_81684  | NW_004516418.1 | scaffold1131 | 81684                   | AA                              | GG                 | GG               | INTERGENIC                    |                    |                                 |
| SNP_90338_A_81840  | NW_004516418.1 | scaffold1131 | 81840                   | AA                              | GG                 | GG               | INTERGENIC                    |                    |                                 |
| SNP_90339_A_82004  | NW_004516418.1 | scaffold1131 | 82004                   | TT                              | GG                 | GG               | INTERGENIC                    |                    |                                 |
| SNP_90340_A_99835  | NW_004516418.1 | scaffold1131 | 99835                   | TT                              | AA                 | AA               | INTERGENIC                    |                    |                                 |
| SNP_90341_A_139954 | NW_004516418.1 | scaffold1131 | 139954                  | GG                              | AA                 | AA               | INTERGENIC                    |                    |                                 |
| SNP_90342_A_146747 | NW_004516418.1 | scaffold1131 | 146747                  | GG                              | AA                 | AA               | INTERGENIC                    |                    |                                 |
| SNP_90343_A_1632   | NW_004516420.1 | scaffold1133 | 1632                    | CC                              | GG                 | GG               | INTERGENIC                    |                    |                                 |
| SNP_90344_A_1666   | NW_004516420.1 | scaffold1133 | 1666                    | TT                              | CC                 | CC               | INTERGENIC                    |                    |                                 |
| SNP_90345_A_7551   | NW_004516420.1 | scaffold1133 | 7551                    | TT                              | AA                 | AA               | INTERGENIC                    |                    |                                 |
| SNP_90346_A_7557   | NW_004516420.1 | scaffold1133 | 7557                    | GG                              | AA                 | AA               | INTERGENIC                    |                    |                                 |
| SNP_90347_A_7566   | NW_004516420.1 | scaffold1133 | 7566                    | GG                              | AA                 | AA               | INTERGENIC                    |                    |                                 |
| SNP_90348_A_8680   | NW_004516420.1 | scaffold1133 | 8680                    | AA                              | TT                 | TT               | INTERGENIC                    |                    |                                 |
| SNP_90349_A_18262  | NW_004516420.1 | scaffold1133 | 18262                   | TT                              | GG                 | GG               | INTERGENIC                    |                    |                                 |
| SNP_90350_A_18322  | NW_004516420.1 | scaffold1133 | 18322                   | CC                              | TT                 | TT               | INTERGENIC                    |                    |                                 |
| SNP_90351_A_18440  | NW_004516420.1 | scaffold1133 | 18440                   | CC                              | GG                 | GG               | INTERGENIC                    |                    |                                 |
| SNP_90352_A_18462  | NW_004516420.1 | scaffold1133 | 18462                   | TT                              | CC                 | CC               | INTERGENIC                    |                    |                                 |

| SNPs IDs          | Chromosome IDs | Chromosomes  | Physical positions (bp) | CDC Frontier (Reference genome) | (Pusa 1103 & HPNB) | (ILWC 46 & LPNB) | Sequence Components of genome | Gene accession IDs | Putative functions |
|-------------------|----------------|--------------|-------------------------|---------------------------------|--------------------|------------------|-------------------------------|--------------------|--------------------|
| SNP_90353_A_18516 | NW_004516420.1 | scaffold1133 | 18516                   | CC                              | GG                 | GG               | INTERGENIC                    |                    |                    |
| SNP_90354_A_18630 | NW_004516420.1 | scaffold1133 | 18630                   | CC                              | TT                 | TT               | INTERGENIC                    |                    |                    |
| SNP_90355_A_18686 | NW_004516420.1 | scaffold1133 | 18686                   | CC                              | GG                 | GG               | INTERGENIC                    |                    |                    |
| SNP_90356_A_18721 | NW_004516420.1 | scaffold1133 | 18721                   | AA                              | TT                 | TT               | INTERGENIC                    |                    |                    |
| SNP_90357_A_18814 | NW_004516420.1 | scaffold1133 | 18814                   | TT                              | GG                 | GG               | INTERGENIC                    |                    |                    |
| SNP_90358_A_18828 | NW_004516420.1 | scaffold1133 | 18828                   | CC                              | TT                 | TT               | INTERGENIC                    |                    |                    |
| SNP_90359_A_18944 | NW_004516420.1 | scaffold1133 | 18944                   | TT                              | GG                 | GG               | INTERGENIC                    |                    |                    |
| SNP_90360_A_18952 | NW_004516420.1 | scaffold1133 | 18952                   | TT                              | AA                 | AA               | INTERGENIC                    |                    |                    |
| SNP_90361_A_19044 | NW_004516420.1 | scaffold1133 | 19044                   | TT                              | GG                 | GG               | INTERGENIC                    |                    |                    |
| SNP_90362_A_20037 | NW_004516420.1 | scaffold1133 | 20037                   | GG                              | AA                 | AA               | INTERGENIC                    |                    |                    |
| SNP_90363_A_53426 | NW_004516420.1 | scaffold1133 | 53426                   | CC                              | AA                 | AA               | INTERGENIC                    |                    |                    |
| SNP_90364_A_53434 | NW_004516420.1 | scaffold1133 | 53434                   | CC                              | TT                 | TT               | INTERGENIC                    |                    |                    |
| SNP_90365_A_58031 | NW_004516420.1 | scaffold1133 | 58031                   | CC                              | TT                 | TT               | INTERGENIC                    |                    |                    |
| SNP_90366_A_349   | NW_004516421.1 | scaffold1134 | 349                     | CC                              | GG                 | GG               | NON_SYNONYMOUS_CODING         | 101501679          | Unknown function   |
| SNP_90367_A_435   | NW_004516421.1 | scaffold1134 | 435                     | CC                              | TT                 | TT               | SYNONYMOUS_CODING             | 101501679          | Unknown function   |
| SNP_90368_A_4564  | NW_004516421.1 | scaffold1134 | 4564                    | TT                              | AA                 | AA               | INTERGENIC                    |                    |                    |
| SNP_90369_A_16095 | NW_004516421.1 | scaffold1134 | 16095                   | TT                              | CC                 | CC               | INTERGENIC                    |                    |                    |
| SNP_90370_A_938   | NW_004516422.1 | scaffold1135 | 938                     | GG                              | AA                 | AA               | INTERGENIC                    |                    |                    |
| SNP_90371_A_1781  | NW_004516422.1 | scaffold1135 | 1781                    | TT                              | CC                 | CC               | INTERGENIC                    |                    |                    |
| SNP_90372_A_9107  | NW_004516422.1 | scaffold1135 | 9107                    | CC                              | TT                 | TT               | INTERGENIC                    |                    |                    |
| SNP_90373_A_9211  | NW_004516422.1 | scaffold1135 | 9211                    | AA                              | GG                 | GG               | INTERGENIC                    |                    |                    |
| SNP_90374_A_9470  | NW_004516422.1 | scaffold1135 | 9470                    | TT                              | CC                 | CC               | INTERGENIC                    |                    |                    |

| SNPs IDs          | Chromosome IDs | Chromosomes  | Physical positions (bp) | CDC Frontier (Reference genome) | (Pusa 1103 & HPNB) | (ILWC 46 & LPNB) | Sequence Components of genome | Gene accession IDs | Putative functions           |
|-------------------|----------------|--------------|-------------------------|---------------------------------|--------------------|------------------|-------------------------------|--------------------|------------------------------|
| SNP_90376_A_9990  | NW_004516422.1 | scaffold1135 | 9990                    | GG                              | AA                 | AA               | INTERGENIC                    |                    |                              |
| SNP_90377_A_10131 | NW_004516422.1 | scaffold1135 | 10131                   | AA                              | TT                 | TT               | INTERGENIC                    |                    |                              |
| SNP_90378_A_10345 | NW_004516422.1 | scaffold1135 | 10345                   | GG                              | AA                 | AA               | INTERGENIC                    |                    |                              |
| SNP_90379_A_10597 | NW_004516422.1 | scaffold1135 | 10597                   | GG                              | AA                 | AA               | INTERGENIC                    |                    |                              |
| SNP_90380_A_10601 | NW_004516422.1 | scaffold1135 | 10601                   | TT                              | CC                 | CC               | INTERGENIC                    |                    |                              |
| SNP_90381_A_10955 | NW_004516422.1 | scaffold1135 | 10955                   | GG                              | AA                 | AA               | INTERGENIC                    |                    |                              |
| SNP_90382_A_11584 | NW_004516422.1 | scaffold1135 | 11584                   | TT                              | CC                 | CC               | INTERGENIC                    |                    |                              |
| SNP_90383_A_11589 | NW_004516422.1 | scaffold1135 | 11589                   | GG                              | TT                 | TT               | INTERGENIC                    |                    |                              |
| SNP_90384_A_13105 | NW_004516422.1 | scaffold1135 | 13105                   | CC                              | GG                 | GG               | DRR                           | 101503282          | uncharacterized LOC101503282 |
| SNP_90385_A_13153 | NW_004516422.1 | scaffold1135 | 13153                   | CC                              | TT                 | TT               | DRR                           | 101503282          | uncharacterized LOC101503282 |
| SNP_90386_A_13367 | NW_004516422.1 | scaffold1135 | 13367                   | CC                              | TT                 | TT               | DRR                           | 101503282          | uncharacterized LOC101503282 |
| SNP_90387_A_13911 | NW_004516422.1 | scaffold1135 | 13911                   | GG                              | AA                 | AA               | NON_SYNONYMOUS_CODING         | 101503282          | uncharacterized LOC101503282 |
| SNP_90389_A_14650 | NW_004516422.1 | scaffold1135 | 14650                   | GG                              | AA                 | AA               | URR                           | 101503282          | uncharacterized LOC101503282 |
| SNP_90390_A_14696 | NW_004516422.1 | scaffold1135 | 14696                   | TT                              | CC                 | CC               | URR                           | 101503282          | uncharacterized LOC101503282 |
| SNP_90391_A_15078 | NW_004516422.1 | scaffold1135 | 15078                   | CC                              | TT                 | TT               | URR                           | 101503282          | uncharacterized LOC101503282 |
| SNP_90392_A_15802 | NW_004516422.1 | scaffold1135 | 15802                   | AA                              | CC                 | CC               | URR                           | 101503282          | uncharacterized LOC101503282 |
| SNP_90393_A_15914 | NW_004516422.1 | scaffold1135 | 15914                   | AA                              | GG                 | GG               | URR                           | 101503282          | uncharacterized LOC101503282 |
| SNP_90394_A_16844 | NW_004516422.1 | scaffold1135 | 16844                   | TT                              | AA                 | AA               | INTERGENIC                    |                    |                              |
| SNP_90395_A_17124 | NW_004516422.1 | scaffold1135 | 17124                   | GG                              | AA                 | AA               | INTERGENIC                    |                    |                              |
| SNP_90396_A_17580 | NW_004516422.1 | scaffold1135 | 17580                   | TT                              | CC                 | CC               | INTERGENIC                    |                    |                              |
| SNP_90397_A_32374 | NW_004516422.1 | scaffold1135 | 32374                   | TT                              | CC                 | CC               | INTERGENIC                    |                    |                              |
| SNP_90398_A_32391 | NW_004516422.1 | scaffold1135 | 32391                   | TT                              | GG                 | GG               | INTERGENIC                    |                    |                              |

| SNPs IDs          | Chromosome IDs | Chromosomes  | Physical positions (bp) | CDC Frontier (Reference genome) | (Pusa 1103 & HPNB) | (ILWC 46 & LPNB) | Sequence Components of genome | Gene accession IDs | Putative functions           |
|-------------------|----------------|--------------|-------------------------|---------------------------------|--------------------|------------------|-------------------------------|--------------------|------------------------------|
| SNP_90399_A_32437 | NW_004516422.1 | scaffold1135 | 32437                   | CC                              | TT                 | TT               | INTERGENIC                    |                    |                              |
| SNP_90400_A_32585 | NW_004516422.1 | scaffold1135 | 32585                   | AA                              | GG                 | GG               | INTERGENIC                    |                    |                              |
| SNP_90401_A_32596 | NW_004516422.1 | scaffold1135 | 32596                   | TT                              | AA                 | AA               | INTERGENIC                    |                    |                              |
| SNP_90402_A_60890 | NW_004516422.1 | scaffold1135 | 60890                   | GG                              | AA                 | AA               | URR                           | 101505209          | uncharacterized LOC101505209 |
| SNP_90403_A_60896 | NW_004516422.1 | scaffold1135 | 60896                   | CC                              | TT                 | TT               | URR                           | 101505209          | uncharacterized LOC101505209 |
| SNP_90404_A_60946 | NW_004516422.1 | scaffold1135 | 60946                   | AA                              | TT                 | TT               | URR                           | 101505209          | uncharacterized LOC101505209 |
| SNP_90405_A_60950 | NW_004516422.1 | scaffold1135 | 60950                   | TT                              | GG                 | GG               | URR                           | 101505209          | uncharacterized LOC101505209 |
| SNP_90406_A_60995 | NW_004516422.1 | scaffold1135 | 60995                   | AA                              | GG                 | GG               | URR                           | 101505209          | uncharacterized LOC101505209 |
| SNP_90407_A_61262 | NW_004516422.1 | scaffold1135 | 61262                   | AA                              | TT                 | TT               | URR                           | 101505209          | uncharacterized LOC101505209 |
| SNP_90408_A_61263 | NW_004516422.1 | scaffold1135 | 61263                   | AA                              | GG                 | GG               | URR                           | 101505209          | uncharacterized LOC101505209 |
| SNP_90409_A_61274 | NW_004516422.1 | scaffold1135 | 61274                   | TT                              | CC                 | CC               | URR                           | 101505209          | uncharacterized LOC101505209 |
| SNP_90410_A_61300 | NW_004516422.1 | scaffold1135 | 61300                   | AA                              | TT                 | TT               | URR                           | 101505209          | uncharacterized LOC101505209 |
| SNP_90412_A_62314 | NW_004516422.1 | scaffold1135 | 62314                   | TT                              | CC                 | CC               | INTERGENIC                    |                    |                              |
| SNP_90413_A_62319 | NW_004516422.1 | scaffold1135 | 62319                   | TT                              | CC                 | CC               | INTERGENIC                    |                    |                              |
| SNP_90414_A_62358 | NW_004516422.1 | scaffold1135 | 62358                   | GG                              | AA                 | AA               | INTERGENIC                    |                    |                              |
| SNP_90415_A_63819 | NW_004516422.1 | scaffold1135 | 63819                   | GG                              | TT                 | TT               | INTERGENIC                    |                    |                              |
| SNP_90417_A_68459 | NW_004516422.1 | scaffold1135 | 68459                   | TT                              | CC                 | CC               | INTERGENIC                    |                    |                              |
| SNP_90418_A_68793 | NW_004516422.1 | scaffold1135 | 68793                   | CC                              | TT                 | TT               | INTERGENIC                    |                    |                              |
| SNP_90419_A_71395 | NW_004516422.1 | scaffold1135 | 71395                   | GG                              | CC                 | CC               | INTERGENIC                    |                    |                              |
| SNP_90420_A_71396 | NW_004516422.1 | scaffold1135 | 71396                   | TT                              | CC                 | CC               | INTERGENIC                    |                    |                              |
| SNP_90421_A_71593 | NW_004516422.1 | scaffold1135 | 71593                   | AA                              | CC                 | CC               | INTERGENIC                    |                    |                              |
| SNP_90422_A_71892 | NW_004516422.1 | scaffold1135 | 71892                   | GG                              | TT                 | TT               | INTERGENIC                    |                    |                              |

| SNPs IDs          | Chromosome IDs | Chromosomes  | Physical positions (bp) | CDC Frontier (Reference genome) | (Pusa 1103 & HPNB) | (ILWC 46 & LPNB) | Sequence genome | Components of | Gene accession IDs | Putative functions |
|-------------------|----------------|--------------|-------------------------|---------------------------------|--------------------|------------------|-----------------|---------------|--------------------|--------------------|
| SNP_90423_A_71899 | NW_004516422.1 | scaffold1135 | 71899                   | GG                              | TT                 | TT               | INTERGENIC      |               |                    |                    |
| SNP_90425_A_72311 | NW_004516422.1 | scaffold1135 | 72311                   | CC                              | TT                 | TT               | INTERGENIC      |               |                    |                    |
| SNP_90427_A_74533 | NW_004516422.1 | scaffold1135 | 74533                   | AA                              | TT                 | TT               | INTERGENIC      |               |                    |                    |
| SNP_90428_A_74802 | NW_004516422.1 | scaffold1135 | 74802                   | AA                              | GG                 | GG               | INTERGENIC      |               |                    |                    |
| SNP_90429_A_74950 | NW_004516422.1 | scaffold1135 | 74950                   | TT                              | CC                 | CC               | INTERGENIC      |               |                    |                    |
| SNP_90430_A_75514 | NW_004516422.1 | scaffold1135 | 75514                   | CC                              | AA                 | AA               | INTERGENIC      |               |                    |                    |
| SNP_90431_A_806   | NW_004516425.1 | scaffold1139 | 806                     | AA                              | CC                 | CC               | INTERGENIC      |               |                    |                    |
| SNP_90432_A_817   | NW_004516425.1 | scaffold1139 | 817                     | TT                              | CC                 | CC               | INTERGENIC      |               |                    |                    |
| SNP_90433_A_842   | NW_004516425.1 | scaffold1139 | 842                     | AA                              | GG                 | GG               | INTERGENIC      |               |                    |                    |
| SNP_90434_A_874   | NW_004516425.1 | scaffold1139 | 874                     | GG                              | TT                 | TT               | INTERGENIC      |               |                    |                    |
| SNP_90435_A_886   | NW_004516425.1 | scaffold1139 | 886                     | TT                              | CC                 | CC               | INTERGENIC      |               |                    |                    |
| SNP_90436_A_939   | NW_004516425.1 | scaffold1139 | 939                     | GG                              | AA                 | AA               | INTERGENIC      |               |                    |                    |
| SNP_90437_A_1116  | NW_004516425.1 | scaffold1139 | 1116                    | TT                              | CC                 | CC               | INTERGENIC      |               |                    |                    |
| SNP_90438_A_1117  | NW_004516425.1 | scaffold1139 | 1117                    | CC                              | AA                 | AA               | INTERGENIC      |               |                    |                    |
| SNP_90439_A_1234  | NW_004516425.1 | scaffold1139 | 1234                    | CC                              | AA                 | AA               | INTERGENIC      |               |                    |                    |
| SNP_90440_A_1235  | NW_004516425.1 | scaffold1139 | 1235                    | AA                              | GG                 | GG               | INTERGENIC      |               |                    |                    |
| SNP_90441_A_1253  | NW_004516425.1 | scaffold1139 | 1253                    | AA                              | GG                 | GG               | INTERGENIC      |               |                    |                    |
| SNP_90443_A_1359  | NW_004516425.1 | scaffold1139 | 1359                    | CC                              | AA                 | AA               | INTERGENIC      |               |                    |                    |
| SNP_90445_A_1409  | NW_004516425.1 | scaffold1139 | 1409                    | TT                              | AA                 | AA               | INTERGENIC      |               |                    |                    |
| SNP_90446_A_1420  | NW_004516425.1 | scaffold1139 | 1420                    | AA                              | GG                 | GG               | INTERGENIC      |               |                    |                    |
| SNP_90448_A_1701  | NW_004516425.1 | scaffold1139 | 1701                    | TT                              | AA                 | AA               | INTERGENIC      |               |                    |                    |
| SNP_90449_A_1764  | NW_004516425.1 | scaffold1139 | 1764                    | AA                              | GG                 | GG               | INTERGENIC      |               |                    |                    |



| SNPs IDs          | Chromosome IDs | Chromosomes  | Physical positions (bp) | CDC Frontier (Reference genome) | (Pusa 1103 & HPNB) | (ILWC 46 & LPNB) | Sequence genome | Components of | Gene accession IDs | Putative functions |
|-------------------|----------------|--------------|-------------------------|---------------------------------|--------------------|------------------|-----------------|---------------|--------------------|--------------------|
| SNP_90450_A_1813  | NW_004516425.1 | scaffold1139 | 1813                    | GG                              | CC                 | CC               | INTERGENIC      |               |                    |                    |
| SNP_90451_A_1828  | NW_004516425.1 | scaffold1139 | 1828                    | CC                              | TT                 | TT               | INTERGENIC      |               |                    |                    |
| SNP_90452_A_1845  | NW_004516425.1 | scaffold1139 | 1845                    | TT                              | GG                 | GG               | INTERGENIC      |               |                    |                    |
| SNP_90453_A_1884  | NW_004516425.1 | scaffold1139 | 1884                    | GG                              | CC                 | CC               | INTERGENIC      |               |                    |                    |
| SNP_90454_A_1892  | NW_004516425.1 | scaffold1139 | 1892                    | TT                              | CC                 | CC               | INTERGENIC      |               |                    |                    |
| SNP_90455_A_1926  | NW_004516425.1 | scaffold1139 | 1926                    | CC                              | TT                 | TT               | INTERGENIC      |               |                    |                    |
| SNP_90456_A_1970  | NW_004516425.1 | scaffold1139 | 1970                    | AA                              | GG                 | GG               | INTERGENIC      |               |                    |                    |
| SNP_90457_A_1990  | NW_004516425.1 | scaffold1139 | 1990                    | CC                              | TT                 | TT               | INTERGENIC      |               |                    |                    |
| SNP_90459_A_5705  | NW_004516427.1 | scaffold1142 | 5705                    | CC                              | TT                 | TT               | INTERGENIC      |               |                    |                    |
| SNP_90460_A_18586 | NW_004516427.1 | scaffold1142 | 18586                   | TT                              | CC                 | CC               | INTERGENIC      |               |                    |                    |
| SNP_90461_A_18959 | NW_004516427.1 | scaffold1142 | 18959                   | AA                              | TT                 | TT               | INTERGENIC      |               |                    |                    |
| SNP_90462_A_2321  | NW_004516428.1 | scaffold1143 | 2321                    | AA                              | GG                 | GG               | INTERGENIC      |               |                    |                    |
| SNP_90463_A_2363  | NW_004516428.1 | scaffold1143 | 2363                    | AA                              | GG                 | GG               | INTERGENIC      |               |                    |                    |
| SNP_90464_A_2152  | NW_004516429.1 | scaffold1145 | 2152                    | TT                              | CC                 | CC               | INTERGENIC      |               |                    |                    |
| SNP_90465_A_2368  | NW_004516429.1 | scaffold1145 | 2368                    | TT                              | CC                 | CC               | INTERGENIC      |               |                    |                    |
| SNP_90466_A_2422  | NW_004516429.1 | scaffold1145 | 2422                    | TT                              | CC                 | GG               | INTERGENIC      |               |                    |                    |
| SNP_90467_A_2514  | NW_004516429.1 | scaffold1145 | 2514                    | CC                              | TT                 | TT               | INTERGENIC      |               |                    |                    |
| SNP_90468_A_2535  | NW_004516429.1 | scaffold1145 | 2535                    | TT                              | CC                 | CC               | INTERGENIC      |               |                    |                    |
| SNP_90469_A_2680  | NW_004516429.1 | scaffold1145 | 2680                    | TT                              | CC                 | CC               | INTERGENIC      |               |                    |                    |
| SNP_90470_A_2709  | NW_004516429.1 | scaffold1145 | 2709                    | TT                              | CC                 | CC               | INTERGENIC      |               |                    |                    |
| SNP_90471_A_3304  | NW_004516429.1 | scaffold1145 | 3304                    | GG                              | TT                 | TT               | INTERGENIC      |               |                    |                    |
| SNP_90473_A_4073  | NW_004516429.1 | scaffold1145 | 4073                    | TT                              | CC                 | CC               | INTERGENIC      |               |                    |                    |

| SNPs IDs           | Chromosome IDs | Chromosomes  | Physical positions (bp) | CDC Frontier (Reference genome) | (Pusa 1103 & HPNB) | (ILWC 46 & LPNB) | Sequence genome | Components of | Gene accession IDs | Putative functions |
|--------------------|----------------|--------------|-------------------------|---------------------------------|--------------------|------------------|-----------------|---------------|--------------------|--------------------|
| SNP_90474_A_4286   | NW_004516429.1 | scaffold1145 | 4286                    | TT                              | GG                 | GG               | INTERGENIC      |               |                    |                    |
| SNP_90475_A_4287   | NW_004516429.1 | scaffold1145 | 4287                    | CC                              | TT                 | TT               | INTERGENIC      |               |                    |                    |
| SNP_90476_A_4320   | NW_004516429.1 | scaffold1145 | 4320                    | GG                              | CC                 | CC               | INTERGENIC      |               |                    |                    |
| SNP_90478_A_7444   | NW_004516429.1 | scaffold1145 | 7444                    | TT                              | CC                 | CC               | INTERGENIC      |               |                    |                    |
| SNP_90479_A_7446   | NW_004516429.1 | scaffold1145 | 7446                    | TT                              | GG                 | GG               | INTERGENIC      |               |                    |                    |
| SNP_90480_A_15698  | NW_004516429.1 | scaffold1145 | 15698                   | AA                              | GG                 | GG               | INTERGENIC      |               |                    |                    |
| SNP_90481_A_15712  | NW_004516429.1 | scaffold1145 | 15712                   | AA                              | TT                 | TT               | INTERGENIC      |               |                    |                    |
| SNP_90483_A_16045  | NW_004516429.1 | scaffold1145 | 16045                   | CC                              | GG                 | GG               | INTERGENIC      |               |                    |                    |
| SNP_90484_A_16115  | NW_004516429.1 | scaffold1145 | 16115                   | AA                              | TT                 | TT               | INTERGENIC      |               |                    |                    |
| SNP_90485_A_16393  | NW_004516429.1 | scaffold1145 | 16393                   | AA                              | TT                 | TT               | INTERGENIC      |               |                    |                    |
| SNP_90486_A_16413  | NW_004516429.1 | scaffold1145 | 16413                   | AA                              | TT                 | TT               | INTERGENIC      |               |                    |                    |
| SNP_90488_A_17418  | NW_004516429.1 | scaffold1145 | 17418                   | TT                              | AA                 | AA               | INTERGENIC      |               |                    |                    |
| SNP_90489_A_17636  | NW_004516429.1 | scaffold1145 | 17636                   | GG                              | AA                 | AA               | INTERGENIC      |               |                    |                    |
| SNP_90490_A_17690  | NW_004516429.1 | scaffold1145 | 17690                   | TT                              | CC                 | CC               | INTERGENIC      |               |                    |                    |
| SNP_90491_A_26375  | NW_004516429.1 | scaffold1145 | 26375                   | GG                              | AA                 | AA               | INTERGENIC      |               |                    |                    |
| SNP_90492_A_26522  | NW_004516429.1 | scaffold1145 | 26522                   | CC                              | TT                 | TT               | INTERGENIC      |               |                    |                    |
| SNP_90493_A_26849  | NW_004516429.1 | scaffold1145 | 26849                   | AA                              | GG                 | GG               | INTERGENIC      |               |                    |                    |
| SNP_90494_A_39729  | NW_004516429.1 | scaffold1145 | 39729                   | GG                              | AA                 | AA               | INTERGENIC      |               |                    |                    |
| SNP_90496_A_81439  | NW_004516429.1 | scaffold1145 | 81439                   | TT                              | CC                 | CC               | INTERGENIC      |               |                    |                    |
| SNP_90497_A_81510  | NW_004516429.1 | scaffold1145 | 81510                   | TT                              | GG                 | GG               | INTERGENIC      |               |                    |                    |
| SNP_90498_A_81531  | NW_004516429.1 | scaffold1145 | 81531                   | TT                              | GG                 | GG               | INTERGENIC      |               |                    |                    |
| SNP_90499_A_100412 | NW_004516429.1 | scaffold1145 | 100412                  | AA                              | CC                 | CC               | INTERGENIC      |               |                    |                    |

| SNPs IDs           | Chromosome IDs | Chromosomes  | Physical positions (bp) | CDC Frontier (Reference genome) | (Pusa 1103 & HPNB) | (ILWC 46 & LPNB) | Sequence genome | Components of | Gene accession IDs                          | Putative functions |
|--------------------|----------------|--------------|-------------------------|---------------------------------|--------------------|------------------|-----------------|---------------|---------------------------------------------|--------------------|
| SNP_90500_A_101105 | NW_004516429.1 | scaffold1145 | 101105                  | CC                              | TT                 | TT               | INTERGENIC      |               |                                             |                    |
| SNP_90501_A_8014   | NW_004516430.1 | scaffold1147 | 8014                    | AA                              | TT                 | TT               | INTERGENIC      |               |                                             |                    |
| SNP_90502_A_8255   | NW_004516430.1 | scaffold1147 | 8255                    | TT                              | CC                 | CC               | INTERGENIC      |               |                                             |                    |
| SNP_90503_A_28094  | NW_004516430.1 | scaffold1147 | 28094                   | CC                              | AA                 | AA               | INTERGENIC      |               |                                             |                    |
| SNP_90504_A_28118  | NW_004516430.1 | scaffold1147 | 28118                   | AA                              | GG                 | GG               | INTERGENIC      |               |                                             |                    |
| SNP_90505_A_796    | NW_004516433.1 | scaffold1150 | 796                     | CC                              | TT                 | TT               | INTERGENIC      |               |                                             |                    |
| SNP_90506_A_849    | NW_004516433.1 | scaffold1150 | 849                     | CC                              | AA                 | AA               | INTERGENIC      |               |                                             |                    |
| SNP_90507_A_911    | NW_004516433.1 | scaffold1150 | 911                     | CC                              | AA                 | AA               | INTERGENIC      |               |                                             |                    |
| SNP_90508_A_1169   | NW_004516433.1 | scaffold1150 | 1169                    | AA                              | CC                 | CC               | INTERGENIC      |               |                                             |                    |
| SNP_90509_A_1195   | NW_004516433.1 | scaffold1150 | 1195                    | AA                              | GG                 | GG               | INTERGENIC      |               |                                             |                    |
| SNP_90510_A_1236   | NW_004516433.1 | scaffold1150 | 1236                    | TT                              | CC                 | CC               | INTERGENIC      |               |                                             |                    |
| SNP_90511_A_18772  | NW_004516434.1 | scaffold1151 | 18772                   | TT                              | AA                 | AA               | INTERGENIC      |               |                                             |                    |
| SNP_90513_A_19855  | NW_004516434.1 | scaffold1151 | 19855                   | CC                              | TT                 | TT               | INTERGENIC      |               |                                             |                    |
| SNP_90514_A_20193  | NW_004516434.1 | scaffold1151 | 20193                   | TT                              | CC                 | CC               | INTERGENIC      |               |                                             |                    |
| SNP_90515_A_27784  | NW_004516434.1 | scaffold1151 | 27784                   | TT                              | AA                 | AA               | INTRON          | 101511756     | aquaporin NIP6-1                            |                    |
| SNP_90516_A_29091  | NW_004516434.1 | scaffold1151 | 29091                   | TT                              | CC                 | CC               | INTRON          | 101511756     | aquaporin NIP6-1                            |                    |
| SNP_90517_A_29561  | NW_004516434.1 | scaffold1151 | 29561                   | GG                              | CC                 | CC               | INTRON          | 101511756     | aquaporin NIP6-1                            |                    |
| SNP_90518_A_175548 | NW_004516434.1 | scaffold1151 | 175548                  | GG                              | AA                 | AA               | INTERGENIC      |               |                                             |                    |
| SNP_90519_A_175655 | NW_004516434.1 | scaffold1151 | 175655                  | GG                              | AA                 | AA               | INTERGENIC      |               |                                             |                    |
| SNP_90520_A_279866 | NW_004516434.1 | scaffold1151 | 279866                  | CC                              | AA                 | AA               | INTRON          | 101511219     | Golgi SNAP receptor complex member 1-1-like |                    |
| SNP_90521_A_279877 | NW_004516434.1 | scaffold1151 | 279877                  | AA                              | GG                 | GG               | INTRON          | 101511219     | Golgi SNAP receptor complex member 1-1-like |                    |
| SNP_90522_A_279888 | NW_004516434.1 | scaffold1151 | 279888                  | GG                              | AA                 | AA               | INTRON          | 101511219     | Golgi SNAP receptor complex member 1-1-like |                    |

| SNPs IDs           | Chromosome IDs | Chromosomes  | Physical positions (bp) | CDC Frontier (Reference genome) | (Pusa 1103 & HPNB) | (ILWC 46 & LPNB) | Sequence Components of genome | Gene accession IDs | Putative functions                          |
|--------------------|----------------|--------------|-------------------------|---------------------------------|--------------------|------------------|-------------------------------|--------------------|---------------------------------------------|
| SNP_90523_A_279896 | NW_004516434.1 | scaffold1151 | 279896                  | AA                              | TT                 | TT               | INTRON                        | 101511219          | Golgi SNAP receptor complex member 1-1-like |
| SNP_90524_A_279904 | NW_004516434.1 | scaffold1151 | 279904                  | AA                              | GG                 | GG               | INTRON                        | 101511219          | Golgi SNAP receptor complex member 1-1-like |
| SNP_90525_A_279919 | NW_004516434.1 | scaffold1151 | 279919                  | CC                              | TT                 | TT               | INTRON                        | 101511219          | Golgi SNAP receptor complex member 1-1-like |
| SNP_90526_A_279931 | NW_004516434.1 | scaffold1151 | 279931                  | AA                              | CC                 | CC               | INTRON                        | 101511219          | Golgi SNAP receptor complex member 1-1-like |
| SNP_90527_A_279948 | NW_004516434.1 | scaffold1151 | 279948                  | TT                              | CC                 | CC               | INTRON                        | 101511219          | Golgi SNAP receptor complex member 1-1-like |
| SNP_90528_A_280116 | NW_004516434.1 | scaffold1151 | 280116                  | AA                              | GG                 | GG               | NON_SYNONYMOUS_CODING         | 101511219          | Golgi SNAP receptor complex member 1-1-like |
| SNP_90529_A_280239 | NW_004516434.1 | scaffold1151 | 280239                  | TT                              | CC                 | CC               | NON_SYNONYMOUS_CODING         | 101511219          | Golgi SNAP receptor complex member 1-1-like |
| SNP_90530_A_281023 | NW_004516434.1 | scaffold1151 | 281023                  | AA                              | TT                 | TT               | INTRON                        | 101511219          | Golgi SNAP receptor complex member 1-1-like |
| SNP_90531_A_281043 | NW_004516434.1 | scaffold1151 | 281043                  | CC                              | AA                 | AA               | INTRON                        | 101511219          | Golgi SNAP receptor complex member 1-1-like |
| SNP_90532_A_281054 | NW_004516434.1 | scaffold1151 | 281054                  | TT                              | CC                 | CC               | INTRON                        | 101511219          | Golgi SNAP receptor complex member 1-1-like |
| SNP_90533_A_9866   | NW_004516435.1 | scaffold1152 | 9866                    | TT                              | GG                 | GG               | DRR                           | 101513680          | 30S ribosomal protein 2, chloroplastic      |
| SNP_90534_A_12647  | NW_004516435.1 | scaffold1152 | 12647                   | TT                              | GG                 | GG               | INTERGENIC                    |                    |                                             |
| SNP_90535_A_13339  | NW_004516435.1 | scaffold1152 | 13339                   | GG                              | CC                 | CC               | INTERGENIC                    |                    |                                             |
| SNP_90536_A_22717  | NW_004516435.1 | scaffold1152 | 22717                   | GG                              | AA                 | AA               | INTERGENIC                    |                    |                                             |
| SNP_90537_A_32779  | NW_004516435.1 | scaffold1152 | 32779                   | TT                              | CC                 | CC               | INTERGENIC                    |                    |                                             |
| SNP_90538_A_32814  | NW_004516435.1 | scaffold1152 | 32814                   | AA                              | TT                 | TT               | INTERGENIC                    |                    |                                             |
| SNP_90539_A_32835  | NW_004516435.1 | scaffold1152 | 32835                   | AA                              | CC                 | CC               | INTERGENIC                    |                    |                                             |
| SNP_90540_A_33084  | NW_004516435.1 | scaffold1152 | 33084                   | TT                              | GG                 | GG               | INTERGENIC                    |                    |                                             |
| SNP_90541_A_33129  | NW_004516435.1 | scaffold1152 | 33129                   | AA                              | GG                 | GG               | INTERGENIC                    |                    |                                             |
| SNP_90542_A_36519  | NW_004516435.1 | scaffold1152 | 36519                   | AA                              | GG                 | GG               | INTERGENIC                    |                    |                                             |
| SNP_90543_A_77695  | NW_004516435.1 | scaffold1152 | 77695                   | TT                              | CC                 | CC               | INTERGENIC                    |                    |                                             |
| SNP_90544_A_77811  | NW_004516435.1 | scaffold1152 | 77811                   | TT                              | CC                 | CC               | INTERGENIC                    |                    |                                             |

| SNPs IDs           | Chromosome IDs | Chromosomes  | Physical positions (bp) | CDC Frontier (Reference genome) | (Pusa 1103 & HPNB) | (ILWC 46 & LPNB) | Sequence genome | Components of | Gene accession IDs | Putative functions |
|--------------------|----------------|--------------|-------------------------|---------------------------------|--------------------|------------------|-----------------|---------------|--------------------|--------------------|
| SNP_90545_A_92897  | NW_004516435.1 | scaffold1152 | 92897                   | TT                              | GG                 | GG               | INTERGENIC      |               |                    |                    |
| SNP_90546_A_92947  | NW_004516435.1 | scaffold1152 | 92947                   | AA                              | CC                 | CC               | INTERGENIC      |               |                    |                    |
| SNP_90547_A_92996  | NW_004516435.1 | scaffold1152 | 92996                   | TT                              | AA                 | AA               | INTERGENIC      |               |                    |                    |
| SNP_90548_A_115273 | NW_004516435.1 | scaffold1152 | 115273                  | CC                              | GG                 | GG               | INTERGENIC      |               |                    |                    |
| SNP_90549_A_115279 | NW_004516435.1 | scaffold1152 | 115279                  | TT                              | AA                 | AA               | INTERGENIC      |               |                    |                    |
| SNP_90551_A_42338  | NW_004516436.1 | scaffold1153 | 42338                   | GG                              | TT                 | TT               | INTERGENIC      |               |                    |                    |
| SNP_90552_A_43770  | NW_004516436.1 | scaffold1153 | 43770                   | GG                              | TT                 | TT               | INTERGENIC      |               |                    |                    |
| SNP_90553_A_61790  | NW_004516436.1 | scaffold1153 | 61790                   | AA                              | GG                 | GG               | INTERGENIC      |               |                    |                    |
| SNP_90554_A_61792  | NW_004516436.1 | scaffold1153 | 61792                   | TT                              | CC                 | CC               | INTERGENIC      |               |                    |                    |
| SNP_90556_A_107695 | NW_004516436.1 | scaffold1153 | 107695                  | TT                              | GG                 | GG               | INTERGENIC      |               |                    |                    |
| SNP_90557_A_118442 | NW_004516436.1 | scaffold1153 | 118442                  | AA                              | GG                 | GG               | INTERGENIC      |               |                    |                    |
| SNP_90558_A_128498 | NW_004516436.1 | scaffold1153 | 128498                  | TT                              | AA                 | AA               | INTERGENIC      |               |                    |                    |
| SNP_90559_A_158    | NW_004516439.1 | scaffold1156 | 158                     | CC                              | AA                 | AA               | INTERGENIC      |               |                    |                    |
| SNP_90560_A_186    | NW_004516439.1 | scaffold1156 | 186                     | TT                              | GG                 | GG               | INTERGENIC      |               |                    |                    |
| SNP_90561_A_507    | NW_004516439.1 | scaffold1156 | 507                     | TT                              | CC                 | CC               | INTERGENIC      |               |                    |                    |
| SNP_90562_A_628    | NW_004516439.1 | scaffold1156 | 628                     | TT                              | CC                 | CC               | INTERGENIC      |               |                    |                    |
| SNP_90563_A_1482   | NW_004516439.1 | scaffold1156 | 1482                    | AA                              | GG                 | GG               | INTERGENIC      |               |                    |                    |
| SNP_90564_A_1649   | NW_004516439.1 | scaffold1156 | 1649                    | AA                              | GG                 | GG               | INTERGENIC      |               |                    |                    |
| SNP_90565_A_2679   | NW_004516439.1 | scaffold1156 | 2679                    | AA                              | CC                 | CC               | INTERGENIC      |               |                    |                    |
| SNP_90566_A_2901   | NW_004516439.1 | scaffold1156 | 2901                    | AA                              | CC                 | CC               | INTERGENIC      |               |                    |                    |
| SNP_90567_A_3051   | NW_004516439.1 | scaffold1156 | 3051                    | AA                              | GG                 | GG               | INTERGENIC      |               |                    |                    |
| SNP_90568_A_3064   | NW_004516439.1 | scaffold1156 | 3064                    | TT                              | CC                 | CC               | INTERGENIC      |               |                    |                    |

| SNPs IDs          | Chromosome IDs | Chromosomes  | Physical positions (bp) | CDC Frontier (Reference genome) | (Pusa 1103 & HPNB) | (ILWC 46 & LPNB) | Sequence genome | Components of | Gene accession IDs | Putative functions |
|-------------------|----------------|--------------|-------------------------|---------------------------------|--------------------|------------------|-----------------|---------------|--------------------|--------------------|
| SNP_90569_A_3131  | NW_004516439.1 | scaffold1156 | 3131                    | TT                              | CC                 | CC               | INTERGENIC      |               |                    |                    |
| SNP_90570_A_3225  | NW_004516439.1 | scaffold1156 | 3225                    | AA                              | TT                 | TT               | INTERGENIC      |               |                    |                    |
| SNP_90571_A_3250  | NW_004516439.1 | scaffold1156 | 3250                    | TT                              | AA                 | AA               | INTERGENIC      |               |                    |                    |
| SNP_90572_A_3291  | NW_004516439.1 | scaffold1156 | 3291                    | CC                              | TT                 | TT               | INTERGENIC      |               |                    |                    |
| SNP_90573_A_3353  | NW_004516439.1 | scaffold1156 | 3353                    | CC                              | TT                 | TT               | INTERGENIC      |               |                    |                    |
| SNP_90574_A_3354  | NW_004516439.1 | scaffold1156 | 3354                    | TT                              | CC                 | CC               | INTERGENIC      |               |                    |                    |
| SNP_90575_A_87    | NW_004516441.1 | scaffold1158 | 87                      | CC                              | TT                 | TT               | INTERGENIC      |               |                    |                    |
| SNP_90576_A_186   | NW_004516441.1 | scaffold1158 | 186                     | TT                              | GG                 | GG               | INTERGENIC      |               |                    |                    |
| SNP_90577_A_199   | NW_004516441.1 | scaffold1158 | 199                     | CC                              | TT                 | TT               | INTERGENIC      |               |                    |                    |
| SNP_90578_A_231   | NW_004516441.1 | scaffold1158 | 231                     | TT                              | CC                 | CC               | INTERGENIC      |               |                    |                    |
| SNP_90579_A_273   | NW_004516441.1 | scaffold1158 | 273                     | AA                              | CC                 | CC               | INTERGENIC      |               |                    |                    |
| SNP_90580_A_289   | NW_004516441.1 | scaffold1158 | 289                     | AA                              | CC                 | CC               | INTERGENIC      |               |                    |                    |
| SNP_90581_A_291   | NW_004516441.1 | scaffold1158 | 291                     | GG                              | TT                 | TT               | INTERGENIC      |               |                    |                    |
| SNP_90582_A_5169  | NW_004516441.1 | scaffold1158 | 5169                    | TT                              | GG                 | GG               | INTERGENIC      |               |                    |                    |
| SNP_90583_A_5274  | NW_004516441.1 | scaffold1158 | 5274                    | CC                              | TT                 | TT               | INTERGENIC      |               |                    |                    |
| SNP_90585_A_494   | NW_004516443.1 | scaffold1161 | 494                     | CC                              | AA                 | AA               | INTERGENIC      |               |                    |                    |
| SNP_90586_A_2631  | NW_004516443.1 | scaffold1161 | 2631                    | GG                              | TT                 | TT               | INTERGENIC      |               |                    |                    |
| SNP_90587_A_12188 | NW_004516443.1 | scaffold1161 | 12188                   | AA                              | TT                 | TT               | INTERGENIC      |               |                    |                    |
| SNP_90588_A_12326 | NW_004516443.1 | scaffold1161 | 12326                   | AA                              | GG                 | GG               | INTERGENIC      |               |                    |                    |
| SNP_90589_A_12343 | NW_004516443.1 | scaffold1161 | 12343                   | TT                              | CC                 | CC               | INTERGENIC      |               |                    |                    |
| SNP_90590_A_12361 | NW_004516443.1 | scaffold1161 | 12361                   | GG                              | AA                 | AA               | INTERGENIC      |               |                    |                    |
| SNP_90591_A_12561 | NW_004516443.1 | scaffold1161 | 12561                   | GG                              | TT                 | TT               | INTERGENIC      |               |                    |                    |

| SNPs IDs          | Chromosome IDs | Chromosomes  | Physical positions (bp) | CDC Frontier (Reference genome) | (Pusa 1103 & HPNB) | (ILWC 46 & LPNB) | Sequence genome | Components of | Gene accession IDs | Putative functions |
|-------------------|----------------|--------------|-------------------------|---------------------------------|--------------------|------------------|-----------------|---------------|--------------------|--------------------|
| SNP_90592_A_12604 | NW_004516443.1 | scaffold1161 | 12604                   | GG                              | TT                 | TT               | INTERGENIC      |               |                    |                    |
| SNP_90593_A_12691 | NW_004516443.1 | scaffold1161 | 12691                   | AA                              | TT                 | TT               | INTERGENIC      |               |                    |                    |
| SNP_90594_A_12735 | NW_004516443.1 | scaffold1161 | 12735                   | TT                              | AA                 | AA               | INTERGENIC      |               |                    |                    |
| SNP_90596_A_12889 | NW_004516443.1 | scaffold1161 | 12889                   | AA                              | TT                 | TT               | INTERGENIC      |               |                    |                    |
| SNP_90597_A_12914 | NW_004516443.1 | scaffold1161 | 12914                   | TT                              | CC                 | CC               | INTERGENIC      |               |                    |                    |
| SNP_90598_A_12960 | NW_004516443.1 | scaffold1161 | 12960                   | AA                              | GG                 | GG               | INTERGENIC      |               |                    |                    |
| SNP_90599_A_13014 | NW_004516443.1 | scaffold1161 | 13014                   | CC                              | AA                 | AA               | INTERGENIC      |               |                    |                    |
| SNP_90600_A_13016 | NW_004516443.1 | scaffold1161 | 13016                   | TT                              | AA                 | AA               | INTERGENIC      |               |                    |                    |
| SNP_90601_A_13018 | NW_004516443.1 | scaffold1161 | 13018                   | AA                              | GG                 | GG               | INTERGENIC      |               |                    |                    |
| SNP_90602_A_759   | NW_004516445.1 | scaffold1164 | 759                     | GG                              | TT                 | TT               | INTERGENIC      |               |                    |                    |
| SNP_90603_A_769   | NW_004516445.1 | scaffold1164 | 769                     | CC                              | AA                 | AA               | INTERGENIC      |               |                    |                    |
| SNP_90604_A_980   | NW_004516446.1 | scaffold1165 | 980                     | TT                              | GG                 | GG               | INTERGENIC      |               |                    |                    |
| SNP_90605_A_18254 | NW_004516447.1 | scaffold1166 | 18254                   | CC                              | AA                 | AA               | INTERGENIC      |               |                    |                    |
| SNP_90606_A_46339 | NW_004516447.1 | scaffold1166 | 46339                   | CC                              | AA                 | AA               | INTERGENIC      |               |                    |                    |
| SNP_90607_A_47658 | NW_004516447.1 | scaffold1166 | 47658                   | AA                              | GG                 | GG               | INTERGENIC      |               |                    |                    |
| SNP_90608_A_47823 | NW_004516447.1 | scaffold1166 | 47823                   | AA                              | GG                 | GG               | INTERGENIC      |               |                    |                    |
| SNP_90610_A_47907 | NW_004516447.1 | scaffold1166 | 47907                   | GG                              | AA                 | AA               | INTERGENIC      |               |                    |                    |
| SNP_90611_A_48085 | NW_004516447.1 | scaffold1166 | 48085                   | CC                              | AA                 | AA               | INTERGENIC      |               |                    |                    |
| SNP_90612_A_48116 | NW_004516447.1 | scaffold1166 | 48116                   | AA                              | TT                 | TT               | INTERGENIC      |               |                    |                    |
| SNP_90613_A_48138 | NW_004516447.1 | scaffold1166 | 48138                   | GG                              | AA                 | AA               | INTERGENIC      |               |                    |                    |
| SNP_90614_A_48184 | NW_004516447.1 | scaffold1166 | 48184                   | TT                              | CC                 | CC               | INTERGENIC      |               |                    |                    |
| SNP_90615_A_1064  | NW_004516450.1 | scaffold1172 | 1064                    | GG                              | AA                 | AA               | INTERGENIC      |               |                    |                    |

| SNPs IDs          | Chromosome IDs | Chromosomes  | Physical positions (bp) | CDC Frontier (Reference genome) | (Pusa 1103 & HPNB) | (ILWC 46 & LPNB) | Sequence genome | Components of | Gene accession IDs | Putative functions |
|-------------------|----------------|--------------|-------------------------|---------------------------------|--------------------|------------------|-----------------|---------------|--------------------|--------------------|
| SNP_90616_A_1094  | NW_004516450.1 | scaffold1172 | 1094                    | TT                              | AA                 | AA               | INTERGENIC      |               |                    |                    |
| SNP_90617_A_11927 | NW_004516451.1 | scaffold1173 | 11927                   | GG                              | TT                 | TT               | INTERGENIC      |               |                    |                    |
| SNP_90618_A_11951 | NW_004516451.1 | scaffold1173 | 11951                   | CC                              | TT                 | TT               | INTERGENIC      |               |                    |                    |
| SNP_90619_A_107   | NW_004516452.1 | scaffold1174 | 107                     | GG                              | AA                 | AA               | INTERGENIC      |               |                    |                    |
| SNP_90620_A_108   | NW_004516452.1 | scaffold1174 | 108                     | AA                              | TT                 | TT               | INTERGENIC      |               |                    |                    |
| SNP_90621_A_274   | NW_004516452.1 | scaffold1174 | 274                     | CC                              | GG                 | GG               | INTERGENIC      |               |                    |                    |
| SNP_90622_A_809   | NW_004516452.1 | scaffold1174 | 809                     | TT                              | AA                 | AA               | INTERGENIC      |               |                    |                    |
| SNP_90623_A_1399  | NW_004516452.1 | scaffold1174 | 1399                    | TT                              | AA                 | AA               | INTERGENIC      |               |                    |                    |
| SNP_90624_A_1445  | NW_004516452.1 | scaffold1174 | 1445                    | CC                              | TT                 | TT               | INTERGENIC      |               |                    |                    |
| SNP_90625_A_1605  | NW_004516452.1 | scaffold1174 | 1605                    | CC                              | TT                 | TT               | INTERGENIC      |               |                    |                    |
| SNP_90626_A_1706  | NW_004516452.1 | scaffold1174 | 1706                    | CC                              | AA                 | AA               | INTERGENIC      |               |                    |                    |
| SNP_90627_A_1808  | NW_004516452.1 | scaffold1174 | 1808                    | AA                              | TT                 | TT               | INTERGENIC      |               |                    |                    |
| SNP_90628_A_1873  | NW_004516452.1 | scaffold1174 | 1873                    | CC                              | TT                 | TT               | INTERGENIC      |               |                    |                    |
| SNP_90629_A_15211 | NW_004516452.1 | scaffold1174 | 15211                   | AA                              | TT                 | TT               | INTERGENIC      |               |                    |                    |
| SNP_90630_A_15270 | NW_004516452.1 | scaffold1174 | 15270                   | GG                              | TT                 | TT               | INTERGENIC      |               |                    |                    |
| SNP_90631_A_15297 | NW_004516452.1 | scaffold1174 | 15297                   | AA                              | GG                 | GG               | INTERGENIC      |               |                    |                    |
| SNP_90632_A_15381 | NW_004516452.1 | scaffold1174 | 15381                   | GG                              | AA                 | AA               | INTERGENIC      |               |                    |                    |
| SNP_90633_A_15569 | NW_004516452.1 | scaffold1174 | 15569                   | TT                              | AA                 | AA               | INTERGENIC      |               |                    |                    |
| SNP_90634_A_15943 | NW_004516452.1 | scaffold1174 | 15943                   | AA                              | CC                 | CC               | INTERGENIC      |               |                    |                    |
| SNP_90635_A_15944 | NW_004516452.1 | scaffold1174 | 15944                   | AA                              | CC                 | CC               | INTERGENIC      |               |                    |                    |
| SNP_90636_A_16176 | NW_004516452.1 | scaffold1174 | 16176                   | GG                              | AA                 | AA               | INTERGENIC      |               |                    |                    |
| SNP_90637_A_16188 | NW_004516452.1 | scaffold1174 | 16188                   | AA                              | CC                 | CC               | INTERGENIC      |               |                    |                    |



| SNPs IDs          | Chromosome IDs | Chromosomes    | Physical positions (bp) | CDC Frontier (Reference genome) | (Pusa 1103 & HPNB) | (ILWC 46 & LPNB) | Sequence genome | Components of | Gene accession IDs | Putative functions |
|-------------------|----------------|----------------|-------------------------|---------------------------------|--------------------|------------------|-----------------|---------------|--------------------|--------------------|
| SNP_90638_A_22867 | NW_004516452.1 | scaffold1174   | 22867                   | CC                              | AA                 | AA               | INTERGENIC      |               |                    |                    |
| SNP_90639_A_22877 | NW_004516452.1 | scaffold1174   | 22877                   | GG                              | AA                 | AA               | INTERGENIC      |               |                    |                    |
| SNP_90640_A_22913 | NW_004516452.1 | scaffold1174   | 22913                   | GG                              | AA                 | AA               | INTERGENIC      |               |                    |                    |
| SNP_90641_A_22973 | NW_004516452.1 | scaffold1174   | 22973                   | TT                              | GG                 | GG               | INTERGENIC      |               |                    |                    |
| SNP_90642_A_22976 | NW_004516452.1 | scaffold1174   | 22976                   | CC                              | AA                 | AA               | INTERGENIC      |               |                    |                    |
| SNP_90643_A_22981 | NW_004516452.1 | scaffold1174   | 22981                   | TT                              | CC                 | CC               | INTERGENIC      |               |                    |                    |
| SNP_90644_A_22982 | NW_004516452.1 | scaffold1174   | 22982                   | TT                              | CC                 | CC               | INTERGENIC      |               |                    |                    |
| SNP_90645_A_23115 | NW_004516452.1 | scaffold1174   | 23115                   | GG                              | AA                 | AA               | INTERGENIC      |               |                    |                    |
| SNP_90646_A_23564 | NW_004516452.1 | scaffold1174   | 23564                   | TT                              | GG                 | GG               | INTERGENIC      |               |                    |                    |
| SNP_90647_A_23886 | NW_004516452.1 | scaffold1174   | 23886                   | GG                              | CC                 | CC               | INTERGENIC      |               |                    |                    |
| SNP_90648_A_24818 | NW_004516452.1 | scaffold1174   | 24818                   | AA                              | TT                 | TT               | INTERGENIC      |               |                    |                    |
| SNP_90649_A_25186 | NW_004516452.1 | scaffold1174   | 25186                   | TT                              | AA                 | AA               | INTERGENIC      |               |                    |                    |
| SNP_90650_A_277   | NW_004516453.1 | scaffold1175   | 277                     | GG                              | AA                 | AA               | INTERGENIC      |               |                    |                    |
| SNP_90651_A_363   | NW_004516453.1 | scaffold1175   | 363                     | AA                              | TT                 | TT               | INTERGENIC      |               |                    |                    |
| SNP_90652_A_376   | NW_004516453.1 | scaffold1175   | 376                     | TT                              | GG                 | GG               | INTERGENIC      |               |                    |                    |
| SNP_90653_A_493   | NW_004516453.1 | scaffold1175   | 493                     | AA                              | GG                 | GG               | INTERGENIC      |               |                    |                    |
| SNP_90654_A_714   | NW_004516453.1 | scaffold1175   | 714                     | AA                              | GG                 | GG               | INTERGENIC      |               |                    |                    |
| SNP_90655_A_721   | NW_004516453.1 | scaffold1175   | 721                     | AA                              | GG                 | GG               | INTERGENIC      |               |                    |                    |
| SNP_90656_A_3407  | NW_004516453.1 | scaffold1175   | 3407                    | TT                              | CC                 | CC               | INTERGENIC      |               |                    |                    |
| SNP_90657_A_3530  | NW_004516453.1 | scaffold1175   | 3530                    | AA                              | TT                 | TT               | INTERGENIC      |               |                    |                    |
| SNP_90658_A_3532  | NW_004516453.1 | scaffold1175   | 3532                    | CC                              | TT                 | TT               | INTERGENIC      |               |                    |                    |
| SNP_90659_A_37121 | NW_004516454.1 | scaffold1176_2 | 37121                   | TT                              | CC                 | CC               | INTERGENIC      |               |                    |                    |

| SNPs IDs           | Chromosome IDs | Chromosomes    | Physical positions (bp) | CDC Frontier (Reference genome) | (Pusa 1103 & HPNB) | (ILWC 46 & LPNB) | Sequence Components of genome | Gene accession IDs | Putative functions               |
|--------------------|----------------|----------------|-------------------------|---------------------------------|--------------------|------------------|-------------------------------|--------------------|----------------------------------|
| SNP_90660_A_51006  | NW_004516454.1 | scaffold1176_2 | 51006                   | CC                              | TT                 | TT               | INTERGENIC                    |                    |                                  |
| SNP_90661_A_51697  | NW_004516454.1 | scaffold1176_2 | 51697                   | AA                              | CC                 | CC               | INTERGENIC                    |                    |                                  |
| SNP_90662_A_57721  | NW_004516454.1 | scaffold1176_2 | 57721                   | AA                              | CC                 | CC               | INTERGENIC                    |                    |                                  |
| SNP_90663_A_58073  | NW_004516454.1 | scaffold1176_2 | 58073                   | TT                              | GG                 | GG               | INTERGENIC                    |                    |                                  |
| SNP_90664_A_58302  | NW_004516454.1 | scaffold1176_2 | 58302                   | CC                              | TT                 | TT               | INTERGENIC                    |                    |                                  |
| SNP_90665_A_72127  | NW_004516454.1 | scaffold1176_2 | 72127                   | TT                              | AA                 | AA               | DRR                           | 101515651          | transcription factor bHLH18-like |
| SNP_90666_A_196334 | NW_004516454.1 | scaffold1176_2 | 196334                  | CC                              | AA                 | AA               | INTERGENIC                    |                    |                                  |
| SNP_90667_A_196383 | NW_004516454.1 | scaffold1176_2 | 196383                  | AA                              | GG                 | GG               | INTERGENIC                    |                    |                                  |
| SNP_90669_A_196623 | NW_004516454.1 | scaffold1176_2 | 196623                  | TT                              | CC                 | CC               | INTERGENIC                    |                    |                                  |
| SNP_90670_A_196655 | NW_004516454.1 | scaffold1176_2 | 196655                  | TT                              | CC                 | CC               | INTERGENIC                    |                    |                                  |
| SNP_90671_A_196676 | NW_004516454.1 | scaffold1176_2 | 196676                  | CC                              | GG                 | GG               | INTERGENIC                    |                    |                                  |
| SNP_90672_A_237547 | NW_004516454.1 | scaffold1176_2 | 237547                  | GG                              | AA                 | AA               | INTERGENIC                    |                    |                                  |
| SNP_90673_A_237788 | NW_004516454.1 | scaffold1176_2 | 237788                  | TT                              | GG                 | GG               | INTERGENIC                    |                    |                                  |
| SNP_90674_A_237897 | NW_004516454.1 | scaffold1176_2 | 237897                  | TT                              | CC                 | CC               | INTERGENIC                    |                    |                                  |
| SNP_90675_A_238525 | NW_004516454.1 | scaffold1176_2 | 238525                  | GG                              | AA                 | AA               | INTERGENIC                    |                    |                                  |
| SNP_90677_A_238592 | NW_004516454.1 | scaffold1176_2 | 238592                  | GG                              | CC                 | CC               | INTERGENIC                    |                    |                                  |
| SNP_90678_A_238889 | NW_004516454.1 | scaffold1176_2 | 238889                  | CC                              | GG                 | GG               | INTERGENIC                    |                    |                                  |
| SNP_90679_A_274442 | NW_004516454.1 | scaffold1176_2 | 274442                  | CC                              | TT                 | TT               | INTERGENIC                    |                    |                                  |
| SNP_90680_A_347107 | NW_004516454.1 | scaffold1176_2 | 347107                  | GG                              | AA                 | AA               | INTERGENIC                    |                    |                                  |
| SNP_90681_A_1898   | NW_004516456.1 | scaffold1178   | 1898                    | CC                              | AA                 | AA               | INTERGENIC                    |                    |                                  |
| SNP_90682_A_1899   | NW_004516456.1 | scaffold1178   | 1899                    | CC                              | TT                 | TT               | INTERGENIC                    |                    |                                  |
| SNP_90683_A_1956   | NW_004516456.1 | scaffold1178   | 1956                    | GG                              | AA                 | AA               | INTERGENIC                    |                    |                                  |

| SNPs IDs         | Chromosome IDs | Chromosomes  | Physical positions (bp) | CDC Frontier (Reference genome) | (Pusa 1103 & HPNB) | (ILWC 46 & LPNB) | Sequence genome | Components of | Gene accession IDs | Putative functions |
|------------------|----------------|--------------|-------------------------|---------------------------------|--------------------|------------------|-----------------|---------------|--------------------|--------------------|
| SNP_90684_A_2249 | NW_004516458.1 | scaffold1178 | 2249                    | CC                              | TT                 | TT               | INTERGENIC      |               |                    |                    |
| SNP_90686_A_226  | NW_004516458.1 | scaffold1180 | 226                     | TT                              | AA                 | AA               | INTERGENIC      |               |                    |                    |
| SNP_90687_A_266  | NW_004516458.1 | scaffold1180 | 266                     | TT                              | CC                 | CC               | INTERGENIC      |               |                    |                    |
| SNP_90688_A_320  | NW_004516458.1 | scaffold1180 | 320                     | GG                              | AA                 | AA               | INTERGENIC      |               |                    |                    |
| SNP_90689_A_439  | NW_004516458.1 | scaffold1180 | 439                     | GG                              | AA                 | AA               | INTERGENIC      |               |                    |                    |
| SNP_90690_A_773  | NW_004516458.1 | scaffold1180 | 773                     | GG                              | TT                 | TT               | INTERGENIC      |               |                    |                    |
| SNP_90691_A_2507 | NW_004516458.1 | scaffold1180 | 2507                    | CC                              | TT                 | TT               | INTERGENIC      |               |                    |                    |
| SNP_90692_A_2525 | NW_004516458.1 | scaffold1180 | 2525                    | AA                              | CC                 | CC               | INTERGENIC      |               |                    |                    |
| SNP_90693_A_2577 | NW_004516458.1 | scaffold1180 | 2577                    | GG                              | AA                 | AA               | INTERGENIC      |               |                    |                    |
| SNP_90695_A_2632 | NW_004516458.1 | scaffold1180 | 2632                    | CC                              | TT                 | TT               | INTERGENIC      |               |                    |                    |
| SNP_90696_A_2647 | NW_004516458.1 | scaffold1180 | 2647                    | CC                              | TT                 | TT               | INTERGENIC      |               |                    |                    |
| SNP_90697_A_2673 | NW_004516458.1 | scaffold1180 | 2673                    | TT                              | CC                 | CC               | INTERGENIC      |               |                    |                    |
| SNP_90698_A_2744 | NW_004516458.1 | scaffold1180 | 2744                    | AA                              | GG                 | GG               | INTERGENIC      |               |                    |                    |
| SNP_90699_A_2749 | NW_004516458.1 | scaffold1180 | 2749                    | CC                              | GG                 | GG               | INTERGENIC      |               |                    |                    |
| SNP_90700_A_2775 | NW_004516458.1 | scaffold1180 | 2775                    | GG                              | CC                 | CC               | INTERGENIC      |               |                    |                    |
| SNP_90701_A_2786 | NW_004516458.1 | scaffold1180 | 2786                    | GG                              | AA                 | AA               | INTERGENIC      |               |                    |                    |
| SNP_90702_A_2787 | NW_004516458.1 | scaffold1180 | 2787                    | GG                              | CC                 | CC               | INTERGENIC      |               |                    |                    |
| SNP_90703_A_2833 | NW_004516458.1 | scaffold1180 | 2833                    | CC                              | GG                 | GG               | INTERGENIC      |               |                    |                    |
| SNP_90704_A_2855 | NW_004516458.1 | scaffold1180 | 2855                    | CC                              | AA                 | AA               | INTERGENIC      |               |                    |                    |
| SNP_90705_A_2856 | NW_004516458.1 | scaffold1180 | 2856                    | GG                              | AA                 | AA               | INTERGENIC      |               |                    |                    |
| SNP_90707_A_2927 | NW_004516458.1 | scaffold1180 | 2927                    | CC                              | AA                 | AA               | INTERGENIC      |               |                    |                    |
| SNP_90708_A_2954 | NW_004516458.1 | scaffold1180 | 2954                    | TT                              | GG                 | GG               | INTERGENIC      |               |                    |                    |

| SNPs IDs         | Chromosome IDs | Chromosomes  | Physical positions (bp) | CDC Frontier (Reference genome) | (Pusa 1103 & HPNB) | (ILWC 46 & LPNB) | Sequence genome | Components of | Gene accession IDs | Putative functions |
|------------------|----------------|--------------|-------------------------|---------------------------------|--------------------|------------------|-----------------|---------------|--------------------|--------------------|
| SNP_90709_A_2959 | NW_004516458.1 | scaffold1180 | 2959                    | CC                              | TT                 | TT               | INTERGENIC      |               |                    |                    |
| SNP_90710_A_2964 | NW_004516458.1 | scaffold1180 | 2964                    | AA                              | GG                 | GG               | INTERGENIC      |               |                    |                    |
| SNP_90711_A_2968 | NW_004516458.1 | scaffold1180 | 2968                    | CC                              | AA                 | AA               | INTERGENIC      |               |                    |                    |
| SNP_90712_A_3087 | NW_004516458.1 | scaffold1180 | 3087                    | GG                              | AA                 | AA               | INTERGENIC      |               |                    |                    |
| SNP_90713_A_3124 | NW_004516458.1 | scaffold1180 | 3124                    | TT                              | CC                 | CC               | INTERGENIC      |               |                    |                    |
| SNP_90714_A_3132 | NW_004516458.1 | scaffold1180 | 3132                    | CC                              | TT                 | TT               | INTERGENIC      |               |                    |                    |
| SNP_90715_A_3184 | NW_004516458.1 | scaffold1180 | 3184                    | AA                              | CC                 | CC               | INTERGENIC      |               |                    |                    |
| SNP_90716_A_3216 | NW_004516458.1 | scaffold1180 | 3216                    | CC                              | TT                 | TT               | INTERGENIC      |               |                    |                    |
| SNP_90717_A_3237 | NW_004516458.1 | scaffold1180 | 3237                    | GG                              | TT                 | TT               | INTERGENIC      |               |                    |                    |
| SNP_90718_A_3240 | NW_004516458.1 | scaffold1180 | 3240                    | GG                              | TT                 | TT               | INTERGENIC      |               |                    |                    |
| SNP_90719_A_3253 | NW_004516458.1 | scaffold1180 | 3253                    | CC                              | TT                 | TT               | INTERGENIC      |               |                    |                    |
| SNP_90720_A_3293 | NW_004516458.1 | scaffold1180 | 3293                    | AA                              | GG                 | GG               | INTERGENIC      |               |                    |                    |
| SNP_90721_A_3311 | NW_004516458.1 | scaffold1180 | 3311                    | CC                              | TT                 | TT               | INTERGENIC      |               |                    |                    |
| SNP_90722_A_3329 | NW_004516458.1 | scaffold1180 | 3329                    | TT                              | CC                 | CC               | INTERGENIC      |               |                    |                    |
| SNP_90723_A_3357 | NW_004516458.1 | scaffold1180 | 3357                    | CC                              | TT                 | TT               | INTERGENIC      |               |                    |                    |
| SNP_90724_A_3395 | NW_004516458.1 | scaffold1180 | 3395                    | AA                              | GG                 | GG               | INTERGENIC      |               |                    |                    |
| SNP_90725_A_3400 | NW_004516458.1 | scaffold1180 | 3400                    | CC                              | GG                 | GG               | INTERGENIC      |               |                    |                    |
| SNP_90726_A_3435 | NW_004516458.1 | scaffold1180 | 3435                    | GG                              | TT                 | TT               | INTERGENIC      |               |                    |                    |
| SNP_90727_A_3440 | NW_004516458.1 | scaffold1180 | 3440                    | CC                              | TT                 | TT               | INTERGENIC      |               |                    |                    |
| SNP_90728_A_3465 | NW_004516458.1 | scaffold1180 | 3465                    | GG                              | AA                 | AA               | INTERGENIC      |               |                    |                    |
| SNP_90729_A_3472 | NW_004516458.1 | scaffold1180 | 3472                    | GG                              | TT                 | TT               | INTERGENIC      |               |                    |                    |
| SNP_90730_A_3478 | NW_004516458.1 | scaffold1180 | 3478                    | CC                              | TT                 | TT               | INTERGENIC      |               |                    |                    |

| SNPs IDs          | Chromosome IDs | Chromosomes  | Physical positions (bp) | CDC Frontier (Reference genome) | (Pusa 1103 & HPNB) | (ILWC 46 & LPNB) | Sequence Components of genome | Gene accession IDs | Putative functions |
|-------------------|----------------|--------------|-------------------------|---------------------------------|--------------------|------------------|-------------------------------|--------------------|--------------------|
| SNP_90731_A_3509  | NW_004516458.1 | scaffold1180 | 3509                    | GG                              | AA                 | AA               | INTERGENIC                    |                    |                    |
| SNP_90732_A_3512  | NW_004516458.1 | scaffold1180 | 3512                    | CC                              | TT                 | TT               | INTERGENIC                    |                    |                    |
| SNP_90733_A_3576  | NW_004516458.1 | scaffold1180 | 3576                    | AA                              | GG                 | GG               | INTERGENIC                    |                    |                    |
| SNP_90734_A_3580  | NW_004516458.1 | scaffold1180 | 3580                    | CC                              | TT                 | TT               | INTERGENIC                    |                    |                    |
| SNP_90735_A_3665  | NW_004516458.1 | scaffold1180 | 3665                    | TT                              | CC                 | CC               | INTERGENIC                    |                    |                    |
| SNP_90737_A_3756  | NW_004516458.1 | scaffold1180 | 3756                    | AA                              | TT                 | TT               | INTERGENIC                    |                    |                    |
| SNP_90738_A_3820  | NW_004516458.1 | scaffold1180 | 3820                    | TT                              | CC                 | CC               | INTERGENIC                    |                    |                    |
| SNP_90739_A_3845  | NW_004516458.1 | scaffold1180 | 3845                    | TT                              | CC                 | CC               | INTERGENIC                    |                    |                    |
| SNP_90740_A_3981  | NW_004516458.1 | scaffold1180 | 3981                    | CC                              | TT                 | TT               | INTERGENIC                    |                    |                    |
| SNP_90741_A_4246  | NW_004516458.1 | scaffold1180 | 4246                    | CC                              | TT                 | TT               | INTERGENIC                    |                    |                    |
| SNP_90742_A_4294  | NW_004516458.1 | scaffold1180 | 4294                    | AA                              | TT                 | TT               | INTERGENIC                    |                    |                    |
| SNP_90743_A_4300  | NW_004516458.1 | scaffold1180 | 4300                    | GG                              | TT                 | TT               | INTERGENIC                    |                    |                    |
| SNP_90745_A_51515 | NW_004516458.1 | scaffold1180 | 51515                   | AA                              | GG                 | GG               | INTRON                        | 101493081          | cucumis-in-like    |
| SNP_90746_A_51852 | NW_004516458.1 | scaffold1180 | 51852                   | TT                              | CC                 | CC               | INTRON                        | 101493081          | cucumis-in-like    |
| SNP_90747_A_51945 | NW_004516458.1 | scaffold1180 | 51945                   | TT                              | CC                 | CC               | INTRON                        | 101493081          | cucumis-in-like    |
| SNP_90748_A_59729 | NW_004516458.1 | scaffold1180 | 59729                   | CC                              | AA                 | AA               | INTRON                        | 101493081          | cucumis-in-like    |
| SNP_90749_A_60611 | NW_004516458.1 | scaffold1180 | 60611                   | GG                              | AA                 | AA               | INTRON                        | 101493081          | cucumis-in-like    |
| SNP_90750_A_61407 | NW_004516458.1 | scaffold1180 | 61407                   | AA                              | CC                 | CC               | INTRON                        | 101493081          | cucumis-in-like    |
| SNP_90751_A_61408 | NW_004516458.1 | scaffold1180 | 61408                   | AA                              | TT                 | TT               | INTRON                        | 101493081          | cucumis-in-like    |
| SNP_90752_A_63050 | NW_004516458.1 | scaffold1180 | 63050                   | GG                              | TT                 | TT               | INTRON                        | 101493081          | cucumis-in-like    |
| SNP_90753_A_67542 | NW_004516458.1 | scaffold1180 | 67542                   | AA                              | GG                 | GG               | INTRON                        | 101493081          | cucumis-in-like    |
| SNP_90754_A_71361 | NW_004516458.1 | scaffold1180 | 71361                   | AA                              | GG                 | GG               | INTRON                        | 101493081          | cucumis-in-like    |

| SNPs IDs          | Chromosome IDs | Chromosomes  | Physical positions (bp) | CDC Frontier (Reference genome) | (Pusa 1103 & HPNB) | (ILWC 46 & LPNB) | Sequence Components of genome | Gene accession IDs | Putative functions |
|-------------------|----------------|--------------|-------------------------|---------------------------------|--------------------|------------------|-------------------------------|--------------------|--------------------|
| SNP_90755_A_71653 | NW_004516458.1 | scaffold1180 | 71653                   | AA                              | GG                 | GG               | INTRON                        | 101493081          | cucumis-in-like    |
| SNP_90756_A_73724 | NW_004516458.1 | scaffold1180 | 73724                   | AA                              | GG                 | GG               | INTRON                        | 101493081          | cucumis-in-like    |
| SNP_90757_A_74540 | NW_004516458.1 | scaffold1180 | 74540                   | AA                              | GG                 | GG               | INTRON                        | 101493081          | cucumis-in-like    |
| SNP_90758_A_76627 | NW_004516458.1 | scaffold1180 | 76627                   | CC                              | GG                 | GG               | INTRON                        | 101493081          | cucumis-in-like    |
| SNP_90759_A_80602 | NW_004516458.1 | scaffold1180 | 80602                   | TT                              | CC                 | CC               | INTERGENIC                    |                    |                    |
| SNP_90760_A_81274 | NW_004516458.1 | scaffold1180 | 81274                   | TT                              | CC                 | CC               | INTERGENIC                    |                    |                    |
| SNP_90761_A_81275 | NW_004516458.1 | scaffold1180 | 81275                   | GG                              | TT                 | TT               | INTERGENIC                    |                    |                    |
| SNP_90762_A_81346 | NW_004516458.1 | scaffold1180 | 81346                   | CC                              | TT                 | TT               | INTERGENIC                    |                    |                    |
| SNP_90763_A_81614 | NW_004516458.1 | scaffold1180 | 81614                   | TT                              | CC                 | CC               | INTERGENIC                    |                    |                    |
| SNP_90765_A_88252 | NW_004516458.1 | scaffold1180 | 88252                   | CC                              | TT                 | TT               | INTERGENIC                    |                    |                    |
| SNP_90766_A_88476 | NW_004516458.1 | scaffold1180 | 88476                   | CC                              | TT                 | TT               | INTERGENIC                    |                    |                    |
| SNP_90767_A_93114 | NW_004516458.1 | scaffold1180 | 93114                   | TT                              | CC                 | CC               | INTERGENIC                    |                    |                    |
| SNP_90768_A_93135 | NW_004516458.1 | scaffold1180 | 93135                   | AA                              | GG                 | GG               | INTERGENIC                    |                    |                    |
| SNP_90769_A_93144 | NW_004516458.1 | scaffold1180 | 93144                   | AA                              | GG                 | GG               | INTERGENIC                    |                    |                    |
| SNP_90770_A_93171 | NW_004516458.1 | scaffold1180 | 93171                   | CC                              | TT                 | TT               | INTERGENIC                    |                    |                    |
| SNP_90771_A_93173 | NW_004516458.1 | scaffold1180 | 93173                   | GG                              | AA                 | AA               | INTERGENIC                    |                    |                    |
| SNP_90772_A_93182 | NW_004516458.1 | scaffold1180 | 93182                   | AA                              | CC                 | CC               | INTERGENIC                    |                    |                    |
| SNP_90773_A_93222 | NW_004516458.1 | scaffold1180 | 93222                   | AA                              | GG                 | GG               | INTERGENIC                    |                    |                    |
| SNP_90774_A_93255 | NW_004516458.1 | scaffold1180 | 93255                   | GG                              | AA                 | AA               | INTERGENIC                    |                    |                    |
| SNP_90775_A_93276 | NW_004516458.1 | scaffold1180 | 93276                   | AA                              | GG                 | GG               | INTERGENIC                    |                    |                    |
| SNP_90776_A_93280 | NW_004516458.1 | scaffold1180 | 93280                   | AA                              | GG                 | GG               | INTERGENIC                    |                    |                    |
| SNP_90777_A_93281 | NW_004516458.1 | scaffold1180 | 93281                   | CC                              | TT                 | TT               | INTERGENIC                    |                    |                    |

| SNPs IDs           | Chromosome IDs | Chromosomes  | Physical positions (bp) | CDC Frontier (Reference genome) | (Pusa 1103 & HPNB) | (ILWC 46 & LPNB) | Sequence genome | Components of | Gene accession IDs | Putative functions |
|--------------------|----------------|--------------|-------------------------|---------------------------------|--------------------|------------------|-----------------|---------------|--------------------|--------------------|
| SNP_90778_A_93309  | NW_004516458.1 | scaffold1180 | 93309                   | GG                              | AA                 | AA               | INTERGENIC      |               |                    |                    |
| SNP_90780_A_124243 | NW_004516458.1 | scaffold1180 | 124243                  | TT                              | CC                 | CC               | INTERGENIC      |               |                    |                    |
| SNP_90781_A_124434 | NW_004516458.1 | scaffold1180 | 124434                  | CC                              | TT                 | TT               | INTERGENIC      |               |                    |                    |
| SNP_90782_A_134695 | NW_004516458.1 | scaffold1180 | 134695                  | GG                              | TT                 | TT               | INTERGENIC      |               |                    |                    |
| SNP_90783_A_134696 | NW_004516458.1 | scaffold1180 | 134696                  | GG                              | CC                 | CC               | INTERGENIC      |               |                    |                    |
| SNP_90784_A_134711 | NW_004516458.1 | scaffold1180 | 134711                  | GG                              | AA                 | AA               | INTERGENIC      |               |                    |                    |
| SNP_90785_A_134734 | NW_004516458.1 | scaffold1180 | 134734                  | GG                              | CC                 | CC               | INTERGENIC      |               |                    |                    |
| SNP_90786_A_134791 | NW_004516458.1 | scaffold1180 | 134791                  | AA                              | GG                 | GG               | INTERGENIC      |               |                    |                    |
| SNP_90787_A_134853 | NW_004516458.1 | scaffold1180 | 134853                  | AA                              | GG                 | GG               | INTERGENIC      |               |                    |                    |
| SNP_90789_A_136044 | NW_004516458.1 | scaffold1180 | 136044                  | CC                              | AA                 | AA               | INTERGENIC      |               |                    |                    |
| SNP_90790_A_136048 | NW_004516458.1 | scaffold1180 | 136048                  | AA                              | GG                 | GG               | INTERGENIC      |               |                    |                    |
| SNP_90791_A_136068 | NW_004516458.1 | scaffold1180 | 136068                  | AA                              | GG                 | GG               | INTERGENIC      |               |                    |                    |
| SNP_90792_A_136090 | NW_004516458.1 | scaffold1180 | 136090                  | TT                              | CC                 | CC               | INTERGENIC      |               |                    |                    |
| SNP_90793_A_137897 | NW_004516458.1 | scaffold1180 | 137897                  | AA                              | TT                 | TT               | INTERGENIC      |               |                    |                    |
| SNP_90794_A_140511 | NW_004516458.1 | scaffold1180 | 140511                  | CC                              | TT                 | TT               | INTERGENIC      |               |                    |                    |
| SNP_90795_A_147204 | NW_004516458.1 | scaffold1180 | 147204                  | TT                              | CC                 | CC               | INTERGENIC      |               |                    |                    |
| SNP_90796_A_149316 | NW_004516458.1 | scaffold1180 | 149316                  | AA                              | TT                 | TT               | INTERGENIC      |               |                    |                    |
| SNP_90797_A_155665 | NW_004516458.1 | scaffold1180 | 155665                  | AA                              | GG                 | GG               | INTERGENIC      |               |                    |                    |
| SNP_90798_A_155723 | NW_004516458.1 | scaffold1180 | 155723                  | TT                              | GG                 | GG               | INTERGENIC      |               |                    |                    |
| SNP_90799_A_156080 | NW_004516458.1 | scaffold1180 | 156080                  | GG                              | AA                 | AA               | INTERGENIC      |               |                    |                    |
| SNP_90800_A_158042 | NW_004516458.1 | scaffold1180 | 158042                  | AA                              | TT                 | TT               | INTERGENIC      |               |                    |                    |
| SNP_90801_A_160303 | NW_004516458.1 | scaffold1180 | 160303                  | GG                              | CC                 | CC               | INTERGENIC      |               |                    |                    |

| SNPs IDs           | Chromosome IDs | Chromosomes  | Physical positions (bp) | CDC Frontier (Reference genome) | (Pusa 1103 & HPNB) | (ILWC 46 & LPNB) | Sequence Components of genome | Gene accession IDs | Putative functions |
|--------------------|----------------|--------------|-------------------------|---------------------------------|--------------------|------------------|-------------------------------|--------------------|--------------------|
| SNP_90802_A_161106 | NW_004516458.1 | scaffold1180 | 161106                  | CC                              | TT                 | TT               | INTERGENIC                    |                    |                    |
| SNP_90803_A_163196 | NW_004516458.1 | scaffold1180 | 163196                  | CC                              | TT                 | TT               | INTERGENIC                    |                    |                    |
| SNP_90804_A_165681 | NW_004516458.1 | scaffold1180 | 165681                  | CC                              | TT                 | TT               | INTERGENIC                    |                    |                    |
| SNP_90805_A_169138 | NW_004516458.1 | scaffold1180 | 169138                  | GG                              | CC                 | CC               | INTERGENIC                    |                    |                    |
| SNP_90806_A_170434 | NW_004516458.1 | scaffold1180 | 170434                  | TT                              | CC                 | CC               | INTERGENIC                    |                    |                    |
| SNP_90807_A_183617 | NW_004516458.1 | scaffold1180 | 183617                  | GG                              | AA                 | AA               | INTERGENIC                    |                    |                    |
| SNP_90808_A_183865 | NW_004516458.1 | scaffold1180 | 183865                  | CC                              | TT                 | TT               | INTERGENIC                    |                    |                    |
| SNP_90809_A_189852 | NW_004516458.1 | scaffold1180 | 189852                  | TT                              | CC                 | CC               | INTERGENIC                    |                    |                    |
| SNP_90810_A_191546 | NW_004516458.1 | scaffold1180 | 191546                  | AA                              | CC                 | CC               | INTERGENIC                    |                    |                    |
| SNP_90811_A_194631 | NW_004516458.1 | scaffold1180 | 194631                  | CC                              | TT                 | TT               | DRR                           | 101494051          | Unknown function   |
| SNP_90812_A_199823 | NW_004516458.1 | scaffold1180 | 199823                  | TT                              | CC                 | CC               | INTERGENIC                    |                    |                    |
| SNP_90814_A_207624 | NW_004516458.1 | scaffold1180 | 207624                  | GG                              | AA                 | AA               | INTERGENIC                    |                    |                    |
| SNP_90815_A_208116 | NW_004516458.1 | scaffold1180 | 208116                  | GG                              | AA                 | AA               | INTERGENIC                    |                    |                    |
| SNP_90816_A_208395 | NW_004516458.1 | scaffold1180 | 208395                  | GG                              | AA                 | AA               | INTERGENIC                    |                    |                    |
| SNP_90818_A_208673 | NW_004516458.1 | scaffold1180 | 208673                  | TT                              | CC                 | CC               | INTERGENIC                    |                    |                    |
| SNP_90819_A_208784 | NW_004516458.1 | scaffold1180 | 208784                  | GG                              | AA                 | AA               | INTERGENIC                    |                    |                    |
| SNP_90822_A_209484 | NW_004516458.1 | scaffold1180 | 209484                  | AA                              | GG                 | GG               | INTERGENIC                    |                    |                    |
| SNP_90823_A_209496 | NW_004516458.1 | scaffold1180 | 209496                  | TT                              | CC                 | CC               | INTERGENIC                    |                    |                    |
| SNP_90824_A_209645 | NW_004516458.1 | scaffold1180 | 209645                  | TT                              | CC                 | CC               | INTERGENIC                    |                    |                    |
| SNP_90825_A_209690 | NW_004516458.1 | scaffold1180 | 209690                  | AA                              | GG                 | GG               | INTERGENIC                    |                    |                    |
| SNP_90826_A_210042 | NW_004516458.1 | scaffold1180 | 210042                  | CC                              | TT                 | TT               | INTERGENIC                    |                    |                    |
| SNP_90827_A_210052 | NW_004516458.1 | scaffold1180 | 210052                  | TT                              | AA                 | AA               | INTERGENIC                    |                    |                    |



| SNPs IDs           | Chromosome IDs | Chromosomes  | Physical positions (bp) | CDC Frontier (Reference genome) | (Pusa 1103 & HPNB) | (ILWC 46 & LPNB) | Sequence genome | Components of | Gene accession IDs | Putative functions |
|--------------------|----------------|--------------|-------------------------|---------------------------------|--------------------|------------------|-----------------|---------------|--------------------|--------------------|
| SNP_90828_A_210794 | NW_004516458.1 | scaffold1180 | 210794                  | GG                              | TT                 | TT               | INTERGENIC      |               |                    |                    |
| SNP_90829_A_210828 | NW_004516458.1 | scaffold1180 | 210828                  | AA                              | TT                 | TT               | INTERGENIC      |               |                    |                    |
| SNP_90830_A_210906 | NW_004516458.1 | scaffold1180 | 210906                  | CC                              | GG                 | GG               | INTERGENIC      |               |                    |                    |
| SNP_90831_A_210987 | NW_004516458.1 | scaffold1180 | 210987                  | CC                              | TT                 | TT               | INTERGENIC      |               |                    |                    |
| SNP_90832_A_211315 | NW_004516458.1 | scaffold1180 | 211315                  | CC                              | AA                 | AA               | INTERGENIC      |               |                    |                    |
| SNP_90833_A_211381 | NW_004516458.1 | scaffold1180 | 211381                  | AA                              | GG                 | GG               | INTERGENIC      |               |                    |                    |
| SNP_90834_A_212664 | NW_004516458.1 | scaffold1180 | 212664                  | CC                              | TT                 | TT               | INTERGENIC      |               |                    |                    |
| SNP_90836_A_213911 | NW_004516458.1 | scaffold1180 | 213911                  | TT                              | CC                 | CC               | INTERGENIC      |               |                    |                    |
| SNP_90837_A_213925 | NW_004516458.1 | scaffold1180 | 213925                  | TT                              | CC                 | CC               | INTERGENIC      |               |                    |                    |
| SNP_90838_A_215388 | NW_004516458.1 | scaffold1180 | 215388                  | AA                              | CC                 | CC               | INTERGENIC      |               |                    |                    |
| SNP_90839_A_216211 | NW_004516458.1 | scaffold1180 | 216211                  | GG                              | AA                 | AA               | INTERGENIC      |               |                    |                    |
| SNP_90841_A_217381 | NW_004516458.1 | scaffold1180 | 217381                  | GG                              | AA                 | AA               | INTERGENIC      |               |                    |                    |
| SNP_90842_A_217630 | NW_004516458.1 | scaffold1180 | 217630                  | TT                              | CC                 | CC               | INTERGENIC      |               |                    |                    |
| SNP_90843_A_218585 | NW_004516458.1 | scaffold1180 | 218585                  | TT                              | CC                 | CC               | INTERGENIC      |               |                    |                    |
| SNP_90844_A_218733 | NW_004516458.1 | scaffold1180 | 218733                  | GG                              | AA                 | AA               | INTERGENIC      |               |                    |                    |
| SNP_90845_A_218887 | NW_004516458.1 | scaffold1180 | 218887                  | GG                              | CC                 | CC               | INTERGENIC      |               |                    |                    |
| SNP_90846_A_218892 | NW_004516458.1 | scaffold1180 | 218892                  | CC                              | TT                 | TT               | INTERGENIC      |               |                    |                    |
| SNP_90847_A_218954 | NW_004516458.1 | scaffold1180 | 218954                  | AA                              | TT                 | TT               | INTERGENIC      |               |                    |                    |
| SNP_90848_A_218958 | NW_004516458.1 | scaffold1180 | 218958                  | GG                              | AA                 | AA               | INTERGENIC      |               |                    |                    |
| SNP_90849_A_219037 | NW_004516458.1 | scaffold1180 | 219037                  | AA                              | CC                 | CC               | INTERGENIC      |               |                    |                    |
| SNP_90850_A_219039 | NW_004516458.1 | scaffold1180 | 219039                  | GG                              | TT                 | TT               | INTERGENIC      |               |                    |                    |
| SNP_90851_A_225229 | NW_004516458.1 | scaffold1180 | 225229                  | AA                              | GG                 | GG               | INTERGENIC      |               |                    |                    |

| SNPs IDs           | Chromosome IDs | Chromosomes  | Physical positions (bp) | CDC Frontier (Reference genome) | (Pusa 1103 & HPNB) | (ILWC 46 & LPNB) | Sequence genome | Components of | Gene accession IDs | Putative functions |
|--------------------|----------------|--------------|-------------------------|---------------------------------|--------------------|------------------|-----------------|---------------|--------------------|--------------------|
| SNP_90852_A_226101 | NW_004516458.1 | scaffold1180 | 226101                  | GG                              | AA                 | AA               | INTERGENIC      |               |                    |                    |
| SNP_90853_A_227295 | NW_004516458.1 | scaffold1180 | 227295                  | AA                              | TT                 | TT               | INTERGENIC      |               |                    |                    |
| SNP_90854_A_227296 | NW_004516458.1 | scaffold1180 | 227296                  | AA                              | TT                 | TT               | INTERGENIC      |               |                    |                    |
| SNP_90855_A_227312 | NW_004516458.1 | scaffold1180 | 227312                  | TT                              | AA                 | AA               | INTERGENIC      |               |                    |                    |
| SNP_90856_A_227392 | NW_004516458.1 | scaffold1180 | 227392                  | TT                              | AA                 | AA               | INTERGENIC      |               |                    |                    |
| SNP_90857_A_227745 | NW_004516458.1 | scaffold1180 | 227745                  | AA                              | TT                 | TT               | INTERGENIC      |               |                    |                    |
| SNP_90858_A_228110 | NW_004516458.1 | scaffold1180 | 228110                  | GG                              | CC                 | CC               | INTERGENIC      |               |                    |                    |
| SNP_90859_A_228205 | NW_004516458.1 | scaffold1180 | 228205                  | GG                              | TT                 | TT               | INTERGENIC      |               |                    |                    |
| SNP_90860_A_228238 | NW_004516458.1 | scaffold1180 | 228238                  | TT                              | CC                 | CC               | INTERGENIC      |               |                    |                    |
| SNP_90861_A_228336 | NW_004516458.1 | scaffold1180 | 228336                  | AA                              | GG                 | GG               | INTERGENIC      |               |                    |                    |
| SNP_90862_A_228444 | NW_004516458.1 | scaffold1180 | 228444                  | GG                              | AA                 | AA               | INTERGENIC      |               |                    |                    |
| SNP_90863_A_234775 | NW_004516458.1 | scaffold1180 | 234775                  | TT                              | CC                 | CC               | INTERGENIC      |               |                    |                    |
| SNP_90864_A_240910 | NW_004516458.1 | scaffold1180 | 240910                  | AA                              | GG                 | GG               | INTERGENIC      |               |                    |                    |
| SNP_90865_A_240923 | NW_004516458.1 | scaffold1180 | 240923                  | AA                              | GG                 | GG               | INTERGENIC      |               |                    |                    |
| SNP_90867_A_241239 | NW_004516458.1 | scaffold1180 | 241239                  | TT                              | AA                 | AA               | INTERGENIC      |               |                    |                    |
| SNP_90868_A_241276 | NW_004516458.1 | scaffold1180 | 241276                  | CC                              | GG                 | GG               | INTERGENIC      |               |                    |                    |
| SNP_90869_A_241313 | NW_004516458.1 | scaffold1180 | 241313                  | AA                              | GG                 | GG               | INTERGENIC      |               |                    |                    |
| SNP_90870_A_241398 | NW_004516458.1 | scaffold1180 | 241398                  | GG                              | AA                 | AA               | INTERGENIC      |               |                    |                    |
| SNP_90871_A_247135 | NW_004516458.1 | scaffold1180 | 247135                  | TT                              | AA                 | AA               | INTERGENIC      |               |                    |                    |
| SNP_90873_A_250448 | NW_004516458.1 | scaffold1180 | 250448                  | CC                              | TT                 | TT               | INTERGENIC      |               |                    |                    |
| SNP_90874_A_252372 | NW_004516458.1 | scaffold1180 | 252372                  | AA                              | GG                 | GG               | INTERGENIC      |               |                    |                    |
| SNP_90875_A_252842 | NW_004516458.1 | scaffold1180 | 252842                  | AA                              | CC                 | CC               | INTERGENIC      |               |                    |                    |

| SNPs IDs           | Chromosome IDs | Chromosomes  | Physical positions (bp) | CDC Frontier (Reference genome) | (Pusa 1103 & HPNB) | (ILWC 46 & LPNB) | Sequence genome | Components of | Gene accession IDs | Putative functions |
|--------------------|----------------|--------------|-------------------------|---------------------------------|--------------------|------------------|-----------------|---------------|--------------------|--------------------|
| SNP_90876_A_255606 | NW_004516458.1 | scaffold1180 | 255606                  | AA                              | CC                 | CC               | INTERGENIC      |               |                    |                    |
| SNP_90877_A_255662 | NW_004516458.1 | scaffold1180 | 255662                  | TT                              | CC                 | CC               | INTERGENIC      |               |                    |                    |
| SNP_90878_A_255713 | NW_004516458.1 | scaffold1180 | 255713                  | AA                              | GG                 | GG               | INTERGENIC      |               |                    |                    |
| SNP_90879_A_255724 | NW_004516458.1 | scaffold1180 | 255724                  | CC                              | GG                 | GG               | INTERGENIC      |               |                    |                    |
| SNP_90880_A_255738 | NW_004516458.1 | scaffold1180 | 255738                  | AA                              | CC                 | CC               | INTERGENIC      |               |                    |                    |
| SNP_90881_A_256024 | NW_004516458.1 | scaffold1180 | 256024                  | AA                              | GG                 | GG               | INTERGENIC      |               |                    |                    |
| SNP_90882_A_270618 | NW_004516458.1 | scaffold1180 | 270618                  | AA                              | GG                 | GG               | INTERGENIC      |               |                    |                    |
| SNP_90883_A_277561 | NW_004516458.1 | scaffold1180 | 277561                  | GG                              | TT                 | TT               | INTERGENIC      |               |                    |                    |
| SNP_90884_A_254    | NW_004516459.1 | scaffold1181 | 254                     | AA                              | GG                 | GG               | INTERGENIC      |               |                    |                    |
| SNP_90885_A_1585   | NW_004516459.1 | scaffold1181 | 1585                    | TT                              | AA                 | AA               | INTERGENIC      |               |                    |                    |
| SNP_90886_A_1665   | NW_004516459.1 | scaffold1181 | 1665                    | TT                              | AA                 | AA               | INTERGENIC      |               |                    |                    |
| SNP_90887_A_5388   | NW_004516459.1 | scaffold1181 | 5388                    | AA                              | CC                 | CC               | INTERGENIC      |               |                    |                    |
| SNP_90888_A_5391   | NW_004516459.1 | scaffold1181 | 5391                    | AA                              | TT                 | TT               | INTERGENIC      |               |                    |                    |
| SNP_90889_A_5445   | NW_004516459.1 | scaffold1181 | 5445                    | CC                              | AA                 | AA               | INTERGENIC      |               |                    |                    |
| SNP_90890_A_5649   | NW_004516459.1 | scaffold1181 | 5649                    | CC                              | TT                 | TT               | INTERGENIC      |               |                    |                    |
| SNP_90891_A_5657   | NW_004516459.1 | scaffold1181 | 5657                    | CC                              | TT                 | TT               | INTERGENIC      |               |                    |                    |
| SNP_90892_A_5737   | NW_004516459.1 | scaffold1181 | 5737                    | CC                              | AA                 | AA               | INTERGENIC      |               |                    |                    |
| SNP_90894_A_6118   | NW_004516459.1 | scaffold1181 | 6118                    | CC                              | AA                 | AA               | INTERGENIC      |               |                    |                    |
| SNP_90895_A_6141   | NW_004516459.1 | scaffold1181 | 6141                    | TT                              | AA                 | AA               | INTERGENIC      |               |                    |                    |
| SNP_90896_A_6775   | NW_004516459.1 | scaffold1181 | 6775                    | AA                              | TT                 | TT               | INTERGENIC      |               |                    |                    |
| SNP_90898_A_6863   | NW_004516459.1 | scaffold1181 | 6863                    | CC                              | AA                 | AA               | INTERGENIC      |               |                    |                    |
| SNP_90899_A_6947   | NW_004516459.1 | scaffold1181 | 6947                    | GG                              | AA                 | AA               | INTERGENIC      |               |                    |                    |

| SNPs IDs          | Chromosome IDs | Chromosomes  | Physical positions (bp) | CDC Frontier (Reference genome) | (Pusa 1103 & HPNB) | (ILWC 46 & LPNB) | Sequence genome | Components of | Gene accession IDs | Putative functions |
|-------------------|----------------|--------------|-------------------------|---------------------------------|--------------------|------------------|-----------------|---------------|--------------------|--------------------|
| SNP_90900_A_7086  | NW_004516459.1 | scaffold1181 | 7086                    | GG                              | CC                 | CC               | INTERGENIC      |               |                    |                    |
| SNP_90901_A_7163  | NW_004516459.1 | scaffold1181 | 7163                    | AA                              | CC                 | CC               | INTERGENIC      |               |                    |                    |
| SNP_90902_A_7164  | NW_004516459.1 | scaffold1181 | 7164                    | GG                              | AA                 | AA               | INTERGENIC      |               |                    |                    |
| SNP_90903_A_7184  | NW_004516459.1 | scaffold1181 | 7184                    | AA                              | CC                 | CC               | INTERGENIC      |               |                    |                    |
| SNP_90904_A_7214  | NW_004516459.1 | scaffold1181 | 7214                    | TT                              | CC                 | CC               | INTERGENIC      |               |                    |                    |
| SNP_90905_A_7752  | NW_004516459.1 | scaffold1181 | 7752                    | CC                              | TT                 | TT               | INTERGENIC      |               |                    |                    |
| SNP_90906_A_10993 | NW_004516459.1 | scaffold1181 | 10993                   | TT                              | CC                 | CC               | INTERGENIC      |               |                    |                    |
| SNP_90907_A_11066 | NW_004516459.1 | scaffold1181 | 11066                   | TT                              | CC                 | CC               | INTERGENIC      |               |                    |                    |
| SNP_90908_A_11257 | NW_004516459.1 | scaffold1181 | 11257                   | AA                              | TT                 | TT               | INTERGENIC      |               |                    |                    |
| SNP_90909_A_11264 | NW_004516459.1 | scaffold1181 | 11264                   | AA                              | TT                 | TT               | INTERGENIC      |               |                    |                    |
| SNP_90910_A_11271 | NW_004516459.1 | scaffold1181 | 11271                   | AA                              | TT                 | TT               | INTERGENIC      |               |                    |                    |
| SNP_90911_A_11273 | NW_004516459.1 | scaffold1181 | 11273                   | AA                              | CC                 | CC               | INTERGENIC      |               |                    |                    |
| SNP_90912_A_11278 | NW_004516459.1 | scaffold1181 | 11278                   | AA                              | TT                 | TT               | INTERGENIC      |               |                    |                    |
| SNP_90913_A_11285 | NW_004516459.1 | scaffold1181 | 11285                   | AA                              | TT                 | TT               | INTERGENIC      |               |                    |                    |
| SNP_90914_A_11300 | NW_004516459.1 | scaffold1181 | 11300                   | TT                              | CC                 | CC               | INTERGENIC      |               |                    |                    |
| SNP_90915_A_11499 | NW_004516459.1 | scaffold1181 | 11499                   | AA                              | GG                 | GG               | INTERGENIC      |               |                    |                    |
| SNP_90916_A_11534 | NW_004516459.1 | scaffold1181 | 11534                   | AA                              | GG                 | GG               | INTERGENIC      |               |                    |                    |
| SNP_90917_A_11546 | NW_004516459.1 | scaffold1181 | 11546                   | GG                              | CC                 | CC               | INTERGENIC      |               |                    |                    |
| SNP_90918_A_11549 | NW_004516459.1 | scaffold1181 | 11549                   | GG                              | CC                 | CC               | INTERGENIC      |               |                    |                    |
| SNP_90919_A_101   | NW_004516461.1 | scaffold1183 | 101                     | AA                              | TT                 | TT               | INTERGENIC      |               |                    |                    |
| SNP_90921_A_181   | NW_004516461.1 | scaffold1183 | 181                     | TT                              | CC                 | CC               | INTERGENIC      |               |                    |                    |
| SNP_90922_A_361   | NW_004516461.1 | scaffold1183 | 361                     | CC                              | GG                 | GG               | INTERGENIC      |               |                    |                    |

| SNPs IDs           | Chromosome IDs | Chromosomes  | Physical positions (bp) | CDC Frontier (Reference genome) | (Pusa 1103 & HPNB) | (ILWC 46 & LPNB) | Sequence genome | Components of | Gene accession IDs | Putative functions |
|--------------------|----------------|--------------|-------------------------|---------------------------------|--------------------|------------------|-----------------|---------------|--------------------|--------------------|
| SNP_90923_A_29415  | NW_004516461.1 | scaffold1183 | 29415                   | TT                              | CC                 | CC               | INTERGENIC      |               |                    |                    |
| SNP_90924_A_29482  | NW_004516461.1 | scaffold1183 | 29482                   | AA                              | GG                 | GG               | INTERGENIC      |               |                    |                    |
| SNP_90925_A_29521  | NW_004516461.1 | scaffold1183 | 29521                   | TT                              | CC                 | CC               | INTERGENIC      |               |                    |                    |
| SNP_90926_A_32614  | NW_004516461.1 | scaffold1183 | 32614                   | CC                              | TT                 | TT               | INTERGENIC      |               |                    |                    |
| SNP_90927_A_60455  | NW_004516461.1 | scaffold1183 | 60455                   | AA                              | GG                 | GG               | INTERGENIC      |               |                    |                    |
| SNP_90928_A_75848  | NW_004516461.1 | scaffold1183 | 75848                   | AA                              | GG                 | GG               | INTERGENIC      |               |                    |                    |
| SNP_90929_A_75853  | NW_004516461.1 | scaffold1183 | 75853                   | AA                              | GG                 | GG               | INTERGENIC      |               |                    |                    |
| SNP_90930_A_75926  | NW_004516461.1 | scaffold1183 | 75926                   | TT                              | CC                 | CC               | INTERGENIC      |               |                    |                    |
| SNP_90931_A_75931  | NW_004516461.1 | scaffold1183 | 75931                   | TT                              | GG                 | GG               | INTERGENIC      |               |                    |                    |
| SNP_90932_A_75951  | NW_004516461.1 | scaffold1183 | 75951                   | GG                              | TT                 | TT               | INTERGENIC      |               |                    |                    |
| SNP_90933_A_76003  | NW_004516461.1 | scaffold1183 | 76003                   | AA                              | TT                 | TT               | INTERGENIC      |               |                    |                    |
| SNP_90934_A_76034  | NW_004516461.1 | scaffold1183 | 76034                   | CC                              | TT                 | TT               | INTERGENIC      |               |                    |                    |
| SNP_90935_A_76114  | NW_004516461.1 | scaffold1183 | 76114                   | TT                              | CC                 | CC               | INTERGENIC      |               |                    |                    |
| SNP_90936_A_96654  | NW_004516461.1 | scaffold1183 | 96654                   | GG                              | TT                 | TT               | INTERGENIC      |               |                    |                    |
| SNP_90937_A_96949  | NW_004516461.1 | scaffold1183 | 96949                   | GG                              | CC                 | CC               | INTERGENIC      |               |                    |                    |
| SNP_90940_A_147623 | NW_004516461.1 | scaffold1183 | 147623                  | AA                              | CC                 | CC               | INTERGENIC      |               |                    |                    |
| SNP_90941_A_147627 | NW_004516461.1 | scaffold1183 | 147627                  | CC                              | AA                 | AA               | INTERGENIC      |               |                    |                    |
| SNP_90942_A_147669 | NW_004516461.1 | scaffold1183 | 147669                  | AA                              | GG                 | GG               | INTERGENIC      |               |                    |                    |
| SNP_90943_A_147831 | NW_004516461.1 | scaffold1183 | 147831                  | CC                              | GG                 | GG               | INTERGENIC      |               |                    |                    |
| SNP_90944_A_148775 | NW_004516461.1 | scaffold1183 | 148775                  | CC                              | TT                 | TT               | INTERGENIC      |               |                    |                    |
| SNP_90945_A_148831 | NW_004516461.1 | scaffold1183 | 148831                  | CC                              | GG                 | GG               | INTERGENIC      |               |                    |                    |
| SNP_90946_A_148919 | NW_004516461.1 | scaffold1183 | 148919                  | AA                              | GG                 | GG               | INTERGENIC      |               |                    |                    |

| SNPs IDs           | Chromosome IDs | Chromosomes  | Physical positions (bp) | CDC Frontier (Reference genome) | (Pusa 1103 & HPNB) | (ILWC 46 & LPNB) | Sequence genome | Components of | Gene accession IDs | Putative functions |
|--------------------|----------------|--------------|-------------------------|---------------------------------|--------------------|------------------|-----------------|---------------|--------------------|--------------------|
| SNP_90947_A_232182 | NW_004516461.1 | scaffold1183 | 232182                  | TT                              | CC                 | CC               | INTERGENIC      |               |                    |                    |
| SNP_90948_A_232434 | NW_004516461.1 | scaffold1183 | 232434                  | AA                              | CC                 | CC               | INTERGENIC      |               |                    |                    |
| SNP_90949_A_234211 | NW_004516461.1 | scaffold1183 | 234211                  | CC                              | TT                 | TT               | INTERGENIC      |               |                    |                    |
| SNP_90950_A_234573 | NW_004516461.1 | scaffold1183 | 234573                  | AA                              | GG                 | GG               | INTERGENIC      |               |                    |                    |
| SNP_90952_A_944    | NW_004516462.1 | scaffold1185 | 944                     | AA                              | GG                 | GG               | INTERGENIC      |               |                    |                    |
| SNP_90953_A_947    | NW_004516462.1 | scaffold1185 | 947                     | AA                              | GG                 | GG               | INTERGENIC      |               |                    |                    |
| SNP_90954_A_2437   | NW_004516462.1 | scaffold1185 | 2437                    | TT                              | CC                 | CC               | INTERGENIC      |               |                    |                    |
| SNP_90955_A_3529   | NW_004516462.1 | scaffold1185 | 3529                    | TT                              | GG                 | GG               | INTERGENIC      |               |                    |                    |
| SNP_90956_A_3698   | NW_004516462.1 | scaffold1185 | 3698                    | CC                              | TT                 | TT               | INTERGENIC      |               |                    |                    |
| SNP_90957_A_3811   | NW_004516462.1 | scaffold1185 | 3811                    | AA                              | TT                 | TT               | INTERGENIC      |               |                    |                    |
| SNP_90958_A_3828   | NW_004516462.1 | scaffold1185 | 3828                    | TT                              | AA                 | AA               | INTERGENIC      |               |                    |                    |
| SNP_90959_A_4030   | NW_004516462.1 | scaffold1185 | 4030                    | GG                              | AA                 | AA               | INTERGENIC      |               |                    |                    |
| SNP_90960_A_4308   | NW_004516462.1 | scaffold1185 | 4308                    | TT                              | AA                 | AA               | INTERGENIC      |               |                    |                    |
| SNP_90961_A_4628   | NW_004516462.1 | scaffold1185 | 4628                    | AA                              | GG                 | GG               | INTERGENIC      |               |                    |                    |
| SNP_90962_A_5496   | NW_004516462.1 | scaffold1185 | 5496                    | GG                              | AA                 | AA               | INTERGENIC      |               |                    |                    |
| SNP_90963_A_5580   | NW_004516462.1 | scaffold1185 | 5580                    | TT                              | CC                 | CC               | INTERGENIC      |               |                    |                    |
| SNP_90964_A_6187   | NW_004516462.1 | scaffold1185 | 6187                    | GG                              | TT                 | TT               | INTERGENIC      |               |                    |                    |
| SNP_90965_A_6648   | NW_004516462.1 | scaffold1185 | 6648                    | AA                              | GG                 | GG               | INTERGENIC      |               |                    |                    |
| SNP_90966_A_6650   | NW_004516462.1 | scaffold1185 | 6650                    | AA                              | TT                 | TT               | INTERGENIC      |               |                    |                    |
| SNP_90967_A_7745   | NW_004516462.1 | scaffold1185 | 7745                    | TT                              | CC                 | CC               | INTERGENIC      |               |                    |                    |
| SNP_90968_A_9100   | NW_004516462.1 | scaffold1185 | 9100                    | GG                              | AA                 | AA               | INTERGENIC      |               |                    |                    |
| SNP_90969_A_9129   | NW_004516462.1 | scaffold1185 | 9129                    | AA                              | GG                 | GG               | INTERGENIC      |               |                    |                    |

| SNPs IDs          | Chromosome IDs | Chromosomes  | Physical positions (bp) | CDC Frontier genome (Reference genome) | (Pusa 1103 & HPNB) | (ILWC 46 & LPNB) | Sequence genome | Components of | Gene accession IDs | Putative functions |
|-------------------|----------------|--------------|-------------------------|----------------------------------------|--------------------|------------------|-----------------|---------------|--------------------|--------------------|
| SNP_90970_A_9192  | NW_004516462.1 | scaffold1185 | 9192                    | GG                                     | AA                 | AA               | INTERGENIC      |               |                    |                    |
| SNP_90971_A_10573 | NW_004516462.1 | scaffold1185 | 10573                   | CC                                     | TT                 | TT               | INTERGENIC      |               |                    |                    |
| SNP_90972_A_10859 | NW_004516462.1 | scaffold1185 | 10859                   | GG                                     | AA                 | AA               | INTERGENIC      |               |                    |                    |
| SNP_90973_A_10951 | NW_004516462.1 | scaffold1185 | 10951                   | GG                                     | TT                 | TT               | INTERGENIC      |               |                    |                    |
| SNP_90974_A_12319 | NW_004516462.1 | scaffold1185 | 12319                   | TT                                     | AA                 | AA               | INTERGENIC      |               |                    |                    |
| SNP_90975_A_12911 | NW_004516462.1 | scaffold1185 | 12911                   | GG                                     | AA                 | AA               | INTERGENIC      |               |                    |                    |
| SNP_90976_A_13994 | NW_004516462.1 | scaffold1185 | 13994                   | GG                                     | TT                 | TT               | INTERGENIC      |               |                    |                    |
| SNP_90977_A_14106 | NW_004516462.1 | scaffold1185 | 14106                   | AA                                     | GG                 | GG               | INTERGENIC      |               |                    |                    |
| SNP_90978_A_14153 | NW_004516462.1 | scaffold1185 | 14153                   | TT                                     | CC                 | CC               | INTERGENIC      |               |                    |                    |
| SNP_90979_A_14447 | NW_004516462.1 | scaffold1185 | 14447                   | GG                                     | TT                 | TT               | INTERGENIC      |               |                    |                    |
| SNP_90980_A_15332 | NW_004516462.1 | scaffold1185 | 15332                   | CC                                     | GG                 | GG               | INTERGENIC      |               |                    |                    |
| SNP_90981_A_15776 | NW_004516462.1 | scaffold1185 | 15776                   | CC                                     | TT                 | TT               | INTERGENIC      |               |                    |                    |
| SNP_90982_A_19972 | NW_004516462.1 | scaffold1185 | 19972                   | CC                                     | TT                 | TT               | INTERGENIC      |               |                    |                    |
| SNP_90983_A_20271 | NW_004516462.1 | scaffold1185 | 20271                   | AA                                     | CC                 | CC               | INTERGENIC      |               |                    |                    |
| SNP_90984_A_20443 | NW_004516462.1 | scaffold1185 | 20443                   | GG                                     | AA                 | AA               | INTERGENIC      |               |                    |                    |
| SNP_90985_A_21798 | NW_004516462.1 | scaffold1185 | 21798                   | TT                                     | AA                 | AA               | INTERGENIC      |               |                    |                    |
| SNP_90986_A_22115 | NW_004516462.1 | scaffold1185 | 22115                   | CC                                     | AA                 | AA               | INTERGENIC      |               |                    |                    |
| SNP_90987_A_22154 | NW_004516462.1 | scaffold1185 | 22154                   | AA                                     | GG                 | GG               | INTERGENIC      |               |                    |                    |
| SNP_90988_A_22287 | NW_004516462.1 | scaffold1185 | 22287                   | TT                                     | AA                 | AA               | INTERGENIC      |               |                    |                    |
| SNP_90989_A_22295 | NW_004516462.1 | scaffold1185 | 22295                   | AA                                     | CC                 | CC               | INTERGENIC      |               |                    |                    |
| SNP_90990_A_22566 | NW_004516462.1 | scaffold1185 | 22566                   | AA                                     | GG                 | GG               | INTERGENIC      |               |                    |                    |
| SNP_90991_A_24596 | NW_004516462.1 | scaffold1185 | 24596                   | AA                                     | CC                 | CC               | INTERGENIC      |               |                    |                    |

| SNPs IDs          | Chromosome IDs | Chromosomes  | Physical positions (bp) | CDC Frontier (Reference genome) | (Pusa 1103 & HPNB) | (ILWC 46 & LPNB) | Sequence genome | Components of | Gene accession IDs | Putative functions |
|-------------------|----------------|--------------|-------------------------|---------------------------------|--------------------|------------------|-----------------|---------------|--------------------|--------------------|
| SNP_90992_A_25006 | NW_004516462.1 | scaffold1185 | 25006                   | CC                              | AA                 | AA               | INTERGENIC      |               |                    |                    |
| SNP_90993_A_26098 | NW_004516462.1 | scaffold1185 | 26098                   | TT                              | CC                 | CC               | INTERGENIC      |               |                    |                    |
| SNP_90994_A_26456 | NW_004516462.1 | scaffold1185 | 26456                   | CC                              | AA                 | AA               | INTERGENIC      |               |                    |                    |
| SNP_90995_A_26643 | NW_004516462.1 | scaffold1185 | 26643                   | GG                              | AA                 | AA               | INTERGENIC      |               |                    |                    |
| SNP_90996_A_27891 | NW_004516462.1 | scaffold1185 | 27891                   | GG                              | AA                 | AA               | INTERGENIC      |               |                    |                    |
| SNP_90997_A_28071 | NW_004516462.1 | scaffold1185 | 28071                   | TT                              | AA                 | AA               | INTERGENIC      |               |                    |                    |
| SNP_90998_A_29835 | NW_004516462.1 | scaffold1185 | 29835                   | GG                              | AA                 | AA               | INTERGENIC      |               |                    |                    |
| SNP_90999_A_29993 | NW_004516462.1 | scaffold1185 | 29993                   | AA                              | GG                 | GG               | INTERGENIC      |               |                    |                    |
| SNP_91000_A_30154 | NW_004516462.1 | scaffold1185 | 30154                   | GG                              | CC                 | CC               | INTERGENIC      |               |                    |                    |
| SNP_91001_A_30199 | NW_004516462.1 | scaffold1185 | 30199                   | CC                              | TT                 | TT               | INTERGENIC      |               |                    |                    |
| SNP_91002_A_30502 | NW_004516462.1 | scaffold1185 | 30502                   | GG                              | AA                 | AA               | INTERGENIC      |               |                    |                    |
| SNP_91003_A_30507 | NW_004516462.1 | scaffold1185 | 30507                   | GG                              | TT                 | TT               | INTERGENIC      |               |                    |                    |
| SNP_91004_A_30539 | NW_004516462.1 | scaffold1185 | 30539                   | CC                              | TT                 | TT               | INTERGENIC      |               |                    |                    |
| SNP_91005_A_30983 | NW_004516462.1 | scaffold1185 | 30983                   | GG                              | AA                 | AA               | INTERGENIC      |               |                    |                    |
| SNP_91006_A_38662 | NW_004516462.1 | scaffold1185 | 38662                   | TT                              | CC                 | CC               | INTERGENIC      |               |                    |                    |
| SNP_91007_A_38749 | NW_004516462.1 | scaffold1185 | 38749                   | TT                              | AA                 | AA               | INTERGENIC      |               |                    |                    |
| SNP_91008_A_38874 | NW_004516462.1 | scaffold1185 | 38874                   | CC                              | AA                 | AA               | INTERGENIC      |               |                    |                    |
| SNP_91009_A_39169 | NW_004516462.1 | scaffold1185 | 39169                   | AA                              | GG                 | GG               | INTERGENIC      |               |                    |                    |
| SNP_91011_A_67222 | NW_004516462.1 | scaffold1185 | 67222                   | AA                              | TT                 | TT               | INTERGENIC      |               |                    |                    |
| SNP_91013_A_67421 | NW_004516462.1 | scaffold1185 | 67421                   | GG                              | AA                 | AA               | INTERGENIC      |               |                    |                    |
| SNP_91015_A_67645 | NW_004516462.1 | scaffold1185 | 67645                   | AA                              | CC                 | CC               | INTERGENIC      |               |                    |                    |
| SNP_91016_A_67697 | NW_004516462.1 | scaffold1185 | 67697                   | TT                              | CC                 | CC               | INTERGENIC      |               |                    |                    |



| SNPs IDs           | Chromosome IDs | Chromosomes  | Physical positions (bp) | CDC Frontier (Reference genome) | (Pusa 1103 & HPNB) | (ILWC 46 & LPNB) | Sequence Components of genome | Gene accession IDs | Putative functions           |
|--------------------|----------------|--------------|-------------------------|---------------------------------|--------------------|------------------|-------------------------------|--------------------|------------------------------|
| SNP_91017_A_92667  | NW_004516462.1 | scaffold1185 | 92667                   | GG                              | CC                 | CC               | URR                           | 101495318          | uncharacterized LOC101495318 |
| SNP_91018_A_92671  | NW_004516462.1 | scaffold1185 | 92671                   | GG                              | CC                 | CC               | URR                           | 101495318          | uncharacterized LOC101495318 |
| SNP_91019_A_93561  | NW_004516462.1 | scaffold1185 | 93561                   | AA                              | GG                 | GG               | URR                           | 101495318          | uncharacterized LOC101495318 |
| SNP_91020_A_93810  | NW_004516462.1 | scaffold1185 | 93810                   | AA                              | GG                 | GG               | URR                           | 101495318          | uncharacterized LOC101495318 |
| SNP_91021_A_93935  | NW_004516462.1 | scaffold1185 | 93935                   | AA                              | GG                 | GG               | URR                           | 101495318          | uncharacterized LOC101495318 |
| SNP_91022_A_105317 | NW_004516462.1 | scaffold1185 | 105317                  | GG                              | AA                 | AA               | INTERGENIC                    |                    |                              |
| SNP_91023_A_105403 | NW_004516462.1 | scaffold1185 | 105403                  | AA                              | GG                 | GG               | INTERGENIC                    |                    |                              |
| SNP_91024_A_105447 | NW_004516462.1 | scaffold1185 | 105447                  | TT                              | AA                 | AA               | INTERGENIC                    |                    |                              |
| SNP_91025_A_105758 | NW_004516462.1 | scaffold1185 | 105758                  | TT                              | CC                 | CC               | INTERGENIC                    |                    |                              |
| SNP_91026_A_105761 | NW_004516462.1 | scaffold1185 | 105761                  | AA                              | CC                 | CC               | INTERGENIC                    |                    |                              |
| SNP_91027_A_107585 | NW_004516462.1 | scaffold1185 | 107585                  | AA                              | CC                 | CC               | INTERGENIC                    |                    |                              |
| SNP_91028_A_107594 | NW_004516462.1 | scaffold1185 | 107594                  | AA                              | TT                 | TT               | INTERGENIC                    |                    |                              |
| SNP_91029_A_107902 | NW_004516462.1 | scaffold1185 | 107902                  | AA                              | CC                 | CC               | INTERGENIC                    |                    |                              |
| SNP_91030_A_115425 | NW_004516462.1 | scaffold1185 | 115425                  | TT                              | CC                 | CC               | INTERGENIC                    |                    |                              |
| SNP_91031_A_115429 | NW_004516462.1 | scaffold1185 | 115429                  | AA                              | CC                 | CC               | INTERGENIC                    |                    |                              |
| SNP_91032_A_115480 | NW_004516462.1 | scaffold1185 | 115480                  | CC                              | GG                 | GG               | INTERGENIC                    |                    |                              |
| SNP_91033_A_115671 | NW_004516462.1 | scaffold1185 | 115671                  | GG                              | AA                 | AA               | INTERGENIC                    |                    |                              |
| SNP_91035_A_115720 | NW_004516462.1 | scaffold1185 | 115720                  | TT                              | CC                 | CC               | INTERGENIC                    |                    |                              |
| SNP_91036_A_115774 | NW_004516462.1 | scaffold1185 | 115774                  | TT                              | CC                 | CC               | INTERGENIC                    |                    |                              |
| SNP_91037_A_134728 | NW_004516462.1 | scaffold1185 | 134728                  | GG                              | AA                 | AA               | INTERGENIC                    |                    |                              |
| SNP_91038_A_588    | NW_004516465.1 | scaffold1191 | 588                     | TT                              | GG                 | GG               | INTERGENIC                    |                    |                              |
| SNP_91039_A_649    | NW_004516465.1 | scaffold1191 | 649                     | AA                              | CC                 | CC               | INTERGENIC                    |                    |                              |

| SNPs IDs          | Chromosome IDs | Chromosomes  | Physical positions (bp) | CDC Frontier (Reference genome) | (Pusa 1103 & HPNB) | (ILWC 46 & LPNB) | Sequence genome | Components of | Gene accession IDs | Putative functions |
|-------------------|----------------|--------------|-------------------------|---------------------------------|--------------------|------------------|-----------------|---------------|--------------------|--------------------|
| SNP_91040_A_824   | NW_004516465.1 | scaffold1191 | 824                     | TT                              | CC                 | CC               | INTERGENIC      |               |                    |                    |
| SNP_91041_A_394   | NW_004516466.1 | scaffold1192 | 394                     | GG                              | AA                 | AA               | INTERGENIC      |               |                    |                    |
| SNP_91042_A_400   | NW_004516466.1 | scaffold1192 | 400                     | TT                              | AA                 | AA               | INTERGENIC      |               |                    |                    |
| SNP_91043_A_470   | NW_004516466.1 | scaffold1192 | 470                     | GG                              | CC                 | CC               | INTERGENIC      |               |                    |                    |
| SNP_91044_A_479   | NW_004516466.1 | scaffold1192 | 479                     | GG                              | AA                 | AA               | INTERGENIC      |               |                    |                    |
| SNP_91045_A_491   | NW_004516466.1 | scaffold1192 | 491                     | CC                              | TT                 | TT               | INTERGENIC      |               |                    |                    |
| SNP_91046_A_517   | NW_004516466.1 | scaffold1192 | 517                     | CC                              | AA                 | AA               | INTERGENIC      |               |                    |                    |
| SNP_91047_A_549   | NW_004516466.1 | scaffold1192 | 549                     | GG                              | TT                 | TT               | INTERGENIC      |               |                    |                    |
| SNP_91048_A_650   | NW_004516466.1 | scaffold1192 | 650                     | GG                              | AA                 | AA               | INTERGENIC      |               |                    |                    |
| SNP_91049_A_660   | NW_004516466.1 | scaffold1192 | 660                     | AA                              | GG                 | GG               | INTERGENIC      |               |                    |                    |
| SNP_91051_A_7605  | NW_004516467.1 | scaffold1193 | 7605                    | TT                              | CC                 | CC               | INTERGENIC      |               |                    |                    |
| SNP_91052_A_9464  | NW_004516467.1 | scaffold1193 | 9464                    | AA                              | TT                 | TT               | INTERGENIC      |               |                    |                    |
| SNP_91055_A_62963 | NW_004516467.1 | scaffold1193 | 62963                   | GG                              | TT                 | TT               | INTERGENIC      |               |                    |                    |
| SNP_91056_A_62991 | NW_004516467.1 | scaffold1193 | 62991                   | AA                              | GG                 | GG               | INTERGENIC      |               |                    |                    |
| SNP_91057_A_62999 | NW_004516467.1 | scaffold1193 | 62999                   | CC                              | TT                 | TT               | INTERGENIC      |               |                    |                    |
| SNP_91058_A_63032 | NW_004516467.1 | scaffold1193 | 63032                   | TT                              | CC                 | CC               | INTERGENIC      |               |                    |                    |
| SNP_91059_A_63093 | NW_004516467.1 | scaffold1193 | 63093                   | AA                              | TT                 | TT               | INTERGENIC      |               |                    |                    |
| SNP_91060_A_63101 | NW_004516467.1 | scaffold1193 | 63101                   | AA                              | TT                 | TT               | INTERGENIC      |               |                    |                    |
| SNP_91061_A_63210 | NW_004516467.1 | scaffold1193 | 63210                   | TT                              | GG                 | GG               | INTERGENIC      |               |                    |                    |
| SNP_91062_A_63213 | NW_004516467.1 | scaffold1193 | 63213                   | TT                              | CC                 | CC               | INTERGENIC      |               |                    |                    |
| SNP_91063_A_63255 | NW_004516467.1 | scaffold1193 | 63255                   | TT                              | CC                 | CC               | INTERGENIC      |               |                    |                    |
| SNP_91064_A_63291 | NW_004516467.1 | scaffold1193 | 63291                   | GG                              | AA                 | AA               | INTERGENIC      |               |                    |                    |

| SNPs IDs           | Chromosome IDs | Chromosomes  | Physical positions (bp) | CDC Frontier (Reference genome) | (Pusa 1103 & HPNB) | (ILWC 46 & LPNB) | Sequence genome | Components of | Gene accession IDs | Putative functions |
|--------------------|----------------|--------------|-------------------------|---------------------------------|--------------------|------------------|-----------------|---------------|--------------------|--------------------|
| SNP_91065_A_128216 | NW_004516467.1 | scaffold1193 | 128216                  | GG                              | AA                 | AA               | INTERGENIC      |               |                    |                    |
| SNP_91066_A_191729 | NW_004516467.1 | scaffold1193 | 191729                  | AA                              | GG                 | GG               | INTERGENIC      |               |                    |                    |
| SNP_91067_A_194079 | NW_004516467.1 | scaffold1193 | 194079                  | CC                              | AA                 | AA               | INTERGENIC      |               |                    |                    |
| SNP_91068_A_194398 | NW_004516467.1 | scaffold1193 | 194398                  | GG                              | TT                 | TT               | INTERGENIC      |               |                    |                    |
| SNP_91069_A_194400 | NW_004516467.1 | scaffold1193 | 194400                  | TT                              | GG                 | GG               | INTERGENIC      |               |                    |                    |
| SNP_91070_A_194401 | NW_004516467.1 | scaffold1193 | 194401                  | TT                              | GG                 | GG               | INTERGENIC      |               |                    |                    |
| SNP_91071_A_222582 | NW_004516467.1 | scaffold1193 | 222582                  | TT                              | AA                 | AA               | INTERGENIC      |               |                    |                    |
| SNP_91072_A_222619 | NW_004516467.1 | scaffold1193 | 222619                  | GG                              | TT                 | TT               | INTERGENIC      |               |                    |                    |
| SNP_91073_A_227269 | NW_004516467.1 | scaffold1193 | 227269                  | TT                              | CC                 | CC               | INTERGENIC      |               |                    |                    |
| SNP_91074_A_237563 | NW_004516467.1 | scaffold1193 | 237563                  | AA                              | GG                 | GG               | INTERGENIC      |               |                    |                    |
| SNP_91075_A_241650 | NW_004516467.1 | scaffold1193 | 241650                  | GG                              | AA                 | AA               | INTERGENIC      |               |                    |                    |
| SNP_91077_A_241720 | NW_004516467.1 | scaffold1193 | 241720                  | TT                              | CC                 | CC               | INTERGENIC      |               |                    |                    |
| SNP_91078_A_241763 | NW_004516467.1 | scaffold1193 | 241763                  | TT                              | CC                 | CC               | INTERGENIC      |               |                    |                    |
| SNP_91079_A_241772 | NW_004516467.1 | scaffold1193 | 241772                  | TT                              | CC                 | CC               | INTERGENIC      |               |                    |                    |
| SNP_91080_A_241865 | NW_004516467.1 | scaffold1193 | 241865                  | CC                              | AA                 | AA               | INTERGENIC      |               |                    |                    |
| SNP_91081_A_241933 | NW_004516467.1 | scaffold1193 | 241933                  | CC                              | TT                 | TT               | INTERGENIC      |               |                    |                    |
| SNP_91082_A_241942 | NW_004516467.1 | scaffold1193 | 241942                  | CC                              | TT                 | TT               | INTERGENIC      |               |                    |                    |
| SNP_91083_A_242043 | NW_004516467.1 | scaffold1193 | 242043                  | AA                              | GG                 | GG               | INTERGENIC      |               |                    |                    |
| SNP_91084_A_242055 | NW_004516467.1 | scaffold1193 | 242055                  | AA                              | GG                 | GG               | INTERGENIC      |               |                    |                    |
| SNP_91085_A_242059 | NW_004516467.1 | scaffold1193 | 242059                  | TT                              | CC                 | CC               | INTERGENIC      |               |                    |                    |
| SNP_91086_A_242203 | NW_004516467.1 | scaffold1193 | 242203                  | TT                              | GG                 | GG               | INTERGENIC      |               |                    |                    |
| SNP_91087_A_242244 | NW_004516467.1 | scaffold1193 | 242244                  | AA                              | GG                 | GG               | INTERGENIC      |               |                    |                    |

| SNPs IDs           | Chromosome IDs | Chromosomes  | Physical positions (bp) | CDC Frontier (Reference genome) | (Pusa 1103 & HPNB) | (ILWC 46 & LPNB) | Sequence genome | Components of | Gene accession IDs | Putative functions |
|--------------------|----------------|--------------|-------------------------|---------------------------------|--------------------|------------------|-----------------|---------------|--------------------|--------------------|
| SNP_91088_A_242341 | NW_004516467.1 | scaffold1193 | 242341                  | TT                              | CC                 | CC               | INTERGENIC      |               |                    |                    |
| SNP_91089_A_272765 | NW_004516467.1 | scaffold1193 | 272765                  | AA                              | GG                 | GG               | INTERGENIC      |               |                    |                    |
| SNP_91090_A_272768 | NW_004516467.1 | scaffold1193 | 272768                  | CC                              | TT                 | TT               | INTERGENIC      |               |                    |                    |
| SNP_91091_A_272771 | NW_004516467.1 | scaffold1193 | 272771                  | GG                              | CC                 | CC               | INTERGENIC      |               |                    |                    |
| SNP_91092_A_272777 | NW_004516467.1 | scaffold1193 | 272777                  | CC                              | TT                 | TT               | INTERGENIC      |               |                    |                    |
| SNP_91093_A_272780 | NW_004516467.1 | scaffold1193 | 272780                  | AA                              | CC                 | CC               | INTERGENIC      |               |                    |                    |
| SNP_91094_A_272786 | NW_004516467.1 | scaffold1193 | 272786                  | CC                              | TT                 | TT               | INTERGENIC      |               |                    |                    |
| SNP_91095_A_272805 | NW_004516467.1 | scaffold1193 | 272805                  | AA                              | GG                 | GG               | INTERGENIC      |               |                    |                    |
| SNP_91096_A_272831 | NW_004516467.1 | scaffold1193 | 272831                  | CC                              | TT                 | TT               | INTERGENIC      |               |                    |                    |
| SNP_91097_A_272837 | NW_004516467.1 | scaffold1193 | 272837                  | CC                              | GG                 | GG               | INTERGENIC      |               |                    |                    |
| SNP_91098_A_272843 | NW_004516467.1 | scaffold1193 | 272843                  | CC                              | TT                 | TT               | INTERGENIC      |               |                    |                    |
| SNP_91099_A_272852 | NW_004516467.1 | scaffold1193 | 272852                  | GG                              | AA                 | AA               | INTERGENIC      |               |                    |                    |
| SNP_91100_A_272858 | NW_004516467.1 | scaffold1193 | 272858                  | TT                              | CC                 | CC               | INTERGENIC      |               |                    |                    |
| SNP_91101_A_272900 | NW_004516467.1 | scaffold1193 | 272900                  | CC                              | TT                 | TT               | INTERGENIC      |               |                    |                    |
| SNP_91102_A_272906 | NW_004516467.1 | scaffold1193 | 272906                  | GG                              | AA                 | AA               | INTERGENIC      |               |                    |                    |
| SNP_91103_A_272921 | NW_004516467.1 | scaffold1193 | 272921                  | GG                              | AA                 | AA               | INTERGENIC      |               |                    |                    |
| SNP_91104_A_272924 | NW_004516467.1 | scaffold1193 | 272924                  | TT                              | CC                 | CC               | INTERGENIC      |               |                    |                    |
| SNP_91105_A_275649 | NW_004516467.1 | scaffold1193 | 275649                  | CC                              | AA                 | AA               | INTERGENIC      |               |                    |                    |
| SNP_91106_A_395    | NW_004516469.1 | scaffold1195 | 395                     | GG                              | AA                 | AA               | INTERGENIC      |               |                    |                    |
| SNP_91107_A_16655  | NW_004516469.1 | scaffold1195 | 16655                   | AA                              | CC                 | CC               | INTERGENIC      |               |                    |                    |
| SNP_91109_A_33506  | NW_004516469.1 | scaffold1195 | 33506                   | AA                              | GG                 | GG               | INTERGENIC      |               |                    |                    |
| SNP_91110_A_34933  | NW_004516469.1 | scaffold1195 | 34933                   | AA                              | GG                 | GG               | INTERGENIC      |               |                    |                    |

| SNPs IDs           | Chromosome IDs | Chromosomes  | Physical positions (bp) | CDC Frontier (Reference genome) | (Pusa 1103 & HPNB) | (ILWC 46 & LPNB) | Sequence genome | Components of | Gene accession IDs | Putative functions |
|--------------------|----------------|--------------|-------------------------|---------------------------------|--------------------|------------------|-----------------|---------------|--------------------|--------------------|
| SNP_91111_A_34974  | NW_004516469.1 | scaffold1195 | 34974                   | AA                              | CC                 | CC               | INTERGENIC      |               |                    |                    |
| SNP_91112_A_35025  | NW_004516469.1 | scaffold1195 | 35025                   | AA                              | GG                 | GG               | INTERGENIC      |               |                    |                    |
| SNP_91113_A_35084  | NW_004516469.1 | scaffold1195 | 35084                   | TT                              | CC                 | CC               | INTERGENIC      |               |                    |                    |
| SNP_91114_A_35129  | NW_004516469.1 | scaffold1195 | 35129                   | AA                              | CC                 | CC               | INTERGENIC      |               |                    |                    |
| SNP_91115_A_35142  | NW_004516469.1 | scaffold1195 | 35142                   | TT                              | CC                 | CC               | INTERGENIC      |               |                    |                    |
| SNP_91116_A_35180  | NW_004516469.1 | scaffold1195 | 35180                   | AA                              | GG                 | GG               | INTERGENIC      |               |                    |                    |
| SNP_91117_A_35494  | NW_004516469.1 | scaffold1195 | 35494                   | GG                              | AA                 | AA               | INTERGENIC      |               |                    |                    |
| SNP_91118_A_35495  | NW_004516469.1 | scaffold1195 | 35495                   | TT                              | CC                 | CC               | INTERGENIC      |               |                    |                    |
| SNP_91119_A_64064  | NW_004516469.1 | scaffold1195 | 64064                   | AA                              | GG                 | GG               | INTERGENIC      |               |                    |                    |
| SNP_91120_A_64514  | NW_004516469.1 | scaffold1195 | 64514                   | TT                              | CC                 | CC               | INTERGENIC      |               |                    |                    |
| SNP_91121_A_91498  | NW_004516469.1 | scaffold1195 | 91498                   | AA                              | TT                 | TT               | INTERGENIC      |               |                    |                    |
| SNP_91122_A_111932 | NW_004516469.1 | scaffold1195 | 111932                  | AA                              | TT                 | TT               | INTERGENIC      |               |                    |                    |
| SNP_91123_A_2583   | NW_004516470.1 | scaffold1196 | 2583                    | AA                              | TT                 | TT               | INTERGENIC      |               |                    |                    |
| SNP_91124_A_13394  | NW_004516470.1 | scaffold1196 | 13394                   | GG                              | TT                 | TT               | INTERGENIC      |               |                    |                    |
| SNP_91125_A_37124  | NW_004516470.1 | scaffold1196 | 37124                   | AA                              | GG                 | GG               | INTERGENIC      |               |                    |                    |
| SNP_91126_A_37125  | NW_004516470.1 | scaffold1196 | 37125                   | TT                              | CC                 | CC               | INTERGENIC      |               |                    |                    |
| SNP_91127_A_37129  | NW_004516470.1 | scaffold1196 | 37129                   | TT                              | CC                 | CC               | INTERGENIC      |               |                    |                    |
| SNP_91128_A_37137  | NW_004516470.1 | scaffold1196 | 37137                   | AA                              | CC                 | CC               | INTERGENIC      |               |                    |                    |
| SNP_91129_A_37189  | NW_004516470.1 | scaffold1196 | 37189                   | TT                              | CC                 | CC               | INTERGENIC      |               |                    |                    |
| SNP_91130_A_37449  | NW_004516470.1 | scaffold1196 | 37449                   | TT                              | CC                 | CC               | INTERGENIC      |               |                    |                    |
| SNP_91131_A_37482  | NW_004516470.1 | scaffold1196 | 37482                   | AA                              | GG                 | GG               | INTERGENIC      |               |                    |                    |
| SNP_91132_A_37486  | NW_004516470.1 | scaffold1196 | 37486                   | TT                              | GG                 | GG               | INTERGENIC      |               |                    |                    |

| SNPs IDs           | Chromosome IDs | Chromosomes  | Physical positions (bp) | CDC Frontier (Reference genome) | (Pusa 1103 & HPNB) | (ILWC 46 & LPNB) | Sequence genome | Components of | Gene accession IDs | Putative functions |
|--------------------|----------------|--------------|-------------------------|---------------------------------|--------------------|------------------|-----------------|---------------|--------------------|--------------------|
| SNP_91134_A_55471  | NW_004516470.1 | scaffold1196 | 55471                   | AA                              | CC                 | CC               | INTERGENIC      |               |                    |                    |
| SNP_91135_A_69977  | NW_004516470.1 | scaffold1196 | 69977                   | AA                              | GG                 | GG               | INTERGENIC      |               |                    |                    |
| SNP_91136_A_70919  | NW_004516470.1 | scaffold1196 | 70919                   | TT                              | CC                 | CC               | INTERGENIC      |               |                    |                    |
| SNP_91137_A_71001  | NW_004516470.1 | scaffold1196 | 71001                   | CC                              | AA                 | AA               | INTERGENIC      |               |                    |                    |
| SNP_91138_A_75682  | NW_004516470.1 | scaffold1196 | 75682                   | CC                              | AA                 | AA               | INTERGENIC      |               |                    |                    |
| SNP_91139_A_78148  | NW_004516470.1 | scaffold1196 | 78148                   | GG                              | TT                 | TT               | INTERGENIC      |               |                    |                    |
| SNP_91140_A_78480  | NW_004516470.1 | scaffold1196 | 78480                   | GG                              | CC                 | CC               | INTERGENIC      |               |                    |                    |
| SNP_91141_A_78506  | NW_004516470.1 | scaffold1196 | 78506                   | AA                              | TT                 | TT               | INTERGENIC      |               |                    |                    |
| SNP_91142_A_78811  | NW_004516470.1 | scaffold1196 | 78811                   | GG                              | TT                 | TT               | INTERGENIC      |               |                    |                    |
| SNP_91143_A_103843 | NW_004516470.1 | scaffold1196 | 103843                  | TT                              | AA                 | AA               | INTERGENIC      |               |                    |                    |
| SNP_91144_A_106246 | NW_004516470.1 | scaffold1196 | 106246                  | AA                              | GG                 | GG               | INTERGENIC      |               |                    |                    |
| SNP_91145_A_111082 | NW_004516470.1 | scaffold1196 | 111082                  | GG                              | AA                 | AA               | INTERGENIC      |               |                    |                    |
| SNP_91146_A_111108 | NW_004516470.1 | scaffold1196 | 111108                  | TT                              | AA                 | AA               | INTERGENIC      |               |                    |                    |
| SNP_91147_A_111597 | NW_004516470.1 | scaffold1196 | 111597                  | AA                              | TT                 | TT               | INTERGENIC      |               |                    |                    |
| SNP_91149_A_115406 | NW_004516470.1 | scaffold1196 | 115406                  | TT                              | CC                 | CC               | INTERGENIC      |               |                    |                    |
| SNP_91150_A_118969 | NW_004516470.1 | scaffold1196 | 118969                  | GG                              | AA                 | AA               | INTERGENIC      |               |                    |                    |
| SNP_91151_A_119622 | NW_004516470.1 | scaffold1196 | 119622                  | AA                              | CC                 | CC               | INTERGENIC      |               |                    |                    |
| SNP_91152_A_119629 | NW_004516470.1 | scaffold1196 | 119629                  | AA                              | GG                 | GG               | INTERGENIC      |               |                    |                    |
| SNP_91153_A_120036 | NW_004516470.1 | scaffold1196 | 120036                  | AA                              | GG                 | GG               | INTERGENIC      |               |                    |                    |
| SNP_91154_A_120533 | NW_004516470.1 | scaffold1196 | 120533                  | TT                              | GG                 | GG               | INTERGENIC      |               |                    |                    |
| SNP_91155_A_134694 | NW_004516470.1 | scaffold1196 | 134694                  | AA                              | TT                 | TT               | INTERGENIC      |               |                    |                    |
| SNP_91156_A_139910 | NW_004516470.1 | scaffold1196 | 139910                  | TT                              | GG                 | GG               | INTERGENIC      |               |                    |                    |

| SNPs IDs           | Chromosome IDs | Chromosomes  | Physical positions (bp) | CDC Frontier (Reference genome) | (Pusa 1103 & HPNB) | (ILWC 46 & LPNB) | Sequence Components of genome | Gene accession IDs | Putative functions                                   |
|--------------------|----------------|--------------|-------------------------|---------------------------------|--------------------|------------------|-------------------------------|--------------------|------------------------------------------------------|
| SNP_91157_A_144419 | NW_004516470.1 | scaffold1196 | 144419                  | CC                              | TT                 | TT               | INTERGENIC                    |                    |                                                      |
| SNP_91158_A_144738 | NW_004516470.1 | scaffold1196 | 144738                  | CC                              | TT                 | TT               | INTERGENIC                    |                    |                                                      |
| SNP_91159_A_144755 | NW_004516470.1 | scaffold1196 | 144755                  | TT                              | AA                 | AA               | INTERGENIC                    |                    |                                                      |
| SNP_91160_A_153078 | NW_004516470.1 | scaffold1196 | 153078                  | AA                              | GG                 | GG               | INTERGENIC                    |                    |                                                      |
| SNP_91161_A_167267 | NW_004516470.1 | scaffold1196 | 167267                  | CC                              | AA                 | AA               | URR                           | 101498593          | L-galactono-1,4-lactone dehydrogenase, mitochondrial |
| SNP_91163_A_182743 | NW_004516470.1 | scaffold1196 | 182743                  | AA                              | CC                 | CC               | INTERGENIC                    |                    |                                                      |
| SNP_91164_A_183621 | NW_004516470.1 | scaffold1196 | 183621                  | AA                              | GG                 | GG               | INTERGENIC                    |                    |                                                      |
| SNP_91166_A_192878 | NW_004516470.1 | scaffold1196 | 192878                  | TT                              | CC                 | CC               | INTERGENIC                    |                    |                                                      |
| SNP_91167_A_192950 | NW_004516470.1 | scaffold1196 | 192950                  | CC                              | AA                 | AA               | INTERGENIC                    |                    |                                                      |
| SNP_91168_A_193304 | NW_004516470.1 | scaffold1196 | 193304                  | AA                              | GG                 | GG               | INTERGENIC                    |                    |                                                      |
| SNP_91169_A_205962 | NW_004516470.1 | scaffold1196 | 205962                  | CC                              | AA                 | AA               | INTERGENIC                    |                    |                                                      |
| SNP_91170_A_206789 | NW_004516470.1 | scaffold1196 | 206789                  | GG                              | TT                 | TT               | INTERGENIC                    |                    |                                                      |
| SNP_91171_A_207287 | NW_004516470.1 | scaffold1196 | 207287                  | AA                              | GG                 | GG               | INTERGENIC                    |                    |                                                      |
| SNP_91172_A_5059   | NW_004516471.1 | scaffold1197 | 5059                    | TT                              | CC                 | CC               | INTERGENIC                    |                    |                                                      |
| SNP_91174_A_5190   | NW_004516471.1 | scaffold1197 | 5190                    | TT                              | CC                 | CC               | INTERGENIC                    |                    |                                                      |
| SNP_91175_A_5244   | NW_004516471.1 | scaffold1197 | 5244                    | AA                              | CC                 | CC               | INTERGENIC                    |                    |                                                      |
| SNP_91176_A_5271   | NW_004516471.1 | scaffold1197 | 5271                    | TT                              | AA                 | AA               | INTERGENIC                    |                    |                                                      |
| SNP_91177_A_5272   | NW_004516471.1 | scaffold1197 | 5272                    | CC                              | AA                 | AA               | INTERGENIC                    |                    |                                                      |
| SNP_91178_A_5326   | NW_004516471.1 | scaffold1197 | 5326                    | GG                              | AA                 | AA               | INTERGENIC                    |                    |                                                      |
| SNP_91179_A_5332   | NW_004516471.1 | scaffold1197 | 5332                    | AA                              | GG                 | GG               | INTERGENIC                    |                    |                                                      |
| SNP_91180_A_5352   | NW_004516471.1 | scaffold1197 | 5352                    | AA                              | GG                 | GG               | INTERGENIC                    |                    |                                                      |
| SNP_91181_A_5407   | NW_004516471.1 | scaffold1197 | 5407                    | AA                              | GG                 | GG               | INTERGENIC                    |                    |                                                      |

| SNPs IDs          | Chromosome IDs | Chromosomes  | Physical positions (bp) | CDC Frontier (Reference genome) | (Pusa 1103 & HPNB) | (ILWC 46 & LPNB) | Sequence genome | Components of | Gene accession IDs | Putative functions |
|-------------------|----------------|--------------|-------------------------|---------------------------------|--------------------|------------------|-----------------|---------------|--------------------|--------------------|
| SNP_91182_A_5411  | NW_004516471.1 | scaffold1197 | 5411                    | GG                              | AA                 | AA               | INTERGENIC      |               |                    |                    |
| SNP_91183_A_5508  | NW_004516471.1 | scaffold1197 | 5508                    | GG                              | AA                 | AA               | INTERGENIC      |               |                    |                    |
| SNP_91184_A_5595  | NW_004516471.1 | scaffold1197 | 5595                    | GG                              | AA                 | AA               | INTERGENIC      |               |                    |                    |
| SNP_91185_A_5615  | NW_004516471.1 | scaffold1197 | 5615                    | AA                              | GG                 | GG               | INTERGENIC      |               |                    |                    |
| SNP_91186_A_5655  | NW_004516471.1 | scaffold1197 | 5655                    | GG                              | TT                 | TT               | INTERGENIC      |               |                    |                    |
| SNP_91187_A_5879  | NW_004516471.1 | scaffold1197 | 5879                    | TT                              | AA                 | AA               | INTERGENIC      |               |                    |                    |
| SNP_91188_A_5880  | NW_004516471.1 | scaffold1197 | 5880                    | GG                              | TT                 | TT               | INTERGENIC      |               |                    |                    |
| SNP_91189_A_5894  | NW_004516471.1 | scaffold1197 | 5894                    | CC                              | AA                 | AA               | INTERGENIC      |               |                    |                    |
| SNP_91190_A_6232  | NW_004516471.1 | scaffold1197 | 6232                    | CC                              | TT                 | TT               | INTERGENIC      |               |                    |                    |
| SNP_91191_A_6243  | NW_004516471.1 | scaffold1197 | 6243                    | TT                              | CC                 | CC               | INTERGENIC      |               |                    |                    |
| SNP_91192_A_9975  | NW_004516471.1 | scaffold1197 | 9975                    | TT                              | CC                 | CC               | INTERGENIC      |               |                    |                    |
| SNP_91193_A_19975 | NW_004516471.1 | scaffold1197 | 19975                   | TT                              | CC                 | CC               | INTERGENIC      |               |                    |                    |
| SNP_91194_A_19980 | NW_004516471.1 | scaffold1197 | 19980                   | TT                              | CC                 | CC               | INTERGENIC      |               |                    |                    |
| SNP_91195_A_23242 | NW_004516471.1 | scaffold1197 | 23242                   | TT                              | AA                 | AA               | INTERGENIC      |               |                    |                    |
| SNP_91196_A_25989 | NW_004516471.1 | scaffold1197 | 25989                   | GG                              | AA                 | AA               | INTERGENIC      |               |                    |                    |
| SNP_91197_A_26009 | NW_004516471.1 | scaffold1197 | 26009                   | CC                              | AA                 | AA               | INTERGENIC      |               |                    |                    |
| SNP_91198_A_26015 | NW_004516471.1 | scaffold1197 | 26015                   | AA                              | CC                 | CC               | INTERGENIC      |               |                    |                    |
| SNP_91199_A_26063 | NW_004516471.1 | scaffold1197 | 26063                   | AA                              | TT                 | TT               | INTERGENIC      |               |                    |                    |
| SNP_91200_A_28092 | NW_004516471.1 | scaffold1197 | 28092                   | AA                              | GG                 | GG               | INTERGENIC      |               |                    |                    |
| SNP_91201_A_28111 | NW_004516471.1 | scaffold1197 | 28111                   | GG                              | AA                 | AA               | INTERGENIC      |               |                    |                    |
| SNP_91202_A_38654 | NW_004516471.1 | scaffold1197 | 38654                   | TT                              | CC                 | CC               | INTERGENIC      |               |                    |                    |
| SNP_91203_A_40336 | NW_004516471.1 | scaffold1197 | 40336                   | GG                              | AA                 | AA               | INTERGENIC      |               |                    |                    |



| SNPs IDs           | Chromosome IDs | Chromosomes  | Physical positions (bp) | CDC Frontier (Reference genome) | (Pusa 1103 & HPNB) | (ILWC 46 & LPNB) | Sequence Components of genome | Gene accession IDs | Putative functions |
|--------------------|----------------|--------------|-------------------------|---------------------------------|--------------------|------------------|-------------------------------|--------------------|--------------------|
| SNP_91204_A_44618  | NW_004516471.1 | scaffold1197 | 44618                   | GG                              | AA                 | AA               | INTERGENIC                    |                    |                    |
| SNP_91205_A_48285  | NW_004516471.1 | scaffold1197 | 48285                   | AA                              | GG                 | GG               | DRR                           | 101502116          | Unknown function   |
| SNP_91206_A_54833  | NW_004516471.1 | scaffold1197 | 54833                   | GG                              | AA                 | AA               | INTRON                        | 101502116          | Unknown function   |
| SNP_91207_A_58181  | NW_004516471.1 | scaffold1197 | 58181                   | AA                              | TT                 | TT               | INTERGENIC                    |                    |                    |
| SNP_91208_A_58196  | NW_004516471.1 | scaffold1197 | 58196                   | CC                              | TT                 | TT               | INTERGENIC                    |                    |                    |
| SNP_91209_A_58374  | NW_004516471.1 | scaffold1197 | 58374                   | TT                              | CC                 | CC               | INTERGENIC                    |                    |                    |
| SNP_91210_A_58522  | NW_004516471.1 | scaffold1197 | 58522                   | CC                              | TT                 | TT               | INTERGENIC                    |                    |                    |
| SNP_91211_A_58587  | NW_004516471.1 | scaffold1197 | 58587                   | TT                              | AA                 | AA               | INTERGENIC                    |                    |                    |
| SNP_91212_A_58619  | NW_004516471.1 | scaffold1197 | 58619                   | GG                              | AA                 | AA               | INTERGENIC                    |                    |                    |
| SNP_91213_A_72858  | NW_004516471.1 | scaffold1197 | 72858                   | CC                              | AA                 | AA               | NON_SYNONYMOUS_CODING         | 101503052          | Unknown function   |
| SNP_91216_A_87101  | NW_004516471.1 | scaffold1197 | 87101                   | AA                              | GG                 | GG               | INTERGENIC                    |                    |                    |
| SNP_91217_A_87157  | NW_004516471.1 | scaffold1197 | 87157                   | TT                              | CC                 | CC               | INTERGENIC                    |                    |                    |
| SNP_91218_A_87263  | NW_004516471.1 | scaffold1197 | 87263                   | AA                              | TT                 | TT               | INTERGENIC                    |                    |                    |
| SNP_91219_A_87425  | NW_004516471.1 | scaffold1197 | 87425                   | TT                              | AA                 | AA               | INTERGENIC                    |                    |                    |
| SNP_91221_A_136559 | NW_004516471.1 | scaffold1197 | 136559                  | GG                              | AA                 | AA               | INTERGENIC                    |                    |                    |
| SNP_91222_A_142109 | NW_004516471.1 | scaffold1197 | 142109                  | TT                              | AA                 | AA               | INTERGENIC                    |                    |                    |
| SNP_91223_A_142202 | NW_004516471.1 | scaffold1197 | 142202                  | CC                              | AA                 | AA               | INTERGENIC                    |                    |                    |
| SNP_91224_A_142218 | NW_004516471.1 | scaffold1197 | 142218                  | TT                              | AA                 | AA               | INTERGENIC                    |                    |                    |
| SNP_91225_A_142354 | NW_004516471.1 | scaffold1197 | 142354                  | TT                              | CC                 | CC               | INTERGENIC                    |                    |                    |
| SNP_91227_A_142360 | NW_004516471.1 | scaffold1197 | 142360                  | GG                              | AA                 | AA               | INTERGENIC                    |                    |                    |
| SNP_91228_A_142361 | NW_004516471.1 | scaffold1197 | 142361                  | TT                              | CC                 | CC               | INTERGENIC                    |                    |                    |
| SNP_91229_A_142412 | NW_004516471.1 | scaffold1197 | 142412                  | GG                              | CC                 | CC               | INTERGENIC                    |                    |                    |

| SNPs IDs           | Chromosome IDs | Chromosomes  | Physical positions (bp) | CDC Frontier (Reference genome) | (Pusa 1103 & HPNB) | (ILWC 46 & LPNB) | Sequence Components of genome | Gene accession IDs | Putative functions            |
|--------------------|----------------|--------------|-------------------------|---------------------------------|--------------------|------------------|-------------------------------|--------------------|-------------------------------|
| SNP_91231_A_147272 | NW_004516471.1 | scaffold1197 | 147272                  | TT                              | CC                 | CC               | INTERGENIC                    |                    |                               |
| SNP_91232_A_151652 | NW_004516471.1 | scaffold1197 | 151652                  | GG                              | AA                 | AA               | INTERGENIC                    |                    |                               |
| SNP_91233_A_173109 | NW_004516471.1 | scaffold1197 | 173109                  | GG                              | AA                 | AA               | INTRON                        | 101499568          | TMV resistance protein N-like |
| SNP_91234_A_186736 | NW_004516471.1 | scaffold1197 | 186736                  | TT                              | CC                 | CC               | INTERGENIC                    |                    |                               |
| SNP_91235_A_187928 | NW_004516471.1 | scaffold1197 | 187928                  | CC                              | AA                 | AA               | INTERGENIC                    |                    |                               |
| SNP_91236_A_191500 | NW_004516471.1 | scaffold1197 | 191500                  | CC                              | TT                 | TT               | INTERGENIC                    |                    |                               |
| SNP_91237_A_191505 | NW_004516471.1 | scaffold1197 | 191505                  | TT                              | CC                 | CC               | INTERGENIC                    |                    |                               |
| SNP_91238_A_196631 | NW_004516471.1 | scaffold1197 | 196631                  | CC                              | TT                 | TT               | INTERGENIC                    |                    |                               |
| SNP_91240_A_210213 | NW_004516471.1 | scaffold1197 | 210213                  | GG                              | AA                 | AA               | INTERGENIC                    |                    |                               |
| SNP_91241_A_211311 | NW_004516471.1 | scaffold1197 | 211311                  | CC                              | TT                 | TT               | INTERGENIC                    |                    |                               |
| SNP_91242_A_231267 | NW_004516471.1 | scaffold1197 | 231267                  | AA                              | GG                 | GG               | INTERGENIC                    |                    |                               |
| SNP_91243_A_237169 | NW_004516471.1 | scaffold1197 | 237169                  | CC                              | TT                 | TT               | INTERGENIC                    |                    |                               |
| SNP_91245_A_248574 | NW_004516471.1 | scaffold1197 | 248574                  | CC                              | TT                 | TT               | INTERGENIC                    |                    |                               |
| SNP_91246_A_248598 | NW_004516471.1 | scaffold1197 | 248598                  | TT                              | CC                 | CC               | INTERGENIC                    |                    |                               |
| SNP_91247_A_260999 | NW_004516471.1 | scaffold1197 | 260999                  | CC                              | TT                 | TT               | INTERGENIC                    |                    |                               |
| SNP_91249_A_369634 | NW_004516471.1 | scaffold1197 | 369634                  | TT                              | GG                 | GG               | INTERGENIC                    |                    |                               |
| SNP_91250_A_380702 | NW_004516471.1 | scaffold1197 | 380702                  | CC                              | TT                 | TT               | INTERGENIC                    |                    |                               |
| SNP_91251_A_427634 | NW_004516471.1 | scaffold1197 | 427634                  | GG                              | AA                 | AA               | INTERGENIC                    |                    |                               |
| SNP_91252_A_433819 | NW_004516471.1 | scaffold1197 | 433819                  | AA                              | CC                 | CC               | INTERGENIC                    |                    |                               |
| SNP_91253_A_439519 | NW_004516471.1 | scaffold1197 | 439519                  | GG                              | AA                 | AA               | INTERGENIC                    |                    |                               |
| SNP_91254_A_447863 | NW_004516471.1 | scaffold1197 | 447863                  | AA                              | GG                 | GG               | INTERGENIC                    |                    |                               |
| SNP_91255_A_447900 | NW_004516471.1 | scaffold1197 | 447900                  | AA                              | CC                 | CC               | INTERGENIC                    |                    |                               |

| SNPs IDs           | Chromosome IDs | Chromosomes  | Physical positions (bp) | CDC Frontier (Reference genome) | (Pusa 1103 & HPNB) | (ILWC 46 & LPNB) | Sequence Components of genome | Gene accession IDs | Putative functions           |
|--------------------|----------------|--------------|-------------------------|---------------------------------|--------------------|------------------|-------------------------------|--------------------|------------------------------|
| SNP_91256_A_447909 | NW_004516471.1 | scaffold1197 | 447909                  | GG                              | CC                 | CC               | INTERGENIC                    |                    |                              |
| SNP_91257_A_447940 | NW_004516471.1 | scaffold1197 | 447940                  | GG                              | TT                 | TT               | INTERGENIC                    |                    |                              |
| SNP_91258_A_447991 | NW_004516471.1 | scaffold1197 | 447991                  | AA                              | GG                 | GG               | INTERGENIC                    |                    |                              |
| SNP_91259_A_510655 | NW_004516471.1 | scaffold1197 | 510655                  | GG                              | AA                 | AA               | INTRON                        | 101505324          | uncharacterized LOC101505324 |
| SNP_91260_A_510674 | NW_004516471.1 | scaffold1197 | 510674                  | TT                              | CC                 | CC               | INTRON                        | 101505324          | uncharacterized LOC101505324 |
| SNP_91261_A_510709 | NW_004516471.1 | scaffold1197 | 510709                  | CC                              | TT                 | TT               | INTRON                        | 101505324          | uncharacterized LOC101505324 |
| SNP_91262_A_510760 | NW_004516471.1 | scaffold1197 | 510760                  | TT                              | CC                 | CC               | INTRON                        | 101505324          | uncharacterized LOC101505324 |
| SNP_91263_A_511060 | NW_004516471.1 | scaffold1197 | 511060                  | AA                              | TT                 | TT               | INTRON                        | 101505324          | uncharacterized LOC101505324 |
| SNP_91264_A_511145 | NW_004516471.1 | scaffold1197 | 511145                  | TT                              | AA                 | AA               | INTRON                        | 101505324          | uncharacterized LOC101505324 |
| SNP_91265_A_511169 | NW_004516471.1 | scaffold1197 | 511169                  | GG                              | AA                 | AA               | INTRON                        | 101505324          | uncharacterized LOC101505324 |
| SNP_91266_A_511189 | NW_004516471.1 | scaffold1197 | 511189                  | GG                              | TT                 | TT               | INTRON                        | 101505324          | uncharacterized LOC101505324 |
| SNP_91267_A_511190 | NW_004516471.1 | scaffold1197 | 511190                  | AA                              | GG                 | GG               | INTRON                        | 101505324          | uncharacterized LOC101505324 |
| SNP_91268_A_540953 | NW_004516471.1 | scaffold1197 | 540953                  | AA                              | TT                 | TT               | INTERGENIC                    |                    |                              |
| SNP_91270_A_550231 | NW_004516471.1 | scaffold1197 | 550231                  | TT                              | AA                 | AA               | INTERGENIC                    |                    |                              |
| SNP_91271_A_550239 | NW_004516471.1 | scaffold1197 | 550239                  | TT                              | GG                 | GG               | INTERGENIC                    |                    |                              |
| SNP_91272_A_530    | NW_004516472.1 | scaffold1198 | 530                     | TT                              | CC                 | CC               | INTERGENIC                    |                    |                              |
| SNP_91273_A_667    | NW_004516472.1 | scaffold1198 | 667                     | AA                              | GG                 | GG               | INTERGENIC                    |                    |                              |
| SNP_91274_A_707    | NW_004516472.1 | scaffold1198 | 707                     | AA                              | GG                 | GG               | INTERGENIC                    |                    |                              |
| SNP_91275_A_772    | NW_004516472.1 | scaffold1198 | 772                     | CC                              | TT                 | TT               | INTERGENIC                    |                    |                              |
| SNP_91278_A_68953  | NW_004516473.1 | scaffold1202 | 68953                   | GG                              | CC                 | CC               | INTERGENIC                    |                    |                              |
| SNP_91279_A_68954  | NW_004516473.1 | scaffold1202 | 68954                   | AA                              | TT                 | TT               | INTERGENIC                    |                    |                              |
| SNP_91282_A_87206  | NW_004516473.1 | scaffold1202 | 87206                   | TT                              | AA                 | AA               | INTERGENIC                    |                    |                              |

| SNPs IDs           | Chromosome IDs | Chromosomes  | Physical positions (bp) | CDC Frontier (Reference genome) | (Pusa 1103 & HPNB) | (ILWC 46 & LPNB) | Sequence Components of genome | Gene accession IDs | Putative functions           |
|--------------------|----------------|--------------|-------------------------|---------------------------------|--------------------|------------------|-------------------------------|--------------------|------------------------------|
| SNP_91283_A_111890 | NW_004516473.1 | scaffold1202 | 111890                  | CC                              | GG                 | GG               | INTERGENIC                    |                    |                              |
| SNP_91284_A_135080 | NW_004516473.1 | scaffold1202 | 135080                  | GG                              | CC                 | CC               | INTERGENIC                    |                    |                              |
| SNP_91285_A_159079 | NW_004516473.1 | scaffold1202 | 159079                  | AA                              | GG                 | GG               | INTERGENIC                    |                    |                              |
| SNP_91286_A_166085 | NW_004516473.1 | scaffold1202 | 166085                  | GG                              | AA                 | AA               | INTERGENIC                    |                    |                              |
| SNP_91287_A_177022 | NW_004516473.1 | scaffold1202 | 177022                  | CC                              | GG                 | GG               | INTERGENIC                    |                    |                              |
| SNP_91288_A_177025 | NW_004516473.1 | scaffold1202 | 177025                  | TT                              | CC                 | CC               | INTERGENIC                    |                    |                              |
| SNP_91289_A_177033 | NW_004516473.1 | scaffold1202 | 177033                  | TT                              | CC                 | CC               | INTERGENIC                    |                    |                              |
| SNP_91290_A_177036 | NW_004516473.1 | scaffold1202 | 177036                  | TT                              | GG                 | GG               | INTERGENIC                    |                    |                              |
| SNP_91291_A_177043 | NW_004516473.1 | scaffold1202 | 177043                  | TT                              | CC                 | CC               | INTERGENIC                    |                    |                              |
| SNP_91293_A_178507 | NW_004516473.1 | scaffold1202 | 178507                  | TT                              | GG                 | GG               | DRR                           | 101510580          | Unknown function             |
| SNP_91294_A_178509 | NW_004516473.1 | scaffold1202 | 178509                  | GG                              | AA                 | AA               | DRR                           | 101510580          | Unknown function             |
| SNP_91295_A_178562 | NW_004516473.1 | scaffold1202 | 178562                  | TT                              | GG                 | GG               | DRR                           | 101510580          | Unknown function             |
| SNP_91297_A_178880 | NW_004516473.1 | scaffold1202 | 178880                  | TT                              | CC                 | CC               | URR                           | 101511537          | uncharacterized LOC101511537 |
| SNP_91298_A_178898 | NW_004516473.1 | scaffold1202 | 178898                  | TT                              | CC                 | CC               | URR                           | 101511537          | uncharacterized LOC101511537 |
| SNP_91299_A_178917 | NW_004516473.1 | scaffold1202 | 178917                  | AA                              | GG                 | GG               | URR                           | 101511537          | uncharacterized LOC101511537 |
| SNP_91300_A_178992 | NW_004516473.1 | scaffold1202 | 178992                  | CC                              | GG                 | GG               | URR                           | 101511537          | uncharacterized LOC101511537 |
| SNP_91301_A_178999 | NW_004516473.1 | scaffold1202 | 178999                  | AA                              | GG                 | GG               | URR                           | 101511537          | uncharacterized LOC101511537 |
| SNP_91302_A_179056 | NW_004516473.1 | scaffold1202 | 179056                  | AA                              | GG                 | GG               | URR                           | 101511537          | uncharacterized LOC101511537 |
| SNP_91303_A_179069 | NW_004516473.1 | scaffold1202 | 179069                  | AA                              | GG                 | GG               | URR                           | 101511537          | uncharacterized LOC101511537 |
| SNP_91304_A_179089 | NW_004516473.1 | scaffold1202 | 179089                  | TT                              | CC                 | CC               | URR                           | 101511537          | uncharacterized LOC101511537 |
| SNP_91305_A_179095 | NW_004516473.1 | scaffold1202 | 179095                  | AA                              | GG                 | GG               | URR                           | 101511537          | uncharacterized LOC101511537 |
| SNP_91306_A_179096 | NW_004516473.1 | scaffold1202 | 179096                  | AA                              | GG                 | GG               | URR                           | 101511537          | uncharacterized LOC101511537 |

| SNPs IDs           | Chromosome IDs | Chromosomes  | Physical positions (bp) | CDC Frontier (Reference genome) | (Pusa 1103 & HPNB) | (ILWC 46 & LPNB) | Sequence Components of genome | Gene accession IDs | Putative functions           |
|--------------------|----------------|--------------|-------------------------|---------------------------------|--------------------|------------------|-------------------------------|--------------------|------------------------------|
| SNP_91307_A_179098 | NW_004516473.1 | scaffold1202 | 179098                  | GG                              | TT                 | TT               | URR                           | 101511537          | uncharacterized LOC101511537 |
| SNP_91308_A_179127 | NW_004516473.1 | scaffold1202 | 179127                  | AA                              | GG                 | GG               | URR                           | 101511537          | uncharacterized LOC101511537 |
| SNP_91309_A_179148 | NW_004516473.1 | scaffold1202 | 179148                  | TT                              | CC                 | CC               | URR                           | 101511537          | uncharacterized LOC101511537 |
| SNP_91310_A_179152 | NW_004516473.1 | scaffold1202 | 179152                  | AA                              | GG                 | GG               | URR                           | 101511537          | uncharacterized LOC101511537 |
| SNP_91311_A_179197 | NW_004516473.1 | scaffold1202 | 179197                  | CC                              | GG                 | GG               | URR                           | 101511537          | uncharacterized LOC101511537 |
| SNP_91312_A_179220 | NW_004516473.1 | scaffold1202 | 179220                  | TT                              | CC                 | CC               | URR                           | 101511537          | uncharacterized LOC101511537 |
| SNP_91313_A_179221 | NW_004516473.1 | scaffold1202 | 179221                  | GG                              | CC                 | CC               | URR                           | 101511537          | uncharacterized LOC101511537 |
| SNP_91314_A_179272 | NW_004516473.1 | scaffold1202 | 179272                  | AA                              | GG                 | GG               | URR                           | 101511537          | uncharacterized LOC101511537 |
| SNP_91315_A_179290 | NW_004516473.1 | scaffold1202 | 179290                  | AA                              | GG                 | GG               | URR                           | 101511537          | uncharacterized LOC101511537 |
| SNP_91316_A_179488 | NW_004516473.1 | scaffold1202 | 179488                  | TT                              | GG                 | GG               | URR                           | 101511537          | uncharacterized LOC101511537 |
| SNP_91317_A_179498 | NW_004516473.1 | scaffold1202 | 179498                  | AA                              | CC                 | CC               | URR                           | 101511537          | uncharacterized LOC101511537 |
| SNP_91318_A_179503 | NW_004516473.1 | scaffold1202 | 179503                  | AA                              | GG                 | GG               | URR                           | 101511537          | uncharacterized LOC101511537 |
| SNP_91319_A_179517 | NW_004516473.1 | scaffold1202 | 179517                  | AA                              | GG                 | GG               | URR                           | 101511537          | uncharacterized LOC101511537 |
| SNP_91320_A_179556 | NW_004516473.1 | scaffold1202 | 179556                  | TT                              | GG                 | GG               | URR                           | 101511537          | uncharacterized LOC101511537 |
| SNP_91321_A_179574 | NW_004516473.1 | scaffold1202 | 179574                  | CC                              | TT                 | TT               | URR                           | 101511537          | uncharacterized LOC101511537 |
| SNP_91323_A_179622 | NW_004516473.1 | scaffold1202 | 179622                  | AA                              | GG                 | GG               | URR                           | 101511537          | uncharacterized LOC101511537 |
| SNP_91324_A_179724 | NW_004516473.1 | scaffold1202 | 179724                  | TT                              | CC                 | CC               | URR                           | 101511537          | uncharacterized LOC101511537 |
| SNP_91325_A_179743 | NW_004516473.1 | scaffold1202 | 179743                  | AA                              | GG                 | GG               | URR                           | 101511537          | uncharacterized LOC101511537 |
| SNP_91326_A_179752 | NW_004516473.1 | scaffold1202 | 179752                  | AA                              | GG                 | GG               | URR                           | 101511537          | uncharacterized LOC101511537 |
| SNP_91327_A_179754 | NW_004516473.1 | scaffold1202 | 179754                  | CC                              | GG                 | GG               | URR                           | 101511537          | uncharacterized LOC101511537 |
| SNP_91328_A_179781 | NW_004516473.1 | scaffold1202 | 179781                  | AA                              | GG                 | GG               | URR                           | 101511537          | uncharacterized LOC101511537 |
| SNP_91329_A_183386 | NW_004516473.1 | scaffold1202 | 183386                  | AA                              | CC                 | CC               | URR                           | 101509926          | Unknown function             |

| SNPs IDs           | Chromosome IDs | Chromosomes  | Physical positions (bp) | CDC Frontier (Reference genome) | (Pusa 1103 & HPNB) | (ILWC 46 & LPNB) | Sequence Components of genome | Gene accession IDs | Putative functions |
|--------------------|----------------|--------------|-------------------------|---------------------------------|--------------------|------------------|-------------------------------|--------------------|--------------------|
| SNP_91330_A_183458 | NW_004516473.1 | scaffold1202 | 183458                  | TT                              | AA                 | AA               | URR                           | 101509926          | Unknown function   |
| SNP_91331_A_183631 | NW_004516473.1 | scaffold1202 | 183631                  | TT                              | AA                 | AA               | INTERGENIC                    |                    |                    |
| SNP_91332_A_183660 | NW_004516473.1 | scaffold1202 | 183660                  | AA                              | GG                 | GG               | INTERGENIC                    |                    |                    |
| SNP_91333_A_183675 | NW_004516473.1 | scaffold1202 | 183675                  | TT                              | CC                 | CC               | INTERGENIC                    |                    |                    |
| SNP_91335_A_190447 | NW_004516473.1 | scaffold1202 | 190447                  | CC                              | TT                 | TT               | INTERGENIC                    |                    |                    |
| SNP_91336_A_190651 | NW_004516473.1 | scaffold1202 | 190651                  | AA                              | CC                 | CC               | INTERGENIC                    |                    |                    |
| SNP_91337_A_190770 | NW_004516473.1 | scaffold1202 | 190770                  | AA                              | CC                 | CC               | INTERGENIC                    |                    |                    |
| SNP_91338_A_190791 | NW_004516473.1 | scaffold1202 | 190791                  | AA                              | TT                 | TT               | INTERGENIC                    |                    |                    |
| SNP_91339_A_190857 | NW_004516473.1 | scaffold1202 | 190857                  | CC                              | AA                 | AA               | INTERGENIC                    |                    |                    |
| SNP_91340_A_190899 | NW_004516473.1 | scaffold1202 | 190899                  | GG                              | TT                 | TT               | INTERGENIC                    |                    |                    |
| SNP_91341_A_190908 | NW_004516473.1 | scaffold1202 | 190908                  | CC                              | AA                 | AA               | INTERGENIC                    |                    |                    |
| SNP_91342_A_190913 | NW_004516473.1 | scaffold1202 | 190913                  | AA                              | GG                 | GG               | INTERGENIC                    |                    |                    |
| SNP_91343_A_190998 | NW_004516473.1 | scaffold1202 | 190998                  | CC                              | TT                 | TT               | INTERGENIC                    |                    |                    |
| SNP_91344_A_204206 | NW_004516473.1 | scaffold1202 | 204206                  | GG                              | CC                 | CC               | INTERGENIC                    |                    |                    |
| SNP_91345_A_227553 | NW_004516473.1 | scaffold1202 | 227553                  | AA                              | GG                 | GG               | INTERGENIC                    |                    |                    |
| SNP_91346_A_227605 | NW_004516473.1 | scaffold1202 | 227605                  | GG                              | AA                 | AA               | INTERGENIC                    |                    |                    |
| SNP_91347_A_227640 | NW_004516473.1 | scaffold1202 | 227640                  | AA                              | GG                 | GG               | INTERGENIC                    |                    |                    |
| SNP_91348_A_227644 | NW_004516473.1 | scaffold1202 | 227644                  | AA                              | TT                 | TT               | INTERGENIC                    |                    |                    |
| SNP_91349_A_227685 | NW_004516473.1 | scaffold1202 | 227685                  | GG                              | AA                 | AA               | INTERGENIC                    |                    |                    |
| SNP_91350_A_227688 | NW_004516473.1 | scaffold1202 | 227688                  | CC                              | TT                 | TT               | INTERGENIC                    |                    |                    |
| SNP_91351_A_227809 | NW_004516473.1 | scaffold1202 | 227809                  | AA                              | GG                 | GG               | INTERGENIC                    |                    |                    |
| SNP_91352_A_227903 | NW_004516473.1 | scaffold1202 | 227903                  | GG                              | AA                 | AA               | INTERGENIC                    |                    |                    |

| SNPs IDs           | Chromosome IDs | Chromosomes  | Physical positions (bp) | CDC Frontier (Reference genome) | (Pusa 1103 & HPNB) | (ILWC 46 & LPNB) | Sequence genome | Components of | Gene accession IDs | Putative functions |
|--------------------|----------------|--------------|-------------------------|---------------------------------|--------------------|------------------|-----------------|---------------|--------------------|--------------------|
| SNP_91353_A_227957 | NW_004516473.1 | scaffold1202 | 227957                  | CC                              | AA                 | AA               | INTERGENIC      |               |                    |                    |
| SNP_91354_A_228080 | NW_004516473.1 | scaffold1202 | 228080                  | CC                              | AA                 | AA               | INTERGENIC      |               |                    |                    |
| SNP_91355_A_228137 | NW_004516473.1 | scaffold1202 | 228137                  | TT                              | CC                 | CC               | INTERGENIC      |               |                    |                    |
| SNP_91356_A_228168 | NW_004516473.1 | scaffold1202 | 228168                  | CC                              | GG                 | GG               | INTERGENIC      |               |                    |                    |
| SNP_91357_A_228179 | NW_004516473.1 | scaffold1202 | 228179                  | AA                              | GG                 | GG               | INTERGENIC      |               |                    |                    |
| SNP_91358_A_228256 | NW_004516473.1 | scaffold1202 | 228256                  | TT                              | CC                 | CC               | INTERGENIC      |               |                    |                    |
| SNP_91359_A_228289 | NW_004516473.1 | scaffold1202 | 228289                  | GG                              | CC                 | CC               | INTERGENIC      |               |                    |                    |
| SNP_91360_A_228654 | NW_004516473.1 | scaffold1202 | 228654                  | CC                              | TT                 | TT               | INTERGENIC      |               |                    |                    |
| SNP_91361_A_270445 | NW_004516473.1 | scaffold1202 | 270445                  | TT                              | AA                 | AA               | INTERGENIC      |               |                    |                    |
| SNP_91362_A_289014 | NW_004516473.1 | scaffold1202 | 289014                  | GG                              | CC                 | CC               | INTERGENIC      |               |                    |                    |
| SNP_91363_A_289383 | NW_004516473.1 | scaffold1202 | 289383                  | GG                              | AA                 | AA               | INTERGENIC      |               |                    |                    |
| SNP_91364_A_289405 | NW_004516473.1 | scaffold1202 | 289405                  | AA                              | CC                 | CC               | INTERGENIC      |               |                    |                    |
| SNP_91366_A_463    | NW_004516474.1 | scaffold1206 | 463                     | CC                              | TT                 | TT               | INTERGENIC      |               |                    |                    |
| SNP_91367_A_616    | NW_004516474.1 | scaffold1206 | 616                     | GG                              | AA                 | AA               | INTERGENIC      |               |                    |                    |
| SNP_91368_A_653    | NW_004516474.1 | scaffold1206 | 653                     | GG                              | CC                 | CC               | INTERGENIC      |               |                    |                    |
| SNP_91369_A_681    | NW_004516474.1 | scaffold1206 | 681                     | AA                              | GG                 | GG               | INTERGENIC      |               |                    |                    |
| SNP_91370_A_709    | NW_004516474.1 | scaffold1206 | 709                     | AA                              | GG                 | GG               | INTERGENIC      |               |                    |                    |
| SNP_91372_A_950    | NW_004516474.1 | scaffold1206 | 950                     | CC                              | GG                 | GG               | INTERGENIC      |               |                    |                    |
| SNP_91373_A_993    | NW_004516474.1 | scaffold1206 | 993                     | TT                              | CC                 | CC               | INTERGENIC      |               |                    |                    |
| SNP_91374_A_995    | NW_004516474.1 | scaffold1206 | 995                     | GG                              | AA                 | AA               | INTERGENIC      |               |                    |                    |
| SNP_91375_A_4542   | NW_004516475.1 | scaffold1207 | 4542                    | TT                              | AA                 | AA               | INTERGENIC      |               |                    |                    |
| SNP_91376_A_660    | NW_004516476.1 | scaffold1210 | 660                     | GG                              | CC                 | CC               | INTERGENIC      |               |                    |                    |

| SNPs IDs          | Chromosome IDs | Chromosomes  | Physical positions (bp) | CDC Frontier (Reference genome) | (Pusa 1103 & HPNB) | (ILWC 46 & LPNB) | Sequence genome | Components of | Gene accession IDs | Putative functions |
|-------------------|----------------|--------------|-------------------------|---------------------------------|--------------------|------------------|-----------------|---------------|--------------------|--------------------|
| SNP_91377_A_12541 | NW_004516479.1 | scaffold1215 | 12541                   | AA                              | CC                 | CC               | INTERGENIC      |               |                    |                    |
| SNP_91378_A_12612 | NW_004516479.1 | scaffold1215 | 12612                   | AA                              | GG                 | GG               | INTERGENIC      |               |                    |                    |
| SNP_91379_A_12627 | NW_004516479.1 | scaffold1215 | 12627                   | CC                              | AA                 | AA               | INTERGENIC      |               |                    |                    |
| SNP_91381_A_12752 | NW_004516479.1 | scaffold1215 | 12752                   | TT                              | CC                 | CC               | INTERGENIC      |               |                    |                    |
| SNP_91382_A_12824 | NW_004516479.1 | scaffold1215 | 12824                   | TT                              | CC                 | CC               | INTERGENIC      |               |                    |                    |
| SNP_91383_A_12891 | NW_004516479.1 | scaffold1215 | 12891                   | GG                              | TT                 | TT               | INTERGENIC      |               |                    |                    |
| SNP_91384_A_12941 | NW_004516479.1 | scaffold1215 | 12941                   | TT                              | GG                 | GG               | INTERGENIC      |               |                    |                    |
| SNP_91386_A_13026 | NW_004516479.1 | scaffold1215 | 13026                   | AA                              | GG                 | GG               | INTERGENIC      |               |                    |                    |
| SNP_91387_A_13045 | NW_004516479.1 | scaffold1215 | 13045                   | GG                              | AA                 | AA               | INTERGENIC      |               |                    |                    |
| SNP_91388_A_13100 | NW_004516479.1 | scaffold1215 | 13100                   | TT                              | CC                 | CC               | INTERGENIC      |               |                    |                    |
| SNP_91389_A_13129 | NW_004516479.1 | scaffold1215 | 13129                   | CC                              | TT                 | TT               | INTERGENIC      |               |                    |                    |
| SNP_91390_A_13136 | NW_004516479.1 | scaffold1215 | 13136                   | TT                              | GG                 | GG               | INTERGENIC      |               |                    |                    |
| SNP_91391_A_13151 | NW_004516479.1 | scaffold1215 | 13151                   | AA                              | GG                 | GG               | INTERGENIC      |               |                    |                    |
| SNP_91392_A_13188 | NW_004516479.1 | scaffold1215 | 13188                   | TT                              | AA                 | AA               | INTERGENIC      |               |                    |                    |
| SNP_91393_A_13249 | NW_004516479.1 | scaffold1215 | 13249                   | GG                              | AA                 | AA               | INTERGENIC      |               |                    |                    |
| SNP_91394_A_13351 | NW_004516479.1 | scaffold1215 | 13351                   | GG                              | AA                 | AA               | INTERGENIC      |               |                    |                    |
| SNP_91395_A_13353 | NW_004516479.1 | scaffold1215 | 13353                   | TT                              | CC                 | CC               | INTERGENIC      |               |                    |                    |
| SNP_91396_A_13398 | NW_004516479.1 | scaffold1215 | 13398                   | TT                              | CC                 | CC               | INTERGENIC      |               |                    |                    |
| SNP_91397_A_13495 | NW_004516479.1 | scaffold1215 | 13495                   | GG                              | TT                 | TT               | INTERGENIC      |               |                    |                    |
| SNP_91398_A_13539 | NW_004516479.1 | scaffold1215 | 13539                   | AA                              | GG                 | GG               | INTERGENIC      |               |                    |                    |
| SNP_91399_A_13610 | NW_004516479.1 | scaffold1215 | 13610                   | GG                              | AA                 | AA               | INTERGENIC      |               |                    |                    |
| SNP_91401_A_13746 | NW_004516479.1 | scaffold1215 | 13746                   | AA                              | TT                 | TT               | INTERGENIC      |               |                    |                    |



| SNPs IDs          | Chromosome IDs | Chromosomes  | Physical positions (bp) | CDC Frontier genome (Reference genome) | (Pusa 1103 & HPNB) | (ILWC 46 & LPNB) | Sequence Components of genome | Gene accession IDs | Putative functions           |
|-------------------|----------------|--------------|-------------------------|----------------------------------------|--------------------|------------------|-------------------------------|--------------------|------------------------------|
| SNP_91402_A_14031 | NW_004516479.1 | scaffold1215 | 14031                   | CC                                     | TT                 | TT               | INTERGENIC                    |                    |                              |
| SNP_91404_A_14080 | NW_004516479.1 | scaffold1215 | 14080                   | CC                                     | TT                 | TT               | INTERGENIC                    |                    |                              |
| SNP_91405_A_14098 | NW_004516479.1 | scaffold1215 | 14098                   | AA                                     | GG                 | GG               | INTERGENIC                    |                    |                              |
| SNP_91406_A_14207 | NW_004516479.1 | scaffold1215 | 14207                   | TT                                     | GG                 | GG               | INTERGENIC                    |                    |                              |
| SNP_91407_A_14340 | NW_004516479.1 | scaffold1215 | 14340                   | TT                                     | CC                 | CC               | INTERGENIC                    |                    |                              |
| SNP_91408_A_14357 | NW_004516479.1 | scaffold1215 | 14357                   | AA                                     | TT                 | TT               | INTERGENIC                    |                    |                              |
| SNP_91409_A_14405 | NW_004516479.1 | scaffold1215 | 14405                   | GG                                     | AA                 | AA               | INTERGENIC                    |                    |                              |
| SNP_91410_A_14434 | NW_004516479.1 | scaffold1215 | 14434                   | CC                                     | GG                 | GG               | INTERGENIC                    |                    |                              |
| SNP_91411_A_16811 | NW_004516479.1 | scaffold1215 | 16811                   | GG                                     | CC                 | CC               | INTERGENIC                    |                    |                              |
| SNP_91412_A_16948 | NW_004516479.1 | scaffold1215 | 16948                   | GG                                     | TT                 | TT               | INTERGENIC                    |                    |                              |
| SNP_91413_A_17303 | NW_004516479.1 | scaffold1215 | 17303                   | AA                                     | GG                 | GG               | INTERGENIC                    |                    |                              |
| SNP_91414_A_17941 | NW_004516479.1 | scaffold1215 | 17941                   | AA                                     | CC                 | CC               | DRR                           | 101512182          | uncharacterized LOC101512182 |
| SNP_91415_A_35885 | NW_004516479.1 | scaffold1215 | 35885                   | TT                                     | AA                 | AA               | INTRON                        | 101512628          | cucumis-in-like              |
| SNP_91416_A_35986 | NW_004516479.1 | scaffold1215 | 35986                   | TT                                     | CC                 | CC               | INTRON                        | 101512628          | cucumis-in-like              |
| SNP_91417_A_36174 | NW_004516479.1 | scaffold1215 | 36174                   | GG                                     | AA                 | AA               | INTRON                        | 101512628          | cucumis-in-like              |
| SNP_91418_A_36175 | NW_004516479.1 | scaffold1215 | 36175                   | GG                                     | CC                 | CC               | INTRON                        | 101512628          | cucumis-in-like              |
| SNP_91419_A_36264 | NW_004516479.1 | scaffold1215 | 36264                   | TT                                     | CC                 | CC               | INTRON                        | 101512628          | cucumis-in-like              |
| SNP_91420_A_36381 | NW_004516479.1 | scaffold1215 | 36381                   | GG                                     | AA                 | AA               | INTRON                        | 101512628          | cucumis-in-like              |
| SNP_91421_A_41363 | NW_004516479.1 | scaffold1215 | 41363                   | AA                                     | GG                 | GG               | INTRON                        | 101512628          | cucumis-in-like              |
| SNP_91422_A_41470 | NW_004516479.1 | scaffold1215 | 41470                   | CC                                     | TT                 | TT               | INTRON                        | 101512628          | cucumis-in-like              |
| SNP_91423_A_41478 | NW_004516479.1 | scaffold1215 | 41478                   | AA                                     | CC                 | CC               | INTRON                        | 101512628          | cucumis-in-like              |
| SNP_91424_A_41503 | NW_004516479.1 | scaffold1215 | 41503                   | CC                                     | TT                 | TT               | INTRON                        | 101512628          | cucumis-in-like              |

| SNPs IDs          | Chromosome IDs | Chromosomes  | Physical positions (bp) | CDC Frontier (Reference genome) | (Pusa 1103 & HPNB) | (ILWC 46 & LPNB) | Sequence Components of genome | Gene accession IDs | Putative functions |
|-------------------|----------------|--------------|-------------------------|---------------------------------|--------------------|------------------|-------------------------------|--------------------|--------------------|
| SNP_91426_A_42150 | NW_004516479.1 | scaffold1215 | 42150                   | GG                              | AA                 | AA               | SYNONYMOUS_CODING             | 101512628          | cucumis-in-like    |
| SNP_91427_A_42164 | NW_004516479.1 | scaffold1215 | 42164                   | CC                              | GG                 | GG               | NON_SYNONYMOUS_CODING         | 101512628          | cucumis-in-like    |
| SNP_91428_A_44423 | NW_004516479.1 | scaffold1215 | 44423                   | TT                              | CC                 | CC               | URR                           | 101512628          | cucumis-in-like    |
| SNP_91429_A_44447 | NW_004516479.1 | scaffold1215 | 44447                   | AA                              | TT                 | TT               | URR                           | 101512628          | cucumis-in-like    |
| SNP_91431_A_44650 | NW_004516479.1 | scaffold1215 | 44650                   | CC                              | TT                 | TT               | URR                           | 101512628          | cucumis-in-like    |
| SNP_91432_A_44672 | NW_004516479.1 | scaffold1215 | 44672                   | AA                              | TT                 | TT               | URR                           | 101512628          | cucumis-in-like    |
| SNP_91434_A_45699 | NW_004516479.1 | scaffold1215 | 45699                   | GG                              | AA                 | AA               | INTERGENIC                    |                    |                    |
| SNP_91436_A_245   | NW_004516480.1 | scaffold1216 | 245                     | GG                              | AA                 | AA               | INTERGENIC                    |                    |                    |
| SNP_91437_A_269   | NW_004516480.1 | scaffold1216 | 269                     | TT                              | AA                 | AA               | INTERGENIC                    |                    |                    |
| SNP_91438_A_305   | NW_004516480.1 | scaffold1216 | 305                     | AA                              | GG                 | GG               | INTERGENIC                    |                    |                    |
| SNP_91439_A_364   | NW_004516480.1 | scaffold1216 | 364                     | GG                              | AA                 | AA               | INTERGENIC                    |                    |                    |
| SNP_91440_A_404   | NW_004516480.1 | scaffold1216 | 404                     | CC                              | TT                 | TT               | INTERGENIC                    |                    |                    |
| SNP_91441_A_486   | NW_004516480.1 | scaffold1216 | 486                     | CC                              | TT                 | TT               | INTERGENIC                    |                    |                    |
| SNP_91442_A_549   | NW_004516480.1 | scaffold1216 | 549                     | TT                              | AA                 | AA               | INTERGENIC                    |                    |                    |
| SNP_91443_A_935   | NW_004516480.1 | scaffold1216 | 935                     | AA                              | TT                 | TT               | INTERGENIC                    |                    |                    |
| SNP_91444_A_3404  | NW_004516480.1 | scaffold1216 | 3404                    | GG                              | CC                 | CC               | INTERGENIC                    |                    |                    |
| SNP_91445_A_3656  | NW_004516480.1 | scaffold1216 | 3656                    | CC                              | TT                 | TT               | INTERGENIC                    |                    |                    |
| SNP_91446_A_3890  | NW_004516480.1 | scaffold1216 | 3890                    | AA                              | TT                 | TT               | INTERGENIC                    |                    |                    |
| SNP_91447_A_4210  | NW_004516480.1 | scaffold1216 | 4210                    | GG                              | TT                 | TT               | INTERGENIC                    |                    |                    |
| SNP_91448_A_4555  | NW_004516480.1 | scaffold1216 | 4555                    | CC                              | TT                 | TT               | INTERGENIC                    |                    |                    |
| SNP_91449_A_4609  | NW_004516480.1 | scaffold1216 | 4609                    | AA                              | GG                 | GG               | INTERGENIC                    |                    |                    |
| SNP_91450_A_4832  | NW_004516480.1 | scaffold1216 | 4832                    | TT                              | CC                 | CC               | INTERGENIC                    |                    |                    |

| SNPs IDs          | Chromosome IDs | Chromosomes  | Physical positions (bp) | CDC Frontier (Reference genome) | (Pusa 1103 & HPNB) | (ILWC 46 & LPNB) | Sequence genome | Components of | Gene accession IDs | Putative functions |
|-------------------|----------------|--------------|-------------------------|---------------------------------|--------------------|------------------|-----------------|---------------|--------------------|--------------------|
| SNP_91451_A_4842  | NW_004516480.1 | scaffold1216 | 4842                    | TT                              | CC                 | CC               | INTERGENIC      |               |                    |                    |
| SNP_91452_A_4844  | NW_004516480.1 | scaffold1216 | 4844                    | GG                              | AA                 | AA               | INTERGENIC      |               |                    |                    |
| SNP_91453_A_5118  | NW_004516480.1 | scaffold1216 | 5118                    | AA                              | TT                 | TT               | INTERGENIC      |               |                    |                    |
| SNP_91454_A_5128  | NW_004516480.1 | scaffold1216 | 5128                    | AA                              | GG                 | GG               | INTERGENIC      |               |                    |                    |
| SNP_91455_A_5176  | NW_004516480.1 | scaffold1216 | 5176                    | TT                              | CC                 | CC               | INTERGENIC      |               |                    |                    |
| SNP_91456_A_5209  | NW_004516480.1 | scaffold1216 | 5209                    | CC                              | TT                 | TT               | INTERGENIC      |               |                    |                    |
| SNP_91457_A_5234  | NW_004516480.1 | scaffold1216 | 5234                    | AA                              | TT                 | TT               | INTERGENIC      |               |                    |                    |
| SNP_91458_A_12659 | NW_004516480.1 | scaffold1216 | 12659                   | GG                              | TT                 | TT               | INTERGENIC      |               |                    |                    |
| SNP_91459_A_12890 | NW_004516480.1 | scaffold1216 | 12890                   | AA                              | GG                 | GG               | INTERGENIC      |               |                    |                    |
| SNP_91460_A_13072 | NW_004516480.1 | scaffold1216 | 13072                   | TT                              | AA                 | AA               | INTERGENIC      |               |                    |                    |
| SNP_91461_A_13266 | NW_004516480.1 | scaffold1216 | 13266                   | CC                              | TT                 | TT               | INTERGENIC      |               |                    |                    |
| SNP_91462_A_13290 | NW_004516480.1 | scaffold1216 | 13290                   | CC                              | TT                 | TT               | INTERGENIC      |               |                    |                    |
| SNP_91463_A_13308 | NW_004516480.1 | scaffold1216 | 13308                   | TT                              | AA                 | AA               | INTERGENIC      |               |                    |                    |
| SNP_91464_A_13444 | NW_004516480.1 | scaffold1216 | 13444                   | GG                              | TT                 | TT               | INTERGENIC      |               |                    |                    |
| SNP_91465_A_13447 | NW_004516480.1 | scaffold1216 | 13447                   | AA                              | TT                 | TT               | INTERGENIC      |               |                    |                    |
| SNP_91466_A_14207 | NW_004516480.1 | scaffold1216 | 14207                   | AA                              | TT                 | TT               | INTERGENIC      |               |                    |                    |
| SNP_91467_A_14267 | NW_004516480.1 | scaffold1216 | 14267                   | CC                              | TT                 | TT               | INTERGENIC      |               |                    |                    |
| SNP_91468_A_14844 | NW_004516480.1 | scaffold1216 | 14844                   | TT                              | GG                 | GG               | INTERGENIC      |               |                    |                    |
| SNP_91469_A_14871 | NW_004516480.1 | scaffold1216 | 14871                   | AA                              | GG                 | GG               | INTERGENIC      |               |                    |                    |
| SNP_91470_A_14885 | NW_004516480.1 | scaffold1216 | 14885                   | TT                              | CC                 | CC               | INTERGENIC      |               |                    |                    |
| SNP_91471_A_15785 | NW_004516480.1 | scaffold1216 | 15785                   | AA                              | GG                 | GG               | INTERGENIC      |               |                    |                    |
| SNP_91472_A_15786 | NW_004516480.1 | scaffold1216 | 15786                   | AA                              | GG                 | GG               | INTERGENIC      |               |                    |                    |

| SNPs IDs          | Chromosome IDs | Chromosomes  | Physical positions (bp) | CDC Frontier genome (Reference genome) | (Pusa 1103 & HPNB) | (ILWC 46 & LPNB) | Sequence genome | Components of | Gene accession IDs | Putative functions |
|-------------------|----------------|--------------|-------------------------|----------------------------------------|--------------------|------------------|-----------------|---------------|--------------------|--------------------|
| SNP_91473_A_16054 | NW_004516480.1 | scaffold1216 | 16054                   | GG                                     | CC                 | CC               | INTERGENIC      |               |                    |                    |
| SNP_91474_A_16109 | NW_004516480.1 | scaffold1216 | 16109                   | GG                                     | AA                 | AA               | INTERGENIC      |               |                    |                    |
| SNP_91475_A_16162 | NW_004516480.1 | scaffold1216 | 16162                   | AA                                     | TT                 | TT               | INTERGENIC      |               |                    |                    |
| SNP_91476_A_16283 | NW_004516480.1 | scaffold1216 | 16283                   | TT                                     | CC                 | CC               | INTERGENIC      |               |                    |                    |
| SNP_91477_A_16376 | NW_004516480.1 | scaffold1216 | 16376                   | CC                                     | AA                 | AA               | INTERGENIC      |               |                    |                    |
| SNP_91478_A_16418 | NW_004516480.1 | scaffold1216 | 16418                   | GG                                     | TT                 | TT               | INTERGENIC      |               |                    |                    |
| SNP_91479_A_16432 | NW_004516480.1 | scaffold1216 | 16432                   | TT                                     | GG                 | GG               | INTERGENIC      |               |                    |                    |
| SNP_91480_A_16433 | NW_004516480.1 | scaffold1216 | 16433                   | GG                                     | AA                 | AA               | INTERGENIC      |               |                    |                    |
| SNP_91481_A_16504 | NW_004516480.1 | scaffold1216 | 16504                   | TT                                     | CC                 | CC               | INTERGENIC      |               |                    |                    |
| SNP_91482_A_16552 | NW_004516480.1 | scaffold1216 | 16552                   | GG                                     | AA                 | AA               | INTERGENIC      |               |                    |                    |
| SNP_91483_A_16701 | NW_004516480.1 | scaffold1216 | 16701                   | AA                                     | TT                 | TT               | INTERGENIC      |               |                    |                    |
| SNP_91484_A_16745 | NW_004516480.1 | scaffold1216 | 16745                   | CC                                     | TT                 | TT               | INTERGENIC      |               |                    |                    |
| SNP_91485_A_16756 | NW_004516480.1 | scaffold1216 | 16756                   | TT                                     | AA                 | AA               | INTERGENIC      |               |                    |                    |
| SNP_91486_A_16814 | NW_004516480.1 | scaffold1216 | 16814                   | CC                                     | AA                 | AA               | INTERGENIC      |               |                    |                    |
| SNP_91487_A_16816 | NW_004516480.1 | scaffold1216 | 16816                   | GG                                     | CC                 | CC               | INTERGENIC      |               |                    |                    |
| SNP_91488_A_16878 | NW_004516480.1 | scaffold1216 | 16878                   | TT                                     | AA                 | AA               | INTERGENIC      |               |                    |                    |
| SNP_91489_A_16918 | NW_004516480.1 | scaffold1216 | 16918                   | AA                                     | GG                 | GG               | INTERGENIC      |               |                    |                    |
| SNP_91490_A_16944 | NW_004516480.1 | scaffold1216 | 16944                   | AA                                     | GG                 | GG               | INTERGENIC      |               |                    |                    |
| SNP_91491_A_16955 | NW_004516480.1 | scaffold1216 | 16955                   | CC                                     | TT                 | TT               | INTERGENIC      |               |                    |                    |
| SNP_91492_A_17014 | NW_004516480.1 | scaffold1216 | 17014                   | TT                                     | CC                 | CC               | INTERGENIC      |               |                    |                    |
| SNP_91493_A_17025 | NW_004516480.1 | scaffold1216 | 17025                   | GG                                     | CC                 | CC               | INTERGENIC      |               |                    |                    |
| SNP_91494_A_17064 | NW_004516480.1 | scaffold1216 | 17064                   | TT                                     | CC                 | CC               | INTERGENIC      |               |                    |                    |

| SNPs IDs          | Chromosome IDs | Chromosomes  | Physical positions (bp) | CDC Frontier (Reference genome) | (Pusa 1103 & HPNB) | (ILWC 46 & LPNB) | Sequence genome | Components of | Gene accession IDs | Putative functions |
|-------------------|----------------|--------------|-------------------------|---------------------------------|--------------------|------------------|-----------------|---------------|--------------------|--------------------|
| SNP_91495_A_17105 | NW_004516480.1 | scaffold1216 | 17105                   | TT                              | AA                 | AA               | INTERGENIC      |               |                    |                    |
| SNP_91496_A_17113 | NW_004516480.1 | scaffold1216 | 17113                   | AA                              | GG                 | GG               | INTERGENIC      |               |                    |                    |
| SNP_91497_A_17186 | NW_004516480.1 | scaffold1216 | 17186                   | GG                              | TT                 | TT               | INTERGENIC      |               |                    |                    |
| SNP_91498_A_17552 | NW_004516480.1 | scaffold1216 | 17552                   | TT                              | CC                 | CC               | INTERGENIC      |               |                    |                    |
| SNP_91499_A_20501 | NW_004516480.1 | scaffold1216 | 20501                   | CC                              | TT                 | TT               | INTERGENIC      |               |                    |                    |
| SNP_91500_A_20523 | NW_004516480.1 | scaffold1216 | 20523                   | AA                              | TT                 | TT               | INTERGENIC      |               |                    |                    |
| SNP_91501_A_20631 | NW_004516480.1 | scaffold1216 | 20631                   | AA                              | TT                 | TT               | INTERGENIC      |               |                    |                    |
| SNP_91502_A_20633 | NW_004516480.1 | scaffold1216 | 20633                   | GG                              | TT                 | TT               | INTERGENIC      |               |                    |                    |
| SNP_91503_A_20653 | NW_004516480.1 | scaffold1216 | 20653                   | GG                              | CC                 | CC               | INTERGENIC      |               |                    |                    |
| SNP_91504_A_20780 | NW_004516480.1 | scaffold1216 | 20780                   | GG                              | CC                 | CC               | INTERGENIC      |               |                    |                    |
| SNP_91505_A_20791 | NW_004516480.1 | scaffold1216 | 20791                   | AA                              | TT                 | TT               | INTERGENIC      |               |                    |                    |
| SNP_91506_A_20806 | NW_004516480.1 | scaffold1216 | 20806                   | TT                              | AA                 | AA               | INTERGENIC      |               |                    |                    |
| SNP_91507_A_20816 | NW_004516480.1 | scaffold1216 | 20816                   | TT                              | CC                 | CC               | INTERGENIC      |               |                    |                    |
| SNP_91508_A_21062 | NW_004516480.1 | scaffold1216 | 21062                   | AA                              | GG                 | GG               | INTERGENIC      |               |                    |                    |
| SNP_91509_A_21393 | NW_004516480.1 | scaffold1216 | 21393                   | GG                              | CC                 | CC               | INTERGENIC      |               |                    |                    |
| SNP_91510_A_21851 | NW_004516480.1 | scaffold1216 | 21851                   | AA                              | CC                 | CC               | INTERGENIC      |               |                    |                    |
| SNP_91511_A_21868 | NW_004516480.1 | scaffold1216 | 21868                   | CC                              | AA                 | AA               | INTERGENIC      |               |                    |                    |
| SNP_91512_A_22111 | NW_004516480.1 | scaffold1216 | 22111                   | TT                              | AA                 | AA               | INTERGENIC      |               |                    |                    |
| SNP_91513_A_22128 | NW_004516480.1 | scaffold1216 | 22128                   | CC                              | AA                 | AA               | INTERGENIC      |               |                    |                    |
| SNP_91514_A_6381  | NW_004516482.1 | scaffold1219 | 6381                    | AA                              | GG                 | GG               | INTERGENIC      |               |                    |                    |
| SNP_91515_A_6475  | NW_004516482.1 | scaffold1219 | 6475                    | GG                              | AA                 | AA               | INTERGENIC      |               |                    |                    |
| SNP_91516_A_6656  | NW_004516482.1 | scaffold1219 | 6656                    | GG                              | AA                 | AA               | INTERGENIC      |               |                    |                    |

| SNPs IDs          | Chromosome IDs | Chromosomes  | Physical positions (bp) | CDC Frontier (Reference genome) | (Pusa 1103 & HPNB) | (ILWC 46 & LPNB) | Sequence Components of genome | Gene accession IDs | Putative functions                              |
|-------------------|----------------|--------------|-------------------------|---------------------------------|--------------------|------------------|-------------------------------|--------------------|-------------------------------------------------|
| SNP_91517_A_6965  | NW_004516482.1 | scaffold1219 | 6965                    | AA                              | TT                 | TT               | INTERGENIC                    |                    |                                                 |
| SNP_91518_A_6985  | NW_004516482.1 | scaffold1219 | 6985                    | TT                              | CC                 | CC               | INTERGENIC                    |                    |                                                 |
| SNP_91519_A_6991  | NW_004516482.1 | scaffold1219 | 6991                    | GG                              | AA                 | AA               | INTERGENIC                    |                    |                                                 |
| SNP_91520_A_7034  | NW_004516482.1 | scaffold1219 | 7034                    | CC                              | TT                 | TT               | INTERGENIC                    |                    |                                                 |
| SNP_91521_A_7073  | NW_004516482.1 | scaffold1219 | 7073                    | AA                              | TT                 | TT               | INTERGENIC                    |                    |                                                 |
| SNP_91522_A_7087  | NW_004516482.1 | scaffold1219 | 7087                    | TT                              | GG                 | GG               | INTERGENIC                    |                    |                                                 |
| SNP_91523_A_7108  | NW_004516482.1 | scaffold1219 | 7108                    | GG                              | AA                 | AA               | INTERGENIC                    |                    |                                                 |
| SNP_91525_A_7214  | NW_004516482.1 | scaffold1219 | 7214                    | TT                              | CC                 | CC               | INTERGENIC                    |                    |                                                 |
| SNP_91526_A_7308  | NW_004516482.1 | scaffold1219 | 7308                    | GG                              | TT                 | TT               | INTERGENIC                    |                    |                                                 |
| SNP_91528_A_11097 | NW_004516482.1 | scaffold1219 | 11097                   | TT                              | CC                 | CC               | INTERGENIC                    |                    |                                                 |
| SNP_91529_A_11137 | NW_004516482.1 | scaffold1219 | 11137                   | TT                              | CC                 | CC               | INTERGENIC                    |                    |                                                 |
| SNP_91530_A_11324 | NW_004516482.1 | scaffold1219 | 11324                   | CC                              | TT                 | TT               | INTERGENIC                    |                    |                                                 |
| SNP_91531_A_11445 | NW_004516482.1 | scaffold1219 | 11445                   | TT                              | GG                 | GG               | INTERGENIC                    |                    |                                                 |
| SNP_91532_A_11470 | NW_004516482.1 | scaffold1219 | 11470                   | CC                              | TT                 | TT               | INTERGENIC                    |                    |                                                 |
| SNP_91533_A_11504 | NW_004516482.1 | scaffold1219 | 11504                   | CC                              | TT                 | TT               | INTERGENIC                    |                    |                                                 |
| SNP_91534_A_11840 | NW_004516482.1 | scaffold1219 | 11840                   | AA                              | GG                 | GG               | INTERGENIC                    |                    |                                                 |
| SNP_91535_A_13021 | NW_004516482.1 | scaffold1219 | 13021                   | GG                              | AA                 | AA               | DRR                           | 101513262          | probable receptor-like protein kinase At2g47060 |
| SNP_91536_A_13367 | NW_004516482.1 | scaffold1219 | 13367                   | CC                              | AA                 | AA               | NON_SYNONYMOUS_CODING         | 101513262          | probable receptor-like protein kinase At2g47060 |
| SNP_91537_A_14923 | NW_004516482.1 | scaffold1219 | 14923                   | CC                              | TT                 | TT               | INTRON                        | 101513262          | probable receptor-like protein kinase At2g47060 |
| SNP_91538_A_15245 | NW_004516482.1 | scaffold1219 | 15245                   | TT                              | GG                 | GG               | INTRON                        | 101513262          | probable receptor-like protein kinase At2g47060 |
| SNP_91539_A_16442 | NW_004516482.1 | scaffold1219 | 16442                   | CC                              | AA                 | AA               | URR                           | 101513262          | probable receptor-like protein kinase At2g47060 |
| SNP_91540_A_16513 | NW_004516482.1 | scaffold1219 | 16513                   | TT                              | GG                 | GG               | URR                           | 101513262          | probable receptor-like protein kinase At2g47060 |

| SNPs IDs           | Chromosome IDs | Chromosomes  | Physical positions (bp) | CDC Frontier (Reference genome) | (Pusa 1103 & HPNB) | (ILWC 46 & LPNB) | Sequence Components of genome | Gene accession IDs | Putative functions                              |
|--------------------|----------------|--------------|-------------------------|---------------------------------|--------------------|------------------|-------------------------------|--------------------|-------------------------------------------------|
| SNP_91541_A_16658  | NW_004516482.1 | scaffold1219 | 16658                   | TT                              | AA                 | AA               | URR                           | 101513262          | probable receptor-like protein kinase At2g47060 |
| SNP_91542_A_16669  | NW_004516482.1 | scaffold1219 | 16669                   | AA                              | TT                 | TT               | URR                           | 101513262          | probable receptor-like protein kinase At2g47060 |
| SNP_91543_A_16706  | NW_004516482.1 | scaffold1219 | 16706                   | GG                              | TT                 | TT               | URR                           | 101513262          | probable receptor-like protein kinase At2g47060 |
| SNP_91544_A_29147  | NW_004516482.1 | scaffold1219 | 29147                   | CC                              | TT                 | TT               | INTERGENIC                    |                    |                                                 |
| SNP_91545_A_29201  | NW_004516482.1 | scaffold1219 | 29201                   | AA                              | CC                 | CC               | INTERGENIC                    |                    |                                                 |
| SNP_91547_A_54163  | NW_004516482.1 | scaffold1219 | 54163                   | GG                              | CC                 | CC               | INTERGENIC                    |                    |                                                 |
| SNP_91548_A_60031  | NW_004516482.1 | scaffold1219 | 60031                   | CC                              | AA                 | AA               | INTERGENIC                    |                    |                                                 |
| SNP_91549_A_112103 | NW_004516482.1 | scaffold1219 | 112103                  | GG                              | AA                 | AA               | INTERGENIC                    |                    |                                                 |
| SNP_91550_A_112133 | NW_004516482.1 | scaffold1219 | 112133                  | AA                              | GG                 | GG               | INTERGENIC                    |                    |                                                 |
| SNP_91551_A_8876   | NW_004516484.1 | scaffold1221 | 8876                    | AA                              | GG                 | GG               | INTERGENIC                    |                    |                                                 |
| SNP_91552_A_9079   | NW_004516484.1 | scaffold1221 | 9079                    | AA                              | GG                 | GG               | INTERGENIC                    |                    |                                                 |
| SNP_91553_A_9088   | NW_004516484.1 | scaffold1221 | 9088                    | GG                              | CC                 | CC               | INTERGENIC                    |                    |                                                 |
| SNP_91554_A_9141   | NW_004516484.1 | scaffold1221 | 9141                    | AA                              | GG                 | GG               | INTERGENIC                    |                    |                                                 |
| SNP_91555_A_42806  | NW_004516484.1 | scaffold1221 | 42806                   | GG                              | CC                 | CC               | INTERGENIC                    |                    |                                                 |
| SNP_91557_A_77238  | NW_004516484.1 | scaffold1221 | 77238                   | AA                              | GG                 | GG               | INTERGENIC                    |                    |                                                 |
| SNP_91558_A_13747  | NW_004516485.1 | scaffold1222 | 13747                   | TT                              | AA                 | AA               | INTERGENIC                    |                    |                                                 |
| SNP_91559_A_13750  | NW_004516485.1 | scaffold1222 | 13750                   | TT                              | AA                 | AA               | INTERGENIC                    |                    |                                                 |
| SNP_91560_A_13831  | NW_004516485.1 | scaffold1222 | 13831                   | AA                              | GG                 | GG               | INTERGENIC                    |                    |                                                 |
| SNP_91561_A_13837  | NW_004516485.1 | scaffold1222 | 13837                   | CC                              | TT                 | TT               | INTERGENIC                    |                    |                                                 |
| SNP_91563_A_13909  | NW_004516485.1 | scaffold1222 | 13909                   | AA                              | GG                 | GG               | INTERGENIC                    |                    |                                                 |
| SNP_91564_A_13915  | NW_004516485.1 | scaffold1222 | 13915                   | TT                              | AA                 | AA               | INTERGENIC                    |                    |                                                 |
| SNP_91565_A_13952  | NW_004516485.1 | scaffold1222 | 13952                   | TT                              | AA                 | AA               | INTERGENIC                    |                    |                                                 |

| SNPs IDs          | Chromosome IDs | Chromosomes  | Physical positions (bp) | CDC Frontier (Reference genome) | (Pusa 1103 & HPNB) | (ILWC 46 & LPNB) | Sequence genome | Components of | Gene accession IDs | Putative functions |
|-------------------|----------------|--------------|-------------------------|---------------------------------|--------------------|------------------|-----------------|---------------|--------------------|--------------------|
| SNP_91566_A_14510 | NW_004516485.1 | scaffold1222 | 14510                   | CC                              | GG                 | GG               | INTERGENIC      |               |                    |                    |
| SNP_91567_A_14520 | NW_004516485.1 | scaffold1222 | 14520                   | AA                              | GG                 | GG               | INTERGENIC      |               |                    |                    |
| SNP_91568_A_14529 | NW_004516485.1 | scaffold1222 | 14529                   | TT                              | AA                 | AA               | INTERGENIC      |               |                    |                    |
| SNP_91569_A_14606 | NW_004516485.1 | scaffold1222 | 14606                   | AA                              | CC                 | CC               | INTERGENIC      |               |                    |                    |
| SNP_91570_A_14615 | NW_004516485.1 | scaffold1222 | 14615                   | CC                              | AA                 | AA               | INTERGENIC      |               |                    |                    |
| SNP_91571_A_14689 | NW_004516485.1 | scaffold1222 | 14689                   | CC                              | TT                 | TT               | INTERGENIC      |               |                    |                    |
| SNP_91572_A_14713 | NW_004516485.1 | scaffold1222 | 14713                   | AA                              | GG                 | GG               | INTERGENIC      |               |                    |                    |
| SNP_91573_A_14755 | NW_004516485.1 | scaffold1222 | 14755                   | GG                              | CC                 | CC               | INTERGENIC      |               |                    |                    |
| SNP_91574_A_14806 | NW_004516485.1 | scaffold1222 | 14806                   | TT                              | AA                 | AA               | INTERGENIC      |               |                    |                    |
| SNP_91575_A_14826 | NW_004516485.1 | scaffold1222 | 14826                   | CC                              | TT                 | TT               | INTERGENIC      |               |                    |                    |
| SNP_91576_A_14856 | NW_004516485.1 | scaffold1222 | 14856                   | TT                              | AA                 | AA               | INTERGENIC      |               |                    |                    |
| SNP_91577_A_14858 | NW_004516485.1 | scaffold1222 | 14858                   | TT                              | AA                 | AA               | INTERGENIC      |               |                    |                    |
| SNP_91578_A_14863 | NW_004516485.1 | scaffold1222 | 14863                   | TT                              | GG                 | GG               | INTERGENIC      |               |                    |                    |
| SNP_91579_A_4016  | NW_004516486.1 | scaffold1224 | 4016                    | TT                              | GG                 | GG               | INTERGENIC      |               |                    |                    |
| SNP_91580_A_4021  | NW_004516486.1 | scaffold1224 | 4021                    | TT                              | AA                 | AA               | INTERGENIC      |               |                    |                    |
| SNP_91581_A_4136  | NW_004516486.1 | scaffold1224 | 4136                    | TT                              | CC                 | CC               | INTERGENIC      |               |                    |                    |
| SNP_91582_A_4138  | NW_004516486.1 | scaffold1224 | 4138                    | GG                              | AA                 | AA               | INTERGENIC      |               |                    |                    |
| SNP_91583_A_4140  | NW_004516486.1 | scaffold1224 | 4140                    | GG                              | CC                 | CC               | INTERGENIC      |               |                    |                    |
| SNP_91584_A_4175  | NW_004516486.1 | scaffold1224 | 4175                    | CC                              | TT                 | TT               | INTERGENIC      |               |                    |                    |
| SNP_91585_A_4187  | NW_004516486.1 | scaffold1224 | 4187                    | CC                              | TT                 | TT               | INTERGENIC      |               |                    |                    |
| SNP_91586_A_4335  | NW_004516486.1 | scaffold1224 | 4335                    | TT                              | CC                 | CC               | INTERGENIC      |               |                    |                    |
| SNP_91587_A_4445  | NW_004516486.1 | scaffold1224 | 4445                    | AA                              | GG                 | GG               | INTERGENIC      |               |                    |                    |



| SNPs IDs           | Chromosome IDs | Chromosomes  | Physical positions (bp) | CDC Frontier (Reference genome) | (Pusa 1103 & HPNB) | (ILWC 46 & LPNB) | Sequence genome | Components of | Gene accession IDs | Putative functions |
|--------------------|----------------|--------------|-------------------------|---------------------------------|--------------------|------------------|-----------------|---------------|--------------------|--------------------|
| SNP_91588_A_5083   | NW_004516486.1 | scaffold1224 | 5083                    | AA                              | GG                 | GG               | INTERGENIC      |               |                    |                    |
| SNP_91589_A_2839   | NW_004516489.1 | scaffold1231 | 2839                    | CC                              | AA                 | AA               | INTERGENIC      |               |                    |                    |
| SNP_91590_A_6816   | NW_004516489.1 | scaffold1231 | 6816                    | CC                              | GG                 | GG               | INTERGENIC      |               |                    |                    |
| SNP_91591_A_7231   | NW_004516489.1 | scaffold1231 | 7231                    | GG                              | TT                 | TT               | INTERGENIC      |               |                    |                    |
| SNP_91592_A_22849  | NW_004516489.1 | scaffold1231 | 22849                   | GG                              | AA                 | AA               | INTERGENIC      |               |                    |                    |
| SNP_91593_A_25734  | NW_004516489.1 | scaffold1231 | 25734                   | CC                              | TT                 | TT               | INTERGENIC      |               |                    |                    |
| SNP_91594_A_25909  | NW_004516489.1 | scaffold1231 | 25909                   | TT                              | AA                 | AA               | INTERGENIC      |               |                    |                    |
| SNP_91595_A_43430  | NW_004516489.1 | scaffold1231 | 43430                   | CC                              | AA                 | AA               | INTERGENIC      |               |                    |                    |
| SNP_91596_A_54952  | NW_004516489.1 | scaffold1231 | 54952                   | TT                              | CC                 | CC               | INTERGENIC      |               |                    |                    |
| SNP_91597_A_74727  | NW_004516489.1 | scaffold1231 | 74727                   | GG                              | AA                 | AA               | INTERGENIC      |               |                    |                    |
| SNP_91598_A_74732  | NW_004516489.1 | scaffold1231 | 74732                   | AA                              | CC                 | CC               | INTERGENIC      |               |                    |                    |
| SNP_91599_A_87001  | NW_004516489.1 | scaffold1231 | 87001                   | CC                              | GG                 | GG               | INTERGENIC      |               |                    |                    |
| SNP_91600_A_87395  | NW_004516489.1 | scaffold1231 | 87395                   | GG                              | TT                 | TT               | INTERGENIC      |               |                    |                    |
| SNP_91601_A_113338 | NW_004516489.1 | scaffold1231 | 113338                  | GG                              | AA                 | AA               | INTERGENIC      |               |                    |                    |
| SNP_91602_A_122486 | NW_004516489.1 | scaffold1231 | 122486                  | AA                              | TT                 | TT               | INTERGENIC      |               |                    |                    |
| SNP_91603_A_124261 | NW_004516489.1 | scaffold1231 | 124261                  | CC                              | TT                 | TT               | INTERGENIC      |               |                    |                    |
| SNP_91604_A_143103 | NW_004516489.1 | scaffold1231 | 143103                  | CC                              | TT                 | TT               | INTERGENIC      |               |                    |                    |
| SNP_91605_A_143114 | NW_004516489.1 | scaffold1231 | 143114                  | GG                              | AA                 | AA               | INTERGENIC      |               |                    |                    |
| SNP_91606_A_143118 | NW_004516489.1 | scaffold1231 | 143118                  | CC                              | TT                 | TT               | INTERGENIC      |               |                    |                    |
| SNP_91607_A_143142 | NW_004516489.1 | scaffold1231 | 143142                  | TT                              | CC                 | CC               | INTERGENIC      |               |                    |                    |
| SNP_91608_A_185155 | NW_004516489.1 | scaffold1231 | 185155                  | AA                              | CC                 | CC               | INTERGENIC      |               |                    |                    |
| SNP_91609_A_185758 | NW_004516489.1 | scaffold1231 | 185758                  | GG                              | AA                 | AA               | INTERGENIC      |               |                    |                    |

| SNPs IDs           | Chromosome IDs | Chromosomes  | Physical positions (bp) | CDC Frontier (Reference genome) | (Pusa 1103 & HPNB) | (ILWC 46 & LPNB) | Sequence genome | Components of | Gene accession IDs | Putative functions |
|--------------------|----------------|--------------|-------------------------|---------------------------------|--------------------|------------------|-----------------|---------------|--------------------|--------------------|
| SNP_91610_A_186606 | NW_004516489.1 | scaffold1231 | 186606                  | GG                              | AA                 | AA               | INTERGENIC      |               |                    |                    |
| SNP_91611_A_186898 | NW_004516489.1 | scaffold1231 | 186898                  | GG                              | AA                 | AA               | INTERGENIC      |               |                    |                    |
| SNP_91612_A_187139 | NW_004516489.1 | scaffold1231 | 187139                  | CC                              | TT                 | TT               | INTERGENIC      |               |                    |                    |
| SNP_91613_A_187189 | NW_004516489.1 | scaffold1231 | 187189                  | TT                              | CC                 | CC               | INTERGENIC      |               |                    |                    |
| SNP_91614_A_187397 | NW_004516489.1 | scaffold1231 | 187397                  | GG                              | AA                 | AA               | INTERGENIC      |               |                    |                    |
| SNP_91615_A_469    | NW_004516492.1 | scaffold1235 | 469                     | TT                              | AA                 | AA               | INTERGENIC      |               |                    |                    |
| SNP_91616_A_544    | NW_004516492.1 | scaffold1235 | 544                     | AA                              | CC                 | CC               | INTERGENIC      |               |                    |                    |
| SNP_91617_A_881    | NW_004516492.1 | scaffold1235 | 881                     | CC                              | TT                 | TT               | INTERGENIC      |               |                    |                    |
| SNP_91618_A_940    | NW_004516492.1 | scaffold1235 | 940                     | GG                              | AA                 | AA               | INTERGENIC      |               |                    |                    |
| SNP_91619_A_1450   | NW_004516495.1 | scaffold1238 | 1450                    | CC                              | TT                 | TT               | INTERGENIC      |               |                    |                    |
| SNP_91620_A_1640   | NW_004516495.1 | scaffold1238 | 1640                    | AA                              | TT                 | TT               | INTERGENIC      |               |                    |                    |
| SNP_91621_A_1928   | NW_004516495.1 | scaffold1238 | 1928                    | TT                              | CC                 | CC               | INTERGENIC      |               |                    |                    |
| SNP_91622_A_31178  | NW_004516495.1 | scaffold1238 | 31178                   | AA                              | TT                 | TT               | INTERGENIC      |               |                    |                    |
| SNP_91623_A_34880  | NW_004516495.1 | scaffold1238 | 34880                   | CC                              | TT                 | TT               | INTERGENIC      |               |                    |                    |
| SNP_91624_A_65650  | NW_004516495.1 | scaffold1238 | 65650                   | AA                              | GG                 | GG               | INTERGENIC      |               |                    |                    |
| SNP_91625_A_103805 | NW_004516495.1 | scaffold1238 | 103805                  | CC                              | TT                 | TT               | INTERGENIC      |               |                    |                    |
| SNP_91626_A_103927 | NW_004516495.1 | scaffold1238 | 103927                  | CC                              | TT                 | TT               | INTERGENIC      |               |                    |                    |
| SNP_91627_A_104024 | NW_004516495.1 | scaffold1238 | 104024                  | AA                              | CC                 | CC               | INTERGENIC      |               |                    |                    |
| SNP_91628_A_104149 | NW_004516495.1 | scaffold1238 | 104149                  | TT                              | GG                 | GG               | INTERGENIC      |               |                    |                    |
| SNP_91629_A_104167 | NW_004516495.1 | scaffold1238 | 104167                  | AA                              | GG                 | GG               | INTERGENIC      |               |                    |                    |
| SNP_91630_A_104205 | NW_004516495.1 | scaffold1238 | 104205                  | TT                              | CC                 | CC               | INTERGENIC      |               |                    |                    |
| SNP_91631_A_104222 | NW_004516495.1 | scaffold1238 | 104222                  | AA                              | TT                 | TT               | INTERGENIC      |               |                    |                    |

| SNPs IDs           | Chromosome IDs | Chromosomes  | Physical positions (bp) | CDC Frontier (Reference genome) | (Pusa 1103 & HPNB) | (ILWC 46 & LPNB) | Sequence genome | Components of | Gene accession IDs           | Putative functions |
|--------------------|----------------|--------------|-------------------------|---------------------------------|--------------------|------------------|-----------------|---------------|------------------------------|--------------------|
| SNP_91632_A_104226 | NW_004516495.1 | scaffold1238 | 104226                  | GG                              | AA                 | AA               | INTERGENIC      |               |                              |                    |
| SNP_91633_A_104364 | NW_004516495.1 | scaffold1238 | 104364                  | TT                              | GG                 | GG               | INTERGENIC      |               |                              |                    |
| SNP_91634_A_104365 | NW_004516495.1 | scaffold1238 | 104365                  | GG                              | TT                 | TT               | INTERGENIC      |               |                              |                    |
| SNP_91635_A_104391 | NW_004516495.1 | scaffold1238 | 104391                  | GG                              | TT                 | TT               | INTERGENIC      |               |                              |                    |
| SNP_91637_A_109869 | NW_004516495.1 | scaffold1238 | 109869                  | CC                              | GG                 | GG               | INTERGENIC      |               |                              |                    |
| SNP_91638_A_110526 | NW_004516495.1 | scaffold1238 | 110526                  | CC                              | TT                 | TT               | INTERGENIC      |               |                              |                    |
| SNP_91639_A_110725 | NW_004516495.1 | scaffold1238 | 110725                  | GG                              | AA                 | AA               | INTERGENIC      |               |                              |                    |
| SNP_91640_A_110727 | NW_004516495.1 | scaffold1238 | 110727                  | AA                              | CC                 | CC               | INTERGENIC      |               |                              |                    |
| SNP_91641_A_110740 | NW_004516495.1 | scaffold1238 | 110740                  | AA                              | GG                 | GG               | INTERGENIC      |               |                              |                    |
| SNP_91642_A_110747 | NW_004516495.1 | scaffold1238 | 110747                  | AA                              | CC                 | CC               | INTERGENIC      |               |                              |                    |
| SNP_91643_A_110759 | NW_004516495.1 | scaffold1238 | 110759                  | TT                              | GG                 | GG               | INTERGENIC      |               |                              |                    |
| SNP_91644_A_110791 | NW_004516495.1 | scaffold1238 | 110791                  | GG                              | AA                 | AA               | INTERGENIC      |               |                              |                    |
| SNP_91645_A_110830 | NW_004516495.1 | scaffold1238 | 110830                  | AA                              | TT                 | TT               | INTERGENIC      |               |                              |                    |
| SNP_91647_A_110842 | NW_004516495.1 | scaffold1238 | 110842                  | GG                              | AA                 | AA               | INTERGENIC      |               |                              |                    |
| SNP_91648_A_110843 | NW_004516495.1 | scaffold1238 | 110843                  | GG                              | AA                 | AA               | INTERGENIC      |               |                              |                    |
| SNP_91649_A_110918 | NW_004516495.1 | scaffold1238 | 110918                  | AA                              | TT                 | TT               | INTERGENIC      |               |                              |                    |
| SNP_91651_A_136281 | NW_004516495.1 | scaffold1238 | 136281                  | TT                              | AA                 | AA               | URR             | 101488619     | uncharacterized LOC101488619 |                    |
| SNP_91652_A_147017 | NW_004516495.1 | scaffold1238 | 147017                  | AA                              | GG                 | GG               | INTERGENIC      |               |                              |                    |
| SNP_91654_A_2437   | NW_004516496.1 | scaffold1239 | 2437                    | CC                              | GG                 | GG               | INTERGENIC      |               |                              |                    |
| SNP_91655_A_3931   | NW_004516496.1 | scaffold1239 | 3931                    | AA                              | GG                 | GG               | INTERGENIC      |               |                              |                    |
| SNP_91656_A_4076   | NW_004516496.1 | scaffold1239 | 4076                    | TT                              | CC                 | CC               | INTERGENIC      |               |                              |                    |
| SNP_91659_A_5719   | NW_004516496.1 | scaffold1239 | 5719                    | AA                              | TT                 | TT               | INTERGENIC      |               |                              |                    |

| SNPs IDs           | Chromosome IDs | Chromosomes  | Physical positions (bp) | CDC Frontier (Reference genome) | (Pusa 1103 & HPNB) | (ILWC 46 & LPNB) | Sequence Components of genome | Gene accession IDs | Putative functions                                       |
|--------------------|----------------|--------------|-------------------------|---------------------------------|--------------------|------------------|-------------------------------|--------------------|----------------------------------------------------------|
| SNP_91660_A_62818  | NW_004516497.1 | scaffold1240 | 62818                   | CC                              | TT                 | TT               | INTERGENIC                    |                    |                                                          |
| SNP_91661_A_62859  | NW_004516497.1 | scaffold1240 | 62859                   | CC                              | AA                 | AA               | INTERGENIC                    |                    |                                                          |
| SNP_91662_A_62912  | NW_004516497.1 | scaffold1240 | 62912                   | CC                              | TT                 | TT               | INTERGENIC                    |                    |                                                          |
| SNP_91663_A_63268  | NW_004516497.1 | scaffold1240 | 63268                   | AA                              | CC                 | CC               | INTERGENIC                    |                    |                                                          |
| SNP_91664_A_68951  | NW_004516497.1 | scaffold1240 | 68951                   | TT                              | AA                 | AA               | INTERGENIC                    |                    |                                                          |
| SNP_91667_A_105518 | NW_004516497.1 | scaffold1240 | 105518                  | AA                              | GG                 | GG               | INTERGENIC                    |                    |                                                          |
| SNP_91669_A_121494 | NW_004516497.1 | scaffold1240 | 121494                  | GG                              | CC                 | CC               | INTRON                        | 101489613          | serine-threonine kinase receptor-associated protein-like |
| SNP_91671_A_2695   | NW_004516498.1 | scaffold1242 | 2695                    | GG                              | AA                 | AA               | INTERGENIC                    |                    |                                                          |
| SNP_91672_A_14700  | NW_004516498.1 | scaffold1242 | 14700                   | AA                              | GG                 | GG               | INTERGENIC                    |                    |                                                          |
| SNP_91673_A_15112  | NW_004516498.1 | scaffold1242 | 15112                   | AA                              | CC                 | CC               | INTERGENIC                    |                    |                                                          |
| SNP_91674_A_17022  | NW_004516498.1 | scaffold1242 | 17022                   | TT                              | CC                 | CC               | INTERGENIC                    |                    |                                                          |
| SNP_91675_A_17030  | NW_004516498.1 | scaffold1242 | 17030                   | TT                              | CC                 | CC               | INTERGENIC                    |                    |                                                          |
| SNP_91676_A_26632  | NW_004516498.1 | scaffold1242 | 26632                   | TT                              | AA                 | AA               | INTERGENIC                    |                    |                                                          |
| SNP_91677_A_26635  | NW_004516498.1 | scaffold1242 | 26635                   | TT                              | GG                 | GG               | INTERGENIC                    |                    |                                                          |
| SNP_91678_A_26658  | NW_004516498.1 | scaffold1242 | 26658                   | CC                              | TT                 | TT               | INTERGENIC                    |                    |                                                          |
| SNP_91679_A_27586  | NW_004516498.1 | scaffold1242 | 27586                   | GG                              | AA                 | AA               | INTERGENIC                    |                    |                                                          |
| SNP_91680_A_40393  | NW_004516498.1 | scaffold1242 | 40393                   | AA                              | GG                 | GG               | INTERGENIC                    |                    |                                                          |
| SNP_91681_A_40428  | NW_004516498.1 | scaffold1242 | 40428                   | AA                              | CC                 | CC               | INTERGENIC                    |                    |                                                          |
| SNP_91682_A_47633  | NW_004516498.1 | scaffold1242 | 47633                   | AA                              | GG                 | GG               | INTERGENIC                    |                    |                                                          |
| SNP_91683_A_47768  | NW_004516498.1 | scaffold1242 | 47768                   | AA                              | TT                 | TT               | INTERGENIC                    |                    |                                                          |
| SNP_91684_A_48030  | NW_004516498.1 | scaffold1242 | 48030                   | TT                              | GG                 | GG               | INTERGENIC                    |                    |                                                          |
| SNP_91685_A_53727  | NW_004516498.1 | scaffold1242 | 53727                   | TT                              | CC                 | CC               | INTERGENIC                    |                    |                                                          |

| SNPs IDs          | Chromosome IDs | Chromosomes  | Physical positions (bp) | CDC Frontier (Reference genome) | (Pusa 1103 & HPNB) | (ILWC 46 & LPNB) | Sequence genome | Components of | Gene accession IDs | Putative functions |
|-------------------|----------------|--------------|-------------------------|---------------------------------|--------------------|------------------|-----------------|---------------|--------------------|--------------------|
| SNP_91686_A_53728 | NW_004516498.1 | scaffold1242 | 53728                   | CC                              | GG                 | GG               | INTERGENIC      |               |                    |                    |
| SNP_91687_A_55644 | NW_004516498.1 | scaffold1242 | 55644                   | GG                              | TT                 | TT               | INTERGENIC      |               |                    |                    |
| SNP_91688_A_62277 | NW_004516498.1 | scaffold1242 | 62277                   | AA                              | GG                 | GG               | INTERGENIC      |               |                    |                    |
| SNP_91689_A_775   | NW_004516499.1 | scaffold1243 | 775                     | TT                              | GG                 | GG               | INTERGENIC      |               |                    |                    |
| SNP_91690_A_994   | NW_004516499.1 | scaffold1243 | 994                     | GG                              | TT                 | TT               | INTERGENIC      |               |                    |                    |
| SNP_91691_A_1104  | NW_004516499.1 | scaffold1243 | 1104                    | AA                              | GG                 | GG               | INTERGENIC      |               |                    |                    |
| SNP_91692_A_1165  | NW_004516499.1 | scaffold1243 | 1165                    | TT                              | GG                 | GG               | INTERGENIC      |               |                    |                    |
| SNP_91693_A_1272  | NW_004516499.1 | scaffold1243 | 1272                    | AA                              | TT                 | TT               | INTERGENIC      |               |                    |                    |
| SNP_91694_A_1335  | NW_004516499.1 | scaffold1243 | 1335                    | TT                              | GG                 | GG               | INTERGENIC      |               |                    |                    |
| SNP_91695_A_1534  | NW_004516499.1 | scaffold1243 | 1534                    | GG                              | AA                 | AA               | INTERGENIC      |               |                    |                    |
| SNP_91696_A_1818  | NW_004516499.1 | scaffold1243 | 1818                    | AA                              | TT                 | TT               | INTERGENIC      |               |                    |                    |
| SNP_91697_A_2211  | NW_004516499.1 | scaffold1243 | 2211                    | AA                              | CC                 | CC               | INTERGENIC      |               |                    |                    |
| SNP_91698_A_2256  | NW_004516499.1 | scaffold1243 | 2256                    | CC                              | GG                 | GG               | INTERGENIC      |               |                    |                    |
| SNP_91699_A_2105  | NW_004516500.1 | scaffold1244 | 2105                    | TT                              | AA                 | AA               | INTERGENIC      |               |                    |                    |
| SNP_91700_A_2175  | NW_004516500.1 | scaffold1244 | 2175                    | TT                              | AA                 | AA               | INTERGENIC      |               |                    |                    |
| SNP_91701_A_2183  | NW_004516500.1 | scaffold1244 | 2183                    | AA                              | TT                 | TT               | INTERGENIC      |               |                    |                    |
| SNP_91702_A_2192  | NW_004516500.1 | scaffold1244 | 2192                    | CC                              | AA                 | AA               | INTERGENIC      |               |                    |                    |
| SNP_91703_A_2305  | NW_004516500.1 | scaffold1244 | 2305                    | TT                              | AA                 | AA               | INTERGENIC      |               |                    |                    |
| SNP_91704_A_2371  | NW_004516500.1 | scaffold1244 | 2371                    | CC                              | AA                 | AA               | INTERGENIC      |               |                    |                    |
| SNP_91705_A_2634  | NW_004516500.1 | scaffold1244 | 2634                    | TT                              | AA                 | AA               | INTERGENIC      |               |                    |                    |
| SNP_91706_A_3086  | NW_004516500.1 | scaffold1244 | 3086                    | AA                              | GG                 | GG               | INTERGENIC      |               |                    |                    |
| SNP_91708_A_3460  | NW_004516500.1 | scaffold1244 | 3460                    | TT                              | CC                 | CC               | INTERGENIC      |               |                    |                    |

| SNPs IDs          | Chromosome IDs | Chromosomes  | Physical positions (bp) | CDC Frontier (Reference genome) | (Pusa 1103 & HPNB) | (ILWC 46 & LPNB) | Sequence genome | Components of | Gene accession IDs | Putative functions |
|-------------------|----------------|--------------|-------------------------|---------------------------------|--------------------|------------------|-----------------|---------------|--------------------|--------------------|
| SNP_91709_A_4886  | NW_004516500.1 | scaffold1244 | 4886                    | TT                              | AA                 | AA               | INTERGENIC      |               |                    |                    |
| SNP_91710_A_5836  | NW_004516500.1 | scaffold1244 | 5836                    | TT                              | CC                 | CC               | INTERGENIC      |               |                    |                    |
| SNP_91711_A_5845  | NW_004516500.1 | scaffold1244 | 5845                    | GG                              | CC                 | CC               | INTERGENIC      |               |                    |                    |
| SNP_91712_A_6059  | NW_004516500.1 | scaffold1244 | 6059                    | TT                              | GG                 | GG               | INTERGENIC      |               |                    |                    |
| SNP_91713_A_7826  | NW_004516500.1 | scaffold1244 | 7826                    | AA                              | TT                 | TT               | INTERGENIC      |               |                    |                    |
| SNP_91714_A_7840  | NW_004516500.1 | scaffold1244 | 7840                    | AA                              | GG                 | GG               | INTERGENIC      |               |                    |                    |
| SNP_91715_A_7841  | NW_004516500.1 | scaffold1244 | 7841                    | GG                              | AA                 | AA               | INTERGENIC      |               |                    |                    |
| SNP_91716_A_7843  | NW_004516500.1 | scaffold1244 | 7843                    | AA                              | GG                 | GG               | INTERGENIC      |               |                    |                    |
| SNP_91717_A_7850  | NW_004516500.1 | scaffold1244 | 7850                    | AA                              | TT                 | TT               | INTERGENIC      |               |                    |                    |
| SNP_91718_A_7856  | NW_004516500.1 | scaffold1244 | 7856                    | CC                              | TT                 | TT               | INTERGENIC      |               |                    |                    |
| SNP_91719_A_7859  | NW_004516500.1 | scaffold1244 | 7859                    | CC                              | TT                 | TT               | INTERGENIC      |               |                    |                    |
| SNP_91720_A_7866  | NW_004516500.1 | scaffold1244 | 7866                    | GG                              | AA                 | AA               | INTERGENIC      |               |                    |                    |
| SNP_91722_A_7984  | NW_004516500.1 | scaffold1244 | 7984                    | CC                              | TT                 | TT               | INTERGENIC      |               |                    |                    |
| SNP_91723_A_7985  | NW_004516500.1 | scaffold1244 | 7985                    | AA                              | GG                 | GG               | INTERGENIC      |               |                    |                    |
| SNP_91724_A_7993  | NW_004516500.1 | scaffold1244 | 7993                    | AA                              | GG                 | GG               | INTERGENIC      |               |                    |                    |
| SNP_91725_A_7994  | NW_004516500.1 | scaffold1244 | 7994                    | AA                              | GG                 | GG               | INTERGENIC      |               |                    |                    |
| SNP_91726_A_8000  | NW_004516500.1 | scaffold1244 | 8000                    | AA                              | GG                 | GG               | INTERGENIC      |               |                    |                    |
| SNP_91727_A_8168  | NW_004516500.1 | scaffold1244 | 8168                    | GG                              | AA                 | AA               | INTERGENIC      |               |                    |                    |
| SNP_91728_A_8246  | NW_004516500.1 | scaffold1244 | 8246                    | TT                              | CC                 | CC               | INTERGENIC      |               |                    |                    |
| SNP_91729_A_10111 | NW_004516500.1 | scaffold1244 | 10111                   | GG                              | AA                 | AA               | INTERGENIC      |               |                    |                    |
| SNP_91730_A_14079 | NW_004516500.1 | scaffold1244 | 14079                   | TT                              | CC                 | CC               | INTERGENIC      |               |                    |                    |
| SNP_91731_A_17129 | NW_004516500.1 | scaffold1244 | 17129                   | CC                              | TT                 | TT               | INTERGENIC      |               |                    |                    |

| SNPs IDs          | Chromosome IDs | Chromosomes  | Physical positions (bp) | CDC Frontier (Reference genome) | (Pusa 1103 & HPNB) | (ILWC 46 & LPNB) | Sequence genome | Components of | Gene accession IDs | Putative functions |
|-------------------|----------------|--------------|-------------------------|---------------------------------|--------------------|------------------|-----------------|---------------|--------------------|--------------------|
| SNP_91732_A_17143 | NW_004516500.1 | scaffold1244 | 17143                   | GG                              | AA                 | AA               | INTERGENIC      |               |                    |                    |
| SNP_91733_A_20590 | NW_004516500.1 | scaffold1244 | 20590                   | CC                              | AA                 | AA               | INTERGENIC      |               |                    |                    |
| SNP_91734_A_4951  | NW_004516503.1 | scaffold1247 | 4951                    | AA                              | GG                 | GG               | INTERGENIC      |               |                    |                    |
| SNP_91735_A_5014  | NW_004516503.1 | scaffold1247 | 5014                    | CC                              | GG                 | GG               | INTERGENIC      |               |                    |                    |
| SNP_91736_A_5021  | NW_004516503.1 | scaffold1247 | 5021                    | TT                              | CC                 | CC               | INTERGENIC      |               |                    |                    |
| SNP_91737_A_7761  | NW_004516503.1 | scaffold1247 | 7761                    | CC                              | AA                 | AA               | INTERGENIC      |               |                    |                    |
| SNP_91738_A_7833  | NW_004516503.1 | scaffold1247 | 7833                    | GG                              | AA                 | AA               | INTERGENIC      |               |                    |                    |
| SNP_91739_A_7838  | NW_004516503.1 | scaffold1247 | 7838                    | GG                              | AA                 | AA               | INTERGENIC      |               |                    |                    |
| SNP_91740_A_13306 | NW_004516503.1 | scaffold1247 | 13306                   | GG                              | CC                 | CC               | INTERGENIC      |               |                    |                    |
| SNP_91741_A_13318 | NW_004516503.1 | scaffold1247 | 13318                   | TT                              | CC                 | CC               | INTERGENIC      |               |                    |                    |
| SNP_91742_A_13372 | NW_004516503.1 | scaffold1247 | 13372                   | GG                              | AA                 | AA               | INTERGENIC      |               |                    |                    |
| SNP_91743_A_13560 | NW_004516503.1 | scaffold1247 | 13560                   | CC                              | AA                 | AA               | INTERGENIC      |               |                    |                    |
| SNP_91744_A_13598 | NW_004516503.1 | scaffold1247 | 13598                   | CC                              | TT                 | TT               | INTERGENIC      |               |                    |                    |
| SNP_91745_A_13951 | NW_004516503.1 | scaffold1247 | 13951                   | AA                              | TT                 | TT               | INTERGENIC      |               |                    |                    |
| SNP_91746_A_30038 | NW_004516503.1 | scaffold1247 | 30038                   | AA                              | TT                 | TT               | INTERGENIC      |               |                    |                    |
| SNP_91747_A_30633 | NW_004516503.1 | scaffold1247 | 30633                   | AA                              | GG                 | GG               | INTERGENIC      |               |                    |                    |
| SNP_91748_A_30634 | NW_004516503.1 | scaffold1247 | 30634                   | AA                              | TT                 | TT               | INTERGENIC      |               |                    |                    |
| SNP_91749_A_32156 | NW_004516503.1 | scaffold1247 | 32156                   | AA                              | GG                 | GG               | INTERGENIC      |               |                    |                    |
| SNP_91750_A_38188 | NW_004516503.1 | scaffold1247 | 38188                   | TT                              | AA                 | AA               | INTERGENIC      |               |                    |                    |
| SNP_91751_A_38258 | NW_004516503.1 | scaffold1247 | 38258                   | TT                              | CC                 | CC               | INTERGENIC      |               |                    |                    |
| SNP_91752_A_38413 | NW_004516503.1 | scaffold1247 | 38413                   | AA                              | GG                 | GG               | INTERGENIC      |               |                    |                    |
| SNP_91753_A_38748 | NW_004516503.1 | scaffold1247 | 38748                   | TT                              | AA                 | AA               | INTERGENIC      |               |                    |                    |

| SNPs IDs          | Chromosome IDs | Chromosomes  | Physical positions (bp) | CDC Frontier (Reference genome) | (Pusa 1103 & HPNB) | (ILWC 46 & LPNB) | Sequence genome | Components of | Gene accession IDs | Putative functions |
|-------------------|----------------|--------------|-------------------------|---------------------------------|--------------------|------------------|-----------------|---------------|--------------------|--------------------|
| SNP_91754_A_38764 | NW_004516503.1 | scaffold1247 | 38764                   | AA                              | CC                 | CC               | INTERGENIC      |               |                    |                    |
| SNP_91755_A_498   | NW_004516504.1 | scaffold1248 | 498                     | CC                              | AA                 | AA               | INTERGENIC      |               |                    |                    |
| SNP_91756_A_574   | NW_004516504.1 | scaffold1248 | 574                     | GG                              | TT                 | TT               | INTERGENIC      |               |                    |                    |
| SNP_91757_A_589   | NW_004516504.1 | scaffold1248 | 589                     | AA                              | CC                 | CC               | INTERGENIC      |               |                    |                    |
| SNP_91758_A_590   | NW_004516504.1 | scaffold1248 | 590                     | TT                              | AA                 | AA               | INTERGENIC      |               |                    |                    |
| SNP_91759_A_1064  | NW_004516507.1 | scaffold1252 | 1064                    | TT                              | GG                 | GG               | INTERGENIC      |               |                    |                    |
| SNP_91760_A_28038 | NW_004516507.1 | scaffold1252 | 28038                   | TT                              | CC                 | CC               | INTERGENIC      |               |                    |                    |
| SNP_91761_A_28574 | NW_004516507.1 | scaffold1252 | 28574                   | TT                              | GG                 | GG               | INTERGENIC      |               |                    |                    |
| SNP_91762_A_28575 | NW_004516507.1 | scaffold1252 | 28575                   | GG                              | TT                 | TT               | INTERGENIC      |               |                    |                    |
| SNP_91763_A_28936 | NW_004516507.1 | scaffold1252 | 28936                   | AA                              | GG                 | GG               | INTERGENIC      |               |                    |                    |
| SNP_91764_A_43292 | NW_004516507.1 | scaffold1252 | 43292                   | TT                              | AA                 | AA               | INTERGENIC      |               |                    |                    |
| SNP_91765_A_43921 | NW_004516507.1 | scaffold1252 | 43921                   | TT                              | GG                 | GG               | INTERGENIC      |               |                    |                    |
| SNP_91766_A_44095 | NW_004516507.1 | scaffold1252 | 44095                   | AA                              | CC                 | CC               | INTERGENIC      |               |                    |                    |
| SNP_91767_A_44238 | NW_004516507.1 | scaffold1252 | 44238                   | TT                              | GG                 | GG               | INTERGENIC      |               |                    |                    |
| SNP_91768_A_44317 | NW_004516507.1 | scaffold1252 | 44317                   | AA                              | TT                 | TT               | INTERGENIC      |               |                    |                    |
| SNP_91769_A_55273 | NW_004516507.1 | scaffold1252 | 55273                   | CC                              | TT                 | TT               | INTERGENIC      |               |                    |                    |
| SNP_91770_A_55572 | NW_004516507.1 | scaffold1252 | 55572                   | TT                              | CC                 | CC               | INTERGENIC      |               |                    |                    |
| SNP_91772_A_55709 | NW_004516507.1 | scaffold1252 | 55709                   | CC                              | TT                 | TT               | INTERGENIC      |               |                    |                    |
| SNP_91773_A_55717 | NW_004516507.1 | scaffold1252 | 55717                   | CC                              | TT                 | TT               | INTERGENIC      |               |                    |                    |
| SNP_91774_A_55922 | NW_004516507.1 | scaffold1252 | 55922                   | AA                              | GG                 | GG               | INTERGENIC      |               |                    |                    |
| SNP_91775_A_56095 | NW_004516507.1 | scaffold1252 | 56095                   | GG                              | AA                 | AA               | INTERGENIC      |               |                    |                    |
| SNP_91776_A_56243 | NW_004516507.1 | scaffold1252 | 56243                   | AA                              | TT                 | TT               | INTERGENIC      |               |                    |                    |



| SNPs IDs          | Chromosome IDs | Chromosomes  | Physical positions (bp) | CDC Frontier (Reference genome) | (Pusa 1103 & HPNB) | (ILWC 46 & LPNB) | Sequence genome | Components of | Gene accession IDs | Putative functions |
|-------------------|----------------|--------------|-------------------------|---------------------------------|--------------------|------------------|-----------------|---------------|--------------------|--------------------|
| SNP_91777_A_60627 | NW_004516507.1 | scaffold1252 | 60627                   | GG                              | AA                 | AA               | INTERGENIC      |               |                    |                    |
| SNP_91778_A_62956 | NW_004516507.1 | scaffold1252 | 62956                   | CC                              | TT                 | TT               | INTERGENIC      |               |                    |                    |
| SNP_91779_A_62957 | NW_004516507.1 | scaffold1252 | 62957                   | GG                              | AA                 | AA               | INTERGENIC      |               |                    |                    |
| SNP_91780_A_62973 | NW_004516507.1 | scaffold1252 | 62973                   | AA                              | GG                 | GG               | INTERGENIC      |               |                    |                    |
| SNP_91781_A_63616 | NW_004516507.1 | scaffold1252 | 63616                   | CC                              | TT                 | TT               | INTERGENIC      |               |                    |                    |
| SNP_91782_A_63693 | NW_004516507.1 | scaffold1252 | 63693                   | TT                              | CC                 | CC               | INTERGENIC      |               |                    |                    |
| SNP_91783_A_69996 | NW_004516507.1 | scaffold1252 | 69996                   | CC                              | GG                 | GG               | INTERGENIC      |               |                    |                    |
| SNP_91784_A_71418 | NW_004516507.1 | scaffold1252 | 71418                   | CC                              | TT                 | TT               | INTERGENIC      |               |                    |                    |
| SNP_91785_A_71458 | NW_004516507.1 | scaffold1252 | 71458                   | GG                              | AA                 | AA               | INTERGENIC      |               |                    |                    |
| SNP_91786_A_76642 | NW_004516507.1 | scaffold1252 | 76642                   | AA                              | GG                 | GG               | INTERGENIC      |               |                    |                    |
| SNP_91787_A_88650 | NW_004516507.1 | scaffold1252 | 88650                   | AA                              | GG                 | GG               | INTERGENIC      |               |                    |                    |
| SNP_91788_A_95468 | NW_004516507.1 | scaffold1252 | 95468                   | GG                              | TT                 | TT               | INTERGENIC      |               |                    |                    |
| SNP_91789_A_95675 | NW_004516507.1 | scaffold1252 | 95675                   | AA                              | TT                 | TT               | INTERGENIC      |               |                    |                    |
| SNP_91790_A_96822 | NW_004516507.1 | scaffold1252 | 96822                   | CC                              | TT                 | TT               | INTERGENIC      |               |                    |                    |
| SNP_91791_A_97953 | NW_004516507.1 | scaffold1252 | 97953                   | TT                              | CC                 | CC               | INTERGENIC      |               |                    |                    |
| SNP_91792_A_97967 | NW_004516507.1 | scaffold1252 | 97967                   | CC                              | TT                 | TT               | INTERGENIC      |               |                    |                    |
| SNP_91793_A_97969 | NW_004516507.1 | scaffold1252 | 97969                   | GG                              | AA                 | AA               | INTERGENIC      |               |                    |                    |
| SNP_91795_A_98000 | NW_004516507.1 | scaffold1252 | 98000                   | AA                              | TT                 | TT               | INTERGENIC      |               |                    |                    |
| SNP_91797_A_98146 | NW_004516507.1 | scaffold1252 | 98146                   | CC                              | AA                 | AA               | INTERGENIC      |               |                    |                    |
| SNP_91798_A_98150 | NW_004516507.1 | scaffold1252 | 98150                   | TT                              | AA                 | AA               | INTERGENIC      |               |                    |                    |
| SNP_91799_A_98443 | NW_004516507.1 | scaffold1252 | 98443                   | TT                              | CC                 | CC               | INTERGENIC      |               |                    |                    |
| SNP_91800_A_99152 | NW_004516507.1 | scaffold1252 | 99152                   | TT                              | CC                 | CC               | INTERGENIC      |               |                    |                    |

| SNPs IDs           | Chromosome IDs | Chromosomes  | Physical positions (bp) | CDC Frontier (Reference genome) | (Pusa 1103 & HPNB) | (ILWC 46 & LPNB) | Sequence genome | Components of | Gene accession IDs | Putative functions |
|--------------------|----------------|--------------|-------------------------|---------------------------------|--------------------|------------------|-----------------|---------------|--------------------|--------------------|
| SNP_91801_A_101543 | NW_004516507.1 | scaffold1252 | 101543                  | TT                              | CC                 | CC               | INTERGENIC      |               |                    |                    |
| SNP_91802_A_105377 | NW_004516507.1 | scaffold1252 | 105377                  | GG                              | CC                 | CC               | INTERGENIC      |               |                    |                    |
| SNP_91803_A_109003 | NW_004516507.1 | scaffold1252 | 109003                  | AA                              | CC                 | CC               | INTERGENIC      |               |                    |                    |
| SNP_91804_A_110715 | NW_004516507.1 | scaffold1252 | 110715                  | TT                              | GG                 | GG               | INTERGENIC      |               |                    |                    |
| SNP_91806_A_114740 | NW_004516507.1 | scaffold1252 | 114740                  | AA                              | GG                 | GG               | INTERGENIC      |               |                    |                    |
| SNP_91807_A_1712   | NW_004516510.1 | scaffold1255 | 1712                    | TT                              | CC                 | CC               | INTERGENIC      |               |                    |                    |
| SNP_91808_A_1718   | NW_004516510.1 | scaffold1255 | 1718                    | CC                              | TT                 | TT               | INTERGENIC      |               |                    |                    |
| SNP_91809_A_1923   | NW_004516510.1 | scaffold1255 | 1923                    | TT                              | AA                 | AA               | INTERGENIC      |               |                    |                    |
| SNP_91810_A_1967   | NW_004516510.1 | scaffold1255 | 1967                    | TT                              | CC                 | CC               | INTERGENIC      |               |                    |                    |
| SNP_91811_A_2121   | NW_004516510.1 | scaffold1255 | 2121                    | AA                              | GG                 | GG               | INTERGENIC      |               |                    |                    |
| SNP_91812_A_2155   | NW_004516510.1 | scaffold1255 | 2155                    | CC                              | GG                 | GG               | INTERGENIC      |               |                    |                    |
| SNP_91813_A_2210   | NW_004516510.1 | scaffold1255 | 2210                    | AA                              | GG                 | GG               | INTERGENIC      |               |                    |                    |
| SNP_91814_A_2241   | NW_004516510.1 | scaffold1255 | 2241                    | AA                              | CC                 | CC               | INTERGENIC      |               |                    |                    |
| SNP_91815_A_3448   | NW_004516510.1 | scaffold1255 | 3448                    | TT                              | AA                 | AA               | INTERGENIC      |               |                    |                    |
| SNP_91816_A_3698   | NW_004516510.1 | scaffold1255 | 3698                    | GG                              | AA                 | AA               | INTERGENIC      |               |                    |                    |
| SNP_91817_A_8581   | NW_004516510.1 | scaffold1255 | 8581                    | TT                              | CC                 | CC               | INTERGENIC      |               |                    |                    |
| SNP_91818_A_8701   | NW_004516510.1 | scaffold1255 | 8701                    | TT                              | CC                 | CC               | INTERGENIC      |               |                    |                    |
| SNP_91819_A_14836  | NW_004516510.1 | scaffold1255 | 14836                   | AA                              | GG                 | GG               | INTERGENIC      |               |                    |                    |
| SNP_91820_A_14840  | NW_004516510.1 | scaffold1255 | 14840                   | AA                              | GG                 | GG               | INTERGENIC      |               |                    |                    |
| SNP_91821_A_14968  | NW_004516510.1 | scaffold1255 | 14968                   | CC                              | GG                 | GG               | INTERGENIC      |               |                    |                    |
| SNP_91822_A_14982  | NW_004516510.1 | scaffold1255 | 14982                   | GG                              | TT                 | TT               | INTERGENIC      |               |                    |                    |
| SNP_91823_A_17313  | NW_004516510.1 | scaffold1255 | 17313                   | CC                              | TT                 | TT               | INTERGENIC      |               |                    |                    |

| SNPs IDs          | Chromosome IDs | Chromosomes  | Physical positions (bp) | CDC Frontier (Reference genome) | (Pusa 1103 & HPNB) | (ILWC 46 & LPNB) | Sequence genome | Components of | Gene accession IDs | Putative functions |
|-------------------|----------------|--------------|-------------------------|---------------------------------|--------------------|------------------|-----------------|---------------|--------------------|--------------------|
| SNP_91824_A_17317 | NW_004516510.1 | scaffold1255 | 17317                   | AA                              | CC                 | CC               | INTERGENIC      |               |                    |                    |
| SNP_91825_A_17461 | NW_004516510.1 | scaffold1255 | 17461                   | CC                              | TT                 | TT               | INTERGENIC      |               |                    |                    |
| SNP_91826_A_17583 | NW_004516510.1 | scaffold1255 | 17583                   | TT                              | AA                 | AA               | INTERGENIC      |               |                    |                    |
| SNP_91827_A_17623 | NW_004516510.1 | scaffold1255 | 17623                   | AA                              | GG                 | GG               | INTERGENIC      |               |                    |                    |
| SNP_91828_A_17653 | NW_004516510.1 | scaffold1255 | 17653                   | GG                              | AA                 | AA               | INTERGENIC      |               |                    |                    |
| SNP_91829_A_477   | NW_004516511.1 | scaffold1256 | 477                     | GG                              | TT                 | TT               | INTERGENIC      |               |                    |                    |
| SNP_91830_A_535   | NW_004516511.1 | scaffold1256 | 535                     | CC                              | AA                 | AA               | INTERGENIC      |               |                    |                    |
| SNP_91832_A_924   | NW_004516511.1 | scaffold1256 | 924                     | TT                              | AA                 | AA               | INTERGENIC      |               |                    |                    |
| SNP_91833_A_4126  | NW_004516511.1 | scaffold1256 | 4126                    | TT                              | CC                 | CC               | INTERGENIC      |               |                    |                    |
| SNP_91834_A_8296  | NW_004516511.1 | scaffold1256 | 8296                    | AA                              | TT                 | TT               | INTERGENIC      |               |                    |                    |
| SNP_91835_A_8321  | NW_004516511.1 | scaffold1256 | 8321                    | AA                              | CC                 | CC               | INTERGENIC      |               |                    |                    |
| SNP_91836_A_18192 | NW_004516511.1 | scaffold1256 | 18192                   | CC                              | GG                 | GG               | INTERGENIC      |               |                    |                    |
| SNP_91837_A_20211 | NW_004516511.1 | scaffold1256 | 20211                   | GG                              | AA                 | AA               | INTERGENIC      |               |                    |                    |
| SNP_91838_A_20338 | NW_004516511.1 | scaffold1256 | 20338                   | CC                              | TT                 | TT               | INTERGENIC      |               |                    |                    |
| SNP_91839_A_23588 | NW_004516511.1 | scaffold1256 | 23588                   | TT                              | CC                 | CC               | INTERGENIC      |               |                    |                    |
| SNP_91840_A_25081 | NW_004516511.1 | scaffold1256 | 25081                   | CC                              | TT                 | TT               | INTERGENIC      |               |                    |                    |
| SNP_91841_A_25160 | NW_004516511.1 | scaffold1256 | 25160                   | CC                              | AA                 | AA               | INTERGENIC      |               |                    |                    |
| SNP_91842_A_25166 | NW_004516511.1 | scaffold1256 | 25166                   | GG                              | TT                 | TT               | INTERGENIC      |               |                    |                    |
| SNP_91843_A_25214 | NW_004516511.1 | scaffold1256 | 25214                   | CC                              | TT                 | TT               | INTERGENIC      |               |                    |                    |
| SNP_91844_A_25321 | NW_004516511.1 | scaffold1256 | 25321                   | TT                              | GG                 | GG               | INTERGENIC      |               |                    |                    |
| SNP_91845_A_30305 | NW_004516511.1 | scaffold1256 | 30305                   | GG                              | AA                 | AA               | INTERGENIC      |               |                    |                    |
| SNP_91846_A_30312 | NW_004516511.1 | scaffold1256 | 30312                   | GG                              | AA                 | AA               | INTERGENIC      |               |                    |                    |

| SNPs IDs          | Chromosome IDs | Chromosomes  | Physical positions (bp) | CDC Frontier (Reference genome) | (Pusa 1103 & HPNB) | (ILWC 46 & LPNB) | Sequence genome | Components of | Gene accession IDs | Putative functions |
|-------------------|----------------|--------------|-------------------------|---------------------------------|--------------------|------------------|-----------------|---------------|--------------------|--------------------|
| SNP_91847_A_32512 | NW_004516511.1 | scaffold1256 | 32512                   | AA                              | CC                 | CC               | INTERGENIC      |               |                    |                    |
| SNP_91848_A_32959 | NW_004516511.1 | scaffold1256 | 32959                   | TT                              | CC                 | CC               | INTERGENIC      |               |                    |                    |
| SNP_91849_A_45121 | NW_004516511.1 | scaffold1256 | 45121                   | AA                              | CC                 | CC               | INTERGENIC      |               |                    |                    |
| SNP_91851_A_54784 | NW_004516511.1 | scaffold1256 | 54784                   | GG                              | AA                 | AA               | INTERGENIC      |               |                    |                    |
| SNP_91852_A_56197 | NW_004516511.1 | scaffold1256 | 56197                   | CC                              | TT                 | TT               | INTERGENIC      |               |                    |                    |
| SNP_91853_A_60494 | NW_004516511.1 | scaffold1256 | 60494                   | TT                              | CC                 | CC               | INTERGENIC      |               |                    |                    |
| SNP_91854_A_60522 | NW_004516511.1 | scaffold1256 | 60522                   | AA                              | TT                 | TT               | INTERGENIC      |               |                    |                    |
| SNP_91855_A_62589 | NW_004516511.1 | scaffold1256 | 62589                   | GG                              | AA                 | AA               | INTERGENIC      |               |                    |                    |
| SNP_91856_A_62595 | NW_004516511.1 | scaffold1256 | 62595                   | TT                              | CC                 | CC               | INTERGENIC      |               |                    |                    |
| SNP_91857_A_62628 | NW_004516511.1 | scaffold1256 | 62628                   | GG                              | AA                 | AA               | INTERGENIC      |               |                    |                    |
| SNP_91858_A_65877 | NW_004516511.1 | scaffold1256 | 65877                   | AA                              | CC                 | CC               | INTERGENIC      |               |                    |                    |
| SNP_91859_A_69281 | NW_004516511.1 | scaffold1256 | 69281                   | AA                              | TT                 | TT               | INTERGENIC      |               |                    |                    |
| SNP_91860_A_69282 | NW_004516511.1 | scaffold1256 | 69282                   | CC                              | AA                 | AA               | INTERGENIC      |               |                    |                    |
| SNP_91861_A_69348 | NW_004516511.1 | scaffold1256 | 69348                   | TT                              | AA                 | AA               | INTERGENIC      |               |                    |                    |
| SNP_91862_A_69586 | NW_004516511.1 | scaffold1256 | 69586                   | AA                              | TT                 | TT               | INTERGENIC      |               |                    |                    |
| SNP_91863_A_69596 | NW_004516511.1 | scaffold1256 | 69596                   | CC                              | GG                 | GG               | INTERGENIC      |               |                    |                    |
| SNP_91864_A_16114 | NW_004516513.1 | scaffold1259 | 16114                   | TT                              | GG                 | GG               | INTERGENIC      |               |                    |                    |
| SNP_91866_A_3125  | NW_004516515.1 | scaffold1261 | 3125                    | GG                              | AA                 | AA               | INTERGENIC      |               |                    |                    |
| SNP_91867_A_3126  | NW_004516515.1 | scaffold1261 | 3126                    | AA                              | TT                 | TT               | INTERGENIC      |               |                    |                    |
| SNP_91868_A_3303  | NW_004516518.1 | scaffold1269 | 3303                    | AA                              | TT                 | TT               | INTERGENIC      |               |                    |                    |
| SNP_91869_A_106   | NW_004516520.1 | scaffold1272 | 106                     | TT                              | CC                 | CC               | INTERGENIC      |               |                    |                    |
| SNP_91870_A_21384 | NW_004516520.1 | scaffold1272 | 21384                   | GG                              | AA                 | AA               | INTERGENIC      |               |                    |                    |

| SNPs IDs           | Chromosome IDs | Chromosomes  | Physical positions (bp) | CDC Frontier (Reference genome) | (Pusa 1103 & HPNB) | (ILWC 46 & LPNB) | Sequence Components of genome | Gene accession IDs | Putative functions                                            |
|--------------------|----------------|--------------|-------------------------|---------------------------------|--------------------|------------------|-------------------------------|--------------------|---------------------------------------------------------------|
| SNP_91871_A_21394  | NW_004516520.1 | scaffold1272 | 21394                   | TT                              | AA                 | AA               | INTERGENIC                    |                    |                                                               |
| SNP_91872_A_21445  | NW_004516520.1 | scaffold1272 | 21445                   | AA                              | TT                 | TT               | INTERGENIC                    |                    |                                                               |
| SNP_91874_A_21840  | NW_004516520.1 | scaffold1272 | 21840                   | AA                              | GG                 | GG               | INTERGENIC                    |                    |                                                               |
| SNP_91875_A_45685  | NW_004516520.1 | scaffold1272 | 45685                   | AA                              | TT                 | TT               | INTRON                        | 101492749          | alpha,alpha-trehalose-phosphate synthase [UDP-forming] 1-like |
| SNP_91876_A_77906  | NW_004516520.1 | scaffold1272 | 77906                   | CC                              | GG                 | GG               | URR                           | 101492749          | alpha,alpha-trehalose-phosphate synthase [UDP-forming] 1-like |
| SNP_91877_A_81247  | NW_004516520.1 | scaffold1272 | 81247                   | TT                              | AA                 | AA               | INTERGENIC                    |                    |                                                               |
| SNP_91878_A_87120  | NW_004516520.1 | scaffold1272 | 87120                   | GG                              | AA                 | AA               | INTERGENIC                    |                    |                                                               |
| SNP_91879_A_87145  | NW_004516520.1 | scaffold1272 | 87145                   | TT                              | CC                 | CC               | INTERGENIC                    |                    |                                                               |
| SNP_91880_A_87195  | NW_004516520.1 | scaffold1272 | 87195                   | TT                              | CC                 | CC               | INTERGENIC                    |                    |                                                               |
| SNP_91881_A_87196  | NW_004516520.1 | scaffold1272 | 87196                   | GG                              | CC                 | CC               | INTERGENIC                    |                    |                                                               |
| SNP_91882_A_87197  | NW_004516520.1 | scaffold1272 | 87197                   | AA                              | GG                 | GG               | INTERGENIC                    |                    |                                                               |
| SNP_91883_A_87240  | NW_004516520.1 | scaffold1272 | 87240                   | AA                              | GG                 | GG               | INTERGENIC                    |                    |                                                               |
| SNP_91884_A_87249  | NW_004516520.1 | scaffold1272 | 87249                   | TT                              | CC                 | CC               | INTERGENIC                    |                    |                                                               |
| SNP_91885_A_87265  | NW_004516520.1 | scaffold1272 | 87265                   | GG                              | AA                 | AA               | INTERGENIC                    |                    |                                                               |
| SNP_91886_A_87579  | NW_004516520.1 | scaffold1272 | 87579                   | CC                              | TT                 | TT               | INTERGENIC                    |                    |                                                               |
| SNP_91887_A_87580  | NW_004516520.1 | scaffold1272 | 87580                   | AA                              | GG                 | GG               | INTERGENIC                    |                    |                                                               |
| SNP_91888_A_87588  | NW_004516520.1 | scaffold1272 | 87588                   | GG                              | AA                 | AA               | INTERGENIC                    |                    |                                                               |
| SNP_91889_A_87589  | NW_004516520.1 | scaffold1272 | 87589                   | TT                              | AA                 | AA               | INTERGENIC                    |                    |                                                               |
| SNP_91890_A_87610  | NW_004516520.1 | scaffold1272 | 87610                   | AA                              | GG                 | GG               | INTERGENIC                    |                    |                                                               |
| SNP_91891_A_87618  | NW_004516520.1 | scaffold1272 | 87618                   | AA                              | GG                 | GG               | INTERGENIC                    |                    |                                                               |
| SNP_91892_A_87669  | NW_004516520.1 | scaffold1272 | 87669                   | AA                              | GG                 | GG               | INTERGENIC                    |                    |                                                               |
| SNP_91894_A_132559 | NW_004516520.1 | scaffold1272 | 132559                  | GG                              | TT                 | TT               | INTERGENIC                    |                    |                                                               |

| SNPs IDs           | Chromosome IDs | Chromosomes  | Physical positions (bp) | CDC Frontier (Reference genome) | (Pusa 1103 & HPNB) | (ILWC 46 & LPNB) | Sequence Components of genome | Gene accession IDs | Putative functions           |
|--------------------|----------------|--------------|-------------------------|---------------------------------|--------------------|------------------|-------------------------------|--------------------|------------------------------|
| SNP_91895_A_132582 | NW_004516520.1 | scaffold1272 | 132582                  | CC                              | TT                 | TT               | INTERGENIC                    |                    |                              |
| SNP_91896_A_132624 | NW_004516520.1 | scaffold1272 | 132624                  | CC                              | TT                 | TT               | INTERGENIC                    |                    |                              |
| SNP_91897_A_132630 | NW_004516520.1 | scaffold1272 | 132630                  | CC                              | AA                 | AA               | INTERGENIC                    |                    |                              |
| SNP_91898_A_132636 | NW_004516520.1 | scaffold1272 | 132636                  | TT                              | CC                 | CC               | INTERGENIC                    |                    |                              |
| SNP_91899_A_132645 | NW_004516520.1 | scaffold1272 | 132645                  | GG                              | AA                 | AA               | INTERGENIC                    |                    |                              |
| SNP_91900_A_132652 | NW_004516520.1 | scaffold1272 | 132652                  | TT                              | CC                 | CC               | INTERGENIC                    |                    |                              |
| SNP_91901_A_132660 | NW_004516520.1 | scaffold1272 | 132660                  | AA                              | GG                 | GG               | INTERGENIC                    |                    |                              |
| SNP_91902_A_132675 | NW_004516520.1 | scaffold1272 | 132675                  | AA                              | GG                 | GG               | INTERGENIC                    |                    |                              |
| SNP_91903_A_132678 | NW_004516520.1 | scaffold1272 | 132678                  | AA                              | GG                 | GG               | INTERGENIC                    |                    |                              |
| SNP_91904_A_132717 | NW_004516520.1 | scaffold1272 | 132717                  | AA                              | GG                 | GG               | INTERGENIC                    |                    |                              |
| SNP_91905_A_132816 | NW_004516520.1 | scaffold1272 | 132816                  | TT                              | CC                 | CC               | INTERGENIC                    |                    |                              |
| SNP_91906_A_133753 | NW_004516520.1 | scaffold1272 | 133753                  | AA                              | GG                 | GG               | INTERGENIC                    |                    |                              |
| SNP_91907_A_133759 | NW_004516520.1 | scaffold1272 | 133759                  | GG                              | AA                 | AA               | INTERGENIC                    |                    |                              |
| SNP_91908_A_133765 | NW_004516520.1 | scaffold1272 | 133765                  | GG                              | CC                 | CC               | INTERGENIC                    |                    |                              |
| SNP_91909_A_147471 | NW_004516520.1 | scaffold1272 | 147471                  | CC                              | GG                 | GG               | INTERGENIC                    |                    |                              |
| SNP_91910_A_147823 | NW_004516520.1 | scaffold1272 | 147823                  | TT                              | CC                 | CC               | INTERGENIC                    |                    |                              |
| SNP_91911_A_147855 | NW_004516520.1 | scaffold1272 | 147855                  | TT                              | GG                 | GG               | INTERGENIC                    |                    |                              |
| SNP_91912_A_148152 | NW_004516520.1 | scaffold1272 | 148152                  | CC                              | TT                 | TT               | DRR                           | 101494675          | Unknown function             |
| SNP_91913_A_148261 | NW_004516520.1 | scaffold1272 | 148261                  | TT                              | GG                 | GG               | DRR                           | 101494675          | Unknown function             |
| SNP_91914_A_164842 | NW_004516520.1 | scaffold1272 | 164842                  | CC                              | AA                 | AA               | INTRON                        | 101495319          | uncharacterized LOC101495319 |
| SNP_91915_A_169242 | NW_004516520.1 | scaffold1272 | 169242                  | CC                              | TT                 | TT               | INTRON                        | 101495319          | uncharacterized LOC101495319 |
| SNP_91916_A_169243 | NW_004516520.1 | scaffold1272 | 169243                  | GG                              | AA                 | AA               | INTRON                        | 101495319          | uncharacterized LOC101495319 |

| SNPs IDs           | Chromosome IDs | Chromosomes  | Physical positions (bp) | CDC Frontier (Reference genome) | (Pusa 1103 & HPNB) | (ILWC 46 & LPNB) | Sequence Components of genome | Gene accession IDs | Putative functions           |
|--------------------|----------------|--------------|-------------------------|---------------------------------|--------------------|------------------|-------------------------------|--------------------|------------------------------|
| SNP_91917_A_183810 | NW_004516520.1 | scaffold1272 | 183810                  | TT                              | CC                 | CC               | INTRON                        | 101495319          | uncharacterized LOC101495319 |
| SNP_91918_A_190558 | NW_004516520.1 | scaffold1272 | 190558                  | TT                              | CC                 | CC               | INTRON                        | 101495319          | uncharacterized LOC101495319 |
| SNP_91919_A_190699 | NW_004516520.1 | scaffold1272 | 190699                  | AA                              | GG                 | GG               | INTRON                        | 101495319          | uncharacterized LOC101495319 |
| SNP_91920_A_190816 | NW_004516520.1 | scaffold1272 | 190816                  | CC                              | AA                 | AA               | INTRON                        | 101495319          | uncharacterized LOC101495319 |
| SNP_91921_A_190829 | NW_004516520.1 | scaffold1272 | 190829                  | AA                              | GG                 | GG               | INTRON                        | 101495319          | uncharacterized LOC101495319 |
| SNP_91922_A_190960 | NW_004516520.1 | scaffold1272 | 190960                  | GG                              | TT                 | TT               | INTRON                        | 101495319          | uncharacterized LOC101495319 |
| SNP_91923_A_197567 | NW_004516520.1 | scaffold1272 | 197567                  | AA                              | GG                 | GG               | INTRON                        | 101495319          | uncharacterized LOC101495319 |
| SNP_91924_A_197663 | NW_004516520.1 | scaffold1272 | 197663                  | CC                              | TT                 | TT               | INTRON                        | 101495319          | uncharacterized LOC101495319 |
| SNP_91925_A_206917 | NW_004516520.1 | scaffold1272 | 206917                  | TT                              | GG                 | GG               | INTRON                        | 101495319          | uncharacterized LOC101495319 |
| SNP_91926_A_215575 | NW_004516520.1 | scaffold1272 | 215575                  | TT                              | AA                 | AA               | INTRON                        | 101495319          | uncharacterized LOC101495319 |
| SNP_91927_A_215577 | NW_004516520.1 | scaffold1272 | 215577                  | TT                              | GG                 | GG               | INTRON                        | 101495319          | uncharacterized LOC101495319 |
| SNP_91928_A_219595 | NW_004516520.1 | scaffold1272 | 219595                  | AA                              | TT                 | TT               | INTRON                        | 101495319          | uncharacterized LOC101495319 |
| SNP_91929_A_231721 | NW_004516520.1 | scaffold1272 | 231721                  | TT                              | CC                 | CC               | INTRON                        | 101495319          | uncharacterized LOC101495319 |
| SNP_91931_A_6991   | NW_004516522.1 | scaffold1274 | 6991                    | CC                              | GG                 | GG               | INTERGENIC                    |                    |                              |
| SNP_91932_A_7038   | NW_004516522.1 | scaffold1274 | 7038                    | TT                              | CC                 | CC               | INTERGENIC                    |                    |                              |
| SNP_91933_A_7071   | NW_004516522.1 | scaffold1274 | 7071                    | GG                              | AA                 | AA               | INTERGENIC                    |                    |                              |
| SNP_91934_A_7075   | NW_004516522.1 | scaffold1274 | 7075                    | AA                              | GG                 | GG               | INTERGENIC                    |                    |                              |
| SNP_91935_A_7085   | NW_004516522.1 | scaffold1274 | 7085                    | GG                              | CC                 | CC               | INTERGENIC                    |                    |                              |
| SNP_91936_A_7191   | NW_004516522.1 | scaffold1274 | 7191                    | GG                              | CC                 | CC               | INTERGENIC                    |                    |                              |
| SNP_91937_A_7199   | NW_004516522.1 | scaffold1274 | 7199                    | AA                              | TT                 | TT               | INTERGENIC                    |                    |                              |
| SNP_91938_A_7212   | NW_004516522.1 | scaffold1274 | 7212                    | CC                              | AA                 | AA               | INTERGENIC                    |                    |                              |
| SNP_91939_A_7230   | NW_004516522.1 | scaffold1274 | 7230                    | CC                              | TT                 | TT               | INTERGENIC                    |                    |                              |

| SNPs IDs         | Chromosome IDs | Chromosomes  | Physical positions (bp) | CDC Frontier (Reference genome) | (Pusa 1103 & HPNB) | (ILWC 46 & LPNB) | Sequence genome | Components of | Gene accession IDs | Putative functions |
|------------------|----------------|--------------|-------------------------|---------------------------------|--------------------|------------------|-----------------|---------------|--------------------|--------------------|
| SNP_91940_A_3706 | NW_004516523.1 | scaffold1275 | 3706                    | GG                              | AA                 | AA               | INTERGENIC      |               |                    |                    |
| SNP_91941_A_5397 | NW_004516523.1 | scaffold1275 | 5397                    | GG                              | TT                 | TT               | INTERGENIC      |               |                    |                    |
| SNP_91942_A_5461 | NW_004516523.1 | scaffold1275 | 5461                    | TT                              | CC                 | CC               | INTERGENIC      |               |                    |                    |
| SNP_91943_A_5470 | NW_004516523.1 | scaffold1275 | 5470                    | AA                              | GG                 | GG               | INTERGENIC      |               |                    |                    |
| SNP_91944_A_5547 | NW_004516523.1 | scaffold1275 | 5547                    | GG                              | CC                 | CC               | INTERGENIC      |               |                    |                    |
| SNP_91945_A_5691 | NW_004516523.1 | scaffold1275 | 5691                    | TT                              | CC                 | CC               | INTERGENIC      |               |                    |                    |
| SNP_91946_A_5698 | NW_004516523.1 | scaffold1275 | 5698                    | TT                              | CC                 | CC               | INTERGENIC      |               |                    |                    |
| SNP_91947_A_5791 | NW_004516523.1 | scaffold1275 | 5791                    | AA                              | GG                 | GG               | INTERGENIC      |               |                    |                    |
| SNP_91948_A_5820 | NW_004516523.1 | scaffold1275 | 5820                    | TT                              | CC                 | CC               | INTERGENIC      |               |                    |                    |
| SNP_91949_A_5827 | NW_004516523.1 | scaffold1275 | 5827                    | TT                              | CC                 | CC               | INTERGENIC      |               |                    |                    |
| SNP_91950_A_5844 | NW_004516523.1 | scaffold1275 | 5844                    | GG                              | AA                 | AA               | INTERGENIC      |               |                    |                    |
| SNP_91951_A_5860 | NW_004516523.1 | scaffold1275 | 5860                    | CC                              | TT                 | TT               | INTERGENIC      |               |                    |                    |
| SNP_91952_A_5861 | NW_004516523.1 | scaffold1275 | 5861                    | AA                              | GG                 | GG               | INTERGENIC      |               |                    |                    |
| SNP_91953_A_5889 | NW_004516523.1 | scaffold1275 | 5889                    | GG                              | AA                 | AA               | INTERGENIC      |               |                    |                    |
| SNP_91954_A_5916 | NW_004516523.1 | scaffold1275 | 5916                    | CC                              | TT                 | TT               | INTERGENIC      |               |                    |                    |
| SNP_91955_A_5917 | NW_004516523.1 | scaffold1275 | 5917                    | GG                              | AA                 | AA               | INTERGENIC      |               |                    |                    |
| SNP_91956_A_5933 | NW_004516523.1 | scaffold1275 | 5933                    | TT                              | CC                 | CC               | INTERGENIC      |               |                    |                    |
| SNP_91957_A_5935 | NW_004516523.1 | scaffold1275 | 5935                    | AA                              | GG                 | GG               | INTERGENIC      |               |                    |                    |
| SNP_91958_A_5972 | NW_004516523.1 | scaffold1275 | 5972                    | GG                              | AA                 | AA               | INTERGENIC      |               |                    |                    |
| SNP_91959_A_5973 | NW_004516523.1 | scaffold1275 | 5973                    | AA                              | GG                 | GG               | INTERGENIC      |               |                    |                    |
| SNP_91960_A_5997 | NW_004516523.1 | scaffold1275 | 5997                    | GG                              | AA                 | AA               | INTERGENIC      |               |                    |                    |
| SNP_91961_A_6003 | NW_004516523.1 | scaffold1275 | 6003                    | CC                              | TT                 | TT               | INTERGENIC      |               |                    |                    |



| SNPs IDs          | Chromosome IDs | Chromosomes  | Physical positions (bp) | CDC Frontier (Reference genome) | (Pusa 1103 & HPNB) | (ILWC 46 & LPNB) | Sequence Components of genome | Gene accession IDs | Putative functions |
|-------------------|----------------|--------------|-------------------------|---------------------------------|--------------------|------------------|-------------------------------|--------------------|--------------------|
| SNP_91962_A_6035  | NW_004516523.1 | scaffold1275 | 6035                    | TT                              | AA                 | AA               | INTERGENIC                    |                    |                    |
| SNP_91963_A_6054  | NW_004516523.1 | scaffold1275 | 6054                    | AA                              | GG                 | GG               | INTERGENIC                    |                    |                    |
| SNP_91964_A_6055  | NW_004516523.1 | scaffold1275 | 6055                    | AA                              | CC                 | CC               | INTERGENIC                    |                    |                    |
| SNP_91965_A_6056  | NW_004516523.1 | scaffold1275 | 6056                    | GG                              | CC                 | CC               | INTERGENIC                    |                    |                    |
| SNP_91966_A_6058  | NW_004516523.1 | scaffold1275 | 6058                    | AA                              | GG                 | GG               | INTERGENIC                    |                    |                    |
| SNP_91967_A_6181  | NW_004516523.1 | scaffold1275 | 6181                    | GG                              | AA                 | AA               | INTERGENIC                    |                    |                    |
| SNP_91969_A_6290  | NW_004516523.1 | scaffold1275 | 6290                    | CC                              | TT                 | TT               | INTERGENIC                    |                    |                    |
| SNP_91970_A_6363  | NW_004516523.1 | scaffold1275 | 6363                    | AA                              | GG                 | GG               | INTERGENIC                    |                    |                    |
| SNP_91971_A_6380  | NW_004516523.1 | scaffold1275 | 6380                    | TT                              | CC                 | CC               | INTERGENIC                    |                    |                    |
| SNP_91972_A_12123 | NW_004516523.1 | scaffold1275 | 12123                   | CC                              | AA                 | AA               | INTRON                        | 101495644          | CEN-like protein 4 |
| SNP_91973_A_12173 | NW_004516523.1 | scaffold1275 | 12173                   | AA                              | GG                 | GG               | INTRON                        | 101495644          | CEN-like protein 4 |
| SNP_91974_A_12341 | NW_004516523.1 | scaffold1275 | 12341                   | CC                              | AA                 | AA               | INTRON                        | 101495644          | CEN-like protein 4 |
| SNP_91975_A_135   | NW_004516524.1 | scaffold1276 | 135                     | AA                              | GG                 | GG               | INTERGENIC                    |                    |                    |
| SNP_91976_A_335   | NW_004516524.1 | scaffold1276 | 335                     | CC                              | TT                 | TT               | INTERGENIC                    |                    |                    |
| SNP_91977_A_615   | NW_004516524.1 | scaffold1276 | 615                     | TT                              | AA                 | AA               | INTERGENIC                    |                    |                    |
| SNP_91978_A_618   | NW_004516524.1 | scaffold1276 | 618                     | AA                              | GG                 | GG               | INTERGENIC                    |                    |                    |
| SNP_91979_A_623   | NW_004516524.1 | scaffold1276 | 623                     | CC                              | TT                 | TT               | INTERGENIC                    |                    |                    |
| SNP_91980_A_958   | NW_004516524.1 | scaffold1276 | 958                     | AA                              | TT                 | TT               | INTERGENIC                    |                    |                    |
| SNP_91981_A_1052  | NW_004516524.1 | scaffold1276 | 1052                    | GG                              | CC                 | CC               | INTERGENIC                    |                    |                    |
| SNP_91982_A_1087  | NW_004516524.1 | scaffold1276 | 1087                    | CC                              | AA                 | AA               | INTERGENIC                    |                    |                    |
| SNP_91983_A_1163  | NW_004516524.1 | scaffold1276 | 1163                    | TT                              | CC                 | CC               | INTERGENIC                    |                    |                    |
| SNP_91985_A_1543  | NW_004516524.1 | scaffold1276 | 1543                    | GG                              | AA                 | AA               | INTERGENIC                    |                    |                    |

| SNPs IDs          | Chromosome IDs | Chromosomes  | Physical positions (bp) | CDC Frontier (Reference genome) | (Pusa 1103 & HPNB) | (ILWC 46 & LPNB) | Sequence genome | Components of | Gene accession IDs | Putative functions |
|-------------------|----------------|--------------|-------------------------|---------------------------------|--------------------|------------------|-----------------|---------------|--------------------|--------------------|
| SNP_91987_A_1686  | NW_004516524.1 | scaffold1276 | 1686                    | CC                              | TT                 | TT               | INTERGENIC      |               |                    |                    |
| SNP_91988_A_1832  | NW_004516524.1 | scaffold1276 | 1832                    | GG                              | TT                 | TT               | INTERGENIC      |               |                    |                    |
| SNP_91989_A_20900 | NW_004516524.1 | scaffold1276 | 20900                   | TT                              | GG                 | GG               | INTERGENIC      |               |                    |                    |
| SNP_91990_A_34877 | NW_004516524.1 | scaffold1276 | 34877                   | AA                              | GG                 | GG               | INTERGENIC      |               |                    |                    |
| SNP_91991_A_45666 | NW_004516524.1 | scaffold1276 | 45666                   | TT                              | GG                 | GG               | INTERGENIC      |               |                    |                    |
| SNP_91992_A_47797 | NW_004516524.1 | scaffold1276 | 47797                   | AA                              | TT                 | TT               | INTERGENIC      |               |                    |                    |
| SNP_91993_A_53690 | NW_004516524.1 | scaffold1276 | 53690                   | TT                              | GG                 | GG               | INTERGENIC      |               |                    |                    |
| SNP_91994_A_58793 | NW_004516524.1 | scaffold1276 | 58793                   | CC                              | TT                 | TT               | INTERGENIC      |               |                    |                    |
| SNP_91995_A_58796 | NW_004516524.1 | scaffold1276 | 58796                   | CC                              | TT                 | TT               | INTERGENIC      |               |                    |                    |
| SNP_91996_A_58804 | NW_004516524.1 | scaffold1276 | 58804                   | CC                              | TT                 | TT               | INTERGENIC      |               |                    |                    |
| SNP_91997_A_495   | NW_004516525.1 | scaffold1278 | 495                     | CC                              | AA                 | AA               | INTERGENIC      |               |                    |                    |
| SNP_91998_A_10782 | NW_004516525.1 | scaffold1278 | 10782                   | CC                              | AA                 | AA               | INTERGENIC      |               |                    |                    |
| SNP_91999_A_10785 | NW_004516525.1 | scaffold1278 | 10785                   | AA                              | GG                 | GG               | INTERGENIC      |               |                    |                    |
| SNP_92000_A_10794 | NW_004516525.1 | scaffold1278 | 10794                   | AA                              | TT                 | TT               | INTERGENIC      |               |                    |                    |
| SNP_92001_A_10813 | NW_004516525.1 | scaffold1278 | 10813                   | AA                              | GG                 | GG               | INTERGENIC      |               |                    |                    |
| SNP_92002_A_10821 | NW_004516525.1 | scaffold1278 | 10821                   | AA                              | GG                 | GG               | INTERGENIC      |               |                    |                    |
| SNP_92003_A_10855 | NW_004516525.1 | scaffold1278 | 10855                   | GG                              | AA                 | AA               | INTERGENIC      |               |                    |                    |
| SNP_92004_A_11164 | NW_004516525.1 | scaffold1278 | 11164                   | AA                              | GG                 | GG               | INTERGENIC      |               |                    |                    |
| SNP_92006_A_34912 | NW_004516525.1 | scaffold1278 | 34912                   | AA                              | GG                 | GG               | INTERGENIC      |               |                    |                    |
| SNP_92007_A_35154 | NW_004516525.1 | scaffold1278 | 35154                   | GG                              | TT                 | TT               | INTERGENIC      |               |                    |                    |
| SNP_92008_A_35330 | NW_004516525.1 | scaffold1278 | 35330                   | TT                              | CC                 | CC               | INTERGENIC      |               |                    |                    |
| SNP_92009_A_35348 | NW_004516525.1 | scaffold1278 | 35348                   | TT                              | GG                 | GG               | INTERGENIC      |               |                    |                    |

| SNPs IDs          | Chromosome IDs | Chromosomes  | Physical positions (bp) | CDC Frontier (Reference genome) | (Pusa 1103 & HPNB) | (ILWC 46 & LPNB) | Sequence Components of genome | Gene accession IDs | Putative functions |
|-------------------|----------------|--------------|-------------------------|---------------------------------|--------------------|------------------|-------------------------------|--------------------|--------------------|
| SNP_92011_A_35914 | NW_004516525.1 | scaffold1278 | 35914                   | CC                              | TT                 | TT               | INTERGENIC                    |                    |                    |
| SNP_92012_A_35942 | NW_004516525.1 | scaffold1278 | 35942                   | AA                              | GG                 | GG               | INTERGENIC                    |                    |                    |
| SNP_92013_A_35972 | NW_004516525.1 | scaffold1278 | 35972                   | CC                              | AA                 | AA               | INTERGENIC                    |                    |                    |
| SNP_92014_A_35975 | NW_004516525.1 | scaffold1278 | 35975                   | GG                              | AA                 | AA               | INTERGENIC                    |                    |                    |
| SNP_92015_A_35990 | NW_004516525.1 | scaffold1278 | 35990                   | TT                              | GG                 | GG               | INTERGENIC                    |                    |                    |
| SNP_92018_A_62178 | NW_004516525.1 | scaffold1278 | 62178                   | TT                              | GG                 | GG               | INTRON                        | id210697           | Unknown function   |
| SNP_92019_A_62180 | NW_004516525.1 | scaffold1278 | 62180                   | TT                              | CC                 | CC               | INTRON                        | id210697           | Unknown function   |
| SNP_92020_A_62182 | NW_004516525.1 | scaffold1278 | 62182                   | GG                              | AA                 | AA               | INTRON                        | id210697           | Unknown function   |
| SNP_92021_A_62193 | NW_004516525.1 | scaffold1278 | 62193                   | TT                              | CC                 | CC               | INTRON                        | id210697           | Unknown function   |
| SNP_92022_A_62213 | NW_004516525.1 | scaffold1278 | 62213                   | GG                              | AA                 | AA               | INTRON                        | id210697           | Unknown function   |
| SNP_92023_A_62249 | NW_004516525.1 | scaffold1278 | 62249                   | AA                              | GG                 | GG               | INTRON                        | id210697           | Unknown function   |
| SNP_92024_A_62271 | NW_004516525.1 | scaffold1278 | 62271                   | TT                              | AA                 | AA               | INTRON                        | id210697           | Unknown function   |
| SNP_92025_A_62272 | NW_004516525.1 | scaffold1278 | 62272                   | GG                              | AA                 | AA               | INTRON                        | id210697           | Unknown function   |
| SNP_92026_A_62273 | NW_004516525.1 | scaffold1278 | 62273                   | GG                              | AA                 | AA               | INTRON                        | id210697           | Unknown function   |
| SNP_92027_A_62278 | NW_004516525.1 | scaffold1278 | 62278                   | AA                              | GG                 | GG               | INTRON                        | id210697           | Unknown function   |
| SNP_92028_A_62334 | NW_004516525.1 | scaffold1278 | 62334                   | TT                              | CC                 | CC               | INTRON                        | id210697           | Unknown function   |
| SNP_92029_A_62335 | NW_004516525.1 | scaffold1278 | 62335                   | TT                              | CC                 | CC               | INTRON                        | id210697           | Unknown function   |
| SNP_92030_A_62346 | NW_004516525.1 | scaffold1278 | 62346                   | GG                              | AA                 | AA               | INTRON                        | id210697           | Unknown function   |
| SNP_92031_A_62371 | NW_004516525.1 | scaffold1278 | 62371                   | CC                              | TT                 | TT               | INTRON                        | id210697           | Unknown function   |
| SNP_92032_A_62511 | NW_004516525.1 | scaffold1278 | 62511                   | GG                              | AA                 | AA               | INTRON                        | id210697           | Unknown function   |
| SNP_92033_A_62733 | NW_004516525.1 | scaffold1278 | 62733                   | TT                              | CC                 | CC               | INTRON                        | id210697           | Unknown function   |
| SNP_92034_A_62740 | NW_004516525.1 | scaffold1278 | 62740                   | GG                              | AA                 | AA               | INTRON                        | id210697           | Unknown function   |

| SNPs IDs          | Chromosome IDs | Chromosomes  | Physical positions (bp) | CDC Frontier (Reference genome) | (Pusa 1103 & HPNB) | (ILWC 46 & LPNB) | Sequence Components of genome | Gene accession IDs | Putative functions           |
|-------------------|----------------|--------------|-------------------------|---------------------------------|--------------------|------------------|-------------------------------|--------------------|------------------------------|
| SNP_92035_A_62836 | NW_004516525.1 | scaffold1278 | 62836                   | TT                              | CC                 | CC               | SYNONYMOUS_CODING             | id210697           | Unknown function             |
| SNP_92036_A_62857 | NW_004516525.1 | scaffold1278 | 62857                   | GG                              | AA                 | AA               | SYNONYMOUS_CODING             | id210697           | Unknown function             |
| SNP_92037_A_62875 | NW_004516525.1 | scaffold1278 | 62875                   | AA                              | CC                 | CC               | NON_SYNONYMOUS_CODING         | id210697           | Unknown function             |
| SNP_92038_A_62879 | NW_004516525.1 | scaffold1278 | 62879                   | CC                              | TT                 | TT               | NON_SYNONYMOUS_CODING         | id210697           | Unknown function             |
| SNP_92039_A_62921 | NW_004516525.1 | scaffold1278 | 62921                   | TT                              | GG                 | GG               | STOP_LOST                     | id210697           | Unknown function             |
| SNP_92041_A_63131 | NW_004516525.1 | scaffold1278 | 63131                   | TT                              | CC                 | CC               | NON_SYNONYMOUS_CODING         | id210697           | Unknown function             |
| SNP_92042_A_63158 | NW_004516525.1 | scaffold1278 | 63158                   | TT                              | CC                 | CC               | NON_SYNONYMOUS_CODING         | id210697           | Unknown function             |
| SNP_92043_A_63160 | NW_004516525.1 | scaffold1278 | 63160                   | AA                              | CC                 | CC               | NON_SYNONYMOUS_CODING         | id210697           | Unknown function             |
| SNP_92044_A_63192 | NW_004516525.1 | scaffold1278 | 63192                   | AA                              | GG                 | GG               | URR                           | 101495969          | uncharacterized LOC101495969 |
| SNP_92045_A_63215 | NW_004516525.1 | scaffold1278 | 63215                   | GG                              | AA                 | AA               | URR                           | 101495969          | uncharacterized LOC101495969 |
| SNP_92046_A_63237 | NW_004516525.1 | scaffold1278 | 63237                   | CC                              | TT                 | TT               | URR                           | 101495969          | uncharacterized LOC101495969 |
| SNP_92049_A_63317 | NW_004516525.1 | scaffold1278 | 63317                   | TT                              | CC                 | CC               | URR                           | 101495969          | uncharacterized LOC101495969 |
| SNP_92050_A_63319 | NW_004516525.1 | scaffold1278 | 63319                   | AA                              | GG                 | GG               | URR                           | 101495969          | uncharacterized LOC101495969 |
| SNP_92051_A_63354 | NW_004516525.1 | scaffold1278 | 63354                   | AA                              | GG                 | GG               | URR                           | 101495969          | uncharacterized LOC101495969 |
| SNP_92052_A_63387 | NW_004516525.1 | scaffold1278 | 63387                   | AA                              | GG                 | GG               | URR                           | 101495969          | uncharacterized LOC101495969 |
| SNP_92055_A_84020 | NW_004516525.1 | scaffold1278 | 84020                   | GG                              | AA                 | AA               | INTERGENIC                    |                    |                              |
| SNP_92056_A_88725 | NW_004516525.1 | scaffold1278 | 88725                   | GG                              | AA                 | AA               | INTERGENIC                    |                    |                              |
| SNP_92057_A_95500 | NW_004516525.1 | scaffold1278 | 95500                   | AA                              | CC                 | CC               | INTERGENIC                    |                    |                              |
| SNP_92058_A_95505 | NW_004516525.1 | scaffold1278 | 95505                   | AA                              | TT                 | TT               | INTERGENIC                    |                    |                              |
| SNP_92059_A_95516 | NW_004516525.1 | scaffold1278 | 95516                   | TT                              | CC                 | CC               | INTERGENIC                    |                    |                              |
| SNP_92060_A_95548 | NW_004516525.1 | scaffold1278 | 95548                   | TT                              | GG                 | GG               | INTERGENIC                    |                    |                              |
| SNP_92061_A_95878 | NW_004516525.1 | scaffold1278 | 95878                   | AA                              | CC                 | CC               | INTERGENIC                    |                    |                              |

| SNPs IDs           | Chromosome IDs | Chromosomes  | Physical positions (bp) | CDC Frontier (Reference genome) | (Pusa 1103 & HPNB) | (ILWC 46 & LPNB) | Sequence Components of genome | Gene accession IDs | Putative functions              |
|--------------------|----------------|--------------|-------------------------|---------------------------------|--------------------|------------------|-------------------------------|--------------------|---------------------------------|
| SNP_92062_A_95990  | NW_004516525.1 | scaffold1278 | 95990                   | AA                              | GG                 | GG               | INTERGENIC                    |                    |                                 |
| SNP_92063_A_96018  | NW_004516525.1 | scaffold1278 | 96018                   | AA                              | GG                 | GG               | INTERGENIC                    |                    |                                 |
| SNP_92064_A_100298 | NW_004516525.1 | scaffold1278 | 100298                  | TT                              | CC                 | CC               | INTERGENIC                    |                    |                                 |
| SNP_92066_A_119973 | NW_004516525.1 | scaffold1278 | 119973                  | AA                              | TT                 | TT               | INTERGENIC                    |                    |                                 |
| SNP_92067_A_1274   | NW_004516526.1 | scaffold1279 | 1274                    | AA                              | GG                 | GG               | INTERGENIC                    |                    |                                 |
| SNP_92068_A_1290   | NW_004516526.1 | scaffold1279 | 1290                    | TT                              | CC                 | CC               | INTERGENIC                    |                    |                                 |
| SNP_92069_A_1539   | NW_004516527.1 | scaffold1281 | 1539                    | TT                              | AA                 | AA               | INTERGENIC                    |                    |                                 |
| SNP_92070_A_46549  | NW_004516527.1 | scaffold1281 | 46549                   | GG                              | TT                 | TT               | DRR                           | 101501899          | transcription factor GTE12-like |
| SNP_92072_A_46576  | NW_004516527.1 | scaffold1281 | 46576                   | CC                              | AA                 | AA               | DRR                           | 101501899          | transcription factor GTE12-like |
| SNP_92073_A_46768  | NW_004516527.1 | scaffold1281 | 46768                   | AA                              | GG                 | GG               | DRR                           | 101501899          | transcription factor GTE12-like |
| SNP_92074_A_46810  | NW_004516527.1 | scaffold1281 | 46810                   | GG                              | AA                 | AA               | DRR                           | 101501899          | transcription factor GTE12-like |
| SNP_92075_A_47457  | NW_004516527.1 | scaffold1281 | 47457                   | CC                              | GG                 | GG               | DRR                           | 101501899          | transcription factor GTE12-like |
| SNP_92076_A_47525  | NW_004516527.1 | scaffold1281 | 47525                   | CC                              | TT                 | TT               | NON_SYNONYMOUS_CODING         | 101501899          | transcription factor GTE12-like |
| SNP_92077_A_48284  | NW_004516527.1 | scaffold1281 | 48284                   | GG                              | AA                 | AA               | URR                           | 101501899          | transcription factor GTE12-like |
| SNP_92078_A_50796  | NW_004516527.1 | scaffold1281 | 50796                   | CC                              | GG                 | GG               | INTERGENIC                    |                    |                                 |
| SNP_92079_A_51547  | NW_004516527.1 | scaffold1281 | 51547                   | GG                              | AA                 | AA               | INTERGENIC                    |                    |                                 |
| SNP_92080_A_51752  | NW_004516527.1 | scaffold1281 | 51752                   | AA                              | GG                 | GG               | INTERGENIC                    |                    |                                 |
| SNP_92081_A_51809  | NW_004516527.1 | scaffold1281 | 51809                   | CC                              | TT                 | TT               | INTERGENIC                    |                    |                                 |
| SNP_92082_A_51921  | NW_004516527.1 | scaffold1281 | 51921                   | TT                              | AA                 | AA               | INTERGENIC                    |                    |                                 |
| SNP_92083_A_51955  | NW_004516527.1 | scaffold1281 | 51955                   | TT                              | AA                 | AA               | INTERGENIC                    |                    |                                 |
| SNP_92084_A_51956  | NW_004516527.1 | scaffold1281 | 51956                   | TT                              | AA                 | AA               | INTERGENIC                    |                    |                                 |
| SNP_92085_A_52043  | NW_004516527.1 | scaffold1281 | 52043                   | CC                              | AA                 | AA               | INTERGENIC                    |                    |                                 |

| SNPs IDs           | Chromosome IDs | Chromosomes  | Physical positions (bp) | CDC Frontier (Reference genome) | (Pusa 1103 & HPNB) | (ILWC 46 & LPNB) | Sequence Components of genome | Gene accession IDs | Putative functions                                |
|--------------------|----------------|--------------|-------------------------|---------------------------------|--------------------|------------------|-------------------------------|--------------------|---------------------------------------------------|
| SNP_92086_A_53409  | NW_004516527.1 | scaffold1281 | 53409                   | GG                              | AA                 | AA               | INTERGENIC                    |                    |                                                   |
| SNP_92087_A_63347  | NW_004516527.1 | scaffold1281 | 63347                   | CC                              | TT                 | TT               | INTERGENIC                    |                    |                                                   |
| SNP_92088_A_66154  | NW_004516527.1 | scaffold1281 | 66154                   | GG                              | TT                 | TT               | INTERGENIC                    |                    |                                                   |
| SNP_92089_A_67294  | NW_004516527.1 | scaffold1281 | 67294                   | GG                              | AA                 | AA               | INTERGENIC                    |                    |                                                   |
| SNP_92090_A_160415 | NW_004516527.1 | scaffold1281 | 160415                  | AA                              | GG                 | GG               | URR                           | 101502859          | uncharacterized LOC101502859                      |
| SNP_92092_A_166134 | NW_004516527.1 | scaffold1281 | 166134                  | AA                              | GG                 | GG               | INTERGENIC                    |                    |                                                   |
| SNP_92093_A_283266 | NW_004516527.1 | scaffold1281 | 283266                  | AA                              | TT                 | TT               | URR                           | 101504151          | uncharacterized LOC101504151                      |
| SNP_92094_A_283271 | NW_004516527.1 | scaffold1281 | 283271                  | TT                              | CC                 | CC               | DRR                           | 101498837          | DNA-directed RNA polymerase 1, mitochondrial-like |
| SNP_92095_A_283287 | NW_004516527.1 | scaffold1281 | 283287                  | AA                              | CC                 | CC               | DRR                           | 101498837          | DNA-directed RNA polymerase 1, mitochondrial-like |
| SNP_92096_A_283298 | NW_004516527.1 | scaffold1281 | 283298                  | GG                              | CC                 | CC               | DRR                           | 101498837          | DNA-directed RNA polymerase 1, mitochondrial-like |
| SNP_92097_A_296926 | NW_004516527.1 | scaffold1281 | 296926                  | GG                              | AA                 | AA               | INTERGENIC                    |                    |                                                   |
| SNP_92098_A_296955 | NW_004516527.1 | scaffold1281 | 296955                  | GG                              | TT                 | TT               | INTERGENIC                    |                    |                                                   |
| SNP_92099_A_308631 | NW_004516527.1 | scaffold1281 | 308631                  | GG                              | AA                 | AA               | INTERGENIC                    |                    |                                                   |
| SNP_92100_A_376316 | NW_004516527.1 | scaffold1281 | 376316                  | GG                              | AA                 | AA               | INTERGENIC                    |                    |                                                   |
| SNP_92102_A_376489 | NW_004516527.1 | scaffold1281 | 376489                  | AA                              | CC                 | CC               | INTERGENIC                    |                    |                                                   |
| SNP_92103_A_376537 | NW_004516527.1 | scaffold1281 | 376537                  | GG                              | TT                 | TT               | INTERGENIC                    |                    |                                                   |
| SNP_92105_A_435240 | NW_004516527.1 | scaffold1281 | 435240                  | GG                              | AA                 | AA               | INTERGENIC                    |                    |                                                   |
| SNP_92107_A_467387 | NW_004516527.1 | scaffold1281 | 467387                  | AA                              | GG                 | GG               | INTERGENIC                    |                    |                                                   |
| SNP_92108_A_469010 | NW_004516527.1 | scaffold1281 | 469010                  | CC                              | TT                 | TT               | INTERGENIC                    |                    |                                                   |
| SNP_92110_A_471201 | NW_004516527.1 | scaffold1281 | 471201                  | CC                              | TT                 | TT               | INTERGENIC                    |                    |                                                   |
| SNP_92111_A_471371 | NW_004516527.1 | scaffold1281 | 471371                  | CC                              | TT                 | TT               | INTERGENIC                    |                    |                                                   |
| SNP_92112_A_471404 | NW_004516527.1 | scaffold1281 | 471404                  | GG                              | AA                 | AA               | INTERGENIC                    |                    |                                                   |

| SNPs IDs           | Chromosome IDs | Chromosomes  | Physical positions (bp) | CDC Frontier (Reference genome) | (Pusa 1103 & HPNB) | (ILWC 46 & LPNB) | Sequence genome | Components of | Gene accession IDs | Putative functions |
|--------------------|----------------|--------------|-------------------------|---------------------------------|--------------------|------------------|-----------------|---------------|--------------------|--------------------|
| SNP_92113_A_471422 | NW_004516527.1 | scaffold1281 | 471422                  | AA                              | TT                 | TT               | INTERGENIC      |               |                    |                    |
| SNP_92114_A_471476 | NW_004516527.1 | scaffold1281 | 471476                  | CC                              | AA                 | AA               | INTERGENIC      |               |                    |                    |
| SNP_92115_A_471502 | NW_004516527.1 | scaffold1281 | 471502                  | TT                              | CC                 | CC               | INTERGENIC      |               |                    |                    |
| SNP_92116_A_471580 | NW_004516527.1 | scaffold1281 | 471580                  | TT                              | GG                 | GG               | INTERGENIC      |               |                    |                    |
| SNP_92118_A_471940 | NW_004516527.1 | scaffold1281 | 471940                  | AA                              | GG                 | GG               | INTERGENIC      |               |                    |                    |
| SNP_92119_A_472102 | NW_004516527.1 | scaffold1281 | 472102                  | TT                              | CC                 | CC               | INTERGENIC      |               |                    |                    |
| SNP_92122_A_475333 | NW_004516527.1 | scaffold1281 | 475333                  | AA                              | GG                 | GG               | INTERGENIC      |               |                    |                    |
| SNP_92123_A_475918 | NW_004516527.1 | scaffold1281 | 475918                  | AA                              | GG                 | GG               | INTERGENIC      |               |                    |                    |
| SNP_92124_A_490478 | NW_004516527.1 | scaffold1281 | 490478                  | TT                              | CC                 | CC               | INTERGENIC      |               |                    |                    |
| SNP_92125_A_492031 | NW_004516527.1 | scaffold1281 | 492031                  | AA                              | GG                 | GG               | INTERGENIC      |               |                    |                    |
| SNP_92126_A_492162 | NW_004516527.1 | scaffold1281 | 492162                  | AA                              | GG                 | GG               | INTERGENIC      |               |                    |                    |
| SNP_92128_A_492386 | NW_004516527.1 | scaffold1281 | 492386                  | CC                              | GG                 | GG               | INTERGENIC      |               |                    |                    |
| SNP_92129_A_492389 | NW_004516527.1 | scaffold1281 | 492389                  | TT                              | CC                 | CC               | INTERGENIC      |               |                    |                    |
| SNP_92130_A_492402 | NW_004516527.1 | scaffold1281 | 492402                  | CC                              | GG                 | GG               | INTERGENIC      |               |                    |                    |
| SNP_92131_A_492455 | NW_004516527.1 | scaffold1281 | 492455                  | AA                              | GG                 | GG               | INTERGENIC      |               |                    |                    |
| SNP_92132_A_503796 | NW_004516527.1 | scaffold1281 | 503796                  | AA                              | CC                 | CC               | INTERGENIC      |               |                    |                    |
| SNP_92133_A_503894 | NW_004516527.1 | scaffold1281 | 503894                  | TT                              | CC                 | CC               | INTERGENIC      |               |                    |                    |
| SNP_92134_A_503919 | NW_004516527.1 | scaffold1281 | 503919                  | TT                              | CC                 | CC               | INTERGENIC      |               |                    |                    |
| SNP_92135_A_503921 | NW_004516527.1 | scaffold1281 | 503921                  | GG                              | TT                 | TT               | INTERGENIC      |               |                    |                    |
| SNP_92136_A_503957 | NW_004516527.1 | scaffold1281 | 503957                  | TT                              | GG                 | GG               | INTERGENIC      |               |                    |                    |
| SNP_92137_A_504024 | NW_004516527.1 | scaffold1281 | 504024                  | TT                              | GG                 | GG               | INTERGENIC      |               |                    |                    |
| SNP_92138_A_504098 | NW_004516527.1 | scaffold1281 | 504098                  | GG                              | TT                 | TT               | INTERGENIC      |               |                    |                    |

| SNPs IDs           | Chromosome IDs | Chromosomes  | Physical positions (bp) | CDC Frontier (Reference genome) | (Pusa 1103 & HPNB) | (ILWC 46 & LPNB) | Sequence genome | Components of | Gene accession IDs | Putative functions |
|--------------------|----------------|--------------|-------------------------|---------------------------------|--------------------|------------------|-----------------|---------------|--------------------|--------------------|
| SNP_92139_A_504107 | NW_004516527.1 | scaffold1281 | 504107                  | TT                              | CC                 | CC               | INTERGENIC      |               |                    |                    |
| SNP_92140_A_504115 | NW_004516527.1 | scaffold1281 | 504115                  | TT                              | CC                 | CC               | INTERGENIC      |               |                    |                    |
| SNP_92141_A_504134 | NW_004516527.1 | scaffold1281 | 504134                  | GG                              | TT                 | TT               | INTERGENIC      |               |                    |                    |
| SNP_92142_A_504138 | NW_004516527.1 | scaffold1281 | 504138                  | CC                              | TT                 | TT               | INTERGENIC      |               |                    |                    |
| SNP_92143_A_504187 | NW_004516527.1 | scaffold1281 | 504187                  | GG                              | CC                 | CC               | INTERGENIC      |               |                    |                    |
| SNP_92144_A_504281 | NW_004516527.1 | scaffold1281 | 504281                  | AA                              | CC                 | CC               | INTERGENIC      |               |                    |                    |
| SNP_92145_A_504408 | NW_004516527.1 | scaffold1281 | 504408                  | CC                              | TT                 | TT               | INTERGENIC      |               |                    |                    |
| SNP_92147_A_504440 | NW_004516527.1 | scaffold1281 | 504440                  | CC                              | TT                 | TT               | INTERGENIC      |               |                    |                    |
| SNP_92148_A_504577 | NW_004516527.1 | scaffold1281 | 504577                  | CC                              | TT                 | TT               | INTERGENIC      |               |                    |                    |
| SNP_92149_A_516222 | NW_004516527.1 | scaffold1281 | 516222                  | GG                              | AA                 | AA               | INTERGENIC      |               |                    |                    |
| SNP_92150_A_518041 | NW_004516527.1 | scaffold1281 | 518041                  | CC                              | TT                 | TT               | INTERGENIC      |               |                    |                    |
| SNP_92151_A_4166   | NW_004516528.1 | scaffold1283 | 4166                    | CC                              | AA                 | AA               | INTERGENIC      |               |                    |                    |
| SNP_92152_A_13734  | NW_004516528.1 | scaffold1283 | 13734                   | AA                              | CC                 | CC               | INTERGENIC      |               |                    |                    |
| SNP_92153_A_13737  | NW_004516528.1 | scaffold1283 | 13737                   | TT                              | GG                 | GG               | INTERGENIC      |               |                    |                    |
| SNP_92154_A_53764  | NW_004516528.1 | scaffold1283 | 53764                   | AA                              | GG                 | GG               | INTERGENIC      |               |                    |                    |
| SNP_92155_A_53805  | NW_004516528.1 | scaffold1283 | 53805                   | TT                              | AA                 | AA               | INTERGENIC      |               |                    |                    |
| SNP_92156_A_53816  | NW_004516528.1 | scaffold1283 | 53816                   | TT                              | AA                 | AA               | INTERGENIC      |               |                    |                    |
| SNP_92157_A_54185  | NW_004516528.1 | scaffold1283 | 54185                   | TT                              | GG                 | GG               | INTERGENIC      |               |                    |                    |
| SNP_92158_A_54191  | NW_004516528.1 | scaffold1283 | 54191                   | GG                              | TT                 | TT               | INTERGENIC      |               |                    |                    |
| SNP_92159_A_54204  | NW_004516528.1 | scaffold1283 | 54204                   | AA                              | GG                 | GG               | INTERGENIC      |               |                    |                    |
| SNP_92160_A_54224  | NW_004516528.1 | scaffold1283 | 54224                   | AA                              | TT                 | TT               | INTERGENIC      |               |                    |                    |
| SNP_92162_A_59698  | NW_004516528.1 | scaffold1283 | 59698                   | TT                              | CC                 | CC               | INTERGENIC      |               |                    |                    |



| SNPs IDs          | Chromosome IDs | Chromosomes  | Physical positions (bp) | CDC Frontier (Reference genome) | (Pusa 1103 & HPNB) | (ILWC 46 & LPNB) | Sequence genome | Components of | Gene accession IDs | Putative functions |
|-------------------|----------------|--------------|-------------------------|---------------------------------|--------------------|------------------|-----------------|---------------|--------------------|--------------------|
| SNP_92164_A_64523 | NW_004516528.1 | scaffold1283 | 64523                   | GG                              | AA                 | AA               | INTERGENIC      |               |                    |                    |
| SNP_92165_A_64551 | NW_004516528.1 | scaffold1283 | 64551                   | TT                              | AA                 | AA               | INTERGENIC      |               |                    |                    |
| SNP_92166_A_64564 | NW_004516528.1 | scaffold1283 | 64564                   | CC                              | TT                 | TT               | INTERGENIC      |               |                    |                    |
| SNP_92167_A_64623 | NW_004516528.1 | scaffold1283 | 64623                   | AA                              | GG                 | GG               | INTERGENIC      |               |                    |                    |
| SNP_92168_A_64624 | NW_004516528.1 | scaffold1283 | 64624                   | TT                              | CC                 | CC               | INTERGENIC      |               |                    |                    |
| SNP_92169_A_64625 | NW_004516528.1 | scaffold1283 | 64625                   | GG                              | AA                 | AA               | INTERGENIC      |               |                    |                    |
| SNP_92170_A_64626 | NW_004516528.1 | scaffold1283 | 64626                   | CC                              | TT                 | TT               | INTERGENIC      |               |                    |                    |
| SNP_92171_A_64627 | NW_004516528.1 | scaffold1283 | 64627                   | GG                              | AA                 | AA               | INTERGENIC      |               |                    |                    |
| SNP_92172_A_74300 | NW_004516528.1 | scaffold1283 | 74300                   | CC                              | TT                 | TT               | INTERGENIC      |               |                    |                    |
| SNP_92173_A_14338 | NW_004516529.1 | scaffold1285 | 14338                   | GG                              | CC                 | CC               | INTERGENIC      |               |                    |                    |
| SNP_92174_A_65327 | NW_004516529.1 | scaffold1285 | 65327                   | TT                              | CC                 | CC               | INTERGENIC      |               |                    |                    |
| SNP_92175_A_65559 | NW_004516529.1 | scaffold1285 | 65559                   | GG                              | AA                 | AA               | INTERGENIC      |               |                    |                    |
| SNP_92176_A_65754 | NW_004516529.1 | scaffold1285 | 65754                   | CC                              | TT                 | TT               | INTERGENIC      |               |                    |                    |
| SNP_92177_A_66234 | NW_004516529.1 | scaffold1285 | 66234                   | CC                              | GG                 | GG               | INTERGENIC      |               |                    |                    |
| SNP_92178_A_67137 | NW_004516529.1 | scaffold1285 | 67137                   | AA                              | GG                 | GG               | INTERGENIC      |               |                    |                    |
| SNP_92179_A_67139 | NW_004516529.1 | scaffold1285 | 67139                   | TT                              | AA                 | AA               | INTERGENIC      |               |                    |                    |
| SNP_92180_A_67274 | NW_004516529.1 | scaffold1285 | 67274                   | TT                              | CC                 | CC               | INTERGENIC      |               |                    |                    |
| SNP_92181_A_67281 | NW_004516529.1 | scaffold1285 | 67281                   | AA                              | GG                 | GG               | INTERGENIC      |               |                    |                    |
| SNP_92182_A_67301 | NW_004516529.1 | scaffold1285 | 67301                   | AA                              | GG                 | GG               | INTERGENIC      |               |                    |                    |
| SNP_92183_A_67418 | NW_004516529.1 | scaffold1285 | 67418                   | TT                              | GG                 | GG               | INTERGENIC      |               |                    |                    |
| SNP_92184_A_67467 | NW_004516529.1 | scaffold1285 | 67467                   | AA                              | TT                 | TT               | INTERGENIC      |               |                    |                    |
| SNP_92185_A_67548 | NW_004516529.1 | scaffold1285 | 67548                   | TT                              | AA                 | AA               | INTERGENIC      |               |                    |                    |

| SNPs IDs           | Chromosome IDs | Chromosomes  | Physical positions (bp) | CDC Frontier (Reference genome) | (Pusa 1103 & HPNB) | (ILWC 46 & LPNB) | Sequence Components of genome | Gene accession IDs | Putative functions                                    |
|--------------------|----------------|--------------|-------------------------|---------------------------------|--------------------|------------------|-------------------------------|--------------------|-------------------------------------------------------|
| SNP_92186_A_67556  | NW_004516529.1 | scaffold1285 | 67556                   | AA                              | GG                 | GG               | INTERGENIC                    |                    |                                                       |
| SNP_92187_A_67598  | NW_004516529.1 | scaffold1285 | 67598                   | GG                              | AA                 | AA               | INTERGENIC                    |                    |                                                       |
| SNP_92188_A_67602  | NW_004516529.1 | scaffold1285 | 67602                   | AA                              | CC                 | CC               | INTERGENIC                    |                    |                                                       |
| SNP_92189_A_67603  | NW_004516529.1 | scaffold1285 | 67603                   | TT                              | CC                 | CC               | INTERGENIC                    |                    |                                                       |
| SNP_92190_A_67606  | NW_004516529.1 | scaffold1285 | 67606                   | AA                              | TT                 | TT               | INTERGENIC                    |                    |                                                       |
| SNP_92191_A_67618  | NW_004516529.1 | scaffold1285 | 67618                   | AA                              | CC                 | CC               | INTERGENIC                    |                    |                                                       |
| SNP_92192_A_67695  | NW_004516529.1 | scaffold1285 | 67695                   | TT                              | CC                 | CC               | INTERGENIC                    |                    |                                                       |
| SNP_92193_A_73102  | NW_004516529.1 | scaffold1285 | 73102                   | AA                              | GG                 | GG               | INTERGENIC                    |                    |                                                       |
| SNP_92194_A_104436 | NW_004516529.1 | scaffold1285 | 104436                  | TT                              | CC                 | CC               | INTRON                        | 101507902          | Unknown function                                      |
| SNP_92195_A_198252 | NW_004516529.1 | scaffold1285 | 198252                  | AA                              | GG                 | GG               | URR                           | 101507069          | pentatricopeptide repeat-containing protein At5g47360 |
| SNP_92196_A_204605 | NW_004516529.1 | scaffold1285 | 204605                  | CC                              | TT                 | TT               | INTERGENIC                    |                    |                                                       |
| SNP_92197_A_210992 | NW_004516529.1 | scaffold1285 | 210992                  | CC                              | TT                 | TT               | INTERGENIC                    |                    |                                                       |
| SNP_92198_A_211052 | NW_004516529.1 | scaffold1285 | 211052                  | TT                              | GG                 | GG               | INTERGENIC                    |                    |                                                       |
| SNP_92199_A_211059 | NW_004516529.1 | scaffold1285 | 211059                  | TT                              | CC                 | CC               | INTERGENIC                    |                    |                                                       |
| SNP_92200_A_211083 | NW_004516529.1 | scaffold1285 | 211083                  | TT                              | CC                 | CC               | INTERGENIC                    |                    |                                                       |
| SNP_92201_A_239631 | NW_004516529.1 | scaffold1285 | 239631                  | AA                              | GG                 | GG               | URR                           | 101508852          | Unknown function                                      |
| SNP_92202_A_239666 | NW_004516529.1 | scaffold1285 | 239666                  | AA                              | CC                 | CC               | URR                           | 101508852          | Unknown function                                      |
| SNP_92203_A_239869 | NW_004516529.1 | scaffold1285 | 239869                  | AA                              | CC                 | CC               | URR                           | 101508852          | Unknown function                                      |
| SNP_92204_A_239884 | NW_004516529.1 | scaffold1285 | 239884                  | AA                              | GG                 | GG               | URR                           | 101508852          | Unknown function                                      |
| SNP_92205_A_244522 | NW_004516529.1 | scaffold1285 | 244522                  | GG                              | AA                 | AA               | INTERGENIC                    |                    |                                                       |
| SNP_92206_A_254815 | NW_004516529.1 | scaffold1285 | 254815                  | AA                              | GG                 | GG               | INTERGENIC                    |                    |                                                       |
| SNP_92207_A_254829 | NW_004516529.1 | scaffold1285 | 254829                  | CC                              | AA                 | AA               | INTERGENIC                    |                    |                                                       |

| SNPs IDs           | Chromosome IDs | Chromosomes  | Physical positions (bp) | CDC Frontier (Reference genome) | (Pusa 1103 & HPNB) | (ILWC 46 & LPNB) | Sequence genome | Components of | Gene accession IDs | Putative functions |
|--------------------|----------------|--------------|-------------------------|---------------------------------|--------------------|------------------|-----------------|---------------|--------------------|--------------------|
| SNP_92208_A_278487 | NW_004516529.1 | scaffold1285 | 278487                  | AA                              | GG                 | GG               | INTERGENIC      |               |                    |                    |
| SNP_92209_A_278501 | NW_004516529.1 | scaffold1285 | 278501                  | TT                              | GG                 | GG               | INTERGENIC      |               |                    |                    |
| SNP_92210_A_278535 | NW_004516529.1 | scaffold1285 | 278535                  | TT                              | AA                 | AA               | INTERGENIC      |               |                    |                    |
| SNP_92211_A_279037 | NW_004516529.1 | scaffold1285 | 279037                  | AA                              | TT                 | TT               | INTERGENIC      |               |                    |                    |
| SNP_92212_A_279049 | NW_004516529.1 | scaffold1285 | 279049                  | CC                              | TT                 | TT               | INTERGENIC      |               |                    |                    |
| SNP_92213_A_279057 | NW_004516529.1 | scaffold1285 | 279057                  | CC                              | AA                 | AA               | INTERGENIC      |               |                    |                    |
| SNP_92214_A_279058 | NW_004516529.1 | scaffold1285 | 279058                  | AA                              | GG                 | GG               | INTERGENIC      |               |                    |                    |
| SNP_92215_A_286072 | NW_004516529.1 | scaffold1285 | 286072                  | CC                              | TT                 | TT               | INTERGENIC      |               |                    |                    |
| SNP_92216_A_332169 | NW_004516529.1 | scaffold1285 | 332169                  | TT                              | CC                 | CC               | INTERGENIC      |               |                    |                    |
| SNP_92217_A_2200   | NW_004516530.1 | scaffold1286 | 2200                    | AA                              | GG                 | GG               | INTERGENIC      |               |                    |                    |
| SNP_92218_A_2255   | NW_004516530.1 | scaffold1286 | 2255                    | GG                              | AA                 | AA               | INTERGENIC      |               |                    |                    |
| SNP_92219_A_2491   | NW_004516530.1 | scaffold1286 | 2491                    | CC                              | TT                 | TT               | INTERGENIC      |               |                    |                    |
| SNP_92220_A_6982   | NW_004516530.1 | scaffold1286 | 6982                    | GG                              | TT                 | TT               | INTERGENIC      |               |                    |                    |
| SNP_92221_A_14591  | NW_004516530.1 | scaffold1286 | 14591                   | GG                              | AA                 | AA               | INTERGENIC      |               |                    |                    |
| SNP_92222_A_15429  | NW_004516530.1 | scaffold1286 | 15429                   | GG                              | TT                 | TT               | INTERGENIC      |               |                    |                    |
| SNP_92223_A_15455  | NW_004516530.1 | scaffold1286 | 15455                   | GG                              | CC                 | CC               | INTERGENIC      |               |                    |                    |
| SNP_92224_A_15547  | NW_004516530.1 | scaffold1286 | 15547                   | CC                              | TT                 | TT               | INTERGENIC      |               |                    |                    |
| SNP_92225_A_15559  | NW_004516530.1 | scaffold1286 | 15559                   | CC                              | GG                 | GG               | INTERGENIC      |               |                    |                    |
| SNP_92226_A_15664  | NW_004516530.1 | scaffold1286 | 15664                   | AA                              | TT                 | TT               | INTERGENIC      |               |                    |                    |
| SNP_92227_A_15689  | NW_004516530.1 | scaffold1286 | 15689                   | AA                              | CC                 | CC               | INTERGENIC      |               |                    |                    |
| SNP_92228_A_15741  | NW_004516530.1 | scaffold1286 | 15741                   | AA                              | CC                 | CC               | INTERGENIC      |               |                    |                    |
| SNP_92229_A_15843  | NW_004516530.1 | scaffold1286 | 15843                   | TT                              | CC                 | CC               | INTERGENIC      |               |                    |                    |

| SNPs IDs          | Chromosome IDs | Chromosomes  | Physical positions (bp) | CDC Frontier (Reference genome) | (Pusa 1103 & HPNB) | (ILWC 46 & LPNB) | Sequence genome | Components of | Gene accession IDs | Putative functions |
|-------------------|----------------|--------------|-------------------------|---------------------------------|--------------------|------------------|-----------------|---------------|--------------------|--------------------|
| SNP_92230_A_15901 | NW_004516530.1 | scaffold1286 | 15901                   | TT                              | AA                 | AA               | INTERGENIC      |               |                    |                    |
| SNP_92231_A_22622 | NW_004516530.1 | scaffold1286 | 22622                   | GG                              | TT                 | TT               | INTERGENIC      |               |                    |                    |
| SNP_92232_A_64    | NW_004516533.1 | scaffold1291 | 64                      | AA                              | GG                 | GG               | INTERGENIC      |               |                    |                    |
| SNP_92233_A_65    | NW_004516533.1 | scaffold1291 | 65                      | AA                              | GG                 | GG               | INTERGENIC      |               |                    |                    |
| SNP_92234_A_4155  | NW_004516534.1 | scaffold1292 | 4155                    | CC                              | TT                 | TT               | INTERGENIC      |               |                    |                    |
| SNP_92235_A_7562  | NW_004516534.1 | scaffold1292 | 7562                    | GG                              | AA                 | AA               | INTERGENIC      |               |                    |                    |
| SNP_92237_A_8032  | NW_004516534.1 | scaffold1292 | 8032                    | TT                              | CC                 | CC               | INTERGENIC      |               |                    |                    |
| SNP_92238_A_8136  | NW_004516534.1 | scaffold1292 | 8136                    | AA                              | GG                 | GG               | INTERGENIC      |               |                    |                    |
| SNP_92239_A_8147  | NW_004516534.1 | scaffold1292 | 8147                    | TT                              | AA                 | AA               | INTERGENIC      |               |                    |                    |
| SNP_92240_A_8181  | NW_004516534.1 | scaffold1292 | 8181                    | TT                              | AA                 | AA               | INTERGENIC      |               |                    |                    |
| SNP_92241_A_8196  | NW_004516534.1 | scaffold1292 | 8196                    | CC                              | AA                 | AA               | INTERGENIC      |               |                    |                    |
| SNP_92242_A_8200  | NW_004516534.1 | scaffold1292 | 8200                    | GG                              | TT                 | TT               | INTERGENIC      |               |                    |                    |
| SNP_92243_A_8270  | NW_004516534.1 | scaffold1292 | 8270                    | TT                              | GG                 | GG               | INTERGENIC      |               |                    |                    |
| SNP_92244_A_31666 | NW_004516535.1 | scaffold1293 | 31666                   | AA                              | CC                 | CC               | INTERGENIC      |               |                    |                    |
| SNP_92245_A_31689 | NW_004516535.1 | scaffold1293 | 31689                   | CC                              | TT                 | TT               | INTERGENIC      |               |                    |                    |
| SNP_92246_A_31806 | NW_004516535.1 | scaffold1293 | 31806                   | CC                              | TT                 | TT               | INTERGENIC      |               |                    |                    |
| SNP_92247_A_31807 | NW_004516535.1 | scaffold1293 | 31807                   | TT                              | GG                 | GG               | INTERGENIC      |               |                    |                    |
| SNP_92248_A_37431 | NW_004516535.1 | scaffold1293 | 37431                   | GG                              | TT                 | TT               | INTERGENIC      |               |                    |                    |
| SNP_92249_A_44413 | NW_004516535.1 | scaffold1293 | 44413                   | AA                              | GG                 | GG               | INTERGENIC      |               |                    |                    |
| SNP_92250_A_44426 | NW_004516535.1 | scaffold1293 | 44426                   | TT                              | CC                 | CC               | INTERGENIC      |               |                    |                    |
| SNP_92251_A_44441 | NW_004516535.1 | scaffold1293 | 44441                   | TT                              | GG                 | GG               | INTERGENIC      |               |                    |                    |
| SNP_92252_A_44764 | NW_004516535.1 | scaffold1293 | 44764                   | AA                              | GG                 | GG               | INTERGENIC      |               |                    |                    |

| SNPs IDs          | Chromosome IDs | Chromosomes  | Physical positions (bp) | CDC Frontier (Reference genome) | (Pusa 1103 & HPNB) | (ILWC 46 & LPNB) | Sequence genome | Components of | Gene accession IDs | Putative functions |
|-------------------|----------------|--------------|-------------------------|---------------------------------|--------------------|------------------|-----------------|---------------|--------------------|--------------------|
| SNP_92253_A_44790 | NW_004516535.1 | scaffold1293 | 44790                   | AA                              | GG                 | GG               | INTERGENIC      |               |                    |                    |
| SNP_92254_A_66592 | NW_004516535.1 | scaffold1293 | 66592                   | CC                              | TT                 | TT               | INTERGENIC      |               |                    |                    |
| SNP_92255_A_66598 | NW_004516535.1 | scaffold1293 | 66598                   | GG                              | TT                 | TT               | INTERGENIC      |               |                    |                    |
| SNP_92256_A_67174 | NW_004516535.1 | scaffold1293 | 67174                   | CC                              | TT                 | TT               | INTERGENIC      |               |                    |                    |
| SNP_92257_A_67196 | NW_004516535.1 | scaffold1293 | 67196                   | CC                              | TT                 | TT               | INTERGENIC      |               |                    |                    |
| SNP_92258_A_67558 | NW_004516535.1 | scaffold1293 | 67558                   | TT                              | AA                 | AA               | INTERGENIC      |               |                    |                    |
| SNP_92259_A_68015 | NW_004516535.1 | scaffold1293 | 68015                   | AA                              | TT                 | TT               | INTERGENIC      |               |                    |                    |
| SNP_92260_A_68226 | NW_004516535.1 | scaffold1293 | 68226                   | GG                              | TT                 | TT               | INTERGENIC      |               |                    |                    |
| SNP_92261_A_68243 | NW_004516535.1 | scaffold1293 | 68243                   | CC                              | TT                 | TT               | INTERGENIC      |               |                    |                    |
| SNP_92262_A_68618 | NW_004516535.1 | scaffold1293 | 68618                   | TT                              | CC                 | CC               | INTERGENIC      |               |                    |                    |
| SNP_92263_A_68867 | NW_004516535.1 | scaffold1293 | 68867                   | TT                              | CC                 | CC               | INTERGENIC      |               |                    |                    |
| SNP_92264_A_72394 | NW_004516535.1 | scaffold1293 | 72394                   | GG                              | AA                 | AA               | INTERGENIC      |               |                    |                    |
| SNP_92265_A_72515 | NW_004516535.1 | scaffold1293 | 72515                   | AA                              | TT                 | TT               | INTERGENIC      |               |                    |                    |
| SNP_92266_A_72518 | NW_004516535.1 | scaffold1293 | 72518                   | TT                              | CC                 | CC               | INTERGENIC      |               |                    |                    |
| SNP_92267_A_73109 | NW_004516535.1 | scaffold1293 | 73109                   | TT                              | CC                 | CC               | INTERGENIC      |               |                    |                    |
| SNP_92268_A_79139 | NW_004516535.1 | scaffold1293 | 79139                   | AA                              | TT                 | TT               | INTERGENIC      |               |                    |                    |
| SNP_92269_A_79161 | NW_004516535.1 | scaffold1293 | 79161                   | CC                              | GG                 | GG               | INTERGENIC      |               |                    |                    |
| SNP_92270_A_79222 | NW_004516535.1 | scaffold1293 | 79222                   | GG                              | TT                 | TT               | INTERGENIC      |               |                    |                    |
| SNP_92271_A_79234 | NW_004516535.1 | scaffold1293 | 79234                   | GG                              | CC                 | CC               | INTERGENIC      |               |                    |                    |
| SNP_92272_A_79330 | NW_004516535.1 | scaffold1293 | 79330                   | TT                              | AA                 | AA               | INTERGENIC      |               |                    |                    |
| SNP_92273_A_80372 | NW_004516535.1 | scaffold1293 | 80372                   | TT                              | AA                 | AA               | INTERGENIC      |               |                    |                    |
| SNP_92274_A_87925 | NW_004516535.1 | scaffold1293 | 87925                   | AA                              | GG                 | GG               | INTERGENIC      |               |                    |                    |

| SNPs IDs          | Chromosome IDs | Chromosomes  | Physical positions (bp) | CDC Frontier (Reference genome) | (Pusa 1103 & HPNB) | (ILWC 46 & LPNB) | Sequence genome | Components of | Gene accession IDs | Putative functions |
|-------------------|----------------|--------------|-------------------------|---------------------------------|--------------------|------------------|-----------------|---------------|--------------------|--------------------|
| SNP_92275_A_87938 | NW_004516535.1 | scaffold1293 | 87938                   | AA                              | CC                 | CC               | INTERGENIC      |               |                    |                    |
| SNP_92276_A_87951 | NW_004516535.1 | scaffold1293 | 87951                   | TT                              | AA                 | AA               | INTERGENIC      |               |                    |                    |
| SNP_92277_A_88500 | NW_004516535.1 | scaffold1293 | 88500                   | GG                              | CC                 | CC               | INTERGENIC      |               |                    |                    |
| SNP_92278_A_88516 | NW_004516535.1 | scaffold1293 | 88516                   | AA                              | CC                 | CC               | INTERGENIC      |               |                    |                    |
| SNP_92279_A_88582 | NW_004516535.1 | scaffold1293 | 88582                   | GG                              | AA                 | AA               | INTERGENIC      |               |                    |                    |
| SNP_92280_A_88594 | NW_004516535.1 | scaffold1293 | 88594                   | GG                              | CC                 | CC               | INTERGENIC      |               |                    |                    |
| SNP_92281_A_88648 | NW_004516535.1 | scaffold1293 | 88648                   | TT                              | CC                 | CC               | INTERGENIC      |               |                    |                    |
| SNP_92282_A_91084 | NW_004516535.1 | scaffold1293 | 91084                   | CC                              | AA                 | AA               | INTERGENIC      |               |                    |                    |
| SNP_92283_A_91334 | NW_004516535.1 | scaffold1293 | 91334                   | GG                              | TT                 | TT               | INTERGENIC      |               |                    |                    |
| SNP_92284_A_91420 | NW_004516535.1 | scaffold1293 | 91420                   | TT                              | GG                 | GG               | INTERGENIC      |               |                    |                    |
| SNP_92285_A_91584 | NW_004516535.1 | scaffold1293 | 91584                   | CC                              | GG                 | GG               | INTERGENIC      |               |                    |                    |
| SNP_92286_A_91654 | NW_004516535.1 | scaffold1293 | 91654                   | CC                              | TT                 | TT               | INTERGENIC      |               |                    |                    |
| SNP_92287_A_91918 | NW_004516535.1 | scaffold1293 | 91918                   | AA                              | TT                 | TT               | INTERGENIC      |               |                    |                    |
| SNP_92288_A_92452 | NW_004516535.1 | scaffold1293 | 92452                   | AA                              | GG                 | GG               | INTERGENIC      |               |                    |                    |
| SNP_92289_A_92476 | NW_004516535.1 | scaffold1293 | 92476                   | GG                              | AA                 | AA               | INTERGENIC      |               |                    |                    |
| SNP_92290_A_26808 | NW_004516536.1 | scaffold1294 | 26808                   | GG                              | CC                 | CC               | INTERGENIC      |               |                    |                    |
| SNP_92291_A_29910 | NW_004516536.1 | scaffold1294 | 29910                   | AA                              | GG                 | GG               | INTERGENIC      |               |                    |                    |
| SNP_92293_A_30021 | NW_004516536.1 | scaffold1294 | 30021                   | AA                              | TT                 | TT               | INTERGENIC      |               |                    |                    |
| SNP_92294_A_30087 | NW_004516536.1 | scaffold1294 | 30087                   | AA                              | TT                 | TT               | INTERGENIC      |               |                    |                    |
| SNP_92296_A_32788 | NW_004516536.1 | scaffold1294 | 32788                   | AA                              | GG                 | GG               | INTERGENIC      |               |                    |                    |
| SNP_92297_A_32899 | NW_004516536.1 | scaffold1294 | 32899                   | GG                              | AA                 | AA               | INTERGENIC      |               |                    |                    |
| SNP_92299_A_34328 | NW_004516536.1 | scaffold1294 | 34328                   | GG                              | CC                 | CC               | INTERGENIC      |               |                    |                    |

| SNPs IDs           | Chromosome IDs | Chromosomes    | Physical positions (bp) | CDC Frontier (Reference genome) | (Pusa 1103 & HPNB) | (ILWC 46 & LPNB) | Sequence genome | Components of | Gene accession IDs                   | Putative functions |
|--------------------|----------------|----------------|-------------------------|---------------------------------|--------------------|------------------|-----------------|---------------|--------------------------------------|--------------------|
| SNP_92300_A_34902  | NW_004516536.1 | scaffold1294   | 34902                   | GG                              | TT                 | TT               | INTERGENIC      |               |                                      |                    |
| SNP_92301_A_2470   | NW_004516538.1 | scaffold1301_1 | 2470                    | GG                              | AA                 | AA               | INTERGENIC      |               |                                      |                    |
| SNP_92302_A_75392  | NW_004516538.1 | scaffold1301_1 | 75392                   | CC                              | TT                 | TT               | INTERGENIC      |               |                                      |                    |
| SNP_92303_A_168297 | NW_004516538.1 | scaffold1301_1 | 168297                  | TT                              | CC                 | CC               | INTERGENIC      |               |                                      |                    |
| SNP_92304_A_168606 | NW_004516538.1 | scaffold1301_1 | 168606                  | AA                              | GG                 | GG               | INTERGENIC      |               |                                      |                    |
| SNP_92305_A_215492 | NW_004516538.1 | scaffold1301_1 | 215492                  | CC                              | TT                 | TT               | INTERGENIC      |               |                                      |                    |
| SNP_92307_A_246354 | NW_004516538.1 | scaffold1301_1 | 246354                  | TT                              | CC                 | CC               | INTERGENIC      |               |                                      |                    |
| SNP_92308_A_259975 | NW_004516538.1 | scaffold1301_1 | 259975                  | GG                              | AA                 | AA               | DRR             | 101492528     | probable polygalacturonase At3g15720 |                    |
| SNP_92310_A_283901 | NW_004516538.1 | scaffold1301_1 | 283901                  | TT                              | CC                 | CC               | INTERGENIC      |               |                                      |                    |
| SNP_92311_A_286850 | NW_004516538.1 | scaffold1301_1 | 286850                  | AA                              | GG                 | GG               | INTERGENIC      |               |                                      |                    |
| SNP_92312_A_290781 | NW_004516538.1 | scaffold1301_1 | 290781                  | GG                              | AA                 | AA               | INTERGENIC      |               |                                      |                    |
| SNP_92313_A_290783 | NW_004516538.1 | scaffold1301_1 | 290783                  | GG                              | AA                 | AA               | INTERGENIC      |               |                                      |                    |
| SNP_92314_A_298938 | NW_004516538.1 | scaffold1301_1 | 298938                  | AA                              | GG                 | GG               | INTERGENIC      |               |                                      |                    |
| SNP_92315_A_299022 | NW_004516538.1 | scaffold1301_1 | 299022                  | CC                              | TT                 | TT               | INTERGENIC      |               |                                      |                    |
| SNP_92316_A_299200 | NW_004516538.1 | scaffold1301_1 | 299200                  | AA                              | GG                 | GG               | INTERGENIC      |               |                                      |                    |
| SNP_92317_A_299359 | NW_004516538.1 | scaffold1301_1 | 299359                  | AA                              | GG                 | GG               | INTERGENIC      |               |                                      |                    |
| SNP_92318_A_299371 | NW_004516538.1 | scaffold1301_1 | 299371                  | TT                              | CC                 | CC               | INTERGENIC      |               |                                      |                    |
| SNP_92319_A_299561 | NW_004516538.1 | scaffold1301_1 | 299561                  | TT                              | CC                 | CC               | INTERGENIC      |               |                                      |                    |
| SNP_92320_A_1920   | NW_004516539.1 | scaffold1302   | 1920                    | TT                              | GG                 | GG               | INTERGENIC      |               |                                      |                    |
| SNP_92321_A_2228   | NW_004516539.1 | scaffold1302   | 2228                    | AA                              | GG                 | GG               | INTERGENIC      |               |                                      |                    |
| SNP_92322_A_15399  | NW_004516539.1 | scaffold1302   | 15399                   | GG                              | AA                 | AA               | INTERGENIC      |               |                                      |                    |
| SNP_92323_A_6082   | NW_004516540.1 | scaffold1303   | 6082                    | TT                              | AA                 | AA               | INTERGENIC      |               |                                      |                    |

| SNPs IDs          | Chromosome IDs | Chromosomes  | Physical positions (bp) | CDC Frontier (Reference genome) | (Pusa 1103 & HPNB) | (ILWC 46 & LPNB) | Sequence genome | Components of | Gene accession IDs | Putative functions |
|-------------------|----------------|--------------|-------------------------|---------------------------------|--------------------|------------------|-----------------|---------------|--------------------|--------------------|
| SNP_92324_A_360   | NW_004516541.1 | scaffold1304 | 360                     | AA                              | CC                 | CC               | INTERGENIC      |               |                    |                    |
| SNP_92326_A_10430 | NW_004516543.1 | scaffold1307 | 10430                   | GG                              | AA                 | AA               | INTERGENIC      |               |                    |                    |
| SNP_92327_A_10533 | NW_004516543.1 | scaffold1307 | 10533                   | AA                              | GG                 | GG               | INTERGENIC      |               |                    |                    |
| SNP_92328_A_20487 | NW_004516543.1 | scaffold1307 | 20487                   | TT                              | CC                 | CC               | INTERGENIC      |               |                    |                    |
| SNP_92329_A_31631 | NW_004516543.1 | scaffold1307 | 31631                   | AA                              | GG                 | GG               | INTERGENIC      |               |                    |                    |
| SNP_92330_A_36162 | NW_004516543.1 | scaffold1307 | 36162                   | AA                              | TT                 | TT               | INTERGENIC      |               |                    |                    |
| SNP_92331_A_36188 | NW_004516543.1 | scaffold1307 | 36188                   | AA                              | CC                 | CC               | INTERGENIC      |               |                    |                    |
| SNP_92332_A_36211 | NW_004516543.1 | scaffold1307 | 36211                   | GG                              | TT                 | TT               | INTERGENIC      |               |                    |                    |
| SNP_92333_A_39634 | NW_004516543.1 | scaffold1307 | 39634                   | CC                              | TT                 | TT               | INTERGENIC      |               |                    |                    |
| SNP_92334_A_44357 | NW_004516543.1 | scaffold1307 | 44357                   | TT                              | CC                 | CC               | INTERGENIC      |               |                    |                    |
| SNP_92335_A_2651  | NW_004516544.1 | scaffold1308 | 2651                    | TT                              | AA                 | AA               | INTERGENIC      |               |                    |                    |
| SNP_92336_A_3398  | NW_004516544.1 | scaffold1308 | 3398                    | AA                              | TT                 | TT               | INTERGENIC      |               |                    |                    |
| SNP_92337_A_5924  | NW_004516544.1 | scaffold1308 | 5924                    | TT                              | CC                 | CC               | INTERGENIC      |               |                    |                    |
| SNP_92338_A_6265  | NW_004516544.1 | scaffold1308 | 6265                    | CC                              | TT                 | TT               | INTERGENIC      |               |                    |                    |
| SNP_92339_A_8949  | NW_004516544.1 | scaffold1308 | 8949                    | CC                              | TT                 | TT               | INTERGENIC      |               |                    |                    |
| SNP_92340_A_8950  | NW_004516544.1 | scaffold1308 | 8950                    | AA                              | TT                 | TT               | INTERGENIC      |               |                    |                    |
| SNP_92341_A_8973  | NW_004516544.1 | scaffold1308 | 8973                    | TT                              | CC                 | CC               | INTERGENIC      |               |                    |                    |
| SNP_92342_A_9033  | NW_004516544.1 | scaffold1308 | 9033                    | TT                              | AA                 | AA               | INTERGENIC      |               |                    |                    |
| SNP_92343_A_9667  | NW_004516544.1 | scaffold1308 | 9667                    | TT                              | CC                 | CC               | INTERGENIC      |               |                    |                    |
| SNP_92344_A_11540 | NW_004516544.1 | scaffold1308 | 11540                   | AA                              | TT                 | TT               | INTERGENIC      |               |                    |                    |
| SNP_92346_A_12023 | NW_004516544.1 | scaffold1308 | 12023                   | CC                              | GG                 | GG               | INTERGENIC      |               |                    |                    |
| SNP_92347_A_12031 | NW_004516544.1 | scaffold1308 | 12031                   | AA                              | TT                 | TT               | INTERGENIC      |               |                    |                    |



| SNPs IDs          | Chromosome IDs | Chromosomes  | Physical positions (bp) | CDC Frontier genome (Reference genome) | (Pusa 1103 & HPNB) | (ILWC 46 & LPNB) | Sequence genome | Components of | Gene accession IDs | Putative functions |
|-------------------|----------------|--------------|-------------------------|----------------------------------------|--------------------|------------------|-----------------|---------------|--------------------|--------------------|
| SNP_92348_A_12655 | NW_004516544.1 | scaffold1308 | 12655                   | GG                                     | TT                 | TT               | INTERGENIC      |               |                    |                    |
| SNP_92349_A_12669 | NW_004516544.1 | scaffold1308 | 12669                   | CC                                     | AA                 | AA               | INTERGENIC      |               |                    |                    |
| SNP_92350_A_12671 | NW_004516544.1 | scaffold1308 | 12671                   | GG                                     | AA                 | AA               | INTERGENIC      |               |                    |                    |
| SNP_92351_A_14254 | NW_004516544.1 | scaffold1308 | 14254                   | CC                                     | AA                 | AA               | INTERGENIC      |               |                    |                    |
| SNP_92352_A_15615 | NW_004516544.1 | scaffold1308 | 15615                   | CC                                     | TT                 | TT               | INTERGENIC      |               |                    |                    |
| SNP_92354_A_21694 | NW_004516544.1 | scaffold1308 | 21694                   | CC                                     | TT                 | TT               | INTERGENIC      |               |                    |                    |
| SNP_92355_A_22699 | NW_004516544.1 | scaffold1308 | 22699                   | AA                                     | TT                 | TT               | INTERGENIC      |               |                    |                    |
| SNP_92356_A_24216 | NW_004516544.1 | scaffold1308 | 24216                   | TT                                     | CC                 | CC               | INTERGENIC      |               |                    |                    |
| SNP_92357_A_24302 | NW_004516544.1 | scaffold1308 | 24302                   | CC                                     | GG                 | GG               | INTERGENIC      |               |                    |                    |
| SNP_92358_A_24555 | NW_004516544.1 | scaffold1308 | 24555                   | CC                                     | AA                 | AA               | INTERGENIC      |               |                    |                    |
| SNP_92359_A_24559 | NW_004516544.1 | scaffold1308 | 24559                   | GG                                     | TT                 | TT               | INTERGENIC      |               |                    |                    |
| SNP_92360_A_24592 | NW_004516544.1 | scaffold1308 | 24592                   | CC                                     | TT                 | TT               | INTERGENIC      |               |                    |                    |
| SNP_92361_A_24622 | NW_004516544.1 | scaffold1308 | 24622                   | AA                                     | TT                 | TT               | INTERGENIC      |               |                    |                    |
| SNP_92362_A_34480 | NW_004516544.1 | scaffold1308 | 34480                   | CC                                     | AA                 | AA               | INTERGENIC      |               |                    |                    |
| SNP_92363_A_34570 | NW_004516544.1 | scaffold1308 | 34570                   | CC                                     | GG                 | GG               | INTERGENIC      |               |                    |                    |
| SNP_92364_A_35268 | NW_004516544.1 | scaffold1308 | 35268                   | AA                                     | GG                 | GG               | INTERGENIC      |               |                    |                    |
| SNP_92365_A_39977 | NW_004516544.1 | scaffold1308 | 39977                   | TT                                     | CC                 | CC               | INTERGENIC      |               |                    |                    |
| SNP_92366_A_42160 | NW_004516544.1 | scaffold1308 | 42160                   | AA                                     | GG                 | GG               | INTERGENIC      |               |                    |                    |
| SNP_92367_A_43282 | NW_004516544.1 | scaffold1308 | 43282                   | GG                                     | CC                 | CC               | INTERGENIC      |               |                    |                    |
| SNP_92368_A_43840 | NW_004516544.1 | scaffold1308 | 43840                   | GG                                     | AA                 | AA               | INTERGENIC      |               |                    |                    |
| SNP_92369_A_43931 | NW_004516544.1 | scaffold1308 | 43931                   | AA                                     | GG                 | GG               | INTERGENIC      |               |                    |                    |
| SNP_92370_A_43936 | NW_004516544.1 | scaffold1308 | 43936                   | TT                                     | GG                 | GG               | INTERGENIC      |               |                    |                    |

| SNPs IDs          | Chromosome IDs | Chromosomes  | Physical positions (bp) | CDC Frontier (Reference genome) | (Pusa 1103 & HPNB) | (ILWC 46 & LPNB) | Sequence genome | Components of | Gene accession IDs | Putative functions |
|-------------------|----------------|--------------|-------------------------|---------------------------------|--------------------|------------------|-----------------|---------------|--------------------|--------------------|
| SNP_92371_A_55580 | NW_004516544.1 | scaffold1308 | 55580                   | CC                              | TT                 | TT               | INTERGENIC      |               |                    |                    |
| SNP_92372_A_55582 | NW_004516544.1 | scaffold1308 | 55582                   | GG                              | TT                 | TT               | INTERGENIC      |               |                    |                    |
| SNP_92373_A_55932 | NW_004516544.1 | scaffold1308 | 55932                   | GG                              | TT                 | TT               | INTERGENIC      |               |                    |                    |
| SNP_92374_A_55963 | NW_004516544.1 | scaffold1308 | 55963                   | TT                              | GG                 | GG               | INTERGENIC      |               |                    |                    |
| SNP_92375_A_55966 | NW_004516544.1 | scaffold1308 | 55966                   | CC                              | TT                 | TT               | INTERGENIC      |               |                    |                    |
| SNP_92376_A_55968 | NW_004516544.1 | scaffold1308 | 55968                   | GG                              | AA                 | AA               | INTERGENIC      |               |                    |                    |
| SNP_92377_A_55977 | NW_004516544.1 | scaffold1308 | 55977                   | CC                              | AA                 | AA               | INTERGENIC      |               |                    |                    |
| SNP_92378_A_55980 | NW_004516544.1 | scaffold1308 | 55980                   | GG                              | AA                 | AA               | INTERGENIC      |               |                    |                    |
| SNP_92379_A_55984 | NW_004516544.1 | scaffold1308 | 55984                   | GG                              | CC                 | CC               | INTERGENIC      |               |                    |                    |
| SNP_92380_A_55989 | NW_004516544.1 | scaffold1308 | 55989                   | AA                              | GG                 | GG               | INTERGENIC      |               |                    |                    |
| SNP_92381_A_56463 | NW_004516544.1 | scaffold1308 | 56463                   | GG                              | AA                 | AA               | INTERGENIC      |               |                    |                    |
| SNP_92382_A_57899 | NW_004516544.1 | scaffold1308 | 57899                   | TT                              | AA                 | AA               | INTERGENIC      |               |                    |                    |
| SNP_92383_A_58920 | NW_004516544.1 | scaffold1308 | 58920                   | GG                              | AA                 | AA               | INTERGENIC      |               |                    |                    |
| SNP_92384_A_58921 | NW_004516544.1 | scaffold1308 | 58921                   | AA                              | CC                 | CC               | INTERGENIC      |               |                    |                    |
| SNP_92385_A_58924 | NW_004516544.1 | scaffold1308 | 58924                   | CC                              | AA                 | AA               | INTERGENIC      |               |                    |                    |
| SNP_92386_A_59323 | NW_004516544.1 | scaffold1308 | 59323                   | GG                              | TT                 | TT               | INTERGENIC      |               |                    |                    |
| SNP_92387_A_61883 | NW_004516544.1 | scaffold1308 | 61883                   | CC                              | TT                 | TT               | INTERGENIC      |               |                    |                    |
| SNP_92388_A_65759 | NW_004516544.1 | scaffold1308 | 65759                   | AA                              | GG                 | GG               | INTERGENIC      |               |                    |                    |
| SNP_92389_A_65820 | NW_004516544.1 | scaffold1308 | 65820                   | CC                              | AA                 | AA               | INTERGENIC      |               |                    |                    |
| SNP_92390_A_78366 | NW_004516544.1 | scaffold1308 | 78366                   | AA                              | GG                 | GG               | INTERGENIC      |               |                    |                    |
| SNP_92391_A_78385 | NW_004516544.1 | scaffold1308 | 78385                   | GG                              | CC                 | CC               | INTERGENIC      |               |                    |                    |
| SNP_92392_A_78528 | NW_004516544.1 | scaffold1308 | 78528                   | CC                              | GG                 | GG               | INTERGENIC      |               |                    |                    |

| SNPs IDs          | Chromosome IDs | Chromosomes  | Physical positions (bp) | CDC Frontier (Reference genome) | (Pusa 1103 & HPNB) | (ILWC 46 & LPNB) | Sequence genome | Components of | Gene accession IDs | Putative functions |
|-------------------|----------------|--------------|-------------------------|---------------------------------|--------------------|------------------|-----------------|---------------|--------------------|--------------------|
| SNP_92393_A_83917 | NW_004516544.1 | scaffold1308 | 83917                   | AA                              | TT                 | TT               | INTERGENIC      |               |                    |                    |
| SNP_92394_A_87209 | NW_004516544.1 | scaffold1308 | 87209                   | TT                              | CC                 | CC               | INTERGENIC      |               |                    |                    |
| SNP_92395_A_87242 | NW_004516544.1 | scaffold1308 | 87242                   | GG                              | AA                 | AA               | INTERGENIC      |               |                    |                    |
| SNP_92396_A_87521 | NW_004516544.1 | scaffold1308 | 87521                   | TT                              | GG                 | GG               | INTERGENIC      |               |                    |                    |
| SNP_92397_A_87539 | NW_004516544.1 | scaffold1308 | 87539                   | AA                              | TT                 | TT               | INTERGENIC      |               |                    |                    |
| SNP_92398_A_87649 | NW_004516544.1 | scaffold1308 | 87649                   | CC                              | GG                 | GG               | INTERGENIC      |               |                    |                    |
| SNP_92399_A_87763 | NW_004516544.1 | scaffold1308 | 87763                   | TT                              | CC                 | CC               | INTERGENIC      |               |                    |                    |
| SNP_92400_A_87795 | NW_004516544.1 | scaffold1308 | 87795                   | AA                              | CC                 | CC               | INTERGENIC      |               |                    |                    |
| SNP_92401_A_87806 | NW_004516544.1 | scaffold1308 | 87806                   | AA                              | CC                 | CC               | INTERGENIC      |               |                    |                    |
| SNP_92402_A_89232 | NW_004516544.1 | scaffold1308 | 89232                   | TT                              | CC                 | CC               | INTERGENIC      |               |                    |                    |
| SNP_92403_A_89234 | NW_004516544.1 | scaffold1308 | 89234                   | TT                              | AA                 | AA               | INTERGENIC      |               |                    |                    |
| SNP_92404_A_90511 | NW_004516544.1 | scaffold1308 | 90511                   | TT                              | CC                 | CC               | INTERGENIC      |               |                    |                    |
| SNP_92405_A_90513 | NW_004516544.1 | scaffold1308 | 90513                   | GG                              | TT                 | TT               | INTERGENIC      |               |                    |                    |
| SNP_92406_A_94360 | NW_004516544.1 | scaffold1308 | 94360                   | CC                              | AA                 | AA               | INTERGENIC      |               |                    |                    |
| SNP_92407_A_94596 | NW_004516544.1 | scaffold1308 | 94596                   | TT                              | GG                 | GG               | INTERGENIC      |               |                    |                    |
| SNP_92408_A_94807 | NW_004516544.1 | scaffold1308 | 94807                   | GG                              | CC                 | CC               | INTERGENIC      |               |                    |                    |
| SNP_92409_A_97100 | NW_004516544.1 | scaffold1308 | 97100                   | CC                              | AA                 | AA               | INTERGENIC      |               |                    |                    |
| SNP_92410_A_97116 | NW_004516544.1 | scaffold1308 | 97116                   | TT                              | CC                 | CC               | INTERGENIC      |               |                    |                    |
| SNP_92411_A_97117 | NW_004516544.1 | scaffold1308 | 97117                   | GG                              | AA                 | AA               | INTERGENIC      |               |                    |                    |
| SNP_92412_A_97120 | NW_004516544.1 | scaffold1308 | 97120                   | GG                              | AA                 | AA               | INTERGENIC      |               |                    |                    |
| SNP_92413_A_97151 | NW_004516544.1 | scaffold1308 | 97151                   | TT                              | CC                 | CC               | INTERGENIC      |               |                    |                    |
| SNP_92414_A_97178 | NW_004516544.1 | scaffold1308 | 97178                   | CC                              | GG                 | GG               | INTERGENIC      |               |                    |                    |

| SNPs IDs          | Chromosome IDs | Chromosomes  | Physical positions (bp) | CDC Frontier (Reference genome) | (Pusa 1103 & HPNB) | (ILWC 46 & LPNB) | Sequence genome | Components of | Gene accession IDs | Putative functions |
|-------------------|----------------|--------------|-------------------------|---------------------------------|--------------------|------------------|-----------------|---------------|--------------------|--------------------|
| SNP_92415_A_97675 | NW_004516544.1 | scaffold1308 | 97675                   | TT                              | AA                 | AA               | INTERGENIC      |               |                    |                    |
| SNP_92416_A_97897 | NW_004516544.1 | scaffold1308 | 97897                   | TT                              | GG                 | GG               | INTERGENIC      |               |                    |                    |
| SNP_92417_A_98002 | NW_004516544.1 | scaffold1308 | 98002                   | CC                              | GG                 | GG               | INTERGENIC      |               |                    |                    |
| SNP_92418_A_98007 | NW_004516544.1 | scaffold1308 | 98007                   | TT                              | AA                 | AA               | INTERGENIC      |               |                    |                    |
| SNP_92419_A_98104 | NW_004516544.1 | scaffold1308 | 98104                   | CC                              | TT                 | TT               | INTERGENIC      |               |                    |                    |
| SNP_92421_A_22169 | NW_004516545.1 | scaffold1309 | 22169                   | TT                              | GG                 | GG               | INTERGENIC      |               |                    |                    |
| SNP_92422_A_26763 | NW_004516545.1 | scaffold1309 | 26763                   | CC                              | TT                 | TT               | INTERGENIC      |               |                    |                    |
| SNP_92423_A_26766 | NW_004516545.1 | scaffold1309 | 26766                   | CC                              | AA                 | AA               | INTERGENIC      |               |                    |                    |
| SNP_92424_A_30046 | NW_004516545.1 | scaffold1309 | 30046                   | TT                              | GG                 | GG               | INTERGENIC      |               |                    |                    |
| SNP_92425_A_36114 | NW_004516545.1 | scaffold1309 | 36114                   | TT                              | CC                 | CC               | INTERGENIC      |               |                    |                    |
| SNP_92426_A_36274 | NW_004516545.1 | scaffold1309 | 36274                   | TT                              | AA                 | AA               | INTERGENIC      |               |                    |                    |
| SNP_92427_A_36298 | NW_004516545.1 | scaffold1309 | 36298                   | AA                              | GG                 | GG               | INTERGENIC      |               |                    |                    |
| SNP_92428_A_36339 | NW_004516545.1 | scaffold1309 | 36339                   | AA                              | TT                 | TT               | INTERGENIC      |               |                    |                    |
| SNP_92429_A_36373 | NW_004516545.1 | scaffold1309 | 36373                   | TT                              | AA                 | AA               | INTERGENIC      |               |                    |                    |
| SNP_92430_A_36390 | NW_004516545.1 | scaffold1309 | 36390                   | AA                              | GG                 | GG               | INTERGENIC      |               |                    |                    |
| SNP_92431_A_40127 | NW_004516545.1 | scaffold1309 | 40127                   | AA                              | CC                 | CC               | INTERGENIC      |               |                    |                    |
| SNP_92432_A_46951 | NW_004516545.1 | scaffold1309 | 46951                   | GG                              | AA                 | AA               | INTERGENIC      |               |                    |                    |
| SNP_92433_A_48917 | NW_004516545.1 | scaffold1309 | 48917                   | CC                              | TT                 | TT               | INTERGENIC      |               |                    |                    |
| SNP_92434_A_49518 | NW_004516545.1 | scaffold1309 | 49518                   | GG                              | TT                 | TT               | INTERGENIC      |               |                    |                    |
| SNP_92436_A_50267 | NW_004516545.1 | scaffold1309 | 50267                   | TT                              | GG                 | GG               | INTERGENIC      |               |                    |                    |
| SNP_92438_A_50888 | NW_004516545.1 | scaffold1309 | 50888                   | GG                              | TT                 | TT               | INTERGENIC      |               |                    |                    |
| SNP_92439_A_51035 | NW_004516545.1 | scaffold1309 | 51035                   | CC                              | TT                 | TT               | INTERGENIC      |               |                    |                    |

| SNPs IDs          | Chromosome IDs | Chromosomes  | Physical positions (bp) | CDC Frontier genome (Reference genome) | (Pusa 1103 & HPNB) | (ILWC 46 & LPNB) | Sequence Components of genome | Gene accession IDs | Putative functions                                 |
|-------------------|----------------|--------------|-------------------------|----------------------------------------|--------------------|------------------|-------------------------------|--------------------|----------------------------------------------------|
| SNP_92440_A_51177 | NW_004516545.1 | scaffold1309 | 51177                   | GG                                     | AA                 | AA               | INTERGENIC                    |                    |                                                    |
| SNP_92441_A_56616 | NW_004516545.1 | scaffold1309 | 56616                   | CC                                     | TT                 | TT               | INTERGENIC                    |                    |                                                    |
| SNP_92442_A_57218 | NW_004516545.1 | scaffold1309 | 57218                   | CC                                     | GG                 | GG               | INTERGENIC                    |                    |                                                    |
| SNP_92443_A_57248 | NW_004516545.1 | scaffold1309 | 57248                   | AA                                     | GG                 | GG               | INTERGENIC                    |                    |                                                    |
| SNP_92444_A_57455 | NW_004516545.1 | scaffold1309 | 57455                   | GG                                     | AA                 | AA               | INTERGENIC                    |                    |                                                    |
| SNP_92445_A_57521 | NW_004516545.1 | scaffold1309 | 57521                   | CC                                     | TT                 | TT               | INTERGENIC                    |                    |                                                    |
| SNP_92446_A_57534 | NW_004516545.1 | scaffold1309 | 57534                   | AA                                     | GG                 | GG               | INTERGENIC                    |                    |                                                    |
| SNP_92447_A_57535 | NW_004516545.1 | scaffold1309 | 57535                   | TT                                     | GG                 | GG               | INTERGENIC                    |                    |                                                    |
| SNP_92449_A_58063 | NW_004516545.1 | scaffold1309 | 58063                   | CC                                     | TT                 | TT               | INTERGENIC                    |                    |                                                    |
| SNP_92452_A_88860 | NW_004516545.1 | scaffold1309 | 88860                   | TT                                     | AA                 | AA               | URR                           | 101495216          | glycine-rich cell wall structural protein 1.8-like |
| SNP_92453_A_89142 | NW_004516545.1 | scaffold1309 | 89142                   | TT                                     | CC                 | CC               | URR                           | 101495216          | glycine-rich cell wall structural protein 1.8-like |
| SNP_92454_A_89154 | NW_004516545.1 | scaffold1309 | 89154                   | AA                                     | GG                 | GG               | URR                           | 101495216          | glycine-rich cell wall structural protein 1.8-like |
| SNP_92455_A_89427 | NW_004516545.1 | scaffold1309 | 89427                   | CC                                     | AA                 | AA               | URR                           | 101495216          | glycine-rich cell wall structural protein 1.8-like |
| SNP_92456_A_89808 | NW_004516545.1 | scaffold1309 | 89808                   | AA                                     | GG                 | GG               | URR                           | 101495216          | glycine-rich cell wall structural protein 1.8-like |
| SNP_92457_A_90176 | NW_004516545.1 | scaffold1309 | 90176                   | TT                                     | CC                 | CC               | URR                           | 101495216          | glycine-rich cell wall structural protein 1.8-like |
| SNP_92458_A_90254 | NW_004516545.1 | scaffold1309 | 90254                   | GG                                     | AA                 | AA               | URR                           | 101495216          | glycine-rich cell wall structural protein 1.8-like |
| SNP_92459_A_90637 | NW_004516545.1 | scaffold1309 | 90637                   | GG                                     | TT                 | TT               | INTERGENIC                    |                    |                                                    |
| SNP_92460_A_94677 | NW_004516545.1 | scaffold1309 | 94677                   | GG                                     | AA                 | AA               | INTRON                        | id211118           | Unknown function                                   |
| SNP_92461_A_94698 | NW_004516545.1 | scaffold1309 | 94698                   | TT                                     | CC                 | CC               | INTRON                        | id211118           | Unknown function                                   |
| SNP_92462_A_6111  | NW_004516547.1 | scaffold1312 | 6111                    | CC                                     | TT                 | TT               | INTERGENIC                    |                    |                                                    |
| SNP_92463_A_52707 | NW_004516547.1 | scaffold1312 | 52707                   | TT                                     | GG                 | GG               | INTERGENIC                    |                    |                                                    |
| SNP_92464_A_58766 | NW_004516547.1 | scaffold1312 | 58766                   | TT                                     | AA                 | AA               | INTERGENIC                    |                    |                                                    |

| SNPs IDs          | Chromosome IDs | Chromosomes  | Physical positions (bp) | CDC Frontier (Reference genome) | (Pusa 1103 & HPNB) | (ILWC 46 & LPNB) | Sequence genome | Components of | Gene accession IDs | Putative functions |
|-------------------|----------------|--------------|-------------------------|---------------------------------|--------------------|------------------|-----------------|---------------|--------------------|--------------------|
| SNP_92465_A_62692 | NW_004516547.1 | scaffold1312 | 62692                   | TT                              | CC                 | CC               | INTERGENIC      |               |                    |                    |
| SNP_92466_A_62703 | NW_004516547.1 | scaffold1312 | 62703                   | TT                              | GG                 | GG               | INTERGENIC      |               |                    |                    |
| SNP_92467_A_64264 | NW_004516547.1 | scaffold1312 | 64264                   | AA                              | TT                 | TT               | INTERGENIC      |               |                    |                    |
| SNP_92468_A_64919 | NW_004516547.1 | scaffold1312 | 64919                   | TT                              | GG                 | GG               | INTERGENIC      |               |                    |                    |
| SNP_92469_A_64994 | NW_004516547.1 | scaffold1312 | 64994                   | CC                              | GG                 | GG               | INTERGENIC      |               |                    |                    |
| SNP_92470_A_64995 | NW_004516547.1 | scaffold1312 | 64995                   | GG                              | CC                 | CC               | INTERGENIC      |               |                    |                    |
| SNP_92471_A_65136 | NW_004516547.1 | scaffold1312 | 65136                   | GG                              | AA                 | AA               | INTERGENIC      |               |                    |                    |
| SNP_92472_A_65599 | NW_004516547.1 | scaffold1312 | 65599                   | TT                              | CC                 | CC               | INTERGENIC      |               |                    |                    |
| SNP_92473_A_65658 | NW_004516547.1 | scaffold1312 | 65658                   | TT                              | CC                 | CC               | INTERGENIC      |               |                    |                    |
| SNP_92474_A_66031 | NW_004516547.1 | scaffold1312 | 66031                   | CC                              | TT                 | TT               | INTERGENIC      |               |                    |                    |
| SNP_92475_A_66606 | NW_004516547.1 | scaffold1312 | 66606                   | AA                              | GG                 | GG               | INTERGENIC      |               |                    |                    |
| SNP_92476_A_67119 | NW_004516547.1 | scaffold1312 | 67119                   | AA                              | CC                 | CC               | INTERGENIC      |               |                    |                    |
| SNP_92477_A_68527 | NW_004516547.1 | scaffold1312 | 68527                   | GG                              | AA                 | AA               | INTERGENIC      |               |                    |                    |
| SNP_92478_A_69466 | NW_004516547.1 | scaffold1312 | 69466                   | GG                              | CC                 | CC               | INTERGENIC      |               |                    |                    |
| SNP_92480_A_71707 | NW_004516547.1 | scaffold1312 | 71707                   | TT                              | CC                 | CC               | INTERGENIC      |               |                    |                    |
| SNP_92481_A_72077 | NW_004516547.1 | scaffold1312 | 72077                   | CC                              | TT                 | TT               | INTERGENIC      |               |                    |                    |
| SNP_92482_A_73979 | NW_004516547.1 | scaffold1312 | 73979                   | AA                              | CC                 | CC               | INTERGENIC      |               |                    |                    |
| SNP_92483_A_74961 | NW_004516547.1 | scaffold1312 | 74961                   | GG                              | AA                 | AA               | INTERGENIC      |               |                    |                    |
| SNP_92484_A_75105 | NW_004516547.1 | scaffold1312 | 75105                   | AA                              | GG                 | GG               | INTERGENIC      |               |                    |                    |
| SNP_92485_A_75340 | NW_004516547.1 | scaffold1312 | 75340                   | GG                              | AA                 | AA               | INTERGENIC      |               |                    |                    |
| SNP_92486_A_75346 | NW_004516547.1 | scaffold1312 | 75346                   | AA                              | GG                 | GG               | INTERGENIC      |               |                    |                    |
| SNP_92487_A_75462 | NW_004516547.1 | scaffold1312 | 75462                   | GG                              | TT                 | TT               | INTERGENIC      |               |                    |                    |

| SNPs IDs          | Chromosome IDs | Chromosomes  | Physical positions (bp) | CDC Frontier (Reference genome) | (Pusa 1103 & HPNB) | (ILWC 46 & LPNB) | Sequence genome | Components of | Gene accession IDs | Putative functions |
|-------------------|----------------|--------------|-------------------------|---------------------------------|--------------------|------------------|-----------------|---------------|--------------------|--------------------|
| SNP_92488_A_75568 | NW_004516547.1 | scaffold1312 | 75568                   | CC                              | TT                 | TT               | INTERGENIC      |               |                    |                    |
| SNP_92489_A_75581 | NW_004516547.1 | scaffold1312 | 75581                   | AA                              | TT                 | TT               | INTERGENIC      |               |                    |                    |
| SNP_92490_A_76281 | NW_004516547.1 | scaffold1312 | 76281                   | GG                              | AA                 | AA               | INTERGENIC      |               |                    |                    |
| SNP_92491_A_76652 | NW_004516547.1 | scaffold1312 | 76652                   | CC                              | TT                 | TT               | INTERGENIC      |               |                    |                    |
| SNP_92492_A_78435 | NW_004516547.1 | scaffold1312 | 78435                   | GG                              | AA                 | AA               | INTERGENIC      |               |                    |                    |
| SNP_92494_A_78625 | NW_004516547.1 | scaffold1312 | 78625                   | AA                              | TT                 | TT               | INTERGENIC      |               |                    |                    |
| SNP_92495_A_78629 | NW_004516547.1 | scaffold1312 | 78629                   | AA                              | GG                 | GG               | INTERGENIC      |               |                    |                    |
| SNP_92497_A_78775 | NW_004516547.1 | scaffold1312 | 78775                   | GG                              | AA                 | AA               | INTERGENIC      |               |                    |                    |
| SNP_92501_A_78980 | NW_004516547.1 | scaffold1312 | 78980                   | TT                              | CC                 | CC               | INTERGENIC      |               |                    |                    |
| SNP_92502_A_79107 | NW_004516547.1 | scaffold1312 | 79107                   | GG                              | AA                 | AA               | INTERGENIC      |               |                    |                    |
| SNP_92503_A_79124 | NW_004516547.1 | scaffold1312 | 79124                   | TT                              | CC                 | CC               | INTERGENIC      |               |                    |                    |
| SNP_92504_A_79155 | NW_004516547.1 | scaffold1312 | 79155                   | CC                              | TT                 | TT               | INTERGENIC      |               |                    |                    |
| SNP_92505_A_79226 | NW_004516547.1 | scaffold1312 | 79226                   | AA                              | TT                 | TT               | INTERGENIC      |               |                    |                    |
| SNP_92506_A_79260 | NW_004516547.1 | scaffold1312 | 79260                   | TT                              | CC                 | CC               | INTERGENIC      |               |                    |                    |
| SNP_92507_A_79280 | NW_004516547.1 | scaffold1312 | 79280                   | GG                              | TT                 | TT               | INTERGENIC      |               |                    |                    |
| SNP_92508_A_79493 | NW_004516547.1 | scaffold1312 | 79493                   | TT                              | CC                 | CC               | INTERGENIC      |               |                    |                    |
| SNP_92509_A_79666 | NW_004516547.1 | scaffold1312 | 79666                   | GG                              | AA                 | AA               | INTERGENIC      |               |                    |                    |
| SNP_92510_A_79682 | NW_004516547.1 | scaffold1312 | 79682                   | GG                              | AA                 | AA               | INTERGENIC      |               |                    |                    |
| SNP_92511_A_79698 | NW_004516547.1 | scaffold1312 | 79698                   | CC                              | AA                 | AA               | INTERGENIC      |               |                    |                    |
| SNP_92512_A_79733 | NW_004516547.1 | scaffold1312 | 79733                   | CC                              | AA                 | AA               | INTERGENIC      |               |                    |                    |
| SNP_92513_A_79764 | NW_004516547.1 | scaffold1312 | 79764                   | CC                              | TT                 | TT               | INTERGENIC      |               |                    |                    |
| SNP_92514_A_79824 | NW_004516547.1 | scaffold1312 | 79824                   | AA                              | GG                 | GG               | INTERGENIC      |               |                    |                    |

| SNPs IDs          | Chromosome IDs | Chromosomes  | Physical positions (bp) | CDC Frontier (Reference genome) | (Pusa 1103 & HPNB) | (ILWC 46 & LPNB) | Sequence genome | Components of | Gene accession IDs | Putative functions |
|-------------------|----------------|--------------|-------------------------|---------------------------------|--------------------|------------------|-----------------|---------------|--------------------|--------------------|
| SNP_92515_A_79842 | NW_004516547.1 | scaffold1312 | 79842                   | GG                              | AA                 | AA               | INTERGENIC      |               |                    |                    |
| SNP_92516_A_79901 | NW_004516547.1 | scaffold1312 | 79901                   | CC                              | TT                 | TT               | INTERGENIC      |               |                    |                    |
| SNP_92517_A_79959 | NW_004516547.1 | scaffold1312 | 79959                   | TT                              | CC                 | CC               | INTERGENIC      |               |                    |                    |
| SNP_92518_A_80007 | NW_004516547.1 | scaffold1312 | 80007                   | CC                              | TT                 | TT               | INTERGENIC      |               |                    |                    |
| SNP_92520_A_80061 | NW_004516547.1 | scaffold1312 | 80061                   | TT                              | GG                 | GG               | INTERGENIC      |               |                    |                    |
| SNP_92521_A_80079 | NW_004516547.1 | scaffold1312 | 80079                   | TT                              | AA                 | AA               | INTERGENIC      |               |                    |                    |
| SNP_92522_A_80259 | NW_004516547.1 | scaffold1312 | 80259                   | CC                              | AA                 | AA               | INTERGENIC      |               |                    |                    |
| SNP_92523_A_80287 | NW_004516547.1 | scaffold1312 | 80287                   | AA                              | CC                 | CC               | INTERGENIC      |               |                    |                    |
| SNP_92524_A_80350 | NW_004516547.1 | scaffold1312 | 80350                   | CC                              | TT                 | TT               | INTERGENIC      |               |                    |                    |
| SNP_92525_A_80372 | NW_004516547.1 | scaffold1312 | 80372                   | GG                              | AA                 | AA               | INTERGENIC      |               |                    |                    |
| SNP_92526_A_80394 | NW_004516547.1 | scaffold1312 | 80394                   | GG                              | AA                 | AA               | INTERGENIC      |               |                    |                    |
| SNP_92527_A_80499 | NW_004516547.1 | scaffold1312 | 80499                   | AA                              | TT                 | TT               | INTERGENIC      |               |                    |                    |
| SNP_92529_A_80593 | NW_004516547.1 | scaffold1312 | 80593                   | GG                              | AA                 | AA               | INTERGENIC      |               |                    |                    |
| SNP_92530_A_80716 | NW_004516547.1 | scaffold1312 | 80716                   | AA                              | GG                 | GG               | INTERGENIC      |               |                    |                    |
| SNP_92531_A_80833 | NW_004516547.1 | scaffold1312 | 80833                   | GG                              | AA                 | AA               | INTERGENIC      |               |                    |                    |
| SNP_92532_A_80955 | NW_004516547.1 | scaffold1312 | 80955                   | TT                              | CC                 | CC               | INTERGENIC      |               |                    |                    |
| SNP_92533_A_81003 | NW_004516547.1 | scaffold1312 | 81003                   | CC                              | TT                 | TT               | INTERGENIC      |               |                    |                    |
| SNP_92534_A_81067 | NW_004516547.1 | scaffold1312 | 81067                   | AA                              | CC                 | CC               | INTERGENIC      |               |                    |                    |
| SNP_92535_A_81081 | NW_004516547.1 | scaffold1312 | 81081                   | TT                              | CC                 | CC               | INTERGENIC      |               |                    |                    |
| SNP_92537_A_81389 | NW_004516547.1 | scaffold1312 | 81389                   | TT                              | GG                 | GG               | INTERGENIC      |               |                    |                    |
| SNP_92538_A_81450 | NW_004516547.1 | scaffold1312 | 81450                   | AA                              | GG                 | GG               | INTERGENIC      |               |                    |                    |
| SNP_92539_A_81454 | NW_004516547.1 | scaffold1312 | 81454                   | CC                              | TT                 | TT               | INTERGENIC      |               |                    |                    |



| SNPs IDs          | Chromosome IDs | Chromosomes  | Physical positions (bp) | CDC Frontier (Reference genome) | (Pusa 1103 & HPNB) | (ILWC 46 & LPNB) | Sequence genome | Components of | Gene accession IDs | Putative functions |
|-------------------|----------------|--------------|-------------------------|---------------------------------|--------------------|------------------|-----------------|---------------|--------------------|--------------------|
| SNP_92540_A_81469 | NW_004516547.1 | scaffold1312 | 81469                   | TT                              | AA                 | AA               | INTERGENIC      |               |                    |                    |
| SNP_92541_A_81590 | NW_004516547.1 | scaffold1312 | 81590                   | TT                              | CC                 | CC               | INTERGENIC      |               |                    |                    |
| SNP_92542_A_81727 | NW_004516547.1 | scaffold1312 | 81727                   | AA                              | GG                 | GG               | INTERGENIC      |               |                    |                    |
| SNP_92543_A_81751 | NW_004516547.1 | scaffold1312 | 81751                   | TT                              | CC                 | CC               | INTERGENIC      |               |                    |                    |
| SNP_92544_A_81898 | NW_004516547.1 | scaffold1312 | 81898                   | AA                              | GG                 | GG               | INTERGENIC      |               |                    |                    |
| SNP_92545_A_81979 | NW_004516547.1 | scaffold1312 | 81979                   | GG                              | TT                 | TT               | INTERGENIC      |               |                    |                    |
| SNP_92546_A_82002 | NW_004516547.1 | scaffold1312 | 82002                   | GG                              | AA                 | AA               | INTERGENIC      |               |                    |                    |
| SNP_92547_A_82003 | NW_004516547.1 | scaffold1312 | 82003                   | AA                              | GG                 | GG               | INTERGENIC      |               |                    |                    |
| SNP_92548_A_82188 | NW_004516547.1 | scaffold1312 | 82188                   | GG                              | AA                 | AA               | INTERGENIC      |               |                    |                    |
| SNP_92549_A_82276 | NW_004516547.1 | scaffold1312 | 82276                   | TT                              | CC                 | CC               | INTERGENIC      |               |                    |                    |
| SNP_92550_A_82296 | NW_004516547.1 | scaffold1312 | 82296                   | CC                              | TT                 | TT               | INTERGENIC      |               |                    |                    |
| SNP_92552_A_82356 | NW_004516547.1 | scaffold1312 | 82356                   | TT                              | CC                 | CC               | INTERGENIC      |               |                    |                    |
| SNP_92553_A_82369 | NW_004516547.1 | scaffold1312 | 82369                   | GG                              | AA                 | AA               | INTERGENIC      |               |                    |                    |
| SNP_92554_A_82416 | NW_004516547.1 | scaffold1312 | 82416                   | TT                              | AA                 | AA               | INTERGENIC      |               |                    |                    |
| SNP_92555_A_82524 | NW_004516547.1 | scaffold1312 | 82524                   | AA                              | GG                 | GG               | INTERGENIC      |               |                    |                    |
| SNP_92556_A_82525 | NW_004516547.1 | scaffold1312 | 82525                   | AA                              | CC                 | CC               | INTERGENIC      |               |                    |                    |
| SNP_92557_A_82588 | NW_004516547.1 | scaffold1312 | 82588                   | CC                              | GG                 | GG               | INTERGENIC      |               |                    |                    |
| SNP_92558_A_82616 | NW_004516547.1 | scaffold1312 | 82616                   | TT                              | CC                 | CC               | INTERGENIC      |               |                    |                    |
| SNP_92559_A_82627 | NW_004516547.1 | scaffold1312 | 82627                   | CC                              | TT                 | TT               | INTERGENIC      |               |                    |                    |
| SNP_92560_A_82637 | NW_004516547.1 | scaffold1312 | 82637                   | AA                              | TT                 | TT               | INTERGENIC      |               |                    |                    |
| SNP_92561_A_82769 | NW_004516547.1 | scaffold1312 | 82769                   | AA                              | TT                 | TT               | INTERGENIC      |               |                    |                    |
| SNP_92562_A_82845 | NW_004516547.1 | scaffold1312 | 82845                   | GG                              | AA                 | AA               | INTERGENIC      |               |                    |                    |

| SNPs IDs          | Chromosome IDs | Chromosomes  | Physical positions (bp) | CDC Frontier (Reference genome) | (Pusa 1103 & HPNB) | (ILWC 46 & LPNB) | Sequence genome | Components of | Gene accession IDs | Putative functions |
|-------------------|----------------|--------------|-------------------------|---------------------------------|--------------------|------------------|-----------------|---------------|--------------------|--------------------|
| SNP_92563_A_82959 | NW_004516547.1 | scaffold1312 | 82959                   | CC                              | AA                 | AA               | INTERGENIC      |               |                    |                    |
| SNP_92564_A_83001 | NW_004516547.1 | scaffold1312 | 83001                   | AA                              | GG                 | GG               | INTERGENIC      |               |                    |                    |
| SNP_92565_A_83177 | NW_004516547.1 | scaffold1312 | 83177                   | GG                              | AA                 | AA               | INTERGENIC      |               |                    |                    |
| SNP_92567_A_83247 | NW_004516547.1 | scaffold1312 | 83247                   | CC                              | TT                 | TT               | INTERGENIC      |               |                    |                    |
| SNP_92568_A_83302 | NW_004516547.1 | scaffold1312 | 83302                   | TT                              | CC                 | CC               | INTERGENIC      |               |                    |                    |
| SNP_92569_A_83376 | NW_004516547.1 | scaffold1312 | 83376                   | CC                              | GG                 | GG               | INTERGENIC      |               |                    |                    |
| SNP_92570_A_83429 | NW_004516547.1 | scaffold1312 | 83429                   | CC                              | GG                 | GG               | INTERGENIC      |               |                    |                    |
| SNP_92571_A_83443 | NW_004516547.1 | scaffold1312 | 83443                   | CC                              | TT                 | TT               | INTERGENIC      |               |                    |                    |
| SNP_92572_A_83449 | NW_004516547.1 | scaffold1312 | 83449                   | GG                              | AA                 | AA               | INTERGENIC      |               |                    |                    |
| SNP_92573_A_83462 | NW_004516547.1 | scaffold1312 | 83462                   | TT                              | CC                 | CC               | INTERGENIC      |               |                    |                    |
| SNP_92574_A_83463 | NW_004516547.1 | scaffold1312 | 83463                   | CC                              | TT                 | TT               | INTERGENIC      |               |                    |                    |
| SNP_92575_A_83625 | NW_004516547.1 | scaffold1312 | 83625                   | TT                              | CC                 | CC               | INTERGENIC      |               |                    |                    |
| SNP_92576_A_83633 | NW_004516547.1 | scaffold1312 | 83633                   | CC                              | AA                 | AA               | INTERGENIC      |               |                    |                    |
| SNP_92577_A_86278 | NW_004516547.1 | scaffold1312 | 86278                   | GG                              | AA                 | AA               | INTERGENIC      |               |                    |                    |
| SNP_92578_A_86291 | NW_004516547.1 | scaffold1312 | 86291                   | GG                              | TT                 | TT               | INTERGENIC      |               |                    |                    |
| SNP_92579_A_86353 | NW_004516547.1 | scaffold1312 | 86353                   | AA                              | TT                 | TT               | INTERGENIC      |               |                    |                    |
| SNP_92580_A_86363 | NW_004516547.1 | scaffold1312 | 86363                   | AA                              | GG                 | GG               | INTERGENIC      |               |                    |                    |
| SNP_92581_A_86383 | NW_004516547.1 | scaffold1312 | 86383                   | GG                              | AA                 | AA               | INTERGENIC      |               |                    |                    |
| SNP_92582_A_86432 | NW_004516547.1 | scaffold1312 | 86432                   | AA                              | GG                 | GG               | INTERGENIC      |               |                    |                    |
| SNP_92583_A_86525 | NW_004516547.1 | scaffold1312 | 86525                   | AA                              | GG                 | GG               | INTERGENIC      |               |                    |                    |
| SNP_92584_A_86738 | NW_004516547.1 | scaffold1312 | 86738                   | AA                              | TT                 | TT               | INTERGENIC      |               |                    |                    |
| SNP_92585_A_86772 | NW_004516547.1 | scaffold1312 | 86772                   | GG                              | CC                 | CC               | INTERGENIC      |               |                    |                    |

| SNPs IDs          | Chromosome IDs | Chromosomes  | Physical positions (bp) | CDC Frontier (Reference genome) | (Pusa 1103 & HPNB) | (ILWC 46 & LPNB) | Sequence genome | Components of | Gene accession IDs | Putative functions |
|-------------------|----------------|--------------|-------------------------|---------------------------------|--------------------|------------------|-----------------|---------------|--------------------|--------------------|
| SNP_92586_A_86834 | NW_004516547.1 | scaffold1312 | 86834                   | CC                              | TT                 | TT               | INTERGENIC      |               |                    |                    |
| SNP_92587_A_86843 | NW_004516547.1 | scaffold1312 | 86843                   | GG                              | AA                 | AA               | INTERGENIC      |               |                    |                    |
| SNP_92588_A_86974 | NW_004516547.1 | scaffold1312 | 86974                   | GG                              | TT                 | TT               | INTERGENIC      |               |                    |                    |
| SNP_92589_A_87071 | NW_004516547.1 | scaffold1312 | 87071                   | TT                              | GG                 | GG               | INTERGENIC      |               |                    |                    |
| SNP_92590_A_87148 | NW_004516547.1 | scaffold1312 | 87148                   | GG                              | TT                 | TT               | INTERGENIC      |               |                    |                    |
| SNP_92591_A_87208 | NW_004516547.1 | scaffold1312 | 87208                   | AA                              | CC                 | CC               | INTERGENIC      |               |                    |                    |
| SNP_92592_A_87216 | NW_004516547.1 | scaffold1312 | 87216                   | TT                              | CC                 | CC               | INTERGENIC      |               |                    |                    |
| SNP_92593_A_87401 | NW_004516547.1 | scaffold1312 | 87401                   | TT                              | AA                 | AA               | INTERGENIC      |               |                    |                    |
| SNP_92594_A_87420 | NW_004516547.1 | scaffold1312 | 87420                   | TT                              | CC                 | CC               | INTERGENIC      |               |                    |                    |
| SNP_92595_A_87451 | NW_004516547.1 | scaffold1312 | 87451                   | AA                              | GG                 | GG               | INTERGENIC      |               |                    |                    |
| SNP_92596_A_87477 | NW_004516547.1 | scaffold1312 | 87477                   | CC                              | TT                 | TT               | INTERGENIC      |               |                    |                    |
| SNP_92597_A_87550 | NW_004516547.1 | scaffold1312 | 87550                   | TT                              | AA                 | AA               | INTERGENIC      |               |                    |                    |
| SNP_92598_A_87645 | NW_004516547.1 | scaffold1312 | 87645                   | GG                              | AA                 | AA               | INTERGENIC      |               |                    |                    |
| SNP_92599_A_87750 | NW_004516547.1 | scaffold1312 | 87750                   | AA                              | GG                 | GG               | INTERGENIC      |               |                    |                    |
| SNP_92600_A_87752 | NW_004516547.1 | scaffold1312 | 87752                   | GG                              | CC                 | CC               | INTERGENIC      |               |                    |                    |
| SNP_92601_A_87807 | NW_004516547.1 | scaffold1312 | 87807                   | AA                              | GG                 | GG               | INTERGENIC      |               |                    |                    |
| SNP_92602_A_87815 | NW_004516547.1 | scaffold1312 | 87815                   | GG                              | AA                 | AA               | INTERGENIC      |               |                    |                    |
| SNP_92603_A_87845 | NW_004516547.1 | scaffold1312 | 87845                   | GG                              | TT                 | TT               | INTERGENIC      |               |                    |                    |
| SNP_92604_A_87935 | NW_004516547.1 | scaffold1312 | 87935                   | CC                              | TT                 | TT               | INTERGENIC      |               |                    |                    |
| SNP_92605_A_87953 | NW_004516547.1 | scaffold1312 | 87953                   | CC                              | AA                 | AA               | INTERGENIC      |               |                    |                    |
| SNP_92606_A_88101 | NW_004516547.1 | scaffold1312 | 88101                   | CC                              | GG                 | GG               | INTERGENIC      |               |                    |                    |
| SNP_92607_A_88605 | NW_004516547.1 | scaffold1312 | 88605                   | GG                              | AA                 | AA               | INTERGENIC      |               |                    |                    |

| SNPs IDs          | Chromosome IDs | Chromosomes  | Physical positions (bp) | CDC Frontier (Reference genome) | (Pusa 1103 & HPNB) | (ILWC 46 & LPNB) | Sequence genome | Components of | Gene accession IDs | Putative functions |
|-------------------|----------------|--------------|-------------------------|---------------------------------|--------------------|------------------|-----------------|---------------|--------------------|--------------------|
| SNP_92608_A_88809 | NW_004516547.1 | scaffold1312 | 88809                   | GG                              | TT                 | TT               | INTERGENIC      |               |                    |                    |
| SNP_92609_A_88931 | NW_004516547.1 | scaffold1312 | 88931                   | TT                              | AA                 | AA               | INTERGENIC      |               |                    |                    |
| SNP_92610_A_88944 | NW_004516547.1 | scaffold1312 | 88944                   | CC                              | TT                 | TT               | INTERGENIC      |               |                    |                    |
| SNP_92611_A_89201 | NW_004516547.1 | scaffold1312 | 89201                   | AA                              | CC                 | CC               | INTERGENIC      |               |                    |                    |
| SNP_92612_A_89333 | NW_004516547.1 | scaffold1312 | 89333                   | AA                              | GG                 | GG               | INTERGENIC      |               |                    |                    |
| SNP_92613_A_89728 | NW_004516547.1 | scaffold1312 | 89728                   | GG                              | TT                 | TT               | INTERGENIC      |               |                    |                    |
| SNP_92615_A_89847 | NW_004516547.1 | scaffold1312 | 89847                   | CC                              | AA                 | AA               | INTERGENIC      |               |                    |                    |
| SNP_92616_A_89910 | NW_004516547.1 | scaffold1312 | 89910                   | AA                              | GG                 | GG               | INTERGENIC      |               |                    |                    |
| SNP_92617_A_90078 | NW_004516547.1 | scaffold1312 | 90078                   | TT                              | CC                 | CC               | INTERGENIC      |               |                    |                    |
| SNP_92618_A_92868 | NW_004516547.1 | scaffold1312 | 92868                   | TT                              | CC                 | CC               | INTERGENIC      |               |                    |                    |
| SNP_92619_A_94554 | NW_004516547.1 | scaffold1312 | 94554                   | GG                              | TT                 | TT               | INTERGENIC      |               |                    |                    |
| SNP_92620_A_95744 | NW_004516547.1 | scaffold1312 | 95744                   | AA                              | GG                 | GG               | INTERGENIC      |               |                    |                    |
| SNP_92621_A_95843 | NW_004516547.1 | scaffold1312 | 95843                   | CC                              | TT                 | TT               | INTERGENIC      |               |                    |                    |
| SNP_92622_A_95881 | NW_004516547.1 | scaffold1312 | 95881                   | GG                              | TT                 | TT               | INTERGENIC      |               |                    |                    |
| SNP_92624_A_95925 | NW_004516547.1 | scaffold1312 | 95925                   | TT                              | AA                 | AA               | INTERGENIC      |               |                    |                    |
| SNP_92625_A_95989 | NW_004516547.1 | scaffold1312 | 95989                   | AA                              | GG                 | GG               | INTERGENIC      |               |                    |                    |
| SNP_92626_A_96428 | NW_004516547.1 | scaffold1312 | 96428                   | GG                              | CC                 | CC               | INTERGENIC      |               |                    |                    |
| SNP_92627_A_96434 | NW_004516547.1 | scaffold1312 | 96434                   | GG                              | TT                 | TT               | INTERGENIC      |               |                    |                    |
| SNP_92628_A_96804 | NW_004516547.1 | scaffold1312 | 96804                   | TT                              | AA                 | AA               | INTERGENIC      |               |                    |                    |
| SNP_92629_A_1402  | NW_004516548.1 | scaffold1313 | 1402                    | TT                              | CC                 | CC               | INTERGENIC      |               |                    |                    |
| SNP_92630_A_1774  | NW_004516548.1 | scaffold1313 | 1774                    | AA                              | GG                 | GG               | INTERGENIC      |               |                    |                    |
| SNP_92631_A_1792  | NW_004516548.1 | scaffold1313 | 1792                    | AA                              | TT                 | TT               | INTERGENIC      |               |                    |                    |

| SNPs IDs           | Chromosome IDs | Chromosomes  | Physical positions (bp) | CDC Frontier (Reference genome) | (Pusa 1103 & HPNB) | (ILWC 46 & LPNB) | Sequence genome | Components of | Gene accession IDs | Putative functions |
|--------------------|----------------|--------------|-------------------------|---------------------------------|--------------------|------------------|-----------------|---------------|--------------------|--------------------|
| SNP_92632_A_43664  | NW_004516548.1 | scaffold1313 | 43664                   | CC                              | AA                 | AA               | INTERGENIC      |               |                    |                    |
| SNP_92633_A_47165  | NW_004516548.1 | scaffold1313 | 47165                   | TT                              | CC                 | CC               | INTERGENIC      |               |                    |                    |
| SNP_92634_A_59187  | NW_004516548.1 | scaffold1313 | 59187                   | TT                              | AA                 | AA               | INTERGENIC      |               |                    |                    |
| SNP_92636_A_102564 | NW_004516548.1 | scaffold1313 | 102564                  | AA                              | GG                 | GG               | INTERGENIC      |               |                    |                    |
| SNP_92637_A_103240 | NW_004516548.1 | scaffold1313 | 103240                  | TT                              | CC                 | CC               | INTERGENIC      |               |                    |                    |
| SNP_92638_A_103650 | NW_004516548.1 | scaffold1313 | 103650                  | TT                              | AA                 | AA               | INTERGENIC      |               |                    |                    |
| SNP_92639_A_103720 | NW_004516548.1 | scaffold1313 | 103720                  | AA                              | GG                 | GG               | INTERGENIC      |               |                    |                    |
| SNP_92640_A_117825 | NW_004516548.1 | scaffold1313 | 117825                  | AA                              | GG                 | GG               | INTERGENIC      |               |                    |                    |
| SNP_92641_A_117826 | NW_004516548.1 | scaffold1313 | 117826                  | TT                              | CC                 | CC               | INTERGENIC      |               |                    |                    |
| SNP_92642_A_117884 | NW_004516548.1 | scaffold1313 | 117884                  | AA                              | GG                 | GG               | INTERGENIC      |               |                    |                    |
| SNP_92643_A_117934 | NW_004516548.1 | scaffold1313 | 117934                  | TT                              | CC                 | CC               | INTERGENIC      |               |                    |                    |
| SNP_92644_A_117941 | NW_004516548.1 | scaffold1313 | 117941                  | AA                              | GG                 | GG               | INTERGENIC      |               |                    |                    |
| SNP_92645_A_117968 | NW_004516548.1 | scaffold1313 | 117968                  | CC                              | TT                 | TT               | INTERGENIC      |               |                    |                    |
| SNP_92646_A_117977 | NW_004516548.1 | scaffold1313 | 117977                  | CC                              | AA                 | AA               | INTERGENIC      |               |                    |                    |
| SNP_92647_A_120068 | NW_004516548.1 | scaffold1313 | 120068                  | CC                              | TT                 | TT               | INTERGENIC      |               |                    |                    |
| SNP_92648_A_120069 | NW_004516548.1 | scaffold1313 | 120069                  | AA                              | CC                 | CC               | INTERGENIC      |               |                    |                    |
| SNP_92649_A_120164 | NW_004516548.1 | scaffold1313 | 120164                  | TT                              | CC                 | CC               | INTERGENIC      |               |                    |                    |
| SNP_92650_A_120408 | NW_004516548.1 | scaffold1313 | 120408                  | AA                              | GG                 | GG               | INTERGENIC      |               |                    |                    |
| SNP_92651_A_120438 | NW_004516548.1 | scaffold1313 | 120438                  | TT                              | GG                 | GG               | INTERGENIC      |               |                    |                    |
| SNP_92652_A_120453 | NW_004516548.1 | scaffold1313 | 120453                  | TT                              | CC                 | CC               | INTERGENIC      |               |                    |                    |
| SNP_92653_A_123889 | NW_004516548.1 | scaffold1313 | 123889                  | AA                              | GG                 | GG               | INTERGENIC      |               |                    |                    |
| SNP_92654_A_132461 | NW_004516548.1 | scaffold1313 | 132461                  | TT                              | AA                 | AA               | URR             | 101496954     | Unknown function   |                    |

| SNPs IDs           | Chromosome IDs | Chromosomes  | Physical positions (bp) | CDC Frontier genome (Reference genome) | (Pusa 1103 & HPNB) | (ILWC 46 & LPNB) | Sequence Components of genome | Gene accession IDs | Putative functions |
|--------------------|----------------|--------------|-------------------------|----------------------------------------|--------------------|------------------|-------------------------------|--------------------|--------------------|
| SNP_92655_A_132556 | NW_004516548.1 | scaffold1313 | 132556                  | AA                                     | CC                 | CC               | URR                           | 101496954          | Unknown function   |
| SNP_92656_A_132870 | NW_004516548.1 | scaffold1313 | 132870                  | AA                                     | TT                 | TT               | URR                           | 101496954          | Unknown function   |
| SNP_92657_A_132874 | NW_004516548.1 | scaffold1313 | 132874                  | TT                                     | CC                 | CC               | URR                           | 101496954          | Unknown function   |
| SNP_92658_A_133023 | NW_004516548.1 | scaffold1313 | 133023                  | TT                                     | CC                 | CC               | URR                           | 101496954          | Unknown function   |
| SNP_92659_A_133549 | NW_004516548.1 | scaffold1313 | 133549                  | TT                                     | GG                 | GG               | URR                           | 101496954          | Unknown function   |
| SNP_92660_A_133556 | NW_004516548.1 | scaffold1313 | 133556                  | TT                                     | CC                 | CC               | URR                           | 101496954          | Unknown function   |
| SNP_92661_A_133561 | NW_004516548.1 | scaffold1313 | 133561                  | GG                                     | CC                 | CC               | URR                           | 101496954          | Unknown function   |
| SNP_92662_A_133562 | NW_004516548.1 | scaffold1313 | 133562                  | AA                                     | CC                 | CC               | URR                           | 101496954          | Unknown function   |
| SNP_92663_A_133746 | NW_004516548.1 | scaffold1313 | 133746                  | TT                                     | CC                 | CC               | URR                           | 101496954          | Unknown function   |
| SNP_92664_A_133935 | NW_004516548.1 | scaffold1313 | 133935                  | TT                                     | CC                 | CC               | URR                           | 101496954          | Unknown function   |
| SNP_92665_A_141532 | NW_004516548.1 | scaffold1313 | 141532                  | GG                                     | CC                 | CC               | INTERGENIC                    |                    |                    |
| SNP_92666_A_151861 | NW_004516548.1 | scaffold1313 | 151861                  | GG                                     | CC                 | CC               | INTERGENIC                    |                    |                    |
| SNP_92668_A_157563 | NW_004516548.1 | scaffold1313 | 157563                  | TT                                     | CC                 | CC               | INTRON                        | id211136           | Unknown function   |
| SNP_92669_A_157565 | NW_004516548.1 | scaffold1313 | 157565                  | TT                                     | AA                 | AA               | INTRON                        | id211136           | Unknown function   |
| SNP_92670_A_165018 | NW_004516548.1 | scaffold1313 | 165018                  | GG                                     | TT                 | TT               | INTERGENIC                    |                    |                    |
| SNP_92671_A_165273 | NW_004516548.1 | scaffold1313 | 165273                  | TT                                     | CC                 | CC               | INTERGENIC                    |                    |                    |
| SNP_92672_A_167243 | NW_004516548.1 | scaffold1313 | 167243                  | GG                                     | TT                 | TT               | INTERGENIC                    |                    |                    |
| SNP_92673_A_167246 | NW_004516548.1 | scaffold1313 | 167246                  | TT                                     | GG                 | GG               | INTERGENIC                    |                    |                    |
| SNP_92674_A_168044 | NW_004516548.1 | scaffold1313 | 168044                  | TT                                     | GG                 | GG               | INTERGENIC                    |                    |                    |
| SNP_92675_A_168716 | NW_004516548.1 | scaffold1313 | 168716                  | CC                                     | GG                 | GG               | INTERGENIC                    |                    |                    |
| SNP_92676_A_168790 | NW_004516548.1 | scaffold1313 | 168790                  | AA                                     | CC                 | CC               | INTERGENIC                    |                    |                    |
| SNP_92677_A_168890 | NW_004516548.1 | scaffold1313 | 168890                  | TT                                     | CC                 | CC               | INTERGENIC                    |                    |                    |

| SNPs IDs           | Chromosome IDs | Chromosomes  | Physical positions (bp) | CDC Frontier (Reference genome) | (Pusa 1103 & HPNB) | (ILWC 46 & LPNB) | Sequence genome | Components of | Gene accession IDs | Putative functions |
|--------------------|----------------|--------------|-------------------------|---------------------------------|--------------------|------------------|-----------------|---------------|--------------------|--------------------|
| SNP_92678_A_168899 | NW_004516548.1 | scaffold1313 | 168899                  | AA                              | CC                 | CC               | INTERGENIC      |               |                    |                    |
| SNP_92679_A_168928 | NW_004516548.1 | scaffold1313 | 168928                  | AA                              | CC                 | CC               | INTERGENIC      |               |                    |                    |
| SNP_92680_A_168938 | NW_004516548.1 | scaffold1313 | 168938                  | GG                              | TT                 | TT               | INTERGENIC      |               |                    |                    |
| SNP_92681_A_168950 | NW_004516548.1 | scaffold1313 | 168950                  | TT                              | CC                 | CC               | INTERGENIC      |               |                    |                    |
| SNP_92682_A_177766 | NW_004516548.1 | scaffold1313 | 177766                  | TT                              | GG                 | GG               | INTERGENIC      |               |                    |                    |
| SNP_92684_A_181818 | NW_004516548.1 | scaffold1313 | 181818                  | GG                              | TT                 | TT               | INTERGENIC      |               |                    |                    |
| SNP_92685_A_197934 | NW_004516548.1 | scaffold1313 | 197934                  | TT                              | CC                 | CC               | INTERGENIC      |               |                    |                    |
| SNP_92686_A_216636 | NW_004516548.1 | scaffold1313 | 216636                  | TT                              | GG                 | GG               | INTERGENIC      |               |                    |                    |
| SNP_92687_A_216670 | NW_004516548.1 | scaffold1313 | 216670                  | CC                              | AA                 | AA               | INTERGENIC      |               |                    |                    |
| SNP_92688_A_216965 | NW_004516548.1 | scaffold1313 | 216965                  | TT                              | GG                 | GG               | INTERGENIC      |               |                    |                    |
| SNP_92689_A_346    | NW_004516549.1 | scaffold1314 | 346                     | CC                              | GG                 | GG               | INTERGENIC      |               |                    |                    |
| SNP_92690_A_524    | NW_004516549.1 | scaffold1314 | 524                     | TT                              | GG                 | GG               | INTERGENIC      |               |                    |                    |
| SNP_92691_A_618    | NW_004516549.1 | scaffold1314 | 618                     | TT                              | CC                 | GG               | INTERGENIC      |               |                    |                    |
| SNP_92692_A_859    | NW_004516549.1 | scaffold1314 | 859                     | AA                              | TT                 | TT               | INTERGENIC      |               |                    |                    |
| SNP_92693_A_12984  | NW_004516550.1 | scaffold1315 | 12984                   | CC                              | AA                 | AA               | INTERGENIC      |               |                    |                    |
| SNP_92694_A_14487  | NW_004516550.1 | scaffold1315 | 14487                   | AA                              | GG                 | GG               | INTERGENIC      |               |                    |                    |
| SNP_92695_A_14779  | NW_004516550.1 | scaffold1315 | 14779                   | GG                              | AA                 | AA               | INTERGENIC      |               |                    |                    |
| SNP_92696_A_37528  | NW_004516550.1 | scaffold1315 | 37528                   | AA                              | GG                 | GG               | INTERGENIC      |               |                    |                    |
| SNP_92697_A_37534  | NW_004516550.1 | scaffold1315 | 37534                   | CC                              | AA                 | AA               | INTERGENIC      |               |                    |                    |
| SNP_92698_A_37536  | NW_004516550.1 | scaffold1315 | 37536                   | AA                              | GG                 | GG               | INTERGENIC      |               |                    |                    |
| SNP_92699_A_37593  | NW_004516550.1 | scaffold1315 | 37593                   | TT                              | CC                 | CC               | INTERGENIC      |               |                    |                    |
| SNP_92700_A_37817  | NW_004516550.1 | scaffold1315 | 37817                   | AA                              | GG                 | GG               | INTERGENIC      |               |                    |                    |

| SNPs IDs           | Chromosome IDs | Chromosomes  | Physical positions (bp) | CDC Frontier (Reference genome) | (Pusa 1103 & HPNB) | (ILWC 46 & LPNB) | Sequence genome | Components of | Gene accession IDs | Putative functions |
|--------------------|----------------|--------------|-------------------------|---------------------------------|--------------------|------------------|-----------------|---------------|--------------------|--------------------|
| SNP_92701_A_37942  | NW_004516550.1 | scaffold1315 | 37942                   | TT                              | AA                 | AA               | INTERGENIC      |               |                    |                    |
| SNP_92702_A_63767  | NW_004516550.1 | scaffold1315 | 63767                   | AA                              | TT                 | TT               | INTERGENIC      |               |                    |                    |
| SNP_92703_A_64121  | NW_004516550.1 | scaffold1315 | 64121                   | CC                              | TT                 | TT               | INTERGENIC      |               |                    |                    |
| SNP_92704_A_64194  | NW_004516550.1 | scaffold1315 | 64194                   | GG                              | AA                 | AA               | INTERGENIC      |               |                    |                    |
| SNP_92705_A_64227  | NW_004516550.1 | scaffold1315 | 64227                   | GG                              | AA                 | AA               | INTERGENIC      |               |                    |                    |
| SNP_92706_A_64623  | NW_004516550.1 | scaffold1315 | 64623                   | TT                              | CC                 | CC               | INTERGENIC      |               |                    |                    |
| SNP_92707_A_100921 | NW_004516550.1 | scaffold1315 | 100921                  | GG                              | TT                 | TT               | INTERGENIC      |               |                    |                    |
| SNP_92708_A_108277 | NW_004516550.1 | scaffold1315 | 108277                  | TT                              | CC                 | CC               | INTERGENIC      |               |                    |                    |
| SNP_92709_A_108974 | NW_004516550.1 | scaffold1315 | 108974                  | TT                              | CC                 | CC               | INTERGENIC      |               |                    |                    |
| SNP_92711_A_114979 | NW_004516550.1 | scaffold1315 | 114979                  | TT                              | CC                 | CC               | INTERGENIC      |               |                    |                    |
| SNP_92712_A_114983 | NW_004516550.1 | scaffold1315 | 114983                  | CC                              | TT                 | TT               | INTERGENIC      |               |                    |                    |
| SNP_92713_A_115048 | NW_004516550.1 | scaffold1315 | 115048                  | CC                              | TT                 | TT               | INTERGENIC      |               |                    |                    |
| SNP_92714_A_115057 | NW_004516550.1 | scaffold1315 | 115057                  | TT                              | CC                 | CC               | INTERGENIC      |               |                    |                    |
| SNP_92716_A_115284 | NW_004516550.1 | scaffold1315 | 115284                  | CC                              | TT                 | TT               | INTERGENIC      |               |                    |                    |
| SNP_92717_A_115305 | NW_004516550.1 | scaffold1315 | 115305                  | AA                              | TT                 | TT               | INTERGENIC      |               |                    |                    |
| SNP_92718_A_120490 | NW_004516550.1 | scaffold1315 | 120490                  | GG                              | AA                 | AA               | INTERGENIC      |               |                    |                    |
| SNP_92720_A_125228 | NW_004516550.1 | scaffold1315 | 125228                  | AA                              | GG                 | GG               | INTERGENIC      |               |                    |                    |
| SNP_92721_A_125243 | NW_004516550.1 | scaffold1315 | 125243                  | TT                              | CC                 | CC               | INTERGENIC      |               |                    |                    |
| SNP_92722_A_127137 | NW_004516550.1 | scaffold1315 | 127137                  | GG                              | TT                 | TT               | INTERGENIC      |               |                    |                    |
| SNP_92723_A_127144 | NW_004516550.1 | scaffold1315 | 127144                  | GG                              | AA                 | AA               | INTERGENIC      |               |                    |                    |
| SNP_92724_A_127678 | NW_004516550.1 | scaffold1315 | 127678                  | TT                              | GG                 | GG               | INTERGENIC      |               |                    |                    |
| SNP_92725_A_128415 | NW_004516550.1 | scaffold1315 | 128415                  | TT                              | GG                 | GG               | INTERGENIC      |               |                    |                    |



| SNPs IDs           | Chromosome IDs | Chromosomes  | Physical positions (bp) | CDC Frontier (Reference genome) | (Pusa 1103 & HPNB) | (ILWC 46 & LPNB) | Sequence Components of genome | Gene accession IDs | Putative functions                                                        |
|--------------------|----------------|--------------|-------------------------|---------------------------------|--------------------|------------------|-------------------------------|--------------------|---------------------------------------------------------------------------|
| SNP_92726_A_140570 | NW_004516550.1 | scaffold1315 | 140570                  | CC                              | TT                 | TT               | INTERGENIC                    |                    |                                                                           |
| SNP_92727_A_151243 | NW_004516550.1 | scaffold1315 | 151243                  | TT                              | GG                 | GG               | URR                           | 101497937          | pentatricopeptide repeat-containing protein At1g12300, mitochondrial-like |
| SNP_92728_A_160144 | NW_004516550.1 | scaffold1315 | 160144                  | CC                              | TT                 | TT               | DRR                           | 101498261          | pectinesterase/pectinesterase inhibitor-like                              |
| SNP_92729_A_163542 | NW_004516550.1 | scaffold1315 | 163542                  | CC                              | TT                 | TT               | URR                           | 101498261          | pectinesterase/pectinesterase inhibitor-like                              |
| SNP_92730_A_163574 | NW_004516550.1 | scaffold1315 | 163574                  | GG                              | TT                 | TT               | URR                           | 101498261          | pectinesterase/pectinesterase inhibitor-like                              |
| SNP_92731_A_163601 | NW_004516550.1 | scaffold1315 | 163601                  | CC                              | TT                 | TT               | URR                           | 101498261          | pectinesterase/pectinesterase inhibitor-like                              |
| SNP_92732_A_169265 | NW_004516550.1 | scaffold1315 | 169265                  | TT                              | CC                 | CC               | DRR                           | 101498595          | sugar carrier protein C-like                                              |
| SNP_92733_A_169354 | NW_004516550.1 | scaffold1315 | 169354                  | CC                              | TT                 | TT               | DRR                           | 101498595          | sugar carrier protein C-like                                              |
| SNP_92734_A_169467 | NW_004516550.1 | scaffold1315 | 169467                  | CC                              | AA                 | AA               | DRR                           | 101498595          | sugar carrier protein C-like                                              |
| SNP_92735_A_169468 | NW_004516550.1 | scaffold1315 | 169468                  | AA                              | TT                 | TT               | DRR                           | 101498595          | sugar carrier protein C-like                                              |
| SNP_92737_A_181360 | NW_004516550.1 | scaffold1315 | 181360                  | CC                              | TT                 | TT               | INTERGENIC                    |                    |                                                                           |
| SNP_92738_A_181811 | NW_004516550.1 | scaffold1315 | 181811                  | TT                              | AA                 | AA               | INTERGENIC                    |                    |                                                                           |
| SNP_92739_A_3852   | NW_004516551.1 | scaffold1316 | 3852                    | TT                              | CC                 | CC               | INTERGENIC                    |                    |                                                                           |
| SNP_92741_A_8009   | NW_004516551.1 | scaffold1316 | 8009                    | CC                              | TT                 | TT               | INTERGENIC                    |                    |                                                                           |
| SNP_92742_A_8402   | NW_004516551.1 | scaffold1316 | 8402                    | AA                              | TT                 | TT               | INTERGENIC                    |                    |                                                                           |
| SNP_92743_A_8686   | NW_004516551.1 | scaffold1316 | 8686                    | TT                              | CC                 | CC               | INTERGENIC                    |                    |                                                                           |
| SNP_92744_A_8972   | NW_004516551.1 | scaffold1316 | 8972                    | CC                              | TT                 | TT               | INTERGENIC                    |                    |                                                                           |
| SNP_92745_A_9928   | NW_004516551.1 | scaffold1316 | 9928                    | AA                              | GG                 | GG               | INTERGENIC                    |                    |                                                                           |
| SNP_92746_A_9992   | NW_004516551.1 | scaffold1316 | 9992                    | TT                              | CC                 | CC               | INTERGENIC                    |                    |                                                                           |
| SNP_92747_A_9995   | NW_004516551.1 | scaffold1316 | 9995                    | AA                              | GG                 | GG               | INTERGENIC                    |                    |                                                                           |
| SNP_92748_A_10268  | NW_004516551.1 | scaffold1316 | 10268                   | AA                              | TT                 | TT               | INTERGENIC                    |                    |                                                                           |
| SNP_92749_A_10484  | NW_004516551.1 | scaffold1316 | 10484                   | GG                              | AA                 | AA               | INTERGENIC                    |                    |                                                                           |

| SNPs IDs          | Chromosome IDs | Chromosomes  | Physical positions (bp) | CDC Frontier (Reference genome) | (Pusa 1103 & HPNB) | (ILWC 46 & LPNB) | Sequence Components of genome | Gene accession IDs | Putative functions                           |
|-------------------|----------------|--------------|-------------------------|---------------------------------|--------------------|------------------|-------------------------------|--------------------|----------------------------------------------|
| SNP_92750_A_10604 | NW_004516551.1 | scaffold1316 | 10604                   | TT                              | GG                 | GG               | INTERGENIC                    |                    |                                              |
| SNP_92751_A_10614 | NW_004516551.1 | scaffold1316 | 10614                   | AA                              | GG                 | GG               | INTERGENIC                    |                    |                                              |
| SNP_92752_A_11140 | NW_004516551.1 | scaffold1316 | 11140                   | AA                              | TT                 | TT               | INTERGENIC                    |                    |                                              |
| SNP_92753_A_12837 | NW_004516551.1 | scaffold1316 | 12837                   | CC                              | GG                 | GG               | INTERGENIC                    |                    |                                              |
| SNP_92754_A_12999 | NW_004516551.1 | scaffold1316 | 12999                   | AA                              | CC                 | CC               | INTERGENIC                    |                    |                                              |
| SNP_92756_A_10447 | NW_004516552.1 | scaffold1317 | 10447                   | AA                              | TT                 | TT               | INTERGENIC                    |                    |                                              |
| SNP_92757_A_11951 | NW_004516552.1 | scaffold1317 | 11951                   | AA                              | GG                 | GG               | INTERGENIC                    |                    |                                              |
| SNP_92758_A_20404 | NW_004516552.1 | scaffold1317 | 20404                   | AA                              | GG                 | GG               | INTERGENIC                    |                    |                                              |
| SNP_92759_A_20476 | NW_004516552.1 | scaffold1317 | 20476                   | AA                              | CC                 | CC               | INTERGENIC                    |                    |                                              |
| SNP_92760_A_44305 | NW_004516552.1 | scaffold1317 | 44305                   | TT                              | GG                 | GG               | INTRON                        | 101499867          | probable CCR4-associated factor 1 homolog 11 |
| SNP_92761_A_44373 | NW_004516552.1 | scaffold1317 | 44373                   | AA                              | GG                 | GG               | INTRON                        | 101499867          | probable CCR4-associated factor 1 homolog 11 |
| SNP_92762_A_44390 | NW_004516552.1 | scaffold1317 | 44390                   | GG                              | TT                 | TT               | INTRON                        | 101499867          | probable CCR4-associated factor 1 homolog 11 |
| SNP_92763_A_44523 | NW_004516552.1 | scaffold1317 | 44523                   | CC                              | TT                 | TT               | INTRON                        | 101499867          | probable CCR4-associated factor 1 homolog 11 |
| SNP_92764_A_44527 | NW_004516552.1 | scaffold1317 | 44527                   | GG                              | AA                 | AA               | INTRON                        | 101499867          | probable CCR4-associated factor 1 homolog 11 |
| SNP_92765_A_44575 | NW_004516552.1 | scaffold1317 | 44575                   | GG                              | AA                 | AA               | INTRON                        | 101499867          | probable CCR4-associated factor 1 homolog 11 |
| SNP_92766_A_44624 | NW_004516552.1 | scaffold1317 | 44624                   | GG                              | CC                 | CC               | INTRON                        | 101499867          | probable CCR4-associated factor 1 homolog 11 |
| SNP_92767_A_44668 | NW_004516552.1 | scaffold1317 | 44668                   | TT                              | CC                 | CC               | INTRON                        | 101499867          | probable CCR4-associated factor 1 homolog 11 |
| SNP_92768_A_44678 | NW_004516552.1 | scaffold1317 | 44678                   | AA                              | GG                 | GG               | INTRON                        | 101499867          | probable CCR4-associated factor 1 homolog 11 |
| SNP_92769_A_44748 | NW_004516552.1 | scaffold1317 | 44748                   | AA                              | GG                 | GG               | INTRON                        | 101499867          | probable CCR4-associated factor 1 homolog 11 |
| SNP_92770_A_44787 | NW_004516552.1 | scaffold1317 | 44787                   | AA                              | GG                 | GG               | INTRON                        | 101499867          | probable CCR4-associated factor 1 homolog 11 |
| SNP_92771_A_44802 | NW_004516552.1 | scaffold1317 | 44802                   | AA                              | GG                 | GG               | INTRON                        | 101499867          | probable CCR4-associated factor 1 homolog 11 |
| SNP_92772_A_44832 | NW_004516552.1 | scaffold1317 | 44832                   | TT                              | GG                 | GG               | INTRON                        | 101499867          | probable CCR4-associated factor 1 homolog 11 |

| SNPs IDs          | Chromosome IDs | Chromosomes  | Physical positions (bp) | CDC Frontier (Reference genome) | (Pusa 1103 & HPNB) | (ILWC 46 & LPNB) | Sequence Components of genome | Gene accession IDs | Putative functions                           |
|-------------------|----------------|--------------|-------------------------|---------------------------------|--------------------|------------------|-------------------------------|--------------------|----------------------------------------------|
| SNP_92773_A_44904 | NW_004516552.1 | scaffold1317 | 44904                   | TT                              | AA                 | AA               | INTRON                        | 101499867          | probable CCR4-associated factor 1 homolog 11 |
| SNP_92774_A_44951 | NW_004516552.1 | scaffold1317 | 44951                   | AA                              | GG                 | GG               | INTRON                        | 101499867          | probable CCR4-associated factor 1 homolog 11 |
| SNP_92775_A_44952 | NW_004516552.1 | scaffold1317 | 44952                   | CC                              | AA                 | AA               | INTRON                        | 101499867          | probable CCR4-associated factor 1 homolog 11 |
| SNP_92776_A_45067 | NW_004516552.1 | scaffold1317 | 45067                   | GG                              | CC                 | CC               | INTRON                        | 101499867          | probable CCR4-associated factor 1 homolog 11 |
| SNP_92777_A_45142 | NW_004516552.1 | scaffold1317 | 45142                   | GG                              | AA                 | AA               | INTRON                        | 101499867          | probable CCR4-associated factor 1 homolog 11 |
| SNP_92778_A_45223 | NW_004516552.1 | scaffold1317 | 45223                   | AA                              | GG                 | GG               | INTRON                        | 101499867          | probable CCR4-associated factor 1 homolog 11 |
| SNP_92779_A_45245 | NW_004516552.1 | scaffold1317 | 45245                   | GG                              | TT                 | TT               | INTRON                        | 101499867          | probable CCR4-associated factor 1 homolog 11 |
| SNP_92780_A_45261 | NW_004516552.1 | scaffold1317 | 45261                   | GG                              | CC                 | CC               | INTRON                        | 101499867          | probable CCR4-associated factor 1 homolog 11 |
| SNP_92781_A_45266 | NW_004516552.1 | scaffold1317 | 45266                   | GG                              | AA                 | AA               | INTRON                        | 101499867          | probable CCR4-associated factor 1 homolog 11 |
| SNP_92782_A_45283 | NW_004516552.1 | scaffold1317 | 45283                   | AA                              | CC                 | CC               | INTRON                        | 101499867          | probable CCR4-associated factor 1 homolog 11 |
| SNP_92783_A_45304 | NW_004516552.1 | scaffold1317 | 45304                   | AA                              | GG                 | GG               | INTRON                        | 101499867          | probable CCR4-associated factor 1 homolog 11 |
| SNP_92784_A_45416 | NW_004516552.1 | scaffold1317 | 45416                   | AA                              | GG                 | GG               | INTRON                        | 101499867          | probable CCR4-associated factor 1 homolog 11 |
| SNP_92785_A_45457 | NW_004516552.1 | scaffold1317 | 45457                   | TT                              | CC                 | CC               | INTRON                        | 101499867          | probable CCR4-associated factor 1 homolog 11 |
| SNP_92786_A_45561 | NW_004516552.1 | scaffold1317 | 45561                   | CC                              | TT                 | TT               | INTRON                        | 101499867          | probable CCR4-associated factor 1 homolog 11 |
| SNP_92787_A_46041 | NW_004516552.1 | scaffold1317 | 46041                   | TT                              | GG                 | GG               | INTRON                        | 101499867          | probable CCR4-associated factor 1 homolog 11 |
| SNP_92788_A_46237 | NW_004516552.1 | scaffold1317 | 46237                   | CC                              | TT                 | TT               | INTRON                        | 101499867          | probable CCR4-associated factor 1 homolog 11 |
| SNP_92790_A_46307 | NW_004516552.1 | scaffold1317 | 46307                   | CC                              | TT                 | TT               | INTRON                        | 101499867          | probable CCR4-associated factor 1 homolog 11 |
| SNP_92791_A_46417 | NW_004516552.1 | scaffold1317 | 46417                   | TT                              | GG                 | GG               | INTRON                        | 101499867          | probable CCR4-associated factor 1 homolog 11 |
| SNP_92792_A_46455 | NW_004516552.1 | scaffold1317 | 46455                   | CC                              | TT                 | TT               | INTRON                        | 101499867          | probable CCR4-associated factor 1 homolog 11 |
| SNP_92793_A_46483 | NW_004516552.1 | scaffold1317 | 46483                   | AA                              | CC                 | CC               | INTRON                        | 101499867          | probable CCR4-associated factor 1 homolog 11 |
| SNP_92794_A_46489 | NW_004516552.1 | scaffold1317 | 46489                   | GG                              | AA                 | AA               | INTRON                        | 101499867          | probable CCR4-associated factor 1 homolog 11 |
| SNP_92795_A_46550 | NW_004516552.1 | scaffold1317 | 46550                   | GG                              | TT                 | TT               | INTRON                        | 101499867          | probable CCR4-associated factor 1 homolog 11 |

| SNPs IDs          | Chromosome IDs | Chromosomes  | Physical positions (bp) | CDC Frontier (Reference genome) | (Pusa 1103 & HPNB) | (ILWC 46 & LPNB) | Sequence Components of genome | Gene accession IDs | Putative functions                           |
|-------------------|----------------|--------------|-------------------------|---------------------------------|--------------------|------------------|-------------------------------|--------------------|----------------------------------------------|
| SNP_92796_A_46551 | NW_004516552.1 | scaffold1317 | 46551                   | AA                              | GG                 | GG               | INTRON                        | 101499867          | probable CCR4-associated factor 1 homolog 11 |
| SNP_92797_A_46553 | NW_004516552.1 | scaffold1317 | 46553                   | TT                              | AA                 | AA               | INTRON                        | 101499867          | probable CCR4-associated factor 1 homolog 11 |
| SNP_92798_A_46567 | NW_004516552.1 | scaffold1317 | 46567                   | GG                              | AA                 | AA               | INTRON                        | 101499867          | probable CCR4-associated factor 1 homolog 11 |
| SNP_92799_A_46621 | NW_004516552.1 | scaffold1317 | 46621                   | TT                              | AA                 | AA               | INTRON                        | 101499867          | probable CCR4-associated factor 1 homolog 11 |
| SNP_92800_A_59382 | NW_004516552.1 | scaffold1317 | 59382                   | TT                              | CC                 | CC               | INTRON                        | 101499867          | probable CCR4-associated factor 1 homolog 11 |
| SNP_92801_A_59708 | NW_004516552.1 | scaffold1317 | 59708                   | AA                              | GG                 | GG               | INTRON                        | 101499867          | probable CCR4-associated factor 1 homolog 11 |
| SNP_92803_A_59899 | NW_004516552.1 | scaffold1317 | 59899                   | AA                              | GG                 | GG               | INTRON                        | 101499867          | probable CCR4-associated factor 1 homolog 11 |
| SNP_92804_A_59928 | NW_004516552.1 | scaffold1317 | 59928                   | TT                              | CC                 | CC               | INTRON                        | 101499867          | probable CCR4-associated factor 1 homolog 11 |
| SNP_92805_A_63283 | NW_004516552.1 | scaffold1317 | 63283                   | GG                              | AA                 | AA               | INTRON                        | 101499867          | probable CCR4-associated factor 1 homolog 11 |
| SNP_92806_A_63289 | NW_004516552.1 | scaffold1317 | 63289                   | AA                              | GG                 | GG               | INTRON                        | 101499867          | probable CCR4-associated factor 1 homolog 11 |
| SNP_92807_A_63297 | NW_004516552.1 | scaffold1317 | 63297                   | AA                              | CC                 | CC               | INTRON                        | 101499867          | probable CCR4-associated factor 1 homolog 11 |
| SNP_92808_A_63316 | NW_004516552.1 | scaffold1317 | 63316                   | CC                              | GG                 | GG               | INTRON                        | 101499867          | probable CCR4-associated factor 1 homolog 11 |
| SNP_92809_A_63335 | NW_004516552.1 | scaffold1317 | 63335                   | TT                              | CC                 | CC               | INTRON                        | 101499867          | probable CCR4-associated factor 1 homolog 11 |
| SNP_92810_A_63369 | NW_004516552.1 | scaffold1317 | 63369                   | TT                              | CC                 | CC               | INTRON                        | 101499867          | probable CCR4-associated factor 1 homolog 11 |
| SNP_92811_A_63406 | NW_004516552.1 | scaffold1317 | 63406                   | CC                              | TT                 | TT               | INTRON                        | 101499867          | probable CCR4-associated factor 1 homolog 11 |
| SNP_92812_A_63420 | NW_004516552.1 | scaffold1317 | 63420                   | CC                              | GG                 | GG               | INTRON                        | 101499867          | probable CCR4-associated factor 1 homolog 11 |
| SNP_92813_A_63454 | NW_004516552.1 | scaffold1317 | 63454                   | GG                              | CC                 | CC               | INTRON                        | 101499867          | probable CCR4-associated factor 1 homolog 11 |
| SNP_92814_A_63590 | NW_004516552.1 | scaffold1317 | 63590                   | CC                              | TT                 | TT               | INTRON                        | 101499867          | probable CCR4-associated factor 1 homolog 11 |
| SNP_92815_A_63593 | NW_004516552.1 | scaffold1317 | 63593                   | CC                              | TT                 | TT               | INTRON                        | 101499867          | probable CCR4-associated factor 1 homolog 11 |
| SNP_92816_A_63595 | NW_004516552.1 | scaffold1317 | 63595                   | CC                              | TT                 | TT               | INTRON                        | 101499867          | probable CCR4-associated factor 1 homolog 11 |
| SNP_92817_A_63603 | NW_004516552.1 | scaffold1317 | 63603                   | GG                              | AA                 | AA               | INTRON                        | 101499867          | probable CCR4-associated factor 1 homolog 11 |
| SNP_92818_A_63658 | NW_004516552.1 | scaffold1317 | 63658                   | TT                              | AA                 | AA               | INTRON                        | 101499867          | probable CCR4-associated factor 1 homolog 11 |

| SNPs IDs          | Chromosome IDs | Chromosomes  | Physical positions (bp) | CDC Frontier (Reference genome) | (Pusa 1103 & HPNB) | (ILWC 46 & LPNB) | Sequence Components of genome | Gene accession IDs | Putative functions                           |
|-------------------|----------------|--------------|-------------------------|---------------------------------|--------------------|------------------|-------------------------------|--------------------|----------------------------------------------|
| SNP_92820_A_63720 | NW_004516552.1 | scaffold1317 | 63720                   | TT                              | CC                 | CC               | INTRON                        | 101499867          | probable CCR4-associated factor 1 homolog 11 |
| SNP_92821_A_63814 | NW_004516552.1 | scaffold1317 | 63814                   | AA                              | CC                 | CC               | INTRON                        | 101499867          | probable CCR4-associated factor 1 homolog 11 |
| SNP_92822_A_63872 | NW_004516552.1 | scaffold1317 | 63872                   | CC                              | TT                 | TT               | INTRON                        | 101499867          | probable CCR4-associated factor 1 homolog 11 |
| SNP_92823_A_63901 | NW_004516552.1 | scaffold1317 | 63901                   | TT                              | CC                 | CC               | INTRON                        | 101499867          | probable CCR4-associated factor 1 homolog 11 |
| SNP_92824_A_66085 | NW_004516552.1 | scaffold1317 | 66085                   | TT                              | CC                 | CC               | NON_SYNONYMOUS_CODING         | 101499867          | probable CCR4-associated factor 1 homolog 11 |
| SNP_92825_A_66093 | NW_004516552.1 | scaffold1317 | 66093                   | AA                              | GG                 | GG               | SYNONYMOUS_CODING             | 101499867          | probable CCR4-associated factor 1 homolog 11 |
| SNP_92826_A_66599 | NW_004516552.1 | scaffold1317 | 66599                   | AA                              | GG                 | GG               | STOP_LOST                     | 101499867          | probable CCR4-associated factor 1 homolog 11 |
| SNP_92827_A_66704 | NW_004516552.1 | scaffold1317 | 66704                   | CC                              | AA                 | AA               | STOP_GAINED                   | 101499867          | probable CCR4-associated factor 1 homolog 11 |
| SNP_92828_A_66713 | NW_004516552.1 | scaffold1317 | 66713                   | GG                              | AA                 | AA               | SYNONYMOUS_CODING             | 101499867          | probable CCR4-associated factor 1 homolog 11 |
| SNP_92829_A_68072 | NW_004516552.1 | scaffold1317 | 68072                   | GG                              | CC                 | CC               | URR                           | 101499867          | probable CCR4-associated factor 1 homolog 11 |
| SNP_92830_A_69277 | NW_004516552.1 | scaffold1317 | 69277                   | AA                              | TT                 | TT               | INTERGENIC                    |                    |                                              |
| SNP_92832_A_69475 | NW_004516552.1 | scaffold1317 | 69475                   | CC                              | TT                 | TT               | INTERGENIC                    |                    |                                              |
| SNP_92833_A_69631 | NW_004516552.1 | scaffold1317 | 69631                   | AA                              | CC                 | CC               | INTERGENIC                    |                    |                                              |
| SNP_92834_A_72852 | NW_004516552.1 | scaffold1317 | 72852                   | AA                              | GG                 | GG               | INTERGENIC                    |                    |                                              |
| SNP_92835_A_73698 | NW_004516552.1 | scaffold1317 | 73698                   | GG                              | AA                 | AA               | INTERGENIC                    |                    |                                              |
| SNP_92836_A_425   | NW_004516554.1 | scaffold1320 | 425                     | TT                              | GG                 | GG               | INTERGENIC                    |                    |                                              |
| SNP_92837_A_454   | NW_004516554.1 | scaffold1320 | 454                     | TT                              | GG                 | GG               | INTERGENIC                    |                    |                                              |
| SNP_92838_A_660   | NW_004516554.1 | scaffold1320 | 660                     | AA                              | CC                 | CC               | INTERGENIC                    |                    |                                              |
| SNP_92839_A_1029  | NW_004516554.1 | scaffold1320 | 1029                    | AA                              | TT                 | TT               | INTERGENIC                    |                    |                                              |
| SNP_92840_A_1187  | NW_004516554.1 | scaffold1320 | 1187                    | AA                              | GG                 | GG               | INTERGENIC                    |                    |                                              |
| SNP_92841_A_17016 | NW_004516554.1 | scaffold1320 | 17016                   | TT                              | AA                 | AA               | INTERGENIC                    |                    |                                              |
| SNP_92842_A_17017 | NW_004516554.1 | scaffold1320 | 17017                   | TT                              | CC                 | CC               | INTERGENIC                    |                    |                                              |

| SNPs IDs          | Chromosome IDs | Chromosomes  | Physical positions (bp) | CDC Frontier (Reference genome) | (Pusa 1103 & HPNB) | (ILWC 46 & LPNB) | Sequence genome | Components of | Gene accession IDs | Putative functions |
|-------------------|----------------|--------------|-------------------------|---------------------------------|--------------------|------------------|-----------------|---------------|--------------------|--------------------|
| SNP_92843_A_17259 | NW_004516554.1 | scaffold1320 | 17259                   | GG                              | AA                 | AA               | INTERGENIC      |               |                    |                    |
| SNP_92844_A_27349 | NW_004516554.1 | scaffold1320 | 27349                   | GG                              | TT                 | TT               | INTERGENIC      |               |                    |                    |
| SNP_92845_A_2515  | NW_004516555.1 | scaffold1321 | 2515                    | AA                              | TT                 | TT               | INTERGENIC      |               |                    |                    |
| SNP_92846_A_913   | NW_004516556.1 | scaffold1322 | 913                     | TT                              | AA                 | AA               | INTERGENIC      |               |                    |                    |
| SNP_92847_A_8807  | NW_004516556.1 | scaffold1322 | 8807                    | TT                              | AA                 | AA               | INTERGENIC      |               |                    |                    |
| SNP_92848_A_9201  | NW_004516556.1 | scaffold1322 | 9201                    | GG                              | TT                 | TT               | INTERGENIC      |               |                    |                    |
| SNP_92849_A_9435  | NW_004516556.1 | scaffold1322 | 9435                    | TT                              | AA                 | AA               | INTERGENIC      |               |                    |                    |
| SNP_92850_A_9711  | NW_004516556.1 | scaffold1322 | 9711                    | TT                              | CC                 | CC               | INTERGENIC      |               |                    |                    |
| SNP_92852_A_9873  | NW_004516556.1 | scaffold1322 | 9873                    | TT                              | AA                 | AA               | INTERGENIC      |               |                    |                    |
| SNP_92853_A_9875  | NW_004516556.1 | scaffold1322 | 9875                    | CC                              | TT                 | TT               | INTERGENIC      |               |                    |                    |
| SNP_92854_A_9936  | NW_004516556.1 | scaffold1322 | 9936                    | TT                              | AA                 | AA               | INTERGENIC      |               |                    |                    |
| SNP_92855_A_9990  | NW_004516556.1 | scaffold1322 | 9990                    | TT                              | AA                 | AA               | INTERGENIC      |               |                    |                    |
| SNP_92856_A_6055  | NW_004516557.1 | scaffold1323 | 6055                    | AA                              | GG                 | GG               | INTERGENIC      |               |                    |                    |
| SNP_92857_A_6070  | NW_004516557.1 | scaffold1323 | 6070                    | TT                              | AA                 | AA               | INTERGENIC      |               |                    |                    |
| SNP_92858_A_6194  | NW_004516557.1 | scaffold1323 | 6194                    | GG                              | TT                 | TT               | INTERGENIC      |               |                    |                    |
| SNP_92859_A_6195  | NW_004516557.1 | scaffold1323 | 6195                    | GG                              | AA                 | AA               | INTERGENIC      |               |                    |                    |
| SNP_92860_A_6231  | NW_004516557.1 | scaffold1323 | 6231                    | CC                              | TT                 | TT               | INTERGENIC      |               |                    |                    |
| SNP_92861_A_6238  | NW_004516557.1 | scaffold1323 | 6238                    | CC                              | TT                 | TT               | INTERGENIC      |               |                    |                    |
| SNP_92862_A_6558  | NW_004516557.1 | scaffold1323 | 6558                    | AA                              | GG                 | GG               | INTERGENIC      |               |                    |                    |
| SNP_92864_A_7366  | NW_004516558.1 | scaffold1324 | 7366                    | AA                              | TT                 | TT               | INTERGENIC      |               |                    |                    |
| SNP_92865_A_7384  | NW_004516558.1 | scaffold1324 | 7384                    | TT                              | GG                 | GG               | INTERGENIC      |               |                    |                    |
| SNP_92866_A_7404  | NW_004516558.1 | scaffold1324 | 7404                    | GG                              | AA                 | AA               | INTERGENIC      |               |                    |                    |

| SNPs IDs         | Chromosome IDs | Chromosomes  | Physical positions (bp) | CDC Frontier (Reference genome) | (Pusa 1103 & HPNB) | (ILWC 46 & LPNB) | Sequence genome | Components of | Gene accession IDs | Putative functions |
|------------------|----------------|--------------|-------------------------|---------------------------------|--------------------|------------------|-----------------|---------------|--------------------|--------------------|
| SNP_92867_A_7409 | NW_004516558.1 | scaffold1324 | 7409                    | AA                              | CC                 | CC               | INTERGENIC      |               |                    |                    |
| SNP_92868_A_7437 | NW_004516558.1 | scaffold1324 | 7437                    | AA                              | GG                 | GG               | INTERGENIC      |               |                    |                    |
| SNP_92869_A_7623 | NW_004516558.1 | scaffold1324 | 7623                    | AA                              | CC                 | CC               | INTERGENIC      |               |                    |                    |
| SNP_92870_A_7924 | NW_004516558.1 | scaffold1324 | 7924                    | CC                              | TT                 | TT               | INTERGENIC      |               |                    |                    |
| SNP_92871_A_7966 | NW_004516558.1 | scaffold1324 | 7966                    | GG                              | TT                 | TT               | INTERGENIC      |               |                    |                    |
| SNP_92872_A_7982 | NW_004516558.1 | scaffold1324 | 7982                    | GG                              | AA                 | AA               | INTERGENIC      |               |                    |                    |
| SNP_92873_A_8025 | NW_004516558.1 | scaffold1324 | 8025                    | GG                              | AA                 | AA               | INTERGENIC      |               |                    |                    |
| SNP_92874_A_8044 | NW_004516558.1 | scaffold1324 | 8044                    | AA                              | GG                 | GG               | INTERGENIC      |               |                    |                    |
| SNP_92875_A_8085 | NW_004516558.1 | scaffold1324 | 8085                    | AA                              | CC                 | CC               | INTERGENIC      |               |                    |                    |
| SNP_92876_A_8088 | NW_004516558.1 | scaffold1324 | 8088                    | GG                              | TT                 | TT               | INTERGENIC      |               |                    |                    |
| SNP_92877_A_8141 | NW_004516558.1 | scaffold1324 | 8141                    | CC                              | TT                 | TT               | INTERGENIC      |               |                    |                    |
| SNP_92878_A_8147 | NW_004516558.1 | scaffold1324 | 8147                    | CC                              | TT                 | TT               | INTERGENIC      |               |                    |                    |
| SNP_92879_A_8163 | NW_004516558.1 | scaffold1324 | 8163                    | TT                              | CC                 | CC               | INTERGENIC      |               |                    |                    |
| SNP_92880_A_8178 | NW_004516558.1 | scaffold1324 | 8178                    | GG                              | TT                 | TT               | INTERGENIC      |               |                    |                    |
| SNP_92881_A_8192 | NW_004516558.1 | scaffold1324 | 8192                    | AA                              | TT                 | TT               | INTERGENIC      |               |                    |                    |
| SNP_92882_A_8195 | NW_004516558.1 | scaffold1324 | 8195                    | AA                              | TT                 | TT               | INTERGENIC      |               |                    |                    |
| SNP_92883_A_8231 | NW_004516558.1 | scaffold1324 | 8231                    | CC                              | AA                 | AA               | INTERGENIC      |               |                    |                    |
| SNP_92884_A_8232 | NW_004516558.1 | scaffold1324 | 8232                    | GG                              | AA                 | AA               | INTERGENIC      |               |                    |                    |
| SNP_92885_A_8259 | NW_004516558.1 | scaffold1324 | 8259                    | AA                              | GG                 | GG               | INTERGENIC      |               |                    |                    |
| SNP_92886_A_8415 | NW_004516558.1 | scaffold1324 | 8415                    | TT                              | GG                 | GG               | INTERGENIC      |               |                    |                    |
| SNP_92887_A_8417 | NW_004516558.1 | scaffold1324 | 8417                    | TT                              | CC                 | CC               | INTERGENIC      |               |                    |                    |
| SNP_92888_A_8421 | NW_004516558.1 | scaffold1324 | 8421                    | GG                              | TT                 | TT               | INTERGENIC      |               |                    |                    |

| SNPs IDs           | Chromosome IDs | Chromosomes  | Physical positions (bp) | CDC Frontier (Reference genome) | (Pusa 1103 & HPNB) | (ILWC 46 & LPNB) | Sequence Components of genome | Gene accession IDs | Putative functions                         |
|--------------------|----------------|--------------|-------------------------|---------------------------------|--------------------|------------------|-------------------------------|--------------------|--------------------------------------------|
| SNP_92889_A_8459   | NW_004516558.1 | scaffold1324 | 8459                    | CC                              | TT                 | TT               | INTERGENIC                    |                    |                                            |
| SNP_92891_A_40116  | NW_004516558.1 | scaffold1324 | 40116                   | TT                              | AA                 | AA               | INTERGENIC                    |                    |                                            |
| SNP_92893_A_49572  | NW_004516558.1 | scaffold1324 | 49572                   | GG                              | AA                 | AA               | URR                           | 101500516          | UPF0329 protein ECU05_1680/ECU11_0050-like |
| SNP_92894_A_49635  | NW_004516558.1 | scaffold1324 | 49635                   | AA                              | TT                 | TT               | URR                           | 101500516          | UPF0329 protein ECU05_1680/ECU11_0050-like |
| SNP_92895_A_50011  | NW_004516558.1 | scaffold1324 | 50011                   | AA                              | TT                 | TT               | URR                           | 101500516          | UPF0329 protein ECU05_1680/ECU11_0050-like |
| SNP_92896_A_53850  | NW_004516558.1 | scaffold1324 | 53850                   | GG                              | AA                 | AA               | INTERGENIC                    |                    |                                            |
| SNP_92898_A_90980  | NW_004516558.1 | scaffold1324 | 90980                   | TT                              | GG                 | GG               | INTERGENIC                    |                    |                                            |
| SNP_92900_A_109842 | NW_004516558.1 | scaffold1324 | 109842                  | TT                              | GG                 | GG               | INTERGENIC                    |                    |                                            |
| SNP_92901_A_110283 | NW_004516558.1 | scaffold1324 | 110283                  | GG                              | AA                 | AA               | INTERGENIC                    |                    |                                            |
| SNP_92902_A_110369 | NW_004516558.1 | scaffold1324 | 110369                  | TT                              | CC                 | CC               | INTERGENIC                    |                    |                                            |
| SNP_92903_A_110426 | NW_004516558.1 | scaffold1324 | 110426                  | AA                              | GG                 | GG               | INTERGENIC                    |                    |                                            |
| SNP_92905_A_110722 | NW_004516558.1 | scaffold1324 | 110722                  | AA                              | CC                 | CC               | INTERGENIC                    |                    |                                            |
| SNP_92906_A_110759 | NW_004516558.1 | scaffold1324 | 110759                  | TT                              | AA                 | AA               | INTERGENIC                    |                    |                                            |
| SNP_92907_A_110808 | NW_004516558.1 | scaffold1324 | 110808                  | AA                              | GG                 | GG               | INTERGENIC                    |                    |                                            |
| SNP_92908_A_118959 | NW_004516558.1 | scaffold1324 | 118959                  | TT                              | GG                 | GG               | INTERGENIC                    |                    |                                            |
| SNP_92909_A_118992 | NW_004516558.1 | scaffold1324 | 118992                  | AA                              | GG                 | GG               | INTERGENIC                    |                    |                                            |
| SNP_92910_A_173988 | NW_004516558.1 | scaffold1324 | 173988                  | AA                              | TT                 | TT               | URR                           | 101502742          | chaperone protein dnaJ 6-like              |
| SNP_92911_A_174252 | NW_004516558.1 | scaffold1324 | 174252                  | AA                              | GG                 | GG               | URR                           | 101502742          | chaperone protein dnaJ 6-like              |
| SNP_92912_A_190199 | NW_004516558.1 | scaffold1324 | 190199                  | TT                              | GG                 | GG               | INTERGENIC                    |                    |                                            |
| SNP_92914_A_219371 | NW_004516558.1 | scaffold1324 | 219371                  | CC                              | AA                 | AA               | INTERGENIC                    |                    |                                            |
| SNP_92915_A_219384 | NW_004516558.1 | scaffold1324 | 219384                  | CC                              | TT                 | TT               | INTERGENIC                    |                    |                                            |
| SNP_92916_A_219401 | NW_004516558.1 | scaffold1324 | 219401                  | AA                              | GG                 | GG               | INTERGENIC                    |                    |                                            |



| SNPs IDs           | Chromosome IDs | Chromosomes  | Physical positions (bp) | CDC Frontier (Reference genome) | (Pusa 1103 & HPNB) | (ILWC 46 & LPNB) | Sequence genome | Components of | Gene accession IDs | Putative functions |
|--------------------|----------------|--------------|-------------------------|---------------------------------|--------------------|------------------|-----------------|---------------|--------------------|--------------------|
| SNP_92917_A_219430 | NW_004516558.1 | scaffold1324 | 219430                  | AA                              | GG                 | GG               | INTERGENIC      |               |                    |                    |
| SNP_92918_A_219706 | NW_004516558.1 | scaffold1324 | 219706                  | GG                              | TT                 | TT               | INTERGENIC      |               |                    |                    |
| SNP_92919_A_219881 | NW_004516558.1 | scaffold1324 | 219881                  | AA                              | GG                 | GG               | INTERGENIC      |               |                    |                    |
| SNP_92920_A_219913 | NW_004516558.1 | scaffold1324 | 219913                  | AA                              | CC                 | CC               | INTERGENIC      |               |                    |                    |
| SNP_92921_A_219934 | NW_004516558.1 | scaffold1324 | 219934                  | CC                              | AA                 | AA               | INTERGENIC      |               |                    |                    |
| SNP_92922_A_219958 | NW_004516558.1 | scaffold1324 | 219958                  | GG                              | AA                 | AA               | INTERGENIC      |               |                    |                    |
| SNP_92923_A_219962 | NW_004516558.1 | scaffold1324 | 219962                  | TT                              | AA                 | AA               | INTERGENIC      |               |                    |                    |
| SNP_92924_A_220828 | NW_004516558.1 | scaffold1324 | 220828                  | AA                              | GG                 | GG               | INTERGENIC      |               |                    |                    |
| SNP_92925_A_220867 | NW_004516558.1 | scaffold1324 | 220867                  | TT                              | AA                 | AA               | INTERGENIC      |               |                    |                    |
| SNP_92926_A_225149 | NW_004516558.1 | scaffold1324 | 225149                  | CC                              | TT                 | TT               | INTERGENIC      |               |                    |                    |
| SNP_92927_A_226975 | NW_004516558.1 | scaffold1324 | 226975                  | AA                              | GG                 | GG               | INTERGENIC      |               |                    |                    |
| SNP_92928_A_226980 | NW_004516558.1 | scaffold1324 | 226980                  | AA                              | GG                 | GG               | INTERGENIC      |               |                    |                    |
| SNP_92929_A_227036 | NW_004516558.1 | scaffold1324 | 227036                  | GG                              | AA                 | AA               | INTERGENIC      |               |                    |                    |
| SNP_92930_A_227049 | NW_004516558.1 | scaffold1324 | 227049                  | TT                              | CC                 | CC               | INTERGENIC      |               |                    |                    |
| SNP_92931_A_227067 | NW_004516558.1 | scaffold1324 | 227067                  | GG                              | AA                 | AA               | INTERGENIC      |               |                    |                    |
| SNP_92932_A_227312 | NW_004516558.1 | scaffold1324 | 227312                  | AA                              | GG                 | GG               | INTERGENIC      |               |                    |                    |
| SNP_92934_A_227409 | NW_004516558.1 | scaffold1324 | 227409                  | TT                              | GG                 | GG               | INTERGENIC      |               |                    |                    |
| SNP_92935_A_227425 | NW_004516558.1 | scaffold1324 | 227425                  | AA                              | CC                 | CC               | INTERGENIC      |               |                    |                    |
| SNP_92936_A_227535 | NW_004516558.1 | scaffold1324 | 227535                  | TT                              | AA                 | AA               | INTERGENIC      |               |                    |                    |
| SNP_92937_A_227536 | NW_004516558.1 | scaffold1324 | 227536                  | GG                              | TT                 | TT               | INTERGENIC      |               |                    |                    |
| SNP_92938_A_227664 | NW_004516558.1 | scaffold1324 | 227664                  | GG                              | AA                 | AA               | INTERGENIC      |               |                    |                    |
| SNP_92939_A_227843 | NW_004516558.1 | scaffold1324 | 227843                  | TT                              | CC                 | CC               | INTERGENIC      |               |                    |                    |

| SNPs IDs           | Chromosome IDs | Chromosomes  | Physical positions (bp) | CDC Frontier (Reference genome) | (Pusa 1103 & HPNB) | (ILWC 46 & LPNB) | Sequence Components of genome | Gene accession IDs | Putative functions |
|--------------------|----------------|--------------|-------------------------|---------------------------------|--------------------|------------------|-------------------------------|--------------------|--------------------|
| SNP_92940_A_227893 | NW_004516558.1 | scaffold1324 | 227893                  | CC                              | TT                 | TT               | INTERGENIC                    |                    |                    |
| SNP_92941_A_227964 | NW_004516558.1 | scaffold1324 | 227964                  | GG                              | AA                 | AA               | INTERGENIC                    |                    |                    |
| SNP_92942_A_227978 | NW_004516558.1 | scaffold1324 | 227978                  | TT                              | AA                 | AA               | INTERGENIC                    |                    |                    |
| SNP_92943_A_228159 | NW_004516558.1 | scaffold1324 | 228159                  | AA                              | CC                 | CC               | INTERGENIC                    |                    |                    |
| SNP_92944_A_228328 | NW_004516558.1 | scaffold1324 | 228328                  | TT                              | GG                 | GG               | DRR                           | 101503387          | Unknown function   |
| SNP_92945_A_228459 | NW_004516558.1 | scaffold1324 | 228459                  | AA                              | TT                 | TT               | DRR                           | 101503387          | Unknown function   |
| SNP_92946_A_228536 | NW_004516558.1 | scaffold1324 | 228536                  | CC                              | AA                 | AA               | DRR                           | 101503387          | Unknown function   |
| SNP_92947_A_228548 | NW_004516558.1 | scaffold1324 | 228548                  | AA                              | TT                 | TT               | DRR                           | 101503387          | Unknown function   |
| SNP_92948_A_228679 | NW_004516558.1 | scaffold1324 | 228679                  | AA                              | GG                 | GG               | DRR                           | 101503387          | Unknown function   |
| SNP_92949_A_228793 | NW_004516558.1 | scaffold1324 | 228793                  | GG                              | AA                 | AA               | DRR                           | 101503387          | Unknown function   |
| SNP_92950_A_228868 | NW_004516558.1 | scaffold1324 | 228868                  | AA                              | GG                 | GG               | DRR                           | 101503387          | Unknown function   |
| SNP_92951_A_229565 | NW_004516558.1 | scaffold1324 | 229565                  | CC                              | TT                 | TT               | NON_SYNONYMOUS_CODING         | id211251           | Unknown function   |
| SNP_92952_A_234817 | NW_004516558.1 | scaffold1324 | 234817                  | CC                              | TT                 | TT               | INTERGENIC                    |                    |                    |
| SNP_92953_A_234985 | NW_004516558.1 | scaffold1324 | 234985                  | GG                              | CC                 | CC               | INTERGENIC                    |                    |                    |
| SNP_92955_A_235263 | NW_004516558.1 | scaffold1324 | 235263                  | CC                              | TT                 | TT               | INTERGENIC                    |                    |                    |
| SNP_92956_A_235264 | NW_004516558.1 | scaffold1324 | 235264                  | AA                              | TT                 | TT               | INTERGENIC                    |                    |                    |
| SNP_92957_A_235302 | NW_004516558.1 | scaffold1324 | 235302                  | CC                              | TT                 | TT               | INTERGENIC                    |                    |                    |
| SNP_92958_A_235323 | NW_004516558.1 | scaffold1324 | 235323                  | TT                              | AA                 | AA               | INTERGENIC                    |                    |                    |
| SNP_92959_A_235325 | NW_004516558.1 | scaffold1324 | 235325                  | TT                              | AA                 | AA               | INTERGENIC                    |                    |                    |
| SNP_92960_A_235374 | NW_004516558.1 | scaffold1324 | 235374                  | TT                              | AA                 | AA               | INTERGENIC                    |                    |                    |
| SNP_92961_A_235454 | NW_004516558.1 | scaffold1324 | 235454                  | TT                              | GG                 | GG               | INTERGENIC                    |                    |                    |
| SNP_92962_A_236020 | NW_004516558.1 | scaffold1324 | 236020                  | AA                              | GG                 | GG               | INTERGENIC                    |                    |                    |

| SNPs IDs           | Chromosome IDs | Chromosomes  | Physical positions (bp) | CDC Frontier (Reference genome) | (Pusa 1103 & HPNB) | (ILWC 46 & LPNB) | Sequence genome | Components of | Gene accession IDs | Putative functions |
|--------------------|----------------|--------------|-------------------------|---------------------------------|--------------------|------------------|-----------------|---------------|--------------------|--------------------|
| SNP_92963_A_236072 | NW_004516558.1 | scaffold1324 | 236072                  | AA                              | CC                 | CC               | INTERGENIC      |               |                    |                    |
| SNP_92964_A_236153 | NW_004516558.1 | scaffold1324 | 236153                  | AA                              | CC                 | CC               | INTERGENIC      |               |                    |                    |
| SNP_92965_A_236212 | NW_004516558.1 | scaffold1324 | 236212                  | GG                              | AA                 | AA               | INTERGENIC      |               |                    |                    |
| SNP_92966_A_236250 | NW_004516558.1 | scaffold1324 | 236250                  | AA                              | GG                 | GG               | INTERGENIC      |               |                    |                    |
| SNP_92967_A_236261 | NW_004516558.1 | scaffold1324 | 236261                  | GG                              | AA                 | AA               | INTERGENIC      |               |                    |                    |
| SNP_92968_A_236280 | NW_004516558.1 | scaffold1324 | 236280                  | TT                              | GG                 | GG               | INTERGENIC      |               |                    |                    |
| SNP_92969_A_236414 | NW_004516558.1 | scaffold1324 | 236414                  | GG                              | AA                 | AA               | INTERGENIC      |               |                    |                    |
| SNP_92970_A_236495 | NW_004516558.1 | scaffold1324 | 236495                  | AA                              | CC                 | CC               | INTERGENIC      |               |                    |                    |
| SNP_92971_A_236516 | NW_004516558.1 | scaffold1324 | 236516                  | CC                              | TT                 | TT               | INTERGENIC      |               |                    |                    |
| SNP_92972_A_236540 | NW_004516558.1 | scaffold1324 | 236540                  | AA                              | GG                 | GG               | INTERGENIC      |               |                    |                    |
| SNP_92974_A_236759 | NW_004516558.1 | scaffold1324 | 236759                  | AA                              | GG                 | GG               | INTERGENIC      |               |                    |                    |
| SNP_92975_A_236853 | NW_004516558.1 | scaffold1324 | 236853                  | GG                              | CC                 | CC               | INTERGENIC      |               |                    |                    |
| SNP_92976_A_236916 | NW_004516558.1 | scaffold1324 | 236916                  | TT                              | CC                 | CC               | INTERGENIC      |               |                    |                    |
| SNP_92977_A_237069 | NW_004516558.1 | scaffold1324 | 237069                  | AA                              | CC                 | CC               | INTERGENIC      |               |                    |                    |
| SNP_92978_A_237071 | NW_004516558.1 | scaffold1324 | 237071                  | CC                              | TT                 | TT               | INTERGENIC      |               |                    |                    |
| SNP_92979_A_237097 | NW_004516558.1 | scaffold1324 | 237097                  | AA                              | GG                 | GG               | INTERGENIC      |               |                    |                    |
| SNP_92980_A_237098 | NW_004516558.1 | scaffold1324 | 237098                  | TT                              | CC                 | CC               | INTERGENIC      |               |                    |                    |
| SNP_92981_A_237112 | NW_004516558.1 | scaffold1324 | 237112                  | TT                              | CC                 | CC               | INTERGENIC      |               |                    |                    |
| SNP_92982_A_237114 | NW_004516558.1 | scaffold1324 | 237114                  | GG                              | TT                 | TT               | INTERGENIC      |               |                    |                    |
| SNP_92983_A_237189 | NW_004516558.1 | scaffold1324 | 237189                  | GG                              | AA                 | AA               | INTERGENIC      |               |                    |                    |
| SNP_92984_A_237202 | NW_004516558.1 | scaffold1324 | 237202                  | GG                              | AA                 | AA               | INTERGENIC      |               |                    |                    |
| SNP_92985_A_237300 | NW_004516558.1 | scaffold1324 | 237300                  | AA                              | GG                 | GG               | INTERGENIC      |               |                    |                    |

| SNPs IDs           | Chromosome IDs | Chromosomes  | Physical positions (bp) | CDC Frontier (Reference genome) | (Pusa 1103 & HPNB) | (ILWC 46 & LPNB) | Sequence genome | Components of | Gene accession IDs | Putative functions |
|--------------------|----------------|--------------|-------------------------|---------------------------------|--------------------|------------------|-----------------|---------------|--------------------|--------------------|
| SNP_92986_A_237379 | NW_004516558.1 | scaffold1324 | 237379                  | TT                              | CC                 | CC               | INTERGENIC      |               |                    |                    |
| SNP_92987_A_237502 | NW_004516558.1 | scaffold1324 | 237502                  | CC                              | TT                 | TT               | INTERGENIC      |               |                    |                    |
| SNP_92988_A_237522 | NW_004516558.1 | scaffold1324 | 237522                  | GG                              | CC                 | CC               | INTERGENIC      |               |                    |                    |
| SNP_92989_A_237539 | NW_004516558.1 | scaffold1324 | 237539                  | TT                              | CC                 | CC               | INTERGENIC      |               |                    |                    |
| SNP_92990_A_237709 | NW_004516558.1 | scaffold1324 | 237709                  | CC                              | TT                 | TT               | INTERGENIC      |               |                    |                    |
| SNP_92991_A_237904 | NW_004516558.1 | scaffold1324 | 237904                  | AA                              | GG                 | GG               | INTERGENIC      |               |                    |                    |
| SNP_92992_A_237932 | NW_004516558.1 | scaffold1324 | 237932                  | CC                              | TT                 | TT               | INTERGENIC      |               |                    |                    |
| SNP_92993_A_237935 | NW_004516558.1 | scaffold1324 | 237935                  | TT                              | CC                 | CC               | INTERGENIC      |               |                    |                    |
| SNP_92994_A_238320 | NW_004516558.1 | scaffold1324 | 238320                  | AA                              | TT                 | TT               | INTERGENIC      |               |                    |                    |
| SNP_92995_A_238322 | NW_004516558.1 | scaffold1324 | 238322                  | AA                              | CC                 | CC               | INTERGENIC      |               |                    |                    |
| SNP_92996_A_238507 | NW_004516558.1 | scaffold1324 | 238507                  | TT                              | CC                 | CC               | INTERGENIC      |               |                    |                    |
| SNP_92997_A_238532 | NW_004516558.1 | scaffold1324 | 238532                  | AA                              | GG                 | GG               | INTERGENIC      |               |                    |                    |
| SNP_92998_A_238745 | NW_004516558.1 | scaffold1324 | 238745                  | CC                              | TT                 | TT               | INTERGENIC      |               |                    |                    |
| SNP_92999_A_238761 | NW_004516558.1 | scaffold1324 | 238761                  | AA                              | TT                 | TT               | INTERGENIC      |               |                    |                    |
| SNP_93000_A_238805 | NW_004516558.1 | scaffold1324 | 238805                  | CC                              | TT                 | TT               | INTERGENIC      |               |                    |                    |
| SNP_93001_A_238872 | NW_004516558.1 | scaffold1324 | 238872                  | GG                              | CC                 | CC               | INTERGENIC      |               |                    |                    |
| SNP_93002_A_238936 | NW_004516558.1 | scaffold1324 | 238936                  | AA                              | GG                 | GG               | INTERGENIC      |               |                    |                    |
| SNP_93003_A_238966 | NW_004516558.1 | scaffold1324 | 238966                  | TT                              | CC                 | CC               | INTERGENIC      |               |                    |                    |
| SNP_93004_A_238992 | NW_004516558.1 | scaffold1324 | 238992                  | TT                              | CC                 | CC               | INTERGENIC      |               |                    |                    |
| SNP_93005_A_239133 | NW_004516558.1 | scaffold1324 | 239133                  | TT                              | CC                 | CC               | INTERGENIC      |               |                    |                    |
| SNP_93006_A_239134 | NW_004516558.1 | scaffold1324 | 239134                  | GG                              | AA                 | AA               | INTERGENIC      |               |                    |                    |
| SNP_93007_A_239184 | NW_004516558.1 | scaffold1324 | 239184                  | GG                              | AA                 | AA               | INTERGENIC      |               |                    |                    |

| SNPs IDs           | Chromosome IDs | Chromosomes  | Physical positions (bp) | CDC Frontier (Reference genome) | (Pusa 1103 & HPNB) | (ILWC 46 & LPNB) | Sequence genome | Components of | Gene accession IDs | Putative functions |
|--------------------|----------------|--------------|-------------------------|---------------------------------|--------------------|------------------|-----------------|---------------|--------------------|--------------------|
| SNP_93008_A_239336 | NW_004516558.1 | scaffold1324 | 239336                  | GG                              | TT                 | TT               | INTERGENIC      |               |                    |                    |
| SNP_93009_A_239790 | NW_004516558.1 | scaffold1324 | 239790                  | GG                              | AA                 | AA               | INTERGENIC      |               |                    |                    |
| SNP_93010_A_239791 | NW_004516558.1 | scaffold1324 | 239791                  | TT                              | CC                 | CC               | INTERGENIC      |               |                    |                    |
| SNP_93011_A_240508 | NW_004516558.1 | scaffold1324 | 240508                  | AA                              | GG                 | GG               | INTERGENIC      |               |                    |                    |
| SNP_93012_A_240530 | NW_004516558.1 | scaffold1324 | 240530                  | CC                              | TT                 | TT               | INTERGENIC      |               |                    |                    |
| SNP_93013_A_240569 | NW_004516558.1 | scaffold1324 | 240569                  | TT                              | CC                 | CC               | INTERGENIC      |               |                    |                    |
| SNP_93014_A_240723 | NW_004516558.1 | scaffold1324 | 240723                  | CC                              | AA                 | AA               | INTERGENIC      |               |                    |                    |
| SNP_93015_A_240761 | NW_004516558.1 | scaffold1324 | 240761                  | TT                              | CC                 | CC               | INTERGENIC      |               |                    |                    |
| SNP_93016_A_240773 | NW_004516558.1 | scaffold1324 | 240773                  | TT                              | AA                 | AA               | INTERGENIC      |               |                    |                    |
| SNP_93017_A_241003 | NW_004516558.1 | scaffold1324 | 241003                  | TT                              | CC                 | CC               | INTERGENIC      |               |                    |                    |
| SNP_93018_A_241021 | NW_004516558.1 | scaffold1324 | 241021                  | AA                              | GG                 | GG               | INTERGENIC      |               |                    |                    |
| SNP_93019_A_241041 | NW_004516558.1 | scaffold1324 | 241041                  | TT                              | CC                 | CC               | INTERGENIC      |               |                    |                    |
| SNP_93020_A_241085 | NW_004516558.1 | scaffold1324 | 241085                  | GG                              | AA                 | AA               | INTERGENIC      |               |                    |                    |
| SNP_93021_A_241203 | NW_004516558.1 | scaffold1324 | 241203                  | TT                              | CC                 | CC               | INTERGENIC      |               |                    |                    |
| SNP_93022_A_241206 | NW_004516558.1 | scaffold1324 | 241206                  | TT                              | GG                 | GG               | INTERGENIC      |               |                    |                    |
| SNP_93023_A_241353 | NW_004516558.1 | scaffold1324 | 241353                  | AA                              | TT                 | TT               | INTERGENIC      |               |                    |                    |
| SNP_93024_A_241523 | NW_004516558.1 | scaffold1324 | 241523                  | TT                              | CC                 | CC               | INTERGENIC      |               |                    |                    |
| SNP_93025_A_241558 | NW_004516558.1 | scaffold1324 | 241558                  | CC                              | TT                 | TT               | INTERGENIC      |               |                    |                    |
| SNP_93026_A_241569 | NW_004516558.1 | scaffold1324 | 241569                  | TT                              | CC                 | CC               | INTERGENIC      |               |                    |                    |
| SNP_93027_A_241582 | NW_004516558.1 | scaffold1324 | 241582                  | GG                              | AA                 | AA               | INTERGENIC      |               |                    |                    |
| SNP_93028_A_241729 | NW_004516558.1 | scaffold1324 | 241729                  | CC                              | TT                 | TT               | INTERGENIC      |               |                    |                    |
| SNP_93029_A_241850 | NW_004516558.1 | scaffold1324 | 241850                  | TT                              | CC                 | CC               | INTERGENIC      |               |                    |                    |

| SNPs IDs           | Chromosome IDs | Chromosomes  | Physical positions (bp) | CDC Frontier (Reference genome) | (Pusa 1103 & HPNB) | (ILWC 46 & LPNB) | Sequence genome | Components of | Gene accession IDs | Putative functions |
|--------------------|----------------|--------------|-------------------------|---------------------------------|--------------------|------------------|-----------------|---------------|--------------------|--------------------|
| SNP_93030_A_241884 | NW_004516558.1 | scaffold1324 | 241884                  | GG                              | CC                 | CC               | INTERGENIC      |               |                    |                    |
| SNP_93032_A_247901 | NW_004516558.1 | scaffold1324 | 247901                  | CC                              | TT                 | TT               | INTERGENIC      |               |                    |                    |
| SNP_93033_A_247965 | NW_004516558.1 | scaffold1324 | 247965                  | AA                              | TT                 | TT               | INTERGENIC      |               |                    |                    |
| SNP_93034_A_248095 | NW_004516558.1 | scaffold1324 | 248095                  | TT                              | AA                 | AA               | INTERGENIC      |               |                    |                    |
| SNP_93035_A_248235 | NW_004516558.1 | scaffold1324 | 248235                  | TT                              | CC                 | CC               | INTERGENIC      |               |                    |                    |
| SNP_93036_A_248314 | NW_004516558.1 | scaffold1324 | 248314                  | AA                              | CC                 | CC               | INTERGENIC      |               |                    |                    |
| SNP_93037_A_248344 | NW_004516558.1 | scaffold1324 | 248344                  | CC                              | TT                 | TT               | INTERGENIC      |               |                    |                    |
| SNP_93038_A_251971 | NW_004516558.1 | scaffold1324 | 251971                  | TT                              | CC                 | CC               | INTERGENIC      |               |                    |                    |
| SNP_93040_A_252751 | NW_004516558.1 | scaffold1324 | 252751                  | CC                              | TT                 | TT               | INTERGENIC      |               |                    |                    |
| SNP_93041_A_252775 | NW_004516558.1 | scaffold1324 | 252775                  | AA                              | GG                 | GG               | INTERGENIC      |               |                    |                    |
| SNP_93043_A_252843 | NW_004516558.1 | scaffold1324 | 252843                  | AA                              | CC                 | CC               | INTERGENIC      |               |                    |                    |
| SNP_93044_A_253082 | NW_004516558.1 | scaffold1324 | 253082                  | TT                              | CC                 | CC               | INTERGENIC      |               |                    |                    |
| SNP_93045_A_253362 | NW_004516558.1 | scaffold1324 | 253362                  | TT                              | GG                 | GG               | INTERGENIC      |               |                    |                    |
| SNP_93046_A_253375 | NW_004516558.1 | scaffold1324 | 253375                  | CC                              | TT                 | TT               | INTERGENIC      |               |                    |                    |
| SNP_93047_A_253379 | NW_004516558.1 | scaffold1324 | 253379                  | GG                              | TT                 | TT               | INTERGENIC      |               |                    |                    |
| SNP_93048_A_253520 | NW_004516558.1 | scaffold1324 | 253520                  | CC                              | AA                 | AA               | INTERGENIC      |               |                    |                    |
| SNP_93049_A_253608 | NW_004516558.1 | scaffold1324 | 253608                  | AA                              | GG                 | GG               | INTERGENIC      |               |                    |                    |
| SNP_93050_A_253611 | NW_004516558.1 | scaffold1324 | 253611                  | CC                              | AA                 | AA               | INTERGENIC      |               |                    |                    |
| SNP_93052_A_253796 | NW_004516558.1 | scaffold1324 | 253796                  | AA                              | TT                 | TT               | INTERGENIC      |               |                    |                    |
| SNP_93053_A_253985 | NW_004516558.1 | scaffold1324 | 253985                  | TT                              | GG                 | GG               | INTERGENIC      |               |                    |                    |
| SNP_93054_A_254034 | NW_004516558.1 | scaffold1324 | 254034                  | TT                              | CC                 | CC               | INTERGENIC      |               |                    |                    |
| SNP_93055_A_254050 | NW_004516558.1 | scaffold1324 | 254050                  | CC                              | AA                 | AA               | INTERGENIC      |               |                    |                    |

| SNPs IDs           | Chromosome IDs | Chromosomes  | Physical positions (bp) | CDC Frontier genome (Reference genome) | (Pusa 1103 & HPNB) | (ILWC 46 & LPNB) | Sequence genome | Components of | Gene accession IDs | Putative functions |
|--------------------|----------------|--------------|-------------------------|----------------------------------------|--------------------|------------------|-----------------|---------------|--------------------|--------------------|
| SNP_93056_A_254052 | NW_004516558.1 | scaffold1324 | 254052                  | AA                                     | TT                 | TT               | INTERGENIC      |               |                    |                    |
| SNP_93057_A_254079 | NW_004516558.1 | scaffold1324 | 254079                  | CC                                     | TT                 | TT               | INTERGENIC      |               |                    |                    |
| SNP_93058_A_254261 | NW_004516558.1 | scaffold1324 | 254261                  | CC                                     | TT                 | TT               | INTERGENIC      |               |                    |                    |
| SNP_93059_A_254945 | NW_004516558.1 | scaffold1324 | 254945                  | AA                                     | GG                 | GG               | INTERGENIC      |               |                    |                    |
| SNP_93060_A_255028 | NW_004516558.1 | scaffold1324 | 255028                  | CC                                     | AA                 | AA               | INTERGENIC      |               |                    |                    |
| SNP_93061_A_255090 | NW_004516558.1 | scaffold1324 | 255090                  | AA                                     | TT                 | TT               | INTERGENIC      |               |                    |                    |
| SNP_93062_A_255279 | NW_004516558.1 | scaffold1324 | 255279                  | GG                                     | TT                 | TT               | INTERGENIC      |               |                    |                    |
| SNP_93063_A_255579 | NW_004516558.1 | scaffold1324 | 255579                  | GG                                     | AA                 | AA               | INTERGENIC      |               |                    |                    |
| SNP_93064_A_255580 | NW_004516558.1 | scaffold1324 | 255580                  | GG                                     | TT                 | TT               | INTERGENIC      |               |                    |                    |
| SNP_93065_A_255591 | NW_004516558.1 | scaffold1324 | 255591                  | CC                                     | GG                 | GG               | INTERGENIC      |               |                    |                    |
| SNP_93067_A_255687 | NW_004516558.1 | scaffold1324 | 255687                  | AA                                     | GG                 | GG               | INTERGENIC      |               |                    |                    |
| SNP_93068_A_255734 | NW_004516558.1 | scaffold1324 | 255734                  | AA                                     | GG                 | GG               | INTERGENIC      |               |                    |                    |
| SNP_93069_A_255774 | NW_004516558.1 | scaffold1324 | 255774                  | CC                                     | TT                 | TT               | INTERGENIC      |               |                    |                    |
| SNP_93070_A_255787 | NW_004516558.1 | scaffold1324 | 255787                  | GG                                     | TT                 | TT               | INTERGENIC      |               |                    |                    |
| SNP_93072_A_255878 | NW_004516558.1 | scaffold1324 | 255878                  | GG                                     | TT                 | TT               | INTERGENIC      |               |                    |                    |
| SNP_93074_A_256014 | NW_004516558.1 | scaffold1324 | 256014                  | AA                                     | GG                 | GG               | INTERGENIC      |               |                    |                    |
| SNP_93075_A_256050 | NW_004516558.1 | scaffold1324 | 256050                  | TT                                     | CC                 | CC               | INTERGENIC      |               |                    |                    |
| SNP_93076_A_256158 | NW_004516558.1 | scaffold1324 | 256158                  | AA                                     | GG                 | GG               | INTERGENIC      |               |                    |                    |
| SNP_93077_A_256209 | NW_004516558.1 | scaffold1324 | 256209                  | GG                                     | CC                 | CC               | INTERGENIC      |               |                    |                    |
| SNP_93078_A_256211 | NW_004516558.1 | scaffold1324 | 256211                  | AA                                     | TT                 | TT               | INTERGENIC      |               |                    |                    |
| SNP_93079_A_256277 | NW_004516558.1 | scaffold1324 | 256277                  | TT                                     | GG                 | GG               | INTERGENIC      |               |                    |                    |
| SNP_93081_A_256352 | NW_004516558.1 | scaffold1324 | 256352                  | AA                                     | GG                 | GG               | INTERGENIC      |               |                    |                    |

| SNPs IDs           | Chromosome IDs | Chromosomes  | Physical positions (bp) | CDC Frontier (Reference genome) | (Pusa 1103 & HPNB) | (ILWC 46 & LPNB) | Sequence genome | Components of | Gene accession IDs | Putative functions |
|--------------------|----------------|--------------|-------------------------|---------------------------------|--------------------|------------------|-----------------|---------------|--------------------|--------------------|
| SNP_93082_A_256403 | NW_004516558.1 | scaffold1324 | 256403                  | AA                              | TT                 | TT               | INTERGENIC      |               |                    |                    |
| SNP_93083_A_256404 | NW_004516558.1 | scaffold1324 | 256404                  | TT                              | AA                 | AA               | INTERGENIC      |               |                    |                    |
| SNP_93084_A_256425 | NW_004516558.1 | scaffold1324 | 256425                  | GG                              | AA                 | AA               | INTERGENIC      |               |                    |                    |
| SNP_93085_A_256503 | NW_004516558.1 | scaffold1324 | 256503                  | AA                              | GG                 | GG               | INTERGENIC      |               |                    |                    |
| SNP_93086_A_265912 | NW_004516558.1 | scaffold1324 | 265912                  | TT                              | CC                 | CC               | INTERGENIC      |               |                    |                    |
| SNP_93087_A_266150 | NW_004516558.1 | scaffold1324 | 266150                  | AA                              | CC                 | CC               | INTERGENIC      |               |                    |                    |
| SNP_93088_A_266152 | NW_004516558.1 | scaffold1324 | 266152                  | CC                              | TT                 | TT               | INTERGENIC      |               |                    |                    |
| SNP_93089_A_266169 | NW_004516558.1 | scaffold1324 | 266169                  | AA                              | GG                 | GG               | INTERGENIC      |               |                    |                    |
| SNP_93090_A_266309 | NW_004516558.1 | scaffold1324 | 266309                  | TT                              | AA                 | AA               | INTERGENIC      |               |                    |                    |
| SNP_93091_A_266386 | NW_004516558.1 | scaffold1324 | 266386                  | GG                              | TT                 | TT               | INTERGENIC      |               |                    |                    |
| SNP_93092_A_266658 | NW_004516558.1 | scaffold1324 | 266658                  | CC                              | TT                 | TT               | INTERGENIC      |               |                    |                    |
| SNP_93094_A_266786 | NW_004516558.1 | scaffold1324 | 266786                  | TT                              | CC                 | CC               | INTERGENIC      |               |                    |                    |
| SNP_93095_A_266787 | NW_004516558.1 | scaffold1324 | 266787                  | GG                              | AA                 | AA               | INTERGENIC      |               |                    |                    |
| SNP_93097_A_266850 | NW_004516558.1 | scaffold1324 | 266850                  | TT                              | GG                 | GG               | INTERGENIC      |               |                    |                    |
| SNP_93098_A_266875 | NW_004516558.1 | scaffold1324 | 266875                  | AA                              | GG                 | GG               | INTERGENIC      |               |                    |                    |
| SNP_93099_A_266930 | NW_004516558.1 | scaffold1324 | 266930                  | TT                              | CC                 | CC               | INTERGENIC      |               |                    |                    |
| SNP_93100_A_267002 | NW_004516558.1 | scaffold1324 | 267002                  | GG                              | CC                 | CC               | INTERGENIC      |               |                    |                    |
| SNP_93101_A_267023 | NW_004516558.1 | scaffold1324 | 267023                  | CC                              | TT                 | TT               | INTERGENIC      |               |                    |                    |
| SNP_93102_A_267072 | NW_004516558.1 | scaffold1324 | 267072                  | TT                              | CC                 | CC               | INTERGENIC      |               |                    |                    |
| SNP_93103_A_267182 | NW_004516558.1 | scaffold1324 | 267182                  | AA                              | TT                 | TT               | INTERGENIC      |               |                    |                    |
| SNP_93104_A_267270 | NW_004516558.1 | scaffold1324 | 267270                  | CC                              | TT                 | TT               | INTERGENIC      |               |                    |                    |
| SNP_93105_A_267692 | NW_004516558.1 | scaffold1324 | 267692                  | AA                              | CC                 | CC               | INTERGENIC      |               |                    |                    |



| SNPs IDs           | Chromosome IDs | Chromosomes  | Physical positions (bp) | CDC Frontier (Reference genome) | (Pusa 1103 & HPNB) | (ILWC 46 & LPNB) | Sequence genome | Components of | Gene accession IDs | Putative functions |
|--------------------|----------------|--------------|-------------------------|---------------------------------|--------------------|------------------|-----------------|---------------|--------------------|--------------------|
| SNP_93106_A_267695 | NW_004516558.1 | scaffold1324 | 267695                  | TT                              | CC                 | CC               | INTERGENIC      |               |                    |                    |
| SNP_93107_A_267814 | NW_004516558.1 | scaffold1324 | 267814                  | AA                              | GG                 | GG               | INTERGENIC      |               |                    |                    |
| SNP_93108_A_267864 | NW_004516558.1 | scaffold1324 | 267864                  | TT                              | CC                 | CC               | INTERGENIC      |               |                    |                    |
| SNP_93109_A_267874 | NW_004516558.1 | scaffold1324 | 267874                  | GG                              | AA                 | AA               | INTERGENIC      |               |                    |                    |
| SNP_93110_A_267967 | NW_004516558.1 | scaffold1324 | 267967                  | GG                              | AA                 | AA               | INTERGENIC      |               |                    |                    |
| SNP_93112_A_268324 | NW_004516558.1 | scaffold1324 | 268324                  | GG                              | TT                 | TT               | INTERGENIC      |               |                    |                    |
| SNP_93114_A_268674 | NW_004516558.1 | scaffold1324 | 268674                  | CC                              | TT                 | TT               | INTERGENIC      |               |                    |                    |
| SNP_93115_A_268786 | NW_004516558.1 | scaffold1324 | 268786                  | GG                              | AA                 | AA               | INTERGENIC      |               |                    |                    |
| SNP_93116_A_268868 | NW_004516558.1 | scaffold1324 | 268868                  | AA                              | GG                 | GG               | INTERGENIC      |               |                    |                    |
| SNP_93117_A_268904 | NW_004516558.1 | scaffold1324 | 268904                  | TT                              | CC                 | CC               | INTERGENIC      |               |                    |                    |
| SNP_93118_A_268926 | NW_004516558.1 | scaffold1324 | 268926                  | TT                              | CC                 | CC               | INTERGENIC      |               |                    |                    |
| SNP_93119_A_268984 | NW_004516558.1 | scaffold1324 | 268984                  | GG                              | TT                 | TT               | INTERGENIC      |               |                    |                    |
| SNP_93120_A_269083 | NW_004516558.1 | scaffold1324 | 269083                  | AA                              | GG                 | GG               | INTERGENIC      |               |                    |                    |
| SNP_93121_A_269298 | NW_004516558.1 | scaffold1324 | 269298                  | TT                              | GG                 | GG               | INTERGENIC      |               |                    |                    |
| SNP_93122_A_269325 | NW_004516558.1 | scaffold1324 | 269325                  | GG                              | AA                 | AA               | INTERGENIC      |               |                    |                    |
| SNP_93123_A_269999 | NW_004516558.1 | scaffold1324 | 269999                  | CC                              | TT                 | TT               | INTERGENIC      |               |                    |                    |
| SNP_93124_A_270055 | NW_004516558.1 | scaffold1324 | 270055                  | TT                              | AA                 | AA               | INTERGENIC      |               |                    |                    |
| SNP_93125_A_270059 | NW_004516558.1 | scaffold1324 | 270059                  | TT                              | GG                 | GG               | INTERGENIC      |               |                    |                    |
| SNP_93126_A_270140 | NW_004516558.1 | scaffold1324 | 270140                  | CC                              | GG                 | GG               | INTERGENIC      |               |                    |                    |
| SNP_93127_A_270172 | NW_004516558.1 | scaffold1324 | 270172                  | AA                              | GG                 | GG               | INTERGENIC      |               |                    |                    |
| SNP_93128_A_270197 | NW_004516558.1 | scaffold1324 | 270197                  | AA                              | TT                 | TT               | INTERGENIC      |               |                    |                    |
| SNP_93129_A_270316 | NW_004516558.1 | scaffold1324 | 270316                  | GG                              | AA                 | AA               | INTERGENIC      |               |                    |                    |

| SNPs IDs           | Chromosome IDs | Chromosomes  | Physical positions (bp) | CDC Frontier (Reference genome) | (Pusa 1103 & HPNB) | (ILWC 46 & LPNB) | Sequence genome | Components of | Gene accession IDs | Putative functions |
|--------------------|----------------|--------------|-------------------------|---------------------------------|--------------------|------------------|-----------------|---------------|--------------------|--------------------|
| SNP_93130_A_270334 | NW_004516558.1 | scaffold1324 | 270334                  | CC                              | TT                 | TT               | INTERGENIC      |               |                    |                    |
| SNP_93131_A_270393 | NW_004516558.1 | scaffold1324 | 270393                  | GG                              | AA                 | AA               | INTERGENIC      |               |                    |                    |
| SNP_93132_A_270398 | NW_004516558.1 | scaffold1324 | 270398                  | CC                              | AA                 | AA               | INTERGENIC      |               |                    |                    |
| SNP_93133_A_270429 | NW_004516558.1 | scaffold1324 | 270429                  | CC                              | TT                 | TT               | INTERGENIC      |               |                    |                    |
| SNP_93134_A_270448 | NW_004516558.1 | scaffold1324 | 270448                  | TT                              | GG                 | GG               | INTERGENIC      |               |                    |                    |
| SNP_93135_A_270488 | NW_004516558.1 | scaffold1324 | 270488                  | TT                              | CC                 | CC               | INTERGENIC      |               |                    |                    |
| SNP_93136_A_270560 | NW_004516558.1 | scaffold1324 | 270560                  | TT                              | AA                 | AA               | INTERGENIC      |               |                    |                    |
| SNP_93137_A_270565 | NW_004516558.1 | scaffold1324 | 270565                  | AA                              | GG                 | GG               | INTERGENIC      |               |                    |                    |
| SNP_93138_A_270627 | NW_004516558.1 | scaffold1324 | 270627                  | CC                              | TT                 | TT               | INTERGENIC      |               |                    |                    |
| SNP_93139_A_270641 | NW_004516558.1 | scaffold1324 | 270641                  | CC                              | AA                 | AA               | INTERGENIC      |               |                    |                    |
| SNP_93140_A_270657 | NW_004516558.1 | scaffold1324 | 270657                  | TT                              | CC                 | CC               | INTERGENIC      |               |                    |                    |
| SNP_93141_A_270664 | NW_004516558.1 | scaffold1324 | 270664                  | GG                              | AA                 | AA               | INTERGENIC      |               |                    |                    |
| SNP_93142_A_270771 | NW_004516558.1 | scaffold1324 | 270771                  | TT                              | AA                 | AA               | INTERGENIC      |               |                    |                    |
| SNP_93143_A_270772 | NW_004516558.1 | scaffold1324 | 270772                  | GG                              | CC                 | CC               | INTERGENIC      |               |                    |                    |
| SNP_93144_A_270778 | NW_004516558.1 | scaffold1324 | 270778                  | TT                              | CC                 | CC               | INTERGENIC      |               |                    |                    |
| SNP_93146_A_270896 | NW_004516558.1 | scaffold1324 | 270896                  | TT                              | CC                 | CC               | INTERGENIC      |               |                    |                    |
| SNP_93147_A_270977 | NW_004516558.1 | scaffold1324 | 270977                  | GG                              | AA                 | AA               | INTERGENIC      |               |                    |                    |
| SNP_93148_A_271002 | NW_004516558.1 | scaffold1324 | 271002                  | CC                              | TT                 | TT               | INTERGENIC      |               |                    |                    |
| SNP_93149_A_271004 | NW_004516558.1 | scaffold1324 | 271004                  | TT                              | CC                 | CC               | INTERGENIC      |               |                    |                    |
| SNP_93150_A_271281 | NW_004516558.1 | scaffold1324 | 271281                  | AA                              | GG                 | GG               | INTERGENIC      |               |                    |                    |
| SNP_93151_A_271299 | NW_004516558.1 | scaffold1324 | 271299                  | TT                              | GG                 | GG               | INTERGENIC      |               |                    |                    |
| SNP_93152_A_271448 | NW_004516558.1 | scaffold1324 | 271448                  | AA                              | TT                 | TT               | INTERGENIC      |               |                    |                    |

| SNPs IDs           | Chromosome IDs | Chromosomes  | Physical positions (bp) | CDC Frontier (Reference genome) | (Pusa 1103 & HPNB) | (ILWC 46 & LPNB) | Sequence genome | Components of | Gene accession IDs | Putative functions |
|--------------------|----------------|--------------|-------------------------|---------------------------------|--------------------|------------------|-----------------|---------------|--------------------|--------------------|
| SNP_93153_A_271450 | NW_004516558.1 | scaffold1324 | 271450                  | CC                              | TT                 | TT               | INTERGENIC      |               |                    |                    |
| SNP_93154_A_271496 | NW_004516558.1 | scaffold1324 | 271496                  | CC                              | GG                 | GG               | INTERGENIC      |               |                    |                    |
| SNP_93155_A_271521 | NW_004516558.1 | scaffold1324 | 271521                  | GG                              | TT                 | TT               | INTERGENIC      |               |                    |                    |
| SNP_93156_A_271584 | NW_004516558.1 | scaffold1324 | 271584                  | AA                              | GG                 | GG               | INTERGENIC      |               |                    |                    |
| SNP_93157_A_271730 | NW_004516558.1 | scaffold1324 | 271730                  | TT                              | CC                 | CC               | INTERGENIC      |               |                    |                    |
| SNP_93158_A_271787 | NW_004516558.1 | scaffold1324 | 271787                  | GG                              | AA                 | AA               | INTERGENIC      |               |                    |                    |
| SNP_93159_A_271820 | NW_004516558.1 | scaffold1324 | 271820                  | CC                              | TT                 | TT               | INTERGENIC      |               |                    |                    |
| SNP_93161_A_272168 | NW_004516558.1 | scaffold1324 | 272168                  | CC                              | TT                 | TT               | INTERGENIC      |               |                    |                    |
| SNP_93162_A_272246 | NW_004516558.1 | scaffold1324 | 272246                  | GG                              | AA                 | AA               | INTERGENIC      |               |                    |                    |
| SNP_93163_A_272252 | NW_004516558.1 | scaffold1324 | 272252                  | TT                              | CC                 | CC               | INTERGENIC      |               |                    |                    |
| SNP_93164_A_272292 | NW_004516558.1 | scaffold1324 | 272292                  | TT                              | CC                 | CC               | INTERGENIC      |               |                    |                    |
| SNP_93165_A_272326 | NW_004516558.1 | scaffold1324 | 272326                  | AA                              | CC                 | CC               | INTERGENIC      |               |                    |                    |
| SNP_93166_A_272332 | NW_004516558.1 | scaffold1324 | 272332                  | TT                              | CC                 | CC               | INTERGENIC      |               |                    |                    |
| SNP_93167_A_272392 | NW_004516558.1 | scaffold1324 | 272392                  | CC                              | TT                 | TT               | INTERGENIC      |               |                    |                    |
| SNP_93168_A_272447 | NW_004516558.1 | scaffold1324 | 272447                  | CC                              | AA                 | AA               | INTERGENIC      |               |                    |                    |
| SNP_93169_A_272463 | NW_004516558.1 | scaffold1324 | 272463                  | GG                              | AA                 | AA               | INTERGENIC      |               |                    |                    |
| SNP_93170_A_272856 | NW_004516558.1 | scaffold1324 | 272856                  | TT                              | CC                 | CC               | INTERGENIC      |               |                    |                    |
| SNP_93171_A_272878 | NW_004516558.1 | scaffold1324 | 272878                  | AA                              | CC                 | CC               | INTERGENIC      |               |                    |                    |
| SNP_93172_A_272879 | NW_004516558.1 | scaffold1324 | 272879                  | AA                              | CC                 | CC               | INTERGENIC      |               |                    |                    |
| SNP_93173_A_272943 | NW_004516558.1 | scaffold1324 | 272943                  | CC                              | TT                 | TT               | INTERGENIC      |               |                    |                    |
| SNP_93174_A_272988 | NW_004516558.1 | scaffold1324 | 272988                  | GG                              | AA                 | AA               | INTERGENIC      |               |                    |                    |
| SNP_93175_A_272993 | NW_004516558.1 | scaffold1324 | 272993                  | CC                              | AA                 | AA               | INTERGENIC      |               |                    |                    |

| SNPs IDs           | Chromosome IDs | Chromosomes  | Physical positions (bp) | CDC Frontier (Reference genome) | (Pusa 1103 & HPNB) | (ILWC 46 & LPNB) | Sequence genome | Components of | Gene accession IDs | Putative functions |
|--------------------|----------------|--------------|-------------------------|---------------------------------|--------------------|------------------|-----------------|---------------|--------------------|--------------------|
| SNP_93176_A_273017 | NW_004516558.1 | scaffold1324 | 273017                  | CC                              | AA                 | AA               | INTERGENIC      |               |                    |                    |
| SNP_93177_A_273045 | NW_004516558.1 | scaffold1324 | 273045                  | AA                              | CC                 | CC               | INTERGENIC      |               |                    |                    |
| SNP_93178_A_273167 | NW_004516558.1 | scaffold1324 | 273167                  | GG                              | AA                 | AA               | INTERGENIC      |               |                    |                    |
| SNP_93179_A_273544 | NW_004516558.1 | scaffold1324 | 273544                  | CC                              | TT                 | TT               | INTERGENIC      |               |                    |                    |
| SNP_93180_A_273567 | NW_004516558.1 | scaffold1324 | 273567                  | AA                              | GG                 | GG               | INTERGENIC      |               |                    |                    |
| SNP_93181_A_273584 | NW_004516558.1 | scaffold1324 | 273584                  | AA                              | TT                 | TT               | INTERGENIC      |               |                    |                    |
| SNP_93182_A_273586 | NW_004516558.1 | scaffold1324 | 273586                  | AA                              | TT                 | TT               | INTERGENIC      |               |                    |                    |
| SNP_93183_A_273600 | NW_004516558.1 | scaffold1324 | 273600                  | AA                              | CC                 | CC               | INTERGENIC      |               |                    |                    |
| SNP_93184_A_273608 | NW_004516558.1 | scaffold1324 | 273608                  | AA                              | GG                 | GG               | INTERGENIC      |               |                    |                    |
| SNP_93185_A_273790 | NW_004516558.1 | scaffold1324 | 273790                  | CC                              | TT                 | TT               | INTERGENIC      |               |                    |                    |
| SNP_93186_A_273865 | NW_004516558.1 | scaffold1324 | 273865                  | AA                              | CC                 | CC               | INTERGENIC      |               |                    |                    |
| SNP_93187_A_273897 | NW_004516558.1 | scaffold1324 | 273897                  | GG                              | CC                 | CC               | INTERGENIC      |               |                    |                    |
| SNP_93188_A_273903 | NW_004516558.1 | scaffold1324 | 273903                  | TT                              | CC                 | CC               | INTERGENIC      |               |                    |                    |
| SNP_93189_A_273911 | NW_004516558.1 | scaffold1324 | 273911                  | AA                              | GG                 | GG               | INTERGENIC      |               |                    |                    |
| SNP_93190_A_273946 | NW_004516558.1 | scaffold1324 | 273946                  | CC                              | GG                 | GG               | INTERGENIC      |               |                    |                    |
| SNP_93191_A_273967 | NW_004516558.1 | scaffold1324 | 273967                  | CC                              | AA                 | AA               | INTERGENIC      |               |                    |                    |
| SNP_93192_A_273970 | NW_004516558.1 | scaffold1324 | 273970                  | GG                              | AA                 | AA               | INTERGENIC      |               |                    |                    |
| SNP_93193_A_274757 | NW_004516558.1 | scaffold1324 | 274757                  | GG                              | AA                 | AA               | INTERGENIC      |               |                    |                    |
| SNP_93194_A_274789 | NW_004516558.1 | scaffold1324 | 274789                  | AA                              | GG                 | GG               | INTERGENIC      |               |                    |                    |
| SNP_93195_A_274964 | NW_004516558.1 | scaffold1324 | 274964                  | TT                              | AA                 | AA               | INTERGENIC      |               |                    |                    |
| SNP_93196_A_274991 | NW_004516558.1 | scaffold1324 | 274991                  | GG                              | CC                 | CC               | INTERGENIC      |               |                    |                    |
| SNP_93197_A_275783 | NW_004516558.1 | scaffold1324 | 275783                  | GG                              | AA                 | AA               | INTERGENIC      |               |                    |                    |

| SNPs IDs           | Chromosome IDs | Chromosomes  | Physical positions (bp) | CDC Frontier (Reference genome) | (Pusa 1103 & HPNB) | (ILWC 46 & LPNB) | Sequence Components of genome | Gene accession IDs | Putative functions                                       |
|--------------------|----------------|--------------|-------------------------|---------------------------------|--------------------|------------------|-------------------------------|--------------------|----------------------------------------------------------|
| SNP_93198_A_276751 | NW_004516558.1 | scaffold1324 | 276751                  | TT                              | AA                 | AA               | INTERGENIC                    |                    |                                                          |
| SNP_93199_A_278422 | NW_004516558.1 | scaffold1324 | 278422                  | AA                              | GG                 | GG               | DRR                           | 101504794          | F-box/LRR-repeat protein At4g14103-like                  |
| SNP_93200_A_279326 | NW_004516558.1 | scaffold1324 | 279326                  | CC                              | TT                 | TT               | DRR                           | 101504794          | F-box/LRR-repeat protein At4g14103-like                  |
| SNP_93201_A_279367 | NW_004516558.1 | scaffold1324 | 279367                  | TT                              | GG                 | GG               | INTERGENIC                    |                    |                                                          |
| SNP_93202_A_319607 | NW_004516558.1 | scaffold1324 | 319607                  | AA                              | CC                 | CC               | INTERGENIC                    |                    |                                                          |
| SNP_93203_A_319892 | NW_004516558.1 | scaffold1324 | 319892                  | TT                              | CC                 | CC               | INTERGENIC                    |                    |                                                          |
| SNP_93204_A_319939 | NW_004516558.1 | scaffold1324 | 319939                  | AA                              | CC                 | CC               | INTERGENIC                    |                    |                                                          |
| SNP_93205_A_394293 | NW_004516558.1 | scaffold1324 | 394293                  | TT                              | AA                 | AA               | DRR                           | 101513265          | Unknown function                                         |
| SNP_93206_A_397545 | NW_004516558.1 | scaffold1324 | 397545                  | GG                              | AA                 | AA               | NON_SYNONYMOUS_CODING         | 101513265          | Unknown function                                         |
| SNP_93207_A_476471 | NW_004516558.1 | scaffold1324 | 476471                  | AA                              | GG                 | GG               | INTERGENIC                    |                    |                                                          |
| SNP_93208_A_476476 | NW_004516558.1 | scaffold1324 | 476476                  | AA                              | GG                 | GG               | INTERGENIC                    |                    |                                                          |
| SNP_93209_A_494439 | NW_004516558.1 | scaffold1324 | 494439                  | GG                              | AA                 | AA               | DRR                           | 101507585          | E3 ubiquitin-protein ligase XBAT33-like                  |
| SNP_93210_A_495758 | NW_004516558.1 | scaffold1324 | 495758                  | GG                              | AA                 | AA               | INTRON                        | 101507585          | E3 ubiquitin-protein ligase XBAT33-like                  |
| SNP_93212_A_514344 | NW_004516558.1 | scaffold1324 | 514344                  | TT                              | CC                 | CC               | INTERGENIC                    |                    |                                                          |
| SNP_93215_A_519446 | NW_004516558.1 | scaffold1324 | 519446                  | TT                              | CC                 | CC               | INTERGENIC                    |                    |                                                          |
| SNP_93216_A_519598 | NW_004516558.1 | scaffold1324 | 519598                  | AA                              | TT                 | TT               | INTERGENIC                    |                    |                                                          |
| SNP_93218_A_524722 | NW_004516558.1 | scaffold1324 | 524722                  | TT                              | AA                 | AA               | DRR                           | 101508214          | serine/threonine-protein phosphatase 7 long form homolog |
| SNP_93219_A_524821 | NW_004516558.1 | scaffold1324 | 524821                  | GG                              | AA                 | AA               | DRR                           | 101508214          | serine/threonine-protein phosphatase 7 long form homolog |
| SNP_93220_A_537004 | NW_004516558.1 | scaffold1324 | 537004                  | TT                              | GG                 | GG               | INTERGENIC                    |                    |                                                          |
| SNP_93221_A_537024 | NW_004516558.1 | scaffold1324 | 537024                  | CC                              | AA                 | AA               | INTERGENIC                    |                    |                                                          |
| SNP_93222_A_538945 | NW_004516558.1 | scaffold1324 | 538945                  | TT                              | CC                 | CC               | INTERGENIC                    |                    |                                                          |
| SNP_93223_A_538958 | NW_004516558.1 | scaffold1324 | 538958                  | CC                              | AA                 | AA               | INTERGENIC                    |                    |                                                          |

| SNPs IDs           | Chromosome IDs | Chromosomes  | Physical positions (bp) | CDC Frontier (Reference genome) | (Pusa 1103 & HPNB) | (ILWC 46 & LPNB) | Sequence genome | Components of | Gene accession IDs | Putative functions |
|--------------------|----------------|--------------|-------------------------|---------------------------------|--------------------|------------------|-----------------|---------------|--------------------|--------------------|
| SNP_93224_A_539215 | NW_004516558.1 | scaffold1324 | 539215                  | CC                              | TT                 | TT               | INTERGENIC      |               |                    |                    |
| SNP_93225_A_573843 | NW_004516558.1 | scaffold1324 | 573843                  | AA                              | GG                 | GG               | INTERGENIC      |               |                    |                    |
| SNP_93226_A_632828 | NW_004516558.1 | scaffold1324 | 632828                  | TT                              | CC                 | CC               | INTERGENIC      |               |                    |                    |
| SNP_93227_A_632904 | NW_004516558.1 | scaffold1324 | 632904                  | CC                              | GG                 | GG               | INTERGENIC      |               |                    |                    |
| SNP_93228_A_633204 | NW_004516558.1 | scaffold1324 | 633204                  | CC                              | AA                 | AA               | INTERGENIC      |               |                    |                    |
| SNP_93229_A_642296 | NW_004516558.1 | scaffold1324 | 642296                  | CC                              | GG                 | GG               | INTERGENIC      |               |                    |                    |
| SNP_93230_A_642345 | NW_004516558.1 | scaffold1324 | 642345                  | CC                              | TT                 | TT               | INTERGENIC      |               |                    |                    |
| SNP_93232_A_684985 | NW_004516558.1 | scaffold1324 | 684985                  | TT                              | CC                 | CC               | INTERGENIC      |               |                    |                    |
| SNP_93233_A_684999 | NW_004516558.1 | scaffold1324 | 684999                  | AA                              | TT                 | TT               | INTERGENIC      |               |                    |                    |
| SNP_93234_A_685353 | NW_004516558.1 | scaffold1324 | 685353                  | TT                              | CC                 | CC               | INTERGENIC      |               |                    |                    |
| SNP_93236_A_1955   | NW_004516560.1 | scaffold1327 | 1955                    | CC                              | GG                 | GG               | INTERGENIC      |               |                    |                    |
| SNP_93237_A_33422  | NW_004516560.1 | scaffold1327 | 33422                   | GG                              | TT                 | TT               | INTERGENIC      |               |                    |                    |
| SNP_93238_A_33438  | NW_004516560.1 | scaffold1327 | 33438                   | TT                              | CC                 | CC               | INTERGENIC      |               |                    |                    |
| SNP_93239_A_33455  | NW_004516560.1 | scaffold1327 | 33455                   | TT                              | CC                 | CC               | INTERGENIC      |               |                    |                    |
| SNP_93240_A_39762  | NW_004516560.1 | scaffold1327 | 39762                   | GG                              | TT                 | TT               | INTERGENIC      |               |                    |                    |
| SNP_93241_A_39766  | NW_004516560.1 | scaffold1327 | 39766                   | TT                              | CC                 | CC               | INTERGENIC      |               |                    |                    |
| SNP_93242_A_39775  | NW_004516560.1 | scaffold1327 | 39775                   | TT                              | AA                 | AA               | INTERGENIC      |               |                    |                    |
| SNP_93243_A_39870  | NW_004516560.1 | scaffold1327 | 39870                   | TT                              | CC                 | CC               | INTERGENIC      |               |                    |                    |
| SNP_93244_A_39905  | NW_004516560.1 | scaffold1327 | 39905                   | GG                              | AA                 | AA               | INTERGENIC      |               |                    |                    |
| SNP_93245_A_40028  | NW_004516560.1 | scaffold1327 | 40028                   | TT                              | CC                 | CC               | INTERGENIC      |               |                    |                    |
| SNP_93246_A_40031  | NW_004516560.1 | scaffold1327 | 40031                   | GG                              | TT                 | TT               | INTERGENIC      |               |                    |                    |
| SNP_93247_A_40044  | NW_004516560.1 | scaffold1327 | 40044                   | GG                              | TT                 | TT               | INTERGENIC      |               |                    |                    |

| SNPs IDs           | Chromosome IDs | Chromosomes  | Physical positions (bp) | CDC Frontier (Reference genome) | (Pusa 1103 & HPNB) | (ILWC 46 & LPNB) | Sequence genome | Components of | Gene accession IDs | Putative functions |
|--------------------|----------------|--------------|-------------------------|---------------------------------|--------------------|------------------|-----------------|---------------|--------------------|--------------------|
| SNP_93248_A_40100  | NW_004516560.1 | scaffold1327 | 40100                   | TT                              | GG                 | GG               | INTERGENIC      |               |                    |                    |
| SNP_93249_A_40130  | NW_004516560.1 | scaffold1327 | 40130                   | TT                              | GG                 | GG               | INTERGENIC      |               |                    |                    |
| SNP_93250_A_40141  | NW_004516560.1 | scaffold1327 | 40141                   | CC                              | TT                 | TT               | INTERGENIC      |               |                    |                    |
| SNP_93251_A_43093  | NW_004516560.1 | scaffold1327 | 43093                   | GG                              | AA                 | AA               | INTERGENIC      |               |                    |                    |
| SNP_93252_A_43222  | NW_004516560.1 | scaffold1327 | 43222                   | AA                              | CC                 | CC               | INTERGENIC      |               |                    |                    |
| SNP_93253_A_43275  | NW_004516560.1 | scaffold1327 | 43275                   | TT                              | CC                 | CC               | INTERGENIC      |               |                    |                    |
| SNP_93254_A_43307  | NW_004516560.1 | scaffold1327 | 43307                   | GG                              | CC                 | CC               | INTERGENIC      |               |                    |                    |
| SNP_93255_A_54149  | NW_004516560.1 | scaffold1327 | 54149                   | AA                              | GG                 | GG               | INTERGENIC      |               |                    |                    |
| SNP_93256_A_54431  | NW_004516560.1 | scaffold1327 | 54431                   | CC                              | GG                 | GG               | INTERGENIC      |               |                    |                    |
| SNP_93257_A_54438  | NW_004516560.1 | scaffold1327 | 54438                   | GG                              | TT                 | TT               | INTERGENIC      |               |                    |                    |
| SNP_93258_A_58229  | NW_004516560.1 | scaffold1327 | 58229                   | TT                              | CC                 | CC               | INTERGENIC      |               |                    |                    |
| SNP_93259_A_65492  | NW_004516560.1 | scaffold1327 | 65492                   | TT                              | GG                 | GG               | INTERGENIC      |               |                    |                    |
| SNP_93260_A_77387  | NW_004516560.1 | scaffold1327 | 77387                   | CC                              | AA                 | AA               | INTERGENIC      |               |                    |                    |
| SNP_93261_A_80956  | NW_004516560.1 | scaffold1327 | 80956                   | AA                              | CC                 | CC               | INTERGENIC      |               |                    |                    |
| SNP_93262_A_92327  | NW_004516560.1 | scaffold1327 | 92327                   | TT                              | GG                 | GG               | INTERGENIC      |               |                    |                    |
| SNP_93263_A_92345  | NW_004516560.1 | scaffold1327 | 92345                   | TT                              | CC                 | CC               | INTERGENIC      |               |                    |                    |
| SNP_93264_A_92398  | NW_004516560.1 | scaffold1327 | 92398                   | AA                              | TT                 | TT               | INTERGENIC      |               |                    |                    |
| SNP_93265_A_92402  | NW_004516560.1 | scaffold1327 | 92402                   | CC                              | TT                 | TT               | INTERGENIC      |               |                    |                    |
| SNP_93266_A_92584  | NW_004516560.1 | scaffold1327 | 92584                   | TT                              | CC                 | CC               | INTERGENIC      |               |                    |                    |
| SNP_93267_A_95744  | NW_004516560.1 | scaffold1327 | 95744                   | TT                              | CC                 | CC               | INTERGENIC      |               |                    |                    |
| SNP_93268_A_114508 | NW_004516560.1 | scaffold1327 | 114508                  | GG                              | TT                 | TT               | INTERGENIC      |               |                    |                    |
| SNP_93269_A_114518 | NW_004516560.1 | scaffold1327 | 114518                  | AA                              | CC                 | CC               | INTERGENIC      |               |                    |                    |

| SNPs IDs           | Chromosome IDs | Chromosomes  | Physical positions (bp) | CDC Frontier (Reference genome) | (Pusa 1103 & HPNB) | (ILWC 46 & LPNB) | Sequence genome | Components of | Gene accession IDs | Putative functions |
|--------------------|----------------|--------------|-------------------------|---------------------------------|--------------------|------------------|-----------------|---------------|--------------------|--------------------|
| SNP_93270_A_114525 | NW_004516560.1 | scaffold1327 | 114525                  | GG                              | AA                 | AA               | INTERGENIC      |               |                    |                    |
| SNP_93271_A_114532 | NW_004516560.1 | scaffold1327 | 114532                  | GG                              | AA                 | AA               | INTERGENIC      |               |                    |                    |
| SNP_93272_A_114553 | NW_004516560.1 | scaffold1327 | 114553                  | TT                              | CC                 | CC               | INTERGENIC      |               |                    |                    |
| SNP_93273_A_114569 | NW_004516560.1 | scaffold1327 | 114569                  | GG                              | AA                 | AA               | INTERGENIC      |               |                    |                    |
| SNP_93274_A_114794 | NW_004516560.1 | scaffold1327 | 114794                  | GG                              | AA                 | AA               | INTERGENIC      |               |                    |                    |
| SNP_93275_A_114804 | NW_004516560.1 | scaffold1327 | 114804                  | TT                              | CC                 | CC               | INTERGENIC      |               |                    |                    |
| SNP_93276_A_114834 | NW_004516560.1 | scaffold1327 | 114834                  | TT                              | CC                 | CC               | INTERGENIC      |               |                    |                    |
| SNP_93277_A_114863 | NW_004516560.1 | scaffold1327 | 114863                  | TT                              | CC                 | CC               | INTERGENIC      |               |                    |                    |
| SNP_93278_A_120201 | NW_004516560.1 | scaffold1327 | 120201                  | GG                              | AA                 | AA               | INTERGENIC      |               |                    |                    |
| SNP_93279_A_122913 | NW_004516560.1 | scaffold1327 | 122913                  | GG                              | CC                 | CC               | INTERGENIC      |               |                    |                    |
| SNP_93280_A_123115 | NW_004516560.1 | scaffold1327 | 123115                  | AA                              | TT                 | TT               | INTERGENIC      |               |                    |                    |
| SNP_93281_A_123159 | NW_004516560.1 | scaffold1327 | 123159                  | AA                              | TT                 | TT               | INTERGENIC      |               |                    |                    |
| SNP_93282_A_11732  | NW_004516561.1 | scaffold1328 | 11732                   | AA                              | TT                 | TT               | INTERGENIC      |               |                    |                    |
| SNP_93284_A_20270  | NW_004516561.1 | scaffold1328 | 20270                   | AA                              | GG                 | GG               | INTERGENIC      |               |                    |                    |
| SNP_93285_A_26375  | NW_004516561.1 | scaffold1328 | 26375                   | AA                              | TT                 | TT               | INTERGENIC      |               |                    |                    |
| SNP_93286_A_26474  | NW_004516561.1 | scaffold1328 | 26474                   | AA                              | CC                 | CC               | INTERGENIC      |               |                    |                    |
| SNP_93287_A_26504  | NW_004516561.1 | scaffold1328 | 26504                   | TT                              | CC                 | CC               | INTERGENIC      |               |                    |                    |
| SNP_93288_A_26716  | NW_004516561.1 | scaffold1328 | 26716                   | GG                              | AA                 | AA               | INTERGENIC      |               |                    |                    |
| SNP_93289_A_26726  | NW_004516561.1 | scaffold1328 | 26726                   | CC                              | AA                 | AA               | INTERGENIC      |               |                    |                    |
| SNP_93290_A_31842  | NW_004516561.1 | scaffold1328 | 31842                   | GG                              | AA                 | AA               | INTERGENIC      |               |                    |                    |
| SNP_93291_A_32077  | NW_004516561.1 | scaffold1328 | 32077                   | GG                              | AA                 | AA               | INTERGENIC      |               |                    |                    |
| SNP_93292_A_33498  | NW_004516561.1 | scaffold1328 | 33498                   | AA                              | GG                 | GG               | INTERGENIC      |               |                    |                    |



| SNPs IDs          | Chromosome IDs | Chromosomes  | Physical positions (bp) | CDC Frontier (Reference genome) | (Pusa 1103 & HPNB) | (ILWC 46 & LPNB) | Sequence genome | Components of | Gene accession IDs | Putative functions |
|-------------------|----------------|--------------|-------------------------|---------------------------------|--------------------|------------------|-----------------|---------------|--------------------|--------------------|
| SNP_93293_A_38586 | NW_004516561.1 | scaffold1328 | 38586                   | TT                              | CC                 | CC               | INTERGENIC      |               |                    |                    |
| SNP_93294_A_38871 | NW_004516561.1 | scaffold1328 | 38871                   | TT                              | CC                 | CC               | INTERGENIC      |               |                    |                    |
| SNP_93295_A_54183 | NW_004516561.1 | scaffold1328 | 54183                   | GG                              | TT                 | TT               | INTERGENIC      |               |                    |                    |
| SNP_93296_A_63527 | NW_004516561.1 | scaffold1328 | 63527                   | CC                              | AA                 | AA               | INTERGENIC      |               |                    |                    |
| SNP_93297_A_63543 | NW_004516561.1 | scaffold1328 | 63543                   | TT                              | CC                 | CC               | INTERGENIC      |               |                    |                    |
| SNP_93298_A_63553 | NW_004516561.1 | scaffold1328 | 63553                   | GG                              | AA                 | AA               | INTERGENIC      |               |                    |                    |
| SNP_93299_A_63857 | NW_004516561.1 | scaffold1328 | 63857                   | AA                              | GG                 | GG               | INTERGENIC      |               |                    |                    |
| SNP_93300_A_71402 | NW_004516561.1 | scaffold1328 | 71402                   | AA                              | CC                 | CC               | INTERGENIC      |               |                    |                    |
| SNP_93301_A_71535 | NW_004516561.1 | scaffold1328 | 71535                   | AA                              | GG                 | GG               | INTERGENIC      |               |                    |                    |
| SNP_93303_A_72390 | NW_004516561.1 | scaffold1328 | 72390                   | AA                              | GG                 | GG               | INTERGENIC      |               |                    |                    |
| SNP_93304_A_72565 | NW_004516561.1 | scaffold1328 | 72565                   | AA                              | GG                 | GG               | INTERGENIC      |               |                    |                    |
| SNP_93305_A_72573 | NW_004516561.1 | scaffold1328 | 72573                   | GG                              | TT                 | TT               | INTERGENIC      |               |                    |                    |
| SNP_93306_A_72592 | NW_004516561.1 | scaffold1328 | 72592                   | TT                              | CC                 | CC               | INTERGENIC      |               |                    |                    |
| SNP_93307_A_72594 | NW_004516561.1 | scaffold1328 | 72594                   | TT                              | GG                 | GG               | INTERGENIC      |               |                    |                    |
| SNP_93308_A_72645 | NW_004516561.1 | scaffold1328 | 72645                   | AA                              | GG                 | GG               | INTERGENIC      |               |                    |                    |
| SNP_93309_A_73307 | NW_004516561.1 | scaffold1328 | 73307                   | TT                              | CC                 | CC               | INTERGENIC      |               |                    |                    |
| SNP_93310_A_77271 | NW_004516561.1 | scaffold1328 | 77271                   | CC                              | TT                 | TT               | INTERGENIC      |               |                    |                    |
| SNP_93312_A_79923 | NW_004516561.1 | scaffold1328 | 79923                   | AA                              | GG                 | GG               | INTERGENIC      |               |                    |                    |
| SNP_93313_A_79948 | NW_004516561.1 | scaffold1328 | 79948                   | TT                              | AA                 | AA               | INTERGENIC      |               |                    |                    |
| SNP_93314_A_16163 | NW_004516563.1 | scaffold1330 | 16163                   | TT                              | CC                 | CC               | INTERGENIC      |               |                    |                    |
| SNP_93315_A_16406 | NW_004516563.1 | scaffold1330 | 16406                   | AA                              | TT                 | TT               | INTERGENIC      |               |                    |                    |
| SNP_93316_A_21062 | NW_004516563.1 | scaffold1330 | 21062                   | TT                              | CC                 | CC               | INTERGENIC      |               |                    |                    |

| SNPs IDs          | Chromosome IDs | Chromosomes  | Physical positions (bp) | CDC Frontier (Reference genome) | (Pusa 1103 & HPNB) | (ILWC 46 & LPNB) | Sequence genome | Components of | Gene accession IDs | Putative functions |
|-------------------|----------------|--------------|-------------------------|---------------------------------|--------------------|------------------|-----------------|---------------|--------------------|--------------------|
| SNP_93317_A_21092 | NW_004516563.1 | scaffold1330 | 21092                   | CC                              | TT                 | TT               | INTERGENIC      |               |                    |                    |
| SNP_93318_A_27859 | NW_004516563.1 | scaffold1330 | 27859                   | AA                              | GG                 | GG               | INTERGENIC      |               |                    |                    |
| SNP_93319_A_27894 | NW_004516563.1 | scaffold1330 | 27894                   | TT                              | GG                 | GG               | INTERGENIC      |               |                    |                    |
| SNP_93320_A_38397 | NW_004516563.1 | scaffold1330 | 38397                   | AA                              | CC                 | CC               | INTERGENIC      |               |                    |                    |
| SNP_93321_A_40847 | NW_004516563.1 | scaffold1330 | 40847                   | AA                              | GG                 | GG               | INTERGENIC      |               |                    |                    |
| SNP_93322_A_40848 | NW_004516563.1 | scaffold1330 | 40848                   | TT                              | AA                 | AA               | INTERGENIC      |               |                    |                    |
| SNP_93323_A_41128 | NW_004516563.1 | scaffold1330 | 41128                   | AA                              | GG                 | GG               | INTERGENIC      |               |                    |                    |
| SNP_93324_A_41163 | NW_004516563.1 | scaffold1330 | 41163                   | AA                              | TT                 | TT               | INTERGENIC      |               |                    |                    |
| SNP_93325_A_64    | NW_004516564.1 | scaffold1331 | 64                      | AA                              | TT                 | TT               | INTERGENIC      |               |                    |                    |
| SNP_93326_A_458   | NW_004516564.1 | scaffold1331 | 458                     | CC                              | TT                 | TT               | INTERGENIC      |               |                    |                    |
| SNP_93327_A_24502 | NW_004516564.1 | scaffold1331 | 24502                   | AA                              | GG                 | GG               | INTERGENIC      |               |                    |                    |
| SNP_93328_A_24511 | NW_004516564.1 | scaffold1331 | 24511                   | AA                              | TT                 | TT               | INTERGENIC      |               |                    |                    |
| SNP_93329_A_32675 | NW_004516564.1 | scaffold1331 | 32675                   | TT                              | CC                 | CC               | INTERGENIC      |               |                    |                    |
| SNP_93330_A_33625 | NW_004516564.1 | scaffold1331 | 33625                   | TT                              | CC                 | CC               | INTERGENIC      |               |                    |                    |
| SNP_93331_A_33926 | NW_004516564.1 | scaffold1331 | 33926                   | TT                              | AA                 | AA               | INTERGENIC      |               |                    |                    |
| SNP_93332_A_38056 | NW_004516564.1 | scaffold1331 | 38056                   | GG                              | AA                 | AA               | INTERGENIC      |               |                    |                    |
| SNP_93333_A_39660 | NW_004516564.1 | scaffold1331 | 39660                   | TT                              | CC                 | CC               | INTERGENIC      |               |                    |                    |
| SNP_93334_A_41279 | NW_004516564.1 | scaffold1331 | 41279                   | AA                              | CC                 | CC               | INTERGENIC      |               |                    |                    |
| SNP_93335_A_41460 | NW_004516564.1 | scaffold1331 | 41460                   | CC                              | AA                 | AA               | INTERGENIC      |               |                    |                    |
| SNP_93336_A_41462 | NW_004516564.1 | scaffold1331 | 41462                   | AA                              | CC                 | CC               | INTERGENIC      |               |                    |                    |
| SNP_93337_A_41482 | NW_004516564.1 | scaffold1331 | 41482                   | CC                              | AA                 | AA               | INTERGENIC      |               |                    |                    |
| SNP_93338_A_41498 | NW_004516564.1 | scaffold1331 | 41498                   | CC                              | TT                 | TT               | INTERGENIC      |               |                    |                    |

| SNPs IDs          | Chromosome IDs | Chromosomes  | Physical positions (bp) | CDC Frontier (Reference genome) | (Pusa 1103 & HPNB) | (ILWC 46 & LPNB) | Sequence genome | Components of | Gene accession IDs | Putative functions |
|-------------------|----------------|--------------|-------------------------|---------------------------------|--------------------|------------------|-----------------|---------------|--------------------|--------------------|
| SNP_93339_A_50309 | NW_004516564.1 | scaffold1331 | 50309                   | CC                              | AA                 | AA               | INTERGENIC      |               |                    |                    |
| SNP_93340_A_50313 | NW_004516564.1 | scaffold1331 | 50313                   | CC                              | TT                 | TT               | INTERGENIC      |               |                    |                    |
| SNP_93341_A_50358 | NW_004516564.1 | scaffold1331 | 50358                   | CC                              | TT                 | TT               | INTERGENIC      |               |                    |                    |
| SNP_93342_A_50359 | NW_004516564.1 | scaffold1331 | 50359                   | GG                              | TT                 | TT               | INTERGENIC      |               |                    |                    |
| SNP_93343_A_50373 | NW_004516564.1 | scaffold1331 | 50373                   | CC                              | TT                 | TT               | INTERGENIC      |               |                    |                    |
| SNP_93345_A_50668 | NW_004516564.1 | scaffold1331 | 50668                   | AA                              | GG                 | GG               | INTERGENIC      |               |                    |                    |
| SNP_93346_A_50721 | NW_004516564.1 | scaffold1331 | 50721                   | TT                              | AA                 | AA               | INTERGENIC      |               |                    |                    |
| SNP_93348_A_53217 | NW_004516564.1 | scaffold1331 | 53217                   | AA                              | TT                 | TT               | INTERGENIC      |               |                    |                    |
| SNP_93349_A_53218 | NW_004516564.1 | scaffold1331 | 53218                   | AA                              | TT                 | TT               | INTERGENIC      |               |                    |                    |
| SNP_93350_A_54739 | NW_004516564.1 | scaffold1331 | 54739                   | GG                              | AA                 | AA               | INTERGENIC      |               |                    |                    |
| SNP_93351_A_57039 | NW_004516564.1 | scaffold1331 | 57039                   | AA                              | CC                 | CC               | INTERGENIC      |               |                    |                    |
| SNP_93352_A_57637 | NW_004516564.1 | scaffold1331 | 57637                   | TT                              | AA                 | AA               | INTERGENIC      |               |                    |                    |
| SNP_93353_A_58536 | NW_004516564.1 | scaffold1331 | 58536                   | TT                              | CC                 | CC               | INTERGENIC      |               |                    |                    |
| SNP_93354_A_61674 | NW_004516564.1 | scaffold1331 | 61674                   | CC                              | GG                 | GG               | INTERGENIC      |               |                    |                    |
| SNP_93355_A_62316 | NW_004516564.1 | scaffold1331 | 62316                   | TT                              | CC                 | CC               | INTERGENIC      |               |                    |                    |
| SNP_93356_A_62626 | NW_004516564.1 | scaffold1331 | 62626                   | GG                              | AA                 | AA               | INTERGENIC      |               |                    |                    |
| SNP_93358_A_64693 | NW_004516564.1 | scaffold1331 | 64693                   | TT                              | CC                 | CC               | INTERGENIC      |               |                    |                    |
| SNP_93359_A_75330 | NW_004516564.1 | scaffold1331 | 75330                   | TT                              | AA                 | AA               | INTERGENIC      |               |                    |                    |
| SNP_93360_A_75654 | NW_004516564.1 | scaffold1331 | 75654                   | AA                              | TT                 | TT               | INTERGENIC      |               |                    |                    |
| SNP_93362_A_86188 | NW_004516564.1 | scaffold1331 | 86188                   | GG                              | AA                 | AA               | INTERGENIC      |               |                    |                    |
| SNP_93363_A_86786 | NW_004516564.1 | scaffold1331 | 86786                   | CC                              | TT                 | TT               | INTERGENIC      |               |                    |                    |
| SNP_93364_A_158   | NW_004516565.1 | scaffold1332 | 158                     | AA                              | TT                 | TT               | INTERGENIC      |               |                    |                    |

| SNPs IDs         | Chromosome IDs | Chromosomes  | Physical positions (bp) | CDC Frontier (Reference genome) | (Pusa 1103 & HPNB) | (ILWC 46 & LPNB) | Sequence genome | Components of | Gene accession IDs | Putative functions |
|------------------|----------------|--------------|-------------------------|---------------------------------|--------------------|------------------|-----------------|---------------|--------------------|--------------------|
| SNP_93365_A_340  | NW_004516565.1 | scaffold1332 | 340                     | GG                              | AA                 | AA               | INTERGENIC      |               |                    |                    |
| SNP_93366_A_364  | NW_004516565.1 | scaffold1332 | 364                     | TT                              | AA                 | AA               | INTERGENIC      |               |                    |                    |
| SNP_93367_A_365  | NW_004516565.1 | scaffold1332 | 365                     | TT                              | AA                 | AA               | INTERGENIC      |               |                    |                    |
| SNP_93368_A_366  | NW_004516565.1 | scaffold1332 | 366                     | TT                              | AA                 | AA               | INTERGENIC      |               |                    |                    |
| SNP_93369_A_386  | NW_004516565.1 | scaffold1332 | 386                     | AA                              | GG                 | GG               | INTERGENIC      |               |                    |                    |
| SNP_93370_A_402  | NW_004516565.1 | scaffold1332 | 402                     | CC                              | TT                 | TT               | INTERGENIC      |               |                    |                    |
| SNP_93371_A_423  | NW_004516565.1 | scaffold1332 | 423                     | CC                              | TT                 | TT               | INTERGENIC      |               |                    |                    |
| SNP_93373_A_536  | NW_004516565.1 | scaffold1332 | 536                     | GG                              | TT                 | TT               | INTERGENIC      |               |                    |                    |
| SNP_93374_A_610  | NW_004516565.1 | scaffold1332 | 610                     | GG                              | AA                 | AA               | INTERGENIC      |               |                    |                    |
| SNP_93375_A_613  | NW_004516565.1 | scaffold1332 | 613                     | TT                              | CC                 | CC               | INTERGENIC      |               |                    |                    |
| SNP_93376_A_673  | NW_004516565.1 | scaffold1332 | 673                     | GG                              | TT                 | TT               | INTERGENIC      |               |                    |                    |
| SNP_93377_A_4554 | NW_004516565.1 | scaffold1332 | 4554                    | TT                              | GG                 | GG               | INTERGENIC      |               |                    |                    |
| SNP_93378_A_4555 | NW_004516565.1 | scaffold1332 | 4555                    | AA                              | CC                 | CC               | INTERGENIC      |               |                    |                    |
| SNP_93379_A_4894 | NW_004516565.1 | scaffold1332 | 4894                    | GG                              | CC                 | CC               | INTERGENIC      |               |                    |                    |
| SNP_93380_A_5571 | NW_004516565.1 | scaffold1332 | 5571                    | TT                              | AA                 | AA               | DRR             | 101489180     | Unknown function   |                    |
| SNP_93381_A_5596 | NW_004516565.1 | scaffold1332 | 5596                    | CC                              | TT                 | TT               | DRR             | 101489180     | Unknown function   |                    |
| SNP_93382_A_5665 | NW_004516565.1 | scaffold1332 | 5665                    | GG                              | TT                 | TT               | DRR             | 101489180     | Unknown function   |                    |
| SNP_93383_A_5926 | NW_004516565.1 | scaffold1332 | 5926                    | TT                              | AA                 | AA               | DRR             | 101489180     | Unknown function   |                    |
| SNP_93384_A_5952 | NW_004516565.1 | scaffold1332 | 5952                    | CC                              | TT                 | TT               | DRR             | 101489180     | Unknown function   |                    |
| SNP_93385_A_6009 | NW_004516565.1 | scaffold1332 | 6009                    | CC                              | AA                 | AA               | DRR             | 101489180     | Unknown function   |                    |
| SNP_93386_A_6029 | NW_004516565.1 | scaffold1332 | 6029                    | GG                              | AA                 | AA               | DRR             | 101489180     | Unknown function   |                    |
| SNP_93387_A_6058 | NW_004516565.1 | scaffold1332 | 6058                    | GG                              | TT                 | TT               | DRR             | 101489180     | Unknown function   |                    |

| SNPs IDs         | Chromosome IDs | Chromosomes  | Physical positions (bp) | CDC Frontier (Reference genome) | (Pusa 1103 & HPNB) | (ILWC 46 & LPNB) | Sequence Components of genome | Gene accession IDs | Putative functions |
|------------------|----------------|--------------|-------------------------|---------------------------------|--------------------|------------------|-------------------------------|--------------------|--------------------|
| SNP_93388_A_6072 | NW_004516565.1 | scaffold1332 | 6072                    | CC                              | AA                 | AA               | DRR                           | 101489180          | Unknown function   |
| SNP_93389_A_6244 | NW_004516565.1 | scaffold1332 | 6244                    | AA                              | GG                 | GG               | NON_SYNONYMOUS_CODING         | 101489180          | Unknown function   |
| SNP_93390_A_6251 | NW_004516565.1 | scaffold1332 | 6251                    | AA                              | TT                 | TT               | NON_SYNONYMOUS_CODING         | 101489180          | Unknown function   |
| SNP_93391_A_6390 | NW_004516565.1 | scaffold1332 | 6390                    | TT                              | CC                 | CC               | NON_SYNONYMOUS_CODING         | 101489180          | Unknown function   |
| SNP_93392_A_7771 | NW_004516565.1 | scaffold1332 | 7771                    | CC                              | TT                 | TT               | URR                           | 101489180          | Unknown function   |
| SNP_93393_A_7940 | NW_004516565.1 | scaffold1332 | 7940                    | AA                              | GG                 | GG               | URR                           | 101489180          | Unknown function   |
| SNP_93395_A_8403 | NW_004516565.1 | scaffold1332 | 8403                    | CC                              | TT                 | TT               | URR                           | 101489180          | Unknown function   |
| SNP_93396_A_8423 | NW_004516565.1 | scaffold1332 | 8423                    | CC                              | AA                 | AA               | URR                           | 101489180          | Unknown function   |
| SNP_93397_A_8453 | NW_004516565.1 | scaffold1332 | 8453                    | AA                              | TT                 | TT               | URR                           | 101489180          | Unknown function   |
| SNP_93398_A_8454 | NW_004516565.1 | scaffold1332 | 8454                    | AA                              | TT                 | TT               | URR                           | 101489180          | Unknown function   |
| SNP_93400_A_8501 | NW_004516565.1 | scaffold1332 | 8501                    | CC                              | AA                 | AA               | INTERGENIC                    |                    |                    |
| SNP_93401_A_8681 | NW_004516565.1 | scaffold1332 | 8681                    | AA                              | GG                 | GG               | INTERGENIC                    |                    |                    |
| SNP_93402_A_8818 | NW_004516565.1 | scaffold1332 | 8818                    | AA                              | TT                 | TT               | INTERGENIC                    |                    |                    |
| SNP_93403_A_8844 | NW_004516565.1 | scaffold1332 | 8844                    | AA                              | GG                 | GG               | INTERGENIC                    |                    |                    |
| SNP_93404_A_8883 | NW_004516565.1 | scaffold1332 | 8883                    | TT                              | CC                 | CC               | INTERGENIC                    |                    |                    |
| SNP_93405_A_8899 | NW_004516565.1 | scaffold1332 | 8899                    | GG                              | AA                 | AA               | INTERGENIC                    |                    |                    |
| SNP_93406_A_9091 | NW_004516565.1 | scaffold1332 | 9091                    | CC                              | GG                 | GG               | INTERGENIC                    |                    |                    |
| SNP_93407_A_9110 | NW_004516565.1 | scaffold1332 | 9110                    | CC                              | TT                 | TT               | INTERGENIC                    |                    |                    |
| SNP_93408_A_9190 | NW_004516565.1 | scaffold1332 | 9190                    | GG                              | TT                 | TT               | INTERGENIC                    |                    |                    |
| SNP_93409_A_9355 | NW_004516565.1 | scaffold1332 | 9355                    | TT                              | GG                 | GG               | INTERGENIC                    |                    |                    |
| SNP_93410_A_9384 | NW_004516565.1 | scaffold1332 | 9384                    | GG                              | TT                 | TT               | INTERGENIC                    |                    |                    |
| SNP_93411_A_9416 | NW_004516565.1 | scaffold1332 | 9416                    | GG                              | TT                 | TT               | INTERGENIC                    |                    |                    |

| SNPs IDs          | Chromosome IDs | Chromosomes  | Physical positions (bp) | CDC Frontier (Reference genome) | (Pusa 1103 & HPNB) | (ILWC 46 & LPNB) | Sequence genome | Components of | Gene accession IDs | Putative functions |
|-------------------|----------------|--------------|-------------------------|---------------------------------|--------------------|------------------|-----------------|---------------|--------------------|--------------------|
| SNP_93412_A_9516  | NW_004516565.1 | scaffold1332 | 9516                    | TT                              | CC                 | CC               | INTERGENIC      |               |                    |                    |
| SNP_93413_A_9624  | NW_004516565.1 | scaffold1332 | 9624                    | TT                              | AA                 | AA               | INTERGENIC      |               |                    |                    |
| SNP_93414_A_9651  | NW_004516565.1 | scaffold1332 | 9651                    | GG                              | AA                 | AA               | INTERGENIC      |               |                    |                    |
| SNP_93415_A_9684  | NW_004516565.1 | scaffold1332 | 9684                    | GG                              | CC                 | CC               | INTERGENIC      |               |                    |                    |
| SNP_93416_A_9875  | NW_004516565.1 | scaffold1332 | 9875                    | GG                              | CC                 | CC               | INTERGENIC      |               |                    |                    |
| SNP_93417_A_9953  | NW_004516565.1 | scaffold1332 | 9953                    | AA                              | GG                 | GG               | INTERGENIC      |               |                    |                    |
| SNP_93419_A_10016 | NW_004516565.1 | scaffold1332 | 10016                   | AA                              | GG                 | GG               | INTERGENIC      |               |                    |                    |
| SNP_93420_A_11000 | NW_004516565.1 | scaffold1332 | 11000                   | GG                              | AA                 | AA               | INTERGENIC      |               |                    |                    |
| SNP_93421_A_11035 | NW_004516565.1 | scaffold1332 | 11035                   | TT                              | GG                 | GG               | INTERGENIC      |               |                    |                    |
| SNP_93422_A_11214 | NW_004516565.1 | scaffold1332 | 11214                   | TT                              | GG                 | GG               | INTERGENIC      |               |                    |                    |
| SNP_93423_A_11260 | NW_004516565.1 | scaffold1332 | 11260                   | GG                              | TT                 | TT               | INTERGENIC      |               |                    |                    |
| SNP_93424_A_11285 | NW_004516565.1 | scaffold1332 | 11285                   | GG                              | CC                 | CC               | INTERGENIC      |               |                    |                    |
| SNP_93425_A_22791 | NW_004516566.1 | scaffold1335 | 22791                   | TT                              | GG                 | GG               | INTERGENIC      |               |                    |                    |
| SNP_93426_A_26509 | NW_004516566.1 | scaffold1335 | 26509                   | TT                              | GG                 | GG               | INTERGENIC      |               |                    |                    |
| SNP_93427_A_33352 | NW_004516566.1 | scaffold1335 | 33352                   | TT                              | GG                 | GG               | INTERGENIC      |               |                    |                    |
| SNP_93428_A_33382 | NW_004516566.1 | scaffold1335 | 33382                   | AA                              | GG                 | GG               | INTERGENIC      |               |                    |                    |
| SNP_93429_A_33392 | NW_004516566.1 | scaffold1335 | 33392                   | GG                              | AA                 | AA               | INTERGENIC      |               |                    |                    |
| SNP_93430_A_33409 | NW_004516566.1 | scaffold1335 | 33409                   | TT                              | AA                 | AA               | INTERGENIC      |               |                    |                    |
| SNP_93431_A_33420 | NW_004516566.1 | scaffold1335 | 33420                   | TT                              | AA                 | AA               | INTERGENIC      |               |                    |                    |
| SNP_93432_A_33452 | NW_004516566.1 | scaffold1335 | 33452                   | AA                              | GG                 | GG               | INTERGENIC      |               |                    |                    |
| SNP_93433_A_33630 | NW_004516566.1 | scaffold1335 | 33630                   | GG                              | AA                 | AA               | INTERGENIC      |               |                    |                    |
| SNP_93434_A_33682 | NW_004516566.1 | scaffold1335 | 33682                   | TT                              | AA                 | AA               | INTERGENIC      |               |                    |                    |

| SNPs IDs          | Chromosome IDs | Chromosomes  | Physical positions (bp) | CDC Frontier (Reference genome) | (Pusa 1103 & HPNB) | (ILWC 46 & LPNB) | Sequence Components of genome | Gene accession IDs | Putative functions           |
|-------------------|----------------|--------------|-------------------------|---------------------------------|--------------------|------------------|-------------------------------|--------------------|------------------------------|
| SNP_93435_A_33716 | NW_004516566.1 | scaffold1335 | 33716                   | GG                              | AA                 | AA               | INTERGENIC                    |                    |                              |
| SNP_93436_A_33727 | NW_004516566.1 | scaffold1335 | 33727                   | GG                              | TT                 | TT               | INTERGENIC                    |                    |                              |
| SNP_93437_A_33732 | NW_004516566.1 | scaffold1335 | 33732                   | AA                              | GG                 | GG               | INTERGENIC                    |                    |                              |
| SNP_93438_A_33733 | NW_004516566.1 | scaffold1335 | 33733                   | GG                              | AA                 | AA               | INTERGENIC                    |                    |                              |
| SNP_93439_A_33857 | NW_004516566.1 | scaffold1335 | 33857                   | AA                              | GG                 | GG               | INTERGENIC                    |                    |                              |
| SNP_93440_A_33860 | NW_004516566.1 | scaffold1335 | 33860                   | GG                              | AA                 | AA               | INTERGENIC                    |                    |                              |
| SNP_93441_A_33888 | NW_004516566.1 | scaffold1335 | 33888                   | CC                              | AA                 | AA               | INTERGENIC                    |                    |                              |
| SNP_93442_A_45125 | NW_004516566.1 | scaffold1335 | 45125                   | AA                              | CC                 | CC               | URR                           | 101489826          | uncharacterized LOC101489826 |
| SNP_93443_A_45373 | NW_004516566.1 | scaffold1335 | 45373                   | TT                              | CC                 | CC               | URR                           | 101489826          | uncharacterized LOC101489826 |
| SNP_93444_A_45374 | NW_004516566.1 | scaffold1335 | 45374                   | GG                              | CC                 | CC               | URR                           | 101489826          | uncharacterized LOC101489826 |
| SNP_93445_A_45410 | NW_004516566.1 | scaffold1335 | 45410                   | AA                              | TT                 | TT               | URR                           | 101489826          | uncharacterized LOC101489826 |
| SNP_93446_A_45449 | NW_004516566.1 | scaffold1335 | 45449                   | AA                              | CC                 | CC               | URR                           | 101489826          | uncharacterized LOC101489826 |
| SNP_93447_A_45452 | NW_004516566.1 | scaffold1335 | 45452                   | AA                              | GG                 | GG               | URR                           | 101489826          | uncharacterized LOC101489826 |
| SNP_93448_A_45473 | NW_004516566.1 | scaffold1335 | 45473                   | AA                              | GG                 | GG               | URR                           | 101489826          | uncharacterized LOC101489826 |
| SNP_93449_A_45482 | NW_004516566.1 | scaffold1335 | 45482                   | TT                              | CC                 | CC               | URR                           | 101489826          | uncharacterized LOC101489826 |
| SNP_93450_A_45494 | NW_004516566.1 | scaffold1335 | 45494                   | CC                              | TT                 | TT               | URR                           | 101489826          | uncharacterized LOC101489826 |
| SNP_93451_A_45502 | NW_004516566.1 | scaffold1335 | 45502                   | AA                              | GG                 | GG               | URR                           | 101489826          | uncharacterized LOC101489826 |
| SNP_93452_A_45527 | NW_004516566.1 | scaffold1335 | 45527                   | TT                              | CC                 | CC               | URR                           | 101489826          | uncharacterized LOC101489826 |
| SNP_93453_A_45590 | NW_004516566.1 | scaffold1335 | 45590                   | AA                              | GG                 | GG               | URR                           | 101489826          | uncharacterized LOC101489826 |
| SNP_93454_A_45667 | NW_004516566.1 | scaffold1335 | 45667                   | GG                              | AA                 | AA               | URR                           | 101489826          | uncharacterized LOC101489826 |
| SNP_93455_A_45691 | NW_004516566.1 | scaffold1335 | 45691                   | TT                              | CC                 | CC               | URR                           | 101489826          | uncharacterized LOC101489826 |
| SNP_93456_A_45791 | NW_004516566.1 | scaffold1335 | 45791                   | CC                              | TT                 | TT               | URR                           | 101489826          | uncharacterized LOC101489826 |

| SNPs IDs          | Chromosome IDs | Chromosomes  | Physical positions (bp) | CDC Frontier (Reference genome) | (Pusa 1103 & HPNB) | (ILWC 46 & LPNB) | Sequence Components of genome | Gene accession IDs | Putative functions           |
|-------------------|----------------|--------------|-------------------------|---------------------------------|--------------------|------------------|-------------------------------|--------------------|------------------------------|
| SNP_93457_A_45793 | NW_004516566.1 | scaffold1335 | 45793                   | GG                              | CC                 | CC               | URR                           | 101489826          | uncharacterized LOC101489826 |
| SNP_93458_A_45806 | NW_004516566.1 | scaffold1335 | 45806                   | TT                              | AA                 | AA               | URR                           | 101489826          | uncharacterized LOC101489826 |
| SNP_93459_A_45840 | NW_004516566.1 | scaffold1335 | 45840                   | TT                              | CC                 | CC               | URR                           | 101489826          | uncharacterized LOC101489826 |
| SNP_93460_A_45863 | NW_004516566.1 | scaffold1335 | 45863                   | GG                              | AA                 | AA               | URR                           | 101489826          | uncharacterized LOC101489826 |
| SNP_93461_A_45886 | NW_004516566.1 | scaffold1335 | 45886                   | GG                              | AA                 | AA               | URR                           | 101489826          | uncharacterized LOC101489826 |
| SNP_93462_A_45905 | NW_004516566.1 | scaffold1335 | 45905                   | AA                              | CC                 | CC               | URR                           | 101489826          | uncharacterized LOC101489826 |
| SNP_93463_A_45924 | NW_004516566.1 | scaffold1335 | 45924                   | GG                              | AA                 | AA               | URR                           | 101489826          | uncharacterized LOC101489826 |
| SNP_93464_A_45933 | NW_004516566.1 | scaffold1335 | 45933                   | TT                              | GG                 | GG               | URR                           | 101489826          | uncharacterized LOC101489826 |
| SNP_93465_A_45941 | NW_004516566.1 | scaffold1335 | 45941                   | GG                              | AA                 | AA               | URR                           | 101489826          | uncharacterized LOC101489826 |
| SNP_93466_A_46050 | NW_004516566.1 | scaffold1335 | 46050                   | CC                              | TT                 | TT               | URR                           | 101489826          | uncharacterized LOC101489826 |
| SNP_93467_A_46073 | NW_004516566.1 | scaffold1335 | 46073                   | TT                              | AA                 | AA               | URR                           | 101489826          | uncharacterized LOC101489826 |
| SNP_93468_A_46127 | NW_004516566.1 | scaffold1335 | 46127                   | GG                              | AA                 | AA               | URR                           | 101489826          | uncharacterized LOC101489826 |
| SNP_93469_A_46137 | NW_004516566.1 | scaffold1335 | 46137                   | CC                              | TT                 | TT               | URR                           | 101489826          | uncharacterized LOC101489826 |
| SNP_93470_A_46184 | NW_004516566.1 | scaffold1335 | 46184                   | TT                              | AA                 | AA               | URR                           | 101489826          | uncharacterized LOC101489826 |
| SNP_93471_A_46212 | NW_004516566.1 | scaffold1335 | 46212                   | GG                              | AA                 | AA               | URR                           | 101489826          | uncharacterized LOC101489826 |
| SNP_93472_A_46255 | NW_004516566.1 | scaffold1335 | 46255                   | GG                              | AA                 | AA               | URR                           | 101489826          | uncharacterized LOC101489826 |
| SNP_93474_A_46291 | NW_004516566.1 | scaffold1335 | 46291                   | GG                              | AA                 | AA               | URR                           | 101489826          | uncharacterized LOC101489826 |
| SNP_93475_A_46361 | NW_004516566.1 | scaffold1335 | 46361                   | GG                              | TT                 | TT               | URR                           | 101489826          | uncharacterized LOC101489826 |
| SNP_93476_A_46375 | NW_004516566.1 | scaffold1335 | 46375                   | CC                              | TT                 | TT               | URR                           | 101489826          | uncharacterized LOC101489826 |
| SNP_93477_A_46433 | NW_004516566.1 | scaffold1335 | 46433                   | TT                              | CC                 | CC               | URR                           | 101489826          | uncharacterized LOC101489826 |
| SNP_93478_A_46471 | NW_004516566.1 | scaffold1335 | 46471                   | TT                              | CC                 | CC               | URR                           | 101489826          | uncharacterized LOC101489826 |
| SNP_93479_A_46531 | NW_004516566.1 | scaffold1335 | 46531                   | TT                              | AA                 | AA               | URR                           | 101489826          | uncharacterized LOC101489826 |



| SNPs IDs          | Chromosome IDs | Chromosomes  | Physical positions (bp) | CDC Frontier (Reference genome) | (Pusa 1103 & HPNB) | (ILWC 46 & LPNB) | Sequence Components of genome | Gene accession IDs | Putative functions           |
|-------------------|----------------|--------------|-------------------------|---------------------------------|--------------------|------------------|-------------------------------|--------------------|------------------------------|
| SNP_93480_A_46547 | NW_004516566.1 | scaffold1335 | 46547                   | AA                              | TT                 | TT               | URR                           | 101489826          | uncharacterized LOC101489826 |
| SNP_93481_A_46549 | NW_004516566.1 | scaffold1335 | 46549                   | TT                              | CC                 | CC               | URR                           | 101489826          | uncharacterized LOC101489826 |
| SNP_93482_A_34879 | NW_004516567.1 | scaffold1337 | 34879                   | TT                              | CC                 | CC               | INTERGENIC                    |                    |                              |
| SNP_93483_A_40818 | NW_004516567.1 | scaffold1337 | 40818                   | AA                              | GG                 | GG               | INTERGENIC                    |                    |                              |
| SNP_93484_A_40893 | NW_004516567.1 | scaffold1337 | 40893                   | GG                              | AA                 | AA               | INTERGENIC                    |                    |                              |
| SNP_93485_A_40897 | NW_004516567.1 | scaffold1337 | 40897                   | AA                              | CC                 | CC               | INTERGENIC                    |                    |                              |
| SNP_93487_A_41438 | NW_004516567.1 | scaffold1337 | 41438                   | CC                              | TT                 | TT               | INTERGENIC                    |                    |                              |
| SNP_93488_A_43016 | NW_004516567.1 | scaffold1337 | 43016                   | TT                              | CC                 | CC               | INTERGENIC                    |                    |                              |
| SNP_93489_A_43081 | NW_004516567.1 | scaffold1337 | 43081                   | CC                              | AA                 | AA               | INTERGENIC                    |                    |                              |
| SNP_93491_A_1266  | NW_004516569.1 | scaffold1339 | 1266                    | TT                              | AA                 | AA               | INTERGENIC                    |                    |                              |
| SNP_93492_A_1296  | NW_004516569.1 | scaffold1339 | 1296                    | TT                              | GG                 | GG               | INTERGENIC                    |                    |                              |
| SNP_93493_A_1301  | NW_004516569.1 | scaffold1339 | 1301                    | GG                              | CC                 | CC               | INTERGENIC                    |                    |                              |
| SNP_93494_A_1555  | NW_004516569.1 | scaffold1339 | 1555                    | AA                              | CC                 | CC               | INTERGENIC                    |                    |                              |
| SNP_93495_A_262   | NW_004516570.1 | scaffold1342 | 262                     | TT                              | CC                 | CC               | INTERGENIC                    |                    |                              |
| SNP_93496_A_269   | NW_004516570.1 | scaffold1342 | 269                     | GG                              | AA                 | AA               | INTERGENIC                    |                    |                              |
| SNP_93497_A_11277 | NW_004516572.1 | scaffold1344 | 11277                   | CC                              | AA                 | AA               | INTERGENIC                    |                    |                              |
| SNP_93498_A_11421 | NW_004516572.1 | scaffold1344 | 11421                   | GG                              | AA                 | AA               | INTERGENIC                    |                    |                              |
| SNP_93499_A_11807 | NW_004516572.1 | scaffold1344 | 11807                   | AA                              | CC                 | CC               | INTERGENIC                    |                    |                              |
| SNP_93500_A_11811 | NW_004516572.1 | scaffold1344 | 11811                   | AA                              | GG                 | GG               | INTERGENIC                    |                    |                              |
| SNP_93501_A_11844 | NW_004516572.1 | scaffold1344 | 11844                   | AA                              | CC                 | CC               | INTERGENIC                    |                    |                              |
| SNP_93502_A_11876 | NW_004516572.1 | scaffold1344 | 11876                   | CC                              | TT                 | TT               | INTERGENIC                    |                    |                              |
| SNP_93503_A_11963 | NW_004516572.1 | scaffold1344 | 11963                   | GG                              | AA                 | AA               | INTERGENIC                    |                    |                              |

| SNPs IDs          | Chromosome IDs | Chromosomes    | Physical positions (bp) | CDC Frontier (Reference genome) | (Pusa 1103 & HPNB) | (ILWC 46 & LPNB) | Sequence Components of genome | Gene accession IDs | Putative functions                   |
|-------------------|----------------|----------------|-------------------------|---------------------------------|--------------------|------------------|-------------------------------|--------------------|--------------------------------------|
| SNP_93504_A_13536 | NW_004516572.1 | scaffold1344   | 13536                   | AA                              | CC                 | CC               | INTERGENIC                    |                    |                                      |
| SNP_93505_A_20948 | NW_004516572.1 | scaffold1344   | 20948                   | GG                              | CC                 | CC               | INTERGENIC                    |                    |                                      |
| SNP_93506_A_20954 | NW_004516572.1 | scaffold1344   | 20954                   | GG                              | AA                 | AA               | INTERGENIC                    |                    |                                      |
| SNP_93507_A_20972 | NW_004516572.1 | scaffold1344   | 20972                   | TT                              | CC                 | CC               | INTERGENIC                    |                    |                                      |
| SNP_93508_A_20998 | NW_004516572.1 | scaffold1344   | 20998                   | AA                              | GG                 | GG               | INTERGENIC                    |                    |                                      |
| SNP_93509_A_22170 | NW_004516572.1 | scaffold1344   | 22170                   | TT                              | CC                 | CC               | INTERGENIC                    |                    |                                      |
| SNP_93511_A_5325  | NW_004516574.1 | scaffold1348_1 | 5325                    | CC                              | AA                 | AA               | DRR                           | 101510251          | Unknown function                     |
| SNP_93512_A_5368  | NW_004516574.1 | scaffold1348_1 | 5368                    | TT                              | CC                 | CC               | DRR                           | 101510251          | Unknown function                     |
| SNP_93513_A_5958  | NW_004516574.1 | scaffold1348_1 | 5958                    | AA                              | GG                 | GG               | URR                           | 101510251          | Unknown function                     |
| SNP_93515_A_16079 | NW_004516574.1 | scaffold1348_1 | 16079                   | GG                              | AA                 | AA               | URR                           | 101490153          | acid beta-fructofuranosidase-like    |
| SNP_93517_A_18020 | NW_004516574.1 | scaffold1348_1 | 18020                   | AA                              | TT                 | TT               | INTERGENIC                    |                    |                                      |
| SNP_93518_A_18061 | NW_004516574.1 | scaffold1348_1 | 18061                   | GG                              | AA                 | AA               | INTERGENIC                    |                    |                                      |
| SNP_93519_A_18062 | NW_004516574.1 | scaffold1348_1 | 18062                   | TT                              | GG                 | GG               | INTERGENIC                    |                    |                                      |
| SNP_93520_A_18101 | NW_004516574.1 | scaffold1348_1 | 18101                   | CC                              | TT                 | TT               | INTERGENIC                    |                    |                                      |
| SNP_93521_A_25829 | NW_004516574.1 | scaffold1348_1 | 25829                   | TT                              | CC                 | CC               | INTRON                        | 101490477          | monocopper oxidase-like protein SKU5 |
| SNP_93523_A_30614 | NW_004516574.1 | scaffold1348_1 | 30614                   | GG                              | CC                 | CC               | INTERGENIC                    |                    |                                      |
| SNP_93524_A_33650 | NW_004516574.1 | scaffold1348_1 | 33650                   | AA                              | GG                 | GG               | INTERGENIC                    |                    |                                      |
| SNP_93525_A_33662 | NW_004516574.1 | scaffold1348_1 | 33662                   | TT                              | CC                 | CC               | INTERGENIC                    |                    |                                      |
| SNP_93526_A_36190 | NW_004516574.1 | scaffold1348_1 | 36190                   | TT                              | CC                 | CC               | INTERGENIC                    |                    |                                      |
| SNP_93527_A_36202 | NW_004516574.1 | scaffold1348_1 | 36202                   | AA                              | CC                 | CC               | INTERGENIC                    |                    |                                      |
| SNP_93528_A_36214 | NW_004516574.1 | scaffold1348_1 | 36214                   | AA                              | TT                 | TT               | INTERGENIC                    |                    |                                      |
| SNP_93529_A_36505 | NW_004516574.1 | scaffold1348_1 | 36505                   | CC                              | TT                 | TT               | INTERGENIC                    |                    |                                      |

| SNPs IDs          | Chromosome IDs | Chromosomes    | Physical positions (bp) | CDC Frontier (Reference genome) | (Pusa 1103 & HPNB) | (ILWC 46 & LPNB) | Sequence Components of genome | Gene accession IDs | Putative functions                   |
|-------------------|----------------|----------------|-------------------------|---------------------------------|--------------------|------------------|-------------------------------|--------------------|--------------------------------------|
| SNP_93530_A_40756 | NW_004516574.1 | scaffold1348_1 | 40756                   | AA                              | GG                 | GG               | DRR                           | 101490802          | protein YABBY 4-like                 |
| SNP_93531_A_40791 | NW_004516574.1 | scaffold1348_1 | 40791                   | GG                              | TT                 | TT               | DRR                           | 101490802          | protein YABBY 4-like                 |
| SNP_93532_A_41006 | NW_004516574.1 | scaffold1348_1 | 41006                   | TT                              | AA                 | AA               | DRR                           | 101490802          | protein YABBY 4-like                 |
| SNP_93534_A_44613 | NW_004516574.1 | scaffold1348_1 | 44613                   | AA                              | CC                 | CC               | URR                           | 101490802          | protein YABBY 4-like                 |
| SNP_93535_A_44615 | NW_004516574.1 | scaffold1348_1 | 44615                   | CC                              | TT                 | TT               | URR                           | 101490802          | protein YABBY 4-like                 |
| SNP_93538_A_45921 | NW_004516574.1 | scaffold1348_1 | 45921                   | CC                              | TT                 | TT               | URR                           | 101490802          | protein YABBY 4-like                 |
| SNP_93539_A_45961 | NW_004516574.1 | scaffold1348_1 | 45961                   | GG                              | AA                 | AA               | URR                           | 101490802          | protein YABBY 4-like                 |
| SNP_93540_A_48952 | NW_004516574.1 | scaffold1348_1 | 48952                   | TT                              | CC                 | CC               | INTERGENIC                    |                    |                                      |
| SNP_93541_A_48958 | NW_004516574.1 | scaffold1348_1 | 48958                   | GG                              | CC                 | CC               | INTERGENIC                    |                    |                                      |
| SNP_93542_A_48978 | NW_004516574.1 | scaffold1348_1 | 48978                   | GG                              | TT                 | TT               | INTERGENIC                    |                    |                                      |
| SNP_93543_A_49002 | NW_004516574.1 | scaffold1348_1 | 49002                   | GG                              | CC                 | CC               | INTERGENIC                    |                    |                                      |
| SNP_93544_A_49790 | NW_004516574.1 | scaffold1348_1 | 49790                   | GG                              | TT                 | TT               | INTERGENIC                    |                    |                                      |
| SNP_93545_A_49818 | NW_004516574.1 | scaffold1348_1 | 49818                   | CC                              | GG                 | GG               | INTERGENIC                    |                    |                                      |
| SNP_93546_A_50018 | NW_004516574.1 | scaffold1348_1 | 50018                   | TT                              | CC                 | CC               | INTERGENIC                    |                    |                                      |
| SNP_93547_A_50101 | NW_004516574.1 | scaffold1348_1 | 50101                   | TT                              | AA                 | AA               | INTERGENIC                    |                    |                                      |
| SNP_93548_A_50131 | NW_004516574.1 | scaffold1348_1 | 50131                   | TT                              | AA                 | AA               | INTERGENIC                    |                    |                                      |
| SNP_93549_A_60952 | NW_004516574.1 | scaffold1348_1 | 60952                   | AA                              | GG                 | GG               | INTERGENIC                    |                    |                                      |
| SNP_93550_A_60959 | NW_004516574.1 | scaffold1348_1 | 60959                   | GG                              | AA                 | AA               | INTERGENIC                    |                    |                                      |
| SNP_93551_A_62610 | NW_004516574.1 | scaffold1348_1 | 62610                   | GG                              | CC                 | CC               | INTERGENIC                    |                    |                                      |
| SNP_93552_A_63851 | NW_004516574.1 | scaffold1348_1 | 63851                   | AA                              | CC                 | CC               | DRR                           | 101491337          | NAC domain-containing protein 7-like |
| SNP_93555_A_65875 | NW_004516574.1 | scaffold1348_1 | 65875                   | GG                              | AA                 | AA               | INTRON                        | 101491337          | NAC domain-containing protein 7-like |
| SNP_93556_A_65883 | NW_004516574.1 | scaffold1348_1 | 65883                   | GG                              | CC                 | CC               | INTRON                        | 101491337          | NAC domain-containing protein 7-like |

| SNPs IDs          | Chromosome IDs | Chromosomes    | Physical positions (bp) | CDC Frontier (Reference genome) | (Pusa 1103 & HPNB) | (ILWC 46 & LPNB) | Sequence Components of genome | Gene accession IDs | Putative functions                   |
|-------------------|----------------|----------------|-------------------------|---------------------------------|--------------------|------------------|-------------------------------|--------------------|--------------------------------------|
| SNP_93557_A_67238 | NW_004516574.1 | scaffold1348_1 | 67238                   | TT                              | CC                 | CC               | INTRON                        | 101491337          | NAC domain-containing protein 7-like |
| SNP_93558_A_67376 | NW_004516574.1 | scaffold1348_1 | 67376                   | GG                              | TT                 | TT               | INTRON                        | 101491337          | NAC domain-containing protein 7-like |
| SNP_93559_A_68229 | NW_004516574.1 | scaffold1348_1 | 68229                   | GG                              | CC                 | CC               | INTRON                        | 101491337          | NAC domain-containing protein 7-like |
| SNP_93560_A_68562 | NW_004516574.1 | scaffold1348_1 | 68562                   | GG                              | AA                 | AA               | SPLICE_SITE_REGION            | 101491337          | NAC domain-containing protein 7-like |
| SNP_93562_A_70818 | NW_004516574.1 | scaffold1348_1 | 70818                   | TT                              | CC                 | CC               | URR                           | 101491337          | NAC domain-containing protein 7-like |
| SNP_93563_A_71015 | NW_004516574.1 | scaffold1348_1 | 71015                   | AA                              | TT                 | TT               | URR                           | 101491337          | NAC domain-containing protein 7-like |
| SNP_93564_A_71723 | NW_004516574.1 | scaffold1348_1 | 71723                   | GG                              | CC                 | CC               | URR                           | 101491337          | NAC domain-containing protein 7-like |
| SNP_93565_A_72624 | NW_004516574.1 | scaffold1348_1 | 72624                   | TT                              | AA                 | AA               | INTERGENIC                    |                    |                                      |
| SNP_93567_A_72676 | NW_004516574.1 | scaffold1348_1 | 72676                   | GG                              | TT                 | TT               | INTERGENIC                    |                    |                                      |
| SNP_93568_A_75073 | NW_004516574.1 | scaffold1348_1 | 75073                   | CC                              | TT                 | TT               | INTERGENIC                    |                    |                                      |
| SNP_93569_A_81162 | NW_004516574.1 | scaffold1348_1 | 81162                   | GG                              | AA                 | AA               | SPLICE_SITE_REGION            | 101491855          | legumain                             |
| SNP_93570_A_81346 | NW_004516574.1 | scaffold1348_1 | 81346                   | AA                              | CC                 | CC               | INTRON                        | 101491855          | legumain                             |
| SNP_93571_A_81763 | NW_004516574.1 | scaffold1348_1 | 81763                   | AA                              | GG                 | GG               | INTRON                        | 101491855          | legumain                             |
| SNP_93572_A_84101 | NW_004516574.1 | scaffold1348_1 | 84101                   | GG                              | AA                 | AA               | INTRON                        | 101491855          | legumain                             |
| SNP_93573_A_87994 | NW_004516574.1 | scaffold1348_1 | 87994                   | TT                              | GG                 | GG               | INTERGENIC                    |                    |                                      |
| SNP_93574_A_88914 | NW_004516574.1 | scaffold1348_1 | 88914                   | TT                              | CC                 | CC               | INTERGENIC                    |                    |                                      |
| SNP_93575_A_89641 | NW_004516574.1 | scaffold1348_1 | 89641                   | AA                              | TT                 | TT               | INTERGENIC                    |                    |                                      |
| SNP_93576_A_89643 | NW_004516574.1 | scaffold1348_1 | 89643                   | TT                              | AA                 | AA               | INTERGENIC                    |                    |                                      |
| SNP_93577_A_89872 | NW_004516574.1 | scaffold1348_1 | 89872                   | AA                              | GG                 | GG               | INTERGENIC                    |                    |                                      |
| SNP_93578_A_89875 | NW_004516574.1 | scaffold1348_1 | 89875                   | TT                              | AA                 | AA               | INTERGENIC                    |                    |                                      |
| SNP_93579_A_89877 | NW_004516574.1 | scaffold1348_1 | 89877                   | TT                              | CC                 | CC               | INTERGENIC                    |                    |                                      |
| SNP_93580_A_90115 | NW_004516574.1 | scaffold1348_1 | 90115                   | TT                              | CC                 | CC               | INTERGENIC                    |                    |                                      |

| SNPs IDs           | Chromosome IDs | Chromosomes    | Physical positions (bp) | CDC Frontier (Reference genome) | (Pusa 1103 & HPNB) | (ILWC 46 & LPNB) | Sequence Components of genome | Gene accession IDs | Putative functions                   |
|--------------------|----------------|----------------|-------------------------|---------------------------------|--------------------|------------------|-------------------------------|--------------------|--------------------------------------|
| SNP_93581_A_90393  | NW_004516574.1 | scaffold1348_1 | 90393                   | AA                              | GG                 | GG               | INTERGENIC                    |                    |                                      |
| SNP_93582_A_90452  | NW_004516574.1 | scaffold1348_1 | 90452                   | GG                              | AA                 | AA               | INTERGENIC                    |                    |                                      |
| SNP_93583_A_90458  | NW_004516574.1 | scaffold1348_1 | 90458                   | GG                              | AA                 | AA               | INTERGENIC                    |                    |                                      |
| SNP_93584_A_95231  | NW_004516574.1 | scaffold1348_1 | 95231                   | GG                              | AA                 | AA               | INTRON                        | 101492190          | elongation factor G-2, chloroplastic |
| SNP_93585_A_96428  | NW_004516574.1 | scaffold1348_1 | 96428                   | CC                              | TT                 | TT               | URR                           | 101492190          | elongation factor G-2, chloroplastic |
| SNP_93586_A_97190  | NW_004516574.1 | scaffold1348_1 | 97190                   | GG                              | TT                 | TT               | URR                           | 101492190          | elongation factor G-2, chloroplastic |
| SNP_93587_A_99477  | NW_004516574.1 | scaffold1348_1 | 99477                   | TT                              | CC                 | CC               | INTERGENIC                    |                    |                                      |
| SNP_93589_A_99715  | NW_004516574.1 | scaffold1348_1 | 99715                   | CC                              | GG                 | GG               | INTERGENIC                    |                    |                                      |
| SNP_93590_A_99720  | NW_004516574.1 | scaffold1348_1 | 99720                   | TT                              | CC                 | CC               | INTERGENIC                    |                    |                                      |
| SNP_93591_A_100767 | NW_004516574.1 | scaffold1348_1 | 100767                  | CC                              | TT                 | TT               | INTERGENIC                    |                    |                                      |
| SNP_93592_A_100788 | NW_004516574.1 | scaffold1348_1 | 100788                  | GG                              | TT                 | TT               | INTERGENIC                    |                    |                                      |
| SNP_93593_A_101014 | NW_004516574.1 | scaffold1348_1 | 101014                  | CC                              | GG                 | GG               | INTERGENIC                    |                    |                                      |
| SNP_93594_A_101070 | NW_004516574.1 | scaffold1348_1 | 101070                  | AA                              | GG                 | GG               | INTERGENIC                    |                    |                                      |
| SNP_93595_A_101125 | NW_004516574.1 | scaffold1348_1 | 101125                  | AA                              | CC                 | CC               | INTERGENIC                    |                    |                                      |
| SNP_93596_A_102018 | NW_004516574.1 | scaffold1348_1 | 102018                  | AA                              | GG                 | GG               | INTERGENIC                    |                    |                                      |
| SNP_93597_A_102043 | NW_004516574.1 | scaffold1348_1 | 102043                  | AA                              | GG                 | GG               | INTERGENIC                    |                    |                                      |
| SNP_93598_A_103263 | NW_004516574.1 | scaffold1348_1 | 103263                  | AA                              | GG                 | GG               | DRR                           | 101492529          | protein YLS3-like                    |
| SNP_93599_A_103611 | NW_004516574.1 | scaffold1348_1 | 103611                  | TT                              | CC                 | CC               | DRR                           | 101492529          | protein YLS3-like                    |
| SNP_93600_A_103626 | NW_004516574.1 | scaffold1348_1 | 103626                  | CC                              | GG                 | GG               | DRR                           | 101492529          | protein YLS3-like                    |
| SNP_93601_A_103627 | NW_004516574.1 | scaffold1348_1 | 103627                  | GG                              | AA                 | AA               | DRR                           | 101492529          | protein YLS3-like                    |
| SNP_93602_A_105909 | NW_004516574.1 | scaffold1348_1 | 105909                  | CC                              | TT                 | TT               | INTRON                        | 101492529          | protein YLS3-like                    |
| SNP_93603_A_105937 | NW_004516574.1 | scaffold1348_1 | 105937                  | GG                              | AA                 | AA               | INTRON                        | 101492529          | protein YLS3-like                    |

| SNPs IDs           | Chromosome IDs | Chromosomes    | Physical positions (bp) | CDC Frontier (Reference genome) | (Pusa 1103 & HPNB) | (ILWC 46 & LPNB) | Sequence Components of genome | Gene accession IDs | Putative functions                                                 |
|--------------------|----------------|----------------|-------------------------|---------------------------------|--------------------|------------------|-------------------------------|--------------------|--------------------------------------------------------------------|
| SNP_93604_A_106125 | NW_004516574.1 | scaffold1348_1 | 106125                  | TT                              | AA                 | AA               | INTRON                        | 101492529          | protein YLS3-like                                                  |
| SNP_93605_A_107008 | NW_004516574.1 | scaffold1348_1 | 107008                  | AA                              | CC                 | CC               | DRR                           | 101492858          | copper chaperone for superoxide dismutase, chloroplastic/cytosolic |
| SNP_93606_A_107070 | NW_004516574.1 | scaffold1348_1 | 107070                  | GG                              | CC                 | CC               | DRR                           | 101492858          | copper chaperone for superoxide dismutase, chloroplastic/cytosolic |
| SNP_93608_A_107730 | NW_004516574.1 | scaffold1348_1 | 107730                  | AA                              | GG                 | GG               | URR                           | 101492529          | protein YLS3-like                                                  |
| SNP_93609_A_109075 | NW_004516574.1 | scaffold1348_1 | 109075                  | TT                              | CC                 | CC               | INTERGENIC                    |                    |                                                                    |
| SNP_93610_A_117746 | NW_004516574.1 | scaffold1348_1 | 117746                  | CC                              | TT                 | TT               | INTRON                        | 101493191          | nudix hydrolase 14, chloroplastic-like                             |
| SNP_93611_A_117768 | NW_004516574.1 | scaffold1348_1 | 117768                  | GG                              | AA                 | AA               | INTRON                        | 101493191          | nudix hydrolase 14, chloroplastic-like                             |
| SNP_93612_A_119189 | NW_004516574.1 | scaffold1348_1 | 119189                  | TT                              | CC                 | CC               | URR                           | 101493191          | nudix hydrolase 14, chloroplastic-like                             |
| SNP_93614_A_123783 | NW_004516574.1 | scaffold1348_1 | 123783                  | GG                              | AA                 | AA               | URR                           | 101493510          | probable sugar phosphate/phosphate translocator At1g12500          |
| SNP_93615_A_124866 | NW_004516574.1 | scaffold1348_1 | 124866                  | AA                              | TT                 | TT               | INTERGENIC                    |                    |                                                                    |
| SNP_93617_A_129479 | NW_004516574.1 | scaffold1348_1 | 129479                  | CC                              | TT                 | TT               | INTRON                        | 101495217          | guard cell S-type anion channel SLAC1                              |
| SNP_93618_A_129650 | NW_004516574.1 | scaffold1348_1 | 129650                  | CC                              | TT                 | TT               | INTRON                        | 101495217          | guard cell S-type anion channel SLAC1                              |
| SNP_93619_A_129870 | NW_004516574.1 | scaffold1348_1 | 129870                  | GG                              | TT                 | TT               | INTRON                        | 101495217          | guard cell S-type anion channel SLAC1                              |
| SNP_93620_A_129912 | NW_004516574.1 | scaffold1348_1 | 129912                  | AA                              | GG                 | GG               | INTRON                        | 101495217          | guard cell S-type anion channel SLAC1                              |
| SNP_93621_A_129977 | NW_004516574.1 | scaffold1348_1 | 129977                  | TT                              | GG                 | GG               | INTERGENIC                    |                    |                                                                    |
| SNP_93622_A_130196 | NW_004516574.1 | scaffold1348_1 | 130196                  | AA                              | GG                 | GG               | INTERGENIC                    |                    |                                                                    |
| SNP_93623_A_130773 | NW_004516574.1 | scaffold1348_1 | 130773                  | TT                              | CC                 | CC               | INTERGENIC                    |                    |                                                                    |
| SNP_93624_A_130792 | NW_004516574.1 | scaffold1348_1 | 130792                  | CC                              | TT                 | TT               | INTERGENIC                    |                    |                                                                    |
| SNP_93625_A_130799 | NW_004516574.1 | scaffold1348_1 | 130799                  | TT                              | GG                 | GG               | INTERGENIC                    |                    |                                                                    |
| SNP_93626_A_136388 | NW_004516574.1 | scaffold1348_1 | 136388                  | GG                              | AA                 | AA               | URR                           | 101495217          | guard cell S-type anion channel SLAC1                              |
| SNP_93627_A_141280 | NW_004516574.1 | scaffold1348_1 | 141280                  | AA                              | CC                 | CC               | INTRON                        | 101493823          | protein TPX2-like                                                  |
| SNP_93629_A_142992 | NW_004516574.1 | scaffold1348_1 | 142992                  | CC                              | GG                 | GG               | URR                           | 101493823          | protein TPX2-like                                                  |

| SNPs IDs           | Chromosome IDs | Chromosomes    | Physical positions (bp) | CDC Frontier (Reference genome) | (Pusa 1103 & HPNB) | (ILWC 46 & LPNB) | Sequence Components of genome | Gene accession IDs | Putative functions            |
|--------------------|----------------|----------------|-------------------------|---------------------------------|--------------------|------------------|-------------------------------|--------------------|-------------------------------|
| SNP_93630_A_142995 | NW_004516574.1 | scaffold1348_1 | 142995                  | GG                              | CC                 | CC               | URR                           | 101493823          | protein TPX2-like             |
| SNP_93631_A_143067 | NW_004516574.1 | scaffold1348_1 | 143067                  | AA                              | CC                 | CC               | URR                           | 101493823          | protein TPX2-like             |
| SNP_93632_A_143687 | NW_004516574.1 | scaffold1348_1 | 143687                  | GG                              | AA                 | AA               | URR                           | 101493823          | protein TPX2-like             |
| SNP_93633_A_143752 | NW_004516574.1 | scaffold1348_1 | 143752                  | GG                              | AA                 | AA               | URR                           | 101493823          | protein TPX2-like             |
| SNP_93634_A_145709 | NW_004516574.1 | scaffold1348_1 | 145709                  | TT                              | GG                 | GG               | INTERGENIC                    |                    |                               |
| SNP_93635_A_145715 | NW_004516574.1 | scaffold1348_1 | 145715                  | CC                              | GG                 | GG               | INTERGENIC                    |                    |                               |
| SNP_93636_A_148647 | NW_004516574.1 | scaffold1348_1 | 148647                  | GG                              | AA                 | AA               | INTRON                        | 101495535          | transmembrane protein 64-like |
| SNP_93637_A_152466 | NW_004516574.1 | scaffold1348_1 | 152466                  | AA                              | TT                 | TT               | URR                           | 101495535          | transmembrane protein 64-like |
| SNP_93638_A_153133 | NW_004516574.1 | scaffold1348_1 | 153133                  | GG                              | AA                 | AA               | URR                           | 101495535          | transmembrane protein 64-like |
| SNP_93639_A_153165 | NW_004516574.1 | scaffold1348_1 | 153165                  | CC                              | GG                 | GG               | URR                           | 101495535          | transmembrane protein 64-like |
| SNP_93640_A_157963 | NW_004516574.1 | scaffold1348_1 | 157963                  | AA                              | GG                 | GG               | INTERGENIC                    |                    |                               |
| SNP_93641_A_159063 | NW_004516574.1 | scaffold1348_1 | 159063                  | TT                              | CC                 | CC               | INTERGENIC                    |                    |                               |
| SNP_93642_A_159189 | NW_004516574.1 | scaffold1348_1 | 159189                  | GG                              | AA                 | AA               | INTERGENIC                    |                    |                               |
| SNP_93645_A_163703 | NW_004516574.1 | scaffold1348_1 | 163703                  | AA                              | GG                 | GG               | INTERGENIC                    |                    |                               |
| SNP_93646_A_163712 | NW_004516574.1 | scaffold1348_1 | 163712                  | AA                              | GG                 | GG               | INTERGENIC                    |                    |                               |
| SNP_93647_A_163925 | NW_004516574.1 | scaffold1348_1 | 163925                  | TT                              | AA                 | AA               | DRR                           | 101495864          | uncharacterized LOC101495864  |
| SNP_93648_A_164002 | NW_004516574.1 | scaffold1348_1 | 164002                  | GG                              | AA                 | AA               | DRR                           | 101495864          | uncharacterized LOC101495864  |
| SNP_93649_A_164025 | NW_004516574.1 | scaffold1348_1 | 164025                  | GG                              | AA                 | AA               | DRR                           | 101495864          | uncharacterized LOC101495864  |
| SNP_93650_A_164048 | NW_004516574.1 | scaffold1348_1 | 164048                  | GG                              | TT                 | TT               | DRR                           | 101495864          | uncharacterized LOC101495864  |
| SNP_93651_A_164214 | NW_004516574.1 | scaffold1348_1 | 164214                  | CC                              | TT                 | TT               | DRR                           | 101495864          | uncharacterized LOC101495864  |
| SNP_93652_A_164352 | NW_004516574.1 | scaffold1348_1 | 164352                  | AA                              | CC                 | CC               | DRR                           | 101495864          | uncharacterized LOC101495864  |
| SNP_93653_A_164358 | NW_004516574.1 | scaffold1348_1 | 164358                  | CC                              | AA                 | AA               | DRR                           | 101495864          | uncharacterized LOC101495864  |

| SNPs IDs           | Chromosome IDs | Chromosomes    | Physical positions (bp) | CDC Frontier (Reference genome) | (Pusa 1103 & HPNB) | (ILWC 46 & LPNB) | Sequence Components of genome | Gene accession IDs | Putative functions                      |
|--------------------|----------------|----------------|-------------------------|---------------------------------|--------------------|------------------|-------------------------------|--------------------|-----------------------------------------|
| SNP_93654_A_168076 | NW_004516574.1 | scaffold1348_1 | 168076                  | AA                              | GG                 | GG               | URR                           | 101495864          | uncharacterized LOC101495864            |
| SNP_93656_A_170056 | NW_004516574.1 | scaffold1348_1 | 170056                  | CC                              | TT                 | TT               | INTERGENIC                    |                    |                                         |
| SNP_93657_A_170095 | NW_004516574.1 | scaffold1348_1 | 170095                  | AA                              | TT                 | TT               | INTERGENIC                    |                    |                                         |
| SNP_93659_A_171075 | NW_004516574.1 | scaffold1348_1 | 171075                  | AA                              | GG                 | GG               | INTERGENIC                    |                    |                                         |
| SNP_93660_A_171740 | NW_004516574.1 | scaffold1348_1 | 171740                  | AA                              | GG                 | GG               | INTERGENIC                    |                    |                                         |
| SNP_93661_A_171810 | NW_004516574.1 | scaffold1348_1 | 171810                  | GG                              | AA                 | AA               | INTERGENIC                    |                    |                                         |
| SNP_93662_A_171861 | NW_004516574.1 | scaffold1348_1 | 171861                  | CC                              | TT                 | TT               | INTERGENIC                    |                    |                                         |
| SNP_93663_A_171900 | NW_004516574.1 | scaffold1348_1 | 171900                  | GG                              | AA                 | AA               | INTERGENIC                    |                    |                                         |
| SNP_93664_A_171942 | NW_004516574.1 | scaffold1348_1 | 171942                  | AA                              | GG                 | GG               | INTERGENIC                    |                    |                                         |
| SNP_93665_A_172099 | NW_004516574.1 | scaffold1348_1 | 172099                  | TT                              | AA                 | AA               | INTERGENIC                    |                    |                                         |
| SNP_93666_A_172191 | NW_004516574.1 | scaffold1348_1 | 172191                  | TT                              | CC                 | CC               | INTERGENIC                    |                    |                                         |
| SNP_93667_A_172233 | NW_004516574.1 | scaffold1348_1 | 172233                  | TT                              | CC                 | CC               | INTERGENIC                    |                    |                                         |
| SNP_93668_A_172249 | NW_004516574.1 | scaffold1348_1 | 172249                  | CC                              | AA                 | AA               | INTERGENIC                    |                    |                                         |
| SNP_93669_A_172265 | NW_004516574.1 | scaffold1348_1 | 172265                  | TT                              | GG                 | CC               | INTERGENIC                    |                    |                                         |
| SNP_93670_A_172274 | NW_004516574.1 | scaffold1348_1 | 172274                  | CC                              | TT                 | TT               | INTERGENIC                    |                    |                                         |
| SNP_93671_A_172290 | NW_004516574.1 | scaffold1348_1 | 172290                  | TT                              | CC                 | CC               | INTERGENIC                    |                    |                                         |
| SNP_93673_A_176187 | NW_004516574.1 | scaffold1348_1 | 176187                  | GG                              | TT                 | TT               | INTERGENIC                    |                    |                                         |
| SNP_93674_A_179587 | NW_004516574.1 | scaffold1348_1 | 179587                  | TT                              | AA                 | AA               | INTERGENIC                    |                    |                                         |
| SNP_93676_A_182370 | NW_004516574.1 | scaffold1348_1 | 182370                  | CC                              | TT                 | TT               | URR                           | 101496193          | ACT domain-containing protein ACR8-like |
| SNP_93677_A_187287 | NW_004516574.1 | scaffold1348_1 | 187287                  | AA                              | GG                 | GG               | INTERGENIC                    |                    |                                         |
| SNP_93678_A_190081 | NW_004516574.1 | scaffold1348_1 | 190081                  | GG                              | AA                 | AA               | INTERGENIC                    |                    |                                         |
| SNP_93679_A_192004 | NW_004516574.1 | scaffold1348_1 | 192004                  | GG                              | TT                 | TT               | INTERGENIC                    |                    |                                         |



| SNPs IDs           | Chromosome IDs | Chromosomes    | Physical positions (bp) | CDC Frontier (Reference genome) | (Pusa 1103 & HPNB) | (ILWC 46 & LPNB) | Sequence Components of genome | Gene accession IDs | Putative functions                                                              |
|--------------------|----------------|----------------|-------------------------|---------------------------------|--------------------|------------------|-------------------------------|--------------------|---------------------------------------------------------------------------------|
| SNP_93680_A_192005 | NW_004516574.1 | scaffold1348_1 | 192005                  | GG                              | AA                 | AA               | INTERGENIC                    |                    |                                                                                 |
| SNP_93681_A_192735 | NW_004516574.1 | scaffold1348_1 | 192735                  | GG                              | AA                 | AA               | INTERGENIC                    |                    |                                                                                 |
| SNP_93682_A_192761 | NW_004516574.1 | scaffold1348_1 | 192761                  | TT                              | CC                 | CC               | INTERGENIC                    |                    |                                                                                 |
| SNP_93683_A_193005 | NW_004516574.1 | scaffold1348_1 | 193005                  | TT                              | CC                 | CC               | INTERGENIC                    |                    |                                                                                 |
| SNP_93684_A_194511 | NW_004516574.1 | scaffold1348_1 | 194511                  | TT                              | AA                 | AA               | INTERGENIC                    |                    |                                                                                 |
| SNP_93685_A_194535 | NW_004516574.1 | scaffold1348_1 | 194535                  | CC                              | TT                 | TT               | INTERGENIC                    |                    |                                                                                 |
| SNP_93686_A_194559 | NW_004516574.1 | scaffold1348_1 | 194559                  | TT                              | GG                 | GG               | INTERGENIC                    |                    |                                                                                 |
| SNP_93687_A_195131 | NW_004516574.1 | scaffold1348_1 | 195131                  | GG                              | TT                 | TT               | INTERGENIC                    |                    |                                                                                 |
| SNP_93688_A_197981 | NW_004516574.1 | scaffold1348_1 | 197981                  | GG                              | AA                 | AA               | INTERGENIC                    |                    |                                                                                 |
| SNP_93690_A_202091 | NW_004516574.1 | scaffold1348_1 | 202091                  | AA                              | TT                 | TT               | INTERGENIC                    |                    |                                                                                 |
| SNP_93691_A_205917 | NW_004516574.1 | scaffold1348_1 | 205917                  | GG                              | AA                 | AA               | INTERGENIC                    |                    |                                                                                 |
| SNP_93692_A_205942 | NW_004516574.1 | scaffold1348_1 | 205942                  | CC                              | GG                 | GG               | INTERGENIC                    |                    |                                                                                 |
| SNP_93693_A_205953 | NW_004516574.1 | scaffold1348_1 | 205953                  | CC                              | TT                 | TT               | INTERGENIC                    |                    |                                                                                 |
| SNP_93694_A_209553 | NW_004516574.1 | scaffold1348_1 | 209553                  | GG                              | AA                 | AA               | DRR                           | 101496855          | ATP-dependent Clp protease proteolytic subunit-related protein 2, chloroplastic |
| SNP_93695_A_209563 | NW_004516574.1 | scaffold1348_1 | 209563                  | AA                              | CC                 | CC               | DRR                           | 101496855          | ATP-dependent Clp protease proteolytic subunit-related protein 2, chloroplastic |
| SNP_93697_A_211857 | NW_004516574.1 | scaffold1348_1 | 211857                  | TT                              | CC                 | CC               | INTERGENIC                    |                    |                                                                                 |
| SNP_93699_A_212191 | NW_004516574.1 | scaffold1348_1 | 212191                  | AA                              | GG                 | GG               | INTERGENIC                    |                    |                                                                                 |
| SNP_93702_A_219576 | NW_004516574.1 | scaffold1348_1 | 219576                  | TT                              | AA                 | AA               | URR                           | 101497181          | protein cornichon homolog 4                                                     |
| SNP_93703_A_219589 | NW_004516574.1 | scaffold1348_1 | 219589                  | AA                              | TT                 | TT               | URR                           | 101497181          | protein cornichon homolog 4                                                     |
| SNP_93704_A_219622 | NW_004516574.1 | scaffold1348_1 | 219622                  | GG                              | AA                 | AA               | URR                           | 101497181          | protein cornichon homolog 4                                                     |
| SNP_93705_A_220612 | NW_004516574.1 | scaffold1348_1 | 220612                  | TT                              | CC                 | CC               | DRR                           | 101497512          | uncharacterized LOC101497512                                                    |
| SNP_93706_A_220644 | NW_004516574.1 | scaffold1348_1 | 220644                  | TT                              | CC                 | CC               | DRR                           | 101497512          | uncharacterized LOC101497512                                                    |

| SNPs IDs           | Chromosome IDs | Chromosomes    | Physical positions (bp) | CDC Frontier (Reference genome) | (Pusa 1103 & HPNB) | (ILWC 46 & LPNB) | Sequence genome | Components of | Gene accession IDs | Putative functions           |
|--------------------|----------------|----------------|-------------------------|---------------------------------|--------------------|------------------|-----------------|---------------|--------------------|------------------------------|
| SNP_93707_A_220709 | NW_004516574.1 | scaffold1348_1 | 220709                  | TT                              | CC                 | CC               | DRR             |               | 101497512          | uncharacterized LOC101497512 |
| SNP_93708_A_220722 | NW_004516574.1 | scaffold1348_1 | 220722                  | AA                              | TT                 | TT               | DRR             |               | 101497512          | uncharacterized LOC101497512 |
| SNP_93709_A_220777 | NW_004516574.1 | scaffold1348_1 | 220777                  | GG                              | AA                 | AA               | DRR             |               | 101497512          | uncharacterized LOC101497512 |
| SNP_93710_A_220968 | NW_004516574.1 | scaffold1348_1 | 220968                  | GG                              | AA                 | AA               | DRR             |               | 101497512          | uncharacterized LOC101497512 |
| SNP_93711_A_220977 | NW_004516574.1 | scaffold1348_1 | 220977                  | TT                              | AA                 | AA               | DRR             |               | 101497512          | uncharacterized LOC101497512 |
| SNP_93712_A_221494 | NW_004516574.1 | scaffold1348_1 | 221494                  | TT                              | CC                 | CC               | DRR             |               | 101497512          | uncharacterized LOC101497512 |
| SNP_93713_A_221620 | NW_004516574.1 | scaffold1348_1 | 221620                  | GG                              | AA                 | AA               | INTERGENIC      |               |                    |                              |
| SNP_93714_A_224866 | NW_004516574.1 | scaffold1348_1 | 224866                  | CC                              | AA                 | AA               | INTERGENIC      |               |                    |                              |
| SNP_93716_A_227299 | NW_004516574.1 | scaffold1348_1 | 227299                  | AA                              | GG                 | GG               | INTERGENIC      |               |                    |                              |
| SNP_93717_A_227302 | NW_004516574.1 | scaffold1348_1 | 227302                  | AA                              | GG                 | GG               | INTERGENIC      |               |                    |                              |
| SNP_93718_A_228690 | NW_004516574.1 | scaffold1348_1 | 228690                  | AA                              | TT                 | TT               | INTERGENIC      |               |                    |                              |
| SNP_93719_A_229148 | NW_004516574.1 | scaffold1348_1 | 229148                  | TT                              | AA                 | AA               | INTERGENIC      |               |                    |                              |
| SNP_93720_A_229435 | NW_004516574.1 | scaffold1348_1 | 229435                  | CC                              | TT                 | TT               | INTERGENIC      |               |                    |                              |
| SNP_93721_A_229504 | NW_004516574.1 | scaffold1348_1 | 229504                  | GG                              | AA                 | AA               | INTERGENIC      |               |                    |                              |
| SNP_93722_A_232903 | NW_004516574.1 | scaffold1348_1 | 232903                  | GG                              | AA                 | AA               | INTERGENIC      |               |                    |                              |
| SNP_93724_A_233808 | NW_004516574.1 | scaffold1348_1 | 233808                  | TT                              | CC                 | CC               | INTERGENIC      |               |                    |                              |
| SNP_93725_A_237360 | NW_004516574.1 | scaffold1348_1 | 237360                  | CC                              | TT                 | TT               | INTERGENIC      |               |                    |                              |
| SNP_93726_A_237512 | NW_004516574.1 | scaffold1348_1 | 237512                  | CC                              | TT                 | TT               | INTERGENIC      |               |                    |                              |
| SNP_93727_A_237532 | NW_004516574.1 | scaffold1348_1 | 237532                  | TT                              | CC                 | CC               | INTERGENIC      |               |                    |                              |
| SNP_93729_A_245339 | NW_004516574.1 | scaffold1348_1 | 245339                  | GG                              | TT                 | TT               | INTERGENIC      |               |                    |                              |
| SNP_93730_A_246862 | NW_004516574.1 | scaffold1348_1 | 246862                  | TT                              | CC                 | CC               | INTERGENIC      |               |                    |                              |
| SNP_93731_A_246885 | NW_004516574.1 | scaffold1348_1 | 246885                  | AA                              | TT                 | TT               | INTERGENIC      |               |                    |                              |

| SNPs IDs           | Chromosome IDs | Chromosomes    | Physical positions (bp) | CDC Frontier genome (Reference genome) | (Pusa 1103 & HPNB) | (ILWC 46 & LPNB) | Sequence Components of genome | Gene accession IDs | Putative functions                   |
|--------------------|----------------|----------------|-------------------------|----------------------------------------|--------------------|------------------|-------------------------------|--------------------|--------------------------------------|
| SNP_93732_A_247063 | NW_004516574.1 | scaffold1348_1 | 247063                  | AA                                     | GG                 | GG               | INTERGENIC                    |                    |                                      |
| SNP_93733_A_247557 | NW_004516574.1 | scaffold1348_1 | 247557                  | TT                                     | CC                 | CC               | INTERGENIC                    |                    |                                      |
| SNP_93734_A_250261 | NW_004516574.1 | scaffold1348_1 | 250261                  | CC                                     | TT                 | TT               | INTERGENIC                    |                    |                                      |
| SNP_93735_A_250283 | NW_004516574.1 | scaffold1348_1 | 250283                  | TT                                     | CC                 | CC               | INTERGENIC                    |                    |                                      |
| SNP_93736_A_250415 | NW_004516574.1 | scaffold1348_1 | 250415                  | CC                                     | TT                 | TT               | DRR                           | 101498387          | uncharacterized LOC101498387         |
| SNP_93737_A_250424 | NW_004516574.1 | scaffold1348_1 | 250424                  | TT                                     | AA                 | AA               | DRR                           | 101498387          | uncharacterized LOC101498387         |
| SNP_93738_A_250470 | NW_004516574.1 | scaffold1348_1 | 250470                  | TT                                     | CC                 | CC               | DRR                           | 101498387          | uncharacterized LOC101498387         |
| SNP_93739_A_250472 | NW_004516574.1 | scaffold1348_1 | 250472                  | TT                                     | AA                 | AA               | DRR                           | 101498387          | uncharacterized LOC101498387         |
| SNP_93740_A_250621 | NW_004516574.1 | scaffold1348_1 | 250621                  | AA                                     | TT                 | TT               | DRR                           | 101498387          | uncharacterized LOC101498387         |
| SNP_93741_A_250639 | NW_004516574.1 | scaffold1348_1 | 250639                  | TT                                     | CC                 | CC               | DRR                           | 101498387          | uncharacterized LOC101498387         |
| SNP_93742_A_254144 | NW_004516574.1 | scaffold1348_1 | 254144                  | AA                                     | GG                 | GG               | URR                           | 101498387          | uncharacterized LOC101498387         |
| SNP_93743_A_259579 | NW_004516574.1 | scaffold1348_1 | 259579                  | AA                                     | GG                 | GG               | INTERGENIC                    |                    |                                      |
| SNP_93744_A_261011 | NW_004516574.1 | scaffold1348_1 | 261011                  | TT                                     | CC                 | CC               | INTERGENIC                    |                    |                                      |
| SNP_93745_A_261904 | NW_004516574.1 | scaffold1348_1 | 261904                  | AA                                     | GG                 | GG               | INTERGENIC                    |                    |                                      |
| SNP_93746_A_261922 | NW_004516574.1 | scaffold1348_1 | 261922                  | CC                                     | TT                 | TT               | INTERGENIC                    |                    |                                      |
| SNP_93747_A_261929 | NW_004516574.1 | scaffold1348_1 | 261929                  | AA                                     | GG                 | GG               | INTERGENIC                    |                    |                                      |
| SNP_93748_A_261950 | NW_004516574.1 | scaffold1348_1 | 261950                  | TT                                     | CC                 | CC               | INTERGENIC                    |                    |                                      |
| SNP_93749_A_262203 | NW_004516574.1 | scaffold1348_1 | 262203                  | TT                                     | GG                 | GG               | INTERGENIC                    |                    |                                      |
| SNP_93750_A_262223 | NW_004516574.1 | scaffold1348_1 | 262223                  | TT                                     | CC                 | CC               | INTERGENIC                    |                    |                                      |
| SNP_93751_A_265081 | NW_004516574.1 | scaffold1348_1 | 265081                  | GG                                     | AA                 | AA               | INTRON                        | 101498728          | SNARE-interacting protein KEULE-like |
| SNP_93752_A_265923 | NW_004516574.1 | scaffold1348_1 | 265923                  | CC                                     | AA                 | AA               | INTRON                        | 101498728          | SNARE-interacting protein KEULE-like |
| SNP_93753_A_267329 | NW_004516574.1 | scaffold1348_1 | 267329                  | AA                                     | CC                 | CC               | INTRON                        | 101498728          | SNARE-interacting protein KEULE-like |

| SNPs IDs           | Chromosome IDs | Chromosomes    | Physical positions (bp) | CDC Frontier (Reference genome) | (Pusa 1103 & HPNB) | (ILWC 46 & LPNB) | Sequence Components of genome | Gene accession IDs | Putative functions                    |
|--------------------|----------------|----------------|-------------------------|---------------------------------|--------------------|------------------|-------------------------------|--------------------|---------------------------------------|
| SNP_93754_A_267574 | NW_004516574.1 | scaffold1348_1 | 267574                  | AA                              | CC                 | CC               | INTRON                        | 101498728          | SNARE-interacting protein KEULE-like  |
| SNP_93755_A_268534 | NW_004516574.1 | scaffold1348_1 | 268534                  | GG                              | AA                 | AA               | INTRON                        | 101498728          | SNARE-interacting protein KEULE-like  |
| SNP_93756_A_269687 | NW_004516574.1 | scaffold1348_1 | 269687                  | TT                              | CC                 | CC               | INTRON                        | 101498728          | SNARE-interacting protein KEULE-like  |
| SNP_93757_A_271937 | NW_004516574.1 | scaffold1348_1 | 271937                  | GG                              | AA                 | AA               | INTRON                        | 101498728          | SNARE-interacting protein KEULE-like  |
| SNP_93758_A_278910 | NW_004516574.1 | scaffold1348_1 | 278910                  | GG                              | TT                 | TT               | URR                           | 101498728          | SNARE-interacting protein KEULE-like  |
| SNP_93759_A_279000 | NW_004516574.1 | scaffold1348_1 | 279000                  | TT                              | AA                 | AA               | URR                           | 101498728          | SNARE-interacting protein KEULE-like  |
| SNP_93760_A_279769 | NW_004516574.1 | scaffold1348_1 | 279769                  | TT                              | GG                 | GG               | DRR                           | 101499048          | probable protein S-acyltransferase 14 |
| SNP_93761_A_279925 | NW_004516574.1 | scaffold1348_1 | 279925                  | GG                              | CC                 | CC               | DRR                           | 101499048          | probable protein S-acyltransferase 14 |
| SNP_93762_A_280355 | NW_004516574.1 | scaffold1348_1 | 280355                  | TT                              | CC                 | CC               | INTRON                        | 101499048          | probable protein S-acyltransferase 14 |
| SNP_93763_A_280589 | NW_004516574.1 | scaffold1348_1 | 280589                  | GG                              | AA                 | AA               | INTRON                        | 101499048          | probable protein S-acyltransferase 14 |
| SNP_93764_A_280813 | NW_004516574.1 | scaffold1348_1 | 280813                  | AA                              | GG                 | GG               | INTRON                        | 101499048          | probable protein S-acyltransferase 14 |
| SNP_93766_A_282665 | NW_004516574.1 | scaffold1348_1 | 282665                  | GG                              | AA                 | AA               | URR                           | 101499048          | probable protein S-acyltransferase 14 |
| SNP_93767_A_283845 | NW_004516574.1 | scaffold1348_1 | 283845                  | CC                              | TT                 | TT               | URR                           | 101499048          | probable protein S-acyltransferase 14 |
| SNP_93768_A_284325 | NW_004516574.1 | scaffold1348_1 | 284325                  | CC                              | TT                 | TT               | INTERGENIC                    |                    |                                       |
| SNP_93770_A_286499 | NW_004516574.1 | scaffold1348_1 | 286499                  | GG                              | CC                 | CC               | INTERGENIC                    |                    |                                       |
| SNP_93771_A_286603 | NW_004516574.1 | scaffold1348_1 | 286603                  | TT                              | CC                 | CC               | INTERGENIC                    |                    |                                       |
| SNP_93772_A_287185 | NW_004516574.1 | scaffold1348_1 | 287185                  | CC                              | TT                 | TT               | DRR                           | 101499362          | uncharacterized LOC101499362          |
| SNP_93773_A_293853 | NW_004516574.1 | scaffold1348_1 | 293853                  | CC                              | TT                 | TT               | INTERGENIC                    |                    |                                       |
| SNP_93774_A_294456 | NW_004516574.1 | scaffold1348_1 | 294456                  | AA                              | GG                 | GG               | INTERGENIC                    |                    |                                       |
| SNP_93775_A_294458 | NW_004516574.1 | scaffold1348_1 | 294458                  | AA                              | GG                 | GG               | INTERGENIC                    |                    |                                       |
| SNP_93776_A_302567 | NW_004516574.1 | scaffold1348_1 | 302567                  | TT                              | GG                 | GG               | INTERGENIC                    |                    |                                       |
| SNP_93777_A_302592 | NW_004516574.1 | scaffold1348_1 | 302592                  | GG                              | AA                 | AA               | INTERGENIC                    |                    |                                       |

| SNPs IDs           | Chromosome IDs | Chromosomes    | Physical positions (bp) | CDC Frontier (Reference genome) | (Pusa 1103 & HPNB) | (ILWC 46 & LPNB) | Sequence Components of genome | Gene accession IDs | Putative functions            |
|--------------------|----------------|----------------|-------------------------|---------------------------------|--------------------|------------------|-------------------------------|--------------------|-------------------------------|
| SNP_93778_A_303350 | NW_004516574.1 | scaffold1348_1 | 303350                  | AA                              | GG                 | GG               | INTERGENIC                    |                    |                               |
| SNP_93779_A_303998 | NW_004516574.1 | scaffold1348_1 | 303998                  | GG                              | AA                 | AA               | INTERGENIC                    |                    |                               |
| SNP_93780_A_304010 | NW_004516574.1 | scaffold1348_1 | 304010                  | CC                              | TT                 | TT               | INTERGENIC                    |                    |                               |
| SNP_93781_A_306906 | NW_004516574.1 | scaffold1348_1 | 306906                  | AA                              | TT                 | TT               | INTERGENIC                    |                    |                               |
| SNP_93783_A_313746 | NW_004516574.1 | scaffold1348_1 | 313746                  | CC                              | AA                 | AA               | INTRON                        | 101500517          | maspardin                     |
| SNP_93784_A_313747 | NW_004516574.1 | scaffold1348_1 | 313747                  | CC                              | TT                 | TT               | INTRON                        | 101500517          | maspardin                     |
| SNP_93785_A_315228 | NW_004516574.1 | scaffold1348_1 | 315228                  | TT                              | GG                 | GG               | URR                           | 101500517          | maspardin                     |
| SNP_93786_A_315260 | NW_004516574.1 | scaffold1348_1 | 315260                  | CC                              | GG                 | GG               | URR                           | 101500517          | maspardin                     |
| SNP_93787_A_315711 | NW_004516574.1 | scaffold1348_1 | 315711                  | GG                              | AA                 | AA               | URR                           | 101500517          | maspardin                     |
| SNP_93788_A_315717 | NW_004516574.1 | scaffold1348_1 | 315717                  | TT                              | CC                 | CC               | URR                           | 101500517          | maspardin                     |
| SNP_93789_A_315722 | NW_004516574.1 | scaffold1348_1 | 315722                  | TT                              | CC                 | CC               | URR                           | 101500517          | maspardin                     |
| SNP_93790_A_316000 | NW_004516574.1 | scaffold1348_1 | 316000                  | CC                              | TT                 | TT               | URR                           | 101500517          | maspardin                     |
| SNP_93791_A_318910 | NW_004516574.1 | scaffold1348_1 | 318910                  | CC                              | AA                 | AA               | INTERGENIC                    |                    |                               |
| SNP_93792_A_318915 | NW_004516574.1 | scaffold1348_1 | 318915                  | CC                              | TT                 | TT               | INTERGENIC                    |                    |                               |
| SNP_93793_A_319558 | NW_004516574.1 | scaffold1348_1 | 319558                  | AA                              | GG                 | GG               | INTERGENIC                    |                    |                               |
| SNP_93795_A_323224 | NW_004516574.1 | scaffold1348_1 | 323224                  | CC                              | AA                 | AA               | DRR                           | 101500840          | UDP-glucuronate 4-epimerase 5 |
| SNP_93796_A_326809 | NW_004516574.1 | scaffold1348_1 | 326809                  | CC                              | TT                 | TT               | URR                           | 101500840          | UDP-glucuronate 4-epimerase 5 |
| SNP_93797_A_329139 | NW_004516574.1 | scaffold1348_1 | 329139                  | CC                              | TT                 | TT               | INTERGENIC                    |                    |                               |
| SNP_93798_A_330650 | NW_004516574.1 | scaffold1348_1 | 330650                  | TT                              | AA                 | AA               | INTRON                        | 101501165          | geraniol 8-hydroxylase-like   |
| SNP_93800_A_334032 | NW_004516574.1 | scaffold1348_1 | 334032                  | TT                              | CC                 | CC               | URR                           | 101501165          | geraniol 8-hydroxylase-like   |
| SNP_93801_A_340354 | NW_004516574.1 | scaffold1348_1 | 340354                  | AA                              | TT                 | TT               | URR                           | 101501479          | uncharacterized LOC101501479  |
| SNP_93802_A_340827 | NW_004516574.1 | scaffold1348_1 | 340827                  | GG                              | AA                 | AA               | URR                           | 101501479          | uncharacterized LOC101501479  |

| SNPs IDs           | Chromosome IDs | Chromosomes    | Physical positions (bp) | CDC Frontier (Reference genome) | (Pusa 1103 & HPNB) | (ILWC 46 & LPNB) | Sequence Components of genome | Gene accession IDs | Putative functions             |
|--------------------|----------------|----------------|-------------------------|---------------------------------|--------------------|------------------|-------------------------------|--------------------|--------------------------------|
| SNP_93803_A_340875 | NW_004516574.1 | scaffold1348_1 | 340875                  | AA                              | GG                 | GG               | URR                           | 101501479          | uncharacterized LOC101501479   |
| SNP_93804_A_341134 | NW_004516574.1 | scaffold1348_1 | 341134                  | TT                              | CC                 | CC               | INTERGENIC                    |                    |                                |
| SNP_93805_A_341135 | NW_004516574.1 | scaffold1348_1 | 341135                  | CC                              | TT                 | TT               | INTERGENIC                    |                    |                                |
| SNP_93806_A_341139 | NW_004516574.1 | scaffold1348_1 | 341139                  | CC                              | GG                 | GG               | INTERGENIC                    |                    |                                |
| SNP_93807_A_341143 | NW_004516574.1 | scaffold1348_1 | 341143                  | CC                              | TT                 | TT               | INTERGENIC                    |                    |                                |
| SNP_93808_A_341151 | NW_004516574.1 | scaffold1348_1 | 341151                  | TT                              | CC                 | CC               | INTERGENIC                    |                    |                                |
| SNP_93811_A_348332 | NW_004516574.1 | scaffold1348_1 | 348332                  | AA                              | CC                 | CC               | URR                           | 101502003          | uncharacterized LOC101502003   |
| SNP_93812_A_348382 | NW_004516574.1 | scaffold1348_1 | 348382                  | CC                              | AA                 | AA               | URR                           | 101502003          | uncharacterized LOC101502003   |
| SNP_93813_A_349784 | NW_004516574.1 | scaffold1348_1 | 349784                  | CC                              | TT                 | TT               | INTERGENIC                    |                    |                                |
| SNP_93814_A_350879 | NW_004516574.1 | scaffold1348_1 | 350879                  | AA                              | GG                 | GG               | DRR                           | 101502959          | protein ODORANT1-like          |
| SNP_93815_A_354540 | NW_004516574.1 | scaffold1348_1 | 354540                  | AA                              | GG                 | GG               | URR                           | 101502959          | protein ODORANT1-like          |
| SNP_93816_A_356807 | NW_004516574.1 | scaffold1348_1 | 356807                  | GG                              | AA                 | AA               | INTERGENIC                    |                    |                                |
| SNP_93817_A_356811 | NW_004516574.1 | scaffold1348_1 | 356811                  | TT                              | AA                 | AA               | INTERGENIC                    |                    |                                |
| SNP_93818_A_356819 | NW_004516574.1 | scaffold1348_1 | 356819                  | CC                              | TT                 | TT               | INTERGENIC                    |                    |                                |
| SNP_93819_A_364514 | NW_004516574.1 | scaffold1348_1 | 364514                  | AA                              | GG                 | GG               | INTERGENIC                    |                    |                                |
| SNP_93820_A_365671 | NW_004516574.1 | scaffold1348_1 | 365671                  | AA                              | CC                 | CC               | INTERGENIC                    |                    |                                |
| SNP_93821_A_365694 | NW_004516574.1 | scaffold1348_1 | 365694                  | GG                              | CC                 | CC               | INTERGENIC                    |                    |                                |
| SNP_93822_A_366957 | NW_004516574.1 | scaffold1348_1 | 366957                  | GG                              | AA                 | AA               | INTERGENIC                    |                    |                                |
| SNP_93823_A_370607 | NW_004516574.1 | scaffold1348_1 | 370607                  | TT                              | CC                 | CC               | INTERGENIC                    |                    |                                |
| SNP_93824_A_375821 | NW_004516574.1 | scaffold1348_1 | 375821                  | GG                              | TT                 | TT               | URR                           | 101503284          | FAM10 family protein At4g22670 |
| SNP_93825_A_375841 | NW_004516574.1 | scaffold1348_1 | 375841                  | TT                              | CC                 | CC               | URR                           | 101503284          | FAM10 family protein At4g22670 |
| SNP_93826_A_375864 | NW_004516574.1 | scaffold1348_1 | 375864                  | AA                              | GG                 | GG               | URR                           | 101503284          | FAM10 family protein At4g22670 |

| SNPs IDs           | Chromosome IDs | Chromosomes    | Physical positions (bp) | CDC Frontier (Reference genome) | (Pusa 1103 & HPNB) | (ILWC 46 & LPNB) | Sequence Components of genome | Gene accession IDs | Putative functions                  |
|--------------------|----------------|----------------|-------------------------|---------------------------------|--------------------|------------------|-------------------------------|--------------------|-------------------------------------|
| SNP_93827_A_381615 | NW_004516574.1 | scaffold1348_1 | 381615                  | AA                              | GG                 | GG               | NON_SYNONYMOUS_CODING         | 101504049          | subtilisin-like protease SBT1.2     |
| SNP_93828_A_382444 | NW_004516574.1 | scaffold1348_1 | 382444                  | GG                              | AA                 | AA               | URR                           | 101504049          | subtilisin-like protease SBT1.2     |
| SNP_93829_A_386323 | NW_004516574.1 | scaffold1348_1 | 386323                  | TT                              | GG                 | GG               | INTERGENIC                    |                    |                                     |
| SNP_93830_A_386577 | NW_004516574.1 | scaffold1348_1 | 386577                  | AA                              | CC                 | CC               | INTERGENIC                    |                    |                                     |
| SNP_93831_A_386615 | NW_004516574.1 | scaffold1348_1 | 386615                  | AA                              | GG                 | GG               | INTERGENIC                    |                    |                                     |
| SNP_93832_A_386616 | NW_004516574.1 | scaffold1348_1 | 386616                  | TT                              | GG                 | GG               | INTERGENIC                    |                    |                                     |
| SNP_93833_A_387299 | NW_004516574.1 | scaffold1348_1 | 387299                  | TT                              | CC                 | CC               | DRR                           | 101504361          | PGR5-like protein 1A, chloroplastic |
| SNP_93834_A_387306 | NW_004516574.1 | scaffold1348_1 | 387306                  | AA                              | GG                 | GG               | DRR                           | 101504361          | PGR5-like protein 1A, chloroplastic |
| SNP_93835_A_387333 | NW_004516574.1 | scaffold1348_1 | 387333                  | CC                              | TT                 | TT               | DRR                           | 101504361          | PGR5-like protein 1A, chloroplastic |
| SNP_93837_A_391792 | NW_004516574.1 | scaffold1348_1 | 391792                  | GG                              | AA                 | AA               | INTRON                        | 101504361          | PGR5-like protein 1A, chloroplastic |
| SNP_93838_A_391795 | NW_004516574.1 | scaffold1348_1 | 391795                  | CC                              | TT                 | TT               | INTRON                        | 101504361          | PGR5-like protein 1A, chloroplastic |
| SNP_93839_A_392481 | NW_004516574.1 | scaffold1348_1 | 392481                  | GG                              | AA                 | AA               | URR                           | 101504361          | PGR5-like protein 1A, chloroplastic |
| SNP_93841_A_394492 | NW_004516574.1 | scaffold1348_1 | 394492                  | CC                              | TT                 | TT               | INTERGENIC                    |                    |                                     |
| SNP_93842_A_394522 | NW_004516574.1 | scaffold1348_1 | 394522                  | TT                              | CC                 | CC               | INTERGENIC                    |                    |                                     |
| SNP_93843_A_394528 | NW_004516574.1 | scaffold1348_1 | 394528                  | AA                              | GG                 | GG               | INTERGENIC                    |                    |                                     |
| SNP_93845_A_402413 | NW_004516574.1 | scaffold1348_1 | 402413                  | TT                              | CC                 | CC               | INTERGENIC                    |                    |                                     |
| SNP_93846_A_402519 | NW_004516574.1 | scaffold1348_1 | 402519                  | CC                              | TT                 | TT               | INTERGENIC                    |                    |                                     |
| SNP_93847_A_402532 | NW_004516574.1 | scaffold1348_1 | 402532                  | CC                              | TT                 | TT               | INTERGENIC                    |                    |                                     |
| SNP_93848_A_402534 | NW_004516574.1 | scaffold1348_1 | 402534                  | TT                              | CC                 | CC               | INTERGENIC                    |                    |                                     |
| SNP_93849_A_402539 | NW_004516574.1 | scaffold1348_1 | 402539                  | TT                              | CC                 | CC               | INTERGENIC                    |                    |                                     |
| SNP_93850_A_402706 | NW_004516574.1 | scaffold1348_1 | 402706                  | CC                              | TT                 | TT               | INTERGENIC                    |                    |                                     |
| SNP_93851_A_404184 | NW_004516574.1 | scaffold1348_1 | 404184                  | AA                              | GG                 | GG               | INTERGENIC                    |                    |                                     |

| SNPs IDs           | Chromosome IDs | Chromosomes    | Physical positions (bp) | CDC Frontier (Reference genome) | (Pusa 1103 & HPNB) | (ILWC 46 & LPNB) | Sequence Components of genome | Gene accession IDs | Putative functions                                                                 |
|--------------------|----------------|----------------|-------------------------|---------------------------------|--------------------|------------------|-------------------------------|--------------------|------------------------------------------------------------------------------------|
| SNP_93852_A_404193 | NW_004516574.1 | scaffold1348_1 | 404193                  | AA                              | CC                 | CC               | INTERGENIC                    |                    |                                                                                    |
| SNP_93853_A_404368 | NW_004516574.1 | scaffold1348_1 | 404368                  | AA                              | GG                 | GG               | INTERGENIC                    |                    |                                                                                    |
| SNP_93854_A_404386 | NW_004516574.1 | scaffold1348_1 | 404386                  | TT                              | CC                 | CC               | INTERGENIC                    |                    |                                                                                    |
| SNP_93855_A_404946 | NW_004516574.1 | scaffold1348_1 | 404946                  | GG                              | AA                 | AA               | INTERGENIC                    |                    |                                                                                    |
| SNP_93856_A_408849 | NW_004516574.1 | scaffold1348_1 | 408849                  | GG                              | TT                 | TT               | INTRON                        | 101505010          | protein FIZZY-RELATED 1-like                                                       |
| SNP_93858_A_410085 | NW_004516574.1 | scaffold1348_1 | 410085                  | GG                              | TT                 | TT               | INTERGENIC                    |                    |                                                                                    |
| SNP_93859_A_410699 | NW_004516574.1 | scaffold1348_1 | 410699                  | TT                              | CC                 | CC               | INTERGENIC                    |                    |                                                                                    |
| SNP_93860_A_411324 | NW_004516574.1 | scaffold1348_1 | 411324                  | GG                              | AA                 | AA               | INTERGENIC                    |                    |                                                                                    |
| SNP_93861_A_412375 | NW_004516574.1 | scaffold1348_1 | 412375                  | AA                              | GG                 | GG               | INTERGENIC                    |                    |                                                                                    |
| SNP_93862_A_413455 | NW_004516574.1 | scaffold1348_1 | 413455                  | CC                              | TT                 | TT               | DRR                           | 101505325          | agamous-like MADS-box protein AGL19                                                |
| SNP_93863_A_413489 | NW_004516574.1 | scaffold1348_1 | 413489                  | AA                              | CC                 | CC               | DRR                           | 101505325          | agamous-like MADS-box protein AGL19                                                |
| SNP_93865_A_418770 | NW_004516574.1 | scaffold1348_1 | 418770                  | AA                              | GG                 | GG               | INTRON                        | 101505325          | agamous-like MADS-box protein AGL19                                                |
| SNP_93866_A_418810 | NW_004516574.1 | scaffold1348_1 | 418810                  | CC                              | AA                 | AA               | INTRON                        | 101505325          | agamous-like MADS-box protein AGL19                                                |
| SNP_93867_A_418812 | NW_004516574.1 | scaffold1348_1 | 418812                  | AA                              | GG                 | GG               | INTRON                        | 101505325          | agamous-like MADS-box protein AGL19                                                |
| SNP_93868_A_418816 | NW_004516574.1 | scaffold1348_1 | 418816                  | CC                              | TT                 | TT               | INTRON                        | 101505325          | agamous-like MADS-box protein AGL19                                                |
| SNP_93869_A_422444 | NW_004516574.1 | scaffold1348_1 | 422444                  | CC                              | GG                 | GG               | NON_SYNONYMOUS_CODING         | 101505325          | agamous-like MADS-box protein AGL19                                                |
| SNP_93871_A_425976 | NW_004516574.1 | scaffold1348_1 | 425976                  | TT                              | CC                 | CC               | INTERGENIC                    |                    |                                                                                    |
| SNP_93872_A_427085 | NW_004516574.1 | scaffold1348_1 | 427085                  | AA                              | GG                 | GG               | INTERGENIC                    |                    |                                                                                    |
| SNP_93873_A_427086 | NW_004516574.1 | scaffold1348_1 | 427086                  | TT                              | AA                 | AA               | INTERGENIC                    |                    |                                                                                    |
| SNP_93874_A_431036 | NW_004516574.1 | scaffold1348_1 | 431036                  | CC                              | AA                 | AA               | INTERGENIC                    |                    |                                                                                    |
| SNP_93875_A_436030 | NW_004516574.1 | scaffold1348_1 | 436030                  | CC                              | TT                 | TT               | URR                           | 101505867          | bifunctional dTDP-4-dehydrorhamnose 3,5-epimerase/dTDP-4-dehydrorhamnose reductase |
| SNP_93876_A_436373 | NW_004516574.1 | scaffold1348_1 | 436373                  | GG                              | TT                 | TT               | URR                           | 101505867          | bifunctional dTDP-4-dehydrorhamnose 3,5-epimerase/dTDP-4-dehydrorhamnose reductase |



| SNPs IDs           | Chromosome IDs | Chromosomes    | Physical positions (bp) | CDC Frontier (Reference genome) | (Pusa 1103 & HPNB) | (ILWC 46 & LPNB) | Sequence Components of genome | Gene accession IDs | Putative functions                                                                 |
|--------------------|----------------|----------------|-------------------------|---------------------------------|--------------------|------------------|-------------------------------|--------------------|------------------------------------------------------------------------------------|
| SNP_93877_A_436409 | NW_004516574.1 | scaffold1348_1 | 436409                  | CC                              | TT                 | TT               | URR                           | 101505867          | bifunctional dTDP-4-dehydrothiamine 3,5-epimerase/dTDP-4-dehydrothiamine reductase |
| SNP_93878_A_436680 | NW_004516574.1 | scaffold1348_1 | 436680                  | GG                              | CC                 | CC               | URR                           | 101505867          | bifunctional dTDP-4-dehydrothiamine 3,5-epimerase/dTDP-4-dehydrothiamine reductase |
| SNP_93879_A_436733 | NW_004516574.1 | scaffold1348_1 | 436733                  | AA                              | GG                 | GG               | DRR                           | 101506185          | molybdenum cofactor sulfurase-like                                                 |
| SNP_93880_A_444696 | NW_004516574.1 | scaffold1348_1 | 444696                  | CC                              | TT                 | TT               | DRR                           | 101506512          | protein HOTHREAD-like                                                              |
| SNP_93881_A_444714 | NW_004516574.1 | scaffold1348_1 | 444714                  | GG                              | AA                 | AA               | DRR                           | 101506512          | protein HOTHREAD-like                                                              |
| SNP_93882_A_444843 | NW_004516574.1 | scaffold1348_1 | 444843                  | TT                              | CC                 | CC               | DRR                           | 101506512          | protein HOTHREAD-like                                                              |
| SNP_93883_A_445388 | NW_004516574.1 | scaffold1348_1 | 445388                  | TT                              | GG                 | GG               | DRR                           | 101506512          | protein HOTHREAD-like                                                              |
| SNP_93884_A_445409 | NW_004516574.1 | scaffold1348_1 | 445409                  | AA                              | GG                 | GG               | DRR                           | 101506512          | protein HOTHREAD-like                                                              |
| SNP_93885_A_445636 | NW_004516574.1 | scaffold1348_1 | 445636                  | GG                              | AA                 | AA               | DRR                           | 101506512          | protein HOTHREAD-like                                                              |
| SNP_93887_A_445699 | NW_004516574.1 | scaffold1348_1 | 445699                  | CC                              | TT                 | TT               | DRR                           | 101506512          | protein HOTHREAD-like                                                              |
| SNP_93888_A_445978 | NW_004516574.1 | scaffold1348_1 | 445978                  | TT                              | CC                 | CC               | INTRON                        | 101506512          | protein HOTHREAD-like                                                              |
| SNP_93889_A_453232 | NW_004516574.1 | scaffold1348_1 | 453232                  | AA                              | TT                 | TT               | INTRON                        | 101506512          | protein HOTHREAD-like                                                              |
| SNP_93890_A_453439 | NW_004516574.1 | scaffold1348_1 | 453439                  | CC                              | AA                 | AA               | INTRON                        | 101506512          | protein HOTHREAD-like                                                              |
| SNP_93892_A_454785 | NW_004516574.1 | scaffold1348_1 | 454785                  | TT                              | AA                 | AA               | URR                           | 101506512          | protein HOTHREAD-like                                                              |
| SNP_93893_A_454786 | NW_004516574.1 | scaffold1348_1 | 454786                  | AA                              | CC                 | CC               | URR                           | 101506512          | protein HOTHREAD-like                                                              |
| SNP_93894_A_458760 | NW_004516574.1 | scaffold1348_1 | 458760                  | AA                              | CC                 | CC               | DRR                           | 101506843          | uncharacterized LOC101506843                                                       |
| SNP_93896_A_461458 | NW_004516574.1 | scaffold1348_1 | 461458                  | AA                              | GG                 | GG               | INTERGENIC                    |                    |                                                                                    |
| SNP_93897_A_463521 | NW_004516574.1 | scaffold1348_1 | 463521                  | AA                              | TT                 | TT               | URR                           | 101506843          | uncharacterized LOC101506843                                                       |
| SNP_93898_A_464930 | NW_004516574.1 | scaffold1348_1 | 464930                  | TT                              | CC                 | CC               | INTERGENIC                    |                    |                                                                                    |
| SNP_93900_A_469348 | NW_004516574.1 | scaffold1348_1 | 469348                  | GG                              | AA                 | AA               | INTERGENIC                    |                    |                                                                                    |
| SNP_93901_A_469354 | NW_004516574.1 | scaffold1348_1 | 469354                  | AA                              | GG                 | GG               | INTERGENIC                    |                    |                                                                                    |
| SNP_93902_A_469356 | NW_004516574.1 | scaffold1348_1 | 469356                  | AA                              | TT                 | TT               | INTERGENIC                    |                    |                                                                                    |

| SNPs IDs           | Chromosome IDs | Chromosomes    | Physical positions (bp) | CDC Frontier (Reference genome) | (Pusa 1103 & HPNB) | (ILWC 46 & LPNB) | Sequence Components of genome | Gene accession IDs | Putative functions                              |
|--------------------|----------------|----------------|-------------------------|---------------------------------|--------------------|------------------|-------------------------------|--------------------|-------------------------------------------------|
| SNP_93903_A_469357 | NW_004516574.1 | scaffold1348_1 | 469357                  | TT                              | AA                 | AA               | INTERGENIC                    |                    |                                                 |
| SNP_93904_A_469360 | NW_004516574.1 | scaffold1348_1 | 469360                  | GG                              | AA                 | AA               | INTERGENIC                    |                    |                                                 |
| SNP_93905_A_477984 | NW_004516574.1 | scaffold1348_1 | 477984                  | AA                              | GG                 | GG               | SYNONYMOUS_CODING             | 101511223          | MATE efflux family protein 5-like               |
| SNP_93906_A_479400 | NW_004516574.1 | scaffold1348_1 | 479400                  | CC                              | TT                 | TT               | URR                           | 101511223          | MATE efflux family protein 5-like               |
| SNP_93907_A_479609 | NW_004516574.1 | scaffold1348_1 | 479609                  | GG                              | AA                 | AA               | URR                           | 101511223          | MATE efflux family protein 5-like               |
| SNP_93908_A_480575 | NW_004516574.1 | scaffold1348_1 | 480575                  | GG                              | AA                 | AA               | INTERGENIC                    |                    |                                                 |
| SNP_93909_A_480889 | NW_004516574.1 | scaffold1348_1 | 480889                  | TT                              | GG                 | GG               | INTERGENIC                    |                    |                                                 |
| SNP_93910_A_487428 | NW_004516574.1 | scaffold1348_1 | 487428                  | GG                              | CC                 | CC               | URR                           | 101507805          | BAG family molecular chaperone regulator 1-like |
| SNP_93911_A_492977 | NW_004516574.1 | scaffold1348_1 | 492977                  | TT                              | GG                 | GG               | DRR                           | 101508855          | F-box protein PP2-A12-like                      |
| SNP_93912_A_493270 | NW_004516574.1 | scaffold1348_1 | 493270                  | GG                              | CC                 | CC               | DRR                           | 101508855          | F-box protein PP2-A12-like                      |
| SNP_93913_A_496838 | NW_004516574.1 | scaffold1348_1 | 496838                  | CC                              | GG                 | GG               | URR                           | 101508855          | F-box protein PP2-A12-like                      |
| SNP_93914_A_496870 | NW_004516574.1 | scaffold1348_1 | 496870                  | CC                              | AA                 | AA               | URR                           | 101508855          | F-box protein PP2-A12-like                      |
| SNP_93915_A_496944 | NW_004516574.1 | scaffold1348_1 | 496944                  | CC                              | TT                 | TT               | URR                           | 101508855          | F-box protein PP2-A12-like                      |
| SNP_93917_A_498129 | NW_004516574.1 | scaffold1348_1 | 498129                  | GG                              | AA                 | AA               | DRR                           | 101509178          | scarecrow-like protein 28                       |
| SNP_93918_A_503207 | NW_004516574.1 | scaffold1348_1 | 503207                  | CC                              | TT                 | TT               | URR                           | 101509178          | scarecrow-like protein 28                       |
| SNP_93919_A_503304 | NW_004516574.1 | scaffold1348_1 | 503304                  | CC                              | AA                 | AA               | URR                           | 101509178          | scarecrow-like protein 28                       |
| SNP_93920_A_503402 | NW_004516574.1 | scaffold1348_1 | 503402                  | GG                              | AA                 | AA               | URR                           | 101509178          | scarecrow-like protein 28                       |
| SNP_93922_A_503708 | NW_004516574.1 | scaffold1348_1 | 503708                  | TT                              | CC                 | CC               | URR                           | 101509178          | scarecrow-like protein 28                       |
| SNP_93923_A_508178 | NW_004516574.1 | scaffold1348_1 | 508178                  | CC                              | TT                 | TT               | INTRON                        | 101509507          | plant UBX domain-containing protein 8           |
| SNP_93924_A_509884 | NW_004516574.1 | scaffold1348_1 | 509884                  | TT                              | GG                 | GG               | URR                           | 101509507          | plant UBX domain-containing protein 8           |
| SNP_93926_A_510765 | NW_004516574.1 | scaffold1348_1 | 510765                  | TT                              | CC                 | CC               | URR                           | 101509507          | plant UBX domain-containing protein 8           |
| SNP_93927_A_510980 | NW_004516574.1 | scaffold1348_1 | 510980                  | GG                              | AA                 | AA               | URR                           | 101509507          | plant UBX domain-containing protein 8           |

| SNPs IDs           | Chromosome IDs | Chromosomes    | Physical positions (bp) | CDC Frontier (Reference genome) | (Pusa 1103 & HPNB) | (ILWC 46 & LPNB) | Sequence Components of genome | Gene accession IDs | Putative functions                                              |
|--------------------|----------------|----------------|-------------------------|---------------------------------|--------------------|------------------|-------------------------------|--------------------|-----------------------------------------------------------------|
| SNP_93929_A_511300 | NW_004516574.1 | scaffold1348_1 | 511300                  | GG                              | AA                 | AA               | URR                           | 101509507          | plant UBX domain-containing protein 8                           |
| SNP_93930_A_522205 | NW_004516574.1 | scaffold1348_1 | 522205                  | GG                              | TT                 | TT               | URR                           | 101509829          | phosphatidylinositol glycan anchor biosynthesis class U protein |
| SNP_93931_A_522234 | NW_004516574.1 | scaffold1348_1 | 522234                  | GG                              | AA                 | AA               | URR                           | 101509829          | phosphatidylinositol glycan anchor biosynthesis class U protein |
| SNP_93932_A_524937 | NW_004516574.1 | scaffold1348_1 | 524937                  | GG                              | AA                 | AA               | INTERGENIC                    |                    |                                                                 |
| SNP_93933_A_525273 | NW_004516574.1 | scaffold1348_1 | 525273                  | AA                              | GG                 | GG               | INTERGENIC                    |                    |                                                                 |
| SNP_93934_A_525282 | NW_004516574.1 | scaffold1348_1 | 525282                  | GG                              | AA                 | AA               | INTERGENIC                    |                    |                                                                 |
| SNP_93936_A_525607 | NW_004516574.1 | scaffold1348_1 | 525607                  | GG                              | AA                 | AA               | INTERGENIC                    |                    |                                                                 |
| SNP_93937_A_525853 | NW_004516574.1 | scaffold1348_1 | 525853                  | CC                              | GG                 | GG               | INTERGENIC                    |                    |                                                                 |
| SNP_93938_A_529940 | NW_004516574.1 | scaffold1348_1 | 529940                  | TT                              | AA                 | AA               | INTERGENIC                    |                    |                                                                 |
| SNP_93939_A_531412 | NW_004516574.1 | scaffold1348_1 | 531412                  | CC                              | AA                 | AA               | INTERGENIC                    |                    |                                                                 |
| SNP_93940_A_531419 | NW_004516574.1 | scaffold1348_1 | 531419                  | AA                              | CC                 | CC               | INTERGENIC                    |                    |                                                                 |
| SNP_93941_A_531441 | NW_004516574.1 | scaffold1348_1 | 531441                  | CC                              | TT                 | TT               | INTERGENIC                    |                    |                                                                 |
| SNP_93942_A_537020 | NW_004516574.1 | scaffold1348_1 | 537020                  | CC                              | GG                 | GG               | DRR                           | 101410559          | transfer RNA valine (anticodon AAC)                             |
| SNP_93943_A_537037 | NW_004516574.1 | scaffold1348_1 | 537037                  | TT                              | CC                 | CC               | DRR                           | 101410559          | transfer RNA valine (anticodon AAC)                             |
| SNP_93944_A_537355 | NW_004516574.1 | scaffold1348_1 | 537355                  | GG                              | TT                 | TT               | URR                           | 101510364          | protein IQ-DOMAIN 14                                            |
| SNP_93945_A_537691 | NW_004516574.1 | scaffold1348_1 | 537691                  | CC                              | AA                 | AA               | URR                           | 101510364          | protein IQ-DOMAIN 14                                            |
| SNP_93946_A_538710 | NW_004516574.1 | scaffold1348_1 | 538710                  | GG                              | AA                 | AA               | DRR                           | 101510692          | replication factor C subunit 2                                  |
| SNP_93947_A_543614 | NW_004516574.1 | scaffold1348_1 | 543614                  | AA                              | CC                 | CC               | URR                           | 101510692          | replication factor C subunit 2                                  |
| SNP_93948_A_548861 | NW_004516574.1 | scaffold1348_1 | 548861                  | TT                              | GG                 | GG               | INTRON                        | 101511011          | E3 ubiquitin-protein ligase At1g12760                           |
| SNP_93950_A_549831 | NW_004516574.1 | scaffold1348_1 | 549831                  | TT                              | CC                 | CC               | INTRON                        | 101511011          | E3 ubiquitin-protein ligase At1g12760                           |
| SNP_93953_A_565662 | NW_004516574.1 | scaffold1348_1 | 565662                  | CC                              | TT                 | TT               | INTERGENIC                    |                    |                                                                 |
| SNP_93955_A_569849 | NW_004516574.1 | scaffold1348_1 | 569849                  | CC                              | GG                 | GG               | DRR                           | 101511969          | protein SHOOT GRAVITROPISM 5                                    |

| SNPs IDs           | Chromosome IDs | Chromosomes    | Physical positions (bp) | CDC Frontier (Reference genome) | (Pusa 1103 & HPNB) | (ILWC 46 & LPNB) | Sequence Components of genome | Gene accession IDs | Putative functions                      |
|--------------------|----------------|----------------|-------------------------|---------------------------------|--------------------|------------------|-------------------------------|--------------------|-----------------------------------------|
| SNP_93956_A_576623 | NW_004516574.1 | scaffold1348_1 | 576623                  | TT                              | AA                 | AA               | DRR                           | 101410551          | transfer RNA leucine (anticodon AAG)    |
| SNP_93957_A_577819 | NW_004516574.1 | scaffold1348_1 | 577819                  | AA                              | GG                 | GG               | URR                           | 101410551          | transfer RNA leucine (anticodon AAG)    |
| SNP_93958_A_577846 | NW_004516574.1 | scaffold1348_1 | 577846                  | TT                              | GG                 | GG               | URR                           | 101410551          | transfer RNA leucine (anticodon AAG)    |
| SNP_93959_A_577866 | NW_004516574.1 | scaffold1348_1 | 577866                  | TT                              | CC                 | CC               | URR                           | 101410551          | transfer RNA leucine (anticodon AAG)    |
| SNP_93961_A_579526 | NW_004516574.1 | scaffold1348_1 | 579526                  | AA                              | TT                 | TT               | INTERGENIC                    |                    |                                         |
| SNP_93962_A_582264 | NW_004516574.1 | scaffold1348_1 | 582264                  | TT                              | CC                 | CC               | INTERGENIC                    |                    |                                         |
| SNP_93963_A_582281 | NW_004516574.1 | scaffold1348_1 | 582281                  | TT                              | CC                 | CC               | INTERGENIC                    |                    |                                         |
| SNP_93964_A_582649 | NW_004516574.1 | scaffold1348_1 | 582649                  | AA                              | TT                 | TT               | INTERGENIC                    |                    |                                         |
| SNP_93965_A_585200 | NW_004516574.1 | scaffold1348_1 | 585200                  | TT                              | AA                 | AA               | INTRON                        | 101512298          | deoxycytidylate deaminase               |
| SNP_93966_A_585595 | NW_004516574.1 | scaffold1348_1 | 585595                  | CC                              | TT                 | TT               | INTRON                        | 101512298          | deoxycytidylate deaminase               |
| SNP_93967_A_585778 | NW_004516574.1 | scaffold1348_1 | 585778                  | GG                              | CC                 | CC               | INTRON                        | 101512298          | deoxycytidylate deaminase               |
| SNP_93968_A_585812 | NW_004516574.1 | scaffold1348_1 | 585812                  | GG                              | TT                 | TT               | INTRON                        | 101512298          | deoxycytidylate deaminase               |
| SNP_93969_A_585820 | NW_004516574.1 | scaffold1348_1 | 585820                  | TT                              | CC                 | CC               | INTRON                        | 101512298          | deoxycytidylate deaminase               |
| SNP_93970_A_585825 | NW_004516574.1 | scaffold1348_1 | 585825                  | CC                              | TT                 | TT               | INTRON                        | 101512298          | deoxycytidylate deaminase               |
| SNP_93971_A_589294 | NW_004516574.1 | scaffold1348_1 | 589294                  | TT                              | CC                 | CC               | INTERGENIC                    |                    |                                         |
| SNP_93972_A_593109 | NW_004516574.1 | scaffold1348_1 | 593109                  | GG                              | AA                 | AA               | URR                           | 101512631          | ATP synthase delta chain, chloroplastic |
| SNP_93973_A_593164 | NW_004516574.1 | scaffold1348_1 | 593164                  | AA                              | GG                 | GG               | URR                           | 101512631          | ATP synthase delta chain, chloroplastic |
| SNP_93974_A_593443 | NW_004516574.1 | scaffold1348_1 | 593443                  | CC                              | GG                 | GG               | URR                           | 101512631          | ATP synthase delta chain, chloroplastic |
| SNP_93975_A_594191 | NW_004516574.1 | scaffold1348_1 | 594191                  | CC                              | TT                 | TT               | INTERGENIC                    |                    |                                         |
| SNP_93976_A_594241 | NW_004516574.1 | scaffold1348_1 | 594241                  | AA                              | CC                 | CC               | INTERGENIC                    |                    |                                         |
| SNP_93978_A_595939 | NW_004516574.1 | scaffold1348_1 | 595939                  | CC                              | TT                 | TT               | INTERGENIC                    |                    |                                         |
| SNP_93979_A_596156 | NW_004516574.1 | scaffold1348_1 | 596156                  | CC                              | TT                 | TT               | INTERGENIC                    |                    |                                         |

| SNPs IDs           | Chromosome IDs | Chromosomes    | Physical positions (bp) | CDC Frontier (Reference genome) | (Pusa 1103 & HPNB) | (ILWC 46 & LPNB) | Sequence Components of genome | Gene accession IDs | Putative functions              |
|--------------------|----------------|----------------|-------------------------|---------------------------------|--------------------|------------------|-------------------------------|--------------------|---------------------------------|
| SNP_93980_A_596970 | NW_004516574.1 | scaffold1348_1 | 596970                  | TT                              | CC                 | CC               | DRR                           | 101512939          | subtilisin-like protease SBT5.3 |
| SNP_93981_A_597071 | NW_004516574.1 | scaffold1348_1 | 597071                  | CC                              | AA                 | AA               | DRR                           | 101512939          | subtilisin-like protease SBT5.3 |
| SNP_93982_A_602527 | NW_004516574.1 | scaffold1348_1 | 602527                  | TT                              | CC                 | CC               | URR                           | 101512939          | subtilisin-like protease SBT5.3 |
| SNP_93983_A_602910 | NW_004516574.1 | scaffold1348_1 | 602910                  | AA                              | GG                 | GG               | URR                           | 101512939          | subtilisin-like protease SBT5.3 |
| SNP_93984_A_603445 | NW_004516574.1 | scaffold1348_1 | 603445                  | TT                              | AA                 | AA               | URR                           | 101512939          | subtilisin-like protease SBT5.3 |
| SNP_93985_A_603512 | NW_004516574.1 | scaffold1348_1 | 603512                  | CC                              | TT                 | TT               | URR                           | 101512939          | subtilisin-like protease SBT5.3 |
| SNP_93986_A_604714 | NW_004516574.1 | scaffold1348_1 | 604714                  | GG                              | AA                 | AA               | INTERGENIC                    |                    |                                 |
| SNP_93987_A_604729 | NW_004516574.1 | scaffold1348_1 | 604729                  | TT                              | CC                 | CC               | INTERGENIC                    |                    |                                 |
| SNP_93988_A_605005 | NW_004516574.1 | scaffold1348_1 | 605005                  | GG                              | AA                 | AA               | INTERGENIC                    |                    |                                 |
| SNP_93989_A_605319 | NW_004516574.1 | scaffold1348_1 | 605319                  | CC                              | TT                 | TT               | INTERGENIC                    |                    |                                 |
| SNP_93990_A_605496 | NW_004516574.1 | scaffold1348_1 | 605496                  | AA                              | TT                 | TT               | INTERGENIC                    |                    |                                 |
| SNP_93991_A_632024 | NW_004516574.1 | scaffold1348_1 | 632024                  | GG                              | AA                 | AA               | INTRON                        | 101512185          | subtilisin-like protease SBT5.4 |
| SNP_93992_A_633516 | NW_004516574.1 | scaffold1348_1 | 633516                  | GG                              | AA                 | AA               | SYNONYMOUS_CODING             | 101512185          | subtilisin-like protease SBT5.4 |
| SNP_93994_A_633759 | NW_004516574.1 | scaffold1348_1 | 633759                  | AA                              | GG                 | GG               | NON_SYNONYMOUS_CODING         | 101512185          | subtilisin-like protease SBT5.4 |
| SNP_93995_A_634840 | NW_004516574.1 | scaffold1348_1 | 634840                  | TT                              | CC                 | CC               | URR                           | 101512185          | subtilisin-like protease SBT5.4 |
| SNP_93996_A_635114 | NW_004516574.1 | scaffold1348_1 | 635114                  | TT                              | CC                 | CC               | URR                           | 101512185          | subtilisin-like protease SBT5.4 |
| SNP_93997_A_635246 | NW_004516574.1 | scaffold1348_1 | 635246                  | AA                              | GG                 | GG               | URR                           | 101512185          | subtilisin-like protease SBT5.4 |
| SNP_93998_A_635853 | NW_004516574.1 | scaffold1348_1 | 635853                  | CC                              | TT                 | TT               | INTERGENIC                    |                    |                                 |
| SNP_93999_A_635896 | NW_004516574.1 | scaffold1348_1 | 635896                  | TT                              | CC                 | CC               | INTERGENIC                    |                    |                                 |
| SNP_94000_A_641622 | NW_004516574.1 | scaffold1348_1 | 641622                  | TT                              | AA                 | AA               | INTERGENIC                    |                    |                                 |
| SNP_94001_A_641903 | NW_004516574.1 | scaffold1348_1 | 641903                  | CC                              | TT                 | TT               | INTERGENIC                    |                    |                                 |
| SNP_94002_A_644760 | NW_004516574.1 | scaffold1348_1 | 644760                  | CC                              | TT                 | TT               | INTERGENIC                    |                    |                                 |

| SNPs IDs           | Chromosome IDs | Chromosomes    | Physical positions (bp) | CDC Frontier (Reference genome) | (Pusa 1103 & HPNB) | (ILWC 46 & LPNB) | Sequence Components of genome | Gene accession IDs | Putative functions              |
|--------------------|----------------|----------------|-------------------------|---------------------------------|--------------------|------------------|-------------------------------|--------------------|---------------------------------|
| SNP_94003_A_644830 | NW_004516574.1 | scaffold1348_1 | 644830                  | CC                              | AA                 | AA               | INTERGENIC                    |                    |                                 |
| SNP_94004_A_645900 | NW_004516574.1 | scaffold1348_1 | 645900                  | GG                              | TT                 | TT               | INTERGENIC                    |                    |                                 |
| SNP_94005_A_646077 | NW_004516574.1 | scaffold1348_1 | 646077                  | GG                              | CC                 | CC               | INTERGENIC                    |                    |                                 |
| SNP_94006_A_646108 | NW_004516574.1 | scaffold1348_1 | 646108                  | AA                              | GG                 | GG               | INTERGENIC                    |                    |                                 |
| SNP_94007_A_646118 | NW_004516574.1 | scaffold1348_1 | 646118                  | CC                              | TT                 | TT               | INTERGENIC                    |                    |                                 |
| SNP_94008_A_646122 | NW_004516574.1 | scaffold1348_1 | 646122                  | TT                              | CC                 | CC               | INTERGENIC                    |                    |                                 |
| SNP_94009_A_646214 | NW_004516574.1 | scaffold1348_1 | 646214                  | AA                              | GG                 | GG               | INTERGENIC                    |                    |                                 |
| SNP_94010_A_646380 | NW_004516574.1 | scaffold1348_1 | 646380                  | TT                              | AA                 | AA               | INTERGENIC                    |                    |                                 |
| SNP_94011_A_646385 | NW_004516574.1 | scaffold1348_1 | 646385                  | GG                              | CC                 | CC               | INTERGENIC                    |                    |                                 |
| SNP_94012_A_647462 | NW_004516574.1 | scaffold1348_1 | 647462                  | GG                              | TT                 | TT               | INTERGENIC                    |                    |                                 |
| SNP_94013_A_647488 | NW_004516574.1 | scaffold1348_1 | 647488                  | GG                              | CC                 | CC               | INTERGENIC                    |                    |                                 |
| SNP_94014_A_648062 | NW_004516574.1 | scaffold1348_1 | 648062                  | CC                              | TT                 | TT               | INTERGENIC                    |                    |                                 |
| SNP_94015_A_651291 | NW_004516574.1 | scaffold1348_1 | 651291                  | GG                              | AA                 | AA               | INTRON                        | 101512510          | subtilisin-like protease SBT5.4 |
| SNP_94016_A_651299 | NW_004516574.1 | scaffold1348_1 | 651299                  | TT                              | GG                 | GG               | INTRON                        | 101512510          | subtilisin-like protease SBT5.4 |
| SNP_94017_A_651592 | NW_004516574.1 | scaffold1348_1 | 651592                  | TT                              | AA                 | AA               | INTRON                        | 101512510          | subtilisin-like protease SBT5.4 |
| SNP_94018_A_653566 | NW_004516574.1 | scaffold1348_1 | 653566                  | GG                              | AA                 | AA               | INTRON                        | 101512510          | subtilisin-like protease SBT5.4 |
| SNP_94019_A_654182 | NW_004516574.1 | scaffold1348_1 | 654182                  | TT                              | AA                 | AA               | INTRON                        | 101512510          | subtilisin-like protease SBT5.4 |
| SNP_94020_A_657438 | NW_004516574.1 | scaffold1348_1 | 657438                  | GG                              | TT                 | TT               | INTERGENIC                    |                    |                                 |
| SNP_94021_A_661643 | NW_004516574.1 | scaffold1348_1 | 661643                  | CC                              | TT                 | TT               | INTERGENIC                    |                    |                                 |
| SNP_94022_A_662831 | NW_004516574.1 | scaffold1348_1 | 662831                  | AA                              | GG                 | GG               | INTERGENIC                    |                    |                                 |
| SNP_94023_A_662877 | NW_004516574.1 | scaffold1348_1 | 662877                  | CC                              | TT                 | TT               | INTERGENIC                    |                    |                                 |
| SNP_94024_A_663082 | NW_004516574.1 | scaffold1348_1 | 663082                  | GG                              | AA                 | AA               | INTERGENIC                    |                    |                                 |

| SNPs IDs           | Chromosome IDs | Chromosomes    | Physical positions (bp) | CDC Frontier (Reference genome) | (Pusa 1103 & HPNB) | (ILWC 46 & LPNB) | Sequence Components of genome | Gene accession IDs | Putative functions              |
|--------------------|----------------|----------------|-------------------------|---------------------------------|--------------------|------------------|-------------------------------|--------------------|---------------------------------|
| SNP_94025_A_664685 | NW_004516574.1 | scaffold1348_1 | 664685                  | AA                              | GG                 | GG               | DRR                           | 101513266          | subtilisin-like protease SBT5.4 |
| SNP_94026_A_664686 | NW_004516574.1 | scaffold1348_1 | 664686                  | CC                              | TT                 | TT               | DRR                           | 101513266          | subtilisin-like protease SBT5.4 |
| SNP_94027_A_664693 | NW_004516574.1 | scaffold1348_1 | 664693                  | GG                              | AA                 | AA               | DRR                           | 101513266          | subtilisin-like protease SBT5.4 |
| SNP_94029_A_669473 | NW_004516574.1 | scaffold1348_1 | 669473                  | TT                              | AA                 | AA               | INTRON                        | 101513266          | subtilisin-like protease SBT5.4 |
| SNP_94030_A_672827 | NW_004516574.1 | scaffold1348_1 | 672827                  | CC                              | GG                 | GG               | INTERGENIC                    |                    |                                 |
| SNP_94031_A_673716 | NW_004516574.1 | scaffold1348_1 | 673716                  | GG                              | AA                 | AA               | INTERGENIC                    |                    |                                 |
| SNP_94032_A_675449 | NW_004516574.1 | scaffold1348_1 | 675449                  | CC                              | AA                 | AA               | INTERGENIC                    |                    |                                 |
| SNP_94033_A_675522 | NW_004516574.1 | scaffold1348_1 | 675522                  | TT                              | GG                 | GG               | INTERGENIC                    |                    |                                 |
| SNP_94034_A_677091 | NW_004516574.1 | scaffold1348_1 | 677091                  | AA                              | GG                 | GG               | INTERGENIC                    |                    |                                 |
| SNP_94035_A_677135 | NW_004516574.1 | scaffold1348_1 | 677135                  | AA                              | CC                 | CC               | INTERGENIC                    |                    |                                 |
| SNP_94036_A_680730 | NW_004516574.1 | scaffold1348_1 | 680730                  | CC                              | TT                 | TT               | NON_SYNONYMOUS_CODING         | 101512820          | subtilisin-like protease SBT5.3 |
| SNP_94037_A_680734 | NW_004516574.1 | scaffold1348_1 | 680734                  | GG                              | TT                 | TT               | NON_SYNONYMOUS_CODING         | 101512820          | subtilisin-like protease SBT5.3 |
| SNP_94038_A_681066 | NW_004516574.1 | scaffold1348_1 | 681066                  | GG                              | CC                 | CC               | INTRON                        | 101512820          | subtilisin-like protease SBT5.3 |
| SNP_94039_A_681403 | NW_004516574.1 | scaffold1348_1 | 681403                  | TT                              | AA                 | AA               | INTRON                        | 101512820          | subtilisin-like protease SBT5.3 |
| SNP_94040_A_683464 | NW_004516574.1 | scaffold1348_1 | 683464                  | TT                              | GG                 | GG               | URR                           | 101512820          | subtilisin-like protease SBT5.3 |
| SNP_94041_A_683465 | NW_004516574.1 | scaffold1348_1 | 683465                  | TT                              | GG                 | GG               | URR                           | 101512820          | subtilisin-like protease SBT5.3 |
| SNP_94042_A_685315 | NW_004516574.1 | scaffold1348_1 | 685315                  | TT                              | CC                 | CC               | INTERGENIC                    |                    |                                 |
| SNP_94043_A_685749 | NW_004516574.1 | scaffold1348_1 | 685749                  | CC                              | TT                 | TT               | INTERGENIC                    |                    |                                 |
| SNP_94044_A_685770 | NW_004516574.1 | scaffold1348_1 | 685770                  | GG                              | AA                 | AA               | INTERGENIC                    |                    |                                 |
| SNP_94045_A_685929 | NW_004516574.1 | scaffold1348_1 | 685929                  | TT                              | AA                 | AA               | INTERGENIC                    |                    |                                 |
| SNP_94046_A_685932 | NW_004516574.1 | scaffold1348_1 | 685932                  | GG                              | AA                 | AA               | INTERGENIC                    |                    |                                 |
| SNP_94047_A_686012 | NW_004516574.1 | scaffold1348_1 | 686012                  | CC                              | TT                 | TT               | INTERGENIC                    |                    |                                 |

| SNPs IDs           | Chromosome IDs | Chromosomes    | Physical positions (bp) | CDC Frontier (Reference genome) | (Pusa 1103 & HPNB) | (ILWC 46 & LPNB) | Sequence Components of genome | Gene accession IDs | Putative functions                           |
|--------------------|----------------|----------------|-------------------------|---------------------------------|--------------------|------------------|-------------------------------|--------------------|----------------------------------------------|
| SNP_94048_A_686081 | NW_004516574.1 | scaffold1348_1 | 686081                  | TT                              | GG                 | GG               | INTERGENIC                    |                    |                                              |
| SNP_94049_A_686086 | NW_004516574.1 | scaffold1348_1 | 686086                  | CC                              | TT                 | TT               | INTERGENIC                    |                    |                                              |
| SNP_94050_A_686292 | NW_004516574.1 | scaffold1348_1 | 686292                  | GG                              | AA                 | AA               | INTERGENIC                    |                    |                                              |
| SNP_94051_A_686422 | NW_004516574.1 | scaffold1348_1 | 686422                  | AA                              | GG                 | GG               | INTERGENIC                    |                    |                                              |
| SNP_94052_A_686900 | NW_004516574.1 | scaffold1348_1 | 686900                  | AA                              | CC                 | CC               | DRR                           | 101513594          | probable inactive purple acid phosphatase 27 |
| SNP_94053_A_687296 | NW_004516574.1 | scaffold1348_1 | 687296                  | AA                              | GG                 | GG               | DRR                           | 101513594          | probable inactive purple acid phosphatase 27 |
| SNP_94054_A_687365 | NW_004516574.1 | scaffold1348_1 | 687365                  | CC                              | GG                 | GG               | DRR                           | 101513594          | probable inactive purple acid phosphatase 27 |
| SNP_94055_A_688246 | NW_004516574.1 | scaffold1348_1 | 688246                  | AA                              | CC                 | CC               | INTRON                        | 101513594          | probable inactive purple acid phosphatase 27 |
| SNP_94056_A_688617 | NW_004516574.1 | scaffold1348_1 | 688617                  | GG                              | AA                 | AA               | SYNONYMOUS_CODING             | 101513594          | probable inactive purple acid phosphatase 27 |
| SNP_94057_A_689062 | NW_004516574.1 | scaffold1348_1 | 689062                  | AA                              | TT                 | TT               | SYNONYMOUS_CODING             | 101513594          | probable inactive purple acid phosphatase 27 |
| SNP_94058_A_689212 | NW_004516574.1 | scaffold1348_1 | 689212                  | TT                              | CC                 | CC               | INTRON                        | 101513594          | probable inactive purple acid phosphatase 27 |
| SNP_94059_A_689240 | NW_004516574.1 | scaffold1348_1 | 689240                  | CC                              | TT                 | TT               | INTRON                        | 101513594          | probable inactive purple acid phosphatase 27 |
| SNP_94060_A_690412 | NW_004516574.1 | scaffold1348_1 | 690412                  | AA                              | CC                 | CC               | INTRON                        | 101513594          | probable inactive purple acid phosphatase 27 |
| SNP_94061_A_690413 | NW_004516574.1 | scaffold1348_1 | 690413                  | CC                              | TT                 | TT               | INTRON                        | 101513594          | probable inactive purple acid phosphatase 27 |
| SNP_94062_A_690697 | NW_004516574.1 | scaffold1348_1 | 690697                  | AA                              | GG                 | GG               | INTRON                        | 101513594          | probable inactive purple acid phosphatase 27 |
| SNP_94063_A_691147 | NW_004516574.1 | scaffold1348_1 | 691147                  | AA                              | GG                 | GG               | INTRON                        | 101513594          | probable inactive purple acid phosphatase 27 |
| SNP_94064_A_691205 | NW_004516574.1 | scaffold1348_1 | 691205                  | AA                              | CC                 | CC               | INTRON                        | 101513594          | probable inactive purple acid phosphatase 27 |
| SNP_94065_A_696856 | NW_004516574.1 | scaffold1348_1 | 696856                  | AA                              | GG                 | GG               | INTERGENIC                    |                    |                                              |
| SNP_94066_A_696864 | NW_004516574.1 | scaffold1348_1 | 696864                  | AA                              | GG                 | GG               | INTERGENIC                    |                    |                                              |
| SNP_94067_A_698185 | NW_004516574.1 | scaffold1348_1 | 698185                  | TT                              | CC                 | CC               | INTERGENIC                    |                    |                                              |
| SNP_94068_A_700551 | NW_004516574.1 | scaffold1348_1 | 700551                  | GG                              | TT                 | TT               | INTERGENIC                    |                    |                                              |
| SNP_94069_A_700993 | NW_004516574.1 | scaffold1348_1 | 700993                  | CC                              | TT                 | TT               | INTERGENIC                    |                    |                                              |



| SNPs IDs           | Chromosome IDs | Chromosomes    | Physical positions (bp) | CDC Frontier (Reference genome) | (Pusa 1103 & HPNB) | (ILWC 46 & LPNB) | Sequence Components of genome | Gene accession IDs | Putative functions                           |
|--------------------|----------------|----------------|-------------------------|---------------------------------|--------------------|------------------|-------------------------------|--------------------|----------------------------------------------|
| SNP_94070_A_702137 | NW_004516574.1 | scaffold1348_1 | 702137                  | AA                              | TT                 | TT               | INTERGENIC                    |                    |                                              |
| SNP_94071_A_702140 | NW_004516574.1 | scaffold1348_1 | 702140                  | AA                              | GG                 | GG               | INTERGENIC                    |                    |                                              |
| SNP_94073_A_702236 | NW_004516574.1 | scaffold1348_1 | 702236                  | AA                              | GG                 | GG               | INTERGENIC                    |                    |                                              |
| SNP_94074_A_702412 | NW_004516574.1 | scaffold1348_1 | 702412                  | CC                              | AA                 | AA               | INTERGENIC                    |                    |                                              |
| SNP_94077_A_713633 | NW_004516574.1 | scaffold1348_1 | 713633                  | TT                              | CC                 | CC               | DRR                           | 101514567          | uncharacterized LOC101514567                 |
| SNP_94078_A_716662 | NW_004516574.1 | scaffold1348_1 | 716662                  | CC                              | GG                 | GG               | INTERGENIC                    |                    |                                              |
| SNP_94079_A_721979 | NW_004516574.1 | scaffold1348_1 | 721979                  | TT                              | CC                 | CC               | INTERGENIC                    |                    |                                              |
| SNP_94080_A_725984 | NW_004516574.1 | scaffold1348_1 | 725984                  | GG                              | TT                 | TT               | URR                           | 101515098          | SWI/SNF complex component SNF12 homolog      |
| SNP_94081_A_726644 | NW_004516574.1 | scaffold1348_1 | 726644                  | CC                              | TT                 | TT               | URR                           | 101515098          | SWI/SNF complex component SNF12 homolog      |
| SNP_94082_A_726667 | NW_004516574.1 | scaffold1348_1 | 726667                  | CC                              | TT                 | TT               | URR                           | 101515098          | SWI/SNF complex component SNF12 homolog      |
| SNP_94083_A_726671 | NW_004516574.1 | scaffold1348_1 | 726671                  | CC                              | TT                 | TT               | URR                           | 101515098          | SWI/SNF complex component SNF12 homolog      |
| SNP_94084_A_726672 | NW_004516574.1 | scaffold1348_1 | 726672                  | TT                              | CC                 | CC               | URR                           | 101515098          | SWI/SNF complex component SNF12 homolog      |
| SNP_94085_A_726692 | NW_004516574.1 | scaffold1348_1 | 726692                  | AA                              | GG                 | GG               | URR                           | 101515098          | SWI/SNF complex component SNF12 homolog      |
| SNP_94086_A_731056 | NW_004516574.1 | scaffold1348_1 | 731056                  | CC                              | GG                 | GG               | INTRON                        | 101515422          | uncharacterized LOC101515422                 |
| SNP_94087_A_743690 | NW_004516574.1 | scaffold1348_1 | 743690                  | TT                              | CC                 | CC               | INTERGENIC                    |                    |                                              |
| SNP_94088_A_743693 | NW_004516574.1 | scaffold1348_1 | 743693                  | CC                              | AA                 | AA               | INTERGENIC                    |                    |                                              |
| SNP_94089_A_744381 | NW_004516574.1 | scaffold1348_1 | 744381                  | AA                              | TT                 | TT               | DRR                           | 101515754          | conserved oligomeric Golgi complex subunit 2 |
| SNP_94090_A_744386 | NW_004516574.1 | scaffold1348_1 | 744386                  | CC                              | TT                 | TT               | DRR                           | 101515754          | conserved oligomeric Golgi complex subunit 2 |
| SNP_94092_A_752124 | NW_004516574.1 | scaffold1348_1 | 752124                  | GG                              | AA                 | AA               | INTERGENIC                    |                    |                                              |
| SNP_94093_A_752911 | NW_004516574.1 | scaffold1348_1 | 752911                  | AA                              | GG                 | GG               | URR                           | 101515754          | conserved oligomeric Golgi complex subunit 2 |
| SNP_94094_A_753258 | NW_004516574.1 | scaffold1348_1 | 753258                  | TT                              | CC                 | CC               | DRR                           | 101489181          | uridine kinase-like protein 2, chloroplastic |
| SNP_94095_A_753265 | NW_004516574.1 | scaffold1348_1 | 753265                  | AA                              | GG                 | GG               | DRR                           | 101489181          | uridine kinase-like protein 2, chloroplastic |

| SNPs IDs           | Chromosome IDs | Chromosomes    | Physical positions (bp) | CDC Frontier (Reference genome) | (Pusa 1103 & HPNB) | (ILWC 46 & LPNB) | Sequence Components of genome | Gene accession IDs | Putative functions                           |
|--------------------|----------------|----------------|-------------------------|---------------------------------|--------------------|------------------|-------------------------------|--------------------|----------------------------------------------|
| SNP_94096_A_753308 | NW_004516574.1 | scaffold1348_1 | 753308                  | TT                              | GG                 | GG               | DRR                           | 101489181          | uridine kinase-like protein 2, chloroplastic |
| SNP_94097_A_760603 | NW_004516574.1 | scaffold1348_1 | 760603                  | CC                              | TT                 | TT               | URR                           | 101489181          | uridine kinase-like protein 2, chloroplastic |
| SNP_94099_A_766376 | NW_004516574.1 | scaffold1348_1 | 766376                  | AA                              | CC                 | CC               | URR                           | 101488854          | putative calcium-binding protein CML19       |
| SNP_94100_A_766407 | NW_004516574.1 | scaffold1348_1 | 766407                  | TT                              | AA                 | AA               | URR                           | 101488854          | putative calcium-binding protein CML19       |
| SNP_94101_A_767012 | NW_004516574.1 | scaffold1348_1 | 767012                  | CC                              | TT                 | TT               | DRR                           | 101488512          | FBD-associated F-box protein At3g52670-like  |
| SNP_94102_A_767014 | NW_004516574.1 | scaffold1348_1 | 767014                  | TT                              | AA                 | AA               | DRR                           | 101488512          | FBD-associated F-box protein At3g52670-like  |
| SNP_94103_A_767221 | NW_004516574.1 | scaffold1348_1 | 767221                  | GG                              | AA                 | AA               | DRR                           | 101488512          | FBD-associated F-box protein At3g52670-like  |
| SNP_94104_A_767951 | NW_004516574.1 | scaffold1348_1 | 767951                  | TT                              | CC                 | CC               | INTERGENIC                    |                    |                                              |
| SNP_94105_A_769175 | NW_004516574.1 | scaffold1348_1 | 769175                  | TT                              | CC                 | CC               | INTERGENIC                    |                    |                                              |
| SNP_94106_A_772715 | NW_004516574.1 | scaffold1348_1 | 772715                  | AA                              | GG                 | GG               | INTERGENIC                    |                    |                                              |
| SNP_94107_A_777770 | NW_004516574.1 | scaffold1348_1 | 777770                  | AA                              | TT                 | TT               | INTERGENIC                    |                    |                                              |
| SNP_94108_A_781058 | NW_004516574.1 | scaffold1348_1 | 781058                  | GG                              | AA                 | AA               | INTERGENIC                    |                    |                                              |
| SNP_94109_A_787740 | NW_004516574.1 | scaffold1348_1 | 787740                  | AA                              | GG                 | GG               | INTERGENIC                    |                    |                                              |
| SNP_94110_A_787743 | NW_004516574.1 | scaffold1348_1 | 787743                  | TT                              | CC                 | CC               | INTERGENIC                    |                    |                                              |
| SNP_94111_A_788695 | NW_004516574.1 | scaffold1348_1 | 788695                  | AA                              | TT                 | TT               | INTERGENIC                    |                    |                                              |
| SNP_94112_A_788706 | NW_004516574.1 | scaffold1348_1 | 788706                  | AA                              | TT                 | TT               | INTERGENIC                    |                    |                                              |
| SNP_94113_A_788848 | NW_004516574.1 | scaffold1348_1 | 788848                  | GG                              | AA                 | AA               | INTERGENIC                    |                    |                                              |
| SNP_94114_A_789112 | NW_004516574.1 | scaffold1348_1 | 789112                  | TT                              | CC                 | CC               | INTERGENIC                    |                    |                                              |
| SNP_94115_A_789852 | NW_004516574.1 | scaffold1348_1 | 789852                  | TT                              | GG                 | GG               | INTERGENIC                    |                    |                                              |
| SNP_94116_A_790279 | NW_004516574.1 | scaffold1348_1 | 790279                  | GG                              | AA                 | AA               | DRR                           | 101489827          | probable acyl-activating enzyme 2            |
| SNP_94117_A_790320 | NW_004516574.1 | scaffold1348_1 | 790320                  | GG                              | AA                 | AA               | DRR                           | 101489827          | probable acyl-activating enzyme 2            |
| SNP_94118_A_790339 | NW_004516574.1 | scaffold1348_1 | 790339                  | GG                              | AA                 | AA               | DRR                           | 101489827          | probable acyl-activating enzyme 2            |

| SNPs IDs           | Chromosome IDs | Chromosomes    | Physical positions (bp) | CDC Frontier (Reference genome) | (Pusa 1103 & HPNB) | (ILWC 46 & LPNB) | Sequence Components of genome | Gene accession IDs | Putative functions                |
|--------------------|----------------|----------------|-------------------------|---------------------------------|--------------------|------------------|-------------------------------|--------------------|-----------------------------------|
| SNP_94119_A_790381 | NW_004516574.1 | scaffold1348_1 | 790381                  | AA                              | GG                 | GG               | DRR                           | 101489827          | probable acyl-activating enzyme 2 |
| SNP_94120_A_792651 | NW_004516574.1 | scaffold1348_1 | 792651                  | CC                              | TT                 | TT               | INTRON                        | 101489827          | probable acyl-activating enzyme 2 |
| SNP_94121_A_792655 | NW_004516574.1 | scaffold1348_1 | 792655                  | TT                              | CC                 | CC               | INTRON                        | 101489827          | probable acyl-activating enzyme 2 |
| SNP_94122_A_792842 | NW_004516574.1 | scaffold1348_1 | 792842                  | AA                              | GG                 | GG               | INTRON                        | 101489827          | probable acyl-activating enzyme 2 |
| SNP_94123_A_795080 | NW_004516574.1 | scaffold1348_1 | 795080                  | AA                              | GG                 | GG               | INTERGENIC                    |                    |                                   |
| SNP_94124_A_811028 | NW_004516574.1 | scaffold1348_1 | 811028                  | CC                              | TT                 | TT               | INTRON                        | 101513472          | uncharacterized LOC101513472      |
| SNP_94125_A_814999 | NW_004516574.1 | scaffold1348_1 | 814999                  | CC                              | GG                 | GG               | NON_SYNONYMOUS_CODING         | 101513472          | uncharacterized LOC101513472      |
| SNP_94126_A_816613 | NW_004516574.1 | scaffold1348_1 | 816613                  | CC                              | TT                 | TT               | URR                           | 101513472          | uncharacterized LOC101513472      |
| SNP_94127_A_817264 | NW_004516574.1 | scaffold1348_1 | 817264                  | CC                              | TT                 | TT               | URR                           | 101513472          | uncharacterized LOC101513472      |
| SNP_94128_A_817331 | NW_004516574.1 | scaffold1348_1 | 817331                  | AA                              | GG                 | GG               | URR                           | 101513472          | uncharacterized LOC101513472      |
| SNP_94129_A_817504 | NW_004516574.1 | scaffold1348_1 | 817504                  | GG                              | TT                 | TT               | INTERGENIC                    |                    |                                   |
| SNP_94130_A_818099 | NW_004516574.1 | scaffold1348_1 | 818099                  | GG                              | AA                 | AA               | INTERGENIC                    |                    |                                   |
| SNP_94131_A_818128 | NW_004516574.1 | scaffold1348_1 | 818128                  | GG                              | TT                 | TT               | INTERGENIC                    |                    |                                   |
| SNP_94132_A_818237 | NW_004516574.1 | scaffold1348_1 | 818237                  | CC                              | TT                 | TT               | INTERGENIC                    |                    |                                   |
| SNP_94133_A_818289 | NW_004516574.1 | scaffold1348_1 | 818289                  | CC                              | TT                 | TT               | INTERGENIC                    |                    |                                   |
| SNP_94135_A_822355 | NW_004516574.1 | scaffold1348_1 | 822355                  | TT                              | CC                 | CC               | INTERGENIC                    |                    |                                   |
| SNP_94136_A_822760 | NW_004516574.1 | scaffold1348_1 | 822760                  | TT                              | GG                 | GG               | DRR                           | 101490154          | nucleolar protein 56              |
| SNP_94137_A_826053 | NW_004516574.1 | scaffold1348_1 | 826053                  | AA                              | GG                 | GG               | NON_SYNONYMOUS_CODING         | NOP56              | Unknown function                  |
| SNP_94138_A_830773 | NW_004516574.1 | scaffold1348_1 | 830773                  | TT                              | CC                 | CC               | DOWNSTREAM                    | NOP56              | Unknown function                  |
| SNP_94139_A_832028 | NW_004516574.1 | scaffold1348_1 | 832028                  | CC                              | AA                 | AA               | INTERGENIC                    |                    |                                   |
| SNP_94140_A_832032 | NW_004516574.1 | scaffold1348_1 | 832032                  | TT                              | CC                 | CC               | INTERGENIC                    |                    |                                   |
| SNP_94141_A_833371 | NW_004516574.1 | scaffold1348_1 | 833371                  | AA                              | GG                 | GG               | DRR                           | 101490478          | adenylate kinase 4                |

| SNPs IDs           | Chromosome IDs | Chromosomes    | Physical positions (bp) | CDC Frontier (Reference genome) | (Pusa 1103 & HPNB) | (ILWC 46 & LPNB) | Sequence Components of genome | Gene accession IDs | Putative functions          |
|--------------------|----------------|----------------|-------------------------|---------------------------------|--------------------|------------------|-------------------------------|--------------------|-----------------------------|
| SNP_94142_A_841407 | NW_004516574.1 | scaffold1348_1 | 841407                  | TT                              | AA                 | AA               | INTERGENIC                    |                    |                             |
| SNP_94143_A_845538 | NW_004516574.1 | scaffold1348_1 | 845538                  | AA                              | CC                 | CC               | INTRON                        | 101490803          | cyclin-dependent kinase G-2 |
| SNP_94144_A_845541 | NW_004516574.1 | scaffold1348_1 | 845541                  | TT                              | AA                 | AA               | INTRON                        | 101490803          | cyclin-dependent kinase G-2 |
| SNP_94145_A_847705 | NW_004516574.1 | scaffold1348_1 | 847705                  | AA                              | GG                 | GG               | URR                           | 101490803          | cyclin-dependent kinase G-2 |
| SNP_94146_A_849780 | NW_004516574.1 | scaffold1348_1 | 849780                  | CC                              | AA                 | AA               | INTERGENIC                    |                    |                             |
| SNP_94147_A_850028 | NW_004516574.1 | scaffold1348_1 | 850028                  | GG                              | TT                 | TT               | INTERGENIC                    |                    |                             |
| SNP_94148_A_850045 | NW_004516574.1 | scaffold1348_1 | 850045                  | TT                              | CC                 | CC               | INTERGENIC                    |                    |                             |
| SNP_94149_A_851437 | NW_004516574.1 | scaffold1348_1 | 851437                  | CC                              | TT                 | TT               | INTERGENIC                    |                    |                             |
| SNP_94150_A_852254 | NW_004516574.1 | scaffold1348_1 | 852254                  | CC                              | TT                 | TT               | INTERGENIC                    |                    |                             |
| SNP_94151_A_855364 | NW_004516574.1 | scaffold1348_1 | 855364                  | TT                              | AA                 | AA               | INTERGENIC                    |                    |                             |
| SNP_94152_A_855746 | NW_004516574.1 | scaffold1348_1 | 855746                  | AA                              | GG                 | GG               | INTERGENIC                    |                    |                             |
| SNP_94153_A_855748 | NW_004516574.1 | scaffold1348_1 | 855748                  | CC                              | TT                 | TT               | INTERGENIC                    |                    |                             |
| SNP_94154_A_855749 | NW_004516574.1 | scaffold1348_1 | 855749                  | AA                              | GG                 | GG               | INTERGENIC                    |                    |                             |
| SNP_94155_A_856033 | NW_004516574.1 | scaffold1348_1 | 856033                  | TT                              | CC                 | CC               | INTERGENIC                    |                    |                             |
| SNP_94156_A_856036 | NW_004516574.1 | scaffold1348_1 | 856036                  | TT                              | CC                 | CC               | INTERGENIC                    |                    |                             |
| SNP_94157_A_856037 | NW_004516574.1 | scaffold1348_1 | 856037                  | GG                              | TT                 | TT               | INTERGENIC                    |                    |                             |
| SNP_94158_A_856112 | NW_004516574.1 | scaffold1348_1 | 856112                  | TT                              | CC                 | CC               | INTERGENIC                    |                    |                             |
| SNP_94159_A_856117 | NW_004516574.1 | scaffold1348_1 | 856117                  | AA                              | CC                 | CC               | INTERGENIC                    |                    |                             |
| SNP_94160_A_856213 | NW_004516574.1 | scaffold1348_1 | 856213                  | CC                              | TT                 | TT               | INTERGENIC                    |                    |                             |
| SNP_94161_A_856218 | NW_004516574.1 | scaffold1348_1 | 856218                  | TT                              | CC                 | CC               | INTERGENIC                    |                    |                             |
| SNP_94162_A_856267 | NW_004516574.1 | scaffold1348_1 | 856267                  | CC                              | TT                 | TT               | INTERGENIC                    |                    |                             |
| SNP_94163_A_856423 | NW_004516574.1 | scaffold1348_1 | 856423                  | GG                              | CC                 | CC               | INTERGENIC                    |                    |                             |

| SNPs IDs           | Chromosome IDs | Chromosomes    | Physical positions (bp) | CDC Frontier (Reference genome) | (Pusa 1103 & HPNB) | (ILWC 46 & LPNB) | Sequence Components of genome | Gene accession IDs | Putative functions                  |
|--------------------|----------------|----------------|-------------------------|---------------------------------|--------------------|------------------|-------------------------------|--------------------|-------------------------------------|
| SNP_94165_A_856878 | NW_004516574.1 | scaffold1348_1 | 856878                  | TT                              | AA                 | AA               | INTERGENIC                    |                    |                                     |
| SNP_94167_A_857151 | NW_004516574.1 | scaffold1348_1 | 857151                  | CC                              | TT                 | TT               | INTERGENIC                    |                    |                                     |
| SNP_94168_A_857153 | NW_004516574.1 | scaffold1348_1 | 857153                  | AA                              | GG                 | GG               | INTERGENIC                    |                    |                                     |
| SNP_94169_A_857211 | NW_004516574.1 | scaffold1348_1 | 857211                  | AA                              | TT                 | TT               | INTERGENIC                    |                    |                                     |
| SNP_94170_A_857264 | NW_004516574.1 | scaffold1348_1 | 857264                  | AA                              | GG                 | GG               | INTERGENIC                    |                    |                                     |
| SNP_94171_A_857269 | NW_004516574.1 | scaffold1348_1 | 857269                  | GG                              | AA                 | AA               | INTERGENIC                    |                    |                                     |
| SNP_94172_A_857281 | NW_004516574.1 | scaffold1348_1 | 857281                  | TT                              | AA                 | AA               | INTERGENIC                    |                    |                                     |
| SNP_94173_A_857770 | NW_004516574.1 | scaffold1348_1 | 857770                  | TT                              | CC                 | CC               | INTERGENIC                    |                    |                                     |
| SNP_94174_A_857806 | NW_004516574.1 | scaffold1348_1 | 857806                  | TT                              | CC                 | CC               | INTERGENIC                    |                    |                                     |
| SNP_94175_A_857815 | NW_004516574.1 | scaffold1348_1 | 857815                  | TT                              | GG                 | GG               | INTERGENIC                    |                    |                                     |
| SNP_94176_A_861406 | NW_004516574.1 | scaffold1348_1 | 861406                  | AA                              | CC                 | CC               | URR                           | 101491129          | uncharacterized LOC101491129        |
| SNP_94177_A_861865 | NW_004516574.1 | scaffold1348_1 | 861865                  | AA                              | TT                 | TT               | URR                           | 101491129          | uncharacterized LOC101491129        |
| SNP_94178_A_861871 | NW_004516574.1 | scaffold1348_1 | 861871                  | TT                              | GG                 | GG               | URR                           | 101491129          | uncharacterized LOC101491129        |
| SNP_94179_A_862045 | NW_004516574.1 | scaffold1348_1 | 862045                  | TT                              | CC                 | CC               | URR                           | 101491129          | uncharacterized LOC101491129        |
| SNP_94180_A_862129 | NW_004516574.1 | scaffold1348_1 | 862129                  | AA                              | GG                 | GG               | URR                           | 101491129          | uncharacterized LOC101491129        |
| SNP_94181_A_862143 | NW_004516574.1 | scaffold1348_1 | 862143                  | AA                              | TT                 | TT               | URR                           | 101491129          | uncharacterized LOC101491129        |
| SNP_94182_A_867138 | NW_004516574.1 | scaffold1348_1 | 867138                  | GG                              | AA                 | AA               | URR                           | 101513783          | lysine histidine transporter 1-like |
| SNP_94183_A_867192 | NW_004516574.1 | scaffold1348_1 | 867192                  | AA                              | TT                 | TT               | URR                           | 101513783          | lysine histidine transporter 1-like |
| SNP_94184_A_868334 | NW_004516574.1 | scaffold1348_1 | 868334                  | AA                              | TT                 | TT               | INTERGENIC                    |                    |                                     |
| SNP_94185_A_868351 | NW_004516574.1 | scaffold1348_1 | 868351                  | AA                              | TT                 | TT               | INTERGENIC                    |                    |                                     |
| SNP_94186_A_868354 | NW_004516574.1 | scaffold1348_1 | 868354                  | TT                              | AA                 | AA               | INTERGENIC                    |                    |                                     |
| SNP_94187_A_868426 | NW_004516574.1 | scaffold1348_1 | 868426                  | AA                              | GG                 | GG               | INTERGENIC                    |                    |                                     |

| SNPs IDs           | Chromosome IDs | Chromosomes    | Physical positions (bp) | CDC Frontier (Reference genome) | (Pusa 1103 & HPNB) | (ILWC 46 & LPNB) | Sequence Components of genome | Gene accession IDs | Putative functions                                  |
|--------------------|----------------|----------------|-------------------------|---------------------------------|--------------------|------------------|-------------------------------|--------------------|-----------------------------------------------------|
| SNP_94188_A_868448 | NW_004516574.1 | scaffold1348_1 | 868448                  | CC                              | AA                 | AA               | INTERGENIC                    |                    |                                                     |
| SNP_94189_A_868464 | NW_004516574.1 | scaffold1348_1 | 868464                  | AA                              | TT                 | TT               | INTERGENIC                    |                    |                                                     |
| SNP_94190_A_868587 | NW_004516574.1 | scaffold1348_1 | 868587                  | TT                              | CC                 | CC               | DRR                           | 101491441          | glyceraldehyde-3-phosphate dehydrogenase, cytosolic |
| SNP_94191_A_868731 | NW_004516574.1 | scaffold1348_1 | 868731                  | AA                              | CC                 | CC               | DRR                           | 101491441          | glyceraldehyde-3-phosphate dehydrogenase, cytosolic |
| SNP_94192_A_869267 | NW_004516574.1 | scaffold1348_1 | 869267                  | TT                              | CC                 | CC               | DRR                           | 101491441          | glyceraldehyde-3-phosphate dehydrogenase, cytosolic |
| SNP_94193_A_869302 | NW_004516574.1 | scaffold1348_1 | 869302                  | CC                              | TT                 | TT               | DRR                           | 101491441          | glyceraldehyde-3-phosphate dehydrogenase, cytosolic |
| SNP_94195_A_869533 | NW_004516574.1 | scaffold1348_1 | 869533                  | GG                              | TT                 | TT               | DRR                           | 101491441          | glyceraldehyde-3-phosphate dehydrogenase, cytosolic |
| SNP_94196_A_871254 | NW_004516574.1 | scaffold1348_1 | 871254                  | AA                              | CC                 | CC               | INTRON                        | 101491441          | glyceraldehyde-3-phosphate dehydrogenase, cytosolic |
| SNP_94197_A_871960 | NW_004516574.1 | scaffold1348_1 | 871960                  | CC                              | AA                 | AA               | INTRON                        | 101491441          | glyceraldehyde-3-phosphate dehydrogenase, cytosolic |
| SNP_94198_A_872330 | NW_004516574.1 | scaffold1348_1 | 872330                  | TT                              | CC                 | CC               | INTRON                        | 101491441          | glyceraldehyde-3-phosphate dehydrogenase, cytosolic |
| SNP_94199_A_876009 | NW_004516574.1 | scaffold1348_1 | 876009                  | GG                              | AA                 | AA               | INTERGENIC                    |                    |                                                     |
| SNP_94200_A_876013 | NW_004516574.1 | scaffold1348_1 | 876013                  | TT                              | CC                 | CC               | INTERGENIC                    |                    |                                                     |
| SNP_94201_A_876015 | NW_004516574.1 | scaffold1348_1 | 876015                  | GG                              | TT                 | TT               | INTERGENIC                    |                    |                                                     |
| SNP_94202_A_876037 | NW_004516574.1 | scaffold1348_1 | 876037                  | AA                              | GG                 | GG               | INTERGENIC                    |                    |                                                     |
| SNP_94203_A_882289 | NW_004516574.1 | scaffold1348_1 | 882289                  | CC                              | TT                 | TT               | INTERGENIC                    |                    |                                                     |
| SNP_94204_A_887091 | NW_004516574.1 | scaffold1348_1 | 887091                  | CC                              | TT                 | TT               | INTERGENIC                    |                    |                                                     |
| SNP_94205_A_887094 | NW_004516574.1 | scaffold1348_1 | 887094                  | CC                              | TT                 | TT               | INTERGENIC                    |                    |                                                     |
| SNP_94206_A_887781 | NW_004516574.1 | scaffold1348_1 | 887781                  | CC                              | TT                 | TT               | INTERGENIC                    |                    |                                                     |
| SNP_94207_A_888013 | NW_004516574.1 | scaffold1348_1 | 888013                  | CC                              | AA                 | AA               | INTERGENIC                    |                    |                                                     |
| SNP_94208_A_888024 | NW_004516574.1 | scaffold1348_1 | 888024                  | TT                              | CC                 | CC               | INTERGENIC                    |                    |                                                     |
| SNP_94209_A_888083 | NW_004516574.1 | scaffold1348_1 | 888083                  | CC                              | TT                 | TT               | INTERGENIC                    |                    |                                                     |
| SNP_94210_A_894345 | NW_004516574.1 | scaffold1348_1 | 894345                  | CC                              | TT                 | TT               | INTERGENIC                    |                    |                                                     |

| SNPs IDs           | Chromosome IDs | Chromosomes    | Physical positions (bp) | CDC Frontier (Reference genome) | (Pusa 1103 & HPNB) | (ILWC 46 & LPNB) | Sequence Components of genome | Gene accession IDs | Putative functions                                           |
|--------------------|----------------|----------------|-------------------------|---------------------------------|--------------------|------------------|-------------------------------|--------------------|--------------------------------------------------------------|
| SNP_94211_A_894367 | NW_004516574.1 | scaffold1348_1 | 894367                  | GG                              | AA                 | AA               | INTERGENIC                    |                    |                                                              |
| SNP_94213_A_894383 | NW_004516574.1 | scaffold1348_1 | 894383                  | TT                              | GG                 | GG               | INTERGENIC                    |                    |                                                              |
| SNP_94214_A_894419 | NW_004516574.1 | scaffold1348_1 | 894419                  | AA                              | GG                 | GG               | INTERGENIC                    |                    |                                                              |
| SNP_94215_A_894706 | NW_004516574.1 | scaffold1348_1 | 894706                  | TT                              | AA                 | AA               | INTERGENIC                    |                    |                                                              |
| SNP_94216_A_894933 | NW_004516574.1 | scaffold1348_1 | 894933                  | CC                              | TT                 | TT               | INTERGENIC                    |                    |                                                              |
| SNP_94217_A_895154 | NW_004516574.1 | scaffold1348_1 | 895154                  | GG                              | AA                 | AA               | INTERGENIC                    |                    |                                                              |
| SNP_94219_A_898806 | NW_004516574.1 | scaffold1348_1 | 898806                  | AA                              | TT                 | TT               | INTERGENIC                    |                    |                                                              |
| SNP_94220_A_906848 | NW_004516574.1 | scaffold1348_1 | 906848                  | TT                              | GG                 | GG               | URR                           | 101514125          | DELLA protein RGL1-like                                      |
| SNP_94221_A_910551 | NW_004516574.1 | scaffold1348_1 | 910551                  | TT                              | CC                 | CC               | URR                           | 101491753          | nucleoside diphosphate kinase 2, chloroplastic               |
| SNP_94222_A_910930 | NW_004516574.1 | scaffold1348_1 | 910930                  | AA                              | CC                 | CC               | URR                           | 101491753          | nucleoside diphosphate kinase 2, chloroplastic               |
| SNP_94223_A_911737 | NW_004516574.1 | scaffold1348_1 | 911737                  | AA                              | GG                 | GG               | URR                           | 101491753          | nucleoside diphosphate kinase 2, chloroplastic               |
| SNP_94224_A_912032 | NW_004516574.1 | scaffold1348_1 | 912032                  | TT                              | AA                 | AA               | DRR                           | 101492420          | uncharacterized aarF domain-containing protein kinase 1-like |
| SNP_94225_A_912067 | NW_004516574.1 | scaffold1348_1 | 912067                  | GG                              | AA                 | AA               | DRR                           | 101492420          | uncharacterized aarF domain-containing protein kinase 1-like |
| SNP_94226_A_914532 | NW_004516574.1 | scaffold1348_1 | 914532                  | GG                              | AA                 | AA               | INTERGENIC                    |                    |                                                              |
| SNP_94227_A_915662 | NW_004516574.1 | scaffold1348_1 | 915662                  | TT                              | CC                 | CC               | INTRON                        | 101492420          | uncharacterized aarF domain-containing protein kinase 1-like |
| SNP_94228_A_917200 | NW_004516574.1 | scaffold1348_1 | 917200                  | TT                              | CC                 | CC               | INTRON                        | 101492420          | uncharacterized aarF domain-containing protein kinase 1-like |
| SNP_94230_A_919400 | NW_004516574.1 | scaffold1348_1 | 919400                  | TT                              | AA                 | AA               | INTERGENIC                    |                    |                                                              |
| SNP_94231_A_921591 | NW_004516574.1 | scaffold1348_1 | 921591                  | AA                              | CC                 | CC               | URR                           | 101492420          | uncharacterized aarF domain-containing protein kinase 1-like |
| SNP_94232_A_921683 | NW_004516574.1 | scaffold1348_1 | 921683                  | CC                              | TT                 | TT               | DRR                           | 101492751          | 26S proteasome non-ATPase regulatory subunit 6 homolog       |
| SNP_94234_A_925760 | NW_004516574.1 | scaffold1348_1 | 925760                  | CC                              | GG                 | GG               | INTERGENIC                    |                    |                                                              |
| SNP_94235_A_927055 | NW_004516574.1 | scaffold1348_1 | 927055                  | CC                              | AA                 | AA               | URR                           | 101492751          | 26S proteasome non-ATPase regulatory subunit 6 homolog       |
| SNP_94236_A_930338 | NW_004516574.1 | scaffold1348_1 | 930338                  | GG                              | CC                 | CC               | INTERGENIC                    |                    |                                                              |

| SNPs IDs           | Chromosome IDs | Chromosomes    | Physical positions (bp) | CDC Frontier (Reference genome) | (Pusa 1103 & HPNB) | (ILWC 46 & LPNB) | Sequence Components of genome | Gene accession IDs | Putative functions                                |
|--------------------|----------------|----------------|-------------------------|---------------------------------|--------------------|------------------|-------------------------------|--------------------|---------------------------------------------------|
| SNP_94237_A_930343 | NW_004516574.1 | scaffold1348_1 | 930343                  | CC                              | AA                 | AA               | INTERGENIC                    |                    |                                                   |
| SNP_94238_A_931533 | NW_004516574.1 | scaffold1348_1 | 931533                  | CC                              | TT                 | TT               | DRR                           | 101493304          | uncharacterized LOC101493304                      |
| SNP_94239_A_931753 | NW_004516574.1 | scaffold1348_1 | 931753                  | TT                              | AA                 | AA               | DRR                           | 101493304          | uncharacterized LOC101493304                      |
| SNP_94240_A_933059 | NW_004516574.1 | scaffold1348_1 | 933059                  | AA                              | GG                 | GG               | URR                           | 101494150          | uncharacterized LOC101494150                      |
| SNP_94241_A_933337 | NW_004516574.1 | scaffold1348_1 | 933337                  | AA                              | GG                 | GG               | INTRON                        | 101493304          | uncharacterized LOC101493304                      |
| SNP_94242_A_937287 | NW_004516574.1 | scaffold1348_1 | 937287                  | TT                              | CC                 | CC               | URR                           | 101493304          | uncharacterized LOC101493304                      |
| SNP_94243_A_937491 | NW_004516574.1 | scaffold1348_1 | 937491                  | GG                              | TT                 | TT               | URR                           | 101493304          | uncharacterized LOC101493304                      |
| SNP_94244_A_940865 | NW_004516574.1 | scaffold1348_1 | 940865                  | TT                              | CC                 | CC               | INTERGENIC                    |                    |                                                   |
| SNP_94245_A_940879 | NW_004516574.1 | scaffold1348_1 | 940879                  | CC                              | TT                 | TT               | URR                           | 101494458          | GDGL esterase/lipase At3g48460                    |
| SNP_94246_A_943400 | NW_004516574.1 | scaffold1348_1 | 943400                  | GG                              | AA                 | AA               | INTERGENIC                    |                    |                                                   |
| SNP_94247_A_943407 | NW_004516574.1 | scaffold1348_1 | 943407                  | AA                              | TT                 | TT               | INTERGENIC                    |                    |                                                   |
| SNP_94249_A_943655 | NW_004516574.1 | scaffold1348_1 | 943655                  | CC                              | TT                 | TT               | INTERGENIC                    |                    |                                                   |
| SNP_94250_A_944483 | NW_004516574.1 | scaffold1348_1 | 944483                  | TT                              | CC                 | CC               | INTERGENIC                    |                    |                                                   |
| SNP_94251_A_944821 | NW_004516574.1 | scaffold1348_1 | 944821                  | AA                              | GG                 | GG               | INTERGENIC                    |                    |                                                   |
| SNP_94252_A_945088 | NW_004516574.1 | scaffold1348_1 | 945088                  | AA                              | GG                 | GG               | INTERGENIC                    |                    |                                                   |
| SNP_94254_A_946341 | NW_004516574.1 | scaffold1348_1 | 946341                  | TT                              | AA                 | AA               | DRR                           | 101494777          | Unknown function                                  |
| SNP_94256_A_952848 | NW_004516574.1 | scaffold1348_1 | 952848                  | AA                              | TT                 | TT               | INTERGENIC                    |                    |                                                   |
| SNP_94258_A_954392 | NW_004516574.1 | scaffold1348_1 | 954392                  | AA                              | CC                 | CC               | URR                           | 101495321          | zinc finger CCH domain-containing protein 43-like |
| SNP_94259_A_954677 | NW_004516574.1 | scaffold1348_1 | 954677                  | GG                              | AA                 | AA               | URR                           | 101495321          | zinc finger CCH domain-containing protein 43-like |
| SNP_94260_A_954702 | NW_004516574.1 | scaffold1348_1 | 954702                  | GG                              | TT                 | TT               | URR                           | 101495321          | zinc finger CCH domain-containing protein 43-like |
| SNP_94261_A_954755 | NW_004516574.1 | scaffold1348_1 | 954755                  | AA                              | GG                 | GG               | URR                           | 101495321          | zinc finger CCH domain-containing protein 43-like |
| SNP_94262_A_955482 | NW_004516574.1 | scaffold1348_1 | 955482                  | TT                              | CC                 | CC               | URR                           | 101495321          | zinc finger CCH domain-containing protein 43-like |



| SNPs IDs           | Chromosome IDs | Chromosomes    | Physical positions (bp) | CDC Frontier (Reference genome) | (Pusa 1103 & HPNB) | (ILWC 46 & LPNB) | Sequence Components of genome | Gene accession IDs | Putative functions                                |
|--------------------|----------------|----------------|-------------------------|---------------------------------|--------------------|------------------|-------------------------------|--------------------|---------------------------------------------------|
| SNP_94263_A_955552 | NW_004516574.1 | scaffold1348_1 | 955552                  | TT                              | CC                 | CC               | URR                           | 101495321          | zinc finger CCH domain-containing protein 43-like |
| SNP_94264_A_955918 | NW_004516574.1 | scaffold1348_1 | 955918                  | AA                              | CC                 | CC               | INTERGENIC                    |                    |                                                   |
| SNP_94265_A_955933 | NW_004516574.1 | scaffold1348_1 | 955933                  | TT                              | GG                 | GG               | INTERGENIC                    |                    |                                                   |
| SNP_94266_A_955946 | NW_004516574.1 | scaffold1348_1 | 955946                  | TT                              | AA                 | AA               | INTERGENIC                    |                    |                                                   |
| SNP_94267_A_956183 | NW_004516574.1 | scaffold1348_1 | 956183                  | AA                              | GG                 | GG               | INTERGENIC                    |                    |                                                   |
| SNP_94268_A_958724 | NW_004516574.1 | scaffold1348_1 | 958724                  | TT                              | AA                 | AA               | DRR                           | 101495646          | lysine-specific demethylase REF6-like             |
| SNP_94269_A_966385 | NW_004516574.1 | scaffold1348_1 | 966385                  | TT                              | GG                 | GG               | INTERGENIC                    |                    |                                                   |
| SNP_94270_A_966937 | NW_004516574.1 | scaffold1348_1 | 966937                  | GG                              | AA                 | AA               | INTERGENIC                    |                    |                                                   |
| SNP_94271_A_968225 | NW_004516574.1 | scaffold1348_1 | 968225                  | GG                              | CC                 | CC               | URR                           | 101495646          | lysine-specific demethylase REF6-like             |
| SNP_94272_A_968485 | NW_004516574.1 | scaffold1348_1 | 968485                  | AA                              | TT                 | TT               | URR                           | 101495646          | lysine-specific demethylase REF6-like             |
| SNP_94273_A_968528 | NW_004516574.1 | scaffold1348_1 | 968528                  | CC                              | TT                 | TT               | URR                           | 101495646          | lysine-specific demethylase REF6-like             |
| SNP_94274_A_969559 | NW_004516574.1 | scaffold1348_1 | 969559                  | CC                              | TT                 | TT               | DRR                           | 101495970          | uncharacterized LOC101495970                      |
| SNP_94275_A_969628 | NW_004516574.1 | scaffold1348_1 | 969628                  | TT                              | AA                 | AA               | DRR                           | 101495970          | uncharacterized LOC101495970                      |
| SNP_94276_A_973473 | NW_004516574.1 | scaffold1348_1 | 973473                  | CC                              | TT                 | TT               | INTRON                        | 101495970          | uncharacterized LOC101495970                      |
| SNP_94277_A_973921 | NW_004516574.1 | scaffold1348_1 | 973921                  | GG                              | AA                 | AA               | INTRON                        | 101495970          | uncharacterized LOC101495970                      |
| SNP_94278_A_976495 | NW_004516574.1 | scaffold1348_1 | 976495                  | CC                              | TT                 | TT               | URR                           | 101495970          | uncharacterized LOC101495970                      |
| SNP_94279_A_983101 | NW_004516574.1 | scaffold1348_1 | 983101                  | TT                              | GG                 | GG               | SYNONYMOUS_CODING             | 101496307          | protein STICHEL-like 2                            |
| SNP_94280_A_985219 | NW_004516574.1 | scaffold1348_1 | 985219                  | CC                              | GG                 | GG               | URR                           | 101496307          | protein STICHEL-like 2                            |
| SNP_94281_A_988130 | NW_004516574.1 | scaffold1348_1 | 988130                  | GG                              | AA                 | AA               | INTERGENIC                    |                    |                                                   |
| SNP_94282_A_988144 | NW_004516574.1 | scaffold1348_1 | 988144                  | AA                              | GG                 | GG               | INTERGENIC                    |                    |                                                   |
| SNP_94283_A_988145 | NW_004516574.1 | scaffold1348_1 | 988145                  | CC                              | TT                 | TT               | INTERGENIC                    |                    |                                                   |
| SNP_94284_A_988155 | NW_004516574.1 | scaffold1348_1 | 988155                  | AA                              | GG                 | GG               | INTERGENIC                    |                    |                                                   |

| SNPs IDs            | Chromosome IDs | Chromosomes    | Physical positions (bp) | CDC Frontier (Reference genome) | (Pusa 1103 & HPNB) | (ILWC 46 & LPNB) | Sequence Components of genome | Gene accession IDs | Putative functions        |
|---------------------|----------------|----------------|-------------------------|---------------------------------|--------------------|------------------|-------------------------------|--------------------|---------------------------|
| SNP_94285_A_988156  | NW_004516574.1 | scaffold1348_1 | 988156                  | GG                              | AA                 | AA               | INTERGENIC                    |                    |                           |
| SNP_94286_A_991258  | NW_004516574.1 | scaffold1348_1 | 991258                  | AA                              | GG                 | GG               | INTERGENIC                    |                    |                           |
| SNP_94288_A_991847  | NW_004516574.1 | scaffold1348_1 | 991847                  | AA                              | TT                 | TT               | INTERGENIC                    |                    |                           |
| SNP_94289_A_991865  | NW_004516574.1 | scaffold1348_1 | 991865                  | GG                              | AA                 | AA               | INTERGENIC                    |                    |                           |
| SNP_94290_A_991881  | NW_004516574.1 | scaffold1348_1 | 991881                  | GG                              | TT                 | TT               | INTERGENIC                    |                    |                           |
| SNP_94291_A_992065  | NW_004516574.1 | scaffold1348_1 | 992065                  | TT                              | CC                 | CC               | INTERGENIC                    |                    |                           |
| SNP_94293_A_992944  | NW_004516574.1 | scaffold1348_1 | 992944                  | CC                              | TT                 | TT               | INTERGENIC                    |                    |                           |
| SNP_94295_A_998162  | NW_004516574.1 | scaffold1348_1 | 998162                  | TT                              | CC                 | CC               | INTERGENIC                    |                    |                           |
| SNP_94296_A_998163  | NW_004516574.1 | scaffold1348_1 | 998163                  | AA                              | GG                 | GG               | INTERGENIC                    |                    |                           |
| SNP_94297_A_1000069 | NW_004516574.1 | scaffold1348_1 | 1000069                 | GG                              | AA                 | AA               | INTERGENIC                    |                    |                           |
| SNP_94298_A_1002902 | NW_004516574.1 | scaffold1348_1 | 1002902                 | TT                              | AA                 | AA               | INTERGENIC                    |                    |                           |
| SNP_94299_A_1002911 | NW_004516574.1 | scaffold1348_1 | 1002911                 | TT                              | GG                 | GG               | INTERGENIC                    |                    |                           |
| SNP_94300_A_1002912 | NW_004516574.1 | scaffold1348_1 | 1002912                 | TT                              | GG                 | GG               | INTERGENIC                    |                    |                           |
| SNP_94301_A_1011794 | NW_004516574.1 | scaffold1348_1 | 1011794                 | AA                              | TT                 | TT               | URR                           | 101496637          | probable pectate lyase 18 |
| SNP_94304_A_1014808 | NW_004516574.1 | scaffold1348_1 | 1014808                 | CC                              | TT                 | TT               | INTERGENIC                    |                    |                           |
| SNP_94305_A_1015214 | NW_004516574.1 | scaffold1348_1 | 1015214                 | TT                              | GG                 | GG               | INTERGENIC                    |                    |                           |
| SNP_94306_A_1020936 | NW_004516574.1 | scaffold1348_1 | 1020936                 | CC                              | TT                 | TT               | INTERGENIC                    |                    |                           |
| SNP_94307_A_1021203 | NW_004516574.1 | scaffold1348_1 | 1021203                 | CC                              | GG                 | GG               | INTERGENIC                    |                    |                           |
| SNP_94308_A_1031945 | NW_004516574.1 | scaffold1348_1 | 1031945                 | CC                              | TT                 | TT               | INTERGENIC                    |                    |                           |
| SNP_94309_A_1041643 | NW_004516574.1 | scaffold1348_1 | 1041643                 | GG                              | TT                 | TT               | INTERGENIC                    |                    |                           |
| SNP_94310_A_1041672 | NW_004516574.1 | scaffold1348_1 | 1041672                 | AA                              | CC                 | CC               | INTERGENIC                    |                    |                           |
| SNP_94311_A_1041782 | NW_004516574.1 | scaffold1348_1 | 1041782                 | GG                              | AA                 | AA               | INTERGENIC                    |                    |                           |

| SNPs IDs            | Chromosome IDs | Chromosomes    | Physical positions (bp) | CDC Frontier (Reference genome) | (Pusa 1103 & HPNB) | (ILWC 46 & LPNB) | Sequence genome | Components of | Gene accession IDs                               | Putative functions |
|---------------------|----------------|----------------|-------------------------|---------------------------------|--------------------|------------------|-----------------|---------------|--------------------------------------------------|--------------------|
| SNP_94312_A_1041784 | NW_004516574.1 | scaffold1348_1 | 1041784                 | GG                              | CC                 | CC               | INTERGENIC      |               |                                                  |                    |
| SNP_94313_A_1041854 | NW_004516574.1 | scaffold1348_1 | 1041854                 | AA                              | TT                 | TT               | INTERGENIC      |               |                                                  |                    |
| SNP_94314_A_1041859 | NW_004516574.1 | scaffold1348_1 | 1041859                 | TT                              | AA                 | AA               | INTERGENIC      |               |                                                  |                    |
| SNP_94315_A_1043485 | NW_004516574.1 | scaffold1348_1 | 1043485                 | AA                              | GG                 | GG               | INTERGENIC      |               |                                                  |                    |
| SNP_94316_A_1044417 | NW_004516574.1 | scaffold1348_1 | 1044417                 | CC                              | TT                 | TT               | INTERGENIC      |               |                                                  |                    |
| SNP_94317_A_1044703 | NW_004516574.1 | scaffold1348_1 | 1044703                 | AA                              | GG                 | GG               | INTERGENIC      |               |                                                  |                    |
| SNP_94318_A_1045149 | NW_004516574.1 | scaffold1348_1 | 1045149                 | CC                              | TT                 | TT               | INTERGENIC      |               |                                                  |                    |
| SNP_94319_A_1045152 | NW_004516574.1 | scaffold1348_1 | 1045152                 | TT                              | CC                 | CC               | INTERGENIC      |               |                                                  |                    |
| SNP_94320_A_1045158 | NW_004516574.1 | scaffold1348_1 | 1045158                 | GG                              | AA                 | AA               | INTERGENIC      |               |                                                  |                    |
| SNP_94321_A_1045214 | NW_004516574.1 | scaffold1348_1 | 1045214                 | CC                              | TT                 | TT               | INTERGENIC      |               |                                                  |                    |
| SNP_94322_A_1045449 | NW_004516574.1 | scaffold1348_1 | 1045449                 | GG                              | AA                 | AA               | INTERGENIC      |               |                                                  |                    |
| SNP_94323_A_1045510 | NW_004516574.1 | scaffold1348_1 | 1045510                 | TT                              | GG                 | GG               | INTERGENIC      |               |                                                  |                    |
| SNP_94324_A_1047822 | NW_004516574.1 | scaffold1348_1 | 1047822                 | TT                              | GG                 | GG               | INTERGENIC      |               |                                                  |                    |
| SNP_94325_A_1047847 | NW_004516574.1 | scaffold1348_1 | 1047847                 | TT                              | AA                 | AA               | INTERGENIC      |               |                                                  |                    |
| SNP_94326_A_1047848 | NW_004516574.1 | scaffold1348_1 | 1047848                 | TT                              | AA                 | AA               | INTERGENIC      |               |                                                  |                    |
| SNP_94327_A_1049779 | NW_004516574.1 | scaffold1348_1 | 1049779                 | CC                              | TT                 | TT               | DRR             | 101496955     | BTB/POZ and TAZ domain-containing protein 2-like |                    |
| SNP_94328_A_1050583 | NW_004516574.1 | scaffold1348_1 | 1050583                 | CC                              | TT                 | TT               | URR             | 101496955     | BTB/POZ and TAZ domain-containing protein 2-like |                    |
| SNP_94329_A_1056137 | NW_004516574.1 | scaffold1348_1 | 1056137                 | TT                              | AA                 | AA               | INTERGENIC      |               |                                                  |                    |
| SNP_94330_A_1056409 | NW_004516574.1 | scaffold1348_1 | 1056409                 | CC                              | TT                 | TT               | INTERGENIC      |               |                                                  |                    |
| SNP_94331_A_1056428 | NW_004516574.1 | scaffold1348_1 | 1056428                 | CC                              | TT                 | TT               | INTERGENIC      |               |                                                  |                    |
| SNP_94332_A_1056720 | NW_004516574.1 | scaffold1348_1 | 1056720                 | AA                              | CC                 | CC               | INTERGENIC      |               |                                                  |                    |
| SNP_94333_A_1056732 | NW_004516574.1 | scaffold1348_1 | 1056732                 | AA                              | GG                 | GG               | INTERGENIC      |               |                                                  |                    |

| SNPs IDs            | Chromosome IDs | Chromosomes    | Physical positions (bp) | CDC Frontier (Reference genome) | (Pusa 1103 & HPNB) | (ILWC 46 & LPNB) | Sequence Components of genome | Gene accession IDs | Putative functions                              |
|---------------------|----------------|----------------|-------------------------|---------------------------------|--------------------|------------------|-------------------------------|--------------------|-------------------------------------------------|
| SNP_94334_A_1056740 | NW_004516574.1 | scaffold1348_1 | 1056740                 | AA                              | GG                 | GG               | INTERGENIC                    |                    |                                                 |
| SNP_94335_A_1057640 | NW_004516574.1 | scaffold1348_1 | 1057640                 | CC                              | TT                 | TT               | INTERGENIC                    |                    |                                                 |
| SNP_94336_A_1057667 | NW_004516574.1 | scaffold1348_1 | 1057667                 | AA                              | TT                 | TT               | INTERGENIC                    |                    |                                                 |
| SNP_94337_A_1059183 | NW_004516574.1 | scaffold1348_1 | 1059183                 | AA                              | GG                 | GG               | DRR                           | 101497285          | vignain-like                                    |
| SNP_94338_A_1059413 | NW_004516574.1 | scaffold1348_1 | 1059413                 | GG                              | AA                 | AA               | DRR                           | 101497285          | vignain-like                                    |
| SNP_94339_A_1060148 | NW_004516574.1 | scaffold1348_1 | 1060148                 | GG                              | TT                 | TT               | INTRON                        | 101497285          | vignain-like                                    |
| SNP_94341_A_1062743 | NW_004516574.1 | scaffold1348_1 | 1062743                 | CC                              | AA                 | AA               | URR                           | 101497285          | vignain-like                                    |
| SNP_94342_A_1066408 | NW_004516574.1 | scaffold1348_1 | 1066408                 | AA                              | CC                 | CC               | INTRON                        | 101497939          | vignain-like                                    |
| SNP_94343_A_1070689 | NW_004516574.1 | scaffold1348_1 | 1070689                 | TT                              | GG                 | GG               | URR                           | 101497939          | vignain-like                                    |
| SNP_94345_A_1075302 | NW_004516574.1 | scaffold1348_1 | 1075302                 | GG                              | TT                 | TT               | URR                           | 101497607          | protein tipD                                    |
| SNP_94346_A_1075342 | NW_004516574.1 | scaffold1348_1 | 1075342                 | CC                              | TT                 | TT               | URR                           | 101497607          | protein tipD                                    |
| SNP_94347_A_1075344 | NW_004516574.1 | scaffold1348_1 | 1075344                 | AA                              | TT                 | TT               | URR                           | 101497607          | protein tipD                                    |
| SNP_94349_A_1075519 | NW_004516574.1 | scaffold1348_1 | 1075519                 | TT                              | CC                 | CC               | URR                           | 101497607          | protein tipD                                    |
| SNP_94350_A_1076776 | NW_004516574.1 | scaffold1348_1 | 1076776                 | GG                              | TT                 | TT               | URR                           | 101497607          | protein tipD                                    |
| SNP_94351_A_1076899 | NW_004516574.1 | scaffold1348_1 | 1076899                 | GG                              | AA                 | AA               | URR                           | 101497607          | protein tipD                                    |
| SNP_94352_A_1092093 | NW_004516574.1 | scaffold1348_1 | 1092093                 | CC                              | TT                 | TT               | URR                           | 101498597          | protein-L-isoaspartate O-methyltransferase-like |
| SNP_94353_A_1093675 | NW_004516574.1 | scaffold1348_1 | 1093675                 | AA                              | CC                 | CC               | URR                           | 101498597          | protein-L-isoaspartate O-methyltransferase-like |
| SNP_94354_A_1094386 | NW_004516574.1 | scaffold1348_1 | 1094386                 | AA                              | TT                 | TT               | INTERGENIC                    |                    |                                                 |
| SNP_94356_A_1096410 | NW_004516574.1 | scaffold1348_1 | 1096410                 | AA                              | CC                 | CC               | DRR                           | 101499157          | 28 kDa ribonucleoprotein, chloroplastic         |
| SNP_94357_A_1096421 | NW_004516574.1 | scaffold1348_1 | 1096421                 | CC                              | AA                 | AA               | DRR                           | 101499157          | 28 kDa ribonucleoprotein, chloroplastic         |
| SNP_94358_A_1096452 | NW_004516574.1 | scaffold1348_1 | 1096452                 | TT                              | AA                 | AA               | DRR                           | 101499157          | 28 kDa ribonucleoprotein, chloroplastic         |
| SNP_94359_A_1097407 | NW_004516574.1 | scaffold1348_1 | 1097407                 | GG                              | AA                 | AA               | DRR                           | 101499157          | 28 kDa ribonucleoprotein, chloroplastic         |

| SNPs IDs            | Chromosome IDs | Chromosomes    | Physical positions (bp) | CDC Frontier (Reference genome) | (Pusa 1103 & HPNB) | (ILWC 46 & LPNB) | Sequence Components of genome | Gene accession IDs | Putative functions                      |
|---------------------|----------------|----------------|-------------------------|---------------------------------|--------------------|------------------|-------------------------------|--------------------|-----------------------------------------|
| SNP_94360_A_1098178 | NW_004516574.1 | scaffold1348_1 | 1098178                 | TT                              | CC                 | CC               | INTRON                        | 101499157          | 28 kDa ribonucleoprotein, chloroplastic |
| SNP_94361_A_1101172 | NW_004516574.1 | scaffold1348_1 | 1101172                 | GG                              | AA                 | AA               | URR                           | 101499157          | 28 kDa ribonucleoprotein, chloroplastic |
| SNP_94362_A_1101174 | NW_004516574.1 | scaffold1348_1 | 1101174                 | GG                              | AA                 | AA               | URR                           | 101499157          | 28 kDa ribonucleoprotein, chloroplastic |
| SNP_94363_A_1101181 | NW_004516574.1 | scaffold1348_1 | 1101181                 | AA                              | GG                 | GG               | URR                           | 101499157          | 28 kDa ribonucleoprotein, chloroplastic |
| SNP_94364_A_1101210 | NW_004516574.1 | scaffold1348_1 | 1101210                 | TT                              | CC                 | CC               | URR                           | 101499157          | 28 kDa ribonucleoprotein, chloroplastic |
| SNP_94365_A_1102558 | NW_004516574.1 | scaffold1348_1 | 1102558                 | AA                              | TT                 | TT               | INTERGENIC                    |                    |                                         |
| SNP_94366_A_1103076 | NW_004516574.1 | scaffold1348_1 | 1103076                 | GG                              | AA                 | AA               | DRR                           | 101499476          | proline transporter 2-like              |
| SNP_94367_A_1103707 | NW_004516574.1 | scaffold1348_1 | 1103707                 | TT                              | CC                 | CC               | DRR                           | 101499476          | proline transporter 2-like              |
| SNP_94368_A_1103758 | NW_004516574.1 | scaffold1348_1 | 1103758                 | AA                              | TT                 | TT               | DRR                           | 101499476          | proline transporter 2-like              |
| SNP_94370_A_1104279 | NW_004516574.1 | scaffold1348_1 | 1104279                 | GG                              | AA                 | AA               | INTRON                        | 101499476          | proline transporter 2-like              |
| SNP_94371_A_1106055 | NW_004516574.1 | scaffold1348_1 | 1106055                 | GG                              | TT                 | TT               | INTRON                        | 101499476          | proline transporter 2-like              |
| SNP_94372_A_1106317 | NW_004516574.1 | scaffold1348_1 | 1106317                 | CC                              | TT                 | TT               | INTRON                        | 101499476          | proline transporter 2-like              |
| SNP_94373_A_1107844 | NW_004516574.1 | scaffold1348_1 | 1107844                 | GG                              | AA                 | AA               | URR                           | 101499476          | proline transporter 2-like              |
| SNP_94374_A_1111453 | NW_004516574.1 | scaffold1348_1 | 1111453                 | CC                              | GG                 | GG               | INTERGENIC                    |                    |                                         |
| SNP_94375_A_1111459 | NW_004516574.1 | scaffold1348_1 | 1111459                 | TT                              | CC                 | CC               | INTERGENIC                    |                    |                                         |
| SNP_94376_A_1114501 | NW_004516574.1 | scaffold1348_1 | 1114501                 | CC                              | AA                 | AA               | INTERGENIC                    |                    |                                         |
| SNP_94377_A_1114503 | NW_004516574.1 | scaffold1348_1 | 1114503                 | AA                              | GG                 | GG               | INTERGENIC                    |                    |                                         |
| SNP_94378_A_1114506 | NW_004516574.1 | scaffold1348_1 | 1114506                 | CC                              | GG                 | GG               | INTERGENIC                    |                    |                                         |
| SNP_94379_A_1114522 | NW_004516574.1 | scaffold1348_1 | 1114522                 | CC                              | AA                 | AA               | INTERGENIC                    |                    |                                         |
| SNP_94380_A_1114524 | NW_004516574.1 | scaffold1348_1 | 1114524                 | GG                              | AA                 | AA               | INTERGENIC                    |                    |                                         |
| SNP_94381_A_1115817 | NW_004516574.1 | scaffold1348_1 | 1115817                 | CC                              | AA                 | AA               | URR                           | 101499779          | proline transporter 2-like              |
| SNP_94382_A_1115829 | NW_004516574.1 | scaffold1348_1 | 1115829                 | CC                              | TT                 | TT               | URR                           | 101499779          | proline transporter 2-like              |

| SNPs IDs            | Chromosome IDs | Chromosomes    | Physical positions (bp) | CDC Frontier (Reference genome) | (Pusa 1103 & HPNB) | (ILWC 46 & LPNB) | Sequence Components of genome | Gene accession IDs | Putative functions           |
|---------------------|----------------|----------------|-------------------------|---------------------------------|--------------------|------------------|-------------------------------|--------------------|------------------------------|
| SNP_94383_A_1115841 | NW_004516574.1 | scaffold1348_1 | 1115841                 | AA                              | TT                 | TT               | URR                           | 101499779          | proline transporter 2-like   |
| SNP_94386_A_1119069 | NW_004516574.1 | scaffold1348_1 | 1119069                 | AA                              | TT                 | TT               | DRR                           | 101515099          | uncharacterized LOC101515099 |
| SNP_94387_A_1119081 | NW_004516574.1 | scaffold1348_1 | 1119081                 | GG                              | CC                 | CC               | DRR                           | 101515099          | uncharacterized LOC101515099 |
| SNP_94388_A_1119131 | NW_004516574.1 | scaffold1348_1 | 1119131                 | CC                              | TT                 | TT               | DRR                           | 101515099          | uncharacterized LOC101515099 |
| SNP_94389_A_1120669 | NW_004516574.1 | scaffold1348_1 | 1120669                 | CC                              | AA                 | AA               | URR                           | 101515099          | uncharacterized LOC101515099 |
| SNP_94390_A_1121984 | NW_004516574.1 | scaffold1348_1 | 1121984                 | CC                              | AA                 | AA               | INTRON                        | 101500097          | cytochrome P450 71A26-like   |
| SNP_94391_A_1122197 | NW_004516574.1 | scaffold1348_1 | 1122197                 | AA                              | CC                 | CC               | INTRON                        | 101500097          | cytochrome P450 71A26-like   |
| SNP_94392_A_1122252 | NW_004516574.1 | scaffold1348_1 | 1122252                 | TT                              | CC                 | CC               | INTRON                        | 101500097          | cytochrome P450 71A26-like   |
| SNP_94393_A_1123885 | NW_004516574.1 | scaffold1348_1 | 1123885                 | GG                              | AA                 | AA               | SYNONYMOUS_CODING             | 101500097          | cytochrome P450 71A26-like   |
| SNP_94395_A_1125035 | NW_004516574.1 | scaffold1348_1 | 1125035                 | CC                              | AA                 | AA               | URR                           | 101500097          | cytochrome P450 71A26-like   |
| SNP_94396_A_1125146 | NW_004516574.1 | scaffold1348_1 | 1125146                 | GG                              | CC                 | CC               | URR                           | 101500097          | cytochrome P450 71A26-like   |
| SNP_94397_A_1125434 | NW_004516574.1 | scaffold1348_1 | 1125434                 | AA                              | GG                 | GG               | URR                           | 101500097          | cytochrome P450 71A26-like   |
| SNP_94399_A_1127470 | NW_004516574.1 | scaffold1348_1 | 1127470                 | CC                              | TT                 | TT               | INTERGENIC                    |                    |                              |
| SNP_94400_A_1127474 | NW_004516574.1 | scaffold1348_1 | 1127474                 | CC                              | AA                 | AA               | INTERGENIC                    |                    |                              |
| SNP_94401_A_1130814 | NW_004516574.1 | scaffold1348_1 | 1130814                 | GG                              | CC                 | CC               | INTERGENIC                    |                    |                              |
| SNP_94402_A_1133558 | NW_004516574.1 | scaffold1348_1 | 1133558                 | AA                              | CC                 | CC               | INTERGENIC                    |                    |                              |
| SNP_94403_A_1133914 | NW_004516574.1 | scaffold1348_1 | 1133914                 | TT                              | GG                 | GG               | INTERGENIC                    |                    |                              |
| SNP_94404_A_1134197 | NW_004516574.1 | scaffold1348_1 | 1134197                 | CC                              | AA                 | AA               | INTERGENIC                    |                    |                              |
| SNP_94405_A_1136640 | NW_004516574.1 | scaffold1348_1 | 1136640                 | AA                              | GG                 | GG               | INTERGENIC                    |                    |                              |
| SNP_94406_A_1136641 | NW_004516574.1 | scaffold1348_1 | 1136641                 | AA                              | GG                 | GG               | INTERGENIC                    |                    |                              |
| SNP_94407_A_1136911 | NW_004516574.1 | scaffold1348_1 | 1136911                 | TT                              | AA                 | AA               | INTERGENIC                    |                    |                              |
| SNP_94408_A_1138055 | NW_004516574.1 | scaffold1348_1 | 1138055                 | AA                              | TT                 | TT               | INTERGENIC                    |                    |                              |

| SNPs IDs            | Chromosome IDs | Chromosomes    | Physical positions (bp) | CDC Frontier (Reference genome) | (Pusa 1103 & HPNB) | (ILWC 46 & LPNB) | Sequence genome | Components of | Gene accession IDs | Putative functions |
|---------------------|----------------|----------------|-------------------------|---------------------------------|--------------------|------------------|-----------------|---------------|--------------------|--------------------|
| SNP_94409_A_1138066 | NW_004516574.1 | scaffold1348_1 | 1138066                 | AA                              | GG                 | GG               | INTERGENIC      |               |                    |                    |
| SNP_94410_A_1138072 | NW_004516574.1 | scaffold1348_1 | 1138072                 | TT                              | AA                 | AA               | INTERGENIC      |               |                    |                    |
| SNP_94411_A_1138097 | NW_004516574.1 | scaffold1348_1 | 1138097                 | TT                              | AA                 | AA               | INTERGENIC      |               |                    |                    |
| SNP_94412_A_1138119 | NW_004516574.1 | scaffold1348_1 | 1138119                 | CC                              | GG                 | GG               | INTERGENIC      |               |                    |                    |
| SNP_94413_A_1138165 | NW_004516574.1 | scaffold1348_1 | 1138165                 | TT                              | AA                 | AA               | INTERGENIC      |               |                    |                    |
| SNP_94414_A_1138212 | NW_004516574.1 | scaffold1348_1 | 1138212                 | AA                              | GG                 | GG               | INTERGENIC      |               |                    |                    |
| SNP_94415_A_1138327 | NW_004516574.1 | scaffold1348_1 | 1138327                 | TT                              | CC                 | CC               | INTERGENIC      |               |                    |                    |
| SNP_94417_A_1138402 | NW_004516574.1 | scaffold1348_1 | 1138402                 | AA                              | GG                 | GG               | INTERGENIC      |               |                    |                    |
| SNP_94418_A_1138410 | NW_004516574.1 | scaffold1348_1 | 1138410                 | AA                              | CC                 | CC               | INTERGENIC      |               |                    |                    |
| SNP_94419_A_1138431 | NW_004516574.1 | scaffold1348_1 | 1138431                 | AA                              | GG                 | GG               | INTERGENIC      |               |                    |                    |
| SNP_94421_A_1138503 | NW_004516574.1 | scaffold1348_1 | 1138503                 | TT                              | CC                 | CC               | INTERGENIC      |               |                    |                    |
| SNP_94422_A_1138587 | NW_004516574.1 | scaffold1348_1 | 1138587                 | TT                              | CC                 | CC               | INTERGENIC      |               |                    |                    |
| SNP_94423_A_1138589 | NW_004516574.1 | scaffold1348_1 | 1138589                 | AA                              | TT                 | TT               | INTERGENIC      |               |                    |                    |
| SNP_94424_A_1138595 | NW_004516574.1 | scaffold1348_1 | 1138595                 | AA                              | CC                 | CC               | INTERGENIC      |               |                    |                    |
| SNP_94425_A_1138618 | NW_004516574.1 | scaffold1348_1 | 1138618                 | CC                              | TT                 | TT               | INTERGENIC      |               |                    |                    |
| SNP_94426_A_1138634 | NW_004516574.1 | scaffold1348_1 | 1138634                 | AA                              | TT                 | TT               | INTERGENIC      |               |                    |                    |
| SNP_94427_A_1138663 | NW_004516574.1 | scaffold1348_1 | 1138663                 | GG                              | TT                 | TT               | INTERGENIC      |               |                    |                    |
| SNP_94428_A_1138678 | NW_004516574.1 | scaffold1348_1 | 1138678                 | AA                              | TT                 | TT               | INTERGENIC      |               |                    |                    |
| SNP_94429_A_1138694 | NW_004516574.1 | scaffold1348_1 | 1138694                 | TT                              | CC                 | CC               | INTERGENIC      |               |                    |                    |
| SNP_94430_A_1138696 | NW_004516574.1 | scaffold1348_1 | 1138696                 | TT                              | CC                 | CC               | INTERGENIC      |               |                    |                    |
| SNP_94431_A_1138722 | NW_004516574.1 | scaffold1348_1 | 1138722                 | AA                              | GG                 | GG               | INTERGENIC      |               |                    |                    |
| SNP_94432_A_1138725 | NW_004516574.1 | scaffold1348_1 | 1138725                 | CC                              | AA                 | AA               | INTERGENIC      |               |                    |                    |

| SNPs IDs            | Chromosome IDs | Chromosomes    | Physical positions (bp) | CDC Frontier (Reference genome) | (Pusa 1103 & HPNB) | (ILWC 46 & LPNB) | Sequence genome | Components of | Gene accession IDs                        | Putative functions |
|---------------------|----------------|----------------|-------------------------|---------------------------------|--------------------|------------------|-----------------|---------------|-------------------------------------------|--------------------|
| SNP_94433_A_1138753 | NW_004516574.1 | scaffold1348_1 | 1138753                 | TT                              | CC                 | CC               | INTERGENIC      |               |                                           |                    |
| SNP_94434_A_1138772 | NW_004516574.1 | scaffold1348_1 | 1138772                 | CC                              | AA                 | AA               | INTERGENIC      |               |                                           |                    |
| SNP_94435_A_1138778 | NW_004516574.1 | scaffold1348_1 | 1138778                 | GG                              | AA                 | AA               | INTERGENIC      |               |                                           |                    |
| SNP_94436_A_1138782 | NW_004516574.1 | scaffold1348_1 | 1138782                 | TT                              | CC                 | CC               | INTERGENIC      |               |                                           |                    |
| SNP_94437_A_1138790 | NW_004516574.1 | scaffold1348_1 | 1138790                 | CC                              | TT                 | TT               | INTERGENIC      |               |                                           |                    |
| SNP_94438_A_1138794 | NW_004516574.1 | scaffold1348_1 | 1138794                 | TT                              | AA                 | AA               | INTERGENIC      |               |                                           |                    |
| SNP_94439_A_1138817 | NW_004516574.1 | scaffold1348_1 | 1138817                 | GG                              | AA                 | AA               | INTERGENIC      |               |                                           |                    |
| SNP_94440_A_1138819 | NW_004516574.1 | scaffold1348_1 | 1138819                 | AA                              | GG                 | GG               | INTERGENIC      |               |                                           |                    |
| SNP_94441_A_1138897 | NW_004516574.1 | scaffold1348_1 | 1138897                 | TT                              | CC                 | CC               | INTERGENIC      |               |                                           |                    |
| SNP_94442_A_1139270 | NW_004516574.1 | scaffold1348_1 | 1139270                 | TT                              | AA                 | AA               | INTERGENIC      |               |                                           |                    |
| SNP_94443_A_1139312 | NW_004516574.1 | scaffold1348_1 | 1139312                 | AA                              | GG                 | GG               | INTERGENIC      |               |                                           |                    |
| SNP_94444_A_1139335 | NW_004516574.1 | scaffold1348_1 | 1139335                 | TT                              | CC                 | CC               | INTERGENIC      |               |                                           |                    |
| SNP_94445_A_1139400 | NW_004516574.1 | scaffold1348_1 | 1139400                 | AA                              | CC                 | CC               | INTERGENIC      |               |                                           |                    |
| SNP_94446_A_1139418 | NW_004516574.1 | scaffold1348_1 | 1139418                 | AA                              | TT                 | TT               | INTERGENIC      |               |                                           |                    |
| SNP_94448_A_1139478 | NW_004516574.1 | scaffold1348_1 | 1139478                 | AA                              | CC                 | CC               | INTERGENIC      |               |                                           |                    |
| SNP_94449_A_1139527 | NW_004516574.1 | scaffold1348_1 | 1139527                 | GG                              | AA                 | AA               | INTERGENIC      |               |                                           |                    |
| SNP_94450_A_1139697 | NW_004516574.1 | scaffold1348_1 | 1139697                 | GG                              | TT                 | TT               | INTERGENIC      |               |                                           |                    |
| SNP_94451_A_1139769 | NW_004516574.1 | scaffold1348_1 | 1139769                 | GG                              | TT                 | TT               | INTERGENIC      |               |                                           |                    |
| SNP_94452_A_1139780 | NW_004516574.1 | scaffold1348_1 | 1139780                 | AA                              | GG                 | GG               | INTERGENIC      |               |                                           |                    |
| SNP_94453_A_1141290 | NW_004516574.1 | scaffold1348_1 | 1141290                 | TT                              | AA                 | AA               | DRR             | 101500425     | serine/threonine-protein kinase AFC2-like |                    |
| SNP_94454_A_1141293 | NW_004516574.1 | scaffold1348_1 | 1141293                 | TT                              | AA                 | AA               | DRR             | 101500425     | serine/threonine-protein kinase AFC2-like |                    |
| SNP_94455_A_1141298 | NW_004516574.1 | scaffold1348_1 | 1141298                 | GG                              | AA                 | AA               | DRR             | 101500425     | serine/threonine-protein kinase AFC2-like |                    |



| SNPs IDs            | Chromosome IDs | Chromosomes    | Physical positions (bp) | CDC Frontier (Reference genome) | (Pusa 1103 & HPNB) | (ILWC 46 & LPNB) | Sequence Components of genome | Gene accession IDs | Putative functions                        |
|---------------------|----------------|----------------|-------------------------|---------------------------------|--------------------|------------------|-------------------------------|--------------------|-------------------------------------------|
| SNP_94456_A_1141946 | NW_004516574.1 | scaffold1348_1 | 1141946                 | GG                              | TT                 | TT               | INTRON                        | 101500425          | serine/threonine-protein kinase AFC2-like |
| SNP_94457_A_1141981 | NW_004516574.1 | scaffold1348_1 | 1141981                 | CC                              | GG                 | GG               | INTRON                        | 101500425          | serine/threonine-protein kinase AFC2-like |
| SNP_94458_A_1141994 | NW_004516574.1 | scaffold1348_1 | 1141994                 | AA                              | CC                 | CC               | INTRON                        | 101500425          | serine/threonine-protein kinase AFC2-like |
| SNP_94459_A_1142478 | NW_004516574.1 | scaffold1348_1 | 1142478                 | AA                              | GG                 | GG               | INTRON                        | 101500425          | serine/threonine-protein kinase AFC2-like |
| SNP_94460_A_1142519 | NW_004516574.1 | scaffold1348_1 | 1142519                 | AA                              | GG                 | GG               | INTRON                        | 101500425          | serine/threonine-protein kinase AFC2-like |
| SNP_94461_A_1145598 | NW_004516574.1 | scaffold1348_1 | 1145598                 | GG                              | TT                 | TT               | URR                           | 101500425          | serine/threonine-protein kinase AFC2-like |
| SNP_94462_A_1145603 | NW_004516574.1 | scaffold1348_1 | 1145603                 | TT                              | CC                 | CC               | URR                           | 101500425          | serine/threonine-protein kinase AFC2-like |
| SNP_94463_A_1145671 | NW_004516574.1 | scaffold1348_1 | 1145671                 | GG                              | AA                 | AA               | URR                           | 101500425          | serine/threonine-protein kinase AFC2-like |
| SNP_94464_A_1145764 | NW_004516574.1 | scaffold1348_1 | 1145764                 | TT                              | AA                 | AA               | URR                           | 101500425          | serine/threonine-protein kinase AFC2-like |
| SNP_94465_A_1146978 | NW_004516574.1 | scaffold1348_1 | 1146978                 | TT                              | AA                 | AA               | URR                           | 101500425          | serine/threonine-protein kinase AFC2-like |
| SNP_94466_A_1147073 | NW_004516574.1 | scaffold1348_1 | 1147073                 | AA                              | GG                 | GG               | URR                           | 101500425          | serine/threonine-protein kinase AFC2-like |
| SNP_94467_A_1147171 | NW_004516574.1 | scaffold1348_1 | 1147171                 | TT                              | GG                 | GG               | URR                           | 101500425          | serine/threonine-protein kinase AFC2-like |
| SNP_94468_A_1147227 | NW_004516574.1 | scaffold1348_1 | 1147227                 | TT                              | AA                 | AA               | URR                           | 101500425          | serine/threonine-protein kinase AFC2-like |
| SNP_94469_A_1147256 | NW_004516574.1 | scaffold1348_1 | 1147256                 | GG                              | AA                 | AA               | URR                           | 101500425          | serine/threonine-protein kinase AFC2-like |
| SNP_94470_A_1147649 | NW_004516574.1 | scaffold1348_1 | 1147649                 | GG                              | AA                 | AA               | INTERGENIC                    |                    |                                           |
| SNP_94471_A_1147657 | NW_004516574.1 | scaffold1348_1 | 1147657                 | TT                              | CC                 | CC               | INTERGENIC                    |                    |                                           |
| SNP_94472_A_1149698 | NW_004516574.1 | scaffold1348_1 | 1149698                 | TT                              | CC                 | CC               | INTERGENIC                    |                    |                                           |
| SNP_94473_A_1151113 | NW_004516574.1 | scaffold1348_1 | 1151113                 | GG                              | AA                 | AA               | INTERGENIC                    |                    |                                           |
| SNP_94474_A_1152371 | NW_004516574.1 | scaffold1348_1 | 1152371                 | AA                              | TT                 | TT               | INTERGENIC                    |                    |                                           |
| SNP_94475_A_1152377 | NW_004516574.1 | scaffold1348_1 | 1152377                 | TT                              | CC                 | CC               | INTERGENIC                    |                    |                                           |
| SNP_94476_A_1152544 | NW_004516574.1 | scaffold1348_1 | 1152544                 | GG                              | AA                 | AA               | INTERGENIC                    |                    |                                           |
| SNP_94477_A_1152573 | NW_004516574.1 | scaffold1348_1 | 1152573                 | GG                              | AA                 | AA               | INTERGENIC                    |                    |                                           |

| SNPs IDs            | Chromosome IDs | Chromosomes    | Physical positions (bp) | CDC Frontier (Reference genome) | (Pusa 1103 & HPNB) | (ILWC 46 & LPNB) | Sequence Components of genome | Gene accession IDs | Putative functions                         |
|---------------------|----------------|----------------|-------------------------|---------------------------------|--------------------|------------------|-------------------------------|--------------------|--------------------------------------------|
| SNP_94478_A_1152621 | NW_004516574.1 | scaffold1348_1 | 1152621                 | TT                              | CC                 | CC               | INTERGENIC                    |                    |                                            |
| SNP_94480_A_1155141 | NW_004516574.1 | scaffold1348_1 | 1155141                 | GG                              | CC                 | CC               | INTERGENIC                    |                    |                                            |
| SNP_94481_A_1155208 | NW_004516574.1 | scaffold1348_1 | 1155208                 | AA                              | GG                 | GG               | INTERGENIC                    |                    |                                            |
| SNP_94482_A_1155281 | NW_004516574.1 | scaffold1348_1 | 1155281                 | TT                              | CC                 | CC               | INTERGENIC                    |                    |                                            |
| SNP_94483_A_1155333 | NW_004516574.1 | scaffold1348_1 | 1155333                 | GG                              | AA                 | AA               | INTERGENIC                    |                    |                                            |
| SNP_94484_A_1155410 | NW_004516574.1 | scaffold1348_1 | 1155410                 | CC                              | TT                 | TT               | INTERGENIC                    |                    |                                            |
| SNP_94485_A_1155503 | NW_004516574.1 | scaffold1348_1 | 1155503                 | CC                              | TT                 | TT               | INTERGENIC                    |                    |                                            |
| SNP_94486_A_1155508 | NW_004516574.1 | scaffold1348_1 | 1155508                 | TT                              | CC                 | CC               | INTERGENIC                    |                    |                                            |
| SNP_94487_A_1156934 | NW_004516574.1 | scaffold1348_1 | 1156934                 | CC                              | GG                 | GG               | DRR                           | 101500736          | cytochrome P450 71A1-like                  |
| SNP_94488_A_1159598 | NW_004516574.1 | scaffold1348_1 | 1159598                 | GG                              | CC                 | CC               | NON_SYNONYMOUS_CODING         | 101500736          | cytochrome P450 71A1-like                  |
| SNP_94489_A_1160129 | NW_004516574.1 | scaffold1348_1 | 1160129                 | GG                              | AA                 | AA               | URR                           | 101500736          | cytochrome P450 71A1-like                  |
| SNP_94490_A_1162343 | NW_004516574.1 | scaffold1348_1 | 1162343                 | AA                              | GG                 | GG               | INTERGENIC                    |                    |                                            |
| SNP_94491_A_1167123 | NW_004516574.1 | scaffold1348_1 | 1167123                 | GG                              | AA                 | AA               | INTERGENIC                    |                    |                                            |
| SNP_94492_A_1167145 | NW_004516574.1 | scaffold1348_1 | 1167145                 | GG                              | AA                 | AA               | DRR                           | 101501046          | quinolinate synthase, chloroplastic        |
| SNP_94493_A_1167320 | NW_004516574.1 | scaffold1348_1 | 1167320                 | GG                              | AA                 | AA               | DRR                           | 101501046          | quinolinate synthase, chloroplastic        |
| SNP_94494_A_1170821 | NW_004516574.1 | scaffold1348_1 | 1170821                 | GG                              | AA                 | AA               | NON_SYNONYMOUS_CODING         | 101501046          | quinolinate synthase, chloroplastic        |
| SNP_94495_A_1172266 | NW_004516574.1 | scaffold1348_1 | 1172266                 | CC                              | GG                 | GG               | NON_SYNONYMOUS_CODING         | 101501046          | quinolinate synthase, chloroplastic        |
| SNP_94496_A_1179892 | NW_004516574.1 | scaffold1348_1 | 1179892                 | GG                              | AA                 | AA               | URR                           | 101501680          | high-affinity nitrate transporter 3.1-like |
| SNP_94497_A_1179900 | NW_004516574.1 | scaffold1348_1 | 1179900                 | TT                              | CC                 | CC               | URR                           | 101501680          | high-affinity nitrate transporter 3.1-like |
| SNP_94498_A_1180227 | NW_004516574.1 | scaffold1348_1 | 1180227                 | TT                              | AA                 | AA               | URR                           | 101501680          | high-affinity nitrate transporter 3.1-like |
| SNP_94500_A_1182598 | NW_004516574.1 | scaffold1348_1 | 1182598                 | GG                              | AA                 | AA               | INTERGENIC                    |                    |                                            |
| SNP_94501_A_1182616 | NW_004516574.1 | scaffold1348_1 | 1182616                 | TT                              | AA                 | AA               | INTERGENIC                    |                    |                                            |

| SNPs IDs            | Chromosome IDs | Chromosomes    | Physical positions (bp) | CDC Frontier (Reference genome) | (Pusa 1103 & HPNB) | (ILWC 46 & LPNB) | Sequence Components of genome | Gene accession IDs | Putative functions                                                        |
|---------------------|----------------|----------------|-------------------------|---------------------------------|--------------------|------------------|-------------------------------|--------------------|---------------------------------------------------------------------------|
| SNP_94502_A_1182637 | NW_004516574.1 | scaffold1348_1 | 1182637                 | GG                              | AA                 | AA               | INTERGENIC                    |                    |                                                                           |
| SNP_94505_A_1191923 | NW_004516574.1 | scaffold1348_1 | 1191923                 | TT                              | CC                 | CC               | URR                           | 101515423          | uncharacterized LOC101515423                                              |
| SNP_94506_A_1193787 | NW_004516574.1 | scaffold1348_1 | 1193787                 | AA                              | GG                 | GG               | URR                           | 101502004          | uncharacterized LOC101502004                                              |
| SNP_94507_A_1193794 | NW_004516574.1 | scaffold1348_1 | 1193794                 | CC                              | TT                 | TT               | URR                           | 101502004          | uncharacterized LOC101502004                                              |
| SNP_94509_A_1196410 | NW_004516574.1 | scaffold1348_1 | 1196410                 | TT                              | CC                 | CC               | DRR                           | 101502330          | protein DEHYDRATION-INDUCED 19 homolog 5-like                             |
| SNP_94510_A_1196546 | NW_004516574.1 | scaffold1348_1 | 1196546                 | TT                              | GG                 | GG               | DRR                           | 101502330          | protein DEHYDRATION-INDUCED 19 homolog 5-like                             |
| SNP_94511_A_1199264 | NW_004516574.1 | scaffold1348_1 | 1199264                 | CC                              | TT                 | TT               | INTRON                        | 101502330          | protein DEHYDRATION-INDUCED 19 homolog 5-like                             |
| SNP_94512_A_1202152 | NW_004516574.1 | scaffold1348_1 | 1202152                 | CC                              | TT                 | TT               | URR                           | 101502330          | protein DEHYDRATION-INDUCED 19 homolog 5-like                             |
| SNP_94513_A_1202163 | NW_004516574.1 | scaffold1348_1 | 1202163                 | GG                              | TT                 | TT               | URR                           | 101502330          | protein DEHYDRATION-INDUCED 19 homolog 5-like                             |
| SNP_94514_A_1205335 | NW_004516574.1 | scaffold1348_1 | 1205335                 | TT                              | AA                 | AA               | DRR                           | 101515755          | pentatricopeptide repeat-containing protein At3g48250, chloroplastic-like |
| SNP_94515_A_1205542 | NW_004516574.1 | scaffold1348_1 | 1205542                 | TT                              | GG                 | GG               | DRR                           | 101515755          | pentatricopeptide repeat-containing protein At3g48250, chloroplastic-like |
| SNP_94516_A_1205887 | NW_004516574.1 | scaffold1348_1 | 1205887                 | CC                              | GG                 | GG               | DRR                           | 101515755          | pentatricopeptide repeat-containing protein At3g48250, chloroplastic-like |
| SNP_94517_A_1206563 | NW_004516574.1 | scaffold1348_1 | 1206563                 | GG                              | AA                 | AA               | SYNONYMOUS_CODING             | 101515755          | pentatricopeptide repeat-containing protein At3g48250, chloroplastic-like |
| SNP_94518_A_1207381 | NW_004516574.1 | scaffold1348_1 | 1207381                 | CC                              | AA                 | AA               | NON_SYNONYMOUS_CODING         | 101515755          | pentatricopeptide repeat-containing protein At3g48250, chloroplastic-like |
| SNP_94519_A_1208571 | NW_004516574.1 | scaffold1348_1 | 1208571                 | TT                              | GG                 | GG               | URR                           | 101515755          | pentatricopeptide repeat-containing protein At3g48250, chloroplastic-like |
| SNP_94520_A_1209681 | NW_004516574.1 | scaffold1348_1 | 1209681                 | AA                              | CC                 | CC               | URR                           | 101515755          | pentatricopeptide repeat-containing protein At3g48250, chloroplastic-like |
| SNP_94521_A_1225948 | NW_004516574.1 | scaffold1348_1 | 1225948                 | TT                              | CC                 | CC               | INTERGENIC                    |                    |                                                                           |
| SNP_94522_A_1226062 | NW_004516574.1 | scaffold1348_1 | 1226062                 | CC                              | AA                 | AA               | INTERGENIC                    |                    |                                                                           |
| SNP_94523_A_1226115 | NW_004516574.1 | scaffold1348_1 | 1226115                 | TT                              | CC                 | CC               | INTERGENIC                    |                    |                                                                           |
| SNP_94524_A_1226235 | NW_004516574.1 | scaffold1348_1 | 1226235                 | AA                              | TT                 | TT               | INTERGENIC                    |                    |                                                                           |
| SNP_94525_A_1230921 | NW_004516574.1 | scaffold1348_1 | 1230921                 | TT                              | CC                 | CC               | DRR                           | 101503182          | uncharacterized LOC101503182                                              |
| SNP_94528_A_1232411 | NW_004516574.1 | scaffold1348_1 | 1232411                 | GG                              | AA                 | AA               | URR                           | 101502861          | pentatricopeptide repeat-containing protein At3g48250, chloroplastic      |

| SNPs IDs            | Chromosome IDs | Chromosomes    | Physical positions (bp) | CDC Frontier (Reference genome) | (Pusa 1103 & HPNB) | (ILWC 46 & LPNB) | Sequence Components of genome | Gene accession IDs | Putative functions                                       |
|---------------------|----------------|----------------|-------------------------|---------------------------------|--------------------|------------------|-------------------------------|--------------------|----------------------------------------------------------|
| SNP_94529_A_1232682 | NW_004516574.1 | scaffold1348_1 | 1232682                 | AA                              | GG                 | GG               | DRR                           | 101503502          | uncharacterized LOC101503502                             |
| SNP_94530_A_1232802 | NW_004516574.1 | scaffold1348_1 | 1232802                 | CC                              | GG                 | GG               | DRR                           | 101503502          | uncharacterized LOC101503502                             |
| SNP_94531_A_1233566 | NW_004516574.1 | scaffold1348_1 | 1233566                 | TT                              | CC                 | CC               | URR                           | 101503182          | uncharacterized LOC101503182                             |
| SNP_94532_A_1233577 | NW_004516574.1 | scaffold1348_1 | 1233577                 | GG                              | AA                 | AA               | URR                           | 101503182          | uncharacterized LOC101503182                             |
| SNP_94533_A_1238905 | NW_004516574.1 | scaffold1348_1 | 1238905                 | AA                              | TT                 | TT               | URR                           | 101503502          | uncharacterized LOC101503502                             |
| SNP_94534_A_1239224 | NW_004516574.1 | scaffold1348_1 | 1239224                 | GG                              | AA                 | AA               | URR                           | 101503502          | uncharacterized LOC101503502                             |
| SNP_94535_A_1239413 | NW_004516574.1 | scaffold1348_1 | 1239413                 | GG                              | TT                 | TT               | URR                           | 101503502          | uncharacterized LOC101503502                             |
| SNP_94536_A_1239757 | NW_004516574.1 | scaffold1348_1 | 1239757                 | GG                              | AA                 | AA               | URR                           | 101503502          | uncharacterized LOC101503502                             |
| SNP_94537_A_1239806 | NW_004516574.1 | scaffold1348_1 | 1239806                 | GG                              | AA                 | AA               | URR                           | 101503502          | uncharacterized LOC101503502                             |
| SNP_94538_A_1240380 | NW_004516574.1 | scaffold1348_1 | 1240380                 | CC                              | TT                 | TT               | URR                           | 101503502          | uncharacterized LOC101503502                             |
| SNP_94539_A_1240672 | NW_004516574.1 | scaffold1348_1 | 1240672                 | TT                              | CC                 | CC               | INTERGENIC                    |                    |                                                          |
| SNP_94540_A_1240692 | NW_004516574.1 | scaffold1348_1 | 1240692                 | GG                              | AA                 | AA               | INTERGENIC                    |                    |                                                          |
| SNP_94541_A_1240701 | NW_004516574.1 | scaffold1348_1 | 1240701                 | GG                              | AA                 | AA               | INTERGENIC                    |                    |                                                          |
| SNP_94542_A_1243127 | NW_004516574.1 | scaffold1348_1 | 1243127                 | TT                              | CC                 | CC               | INTERGENIC                    |                    |                                                          |
| SNP_94543_A_1244972 | NW_004516574.1 | scaffold1348_1 | 1244972                 | GG                              | CC                 | CC               | DRR                           | 101503838          | plant intracellular Ras-group-related LRR protein 9-like |
| SNP_94544_A_1245854 | NW_004516574.1 | scaffold1348_1 | 1245854                 | CC                              | AA                 | AA               | INTERGENIC                    |                    |                                                          |
| SNP_94545_A_1246232 | NW_004516574.1 | scaffold1348_1 | 1246232                 | GG                              | AA                 | AA               | INTERGENIC                    |                    |                                                          |
| SNP_94546_A_1250240 | NW_004516574.1 | scaffold1348_1 | 1250240                 | TT                              | GG                 | GG               | URR                           | 101503838          | plant intracellular Ras-group-related LRR protein 9-like |
| SNP_94547_A_1250755 | NW_004516574.1 | scaffold1348_1 | 1250755                 | AA                              | GG                 | GG               | URR                           | 101503838          | plant intracellular Ras-group-related LRR protein 9-like |
| SNP_94548_A_1251559 | NW_004516574.1 | scaffold1348_1 | 1251559                 | GG                              | AA                 | AA               | INTERGENIC                    |                    |                                                          |
| SNP_94549_A_1251592 | NW_004516574.1 | scaffold1348_1 | 1251592                 | AA                              | GG                 | GG               | INTERGENIC                    |                    |                                                          |
| SNP_94550_A_1252927 | NW_004516574.1 | scaffold1348_1 | 1252927                 | AA                              | CC                 | CC               | DRR                           | 101504255          | uncharacterized LOC101504255                             |

| SNPs IDs            | Chromosome IDs | Chromosomes    | Physical positions (bp) | CDC Frontier (Reference genome) | (Pusa 1103 & HPNB) | (ILWC 46 & LPNB) | Sequence Components of genome | Gene accession IDs | Putative functions                                       |
|---------------------|----------------|----------------|-------------------------|---------------------------------|--------------------|------------------|-------------------------------|--------------------|----------------------------------------------------------|
| SNP_94551_A_1254603 | NW_004516574.1 | scaffold1348_1 | 1254603                 | AA                              | TT                 | TT               | URR                           | 101504255          | uncharacterized LOC101504255                             |
| SNP_94552_A_1255022 | NW_004516574.1 | scaffold1348_1 | 1255022                 | AA                              | GG                 | GG               | URR                           | 101504255          | uncharacterized LOC101504255                             |
| SNP_94553_A_1255739 | NW_004516574.1 | scaffold1348_1 | 1255739                 | CC                              | TT                 | TT               | URR                           | 101504255          | uncharacterized LOC101504255                             |
| SNP_94554_A_1255768 | NW_004516574.1 | scaffold1348_1 | 1255768                 | TT                              | CC                 | CC               | URR                           | 101504255          | uncharacterized LOC101504255                             |
| SNP_94555_A_1255805 | NW_004516574.1 | scaffold1348_1 | 1255805                 | TT                              | AA                 | AA               | URR                           | 101504255          | uncharacterized LOC101504255                             |
| SNP_94556_A_1255831 | NW_004516574.1 | scaffold1348_1 | 1255831                 | CC                              | TT                 | TT               | URR                           | 101504255          | uncharacterized LOC101504255                             |
| SNP_94557_A_1258288 | NW_004516574.1 | scaffold1348_1 | 1258288                 | TT                              | AA                 | AA               | INTERGENIC                    |                    |                                                          |
| SNP_94559_A_1261514 | NW_004516574.1 | scaffold1348_1 | 1261514                 | CC                              | TT                 | TT               | INTERGENIC                    |                    |                                                          |
| SNP_94560_A_1262594 | NW_004516574.1 | scaffold1348_1 | 1262594                 | AA                              | GG                 | GG               | INTERGENIC                    |                    |                                                          |
| SNP_94561_A_1262630 | NW_004516574.1 | scaffold1348_1 | 1262630                 | TT                              | AA                 | AA               | INTERGENIC                    |                    |                                                          |
| SNP_94562_A_1262689 | NW_004516574.1 | scaffold1348_1 | 1262689                 | AA                              | GG                 | GG               | INTERGENIC                    |                    |                                                          |
| SNP_94563_A_1262708 | NW_004516574.1 | scaffold1348_1 | 1262708                 | AA                              | GG                 | GG               | INTERGENIC                    |                    |                                                          |
| SNP_94564_A_1262715 | NW_004516574.1 | scaffold1348_1 | 1262715                 | GG                              | AA                 | AA               | INTERGENIC                    |                    |                                                          |
| SNP_94566_A_1268193 | NW_004516574.1 | scaffold1348_1 | 1268193                 | GG                              | AA                 | AA               | URR                           | 101504589          | L-type lectin-domain containing receptor kinase S.1-like |
| SNP_94567_A_1275329 | NW_004516574.1 | scaffold1348_1 | 1275329                 | GG                              | AA                 | AA               | INTERGENIC                    |                    |                                                          |
| SNP_94568_A_1276452 | NW_004516574.1 | scaffold1348_1 | 1276452                 | GG                              | CC                 | CC               | URR                           | 101505212          | ferric reduction oxidase 8, mitochondrial                |
| SNP_94569_A_1277543 | NW_004516574.1 | scaffold1348_1 | 1277543                 | TT                              | AA                 | AA               | URR                           | 101505212          | ferric reduction oxidase 8, mitochondrial                |
| SNP_94571_A_1277580 | NW_004516574.1 | scaffold1348_1 | 1277580                 | CC                              | TT                 | TT               | URR                           | 101505212          | ferric reduction oxidase 8, mitochondrial                |
| SNP_94572_A_1277588 | NW_004516574.1 | scaffold1348_1 | 1277588                 | TT                              | CC                 | CC               | URR                           | 101505212          | ferric reduction oxidase 8, mitochondrial                |
| SNP_94573_A_1281203 | NW_004516574.1 | scaffold1348_1 | 1281203                 | GG                              | CC                 | CC               | INTRON                        | 101488856          | uncharacterized LOC101488856                             |
| SNP_94574_A_1281266 | NW_004516574.1 | scaffold1348_1 | 1281266                 | CC                              | TT                 | TT               | INTRON                        | 101488856          | uncharacterized LOC101488856                             |
| SNP_94575_A_1282756 | NW_004516574.1 | scaffold1348_1 | 1282756                 | TT                              | AA                 | AA               | URR                           | 101488856          | uncharacterized LOC101488856                             |

| SNPs IDs            | Chromosome IDs | Chromosomes    | Physical positions (bp) | CDC Frontier (Reference genome) | (Pusa 1103 & HPNB) | (ILWC 46 & LPNB) | Sequence Components of genome | Gene accession IDs | Putative functions                     |
|---------------------|----------------|----------------|-------------------------|---------------------------------|--------------------|------------------|-------------------------------|--------------------|----------------------------------------|
| SNP_94576_A_1284355 | NW_004516574.1 | scaffold1348_1 | 1284355                 | CC                              | TT                 | TT               | DRR                           | 101505535          | DEAD-box ATP-dependent RNA helicase 20 |
| SNP_94577_A_1284444 | NW_004516574.1 | scaffold1348_1 | 1284444                 | AA                              | TT                 | TT               | DRR                           | 101505535          | DEAD-box ATP-dependent RNA helicase 20 |
| SNP_94578_A_1290447 | NW_004516574.1 | scaffold1348_1 | 1290447                 | AA                              | GG                 | GG               | DRR                           | 101506293          | uncharacterized LOC101506293           |
| SNP_94580_A_1290594 | NW_004516574.1 | scaffold1348_1 | 1290594                 | TT                              | CC                 | CC               | DRR                           | 101506293          | uncharacterized LOC101506293           |
| SNP_94581_A_1290951 | NW_004516574.1 | scaffold1348_1 | 1290951                 | TT                              | CC                 | CC               | URR                           | 101505535          | DEAD-box ATP-dependent RNA helicase 20 |
| SNP_94582_A_1294495 | NW_004516574.1 | scaffold1348_1 | 1294495                 | TT                              | GG                 | GG               | URR                           | 101506293          | uncharacterized LOC101506293           |
| SNP_94583_A_1294496 | NW_004516574.1 | scaffold1348_1 | 1294496                 | AA                              | CC                 | CC               | URR                           | 101506293          | uncharacterized LOC101506293           |
| SNP_94584_A_1294505 | NW_004516574.1 | scaffold1348_1 | 1294505                 | TT                              | CC                 | CC               | URR                           | 101506293          | uncharacterized LOC101506293           |
| SNP_94585_A_1294506 | NW_004516574.1 | scaffold1348_1 | 1294506                 | TT                              | CC                 | CC               | URR                           | 101506293          | uncharacterized LOC101506293           |
| SNP_94586_A_1294892 | NW_004516574.1 | scaffold1348_1 | 1294892                 | CC                              | TT                 | TT               | URR                           | 101506293          | uncharacterized LOC101506293           |
| SNP_94587_A_1295145 | NW_004516574.1 | scaffold1348_1 | 1295145                 | AA                              | GG                 | GG               | URR                           | 101506293          | uncharacterized LOC101506293           |
| SNP_94588_A_1295199 | NW_004516574.1 | scaffold1348_1 | 1295199                 | CC                              | TT                 | TT               | URR                           | 101506293          | uncharacterized LOC101506293           |
| SNP_94589_A_1295456 | NW_004516574.1 | scaffold1348_1 | 1295456                 | CC                              | TT                 | TT               | INTERGENIC                    |                    |                                        |
| SNP_94590_A_1295532 | NW_004516574.1 | scaffold1348_1 | 1295532                 | TT                              | CC                 | CC               | INTERGENIC                    |                    |                                        |
| SNP_94591_A_1295775 | NW_004516574.1 | scaffold1348_1 | 1295775                 | CC                              | TT                 | TT               | INTERGENIC                    |                    |                                        |
| SNP_94592_A_1295840 | NW_004516574.1 | scaffold1348_1 | 1295840                 | TT                              | CC                 | CC               | INTERGENIC                    |                    |                                        |
| SNP_94593_A_1295851 | NW_004516574.1 | scaffold1348_1 | 1295851                 | CC                              | TT                 | TT               | INTERGENIC                    |                    |                                        |
| SNP_94594_A_1295852 | NW_004516574.1 | scaffold1348_1 | 1295852                 | GG                              | AA                 | AA               | INTERGENIC                    |                    |                                        |
| SNP_94595_A_1296159 | NW_004516574.1 | scaffold1348_1 | 1296159                 | CC                              | AA                 | AA               | INTERGENIC                    |                    |                                        |
| SNP_94596_A_1296205 | NW_004516574.1 | scaffold1348_1 | 1296205                 | TT                              | CC                 | CC               | INTERGENIC                    |                    |                                        |
| SNP_94597_A_1298623 | NW_004516574.1 | scaffold1348_1 | 1298623                 | TT                              | AA                 | AA               | INTERGENIC                    |                    |                                        |
| SNP_94598_A_1298647 | NW_004516574.1 | scaffold1348_1 | 1298647                 | AA                              | TT                 | TT               | INTERGENIC                    |                    |                                        |

| SNPs IDs            | Chromosome IDs | Chromosomes    | Physical positions (bp) | CDC Frontier (Reference genome) | (Pusa 1103 & HPNB) | (ILWC 46 & LPNB) | Sequence Components of genome | Gene accession IDs | Putative functions              |
|---------------------|----------------|----------------|-------------------------|---------------------------------|--------------------|------------------|-------------------------------|--------------------|---------------------------------|
| SNP_94599_A_1299912 | NW_004516574.1 | scaffold1348_1 | 1299912                 | GG                              | AA                 | AA               | INTERGENIC                    |                    |                                 |
| SNP_94600_A_1300165 | NW_004516574.1 | scaffold1348_1 | 1300165                 | GG                              | AA                 | AA               | INTERGENIC                    |                    |                                 |
| SNP_94601_A_1301283 | NW_004516574.1 | scaffold1348_1 | 1301283                 | TT                              | AA                 | AA               | INTERGENIC                    |                    |                                 |
| SNP_94602_A_1306598 | NW_004516574.1 | scaffold1348_1 | 1306598                 | TT                              | GG                 | GG               | URR                           | 101506615          | transcription factor MYB86-like |
| SNP_94603_A_1306854 | NW_004516574.1 | scaffold1348_1 | 1306854                 | TT                              | CC                 | CC               | URR                           | 101506615          | transcription factor MYB86-like |
| SNP_94604_A_1306866 | NW_004516574.1 | scaffold1348_1 | 1306866                 | TT                              | CC                 | CC               | URR                           | 101506615          | transcription factor MYB86-like |
| SNP_94605_A_1314698 | NW_004516574.1 | scaffold1348_1 | 1314698                 | TT                              | AA                 | AA               | INTERGENIC                    |                    |                                 |
| SNP_94606_A_1315942 | NW_004516574.1 | scaffold1348_1 | 1315942                 | TT                              | AA                 | AA               | INTERGENIC                    |                    |                                 |
| SNP_94607_A_1318037 | NW_004516574.1 | scaffold1348_1 | 1318037                 | CC                              | AA                 | AA               | INTERGENIC                    |                    |                                 |
| SNP_94608_A_1318197 | NW_004516574.1 | scaffold1348_1 | 1318197                 | CC                              | AA                 | AA               | INTERGENIC                    |                    |                                 |
| SNP_94609_A_1318253 | NW_004516574.1 | scaffold1348_1 | 1318253                 | CC                              | TT                 | TT               | INTERGENIC                    |                    |                                 |
| SNP_94610_A_1323076 | NW_004516574.1 | scaffold1348_1 | 1323076                 | AA                              | TT                 | TT               | INTERGENIC                    |                    |                                 |
| SNP_94611_A_1323087 | NW_004516574.1 | scaffold1348_1 | 1323087                 | AA                              | GG                 | GG               | INTERGENIC                    |                    |                                 |
| SNP_94612_A_1323182 | NW_004516574.1 | scaffold1348_1 | 1323182                 | TT                              | CC                 | CC               | INTERGENIC                    |                    |                                 |
| SNP_94613_A_1323248 | NW_004516574.1 | scaffold1348_1 | 1323248                 | AA                              | GG                 | GG               | INTERGENIC                    |                    |                                 |
| SNP_94614_A_1323270 | NW_004516574.1 | scaffold1348_1 | 1323270                 | TT                              | CC                 | CC               | INTERGENIC                    |                    |                                 |
| SNP_94615_A_1324256 | NW_004516574.1 | scaffold1348_1 | 1324256                 | GG                              | AA                 | AA               | DRR                           | 101506952          | uncharacterized LOC101506952    |
| SNP_94616_A_1326876 | NW_004516574.1 | scaffold1348_1 | 1326876                 | CC                              | TT                 | TT               | URR                           | 101506952          | uncharacterized LOC101506952    |
| SNP_94617_A_1326881 | NW_004516574.1 | scaffold1348_1 | 1326881                 | GG                              | AA                 | AA               | URR                           | 101506952          | uncharacterized LOC101506952    |
| SNP_94618_A_1326925 | NW_004516574.1 | scaffold1348_1 | 1326925                 | GG                              | TT                 | TT               | URR                           | 101506952          | uncharacterized LOC101506952    |
| SNP_94619_A_1329948 | NW_004516574.1 | scaffold1348_1 | 1329948                 | GG                              | AA                 | AA               | INTERGENIC                    |                    |                                 |
| SNP_94620_A_1330052 | NW_004516574.1 | scaffold1348_1 | 1330052                 | TT                              | GG                 | GG               | INTERGENIC                    |                    |                                 |

| SNPs IDs            | Chromosome IDs | Chromosomes    | Physical positions (bp) | CDC Frontier (Reference genome) | (Pusa 1103 & HPNB) | (ILWC 46 & LPNB) | Sequence Components of genome | Gene accession IDs | Putative functions                                 |
|---------------------|----------------|----------------|-------------------------|---------------------------------|--------------------|------------------|-------------------------------|--------------------|----------------------------------------------------|
| SNP_94621_A_1330053 | NW_004516574.1 | scaffold1348_1 | 1330053                 | TT                              | GG                 | GG               | INTERGENIC                    |                    |                                                    |
| SNP_94622_A_1330054 | NW_004516574.1 | scaffold1348_1 | 1330054                 | TT                              | CC                 | CC               | INTERGENIC                    |                    |                                                    |
| SNP_94623_A_1330353 | NW_004516574.1 | scaffold1348_1 | 1330353                 | TT                              | AA                 | AA               | INTERGENIC                    |                    |                                                    |
| SNP_94624_A_1330355 | NW_004516574.1 | scaffold1348_1 | 1330355                 | TT                              | AA                 | AA               | INTERGENIC                    |                    |                                                    |
| SNP_94625_A_1332094 | NW_004516574.1 | scaffold1348_1 | 1332094                 | TT                              | AA                 | AA               | INTERGENIC                    |                    |                                                    |
| SNP_94626_A_1332164 | NW_004516574.1 | scaffold1348_1 | 1332164                 | GG                              | CC                 | CC               | INTERGENIC                    |                    |                                                    |
| SNP_94627_A_1332539 | NW_004516574.1 | scaffold1348_1 | 1332539                 | CC                              | GG                 | GG               | INTERGENIC                    |                    |                                                    |
| SNP_94628_A_1332683 | NW_004516574.1 | scaffold1348_1 | 1332683                 | CC                              | AA                 | AA               | INTERGENIC                    |                    |                                                    |
| SNP_94629_A_1336085 | NW_004516574.1 | scaffold1348_1 | 1336085                 | TT                              | AA                 | AA               | INTRON                        | 101507273          | protein LATERAL ORGAN BOUNDARIES-like              |
| SNP_94630_A_1337376 | NW_004516574.1 | scaffold1348_1 | 1337376                 | AA                              | GG                 | GG               | URR                           | 101507273          | protein LATERAL ORGAN BOUNDARIES-like              |
| SNP_94631_A_1341027 | NW_004516574.1 | scaffold1348_1 | 1341027                 | TT                              | CC                 | CC               | INTERGENIC                    |                    |                                                    |
| SNP_94632_A_1341587 | NW_004516574.1 | scaffold1348_1 | 1341587                 | TT                              | CC                 | CC               | INTERGENIC                    |                    |                                                    |
| SNP_94633_A_1346857 | NW_004516574.1 | scaffold1348_1 | 1346857                 | GG                              | AA                 | AA               | URR                           | 101507806          | oleosin 16.4 kDa-like                              |
| SNP_94634_A_1350917 | NW_004516574.1 | scaffold1348_1 | 1350917                 | TT                              | CC                 | CC               | INTERGENIC                    |                    |                                                    |
| SNP_94635_A_1350941 | NW_004516574.1 | scaffold1348_1 | 1350941                 | GG                              | AA                 | AA               | INTERGENIC                    |                    |                                                    |
| SNP_94637_A_1354157 | NW_004516574.1 | scaffold1348_1 | 1354157                 | GG                              | AA                 | AA               | INTRON                        | 101508125          | tryptophan aminotransferase-related protein 2-like |
| SNP_94638_A_1355406 | NW_004516574.1 | scaffold1348_1 | 1355406                 | CC                              | TT                 | TT               | URR                           | 101508125          | tryptophan aminotransferase-related protein 2-like |
| SNP_94639_A_1355422 | NW_004516574.1 | scaffold1348_1 | 1355422                 | CC                              | AA                 | AA               | URR                           | 101508125          | tryptophan aminotransferase-related protein 2-like |
| SNP_94640_A_1355464 | NW_004516574.1 | scaffold1348_1 | 1355464                 | TT                              | CC                 | CC               | URR                           | 101508125          | tryptophan aminotransferase-related protein 2-like |
| SNP_94641_A_1355688 | NW_004516574.1 | scaffold1348_1 | 1355688                 | TT                              | AA                 | AA               | URR                           | 101508125          | tryptophan aminotransferase-related protein 2-like |
| SNP_94642_A_1358199 | NW_004516574.1 | scaffold1348_1 | 1358199                 | TT                              | AA                 | AA               | INTERGENIC                    |                    |                                                    |
| SNP_94643_A_1361041 | NW_004516574.1 | scaffold1348_1 | 1361041                 | CC                              | TT                 | TT               | INTERGENIC                    |                    |                                                    |



| SNPs IDs            | Chromosome IDs | Chromosomes    | Physical positions (bp) | CDC Frontier (Reference genome) | (Pusa 1103 & HPNB) | (ILWC 46 & LPNB) | Sequence Components of genome | Gene accession IDs | Putative functions                        |
|---------------------|----------------|----------------|-------------------------|---------------------------------|--------------------|------------------|-------------------------------|--------------------|-------------------------------------------|
| SNP_94645_A_1361409 | NW_004516574.1 | scaffold1348_1 | 1361409                 | TT                              | CC                 | CC               | INTERGENIC                    |                    |                                           |
| SNP_94646_A_1361429 | NW_004516574.1 | scaffold1348_1 | 1361429                 | AA                              | GG                 | GG               | INTERGENIC                    |                    |                                           |
| SNP_94647_A_1361745 | NW_004516574.1 | scaffold1348_1 | 1361745                 | GG                              | CC                 | CC               | INTERGENIC                    |                    |                                           |
| SNP_94648_A_1361757 | NW_004516574.1 | scaffold1348_1 | 1361757                 | AA                              | GG                 | GG               | INTERGENIC                    |                    |                                           |
| SNP_94649_A_1364314 | NW_004516574.1 | scaffold1348_1 | 1364314                 | TT                              | CC                 | CC               | INTERGENIC                    |                    |                                           |
| SNP_94650_A_1364383 | NW_004516574.1 | scaffold1348_1 | 1364383                 | AA                              | TT                 | TT               | INTERGENIC                    |                    |                                           |
| SNP_94651_A_1364594 | NW_004516574.1 | scaffold1348_1 | 1364594                 | TT                              | AA                 | AA               | INTERGENIC                    |                    |                                           |
| SNP_94652_A_1364602 | NW_004516574.1 | scaffold1348_1 | 1364602                 | GG                              | AA                 | AA               | INTERGENIC                    |                    |                                           |
| SNP_94653_A_1364667 | NW_004516574.1 | scaffold1348_1 | 1364667                 | GG                              | CC                 | CC               | INTERGENIC                    |                    |                                           |
| SNP_94654_A_1365096 | NW_004516574.1 | scaffold1348_1 | 1365096                 | TT                              | AA                 | AA               | INTERGENIC                    |                    |                                           |
| SNP_94655_A_1366499 | NW_004516574.1 | scaffold1348_1 | 1366499                 | AA                              | GG                 | GG               | INTERGENIC                    |                    |                                           |
| SNP_94656_A_1366520 | NW_004516574.1 | scaffold1348_1 | 1366520                 | CC                              | TT                 | TT               | INTERGENIC                    |                    |                                           |
| SNP_94658_A_1371304 | NW_004516574.1 | scaffold1348_1 | 1371304                 | TT                              | AA                 | AA               | DRR                           | 101508653          | FKBP12-interacting protein of 37 kDa-like |
| SNP_94659_A_1371614 | NW_004516574.1 | scaffold1348_1 | 1371614                 | TT                              | GG                 | GG               | NON_SYNONYMOUS_CODING         | 101508653          | FKBP12-interacting protein of 37 kDa-like |
| SNP_94660_A_1372535 | NW_004516574.1 | scaffold1348_1 | 1372535                 | GG                              | AA                 | AA               | SYNONYMOUS_CODING             | 101508653          | FKBP12-interacting protein of 37 kDa-like |
| SNP_94661_A_1372853 | NW_004516574.1 | scaffold1348_1 | 1372853                 | AA                              | GG                 | GG               | SYNONYMOUS_CODING             | 101508653          | FKBP12-interacting protein of 37 kDa-like |
| SNP_94663_A_1382894 | NW_004516574.1 | scaffold1348_1 | 1382894                 | TT                              | CC                 | CC               | INTRON                        | 101508653          | FKBP12-interacting protein of 37 kDa-like |
| SNP_94664_A_1383210 | NW_004516574.1 | scaffold1348_1 | 1383210                 | TT                              | CC                 | CC               | SYNONYMOUS_CODING             | 101508653          | FKBP12-interacting protein of 37 kDa-like |
| SNP_94665_A_1387479 | NW_004516574.1 | scaffold1348_1 | 1387479                 | GG                              | AA                 | AA               | INTERGENIC                    |                    |                                           |
| SNP_94666_A_1387483 | NW_004516574.1 | scaffold1348_1 | 1387483                 | CC                              | GG                 | GG               | INTERGENIC                    |                    |                                           |
| SNP_94667_A_1391261 | NW_004516574.1 | scaffold1348_1 | 1391261                 | GG                              | AA                 | AA               | INTERGENIC                    |                    |                                           |
| SNP_94668_A_1397486 | NW_004516574.1 | scaffold1348_1 | 1397486                 | GG                              | AA                 | AA               | INTERGENIC                    |                    |                                           |

| SNPs IDs            | Chromosome IDs | Chromosomes    | Physical positions (bp) | CDC Frontier (Reference genome) | (Pusa 1103 & HPNB) | (ILWC 46 & LPNB) | Sequence Components of genome | Gene accession IDs | Putative functions              |
|---------------------|----------------|----------------|-------------------------|---------------------------------|--------------------|------------------|-------------------------------|--------------------|---------------------------------|
| SNP_94669_A_1403163 | NW_004516574.1 | scaffold1348_1 | 1403163                 | AA                              | TT                 | TT               | INTERGENIC                    |                    |                                 |
| SNP_94670_A_1408512 | NW_004516574.1 | scaffold1348_1 | 1408512                 | AA                              | CC                 | CC               | URR                           | 101489511          | Unknown function                |
| SNP_94671_A_1408784 | NW_004516574.1 | scaffold1348_1 | 1408784                 | CC                              | TT                 | TT               | URR                           | 101489511          | Unknown function                |
| SNP_94672_A_76      | NW_004516576.1 | scaffold1351   | 76                      | GG                              | TT                 | TT               | INTERGENIC                    |                    |                                 |
| SNP_94673_A_133     | NW_004516576.1 | scaffold1351   | 133                     | CC                              | TT                 | TT               | INTERGENIC                    |                    |                                 |
| SNP_94674_A_143     | NW_004516576.1 | scaffold1351   | 143                     | AA                              | CC                 | CC               | INTERGENIC                    |                    |                                 |
| SNP_94676_A_21764   | NW_004516576.1 | scaffold1351   | 21764                   | TT                              | CC                 | CC               | INTERGENIC                    |                    |                                 |
| SNP_94677_A_45779   | NW_004516576.1 | scaffold1351   | 45779                   | TT                              | CC                 | CC               | INTERGENIC                    |                    |                                 |
| SNP_94678_A_62536   | NW_004516576.1 | scaffold1351   | 62536                   | CC                              | TT                 | TT               | INTERGENIC                    |                    |                                 |
| SNP_94679_A_62544   | NW_004516576.1 | scaffold1351   | 62544                   | CC                              | TT                 | TT               | INTERGENIC                    |                    |                                 |
| SNP_94680_A_62548   | NW_004516576.1 | scaffold1351   | 62548                   | CC                              | AA                 | AA               | INTERGENIC                    |                    |                                 |
| SNP_94681_A_62568   | NW_004516576.1 | scaffold1351   | 62568                   | GG                              | AA                 | AA               | INTERGENIC                    |                    |                                 |
| SNP_94682_A_98237   | NW_004516576.1 | scaffold1351   | 98237                   | AA                              | CC                 | CC               | INTERGENIC                    |                    |                                 |
| SNP_94683_A_128227  | NW_004516576.1 | scaffold1351   | 128227                  | AA                              | TT                 | TT               | INTERGENIC                    |                    |                                 |
| SNP_94684_A_143534  | NW_004516576.1 | scaffold1351   | 143534                  | TT                              | CC                 | CC               | DRR                           | 101493084          | probable pectate lyase 12       |
| SNP_94685_A_163210  | NW_004516576.1 | scaffold1351   | 163210                  | AA                              | GG                 | GG               | INTRON                        | 101499364          | transcription factor MYB32-like |
| SNP_94686_A_194779  | NW_004516576.1 | scaffold1351   | 194779                  | GG                              | TT                 | TT               | INTERGENIC                    |                    |                                 |
| SNP_94687_A_198685  | NW_004516576.1 | scaffold1351   | 198685                  | GG                              | AA                 | AA               | INTRON                        | 101495866          | alpha carbonic anhydrase 7-like |
| SNP_94688_A_198952  | NW_004516576.1 | scaffold1351   | 198952                  | CC                              | TT                 | TT               | INTRON                        | 101495866          | alpha carbonic anhydrase 7-like |
| SNP_94689_A_198998  | NW_004516576.1 | scaffold1351   | 198998                  | CC                              | TT                 | TT               | INTRON                        | 101495866          | alpha carbonic anhydrase 7-like |
| SNP_94690_A_199094  | NW_004516576.1 | scaffold1351   | 199094                  | GG                              | AA                 | AA               | INTRON                        | 101495866          | alpha carbonic anhydrase 7-like |
| SNP_94691_A_220066  | NW_004516576.1 | scaffold1351   | 220066                  | TT                              | CC                 | CC               | INTERGENIC                    |                    |                                 |

| SNPs IDs           | Chromosome IDs | Chromosomes  | Physical positions (bp) | CDC Frontier (Reference genome) | (Pusa 1103 & HPNB) | (ILWC 46 & LPNB) | Sequence Components of genome | Gene accession IDs | Putative functions                             |
|--------------------|----------------|--------------|-------------------------|---------------------------------|--------------------|------------------|-------------------------------|--------------------|------------------------------------------------|
| SNP_94692_A_224364 | NW_004516576.1 | scaffold1351 | 224364                  | GG                              | TT                 | TT               | DRR                           | 101496523          | zinc finger protein ZAT5                       |
| SNP_94693_A_264773 | NW_004516576.1 | scaffold1351 | 264773                  | TT                              | CC                 | CC               | INTERGENIC                    |                    |                                                |
| SNP_94694_A_274726 | NW_004516576.1 | scaffold1351 | 274726                  | GG                              | AA                 | AA               | INTERGENIC                    |                    |                                                |
| SNP_94695_A_274812 | NW_004516576.1 | scaffold1351 | 274812                  | CC                              | TT                 | TT               | INTERGENIC                    |                    |                                                |
| SNP_94697_A_286240 | NW_004516576.1 | scaffold1351 | 286240                  | AA                              | GG                 | GG               | INTERGENIC                    |                    |                                                |
| SNP_94698_A_302713 | NW_004516576.1 | scaffold1351 | 302713                  | AA                              | GG                 | GG               | SYNONYMOUS_CODING             | 101500644          | Unknown function                               |
| SNP_94699_A_302734 | NW_004516576.1 | scaffold1351 | 302734                  | GG                              | CC                 | CC               | NON_SYNONYMOUS_CODING         | 101500644          | Unknown function                               |
| SNP_94700_A_302771 | NW_004516576.1 | scaffold1351 | 302771                  | TT                              | CC                 | CC               | NON_SYNONYMOUS_CODING         | 101500644          | Unknown function                               |
| SNP_94701_A_332801 | NW_004516576.1 | scaffold1351 | 332801                  | AA                              | GG                 | GG               | INTERGENIC                    |                    |                                                |
| SNP_94702_A_332808 | NW_004516576.1 | scaffold1351 | 332808                  | CC                              | AA                 | AA               | INTERGENIC                    |                    |                                                |
| SNP_94704_A_333082 | NW_004516576.1 | scaffold1351 | 333082                  | TT                              | CC                 | CC               | INTERGENIC                    |                    |                                                |
| SNP_94705_A_342422 | NW_004516576.1 | scaffold1351 | 342422                  | GG                              | AA                 | AA               | DRR                           | 101500952          | Unknown function                               |
| SNP_94706_A_342503 | NW_004516576.1 | scaffold1351 | 342503                  | TT                              | GG                 | GG               | DRR                           | 101500952          | Unknown function                               |
| SNP_94707_A_342783 | NW_004516576.1 | scaffold1351 | 342783                  | GG                              | TT                 | TT               | DRR                           | 101500952          | Unknown function                               |
| SNP_94708_A_342835 | NW_004516576.1 | scaffold1351 | 342835                  | TT                              | CC                 | CC               | DRR                           | 101500952          | Unknown function                               |
| SNP_94709_A_350106 | NW_004516576.1 | scaffold1351 | 350106                  | CC                              | TT                 | TT               | INTERGENIC                    |                    |                                                |
| SNP_94710_A_365754 | NW_004516576.1 | scaffold1351 | 365754                  | TT                              | CC                 | CC               | INTERGENIC                    |                    |                                                |
| SNP_94711_A_365774 | NW_004516576.1 | scaffold1351 | 365774                  | CC                              | TT                 | TT               | INTERGENIC                    |                    |                                                |
| SNP_94712_A_366068 | NW_004516576.1 | scaffold1351 | 366068                  | GG                              | TT                 | TT               | INTRON                        | 101497514          | aldehyde dehydrogenase family 3 member H1-like |
| SNP_94713_A_405    | NW_004516582.1 | scaffold1358 | 405                     | AA                              | TT                 | TT               | INTERGENIC                    |                    |                                                |
| SNP_94714_A_476    | NW_004516582.1 | scaffold1358 | 476                     | CC                              | TT                 | TT               | INTERGENIC                    |                    |                                                |
| SNP_94716_A_522    | NW_004516582.1 | scaffold1358 | 522                     | TT                              | CC                 | CC               | INTERGENIC                    |                    |                                                |

| SNPs IDs          | Chromosome IDs | Chromosomes  | Physical positions (bp) | CDC Frontier (Reference genome) | (Pusa 1103 & HPNB) | (ILWC 46 & LPNB) | Sequence genome | Components of | Gene accession IDs | Putative functions |
|-------------------|----------------|--------------|-------------------------|---------------------------------|--------------------|------------------|-----------------|---------------|--------------------|--------------------|
| SNP_94717_A_578   | NW_004516582.1 | scaffold1358 | 578                     | AA                              | GG                 | GG               | INTERGENIC      |               |                    |                    |
| SNP_94718_A_682   | NW_004516582.1 | scaffold1358 | 682                     | TT                              | CC                 | CC               | INTERGENIC      |               |                    |                    |
| SNP_94719_A_705   | NW_004516582.1 | scaffold1358 | 705                     | CC                              | AA                 | AA               | INTERGENIC      |               |                    |                    |
| SNP_94720_A_732   | NW_004516582.1 | scaffold1358 | 732                     | AA                              | CC                 | CC               | INTERGENIC      |               |                    |                    |
| SNP_94721_A_752   | NW_004516582.1 | scaffold1358 | 752                     | GG                              | AA                 | AA               | INTERGENIC      |               |                    |                    |
| SNP_94723_A_812   | NW_004516582.1 | scaffold1358 | 812                     | CC                              | AA                 | AA               | INTERGENIC      |               |                    |                    |
| SNP_94724_A_814   | NW_004516582.1 | scaffold1358 | 814                     | AA                              | TT                 | TT               | INTERGENIC      |               |                    |                    |
| SNP_94725_A_1229  | NW_004516582.1 | scaffold1358 | 1229                    | AA                              | CC                 | CC               | INTERGENIC      |               |                    |                    |
| SNP_94726_A_1295  | NW_004516582.1 | scaffold1358 | 1295                    | CC                              | TT                 | TT               | INTERGENIC      |               |                    |                    |
| SNP_94727_A_9749  | NW_004516582.1 | scaffold1358 | 9749                    | AA                              | GG                 | GG               | INTERGENIC      |               |                    |                    |
| SNP_94728_A_9797  | NW_004516582.1 | scaffold1358 | 9797                    | TT                              | AA                 | AA               | INTERGENIC      |               |                    |                    |
| SNP_94729_A_10073 | NW_004516582.1 | scaffold1358 | 10073                   | GG                              | AA                 | AA               | INTERGENIC      |               |                    |                    |
| SNP_94730_A_10138 | NW_004516582.1 | scaffold1358 | 10138                   | CC                              | AA                 | AA               | INTERGENIC      |               |                    |                    |
| SNP_94731_A_10227 | NW_004516582.1 | scaffold1358 | 10227                   | AA                              | CC                 | CC               | INTERGENIC      |               |                    |                    |
| SNP_94732_A_10289 | NW_004516582.1 | scaffold1358 | 10289                   | AA                              | TT                 | TT               | INTERGENIC      |               |                    |                    |
| SNP_94733_A_10592 | NW_004516582.1 | scaffold1358 | 10592                   | GG                              | AA                 | AA               | INTERGENIC      |               |                    |                    |
| SNP_94734_A_11757 | NW_004516582.1 | scaffold1358 | 11757                   | AA                              | GG                 | GG               | INTERGENIC      |               |                    |                    |
| SNP_94735_A_11825 | NW_004516582.1 | scaffold1358 | 11825                   | AA                              | GG                 | GG               | INTERGENIC      |               |                    |                    |
| SNP_94736_A_11940 | NW_004516582.1 | scaffold1358 | 11940                   | CC                              | TT                 | TT               | INTERGENIC      |               |                    |                    |
| SNP_94737_A_12062 | NW_004516582.1 | scaffold1358 | 12062                   | CC                              | GG                 | GG               | INTERGENIC      |               |                    |                    |
| SNP_94738_A_12088 | NW_004516582.1 | scaffold1358 | 12088                   | CC                              | GG                 | GG               | INTERGENIC      |               |                    |                    |
| SNP_94739_A_12128 | NW_004516582.1 | scaffold1358 | 12128                   | AA                              | GG                 | GG               | INTERGENIC      |               |                    |                    |

| SNPs IDs           | Chromosome IDs | Chromosomes  | Physical positions (bp) | CDC Frontier (Reference genome) | (Pusa 1103 & HPNB) | (ILWC 46 & LPNB) | Sequence Components of genome | Gene accession IDs | Putative functions |
|--------------------|----------------|--------------|-------------------------|---------------------------------|--------------------|------------------|-------------------------------|--------------------|--------------------|
| SNP_94740_A_58609  | NW_004516583.1 | scaffold1359 | 58609                   | CC                              | TT                 | TT               | INTERGENIC                    |                    |                    |
| SNP_94741_A_74383  | NW_004516583.1 | scaffold1359 | 74383                   | TT                              | AA                 | AA               | INTERGENIC                    |                    |                    |
| SNP_94743_A_74688  | NW_004516583.1 | scaffold1359 | 74688                   | AA                              | TT                 | TT               | DRR                           | 101501796          | Unknown function   |
| SNP_94744_A_74690  | NW_004516583.1 | scaffold1359 | 74690                   | CC                              | TT                 | TT               | DRR                           | 101501796          | Unknown function   |
| SNP_94745_A_99544  | NW_004516583.1 | scaffold1359 | 99544                   | TT                              | CC                 | CC               | INTERGENIC                    |                    |                    |
| SNP_94747_A_101209 | NW_004516583.1 | scaffold1359 | 101209                  | TT                              | CC                 | CC               | INTERGENIC                    |                    |                    |
| SNP_94748_A_101234 | NW_004516583.1 | scaffold1359 | 101234                  | TT                              | CC                 | CC               | INTERGENIC                    |                    |                    |
| SNP_94749_A_109129 | NW_004516583.1 | scaffold1359 | 109129                  | CC                              | TT                 | TT               | INTERGENIC                    |                    |                    |
| SNP_94750_A_115186 | NW_004516583.1 | scaffold1359 | 115186                  | TT                              | CC                 | CC               | INTERGENIC                    |                    |                    |
| SNP_94751_A_126901 | NW_004516583.1 | scaffold1359 | 126901                  | TT                              | GG                 | GG               | INTERGENIC                    |                    |                    |
| SNP_94752_A_2830   | NW_004516584.1 | scaffold1360 | 2830                    | CC                              | TT                 | TT               | INTERGENIC                    |                    |                    |
| SNP_94753_A_2835   | NW_004516584.1 | scaffold1360 | 2835                    | TT                              | AA                 | AA               | INTERGENIC                    |                    |                    |
| SNP_94754_A_10528  | NW_004516584.1 | scaffold1360 | 10528                   | CC                              | AA                 | AA               | INTERGENIC                    |                    |                    |
| SNP_94755_A_14198  | NW_004516584.1 | scaffold1360 | 14198                   | GG                              | TT                 | TT               | INTERGENIC                    |                    |                    |
| SNP_94756_A_14354  | NW_004516584.1 | scaffold1360 | 14354                   | AA                              | GG                 | GG               | INTERGENIC                    |                    |                    |
| SNP_94757_A_14459  | NW_004516584.1 | scaffold1360 | 14459                   | AA                              | TT                 | TT               | INTERGENIC                    |                    |                    |
| SNP_94758_A_17301  | NW_004516584.1 | scaffold1360 | 17301                   | GG                              | AA                 | AA               | INTERGENIC                    |                    |                    |
| SNP_94759_A_17318  | NW_004516584.1 | scaffold1360 | 17318                   | AA                              | CC                 | CC               | INTERGENIC                    |                    |                    |
| SNP_94761_A_17450  | NW_004516584.1 | scaffold1360 | 17450                   | GG                              | AA                 | AA               | INTERGENIC                    |                    |                    |
| SNP_94762_A_76885  | NW_004516587.1 | scaffold1364 | 76885                   | TT                              | AA                 | AA               | INTERGENIC                    |                    |                    |
| SNP_94764_A_110485 | NW_004516587.1 | scaffold1364 | 110485                  | AA                              | GG                 | GG               | INTERGENIC                    |                    |                    |
| SNP_94765_A_114925 | NW_004516587.1 | scaffold1364 | 114925                  | GG                              | AA                 | AA               | INTERGENIC                    |                    |                    |

| SNPs IDs           | Chromosome IDs | Chromosomes  | Physical positions (bp) | CDC Frontier (Reference genome) | (Pusa 1103 & HPNB) | (ILWC 46 & LPNB) | Sequence genome | Components of | Gene accession IDs | Putative functions |
|--------------------|----------------|--------------|-------------------------|---------------------------------|--------------------|------------------|-----------------|---------------|--------------------|--------------------|
| SNP_94766_A_137283 | NW_004516587.1 | scaffold1364 | 137283                  | GG                              | AA                 | AA               | INTERGENIC      |               |                    |                    |
| SNP_94767_A_149523 | NW_004516587.1 | scaffold1364 | 149523                  | CC                              | AA                 | AA               | INTERGENIC      |               |                    |                    |
| SNP_94768_A_604    | NW_004516588.1 | scaffold1365 | 604                     | AA                              | TT                 | TT               | INTERGENIC      |               |                    |                    |
| SNP_94769_A_682    | NW_004516588.1 | scaffold1365 | 682                     | CC                              | AA                 | AA               | INTERGENIC      |               |                    |                    |
| SNP_94771_A_7094   | NW_004516588.1 | scaffold1365 | 7094                    | AA                              | TT                 | TT               | INTERGENIC      |               |                    |                    |
| SNP_94772_A_7404   | NW_004516588.1 | scaffold1365 | 7404                    | GG                              | AA                 | AA               | INTERGENIC      |               |                    |                    |
| SNP_94773_A_7426   | NW_004516588.1 | scaffold1365 | 7426                    | TT                              | GG                 | GG               | INTERGENIC      |               |                    |                    |
| SNP_94774_A_7472   | NW_004516588.1 | scaffold1365 | 7472                    | AA                              | TT                 | TT               | INTERGENIC      |               |                    |                    |
| SNP_94775_A_7760   | NW_004516588.1 | scaffold1365 | 7760                    | GG                              | TT                 | TT               | INTERGENIC      |               |                    |                    |
| SNP_94776_A_7768   | NW_004516588.1 | scaffold1365 | 7768                    | CC                              | TT                 | TT               | INTERGENIC      |               |                    |                    |
| SNP_94777_A_7774   | NW_004516588.1 | scaffold1365 | 7774                    | GG                              | CC                 | CC               | INTERGENIC      |               |                    |                    |
| SNP_94778_A_7843   | NW_004516588.1 | scaffold1365 | 7843                    | AA                              | TT                 | TT               | INTERGENIC      |               |                    |                    |
| SNP_94779_A_8126   | NW_004516588.1 | scaffold1365 | 8126                    | CC                              | TT                 | TT               | INTERGENIC      |               |                    |                    |
| SNP_94780_A_8129   | NW_004516588.1 | scaffold1365 | 8129                    | AA                              | TT                 | TT               | INTERGENIC      |               |                    |                    |
| SNP_94781_A_8130   | NW_004516588.1 | scaffold1365 | 8130                    | TT                              | CC                 | CC               | INTERGENIC      |               |                    |                    |
| SNP_94782_A_8200   | NW_004516588.1 | scaffold1365 | 8200                    | TT                              | AA                 | AA               | INTERGENIC      |               |                    |                    |
| SNP_94783_A_8212   | NW_004516588.1 | scaffold1365 | 8212                    | AA                              | GG                 | GG               | INTERGENIC      |               |                    |                    |
| SNP_94784_A_8227   | NW_004516588.1 | scaffold1365 | 8227                    | TT                              | AA                 | AA               | INTERGENIC      |               |                    |                    |
| SNP_94785_A_8265   | NW_004516588.1 | scaffold1365 | 8265                    | CC                              | GG                 | GG               | INTERGENIC      |               |                    |                    |
| SNP_94786_A_8277   | NW_004516588.1 | scaffold1365 | 8277                    | GG                              | AA                 | AA               | INTERGENIC      |               |                    |                    |
| SNP_94787_A_8354   | NW_004516588.1 | scaffold1365 | 8354                    | CC                              | TT                 | TT               | INTERGENIC      |               |                    |                    |
| SNP_94788_A_8423   | NW_004516588.1 | scaffold1365 | 8423                    | TT                              | AA                 | AA               | INTERGENIC      |               |                    |                    |

| SNPs IDs          | Chromosome IDs | Chromosomes  | Physical positions (bp) | CDC Frontier (Reference genome) | (Pusa 1103 & HPNB) | (ILWC 46 & LPNB) | Sequence genome | Components of | Gene accession IDs | Putative functions |
|-------------------|----------------|--------------|-------------------------|---------------------------------|--------------------|------------------|-----------------|---------------|--------------------|--------------------|
| SNP_94789_A_8468  | NW_004516588.1 | scaffold1365 | 8468                    | CC                              | GG                 | GG               | INTERGENIC      |               |                    |                    |
| SNP_94790_A_8563  | NW_004516588.1 | scaffold1365 | 8563                    | GG                              | CC                 | CC               | INTERGENIC      |               |                    |                    |
| SNP_94791_A_8658  | NW_004516588.1 | scaffold1365 | 8658                    | TT                              | AA                 | AA               | INTERGENIC      |               |                    |                    |
| SNP_94792_A_8723  | NW_004516588.1 | scaffold1365 | 8723                    | TT                              | GG                 | GG               | INTERGENIC      |               |                    |                    |
| SNP_94793_A_18151 | NW_004516588.1 | scaffold1365 | 18151                   | TT                              | AA                 | AA               | INTERGENIC      |               |                    |                    |
| SNP_94794_A_18215 | NW_004516588.1 | scaffold1365 | 18215                   | CC                              | AA                 | AA               | INTERGENIC      |               |                    |                    |
| SNP_94797_A_74762 | NW_004516588.1 | scaffold1365 | 74762                   | AA                              | GG                 | GG               | INTERGENIC      |               |                    |                    |
| SNP_94798_A_86598 | NW_004516588.1 | scaffold1365 | 86598                   | TT                              | AA                 | AA               | INTERGENIC      |               |                    |                    |
| SNP_94799_A_86662 | NW_004516588.1 | scaffold1365 | 86662                   | CC                              | TT                 | TT               | INTERGENIC      |               |                    |                    |
| SNP_94800_A_86831 | NW_004516588.1 | scaffold1365 | 86831                   | CC                              | AA                 | AA               | INTERGENIC      |               |                    |                    |
| SNP_94801_A_86862 | NW_004516588.1 | scaffold1365 | 86862                   | TT                              | CC                 | CC               | INTERGENIC      |               |                    |                    |
| SNP_94802_A_86973 | NW_004516588.1 | scaffold1365 | 86973                   | AA                              | GG                 | GG               | INTERGENIC      |               |                    |                    |
| SNP_94803_A_86993 | NW_004516588.1 | scaffold1365 | 86993                   | TT                              | CC                 | CC               | INTERGENIC      |               |                    |                    |
| SNP_94804_A_87050 | NW_004516588.1 | scaffold1365 | 87050                   | CC                              | GG                 | GG               | INTERGENIC      |               |                    |                    |
| SNP_94805_A_87505 | NW_004516588.1 | scaffold1365 | 87505                   | GG                              | TT                 | TT               | INTERGENIC      |               |                    |                    |
| SNP_94806_A_87506 | NW_004516588.1 | scaffold1365 | 87506                   | TT                              | GG                 | GG               | INTERGENIC      |               |                    |                    |
| SNP_94807_A_87526 | NW_004516588.1 | scaffold1365 | 87526                   | CC                              | AA                 | AA               | INTERGENIC      |               |                    |                    |
| SNP_94808_A_87551 | NW_004516588.1 | scaffold1365 | 87551                   | CC                              | AA                 | AA               | INTERGENIC      |               |                    |                    |
| SNP_94809_A_89127 | NW_004516588.1 | scaffold1365 | 89127                   | GG                              | AA                 | AA               | INTERGENIC      |               |                    |                    |
| SNP_94810_A_95518 | NW_004516588.1 | scaffold1365 | 95518                   | AA                              | TT                 | TT               | INTERGENIC      |               |                    |                    |
| SNP_94811_A_96106 | NW_004516588.1 | scaffold1365 | 96106                   | CC                              | TT                 | TT               | INTERGENIC      |               |                    |                    |
| SNP_94812_A_96631 | NW_004516588.1 | scaffold1365 | 96631                   | AA                              | TT                 | TT               | INTERGENIC      |               |                    |                    |

| SNPs IDs           | Chromosome IDs | Chromosomes  | Physical positions (bp) | CDC Frontier genome (Reference genome) | (Pusa 1103 & HPNB) | (ILWC 46 & LPNB) | Sequence genome | Components of | Gene accession IDs | Putative functions |
|--------------------|----------------|--------------|-------------------------|----------------------------------------|--------------------|------------------|-----------------|---------------|--------------------|--------------------|
| SNP_94813_A_96864  | NW_004516588.1 | scaffold1365 | 96864                   | GG                                     | AA                 | AA               | INTERGENIC      |               |                    |                    |
| SNP_94814_A_97347  | NW_004516588.1 | scaffold1365 | 97347                   | CC                                     | TT                 | TT               | INTERGENIC      |               |                    |                    |
| SNP_94815_A_97469  | NW_004516588.1 | scaffold1365 | 97469                   | TT                                     | CC                 | CC               | INTERGENIC      |               |                    |                    |
| SNP_94816_A_98724  | NW_004516588.1 | scaffold1365 | 98724                   | TT                                     | CC                 | CC               | INTERGENIC      |               |                    |                    |
| SNP_94817_A_98787  | NW_004516588.1 | scaffold1365 | 98787                   | GG                                     | CC                 | CC               | INTERGENIC      |               |                    |                    |
| SNP_94818_A_98885  | NW_004516588.1 | scaffold1365 | 98885                   | CC                                     | AA                 | AA               | INTERGENIC      |               |                    |                    |
| SNP_94819_A_98901  | NW_004516588.1 | scaffold1365 | 98901                   | TT                                     | GG                 | GG               | INTERGENIC      |               |                    |                    |
| SNP_94820_A_99083  | NW_004516588.1 | scaffold1365 | 99083                   | AA                                     | TT                 | TT               | INTERGENIC      |               |                    |                    |
| SNP_94821_A_99146  | NW_004516588.1 | scaffold1365 | 99146                   | AA                                     | GG                 | GG               | INTERGENIC      |               |                    |                    |
| SNP_94822_A_99150  | NW_004516588.1 | scaffold1365 | 99150                   | GG                                     | TT                 | TT               | INTERGENIC      |               |                    |                    |
| SNP_94823_A_99268  | NW_004516588.1 | scaffold1365 | 99268                   | CC                                     | TT                 | TT               | INTERGENIC      |               |                    |                    |
| SNP_94824_A_99351  | NW_004516588.1 | scaffold1365 | 99351                   | CC                                     | AA                 | AA               | INTERGENIC      |               |                    |                    |
| SNP_94825_A_99834  | NW_004516588.1 | scaffold1365 | 99834                   | GG                                     | TT                 | TT               | INTERGENIC      |               |                    |                    |
| SNP_94826_A_102505 | NW_004516588.1 | scaffold1365 | 102505                  | AA                                     | GG                 | GG               | INTERGENIC      |               |                    |                    |
| SNP_94827_A_102523 | NW_004516588.1 | scaffold1365 | 102523                  | GG                                     | TT                 | TT               | INTERGENIC      |               |                    |                    |
| SNP_94828_A_104475 | NW_004516588.1 | scaffold1365 | 104475                  | AA                                     | TT                 | TT               | INTERGENIC      |               |                    |                    |
| SNP_94829_A_104476 | NW_004516588.1 | scaffold1365 | 104476                  | TT                                     | CC                 | CC               | INTERGENIC      |               |                    |                    |
| SNP_94830_A_104504 | NW_004516588.1 | scaffold1365 | 104504                  | AA                                     | TT                 | TT               | INTERGENIC      |               |                    |                    |
| SNP_94831_A_104524 | NW_004516588.1 | scaffold1365 | 104524                  | CC                                     | GG                 | GG               | INTERGENIC      |               |                    |                    |
| SNP_94832_A_231    | NW_004516589.1 | scaffold1366 | 231                     | AA                                     | TT                 | TT               | INTERGENIC      |               |                    |                    |
| SNP_94833_A_1046   | NW_004516589.1 | scaffold1366 | 1046                    | AA                                     | GG                 | GG               | INTERGENIC      |               |                    |                    |
| SNP_94835_A_22363  | NW_004516590.1 | scaffold1367 | 22363                   | TT                                     | GG                 | GG               | INTERGENIC      |               |                    |                    |



| SNPs IDs           | Chromosome IDs | Chromosomes  | Physical positions (bp) | CDC Frontier (Reference genome) | (Pusa 1103 & HPNB) | (ILWC 46 & LPNB) | Sequence Components of genome | Gene accession IDs | Putative functions           |
|--------------------|----------------|--------------|-------------------------|---------------------------------|--------------------|------------------|-------------------------------|--------------------|------------------------------|
| SNP_94836_A_22371  | NW_004516590.1 | scaffold1367 | 22371                   | AA                              | CC                 | CC               | INTERGENIC                    |                    |                              |
| SNP_94837_A_22398  | NW_004516590.1 | scaffold1367 | 22398                   | AA                              | GG                 | GG               | INTERGENIC                    |                    |                              |
| SNP_94838_A_22418  | NW_004516590.1 | scaffold1367 | 22418                   | AA                              | TT                 | TT               | INTERGENIC                    |                    |                              |
| SNP_94839_A_31184  | NW_004516590.1 | scaffold1367 | 31184                   | CC                              | TT                 | TT               | INTERGENIC                    |                    |                              |
| SNP_94840_A_683    | NW_004516591.1 | scaffold1368 | 683                     | CC                              | TT                 | TT               | INTERGENIC                    |                    |                              |
| SNP_94841_A_5116   | NW_004516592.1 | scaffold1369 | 5116                    | CC                              | AA                 | AA               | DRR                           | 101502641          | PRA1 family protein A1-like  |
| SNP_94842_A_68091  | NW_004516592.1 | scaffold1369 | 68091                   | AA                              | CC                 | CC               | INTERGENIC                    |                    |                              |
| SNP_94843_A_68092  | NW_004516592.1 | scaffold1369 | 68092                   | GG                              | AA                 | AA               | INTERGENIC                    |                    |                              |
| SNP_94844_A_75583  | NW_004516592.1 | scaffold1369 | 75583                   | AA                              | GG                 | GG               | INTRON                        | 101504796          | uncharacterized LOC101504796 |
| SNP_94845_A_76646  | NW_004516592.1 | scaffold1369 | 76646                   | TT                              | AA                 | AA               | INTRON                        | 101504796          | uncharacterized LOC101504796 |
| SNP_94846_A_76676  | NW_004516592.1 | scaffold1369 | 76676                   | TT                              | CC                 | CC               | INTRON                        | 101504796          | uncharacterized LOC101504796 |
| SNP_94847_A_76677  | NW_004516592.1 | scaffold1369 | 76677                   | CC                              | TT                 | TT               | INTRON                        | 101504796          | uncharacterized LOC101504796 |
| SNP_94848_A_76742  | NW_004516592.1 | scaffold1369 | 76742                   | AA                              | GG                 | GG               | INTRON                        | 101504796          | uncharacterized LOC101504796 |
| SNP_94849_A_77014  | NW_004516592.1 | scaffold1369 | 77014                   | AA                              | GG                 | GG               | INTRON                        | 101504796          | uncharacterized LOC101504796 |
| SNP_94850_A_77113  | NW_004516592.1 | scaffold1369 | 77113                   | TT                              | GG                 | GG               | NON_SYNONYMOUS_CODING         | 101504796          | uncharacterized LOC101504796 |
| SNP_94851_A_77140  | NW_004516592.1 | scaffold1369 | 77140                   | AA                              | GG                 | GG               | SYNONYMOUS_CODING             | 101504796          | uncharacterized LOC101504796 |
| SNP_94852_A_77199  | NW_004516592.1 | scaffold1369 | 77199                   | GG                              | TT                 | TT               | NON_SYNONYMOUS_CODING         | 101504796          | uncharacterized LOC101504796 |
| SNP_94853_A_81027  | NW_004516592.1 | scaffold1369 | 81027                   | AA                              | GG                 | GG               | INTRON                        | 101504796          | uncharacterized LOC101504796 |
| SNP_94854_A_196937 | NW_004516592.1 | scaffold1369 | 196937                  | CC                              | TT                 | TT               | INTERGENIC                    |                    |                              |
| SNP_94855_A_197020 | NW_004516592.1 | scaffold1369 | 197020                  | GG                              | AA                 | AA               | INTERGENIC                    |                    |                              |
| SNP_94856_A_197203 | NW_004516592.1 | scaffold1369 | 197203                  | GG                              | TT                 | TT               | INTERGENIC                    |                    |                              |
| SNP_94857_A_197264 | NW_004516592.1 | scaffold1369 | 197264                  | GG                              | AA                 | AA               | INTERGENIC                    |                    |                              |

| SNPs IDs           | Chromosome IDs | Chromosomes  | Physical positions (bp) | CDC Frontier genome (Reference genome) | (Pusa 1103 & HPNB) | (ILWC 46 & LPNB) | Sequence genome | Components of | Gene accession IDs | Putative functions |
|--------------------|----------------|--------------|-------------------------|----------------------------------------|--------------------|------------------|-----------------|---------------|--------------------|--------------------|
| SNP_94858_A_205531 | NW_004516592.1 | scaffold1369 | 205531                  | CC                                     | TT                 | TT               | INTERGENIC      |               |                    |                    |
| SNP_94859_A_205541 | NW_004516592.1 | scaffold1369 | 205541                  | CC                                     | TT                 | TT               | INTERGENIC      |               |                    |                    |
| SNP_94860_A_214386 | NW_004516592.1 | scaffold1369 | 214386                  | CC                                     | TT                 | TT               | INTERGENIC      |               |                    |                    |
| SNP_94861_A_214394 | NW_004516592.1 | scaffold1369 | 214394                  | TT                                     | CC                 | CC               | INTERGENIC      |               |                    |                    |
| SNP_94862_A_448    | NW_004516593.1 | scaffold1370 | 448                     | TT                                     | AA                 | AA               | INTERGENIC      |               |                    |                    |
| SNP_94864_A_22792  | NW_004516593.1 | scaffold1370 | 22792                   | AA                                     | GG                 | GG               | INTERGENIC      |               |                    |                    |
| SNP_94865_A_22821  | NW_004516593.1 | scaffold1370 | 22821                   | AA                                     | GG                 | GG               | INTERGENIC      |               |                    |                    |
| SNP_94866_A_23117  | NW_004516593.1 | scaffold1370 | 23117                   | TT                                     | GG                 | GG               | INTERGENIC      |               |                    |                    |
| SNP_94867_A_23188  | NW_004516593.1 | scaffold1370 | 23188                   | TT                                     | CC                 | CC               | INTERGENIC      |               |                    |                    |
| SNP_94868_A_27588  | NW_004516593.1 | scaffold1370 | 27588                   | GG                                     | AA                 | AA               | INTERGENIC      |               |                    |                    |
| SNP_94869_A_27669  | NW_004516593.1 | scaffold1370 | 27669                   | AA                                     | GG                 | GG               | INTERGENIC      |               |                    |                    |
| SNP_94870_A_27721  | NW_004516593.1 | scaffold1370 | 27721                   | AA                                     | GG                 | GG               | INTERGENIC      |               |                    |                    |
| SNP_94871_A_27871  | NW_004516593.1 | scaffold1370 | 27871                   | TT                                     | CC                 | CC               | INTERGENIC      |               |                    |                    |
| SNP_94872_A_27890  | NW_004516593.1 | scaffold1370 | 27890                   | TT                                     | GG                 | GG               | INTERGENIC      |               |                    |                    |
| SNP_94873_A_27894  | NW_004516593.1 | scaffold1370 | 27894                   | AA                                     | GG                 | GG               | INTERGENIC      |               |                    |                    |
| SNP_94874_A_27901  | NW_004516593.1 | scaffold1370 | 27901                   | AA                                     | GG                 | GG               | INTERGENIC      |               |                    |                    |
| SNP_94875_A_27935  | NW_004516593.1 | scaffold1370 | 27935                   | GG                                     | TT                 | TT               | INTERGENIC      |               |                    |                    |
| SNP_94876_A_27936  | NW_004516593.1 | scaffold1370 | 27936                   | CC                                     | TT                 | TT               | INTERGENIC      |               |                    |                    |
| SNP_94877_A_28040  | NW_004516593.1 | scaffold1370 | 28040                   | TT                                     | CC                 | CC               | INTERGENIC      |               |                    |                    |
| SNP_94878_A_39244  | NW_004516593.1 | scaffold1370 | 39244                   | AA                                     | GG                 | GG               | INTERGENIC      |               |                    |                    |
| SNP_94879_A_86394  | NW_004516593.1 | scaffold1370 | 86394                   | CC                                     | GG                 | GG               | INTERGENIC      |               |                    |                    |
| SNP_94880_A_86437  | NW_004516593.1 | scaffold1370 | 86437                   | GG                                     | AA                 | AA               | INTERGENIC      |               |                    |                    |

| SNPs IDs          | Chromosome IDs | Chromosomes  | Physical positions (bp) | CDC Frontier (Reference genome) | (Pusa 1103 & HPNB) | (ILWC 46 & LPNB) | Sequence genome       | Components of | Gene accession IDs | Putative functions |
|-------------------|----------------|--------------|-------------------------|---------------------------------|--------------------|------------------|-----------------------|---------------|--------------------|--------------------|
| SNP_94881_A_25860 | NW_004516594.1 | scaffold1371 | 25860                   | TT                              | CC                 | CC               | INTERGENIC            |               |                    |                    |
| SNP_94882_A_26768 | NW_004516594.1 | scaffold1371 | 26768                   | AA                              | CC                 | CC               | INTERGENIC            |               |                    |                    |
| SNP_94883_A_27121 | NW_004516594.1 | scaffold1371 | 27121                   | TT                              | GG                 | GG               | INTERGENIC            |               |                    |                    |
| SNP_94884_A_27162 | NW_004516594.1 | scaffold1371 | 27162                   | AA                              | GG                 | GG               | INTERGENIC            |               |                    |                    |
| SNP_94885_A_27238 | NW_004516594.1 | scaffold1371 | 27238                   | GG                              | TT                 | TT               | INTERGENIC            |               |                    |                    |
| SNP_94886_A_27261 | NW_004516594.1 | scaffold1371 | 27261                   | AA                              | GG                 | GG               | INTERGENIC            |               |                    |                    |
| SNP_94887_A_27297 | NW_004516594.1 | scaffold1371 | 27297                   | GG                              | CC                 | CC               | INTERGENIC            |               |                    |                    |
| SNP_94888_A_27363 | NW_004516594.1 | scaffold1371 | 27363                   | GG                              | AA                 | AA               | INTERGENIC            |               |                    |                    |
| SNP_94889_A_27418 | NW_004516594.1 | scaffold1371 | 27418                   | AA                              | GG                 | GG               | INTERGENIC            |               |                    |                    |
| SNP_94890_A_27423 | NW_004516594.1 | scaffold1371 | 27423                   | CC                              | TT                 | TT               | INTERGENIC            |               |                    |                    |
| SNP_94891_A_27526 | NW_004516594.1 | scaffold1371 | 27526                   | TT                              | CC                 | CC               | INTERGENIC            |               |                    |                    |
| SNP_94892_A_27548 | NW_004516594.1 | scaffold1371 | 27548                   | GG                              | AA                 | AA               | INTERGENIC            |               |                    |                    |
| SNP_94893_A_27667 | NW_004516594.1 | scaffold1371 | 27667                   | TT                              | CC                 | CC               | INTERGENIC            |               |                    |                    |
| SNP_94895_A_65095 | NW_004516594.1 | scaffold1371 | 65095                   | AA                              | GG                 | GG               | INTERGENIC            |               |                    |                    |
| SNP_94896_A_65206 | NW_004516594.1 | scaffold1371 | 65206                   | CC                              | GG                 | GG               | INTERGENIC            |               |                    |                    |
| SNP_94897_A_65230 | NW_004516594.1 | scaffold1371 | 65230                   | TT                              | CC                 | CC               | INTERGENIC            |               |                    |                    |
| SNP_94898_A_65257 | NW_004516594.1 | scaffold1371 | 65257                   | AA                              | GG                 | GG               | INTERGENIC            |               |                    |                    |
| SNP_94899_A_65307 | NW_004516594.1 | scaffold1371 | 65307                   | TT                              | CC                 | CC               | INTERGENIC            |               |                    |                    |
| SNP_94900_A_66609 | NW_004516594.1 | scaffold1371 | 66609                   | AA                              | GG                 | GG               | INTERGENIC            |               |                    |                    |
| SNP_94902_A_21854 | NW_004516597.1 | scaffold1376 | 21854                   | GG                              | AA                 | AA               | NON_SYNONYMOUS_CODING | 101507808     | Unknown function   |                    |
| SNP_94903_A_21877 | NW_004516597.1 | scaffold1376 | 21877                   | TT                              | CC                 | CC               | NON_SYNONYMOUS_CODING | 101507808     | Unknown function   |                    |
| SNP_94904_A_21943 | NW_004516597.1 | scaffold1376 | 21943                   | TT                              | CC                 | CC               | INTRON                | 101507808     | Unknown function   |                    |

| SNPs IDs          | Chromosome IDs | Chromosomes  | Physical positions (bp) | CDC Frontier (Reference genome) | (Pusa 1103 & HPNB) | (ILWC 46 & LPNB) | Sequence Components of genome | Gene accession IDs | Putative functions |
|-------------------|----------------|--------------|-------------------------|---------------------------------|--------------------|------------------|-------------------------------|--------------------|--------------------|
| SNP_94905_A_22232 | NW_004516597.1 | scaffold1376 | 22232                   | GG                              | AA                 | AA               | NON_SYNONYMOUS_CODING         | 101507808          | Unknown function   |
| SNP_94906_A_22262 | NW_004516597.1 | scaffold1376 | 22262                   | TT                              | CC                 | CC               | NON_SYNONYMOUS_CODING         | 101507808          | Unknown function   |
| SNP_94907_A_22269 | NW_004516597.1 | scaffold1376 | 22269                   | TT                              | AA                 | AA               | NON_SYNONYMOUS_CODING         | 101507808          | Unknown function   |
| SNP_94908_A_22273 | NW_004516597.1 | scaffold1376 | 22273                   | AA                              | GG                 | GG               | SYNONYMOUS_CODING             | 101507808          | Unknown function   |
| SNP_94910_A_41658 | NW_004516597.1 | scaffold1376 | 41658                   | AA                              | GG                 | GG               | INTERGENIC                    |                    |                    |
| SNP_94911_A_54150 | NW_004516597.1 | scaffold1376 | 54150                   | CC                              | AA                 | AA               | INTERGENIC                    |                    |                    |
| SNP_94912_A_54155 | NW_004516597.1 | scaffold1376 | 54155                   | GG                              | TT                 | TT               | INTERGENIC                    |                    |                    |
| SNP_94913_A_54222 | NW_004516597.1 | scaffold1376 | 54222                   | AA                              | GG                 | GG               | INTERGENIC                    |                    |                    |
| SNP_94914_A_57806 | NW_004516597.1 | scaffold1376 | 57806                   | GG                              | AA                 | AA               | INTERGENIC                    |                    |                    |
| SNP_94915_A_57809 | NW_004516597.1 | scaffold1376 | 57809                   | AA                              | CC                 | CC               | INTERGENIC                    |                    |                    |
| SNP_94916_A_57819 | NW_004516597.1 | scaffold1376 | 57819                   | AA                              | GG                 | GG               | INTERGENIC                    |                    |                    |
| SNP_94917_A_57835 | NW_004516597.1 | scaffold1376 | 57835                   | AA                              | GG                 | GG               | INTERGENIC                    |                    |                    |
| SNP_94918_A_57839 | NW_004516597.1 | scaffold1376 | 57839                   | AA                              | GG                 | GG               | INTERGENIC                    |                    |                    |
| SNP_94919_A_57845 | NW_004516597.1 | scaffold1376 | 57845                   | TT                              | AA                 | AA               | INTERGENIC                    |                    |                    |
| SNP_94920_A_57853 | NW_004516597.1 | scaffold1376 | 57853                   | AA                              | GG                 | GG               | INTERGENIC                    |                    |                    |
| SNP_94921_A_57872 | NW_004516597.1 | scaffold1376 | 57872                   | GG                              | AA                 | AA               | INTERGENIC                    |                    |                    |
| SNP_94922_A_57884 | NW_004516597.1 | scaffold1376 | 57884                   | TT                              | GG                 | GG               | INTERGENIC                    |                    |                    |
| SNP_94923_A_57889 | NW_004516597.1 | scaffold1376 | 57889                   | CC                              | AA                 | AA               | INTERGENIC                    |                    |                    |
| SNP_94924_A_57905 | NW_004516597.1 | scaffold1376 | 57905                   | TT                              | CC                 | CC               | INTERGENIC                    |                    |                    |
| SNP_94925_A_57929 | NW_004516597.1 | scaffold1376 | 57929                   | CC                              | TT                 | TT               | INTERGENIC                    |                    |                    |
| SNP_94926_A_57971 | NW_004516597.1 | scaffold1376 | 57971                   | TT                              | CC                 | CC               | INTERGENIC                    |                    |                    |
| SNP_94927_A_58001 | NW_004516597.1 | scaffold1376 | 58001                   | CC                              | TT                 | TT               | INTERGENIC                    |                    |                    |

| SNPs IDs          | Chromosome IDs | Chromosomes  | Physical positions (bp) | CDC Frontier genome (Reference genome) | (Pusa 1103 & HPNB) | (ILWC 46 & LPNB) | Sequence genome | Components of | Gene accession IDs | Putative functions |
|-------------------|----------------|--------------|-------------------------|----------------------------------------|--------------------|------------------|-----------------|---------------|--------------------|--------------------|
| SNP_94928_A_58034 | NW_004516597.1 | scaffold1376 | 58034                   | AA                                     | GG                 | GG               | INTERGENIC      |               |                    |                    |
| SNP_94929_A_58083 | NW_004516597.1 | scaffold1376 | 58083                   | GG                                     | AA                 | AA               | INTERGENIC      |               |                    |                    |
| SNP_94930_A_58266 | NW_004516597.1 | scaffold1376 | 58266                   | TT                                     | AA                 | AA               | INTERGENIC      |               |                    |                    |
| SNP_94931_A_58335 | NW_004516597.1 | scaffold1376 | 58335                   | CC                                     | TT                 | TT               | INTERGENIC      |               |                    |                    |
| SNP_94932_A_58345 | NW_004516597.1 | scaffold1376 | 58345                   | GG                                     | AA                 | AA               | INTERGENIC      |               |                    |                    |
| SNP_94933_A_58371 | NW_004516597.1 | scaffold1376 | 58371                   | CC                                     | AA                 | AA               | INTERGENIC      |               |                    |                    |
| SNP_94934_A_58383 | NW_004516597.1 | scaffold1376 | 58383                   | AA                                     | GG                 | GG               | INTERGENIC      |               |                    |                    |
| SNP_94935_A_58403 | NW_004516597.1 | scaffold1376 | 58403                   | TT                                     | CC                 | CC               | INTERGENIC      |               |                    |                    |
| SNP_94936_A_60342 | NW_004516597.1 | scaffold1376 | 60342                   | GG                                     | AA                 | AA               | INTERGENIC      |               |                    |                    |
| SNP_94937_A_66227 | NW_004516597.1 | scaffold1376 | 66227                   | AA                                     | GG                 | GG               | INTERGENIC      |               |                    |                    |
| SNP_94938_A_66273 | NW_004516597.1 | scaffold1376 | 66273                   | GG                                     | AA                 | AA               | INTERGENIC      |               |                    |                    |
| SNP_94939_A_66274 | NW_004516597.1 | scaffold1376 | 66274                   | AA                                     | GG                 | GG               | INTERGENIC      |               |                    |                    |
| SNP_94940_A_66292 | NW_004516597.1 | scaffold1376 | 66292                   | TT                                     | CC                 | CC               | INTERGENIC      |               |                    |                    |
| SNP_94941_A_66466 | NW_004516597.1 | scaffold1376 | 66466                   | CC                                     | TT                 | TT               | INTERGENIC      |               |                    |                    |
| SNP_94942_A_66493 | NW_004516597.1 | scaffold1376 | 66493                   | AA                                     | GG                 | GG               | INTERGENIC      |               |                    |                    |
| SNP_94943_A_66655 | NW_004516597.1 | scaffold1376 | 66655                   | TT                                     | CC                 | CC               | INTERGENIC      |               |                    |                    |
| SNP_94944_A_68993 | NW_004516597.1 | scaffold1376 | 68993                   | GG                                     | AA                 | AA               | INTERGENIC      |               |                    |                    |
| SNP_94945_A_69130 | NW_004516597.1 | scaffold1376 | 69130                   | CC                                     | AA                 | AA               | INTERGENIC      |               |                    |                    |
| SNP_94946_A_69397 | NW_004516597.1 | scaffold1376 | 69397                   | CC                                     | TT                 | TT               | INTERGENIC      |               |                    |                    |
| SNP_94947_A_69398 | NW_004516597.1 | scaffold1376 | 69398                   | GG                                     | AA                 | AA               | INTERGENIC      |               |                    |                    |
| SNP_94948_A_69537 | NW_004516597.1 | scaffold1376 | 69537                   | CC                                     | TT                 | TT               | INTERGENIC      |               |                    |                    |
| SNP_94949_A_69624 | NW_004516597.1 | scaffold1376 | 69624                   | GG                                     | AA                 | AA               | INTERGENIC      |               |                    |                    |

| SNPs IDs           | Chromosome IDs | Chromosomes  | Physical positions (bp) | CDC Frontier (Reference genome) | (Pusa 1103 & HPNB) | (ILWC 46 & LPNB) | Sequence genome | Components of | Gene accession IDs | Putative functions |
|--------------------|----------------|--------------|-------------------------|---------------------------------|--------------------|------------------|-----------------|---------------|--------------------|--------------------|
| SNP_94950_A_69648  | NW_004516597.1 | scaffold1376 | 69648                   | CC                              | AA                 | AA               | INTERGENIC      |               |                    |                    |
| SNP_94951_A_1726   | NW_004516600.1 | scaffold1380 | 1726                    | AA                              | GG                 | GG               | INTERGENIC      |               |                    |                    |
| SNP_94952_A_1828   | NW_004516600.1 | scaffold1380 | 1828                    | GG                              | CC                 | CC               | INTERGENIC      |               |                    |                    |
| SNP_94953_A_5355   | NW_004516600.1 | scaffold1380 | 5355                    | AA                              | CC                 | CC               | INTERGENIC      |               |                    |                    |
| SNP_94955_A_6440   | NW_004516600.1 | scaffold1380 | 6440                    | AA                              | CC                 | CC               | INTERGENIC      |               |                    |                    |
| SNP_94956_A_6876   | NW_004516600.1 | scaffold1380 | 6876                    | TT                              | GG                 | GG               | INTERGENIC      |               |                    |                    |
| SNP_94957_A_6939   | NW_004516600.1 | scaffold1380 | 6939                    | AA                              | GG                 | GG               | INTERGENIC      |               |                    |                    |
| SNP_94958_A_7134   | NW_004516600.1 | scaffold1380 | 7134                    | AA                              | TT                 | TT               | INTERGENIC      |               |                    |                    |
| SNP_94959_A_8337   | NW_004516600.1 | scaffold1380 | 8337                    | AA                              | GG                 | GG               | INTERGENIC      |               |                    |                    |
| SNP_94960_A_8355   | NW_004516600.1 | scaffold1380 | 8355                    | GG                              | AA                 | AA               | INTERGENIC      |               |                    |                    |
| SNP_94961_A_8999   | NW_004516600.1 | scaffold1380 | 8999                    | CC                              | AA                 | AA               | INTERGENIC      |               |                    |                    |
| SNP_94963_A_10622  | NW_004516600.1 | scaffold1380 | 10622                   | GG                              | CC                 | CC               | INTERGENIC      |               |                    |                    |
| SNP_94964_A_10723  | NW_004516600.1 | scaffold1380 | 10723                   | GG                              | AA                 | AA               | INTERGENIC      |               |                    |                    |
| SNP_94965_A_10759  | NW_004516600.1 | scaffold1380 | 10759                   | TT                              | GG                 | GG               | INTERGENIC      |               |                    |                    |
| SNP_94966_A_10868  | NW_004516600.1 | scaffold1380 | 10868                   | AA                              | GG                 | GG               | INTERGENIC      |               |                    |                    |
| SNP_94967_A_11105  | NW_004516600.1 | scaffold1380 | 11105                   | CC                              | AA                 | AA               | INTERGENIC      |               |                    |                    |
| SNP_94968_A_12202  | NW_004516600.1 | scaffold1380 | 12202                   | CC                              | TT                 | TT               | INTERGENIC      |               |                    |                    |
| SNP_94970_A_26497  | NW_004516601.1 | scaffold1382 | 26497                   | AA                              | GG                 | GG               | INTERGENIC      |               |                    |                    |
| SNP_94972_A_87709  | NW_004516601.1 | scaffold1382 | 87709                   | CC                              | TT                 | TT               | INTERGENIC      |               |                    |                    |
| SNP_94973_A_150598 | NW_004516601.1 | scaffold1382 | 150598                  | TT                              | GG                 | GG               | INTERGENIC      |               |                    |                    |
| SNP_94974_A_150627 | NW_004516601.1 | scaffold1382 | 150627                  | TT                              | GG                 | GG               | INTERGENIC      |               |                    |                    |
| SNP_94975_A_161600 | NW_004516601.1 | scaffold1382 | 161600                  | TT                              | CC                 | CC               | INTERGENIC      |               |                    |                    |

| SNPs IDs           | Chromosome IDs | Chromosomes  | Physical positions (bp) | CDC Frontier (Reference genome) | (Pusa 1103 & HPNB) | (ILWC 46 & LPNB) | Sequence Components of genome | Gene accession IDs | Putative functions           |
|--------------------|----------------|--------------|-------------------------|---------------------------------|--------------------|------------------|-------------------------------|--------------------|------------------------------|
| SNP_94977_A_225516 | NW_004516601.1 | scaffold1382 | 225516                  | GG                              | AA                 | AA               | INTRON                        | 101511012          | uncharacterized LOC101511012 |
| SNP_94979_A_225629 | NW_004516601.1 | scaffold1382 | 225629                  | AA                              | TT                 | TT               | INTRON                        | 101511012          | uncharacterized LOC101511012 |
| SNP_94980_A_225633 | NW_004516601.1 | scaffold1382 | 225633                  | AA                              | GG                 | GG               | INTRON                        | 101511012          | uncharacterized LOC101511012 |
| SNP_94981_A_225783 | NW_004516601.1 | scaffold1382 | 225783                  | GG                              | AA                 | AA               | INTRON                        | 101511012          | uncharacterized LOC101511012 |
| SNP_94982_A_225799 | NW_004516601.1 | scaffold1382 | 225799                  | TT                              | CC                 | CC               | INTRON                        | 101511012          | uncharacterized LOC101511012 |
| SNP_94983_A_225949 | NW_004516601.1 | scaffold1382 | 225949                  | GG                              | TT                 | TT               | INTRON                        | 101511012          | uncharacterized LOC101511012 |
| SNP_94984_A_225960 | NW_004516601.1 | scaffold1382 | 225960                  | CC                              | GG                 | GG               | INTRON                        | 101511012          | uncharacterized LOC101511012 |
| SNP_94985_A_225971 | NW_004516601.1 | scaffold1382 | 225971                  | CC                              | AA                 | AA               | INTRON                        | 101511012          | uncharacterized LOC101511012 |
| SNP_94986_A_234117 | NW_004516601.1 | scaffold1382 | 234117                  | CC                              | TT                 | TT               | INTRON                        | 101511012          | uncharacterized LOC101511012 |
| SNP_94987_A_234151 | NW_004516601.1 | scaffold1382 | 234151                  | TT                              | CC                 | CC               | INTRON                        | 101511012          | uncharacterized LOC101511012 |
| SNP_94988_A_234157 | NW_004516601.1 | scaffold1382 | 234157                  | TT                              | AA                 | AA               | INTRON                        | 101511012          | uncharacterized LOC101511012 |
| SNP_94989_A_234168 | NW_004516601.1 | scaffold1382 | 234168                  | CC                              | TT                 | TT               | INTRON                        | 101511012          | uncharacterized LOC101511012 |
| SNP_94990_A_260584 | NW_004516601.1 | scaffold1382 | 260584                  | TT                              | AA                 | AA               | INTERGENIC                    |                    |                              |
| SNP_94991_A_260911 | NW_004516601.1 | scaffold1382 | 260911                  | CC                              | GG                 | GG               | INTERGENIC                    |                    |                              |
| SNP_94992_A_260972 | NW_004516601.1 | scaffold1382 | 260972                  | GG                              | AA                 | AA               | INTERGENIC                    |                    |                              |
| SNP_94993_A_260987 | NW_004516601.1 | scaffold1382 | 260987                  | AA                              | TT                 | TT               | INTERGENIC                    |                    |                              |
| SNP_94994_A_281777 | NW_004516601.1 | scaffold1382 | 281777                  | TT                              | CC                 | CC               | INTERGENIC                    |                    |                              |
| SNP_94995_A_281778 | NW_004516601.1 | scaffold1382 | 281778                  | TT                              | CC                 | CC               | INTERGENIC                    |                    |                              |
| SNP_94996_A_281791 | NW_004516601.1 | scaffold1382 | 281791                  | TT                              | CC                 | CC               | INTERGENIC                    |                    |                              |
| SNP_94997_A_281851 | NW_004516601.1 | scaffold1382 | 281851                  | CC                              | TT                 | TT               | INTERGENIC                    |                    |                              |
| SNP_94998_A_281869 | NW_004516601.1 | scaffold1382 | 281869                  | AA                              | CC                 | CC               | INTERGENIC                    |                    |                              |
| SNP_94999_A_281913 | NW_004516601.1 | scaffold1382 | 281913                  | CC                              | GG                 | GG               | INTERGENIC                    |                    |                              |

| SNPs IDs           | Chromosome IDs | Chromosomes  | Physical positions (bp) | CDC Frontier (Reference genome) | (Pusa 1103 & HPNB) | (ILWC 46 & LPNB) | Sequence genome | Components of | Gene accession IDs | Putative functions |
|--------------------|----------------|--------------|-------------------------|---------------------------------|--------------------|------------------|-----------------|---------------|--------------------|--------------------|
| SNP_95000_A_281935 | NW_004516601.1 | scaffold1382 | 281935                  | GG                              | AA                 | AA               | INTERGENIC      |               |                    |                    |
| SNP_95001_A_281988 | NW_004516601.1 | scaffold1382 | 281988                  | AA                              | GG                 | GG               | INTERGENIC      |               |                    |                    |
| SNP_95002_A_282090 | NW_004516601.1 | scaffold1382 | 282090                  | TT                              | CC                 | CC               | INTERGENIC      |               |                    |                    |
| SNP_95003_A_285939 | NW_004516601.1 | scaffold1382 | 285939                  | AA                              | CC                 | CC               | INTERGENIC      |               |                    |                    |
| SNP_95004_A_292107 | NW_004516601.1 | scaffold1382 | 292107                  | AA                              | CC                 | CC               | INTERGENIC      |               |                    |                    |
| SNP_95005_A_292264 | NW_004516601.1 | scaffold1382 | 292264                  | TT                              | CC                 | CC               | INTERGENIC      |               |                    |                    |
| SNP_95006_A_292483 | NW_004516601.1 | scaffold1382 | 292483                  | AA                              | CC                 | CC               | INTERGENIC      |               |                    |                    |
| SNP_95007_A_292711 | NW_004516601.1 | scaffold1382 | 292711                  | GG                              | AA                 | AA               | INTERGENIC      |               |                    |                    |
| SNP_95008_A_292890 | NW_004516601.1 | scaffold1382 | 292890                  | GG                              | AA                 | AA               | INTERGENIC      |               |                    |                    |
| SNP_95009_A_292945 | NW_004516601.1 | scaffold1382 | 292945                  | CC                              | TT                 | TT               | INTERGENIC      |               |                    |                    |
| SNP_95010_A_293945 | NW_004516601.1 | scaffold1382 | 293945                  | TT                              | AA                 | AA               | INTERGENIC      |               |                    |                    |
| SNP_95011_A_293960 | NW_004516601.1 | scaffold1382 | 293960                  | TT                              | AA                 | AA               | INTERGENIC      |               |                    |                    |
| SNP_95012_A_294026 | NW_004516601.1 | scaffold1382 | 294026                  | TT                              | AA                 | AA               | INTERGENIC      |               |                    |                    |
| SNP_95013_A_294043 | NW_004516601.1 | scaffold1382 | 294043                  | CC                              | GG                 | GG               | INTERGENIC      |               |                    |                    |
| SNP_95014_A_294046 | NW_004516601.1 | scaffold1382 | 294046                  | AA                              | TT                 | TT               | INTERGENIC      |               |                    |                    |
| SNP_95015_A_294052 | NW_004516601.1 | scaffold1382 | 294052                  | CC                              | TT                 | TT               | INTERGENIC      |               |                    |                    |
| SNP_95016_A_294074 | NW_004516601.1 | scaffold1382 | 294074                  | TT                              | CC                 | CC               | INTERGENIC      |               |                    |                    |
| SNP_95017_A_294103 | NW_004516601.1 | scaffold1382 | 294103                  | CC                              | TT                 | TT               | INTERGENIC      |               |                    |                    |
| SNP_95018_A_294110 | NW_004516601.1 | scaffold1382 | 294110                  | CC                              | AA                 | AA               | INTERGENIC      |               |                    |                    |
| SNP_95019_A_294189 | NW_004516601.1 | scaffold1382 | 294189                  | TT                              | AA                 | AA               | INTERGENIC      |               |                    |                    |
| SNP_95020_A_294228 | NW_004516601.1 | scaffold1382 | 294228                  | AA                              | GG                 | GG               | INTERGENIC      |               |                    |                    |
| SNP_95021_A_294264 | NW_004516601.1 | scaffold1382 | 294264                  | TT                              | GG                 | GG               | INTERGENIC      |               |                    |                    |



| SNPs IDs           | Chromosome IDs | Chromosomes  | Physical positions (bp) | CDC Frontier (Reference genome) | (Pusa 1103 & HPNB) | (ILWC 46 & LPNB) | Sequence genome | Components of | Gene accession IDs | Putative functions |
|--------------------|----------------|--------------|-------------------------|---------------------------------|--------------------|------------------|-----------------|---------------|--------------------|--------------------|
| SNP_95022_A_294432 | NW_004516601.1 | scaffold1382 | 294432                  | TT                              | AA                 | AA               | INTERGENIC      |               |                    |                    |
| SNP_95023_A_295001 | NW_004516601.1 | scaffold1382 | 295001                  | CC                              | TT                 | TT               | INTERGENIC      |               |                    |                    |
| SNP_95024_A_295013 | NW_004516601.1 | scaffold1382 | 295013                  | CC                              | TT                 | TT               | INTERGENIC      |               |                    |                    |
| SNP_95025_A_295102 | NW_004516601.1 | scaffold1382 | 295102                  | CC                              | GG                 | GG               | INTERGENIC      |               |                    |                    |
| SNP_95026_A_295348 | NW_004516601.1 | scaffold1382 | 295348                  | AA                              | CC                 | CC               | INTERGENIC      |               |                    |                    |
| SNP_95027_A_295406 | NW_004516601.1 | scaffold1382 | 295406                  | CC                              | GG                 | GG               | INTERGENIC      |               |                    |                    |
| SNP_95028_A_295415 | NW_004516601.1 | scaffold1382 | 295415                  | CC                              | GG                 | GG               | INTERGENIC      |               |                    |                    |
| SNP_95029_A_295424 | NW_004516601.1 | scaffold1382 | 295424                  | GG                              | AA                 | AA               | INTERGENIC      |               |                    |                    |
| SNP_95030_A_295455 | NW_004516601.1 | scaffold1382 | 295455                  | GG                              | TT                 | TT               | INTERGENIC      |               |                    |                    |
| SNP_95031_A_295504 | NW_004516601.1 | scaffold1382 | 295504                  | GG                              | CC                 | CC               | INTERGENIC      |               |                    |                    |
| SNP_95032_A_295505 | NW_004516601.1 | scaffold1382 | 295505                  | AA                              | GG                 | GG               | INTERGENIC      |               |                    |                    |
| SNP_95033_A_295693 | NW_004516601.1 | scaffold1382 | 295693                  | AA                              | GG                 | GG               | INTERGENIC      |               |                    |                    |
| SNP_95034_A_295725 | NW_004516601.1 | scaffold1382 | 295725                  | GG                              | AA                 | AA               | INTERGENIC      |               |                    |                    |
| SNP_95035_A_295849 | NW_004516601.1 | scaffold1382 | 295849                  | TT                              | CC                 | CC               | INTERGENIC      |               |                    |                    |
| SNP_95036_A_295961 | NW_004516601.1 | scaffold1382 | 295961                  | AA                              | TT                 | TT               | INTERGENIC      |               |                    |                    |
| SNP_95037_A_296027 | NW_004516601.1 | scaffold1382 | 296027                  | TT                              | CC                 | CC               | INTERGENIC      |               |                    |                    |
| SNP_95038_A_296028 | NW_004516601.1 | scaffold1382 | 296028                  | GG                              | TT                 | TT               | INTERGENIC      |               |                    |                    |
| SNP_95039_A_296051 | NW_004516601.1 | scaffold1382 | 296051                  | GG                              | CC                 | CC               | INTERGENIC      |               |                    |                    |
| SNP_95040_A_296079 | NW_004516601.1 | scaffold1382 | 296079                  | AA                              | TT                 | TT               | INTERGENIC      |               |                    |                    |
| SNP_95041_A_296156 | NW_004516601.1 | scaffold1382 | 296156                  | CC                              | TT                 | TT               | INTERGENIC      |               |                    |                    |
| SNP_95042_A_296177 | NW_004516601.1 | scaffold1382 | 296177                  | AA                              | TT                 | TT               | INTERGENIC      |               |                    |                    |
| SNP_95043_A_296248 | NW_004516601.1 | scaffold1382 | 296248                  | AA                              | TT                 | TT               | INTERGENIC      |               |                    |                    |

| SNPs IDs           | Chromosome IDs | Chromosomes  | Physical positions (bp) | CDC Frontier (Reference genome) | (Pusa 1103 & HPNB) | (ILWC 46 & LPNB) | Sequence genome | Components of | Gene accession IDs | Putative functions |
|--------------------|----------------|--------------|-------------------------|---------------------------------|--------------------|------------------|-----------------|---------------|--------------------|--------------------|
| SNP_95044_A_296252 | NW_004516601.1 | scaffold1382 | 296252                  | AA                              | TT                 | TT               | INTERGENIC      |               |                    |                    |
| SNP_95045_A_296357 | NW_004516601.1 | scaffold1382 | 296357                  | AA                              | TT                 | TT               | INTERGENIC      |               |                    |                    |
| SNP_95046_A_296377 | NW_004516601.1 | scaffold1382 | 296377                  | CC                              | GG                 | GG               | INTERGENIC      |               |                    |                    |
| SNP_95047_A_296459 | NW_004516601.1 | scaffold1382 | 296459                  | TT                              | AA                 | AA               | INTERGENIC      |               |                    |                    |
| SNP_95048_A_296496 | NW_004516601.1 | scaffold1382 | 296496                  | TT                              | CC                 | CC               | INTERGENIC      |               |                    |                    |
| SNP_95049_A_296497 | NW_004516601.1 | scaffold1382 | 296497                  | GG                              | TT                 | TT               | INTERGENIC      |               |                    |                    |
| SNP_95050_A_296503 | NW_004516601.1 | scaffold1382 | 296503                  | GG                              | AA                 | AA               | INTERGENIC      |               |                    |                    |
| SNP_95051_A_296544 | NW_004516601.1 | scaffold1382 | 296544                  | TT                              | CC                 | CC               | INTERGENIC      |               |                    |                    |
| SNP_95052_A_296722 | NW_004516601.1 | scaffold1382 | 296722                  | CC                              | GG                 | GG               | INTERGENIC      |               |                    |                    |
| SNP_95053_A_296728 | NW_004516601.1 | scaffold1382 | 296728                  | TT                              | AA                 | AA               | INTERGENIC      |               |                    |                    |
| SNP_95054_A_296735 | NW_004516601.1 | scaffold1382 | 296735                  | TT                              | CC                 | CC               | INTERGENIC      |               |                    |                    |
| SNP_95055_A_296763 | NW_004516601.1 | scaffold1382 | 296763                  | AA                              | GG                 | GG               | INTERGENIC      |               |                    |                    |
| SNP_95056_A_305650 | NW_004516601.1 | scaffold1382 | 305650                  | TT                              | CC                 | CC               | INTERGENIC      |               |                    |                    |
| SNP_95057_A_317135 | NW_004516601.1 | scaffold1382 | 317135                  | TT                              | AA                 | AA               | INTERGENIC      |               |                    |                    |
| SNP_95058_A_338943 | NW_004516601.1 | scaffold1382 | 338943                  | GG                              | CC                 | CC               | INTERGENIC      |               |                    |                    |
| SNP_95060_A_339472 | NW_004516601.1 | scaffold1382 | 339472                  | AA                              | CC                 | CC               | INTERGENIC      |               |                    |                    |
| SNP_95061_A_339522 | NW_004516601.1 | scaffold1382 | 339522                  | TT                              | GG                 | GG               | INTERGENIC      |               |                    |                    |
| SNP_95062_A_339531 | NW_004516601.1 | scaffold1382 | 339531                  | GG                              | CC                 | CC               | INTERGENIC      |               |                    |                    |
| SNP_95063_A_365638 | NW_004516601.1 | scaffold1382 | 365638                  | AA                              | TT                 | TT               | INTERGENIC      |               |                    |                    |
| SNP_95064_A_365646 | NW_004516601.1 | scaffold1382 | 365646                  | GG                              | TT                 | TT               | INTERGENIC      |               |                    |                    |
| SNP_95065_A_365649 | NW_004516601.1 | scaffold1382 | 365649                  | TT                              | CC                 | CC               | INTERGENIC      |               |                    |                    |
| SNP_95066_A_367665 | NW_004516601.1 | scaffold1382 | 367665                  | CC                              | TT                 | TT               | INTERGENIC      |               |                    |                    |

| SNPs IDs           | Chromosome IDs | Chromosomes  | Physical positions (bp) | CDC Frontier (Reference genome) | (Pusa 1103 & HPNB) | (ILWC 46 & LPNB) | Sequence genome | Components of | Gene accession IDs | Putative functions |
|--------------------|----------------|--------------|-------------------------|---------------------------------|--------------------|------------------|-----------------|---------------|--------------------|--------------------|
| SNP_95067_A_369136 | NW_004516601.1 | scaffold1382 | 369136                  | CC                              | AA                 | AA               | INTERGENIC      |               |                    |                    |
| SNP_95068_A_374967 | NW_004516601.1 | scaffold1382 | 374967                  | TT                              | AA                 | AA               | INTERGENIC      |               |                    |                    |
| SNP_95069_A_374974 | NW_004516601.1 | scaffold1382 | 374974                  | TT                              | GG                 | GG               | INTERGENIC      |               |                    |                    |
| SNP_95070_A_375254 | NW_004516601.1 | scaffold1382 | 375254                  | AA                              | CC                 | CC               | INTERGENIC      |               |                    |                    |
| SNP_95071_A_375596 | NW_004516601.1 | scaffold1382 | 375596                  | AA                              | CC                 | CC               | INTERGENIC      |               |                    |                    |
| SNP_95072_A_376839 | NW_004516601.1 | scaffold1382 | 376839                  | GG                              | TT                 | TT               | INTERGENIC      |               |                    |                    |
| SNP_95073_A_388189 | NW_004516601.1 | scaffold1382 | 388189                  | AA                              | TT                 | TT               | INTERGENIC      |               |                    |                    |
| SNP_95074_A_397082 | NW_004516601.1 | scaffold1382 | 397082                  | CC                              | AA                 | AA               | URR             |               | 101511645          | Unknown function   |
| SNP_95075_A_397390 | NW_004516601.1 | scaffold1382 | 397390                  | TT                              | CC                 | CC               | URR             |               | 101511645          | Unknown function   |
| SNP_95076_A_397395 | NW_004516601.1 | scaffold1382 | 397395                  | TT                              | GG                 | GG               | URR             |               | 101511645          | Unknown function   |
| SNP_95077_A_397478 | NW_004516601.1 | scaffold1382 | 397478                  | AA                              | CC                 | CC               | URR             |               | 101511645          | Unknown function   |
| SNP_95078_A_397479 | NW_004516601.1 | scaffold1382 | 397479                  | TT                              | CC                 | CC               | URR             |               | 101511645          | Unknown function   |
| SNP_95079_A_424339 | NW_004516601.1 | scaffold1382 | 424339                  | CC                              | TT                 | TT               | INTERGENIC      |               |                    |                    |
| SNP_95080_A_424348 | NW_004516601.1 | scaffold1382 | 424348                  | AA                              | GG                 | GG               | INTERGENIC      |               |                    |                    |
| SNP_95081_A_428895 | NW_004516601.1 | scaffold1382 | 428895                  | TT                              | GG                 | GG               | INTERGENIC      |               |                    |                    |
| SNP_95082_A_433800 | NW_004516601.1 | scaffold1382 | 433800                  | TT                              | CC                 | CC               | INTERGENIC      |               |                    |                    |
| SNP_95083_A_449009 | NW_004516601.1 | scaffold1382 | 449009                  | TT                              | CC                 | CC               | INTERGENIC      |               |                    |                    |
| SNP_95084_A_449413 | NW_004516601.1 | scaffold1382 | 449413                  | TT                              | AA                 | AA               | INTERGENIC      |               |                    |                    |
| SNP_95085_A_449426 | NW_004516601.1 | scaffold1382 | 449426                  | AA                              | TT                 | TT               | INTERGENIC      |               |                    |                    |
| SNP_95086_A_457020 | NW_004516601.1 | scaffold1382 | 457020                  | TT                              | CC                 | CC               | INTERGENIC      |               |                    |                    |
| SNP_95087_A_457133 | NW_004516601.1 | scaffold1382 | 457133                  | GG                              | AA                 | AA               | INTERGENIC      |               |                    |                    |
| SNP_95088_A_470706 | NW_004516601.1 | scaffold1382 | 470706                  | AA                              | CC                 | CC               | INTERGENIC      |               |                    |                    |

| SNPs IDs           | Chromosome IDs | Chromosomes  | Physical positions (bp) | CDC Frontier (Reference genome) | (Pusa 1103 & HPNB) | (ILWC 46 & LPNB) | Sequence genome | Components of | Gene accession IDs | Putative functions |
|--------------------|----------------|--------------|-------------------------|---------------------------------|--------------------|------------------|-----------------|---------------|--------------------|--------------------|
| SNP_95089_A_479167 | NW_004516601.1 | scaffold1382 | 479167                  | TT                              | AA                 | AA               | INTERGENIC      |               |                    |                    |
| SNP_95090_A_479171 | NW_004516601.1 | scaffold1382 | 479171                  | CC                              | AA                 | AA               | INTERGENIC      |               |                    |                    |
| SNP_95091_A_492242 | NW_004516601.1 | scaffold1382 | 492242                  | GG                              | AA                 | AA               | INTERGENIC      |               |                    |                    |
| SNP_95092_A_492258 | NW_004516601.1 | scaffold1382 | 492258                  | GG                              | TT                 | TT               | INTERGENIC      |               |                    |                    |
| SNP_95093_A_526553 | NW_004516601.1 | scaffold1382 | 526553                  | TT                              | GG                 | GG               | INTERGENIC      |               |                    |                    |
| SNP_95094_A_526610 | NW_004516601.1 | scaffold1382 | 526610                  | GG                              | TT                 | TT               | INTERGENIC      |               |                    |                    |
| SNP_95095_A_526614 | NW_004516601.1 | scaffold1382 | 526614                  | TT                              | GG                 | GG               | INTERGENIC      |               |                    |                    |
| SNP_95096_A_526616 | NW_004516601.1 | scaffold1382 | 526616                  | AA                              | TT                 | TT               | INTERGENIC      |               |                    |                    |
| SNP_95097_A_526617 | NW_004516601.1 | scaffold1382 | 526617                  | TT                              | CC                 | CC               | INTERGENIC      |               |                    |                    |
| SNP_95098_A_536212 | NW_004516601.1 | scaffold1382 | 536212                  | GG                              | CC                 | CC               | INTERGENIC      |               |                    |                    |
| SNP_95099_A_536398 | NW_004516601.1 | scaffold1382 | 536398                  | TT                              | CC                 | CC               | INTERGENIC      |               |                    |                    |
| SNP_95100_A_536400 | NW_004516601.1 | scaffold1382 | 536400                  | TT                              | AA                 | AA               | INTERGENIC      |               |                    |                    |
| SNP_95101_A_536640 | NW_004516601.1 | scaffold1382 | 536640                  | CC                              | TT                 | TT               | INTERGENIC      |               |                    |                    |
| SNP_95102_A_536742 | NW_004516601.1 | scaffold1382 | 536742                  | AA                              | TT                 | TT               | INTERGENIC      |               |                    |                    |
| SNP_95103_A_536761 | NW_004516601.1 | scaffold1382 | 536761                  | TT                              | GG                 | GG               | INTERGENIC      |               |                    |                    |
| SNP_95104_A_536769 | NW_004516601.1 | scaffold1382 | 536769                  | GG                              | CC                 | CC               | INTERGENIC      |               |                    |                    |
| SNP_95105_A_536839 | NW_004516601.1 | scaffold1382 | 536839                  | AA                              | GG                 | GG               | INTERGENIC      |               |                    |                    |
| SNP_95106_A_536952 | NW_004516601.1 | scaffold1382 | 536952                  | CC                              | GG                 | GG               | INTERGENIC      |               |                    |                    |
| SNP_95107_A_536961 | NW_004516601.1 | scaffold1382 | 536961                  | TT                              | GG                 | GG               | INTERGENIC      |               |                    |                    |
| SNP_95108_A_537025 | NW_004516601.1 | scaffold1382 | 537025                  | CC                              | AA                 | AA               | INTERGENIC      |               |                    |                    |
| SNP_95109_A_537046 | NW_004516601.1 | scaffold1382 | 537046                  | AA                              | TT                 | TT               | INTERGENIC      |               |                    |                    |
| SNP_95110_A_537062 | NW_004516601.1 | scaffold1382 | 537062                  | TT                              | GG                 | GG               | INTERGENIC      |               |                    |                    |

| SNPs IDs           | Chromosome IDs | Chromosomes  | Physical positions (bp) | CDC Frontier (Reference genome) | (Pusa 1103 & HPNB) | (ILWC 46 & LPNB) | Sequence genome | Components of | Gene accession IDs | Putative functions |
|--------------------|----------------|--------------|-------------------------|---------------------------------|--------------------|------------------|-----------------|---------------|--------------------|--------------------|
| SNP_95111_A_537141 | NW_004516601.1 | scaffold1382 | 537141                  | GG                              | TT                 | TT               | INTERGENIC      |               |                    |                    |
| SNP_95112_A_537159 | NW_004516601.1 | scaffold1382 | 537159                  | AA                              | TT                 | TT               | INTERGENIC      |               |                    |                    |
| SNP_95113_A_7440   | NW_004516603.1 | scaffold1386 | 7440                    | CC                              | TT                 | TT               | INTERGENIC      |               |                    |                    |
| SNP_95114_A_7500   | NW_004516603.1 | scaffold1386 | 7500                    | CC                              | AA                 | AA               | INTERGENIC      |               |                    |                    |
| SNP_95117_A_13303  | NW_004516603.1 | scaffold1386 | 13303                   | CC                              | TT                 | TT               | INTERGENIC      |               |                    |                    |
| SNP_95118_A_13392  | NW_004516603.1 | scaffold1386 | 13392                   | AA                              | GG                 | GG               | INTERGENIC      |               |                    |                    |
| SNP_95119_A_13516  | NW_004516603.1 | scaffold1386 | 13516                   | GG                              | TT                 | TT               | INTERGENIC      |               |                    |                    |
| SNP_95120_A_13590  | NW_004516603.1 | scaffold1386 | 13590                   | GG                              | AA                 | AA               | INTERGENIC      |               |                    |                    |
| SNP_95121_A_13604  | NW_004516603.1 | scaffold1386 | 13604                   | CC                              | TT                 | TT               | INTERGENIC      |               |                    |                    |
| SNP_95123_A_13659  | NW_004516603.1 | scaffold1386 | 13659                   | TT                              | CC                 | CC               | INTERGENIC      |               |                    |                    |
| SNP_95124_A_13671  | NW_004516603.1 | scaffold1386 | 13671                   | GG                              | AA                 | AA               | INTERGENIC      |               |                    |                    |
| SNP_95125_A_13699  | NW_004516603.1 | scaffold1386 | 13699                   | GG                              | AA                 | AA               | INTERGENIC      |               |                    |                    |
| SNP_95126_A_13707  | NW_004516603.1 | scaffold1386 | 13707                   | AA                              | TT                 | TT               | INTERGENIC      |               |                    |                    |
| SNP_95127_A_13710  | NW_004516603.1 | scaffold1386 | 13710                   | TT                              | AA                 | AA               | INTERGENIC      |               |                    |                    |
| SNP_95128_A_22329  | NW_004516603.1 | scaffold1386 | 22329                   | GG                              | CC                 | CC               | INTERGENIC      |               |                    |                    |
| SNP_95129_A_22356  | NW_004516603.1 | scaffold1386 | 22356                   | CC                              | TT                 | TT               | INTERGENIC      |               |                    |                    |
| SNP_95130_A_38461  | NW_004516603.1 | scaffold1386 | 38461                   | CC                              | GG                 | GG               | INTERGENIC      |               |                    |                    |
| SNP_95131_A_38507  | NW_004516603.1 | scaffold1386 | 38507                   | AA                              | GG                 | GG               | INTERGENIC      |               |                    |                    |
| SNP_95132_A_38540  | NW_004516603.1 | scaffold1386 | 38540                   | AA                              | GG                 | GG               | INTERGENIC      |               |                    |                    |
| SNP_95134_A_10301  | NW_004516606.1 | scaffold1390 | 10301                   | GG                              | AA                 | AA               | INTERGENIC      |               |                    |                    |
| SNP_95135_A_37624  | NW_004516606.1 | scaffold1390 | 37624                   | TT                              | CC                 | CC               | INTERGENIC      |               |                    |                    |
| SNP_95136_A_69230  | NW_004516606.1 | scaffold1390 | 69230                   | GG                              | AA                 | AA               | INTERGENIC      |               |                    |                    |

| SNPs IDs           | Chromosome IDs | Chromosomes  | Physical positions (bp) | CDC Frontier (Reference genome) | (Pusa 1103 & HPNB) | (ILWC 46 & LPNB) | Sequence genome | Components of | Gene accession IDs | Putative functions |
|--------------------|----------------|--------------|-------------------------|---------------------------------|--------------------|------------------|-----------------|---------------|--------------------|--------------------|
| SNP_95137_A_93444  | NW_004516606.1 | scaffold1390 | 93444                   | TT                              | CC                 | CC               | INTERGENIC      |               |                    |                    |
| SNP_95138_A_108882 | NW_004516606.1 | scaffold1390 | 108882                  | GG                              | AA                 | AA               | INTERGENIC      |               |                    |                    |
| SNP_95139_A_7890   | NW_004516609.1 | scaffold1394 | 7890                    | CC                              | TT                 | TT               | INTERGENIC      |               |                    |                    |
| SNP_95140_A_7905   | NW_004516609.1 | scaffold1394 | 7905                    | AA                              | GG                 | GG               | INTERGENIC      |               |                    |                    |
| SNP_95141_A_8515   | NW_004516609.1 | scaffold1394 | 8515                    | AA                              | CC                 | CC               | INTERGENIC      |               |                    |                    |
| SNP_95142_A_12007  | NW_004516609.1 | scaffold1394 | 12007                   | TT                              | CC                 | CC               | INTERGENIC      |               |                    |                    |
| SNP_95143_A_12130  | NW_004516609.1 | scaffold1394 | 12130                   | CC                              | TT                 | TT               | INTERGENIC      |               |                    |                    |
| SNP_95144_A_12219  | NW_004516609.1 | scaffold1394 | 12219                   | GG                              | AA                 | AA               | INTERGENIC      |               |                    |                    |
| SNP_95145_A_12223  | NW_004516609.1 | scaffold1394 | 12223                   | CC                              | AA                 | AA               | INTERGENIC      |               |                    |                    |
| SNP_95146_A_12262  | NW_004516609.1 | scaffold1394 | 12262                   | AA                              | GG                 | GG               | INTERGENIC      |               |                    |                    |
| SNP_95147_A_12374  | NW_004516609.1 | scaffold1394 | 12374                   | AA                              | GG                 | GG               | INTERGENIC      |               |                    |                    |
| SNP_95148_A_12415  | NW_004516609.1 | scaffold1394 | 12415                   | AA                              | TT                 | TT               | INTERGENIC      |               |                    |                    |
| SNP_95149_A_12440  | NW_004516609.1 | scaffold1394 | 12440                   | TT                              | CC                 | CC               | INTERGENIC      |               |                    |                    |
| SNP_95150_A_12497  | NW_004516609.1 | scaffold1394 | 12497                   | GG                              | TT                 | TT               | INTERGENIC      |               |                    |                    |
| SNP_95151_A_25557  | NW_004516609.1 | scaffold1394 | 25557                   | GG                              | AA                 | AA               | INTERGENIC      |               |                    |                    |
| SNP_95152_A_25567  | NW_004516609.1 | scaffold1394 | 25567                   | GG                              | AA                 | AA               | INTERGENIC      |               |                    |                    |
| SNP_95153_A_25622  | NW_004516609.1 | scaffold1394 | 25622                   | AA                              | GG                 | GG               | INTERGENIC      |               |                    |                    |
| SNP_95154_A_27158  | NW_004516609.1 | scaffold1394 | 27158                   | AA                              | TT                 | TT               | INTERGENIC      |               |                    |                    |
| SNP_95155_A_1504   | NW_004516612.1 | scaffold1399 | 1504                    | CC                              | TT                 | TT               | INTERGENIC      |               |                    |                    |
| SNP_95156_A_5718   | NW_004516612.1 | scaffold1399 | 5718                    | AA                              | GG                 | GG               | INTERGENIC      |               |                    |                    |
| SNP_95157_A_5781   | NW_004516612.1 | scaffold1399 | 5781                    | TT                              | CC                 | CC               | INTERGENIC      |               |                    |                    |
| SNP_95158_A_5853   | NW_004516612.1 | scaffold1399 | 5853                    | GG                              | CC                 | CC               | INTERGENIC      |               |                    |                    |

| SNPs IDs          | Chromosome IDs | Chromosomes  | Physical positions (bp) | CDC Frontier (Reference genome) | (Pusa 1103 & HPNB) | (ILWC 46 & LPNB) | Sequence Components of genome | Gene accession IDs | Putative functions                                                        |
|-------------------|----------------|--------------|-------------------------|---------------------------------|--------------------|------------------|-------------------------------|--------------------|---------------------------------------------------------------------------|
| SNP_95159_A_5979  | NW_004516612.1 | scaffold1399 | 5979                    | CC                              | TT                 | TT               | INTERGENIC                    |                    |                                                                           |
| SNP_95160_A_6020  | NW_004516612.1 | scaffold1399 | 6020                    | AA                              | TT                 | TT               | INTERGENIC                    |                    |                                                                           |
| SNP_95161_A_6047  | NW_004516612.1 | scaffold1399 | 6047                    | TT                              | GG                 | GG               | INTERGENIC                    |                    |                                                                           |
| SNP_95162_A_18964 | NW_004516612.1 | scaffold1399 | 18964                   | AA                              | GG                 | GG               | INTERGENIC                    |                    |                                                                           |
| SNP_95163_A_19032 | NW_004516612.1 | scaffold1399 | 19032                   | CC                              | TT                 | TT               | INTERGENIC                    |                    |                                                                           |
| SNP_95164_A_19377 | NW_004516612.1 | scaffold1399 | 19377                   | CC                              | AA                 | AA               | INTERGENIC                    |                    |                                                                           |
| SNP_95166_A_42143 | NW_004516612.1 | scaffold1399 | 42143                   | CC                              | AA                 | AA               | INTERGENIC                    |                    |                                                                           |
| SNP_95167_A_2674  | NW_004516614.1 | scaffold1401 | 2674                    | TT                              | GG                 | GG               | INTRON                        | 101513596          | pentatricopeptide repeat-containing protein mitochondrial-like At1g62670, |
| SNP_95168_A_2901  | NW_004516614.1 | scaffold1401 | 2901                    | GG                              | CC                 | CC               | INTRON                        | 101513596          | pentatricopeptide repeat-containing protein mitochondrial-like At1g62670, |
| SNP_95169_A_2904  | NW_004516614.1 | scaffold1401 | 2904                    | TT                              | AA                 | AA               | INTRON                        | 101513596          | pentatricopeptide repeat-containing protein mitochondrial-like At1g62670, |
| SNP_95170_A_2992  | NW_004516614.1 | scaffold1401 | 2992                    | CC                              | TT                 | TT               | INTRON                        | 101513596          | pentatricopeptide repeat-containing protein mitochondrial-like At1g62670, |
| SNP_95171_A_3005  | NW_004516614.1 | scaffold1401 | 3005                    | GG                              | AA                 | AA               | INTRON                        | 101513596          | pentatricopeptide repeat-containing protein mitochondrial-like At1g62670, |
| SNP_95172_A_25673 | NW_004516614.1 | scaffold1401 | 25673                   | TT                              | CC                 | CC               | INTRON                        | 101514450          | cucumis-in-like                                                           |
| SNP_95174_A_67483 | NW_004516614.1 | scaffold1401 | 67483                   | CC                              | GG                 | GG               | DRR                           | 101514254          | Unknown function                                                          |
| SNP_95175_A_67563 | NW_004516614.1 | scaffold1401 | 67563                   | TT                              | AA                 | AA               | DRR                           | 101514254          | Unknown function                                                          |
| SNP_95176_A_70853 | NW_004516614.1 | scaffold1401 | 70853                   | TT                              | CC                 | CC               | INTERGENIC                    |                    |                                                                           |
| SNP_95177_A_70952 | NW_004516614.1 | scaffold1401 | 70952                   | TT                              | CC                 | CC               | INTERGENIC                    |                    |                                                                           |
| SNP_95178_A_71054 | NW_004516614.1 | scaffold1401 | 71054                   | TT                              | CC                 | CC               | INTERGENIC                    |                    |                                                                           |
| SNP_95179_A_71066 | NW_004516614.1 | scaffold1401 | 71066                   | TT                              | CC                 | CC               | INTERGENIC                    |                    |                                                                           |
| SNP_95180_A_71080 | NW_004516614.1 | scaffold1401 | 71080                   | AA                              | TT                 | TT               | INTERGENIC                    |                    |                                                                           |
| SNP_95181_A_71193 | NW_004516614.1 | scaffold1401 | 71193                   | TT                              | CC                 | CC               | INTERGENIC                    |                    |                                                                           |
| SNP_95182_A_71374 | NW_004516614.1 | scaffold1401 | 71374                   | AA                              | GG                 | GG               | INTERGENIC                    |                    |                                                                           |

| SNPs IDs          | Chromosome IDs | Chromosomes  | Physical positions (bp) | CDC Frontier (Reference genome) | (Pusa 1103 & HPNB) | (ILWC 46 & LPNB) | Sequence genome | Components of | Gene accession IDs | Putative functions |
|-------------------|----------------|--------------|-------------------------|---------------------------------|--------------------|------------------|-----------------|---------------|--------------------|--------------------|
| SNP_95183_A_71485 | NW_004516614.1 | scaffold1401 | 71485                   | CC                              | TT                 | TT               | INTERGENIC      |               |                    |                    |
| SNP_95184_A_71613 | NW_004516614.1 | scaffold1401 | 71613                   | AA                              | GG                 | GG               | INTERGENIC      |               |                    |                    |
| SNP_95185_A_840   | NW_004516615.1 | scaffold1403 | 840                     | GG                              | TT                 | TT               | INTERGENIC      |               |                    |                    |
| SNP_95186_A_862   | NW_004516615.1 | scaffold1403 | 862                     | CC                              | TT                 | TT               | INTERGENIC      |               |                    |                    |
| SNP_95187_A_889   | NW_004516615.1 | scaffold1403 | 889                     | TT                              | AA                 | AA               | INTERGENIC      |               |                    |                    |
| SNP_95188_A_961   | NW_004516615.1 | scaffold1403 | 961                     | AA                              | GG                 | GG               | INTERGENIC      |               |                    |                    |
| SNP_95189_A_4198  | NW_004516616.1 | scaffold1404 | 4198                    | CC                              | TT                 | TT               | INTERGENIC      |               |                    |                    |
| SNP_95190_A_4199  | NW_004516616.1 | scaffold1404 | 4199                    | AA                              | GG                 | GG               | INTERGENIC      |               |                    |                    |
| SNP_95191_A_4214  | NW_004516616.1 | scaffold1404 | 4214                    | GG                              | AA                 | AA               | INTERGENIC      |               |                    |                    |
| SNP_95192_A_2965  | NW_004516617.1 | scaffold1405 | 2965                    | CC                              | AA                 | AA               | INTERGENIC      |               |                    |                    |
| SNP_95193_A_4454  | NW_004516617.1 | scaffold1405 | 4454                    | GG                              | CC                 | CC               | INTERGENIC      |               |                    |                    |
| SNP_95194_A_624   | NW_004516619.1 | scaffold1408 | 624                     | AA                              | GG                 | GG               | INTERGENIC      |               |                    |                    |
| SNP_95195_A_2211  | NW_004516619.1 | scaffold1408 | 2211                    | TT                              | CC                 | CC               | INTERGENIC      |               |                    |                    |
| SNP_95196_A_2528  | NW_004516619.1 | scaffold1408 | 2528                    | CC                              | AA                 | AA               | INTERGENIC      |               |                    |                    |
| SNP_95197_A_2699  | NW_004516619.1 | scaffold1408 | 2699                    | AA                              | GG                 | GG               | INTERGENIC      |               |                    |                    |
| SNP_95198_A_2903  | NW_004516619.1 | scaffold1408 | 2903                    | GG                              | CC                 | CC               | INTERGENIC      |               |                    |                    |
| SNP_95199_A_4424  | NW_004516619.1 | scaffold1408 | 4424                    | GG                              | TT                 | TT               | INTERGENIC      |               |                    |                    |
| SNP_95200_A_4692  | NW_004516619.1 | scaffold1408 | 4692                    | GG                              | TT                 | TT               | INTERGENIC      |               |                    |                    |
| SNP_95201_A_4717  | NW_004516619.1 | scaffold1408 | 4717                    | TT                              | CC                 | CC               | INTERGENIC      |               |                    |                    |
| SNP_95202_A_4933  | NW_004516619.1 | scaffold1408 | 4933                    | AA                              | GG                 | GG               | INTERGENIC      |               |                    |                    |
| SNP_95203_A_5273  | NW_004516619.1 | scaffold1408 | 5273                    | AA                              | GG                 | GG               | INTERGENIC      |               |                    |                    |
| SNP_95204_A_5330  | NW_004516619.1 | scaffold1408 | 5330                    | AA                              | TT                 | TT               | INTERGENIC      |               |                    |                    |



| SNPs IDs          | Chromosome IDs | Chromosomes  | Physical positions (bp) | CDC Frontier (Reference genome) | (Pusa 1103 & HPNB) | (ILWC 46 & LPNB) | Sequence genome | Components of | Gene accession IDs | Putative functions |
|-------------------|----------------|--------------|-------------------------|---------------------------------|--------------------|------------------|-----------------|---------------|--------------------|--------------------|
| SNP_95205_A_5484  | NW_004516619.1 | scaffold1408 | 5484                    | AA                              | TT                 | TT               | INTERGENIC      |               |                    |                    |
| SNP_95206_A_5505  | NW_004516619.1 | scaffold1408 | 5505                    | TT                              | CC                 | CC               | INTERGENIC      |               |                    |                    |
| SNP_95207_A_5949  | NW_004516619.1 | scaffold1408 | 5949                    | GG                              | TT                 | TT               | INTERGENIC      |               |                    |                    |
| SNP_95209_A_7919  | NW_004516619.1 | scaffold1408 | 7919                    | TT                              | AA                 | AA               | INTERGENIC      |               |                    |                    |
| SNP_95210_A_9235  | NW_004516619.1 | scaffold1408 | 9235                    | TT                              | CC                 | CC               | INTERGENIC      |               |                    |                    |
| SNP_95211_A_9407  | NW_004516619.1 | scaffold1408 | 9407                    | AA                              | CC                 | CC               | INTERGENIC      |               |                    |                    |
| SNP_95212_A_9633  | NW_004516619.1 | scaffold1408 | 9633                    | CC                              | TT                 | TT               | INTERGENIC      |               |                    |                    |
| SNP_95213_A_9833  | NW_004516619.1 | scaffold1408 | 9833                    | GG                              | CC                 | CC               | INTERGENIC      |               |                    |                    |
| SNP_95214_A_10022 | NW_004516619.1 | scaffold1408 | 10022                   | AA                              | TT                 | TT               | INTERGENIC      |               |                    |                    |
| SNP_95215_A_10031 | NW_004516619.1 | scaffold1408 | 10031                   | GG                              | CC                 | CC               | INTERGENIC      |               |                    |                    |
| SNP_95216_A_10044 | NW_004516619.1 | scaffold1408 | 10044                   | TT                              | CC                 | CC               | INTERGENIC      |               |                    |                    |
| SNP_95217_A_10131 | NW_004516619.1 | scaffold1408 | 10131                   | AA                              | GG                 | GG               | INTERGENIC      |               |                    |                    |
| SNP_95218_A_10449 | NW_004516619.1 | scaffold1408 | 10449                   | TT                              | AA                 | AA               | INTERGENIC      |               |                    |                    |
| SNP_95219_A_10511 | NW_004516619.1 | scaffold1408 | 10511                   | GG                              | AA                 | AA               | INTERGENIC      |               |                    |                    |
| SNP_95220_A_10610 | NW_004516619.1 | scaffold1408 | 10610                   | GG                              | AA                 | AA               | INTERGENIC      |               |                    |                    |
| SNP_95221_A_10668 | NW_004516619.1 | scaffold1408 | 10668                   | TT                              | GG                 | GG               | INTERGENIC      |               |                    |                    |
| SNP_95222_A_10897 | NW_004516619.1 | scaffold1408 | 10897                   | TT                              | GG                 | GG               | INTERGENIC      |               |                    |                    |
| SNP_95223_A_10937 | NW_004516619.1 | scaffold1408 | 10937                   | GG                              | TT                 | TT               | INTERGENIC      |               |                    |                    |
| SNP_95224_A_11039 | NW_004516619.1 | scaffold1408 | 11039                   | CC                              | TT                 | TT               | INTERGENIC      |               |                    |                    |
| SNP_95225_A_11041 | NW_004516619.1 | scaffold1408 | 11041                   | TT                              | GG                 | GG               | INTERGENIC      |               |                    |                    |
| SNP_95226_A_12084 | NW_004516619.1 | scaffold1408 | 12084                   | CC                              | TT                 | TT               | INTERGENIC      |               |                    |                    |
| SNP_95227_A_12140 | NW_004516619.1 | scaffold1408 | 12140                   | CC                              | GG                 | GG               | INTERGENIC      |               |                    |                    |

| SNPs IDs          | Chromosome IDs | Chromosomes  | Physical positions (bp) | CDC Frontier (Reference genome) | (Pusa 1103 & HPNB) | (ILWC 46 & LPNB) | Sequence genome | Components of | Gene accession IDs | Putative functions |
|-------------------|----------------|--------------|-------------------------|---------------------------------|--------------------|------------------|-----------------|---------------|--------------------|--------------------|
| SNP_95228_A_12292 | NW_004516619.1 | scaffold1408 | 12292                   | CC                              | GG                 | TT               | INTERGENIC      |               |                    |                    |
| SNP_95229_A_18760 | NW_004516619.1 | scaffold1408 | 18760                   | TT                              | AA                 | AA               | INTERGENIC      |               |                    |                    |
| SNP_95230_A_18836 | NW_004516619.1 | scaffold1408 | 18836                   | TT                              | AA                 | AA               | INTERGENIC      |               |                    |                    |
| SNP_95231_A_19137 | NW_004516619.1 | scaffold1408 | 19137                   | GG                              | TT                 | TT               | INTERGENIC      |               |                    |                    |
| SNP_95232_A_19138 | NW_004516619.1 | scaffold1408 | 19138                   | TT                              | AA                 | AA               | INTERGENIC      |               |                    |                    |
| SNP_95233_A_20442 | NW_004516619.1 | scaffold1408 | 20442                   | TT                              | AA                 | AA               | INTERGENIC      |               |                    |                    |
| SNP_95235_A_23083 | NW_004516619.1 | scaffold1408 | 23083                   | TT                              | GG                 | GG               | INTERGENIC      |               |                    |                    |
| SNP_95236_A_23814 | NW_004516619.1 | scaffold1408 | 23814                   | GG                              | AA                 | AA               | INTERGENIC      |               |                    |                    |
| SNP_95237_A_23819 | NW_004516619.1 | scaffold1408 | 23819                   | CC                              | TT                 | TT               | INTERGENIC      |               |                    |                    |
| SNP_95238_A_23822 | NW_004516619.1 | scaffold1408 | 23822                   | TT                              | CC                 | CC               | INTERGENIC      |               |                    |                    |
| SNP_95239_A_23986 | NW_004516619.1 | scaffold1408 | 23986                   | GG                              | TT                 | TT               | INTERGENIC      |               |                    |                    |
| SNP_95240_A_24607 | NW_004516619.1 | scaffold1408 | 24607                   | CC                              | TT                 | TT               | INTERGENIC      |               |                    |                    |
| SNP_95241_A_24672 | NW_004516619.1 | scaffold1408 | 24672                   | GG                              | AA                 | AA               | INTERGENIC      |               |                    |                    |
| SNP_95243_A_25071 | NW_004516619.1 | scaffold1408 | 25071                   | GG                              | TT                 | TT               | INTERGENIC      |               |                    |                    |
| SNP_95244_A_25112 | NW_004516619.1 | scaffold1408 | 25112                   | AA                              | GG                 | GG               | INTERGENIC      |               |                    |                    |
| SNP_95245_A_25228 | NW_004516619.1 | scaffold1408 | 25228                   | CC                              | GG                 | GG               | INTERGENIC      |               |                    |                    |
| SNP_95246_A_25233 | NW_004516619.1 | scaffold1408 | 25233                   | AA                              | CC                 | CC               | INTERGENIC      |               |                    |                    |
| SNP_95247_A_25962 | NW_004516619.1 | scaffold1408 | 25962                   | CC                              | TT                 | TT               | INTERGENIC      |               |                    |                    |
| SNP_95248_A_26068 | NW_004516619.1 | scaffold1408 | 26068                   | AA                              | GG                 | GG               | INTERGENIC      |               |                    |                    |
| SNP_95249_A_26092 | NW_004516619.1 | scaffold1408 | 26092                   | CC                              | TT                 | TT               | INTERGENIC      |               |                    |                    |
| SNP_95250_A_26220 | NW_004516619.1 | scaffold1408 | 26220                   | CC                              | TT                 | TT               | INTERGENIC      |               |                    |                    |
| SNP_95251_A_26296 | NW_004516619.1 | scaffold1408 | 26296                   | TT                              | CC                 | CC               | INTERGENIC      |               |                    |                    |

| SNPs IDs          | Chromosome IDs | Chromosomes  | Physical positions (bp) | CDC Frontier (Reference genome) | (Pusa 1103 & HPNB) | (ILWC 46 & LPNB) | Sequence genome | Components of | Gene accession IDs | Putative functions |
|-------------------|----------------|--------------|-------------------------|---------------------------------|--------------------|------------------|-----------------|---------------|--------------------|--------------------|
| SNP_95252_A_26338 | NW_004516619.1 | scaffold1408 | 26338                   | CC                              | GG                 | GG               | INTERGENIC      |               |                    |                    |
| SNP_95253_A_26395 | NW_004516619.1 | scaffold1408 | 26395                   | TT                              | AA                 | AA               | INTERGENIC      |               |                    |                    |
| SNP_95254_A_26413 | NW_004516619.1 | scaffold1408 | 26413                   | AA                              | TT                 | TT               | INTERGENIC      |               |                    |                    |
| SNP_95255_A_26414 | NW_004516619.1 | scaffold1408 | 26414                   | TT                              | AA                 | AA               | INTERGENIC      |               |                    |                    |
| SNP_95256_A_26485 | NW_004516619.1 | scaffold1408 | 26485                   | AA                              | TT                 | TT               | INTERGENIC      |               |                    |                    |
| SNP_95257_A_26534 | NW_004516619.1 | scaffold1408 | 26534                   | TT                              | CC                 | CC               | INTERGENIC      |               |                    |                    |
| SNP_95258_A_26602 | NW_004516619.1 | scaffold1408 | 26602                   | GG                              | CC                 | CC               | INTERGENIC      |               |                    |                    |
| SNP_95259_A_26651 | NW_004516619.1 | scaffold1408 | 26651                   | TT                              | AA                 | AA               | INTERGENIC      |               |                    |                    |
| SNP_95260_A_26751 | NW_004516619.1 | scaffold1408 | 26751                   | AA                              | CC                 | CC               | INTERGENIC      |               |                    |                    |
| SNP_95261_A_26756 | NW_004516619.1 | scaffold1408 | 26756                   | CC                              | TT                 | TT               | INTERGENIC      |               |                    |                    |
| SNP_95262_A_26762 | NW_004516619.1 | scaffold1408 | 26762                   | CC                              | TT                 | TT               | INTERGENIC      |               |                    |                    |
| SNP_95263_A_26768 | NW_004516619.1 | scaffold1408 | 26768                   | GG                              | TT                 | TT               | INTERGENIC      |               |                    |                    |
| SNP_95264_A_26778 | NW_004516619.1 | scaffold1408 | 26778                   | GG                              | TT                 | TT               | INTERGENIC      |               |                    |                    |
| SNP_95266_A_26991 | NW_004516619.1 | scaffold1408 | 26991                   | TT                              | AA                 | AA               | INTERGENIC      |               |                    |                    |
| SNP_95267_A_27035 | NW_004516619.1 | scaffold1408 | 27035                   | GG                              | AA                 | AA               | INTERGENIC      |               |                    |                    |
| SNP_95268_A_27147 | NW_004516619.1 | scaffold1408 | 27147                   | GG                              | CC                 | CC               | INTERGENIC      |               |                    |                    |
| SNP_95269_A_27277 | NW_004516619.1 | scaffold1408 | 27277                   | CC                              | TT                 | TT               | INTERGENIC      |               |                    |                    |
| SNP_95270_A_27349 | NW_004516619.1 | scaffold1408 | 27349                   | GG                              | TT                 | TT               | INTERGENIC      |               |                    |                    |
| SNP_95271_A_27360 | NW_004516619.1 | scaffold1408 | 27360                   | CC                              | TT                 | TT               | INTERGENIC      |               |                    |                    |
| SNP_95272_A_27372 | NW_004516619.1 | scaffold1408 | 27372                   | AA                              | TT                 | TT               | INTERGENIC      |               |                    |                    |
| SNP_95273_A_27451 | NW_004516619.1 | scaffold1408 | 27451                   | GG                              | CC                 | CC               | INTERGENIC      |               |                    |                    |
| SNP_95274_A_27479 | NW_004516619.1 | scaffold1408 | 27479                   | GG                              | TT                 | TT               | INTERGENIC      |               |                    |                    |

| SNPs IDs          | Chromosome IDs | Chromosomes  | Physical positions (bp) | CDC Frontier (Reference genome) | (Pusa 1103 & HPNB) | (ILWC 46 & LPNB) | Sequence genome | Components of | Gene accession IDs | Putative functions |
|-------------------|----------------|--------------|-------------------------|---------------------------------|--------------------|------------------|-----------------|---------------|--------------------|--------------------|
| SNP_95275_A_27498 | NW_004516619.1 | scaffold1408 | 27498                   | CC                              | GG                 | GG               | INTERGENIC      |               |                    |                    |
| SNP_95276_A_27523 | NW_004516619.1 | scaffold1408 | 27523                   | AA                              | GG                 | GG               | INTERGENIC      |               |                    |                    |
| SNP_95277_A_27995 | NW_004516619.1 | scaffold1408 | 27995                   | AA                              | TT                 | TT               | INTERGENIC      |               |                    |                    |
| SNP_95278_A_28025 | NW_004516619.1 | scaffold1408 | 28025                   | TT                              | CC                 | CC               | INTERGENIC      |               |                    |                    |
| SNP_95279_A_28029 | NW_004516619.1 | scaffold1408 | 28029                   | CC                              | TT                 | TT               | INTERGENIC      |               |                    |                    |
| SNP_95280_A_28129 | NW_004516619.1 | scaffold1408 | 28129                   | TT                              | AA                 | AA               | INTERGENIC      |               |                    |                    |
| SNP_95281_A_28182 | NW_004516619.1 | scaffold1408 | 28182                   | TT                              | GG                 | GG               | INTERGENIC      |               |                    |                    |
| SNP_95282_A_28329 | NW_004516619.1 | scaffold1408 | 28329                   | GG                              | CC                 | CC               | INTERGENIC      |               |                    |                    |
| SNP_95283_A_29186 | NW_004516619.1 | scaffold1408 | 29186                   | CC                              | TT                 | TT               | INTERGENIC      |               |                    |                    |
| SNP_95284_A_29202 | NW_004516619.1 | scaffold1408 | 29202                   | AA                              | GG                 | GG               | INTERGENIC      |               |                    |                    |
| SNP_95285_A_29283 | NW_004516619.1 | scaffold1408 | 29283                   | AA                              | TT                 | TT               | INTERGENIC      |               |                    |                    |
| SNP_95286_A_29302 | NW_004516619.1 | scaffold1408 | 29302                   | TT                              | GG                 | GG               | INTERGENIC      |               |                    |                    |
| SNP_95287_A_29303 | NW_004516619.1 | scaffold1408 | 29303                   | AA                              | TT                 | TT               | INTERGENIC      |               |                    |                    |
| SNP_95288_A_29328 | NW_004516619.1 | scaffold1408 | 29328                   | CC                              | TT                 | TT               | INTERGENIC      |               |                    |                    |
| SNP_95289_A_29389 | NW_004516619.1 | scaffold1408 | 29389                   | AA                              | GG                 | GG               | INTERGENIC      |               |                    |                    |
| SNP_95290_A_29441 | NW_004516619.1 | scaffold1408 | 29441                   | AA                              | GG                 | GG               | INTERGENIC      |               |                    |                    |
| SNP_95291_A_34721 | NW_004516619.1 | scaffold1408 | 34721                   | AA                              | CC                 | CC               | INTERGENIC      |               |                    |                    |
| SNP_95292_A_34804 | NW_004516619.1 | scaffold1408 | 34804                   | AA                              | GG                 | GG               | INTERGENIC      |               |                    |                    |
| SNP_95293_A_34851 | NW_004516619.1 | scaffold1408 | 34851                   | GG                              | AA                 | AA               | INTERGENIC      |               |                    |                    |
| SNP_95294_A_34963 | NW_004516619.1 | scaffold1408 | 34963                   | GG                              | AA                 | AA               | INTERGENIC      |               |                    |                    |
| SNP_95295_A_34994 | NW_004516619.1 | scaffold1408 | 34994                   | TT                              | CC                 | CC               | INTERGENIC      |               |                    |                    |
| SNP_95296_A_35214 | NW_004516619.1 | scaffold1408 | 35214                   | GG                              | AA                 | AA               | INTERGENIC      |               |                    |                    |

| SNPs IDs          | Chromosome IDs | Chromosomes  | Physical positions (bp) | CDC Frontier (Reference genome) | (Pusa 1103 & HPNB) | (ILWC 46 & LPNB) | Sequence genome | Components of | Gene accession IDs | Putative functions |
|-------------------|----------------|--------------|-------------------------|---------------------------------|--------------------|------------------|-----------------|---------------|--------------------|--------------------|
| SNP_95297_A_35313 | NW_004516619.1 | scaffold1408 | 35313                   | TT                              | AA                 | AA               | INTERGENIC      |               |                    |                    |
| SNP_95298_A_37011 | NW_004516619.1 | scaffold1408 | 37011                   | TT                              | GG                 | GG               | INTERGENIC      |               |                    |                    |
| SNP_95299_A_37063 | NW_004516619.1 | scaffold1408 | 37063                   | GG                              | AA                 | AA               | INTERGENIC      |               |                    |                    |
| SNP_95300_A_37235 | NW_004516619.1 | scaffold1408 | 37235                   | GG                              | AA                 | AA               | INTERGENIC      |               |                    |                    |
| SNP_95301_A_37248 | NW_004516619.1 | scaffold1408 | 37248                   | AA                              | TT                 | TT               | INTERGENIC      |               |                    |                    |
| SNP_95302_A_37249 | NW_004516619.1 | scaffold1408 | 37249                   | GG                              | AA                 | AA               | INTERGENIC      |               |                    |                    |
| SNP_95303_A_37265 | NW_004516619.1 | scaffold1408 | 37265                   | GG                              | CC                 | CC               | INTERGENIC      |               |                    |                    |
| SNP_95304_A_37326 | NW_004516619.1 | scaffold1408 | 37326                   | TT                              | CC                 | CC               | INTERGENIC      |               |                    |                    |
| SNP_95305_A_37389 | NW_004516619.1 | scaffold1408 | 37389                   | AA                              | GG                 | GG               | INTERGENIC      |               |                    |                    |
| SNP_95306_A_39530 | NW_004516619.1 | scaffold1408 | 39530                   | TT                              | GG                 | GG               | INTERGENIC      |               |                    |                    |
| SNP_95307_A_53097 | NW_004516619.1 | scaffold1408 | 53097                   | AA                              | GG                 | GG               | INTERGENIC      |               |                    |                    |
| SNP_95308_A_53100 | NW_004516619.1 | scaffold1408 | 53100                   | CC                              | AA                 | AA               | INTERGENIC      |               |                    |                    |
| SNP_95309_A_53104 | NW_004516619.1 | scaffold1408 | 53104                   | CC                              | TT                 | TT               | INTERGENIC      |               |                    |                    |
| SNP_95310_A_53106 | NW_004516619.1 | scaffold1408 | 53106                   | TT                              | AA                 | AA               | INTERGENIC      |               |                    |                    |
| SNP_95311_A_53132 | NW_004516619.1 | scaffold1408 | 53132                   | AA                              | TT                 | TT               | INTERGENIC      |               |                    |                    |
| SNP_95312_A_53145 | NW_004516619.1 | scaffold1408 | 53145                   | GG                              | AA                 | AA               | INTERGENIC      |               |                    |                    |
| SNP_95313_A_53150 | NW_004516619.1 | scaffold1408 | 53150                   | TT                              | CC                 | CC               | INTERGENIC      |               |                    |                    |
| SNP_95314_A_53298 | NW_004516619.1 | scaffold1408 | 53298                   | CC                              | TT                 | TT               | INTERGENIC      |               |                    |                    |
| SNP_95315_A_53596 | NW_004516619.1 | scaffold1408 | 53596                   | TT                              | AA                 | AA               | INTERGENIC      |               |                    |                    |
| SNP_95316_A_54611 | NW_004516619.1 | scaffold1408 | 54611                   | AA                              | CC                 | CC               | INTERGENIC      |               |                    |                    |
| SNP_95317_A_54797 | NW_004516619.1 | scaffold1408 | 54797                   | AA                              | GG                 | GG               | INTERGENIC      |               |                    |                    |
| SNP_95318_A_54907 | NW_004516619.1 | scaffold1408 | 54907                   | AA                              | GG                 | GG               | INTERGENIC      |               |                    |                    |

| SNPs IDs          | Chromosome IDs | Chromosomes  | Physical positions (bp) | CDC Frontier (Reference genome) | (Pusa 1103 & HPNB) | (ILWC 46 & LPNB) | Sequence genome | Components of | Gene accession IDs | Putative functions |
|-------------------|----------------|--------------|-------------------------|---------------------------------|--------------------|------------------|-----------------|---------------|--------------------|--------------------|
| SNP_95319_A_55167 | NW_004516619.1 | scaffold1408 | 55167                   | AA                              | TT                 | TT               | INTERGENIC      |               |                    |                    |
| SNP_95320_A_55219 | NW_004516619.1 | scaffold1408 | 55219                   | CC                              | TT                 | TT               | INTERGENIC      |               |                    |                    |
| SNP_95321_A_55670 | NW_004516619.1 | scaffold1408 | 55670                   | AA                              | GG                 | GG               | INTERGENIC      |               |                    |                    |
| SNP_95322_A_55793 | NW_004516619.1 | scaffold1408 | 55793                   | TT                              | CC                 | CC               | INTERGENIC      |               |                    |                    |
| SNP_95324_A_56180 | NW_004516619.1 | scaffold1408 | 56180                   | AA                              | CC                 | CC               | INTERGENIC      |               |                    |                    |
| SNP_95325_A_63231 | NW_004516619.1 | scaffold1408 | 63231                   | AA                              | GG                 | GG               | INTERGENIC      |               |                    |                    |
| SNP_95326_A_66530 | NW_004516619.1 | scaffold1408 | 66530                   | TT                              | GG                 | GG               | INTERGENIC      |               |                    |                    |
| SNP_95327_A_66596 | NW_004516619.1 | scaffold1408 | 66596                   | TT                              | CC                 | CC               | INTERGENIC      |               |                    |                    |
| SNP_95328_A_66725 | NW_004516619.1 | scaffold1408 | 66725                   | TT                              | AA                 | AA               | INTERGENIC      |               |                    |                    |
| SNP_95329_A_68209 | NW_004516619.1 | scaffold1408 | 68209                   | CC                              | AA                 | AA               | INTERGENIC      |               |                    |                    |
| SNP_95330_A_68240 | NW_004516619.1 | scaffold1408 | 68240                   | CC                              | GG                 | GG               | INTERGENIC      |               |                    |                    |
| SNP_95331_A_68250 | NW_004516619.1 | scaffold1408 | 68250                   | CC                              | GG                 | GG               | INTERGENIC      |               |                    |                    |
| SNP_95332_A_68267 | NW_004516619.1 | scaffold1408 | 68267                   | TT                              | AA                 | AA               | INTERGENIC      |               |                    |                    |
| SNP_95333_A_68306 | NW_004516619.1 | scaffold1408 | 68306                   | TT                              | GG                 | GG               | INTERGENIC      |               |                    |                    |
| SNP_95334_A_68335 | NW_004516619.1 | scaffold1408 | 68335                   | AA                              | GG                 | GG               | INTERGENIC      |               |                    |                    |
| SNP_95335_A_68490 | NW_004516619.1 | scaffold1408 | 68490                   | AA                              | GG                 | GG               | INTERGENIC      |               |                    |                    |
| SNP_95336_A_68508 | NW_004516619.1 | scaffold1408 | 68508                   | CC                              | TT                 | TT               | INTERGENIC      |               |                    |                    |
| SNP_95337_A_69184 | NW_004516619.1 | scaffold1408 | 69184                   | AA                              | GG                 | GG               | INTERGENIC      |               |                    |                    |
| SNP_95338_A_69220 | NW_004516619.1 | scaffold1408 | 69220                   | TT                              | GG                 | GG               | INTERGENIC      |               |                    |                    |
| SNP_95339_A_69225 | NW_004516619.1 | scaffold1408 | 69225                   | GG                              | CC                 | CC               | INTERGENIC      |               |                    |                    |
| SNP_95340_A_69770 | NW_004516619.1 | scaffold1408 | 69770                   | GG                              | TT                 | TT               | INTERGENIC      |               |                    |                    |
| SNP_95341_A_69816 | NW_004516619.1 | scaffold1408 | 69816                   | AA                              | CC                 | CC               | INTERGENIC      |               |                    |                    |

| SNPs IDs          | Chromosome IDs | Chromosomes  | Physical positions (bp) | CDC Frontier (Reference genome) | (Pusa 1103 & HPNB) | (ILWC 46 & LPNB) | Sequence genome | Components of | Gene accession IDs | Putative functions |
|-------------------|----------------|--------------|-------------------------|---------------------------------|--------------------|------------------|-----------------|---------------|--------------------|--------------------|
| SNP_95342_A_69863 | NW_004516619.1 | scaffold1408 | 69863                   | CC                              | TT                 | TT               | INTERGENIC      |               |                    |                    |
| SNP_95343_A_70058 | NW_004516619.1 | scaffold1408 | 70058                   | TT                              | CC                 | CC               | INTERGENIC      |               |                    |                    |
| SNP_95344_A_70141 | NW_004516619.1 | scaffold1408 | 70141                   | GG                              | AA                 | AA               | INTERGENIC      |               |                    |                    |
| SNP_95345_A_70248 | NW_004516619.1 | scaffold1408 | 70248                   | TT                              | CC                 | CC               | INTERGENIC      |               |                    |                    |
| SNP_95346_A_71683 | NW_004516619.1 | scaffold1408 | 71683                   | TT                              | AA                 | AA               | INTERGENIC      |               |                    |                    |
| SNP_95347_A_71985 | NW_004516619.1 | scaffold1408 | 71985                   | GG                              | AA                 | AA               | INTERGENIC      |               |                    |                    |
| SNP_95348_A_72045 | NW_004516619.1 | scaffold1408 | 72045                   | GG                              | TT                 | TT               | INTERGENIC      |               |                    |                    |
| SNP_95349_A_72312 | NW_004516619.1 | scaffold1408 | 72312                   | TT                              | CC                 | CC               | INTERGENIC      |               |                    |                    |
| SNP_95350_A_72491 | NW_004516619.1 | scaffold1408 | 72491                   | CC                              | GG                 | GG               | INTERGENIC      |               |                    |                    |
| SNP_95351_A_72621 | NW_004516619.1 | scaffold1408 | 72621                   | GG                              | TT                 | TT               | INTERGENIC      |               |                    |                    |
| SNP_95352_A_73240 | NW_004516619.1 | scaffold1408 | 73240                   | AA                              | TT                 | TT               | INTERGENIC      |               |                    |                    |
| SNP_95353_A_74896 | NW_004516619.1 | scaffold1408 | 74896                   | GG                              | AA                 | AA               | INTERGENIC      |               |                    |                    |
| SNP_95354_A_75535 | NW_004516619.1 | scaffold1408 | 75535                   | TT                              | AA                 | AA               | INTERGENIC      |               |                    |                    |
| SNP_95355_A_75536 | NW_004516619.1 | scaffold1408 | 75536                   | CC                              | TT                 | TT               | INTERGENIC      |               |                    |                    |
| SNP_95356_A_76364 | NW_004516619.1 | scaffold1408 | 76364                   | CC                              | TT                 | TT               | INTERGENIC      |               |                    |                    |
| SNP_95357_A_77899 | NW_004516619.1 | scaffold1408 | 77899                   | TT                              | CC                 | CC               | INTERGENIC      |               |                    |                    |
| SNP_95358_A_78006 | NW_004516619.1 | scaffold1408 | 78006                   | TT                              | CC                 | CC               | INTERGENIC      |               |                    |                    |
| SNP_95359_A_78161 | NW_004516619.1 | scaffold1408 | 78161                   | CC                              | AA                 | AA               | INTERGENIC      |               |                    |                    |
| SNP_95360_A_80229 | NW_004516619.1 | scaffold1408 | 80229                   | TT                              | AA                 | AA               | INTERGENIC      |               |                    |                    |
| SNP_95361_A_80470 | NW_004516619.1 | scaffold1408 | 80470                   | AA                              | TT                 | TT               | INTERGENIC      |               |                    |                    |
| SNP_95362_A_80619 | NW_004516619.1 | scaffold1408 | 80619                   | AA                              | TT                 | TT               | INTERGENIC      |               |                    |                    |
| SNP_95363_A_80953 | NW_004516619.1 | scaffold1408 | 80953                   | CC                              | GG                 | GG               | INTERGENIC      |               |                    |                    |

| SNPs IDs          | Chromosome IDs | Chromosomes  | Physical positions (bp) | CDC Frontier genome (Reference genome) | (Pusa 1103 & HPNB) | (ILWC 46 & LPNB) | Sequence genome | Components of | Gene accession IDs | Putative functions |
|-------------------|----------------|--------------|-------------------------|----------------------------------------|--------------------|------------------|-----------------|---------------|--------------------|--------------------|
| SNP_95364_A_81246 | NW_004516619.1 | scaffold1408 | 81246                   | GG                                     | AA                 | AA               | INTERGENIC      |               |                    |                    |
| SNP_95365_A_81378 | NW_004516619.1 | scaffold1408 | 81378                   | TT                                     | CC                 | CC               | INTERGENIC      |               |                    |                    |
| SNP_95366_A_81819 | NW_004516619.1 | scaffold1408 | 81819                   | CC                                     | TT                 | TT               | INTERGENIC      |               |                    |                    |
| SNP_95367_A_82001 | NW_004516619.1 | scaffold1408 | 82001                   | TT                                     | AA                 | AA               | INTERGENIC      |               |                    |                    |
| SNP_95368_A_82064 | NW_004516619.1 | scaffold1408 | 82064                   | GG                                     | TT                 | TT               | INTERGENIC      |               |                    |                    |
| SNP_95369_A_82136 | NW_004516619.1 | scaffold1408 | 82136                   | CC                                     | TT                 | TT               | INTERGENIC      |               |                    |                    |
| SNP_95370_A_82714 | NW_004516619.1 | scaffold1408 | 82714                   | GG                                     | CC                 | CC               | INTERGENIC      |               |                    |                    |
| SNP_95371_A_82828 | NW_004516619.1 | scaffold1408 | 82828                   | GG                                     | AA                 | AA               | INTERGENIC      |               |                    |                    |
| SNP_95372_A_82922 | NW_004516619.1 | scaffold1408 | 82922                   | AA                                     | TT                 | TT               | INTERGENIC      |               |                    |                    |
| SNP_95373_A_82974 | NW_004516619.1 | scaffold1408 | 82974                   | CC                                     | GG                 | GG               | INTERGENIC      |               |                    |                    |
| SNP_95374_A_83047 | NW_004516619.1 | scaffold1408 | 83047                   | GG                                     | TT                 | TT               | INTERGENIC      |               |                    |                    |
| SNP_95375_A_83108 | NW_004516619.1 | scaffold1408 | 83108                   | TT                                     | CC                 | CC               | INTERGENIC      |               |                    |                    |
| SNP_95376_A_83610 | NW_004516619.1 | scaffold1408 | 83610                   | CC                                     | TT                 | TT               | INTERGENIC      |               |                    |                    |
| SNP_95377_A_83784 | NW_004516619.1 | scaffold1408 | 83784                   | GG                                     | TT                 | TT               | INTERGENIC      |               |                    |                    |
| SNP_95378_A_84068 | NW_004516619.1 | scaffold1408 | 84068                   | TT                                     | GG                 | GG               | INTERGENIC      |               |                    |                    |
| SNP_95379_A_84605 | NW_004516619.1 | scaffold1408 | 84605                   | TT                                     | GG                 | GG               | INTERGENIC      |               |                    |                    |
| SNP_95380_A_84900 | NW_004516619.1 | scaffold1408 | 84900                   | TT                                     | CC                 | CC               | INTERGENIC      |               |                    |                    |
| SNP_95381_A_84941 | NW_004516619.1 | scaffold1408 | 84941                   | CC                                     | TT                 | TT               | INTERGENIC      |               |                    |                    |
| SNP_95383_A_85772 | NW_004516619.1 | scaffold1408 | 85772                   | AA                                     | CC                 | CC               | INTERGENIC      |               |                    |                    |
| SNP_95384_A_85906 | NW_004516619.1 | scaffold1408 | 85906                   | AA                                     | TT                 | TT               | INTERGENIC      |               |                    |                    |
| SNP_95385_A_85912 | NW_004516619.1 | scaffold1408 | 85912                   | TT                                     | CC                 | CC               | INTERGENIC      |               |                    |                    |
| SNP_95386_A_85918 | NW_004516619.1 | scaffold1408 | 85918                   | GG                                     | TT                 | TT               | INTERGENIC      |               |                    |                    |



| SNPs IDs           | Chromosome IDs | Chromosomes  | Physical positions (bp) | CDC Frontier (Reference genome) | (Pusa 1103 & HPNB) | (ILWC 46 & LPNB) | Sequence genome | Components of | Gene accession IDs | Putative functions |
|--------------------|----------------|--------------|-------------------------|---------------------------------|--------------------|------------------|-----------------|---------------|--------------------|--------------------|
| SNP_95387_A_86640  | NW_004516619.1 | scaffold1408 | 86640                   | AA                              | TT                 | TT               | INTERGENIC      |               |                    |                    |
| SNP_95388_A_87110  | NW_004516619.1 | scaffold1408 | 87110                   | AA                              | GG                 | GG               | INTERGENIC      |               |                    |                    |
| SNP_95389_A_87138  | NW_004516619.1 | scaffold1408 | 87138                   | AA                              | CC                 | CC               | INTERGENIC      |               |                    |                    |
| SNP_95390_A_91980  | NW_004516619.1 | scaffold1408 | 91980                   | AA                              | TT                 | TT               | INTERGENIC      |               |                    |                    |
| SNP_95391_A_92249  | NW_004516619.1 | scaffold1408 | 92249                   | AA                              | TT                 | TT               | INTERGENIC      |               |                    |                    |
| SNP_95393_A_92365  | NW_004516619.1 | scaffold1408 | 92365                   | TT                              | CC                 | CC               | INTERGENIC      |               |                    |                    |
| SNP_95394_A_92446  | NW_004516619.1 | scaffold1408 | 92446                   | GG                              | AA                 | AA               | INTERGENIC      |               |                    |                    |
| SNP_95395_A_92451  | NW_004516619.1 | scaffold1408 | 92451                   | CC                              | GG                 | GG               | INTERGENIC      |               |                    |                    |
| SNP_95396_A_92486  | NW_004516619.1 | scaffold1408 | 92486                   | AA                              | GG                 | GG               | INTERGENIC      |               |                    |                    |
| SNP_95397_A_92545  | NW_004516619.1 | scaffold1408 | 92545                   | AA                              | TT                 | TT               | INTERGENIC      |               |                    |                    |
| SNP_95398_A_92582  | NW_004516619.1 | scaffold1408 | 92582                   | CC                              | TT                 | TT               | INTERGENIC      |               |                    |                    |
| SNP_95399_A_92592  | NW_004516619.1 | scaffold1408 | 92592                   | TT                              | GG                 | GG               | INTERGENIC      |               |                    |                    |
| SNP_95400_A_92620  | NW_004516619.1 | scaffold1408 | 92620                   | TT                              | GG                 | GG               | INTERGENIC      |               |                    |                    |
| SNP_95401_A_92667  | NW_004516619.1 | scaffold1408 | 92667                   | GG                              | AA                 | AA               | INTERGENIC      |               |                    |                    |
| SNP_95402_A_92736  | NW_004516619.1 | scaffold1408 | 92736                   | TT                              | AA                 | AA               | INTERGENIC      |               |                    |                    |
| SNP_95403_A_92870  | NW_004516619.1 | scaffold1408 | 92870                   | TT                              | GG                 | GG               | INTERGENIC      |               |                    |                    |
| SNP_95405_A_96197  | NW_004516619.1 | scaffold1408 | 96197                   | CC                              | TT                 | TT               | INTERGENIC      |               |                    |                    |
| SNP_95406_A_96269  | NW_004516619.1 | scaffold1408 | 96269                   | TT                              | AA                 | AA               | INTERGENIC      |               |                    |                    |
| SNP_95407_A_96290  | NW_004516619.1 | scaffold1408 | 96290                   | GG                              | AA                 | AA               | INTERGENIC      |               |                    |                    |
| SNP_95408_A_96558  | NW_004516619.1 | scaffold1408 | 96558                   | TT                              | AA                 | AA               | INTERGENIC      |               |                    |                    |
| SNP_95409_A_96936  | NW_004516619.1 | scaffold1408 | 96936                   | TT                              | GG                 | GG               | INTERGENIC      |               |                    |                    |
| SNP_95410_A_101536 | NW_004516619.1 | scaffold1408 | 101536                  | AA                              | GG                 | GG               | INTERGENIC      |               |                    |                    |

| SNPs IDs           | Chromosome IDs | Chromosomes  | Physical positions (bp) | CDC Frontier (Reference genome) | (Pusa 1103 & HPNB) | (ILWC 46 & LPNB) | Sequence genome | Components of | Gene accession IDs | Putative functions |
|--------------------|----------------|--------------|-------------------------|---------------------------------|--------------------|------------------|-----------------|---------------|--------------------|--------------------|
| SNP_95411_A_101665 | NW_004516619.1 | scaffold1408 | 101665                  | TT                              | AA                 | AA               | INTERGENIC      |               |                    |                    |
| SNP_95412_A_101954 | NW_004516619.1 | scaffold1408 | 101954                  | TT                              | AA                 | AA               | INTERGENIC      |               |                    |                    |
| SNP_95413_A_102065 | NW_004516619.1 | scaffold1408 | 102065                  | TT                              | AA                 | AA               | INTERGENIC      |               |                    |                    |
| SNP_95414_A_102289 | NW_004516619.1 | scaffold1408 | 102289                  | AA                              | CC                 | CC               | INTERGENIC      |               |                    |                    |
| SNP_95415_A_102347 | NW_004516619.1 | scaffold1408 | 102347                  | TT                              | CC                 | CC               | INTERGENIC      |               |                    |                    |
| SNP_95416_A_102376 | NW_004516619.1 | scaffold1408 | 102376                  | AA                              | CC                 | CC               | INTERGENIC      |               |                    |                    |
| SNP_95417_A_103316 | NW_004516619.1 | scaffold1408 | 103316                  | AA                              | CC                 | CC               | INTERGENIC      |               |                    |                    |
| SNP_95418_A_103333 | NW_004516619.1 | scaffold1408 | 103333                  | TT                              | GG                 | GG               | INTERGENIC      |               |                    |                    |
| SNP_95419_A_103646 | NW_004516619.1 | scaffold1408 | 103646                  | TT                              | CC                 | CC               | INTERGENIC      |               |                    |                    |
| SNP_95420_A_104372 | NW_004516619.1 | scaffold1408 | 104372                  | GG                              | AA                 | AA               | INTERGENIC      |               |                    |                    |
| SNP_95421_A_104452 | NW_004516619.1 | scaffold1408 | 104452                  | AA                              | GG                 | GG               | INTERGENIC      |               |                    |                    |
| SNP_95422_A_104667 | NW_004516619.1 | scaffold1408 | 104667                  | AA                              | TT                 | TT               | INTERGENIC      |               |                    |                    |
| SNP_95423_A_105712 | NW_004516619.1 | scaffold1408 | 105712                  | GG                              | TT                 | TT               | INTERGENIC      |               |                    |                    |
| SNP_95425_A_108639 | NW_004516619.1 | scaffold1408 | 108639                  | GG                              | TT                 | TT               | INTERGENIC      |               |                    |                    |
| SNP_95426_A_108640 | NW_004516619.1 | scaffold1408 | 108640                  | TT                              | GG                 | GG               | INTERGENIC      |               |                    |                    |
| SNP_95427_A_5728   | NW_004516620.1 | scaffold1409 | 5728                    | CC                              | TT                 | TT               | INTERGENIC      |               |                    |                    |
| SNP_95428_A_5761   | NW_004516620.1 | scaffold1409 | 5761                    | AA                              | CC                 | CC               | INTERGENIC      |               |                    |                    |
| SNP_95429_A_6094   | NW_004516620.1 | scaffold1409 | 6094                    | TT                              | AA                 | AA               | INTERGENIC      |               |                    |                    |
| SNP_95430_A_8982   | NW_004516620.1 | scaffold1409 | 8982                    | TT                              | CC                 | CC               | INTERGENIC      |               |                    |                    |
| SNP_95431_A_9152   | NW_004516620.1 | scaffold1409 | 9152                    | CC                              | TT                 | TT               | INTERGENIC      |               |                    |                    |
| SNP_95432_A_9213   | NW_004516620.1 | scaffold1409 | 9213                    | CC                              | TT                 | TT               | INTERGENIC      |               |                    |                    |
| SNP_95434_A_9257   | NW_004516620.1 | scaffold1409 | 9257                    | TT                              | AA                 | AA               | INTERGENIC      |               |                    |                    |

| SNPs IDs           | Chromosome IDs | Chromosomes  | Physical positions (bp) | CDC Frontier (Reference genome) | (Pusa 1103 & HPNB) | (ILWC 46 & LPNB) | Sequence genome | Components of | Gene accession IDs | Putative functions |
|--------------------|----------------|--------------|-------------------------|---------------------------------|--------------------|------------------|-----------------|---------------|--------------------|--------------------|
| SNP_95435_A_9452   | NW_004516620.1 | scaffold1409 | 9452                    | CC                              | TT                 | TT               | INTERGENIC      |               |                    |                    |
| SNP_95436_A_9510   | NW_004516620.1 | scaffold1409 | 9510                    | TT                              | CC                 | CC               | INTERGENIC      |               |                    |                    |
| SNP_95437_A_9568   | NW_004516620.1 | scaffold1409 | 9568                    | CC                              | TT                 | TT               | INTERGENIC      |               |                    |                    |
| SNP_95438_A_9591   | NW_004516620.1 | scaffold1409 | 9591                    | AA                              | TT                 | TT               | INTERGENIC      |               |                    |                    |
| SNP_95439_A_9910   | NW_004516620.1 | scaffold1409 | 9910                    | AA                              | CC                 | CC               | INTERGENIC      |               |                    |                    |
| SNP_95440_A_9978   | NW_004516620.1 | scaffold1409 | 9978                    | TT                              | CC                 | CC               | INTERGENIC      |               |                    |                    |
| SNP_95441_A_9982   | NW_004516620.1 | scaffold1409 | 9982                    | TT                              | CC                 | CC               | INTERGENIC      |               |                    |                    |
| SNP_95442_A_10158  | NW_004516620.1 | scaffold1409 | 10158                   | TT                              | GG                 | GG               | INTERGENIC      |               |                    |                    |
| SNP_95443_A_10237  | NW_004516620.1 | scaffold1409 | 10237                   | AA                              | GG                 | GG               | INTERGENIC      |               |                    |                    |
| SNP_95445_A_12482  | NW_004516620.1 | scaffold1409 | 12482                   | TT                              | CC                 | CC               | INTERGENIC      |               |                    |                    |
| SNP_95446_A_14734  | NW_004516620.1 | scaffold1409 | 14734                   | GG                              | CC                 | CC               | INTERGENIC      |               |                    |                    |
| SNP_95447_A_35683  | NW_004516622.1 | scaffold1411 | 35683                   | AA                              | GG                 | GG               | INTERGENIC      |               |                    |                    |
| SNP_95448_A_35965  | NW_004516622.1 | scaffold1411 | 35965                   | CC                              | AA                 | AA               | INTERGENIC      |               |                    |                    |
| SNP_95449_A_36150  | NW_004516622.1 | scaffold1411 | 36150                   | AA                              | CC                 | CC               | INTERGENIC      |               |                    |                    |
| SNP_95450_A_36153  | NW_004516622.1 | scaffold1411 | 36153                   | GG                              | AA                 | AA               | INTERGENIC      |               |                    |                    |
| SNP_95451_A_39021  | NW_004516622.1 | scaffold1411 | 39021                   | GG                              | TT                 | TT               | INTERGENIC      |               |                    |                    |
| SNP_95452_A_39207  | NW_004516622.1 | scaffold1411 | 39207                   | TT                              | CC                 | CC               | INTERGENIC      |               |                    |                    |
| SNP_95453_A_125347 | NW_004516622.1 | scaffold1411 | 125347                  | GG                              | TT                 | TT               | INTERGENIC      |               |                    |                    |
| SNP_95454_A_135337 | NW_004516622.1 | scaffold1411 | 135337                  | CC                              | AA                 | AA               | INTERGENIC      |               |                    |                    |
| SNP_95455_A_139327 | NW_004516622.1 | scaffold1411 | 139327                  | CC                              | TT                 | TT               | INTERGENIC      |               |                    |                    |
| SNP_95456_A_304    | NW_004516623.1 | scaffold1412 | 304                     | GG                              | AA                 | AA               | INTERGENIC      |               |                    |                    |
| SNP_95457_A_3426   | NW_004516623.1 | scaffold1412 | 3426                    | TT                              | AA                 | GG               | INTERGENIC      |               |                    |                    |

| SNPs IDs          | Chromosome IDs | Chromosomes  | Physical positions (bp) | CDC Frontier genome (Reference genome) | (Pusa 1103 & HPNB) | (ILWC 46 & LPNB) | Sequence genome | Components of | Gene accession IDs | Putative functions |
|-------------------|----------------|--------------|-------------------------|----------------------------------------|--------------------|------------------|-----------------|---------------|--------------------|--------------------|
| SNP_95458_A_3460  | NW_004516623.1 | scaffold1412 | 3460                    | GG                                     | AA                 | AA               | INTERGENIC      |               |                    |                    |
| SNP_95459_A_3482  | NW_004516623.1 | scaffold1412 | 3482                    | GG                                     | AA                 | AA               | INTERGENIC      |               |                    |                    |
| SNP_95460_A_3734  | NW_004516623.1 | scaffold1412 | 3734                    | TT                                     | CC                 | CC               | INTERGENIC      |               |                    |                    |
| SNP_95461_A_3748  | NW_004516623.1 | scaffold1412 | 3748                    | TT                                     | GG                 | GG               | INTERGENIC      |               |                    |                    |
| SNP_95462_A_3786  | NW_004516623.1 | scaffold1412 | 3786                    | TT                                     | GG                 | GG               | INTERGENIC      |               |                    |                    |
| SNP_95463_A_4774  | NW_004516623.1 | scaffold1412 | 4774                    | AA                                     | GG                 | GG               | INTERGENIC      |               |                    |                    |
| SNP_95464_A_4786  | NW_004516623.1 | scaffold1412 | 4786                    | AA                                     | GG                 | GG               | INTERGENIC      |               |                    |                    |
| SNP_95465_A_17077 | NW_004516623.1 | scaffold1412 | 17077                   | GG                                     | AA                 | AA               | INTERGENIC      |               |                    |                    |
| SNP_95466_A_17458 | NW_004516623.1 | scaffold1412 | 17458                   | TT                                     | AA                 | AA               | INTERGENIC      |               |                    |                    |
| SNP_95467_A_17595 | NW_004516623.1 | scaffold1412 | 17595                   | CC                                     | TT                 | TT               | INTERGENIC      |               |                    |                    |
| SNP_95468_A_447   | NW_004516624.1 | scaffold1413 | 447                     | AA                                     | CC                 | CC               | INTERGENIC      |               |                    |                    |
| SNP_95469_A_2038  | NW_004516625.1 | scaffold1414 | 2038                    | TT                                     | GG                 | GG               | INTERGENIC      |               |                    |                    |
| SNP_95470_A_2051  | NW_004516625.1 | scaffold1414 | 2051                    | AA                                     | GG                 | GG               | INTERGENIC      |               |                    |                    |
| SNP_95471_A_2437  | NW_004516625.1 | scaffold1414 | 2437                    | AA                                     | TT                 | TT               | INTERGENIC      |               |                    |                    |
| SNP_95472_A_2521  | NW_004516625.1 | scaffold1414 | 2521                    | AA                                     | TT                 | TT               | INTERGENIC      |               |                    |                    |
| SNP_95474_A_20673 | NW_004516625.1 | scaffold1414 | 20673                   | AA                                     | GG                 | GG               | INTERGENIC      |               |                    |                    |
| SNP_95475_A_29817 | NW_004516625.1 | scaffold1414 | 29817                   | TT                                     | CC                 | CC               | INTERGENIC      |               |                    |                    |
| SNP_95476_A_32255 | NW_004516625.1 | scaffold1414 | 32255                   | TT                                     | CC                 | CC               | INTERGENIC      |               |                    |                    |
| SNP_95477_A_32360 | NW_004516625.1 | scaffold1414 | 32360                   | CC                                     | TT                 | TT               | INTERGENIC      |               |                    |                    |
| SNP_95478_A_36025 | NW_004516625.1 | scaffold1414 | 36025                   | GG                                     | CC                 | CC               | INTERGENIC      |               |                    |                    |
| SNP_95479_A_36140 | NW_004516625.1 | scaffold1414 | 36140                   | TT                                     | CC                 | CC               | INTERGENIC      |               |                    |                    |
| SNP_95480_A_36281 | NW_004516625.1 | scaffold1414 | 36281                   | GG                                     | TT                 | TT               | INTERGENIC      |               |                    |                    |

| SNPs IDs          | Chromosome IDs | Chromosomes  | Physical positions (bp) | CDC Frontier (Reference genome) | (Pusa 1103 & HPNB) | (ILWC 46 & LPNB) | Sequence Components of genome | Gene accession IDs | Putative functions |
|-------------------|----------------|--------------|-------------------------|---------------------------------|--------------------|------------------|-------------------------------|--------------------|--------------------|
| SNP_95481_A_36485 | NW_004516625.1 | scaffold1414 | 36485                   | CC                              | AA                 | AA               | INTERGENIC                    |                    |                    |
| SNP_95482_A_36500 | NW_004516625.1 | scaffold1414 | 36500                   | TT                              | AA                 | AA               | INTERGENIC                    |                    |                    |
| SNP_95483_A_36517 | NW_004516625.1 | scaffold1414 | 36517                   | AA                              | GG                 | GG               | INTERGENIC                    |                    |                    |
| SNP_95484_A_36519 | NW_004516625.1 | scaffold1414 | 36519                   | AA                              | TT                 | TT               | INTERGENIC                    |                    |                    |
| SNP_95485_A_36520 | NW_004516625.1 | scaffold1414 | 36520                   | AA                              | GG                 | GG               | INTERGENIC                    |                    |                    |
| SNP_95486_A_38087 | NW_004516625.1 | scaffold1414 | 38087                   | GG                              | AA                 | AA               | INTERGENIC                    |                    |                    |
| SNP_95487_A_38155 | NW_004516625.1 | scaffold1414 | 38155                   | TT                              | CC                 | CC               | INTERGENIC                    |                    |                    |
| SNP_95488_A_38194 | NW_004516625.1 | scaffold1414 | 38194                   | GG                              | AA                 | AA               | INTERGENIC                    |                    |                    |
| SNP_95490_A_40007 | NW_004516625.1 | scaffold1414 | 40007                   | CC                              | TT                 | TT               | INTERGENIC                    |                    |                    |
| SNP_95491_A_46367 | NW_004516625.1 | scaffold1414 | 46367                   | CC                              | TT                 | TT               | INTERGENIC                    |                    |                    |
| SNP_95492_A_48610 | NW_004516625.1 | scaffold1414 | 48610                   | GG                              | TT                 | TT               | INTERGENIC                    |                    |                    |
| SNP_95493_A_48682 | NW_004516625.1 | scaffold1414 | 48682                   | GG                              | TT                 | TT               | INTERGENIC                    |                    |                    |
| SNP_95494_A_48687 | NW_004516625.1 | scaffold1414 | 48687                   | CC                              | TT                 | TT               | INTERGENIC                    |                    |                    |
| SNP_95495_A_48864 | NW_004516625.1 | scaffold1414 | 48864                   | TT                              | CC                 | CC               | INTERGENIC                    |                    |                    |
| SNP_95496_A_55014 | NW_004516625.1 | scaffold1414 | 55014                   | AA                              | TT                 | TT               | INTERGENIC                    |                    |                    |
| SNP_95497_A_55023 | NW_004516625.1 | scaffold1414 | 55023                   | AA                              | GG                 | GG               | INTERGENIC                    |                    |                    |
| SNP_95498_A_55033 | NW_004516625.1 | scaffold1414 | 55033                   | TT                              | CC                 | CC               | INTERGENIC                    |                    |                    |
| SNP_95499_A_55133 | NW_004516625.1 | scaffold1414 | 55133                   | CC                              | GG                 | GG               | INTERGENIC                    |                    |                    |
| SNP_95500_A_55402 | NW_004516625.1 | scaffold1414 | 55402                   | AA                              | CC                 | CC               | INTERGENIC                    |                    |                    |
| SNP_95501_A_55434 | NW_004516625.1 | scaffold1414 | 55434                   | AA                              | GG                 | GG               | INTERGENIC                    |                    |                    |
| SNP_95502_A_56285 | NW_004516625.1 | scaffold1414 | 56285                   | AA                              | GG                 | GG               | INTERGENIC                    |                    |                    |
| SNP_95503_A_59813 | NW_004516625.1 | scaffold1414 | 59813                   | CC                              | TT                 | TT               | URR                           | 101489183          | Unknown function   |

| SNPs IDs           | Chromosome IDs | Chromosomes  | Physical positions (bp) | CDC Frontier (Reference genome) | (Pusa 1103 & HPNB) | (ILWC 46 & LPNB) | Sequence Components of genome | Gene accession IDs | Putative functions |
|--------------------|----------------|--------------|-------------------------|---------------------------------|--------------------|------------------|-------------------------------|--------------------|--------------------|
| SNP_95504_A_59835  | NW_004516625.1 | scaffold1414 | 59835                   | AA                              | GG                 | GG               | URR                           | 101489183          | Unknown function   |
| SNP_95505_A_64718  | NW_004516625.1 | scaffold1414 | 64718                   | AA                              | CC                 | CC               | INTERGENIC                    |                    |                    |
| SNP_95506_A_71090  | NW_004516625.1 | scaffold1414 | 71090                   | CC                              | TT                 | TT               | INTERGENIC                    |                    |                    |
| SNP_95507_A_71232  | NW_004516625.1 | scaffold1414 | 71232                   | AA                              | TT                 | TT               | INTERGENIC                    |                    |                    |
| SNP_95508_A_71247  | NW_004516625.1 | scaffold1414 | 71247                   | TT                              | CC                 | CC               | INTERGENIC                    |                    |                    |
| SNP_95509_A_71248  | NW_004516625.1 | scaffold1414 | 71248                   | CC                              | TT                 | TT               | INTERGENIC                    |                    |                    |
| SNP_95510_A_71249  | NW_004516625.1 | scaffold1414 | 71249                   | TT                              | GG                 | GG               | INTERGENIC                    |                    |                    |
| SNP_95511_A_71272  | NW_004516625.1 | scaffold1414 | 71272                   | CC                              | TT                 | TT               | INTERGENIC                    |                    |                    |
| SNP_95512_A_71273  | NW_004516625.1 | scaffold1414 | 71273                   | TT                              | GG                 | GG               | INTERGENIC                    |                    |                    |
| SNP_95514_A_82418  | NW_004516625.1 | scaffold1414 | 82418                   | AA                              | GG                 | GG               | INTERGENIC                    |                    |                    |
| SNP_95515_A_115012 | NW_004516625.1 | scaffold1414 | 115012                  | TT                              | CC                 | CC               | INTERGENIC                    |                    |                    |
| SNP_95516_A_115802 | NW_004516625.1 | scaffold1414 | 115802                  | TT                              | CC                 | CC               | INTERGENIC                    |                    |                    |
| SNP_95517_A_124829 | NW_004516625.1 | scaffold1414 | 124829                  | CC                              | TT                 | TT               | INTERGENIC                    |                    |                    |
| SNP_95518_A_124832 | NW_004516625.1 | scaffold1414 | 124832                  | AA                              | TT                 | TT               | INTERGENIC                    |                    |                    |
| SNP_95519_A_124963 | NW_004516625.1 | scaffold1414 | 124963                  | GG                              | AA                 | AA               | INTERGENIC                    |                    |                    |
| SNP_95520_A_125064 | NW_004516625.1 | scaffold1414 | 125064                  | GG                              | AA                 | AA               | INTERGENIC                    |                    |                    |
| SNP_95521_A_125174 | NW_004516625.1 | scaffold1414 | 125174                  | GG                              | AA                 | AA               | INTERGENIC                    |                    |                    |
| SNP_95522_A_139602 | NW_004516625.1 | scaffold1414 | 139602                  | TT                              | CC                 | CC               | DRR                           | 101490482          | Unknown function   |
| SNP_95523_A_139944 | NW_004516625.1 | scaffold1414 | 139944                  | CC                              | GG                 | GG               | URR                           | 101490157          | Unknown function   |
| SNP_95524_A_145241 | NW_004516625.1 | scaffold1414 | 145241                  | GG                              | AA                 | AA               | INTRON                        | 101490482          | Unknown function   |
| SNP_95525_A_145242 | NW_004516625.1 | scaffold1414 | 145242                  | CC                              | AA                 | AA               | INTRON                        | 101490482          | Unknown function   |
| SNP_95526_A_145246 | NW_004516625.1 | scaffold1414 | 145246                  | AA                              | TT                 | TT               | INTRON                        | 101490482          | Unknown function   |

| SNPs IDs           | Chromosome IDs | Chromosomes  | Physical positions (bp) | CDC Frontier (Reference genome) | (Pusa 1103 & HPNB) | (ILWC 46 & LPNB) | Sequence Components of genome | Gene accession IDs | Putative functions |
|--------------------|----------------|--------------|-------------------------|---------------------------------|--------------------|------------------|-------------------------------|--------------------|--------------------|
| SNP_95527_A_145252 | NW_004516625.1 | scaffold1414 | 145252                  | AA                              | TT                 | TT               | INTRON                        | 101490482          | Unknown function   |
| SNP_95528_A_145550 | NW_004516625.1 | scaffold1414 | 145550                  | AA                              | CC                 | CC               | INTRON                        | 101490482          | Unknown function   |
| SNP_95530_A_145601 | NW_004516625.1 | scaffold1414 | 145601                  | GG                              | AA                 | AA               | INTERGENIC                    |                    |                    |
| SNP_95531_A_145631 | NW_004516625.1 | scaffold1414 | 145631                  | CC                              | GG                 | GG               | INTERGENIC                    |                    |                    |
| SNP_95532_A_145666 | NW_004516625.1 | scaffold1414 | 145666                  | AA                              | CC                 | CC               | INTERGENIC                    |                    |                    |
| SNP_95533_A_148485 | NW_004516625.1 | scaffold1414 | 148485                  | CC                              | TT                 | TT               | INTERGENIC                    |                    |                    |
| SNP_95534_A_148516 | NW_004516625.1 | scaffold1414 | 148516                  | TT                              | CC                 | CC               | INTERGENIC                    |                    |                    |
| SNP_95535_A_148517 | NW_004516625.1 | scaffold1414 | 148517                  | AA                              | GG                 | GG               | INTERGENIC                    |                    |                    |
| SNP_95536_A_148547 | NW_004516625.1 | scaffold1414 | 148547                  | TT                              | GG                 | GG               | INTERGENIC                    |                    |                    |
| SNP_95537_A_148778 | NW_004516625.1 | scaffold1414 | 148778                  | GG                              | TT                 | TT               | INTERGENIC                    |                    |                    |
| SNP_95538_A_148787 | NW_004516625.1 | scaffold1414 | 148787                  | GG                              | TT                 | TT               | INTERGENIC                    |                    |                    |
| SNP_95539_A_154900 | NW_004516625.1 | scaffold1414 | 154900                  | GG                              | TT                 | TT               | INTERGENIC                    |                    |                    |
| SNP_95540_A_190257 | NW_004516625.1 | scaffold1414 | 190257                  | CC                              | AA                 | AA               | INTERGENIC                    |                    |                    |
| SNP_95541_A_190283 | NW_004516625.1 | scaffold1414 | 190283                  | AA                              | CC                 | CC               | INTERGENIC                    |                    |                    |
| SNP_95542_A_190286 | NW_004516625.1 | scaffold1414 | 190286                  | TT                              | GG                 | GG               | INTERGENIC                    |                    |                    |
| SNP_95543_A_190327 | NW_004516625.1 | scaffold1414 | 190327                  | TT                              | CC                 | CC               | INTERGENIC                    |                    |                    |
| SNP_95544_A_190363 | NW_004516625.1 | scaffold1414 | 190363                  | AA                              | TT                 | TT               | INTERGENIC                    |                    |                    |
| SNP_95545_A_190375 | NW_004516625.1 | scaffold1414 | 190375                  | TT                              | CC                 | CC               | INTERGENIC                    |                    |                    |
| SNP_95546_A_190394 | NW_004516625.1 | scaffold1414 | 190394                  | GG                              | AA                 | AA               | INTERGENIC                    |                    |                    |
| SNP_95547_A_190433 | NW_004516625.1 | scaffold1414 | 190433                  | AA                              | GG                 | GG               | INTERGENIC                    |                    |                    |
| SNP_95548_A_190449 | NW_004516625.1 | scaffold1414 | 190449                  | CC                              | TT                 | TT               | INTERGENIC                    |                    |                    |
| SNP_95549_A_190462 | NW_004516625.1 | scaffold1414 | 190462                  | CC                              | TT                 | TT               | INTERGENIC                    |                    |                    |

| SNPs IDs           | Chromosome IDs | Chromosomes  | Physical positions (bp) | CDC Frontier (Reference genome) | (Pusa 1103 & HPNB) | (ILWC 46 & LPNB) | Sequence genome | Components of | Gene accession IDs | Putative functions |
|--------------------|----------------|--------------|-------------------------|---------------------------------|--------------------|------------------|-----------------|---------------|--------------------|--------------------|
| SNP_95550_A_190469 | NW_004516625.1 | scaffold1414 | 190469                  | AA                              | TT                 | TT               | INTERGENIC      |               |                    |                    |
| SNP_95552_A_190638 | NW_004516625.1 | scaffold1414 | 190638                  | TT                              | CC                 | CC               | INTERGENIC      |               |                    |                    |
| SNP_95553_A_190644 | NW_004516625.1 | scaffold1414 | 190644                  | GG                              | AA                 | AA               | INTERGENIC      |               |                    |                    |
| SNP_95554_A_190698 | NW_004516625.1 | scaffold1414 | 190698                  | TT                              | GG                 | GG               | INTERGENIC      |               |                    |                    |
| SNP_95555_A_195589 | NW_004516625.1 | scaffold1414 | 195589                  | AA                              | CC                 | CC               | INTERGENIC      |               |                    |                    |
| SNP_95556_A_222231 | NW_004516625.1 | scaffold1414 | 222231                  | GG                              | CC                 | CC               | INTERGENIC      |               |                    |                    |
| SNP_95557_A_241015 | NW_004516625.1 | scaffold1414 | 241015                  | GG                              | AA                 | AA               | INTERGENIC      |               |                    |                    |
| SNP_95558_A_241209 | NW_004516625.1 | scaffold1414 | 241209                  | TT                              | CC                 | CC               | INTERGENIC      |               |                    |                    |
| SNP_95559_A_245774 | NW_004516625.1 | scaffold1414 | 245774                  | TT                              | AA                 | AA               | INTERGENIC      |               |                    |                    |
| SNP_95560_A_245775 | NW_004516625.1 | scaffold1414 | 245775                  | AA                              | CC                 | CC               | INTERGENIC      |               |                    |                    |
| SNP_95561_A_245776 | NW_004516625.1 | scaffold1414 | 245776                  | TT                              | CC                 | CC               | INTERGENIC      |               |                    |                    |
| SNP_95562_A_246134 | NW_004516625.1 | scaffold1414 | 246134                  | CC                              | GG                 | GG               | INTERGENIC      |               |                    |                    |
| SNP_95563_A_246148 | NW_004516625.1 | scaffold1414 | 246148                  | CC                              | AA                 | AA               | INTERGENIC      |               |                    |                    |
| SNP_95564_A_246149 | NW_004516625.1 | scaffold1414 | 246149                  | TT                              | CC                 | CC               | INTERGENIC      |               |                    |                    |
| SNP_95566_A_41744  | NW_004516627.1 | scaffold1417 | 41744                   | TT                              | AA                 | AA               | INTERGENIC      |               |                    |                    |
| SNP_95567_A_43611  | NW_004516627.1 | scaffold1417 | 43611                   | TT                              | CC                 | CC               | INTERGENIC      |               |                    |                    |
| SNP_95568_A_47226  | NW_004516627.1 | scaffold1417 | 47226                   | CC                              | TT                 | TT               | INTERGENIC      |               |                    |                    |
| SNP_95569_A_58599  | NW_004516627.1 | scaffold1417 | 58599                   | AA                              | GG                 | GG               | INTERGENIC      |               |                    |                    |
| SNP_95570_A_58658  | NW_004516627.1 | scaffold1417 | 58658                   | GG                              | AA                 | AA               | INTERGENIC      |               |                    |                    |
| SNP_95571_A_58661  | NW_004516627.1 | scaffold1417 | 58661                   | TT                              | AA                 | AA               | INTERGENIC      |               |                    |                    |
| SNP_95572_A_58674  | NW_004516627.1 | scaffold1417 | 58674                   | AA                              | TT                 | TT               | INTERGENIC      |               |                    |                    |
| SNP_95574_A_78441  | NW_004516627.1 | scaffold1417 | 78441                   | AA                              | TT                 | TT               | INTERGENIC      |               |                    |                    |



| SNPs IDs           | Chromosome IDs | Chromosomes  | Physical positions (bp) | CDC Frontier (Reference genome) | (Pusa 1103 & HPNB) | (ILWC 46 & LPNB) | Sequence genome | Components of | Gene accession IDs | Putative functions |
|--------------------|----------------|--------------|-------------------------|---------------------------------|--------------------|------------------|-----------------|---------------|--------------------|--------------------|
| SNP_95575_A_78447  | NW_004516627.1 | scaffold1417 | 78447                   | AA                              | TT                 | TT               | INTERGENIC      |               |                    |                    |
| SNP_95576_A_120013 | NW_004516627.1 | scaffold1417 | 120013                  | CC                              | TT                 | TT               | INTERGENIC      |               |                    |                    |
| SNP_95577_A_123643 | NW_004516627.1 | scaffold1417 | 123643                  | TT                              | GG                 | GG               | INTERGENIC      |               |                    |                    |
| SNP_95578_A_123859 | NW_004516627.1 | scaffold1417 | 123859                  | TT                              | CC                 | CC               | INTERGENIC      |               |                    |                    |
| SNP_95579_A_123927 | NW_004516627.1 | scaffold1417 | 123927                  | GG                              | AA                 | AA               | INTERGENIC      |               |                    |                    |
| SNP_95580_A_123950 | NW_004516627.1 | scaffold1417 | 123950                  | TT                              | AA                 | AA               | INTERGENIC      |               |                    |                    |
| SNP_95581_A_124114 | NW_004516627.1 | scaffold1417 | 124114                  | TT                              | CC                 | CC               | INTERGENIC      |               |                    |                    |
| SNP_95582_A_149520 | NW_004516627.1 | scaffold1417 | 149520                  | AA                              | CC                 | CC               | INTERGENIC      |               |                    |                    |
| SNP_95584_A_151209 | NW_004516627.1 | scaffold1417 | 151209                  | AA                              | GG                 | GG               | INTERGENIC      |               |                    |                    |
| SNP_95585_A_151446 | NW_004516627.1 | scaffold1417 | 151446                  | AA                              | CC                 | CC               | INTERGENIC      |               |                    |                    |
| SNP_95586_A_184458 | NW_004516627.1 | scaffold1417 | 184458                  | TT                              | CC                 | CC               | INTERGENIC      |               |                    |                    |
| SNP_95587_A_189666 | NW_004516627.1 | scaffold1417 | 189666                  | GG                              | AA                 | AA               | INTERGENIC      |               |                    |                    |
| SNP_95588_A_189863 | NW_004516627.1 | scaffold1417 | 189863                  | GG                              | AA                 | AA               | INTERGENIC      |               |                    |                    |
| SNP_95589_A_191830 | NW_004516627.1 | scaffold1417 | 191830                  | GG                              | AA                 | AA               | INTERGENIC      |               |                    |                    |
| SNP_95591_A_191849 | NW_004516627.1 | scaffold1417 | 191849                  | AA                              | GG                 | GG               | INTERGENIC      |               |                    |                    |
| SNP_95592_A_234240 | NW_004516627.1 | scaffold1417 | 234240                  | TT                              | CC                 | CC               | INTERGENIC      |               |                    |                    |
| SNP_95593_A_242594 | NW_004516627.1 | scaffold1417 | 242594                  | AA                              | TT                 | TT               | INTERGENIC      |               |                    |                    |
| SNP_95594_A_245243 | NW_004516627.1 | scaffold1417 | 245243                  | TT                              | CC                 | CC               | INTERGENIC      |               |                    |                    |
| SNP_95595_A_245426 | NW_004516627.1 | scaffold1417 | 245426                  | TT                              | CC                 | CC               | INTERGENIC      |               |                    |                    |
| SNP_95596_A_249671 | NW_004516627.1 | scaffold1417 | 249671                  | AA                              | GG                 | GG               | INTERGENIC      |               |                    |                    |
| SNP_95597_A_249942 | NW_004516627.1 | scaffold1417 | 249942                  | GG                              | TT                 | TT               | INTERGENIC      |               |                    |                    |
| SNP_95598_A_249955 | NW_004516627.1 | scaffold1417 | 249955                  | TT                              | CC                 | CC               | INTERGENIC      |               |                    |                    |

| SNPs IDs           | Chromosome IDs | Chromosomes  | Physical positions (bp) | CDC Frontier (Reference genome) | (Pusa 1103 & HPNB) | (ILWC 46 & LPNB) | Sequence Components of genome | Gene accession IDs | Putative functions                                         |
|--------------------|----------------|--------------|-------------------------|---------------------------------|--------------------|------------------|-------------------------------|--------------------|------------------------------------------------------------|
| SNP_95599_A_260027 | NW_004516627.1 | scaffold1417 | 260027                  | GG                              | TT                 | TT               | DRR                           | 101492639          | Unknown function                                           |
| SNP_95600_A_260055 | NW_004516627.1 | scaffold1417 | 260055                  | GG                              | AA                 | AA               | DRR                           | 101492639          | Unknown function                                           |
| SNP_95601_A_260064 | NW_004516627.1 | scaffold1417 | 260064                  | CC                              | TT                 | TT               | DRR                           | 101492639          | Unknown function                                           |
| SNP_95602_A_260065 | NW_004516627.1 | scaffold1417 | 260065                  | TT                              | CC                 | CC               | DRR                           | 101492639          | Unknown function                                           |
| SNP_95603_A_260081 | NW_004516627.1 | scaffold1417 | 260081                  | AA                              | TT                 | TT               | SYNONYMOUS_CODING             | id212960           | Unknown function                                           |
| SNP_95604_A_260257 | NW_004516627.1 | scaffold1417 | 260257                  | GG                              | TT                 | TT               | INTRON                        | id212960           | Unknown function                                           |
| SNP_95605_A_260275 | NW_004516627.1 | scaffold1417 | 260275                  | CC                              | TT                 | TT               | INTRON                        | id212960           | Unknown function                                           |
| SNP_95606_A_260347 | NW_004516627.1 | scaffold1417 | 260347                  | GG                              | AA                 | AA               | INTRON                        | id212960           | Unknown function                                           |
| SNP_95607_A_282879 | NW_004516627.1 | scaffold1417 | 282879                  | AA                              | GG                 | GG               | INTERGENIC                    |                    |                                                            |
| SNP_95608_A_282942 | NW_004516627.1 | scaffold1417 | 282942                  | AA                              | TT                 | TT               | INTERGENIC                    |                    |                                                            |
| SNP_95609_A_352211 | NW_004516627.1 | scaffold1417 | 352211                  | CC                              | TT                 | TT               | INTERGENIC                    |                    |                                                            |
| SNP_95610_A_352223 | NW_004516627.1 | scaffold1417 | 352223                  | TT                              | CC                 | CC               | INTERGENIC                    |                    |                                                            |
| SNP_95611_A_4092   | NW_004516628.1 | scaffold1418 | 4092                    | GG                              | TT                 | TT               | URR                           | 101494676          | protein SRG1-like                                          |
| SNP_95613_A_8542   | NW_004516628.1 | scaffold1418 | 8542                    | GG                              | AA                 | AA               | INTERGENIC                    |                    |                                                            |
| SNP_95614_A_8780   | NW_004516628.1 | scaffold1418 | 8780                    | TT                              | CC                 | CC               | INTERGENIC                    |                    |                                                            |
| SNP_95615_A_9705   | NW_004516628.1 | scaffold1418 | 9705                    | TT                              | GG                 | GG               | INTERGENIC                    |                    |                                                            |
| SNP_95616_A_12152  | NW_004516628.1 | scaffold1418 | 12152                   | CC                              | AA                 | AA               | INTRON                        | 101494995          | pentatricopeptide repeat-containing protein At4g33170-like |
| SNP_95617_A_12153  | NW_004516628.1 | scaffold1418 | 12153                   | AA                              | TT                 | TT               | INTRON                        | 101494995          | pentatricopeptide repeat-containing protein At4g33170-like |
| SNP_95619_A_13957  | NW_004516628.1 | scaffold1418 | 13957                   | TT                              | CC                 | CC               | INTERGENIC                    |                    |                                                            |
| SNP_95620_A_14333  | NW_004516628.1 | scaffold1418 | 14333                   | AA                              | GG                 | GG               | INTERGENIC                    |                    |                                                            |
| SNP_95621_A_14452  | NW_004516628.1 | scaffold1418 | 14452                   | TT                              | CC                 | CC               | INTERGENIC                    |                    |                                                            |
| SNP_95622_A_16368  | NW_004516628.1 | scaffold1418 | 16368                   | CC                              | TT                 | TT               | URR                           | 101494995          | pentatricopeptide repeat-containing protein At4g33170-like |

| SNPs IDs          | Chromosome IDs | Chromosomes  | Physical positions (bp) | CDC Frontier (Reference genome) | (Pusa 1103 & HPNB) | (ILWC 46 & LPNB) | Sequence Components of genome | Gene accession IDs | Putative functions                                         |
|-------------------|----------------|--------------|-------------------------|---------------------------------|--------------------|------------------|-------------------------------|--------------------|------------------------------------------------------------|
| SNP_95623_A_17363 | NW_004516628.1 | scaffold1418 | 17363                   | TT                              | CC                 | CC               | DRR                           | 101496308          | protein SRG1-like                                          |
| SNP_95624_A_17777 | NW_004516628.1 | scaffold1418 | 17777                   | CC                              | TT                 | TT               | URR                           | 101494995          | pentatricopeptide repeat-containing protein At4g33170-like |
| SNP_95627_A_18480 | NW_004516628.1 | scaffold1418 | 18480                   | CC                              | TT                 | TT               | INTRON                        | 101496308          | protein SRG1-like                                          |
| SNP_95628_A_18543 | NW_004516628.1 | scaffold1418 | 18543                   | AA                              | GG                 | GG               | INTRON                        | 101496308          | protein SRG1-like                                          |
| SNP_95629_A_18812 | NW_004516628.1 | scaffold1418 | 18812                   | CC                              | AA                 | AA               | INTRON                        | 101496308          | protein SRG1-like                                          |
| SNP_95631_A_23064 | NW_004516628.1 | scaffold1418 | 23064                   | AA                              | TT                 | TT               | URR                           | 101496308          | protein SRG1-like                                          |
| SNP_95632_A_23065 | NW_004516628.1 | scaffold1418 | 23065                   | TT                              | CC                 | CC               | URR                           | 101496308          | protein SRG1-like                                          |
| SNP_95633_A_23067 | NW_004516628.1 | scaffold1418 | 23067                   | GG                              | AA                 | AA               | URR                           | 101496308          | protein SRG1-like                                          |
| SNP_95634_A_24706 | NW_004516628.1 | scaffold1418 | 24706                   | CC                              | GG                 | GG               | URR                           | 101496308          | protein SRG1-like                                          |
| SNP_95636_A_32025 | NW_004516628.1 | scaffold1418 | 32025                   | AA                              | TT                 | TT               | DRR                           | 101496638          | DUF21 domain-containing protein At5g52790-like             |
| SNP_95637_A_32984 | NW_004516628.1 | scaffold1418 | 32984                   | GG                              | AA                 | AA               | INTRON                        | 101496638          | DUF21 domain-containing protein At5g52790-like             |
| SNP_95638_A_33084 | NW_004516628.1 | scaffold1418 | 33084                   | AA                              | TT                 | TT               | INTRON                        | 101496638          | DUF21 domain-containing protein At5g52790-like             |
| SNP_95640_A_38722 | NW_004516628.1 | scaffold1418 | 38722                   | CC                              | TT                 | TT               | INTRON                        | 101496638          | DUF21 domain-containing protein At5g52790-like             |
| SNP_95641_A_39466 | NW_004516628.1 | scaffold1418 | 39466                   | CC                              | TT                 | TT               | INTRON                        | 101496638          | DUF21 domain-containing protein At5g52790-like             |
| SNP_95643_A_1989  | NW_004516629.1 | scaffold1419 | 1989                    | CC                              | TT                 | TT               | INTRON                        | 101497608          | GDP-mannose 3,5-epimerase 1-like                           |
| SNP_95644_A_2004  | NW_004516629.1 | scaffold1419 | 2004                    | TT                              | CC                 | CC               | INTRON                        | 101497608          | GDP-mannose 3,5-epimerase 1-like                           |
| SNP_95645_A_10358 | NW_004516629.1 | scaffold1419 | 10358                   | TT                              | AA                 | AA               | INTRON                        | 101497608          | GDP-mannose 3,5-epimerase 1-like                           |
| SNP_95646_A_10422 | NW_004516629.1 | scaffold1419 | 10422                   | GG                              | CC                 | CC               | INTRON                        | 101497608          | GDP-mannose 3,5-epimerase 1-like                           |
| SNP_95647_A_10553 | NW_004516629.1 | scaffold1419 | 10553                   | GG                              | CC                 | CC               | INTRON                        | 101497608          | GDP-mannose 3,5-epimerase 1-like                           |
| SNP_95648_A_10564 | NW_004516629.1 | scaffold1419 | 10564                   | GG                              | AA                 | AA               | INTRON                        | 101497608          | GDP-mannose 3,5-epimerase 1-like                           |
| SNP_95649_A_10567 | NW_004516629.1 | scaffold1419 | 10567                   | TT                              | CC                 | CC               | INTRON                        | 101497608          | GDP-mannose 3,5-epimerase 1-like                           |
| SNP_95651_A_10762 | NW_004516629.1 | scaffold1419 | 10762                   | GG                              | AA                 | AA               | INTRON                        | 101497608          | GDP-mannose 3,5-epimerase 1-like                           |

| SNPs IDs          | Chromosome IDs | Chromosomes  | Physical positions (bp) | CDC Frontier (Reference genome) | (Pusa 1103 & HPNB) | (ILWC 46 & LPNB) | Sequence Components of genome | Gene accession IDs | Putative functions               |
|-------------------|----------------|--------------|-------------------------|---------------------------------|--------------------|------------------|-------------------------------|--------------------|----------------------------------|
| SNP_95652_A_14861 | NW_004516629.1 | scaffold1419 | 14861                   | CC                              | TT                 | TT               | INTRON                        | 101497608          | GDP-mannose 3,5-epimerase 1-like |
| SNP_95653_A_14875 | NW_004516629.1 | scaffold1419 | 14875                   | TT                              | AA                 | AA               | INTRON                        | 101497608          | GDP-mannose 3,5-epimerase 1-like |
| SNP_95654_A_14905 | NW_004516629.1 | scaffold1419 | 14905                   | TT                              | AA                 | AA               | INTRON                        | 101497608          | GDP-mannose 3,5-epimerase 1-like |
| SNP_95655_A_19690 | NW_004516629.1 | scaffold1419 | 19690                   | CC                              | TT                 | TT               | INTERGENIC                    |                    |                                  |
| SNP_95656_A_19692 | NW_004516629.1 | scaffold1419 | 19692                   | TT                              | GG                 | GG               | INTERGENIC                    |                    |                                  |
| SNP_95657_A_19767 | NW_004516629.1 | scaffold1419 | 19767                   | TT                              | CC                 | CC               | INTERGENIC                    |                    |                                  |
| SNP_95658_A_20019 | NW_004516629.1 | scaffold1419 | 20019                   | CC                              | TT                 | TT               | INTERGENIC                    |                    |                                  |
| SNP_95659_A_20140 | NW_004516629.1 | scaffold1419 | 20140                   | AA                              | CC                 | CC               | INTERGENIC                    |                    |                                  |
| SNP_95660_A_20146 | NW_004516629.1 | scaffold1419 | 20146                   | GG                              | CC                 | CC               | INTERGENIC                    |                    |                                  |
| SNP_95661_A_20148 | NW_004516629.1 | scaffold1419 | 20148                   | GG                              | AA                 | AA               | INTERGENIC                    |                    |                                  |
| SNP_95662_A_20164 | NW_004516629.1 | scaffold1419 | 20164                   | CC                              | TT                 | TT               | INTERGENIC                    |                    |                                  |
| SNP_95663_A_20193 | NW_004516629.1 | scaffold1419 | 20193                   | AA                              | CC                 | CC               | INTERGENIC                    |                    |                                  |
| SNP_95664_A_20761 | NW_004516629.1 | scaffold1419 | 20761                   | GG                              | AA                 | AA               | INTERGENIC                    |                    |                                  |
| SNP_95665_A_20763 | NW_004516629.1 | scaffold1419 | 20763                   | GG                              | CC                 | CC               | INTERGENIC                    |                    |                                  |
| SNP_95666_A_21645 | NW_004516629.1 | scaffold1419 | 21645                   | TT                              | AA                 | AA               | INTERGENIC                    |                    |                                  |
| SNP_95667_A_21646 | NW_004516629.1 | scaffold1419 | 21646                   | CC                              | AA                 | AA               | INTERGENIC                    |                    |                                  |
| SNP_95668_A_21651 | NW_004516629.1 | scaffold1419 | 21651                   | AA                              | TT                 | TT               | INTERGENIC                    |                    |                                  |
| SNP_95669_A_21664 | NW_004516629.1 | scaffold1419 | 21664                   | TT                              | AA                 | AA               | INTERGENIC                    |                    |                                  |
| SNP_95670_A_21682 | NW_004516629.1 | scaffold1419 | 21682                   | AA                              | GG                 | GG               | INTERGENIC                    |                    |                                  |
| SNP_95671_A_21748 | NW_004516629.1 | scaffold1419 | 21748                   | GG                              | AA                 | AA               | INTERGENIC                    |                    |                                  |
| SNP_95672_A_21758 | NW_004516629.1 | scaffold1419 | 21758                   | AA                              | TT                 | TT               | INTERGENIC                    |                    |                                  |
| SNP_95673_A_21779 | NW_004516629.1 | scaffold1419 | 21779                   | GG                              | AA                 | AA               | INTERGENIC                    |                    |                                  |

| SNPs IDs          | Chromosome IDs | Chromosomes  | Physical positions (bp) | CDC Frontier (Reference genome) | (Pusa 1103 & HPNB) | (ILWC 46 & LPNB) | Sequence Components of genome | Gene accession IDs | Putative functions                                               |
|-------------------|----------------|--------------|-------------------------|---------------------------------|--------------------|------------------|-------------------------------|--------------------|------------------------------------------------------------------|
| SNP_95674_A_22058 | NW_004516629.1 | scaffold1419 | 22058                   | CC                              | TT                 | TT               | INTERGENIC                    |                    |                                                                  |
| SNP_95675_A_22070 | NW_004516629.1 | scaffold1419 | 22070                   | AA                              | TT                 | TT               | INTERGENIC                    |                    |                                                                  |
| SNP_95676_A_22122 | NW_004516629.1 | scaffold1419 | 22122                   | AA                              | TT                 | TT               | INTERGENIC                    |                    |                                                                  |
| SNP_95677_A_22323 | NW_004516629.1 | scaffold1419 | 22323                   | AA                              | GG                 | GG               | INTERGENIC                    |                    |                                                                  |
| SNP_95678_A_22395 | NW_004516629.1 | scaffold1419 | 22395                   | GG                              | TT                 | TT               | INTERGENIC                    |                    |                                                                  |
| SNP_95680_A_22472 | NW_004516629.1 | scaffold1419 | 22472                   | GG                              | AA                 | AA               | INTERGENIC                    |                    |                                                                  |
| SNP_95681_A_25919 | NW_004516629.1 | scaffold1419 | 25919                   | GG                              | TT                 | TT               | INTERGENIC                    |                    |                                                                  |
| SNP_95682_A_26316 | NW_004516629.1 | scaffold1419 | 26316                   | CC                              | TT                 | TT               | DRR                           | 101497940          | granule-bound starch synthase 1, chloroplastic/amyloplastic-like |
| SNP_95683_A_26324 | NW_004516629.1 | scaffold1419 | 26324                   | TT                              | CC                 | CC               | DRR                           | 101497940          | granule-bound starch synthase 1, chloroplastic/amyloplastic-like |
| SNP_95684_A_26632 | NW_004516629.1 | scaffold1419 | 26632                   | TT                              | GG                 | GG               | DRR                           | 101497940          | granule-bound starch synthase 1, chloroplastic/amyloplastic-like |
| SNP_95685_A_26736 | NW_004516629.1 | scaffold1419 | 26736                   | CC                              | TT                 | TT               | DRR                           | 101497940          | granule-bound starch synthase 1, chloroplastic/amyloplastic-like |
| SNP_95686_A_26753 | NW_004516629.1 | scaffold1419 | 26753                   | TT                              | AA                 | AA               | DRR                           | 101497940          | granule-bound starch synthase 1, chloroplastic/amyloplastic-like |
| SNP_95687_A_26783 | NW_004516629.1 | scaffold1419 | 26783                   | GG                              | AA                 | AA               | DRR                           | 101497940          | granule-bound starch synthase 1, chloroplastic/amyloplastic-like |
| SNP_95688_A_26847 | NW_004516629.1 | scaffold1419 | 26847                   | CC                              | TT                 | TT               | DRR                           | 101497940          | granule-bound starch synthase 1, chloroplastic/amyloplastic-like |
| SNP_95689_A_26879 | NW_004516629.1 | scaffold1419 | 26879                   | TT                              | CC                 | CC               | DRR                           | 101497940          | granule-bound starch synthase 1, chloroplastic/amyloplastic-like |
| SNP_95690_A_26895 | NW_004516629.1 | scaffold1419 | 26895                   | AA                              | CC                 | CC               | DRR                           | 101497940          | granule-bound starch synthase 1, chloroplastic/amyloplastic-like |
| SNP_95691_A_26897 | NW_004516629.1 | scaffold1419 | 26897                   | AA                              | GG                 | GG               | DRR                           | 101497940          | granule-bound starch synthase 1, chloroplastic/amyloplastic-like |
| SNP_95692_A_27067 | NW_004516629.1 | scaffold1419 | 27067                   | TT                              | CC                 | CC               | URR                           | 101497286          | 60S acidic ribosomal protein P1-2-like                           |
| SNP_95693_A_27160 | NW_004516629.1 | scaffold1419 | 27160                   | CC                              | TT                 | TT               | URR                           | 101497286          | 60S acidic ribosomal protein P1-2-like                           |
| SNP_95694_A_30673 | NW_004516629.1 | scaffold1419 | 30673                   | GG                              | AA                 | AA               | URR                           | 101497940          | granule-bound starch synthase 1, chloroplastic/amyloplastic-like |
| SNP_95695_A_30675 | NW_004516629.1 | scaffold1419 | 30675                   | AA                              | GG                 | GG               | URR                           | 101497940          | granule-bound starch synthase 1, chloroplastic/amyloplastic-like |
| SNP_95699_A_49571 | NW_004516629.1 | scaffold1419 | 49571                   | AA                              | TT                 | TT               | INTRON                        | 101498264          | Unknown function                                                 |

| SNPs IDs          | Chromosome IDs | Chromosomes  | Physical positions (bp) | CDC Frontier (Reference genome) | (Pusa 1103 & HPNB) | (ILWC 46 & LPNB) | Sequence Components of genome | Gene accession IDs | Putative functions |
|-------------------|----------------|--------------|-------------------------|---------------------------------|--------------------|------------------|-------------------------------|--------------------|--------------------|
| SNP_95700_A_49576 | NW_004516629.1 | scaffold1419 | 49576                   | AA                              | TT                 | TT               | INTRON                        | 101498264          | Unknown function   |
| SNP_95701_A_50898 | NW_004516629.1 | scaffold1419 | 50898                   | TT                              | AA                 | AA               | INTRON                        | 101498264          | Unknown function   |
| SNP_95702_A_51069 | NW_004516629.1 | scaffold1419 | 51069                   | CC                              | TT                 | TT               | INTRON                        | 101498264          | Unknown function   |
| SNP_95703_A_57438 | NW_004516629.1 | scaffold1419 | 57438                   | AA                              | GG                 | GG               | INTERGENIC                    |                    |                    |
| SNP_95704_A_57444 | NW_004516629.1 | scaffold1419 | 57444                   | AA                              | GG                 | GG               | INTERGENIC                    |                    |                    |
| SNP_95705_A_57469 | NW_004516629.1 | scaffold1419 | 57469                   | GG                              | TT                 | TT               | INTERGENIC                    |                    |                    |
| SNP_95706_A_57483 | NW_004516629.1 | scaffold1419 | 57483                   | AA                              | GG                 | GG               | INTERGENIC                    |                    |                    |
| SNP_95707_A_57499 | NW_004516629.1 | scaffold1419 | 57499                   | TT                              | CC                 | CC               | INTERGENIC                    |                    |                    |
| SNP_95708_A_57593 | NW_004516629.1 | scaffold1419 | 57593                   | TT                              | GG                 | GG               | INTERGENIC                    |                    |                    |
| SNP_95709_A_57601 | NW_004516629.1 | scaffold1419 | 57601                   | TT                              | GG                 | GG               | INTERGENIC                    |                    |                    |
| SNP_95710_A_1750  | NW_004516630.1 | scaffold1420 | 1750                    | AA                              | CC                 | CC               | INTERGENIC                    |                    |                    |
| SNP_95711_A_1753  | NW_004516630.1 | scaffold1420 | 1753                    | AA                              | CC                 | CC               | INTERGENIC                    |                    |                    |
| SNP_95712_A_1782  | NW_004516630.1 | scaffold1420 | 1782                    | CC                              | TT                 | TT               | INTERGENIC                    |                    |                    |
| SNP_95713_A_1817  | NW_004516630.1 | scaffold1420 | 1817                    | TT                              | CC                 | CC               | INTERGENIC                    |                    |                    |
| SNP_95714_A_1835  | NW_004516630.1 | scaffold1420 | 1835                    | TT                              | CC                 | CC               | INTERGENIC                    |                    |                    |
| SNP_95715_A_1867  | NW_004516630.1 | scaffold1420 | 1867                    | AA                              | CC                 | CC               | INTERGENIC                    |                    |                    |
| SNP_95716_A_1924  | NW_004516630.1 | scaffold1420 | 1924                    | CC                              | GG                 | GG               | INTERGENIC                    |                    |                    |
| SNP_95717_A_1928  | NW_004516630.1 | scaffold1420 | 1928                    | TT                              | AA                 | AA               | INTERGENIC                    |                    |                    |
| SNP_95718_A_2092  | NW_004516630.1 | scaffold1420 | 2092                    | AA                              | GG                 | GG               | INTERGENIC                    |                    |                    |
| SNP_95719_A_2105  | NW_004516630.1 | scaffold1420 | 2105                    | TT                              | CC                 | CC               | INTERGENIC                    |                    |                    |
| SNP_95720_A_2195  | NW_004516630.1 | scaffold1420 | 2195                    | AA                              | GG                 | GG               | INTERGENIC                    |                    |                    |
| SNP_95721_A_2229  | NW_004516630.1 | scaffold1420 | 2229                    | TT                              | GG                 | GG               | INTERGENIC                    |                    |                    |

| SNPs IDs          | Chromosome IDs | Chromosomes  | Physical positions (bp) | CDC Frontier (Reference genome) | (Pusa 1103 & HPNB) | (ILWC 46 & LPNB) | Sequence genome | Components of | Gene accession IDs                   | Putative functions |
|-------------------|----------------|--------------|-------------------------|---------------------------------|--------------------|------------------|-----------------|---------------|--------------------------------------|--------------------|
| SNP_95722_A_2274  | NW_004516630.1 | scaffold1420 | 2274                    | GG                              | AA                 | AA               | INTERGENIC      |               |                                      |                    |
| SNP_95723_A_4930  | NW_004516630.1 | scaffold1420 | 4930                    | TT                              | CC                 | CC               | INTERGENIC      |               |                                      |                    |
| SNP_95724_A_5121  | NW_004516630.1 | scaffold1420 | 5121                    | CC                              | TT                 | TT               | INTERGENIC      |               |                                      |                    |
| SNP_95725_A_5146  | NW_004516630.1 | scaffold1420 | 5146                    | AA                              | TT                 | TT               | INTERGENIC      |               |                                      |                    |
| SNP_95726_A_5355  | NW_004516630.1 | scaffold1420 | 5355                    | CC                              | AA                 | AA               | INTERGENIC      |               |                                      |                    |
| SNP_95727_A_5381  | NW_004516630.1 | scaffold1420 | 5381                    | AA                              | GG                 | GG               | INTERGENIC      |               |                                      |                    |
| SNP_95728_A_5384  | NW_004516630.1 | scaffold1420 | 5384                    | CC                              | AA                 | AA               | INTERGENIC      |               |                                      |                    |
| SNP_95729_A_5408  | NW_004516630.1 | scaffold1420 | 5408                    | CC                              | TT                 | TT               | INTERGENIC      |               |                                      |                    |
| SNP_95730_A_5409  | NW_004516630.1 | scaffold1420 | 5409                    | AA                              | CC                 | CC               | INTERGENIC      |               |                                      |                    |
| SNP_95731_A_9446  | NW_004516630.1 | scaffold1420 | 9446                    | TT                              | GG                 | GG               | INTERGENIC      |               |                                      |                    |
| SNP_95732_A_9554  | NW_004516630.1 | scaffold1420 | 9554                    | TT                              | CC                 | CC               | INTERGENIC      |               |                                      |                    |
| SNP_95733_A_15131 | NW_004516630.1 | scaffold1420 | 15131                   | CC                              | TT                 | TT               | INTERGENIC      |               |                                      |                    |
| SNP_95734_A_15166 | NW_004516630.1 | scaffold1420 | 15166                   | TT                              | AA                 | AA               | INTERGENIC      |               |                                      |                    |
| SNP_95735_A_15167 | NW_004516630.1 | scaffold1420 | 15167                   | TT                              | CC                 | CC               | INTERGENIC      |               |                                      |                    |
| SNP_95737_A_21199 | NW_004516630.1 | scaffold1420 | 21199                   | CC                              | GG                 | GG               | URR             | 101498598     | 60S acidic ribosomal protein P1-like |                    |
| SNP_95739_A_1951  | NW_004516631.1 | scaffold1422 | 1951                    | GG                              | AA                 | AA               | INTERGENIC      |               |                                      |                    |
| SNP_95740_A_2250  | NW_004516631.1 | scaffold1422 | 2250                    | CC                              | TT                 | TT               | INTERGENIC      |               |                                      |                    |
| SNP_95741_A_2267  | NW_004516631.1 | scaffold1422 | 2267                    | AA                              | TT                 | TT               | INTERGENIC      |               |                                      |                    |
| SNP_95742_A_64    | NW_004516633.1 | scaffold1424 | 64                      | CC                              | GG                 | GG               | INTERGENIC      |               |                                      |                    |
| SNP_95743_A_91    | NW_004516633.1 | scaffold1424 | 91                      | AA                              | TT                 | TT               | INTERGENIC      |               |                                      |                    |
| SNP_95744_A_496   | NW_004516633.1 | scaffold1424 | 496                     | GG                              | TT                 | TT               | INTERGENIC      |               |                                      |                    |
| SNP_95745_A_3283  | NW_004516633.1 | scaffold1424 | 3283                    | TT                              | AA                 | AA               | INTERGENIC      |               |                                      |                    |

| SNPs IDs          | Chromosome IDs | Chromosomes  | Physical positions (bp) | CDC Frontier (Reference genome) | (Pusa 1103 & HPNB) | (ILWC 46 & LPNB) | Sequence genome | Components of | Gene accession IDs | Putative functions |
|-------------------|----------------|--------------|-------------------------|---------------------------------|--------------------|------------------|-----------------|---------------|--------------------|--------------------|
| SNP_95749_A_15325 | NW_004516633.1 | scaffold1424 | 15325                   | AA                              | GG                 | GG               | INTERGENIC      |               |                    |                    |
| SNP_95750_A_15348 | NW_004516633.1 | scaffold1424 | 15348                   | CC                              | TT                 | TT               | INTERGENIC      |               |                    |                    |
| SNP_95751_A_15371 | NW_004516633.1 | scaffold1424 | 15371                   | TT                              | GG                 | GG               | INTERGENIC      |               |                    |                    |
| SNP_95752_A_43807 | NW_004516633.1 | scaffold1424 | 43807                   | TT                              | CC                 | CC               | INTERGENIC      |               |                    |                    |
| SNP_95753_A_43828 | NW_004516633.1 | scaffold1424 | 43828                   | TT                              | AA                 | AA               | INTERGENIC      |               |                    |                    |
| SNP_95754_A_43842 | NW_004516633.1 | scaffold1424 | 43842                   | TT                              | CC                 | CC               | INTERGENIC      |               |                    |                    |
| SNP_95755_A_43858 | NW_004516633.1 | scaffold1424 | 43858                   | AA                              | GG                 | GG               | INTERGENIC      |               |                    |                    |
| SNP_95756_A_43881 | NW_004516633.1 | scaffold1424 | 43881                   | CC                              | GG                 | GG               | INTERGENIC      |               |                    |                    |
| SNP_95757_A_43913 | NW_004516633.1 | scaffold1424 | 43913                   | GG                              | CC                 | CC               | INTERGENIC      |               |                    |                    |
| SNP_95758_A_44027 | NW_004516633.1 | scaffold1424 | 44027                   | GG                              | CC                 | CC               | INTERGENIC      |               |                    |                    |
| SNP_95759_A_44093 | NW_004516633.1 | scaffold1424 | 44093                   | GG                              | TT                 | TT               | INTERGENIC      |               |                    |                    |
| SNP_95760_A_44104 | NW_004516633.1 | scaffold1424 | 44104                   | CC                              | AA                 | AA               | INTERGENIC      |               |                    |                    |
| SNP_95761_A_44143 | NW_004516633.1 | scaffold1424 | 44143                   | GG                              | CC                 | CC               | INTERGENIC      |               |                    |                    |
| SNP_95762_A_44144 | NW_004516633.1 | scaffold1424 | 44144                   | GG                              | AA                 | AA               | INTERGENIC      |               |                    |                    |
| SNP_95763_A_44149 | NW_004516633.1 | scaffold1424 | 44149                   | AA                              | TT                 | TT               | INTERGENIC      |               |                    |                    |
| SNP_95764_A_44169 | NW_004516633.1 | scaffold1424 | 44169                   | GG                              | TT                 | TT               | INTERGENIC      |               |                    |                    |
| SNP_95765_A_44177 | NW_004516633.1 | scaffold1424 | 44177                   | TT                              | CC                 | CC               | INTERGENIC      |               |                    |                    |
| SNP_95766_A_48247 | NW_004516633.1 | scaffold1424 | 48247                   | CC                              | AA                 | AA               | INTERGENIC      |               |                    |                    |
| SNP_95767_A_48315 | NW_004516633.1 | scaffold1424 | 48315                   | AA                              | CC                 | CC               | INTERGENIC      |               |                    |                    |
| SNP_95768_A_48327 | NW_004516633.1 | scaffold1424 | 48327                   | GG                              | TT                 | TT               | INTERGENIC      |               |                    |                    |
| SNP_95769_A_48360 | NW_004516633.1 | scaffold1424 | 48360                   | TT                              | GG                 | GG               | INTERGENIC      |               |                    |                    |
| SNP_95770_A_48362 | NW_004516633.1 | scaffold1424 | 48362                   | TT                              | GG                 | GG               | INTERGENIC      |               |                    |                    |



| SNPs IDs          | Chromosome IDs | Chromosomes  | Physical positions (bp) | CDC Frontier (Reference genome) | (Pusa 1103 & HPNB) | (ILWC 46 & LPNB) | Sequence genome | Components of | Gene accession IDs | Putative functions |
|-------------------|----------------|--------------|-------------------------|---------------------------------|--------------------|------------------|-----------------|---------------|--------------------|--------------------|
| SNP_95771_A_48400 | NW_004516633.1 | scaffold1424 | 48400                   | AA                              | CC                 | CC               | INTERGENIC      |               |                    |                    |
| SNP_95772_A_48407 | NW_004516633.1 | scaffold1424 | 48407                   | AA                              | GG                 | GG               | INTERGENIC      |               |                    |                    |
| SNP_95773_A_48468 | NW_004516633.1 | scaffold1424 | 48468                   | GG                              | AA                 | AA               | INTERGENIC      |               |                    |                    |
| SNP_95774_A_48493 | NW_004516633.1 | scaffold1424 | 48493                   | GG                              | TT                 | TT               | INTERGENIC      |               |                    |                    |
| SNP_95776_A_48711 | NW_004516633.1 | scaffold1424 | 48711                   | TT                              | GG                 | GG               | INTERGENIC      |               |                    |                    |
| SNP_95777_A_48741 | NW_004516633.1 | scaffold1424 | 48741                   | GG                              | AA                 | AA               | INTERGENIC      |               |                    |                    |
| SNP_95778_A_52302 | NW_004516633.1 | scaffold1424 | 52302                   | GG                              | CC                 | CC               | INTERGENIC      |               |                    |                    |
| SNP_95779_A_4237  | NW_004516634.1 | scaffold1425 | 4237                    | TT                              | CC                 | CC               | INTERGENIC      |               |                    |                    |
| SNP_95780_A_4364  | NW_004516634.1 | scaffold1425 | 4364                    | AA                              | CC                 | CC               | INTERGENIC      |               |                    |                    |
| SNP_95781_A_4381  | NW_004516634.1 | scaffold1425 | 4381                    | AA                              | GG                 | GG               | INTERGENIC      |               |                    |                    |
| SNP_95782_A_4412  | NW_004516634.1 | scaffold1425 | 4412                    | AA                              | CC                 | CC               | INTERGENIC      |               |                    |                    |
| SNP_95783_A_4447  | NW_004516634.1 | scaffold1425 | 4447                    | TT                              | CC                 | CC               | INTERGENIC      |               |                    |                    |
| SNP_95784_A_4525  | NW_004516634.1 | scaffold1425 | 4525                    | GG                              | AA                 | AA               | INTERGENIC      |               |                    |                    |
| SNP_95785_A_4776  | NW_004516634.1 | scaffold1425 | 4776                    | AA                              | CC                 | CC               | INTERGENIC      |               |                    |                    |
| SNP_95786_A_4804  | NW_004516634.1 | scaffold1425 | 4804                    | AA                              | GG                 | GG               | INTERGENIC      |               |                    |                    |
| SNP_95787_A_4814  | NW_004516634.1 | scaffold1425 | 4814                    | TT                              | GG                 | GG               | INTERGENIC      |               |                    |                    |
| SNP_95788_A_4852  | NW_004516634.1 | scaffold1425 | 4852                    | TT                              | AA                 | AA               | INTERGENIC      |               |                    |                    |
| SNP_95789_A_4853  | NW_004516634.1 | scaffold1425 | 4853                    | AA                              | CC                 | CC               | INTERGENIC      |               |                    |                    |
| SNP_95790_A_4874  | NW_004516634.1 | scaffold1425 | 4874                    | AA                              | TT                 | TT               | INTERGENIC      |               |                    |                    |
| SNP_95791_A_4889  | NW_004516634.1 | scaffold1425 | 4889                    | GG                              | AA                 | AA               | INTERGENIC      |               |                    |                    |
| SNP_95792_A_452   | NW_004516635.1 | scaffold1426 | 452                     | TT                              | CC                 | CC               | INTERGENIC      |               |                    |                    |
| SNP_95794_A_5570  | NW_004516635.1 | scaffold1426 | 5570                    | AA                              | GG                 | GG               | INTERGENIC      |               |                    |                    |

| SNPs IDs          | Chromosome IDs | Chromosomes  | Physical positions (bp) | CDC Frontier (Reference genome) | (Pusa 1103 & HPNB) | (ILWC 46 & LPNB) | Sequence genome | Components of | Gene accession IDs | Putative functions |
|-------------------|----------------|--------------|-------------------------|---------------------------------|--------------------|------------------|-----------------|---------------|--------------------|--------------------|
| SNP_95795_A_5631  | NW_004516635.1 | scaffold1426 | 5631                    | TT                              | AA                 | AA               | INTERGENIC      |               |                    |                    |
| SNP_95796_A_5786  | NW_004516635.1 | scaffold1426 | 5786                    | CC                              | TT                 | TT               | INTERGENIC      |               |                    |                    |
| SNP_95798_A_5971  | NW_004516635.1 | scaffold1426 | 5971                    | TT                              | GG                 | GG               | INTERGENIC      |               |                    |                    |
| SNP_95799_A_6191  | NW_004516635.1 | scaffold1426 | 6191                    | TT                              | GG                 | GG               | INTERGENIC      |               |                    |                    |
| SNP_95800_A_6209  | NW_004516635.1 | scaffold1426 | 6209                    | TT                              | CC                 | CC               | INTERGENIC      |               |                    |                    |
| SNP_95801_A_6220  | NW_004516635.1 | scaffold1426 | 6220                    | AA                              | GG                 | GG               | INTERGENIC      |               |                    |                    |
| SNP_95802_A_6332  | NW_004516635.1 | scaffold1426 | 6332                    | AA                              | TT                 | TT               | INTERGENIC      |               |                    |                    |
| SNP_95804_A_6855  | NW_004516635.1 | scaffold1426 | 6855                    | CC                              | TT                 | TT               | INTERGENIC      |               |                    |                    |
| SNP_95805_A_7007  | NW_004516635.1 | scaffold1426 | 7007                    | CC                              | AA                 | AA               | INTERGENIC      |               |                    |                    |
| SNP_95806_A_7023  | NW_004516635.1 | scaffold1426 | 7023                    | TT                              | CC                 | CC               | INTERGENIC      |               |                    |                    |
| SNP_95807_A_7044  | NW_004516635.1 | scaffold1426 | 7044                    | AA                              | GG                 | GG               | INTERGENIC      |               |                    |                    |
| SNP_95808_A_7073  | NW_004516635.1 | scaffold1426 | 7073                    | AA                              | TT                 | TT               | INTERGENIC      |               |                    |                    |
| SNP_95810_A_7241  | NW_004516635.1 | scaffold1426 | 7241                    | AA                              | GG                 | GG               | INTERGENIC      |               |                    |                    |
| SNP_95811_A_7380  | NW_004516635.1 | scaffold1426 | 7380                    | TT                              | CC                 | CC               | INTERGENIC      |               |                    |                    |
| SNP_95812_A_7412  | NW_004516635.1 | scaffold1426 | 7412                    | CC                              | GG                 | GG               | INTERGENIC      |               |                    |                    |
| SNP_95813_A_7439  | NW_004516635.1 | scaffold1426 | 7439                    | CC                              | TT                 | TT               | INTERGENIC      |               |                    |                    |
| SNP_95814_A_11640 | NW_004516635.1 | scaffold1426 | 11640                   | AA                              | TT                 | TT               | INTERGENIC      |               |                    |                    |
| SNP_95815_A_779   | NW_004516636.1 | scaffold1429 | 779                     | GG                              | AA                 | AA               | INTERGENIC      |               |                    |                    |
| SNP_95816_A_787   | NW_004516636.1 | scaffold1429 | 787                     | CC                              | GG                 | GG               | INTERGENIC      |               |                    |                    |
| SNP_95817_A_820   | NW_004516636.1 | scaffold1429 | 820                     | AA                              | GG                 | GG               | INTERGENIC      |               |                    |                    |
| SNP_95819_A_1560  | NW_004516637.1 | scaffold1430 | 1560                    | AA                              | GG                 | GG               | INTERGENIC      |               |                    |                    |
| SNP_95820_A_4425  | NW_004516637.1 | scaffold1430 | 4425                    | AA                              | CC                 | CC               | INTERGENIC      |               |                    |                    |

| SNPs IDs          | Chromosome IDs | Chromosomes  | Physical positions (bp) | CDC Frontier (Reference genome) | (Pusa 1103 & HPNB) | (ILWC 46 & LPNB) | Sequence genome | Components of | Gene accession IDs | Putative functions |
|-------------------|----------------|--------------|-------------------------|---------------------------------|--------------------|------------------|-----------------|---------------|--------------------|--------------------|
| SNP_95821_A_4457  | NW_004516637.1 | scaffold1430 | 4457                    | TT                              | CC                 | CC               | INTERGENIC      |               |                    |                    |
| SNP_95822_A_4482  | NW_004516637.1 | scaffold1430 | 4482                    | CC                              | TT                 | TT               | INTERGENIC      |               |                    |                    |
| SNP_95823_A_4491  | NW_004516637.1 | scaffold1430 | 4491                    | GG                              | AA                 | AA               | INTERGENIC      |               |                    |                    |
| SNP_95824_A_4830  | NW_004516637.1 | scaffold1430 | 4830                    | GG                              | AA                 | AA               | INTERGENIC      |               |                    |                    |
| SNP_95825_A_4841  | NW_004516637.1 | scaffold1430 | 4841                    | TT                              | AA                 | AA               | INTERGENIC      |               |                    |                    |
| SNP_95826_A_4846  | NW_004516637.1 | scaffold1430 | 4846                    | GG                              | AA                 | AA               | INTERGENIC      |               |                    |                    |
| SNP_95827_A_4868  | NW_004516637.1 | scaffold1430 | 4868                    | TT                              | GG                 | GG               | INTERGENIC      |               |                    |                    |
| SNP_95828_A_5241  | NW_004516637.1 | scaffold1430 | 5241                    | AA                              | GG                 | GG               | INTERGENIC      |               |                    |                    |
| SNP_95829_A_5376  | NW_004516637.1 | scaffold1430 | 5376                    | TT                              | CC                 | CC               | INTERGENIC      |               |                    |                    |
| SNP_95830_A_5443  | NW_004516637.1 | scaffold1430 | 5443                    | TT                              | CC                 | CC               | INTERGENIC      |               |                    |                    |
| SNP_95831_A_5689  | NW_004516637.1 | scaffold1430 | 5689                    | AA                              | GG                 | GG               | INTERGENIC      |               |                    |                    |
| SNP_95832_A_5760  | NW_004516637.1 | scaffold1430 | 5760                    | AA                              | TT                 | TT               | INTERGENIC      |               |                    |                    |
| SNP_95833_A_6254  | NW_004516637.1 | scaffold1430 | 6254                    | AA                              | TT                 | TT               | INTERGENIC      |               |                    |                    |
| SNP_95834_A_6832  | NW_004516637.1 | scaffold1430 | 6832                    | GG                              | AA                 | AA               | INTERGENIC      |               |                    |                    |
| SNP_95835_A_1569  | NW_004516638.1 | scaffold1432 | 1569                    | TT                              | CC                 | CC               | INTERGENIC      |               |                    |                    |
| SNP_95836_A_1966  | NW_004516638.1 | scaffold1432 | 1966                    | GG                              | AA                 | AA               | INTERGENIC      |               |                    |                    |
| SNP_95838_A_53497 | NW_004516638.1 | scaffold1432 | 53497                   | AA                              | GG                 | GG               | INTERGENIC      |               |                    |                    |
| SNP_95839_A_53502 | NW_004516638.1 | scaffold1432 | 53502                   | GG                              | CC                 | CC               | INTERGENIC      |               |                    |                    |
| SNP_95840_A_53511 | NW_004516638.1 | scaffold1432 | 53511                   | CC                              | TT                 | TT               | INTERGENIC      |               |                    |                    |
| SNP_95841_A_58321 | NW_004516638.1 | scaffold1432 | 58321                   | CC                              | GG                 | GG               | INTERGENIC      |               |                    |                    |
| SNP_95842_A_59852 | NW_004516638.1 | scaffold1432 | 59852                   | CC                              | AA                 | AA               | INTERGENIC      |               |                    |                    |
| SNP_95844_A_71401 | NW_004516638.1 | scaffold1432 | 71401                   | CC                              | GG                 | GG               | INTERGENIC      |               |                    |                    |

| SNPs IDs          | Chromosome IDs | Chromosomes  | Physical positions (bp) | CDC Frontier (Reference genome) | (Pusa 1103 & HPNB) | (ILWC 46 & LPNB) | Sequence genome | Components of | Gene accession IDs | Putative functions |
|-------------------|----------------|--------------|-------------------------|---------------------------------|--------------------|------------------|-----------------|---------------|--------------------|--------------------|
| SNP_95845_A_79988 | NW_004516638.1 | scaffold1432 | 79988                   | TT                              | CC                 | CC               | INTERGENIC      |               |                    |                    |
| SNP_95846_A_80022 | NW_004516638.1 | scaffold1432 | 80022                   | CC                              | GG                 | GG               | INTERGENIC      |               |                    |                    |
| SNP_95847_A_80033 | NW_004516638.1 | scaffold1432 | 80033                   | TT                              | CC                 | CC               | INTERGENIC      |               |                    |                    |
| SNP_95848_A_80134 | NW_004516638.1 | scaffold1432 | 80134                   | TT                              | CC                 | CC               | INTERGENIC      |               |                    |                    |
| SNP_95850_A_80235 | NW_004516638.1 | scaffold1432 | 80235                   | TT                              | AA                 | AA               | INTERGENIC      |               |                    |                    |
| SNP_95851_A_80283 | NW_004516638.1 | scaffold1432 | 80283                   | TT                              | AA                 | AA               | INTERGENIC      |               |                    |                    |
| SNP_95852_A_80327 | NW_004516638.1 | scaffold1432 | 80327                   | CC                              | TT                 | TT               | INTERGENIC      |               |                    |                    |
| SNP_95853_A_80344 | NW_004516638.1 | scaffold1432 | 80344                   | GG                              | AA                 | AA               | INTERGENIC      |               |                    |                    |
| SNP_95854_A_80402 | NW_004516638.1 | scaffold1432 | 80402                   | CC                              | AA                 | AA               | INTERGENIC      |               |                    |                    |
| SNP_95857_A_80578 | NW_004516638.1 | scaffold1432 | 80578                   | TT                              | AA                 | AA               | INTERGENIC      |               |                    |                    |
| SNP_95858_A_80595 | NW_004516638.1 | scaffold1432 | 80595                   | AA                              | CC                 | CC               | INTERGENIC      |               |                    |                    |
| SNP_95859_A_80627 | NW_004516638.1 | scaffold1432 | 80627                   | AA                              | GG                 | GG               | INTERGENIC      |               |                    |                    |
| SNP_95860_A_80633 | NW_004516638.1 | scaffold1432 | 80633                   | CC                              | TT                 | TT               | INTERGENIC      |               |                    |                    |
| SNP_95861_A_80884 | NW_004516638.1 | scaffold1432 | 80884                   | TT                              | CC                 | CC               | INTERGENIC      |               |                    |                    |
| SNP_95862_A_80924 | NW_004516638.1 | scaffold1432 | 80924                   | AA                              | TT                 | TT               | INTERGENIC      |               |                    |                    |
| SNP_95863_A_80940 | NW_004516638.1 | scaffold1432 | 80940                   | AA                              | GG                 | GG               | INTERGENIC      |               |                    |                    |
| SNP_95864_A_449   | NW_004516639.1 | scaffold1433 | 449                     | AA                              | CC                 | CC               | INTERGENIC      |               |                    |                    |
| SNP_95865_A_479   | NW_004516639.1 | scaffold1433 | 479                     | CC                              | TT                 | TT               | INTERGENIC      |               |                    |                    |
| SNP_95866_A_579   | NW_004516639.1 | scaffold1433 | 579                     | TT                              | AA                 | AA               | INTERGENIC      |               |                    |                    |
| SNP_95867_A_898   | NW_004516639.1 | scaffold1433 | 898                     | CC                              | TT                 | TT               | INTERGENIC      |               |                    |                    |
| SNP_95868_A_3436  | NW_004516639.1 | scaffold1433 | 3436                    | GG                              | AA                 | AA               | INTERGENIC      |               |                    |                    |
| SNP_95869_A_4210  | NW_004516639.1 | scaffold1433 | 4210                    | CC                              | TT                 | TT               | INTERGENIC      |               |                    |                    |

| SNPs IDs          | Chromosome IDs | Chromosomes  | Physical positions (bp) | CDC Frontier (Reference genome) | (Pusa 1103 & HPNB) | (ILWC 46 & LPNB) | Sequence genome | Components of | Gene accession IDs | Putative functions |
|-------------------|----------------|--------------|-------------------------|---------------------------------|--------------------|------------------|-----------------|---------------|--------------------|--------------------|
| SNP_95870_A_4936  | NW_004516639.1 | scaffold1433 | 4936                    | AA                              | GG                 | GG               | INTERGENIC      |               |                    |                    |
| SNP_95871_A_4943  | NW_004516639.1 | scaffold1433 | 4943                    | TT                              | GG                 | GG               | INTERGENIC      |               |                    |                    |
| SNP_95872_A_5909  | NW_004516639.1 | scaffold1433 | 5909                    | GG                              | AA                 | AA               | INTERGENIC      |               |                    |                    |
| SNP_95873_A_8312  | NW_004516639.1 | scaffold1433 | 8312                    | TT                              | GG                 | GG               | INTERGENIC      |               |                    |                    |
| SNP_95874_A_8331  | NW_004516639.1 | scaffold1433 | 8331                    | AA                              | TT                 | TT               | INTERGENIC      |               |                    |                    |
| SNP_95875_A_8358  | NW_004516639.1 | scaffold1433 | 8358                    | AA                              | GG                 | GG               | INTERGENIC      |               |                    |                    |
| SNP_95876_A_8663  | NW_004516639.1 | scaffold1433 | 8663                    | TT                              | CC                 | CC               | INTERGENIC      |               |                    |                    |
| SNP_95877_A_9052  | NW_004516639.1 | scaffold1433 | 9052                    | CC                              | AA                 | AA               | INTERGENIC      |               |                    |                    |
| SNP_95878_A_9094  | NW_004516639.1 | scaffold1433 | 9094                    | AA                              | CC                 | CC               | INTERGENIC      |               |                    |                    |
| SNP_95879_A_9327  | NW_004516639.1 | scaffold1433 | 9327                    | AA                              | GG                 | GG               | INTERGENIC      |               |                    |                    |
| SNP_95880_A_15512 | NW_004516639.1 | scaffold1433 | 15512                   | TT                              | GG                 | GG               | INTERGENIC      |               |                    |                    |
| SNP_95881_A_15716 | NW_004516639.1 | scaffold1433 | 15716                   | GG                              | AA                 | AA               | INTERGENIC      |               |                    |                    |
| SNP_95882_A_15737 | NW_004516639.1 | scaffold1433 | 15737                   | GG                              | AA                 | AA               | INTERGENIC      |               |                    |                    |
| SNP_95883_A_15750 | NW_004516639.1 | scaffold1433 | 15750                   | AA                              | GG                 | GG               | INTERGENIC      |               |                    |                    |
| SNP_95884_A_15787 | NW_004516639.1 | scaffold1433 | 15787                   | CC                              | AA                 | AA               | INTERGENIC      |               |                    |                    |
| SNP_95885_A_15798 | NW_004516639.1 | scaffold1433 | 15798                   | GG                              | AA                 | AA               | INTERGENIC      |               |                    |                    |
| SNP_95886_A_17136 | NW_004516639.1 | scaffold1433 | 17136                   | AA                              | GG                 | GG               | INTERGENIC      |               |                    |                    |
| SNP_95887_A_17153 | NW_004516639.1 | scaffold1433 | 17153                   | AA                              | GG                 | GG               | INTERGENIC      |               |                    |                    |
| SNP_95888_A_18727 | NW_004516639.1 | scaffold1433 | 18727                   | AA                              | GG                 | GG               | INTERGENIC      |               |                    |                    |
| SNP_95889_A_18927 | NW_004516639.1 | scaffold1433 | 18927                   | AA                              | CC                 | CC               | INTERGENIC      |               |                    |                    |
| SNP_95890_A_18945 | NW_004516639.1 | scaffold1433 | 18945                   | TT                              | CC                 | CC               | INTERGENIC      |               |                    |                    |
| SNP_95891_A_19088 | NW_004516639.1 | scaffold1433 | 19088                   | TT                              | GG                 | GG               | INTERGENIC      |               |                    |                    |

| SNPs IDs          | Chromosome IDs | Chromosomes  | Physical positions (bp) | CDC Frontier (Reference genome) | (Pusa 1103 & HPNB) | (ILWC 46 & LPNB) | Sequence genome | Components of | Gene accession IDs | Putative functions |
|-------------------|----------------|--------------|-------------------------|---------------------------------|--------------------|------------------|-----------------|---------------|--------------------|--------------------|
| SNP_95892_A_19090 | NW_004516639.1 | scaffold1433 | 19090                   | TT                              | CC                 | CC               | INTERGENIC      |               |                    |                    |
| SNP_95893_A_20871 | NW_004516639.1 | scaffold1433 | 20871                   | TT                              | CC                 | CC               | INTERGENIC      |               |                    |                    |
| SNP_95894_A_21067 | NW_004516639.1 | scaffold1433 | 21067                   | AA                              | TT                 | TT               | INTERGENIC      |               |                    |                    |
| SNP_95895_A_21076 | NW_004516639.1 | scaffold1433 | 21076                   | AA                              | GG                 | GG               | INTERGENIC      |               |                    |                    |
| SNP_95896_A_21101 | NW_004516639.1 | scaffold1433 | 21101                   | GG                              | AA                 | AA               | INTERGENIC      |               |                    |                    |
| SNP_95898_A_21161 | NW_004516639.1 | scaffold1433 | 21161                   | CC                              | TT                 | TT               | INTERGENIC      |               |                    |                    |
| SNP_95899_A_21186 | NW_004516639.1 | scaffold1433 | 21186                   | CC                              | TT                 | TT               | INTERGENIC      |               |                    |                    |
| SNP_95900_A_21239 | NW_004516639.1 | scaffold1433 | 21239                   | CC                              | TT                 | TT               | INTERGENIC      |               |                    |                    |
| SNP_95901_A_21280 | NW_004516639.1 | scaffold1433 | 21280                   | AA                              | TT                 | TT               | INTERGENIC      |               |                    |                    |
| SNP_95902_A_21298 | NW_004516639.1 | scaffold1433 | 21298                   | GG                              | AA                 | AA               | INTERGENIC      |               |                    |                    |
| SNP_95903_A_21306 | NW_004516639.1 | scaffold1433 | 21306                   | AA                              | GG                 | GG               | INTERGENIC      |               |                    |                    |
| SNP_95904_A_21401 | NW_004516639.1 | scaffold1433 | 21401                   | TT                              | CC                 | CC               | INTERGENIC      |               |                    |                    |
| SNP_95905_A_21534 | NW_004516639.1 | scaffold1433 | 21534                   | TT                              | GG                 | GG               | INTERGENIC      |               |                    |                    |
| SNP_95906_A_21662 | NW_004516639.1 | scaffold1433 | 21662                   | AA                              | TT                 | TT               | INTERGENIC      |               |                    |                    |
| SNP_95907_A_21696 | NW_004516639.1 | scaffold1433 | 21696                   | GG                              | AA                 | AA               | INTERGENIC      |               |                    |                    |
| SNP_95908_A_21735 | NW_004516639.1 | scaffold1433 | 21735                   | TT                              | GG                 | GG               | INTERGENIC      |               |                    |                    |
| SNP_95910_A_21803 | NW_004516639.1 | scaffold1433 | 21803                   | GG                              | TT                 | TT               | INTERGENIC      |               |                    |                    |
| SNP_95911_A_21828 | NW_004516639.1 | scaffold1433 | 21828                   | GG                              | AA                 | AA               | INTERGENIC      |               |                    |                    |
| SNP_95912_A_21886 | NW_004516639.1 | scaffold1433 | 21886                   | CC                              | TT                 | TT               | INTERGENIC      |               |                    |                    |
| SNP_95914_A_22036 | NW_004516639.1 | scaffold1433 | 22036                   | CC                              | GG                 | GG               | INTERGENIC      |               |                    |                    |
| SNP_95915_A_22054 | NW_004516639.1 | scaffold1433 | 22054                   | CC                              | AA                 | AA               | INTERGENIC      |               |                    |                    |
| SNP_95916_A_22055 | NW_004516639.1 | scaffold1433 | 22055                   | TT                              | CC                 | CC               | INTERGENIC      |               |                    |                    |

| SNPs IDs          | Chromosome IDs | Chromosomes  | Physical positions (bp) | CDC Frontier (Reference genome) | (Pusa 1103 & HPNB) | (ILWC 46 & LPNB) | Sequence genome | Components of | Gene accession IDs | Putative functions |
|-------------------|----------------|--------------|-------------------------|---------------------------------|--------------------|------------------|-----------------|---------------|--------------------|--------------------|
| SNP_95917_A_22157 | NW_004516639.1 | scaffold1433 | 22157                   | CC                              | AA                 | AA               | INTERGENIC      |               |                    |                    |
| SNP_95918_A_22214 | NW_004516639.1 | scaffold1433 | 22214                   | TT                              | CC                 | CC               | INTERGENIC      |               |                    |                    |
| SNP_95919_A_22239 | NW_004516639.1 | scaffold1433 | 22239                   | GG                              | AA                 | AA               | INTERGENIC      |               |                    |                    |
| SNP_95920_A_22328 | NW_004516639.1 | scaffold1433 | 22328                   | TT                              | GG                 | GG               | INTERGENIC      |               |                    |                    |
| SNP_95921_A_22331 | NW_004516639.1 | scaffold1433 | 22331                   | GG                              | TT                 | TT               | INTERGENIC      |               |                    |                    |
| SNP_95922_A_22393 | NW_004516639.1 | scaffold1433 | 22393                   | GG                              | CC                 | CC               | INTERGENIC      |               |                    |                    |
| SNP_95923_A_22413 | NW_004516639.1 | scaffold1433 | 22413                   | TT                              | GG                 | GG               | INTERGENIC      |               |                    |                    |
| SNP_95924_A_22457 | NW_004516639.1 | scaffold1433 | 22457                   | AA                              | GG                 | GG               | INTERGENIC      |               |                    |                    |
| SNP_95925_A_22489 | NW_004516639.1 | scaffold1433 | 22489                   | CC                              | TT                 | TT               | INTERGENIC      |               |                    |                    |
| SNP_95926_A_22493 | NW_004516639.1 | scaffold1433 | 22493                   | CC                              | TT                 | TT               | INTERGENIC      |               |                    |                    |
| SNP_95927_A_22527 | NW_004516639.1 | scaffold1433 | 22527                   | CC                              | TT                 | TT               | INTERGENIC      |               |                    |                    |
| SNP_95928_A_22543 | NW_004516639.1 | scaffold1433 | 22543                   | AA                              | TT                 | TT               | INTERGENIC      |               |                    |                    |
| SNP_95929_A_22584 | NW_004516639.1 | scaffold1433 | 22584                   | TT                              | AA                 | AA               | INTERGENIC      |               |                    |                    |
| SNP_95930_A_22638 | NW_004516639.1 | scaffold1433 | 22638                   | CC                              | GG                 | GG               | INTERGENIC      |               |                    |                    |
| SNP_95931_A_22669 | NW_004516639.1 | scaffold1433 | 22669                   | TT                              | CC                 | CC               | INTERGENIC      |               |                    |                    |
| SNP_95932_A_22692 | NW_004516639.1 | scaffold1433 | 22692                   | AA                              | GG                 | GG               | INTERGENIC      |               |                    |                    |
| SNP_95933_A_22721 | NW_004516639.1 | scaffold1433 | 22721                   | GG                              | CC                 | CC               | INTERGENIC      |               |                    |                    |
| SNP_95934_A_22818 | NW_004516639.1 | scaffold1433 | 22818                   | CC                              | AA                 | AA               | INTERGENIC      |               |                    |                    |
| SNP_95935_A_22870 | NW_004516639.1 | scaffold1433 | 22870                   | TT                              | GG                 | GG               | INTERGENIC      |               |                    |                    |
| SNP_95936_A_23040 | NW_004516639.1 | scaffold1433 | 23040                   | AA                              | TT                 | TT               | INTERGENIC      |               |                    |                    |
| SNP_95937_A_23157 | NW_004516639.1 | scaffold1433 | 23157                   | CC                              | AA                 | AA               | INTERGENIC      |               |                    |                    |
| SNP_95938_A_24339 | NW_004516639.1 | scaffold1433 | 24339                   | GG                              | CC                 | CC               | INTERGENIC      |               |                    |                    |

| SNPs IDs          | Chromosome IDs | Chromosomes  | Physical positions (bp) | CDC Frontier (Reference genome) | (Pusa 1103 & HPNB) | (ILWC 46 & LPNB) | Sequence genome | Components of | Gene accession IDs | Putative functions |
|-------------------|----------------|--------------|-------------------------|---------------------------------|--------------------|------------------|-----------------|---------------|--------------------|--------------------|
| SNP_95939_A_24689 | NW_004516639.1 | scaffold1433 | 24689                   | CC                              | TT                 | TT               | INTERGENIC      |               |                    |                    |
| SNP_95940_A_24700 | NW_004516639.1 | scaffold1433 | 24700                   | AA                              | TT                 | TT               | INTERGENIC      |               |                    |                    |
| SNP_95941_A_24859 | NW_004516639.1 | scaffold1433 | 24859                   | GG                              | AA                 | AA               | INTERGENIC      |               |                    |                    |
| SNP_95942_A_24964 | NW_004516639.1 | scaffold1433 | 24964                   | AA                              | GG                 | GG               | INTERGENIC      |               |                    |                    |
| SNP_95943_A_24979 | NW_004516639.1 | scaffold1433 | 24979                   | AA                              | GG                 | GG               | INTERGENIC      |               |                    |                    |
| SNP_95944_A_25051 | NW_004516639.1 | scaffold1433 | 25051                   | AA                              | GG                 | GG               | INTERGENIC      |               |                    |                    |
| SNP_95945_A_25104 | NW_004516639.1 | scaffold1433 | 25104                   | TT                              | CC                 | CC               | INTERGENIC      |               |                    |                    |
| SNP_95946_A_25106 | NW_004516639.1 | scaffold1433 | 25106                   | GG                              | TT                 | TT               | INTERGENIC      |               |                    |                    |
| SNP_95947_A_25108 | NW_004516639.1 | scaffold1433 | 25108                   | CC                              | TT                 | TT               | INTERGENIC      |               |                    |                    |
| SNP_95948_A_25134 | NW_004516639.1 | scaffold1433 | 25134                   | CC                              | TT                 | TT               | INTERGENIC      |               |                    |                    |
| SNP_95949_A_25424 | NW_004516639.1 | scaffold1433 | 25424                   | GG                              | CC                 | CC               | INTERGENIC      |               |                    |                    |
| SNP_95950_A_25594 | NW_004516639.1 | scaffold1433 | 25594                   | TT                              | CC                 | CC               | INTERGENIC      |               |                    |                    |
| SNP_95951_A_25889 | NW_004516639.1 | scaffold1433 | 25889                   | GG                              | CC                 | CC               | INTERGENIC      |               |                    |                    |
| SNP_95952_A_26323 | NW_004516639.1 | scaffold1433 | 26323                   | CC                              | AA                 | AA               | INTERGENIC      |               |                    |                    |
| SNP_95953_A_32045 | NW_004516639.1 | scaffold1433 | 32045                   | AA                              | CC                 | CC               | INTERGENIC      |               |                    |                    |
| SNP_95954_A_33296 | NW_004516639.1 | scaffold1433 | 33296                   | TT                              | CC                 | CC               | INTERGENIC      |               |                    |                    |
| SNP_95955_A_33555 | NW_004516639.1 | scaffold1433 | 33555                   | AA                              | TT                 | TT               | INTERGENIC      |               |                    |                    |
| SNP_95956_A_33556 | NW_004516639.1 | scaffold1433 | 33556                   | GG                              | AA                 | AA               | INTERGENIC      |               |                    |                    |
| SNP_95959_A_38887 | NW_004516639.1 | scaffold1433 | 38887                   | TT                              | CC                 | CC               | INTERGENIC      |               |                    |                    |
| SNP_95960_A_39179 | NW_004516639.1 | scaffold1433 | 39179                   | GG                              | AA                 | AA               | INTERGENIC      |               |                    |                    |
| SNP_95961_A_722   | NW_004516640.1 | scaffold1436 | 722                     | GG                              | AA                 | AA               | INTERGENIC      |               |                    |                    |
| SNP_95962_A_1305  | NW_004516640.1 | scaffold1436 | 1305                    | GG                              | AA                 | AA               | INTERGENIC      |               |                    |                    |



| SNPs IDs           | Chromosome IDs | Chromosomes  | Physical positions (bp) | CDC Frontier (Reference genome) | (Pusa 1103 & HPNB) | (ILWC 46 & LPNB) | Sequence Components of genome | Gene accession IDs | Putative functions           |
|--------------------|----------------|--------------|-------------------------|---------------------------------|--------------------|------------------|-------------------------------|--------------------|------------------------------|
| SNP_95964_A_64     | NW_004516641.1 | scaffold1437 | 64                      | CC                              | TT                 | TT               | INTERGENIC                    |                    |                              |
| SNP_95965_A_85     | NW_004516641.1 | scaffold1437 | 85                      | AA                              | GG                 | GG               | INTERGENIC                    |                    |                              |
| SNP_95966_A_91     | NW_004516641.1 | scaffold1437 | 91                      | GG                              | AA                 | AA               | INTERGENIC                    |                    |                              |
| SNP_95967_A_98     | NW_004516641.1 | scaffold1437 | 98                      | TT                              | CC                 | CC               | INTERGENIC                    |                    |                              |
| SNP_95969_A_199000 | NW_004516642.1 | scaffold1439 | 199000                  | AA                              | GG                 | GG               | URR                           | 101502227          | potassium transporter 4      |
| SNP_95970_A_199541 | NW_004516642.1 | scaffold1439 | 199541                  | TT                              | AA                 | AA               | URR                           | 101502227          | potassium transporter 4      |
| SNP_95971_A_248568 | NW_004516642.1 | scaffold1439 | 248568                  | GG                              | TT                 | TT               | INTERGENIC                    |                    |                              |
| SNP_95972_A_248575 | NW_004516642.1 | scaffold1439 | 248575                  | CC                              | GG                 | GG               | INTERGENIC                    |                    |                              |
| SNP_95973_A_248847 | NW_004516642.1 | scaffold1439 | 248847                  | CC                              | AA                 | AA               | INTERGENIC                    |                    |                              |
| SNP_95974_A_270779 | NW_004516642.1 | scaffold1439 | 270779                  | GG                              | AA                 | AA               | NON_SYNONYMOUS_CODING         | 101505328          | uncharacterized LOC101505328 |
| SNP_95975_A_270782 | NW_004516642.1 | scaffold1439 | 270782                  | CC                              | TT                 | TT               | SYNONYMOUS_CODING             | 101505328          | uncharacterized LOC101505328 |
| SNP_95976_A_274440 | NW_004516642.1 | scaffold1439 | 274440                  | CC                              | TT                 | TT               | INTERGENIC                    |                    |                              |
| SNP_95977_A_281509 | NW_004516642.1 | scaffold1439 | 281509                  | TT                              | GG                 | GG               | INTERGENIC                    |                    |                              |
| SNP_95978_A_281511 | NW_004516642.1 | scaffold1439 | 281511                  | CC                              | TT                 | TT               | INTERGENIC                    |                    |                              |
| SNP_95979_A_1262   | NW_004516643.1 | scaffold1440 | 1262                    | AA                              | GG                 | GG               | INTERGENIC                    |                    |                              |
| SNP_95980_A_1470   | NW_004516643.1 | scaffold1440 | 1470                    | CC                              | TT                 | TT               | INTERGENIC                    |                    |                              |
| SNP_95981_A_2645   | NW_004516643.1 | scaffold1440 | 2645                    | CC                              | AA                 | AA               | INTERGENIC                    |                    |                              |
| SNP_95982_A_2728   | NW_004516643.1 | scaffold1440 | 2728                    | GG                              | TT                 | TT               | INTERGENIC                    |                    |                              |
| SNP_95983_A_2730   | NW_004516643.1 | scaffold1440 | 2730                    | TT                              | AA                 | AA               | INTERGENIC                    |                    |                              |
| SNP_95984_A_2782   | NW_004516643.1 | scaffold1440 | 2782                    | CC                              | TT                 | TT               | INTERGENIC                    |                    |                              |
| SNP_95985_A_2790   | NW_004516643.1 | scaffold1440 | 2790                    | TT                              | CC                 | CC               | INTERGENIC                    |                    |                              |
| SNP_95986_A_2816   | NW_004516643.1 | scaffold1440 | 2816                    | AA                              | CC                 | CC               | INTERGENIC                    |                    |                              |

| SNPs IDs          | Chromosome IDs | Chromosomes  | Physical positions (bp) | CDC Frontier genome (Reference genome) | (Pusa 1103 & HPNB) | (ILWC 46 & LPNB) | Sequence genome | Components of | Gene accession IDs | Putative functions |
|-------------------|----------------|--------------|-------------------------|----------------------------------------|--------------------|------------------|-----------------|---------------|--------------------|--------------------|
| SNP_95987_A_2843  | NW_004516643.1 | scaffold1440 | 2843                    | GG                                     | TT                 | TT               | INTERGENIC      |               |                    |                    |
| SNP_95988_A_2861  | NW_004516643.1 | scaffold1440 | 2861                    | CC                                     | TT                 | TT               | INTERGENIC      |               |                    |                    |
| SNP_95989_A_2871  | NW_004516643.1 | scaffold1440 | 2871                    | CC                                     | GG                 | GG               | INTERGENIC      |               |                    |                    |
| SNP_95990_A_2881  | NW_004516643.1 | scaffold1440 | 2881                    | GG                                     | AA                 | AA               | INTERGENIC      |               |                    |                    |
| SNP_95991_A_3029  | NW_004516643.1 | scaffold1440 | 3029                    | AA                                     | GG                 | GG               | INTERGENIC      |               |                    |                    |
| SNP_95992_A_3088  | NW_004516643.1 | scaffold1440 | 3088                    | TT                                     | CC                 | CC               | INTERGENIC      |               |                    |                    |
| SNP_95993_A_3091  | NW_004516643.1 | scaffold1440 | 3091                    | AA                                     | TT                 | TT               | INTERGENIC      |               |                    |                    |
| SNP_95994_A_3099  | NW_004516643.1 | scaffold1440 | 3099                    | TT                                     | GG                 | GG               | INTERGENIC      |               |                    |                    |
| SNP_95995_A_3121  | NW_004516643.1 | scaffold1440 | 3121                    | TT                                     | CC                 | CC               | INTERGENIC      |               |                    |                    |
| SNP_95996_A_3155  | NW_004516643.1 | scaffold1440 | 3155                    | AA                                     | GG                 | GG               | INTERGENIC      |               |                    |                    |
| SNP_95997_A_49207 | NW_004516643.1 | scaffold1440 | 49207                   | CC                                     | TT                 | TT               | INTERGENIC      |               |                    |                    |
| SNP_95998_A_49456 | NW_004516643.1 | scaffold1440 | 49456                   | GG                                     | AA                 | AA               | INTERGENIC      |               |                    |                    |
| SNP_95999_A_49478 | NW_004516643.1 | scaffold1440 | 49478                   | CC                                     | TT                 | TT               | INTERGENIC      |               |                    |                    |
| SNP_96000_A_49577 | NW_004516643.1 | scaffold1440 | 49577                   | GG                                     | CC                 | CC               | INTERGENIC      |               |                    |                    |
| SNP_96001_A_1407  | NW_004516646.1 | scaffold1445 | 1407                    | TT                                     | AA                 | AA               | INTERGENIC      |               |                    |                    |
| SNP_96002_A_2933  | NW_004516646.1 | scaffold1445 | 2933                    | CC                                     | TT                 | TT               | INTERGENIC      |               |                    |                    |
| SNP_96003_A_4556  | NW_004516646.1 | scaffold1445 | 4556                    | AA                                     | CC                 | CC               | INTERGENIC      |               |                    |                    |
| SNP_96004_A_4589  | NW_004516646.1 | scaffold1445 | 4589                    | AA                                     | TT                 | TT               | INTERGENIC      |               |                    |                    |
| SNP_96005_A_11301 | NW_004516647.1 | scaffold1446 | 11301                   | GG                                     | AA                 | AA               | INTERGENIC      |               |                    |                    |
| SNP_96006_A_13210 | NW_004516647.1 | scaffold1446 | 13210                   | GG                                     | AA                 | AA               | INTERGENIC      |               |                    |                    |
| SNP_96008_A_10279 | NW_004516648.1 | scaffold1447 | 10279                   | TT                                     | CC                 | CC               | INTERGENIC      |               |                    |                    |
| SNP_96009_A_11576 | NW_004516648.1 | scaffold1447 | 11576                   | GG                                     | CC                 | CC               | INTERGENIC      |               |                    |                    |

| SNPs IDs          | Chromosome IDs | Chromosomes  | Physical positions (bp) | CDC Frontier (Reference genome) | (Pusa 1103 & HPNB) | (ILWC 46 & LPNB) | Sequence genome | Components of | Gene accession IDs | Putative functions |
|-------------------|----------------|--------------|-------------------------|---------------------------------|--------------------|------------------|-----------------|---------------|--------------------|--------------------|
| SNP_96010_A_18932 | NW_004516648.1 | scaffold1447 | 18932                   | TT                              | GG                 | GG               | INTERGENIC      |               |                    |                    |
| SNP_96011_A_18945 | NW_004516648.1 | scaffold1447 | 18945                   | TT                              | CC                 | CC               | INTERGENIC      |               |                    |                    |
| SNP_96012_A_20108 | NW_004516648.1 | scaffold1447 | 20108                   | TT                              | CC                 | CC               | INTERGENIC      |               |                    |                    |
| SNP_96013_A_20123 | NW_004516648.1 | scaffold1447 | 20123                   | AA                              | GG                 | GG               | INTERGENIC      |               |                    |                    |
| SNP_96014_A_20163 | NW_004516648.1 | scaffold1447 | 20163                   | TT                              | GG                 | GG               | INTERGENIC      |               |                    |                    |
| SNP_96015_A_20164 | NW_004516648.1 | scaffold1447 | 20164                   | TT                              | AA                 | AA               | INTERGENIC      |               |                    |                    |
| SNP_96016_A_20366 | NW_004516648.1 | scaffold1447 | 20366                   | TT                              | CC                 | CC               | INTERGENIC      |               |                    |                    |
| SNP_96017_A_20418 | NW_004516648.1 | scaffold1447 | 20418                   | AA                              | GG                 | GG               | INTERGENIC      |               |                    |                    |
| SNP_96018_A_20423 | NW_004516648.1 | scaffold1447 | 20423                   | CC                              | TT                 | TT               | INTERGENIC      |               |                    |                    |
| SNP_96019_A_20438 | NW_004516648.1 | scaffold1447 | 20438                   | TT                              | CC                 | CC               | INTERGENIC      |               |                    |                    |
| SNP_96020_A_20439 | NW_004516648.1 | scaffold1447 | 20439                   | CC                              | TT                 | TT               | INTERGENIC      |               |                    |                    |
| SNP_96021_A_20450 | NW_004516648.1 | scaffold1447 | 20450                   | GG                              | TT                 | TT               | INTERGENIC      |               |                    |                    |
| SNP_96022_A_21271 | NW_004516648.1 | scaffold1447 | 21271                   | TT                              | CC                 | CC               | INTERGENIC      |               |                    |                    |
| SNP_96023_A_21615 | NW_004516648.1 | scaffold1447 | 21615                   | GG                              | TT                 | TT               | INTERGENIC      |               |                    |                    |
| SNP_96024_A_21660 | NW_004516648.1 | scaffold1447 | 21660                   | TT                              | AA                 | AA               | INTERGENIC      |               |                    |                    |
| SNP_96025_A_21684 | NW_004516648.1 | scaffold1447 | 21684                   | TT                              | CC                 | CC               | INTERGENIC      |               |                    |                    |
| SNP_96027_A_24328 | NW_004516648.1 | scaffold1447 | 24328                   | TT                              | GG                 | GG               | INTERGENIC      |               |                    |                    |
| SNP_96028_A_24370 | NW_004516648.1 | scaffold1447 | 24370                   | CC                              | TT                 | TT               | INTERGENIC      |               |                    |                    |
| SNP_96029_A_24371 | NW_004516648.1 | scaffold1447 | 24371                   | AA                              | GG                 | GG               | INTERGENIC      |               |                    |                    |
| SNP_96030_A_24635 | NW_004516648.1 | scaffold1447 | 24635                   | TT                              | CC                 | CC               | INTERGENIC      |               |                    |                    |
| SNP_96031_A_24663 | NW_004516648.1 | scaffold1447 | 24663                   | AA                              | CC                 | CC               | INTERGENIC      |               |                    |                    |
| SNP_96033_A_24684 | NW_004516648.1 | scaffold1447 | 24684                   | GG                              | AA                 | AA               | INTERGENIC      |               |                    |                    |

| SNPs IDs          | Chromosome IDs | Chromosomes  | Physical positions (bp) | CDC Frontier (Reference genome) | (Pusa 1103 & HPNB) | (ILWC 46 & LPNB) | Sequence Components of genome | Gene accession IDs | Putative functions |
|-------------------|----------------|--------------|-------------------------|---------------------------------|--------------------|------------------|-------------------------------|--------------------|--------------------|
| SNP_96034_A_24780 | NW_004516648.1 | scaffold1447 | 24780                   | GG                              | AA                 | AA               | INTERGENIC                    |                    |                    |
| SNP_96035_A_26280 | NW_004516648.1 | scaffold1447 | 26280                   | AA                              | TT                 | TT               | INTERGENIC                    |                    |                    |
| SNP_96036_A_26295 | NW_004516648.1 | scaffold1447 | 26295                   | GG                              | AA                 | AA               | INTERGENIC                    |                    |                    |
| SNP_96037_A_30861 | NW_004516648.1 | scaffold1447 | 30861                   | GG                              | CC                 | CC               | INTERGENIC                    |                    |                    |
| SNP_96038_A_30872 | NW_004516648.1 | scaffold1447 | 30872                   | TT                              | AA                 | AA               | INTERGENIC                    |                    |                    |
| SNP_96039_A_30879 | NW_004516648.1 | scaffold1447 | 30879                   | CC                              | TT                 | TT               | INTERGENIC                    |                    |                    |
| SNP_96040_A_30937 | NW_004516648.1 | scaffold1447 | 30937                   | GG                              | TT                 | TT               | INTERGENIC                    |                    |                    |
| SNP_96041_A_30964 | NW_004516648.1 | scaffold1447 | 30964                   | CC                              | TT                 | TT               | INTERGENIC                    |                    |                    |
| SNP_96042_A_43349 | NW_004516648.1 | scaffold1447 | 43349                   | CC                              | TT                 | TT               | INTERGENIC                    |                    |                    |
| SNP_96043_A_585   | NW_004516649.1 | scaffold1448 | 585                     | TT                              | GG                 | GG               | INTERGENIC                    |                    |                    |
| SNP_96044_A_650   | NW_004516649.1 | scaffold1448 | 650                     | GG                              | AA                 | AA               | INTERGENIC                    |                    |                    |
| SNP_96045_A_861   | NW_004516649.1 | scaffold1448 | 861                     | GG                              | AA                 | AA               | INTERGENIC                    |                    |                    |
| SNP_96046_A_5793  | NW_004516649.1 | scaffold1448 | 5793                    | CC                              | AA                 | AA               | INTERGENIC                    |                    |                    |
| SNP_96048_A_12043 | NW_004516649.1 | scaffold1448 | 12043                   | TT                              | GG                 | GG               | INTERGENIC                    |                    |                    |
| SNP_96049_A_20646 | NW_004516649.1 | scaffold1448 | 20646                   | GG                              | AA                 | AA               | INTRON                        | 101506404          | Unknown function   |
| SNP_96050_A_20685 | NW_004516649.1 | scaffold1448 | 20685                   | TT                              | CC                 | CC               | INTRON                        | 101506404          | Unknown function   |
| SNP_96051_A_20698 | NW_004516649.1 | scaffold1448 | 20698                   | CC                              | AA                 | AA               | INTRON                        | 101506404          | Unknown function   |
| SNP_96052_A_20706 | NW_004516649.1 | scaffold1448 | 20706                   | AA                              | GG                 | GG               | INTRON                        | 101506404          | Unknown function   |
| SNP_96053_A_20749 | NW_004516649.1 | scaffold1448 | 20749                   | TT                              | CC                 | CC               | INTRON                        | 101506404          | Unknown function   |
| SNP_96054_A_20751 | NW_004516649.1 | scaffold1448 | 20751                   | TT                              | GG                 | GG               | INTRON                        | 101506404          | Unknown function   |
| SNP_96055_A_20990 | NW_004516649.1 | scaffold1448 | 20990                   | AA                              | GG                 | GG               | INTRON                        | 101506404          | Unknown function   |
| SNP_96056_A_21025 | NW_004516649.1 | scaffold1448 | 21025                   | AA                              | CC                 | CC               | INTRON                        | 101506404          | Unknown function   |

| SNPs IDs          | Chromosome IDs | Chromosomes  | Physical positions (bp) | CDC Frontier (Reference genome) | (Pusa 1103 & HPNB) | (ILWC 46 & LPNB) | Sequence Components of genome | Gene accession IDs | Putative functions |
|-------------------|----------------|--------------|-------------------------|---------------------------------|--------------------|------------------|-------------------------------|--------------------|--------------------|
| SNP_96057_A_21034 | NW_004516649.1 | scaffold1448 | 21034                   | GG                              | TT                 | TT               | INTRON                        | 101506404          | Unknown function   |
| SNP_96058_A_21039 | NW_004516649.1 | scaffold1448 | 21039                   | AA                              | GG                 | GG               | INTRON                        | 101506404          | Unknown function   |
| SNP_96059_A_30131 | NW_004516649.1 | scaffold1448 | 30131                   | CC                              | AA                 | AA               | INTERGENIC                    |                    |                    |
| SNP_96060_A_32834 | NW_004516649.1 | scaffold1448 | 32834                   | AA                              | TT                 | TT               | INTERGENIC                    |                    |                    |
| SNP_96062_A_38631 | NW_004516649.1 | scaffold1448 | 38631                   | CC                              | TT                 | TT               | INTERGENIC                    |                    |                    |
| SNP_96063_A_40798 | NW_004516649.1 | scaffold1448 | 40798                   | CC                              | AA                 | AA               | INTERGENIC                    |                    |                    |
| SNP_96064_A_41006 | NW_004516649.1 | scaffold1448 | 41006                   | TT                              | CC                 | CC               | INTERGENIC                    |                    |                    |
| SNP_96065_A_42593 | NW_004516649.1 | scaffold1448 | 42593                   | AA                              | TT                 | TT               | INTERGENIC                    |                    |                    |
| SNP_96066_A_52265 | NW_004516649.1 | scaffold1448 | 52265                   | CC                              | GG                 | GG               | INTRON                        | 101505659          | exportin-7-like    |
| SNP_96067_A_52267 | NW_004516649.1 | scaffold1448 | 52267                   | AA                              | GG                 | GG               | INTRON                        | 101505659          | exportin-7-like    |
| SNP_96068_A_67438 | NW_004516649.1 | scaffold1448 | 67438                   | AA                              | TT                 | TT               | INTRON                        | 101505659          | exportin-7-like    |
| SNP_96069_A_70808 | NW_004516649.1 | scaffold1448 | 70808                   | GG                              | AA                 | AA               | INTRON                        | 101505659          | exportin-7-like    |
| SNP_96070_A_79659 | NW_004516649.1 | scaffold1448 | 79659                   | TT                              | CC                 | CC               | INTERGENIC                    |                    |                    |
| SNP_96071_A_79663 | NW_004516649.1 | scaffold1448 | 79663                   | CC                              | AA                 | AA               | INTERGENIC                    |                    |                    |
| SNP_96072_A_80510 | NW_004516649.1 | scaffold1448 | 80510                   | AA                              | GG                 | GG               | INTERGENIC                    |                    |                    |
| SNP_96073_A_90092 | NW_004516649.1 | scaffold1448 | 90092                   | GG                              | CC                 | CC               | INTRON                        | 101505659          | exportin-7-like    |
| SNP_96074_A_90100 | NW_004516649.1 | scaffold1448 | 90100                   | AA                              | GG                 | GG               | INTRON                        | 101505659          | exportin-7-like    |
| SNP_96075_A_90120 | NW_004516649.1 | scaffold1448 | 90120                   | TT                              | CC                 | CC               | INTRON                        | 101505659          | exportin-7-like    |
| SNP_96076_A_90179 | NW_004516649.1 | scaffold1448 | 90179                   | GG                              | AA                 | AA               | INTRON                        | 101505659          | exportin-7-like    |
| SNP_96077_A_90180 | NW_004516649.1 | scaffold1448 | 90180                   | TT                              | AA                 | AA               | INTRON                        | 101505659          | exportin-7-like    |
| SNP_96078_A_90197 | NW_004516649.1 | scaffold1448 | 90197                   | AA                              | GG                 | GG               | INTRON                        | 101505659          | exportin-7-like    |
| SNP_96079_A_90322 | NW_004516649.1 | scaffold1448 | 90322                   | GG                              | AA                 | AA               | INTRON                        | 101505659          | exportin-7-like    |

| SNPs IDs           | Chromosome IDs | Chromosomes  | Physical positions (bp) | CDC Frontier genome (Reference genome) | (Pusa 1103 & HPNB) | (ILWC 46 & LPNB) | Sequence Components of genome | Gene accession IDs | Putative functions |
|--------------------|----------------|--------------|-------------------------|----------------------------------------|--------------------|------------------|-------------------------------|--------------------|--------------------|
| SNP_96080_A_90420  | NW_004516649.1 | scaffold1448 | 90420                   | GG                                     | AA                 | AA               | INTRON                        | 101505659          | exportin-7-like    |
| SNP_96081_A_90467  | NW_004516649.1 | scaffold1448 | 90467                   | GG                                     | CC                 | CC               | INTRON                        | 101505659          | exportin-7-like    |
| SNP_96082_A_90509  | NW_004516649.1 | scaffold1448 | 90509                   | AA                                     | GG                 | GG               | INTRON                        | 101505659          | exportin-7-like    |
| SNP_96083_A_92400  | NW_004516649.1 | scaffold1448 | 92400                   | TT                                     | AA                 | AA               | URR                           | 101505659          | exportin-7-like    |
| SNP_96085_A_102110 | NW_004516649.1 | scaffold1448 | 102110                  | TT                                     | AA                 | AA               | INTERGENIC                    |                    |                    |
| SNP_96086_A_103393 | NW_004516649.1 | scaffold1448 | 103393                  | CC                                     | TT                 | TT               | INTERGENIC                    |                    |                    |
| SNP_96087_A_109285 | NW_004516649.1 | scaffold1448 | 109285                  | GG                                     | AA                 | AA               | INTERGENIC                    |                    |                    |
| SNP_96088_A_109340 | NW_004516649.1 | scaffold1448 | 109340                  | GG                                     | AA                 | AA               | INTERGENIC                    |                    |                    |
| SNP_96089_A_109419 | NW_004516649.1 | scaffold1448 | 109419                  | AA                                     | GG                 | GG               | INTERGENIC                    |                    |                    |
| SNP_96090_A_113511 | NW_004516649.1 | scaffold1448 | 113511                  | AA                                     | GG                 | GG               | INTERGENIC                    |                    |                    |
| SNP_96091_A_119438 | NW_004516649.1 | scaffold1448 | 119438                  | AA                                     | GG                 | GG               | INTERGENIC                    |                    |                    |
| SNP_96093_A_142306 | NW_004516649.1 | scaffold1448 | 142306                  | TT                                     | CC                 | CC               | INTERGENIC                    |                    |                    |
| SNP_96094_A_144081 | NW_004516649.1 | scaffold1448 | 144081                  | AA                                     | GG                 | GG               | INTERGENIC                    |                    |                    |
| SNP_96095_A_148115 | NW_004516649.1 | scaffold1448 | 148115                  | AA                                     | GG                 | GG               | INTERGENIC                    |                    |                    |
| SNP_96096_A_150687 | NW_004516649.1 | scaffold1448 | 150687                  | GG                                     | AA                 | AA               | INTERGENIC                    |                    |                    |
| SNP_96097_A_3377   | NW_004516650.1 | scaffold1449 | 3377                    | CC                                     | AA                 | AA               | INTERGENIC                    |                    |                    |
| SNP_96098_A_3494   | NW_004516650.1 | scaffold1449 | 3494                    | AA                                     | GG                 | GG               | INTERGENIC                    |                    |                    |
| SNP_96099_A_3530   | NW_004516650.1 | scaffold1449 | 3530                    | TT                                     | CC                 | CC               | INTERGENIC                    |                    |                    |
| SNP_96100_A_3537   | NW_004516650.1 | scaffold1449 | 3537                    | CC                                     | GG                 | GG               | INTERGENIC                    |                    |                    |
| SNP_96101_A_3538   | NW_004516650.1 | scaffold1449 | 3538                    | GG                                     | TT                 | TT               | INTERGENIC                    |                    |                    |
| SNP_96102_A_3558   | NW_004516650.1 | scaffold1449 | 3558                    | AA                                     | TT                 | TT               | INTERGENIC                    |                    |                    |
| SNP_96103_A_3559   | NW_004516650.1 | scaffold1449 | 3559                    | TT                                     | GG                 | GG               | INTERGENIC                    |                    |                    |

| SNPs IDs          | Chromosome IDs | Chromosomes  | Physical positions (bp) | CDC Frontier (Reference genome) | (Pusa 1103 & HPNB) | (ILWC 46 & LPNB) | Sequence genome | Components of | Gene accession IDs | Putative functions |
|-------------------|----------------|--------------|-------------------------|---------------------------------|--------------------|------------------|-----------------|---------------|--------------------|--------------------|
| SNP_96104_A_3572  | NW_004516650.1 | scaffold1449 | 3572                    | CC                              | TT                 | TT               | INTERGENIC      |               |                    |                    |
| SNP_96105_A_3573  | NW_004516650.1 | scaffold1449 | 3573                    | TT                              | CC                 | CC               | INTERGENIC      |               |                    |                    |
| SNP_96107_A_6752  | NW_004516650.1 | scaffold1449 | 6752                    | TT                              | CC                 | CC               | INTERGENIC      |               |                    |                    |
| SNP_96108_A_6765  | NW_004516650.1 | scaffold1449 | 6765                    | CC                              | GG                 | GG               | INTERGENIC      |               |                    |                    |
| SNP_96109_A_6844  | NW_004516650.1 | scaffold1449 | 6844                    | AA                              | GG                 | GG               | INTERGENIC      |               |                    |                    |
| SNP_96110_A_7252  | NW_004516650.1 | scaffold1449 | 7252                    | TT                              | CC                 | CC               | INTERGENIC      |               |                    |                    |
| SNP_96111_A_7581  | NW_004516650.1 | scaffold1449 | 7581                    | AA                              | CC                 | CC               | INTERGENIC      |               |                    |                    |
| SNP_96112_A_7638  | NW_004516650.1 | scaffold1449 | 7638                    | GG                              | AA                 | AA               | INTERGENIC      |               |                    |                    |
| SNP_96113_A_7668  | NW_004516650.1 | scaffold1449 | 7668                    | GG                              | TT                 | TT               | INTERGENIC      |               |                    |                    |
| SNP_96114_A_10864 | NW_004516650.1 | scaffold1449 | 10864                   | TT                              | CC                 | CC               | INTERGENIC      |               |                    |                    |
| SNP_96115_A_11307 | NW_004516650.1 | scaffold1449 | 11307                   | TT                              | CC                 | CC               | INTERGENIC      |               |                    |                    |
| SNP_96116_A_13482 | NW_004516650.1 | scaffold1449 | 13482                   | AA                              | GG                 | GG               | INTERGENIC      |               |                    |                    |
| SNP_96117_A_19493 | NW_004516650.1 | scaffold1449 | 19493                   | TT                              | CC                 | CC               | INTERGENIC      |               |                    |                    |
| SNP_96118_A_19528 | NW_004516650.1 | scaffold1449 | 19528                   | GG                              | TT                 | TT               | INTERGENIC      |               |                    |                    |
| SNP_96120_A_47982 | NW_004516650.1 | scaffold1449 | 47982                   | TT                              | CC                 | CC               | INTERGENIC      |               |                    |                    |
| SNP_96121_A_44412 | NW_004516651.1 | scaffold1450 | 44412                   | CC                              | TT                 | TT               | INTERGENIC      |               |                    |                    |
| SNP_96122_A_71870 | NW_004516651.1 | scaffold1450 | 71870                   | GG                              | AA                 | AA               | INTERGENIC      |               |                    |                    |
| SNP_96123_A_71932 | NW_004516651.1 | scaffold1450 | 71932                   | TT                              | CC                 | CC               | INTERGENIC      |               |                    |                    |
| SNP_96124_A_880   | NW_004516653.1 | scaffold1452 | 880                     | AA                              | TT                 | TT               | INTERGENIC      |               |                    |                    |
| SNP_96126_A_6389  | NW_004516653.1 | scaffold1452 | 6389                    | GG                              | AA                 | AA               | INTERGENIC      |               |                    |                    |
| SNP_96127_A_8057  | NW_004516653.1 | scaffold1452 | 8057                    | GG                              | AA                 | AA               | INTERGENIC      |               |                    |                    |
| SNP_96130_A_29820 | NW_004516653.1 | scaffold1452 | 29820                   | TT                              | AA                 | AA               | INTERGENIC      |               |                    |                    |

| SNPs IDs          | Chromosome IDs | Chromosomes  | Physical positions (bp) | CDC Frontier (Reference genome) | (Pusa 1103 & HPNB) | (ILWC 46 & LPNB) | Sequence genome | Components of | Gene accession IDs | Putative functions |
|-------------------|----------------|--------------|-------------------------|---------------------------------|--------------------|------------------|-----------------|---------------|--------------------|--------------------|
| SNP_96131_A_29854 | NW_004516653.1 | scaffold1452 | 29854                   | TT                              | AA                 | AA               | INTERGENIC      |               |                    |                    |
| SNP_96132_A_29871 | NW_004516653.1 | scaffold1452 | 29871                   | AA                              | TT                 | TT               | INTERGENIC      |               |                    |                    |
| SNP_96133_A_30013 | NW_004516653.1 | scaffold1452 | 30013                   | CC                              | AA                 | AA               | INTERGENIC      |               |                    |                    |
| SNP_96134_A_30034 | NW_004516653.1 | scaffold1452 | 30034                   | TT                              | GG                 | GG               | INTERGENIC      |               |                    |                    |
| SNP_96135_A_30167 | NW_004516653.1 | scaffold1452 | 30167                   | TT                              | AA                 | AA               | INTERGENIC      |               |                    |                    |
| SNP_96136_A_30196 | NW_004516653.1 | scaffold1452 | 30196                   | AA                              | CC                 | CC               | INTERGENIC      |               |                    |                    |
| SNP_96137_A_30205 | NW_004516653.1 | scaffold1452 | 30205                   | CC                              | TT                 | TT               | INTERGENIC      |               |                    |                    |
| SNP_96139_A_30221 | NW_004516653.1 | scaffold1452 | 30221                   | CC                              | AA                 | AA               | INTERGENIC      |               |                    |                    |
| SNP_96140_A_30289 | NW_004516653.1 | scaffold1452 | 30289                   | GG                              | TT                 | TT               | INTERGENIC      |               |                    |                    |
| SNP_96141_A_30293 | NW_004516653.1 | scaffold1452 | 30293                   | GG                              | TT                 | TT               | INTERGENIC      |               |                    |                    |
| SNP_96142_A_30349 | NW_004516653.1 | scaffold1452 | 30349                   | CC                              | GG                 | GG               | INTERGENIC      |               |                    |                    |
| SNP_96143_A_30386 | NW_004516653.1 | scaffold1452 | 30386                   | TT                              | GG                 | GG               | INTERGENIC      |               |                    |                    |
| SNP_96144_A_30390 | NW_004516653.1 | scaffold1452 | 30390                   | AA                              | TT                 | TT               | INTERGENIC      |               |                    |                    |
| SNP_96145_A_30414 | NW_004516653.1 | scaffold1452 | 30414                   | CC                              | AA                 | AA               | INTERGENIC      |               |                    |                    |
| SNP_96146_A_30422 | NW_004516653.1 | scaffold1452 | 30422                   | TT                              | GG                 | GG               | INTERGENIC      |               |                    |                    |
| SNP_96147_A_30481 | NW_004516653.1 | scaffold1452 | 30481                   | GG                              | AA                 | AA               | INTERGENIC      |               |                    |                    |
| SNP_96148_A_30487 | NW_004516653.1 | scaffold1452 | 30487                   | GG                              | TT                 | TT               | INTERGENIC      |               |                    |                    |
| SNP_96149_A_30490 | NW_004516653.1 | scaffold1452 | 30490                   | AA                              | CC                 | CC               | INTERGENIC      |               |                    |                    |
| SNP_96151_A_34434 | NW_004516653.1 | scaffold1452 | 34434                   | GG                              | AA                 | AA               | INTERGENIC      |               |                    |                    |
| SNP_96152_A_414   | NW_004516654.1 | scaffold1453 | 414                     | GG                              | CC                 | CC               | INTERGENIC      |               |                    |                    |
| SNP_96153_A_519   | NW_004516654.1 | scaffold1453 | 519                     | AA                              | GG                 | GG               | INTERGENIC      |               |                    |                    |
| SNP_96154_A_574   | NW_004516654.1 | scaffold1453 | 574                     | AA                              | GG                 | GG               | INTERGENIC      |               |                    |                    |



| SNPs IDs           | Chromosome IDs | Chromosomes  | Physical positions (bp) | CDC Frontier (Reference genome) | (Pusa 1103 & HPNB) | (ILWC 46 & LPNB) | Sequence genome | Components of | Gene accession IDs | Putative functions |
|--------------------|----------------|--------------|-------------------------|---------------------------------|--------------------|------------------|-----------------|---------------|--------------------|--------------------|
| SNP_96155_A_816    | NW_004516654.1 | scaffold1453 | 816                     | CC                              | TT                 | TT               | INTERGENIC      |               |                    |                    |
| SNP_96156_A_42284  | NW_004516654.1 | scaffold1453 | 42284                   | AA                              | CC                 | CC               | INTERGENIC      |               |                    |                    |
| SNP_96157_A_52276  | NW_004516654.1 | scaffold1453 | 52276                   | TT                              | AA                 | AA               | INTERGENIC      |               |                    |                    |
| SNP_96158_A_93594  | NW_004516654.1 | scaffold1453 | 93594                   | AA                              | TT                 | TT               | INTERGENIC      |               |                    |                    |
| SNP_96159_A_99040  | NW_004516654.1 | scaffold1453 | 99040                   | CC                              | TT                 | TT               | INTERGENIC      |               |                    |                    |
| SNP_96160_A_99041  | NW_004516654.1 | scaffold1453 | 99041                   | CC                              | AA                 | AA               | INTERGENIC      |               |                    |                    |
| SNP_96161_A_106710 | NW_004516654.1 | scaffold1453 | 106710                  | TT                              | GG                 | GG               | INTERGENIC      |               |                    |                    |
| SNP_96162_A_108784 | NW_004516654.1 | scaffold1453 | 108784                  | CC                              | TT                 | TT               | INTERGENIC      |               |                    |                    |
| SNP_96163_A_108788 | NW_004516654.1 | scaffold1453 | 108788                  | AA                              | GG                 | GG               | INTERGENIC      |               |                    |                    |
| SNP_96164_A_108807 | NW_004516654.1 | scaffold1453 | 108807                  | CC                              | GG                 | GG               | INTERGENIC      |               |                    |                    |
| SNP_96165_A_108834 | NW_004516654.1 | scaffold1453 | 108834                  | AA                              | GG                 | GG               | INTERGENIC      |               |                    |                    |
| SNP_96166_A_108865 | NW_004516654.1 | scaffold1453 | 108865                  | AA                              | GG                 | GG               | INTERGENIC      |               |                    |                    |
| SNP_96167_A_108904 | NW_004516654.1 | scaffold1453 | 108904                  | AA                              | GG                 | GG               | INTERGENIC      |               |                    |                    |
| SNP_96168_A_108926 | NW_004516654.1 | scaffold1453 | 108926                  | CC                              | TT                 | TT               | INTERGENIC      |               |                    |                    |
| SNP_96169_A_108943 | NW_004516654.1 | scaffold1453 | 108943                  | GG                              | AA                 | AA               | INTERGENIC      |               |                    |                    |
| SNP_96170_A_109079 | NW_004516654.1 | scaffold1453 | 109079                  | CC                              | TT                 | TT               | INTERGENIC      |               |                    |                    |
| SNP_96171_A_109085 | NW_004516654.1 | scaffold1453 | 109085                  | TT                              | AA                 | AA               | INTERGENIC      |               |                    |                    |
| SNP_96172_A_109106 | NW_004516654.1 | scaffold1453 | 109106                  | TT                              | CC                 | CC               | INTERGENIC      |               |                    |                    |
| SNP_96173_A_109134 | NW_004516654.1 | scaffold1453 | 109134                  | GG                              | TT                 | TT               | INTERGENIC      |               |                    |                    |
| SNP_96174_A_109135 | NW_004516654.1 | scaffold1453 | 109135                  | GG                              | CC                 | CC               | INTERGENIC      |               |                    |                    |
| SNP_96175_A_109214 | NW_004516654.1 | scaffold1453 | 109214                  | CC                              | GG                 | GG               | INTERGENIC      |               |                    |                    |
| SNP_96176_A_109222 | NW_004516654.1 | scaffold1453 | 109222                  | TT                              | CC                 | CC               | INTERGENIC      |               |                    |                    |

| SNPs IDs           | Chromosome IDs | Chromosomes  | Physical positions (bp) | CDC Frontier (Reference genome) | (Pusa 1103 & HPNB) | (ILWC 46 & LPNB) | Sequence genome | Components of | Gene accession IDs | Putative functions |
|--------------------|----------------|--------------|-------------------------|---------------------------------|--------------------|------------------|-----------------|---------------|--------------------|--------------------|
| SNP_96177_A_109297 | NW_004516654.1 | scaffold1453 | 109297                  | CC                              | AA                 | AA               | INTERGENIC      |               |                    |                    |
| SNP_96178_A_109307 | NW_004516654.1 | scaffold1453 | 109307                  | AA                              | CC                 | CC               | INTERGENIC      |               |                    |                    |
| SNP_96179_A_6128   | NW_004516655.1 | scaffold1455 | 6128                    | GG                              | CC                 | CC               | INTERGENIC      |               |                    |                    |
| SNP_96180_A_6891   | NW_004516655.1 | scaffold1455 | 6891                    | GG                              | AA                 | AA               | INTERGENIC      |               |                    |                    |
| SNP_96181_A_7015   | NW_004516655.1 | scaffold1455 | 7015                    | TT                              | AA                 | AA               | INTERGENIC      |               |                    |                    |
| SNP_96182_A_7075   | NW_004516655.1 | scaffold1455 | 7075                    | AA                              | GG                 | GG               | INTERGENIC      |               |                    |                    |
| SNP_96183_A_7116   | NW_004516655.1 | scaffold1455 | 7116                    | TT                              | AA                 | AA               | INTERGENIC      |               |                    |                    |
| SNP_96184_A_7133   | NW_004516655.1 | scaffold1455 | 7133                    | GG                              | AA                 | AA               | INTERGENIC      |               |                    |                    |
| SNP_96185_A_7134   | NW_004516655.1 | scaffold1455 | 7134                    | AA                              | CC                 | CC               | INTERGENIC      |               |                    |                    |
| SNP_96186_A_7162   | NW_004516655.1 | scaffold1455 | 7162                    | TT                              | CC                 | CC               | INTERGENIC      |               |                    |                    |
| SNP_96187_A_7384   | NW_004516655.1 | scaffold1455 | 7384                    | CC                              | TT                 | TT               | INTERGENIC      |               |                    |                    |
| SNP_96188_A_11106  | NW_004516655.1 | scaffold1455 | 11106                   | AA                              | GG                 | GG               | INTERGENIC      |               |                    |                    |
| SNP_96189_A_11129  | NW_004516655.1 | scaffold1455 | 11129                   | TT                              | CC                 | CC               | INTERGENIC      |               |                    |                    |
| SNP_96190_A_11252  | NW_004516655.1 | scaffold1455 | 11252                   | AA                              | TT                 | TT               | INTERGENIC      |               |                    |                    |
| SNP_96191_A_11414  | NW_004516655.1 | scaffold1455 | 11414                   | GG                              | AA                 | AA               | INTERGENIC      |               |                    |                    |
| SNP_96192_A_11459  | NW_004516655.1 | scaffold1455 | 11459                   | TT                              | GG                 | GG               | INTERGENIC      |               |                    |                    |
| SNP_96193_A_11734  | NW_004516655.1 | scaffold1455 | 11734                   | CC                              | TT                 | TT               | INTERGENIC      |               |                    |                    |
| SNP_96194_A_11790  | NW_004516655.1 | scaffold1455 | 11790                   | CC                              | TT                 | TT               | INTERGENIC      |               |                    |                    |
| SNP_96195_A_12403  | NW_004516655.1 | scaffold1455 | 12403                   | AA                              | GG                 | GG               | INTERGENIC      |               |                    |                    |
| SNP_96196_A_12411  | NW_004516655.1 | scaffold1455 | 12411                   | TT                              | AA                 | AA               | INTERGENIC      |               |                    |                    |
| SNP_96197_A_12495  | NW_004516655.1 | scaffold1455 | 12495                   | AA                              | CC                 | CC               | INTERGENIC      |               |                    |                    |
| SNP_96199_A_12662  | NW_004516655.1 | scaffold1455 | 12662                   | TT                              | GG                 | GG               | INTERGENIC      |               |                    |                    |

| SNPs IDs          | Chromosome IDs | Chromosomes  | Physical positions (bp) | CDC Frontier (Reference genome) | (Pusa 1103 & HPNB) | (ILWC 46 & LPNB) | Sequence genome | Components of | Gene accession IDs | Putative functions |
|-------------------|----------------|--------------|-------------------------|---------------------------------|--------------------|------------------|-----------------|---------------|--------------------|--------------------|
| SNP_96200_A_12813 | NW_004516655.1 | scaffold1455 | 12813                   | GG                              | AA                 | AA               | INTERGENIC      |               |                    |                    |
| SNP_96201_A_12908 | NW_004516655.1 | scaffold1455 | 12908                   | AA                              | CC                 | CC               | INTERGENIC      |               |                    |                    |
| SNP_96202_A_13196 | NW_004516655.1 | scaffold1455 | 13196                   | AA                              | CC                 | CC               | INTERGENIC      |               |                    |                    |
| SNP_96203_A_13238 | NW_004516655.1 | scaffold1455 | 13238                   | CC                              | TT                 | TT               | INTERGENIC      |               |                    |                    |
| SNP_96204_A_13724 | NW_004516655.1 | scaffold1455 | 13724                   | TT                              | CC                 | CC               | INTERGENIC      |               |                    |                    |
| SNP_96205_A_13813 | NW_004516655.1 | scaffold1455 | 13813                   | CC                              | GG                 | GG               | INTERGENIC      |               |                    |                    |
| SNP_96206_A_14570 | NW_004516655.1 | scaffold1455 | 14570                   | GG                              | TT                 | TT               | INTERGENIC      |               |                    |                    |
| SNP_96207_A_14581 | NW_004516655.1 | scaffold1455 | 14581                   | AA                              | CC                 | CC               | INTERGENIC      |               |                    |                    |
| SNP_96208_A_14583 | NW_004516655.1 | scaffold1455 | 14583                   | GG                              | AA                 | AA               | INTERGENIC      |               |                    |                    |
| SNP_96209_A_14612 | NW_004516655.1 | scaffold1455 | 14612                   | GG                              | AA                 | AA               | INTERGENIC      |               |                    |                    |
| SNP_96210_A_14629 | NW_004516655.1 | scaffold1455 | 14629                   | GG                              | AA                 | AA               | INTERGENIC      |               |                    |                    |
| SNP_96211_A_14633 | NW_004516655.1 | scaffold1455 | 14633                   | AA                              | TT                 | TT               | INTERGENIC      |               |                    |                    |
| SNP_96212_A_14968 | NW_004516655.1 | scaffold1455 | 14968                   | AA                              | GG                 | GG               | INTERGENIC      |               |                    |                    |
| SNP_96213_A_14971 | NW_004516655.1 | scaffold1455 | 14971                   | AA                              | GG                 | GG               | INTERGENIC      |               |                    |                    |
| SNP_96214_A_15062 | NW_004516655.1 | scaffold1455 | 15062                   | GG                              | CC                 | CC               | INTERGENIC      |               |                    |                    |
| SNP_96215_A_16202 | NW_004516655.1 | scaffold1455 | 16202                   | GG                              | AA                 | AA               | INTERGENIC      |               |                    |                    |
| SNP_96216_A_16503 | NW_004516655.1 | scaffold1455 | 16503                   | TT                              | CC                 | CC               | INTERGENIC      |               |                    |                    |
| SNP_96217_A_18310 | NW_004516655.1 | scaffold1455 | 18310                   | AA                              | TT                 | TT               | INTERGENIC      |               |                    |                    |
| SNP_96218_A_18320 | NW_004516655.1 | scaffold1455 | 18320                   | TT                              | CC                 | CC               | INTERGENIC      |               |                    |                    |
| SNP_96219_A_18515 | NW_004516655.1 | scaffold1455 | 18515                   | TT                              | AA                 | AA               | INTERGENIC      |               |                    |                    |
| SNP_96220_A_18652 | NW_004516655.1 | scaffold1455 | 18652                   | TT                              | GG                 | GG               | INTERGENIC      |               |                    |                    |
| SNP_96221_A_18655 | NW_004516655.1 | scaffold1455 | 18655                   | GG                              | AA                 | AA               | INTERGENIC      |               |                    |                    |

| SNPs IDs          | Chromosome IDs | Chromosomes  | Physical positions (bp) | CDC Frontier (Reference genome) | (Pusa 1103 & HPNB) | (ILWC 46 & LPNB) | Sequence Components of genome | Gene accession IDs | Putative functions           |
|-------------------|----------------|--------------|-------------------------|---------------------------------|--------------------|------------------|-------------------------------|--------------------|------------------------------|
| SNP_96222_A_19070 | NW_004516655.1 | scaffold1455 | 19070                   | GG                              | AA                 | AA               | INTERGENIC                    |                    |                              |
| SNP_96224_A_21093 | NW_004516655.1 | scaffold1455 | 21093                   | AA                              | GG                 | GG               | INTERGENIC                    |                    |                              |
| SNP_96225_A_21151 | NW_004516655.1 | scaffold1455 | 21151                   | TT                              | AA                 | AA               | INTERGENIC                    |                    |                              |
| SNP_96226_A_21495 | NW_004516655.1 | scaffold1455 | 21495                   | CC                              | TT                 | TT               | INTERGENIC                    |                    |                              |
| SNP_96227_A_42388 | NW_004516655.1 | scaffold1455 | 42388                   | TT                              | GG                 | GG               | INTERGENIC                    |                    |                              |
| SNP_96228_A_19492 | NW_004516657.1 | scaffold1457 | 19492                   | CC                              | GG                 | GG               | INTERGENIC                    |                    |                              |
| SNP_96229_A_19500 | NW_004516657.1 | scaffold1457 | 19500                   | GG                              | TT                 | TT               | INTERGENIC                    |                    |                              |
| SNP_96231_A_34301 | NW_004516657.1 | scaffold1457 | 34301                   | TT                              | CC                 | CC               | INTERGENIC                    |                    |                              |
| SNP_96232_A_68576 | NW_004516657.1 | scaffold1457 | 68576                   | AA                              | CC                 | CC               | INTERGENIC                    |                    |                              |
| SNP_96233_A_68626 | NW_004516657.1 | scaffold1457 | 68626                   | AA                              | GG                 | GG               | INTERGENIC                    |                    |                              |
| SNP_96234_A_935   | NW_004516659.1 | scaffold1459 | 935                     | TT                              | CC                 | CC               | INTERGENIC                    |                    |                              |
| SNP_96235_A_1158  | NW_004516659.1 | scaffold1459 | 1158                    | GG                              | TT                 | TT               | INTERGENIC                    |                    |                              |
| SNP_96236_A_5511  | NW_004516659.1 | scaffold1459 | 5511                    | GG                              | AA                 | AA               | STOP_GAINED                   | 101507699          | uncharacterized LOC101507699 |
| SNP_96237_A_8699  | NW_004516659.1 | scaffold1459 | 8699                    | TT                              | AA                 | AA               | NON_SYNONYMOUS_CODING         | 101507699          | uncharacterized LOC101507699 |
| SNP_96238_A_8731  | NW_004516659.1 | scaffold1459 | 8731                    | GG                              | AA                 | AA               | SYNONYMOUS_CODING             | 101507699          | uncharacterized LOC101507699 |
| SNP_96239_A_8772  | NW_004516659.1 | scaffold1459 | 8772                    | TT                              | GG                 | GG               | URR                           | 101507699          | uncharacterized LOC101507699 |
| SNP_96240_A_7629  | NW_004516661.1 | scaffold1461 | 7629                    | AA                              | GG                 | GG               | INTERGENIC                    |                    |                              |
| SNP_96241_A_13019 | NW_004516661.1 | scaffold1461 | 13019                   | GG                              | AA                 | AA               | INTERGENIC                    |                    |                              |
| SNP_96242_A_13164 | NW_004516661.1 | scaffold1461 | 13164                   | CC                              | GG                 | GG               | INTERGENIC                    |                    |                              |
| SNP_96243_A_7667  | NW_004516662.1 | scaffold1462 | 7667                    | GG                              | TT                 | TT               | INTERGENIC                    |                    |                              |
| SNP_96244_A_12085 | NW_004516662.1 | scaffold1462 | 12085                   | CC                              | TT                 | TT               | INTERGENIC                    |                    |                              |
| SNP_96245_A_12174 | NW_004516662.1 | scaffold1462 | 12174                   | GG                              | CC                 | CC               | INTERGENIC                    |                    |                              |

| SNPs IDs          | Chromosome IDs | Chromosomes  | Physical positions (bp) | CDC Frontier (Reference genome) | (Pusa 1103 & HPNB) | (ILWC 46 & LPNB) | Sequence genome | Components of | Gene accession IDs | Putative functions |
|-------------------|----------------|--------------|-------------------------|---------------------------------|--------------------|------------------|-----------------|---------------|--------------------|--------------------|
| SNP_96246_A_12192 | NW_004516662.1 | scaffold1462 | 12192                   | CC                              | TT                 | TT               | INTERGENIC      |               |                    |                    |
| SNP_96247_A_12199 | NW_004516662.1 | scaffold1462 | 12199                   | TT                              | CC                 | CC               | INTERGENIC      |               |                    |                    |
| SNP_96249_A_12477 | NW_004516662.1 | scaffold1462 | 12477                   | AA                              | TT                 | TT               | INTERGENIC      |               |                    |                    |
| SNP_96250_A_12719 | NW_004516662.1 | scaffold1462 | 12719                   | CC                              | TT                 | TT               | INTERGENIC      |               |                    |                    |
| SNP_96251_A_12893 | NW_004516662.1 | scaffold1462 | 12893                   | AA                              | TT                 | TT               | INTERGENIC      |               |                    |                    |
| SNP_96253_A_14748 | NW_004516662.1 | scaffold1462 | 14748                   | AA                              | GG                 | GG               | INTERGENIC      |               |                    |                    |
| SNP_96254_A_14749 | NW_004516662.1 | scaffold1462 | 14749                   | TT                              | CC                 | CC               | INTERGENIC      |               |                    |                    |
| SNP_96255_A_15068 | NW_004516662.1 | scaffold1462 | 15068                   | GG                              | TT                 | TT               | INTERGENIC      |               |                    |                    |
| SNP_96256_A_15081 | NW_004516662.1 | scaffold1462 | 15081                   | TT                              | GG                 | GG               | INTERGENIC      |               |                    |                    |
| SNP_96257_A_15896 | NW_004516662.1 | scaffold1462 | 15896                   | TT                              | AA                 | AA               | INTERGENIC      |               |                    |                    |
| SNP_96258_A_12717 | NW_004516663.1 | scaffold1464 | 12717                   | GG                              | AA                 | AA               | INTERGENIC      |               |                    |                    |
| SNP_96259_A_15032 | NW_004516663.1 | scaffold1464 | 15032                   | GG                              | AA                 | AA               | INTERGENIC      |               |                    |                    |
| SNP_96260_A_15080 | NW_004516663.1 | scaffold1464 | 15080                   | AA                              | GG                 | GG               | INTERGENIC      |               |                    |                    |
| SNP_96261_A_28029 | NW_004516663.1 | scaffold1464 | 28029                   | AA                              | GG                 | GG               | INTERGENIC      |               |                    |                    |
| SNP_96262_A_69799 | NW_004516663.1 | scaffold1464 | 69799                   | TT                              | AA                 | AA               | INTERGENIC      |               |                    |                    |
| SNP_96263_A_69835 | NW_004516663.1 | scaffold1464 | 69835                   | GG                              | AA                 | AA               | INTERGENIC      |               |                    |                    |
| SNP_96264_A_69873 | NW_004516663.1 | scaffold1464 | 69873                   | AA                              | CC                 | CC               | INTERGENIC      |               |                    |                    |
| SNP_96265_A_69894 | NW_004516663.1 | scaffold1464 | 69894                   | CC                              | GG                 | GG               | INTERGENIC      |               |                    |                    |
| SNP_96266_A_69992 | NW_004516663.1 | scaffold1464 | 69992                   | AA                              | GG                 | GG               | INTERGENIC      |               |                    |                    |
| SNP_96267_A_70236 | NW_004516663.1 | scaffold1464 | 70236                   | CC                              | TT                 | TT               | INTERGENIC      |               |                    |                    |
| SNP_96268_A_70240 | NW_004516663.1 | scaffold1464 | 70240                   | TT                              | AA                 | AA               | INTERGENIC      |               |                    |                    |
| SNP_96269_A_70310 | NW_004516663.1 | scaffold1464 | 70310                   | GG                              | TT                 | TT               | INTERGENIC      |               |                    |                    |

| SNPs IDs           | Chromosome IDs | Chromosomes  | Physical positions (bp) | CDC Frontier (Reference genome) | (Pusa 1103 & HPNB) | (ILWC 46 & LPNB) | Sequence genome       | Components of | Gene accession IDs | Putative functions |
|--------------------|----------------|--------------|-------------------------|---------------------------------|--------------------|------------------|-----------------------|---------------|--------------------|--------------------|
| SNP_96270_A_79091  | NW_004516663.1 | scaffold1464 | 79091                   | GG                              | TT                 | TT               | INTERGENIC            |               |                    |                    |
| SNP_96271_A_89961  | NW_004516663.1 | scaffold1464 | 89961                   | TT                              | CC                 | CC               | INTERGENIC            |               |                    |                    |
| SNP_96272_A_90017  | NW_004516663.1 | scaffold1464 | 90017                   | GG                              | AA                 | AA               | INTERGENIC            |               |                    |                    |
| SNP_96273_A_2646   | NW_004516664.1 | scaffold1465 | 2646                    | AA                              | TT                 | TT               | INTERGENIC            |               |                    |                    |
| SNP_96275_A_4693   | NW_004516664.1 | scaffold1465 | 4693                    | AA                              | TT                 | TT               | INTERGENIC            |               |                    |                    |
| SNP_96277_A_12140  | NW_004516664.1 | scaffold1465 | 12140                   | AA                              | TT                 | TT               | INTERGENIC            |               |                    |                    |
| SNP_96278_A_12668  | NW_004516664.1 | scaffold1465 | 12668                   | GG                              | AA                 | AA               | INTERGENIC            |               |                    |                    |
| SNP_96280_A_20330  | NW_004516664.1 | scaffold1465 | 20330                   | TT                              | CC                 | CC               | INTERGENIC            |               |                    |                    |
| SNP_96282_A_22550  | NW_004516664.1 | scaffold1465 | 22550                   | CC                              | TT                 | TT               | INTERGENIC            |               |                    |                    |
| SNP_96283_A_22571  | NW_004516664.1 | scaffold1465 | 22571                   | CC                              | GG                 | GG               | INTERGENIC            |               |                    |                    |
| SNP_96284_A_22577  | NW_004516664.1 | scaffold1465 | 22577                   | AA                              | TT                 | TT               | INTERGENIC            |               |                    |                    |
| SNP_96285_A_22814  | NW_004516664.1 | scaffold1465 | 22814                   | AA                              | GG                 | GG               | INTERGENIC            |               |                    |                    |
| SNP_96286_A_36619  | NW_004516664.1 | scaffold1465 | 36619                   | CC                              | TT                 | TT               | INTERGENIC            |               |                    |                    |
| SNP_96288_A_40468  | NW_004516665.1 | scaffold1466 | 40468                   | CC                              | TT                 | TT               | INTERGENIC            |               |                    |                    |
| SNP_96289_A_71449  | NW_004516665.1 | scaffold1466 | 71449                   | TT                              | GG                 | GG               | INTERGENIC            |               |                    |                    |
| SNP_96290_A_178769 | NW_004516665.1 | scaffold1466 | 178769                  | GG                              | TT                 | TT               | INTERGENIC            |               |                    |                    |
| SNP_96292_A_239648 | NW_004516665.1 | scaffold1466 | 239648                  | TT                              | AA                 | AA               | INTERGENIC            |               |                    |                    |
| SNP_96293_A_284574 | NW_004516665.1 | scaffold1466 | 284574                  | CC                              | TT                 | TT               | NON_SYNONYMOUS_CODING | 101515101     | Unknown function   |                    |
| SNP_96294_A_311987 | NW_004516665.1 | scaffold1466 | 311987                  | AA                              | GG                 | GG               | INTERGENIC            |               |                    |                    |
| SNP_96295_A_321600 | NW_004516665.1 | scaffold1466 | 321600                  | GG                              | TT                 | TT               | INTERGENIC            |               |                    |                    |
| SNP_96296_A_323421 | NW_004516665.1 | scaffold1466 | 323421                  | TT                              | GG                 | GG               | INTERGENIC            |               |                    |                    |
| SNP_96297_A_328634 | NW_004516665.1 | scaffold1466 | 328634                  | AA                              | GG                 | GG               | INTERGENIC            |               |                    |                    |

| SNPs IDs           | Chromosome IDs | Chromosomes  | Physical positions (bp) | CDC Frontier (Reference genome) | (Pusa 1103 & HPNB) | (ILWC 46 & LPNB) | Sequence Components of genome | Gene accession IDs | Putative functions           |
|--------------------|----------------|--------------|-------------------------|---------------------------------|--------------------|------------------|-------------------------------|--------------------|------------------------------|
| SNP_96298_A_347238 | NW_004516665.1 | scaffold1466 | 347238                  | CC                              | TT                 | TT               | INTERGENIC                    |                    |                              |
| SNP_96299_A_350924 | NW_004516665.1 | scaffold1466 | 350924                  | GG                              | AA                 | AA               | INTERGENIC                    |                    |                              |
| SNP_96300_A_358112 | NW_004516665.1 | scaffold1466 | 358112                  | GG                              | AA                 | AA               | URR                           | 101488515          | uncharacterized LOC101488515 |
| SNP_96301_A_358205 | NW_004516665.1 | scaffold1466 | 358205                  | TT                              | CC                 | CC               | URR                           | 101488515          | uncharacterized LOC101488515 |
| SNP_96302_A_358458 | NW_004516665.1 | scaffold1466 | 358458                  | TT                              | CC                 | CC               | URR                           | 101488515          | uncharacterized LOC101488515 |
| SNP_96303_A_358484 | NW_004516665.1 | scaffold1466 | 358484                  | AA                              | GG                 | GG               | URR                           | 101488515          | uncharacterized LOC101488515 |
| SNP_96304_A_3216   | NW_004516666.1 | scaffold1467 | 3216                    | CC                              | TT                 | TT               | DRR                           | 101489185          | uncharacterized LOC101489185 |
| SNP_96305_A_8723   | NW_004516666.1 | scaffold1467 | 8723                    | AA                              | TT                 | TT               | INTERGENIC                    |                    |                              |
| SNP_96307_A_11974  | NW_004516666.1 | scaffold1467 | 11974                   | AA                              | GG                 | GG               | DRR                           | 101489405          | cytochrome P450 83B1-like    |
| SNP_96309_A_22476  | NW_004516666.1 | scaffold1467 | 22476                   | TT                              | CC                 | CC               | INTERGENIC                    |                    |                              |
| SNP_96310_A_22480  | NW_004516666.1 | scaffold1467 | 22480                   | TT                              | GG                 | GG               | INTERGENIC                    |                    |                              |
| SNP_96311_A_22481  | NW_004516666.1 | scaffold1467 | 22481                   | GG                              | TT                 | TT               | INTERGENIC                    |                    |                              |
| SNP_96312_A_23806  | NW_004516666.1 | scaffold1467 | 23806                   | AA                              | TT                 | TT               | INTERGENIC                    |                    |                              |
| SNP_96314_A_91880  | NW_004516666.1 | scaffold1467 | 91880                   | CC                              | TT                 | TT               | INTERGENIC                    |                    |                              |
| SNP_96315_A_92235  | NW_004516666.1 | scaffold1467 | 92235                   | TT                              | GG                 | GG               | INTERGENIC                    |                    |                              |
| SNP_96316_A_202735 | NW_004516666.1 | scaffold1467 | 202735                  | TT                              | CC                 | CC               | INTERGENIC                    |                    |                              |
| SNP_96317_A_202757 | NW_004516666.1 | scaffold1467 | 202757                  | GG                              | AA                 | AA               | INTERGENIC                    |                    |                              |
| SNP_96318_A_206307 | NW_004516666.1 | scaffold1467 | 206307                  | GG                              | AA                 | AA               | INTERGENIC                    |                    |                              |
| SNP_96319_A_3734   | NW_004516667.1 | scaffold1468 | 3734                    | GG                              | CC                 | CC               | INTERGENIC                    |                    |                              |
| SNP_96320_A_4037   | NW_004516667.1 | scaffold1468 | 4037                    | GG                              | TT                 | TT               | INTERGENIC                    |                    |                              |
| SNP_96321_A_2253   | NW_004516669.1 | scaffold1472 | 2253                    | TT                              | CC                 | CC               | INTERGENIC                    |                    |                              |
| SNP_96322_A_2063   | NW_004516670.1 | scaffold1473 | 2063                    | AA                              | GG                 | GG               | INTERGENIC                    |                    |                              |

| SNPs IDs          | Chromosome IDs | Chromosomes  | Physical positions (bp) | CDC Frontier (Reference genome) | (Pusa 1103 & HPNB) | (ILWC 46 & LPNB) | Sequence Components of genome | Gene accession IDs | Putative functions           |
|-------------------|----------------|--------------|-------------------------|---------------------------------|--------------------|------------------|-------------------------------|--------------------|------------------------------|
| SNP_96323_A_2168  | NW_004516670.1 | scaffold1473 | 2168                    | CC                              | TT                 | TT               | INTERGENIC                    |                    |                              |
| SNP_96324_A_2230  | NW_004516670.1 | scaffold1473 | 2230                    | CC                              | TT                 | TT               | INTERGENIC                    |                    |                              |
| SNP_96325_A_2255  | NW_004516670.1 | scaffold1473 | 2255                    | GG                              | AA                 | AA               | INTERGENIC                    |                    |                              |
| SNP_96326_A_2347  | NW_004516670.1 | scaffold1473 | 2347                    | TT                              | GG                 | GG               | INTERGENIC                    |                    |                              |
| SNP_96327_A_2590  | NW_004516670.1 | scaffold1473 | 2590                    | TT                              | AA                 | AA               | INTERGENIC                    |                    |                              |
| SNP_96328_A_2737  | NW_004516670.1 | scaffold1473 | 2737                    | AA                              | GG                 | GG               | INTERGENIC                    |                    |                              |
| SNP_96329_A_2924  | NW_004516670.1 | scaffold1473 | 2924                    | AA                              | GG                 | GG               | INTERGENIC                    |                    |                              |
| SNP_96330_A_3047  | NW_004516670.1 | scaffold1473 | 3047                    | TT                              | CC                 | CC               | INTERGENIC                    |                    |                              |
| SNP_96331_A_3060  | NW_004516670.1 | scaffold1473 | 3060                    | GG                              | AA                 | AA               | INTERGENIC                    |                    |                              |
| SNP_96332_A_69084 | NW_004516671.1 | scaffold1475 | 69084                   | AA                              | GG                 | GG               | INTRON                        | 101492305          | uncharacterized LOC101492305 |
| SNP_96333_A_99384 | NW_004516671.1 | scaffold1475 | 99384                   | CC                              | TT                 | TT               | INTERGENIC                    |                    |                              |
| SNP_96334_A_99630 | NW_004516671.1 | scaffold1475 | 99630                   | AA                              | GG                 | GG               | INTERGENIC                    |                    |                              |
| SNP_96335_A_99632 | NW_004516671.1 | scaffold1475 | 99632                   | TT                              | CC                 | CC               | INTERGENIC                    |                    |                              |
| SNP_96336_A_99658 | NW_004516671.1 | scaffold1475 | 99658                   | TT                              | GG                 | GG               | INTERGENIC                    |                    |                              |
| SNP_96337_A_99723 | NW_004516671.1 | scaffold1475 | 99723                   | TT                              | CC                 | CC               | INTERGENIC                    |                    |                              |
| SNP_96338_A_99733 | NW_004516671.1 | scaffold1475 | 99733                   | AA                              | GG                 | GG               | INTERGENIC                    |                    |                              |
| SNP_96339_A_899   | NW_004516673.1 | scaffold1477 | 899                     | TT                              | CC                 | CC               | INTERGENIC                    |                    |                              |
| SNP_96340_A_7515  | NW_004516674.1 | scaffold1478 | 7515                    | GG                              | AA                 | AA               | INTERGENIC                    |                    |                              |
| SNP_96341_A_8983  | NW_004516674.1 | scaffold1478 | 8983                    | TT                              | GG                 | GG               | INTERGENIC                    |                    |                              |
| SNP_96342_A_9033  | NW_004516674.1 | scaffold1478 | 9033                    | TT                              | CC                 | CC               | INTERGENIC                    |                    |                              |
| SNP_96343_A_9187  | NW_004516674.1 | scaffold1478 | 9187                    | TT                              | CC                 | CC               | INTERGENIC                    |                    |                              |
| SNP_96344_A_10912 | NW_004516674.1 | scaffold1478 | 10912                   | CC                              | TT                 | TT               | INTERGENIC                    |                    |                              |



| SNPs IDs          | Chromosome IDs | Chromosomes  | Physical positions (bp) | CDC Frontier (Reference genome) | (Pusa 1103 & HPNB) | (ILWC 46 & LPNB) | Sequence genome | Components of | Gene accession IDs | Putative functions |
|-------------------|----------------|--------------|-------------------------|---------------------------------|--------------------|------------------|-----------------|---------------|--------------------|--------------------|
| SNP_96345_A_11118 | NW_004516674.1 | scaffold1478 | 11118                   | CC                              | TT                 | TT               | INTERGENIC      |               |                    |                    |
| SNP_96346_A_11153 | NW_004516674.1 | scaffold1478 | 11153                   | AA                              | TT                 | TT               | INTERGENIC      |               |                    |                    |
| SNP_96347_A_21378 | NW_004516674.1 | scaffold1478 | 21378                   | AA                              | TT                 | TT               | INTERGENIC      |               |                    |                    |
| SNP_96348_A_21930 | NW_004516674.1 | scaffold1478 | 21930                   | CC                              | TT                 | TT               | INTERGENIC      |               |                    |                    |
| SNP_96349_A_33845 | NW_004516674.1 | scaffold1478 | 33845                   | CC                              | AA                 | AA               | INTERGENIC      |               |                    |                    |
| SNP_96350_A_45183 | NW_004516674.1 | scaffold1478 | 45183                   | TT                              | CC                 | CC               | INTERGENIC      |               |                    |                    |
| SNP_96351_A_73500 | NW_004516674.1 | scaffold1478 | 73500                   | CC                              | AA                 | AA               | INTERGENIC      |               |                    |                    |
| SNP_96352_A_73537 | NW_004516674.1 | scaffold1478 | 73537                   | TT                              | AA                 | AA               | INTERGENIC      |               |                    |                    |
| SNP_96353_A_73539 | NW_004516674.1 | scaffold1478 | 73539                   | AA                              | CC                 | CC               | INTERGENIC      |               |                    |                    |
| SNP_96354_A_73581 | NW_004516674.1 | scaffold1478 | 73581                   | GG                              | AA                 | AA               | INTERGENIC      |               |                    |                    |
| SNP_96356_A_73797 | NW_004516674.1 | scaffold1478 | 73797                   | GG                              | AA                 | AA               | INTERGENIC      |               |                    |                    |
| SNP_96357_A_73806 | NW_004516674.1 | scaffold1478 | 73806                   | GG                              | TT                 | TT               | INTERGENIC      |               |                    |                    |
| SNP_96358_A_73866 | NW_004516674.1 | scaffold1478 | 73866                   | CC                              | TT                 | TT               | INTERGENIC      |               |                    |                    |
| SNP_96359_A_92264 | NW_004516674.1 | scaffold1478 | 92264                   | CC                              | TT                 | TT               | INTERGENIC      |               |                    |                    |
| SNP_96360_A_92265 | NW_004516674.1 | scaffold1478 | 92265                   | TT                              | CC                 | CC               | INTERGENIC      |               |                    |                    |
| SNP_96361_A_2542  | NW_004516675.1 | scaffold1479 | 2542                    | TT                              | CC                 | CC               | INTERGENIC      |               |                    |                    |
| SNP_96362_A_5716  | NW_004516678.1 | scaffold1483 | 5716                    | AA                              | GG                 | GG               | INTERGENIC      |               |                    |                    |
| SNP_96363_A_5748  | NW_004516678.1 | scaffold1483 | 5748                    | TT                              | CC                 | CC               | INTERGENIC      |               |                    |                    |
| SNP_96364_A_5984  | NW_004516678.1 | scaffold1483 | 5984                    | GG                              | AA                 | AA               | INTERGENIC      |               |                    |                    |
| SNP_96365_A_6000  | NW_004516678.1 | scaffold1483 | 6000                    | CC                              | TT                 | TT               | INTERGENIC      |               |                    |                    |
| SNP_96366_A_6016  | NW_004516678.1 | scaffold1483 | 6016                    | GG                              | TT                 | TT               | INTERGENIC      |               |                    |                    |
| SNP_96367_A_6017  | NW_004516678.1 | scaffold1483 | 6017                    | GG                              | AA                 | AA               | INTERGENIC      |               |                    |                    |

| SNPs IDs         | Chromosome IDs | Chromosomes  | Physical positions (bp) | CDC Frontier (Reference genome) | (Pusa 1103 & HPNB) | (ILWC 46 & LPNB) | Sequence Components of genome | Gene accession IDs | Putative functions |
|------------------|----------------|--------------|-------------------------|---------------------------------|--------------------|------------------|-------------------------------|--------------------|--------------------|
| SNP_96368_A_6030 | NW_004516678.1 | scaffold1483 | 6030                    | CC                              | TT                 | TT               | INTERGENIC                    |                    |                    |
| SNP_96369_A_6085 | NW_004516678.1 | scaffold1483 | 6085                    | TT                              | GG                 | GG               | INTERGENIC                    |                    |                    |
| SNP_96370_A_6309 | NW_004516678.1 | scaffold1483 | 6309                    | GG                              | CC                 | CC               | DRR                           | 101494677          | Unknown function   |
| SNP_96371_A_6377 | NW_004516678.1 | scaffold1483 | 6377                    | AA                              | GG                 | GG               | DRR                           | 101494677          | Unknown function   |
| SNP_96372_A_6393 | NW_004516678.1 | scaffold1483 | 6393                    | AA                              | GG                 | GG               | DRR                           | 101494677          | Unknown function   |
| SNP_96373_A_6399 | NW_004516678.1 | scaffold1483 | 6399                    | GG                              | CC                 | CC               | DRR                           | 101494677          | Unknown function   |
| SNP_96374_A_6411 | NW_004516678.1 | scaffold1483 | 6411                    | CC                              | AA                 | AA               | DRR                           | 101494677          | Unknown function   |
| SNP_96376_A_6533 | NW_004516678.1 | scaffold1483 | 6533                    | CC                              | TT                 | TT               | DRR                           | 101494677          | Unknown function   |
| SNP_96377_A_6536 | NW_004516678.1 | scaffold1483 | 6536                    | GG                              | AA                 | AA               | DRR                           | 101494677          | Unknown function   |
| SNP_96378_A_6564 | NW_004516678.1 | scaffold1483 | 6564                    | GG                              | CC                 | CC               | DRR                           | 101494677          | Unknown function   |
| SNP_96379_A_6606 | NW_004516678.1 | scaffold1483 | 6606                    | GG                              | AA                 | AA               | DRR                           | 101494677          | Unknown function   |
| SNP_96380_A_6618 | NW_004516678.1 | scaffold1483 | 6618                    | TT                              | GG                 | GG               | DRR                           | 101494677          | Unknown function   |
| SNP_96381_A_6665 | NW_004516678.1 | scaffold1483 | 6665                    | AA                              | CC                 | CC               | DRR                           | 101494677          | Unknown function   |
| SNP_96382_A_6713 | NW_004516678.1 | scaffold1483 | 6713                    | CC                              | TT                 | TT               | DRR                           | 101494677          | Unknown function   |
| SNP_96383_A_6764 | NW_004516678.1 | scaffold1483 | 6764                    | TT                              | CC                 | CC               | DRR                           | 101494677          | Unknown function   |
| SNP_96384_A_6772 | NW_004516678.1 | scaffold1483 | 6772                    | CC                              | TT                 | TT               | DRR                           | 101494677          | Unknown function   |
| SNP_96385_A_6809 | NW_004516678.1 | scaffold1483 | 6809                    | TT                              | CC                 | CC               | DRR                           | 101494677          | Unknown function   |
| SNP_96386_A_6814 | NW_004516678.1 | scaffold1483 | 6814                    | TT                              | CC                 | CC               | DRR                           | 101494677          | Unknown function   |
| SNP_96387_A_6817 | NW_004516678.1 | scaffold1483 | 6817                    | AA                              | TT                 | TT               | DRR                           | 101494677          | Unknown function   |
| SNP_96389_A_6891 | NW_004516678.1 | scaffold1483 | 6891                    | TT                              | GG                 | GG               | DRR                           | 101494677          | Unknown function   |
| SNP_96390_A_6901 | NW_004516678.1 | scaffold1483 | 6901                    | AA                              | GG                 | GG               | DRR                           | 101494677          | Unknown function   |
| SNP_96391_A_6917 | NW_004516678.1 | scaffold1483 | 6917                    | AA                              | CC                 | CC               | DRR                           | 101494677          | Unknown function   |

| SNPs IDs          | Chromosome IDs | Chromosomes  | Physical positions (bp) | CDC Frontier (Reference genome) | (Pusa 1103 & HPNB) | (ILWC 46 & LPNB) | Sequence Components of genome | Gene accession IDs | Putative functions                                                        |
|-------------------|----------------|--------------|-------------------------|---------------------------------|--------------------|------------------|-------------------------------|--------------------|---------------------------------------------------------------------------|
| SNP_96392_A_6930  | NW_004516678.1 | scaffold1483 | 6930                    | GG                              | CC                 | CC               | DRR                           | 101494677          | Unknown function                                                          |
| SNP_96393_A_20437 | NW_004516678.1 | scaffold1483 | 20437                   | AA                              | TT                 | TT               | INTERGENIC                    |                    |                                                                           |
| SNP_96395_A_54800 | NW_004516678.1 | scaffold1483 | 54800                   | AA                              | TT                 | TT               | INTERGENIC                    |                    |                                                                           |
| SNP_96396_A_54848 | NW_004516678.1 | scaffold1483 | 54848                   | CC                              | TT                 | TT               | INTERGENIC                    |                    |                                                                           |
| SNP_96397_A_55117 | NW_004516678.1 | scaffold1483 | 55117                   | TT                              | GG                 | GG               | INTERGENIC                    |                    |                                                                           |
| SNP_96398_A_55122 | NW_004516678.1 | scaffold1483 | 55122                   | TT                              | CC                 | CC               | INTERGENIC                    |                    |                                                                           |
| SNP_96399_A_56575 | NW_004516678.1 | scaffold1483 | 56575                   | AA                              | GG                 | GG               | URR                           | 101493627          | probable serine/threonine-protein kinase WNK3                             |
| SNP_96400_A_57081 | NW_004516678.1 | scaffold1483 | 57081                   | AA                              | CC                 | CC               | URR                           | 101493627          | probable serine/threonine-protein kinase WNK3                             |
| SNP_96402_A_69213 | NW_004516678.1 | scaffold1483 | 69213                   | AA                              | GG                 | GG               | INTERGENIC                    |                    |                                                                           |
| SNP_96403_A_69313 | NW_004516678.1 | scaffold1483 | 69313                   | TT                              | AA                 | AA               | INTERGENIC                    |                    |                                                                           |
| SNP_96404_A_69768 | NW_004516678.1 | scaffold1483 | 69768                   | AA                              | CC                 | CC               | DRR                           | 101492971          | pentatricopeptide repeat-containing protein At3g22470, mitochondrial-like |
| SNP_96405_A_69969 | NW_004516678.1 | scaffold1483 | 69969                   | GG                              | AA                 | AA               | DRR                           | 101492971          | pentatricopeptide repeat-containing protein At3g22470, mitochondrial-like |
| SNP_96406_A_70221 | NW_004516678.1 | scaffold1483 | 70221                   | GG                              | AA                 | AA               | DRR                           | 101492971          | pentatricopeptide repeat-containing protein At3g22470, mitochondrial-like |
| SNP_96408_A_40    | NW_004516680.1 | scaffold1486 | 40                      | TT                              | GG                 | GG               | INTERGENIC                    |                    |                                                                           |
| SNP_96409_A_52    | NW_004516680.1 | scaffold1486 | 52                      | CC                              | AA                 | AA               | INTERGENIC                    |                    |                                                                           |
| SNP_96410_A_240   | NW_004516680.1 | scaffold1486 | 240                     | TT                              | AA                 | AA               | INTERGENIC                    |                    |                                                                           |
| SNP_96411_A_474   | NW_004516680.1 | scaffold1486 | 474                     | TT                              | AA                 | AA               | INTERGENIC                    |                    |                                                                           |
| SNP_96412_A_341   | NW_004516681.1 | scaffold1488 | 341                     | AA                              | CC                 | CC               | INTERGENIC                    |                    |                                                                           |
| SNP_96413_A_9231  | NW_004516681.1 | scaffold1488 | 9231                    | CC                              | AA                 | AA               | INTERGENIC                    |                    |                                                                           |
| SNP_96414_A_9367  | NW_004516681.1 | scaffold1488 | 9367                    | AA                              | TT                 | TT               | INTERGENIC                    |                    |                                                                           |
| SNP_96416_A_636   | NW_004516683.1 | scaffold1490 | 636                     | AA                              | TT                 | TT               | INTERGENIC                    |                    |                                                                           |
| SNP_96417_A_638   | NW_004516683.1 | scaffold1490 | 638                     | CC                              | AA                 | AA               | INTERGENIC                    |                    |                                                                           |

| SNPs IDs          | Chromosome IDs | Chromosomes  | Physical positions (bp) | CDC Frontier (Reference genome) | (Pusa 1103 & HPNB) | (ILWC 46 & LPNB) | Sequence genome | Components of | Gene accession IDs | Putative functions |
|-------------------|----------------|--------------|-------------------------|---------------------------------|--------------------|------------------|-----------------|---------------|--------------------|--------------------|
| SNP_96418_A_650   | NW_004516683.1 | scaffold1490 | 650                     | GG                              | CC                 | CC               | INTERGENIC      |               |                    |                    |
| SNP_96419_A_668   | NW_004516683.1 | scaffold1490 | 668                     | GG                              | CC                 | CC               | INTERGENIC      |               |                    |                    |
| SNP_96420_A_687   | NW_004516683.1 | scaffold1490 | 687                     | TT                              | AA                 | AA               | INTERGENIC      |               |                    |                    |
| SNP_96421_A_702   | NW_004516683.1 | scaffold1490 | 702                     | CC                              | AA                 | AA               | INTERGENIC      |               |                    |                    |
| SNP_96422_A_730   | NW_004516683.1 | scaffold1490 | 730                     | CC                              | TT                 | TT               | INTERGENIC      |               |                    |                    |
| SNP_96423_A_928   | NW_004516683.1 | scaffold1490 | 928                     | TT                              | GG                 | GG               | INTERGENIC      |               |                    |                    |
| SNP_96424_A_938   | NW_004516683.1 | scaffold1490 | 938                     | CC                              | AA                 | AA               | INTERGENIC      |               |                    |                    |
| SNP_96425_A_968   | NW_004516683.1 | scaffold1490 | 968                     | GG                              | AA                 | AA               | INTERGENIC      |               |                    |                    |
| SNP_96426_A_973   | NW_004516683.1 | scaffold1490 | 973                     | CC                              | AA                 | AA               | INTERGENIC      |               |                    |                    |
| SNP_96427_A_974   | NW_004516683.1 | scaffold1490 | 974                     | GG                              | AA                 | AA               | INTERGENIC      |               |                    |                    |
| SNP_96428_A_1009  | NW_004516683.1 | scaffold1490 | 1009                    | GG                              | AA                 | AA               | INTERGENIC      |               |                    |                    |
| SNP_96429_A_1048  | NW_004516683.1 | scaffold1490 | 1048                    | TT                              | CC                 | CC               | INTERGENIC      |               |                    |                    |
| SNP_96430_A_1141  | NW_004516683.1 | scaffold1490 | 1141                    | AA                              | CC                 | CC               | INTERGENIC      |               |                    |                    |
| SNP_96431_A_1151  | NW_004516683.1 | scaffold1490 | 1151                    | AA                              | GG                 | GG               | INTERGENIC      |               |                    |                    |
| SNP_96432_A_1158  | NW_004516683.1 | scaffold1490 | 1158                    | GG                              | AA                 | AA               | INTERGENIC      |               |                    |                    |
| SNP_96433_A_1229  | NW_004516683.1 | scaffold1490 | 1229                    | GG                              | CC                 | CC               | INTERGENIC      |               |                    |                    |
| SNP_96435_A_1296  | NW_004516683.1 | scaffold1490 | 1296                    | TT                              | CC                 | CC               | INTERGENIC      |               |                    |                    |
| SNP_96436_A_1431  | NW_004516683.1 | scaffold1490 | 1431                    | AA                              | TT                 | TT               | INTERGENIC      |               |                    |                    |
| SNP_96437_A_1450  | NW_004516683.1 | scaffold1490 | 1450                    | AA                              | GG                 | GG               | INTERGENIC      |               |                    |                    |
| SNP_96438_A_1461  | NW_004516683.1 | scaffold1490 | 1461                    | GG                              | AA                 | AA               | INTERGENIC      |               |                    |                    |
| SNP_96439_A_9803  | NW_004516683.1 | scaffold1490 | 9803                    | GG                              | TT                 | TT               | INTERGENIC      |               |                    |                    |
| SNP_96440_A_10831 | NW_004516683.1 | scaffold1490 | 10831                   | GG                              | CC                 | CC               | INTERGENIC      |               |                    |                    |

| SNPs IDs          | Chromosome IDs | Chromosomes  | Physical positions (bp) | CDC Frontier (Reference genome) | (Pusa 1103 & HPNB) | (ILWC 46 & LPNB) | Sequence genome | Components of | Gene accession IDs | Putative functions |
|-------------------|----------------|--------------|-------------------------|---------------------------------|--------------------|------------------|-----------------|---------------|--------------------|--------------------|
| SNP_96441_A_14257 | NW_004516683.1 | scaffold1490 | 14257                   | AA                              | CC                 | CC               | INTERGENIC      |               |                    |                    |
| SNP_96442_A_14329 | NW_004516683.1 | scaffold1490 | 14329                   | GG                              | TT                 | TT               | INTERGENIC      |               |                    |                    |
| SNP_96443_A_14336 | NW_004516683.1 | scaffold1490 | 14336                   | TT                              | GG                 | GG               | INTERGENIC      |               |                    |                    |
| SNP_96444_A_14357 | NW_004516683.1 | scaffold1490 | 14357                   | AA                              | CC                 | CC               | INTERGENIC      |               |                    |                    |
| SNP_96446_A_62551 | NW_004516683.1 | scaffold1490 | 62551                   | GG                              | TT                 | TT               | INTERGENIC      |               |                    |                    |
| SNP_96447_A_62600 | NW_004516683.1 | scaffold1490 | 62600                   | AA                              | GG                 | GG               | INTERGENIC      |               |                    |                    |
| SNP_96448_A_62605 | NW_004516683.1 | scaffold1490 | 62605                   | AA                              | GG                 | GG               | INTERGENIC      |               |                    |                    |
| SNP_96449_A_66615 | NW_004516683.1 | scaffold1490 | 66615                   | AA                              | GG                 | GG               | INTERGENIC      |               |                    |                    |
| SNP_96450_A_72930 | NW_004516683.1 | scaffold1490 | 72930                   | CC                              | TT                 | TT               | INTERGENIC      |               |                    |                    |
| SNP_96451_A_73031 | NW_004516683.1 | scaffold1490 | 73031                   | TT                              | AA                 | AA               | INTERGENIC      |               |                    |                    |
| SNP_96452_A_73690 | NW_004516683.1 | scaffold1490 | 73690                   | TT                              | CC                 | CC               | INTERGENIC      |               |                    |                    |
| SNP_96453_A_73691 | NW_004516683.1 | scaffold1490 | 73691                   | CC                              | TT                 | TT               | INTERGENIC      |               |                    |                    |
| SNP_96454_A_73971 | NW_004516683.1 | scaffold1490 | 73971                   | GG                              | AA                 | AA               | INTERGENIC      |               |                    |                    |
| SNP_96455_A_74028 | NW_004516683.1 | scaffold1490 | 74028                   | TT                              | CC                 | CC               | INTERGENIC      |               |                    |                    |
| SNP_96456_A_74168 | NW_004516683.1 | scaffold1490 | 74168                   | AA                              | GG                 | GG               | INTERGENIC      |               |                    |                    |
| SNP_96457_A_74169 | NW_004516683.1 | scaffold1490 | 74169                   | AA                              | CC                 | CC               | INTERGENIC      |               |                    |                    |
| SNP_96458_A_74312 | NW_004516683.1 | scaffold1490 | 74312                   | TT                              | AA                 | AA               | INTERGENIC      |               |                    |                    |
| SNP_96459_A_74360 | NW_004516683.1 | scaffold1490 | 74360                   | TT                              | CC                 | CC               | INTERGENIC      |               |                    |                    |
| SNP_96460_A_74446 | NW_004516683.1 | scaffold1490 | 74446                   | TT                              | CC                 | CC               | INTERGENIC      |               |                    |                    |
| SNP_96461_A_74649 | NW_004516683.1 | scaffold1490 | 74649                   | AA                              | GG                 | GG               | INTERGENIC      |               |                    |                    |
| SNP_96462_A_78035 | NW_004516683.1 | scaffold1490 | 78035                   | TT                              | CC                 | CC               | INTERGENIC      |               |                    |                    |
| SNP_96463_A_78057 | NW_004516683.1 | scaffold1490 | 78057                   | GG                              | AA                 | AA               | INTERGENIC      |               |                    |                    |

| SNPs IDs          | Chromosome IDs | Chromosomes  | Physical positions (bp) | CDC Frontier (Reference genome) | (Pusa 1103 & HPNB) | (ILWC 46 & LPNB) | Sequence Components of genome | Gene accession IDs | Putative functions           |
|-------------------|----------------|--------------|-------------------------|---------------------------------|--------------------|------------------|-------------------------------|--------------------|------------------------------|
| SNP_96464_A_78070 | NW_004516683.1 | scaffold1490 | 78070                   | TT                              | GG                 | GG               | INTERGENIC                    |                    |                              |
| SNP_96465_A_79586 | NW_004516683.1 | scaffold1490 | 79586                   | AA                              | GG                 | GG               | INTERGENIC                    |                    |                              |
| SNP_96466_A_79619 | NW_004516683.1 | scaffold1490 | 79619                   | AA                              | GG                 | GG               | INTERGENIC                    |                    |                              |
| SNP_96467_A_84101 | NW_004516683.1 | scaffold1490 | 84101                   | AA                              | CC                 | CC               | URR                           | 101496310          | proteinase inhibitor PSI-1.2 |
| SNP_96468_A_479   | NW_004516684.1 | scaffold1491 | 479                     | AA                              | CC                 | CC               | INTERGENIC                    |                    |                              |
| SNP_96469_A_571   | NW_004516684.1 | scaffold1491 | 571                     | TT                              | GG                 | GG               | INTERGENIC                    |                    |                              |
| SNP_96471_A_1669  | NW_004516686.1 | scaffold1493 | 1669                    | TT                              | GG                 | GG               | INTERGENIC                    |                    |                              |
| SNP_96472_A_2064  | NW_004516686.1 | scaffold1493 | 2064                    | AA                              | TT                 | TT               | INTERGENIC                    |                    |                              |
| SNP_96473_A_2174  | NW_004516686.1 | scaffold1493 | 2174                    | GG                              | AA                 | AA               | INTERGENIC                    |                    |                              |
| SNP_96474_A_2217  | NW_004516686.1 | scaffold1493 | 2217                    | CC                              | TT                 | TT               | INTERGENIC                    |                    |                              |
| SNP_96475_A_2349  | NW_004516686.1 | scaffold1493 | 2349                    | GG                              | AA                 | AA               | INTERGENIC                    |                    |                              |
| SNP_96476_A_2355  | NW_004516686.1 | scaffold1493 | 2355                    | AA                              | GG                 | GG               | INTERGENIC                    |                    |                              |
| SNP_96477_A_2484  | NW_004516686.1 | scaffold1493 | 2484                    | CC                              | AA                 | AA               | INTERGENIC                    |                    |                              |
| SNP_96478_A_2827  | NW_004516686.1 | scaffold1493 | 2827                    | GG                              | CC                 | CC               | INTERGENIC                    |                    |                              |
| SNP_96479_A_2843  | NW_004516686.1 | scaffold1493 | 2843                    | AA                              | GG                 | GG               | INTERGENIC                    |                    |                              |
| SNP_96480_A_3262  | NW_004516686.1 | scaffold1493 | 3262                    | CC                              | AA                 | AA               | INTERGENIC                    |                    |                              |
| SNP_96481_A_3363  | NW_004516686.1 | scaffold1493 | 3363                    | AA                              | GG                 | GG               | INTERGENIC                    |                    |                              |
| SNP_96482_A_3434  | NW_004516686.1 | scaffold1493 | 3434                    | AA                              | GG                 | GG               | INTERGENIC                    |                    |                              |
| SNP_96483_A_3609  | NW_004516686.1 | scaffold1493 | 3609                    | TT                              | AA                 | AA               | INTERGENIC                    |                    |                              |
| SNP_96484_A_5870  | NW_004516686.1 | scaffold1493 | 5870                    | TT                              | AA                 | AA               | INTERGENIC                    |                    |                              |
| SNP_96485_A_12722 | NW_004516686.1 | scaffold1493 | 12722                   | TT                              | AA                 | AA               | INTERGENIC                    |                    |                              |
| SNP_96486_A_12785 | NW_004516686.1 | scaffold1493 | 12785                   | TT                              | CC                 | CC               | INTERGENIC                    |                    |                              |

| SNPs IDs          | Chromosome IDs | Chromosomes  | Physical positions (bp) | CDC Frontier (Reference genome) | (Pusa 1103 & HPNB) | (ILWC 46 & LPNB) | Sequence genome | Components of | Gene accession IDs | Putative functions |
|-------------------|----------------|--------------|-------------------------|---------------------------------|--------------------|------------------|-----------------|---------------|--------------------|--------------------|
| SNP_96487_A_12793 | NW_004516686.1 | scaffold1493 | 12793                   | AA                              | GG                 | GG               | INTERGENIC      |               |                    |                    |
| SNP_96488_A_16385 | NW_004516686.1 | scaffold1493 | 16385                   | TT                              | CC                 | CC               | INTERGENIC      |               |                    |                    |
| SNP_96489_A_24987 | NW_004516686.1 | scaffold1493 | 24987                   | TT                              | AA                 | AA               | INTERGENIC      |               |                    |                    |
| SNP_96490_A_34739 | NW_004516686.1 | scaffold1493 | 34739                   | GG                              | AA                 | AA               | INTERGENIC      |               |                    |                    |
| SNP_96491_A_34874 | NW_004516686.1 | scaffold1493 | 34874                   | CC                              | TT                 | TT               | INTERGENIC      |               |                    |                    |
| SNP_96492_A_34897 | NW_004516686.1 | scaffold1493 | 34897                   | AA                              | GG                 | GG               | INTERGENIC      |               |                    |                    |
| SNP_96493_A_34907 | NW_004516686.1 | scaffold1493 | 34907                   | GG                              | AA                 | AA               | INTERGENIC      |               |                    |                    |
| SNP_96494_A_34913 | NW_004516686.1 | scaffold1493 | 34913                   | TT                              | CC                 | CC               | INTERGENIC      |               |                    |                    |
| SNP_96495_A_34922 | NW_004516686.1 | scaffold1493 | 34922                   | AA                              | TT                 | TT               | INTERGENIC      |               |                    |                    |
| SNP_96496_A_38511 | NW_004516686.1 | scaffold1493 | 38511                   | CC                              | GG                 | GG               | INTERGENIC      |               |                    |                    |
| SNP_96497_A_56103 | NW_004516686.1 | scaffold1493 | 56103                   | TT                              | AA                 | AA               | INTERGENIC      |               |                    |                    |
| SNP_96498_A_56108 | NW_004516686.1 | scaffold1493 | 56108                   | AA                              | GG                 | GG               | INTERGENIC      |               |                    |                    |
| SNP_96499_A_56118 | NW_004516686.1 | scaffold1493 | 56118                   | AA                              | GG                 | GG               | INTERGENIC      |               |                    |                    |
| SNP_96500_A_56149 | NW_004516686.1 | scaffold1493 | 56149                   | AA                              | GG                 | GG               | INTERGENIC      |               |                    |                    |
| SNP_96501_A_56157 | NW_004516686.1 | scaffold1493 | 56157                   | TT                              | CC                 | CC               | INTERGENIC      |               |                    |                    |
| SNP_96502_A_56162 | NW_004516686.1 | scaffold1493 | 56162                   | TT                              | CC                 | CC               | INTERGENIC      |               |                    |                    |
| SNP_96503_A_56172 | NW_004516686.1 | scaffold1493 | 56172                   | GG                              | TT                 | TT               | INTERGENIC      |               |                    |                    |
| SNP_96504_A_56419 | NW_004516686.1 | scaffold1493 | 56419                   | TT                              | CC                 | CC               | INTERGENIC      |               |                    |                    |
| SNP_96505_A_56420 | NW_004516686.1 | scaffold1493 | 56420                   | GG                              | AA                 | AA               | INTERGENIC      |               |                    |                    |
| SNP_96506_A_56522 | NW_004516686.1 | scaffold1493 | 56522                   | GG                              | AA                 | AA               | INTERGENIC      |               |                    |                    |
| SNP_96507_A_64522 | NW_004516686.1 | scaffold1493 | 64522                   | CC                              | TT                 | TT               | INTERGENIC      |               |                    |                    |
| SNP_96509_A_65521 | NW_004516686.1 | scaffold1493 | 65521                   | CC                              | AA                 | AA               | INTERGENIC      |               |                    |                    |

| SNPs IDs          | Chromosome IDs | Chromosomes  | Physical positions (bp) | CDC Frontier (Reference genome) | (Pusa 1103 & HPNB) | (ILWC 46 & LPNB) | Sequence genome | Components of | Gene accession IDs | Putative functions |
|-------------------|----------------|--------------|-------------------------|---------------------------------|--------------------|------------------|-----------------|---------------|--------------------|--------------------|
| SNP_96510_A_65594 | NW_004516686.1 | scaffold1493 | 65594                   | TT                              | CC                 | CC               | INTERGENIC      |               |                    |                    |
| SNP_96511_A_65676 | NW_004516686.1 | scaffold1493 | 65676                   | TT                              | AA                 | AA               | INTERGENIC      |               |                    |                    |
| SNP_96512_A_65684 | NW_004516686.1 | scaffold1493 | 65684                   | TT                              | GG                 | GG               | INTERGENIC      |               |                    |                    |
| SNP_96513_A_65697 | NW_004516686.1 | scaffold1493 | 65697                   | CC                              | TT                 | TT               | INTERGENIC      |               |                    |                    |
| SNP_96514_A_65699 | NW_004516686.1 | scaffold1493 | 65699                   | AA                              | CC                 | CC               | INTERGENIC      |               |                    |                    |
| SNP_96515_A_65719 | NW_004516686.1 | scaffold1493 | 65719                   | AA                              | GG                 | GG               | INTERGENIC      |               |                    |                    |
| SNP_96516_A_65786 | NW_004516686.1 | scaffold1493 | 65786                   | CC                              | TT                 | TT               | INTERGENIC      |               |                    |                    |
| SNP_96517_A_65828 | NW_004516686.1 | scaffold1493 | 65828                   | CC                              | TT                 | TT               | INTERGENIC      |               |                    |                    |
| SNP_96518_A_65917 | NW_004516686.1 | scaffold1493 | 65917                   | TT                              | CC                 | CC               | INTERGENIC      |               |                    |                    |
| SNP_96519_A_85010 | NW_004516686.1 | scaffold1493 | 85010                   | TT                              | CC                 | CC               | INTERGENIC      |               |                    |                    |
| SNP_96520_A_85017 | NW_004516686.1 | scaffold1493 | 85017                   | TT                              | CC                 | CC               | INTERGENIC      |               |                    |                    |
| SNP_96521_A_85049 | NW_004516686.1 | scaffold1493 | 85049                   | TT                              | CC                 | CC               | INTERGENIC      |               |                    |                    |
| SNP_96522_A_85074 | NW_004516686.1 | scaffold1493 | 85074                   | TT                              | CC                 | CC               | INTERGENIC      |               |                    |                    |
| SNP_96523_A_85114 | NW_004516686.1 | scaffold1493 | 85114                   | GG                              | AA                 | AA               | INTERGENIC      |               |                    |                    |
| SNP_96524_A_85145 | NW_004516686.1 | scaffold1493 | 85145                   | AA                              | GG                 | GG               | INTERGENIC      |               |                    |                    |
| SNP_96525_A_85210 | NW_004516686.1 | scaffold1493 | 85210                   | TT                              | GG                 | GG               | INTERGENIC      |               |                    |                    |
| SNP_96526_A_85231 | NW_004516686.1 | scaffold1493 | 85231                   | CC                              | TT                 | TT               | INTERGENIC      |               |                    |                    |
| SNP_96527_A_85373 | NW_004516686.1 | scaffold1493 | 85373                   | TT                              | CC                 | CC               | INTERGENIC      |               |                    |                    |
| SNP_96528_A_85401 | NW_004516686.1 | scaffold1493 | 85401                   | GG                              | AA                 | AA               | INTERGENIC      |               |                    |                    |
| SNP_96529_A_85428 | NW_004516686.1 | scaffold1493 | 85428                   | CC                              | TT                 | TT               | INTERGENIC      |               |                    |                    |
| SNP_96530_A_85431 | NW_004516686.1 | scaffold1493 | 85431                   | GG                              | AA                 | AA               | INTERGENIC      |               |                    |                    |
| SNP_96531_A_85451 | NW_004516686.1 | scaffold1493 | 85451                   | CC                              | TT                 | TT               | INTERGENIC      |               |                    |                    |



| SNPs IDs           | Chromosome IDs | Chromosomes  | Physical positions (bp) | CDC Frontier (Reference genome) | (Pusa 1103 & HPNB) | (ILWC 46 & LPNB) | Sequence Components of genome | Gene accession IDs | Putative functions                               |
|--------------------|----------------|--------------|-------------------------|---------------------------------|--------------------|------------------|-------------------------------|--------------------|--------------------------------------------------|
| SNP_96532_A_88721  | NW_004516686.1 | scaffold1493 | 88721                   | TT                              | CC                 | CC               | INTERGENIC                    |                    |                                                  |
| SNP_96533_A_11765  | NW_004516689.1 | scaffold1496 | 11765                   | CC                              | GG                 | GG               | URR                           | 101498266          | uncharacterized LOC101498266                     |
| SNP_96534_A_13170  | NW_004516689.1 | scaffold1496 | 13170                   | AA                              | GG                 | GG               | INTERGENIC                    |                    |                                                  |
| SNP_96535_A_21174  | NW_004516689.1 | scaffold1496 | 21174                   | TT                              | CC                 | CC               | INTERGENIC                    |                    |                                                  |
| SNP_96536_A_21186  | NW_004516689.1 | scaffold1496 | 21186                   | TT                              | CC                 | CC               | INTERGENIC                    |                    |                                                  |
| SNP_96537_A_21426  | NW_004516689.1 | scaffold1496 | 21426                   | TT                              | AA                 | AA               | INTERGENIC                    |                    |                                                  |
| SNP_96538_A_31008  | NW_004516689.1 | scaffold1496 | 31008                   | CC                              | TT                 | TT               | INTERGENIC                    |                    |                                                  |
| SNP_96539_A_55648  | NW_004516689.1 | scaffold1496 | 55648                   | TT                              | CC                 | CC               | INTERGENIC                    |                    |                                                  |
| SNP_96540_A_74005  | NW_004516689.1 | scaffold1496 | 74005                   | TT                              | CC                 | CC               | INTERGENIC                    |                    |                                                  |
| SNP_96541_A_88686  | NW_004516689.1 | scaffold1496 | 88686                   | TT                              | CC                 | CC               | INTRON                        | 101498491          | DNA repair protein recA homolog 1, chloroplastic |
| SNP_96542_A_120765 | NW_004516689.1 | scaffold1496 | 120765                  | TT                              | AA                 | AA               | INTERGENIC                    |                    |                                                  |
| SNP_96543_A_121099 | NW_004516689.1 | scaffold1496 | 121099                  | TT                              | CC                 | CC               | INTERGENIC                    |                    |                                                  |
| SNP_96544_A_123085 | NW_004516689.1 | scaffold1496 | 123085                  | AA                              | CC                 | CC               | INTERGENIC                    |                    |                                                  |
| SNP_96545_A_123117 | NW_004516689.1 | scaffold1496 | 123117                  | CC                              | TT                 | TT               | INTERGENIC                    |                    |                                                  |
| SNP_96546_A_123207 | NW_004516689.1 | scaffold1496 | 123207                  | AA                              | GG                 | GG               | INTERGENIC                    |                    |                                                  |
| SNP_96547_A_123208 | NW_004516689.1 | scaffold1496 | 123208                  | CC                              | TT                 | TT               | INTERGENIC                    |                    |                                                  |
| SNP_96548_A_123209 | NW_004516689.1 | scaffold1496 | 123209                  | AA                              | CC                 | CC               | INTERGENIC                    |                    |                                                  |
| SNP_96549_A_123325 | NW_004516689.1 | scaffold1496 | 123325                  | CC                              | TT                 | TT               | INTERGENIC                    |                    |                                                  |
| SNP_96550_A_123396 | NW_004516689.1 | scaffold1496 | 123396                  | CC                              | TT                 | TT               | INTERGENIC                    |                    |                                                  |
| SNP_96551_A_123427 | NW_004516689.1 | scaffold1496 | 123427                  | GG                              | AA                 | AA               | INTERGENIC                    |                    |                                                  |
| SNP_96552_A_123446 | NW_004516689.1 | scaffold1496 | 123446                  | AA                              | GG                 | GG               | INTERGENIC                    |                    |                                                  |
| SNP_96553_A_123503 | NW_004516689.1 | scaffold1496 | 123503                  | GG                              | AA                 | AA               | INTERGENIC                    |                    |                                                  |

| SNPs IDs           | Chromosome IDs | Chromosomes  | Physical positions (bp) | CDC Frontier genome (Reference genome) | (Pusa 1103 & HPNB) | (ILWC 46 & LPNB) | Sequence genome       | Components of | Gene accession IDs                                                   | Putative functions |
|--------------------|----------------|--------------|-------------------------|----------------------------------------|--------------------|------------------|-----------------------|---------------|----------------------------------------------------------------------|--------------------|
| SNP_96555_A_138434 | NW_004516689.1 | scaffold1496 | 138434                  | GG                                     | AA                 | AA               | INTERGENIC            |               |                                                                      |                    |
| SNP_96556_A_178058 | NW_004516689.1 | scaffold1496 | 178058                  | GG                                     | TT                 | TT               | INTERGENIC            |               |                                                                      |                    |
| SNP_96557_A_189242 | NW_004516689.1 | scaffold1496 | 189242                  | CC                                     | TT                 | TT               | INTERGENIC            |               |                                                                      |                    |
| SNP_96558_A_193841 | NW_004516689.1 | scaffold1496 | 193841                  | TT                                     | GG                 | GG               | INTERGENIC            |               |                                                                      |                    |
| SNP_96559_A_202769 | NW_004516689.1 | scaffold1496 | 202769                  | AA                                     | GG                 | GG               | INTERGENIC            |               |                                                                      |                    |
| SNP_96561_A_209095 | NW_004516689.1 | scaffold1496 | 209095                  | CC                                     | GG                 | GG               | INTERGENIC            |               |                                                                      |                    |
| SNP_96562_A_210010 | NW_004516689.1 | scaffold1496 | 210010                  | AA                                     | TT                 | TT               | INTERGENIC            |               |                                                                      |                    |
| SNP_96563_A_213400 | NW_004516689.1 | scaffold1496 | 213400                  | CC                                     | AA                 | AA               | INTERGENIC            |               |                                                                      |                    |
| SNP_96564_A_214465 | NW_004516689.1 | scaffold1496 | 214465                  | TT                                     | GG                 | GG               | INTERGENIC            |               |                                                                      |                    |
| SNP_96565_A_215617 | NW_004516689.1 | scaffold1496 | 215617                  | GG                                     | AA                 | AA               | INTERGENIC            |               |                                                                      |                    |
| SNP_96566_A_231886 | NW_004516689.1 | scaffold1496 | 231886                  | CC                                     | AA                 | AA               | INTERGENIC            |               |                                                                      |                    |
| SNP_96568_A_234298 | NW_004516689.1 | scaffold1496 | 234298                  | AA                                     | GG                 | GG               | INTERGENIC            |               |                                                                      |                    |
| SNP_96570_A_238797 | NW_004516689.1 | scaffold1496 | 238797                  | CC                                     | TT                 | TT               | INTERGENIC            |               |                                                                      |                    |
| SNP_96571_A_238913 | NW_004516689.1 | scaffold1496 | 238913                  | CC                                     | TT                 | TT               | NON_SYNONYMOUS_CODING | 101498839     | probable LRR receptor-like serine/threonine-protein kinase At1g56140 |                    |
| SNP_96572_A_247630 | NW_004516689.1 | scaffold1496 | 247630                  | GG                                     | AA                 | AA               | INTRON                | 101498839     | probable LRR receptor-like serine/threonine-protein kinase At1g56140 |                    |
| SNP_96573_A_252632 | NW_004516689.1 | scaffold1496 | 252632                  | AA                                     | TT                 | TT               | NON_SYNONYMOUS_CODING | 101498839     | probable LRR receptor-like serine/threonine-protein kinase At1g56140 |                    |
| SNP_96574_A_252720 | NW_004516689.1 | scaffold1496 | 252720                  | CC                                     | AA                 | AA               | INTRON                | 101498839     | probable LRR receptor-like serine/threonine-protein kinase At1g56140 |                    |
| SNP_96575_A_252931 | NW_004516689.1 | scaffold1496 | 252931                  | AA                                     | GG                 | GG               | INTRON                | 101498839     | probable LRR receptor-like serine/threonine-protein kinase At1g56140 |                    |
| SNP_96576_A_254260 | NW_004516689.1 | scaffold1496 | 254260                  | CC                                     | GG                 | GG               | NON_SYNONYMOUS_CODING | 101498839     | probable LRR receptor-like serine/threonine-protein kinase At1g56140 |                    |
| SNP_96577_A_269540 | NW_004516689.1 | scaffold1496 | 269540                  | CC                                     | GG                 | GG               | NON_SYNONYMOUS_CODING | 101498839     | probable LRR receptor-like serine/threonine-protein kinase At1g56140 |                    |
| SNP_96578_A_269957 | NW_004516689.1 | scaffold1496 | 269957                  | GG                                     | AA                 | AA               | INTRON                | 101498839     | probable LRR receptor-like serine/threonine-protein kinase At1g56140 |                    |
| SNP_96579_A_275732 | NW_004516689.1 | scaffold1496 | 275732                  | TT                                     | CC                 | CC               | INTERGENIC            |               |                                                                      |                    |

| SNPs IDs           | Chromosome IDs | Chromosomes  | Physical positions (bp) | CDC Frontier (Reference genome) | (Pusa 1103 & HPNB) | (ILWC 46 & LPNB) | Sequence Components of genome | Gene accession IDs | Putative functions                            |
|--------------------|----------------|--------------|-------------------------|---------------------------------|--------------------|------------------|-------------------------------|--------------------|-----------------------------------------------|
| SNP_96580_A_275820 | NW_004516689.1 | scaffold1496 | 275820                  | TT                              | CC                 | CC               | INTERGENIC                    |                    |                                               |
| SNP_96581_A_276391 | NW_004516689.1 | scaffold1496 | 276391                  | GG                              | AA                 | AA               | INTERGENIC                    |                    |                                               |
| SNP_96582_A_278252 | NW_004516689.1 | scaffold1496 | 278252                  | TT                              | CC                 | CC               | INTERGENIC                    |                    |                                               |
| SNP_96583_A_285343 | NW_004516689.1 | scaffold1496 | 285343                  | GG                              | AA                 | AA               | INTERGENIC                    |                    |                                               |
| SNP_96584_A_285645 | NW_004516689.1 | scaffold1496 | 285645                  | GG                              | AA                 | AA               | INTERGENIC                    |                    |                                               |
| SNP_96585_A_286202 | NW_004516689.1 | scaffold1496 | 286202                  | GG                              | AA                 | AA               | INTERGENIC                    |                    |                                               |
| SNP_96586_A_287858 | NW_004516689.1 | scaffold1496 | 287858                  | GG                              | AA                 | AA               | INTERGENIC                    |                    |                                               |
| SNP_96587_A_291111 | NW_004516689.1 | scaffold1496 | 291111                  | GG                              | TT                 | TT               | INTERGENIC                    |                    |                                               |
| SNP_96589_A_301288 | NW_004516689.1 | scaffold1496 | 301288                  | CC                              | AA                 | AA               | INTERGENIC                    |                    |                                               |
| SNP_96590_A_305593 | NW_004516689.1 | scaffold1496 | 305593                  | AA                              | TT                 | TT               | INTERGENIC                    |                    |                                               |
| SNP_96592_A_3238   | NW_004516690.1 | scaffold1497 | 3238                    | TT                              | CC                 | CC               | INTERGENIC                    |                    |                                               |
| SNP_96593_A_4127   | NW_004516690.1 | scaffold1497 | 4127                    | CC                              | TT                 | TT               | INTERGENIC                    |                    |                                               |
| SNP_96594_A_4152   | NW_004516690.1 | scaffold1497 | 4152                    | AA                              | TT                 | TT               | INTERGENIC                    |                    |                                               |
| SNP_96595_A_4534   | NW_004516690.1 | scaffold1497 | 4534                    | CC                              | TT                 | TT               | INTERGENIC                    |                    |                                               |
| SNP_96596_A_4505   | NW_004516691.1 | scaffold1498 | 4505                    | GG                              | TT                 | TT               | URR                           | 101500520          | multidrug and toxin extrusion protein 1-like  |
| SNP_96597_A_4691   | NW_004516691.1 | scaffold1498 | 4691                    | TT                              | CC                 | CC               | URR                           | 101500520          | multidrug and toxin extrusion protein 1-like  |
| SNP_96598_A_592    | NW_004516692.1 | scaffold1499 | 592                     | CC                              | AA                 | AA               | INTERGENIC                    |                    |                                               |
| SNP_96599_A_867    | NW_004516692.1 | scaffold1499 | 867                     | GG                              | CC                 | CC               | INTERGENIC                    |                    |                                               |
| SNP_96601_A_998    | NW_004516692.1 | scaffold1499 | 998                     | TT                              | AA                 | AA               | INTERGENIC                    |                    |                                               |
| SNP_96602_A_1244   | NW_004516692.1 | scaffold1499 | 1244                    | TT                              | CC                 | CC               | INTERGENIC                    |                    |                                               |
| SNP_96603_A_4445   | NW_004516692.1 | scaffold1499 | 4445                    | AA                              | TT                 | TT               | INTRON                        | 101501167          | putative uncharacterized protein DDB_G0290521 |
| SNP_96604_A_8725   | NW_004516692.1 | scaffold1499 | 8725                    | AA                              | GG                 | GG               | URR                           | 101501167          | putative uncharacterized protein DDB_G0290521 |

| SNPs IDs          | Chromosome IDs | Chromosomes  | Physical positions (bp) | CDC Frontier (Reference genome) | (Pusa 1103 & HPNB) | (ILWC 46 & LPNB) | Sequence genome | Components of | Gene accession IDs           | Putative functions |
|-------------------|----------------|--------------|-------------------------|---------------------------------|--------------------|------------------|-----------------|---------------|------------------------------|--------------------|
| SNP_96606_A_11639 | NW_004516692.1 | scaffold1499 | 11639                   | TT                              | CC                 | CC               | INTERGENIC      |               |                              |                    |
| SNP_96607_A_11641 | NW_004516692.1 | scaffold1499 | 11641                   | TT                              | AA                 | AA               | INTERGENIC      |               |                              |                    |
| SNP_96608_A_11647 | NW_004516692.1 | scaffold1499 | 11647                   | TT                              | CC                 | CC               | INTERGENIC      |               |                              |                    |
| SNP_96609_A_12255 | NW_004516692.1 | scaffold1499 | 12255                   | TT                              | AA                 | AA               | INTERGENIC      |               |                              |                    |
| SNP_96610_A_12388 | NW_004516692.1 | scaffold1499 | 12388                   | CC                              | TT                 | TT               | INTERGENIC      |               |                              |                    |
| SNP_96611_A_12504 | NW_004516692.1 | scaffold1499 | 12504                   | CC                              | AA                 | AA               | INTERGENIC      |               |                              |                    |
| SNP_96612_A_12519 | NW_004516692.1 | scaffold1499 | 12519                   | GG                              | AA                 | AA               | INTERGENIC      |               |                              |                    |
| SNP_96613_A_12520 | NW_004516692.1 | scaffold1499 | 12520                   | CC                              | GG                 | GG               | INTERGENIC      |               |                              |                    |
| SNP_96614_A_12551 | NW_004516692.1 | scaffold1499 | 12551                   | CC                              | TT                 | TT               | INTERGENIC      |               |                              |                    |
| SNP_96615_A_12656 | NW_004516692.1 | scaffold1499 | 12656                   | CC                              | AA                 | AA               | INTERGENIC      |               |                              |                    |
| SNP_96616_A_12693 | NW_004516692.1 | scaffold1499 | 12693                   | CC                              | AA                 | AA               | INTERGENIC      |               |                              |                    |
| SNP_96617_A_12742 | NW_004516692.1 | scaffold1499 | 12742                   | CC                              | TT                 | TT               | INTERGENIC      |               |                              |                    |
| SNP_96618_A_13539 | NW_004516692.1 | scaffold1499 | 13539                   | AA                              | GG                 | GG               | INTERGENIC      |               |                              |                    |
| SNP_96620_A_19340 | NW_004516692.1 | scaffold1499 | 19340                   | AA                              | GG                 | GG               | INTERGENIC      |               |                              |                    |
| SNP_96621_A_19438 | NW_004516692.1 | scaffold1499 | 19438                   | TT                              | GG                 | GG               | INTERGENIC      |               |                              |                    |
| SNP_96622_A_19501 | NW_004516692.1 | scaffold1499 | 19501                   | TT                              | CC                 | CC               | INTERGENIC      |               |                              |                    |
| SNP_96623_A_20504 | NW_004516692.1 | scaffold1499 | 20504                   | CC                              | AA                 | AA               | INTERGENIC      |               |                              |                    |
| SNP_96626_A_25288 | NW_004516692.1 | scaffold1499 | 25288                   | GG                              | CC                 | CC               | URR             | 101501484     | uncharacterized LOC101501484 |                    |
| SNP_96627_A_28958 | NW_004516692.1 | scaffold1499 | 28958                   | AA                              | GG                 | GG               | INTERGENIC      |               |                              |                    |
| SNP_96628_A_29992 | NW_004516692.1 | scaffold1499 | 29992                   | GG                              | AA                 | AA               | INTERGENIC      |               |                              |                    |
| SNP_96629_A_34115 | NW_004516692.1 | scaffold1499 | 34115                   | GG                              | AA                 | AA               | INTERGENIC      |               |                              |                    |
| SNP_96630_A_34163 | NW_004516692.1 | scaffold1499 | 34163                   | AA                              | TT                 | TT               | INTERGENIC      |               |                              |                    |

| SNPs IDs          | Chromosome IDs | Chromosomes  | Physical positions (bp) | CDC Frontier (Reference genome) | (Pusa 1103 & HPNB) | (ILWC 46 & LPNB) | Sequence genome | Components of | Gene accession IDs | Putative functions |
|-------------------|----------------|--------------|-------------------------|---------------------------------|--------------------|------------------|-----------------|---------------|--------------------|--------------------|
| SNP_96631_A_34169 | NW_004516692.1 | scaffold1499 | 34169                   | CC                              | TT                 | TT               | INTERGENIC      |               |                    |                    |
| SNP_96632_A_34181 | NW_004516692.1 | scaffold1499 | 34181                   | AA                              | TT                 | TT               | INTERGENIC      |               |                    |                    |
| SNP_96633_A_34196 | NW_004516692.1 | scaffold1499 | 34196                   | TT                              | AA                 | AA               | INTERGENIC      |               |                    |                    |
| SNP_96634_A_34245 | NW_004516692.1 | scaffold1499 | 34245                   | CC                              | AA                 | AA               | INTERGENIC      |               |                    |                    |
| SNP_96635_A_34256 | NW_004516692.1 | scaffold1499 | 34256                   | AA                              | GG                 | GG               | INTERGENIC      |               |                    |                    |
| SNP_96636_A_34350 | NW_004516692.1 | scaffold1499 | 34350                   | AA                              | TT                 | TT               | INTERGENIC      |               |                    |                    |
| SNP_96637_A_34357 | NW_004516692.1 | scaffold1499 | 34357                   | GG                              | TT                 | TT               | INTERGENIC      |               |                    |                    |
| SNP_96638_A_34419 | NW_004516692.1 | scaffold1499 | 34419                   | GG                              | AA                 | AA               | INTERGENIC      |               |                    |                    |
| SNP_96639_A_34433 | NW_004516692.1 | scaffold1499 | 34433                   | TT                              | AA                 | AA               | INTERGENIC      |               |                    |                    |
| SNP_96640_A_34447 | NW_004516692.1 | scaffold1499 | 34447                   | AA                              | GG                 | GG               | INTERGENIC      |               |                    |                    |
| SNP_96641_A_34486 | NW_004516692.1 | scaffold1499 | 34486                   | GG                              | TT                 | TT               | INTERGENIC      |               |                    |                    |
| SNP_96642_A_34492 | NW_004516692.1 | scaffold1499 | 34492                   | CC                              | TT                 | TT               | INTERGENIC      |               |                    |                    |
| SNP_96643_A_34568 | NW_004516692.1 | scaffold1499 | 34568                   | AA                              | TT                 | TT               | INTERGENIC      |               |                    |                    |
| SNP_96644_A_34629 | NW_004516692.1 | scaffold1499 | 34629                   | GG                              | CC                 | CC               | INTERGENIC      |               |                    |                    |
| SNP_96645_A_34648 | NW_004516692.1 | scaffold1499 | 34648                   | CC                              | AA                 | AA               | INTERGENIC      |               |                    |                    |
| SNP_96646_A_34664 | NW_004516692.1 | scaffold1499 | 34664                   | TT                              | GG                 | GG               | INTERGENIC      |               |                    |                    |
| SNP_96647_A_34682 | NW_004516692.1 | scaffold1499 | 34682                   | CC                              | AA                 | AA               | INTERGENIC      |               |                    |                    |
| SNP_96648_A_40154 | NW_004516692.1 | scaffold1499 | 40154                   | CC                              | TT                 | TT               | INTERGENIC      |               |                    |                    |
| SNP_96649_A_40365 | NW_004516692.1 | scaffold1499 | 40365                   | CC                              | GG                 | GG               | INTERGENIC      |               |                    |                    |
| SNP_96650_A_40373 | NW_004516692.1 | scaffold1499 | 40373                   | CC                              | TT                 | TT               | INTERGENIC      |               |                    |                    |
| SNP_96651_A_45962 | NW_004516692.1 | scaffold1499 | 45962                   | CC                              | AA                 | AA               | INTERGENIC      |               |                    |                    |
| SNP_96652_A_46042 | NW_004516692.1 | scaffold1499 | 46042                   | AA                              | CC                 | CC               | INTERGENIC      |               |                    |                    |

| SNPs IDs           | Chromosome IDs | Chromosomes  | Physical positions (bp) | CDC Frontier genome (Reference genome) | (Pusa 1103 & HPNB) | (ILWC 46 & LPNB) | Sequence Components of genome | Gene accession IDs | Putative functions |
|--------------------|----------------|--------------|-------------------------|----------------------------------------|--------------------|------------------|-------------------------------|--------------------|--------------------|
| SNP_96653_A_46207  | NW_004516692.1 | scaffold1499 | 46207                   | TT                                     | GG                 | GG               | INTERGENIC                    |                    |                    |
| SNP_96654_A_46233  | NW_004516692.1 | scaffold1499 | 46233                   | GG                                     | AA                 | AA               | INTERGENIC                    |                    |                    |
| SNP_96655_A_46241  | NW_004516692.1 | scaffold1499 | 46241                   | CC                                     | AA                 | AA               | INTERGENIC                    |                    |                    |
| SNP_96656_A_46315  | NW_004516692.1 | scaffold1499 | 46315                   | GG                                     | TT                 | TT               | INTERGENIC                    |                    |                    |
| SNP_96657_A_46320  | NW_004516692.1 | scaffold1499 | 46320                   | AA                                     | CC                 | CC               | INTERGENIC                    |                    |                    |
| SNP_96658_A_46514  | NW_004516692.1 | scaffold1499 | 46514                   | AA                                     | CC                 | CC               | INTERGENIC                    |                    |                    |
| SNP_96660_A_53866  | NW_004516692.1 | scaffold1499 | 53866                   | CC                                     | TT                 | TT               | INTERGENIC                    |                    |                    |
| SNP_96661_A_55985  | NW_004516692.1 | scaffold1499 | 55985                   | TT                                     | GG                 | GG               | INTERGENIC                    |                    |                    |
| SNP_96662_A_58036  | NW_004516692.1 | scaffold1499 | 58036                   | CC                                     | TT                 | TT               | INTERGENIC                    |                    |                    |
| SNP_96663_A_59324  | NW_004516692.1 | scaffold1499 | 59324                   | AA                                     | GG                 | GG               | INTERGENIC                    |                    |                    |
| SNP_96664_A_60034  | NW_004516692.1 | scaffold1499 | 60034                   | AA                                     | GG                 | GG               | INTERGENIC                    |                    |                    |
| SNP_96666_A_70952  | NW_004516692.1 | scaffold1499 | 70952                   | TT                                     | AA                 | AA               | INTERGENIC                    |                    |                    |
| SNP_96668_A_74444  | NW_004516692.1 | scaffold1499 | 74444                   | CC                                     | TT                 | TT               | INTERGENIC                    |                    |                    |
| SNP_96671_A_87115  | NW_004516692.1 | scaffold1499 | 87115                   | TT                                     | AA                 | AA               | INTERGENIC                    |                    |                    |
| SNP_96673_A_115435 | NW_004516692.1 | scaffold1499 | 115435                  | TT                                     | CC                 | CC               | INTERGENIC                    |                    |                    |
| SNP_96674_A_116182 | NW_004516692.1 | scaffold1499 | 116182                  | GG                                     | AA                 | AA               | INTERGENIC                    |                    |                    |
| SNP_96675_A_121228 | NW_004516692.1 | scaffold1499 | 121228                  | AA                                     | CC                 | CC               | INTERGENIC                    |                    |                    |
| SNP_96676_A_124413 | NW_004516692.1 | scaffold1499 | 124413                  | AA                                     | GG                 | GG               | INTERGENIC                    |                    |                    |
| SNP_96678_A_139155 | NW_004516692.1 | scaffold1499 | 139155                  | TT                                     | CC                 | CC               | NON_SYNONYMOUS_CODING         | 101502445          | Unknown function   |
| SNP_96679_A_147916 | NW_004516692.1 | scaffold1499 | 147916                  | GG                                     | CC                 | CC               | INTERGENIC                    |                    |                    |
| SNP_96680_A_152510 | NW_004516692.1 | scaffold1499 | 152510                  | TT                                     | CC                 | CC               | INTERGENIC                    |                    |                    |
| SNP_96681_A_154272 | NW_004516692.1 | scaffold1499 | 154272                  | GG                                     | AA                 | AA               | INTERGENIC                    |                    |                    |

| SNPs IDs           | Chromosome IDs | Chromosomes  | Physical positions (bp) | CDC Frontier (Reference genome) | (Pusa 1103 & HPNB) | (ILWC 46 & LPNB) | Sequence genome | Components of | Gene accession IDs | Putative functions |
|--------------------|----------------|--------------|-------------------------|---------------------------------|--------------------|------------------|-----------------|---------------|--------------------|--------------------|
| SNP_96682_A_161044 | NW_004516692.1 | scaffold1499 | 161044                  | TT                              | CC                 | CC               | INTERGENIC      |               |                    |                    |
| SNP_96683_A_727    | NW_004516693.1 | scaffold1502 | 727                     | GG                              | AA                 | AA               | INTERGENIC      |               |                    |                    |
| SNP_96684_A_1180   | NW_004516693.1 | scaffold1502 | 1180                    | CC                              | GG                 | GG               | INTERGENIC      |               |                    |                    |
| SNP_96685_A_1193   | NW_004516693.1 | scaffold1502 | 1193                    | GG                              | TT                 | TT               | INTERGENIC      |               |                    |                    |
| SNP_96686_A_1205   | NW_004516693.1 | scaffold1502 | 1205                    | GG                              | AA                 | AA               | INTERGENIC      |               |                    |                    |
| SNP_96687_A_1339   | NW_004516693.1 | scaffold1502 | 1339                    | CC                              | TT                 | TT               | INTERGENIC      |               |                    |                    |
| SNP_96688_A_1432   | NW_004516693.1 | scaffold1502 | 1432                    | CC                              | AA                 | AA               | INTERGENIC      |               |                    |                    |
| SNP_96689_A_1847   | NW_004516693.1 | scaffold1502 | 1847                    | GG                              | CC                 | CC               | INTERGENIC      |               |                    |                    |
| SNP_96690_A_1864   | NW_004516693.1 | scaffold1502 | 1864                    | GG                              | CC                 | CC               | INTERGENIC      |               |                    |                    |
| SNP_96691_A_2170   | NW_004516693.1 | scaffold1502 | 2170                    | AA                              | GG                 | GG               | INTERGENIC      |               |                    |                    |
| SNP_96692_A_2317   | NW_004516693.1 | scaffold1502 | 2317                    | CC                              | TT                 | TT               | INTERGENIC      |               |                    |                    |
| SNP_96693_A_2487   | NW_004516693.1 | scaffold1502 | 2487                    | AA                              | CC                 | CC               | INTERGENIC      |               |                    |                    |
| SNP_96694_A_10345  | NW_004516694.1 | scaffold1504 | 10345                   | TT                              | GG                 | GG               | INTERGENIC      |               |                    |                    |
| SNP_96695_A_10413  | NW_004516694.1 | scaffold1504 | 10413                   | TT                              | CC                 | CC               | INTERGENIC      |               |                    |                    |
| SNP_96696_A_10501  | NW_004516694.1 | scaffold1504 | 10501                   | GG                              | AA                 | AA               | INTERGENIC      |               |                    |                    |
| SNP_96697_A_52802  | NW_004516694.1 | scaffold1504 | 52802                   | CC                              | AA                 | AA               | INTERGENIC      |               |                    |                    |
| SNP_96700_A_141069 | NW_004516694.1 | scaffold1504 | 141069                  | AA                              | GG                 | GG               | INTERGENIC      |               |                    |                    |
| SNP_96701_A_141110 | NW_004516694.1 | scaffold1504 | 141110                  | TT                              | CC                 | CC               | INTERGENIC      |               |                    |                    |
| SNP_96702_A_141118 | NW_004516694.1 | scaffold1504 | 141118                  | TT                              | CC                 | CC               | INTERGENIC      |               |                    |                    |
| SNP_96703_A_161224 | NW_004516694.1 | scaffold1504 | 161224                  | AA                              | GG                 | GG               | INTERGENIC      |               |                    |                    |
| SNP_96704_A_161263 | NW_004516694.1 | scaffold1504 | 161263                  | AA                              | TT                 | TT               | INTERGENIC      |               |                    |                    |
| SNP_96705_A_161643 | NW_004516694.1 | scaffold1504 | 161643                  | TT                              | CC                 | CC               | INTERGENIC      |               |                    |                    |

| SNPs IDs           | Chromosome IDs | Chromosomes  | Physical positions (bp) | CDC Frontier (Reference genome) | (Pusa 1103 & HPNB) | (ILWC 46 & LPNB) | Sequence genome | Components of | Gene accession IDs | Putative functions |
|--------------------|----------------|--------------|-------------------------|---------------------------------|--------------------|------------------|-----------------|---------------|--------------------|--------------------|
| SNP_96706_A_161685 | NW_004516694.1 | scaffold1504 | 161685                  | TT                              | AA                 | AA               | INTERGENIC      |               |                    |                    |
| SNP_96707_A_174106 | NW_004516694.1 | scaffold1504 | 174106                  | GG                              | AA                 | AA               | INTERGENIC      |               |                    |                    |
| SNP_96708_A_174467 | NW_004516694.1 | scaffold1504 | 174467                  | AA                              | GG                 | GG               | INTERGENIC      |               |                    |                    |
| SNP_96709_A_174493 | NW_004516694.1 | scaffold1504 | 174493                  | GG                              | TT                 | TT               | INTERGENIC      |               |                    |                    |
| SNP_96710_A_182283 | NW_004516694.1 | scaffold1504 | 182283                  | CC                              | TT                 | TT               | INTERGENIC      |               |                    |                    |
| SNP_96711_A_182375 | NW_004516694.1 | scaffold1504 | 182375                  | CC                              | AA                 | AA               | INTERGENIC      |               |                    |                    |
| SNP_96712_A_182672 | NW_004516694.1 | scaffold1504 | 182672                  | TT                              | AA                 | AA               | INTERGENIC      |               |                    |                    |
| SNP_96713_A_182680 | NW_004516694.1 | scaffold1504 | 182680                  | GG                              | TT                 | TT               | INTERGENIC      |               |                    |                    |
| SNP_96714_A_182685 | NW_004516694.1 | scaffold1504 | 182685                  | AA                              | TT                 | TT               | INTERGENIC      |               |                    |                    |
| SNP_96715_A_182732 | NW_004516694.1 | scaffold1504 | 182732                  | TT                              | CC                 | CC               | INTERGENIC      |               |                    |                    |
| SNP_96716_A_182735 | NW_004516694.1 | scaffold1504 | 182735                  | TT                              | CC                 | CC               | INTERGENIC      |               |                    |                    |
| SNP_96717_A_182754 | NW_004516694.1 | scaffold1504 | 182754                  | TT                              | AA                 | AA               | INTERGENIC      |               |                    |                    |
| SNP_96718_A_182801 | NW_004516694.1 | scaffold1504 | 182801                  | TT                              | CC                 | CC               | INTERGENIC      |               |                    |                    |
| SNP_96719_A_191945 | NW_004516694.1 | scaffold1504 | 191945                  | TT                              | GG                 | GG               | INTERGENIC      |               |                    |                    |
| SNP_96720_A_194941 | NW_004516694.1 | scaffold1504 | 194941                  | AA                              | GG                 | GG               | INTERGENIC      |               |                    |                    |
| SNP_96721_A_194993 | NW_004516694.1 | scaffold1504 | 194993                  | AA                              | GG                 | GG               | INTERGENIC      |               |                    |                    |
| SNP_96722_A_195005 | NW_004516694.1 | scaffold1504 | 195005                  | TT                              | CC                 | CC               | INTERGENIC      |               |                    |                    |
| SNP_96723_A_195029 | NW_004516694.1 | scaffold1504 | 195029                  | CC                              | TT                 | TT               | INTERGENIC      |               |                    |                    |
| SNP_96725_A_200374 | NW_004516694.1 | scaffold1504 | 200374                  | CC                              | TT                 | TT               | INTERGENIC      |               |                    |                    |
| SNP_96726_A_204759 | NW_004516694.1 | scaffold1504 | 204759                  | AA                              | GG                 | GG               | INTERGENIC      |               |                    |                    |
| SNP_96727_A_240740 | NW_004516694.1 | scaffold1504 | 240740                  | TT                              | GG                 | GG               | INTERGENIC      |               |                    |                    |
| SNP_96728_A_240775 | NW_004516694.1 | scaffold1504 | 240775                  | TT                              | GG                 | GG               | INTERGENIC      |               |                    |                    |



| SNPs IDs           | Chromosome IDs | Chromosomes  | Physical positions (bp) | CDC Frontier (Reference genome) | (Pusa 1103 & HPNB) | (ILWC 46 & LPNB) | Sequence genome       | Components of | Gene accession IDs           | Putative functions |
|--------------------|----------------|--------------|-------------------------|---------------------------------|--------------------|------------------|-----------------------|---------------|------------------------------|--------------------|
| SNP_96729_A_240781 | NW_004516694.1 | scaffold1504 | 240781                  | AA                              | GG                 | GG               | INTERGENIC            |               |                              |                    |
| SNP_96730_A_240789 | NW_004516694.1 | scaffold1504 | 240789                  | TT                              | CC                 | CC               | INTERGENIC            |               |                              |                    |
| SNP_96731_A_240793 | NW_004516694.1 | scaffold1504 | 240793                  | CC                              | TT                 | TT               | INTERGENIC            |               |                              |                    |
| SNP_96732_A_240802 | NW_004516694.1 | scaffold1504 | 240802                  | GG                              | CC                 | CC               | INTERGENIC            |               |                              |                    |
| SNP_96733_A_241177 | NW_004516694.1 | scaffold1504 | 241177                  | AA                              | GG                 | GG               | INTERGENIC            |               |                              |                    |
| SNP_96734_A_241204 | NW_004516694.1 | scaffold1504 | 241204                  | GG                              | AA                 | AA               | INTERGENIC            |               |                              |                    |
| SNP_96735_A_241228 | NW_004516694.1 | scaffold1504 | 241228                  | GG                              | AA                 | AA               | INTERGENIC            |               |                              |                    |
| SNP_96736_A_241243 | NW_004516694.1 | scaffold1504 | 241243                  | AA                              | GG                 | GG               | INTERGENIC            |               |                              |                    |
| SNP_96737_A_242878 | NW_004516694.1 | scaffold1504 | 242878                  | AA                              | GG                 | GG               | INTERGENIC            |               |                              |                    |
| SNP_96738_A_242890 | NW_004516694.1 | scaffold1504 | 242890                  | AA                              | GG                 | GG               | INTERGENIC            |               |                              |                    |
| SNP_96739_A_242893 | NW_004516694.1 | scaffold1504 | 242893                  | GG                              | AA                 | AA               | INTERGENIC            |               |                              |                    |
| SNP_96740_A_242922 | NW_004516694.1 | scaffold1504 | 242922                  | GG                              | CC                 | CC               | INTERGENIC            |               |                              |                    |
| SNP_96742_A_290723 | NW_004516694.1 | scaffold1504 | 290723                  | GG                              | CC                 | CC               | INTERGENIC            |               |                              |                    |
| SNP_96743_A_316042 | NW_004516694.1 | scaffold1504 | 316042                  | GG                              | TT                 | TT               | INTERGENIC            |               |                              |                    |
| SNP_96744_A_318576 | NW_004516694.1 | scaffold1504 | 318576                  | CC                              | AA                 | AA               | INTERGENIC            |               |                              |                    |
| SNP_96745_A_318595 | NW_004516694.1 | scaffold1504 | 318595                  | TT                              | CC                 | CC               | INTERGENIC            |               |                              |                    |
| SNP_96746_A_318645 | NW_004516694.1 | scaffold1504 | 318645                  | TT                              | CC                 | CC               | INTERGENIC            |               |                              |                    |
| SNP_96747_A_318738 | NW_004516694.1 | scaffold1504 | 318738                  | AA                              | CC                 | CC               | INTERGENIC            |               |                              |                    |
| SNP_96748_A_318844 | NW_004516694.1 | scaffold1504 | 318844                  | TT                              | AA                 | AA               | INTERGENIC            |               |                              |                    |
| SNP_96749_A_318875 | NW_004516694.1 | scaffold1504 | 318875                  | AA                              | GG                 | GG               | INTERGENIC            |               |                              |                    |
| SNP_96750_A_326379 | NW_004516694.1 | scaffold1504 | 326379                  | TT                              | GG                 | GG               | NON_SYNONYMOUS_CODING | 101505329     | uncharacterized LOC101505329 |                    |
| SNP_96752_A_328714 | NW_004516694.1 | scaffold1504 | 328714                  | GG                              | AA                 | AA               | INTERGENIC            |               |                              |                    |

| SNPs IDs           | Chromosome IDs | Chromosomes  | Physical positions (bp) | CDC Frontier (Reference genome) | (Pusa 1103 & HPNB) | (ILWC 46 & LPNB) | Sequence genome | Components of | Gene accession IDs | Putative functions |
|--------------------|----------------|--------------|-------------------------|---------------------------------|--------------------|------------------|-----------------|---------------|--------------------|--------------------|
| SNP_96753_A_328717 | NW_004516694.1 | scaffold1504 | 328717                  | GG                              | AA                 | AA               | INTERGENIC      |               |                    |                    |
| SNP_96754_A_398289 | NW_004516694.1 | scaffold1504 | 398289                  | GG                              | TT                 | TT               | INTERGENIC      |               |                    |                    |
| SNP_96755_A_398757 | NW_004516694.1 | scaffold1504 | 398757                  | GG                              | AA                 | AA               | INTERGENIC      |               |                    |                    |
| SNP_96756_A_398802 | NW_004516694.1 | scaffold1504 | 398802                  | AA                              | GG                 | GG               | INTERGENIC      |               |                    |                    |
| SNP_96757_A_398848 | NW_004516694.1 | scaffold1504 | 398848                  | GG                              | AA                 | AA               | INTERGENIC      |               |                    |                    |
| SNP_96758_A_18689  | NW_004516695.1 | scaffold1505 | 18689                   | CC                              | TT                 | TT               | INTERGENIC      |               |                    |                    |
| SNP_96759_A_18696  | NW_004516695.1 | scaffold1505 | 18696                   | GG                              | AA                 | AA               | INTERGENIC      |               |                    |                    |
| SNP_96760_A_14013  | NW_004516696.1 | scaffold1506 | 14013                   | AA                              | TT                 | TT               | INTERGENIC      |               |                    |                    |
| SNP_96761_A_14021  | NW_004516696.1 | scaffold1506 | 14021                   | TT                              | CC                 | CC               | INTERGENIC      |               |                    |                    |
| SNP_96762_A_14282  | NW_004516696.1 | scaffold1506 | 14282                   | AA                              | GG                 | GG               | INTERGENIC      |               |                    |                    |
| SNP_96763_A_14330  | NW_004516696.1 | scaffold1506 | 14330                   | AA                              | TT                 | TT               | INTERGENIC      |               |                    |                    |
| SNP_96765_A_103299 | NW_004516696.1 | scaffold1506 | 103299                  | AA                              | GG                 | GG               | INTERGENIC      |               |                    |                    |
| SNP_96766_A_103725 | NW_004516696.1 | scaffold1506 | 103725                  | AA                              | CC                 | CC               | INTERGENIC      |               |                    |                    |
| SNP_96767_A_103726 | NW_004516696.1 | scaffold1506 | 103726                  | TT                              | AA                 | AA               | INTERGENIC      |               |                    |                    |
| SNP_96768_A_103730 | NW_004516696.1 | scaffold1506 | 103730                  | AA                              | CC                 | CC               | INTERGENIC      |               |                    |                    |
| SNP_96769_A_103742 | NW_004516696.1 | scaffold1506 | 103742                  | TT                              | CC                 | CC               | INTERGENIC      |               |                    |                    |
| SNP_96770_A_30266  | NW_004516697.1 | scaffold1507 | 30266                   | TT                              | GG                 | GG               | INTERGENIC      |               |                    |                    |
| SNP_96771_A_30559  | NW_004516697.1 | scaffold1507 | 30559                   | TT                              | GG                 | GG               | INTERGENIC      |               |                    |                    |
| SNP_96772_A_30614  | NW_004516697.1 | scaffold1507 | 30614                   | CC                              | AA                 | AA               | INTERGENIC      |               |                    |                    |
| SNP_96773_A_30615  | NW_004516697.1 | scaffold1507 | 30615                   | CC                              | TT                 | TT               | INTERGENIC      |               |                    |                    |
| SNP_96774_A_30625  | NW_004516697.1 | scaffold1507 | 30625                   | CC                              | TT                 | TT               | INTERGENIC      |               |                    |                    |
| SNP_96775_A_25573  | NW_004516698.1 | scaffold1508 | 25573                   | AA                              | GG                 | GG               | INTERGENIC      |               |                    |                    |

| SNPs IDs          | Chromosome IDs | Chromosomes  | Physical positions (bp) | CDC Frontier (Reference genome) | (Pusa 1103 & HPNB) | (ILWC 46 & LPNB) | Sequence genome | Components of | Gene accession IDs | Putative functions |
|-------------------|----------------|--------------|-------------------------|---------------------------------|--------------------|------------------|-----------------|---------------|--------------------|--------------------|
| SNP_96778_A_1095  | NW_004516700.1 | scaffold1511 | 1095                    | GG                              | TT                 | TT               | INTERGENIC      |               |                    |                    |
| SNP_96779_A_2660  | NW_004516700.1 | scaffold1511 | 2660                    | AA                              | TT                 | TT               | INTERGENIC      |               |                    |                    |
| SNP_96780_A_4893  | NW_004516700.1 | scaffold1511 | 4893                    | CC                              | TT                 | TT               | INTERGENIC      |               |                    |                    |
| SNP_96781_A_11943 | NW_004516700.1 | scaffold1511 | 11943                   | AA                              | TT                 | TT               | INTERGENIC      |               |                    |                    |
| SNP_96782_A_19199 | NW_004516700.1 | scaffold1511 | 19199                   | AA                              | GG                 | GG               | INTERGENIC      |               |                    |                    |
| SNP_96783_A_19202 | NW_004516700.1 | scaffold1511 | 19202                   | AA                              | CC                 | CC               | INTERGENIC      |               |                    |                    |
| SNP_96784_A_24718 | NW_004516700.1 | scaffold1511 | 24718                   | CC                              | TT                 | TT               | INTERGENIC      |               |                    |                    |
| SNP_96785_A_25076 | NW_004516700.1 | scaffold1511 | 25076                   | AA                              | GG                 | GG               | INTERGENIC      |               |                    |                    |
| SNP_96787_A_32626 | NW_004516700.1 | scaffold1511 | 32626                   | TT                              | GG                 | GG               | INTERGENIC      |               |                    |                    |
| SNP_96788_A_33988 | NW_004516700.1 | scaffold1511 | 33988                   | CC                              | TT                 | TT               | INTERGENIC      |               |                    |                    |
| SNP_96789_A_34272 | NW_004516700.1 | scaffold1511 | 34272                   | TT                              | GG                 | GG               | INTERGENIC      |               |                    |                    |
| SNP_96790_A_34289 | NW_004516700.1 | scaffold1511 | 34289                   | CC                              | GG                 | GG               | INTERGENIC      |               |                    |                    |
| SNP_96791_A_34538 | NW_004516700.1 | scaffold1511 | 34538                   | TT                              | CC                 | CC               | INTERGENIC      |               |                    |                    |
| SNP_96792_A_34894 | NW_004516700.1 | scaffold1511 | 34894                   | TT                              | GG                 | GG               | INTERGENIC      |               |                    |                    |
| SNP_96793_A_35239 | NW_004516700.1 | scaffold1511 | 35239                   | GG                              | AA                 | AA               | INTERGENIC      |               |                    |                    |
| SNP_96794_A_35255 | NW_004516700.1 | scaffold1511 | 35255                   | AA                              | CC                 | CC               | INTERGENIC      |               |                    |                    |
| SNP_96795_A_35261 | NW_004516700.1 | scaffold1511 | 35261                   | GG                              | AA                 | AA               | INTERGENIC      |               |                    |                    |
| SNP_96796_A_35591 | NW_004516700.1 | scaffold1511 | 35591                   | AA                              | TT                 | TT               | INTERGENIC      |               |                    |                    |
| SNP_96798_A_38772 | NW_004516700.1 | scaffold1511 | 38772                   | GG                              | AA                 | AA               | INTERGENIC      |               |                    |                    |
| SNP_96799_A_46537 | NW_004516700.1 | scaffold1511 | 46537                   | TT                              | CC                 | CC               | INTERGENIC      |               |                    |                    |
| SNP_96800_A_47331 | NW_004516700.1 | scaffold1511 | 47331                   | CC                              | AA                 | AA               | INTERGENIC      |               |                    |                    |
| SNP_96801_A_47846 | NW_004516700.1 | scaffold1511 | 47846                   | AA                              | CC                 | CC               | INTERGENIC      |               |                    |                    |

| SNPs IDs           | Chromosome IDs | Chromosomes  | Physical positions (bp) | CDC Frontier (Reference genome) | (Pusa 1103 & HPNB) | (ILWC 46 & LPNB) | Sequence Components of genome | Gene accession IDs | Putative functions           |
|--------------------|----------------|--------------|-------------------------|---------------------------------|--------------------|------------------|-------------------------------|--------------------|------------------------------|
| SNP_96802_A_48429  | NW_004516700.1 | scaffold1511 | 48429                   | AA                              | TT                 | TT               | INTERGENIC                    |                    |                              |
| SNP_96803_A_54498  | NW_004516700.1 | scaffold1511 | 54498                   | AA                              | CC                 | CC               | INTERGENIC                    |                    |                              |
| SNP_96804_A_59122  | NW_004516700.1 | scaffold1511 | 59122                   | AA                              | GG                 | GG               | INTERGENIC                    |                    |                              |
| SNP_96805_A_71859  | NW_004516700.1 | scaffold1511 | 71859                   | AA                              | GG                 | GG               | INTRON                        | 101508857          | uncharacterized LOC101508857 |
| SNP_96806_A_74105  | NW_004516700.1 | scaffold1511 | 74105                   | GG                              | AA                 | AA               | URR                           | 101508857          | uncharacterized LOC101508857 |
| SNP_96807_A_82742  | NW_004516700.1 | scaffold1511 | 82742                   | TT                              | CC                 | CC               | INTERGENIC                    |                    |                              |
| SNP_96808_A_82803  | NW_004516700.1 | scaffold1511 | 82803                   | AA                              | CC                 | CC               | INTERGENIC                    |                    |                              |
| SNP_96809_A_82902  | NW_004516700.1 | scaffold1511 | 82902                   | GG                              | AA                 | AA               | INTERGENIC                    |                    |                              |
| SNP_96810_A_82936  | NW_004516700.1 | scaffold1511 | 82936                   | GG                              | AA                 | AA               | INTERGENIC                    |                    |                              |
| SNP_96811_A_83141  | NW_004516700.1 | scaffold1511 | 83141                   | AA                              | GG                 | GG               | INTERGENIC                    |                    |                              |
| SNP_96812_A_86417  | NW_004516700.1 | scaffold1511 | 86417                   | AA                              | CC                 | CC               | INTERGENIC                    |                    |                              |
| SNP_96813_A_88426  | NW_004516700.1 | scaffold1511 | 88426                   | TT                              | CC                 | CC               | INTERGENIC                    |                    |                              |
| SNP_96814_A_90040  | NW_004516700.1 | scaffold1511 | 90040                   | AA                              | GG                 | GG               | INTERGENIC                    |                    |                              |
| SNP_96815_A_90158  | NW_004516700.1 | scaffold1511 | 90158                   | AA                              | GG                 | GG               | INTERGENIC                    |                    |                              |
| SNP_96816_A_93436  | NW_004516700.1 | scaffold1511 | 93436                   | GG                              | AA                 | AA               | INTERGENIC                    |                    |                              |
| SNP_96817_A_103163 | NW_004516700.1 | scaffold1511 | 103163                  | GG                              | AA                 | AA               | INTERGENIC                    |                    |                              |
| SNP_96818_A_104734 | NW_004516700.1 | scaffold1511 | 104734                  | TT                              | AA                 | AA               | INTERGENIC                    |                    |                              |
| SNP_96819_A_104742 | NW_004516700.1 | scaffold1511 | 104742                  | CC                              | TT                 | TT               | INTERGENIC                    |                    |                              |
| SNP_96820_A_105654 | NW_004516700.1 | scaffold1511 | 105654                  | TT                              | GG                 | GG               | INTERGENIC                    |                    |                              |
| SNP_96821_A_107259 | NW_004516700.1 | scaffold1511 | 107259                  | CC                              | TT                 | TT               | INTERGENIC                    |                    |                              |
| SNP_96822_A_109664 | NW_004516700.1 | scaffold1511 | 109664                  | GG                              | TT                 | TT               | INTERGENIC                    |                    |                              |
| SNP_96824_A_110258 | NW_004516700.1 | scaffold1511 | 110258                  | TT                              | AA                 | AA               | INTERGENIC                    |                    |                              |

| SNPs IDs           | Chromosome IDs | Chromosomes  | Physical positions (bp) | CDC Frontier (Reference genome) | (Pusa 1103 & HPNB) | (ILWC 46 & LPNB) | Sequence genome | Components of | Gene accession IDs                | Putative functions |
|--------------------|----------------|--------------|-------------------------|---------------------------------|--------------------|------------------|-----------------|---------------|-----------------------------------|--------------------|
| SNP_96825_A_110876 | NW_004516700.1 | scaffold1511 | 110876                  | AA                              | GG                 | GG               | INTERGENIC      |               |                                   |                    |
| SNP_96826_A_110882 | NW_004516700.1 | scaffold1511 | 110882                  | GG                              | CC                 | CC               | INTERGENIC      |               |                                   |                    |
| SNP_96827_A_111846 | NW_004516700.1 | scaffold1511 | 111846                  | TT                              | CC                 | CC               | INTERGENIC      |               |                                   |                    |
| SNP_96828_A_112195 | NW_004516700.1 | scaffold1511 | 112195                  | CC                              | TT                 | TT               | INTERGENIC      |               |                                   |                    |
| SNP_96829_A_114850 | NW_004516700.1 | scaffold1511 | 114850                  | GG                              | AA                 | AA               | INTERGENIC      |               |                                   |                    |
| SNP_96830_A_115235 | NW_004516700.1 | scaffold1511 | 115235                  | CC                              | AA                 | AA               | INTERGENIC      |               |                                   |                    |
| SNP_96831_A_122120 | NW_004516700.1 | scaffold1511 | 122120                  | TT                              | CC                 | CC               | INTERGENIC      |               |                                   |                    |
| SNP_96832_A_122359 | NW_004516700.1 | scaffold1511 | 122359                  | TT                              | GG                 | GG               | INTERGENIC      |               |                                   |                    |
| SNP_96833_A_122363 | NW_004516700.1 | scaffold1511 | 122363                  | AA                              | TT                 | TT               | INTERGENIC      |               |                                   |                    |
| SNP_96834_A_122392 | NW_004516700.1 | scaffold1511 | 122392                  | AA                              | GG                 | GG               | INTERGENIC      |               |                                   |                    |
| SNP_96835_A_122575 | NW_004516700.1 | scaffold1511 | 122575                  | TT                              | CC                 | CC               | INTERGENIC      |               |                                   |                    |
| SNP_96836_A_122703 | NW_004516700.1 | scaffold1511 | 122703                  | AA                              | GG                 | GG               | INTERGENIC      |               |                                   |                    |
| SNP_96838_A_124385 | NW_004516700.1 | scaffold1511 | 124385                  | GG                              | TT                 | TT               | INTERGENIC      |               |                                   |                    |
| SNP_96839_A_125254 | NW_004516700.1 | scaffold1511 | 125254                  | TT                              | AA                 | AA               | INTERGENIC      |               |                                   |                    |
| SNP_96840_A_127677 | NW_004516700.1 | scaffold1511 | 127677                  | CC                              | TT                 | TT               | INTERGENIC      |               |                                   |                    |
| SNP_96841_A_130282 | NW_004516700.1 | scaffold1511 | 130282                  | AA                              | TT                 | TT               | INTERGENIC      |               |                                   |                    |
| SNP_96842_A_133111 | NW_004516700.1 | scaffold1511 | 133111                  | TT                              | CC                 | CC               | INTERGENIC      |               |                                   |                    |
| SNP_96843_A_133165 | NW_004516700.1 | scaffold1511 | 133165                  | AA                              | GG                 | GG               | INTERGENIC      |               |                                   |                    |
| SNP_96845_A_135749 | NW_004516700.1 | scaffold1511 | 135749                  | AA                              | TT                 | TT               | INTERGENIC      |               |                                   |                    |
| SNP_96846_A_135873 | NW_004516700.1 | scaffold1511 | 135873                  | CC                              | TT                 | TT               | INTERGENIC      |               |                                   |                    |
| SNP_96847_A_136394 | NW_004516700.1 | scaffold1511 | 136394                  | TT                              | CC                 | CC               | INTERGENIC      |               |                                   |                    |
| SNP_96849_A_142974 | NW_004516700.1 | scaffold1511 | 142974                  | TT                              | CC                 | CC               | DRR             | 101509930     | MATE efflux family protein 1-like |                    |

| SNPs IDs           | Chromosome IDs | Chromosomes  | Physical positions (bp) | CDC Frontier (Reference genome) | (Pusa 1103 & HPNB) | (ILWC 46 & LPNB) | Sequence Components of genome | Gene accession IDs | Putative functions                |
|--------------------|----------------|--------------|-------------------------|---------------------------------|--------------------|------------------|-------------------------------|--------------------|-----------------------------------|
| SNP_96850_A_147290 | NW_004516700.1 | scaffold1511 | 147290                  | CC                              | TT                 | TT               | NON_SYNONYMOUS_CODING         | 101509930          | MATE efflux family protein 1-like |
| SNP_96851_A_151884 | NW_004516700.1 | scaffold1511 | 151884                  | GG                              | AA                 | AA               | INTERGENIC                    |                    |                                   |
| SNP_96852_A_152216 | NW_004516700.1 | scaffold1511 | 152216                  | GG                              | AA                 | AA               | INTERGENIC                    |                    |                                   |
| SNP_96853_A_152522 | NW_004516700.1 | scaffold1511 | 152522                  | GG                              | AA                 | AA               | INTERGENIC                    |                    |                                   |
| SNP_96854_A_156909 | NW_004516700.1 | scaffold1511 | 156909                  | CC                              | TT                 | TT               | INTERGENIC                    |                    |                                   |
| SNP_96855_A_157147 | NW_004516700.1 | scaffold1511 | 157147                  | CC                              | TT                 | TT               | INTERGENIC                    |                    |                                   |
| SNP_96856_A_157473 | NW_004516700.1 | scaffold1511 | 157473                  | CC                              | AA                 | AA               | INTERGENIC                    |                    |                                   |
| SNP_96857_A_158888 | NW_004516700.1 | scaffold1511 | 158888                  | AA                              | CC                 | CC               | INTERGENIC                    |                    |                                   |
| SNP_96858_A_159248 | NW_004516700.1 | scaffold1511 | 159248                  | AA                              | CC                 | CC               | INTERGENIC                    |                    |                                   |
| SNP_96859_A_164795 | NW_004516700.1 | scaffold1511 | 164795                  | AA                              | CC                 | CC               | INTERGENIC                    |                    |                                   |
| SNP_96860_A_165196 | NW_004516700.1 | scaffold1511 | 165196                  | CC                              | TT                 | TT               | INTERGENIC                    |                    |                                   |
| SNP_96861_A_165796 | NW_004516700.1 | scaffold1511 | 165796                  | AA                              | TT                 | TT               | INTERGENIC                    |                    |                                   |
| SNP_96863_A_167781 | NW_004516700.1 | scaffold1511 | 167781                  | AA                              | GG                 | GG               | INTERGENIC                    |                    |                                   |
| SNP_96864_A_173774 | NW_004516700.1 | scaffold1511 | 173774                  | CC                              | TT                 | TT               | INTERGENIC                    |                    |                                   |
| SNP_96865_A_174183 | NW_004516700.1 | scaffold1511 | 174183                  | TT                              | CC                 | CC               | INTERGENIC                    |                    |                                   |
| SNP_96866_A_174276 | NW_004516700.1 | scaffold1511 | 174276                  | AA                              | GG                 | GG               | INTERGENIC                    |                    |                                   |
| SNP_96867_A_174277 | NW_004516700.1 | scaffold1511 | 174277                  | GG                              | AA                 | AA               | INTERGENIC                    |                    |                                   |
| SNP_96868_A_174581 | NW_004516700.1 | scaffold1511 | 174581                  | TT                              | CC                 | CC               | INTERGENIC                    |                    |                                   |
| SNP_96869_A_174631 | NW_004516700.1 | scaffold1511 | 174631                  | AA                              | GG                 | GG               | INTERGENIC                    |                    |                                   |
| SNP_96870_A_174643 | NW_004516700.1 | scaffold1511 | 174643                  | CC                              | GG                 | GG               | INTERGENIC                    |                    |                                   |
| SNP_96871_A_174676 | NW_004516700.1 | scaffold1511 | 174676                  | GG                              | TT                 | TT               | INTERGENIC                    |                    |                                   |
| SNP_96872_A_174693 | NW_004516700.1 | scaffold1511 | 174693                  | TT                              | CC                 | CC               | INTERGENIC                    |                    |                                   |

| SNPs IDs           | Chromosome IDs | Chromosomes  | Physical positions (bp) | CDC Frontier (Reference genome) | (Pusa 1103 & HPNB) | (ILWC 46 & LPNB) | Sequence genome | Components of | Gene accession IDs | Putative functions |
|--------------------|----------------|--------------|-------------------------|---------------------------------|--------------------|------------------|-----------------|---------------|--------------------|--------------------|
| SNP_96873_A_174811 | NW_004516700.1 | scaffold1511 | 174811                  | TT                              | CC                 | CC               | INTERGENIC      |               |                    |                    |
| SNP_96874_A_176590 | NW_004516700.1 | scaffold1511 | 176590                  | GG                              | TT                 | TT               | INTERGENIC      |               |                    |                    |
| SNP_96875_A_176606 | NW_004516700.1 | scaffold1511 | 176606                  | CC                              | TT                 | TT               | INTERGENIC      |               |                    |                    |
| SNP_96876_A_176630 | NW_004516700.1 | scaffold1511 | 176630                  | GG                              | AA                 | AA               | INTERGENIC      |               |                    |                    |
| SNP_96877_A_176655 | NW_004516700.1 | scaffold1511 | 176655                  | CC                              | TT                 | TT               | INTERGENIC      |               |                    |                    |
| SNP_96878_A_177832 | NW_004516700.1 | scaffold1511 | 177832                  | GG                              | TT                 | TT               | INTERGENIC      |               |                    |                    |
| SNP_96879_A_180354 | NW_004516700.1 | scaffold1511 | 180354                  | AA                              | CC                 | CC               | INTERGENIC      |               |                    |                    |
| SNP_96880_A_180388 | NW_004516700.1 | scaffold1511 | 180388                  | GG                              | AA                 | AA               | INTERGENIC      |               |                    |                    |
| SNP_96881_A_181038 | NW_004516700.1 | scaffold1511 | 181038                  | AA                              | GG                 | GG               | INTERGENIC      |               |                    |                    |
| SNP_96882_A_182739 | NW_004516700.1 | scaffold1511 | 182739                  | CC                              | TT                 | TT               | INTERGENIC      |               |                    |                    |
| SNP_96883_A_187062 | NW_004516700.1 | scaffold1511 | 187062                  | AA                              | CC                 | CC               | INTERGENIC      |               |                    |                    |
| SNP_96884_A_187110 | NW_004516700.1 | scaffold1511 | 187110                  | GG                              | TT                 | TT               | INTERGENIC      |               |                    |                    |
| SNP_96885_A_187289 | NW_004516700.1 | scaffold1511 | 187289                  | CC                              | TT                 | TT               | INTERGENIC      |               |                    |                    |
| SNP_96886_A_187298 | NW_004516700.1 | scaffold1511 | 187298                  | CC                              | GG                 | GG               | INTERGENIC      |               |                    |                    |
| SNP_96887_A_187622 | NW_004516700.1 | scaffold1511 | 187622                  | TT                              | GG                 | GG               | INTERGENIC      |               |                    |                    |
| SNP_96888_A_188666 | NW_004516700.1 | scaffold1511 | 188666                  | CC                              | TT                 | TT               | INTERGENIC      |               |                    |                    |
| SNP_96889_A_189261 | NW_004516700.1 | scaffold1511 | 189261                  | AA                              | CC                 | CC               | INTERGENIC      |               |                    |                    |
| SNP_96890_A_189263 | NW_004516700.1 | scaffold1511 | 189263                  | CC                              | TT                 | TT               | INTERGENIC      |               |                    |                    |
| SNP_96891_A_191339 | NW_004516700.1 | scaffold1511 | 191339                  | TT                              | CC                 | CC               | INTERGENIC      |               |                    |                    |
| SNP_96892_A_192359 | NW_004516700.1 | scaffold1511 | 192359                  | GG                              | CC                 | CC               | INTERGENIC      |               |                    |                    |
| SNP_96893_A_193340 | NW_004516700.1 | scaffold1511 | 193340                  | AA                              | TT                 | TT               | INTERGENIC      |               |                    |                    |
| SNP_96894_A_8544   | NW_004516701.1 | scaffold1512 | 8544                    | CC                              | AA                 | AA               | INTERGENIC      |               |                    |                    |

| SNPs IDs          | Chromosome IDs | Chromosomes  | Physical positions (bp) | CDC Frontier (Reference genome) | (Pusa 1103 & HPNB) | (ILWC 46 & LPNB) | Sequence genome | Components of | Gene accession IDs | Putative functions |
|-------------------|----------------|--------------|-------------------------|---------------------------------|--------------------|------------------|-----------------|---------------|--------------------|--------------------|
| SNP_96895_A_9174  | NW_004516701.1 | scaffold1512 | 9174                    | AA                              | GG                 | GG               | INTERGENIC      |               |                    |                    |
| SNP_96896_A_7955  | NW_004516704.1 | scaffold1515 | 7955                    | GG                              | AA                 | AA               | INTERGENIC      |               |                    |                    |
| SNP_96897_A_9254  | NW_004516704.1 | scaffold1515 | 9254                    | TT                              | AA                 | AA               | INTERGENIC      |               |                    |                    |
| SNP_96898_A_9263  | NW_004516704.1 | scaffold1515 | 9263                    | TT                              | AA                 | AA               | INTERGENIC      |               |                    |                    |
| SNP_96899_A_9358  | NW_004516704.1 | scaffold1515 | 9358                    | GG                              | AA                 | AA               | INTERGENIC      |               |                    |                    |
| SNP_96900_A_9387  | NW_004516704.1 | scaffold1515 | 9387                    | GG                              | TT                 | TT               | INTERGENIC      |               |                    |                    |
| SNP_96901_A_9503  | NW_004516704.1 | scaffold1515 | 9503                    | AA                              | TT                 | TT               | INTERGENIC      |               |                    |                    |
| SNP_96902_A_9548  | NW_004516704.1 | scaffold1515 | 9548                    | TT                              | CC                 | CC               | INTERGENIC      |               |                    |                    |
| SNP_96903_A_9675  | NW_004516704.1 | scaffold1515 | 9675                    | AA                              | TT                 | TT               | INTERGENIC      |               |                    |                    |
| SNP_96904_A_9791  | NW_004516704.1 | scaffold1515 | 9791                    | CC                              | TT                 | TT               | INTERGENIC      |               |                    |                    |
| SNP_96905_A_9885  | NW_004516704.1 | scaffold1515 | 9885                    | AA                              | GG                 | GG               | INTERGENIC      |               |                    |                    |
| SNP_96906_A_9909  | NW_004516704.1 | scaffold1515 | 9909                    | AA                              | GG                 | GG               | INTERGENIC      |               |                    |                    |
| SNP_96907_A_10026 | NW_004516704.1 | scaffold1515 | 10026                   | TT                              | CC                 | CC               | INTERGENIC      |               |                    |                    |
| SNP_96908_A_10043 | NW_004516704.1 | scaffold1515 | 10043                   | GG                              | AA                 | AA               | INTERGENIC      |               |                    |                    |
| SNP_96909_A_10090 | NW_004516704.1 | scaffold1515 | 10090                   | CC                              | TT                 | TT               | INTERGENIC      |               |                    |                    |
| SNP_96910_A_10204 | NW_004516704.1 | scaffold1515 | 10204                   | TT                              | CC                 | CC               | INTERGENIC      |               |                    |                    |
| SNP_96911_A_10258 | NW_004516704.1 | scaffold1515 | 10258                   | AA                              | GG                 | GG               | INTERGENIC      |               |                    |                    |
| SNP_96912_A_10471 | NW_004516704.1 | scaffold1515 | 10471                   | TT                              | AA                 | AA               | INTERGENIC      |               |                    |                    |
| SNP_96913_A_13327 | NW_004516704.1 | scaffold1515 | 13327                   | GG                              | CC                 | CC               | INTERGENIC      |               |                    |                    |
| SNP_96914_A_15199 | NW_004516704.1 | scaffold1515 | 15199                   | GG                              | AA                 | AA               | INTERGENIC      |               |                    |                    |
| SNP_96915_A_15278 | NW_004516704.1 | scaffold1515 | 15278                   | CC                              | AA                 | AA               | INTERGENIC      |               |                    |                    |
| SNP_96916_A_15280 | NW_004516704.1 | scaffold1515 | 15280                   | GG                              | AA                 | AA               | INTERGENIC      |               |                    |                    |



| SNPs IDs          | Chromosome IDs | Chromosomes  | Physical positions (bp) | CDC Frontier (Reference genome) | (Pusa 1103 & HPNB) | (ILWC 46 & LPNB) | Sequence genome | Components of | Gene accession IDs | Putative functions |
|-------------------|----------------|--------------|-------------------------|---------------------------------|--------------------|------------------|-----------------|---------------|--------------------|--------------------|
| SNP_96917_A_15383 | NW_004516704.1 | scaffold1515 | 15383                   | CC                              | TT                 | TT               | INTERGENIC      |               |                    |                    |
| SNP_96918_A_15413 | NW_004516704.1 | scaffold1515 | 15413                   | CC                              | TT                 | TT               | INTERGENIC      |               |                    |                    |
| SNP_96919_A_15424 | NW_004516704.1 | scaffold1515 | 15424                   | TT                              | CC                 | CC               | INTERGENIC      |               |                    |                    |
| SNP_96920_A_15460 | NW_004516704.1 | scaffold1515 | 15460                   | CC                              | GG                 | GG               | INTERGENIC      |               |                    |                    |
| SNP_96921_A_15506 | NW_004516704.1 | scaffold1515 | 15506                   | TT                              | AA                 | AA               | INTERGENIC      |               |                    |                    |
| SNP_96922_A_15775 | NW_004516704.1 | scaffold1515 | 15775                   | TT                              | CC                 | CC               | INTERGENIC      |               |                    |                    |
| SNP_96923_A_17765 | NW_004516704.1 | scaffold1515 | 17765                   | GG                              | AA                 | AA               | INTERGENIC      |               |                    |                    |
| SNP_96924_A_17835 | NW_004516704.1 | scaffold1515 | 17835                   | GG                              | AA                 | AA               | INTERGENIC      |               |                    |                    |
| SNP_96925_A_18024 | NW_004516704.1 | scaffold1515 | 18024                   | GG                              | AA                 | AA               | INTERGENIC      |               |                    |                    |
| SNP_96926_A_18052 | NW_004516704.1 | scaffold1515 | 18052                   | TT                              | CC                 | CC               | INTERGENIC      |               |                    |                    |
| SNP_96927_A_18225 | NW_004516704.1 | scaffold1515 | 18225                   | TT                              | CC                 | CC               | INTERGENIC      |               |                    |                    |
| SNP_96928_A_18247 | NW_004516704.1 | scaffold1515 | 18247                   | TT                              | AA                 | AA               | INTERGENIC      |               |                    |                    |
| SNP_96929_A_20888 | NW_004516704.1 | scaffold1515 | 20888                   | GG                              | AA                 | AA               | INTERGENIC      |               |                    |                    |
| SNP_96930_A_30530 | NW_004516704.1 | scaffold1515 | 30530                   | TT                              | CC                 | CC               | INTERGENIC      |               |                    |                    |
| SNP_96931_A_30919 | NW_004516704.1 | scaffold1515 | 30919                   | AA                              | GG                 | GG               | INTERGENIC      |               |                    |                    |
| SNP_96932_A_2623  | NW_004516705.1 | scaffold1516 | 2623                    | CC                              | GG                 | GG               | INTERGENIC      |               |                    |                    |
| SNP_96933_A_2725  | NW_004516705.1 | scaffold1516 | 2725                    | GG                              | TT                 | TT               | INTERGENIC      |               |                    |                    |
| SNP_96934_A_2748  | NW_004516705.1 | scaffold1516 | 2748                    | AA                              | GG                 | GG               | INTERGENIC      |               |                    |                    |
| SNP_96935_A_3038  | NW_004516705.1 | scaffold1516 | 3038                    | GG                              | TT                 | TT               | INTERGENIC      |               |                    |                    |
| SNP_96936_A_3058  | NW_004516705.1 | scaffold1516 | 3058                    | AA                              | CC                 | CC               | INTERGENIC      |               |                    |                    |
| SNP_96937_A_3059  | NW_004516705.1 | scaffold1516 | 3059                    | TT                              | AA                 | AA               | INTERGENIC      |               |                    |                    |
| SNP_96938_A_8052  | NW_004516705.1 | scaffold1516 | 8052                    | AA                              | CC                 | CC               | INTERGENIC      |               |                    |                    |

| SNPs IDs          | Chromosome IDs | Chromosomes  | Physical positions (bp) | CDC Frontier (Reference genome) | (Pusa 1103 & HPNB) | (ILWC 46 & LPNB) | Sequence genome | Components of | Gene accession IDs | Putative functions |
|-------------------|----------------|--------------|-------------------------|---------------------------------|--------------------|------------------|-----------------|---------------|--------------------|--------------------|
| SNP_96939_A_8098  | NW_004516705.1 | scaffold1516 | 8098                    | CC                              | TT                 | TT               | INTERGENIC      |               |                    |                    |
| SNP_96940_A_8143  | NW_004516705.1 | scaffold1516 | 8143                    | TT                              | CC                 | CC               | INTERGENIC      |               |                    |                    |
| SNP_96941_A_8320  | NW_004516705.1 | scaffold1516 | 8320                    | AA                              | CC                 | CC               | INTERGENIC      |               |                    |                    |
| SNP_96942_A_8351  | NW_004516705.1 | scaffold1516 | 8351                    | TT                              | GG                 | GG               | INTERGENIC      |               |                    |                    |
| SNP_96943_A_8430  | NW_004516705.1 | scaffold1516 | 8430                    | GG                              | AA                 | AA               | INTERGENIC      |               |                    |                    |
| SNP_96944_A_8441  | NW_004516705.1 | scaffold1516 | 8441                    | CC                              | GG                 | GG               | INTERGENIC      |               |                    |                    |
| SNP_96945_A_9111  | NW_004516705.1 | scaffold1516 | 9111                    | TT                              | CC                 | CC               | INTERGENIC      |               |                    |                    |
| SNP_96946_A_16800 | NW_004516706.1 | scaffold1519 | 16800                   | GG                              | AA                 | AA               | INTERGENIC      |               |                    |                    |
| SNP_96948_A_16809 | NW_004516706.1 | scaffold1519 | 16809                   | TT                              | AA                 | AA               | INTERGENIC      |               |                    |                    |
| SNP_96949_A_16951 | NW_004516706.1 | scaffold1519 | 16951                   | TT                              | CC                 | CC               | INTERGENIC      |               |                    |                    |
| SNP_96950_A_16993 | NW_004516706.1 | scaffold1519 | 16993                   | TT                              | CC                 | CC               | INTERGENIC      |               |                    |                    |
| SNP_96951_A_17063 | NW_004516706.1 | scaffold1519 | 17063                   | GG                              | TT                 | TT               | INTERGENIC      |               |                    |                    |
| SNP_96952_A_115   | NW_004516708.1 | scaffold1521 | 115                     | CC                              | TT                 | TT               | INTERGENIC      |               |                    |                    |
| SNP_96953_A_425   | NW_004516708.1 | scaffold1521 | 425                     | TT                              | GG                 | GG               | INTERGENIC      |               |                    |                    |
| SNP_96954_A_559   | NW_004516708.1 | scaffold1521 | 559                     | GG                              | AA                 | AA               | INTERGENIC      |               |                    |                    |
| SNP_96955_A_593   | NW_004516708.1 | scaffold1521 | 593                     | AA                              | GG                 | GG               | INTERGENIC      |               |                    |                    |
| SNP_96956_A_599   | NW_004516708.1 | scaffold1521 | 599                     | AA                              | GG                 | GG               | INTERGENIC      |               |                    |                    |
| SNP_96957_A_705   | NW_004516708.1 | scaffold1521 | 705                     | CC                              | TT                 | TT               | INTERGENIC      |               |                    |                    |
| SNP_96958_A_725   | NW_004516708.1 | scaffold1521 | 725                     | CC                              | TT                 | TT               | INTERGENIC      |               |                    |                    |
| SNP_96959_A_1065  | NW_004516708.1 | scaffold1521 | 1065                    | AA                              | TT                 | TT               | INTERGENIC      |               |                    |                    |
| SNP_96960_A_1133  | NW_004516708.1 | scaffold1521 | 1133                    | CC                              | AA                 | AA               | INTERGENIC      |               |                    |                    |
| SNP_96962_A_5973  | NW_004516708.1 | scaffold1521 | 5973                    | CC                              | TT                 | TT               | INTERGENIC      |               |                    |                    |

| SNPs IDs          | Chromosome IDs | Chromosomes  | Physical positions (bp) | CDC Frontier (Reference genome) | (Pusa 1103 & HPNB) | (ILWC 46 & LPNB) | Sequence Components of genome | Gene accession IDs | Putative functions                                        |
|-------------------|----------------|--------------|-------------------------|---------------------------------|--------------------|------------------|-------------------------------|--------------------|-----------------------------------------------------------|
| SNP_96963_A_7659  | NW_004516708.1 | scaffold1521 | 7659                    | TT                              | GG                 | GG               | INTERGENIC                    |                    |                                                           |
| SNP_96964_A_8212  | NW_004516708.1 | scaffold1521 | 8212                    | TT                              | CC                 | CC               | DRR                           | 101512187          | L-type lectin-domain containing receptor kinase IX.1-like |
| SNP_96965_A_8220  | NW_004516708.1 | scaffold1521 | 8220                    | AA                              | CC                 | CC               | DRR                           | 101512187          | L-type lectin-domain containing receptor kinase IX.1-like |
| SNP_96966_A_8339  | NW_004516708.1 | scaffold1521 | 8339                    | AA                              | CC                 | CC               | DRR                           | 101512187          | L-type lectin-domain containing receptor kinase IX.1-like |
| SNP_96967_A_8365  | NW_004516708.1 | scaffold1521 | 8365                    | AA                              | TT                 | TT               | DRR                           | 101512187          | L-type lectin-domain containing receptor kinase IX.1-like |
| SNP_96968_A_8377  | NW_004516708.1 | scaffold1521 | 8377                    | AA                              | TT                 | TT               | DRR                           | 101512187          | L-type lectin-domain containing receptor kinase IX.1-like |
| SNP_96969_A_8383  | NW_004516708.1 | scaffold1521 | 8383                    | TT                              | GG                 | GG               | DRR                           | 101512187          | L-type lectin-domain containing receptor kinase IX.1-like |
| SNP_96970_A_10345 | NW_004516708.1 | scaffold1521 | 10345                   | TT                              | AA                 | AA               | URR                           | 101512187          | L-type lectin-domain containing receptor kinase IX.1-like |
| SNP_96971_A_10356 | NW_004516708.1 | scaffold1521 | 10356                   | TT                              | AA                 | AA               | URR                           | 101512187          | L-type lectin-domain containing receptor kinase IX.1-like |
| SNP_96972_A_10386 | NW_004516708.1 | scaffold1521 | 10386                   | GG                              | AA                 | AA               | URR                           | 101512187          | L-type lectin-domain containing receptor kinase IX.1-like |
| SNP_96973_A_10400 | NW_004516708.1 | scaffold1521 | 10400                   | CC                              | TT                 | TT               | URR                           | 101512187          | L-type lectin-domain containing receptor kinase IX.1-like |
| SNP_96974_A_10585 | NW_004516708.1 | scaffold1521 | 10585                   | GG                              | TT                 | TT               | URR                           | 101512187          | L-type lectin-domain containing receptor kinase IX.1-like |
| SNP_96976_A_11946 | NW_004516708.1 | scaffold1521 | 11946                   | CC                              | GG                 | GG               | URR                           | 101512187          | L-type lectin-domain containing receptor kinase IX.1-like |
| SNP_96977_A_13482 | NW_004516708.1 | scaffold1521 | 13482                   | GG                              | AA                 | AA               | INTERGENIC                    |                    |                                                           |
| SNP_96978_A_13539 | NW_004516708.1 | scaffold1521 | 13539                   | TT                              | AA                 | AA               | INTERGENIC                    |                    |                                                           |
| SNP_96980_A_15273 | NW_004516708.1 | scaffold1521 | 15273                   | TT                              | CC                 | CC               | INTERGENIC                    |                    |                                                           |
| SNP_96981_A_15300 | NW_004516708.1 | scaffold1521 | 15300                   | TT                              | AA                 | AA               | INTERGENIC                    |                    |                                                           |
| SNP_96982_A_15309 | NW_004516708.1 | scaffold1521 | 15309                   | TT                              | GG                 | GG               | INTERGENIC                    |                    |                                                           |
| SNP_96983_A_15346 | NW_004516708.1 | scaffold1521 | 15346                   | TT                              | AA                 | AA               | INTERGENIC                    |                    |                                                           |
| SNP_96984_A_15440 | NW_004516708.1 | scaffold1521 | 15440                   | AA                              | TT                 | TT               | INTERGENIC                    |                    |                                                           |
| SNP_96985_A_15463 | NW_004516708.1 | scaffold1521 | 15463                   | AA                              | TT                 | TT               | INTERGENIC                    |                    |                                                           |
| SNP_96986_A_15470 | NW_004516708.1 | scaffold1521 | 15470                   | AA                              | CC                 | CC               | INTERGENIC                    |                    |                                                           |

| SNPs IDs          | Chromosome IDs | Chromosomes  | Physical positions (bp) | CDC Frontier (Reference genome) | (Pusa 1103 & HPNB) | (ILWC 46 & LPNB) | Sequence Components of genome | Gene accession IDs | Putative functions                                        |
|-------------------|----------------|--------------|-------------------------|---------------------------------|--------------------|------------------|-------------------------------|--------------------|-----------------------------------------------------------|
| SNP_96987_A_15481 | NW_004516708.1 | scaffold1521 | 15481                   | TT                              | AA                 | AA               | INTERGENIC                    |                    |                                                           |
| SNP_96988_A_15531 | NW_004516708.1 | scaffold1521 | 15531                   | CC                              | AA                 | AA               | INTERGENIC                    |                    |                                                           |
| SNP_96989_A_15538 | NW_004516708.1 | scaffold1521 | 15538                   | CC                              | TT                 | TT               | INTERGENIC                    |                    |                                                           |
| SNP_96990_A_15560 | NW_004516708.1 | scaffold1521 | 15560                   | TT                              | CC                 | CC               | INTERGENIC                    |                    |                                                           |
| SNP_96993_A_19302 | NW_004516708.1 | scaffold1521 | 19302                   | TT                              | GG                 | GG               | NON_SYNONYMOUS_CODING         | 101512512          | L-type lectin-domain containing receptor kinase IX.1-like |
| SNP_96994_A_19363 | NW_004516708.1 | scaffold1521 | 19363                   | CC                              | TT                 | TT               | SYNONYMOUS_CODING             | 101512512          | L-type lectin-domain containing receptor kinase IX.1-like |
| SNP_96995_A_19398 | NW_004516708.1 | scaffold1521 | 19398                   | TT                              | GG                 | GG               | NON_SYNONYMOUS_CODING         | 101512512          | L-type lectin-domain containing receptor kinase IX.1-like |
| SNP_96996_A_19506 | NW_004516708.1 | scaffold1521 | 19506                   | GG                              | AA                 | AA               | NON_SYNONYMOUS_CODING         | 101512512          | L-type lectin-domain containing receptor kinase IX.1-like |
| SNP_96997_A_19605 | NW_004516708.1 | scaffold1521 | 19605                   | CC                              | AA                 | AA               | NON_SYNONYMOUS_CODING         | 101512512          | L-type lectin-domain containing receptor kinase IX.1-like |
| SNP_96998_A_19653 | NW_004516708.1 | scaffold1521 | 19653                   | CC                              | AA                 | AA               | NON_SYNONYMOUS_CODING         | 101512512          | L-type lectin-domain containing receptor kinase IX.1-like |
| SNP_96999_A_19670 | NW_004516708.1 | scaffold1521 | 19670                   | TT                              | AA                 | AA               | URR                           | 101512512          | L-type lectin-domain containing receptor kinase IX.1-like |
| SNP_97000_A_19764 | NW_004516708.1 | scaffold1521 | 19764                   | CC                              | TT                 | TT               | URR                           | 101512512          | L-type lectin-domain containing receptor kinase IX.1-like |
| SNP_97001_A_19964 | NW_004516708.1 | scaffold1521 | 19964                   | TT                              | CC                 | CC               | URR                           | 101512512          | L-type lectin-domain containing receptor kinase IX.1-like |
| SNP_97002_A_20082 | NW_004516708.1 | scaffold1521 | 20082                   | CC                              | TT                 | TT               | URR                           | 101512512          | L-type lectin-domain containing receptor kinase IX.1-like |
| SNP_97003_A_20335 | NW_004516708.1 | scaffold1521 | 20335                   | GG                              | CC                 | CC               | URR                           | 101512512          | L-type lectin-domain containing receptor kinase IX.1-like |
| SNP_97004_A_21318 | NW_004516708.1 | scaffold1521 | 21318                   | AA                              | CC                 | CC               | URR                           | 101512512          | L-type lectin-domain containing receptor kinase IX.1-like |
| SNP_97005_A_21505 | NW_004516708.1 | scaffold1521 | 21505                   | CC                              | TT                 | TT               | URR                           | 101512512          | L-type lectin-domain containing receptor kinase IX.1-like |
| SNP_97006_A_21510 | NW_004516708.1 | scaffold1521 | 21510                   | CC                              | TT                 | TT               | URR                           | 101512512          | L-type lectin-domain containing receptor kinase IX.1-like |
| SNP_97007_A_21578 | NW_004516708.1 | scaffold1521 | 21578                   | TT                              | AA                 | AA               | URR                           | 101512512          | L-type lectin-domain containing receptor kinase IX.1-like |
| SNP_97008_A_21606 | NW_004516708.1 | scaffold1521 | 21606                   | AA                              | GG                 | GG               | URR                           | 101512512          | L-type lectin-domain containing receptor kinase IX.1-like |
| SNP_97009_A_23355 | NW_004516708.1 | scaffold1521 | 23355                   | AA                              | TT                 | TT               | INTERGENIC                    |                    |                                                           |
| SNP_97010_A_23422 | NW_004516708.1 | scaffold1521 | 23422                   | GG                              | TT                 | TT               | INTERGENIC                    |                    |                                                           |

| SNPs IDs          | Chromosome IDs | Chromosomes  | Physical positions (bp) | CDC Frontier (Reference genome) | (Pusa 1103 & HPNB) | (ILWC 46 & LPNB) | Sequence genome | Components of | Gene accession IDs | Putative functions |
|-------------------|----------------|--------------|-------------------------|---------------------------------|--------------------|------------------|-----------------|---------------|--------------------|--------------------|
| SNP_97011_A_23613 | NW_004516708.1 | scaffold1521 | 23613                   | TT                              | CC                 | CC               | INTERGENIC      |               |                    |                    |
| SNP_97012_A_23817 | NW_004516708.1 | scaffold1521 | 23817                   | TT                              | GG                 | GG               | INTERGENIC      |               |                    |                    |
| SNP_97013_A_25700 | NW_004516708.1 | scaffold1521 | 25700                   | GG                              | CC                 | CC               | INTERGENIC      |               |                    |                    |
| SNP_97014_A_25915 | NW_004516708.1 | scaffold1521 | 25915                   | AA                              | GG                 | GG               | INTERGENIC      |               |                    |                    |
| SNP_97015_A_26566 | NW_004516708.1 | scaffold1521 | 26566                   | AA                              | GG                 | GG               | INTERGENIC      |               |                    |                    |
| SNP_97016_A_26705 | NW_004516708.1 | scaffold1521 | 26705                   | CC                              | TT                 | TT               | INTERGENIC      |               |                    |                    |
| SNP_97017_A_26732 | NW_004516708.1 | scaffold1521 | 26732                   | GG                              | TT                 | TT               | INTERGENIC      |               |                    |                    |
| SNP_97018_A_26740 | NW_004516708.1 | scaffold1521 | 26740                   | AA                              | GG                 | GG               | INTERGENIC      |               |                    |                    |
| SNP_97019_A_26848 | NW_004516708.1 | scaffold1521 | 26848                   | TT                              | AA                 | AA               | INTERGENIC      |               |                    |                    |
| SNP_97020_A_26925 | NW_004516708.1 | scaffold1521 | 26925                   | GG                              | TT                 | TT               | INTERGENIC      |               |                    |                    |
| SNP_97021_A_27261 | NW_004516708.1 | scaffold1521 | 27261                   | TT                              | CC                 | CC               | INTERGENIC      |               |                    |                    |
| SNP_97022_A_27262 | NW_004516708.1 | scaffold1521 | 27262                   | TT                              | AA                 | AA               | INTERGENIC      |               |                    |                    |
| SNP_97023_A_1594  | NW_004516709.1 | scaffold1523 | 1594                    | AA                              | TT                 | TT               | INTERGENIC      |               |                    |                    |
| SNP_97024_A_1607  | NW_004516709.1 | scaffold1523 | 1607                    | CC                              | TT                 | TT               | INTERGENIC      |               |                    |                    |
| SNP_97025_A_1863  | NW_004516709.1 | scaffold1523 | 1863                    | GG                              | TT                 | TT               | INTERGENIC      |               |                    |                    |
| SNP_97026_A_1876  | NW_004516709.1 | scaffold1523 | 1876                    | CC                              | TT                 | TT               | INTERGENIC      |               |                    |                    |
| SNP_97027_A_1923  | NW_004516709.1 | scaffold1523 | 1923                    | GG                              | CC                 | CC               | INTERGENIC      |               |                    |                    |
| SNP_97028_A_5067  | NW_004516709.1 | scaffold1523 | 5067                    | GG                              | TT                 | TT               | INTERGENIC      |               |                    |                    |
| SNP_97029_A_9777  | NW_004516709.1 | scaffold1523 | 9777                    | GG                              | TT                 | TT               | INTERGENIC      |               |                    |                    |
| SNP_97030_A_9867  | NW_004516709.1 | scaffold1523 | 9867                    | GG                              | CC                 | CC               | INTERGENIC      |               |                    |                    |
| SNP_97031_A_6911  | NW_004516710.1 | scaffold1524 | 6911                    | AA                              | TT                 | TT               | INTERGENIC      |               |                    |                    |
| SNP_97032_A_3319  | NW_004516712.1 | scaffold1526 | 3319                    | TT                              | AA                 | AA               | INTERGENIC      |               |                    |                    |

| SNPs IDs          | Chromosome IDs | Chromosomes  | Physical positions (bp) | CDC Frontier (Reference genome) | (Pusa 1103 & HPNB) | (ILWC 46 & LPNB) | Sequence genome | Components of | Gene accession IDs | Putative functions |
|-------------------|----------------|--------------|-------------------------|---------------------------------|--------------------|------------------|-----------------|---------------|--------------------|--------------------|
| SNP_97033_A_7420  | NW_004516714.1 | scaffold1530 | 7420                    | TT                              | AA                 | AA               | INTERGENIC      |               |                    |                    |
| SNP_97034_A_10165 | NW_004516714.1 | scaffold1530 | 10165                   | TT                              | AA                 | AA               | INTERGENIC      |               |                    |                    |
| SNP_97035_A_10194 | NW_004516714.1 | scaffold1530 | 10194                   | TT                              | CC                 | CC               | INTERGENIC      |               |                    |                    |
| SNP_97036_A_10225 | NW_004516714.1 | scaffold1530 | 10225                   | CC                              | TT                 | TT               | INTERGENIC      |               |                    |                    |
| SNP_97037_A_10299 | NW_004516714.1 | scaffold1530 | 10299                   | GG                              | AA                 | AA               | INTERGENIC      |               |                    |                    |
| SNP_97038_A_10309 | NW_004516714.1 | scaffold1530 | 10309                   | CC                              | TT                 | TT               | INTERGENIC      |               |                    |                    |
| SNP_97039_A_10320 | NW_004516714.1 | scaffold1530 | 10320                   | GG                              | AA                 | AA               | INTERGENIC      |               |                    |                    |
| SNP_97040_A_10432 | NW_004516714.1 | scaffold1530 | 10432                   | TT                              | CC                 | CC               | INTERGENIC      |               |                    |                    |
| SNP_97041_A_10462 | NW_004516714.1 | scaffold1530 | 10462                   | TT                              | CC                 | CC               | INTERGENIC      |               |                    |                    |
| SNP_97042_A_10507 | NW_004516714.1 | scaffold1530 | 10507                   | TT                              | AA                 | AA               | INTERGENIC      |               |                    |                    |
| SNP_97043_A_13129 | NW_004516714.1 | scaffold1530 | 13129                   | GG                              | AA                 | AA               | INTERGENIC      |               |                    |                    |
| SNP_97044_A_13385 | NW_004516714.1 | scaffold1530 | 13385                   | AA                              | TT                 | TT               | INTERGENIC      |               |                    |                    |
| SNP_97045_A_13457 | NW_004516714.1 | scaffold1530 | 13457                   | GG                              | TT                 | TT               | INTERGENIC      |               |                    |                    |
| SNP_97046_A_13460 | NW_004516714.1 | scaffold1530 | 13460                   | TT                              | CC                 | CC               | INTERGENIC      |               |                    |                    |
| SNP_97047_A_13465 | NW_004516714.1 | scaffold1530 | 13465                   | CC                              | AA                 | AA               | INTERGENIC      |               |                    |                    |
| SNP_97048_A_13510 | NW_004516714.1 | scaffold1530 | 13510                   | TT                              | CC                 | CC               | INTERGENIC      |               |                    |                    |
| SNP_97049_A_13548 | NW_004516714.1 | scaffold1530 | 13548                   | GG                              | AA                 | AA               | INTERGENIC      |               |                    |                    |
| SNP_97050_A_13628 | NW_004516714.1 | scaffold1530 | 13628                   | TT                              | CC                 | CC               | INTERGENIC      |               |                    |                    |
| SNP_97051_A_13752 | NW_004516714.1 | scaffold1530 | 13752                   | TT                              | CC                 | CC               | INTERGENIC      |               |                    |                    |
| SNP_97052_A_13811 | NW_004516714.1 | scaffold1530 | 13811                   | GG                              | CC                 | CC               | INTERGENIC      |               |                    |                    |
| SNP_97053_A_14007 | NW_004516714.1 | scaffold1530 | 14007                   | AA                              | GG                 | GG               | INTERGENIC      |               |                    |                    |
| SNP_97054_A_14203 | NW_004516714.1 | scaffold1530 | 14203                   | AA                              | TT                 | TT               | INTERGENIC      |               |                    |                    |

| SNPs IDs          | Chromosome IDs | Chromosomes  | Physical positions (bp) | CDC Frontier (Reference genome) | (Pusa 1103 & HPNB) | (ILWC 46 & LPNB) | Sequence genome | Components of | Gene accession IDs | Putative functions |
|-------------------|----------------|--------------|-------------------------|---------------------------------|--------------------|------------------|-----------------|---------------|--------------------|--------------------|
| SNP_97055_A_14488 | NW_004516714.1 | scaffold1530 | 14488                   | GG                              | TT                 | TT               | INTERGENIC      |               |                    |                    |
| SNP_97056_A_14647 | NW_004516714.1 | scaffold1530 | 14647                   | TT                              | CC                 | CC               | INTERGENIC      |               |                    |                    |
| SNP_97057_A_14720 | NW_004516714.1 | scaffold1530 | 14720                   | TT                              | GG                 | GG               | INTERGENIC      |               |                    |                    |
| SNP_97058_A_14755 | NW_004516714.1 | scaffold1530 | 14755                   | TT                              | CC                 | CC               | INTERGENIC      |               |                    |                    |
| SNP_97059_A_14924 | NW_004516714.1 | scaffold1530 | 14924                   | AA                              | GG                 | GG               | INTERGENIC      |               |                    |                    |
| SNP_97060_A_14976 | NW_004516714.1 | scaffold1530 | 14976                   | AA                              | CC                 | CC               | INTERGENIC      |               |                    |                    |
| SNP_97061_A_15043 | NW_004516714.1 | scaffold1530 | 15043                   | TT                              | AA                 | AA               | INTERGENIC      |               |                    |                    |
| SNP_97062_A_15046 | NW_004516714.1 | scaffold1530 | 15046                   | GG                              | AA                 | AA               | INTERGENIC      |               |                    |                    |
| SNP_97063_A_15089 | NW_004516714.1 | scaffold1530 | 15089                   | CC                              | TT                 | TT               | INTERGENIC      |               |                    |                    |
| SNP_97065_A_16172 | NW_004516714.1 | scaffold1530 | 16172                   | GG                              | AA                 | AA               | INTERGENIC      |               |                    |                    |
| SNP_97066_A_16440 | NW_004516714.1 | scaffold1530 | 16440                   | GG                              | AA                 | AA               | INTERGENIC      |               |                    |                    |
| SNP_97067_A_16460 | NW_004516714.1 | scaffold1530 | 16460                   | CC                              | TT                 | TT               | INTERGENIC      |               |                    |                    |
| SNP_97068_A_16525 | NW_004516714.1 | scaffold1530 | 16525                   | GG                              | AA                 | AA               | INTERGENIC      |               |                    |                    |
| SNP_97069_A_16658 | NW_004516714.1 | scaffold1530 | 16658                   | GG                              | CC                 | CC               | INTERGENIC      |               |                    |                    |
| SNP_97070_A_16847 | NW_004516714.1 | scaffold1530 | 16847                   | GG                              | AA                 | AA               | INTERGENIC      |               |                    |                    |
| SNP_97071_A_16865 | NW_004516714.1 | scaffold1530 | 16865                   | AA                              | CC                 | CC               | INTERGENIC      |               |                    |                    |
| SNP_97072_A_16890 | NW_004516714.1 | scaffold1530 | 16890                   | GG                              | CC                 | CC               | INTERGENIC      |               |                    |                    |
| SNP_97073_A_16998 | NW_004516714.1 | scaffold1530 | 16998                   | CC                              | TT                 | TT               | INTERGENIC      |               |                    |                    |
| SNP_97074_A_17184 | NW_004516714.1 | scaffold1530 | 17184                   | AA                              | GG                 | GG               | INTERGENIC      |               |                    |                    |
| SNP_97075_A_17477 | NW_004516714.1 | scaffold1530 | 17477                   | GG                              | AA                 | AA               | INTERGENIC      |               |                    |                    |
| SNP_97076_A_17510 | NW_004516714.1 | scaffold1530 | 17510                   | CC                              | AA                 | AA               | INTERGENIC      |               |                    |                    |
| SNP_97078_A_17710 | NW_004516714.1 | scaffold1530 | 17710                   | TT                              | GG                 | GG               | INTERGENIC      |               |                    |                    |

| SNPs IDs          | Chromosome IDs | Chromosomes  | Physical positions (bp) | CDC Frontier (Reference genome) | (Pusa 1103 & HPNB) | (ILWC 46 & LPNB) | Sequence genome | Components of | Gene accession IDs | Putative functions |
|-------------------|----------------|--------------|-------------------------|---------------------------------|--------------------|------------------|-----------------|---------------|--------------------|--------------------|
| SNP_97079_A_17769 | NW_004516714.1 | scaffold1530 | 17769                   | GG                              | CC                 | CC               | INTERGENIC      |               |                    |                    |
| SNP_97080_A_17792 | NW_004516714.1 | scaffold1530 | 17792                   | GG                              | TT                 | TT               | INTERGENIC      |               |                    |                    |
| SNP_97081_A_17814 | NW_004516714.1 | scaffold1530 | 17814                   | GG                              | TT                 | TT               | INTERGENIC      |               |                    |                    |
| SNP_97082_A_17883 | NW_004516714.1 | scaffold1530 | 17883                   | CC                              | TT                 | TT               | INTERGENIC      |               |                    |                    |
| SNP_97083_A_17889 | NW_004516714.1 | scaffold1530 | 17889                   | GG                              | TT                 | TT               | INTERGENIC      |               |                    |                    |
| SNP_97084_A_17890 | NW_004516714.1 | scaffold1530 | 17890                   | AA                              | TT                 | TT               | INTERGENIC      |               |                    |                    |
| SNP_97085_A_17919 | NW_004516714.1 | scaffold1530 | 17919                   | TT                              | AA                 | AA               | INTERGENIC      |               |                    |                    |
| SNP_97086_A_17997 | NW_004516714.1 | scaffold1530 | 17997                   | CC                              | TT                 | TT               | INTERGENIC      |               |                    |                    |
| SNP_97087_A_18077 | NW_004516714.1 | scaffold1530 | 18077                   | GG                              | AA                 | AA               | INTERGENIC      |               |                    |                    |
| SNP_97088_A_18838 | NW_004516714.1 | scaffold1530 | 18838                   | GG                              | AA                 | AA               | INTERGENIC      |               |                    |                    |
| SNP_97089_A_18839 | NW_004516714.1 | scaffold1530 | 18839                   | AA                              | GG                 | GG               | INTERGENIC      |               |                    |                    |
| SNP_97090_A_18918 | NW_004516714.1 | scaffold1530 | 18918                   | CC                              | AA                 | AA               | INTERGENIC      |               |                    |                    |
| SNP_97091_A_18929 | NW_004516714.1 | scaffold1530 | 18929                   | GG                              | TT                 | TT               | INTERGENIC      |               |                    |                    |
| SNP_97092_A_18932 | NW_004516714.1 | scaffold1530 | 18932                   | AA                              | GG                 | GG               | INTERGENIC      |               |                    |                    |
| SNP_97094_A_19158 | NW_004516714.1 | scaffold1530 | 19158                   | GG                              | TT                 | TT               | INTERGENIC      |               |                    |                    |
| SNP_97095_A_19165 | NW_004516714.1 | scaffold1530 | 19165                   | GG                              | AA                 | AA               | INTERGENIC      |               |                    |                    |
| SNP_97096_A_19186 | NW_004516714.1 | scaffold1530 | 19186                   | AA                              | TT                 | TT               | INTERGENIC      |               |                    |                    |
| SNP_97097_A_19420 | NW_004516714.1 | scaffold1530 | 19420                   | AA                              | TT                 | TT               | INTERGENIC      |               |                    |                    |
| SNP_97098_A_19443 | NW_004516714.1 | scaffold1530 | 19443                   | CC                              | GG                 | GG               | INTERGENIC      |               |                    |                    |
| SNP_97099_A_19735 | NW_004516714.1 | scaffold1530 | 19735                   | TT                              | AA                 | AA               | INTERGENIC      |               |                    |                    |
| SNP_97100_A_19742 | NW_004516714.1 | scaffold1530 | 19742                   | CC                              | TT                 | TT               | INTERGENIC      |               |                    |                    |
| SNP_97101_A_19957 | NW_004516714.1 | scaffold1530 | 19957                   | TT                              | CC                 | CC               | INTERGENIC      |               |                    |                    |



| SNPs IDs          | Chromosome IDs | Chromosomes  | Physical positions (bp) | CDC Frontier (Reference genome) | (Pusa 1103 & HPNB) | (ILWC 46 & LPNB) | Sequence genome | Components of | Gene accession IDs | Putative functions |
|-------------------|----------------|--------------|-------------------------|---------------------------------|--------------------|------------------|-----------------|---------------|--------------------|--------------------|
| SNP_97102_A_19958 | NW_004516714.1 | scaffold1530 | 19958                   | GG                              | AA                 | AA               | INTERGENIC      |               |                    |                    |
| SNP_97103_A_20007 | NW_004516714.1 | scaffold1530 | 20007                   | CC                              | GG                 | GG               | INTERGENIC      |               |                    |                    |
| SNP_97104_A_20457 | NW_004516714.1 | scaffold1530 | 20457                   | CC                              | TT                 | TT               | INTERGENIC      |               |                    |                    |
| SNP_97105_A_20653 | NW_004516714.1 | scaffold1530 | 20653                   | AA                              | GG                 | GG               | INTERGENIC      |               |                    |                    |
| SNP_97106_A_20799 | NW_004516714.1 | scaffold1530 | 20799                   | TT                              | AA                 | AA               | INTERGENIC      |               |                    |                    |
| SNP_97107_A_20825 | NW_004516714.1 | scaffold1530 | 20825                   | GG                              | AA                 | AA               | INTERGENIC      |               |                    |                    |
| SNP_97108_A_21032 | NW_004516714.1 | scaffold1530 | 21032                   | AA                              | TT                 | TT               | INTERGENIC      |               |                    |                    |
| SNP_97110_A_21189 | NW_004516714.1 | scaffold1530 | 21189                   | AA                              | GG                 | GG               | INTERGENIC      |               |                    |                    |
| SNP_97111_A_21234 | NW_004516714.1 | scaffold1530 | 21234                   | CC                              | TT                 | TT               | INTERGENIC      |               |                    |                    |
| SNP_97112_A_21256 | NW_004516714.1 | scaffold1530 | 21256                   | GG                              | AA                 | AA               | INTERGENIC      |               |                    |                    |
| SNP_97113_A_21327 | NW_004516714.1 | scaffold1530 | 21327                   | GG                              | AA                 | AA               | INTERGENIC      |               |                    |                    |
| SNP_97114_A_21344 | NW_004516714.1 | scaffold1530 | 21344                   | AA                              | GG                 | GG               | INTERGENIC      |               |                    |                    |
| SNP_97115_A_21399 | NW_004516714.1 | scaffold1530 | 21399                   | GG                              | AA                 | AA               | INTERGENIC      |               |                    |                    |
| SNP_97116_A_21410 | NW_004516714.1 | scaffold1530 | 21410                   | AA                              | GG                 | GG               | INTERGENIC      |               |                    |                    |
| SNP_97117_A_21416 | NW_004516714.1 | scaffold1530 | 21416                   | AA                              | CC                 | CC               | INTERGENIC      |               |                    |                    |
| SNP_97118_A_21420 | NW_004516714.1 | scaffold1530 | 21420                   | CC                              | AA                 | AA               | INTERGENIC      |               |                    |                    |
| SNP_97119_A_21430 | NW_004516714.1 | scaffold1530 | 21430                   | AA                              | CC                 | CC               | INTERGENIC      |               |                    |                    |
| SNP_97120_A_21451 | NW_004516714.1 | scaffold1530 | 21451                   | GG                              | AA                 | AA               | INTERGENIC      |               |                    |                    |
| SNP_97121_A_21510 | NW_004516714.1 | scaffold1530 | 21510                   | TT                              | CC                 | CC               | INTERGENIC      |               |                    |                    |
| SNP_97122_A_21520 | NW_004516714.1 | scaffold1530 | 21520                   | AA                              | GG                 | GG               | INTERGENIC      |               |                    |                    |
| SNP_97123_A_21577 | NW_004516714.1 | scaffold1530 | 21577                   | GG                              | TT                 | TT               | INTERGENIC      |               |                    |                    |
| SNP_97124_A_21582 | NW_004516714.1 | scaffold1530 | 21582                   | CC                              | TT                 | TT               | INTERGENIC      |               |                    |                    |

| SNPs IDs          | Chromosome IDs | Chromosomes  | Physical positions (bp) | CDC Frontier (Reference genome) | (Pusa 1103 & HPNB) | (ILWC 46 & LPNB) | Sequence genome | Components of | Gene accession IDs | Putative functions |
|-------------------|----------------|--------------|-------------------------|---------------------------------|--------------------|------------------|-----------------|---------------|--------------------|--------------------|
| SNP_97125_A_21725 | NW_004516714.1 | scaffold1530 | 21725                   | CC                              | TT                 | TT               | INTERGENIC      |               |                    |                    |
| SNP_97126_A_21821 | NW_004516714.1 | scaffold1530 | 21821                   | TT                              | CC                 | CC               | INTERGENIC      |               |                    |                    |
| SNP_97127_A_21852 | NW_004516714.1 | scaffold1530 | 21852                   | GG                              | AA                 | AA               | INTERGENIC      |               |                    |                    |
| SNP_97128_A_22141 | NW_004516714.1 | scaffold1530 | 22141                   | AA                              | GG                 | GG               | INTERGENIC      |               |                    |                    |
| SNP_97129_A_22158 | NW_004516714.1 | scaffold1530 | 22158                   | GG                              | TT                 | TT               | INTERGENIC      |               |                    |                    |
| SNP_97130_A_22214 | NW_004516714.1 | scaffold1530 | 22214                   | GG                              | TT                 | TT               | INTERGENIC      |               |                    |                    |
| SNP_97131_A_22280 | NW_004516714.1 | scaffold1530 | 22280                   | TT                              | CC                 | CC               | INTERGENIC      |               |                    |                    |
| SNP_97132_A_22298 | NW_004516714.1 | scaffold1530 | 22298                   | CC                              | TT                 | TT               | INTERGENIC      |               |                    |                    |
| SNP_97133_A_22300 | NW_004516714.1 | scaffold1530 | 22300                   | CC                              | TT                 | TT               | INTERGENIC      |               |                    |                    |
| SNP_97134_A_22322 | NW_004516714.1 | scaffold1530 | 22322                   | TT                              | CC                 | CC               | INTERGENIC      |               |                    |                    |
| SNP_97135_A_22403 | NW_004516714.1 | scaffold1530 | 22403                   | AA                              | GG                 | GG               | INTERGENIC      |               |                    |                    |
| SNP_97136_A_22465 | NW_004516714.1 | scaffold1530 | 22465                   | GG                              | AA                 | AA               | INTERGENIC      |               |                    |                    |
| SNP_97137_A_22491 | NW_004516714.1 | scaffold1530 | 22491                   | AA                              | GG                 | GG               | INTERGENIC      |               |                    |                    |
| SNP_97138_A_22520 | NW_004516714.1 | scaffold1530 | 22520                   | GG                              | CC                 | CC               | INTERGENIC      |               |                    |                    |
| SNP_97139_A_22563 | NW_004516714.1 | scaffold1530 | 22563                   | CC                              | TT                 | TT               | INTERGENIC      |               |                    |                    |
| SNP_97140_A_22595 | NW_004516714.1 | scaffold1530 | 22595                   | AA                              | GG                 | GG               | INTERGENIC      |               |                    |                    |
| SNP_97141_A_23014 | NW_004516714.1 | scaffold1530 | 23014                   | AA                              | GG                 | GG               | INTERGENIC      |               |                    |                    |
| SNP_97143_A_23612 | NW_004516714.1 | scaffold1530 | 23612                   | AA                              | TT                 | TT               | INTERGENIC      |               |                    |                    |
| SNP_97144_A_23711 | NW_004516714.1 | scaffold1530 | 23711                   | AA                              | GG                 | GG               | INTERGENIC      |               |                    |                    |
| SNP_97145_A_23858 | NW_004516714.1 | scaffold1530 | 23858                   | CC                              | AA                 | AA               | INTERGENIC      |               |                    |                    |
| SNP_97146_A_23866 | NW_004516714.1 | scaffold1530 | 23866                   | TT                              | AA                 | AA               | INTERGENIC      |               |                    |                    |
| SNP_97147_A_23895 | NW_004516714.1 | scaffold1530 | 23895                   | CC                              | TT                 | TT               | INTERGENIC      |               |                    |                    |

| SNPs IDs          | Chromosome IDs | Chromosomes  | Physical positions (bp) | CDC Frontier (Reference genome) | (Pusa 1103 & HPNB) | (ILWC 46 & LPNB) | Sequence genome | Components of | Gene accession IDs | Putative functions |
|-------------------|----------------|--------------|-------------------------|---------------------------------|--------------------|------------------|-----------------|---------------|--------------------|--------------------|
| SNP_97148_A_23906 | NW_004516714.1 | scaffold1530 | 23906                   | AA                              | CC                 | CC               | INTERGENIC      |               |                    |                    |
| SNP_97149_A_23918 | NW_004516714.1 | scaffold1530 | 23918                   | CC                              | AA                 | AA               | INTERGENIC      |               |                    |                    |
| SNP_97150_A_24066 | NW_004516714.1 | scaffold1530 | 24066                   | TT                              | CC                 | CC               | INTERGENIC      |               |                    |                    |
| SNP_97151_A_24232 | NW_004516714.1 | scaffold1530 | 24232                   | CC                              | AA                 | AA               | INTERGENIC      |               |                    |                    |
| SNP_97152_A_24256 | NW_004516714.1 | scaffold1530 | 24256                   | TT                              | GG                 | GG               | INTERGENIC      |               |                    |                    |
| SNP_97153_A_24313 | NW_004516714.1 | scaffold1530 | 24313                   | CC                              | GG                 | GG               | INTERGENIC      |               |                    |                    |
| SNP_97154_A_24427 | NW_004516714.1 | scaffold1530 | 24427                   | TT                              | CC                 | CC               | INTERGENIC      |               |                    |                    |
| SNP_97156_A_24470 | NW_004516714.1 | scaffold1530 | 24470                   | CC                              | TT                 | TT               | INTERGENIC      |               |                    |                    |
| SNP_97157_A_24528 | NW_004516714.1 | scaffold1530 | 24528                   | AA                              | GG                 | GG               | INTERGENIC      |               |                    |                    |
| SNP_97158_A_24604 | NW_004516714.1 | scaffold1530 | 24604                   | AA                              | GG                 | GG               | INTERGENIC      |               |                    |                    |
| SNP_97159_A_24621 | NW_004516714.1 | scaffold1530 | 24621                   | AA                              | GG                 | GG               | INTERGENIC      |               |                    |                    |
| SNP_97160_A_24638 | NW_004516714.1 | scaffold1530 | 24638                   | TT                              | CC                 | CC               | INTERGENIC      |               |                    |                    |
| SNP_97161_A_24686 | NW_004516714.1 | scaffold1530 | 24686                   | AA                              | GG                 | GG               | INTERGENIC      |               |                    |                    |
| SNP_97163_A_24718 | NW_004516714.1 | scaffold1530 | 24718                   | AA                              | TT                 | TT               | INTERGENIC      |               |                    |                    |
| SNP_97164_A_24741 | NW_004516714.1 | scaffold1530 | 24741                   | TT                              | AA                 | AA               | INTERGENIC      |               |                    |                    |
| SNP_97165_A_24781 | NW_004516714.1 | scaffold1530 | 24781                   | CC                              | TT                 | TT               | INTERGENIC      |               |                    |                    |
| SNP_97166_A_25059 | NW_004516714.1 | scaffold1530 | 25059                   | TT                              | CC                 | CC               | INTERGENIC      |               |                    |                    |
| SNP_97167_A_25074 | NW_004516714.1 | scaffold1530 | 25074                   | GG                              | AA                 | AA               | INTERGENIC      |               |                    |                    |
| SNP_97168_A_25097 | NW_004516714.1 | scaffold1530 | 25097                   | CC                              | AA                 | AA               | INTERGENIC      |               |                    |                    |
| SNP_97169_A_25098 | NW_004516714.1 | scaffold1530 | 25098                   | GG                              | AA                 | AA               | INTERGENIC      |               |                    |                    |
| SNP_97170_A_25101 | NW_004516714.1 | scaffold1530 | 25101                   | TT                              | GG                 | GG               | INTERGENIC      |               |                    |                    |
| SNP_97171_A_25111 | NW_004516714.1 | scaffold1530 | 25111                   | GG                              | CC                 | CC               | INTERGENIC      |               |                    |                    |

| SNPs IDs          | Chromosome IDs | Chromosomes  | Physical positions (bp) | CDC Frontier (Reference genome) | (Pusa 1103 & HPNB) | (ILWC 46 & LPNB) | Sequence genome | Components of | Gene accession IDs | Putative functions |
|-------------------|----------------|--------------|-------------------------|---------------------------------|--------------------|------------------|-----------------|---------------|--------------------|--------------------|
| SNP_97172_A_25144 | NW_004516714.1 | scaffold1530 | 25144                   | TT                              | CC                 | CC               | INTERGENIC      |               |                    |                    |
| SNP_97173_A_25160 | NW_004516714.1 | scaffold1530 | 25160                   | TT                              | CC                 | CC               | INTERGENIC      |               |                    |                    |
| SNP_97174_A_25223 | NW_004516714.1 | scaffold1530 | 25223                   | TT                              | AA                 | AA               | INTERGENIC      |               |                    |                    |
| SNP_97175_A_25224 | NW_004516714.1 | scaffold1530 | 25224                   | TT                              | AA                 | AA               | INTERGENIC      |               |                    |                    |
| SNP_97176_A_25399 | NW_004516714.1 | scaffold1530 | 25399                   | TT                              | CC                 | CC               | INTERGENIC      |               |                    |                    |
| SNP_97177_A_25441 | NW_004516714.1 | scaffold1530 | 25441                   | TT                              | AA                 | AA               | INTERGENIC      |               |                    |                    |
| SNP_97178_A_25485 | NW_004516714.1 | scaffold1530 | 25485                   | AA                              | GG                 | GG               | INTERGENIC      |               |                    |                    |
| SNP_97180_A_25535 | NW_004516714.1 | scaffold1530 | 25535                   | GG                              | TT                 | TT               | INTERGENIC      |               |                    |                    |
| SNP_97181_A_25629 | NW_004516714.1 | scaffold1530 | 25629                   | CC                              | GG                 | GG               | INTERGENIC      |               |                    |                    |
| SNP_97182_A_25706 | NW_004516714.1 | scaffold1530 | 25706                   | CC                              | GG                 | GG               | INTERGENIC      |               |                    |                    |
| SNP_97183_A_25823 | NW_004516714.1 | scaffold1530 | 25823                   | GG                              | AA                 | AA               | INTERGENIC      |               |                    |                    |
| SNP_97185_A_25908 | NW_004516714.1 | scaffold1530 | 25908                   | AA                              | GG                 | GG               | INTERGENIC      |               |                    |                    |
| SNP_97186_A_25987 | NW_004516714.1 | scaffold1530 | 25987                   | AA                              | GG                 | GG               | INTERGENIC      |               |                    |                    |
| SNP_97187_A_26013 | NW_004516714.1 | scaffold1530 | 26013                   | TT                              | CC                 | CC               | INTERGENIC      |               |                    |                    |
| SNP_97188_A_26023 | NW_004516714.1 | scaffold1530 | 26023                   | CC                              | TT                 | TT               | INTERGENIC      |               |                    |                    |
| SNP_97189_A_26147 | NW_004516714.1 | scaffold1530 | 26147                   | GG                              | TT                 | TT               | INTERGENIC      |               |                    |                    |
| SNP_97190_A_26244 | NW_004516714.1 | scaffold1530 | 26244                   | AA                              | TT                 | TT               | INTERGENIC      |               |                    |                    |
| SNP_97191_A_26262 | NW_004516714.1 | scaffold1530 | 26262                   | AA                              | TT                 | TT               | INTERGENIC      |               |                    |                    |
| SNP_97192_A_26270 | NW_004516714.1 | scaffold1530 | 26270                   | GG                              | AA                 | AA               | INTERGENIC      |               |                    |                    |
| SNP_97193_A_26363 | NW_004516714.1 | scaffold1530 | 26363                   | CC                              | TT                 | TT               | INTERGENIC      |               |                    |                    |
| SNP_97194_A_26417 | NW_004516714.1 | scaffold1530 | 26417                   | CC                              | AA                 | AA               | INTERGENIC      |               |                    |                    |
| SNP_97195_A_26432 | NW_004516714.1 | scaffold1530 | 26432                   | TT                              | AA                 | AA               | INTERGENIC      |               |                    |                    |

| SNPs IDs          | Chromosome IDs | Chromosomes  | Physical positions (bp) | CDC Frontier (Reference genome) | (Pusa 1103 & HPNB) | (ILWC 46 & LPNB) | Sequence genome | Components of | Gene accession IDs | Putative functions |
|-------------------|----------------|--------------|-------------------------|---------------------------------|--------------------|------------------|-----------------|---------------|--------------------|--------------------|
| SNP_97196_A_26462 | NW_004516714.1 | scaffold1530 | 26462                   | TT                              | CC                 | CC               | INTERGENIC      |               |                    |                    |
| SNP_97197_A_26542 | NW_004516714.1 | scaffold1530 | 26542                   | TT                              | AA                 | AA               | INTERGENIC      |               |                    |                    |
| SNP_97198_A_26557 | NW_004516714.1 | scaffold1530 | 26557                   | AA                              | GG                 | GG               | INTERGENIC      |               |                    |                    |
| SNP_97199_A_26603 | NW_004516714.1 | scaffold1530 | 26603                   | AA                              | TT                 | TT               | INTERGENIC      |               |                    |                    |
| SNP_97201_A_26782 | NW_004516714.1 | scaffold1530 | 26782                   | AA                              | GG                 | GG               | INTERGENIC      |               |                    |                    |
| SNP_97202_A_27016 | NW_004516714.1 | scaffold1530 | 27016                   | AA                              | GG                 | GG               | INTERGENIC      |               |                    |                    |
| SNP_97203_A_27025 | NW_004516714.1 | scaffold1530 | 27025                   | TT                              | CC                 | CC               | INTERGENIC      |               |                    |                    |
| SNP_97205_A_27115 | NW_004516714.1 | scaffold1530 | 27115                   | TT                              | CC                 | CC               | INTERGENIC      |               |                    |                    |
| SNP_97207_A_27386 | NW_004516714.1 | scaffold1530 | 27386                   | GG                              | AA                 | AA               | INTERGENIC      |               |                    |                    |
| SNP_97208_A_27476 | NW_004516714.1 | scaffold1530 | 27476                   | TT                              | AA                 | AA               | INTERGENIC      |               |                    |                    |
| SNP_97209_A_27480 | NW_004516714.1 | scaffold1530 | 27480                   | AA                              | TT                 | TT               | INTERGENIC      |               |                    |                    |
| SNP_97210_A_27582 | NW_004516714.1 | scaffold1530 | 27582                   | AA                              | GG                 | GG               | INTERGENIC      |               |                    |                    |
| SNP_97211_A_27592 | NW_004516714.1 | scaffold1530 | 27592                   | AA                              | GG                 | GG               | INTERGENIC      |               |                    |                    |
| SNP_97212_A_27737 | NW_004516714.1 | scaffold1530 | 27737                   | TT                              | CC                 | CC               | INTERGENIC      |               |                    |                    |
| SNP_97214_A_27835 | NW_004516714.1 | scaffold1530 | 27835                   | AA                              | GG                 | GG               | INTERGENIC      |               |                    |                    |
| SNP_97215_A_27873 | NW_004516714.1 | scaffold1530 | 27873                   | GG                              | TT                 | TT               | INTERGENIC      |               |                    |                    |
| SNP_97217_A_28052 | NW_004516714.1 | scaffold1530 | 28052                   | GG                              | AA                 | AA               | INTERGENIC      |               |                    |                    |
| SNP_97218_A_28165 | NW_004516714.1 | scaffold1530 | 28165                   | GG                              | AA                 | AA               | INTERGENIC      |               |                    |                    |
| SNP_97219_A_28179 | NW_004516714.1 | scaffold1530 | 28179                   | AA                              | TT                 | TT               | INTERGENIC      |               |                    |                    |
| SNP_97220_A_28275 | NW_004516714.1 | scaffold1530 | 28275                   | TT                              | CC                 | CC               | INTERGENIC      |               |                    |                    |
| SNP_97221_A_28342 | NW_004516714.1 | scaffold1530 | 28342                   | AA                              | GG                 | GG               | INTERGENIC      |               |                    |                    |
| SNP_97222_A_28360 | NW_004516714.1 | scaffold1530 | 28360                   | TT                              | CC                 | CC               | INTERGENIC      |               |                    |                    |

| SNPs IDs          | Chromosome IDs | Chromosomes  | Physical positions (bp) | CDC Frontier (Reference genome) | (Pusa 1103 & HPNB) | (ILWC 46 & LPNB) | Sequence genome | Components of | Gene accession IDs | Putative functions |
|-------------------|----------------|--------------|-------------------------|---------------------------------|--------------------|------------------|-----------------|---------------|--------------------|--------------------|
| SNP_97224_A_28454 | NW_004516714.1 | scaffold1530 | 28454                   | AA                              | TT                 | TT               | INTERGENIC      |               |                    |                    |
| SNP_97225_A_28599 | NW_004516714.1 | scaffold1530 | 28599                   | CC                              | AA                 | AA               | INTERGENIC      |               |                    |                    |
| SNP_97226_A_28621 | NW_004516714.1 | scaffold1530 | 28621                   | GG                              | AA                 | AA               | INTERGENIC      |               |                    |                    |
| SNP_97227_A_28626 | NW_004516714.1 | scaffold1530 | 28626                   | CC                              | TT                 | TT               | INTERGENIC      |               |                    |                    |
| SNP_97228_A_28652 | NW_004516714.1 | scaffold1530 | 28652                   | TT                              | GG                 | GG               | INTERGENIC      |               |                    |                    |
| SNP_97229_A_28671 | NW_004516714.1 | scaffold1530 | 28671                   | CC                              | TT                 | TT               | INTERGENIC      |               |                    |                    |
| SNP_97230_A_28710 | NW_004516714.1 | scaffold1530 | 28710                   | TT                              | CC                 | CC               | INTERGENIC      |               |                    |                    |
| SNP_97231_A_28716 | NW_004516714.1 | scaffold1530 | 28716                   | AA                              | GG                 | GG               | INTERGENIC      |               |                    |                    |
| SNP_97233_A_28888 | NW_004516714.1 | scaffold1530 | 28888                   | CC                              | TT                 | TT               | INTERGENIC      |               |                    |                    |
| SNP_97234_A_517   | NW_004516715.1 | scaffold1531 | 517                     | CC                              | TT                 | TT               | INTERGENIC      |               |                    |                    |
| SNP_97235_A_778   | NW_004516715.1 | scaffold1531 | 778                     | AA                              | TT                 | TT               | INTERGENIC      |               |                    |                    |
| SNP_97236_A_3785  | NW_004516715.1 | scaffold1531 | 3785                    | GG                              | AA                 | AA               | INTERGENIC      |               |                    |                    |
| SNP_97237_A_3984  | NW_004516715.1 | scaffold1531 | 3984                    | CC                              | GG                 | GG               | INTERGENIC      |               |                    |                    |
| SNP_97238_A_4236  | NW_004516715.1 | scaffold1531 | 4236                    | GG                              | TT                 | TT               | INTERGENIC      |               |                    |                    |
| SNP_97239_A_21993 | NW_004516715.1 | scaffold1531 | 21993                   | AA                              | CC                 | CC               | INTERGENIC      |               |                    |                    |
| SNP_97240_A_22282 | NW_004516715.1 | scaffold1531 | 22282                   | CC                              | TT                 | TT               | INTERGENIC      |               |                    |                    |
| SNP_97241_A_23951 | NW_004516715.1 | scaffold1531 | 23951                   | TT                              | CC                 | CC               | INTERGENIC      |               |                    |                    |
| SNP_97242_A_24027 | NW_004516715.1 | scaffold1531 | 24027                   | CC                              | AA                 | AA               | INTERGENIC      |               |                    |                    |
| SNP_97243_A_24030 | NW_004516715.1 | scaffold1531 | 24030                   | CC                              | GG                 | GG               | INTERGENIC      |               |                    |                    |
| SNP_97244_A_24251 | NW_004516715.1 | scaffold1531 | 24251                   | AA                              | GG                 | GG               | INTERGENIC      |               |                    |                    |
| SNP_97245_A_24341 | NW_004516715.1 | scaffold1531 | 24341                   | TT                              | CC                 | CC               | INTERGENIC      |               |                    |                    |
| SNP_97246_A_24349 | NW_004516715.1 | scaffold1531 | 24349                   | AA                              | TT                 | TT               | INTERGENIC      |               |                    |                    |

| SNPs IDs          | Chromosome IDs | Chromosomes  | Physical positions (bp) | CDC Frontier (Reference genome) | (Pusa 1103 & HPNB) | (ILWC 46 & LPNB) | Sequence genome | Components of | Gene accession IDs | Putative functions |
|-------------------|----------------|--------------|-------------------------|---------------------------------|--------------------|------------------|-----------------|---------------|--------------------|--------------------|
| SNP_97247_A_24525 | NW_004516715.1 | scaffold1531 | 24525                   | GG                              | CC                 | CC               | INTERGENIC      |               |                    |                    |
| SNP_97248_A_24529 | NW_004516715.1 | scaffold1531 | 24529                   | CC                              | TT                 | TT               | INTERGENIC      |               |                    |                    |
| SNP_97249_A_24546 | NW_004516715.1 | scaffold1531 | 24546                   | CC                              | AA                 | AA               | INTERGENIC      |               |                    |                    |
| SNP_97250_A_24547 | NW_004516715.1 | scaffold1531 | 24547                   | AA                              | GG                 | GG               | INTERGENIC      |               |                    |                    |
| SNP_97251_A_24858 | NW_004516715.1 | scaffold1531 | 24858                   | CC                              | AA                 | AA               | INTERGENIC      |               |                    |                    |
| SNP_97252_A_24868 | NW_004516715.1 | scaffold1531 | 24868                   | AA                              | CC                 | CC               | INTERGENIC      |               |                    |                    |
| SNP_97253_A_24875 | NW_004516715.1 | scaffold1531 | 24875                   | GG                              | TT                 | TT               | INTERGENIC      |               |                    |                    |
| SNP_97255_A_24941 | NW_004516715.1 | scaffold1531 | 24941                   | GG                              | AA                 | AA               | INTERGENIC      |               |                    |                    |
| SNP_97257_A_25698 | NW_004516715.1 | scaffold1531 | 25698                   | TT                              | AA                 | AA               | INTERGENIC      |               |                    |                    |
| SNP_97258_A_25925 | NW_004516715.1 | scaffold1531 | 25925                   | AA                              | GG                 | GG               | INTERGENIC      |               |                    |                    |
| SNP_97259_A_25931 | NW_004516715.1 | scaffold1531 | 25931                   | TT                              | CC                 | CC               | INTERGENIC      |               |                    |                    |
| SNP_97260_A_25945 | NW_004516715.1 | scaffold1531 | 25945                   | CC                              | GG                 | GG               | INTERGENIC      |               |                    |                    |
| SNP_97261_A_26082 | NW_004516715.1 | scaffold1531 | 26082                   | CC                              | TT                 | TT               | INTERGENIC      |               |                    |                    |
| SNP_97262_A_26084 | NW_004516715.1 | scaffold1531 | 26084                   | TT                              | AA                 | AA               | INTERGENIC      |               |                    |                    |
| SNP_97263_A_26550 | NW_004516715.1 | scaffold1531 | 26550                   | CC                              | AA                 | AA               | INTERGENIC      |               |                    |                    |
| SNP_97264_A_26771 | NW_004516715.1 | scaffold1531 | 26771                   | TT                              | GG                 | GG               | INTERGENIC      |               |                    |                    |
| SNP_97265_A_26777 | NW_004516715.1 | scaffold1531 | 26777                   | TT                              | CC                 | CC               | INTERGENIC      |               |                    |                    |
| SNP_97266_A_26807 | NW_004516715.1 | scaffold1531 | 26807                   | CC                              | AA                 | AA               | INTERGENIC      |               |                    |                    |
| SNP_97269_A_27206 | NW_004516715.1 | scaffold1531 | 27206                   | AA                              | GG                 | GG               | INTERGENIC      |               |                    |                    |
| SNP_97270_A_27767 | NW_004516715.1 | scaffold1531 | 27767                   | AA                              | GG                 | GG               | INTERGENIC      |               |                    |                    |
| SNP_97271_A_27820 | NW_004516715.1 | scaffold1531 | 27820                   | AA                              | GG                 | GG               | INTERGENIC      |               |                    |                    |
| SNP_97272_A_27856 | NW_004516715.1 | scaffold1531 | 27856                   | TT                              | GG                 | GG               | INTERGENIC      |               |                    |                    |

| SNPs IDs          | Chromosome IDs | Chromosomes  | Physical positions (bp) | CDC Frontier (Reference genome) | (Pusa 1103 & HPNB) | (ILWC 46 & LPNB) | Sequence genome | Components of | Gene accession IDs | Putative functions |
|-------------------|----------------|--------------|-------------------------|---------------------------------|--------------------|------------------|-----------------|---------------|--------------------|--------------------|
| SNP_97273_A_27884 | NW_004516715.1 | scaffold1531 | 27884                   | AA                              | TT                 | TT               | INTERGENIC      |               |                    |                    |
| SNP_97274_A_27941 | NW_004516715.1 | scaffold1531 | 27941                   | TT                              | CC                 | CC               | INTERGENIC      |               |                    |                    |
| SNP_97275_A_27959 | NW_004516715.1 | scaffold1531 | 27959                   | CC                              | GG                 | GG               | INTERGENIC      |               |                    |                    |
| SNP_97276_A_28008 | NW_004516715.1 | scaffold1531 | 28008                   | GG                              | AA                 | AA               | INTERGENIC      |               |                    |                    |
| SNP_97277_A_28034 | NW_004516715.1 | scaffold1531 | 28034                   | TT                              | CC                 | CC               | INTERGENIC      |               |                    |                    |
| SNP_97278_A_28138 | NW_004516715.1 | scaffold1531 | 28138                   | TT                              | AA                 | AA               | INTERGENIC      |               |                    |                    |
| SNP_97279_A_28145 | NW_004516715.1 | scaffold1531 | 28145                   | GG                              | AA                 | AA               | INTERGENIC      |               |                    |                    |
| SNP_97280_A_28175 | NW_004516715.1 | scaffold1531 | 28175                   | TT                              | GG                 | GG               | INTERGENIC      |               |                    |                    |
| SNP_97281_A_28187 | NW_004516715.1 | scaffold1531 | 28187                   | CC                              | AA                 | AA               | INTERGENIC      |               |                    |                    |
| SNP_97282_A_28363 | NW_004516715.1 | scaffold1531 | 28363                   | TT                              | GG                 | GG               | INTERGENIC      |               |                    |                    |
| SNP_97283_A_28435 | NW_004516715.1 | scaffold1531 | 28435                   | CC                              | AA                 | AA               | INTERGENIC      |               |                    |                    |
| SNP_97284_A_28443 | NW_004516715.1 | scaffold1531 | 28443                   | CC                              | AA                 | AA               | INTERGENIC      |               |                    |                    |
| SNP_97285_A_28494 | NW_004516715.1 | scaffold1531 | 28494                   | AA                              | GG                 | GG               | INTERGENIC      |               |                    |                    |
| SNP_97286_A_28528 | NW_004516715.1 | scaffold1531 | 28528                   | TT                              | CC                 | CC               | INTERGENIC      |               |                    |                    |
| SNP_97287_A_28531 | NW_004516715.1 | scaffold1531 | 28531                   | GG                              | AA                 | AA               | INTERGENIC      |               |                    |                    |
| SNP_97288_A_28564 | NW_004516715.1 | scaffold1531 | 28564                   | TT                              | AA                 | AA               | INTERGENIC      |               |                    |                    |
| SNP_97289_A_28579 | NW_004516715.1 | scaffold1531 | 28579                   | AA                              | CC                 | CC               | INTERGENIC      |               |                    |                    |
| SNP_97290_A_28589 | NW_004516715.1 | scaffold1531 | 28589                   | GG                              | TT                 | TT               | INTERGENIC      |               |                    |                    |
| SNP_97291_A_28623 | NW_004516715.1 | scaffold1531 | 28623                   | AA                              | TT                 | TT               | INTERGENIC      |               |                    |                    |
| SNP_97292_A_28644 | NW_004516715.1 | scaffold1531 | 28644                   | TT                              | GG                 | GG               | INTERGENIC      |               |                    |                    |
| SNP_97293_A_28790 | NW_004516715.1 | scaffold1531 | 28790                   | AA                              | GG                 | GG               | INTERGENIC      |               |                    |                    |
| SNP_97294_A_28795 | NW_004516715.1 | scaffold1531 | 28795                   | TT                              | CC                 | CC               | INTERGENIC      |               |                    |                    |



| SNPs IDs          | Chromosome IDs | Chromosomes  | Physical positions (bp) | CDC Frontier (Reference genome) | (Pusa 1103 & HPNB) | (ILWC 46 & LPNB) | Sequence genome | Components of | Gene accession IDs | Putative functions |
|-------------------|----------------|--------------|-------------------------|---------------------------------|--------------------|------------------|-----------------|---------------|--------------------|--------------------|
| SNP_97295_A_28908 | NW_004516715.1 | scaffold1531 | 28908                   | AA                              | GG                 | GG               | INTERGENIC      |               |                    |                    |
| SNP_97296_A_28925 | NW_004516715.1 | scaffold1531 | 28925                   | GG                              | CC                 | CC               | INTERGENIC      |               |                    |                    |
| SNP_97297_A_28972 | NW_004516715.1 | scaffold1531 | 28972                   | GG                              | AA                 | AA               | INTERGENIC      |               |                    |                    |
| SNP_97298_A_29017 | NW_004516715.1 | scaffold1531 | 29017                   | CC                              | TT                 | TT               | INTERGENIC      |               |                    |                    |
| SNP_97299_A_29064 | NW_004516715.1 | scaffold1531 | 29064                   | TT                              | CC                 | CC               | INTERGENIC      |               |                    |                    |
| SNP_97300_A_29106 | NW_004516715.1 | scaffold1531 | 29106                   | GG                              | AA                 | AA               | INTERGENIC      |               |                    |                    |
| SNP_97301_A_29133 | NW_004516715.1 | scaffold1531 | 29133                   | CC                              | TT                 | TT               | INTERGENIC      |               |                    |                    |
| SNP_97302_A_29158 | NW_004516715.1 | scaffold1531 | 29158                   | TT                              | AA                 | AA               | INTERGENIC      |               |                    |                    |
| SNP_97303_A_29214 | NW_004516715.1 | scaffold1531 | 29214                   | GG                              | TT                 | TT               | INTERGENIC      |               |                    |                    |
| SNP_97304_A_29221 | NW_004516715.1 | scaffold1531 | 29221                   | TT                              | AA                 | AA               | INTERGENIC      |               |                    |                    |
| SNP_97305_A_29265 | NW_004516715.1 | scaffold1531 | 29265                   | TT                              | AA                 | AA               | INTERGENIC      |               |                    |                    |
| SNP_97306_A_29276 | NW_004516715.1 | scaffold1531 | 29276                   | GG                              | AA                 | AA               | INTERGENIC      |               |                    |                    |
| SNP_97307_A_29327 | NW_004516715.1 | scaffold1531 | 29327                   | TT                              | GG                 | GG               | INTERGENIC      |               |                    |                    |
| SNP_97308_A_29344 | NW_004516715.1 | scaffold1531 | 29344                   | GG                              | CC                 | CC               | INTERGENIC      |               |                    |                    |
| SNP_97309_A_29362 | NW_004516715.1 | scaffold1531 | 29362                   | CC                              | GG                 | GG               | INTERGENIC      |               |                    |                    |
| SNP_97310_A_29403 | NW_004516715.1 | scaffold1531 | 29403                   | GG                              | CC                 | CC               | INTERGENIC      |               |                    |                    |
| SNP_97311_A_29421 | NW_004516715.1 | scaffold1531 | 29421                   | GG                              | CC                 | CC               | INTERGENIC      |               |                    |                    |
| SNP_97312_A_29423 | NW_004516715.1 | scaffold1531 | 29423                   | GG                              | AA                 | AA               | INTERGENIC      |               |                    |                    |
| SNP_97314_A_29460 | NW_004516715.1 | scaffold1531 | 29460                   | GG                              | TT                 | TT               | INTERGENIC      |               |                    |                    |
| SNP_97315_A_29509 | NW_004516715.1 | scaffold1531 | 29509                   | AA                              | TT                 | TT               | INTERGENIC      |               |                    |                    |
| SNP_97316_A_29605 | NW_004516715.1 | scaffold1531 | 29605                   | CC                              | TT                 | TT               | INTERGENIC      |               |                    |                    |
| SNP_97317_A_29606 | NW_004516715.1 | scaffold1531 | 29606                   | AA                              | GG                 | GG               | INTERGENIC      |               |                    |                    |

| SNPs IDs          | Chromosome IDs | Chromosomes  | Physical positions (bp) | CDC Frontier (Reference genome) | (Pusa 1103 & HPNB) | (ILWC 46 & LPNB) | Sequence genome | Components of | Gene accession IDs | Putative functions |
|-------------------|----------------|--------------|-------------------------|---------------------------------|--------------------|------------------|-----------------|---------------|--------------------|--------------------|
| SNP_97318_A_30003 | NW_004516715.1 | scaffold1531 | 30003                   | TT                              | AA                 | AA               | INTERGENIC      |               |                    |                    |
| SNP_97319_A_30234 | NW_004516715.1 | scaffold1531 | 30234                   | AA                              | GG                 | GG               | INTERGENIC      |               |                    |                    |
| SNP_97320_A_34785 | NW_004516715.1 | scaffold1531 | 34785                   | GG                              | AA                 | AA               | INTERGENIC      |               |                    |                    |
| SNP_97321_A_34799 | NW_004516715.1 | scaffold1531 | 34799                   | GG                              | AA                 | AA               | INTERGENIC      |               |                    |                    |
| SNP_97322_A_34841 | NW_004516715.1 | scaffold1531 | 34841                   | CC                              | TT                 | TT               | INTERGENIC      |               |                    |                    |
| SNP_97323_A_34931 | NW_004516715.1 | scaffold1531 | 34931                   | AA                              | TT                 | TT               | INTERGENIC      |               |                    |                    |
| SNP_97324_A_34957 | NW_004516715.1 | scaffold1531 | 34957                   | AA                              | TT                 | TT               | INTERGENIC      |               |                    |                    |
| SNP_97325_A_34989 | NW_004516715.1 | scaffold1531 | 34989                   | TT                              | CC                 | CC               | INTERGENIC      |               |                    |                    |
| SNP_97326_A_35117 | NW_004516715.1 | scaffold1531 | 35117                   | TT                              | CC                 | CC               | INTERGENIC      |               |                    |                    |
| SNP_97327_A_35143 | NW_004516715.1 | scaffold1531 | 35143                   | TT                              | GG                 | GG               | INTERGENIC      |               |                    |                    |
| SNP_97328_A_35192 | NW_004516715.1 | scaffold1531 | 35192                   | CC                              | TT                 | TT               | INTERGENIC      |               |                    |                    |
| SNP_97329_A_35245 | NW_004516715.1 | scaffold1531 | 35245                   | CC                              | AA                 | AA               | INTERGENIC      |               |                    |                    |
| SNP_97330_A_35602 | NW_004516715.1 | scaffold1531 | 35602                   | AA                              | CC                 | CC               | INTERGENIC      |               |                    |                    |
| SNP_97331_A_35650 | NW_004516715.1 | scaffold1531 | 35650                   | GG                              | TT                 | TT               | INTERGENIC      |               |                    |                    |
| SNP_97332_A_35654 | NW_004516715.1 | scaffold1531 | 35654                   | CC                              | TT                 | TT               | INTERGENIC      |               |                    |                    |
| SNP_97333_A_35684 | NW_004516715.1 | scaffold1531 | 35684                   | GG                              | AA                 | AA               | INTERGENIC      |               |                    |                    |
| SNP_97334_A_35733 | NW_004516715.1 | scaffold1531 | 35733                   | AA                              | GG                 | GG               | INTERGENIC      |               |                    |                    |
| SNP_97335_A_35817 | NW_004516715.1 | scaffold1531 | 35817                   | TT                              | CC                 | CC               | INTERGENIC      |               |                    |                    |
| SNP_97336_A_35831 | NW_004516715.1 | scaffold1531 | 35831                   | TT                              | AA                 | AA               | INTERGENIC      |               |                    |                    |
| SNP_97337_A_35838 | NW_004516715.1 | scaffold1531 | 35838                   | CC                              | GG                 | GG               | INTERGENIC      |               |                    |                    |
| SNP_97338_A_35879 | NW_004516715.1 | scaffold1531 | 35879                   | TT                              | CC                 | CC               | INTERGENIC      |               |                    |                    |
| SNP_97339_A_36028 | NW_004516715.1 | scaffold1531 | 36028                   | CC                              | GG                 | GG               | INTERGENIC      |               |                    |                    |

| SNPs IDs          | Chromosome IDs | Chromosomes  | Physical positions (bp) | CDC Frontier (Reference genome) | (Pusa 1103 & HPNB) | (ILWC 46 & LPNB) | Sequence genome | Components of | Gene accession IDs | Putative functions |
|-------------------|----------------|--------------|-------------------------|---------------------------------|--------------------|------------------|-----------------|---------------|--------------------|--------------------|
| SNP_97340_A_36119 | NW_004516715.1 | scaffold1531 | 36119                   | CC                              | GG                 | GG               | INTERGENIC      |               |                    |                    |
| SNP_97341_A_36129 | NW_004516715.1 | scaffold1531 | 36129                   | CC                              | AA                 | AA               | INTERGENIC      |               |                    |                    |
| SNP_97342_A_36252 | NW_004516715.1 | scaffold1531 | 36252                   | GG                              | AA                 | AA               | INTERGENIC      |               |                    |                    |
| SNP_97343_A_36269 | NW_004516715.1 | scaffold1531 | 36269                   | AA                              | TT                 | TT               | INTERGENIC      |               |                    |                    |
| SNP_97344_A_36289 | NW_004516715.1 | scaffold1531 | 36289                   | GG                              | TT                 | TT               | INTERGENIC      |               |                    |                    |
| SNP_97345_A_36292 | NW_004516715.1 | scaffold1531 | 36292                   | TT                              | AA                 | AA               | INTERGENIC      |               |                    |                    |
| SNP_97346_A_36586 | NW_004516715.1 | scaffold1531 | 36586                   | AA                              | GG                 | GG               | INTERGENIC      |               |                    |                    |
| SNP_97347_A_36590 | NW_004516715.1 | scaffold1531 | 36590                   | AA                              | GG                 | GG               | INTERGENIC      |               |                    |                    |
| SNP_97348_A_36591 | NW_004516715.1 | scaffold1531 | 36591                   | GG                              | TT                 | TT               | INTERGENIC      |               |                    |                    |
| SNP_97349_A_36690 | NW_004516715.1 | scaffold1531 | 36690                   | TT                              | CC                 | CC               | INTERGENIC      |               |                    |                    |
| SNP_97350_A_36738 | NW_004516715.1 | scaffold1531 | 36738                   | CC                              | GG                 | GG               | INTERGENIC      |               |                    |                    |
| SNP_97351_A_36824 | NW_004516715.1 | scaffold1531 | 36824                   | GG                              | TT                 | TT               | INTERGENIC      |               |                    |                    |
| SNP_97352_A_36873 | NW_004516715.1 | scaffold1531 | 36873                   | AA                              | TT                 | TT               | INTERGENIC      |               |                    |                    |
| SNP_97353_A_37166 | NW_004516715.1 | scaffold1531 | 37166                   | CC                              | TT                 | TT               | INTERGENIC      |               |                    |                    |
| SNP_97354_A_37226 | NW_004516715.1 | scaffold1531 | 37226                   | GG                              | AA                 | AA               | INTERGENIC      |               |                    |                    |
| SNP_97355_A_37778 | NW_004516715.1 | scaffold1531 | 37778                   | CC                              | TT                 | TT               | INTERGENIC      |               |                    |                    |
| SNP_97356_A_37814 | NW_004516715.1 | scaffold1531 | 37814                   | TT                              | CC                 | CC               | INTERGENIC      |               |                    |                    |
| SNP_97357_A_37909 | NW_004516715.1 | scaffold1531 | 37909                   | TT                              | GG                 | GG               | INTERGENIC      |               |                    |                    |
| SNP_97358_A_37964 | NW_004516715.1 | scaffold1531 | 37964                   | CC                              | TT                 | TT               | INTERGENIC      |               |                    |                    |
| SNP_97359_A_37978 | NW_004516715.1 | scaffold1531 | 37978                   | CC                              | TT                 | TT               | INTERGENIC      |               |                    |                    |
| SNP_97360_A_38017 | NW_004516715.1 | scaffold1531 | 38017                   | TT                              | CC                 | CC               | INTERGENIC      |               |                    |                    |
| SNP_97361_A_38044 | NW_004516715.1 | scaffold1531 | 38044                   | TT                              | CC                 | CC               | INTERGENIC      |               |                    |                    |

| SNPs IDs          | Chromosome IDs | Chromosomes  | Physical positions (bp) | CDC Frontier (Reference genome) | (Pusa 1103 & HPNB) | (ILWC 46 & LPNB) | Sequence genome | Components of | Gene accession IDs | Putative functions |
|-------------------|----------------|--------------|-------------------------|---------------------------------|--------------------|------------------|-----------------|---------------|--------------------|--------------------|
| SNP_97362_A_38156 | NW_004516715.1 | scaffold1531 | 38156                   | AA                              | TT                 | TT               | INTERGENIC      |               |                    |                    |
| SNP_97363_A_38239 | NW_004516715.1 | scaffold1531 | 38239                   | TT                              | CC                 | CC               | INTERGENIC      |               |                    |                    |
| SNP_97364_A_38258 | NW_004516715.1 | scaffold1531 | 38258                   | AA                              | TT                 | TT               | INTERGENIC      |               |                    |                    |
| SNP_97365_A_39409 | NW_004516715.1 | scaffold1531 | 39409                   | AA                              | GG                 | GG               | INTERGENIC      |               |                    |                    |
| SNP_97366_A_40573 | NW_004516715.1 | scaffold1531 | 40573                   | AA                              | GG                 | GG               | INTERGENIC      |               |                    |                    |
| SNP_97367_A_7992  | NW_004516716.1 | scaffold1532 | 7992                    | TT                              | AA                 | AA               | INTERGENIC      |               |                    |                    |
| SNP_97368_A_8283  | NW_004516716.1 | scaffold1532 | 8283                    | AA                              | CC                 | CC               | INTERGENIC      |               |                    |                    |
| SNP_97369_A_8308  | NW_004516716.1 | scaffold1532 | 8308                    | AA                              | GG                 | GG               | INTERGENIC      |               |                    |                    |
| SNP_97370_A_10243 | NW_004516716.1 | scaffold1532 | 10243                   | AA                              | GG                 | GG               | INTERGENIC      |               |                    |                    |
| SNP_97371_A_10280 | NW_004516716.1 | scaffold1532 | 10280                   | CC                              | TT                 | TT               | INTERGENIC      |               |                    |                    |
| SNP_97372_A_10288 | NW_004516716.1 | scaffold1532 | 10288                   | GG                              | AA                 | AA               | INTERGENIC      |               |                    |                    |
| SNP_97373_A_10348 | NW_004516716.1 | scaffold1532 | 10348                   | AA                              | GG                 | GG               | INTERGENIC      |               |                    |                    |
| SNP_97374_A_10527 | NW_004516716.1 | scaffold1532 | 10527                   | TT                              | CC                 | CC               | INTERGENIC      |               |                    |                    |
| SNP_97375_A_10541 | NW_004516716.1 | scaffold1532 | 10541                   | CC                              | GG                 | GG               | INTERGENIC      |               |                    |                    |
| SNP_97377_A_10685 | NW_004516716.1 | scaffold1532 | 10685                   | GG                              | CC                 | CC               | INTERGENIC      |               |                    |                    |
| SNP_97378_A_10703 | NW_004516716.1 | scaffold1532 | 10703                   | TT                              | AA                 | AA               | INTERGENIC      |               |                    |                    |
| SNP_97379_A_10823 | NW_004516716.1 | scaffold1532 | 10823                   | AA                              | GG                 | GG               | INTERGENIC      |               |                    |                    |
| SNP_97380_A_10849 | NW_004516716.1 | scaffold1532 | 10849                   | CC                              | TT                 | TT               | INTERGENIC      |               |                    |                    |
| SNP_97381_A_10855 | NW_004516716.1 | scaffold1532 | 10855                   | TT                              | AA                 | AA               | INTERGENIC      |               |                    |                    |
| SNP_97382_A_15772 | NW_004516716.1 | scaffold1532 | 15772                   | AA                              | GG                 | GG               | INTERGENIC      |               |                    |                    |
| SNP_97383_A_17484 | NW_004516716.1 | scaffold1532 | 17484                   | CC                              | TT                 | TT               | INTERGENIC      |               |                    |                    |
| SNP_97384_A_18526 | NW_004516716.1 | scaffold1532 | 18526                   | GG                              | AA                 | AA               | INTERGENIC      |               |                    |                    |

| SNPs IDs          | Chromosome IDs | Chromosomes  | Physical positions (bp) | CDC Frontier (Reference genome) | (Pusa 1103 & HPNB) | (ILWC 46 & LPNB) | Sequence genome | Components of | Gene accession IDs | Putative functions |
|-------------------|----------------|--------------|-------------------------|---------------------------------|--------------------|------------------|-----------------|---------------|--------------------|--------------------|
| SNP_97385_A_22154 | NW_004516716.1 | scaffold1532 | 22154                   | AA                              | GG                 | GG               | INTERGENIC      |               |                    |                    |
| SNP_97386_A_22161 | NW_004516716.1 | scaffold1532 | 22161                   | TT                              | CC                 | CC               | INTERGENIC      |               |                    |                    |
| SNP_97387_A_22176 | NW_004516716.1 | scaffold1532 | 22176                   | TT                              | CC                 | CC               | INTERGENIC      |               |                    |                    |
| SNP_97388_A_22182 | NW_004516716.1 | scaffold1532 | 22182                   | GG                              | AA                 | AA               | INTERGENIC      |               |                    |                    |
| SNP_97389_A_22188 | NW_004516716.1 | scaffold1532 | 22188                   | AA                              | GG                 | GG               | INTERGENIC      |               |                    |                    |
| SNP_97390_A_22190 | NW_004516716.1 | scaffold1532 | 22190                   | TT                              | CC                 | CC               | INTERGENIC      |               |                    |                    |
| SNP_97391_A_22209 | NW_004516716.1 | scaffold1532 | 22209                   | TT                              | CC                 | CC               | INTERGENIC      |               |                    |                    |
| SNP_97392_A_22606 | NW_004516716.1 | scaffold1532 | 22606                   | AA                              | GG                 | GG               | INTERGENIC      |               |                    |                    |
| SNP_97393_A_24826 | NW_004516716.1 | scaffold1532 | 24826                   | AA                              | CC                 | CC               | INTERGENIC      |               |                    |                    |
| SNP_97394_A_24851 | NW_004516716.1 | scaffold1532 | 24851                   | CC                              | TT                 | TT               | INTERGENIC      |               |                    |                    |
| SNP_97395_A_25161 | NW_004516716.1 | scaffold1532 | 25161                   | CC                              | TT                 | TT               | INTERGENIC      |               |                    |                    |
| SNP_97396_A_25182 | NW_004516716.1 | scaffold1532 | 25182                   | GG                              | TT                 | TT               | INTERGENIC      |               |                    |                    |
| SNP_97397_A_25211 | NW_004516716.1 | scaffold1532 | 25211                   | GG                              | AA                 | AA               | INTERGENIC      |               |                    |                    |
| SNP_97398_A_25236 | NW_004516716.1 | scaffold1532 | 25236                   | TT                              | CC                 | CC               | INTERGENIC      |               |                    |                    |
| SNP_97399_A_25248 | NW_004516716.1 | scaffold1532 | 25248                   | GG                              | TT                 | TT               | INTERGENIC      |               |                    |                    |
| SNP_97400_A_25270 | NW_004516716.1 | scaffold1532 | 25270                   | GG                              | AA                 | AA               | INTERGENIC      |               |                    |                    |
| SNP_97401_A_25298 | NW_004516716.1 | scaffold1532 | 25298                   | TT                              | CC                 | CC               | INTERGENIC      |               |                    |                    |
| SNP_97402_A_25299 | NW_004516716.1 | scaffold1532 | 25299                   | TT                              | CC                 | CC               | INTERGENIC      |               |                    |                    |
| SNP_97403_A_25348 | NW_004516716.1 | scaffold1532 | 25348                   | TT                              | AA                 | AA               | INTERGENIC      |               |                    |                    |
| SNP_97404_A_25466 | NW_004516716.1 | scaffold1532 | 25466                   | CC                              | TT                 | TT               | INTERGENIC      |               |                    |                    |
| SNP_97405_A_25899 | NW_004516716.1 | scaffold1532 | 25899                   | GG                              | TT                 | TT               | INTERGENIC      |               |                    |                    |
| SNP_97406_A_26119 | NW_004516716.1 | scaffold1532 | 26119                   | AA                              | TT                 | TT               | INTERGENIC      |               |                    |                    |

| SNPs IDs          | Chromosome IDs | Chromosomes  | Physical positions (bp) | CDC Frontier (Reference genome) | (Pusa 1103 & HPNB) | (ILWC 46 & LPNB) | Sequence Components of genome | Gene accession IDs | Putative functions |
|-------------------|----------------|--------------|-------------------------|---------------------------------|--------------------|------------------|-------------------------------|--------------------|--------------------|
| SNP_97407_A_26127 | NW_004516716.1 | scaffold1532 | 26127                   | TT                              | AA                 | AA               | INTERGENIC                    |                    |                    |
| SNP_97408_A_26362 | NW_004516716.1 | scaffold1532 | 26362                   | AA                              | TT                 | TT               | INTERGENIC                    |                    |                    |
| SNP_97409_A_29066 | NW_004516716.1 | scaffold1532 | 29066                   | GG                              | TT                 | TT               | INTERGENIC                    |                    |                    |
| SNP_97410_A_29105 | NW_004516716.1 | scaffold1532 | 29105                   | GG                              | AA                 | AA               | INTERGENIC                    |                    |                    |
| SNP_97411_A_29532 | NW_004516716.1 | scaffold1532 | 29532                   | TT                              | CC                 | CC               | INTERGENIC                    |                    |                    |
| SNP_97412_A_32814 | NW_004516716.1 | scaffold1532 | 32814                   | GG                              | TT                 | TT               | INTERGENIC                    |                    |                    |
| SNP_97413_A_45468 | NW_004516716.1 | scaffold1532 | 45468                   | CC                              | GG                 | GG               | INTERGENIC                    |                    |                    |
| SNP_97414_A_57881 | NW_004516716.1 | scaffold1532 | 57881                   | GG                              | TT                 | TT               | INTERGENIC                    |                    |                    |
| SNP_97415_A_65493 | NW_004516716.1 | scaffold1532 | 65493                   | CC                              | TT                 | TT               | INTERGENIC                    |                    |                    |
| SNP_97417_A_72912 | NW_004516716.1 | scaffold1532 | 72912                   | TT                              | CC                 | CC               | INTERGENIC                    |                    |                    |
| SNP_97418_A_82048 | NW_004516716.1 | scaffold1532 | 82048                   | CC                              | TT                 | TT               | INTERGENIC                    |                    |                    |
| SNP_97419_A_82069 | NW_004516716.1 | scaffold1532 | 82069                   | AA                              | CC                 | CC               | INTERGENIC                    |                    |                    |
| SNP_97420_A_82073 | NW_004516716.1 | scaffold1532 | 82073                   | TT                              | GG                 | GG               | INTERGENIC                    |                    |                    |
| SNP_97421_A_6734  | NW_004516717.1 | scaffold1533 | 6734                    | AA                              | GG                 | GG               | INTERGENIC                    |                    |                    |
| SNP_97422_A_11378 | NW_004516717.1 | scaffold1533 | 11378                   | CC                              | TT                 | TT               | INTERGENIC                    |                    |                    |
| SNP_97423_A_11385 | NW_004516717.1 | scaffold1533 | 11385                   | AA                              | CC                 | CC               | INTERGENIC                    |                    |                    |
| SNP_97424_A_11571 | NW_004516717.1 | scaffold1533 | 11571                   | AA                              | GG                 | GG               | INTERGENIC                    |                    |                    |
| SNP_97425_A_14484 | NW_004516717.1 | scaffold1533 | 14484                   | CC                              | TT                 | TT               | INTRON                        | 101512821          | Unknown function   |
| SNP_97426_A_14903 | NW_004516717.1 | scaffold1533 | 14903                   | AA                              | TT                 | TT               | INTRON                        | 101512821          | Unknown function   |
| SNP_97427_A_28342 | NW_004516717.1 | scaffold1533 | 28342                   | GG                              | TT                 | TT               | INTRON                        | 101512821          | Unknown function   |
| SNP_97430_A_65430 | NW_004516717.1 | scaffold1533 | 65430                   | AA                              | GG                 | GG               | INTRON                        | 101512821          | Unknown function   |
| SNP_97431_A_72467 | NW_004516717.1 | scaffold1533 | 72467                   | TT                              | CC                 | CC               | INTERGENIC                    |                    |                    |

| SNPs IDs           | Chromosome IDs | Chromosomes  | Physical positions (bp) | CDC Frontier (Reference genome) | (Pusa 1103 & HPNB) | (ILWC 46 & LPNB) | Sequence genome | Components of | Gene accession IDs                                        | Putative functions |
|--------------------|----------------|--------------|-------------------------|---------------------------------|--------------------|------------------|-----------------|---------------|-----------------------------------------------------------|--------------------|
| SNP_97432_A_73857  | NW_004516717.1 | scaffold1533 | 73857                   | AA                              | GG                 | GG               | INTERGENIC      |               |                                                           |                    |
| SNP_97433_A_84738  | NW_004516717.1 | scaffold1533 | 84738                   | AA                              | GG                 | GG               | INTERGENIC      |               |                                                           |                    |
| SNP_97434_A_84748  | NW_004516717.1 | scaffold1533 | 84748                   | TT                              | CC                 | CC               | INTERGENIC      |               |                                                           |                    |
| SNP_97435_A_88920  | NW_004516717.1 | scaffold1533 | 88920                   | CC                              | TT                 | TT               | INTERGENIC      |               |                                                           |                    |
| SNP_97436_A_88972  | NW_004516717.1 | scaffold1533 | 88972                   | AA                              | CC                 | CC               | INTERGENIC      |               |                                                           |                    |
| SNP_97437_A_89089  | NW_004516717.1 | scaffold1533 | 89089                   | TT                              | GG                 | GG               | INTERGENIC      |               |                                                           |                    |
| SNP_97438_A_89332  | NW_004516717.1 | scaffold1533 | 89332                   | CC                              | TT                 | TT               | INTERGENIC      |               |                                                           |                    |
| SNP_97439_A_89982  | NW_004516717.1 | scaffold1533 | 89982                   | TT                              | CC                 | CC               | INTERGENIC      |               |                                                           |                    |
| SNP_97440_A_134928 | NW_004516717.1 | scaffold1533 | 134928                  | TT                              | GG                 | GG               | INTERGENIC      |               |                                                           |                    |
| SNP_97441_A_134952 | NW_004516717.1 | scaffold1533 | 134952                  | GG                              | AA                 | AA               | INTERGENIC      |               |                                                           |                    |
| SNP_97442_A_135156 | NW_004516717.1 | scaffold1533 | 135156                  | AA                              | GG                 | GG               | INTERGENIC      |               |                                                           |                    |
| SNP_97443_A_135263 | NW_004516717.1 | scaffold1533 | 135263                  | TT                              | CC                 | CC               | INTERGENIC      |               |                                                           |                    |
| SNP_97444_A_3034   | NW_004516718.1 | scaffold1535 | 3034                    | CC                              | GG                 | GG               | URR             | 101513150     | L-type lectin-domain containing receptor kinase IX.1-like |                    |
| SNP_97445_A_442    | NW_004516720.1 | scaffold1542 | 442                     | AA                              | GG                 | GG               | INTERGENIC      |               |                                                           |                    |
| SNP_97446_A_7035   | NW_004516720.1 | scaffold1542 | 7035                    | TT                              | AA                 | AA               | INTERGENIC      |               |                                                           |                    |
| SNP_97447_A_328    | NW_004516721.1 | scaffold1543 | 328                     | GG                              | TT                 | TT               | INTERGENIC      |               |                                                           |                    |
| SNP_97448_A_644    | NW_004516722.1 | scaffold1544 | 644                     | TT                              | AA                 | AA               | INTERGENIC      |               |                                                           |                    |
| SNP_97449_A_782    | NW_004516722.1 | scaffold1544 | 782                     | TT                              | GG                 | GG               | INTERGENIC      |               |                                                           |                    |
| SNP_97450_A_830    | NW_004516722.1 | scaffold1544 | 830                     | CC                              | AA                 | AA               | INTERGENIC      |               |                                                           |                    |
| SNP_97451_A_1190   | NW_004516722.1 | scaffold1544 | 1190                    | TT                              | AA                 | AA               | INTERGENIC      |               |                                                           |                    |
| SNP_97452_A_1191   | NW_004516722.1 | scaffold1544 | 1191                    | GG                              | TT                 | TT               | INTERGENIC      |               |                                                           |                    |
| SNP_97453_A_1589   | NW_004516722.1 | scaffold1544 | 1589                    | AA                              | GG                 | GG               | INTERGENIC      |               |                                                           |                    |

| SNPs IDs          | Chromosome IDs | Chromosomes  | Physical positions (bp) | CDC Frontier (Reference genome) | (Pusa 1103 & HPNB) | (ILWC 46 & LPNB) | Sequence genome | Components of | Gene accession IDs | Putative functions |
|-------------------|----------------|--------------|-------------------------|---------------------------------|--------------------|------------------|-----------------|---------------|--------------------|--------------------|
| SNP_97454_A_1656  | NW_004516722.1 | scaffold1544 | 1656                    | AA                              | TT                 | TT               | INTERGENIC      |               |                    |                    |
| SNP_97455_A_1679  | NW_004516722.1 | scaffold1544 | 1679                    | CC                              | TT                 | TT               | INTERGENIC      |               |                    |                    |
| SNP_97456_A_1705  | NW_004516722.1 | scaffold1544 | 1705                    | TT                              | CC                 | CC               | INTERGENIC      |               |                    |                    |
| SNP_97457_A_1767  | NW_004516722.1 | scaffold1544 | 1767                    | AA                              | CC                 | CC               | INTERGENIC      |               |                    |                    |
| SNP_97458_A_2411  | NW_004516722.1 | scaffold1544 | 2411                    | GG                              | AA                 | AA               | INTERGENIC      |               |                    |                    |
| SNP_97459_A_2527  | NW_004516722.1 | scaffold1544 | 2527                    | TT                              | CC                 | CC               | INTERGENIC      |               |                    |                    |
| SNP_97460_A_2804  | NW_004516722.1 | scaffold1544 | 2804                    | AA                              | GG                 | GG               | INTERGENIC      |               |                    |                    |
| SNP_97461_A_2874  | NW_004516722.1 | scaffold1544 | 2874                    | GG                              | AA                 | AA               | INTERGENIC      |               |                    |                    |
| SNP_97462_A_9076  | NW_004516722.1 | scaffold1544 | 9076                    | TT                              | GG                 | GG               | INTERGENIC      |               |                    |                    |
| SNP_97463_A_9127  | NW_004516722.1 | scaffold1544 | 9127                    | CC                              | GG                 | GG               | INTERGENIC      |               |                    |                    |
| SNP_97464_A_9308  | NW_004516722.1 | scaffold1544 | 9308                    | AA                              | TT                 | TT               | INTERGENIC      |               |                    |                    |
| SNP_97465_A_9549  | NW_004516722.1 | scaffold1544 | 9549                    | TT                              | AA                 | AA               | INTERGENIC      |               |                    |                    |
| SNP_97466_A_14187 | NW_004516722.1 | scaffold1544 | 14187                   | AA                              | GG                 | GG               | INTERGENIC      |               |                    |                    |
| SNP_97467_A_14214 | NW_004516722.1 | scaffold1544 | 14214                   | GG                              | AA                 | AA               | INTERGENIC      |               |                    |                    |
| SNP_97468_A_14401 | NW_004516722.1 | scaffold1544 | 14401                   | AA                              | TT                 | TT               | INTERGENIC      |               |                    |                    |
| SNP_97469_A_14576 | NW_004516722.1 | scaffold1544 | 14576                   | GG                              | CC                 | CC               | INTERGENIC      |               |                    |                    |
| SNP_97471_A_14944 | NW_004516722.1 | scaffold1544 | 14944                   | TT                              | CC                 | CC               | INTERGENIC      |               |                    |                    |
| SNP_97472_A_39685 | NW_004516723.1 | scaffold1545 | 39685                   | AA                              | GG                 | GG               | INTERGENIC      |               |                    |                    |
| SNP_97473_A_40031 | NW_004516723.1 | scaffold1545 | 40031                   | AA                              | GG                 | GG               | INTERGENIC      |               |                    |                    |
| SNP_97474_A_60755 | NW_004516723.1 | scaffold1545 | 60755                   | TT                              | CC                 | CC               | INTERGENIC      |               |                    |                    |
| SNP_97475_A_81342 | NW_004516723.1 | scaffold1545 | 81342                   | AA                              | TT                 | TT               | INTERGENIC      |               |                    |                    |
| SNP_97476_A_81343 | NW_004516723.1 | scaffold1545 | 81343                   | GG                              | AA                 | AA               | INTERGENIC      |               |                    |                    |



| SNPs IDs           | Chromosome IDs | Chromosomes  | Physical positions (bp) | CDC Frontier (Reference genome) | (Pusa 1103 & HPNB) | (ILWC 46 & LPNB) | Sequence Components of genome | Gene accession IDs | Putative functions                   |
|--------------------|----------------|--------------|-------------------------|---------------------------------|--------------------|------------------|-------------------------------|--------------------|--------------------------------------|
| SNP_97477_A_81400  | NW_004516723.1 | scaffold1545 | 81400                   | GG                              | CC                 | CC               | INTERGENIC                    |                    |                                      |
| SNP_97478_A_81406  | NW_004516723.1 | scaffold1545 | 81406                   | TT                              | CC                 | CC               | INTERGENIC                    |                    |                                      |
| SNP_97479_A_81521  | NW_004516723.1 | scaffold1545 | 81521                   | AA                              | GG                 | GG               | INTERGENIC                    |                    |                                      |
| SNP_97480_A_81569  | NW_004516723.1 | scaffold1545 | 81569                   | AA                              | GG                 | GG               | INTERGENIC                    |                    |                                      |
| SNP_97481_A_81648  | NW_004516723.1 | scaffold1545 | 81648                   | AA                              | GG                 | GG               | INTERGENIC                    |                    |                                      |
| SNP_97482_A_81661  | NW_004516723.1 | scaffold1545 | 81661                   | CC                              | GG                 | GG               | INTERGENIC                    |                    |                                      |
| SNP_97483_A_81665  | NW_004516723.1 | scaffold1545 | 81665                   | TT                              | GG                 | GG               | INTERGENIC                    |                    |                                      |
| SNP_97484_A_81699  | NW_004516723.1 | scaffold1545 | 81699                   | AA                              | GG                 | GG               | INTERGENIC                    |                    |                                      |
| SNP_97485_A_81763  | NW_004516723.1 | scaffold1545 | 81763                   | TT                              | GG                 | GG               | INTERGENIC                    |                    |                                      |
| SNP_97486_A_81779  | NW_004516723.1 | scaffold1545 | 81779                   | TT                              | CC                 | CC               | INTERGENIC                    |                    |                                      |
| SNP_97487_A_81786  | NW_004516723.1 | scaffold1545 | 81786                   | TT                              | CC                 | CC               | INTERGENIC                    |                    |                                      |
| SNP_97488_A_81787  | NW_004516723.1 | scaffold1545 | 81787                   | TT                              | GG                 | GG               | INTERGENIC                    |                    |                                      |
| SNP_97489_A_81790  | NW_004516723.1 | scaffold1545 | 81790                   | GG                              | AA                 | AA               | INTERGENIC                    |                    |                                      |
| SNP_97490_A_81791  | NW_004516723.1 | scaffold1545 | 81791                   | AA                              | GG                 | GG               | INTERGENIC                    |                    |                                      |
| SNP_97491_A_81797  | NW_004516723.1 | scaffold1545 | 81797                   | TT                              | AA                 | AA               | INTERGENIC                    |                    |                                      |
| SNP_97492_A_81813  | NW_004516723.1 | scaffold1545 | 81813                   | AA                              | TT                 | TT               | INTERGENIC                    |                    |                                      |
| SNP_97493_A_81855  | NW_004516723.1 | scaffold1545 | 81855                   | AA                              | GG                 | GG               | INTERGENIC                    |                    |                                      |
| SNP_97494_A_81874  | NW_004516723.1 | scaffold1545 | 81874                   | AA                              | TT                 | TT               | INTERGENIC                    |                    |                                      |
| SNP_97496_A_105061 | NW_004516723.1 | scaffold1545 | 105061                  | CC                              | TT                 | TT               | INTERGENIC                    |                    |                                      |
| SNP_97497_A_192180 | NW_004516723.1 | scaffold1545 | 192180                  | GG                              | AA                 | AA               | INTERGENIC                    |                    |                                      |
| SNP_97498_A_225105 | NW_004516723.1 | scaffold1545 | 225105                  | GG                              | TT                 | TT               | NON_SYNONYMOUS_CODING         | 101515103          | mitochondrial protein pet191 homolog |
| SNP_97499_A_237472 | NW_004516723.1 | scaffold1545 | 237472                  | CC                              | AA                 | AA               | URR                           | 101515428          | uncharacterized LOC101515428         |

| SNPs IDs           | Chromosome IDs | Chromosomes  | Physical positions (bp) | CDC Frontier (Reference genome) | (Pusa 1103 & HPNB) | (ILWC 46 & LPNB) | Sequence Components of genome | Gene accession IDs | Putative functions           |
|--------------------|----------------|--------------|-------------------------|---------------------------------|--------------------|------------------|-------------------------------|--------------------|------------------------------|
| SNP_97500_A_237498 | NW_004516723.1 | scaffold1545 | 237498                  | TT                              | CC                 | CC               | URR                           | 101515428          | uncharacterized LOC101515428 |
| SNP_97501_A_237523 | NW_004516723.1 | scaffold1545 | 237523                  | AA                              | CC                 | CC               | URR                           | 101515428          | uncharacterized LOC101515428 |
| SNP_97502_A_268651 | NW_004516723.1 | scaffold1545 | 268651                  | CC                              | GG                 | GG               | INTERGENIC                    |                    |                              |
| SNP_97503_A_269162 | NW_004516723.1 | scaffold1545 | 269162                  | CC                              | AA                 | AA               | INTERGENIC                    |                    |                              |
| SNP_97504_A_288438 | NW_004516723.1 | scaffold1545 | 288438                  | AA                              | GG                 | GG               | INTERGENIC                    |                    |                              |
| SNP_97505_A_288461 | NW_004516723.1 | scaffold1545 | 288461                  | GG                              | CC                 | CC               | INTERGENIC                    |                    |                              |
| SNP_97506_A_76904  | NW_004516724.1 | scaffold1546 | 76904                   | GG                              | AA                 | AA               | INTERGENIC                    |                    |                              |
| SNP_97507_A_114119 | NW_004516724.1 | scaffold1546 | 114119                  | CC                              | AA                 | AA               | INTERGENIC                    |                    |                              |
| SNP_97508_A_127817 | NW_004516724.1 | scaffold1546 | 127817                  | GG                              | TT                 | TT               | INTERGENIC                    |                    |                              |
| SNP_97509_A_134708 | NW_004516724.1 | scaffold1546 | 134708                  | CC                              | TT                 | TT               | INTERGENIC                    |                    |                              |
| SNP_97510_A_137758 | NW_004516724.1 | scaffold1546 | 137758                  | CC                              | TT                 | TT               | INTERGENIC                    |                    |                              |
| SNP_97511_A_141049 | NW_004516724.1 | scaffold1546 | 141049                  | TT                              | GG                 | GG               | INTERGENIC                    |                    |                              |
| SNP_97512_A_141056 | NW_004516724.1 | scaffold1546 | 141056                  | GG                              | CC                 | CC               | INTERGENIC                    |                    |                              |
| SNP_97513_A_141062 | NW_004516724.1 | scaffold1546 | 141062                  | GG                              | AA                 | AA               | INTERGENIC                    |                    |                              |
| SNP_97514_A_141064 | NW_004516724.1 | scaffold1546 | 141064                  | AA                              | TT                 | TT               | INTERGENIC                    |                    |                              |
| SNP_97515_A_141072 | NW_004516724.1 | scaffold1546 | 141072                  | GG                              | AA                 | AA               | INTERGENIC                    |                    |                              |
| SNP_97516_A_141086 | NW_004516724.1 | scaffold1546 | 141086                  | CC                              | AA                 | AA               | INTERGENIC                    |                    |                              |
| SNP_97517_A_141115 | NW_004516724.1 | scaffold1546 | 141115                  | GG                              | TT                 | TT               | INTERGENIC                    |                    |                              |
| SNP_97518_A_141122 | NW_004516724.1 | scaffold1546 | 141122                  | AA                              | GG                 | GG               | INTERGENIC                    |                    |                              |
| SNP_97519_A_141381 | NW_004516724.1 | scaffold1546 | 141381                  | TT                              | GG                 | GG               | INTERGENIC                    |                    |                              |
| SNP_97520_A_141430 | NW_004516724.1 | scaffold1546 | 141430                  | CC                              | TT                 | TT               | INTERGENIC                    |                    |                              |
| SNP_97521_A_141503 | NW_004516724.1 | scaffold1546 | 141503                  | AA                              | GG                 | GG               | INTERGENIC                    |                    |                              |

| SNPs IDs           | Chromosome IDs | Chromosomes  | Physical positions (bp) | CDC Frontier (Reference genome) | (Pusa 1103 & HPNB) | (ILWC 46 & LPNB) | Sequence genome | Components of | Gene accession IDs | Putative functions |
|--------------------|----------------|--------------|-------------------------|---------------------------------|--------------------|------------------|-----------------|---------------|--------------------|--------------------|
| SNP_97522_A_141511 | NW_004516724.1 | scaffold1546 | 141511                  | TT                              | CC                 | CC               | INTERGENIC      |               |                    |                    |
| SNP_97523_A_141516 | NW_004516724.1 | scaffold1546 | 141516                  | GG                              | AA                 | AA               | INTERGENIC      |               |                    |                    |
| SNP_97524_A_141772 | NW_004516724.1 | scaffold1546 | 141772                  | GG                              | AA                 | AA               | INTERGENIC      |               |                    |                    |
| SNP_97525_A_141776 | NW_004516724.1 | scaffold1546 | 141776                  | AA                              | TT                 | TT               | INTERGENIC      |               |                    |                    |
| SNP_97527_A_1173   | NW_004516726.1 | scaffold1548 | 1173                    | AA                              | GG                 | GG               | INTERGENIC      |               |                    |                    |
| SNP_97528_A_1469   | NW_004516726.1 | scaffold1548 | 1469                    | GG                              | TT                 | TT               | INTERGENIC      |               |                    |                    |
| SNP_97529_A_1557   | NW_004516726.1 | scaffold1548 | 1557                    | AA                              | TT                 | TT               | INTERGENIC      |               |                    |                    |
| SNP_97530_A_1732   | NW_004516726.1 | scaffold1548 | 1732                    | TT                              | CC                 | CC               | INTERGENIC      |               |                    |                    |
| SNP_97531_A_11023  | NW_004516726.1 | scaffold1548 | 11023                   | AA                              | TT                 | TT               | INTERGENIC      |               |                    |                    |
| SNP_97532_A_11187  | NW_004516726.1 | scaffold1548 | 11187                   | CC                              | TT                 | TT               | INTERGENIC      |               |                    |                    |
| SNP_97533_A_11283  | NW_004516726.1 | scaffold1548 | 11283                   | CC                              | TT                 | TT               | INTERGENIC      |               |                    |                    |
| SNP_97534_A_11314  | NW_004516726.1 | scaffold1548 | 11314                   | AA                              | GG                 | GG               | INTERGENIC      |               |                    |                    |
| SNP_97535_A_15102  | NW_004516726.1 | scaffold1548 | 15102                   | GG                              | AA                 | AA               | INTERGENIC      |               |                    |                    |
| SNP_97536_A_15339  | NW_004516726.1 | scaffold1548 | 15339                   | CC                              | AA                 | AA               | INTERGENIC      |               |                    |                    |
| SNP_97537_A_15422  | NW_004516726.1 | scaffold1548 | 15422                   | TT                              | GG                 | GG               | INTERGENIC      |               |                    |                    |
| SNP_97538_A_15467  | NW_004516726.1 | scaffold1548 | 15467                   | AA                              | CC                 | CC               | INTERGENIC      |               |                    |                    |
| SNP_97539_A_15490  | NW_004516726.1 | scaffold1548 | 15490                   | AA                              | TT                 | TT               | INTERGENIC      |               |                    |                    |
| SNP_97540_A_20187  | NW_004516726.1 | scaffold1548 | 20187                   | CC                              | TT                 | TT               | INTERGENIC      |               |                    |                    |
| SNP_97541_A_20264  | NW_004516726.1 | scaffold1548 | 20264                   | TT                              | CC                 | CC               | INTERGENIC      |               |                    |                    |
| SNP_97542_A_20478  | NW_004516726.1 | scaffold1548 | 20478                   | CC                              | TT                 | TT               | INTERGENIC      |               |                    |                    |
| SNP_97543_A_27048  | NW_004516726.1 | scaffold1548 | 27048                   | TT                              | CC                 | CC               | INTERGENIC      |               |                    |                    |
| SNP_97544_A_27407  | NW_004516726.1 | scaffold1548 | 27407                   | TT                              | CC                 | CC               | INTERGENIC      |               |                    |                    |

| SNPs IDs          | Chromosome IDs | Chromosomes  | Physical positions (bp) | CDC Frontier (Reference genome) | (Pusa 1103 & HPNB) | (ILWC 46 & LPNB) | Sequence genome | Components of | Gene accession IDs | Putative functions |
|-------------------|----------------|--------------|-------------------------|---------------------------------|--------------------|------------------|-----------------|---------------|--------------------|--------------------|
| SNP_97545_A_27590 | NW_004516726.1 | scaffold1548 | 27590                   | CC                              | TT                 | TT               | INTERGENIC      |               |                    |                    |
| SNP_97546_A_27731 | NW_004516726.1 | scaffold1548 | 27731                   | GG                              | AA                 | AA               | INTERGENIC      |               |                    |                    |
| SNP_97547_A_5792  | NW_004516728.1 | scaffold1550 | 5792                    | AA                              | GG                 | GG               | INTERGENIC      |               |                    |                    |
| SNP_97548_A_5795  | NW_004516728.1 | scaffold1550 | 5795                    | GG                              | TT                 | TT               | INTERGENIC      |               |                    |                    |
| SNP_97549_A_16376 | NW_004516728.1 | scaffold1550 | 16376                   | CC                              | TT                 | TT               | INTERGENIC      |               |                    |                    |
| SNP_97550_A_16785 | NW_004516728.1 | scaffold1550 | 16785                   | TT                              | GG                 | GG               | INTERGENIC      |               |                    |                    |
| SNP_97551_A_18104 | NW_004516728.1 | scaffold1550 | 18104                   | AA                              | GG                 | GG               | INTERGENIC      |               |                    |                    |
| SNP_97552_A_18336 | NW_004516728.1 | scaffold1550 | 18336                   | AA                              | TT                 | TT               | INTERGENIC      |               |                    |                    |
| SNP_97553_A_18351 | NW_004516728.1 | scaffold1550 | 18351                   | GG                              | TT                 | TT               | INTERGENIC      |               |                    |                    |
| SNP_97554_A_43159 | NW_004516728.1 | scaffold1550 | 43159                   | TT                              | CC                 | CC               | INTERGENIC      |               |                    |                    |
| SNP_97555_A_43470 | NW_004516728.1 | scaffold1550 | 43470                   | CC                              | TT                 | TT               | INTERGENIC      |               |                    |                    |
| SNP_97556_A_43658 | NW_004516728.1 | scaffold1550 | 43658                   | TT                              | GG                 | GG               | INTERGENIC      |               |                    |                    |
| SNP_97557_A_43715 | NW_004516728.1 | scaffold1550 | 43715                   | GG                              | AA                 | AA               | INTERGENIC      |               |                    |                    |
| SNP_97558_A_43766 | NW_004516728.1 | scaffold1550 | 43766                   | AA                              | CC                 | CC               | INTERGENIC      |               |                    |                    |
| SNP_97559_A_43768 | NW_004516728.1 | scaffold1550 | 43768                   | AA                              | GG                 | GG               | INTERGENIC      |               |                    |                    |
| SNP_97560_A_43804 | NW_004516728.1 | scaffold1550 | 43804                   | AA                              | GG                 | GG               | INTERGENIC      |               |                    |                    |
| SNP_97561_A_43889 | NW_004516728.1 | scaffold1550 | 43889                   | CC                              | AA                 | AA               | INTERGENIC      |               |                    |                    |
| SNP_97562_A_43907 | NW_004516728.1 | scaffold1550 | 43907                   | AA                              | GG                 | GG               | INTERGENIC      |               |                    |                    |
| SNP_97563_A_44137 | NW_004516728.1 | scaffold1550 | 44137                   | AA                              | TT                 | TT               | INTERGENIC      |               |                    |                    |
| SNP_97564_A_44240 | NW_004516728.1 | scaffold1550 | 44240                   | AA                              | GG                 | GG               | INTERGENIC      |               |                    |                    |
| SNP_97565_A_44277 | NW_004516728.1 | scaffold1550 | 44277                   | TT                              | AA                 | AA               | INTERGENIC      |               |                    |                    |
| SNP_97567_A_44394 | NW_004516728.1 | scaffold1550 | 44394                   | TT                              | CC                 | CC               | INTERGENIC      |               |                    |                    |

| SNPs IDs           | Chromosome IDs | Chromosomes  | Physical positions (bp) | CDC Frontier (Reference genome) | (Pusa 1103 & HPNB) | (ILWC 46 & LPNB) | Sequence genome | Components of | Gene accession IDs | Putative functions |
|--------------------|----------------|--------------|-------------------------|---------------------------------|--------------------|------------------|-----------------|---------------|--------------------|--------------------|
| SNP_97568_A_44511  | NW_004516728.1 | scaffold1550 | 44511                   | AA                              | CC                 | CC               | INTERGENIC      |               |                    |                    |
| SNP_97569_A_44512  | NW_004516728.1 | scaffold1550 | 44512                   | CC                              | AA                 | AA               | INTERGENIC      |               |                    |                    |
| SNP_97570_A_49213  | NW_004516728.1 | scaffold1550 | 49213                   | AA                              | CC                 | CC               | INTERGENIC      |               |                    |                    |
| SNP_97571_A_49221  | NW_004516728.1 | scaffold1550 | 49221                   | TT                              | GG                 | GG               | INTERGENIC      |               |                    |                    |
| SNP_97572_A_49266  | NW_004516728.1 | scaffold1550 | 49266                   | TT                              | CC                 | CC               | INTERGENIC      |               |                    |                    |
| SNP_97573_A_49267  | NW_004516728.1 | scaffold1550 | 49267                   | AA                              | TT                 | TT               | INTERGENIC      |               |                    |                    |
| SNP_97574_A_49398  | NW_004516728.1 | scaffold1550 | 49398                   | CC                              | TT                 | TT               | INTERGENIC      |               |                    |                    |
| SNP_97575_A_53031  | NW_004516728.1 | scaffold1550 | 53031                   | AA                              | GG                 | GG               | INTERGENIC      |               |                    |                    |
| SNP_97576_A_53172  | NW_004516728.1 | scaffold1550 | 53172                   | AA                              | CC                 | CC               | INTERGENIC      |               |                    |                    |
| SNP_97577_A_53515  | NW_004516728.1 | scaffold1550 | 53515                   | AA                              | CC                 | CC               | INTERGENIC      |               |                    |                    |
| SNP_97578_A_53527  | NW_004516728.1 | scaffold1550 | 53527                   | AA                              | GG                 | GG               | INTERGENIC      |               |                    |                    |
| SNP_97579_A_55579  | NW_004516728.1 | scaffold1550 | 55579                   | TT                              | AA                 | AA               | INTERGENIC      |               |                    |                    |
| SNP_97580_A_55582  | NW_004516728.1 | scaffold1550 | 55582                   | AA                              | GG                 | GG               | INTERGENIC      |               |                    |                    |
| SNP_97582_A_62083  | NW_004516728.1 | scaffold1550 | 62083                   | AA                              | TT                 | TT               | INTERGENIC      |               |                    |                    |
| SNP_97583_A_69491  | NW_004516728.1 | scaffold1550 | 69491                   | AA                              | TT                 | TT               | INTERGENIC      |               |                    |                    |
| SNP_97584_A_71336  | NW_004516728.1 | scaffold1550 | 71336                   | TT                              | GG                 | GG               | INTERGENIC      |               |                    |                    |
| SNP_97585_A_81716  | NW_004516728.1 | scaffold1550 | 81716                   | GG                              | AA                 | AA               | INTERGENIC      |               |                    |                    |
| SNP_97586_A_100238 | NW_004516728.1 | scaffold1550 | 100238                  | TT                              | CC                 | CC               | INTERGENIC      |               |                    |                    |
| SNP_97587_A_100250 | NW_004516728.1 | scaffold1550 | 100250                  | AA                              | GG                 | GG               | INTERGENIC      |               |                    |                    |
| SNP_97588_A_100264 | NW_004516728.1 | scaffold1550 | 100264                  | TT                              | AA                 | AA               | INTERGENIC      |               |                    |                    |
| SNP_97589_A_100306 | NW_004516728.1 | scaffold1550 | 100306                  | AA                              | TT                 | TT               | INTERGENIC      |               |                    |                    |
| SNP_97590_A_100508 | NW_004516728.1 | scaffold1550 | 100508                  | AA                              | TT                 | TT               | INTERGENIC      |               |                    |                    |

| SNPs IDs           | Chromosome IDs | Chromosomes  | Physical positions (bp) | CDC Frontier (Reference genome) | (Pusa 1103 & HPNB) | (ILWC 46 & LPNB) | Sequence genome | Components of | Gene accession IDs | Putative functions |
|--------------------|----------------|--------------|-------------------------|---------------------------------|--------------------|------------------|-----------------|---------------|--------------------|--------------------|
| SNP_97591_A_100520 | NW_004516728.1 | scaffold1550 | 100520                  | AA                              | CC                 | CC               | INTERGENIC      |               |                    |                    |
| SNP_97593_A_1903   | NW_004516730.1 | scaffold1552 | 1903                    | CC                              | GG                 | GG               | INTERGENIC      |               |                    |                    |
| SNP_97594_A_1928   | NW_004516730.1 | scaffold1552 | 1928                    | TT                              | AA                 | AA               | INTERGENIC      |               |                    |                    |
| SNP_97595_A_1954   | NW_004516730.1 | scaffold1552 | 1954                    | CC                              | TT                 | TT               | INTERGENIC      |               |                    |                    |
| SNP_97596_A_2004   | NW_004516730.1 | scaffold1552 | 2004                    | CC                              | TT                 | TT               | INTERGENIC      |               |                    |                    |
| SNP_97597_A_2125   | NW_004516730.1 | scaffold1552 | 2125                    | GG                              | AA                 | AA               | INTERGENIC      |               |                    |                    |
| SNP_97600_A_2280   | NW_004516730.1 | scaffold1552 | 2280                    | TT                              | CC                 | CC               | INTERGENIC      |               |                    |                    |
| SNP_97601_A_2534   | NW_004516730.1 | scaffold1552 | 2534                    | TT                              | AA                 | AA               | INTERGENIC      |               |                    |                    |
| SNP_97602_A_4664   | NW_004516730.1 | scaffold1552 | 4664                    | TT                              | CC                 | CC               | INTERGENIC      |               |                    |                    |
| SNP_97603_A_4872   | NW_004516730.1 | scaffold1552 | 4872                    | TT                              | CC                 | CC               | INTERGENIC      |               |                    |                    |
| SNP_97604_A_5040   | NW_004516730.1 | scaffold1552 | 5040                    | AA                              | GG                 | GG               | INTERGENIC      |               |                    |                    |
| SNP_97605_A_6321   | NW_004516730.1 | scaffold1552 | 6321                    | CC                              | GG                 | GG               | INTERGENIC      |               |                    |                    |
| SNP_97606_A_6352   | NW_004516730.1 | scaffold1552 | 6352                    | TT                              | CC                 | CC               | INTERGENIC      |               |                    |                    |
| SNP_97607_A_6361   | NW_004516730.1 | scaffold1552 | 6361                    | CC                              | TT                 | TT               | INTERGENIC      |               |                    |                    |
| SNP_97608_A_6380   | NW_004516730.1 | scaffold1552 | 6380                    | AA                              | GG                 | GG               | INTERGENIC      |               |                    |                    |
| SNP_97609_A_6585   | NW_004516730.1 | scaffold1552 | 6585                    | GG                              | AA                 | AA               | INTERGENIC      |               |                    |                    |
| SNP_97610_A_6591   | NW_004516730.1 | scaffold1552 | 6591                    | CC                              | AA                 | AA               | INTERGENIC      |               |                    |                    |
| SNP_97611_A_6596   | NW_004516730.1 | scaffold1552 | 6596                    | GG                              | TT                 | TT               | INTERGENIC      |               |                    |                    |
| SNP_97612_A_6598   | NW_004516730.1 | scaffold1552 | 6598                    | CC                              | TT                 | TT               | INTERGENIC      |               |                    |                    |
| SNP_97613_A_6615   | NW_004516730.1 | scaffold1552 | 6615                    | CC                              | TT                 | TT               | INTERGENIC      |               |                    |                    |
| SNP_97614_A_7414   | NW_004516730.1 | scaffold1552 | 7414                    | AA                              | GG                 | GG               | INTERGENIC      |               |                    |                    |
| SNP_97615_A_8070   | NW_004516730.1 | scaffold1552 | 8070                    | CC                              | TT                 | TT               | INTERGENIC      |               |                    |                    |

| SNPs IDs          | Chromosome IDs | Chromosomes  | Physical positions (bp) | CDC Frontier (Reference genome) | (Pusa 1103 & HPNB) | (ILWC 46 & LPNB) | Sequence genome | Components of | Gene accession IDs | Putative functions |
|-------------------|----------------|--------------|-------------------------|---------------------------------|--------------------|------------------|-----------------|---------------|--------------------|--------------------|
| SNP_97616_A_8125  | NW_004516730.1 | scaffold1552 | 8125                    | CC                              | TT                 | TT               | INTERGENIC      |               |                    |                    |
| SNP_97617_A_8197  | NW_004516730.1 | scaffold1552 | 8197                    | GG                              | TT                 | TT               | INTERGENIC      |               |                    |                    |
| SNP_97618_A_8275  | NW_004516730.1 | scaffold1552 | 8275                    | CC                              | TT                 | TT               | INTERGENIC      |               |                    |                    |
| SNP_97619_A_10445 | NW_004516730.1 | scaffold1552 | 10445                   | GG                              | AA                 | AA               | INTERGENIC      |               |                    |                    |
| SNP_97620_A_10856 | NW_004516730.1 | scaffold1552 | 10856                   | AA                              | CC                 | CC               | INTERGENIC      |               |                    |                    |
| SNP_97621_A_11289 | NW_004516730.1 | scaffold1552 | 11289                   | GG                              | AA                 | AA               | INTERGENIC      |               |                    |                    |
| SNP_97622_A_11332 | NW_004516730.1 | scaffold1552 | 11332                   | AA                              | TT                 | TT               | INTERGENIC      |               |                    |                    |
| SNP_97623_A_13312 | NW_004516730.1 | scaffold1552 | 13312                   | AA                              | TT                 | TT               | INTERGENIC      |               |                    |                    |
| SNP_97624_A_17471 | NW_004516730.1 | scaffold1552 | 17471                   | CC                              | GG                 | GG               | INTERGENIC      |               |                    |                    |
| SNP_97625_A_19741 | NW_004516730.1 | scaffold1552 | 19741                   | GG                              | TT                 | TT               | INTERGENIC      |               |                    |                    |
| SNP_97626_A_19809 | NW_004516730.1 | scaffold1552 | 19809                   | CC                              | AA                 | AA               | INTERGENIC      |               |                    |                    |
| SNP_97627_A_19952 | NW_004516730.1 | scaffold1552 | 19952                   | AA                              | GG                 | GG               | INTERGENIC      |               |                    |                    |
| SNP_97628_A_19992 | NW_004516730.1 | scaffold1552 | 19992                   | GG                              | AA                 | AA               | INTERGENIC      |               |                    |                    |
| SNP_97629_A_20170 | NW_004516730.1 | scaffold1552 | 20170                   | CC                              | TT                 | TT               | INTERGENIC      |               |                    |                    |
| SNP_97630_A_20290 | NW_004516730.1 | scaffold1552 | 20290                   | TT                              | CC                 | CC               | INTERGENIC      |               |                    |                    |
| SNP_97631_A_20295 | NW_004516730.1 | scaffold1552 | 20295                   | GG                              | AA                 | AA               | INTERGENIC      |               |                    |                    |
| SNP_97632_A_20558 | NW_004516730.1 | scaffold1552 | 20558                   | TT                              | AA                 | AA               | INTERGENIC      |               |                    |                    |
| SNP_97633_A_4317  | NW_004516731.1 | scaffold1553 | 4317                    | TT                              | CC                 | CC               | INTERGENIC      |               |                    |                    |
| SNP_97634_A_4382  | NW_004516731.1 | scaffold1553 | 4382                    | AA                              | GG                 | GG               | INTERGENIC      |               |                    |                    |
| SNP_97635_A_4569  | NW_004516731.1 | scaffold1553 | 4569                    | CC                              | TT                 | TT               | INTERGENIC      |               |                    |                    |
| SNP_97636_A_4576  | NW_004516731.1 | scaffold1553 | 4576                    | CC                              | AA                 | AA               | INTERGENIC      |               |                    |                    |
| SNP_97639_A_1182  | NW_004516734.1 | scaffold1557 | 1182                    | CC                              | TT                 | TT               | INTERGENIC      |               |                    |                    |

| SNPs IDs          | Chromosome IDs | Chromosomes  | Physical positions (bp) | CDC Frontier (Reference genome) | (Pusa 1103 & HPNB) | (ILWC 46 & LPNB) | Sequence genome | Components of | Gene accession IDs | Putative functions |
|-------------------|----------------|--------------|-------------------------|---------------------------------|--------------------|------------------|-----------------|---------------|--------------------|--------------------|
| SNP_97640_A_1540  | NW_004516734.1 | scaffold1557 | 1540                    | TT                              | GG                 | GG               | INTERGENIC      |               |                    |                    |
| SNP_97641_A_1793  | NW_004516734.1 | scaffold1557 | 1793                    | AA                              | TT                 | TT               | INTERGENIC      |               |                    |                    |
| SNP_97642_A_320   | NW_004516736.1 | scaffold1559 | 320                     | AA                              | TT                 | TT               | INTERGENIC      |               |                    |                    |
| SNP_97643_A_321   | NW_004516736.1 | scaffold1559 | 321                     | TT                              | CC                 | CC               | INTERGENIC      |               |                    |                    |
| SNP_97644_A_460   | NW_004516736.1 | scaffold1559 | 460                     | AA                              | TT                 | TT               | INTERGENIC      |               |                    |                    |
| SNP_97646_A_758   | NW_004516736.1 | scaffold1559 | 758                     | CC                              | TT                 | TT               | INTERGENIC      |               |                    |                    |
| SNP_97647_A_955   | NW_004516736.1 | scaffold1559 | 955                     | AA                              | GG                 | GG               | INTERGENIC      |               |                    |                    |
| SNP_97648_A_7396  | NW_004516738.1 | scaffold1561 | 7396                    | TT                              | CC                 | CC               | INTERGENIC      |               |                    |                    |
| SNP_97649_A_7404  | NW_004516738.1 | scaffold1561 | 7404                    | TT                              | AA                 | AA               | INTERGENIC      |               |                    |                    |
| SNP_97650_A_7415  | NW_004516738.1 | scaffold1561 | 7415                    | CC                              | AA                 | AA               | INTERGENIC      |               |                    |                    |
| SNP_97651_A_7440  | NW_004516738.1 | scaffold1561 | 7440                    | TT                              | GG                 | GG               | INTERGENIC      |               |                    |                    |
| SNP_97652_A_7731  | NW_004516738.1 | scaffold1561 | 7731                    | GG                              | TT                 | TT               | INTERGENIC      |               |                    |                    |
| SNP_97653_A_7893  | NW_004516738.1 | scaffold1561 | 7893                    | TT                              | GG                 | GG               | INTERGENIC      |               |                    |                    |
| SNP_97654_A_17612 | NW_004516738.1 | scaffold1561 | 17612                   | GG                              | TT                 | TT               | INTERGENIC      |               |                    |                    |
| SNP_97655_A_17790 | NW_004516738.1 | scaffold1561 | 17790                   | CC                              | TT                 | TT               | INTERGENIC      |               |                    |                    |
| SNP_97656_A_26036 | NW_004516738.1 | scaffold1561 | 26036                   | TT                              | CC                 | CC               | INTERGENIC      |               |                    |                    |
| SNP_97657_A_52735 | NW_004516738.1 | scaffold1561 | 52735                   | TT                              | CC                 | CC               | INTERGENIC      |               |                    |                    |
| SNP_97658_A_52742 | NW_004516738.1 | scaffold1561 | 52742                   | CC                              | TT                 | TT               | INTERGENIC      |               |                    |                    |
| SNP_97659_A_53063 | NW_004516738.1 | scaffold1561 | 53063                   | GG                              | TT                 | TT               | INTERGENIC      |               |                    |                    |
| SNP_97660_A_54774 | NW_004516738.1 | scaffold1561 | 54774                   | AA                              | GG                 | GG               | INTERGENIC      |               |                    |                    |
| SNP_97661_A_55106 | NW_004516738.1 | scaffold1561 | 55106                   | AA                              | TT                 | TT               | INTERGENIC      |               |                    |                    |
| SNP_97662_A_55110 | NW_004516738.1 | scaffold1561 | 55110                   | AA                              | GG                 | GG               | INTERGENIC      |               |                    |                    |



| SNPs IDs          | Chromosome IDs | Chromosomes  | Physical positions (bp) | CDC Frontier (Reference genome) | (Pusa 1103 & HPNB) | (ILWC 46 & LPNB) | Sequence genome | Components of | Gene accession IDs | Putative functions |
|-------------------|----------------|--------------|-------------------------|---------------------------------|--------------------|------------------|-----------------|---------------|--------------------|--------------------|
| SNP_97663_A_55118 | NW_004516738.1 | scaffold1561 | 55118                   | CC                              | TT                 | TT               | INTERGENIC      |               |                    |                    |
| SNP_97664_A_55146 | NW_004516738.1 | scaffold1561 | 55146                   | AA                              | GG                 | GG               | INTERGENIC      |               |                    |                    |
| SNP_97665_A_55164 | NW_004516738.1 | scaffold1561 | 55164                   | TT                              | CC                 | CC               | INTERGENIC      |               |                    |                    |
| SNP_97666_A_55229 | NW_004516738.1 | scaffold1561 | 55229                   | CC                              | AA                 | AA               | INTERGENIC      |               |                    |                    |
| SNP_97667_A_55271 | NW_004516738.1 | scaffold1561 | 55271                   | CC                              | TT                 | TT               | INTERGENIC      |               |                    |                    |
| SNP_97668_A_55285 | NW_004516738.1 | scaffold1561 | 55285                   | AA                              | TT                 | TT               | INTERGENIC      |               |                    |                    |
| SNP_97669_A_55298 | NW_004516738.1 | scaffold1561 | 55298                   | GG                              | AA                 | AA               | INTERGENIC      |               |                    |                    |
| SNP_97670_A_55328 | NW_004516738.1 | scaffold1561 | 55328                   | AA                              | TT                 | TT               | INTERGENIC      |               |                    |                    |
| SNP_97671_A_55330 | NW_004516738.1 | scaffold1561 | 55330                   | AA                              | TT                 | TT               | INTERGENIC      |               |                    |                    |
| SNP_97672_A_55356 | NW_004516738.1 | scaffold1561 | 55356                   | CC                              | TT                 | TT               | INTERGENIC      |               |                    |                    |
| SNP_97673_A_55594 | NW_004516738.1 | scaffold1561 | 55594                   | AA                              | GG                 | GG               | INTERGENIC      |               |                    |                    |
| SNP_97674_A_55701 | NW_004516738.1 | scaffold1561 | 55701                   | TT                              | CC                 | CC               | INTERGENIC      |               |                    |                    |
| SNP_97675_A_69864 | NW_004516738.1 | scaffold1561 | 69864                   | GG                              | TT                 | TT               | INTERGENIC      |               |                    |                    |
| SNP_97676_A_69885 | NW_004516738.1 | scaffold1561 | 69885                   | GG                              | TT                 | TT               | INTERGENIC      |               |                    |                    |
| SNP_97677_A_70061 | NW_004516738.1 | scaffold1561 | 70061                   | TT                              | AA                 | AA               | INTERGENIC      |               |                    |                    |
| SNP_97678_A_70404 | NW_004516738.1 | scaffold1561 | 70404                   | AA                              | TT                 | TT               | INTERGENIC      |               |                    |                    |
| SNP_97679_A_70497 | NW_004516738.1 | scaffold1561 | 70497                   | AA                              | GG                 | GG               | INTERGENIC      |               |                    |                    |
| SNP_97680_A_70521 | NW_004516738.1 | scaffold1561 | 70521                   | TT                              | CC                 | CC               | INTERGENIC      |               |                    |                    |
| SNP_97681_A_70536 | NW_004516738.1 | scaffold1561 | 70536                   | AA                              | TT                 | TT               | INTERGENIC      |               |                    |                    |
| SNP_97682_A_70544 | NW_004516738.1 | scaffold1561 | 70544                   | AA                              | CC                 | CC               | INTERGENIC      |               |                    |                    |
| SNP_97683_A_70628 | NW_004516738.1 | scaffold1561 | 70628                   | AA                              | GG                 | GG               | INTERGENIC      |               |                    |                    |
| SNP_97684_A_70667 | NW_004516738.1 | scaffold1561 | 70667                   | TT                              | CC                 | CC               | INTERGENIC      |               |                    |                    |

| SNPs IDs           | Chromosome IDs | Chromosomes  | Physical positions (bp) | CDC Frontier (Reference genome) | (Pusa 1103 & HPNB) | (ILWC 46 & LPNB) | Sequence genome | Components of | Gene accession IDs | Putative functions |
|--------------------|----------------|--------------|-------------------------|---------------------------------|--------------------|------------------|-----------------|---------------|--------------------|--------------------|
| SNP_97685_A_80132  | NW_004516738.1 | scaffold1561 | 80132                   | AA                              | GG                 | GG               | INTERGENIC      |               |                    |                    |
| SNP_97686_A_80157  | NW_004516738.1 | scaffold1561 | 80157                   | TT                              | GG                 | GG               | INTERGENIC      |               |                    |                    |
| SNP_97687_A_80419  | NW_004516738.1 | scaffold1561 | 80419                   | AA                              | GG                 | GG               | INTERGENIC      |               |                    |                    |
| SNP_97688_A_979    | NW_004516739.1 | scaffold1562 | 979                     | GG                              | AA                 | AA               | INTERGENIC      |               |                    |                    |
| SNP_97689_A_994    | NW_004516739.1 | scaffold1562 | 994                     | GG                              | AA                 | AA               | INTERGENIC      |               |                    |                    |
| SNP_97690_A_1080   | NW_004516739.1 | scaffold1562 | 1080                    | AA                              | CC                 | CC               | INTERGENIC      |               |                    |                    |
| SNP_97691_A_1082   | NW_004516739.1 | scaffold1562 | 1082                    | GG                              | AA                 | AA               | INTERGENIC      |               |                    |                    |
| SNP_97692_A_39286  | NW_004516739.1 | scaffold1562 | 39286                   | GG                              | TT                 | TT               | INTERGENIC      |               |                    |                    |
| SNP_97693_A_39298  | NW_004516739.1 | scaffold1562 | 39298                   | TT                              | CC                 | CC               | INTERGENIC      |               |                    |                    |
| SNP_97694_A_51417  | NW_004516739.1 | scaffold1562 | 51417                   | TT                              | CC                 | CC               | INTERGENIC      |               |                    |                    |
| SNP_97695_A_64421  | NW_004516739.1 | scaffold1562 | 64421                   | CC                              | TT                 | TT               | INTERGENIC      |               |                    |                    |
| SNP_97696_A_64444  | NW_004516739.1 | scaffold1562 | 64444                   | GG                              | AA                 | AA               | INTERGENIC      |               |                    |                    |
| SNP_97697_A_66610  | NW_004516739.1 | scaffold1562 | 66610                   | AA                              | GG                 | GG               | INTERGENIC      |               |                    |                    |
| SNP_97698_A_102254 | NW_004516739.1 | scaffold1562 | 102254                  | TT                              | GG                 | GG               | INTERGENIC      |               |                    |                    |
| SNP_97699_A_102314 | NW_004516739.1 | scaffold1562 | 102314                  | TT                              | AA                 | AA               | INTERGENIC      |               |                    |                    |
| SNP_97700_A_103703 | NW_004516739.1 | scaffold1562 | 103703                  | AA                              | GG                 | GG               | INTERGENIC      |               |                    |                    |
| SNP_97701_A_104130 | NW_004516739.1 | scaffold1562 | 104130                  | TT                              | CC                 | CC               | INTERGENIC      |               |                    |                    |
| SNP_97702_A_1861   | NW_004516742.1 | scaffold1568 | 1861                    | TT                              | GG                 | GG               | INTERGENIC      |               |                    |                    |
| SNP_97703_A_1981   | NW_004516742.1 | scaffold1568 | 1981                    | GG                              | CC                 | CC               | INTERGENIC      |               |                    |                    |
| SNP_97704_A_2042   | NW_004516742.1 | scaffold1568 | 2042                    | GG                              | TT                 | TT               | INTERGENIC      |               |                    |                    |
| SNP_97705_A_2130   | NW_004516742.1 | scaffold1568 | 2130                    | TT                              | AA                 | AA               | INTERGENIC      |               |                    |                    |
| SNP_97706_A_2271   | NW_004516742.1 | scaffold1568 | 2271                    | TT                              | AA                 | AA               | INTERGENIC      |               |                    |                    |

| SNPs IDs          | Chromosome IDs | Chromosomes  | Physical positions (bp) | CDC Frontier (Reference genome) | (Pusa 1103 & HPNB) | (ILWC 46 & LPNB) | Sequence genome | Components of | Gene accession IDs | Putative functions |
|-------------------|----------------|--------------|-------------------------|---------------------------------|--------------------|------------------|-----------------|---------------|--------------------|--------------------|
| SNP_97707_A_9656  | NW_004516742.1 | scaffold1568 | 9656                    | GG                              | AA                 | AA               | INTERGENIC      |               |                    |                    |
| SNP_97708_A_9764  | NW_004516742.1 | scaffold1568 | 9764                    | CC                              | AA                 | AA               | INTERGENIC      |               |                    |                    |
| SNP_97709_A_11652 | NW_004516742.1 | scaffold1568 | 11652                   | GG                              | TT                 | TT               | INTERGENIC      |               |                    |                    |
| SNP_97710_A_11933 | NW_004516742.1 | scaffold1568 | 11933                   | TT                              | CC                 | CC               | INTERGENIC      |               |                    |                    |
| SNP_97711_A_12003 | NW_004516742.1 | scaffold1568 | 12003                   | AA                              | TT                 | TT               | INTERGENIC      |               |                    |                    |
| SNP_97713_A_16683 | NW_004516742.1 | scaffold1568 | 16683                   | GG                              | CC                 | CC               | INTERGENIC      |               |                    |                    |
| SNP_97714_A_17271 | NW_004516742.1 | scaffold1568 | 17271                   | AA                              | TT                 | TT               | INTERGENIC      |               |                    |                    |
| SNP_97715_A_17905 | NW_004516742.1 | scaffold1568 | 17905                   | CC                              | GG                 | GG               | INTERGENIC      |               |                    |                    |
| SNP_97716_A_18012 | NW_004516742.1 | scaffold1568 | 18012                   | AA                              | TT                 | TT               | INTERGENIC      |               |                    |                    |
| SNP_97717_A_22086 | NW_004516742.1 | scaffold1568 | 22086                   | CC                              | AA                 | AA               | INTERGENIC      |               |                    |                    |
| SNP_97718_A_22311 | NW_004516742.1 | scaffold1568 | 22311                   | AA                              | GG                 | GG               | INTERGENIC      |               |                    |                    |
| SNP_97719_A_22332 | NW_004516742.1 | scaffold1568 | 22332                   | CC                              | TT                 | TT               | INTERGENIC      |               |                    |                    |
| SNP_97720_A_22966 | NW_004516742.1 | scaffold1568 | 22966                   | AA                              | TT                 | TT               | INTERGENIC      |               |                    |                    |
| SNP_97721_A_22973 | NW_004516742.1 | scaffold1568 | 22973                   | CC                              | TT                 | TT               | INTERGENIC      |               |                    |                    |
| SNP_97722_A_22977 | NW_004516742.1 | scaffold1568 | 22977                   | GG                              | AA                 | AA               | INTERGENIC      |               |                    |                    |
| SNP_97723_A_23008 | NW_004516742.1 | scaffold1568 | 23008                   | TT                              | AA                 | AA               | INTERGENIC      |               |                    |                    |
| SNP_97724_A_23068 | NW_004516742.1 | scaffold1568 | 23068                   | TT                              | AA                 | AA               | INTERGENIC      |               |                    |                    |
| SNP_97725_A_23072 | NW_004516742.1 | scaffold1568 | 23072                   | TT                              | CC                 | CC               | INTERGENIC      |               |                    |                    |
| SNP_97726_A_23196 | NW_004516742.1 | scaffold1568 | 23196                   | TT                              | GG                 | GG               | INTERGENIC      |               |                    |                    |
| SNP_97727_A_23610 | NW_004516742.1 | scaffold1568 | 23610                   | AA                              | GG                 | GG               | INTERGENIC      |               |                    |                    |
| SNP_97728_A_23667 | NW_004516742.1 | scaffold1568 | 23667                   | AA                              | TT                 | TT               | INTERGENIC      |               |                    |                    |
| SNP_97729_A_24472 | NW_004516742.1 | scaffold1568 | 24472                   | GG                              | AA                 | AA               | INTERGENIC      |               |                    |                    |

| SNPs IDs          | Chromosome IDs | Chromosomes  | Physical positions (bp) | CDC Frontier (Reference genome) | (Pusa 1103 & HPNB) | (ILWC 46 & LPNB) | Sequence genome | Components of | Gene accession IDs | Putative functions |
|-------------------|----------------|--------------|-------------------------|---------------------------------|--------------------|------------------|-----------------|---------------|--------------------|--------------------|
| SNP_97730_A_24778 | NW_004516742.1 | scaffold1568 | 24778                   | TT                              | GG                 | GG               | INTERGENIC      |               |                    |                    |
| SNP_97732_A_25009 | NW_004516742.1 | scaffold1568 | 25009                   | CC                              | TT                 | TT               | INTERGENIC      |               |                    |                    |
| SNP_97733_A_25098 | NW_004516742.1 | scaffold1568 | 25098                   | TT                              | GG                 | GG               | INTERGENIC      |               |                    |                    |
| SNP_97734_A_25510 | NW_004516742.1 | scaffold1568 | 25510                   | GG                              | CC                 | CC               | INTERGENIC      |               |                    |                    |
| SNP_97735_A_29438 | NW_004516742.1 | scaffold1568 | 29438                   | GG                              | AA                 | AA               | INTERGENIC      |               |                    |                    |
| SNP_97736_A_29455 | NW_004516742.1 | scaffold1568 | 29455                   | CC                              | GG                 | GG               | INTERGENIC      |               |                    |                    |
| SNP_97737_A_33313 | NW_004516742.1 | scaffold1568 | 33313                   | AA                              | TT                 | TT               | INTERGENIC      |               |                    |                    |
| SNP_97739_A_33374 | NW_004516742.1 | scaffold1568 | 33374                   | TT                              | GG                 | GG               | INTERGENIC      |               |                    |                    |
| SNP_97740_A_33390 | NW_004516742.1 | scaffold1568 | 33390                   | CC                              | TT                 | TT               | INTERGENIC      |               |                    |                    |
| SNP_97741_A_33911 | NW_004516742.1 | scaffold1568 | 33911                   | CC                              | GG                 | GG               | INTERGENIC      |               |                    |                    |
| SNP_97742_A_44372 | NW_004516742.1 | scaffold1568 | 44372                   | TT                              | AA                 | AA               | INTERGENIC      |               |                    |                    |
| SNP_97743_A_44378 | NW_004516742.1 | scaffold1568 | 44378                   | AA                              | GG                 | GG               | INTERGENIC      |               |                    |                    |
| SNP_97744_A_44391 | NW_004516742.1 | scaffold1568 | 44391                   | AA                              | TT                 | TT               | INTERGENIC      |               |                    |                    |
| SNP_97745_A_44419 | NW_004516742.1 | scaffold1568 | 44419                   | TT                              | CC                 | CC               | INTERGENIC      |               |                    |                    |
| SNP_97749_A_44478 | NW_004516742.1 | scaffold1568 | 44478                   | AA                              | GG                 | GG               | INTERGENIC      |               |                    |                    |
| SNP_97750_A_44487 | NW_004516742.1 | scaffold1568 | 44487                   | TT                              | AA                 | AA               | INTERGENIC      |               |                    |                    |
| SNP_97751_A_44506 | NW_004516742.1 | scaffold1568 | 44506                   | AA                              | TT                 | TT               | INTERGENIC      |               |                    |                    |
| SNP_97752_A_44511 | NW_004516742.1 | scaffold1568 | 44511                   | GG                              | TT                 | TT               | INTERGENIC      |               |                    |                    |
| SNP_97753_A_44530 | NW_004516742.1 | scaffold1568 | 44530                   | TT                              | AA                 | AA               | INTERGENIC      |               |                    |                    |
| SNP_97754_A_44559 | NW_004516742.1 | scaffold1568 | 44559                   | TT                              | GG                 | GG               | INTERGENIC      |               |                    |                    |
| SNP_97755_A_44576 | NW_004516742.1 | scaffold1568 | 44576                   | AA                              | TT                 | TT               | INTERGENIC      |               |                    |                    |
| SNP_97756_A_45165 | NW_004516742.1 | scaffold1568 | 45165                   | TT                              | CC                 | CC               | INTERGENIC      |               |                    |                    |

| SNPs IDs          | Chromosome IDs | Chromosomes  | Physical positions (bp) | CDC Frontier (Reference genome) | (Pusa 1103 & HPNB) | (ILWC 46 & LPNB) | Sequence genome | Components of | Gene accession IDs | Putative functions |
|-------------------|----------------|--------------|-------------------------|---------------------------------|--------------------|------------------|-----------------|---------------|--------------------|--------------------|
| SNP_97757_A_45176 | NW_004516742.1 | scaffold1568 | 45176                   | CC                              | TT                 | TT               | INTERGENIC      |               |                    |                    |
| SNP_97758_A_45899 | NW_004516742.1 | scaffold1568 | 45899                   | CC                              | GG                 | GG               | INTERGENIC      |               |                    |                    |
| SNP_97759_A_46253 | NW_004516742.1 | scaffold1568 | 46253                   | TT                              | CC                 | CC               | INTERGENIC      |               |                    |                    |
| SNP_97760_A_46493 | NW_004516742.1 | scaffold1568 | 46493                   | TT                              | CC                 | CC               | INTERGENIC      |               |                    |                    |
| SNP_97761_A_46720 | NW_004516742.1 | scaffold1568 | 46720                   | GG                              | AA                 | AA               | INTERGENIC      |               |                    |                    |
| SNP_97762_A_47641 | NW_004516742.1 | scaffold1568 | 47641                   | TT                              | AA                 | AA               | INTERGENIC      |               |                    |                    |
| SNP_97763_A_49083 | NW_004516742.1 | scaffold1568 | 49083                   | AA                              | TT                 | TT               | INTERGENIC      |               |                    |                    |
| SNP_97764_A_49157 | NW_004516742.1 | scaffold1568 | 49157                   | GG                              | CC                 | CC               | INTERGENIC      |               |                    |                    |
| SNP_97765_A_49164 | NW_004516742.1 | scaffold1568 | 49164                   | TT                              | CC                 | CC               | INTERGENIC      |               |                    |                    |
| SNP_97766_A_49719 | NW_004516742.1 | scaffold1568 | 49719                   | TT                              | CC                 | CC               | INTERGENIC      |               |                    |                    |
| SNP_97767_A_51726 | NW_004516742.1 | scaffold1568 | 51726                   | CC                              | GG                 | GG               | INTERGENIC      |               |                    |                    |
| SNP_97768_A_51914 | NW_004516742.1 | scaffold1568 | 51914                   | GG                              | AA                 | AA               | INTERGENIC      |               |                    |                    |
| SNP_97769_A_52323 | NW_004516742.1 | scaffold1568 | 52323                   | GG                              | AA                 | AA               | INTERGENIC      |               |                    |                    |
| SNP_97770_A_53747 | NW_004516742.1 | scaffold1568 | 53747                   | TT                              | CC                 | CC               | INTERGENIC      |               |                    |                    |
| SNP_97771_A_54350 | NW_004516742.1 | scaffold1568 | 54350                   | TT                              | AA                 | AA               | INTERGENIC      |               |                    |                    |
| SNP_97772_A_54887 | NW_004516742.1 | scaffold1568 | 54887                   | GG                              | AA                 | AA               | INTERGENIC      |               |                    |                    |
| SNP_97773_A_57139 | NW_004516742.1 | scaffold1568 | 57139                   | TT                              | CC                 | CC               | INTERGENIC      |               |                    |                    |
| SNP_97774_A_57506 | NW_004516742.1 | scaffold1568 | 57506                   | GG                              | AA                 | AA               | INTERGENIC      |               |                    |                    |
| SNP_97775_A_66587 | NW_004516742.1 | scaffold1568 | 66587                   | TT                              | AA                 | AA               | INTERGENIC      |               |                    |                    |
| SNP_97776_A_66600 | NW_004516742.1 | scaffold1568 | 66600                   | TT                              | AA                 | AA               | INTERGENIC      |               |                    |                    |
| SNP_97777_A_66716 | NW_004516742.1 | scaffold1568 | 66716                   | TT                              | AA                 | AA               | INTERGENIC      |               |                    |                    |
| SNP_97778_A_68216 | NW_004516742.1 | scaffold1568 | 68216                   | AA                              | TT                 | TT               | INTERGENIC      |               |                    |                    |

| SNPs IDs          | Chromosome IDs | Chromosomes  | Physical positions (bp) | CDC Frontier (Reference genome) | (Pusa 1103 & HPNB) | (ILWC 46 & LPNB) | Sequence genome | Components of | Gene accession IDs | Putative functions |
|-------------------|----------------|--------------|-------------------------|---------------------------------|--------------------|------------------|-----------------|---------------|--------------------|--------------------|
| SNP_97779_A_68217 | NW_004516742.1 | scaffold1568 | 68217                   | TT                              | AA                 | AA               | INTERGENIC      |               |                    |                    |
| SNP_97780_A_70768 | NW_004516742.1 | scaffold1568 | 70768                   | AA                              | TT                 | TT               | INTERGENIC      |               |                    |                    |
| SNP_97781_A_73482 | NW_004516742.1 | scaffold1568 | 73482                   | CC                              | AA                 | AA               | INTERGENIC      |               |                    |                    |
| SNP_97782_A_73494 | NW_004516742.1 | scaffold1568 | 73494                   | GG                              | TT                 | TT               | INTERGENIC      |               |                    |                    |
| SNP_97783_A_77830 | NW_004516742.1 | scaffold1568 | 77830                   | CC                              | TT                 | TT               | INTERGENIC      |               |                    |                    |
| SNP_97784_A_78785 | NW_004516742.1 | scaffold1568 | 78785                   | AA                              | GG                 | GG               | INTERGENIC      |               |                    |                    |
| SNP_97785_A_78796 | NW_004516742.1 | scaffold1568 | 78796                   | AA                              | TT                 | TT               | INTERGENIC      |               |                    |                    |
| SNP_97786_A_78848 | NW_004516742.1 | scaffold1568 | 78848                   | AA                              | GG                 | GG               | INTERGENIC      |               |                    |                    |
| SNP_97787_A_79000 | NW_004516742.1 | scaffold1568 | 79000                   | TT                              | GG                 | GG               | INTERGENIC      |               |                    |                    |
| SNP_97788_A_79069 | NW_004516742.1 | scaffold1568 | 79069                   | GG                              | AA                 | AA               | INTERGENIC      |               |                    |                    |
| SNP_97789_A_79077 | NW_004516742.1 | scaffold1568 | 79077                   | TT                              | AA                 | AA               | INTERGENIC      |               |                    |                    |
| SNP_97790_A_80149 | NW_004516742.1 | scaffold1568 | 80149                   | TT                              | CC                 | CC               | INTERGENIC      |               |                    |                    |
| SNP_97791_A_80671 | NW_004516742.1 | scaffold1568 | 80671                   | CC                              | GG                 | GG               | INTERGENIC      |               |                    |                    |
| SNP_97792_A_81392 | NW_004516742.1 | scaffold1568 | 81392                   | CC                              | TT                 | TT               | INTERGENIC      |               |                    |                    |
| SNP_97793_A_81815 | NW_004516742.1 | scaffold1568 | 81815                   | GG                              | AA                 | AA               | INTERGENIC      |               |                    |                    |
| SNP_97794_A_82223 | NW_004516742.1 | scaffold1568 | 82223                   | TT                              | GG                 | GG               | INTERGENIC      |               |                    |                    |
| SNP_97795_A_82246 | NW_004516742.1 | scaffold1568 | 82246                   | AA                              | TT                 | TT               | INTERGENIC      |               |                    |                    |
| SNP_97796_A_82524 | NW_004516742.1 | scaffold1568 | 82524                   | CC                              | GG                 | GG               | INTERGENIC      |               |                    |                    |
| SNP_97797_A_82550 | NW_004516742.1 | scaffold1568 | 82550                   | AA                              | TT                 | TT               | INTERGENIC      |               |                    |                    |
| SNP_97798_A_82717 | NW_004516742.1 | scaffold1568 | 82717                   | TT                              | CC                 | CC               | INTERGENIC      |               |                    |                    |
| SNP_97800_A_16094 | NW_004516743.1 | scaffold1569 | 16094                   | CC                              | AA                 | AA               | INTERGENIC      |               |                    |                    |
| SNP_97801_A_18763 | NW_004516743.1 | scaffold1569 | 18763                   | TT                              | AA                 | AA               | INTERGENIC      |               |                    |                    |

| SNPs IDs          | Chromosome IDs | Chromosomes  | Physical positions (bp) | CDC Frontier (Reference genome) | (Pusa 1103 & HPNB) | (ILWC 46 & LPNB) | Sequence genome | Components of | Gene accession IDs | Putative functions |
|-------------------|----------------|--------------|-------------------------|---------------------------------|--------------------|------------------|-----------------|---------------|--------------------|--------------------|
| SNP_97802_A_19611 | NW_004516743.1 | scaffold1569 | 19611                   | AA                              | GG                 | GG               | INTERGENIC      |               |                    |                    |
| SNP_97803_A_19620 | NW_004516743.1 | scaffold1569 | 19620                   | CC                              | GG                 | GG               | INTERGENIC      |               |                    |                    |
| SNP_97804_A_19628 | NW_004516743.1 | scaffold1569 | 19628                   | CC                              | TT                 | TT               | INTERGENIC      |               |                    |                    |
| SNP_97805_A_19634 | NW_004516743.1 | scaffold1569 | 19634                   | CC                              | AA                 | AA               | INTERGENIC      |               |                    |                    |
| SNP_97806_A_25106 | NW_004516743.1 | scaffold1569 | 25106                   | AA                              | TT                 | TT               | INTERGENIC      |               |                    |                    |
| SNP_97807_A_25545 | NW_004516743.1 | scaffold1569 | 25545                   | GG                              | AA                 | AA               | INTERGENIC      |               |                    |                    |
| SNP_97808_A_25655 | NW_004516743.1 | scaffold1569 | 25655                   | TT                              | AA                 | AA               | INTERGENIC      |               |                    |                    |
| SNP_97809_A_25899 | NW_004516743.1 | scaffold1569 | 25899                   | AA                              | CC                 | CC               | INTERGENIC      |               |                    |                    |
| SNP_97810_A_32401 | NW_004516743.1 | scaffold1569 | 32401                   | AA                              | CC                 | CC               | INTERGENIC      |               |                    |                    |
| SNP_97811_A_32457 | NW_004516743.1 | scaffold1569 | 32457                   | CC                              | GG                 | GG               | INTERGENIC      |               |                    |                    |
| SNP_97813_A_32571 | NW_004516743.1 | scaffold1569 | 32571                   | AA                              | CC                 | CC               | INTERGENIC      |               |                    |                    |
| SNP_97814_A_32774 | NW_004516743.1 | scaffold1569 | 32774                   | AA                              | CC                 | CC               | INTERGENIC      |               |                    |                    |
| SNP_97815_A_32866 | NW_004516743.1 | scaffold1569 | 32866                   | AA                              | CC                 | CC               | INTERGENIC      |               |                    |                    |
| SNP_97816_A_32956 | NW_004516743.1 | scaffold1569 | 32956                   | AA                              | CC                 | CC               | INTERGENIC      |               |                    |                    |
| SNP_97818_A_33009 | NW_004516743.1 | scaffold1569 | 33009                   | CC                              | TT                 | TT               | INTERGENIC      |               |                    |                    |
| SNP_97819_A_33019 | NW_004516743.1 | scaffold1569 | 33019                   | TT                              | CC                 | CC               | INTERGENIC      |               |                    |                    |
| SNP_97820_A_33042 | NW_004516743.1 | scaffold1569 | 33042                   | GG                              | TT                 | TT               | INTERGENIC      |               |                    |                    |
| SNP_97821_A_33047 | NW_004516743.1 | scaffold1569 | 33047                   | TT                              | CC                 | CC               | INTERGENIC      |               |                    |                    |
| SNP_97823_A_64    | NW_004516746.1 | scaffold1573 | 64                      | TT                              | AA                 | AA               | INTERGENIC      |               |                    |                    |
| SNP_97824_A_2043  | NW_004516746.1 | scaffold1573 | 2043                    | AA                              | GG                 | GG               | INTERGENIC      |               |                    |                    |
| SNP_97825_A_2578  | NW_004516746.1 | scaffold1573 | 2578                    | AA                              | TT                 | TT               | INTERGENIC      |               |                    |                    |
| SNP_97826_A_20833 | NW_004516747.1 | scaffold1574 | 20833                   | TT                              | CC                 | CC               | INTERGENIC      |               |                    |                    |

| SNPs IDs           | Chromosome IDs | Chromosomes  | Physical positions (bp) | CDC Frontier (Reference genome) | (Pusa 1103 & HPNB) | (ILWC 46 & LPNB) | Sequence genome | Components of | Gene accession IDs | Putative functions |
|--------------------|----------------|--------------|-------------------------|---------------------------------|--------------------|------------------|-----------------|---------------|--------------------|--------------------|
| SNP_97827_A_40099  | NW_004516747.1 | scaffold1574 | 40099                   | TT                              | AA                 | AA               | INTERGENIC      |               |                    |                    |
| SNP_97828_A_68795  | NW_004516747.1 | scaffold1574 | 68795                   | CC                              | TT                 | TT               | INTERGENIC      |               |                    |                    |
| SNP_97829_A_68815  | NW_004516747.1 | scaffold1574 | 68815                   | GG                              | AA                 | AA               | INTERGENIC      |               |                    |                    |
| SNP_97830_A_69279  | NW_004516747.1 | scaffold1574 | 69279                   | AA                              | TT                 | TT               | INTERGENIC      |               |                    |                    |
| SNP_97831_A_69328  | NW_004516747.1 | scaffold1574 | 69328                   | TT                              | CC                 | CC               | INTERGENIC      |               |                    |                    |
| SNP_97832_A_110172 | NW_004516747.1 | scaffold1574 | 110172                  | TT                              | CC                 | CC               | INTERGENIC      |               |                    |                    |
| SNP_97833_A_110180 | NW_004516747.1 | scaffold1574 | 110180                  | AA                              | GG                 | GG               | INTERGENIC      |               |                    |                    |
| SNP_97834_A_110827 | NW_004516747.1 | scaffold1574 | 110827                  | AA                              | TT                 | TT               | INTERGENIC      |               |                    |                    |
| SNP_97835_A_42984  | NW_004516748.1 | scaffold1575 | 42984                   | CC                              | GG                 | GG               | INTERGENIC      |               |                    |                    |
| SNP_97836_A_43665  | NW_004516748.1 | scaffold1575 | 43665                   | AA                              | TT                 | TT               | INTERGENIC      |               |                    |                    |
| SNP_97837_A_123942 | NW_004516748.1 | scaffold1575 | 123942                  | TT                              | CC                 | CC               | INTERGENIC      |               |                    |                    |
| SNP_97838_A_142815 | NW_004516748.1 | scaffold1575 | 142815                  | AA                              | GG                 | GG               | INTERGENIC      |               |                    |                    |
| SNP_97839_A_142831 | NW_004516748.1 | scaffold1575 | 142831                  | GG                              | AA                 | AA               | INTERGENIC      |               |                    |                    |
| SNP_97840_A_142855 | NW_004516748.1 | scaffold1575 | 142855                  | TT                              | CC                 | CC               | INTERGENIC      |               |                    |                    |
| SNP_97841_A_2940   | NW_004516751.1 | scaffold1578 | 2940                    | TT                              | CC                 | CC               | INTERGENIC      |               |                    |                    |
| SNP_97842_A_2972   | NW_004516751.1 | scaffold1578 | 2972                    | AA                              | GG                 | GG               | INTERGENIC      |               |                    |                    |
| SNP_97843_A_3003   | NW_004516751.1 | scaffold1578 | 3003                    | TT                              | CC                 | CC               | INTERGENIC      |               |                    |                    |
| SNP_97844_A_3169   | NW_004516751.1 | scaffold1578 | 3169                    | AA                              | CC                 | CC               | INTERGENIC      |               |                    |                    |
| SNP_97845_A_17190  | NW_004516751.1 | scaffold1578 | 17190                   | CC                              | TT                 | TT               | INTERGENIC      |               |                    |                    |
| SNP_97846_A_19662  | NW_004516751.1 | scaffold1578 | 19662                   | TT                              | GG                 | GG               | INTERGENIC      |               |                    |                    |
| SNP_97847_A_22266  | NW_004516751.1 | scaffold1578 | 22266                   | GG                              | TT                 | TT               | INTERGENIC      |               |                    |                    |
| SNP_97848_A_22281  | NW_004516751.1 | scaffold1578 | 22281                   | CC                              | TT                 | TT               | INTERGENIC      |               |                    |                    |



| SNPs IDs          | Chromosome IDs | Chromosomes  | Physical positions (bp) | CDC Frontier (Reference genome) | (Pusa 1103 & HPNB) | (ILWC 46 & LPNB) | Sequence genome | Components of | Gene accession IDs | Putative functions |
|-------------------|----------------|--------------|-------------------------|---------------------------------|--------------------|------------------|-----------------|---------------|--------------------|--------------------|
| SNP_97850_A_22308 | NW_004516751.1 | scaffold1578 | 22308                   | AA                              | TT                 | TT               | INTERGENIC      |               |                    |                    |
| SNP_97851_A_22353 | NW_004516751.1 | scaffold1578 | 22353                   | AA                              | GG                 | GG               | INTERGENIC      |               |                    |                    |
| SNP_97852_A_29485 | NW_004516751.1 | scaffold1578 | 29485                   | CC                              | TT                 | TT               | INTERGENIC      |               |                    |                    |
| SNP_97853_A_29512 | NW_004516751.1 | scaffold1578 | 29512                   | CC                              | TT                 | TT               | INTERGENIC      |               |                    |                    |
| SNP_97854_A_29557 | NW_004516751.1 | scaffold1578 | 29557                   | GG                              | AA                 | AA               | INTERGENIC      |               |                    |                    |
| SNP_97855_A_29622 | NW_004516751.1 | scaffold1578 | 29622                   | TT                              | AA                 | AA               | INTERGENIC      |               |                    |                    |
| SNP_97857_A_30054 | NW_004516751.1 | scaffold1578 | 30054                   | AA                              | TT                 | TT               | INTERGENIC      |               |                    |                    |
| SNP_97858_A_41958 | NW_004516751.1 | scaffold1578 | 41958                   | TT                              | GG                 | GG               | INTERGENIC      |               |                    |                    |
| SNP_97859_A_46541 | NW_004516751.1 | scaffold1578 | 46541                   | TT                              | GG                 | GG               | INTERGENIC      |               |                    |                    |
| SNP_97860_A_46562 | NW_004516751.1 | scaffold1578 | 46562                   | CC                              | AA                 | AA               | INTERGENIC      |               |                    |                    |
| SNP_97861_A_59797 | NW_004516751.1 | scaffold1578 | 59797                   | TT                              | CC                 | CC               | INTERGENIC      |               |                    |                    |
| SNP_97862_A_61142 | NW_004516751.1 | scaffold1578 | 61142                   | GG                              | AA                 | AA               | INTERGENIC      |               |                    |                    |
| SNP_97865_A_76725 | NW_004516751.1 | scaffold1578 | 76725                   | GG                              | AA                 | AA               | INTERGENIC      |               |                    |                    |
| SNP_97867_A_77067 | NW_004516751.1 | scaffold1578 | 77067                   | AA                              | GG                 | GG               | INTERGENIC      |               |                    |                    |
| SNP_97868_A_77122 | NW_004516751.1 | scaffold1578 | 77122                   | TT                              | AA                 | AA               | INTERGENIC      |               |                    |                    |
| SNP_97869_A_77150 | NW_004516751.1 | scaffold1578 | 77150                   | GG                              | TT                 | TT               | INTERGENIC      |               |                    |                    |
| SNP_97870_A_77234 | NW_004516751.1 | scaffold1578 | 77234                   | TT                              | AA                 | AA               | INTERGENIC      |               |                    |                    |
| SNP_97872_A_78861 | NW_004516751.1 | scaffold1578 | 78861                   | CC                              | TT                 | TT               | INTERGENIC      |               |                    |                    |
| SNP_97873_A_78862 | NW_004516751.1 | scaffold1578 | 78862                   | GG                              | AA                 | AA               | INTERGENIC      |               |                    |                    |
| SNP_97874_A_78914 | NW_004516751.1 | scaffold1578 | 78914                   | TT                              | AA                 | AA               | INTERGENIC      |               |                    |                    |
| SNP_97875_A_79007 | NW_004516751.1 | scaffold1578 | 79007                   | GG                              | TT                 | TT               | INTERGENIC      |               |                    |                    |
| SNP_97877_A_86455 | NW_004516751.1 | scaffold1578 | 86455                   | AA                              | GG                 | GG               | INTERGENIC      |               |                    |                    |

| SNPs IDs          | Chromosome IDs | Chromosomes  | Physical positions (bp) | CDC Frontier genome (Reference genome) | (Pusa 1103 & HPNB) | (ILWC 46 & LPNB) | Sequence genome | Components of | Gene accession IDs | Putative functions |
|-------------------|----------------|--------------|-------------------------|----------------------------------------|--------------------|------------------|-----------------|---------------|--------------------|--------------------|
| SNP_97878_A_86831 | NW_004516751.1 | scaffold1578 | 86831                   | AA                                     | GG                 | GG               | INTERGENIC      |               |                    |                    |
| SNP_97879_A_86859 | NW_004516751.1 | scaffold1578 | 86859                   | AA                                     | GG                 | GG               | INTERGENIC      |               |                    |                    |
| SNP_97880_A_86920 | NW_004516751.1 | scaffold1578 | 86920                   | AA                                     | GG                 | GG               | INTERGENIC      |               |                    |                    |
| SNP_97881_A_9028  | NW_004516752.1 | scaffold1579 | 9028                    | TT                                     | CC                 | CC               | INTERGENIC      |               |                    |                    |
| SNP_97882_A_9299  | NW_004516752.1 | scaffold1579 | 9299                    | CC                                     | AA                 | AA               | INTERGENIC      |               |                    |                    |
| SNP_97883_A_9339  | NW_004516752.1 | scaffold1579 | 9339                    | TT                                     | CC                 | CC               | INTERGENIC      |               |                    |                    |
| SNP_97884_A_9343  | NW_004516752.1 | scaffold1579 | 9343                    | AA                                     | GG                 | GG               | INTERGENIC      |               |                    |                    |
| SNP_97885_A_9348  | NW_004516752.1 | scaffold1579 | 9348                    | TT                                     | GG                 | GG               | INTERGENIC      |               |                    |                    |
| SNP_97886_A_9442  | NW_004516752.1 | scaffold1579 | 9442                    | CC                                     | TT                 | TT               | INTERGENIC      |               |                    |                    |
| SNP_97887_A_9521  | NW_004516752.1 | scaffold1579 | 9521                    | CC                                     | GG                 | GG               | INTERGENIC      |               |                    |                    |
| SNP_97888_A_9692  | NW_004516752.1 | scaffold1579 | 9692                    | GG                                     | AA                 | AA               | INTERGENIC      |               |                    |                    |
| SNP_97889_A_9703  | NW_004516752.1 | scaffold1579 | 9703                    | GG                                     | TT                 | TT               | INTERGENIC      |               |                    |                    |
| SNP_97890_A_9793  | NW_004516752.1 | scaffold1579 | 9793                    | TT                                     | CC                 | CC               | INTERGENIC      |               |                    |                    |
| SNP_97891_A_9833  | NW_004516752.1 | scaffold1579 | 9833                    | AA                                     | CC                 | CC               | INTERGENIC      |               |                    |                    |
| SNP_97892_A_9844  | NW_004516752.1 | scaffold1579 | 9844                    | AA                                     | GG                 | GG               | INTERGENIC      |               |                    |                    |
| SNP_97893_A_9894  | NW_004516752.1 | scaffold1579 | 9894                    | AA                                     | GG                 | GG               | INTERGENIC      |               |                    |                    |
| SNP_97894_A_10372 | NW_004516752.1 | scaffold1579 | 10372                   | TT                                     | CC                 | CC               | INTERGENIC      |               |                    |                    |
| SNP_97895_A_17623 | NW_004516752.1 | scaffold1579 | 17623                   | AA                                     | GG                 | GG               | INTERGENIC      |               |                    |                    |
| SNP_97896_A_17879 | NW_004516752.1 | scaffold1579 | 17879                   | TT                                     | CC                 | CC               | INTERGENIC      |               |                    |                    |
| SNP_97897_A_35173 | NW_004516752.1 | scaffold1579 | 35173                   | AA                                     | GG                 | GG               | INTERGENIC      |               |                    |                    |
| SNP_97899_A_35254 | NW_004516752.1 | scaffold1579 | 35254                   | AA                                     | GG                 | GG               | INTERGENIC      |               |                    |                    |
| SNP_97900_A_35487 | NW_004516752.1 | scaffold1579 | 35487                   | TT                                     | AA                 | AA               | INTERGENIC      |               |                    |                    |

| SNPs IDs           | Chromosome IDs | Chromosomes  | Physical positions (bp) | CDC Frontier (Reference genome) | (Pusa 1103 & HPNB) | (ILWC 46 & LPNB) | Sequence genome | Components of | Gene accession IDs | Putative functions |
|--------------------|----------------|--------------|-------------------------|---------------------------------|--------------------|------------------|-----------------|---------------|--------------------|--------------------|
| SNP_97901_A_35524  | NW_004516752.1 | scaffold1579 | 35524                   | AA                              | TT                 | TT               | INTERGENIC      |               |                    |                    |
| SNP_97902_A_35592  | NW_004516752.1 | scaffold1579 | 35592                   | TT                              | CC                 | CC               | INTERGENIC      |               |                    |                    |
| SNP_97903_A_63869  | NW_004516752.1 | scaffold1579 | 63869                   | AA                              | GG                 | GG               | INTERGENIC      |               |                    |                    |
| SNP_97905_A_65117  | NW_004516752.1 | scaffold1579 | 65117                   | TT                              | CC                 | CC               | INTERGENIC      |               |                    |                    |
| SNP_97906_A_65172  | NW_004516752.1 | scaffold1579 | 65172                   | TT                              | AA                 | AA               | INTERGENIC      |               |                    |                    |
| SNP_97907_A_65194  | NW_004516752.1 | scaffold1579 | 65194                   | CC                              | TT                 | TT               | INTERGENIC      |               |                    |                    |
| SNP_97908_A_65196  | NW_004516752.1 | scaffold1579 | 65196                   | GG                              | AA                 | AA               | INTERGENIC      |               |                    |                    |
| SNP_97909_A_65343  | NW_004516752.1 | scaffold1579 | 65343                   | TT                              | AA                 | AA               | INTERGENIC      |               |                    |                    |
| SNP_97910_A_65477  | NW_004516752.1 | scaffold1579 | 65477                   | TT                              | AA                 | AA               | INTERGENIC      |               |                    |                    |
| SNP_97911_A_65542  | NW_004516752.1 | scaffold1579 | 65542                   | TT                              | CC                 | CC               | INTERGENIC      |               |                    |                    |
| SNP_97912_A_82828  | NW_004516752.1 | scaffold1579 | 82828                   | CC                              | TT                 | TT               | INTERGENIC      |               |                    |                    |
| SNP_97913_A_153244 | NW_004516752.1 | scaffold1579 | 153244                  | CC                              | TT                 | TT               | INTERGENIC      |               |                    |                    |
| SNP_97914_A_187208 | NW_004516752.1 | scaffold1579 | 187208                  | TT                              | CC                 | CC               | INTERGENIC      |               |                    |                    |
| SNP_97915_A_187217 | NW_004516752.1 | scaffold1579 | 187217                  | TT                              | GG                 | GG               | INTERGENIC      |               |                    |                    |
| SNP_97916_A_187245 | NW_004516752.1 | scaffold1579 | 187245                  | TT                              | GG                 | GG               | INTERGENIC      |               |                    |                    |
| SNP_97917_A_194242 | NW_004516752.1 | scaffold1579 | 194242                  | AA                              | CC                 | CC               | INTERGENIC      |               |                    |                    |
| SNP_97918_A_195303 | NW_004516752.1 | scaffold1579 | 195303                  | CC                              | TT                 | TT               | INTERGENIC      |               |                    |                    |
| SNP_97920_A_202987 | NW_004516752.1 | scaffold1579 | 202987                  | GG                              | CC                 | CC               | INTERGENIC      |               |                    |                    |
| SNP_97921_A_203001 | NW_004516752.1 | scaffold1579 | 203001                  | AA                              | TT                 | TT               | INTERGENIC      |               |                    |                    |
| SNP_97922_A_203342 | NW_004516752.1 | scaffold1579 | 203342                  | TT                              | CC                 | CC               | INTERGENIC      |               |                    |                    |
| SNP_97923_A_203345 | NW_004516752.1 | scaffold1579 | 203345                  | AA                              | CC                 | CC               | INTERGENIC      |               |                    |                    |
| SNP_97924_A_203490 | NW_004516752.1 | scaffold1579 | 203490                  | AA                              | TT                 | TT               | INTERGENIC      |               |                    |                    |

| SNPs IDs           | Chromosome IDs | Chromosomes  | Physical positions (bp) | CDC Frontier (Reference genome) | (Pusa 1103 & HPNB) | (ILWC 46 & LPNB) | Sequence genome | Components of | Gene accession IDs | Putative functions |
|--------------------|----------------|--------------|-------------------------|---------------------------------|--------------------|------------------|-----------------|---------------|--------------------|--------------------|
| SNP_97925_A_205771 | NW_004516752.1 | scaffold1579 | 205771                  | GG                              | CC                 | CC               | INTERGENIC      |               |                    |                    |
| SNP_97926_A_228342 | NW_004516752.1 | scaffold1579 | 228342                  | GG                              | AA                 | AA               | INTERGENIC      |               |                    |                    |
| SNP_97927_A_232819 | NW_004516752.1 | scaffold1579 | 232819                  | AA                              | CC                 | CC               | INTERGENIC      |               |                    |                    |
| SNP_97928_A_232820 | NW_004516752.1 | scaffold1579 | 232820                  | AA                              | TT                 | TT               | INTERGENIC      |               |                    |                    |
| SNP_97929_A_233206 | NW_004516752.1 | scaffold1579 | 233206                  | AA                              | GG                 | GG               | INTERGENIC      |               |                    |                    |
| SNP_97930_A_233211 | NW_004516752.1 | scaffold1579 | 233211                  | AA                              | CC                 | CC               | INTERGENIC      |               |                    |                    |
| SNP_97931_A_234063 | NW_004516752.1 | scaffold1579 | 234063                  | TT                              | GG                 | GG               | INTERGENIC      |               |                    |                    |
| SNP_97932_A_234077 | NW_004516752.1 | scaffold1579 | 234077                  | AA                              | GG                 | GG               | INTERGENIC      |               |                    |                    |
| SNP_97933_A_234325 | NW_004516752.1 | scaffold1579 | 234325                  | AA                              | GG                 | GG               | INTERGENIC      |               |                    |                    |
| SNP_97935_A_234350 | NW_004516752.1 | scaffold1579 | 234350                  | CC                              | TT                 | TT               | INTERGENIC      |               |                    |                    |
| SNP_97936_A_240973 | NW_004516752.1 | scaffold1579 | 240973                  | AA                              | GG                 | GG               | INTERGENIC      |               |                    |                    |
| SNP_97937_A_241246 | NW_004516752.1 | scaffold1579 | 241246                  | AA                              | CC                 | CC               | INTERGENIC      |               |                    |                    |
| SNP_97938_A_243275 | NW_004516752.1 | scaffold1579 | 243275                  | AA                              | GG                 | GG               | INTERGENIC      |               |                    |                    |
| SNP_97939_A_243292 | NW_004516752.1 | scaffold1579 | 243292                  | AA                              | CC                 | CC               | INTERGENIC      |               |                    |                    |
| SNP_97940_A_243297 | NW_004516752.1 | scaffold1579 | 243297                  | CC                              | TT                 | TT               | INTERGENIC      |               |                    |                    |
| SNP_97941_A_243396 | NW_004516752.1 | scaffold1579 | 243396                  | TT                              | GG                 | GG               | INTERGENIC      |               |                    |                    |
| SNP_97942_A_243710 | NW_004516752.1 | scaffold1579 | 243710                  | TT                              | CC                 | CC               | INTERGENIC      |               |                    |                    |
| SNP_97943_A_243755 | NW_004516752.1 | scaffold1579 | 243755                  | TT                              | CC                 | CC               | INTERGENIC      |               |                    |                    |
| SNP_97944_A_243800 | NW_004516752.1 | scaffold1579 | 243800                  | AA                              | GG                 | GG               | INTERGENIC      |               |                    |                    |
| SNP_97945_A_244430 | NW_004516752.1 | scaffold1579 | 244430                  | GG                              | AA                 | AA               | INTERGENIC      |               |                    |                    |
| SNP_97946_A_244431 | NW_004516752.1 | scaffold1579 | 244431                  | AA                              | GG                 | GG               | INTERGENIC      |               |                    |                    |
| SNP_97947_A_244445 | NW_004516752.1 | scaffold1579 | 244445                  | TT                              | CC                 | CC               | INTERGENIC      |               |                    |                    |

| SNPs IDs           | Chromosome IDs | Chromosomes  | Physical positions (bp) | CDC Frontier (Reference genome) | (Pusa 1103 & HPNB) | (ILWC 46 & LPNB) | Sequence Components of genome | Gene accession IDs | Putative functions           |
|--------------------|----------------|--------------|-------------------------|---------------------------------|--------------------|------------------|-------------------------------|--------------------|------------------------------|
| SNP_97948_A_7202   | NW_004516753.1 | scaffold1580 | 7202                    | AA                              | TT                 | TT               | INTERGENIC                    |                    |                              |
| SNP_97949_A_7207   | NW_004516753.1 | scaffold1580 | 7207                    | AA                              | CC                 | CC               | INTERGENIC                    |                    |                              |
| SNP_97950_A_7217   | NW_004516753.1 | scaffold1580 | 7217                    | TT                              | GG                 | GG               | INTERGENIC                    |                    |                              |
| SNP_97951_A_7241   | NW_004516753.1 | scaffold1580 | 7241                    | AA                              | CC                 | CC               | INTERGENIC                    |                    |                              |
| SNP_97952_A_7294   | NW_004516753.1 | scaffold1580 | 7294                    | TT                              | AA                 | AA               | INTERGENIC                    |                    |                              |
| SNP_97953_A_7298   | NW_004516753.1 | scaffold1580 | 7298                    | AA                              | TT                 | TT               | INTERGENIC                    |                    |                              |
| SNP_97954_A_7311   | NW_004516753.1 | scaffold1580 | 7311                    | CC                              | TT                 | TT               | INTERGENIC                    |                    |                              |
| SNP_97955_A_7596   | NW_004516753.1 | scaffold1580 | 7596                    | TT                              | AA                 | AA               | INTERGENIC                    |                    |                              |
| SNP_97956_A_61949  | NW_004516753.1 | scaffold1580 | 61949                   | AA                              | GG                 | GG               | INTERGENIC                    |                    |                              |
| SNP_97958_A_69803  | NW_004516753.1 | scaffold1580 | 69803                   | TT                              | GG                 | GG               | INTERGENIC                    |                    |                              |
| SNP_97959_A_69840  | NW_004516753.1 | scaffold1580 | 69840                   | AA                              | TT                 | TT               | INTERGENIC                    |                    |                              |
| SNP_97960_A_69874  | NW_004516753.1 | scaffold1580 | 69874                   | TT                              | CC                 | CC               | INTERGENIC                    |                    |                              |
| SNP_97962_A_70138  | NW_004516753.1 | scaffold1580 | 70138                   | GG                              | AA                 | AA               | INTERGENIC                    |                    |                              |
| SNP_97963_A_98195  | NW_004516753.1 | scaffold1580 | 98195                   | AA                              | GG                 | GG               | INTERGENIC                    |                    |                              |
| SNP_97965_A_184211 | NW_004516753.1 | scaffold1580 | 184211                  | CC                              | TT                 | TT               | INTERGENIC                    |                    |                              |
| SNP_97967_A_199311 | NW_004516753.1 | scaffold1580 | 199311                  | AA                              | TT                 | TT               | INTERGENIC                    |                    |                              |
| SNP_97968_A_228552 | NW_004516753.1 | scaffold1580 | 228552                  | CC                              | TT                 | TT               | INTERGENIC                    |                    |                              |
| SNP_97969_A_232566 | NW_004516753.1 | scaffold1580 | 232566                  | CC                              | AA                 | AA               | INTERGENIC                    |                    |                              |
| SNP_97970_A_232585 | NW_004516753.1 | scaffold1580 | 232585                  | GG                              | AA                 | AA               | INTERGENIC                    |                    |                              |
| SNP_97972_A_361103 | NW_004516753.1 | scaffold1580 | 361103                  | AA                              | TT                 | TT               | INTERGENIC                    |                    |                              |
| SNP_97973_A_416939 | NW_004516753.1 | scaffold1580 | 416939                  | GG                              | AA                 | AA               | DRR                           | 101501049          | uncharacterized LOC101501049 |
| SNP_97974_A_445333 | NW_004516753.1 | scaffold1580 | 445333                  | TT                              | CC                 | CC               | START_GAINED                  | 101500739          | uncharacterized LOC101500739 |

| SNPs IDs           | Chromosome IDs | Chromosomes  | Physical positions (bp) | CDC Frontier (Reference genome) | (Pusa 1103 & HPNB) | (ILWC 46 & LPNB) | Sequence genome | Components of | Gene accession IDs | Putative functions |
|--------------------|----------------|--------------|-------------------------|---------------------------------|--------------------|------------------|-----------------|---------------|--------------------|--------------------|
| SNP_97975_A_472094 | NW_004516753.1 | scaffold1580 | 472094                  | GG                              | AA                 | AA               | INTERGENIC      |               |                    |                    |
| SNP_97979_A_472715 | NW_004516753.1 | scaffold1580 | 472715                  | TT                              | GG                 | GG               | INTERGENIC      |               |                    |                    |
| SNP_97980_A_472834 | NW_004516753.1 | scaffold1580 | 472834                  | AA                              | TT                 | TT               | INTERGENIC      |               |                    |                    |
| SNP_97981_A_472849 | NW_004516753.1 | scaffold1580 | 472849                  | CC                              | AA                 | AA               | INTERGENIC      |               |                    |                    |
| SNP_97982_A_472905 | NW_004516753.1 | scaffold1580 | 472905                  | AA                              | GG                 | GG               | INTERGENIC      |               |                    |                    |
| SNP_97983_A_472915 | NW_004516753.1 | scaffold1580 | 472915                  | CC                              | AA                 | AA               | INTERGENIC      |               |                    |                    |
| SNP_97984_A_472917 | NW_004516753.1 | scaffold1580 | 472917                  | AA                              | GG                 | GG               | INTERGENIC      |               |                    |                    |
| SNP_97985_A_472945 | NW_004516753.1 | scaffold1580 | 472945                  | AA                              | GG                 | GG               | INTERGENIC      |               |                    |                    |
| SNP_97986_A_472951 | NW_004516753.1 | scaffold1580 | 472951                  | CC                              | AA                 | AA               | INTERGENIC      |               |                    |                    |
| SNP_97987_A_472952 | NW_004516753.1 | scaffold1580 | 472952                  | AA                              | GG                 | GG               | INTERGENIC      |               |                    |                    |
| SNP_97988_A_473072 | NW_004516753.1 | scaffold1580 | 473072                  | TT                              | CC                 | CC               | INTERGENIC      |               |                    |                    |
| SNP_97989_A_473112 | NW_004516753.1 | scaffold1580 | 473112                  | AA                              | GG                 | GG               | INTERGENIC      |               |                    |                    |
| SNP_97990_A_473120 | NW_004516753.1 | scaffold1580 | 473120                  | GG                              | AA                 | AA               | INTERGENIC      |               |                    |                    |
| SNP_97991_A_473123 | NW_004516753.1 | scaffold1580 | 473123                  | AA                              | TT                 | TT               | INTERGENIC      |               |                    |                    |
| SNP_97992_A_473150 | NW_004516753.1 | scaffold1580 | 473150                  | TT                              | GG                 | GG               | INTERGENIC      |               |                    |                    |
| SNP_97993_A_504806 | NW_004516753.1 | scaffold1580 | 504806                  | AA                              | TT                 | TT               | INTERGENIC      |               |                    |                    |
| SNP_97994_A_504949 | NW_004516753.1 | scaffold1580 | 504949                  | CC                              | TT                 | TT               | INTERGENIC      |               |                    |                    |
| SNP_97995_A_504952 | NW_004516753.1 | scaffold1580 | 504952                  | AA                              | CC                 | CC               | INTERGENIC      |               |                    |                    |
| SNP_97996_A_505307 | NW_004516753.1 | scaffold1580 | 505307                  | AA                              | CC                 | CC               | INTERGENIC      |               |                    |                    |
| SNP_97997_A_505415 | NW_004516753.1 | scaffold1580 | 505415                  | TT                              | CC                 | CC               | INTERGENIC      |               |                    |                    |
| SNP_97998_A_14233  | NW_004516754.1 | scaffold1581 | 14233                   | TT                              | AA                 | AA               | INTERGENIC      |               |                    |                    |
| SNP_97999_A_14237  | NW_004516754.1 | scaffold1581 | 14237                   | AA                              | CC                 | CC               | INTERGENIC      |               |                    |                    |

| SNPs IDs           | Chromosome IDs | Chromosomes  | Physical positions (bp) | CDC Frontier (Reference genome) | (Pusa 1103 & HPNB) | (ILWC 46 & LPNB) | Sequence Components of genome | Gene accession IDs | Putative functions |
|--------------------|----------------|--------------|-------------------------|---------------------------------|--------------------|------------------|-------------------------------|--------------------|--------------------|
| SNP_98000_A_156    | NW_004516755.1 | scaffold1585 | 156                     | GG                              | TT                 | TT               | INTERGENIC                    |                    |                    |
| SNP_98001_A_58074  | NW_004516755.1 | scaffold1585 | 58074                   | AA                              | GG                 | GG               | INTERGENIC                    |                    |                    |
| SNP_98002_A_58139  | NW_004516755.1 | scaffold1585 | 58139                   | TT                              | CC                 | CC               | INTERGENIC                    |                    |                    |
| SNP_98003_A_58342  | NW_004516755.1 | scaffold1585 | 58342                   | CC                              | TT                 | TT               | INTERGENIC                    |                    |                    |
| SNP_98004_A_58466  | NW_004516755.1 | scaffold1585 | 58466                   | GG                              | TT                 | TT               | INTERGENIC                    |                    |                    |
| SNP_98005_A_58562  | NW_004516755.1 | scaffold1585 | 58562                   | GG                              | AA                 | AA               | INTERGENIC                    |                    |                    |
| SNP_98006_A_58577  | NW_004516755.1 | scaffold1585 | 58577                   | TT                              | CC                 | CC               | INTERGENIC                    |                    |                    |
| SNP_98007_A_58785  | NW_004516755.1 | scaffold1585 | 58785                   | AA                              | CC                 | CC               | INTERGENIC                    |                    |                    |
| SNP_98009_A_58805  | NW_004516755.1 | scaffold1585 | 58805                   | TT                              | CC                 | CC               | INTERGENIC                    |                    |                    |
| SNP_98011_A_59001  | NW_004516755.1 | scaffold1585 | 59001                   | CC                              | TT                 | TT               | INTERGENIC                    |                    |                    |
| SNP_98012_A_62170  | NW_004516755.1 | scaffold1585 | 62170                   | TT                              | CC                 | CC               | INTERGENIC                    |                    |                    |
| SNP_98013_A_62176  | NW_004516755.1 | scaffold1585 | 62176                   | TT                              | CC                 | CC               | INTERGENIC                    |                    |                    |
| SNP_98014_A_147399 | NW_004516755.1 | scaffold1585 | 147399                  | TT                              | CC                 | CC               | NON_SYNONYMOUS_CODING         | id214067           | Unknown function   |
| SNP_98015_A_147703 | NW_004516755.1 | scaffold1585 | 147703                  | TT                              | CC                 | CC               | NON_SYNONYMOUS_CODING         | id214067           | Unknown function   |
| SNP_98016_A_147778 | NW_004516755.1 | scaffold1585 | 147778                  | AA                              | CC                 | CC               | NON_SYNONYMOUS_CODING         | id214067           | Unknown function   |
| SNP_98017_A_147789 | NW_004516755.1 | scaffold1585 | 147789                  | GG                              | AA                 | AA               | NON_SYNONYMOUS_CODING         | id214067           | Unknown function   |
| SNP_98018_A_183403 | NW_004516755.1 | scaffold1585 | 183403                  | GG                              | AA                 | AA               | INTERGENIC                    |                    |                    |
| SNP_98019_A_427    | NW_004516756.1 | scaffold1586 | 427                     | GG                              | AA                 | AA               | INTERGENIC                    |                    |                    |
| SNP_98020_A_799    | NW_004516756.1 | scaffold1586 | 799                     | TT                              | CC                 | CC               | INTERGENIC                    |                    |                    |
| SNP_98021_A_1821   | NW_004516756.1 | scaffold1586 | 1821                    | AA                              | TT                 | TT               | INTERGENIC                    |                    |                    |
| SNP_98023_A_2154   | NW_004516756.1 | scaffold1586 | 2154                    | GG                              | AA                 | AA               | INTERGENIC                    |                    |                    |
| SNP_98024_A_11439  | NW_004516756.1 | scaffold1586 | 11439                   | TT                              | AA                 | AA               | INTERGENIC                    |                    |                    |

| SNPs IDs          | Chromosome IDs | Chromosomes  | Physical positions (bp) | CDC Frontier (Reference genome) | (Pusa 1103 & HPNB) | (ILWC 46 & LPNB) | Sequence genome | Components of | Gene accession IDs | Putative functions |
|-------------------|----------------|--------------|-------------------------|---------------------------------|--------------------|------------------|-----------------|---------------|--------------------|--------------------|
| SNP_98025_A_4771  | NW_004516758.1 | scaffold1588 | 4771                    | AA                              | TT                 | TT               | INTERGENIC      |               |                    |                    |
| SNP_98026_A_6506  | NW_004516758.1 | scaffold1588 | 6506                    | AA                              | GG                 | GG               | INTERGENIC      |               |                    |                    |
| SNP_98027_A_8373  | NW_004516759.1 | scaffold1590 | 8373                    | AA                              | CC                 | CC               | INTERGENIC      |               |                    |                    |
| SNP_98028_A_8470  | NW_004516759.1 | scaffold1590 | 8470                    | CC                              | TT                 | TT               | INTERGENIC      |               |                    |                    |
| SNP_98029_A_8487  | NW_004516759.1 | scaffold1590 | 8487                    | CC                              | TT                 | TT               | INTERGENIC      |               |                    |                    |
| SNP_98030_A_8517  | NW_004516759.1 | scaffold1590 | 8517                    | CC                              | AA                 | AA               | INTERGENIC      |               |                    |                    |
| SNP_98031_A_8609  | NW_004516759.1 | scaffold1590 | 8609                    | TT                              | CC                 | CC               | INTERGENIC      |               |                    |                    |
| SNP_98032_A_8633  | NW_004516759.1 | scaffold1590 | 8633                    | CC                              | AA                 | AA               | INTERGENIC      |               |                    |                    |
| SNP_98033_A_8726  | NW_004516759.1 | scaffold1590 | 8726                    | TT                              | CC                 | CC               | INTERGENIC      |               |                    |                    |
| SNP_98034_A_9812  | NW_004516759.1 | scaffold1590 | 9812                    | GG                              | AA                 | AA               | INTERGENIC      |               |                    |                    |
| SNP_98035_A_12414 | NW_004516759.1 | scaffold1590 | 12414                   | TT                              | CC                 | CC               | INTERGENIC      |               |                    |                    |
| SNP_98037_A_426   | NW_004516763.1 | scaffold1600 | 426                     | AA                              | TT                 | TT               | INTERGENIC      |               |                    |                    |
| SNP_98038_A_1210  | NW_004516763.1 | scaffold1600 | 1210                    | CC                              | GG                 | GG               | INTERGENIC      |               |                    |                    |
| SNP_98039_A_13766 | NW_004516764.1 | scaffold1603 | 13766                   | GG                              | TT                 | TT               | INTERGENIC      |               |                    |                    |
| SNP_98040_A_46703 | NW_004516764.1 | scaffold1603 | 46703                   | TT                              | CC                 | CC               | INTERGENIC      |               |                    |                    |
| SNP_98041_A_47110 | NW_004516764.1 | scaffold1603 | 47110                   | TT                              | AA                 | AA               | INTERGENIC      |               |                    |                    |
| SNP_98042_A_1691  | NW_004516765.1 | scaffold1606 | 1691                    | AA                              | TT                 | TT               | INTERGENIC      |               |                    |                    |
| SNP_98043_A_1812  | NW_004516765.1 | scaffold1606 | 1812                    | CC                              | GG                 | GG               | INTERGENIC      |               |                    |                    |
| SNP_98045_A_14171 | NW_004516766.1 | scaffold1607 | 14171                   | AA                              | TT                 | TT               | INTERGENIC      |               |                    |                    |
| SNP_98046_A_14323 | NW_004516766.1 | scaffold1607 | 14323                   | GG                              | TT                 | TT               | INTERGENIC      |               |                    |                    |
| SNP_98047_A_14540 | NW_004516766.1 | scaffold1607 | 14540                   | GG                              | AA                 | AA               | INTERGENIC      |               |                    |                    |
| SNP_98048_A_31817 | NW_004516766.1 | scaffold1607 | 31817                   | GG                              | AA                 | AA               | INTERGENIC      |               |                    |                    |



| SNPs IDs           | Chromosome IDs | Chromosomes  | Physical positions (bp) | CDC Frontier (Reference genome) | (Pusa 1103 & HPNB) | (ILWC 46 & LPNB) | Sequence genome | Components of | Gene accession IDs | Putative functions |
|--------------------|----------------|--------------|-------------------------|---------------------------------|--------------------|------------------|-----------------|---------------|--------------------|--------------------|
| SNP_98049_A_33291  | NW_004516766.1 | scaffold1607 | 33291                   | TT                              | CC                 | CC               | INTERGENIC      |               |                    |                    |
| SNP_98050_A_33297  | NW_004516766.1 | scaffold1607 | 33297                   | AA                              | GG                 | GG               | INTERGENIC      |               |                    |                    |
| SNP_98051_A_36214  | NW_004516766.1 | scaffold1607 | 36214                   | AA                              | TT                 | TT               | INTERGENIC      |               |                    |                    |
| SNP_98053_A_41384  | NW_004516766.1 | scaffold1607 | 41384                   | GG                              | AA                 | AA               | INTERGENIC      |               |                    |                    |
| SNP_98054_A_42086  | NW_004516766.1 | scaffold1607 | 42086                   | CC                              | TT                 | TT               | INTERGENIC      |               |                    |                    |
| SNP_98055_A_47255  | NW_004516766.1 | scaffold1607 | 47255                   | AA                              | CC                 | CC               | INTERGENIC      |               |                    |                    |
| SNP_98056_A_47430  | NW_004516766.1 | scaffold1607 | 47430                   | TT                              | AA                 | AA               | INTERGENIC      |               |                    |                    |
| SNP_98058_A_47443  | NW_004516766.1 | scaffold1607 | 47443                   | AA                              | TT                 | TT               | INTERGENIC      |               |                    |                    |
| SNP_98059_A_47560  | NW_004516766.1 | scaffold1607 | 47560                   | TT                              | CC                 | CC               | INTERGENIC      |               |                    |                    |
| SNP_98061_A_66914  | NW_004516766.1 | scaffold1607 | 66914                   | CC                              | TT                 | TT               | INTERGENIC      |               |                    |                    |
| SNP_98062_A_72150  | NW_004516766.1 | scaffold1607 | 72150                   | AA                              | GG                 | GG               | INTERGENIC      |               |                    |                    |
| SNP_98063_A_75678  | NW_004516766.1 | scaffold1607 | 75678                   | AA                              | TT                 | TT               | INTERGENIC      |               |                    |                    |
| SNP_98064_A_76043  | NW_004516766.1 | scaffold1607 | 76043                   | AA                              | GG                 | GG               | INTERGENIC      |               |                    |                    |
| SNP_98065_A_76052  | NW_004516766.1 | scaffold1607 | 76052                   | GG                              | AA                 | AA               | INTERGENIC      |               |                    |                    |
| SNP_98066_A_91483  | NW_004516766.1 | scaffold1607 | 91483                   | CC                              | TT                 | TT               | INTERGENIC      |               |                    |                    |
| SNP_98067_A_99760  | NW_004516766.1 | scaffold1607 | 99760                   | AA                              | GG                 | GG               | INTERGENIC      |               |                    |                    |
| SNP_98068_A_116848 | NW_004516766.1 | scaffold1607 | 116848                  | TT                              | AA                 | AA               | INTRON          | 101508858     | Unknown function   |                    |
| SNP_98069_A_117126 | NW_004516766.1 | scaffold1607 | 117126                  | GG                              | CC                 | CC               | INTRON          | 101508858     | Unknown function   |                    |
| SNP_98070_A_117128 | NW_004516766.1 | scaffold1607 | 117128                  | GG                              | TT                 | TT               | INTRON          | 101508858     | Unknown function   |                    |
| SNP_98071_A_117170 | NW_004516766.1 | scaffold1607 | 117170                  | TT                              | AA                 | AA               | INTRON          | 101508858     | Unknown function   |                    |
| SNP_98073_A_119717 | NW_004516766.1 | scaffold1607 | 119717                  | AA                              | TT                 | TT               | INTRON          | 101508858     | Unknown function   |                    |
| SNP_98074_A_119768 | NW_004516766.1 | scaffold1607 | 119768                  | AA                              | GG                 | GG               | INTRON          | 101508858     | Unknown function   |                    |

| SNPs IDs           | Chromosome IDs | Chromosomes  | Physical positions (bp) | CDC Frontier genome (Reference genome) | (Pusa 1103 & HPNB) | (ILWC 46 & LPNB) | Sequence Components of genome | Gene accession IDs | Putative functions                        |
|--------------------|----------------|--------------|-------------------------|----------------------------------------|--------------------|------------------|-------------------------------|--------------------|-------------------------------------------|
| SNP_98075_A_119775 | NW_004516766.1 | scaffold1607 | 119775                  | GG                                     | AA                 | AA               | INTRON                        | 101508858          | Unknown function                          |
| SNP_98076_A_119813 | NW_004516766.1 | scaffold1607 | 119813                  | TT                                     | AA                 | AA               | INTRON                        | 101508858          | Unknown function                          |
| SNP_98077_A_119895 | NW_004516766.1 | scaffold1607 | 119895                  | GG                                     | AA                 | AA               | INTRON                        | 101508858          | Unknown function                          |
| SNP_98078_A_119896 | NW_004516766.1 | scaffold1607 | 119896                  | CC                                     | AA                 | AA               | INTRON                        | 101508858          | Unknown function                          |
| SNP_98079_A_119928 | NW_004516766.1 | scaffold1607 | 119928                  | TT                                     | CC                 | CC               | INTRON                        | 101508858          | Unknown function                          |
| SNP_98080_A_119938 | NW_004516766.1 | scaffold1607 | 119938                  | AA                                     | CC                 | CC               | INTRON                        | 101508858          | Unknown function                          |
| SNP_98081_A_120038 | NW_004516766.1 | scaffold1607 | 120038                  | CC                                     | AA                 | AA               | INTRON                        | 101508858          | Unknown function                          |
| SNP_98082_A_120081 | NW_004516766.1 | scaffold1607 | 120081                  | GG                                     | TT                 | TT               | INTRON                        | 101508858          | Unknown function                          |
| SNP_98083_A_122623 | NW_004516766.1 | scaffold1607 | 122623                  | TT                                     | GG                 | GG               | URR                           | 101508858          | Unknown function                          |
| SNP_98085_A_2428   | NW_004516771.1 | scaffold1613 | 2428                    | AA                                     | GG                 | GG               | INTERGENIC                    |                    |                                           |
| SNP_98086_A_10630  | NW_004516771.1 | scaffold1613 | 10630                   | GG                                     | AA                 | AA               | INTERGENIC                    |                    |                                           |
| SNP_98087_A_10633  | NW_004516771.1 | scaffold1613 | 10633                   | AA                                     | TT                 | TT               | INTERGENIC                    |                    |                                           |
| SNP_98088_A_10726  | NW_004516771.1 | scaffold1613 | 10726                   | TT                                     | CC                 | CC               | INTERGENIC                    |                    |                                           |
| SNP_98089_A_46476  | NW_004516771.1 | scaffold1613 | 46476                   | CC                                     | GG                 | GG               | NON_SYNONYMOUS_CODING         | 101509182          | serine/threonine-protein kinase ATG1-like |
| SNP_98090_A_54699  | NW_004516771.1 | scaffold1613 | 54699                   | AA                                     | CC                 | CC               | URR                           | 101509182          | serine/threonine-protein kinase ATG1-like |
| SNP_98091_A_65333  | NW_004516771.1 | scaffold1613 | 65333                   | TT                                     | CC                 | CC               | INTERGENIC                    |                    |                                           |
| SNP_98092_A_65339  | NW_004516771.1 | scaffold1613 | 65339                   | AA                                     | CC                 | CC               | INTERGENIC                    |                    |                                           |
| SNP_98093_A_65341  | NW_004516771.1 | scaffold1613 | 65341                   | GG                                     | AA                 | AA               | INTERGENIC                    |                    |                                           |
| SNP_98094_A_91702  | NW_004516771.1 | scaffold1613 | 91702                   | CC                                     | TT                 | TT               | INTERGENIC                    |                    |                                           |
| SNP_98095_A_98123  | NW_004516771.1 | scaffold1613 | 98123                   | CC                                     | TT                 | TT               | INTERGENIC                    |                    |                                           |
| SNP_98096_A_98142  | NW_004516771.1 | scaffold1613 | 98142                   | CC                                     | AA                 | AA               | INTERGENIC                    |                    |                                           |
| SNP_98097_A_98146  | NW_004516771.1 | scaffold1613 | 98146                   | AA                                     | CC                 | CC               | INTERGENIC                    |                    |                                           |

| SNPs IDs           | Chromosome IDs | Chromosomes  | Physical positions (bp) | CDC Frontier (Reference genome) | (Pusa 1103 & HPNB) | (ILWC 46 & LPNB) | Sequence Components of genome | Gene accession IDs | Putative functions |
|--------------------|----------------|--------------|-------------------------|---------------------------------|--------------------|------------------|-------------------------------|--------------------|--------------------|
| SNP_98099_A_98293  | NW_004516771.1 | scaffold1613 | 98293                   | TT                              | GG                 | GG               | INTERGENIC                    |                    |                    |
| SNP_98100_A_98421  | NW_004516771.1 | scaffold1613 | 98421                   | AA                              | TT                 | TT               | INTERGENIC                    |                    |                    |
| SNP_98102_A_98456  | NW_004516771.1 | scaffold1613 | 98456                   | TT                              | CC                 | CC               | INTERGENIC                    |                    |                    |
| SNP_98104_A_108684 | NW_004516771.1 | scaffold1613 | 108684                  | AA                              | CC                 | CC               | SYNONYMOUS_CODING             | 101510795          | Unknown function   |
| SNP_98105_A_116913 | NW_004516771.1 | scaffold1613 | 116913                  | AA                              | GG                 | GG               | INTERGENIC                    |                    |                    |
| SNP_98106_A_117313 | NW_004516771.1 | scaffold1613 | 117313                  | AA                              | GG                 | GG               | INTERGENIC                    |                    |                    |
| SNP_98107_A_117373 | NW_004516771.1 | scaffold1613 | 117373                  | AA                              | GG                 | GG               | INTERGENIC                    |                    |                    |
| SNP_98108_A_117379 | NW_004516771.1 | scaffold1613 | 117379                  | AA                              | GG                 | GG               | INTERGENIC                    |                    |                    |
| SNP_98109_A_117436 | NW_004516771.1 | scaffold1613 | 117436                  | CC                              | AA                 | AA               | INTERGENIC                    |                    |                    |
| SNP_98110_A_117658 | NW_004516771.1 | scaffold1613 | 117658                  | CC                              | TT                 | TT               | INTERGENIC                    |                    |                    |
| SNP_98111_A_117681 | NW_004516771.1 | scaffold1613 | 117681                  | AA                              | CC                 | CC               | INTERGENIC                    |                    |                    |
| SNP_98112_A_5436   | NW_004516772.1 | scaffold1614 | 5436                    | AA                              | GG                 | GG               | INTERGENIC                    |                    |                    |
| SNP_98113_A_5510   | NW_004516772.1 | scaffold1614 | 5510                    | TT                              | CC                 | CC               | INTERGENIC                    |                    |                    |
| SNP_98114_A_6566   | NW_004516772.1 | scaffold1614 | 6566                    | TT                              | GG                 | GG               | INTERGENIC                    |                    |                    |
| SNP_98115_A_6807   | NW_004516772.1 | scaffold1614 | 6807                    | TT                              | GG                 | GG               | INTERGENIC                    |                    |                    |
| SNP_98116_A_7613   | NW_004516772.1 | scaffold1614 | 7613                    | TT                              | AA                 | AA               | INTERGENIC                    |                    |                    |
| SNP_98117_A_7663   | NW_004516772.1 | scaffold1614 | 7663                    | CC                              | AA                 | AA               | INTERGENIC                    |                    |                    |
| SNP_98118_A_7714   | NW_004516772.1 | scaffold1614 | 7714                    | TT                              | AA                 | AA               | INTERGENIC                    |                    |                    |
| SNP_98119_A_8043   | NW_004516772.1 | scaffold1614 | 8043                    | GG                              | AA                 | AA               | INTERGENIC                    |                    |                    |
| SNP_98120_A_8066   | NW_004516772.1 | scaffold1614 | 8066                    | AA                              | CC                 | CC               | INTERGENIC                    |                    |                    |
| SNP_98121_A_8113   | NW_004516772.1 | scaffold1614 | 8113                    | AA                              | CC                 | CC               | INTERGENIC                    |                    |                    |
| SNP_98123_A_8344   | NW_004516772.1 | scaffold1614 | 8344                    | GG                              | TT                 | TT               | INTERGENIC                    |                    |                    |

| SNPs IDs          | Chromosome IDs | Chromosomes  | Physical positions (bp) | CDC Frontier (Reference genome) | (Pusa 1103 & HPNB) | (ILWC 46 & LPNB) | Sequence genome | Components of | Gene accession IDs | Putative functions |
|-------------------|----------------|--------------|-------------------------|---------------------------------|--------------------|------------------|-----------------|---------------|--------------------|--------------------|
| SNP_98124_A_8697  | NW_004516772.1 | scaffold1614 | 8697                    | TT                              | CC                 | CC               | INTERGENIC      |               |                    |                    |
| SNP_98125_A_9022  | NW_004516772.1 | scaffold1614 | 9022                    | GG                              | AA                 | AA               | INTERGENIC      |               |                    |                    |
| SNP_98126_A_9032  | NW_004516772.1 | scaffold1614 | 9032                    | GG                              | AA                 | AA               | INTERGENIC      |               |                    |                    |
| SNP_98127_A_9318  | NW_004516772.1 | scaffold1614 | 9318                    | TT                              | CC                 | CC               | INTERGENIC      |               |                    |                    |
| SNP_98128_A_9319  | NW_004516772.1 | scaffold1614 | 9319                    | GG                              | AA                 | AA               | INTERGENIC      |               |                    |                    |
| SNP_98129_A_9389  | NW_004516772.1 | scaffold1614 | 9389                    | AA                              | GG                 | GG               | INTERGENIC      |               |                    |                    |
| SNP_98130_A_9462  | NW_004516772.1 | scaffold1614 | 9462                    | AA                              | CC                 | CC               | INTERGENIC      |               |                    |                    |
| SNP_98131_A_13669 | NW_004516772.1 | scaffold1614 | 13669                   | CC                              | TT                 | TT               | INTERGENIC      |               |                    |                    |
| SNP_98132_A_13695 | NW_004516772.1 | scaffold1614 | 13695                   | AA                              | TT                 | TT               | INTERGENIC      |               |                    |                    |
| SNP_98133_A_13706 | NW_004516772.1 | scaffold1614 | 13706                   | TT                              | GG                 | GG               | INTERGENIC      |               |                    |                    |
| SNP_98134_A_13732 | NW_004516772.1 | scaffold1614 | 13732                   | CC                              | TT                 | TT               | INTERGENIC      |               |                    |                    |
| SNP_98135_A_13791 | NW_004516772.1 | scaffold1614 | 13791                   | AA                              | TT                 | TT               | INTERGENIC      |               |                    |                    |
| SNP_98136_A_13828 | NW_004516772.1 | scaffold1614 | 13828                   | CC                              | GG                 | GG               | INTERGENIC      |               |                    |                    |
| SNP_98137_A_13878 | NW_004516772.1 | scaffold1614 | 13878                   | GG                              | CC                 | CC               | INTERGENIC      |               |                    |                    |
| SNP_98138_A_13933 | NW_004516772.1 | scaffold1614 | 13933                   | CC                              | TT                 | TT               | INTERGENIC      |               |                    |                    |
| SNP_98139_A_14103 | NW_004516772.1 | scaffold1614 | 14103                   | TT                              | AA                 | AA               | INTERGENIC      |               |                    |                    |
| SNP_98140_A_14189 | NW_004516772.1 | scaffold1614 | 14189                   | AA                              | CC                 | CC               | INTERGENIC      |               |                    |                    |
| SNP_98141_A_14195 | NW_004516772.1 | scaffold1614 | 14195                   | GG                              | CC                 | CC               | INTERGENIC      |               |                    |                    |
| SNP_98142_A_14198 | NW_004516772.1 | scaffold1614 | 14198                   | TT                              | CC                 | CC               | INTERGENIC      |               |                    |                    |
| SNP_98143_A_14276 | NW_004516772.1 | scaffold1614 | 14276                   | TT                              | GG                 | GG               | INTERGENIC      |               |                    |                    |
| SNP_98144_A_58041 | NW_004516772.1 | scaffold1614 | 58041                   | TT                              | GG                 | GG               | INTERGENIC      |               |                    |                    |
| SNP_98145_A_62087 | NW_004516772.1 | scaffold1614 | 62087                   | TT                              | CC                 | CC               | INTERGENIC      |               |                    |                    |

| SNPs IDs           | Chromosome IDs | Chromosomes  | Physical positions (bp) | CDC Frontier (Reference genome) | (Pusa 1103 & HPNB) | (ILWC 46 & LPNB) | Sequence Components of genome | Gene accession IDs | Putative functions |
|--------------------|----------------|--------------|-------------------------|---------------------------------|--------------------|------------------|-------------------------------|--------------------|--------------------|
| SNP_98146_A_66848  | NW_004516772.1 | scaffold1614 | 66848                   | CC                              | TT                 | TT               | INTERGENIC                    |                    |                    |
| SNP_98147_A_70035  | NW_004516772.1 | scaffold1614 | 70035                   | TT                              | AA                 | AA               | INTERGENIC                    |                    |                    |
| SNP_98148_A_96569  | NW_004516772.1 | scaffold1614 | 96569                   | CC                              | TT                 | TT               | INTERGENIC                    |                    |                    |
| SNP_98149_A_97219  | NW_004516772.1 | scaffold1614 | 97219                   | GG                              | CC                 | CC               | INTERGENIC                    |                    |                    |
| SNP_98150_A_99702  | NW_004516772.1 | scaffold1614 | 99702                   | CC                              | TT                 | TT               | INTERGENIC                    |                    |                    |
| SNP_98151_A_100165 | NW_004516772.1 | scaffold1614 | 100165                  | AA                              | GG                 | GG               | INTERGENIC                    |                    |                    |
| SNP_98152_A_100446 | NW_004516772.1 | scaffold1614 | 100446                  | CC                              | AA                 | AA               | INTERGENIC                    |                    |                    |
| SNP_98153_A_102331 | NW_004516772.1 | scaffold1614 | 102331                  | TT                              | GG                 | GG               | INTERGENIC                    |                    |                    |
| SNP_98154_A_102663 | NW_004516772.1 | scaffold1614 | 102663                  | TT                              | GG                 | GG               | INTERGENIC                    |                    |                    |
| SNP_98155_A_103646 | NW_004516772.1 | scaffold1614 | 103646                  | GG                              | TT                 | TT               | INTERGENIC                    |                    |                    |
| SNP_98156_A_104578 | NW_004516772.1 | scaffold1614 | 104578                  | CC                              | TT                 | TT               | INTERGENIC                    |                    |                    |
| SNP_98157_A_104583 | NW_004516772.1 | scaffold1614 | 104583                  | CC                              | TT                 | TT               | INTERGENIC                    |                    |                    |
| SNP_98158_A_105128 | NW_004516772.1 | scaffold1614 | 105128                  | TT                              | GG                 | GG               | INTERGENIC                    |                    |                    |
| SNP_98159_A_108769 | NW_004516772.1 | scaffold1614 | 108769                  | GG                              | AA                 | AA               | INTERGENIC                    |                    |                    |
| SNP_98160_A_108782 | NW_004516772.1 | scaffold1614 | 108782                  | CC                              | TT                 | TT               | INTERGENIC                    |                    |                    |
| SNP_98161_A_110728 | NW_004516772.1 | scaffold1614 | 110728                  | TT                              | GG                 | GG               | INTERGENIC                    |                    |                    |
| SNP_98162_A_111066 | NW_004516772.1 | scaffold1614 | 111066                  | TT                              | CC                 | CC               | INTERGENIC                    |                    |                    |
| SNP_98163_A_111164 | NW_004516772.1 | scaffold1614 | 111164                  | GG                              | AA                 | AA               | INTERGENIC                    |                    |                    |
| SNP_98164_A_112879 | NW_004516772.1 | scaffold1614 | 112879                  | TT                              | AA                 | AA               | INTERGENIC                    |                    |                    |
| SNP_98165_A_113023 | NW_004516772.1 | scaffold1614 | 113023                  | AA                              | TT                 | TT               | INTERGENIC                    |                    |                    |
| SNP_98166_A_113229 | NW_004516772.1 | scaffold1614 | 113229                  | TT                              | CC                 | CC               | INTERGENIC                    |                    |                    |
| SNP_98167_A_113859 | NW_004516772.1 | scaffold1614 | 113859                  | TT                              | CC                 | CC               | INTERGENIC                    |                    |                    |

| SNPs IDs           | Chromosome IDs | Chromosomes  | Physical positions (bp) | CDC Frontier (Reference genome) | (Pusa 1103 & HPNB) | (ILWC 46 & LPNB) | Sequence genome | Components of | Gene accession IDs | Putative functions |
|--------------------|----------------|--------------|-------------------------|---------------------------------|--------------------|------------------|-----------------|---------------|--------------------|--------------------|
| SNP_98168_A_113930 | NW_004516772.1 | scaffold1614 | 113930                  | AA                              | TT                 | TT               | INTERGENIC      |               |                    |                    |
| SNP_98169_A_114003 | NW_004516772.1 | scaffold1614 | 114003                  | TT                              | CC                 | CC               | INTERGENIC      |               |                    |                    |
| SNP_98170_A_114019 | NW_004516772.1 | scaffold1614 | 114019                  | CC                              | TT                 | TT               | INTERGENIC      |               |                    |                    |
| SNP_98171_A_114044 | NW_004516772.1 | scaffold1614 | 114044                  | TT                              | CC                 | CC               | INTERGENIC      |               |                    |                    |
| SNP_98172_A_114068 | NW_004516772.1 | scaffold1614 | 114068                  | TT                              | CC                 | CC               | INTERGENIC      |               |                    |                    |
| SNP_98173_A_114325 | NW_004516772.1 | scaffold1614 | 114325                  | AA                              | GG                 | GG               | INTERGENIC      |               |                    |                    |
| SNP_98174_A_114700 | NW_004516772.1 | scaffold1614 | 114700                  | CC                              | TT                 | TT               | INTERGENIC      |               |                    |                    |
| SNP_98175_A_114723 | NW_004516772.1 | scaffold1614 | 114723                  | AA                              | TT                 | TT               | INTERGENIC      |               |                    |                    |
| SNP_98176_A_114756 | NW_004516772.1 | scaffold1614 | 114756                  | AA                              | TT                 | TT               | INTERGENIC      |               |                    |                    |
| SNP_98177_A_114805 | NW_004516772.1 | scaffold1614 | 114805                  | GG                              | AA                 | AA               | INTERGENIC      |               |                    |                    |
| SNP_98178_A_114810 | NW_004516772.1 | scaffold1614 | 114810                  | GG                              | AA                 | AA               | INTERGENIC      |               |                    |                    |
| SNP_98179_A_114818 | NW_004516772.1 | scaffold1614 | 114818                  | AA                              | TT                 | TT               | INTERGENIC      |               |                    |                    |
| SNP_98180_A_114900 | NW_004516772.1 | scaffold1614 | 114900                  | TT                              | CC                 | CC               | INTERGENIC      |               |                    |                    |
| SNP_98181_A_114920 | NW_004516772.1 | scaffold1614 | 114920                  | TT                              | AA                 | AA               | INTERGENIC      |               |                    |                    |
| SNP_98182_A_114921 | NW_004516772.1 | scaffold1614 | 114921                  | AA                              | TT                 | TT               | INTERGENIC      |               |                    |                    |
| SNP_98183_A_114926 | NW_004516772.1 | scaffold1614 | 114926                  | TT                              | GG                 | GG               | INTERGENIC      |               |                    |                    |
| SNP_98184_A_114977 | NW_004516772.1 | scaffold1614 | 114977                  | AA                              | CC                 | CC               | INTERGENIC      |               |                    |                    |
| SNP_98185_A_115028 | NW_004516772.1 | scaffold1614 | 115028                  | CC                              | TT                 | TT               | INTERGENIC      |               |                    |                    |
| SNP_98186_A_115113 | NW_004516772.1 | scaffold1614 | 115113                  | AA                              | GG                 | GG               | INTERGENIC      |               |                    |                    |
| SNP_98187_A_115114 | NW_004516772.1 | scaffold1614 | 115114                  | TT                              | GG                 | GG               | INTERGENIC      |               |                    |                    |
| SNP_98188_A_115120 | NW_004516772.1 | scaffold1614 | 115120                  | CC                              | GG                 | GG               | INTERGENIC      |               |                    |                    |
| SNP_98189_A_115131 | NW_004516772.1 | scaffold1614 | 115131                  | CC                              | TT                 | TT               | INTERGENIC      |               |                    |                    |

| SNPs IDs           | Chromosome IDs | Chromosomes  | Physical positions (bp) | CDC Frontier (Reference genome) | (Pusa 1103 & HPNB) | (ILWC 46 & LPNB) | Sequence genome | Components of | Gene accession IDs | Putative functions |
|--------------------|----------------|--------------|-------------------------|---------------------------------|--------------------|------------------|-----------------|---------------|--------------------|--------------------|
| SNP_98190_A_115627 | NW_004516772.1 | scaffold1614 | 115627                  | GG                              | AA                 | AA               | INTERGENIC      |               |                    |                    |
| SNP_98191_A_115749 | NW_004516772.1 | scaffold1614 | 115749                  | TT                              | CC                 | CC               | INTERGENIC      |               |                    |                    |
| SNP_98192_A_115750 | NW_004516772.1 | scaffold1614 | 115750                  | GG                              | AA                 | AA               | INTERGENIC      |               |                    |                    |
| SNP_98193_A_115760 | NW_004516772.1 | scaffold1614 | 115760                  | GG                              | AA                 | AA               | INTERGENIC      |               |                    |                    |
| SNP_98194_A_115773 | NW_004516772.1 | scaffold1614 | 115773                  | GG                              | CC                 | CC               | INTERGENIC      |               |                    |                    |
| SNP_98195_A_115857 | NW_004516772.1 | scaffold1614 | 115857                  | CC                              | TT                 | TT               | INTERGENIC      |               |                    |                    |
| SNP_98196_A_116264 | NW_004516772.1 | scaffold1614 | 116264                  | TT                              | AA                 | AA               | INTERGENIC      |               |                    |                    |
| SNP_98197_A_116740 | NW_004516772.1 | scaffold1614 | 116740                  | AA                              | TT                 | TT               | INTERGENIC      |               |                    |                    |
| SNP_98198_A_116917 | NW_004516772.1 | scaffold1614 | 116917                  | CC                              | GG                 | GG               | INTERGENIC      |               |                    |                    |
| SNP_98199_A_118616 | NW_004516772.1 | scaffold1614 | 118616                  | AA                              | TT                 | TT               | INTERGENIC      |               |                    |                    |
| SNP_98200_A_118980 | NW_004516772.1 | scaffold1614 | 118980                  | TT                              | CC                 | CC               | INTERGENIC      |               |                    |                    |
| SNP_98201_A_119678 | NW_004516772.1 | scaffold1614 | 119678                  | TT                              | GG                 | GG               | INTERGENIC      |               |                    |                    |
| SNP_98202_A_119989 | NW_004516772.1 | scaffold1614 | 119989                  | TT                              | GG                 | GG               | INTERGENIC      |               |                    |                    |
| SNP_98203_A_120875 | NW_004516772.1 | scaffold1614 | 120875                  | GG                              | CC                 | CC               | INTERGENIC      |               |                    |                    |
| SNP_98204_A_120964 | NW_004516772.1 | scaffold1614 | 120964                  | TT                              | AA                 | AA               | INTERGENIC      |               |                    |                    |
| SNP_98205_A_121033 | NW_004516772.1 | scaffold1614 | 121033                  | CC                              | GG                 | GG               | INTERGENIC      |               |                    |                    |
| SNP_98206_A_121043 | NW_004516772.1 | scaffold1614 | 121043                  | CC                              | TT                 | TT               | INTERGENIC      |               |                    |                    |
| SNP_98207_A_121702 | NW_004516772.1 | scaffold1614 | 121702                  | AA                              | CC                 | CC               | INTERGENIC      |               |                    |                    |
| SNP_98208_A_124167 | NW_004516772.1 | scaffold1614 | 124167                  | AA                              | CC                 | CC               | INTERGENIC      |               |                    |                    |
| SNP_98209_A_124290 | NW_004516772.1 | scaffold1614 | 124290                  | GG                              | AA                 | AA               | INTERGENIC      |               |                    |                    |
| SNP_98210_A_124660 | NW_004516772.1 | scaffold1614 | 124660                  | GG                              | TT                 | TT               | INTERGENIC      |               |                    |                    |
| SNP_98212_A_132630 | NW_004516772.1 | scaffold1614 | 132630                  | AA                              | CC                 | CC               | INTERGENIC      |               |                    |                    |

| SNPs IDs           | Chromosome IDs | Chromosomes  | Physical positions (bp) | CDC Frontier (Reference genome) | (Pusa 1103 & HPNB) | (ILWC 46 & LPNB) | Sequence genome | Components of | Gene accession IDs | Putative functions |
|--------------------|----------------|--------------|-------------------------|---------------------------------|--------------------|------------------|-----------------|---------------|--------------------|--------------------|
| SNP_98213_A_132680 | NW_004516772.1 | scaffold1614 | 132680                  | AA                              | GG                 | GG               | INTERGENIC      |               |                    |                    |
| SNP_98214_A_132916 | NW_004516772.1 | scaffold1614 | 132916                  | CC                              | AA                 | AA               | INTERGENIC      |               |                    |                    |
| SNP_98215_A_133251 | NW_004516772.1 | scaffold1614 | 133251                  | TT                              | GG                 | GG               | INTERGENIC      |               |                    |                    |
| SNP_98216_A_134404 | NW_004516772.1 | scaffold1614 | 134404                  | AA                              | TT                 | TT               | INTERGENIC      |               |                    |                    |
| SNP_98217_A_135517 | NW_004516772.1 | scaffold1614 | 135517                  | GG                              | AA                 | AA               | INTERGENIC      |               |                    |                    |
| SNP_98218_A_135560 | NW_004516772.1 | scaffold1614 | 135560                  | CC                              | TT                 | TT               | INTERGENIC      |               |                    |                    |
| SNP_98219_A_136578 | NW_004516772.1 | scaffold1614 | 136578                  | GG                              | TT                 | TT               | INTERGENIC      |               |                    |                    |
| SNP_98220_A_137114 | NW_004516772.1 | scaffold1614 | 137114                  | CC                              | GG                 | GG               | INTERGENIC      |               |                    |                    |
| SNP_98221_A_140867 | NW_004516772.1 | scaffold1614 | 140867                  | CC                              | TT                 | TT               | INTERGENIC      |               |                    |                    |
| SNP_98222_A_141715 | NW_004516772.1 | scaffold1614 | 141715                  | GG                              | AA                 | AA               | INTERGENIC      |               |                    |                    |
| SNP_98223_A_142008 | NW_004516772.1 | scaffold1614 | 142008                  | TT                              | GG                 | GG               | INTERGENIC      |               |                    |                    |
| SNP_98224_A_145930 | NW_004516772.1 | scaffold1614 | 145930                  | AA                              | TT                 | TT               | INTERGENIC      |               |                    |                    |
| SNP_98225_A_146683 | NW_004516772.1 | scaffold1614 | 146683                  | TT                              | CC                 | CC               | INTERGENIC      |               |                    |                    |
| SNP_98226_A_148170 | NW_004516772.1 | scaffold1614 | 148170                  | AA                              | TT                 | TT               | INTERGENIC      |               |                    |                    |
| SNP_98227_A_148233 | NW_004516772.1 | scaffold1614 | 148233                  | AA                              | GG                 | GG               | INTERGENIC      |               |                    |                    |
| SNP_98228_A_148237 | NW_004516772.1 | scaffold1614 | 148237                  | AA                              | GG                 | GG               | INTERGENIC      |               |                    |                    |
| SNP_98229_A_148238 | NW_004516772.1 | scaffold1614 | 148238                  | CC                              | GG                 | GG               | INTERGENIC      |               |                    |                    |
| SNP_98230_A_151877 | NW_004516772.1 | scaffold1614 | 151877                  | TT                              | AA                 | AA               | INTERGENIC      |               |                    |                    |
| SNP_98231_A_151892 | NW_004516772.1 | scaffold1614 | 151892                  | AA                              | TT                 | TT               | INTERGENIC      |               |                    |                    |
| SNP_98232_A_152936 | NW_004516772.1 | scaffold1614 | 152936                  | CC                              | TT                 | TT               | INTERGENIC      |               |                    |                    |
| SNP_98233_A_153481 | NW_004516772.1 | scaffold1614 | 153481                  | CC                              | TT                 | TT               | INTERGENIC      |               |                    |                    |
| SNP_98234_A_154090 | NW_004516772.1 | scaffold1614 | 154090                  | TT                              | CC                 | CC               | INTERGENIC      |               |                    |                    |



| SNPs IDs           | Chromosome IDs | Chromosomes  | Physical positions (bp) | CDC Frontier (Reference genome) | (Pusa 1103 & HPNB) | (ILWC 46 & LPNB) | Sequence genome | Components of | Gene accession IDs | Putative functions |
|--------------------|----------------|--------------|-------------------------|---------------------------------|--------------------|------------------|-----------------|---------------|--------------------|--------------------|
| SNP_98235_A_154092 | NW_004516772.1 | scaffold1614 | 154092                  | AA                              | CC                 | CC               | INTERGENIC      |               |                    |                    |
| SNP_98236_A_154173 | NW_004516772.1 | scaffold1614 | 154173                  | GG                              | CC                 | CC               | INTERGENIC      |               |                    |                    |
| SNP_98237_A_154349 | NW_004516772.1 | scaffold1614 | 154349                  | CC                              | AA                 | AA               | INTERGENIC      |               |                    |                    |
| SNP_98238_A_154402 | NW_004516772.1 | scaffold1614 | 154402                  | CC                              | TT                 | TT               | INTERGENIC      |               |                    |                    |
| SNP_98239_A_155028 | NW_004516772.1 | scaffold1614 | 155028                  | GG                              | TT                 | TT               | INTERGENIC      |               |                    |                    |
| SNP_98240_A_155686 | NW_004516772.1 | scaffold1614 | 155686                  | TT                              | CC                 | CC               | INTERGENIC      |               |                    |                    |
| SNP_98241_A_157135 | NW_004516772.1 | scaffold1614 | 157135                  | GG                              | CC                 | CC               | INTERGENIC      |               |                    |                    |
| SNP_98242_A_158187 | NW_004516772.1 | scaffold1614 | 158187                  | CC                              | GG                 | GG               | INTERGENIC      |               |                    |                    |
| SNP_98243_A_158255 | NW_004516772.1 | scaffold1614 | 158255                  | AA                              | GG                 | GG               | INTERGENIC      |               |                    |                    |
| SNP_98244_A_159007 | NW_004516772.1 | scaffold1614 | 159007                  | CC                              | GG                 | GG               | INTERGENIC      |               |                    |                    |
| SNP_98245_A_159655 | NW_004516772.1 | scaffold1614 | 159655                  | AA                              | CC                 | CC               | INTERGENIC      |               |                    |                    |
| SNP_98246_A_160277 | NW_004516772.1 | scaffold1614 | 160277                  | TT                              | CC                 | CC               | INTERGENIC      |               |                    |                    |
| SNP_98247_A_161453 | NW_004516772.1 | scaffold1614 | 161453                  | AA                              | GG                 | GG               | INTERGENIC      |               |                    |                    |
| SNP_98248_A_161706 | NW_004516772.1 | scaffold1614 | 161706                  | AA                              | CC                 | CC               | INTERGENIC      |               |                    |                    |
| SNP_98249_A_162051 | NW_004516772.1 | scaffold1614 | 162051                  | CC                              | GG                 | GG               | INTERGENIC      |               |                    |                    |
| SNP_98250_A_162298 | NW_004516772.1 | scaffold1614 | 162298                  | CC                              | GG                 | GG               | INTERGENIC      |               |                    |                    |
| SNP_98251_A_162315 | NW_004516772.1 | scaffold1614 | 162315                  | AA                              | CC                 | CC               | INTERGENIC      |               |                    |                    |
| SNP_98252_A_163848 | NW_004516772.1 | scaffold1614 | 163848                  | AA                              | GG                 | GG               | INTERGENIC      |               |                    |                    |
| SNP_98253_A_163859 | NW_004516772.1 | scaffold1614 | 163859                  | GG                              | AA                 | AA               | INTERGENIC      |               |                    |                    |
| SNP_98254_A_163872 | NW_004516772.1 | scaffold1614 | 163872                  | GG                              | AA                 | AA               | INTERGENIC      |               |                    |                    |
| SNP_98255_A_163894 | NW_004516772.1 | scaffold1614 | 163894                  | GG                              | AA                 | AA               | INTERGENIC      |               |                    |                    |
| SNP_98256_A_164141 | NW_004516772.1 | scaffold1614 | 164141                  | CC                              | TT                 | TT               | INTERGENIC      |               |                    |                    |

| SNPs IDs           | Chromosome IDs | Chromosomes  | Physical positions (bp) | CDC Frontier (Reference genome) | (Pusa 1103 & HPNB) | (ILWC 46 & LPNB) | Sequence genome | Components of | Gene accession IDs | Putative functions |
|--------------------|----------------|--------------|-------------------------|---------------------------------|--------------------|------------------|-----------------|---------------|--------------------|--------------------|
| SNP_98257_A_164145 | NW_004516772.1 | scaffold1614 | 164145                  | AA                              | GG                 | GG               | INTERGENIC      |               |                    |                    |
| SNP_98258_A_164153 | NW_004516772.1 | scaffold1614 | 164153                  | CC                              | GG                 | GG               | INTERGENIC      |               |                    |                    |
| SNP_98259_A_164156 | NW_004516772.1 | scaffold1614 | 164156                  | AA                              | TT                 | TT               | INTERGENIC      |               |                    |                    |
| SNP_98260_A_164157 | NW_004516772.1 | scaffold1614 | 164157                  | CC                              | AA                 | AA               | INTERGENIC      |               |                    |                    |
| SNP_98261_A_164277 | NW_004516772.1 | scaffold1614 | 164277                  | AA                              | GG                 | GG               | INTERGENIC      |               |                    |                    |
| SNP_98262_A_164282 | NW_004516772.1 | scaffold1614 | 164282                  | TT                              | GG                 | GG               | INTERGENIC      |               |                    |                    |
| SNP_98263_A_164494 | NW_004516772.1 | scaffold1614 | 164494                  | GG                              | AA                 | AA               | INTERGENIC      |               |                    |                    |
| SNP_98264_A_164504 | NW_004516772.1 | scaffold1614 | 164504                  | CC                              | TT                 | TT               | INTERGENIC      |               |                    |                    |
| SNP_98265_A_164533 | NW_004516772.1 | scaffold1614 | 164533                  | CC                              | TT                 | TT               | INTERGENIC      |               |                    |                    |
| SNP_98266_A_164555 | NW_004516772.1 | scaffold1614 | 164555                  | GG                              | AA                 | AA               | INTERGENIC      |               |                    |                    |
| SNP_98267_A_167342 | NW_004516772.1 | scaffold1614 | 167342                  | GG                              | TT                 | TT               | INTERGENIC      |               |                    |                    |
| SNP_98268_A_168729 | NW_004516772.1 | scaffold1614 | 168729                  | TT                              | CC                 | CC               | INTERGENIC      |               |                    |                    |
| SNP_98269_A_168858 | NW_004516772.1 | scaffold1614 | 168858                  | GG                              | CC                 | CC               | INTERGENIC      |               |                    |                    |
| SNP_98270_A_169135 | NW_004516772.1 | scaffold1614 | 169135                  | AA                              | CC                 | CC               | INTERGENIC      |               |                    |                    |
| SNP_98271_A_184308 | NW_004516772.1 | scaffold1614 | 184308                  | AA                              | CC                 | CC               | INTERGENIC      |               |                    |                    |
| SNP_98272_A_186600 | NW_004516772.1 | scaffold1614 | 186600                  | GG                              | AA                 | AA               | INTERGENIC      |               |                    |                    |
| SNP_98273_A_186861 | NW_004516772.1 | scaffold1614 | 186861                  | CC                              | AA                 | AA               | INTERGENIC      |               |                    |                    |
| SNP_98274_A_186870 | NW_004516772.1 | scaffold1614 | 186870                  | CC                              | GG                 | GG               | INTERGENIC      |               |                    |                    |
| SNP_98275_A_187728 | NW_004516772.1 | scaffold1614 | 187728                  | AA                              | GG                 | GG               | INTERGENIC      |               |                    |                    |
| SNP_98276_A_188421 | NW_004516772.1 | scaffold1614 | 188421                  | AA                              | CC                 | CC               | INTERGENIC      |               |                    |                    |
| SNP_98278_A_190866 | NW_004516772.1 | scaffold1614 | 190866                  | TT                              | AA                 | AA               | INTERGENIC      |               |                    |                    |
| SNP_98279_A_192873 | NW_004516772.1 | scaffold1614 | 192873                  | GG                              | TT                 | TT               | INTERGENIC      |               |                    |                    |

| SNPs IDs           | Chromosome IDs | Chromosomes  | Physical positions (bp) | CDC Frontier (Reference genome) | (Pusa 1103 & HPNB) | (ILWC 46 & LPNB) | Sequence genome | Components of | Gene accession IDs | Putative functions |
|--------------------|----------------|--------------|-------------------------|---------------------------------|--------------------|------------------|-----------------|---------------|--------------------|--------------------|
| SNP_98280_A_193075 | NW_004516772.1 | scaffold1614 | 193075                  | GG                              | AA                 | AA               | INTERGENIC      |               |                    |                    |
| SNP_98281_A_193112 | NW_004516772.1 | scaffold1614 | 193112                  | GG                              | AA                 | AA               | INTERGENIC      |               |                    |                    |
| SNP_98282_A_193134 | NW_004516772.1 | scaffold1614 | 193134                  | AA                              | GG                 | GG               | INTERGENIC      |               |                    |                    |
| SNP_98283_A_194652 | NW_004516772.1 | scaffold1614 | 194652                  | GG                              | AA                 | AA               | INTERGENIC      |               |                    |                    |
| SNP_98284_A_546    | NW_004516773.1 | scaffold1615 | 546                     | CC                              | TT                 | TT               | INTERGENIC      |               |                    |                    |
| SNP_98285_A_549    | NW_004516773.1 | scaffold1615 | 549                     | GG                              | AA                 | AA               | INTERGENIC      |               |                    |                    |
| SNP_98286_A_430    | NW_004516775.1 | scaffold1620 | 430                     | TT                              | GG                 | GG               | INTERGENIC      |               |                    |                    |
| SNP_98287_A_516    | NW_004516775.1 | scaffold1620 | 516                     | TT                              | CC                 | CC               | INTERGENIC      |               |                    |                    |
| SNP_98288_A_810    | NW_004516775.1 | scaffold1620 | 810                     | TT                              | GG                 | GG               | INTERGENIC      |               |                    |                    |
| SNP_98289_A_1074   | NW_004516775.1 | scaffold1620 | 1074                    | GG                              | AA                 | AA               | INTERGENIC      |               |                    |                    |
| SNP_98290_A_1163   | NW_004516775.1 | scaffold1620 | 1163                    | GG                              | AA                 | AA               | INTERGENIC      |               |                    |                    |
| SNP_98291_A_1228   | NW_004516775.1 | scaffold1620 | 1228                    | GG                              | AA                 | AA               | INTERGENIC      |               |                    |                    |
| SNP_98292_A_14045  | NW_004516777.1 | scaffold1623 | 14045                   | GG                              | TT                 | TT               | INTERGENIC      |               |                    |                    |
| SNP_98293_A_14738  | NW_004516779.1 | scaffold1626 | 14738                   | TT                              | CC                 | CC               | INTERGENIC      |               |                    |                    |
| SNP_98294_A_14739  | NW_004516779.1 | scaffold1626 | 14739                   | GG                              | AA                 | AA               | INTERGENIC      |               |                    |                    |
| SNP_98295_A_14742  | NW_004516779.1 | scaffold1626 | 14742                   | GG                              | AA                 | AA               | INTERGENIC      |               |                    |                    |
| SNP_98296_A_31246  | NW_004516779.1 | scaffold1626 | 31246                   | AA                              | GG                 | GG               | INTERGENIC      |               |                    |                    |
| SNP_98297_A_31484  | NW_004516779.1 | scaffold1626 | 31484                   | TT                              | GG                 | GG               | INTERGENIC      |               |                    |                    |
| SNP_98298_A_31500  | NW_004516779.1 | scaffold1626 | 31500                   | AA                              | GG                 | GG               | INTERGENIC      |               |                    |                    |
| SNP_98299_A_31539  | NW_004516779.1 | scaffold1626 | 31539                   | AA                              | CC                 | CC               | INTERGENIC      |               |                    |                    |
| SNP_98300_A_32455  | NW_004516779.1 | scaffold1626 | 32455                   | CC                              | TT                 | TT               | INTERGENIC      |               |                    |                    |
| SNP_98301_A_37718  | NW_004516779.1 | scaffold1626 | 37718                   | TT                              | CC                 | CC               | INTERGENIC      |               |                    |                    |

| SNPs IDs           | Chromosome IDs | Chromosomes  | Physical positions (bp) | CDC Frontier (Reference genome) | (Pusa 1103 & HPNB) | (ILWC 46 & LPNB) | Sequence genome | Components of | Gene accession IDs | Putative functions |
|--------------------|----------------|--------------|-------------------------|---------------------------------|--------------------|------------------|-----------------|---------------|--------------------|--------------------|
| SNP_98302_A_108691 | NW_004516779.1 | scaffold1626 | 108691                  | TT                              | GG                 | GG               | INTERGENIC      |               |                    |                    |
| SNP_98304_A_127026 | NW_004516779.1 | scaffold1626 | 127026                  | TT                              | CC                 | CC               | INTERGENIC      |               |                    |                    |
| SNP_98305_A_127322 | NW_004516779.1 | scaffold1626 | 127322                  | GG                              | AA                 | AA               | INTERGENIC      |               |                    |                    |
| SNP_98306_A_128015 | NW_004516779.1 | scaffold1626 | 128015                  | AA                              | TT                 | TT               | INTERGENIC      |               |                    |                    |
| SNP_98307_A_144738 | NW_004516779.1 | scaffold1626 | 144738                  | GG                              | AA                 | AA               | INTERGENIC      |               |                    |                    |
| SNP_98308_A_2346   | NW_004516781.1 | scaffold1630 | 2346                    | AA                              | CC                 | CC               | INTERGENIC      |               |                    |                    |
| SNP_98309_A_5941   | NW_004516781.1 | scaffold1630 | 5941                    | TT                              | CC                 | CC               | INTERGENIC      |               |                    |                    |
| SNP_98311_A_8855   | NW_004516781.1 | scaffold1630 | 8855                    | AA                              | GG                 | GG               | INTERGENIC      |               |                    |                    |
| SNP_98312_A_11912  | NW_004516781.1 | scaffold1630 | 11912                   | CC                              | AA                 | AA               | INTERGENIC      |               |                    |                    |
| SNP_98313_A_11950  | NW_004516781.1 | scaffold1630 | 11950                   | TT                              | CC                 | CC               | INTERGENIC      |               |                    |                    |
| SNP_98314_A_13295  | NW_004516781.1 | scaffold1630 | 13295                   | GG                              | TT                 | TT               | INTERGENIC      |               |                    |                    |
| SNP_98315_A_13474  | NW_004516781.1 | scaffold1630 | 13474                   | TT                              | AA                 | AA               | INTERGENIC      |               |                    |                    |
| SNP_98316_A_20399  | NW_004516781.1 | scaffold1630 | 20399                   | GG                              | AA                 | AA               | INTERGENIC      |               |                    |                    |
| SNP_98317_A_20425  | NW_004516781.1 | scaffold1630 | 20425                   | GG                              | TT                 | TT               | INTERGENIC      |               |                    |                    |
| SNP_98318_A_20430  | NW_004516781.1 | scaffold1630 | 20430                   | CC                              | TT                 | TT               | INTERGENIC      |               |                    |                    |
| SNP_98319_A_28743  | NW_004516781.1 | scaffold1630 | 28743                   | GG                              | AA                 | AA               | INTERGENIC      |               |                    |                    |
| SNP_98320_A_30252  | NW_004516781.1 | scaffold1630 | 30252                   | AA                              | TT                 | TT               | INTERGENIC      |               |                    |                    |
| SNP_98321_A_30264  | NW_004516781.1 | scaffold1630 | 30264                   | CC                              | TT                 | TT               | INTERGENIC      |               |                    |                    |
| SNP_98322_A_30269  | NW_004516781.1 | scaffold1630 | 30269                   | TT                              | CC                 | CC               | INTERGENIC      |               |                    |                    |
| SNP_98323_A_30284  | NW_004516781.1 | scaffold1630 | 30284                   | GG                              | CC                 | CC               | INTERGENIC      |               |                    |                    |
| SNP_98324_A_30432  | NW_004516781.1 | scaffold1630 | 30432                   | AA                              | GG                 | GG               | INTERGENIC      |               |                    |                    |
| SNP_98325_A_30439  | NW_004516781.1 | scaffold1630 | 30439                   | CC                              | AA                 | AA               | INTERGENIC      |               |                    |                    |

| SNPs IDs          | Chromosome IDs | Chromosomes  | Physical positions (bp) | CDC Frontier (Reference genome) | (Pusa 1103 & HPNB) | (ILWC 46 & LPNB) | Sequence genome | Components of | Gene accession IDs | Putative functions |
|-------------------|----------------|--------------|-------------------------|---------------------------------|--------------------|------------------|-----------------|---------------|--------------------|--------------------|
| SNP_98326_A_30471 | NW_004516781.1 | scaffold1630 | 30471                   | TT                              | CC                 | CC               | INTERGENIC      |               |                    |                    |
| SNP_98327_A_30532 | NW_004516781.1 | scaffold1630 | 30532                   | GG                              | AA                 | AA               | INTERGENIC      |               |                    |                    |
| SNP_98328_A_30546 | NW_004516781.1 | scaffold1630 | 30546                   | TT                              | CC                 | CC               | INTERGENIC      |               |                    |                    |
| SNP_98329_A_30550 | NW_004516781.1 | scaffold1630 | 30550                   | AA                              | TT                 | TT               | INTERGENIC      |               |                    |                    |
| SNP_98330_A_37113 | NW_004516781.1 | scaffold1630 | 37113                   | CC                              | TT                 | TT               | INTERGENIC      |               |                    |                    |
| SNP_98331_A_37251 | NW_004516781.1 | scaffold1630 | 37251                   | TT                              | AA                 | AA               | INTERGENIC      |               |                    |                    |
| SNP_98332_A_37317 | NW_004516781.1 | scaffold1630 | 37317                   | TT                              | AA                 | AA               | INTERGENIC      |               |                    |                    |
| SNP_98333_A_37323 | NW_004516781.1 | scaffold1630 | 37323                   | GG                              | CC                 | CC               | INTERGENIC      |               |                    |                    |
| SNP_98334_A_37333 | NW_004516781.1 | scaffold1630 | 37333                   | GG                              | TT                 | TT               | INTERGENIC      |               |                    |                    |
| SNP_98335_A_37343 | NW_004516781.1 | scaffold1630 | 37343                   | GG                              | CC                 | CC               | INTERGENIC      |               |                    |                    |
| SNP_98336_A_37606 | NW_004516781.1 | scaffold1630 | 37606                   | TT                              | CC                 | CC               | INTERGENIC      |               |                    |                    |
| SNP_98337_A_37643 | NW_004516781.1 | scaffold1630 | 37643                   | AA                              | TT                 | TT               | INTERGENIC      |               |                    |                    |
| SNP_98338_A_41226 | NW_004516781.1 | scaffold1630 | 41226                   | AA                              | GG                 | GG               | INTERGENIC      |               |                    |                    |
| SNP_98339_A_44047 | NW_004516781.1 | scaffold1630 | 44047                   | GG                              | CC                 | CC               | INTERGENIC      |               |                    |                    |
| SNP_98340_A_57190 | NW_004516781.1 | scaffold1630 | 57190                   | GG                              | AA                 | AA               | INTERGENIC      |               |                    |                    |
| SNP_98341_A_57318 | NW_004516781.1 | scaffold1630 | 57318                   | CC                              | TT                 | TT               | INTERGENIC      |               |                    |                    |
| SNP_98342_A_57327 | NW_004516781.1 | scaffold1630 | 57327                   | AA                              | GG                 | GG               | INTERGENIC      |               |                    |                    |
| SNP_98343_A_81561 | NW_004516781.1 | scaffold1630 | 81561                   | AA                              | TT                 | TT               | INTERGENIC      |               |                    |                    |
| SNP_98344_A_91501 | NW_004516781.1 | scaffold1630 | 91501                   | TT                              | CC                 | CC               | INTERGENIC      |               |                    |                    |
| SNP_98345_A_91504 | NW_004516781.1 | scaffold1630 | 91504                   | GG                              | AA                 | AA               | INTERGENIC      |               |                    |                    |
| SNP_98346_A_93374 | NW_004516781.1 | scaffold1630 | 93374                   | GG                              | AA                 | AA               | INTERGENIC      |               |                    |                    |
| SNP_98347_A_93377 | NW_004516781.1 | scaffold1630 | 93377                   | AA                              | TT                 | TT               | INTERGENIC      |               |                    |                    |

| SNPs IDs           | Chromosome IDs | Chromosomes  | Physical positions (bp) | CDC Frontier (Reference genome) | (Pusa 1103 & HPNB) | (ILWC 46 & LPNB) | Sequence genome | Components of | Gene accession IDs | Putative functions |
|--------------------|----------------|--------------|-------------------------|---------------------------------|--------------------|------------------|-----------------|---------------|--------------------|--------------------|
| SNP_98348_A_96750  | NW_004516781.1 | scaffold1630 | 96750                   | AA                              | CC                 | CC               | INTERGENIC      |               |                    |                    |
| SNP_98349_A_105399 | NW_004516781.1 | scaffold1630 | 105399                  | GG                              | AA                 | AA               | INTERGENIC      |               |                    |                    |
| SNP_98350_A_106780 | NW_004516781.1 | scaffold1630 | 106780                  | TT                              | AA                 | AA               | INTERGENIC      |               |                    |                    |
| SNP_98351_A_106811 | NW_004516781.1 | scaffold1630 | 106811                  | GG                              | AA                 | AA               | INTERGENIC      |               |                    |                    |
| SNP_98352_A_106812 | NW_004516781.1 | scaffold1630 | 106812                  | GG                              | AA                 | AA               | INTERGENIC      |               |                    |                    |
| SNP_98353_A_106827 | NW_004516781.1 | scaffold1630 | 106827                  | CC                              | TT                 | TT               | INTERGENIC      |               |                    |                    |
| SNP_98354_A_106833 | NW_004516781.1 | scaffold1630 | 106833                  | AA                              | GG                 | GG               | INTERGENIC      |               |                    |                    |
| SNP_98355_A_106838 | NW_004516781.1 | scaffold1630 | 106838                  | TT                              | GG                 | GG               | INTERGENIC      |               |                    |                    |
| SNP_98356_A_106906 | NW_004516781.1 | scaffold1630 | 106906                  | AA                              | CC                 | CC               | INTERGENIC      |               |                    |                    |
| SNP_98357_A_107430 | NW_004516781.1 | scaffold1630 | 107430                  | GG                              | CC                 | CC               | INTERGENIC      |               |                    |                    |
| SNP_98358_A_107734 | NW_004516781.1 | scaffold1630 | 107734                  | CC                              | AA                 | AA               | INTERGENIC      |               |                    |                    |
| SNP_98359_A_107736 | NW_004516781.1 | scaffold1630 | 107736                  | TT                              | CC                 | CC               | INTERGENIC      |               |                    |                    |
| SNP_98360_A_107740 | NW_004516781.1 | scaffold1630 | 107740                  | AA                              | TT                 | TT               | INTERGENIC      |               |                    |                    |
| SNP_98361_A_107747 | NW_004516781.1 | scaffold1630 | 107747                  | TT                              | AA                 | AA               | INTERGENIC      |               |                    |                    |
| SNP_98362_A_107764 | NW_004516781.1 | scaffold1630 | 107764                  | CC                              | TT                 | TT               | INTERGENIC      |               |                    |                    |
| SNP_98363_A_107794 | NW_004516781.1 | scaffold1630 | 107794                  | AA                              | GG                 | GG               | INTERGENIC      |               |                    |                    |
| SNP_98364_A_107815 | NW_004516781.1 | scaffold1630 | 107815                  | AA                              | TT                 | TT               | INTERGENIC      |               |                    |                    |
| SNP_98365_A_112867 | NW_004516781.1 | scaffold1630 | 112867                  | GG                              | AA                 | AA               | INTERGENIC      |               |                    |                    |
| SNP_98366_A_112875 | NW_004516781.1 | scaffold1630 | 112875                  | CC                              | TT                 | TT               | INTERGENIC      |               |                    |                    |
| SNP_98367_A_113259 | NW_004516781.1 | scaffold1630 | 113259                  | AA                              | GG                 | GG               | INTERGENIC      |               |                    |                    |
| SNP_98368_A_113272 | NW_004516781.1 | scaffold1630 | 113272                  | TT                              | AA                 | AA               | INTERGENIC      |               |                    |                    |
| SNP_98369_A_121188 | NW_004516781.1 | scaffold1630 | 121188                  | GG                              | TT                 | TT               | INTERGENIC      |               |                    |                    |

| SNPs IDs           | Chromosome IDs | Chromosomes  | Physical positions (bp) | CDC Frontier (Reference genome) | (Pusa 1103 & HPNB) | (ILWC 46 & LPNB) | Sequence genome | Components of | Gene accession IDs | Putative functions |
|--------------------|----------------|--------------|-------------------------|---------------------------------|--------------------|------------------|-----------------|---------------|--------------------|--------------------|
| SNP_98370_A_125683 | NW_004516781.1 | scaffold1630 | 125683                  | GG                              | TT                 | TT               | INTERGENIC      |               |                    |                    |
| SNP_98371_A_136763 | NW_004516781.1 | scaffold1630 | 136763                  | GG                              | CC                 | CC               | INTERGENIC      |               |                    |                    |
| SNP_98372_A_136771 | NW_004516781.1 | scaffold1630 | 136771                  | TT                              | CC                 | CC               | INTERGENIC      |               |                    |                    |
| SNP_98373_A_143193 | NW_004516781.1 | scaffold1630 | 143193                  | AA                              | CC                 | CC               | INTERGENIC      |               |                    |                    |
| SNP_98374_A_158029 | NW_004516781.1 | scaffold1630 | 158029                  | GG                              | CC                 | CC               | INTERGENIC      |               |                    |                    |
| SNP_98375_A_158055 | NW_004516781.1 | scaffold1630 | 158055                  | TT                              | AA                 | AA               | INTERGENIC      |               |                    |                    |
| SNP_98376_A_177196 | NW_004516781.1 | scaffold1630 | 177196                  | AA                              | GG                 | GG               | INTERGENIC      |               |                    |                    |
| SNP_98377_A_185020 | NW_004516781.1 | scaffold1630 | 185020                  | CC                              | AA                 | AA               | INTERGENIC      |               |                    |                    |
| SNP_98378_A_185283 | NW_004516781.1 | scaffold1630 | 185283                  | TT                              | AA                 | AA               | INTERGENIC      |               |                    |                    |
| SNP_98380_A_58366  | NW_004516782.1 | scaffold1631 | 58366                   | TT                              | AA                 | AA               | INTERGENIC      |               |                    |                    |
| SNP_98381_A_86604  | NW_004516782.1 | scaffold1631 | 86604                   | TT                              | GG                 | GG               | INTERGENIC      |               |                    |                    |
| SNP_98382_A_121042 | NW_004516782.1 | scaffold1631 | 121042                  | AA                              | GG                 | GG               | INTERGENIC      |               |                    |                    |
| SNP_98383_A_121043 | NW_004516782.1 | scaffold1631 | 121043                  | AA                              | TT                 | TT               | INTERGENIC      |               |                    |                    |
| SNP_98384_A_121105 | NW_004516782.1 | scaffold1631 | 121105                  | GG                              | AA                 | AA               | INTERGENIC      |               |                    |                    |
| SNP_98385_A_121402 | NW_004516782.1 | scaffold1631 | 121402                  | CC                              | TT                 | TT               | INTERGENIC      |               |                    |                    |
| SNP_98386_A_143672 | NW_004516782.1 | scaffold1631 | 143672                  | GG                              | AA                 | AA               | INTERGENIC      |               |                    |                    |
| SNP_98387_A_175706 | NW_004516782.1 | scaffold1631 | 175706                  | TT                              | CC                 | CC               | INTERGENIC      |               |                    |                    |
| SNP_98388_A_175712 | NW_004516782.1 | scaffold1631 | 175712                  | AA                              | GG                 | GG               | INTERGENIC      |               |                    |                    |
| SNP_98389_A_175723 | NW_004516782.1 | scaffold1631 | 175723                  | CC                              | AA                 | AA               | INTERGENIC      |               |                    |                    |
| SNP_98390_A_175754 | NW_004516782.1 | scaffold1631 | 175754                  | TT                              | CC                 | CC               | INTERGENIC      |               |                    |                    |
| SNP_98391_A_176823 | NW_004516782.1 | scaffold1631 | 176823                  | TT                              | CC                 | CC               | INTERGENIC      |               |                    |                    |
| SNP_98392_A_176841 | NW_004516782.1 | scaffold1631 | 176841                  | AA                              | GG                 | GG               | INTERGENIC      |               |                    |                    |

| SNPs IDs           | Chromosome IDs | Chromosomes  | Physical positions (bp) | CDC Frontier (Reference genome) | (Pusa 1103 & HPNB) | (ILWC 46 & LPNB) | Sequence Components of genome | Gene accession IDs | Putative functions                                       |
|--------------------|----------------|--------------|-------------------------|---------------------------------|--------------------|------------------|-------------------------------|--------------------|----------------------------------------------------------|
| SNP_98394_A_26487  | NW_004516783.1 | scaffold1632 | 26487                   | TT                              | CC                 | CC               | INTERGENIC                    |                    |                                                          |
| SNP_98395_A_26610  | NW_004516783.1 | scaffold1632 | 26610                   | AA                              | GG                 | GG               | INTERGENIC                    |                    |                                                          |
| SNP_98396_A_34938  | NW_004516783.1 | scaffold1632 | 34938                   | CC                              | TT                 | TT               | URR                           | 101488295          | uncharacterized LOC101488295                             |
| SNP_98397_A_36996  | NW_004516783.1 | scaffold1632 | 36996                   | AA                              | GG                 | GG               | DRR                           | 101488622          | uncharacterized LOC101488622                             |
| SNP_98398_A_62189  | NW_004516784.1 | scaffold1633 | 62189                   | TT                              | CC                 | CC               | DRR                           | 101489940          | serine/threonine-protein phosphatase 7 long form homolog |
| SNP_98399_A_96778  | NW_004516784.1 | scaffold1633 | 96778                   | TT                              | GG                 | GG               | INTERGENIC                    |                    |                                                          |
| SNP_98400_A_96779  | NW_004516784.1 | scaffold1633 | 96779                   | TT                              | GG                 | GG               | INTERGENIC                    |                    |                                                          |
| SNP_98401_A_115333 | NW_004516784.1 | scaffold1633 | 115333                  | CC                              | AA                 | AA               | INTERGENIC                    |                    |                                                          |
| SNP_98402_A_121876 | NW_004516784.1 | scaffold1633 | 121876                  | TT                              | CC                 | CC               | INTERGENIC                    |                    |                                                          |
| SNP_98403_A_122049 | NW_004516784.1 | scaffold1633 | 122049                  | CC                              | AA                 | AA               | INTERGENIC                    |                    |                                                          |
| SNP_98404_A_15447  | NW_004516785.1 | scaffold1634 | 15447                   | TT                              | CC                 | CC               | INTERGENIC                    |                    |                                                          |
| SNP_98405_A_18473  | NW_004516785.1 | scaffold1634 | 18473                   | AA                              | CC                 | CC               | INTERGENIC                    |                    |                                                          |
| SNP_98406_A_18577  | NW_004516785.1 | scaffold1634 | 18577                   | TT                              | CC                 | CC               | INTERGENIC                    |                    |                                                          |
| SNP_98407_A_18780  | NW_004516785.1 | scaffold1634 | 18780                   | TT                              | CC                 | CC               | INTERGENIC                    |                    |                                                          |
| SNP_98408_A_18927  | NW_004516785.1 | scaffold1634 | 18927                   | TT                              | GG                 | GG               | INTERGENIC                    |                    |                                                          |
| SNP_98409_A_18994  | NW_004516785.1 | scaffold1634 | 18994                   | CC                              | TT                 | TT               | INTERGENIC                    |                    |                                                          |
| SNP_98410_A_20967  | NW_004516785.1 | scaffold1634 | 20967                   | CC                              | TT                 | TT               | INTERGENIC                    |                    |                                                          |
| SNP_98411_A_23536  | NW_004516785.1 | scaffold1634 | 23536                   | CC                              | TT                 | TT               | INTERGENIC                    |                    |                                                          |
| SNP_98412_A_23539  | NW_004516785.1 | scaffold1634 | 23539                   | GG                              | AA                 | AA               | INTERGENIC                    |                    |                                                          |
| SNP_98413_A_23542  | NW_004516785.1 | scaffold1634 | 23542                   | TT                              | AA                 | AA               | INTERGENIC                    |                    |                                                          |
| SNP_98414_A_23544  | NW_004516785.1 | scaffold1634 | 23544                   | GG                              | AA                 | AA               | INTERGENIC                    |                    |                                                          |
| SNP_98415_A_23549  | NW_004516785.1 | scaffold1634 | 23549                   | GG                              | CC                 | CC               | INTERGENIC                    |                    |                                                          |



| SNPs IDs           | Chromosome IDs | Chromosomes  | Physical positions (bp) | CDC Frontier (Reference genome) | (Pusa 1103 & HPNB) | (ILWC 46 & LPNB) | Sequence genome | Components of | Gene accession IDs | Putative functions |
|--------------------|----------------|--------------|-------------------------|---------------------------------|--------------------|------------------|-----------------|---------------|--------------------|--------------------|
| SNP_98416_A_23551  | NW_004516785.1 | scaffold1634 | 23551                   | AA                              | CC                 | CC               | INTERGENIC      |               |                    |                    |
| SNP_98417_A_23557  | NW_004516785.1 | scaffold1634 | 23557                   | CC                              | TT                 | TT               | INTERGENIC      |               |                    |                    |
| SNP_98418_A_34903  | NW_004516785.1 | scaffold1634 | 34903                   | GG                              | AA                 | AA               | INTERGENIC      |               |                    |                    |
| SNP_98419_A_8356   | NW_004516786.1 | scaffold1635 | 8356                    | AA                              | CC                 | CC               | INTERGENIC      |               |                    |                    |
| SNP_98420_A_34634  | NW_004516786.1 | scaffold1635 | 34634                   | CC                              | TT                 | TT               | INTERGENIC      |               |                    |                    |
| SNP_98421_A_35178  | NW_004516786.1 | scaffold1635 | 35178                   | CC                              | TT                 | TT               | INTERGENIC      |               |                    |                    |
| SNP_98422_A_72076  | NW_004516786.1 | scaffold1635 | 72076                   | AA                              | GG                 | GG               | INTERGENIC      |               |                    |                    |
| SNP_98423_A_72086  | NW_004516786.1 | scaffold1635 | 72086                   | AA                              | TT                 | TT               | INTERGENIC      |               |                    |                    |
| SNP_98424_A_72305  | NW_004516786.1 | scaffold1635 | 72305                   | AA                              | GG                 | GG               | INTERGENIC      |               |                    |                    |
| SNP_98425_A_72471  | NW_004516786.1 | scaffold1635 | 72471                   | CC                              | TT                 | TT               | INTERGENIC      |               |                    |                    |
| SNP_98427_A_74294  | NW_004516786.1 | scaffold1635 | 74294                   | AA                              | CC                 | CC               | INTERGENIC      |               |                    |                    |
| SNP_98428_A_74816  | NW_004516786.1 | scaffold1635 | 74816                   | TT                              | CC                 | CC               | INTERGENIC      |               |                    |                    |
| SNP_98429_A_75030  | NW_004516786.1 | scaffold1635 | 75030                   | GG                              | AA                 | AA               | INTERGENIC      |               |                    |                    |
| SNP_98430_A_75133  | NW_004516786.1 | scaffold1635 | 75133                   | TT                              | CC                 | CC               | INTERGENIC      |               |                    |                    |
| SNP_98431_A_75222  | NW_004516786.1 | scaffold1635 | 75222                   | CC                              | TT                 | TT               | INTERGENIC      |               |                    |                    |
| SNP_98432_A_105109 | NW_004516786.1 | scaffold1635 | 105109                  | AA                              | GG                 | GG               | INTERGENIC      |               |                    |                    |
| SNP_98433_A_105130 | NW_004516786.1 | scaffold1635 | 105130                  | CC                              | GG                 | GG               | INTERGENIC      |               |                    |                    |
| SNP_98434_A_130437 | NW_004516786.1 | scaffold1635 | 130437                  | AA                              | GG                 | GG               | INTERGENIC      |               |                    |                    |
| SNP_98435_A_131484 | NW_004516786.1 | scaffold1635 | 131484                  | GG                              | AA                 | AA               | INTERGENIC      |               |                    |                    |
| SNP_98436_A_131494 | NW_004516786.1 | scaffold1635 | 131494                  | AA                              | TT                 | TT               | INTERGENIC      |               |                    |                    |
| SNP_98437_A_131496 | NW_004516786.1 | scaffold1635 | 131496                  | GG                              | CC                 | CC               | INTERGENIC      |               |                    |                    |
| SNP_98438_A_131503 | NW_004516786.1 | scaffold1635 | 131503                  | TT                              | AA                 | AA               | INTERGENIC      |               |                    |                    |

| SNPs IDs           | Chromosome IDs | Chromosomes  | Physical positions (bp) | CDC Frontier (Reference genome) | (Pusa 1103 & HPNB) | (ILWC 46 & LPNB) | Sequence genome | Components of | Gene accession IDs | Putative functions |
|--------------------|----------------|--------------|-------------------------|---------------------------------|--------------------|------------------|-----------------|---------------|--------------------|--------------------|
| SNP_98439_A_131509 | NW_004516786.1 | scaffold1635 | 131509                  | CC                              | TT                 | TT               | INTERGENIC      |               |                    |                    |
| SNP_98440_A_131514 | NW_004516786.1 | scaffold1635 | 131514                  | GG                              | TT                 | TT               | INTERGENIC      |               |                    |                    |
| SNP_98441_A_131543 | NW_004516786.1 | scaffold1635 | 131543                  | AA                              | TT                 | TT               | INTERGENIC      |               |                    |                    |
| SNP_98442_A_131590 | NW_004516786.1 | scaffold1635 | 131590                  | AA                              | CC                 | CC               | INTERGENIC      |               |                    |                    |
| SNP_98443_A_131627 | NW_004516786.1 | scaffold1635 | 131627                  | TT                              | CC                 | CC               | INTERGENIC      |               |                    |                    |
| SNP_98444_A_131629 | NW_004516786.1 | scaffold1635 | 131629                  | GG                              | TT                 | TT               | INTERGENIC      |               |                    |                    |
| SNP_98445_A_131691 | NW_004516786.1 | scaffold1635 | 131691                  | TT                              | AA                 | AA               | INTERGENIC      |               |                    |                    |
| SNP_98446_A_131703 | NW_004516786.1 | scaffold1635 | 131703                  | TT                              | CC                 | CC               | INTERGENIC      |               |                    |                    |
| SNP_98447_A_133264 | NW_004516786.1 | scaffold1635 | 133264                  | GG                              | TT                 | TT               | INTERGENIC      |               |                    |                    |
| SNP_98448_A_140023 | NW_004516786.1 | scaffold1635 | 140023                  | TT                              | AA                 | AA               | INTERGENIC      |               |                    |                    |
| SNP_98449_A_1243   | NW_004516787.1 | scaffold1637 | 1243                    | AA                              | GG                 | GG               | INTERGENIC      |               |                    |                    |
| SNP_98450_A_1272   | NW_004516787.1 | scaffold1637 | 1272                    | CC                              | GG                 | GG               | INTERGENIC      |               |                    |                    |
| SNP_98451_A_9915   | NW_004516788.1 | scaffold1638 | 9915                    | AA                              | TT                 | TT               | INTERGENIC      |               |                    |                    |
| SNP_98452_A_9916   | NW_004516788.1 | scaffold1638 | 9916                    | TT                              | AA                 | AA               | INTERGENIC      |               |                    |                    |
| SNP_98453_A_32356  | NW_004516788.1 | scaffold1638 | 32356                   | CC                              | TT                 | TT               | INTERGENIC      |               |                    |                    |
| SNP_98454_A_46227  | NW_004516788.1 | scaffold1638 | 46227                   | GG                              | TT                 | TT               | INTERGENIC      |               |                    |                    |
| SNP_98455_A_53034  | NW_004516788.1 | scaffold1638 | 53034                   | TT                              | GG                 | GG               | INTERGENIC      |               |                    |                    |
| SNP_98456_A_54485  | NW_004516788.1 | scaffold1638 | 54485                   | CC                              | TT                 | TT               | INTERGENIC      |               |                    |                    |
| SNP_98457_A_54643  | NW_004516788.1 | scaffold1638 | 54643                   | CC                              | TT                 | TT               | INTERGENIC      |               |                    |                    |
| SNP_98458_A_54648  | NW_004516788.1 | scaffold1638 | 54648                   | AA                              | GG                 | GG               | INTERGENIC      |               |                    |                    |
| SNP_98459_A_54747  | NW_004516788.1 | scaffold1638 | 54747                   | AA                              | GG                 | GG               | INTERGENIC      |               |                    |                    |
| SNP_98460_A_54757  | NW_004516788.1 | scaffold1638 | 54757                   | TT                              | CC                 | CC               | INTERGENIC      |               |                    |                    |

| SNPs IDs           | Chromosome IDs | Chromosomes  | Physical positions (bp) | CDC Frontier (Reference genome) | (Pusa 1103 & HPNB) | (ILWC 46 & LPNB) | Sequence Components of genome | Gene accession IDs | Putative functions                          |
|--------------------|----------------|--------------|-------------------------|---------------------------------|--------------------|------------------|-------------------------------|--------------------|---------------------------------------------|
| SNP_98461_A_54784  | NW_004516788.1 | scaffold1638 | 54784                   | CC                              | TT                 | TT               | INTERGENIC                    |                    |                                             |
| SNP_98462_A_54802  | NW_004516788.1 | scaffold1638 | 54802                   | AA                              | GG                 | GG               | INTERGENIC                    |                    |                                             |
| SNP_98463_A_54852  | NW_004516788.1 | scaffold1638 | 54852                   | TT                              | AA                 | AA               | INTERGENIC                    |                    |                                             |
| SNP_98464_A_54937  | NW_004516788.1 | scaffold1638 | 54937                   | TT                              | CC                 | CC               | INTERGENIC                    |                    |                                             |
| SNP_98465_A_54951  | NW_004516788.1 | scaffold1638 | 54951                   | AA                              | TT                 | TT               | INTERGENIC                    |                    |                                             |
| SNP_98466_A_68653  | NW_004516788.1 | scaffold1638 | 68653                   | CC                              | GG                 | GG               | INTERGENIC                    |                    |                                             |
| SNP_98467_A_72544  | NW_004516788.1 | scaffold1638 | 72544                   | CC                              | GG                 | GG               | INTERGENIC                    |                    |                                             |
| SNP_98468_A_1483   | NW_004516792.1 | scaffold1643 | 1483                    | TT                              | CC                 | CC               | INTERGENIC                    |                    |                                             |
| SNP_98469_A_4477   | NW_004516792.1 | scaffold1643 | 4477                    | AA                              | TT                 | TT               | INTERGENIC                    |                    |                                             |
| SNP_98470_A_4719   | NW_004516792.1 | scaffold1643 | 4719                    | AA                              | GG                 | GG               | INTERGENIC                    |                    |                                             |
| SNP_98471_A_5189   | NW_004516792.1 | scaffold1643 | 5189                    | AA                              | CC                 | CC               | DRR                           | 101492194          | B3 domain-containing protein At3g25182-like |
| SNP_98472_A_5330   | NW_004516792.1 | scaffold1643 | 5330                    | CC                              | GG                 | GG               | DRR                           | 101492194          | B3 domain-containing protein At3g25182-like |
| SNP_98473_A_5412   | NW_004516792.1 | scaffold1643 | 5412                    | CC                              | TT                 | TT               | DRR                           | 101492194          | B3 domain-containing protein At3g25182-like |
| SNP_98474_A_5442   | NW_004516792.1 | scaffold1643 | 5442                    | AA                              | GG                 | GG               | DRR                           | 101492194          | B3 domain-containing protein At3g25182-like |
| SNP_98475_A_7499   | NW_004516792.1 | scaffold1643 | 7499                    | TT                              | CC                 | CC               | URR                           | 101492194          | B3 domain-containing protein At3g25182-like |
| SNP_98476_A_8475   | NW_004516792.1 | scaffold1643 | 8475                    | AA                              | TT                 | TT               | URR                           | 101492194          | B3 domain-containing protein At3g25182-like |
| SNP_98477_A_15680  | NW_004516792.1 | scaffold1643 | 15680                   | GG                              | AA                 | AA               | INTERGENIC                    |                    |                                             |
| SNP_98478_A_15756  | NW_004516792.1 | scaffold1643 | 15756                   | AA                              | GG                 | GG               | INTERGENIC                    |                    |                                             |
| SNP_98479_A_67727  | NW_004516792.1 | scaffold1643 | 67727                   | GG                              | AA                 | AA               | INTERGENIC                    |                    |                                             |
| SNP_98481_A_67784  | NW_004516792.1 | scaffold1643 | 67784                   | TT                              | CC                 | CC               | INTERGENIC                    |                    |                                             |
| SNP_98482_A_102607 | NW_004516792.1 | scaffold1643 | 102607                  | GG                              | AA                 | AA               | INTRON                        | 101493825          | probable pectinesterase 55                  |
| SNP_98484_A_109194 | NW_004516792.1 | scaffold1643 | 109194                  | CC                              | TT                 | TT               | INTRON                        | 101493825          | probable pectinesterase 55                  |

| SNPs IDs           | Chromosome IDs | Chromosomes  | Physical positions (bp) | CDC Frontier (Reference genome) | (Pusa 1103 & HPNB) | (ILWC 46 & LPNB) | Sequence Components of genome | Gene accession IDs | Putative functions         |
|--------------------|----------------|--------------|-------------------------|---------------------------------|--------------------|------------------|-------------------------------|--------------------|----------------------------|
| SNP_98486_A_126696 | NW_004516792.1 | scaffold1643 | 126696                  | AA                              | GG                 | GG               | URR                           | 101493825          | probable pectinesterase 55 |
| SNP_98487_A_128571 | NW_004516792.1 | scaffold1643 | 128571                  | CC                              | TT                 | TT               | INTERGENIC                    |                    |                            |
| SNP_98488_A_128594 | NW_004516792.1 | scaffold1643 | 128594                  | GG                              | AA                 | AA               | INTERGENIC                    |                    |                            |
| SNP_98489_A_128602 | NW_004516792.1 | scaffold1643 | 128602                  | AA                              | CC                 | CC               | INTERGENIC                    |                    |                            |
| SNP_98490_A_128603 | NW_004516792.1 | scaffold1643 | 128603                  | CC                              | TT                 | TT               | INTERGENIC                    |                    |                            |
| SNP_98491_A_128604 | NW_004516792.1 | scaffold1643 | 128604                  | GG                              | AA                 | AA               | INTERGENIC                    |                    |                            |
| SNP_98492_A_128605 | NW_004516792.1 | scaffold1643 | 128605                  | CC                              | TT                 | TT               | INTERGENIC                    |                    |                            |
| SNP_98495_A_155986 | NW_004516792.1 | scaffold1643 | 155986                  | CC                              | TT                 | TT               | INTERGENIC                    |                    |                            |
| SNP_98496_A_155994 | NW_004516792.1 | scaffold1643 | 155994                  | GG                              | AA                 | AA               | INTERGENIC                    |                    |                            |
| SNP_98497_A_155998 | NW_004516792.1 | scaffold1643 | 155998                  | GG                              | AA                 | AA               | INTERGENIC                    |                    |                            |
| SNP_98498_A_156027 | NW_004516792.1 | scaffold1643 | 156027                  | TT                              | CC                 | CC               | INTERGENIC                    |                    |                            |
| SNP_98499_A_159471 | NW_004516792.1 | scaffold1643 | 159471                  | GG                              | TT                 | TT               | INTERGENIC                    |                    |                            |
| SNP_98500_A_159512 | NW_004516792.1 | scaffold1643 | 159512                  | GG                              | AA                 | AA               | INTERGENIC                    |                    |                            |
| SNP_98501_A_159531 | NW_004516792.1 | scaffold1643 | 159531                  | CC                              | TT                 | TT               | INTERGENIC                    |                    |                            |
| SNP_98502_A_160876 | NW_004516792.1 | scaffold1643 | 160876                  | CC                              | AA                 | AA               | INTERGENIC                    |                    |                            |
| SNP_98503_A_160924 | NW_004516792.1 | scaffold1643 | 160924                  | TT                              | AA                 | AA               | INTERGENIC                    |                    |                            |
| SNP_98504_A_160933 | NW_004516792.1 | scaffold1643 | 160933                  | GG                              | AA                 | AA               | INTERGENIC                    |                    |                            |
| SNP_98505_A_160934 | NW_004516792.1 | scaffold1643 | 160934                  | TT                              | GG                 | GG               | INTERGENIC                    |                    |                            |
| SNP_98506_A_163566 | NW_004516792.1 | scaffold1643 | 163566                  | TT                              | CC                 | CC               | INTERGENIC                    |                    |                            |
| SNP_98508_A_163893 | NW_004516792.1 | scaffold1643 | 163893                  | GG                              | AA                 | AA               | INTERGENIC                    |                    |                            |
| SNP_98509_A_163963 | NW_004516792.1 | scaffold1643 | 163963                  | CC                              | AA                 | AA               | INTERGENIC                    |                    |                            |
| SNP_98510_A_164484 | NW_004516792.1 | scaffold1643 | 164484                  | TT                              | AA                 | AA               | INTERGENIC                    |                    |                            |

| SNPs IDs           | Chromosome IDs | Chromosomes  | Physical positions (bp) | CDC Frontier genome (Reference genome) | (Pusa 1103 & HPNB) | (ILWC 46 & LPNB) | Sequence genome | Components of | Gene accession IDs | Putative functions |
|--------------------|----------------|--------------|-------------------------|----------------------------------------|--------------------|------------------|-----------------|---------------|--------------------|--------------------|
| SNP_98511_A_164736 | NW_004516792.1 | scaffold1643 | 164736                  | TT                                     | CC                 | CC               | INTERGENIC      |               |                    |                    |
| SNP_98512_A_165562 | NW_004516792.1 | scaffold1643 | 165562                  | GG                                     | AA                 | AA               | INTERGENIC      |               |                    |                    |
| SNP_98514_A_166960 | NW_004516792.1 | scaffold1643 | 166960                  | AA                                     | TT                 | TT               | INTERGENIC      |               |                    |                    |
| SNP_98515_A_166961 | NW_004516792.1 | scaffold1643 | 166961                  | TT                                     | AA                 | AA               | INTERGENIC      |               |                    |                    |
| SNP_98516_A_166984 | NW_004516792.1 | scaffold1643 | 166984                  | AA                                     | TT                 | TT               | INTERGENIC      |               |                    |                    |
| SNP_98517_A_167002 | NW_004516792.1 | scaffold1643 | 167002                  | AA                                     | CC                 | CC               | INTERGENIC      |               |                    |                    |
| SNP_98518_A_167116 | NW_004516792.1 | scaffold1643 | 167116                  | GG                                     | AA                 | AA               | INTERGENIC      |               |                    |                    |
| SNP_98519_A_167336 | NW_004516792.1 | scaffold1643 | 167336                  | TT                                     | CC                 | CC               | INTERGENIC      |               |                    |                    |
| SNP_98520_A_167347 | NW_004516792.1 | scaffold1643 | 167347                  | GG                                     | AA                 | AA               | INTERGENIC      |               |                    |                    |
| SNP_98521_A_167375 | NW_004516792.1 | scaffold1643 | 167375                  | AA                                     | GG                 | GG               | INTERGENIC      |               |                    |                    |
| SNP_98522_A_167395 | NW_004516792.1 | scaffold1643 | 167395                  | AA                                     | GG                 | GG               | INTERGENIC      |               |                    |                    |
| SNP_98523_A_167398 | NW_004516792.1 | scaffold1643 | 167398                  | CC                                     | TT                 | TT               | INTERGENIC      |               |                    |                    |
| SNP_98524_A_167419 | NW_004516792.1 | scaffold1643 | 167419                  | TT                                     | CC                 | CC               | INTERGENIC      |               |                    |                    |
| SNP_98526_A_167454 | NW_004516792.1 | scaffold1643 | 167454                  | CC                                     | AA                 | AA               | INTERGENIC      |               |                    |                    |
| SNP_98527_A_167478 | NW_004516792.1 | scaffold1643 | 167478                  | GG                                     | AA                 | AA               | INTERGENIC      |               |                    |                    |
| SNP_98528_A_167511 | NW_004516792.1 | scaffold1643 | 167511                  | CC                                     | TT                 | TT               | INTERGENIC      |               |                    |                    |
| SNP_98529_A_167548 | NW_004516792.1 | scaffold1643 | 167548                  | AA                                     | GG                 | GG               | INTERGENIC      |               |                    |                    |
| SNP_98530_A_167549 | NW_004516792.1 | scaffold1643 | 167549                  | CC                                     | TT                 | TT               | INTERGENIC      |               |                    |                    |
| SNP_98531_A_167550 | NW_004516792.1 | scaffold1643 | 167550                  | GG                                     | AA                 | AA               | INTERGENIC      |               |                    |                    |
| SNP_98532_A_167584 | NW_004516792.1 | scaffold1643 | 167584                  | CC                                     | AA                 | AA               | INTERGENIC      |               |                    |                    |
| SNP_98533_A_167638 | NW_004516792.1 | scaffold1643 | 167638                  | TT                                     | AA                 | AA               | INTERGENIC      |               |                    |                    |
| SNP_98534_A_167656 | NW_004516792.1 | scaffold1643 | 167656                  | GG                                     | AA                 | AA               | INTERGENIC      |               |                    |                    |

| SNPs IDs           | Chromosome IDs | Chromosomes  | Physical positions (bp) | CDC Frontier (Reference genome) | (Pusa 1103 & HPNB) | (ILWC 46 & LPNB) | Sequence Components of genome | Gene accession IDs | Putative functions         |
|--------------------|----------------|--------------|-------------------------|---------------------------------|--------------------|------------------|-------------------------------|--------------------|----------------------------|
| SNP_98535_A_167681 | NW_004516792.1 | scaffold1643 | 167681                  | GG                              | AA                 | AA               | INTERGENIC                    |                    |                            |
| SNP_98536_A_167766 | NW_004516792.1 | scaffold1643 | 167766                  | TT                              | AA                 | AA               | INTERGENIC                    |                    |                            |
| SNP_98538_A_169482 | NW_004516792.1 | scaffold1643 | 169482                  | GG                              | AA                 | AA               | DRR                           | 101494460          | probable pectinesterase 55 |
| SNP_98539_A_169501 | NW_004516792.1 | scaffold1643 | 169501                  | GG                              | TT                 | TT               | DRR                           | 101494460          | probable pectinesterase 55 |
| SNP_98540_A_169558 | NW_004516792.1 | scaffold1643 | 169558                  | CC                              | TT                 | TT               | DRR                           | 101494460          | probable pectinesterase 55 |
| SNP_98541_A_170474 | NW_004516792.1 | scaffold1643 | 170474                  | TT                              | AA                 | AA               | INTRON                        | 101494460          | probable pectinesterase 55 |
| SNP_98542_A_170986 | NW_004516792.1 | scaffold1643 | 170986                  | CC                              | TT                 | TT               | NON_SYNONYMOUS_CODING         | 101494460          | probable pectinesterase 55 |
| SNP_98544_A_171703 | NW_004516792.1 | scaffold1643 | 171703                  | CC                              | TT                 | TT               | INTRON                        | 101494460          | probable pectinesterase 55 |
| SNP_98545_A_171915 | NW_004516792.1 | scaffold1643 | 171915                  | CC                              | TT                 | TT               | SYNONYMOUS_CODING             | 101494460          | probable pectinesterase 55 |
| SNP_98546_A_172001 | NW_004516792.1 | scaffold1643 | 172001                  | TT                              | AA                 | AA               | INTRON                        | 101494460          | probable pectinesterase 55 |
| SNP_98547_A_172037 | NW_004516792.1 | scaffold1643 | 172037                  | CC                              | TT                 | TT               | INTRON                        | 101494460          | probable pectinesterase 55 |
| SNP_98548_A_172294 | NW_004516792.1 | scaffold1643 | 172294                  | CC                              | AA                 | AA               | INTRON                        | 101494460          | probable pectinesterase 55 |
| SNP_98549_A_180898 | NW_004516792.1 | scaffold1643 | 180898                  | CC                              | TT                 | TT               | SYNONYMOUS_CODING             | 101494460          | probable pectinesterase 55 |
| SNP_98550_A_180904 | NW_004516792.1 | scaffold1643 | 180904                  | CC                              | TT                 | TT               | START_LOST                    | 101494460          | probable pectinesterase 55 |
| SNP_98551_A_180916 | NW_004516792.1 | scaffold1643 | 180916                  | TT                              | CC                 | CC               | URR                           | 101494460          | probable pectinesterase 55 |
| SNP_98552_A_180924 | NW_004516792.1 | scaffold1643 | 180924                  | TT                              | CC                 | CC               | URR                           | 101494460          | probable pectinesterase 55 |
| SNP_98554_A_181071 | NW_004516792.1 | scaffold1643 | 181071                  | GG                              | CC                 | CC               | URR                           | 101494460          | probable pectinesterase 55 |
| SNP_98555_A_181151 | NW_004516792.1 | scaffold1643 | 181151                  | AA                              | CC                 | CC               | URR                           | 101494460          | probable pectinesterase 55 |
| SNP_98556_A_181164 | NW_004516792.1 | scaffold1643 | 181164                  | GG                              | AA                 | AA               | URR                           | 101494460          | probable pectinesterase 55 |
| SNP_98557_A_181333 | NW_004516792.1 | scaffold1643 | 181333                  | TT                              | GG                 | GG               | URR                           | 101494460          | probable pectinesterase 55 |
| SNP_98558_A_181385 | NW_004516792.1 | scaffold1643 | 181385                  | GG                              | AA                 | AA               | URR                           | 101494460          | probable pectinesterase 55 |
| SNP_98559_A_181447 | NW_004516792.1 | scaffold1643 | 181447                  | CC                              | TT                 | TT               | URR                           | 101494460          | probable pectinesterase 55 |

| SNPs IDs           | Chromosome IDs | Chromosomes  | Physical positions (bp) | CDC Frontier (Reference genome) | (Pusa 1103 & HPNB) | (ILWC 46 & LPNB) | Sequence Components of genome | Gene accession IDs | Putative functions         |
|--------------------|----------------|--------------|-------------------------|---------------------------------|--------------------|------------------|-------------------------------|--------------------|----------------------------|
| SNP_98560_A_181492 | NW_004516792.1 | scaffold1643 | 181492                  | GG                              | TT                 | TT               | URR                           | 101494460          | probable pectinesterase 55 |
| SNP_98561_A_183220 | NW_004516792.1 | scaffold1643 | 183220                  | AA                              | CC                 | CC               | INTERGENIC                    |                    |                            |
| SNP_98562_A_183228 | NW_004516792.1 | scaffold1643 | 183228                  | AA                              | GG                 | GG               | INTERGENIC                    |                    |                            |
| SNP_98563_A_183255 | NW_004516792.1 | scaffold1643 | 183255                  | TT                              | GG                 | GG               | INTERGENIC                    |                    |                            |
| SNP_98564_A_183302 | NW_004516792.1 | scaffold1643 | 183302                  | GG                              | AA                 | AA               | INTERGENIC                    |                    |                            |
| SNP_98565_A_183362 | NW_004516792.1 | scaffold1643 | 183362                  | TT                              | CC                 | CC               | INTERGENIC                    |                    |                            |
| SNP_98566_A_185554 | NW_004516792.1 | scaffold1643 | 185554                  | AA                              | GG                 | GG               | INTERGENIC                    |                    |                            |
| SNP_98567_A_187365 | NW_004516792.1 | scaffold1643 | 187365                  | GG                              | AA                 | AA               | INTERGENIC                    |                    |                            |
| SNP_98568_A_187405 | NW_004516792.1 | scaffold1643 | 187405                  | CC                              | TT                 | TT               | INTERGENIC                    |                    |                            |
| SNP_98569_A_187437 | NW_004516792.1 | scaffold1643 | 187437                  | CC                              | TT                 | TT               | INTERGENIC                    |                    |                            |
| SNP_98570_A_189062 | NW_004516792.1 | scaffold1643 | 189062                  | CC                              | TT                 | TT               | INTERGENIC                    |                    |                            |
| SNP_98571_A_189083 | NW_004516792.1 | scaffold1643 | 189083                  | GG                              | AA                 | AA               | INTERGENIC                    |                    |                            |
| SNP_98572_A_189086 | NW_004516792.1 | scaffold1643 | 189086                  | GG                              | AA                 | AA               | INTERGENIC                    |                    |                            |
| SNP_98573_A_189207 | NW_004516792.1 | scaffold1643 | 189207                  | CC                              | GG                 | GG               | INTERGENIC                    |                    |                            |
| SNP_98574_A_189959 | NW_004516792.1 | scaffold1643 | 189959                  | GG                              | AA                 | AA               | INTERGENIC                    |                    |                            |
| SNP_98575_A_189978 | NW_004516792.1 | scaffold1643 | 189978                  | CC                              | AA                 | AA               | INTERGENIC                    |                    |                            |
| SNP_98576_A_190007 | NW_004516792.1 | scaffold1643 | 190007                  | AA                              | GG                 | GG               | INTERGENIC                    |                    |                            |
| SNP_98577_A_190030 | NW_004516792.1 | scaffold1643 | 190030                  | CC                              | GG                 | GG               | INTERGENIC                    |                    |                            |
| SNP_98578_A_190075 | NW_004516792.1 | scaffold1643 | 190075                  | GG                              | AA                 | AA               | INTERGENIC                    |                    |                            |
| SNP_98579_A_190413 | NW_004516792.1 | scaffold1643 | 190413                  | AA                              | CC                 | CC               | INTERGENIC                    |                    |                            |
| SNP_98580_A_190520 | NW_004516792.1 | scaffold1643 | 190520                  | AA                              | TT                 | TT               | INTERGENIC                    |                    |                            |
| SNP_98581_A_190537 | NW_004516792.1 | scaffold1643 | 190537                  | AA                              | CC                 | CC               | INTERGENIC                    |                    |                            |

| SNPs IDs           | Chromosome IDs | Chromosomes  | Physical positions (bp) | CDC Frontier (Reference genome) | (Pusa 1103 & HPNB) | (ILWC 46 & LPNB) | Sequence genome | Components of | Gene accession IDs | Putative functions |
|--------------------|----------------|--------------|-------------------------|---------------------------------|--------------------|------------------|-----------------|---------------|--------------------|--------------------|
| SNP_98582_A_190539 | NW_004516792.1 | scaffold1643 | 190539                  | GG                              | AA                 | AA               | INTERGENIC      |               |                    |                    |
| SNP_98583_A_190596 | NW_004516792.1 | scaffold1643 | 190596                  | AA                              | CC                 | CC               | INTERGENIC      |               |                    |                    |
| SNP_98584_A_190655 | NW_004516792.1 | scaffold1643 | 190655                  | AA                              | GG                 | GG               | INTERGENIC      |               |                    |                    |
| SNP_98585_A_190743 | NW_004516792.1 | scaffold1643 | 190743                  | TT                              | AA                 | AA               | INTERGENIC      |               |                    |                    |
| SNP_98586_A_192041 | NW_004516792.1 | scaffold1643 | 192041                  | GG                              | AA                 | AA               | INTERGENIC      |               |                    |                    |
| SNP_98589_A_192975 | NW_004516792.1 | scaffold1643 | 192975                  | CC                              | TT                 | TT               | INTERGENIC      |               |                    |                    |
| SNP_98590_A_192978 | NW_004516792.1 | scaffold1643 | 192978                  | TT                              | CC                 | CC               | INTERGENIC      |               |                    |                    |
| SNP_98591_A_193057 | NW_004516792.1 | scaffold1643 | 193057                  | CC                              | TT                 | TT               | INTERGENIC      |               |                    |                    |
| SNP_98592_A_193066 | NW_004516792.1 | scaffold1643 | 193066                  | GG                              | AA                 | AA               | INTERGENIC      |               |                    |                    |
| SNP_98593_A_193108 | NW_004516792.1 | scaffold1643 | 193108                  | GG                              | AA                 | AA               | INTERGENIC      |               |                    |                    |
| SNP_98594_A_193132 | NW_004516792.1 | scaffold1643 | 193132                  | GG                              | AA                 | AA               | INTERGENIC      |               |                    |                    |
| SNP_98595_A_193256 | NW_004516792.1 | scaffold1643 | 193256                  | AA                              | GG                 | GG               | INTERGENIC      |               |                    |                    |
| SNP_98596_A_193308 | NW_004516792.1 | scaffold1643 | 193308                  | CC                              | TT                 | TT               | INTERGENIC      |               |                    |                    |
| SNP_98597_A_193577 | NW_004516792.1 | scaffold1643 | 193577                  | AA                              | CC                 | CC               | INTERGENIC      |               |                    |                    |
| SNP_98598_A_201063 | NW_004516792.1 | scaffold1643 | 201063                  | GG                              | AA                 | AA               | INTERGENIC      |               |                    |                    |
| SNP_98599_A_201177 | NW_004516792.1 | scaffold1643 | 201177                  | AA                              | GG                 | GG               | INTERGENIC      |               |                    |                    |
| SNP_98600_A_201267 | NW_004516792.1 | scaffold1643 | 201267                  | TT                              | CC                 | CC               | INTERGENIC      |               |                    |                    |
| SNP_98601_A_201277 | NW_004516792.1 | scaffold1643 | 201277                  | TT                              | CC                 | CC               | INTERGENIC      |               |                    |                    |
| SNP_98602_A_201308 | NW_004516792.1 | scaffold1643 | 201308                  | AA                              | GG                 | GG               | INTERGENIC      |               |                    |                    |
| SNP_98603_A_201337 | NW_004516792.1 | scaffold1643 | 201337                  | CC                              | GG                 | GG               | INTERGENIC      |               |                    |                    |
| SNP_98604_A_201340 | NW_004516792.1 | scaffold1643 | 201340                  | CC                              | TT                 | TT               | INTERGENIC      |               |                    |                    |
| SNP_98605_A_201365 | NW_004516792.1 | scaffold1643 | 201365                  | CC                              | TT                 | TT               | INTERGENIC      |               |                    |                    |



| SNPs IDs           | Chromosome IDs | Chromosomes  | Physical positions (bp) | CDC Frontier (Reference genome) | (Pusa 1103 & HPNB) | (ILWC 46 & LPNB) | Sequence genome | Components of | Gene accession IDs | Putative functions |
|--------------------|----------------|--------------|-------------------------|---------------------------------|--------------------|------------------|-----------------|---------------|--------------------|--------------------|
| SNP_98606_A_201373 | NW_004516792.1 | scaffold1643 | 201373                  | TT                              | CC                 | CC               | INTERGENIC      |               |                    |                    |
| SNP_98607_A_201378 | NW_004516792.1 | scaffold1643 | 201378                  | TT                              | CC                 | CC               | INTERGENIC      |               |                    |                    |
| SNP_98608_A_201387 | NW_004516792.1 | scaffold1643 | 201387                  | CC                              | TT                 | TT               | INTERGENIC      |               |                    |                    |
| SNP_98609_A_201467 | NW_004516792.1 | scaffold1643 | 201467                  | AA                              | GG                 | GG               | INTERGENIC      |               |                    |                    |
| SNP_98610_A_201482 | NW_004516792.1 | scaffold1643 | 201482                  | GG                              | CC                 | CC               | INTERGENIC      |               |                    |                    |
| SNP_98611_A_201485 | NW_004516792.1 | scaffold1643 | 201485                  | TT                              | CC                 | CC               | INTERGENIC      |               |                    |                    |
| SNP_98612_A_201662 | NW_004516792.1 | scaffold1643 | 201662                  | CC                              | AA                 | AA               | INTERGENIC      |               |                    |                    |
| SNP_98613_A_202551 | NW_004516792.1 | scaffold1643 | 202551                  | AA                              | GG                 | GG               | INTERGENIC      |               |                    |                    |
| SNP_98614_A_204010 | NW_004516792.1 | scaffold1643 | 204010                  | CC                              | AA                 | AA               | INTERGENIC      |               |                    |                    |
| SNP_98615_A_204348 | NW_004516792.1 | scaffold1643 | 204348                  | TT                              | CC                 | CC               | INTERGENIC      |               |                    |                    |
| SNP_98616_A_204401 | NW_004516792.1 | scaffold1643 | 204401                  | CC                              | TT                 | TT               | INTERGENIC      |               |                    |                    |
| SNP_98618_A_206791 | NW_004516792.1 | scaffold1643 | 206791                  | TT                              | CC                 | CC               | INTERGENIC      |               |                    |                    |
| SNP_98619_A_206814 | NW_004516792.1 | scaffold1643 | 206814                  | CC                              | AA                 | AA               | INTERGENIC      |               |                    |                    |
| SNP_98620_A_206836 | NW_004516792.1 | scaffold1643 | 206836                  | AA                              | TT                 | TT               | INTERGENIC      |               |                    |                    |
| SNP_98621_A_206938 | NW_004516792.1 | scaffold1643 | 206938                  | AA                              | GG                 | GG               | INTERGENIC      |               |                    |                    |
| SNP_98622_A_206996 | NW_004516792.1 | scaffold1643 | 206996                  | CC                              | TT                 | TT               | INTERGENIC      |               |                    |                    |
| SNP_98623_A_207175 | NW_004516792.1 | scaffold1643 | 207175                  | CC                              | GG                 | GG               | INTERGENIC      |               |                    |                    |
| SNP_98624_A_207305 | NW_004516792.1 | scaffold1643 | 207305                  | TT                              | CC                 | CC               | INTERGENIC      |               |                    |                    |
| SNP_98625_A_207333 | NW_004516792.1 | scaffold1643 | 207333                  | AA                              | GG                 | GG               | INTERGENIC      |               |                    |                    |
| SNP_98626_A_207397 | NW_004516792.1 | scaffold1643 | 207397                  | TT                              | AA                 | AA               | INTERGENIC      |               |                    |                    |
| SNP_98627_A_207828 | NW_004516792.1 | scaffold1643 | 207828                  | GG                              | AA                 | AA               | INTERGENIC      |               |                    |                    |
| SNP_98628_A_207859 | NW_004516792.1 | scaffold1643 | 207859                  | GG                              | AA                 | AA               | INTERGENIC      |               |                    |                    |

| SNPs IDs           | Chromosome IDs | Chromosomes  | Physical positions (bp) | CDC Frontier (Reference genome) | (Pusa 1103 & HPNB) | (ILWC 46 & LPNB) | Sequence genome | Components of | Gene accession IDs | Putative functions |
|--------------------|----------------|--------------|-------------------------|---------------------------------|--------------------|------------------|-----------------|---------------|--------------------|--------------------|
| SNP_98629_A_207940 | NW_004516792.1 | scaffold1643 | 207940                  | CC                              | AA                 | AA               | INTERGENIC      |               |                    |                    |
| SNP_98630_A_207969 | NW_004516792.1 | scaffold1643 | 207969                  | AA                              | GG                 | GG               | INTERGENIC      |               |                    |                    |
| SNP_98632_A_207991 | NW_004516792.1 | scaffold1643 | 207991                  | CC                              | GG                 | GG               | INTERGENIC      |               |                    |                    |
| SNP_98633_A_208010 | NW_004516792.1 | scaffold1643 | 208010                  | GG                              | AA                 | AA               | INTERGENIC      |               |                    |                    |
| SNP_98634_A_208036 | NW_004516792.1 | scaffold1643 | 208036                  | GG                              | AA                 | AA               | INTERGENIC      |               |                    |                    |
| SNP_98635_A_208369 | NW_004516792.1 | scaffold1643 | 208369                  | AA                              | CC                 | CC               | INTERGENIC      |               |                    |                    |
| SNP_98636_A_208403 | NW_004516792.1 | scaffold1643 | 208403                  | AA                              | TT                 | TT               | INTERGENIC      |               |                    |                    |
| SNP_98637_A_208422 | NW_004516792.1 | scaffold1643 | 208422                  | GG                              | AA                 | AA               | INTERGENIC      |               |                    |                    |
| SNP_98638_A_208431 | NW_004516792.1 | scaffold1643 | 208431                  | CC                              | AA                 | AA               | INTERGENIC      |               |                    |                    |
| SNP_98639_A_208435 | NW_004516792.1 | scaffold1643 | 208435                  | AA                              | CC                 | CC               | INTERGENIC      |               |                    |                    |
| SNP_98640_A_208436 | NW_004516792.1 | scaffold1643 | 208436                  | AA                              | TT                 | TT               | INTERGENIC      |               |                    |                    |
| SNP_98641_A_208457 | NW_004516792.1 | scaffold1643 | 208457                  | AA                              | GG                 | GG               | INTERGENIC      |               |                    |                    |
| SNP_98642_A_208470 | NW_004516792.1 | scaffold1643 | 208470                  | AA                              | TT                 | TT               | INTERGENIC      |               |                    |                    |
| SNP_98643_A_209385 | NW_004516792.1 | scaffold1643 | 209385                  | CC                              | GG                 | GG               | INTERGENIC      |               |                    |                    |
| SNP_98644_A_209452 | NW_004516792.1 | scaffold1643 | 209452                  | TT                              | AA                 | AA               | INTERGENIC      |               |                    |                    |
| SNP_98645_A_210161 | NW_004516792.1 | scaffold1643 | 210161                  | TT                              | AA                 | AA               | INTERGENIC      |               |                    |                    |
| SNP_98647_A_210213 | NW_004516792.1 | scaffold1643 | 210213                  | AA                              | GG                 | GG               | INTERGENIC      |               |                    |                    |
| SNP_98648_A_210234 | NW_004516792.1 | scaffold1643 | 210234                  | TT                              | CC                 | CC               | INTERGENIC      |               |                    |                    |
| SNP_98649_A_210242 | NW_004516792.1 | scaffold1643 | 210242                  | TT                              | AA                 | AA               | INTERGENIC      |               |                    |                    |
| SNP_98650_A_210260 | NW_004516792.1 | scaffold1643 | 210260                  | AA                              | TT                 | TT               | INTERGENIC      |               |                    |                    |
| SNP_98651_A_210279 | NW_004516792.1 | scaffold1643 | 210279                  | GG                              | AA                 | AA               | INTERGENIC      |               |                    |                    |
| SNP_98652_A_210309 | NW_004516792.1 | scaffold1643 | 210309                  | TT                              | AA                 | AA               | INTERGENIC      |               |                    |                    |

| SNPs IDs           | Chromosome IDs | Chromosomes  | Physical positions (bp) | CDC Frontier (Reference genome) | (Pusa 1103 & HPNB) | (ILWC 46 & LPNB) | Sequence genome | Components of | Gene accession IDs | Putative functions |
|--------------------|----------------|--------------|-------------------------|---------------------------------|--------------------|------------------|-----------------|---------------|--------------------|--------------------|
| SNP_98653_A_210344 | NW_004516792.1 | scaffold1643 | 210344                  | AA                              | GG                 | GG               | INTERGENIC      |               |                    |                    |
| SNP_98654_A_210515 | NW_004516792.1 | scaffold1643 | 210515                  | TT                              | CC                 | CC               | INTERGENIC      |               |                    |                    |
| SNP_98655_A_210516 | NW_004516792.1 | scaffold1643 | 210516                  | GG                              | TT                 | TT               | INTERGENIC      |               |                    |                    |
| SNP_98657_A_210595 | NW_004516792.1 | scaffold1643 | 210595                  | AA                              | CC                 | CC               | INTERGENIC      |               |                    |                    |
| SNP_98658_A_210914 | NW_004516792.1 | scaffold1643 | 210914                  | TT                              | AA                 | AA               | INTERGENIC      |               |                    |                    |
| SNP_98659_A_210976 | NW_004516792.1 | scaffold1643 | 210976                  | TT                              | AA                 | AA               | INTERGENIC      |               |                    |                    |
| SNP_98661_A_211057 | NW_004516792.1 | scaffold1643 | 211057                  | TT                              | AA                 | AA               | INTERGENIC      |               |                    |                    |
| SNP_98663_A_211113 | NW_004516792.1 | scaffold1643 | 211113                  | CC                              | AA                 | AA               | INTERGENIC      |               |                    |                    |
| SNP_98664_A_211176 | NW_004516792.1 | scaffold1643 | 211176                  | TT                              | CC                 | CC               | INTERGENIC      |               |                    |                    |
| SNP_98665_A_211191 | NW_004516792.1 | scaffold1643 | 211191                  | GG                              | AA                 | AA               | INTERGENIC      |               |                    |                    |
| SNP_98666_A_211346 | NW_004516792.1 | scaffold1643 | 211346                  | TT                              | AA                 | AA               | INTERGENIC      |               |                    |                    |
| SNP_98667_A_211354 | NW_004516792.1 | scaffold1643 | 211354                  | CC                              | AA                 | AA               | INTERGENIC      |               |                    |                    |
| SNP_98668_A_211367 | NW_004516792.1 | scaffold1643 | 211367                  | GG                              | TT                 | TT               | INTERGENIC      |               |                    |                    |
| SNP_98669_A_213227 | NW_004516792.1 | scaffold1643 | 213227                  | AA                              | TT                 | TT               | INTERGENIC      |               |                    |                    |
| SNP_98670_A_213915 | NW_004516792.1 | scaffold1643 | 213915                  | GG                              | CC                 | CC               | INTERGENIC      |               |                    |                    |
| SNP_98672_A_214715 | NW_004516792.1 | scaffold1643 | 214715                  | TT                              | CC                 | CC               | INTERGENIC      |               |                    |                    |
| SNP_98673_A_215033 | NW_004516792.1 | scaffold1643 | 215033                  | GG                              | AA                 | AA               | INTERGENIC      |               |                    |                    |
| SNP_98674_A_215158 | NW_004516792.1 | scaffold1643 | 215158                  | GG                              | AA                 | AA               | INTERGENIC      |               |                    |                    |
| SNP_98675_A_215240 | NW_004516792.1 | scaffold1643 | 215240                  | CC                              | TT                 | TT               | INTERGENIC      |               |                    |                    |
| SNP_98676_A_4585   | NW_004516793.1 | scaffold1644 | 4585                    | TT                              | AA                 | AA               | INTERGENIC      |               |                    |                    |
| SNP_98678_A_10075  | NW_004516793.1 | scaffold1644 | 10075                   | GG                              | AA                 | AA               | INTERGENIC      |               |                    |                    |
| SNP_98679_A_10079  | NW_004516793.1 | scaffold1644 | 10079                   | GG                              | AA                 | AA               | INTERGENIC      |               |                    |                    |

| SNPs IDs          | Chromosome IDs | Chromosomes  | Physical positions (bp) | CDC Frontier (Reference genome) | (Pusa 1103 & HPNB) | (ILWC 46 & LPNB) | Sequence genome | Components of | Gene accession IDs | Putative functions |
|-------------------|----------------|--------------|-------------------------|---------------------------------|--------------------|------------------|-----------------|---------------|--------------------|--------------------|
| SNP_98680_A_10082 | NW_004516793.1 | scaffold1644 | 10082                   | TT                              | CC                 | CC               | INTERGENIC      |               |                    |                    |
| SNP_98681_A_10092 | NW_004516793.1 | scaffold1644 | 10092                   | TT                              | CC                 | CC               | INTERGENIC      |               |                    |                    |
| SNP_98682_A_10147 | NW_004516793.1 | scaffold1644 | 10147                   | AA                              | GG                 | GG               | INTERGENIC      |               |                    |                    |
| SNP_98683_A_10551 | NW_004516793.1 | scaffold1644 | 10551                   | AA                              | TT                 | TT               | INTERGENIC      |               |                    |                    |
| SNP_98684_A_10554 | NW_004516793.1 | scaffold1644 | 10554                   | CC                              | TT                 | TT               | INTERGENIC      |               |                    |                    |
| SNP_98685_A_17726 | NW_004516795.1 | scaffold1649 | 17726                   | CC                              | TT                 | TT               | INTERGENIC      |               |                    |                    |
| SNP_98686_A_4184  | NW_004516797.1 | scaffold1651 | 4184                    | AA                              | GG                 | GG               | INTERGENIC      |               |                    |                    |
| SNP_98687_A_4305  | NW_004516797.1 | scaffold1651 | 4305                    | GG                              | AA                 | AA               | INTERGENIC      |               |                    |                    |
| SNP_98688_A_4367  | NW_004516797.1 | scaffold1651 | 4367                    | GG                              | AA                 | AA               | INTERGENIC      |               |                    |                    |
| SNP_98689_A_4485  | NW_004516797.1 | scaffold1651 | 4485                    | TT                              | CC                 | CC               | INTERGENIC      |               |                    |                    |
| SNP_98690_A_4665  | NW_004516797.1 | scaffold1651 | 4665                    | TT                              | CC                 | CC               | INTERGENIC      |               |                    |                    |
| SNP_98691_A_4675  | NW_004516797.1 | scaffold1651 | 4675                    | GG                              | AA                 | AA               | INTERGENIC      |               |                    |                    |
| SNP_98692_A_4809  | NW_004516797.1 | scaffold1651 | 4809                    | TT                              | CC                 | CC               | INTERGENIC      |               |                    |                    |
| SNP_98693_A_5085  | NW_004516797.1 | scaffold1651 | 5085                    | TT                              | GG                 | GG               | INTERGENIC      |               |                    |                    |
| SNP_98695_A_5171  | NW_004516797.1 | scaffold1651 | 5171                    | CC                              | TT                 | TT               | INTERGENIC      |               |                    |                    |
| SNP_98696_A_5265  | NW_004516797.1 | scaffold1651 | 5265                    | GG                              | AA                 | AA               | INTERGENIC      |               |                    |                    |
| SNP_98697_A_5441  | NW_004516797.1 | scaffold1651 | 5441                    | TT                              | CC                 | CC               | INTERGENIC      |               |                    |                    |
| SNP_98698_A_5473  | NW_004516797.1 | scaffold1651 | 5473                    | TT                              | CC                 | CC               | INTERGENIC      |               |                    |                    |
| SNP_98699_A_5474  | NW_004516797.1 | scaffold1651 | 5474                    | TT                              | CC                 | CC               | INTERGENIC      |               |                    |                    |
| SNP_98700_A_5662  | NW_004516797.1 | scaffold1651 | 5662                    | TT                              | CC                 | CC               | INTERGENIC      |               |                    |                    |
| SNP_98701_A_5669  | NW_004516797.1 | scaffold1651 | 5669                    | AA                              | GG                 | GG               | INTERGENIC      |               |                    |                    |
| SNP_98702_A_5711  | NW_004516797.1 | scaffold1651 | 5711                    | GG                              | CC                 | CC               | INTERGENIC      |               |                    |                    |

| SNPs IDs         | Chromosome IDs | Chromosomes  | Physical positions (bp) | CDC Frontier (Reference genome) | (Pusa 1103 & HPNB) | (ILWC 46 & LPNB) | Sequence genome | Components of | Gene accession IDs | Putative functions |
|------------------|----------------|--------------|-------------------------|---------------------------------|--------------------|------------------|-----------------|---------------|--------------------|--------------------|
| SNP_98703_A_6032 | NW_004516797.1 | scaffold1651 | 6032                    | TT                              | CC                 | CC               | INTERGENIC      |               |                    |                    |
| SNP_98704_A_6068 | NW_004516797.1 | scaffold1651 | 6068                    | AA                              | GG                 | GG               | INTERGENIC      |               |                    |                    |
| SNP_98705_A_6076 | NW_004516797.1 | scaffold1651 | 6076                    | CC                              | TT                 | TT               | INTERGENIC      |               |                    |                    |
| SNP_98706_A_6108 | NW_004516797.1 | scaffold1651 | 6108                    | TT                              | CC                 | CC               | INTERGENIC      |               |                    |                    |
| SNP_98707_A_6152 | NW_004516797.1 | scaffold1651 | 6152                    | TT                              | CC                 | CC               | INTERGENIC      |               |                    |                    |
| SNP_98708_A_6197 | NW_004516797.1 | scaffold1651 | 6197                    | GG                              | AA                 | AA               | INTERGENIC      |               |                    |                    |
| SNP_98709_A_6223 | NW_004516797.1 | scaffold1651 | 6223                    | TT                              | CC                 | CC               | INTERGENIC      |               |                    |                    |
| SNP_98710_A_6549 | NW_004516797.1 | scaffold1651 | 6549                    | GG                              | AA                 | AA               | INTERGENIC      |               |                    |                    |
| SNP_98711_A_6685 | NW_004516797.1 | scaffold1651 | 6685                    | TT                              | GG                 | GG               | INTERGENIC      |               |                    |                    |
| SNP_98712_A_6848 | NW_004516797.1 | scaffold1651 | 6848                    | CC                              | TT                 | TT               | INTERGENIC      |               |                    |                    |
| SNP_98713_A_7087 | NW_004516797.1 | scaffold1651 | 7087                    | AA                              | TT                 | TT               | INTERGENIC      |               |                    |                    |
| SNP_98714_A_7151 | NW_004516797.1 | scaffold1651 | 7151                    | CC                              | AA                 | AA               | INTERGENIC      |               |                    |                    |
| SNP_98715_A_7212 | NW_004516797.1 | scaffold1651 | 7212                    | AA                              | GG                 | GG               | INTERGENIC      |               |                    |                    |
| SNP_98716_A_7370 | NW_004516797.1 | scaffold1651 | 7370                    | CC                              | TT                 | TT               | INTERGENIC      |               |                    |                    |
| SNP_98717_A_7376 | NW_004516797.1 | scaffold1651 | 7376                    | TT                              | CC                 | CC               | INTERGENIC      |               |                    |                    |
| SNP_98718_A_7440 | NW_004516797.1 | scaffold1651 | 7440                    | GG                              | TT                 | TT               | INTERGENIC      |               |                    |                    |
| SNP_98719_A_7492 | NW_004516797.1 | scaffold1651 | 7492                    | GG                              | AA                 | AA               | INTERGENIC      |               |                    |                    |
| SNP_98720_A_7494 | NW_004516797.1 | scaffold1651 | 7494                    | CC                              | TT                 | TT               | INTERGENIC      |               |                    |                    |
| SNP_98721_A_7558 | NW_004516797.1 | scaffold1651 | 7558                    | AA                              | GG                 | GG               | INTERGENIC      |               |                    |                    |
| SNP_98722_A_7638 | NW_004516797.1 | scaffold1651 | 7638                    | GG                              | AA                 | AA               | INTERGENIC      |               |                    |                    |
| SNP_98723_A_7707 | NW_004516797.1 | scaffold1651 | 7707                    | AA                              | CC                 | CC               | INTERGENIC      |               |                    |                    |
| SNP_98724_A_9019 | NW_004516797.1 | scaffold1651 | 9019                    | CC                              | AA                 | AA               | INTERGENIC      |               |                    |                    |

| SNPs IDs          | Chromosome IDs | Chromosomes  | Physical positions (bp) | CDC Frontier genome (Reference genome) | (Pusa 1103 & HPNB) | (ILWC 46 & LPNB) | Sequence genome | Components of | Gene accession IDs | Putative functions |
|-------------------|----------------|--------------|-------------------------|----------------------------------------|--------------------|------------------|-----------------|---------------|--------------------|--------------------|
| SNP_98725_A_9026  | NW_004516797.1 | scaffold1651 | 9026                    | CC                                     | TT                 | TT               | INTERGENIC      |               |                    |                    |
| SNP_98726_A_9081  | NW_004516797.1 | scaffold1651 | 9081                    | GG                                     | AA                 | AA               | INTERGENIC      |               |                    |                    |
| SNP_98727_A_9085  | NW_004516797.1 | scaffold1651 | 9085                    | GG                                     | TT                 | TT               | INTERGENIC      |               |                    |                    |
| SNP_98728_A_9305  | NW_004516797.1 | scaffold1651 | 9305                    | TT                                     | CC                 | CC               | INTERGENIC      |               |                    |                    |
| SNP_98729_A_9323  | NW_004516797.1 | scaffold1651 | 9323                    | TT                                     | GG                 | GG               | INTERGENIC      |               |                    |                    |
| SNP_98730_A_9331  | NW_004516797.1 | scaffold1651 | 9331                    | GG                                     | TT                 | TT               | INTERGENIC      |               |                    |                    |
| SNP_98731_A_9343  | NW_004516797.1 | scaffold1651 | 9343                    | AA                                     | CC                 | CC               | INTERGENIC      |               |                    |                    |
| SNP_98732_A_9353  | NW_004516797.1 | scaffold1651 | 9353                    | TT                                     | GG                 | GG               | INTERGENIC      |               |                    |                    |
| SNP_98733_A_9452  | NW_004516797.1 | scaffold1651 | 9452                    | GG                                     | TT                 | TT               | INTERGENIC      |               |                    |                    |
| SNP_98734_A_9771  | NW_004516797.1 | scaffold1651 | 9771                    | GG                                     | AA                 | AA               | INTERGENIC      |               |                    |                    |
| SNP_98735_A_9813  | NW_004516797.1 | scaffold1651 | 9813                    | GG                                     | AA                 | AA               | INTERGENIC      |               |                    |                    |
| SNP_98737_A_9986  | NW_004516797.1 | scaffold1651 | 9986                    | CC                                     | TT                 | TT               | INTERGENIC      |               |                    |                    |
| SNP_98738_A_10086 | NW_004516797.1 | scaffold1651 | 10086                   | CC                                     | AA                 | AA               | INTERGENIC      |               |                    |                    |
| SNP_98739_A_10258 | NW_004516797.1 | scaffold1651 | 10258                   | TT                                     | CC                 | CC               | INTERGENIC      |               |                    |                    |
| SNP_98740_A_10314 | NW_004516797.1 | scaffold1651 | 10314                   | AA                                     | GG                 | GG               | INTERGENIC      |               |                    |                    |
| SNP_98741_A_10362 | NW_004516797.1 | scaffold1651 | 10362                   | GG                                     | AA                 | AA               | INTERGENIC      |               |                    |                    |
| SNP_98742_A_10400 | NW_004516797.1 | scaffold1651 | 10400                   | AA                                     | GG                 | GG               | INTERGENIC      |               |                    |                    |
| SNP_98743_A_10429 | NW_004516797.1 | scaffold1651 | 10429                   | CC                                     | TT                 | TT               | INTERGENIC      |               |                    |                    |
| SNP_98744_A_10503 | NW_004516797.1 | scaffold1651 | 10503                   | GG                                     | AA                 | AA               | INTERGENIC      |               |                    |                    |
| SNP_98745_A_10722 | NW_004516797.1 | scaffold1651 | 10722                   | GG                                     | AA                 | AA               | INTERGENIC      |               |                    |                    |
| SNP_98746_A_10836 | NW_004516797.1 | scaffold1651 | 10836                   | GG                                     | AA                 | AA               | INTERGENIC      |               |                    |                    |
| SNP_98747_A_10841 | NW_004516797.1 | scaffold1651 | 10841                   | CC                                     | TT                 | TT               | INTERGENIC      |               |                    |                    |

| SNPs IDs          | Chromosome IDs | Chromosomes  | Physical positions (bp) | CDC Frontier (Reference genome) | (Pusa 1103 & HPNB) | (ILWC 46 & LPNB) | Sequence genome | Components of | Gene accession IDs | Putative functions |
|-------------------|----------------|--------------|-------------------------|---------------------------------|--------------------|------------------|-----------------|---------------|--------------------|--------------------|
| SNP_98748_A_10882 | NW_004516797.1 | scaffold1651 | 10882                   | CC                              | TT                 | TT               | INTERGENIC      |               |                    |                    |
| SNP_98749_A_11014 | NW_004516797.1 | scaffold1651 | 11014                   | AA                              | TT                 | TT               | INTERGENIC      |               |                    |                    |
| SNP_98750_A_11033 | NW_004516797.1 | scaffold1651 | 11033                   | AA                              | GG                 | GG               | INTERGENIC      |               |                    |                    |
| SNP_98751_A_11042 | NW_004516797.1 | scaffold1651 | 11042                   | GG                              | AA                 | AA               | INTERGENIC      |               |                    |                    |
| SNP_98752_A_11047 | NW_004516797.1 | scaffold1651 | 11047                   | GG                              | AA                 | AA               | INTERGENIC      |               |                    |                    |
| SNP_98753_A_11081 | NW_004516797.1 | scaffold1651 | 11081                   | TT                              | GG                 | GG               | INTERGENIC      |               |                    |                    |
| SNP_98754_A_11155 | NW_004516797.1 | scaffold1651 | 11155                   | CC                              | TT                 | TT               | INTERGENIC      |               |                    |                    |
| SNP_98755_A_11219 | NW_004516797.1 | scaffold1651 | 11219                   | CC                              | TT                 | TT               | INTERGENIC      |               |                    |                    |
| SNP_98756_A_11242 | NW_004516797.1 | scaffold1651 | 11242                   | TT                              | CC                 | CC               | INTERGENIC      |               |                    |                    |
| SNP_98757_A_11463 | NW_004516797.1 | scaffold1651 | 11463                   | GG                              | AA                 | AA               | INTERGENIC      |               |                    |                    |
| SNP_98758_A_11486 | NW_004516797.1 | scaffold1651 | 11486                   | TT                              | CC                 | CC               | INTERGENIC      |               |                    |                    |
| SNP_98759_A_11490 | NW_004516797.1 | scaffold1651 | 11490                   | GG                              | TT                 | TT               | INTERGENIC      |               |                    |                    |
| SNP_98761_A_11572 | NW_004516797.1 | scaffold1651 | 11572                   | AA                              | GG                 | GG               | INTERGENIC      |               |                    |                    |
| SNP_98762_A_11638 | NW_004516797.1 | scaffold1651 | 11638                   | AA                              | GG                 | GG               | INTERGENIC      |               |                    |                    |
| SNP_98763_A_11648 | NW_004516797.1 | scaffold1651 | 11648                   | GG                              | TT                 | TT               | INTERGENIC      |               |                    |                    |
| SNP_98764_A_11829 | NW_004516797.1 | scaffold1651 | 11829                   | AA                              | GG                 | GG               | INTERGENIC      |               |                    |                    |
| SNP_98765_A_12084 | NW_004516797.1 | scaffold1651 | 12084                   | CC                              | TT                 | TT               | INTERGENIC      |               |                    |                    |
| SNP_98766_A_12323 | NW_004516797.1 | scaffold1651 | 12323                   | CC                              | TT                 | TT               | INTERGENIC      |               |                    |                    |
| SNP_98767_A_12330 | NW_004516797.1 | scaffold1651 | 12330                   | CC                              | TT                 | TT               | INTERGENIC      |               |                    |                    |
| SNP_98768_A_12337 | NW_004516797.1 | scaffold1651 | 12337                   | AA                              | GG                 | GG               | INTERGENIC      |               |                    |                    |
| SNP_98770_A_13043 | NW_004516797.1 | scaffold1651 | 13043                   | TT                              | CC                 | CC               | INTERGENIC      |               |                    |                    |
| SNP_98771_A_13097 | NW_004516797.1 | scaffold1651 | 13097                   | AA                              | TT                 | TT               | INTERGENIC      |               |                    |                    |

| SNPs IDs          | Chromosome IDs | Chromosomes  | Physical positions (bp) | CDC Frontier (Reference genome) | (Pusa 1103 & HPNB) | (ILWC 46 & LPNB) | Sequence genome | Components of | Gene accession IDs | Putative functions |
|-------------------|----------------|--------------|-------------------------|---------------------------------|--------------------|------------------|-----------------|---------------|--------------------|--------------------|
| SNP_98772_A_13161 | NW_004516797.1 | scaffold1651 | 13161                   | CC                              | TT                 | TT               | INTERGENIC      |               |                    |                    |
| SNP_98773_A_13209 | NW_004516797.1 | scaffold1651 | 13209                   | GG                              | AA                 | AA               | INTERGENIC      |               |                    |                    |
| SNP_98775_A_13454 | NW_004516797.1 | scaffold1651 | 13454                   | AA                              | CC                 | CC               | INTERGENIC      |               |                    |                    |
| SNP_98776_A_13462 | NW_004516797.1 | scaffold1651 | 13462                   | CC                              | TT                 | TT               | INTERGENIC      |               |                    |                    |
| SNP_98777_A_13487 | NW_004516797.1 | scaffold1651 | 13487                   | CC                              | TT                 | TT               | INTERGENIC      |               |                    |                    |
| SNP_98779_A_13627 | NW_004516797.1 | scaffold1651 | 13627                   | AA                              | GG                 | GG               | INTERGENIC      |               |                    |                    |
| SNP_98780_A_13644 | NW_004516797.1 | scaffold1651 | 13644                   | CC                              | AA                 | AA               | INTERGENIC      |               |                    |                    |
| SNP_98781_A_13668 | NW_004516797.1 | scaffold1651 | 13668                   | AA                              | TT                 | TT               | INTERGENIC      |               |                    |                    |
| SNP_98782_A_13679 | NW_004516797.1 | scaffold1651 | 13679                   | GG                              | AA                 | AA               | INTERGENIC      |               |                    |                    |
| SNP_98783_A_13694 | NW_004516797.1 | scaffold1651 | 13694                   | AA                              | GG                 | GG               | INTERGENIC      |               |                    |                    |
| SNP_98784_A_13843 | NW_004516797.1 | scaffold1651 | 13843                   | GG                              | CC                 | CC               | INTERGENIC      |               |                    |                    |
| SNP_98785_A_14049 | NW_004516797.1 | scaffold1651 | 14049                   | AA                              | CC                 | CC               | INTERGENIC      |               |                    |                    |
| SNP_98786_A_14177 | NW_004516797.1 | scaffold1651 | 14177                   | GG                              | TT                 | TT               | INTERGENIC      |               |                    |                    |
| SNP_98788_A_14358 | NW_004516797.1 | scaffold1651 | 14358                   | GG                              | AA                 | AA               | INTERGENIC      |               |                    |                    |
| SNP_98789_A_14585 | NW_004516797.1 | scaffold1651 | 14585                   | AA                              | CC                 | CC               | INTERGENIC      |               |                    |                    |
| SNP_98790_A_14639 | NW_004516797.1 | scaffold1651 | 14639                   | CC                              | AA                 | AA               | INTERGENIC      |               |                    |                    |
| SNP_98791_A_14813 | NW_004516797.1 | scaffold1651 | 14813                   | AA                              | CC                 | CC               | INTERGENIC      |               |                    |                    |
| SNP_98792_A_14919 | NW_004516797.1 | scaffold1651 | 14919                   | GG                              | AA                 | AA               | INTERGENIC      |               |                    |                    |
| SNP_98793_A_14967 | NW_004516797.1 | scaffold1651 | 14967                   | TT                              | CC                 | CC               | INTERGENIC      |               |                    |                    |
| SNP_98794_A_15872 | NW_004516797.1 | scaffold1651 | 15872                   | TT                              | AA                 | AA               | INTERGENIC      |               |                    |                    |
| SNP_98795_A_15887 | NW_004516797.1 | scaffold1651 | 15887                   | GG                              | AA                 | AA               | INTERGENIC      |               |                    |                    |
| SNP_98796_A_16101 | NW_004516797.1 | scaffold1651 | 16101                   | CC                              | TT                 | TT               | INTERGENIC      |               |                    |                    |



| SNPs IDs          | Chromosome IDs | Chromosomes  | Physical positions (bp) | CDC Frontier (Reference genome) | (Pusa 1103 & HPNB) | (ILWC 46 & LPNB) | Sequence genome | Components of | Gene accession IDs | Putative functions |
|-------------------|----------------|--------------|-------------------------|---------------------------------|--------------------|------------------|-----------------|---------------|--------------------|--------------------|
| SNP_98797_A_16191 | NW_004516797.1 | scaffold1651 | 16191                   | AA                              | GG                 | GG               | INTERGENIC      |               |                    |                    |
| SNP_98800_A_16690 | NW_004516797.1 | scaffold1651 | 16690                   | TT                              | GG                 | GG               | INTERGENIC      |               |                    |                    |
| SNP_98801_A_16784 | NW_004516797.1 | scaffold1651 | 16784                   | AA                              | GG                 | GG               | INTERGENIC      |               |                    |                    |
| SNP_98803_A_16872 | NW_004516797.1 | scaffold1651 | 16872                   | GG                              | AA                 | AA               | INTERGENIC      |               |                    |                    |
| SNP_98805_A_17291 | NW_004516797.1 | scaffold1651 | 17291                   | GG                              | AA                 | AA               | INTERGENIC      |               |                    |                    |
| SNP_98806_A_17314 | NW_004516797.1 | scaffold1651 | 17314                   | CC                              | GG                 | GG               | INTERGENIC      |               |                    |                    |
| SNP_98807_A_17352 | NW_004516797.1 | scaffold1651 | 17352                   | CC                              | TT                 | TT               | INTERGENIC      |               |                    |                    |
| SNP_98808_A_17497 | NW_004516797.1 | scaffold1651 | 17497                   | CC                              | TT                 | TT               | INTERGENIC      |               |                    |                    |
| SNP_98810_A_17739 | NW_004516797.1 | scaffold1651 | 17739                   | GG                              | AA                 | AA               | INTERGENIC      |               |                    |                    |
| SNP_98812_A_18310 | NW_004516797.1 | scaffold1651 | 18310                   | GG                              | AA                 | AA               | INTERGENIC      |               |                    |                    |
| SNP_98813_A_18415 | NW_004516797.1 | scaffold1651 | 18415                   | TT                              | CC                 | CC               | INTERGENIC      |               |                    |                    |
| SNP_98814_A_18477 | NW_004516797.1 | scaffold1651 | 18477                   | CC                              | TT                 | TT               | INTERGENIC      |               |                    |                    |
| SNP_98816_A_18579 | NW_004516797.1 | scaffold1651 | 18579                   | GG                              | CC                 | CC               | INTERGENIC      |               |                    |                    |
| SNP_98817_A_18614 | NW_004516797.1 | scaffold1651 | 18614                   | GG                              | AA                 | AA               | INTERGENIC      |               |                    |                    |
| SNP_98818_A_18754 | NW_004516797.1 | scaffold1651 | 18754                   | TT                              | CC                 | CC               | INTERGENIC      |               |                    |                    |
| SNP_98819_A_18759 | NW_004516797.1 | scaffold1651 | 18759                   | GG                              | AA                 | AA               | INTERGENIC      |               |                    |                    |
| SNP_98820_A_18795 | NW_004516797.1 | scaffold1651 | 18795                   | TT                              | AA                 | AA               | INTERGENIC      |               |                    |                    |
| SNP_98821_A_18796 | NW_004516797.1 | scaffold1651 | 18796                   | GG                              | AA                 | AA               | INTERGENIC      |               |                    |                    |
| SNP_98822_A_18813 | NW_004516797.1 | scaffold1651 | 18813                   | GG                              | TT                 | TT               | INTERGENIC      |               |                    |                    |
| SNP_98824_A_19021 | NW_004516797.1 | scaffold1651 | 19021                   | TT                              | CC                 | CC               | INTERGENIC      |               |                    |                    |
| SNP_98825_A_19817 | NW_004516797.1 | scaffold1651 | 19817                   | AA                              | TT                 | TT               | INTERGENIC      |               |                    |                    |
| SNP_98826_A_19854 | NW_004516797.1 | scaffold1651 | 19854                   | AA                              | GG                 | GG               | INTERGENIC      |               |                    |                    |

| SNPs IDs          | Chromosome IDs | Chromosomes  | Physical positions (bp) | CDC Frontier (Reference genome) | (Pusa 1103 & HPNB) | (ILWC 46 & LPNB) | Sequence genome | Components of | Gene accession IDs | Putative functions |
|-------------------|----------------|--------------|-------------------------|---------------------------------|--------------------|------------------|-----------------|---------------|--------------------|--------------------|
| SNP_98827_A_20099 | NW_004516797.1 | scaffold1651 | 20099                   | CC                              | TT                 | TT               | INTERGENIC      |               |                    |                    |
| SNP_98828_A_20104 | NW_004516797.1 | scaffold1651 | 20104                   | AA                              | TT                 | TT               | INTERGENIC      |               |                    |                    |
| SNP_98829_A_20253 | NW_004516797.1 | scaffold1651 | 20253                   | GG                              | TT                 | TT               | INTERGENIC      |               |                    |                    |
| SNP_98830_A_20382 | NW_004516797.1 | scaffold1651 | 20382                   | CC                              | TT                 | TT               | INTERGENIC      |               |                    |                    |
| SNP_98831_A_20709 | NW_004516797.1 | scaffold1651 | 20709                   | AA                              | GG                 | GG               | INTERGENIC      |               |                    |                    |
| SNP_98832_A_22607 | NW_004516797.1 | scaffold1651 | 22607                   | TT                              | CC                 | CC               | INTERGENIC      |               |                    |                    |
| SNP_98833_A_22608 | NW_004516797.1 | scaffold1651 | 22608                   | TT                              | CC                 | CC               | INTERGENIC      |               |                    |                    |
| SNP_98834_A_22686 | NW_004516797.1 | scaffold1651 | 22686                   | GG                              | TT                 | TT               | INTERGENIC      |               |                    |                    |
| SNP_98835_A_22724 | NW_004516797.1 | scaffold1651 | 22724                   | CC                              | AA                 | AA               | INTERGENIC      |               |                    |                    |
| SNP_98837_A_23019 | NW_004516797.1 | scaffold1651 | 23019                   | TT                              | CC                 | CC               | INTERGENIC      |               |                    |                    |
| SNP_98838_A_26872 | NW_004516797.1 | scaffold1651 | 26872                   | CC                              | TT                 | TT               | INTERGENIC      |               |                    |                    |
| SNP_98839_A_26874 | NW_004516797.1 | scaffold1651 | 26874                   | TT                              | GG                 | GG               | INTERGENIC      |               |                    |                    |
| SNP_98840_A_30268 | NW_004516797.1 | scaffold1651 | 30268                   | CC                              | TT                 | TT               | INTERGENIC      |               |                    |                    |
| SNP_98841_A_30471 | NW_004516797.1 | scaffold1651 | 30471                   | GG                              | AA                 | AA               | INTERGENIC      |               |                    |                    |
| SNP_98842_A_30556 | NW_004516797.1 | scaffold1651 | 30556                   | AA                              | TT                 | TT               | INTERGENIC      |               |                    |                    |
| SNP_98843_A_30934 | NW_004516797.1 | scaffold1651 | 30934                   | CC                              | TT                 | TT               | INTERGENIC      |               |                    |                    |
| SNP_98844_A_30991 | NW_004516797.1 | scaffold1651 | 30991                   | TT                              | AA                 | AA               | INTERGENIC      |               |                    |                    |
| SNP_98845_A_31077 | NW_004516797.1 | scaffold1651 | 31077                   | GG                              | AA                 | AA               | INTERGENIC      |               |                    |                    |
| SNP_98846_A_31081 | NW_004516797.1 | scaffold1651 | 31081                   | TT                              | CC                 | CC               | INTERGENIC      |               |                    |                    |
| SNP_98847_A_31123 | NW_004516797.1 | scaffold1651 | 31123                   | CC                              | TT                 | TT               | INTERGENIC      |               |                    |                    |
| SNP_98848_A_31137 | NW_004516797.1 | scaffold1651 | 31137                   | AA                              | GG                 | GG               | INTERGENIC      |               |                    |                    |
| SNP_98849_A_31440 | NW_004516797.1 | scaffold1651 | 31440                   | TT                              | GG                 | GG               | INTERGENIC      |               |                    |                    |

| SNPs IDs          | Chromosome IDs | Chromosomes  | Physical positions (bp) | CDC Frontier (Reference genome) | (Pusa 1103 & HPNB) | (ILWC 46 & LPNB) | Sequence genome | Components of | Gene accession IDs | Putative functions |
|-------------------|----------------|--------------|-------------------------|---------------------------------|--------------------|------------------|-----------------|---------------|--------------------|--------------------|
| SNP_98850_A_31441 | NW_004516797.1 | scaffold1651 | 31441                   | CC                              | TT                 | TT               | INTERGENIC      |               |                    |                    |
| SNP_98851_A_31672 | NW_004516797.1 | scaffold1651 | 31672                   | CC                              | TT                 | TT               | INTERGENIC      |               |                    |                    |
| SNP_98852_A_31676 | NW_004516797.1 | scaffold1651 | 31676                   | TT                              | CC                 | CC               | INTERGENIC      |               |                    |                    |
| SNP_98853_A_44516 | NW_004516799.1 | scaffold1654 | 44516                   | AA                              | GG                 | GG               | INTERGENIC      |               |                    |                    |
| SNP_98854_A_44673 | NW_004516799.1 | scaffold1654 | 44673                   | GG                              | AA                 | AA               | INTERGENIC      |               |                    |                    |
| SNP_98855_A_44723 | NW_004516799.1 | scaffold1654 | 44723                   | TT                              | CC                 | CC               | INTERGENIC      |               |                    |                    |
| SNP_98856_A_66291 | NW_004516799.1 | scaffold1654 | 66291                   | TT                              | CC                 | CC               | INTERGENIC      |               |                    |                    |
| SNP_98857_A_74254 | NW_004516799.1 | scaffold1654 | 74254                   | GG                              | TT                 | TT               | INTERGENIC      |               |                    |                    |
| SNP_98858_A_64    | NW_004516801.1 | scaffold1657 | 64                      | CC                              | TT                 | TT               | INTERGENIC      |               |                    |                    |
| SNP_98859_A_65    | NW_004516801.1 | scaffold1657 | 65                      | TT                              | GG                 | GG               | INTERGENIC      |               |                    |                    |
| SNP_98860_A_87    | NW_004516801.1 | scaffold1657 | 87                      | GG                              | AA                 | AA               | INTERGENIC      |               |                    |                    |
| SNP_98861_A_154   | NW_004516801.1 | scaffold1657 | 154                     | CC                              | TT                 | TT               | INTERGENIC      |               |                    |                    |
| SNP_98862_A_169   | NW_004516801.1 | scaffold1657 | 169                     | CC                              | TT                 | TT               | INTERGENIC      |               |                    |                    |
| SNP_98863_A_279   | NW_004516801.1 | scaffold1657 | 279                     | TT                              | CC                 | CC               | INTERGENIC      |               |                    |                    |
| SNP_98864_A_320   | NW_004516801.1 | scaffold1657 | 320                     | AA                              | GG                 | GG               | INTERGENIC      |               |                    |                    |
| SNP_98865_A_324   | NW_004516801.1 | scaffold1657 | 324                     | GG                              | AA                 | AA               | INTERGENIC      |               |                    |                    |
| SNP_98866_A_337   | NW_004516801.1 | scaffold1657 | 337                     | TT                              | AA                 | AA               | INTERGENIC      |               |                    |                    |
| SNP_98867_A_411   | NW_004516801.1 | scaffold1657 | 411                     | GG                              | CC                 | CC               | INTERGENIC      |               |                    |                    |
| SNP_98868_A_460   | NW_004516801.1 | scaffold1657 | 460                     | CC                              | AA                 | AA               | INTERGENIC      |               |                    |                    |
| SNP_98869_A_568   | NW_004516801.1 | scaffold1657 | 568                     | AA                              | GG                 | GG               | INTERGENIC      |               |                    |                    |
| SNP_98870_A_578   | NW_004516801.1 | scaffold1657 | 578                     | GG                              | TT                 | TT               | INTERGENIC      |               |                    |                    |
| SNP_98871_A_660   | NW_004516801.1 | scaffold1657 | 660                     | TT                              | AA                 | AA               | INTERGENIC      |               |                    |                    |

| SNPs IDs         | Chromosome IDs | Chromosomes  | Physical positions (bp) | CDC Frontier (Reference genome) | (Pusa 1103 & HPNB) | (ILWC 46 & LPNB) | Sequence Components of genome | Gene accession IDs | Putative functions |
|------------------|----------------|--------------|-------------------------|---------------------------------|--------------------|------------------|-------------------------------|--------------------|--------------------|
| SNP_98872_A_661  | NW_004516801.1 | scaffold1657 | 661                     | GG                              | TT                 | TT               | INTERGENIC                    |                    |                    |
| SNP_98873_A_913  | NW_004516801.1 | scaffold1657 | 913                     | TT                              | CC                 | CC               | INTERGENIC                    |                    |                    |
| SNP_98874_A_1030 | NW_004516801.1 | scaffold1657 | 1030                    | AA                              | GG                 | GG               | INTERGENIC                    |                    |                    |
| SNP_98875_A_64   | NW_004516803.1 | scaffold1659 | 64                      | AA                              | TT                 | TT               | INTERGENIC                    |                    |                    |
| SNP_98876_A_99   | NW_004516803.1 | scaffold1659 | 99                      | GG                              | TT                 | TT               | INTERGENIC                    |                    |                    |
| SNP_98878_A_157  | NW_004516803.1 | scaffold1659 | 157                     | GG                              | AA                 | AA               | INTERGENIC                    |                    |                    |
| SNP_98879_A_453  | NW_004516803.1 | scaffold1659 | 453                     | TT                              | AA                 | AA               | INTERGENIC                    |                    |                    |
| SNP_98880_A_565  | NW_004516803.1 | scaffold1659 | 565                     | TT                              | AA                 | AA               | INTERGENIC                    |                    |                    |
| SNP_98881_A_702  | NW_004516803.1 | scaffold1659 | 702                     | TT                              | CC                 | CC               | INTERGENIC                    |                    |                    |
| SNP_98882_A_1583 | NW_004516803.1 | scaffold1659 | 1583                    | TT                              | AA                 | AA               | INTERGENIC                    |                    |                    |
| SNP_98883_A_2088 | NW_004516803.1 | scaffold1659 | 2088                    | GG                              | AA                 | AA               | INTERGENIC                    |                    |                    |
| SNP_98884_A_2162 | NW_004516803.1 | scaffold1659 | 2162                    | TT                              | CC                 | CC               | INTERGENIC                    |                    |                    |
| SNP_98885_A_2216 | NW_004516803.1 | scaffold1659 | 2216                    | GG                              | AA                 | AA               | INTERGENIC                    |                    |                    |
| SNP_98886_A_2279 | NW_004516803.1 | scaffold1659 | 2279                    | CC                              | TT                 | TT               | INTERGENIC                    |                    |                    |
| SNP_98887_A_2869 | NW_004516803.1 | scaffold1659 | 2869                    | GG                              | AA                 | AA               | DRR                           | 101498389          | Unknown function   |
| SNP_98888_A_2925 | NW_004516803.1 | scaffold1659 | 2925                    | GG                              | AA                 | AA               | DRR                           | 101498389          | Unknown function   |
| SNP_98889_A_3019 | NW_004516803.1 | scaffold1659 | 3019                    | AA                              | TT                 | TT               | DRR                           | 101498389          | Unknown function   |
| SNP_98890_A_3212 | NW_004516803.1 | scaffold1659 | 3212                    | GG                              | AA                 | AA               | DRR                           | 101498389          | Unknown function   |
| SNP_98891_A_3810 | NW_004516803.1 | scaffold1659 | 3810                    | CC                              | AA                 | AA               | INTRON                        | 101498389          | Unknown function   |
| SNP_98892_A_3978 | NW_004516803.1 | scaffold1659 | 3978                    | CC                              | TT                 | TT               | SYNONYMOUS_CODING             | 101498389          | Unknown function   |
| SNP_98893_A_4080 | NW_004516803.1 | scaffold1659 | 4080                    | GG                              | AA                 | AA               | NON_SYNONYMOUS_CODING         | 101498389          | Unknown function   |
| SNP_98894_A_4527 | NW_004516803.1 | scaffold1659 | 4527                    | CC                              | AA                 | AA               | INTRON                        | 101498389          | Unknown function   |

| SNPs IDs          | Chromosome IDs | Chromosomes  | Physical positions (bp) | CDC Frontier (Reference genome) | (Pusa 1103 & HPNB) | (ILWC 46 & LPNB) | Sequence Components of genome | Gene accession IDs | Putative functions |
|-------------------|----------------|--------------|-------------------------|---------------------------------|--------------------|------------------|-------------------------------|--------------------|--------------------|
| SNP_98895_A_4902  | NW_004516803.1 | scaffold1659 | 4902                    | TT                              | CC                 | CC               | URR                           | 101498389          | Unknown function   |
| SNP_98896_A_4918  | NW_004516803.1 | scaffold1659 | 4918                    | GG                              | TT                 | TT               | URR                           | 101498389          | Unknown function   |
| SNP_98897_A_4997  | NW_004516803.1 | scaffold1659 | 4997                    | TT                              | CC                 | CC               | URR                           | 101498389          | Unknown function   |
| SNP_98898_A_19830 | NW_004516803.1 | scaffold1659 | 19830                   | GG                              | AA                 | AA               | INTERGENIC                    |                    |                    |
| SNP_98899_A_19940 | NW_004516803.1 | scaffold1659 | 19940                   | AA                              | GG                 | GG               | INTERGENIC                    |                    |                    |
| SNP_98900_A_20029 | NW_004516803.1 | scaffold1659 | 20029                   | TT                              | GG                 | GG               | INTERGENIC                    |                    |                    |
| SNP_98901_A_20075 | NW_004516803.1 | scaffold1659 | 20075                   | CC                              | TT                 | TT               | INTERGENIC                    |                    |                    |
| SNP_98902_A_20186 | NW_004516803.1 | scaffold1659 | 20186                   | TT                              | CC                 | CC               | INTERGENIC                    |                    |                    |
| SNP_98903_A_20229 | NW_004516803.1 | scaffold1659 | 20229                   | AA                              | GG                 | GG               | INTERGENIC                    |                    |                    |
| SNP_98904_A_20349 | NW_004516803.1 | scaffold1659 | 20349                   | GG                              | AA                 | AA               | INTERGENIC                    |                    |                    |
| SNP_98905_A_20366 | NW_004516803.1 | scaffold1659 | 20366                   | AA                              | TT                 | TT               | INTERGENIC                    |                    |                    |
| SNP_98906_A_20499 | NW_004516803.1 | scaffold1659 | 20499                   | TT                              | AA                 | AA               | INTERGENIC                    |                    |                    |
| SNP_98907_A_21061 | NW_004516803.1 | scaffold1659 | 21061                   | AA                              | GG                 | GG               | INTERGENIC                    |                    |                    |
| SNP_98908_A_21117 | NW_004516803.1 | scaffold1659 | 21117                   | GG                              | AA                 | AA               | INTERGENIC                    |                    |                    |
| SNP_98909_A_21629 | NW_004516803.1 | scaffold1659 | 21629                   | CC                              | TT                 | TT               | INTERGENIC                    |                    |                    |
| SNP_98910_A_21977 | NW_004516803.1 | scaffold1659 | 21977                   | GG                              | AA                 | AA               | INTERGENIC                    |                    |                    |
| SNP_98911_A_59548 | NW_004516803.1 | scaffold1659 | 59548                   | TT                              | AA                 | AA               | INTERGENIC                    |                    |                    |
| SNP_98912_A_81360 | NW_004516803.1 | scaffold1659 | 81360                   | CC                              | TT                 | TT               | INTERGENIC                    |                    |                    |
| SNP_98913_A_95917 | NW_004516803.1 | scaffold1659 | 95917                   | AA                              | GG                 | GG               | INTERGENIC                    |                    |                    |
| SNP_98914_A_95926 | NW_004516803.1 | scaffold1659 | 95926                   | TT                              | GG                 | GG               | INTERGENIC                    |                    |                    |
| SNP_98915_A_95977 | NW_004516803.1 | scaffold1659 | 95977                   | AA                              | GG                 | GG               | INTERGENIC                    |                    |                    |
| SNP_98916_A_96017 | NW_004516803.1 | scaffold1659 | 96017                   | AA                              | GG                 | GG               | INTERGENIC                    |                    |                    |

| SNPs IDs           | Chromosome IDs | Chromosomes  | Physical positions (bp) | CDC Frontier (Reference genome) | (Pusa 1103 & HPNB) | (ILWC 46 & LPNB) | Sequence Components of genome | Gene accession IDs | Putative functions           |
|--------------------|----------------|--------------|-------------------------|---------------------------------|--------------------|------------------|-------------------------------|--------------------|------------------------------|
| SNP_98918_A_104997 | NW_004516803.1 | scaffold1659 | 104997                  | AA                              | GG                 | GG               | INTERGENIC                    |                    |                              |
| SNP_98919_A_105001 | NW_004516803.1 | scaffold1659 | 105001                  | CC                              | AA                 | AA               | INTERGENIC                    |                    |                              |
| SNP_98920_A_123381 | NW_004516803.1 | scaffold1659 | 123381                  | CC                              | TT                 | TT               | INTERGENIC                    |                    |                              |
| SNP_98921_A_135811 | NW_004516803.1 | scaffold1659 | 135811                  | GG                              | AA                 | AA               | INTERGENIC                    |                    |                              |
| SNP_98922_A_135817 | NW_004516803.1 | scaffold1659 | 135817                  | CC                              | TT                 | TT               | INTERGENIC                    |                    |                              |
| SNP_98923_A_195474 | NW_004516803.1 | scaffold1659 | 195474                  | AA                              | GG                 | GG               | INTERGENIC                    |                    |                              |
| SNP_98924_A_217066 | NW_004516803.1 | scaffold1659 | 217066                  | TT                              | AA                 | AA               | URR                           | 101499673          | uncharacterized LOC101499673 |
| SNP_98925_A_217144 | NW_004516803.1 | scaffold1659 | 217144                  | AA                              | CC                 | CC               | URR                           | 101499673          | uncharacterized LOC101499673 |
| SNP_98926_A_268691 | NW_004516803.1 | scaffold1659 | 268691                  | AA                              | GG                 | GG               | INTERGENIC                    |                    |                              |
| SNP_98927_A_269080 | NW_004516803.1 | scaffold1659 | 269080                  | CC                              | GG                 | GG               | INTERGENIC                    |                    |                              |
| SNP_98928_A_269101 | NW_004516803.1 | scaffold1659 | 269101                  | CC                              | GG                 | GG               | INTERGENIC                    |                    |                              |
| SNP_98930_A_282444 | NW_004516803.1 | scaffold1659 | 282444                  | AA                              | GG                 | GG               | INTERGENIC                    |                    |                              |
| SNP_98932_A_283386 | NW_004516803.1 | scaffold1659 | 283386                  | TT                              | AA                 | AA               | INTERGENIC                    |                    |                              |
| SNP_98933_A_287486 | NW_004516803.1 | scaffold1659 | 287486                  | GG                              | TT                 | TT               | INTERGENIC                    |                    |                              |
| SNP_98934_A_309933 | NW_004516803.1 | scaffold1659 | 309933                  | AA                              | TT                 | TT               | INTERGENIC                    |                    |                              |
| SNP_98935_A_309939 | NW_004516803.1 | scaffold1659 | 309939                  | TT                              | GG                 | GG               | INTERGENIC                    |                    |                              |
| SNP_98936_A_342216 | NW_004516803.1 | scaffold1659 | 342216                  | AA                              | GG                 | GG               | INTERGENIC                    |                    |                              |
| SNP_98937_A_359178 | NW_004516803.1 | scaffold1659 | 359178                  | AA                              | GG                 | GG               | INTERGENIC                    |                    |                              |
| SNP_98938_A_364314 | NW_004516803.1 | scaffold1659 | 364314                  | CC                              | TT                 | TT               | INTERGENIC                    |                    |                              |
| SNP_98939_A_364329 | NW_004516803.1 | scaffold1659 | 364329                  | TT                              | CC                 | CC               | INTERGENIC                    |                    |                              |
| SNP_98940_A_385381 | NW_004516803.1 | scaffold1659 | 385381                  | AA                              | GG                 | GG               | INTERGENIC                    |                    |                              |
| SNP_98941_A_385421 | NW_004516803.1 | scaffold1659 | 385421                  | GG                              | AA                 | AA               | INTERGENIC                    |                    |                              |

| SNPs IDs           | Chromosome IDs | Chromosomes  | Physical positions (bp) | CDC Frontier (Reference genome) | (Pusa 1103 & HPNB) | (ILWC 46 & LPNB) | Sequence genome | Components of | Gene accession IDs | Putative functions |
|--------------------|----------------|--------------|-------------------------|---------------------------------|--------------------|------------------|-----------------|---------------|--------------------|--------------------|
| SNP_98942_A_422796 | NW_004516803.1 | scaffold1659 | 422796                  | GG                              | AA                 | AA               | INTERGENIC      |               |                    |                    |
| SNP_98943_A_422822 | NW_004516803.1 | scaffold1659 | 422822                  | TT                              | GG                 | GG               | INTERGENIC      |               |                    |                    |
| SNP_98944_A_422837 | NW_004516803.1 | scaffold1659 | 422837                  | TT                              | GG                 | GG               | INTERGENIC      |               |                    |                    |
| SNP_98945_A_424204 | NW_004516803.1 | scaffold1659 | 424204                  | CC                              | TT                 | TT               | INTERGENIC      |               |                    |                    |
| SNP_98946_A_424250 | NW_004516803.1 | scaffold1659 | 424250                  | CC                              | TT                 | TT               | INTERGENIC      |               |                    |                    |
| SNP_98947_A_430193 | NW_004516803.1 | scaffold1659 | 430193                  | TT                              | AA                 | AA               | INTERGENIC      |               |                    |                    |
| SNP_98948_A_430466 | NW_004516803.1 | scaffold1659 | 430466                  | AA                              | GG                 | GG               | INTERGENIC      |               |                    |                    |
| SNP_98949_A_430470 | NW_004516803.1 | scaffold1659 | 430470                  | AA                              | GG                 | GG               | INTERGENIC      |               |                    |                    |
| SNP_98950_A_430485 | NW_004516803.1 | scaffold1659 | 430485                  | AA                              | CC                 | CC               | INTERGENIC      |               |                    |                    |
| SNP_98951_A_430490 | NW_004516803.1 | scaffold1659 | 430490                  | AA                              | GG                 | GG               | INTERGENIC      |               |                    |                    |
| SNP_98952_A_430513 | NW_004516803.1 | scaffold1659 | 430513                  | GG                              | CC                 | CC               | INTERGENIC      |               |                    |                    |
| SNP_98953_A_466160 | NW_004516803.1 | scaffold1659 | 466160                  | GG                              | AA                 | AA               | INTERGENIC      |               |                    |                    |
| SNP_98954_A_466910 | NW_004516803.1 | scaffold1659 | 466910                  | TT                              | CC                 | CC               | INTERGENIC      |               |                    |                    |
| SNP_98955_A_468162 | NW_004516803.1 | scaffold1659 | 468162                  | AA                              | GG                 | GG               | INTERGENIC      |               |                    |                    |
| SNP_98956_A_468543 | NW_004516803.1 | scaffold1659 | 468543                  | TT                              | CC                 | CC               | INTERGENIC      |               |                    |                    |
| SNP_98957_A_10507  | NW_004516805.1 | scaffold1661 | 10507                   | AA                              | CC                 | CC               | INTERGENIC      |               |                    |                    |
| SNP_98958_A_12075  | NW_004516805.1 | scaffold1661 | 12075                   | TT                              | CC                 | CC               | INTERGENIC      |               |                    |                    |
| SNP_98959_A_12242  | NW_004516805.1 | scaffold1661 | 12242                   | CC                              | AA                 | AA               | INTERGENIC      |               |                    |                    |
| SNP_98960_A_19781  | NW_004516805.1 | scaffold1661 | 19781                   | CC                              | AA                 | AA               | INTERGENIC      |               |                    |                    |
| SNP_98961_A_34653  | NW_004516805.1 | scaffold1661 | 34653                   | GG                              | TT                 | TT               | INTERGENIC      |               |                    |                    |
| SNP_98962_A_34661  | NW_004516805.1 | scaffold1661 | 34661                   | AA                              | CC                 | CC               | INTERGENIC      |               |                    |                    |
| SNP_98963_A_38580  | NW_004516805.1 | scaffold1661 | 38580                   | TT                              | CC                 | CC               | INTERGENIC      |               |                    |                    |

| SNPs IDs           | Chromosome IDs | Chromosomes  | Physical positions (bp) | CDC Frontier (Reference genome) | (Pusa 1103 & HPNB) | (ILWC 46 & LPNB) | Sequence genome | Components of | Gene accession IDs | Putative functions |
|--------------------|----------------|--------------|-------------------------|---------------------------------|--------------------|------------------|-----------------|---------------|--------------------|--------------------|
| SNP_98964_A_53917  | NW_004516805.1 | scaffold1661 | 53917                   | AA                              | GG                 | GG               | INTERGENIC      |               |                    |                    |
| SNP_98965_A_61758  | NW_004516805.1 | scaffold1661 | 61758                   | GG                              | TT                 | TT               | INTERGENIC      |               |                    |                    |
| SNP_98967_A_89688  | NW_004516805.1 | scaffold1661 | 89688                   | GG                              | AA                 | AA               | INTERGENIC      |               |                    |                    |
| SNP_98968_A_89919  | NW_004516805.1 | scaffold1661 | 89919                   | AA                              | GG                 | GG               | INTERGENIC      |               |                    |                    |
| SNP_98970_A_112826 | NW_004516805.1 | scaffold1661 | 112826                  | AA                              | GG                 | GG               | INTERGENIC      |               |                    |                    |
| SNP_98971_A_554    | NW_004516806.1 | scaffold1663 | 554                     | TT                              | AA                 | AA               | INTERGENIC      |               |                    |                    |
| SNP_98972_A_604    | NW_004516806.1 | scaffold1663 | 604                     | TT                              | AA                 | AA               | INTERGENIC      |               |                    |                    |
| SNP_98974_A_34145  | NW_004516807.1 | scaffold1664 | 34145                   | CC                              | TT                 | TT               | INTERGENIC      |               |                    |                    |
| SNP_98975_A_37545  | NW_004516807.1 | scaffold1664 | 37545                   | TT                              | CC                 | CC               | INTERGENIC      |               |                    |                    |
| SNP_98976_A_48589  | NW_004516807.1 | scaffold1664 | 48589                   | AA                              | TT                 | TT               | INTERGENIC      |               |                    |                    |
| SNP_98978_A_94797  | NW_004516807.1 | scaffold1664 | 94797                   | AA                              | GG                 | GG               | INTERGENIC      |               |                    |                    |
| SNP_98979_A_94979  | NW_004516807.1 | scaffold1664 | 94979                   | AA                              | GG                 | GG               | INTERGENIC      |               |                    |                    |
| SNP_98980_A_191347 | NW_004516807.1 | scaffold1664 | 191347                  | AA                              | GG                 | GG               | INTERGENIC      |               |                    |                    |
| SNP_98981_A_2617   | NW_004516810.1 | scaffold1673 | 2617                    | AA                              | GG                 | GG               | INTERGENIC      |               |                    |                    |
| SNP_98982_A_64     | NW_004516811.1 | scaffold1674 | 64                      | TT                              | CC                 | CC               | INTERGENIC      |               |                    |                    |
| SNP_98983_A_65     | NW_004516811.1 | scaffold1674 | 65                      | AA                              | GG                 | GG               | INTERGENIC      |               |                    |                    |
| SNP_98984_A_405    | NW_004516811.1 | scaffold1674 | 405                     | CC                              | TT                 | TT               | INTERGENIC      |               |                    |                    |
| SNP_98985_A_511    | NW_004516811.1 | scaffold1674 | 511                     | GG                              | TT                 | TT               | INTERGENIC      |               |                    |                    |
| SNP_98987_A_504    | NW_004516812.1 | scaffold1675 | 504                     | AA                              | GG                 | GG               | INTERGENIC      |               |                    |                    |
| SNP_98988_A_895    | NW_004516812.1 | scaffold1675 | 895                     | CC                              | GG                 | GG               | INTERGENIC      |               |                    |                    |
| SNP_98989_A_1264   | NW_004516812.1 | scaffold1675 | 1264                    | AA                              | GG                 | GG               | INTERGENIC      |               |                    |                    |
| SNP_98990_A_1309   | NW_004516812.1 | scaffold1675 | 1309                    | TT                              | CC                 | CC               | INTERGENIC      |               |                    |                    |



| SNPs IDs          | Chromosome IDs | Chromosomes  | Physical positions (bp) | CDC Frontier (Reference genome) | (Pusa 1103 & HPNB) | (ILWC 46 & LPNB) | Sequence genome | Components of | Gene accession IDs | Putative functions |
|-------------------|----------------|--------------|-------------------------|---------------------------------|--------------------|------------------|-----------------|---------------|--------------------|--------------------|
| SNP_98991_A_604   | NW_004516814.1 | scaffold1679 | 604                     | AA                              | GG                 | GG               | INTERGENIC      |               |                    |                    |
| SNP_98993_A_15886 | NW_004516815.1 | scaffold1680 | 15886                   | AA                              | TT                 | TT               | INTERGENIC      |               |                    |                    |
| SNP_98994_A_16312 | NW_004516815.1 | scaffold1680 | 16312                   | CC                              | GG                 | GG               | INTERGENIC      |               |                    |                    |
| SNP_98995_A_21212 | NW_004516815.1 | scaffold1680 | 21212                   | TT                              | GG                 | GG               | INTERGENIC      |               |                    |                    |
| SNP_98996_A_294   | NW_004516816.1 | scaffold1681 | 294                     | TT                              | CC                 | CC               | INTERGENIC      |               |                    |                    |
| SNP_98997_A_402   | NW_004516816.1 | scaffold1681 | 402                     | AA                              | TT                 | TT               | INTERGENIC      |               |                    |                    |
| SNP_98998_A_450   | NW_004516816.1 | scaffold1681 | 450                     | GG                              | TT                 | TT               | INTERGENIC      |               |                    |                    |
| SNP_99000_A_1160  | NW_004516816.1 | scaffold1681 | 1160                    | GG                              | TT                 | TT               | INTERGENIC      |               |                    |                    |
| SNP_99001_A_1335  | NW_004516816.1 | scaffold1681 | 1335                    | AA                              | GG                 | GG               | INTERGENIC      |               |                    |                    |
| SNP_99002_A_1364  | NW_004516816.1 | scaffold1681 | 1364                    | TT                              | AA                 | AA               | INTERGENIC      |               |                    |                    |
| SNP_99003_A_1421  | NW_004516816.1 | scaffold1681 | 1421                    | AA                              | CC                 | CC               | INTERGENIC      |               |                    |                    |
| SNP_99004_A_1935  | NW_004516816.1 | scaffold1681 | 1935                    | GG                              | TT                 | TT               | INTERGENIC      |               |                    |                    |
| SNP_99005_A_2513  | NW_004516816.1 | scaffold1681 | 2513                    | GG                              | AA                 | AA               | INTERGENIC      |               |                    |                    |
| SNP_99006_A_3608  | NW_004516816.1 | scaffold1681 | 3608                    | AA                              | TT                 | TT               | INTERGENIC      |               |                    |                    |
| SNP_99007_A_3911  | NW_004516816.1 | scaffold1681 | 3911                    | AA                              | TT                 | TT               | INTERGENIC      |               |                    |                    |
| SNP_99008_A_3944  | NW_004516816.1 | scaffold1681 | 3944                    | TT                              | AA                 | AA               | INTERGENIC      |               |                    |                    |
| SNP_99009_A_5949  | NW_004516816.1 | scaffold1681 | 5949                    | TT                              | CC                 | CC               | INTERGENIC      |               |                    |                    |
| SNP_99010_A_6544  | NW_004516816.1 | scaffold1681 | 6544                    | CC                              | TT                 | TT               | INTERGENIC      |               |                    |                    |
| SNP_99011_A_6614  | NW_004516816.1 | scaffold1681 | 6614                    | TT                              | GG                 | GG               | INTERGENIC      |               |                    |                    |
| SNP_99012_A_6634  | NW_004516816.1 | scaffold1681 | 6634                    | AA                              | TT                 | TT               | INTERGENIC      |               |                    |                    |
| SNP_99013_A_6714  | NW_004516816.1 | scaffold1681 | 6714                    | AA                              | GG                 | GG               | INTERGENIC      |               |                    |                    |
| SNP_99014_A_6722  | NW_004516816.1 | scaffold1681 | 6722                    | AA                              | GG                 | GG               | INTERGENIC      |               |                    |                    |

| SNPs IDs          | Chromosome IDs | Chromosomes  | Physical positions (bp) | CDC Frontier (Reference genome) | (Pusa 1103 & HPNB) | (ILWC 46 & LPNB) | Sequence genome | Components of | Gene accession IDs | Putative functions |
|-------------------|----------------|--------------|-------------------------|---------------------------------|--------------------|------------------|-----------------|---------------|--------------------|--------------------|
| SNP_99015_A_6838  | NW_004516816.1 | scaffold1681 | 6838                    | GG                              | AA                 | AA               | INTERGENIC      |               |                    |                    |
| SNP_99016_A_6864  | NW_004516816.1 | scaffold1681 | 6864                    | CC                              | GG                 | GG               | INTERGENIC      |               |                    |                    |
| SNP_99017_A_6904  | NW_004516816.1 | scaffold1681 | 6904                    | CC                              | AA                 | AA               | INTERGENIC      |               |                    |                    |
| SNP_99018_A_7147  | NW_004516816.1 | scaffold1681 | 7147                    | AA                              | GG                 | GG               | INTERGENIC      |               |                    |                    |
| SNP_99020_A_16532 | NW_004516817.1 | scaffold1682 | 16532                   | CC                              | TT                 | TT               | INTERGENIC      |               |                    |                    |
| SNP_99022_A_6135  | NW_004516819.1 | scaffold1684 | 6135                    | AA                              | GG                 | GG               | INTERGENIC      |               |                    |                    |
| SNP_99023_A_6391  | NW_004516819.1 | scaffold1684 | 6391                    | GG                              | AA                 | AA               | INTERGENIC      |               |                    |                    |
| SNP_99024_A_17096 | NW_004516819.1 | scaffold1684 | 17096                   | TT                              | CC                 | CC               | INTERGENIC      |               |                    |                    |
| SNP_99025_A_17101 | NW_004516819.1 | scaffold1684 | 17101                   | TT                              | CC                 | CC               | INTERGENIC      |               |                    |                    |
| SNP_99027_A_17127 | NW_004516819.1 | scaffold1684 | 17127                   | AA                              | CC                 | CC               | INTERGENIC      |               |                    |                    |
| SNP_99028_A_17169 | NW_004516819.1 | scaffold1684 | 17169                   | AA                              | TT                 | TT               | INTERGENIC      |               |                    |                    |
| SNP_99029_A_17212 | NW_004516819.1 | scaffold1684 | 17212                   | CC                              | TT                 | TT               | INTERGENIC      |               |                    |                    |
| SNP_99030_A_17215 | NW_004516819.1 | scaffold1684 | 17215                   | CC                              | GG                 | GG               | INTERGENIC      |               |                    |                    |
| SNP_99031_A_22957 | NW_004516819.1 | scaffold1684 | 22957                   | TT                              | GG                 | GG               | INTERGENIC      |               |                    |                    |
| SNP_99032_A_23002 | NW_004516819.1 | scaffold1684 | 23002                   | TT                              | GG                 | GG               | INTERGENIC      |               |                    |                    |
| SNP_99033_A_23035 | NW_004516819.1 | scaffold1684 | 23035                   | GG                              | AA                 | AA               | INTERGENIC      |               |                    |                    |
| SNP_99034_A_23057 | NW_004516819.1 | scaffold1684 | 23057                   | AA                              | GG                 | GG               | INTERGENIC      |               |                    |                    |
| SNP_99035_A_24226 | NW_004516819.1 | scaffold1684 | 24226                   | CC                              | GG                 | GG               | INTERGENIC      |               |                    |                    |
| SNP_99036_A_24642 | NW_004516819.1 | scaffold1684 | 24642                   | TT                              | AA                 | AA               | INTERGENIC      |               |                    |                    |
| SNP_99037_A_26738 | NW_004516819.1 | scaffold1684 | 26738                   | AA                              | GG                 | GG               | INTERGENIC      |               |                    |                    |
| SNP_99038_A_28471 | NW_004516819.1 | scaffold1684 | 28471                   | CC                              | TT                 | TT               | INTERGENIC      |               |                    |                    |
| SNP_99039_A_28632 | NW_004516819.1 | scaffold1684 | 28632                   | TT                              | CC                 | CC               | INTERGENIC      |               |                    |                    |

| SNPs IDs          | Chromosome IDs | Chromosomes  | Physical positions (bp) | CDC Frontier (Reference genome) | (Pusa 1103 & HPNB) | (ILWC 46 & LPNB) | Sequence genome | Components of | Gene accession IDs | Putative functions |
|-------------------|----------------|--------------|-------------------------|---------------------------------|--------------------|------------------|-----------------|---------------|--------------------|--------------------|
| SNP_99040_A_28940 | NW_004516819.1 | scaffold1684 | 28940                   | GG                              | CC                 | CC               | INTERGENIC      |               |                    |                    |
| SNP_99041_A_28968 | NW_004516819.1 | scaffold1684 | 28968                   | GG                              | AA                 | AA               | INTERGENIC      |               |                    |                    |
| SNP_99042_A_28975 | NW_004516819.1 | scaffold1684 | 28975                   | TT                              | CC                 | CC               | INTERGENIC      |               |                    |                    |
| SNP_99043_A_28989 | NW_004516819.1 | scaffold1684 | 28989                   | CC                              | TT                 | TT               | INTERGENIC      |               |                    |                    |
| SNP_99044_A_29014 | NW_004516819.1 | scaffold1684 | 29014                   | CC                              | TT                 | TT               | INTERGENIC      |               |                    |                    |
| SNP_99045_A_29037 | NW_004516819.1 | scaffold1684 | 29037                   | AA                              | TT                 | TT               | INTERGENIC      |               |                    |                    |
| SNP_99046_A_29071 | NW_004516819.1 | scaffold1684 | 29071                   | AA                              | TT                 | TT               | INTERGENIC      |               |                    |                    |
| SNP_99047_A_29089 | NW_004516819.1 | scaffold1684 | 29089                   | GG                              | CC                 | CC               | INTERGENIC      |               |                    |                    |
| SNP_99048_A_29091 | NW_004516819.1 | scaffold1684 | 29091                   | GG                              | TT                 | TT               | INTERGENIC      |               |                    |                    |
| SNP_99049_A_29122 | NW_004516819.1 | scaffold1684 | 29122                   | CC                              | TT                 | TT               | INTERGENIC      |               |                    |                    |
| SNP_99050_A_29200 | NW_004516819.1 | scaffold1684 | 29200                   | TT                              | AA                 | AA               | INTERGENIC      |               |                    |                    |
| SNP_99051_A_29392 | NW_004516819.1 | scaffold1684 | 29392                   | TT                              | AA                 | AA               | INTERGENIC      |               |                    |                    |
| SNP_99052_A_29440 | NW_004516819.1 | scaffold1684 | 29440                   | AA                              | TT                 | TT               | INTERGENIC      |               |                    |                    |
| SNP_99053_A_29480 | NW_004516819.1 | scaffold1684 | 29480                   | TT                              | CC                 | CC               | INTERGENIC      |               |                    |                    |
| SNP_99054_A_29494 | NW_004516819.1 | scaffold1684 | 29494                   | AA                              | TT                 | TT               | INTERGENIC      |               |                    |                    |
| SNP_99055_A_29533 | NW_004516819.1 | scaffold1684 | 29533                   | TT                              | CC                 | CC               | INTERGENIC      |               |                    |                    |
| SNP_99056_A_29552 | NW_004516819.1 | scaffold1684 | 29552                   | AA                              | TT                 | TT               | INTERGENIC      |               |                    |                    |
| SNP_99057_A_29563 | NW_004516819.1 | scaffold1684 | 29563                   | GG                              | CC                 | CC               | INTERGENIC      |               |                    |                    |
| SNP_99058_A_29637 | NW_004516819.1 | scaffold1684 | 29637                   | AA                              | CC                 | CC               | INTERGENIC      |               |                    |                    |
| SNP_99059_A_29673 | NW_004516819.1 | scaffold1684 | 29673                   | GG                              | AA                 | AA               | INTERGENIC      |               |                    |                    |
| SNP_99060_A_29692 | NW_004516819.1 | scaffold1684 | 29692                   | TT                              | AA                 | AA               | INTERGENIC      |               |                    |                    |
| SNP_99061_A_29726 | NW_004516819.1 | scaffold1684 | 29726                   | CC                              | TT                 | TT               | INTERGENIC      |               |                    |                    |

| SNPs IDs          | Chromosome IDs | Chromosomes  | Physical positions (bp) | CDC Frontier (Reference genome) | (Pusa 1103 & HPNB) | (ILWC 46 & LPNB) | Sequence genome | Components of | Gene accession IDs | Putative functions |
|-------------------|----------------|--------------|-------------------------|---------------------------------|--------------------|------------------|-----------------|---------------|--------------------|--------------------|
| SNP_99062_A_29742 | NW_004516819.1 | scaffold1684 | 29742                   | CC                              | TT                 | TT               | INTERGENIC      |               |                    |                    |
| SNP_99063_A_40850 | NW_004516819.1 | scaffold1684 | 40850                   | GG                              | TT                 | TT               | INTERGENIC      |               |                    |                    |
| SNP_99064_A_44572 | NW_004516819.1 | scaffold1684 | 44572                   | CC                              | TT                 | TT               | INTERGENIC      |               |                    |                    |
| SNP_99065_A_44987 | NW_004516819.1 | scaffold1684 | 44987                   | TT                              | CC                 | CC               | INTERGENIC      |               |                    |                    |
| SNP_99066_A_53287 | NW_004516819.1 | scaffold1684 | 53287                   | GG                              | AA                 | AA               | INTERGENIC      |               |                    |                    |
| SNP_99067_A_60162 | NW_004516819.1 | scaffold1684 | 60162                   | TT                              | GG                 | GG               | INTERGENIC      |               |                    |                    |
| SNP_99068_A_62694 | NW_004516819.1 | scaffold1684 | 62694                   | CC                              | TT                 | TT               | INTERGENIC      |               |                    |                    |
| SNP_99069_A_62991 | NW_004516819.1 | scaffold1684 | 62991                   | AA                              | GG                 | GG               | INTERGENIC      |               |                    |                    |
| SNP_99070_A_63107 | NW_004516819.1 | scaffold1684 | 63107                   | CC                              | TT                 | TT               | INTERGENIC      |               |                    |                    |
| SNP_99072_A_70877 | NW_004516819.1 | scaffold1684 | 70877                   | GG                              | AA                 | AA               | INTERGENIC      |               |                    |                    |
| SNP_99073_A_71059 | NW_004516819.1 | scaffold1684 | 71059                   | CC                              | AA                 | AA               | INTERGENIC      |               |                    |                    |
| SNP_99074_A_71276 | NW_004516819.1 | scaffold1684 | 71276                   | AA                              | GG                 | GG               | INTERGENIC      |               |                    |                    |
| SNP_99075_A_71460 | NW_004516819.1 | scaffold1684 | 71460                   | AA                              | TT                 | TT               | INTERGENIC      |               |                    |                    |
| SNP_99076_A_15717 | NW_004516820.1 | scaffold1685 | 15717                   | TT                              | AA                 | AA               | DRR             | 101503389     | Unknown function   |                    |
| SNP_99077_A_32843 | NW_004516820.1 | scaffold1685 | 32843                   | GG                              | AA                 | AA               | INTERGENIC      |               |                    |                    |
| SNP_99078_A_33247 | NW_004516820.1 | scaffold1685 | 33247                   | AA                              | CC                 | CC               | INTERGENIC      |               |                    |                    |
| SNP_99079_A_33394 | NW_004516820.1 | scaffold1685 | 33394                   | TT                              | CC                 | CC               | INTERGENIC      |               |                    |                    |
| SNP_99080_A_53481 | NW_004516820.1 | scaffold1685 | 53481                   | CC                              | TT                 | TT               | INTERGENIC      |               |                    |                    |
| SNP_99081_A_53511 | NW_004516820.1 | scaffold1685 | 53511                   | TT                              | GG                 | GG               | INTERGENIC      |               |                    |                    |
| SNP_99082_A_53519 | NW_004516820.1 | scaffold1685 | 53519                   | GG                              | AA                 | AA               | INTERGENIC      |               |                    |                    |
| SNP_99083_A_59050 | NW_004516820.1 | scaffold1685 | 59050                   | TT                              | CC                 | CC               | INTERGENIC      |               |                    |                    |
| SNP_99084_A_64716 | NW_004516820.1 | scaffold1685 | 64716                   | AA                              | CC                 | CC               | INTERGENIC      |               |                    |                    |

| SNPs IDs           | Chromosome IDs | Chromosomes  | Physical positions (bp) | CDC Frontier (Reference genome) | (Pusa 1103 & HPNB) | (ILWC 46 & LPNB) | Sequence genome | Components of | Gene accession IDs                         | Putative functions |
|--------------------|----------------|--------------|-------------------------|---------------------------------|--------------------|------------------|-----------------|---------------|--------------------------------------------|--------------------|
| SNP_99085_A_64750  | NW_004516820.1 | scaffold1685 | 64750                   | CC                              | TT                 | TT               | INTERGENIC      |               |                                            |                    |
| SNP_99086_A_64797  | NW_004516820.1 | scaffold1685 | 64797                   | GG                              | CC                 | CC               | INTERGENIC      |               |                                            |                    |
| SNP_99087_A_65150  | NW_004516820.1 | scaffold1685 | 65150                   | GG                              | AA                 | AA               | INTERGENIC      |               |                                            |                    |
| SNP_99088_A_77026  | NW_004516820.1 | scaffold1685 | 77026                   | AA                              | GG                 | GG               | INTERGENIC      |               |                                            |                    |
| SNP_99089_A_77045  | NW_004516820.1 | scaffold1685 | 77045                   | GG                              | CC                 | CC               | INTERGENIC      |               |                                            |                    |
| SNP_99091_A_77056  | NW_004516820.1 | scaffold1685 | 77056                   | AA                              | GG                 | GG               | INTERGENIC      |               |                                            |                    |
| SNP_99092_A_77067  | NW_004516820.1 | scaffold1685 | 77067                   | CC                              | TT                 | TT               | INTERGENIC      |               |                                            |                    |
| SNP_99093_A_83166  | NW_004516820.1 | scaffold1685 | 83166                   | TT                              | CC                 | CC               | INTERGENIC      |               |                                            |                    |
| SNP_99094_A_83235  | NW_004516820.1 | scaffold1685 | 83235                   | AA                              | CC                 | CC               | INTERGENIC      |               |                                            |                    |
| SNP_99095_A_83438  | NW_004516820.1 | scaffold1685 | 83438                   | TT                              | CC                 | CC               | INTERGENIC      |               |                                            |                    |
| SNP_99096_A_88573  | NW_004516820.1 | scaffold1685 | 88573                   | TT                              | CC                 | CC               | INTERGENIC      |               |                                            |                    |
| SNP_99097_A_88825  | NW_004516820.1 | scaffold1685 | 88825                   | AA                              | TT                 | TT               | INTERGENIC      |               |                                            |                    |
| SNP_99098_A_88828  | NW_004516820.1 | scaffold1685 | 88828                   | TT                              | CC                 | CC               | INTERGENIC      |               |                                            |                    |
| SNP_99099_A_88885  | NW_004516820.1 | scaffold1685 | 88885                   | AA                              | CC                 | CC               | INTERGENIC      |               |                                            |                    |
| SNP_99100_A_128047 | NW_004516820.1 | scaffold1685 | 128047                  | TT                              | AA                 | AA               | INTERGENIC      |               |                                            |                    |
| SNP_99101_A_128312 | NW_004516820.1 | scaffold1685 | 128312                  | GG                              | TT                 | TT               | INTERGENIC      |               |                                            |                    |
| SNP_99102_A_136209 | NW_004516820.1 | scaffold1685 | 136209                  | AA                              | GG                 | GG               | INTERGENIC      |               |                                            |                    |
| SNP_99103_A_136218 | NW_004516820.1 | scaffold1685 | 136218                  | CC                              | GG                 | GG               | INTERGENIC      |               |                                            |                    |
| SNP_99104_A_136266 | NW_004516820.1 | scaffold1685 | 136266                  | GG                              | AA                 | AA               | INTERGENIC      |               |                                            |                    |
| SNP_99105_A_80310  | NW_004516822.1 | scaffold1687 | 80310                   | AA                              | GG                 | GG               | INTERGENIC      |               |                                            |                    |
| SNP_99106_A_80637  | NW_004516822.1 | scaffold1687 | 80637                   | TT                              | AA                 | AA               | INTERGENIC      |               |                                            |                    |
| SNP_99107_A_85085  | NW_004516822.1 | scaffold1687 | 85085                   | AA                              | GG                 | GG               | URR             | 101503723     | non-specific lipid-transfer protein 1-like |                    |

| SNPs IDs           | Chromosome IDs | Chromosomes  | Physical positions (bp) | CDC Frontier (Reference genome) | (Pusa 1103 & HPNB) | (ILWC 46 & LPNB) | Sequence Components of genome | Gene accession IDs | Putative functions                         |
|--------------------|----------------|--------------|-------------------------|---------------------------------|--------------------|------------------|-------------------------------|--------------------|--------------------------------------------|
| SNP_99108_A_85088  | NW_004516822.1 | scaffold1687 | 85088                   | AA                              | GG                 | GG               | URR                           | 101503723          | non-specific lipid-transfer protein 1-like |
| SNP_99109_A_144481 | NW_004516822.1 | scaffold1687 | 144481                  | CC                              | TT                 | TT               | INTERGENIC                    |                    |                                            |
| SNP_99110_A_144609 | NW_004516822.1 | scaffold1687 | 144609                  | GG                              | AA                 | AA               | INTERGENIC                    |                    |                                            |
| SNP_99111_A_144623 | NW_004516822.1 | scaffold1687 | 144623                  | TT                              | GG                 | GG               | INTERGENIC                    |                    |                                            |
| SNP_99112_A_144636 | NW_004516822.1 | scaffold1687 | 144636                  | AA                              | GG                 | GG               | INTERGENIC                    |                    |                                            |
| SNP_99113_A_144637 | NW_004516822.1 | scaffold1687 | 144637                  | GG                              | AA                 | AA               | INTERGENIC                    |                    |                                            |
| SNP_99114_A_144662 | NW_004516822.1 | scaffold1687 | 144662                  | CC                              | AA                 | AA               | INTERGENIC                    |                    |                                            |
| SNP_99115_A_144667 | NW_004516822.1 | scaffold1687 | 144667                  | CC                              | GG                 | GG               | INTERGENIC                    |                    |                                            |
| SNP_99117_A_150652 | NW_004516822.1 | scaffold1687 | 150652                  | GG                              | AA                 | AA               | INTERGENIC                    |                    |                                            |
| SNP_99119_A_180732 | NW_004516822.1 | scaffold1687 | 180732                  | TT                              | CC                 | CC               | INTERGENIC                    |                    |                                            |
| SNP_99120_A_189466 | NW_004516822.1 | scaffold1687 | 189466                  | TT                              | CC                 | CC               | INTERGENIC                    |                    |                                            |
| SNP_99121_A_192103 | NW_004516822.1 | scaffold1687 | 192103                  | GG                              | AA                 | AA               | INTERGENIC                    |                    |                                            |
| SNP_99122_A_192945 | NW_004516822.1 | scaffold1687 | 192945                  | GG                              | AA                 | AA               | INTERGENIC                    |                    |                                            |
| SNP_99123_A_224163 | NW_004516822.1 | scaffold1687 | 224163                  | TT                              | CC                 | CC               | INTERGENIC                    |                    |                                            |
| SNP_99125_A_224512 | NW_004516822.1 | scaffold1687 | 224512                  | TT                              | CC                 | CC               | INTERGENIC                    |                    |                                            |
| SNP_99126_A_2378   | NW_004516823.1 | scaffold1688 | 2378                    | TT                              | CC                 | CC               | INTERGENIC                    |                    |                                            |
| SNP_99127_A_2423   | NW_004516823.1 | scaffold1688 | 2423                    | AA                              | GG                 | GG               | INTERGENIC                    |                    |                                            |
| SNP_99128_A_2431   | NW_004516823.1 | scaffold1688 | 2431                    | TT                              | CC                 | CC               | INTERGENIC                    |                    |                                            |
| SNP_99129_A_2432   | NW_004516823.1 | scaffold1688 | 2432                    | CC                              | GG                 | GG               | INTERGENIC                    |                    |                                            |
| SNP_99130_A_1821   | NW_004516824.1 | scaffold1689 | 1821                    | AA                              | CC                 | CC               | INTERGENIC                    |                    |                                            |
| SNP_99131_A_2363   | NW_004516829.1 | scaffold1695 | 2363                    | TT                              | CC                 | CC               | INTERGENIC                    |                    |                                            |
| SNP_99132_A_2727   | NW_004516829.1 | scaffold1695 | 2727                    | GG                              | TT                 | TT               | INTERGENIC                    |                    |                                            |

| SNPs IDs         | Chromosome IDs | Chromosomes  | Physical positions (bp) | CDC Frontier (Reference genome) | (Pusa 1103 & HPNB) | (ILWC 46 & LPNB) | Sequence genome | Components of | Gene accession IDs | Putative functions |
|------------------|----------------|--------------|-------------------------|---------------------------------|--------------------|------------------|-----------------|---------------|--------------------|--------------------|
| SNP_99133_A_2744 | NW_004516829.1 | scaffold1695 | 2744                    | CC                              | TT                 | TT               | INTERGENIC      |               |                    |                    |
| SNP_99134_A_6193 | NW_004516829.1 | scaffold1695 | 6193                    | GG                              | AA                 | AA               | INTERGENIC      |               |                    |                    |
| SNP_99135_A_470  | NW_004516830.1 | scaffold1696 | 470                     | TT                              | AA                 | AA               | INTERGENIC      |               |                    |                    |
| SNP_99136_A_3708 | NW_004516830.1 | scaffold1696 | 3708                    | TT                              | GG                 | GG               | INTERGENIC      |               |                    |                    |
| SNP_99137_A_3710 | NW_004516830.1 | scaffold1696 | 3710                    | TT                              | CC                 | CC               | INTERGENIC      |               |                    |                    |
| SNP_99138_A_4137 | NW_004516830.1 | scaffold1696 | 4137                    | CC                              | TT                 | TT               | INTERGENIC      |               |                    |                    |
| SNP_99140_A_4571 | NW_004516830.1 | scaffold1696 | 4571                    | TT                              | CC                 | CC               | INTERGENIC      |               |                    |                    |
| SNP_99141_A_4637 | NW_004516830.1 | scaffold1696 | 4637                    | AA                              | GG                 | GG               | INTERGENIC      |               |                    |                    |
| SNP_99142_A_4875 | NW_004516830.1 | scaffold1696 | 4875                    | TT                              | CC                 | CC               | INTERGENIC      |               |                    |                    |
| SNP_99143_A_4930 | NW_004516830.1 | scaffold1696 | 4930                    | CC                              | GG                 | GG               | INTERGENIC      |               |                    |                    |
| SNP_99144_A_4948 | NW_004516830.1 | scaffold1696 | 4948                    | CC                              | TT                 | TT               | INTERGENIC      |               |                    |                    |
| SNP_99145_A_5007 | NW_004516830.1 | scaffold1696 | 5007                    | CC                              | TT                 | TT               | INTERGENIC      |               |                    |                    |
| SNP_99146_A_5008 | NW_004516830.1 | scaffold1696 | 5008                    | GG                              | CC                 | CC               | INTERGENIC      |               |                    |                    |
| SNP_99147_A_5088 | NW_004516830.1 | scaffold1696 | 5088                    | CC                              | TT                 | TT               | INTERGENIC      |               |                    |                    |
| SNP_99148_A_5104 | NW_004516830.1 | scaffold1696 | 5104                    | GG                              | AA                 | AA               | INTERGENIC      |               |                    |                    |
| SNP_99149_A_5134 | NW_004516830.1 | scaffold1696 | 5134                    | TT                              | AA                 | AA               | INTERGENIC      |               |                    |                    |
| SNP_99150_A_5198 | NW_004516830.1 | scaffold1696 | 5198                    | GG                              | AA                 | AA               | INTERGENIC      |               |                    |                    |
| SNP_99151_A_5308 | NW_004516830.1 | scaffold1696 | 5308                    | TT                              | GG                 | GG               | INTERGENIC      |               |                    |                    |
| SNP_99152_A_5348 | NW_004516830.1 | scaffold1696 | 5348                    | CC                              | AA                 | AA               | INTERGENIC      |               |                    |                    |
| SNP_99154_A_5448 | NW_004516830.1 | scaffold1696 | 5448                    | AA                              | GG                 | GG               | INTERGENIC      |               |                    |                    |
| SNP_99155_A_5532 | NW_004516830.1 | scaffold1696 | 5532                    | CC                              | AA                 | AA               | INTERGENIC      |               |                    |                    |
| SNP_99156_A_6775 | NW_004516830.1 | scaffold1696 | 6775                    | GG                              | CC                 | CC               | INTERGENIC      |               |                    |                    |

| SNPs IDs          | Chromosome IDs | Chromosomes  | Physical positions (bp) | CDC Frontier (Reference genome) | (Pusa 1103 & HPNB) | (ILWC 46 & LPNB) | Sequence genome | Components of | Gene accession IDs | Putative functions |
|-------------------|----------------|--------------|-------------------------|---------------------------------|--------------------|------------------|-----------------|---------------|--------------------|--------------------|
| SNP_99157_A_6786  | NW_004516830.1 | scaffold1696 | 6786                    | GG                              | AA                 | AA               | INTERGENIC      |               |                    |                    |
| SNP_99158_A_7997  | NW_004516830.1 | scaffold1696 | 7997                    | CC                              | TT                 | TT               | INTERGENIC      |               |                    |                    |
| SNP_99159_A_8230  | NW_004516830.1 | scaffold1696 | 8230                    | AA                              | CC                 | CC               | INTERGENIC      |               |                    |                    |
| SNP_99160_A_8369  | NW_004516830.1 | scaffold1696 | 8369                    | CC                              | AA                 | AA               | INTERGENIC      |               |                    |                    |
| SNP_99161_A_8383  | NW_004516830.1 | scaffold1696 | 8383                    | CC                              | TT                 | TT               | INTERGENIC      |               |                    |                    |
| SNP_99162_A_10695 | NW_004516830.1 | scaffold1696 | 10695                   | TT                              | AA                 | AA               | INTERGENIC      |               |                    |                    |
| SNP_99163_A_12510 | NW_004516830.1 | scaffold1696 | 12510                   | TT                              | CC                 | CC               | INTERGENIC      |               |                    |                    |
| SNP_99164_A_12572 | NW_004516830.1 | scaffold1696 | 12572                   | CC                              | TT                 | TT               | INTERGENIC      |               |                    |                    |
| SNP_99165_A_12584 | NW_004516830.1 | scaffold1696 | 12584                   | CC                              | TT                 | TT               | INTERGENIC      |               |                    |                    |
| SNP_99166_A_12704 | NW_004516830.1 | scaffold1696 | 12704                   | AA                              | GG                 | GG               | INTERGENIC      |               |                    |                    |
| SNP_99167_A_12754 | NW_004516830.1 | scaffold1696 | 12754                   | TT                              | CC                 | CC               | INTERGENIC      |               |                    |                    |
| SNP_99168_A_12853 | NW_004516830.1 | scaffold1696 | 12853                   | AA                              | GG                 | GG               | INTERGENIC      |               |                    |                    |
| SNP_99169_A_12901 | NW_004516830.1 | scaffold1696 | 12901                   | CC                              | AA                 | AA               | INTERGENIC      |               |                    |                    |
| SNP_99170_A_12946 | NW_004516830.1 | scaffold1696 | 12946                   | GG                              | TT                 | TT               | INTERGENIC      |               |                    |                    |
| SNP_99171_A_12951 | NW_004516830.1 | scaffold1696 | 12951                   | CC                              | AA                 | AA               | INTERGENIC      |               |                    |                    |
| SNP_99172_A_12956 | NW_004516830.1 | scaffold1696 | 12956                   | TT                              | CC                 | CC               | INTERGENIC      |               |                    |                    |
| SNP_99173_A_12957 | NW_004516830.1 | scaffold1696 | 12957                   | GG                              | AA                 | AA               | INTERGENIC      |               |                    |                    |
| SNP_99174_A_13432 | NW_004516830.1 | scaffold1696 | 13432                   | TT                              | CC                 | CC               | INTERGENIC      |               |                    |                    |
| SNP_99175_A_15979 | NW_004516830.1 | scaffold1696 | 15979                   | TT                              | CC                 | CC               | INTERGENIC      |               |                    |                    |
| SNP_99176_A_16022 | NW_004516830.1 | scaffold1696 | 16022                   | TT                              | GG                 | GG               | INTERGENIC      |               |                    |                    |
| SNP_99177_A_16104 | NW_004516830.1 | scaffold1696 | 16104                   | AA                              | CC                 | CC               | INTERGENIC      |               |                    |                    |
| SNP_99178_A_16268 | NW_004516830.1 | scaffold1696 | 16268                   | GG                              | CC                 | CC               | INTERGENIC      |               |                    |                    |



| SNPs IDs          | Chromosome IDs | Chromosomes  | Physical positions (bp) | CDC Frontier (Reference genome) | (Pusa 1103 & HPNB) | (ILWC 46 & LPNB) | Sequence genome | Components of | Gene accession IDs | Putative functions |
|-------------------|----------------|--------------|-------------------------|---------------------------------|--------------------|------------------|-----------------|---------------|--------------------|--------------------|
| SNP_99179_A_16362 | NW_004516830.1 | scaffold1696 | 16362                   | CC                              | AA                 | AA               | INTERGENIC      |               |                    |                    |
| SNP_99180_A_16431 | NW_004516830.1 | scaffold1696 | 16431                   | GG                              | AA                 | AA               | INTERGENIC      |               |                    |                    |
| SNP_99181_A_20255 | NW_004516830.1 | scaffold1696 | 20255                   | TT                              | CC                 | CC               | INTERGENIC      |               |                    |                    |
| SNP_99182_A_20420 | NW_004516830.1 | scaffold1696 | 20420                   | AA                              | TT                 | TT               | INTERGENIC      |               |                    |                    |
| SNP_99183_A_20465 | NW_004516830.1 | scaffold1696 | 20465                   | CC                              | TT                 | TT               | INTERGENIC      |               |                    |                    |
| SNP_99184_A_20483 | NW_004516830.1 | scaffold1696 | 20483                   | AA                              | GG                 | GG               | INTERGENIC      |               |                    |                    |
| SNP_99185_A_20494 | NW_004516830.1 | scaffold1696 | 20494                   | CC                              | AA                 | AA               | INTERGENIC      |               |                    |                    |
| SNP_99186_A_20499 | NW_004516830.1 | scaffold1696 | 20499                   | AA                              | CC                 | CC               | INTERGENIC      |               |                    |                    |
| SNP_99187_A_20758 | NW_004516830.1 | scaffold1696 | 20758                   | CC                              | AA                 | AA               | INTERGENIC      |               |                    |                    |
| SNP_99188_A_20899 | NW_004516830.1 | scaffold1696 | 20899                   | CC                              | TT                 | TT               | INTERGENIC      |               |                    |                    |
| SNP_99189_A_21252 | NW_004516830.1 | scaffold1696 | 21252                   | GG                              | TT                 | TT               | INTERGENIC      |               |                    |                    |
| SNP_99190_A_21270 | NW_004516830.1 | scaffold1696 | 21270                   | AA                              | GG                 | GG               | INTERGENIC      |               |                    |                    |
| SNP_99191_A_21318 | NW_004516830.1 | scaffold1696 | 21318                   | TT                              | CC                 | CC               | INTERGENIC      |               |                    |                    |
| SNP_99192_A_21357 | NW_004516830.1 | scaffold1696 | 21357                   | AA                              | TT                 | TT               | INTERGENIC      |               |                    |                    |
| SNP_99193_A_21365 | NW_004516830.1 | scaffold1696 | 21365                   | AA                              | GG                 | GG               | INTERGENIC      |               |                    |                    |
| SNP_99194_A_21449 | NW_004516830.1 | scaffold1696 | 21449                   | TT                              | AA                 | AA               | INTERGENIC      |               |                    |                    |
| SNP_99196_A_21486 | NW_004516830.1 | scaffold1696 | 21486                   | GG                              | AA                 | AA               | INTERGENIC      |               |                    |                    |
| SNP_99197_A_21582 | NW_004516830.1 | scaffold1696 | 21582                   | GG                              | AA                 | AA               | INTERGENIC      |               |                    |                    |
| SNP_99198_A_21614 | NW_004516830.1 | scaffold1696 | 21614                   | TT                              | CC                 | CC               | INTERGENIC      |               |                    |                    |
| SNP_99199_A_21648 | NW_004516830.1 | scaffold1696 | 21648                   | AA                              | TT                 | TT               | INTERGENIC      |               |                    |                    |
| SNP_99201_A_21677 | NW_004516830.1 | scaffold1696 | 21677                   | CC                              | TT                 | TT               | INTERGENIC      |               |                    |                    |
| SNP_99202_A_22855 | NW_004516830.1 | scaffold1696 | 22855                   | AA                              | GG                 | GG               | INTERGENIC      |               |                    |                    |

| SNPs IDs          | Chromosome IDs | Chromosomes  | Physical positions (bp) | CDC Frontier (Reference genome) | (Pusa 1103 & HPNB) | (ILWC 46 & LPNB) | Sequence genome | Components of | Gene accession IDs | Putative functions |
|-------------------|----------------|--------------|-------------------------|---------------------------------|--------------------|------------------|-----------------|---------------|--------------------|--------------------|
| SNP_99203_A_22924 | NW_004516830.1 | scaffold1696 | 22924                   | AA                              | GG                 | GG               | INTERGENIC      |               |                    |                    |
| SNP_99204_A_23124 | NW_004516830.1 | scaffold1696 | 23124                   | GG                              | TT                 | TT               | INTERGENIC      |               |                    |                    |
| SNP_99205_A_23179 | NW_004516830.1 | scaffold1696 | 23179                   | CC                              | TT                 | TT               | INTERGENIC      |               |                    |                    |
| SNP_99206_A_450   | NW_004516832.1 | scaffold1699 | 450                     | AA                              | TT                 | TT               | INTERGENIC      |               |                    |                    |
| SNP_99207_A_456   | NW_004516832.1 | scaffold1699 | 456                     | GG                              | AA                 | AA               | INTERGENIC      |               |                    |                    |
| SNP_99208_A_1066  | NW_004516832.1 | scaffold1699 | 1066                    | AA                              | CC                 | CC               | INTERGENIC      |               |                    |                    |
| SNP_99209_A_1167  | NW_004516832.1 | scaffold1699 | 1167                    | AA                              | TT                 | TT               | INTERGENIC      |               |                    |                    |
| SNP_99210_A_18649 | NW_004516832.1 | scaffold1699 | 18649                   | CC                              | AA                 | AA               | INTERGENIC      |               |                    |                    |
| SNP_99211_A_26720 | NW_004516833.1 | scaffold1701 | 26720                   | AA                              | GG                 | GG               | INTERGENIC      |               |                    |                    |
| SNP_99212_A_26947 | NW_004516833.1 | scaffold1701 | 26947                   | TT                              | GG                 | GG               | INTERGENIC      |               |                    |                    |
| SNP_99214_A_26984 | NW_004516833.1 | scaffold1701 | 26984                   | AA                              | GG                 | GG               | INTERGENIC      |               |                    |                    |
| SNP_99215_A_27023 | NW_004516833.1 | scaffold1701 | 27023                   | CC                              | AA                 | AA               | INTERGENIC      |               |                    |                    |
| SNP_99216_A_27027 | NW_004516833.1 | scaffold1701 | 27027                   | CC                              | GG                 | GG               | INTERGENIC      |               |                    |                    |
| SNP_99217_A_27053 | NW_004516833.1 | scaffold1701 | 27053                   | TT                              | CC                 | CC               | INTERGENIC      |               |                    |                    |
| SNP_99218_A_37626 | NW_004516833.1 | scaffold1701 | 37626                   | AA                              | GG                 | GG               | INTERGENIC      |               |                    |                    |
| SNP_99219_A_37779 | NW_004516833.1 | scaffold1701 | 37779                   | GG                              | TT                 | TT               | INTERGENIC      |               |                    |                    |
| SNP_99220_A_40154 | NW_004516833.1 | scaffold1701 | 40154                   | TT                              | GG                 | GG               | INTERGENIC      |               |                    |                    |
| SNP_99221_A_40176 | NW_004516833.1 | scaffold1701 | 40176                   | TT                              | CC                 | CC               | INTERGENIC      |               |                    |                    |
| SNP_99222_A_54190 | NW_004516833.1 | scaffold1701 | 54190                   | GG                              | CC                 | CC               | INTERGENIC      |               |                    |                    |
| SNP_99223_A_54202 | NW_004516833.1 | scaffold1701 | 54202                   | AA                              | TT                 | TT               | INTERGENIC      |               |                    |                    |
| SNP_99224_A_54410 | NW_004516833.1 | scaffold1701 | 54410                   | TT                              | CC                 | CC               | INTERGENIC      |               |                    |                    |
| SNP_99225_A_57734 | NW_004516833.1 | scaffold1701 | 57734                   | TT                              | CC                 | CC               | INTERGENIC      |               |                    |                    |

| SNPs IDs           | Chromosome IDs | Chromosomes  | Physical positions (bp) | CDC Frontier (Reference genome) | (Pusa 1103 & HPNB) | (ILWC 46 & LPNB) | Sequence genome | Components of | Gene accession IDs | Putative functions |
|--------------------|----------------|--------------|-------------------------|---------------------------------|--------------------|------------------|-----------------|---------------|--------------------|--------------------|
| SNP_99226_A_57739  | NW_004516833.1 | scaffold1701 | 57739                   | AA                              | GG                 | GG               | INTERGENIC      |               |                    |                    |
| SNP_99227_A_57760  | NW_004516833.1 | scaffold1701 | 57760                   | GG                              | AA                 | AA               | INTERGENIC      |               |                    |                    |
| SNP_99228_A_57873  | NW_004516833.1 | scaffold1701 | 57873                   | AA                              | TT                 | TT               | INTERGENIC      |               |                    |                    |
| SNP_99229_A_57945  | NW_004516833.1 | scaffold1701 | 57945                   | TT                              | CC                 | CC               | INTERGENIC      |               |                    |                    |
| SNP_99230_A_68115  | NW_004516833.1 | scaffold1701 | 68115                   | AA                              | GG                 | GG               | INTERGENIC      |               |                    |                    |
| SNP_99231_A_76961  | NW_004516833.1 | scaffold1701 | 76961                   | GG                              | CC                 | CC               | INTERGENIC      |               |                    |                    |
| SNP_99232_A_86520  | NW_004516833.1 | scaffold1701 | 86520                   | AA                              | CC                 | CC               | INTERGENIC      |               |                    |                    |
| SNP_99233_A_86537  | NW_004516833.1 | scaffold1701 | 86537                   | CC                              | TT                 | TT               | INTERGENIC      |               |                    |                    |
| SNP_99234_A_86540  | NW_004516833.1 | scaffold1701 | 86540                   | GG                              | CC                 | CC               | INTERGENIC      |               |                    |                    |
| SNP_99235_A_86550  | NW_004516833.1 | scaffold1701 | 86550                   | TT                              | CC                 | CC               | INTERGENIC      |               |                    |                    |
| SNP_99236_A_86558  | NW_004516833.1 | scaffold1701 | 86558                   | GG                              | TT                 | TT               | INTERGENIC      |               |                    |                    |
| SNP_99237_A_86567  | NW_004516833.1 | scaffold1701 | 86567                   | GG                              | AA                 | AA               | INTERGENIC      |               |                    |                    |
| SNP_99238_A_86592  | NW_004516833.1 | scaffold1701 | 86592                   | GG                              | AA                 | AA               | INTERGENIC      |               |                    |                    |
| SNP_99239_A_86607  | NW_004516833.1 | scaffold1701 | 86607                   | CC                              | TT                 | TT               | INTERGENIC      |               |                    |                    |
| SNP_99240_A_86612  | NW_004516833.1 | scaffold1701 | 86612                   | GG                              | AA                 | AA               | INTERGENIC      |               |                    |                    |
| SNP_99241_A_86613  | NW_004516833.1 | scaffold1701 | 86613                   | GG                              | TT                 | TT               | INTERGENIC      |               |                    |                    |
| SNP_99242_A_86623  | NW_004516833.1 | scaffold1701 | 86623                   | CC                              | AA                 | AA               | INTERGENIC      |               |                    |                    |
| SNP_99243_A_86656  | NW_004516833.1 | scaffold1701 | 86656                   | CC                              | TT                 | TT               | INTERGENIC      |               |                    |                    |
| SNP_99244_A_92564  | NW_004516833.1 | scaffold1701 | 92564                   | CC                              | TT                 | TT               | INTERGENIC      |               |                    |                    |
| SNP_99245_A_95564  | NW_004516833.1 | scaffold1701 | 95564                   | GG                              | CC                 | CC               | INTERGENIC      |               |                    |                    |
| SNP_99246_A_95571  | NW_004516833.1 | scaffold1701 | 95571                   | AA                              | TT                 | TT               | INTERGENIC      |               |                    |                    |
| SNP_99247_A_101017 | NW_004516833.1 | scaffold1701 | 101017                  | AA                              | TT                 | TT               | INTERGENIC      |               |                    |                    |

| SNPs IDs           | Chromosome IDs | Chromosomes  | Physical positions (bp) | CDC Frontier (Reference genome) | (Pusa 1103 & HPNB) | (ILWC 46 & LPNB) | Sequence Components of genome | Gene accession IDs | Putative functions           |
|--------------------|----------------|--------------|-------------------------|---------------------------------|--------------------|------------------|-------------------------------|--------------------|------------------------------|
| SNP_99249_A_101230 | NW_004516833.1 | scaffold1701 | 101230                  | TT                              | CC                 | CC               | INTERGENIC                    |                    |                              |
| SNP_99250_A_101256 | NW_004516833.1 | scaffold1701 | 101256                  | GG                              | AA                 | AA               | INTERGENIC                    |                    |                              |
| SNP_99251_A_106728 | NW_004516833.1 | scaffold1701 | 106728                  | TT                              | GG                 | GG               | INTERGENIC                    |                    |                              |
| SNP_99252_A_109185 | NW_004516833.1 | scaffold1701 | 109185                  | GG                              | TT                 | TT               | INTERGENIC                    |                    |                              |
| SNP_99253_A_126569 | NW_004516833.1 | scaffold1701 | 126569                  | AA                              | GG                 | GG               | URR                           | 101504691          | uncharacterized LOC101504691 |
| SNP_99254_A_126571 | NW_004516833.1 | scaffold1701 | 126571                  | AA                              | CC                 | CC               | URR                           | 101504691          | uncharacterized LOC101504691 |
| SNP_99255_A_126581 | NW_004516833.1 | scaffold1701 | 126581                  | AA                              | CC                 | CC               | URR                           | 101504691          | uncharacterized LOC101504691 |
| SNP_99256_A_141678 | NW_004516833.1 | scaffold1701 | 141678                  | TT                              | CC                 | CC               | INTERGENIC                    |                    |                              |
| SNP_99257_A_142670 | NW_004516833.1 | scaffold1701 | 142670                  | AA                              | GG                 | GG               | INTERGENIC                    |                    |                              |
| SNP_99258_A_142751 | NW_004516833.1 | scaffold1701 | 142751                  | CC                              | TT                 | TT               | INTERGENIC                    |                    |                              |
| SNP_99259_A_145298 | NW_004516833.1 | scaffold1701 | 145298                  | GG                              | AA                 | AA               | INTERGENIC                    |                    |                              |
| SNP_99260_A_145787 | NW_004516833.1 | scaffold1701 | 145787                  | CC                              | TT                 | TT               | INTERGENIC                    |                    |                              |
| SNP_99261_A_145801 | NW_004516833.1 | scaffold1701 | 145801                  | GG                              | AA                 | AA               | INTERGENIC                    |                    |                              |
| SNP_99262_A_151013 | NW_004516833.1 | scaffold1701 | 151013                  | TT                              | GG                 | GG               | INTERGENIC                    |                    |                              |
| SNP_99263_A_151014 | NW_004516833.1 | scaffold1701 | 151014                  | CC                              | TT                 | TT               | INTERGENIC                    |                    |                              |
| SNP_99264_A_151569 | NW_004516833.1 | scaffold1701 | 151569                  | AA                              | GG                 | GG               | INTERGENIC                    |                    |                              |
| SNP_99265_A_151941 | NW_004516833.1 | scaffold1701 | 151941                  | GG                              | AA                 | AA               | INTERGENIC                    |                    |                              |
| SNP_99266_A_151955 | NW_004516833.1 | scaffold1701 | 151955                  | AA                              | GG                 | GG               | INTERGENIC                    |                    |                              |
| SNP_99267_A_151979 | NW_004516833.1 | scaffold1701 | 151979                  | CC                              | TT                 | TT               | INTERGENIC                    |                    |                              |
| SNP_99268_A_151982 | NW_004516833.1 | scaffold1701 | 151982                  | AA                              | GG                 | GG               | INTERGENIC                    |                    |                              |
| SNP_99269_A_152024 | NW_004516833.1 | scaffold1701 | 152024                  | TT                              | CC                 | CC               | INTERGENIC                    |                    |                              |
| SNP_99270_A_154091 | NW_004516833.1 | scaffold1701 | 154091                  | CC                              | AA                 | AA               | INTERGENIC                    |                    |                              |

| SNPs IDs           | Chromosome IDs | Chromosomes  | Physical positions (bp) | CDC Frontier genome (Reference genome) | (Pusa 1103 & HPNB) | (ILWC 46 & LPNB) | Sequence genome | Components of | Gene accession IDs | Putative functions |
|--------------------|----------------|--------------|-------------------------|----------------------------------------|--------------------|------------------|-----------------|---------------|--------------------|--------------------|
| SNP_99271_A_154093 | NW_004516833.1 | scaffold1701 | 154093                  | TT                                     | CC                 | CC               | INTERGENIC      |               |                    |                    |
| SNP_99272_A_154121 | NW_004516833.1 | scaffold1701 | 154121                  | CC                                     | TT                 | TT               | INTERGENIC      |               |                    |                    |
| SNP_99274_A_86499  | NW_004516835.1 | scaffold1703 | 86499                   | CC                                     | AA                 | AA               | INTERGENIC      |               |                    |                    |
| SNP_99275_A_91059  | NW_004516835.1 | scaffold1703 | 91059                   | CC                                     | TT                 | TT               | INTERGENIC      |               |                    |                    |
| SNP_99276_A_130642 | NW_004516835.1 | scaffold1703 | 130642                  | GG                                     | AA                 | AA               | INTERGENIC      |               |                    |                    |
| SNP_99277_A_130670 | NW_004516835.1 | scaffold1703 | 130670                  | TT                                     | CC                 | CC               | INTERGENIC      |               |                    |                    |
| SNP_99278_A_130696 | NW_004516835.1 | scaffold1703 | 130696                  | CC                                     | TT                 | TT               | INTERGENIC      |               |                    |                    |
| SNP_99279_A_130722 | NW_004516835.1 | scaffold1703 | 130722                  | TT                                     | CC                 | CC               | INTERGENIC      |               |                    |                    |
| SNP_99280_A_130744 | NW_004516835.1 | scaffold1703 | 130744                  | CC                                     | TT                 | TT               | INTERGENIC      |               |                    |                    |
| SNP_99281_A_130911 | NW_004516835.1 | scaffold1703 | 130911                  | AA                                     | GG                 | GG               | INTERGENIC      |               |                    |                    |
| SNP_99282_A_130935 | NW_004516835.1 | scaffold1703 | 130935                  | CC                                     | AA                 | AA               | INTERGENIC      |               |                    |                    |
| SNP_99283_A_130943 | NW_004516835.1 | scaffold1703 | 130943                  | GG                                     | AA                 | AA               | INTERGENIC      |               |                    |                    |
| SNP_99286_A_137618 | NW_004516835.1 | scaffold1703 | 137618                  | GG                                     | AA                 | AA               | INTERGENIC      |               |                    |                    |
| SNP_99287_A_165049 | NW_004516835.1 | scaffold1703 | 165049                  | GG                                     | AA                 | AA               | INTRON          | 101509285     | Unknown function   |                    |
| SNP_99288_A_165088 | NW_004516835.1 | scaffold1703 | 165088                  | TT                                     | AA                 | AA               | INTRON          | 101509285     | Unknown function   |                    |
| SNP_99289_A_165097 | NW_004516835.1 | scaffold1703 | 165097                  | TT                                     | GG                 | GG               | INTRON          | 101509285     | Unknown function   |                    |
| SNP_99290_A_165112 | NW_004516835.1 | scaffold1703 | 165112                  | TT                                     | CC                 | CC               | INTRON          | 101509285     | Unknown function   |                    |
| SNP_99291_A_199063 | NW_004516835.1 | scaffold1703 | 199063                  | GG                                     | TT                 | TT               | INTERGENIC      |               |                    |                    |
| SNP_99292_A_200062 | NW_004516835.1 | scaffold1703 | 200062                  | CC                                     | TT                 | TT               | INTERGENIC      |               |                    |                    |
| SNP_99293_A_200147 | NW_004516835.1 | scaffold1703 | 200147                  | TT                                     | AA                 | AA               | INTERGENIC      |               |                    |                    |
| SNP_99294_A_200679 | NW_004516835.1 | scaffold1703 | 200679                  | TT                                     | CC                 | CC               | INTERGENIC      |               |                    |                    |
| SNP_99295_A_203344 | NW_004516835.1 | scaffold1703 | 203344                  | TT                                     | AA                 | AA               | INTERGENIC      |               |                    |                    |

| SNPs IDs           | Chromosome IDs | Chromosomes  | Physical positions (bp) | CDC Frontier (Reference genome) | (Pusa 1103 & HPNB) | (ILWC 46 & LPNB) | Sequence genome | Components of | Gene accession IDs | Putative functions |
|--------------------|----------------|--------------|-------------------------|---------------------------------|--------------------|------------------|-----------------|---------------|--------------------|--------------------|
| SNP_99296_A_203819 | NW_004516835.1 | scaffold1703 | 203819                  | TT                              | GG                 | GG               | INTERGENIC      |               |                    |                    |
| SNP_99297_A_221820 | NW_004516835.1 | scaffold1703 | 221820                  | AA                              | GG                 | GG               | INTERGENIC      |               |                    |                    |
| SNP_99298_A_223111 | NW_004516835.1 | scaffold1703 | 223111                  | TT                              | CC                 | CC               | INTERGENIC      |               |                    |                    |
| SNP_99299_A_232499 | NW_004516835.1 | scaffold1703 | 232499                  | TT                              | AA                 | AA               | INTERGENIC      |               |                    |                    |
| SNP_99300_A_232590 | NW_004516835.1 | scaffold1703 | 232590                  | AA                              | GG                 | GG               | INTERGENIC      |               |                    |                    |
| SNP_99302_A_262400 | NW_004516835.1 | scaffold1703 | 262400                  | AA                              | TT                 | TT               | INTERGENIC      |               |                    |                    |
| SNP_99303_A_277824 | NW_004516835.1 | scaffold1703 | 277824                  | CC                              | TT                 | TT               | INTERGENIC      |               |                    |                    |
| SNP_99304_A_297240 | NW_004516835.1 | scaffold1703 | 297240                  | AA                              | TT                 | TT               | INTERGENIC      |               |                    |                    |
| SNP_99305_A_8790   | NW_004516836.1 | scaffold1704 | 8790                    | AA                              | GG                 | GG               | INTERGENIC      |               |                    |                    |
| SNP_99306_A_8834   | NW_004516836.1 | scaffold1704 | 8834                    | TT                              | CC                 | CC               | INTERGENIC      |               |                    |                    |
| SNP_99308_A_9137   | NW_004516836.1 | scaffold1704 | 9137                    | AA                              | GG                 | GG               | INTERGENIC      |               |                    |                    |
| SNP_99309_A_9165   | NW_004516836.1 | scaffold1704 | 9165                    | GG                              | CC                 | CC               | INTERGENIC      |               |                    |                    |
| SNP_99310_A_9221   | NW_004516836.1 | scaffold1704 | 9221                    | AA                              | TT                 | TT               | INTERGENIC      |               |                    |                    |
| SNP_99311_A_9301   | NW_004516836.1 | scaffold1704 | 9301                    | AA                              | CC                 | CC               | INTERGENIC      |               |                    |                    |
| SNP_99312_A_10823  | NW_004516836.1 | scaffold1704 | 10823                   | CC                              | TT                 | TT               | INTERGENIC      |               |                    |                    |
| SNP_99313_A_10969  | NW_004516836.1 | scaffold1704 | 10969                   | AA                              | GG                 | GG               | INTERGENIC      |               |                    |                    |
| SNP_99314_A_11047  | NW_004516836.1 | scaffold1704 | 11047                   | AA                              | CC                 | CC               | INTERGENIC      |               |                    |                    |
| SNP_99315_A_11073  | NW_004516836.1 | scaffold1704 | 11073                   | CC                              | GG                 | GG               | INTERGENIC      |               |                    |                    |
| SNP_99316_A_11427  | NW_004516836.1 | scaffold1704 | 11427                   | GG                              | CC                 | CC               | INTERGENIC      |               |                    |                    |
| SNP_99318_A_26009  | NW_004516836.1 | scaffold1704 | 26009                   | CC                              | GG                 | GG               | INTERGENIC      |               |                    |                    |
| SNP_99319_A_26128  | NW_004516836.1 | scaffold1704 | 26128                   | TT                              | CC                 | CC               | INTERGENIC      |               |                    |                    |
| SNP_99320_A_32901  | NW_004516836.1 | scaffold1704 | 32901                   | TT                              | AA                 | AA               | INTERGENIC      |               |                    |                    |

| SNPs IDs          | Chromosome IDs | Chromosomes  | Physical positions (bp) | CDC Frontier (Reference genome) | (Pusa 1103 & HPNB) | (ILWC 46 & LPNB) | Sequence Components of genome | Gene accession IDs | Putative functions            |
|-------------------|----------------|--------------|-------------------------|---------------------------------|--------------------|------------------|-------------------------------|--------------------|-------------------------------|
| SNP_99321_A_32938 | NW_004516836.1 | scaffold1704 | 32938                   | AA                              | GG                 | GG               | INTERGENIC                    |                    |                               |
| SNP_99322_A_39154 | NW_004516836.1 | scaffold1704 | 39154                   | CC                              | GG                 | GG               | INTERGENIC                    |                    |                               |
| SNP_99323_A_39653 | NW_004516836.1 | scaffold1704 | 39653                   | AA                              | CC                 | CC               | INTERGENIC                    |                    |                               |
| SNP_99324_A_92482 | NW_004516836.1 | scaffold1704 | 92482                   | GG                              | AA                 | AA               | INTERGENIC                    |                    |                               |
| SNP_99325_A_540   | NW_004516837.1 | scaffold1706 | 540                     | CC                              | TT                 | TT               | INTERGENIC                    |                    |                               |
| SNP_99326_A_1128  | NW_004516837.1 | scaffold1706 | 1128                    | CC                              | TT                 | TT               | INTERGENIC                    |                    |                               |
| SNP_99327_A_22318 | NW_004516837.1 | scaffold1706 | 22318                   | AA                              | TT                 | TT               | NON_SYNONYMOUS_CODING         | 101510585          | 40S ribosomal protein S8-like |
| SNP_99328_A_22579 | NW_004516837.1 | scaffold1706 | 22579                   | AA                              | GG                 | GG               | INTRON                        | 101510585          | 40S ribosomal protein S8-like |
| SNP_99329_A_29490 | NW_004516837.1 | scaffold1706 | 29490                   | AA                              | GG                 | GG               | INTRON                        | 101510585          | 40S ribosomal protein S8-like |
| SNP_99330_A_61837 | NW_004516837.1 | scaffold1706 | 61837                   | CC                              | AA                 | AA               | INTERGENIC                    |                    |                               |
| SNP_99331_A_76903 | NW_004516837.1 | scaffold1706 | 76903                   | TT                              | CC                 | CC               | INTERGENIC                    |                    |                               |
| SNP_99332_A_76959 | NW_004516837.1 | scaffold1706 | 76959                   | TT                              | CC                 | CC               | INTERGENIC                    |                    |                               |
| SNP_99333_A_76987 | NW_004516837.1 | scaffold1706 | 76987                   | AA                              | GG                 | GG               | INTERGENIC                    |                    |                               |
| SNP_99334_A_77022 | NW_004516837.1 | scaffold1706 | 77022                   | GG                              | AA                 | AA               | INTERGENIC                    |                    |                               |
| SNP_99335_A_77072 | NW_004516837.1 | scaffold1706 | 77072                   | CC                              | GG                 | GG               | INTERGENIC                    |                    |                               |
| SNP_99336_A_79654 | NW_004516837.1 | scaffold1706 | 79654                   | AA                              | GG                 | GG               | INTERGENIC                    |                    |                               |
| SNP_99337_A_79670 | NW_004516837.1 | scaffold1706 | 79670                   | AA                              | TT                 | TT               | INTERGENIC                    |                    |                               |
| SNP_99339_A_79707 | NW_004516837.1 | scaffold1706 | 79707                   | TT                              | CC                 | CC               | INTERGENIC                    |                    |                               |
| SNP_99340_A_79712 | NW_004516837.1 | scaffold1706 | 79712                   | GG                              | AA                 | AA               | INTERGENIC                    |                    |                               |
| SNP_99341_A_79722 | NW_004516837.1 | scaffold1706 | 79722                   | TT                              | CC                 | CC               | INTERGENIC                    |                    |                               |
| SNP_99342_A_83591 | NW_004516837.1 | scaffold1706 | 83591                   | TT                              | AA                 | AA               | INTERGENIC                    |                    |                               |
| SNP_99343_A_83652 | NW_004516837.1 | scaffold1706 | 83652                   | GG                              | AA                 | AA               | INTERGENIC                    |                    |                               |

| SNPs IDs           | Chromosome IDs | Chromosomes  | Physical positions (bp) | CDC Frontier (Reference genome) | (Pusa 1103 & HPNB) | (ILWC 46 & LPNB) | Sequence genome | Components of | Gene accession IDs | Putative functions |
|--------------------|----------------|--------------|-------------------------|---------------------------------|--------------------|------------------|-----------------|---------------|--------------------|--------------------|
| SNP_99345_A_84355  | NW_004516837.1 | scaffold1706 | 84355                   | CC                              | TT                 | TT               | INTERGENIC      |               |                    |                    |
| SNP_99346_A_84366  | NW_004516837.1 | scaffold1706 | 84366                   | GG                              | AA                 | AA               | INTERGENIC      |               |                    |                    |
| SNP_99347_A_86546  | NW_004516837.1 | scaffold1706 | 86546                   | TT                              | GG                 | GG               | INTERGENIC      |               |                    |                    |
| SNP_99348_A_90760  | NW_004516837.1 | scaffold1706 | 90760                   | AA                              | CC                 | CC               | INTERGENIC      |               |                    |                    |
| SNP_99349_A_93788  | NW_004516837.1 | scaffold1706 | 93788                   | CC                              | TT                 | TT               | INTERGENIC      |               |                    |                    |
| SNP_99350_A_99093  | NW_004516837.1 | scaffold1706 | 99093                   | AA                              | GG                 | GG               | INTERGENIC      |               |                    |                    |
| SNP_99351_A_99305  | NW_004516837.1 | scaffold1706 | 99305                   | AA                              | GG                 | GG               | INTERGENIC      |               |                    |                    |
| SNP_99352_A_100260 | NW_004516837.1 | scaffold1706 | 100260                  | AA                              | GG                 | GG               | INTERGENIC      |               |                    |                    |
| SNP_99353_A_101504 | NW_004516837.1 | scaffold1706 | 101504                  | TT                              | GG                 | GG               | INTERGENIC      |               |                    |                    |
| SNP_99354_A_109366 | NW_004516837.1 | scaffold1706 | 109366                  | GG                              | CC                 | CC               | INTERGENIC      |               |                    |                    |
| SNP_99355_A_491    | NW_004516839.1 | scaffold1708 | 491                     | CC                              | TT                 | TT               | INTERGENIC      |               |                    |                    |
| SNP_99356_A_2345   | NW_004516839.1 | scaffold1708 | 2345                    | CC                              | TT                 | TT               | INTERGENIC      |               |                    |                    |
| SNP_99357_A_2346   | NW_004516839.1 | scaffold1708 | 2346                    | CC                              | TT                 | TT               | INTERGENIC      |               |                    |                    |
| SNP_99358_A_5722   | NW_004516839.1 | scaffold1708 | 5722                    | AA                              | GG                 | GG               | INTERGENIC      |               |                    |                    |
| SNP_99359_A_7683   | NW_004516839.1 | scaffold1708 | 7683                    | AA                              | GG                 | GG               | INTERGENIC      |               |                    |                    |
| SNP_99360_A_8044   | NW_004516839.1 | scaffold1708 | 8044                    | AA                              | TT                 | TT               | INTERGENIC      |               |                    |                    |
| SNP_99361_A_10423  | NW_004516839.1 | scaffold1708 | 10423                   | AA                              | GG                 | GG               | INTERGENIC      |               |                    |                    |
| SNP_99363_A_11785  | NW_004516839.1 | scaffold1708 | 11785                   | TT                              | AA                 | AA               | INTERGENIC      |               |                    |                    |
| SNP_99365_A_14170  | NW_004516839.1 | scaffold1708 | 14170                   | CC                              | GG                 | GG               | INTERGENIC      |               |                    |                    |
| SNP_99367_A_24239  | NW_004516839.1 | scaffold1708 | 24239                   | AA                              | TT                 | TT               | INTERGENIC      |               |                    |                    |
| SNP_99368_A_26625  | NW_004516839.1 | scaffold1708 | 26625                   | TT                              | CC                 | CC               | INTERGENIC      |               |                    |                    |
| SNP_99369_A_26636  | NW_004516839.1 | scaffold1708 | 26636                   | TT                              | CC                 | CC               | INTERGENIC      |               |                    |                    |



| SNPs IDs          | Chromosome IDs | Chromosomes  | Physical positions (bp) | CDC Frontier (Reference genome) | (Pusa 1103 & HPNB) | (ILWC 46 & LPNB) | Sequence genome | Components of | Gene accession IDs | Putative functions |
|-------------------|----------------|--------------|-------------------------|---------------------------------|--------------------|------------------|-----------------|---------------|--------------------|--------------------|
| SNP_99370_A_29646 | NW_004516839.1 | scaffold1708 | 29646                   | GG                              | TT                 | TT               | INTERGENIC      |               |                    |                    |
| SNP_99371_A_29825 | NW_004516839.1 | scaffold1708 | 29825                   | AA                              | TT                 | TT               | INTERGENIC      |               |                    |                    |
| SNP_99372_A_29880 | NW_004516839.1 | scaffold1708 | 29880                   | GG                              | CC                 | CC               | INTERGENIC      |               |                    |                    |
| SNP_99373_A_29914 | NW_004516839.1 | scaffold1708 | 29914                   | CC                              | TT                 | TT               | INTERGENIC      |               |                    |                    |
| SNP_99374_A_29961 | NW_004516839.1 | scaffold1708 | 29961                   | CC                              | TT                 | TT               | INTERGENIC      |               |                    |                    |
| SNP_99375_A_31574 | NW_004516839.1 | scaffold1708 | 31574                   | TT                              | GG                 | GG               | INTERGENIC      |               |                    |                    |
| SNP_99376_A_35381 | NW_004516839.1 | scaffold1708 | 35381                   | TT                              | CC                 | CC               | INTERGENIC      |               |                    |                    |
| SNP_99377_A_35401 | NW_004516839.1 | scaffold1708 | 35401                   | CC                              | TT                 | TT               | INTERGENIC      |               |                    |                    |
| SNP_99378_A_38170 | NW_004516839.1 | scaffold1708 | 38170                   | GG                              | AA                 | AA               | INTERGENIC      |               |                    |                    |
| SNP_99379_A_40740 | NW_004516839.1 | scaffold1708 | 40740                   | TT                              | GG                 | GG               | INTERGENIC      |               |                    |                    |
| SNP_99381_A_44787 | NW_004516839.1 | scaffold1708 | 44787                   | AA                              | TT                 | TT               | INTERGENIC      |               |                    |                    |
| SNP_99382_A_46683 | NW_004516839.1 | scaffold1708 | 46683                   | CC                              | AA                 | AA               | INTERGENIC      |               |                    |                    |
| SNP_99383_A_49156 | NW_004516839.1 | scaffold1708 | 49156                   | CC                              | TT                 | TT               | INTERGENIC      |               |                    |                    |
| SNP_99385_A_49925 | NW_004516839.1 | scaffold1708 | 49925                   | CC                              | AA                 | AA               | INTERGENIC      |               |                    |                    |
| SNP_99386_A_50609 | NW_004516839.1 | scaffold1708 | 50609                   | AA                              | GG                 | GG               | INTERGENIC      |               |                    |                    |
| SNP_99387_A_58809 | NW_004516839.1 | scaffold1708 | 58809                   | CC                              | AA                 | AA               | INTERGENIC      |               |                    |                    |
| SNP_99389_A_86669 | NW_004516839.1 | scaffold1708 | 86669                   | CC                              | TT                 | TT               | INTERGENIC      |               |                    |                    |
| SNP_99390_A_87286 | NW_004516839.1 | scaffold1708 | 87286                   | CC                              | TT                 | TT               | INTERGENIC      |               |                    |                    |
| SNP_99392_A_87411 | NW_004516839.1 | scaffold1708 | 87411                   | TT                              | CC                 | CC               | INTERGENIC      |               |                    |                    |
| SNP_99393_A_87413 | NW_004516839.1 | scaffold1708 | 87413                   | GG                              | AA                 | AA               | INTERGENIC      |               |                    |                    |
| SNP_99394_A_87427 | NW_004516839.1 | scaffold1708 | 87427                   | GG                              | CC                 | CC               | INTERGENIC      |               |                    |                    |
| SNP_99395_A_87688 | NW_004516839.1 | scaffold1708 | 87688                   | AA                              | TT                 | TT               | INTERGENIC      |               |                    |                    |

| SNPs IDs           | Chromosome IDs | Chromosomes  | Physical positions (bp) | CDC Frontier (Reference genome) | (Pusa 1103 & HPNB) | (ILWC 46 & LPNB) | Sequence genome | Components of | Gene accession IDs | Putative functions |
|--------------------|----------------|--------------|-------------------------|---------------------------------|--------------------|------------------|-----------------|---------------|--------------------|--------------------|
| SNP_99396_A_88271  | NW_004516839.1 | scaffold1708 | 88271                   | AA                              | GG                 | GG               | INTERGENIC      |               |                    |                    |
| SNP_99398_A_88377  | NW_004516839.1 | scaffold1708 | 88377                   | TT                              | CC                 | CC               | INTERGENIC      |               |                    |                    |
| SNP_99400_A_64     | NW_004516840.1 | scaffold1709 | 64                      | CC                              | AA                 | AA               | INTERGENIC      |               |                    |                    |
| SNP_99401_A_65     | NW_004516840.1 | scaffold1709 | 65                      | AA                              | TT                 | TT               | INTERGENIC      |               |                    |                    |
| SNP_99402_A_81     | NW_004516840.1 | scaffold1709 | 81                      | TT                              | CC                 | CC               | INTERGENIC      |               |                    |                    |
| SNP_99403_A_186    | NW_004516840.1 | scaffold1709 | 186                     | AA                              | TT                 | TT               | INTERGENIC      |               |                    |                    |
| SNP_99404_A_188    | NW_004516840.1 | scaffold1709 | 188                     | CC                              | GG                 | GG               | INTERGENIC      |               |                    |                    |
| SNP_99405_A_196    | NW_004516840.1 | scaffold1709 | 196                     | GG                              | AA                 | AA               | INTERGENIC      |               |                    |                    |
| SNP_99406_A_197    | NW_004516840.1 | scaffold1709 | 197                     | CC                              | GG                 | GG               | INTERGENIC      |               |                    |                    |
| SNP_99407_A_202    | NW_004516840.1 | scaffold1709 | 202                     | GG                              | AA                 | AA               | INTERGENIC      |               |                    |                    |
| SNP_99408_A_203    | NW_004516840.1 | scaffold1709 | 203                     | GG                              | TT                 | TT               | INTERGENIC      |               |                    |                    |
| SNP_99409_A_403    | NW_004516840.1 | scaffold1709 | 403                     | AA                              | GG                 | GG               | INTERGENIC      |               |                    |                    |
| SNP_99410_A_8585   | NW_004516841.1 | scaffold1710 | 8585                    | AA                              | CC                 | CC               | INTERGENIC      |               |                    |                    |
| SNP_99411_A_8589   | NW_004516841.1 | scaffold1710 | 8589                    | TT                              | AA                 | AA               | INTERGENIC      |               |                    |                    |
| SNP_99413_A_35836  | NW_004516841.1 | scaffold1710 | 35836                   | CC                              | TT                 | TT               | INTERGENIC      |               |                    |                    |
| SNP_99415_A_82897  | NW_004516841.1 | scaffold1710 | 82897                   | TT                              | AA                 | AA               | INTERGENIC      |               |                    |                    |
| SNP_99416_A_93324  | NW_004516841.1 | scaffold1710 | 93324                   | CC                              | TT                 | TT               | INTERGENIC      |               |                    |                    |
| SNP_99417_A_93757  | NW_004516841.1 | scaffold1710 | 93757                   | AA                              | GG                 | GG               | INTERGENIC      |               |                    |                    |
| SNP_99418_A_132827 | NW_004516841.1 | scaffold1710 | 132827                  | TT                              | CC                 | CC               | INTERGENIC      |               |                    |                    |
| SNP_99420_A_133080 | NW_004516841.1 | scaffold1710 | 133080                  | CC                              | TT                 | TT               | INTERGENIC      |               |                    |                    |
| SNP_99421_A_143555 | NW_004516841.1 | scaffold1710 | 143555                  | AA                              | GG                 | GG               | INTERGENIC      |               |                    |                    |
| SNP_99422_A_144247 | NW_004516841.1 | scaffold1710 | 144247                  | TT                              | GG                 | GG               | INTERGENIC      |               |                    |                    |

| SNPs IDs           | Chromosome IDs | Chromosomes  | Physical positions (bp) | CDC Frontier (Reference genome) | (Pusa 1103 & HPNB) | (ILWC 46 & LPNB) | Sequence Components of genome | Gene accession IDs | Putative functions                                       |
|--------------------|----------------|--------------|-------------------------|---------------------------------|--------------------|------------------|-------------------------------|--------------------|----------------------------------------------------------|
| SNP_99424_A_950    | NW_004516842.1 | scaffold1711 | 950                     | TT                              | GG                 | GG               | INTERGENIC                    |                    |                                                          |
| SNP_99425_A_990    | NW_004516842.1 | scaffold1711 | 990                     | TT                              | AA                 | AA               | INTERGENIC                    |                    |                                                          |
| SNP_99426_A_1188   | NW_004516845.1 | scaffold1717 | 1188                    | GG                              | CC                 | CC               | INTERGENIC                    |                    |                                                          |
| SNP_99427_A_1384   | NW_004516845.1 | scaffold1717 | 1384                    | GG                              | TT                 | TT               | INTERGENIC                    |                    |                                                          |
| SNP_99428_A_1447   | NW_004516845.1 | scaffold1717 | 1447                    | AA                              | GG                 | GG               | INTERGENIC                    |                    |                                                          |
| SNP_99429_A_8170   | NW_004516845.1 | scaffold1717 | 8170                    | TT                              | AA                 | AA               | INTERGENIC                    |                    |                                                          |
| SNP_99430_A_8719   | NW_004516845.1 | scaffold1717 | 8719                    | TT                              | AA                 | AA               | INTERGENIC                    |                    |                                                          |
| SNP_99431_A_60473  | NW_004516846.1 | scaffold1718 | 60473                   | TT                              | CC                 | CC               | INTERGENIC                    |                    |                                                          |
| SNP_99432_A_42687  | NW_004516849.1 | scaffold1722 | 42687                   | CC                              | AA                 | AA               | INTERGENIC                    |                    |                                                          |
| SNP_99433_A_56373  | NW_004516849.1 | scaffold1722 | 56373                   | TT                              | AA                 | AA               | INTERGENIC                    |                    |                                                          |
| SNP_99434_A_57658  | NW_004516849.1 | scaffold1722 | 57658                   | TT                              | AA                 | AA               | INTERGENIC                    |                    |                                                          |
| SNP_99436_A_66019  | NW_004516849.1 | scaffold1722 | 66019                   | TT                              | GG                 | GG               | INTRON                        | 101491133          | ribulose-phosphate 3-epimerase, cytoplasmic isoform-like |
| SNP_99437_A_66047  | NW_004516849.1 | scaffold1722 | 66047                   | AA                              | GG                 | GG               | INTRON                        | 101491133          | ribulose-phosphate 3-epimerase, cytoplasmic isoform-like |
| SNP_99438_A_66341  | NW_004516849.1 | scaffold1722 | 66341                   | AA                              | GG                 | GG               | INTRON                        | 101491133          | ribulose-phosphate 3-epimerase, cytoplasmic isoform-like |
| SNP_99439_A_112263 | NW_004516849.1 | scaffold1722 | 112263                  | CC                              | TT                 | TT               | INTERGENIC                    |                    |                                                          |
| SNP_99441_A_153676 | NW_004516849.1 | scaffold1722 | 153676                  | TT                              | GG                 | GG               | DRR                           | 101492972          | uncharacterized LOC101492972                             |
| SNP_99442_A_156214 | NW_004516849.1 | scaffold1722 | 156214                  | AA                              | GG                 | GG               | URR                           | 101492972          | uncharacterized LOC101492972                             |
| SNP_99443_A_168191 | NW_004516849.1 | scaffold1722 | 168191                  | GG                              | TT                 | TT               | INTERGENIC                    |                    |                                                          |
| SNP_99444_A_168234 | NW_004516849.1 | scaffold1722 | 168234                  | GG                              | AA                 | AA               | INTERGENIC                    |                    |                                                          |
| SNP_99445_A_176623 | NW_004516849.1 | scaffold1722 | 176623                  | CC                              | TT                 | TT               | INTERGENIC                    |                    |                                                          |
| SNP_99446_A_184366 | NW_004516849.1 | scaffold1722 | 184366                  | CC                              | TT                 | TT               | INTERGENIC                    |                    |                                                          |
| SNP_99447_A_184376 | NW_004516849.1 | scaffold1722 | 184376                  | AA                              | TT                 | TT               | INTERGENIC                    |                    |                                                          |

| SNPs IDs           | Chromosome IDs | Chromosomes  | Physical positions (bp) | CDC Frontier (Reference genome) | (Pusa 1103 & HPNB) | (ILWC 46 & LPNB) | Sequence genome | Components of | Gene accession IDs | Putative functions |
|--------------------|----------------|--------------|-------------------------|---------------------------------|--------------------|------------------|-----------------|---------------|--------------------|--------------------|
| SNP_99448_A_184388 | NW_004516849.1 | scaffold1722 | 184388                  | CC                              | AA                 | AA               | INTERGENIC      |               |                    |                    |
| SNP_99449_A_184390 | NW_004516849.1 | scaffold1722 | 184390                  | AA                              | GG                 | GG               | INTERGENIC      |               |                    |                    |
| SNP_99450_A_184587 | NW_004516849.1 | scaffold1722 | 184587                  | AA                              | GG                 | GG               | INTERGENIC      |               |                    |                    |
| SNP_99451_A_184654 | NW_004516849.1 | scaffold1722 | 184654                  | AA                              | GG                 | GG               | INTERGENIC      |               |                    |                    |
| SNP_99452_A_184665 | NW_004516849.1 | scaffold1722 | 184665                  | GG                              | AA                 | AA               | INTERGENIC      |               |                    |                    |
| SNP_99453_A_187128 | NW_004516849.1 | scaffold1722 | 187128                  | AA                              | GG                 | GG               | INTERGENIC      |               |                    |                    |
| SNP_99454_A_187131 | NW_004516849.1 | scaffold1722 | 187131                  | TT                              | GG                 | GG               | INTERGENIC      |               |                    |                    |
| SNP_99455_A_657    | NW_004516850.1 | scaffold1723 | 657                     | CC                              | TT                 | TT               | INTERGENIC      |               |                    |                    |
| SNP_99456_A_796    | NW_004516850.1 | scaffold1723 | 796                     | GG                              | CC                 | CC               | INTERGENIC      |               |                    |                    |
| SNP_99458_A_817    | NW_004516850.1 | scaffold1723 | 817                     | TT                              | CC                 | CC               | INTERGENIC      |               |                    |                    |
| SNP_99459_A_869    | NW_004516850.1 | scaffold1723 | 869                     | CC                              | TT                 | TT               | INTERGENIC      |               |                    |                    |
| SNP_99461_A_1133   | NW_004516850.1 | scaffold1723 | 1133                    | AA                              | GG                 | GG               | INTERGENIC      |               |                    |                    |
| SNP_99462_A_1176   | NW_004516850.1 | scaffold1723 | 1176                    | TT                              | CC                 | CC               | INTERGENIC      |               |                    |                    |
| SNP_99463_A_1188   | NW_004516850.1 | scaffold1723 | 1188                    | AA                              | CC                 | CC               | INTERGENIC      |               |                    |                    |
| SNP_99464_A_1271   | NW_004516850.1 | scaffold1723 | 1271                    | GG                              | TT                 | TT               | INTERGENIC      |               |                    |                    |
| SNP_99466_A_1314   | NW_004516850.1 | scaffold1723 | 1314                    | GG                              | AA                 | AA               | INTERGENIC      |               |                    |                    |
| SNP_99467_A_1351   | NW_004516850.1 | scaffold1723 | 1351                    | TT                              | AA                 | AA               | INTERGENIC      |               |                    |                    |
| SNP_99468_A_1391   | NW_004516850.1 | scaffold1723 | 1391                    | AA                              | TT                 | TT               | INTERGENIC      |               |                    |                    |
| SNP_99469_A_1418   | NW_004516850.1 | scaffold1723 | 1418                    | TT                              | CC                 | CC               | INTERGENIC      |               |                    |                    |
| SNP_99470_A_1424   | NW_004516850.1 | scaffold1723 | 1424                    | CC                              | TT                 | TT               | INTERGENIC      |               |                    |                    |
| SNP_99471_A_1487   | NW_004516850.1 | scaffold1723 | 1487                    | AA                              | TT                 | TT               | INTERGENIC      |               |                    |                    |
| SNP_99472_A_1488   | NW_004516850.1 | scaffold1723 | 1488                    | CC                              | AA                 | AA               | INTERGENIC      |               |                    |                    |

| SNPs IDs          | Chromosome IDs | Chromosomes  | Physical positions (bp) | CDC Frontier (Reference genome) | (Pusa 1103 & HPNB) | (ILWC 46 & LPNB) | Sequence Components of genome | Gene accession IDs | Putative functions           |
|-------------------|----------------|--------------|-------------------------|---------------------------------|--------------------|------------------|-------------------------------|--------------------|------------------------------|
| SNP_99473_A_179   | NW_004516851.1 | scaffold1725 | 179                     | CC                              | GG                 | GG               | INTERGENIC                    |                    |                              |
| SNP_99474_A_22112 | NW_004516851.1 | scaffold1725 | 22112                   | TT                              | CC                 | CC               | INTERGENIC                    |                    |                              |
| SNP_99475_A_22140 | NW_004516851.1 | scaffold1725 | 22140                   | TT                              | GG                 | GG               | INTERGENIC                    |                    |                              |
| SNP_99476_A_28621 | NW_004516851.1 | scaffold1725 | 28621                   | TT                              | AA                 | AA               | INTERGENIC                    |                    |                              |
| SNP_99477_A_28648 | NW_004516851.1 | scaffold1725 | 28648                   | AA                              | CC                 | CC               | INTERGENIC                    |                    |                              |
| SNP_99478_A_28662 | NW_004516851.1 | scaffold1725 | 28662                   | AA                              | TT                 | TT               | INTERGENIC                    |                    |                              |
| SNP_99480_A_33622 | NW_004516851.1 | scaffold1725 | 33622                   | AA                              | GG                 | GG               | SYNONYMOUS_CODING             | 101493307          | uncharacterized LOC101493307 |
| SNP_99481_A_33665 | NW_004516851.1 | scaffold1725 | 33665                   | AA                              | GG                 | GG               | NON_SYNONYMOUS_CODING         | 101493307          | uncharacterized LOC101493307 |
| SNP_99482_A_33885 | NW_004516851.1 | scaffold1725 | 33885                   | TT                              | GG                 | GG               | NON_SYNONYMOUS_CODING         | 101493307          | uncharacterized LOC101493307 |
| SNP_99483_A_33973 | NW_004516851.1 | scaffold1725 | 33973                   | TT                              | CC                 | CC               | SYNONYMOUS_CODING             | 101493307          | uncharacterized LOC101493307 |
| SNP_99484_A_34060 | NW_004516851.1 | scaffold1725 | 34060                   | TT                              | CC                 | CC               | SYNONYMOUS_CODING             | 101493307          | uncharacterized LOC101493307 |
| SNP_99485_A_34068 | NW_004516851.1 | scaffold1725 | 34068                   | AA                              | CC                 | CC               | NON_SYNONYMOUS_CODING         | 101493307          | uncharacterized LOC101493307 |
| SNP_99486_A_34465 | NW_004516851.1 | scaffold1725 | 34465                   | TT                              | CC                 | CC               | SYNONYMOUS_CODING             | 101493307          | uncharacterized LOC101493307 |
| SNP_99487_A_40077 | NW_004516851.1 | scaffold1725 | 40077                   | TT                              | CC                 | CC               | SYNONYMOUS_CODING             | 101493628          | uncharacterized LOC101493628 |
| SNP_99488_A_40132 | NW_004516851.1 | scaffold1725 | 40132                   | TT                              | CC                 | CC               | NON_SYNONYMOUS_CODING         | 101493628          | uncharacterized LOC101493628 |
| SNP_99489_A_40347 | NW_004516851.1 | scaffold1725 | 40347                   | CC                              | AA                 | AA               | NON_SYNONYMOUS_CODING         | 101493628          | uncharacterized LOC101493628 |
| SNP_99490_A_40424 | NW_004516851.1 | scaffold1725 | 40424                   | TT                              | CC                 | CC               | NON_SYNONYMOUS_CODING         | 101493628          | uncharacterized LOC101493628 |
| SNP_99491_A_40432 | NW_004516851.1 | scaffold1725 | 40432                   | AA                              | GG                 | GG               | NON_SYNONYMOUS_CODING         | 101493628          | uncharacterized LOC101493628 |
| SNP_99492_A_40443 | NW_004516851.1 | scaffold1725 | 40443                   | AA                              | CC                 | CC               | SYNONYMOUS_CODING             | 101493628          | uncharacterized LOC101493628 |
| SNP_99493_A_40491 | NW_004516851.1 | scaffold1725 | 40491                   | TT                              | CC                 | CC               | SYNONYMOUS_CODING             | 101493628          | uncharacterized LOC101493628 |
| SNP_99494_A_40502 | NW_004516851.1 | scaffold1725 | 40502                   | AA                              | GG                 | GG               | NON_SYNONYMOUS_CODING         | 101493628          | uncharacterized LOC101493628 |
| SNP_99495_A_16009 | NW_004516852.1 | scaffold1726 | 16009                   | TT                              | GG                 | GG               | INTERGENIC                    |                    |                              |

| SNPs IDs           | Chromosome IDs | Chromosomes  | Physical positions (bp) | CDC Frontier (Reference genome) | (Pusa 1103 & HPNB) | (ILWC 46 & LPNB) | Sequence Components of genome | Gene accession IDs | Putative functions           |
|--------------------|----------------|--------------|-------------------------|---------------------------------|--------------------|------------------|-------------------------------|--------------------|------------------------------|
| SNP_99496_A_16011  | NW_004516852.1 | scaffold1726 | 16011                   | AA                              | GG                 | GG               | INTERGENIC                    |                    |                              |
| SNP_99497_A_30749  | NW_004516852.1 | scaffold1726 | 30749                   | GG                              | AA                 | AA               | INTERGENIC                    |                    |                              |
| SNP_99498_A_35338  | NW_004516852.1 | scaffold1726 | 35338                   | AA                              | GG                 | GG               | INTERGENIC                    |                    |                              |
| SNP_99499_A_41172  | NW_004516852.1 | scaffold1726 | 41172                   | TT                              | CC                 | CC               | INTERGENIC                    |                    |                              |
| SNP_99500_A_2055   | NW_004516854.1 | scaffold1728 | 2055                    | AA                              | GG                 | GG               | INTRON                        | 101494580          | uncharacterized LOC101494580 |
| SNP_99501_A_16395  | NW_004516854.1 | scaffold1728 | 16395                   | GG                              | AA                 | AA               | INTRON                        | 101494580          | uncharacterized LOC101494580 |
| SNP_99502_A_470    | NW_004516855.1 | scaffold1729 | 470                     | CC                              | GG                 | GG               | INTERGENIC                    |                    |                              |
| SNP_99503_A_522    | NW_004516855.1 | scaffold1729 | 522                     | AA                              | TT                 | TT               | INTERGENIC                    |                    |                              |
| SNP_99504_A_79849  | NW_004516855.1 | scaffold1729 | 79849                   | AA                              | GG                 | GG               | DRR                           | 101499366          | Unknown function             |
| SNP_99505_A_80209  | NW_004516855.1 | scaffold1729 | 80209                   | CC                              | TT                 | TT               | DRR                           | 101499366          | Unknown function             |
| SNP_99506_A_80374  | NW_004516855.1 | scaffold1729 | 80374                   | AA                              | GG                 | GG               | DRR                           | 101499366          | Unknown function             |
| SNP_99507_A_80390  | NW_004516855.1 | scaffold1729 | 80390                   | TT                              | CC                 | CC               | DRR                           | 101499366          | Unknown function             |
| SNP_99508_A_80423  | NW_004516855.1 | scaffold1729 | 80423                   | TT                              | CC                 | CC               | DRR                           | 101499366          | Unknown function             |
| SNP_99509_A_147197 | NW_004516855.1 | scaffold1729 | 147197                  | AA                              | GG                 | GG               | INTERGENIC                    |                    |                              |
| SNP_99510_A_12188  | NW_004516856.1 | scaffold1730 | 12188                   | CC                              | TT                 | TT               | INTERGENIC                    |                    |                              |
| SNP_99511_A_15688  | NW_004516856.1 | scaffold1730 | 15688                   | AA                              | GG                 | GG               | INTERGENIC                    |                    |                              |
| SNP_99512_A_18183  | NW_004516856.1 | scaffold1730 | 18183                   | CC                              | TT                 | TT               | INTERGENIC                    |                    |                              |
| SNP_99513_A_18937  | NW_004516856.1 | scaffold1730 | 18937                   | GG                              | AA                 | AA               | INTERGENIC                    |                    |                              |
| SNP_99514_A_22373  | NW_004516856.1 | scaffold1730 | 22373                   | TT                              | CC                 | CC               | INTERGENIC                    |                    |                              |
| SNP_99515_A_24540  | NW_004516856.1 | scaffold1730 | 24540                   | AA                              | CC                 | CC               | INTERGENIC                    |                    |                              |
| SNP_99516_A_25173  | NW_004516856.1 | scaffold1730 | 25173                   | TT                              | AA                 | AA               | INTERGENIC                    |                    |                              |
| SNP_99517_A_25209  | NW_004516856.1 | scaffold1730 | 25209                   | AA                              | TT                 | TT               | INTERGENIC                    |                    |                              |

| SNPs IDs          | Chromosome IDs | Chromosomes  | Physical positions (bp) | CDC Frontier (Reference genome) | (Pusa 1103 & HPNB) | (ILWC 46 & LPNB) | Sequence genome | Components of | Gene accession IDs | Putative functions |
|-------------------|----------------|--------------|-------------------------|---------------------------------|--------------------|------------------|-----------------|---------------|--------------------|--------------------|
| SNP_99518_A_25503 | NW_004516856.1 | scaffold1730 | 25503                   | AA                              | TT                 | TT               | INTERGENIC      |               |                    |                    |
| SNP_99519_A_25504 | NW_004516856.1 | scaffold1730 | 25504                   | AA                              | CC                 | CC               | INTERGENIC      |               |                    |                    |
| SNP_99520_A_28373 | NW_004516856.1 | scaffold1730 | 28373                   | AA                              | GG                 | GG               | INTERGENIC      |               |                    |                    |
| SNP_99521_A_28567 | NW_004516856.1 | scaffold1730 | 28567                   | TT                              | CC                 | CC               | INTERGENIC      |               |                    |                    |
| SNP_99522_A_28590 | NW_004516856.1 | scaffold1730 | 28590                   | AA                              | TT                 | TT               | INTERGENIC      |               |                    |                    |
| SNP_99523_A_28648 | NW_004516856.1 | scaffold1730 | 28648                   | TT                              | CC                 | CC               | INTERGENIC      |               |                    |                    |
| SNP_99524_A_28711 | NW_004516856.1 | scaffold1730 | 28711                   | CC                              | GG                 | GG               | INTERGENIC      |               |                    |                    |
| SNP_99525_A_28768 | NW_004516856.1 | scaffold1730 | 28768                   | GG                              | AA                 | AA               | INTERGENIC      |               |                    |                    |
| SNP_99526_A_28806 | NW_004516856.1 | scaffold1730 | 28806                   | TT                              | GG                 | GG               | INTERGENIC      |               |                    |                    |
| SNP_99527_A_28828 | NW_004516856.1 | scaffold1730 | 28828                   | TT                              | AA                 | AA               | INTERGENIC      |               |                    |                    |
| SNP_99528_A_28890 | NW_004516856.1 | scaffold1730 | 28890                   | GG                              | TT                 | TT               | INTERGENIC      |               |                    |                    |
| SNP_99529_A_32368 | NW_004516856.1 | scaffold1730 | 32368                   | AA                              | TT                 | TT               | INTERGENIC      |               |                    |                    |
| SNP_99530_A_33213 | NW_004516856.1 | scaffold1730 | 33213                   | AA                              | GG                 | GG               | INTERGENIC      |               |                    |                    |
| SNP_99531_A_33548 | NW_004516856.1 | scaffold1730 | 33548                   | TT                              | CC                 | CC               | INTERGENIC      |               |                    |                    |
| SNP_99532_A_34148 | NW_004516856.1 | scaffold1730 | 34148                   | GG                              | TT                 | TT               | INTERGENIC      |               |                    |                    |
| SNP_99533_A_43228 | NW_004516856.1 | scaffold1730 | 43228                   | CC                              | GG                 | GG               | INTERGENIC      |               |                    |                    |
| SNP_99534_A_45558 | NW_004516856.1 | scaffold1730 | 45558                   | AA                              | GG                 | GG               | INTERGENIC      |               |                    |                    |
| SNP_99535_A_47030 | NW_004516856.1 | scaffold1730 | 47030                   | TT                              | CC                 | CC               | INTERGENIC      |               |                    |                    |
| SNP_99536_A_49583 | NW_004516856.1 | scaffold1730 | 49583                   | GG                              | TT                 | TT               | INTERGENIC      |               |                    |                    |
| SNP_99537_A_52537 | NW_004516856.1 | scaffold1730 | 52537                   | TT                              | GG                 | GG               | INTERGENIC      |               |                    |                    |
| SNP_99539_A_52667 | NW_004516856.1 | scaffold1730 | 52667                   | TT                              | AA                 | AA               | INTERGENIC      |               |                    |                    |
| SNP_99540_A_52786 | NW_004516856.1 | scaffold1730 | 52786                   | TT                              | AA                 | AA               | INTERGENIC      |               |                    |                    |

| SNPs IDs          | Chromosome IDs | Chromosomes  | Physical positions (bp) | CDC Frontier (Reference genome) | (Pusa 1103 & HPNB) | (ILWC 46 & LPNB) | Sequence genome | Components of | Gene accession IDs | Putative functions |
|-------------------|----------------|--------------|-------------------------|---------------------------------|--------------------|------------------|-----------------|---------------|--------------------|--------------------|
| SNP_99541_A_52990 | NW_004516856.1 | scaffold1730 | 52990                   | AA                              | CC                 | CC               | INTERGENIC      |               |                    |                    |
| SNP_99542_A_53033 | NW_004516856.1 | scaffold1730 | 53033                   | TT                              | CC                 | CC               | INTERGENIC      |               |                    |                    |
| SNP_99543_A_58757 | NW_004516856.1 | scaffold1730 | 58757                   | TT                              | AA                 | AA               | INTERGENIC      |               |                    |                    |
| SNP_99544_A_58819 | NW_004516856.1 | scaffold1730 | 58819                   | CC                              | TT                 | TT               | INTERGENIC      |               |                    |                    |
| SNP_99545_A_58896 | NW_004516856.1 | scaffold1730 | 58896                   | GG                              | TT                 | TT               | INTERGENIC      |               |                    |                    |
| SNP_99546_A_58914 | NW_004516856.1 | scaffold1730 | 58914                   | TT                              | CC                 | CC               | INTERGENIC      |               |                    |                    |
| SNP_99547_A_59389 | NW_004516856.1 | scaffold1730 | 59389                   | TT                              | GG                 | GG               | INTERGENIC      |               |                    |                    |
| SNP_99548_A_64014 | NW_004516856.1 | scaffold1730 | 64014                   | CC                              | GG                 | GG               | INTERGENIC      |               |                    |                    |
| SNP_99550_A_67044 | NW_004516856.1 | scaffold1730 | 67044                   | CC                              | AA                 | AA               | INTERGENIC      |               |                    |                    |
| SNP_99551_A_67218 | NW_004516856.1 | scaffold1730 | 67218                   | GG                              | AA                 | AA               | INTERGENIC      |               |                    |                    |
| SNP_99552_A_67292 | NW_004516856.1 | scaffold1730 | 67292                   | TT                              | CC                 | CC               | INTERGENIC      |               |                    |                    |
| SNP_99553_A_67910 | NW_004516856.1 | scaffold1730 | 67910                   | AA                              | GG                 | GG               | INTERGENIC      |               |                    |                    |
| SNP_99554_A_68296 | NW_004516856.1 | scaffold1730 | 68296                   | CC                              | TT                 | TT               | INTERGENIC      |               |                    |                    |
| SNP_99555_A_68300 | NW_004516856.1 | scaffold1730 | 68300                   | GG                              | TT                 | TT               | INTERGENIC      |               |                    |                    |
| SNP_99556_A_68611 | NW_004516856.1 | scaffold1730 | 68611                   | CC                              | AA                 | AA               | INTERGENIC      |               |                    |                    |
| SNP_99557_A_68670 | NW_004516856.1 | scaffold1730 | 68670                   | CC                              | TT                 | TT               | INTERGENIC      |               |                    |                    |
| SNP_99558_A_68688 | NW_004516856.1 | scaffold1730 | 68688                   | AA                              | GG                 | GG               | INTERGENIC      |               |                    |                    |
| SNP_99559_A_68718 | NW_004516856.1 | scaffold1730 | 68718                   | AA                              | GG                 | GG               | INTERGENIC      |               |                    |                    |
| SNP_99560_A_72182 | NW_004516856.1 | scaffold1730 | 72182                   | GG                              | CC                 | CC               | INTERGENIC      |               |                    |                    |
| SNP_99561_A_73723 | NW_004516856.1 | scaffold1730 | 73723                   | GG                              | CC                 | CC               | INTERGENIC      |               |                    |                    |
| SNP_99562_A_74525 | NW_004516856.1 | scaffold1730 | 74525                   | GG                              | TT                 | TT               | INTERGENIC      |               |                    |                    |
| SNP_99563_A_74564 | NW_004516856.1 | scaffold1730 | 74564                   | GG                              | AA                 | AA               | INTERGENIC      |               |                    |                    |



| SNPs IDs           | Chromosome IDs | Chromosomes  | Physical positions (bp) | CDC Frontier (Reference genome) | (Pusa 1103 & HPNB) | (ILWC 46 & LPNB) | Sequence genome | Components of | Gene accession IDs | Putative functions |
|--------------------|----------------|--------------|-------------------------|---------------------------------|--------------------|------------------|-----------------|---------------|--------------------|--------------------|
| SNP_99564_A_80447  | NW_004516856.1 | scaffold1730 | 80447                   | AA                              | TT                 | TT               | INTERGENIC      |               |                    |                    |
| SNP_99565_A_86103  | NW_004516856.1 | scaffold1730 | 86103                   | GG                              | AA                 | AA               | INTERGENIC      |               |                    |                    |
| SNP_99567_A_95545  | NW_004516856.1 | scaffold1730 | 95545                   | TT                              | GG                 | GG               | INTERGENIC      |               |                    |                    |
| SNP_99570_A_105087 | NW_004516856.1 | scaffold1730 | 105087                  | GG                              | TT                 | TT               | INTERGENIC      |               |                    |                    |
| SNP_99571_A_105664 | NW_004516856.1 | scaffold1730 | 105664                  | TT                              | CC                 | CC               | INTERGENIC      |               |                    |                    |
| SNP_99572_A_105668 | NW_004516856.1 | scaffold1730 | 105668                  | AA                              | CC                 | CC               | INTERGENIC      |               |                    |                    |
| SNP_99573_A_105685 | NW_004516856.1 | scaffold1730 | 105685                  | AA                              | CC                 | CC               | INTERGENIC      |               |                    |                    |
| SNP_99574_A_105698 | NW_004516856.1 | scaffold1730 | 105698                  | CC                              | TT                 | TT               | INTERGENIC      |               |                    |                    |
| SNP_99575_A_105910 | NW_004516856.1 | scaffold1730 | 105910                  | TT                              | GG                 | GG               | INTERGENIC      |               |                    |                    |
| SNP_99576_A_105939 | NW_004516856.1 | scaffold1730 | 105939                  | GG                              | AA                 | AA               | INTERGENIC      |               |                    |                    |
| SNP_99577_A_105945 | NW_004516856.1 | scaffold1730 | 105945                  | CC                              | AA                 | AA               | INTERGENIC      |               |                    |                    |
| SNP_99578_A_105950 | NW_004516856.1 | scaffold1730 | 105950                  | GG                              | AA                 | AA               | INTERGENIC      |               |                    |                    |
| SNP_99579_A_106010 | NW_004516856.1 | scaffold1730 | 106010                  | CC                              | TT                 | TT               | INTERGENIC      |               |                    |                    |
| SNP_99580_A_106064 | NW_004516856.1 | scaffold1730 | 106064                  | GG                              | AA                 | AA               | INTERGENIC      |               |                    |                    |
| SNP_99581_A_106070 | NW_004516856.1 | scaffold1730 | 106070                  | TT                              | CC                 | CC               | INTERGENIC      |               |                    |                    |
| SNP_99582_A_106072 | NW_004516856.1 | scaffold1730 | 106072                  | TT                              | CC                 | CC               | INTERGENIC      |               |                    |                    |
| SNP_99583_A_106078 | NW_004516856.1 | scaffold1730 | 106078                  | CC                              | TT                 | TT               | INTERGENIC      |               |                    |                    |
| SNP_99584_A_106083 | NW_004516856.1 | scaffold1730 | 106083                  | GG                              | AA                 | AA               | INTERGENIC      |               |                    |                    |
| SNP_99585_A_109372 | NW_004516856.1 | scaffold1730 | 109372                  | AA                              | GG                 | GG               | INTERGENIC      |               |                    |                    |
| SNP_99586_A_110485 | NW_004516856.1 | scaffold1730 | 110485                  | TT                              | CC                 | CC               | INTERGENIC      |               |                    |                    |
| SNP_99587_A_110744 | NW_004516856.1 | scaffold1730 | 110744                  | CC                              | GG                 | GG               | INTERGENIC      |               |                    |                    |
| SNP_99588_A_110804 | NW_004516856.1 | scaffold1730 | 110804                  | AA                              | CC                 | CC               | INTERGENIC      |               |                    |                    |

| SNPs IDs           | Chromosome IDs | Chromosomes  | Physical positions (bp) | CDC Frontier (Reference genome) | (Pusa 1103 & HPNB) | (ILWC 46 & LPNB) | Sequence genome       | Components of | Gene accession IDs | Putative functions |
|--------------------|----------------|--------------|-------------------------|---------------------------------|--------------------|------------------|-----------------------|---------------|--------------------|--------------------|
| SNP_99589_A_111049 | NW_004516856.1 | scaffold1730 | 111049                  | TT                              | CC                 | CC               | INTERGENIC            |               |                    |                    |
| SNP_99590_A_111319 | NW_004516856.1 | scaffold1730 | 111319                  | CC                              | TT                 | TT               | INTERGENIC            |               |                    |                    |
| SNP_99591_A_112295 | NW_004516856.1 | scaffold1730 | 112295                  | TT                              | AA                 | AA               | INTERGENIC            |               |                    |                    |
| SNP_99592_A_112418 | NW_004516856.1 | scaffold1730 | 112418                  | CC                              | TT                 | TT               | INTERGENIC            |               |                    |                    |
| SNP_99593_A_113612 | NW_004516856.1 | scaffold1730 | 113612                  | GG                              | CC                 | CC               | INTERGENIC            |               |                    |                    |
| SNP_99594_A_114659 | NW_004516856.1 | scaffold1730 | 114659                  | CC                              | AA                 | AA               | INTERGENIC            |               |                    |                    |
| SNP_99595_A_114666 | NW_004516856.1 | scaffold1730 | 114666                  | AA                              | GG                 | GG               | INTERGENIC            |               |                    |                    |
| SNP_99596_A_114723 | NW_004516856.1 | scaffold1730 | 114723                  | CC                              | AA                 | AA               | INTERGENIC            |               |                    |                    |
| SNP_99597_A_114730 | NW_004516856.1 | scaffold1730 | 114730                  | GG                              | AA                 | AA               | INTERGENIC            |               |                    |                    |
| SNP_99598_A_114802 | NW_004516856.1 | scaffold1730 | 114802                  | CC                              | TT                 | TT               | INTERGENIC            |               |                    |                    |
| SNP_99599_A_114941 | NW_004516856.1 | scaffold1730 | 114941                  | TT                              | CC                 | CC               | INTERGENIC            |               |                    |                    |
| SNP_99600_A_121915 | NW_004516856.1 | scaffold1730 | 121915                  | CC                              | TT                 | TT               | INTERGENIC            |               |                    |                    |
| SNP_99601_A_121929 | NW_004516856.1 | scaffold1730 | 121929                  | CC                              | AA                 | AA               | INTERGENIC            |               |                    |                    |
| SNP_99602_A_123671 | NW_004516856.1 | scaffold1730 | 123671                  | CC                              | GG                 | GG               | NON_SYNONYMOUS_CODING | 101500645     | Unknown function   |                    |
| SNP_99603_A_125681 | NW_004516856.1 | scaffold1730 | 125681                  | GG                              | TT                 | TT               | URR                   | 101500645     | Unknown function   |                    |
| SNP_99604_A_126179 | NW_004516856.1 | scaffold1730 | 126179                  | TT                              | CC                 | CC               | INTERGENIC            |               |                    |                    |
| SNP_99605_A_126183 | NW_004516856.1 | scaffold1730 | 126183                  | GG                              | AA                 | AA               | INTERGENIC            |               |                    |                    |
| SNP_99606_A_2748   | NW_004516857.1 | scaffold1731 | 2748                    | GG                              | AA                 | AA               | INTERGENIC            |               |                    |                    |
| SNP_99607_A_9523   | NW_004516857.1 | scaffold1731 | 9523                    | AA                              | TT                 | TT               | INTERGENIC            |               |                    |                    |
| SNP_99608_A_13277  | NW_004516857.1 | scaffold1731 | 13277                   | TT                              | CC                 | CC               | INTERGENIC            |               |                    |                    |
| SNP_99609_A_13531  | NW_004516857.1 | scaffold1731 | 13531                   | AA                              | GG                 | GG               | INTERGENIC            |               |                    |                    |
| SNP_99610_A_22657  | NW_004516857.1 | scaffold1731 | 22657                   | CC                              | TT                 | TT               | INTERGENIC            |               |                    |                    |

| SNPs IDs          | Chromosome IDs | Chromosomes  | Physical positions (bp) | CDC Frontier (Reference genome) | (Pusa 1103 & HPNB) | (ILWC 46 & LPNB) | Sequence genome | Components of | Gene accession IDs | Putative functions |
|-------------------|----------------|--------------|-------------------------|---------------------------------|--------------------|------------------|-----------------|---------------|--------------------|--------------------|
| SNP_99611_A_30693 | NW_004516857.1 | scaffold1731 | 30693                   | TT                              | AA                 | AA               | INTERGENIC      |               |                    |                    |
| SNP_99612_A_38803 | NW_004516857.1 | scaffold1731 | 38803                   | CC                              | TT                 | TT               | INTERGENIC      |               |                    |                    |
| SNP_99613_A_38811 | NW_004516857.1 | scaffold1731 | 38811                   | CC                              | TT                 | TT               | INTERGENIC      |               |                    |                    |
| SNP_99614_A_38819 | NW_004516857.1 | scaffold1731 | 38819                   | CC                              | TT                 | TT               | INTERGENIC      |               |                    |                    |
| SNP_99615_A_38827 | NW_004516857.1 | scaffold1731 | 38827                   | CC                              | TT                 | TT               | INTERGENIC      |               |                    |                    |
| SNP_99616_A_38835 | NW_004516857.1 | scaffold1731 | 38835                   | CC                              | TT                 | TT               | INTERGENIC      |               |                    |                    |
| SNP_99618_A_38910 | NW_004516857.1 | scaffold1731 | 38910                   | AA                              | CC                 | CC               | INTERGENIC      |               |                    |                    |
| SNP_99619_A_38974 | NW_004516857.1 | scaffold1731 | 38974                   | TT                              | AA                 | AA               | INTERGENIC      |               |                    |                    |
| SNP_99620_A_39828 | NW_004516857.1 | scaffold1731 | 39828                   | CC                              | TT                 | TT               | INTERGENIC      |               |                    |                    |
| SNP_99622_A_39917 | NW_004516857.1 | scaffold1731 | 39917                   | AA                              | GG                 | GG               | INTERGENIC      |               |                    |                    |
| SNP_99623_A_41767 | NW_004516857.1 | scaffold1731 | 41767                   | GG                              | TT                 | TT               | INTERGENIC      |               |                    |                    |
| SNP_99624_A_47385 | NW_004516857.1 | scaffold1731 | 47385                   | AA                              | GG                 | GG               | INTERGENIC      |               |                    |                    |
| SNP_99625_A_48560 | NW_004516857.1 | scaffold1731 | 48560                   | GG                              | AA                 | AA               | INTERGENIC      |               |                    |                    |
| SNP_99627_A_50013 | NW_004516857.1 | scaffold1731 | 50013                   | CC                              | TT                 | TT               | INTERGENIC      |               |                    |                    |
| SNP_99628_A_51758 | NW_004516857.1 | scaffold1731 | 51758                   | TT                              | CC                 | CC               | INTERGENIC      |               |                    |                    |
| SNP_99629_A_52597 | NW_004516857.1 | scaffold1731 | 52597                   | CC                              | AA                 | AA               | INTERGENIC      |               |                    |                    |
| SNP_99631_A_54079 | NW_004516857.1 | scaffold1731 | 54079                   | AA                              | GG                 | GG               | INTERGENIC      |               |                    |                    |
| SNP_99632_A_54357 | NW_004516857.1 | scaffold1731 | 54357                   | AA                              | GG                 | GG               | INTERGENIC      |               |                    |                    |
| SNP_99633_A_54370 | NW_004516857.1 | scaffold1731 | 54370                   | CC                              | TT                 | TT               | INTERGENIC      |               |                    |                    |
| SNP_99634_A_62720 | NW_004516857.1 | scaffold1731 | 62720                   | AA                              | GG                 | GG               | INTERGENIC      |               |                    |                    |
| SNP_99635_A_62723 | NW_004516857.1 | scaffold1731 | 62723                   | CC                              | TT                 | TT               | INTERGENIC      |               |                    |                    |
| SNP_99636_A_63731 | NW_004516857.1 | scaffold1731 | 63731                   | TT                              | CC                 | CC               | INTERGENIC      |               |                    |                    |

| SNPs IDs          | Chromosome IDs | Chromosomes  | Physical positions (bp) | CDC Frontier (Reference genome) | (Pusa 1103 & HPNB) | (ILWC 46 & LPNB) | Sequence genome | Components of | Gene accession IDs | Putative functions |
|-------------------|----------------|--------------|-------------------------|---------------------------------|--------------------|------------------|-----------------|---------------|--------------------|--------------------|
| SNP_99637_A_65438 | NW_004516857.1 | scaffold1731 | 65438                   | GG                              | TT                 | TT               | INTERGENIC      |               |                    |                    |
| SNP_99639_A_66198 | NW_004516857.1 | scaffold1731 | 66198                   | GG                              | AA                 | AA               | INTERGENIC      |               |                    |                    |
| SNP_99640_A_71750 | NW_004516857.1 | scaffold1731 | 71750                   | GG                              | TT                 | TT               | INTERGENIC      |               |                    |                    |
| SNP_99641_A_71756 | NW_004516857.1 | scaffold1731 | 71756                   | TT                              | AA                 | AA               | INTERGENIC      |               |                    |                    |
| SNP_99642_A_82281 | NW_004516857.1 | scaffold1731 | 82281                   | GG                              | AA                 | AA               | INTERGENIC      |               |                    |                    |
| SNP_99644_A_85402 | NW_004516857.1 | scaffold1731 | 85402                   | AA                              | GG                 | GG               | INTERGENIC      |               |                    |                    |
| SNP_99645_A_85936 | NW_004516857.1 | scaffold1731 | 85936                   | TT                              | CC                 | CC               | INTERGENIC      |               |                    |                    |
| SNP_99647_A_356   | NW_004516858.1 | scaffold1734 | 356                     | AA                              | GG                 | GG               | INTERGENIC      |               |                    |                    |
| SNP_99648_A_415   | NW_004516858.1 | scaffold1734 | 415                     | GG                              | AA                 | AA               | INTERGENIC      |               |                    |                    |
| SNP_99649_A_417   | NW_004516858.1 | scaffold1734 | 417                     | GG                              | AA                 | AA               | INTERGENIC      |               |                    |                    |
| SNP_99650_A_437   | NW_004516858.1 | scaffold1734 | 437                     | TT                              | CC                 | CC               | INTERGENIC      |               |                    |                    |
| SNP_99651_A_462   | NW_004516858.1 | scaffold1734 | 462                     | AA                              | TT                 | TT               | INTERGENIC      |               |                    |                    |
| SNP_99652_A_464   | NW_004516858.1 | scaffold1734 | 464                     | CC                              | TT                 | TT               | INTERGENIC      |               |                    |                    |
| SNP_99653_A_827   | NW_004516858.1 | scaffold1734 | 827                     | GG                              | AA                 | AA               | INTERGENIC      |               |                    |                    |
| SNP_99654_A_6599  | NW_004516858.1 | scaffold1734 | 6599                    | TT                              | CC                 | CC               | INTERGENIC      |               |                    |                    |
| SNP_99655_A_7138  | NW_004516858.1 | scaffold1734 | 7138                    | CC                              | TT                 | TT               | INTERGENIC      |               |                    |                    |
| SNP_99656_A_10377 | NW_004516858.1 | scaffold1734 | 10377                   | GG                              | TT                 | TT               | INTERGENIC      |               |                    |                    |
| SNP_99657_A_10583 | NW_004516858.1 | scaffold1734 | 10583                   | GG                              | AA                 | AA               | INTERGENIC      |               |                    |                    |
| SNP_99658_A_8179  | NW_004516859.1 | scaffold1736 | 8179                    | TT                              | CC                 | CC               | INTERGENIC      |               |                    |                    |
| SNP_99659_A_8236  | NW_004516859.1 | scaffold1736 | 8236                    | GG                              | AA                 | AA               | INTERGENIC      |               |                    |                    |
| SNP_99660_A_8282  | NW_004516859.1 | scaffold1736 | 8282                    | CC                              | AA                 | AA               | INTERGENIC      |               |                    |                    |
| SNP_99662_A_8334  | NW_004516859.1 | scaffold1736 | 8334                    | AA                              | GG                 | GG               | INTERGENIC      |               |                    |                    |

| SNPs IDs          | Chromosome IDs | Chromosomes  | Physical positions (bp) | CDC Frontier (Reference genome) | (Pusa 1103 & HPNB) | (ILWC 46 & LPNB) | Sequence genome | Components of | Gene accession IDs | Putative functions |
|-------------------|----------------|--------------|-------------------------|---------------------------------|--------------------|------------------|-----------------|---------------|--------------------|--------------------|
| SNP_99664_A_8623  | NW_004516859.1 | scaffold1736 | 8623                    | GG                              | AA                 | AA               | INTERGENIC      |               |                    |                    |
| SNP_99665_A_8789  | NW_004516859.1 | scaffold1736 | 8789                    | CC                              | TT                 | TT               | INTERGENIC      |               |                    |                    |
| SNP_99666_A_8792  | NW_004516859.1 | scaffold1736 | 8792                    | GG                              | AA                 | AA               | INTERGENIC      |               |                    |                    |
| SNP_99667_A_17304 | NW_004516859.1 | scaffold1736 | 17304                   | TT                              | CC                 | CC               | INTERGENIC      |               |                    |                    |
| SNP_99669_A_25804 | NW_004516859.1 | scaffold1736 | 25804                   | GG                              | AA                 | AA               | INTERGENIC      |               |                    |                    |
| SNP_99670_A_25876 | NW_004516859.1 | scaffold1736 | 25876                   | TT                              | AA                 | AA               | INTERGENIC      |               |                    |                    |
| SNP_99671_A_32471 | NW_004516859.1 | scaffold1736 | 32471                   | TT                              | CC                 | CC               | INTERGENIC      |               |                    |                    |
| SNP_99672_A_1338  | NW_004516861.1 | scaffold1739 | 1338                    | AA                              | GG                 | GG               | INTERGENIC      |               |                    |                    |
| SNP_99673_A_446   | NW_004516862.1 | scaffold1740 | 446                     | CC                              | TT                 | TT               | INTERGENIC      |               |                    |                    |
| SNP_99674_A_603   | NW_004516862.1 | scaffold1740 | 603                     | AA                              | GG                 | GG               | INTERGENIC      |               |                    |                    |
| SNP_99675_A_918   | NW_004516862.1 | scaffold1740 | 918                     | GG                              | TT                 | TT               | INTERGENIC      |               |                    |                    |
| SNP_99676_A_929   | NW_004516862.1 | scaffold1740 | 929                     | TT                              | GG                 | GG               | INTERGENIC      |               |                    |                    |
| SNP_99677_A_1026  | NW_004516862.1 | scaffold1740 | 1026                    | GG                              | AA                 | AA               | INTERGENIC      |               |                    |                    |
| SNP_99678_A_1055  | NW_004516862.1 | scaffold1740 | 1055                    | TT                              | GG                 | GG               | INTERGENIC      |               |                    |                    |
| SNP_99679_A_1384  | NW_004516862.1 | scaffold1740 | 1384                    | AA                              | GG                 | GG               | INTERGENIC      |               |                    |                    |
| SNP_99680_A_1495  | NW_004516862.1 | scaffold1740 | 1495                    | GG                              | TT                 | TT               | INTERGENIC      |               |                    |                    |
| SNP_99681_A_2104  | NW_004516862.1 | scaffold1740 | 2104                    | CC                              | GG                 | GG               | INTERGENIC      |               |                    |                    |
| SNP_99682_A_2186  | NW_004516862.1 | scaffold1740 | 2186                    | GG                              | TT                 | TT               | INTERGENIC      |               |                    |                    |
| SNP_99683_A_2422  | NW_004516862.1 | scaffold1740 | 2422                    | GG                              | AA                 | AA               | INTERGENIC      |               |                    |                    |
| SNP_99684_A_2428  | NW_004516862.1 | scaffold1740 | 2428                    | TT                              | CC                 | CC               | INTERGENIC      |               |                    |                    |
| SNP_99685_A_2462  | NW_004516862.1 | scaffold1740 | 2462                    | GG                              | AA                 | AA               | INTERGENIC      |               |                    |                    |
| SNP_99686_A_2506  | NW_004516862.1 | scaffold1740 | 2506                    | GG                              | AA                 | AA               | INTERGENIC      |               |                    |                    |

| SNPs IDs           | Chromosome IDs | Chromosomes  | Physical positions (bp) | CDC Frontier (Reference genome) | (Pusa 1103 & HPNB) | (ILWC 46 & LPNB) | Sequence genome | Components of | Gene accession IDs        | Putative functions |
|--------------------|----------------|--------------|-------------------------|---------------------------------|--------------------|------------------|-----------------|---------------|---------------------------|--------------------|
| SNP_99688_A_5247   | NW_004516862.1 | scaffold1740 | 5247                    | CC                              | TT                 | TT               | INTERGENIC      |               |                           |                    |
| SNP_99689_A_5248   | NW_004516862.1 | scaffold1740 | 5248                    | GG                              | AA                 | AA               | INTERGENIC      |               |                           |                    |
| SNP_99690_A_5277   | NW_004516862.1 | scaffold1740 | 5277                    | GG                              | AA                 | AA               | INTERGENIC      |               |                           |                    |
| SNP_99691_A_16526  | NW_004516862.1 | scaffold1740 | 16526                   | TT                              | CC                 | CC               | INTERGENIC      |               |                           |                    |
| SNP_99692_A_65272  | NW_004516870.1 | scaffold1750 | 65272                   | GG                              | AA                 | AA               | INTERGENIC      |               |                           |                    |
| SNP_99693_A_69986  | NW_004516870.1 | scaffold1750 | 69986                   | TT                              | CC                 | CC               | INTERGENIC      |               |                           |                    |
| SNP_99694_A_87482  | NW_004516870.1 | scaffold1750 | 87482                   | TT                              | AA                 | AA               | INTERGENIC      |               |                           |                    |
| SNP_99695_A_87485  | NW_004516870.1 | scaffold1750 | 87485                   | AA                              | GG                 | GG               | INTERGENIC      |               |                           |                    |
| SNP_99696_A_97601  | NW_004516870.1 | scaffold1750 | 97601                   | GG                              | AA                 | AA               | INTERGENIC      |               |                           |                    |
| SNP_99697_A_113141 | NW_004516870.1 | scaffold1750 | 113141                  | CC                              | TT                 | TT               | INTERGENIC      |               |                           |                    |
| SNP_99698_A_113258 | NW_004516870.1 | scaffold1750 | 113258                  | AA                              | GG                 | GG               | INTERGENIC      |               |                           |                    |
| SNP_99700_A_151810 | NW_004516870.1 | scaffold1750 | 151810                  | AA                              | GG                 | GG               | INTERGENIC      |               |                           |                    |
| SNP_99701_A_152174 | NW_004516870.1 | scaffold1750 | 152174                  | CC                              | TT                 | TT               | INTERGENIC      |               |                           |                    |
| SNP_99702_A_152202 | NW_004516870.1 | scaffold1750 | 152202                  | GG                              | TT                 | TT               | INTERGENIC      |               |                           |                    |
| SNP_99703_A_236652 | NW_004516870.1 | scaffold1750 | 236652                  | GG                              | AA                 | AA               | INTERGENIC      |               |                           |                    |
| SNP_99704_A_242969 | NW_004516870.1 | scaffold1750 | 242969                  | AA                              | GG                 | GG               | INTERGENIC      |               |                           |                    |
| SNP_99705_A_258882 | NW_004516870.1 | scaffold1750 | 258882                  | CC                              | TT                 | TT               | URR             | 101504157     | ubiquitin-fold modifier 1 |                    |
| SNP_99706_A_6239   | NW_004516871.1 | scaffold1751 | 6239                    | AA                              | GG                 | GG               | INTERGENIC      |               |                           |                    |
| SNP_99707_A_6344   | NW_004516871.1 | scaffold1751 | 6344                    | CC                              | AA                 | AA               | INTERGENIC      |               |                           |                    |
| SNP_99708_A_9041   | NW_004516871.1 | scaffold1751 | 9041                    | AA                              | GG                 | GG               | INTERGENIC      |               |                           |                    |
| SNP_99709_A_10117  | NW_004516871.1 | scaffold1751 | 10117                   | TT                              | CC                 | CC               | INTERGENIC      |               |                           |                    |
| SNP_99710_A_10121  | NW_004516871.1 | scaffold1751 | 10121                   | TT                              | CC                 | CC               | INTERGENIC      |               |                           |                    |

| SNPs IDs          | Chromosome IDs | Chromosomes  | Physical positions (bp) | CDC Frontier (Reference genome) | (Pusa 1103 & HPNB) | (ILWC 46 & LPNB) | Sequence genome | Components of | Gene accession IDs | Putative functions |
|-------------------|----------------|--------------|-------------------------|---------------------------------|--------------------|------------------|-----------------|---------------|--------------------|--------------------|
| SNP_99711_A_14860 | NW_004516871.1 | scaffold1751 | 14860                   | CC                              | AA                 | AA               | INTERGENIC      |               |                    |                    |
| SNP_99712_A_17601 | NW_004516871.1 | scaffold1751 | 17601                   | AA                              | GG                 | GG               | INTERGENIC      |               |                    |                    |
| SNP_99713_A_38362 | NW_004516871.1 | scaffold1751 | 38362                   | AA                              | TT                 | TT               | INTERGENIC      |               |                    |                    |
| SNP_99714_A_40854 | NW_004516871.1 | scaffold1751 | 40854                   | CC                              | TT                 | TT               | INTERGENIC      |               |                    |                    |
| SNP_99715_A_63358 | NW_004516871.1 | scaffold1751 | 63358                   | AA                              | TT                 | TT               | INTERGENIC      |               |                    |                    |
| SNP_99717_A_63373 | NW_004516871.1 | scaffold1751 | 63373                   | GG                              | AA                 | AA               | INTERGENIC      |               |                    |                    |
| SNP_99718_A_63376 | NW_004516871.1 | scaffold1751 | 63376                   | TT                              | GG                 | GG               | INTERGENIC      |               |                    |                    |
| SNP_99719_A_63441 | NW_004516871.1 | scaffold1751 | 63441                   | TT                              | CC                 | CC               | INTERGENIC      |               |                    |                    |
| SNP_99720_A_63482 | NW_004516871.1 | scaffold1751 | 63482                   | TT                              | GG                 | GG               | INTERGENIC      |               |                    |                    |
| SNP_99721_A_63487 | NW_004516871.1 | scaffold1751 | 63487                   | CC                              | TT                 | TT               | INTERGENIC      |               |                    |                    |
| SNP_99722_A_63491 | NW_004516871.1 | scaffold1751 | 63491                   | AA                              | GG                 | GG               | INTERGENIC      |               |                    |                    |
| SNP_99723_A_65096 | NW_004516871.1 | scaffold1751 | 65096                   | TT                              | CC                 | CC               | INTERGENIC      |               |                    |                    |
| SNP_99724_A_65108 | NW_004516871.1 | scaffold1751 | 65108                   | AA                              | GG                 | GG               | INTERGENIC      |               |                    |                    |
| SNP_99725_A_65302 | NW_004516871.1 | scaffold1751 | 65302                   | GG                              | AA                 | AA               | INTERGENIC      |               |                    |                    |
| SNP_99726_A_65314 | NW_004516871.1 | scaffold1751 | 65314                   | AA                              | TT                 | TT               | INTERGENIC      |               |                    |                    |
| SNP_99727_A_65323 | NW_004516871.1 | scaffold1751 | 65323                   | CC                              | TT                 | TT               | INTERGENIC      |               |                    |                    |
| SNP_99728_A_65332 | NW_004516871.1 | scaffold1751 | 65332                   | TT                              | CC                 | CC               | INTERGENIC      |               |                    |                    |
| SNP_99729_A_65334 | NW_004516871.1 | scaffold1751 | 65334                   | AA                              | GG                 | GG               | INTERGENIC      |               |                    |                    |
| SNP_99730_A_65338 | NW_004516871.1 | scaffold1751 | 65338                   | TT                              | CC                 | CC               | INTERGENIC      |               |                    |                    |
| SNP_99731_A_65356 | NW_004516871.1 | scaffold1751 | 65356                   | GG                              | AA                 | AA               | INTERGENIC      |               |                    |                    |
| SNP_99732_A_65362 | NW_004516871.1 | scaffold1751 | 65362                   | AA                              | TT                 | TT               | INTERGENIC      |               |                    |                    |
| SNP_99733_A_65368 | NW_004516871.1 | scaffold1751 | 65368                   | CC                              | TT                 | TT               | INTERGENIC      |               |                    |                    |

| SNPs IDs           | Chromosome IDs | Chromosomes  | Physical positions (bp) | CDC Frontier (Reference genome) | (Pusa 1103 & HPNB) | (ILWC 46 & LPNB) | Sequence genome | Components of | Gene accession IDs | Putative functions |
|--------------------|----------------|--------------|-------------------------|---------------------------------|--------------------|------------------|-----------------|---------------|--------------------|--------------------|
| SNP_99734_A_65378  | NW_004516871.1 | scaffold1751 | 65378                   | TT                              | GG                 | GG               | INTERGENIC      |               |                    |                    |
| SNP_99735_A_65467  | NW_004516871.1 | scaffold1751 | 65467                   | TT                              | CC                 | CC               | INTERGENIC      |               |                    |                    |
| SNP_99736_A_68991  | NW_004516871.1 | scaffold1751 | 68991                   | GG                              | AA                 | AA               | INTERGENIC      |               |                    |                    |
| SNP_99737_A_69017  | NW_004516871.1 | scaffold1751 | 69017                   | TT                              | AA                 | AA               | INTERGENIC      |               |                    |                    |
| SNP_99738_A_69036  | NW_004516871.1 | scaffold1751 | 69036                   | AA                              | GG                 | GG               | INTERGENIC      |               |                    |                    |
| SNP_99739_A_69055  | NW_004516871.1 | scaffold1751 | 69055                   | AA                              | GG                 | GG               | INTERGENIC      |               |                    |                    |
| SNP_99740_A_69537  | NW_004516871.1 | scaffold1751 | 69537                   | GG                              | TT                 | TT               | INTERGENIC      |               |                    |                    |
| SNP_99741_A_97244  | NW_004516871.1 | scaffold1751 | 97244                   | GG                              | TT                 | TT               | INTERGENIC      |               |                    |                    |
| SNP_99742_A_113992 | NW_004516871.1 | scaffold1751 | 113992                  | TT                              | AA                 | AA               | INTERGENIC      |               |                    |                    |
| SNP_99743_A_121125 | NW_004516871.1 | scaffold1751 | 121125                  | AA                              | TT                 | TT               | INTERGENIC      |               |                    |                    |
| SNP_99744_A_127332 | NW_004516871.1 | scaffold1751 | 127332                  | AA                              | GG                 | GG               | INTERGENIC      |               |                    |                    |
| SNP_99745_A_127566 | NW_004516871.1 | scaffold1751 | 127566                  | CC                              | AA                 | AA               | INTERGENIC      |               |                    |                    |
| SNP_99746_A_127615 | NW_004516871.1 | scaffold1751 | 127615                  | AA                              | CC                 | CC               | INTERGENIC      |               |                    |                    |
| SNP_99747_A_132413 | NW_004516871.1 | scaffold1751 | 132413                  | TT                              | AA                 | AA               | INTERGENIC      |               |                    |                    |
| SNP_99748_A_135030 | NW_004516871.1 | scaffold1751 | 135030                  | CC                              | TT                 | TT               | INTERGENIC      |               |                    |                    |
| SNP_99749_A_144109 | NW_004516871.1 | scaffold1751 | 144109                  | CC                              | GG                 | GG               | INTERGENIC      |               |                    |                    |
| SNP_99750_A_144140 | NW_004516871.1 | scaffold1751 | 144140                  | GG                              | CC                 | CC               | INTERGENIC      |               |                    |                    |
| SNP_99751_A_144150 | NW_004516871.1 | scaffold1751 | 144150                  | CC                              | AA                 | AA               | INTERGENIC      |               |                    |                    |
| SNP_99752_A_144151 | NW_004516871.1 | scaffold1751 | 144151                  | AA                              | CC                 | CC               | INTERGENIC      |               |                    |                    |
| SNP_99753_A_144181 | NW_004516871.1 | scaffold1751 | 144181                  | AA                              | GG                 | GG               | INTERGENIC      |               |                    |                    |
| SNP_99754_A_144186 | NW_004516871.1 | scaffold1751 | 144186                  | GG                              | TT                 | TT               | INTERGENIC      |               |                    |                    |
| SNP_99755_A_144228 | NW_004516871.1 | scaffold1751 | 144228                  | GG                              | CC                 | CC               | INTERGENIC      |               |                    |                    |



| SNPs IDs           | Chromosome IDs | Chromosomes  | Physical positions (bp) | CDC Frontier (Reference genome) | (Pusa 1103 & HPNB) | (ILWC 46 & LPNB) | Sequence genome | Components of | Gene accession IDs | Putative functions |
|--------------------|----------------|--------------|-------------------------|---------------------------------|--------------------|------------------|-----------------|---------------|--------------------|--------------------|
| SNP_99756_A_144287 | NW_004516871.1 | scaffold1751 | 144287                  | GG                              | AA                 | AA               | INTERGENIC      |               |                    |                    |
| SNP_99757_A_144328 | NW_004516871.1 | scaffold1751 | 144328                  | AA                              | CC                 | CC               | INTERGENIC      |               |                    |                    |
| SNP_99758_A_155033 | NW_004516871.1 | scaffold1751 | 155033                  | GG                              | AA                 | AA               | INTERGENIC      |               |                    |                    |
| SNP_99759_A_158857 | NW_004516871.1 | scaffold1751 | 158857                  | AA                              | CC                 | CC               | INTERGENIC      |               |                    |                    |
| SNP_99760_A_159199 | NW_004516871.1 | scaffold1751 | 159199                  | GG                              | TT                 | TT               | INTERGENIC      |               |                    |                    |
| SNP_99761_A_159208 | NW_004516871.1 | scaffold1751 | 159208                  | GG                              | TT                 | TT               | INTERGENIC      |               |                    |                    |
| SNP_99762_A_159227 | NW_004516871.1 | scaffold1751 | 159227                  | GG                              | AA                 | AA               | INTERGENIC      |               |                    |                    |
| SNP_99763_A_165790 | NW_004516871.1 | scaffold1751 | 165790                  | AA                              | GG                 | GG               | INTERGENIC      |               |                    |                    |
| SNP_99764_A_167160 | NW_004516871.1 | scaffold1751 | 167160                  | TT                              | AA                 | AA               | INTERGENIC      |               |                    |                    |
| SNP_99765_A_167162 | NW_004516871.1 | scaffold1751 | 167162                  | CC                              | TT                 | TT               | INTERGENIC      |               |                    |                    |
| SNP_99766_A_167169 | NW_004516871.1 | scaffold1751 | 167169                  | AA                              | GG                 | GG               | INTERGENIC      |               |                    |                    |
| SNP_99767_A_167171 | NW_004516871.1 | scaffold1751 | 167171                  | TT                              | CC                 | CC               | INTERGENIC      |               |                    |                    |
| SNP_99768_A_167895 | NW_004516871.1 | scaffold1751 | 167895                  | TT                              | AA                 | AA               | INTERGENIC      |               |                    |                    |
| SNP_99769_A_193883 | NW_004516871.1 | scaffold1751 | 193883                  | AA                              | CC                 | CC               | INTERGENIC      |               |                    |                    |
| SNP_99770_A_194192 | NW_004516871.1 | scaffold1751 | 194192                  | GG                              | AA                 | AA               | INTERGENIC      |               |                    |                    |
| SNP_99771_A_194210 | NW_004516871.1 | scaffold1751 | 194210                  | AA                              | GG                 | GG               | INTERGENIC      |               |                    |                    |
| SNP_99772_A_194531 | NW_004516871.1 | scaffold1751 | 194531                  | CC                              | AA                 | AA               | INTERGENIC      |               |                    |                    |
| SNP_99773_A_267690 | NW_004516871.1 | scaffold1751 | 267690                  | AA                              | TT                 | TT               | INTERGENIC      |               |                    |                    |
| SNP_99774_A_267707 | NW_004516871.1 | scaffold1751 | 267707                  | GG                              | AA                 | AA               | INTERGENIC      |               |                    |                    |
| SNP_99775_A_267717 | NW_004516871.1 | scaffold1751 | 267717                  | AA                              | TT                 | TT               | INTERGENIC      |               |                    |                    |
| SNP_99776_A_305978 | NW_004516871.1 | scaffold1751 | 305978                  | CC                              | TT                 | TT               | INTERGENIC      |               |                    |                    |
| SNP_99777_A_346699 | NW_004516871.1 | scaffold1751 | 346699                  | TT                              | CC                 | CC               | INTERGENIC      |               |                    |                    |

| SNPs IDs           | Chromosome IDs | Chromosomes  | Physical positions (bp) | CDC Frontier (Reference genome) | (Pusa 1103 & HPNB) | (ILWC 46 & LPNB) | Sequence Components of genome | Gene accession IDs | Putative functions           |
|--------------------|----------------|--------------|-------------------------|---------------------------------|--------------------|------------------|-------------------------------|--------------------|------------------------------|
| SNP_99778_A_362158 | NW_004516871.1 | scaffold1751 | 362158                  | AA                              | GG                 | GG               | INTRON                        | 101511120          | uncharacterized LOC101511120 |
| SNP_99779_A_378844 | NW_004516871.1 | scaffold1751 | 378844                  | CC                              | AA                 | AA               | INTERGENIC                    |                    |                              |
| SNP_99780_A_390504 | NW_004516871.1 | scaffold1751 | 390504                  | GG                              | AA                 | AA               | INTERGENIC                    |                    |                              |
| SNP_99781_A_390537 | NW_004516871.1 | scaffold1751 | 390537                  | AA                              | GG                 | GG               | INTERGENIC                    |                    |                              |
| SNP_99782_A_423682 | NW_004516871.1 | scaffold1751 | 423682                  | CC                              | TT                 | TT               | INTERGENIC                    |                    |                              |
| SNP_99783_A_423736 | NW_004516871.1 | scaffold1751 | 423736                  | TT                              | CC                 | CC               | INTERGENIC                    |                    |                              |
| SNP_99784_A_425043 | NW_004516871.1 | scaffold1751 | 425043                  | AA                              | TT                 | TT               | INTERGENIC                    |                    |                              |
| SNP_99785_A_425066 | NW_004516871.1 | scaffold1751 | 425066                  | AA                              | GG                 | GG               | INTERGENIC                    |                    |                              |
| SNP_99786_A_425160 | NW_004516871.1 | scaffold1751 | 425160                  | TT                              | CC                 | CC               | INTERGENIC                    |                    |                              |
| SNP_99787_A_448512 | NW_004516871.1 | scaffold1751 | 448512                  | TT                              | GG                 | GG               | INTERGENIC                    |                    |                              |
| SNP_99788_A_448976 | NW_004516871.1 | scaffold1751 | 448976                  | AA                              | GG                 | GG               | INTERGENIC                    |                    |                              |
| SNP_99789_A_448991 | NW_004516871.1 | scaffold1751 | 448991                  | GG                              | AA                 | AA               | INTERGENIC                    |                    |                              |
| SNP_99790_A_449013 | NW_004516871.1 | scaffold1751 | 449013                  | AA                              | TT                 | TT               | INTERGENIC                    |                    |                              |
| SNP_99791_A_449089 | NW_004516871.1 | scaffold1751 | 449089                  | CC                              | TT                 | TT               | INTERGENIC                    |                    |                              |
| SNP_99792_A_471803 | NW_004516871.1 | scaffold1751 | 471803                  | AA                              | GG                 | GG               | INTERGENIC                    |                    |                              |
| SNP_99793_A_494403 | NW_004516871.1 | scaffold1751 | 494403                  | AA                              | GG                 | GG               | INTERGENIC                    |                    |                              |
| SNP_99794_A_497112 | NW_004516871.1 | scaffold1751 | 497112                  | TT                              | CC                 | CC               | INTERGENIC                    |                    |                              |
| SNP_99795_A_497392 | NW_004516871.1 | scaffold1751 | 497392                  | TT                              | GG                 | GG               | INTERGENIC                    |                    |                              |
| SNP_99796_A_510293 | NW_004516871.1 | scaffold1751 | 510293                  | AA                              | GG                 | GG               | INTERGENIC                    |                    |                              |
| SNP_99797_A_624296 | NW_004516871.1 | scaffold1751 | 624296                  | GG                              | CC                 | CC               | INTERGENIC                    |                    |                              |
| SNP_99799_A_624724 | NW_004516871.1 | scaffold1751 | 624724                  | GG                              | CC                 | CC               | INTERGENIC                    |                    |                              |
| SNP_99800_A_624737 | NW_004516871.1 | scaffold1751 | 624737                  | CC                              | GG                 | GG               | INTERGENIC                    |                    |                              |

| SNPs IDs           | Chromosome IDs | Chromosomes  | Physical positions (bp) | CDC Frontier (Reference genome) | (Pusa 1103 & HPNB) | (ILWC 46 & LPNB) | Sequence genome | Components of | Gene accession IDs | Putative functions |
|--------------------|----------------|--------------|-------------------------|---------------------------------|--------------------|------------------|-----------------|---------------|--------------------|--------------------|
| SNP_99801_A_631254 | NW_004516871.1 | scaffold1751 | 631254                  | CC                              | TT                 | TT               | INTERGENIC      |               |                    |                    |
| SNP_99802_A_631455 | NW_004516871.1 | scaffold1751 | 631455                  | AA                              | GG                 | GG               | INTERGENIC      |               |                    |                    |
| SNP_99803_A_631505 | NW_004516871.1 | scaffold1751 | 631505                  | AA                              | GG                 | GG               | INTERGENIC      |               |                    |                    |
| SNP_99804_A_631894 | NW_004516871.1 | scaffold1751 | 631894                  | TT                              | AA                 | AA               | INTERGENIC      |               |                    |                    |
| SNP_99805_A_632104 | NW_004516871.1 | scaffold1751 | 632104                  | GG                              | AA                 | AA               | INTERGENIC      |               |                    |                    |
| SNP_99806_A_632356 | NW_004516871.1 | scaffold1751 | 632356                  | TT                              | CC                 | CC               | INTERGENIC      |               |                    |                    |
| SNP_99807_A_632720 | NW_004516871.1 | scaffold1751 | 632720                  | GG                              | AA                 | AA               | INTERGENIC      |               |                    |                    |
| SNP_99808_A_396    | NW_004516872.1 | scaffold1752 | 396                     | GG                              | CC                 | CC               | INTERGENIC      |               |                    |                    |
| SNP_99809_A_4845   | NW_004516873.1 | scaffold1754 | 4845                    | TT                              | CC                 | CC               | INTERGENIC      |               |                    |                    |
| SNP_99810_A_4919   | NW_004516873.1 | scaffold1754 | 4919                    | TT                              | GG                 | GG               | INTERGENIC      |               |                    |                    |
| SNP_99811_A_5212   | NW_004516873.1 | scaffold1754 | 5212                    | CC                              | TT                 | TT               | INTERGENIC      |               |                    |                    |
| SNP_99812_A_5233   | NW_004516873.1 | scaffold1754 | 5233                    | TT                              | GG                 | GG               | INTERGENIC      |               |                    |                    |
| SNP_99813_A_5534   | NW_004516873.1 | scaffold1754 | 5534                    | AA                              | GG                 | GG               | INTERGENIC      |               |                    |                    |
| SNP_99814_A_5556   | NW_004516873.1 | scaffold1754 | 5556                    | GG                              | AA                 | AA               | INTERGENIC      |               |                    |                    |
| SNP_99815_A_6397   | NW_004516873.1 | scaffold1754 | 6397                    | TT                              | GG                 | GG               | INTERGENIC      |               |                    |                    |
| SNP_99816_A_6491   | NW_004516873.1 | scaffold1754 | 6491                    | TT                              | AA                 | AA               | INTERGENIC      |               |                    |                    |
| SNP_99817_A_6514   | NW_004516873.1 | scaffold1754 | 6514                    | CC                              | TT                 | TT               | INTERGENIC      |               |                    |                    |
| SNP_99818_A_6716   | NW_004516873.1 | scaffold1754 | 6716                    | TT                              | GG                 | GG               | INTERGENIC      |               |                    |                    |
| SNP_99819_A_6939   | NW_004516873.1 | scaffold1754 | 6939                    | GG                              | TT                 | TT               | INTERGENIC      |               |                    |                    |
| SNP_99820_A_6963   | NW_004516873.1 | scaffold1754 | 6963                    | AA                              | CC                 | CC               | INTERGENIC      |               |                    |                    |
| SNP_99821_A_6972   | NW_004516873.1 | scaffold1754 | 6972                    | GG                              | AA                 | AA               | INTERGENIC      |               |                    |                    |
| SNP_99822_A_166    | NW_004516874.1 | scaffold1755 | 166                     | TT                              | AA                 | AA               | INTERGENIC      |               |                    |                    |

| SNPs IDs           | Chromosome IDs | Chromosomes  | Physical positions (bp) | CDC Frontier (Reference genome) | (Pusa 1103 & HPNB) | (ILWC 46 & LPNB) | Sequence Components of genome | Gene accession IDs | Putative functions |
|--------------------|----------------|--------------|-------------------------|---------------------------------|--------------------|------------------|-------------------------------|--------------------|--------------------|
| SNP_99823_A_10460  | NW_004516874.1 | scaffold1755 | 10460                   | GG                              | AA                 | AA               | INTERGENIC                    |                    |                    |
| SNP_99824_A_10487  | NW_004516874.1 | scaffold1755 | 10487                   | AA                              | TT                 | TT               | INTERGENIC                    |                    |                    |
| SNP_99825_A_13493  | NW_004516874.1 | scaffold1755 | 13493                   | TT                              | AA                 | AA               | INTERGENIC                    |                    |                    |
| SNP_99826_A_13500  | NW_004516874.1 | scaffold1755 | 13500                   | TT                              | CC                 | CC               | INTERGENIC                    |                    |                    |
| SNP_99827_A_24017  | NW_004516874.1 | scaffold1755 | 24017                   | TT                              | GG                 | GG               | URR                           | 101512301          | Unknown function   |
| SNP_99828_A_33107  | NW_004516874.1 | scaffold1755 | 33107                   | GG                              | TT                 | TT               | INTERGENIC                    |                    |                    |
| SNP_99829_A_33270  | NW_004516874.1 | scaffold1755 | 33270                   | TT                              | CC                 | CC               | INTERGENIC                    |                    |                    |
| SNP_99830_A_33499  | NW_004516874.1 | scaffold1755 | 33499                   | GG                              | AA                 | AA               | INTERGENIC                    |                    |                    |
| SNP_99831_A_33554  | NW_004516874.1 | scaffold1755 | 33554                   | TT                              | CC                 | CC               | INTERGENIC                    |                    |                    |
| SNP_99832_A_41384  | NW_004516874.1 | scaffold1755 | 41384                   | TT                              | GG                 | GG               | INTERGENIC                    |                    |                    |
| SNP_99833_A_41385  | NW_004516874.1 | scaffold1755 | 41385                   | AA                              | TT                 | TT               | INTERGENIC                    |                    |                    |
| SNP_99834_A_41404  | NW_004516874.1 | scaffold1755 | 41404                   | GG                              | AA                 | AA               | INTERGENIC                    |                    |                    |
| SNP_99835_A_66035  | NW_004516874.1 | scaffold1755 | 66035                   | GG                              | AA                 | AA               | INTERGENIC                    |                    |                    |
| SNP_99836_A_126183 | NW_004516874.1 | scaffold1755 | 126183                  | AA                              | TT                 | TT               | INTERGENIC                    |                    |                    |
| SNP_99837_A_126388 | NW_004516874.1 | scaffold1755 | 126388                  | AA                              | CC                 | CC               | INTERGENIC                    |                    |                    |
| SNP_99838_A_126685 | NW_004516874.1 | scaffold1755 | 126685                  | TT                              | AA                 | AA               | INTERGENIC                    |                    |                    |
| SNP_99839_A_126750 | NW_004516874.1 | scaffold1755 | 126750                  | TT                              | CC                 | CC               | INTERGENIC                    |                    |                    |
| SNP_99840_A_126796 | NW_004516874.1 | scaffold1755 | 126796                  | CC                              | TT                 | TT               | INTERGENIC                    |                    |                    |
| SNP_99841_A_126805 | NW_004516874.1 | scaffold1755 | 126805                  | AA                              | CC                 | CC               | INTERGENIC                    |                    |                    |
| SNP_99842_A_128707 | NW_004516874.1 | scaffold1755 | 128707                  | CC                              | TT                 | TT               | INTERGENIC                    |                    |                    |
| SNP_99844_A_128794 | NW_004516874.1 | scaffold1755 | 128794                  | AA                              | GG                 | GG               | INTERGENIC                    |                    |                    |
| SNP_99845_A_128875 | NW_004516874.1 | scaffold1755 | 128875                  | CC                              | AA                 | AA               | INTERGENIC                    |                    |                    |

| SNPs IDs           | Chromosome IDs | Chromosomes  | Physical positions (bp) | CDC Frontier (Reference genome) | (Pusa 1103 & HPNB) | (ILWC 46 & LPNB) | Sequence genome | Components of | Gene accession IDs                                    | Putative functions |
|--------------------|----------------|--------------|-------------------------|---------------------------------|--------------------|------------------|-----------------|---------------|-------------------------------------------------------|--------------------|
| SNP_99846_A_129030 | NW_004516874.1 | scaffold1755 | 129030                  | AA                              | GG                 | GG               | INTERGENIC      |               |                                                       |                    |
| SNP_99847_A_129036 | NW_004516874.1 | scaffold1755 | 129036                  | TT                              | AA                 | AA               | INTERGENIC      |               |                                                       |                    |
| SNP_99848_A_129054 | NW_004516874.1 | scaffold1755 | 129054                  | TT                              | CC                 | CC               | INTERGENIC      |               |                                                       |                    |
| SNP_99849_A_129077 | NW_004516874.1 | scaffold1755 | 129077                  | AA                              | CC                 | CC               | INTERGENIC      |               |                                                       |                    |
| SNP_99850_A_129084 | NW_004516874.1 | scaffold1755 | 129084                  | TT                              | GG                 | GG               | INTERGENIC      |               |                                                       |                    |
| SNP_99852_A_129093 | NW_004516874.1 | scaffold1755 | 129093                  | CC                              | GG                 | GG               | INTERGENIC      |               |                                                       |                    |
| SNP_99853_A_129130 | NW_004516874.1 | scaffold1755 | 129130                  | AA                              | GG                 | GG               | INTERGENIC      |               |                                                       |                    |
| SNP_99855_A_165    | NW_004516875.1 | scaffold1756 | 165                     | GG                              | AA                 | AA               | INTERGENIC      |               |                                                       |                    |
| SNP_99856_A_172    | NW_004516875.1 | scaffold1756 | 172                     | TT                              | GG                 | GG               | INTERGENIC      |               |                                                       |                    |
| SNP_99857_A_372    | NW_004516875.1 | scaffold1756 | 372                     | GG                              | AA                 | AA               | INTERGENIC      |               |                                                       |                    |
| SNP_99858_A_922    | NW_004516875.1 | scaffold1756 | 922                     | TT                              | AA                 | AA               | INTERGENIC      |               |                                                       |                    |
| SNP_99859_A_937    | NW_004516875.1 | scaffold1756 | 937                     | GG                              | TT                 | TT               | INTERGENIC      |               |                                                       |                    |
| SNP_99860_A_974    | NW_004516875.1 | scaffold1756 | 974                     | CC                              | TT                 | TT               | INTERGENIC      |               |                                                       |                    |
| SNP_99861_A_1351   | NW_004516875.1 | scaffold1756 | 1351                    | GG                              | AA                 | AA               | INTERGENIC      |               |                                                       |                    |
| SNP_99862_A_4095   | NW_004516875.1 | scaffold1756 | 4095                    | CC                              | GG                 | GG               | INTERGENIC      |               |                                                       |                    |
| SNP_99863_A_4677   | NW_004516875.1 | scaffold1756 | 4677                    | GG                              | AA                 | AA               | INTERGENIC      |               |                                                       |                    |
| SNP_99864_A_4787   | NW_004516875.1 | scaffold1756 | 4787                    | GG                              | AA                 | AA               | INTERGENIC      |               |                                                       |                    |
| SNP_99865_A_5156   | NW_004516875.1 | scaffold1756 | 5156                    | CC                              | TT                 | TT               | INTERGENIC      |               |                                                       |                    |
| SNP_99867_A_6600   | NW_004516875.1 | scaffold1756 | 6600                    | CC                              | TT                 | TT               | INTERGENIC      |               |                                                       |                    |
| SNP_99869_A_78372  | NW_004516875.1 | scaffold1756 | 78372                   | GG                              | AA                 | AA               | INTRON          | 101512942     | DNA-directed RNA polymerases IV and V subunit 5B-like |                    |
| SNP_99870_A_86108  | NW_004516875.1 | scaffold1756 | 86108                   | CC                              | AA                 | AA               | INTERGENIC      |               |                                                       |                    |
| SNP_99871_A_86525  | NW_004516875.1 | scaffold1756 | 86525                   | GG                              | CC                 | CC               | INTERGENIC      |               |                                                       |                    |

| SNPs IDs          | Chromosome IDs | Chromosomes  | Physical positions (bp) | CDC Frontier (Reference genome) | (Pusa 1103 & HPNB) | (ILWC 46 & LPNB) | Sequence genome | Components of | Gene accession IDs | Putative functions |
|-------------------|----------------|--------------|-------------------------|---------------------------------|--------------------|------------------|-----------------|---------------|--------------------|--------------------|
| SNP_99872_A_86544 | NW_004516875.1 | scaffold1756 | 86544                   | AA                              | GG                 | GG               | INTERGENIC      |               |                    |                    |
| SNP_99873_A_520   | NW_004516876.1 | scaffold1757 | 520                     | TT                              | CC                 | CC               | INTERGENIC      |               |                    |                    |
| SNP_99874_A_796   | NW_004516876.1 | scaffold1757 | 796                     | AA                              | CC                 | CC               | INTERGENIC      |               |                    |                    |
| SNP_99876_A_1271  | NW_004516876.1 | scaffold1757 | 1271                    | GG                              | AA                 | AA               | INTERGENIC      |               |                    |                    |
| SNP_99877_A_1272  | NW_004516876.1 | scaffold1757 | 1272                    | CC                              | TT                 | TT               | INTERGENIC      |               |                    |                    |
| SNP_99878_A_1306  | NW_004516876.1 | scaffold1757 | 1306                    | AA                              | TT                 | TT               | INTERGENIC      |               |                    |                    |
| SNP_99879_A_1307  | NW_004516876.1 | scaffold1757 | 1307                    | TT                              | AA                 | AA               | INTERGENIC      |               |                    |                    |
| SNP_99880_A_1863  | NW_004516876.1 | scaffold1757 | 1863                    | TT                              | AA                 | AA               | INTERGENIC      |               |                    |                    |
| SNP_99881_A_1938  | NW_004516876.1 | scaffold1757 | 1938                    | TT                              | GG                 | GG               | INTERGENIC      |               |                    |                    |
| SNP_99882_A_1946  | NW_004516876.1 | scaffold1757 | 1946                    | CC                              | TT                 | TT               | INTERGENIC      |               |                    |                    |
| SNP_99883_A_2092  | NW_004516876.1 | scaffold1757 | 2092                    | AA                              | CC                 | CC               | INTERGENIC      |               |                    |                    |
| SNP_99884_A_2123  | NW_004516876.1 | scaffold1757 | 2123                    | GG                              | AA                 | AA               | INTERGENIC      |               |                    |                    |
| SNP_99885_A_2178  | NW_004516876.1 | scaffold1757 | 2178                    | AA                              | TT                 | TT               | INTERGENIC      |               |                    |                    |
| SNP_99886_A_2372  | NW_004516876.1 | scaffold1757 | 2372                    | AA                              | GG                 | GG               | INTERGENIC      |               |                    |                    |
| SNP_99887_A_2406  | NW_004516876.1 | scaffold1757 | 2406                    | TT                              | AA                 | AA               | INTERGENIC      |               |                    |                    |
| SNP_99888_A_16415 | NW_004516876.1 | scaffold1757 | 16415                   | TT                              | CC                 | CC               | INTERGENIC      |               |                    |                    |
| SNP_99889_A_16418 | NW_004516876.1 | scaffold1757 | 16418                   | TT                              | CC                 | CC               | INTERGENIC      |               |                    |                    |
| SNP_99890_A_16538 | NW_004516876.1 | scaffold1757 | 16538                   | TT                              | CC                 | CC               | INTERGENIC      |               |                    |                    |
| SNP_99891_A_16576 | NW_004516876.1 | scaffold1757 | 16576                   | AA                              | GG                 | GG               | INTERGENIC      |               |                    |                    |
| SNP_99892_A_16840 | NW_004516876.1 | scaffold1757 | 16840                   | TT                              | AA                 | AA               | INTERGENIC      |               |                    |                    |
| SNP_99893_A_27829 | NW_004516876.1 | scaffold1757 | 27829                   | CC                              | AA                 | AA               | INTERGENIC      |               |                    |                    |
| SNP_99894_A_31732 | NW_004516876.1 | scaffold1757 | 31732                   | AA                              | CC                 | CC               | INTERGENIC      |               |                    |                    |

| SNPs IDs           | Chromosome IDs | Chromosomes  | Physical positions (bp) | CDC Frontier (Reference genome) | (Pusa 1103 & HPNB) | (ILWC 46 & LPNB) | Sequence Components of genome | Gene accession IDs | Putative functions |
|--------------------|----------------|--------------|-------------------------|---------------------------------|--------------------|------------------|-------------------------------|--------------------|--------------------|
| SNP_99895_A_31742  | NW_004516876.1 | scaffold1757 | 31742                   | TT                              | AA                 | AA               | INTERGENIC                    |                    |                    |
| SNP_99897_A_62362  | NW_004516876.1 | scaffold1757 | 62362                   | CC                              | TT                 | TT               | INTRON                        | 101514258          | cucumis-in-like    |
| SNP_99899_A_151638 | NW_004516876.1 | scaffold1757 | 151638                  | CC                              | TT                 | TT               | NON_SYNONYMOUS_CODING         | 101515545          | cucumis-in-like    |
| SNP_99900_A_151841 | NW_004516876.1 | scaffold1757 | 151841                  | CC                              | AA                 | AA               | INTRON                        | 101515545          | cucumis-in-like    |
| SNP_99901_A_1099   | NW_004516877.1 | scaffold1761 | 1099                    | CC                              | TT                 | TT               | INTERGENIC                    |                    |                    |
| SNP_99902_A_3883   | NW_004516877.1 | scaffold1761 | 3883                    | TT                              | CC                 | CC               | INTERGENIC                    |                    |                    |
| SNP_99903_A_3909   | NW_004516877.1 | scaffold1761 | 3909                    | CC                              | TT                 | TT               | INTERGENIC                    |                    |                    |
| SNP_99904_A_3915   | NW_004516877.1 | scaffold1761 | 3915                    | AA                              | CC                 | CC               | INTERGENIC                    |                    |                    |
| SNP_99905_A_3923   | NW_004516877.1 | scaffold1761 | 3923                    | GG                              | TT                 | TT               | INTERGENIC                    |                    |                    |
| SNP_99906_A_4005   | NW_004516877.1 | scaffold1761 | 4005                    | AA                              | CC                 | CC               | INTERGENIC                    |                    |                    |
| SNP_99907_A_4014   | NW_004516877.1 | scaffold1761 | 4014                    | TT                              | CC                 | CC               | INTERGENIC                    |                    |                    |
| SNP_99908_A_4262   | NW_004516877.1 | scaffold1761 | 4262                    | CC                              | AA                 | AA               | INTERGENIC                    |                    |                    |
| SNP_99909_A_4266   | NW_004516877.1 | scaffold1761 | 4266                    | AA                              | CC                 | CC               | INTERGENIC                    |                    |                    |
| SNP_99910_A_4284   | NW_004516877.1 | scaffold1761 | 4284                    | GG                              | TT                 | TT               | INTERGENIC                    |                    |                    |
| SNP_99911_A_4294   | NW_004516877.1 | scaffold1761 | 4294                    | TT                              | CC                 | CC               | INTERGENIC                    |                    |                    |
| SNP_99912_A_4352   | NW_004516877.1 | scaffold1761 | 4352                    | TT                              | AA                 | AA               | INTERGENIC                    |                    |                    |
| SNP_99913_A_10869  | NW_004516877.1 | scaffold1761 | 10869                   | AA                              | GG                 | GG               | INTERGENIC                    |                    |                    |
| SNP_99914_A_10919  | NW_004516877.1 | scaffold1761 | 10919                   | CC                              | TT                 | TT               | INTERGENIC                    |                    |                    |
| SNP_99915_A_11075  | NW_004516877.1 | scaffold1761 | 11075                   | AA                              | CC                 | CC               | INTERGENIC                    |                    |                    |
| SNP_99916_A_11170  | NW_004516877.1 | scaffold1761 | 11170                   | AA                              | TT                 | TT               | INTERGENIC                    |                    |                    |
| SNP_99917_A_11320  | NW_004516877.1 | scaffold1761 | 11320                   | TT                              | CC                 | CC               | INTERGENIC                    |                    |                    |
| SNP_99918_A_11372  | NW_004516877.1 | scaffold1761 | 11372                   | TT                              | CC                 | CC               | INTERGENIC                    |                    |                    |

| SNPs IDs          | Chromosome IDs | Chromosomes  | Physical positions (bp) | CDC Frontier (Reference genome) | (Pusa 1103 & HPNB) | (ILWC 46 & LPNB) | Sequence Components of genome | Gene accession IDs | Putative functions                          |
|-------------------|----------------|--------------|-------------------------|---------------------------------|--------------------|------------------|-------------------------------|--------------------|---------------------------------------------|
| SNP_99919_A_11415 | NW_004516877.1 | scaffold1761 | 11415                   | TT                              | AA                 | AA               | INTERGENIC                    |                    |                                             |
| SNP_99920_A_16761 | NW_004516877.1 | scaffold1761 | 16761                   | TT                              | AA                 | AA               | INTERGENIC                    |                    |                                             |
| SNP_99921_A_30289 | NW_004516877.1 | scaffold1761 | 30289                   | AA                              | TT                 | TT               | INTERGENIC                    |                    |                                             |
| SNP_99922_A_41510 | NW_004516877.1 | scaffold1761 | 41510                   | GG                              | AA                 | AA               | URR                           | 101488298          | E3 ubiquitin-protein ligase CCNB1P1 homolog |
| SNP_99923_A_58383 | NW_004516877.1 | scaffold1761 | 58383                   | CC                              | GG                 | GG               | INTERGENIC                    |                    |                                             |
| SNP_99925_A_2220  | NW_004516879.1 | scaffold1763 | 2220                    | CC                              | TT                 | TT               | INTERGENIC                    |                    |                                             |
| SNP_99926_A_2625  | NW_004516879.1 | scaffold1763 | 2625                    | AA                              | GG                 | GG               | INTERGENIC                    |                    |                                             |
| SNP_99927_A_3067  | NW_004516879.1 | scaffold1763 | 3067                    | TT                              | AA                 | AA               | INTERGENIC                    |                    |                                             |
| SNP_99928_A_3073  | NW_004516879.1 | scaffold1763 | 3073                    | GG                              | TT                 | TT               | INTERGENIC                    |                    |                                             |
| SNP_99929_A_8481  | NW_004516879.1 | scaffold1763 | 8481                    | TT                              | CC                 | CC               | INTERGENIC                    |                    |                                             |
| SNP_99930_A_10578 | NW_004516879.1 | scaffold1763 | 10578                   | AA                              | CC                 | TT               | INTERGENIC                    |                    |                                             |
| SNP_99931_A_10595 | NW_004516879.1 | scaffold1763 | 10595                   | AA                              | CC                 | CC               | INTERGENIC                    |                    |                                             |
| SNP_99932_A_10632 | NW_004516879.1 | scaffold1763 | 10632                   | AA                              | GG                 | GG               | INTERGENIC                    |                    |                                             |
| SNP_99933_A_19194 | NW_004516879.1 | scaffold1763 | 19194                   | TT                              | CC                 | CC               | INTERGENIC                    |                    |                                             |
| SNP_99934_A_19425 | NW_004516879.1 | scaffold1763 | 19425                   | AA                              | CC                 | CC               | INTERGENIC                    |                    |                                             |
| SNP_99935_A_19459 | NW_004516879.1 | scaffold1763 | 19459                   | TT                              | AA                 | AA               | INTERGENIC                    |                    |                                             |
| SNP_99936_A_19460 | NW_004516879.1 | scaffold1763 | 19460                   | CC                              | AA                 | AA               | INTERGENIC                    |                    |                                             |
| SNP_99937_A_19461 | NW_004516879.1 | scaffold1763 | 19461                   | AA                              | CC                 | CC               | INTERGENIC                    |                    |                                             |
| SNP_99938_A_690   | NW_004516880.1 | scaffold1767 | 690                     | TT                              | CC                 | CC               | INTERGENIC                    |                    |                                             |
| SNP_99939_A_814   | NW_004516880.1 | scaffold1767 | 814                     | GG                              | TT                 | TT               | INTERGENIC                    |                    |                                             |
| SNP_99940_A_1306  | NW_004516880.1 | scaffold1767 | 1306                    | AA                              | CC                 | CC               | INTERGENIC                    |                    |                                             |
| SNP_99941_A_6091  | NW_004516880.1 | scaffold1767 | 6091                    | GG                              | AA                 | AA               | INTERGENIC                    |                    |                                             |



| SNPs IDs          | Chromosome IDs | Chromosomes  | Physical positions (bp) | CDC Frontier (Reference genome) | (Pusa 1103 & HPNB) | (ILWC 46 & LPNB) | Sequence genome | Components of | Gene accession IDs | Putative functions |
|-------------------|----------------|--------------|-------------------------|---------------------------------|--------------------|------------------|-----------------|---------------|--------------------|--------------------|
| SNP_99942_A_6920  | NW_004516880.1 | scaffold1767 | 6920                    | AA                              | GG                 | GG               | INTERGENIC      |               |                    |                    |
| SNP_99943_A_7161  | NW_004516880.1 | scaffold1767 | 7161                    | GG                              | AA                 | AA               | INTERGENIC      |               |                    |                    |
| SNP_99944_A_8910  | NW_004516880.1 | scaffold1767 | 8910                    | TT                              | CC                 | CC               | INTERGENIC      |               |                    |                    |
| SNP_99945_A_8923  | NW_004516880.1 | scaffold1767 | 8923                    | GG                              | AA                 | AA               | INTERGENIC      |               |                    |                    |
| SNP_99946_A_11868 | NW_004516880.1 | scaffold1767 | 11868                   | AA                              | TT                 | TT               | INTERGENIC      |               |                    |                    |
| SNP_99947_A_16716 | NW_004516880.1 | scaffold1767 | 16716                   | GG                              | AA                 | AA               | INTERGENIC      |               |                    |                    |
| SNP_99948_A_18059 | NW_004516880.1 | scaffold1767 | 18059                   | AA                              | GG                 | GG               | INTERGENIC      |               |                    |                    |
| SNP_99949_A_18071 | NW_004516880.1 | scaffold1767 | 18071                   | TT                              | GG                 | GG               | INTERGENIC      |               |                    |                    |
| SNP_99950_A_25238 | NW_004516880.1 | scaffold1767 | 25238                   | TT                              | GG                 | GG               | INTERGENIC      |               |                    |                    |
| SNP_99951_A_32310 | NW_004516880.1 | scaffold1767 | 32310                   | AA                              | TT                 | TT               | INTERGENIC      |               |                    |                    |
| SNP_99952_A_36710 | NW_004516880.1 | scaffold1767 | 36710                   | CC                              | TT                 | TT               | INTERGENIC      |               |                    |                    |
| SNP_99953_A_38658 | NW_004516880.1 | scaffold1767 | 38658                   | AA                              | GG                 | GG               | INTERGENIC      |               |                    |                    |
| SNP_99954_A_68497 | NW_004516880.1 | scaffold1767 | 68497                   | CC                              | AA                 | AA               | INTERGENIC      |               |                    |                    |
| SNP_99955_A_316   | NW_004516881.1 | scaffold1768 | 316                     | GG                              | TT                 | TT               | INTERGENIC      |               |                    |                    |
| SNP_99956_A_619   | NW_004516881.1 | scaffold1768 | 619                     | CC                              | TT                 | TT               | INTERGENIC      |               |                    |                    |
| SNP_99957_A_1467  | NW_004516881.1 | scaffold1768 | 1467                    | CC                              | TT                 | TT               | INTERGENIC      |               |                    |                    |
| SNP_99958_A_1522  | NW_004516881.1 | scaffold1768 | 1522                    | CC                              | TT                 | TT               | INTERGENIC      |               |                    |                    |
| SNP_99959_A_1548  | NW_004516881.1 | scaffold1768 | 1548                    | AA                              | GG                 | GG               | INTERGENIC      |               |                    |                    |
| SNP_99960_A_1873  | NW_004516881.1 | scaffold1768 | 1873                    | GG                              | AA                 | AA               | INTERGENIC      |               |                    |                    |
| SNP_99961_A_1894  | NW_004516881.1 | scaffold1768 | 1894                    | TT                              | GG                 | GG               | INTERGENIC      |               |                    |                    |
| SNP_99962_A_10217 | NW_004516881.1 | scaffold1768 | 10217                   | AA                              | CC                 | CC               | INTERGENIC      |               |                    |                    |
| SNP_99963_A_10240 | NW_004516881.1 | scaffold1768 | 10240                   | CC                              | TT                 | TT               | INTERGENIC      |               |                    |                    |

| SNPs IDs          | Chromosome IDs | Chromosomes  | Physical positions (bp) | CDC Frontier (Reference genome) | (Pusa 1103 & HPNB) | (ILWC 46 & LPNB) | Sequence genome | Components of | Gene accession IDs | Putative functions |
|-------------------|----------------|--------------|-------------------------|---------------------------------|--------------------|------------------|-----------------|---------------|--------------------|--------------------|
| SNP_99964_A_12690 | NW_004516881.1 | scaffold1768 | 12690                   | AA                              | CC                 | CC               | INTERGENIC      |               |                    |                    |
| SNP_99965_A_12772 | NW_004516881.1 | scaffold1768 | 12772                   | CC                              | AA                 | AA               | INTERGENIC      |               |                    |                    |
| SNP_99967_A_13108 | NW_004516881.1 | scaffold1768 | 13108                   | GG                              | CC                 | CC               | INTERGENIC      |               |                    |                    |
| SNP_99968_A_15493 | NW_004516881.1 | scaffold1768 | 15493                   | AA                              | GG                 | GG               | INTERGENIC      |               |                    |                    |
| SNP_99969_A_29747 | NW_004516881.1 | scaffold1768 | 29747                   | AA                              | CC                 | CC               | INTERGENIC      |               |                    |                    |
| SNP_99970_A_29849 | NW_004516881.1 | scaffold1768 | 29849                   | GG                              | AA                 | AA               | INTERGENIC      |               |                    |                    |
| SNP_99971_A_29893 | NW_004516881.1 | scaffold1768 | 29893                   | GG                              | AA                 | AA               | INTERGENIC      |               |                    |                    |
| SNP_99972_A_29901 | NW_004516881.1 | scaffold1768 | 29901                   | TT                              | CC                 | CC               | INTERGENIC      |               |                    |                    |
| SNP_99973_A_29969 | NW_004516881.1 | scaffold1768 | 29969                   | CC                              | GG                 | GG               | INTERGENIC      |               |                    |                    |
| SNP_99974_A_38125 | NW_004516881.1 | scaffold1768 | 38125                   | GG                              | AA                 | AA               | INTERGENIC      |               |                    |                    |
| SNP_99975_A_38165 | NW_004516881.1 | scaffold1768 | 38165                   | TT                              | AA                 | AA               | INTERGENIC      |               |                    |                    |
| SNP_99976_A_3377  | NW_004516882.1 | scaffold1769 | 3377                    | GG                              | AA                 | AA               | INTERGENIC      |               |                    |                    |
| SNP_99977_A_3407  | NW_004516882.1 | scaffold1769 | 3407                    | AA                              | GG                 | GG               | INTERGENIC      |               |                    |                    |
| SNP_99978_A_3705  | NW_004516882.1 | scaffold1769 | 3705                    | TT                              | AA                 | AA               | INTERGENIC      |               |                    |                    |
| SNP_99979_A_3724  | NW_004516882.1 | scaffold1769 | 3724                    | AA                              | TT                 | TT               | INTERGENIC      |               |                    |                    |
| SNP_99980_A_5886  | NW_004516884.1 | scaffold1771 | 5886                    | TT                              | CC                 | CC               | INTERGENIC      |               |                    |                    |
| SNP_99981_A_5896  | NW_004516884.1 | scaffold1771 | 5896                    | TT                              | CC                 | CC               | INTERGENIC      |               |                    |                    |
| SNP_99982_A_5905  | NW_004516884.1 | scaffold1771 | 5905                    | GG                              | AA                 | AA               | INTERGENIC      |               |                    |                    |
| SNP_99983_A_5923  | NW_004516884.1 | scaffold1771 | 5923                    | CC                              | TT                 | TT               | INTERGENIC      |               |                    |                    |
| SNP_99984_A_5941  | NW_004516884.1 | scaffold1771 | 5941                    | TT                              | CC                 | CC               | INTERGENIC      |               |                    |                    |
| SNP_99985_A_6894  | NW_004516884.1 | scaffold1771 | 6894                    | CC                              | TT                 | TT               | INTERGENIC      |               |                    |                    |
| SNP_99986_A_6902  | NW_004516884.1 | scaffold1771 | 6902                    | CC                              | AA                 | AA               | INTERGENIC      |               |                    |                    |

| SNPs IDs           | Chromosome IDs | Chromosomes  | Physical positions (bp) | CDC Frontier (Reference genome) | (Pusa 1103 & HPNB) | (ILWC 46 & LPNB) | Sequence genome | Components of | Gene accession IDs | Putative functions |
|--------------------|----------------|--------------|-------------------------|---------------------------------|--------------------|------------------|-----------------|---------------|--------------------|--------------------|
| SNP_99987_A_7083   | NW_004516884.1 | scaffold1771 | 7083                    | TT                              | CC                 | CC               | INTERGENIC      |               |                    |                    |
| SNP_99988_A_7104   | NW_004516884.1 | scaffold1771 | 7104                    | GG                              | TT                 | TT               | INTERGENIC      |               |                    |                    |
| SNP_99989_A_15808  | NW_004516884.1 | scaffold1771 | 15808                   | AA                              | TT                 | TT               | INTERGENIC      |               |                    |                    |
| SNP_99990_A_24289  | NW_004516884.1 | scaffold1771 | 24289                   | TT                              | GG                 | GG               | INTERGENIC      |               |                    |                    |
| SNP_99991_A_35281  | NW_004516884.1 | scaffold1771 | 35281                   | GG                              | AA                 | AA               | INTERGENIC      |               |                    |                    |
| SNP_99993_A_83455  | NW_004516884.1 | scaffold1771 | 83455                   | CC                              | TT                 | TT               | INTERGENIC      |               |                    |                    |
| SNP_99994_A_83491  | NW_004516884.1 | scaffold1771 | 83491                   | AA                              | GG                 | GG               | INTERGENIC      |               |                    |                    |
| SNP_99995_A_131466 | NW_004516884.1 | scaffold1771 | 131466                  | CC                              | TT                 | TT               | INTERGENIC      |               |                    |                    |
| SNP_99996_A_847    | NW_004516886.1 | scaffold1773 | 847                     | TT                              | AA                 | AA               | INTERGENIC      |               |                    |                    |
| SNP_99997_A_2942   | NW_004516886.1 | scaffold1773 | 2942                    | CC                              | TT                 | TT               | INTERGENIC      |               |                    |                    |
| SNP_99998_A_3311   | NW_004516886.1 | scaffold1773 | 3311                    | TT                              | GG                 | GG               | INTERGENIC      |               |                    |                    |
| SNP_99999_A_4498   | NW_004516886.1 | scaffold1773 | 4498                    | TT                              | CC                 | CC               | INTERGENIC      |               |                    |                    |
| SNP_100000_A_4827  | NW_004516886.1 | scaffold1773 | 4827                    | TT                              | CC                 | CC               | INTERGENIC      |               |                    |                    |
| SNP_100001_A_5390  | NW_004516886.1 | scaffold1773 | 5390                    | GG                              | TT                 | TT               | INTERGENIC      |               |                    |                    |
| SNP_100002_A_6884  | NW_004516886.1 | scaffold1773 | 6884                    | CC                              | AA                 | AA               | INTERGENIC      |               |                    |                    |
| SNP_100003_A_6917  | NW_004516886.1 | scaffold1773 | 6917                    | AA                              | GG                 | GG               | INTERGENIC      |               |                    |                    |
| SNP_100004_A_8102  | NW_004516886.1 | scaffold1773 | 8102                    | AA                              | TT                 | TT               | INTERGENIC      |               |                    |                    |
| SNP_100005_A_8644  | NW_004516886.1 | scaffold1773 | 8644                    | AA                              | GG                 | GG               | INTERGENIC      |               |                    |                    |
| SNP_100006_A_8762  | NW_004516886.1 | scaffold1773 | 8762                    | AA                              | TT                 | TT               | INTERGENIC      |               |                    |                    |
| SNP_100007_A_8778  | NW_004516886.1 | scaffold1773 | 8778                    | AA                              | GG                 | GG               | INTERGENIC      |               |                    |                    |
| SNP_100008_A_8779  | NW_004516886.1 | scaffold1773 | 8779                    | AA                              | GG                 | GG               | INTERGENIC      |               |                    |                    |
| SNP_100009_A_8782  | NW_004516886.1 | scaffold1773 | 8782                    | GG                              | AA                 | AA               | INTERGENIC      |               |                    |                    |

| SNPs IDs           | Chromosome IDs | Chromosomes  | Physical positions (bp) | CDC Frontier (Reference genome) | (Pusa 1103 & HPNB) | (ILWC 46 & LPNB) | Sequence genome | Components of | Gene accession IDs | Putative functions |
|--------------------|----------------|--------------|-------------------------|---------------------------------|--------------------|------------------|-----------------|---------------|--------------------|--------------------|
| SNP_100010_A_9108  | NW_004516886.1 | scaffold1773 | 9108                    | AA                              | TT                 | TT               | INTERGENIC      |               |                    |                    |
| SNP_100011_A_9721  | NW_004516886.1 | scaffold1773 | 9721                    | TT                              | AA                 | AA               | INTERGENIC      |               |                    |                    |
| SNP_100012_A_9876  | NW_004516886.1 | scaffold1773 | 9876                    | TT                              | AA                 | AA               | INTERGENIC      |               |                    |                    |
| SNP_100013_A_10032 | NW_004516886.1 | scaffold1773 | 10032                   | CC                              | TT                 | TT               | INTERGENIC      |               |                    |                    |
| SNP_100015_A_10551 | NW_004516886.1 | scaffold1773 | 10551                   | TT                              | CC                 | CC               | INTERGENIC      |               |                    |                    |
| SNP_100016_A_10552 | NW_004516886.1 | scaffold1773 | 10552                   | CC                              | AA                 | AA               | INTERGENIC      |               |                    |                    |
| SNP_100017_A_10555 | NW_004516886.1 | scaffold1773 | 10555                   | AA                              | GG                 | GG               | INTERGENIC      |               |                    |                    |
| SNP_100018_A_13397 | NW_004516886.1 | scaffold1773 | 13397                   | TT                              | AA                 | AA               | INTERGENIC      |               |                    |                    |
| SNP_100019_A_14182 | NW_004516886.1 | scaffold1773 | 14182                   | GG                              | AA                 | AA               | INTERGENIC      |               |                    |                    |
| SNP_100020_A_15954 | NW_004516886.1 | scaffold1773 | 15954                   | TT                              | CC                 | CC               | INTERGENIC      |               |                    |                    |
| SNP_100021_A_16001 | NW_004516886.1 | scaffold1773 | 16001                   | AA                              | TT                 | TT               | INTERGENIC      |               |                    |                    |
| SNP_100022_A_16224 | NW_004516886.1 | scaffold1773 | 16224                   | GG                              | TT                 | TT               | INTERGENIC      |               |                    |                    |
| SNP_100023_A_16309 | NW_004516886.1 | scaffold1773 | 16309                   | GG                              | AA                 | AA               | INTERGENIC      |               |                    |                    |
| SNP_100024_A_16316 | NW_004516886.1 | scaffold1773 | 16316                   | AA                              | TT                 | TT               | INTERGENIC      |               |                    |                    |
| SNP_100025_A_16390 | NW_004516886.1 | scaffold1773 | 16390                   | AA                              | GG                 | GG               | INTERGENIC      |               |                    |                    |
| SNP_100026_A_16537 | NW_004516886.1 | scaffold1773 | 16537                   | TT                              | CC                 | CC               | INTERGENIC      |               |                    |                    |
| SNP_100027_A_17822 | NW_004516886.1 | scaffold1773 | 17822                   | GG                              | AA                 | AA               | INTERGENIC      |               |                    |                    |
| SNP_100028_A_18104 | NW_004516886.1 | scaffold1773 | 18104                   | CC                              | GG                 | GG               | INTERGENIC      |               |                    |                    |
| SNP_100029_A_18124 | NW_004516886.1 | scaffold1773 | 18124                   | AA                              | TT                 | TT               | INTERGENIC      |               |                    |                    |
| SNP_100030_A_18171 | NW_004516886.1 | scaffold1773 | 18171                   | CC                              | AA                 | AA               | INTERGENIC      |               |                    |                    |
| SNP_100031_A_18172 | NW_004516886.1 | scaffold1773 | 18172                   | CC                              | TT                 | TT               | INTERGENIC      |               |                    |                    |
| SNP_100032_A_19317 | NW_004516886.1 | scaffold1773 | 19317                   | CC                              | GG                 | GG               | INTERGENIC      |               |                    |                    |

| SNPs IDs           | Chromosome IDs | Chromosomes  | Physical positions (bp) | CDC Frontier (Reference genome) | (Pusa 1103 & HPNB) | (ILWC 46 & LPNB) | Sequence genome | Components of | Gene accession IDs | Putative functions |
|--------------------|----------------|--------------|-------------------------|---------------------------------|--------------------|------------------|-----------------|---------------|--------------------|--------------------|
| SNP_100033_A_19329 | NW_004516886.1 | scaffold1773 | 19329                   | TT                              | AA                 | AA               | INTERGENIC      |               |                    |                    |
| SNP_100034_A_19344 | NW_004516886.1 | scaffold1773 | 19344                   | TT                              | CC                 | CC               | INTERGENIC      |               |                    |                    |
| SNP_100035_A_19348 | NW_004516886.1 | scaffold1773 | 19348                   | GG                              | AA                 | AA               | INTERGENIC      |               |                    |                    |
| SNP_100036_A_19359 | NW_004516886.1 | scaffold1773 | 19359                   | TT                              | AA                 | AA               | INTERGENIC      |               |                    |                    |
| SNP_100037_A_21724 | NW_004516886.1 | scaffold1773 | 21724                   | TT                              | GG                 | GG               | INTERGENIC      |               |                    |                    |
| SNP_100038_A_21739 | NW_004516886.1 | scaffold1773 | 21739                   | CC                              | TT                 | TT               | INTERGENIC      |               |                    |                    |
| SNP_100039_A_26029 | NW_004516886.1 | scaffold1773 | 26029                   | AA                              | GG                 | GG               | INTERGENIC      |               |                    |                    |
| SNP_100040_A_26089 | NW_004516886.1 | scaffold1773 | 26089                   | AA                              | GG                 | GG               | INTERGENIC      |               |                    |                    |
| SNP_100041_A_26107 | NW_004516886.1 | scaffold1773 | 26107                   | CC                              | AA                 | AA               | INTERGENIC      |               |                    |                    |
| SNP_100042_A_28407 | NW_004516886.1 | scaffold1773 | 28407                   | CC                              | TT                 | TT               | INTERGENIC      |               |                    |                    |
| SNP_100043_A_28982 | NW_004516886.1 | scaffold1773 | 28982                   | CC                              | TT                 | TT               | INTERGENIC      |               |                    |                    |
| SNP_100044_A_30071 | NW_004516886.1 | scaffold1773 | 30071                   | GG                              | CC                 | CC               | INTERGENIC      |               |                    |                    |
| SNP_100045_A_31139 | NW_004516886.1 | scaffold1773 | 31139                   | AA                              | GG                 | GG               | INTERGENIC      |               |                    |                    |
| SNP_100046_A_32977 | NW_004516886.1 | scaffold1773 | 32977                   | CC                              | TT                 | TT               | INTERGENIC      |               |                    |                    |
| SNP_100047_A_33041 | NW_004516886.1 | scaffold1773 | 33041                   | CC                              | AA                 | AA               | INTERGENIC      |               |                    |                    |
| SNP_100048_A_33955 | NW_004516886.1 | scaffold1773 | 33955                   | AA                              | TT                 | TT               | INTERGENIC      |               |                    |                    |
| SNP_100049_A_35303 | NW_004516886.1 | scaffold1773 | 35303                   | CC                              | TT                 | TT               | INTERGENIC      |               |                    |                    |
| SNP_100050_A_35438 | NW_004516886.1 | scaffold1773 | 35438                   | TT                              | CC                 | CC               | INTERGENIC      |               |                    |                    |
| SNP_100051_A_35543 | NW_004516886.1 | scaffold1773 | 35543                   | GG                              | AA                 | AA               | INTERGENIC      |               |                    |                    |
| SNP_100052_A_35674 | NW_004516886.1 | scaffold1773 | 35674                   | TT                              | CC                 | CC               | INTERGENIC      |               |                    |                    |
| SNP_100053_A_40890 | NW_004516886.1 | scaffold1773 | 40890                   | GG                              | AA                 | AA               | INTERGENIC      |               |                    |                    |
| SNP_100054_A_49140 | NW_004516886.1 | scaffold1773 | 49140                   | CC                              | AA                 | AA               | INTERGENIC      |               |                    |                    |

| SNPs IDs           | Chromosome IDs | Chromosomes  | Physical positions (bp) | CDC Frontier (Reference genome) | (Pusa 1103 & HPNB) | (ILWC 46 & LPNB) | Sequence genome | Components of | Gene accession IDs | Putative functions |
|--------------------|----------------|--------------|-------------------------|---------------------------------|--------------------|------------------|-----------------|---------------|--------------------|--------------------|
| SNP_100055_A_6197  | NW_004516888.1 | scaffold1776 | 6197                    | CC                              | TT                 | TT               | INTERGENIC      |               |                    |                    |
| SNP_100056_A_16234 | NW_004516888.1 | scaffold1776 | 16234                   | TT                              | CC                 | CC               | INTERGENIC      |               |                    |                    |
| SNP_100057_A_16283 | NW_004516888.1 | scaffold1776 | 16283                   | AA                              | CC                 | CC               | INTERGENIC      |               |                    |                    |
| SNP_100058_A_16309 | NW_004516888.1 | scaffold1776 | 16309                   | AA                              | GG                 | GG               | INTERGENIC      |               |                    |                    |
| SNP_100059_A_16317 | NW_004516888.1 | scaffold1776 | 16317                   | TT                              | CC                 | CC               | INTERGENIC      |               |                    |                    |
| SNP_100060_A_16515 | NW_004516888.1 | scaffold1776 | 16515                   | TT                              | CC                 | CC               | INTERGENIC      |               |                    |                    |
| SNP_100061_A_16544 | NW_004516888.1 | scaffold1776 | 16544                   | TT                              | CC                 | CC               | INTERGENIC      |               |                    |                    |
| SNP_100062_A_23437 | NW_004516888.1 | scaffold1776 | 23437                   | TT                              | AA                 | AA               | INTERGENIC      |               |                    |                    |
| SNP_100063_A_23855 | NW_004516888.1 | scaffold1776 | 23855                   | GG                              | CC                 | CC               | INTERGENIC      |               |                    |                    |
| SNP_100064_A_25466 | NW_004516888.1 | scaffold1776 | 25466                   | AA                              | TT                 | TT               | INTERGENIC      |               |                    |                    |
| SNP_100065_A_26660 | NW_004516888.1 | scaffold1776 | 26660                   | AA                              | TT                 | TT               | INTERGENIC      |               |                    |                    |
| SNP_100066_A_27256 | NW_004516888.1 | scaffold1776 | 27256                   | GG                              | TT                 | TT               | INTERGENIC      |               |                    |                    |
| SNP_100067_A_27277 | NW_004516888.1 | scaffold1776 | 27277                   | TT                              | CC                 | CC               | INTERGENIC      |               |                    |                    |
| SNP_100068_A_27788 | NW_004516888.1 | scaffold1776 | 27788                   | CC                              | TT                 | TT               | INTERGENIC      |               |                    |                    |
| SNP_100069_A_18119 | NW_004516889.1 | scaffold1777 | 18119                   | CC                              | TT                 | TT               | INTERGENIC      |               |                    |                    |
| SNP_100070_A_22254 | NW_004516889.1 | scaffold1777 | 22254                   | CC                              | GG                 | GG               | INTERGENIC      |               |                    |                    |
| SNP_100071_A_22306 | NW_004516889.1 | scaffold1777 | 22306                   | AA                              | GG                 | GG               | INTERGENIC      |               |                    |                    |
| SNP_100072_A_22385 | NW_004516889.1 | scaffold1777 | 22385                   | TT                              | AA                 | AA               | INTERGENIC      |               |                    |                    |
| SNP_100073_A_22444 | NW_004516889.1 | scaffold1777 | 22444                   | AA                              | TT                 | TT               | INTERGENIC      |               |                    |                    |
| SNP_100074_A_22451 | NW_004516889.1 | scaffold1777 | 22451                   | GG                              | AA                 | AA               | INTERGENIC      |               |                    |                    |
| SNP_100075_A_22626 | NW_004516889.1 | scaffold1777 | 22626                   | AA                              | GG                 | GG               | INTERGENIC      |               |                    |                    |
| SNP_100076_A_22809 | NW_004516889.1 | scaffold1777 | 22809                   | AA                              | GG                 | GG               | INTERGENIC      |               |                    |                    |

| SNPs IDs            | Chromosome IDs | Chromosomes  | Physical positions (bp) | CDC Frontier (Reference genome) | (Pusa 1103 & HPNB) | (ILWC 46 & LPNB) | Sequence Components of genome | Gene accession IDs | Putative functions                      |
|---------------------|----------------|--------------|-------------------------|---------------------------------|--------------------|------------------|-------------------------------|--------------------|-----------------------------------------|
| SNP_100077_A_22844  | NW_004516889.1 | scaffold1777 | 22844                   | TT                              | CC                 | CC               | INTERGENIC                    |                    |                                         |
| SNP_100078_A_22857  | NW_004516889.1 | scaffold1777 | 22857                   | TT                              | CC                 | CC               | INTERGENIC                    |                    |                                         |
| SNP_100079_A_22873  | NW_004516889.1 | scaffold1777 | 22873                   | GG                              | CC                 | CC               | INTERGENIC                    |                    |                                         |
| SNP_100081_A_70396  | NW_004516889.1 | scaffold1777 | 70396                   | CC                              | TT                 | TT               | INTERGENIC                    |                    |                                         |
| SNP_100082_A_104197 | NW_004516889.1 | scaffold1777 | 104197                  | GG                              | AA                 | AA               | INTERGENIC                    |                    |                                         |
| SNP_100083_A_104242 | NW_004516889.1 | scaffold1777 | 104242                  | CC                              | TT                 | TT               | INTERGENIC                    |                    |                                         |
| SNP_100084_A_104295 | NW_004516889.1 | scaffold1777 | 104295                  | CC                              | TT                 | TT               | INTERGENIC                    |                    |                                         |
| SNP_100085_A_105193 | NW_004516889.1 | scaffold1777 | 105193                  | GG                              | AA                 | AA               | INTERGENIC                    |                    |                                         |
| SNP_100086_A_105197 | NW_004516889.1 | scaffold1777 | 105197                  | AA                              | GG                 | GG               | INTERGENIC                    |                    |                                         |
| SNP_100087_A_113313 | NW_004516889.1 | scaffold1777 | 113313                  | TT                              | CC                 | CC               | INTERGENIC                    |                    |                                         |
| SNP_100088_A_114217 | NW_004516889.1 | scaffold1777 | 114217                  | TT                              | GG                 | GG               | DRR                           | 101494781          | probable calcium-binding protein CML22  |
| SNP_100089_A_114287 | NW_004516889.1 | scaffold1777 | 114287                  | TT                              | CC                 | CC               | DRR                           | 101494781          | probable calcium-binding protein CML22  |
| SNP_100090_A_114314 | NW_004516889.1 | scaffold1777 | 114314                  | CC                              | GG                 | GG               | DRR                           | 101494781          | probable calcium-binding protein CML22  |
| SNP_100091_A_114358 | NW_004516889.1 | scaffold1777 | 114358                  | CC                              | TT                 | TT               | DRR                           | 101494781          | probable calcium-binding protein CML22  |
| SNP_100092_A_147376 | NW_004516889.1 | scaffold1777 | 147376                  | CC                              | GG                 | GG               | INTERGENIC                    |                    |                                         |
| SNP_100093_A_182099 | NW_004516889.1 | scaffold1777 | 182099                  | GG                              | TT                 | TT               | URR                           | 101495112          | Unknown function                        |
| SNP_100094_A_186979 | NW_004516889.1 | scaffold1777 | 186979                  | GG                              | AA                 | AA               | INTERGENIC                    |                    |                                         |
| SNP_100096_A_282895 | NW_004516889.1 | scaffold1777 | 282895                  | GG                              | AA                 | AA               | URR                           | 101491973          | SNF2 domain-containing protein CLASSY 4 |
| SNP_100097_A_340032 | NW_004516889.1 | scaffold1777 | 340032                  | CC                              | TT                 | TT               | INTERGENIC                    |                    |                                         |
| SNP_100098_A_340048 | NW_004516889.1 | scaffold1777 | 340048                  | TT                              | CC                 | CC               | INTERGENIC                    |                    |                                         |
| SNP_100099_A_340054 | NW_004516889.1 | scaffold1777 | 340054                  | TT                              | GG                 | GG               | INTERGENIC                    |                    |                                         |
| SNP_100100_A_340110 | NW_004516889.1 | scaffold1777 | 340110                  | AA                              | GG                 | GG               | INTERGENIC                    |                    |                                         |

| SNPs IDs            | Chromosome IDs | Chromosomes  | Physical positions (bp) | CDC Frontier (Reference genome) | (Pusa 1103 & HPNB) | (ILWC 46 & LPNB) | Sequence Components of genome | Gene accession IDs | Putative functions |
|---------------------|----------------|--------------|-------------------------|---------------------------------|--------------------|------------------|-------------------------------|--------------------|--------------------|
| SNP_100101_A_340443 | NW_004516889.1 | scaffold1777 | 340443                  | TT                              | CC                 | CC               | INTERGENIC                    |                    |                    |
| SNP_100102_A_340456 | NW_004516889.1 | scaffold1777 | 340456                  | CC                              | TT                 | TT               | INTERGENIC                    |                    |                    |
| SNP_100103_A_343116 | NW_004516889.1 | scaffold1777 | 343116                  | CC                              | TT                 | TT               | SYNONYMOUS_CODING             | 101496095          | Unknown function   |
| SNP_100104_A_343140 | NW_004516889.1 | scaffold1777 | 343140                  | TT                              | CC                 | CC               | SYNONYMOUS_CODING             | 101496095          | Unknown function   |
| SNP_100105_A_343164 | NW_004516889.1 | scaffold1777 | 343164                  | CC                              | TT                 | TT               | SYNONYMOUS_CODING             | 101496095          | Unknown function   |
| SNP_100106_A_343173 | NW_004516889.1 | scaffold1777 | 343173                  | CC                              | TT                 | TT               | SYNONYMOUS_CODING             | 101496095          | Unknown function   |
| SNP_100107_A_343185 | NW_004516889.1 | scaffold1777 | 343185                  | GG                              | AA                 | AA               | SYNONYMOUS_CODING             | 101496095          | Unknown function   |
| SNP_100108_A_343228 | NW_004516889.1 | scaffold1777 | 343228                  | TT                              | CC                 | CC               | NON_SYNONYMOUS_CODING         | 101496095          | Unknown function   |
| SNP_100109_A_343253 | NW_004516889.1 | scaffold1777 | 343253                  | AA                              | GG                 | GG               | SYNONYMOUS_CODING             | 101496095          | Unknown function   |
| SNP_100110_A_343257 | NW_004516889.1 | scaffold1777 | 343257                  | AA                              | GG                 | GG               | SYNONYMOUS_CODING             | 101496095          | Unknown function   |
| SNP_100111_A_343260 | NW_004516889.1 | scaffold1777 | 343260                  | AA                              | GG                 | GG               | SYNONYMOUS_CODING             | 101496095          | Unknown function   |
| SNP_100112_A_343330 | NW_004516889.1 | scaffold1777 | 343330                  | AA                              | CC                 | CC               | INTRON                        | 101496095          | Unknown function   |
| SNP_100113_A_343381 | NW_004516889.1 | scaffold1777 | 343381                  | CC                              | TT                 | TT               | INTRON                        | 101496095          | Unknown function   |
| SNP_100114_A_343417 | NW_004516889.1 | scaffold1777 | 343417                  | TT                              | CC                 | CC               | INTRON                        | 101496095          | Unknown function   |
| SNP_100115_A_343438 | NW_004516889.1 | scaffold1777 | 343438                  | TT                              | AA                 | AA               | INTRON                        | 101496095          | Unknown function   |
| SNP_100116_A_343462 | NW_004516889.1 | scaffold1777 | 343462                  | AA                              | GG                 | GG               | INTRON                        | 101496095          | Unknown function   |
| SNP_100117_A_343466 | NW_004516889.1 | scaffold1777 | 343466                  | TT                              | CC                 | CC               | INTRON                        | 101496095          | Unknown function   |
| SNP_100118_A_343484 | NW_004516889.1 | scaffold1777 | 343484                  | TT                              | AA                 | AA               | INTRON                        | 101496095          | Unknown function   |
| SNP_100119_A_343489 | NW_004516889.1 | scaffold1777 | 343489                  | TT                              | CC                 | CC               | INTRON                        | 101496095          | Unknown function   |
| SNP_100120_A_343506 | NW_004516889.1 | scaffold1777 | 343506                  | CC                              | TT                 | TT               | INTRON                        | 101496095          | Unknown function   |
| SNP_100121_A_343513 | NW_004516889.1 | scaffold1777 | 343513                  | GG                              | TT                 | TT               | INTRON                        | 101496095          | Unknown function   |
| SNP_100122_A_343522 | NW_004516889.1 | scaffold1777 | 343522                  | AA                              | GG                 | GG               | INTRON                        | 101496095          | Unknown function   |



| SNPs IDs            | Chromosome IDs | Chromosomes  | Physical positions (bp) | CDC Frontier (Reference genome) | (Pusa 1103 & HPNB) | (ILWC 46 & LPNB) | Sequence Components of genome | Gene accession IDs | Putative functions |
|---------------------|----------------|--------------|-------------------------|---------------------------------|--------------------|------------------|-------------------------------|--------------------|--------------------|
| SNP_100123_A_343525 | NW_004516889.1 | scaffold1777 | 343525                  | TT                              | CC                 | CC               | INTRON                        | 101496095          | Unknown function   |
| SNP_100124_A_343537 | NW_004516889.1 | scaffold1777 | 343537                  | GG                              | AA                 | AA               | INTRON                        | 101496095          | Unknown function   |
| SNP_100125_A_343621 | NW_004516889.1 | scaffold1777 | 343621                  | GG                              | AA                 | AA               | INTRON                        | 101496095          | Unknown function   |
| SNP_100126_A_347665 | NW_004516889.1 | scaffold1777 | 347665                  | CC                              | TT                 | TT               | INTERGENIC                    |                    |                    |
| SNP_100127_A_347821 | NW_004516889.1 | scaffold1777 | 347821                  | AA                              | CC                 | CC               | INTERGENIC                    |                    |                    |
| SNP_100128_A_347827 | NW_004516889.1 | scaffold1777 | 347827                  | GG                              | AA                 | AA               | INTERGENIC                    |                    |                    |
| SNP_100129_A_347873 | NW_004516889.1 | scaffold1777 | 347873                  | GG                              | AA                 | AA               | INTERGENIC                    |                    |                    |
| SNP_100131_A_348110 | NW_004516889.1 | scaffold1777 | 348110                  | AA                              | TT                 | TT               | INTERGENIC                    |                    |                    |
| SNP_100132_A_375938 | NW_004516889.1 | scaffold1777 | 375938                  | AA                              | CC                 | CC               | INTERGENIC                    |                    |                    |
| SNP_100133_A_492294 | NW_004516889.1 | scaffold1777 | 492294                  | AA                              | CC                 | CC               | INTERGENIC                    |                    |                    |
| SNP_100134_A_492309 | NW_004516889.1 | scaffold1777 | 492309                  | AA                              | GG                 | GG               | INTERGENIC                    |                    |                    |
| SNP_100135_A_492339 | NW_004516889.1 | scaffold1777 | 492339                  | TT                              | CC                 | CC               | INTERGENIC                    |                    |                    |
| SNP_100137_A_518894 | NW_004516889.1 | scaffold1777 | 518894                  | AA                              | GG                 | GG               | INTERGENIC                    |                    |                    |
| SNP_100138_A_518940 | NW_004516889.1 | scaffold1777 | 518940                  | TT                              | CC                 | CC               | INTERGENIC                    |                    |                    |
| SNP_100139_A_518955 | NW_004516889.1 | scaffold1777 | 518955                  | TT                              | CC                 | CC               | INTERGENIC                    |                    |                    |
| SNP_100140_A_518970 | NW_004516889.1 | scaffold1777 | 518970                  | AA                              | GG                 | GG               | INTERGENIC                    |                    |                    |
| SNP_100141_A_551373 | NW_004516889.1 | scaffold1777 | 551373                  | TT                              | CC                 | CC               | INTERGENIC                    |                    |                    |
| SNP_100142_A_567465 | NW_004516889.1 | scaffold1777 | 567465                  | CC                              | TT                 | TT               | INTERGENIC                    |                    |                    |
| SNP_100143_A_569614 | NW_004516889.1 | scaffold1777 | 569614                  | AA                              | GG                 | GG               | INTERGENIC                    |                    |                    |
| SNP_100144_A_569622 | NW_004516889.1 | scaffold1777 | 569622                  | AA                              | CC                 | CC               | INTERGENIC                    |                    |                    |
| SNP_100145_A_570153 | NW_004516889.1 | scaffold1777 | 570153                  | TT                              | AA                 | AA               | INTERGENIC                    |                    |                    |
| SNP_100146_A_570158 | NW_004516889.1 | scaffold1777 | 570158                  | CC                              | AA                 | AA               | INTERGENIC                    |                    |                    |

| SNPs IDs            | Chromosome IDs | Chromosomes  | Physical positions (bp) | CDC Frontier (Reference genome) | (Pusa 1103 & HPNB) | (ILWC 46 & LPNB) | Sequence genome | Components of | Gene accession IDs | Putative functions |
|---------------------|----------------|--------------|-------------------------|---------------------------------|--------------------|------------------|-----------------|---------------|--------------------|--------------------|
| SNP_100147_A_579879 | NW_004516889.1 | scaffold1777 | 579879                  | CC                              | TT                 | TT               | INTERGENIC      |               |                    |                    |
| SNP_100148_A_613731 | NW_004516889.1 | scaffold1777 | 613731                  | AA                              | GG                 | GG               | INTERGENIC      |               |                    |                    |
| SNP_100149_A_613787 | NW_004516889.1 | scaffold1777 | 613787                  | GG                              | AA                 | AA               | INTERGENIC      |               |                    |                    |
| SNP_100150_A_613810 | NW_004516889.1 | scaffold1777 | 613810                  | TT                              | CC                 | CC               | INTERGENIC      |               |                    |                    |
| SNP_100151_A_614044 | NW_004516889.1 | scaffold1777 | 614044                  | TT                              | CC                 | CC               | INTERGENIC      |               |                    |                    |
| SNP_100152_A_614064 | NW_004516889.1 | scaffold1777 | 614064                  | AA                              | GG                 | GG               | INTERGENIC      |               |                    |                    |
| SNP_100153_A_614402 | NW_004516889.1 | scaffold1777 | 614402                  | AA                              | GG                 | GG               | INTERGENIC      |               |                    |                    |
| SNP_100154_A_614494 | NW_004516889.1 | scaffold1777 | 614494                  | CC                              | TT                 | TT               | INTERGENIC      |               |                    |                    |
| SNP_100155_A_614511 | NW_004516889.1 | scaffold1777 | 614511                  | GG                              | AA                 | AA               | INTERGENIC      |               |                    |                    |
| SNP_100156_A_614599 | NW_004516889.1 | scaffold1777 | 614599                  | TT                              | GG                 | GG               | INTERGENIC      |               |                    |                    |
| SNP_100157_A_614684 | NW_004516889.1 | scaffold1777 | 614684                  | CC                              | TT                 | TT               | INTERGENIC      |               |                    |                    |
| SNP_100158_A_614699 | NW_004516889.1 | scaffold1777 | 614699                  | TT                              | GG                 | GG               | INTERGENIC      |               |                    |                    |
| SNP_100159_A_614717 | NW_004516889.1 | scaffold1777 | 614717                  | CC                              | TT                 | TT               | INTERGENIC      |               |                    |                    |
| SNP_100160_A_623744 | NW_004516889.1 | scaffold1777 | 623744                  | CC                              | AA                 | AA               | INTERGENIC      |               |                    |                    |
| SNP_100161_A_623763 | NW_004516889.1 | scaffold1777 | 623763                  | GG                              | AA                 | AA               | INTERGENIC      |               |                    |                    |
| SNP_100162_A_624109 | NW_004516889.1 | scaffold1777 | 624109                  | AA                              | TT                 | TT               | INTERGENIC      |               |                    |                    |
| SNP_100163_A_624116 | NW_004516889.1 | scaffold1777 | 624116                  | TT                              | AA                 | AA               | INTERGENIC      |               |                    |                    |
| SNP_100164_A_625648 | NW_004516889.1 | scaffold1777 | 625648                  | AA                              | GG                 | GG               | INTERGENIC      |               |                    |                    |
| SNP_100165_A_625735 | NW_004516889.1 | scaffold1777 | 625735                  | AA                              | GG                 | GG               | INTERGENIC      |               |                    |                    |
| SNP_100166_A_625749 | NW_004516889.1 | scaffold1777 | 625749                  | GG                              | CC                 | CC               | INTERGENIC      |               |                    |                    |
| SNP_100167_A_626478 | NW_004516889.1 | scaffold1777 | 626478                  | AA                              | TT                 | TT               | INTERGENIC      |               |                    |                    |
| SNP_100168_A_626517 | NW_004516889.1 | scaffold1777 | 626517                  | CC                              | AA                 | AA               | INTERGENIC      |               |                    |                    |

| SNPs IDs            | Chromosome IDs | Chromosomes  | Physical positions (bp) | CDC Frontier (Reference genome) | (Pusa 1103 & HPNB) | (ILWC 46 & LPNB) | Sequence genome | Components of | Gene accession IDs | Putative functions |
|---------------------|----------------|--------------|-------------------------|---------------------------------|--------------------|------------------|-----------------|---------------|--------------------|--------------------|
| SNP_100169_A_626782 | NW_004516889.1 | scaffold1777 | 626782                  | TT                              | CC                 | CC               | INTERGENIC      |               |                    |                    |
| SNP_100170_A_626817 | NW_004516889.1 | scaffold1777 | 626817                  | AA                              | TT                 | TT               | INTERGENIC      |               |                    |                    |
| SNP_100171_A_626838 | NW_004516889.1 | scaffold1777 | 626838                  | AA                              | GG                 | GG               | INTERGENIC      |               |                    |                    |
| SNP_100172_A_628203 | NW_004516889.1 | scaffold1777 | 628203                  | CC                              | TT                 | TT               | INTERGENIC      |               |                    |                    |
| SNP_100173_A_628264 | NW_004516889.1 | scaffold1777 | 628264                  | TT                              | CC                 | CC               | INTERGENIC      |               |                    |                    |
| SNP_100174_A_628295 | NW_004516889.1 | scaffold1777 | 628295                  | TT                              | CC                 | CC               | INTERGENIC      |               |                    |                    |
| SNP_100175_A_628406 | NW_004516889.1 | scaffold1777 | 628406                  | GG                              | AA                 | AA               | INTERGENIC      |               |                    |                    |
| SNP_100176_A_628448 | NW_004516889.1 | scaffold1777 | 628448                  | AA                              | GG                 | GG               | INTERGENIC      |               |                    |                    |
| SNP_100177_A_628509 | NW_004516889.1 | scaffold1777 | 628509                  | AA                              | GG                 | GG               | INTERGENIC      |               |                    |                    |
| SNP_100178_A_628540 | NW_004516889.1 | scaffold1777 | 628540                  | CC                              | AA                 | AA               | INTERGENIC      |               |                    |                    |
| SNP_100179_A_628629 | NW_004516889.1 | scaffold1777 | 628629                  | AA                              | GG                 | GG               | INTERGENIC      |               |                    |                    |
| SNP_100180_A_628701 | NW_004516889.1 | scaffold1777 | 628701                  | AA                              | CC                 | CC               | INTERGENIC      |               |                    |                    |
| SNP_100181_A_628777 | NW_004516889.1 | scaffold1777 | 628777                  | CC                              | TT                 | TT               | INTERGENIC      |               |                    |                    |
| SNP_100182_A_629227 | NW_004516889.1 | scaffold1777 | 629227                  | GG                              | CC                 | CC               | INTERGENIC      |               |                    |                    |
| SNP_100183_A_629487 | NW_004516889.1 | scaffold1777 | 629487                  | CC                              | TT                 | TT               | INTERGENIC      |               |                    |                    |
| SNP_100184_A_632479 | NW_004516889.1 | scaffold1777 | 632479                  | CC                              | TT                 | TT               | INTERGENIC      |               |                    |                    |
| SNP_100185_A_636598 | NW_004516889.1 | scaffold1777 | 636598                  | TT                              | AA                 | AA               | INTERGENIC      |               |                    |                    |
| SNP_100186_A_414    | NW_004516890.1 | scaffold1778 | 414                     | GG                              | CC                 | CC               | INTERGENIC      |               |                    |                    |
| SNP_100187_A_852    | NW_004516890.1 | scaffold1778 | 852                     | TT                              | AA                 | AA               | INTERGENIC      |               |                    |                    |
| SNP_100188_A_908    | NW_004516890.1 | scaffold1778 | 908                     | AA                              | CC                 | CC               | INTERGENIC      |               |                    |                    |
| SNP_100189_A_915    | NW_004516890.1 | scaffold1778 | 915                     | AA                              | GG                 | GG               | INTERGENIC      |               |                    |                    |
| SNP_100190_A_925    | NW_004516890.1 | scaffold1778 | 925                     | TT                              | CC                 | CC               | INTERGENIC      |               |                    |                    |

| SNPs IDs           | Chromosome IDs | Chromosomes  | Physical positions (bp) | CDC Frontier (Reference genome) | (Pusa 1103 & HPNB) | (ILWC 46 & LPNB) | Sequence genome | Components of | Gene accession IDs | Putative functions |
|--------------------|----------------|--------------|-------------------------|---------------------------------|--------------------|------------------|-----------------|---------------|--------------------|--------------------|
| SNP_100191_A_982   | NW_004516890.1 | scaffold1778 | 982                     | GG                              | AA                 | AA               | INTERGENIC      |               |                    |                    |
| SNP_100192_A_1218  | NW_004516890.1 | scaffold1778 | 1218                    | AA                              | CC                 | CC               | INTERGENIC      |               |                    |                    |
| SNP_100193_A_1223  | NW_004516890.1 | scaffold1778 | 1223                    | TT                              | GG                 | GG               | INTERGENIC      |               |                    |                    |
| SNP_100195_A_1527  | NW_004516890.1 | scaffold1778 | 1527                    | AA                              | CC                 | CC               | INTERGENIC      |               |                    |                    |
| SNP_100196_A_1651  | NW_004516890.1 | scaffold1778 | 1651                    | CC                              | TT                 | TT               | INTERGENIC      |               |                    |                    |
| SNP_100197_A_1918  | NW_004516890.1 | scaffold1778 | 1918                    | AA                              | GG                 | GG               | INTERGENIC      |               |                    |                    |
| SNP_100198_A_1973  | NW_004516890.1 | scaffold1778 | 1973                    | TT                              | GG                 | GG               | INTERGENIC      |               |                    |                    |
| SNP_100199_A_1980  | NW_004516890.1 | scaffold1778 | 1980                    | CC                              | TT                 | TT               | INTERGENIC      |               |                    |                    |
| SNP_100200_A_4156  | NW_004516890.1 | scaffold1778 | 4156                    | GG                              | AA                 | AA               | INTERGENIC      |               |                    |                    |
| SNP_100201_A_4177  | NW_004516890.1 | scaffold1778 | 4177                    | TT                              | GG                 | GG               | INTERGENIC      |               |                    |                    |
| SNP_100202_A_4184  | NW_004516890.1 | scaffold1778 | 4184                    | GG                              | AA                 | AA               | INTERGENIC      |               |                    |                    |
| SNP_100203_A_4197  | NW_004516890.1 | scaffold1778 | 4197                    | CC                              | TT                 | TT               | INTERGENIC      |               |                    |                    |
| SNP_100204_A_4236  | NW_004516890.1 | scaffold1778 | 4236                    | TT                              | CC                 | CC               | INTERGENIC      |               |                    |                    |
| SNP_100205_A_4571  | NW_004516890.1 | scaffold1778 | 4571                    | TT                              | AA                 | AA               | INTERGENIC      |               |                    |                    |
| SNP_100206_A_4573  | NW_004516890.1 | scaffold1778 | 4573                    | CC                              | TT                 | TT               | INTERGENIC      |               |                    |                    |
| SNP_100207_A_4586  | NW_004516890.1 | scaffold1778 | 4586                    | TT                              | CC                 | CC               | INTERGENIC      |               |                    |                    |
| SNP_100208_A_4925  | NW_004516890.1 | scaffold1778 | 4925                    | TT                              | CC                 | CC               | INTERGENIC      |               |                    |                    |
| SNP_100209_A_4960  | NW_004516890.1 | scaffold1778 | 4960                    | GG                              | AA                 | AA               | INTERGENIC      |               |                    |                    |
| SNP_100210_A_5011  | NW_004516890.1 | scaffold1778 | 5011                    | AA                              | GG                 | GG               | INTERGENIC      |               |                    |                    |
| SNP_100211_A_10582 | NW_004516890.1 | scaffold1778 | 10582                   | CC                              | GG                 | GG               | INTERGENIC      |               |                    |                    |
| SNP_100212_A_12078 | NW_004516890.1 | scaffold1778 | 12078                   | CC                              | TT                 | TT               | INTERGENIC      |               |                    |                    |
| SNP_100213_A_12515 | NW_004516890.1 | scaffold1778 | 12515                   | TT                              | AA                 | AA               | INTERGENIC      |               |                    |                    |

| SNPs IDs           | Chromosome IDs | Chromosomes  | Physical positions (bp) | CDC Frontier (Reference genome) | (Pusa 1103 & HPNB) | (ILWC 46 & LPNB) | Sequence genome | Components of | Gene accession IDs | Putative functions |
|--------------------|----------------|--------------|-------------------------|---------------------------------|--------------------|------------------|-----------------|---------------|--------------------|--------------------|
| SNP_100214_A_15750 | NW_004516890.1 | scaffold1778 | 15750                   | AA                              | TT                 | TT               | INTERGENIC      |               |                    |                    |
| SNP_100215_A_15832 | NW_004516890.1 | scaffold1778 | 15832                   | AA                              | GG                 | GG               | INTERGENIC      |               |                    |                    |
| SNP_100216_A_15882 | NW_004516890.1 | scaffold1778 | 15882                   | AA                              | TT                 | TT               | INTERGENIC      |               |                    |                    |
| SNP_100217_A_15959 | NW_004516890.1 | scaffold1778 | 15959                   | GG                              | AA                 | AA               | INTERGENIC      |               |                    |                    |
| SNP_100218_A_16103 | NW_004516890.1 | scaffold1778 | 16103                   | CC                              | TT                 | TT               | INTERGENIC      |               |                    |                    |
| SNP_100219_A_16129 | NW_004516890.1 | scaffold1778 | 16129                   | CC                              | GG                 | GG               | INTERGENIC      |               |                    |                    |
| SNP_100220_A_16171 | NW_004516890.1 | scaffold1778 | 16171                   | AA                              | GG                 | GG               | INTERGENIC      |               |                    |                    |
| SNP_100221_A_16240 | NW_004516890.1 | scaffold1778 | 16240                   | TT                              | CC                 | CC               | INTERGENIC      |               |                    |                    |
| SNP_100222_A_16241 | NW_004516890.1 | scaffold1778 | 16241                   | TT                              | GG                 | GG               | INTERGENIC      |               |                    |                    |
| SNP_100223_A_16286 | NW_004516890.1 | scaffold1778 | 16286                   | AA                              | GG                 | GG               | INTERGENIC      |               |                    |                    |
| SNP_100224_A_16312 | NW_004516890.1 | scaffold1778 | 16312                   | TT                              | CC                 | CC               | INTERGENIC      |               |                    |                    |
| SNP_100225_A_16340 | NW_004516890.1 | scaffold1778 | 16340                   | CC                              | TT                 | TT               | INTERGENIC      |               |                    |                    |
| SNP_100226_A_16420 | NW_004516890.1 | scaffold1778 | 16420                   | AA                              | CC                 | CC               | INTERGENIC      |               |                    |                    |
| SNP_100227_A_16421 | NW_004516890.1 | scaffold1778 | 16421                   | GG                              | AA                 | AA               | INTERGENIC      |               |                    |                    |
| SNP_100228_A_16423 | NW_004516890.1 | scaffold1778 | 16423                   | GG                              | AA                 | AA               | INTERGENIC      |               |                    |                    |
| SNP_100229_A_16476 | NW_004516890.1 | scaffold1778 | 16476                   | GG                              | AA                 | AA               | INTERGENIC      |               |                    |                    |
| SNP_100230_A_16489 | NW_004516890.1 | scaffold1778 | 16489                   | CC                              | TT                 | TT               | INTERGENIC      |               |                    |                    |
| SNP_100231_A_16555 | NW_004516890.1 | scaffold1778 | 16555                   | GG                              | CC                 | CC               | INTERGENIC      |               |                    |                    |
| SNP_100232_A_16601 | NW_004516890.1 | scaffold1778 | 16601                   | AA                              | GG                 | GG               | INTERGENIC      |               |                    |                    |
| SNP_100233_A_16645 | NW_004516890.1 | scaffold1778 | 16645                   | TT                              | AA                 | AA               | INTERGENIC      |               |                    |                    |
| SNP_100234_A_16648 | NW_004516890.1 | scaffold1778 | 16648                   | TT                              | GG                 | GG               | INTERGENIC      |               |                    |                    |
| SNP_100235_A_16716 | NW_004516890.1 | scaffold1778 | 16716                   | CC                              | TT                 | TT               | INTERGENIC      |               |                    |                    |

| SNPs IDs            | Chromosome IDs | Chromosomes  | Physical positions (bp) | CDC Frontier (Reference genome) | (Pusa 1103 & HPNB) | (ILWC 46 & LPNB) | Sequence genome | Components of | Gene accession IDs | Putative functions |
|---------------------|----------------|--------------|-------------------------|---------------------------------|--------------------|------------------|-----------------|---------------|--------------------|--------------------|
| SNP_100236_A_16776  | NW_004516890.1 | scaffold1778 | 16776                   | TT                              | CC                 | CC               | INTERGENIC      |               |                    |                    |
| SNP_100237_A_16858  | NW_004516890.1 | scaffold1778 | 16858                   | CC                              | GG                 | GG               | INTERGENIC      |               |                    |                    |
| SNP_100238_A_16931  | NW_004516890.1 | scaffold1778 | 16931                   | AA                              | GG                 | GG               | INTERGENIC      |               |                    |                    |
| SNP_100239_A_16988  | NW_004516890.1 | scaffold1778 | 16988                   | AA                              | GG                 | GG               | INTERGENIC      |               |                    |                    |
| SNP_100240_A_18767  | NW_004516890.1 | scaffold1778 | 18767                   | CC                              | TT                 | TT               | INTERGENIC      |               |                    |                    |
| SNP_100241_A_18805  | NW_004516890.1 | scaffold1778 | 18805                   | TT                              | CC                 | CC               | INTERGENIC      |               |                    |                    |
| SNP_100242_A_8671   | NW_004516891.1 | scaffold1779 | 8671                    | CC                              | TT                 | TT               | INTERGENIC      |               |                    |                    |
| SNP_100243_A_11585  | NW_004516891.1 | scaffold1779 | 11585                   | GG                              | TT                 | TT               | INTERGENIC      |               |                    |                    |
| SNP_100244_A_11659  | NW_004516891.1 | scaffold1779 | 11659                   | TT                              | GG                 | GG               | INTERGENIC      |               |                    |                    |
| SNP_100245_A_12688  | NW_004516891.1 | scaffold1779 | 12688                   | TT                              | CC                 | CC               | INTERGENIC      |               |                    |                    |
| SNP_100246_A_12702  | NW_004516891.1 | scaffold1779 | 12702                   | GG                              | AA                 | AA               | INTERGENIC      |               |                    |                    |
| SNP_100247_A_110543 | NW_004516891.1 | scaffold1779 | 110543                  | AA                              | CC                 | CC               | INTERGENIC      |               |                    |                    |
| SNP_100248_A_118767 | NW_004516891.1 | scaffold1779 | 118767                  | GG                              | AA                 | AA               | INTERGENIC      |               |                    |                    |
| SNP_100249_A_119111 | NW_004516891.1 | scaffold1779 | 119111                  | CC                              | TT                 | TT               | INTERGENIC      |               |                    |                    |
| SNP_100250_A_119160 | NW_004516891.1 | scaffold1779 | 119160                  | CC                              | AA                 | AA               | INTERGENIC      |               |                    |                    |
| SNP_100251_A_119244 | NW_004516891.1 | scaffold1779 | 119244                  | TT                              | CC                 | CC               | INTERGENIC      |               |                    |                    |
| SNP_100252_A_119275 | NW_004516891.1 | scaffold1779 | 119275                  | TT                              | AA                 | AA               | INTERGENIC      |               |                    |                    |
| SNP_100253_A_119450 | NW_004516891.1 | scaffold1779 | 119450                  | GG                              | TT                 | TT               | INTERGENIC      |               |                    |                    |
| SNP_100254_A_119679 | NW_004516891.1 | scaffold1779 | 119679                  | AA                              | TT                 | TT               | INTERGENIC      |               |                    |                    |
| SNP_100255_A_119694 | NW_004516891.1 | scaffold1779 | 119694                  | AA                              | TT                 | TT               | INTERGENIC      |               |                    |                    |
| SNP_100256_A_120129 | NW_004516891.1 | scaffold1779 | 120129                  | CC                              | TT                 | TT               | INTERGENIC      |               |                    |                    |
| SNP_100257_A_120171 | NW_004516891.1 | scaffold1779 | 120171                  | AA                              | GG                 | GG               | INTERGENIC      |               |                    |                    |

| SNPs IDs            | Chromosome IDs | Chromosomes  | Physical positions (bp) | CDC Frontier (Reference genome) | (Pusa 1103 & HPNB) | (ILWC 46 & LPNB) | Sequence genome | Components of | Gene accession IDs | Putative functions |
|---------------------|----------------|--------------|-------------------------|---------------------------------|--------------------|------------------|-----------------|---------------|--------------------|--------------------|
| SNP_100258_A_121926 | NW_004516891.1 | scaffold1779 | 121926                  | CC                              | TT                 | TT               | INTERGENIC      |               |                    |                    |
| SNP_100259_A_122089 | NW_004516891.1 | scaffold1779 | 122089                  | AA                              | GG                 | GG               | INTERGENIC      |               |                    |                    |
| SNP_100260_A_122238 | NW_004516891.1 | scaffold1779 | 122238                  | AA                              | GG                 | GG               | INTERGENIC      |               |                    |                    |
| SNP_100261_A_128221 | NW_004516891.1 | scaffold1779 | 128221                  | AA                              | CC                 | CC               | INTERGENIC      |               |                    |                    |
| SNP_100262_A_128231 | NW_004516891.1 | scaffold1779 | 128231                  | AA                              | CC                 | CC               | INTERGENIC      |               |                    |                    |
| SNP_100265_A_131566 | NW_004516891.1 | scaffold1779 | 131566                  | CC                              | AA                 | AA               | INTERGENIC      |               |                    |                    |
| SNP_100266_A_132015 | NW_004516891.1 | scaffold1779 | 132015                  | TT                              | CC                 | CC               | INTERGENIC      |               |                    |                    |
| SNP_100268_A_132441 | NW_004516891.1 | scaffold1779 | 132441                  | AA                              | GG                 | GG               | INTERGENIC      |               |                    |                    |
| SNP_100269_A_132965 | NW_004516891.1 | scaffold1779 | 132965                  | GG                              | AA                 | AA               | INTERGENIC      |               |                    |                    |
| SNP_100270_A_132999 | NW_004516891.1 | scaffold1779 | 132999                  | GG                              | AA                 | AA               | INTERGENIC      |               |                    |                    |
| SNP_100271_A_5693   | NW_004516893.1 | scaffold1782 | 5693                    | AA                              | GG                 | GG               | INTERGENIC      |               |                    |                    |
| SNP_100272_A_6055   | NW_004516893.1 | scaffold1782 | 6055                    | TT                              | GG                 | GG               | INTERGENIC      |               |                    |                    |
| SNP_100273_A_6072   | NW_004516893.1 | scaffold1782 | 6072                    | AA                              | TT                 | TT               | INTERGENIC      |               |                    |                    |
| SNP_100274_A_6121   | NW_004516893.1 | scaffold1782 | 6121                    | GG                              | AA                 | AA               | INTERGENIC      |               |                    |                    |
| SNP_100275_A_6158   | NW_004516893.1 | scaffold1782 | 6158                    | TT                              | CC                 | CC               | INTERGENIC      |               |                    |                    |
| SNP_100276_A_6171   | NW_004516893.1 | scaffold1782 | 6171                    | TT                              | GG                 | GG               | INTERGENIC      |               |                    |                    |
| SNP_100277_A_6208   | NW_004516893.1 | scaffold1782 | 6208                    | AA                              | GG                 | GG               | INTERGENIC      |               |                    |                    |
| SNP_100278_A_5042   | NW_004516894.1 | scaffold1783 | 5042                    | AA                              | GG                 | GG               | INTERGENIC      |               |                    |                    |
| SNP_100279_A_8168   | NW_004516894.1 | scaffold1783 | 8168                    | AA                              | GG                 | GG               | INTERGENIC      |               |                    |                    |
| SNP_100280_A_10731  | NW_004516894.1 | scaffold1783 | 10731                   | CC                              | TT                 | TT               | INTERGENIC      |               |                    |                    |
| SNP_100281_A_10973  | NW_004516894.1 | scaffold1783 | 10973                   | GG                              | AA                 | AA               | INTERGENIC      |               |                    |                    |
| SNP_100282_A_30094  | NW_004516894.1 | scaffold1783 | 30094                   | TT                              | CC                 | CC               | INTERGENIC      |               |                    |                    |

| SNPs IDs           | Chromosome IDs | Chromosomes  | Physical positions (bp) | CDC Frontier (Reference genome) | (Pusa 1103 & HPNB) | (ILWC 46 & LPNB) | Sequence genome | Components of | Gene accession IDs | Putative functions |
|--------------------|----------------|--------------|-------------------------|---------------------------------|--------------------|------------------|-----------------|---------------|--------------------|--------------------|
| SNP_100283_A_37357 | NW_004516894.1 | scaffold1783 | 37357                   | AA                              | TT                 | TT               | INTERGENIC      |               |                    |                    |
| SNP_100284_A_37671 | NW_004516894.1 | scaffold1783 | 37671                   | GG                              | AA                 | AA               | INTERGENIC      |               |                    |                    |
| SNP_100285_A_38096 | NW_004516894.1 | scaffold1783 | 38096                   | TT                              | AA                 | AA               | INTERGENIC      |               |                    |                    |
| SNP_100286_A_38185 | NW_004516894.1 | scaffold1783 | 38185                   | AA                              | GG                 | GG               | INTERGENIC      |               |                    |                    |
| SNP_100287_A_38254 | NW_004516894.1 | scaffold1783 | 38254                   | AA                              | TT                 | TT               | INTERGENIC      |               |                    |                    |
| SNP_100288_A_39340 | NW_004516894.1 | scaffold1783 | 39340                   | TT                              | CC                 | CC               | INTERGENIC      |               |                    |                    |
| SNP_100289_A_39344 | NW_004516894.1 | scaffold1783 | 39344                   | CC                              | AA                 | AA               | INTERGENIC      |               |                    |                    |
| SNP_100290_A_40251 | NW_004516894.1 | scaffold1783 | 40251                   | AA                              | CC                 | CC               | INTERGENIC      |               |                    |                    |
| SNP_100291_A_40269 | NW_004516894.1 | scaffold1783 | 40269                   | TT                              | GG                 | GG               | INTERGENIC      |               |                    |                    |
| SNP_100292_A_40291 | NW_004516894.1 | scaffold1783 | 40291                   | GG                              | AA                 | AA               | INTERGENIC      |               |                    |                    |
| SNP_100293_A_46055 | NW_004516894.1 | scaffold1783 | 46055                   | TT                              | CC                 | CC               | INTERGENIC      |               |                    |                    |
| SNP_100294_A_46057 | NW_004516894.1 | scaffold1783 | 46057                   | TT                              | CC                 | CC               | INTERGENIC      |               |                    |                    |
| SNP_100295_A_46060 | NW_004516894.1 | scaffold1783 | 46060                   | AA                              | GG                 | GG               | INTERGENIC      |               |                    |                    |
| SNP_100296_A_46087 | NW_004516894.1 | scaffold1783 | 46087                   | CC                              | AA                 | AA               | INTERGENIC      |               |                    |                    |
| SNP_100297_A_296   | NW_004516897.1 | scaffold1789 | 296                     | GG                              | AA                 | AA               | INTERGENIC      |               |                    |                    |
| SNP_100298_A_417   | NW_004516897.1 | scaffold1789 | 417                     | AA                              | GG                 | GG               | INTERGENIC      |               |                    |                    |
| SNP_100299_A_551   | NW_004516897.1 | scaffold1789 | 551                     | GG                              | AA                 | AA               | INTERGENIC      |               |                    |                    |
| SNP_100300_A_21349 | NW_004516897.1 | scaffold1789 | 21349                   | AA                              | TT                 | TT               | INTERGENIC      |               |                    |                    |
| SNP_100301_A_208   | NW_004516900.1 | scaffold1793 | 208                     | GG                              | TT                 | TT               | INTERGENIC      |               |                    |                    |
| SNP_100302_A_5671  | NW_004516901.1 | scaffold1795 | 5671                    | AA                              | GG                 | GG               | INTERGENIC      |               |                    |                    |
| SNP_100303_A_16773 | NW_004516903.1 | scaffold1797 | 16773                   | AA                              | CC                 | CC               | INTERGENIC      |               |                    |                    |
| SNP_100304_A_16777 | NW_004516903.1 | scaffold1797 | 16777                   | AA                              | TT                 | TT               | INTERGENIC      |               |                    |                    |



| SNPs IDs            | Chromosome IDs | Chromosomes  | Physical positions (bp) | CDC Frontier (Reference genome) | (Pusa 1103 & HPNB) | (ILWC 46 & LPNB) | Sequence Components of genome | Gene accession IDs | Putative functions |
|---------------------|----------------|--------------|-------------------------|---------------------------------|--------------------|------------------|-------------------------------|--------------------|--------------------|
| SNP_100305_A_16824  | NW_004516903.1 | scaffold1797 | 16824                   | CC                              | AA                 | AA               | INTERGENIC                    |                    |                    |
| SNP_100306_A_26277  | NW_004516903.1 | scaffold1797 | 26277                   | AA                              | GG                 | GG               | INTERGENIC                    |                    |                    |
| SNP_100308_A_37844  | NW_004516903.1 | scaffold1797 | 37844                   | CC                              | AA                 | AA               | INTERGENIC                    |                    |                    |
| SNP_100309_A_37895  | NW_004516903.1 | scaffold1797 | 37895                   | CC                              | GG                 | GG               | INTERGENIC                    |                    |                    |
| SNP_100310_A_1533   | NW_004516904.1 | scaffold1798 | 1533                    | AA                              | TT                 | TT               | INTERGENIC                    |                    |                    |
| SNP_100311_A_1579   | NW_004516904.1 | scaffold1798 | 1579                    | CC                              | TT                 | TT               | INTERGENIC                    |                    |                    |
| SNP_100312_A_1588   | NW_004516904.1 | scaffold1798 | 1588                    | TT                              | AA                 | AA               | INTERGENIC                    |                    |                    |
| SNP_100313_A_1731   | NW_004516904.1 | scaffold1798 | 1731                    | CC                              | AA                 | AA               | INTERGENIC                    |                    |                    |
| SNP_100314_A_1757   | NW_004516904.1 | scaffold1798 | 1757                    | AA                              | GG                 | GG               | INTERGENIC                    |                    |                    |
| SNP_100315_A_1785   | NW_004516904.1 | scaffold1798 | 1785                    | TT                              | CC                 | CC               | INTERGENIC                    |                    |                    |
| SNP_100316_A_1802   | NW_004516904.1 | scaffold1798 | 1802                    | TT                              | CC                 | CC               | INTERGENIC                    |                    |                    |
| SNP_100317_A_3437   | NW_004516907.1 | scaffold1802 | 3437                    | CC                              | AA                 | AA               | NON_SYNONYMOUS_CODING         | 101500099          | Unknown function   |
| SNP_100318_A_3722   | NW_004516907.1 | scaffold1802 | 3722                    | GG                              | AA                 | AA               | NON_SYNONYMOUS_CODING         | 101500099          | Unknown function   |
| SNP_100319_A_18888  | NW_004516907.1 | scaffold1802 | 18888                   | CC                              | TT                 | TT               | INTERGENIC                    |                    |                    |
| SNP_100320_A_18891  | NW_004516907.1 | scaffold1802 | 18891                   | AA                              | GG                 | GG               | INTERGENIC                    |                    |                    |
| SNP_100321_A_18894  | NW_004516907.1 | scaffold1802 | 18894                   | TT                              | CC                 | CC               | INTERGENIC                    |                    |                    |
| SNP_100323_A_82017  | NW_004516909.1 | scaffold1804 | 82017                   | TT                              | CC                 | CC               | SYNONYMOUS_CODING             | 101501595          | Unknown function   |
| SNP_100324_A_82206  | NW_004516909.1 | scaffold1804 | 82206                   | AA                              | GG                 | GG               | SYNONYMOUS_CODING             | 101501595          | Unknown function   |
| SNP_100325_A_116070 | NW_004516909.1 | scaffold1804 | 116070                  | CC                              | TT                 | TT               | INTERGENIC                    |                    |                    |
| SNP_100326_A_116307 | NW_004516909.1 | scaffold1804 | 116307                  | CC                              | TT                 | TT               | DRR                           | 101501051          | expansin-B15-like  |
| SNP_100327_A_116347 | NW_004516909.1 | scaffold1804 | 116347                  | TT                              | GG                 | GG               | DRR                           | 101501051          | expansin-B15-like  |
| SNP_100328_A_116392 | NW_004516909.1 | scaffold1804 | 116392                  | CC                              | TT                 | TT               | DRR                           | 101501051          | expansin-B15-like  |

| SNPs IDs            | Chromosome IDs | Chromosomes  | Physical positions (bp) | CDC Frontier (Reference genome) | (Pusa 1103 & HPNB) | (ILWC 46 & LPNB) | Sequence Components of genome | Gene accession IDs | Putative functions    |
|---------------------|----------------|--------------|-------------------------|---------------------------------|--------------------|------------------|-------------------------------|--------------------|-----------------------|
| SNP_100329_A_116409 | NW_004516909.1 | scaffold1804 | 116409                  | GG                              | TT                 | TT               | DRR                           | 101501051          | expansin-B15-like     |
| SNP_100330_A_118945 | NW_004516909.1 | scaffold1804 | 118945                  | AA                              | TT                 | TT               | URR                           | 101501051          | expansin-B15-like     |
| SNP_100331_A_118951 | NW_004516909.1 | scaffold1804 | 118951                  | GG                              | AA                 | AA               | URR                           | 101501051          | expansin-B15-like     |
| SNP_100333_A_149172 | NW_004516909.1 | scaffold1804 | 149172                  | CC                              | TT                 | TT               | INTERGENIC                    |                    |                       |
| SNP_100334_A_149175 | NW_004516909.1 | scaffold1804 | 149175                  | CC                              | GG                 | GG               | INTERGENIC                    |                    |                       |
| SNP_100335_A_149422 | NW_004516909.1 | scaffold1804 | 149422                  | AA                              | GG                 | GG               | INTERGENIC                    |                    |                       |
| SNP_100336_A_149757 | NW_004516909.1 | scaffold1804 | 149757                  | TT                              | GG                 | GG               | INTERGENIC                    |                    |                       |
| SNP_100337_A_154574 | NW_004516909.1 | scaffold1804 | 154574                  | CC                              | TT                 | TT               | INTERGENIC                    |                    |                       |
| SNP_100338_A_154855 | NW_004516909.1 | scaffold1804 | 154855                  | GG                              | AA                 | AA               | INTERGENIC                    |                    |                       |
| SNP_100340_A_176362 | NW_004516909.1 | scaffold1804 | 176362                  | AA                              | GG                 | GG               | INTERGENIC                    |                    |                       |
| SNP_100341_A_176410 | NW_004516909.1 | scaffold1804 | 176410                  | AA                              | GG                 | GG               | INTERGENIC                    |                    |                       |
| SNP_100342_A_180252 | NW_004516909.1 | scaffold1804 | 180252                  | TT                              | GG                 | GG               | INTERGENIC                    |                    |                       |
| SNP_100343_A_183783 | NW_004516909.1 | scaffold1804 | 183783                  | AA                              | TT                 | TT               | INTERGENIC                    |                    |                       |
| SNP_100344_A_184143 | NW_004516909.1 | scaffold1804 | 184143                  | AA                              | GG                 | GG               | INTERGENIC                    |                    |                       |
| SNP_100345_A_184229 | NW_004516909.1 | scaffold1804 | 184229                  | GG                              | TT                 | TT               | INTERGENIC                    |                    |                       |
| SNP_100346_A_190951 | NW_004516909.1 | scaffold1804 | 190951                  | TT                              | AA                 | AA               | URR                           | 101502552          | putative expansin-B14 |
| SNP_100347_A_191259 | NW_004516909.1 | scaffold1804 | 191259                  | GG                              | CC                 | CC               | URR                           | 101502552          | putative expansin-B14 |
| SNP_100348_A_191696 | NW_004516909.1 | scaffold1804 | 191696                  | CC                              | TT                 | TT               | URR                           | 101502552          | putative expansin-B14 |
| SNP_100349_A_191720 | NW_004516909.1 | scaffold1804 | 191720                  | AA                              | GG                 | GG               | URR                           | 101502552          | putative expansin-B14 |
| SNP_100350_A_191811 | NW_004516909.1 | scaffold1804 | 191811                  | GG                              | AA                 | AA               | URR                           | 101502552          | putative expansin-B14 |
| SNP_100351_A_192093 | NW_004516909.1 | scaffold1804 | 192093                  | AA                              | GG                 | GG               | URR                           | 101502552          | putative expansin-B14 |
| SNP_100352_A_192140 | NW_004516909.1 | scaffold1804 | 192140                  | TT                              | AA                 | AA               | URR                           | 101502552          | putative expansin-B14 |

| SNPs IDs            | Chromosome IDs | Chromosomes  | Physical positions (bp) | CDC Frontier (Reference genome) | (Pusa 1103 & HPNB) | (ILWC 46 & LPNB) | Sequence Components of genome | Gene accession IDs | Putative functions    |
|---------------------|----------------|--------------|-------------------------|---------------------------------|--------------------|------------------|-------------------------------|--------------------|-----------------------|
| SNP_100353_A_192173 | NW_004516909.1 | scaffold1804 | 192173                  | AA                              | GG                 | GG               | URR                           | 101502552          | putative expansin-B14 |
| SNP_100354_A_192247 | NW_004516909.1 | scaffold1804 | 192247                  | TT                              | AA                 | AA               | URR                           | 101502552          | putative expansin-B14 |
| SNP_100355_A_192248 | NW_004516909.1 | scaffold1804 | 192248                  | AA                              | GG                 | GG               | URR                           | 101502552          | putative expansin-B14 |
| SNP_100356_A_192249 | NW_004516909.1 | scaffold1804 | 192249                  | TT                              | AA                 | AA               | URR                           | 101502552          | putative expansin-B14 |
| SNP_100357_A_219874 | NW_004516909.1 | scaffold1804 | 219874                  | AA                              | GG                 | GG               | INTRON                        | 101502865          | expansin-B15-like     |
| SNP_100358_A_230702 | NW_004516909.1 | scaffold1804 | 230702                  | GG                              | AA                 | AA               | INTRON                        | 101502865          | expansin-B15-like     |
| SNP_100359_A_234328 | NW_004516909.1 | scaffold1804 | 234328                  | TT                              | CC                 | CC               | INTRON                        | 101502865          | expansin-B15-like     |
| SNP_100360_A_236960 | NW_004516909.1 | scaffold1804 | 236960                  | GG                              | AA                 | AA               | URR                           | 101502865          | expansin-B15-like     |
| SNP_100361_A_244532 | NW_004516909.1 | scaffold1804 | 244532                  | AA                              | CC                 | CC               | INTERGENIC                    |                    |                       |
| SNP_100362_A_244682 | NW_004516909.1 | scaffold1804 | 244682                  | CC                              | AA                 | AA               | INTERGENIC                    |                    |                       |
| SNP_100363_A_246799 | NW_004516909.1 | scaffold1804 | 246799                  | GG                              | AA                 | AA               | INTERGENIC                    |                    |                       |
| SNP_100364_A_246834 | NW_004516909.1 | scaffold1804 | 246834                  | GG                              | TT                 | TT               | INTERGENIC                    |                    |                       |
| SNP_100365_A_246865 | NW_004516909.1 | scaffold1804 | 246865                  | AA                              | GG                 | GG               | INTERGENIC                    |                    |                       |
| SNP_100366_A_246901 | NW_004516909.1 | scaffold1804 | 246901                  | GG                              | TT                 | TT               | INTERGENIC                    |                    |                       |
| SNP_100367_A_247089 | NW_004516909.1 | scaffold1804 | 247089                  | AA                              | GG                 | GG               | INTERGENIC                    |                    |                       |
| SNP_100368_A_247095 | NW_004516909.1 | scaffold1804 | 247095                  | AA                              | TT                 | TT               | INTERGENIC                    |                    |                       |
| SNP_100369_A_247102 | NW_004516909.1 | scaffold1804 | 247102                  | CC                              | TT                 | TT               | INTERGENIC                    |                    |                       |
| SNP_100370_A_247171 | NW_004516909.1 | scaffold1804 | 247171                  | CC                              | GG                 | GG               | INTERGENIC                    |                    |                       |
| SNP_100371_A_247307 | NW_004516909.1 | scaffold1804 | 247307                  | AA                              | CC                 | CC               | INTERGENIC                    |                    |                       |
| SNP_100372_A_247315 | NW_004516909.1 | scaffold1804 | 247315                  | AA                              | GG                 | GG               | INTERGENIC                    |                    |                       |
| SNP_100373_A_253031 | NW_004516909.1 | scaffold1804 | 253031                  | AA                              | CC                 | CC               | INTERGENIC                    |                    |                       |
| SNP_100374_A_253574 | NW_004516909.1 | scaffold1804 | 253574                  | TT                              | CC                 | CC               | INTERGENIC                    |                    |                       |

| SNPs IDs            | Chromosome IDs | Chromosomes  | Physical positions (bp) | CDC Frontier (Reference genome) | (Pusa 1103 & HPNB) | (ILWC 46 & LPNB) | Sequence genome | Components of | Gene accession IDs | Putative functions |
|---------------------|----------------|--------------|-------------------------|---------------------------------|--------------------|------------------|-----------------|---------------|--------------------|--------------------|
| SNP_100375_A_253716 | NW_004516909.1 | scaffold1804 | 253716                  | TT                              | CC                 | CC               | INTERGENIC      |               |                    |                    |
| SNP_100376_A_253840 | NW_004516909.1 | scaffold1804 | 253840                  | CC                              | TT                 | TT               | INTERGENIC      |               |                    |                    |
| SNP_100377_A_253897 | NW_004516909.1 | scaffold1804 | 253897                  | CC                              | TT                 | TT               | INTERGENIC      |               |                    |                    |
| SNP_100378_A_257644 | NW_004516909.1 | scaffold1804 | 257644                  | GG                              | TT                 | TT               | INTERGENIC      |               |                    |                    |
| SNP_100379_A_257727 | NW_004516909.1 | scaffold1804 | 257727                  | GG                              | AA                 | AA               | INTERGENIC      |               |                    |                    |
| SNP_100380_A_271321 | NW_004516909.1 | scaffold1804 | 271321                  | TT                              | CC                 | CC               | INTERGENIC      |               |                    |                    |
| SNP_100381_A_303353 | NW_004516909.1 | scaffold1804 | 303353                  | TT                              | CC                 | CC               | INTERGENIC      |               |                    |                    |
| SNP_100382_A_317904 | NW_004516909.1 | scaffold1804 | 317904                  | CC                              | AA                 | AA               | DRR             | 101503844     | expansin-B11-like  |                    |
| SNP_100383_A_317906 | NW_004516909.1 | scaffold1804 | 317906                  | TT                              | AA                 | AA               | DRR             | 101503844     | expansin-B11-like  |                    |
| SNP_100385_A_64     | NW_004516910.1 | scaffold1806 | 64                      | CC                              | AA                 | AA               | INTERGENIC      |               |                    |                    |
| SNP_100386_A_107    | NW_004516910.1 | scaffold1806 | 107                     | AA                              | TT                 | TT               | INTERGENIC      |               |                    |                    |
| SNP_100388_A_347    | NW_004516910.1 | scaffold1806 | 347                     | AA                              | CC                 | CC               | INTERGENIC      |               |                    |                    |
| SNP_100389_A_446    | NW_004516910.1 | scaffold1806 | 446                     | GG                              | TT                 | TT               | INTERGENIC      |               |                    |                    |
| SNP_100390_A_541    | NW_004516910.1 | scaffold1806 | 541                     | AA                              | GG                 | GG               | INTERGENIC      |               |                    |                    |
| SNP_100391_A_555    | NW_004516910.1 | scaffold1806 | 555                     | AA                              | GG                 | GG               | INTERGENIC      |               |                    |                    |
| SNP_100392_A_650    | NW_004516910.1 | scaffold1806 | 650                     | GG                              | CC                 | CC               | INTERGENIC      |               |                    |                    |
| SNP_100393_A_701    | NW_004516910.1 | scaffold1806 | 701                     | AA                              | GG                 | GG               | INTERGENIC      |               |                    |                    |
| SNP_100394_A_730    | NW_004516910.1 | scaffold1806 | 730                     | AA                              | GG                 | GG               | INTERGENIC      |               |                    |                    |
| SNP_100395_A_2422   | NW_004516910.1 | scaffold1806 | 2422                    | TT                              | CC                 | CC               | INTERGENIC      |               |                    |                    |
| SNP_100396_A_2435   | NW_004516910.1 | scaffold1806 | 2435                    | AA                              | GG                 | GG               | INTERGENIC      |               |                    |                    |
| SNP_100397_A_2563   | NW_004516910.1 | scaffold1806 | 2563                    | TT                              | AA                 | AA               | INTERGENIC      |               |                    |                    |
| SNP_100398_A_2566   | NW_004516910.1 | scaffold1806 | 2566                    | TT                              | CC                 | CC               | INTERGENIC      |               |                    |                    |

| SNPs IDs           | Chromosome IDs | Chromosomes  | Physical positions (bp) | CDC Frontier (Reference genome) | (Pusa 1103 & HPNB) | (ILWC 46 & LPNB) | Sequence genome | Components of | Gene accession IDs | Putative functions |
|--------------------|----------------|--------------|-------------------------|---------------------------------|--------------------|------------------|-----------------|---------------|--------------------|--------------------|
| SNP_100399_A_2754  | NW_004516910.1 | scaffold1806 | 2754                    | CC                              | TT                 | TT               | INTERGENIC      |               |                    |                    |
| SNP_100400_A_4702  | NW_004516910.1 | scaffold1806 | 4702                    | TT                              | CC                 | CC               | INTERGENIC      |               |                    |                    |
| SNP_100401_A_4919  | NW_004516910.1 | scaffold1806 | 4919                    | AA                              | GG                 | GG               | INTERGENIC      |               |                    |                    |
| SNP_100402_A_4925  | NW_004516910.1 | scaffold1806 | 4925                    | CC                              | TT                 | TT               | INTERGENIC      |               |                    |                    |
| SNP_100403_A_4956  | NW_004516910.1 | scaffold1806 | 4956                    | CC                              | GG                 | GG               | INTERGENIC      |               |                    |                    |
| SNP_100404_A_4966  | NW_004516910.1 | scaffold1806 | 4966                    | GG                              | AA                 | AA               | INTERGENIC      |               |                    |                    |
| SNP_100405_A_5041  | NW_004516910.1 | scaffold1806 | 5041                    | AA                              | TT                 | TT               | INTERGENIC      |               |                    |                    |
| SNP_100406_A_6730  | NW_004516910.1 | scaffold1806 | 6730                    | CC                              | GG                 | GG               | INTERGENIC      |               |                    |                    |
| SNP_100407_A_6906  | NW_004516910.1 | scaffold1806 | 6906                    | AA                              | GG                 | GG               | INTERGENIC      |               |                    |                    |
| SNP_100408_A_6978  | NW_004516910.1 | scaffold1806 | 6978                    | CC                              | TT                 | TT               | INTERGENIC      |               |                    |                    |
| SNP_100409_A_7016  | NW_004516910.1 | scaffold1806 | 7016                    | AA                              | GG                 | GG               | INTERGENIC      |               |                    |                    |
| SNP_100410_A_7535  | NW_004516910.1 | scaffold1806 | 7535                    | AA                              | GG                 | GG               | INTERGENIC      |               |                    |                    |
| SNP_100411_A_7906  | NW_004516910.1 | scaffold1806 | 7906                    | GG                              | TT                 | TT               | INTERGENIC      |               |                    |                    |
| SNP_100412_A_8599  | NW_004516910.1 | scaffold1806 | 8599                    | AA                              | GG                 | GG               | INTERGENIC      |               |                    |                    |
| SNP_100413_A_8760  | NW_004516910.1 | scaffold1806 | 8760                    | CC                              | GG                 | GG               | INTERGENIC      |               |                    |                    |
| SNP_100414_A_8776  | NW_004516910.1 | scaffold1806 | 8776                    | AA                              | GG                 | GG               | INTERGENIC      |               |                    |                    |
| SNP_100415_A_23856 | NW_004516910.1 | scaffold1806 | 23856                   | CC                              | TT                 | TT               | INTERGENIC      |               |                    |                    |
| SNP_100416_A_23943 | NW_004516910.1 | scaffold1806 | 23943                   | TT                              | AA                 | AA               | INTERGENIC      |               |                    |                    |
| SNP_100417_A_24090 | NW_004516910.1 | scaffold1806 | 24090                   | CC                              | TT                 | TT               | INTERGENIC      |               |                    |                    |
| SNP_100418_A_24170 | NW_004516910.1 | scaffold1806 | 24170                   | TT                              | AA                 | AA               | INTERGENIC      |               |                    |                    |
| SNP_100419_A_24427 | NW_004516910.1 | scaffold1806 | 24427                   | CC                              | AA                 | AA               | INTERGENIC      |               |                    |                    |
| SNP_100420_A_24656 | NW_004516910.1 | scaffold1806 | 24656                   | CC                              | TT                 | TT               | INTERGENIC      |               |                    |                    |

| SNPs IDs           | Chromosome IDs | Chromosomes  | Physical positions (bp) | CDC Frontier (Reference genome) | (Pusa 1103 & HPNB) | (ILWC 46 & LPNB) | Sequence genome | Components of | Gene accession IDs | Putative functions |
|--------------------|----------------|--------------|-------------------------|---------------------------------|--------------------|------------------|-----------------|---------------|--------------------|--------------------|
| SNP_100422_A_24768 | NW_004516910.1 | scaffold1806 | 24768                   | CC                              | AA                 | AA               | INTERGENIC      |               |                    |                    |
| SNP_100423_A_24793 | NW_004516910.1 | scaffold1806 | 24793                   | TT                              | AA                 | AA               | INTERGENIC      |               |                    |                    |
| SNP_100424_A_25347 | NW_004516910.1 | scaffold1806 | 25347                   | AA                              | CC                 | CC               | INTERGENIC      |               |                    |                    |
| SNP_100425_A_25354 | NW_004516910.1 | scaffold1806 | 25354                   | CC                              | GG                 | GG               | INTERGENIC      |               |                    |                    |
| SNP_100426_A_28481 | NW_004516910.1 | scaffold1806 | 28481                   | GG                              | AA                 | AA               | INTERGENIC      |               |                    |                    |
| SNP_100427_A_417   | NW_004516913.1 | scaffold1810 | 417                     | TT                              | CC                 | CC               | INTERGENIC      |               |                    |                    |
| SNP_100428_A_519   | NW_004516913.1 | scaffold1810 | 519                     | GG                              | AA                 | AA               | INTERGENIC      |               |                    |                    |
| SNP_100429_A_731   | NW_004516913.1 | scaffold1810 | 731                     | TT                              | GG                 | GG               | INTERGENIC      |               |                    |                    |
| SNP_100430_A_969   | NW_004516913.1 | scaffold1810 | 969                     | AA                              | TT                 | TT               | INTERGENIC      |               |                    |                    |
| SNP_100431_A_1649  | NW_004516913.1 | scaffold1810 | 1649                    | AA                              | CC                 | CC               | INTERGENIC      |               |                    |                    |
| SNP_100432_A_1694  | NW_004516913.1 | scaffold1810 | 1694                    | CC                              | TT                 | TT               | INTERGENIC      |               |                    |                    |
| SNP_100433_A_1735  | NW_004516913.1 | scaffold1810 | 1735                    | TT                              | AA                 | AA               | INTERGENIC      |               |                    |                    |
| SNP_100434_A_2053  | NW_004516913.1 | scaffold1810 | 2053                    | CC                              | TT                 | TT               | INTERGENIC      |               |                    |                    |
| SNP_100435_A_2066  | NW_004516913.1 | scaffold1810 | 2066                    | GG                              | AA                 | AA               | INTERGENIC      |               |                    |                    |
| SNP_100436_A_43942 | NW_004516913.1 | scaffold1810 | 43942                   | TT                              | CC                 | CC               | INTRON          | 101504158     | Unknown function   |                    |
| SNP_100437_A_48301 | NW_004516913.1 | scaffold1810 | 48301                   | AA                              | GG                 | GG               | URR             | 101504158     | Unknown function   |                    |
| SNP_100438_A_95353 | NW_004516913.1 | scaffold1810 | 95353                   | TT                              | CC                 | CC               | INTERGENIC      |               |                    |                    |
| SNP_100440_A_98595 | NW_004516913.1 | scaffold1810 | 98595                   | TT                              | AA                 | AA               | INTERGENIC      |               |                    |                    |
| SNP_100441_A_98663 | NW_004516913.1 | scaffold1810 | 98663                   | AA                              | GG                 | GG               | INTERGENIC      |               |                    |                    |
| SNP_100442_A_98676 | NW_004516913.1 | scaffold1810 | 98676                   | CC                              | TT                 | TT               | INTERGENIC      |               |                    |                    |
| SNP_100443_A_98679 | NW_004516913.1 | scaffold1810 | 98679                   | CC                              | AA                 | AA               | INTERGENIC      |               |                    |                    |
| SNP_100444_A_98752 | NW_004516913.1 | scaffold1810 | 98752                   | GG                              | AA                 | AA               | INTERGENIC      |               |                    |                    |

| SNPs IDs            | Chromosome IDs | Chromosomes  | Physical positions (bp) | CDC Frontier (Reference genome) | (Pusa 1103 & HPNB) | (ILWC 46 & LPNB) | Sequence genome | Components of | Gene accession IDs           | Putative functions |
|---------------------|----------------|--------------|-------------------------|---------------------------------|--------------------|------------------|-----------------|---------------|------------------------------|--------------------|
| SNP_100445_A_98769  | NW_004516913.1 | scaffold1810 | 98769                   | GG                              | AA                 | AA               | INTERGENIC      |               |                              |                    |
| SNP_100446_A_101967 | NW_004516913.1 | scaffold1810 | 101967                  | AA                              | TT                 | TT               | INTERGENIC      |               |                              |                    |
| SNP_100447_A_103203 | NW_004516913.1 | scaffold1810 | 103203                  | TT                              | CC                 | CC               | INTERGENIC      |               |                              |                    |
| SNP_100448_A_103209 | NW_004516913.1 | scaffold1810 | 103209                  | TT                              | GG                 | GG               | INTERGENIC      |               |                              |                    |
| SNP_100450_A_103413 | NW_004516913.1 | scaffold1810 | 103413                  | AA                              | GG                 | GG               | INTERGENIC      |               |                              |                    |
| SNP_100451_A_103633 | NW_004516913.1 | scaffold1810 | 103633                  | GG                              | AA                 | AA               | INTERGENIC      |               |                              |                    |
| SNP_100452_A_103667 | NW_004516913.1 | scaffold1810 | 103667                  | GG                              | TT                 | TT               | INTERGENIC      |               |                              |                    |
| SNP_100455_A_105071 | NW_004516913.1 | scaffold1810 | 105071                  | AA                              | TT                 | TT               | INTERGENIC      |               |                              |                    |
| SNP_100456_A_105085 | NW_004516913.1 | scaffold1810 | 105085                  | TT                              | AA                 | AA               | INTERGENIC      |               |                              |                    |
| SNP_100457_A_105320 | NW_004516913.1 | scaffold1810 | 105320                  | TT                              | AA                 | AA               | INTERGENIC      |               |                              |                    |
| SNP_100458_A_105    | NW_004516914.1 | scaffold1811 | 105                     | TT                              | CC                 | CC               | INTERGENIC      |               |                              |                    |
| SNP_100459_A_1579   | NW_004516916.1 | scaffold1813 | 1579                    | GG                              | AA                 | AA               | INTERGENIC      |               |                              |                    |
| SNP_100460_A_1580   | NW_004516916.1 | scaffold1813 | 1580                    | AA                              | GG                 | GG               | INTERGENIC      |               |                              |                    |
| SNP_100461_A_5738   | NW_004516918.1 | scaffold1815 | 5738                    | GG                              | AA                 | AA               | INTERGENIC      |               |                              |                    |
| SNP_100463_A_12795  | NW_004516918.1 | scaffold1815 | 12795                   | AA                              | GG                 | GG               | INTERGENIC      |               |                              |                    |
| SNP_100464_A_16703  | NW_004516918.1 | scaffold1815 | 16703                   | CC                              | AA                 | AA               | INTERGENIC      |               |                              |                    |
| SNP_100465_A_24135  | NW_004516918.1 | scaffold1815 | 24135                   | TT                              | CC                 | CC               | URR             | 101505989     | uncharacterized LOC101505989 |                    |
| SNP_100466_A_24331  | NW_004516918.1 | scaffold1815 | 24331                   | AA                              | GG                 | GG               | URR             | 101505989     | uncharacterized LOC101505989 |                    |
| SNP_100467_A_31835  | NW_004516918.1 | scaffold1815 | 31835                   | AA                              | GG                 | GG               | INTERGENIC      |               |                              |                    |
| SNP_100468_A_31860  | NW_004516918.1 | scaffold1815 | 31860                   | AA                              | GG                 | GG               | INTERGENIC      |               |                              |                    |
| SNP_100469_A_34555  | NW_004516918.1 | scaffold1815 | 34555                   | CC                              | TT                 | TT               | INTERGENIC      |               |                              |                    |
| SNP_100470_A_15682  | NW_004516919.1 | scaffold1816 | 15682                   | AA                              | GG                 | GG               | INTERGENIC      |               |                              |                    |

| SNPs IDs           | Chromosome IDs | Chromosomes  | Physical positions (bp) | CDC Frontier (Reference genome) | (Pusa 1103 & HPNB) | (ILWC 46 & LPNB) | Sequence genome | Components of | Gene accession IDs | Putative functions |
|--------------------|----------------|--------------|-------------------------|---------------------------------|--------------------|------------------|-----------------|---------------|--------------------|--------------------|
| SNP_100471_A_15928 | NW_004516919.1 | scaffold1816 | 15928                   | CC                              | GG                 | GG               | INTERGENIC      |               |                    |                    |
| SNP_100472_A_15966 | NW_004516919.1 | scaffold1816 | 15966                   | TT                              | CC                 | CC               | INTERGENIC      |               |                    |                    |
| SNP_100473_A_19267 | NW_004516919.1 | scaffold1816 | 19267                   | TT                              | GG                 | GG               | INTERGENIC      |               |                    |                    |
| SNP_100474_A_26240 | NW_004516919.1 | scaffold1816 | 26240                   | TT                              | CC                 | CC               | INTERGENIC      |               |                    |                    |
| SNP_100475_A_26302 | NW_004516919.1 | scaffold1816 | 26302                   | CC                              | AA                 | AA               | INTERGENIC      |               |                    |                    |
| SNP_100476_A_26494 | NW_004516919.1 | scaffold1816 | 26494                   | CC                              | TT                 | TT               | INTERGENIC      |               |                    |                    |
| SNP_100477_A_27803 | NW_004516919.1 | scaffold1816 | 27803                   | AA                              | CC                 | CC               | INTERGENIC      |               |                    |                    |
| SNP_100478_A_27897 | NW_004516919.1 | scaffold1816 | 27897                   | CC                              | AA                 | AA               | INTERGENIC      |               |                    |                    |
| SNP_100479_A_28276 | NW_004516919.1 | scaffold1816 | 28276                   | GG                              | AA                 | AA               | INTERGENIC      |               |                    |                    |
| SNP_100480_A_28316 | NW_004516919.1 | scaffold1816 | 28316                   | TT                              | GG                 | GG               | INTERGENIC      |               |                    |                    |
| SNP_100481_A_52991 | NW_004516919.1 | scaffold1816 | 52991                   | CC                              | AA                 | AA               | INTERGENIC      |               |                    |                    |
| SNP_100482_A_53044 | NW_004516919.1 | scaffold1816 | 53044                   | TT                              | AA                 | AA               | INTERGENIC      |               |                    |                    |
| SNP_100483_A_53064 | NW_004516919.1 | scaffold1816 | 53064                   | TT                              | CC                 | CC               | INTERGENIC      |               |                    |                    |
| SNP_100484_A_53083 | NW_004516919.1 | scaffold1816 | 53083                   | CC                              | GG                 | GG               | INTERGENIC      |               |                    |                    |
| SNP_100485_A_53110 | NW_004516919.1 | scaffold1816 | 53110                   | AA                              | GG                 | GG               | INTERGENIC      |               |                    |                    |
| SNP_100486_A_53115 | NW_004516919.1 | scaffold1816 | 53115                   | GG                              | AA                 | AA               | INTERGENIC      |               |                    |                    |
| SNP_100487_A_53141 | NW_004516919.1 | scaffold1816 | 53141                   | AA                              | GG                 | GG               | INTERGENIC      |               |                    |                    |
| SNP_100488_A_53201 | NW_004516919.1 | scaffold1816 | 53201                   | GG                              | AA                 | AA               | INTERGENIC      |               |                    |                    |
| SNP_100489_A_53221 | NW_004516919.1 | scaffold1816 | 53221                   | TT                              | GG                 | GG               | INTERGENIC      |               |                    |                    |
| SNP_100490_A_53347 | NW_004516919.1 | scaffold1816 | 53347                   | CC                              | GG                 | GG               | INTERGENIC      |               |                    |                    |
| SNP_100491_A_53349 | NW_004516919.1 | scaffold1816 | 53349                   | AA                              | GG                 | GG               | INTERGENIC      |               |                    |                    |
| SNP_100492_A_53367 | NW_004516919.1 | scaffold1816 | 53367                   | AA                              | GG                 | GG               | INTERGENIC      |               |                    |                    |



| SNPs IDs           | Chromosome IDs | Chromosomes  | Physical positions (bp) | CDC Frontier (Reference genome) | (Pusa 1103 & HPNB) | (ILWC 46 & LPNB) | Sequence genome | Components of | Gene accession IDs | Putative functions |
|--------------------|----------------|--------------|-------------------------|---------------------------------|--------------------|------------------|-----------------|---------------|--------------------|--------------------|
| SNP_100493_A_53386 | NW_004516919.1 | scaffold1816 | 53386                   | TT                              | AA                 | AA               | INTERGENIC      |               |                    |                    |
| SNP_100494_A_53496 | NW_004516919.1 | scaffold1816 | 53496                   | GG                              | CC                 | CC               | INTERGENIC      |               |                    |                    |
| SNP_100495_A_53582 | NW_004516919.1 | scaffold1816 | 53582                   | CC                              | TT                 | TT               | INTERGENIC      |               |                    |                    |
| SNP_100497_A_53666 | NW_004516919.1 | scaffold1816 | 53666                   | CC                              | TT                 | TT               | INTERGENIC      |               |                    |                    |
| SNP_100498_A_53686 | NW_004516919.1 | scaffold1816 | 53686                   | TT                              | CC                 | CC               | INTERGENIC      |               |                    |                    |
| SNP_100499_A_53752 | NW_004516919.1 | scaffold1816 | 53752                   | CC                              | TT                 | TT               | INTERGENIC      |               |                    |                    |
| SNP_100500_A_53754 | NW_004516919.1 | scaffold1816 | 53754                   | CC                              | GG                 | GG               | INTERGENIC      |               |                    |                    |
| SNP_100501_A_1810  | NW_004516920.1 | scaffold1817 | 1810                    | TT                              | CC                 | CC               | INTERGENIC      |               |                    |                    |
| SNP_100502_A_3298  | NW_004516920.1 | scaffold1817 | 3298                    | AA                              | GG                 | GG               | INTERGENIC      |               |                    |                    |
| SNP_100503_A_3336  | NW_004516920.1 | scaffold1817 | 3336                    | TT                              | CC                 | CC               | INTERGENIC      |               |                    |                    |
| SNP_100504_A_3403  | NW_004516920.1 | scaffold1817 | 3403                    | TT                              | CC                 | CC               | INTERGENIC      |               |                    |                    |
| SNP_100505_A_3432  | NW_004516920.1 | scaffold1817 | 3432                    | TT                              | CC                 | CC               | INTERGENIC      |               |                    |                    |
| SNP_100506_A_3679  | NW_004516920.1 | scaffold1817 | 3679                    | CC                              | GG                 | GG               | INTERGENIC      |               |                    |                    |
| SNP_100507_A_3748  | NW_004516920.1 | scaffold1817 | 3748                    | AA                              | GG                 | GG               | INTERGENIC      |               |                    |                    |
| SNP_100508_A_9126  | NW_004516921.1 | scaffold1818 | 9126                    | AA                              | GG                 | GG               | INTERGENIC      |               |                    |                    |
| SNP_100509_A_19312 | NW_004516921.1 | scaffold1818 | 19312                   | AA                              | TT                 | TT               | INTERGENIC      |               |                    |                    |
| SNP_100510_A_25839 | NW_004516921.1 | scaffold1818 | 25839                   | GG                              | CC                 | CC               | INTERGENIC      |               |                    |                    |
| SNP_100511_A_25843 | NW_004516921.1 | scaffold1818 | 25843                   | TT                              | CC                 | CC               | INTERGENIC      |               |                    |                    |
| SNP_100512_A_28531 | NW_004516921.1 | scaffold1818 | 28531                   | TT                              | CC                 | CC               | INTERGENIC      |               |                    |                    |
| SNP_100513_A_28603 | NW_004516921.1 | scaffold1818 | 28603                   | AA                              | TT                 | TT               | INTERGENIC      |               |                    |                    |
| SNP_100514_A_28630 | NW_004516921.1 | scaffold1818 | 28630                   | GG                              | AA                 | AA               | INTERGENIC      |               |                    |                    |
| SNP_100515_A_28652 | NW_004516921.1 | scaffold1818 | 28652                   | CC                              | AA                 | AA               | INTERGENIC      |               |                    |                    |

| SNPs IDs           | Chromosome IDs | Chromosomes  | Physical positions (bp) | CDC Frontier (Reference genome) | (Pusa 1103 & HPNB) | (ILWC 46 & LPNB) | Sequence genome | Components of | Gene accession IDs | Putative functions |
|--------------------|----------------|--------------|-------------------------|---------------------------------|--------------------|------------------|-----------------|---------------|--------------------|--------------------|
| SNP_100516_A_8597  | NW_004516924.1 | scaffold1822 | 8597                    | TT                              | CC                 | CC               | INTERGENIC      |               |                    |                    |
| SNP_100517_A_8781  | NW_004516924.1 | scaffold1822 | 8781                    | GG                              | AA                 | AA               | INTERGENIC      |               |                    |                    |
| SNP_100519_A_17507 | NW_004516924.1 | scaffold1822 | 17507                   | TT                              | AA                 | AA               | INTERGENIC      |               |                    |                    |
| SNP_100520_A_17528 | NW_004516924.1 | scaffold1822 | 17528                   | AA                              | GG                 | GG               | INTERGENIC      |               |                    |                    |
| SNP_100521_A_17846 | NW_004516924.1 | scaffold1822 | 17846                   | CC                              | TT                 | TT               | INTERGENIC      |               |                    |                    |
| SNP_100522_A_18282 | NW_004516924.1 | scaffold1822 | 18282                   | AA                              | GG                 | GG               | INTERGENIC      |               |                    |                    |
| SNP_100523_A_18329 | NW_004516924.1 | scaffold1822 | 18329                   | CC                              | AA                 | AA               | INTERGENIC      |               |                    |                    |
| SNP_100524_A_18332 | NW_004516924.1 | scaffold1822 | 18332                   | GG                              | AA                 | AA               | INTERGENIC      |               |                    |                    |
| SNP_100525_A_27090 | NW_004516924.1 | scaffold1822 | 27090                   | CC                              | TT                 | TT               | INTERGENIC      |               |                    |                    |
| SNP_100526_A_39662 | NW_004516924.1 | scaffold1822 | 39662                   | GG                              | CC                 | CC               | INTERGENIC      |               |                    |                    |
| SNP_100527_A_47089 | NW_004516924.1 | scaffold1822 | 47089                   | TT                              | CC                 | CC               | INTERGENIC      |               |                    |                    |
| SNP_100528_A_47134 | NW_004516924.1 | scaffold1822 | 47134                   | TT                              | CC                 | CC               | INTERGENIC      |               |                    |                    |
| SNP_100529_A_47157 | NW_004516924.1 | scaffold1822 | 47157                   | AA                              | TT                 | TT               | INTERGENIC      |               |                    |                    |
| SNP_100530_A_53753 | NW_004516924.1 | scaffold1822 | 53753                   | GG                              | TT                 | TT               | INTERGENIC      |               |                    |                    |
| SNP_100531_A_24612 | NW_004516926.1 | scaffold1825 | 24612                   | CC                              | GG                 | GG               | INTERGENIC      |               |                    |                    |
| SNP_100532_A_24626 | NW_004516926.1 | scaffold1825 | 24626                   | TT                              | CC                 | CC               | INTERGENIC      |               |                    |                    |
| SNP_100533_A_26276 | NW_004516926.1 | scaffold1825 | 26276                   | CC                              | TT                 | TT               | INTERGENIC      |               |                    |                    |
| SNP_100534_A_40444 | NW_004516926.1 | scaffold1825 | 40444                   | CC                              | TT                 | TT               | INTERGENIC      |               |                    |                    |
| SNP_100535_A_45493 | NW_004516926.1 | scaffold1825 | 45493                   | AA                              | GG                 | GG               | INTERGENIC      |               |                    |                    |
| SNP_100536_A_48808 | NW_004516926.1 | scaffold1825 | 48808                   | CC                              | TT                 | TT               | INTERGENIC      |               |                    |                    |
| SNP_100537_A_48840 | NW_004516926.1 | scaffold1825 | 48840                   | GG                              | AA                 | AA               | INTERGENIC      |               |                    |                    |
| SNP_100538_A_48858 | NW_004516926.1 | scaffold1825 | 48858                   | TT                              | CC                 | CC               | INTERGENIC      |               |                    |                    |

| SNPs IDs            | Chromosome IDs | Chromosomes  | Physical positions (bp) | CDC Frontier (Reference genome) | (Pusa 1103 & HPNB) | (ILWC 46 & LPNB) | Sequence Components of genome | Gene accession IDs | Putative functions            |
|---------------------|----------------|--------------|-------------------------|---------------------------------|--------------------|------------------|-------------------------------|--------------------|-------------------------------|
| SNP_100539_A_48876  | NW_004516926.1 | scaffold1825 | 48876                   | CC                              | TT                 | TT               | INTERGENIC                    |                    |                               |
| SNP_100540_A_63787  | NW_004516926.1 | scaffold1825 | 63787                   | GG                              | CC                 | CC               | INTERGENIC                    |                    |                               |
| SNP_100541_A_112049 | NW_004516926.1 | scaffold1825 | 112049                  | AA                              | TT                 | TT               | INTERGENIC                    |                    |                               |
| SNP_100542_A_112050 | NW_004516926.1 | scaffold1825 | 112050                  | TT                              | AA                 | AA               | INTERGENIC                    |                    |                               |
| SNP_100543_A_118214 | NW_004516926.1 | scaffold1825 | 118214                  | GG                              | TT                 | TT               | INTERGENIC                    |                    |                               |
| SNP_100544_A_133693 | NW_004516926.1 | scaffold1825 | 133693                  | CC                              | TT                 | TT               | SYNONYMOUS_CODING             | 101507589          | 40S ribosomal protein S8-like |
| SNP_100545_A_134910 | NW_004516926.1 | scaffold1825 | 134910                  | TT                              | CC                 | CC               | INTRON                        | 101507589          | 40S ribosomal protein S8-like |
| SNP_100546_A_134964 | NW_004516926.1 | scaffold1825 | 134964                  | AA                              | GG                 | GG               | INTRON                        | 101507589          | 40S ribosomal protein S8-like |
| SNP_100547_A_135657 | NW_004516926.1 | scaffold1825 | 135657                  | AA                              | TT                 | TT               | INTRON                        | 101507589          | 40S ribosomal protein S8-like |
| SNP_100548_A_135658 | NW_004516926.1 | scaffold1825 | 135658                  | TT                              | CC                 | CC               | INTRON                        | 101507589          | 40S ribosomal protein S8-like |
| SNP_100549_A_135705 | NW_004516926.1 | scaffold1825 | 135705                  | GG                              | CC                 | CC               | INTRON                        | 101507589          | 40S ribosomal protein S8-like |
| SNP_100550_A_142323 | NW_004516926.1 | scaffold1825 | 142323                  | CC                              | AA                 | AA               | INTERGENIC                    |                    |                               |
| SNP_100551_A_144112 | NW_004516926.1 | scaffold1825 | 144112                  | CC                              | TT                 | TT               | INTERGENIC                    |                    |                               |
| SNP_100552_A_147746 | NW_004516926.1 | scaffold1825 | 147746                  | TT                              | CC                 | CC               | INTERGENIC                    |                    |                               |
| SNP_100553_A_147754 | NW_004516926.1 | scaffold1825 | 147754                  | GG                              | CC                 | CC               | INTERGENIC                    |                    |                               |
| SNP_100554_A_147842 | NW_004516926.1 | scaffold1825 | 147842                  | AA                              | GG                 | GG               | INTERGENIC                    |                    |                               |
| SNP_100555_A_147846 | NW_004516926.1 | scaffold1825 | 147846                  | GG                              | AA                 | AA               | INTERGENIC                    |                    |                               |
| SNP_100557_A_148249 | NW_004516926.1 | scaffold1825 | 148249                  | TT                              | CC                 | CC               | INTERGENIC                    |                    |                               |
| SNP_100558_A_149764 | NW_004516926.1 | scaffold1825 | 149764                  | CC                              | TT                 | TT               | INTERGENIC                    |                    |                               |
| SNP_100559_A_149857 | NW_004516926.1 | scaffold1825 | 149857                  | CC                              | TT                 | TT               | INTERGENIC                    |                    |                               |
| SNP_100560_A_153613 | NW_004516926.1 | scaffold1825 | 153613                  | CC                              | TT                 | TT               | INTERGENIC                    |                    |                               |
| SNP_100561_A_156503 | NW_004516926.1 | scaffold1825 | 156503                  | AA                              | GG                 | GG               | INTERGENIC                    |                    |                               |

| SNPs IDs           | Chromosome IDs | Chromosomes  | Physical positions (bp) | CDC Frontier (Reference genome) | (Pusa 1103 & HPNB) | (ILWC 46 & LPNB) | Sequence genome | Components of | Gene accession IDs | Putative functions |
|--------------------|----------------|--------------|-------------------------|---------------------------------|--------------------|------------------|-----------------|---------------|--------------------|--------------------|
| SNP_100562_A_2135  | NW_004516927.1 | scaffold1826 | 2135                    | GG                              | AA                 | AA               | INTERGENIC      |               |                    |                    |
| SNP_100563_A_2136  | NW_004516927.1 | scaffold1826 | 2136                    | CC                              | AA                 | AA               | INTERGENIC      |               |                    |                    |
| SNP_100565_A_29802 | NW_004516929.1 | scaffold1830 | 29802                   | AA                              | TT                 | TT               | INTERGENIC      |               |                    |                    |
| SNP_100566_A_33494 | NW_004516929.1 | scaffold1830 | 33494                   | CC                              | AA                 | AA               | INTERGENIC      |               |                    |                    |
| SNP_100567_A_1506  | NW_004516930.1 | scaffold1832 | 1506                    | CC                              | TT                 | TT               | INTERGENIC      |               |                    |                    |
| SNP_100568_A_1532  | NW_004516930.1 | scaffold1832 | 1532                    | AA                              | GG                 | GG               | INTERGENIC      |               |                    |                    |
| SNP_100569_A_558   | NW_004516931.1 | scaffold1835 | 558                     | GG                              | AA                 | AA               | INTERGENIC      |               |                    |                    |
| SNP_100570_A_666   | NW_004516931.1 | scaffold1835 | 666                     | TT                              | GG                 | GG               | INTERGENIC      |               |                    |                    |
| SNP_100571_A_758   | NW_004516931.1 | scaffold1835 | 758                     | TT                              | CC                 | CC               | INTERGENIC      |               |                    |                    |
| SNP_100572_A_988   | NW_004516931.1 | scaffold1835 | 988                     | CC                              | AA                 | AA               | INTERGENIC      |               |                    |                    |
| SNP_100573_A_1716  | NW_004516931.1 | scaffold1835 | 1716                    | AA                              | GG                 | GG               | INTERGENIC      |               |                    |                    |
| SNP_100574_A_1774  | NW_004516931.1 | scaffold1835 | 1774                    | TT                              | CC                 | CC               | INTERGENIC      |               |                    |                    |
| SNP_100575_A_2038  | NW_004516931.1 | scaffold1835 | 2038                    | AA                              | GG                 | GG               | INTERGENIC      |               |                    |                    |
| SNP_100576_A_2044  | NW_004516931.1 | scaffold1835 | 2044                    | TT                              | CC                 | CC               | INTERGENIC      |               |                    |                    |
| SNP_100577_A_2068  | NW_004516931.1 | scaffold1835 | 2068                    | CC                              | TT                 | TT               | INTERGENIC      |               |                    |                    |
| SNP_100578_A_2161  | NW_004516931.1 | scaffold1835 | 2161                    | CC                              | TT                 | TT               | INTERGENIC      |               |                    |                    |
| SNP_100579_A_5325  | NW_004516931.1 | scaffold1835 | 5325                    | TT                              | CC                 | CC               | INTERGENIC      |               |                    |                    |
| SNP_100580_A_5364  | NW_004516931.1 | scaffold1835 | 5364                    | CC                              | AA                 | AA               | INTERGENIC      |               |                    |                    |
| SNP_100581_A_5430  | NW_004516931.1 | scaffold1835 | 5430                    | TT                              | CC                 | CC               | INTERGENIC      |               |                    |                    |
| SNP_100582_A_5463  | NW_004516931.1 | scaffold1835 | 5463                    | CC                              | AA                 | AA               | INTERGENIC      |               |                    |                    |
| SNP_100583_A_5785  | NW_004516931.1 | scaffold1835 | 5785                    | GG                              | AA                 | AA               | INTERGENIC      |               |                    |                    |
| SNP_100584_A_6732  | NW_004516931.1 | scaffold1835 | 6732                    | TT                              | GG                 | GG               | INTERGENIC      |               |                    |                    |

| SNPs IDs          | Chromosome IDs | Chromosomes  | Physical positions (bp) | CDC Frontier (Reference genome) | (Pusa 1103 & HPNB) | (ILWC 46 & LPNB) | Sequence genome | Components of | Gene accession IDs | Putative functions |
|-------------------|----------------|--------------|-------------------------|---------------------------------|--------------------|------------------|-----------------|---------------|--------------------|--------------------|
| SNP_100585_A_6736 | NW_004516931.1 | scaffold1835 | 6736                    | GG                              | AA                 | AA               | INTERGENIC      |               |                    |                    |
| SNP_100586_A_6783 | NW_004516931.1 | scaffold1835 | 6783                    | GG                              | CC                 | CC               | INTERGENIC      |               |                    |                    |
| SNP_100587_A_6785 | NW_004516931.1 | scaffold1835 | 6785                    | GG                              | CC                 | CC               | INTERGENIC      |               |                    |                    |
| SNP_100588_A_6812 | NW_004516931.1 | scaffold1835 | 6812                    | TT                              | CC                 | CC               | INTERGENIC      |               |                    |                    |
| SNP_100589_A_6814 | NW_004516931.1 | scaffold1835 | 6814                    | GG                              | AA                 | AA               | INTERGENIC      |               |                    |                    |
| SNP_100590_A_6839 | NW_004516931.1 | scaffold1835 | 6839                    | AA                              | GG                 | GG               | INTERGENIC      |               |                    |                    |
| SNP_100591_A_7345 | NW_004516931.1 | scaffold1835 | 7345                    | AA                              | GG                 | GG               | INTERGENIC      |               |                    |                    |
| SNP_100592_A_7559 | NW_004516931.1 | scaffold1835 | 7559                    | CC                              | TT                 | TT               | INTERGENIC      |               |                    |                    |
| SNP_100593_A_7710 | NW_004516931.1 | scaffold1835 | 7710                    | GG                              | CC                 | CC               | INTERGENIC      |               |                    |                    |
| SNP_100594_A_7766 | NW_004516931.1 | scaffold1835 | 7766                    | CC                              | TT                 | TT               | INTERGENIC      |               |                    |                    |
| SNP_100595_A_7829 | NW_004516931.1 | scaffold1835 | 7829                    | AA                              | GG                 | GG               | INTERGENIC      |               |                    |                    |
| SNP_100596_A_7977 | NW_004516931.1 | scaffold1835 | 7977                    | AA                              | TT                 | TT               | INTERGENIC      |               |                    |                    |
| SNP_100598_A_8207 | NW_004516931.1 | scaffold1835 | 8207                    | GG                              | AA                 | AA               | INTERGENIC      |               |                    |                    |
| SNP_100599_A_8208 | NW_004516931.1 | scaffold1835 | 8208                    | CC                              | TT                 | TT               | INTERGENIC      |               |                    |                    |
| SNP_100600_A_8324 | NW_004516931.1 | scaffold1835 | 8324                    | CC                              | TT                 | TT               | INTERGENIC      |               |                    |                    |
| SNP_100601_A_8339 | NW_004516931.1 | scaffold1835 | 8339                    | CC                              | GG                 | GG               | INTERGENIC      |               |                    |                    |
| SNP_100602_A_8341 | NW_004516931.1 | scaffold1835 | 8341                    | GG                              | TT                 | TT               | INTERGENIC      |               |                    |                    |
| SNP_100603_A_8404 | NW_004516931.1 | scaffold1835 | 8404                    | TT                              | GG                 | GG               | INTERGENIC      |               |                    |                    |
| SNP_100604_A_8438 | NW_004516931.1 | scaffold1835 | 8438                    | TT                              | GG                 | GG               | INTERGENIC      |               |                    |                    |
| SNP_100605_A_8456 | NW_004516931.1 | scaffold1835 | 8456                    | AA                              | GG                 | GG               | INTERGENIC      |               |                    |                    |
| SNP_100607_A_8515 | NW_004516931.1 | scaffold1835 | 8515                    | GG                              | AA                 | AA               | INTERGENIC      |               |                    |                    |
| SNP_100608_A_8762 | NW_004516931.1 | scaffold1835 | 8762                    | GG                              | TT                 | TT               | INTERGENIC      |               |                    |                    |

| SNPs IDs           | Chromosome IDs | Chromosomes  | Physical positions (bp) | CDC Frontier (Reference genome) | (Pusa 1103 & HPNB) | (ILWC 46 & LPNB) | Sequence genome | Components of | Gene accession IDs | Putative functions |
|--------------------|----------------|--------------|-------------------------|---------------------------------|--------------------|------------------|-----------------|---------------|--------------------|--------------------|
| SNP_100609_A_8831  | NW_004516931.1 | scaffold1835 | 8831                    | CC                              | AA                 | AA               | INTERGENIC      |               |                    |                    |
| SNP_100610_A_8927  | NW_004516931.1 | scaffold1835 | 8927                    | AA                              | GG                 | GG               | INTERGENIC      |               |                    |                    |
| SNP_100611_A_9417  | NW_004516931.1 | scaffold1835 | 9417                    | CC                              | AA                 | AA               | INTERGENIC      |               |                    |                    |
| SNP_100613_A_10541 | NW_004516931.1 | scaffold1835 | 10541                   | CC                              | GG                 | GG               | INTERGENIC      |               |                    |                    |
| SNP_100614_A_10563 | NW_004516931.1 | scaffold1835 | 10563                   | TT                              | CC                 | CC               | INTERGENIC      |               |                    |                    |
| SNP_100616_A_11356 | NW_004516931.1 | scaffold1835 | 11356                   | CC                              | TT                 | TT               | INTERGENIC      |               |                    |                    |
| SNP_100617_A_11545 | NW_004516931.1 | scaffold1835 | 11545                   | GG                              | CC                 | CC               | INTERGENIC      |               |                    |                    |
| SNP_100618_A_25517 | NW_004516931.1 | scaffold1835 | 25517                   | TT                              | CC                 | CC               | INTERGENIC      |               |                    |                    |
| SNP_100619_A_25690 | NW_004516931.1 | scaffold1835 | 25690                   | CC                              | TT                 | TT               | INTERGENIC      |               |                    |                    |
| SNP_100620_A_25836 | NW_004516931.1 | scaffold1835 | 25836                   | CC                              | TT                 | TT               | INTERGENIC      |               |                    |                    |
| SNP_100621_A_26148 | NW_004516931.1 | scaffold1835 | 26148                   | TT                              | AA                 | AA               | INTERGENIC      |               |                    |                    |
| SNP_100622_A_26198 | NW_004516931.1 | scaffold1835 | 26198                   | AA                              | GG                 | GG               | INTERGENIC      |               |                    |                    |
| SNP_100623_A_26248 | NW_004516931.1 | scaffold1835 | 26248                   | CC                              | TT                 | TT               | INTERGENIC      |               |                    |                    |
| SNP_100624_A_26901 | NW_004516931.1 | scaffold1835 | 26901                   | AA                              | GG                 | GG               | INTERGENIC      |               |                    |                    |
| SNP_100625_A_2025  | NW_004516933.1 | scaffold1839 | 2025                    | CC                              | TT                 | TT               | INTERGENIC      |               |                    |                    |
| SNP_100626_A_2030  | NW_004516933.1 | scaffold1839 | 2030                    | AA                              | CC                 | CC               | INTERGENIC      |               |                    |                    |
| SNP_100627_A_2031  | NW_004516933.1 | scaffold1839 | 2031                    | AA                              | TT                 | TT               | INTERGENIC      |               |                    |                    |
| SNP_100628_A_2040  | NW_004516933.1 | scaffold1839 | 2040                    | AA                              | CC                 | CC               | INTERGENIC      |               |                    |                    |
| SNP_100629_A_5873  | NW_004516934.1 | scaffold1840 | 5873                    | GG                              | AA                 | AA               | INTERGENIC      |               |                    |                    |
| SNP_100630_A_665   | NW_004516937.1 | scaffold1844 | 665                     | AA                              | GG                 | GG               | INTERGENIC      |               |                    |                    |
| SNP_100631_A_679   | NW_004516937.1 | scaffold1844 | 679                     | GG                              | AA                 | AA               | INTERGENIC      |               |                    |                    |
| SNP_100632_A_710   | NW_004516937.1 | scaffold1844 | 710                     | TT                              | GG                 | GG               | INTERGENIC      |               |                    |                    |

| SNPs IDs          | Chromosome IDs | Chromosomes  | Physical positions (bp) | CDC Frontier (Reference genome) | (Pusa 1103 & HPNB) | (ILWC 46 & LPNB) | Sequence genome | Components of | Gene accession IDs | Putative functions |
|-------------------|----------------|--------------|-------------------------|---------------------------------|--------------------|------------------|-----------------|---------------|--------------------|--------------------|
| SNP_100633_A_734  | NW_004516937.1 | scaffold1844 | 734                     | AA                              | GG                 | GG               | INTERGENIC      |               |                    |                    |
| SNP_100634_A_837  | NW_004516937.1 | scaffold1844 | 837                     | AA                              | GG                 | GG               | INTERGENIC      |               |                    |                    |
| SNP_100635_A_847  | NW_004516937.1 | scaffold1844 | 847                     | CC                              | AA                 | AA               | INTERGENIC      |               |                    |                    |
| SNP_100636_A_886  | NW_004516937.1 | scaffold1844 | 886                     | CC                              | TT                 | TT               | INTERGENIC      |               |                    |                    |
| SNP_100637_A_917  | NW_004516937.1 | scaffold1844 | 917                     | CC                              | TT                 | TT               | INTERGENIC      |               |                    |                    |
| SNP_100638_A_957  | NW_004516937.1 | scaffold1844 | 957                     | TT                              | CC                 | CC               | INTERGENIC      |               |                    |                    |
| SNP_100639_A_967  | NW_004516937.1 | scaffold1844 | 967                     | TT                              | CC                 | CC               | INTERGENIC      |               |                    |                    |
| SNP_100640_A_990  | NW_004516937.1 | scaffold1844 | 990                     | TT                              | CC                 | CC               | INTERGENIC      |               |                    |                    |
| SNP_100641_A_1035 | NW_004516937.1 | scaffold1844 | 1035                    | AA                              | CC                 | CC               | INTERGENIC      |               |                    |                    |
| SNP_100642_A_1686 | NW_004516937.1 | scaffold1844 | 1686                    | GG                              | TT                 | TT               | INTERGENIC      |               |                    |                    |
| SNP_100643_A_1701 | NW_004516937.1 | scaffold1844 | 1701                    | CC                              | TT                 | TT               | INTERGENIC      |               |                    |                    |
| SNP_100644_A_1777 | NW_004516937.1 | scaffold1844 | 1777                    | GG                              | AA                 | AA               | INTERGENIC      |               |                    |                    |
| SNP_100645_A_1881 | NW_004516937.1 | scaffold1844 | 1881                    | TT                              | CC                 | CC               | INTERGENIC      |               |                    |                    |
| SNP_100646_A_1932 | NW_004516937.1 | scaffold1844 | 1932                    | AA                              | TT                 | TT               | INTERGENIC      |               |                    |                    |
| SNP_100648_A_2126 | NW_004516937.1 | scaffold1844 | 2126                    | AA                              | CC                 | CC               | INTERGENIC      |               |                    |                    |
| SNP_100649_A_2154 | NW_004516937.1 | scaffold1844 | 2154                    | TT                              | GG                 | GG               | INTERGENIC      |               |                    |                    |
| SNP_100651_A_2240 | NW_004516937.1 | scaffold1844 | 2240                    | TT                              | AA                 | AA               | INTERGENIC      |               |                    |                    |
| SNP_100652_A_2309 | NW_004516937.1 | scaffold1844 | 2309                    | CC                              | AA                 | AA               | INTERGENIC      |               |                    |                    |
| SNP_100653_A_2327 | NW_004516937.1 | scaffold1844 | 2327                    | CC                              | AA                 | AA               | INTERGENIC      |               |                    |                    |
| SNP_100654_A_2403 | NW_004516937.1 | scaffold1844 | 2403                    | TT                              | GG                 | GG               | INTERGENIC      |               |                    |                    |
| SNP_100655_A_2462 | NW_004516937.1 | scaffold1844 | 2462                    | TT                              | CC                 | CC               | INTERGENIC      |               |                    |                    |
| SNP_100656_A_2464 | NW_004516937.1 | scaffold1844 | 2464                    | GG                              | TT                 | TT               | INTERGENIC      |               |                    |                    |

| SNPs IDs           | Chromosome IDs | Chromosomes  | Physical positions (bp) | CDC Frontier (Reference genome) | (Pusa 1103 & HPNB) | (ILWC 46 & LPNB) | Sequence Components of genome | Gene accession IDs | Putative functions                               |
|--------------------|----------------|--------------|-------------------------|---------------------------------|--------------------|------------------|-------------------------------|--------------------|--------------------------------------------------|
| SNP_100658_A_2631  | NW_004516937.1 | scaffold1844 | 2631                    | CC                              | AA                 | AA               | INTERGENIC                    |                    |                                                  |
| SNP_100659_A_2673  | NW_004516937.1 | scaffold1844 | 2673                    | AA                              | TT                 | TT               | INTERGENIC                    |                    |                                                  |
| SNP_100660_A_2766  | NW_004516937.1 | scaffold1844 | 2766                    | CC                              | TT                 | TT               | INTERGENIC                    |                    |                                                  |
| SNP_100662_A_10710 | NW_004516937.1 | scaffold1844 | 10710                   | GG                              | CC                 | CC               | INTERGENIC                    |                    |                                                  |
| SNP_100663_A_10723 | NW_004516937.1 | scaffold1844 | 10723                   | CC                              | TT                 | TT               | INTERGENIC                    |                    |                                                  |
| SNP_100664_A_12452 | NW_004516937.1 | scaffold1844 | 12452                   | CC                              | GG                 | GG               | INTERGENIC                    |                    |                                                  |
| SNP_100665_A_12745 | NW_004516937.1 | scaffold1844 | 12745                   | AA                              | GG                 | GG               | INTERGENIC                    |                    |                                                  |
| SNP_100666_A_12805 | NW_004516937.1 | scaffold1844 | 12805                   | GG                              | AA                 | AA               | INTERGENIC                    |                    |                                                  |
| SNP_100667_A_12816 | NW_004516937.1 | scaffold1844 | 12816                   | AA                              | TT                 | TT               | INTERGENIC                    |                    |                                                  |
| SNP_100668_A_12819 | NW_004516937.1 | scaffold1844 | 12819                   | AA                              | GG                 | GG               | INTERGENIC                    |                    |                                                  |
| SNP_100669_A_15936 | NW_004516937.1 | scaffold1844 | 15936                   | AA                              | TT                 | TT               | INTERGENIC                    |                    |                                                  |
| SNP_100670_A_15950 | NW_004516937.1 | scaffold1844 | 15950                   | AA                              | GG                 | GG               | INTERGENIC                    |                    |                                                  |
| SNP_100671_A_15981 | NW_004516937.1 | scaffold1844 | 15981                   | AA                              | TT                 | TT               | INTERGENIC                    |                    |                                                  |
| SNP_100672_A_16615 | NW_004516937.1 | scaffold1844 | 16615                   | TT                              | CC                 | CC               | INTERGENIC                    |                    |                                                  |
| SNP_100673_A_16947 | NW_004516937.1 | scaffold1844 | 16947                   | CC                              | TT                 | TT               | INTERGENIC                    |                    |                                                  |
| SNP_100674_A_34120 | NW_004516937.1 | scaffold1844 | 34120                   | TT                              | CC                 | CC               | URR                           | 101508861          | uncharacterized LOC101508861                     |
| SNP_100675_A_34125 | NW_004516937.1 | scaffold1844 | 34125                   | CC                              | TT                 | TT               | URR                           | 101508861          | uncharacterized LOC101508861                     |
| SNP_100676_A_34274 | NW_004516937.1 | scaffold1844 | 34274                   | TT                              | CC                 | CC               | DRR                           | 101509185          | cytochrome c oxidase assembly protein COX19-like |
| SNP_100677_A_34306 | NW_004516937.1 | scaffold1844 | 34306                   | AA                              | GG                 | GG               | DRR                           | 101509185          | cytochrome c oxidase assembly protein COX19-like |
| SNP_100678_A_34360 | NW_004516937.1 | scaffold1844 | 34360                   | GG                              | TT                 | TT               | DRR                           | 101509185          | cytochrome c oxidase assembly protein COX19-like |
| SNP_100679_A_34366 | NW_004516937.1 | scaffold1844 | 34366                   | TT                              | CC                 | CC               | DRR                           | 101509185          | cytochrome c oxidase assembly protein COX19-like |
| SNP_100681_A_55120 | NW_004516937.1 | scaffold1844 | 55120                   | GG                              | CC                 | CC               | INTERGENIC                    |                    |                                                  |



| SNPs IDs            | Chromosome IDs | Chromosomes  | Physical positions (bp) | CDC Frontier (Reference genome) | (Pusa 1103 & HPNB) | (ILWC 46 & LPNB) | Sequence Components of genome | Gene accession IDs | Putative functions                                                      |
|---------------------|----------------|--------------|-------------------------|---------------------------------|--------------------|------------------|-------------------------------|--------------------|-------------------------------------------------------------------------|
| SNP_100682_A_57829  | NW_004516937.1 | scaffold1844 | 57829                   | TT                              | AA                 | AA               | INTERGENIC                    |                    |                                                                         |
| SNP_100683_A_63396  | NW_004516937.1 | scaffold1844 | 63396                   | CC                              | AA                 | AA               | DRR                           | 101510586          | uncharacterized LOC101510586                                            |
| SNP_100684_A_76572  | NW_004516937.1 | scaffold1844 | 76572                   | CC                              | GG                 | GG               | INTERGENIC                    |                    |                                                                         |
| SNP_100685_A_78673  | NW_004516937.1 | scaffold1844 | 78673                   | AA                              | CC                 | CC               | NON_SYNONYMOUS_CODING         | 101511225          | LON peptidase N-terminal domain and RING finger protein 2-like          |
| SNP_100686_A_79417  | NW_004516937.1 | scaffold1844 | 79417                   | AA                              | GG                 | GG               | URR                           | 101511225          | LON peptidase N-terminal domain and RING finger protein 2-like          |
| SNP_100687_A_79420  | NW_004516937.1 | scaffold1844 | 79420                   | CC                              | TT                 | TT               | URR                           | 101511225          | LON peptidase N-terminal domain and RING finger protein 2-like          |
| SNP_100688_A_82009  | NW_004516937.1 | scaffold1844 | 82009                   | AA                              | CC                 | CC               | INTERGENIC                    |                    |                                                                         |
| SNP_100689_A_94024  | NW_004516937.1 | scaffold1844 | 94024                   | AA                              | CC                 | CC               | INTERGENIC                    |                    |                                                                         |
| SNP_100690_A_94085  | NW_004516937.1 | scaffold1844 | 94085                   | TT                              | AA                 | AA               | INTERGENIC                    |                    |                                                                         |
| SNP_100691_A_94889  | NW_004516937.1 | scaffold1844 | 94889                   | AA                              | TT                 | TT               | URR                           | 101511544          | uncharacterized LOC101511544                                            |
| SNP_100692_A_96019  | NW_004516937.1 | scaffold1844 | 96019                   | TT                              | CC                 | CC               | URR                           | 101511544          | uncharacterized LOC101511544                                            |
| SNP_100693_A_96931  | NW_004516937.1 | scaffold1844 | 96931                   | TT                              | CC                 | CC               | INTERGENIC                    |                    |                                                                         |
| SNP_100694_A_97125  | NW_004516937.1 | scaffold1844 | 97125                   | GG                              | AA                 | AA               | INTERGENIC                    |                    |                                                                         |
| SNP_100695_A_97142  | NW_004516937.1 | scaffold1844 | 97142                   | TT                              | GG                 | GG               | INTERGENIC                    |                    |                                                                         |
| SNP_100696_A_97173  | NW_004516937.1 | scaffold1844 | 97173                   | AA                              | GG                 | GG               | INTERGENIC                    |                    |                                                                         |
| SNP_100697_A_100240 | NW_004516937.1 | scaffold1844 | 100240                  | CC                              | TT                 | TT               | INTERGENIC                    |                    |                                                                         |
| SNP_100698_A_100702 | NW_004516937.1 | scaffold1844 | 100702                  | GG                              | AA                 | AA               | INTERGENIC                    |                    |                                                                         |
| SNP_100699_A_100941 | NW_004516937.1 | scaffold1844 | 100941                  | TT                              | CC                 | CC               | INTERGENIC                    |                    |                                                                         |
| SNP_100700_A_100945 | NW_004516937.1 | scaffold1844 | 100945                  | TT                              | AA                 | AA               | INTERGENIC                    |                    |                                                                         |
| SNP_100701_A_101014 | NW_004516937.1 | scaffold1844 | 101014                  | TT                              | CC                 | CC               | INTERGENIC                    |                    |                                                                         |
| SNP_100703_A_104181 | NW_004516937.1 | scaffold1844 | 104181                  | CC                              | TT                 | TT               | INTRON                        | 101511872          | G-type lectin S-receptor-like serine/threonine-protein kinase At1g11330 |
| SNP_100704_A_111679 | NW_004516937.1 | scaffold1844 | 111679                  | CC                              | TT                 | TT               | INTERGENIC                    |                    |                                                                         |

| SNPs IDs            | Chromosome IDs | Chromosomes  | Physical positions (bp) | CDC Frontier (Reference genome) | (Pusa 1103 & HPNB) | (ILWC 46 & LPNB) | Sequence Components of genome | Gene accession IDs | Putative functions |
|---------------------|----------------|--------------|-------------------------|---------------------------------|--------------------|------------------|-------------------------------|--------------------|--------------------|
| SNP_100705_A_112245 | NW_004516937.1 | scaffold1844 | 112245                  | CC                              | TT                 | TT               | INTERGENIC                    |                    |                    |
| SNP_100706_A_115393 | NW_004516937.1 | scaffold1844 | 115393                  | TT                              | AA                 | AA               | URR                           | 101512191          | protein XRI1-like  |
| SNP_100707_A_115407 | NW_004516937.1 | scaffold1844 | 115407                  | GG                              | AA                 | AA               | URR                           | 101512191          | protein XRI1-like  |
| SNP_100708_A_115416 | NW_004516937.1 | scaffold1844 | 115416                  | AA                              | CC                 | CC               | URR                           | 101512191          | protein XRI1-like  |
| SNP_100709_A_115487 | NW_004516937.1 | scaffold1844 | 115487                  | CC                              | TT                 | TT               | URR                           | 101512191          | protein XRI1-like  |
| SNP_100710_A_115514 | NW_004516937.1 | scaffold1844 | 115514                  | TT                              | GG                 | GG               | URR                           | 101512191          | protein XRI1-like  |
| SNP_100711_A_115520 | NW_004516937.1 | scaffold1844 | 115520                  | AA                              | TT                 | TT               | URR                           | 101512191          | protein XRI1-like  |
| SNP_100712_A_119288 | NW_004516937.1 | scaffold1844 | 119288                  | GG                              | AA                 | AA               | INTERGENIC                    |                    |                    |
| SNP_100713_A_119442 | NW_004516937.1 | scaffold1844 | 119442                  | GG                              | AA                 | AA               | INTERGENIC                    |                    |                    |
| SNP_100714_A_119517 | NW_004516937.1 | scaffold1844 | 119517                  | GG                              | TT                 | TT               | INTERGENIC                    |                    |                    |
| SNP_100715_A_120998 | NW_004516937.1 | scaffold1844 | 120998                  | AA                              | GG                 | GG               | INTERGENIC                    |                    |                    |
| SNP_100716_A_121176 | NW_004516937.1 | scaffold1844 | 121176                  | CC                              | AA                 | AA               | INTERGENIC                    |                    |                    |
| SNP_100718_A_123434 | NW_004516937.1 | scaffold1844 | 123434                  | AA                              | TT                 | TT               | INTERGENIC                    |                    |                    |
| SNP_100719_A_134053 | NW_004516937.1 | scaffold1844 | 134053                  | GG                              | TT                 | TT               | INTERGENIC                    |                    |                    |
| SNP_100720_A_134194 | NW_004516937.1 | scaffold1844 | 134194                  | TT                              | AA                 | AA               | INTERGENIC                    |                    |                    |
| SNP_100721_A_134285 | NW_004516937.1 | scaffold1844 | 134285                  | AA                              | GG                 | GG               | INTERGENIC                    |                    |                    |
| SNP_100722_A_134351 | NW_004516937.1 | scaffold1844 | 134351                  | TT                              | AA                 | AA               | INTERGENIC                    |                    |                    |
| SNP_100723_A_134376 | NW_004516937.1 | scaffold1844 | 134376                  | AA                              | TT                 | TT               | INTERGENIC                    |                    |                    |
| SNP_100724_A_134896 | NW_004516937.1 | scaffold1844 | 134896                  | GG                              | AA                 | AA               | INTERGENIC                    |                    |                    |
| SNP_100726_A_137451 | NW_004516937.1 | scaffold1844 | 137451                  | GG                              | TT                 | TT               | INTERGENIC                    |                    |                    |
| SNP_100727_A_137455 | NW_004516937.1 | scaffold1844 | 137455                  | GG                              | TT                 | TT               | INTERGENIC                    |                    |                    |
| SNP_100728_A_137578 | NW_004516937.1 | scaffold1844 | 137578                  | TT                              | AA                 | AA               | INTERGENIC                    |                    |                    |

| SNPs IDs            | Chromosome IDs | Chromosomes  | Physical positions (bp) | CDC Frontier (Reference genome) | (Pusa 1103 & HPNB) | (ILWC 46 & LPNB) | Sequence Components of genome | Gene accession IDs | Putative functions                                       |
|---------------------|----------------|--------------|-------------------------|---------------------------------|--------------------|------------------|-------------------------------|--------------------|----------------------------------------------------------|
| SNP_100729_A_137901 | NW_004516937.1 | scaffold1844 | 137901                  | TT                              | GG                 | GG               | INTERGENIC                    |                    |                                                          |
| SNP_100730_A_138893 | NW_004516937.1 | scaffold1844 | 138893                  | CC                              | TT                 | TT               | INTERGENIC                    |                    |                                                          |
| SNP_100731_A_142008 | NW_004516937.1 | scaffold1844 | 142008                  | CC                              | TT                 | TT               | INTRON                        | 101512515          | acid phosphatase 1-like                                  |
| SNP_100732_A_142066 | NW_004516937.1 | scaffold1844 | 142066                  | CC                              | GG                 | GG               | INTRON                        | 101512515          | acid phosphatase 1-like                                  |
| SNP_100733_A_145038 | NW_004516937.1 | scaffold1844 | 145038                  | GG                              | TT                 | TT               | URR                           | 101512515          | acid phosphatase 1-like                                  |
| SNP_100734_A_145397 | NW_004516937.1 | scaffold1844 | 145397                  | TT                              | AA                 | AA               | URR                           | 101512515          | acid phosphatase 1-like                                  |
| SNP_100735_A_145694 | NW_004516937.1 | scaffold1844 | 145694                  | GG                              | TT                 | TT               | URR                           | 101512515          | acid phosphatase 1-like                                  |
| SNP_100736_A_145873 | NW_004516937.1 | scaffold1844 | 145873                  | GG                              | TT                 | TT               | INTERGENIC                    |                    |                                                          |
| SNP_100737_A_146315 | NW_004516937.1 | scaffold1844 | 146315                  | AA                              | GG                 | GG               | INTERGENIC                    |                    |                                                          |
| SNP_100738_A_146343 | NW_004516937.1 | scaffold1844 | 146343                  | CC                              | TT                 | TT               | INTERGENIC                    |                    |                                                          |
| SNP_100739_A_146531 | NW_004516937.1 | scaffold1844 | 146531                  | AA                              | GG                 | GG               | INTERGENIC                    |                    |                                                          |
| SNP_100740_A_146596 | NW_004516937.1 | scaffold1844 | 146596                  | TT                              | AA                 | AA               | INTERGENIC                    |                    |                                                          |
| SNP_100741_A_146602 | NW_004516937.1 | scaffold1844 | 146602                  | CC                              | AA                 | AA               | INTERGENIC                    |                    |                                                          |
| SNP_100742_A_146739 | NW_004516937.1 | scaffold1844 | 146739                  | AA                              | TT                 | TT               | INTERGENIC                    |                    |                                                          |
| SNP_100744_A_148364 | NW_004516937.1 | scaffold1844 | 148364                  | CC                              | TT                 | TT               | INTERGENIC                    |                    |                                                          |
| SNP_100745_A_151661 | NW_004516937.1 | scaffold1844 | 151661                  | AA                              | GG                 | GG               | INTRON                        | 101512824          | xyloglucan endotransglucosylase/hydrolase protein 2-like |
| SNP_100746_A_154904 | NW_004516937.1 | scaffold1844 | 154904                  | GG                              | TT                 | TT               | URR                           | 101512824          | xyloglucan endotransglucosylase/hydrolase protein 2-like |
| SNP_100747_A_155804 | NW_004516937.1 | scaffold1844 | 155804                  | GG                              | AA                 | AA               | URR                           | 101512824          | xyloglucan endotransglucosylase/hydrolase protein 2-like |
| SNP_100748_A_155863 | NW_004516937.1 | scaffold1844 | 155863                  | TT                              | CC                 | CC               | URR                           | 101512824          | xyloglucan endotransglucosylase/hydrolase protein 2-like |
| SNP_100750_A_157438 | NW_004516937.1 | scaffold1844 | 157438                  | TT                              | CC                 | CC               | INTERGENIC                    |                    |                                                          |
| SNP_100751_A_157447 | NW_004516937.1 | scaffold1844 | 157447                  | CC                              | TT                 | TT               | INTERGENIC                    |                    |                                                          |
| SNP_100752_A_157464 | NW_004516937.1 | scaffold1844 | 157464                  | TT                              | GG                 | GG               | INTERGENIC                    |                    |                                                          |

| SNPs IDs            | Chromosome IDs | Chromosomes  | Physical positions (bp) | CDC Frontier (Reference genome) | (Pusa 1103 & HPNB) | (ILWC 46 & LPNB) | Sequence genome | Components of | Gene accession IDs | Putative functions |
|---------------------|----------------|--------------|-------------------------|---------------------------------|--------------------|------------------|-----------------|---------------|--------------------|--------------------|
| SNP_100753_A_157534 | NW_004516937.1 | scaffold1844 | 157534                  | TT                              | CC                 | CC               | INTERGENIC      |               |                    |                    |
| SNP_100754_A_157540 | NW_004516937.1 | scaffold1844 | 157540                  | CC                              | AA                 | AA               | INTERGENIC      |               |                    |                    |
| SNP_100755_A_157549 | NW_004516937.1 | scaffold1844 | 157549                  | TT                              | AA                 | AA               | INTERGENIC      |               |                    |                    |
| SNP_100756_A_157821 | NW_004516937.1 | scaffold1844 | 157821                  | TT                              | AA                 | AA               | INTERGENIC      |               |                    |                    |
| SNP_100757_A_163122 | NW_004516937.1 | scaffold1844 | 163122                  | TT                              | CC                 | CC               | INTERGENIC      |               |                    |                    |
| SNP_100758_A_163893 | NW_004516937.1 | scaffold1844 | 163893                  | GG                              | AA                 | AA               | INTERGENIC      |               |                    |                    |
| SNP_100759_A_163901 | NW_004516937.1 | scaffold1844 | 163901                  | GG                              | AA                 | AA               | INTERGENIC      |               |                    |                    |
| SNP_100760_A_164652 | NW_004516937.1 | scaffold1844 | 164652                  | TT                              | CC                 | CC               | INTERGENIC      |               |                    |                    |
| SNP_100763_A_166906 | NW_004516937.1 | scaffold1844 | 166906                  | TT                              | CC                 | CC               | INTERGENIC      |               |                    |                    |
| SNP_100764_A_166980 | NW_004516937.1 | scaffold1844 | 166980                  | TT                              | CC                 | CC               | INTERGENIC      |               |                    |                    |
| SNP_100765_A_167034 | NW_004516937.1 | scaffold1844 | 167034                  | TT                              | GG                 | GG               | INTERGENIC      |               |                    |                    |
| SNP_100766_A_167045 | NW_004516937.1 | scaffold1844 | 167045                  | TT                              | CC                 | CC               | INTERGENIC      |               |                    |                    |
| SNP_100767_A_167090 | NW_004516937.1 | scaffold1844 | 167090                  | AA                              | GG                 | GG               | INTERGENIC      |               |                    |                    |
| SNP_100768_A_167103 | NW_004516937.1 | scaffold1844 | 167103                  | AA                              | GG                 | GG               | INTERGENIC      |               |                    |                    |
| SNP_100769_A_167132 | NW_004516937.1 | scaffold1844 | 167132                  | CC                              | TT                 | TT               | INTERGENIC      |               |                    |                    |
| SNP_100770_A_167141 | NW_004516937.1 | scaffold1844 | 167141                  | CC                              | TT                 | TT               | INTERGENIC      |               |                    |                    |
| SNP_100771_A_167163 | NW_004516937.1 | scaffold1844 | 167163                  | AA                              | TT                 | TT               | INTERGENIC      |               |                    |                    |
| SNP_100772_A_167164 | NW_004516937.1 | scaffold1844 | 167164                  | AA                              | TT                 | TT               | INTERGENIC      |               |                    |                    |
| SNP_100774_A_167317 | NW_004516937.1 | scaffold1844 | 167317                  | GG                              | TT                 | TT               | INTERGENIC      |               |                    |                    |
| SNP_100775_A_167318 | NW_004516937.1 | scaffold1844 | 167318                  | TT                              | GG                 | GG               | INTERGENIC      |               |                    |                    |
| SNP_100776_A_167324 | NW_004516937.1 | scaffold1844 | 167324                  | CC                              | TT                 | TT               | INTERGENIC      |               |                    |                    |
| SNP_100778_A_167462 | NW_004516937.1 | scaffold1844 | 167462                  | AA                              | CC                 | CC               | INTERGENIC      |               |                    |                    |

| SNPs IDs            | Chromosome IDs | Chromosomes  | Physical positions (bp) | CDC Frontier (Reference genome) | (Pusa 1103 & HPNB) | (ILWC 46 & LPNB) | Sequence genome | Components of | Gene accession IDs | Putative functions |
|---------------------|----------------|--------------|-------------------------|---------------------------------|--------------------|------------------|-----------------|---------------|--------------------|--------------------|
| SNP_100779_A_167549 | NW_004516937.1 | scaffold1844 | 167549                  | GG                              | TT                 | TT               | INTERGENIC      |               |                    |                    |
| SNP_100780_A_167554 | NW_004516937.1 | scaffold1844 | 167554                  | AA                              | GG                 | GG               | INTERGENIC      |               |                    |                    |
| SNP_100781_A_167602 | NW_004516937.1 | scaffold1844 | 167602                  | CC                              | TT                 | TT               | INTERGENIC      |               |                    |                    |
| SNP_100782_A_167996 | NW_004516937.1 | scaffold1844 | 167996                  | CC                              | GG                 | GG               | INTERGENIC      |               |                    |                    |
| SNP_100783_A_7389   | NW_004516938.1 | scaffold1845 | 7389                    | CC                              | TT                 | TT               | INTERGENIC      |               |                    |                    |
| SNP_100784_A_8057   | NW_004516938.1 | scaffold1845 | 8057                    | TT                              | CC                 | CC               | INTERGENIC      |               |                    |                    |
| SNP_100785_A_15376  | NW_004516938.1 | scaffold1845 | 15376                   | GG                              | TT                 | TT               | INTERGENIC      |               |                    |                    |
| SNP_100786_A_15470  | NW_004516938.1 | scaffold1845 | 15470                   | TT                              | CC                 | CC               | INTERGENIC      |               |                    |                    |
| SNP_100787_A_15483  | NW_004516938.1 | scaffold1845 | 15483                   | AA                              | GG                 | GG               | INTERGENIC      |               |                    |                    |
| SNP_100788_A_15525  | NW_004516938.1 | scaffold1845 | 15525                   | AA                              | CC                 | CC               | INTERGENIC      |               |                    |                    |
| SNP_100790_A_20262  | NW_004516938.1 | scaffold1845 | 20262                   | CC                              | TT                 | TT               | INTERGENIC      |               |                    |                    |
| SNP_100791_A_28566  | NW_004516938.1 | scaffold1845 | 28566                   | AA                              | GG                 | GG               | INTERGENIC      |               |                    |                    |
| SNP_100792_A_28787  | NW_004516938.1 | scaffold1845 | 28787                   | CC                              | AA                 | AA               | INTERGENIC      |               |                    |                    |
| SNP_100793_A_28790  | NW_004516938.1 | scaffold1845 | 28790                   | AA                              | GG                 | GG               | INTERGENIC      |               |                    |                    |
| SNP_100794_A_28820  | NW_004516938.1 | scaffold1845 | 28820                   | AA                              | CC                 | CC               | INTERGENIC      |               |                    |                    |
| SNP_100795_A_28842  | NW_004516938.1 | scaffold1845 | 28842                   | CC                              | GG                 | GG               | INTERGENIC      |               |                    |                    |
| SNP_100796_A_31613  | NW_004516938.1 | scaffold1845 | 31613                   | AA                              | TT                 | TT               | INTERGENIC      |               |                    |                    |
| SNP_100797_A_33267  | NW_004516938.1 | scaffold1845 | 33267                   | AA                              | TT                 | TT               | INTERGENIC      |               |                    |                    |
| SNP_100798_A_34803  | NW_004516938.1 | scaffold1845 | 34803                   | CC                              | GG                 | GG               | INTERGENIC      |               |                    |                    |
| SNP_100799_A_43159  | NW_004516938.1 | scaffold1845 | 43159                   | TT                              | CC                 | CC               | INTERGENIC      |               |                    |                    |
| SNP_100800_A_43267  | NW_004516938.1 | scaffold1845 | 43267                   | GG                              | AA                 | AA               | INTERGENIC      |               |                    |                    |
| SNP_100801_A_45747  | NW_004516938.1 | scaffold1845 | 45747                   | TT                              | AA                 | AA               | INTERGENIC      |               |                    |                    |

| SNPs IDs            | Chromosome IDs | Chromosomes  | Physical positions (bp) | CDC Frontier (Reference genome) | (Pusa 1103 & HPNB) | (ILWC 46 & LPNB) | Sequence genome | Components of | Gene accession IDs                     | Putative functions |
|---------------------|----------------|--------------|-------------------------|---------------------------------|--------------------|------------------|-----------------|---------------|----------------------------------------|--------------------|
| SNP_100802_A_46782  | NW_004516938.1 | scaffold1845 | 46782                   | GG                              | CC                 | CC               | INTERGENIC      |               |                                        |                    |
| SNP_100804_A_52808  | NW_004516938.1 | scaffold1845 | 52808                   | TT                              | GG                 | GG               | INTERGENIC      |               |                                        |                    |
| SNP_100805_A_53106  | NW_004516938.1 | scaffold1845 | 53106                   | GG                              | AA                 | AA               | INTERGENIC      |               |                                        |                    |
| SNP_100806_A_56891  | NW_004516938.1 | scaffold1845 | 56891                   | AA                              | CC                 | CC               | INTERGENIC      |               |                                        |                    |
| SNP_100807_A_61997  | NW_004516938.1 | scaffold1845 | 61997                   | GG                              | AA                 | AA               | INTERGENIC      |               |                                        |                    |
| SNP_100808_A_63028  | NW_004516938.1 | scaffold1845 | 63028                   | GG                              | AA                 | AA               | INTERGENIC      |               |                                        |                    |
| SNP_100809_A_69428  | NW_004516938.1 | scaffold1845 | 69428                   | GG                              | AA                 | AA               | INTERGENIC      |               |                                        |                    |
| SNP_100810_A_71247  | NW_004516938.1 | scaffold1845 | 71247                   | GG                              | TT                 | TT               | INTERGENIC      |               |                                        |                    |
| SNP_100812_A_81179  | NW_004516938.1 | scaffold1845 | 81179                   | TT                              | CC                 | CC               | URR             | 101515331     | Unknown function                       |                    |
| SNP_100813_A_82017  | NW_004516938.1 | scaffold1845 | 82017                   | GG                              | AA                 | AA               | INTERGENIC      |               |                                        |                    |
| SNP_100814_A_84120  | NW_004516938.1 | scaffold1845 | 84120                   | AA                              | TT                 | TT               | INTERGENIC      |               |                                        |                    |
| SNP_100815_A_85111  | NW_004516938.1 | scaffold1845 | 85111                   | GG                              | AA                 | AA               | INTERGENIC      |               |                                        |                    |
| SNP_100816_A_98197  | NW_004516938.1 | scaffold1845 | 98197                   | GG                              | CC                 | CC               | INTERGENIC      |               |                                        |                    |
| SNP_100817_A_98591  | NW_004516938.1 | scaffold1845 | 98591                   | AA                              | GG                 | GG               | INTERGENIC      |               |                                        |                    |
| SNP_100818_A_104511 | NW_004516938.1 | scaffold1845 | 104511                  | TT                              | CC                 | CC               | URR             | 101513476     | Unknown function                       |                    |
| SNP_100819_A_126546 | NW_004516938.1 | scaffold1845 | 126546                  | AA                              | GG                 | GG               | INTRON          | 101515655     | phosphoenolpyruvate carboxylase 4-like |                    |
| SNP_100820_A_127584 | NW_004516938.1 | scaffold1845 | 127584                  | AA                              | GG                 | GG               | INTRON          | 101515655     | phosphoenolpyruvate carboxylase 4-like |                    |
| SNP_100821_A_5231   | NW_004516940.1 | scaffold1847 | 5231                    | AA                              | GG                 | GG               | INTERGENIC      |               |                                        |                    |
| SNP_100822_A_5255   | NW_004516940.1 | scaffold1847 | 5255                    | TT                              | CC                 | CC               | INTERGENIC      |               |                                        |                    |
| SNP_100823_A_932    | NW_004516941.1 | scaffold1848 | 932                     | CC                              | TT                 | TT               | INTERGENIC      |               |                                        |                    |
| SNP_100824_A_4359   | NW_004516941.1 | scaffold1848 | 4359                    | GG                              | TT                 | TT               | INTERGENIC      |               |                                        |                    |
| SNP_100825_A_10934  | NW_004516941.1 | scaffold1848 | 10934                   | GG                              | CC                 | CC               | INTERGENIC      |               |                                        |                    |

| SNPs IDs           | Chromosome IDs | Chromosomes  | Physical positions (bp) | CDC Frontier (Reference genome) | (Pusa 1103 & HPNB) | (ILWC 46 & LPNB) | Sequence Components of genome | Gene accession IDs | Putative functions                   |
|--------------------|----------------|--------------|-------------------------|---------------------------------|--------------------|------------------|-------------------------------|--------------------|--------------------------------------|
| SNP_100826_A_10940 | NW_004516941.1 | scaffold1848 | 10940                   | CC                              | TT                 | TT               | INTERGENIC                    |                    |                                      |
| SNP_100827_A_10951 | NW_004516941.1 | scaffold1848 | 10951                   | GG                              | TT                 | TT               | INTERGENIC                    |                    |                                      |
| SNP_100828_A_12050 | NW_004516941.1 | scaffold1848 | 12050                   | AA                              | GG                 | GG               | DRR                           | 101488410          | 60S acidic ribosomal protein P1-like |
| SNP_100829_A_12161 | NW_004516941.1 | scaffold1848 | 12161                   | AA                              | GG                 | GG               | DRR                           | 101488410          | 60S acidic ribosomal protein P1-like |
| SNP_100830_A_12166 | NW_004516941.1 | scaffold1848 | 12166                   | TT                              | CC                 | CC               | DRR                           | 101488410          | 60S acidic ribosomal protein P1-like |
| SNP_100831_A_12207 | NW_004516941.1 | scaffold1848 | 12207                   | AA                              | GG                 | GG               | DRR                           | 101488410          | 60S acidic ribosomal protein P1-like |
| SNP_100832_A_12213 | NW_004516941.1 | scaffold1848 | 12213                   | CC                              | TT                 | TT               | DRR                           | 101488410          | 60S acidic ribosomal protein P1-like |
| SNP_100833_A_64    | NW_004516943.1 | scaffold1851 | 64                      | AA                              | CC                 | CC               | INTERGENIC                    |                    |                                      |
| SNP_100834_A_121   | NW_004516943.1 | scaffold1851 | 121                     | TT                              | AA                 | AA               | INTERGENIC                    |                    |                                      |
| SNP_100835_A_385   | NW_004516943.1 | scaffold1851 | 385                     | TT                              | CC                 | CC               | INTERGENIC                    |                    |                                      |
| SNP_100836_A_539   | NW_004516943.1 | scaffold1851 | 539                     | GG                              | CC                 | CC               | INTERGENIC                    |                    |                                      |
| SNP_100837_A_22142 | NW_004516944.1 | scaffold1852 | 22142                   | TT                              | AA                 | AA               | INTERGENIC                    |                    |                                      |
| SNP_100838_A_42750 | NW_004516944.1 | scaffold1852 | 42750                   | AA                              | CC                 | CC               | INTERGENIC                    |                    |                                      |
| SNP_100839_A_42764 | NW_004516944.1 | scaffold1852 | 42764                   | TT                              | GG                 | GG               | INTERGENIC                    |                    |                                      |
| SNP_100840_A_43156 | NW_004516944.1 | scaffold1852 | 43156                   | CC                              | TT                 | TT               | INTERGENIC                    |                    |                                      |
| SNP_100841_A_43161 | NW_004516944.1 | scaffold1852 | 43161                   | GG                              | CC                 | CC               | INTERGENIC                    |                    |                                      |
| SNP_100842_A_43192 | NW_004516944.1 | scaffold1852 | 43192                   | TT                              | GG                 | GG               | INTERGENIC                    |                    |                                      |
| SNP_100843_A_43307 | NW_004516944.1 | scaffold1852 | 43307                   | AA                              | GG                 | GG               | INTERGENIC                    |                    |                                      |
| SNP_100844_A_55202 | NW_004516944.1 | scaffold1852 | 55202                   | CC                              | TT                 | TT               | INTERGENIC                    |                    |                                      |
| SNP_100845_A_55231 | NW_004516944.1 | scaffold1852 | 55231                   | AA                              | GG                 | GG               | INTERGENIC                    |                    |                                      |
| SNP_100847_A_93824 | NW_004516944.1 | scaffold1852 | 93824                   | GG                              | TT                 | TT               | INTERGENIC                    |                    |                                      |
| SNP_100848_A_93832 | NW_004516944.1 | scaffold1852 | 93832                   | AA                              | GG                 | GG               | INTERGENIC                    |                    |                                      |

| SNPs IDs           | Chromosome IDs | Chromosomes  | Physical positions (bp) | CDC Frontier (Reference genome) | (Pusa 1103 & HPNB) | (ILWC 46 & LPNB) | Sequence genome | Components of | Gene accession IDs | Putative functions |
|--------------------|----------------|--------------|-------------------------|---------------------------------|--------------------|------------------|-----------------|---------------|--------------------|--------------------|
| SNP_100849_A_93835 | NW_004516944.1 | scaffold1852 | 93835                   | AA                              | GG                 | GG               | INTERGENIC      |               |                    |                    |
| SNP_100850_A_93988 | NW_004516944.1 | scaffold1852 | 93988                   | TT                              | GG                 | GG               | INTERGENIC      |               |                    |                    |
| SNP_100851_A_94051 | NW_004516944.1 | scaffold1852 | 94051                   | TT                              | CC                 | CC               | INTERGENIC      |               |                    |                    |
| SNP_100852_A_94239 | NW_004516944.1 | scaffold1852 | 94239                   | TT                              | CC                 | CC               | INTERGENIC      |               |                    |                    |
| SNP_100853_A_94271 | NW_004516944.1 | scaffold1852 | 94271                   | AA                              | TT                 | TT               | INTERGENIC      |               |                    |                    |
| SNP_100854_A_94277 | NW_004516944.1 | scaffold1852 | 94277                   | AA                              | GG                 | GG               | INTERGENIC      |               |                    |                    |
| SNP_100855_A_94281 | NW_004516944.1 | scaffold1852 | 94281                   | TT                              | CC                 | CC               | INTERGENIC      |               |                    |                    |
| SNP_100856_A_94296 | NW_004516944.1 | scaffold1852 | 94296                   | CC                              | TT                 | TT               | INTERGENIC      |               |                    |                    |
| SNP_100857_A_94298 | NW_004516944.1 | scaffold1852 | 94298                   | GG                              | CC                 | CC               | INTERGENIC      |               |                    |                    |
| SNP_100858_A_94303 | NW_004516944.1 | scaffold1852 | 94303                   | CC                              | TT                 | TT               | INTERGENIC      |               |                    |                    |
| SNP_100859_A_94307 | NW_004516944.1 | scaffold1852 | 94307                   | TT                              | CC                 | CC               | INTERGENIC      |               |                    |                    |
| SNP_100860_A_94340 | NW_004516944.1 | scaffold1852 | 94340                   | TT                              | CC                 | CC               | INTERGENIC      |               |                    |                    |
| SNP_100862_A_94420 | NW_004516944.1 | scaffold1852 | 94420                   | CC                              | TT                 | TT               | INTERGENIC      |               |                    |                    |
| SNP_100863_A_94454 | NW_004516944.1 | scaffold1852 | 94454                   | AA                              | GG                 | GG               | INTERGENIC      |               |                    |                    |
| SNP_100865_A_94670 | NW_004516944.1 | scaffold1852 | 94670                   | AA                              | GG                 | GG               | INTERGENIC      |               |                    |                    |
| SNP_100866_A_94685 | NW_004516944.1 | scaffold1852 | 94685                   | AA                              | GG                 | GG               | INTERGENIC      |               |                    |                    |
| SNP_100867_A_94707 | NW_004516944.1 | scaffold1852 | 94707                   | GG                              | AA                 | AA               | INTERGENIC      |               |                    |                    |
| SNP_100868_A_94739 | NW_004516944.1 | scaffold1852 | 94739                   | CC                              | TT                 | TT               | INTERGENIC      |               |                    |                    |
| SNP_100870_A_94799 | NW_004516944.1 | scaffold1852 | 94799                   | GG                              | AA                 | AA               | INTERGENIC      |               |                    |                    |
| SNP_100872_A_95104 | NW_004516944.1 | scaffold1852 | 95104                   | AA                              | TT                 | TT               | INTERGENIC      |               |                    |                    |
| SNP_100873_A_95109 | NW_004516944.1 | scaffold1852 | 95109                   | GG                              | AA                 | AA               | INTERGENIC      |               |                    |                    |
| SNP_100874_A_95122 | NW_004516944.1 | scaffold1852 | 95122                   | CC                              | TT                 | TT               | INTERGENIC      |               |                    |                    |



| SNPs IDs            | Chromosome IDs | Chromosomes  | Physical positions (bp) | CDC Frontier (Reference genome) | (Pusa 1103 & HPNB) | (ILWC 46 & LPNB) | Sequence Components of genome | Gene accession IDs | Putative functions                         |
|---------------------|----------------|--------------|-------------------------|---------------------------------|--------------------|------------------|-------------------------------|--------------------|--------------------------------------------|
| SNP_100875_A_95143  | NW_004516944.1 | scaffold1852 | 95143                   | TT                              | AA                 | AA               | INTERGENIC                    |                    |                                            |
| SNP_100876_A_95147  | NW_004516944.1 | scaffold1852 | 95147                   | AA                              | TT                 | TT               | INTERGENIC                    |                    |                                            |
| SNP_100877_A_95167  | NW_004516944.1 | scaffold1852 | 95167                   | TT                              | GG                 | GG               | INTERGENIC                    |                    |                                            |
| SNP_100878_A_95191  | NW_004516944.1 | scaffold1852 | 95191                   | TT                              | CC                 | CC               | INTERGENIC                    |                    |                                            |
| SNP_100879_A_95249  | NW_004516944.1 | scaffold1852 | 95249                   | GG                              | TT                 | TT               | INTERGENIC                    |                    |                                            |
| SNP_100880_A_95335  | NW_004516944.1 | scaffold1852 | 95335                   | TT                              | GG                 | GG               | INTERGENIC                    |                    |                                            |
| SNP_100881_A_95380  | NW_004516944.1 | scaffold1852 | 95380                   | TT                              | GG                 | GG               | INTERGENIC                    |                    |                                            |
| SNP_100882_A_101606 | NW_004516944.1 | scaffold1852 | 101606                  | CC                              | AA                 | AA               | URR                           | 101489941          | non-specific lipid-transfer protein A-like |
| SNP_100883_A_101615 | NW_004516944.1 | scaffold1852 | 101615                  | GG                              | AA                 | AA               | URR                           | 101489941          | non-specific lipid-transfer protein A-like |
| SNP_100884_A_101955 | NW_004516944.1 | scaffold1852 | 101955                  | TT                              | AA                 | AA               | URR                           | 101489941          | non-specific lipid-transfer protein A-like |
| SNP_100885_A_101979 | NW_004516944.1 | scaffold1852 | 101979                  | GG                              | AA                 | AA               | URR                           | 101489941          | non-specific lipid-transfer protein A-like |
| SNP_100886_A_101990 | NW_004516944.1 | scaffold1852 | 101990                  | GG                              | AA                 | AA               | URR                           | 101489941          | non-specific lipid-transfer protein A-like |
| SNP_100887_A_102199 | NW_004516944.1 | scaffold1852 | 102199                  | GG                              | AA                 | AA               | URR                           | 101489941          | non-specific lipid-transfer protein A-like |
| SNP_100888_A_102217 | NW_004516944.1 | scaffold1852 | 102217                  | GG                              | CC                 | CC               | URR                           | 101489941          | non-specific lipid-transfer protein A-like |
| SNP_100889_A_102936 | NW_004516944.1 | scaffold1852 | 102936                  | GG                              | AA                 | AA               | URR                           | 101489941          | non-specific lipid-transfer protein A-like |
| SNP_100891_A_103023 | NW_004516944.1 | scaffold1852 | 103023                  | CC                              | TT                 | TT               | INTERGENIC                    |                    |                                            |
| SNP_100892_A_103101 | NW_004516944.1 | scaffold1852 | 103101                  | CC                              | AA                 | AA               | INTERGENIC                    |                    |                                            |
| SNP_100893_A_103133 | NW_004516944.1 | scaffold1852 | 103133                  | AA                              | TT                 | TT               | INTERGENIC                    |                    |                                            |
| SNP_100894_A_103134 | NW_004516944.1 | scaffold1852 | 103134                  | TT                              | AA                 | AA               | INTERGENIC                    |                    |                                            |
| SNP_100895_A_103192 | NW_004516944.1 | scaffold1852 | 103192                  | TT                              | AA                 | AA               | INTERGENIC                    |                    |                                            |
| SNP_100897_A_103457 | NW_004516944.1 | scaffold1852 | 103457                  | GG                              | AA                 | AA               | INTERGENIC                    |                    |                                            |
| SNP_100898_A_103458 | NW_004516944.1 | scaffold1852 | 103458                  | TT                              | CC                 | CC               | INTERGENIC                    |                    |                                            |

| SNPs IDs            | Chromosome IDs | Chromosomes  | Physical positions (bp) | CDC Frontier (Reference genome) | (Pusa 1103 & HPNB) | (ILWC 46 & LPNB) | Sequence genome | Components of | Gene accession IDs | Putative functions |
|---------------------|----------------|--------------|-------------------------|---------------------------------|--------------------|------------------|-----------------|---------------|--------------------|--------------------|
| SNP_100899_A_103499 | NW_004516944.1 | scaffold1852 | 103499                  | TT                              | CC                 | CC               | INTERGENIC      |               |                    |                    |
| SNP_100900_A_103552 | NW_004516944.1 | scaffold1852 | 103552                  | CC                              | TT                 | TT               | INTERGENIC      |               |                    |                    |
| SNP_100901_A_103561 | NW_004516944.1 | scaffold1852 | 103561                  | TT                              | CC                 | CC               | INTERGENIC      |               |                    |                    |
| SNP_100902_A_103577 | NW_004516944.1 | scaffold1852 | 103577                  | GG                              | AA                 | AA               | INTERGENIC      |               |                    |                    |
| SNP_100903_A_103630 | NW_004516944.1 | scaffold1852 | 103630                  | AA                              | GG                 | GG               | INTERGENIC      |               |                    |                    |
| SNP_100904_A_10528  | NW_004516945.1 | scaffold1854 | 10528                   | TT                              | AA                 | AA               | INTERGENIC      |               |                    |                    |
| SNP_100905_A_10690  | NW_004516945.1 | scaffold1854 | 10690                   | CC                              | AA                 | AA               | INTERGENIC      |               |                    |                    |
| SNP_100906_A_39785  | NW_004516945.1 | scaffold1854 | 39785                   | TT                              | AA                 | AA               | INTERGENIC      |               |                    |                    |
| SNP_100907_A_49964  | NW_004516945.1 | scaffold1854 | 49964                   | AA                              | GG                 | GG               | INTERGENIC      |               |                    |                    |
| SNP_100908_A_50045  | NW_004516945.1 | scaffold1854 | 50045                   | GG                              | AA                 | AA               | INTERGENIC      |               |                    |                    |
| SNP_100909_A_6790   | NW_004516947.1 | scaffold1856 | 6790                    | GG                              | AA                 | AA               | INTERGENIC      |               |                    |                    |
| SNP_100910_A_333    | NW_004516949.1 | scaffold1858 | 333                     | GG                              | TT                 | TT               | INTERGENIC      |               |                    |                    |
| SNP_100912_A_12407  | NW_004516951.1 | scaffold1861 | 12407                   | CC                              | AA                 | AA               | INTERGENIC      |               |                    |                    |
| SNP_100913_A_12439  | NW_004516951.1 | scaffold1861 | 12439                   | AA                              | GG                 | GG               | INTERGENIC      |               |                    |                    |
| SNP_100914_A_12478  | NW_004516951.1 | scaffold1861 | 12478                   | TT                              | CC                 | CC               | INTERGENIC      |               |                    |                    |
| SNP_100915_A_12778  | NW_004516951.1 | scaffold1861 | 12778                   | TT                              | CC                 | CC               | INTERGENIC      |               |                    |                    |
| SNP_100916_A_12793  | NW_004516951.1 | scaffold1861 | 12793                   | AA                              | GG                 | GG               | INTERGENIC      |               |                    |                    |
| SNP_100917_A_4619   | NW_004516953.1 | scaffold1864 | 4619                    | CC                              | TT                 | TT               | INTERGENIC      |               |                    |                    |
| SNP_100918_A_5523   | NW_004516953.1 | scaffold1864 | 5523                    | TT                              | AA                 | AA               | INTERGENIC      |               |                    |                    |
| SNP_100919_A_5603   | NW_004516953.1 | scaffold1864 | 5603                    | CC                              | TT                 | TT               | INTERGENIC      |               |                    |                    |
| SNP_100920_A_5613   | NW_004516953.1 | scaffold1864 | 5613                    | CC                              | TT                 | TT               | INTERGENIC      |               |                    |                    |
| SNP_100921_A_5753   | NW_004516953.1 | scaffold1864 | 5753                    | AA                              | GG                 | GG               | INTERGENIC      |               |                    |                    |

| SNPs IDs           | Chromosome IDs | Chromosomes  | Physical positions (bp) | CDC Frontier (Reference genome) | (Pusa 1103 & HPNB) | (ILWC 46 & LPNB) | Sequence genome | Components of | Gene accession IDs | Putative functions |
|--------------------|----------------|--------------|-------------------------|---------------------------------|--------------------|------------------|-----------------|---------------|--------------------|--------------------|
| SNP_100922_A_5754  | NW_004516953.1 | scaffold1864 | 5754                    | CC                              | TT                 | TT               | INTERGENIC      |               |                    |                    |
| SNP_100923_A_5758  | NW_004516953.1 | scaffold1864 | 5758                    | TT                              | CC                 | CC               | INTERGENIC      |               |                    |                    |
| SNP_100924_A_5762  | NW_004516953.1 | scaffold1864 | 5762                    | AA                              | GG                 | GG               | INTERGENIC      |               |                    |                    |
| SNP_100925_A_5789  | NW_004516953.1 | scaffold1864 | 5789                    | TT                              | CC                 | CC               | INTERGENIC      |               |                    |                    |
| SNP_100927_A_6058  | NW_004516953.1 | scaffold1864 | 6058                    | CC                              | AA                 | AA               | INTERGENIC      |               |                    |                    |
| SNP_100928_A_10359 | NW_004516953.1 | scaffold1864 | 10359                   | CC                              | TT                 | TT               | INTERGENIC      |               |                    |                    |
| SNP_100929_A_10477 | NW_004516953.1 | scaffold1864 | 10477                   | CC                              | AA                 | AA               | INTERGENIC      |               |                    |                    |
| SNP_100930_A_10841 | NW_004516953.1 | scaffold1864 | 10841                   | TT                              | CC                 | CC               | INTERGENIC      |               |                    |                    |
| SNP_100931_A_11585 | NW_004516953.1 | scaffold1864 | 11585                   | AA                              | GG                 | GG               | INTERGENIC      |               |                    |                    |
| SNP_100932_A_14634 | NW_004516953.1 | scaffold1864 | 14634                   | GG                              | AA                 | AA               | INTERGENIC      |               |                    |                    |
| SNP_100933_A_14640 | NW_004516953.1 | scaffold1864 | 14640                   | CC                              | TT                 | TT               | INTERGENIC      |               |                    |                    |
| SNP_100935_A_14907 | NW_004516953.1 | scaffold1864 | 14907                   | CC                              | TT                 | TT               | INTERGENIC      |               |                    |                    |
| SNP_100936_A_15049 | NW_004516953.1 | scaffold1864 | 15049                   | CC                              | TT                 | TT               | INTERGENIC      |               |                    |                    |
| SNP_100937_A_15257 | NW_004516953.1 | scaffold1864 | 15257                   | TT                              | GG                 | GG               | INTERGENIC      |               |                    |                    |
| SNP_100938_A_15269 | NW_004516953.1 | scaffold1864 | 15269                   | GG                              | AA                 | AA               | INTERGENIC      |               |                    |                    |
| SNP_100939_A_20060 | NW_004516953.1 | scaffold1864 | 20060                   | GG                              | AA                 | AA               | INTERGENIC      |               |                    |                    |
| SNP_100940_A_4320  | NW_004516955.1 | scaffold1866 | 4320                    | CC                              | TT                 | TT               | INTERGENIC      |               |                    |                    |
| SNP_100942_A_4435  | NW_004516955.1 | scaffold1866 | 4435                    | AA                              | GG                 | GG               | INTERGENIC      |               |                    |                    |
| SNP_100943_A_4437  | NW_004516955.1 | scaffold1866 | 4437                    | CC                              | TT                 | TT               | INTERGENIC      |               |                    |                    |
| SNP_100944_A_4475  | NW_004516955.1 | scaffold1866 | 4475                    | GG                              | AA                 | AA               | INTERGENIC      |               |                    |                    |
| SNP_100945_A_4480  | NW_004516955.1 | scaffold1866 | 4480                    | AA                              | GG                 | GG               | INTERGENIC      |               |                    |                    |
| SNP_100946_A_4510  | NW_004516955.1 | scaffold1866 | 4510                    | AA                              | GG                 | GG               | INTERGENIC      |               |                    |                    |

| SNPs IDs            | Chromosome IDs | Chromosomes  | Physical positions (bp) | CDC Frontier (Reference genome) | (Pusa 1103 & HPNB) | (ILWC 46 & LPNB) | Sequence Components of genome | Gene accession IDs | Putative functions               |
|---------------------|----------------|--------------|-------------------------|---------------------------------|--------------------|------------------|-------------------------------|--------------------|----------------------------------|
| SNP_100947_A_4520   | NW_004516955.1 | scaffold1866 | 4520                    | AA                              | GG                 | GG               | INTERGENIC                    |                    |                                  |
| SNP_100948_A_4660   | NW_004516955.1 | scaffold1866 | 4660                    | GG                              | TT                 | TT               | INTERGENIC                    |                    |                                  |
| SNP_100949_A_4688   | NW_004516955.1 | scaffold1866 | 4688                    | AA                              | TT                 | TT               | INTERGENIC                    |                    |                                  |
| SNP_100950_A_4836   | NW_004516955.1 | scaffold1866 | 4836                    | GG                              | TT                 | TT               | INTERGENIC                    |                    |                                  |
| SNP_100952_A_50333  | NW_004516955.1 | scaffold1866 | 50333                   | AA                              | GG                 | GG               | DRR                           | 101491861          | putative F-box protein At3g16210 |
| SNP_100954_A_62883  | NW_004516955.1 | scaffold1866 | 62883                   | CC                              | TT                 | TT               | INTERGENIC                    |                    |                                  |
| SNP_100955_A_63070  | NW_004516955.1 | scaffold1866 | 63070                   | TT                              | AA                 | AA               | INTERGENIC                    |                    |                                  |
| SNP_100957_A_92625  | NW_004516955.1 | scaffold1866 | 92625                   | TT                              | AA                 | AA               | INTERGENIC                    |                    |                                  |
| SNP_100958_A_100408 | NW_004516955.1 | scaffold1866 | 100408                  | AA                              | GG                 | GG               | INTERGENIC                    |                    |                                  |
| SNP_100959_A_100508 | NW_004516955.1 | scaffold1866 | 100508                  | CC                              | TT                 | TT               | INTERGENIC                    |                    |                                  |
| SNP_100960_A_103242 | NW_004516955.1 | scaffold1866 | 103242                  | TT                              | AA                 | AA               | INTERGENIC                    |                    |                                  |
| SNP_100962_A_103265 | NW_004516955.1 | scaffold1866 | 103265                  | TT                              | GG                 | GG               | INTERGENIC                    |                    |                                  |
| SNP_100964_A_115673 | NW_004516955.1 | scaffold1866 | 115673                  | TT                              | AA                 | AA               | INTERGENIC                    |                    |                                  |
| SNP_100966_A_135305 | NW_004516955.1 | scaffold1866 | 135305                  | CC                              | TT                 | TT               | INTERGENIC                    |                    |                                  |
| SNP_100967_A_143333 | NW_004516955.1 | scaffold1866 | 143333                  | CC                              | TT                 | TT               | INTERGENIC                    |                    |                                  |
| SNP_100968_A_47551  | NW_004516956.1 | scaffold1867 | 47551                   | TT                              | CC                 | CC               | INTERGENIC                    |                    |                                  |
| SNP_100969_A_58984  | NW_004516956.1 | scaffold1867 | 58984                   | GG                              | TT                 | TT               | INTERGENIC                    |                    |                                  |
| SNP_100970_A_70977  | NW_004516956.1 | scaffold1867 | 70977                   | TT                              | CC                 | CC               | INTERGENIC                    |                    |                                  |
| SNP_100971_A_70991  | NW_004516956.1 | scaffold1867 | 70991                   | CC                              | TT                 | TT               | INTERGENIC                    |                    |                                  |
| SNP_100972_A_71006  | NW_004516956.1 | scaffold1867 | 71006                   | GG                              | AA                 | AA               | INTERGENIC                    |                    |                                  |
| SNP_100973_A_71012  | NW_004516956.1 | scaffold1867 | 71012                   | AA                              | CC                 | CC               | INTERGENIC                    |                    |                                  |
| SNP_100974_A_71018  | NW_004516956.1 | scaffold1867 | 71018                   | TT                              | CC                 | CC               | INTERGENIC                    |                    |                                  |

| SNPs IDs            | Chromosome IDs | Chromosomes  | Physical positions (bp) | CDC Frontier (Reference genome) | (Pusa 1103 & HPNB) | (ILWC 46 & LPNB) | Sequence genome | Components of | Gene accession IDs           | Putative functions |
|---------------------|----------------|--------------|-------------------------|---------------------------------|--------------------|------------------|-----------------|---------------|------------------------------|--------------------|
| SNP_100975_A_76922  | NW_004516956.1 | scaffold1867 | 76922                   | CC                              | TT                 | TT               | INTERGENIC      |               |                              |                    |
| SNP_100976_A_96083  | NW_004516956.1 | scaffold1867 | 96083                   | TT                              | AA                 | AA               | INTERGENIC      |               |                              |                    |
| SNP_100977_A_96395  | NW_004516956.1 | scaffold1867 | 96395                   | AA                              | GG                 | GG               | INTERGENIC      |               |                              |                    |
| SNP_100978_A_96424  | NW_004516956.1 | scaffold1867 | 96424                   | AA                              | GG                 | GG               | INTERGENIC      |               |                              |                    |
| SNP_100979_A_96814  | NW_004516956.1 | scaffold1867 | 96814                   | AA                              | GG                 | GG               | INTERGENIC      |               |                              |                    |
| SNP_100980_A_163188 | NW_004516956.1 | scaffold1867 | 163188                  | TT                              | CC                 | CC               | INTERGENIC      |               |                              |                    |
| SNP_100981_A_163285 | NW_004516956.1 | scaffold1867 | 163285                  | AA                              | CC                 | CC               | INTERGENIC      |               |                              |                    |
| SNP_100982_A_163455 | NW_004516956.1 | scaffold1867 | 163455                  | TT                              | CC                 | CC               | INTERGENIC      |               |                              |                    |
| SNP_100983_A_163467 | NW_004516956.1 | scaffold1867 | 163467                  | AA                              | GG                 | GG               | INTERGENIC      |               |                              |                    |
| SNP_100984_A_163529 | NW_004516956.1 | scaffold1867 | 163529                  | CC                              | TT                 | TT               | INTERGENIC      |               |                              |                    |
| SNP_100985_A_164369 | NW_004516956.1 | scaffold1867 | 164369                  | CC                              | TT                 | TT               | INTERGENIC      |               |                              |                    |
| SNP_100986_A_164390 | NW_004516956.1 | scaffold1867 | 164390                  | CC                              | AA                 | AA               | INTERGENIC      |               |                              |                    |
| SNP_100987_A_172572 | NW_004516956.1 | scaffold1867 | 172572                  | AA                              | TT                 | TT               | INTERGENIC      |               |                              |                    |
| SNP_100988_A_200788 | NW_004516956.1 | scaffold1867 | 200788                  | AA                              | GG                 | GG               | INTERGENIC      |               |                              |                    |
| SNP_100990_A_228721 | NW_004516956.1 | scaffold1867 | 228721                  | GG                              | AA                 | AA               | INTRON          | 101494999     | diacylglycerol kinase 4-like |                    |
| SNP_100992_A_233738 | NW_004516956.1 | scaffold1867 | 233738                  | TT                              | CC                 | CC               | INTRON          | 101494999     | diacylglycerol kinase 4-like |                    |
| SNP_100993_A_237465 | NW_004516956.1 | scaffold1867 | 237465                  | GG                              | AA                 | AA               | INTRON          | 101494999     | diacylglycerol kinase 4-like |                    |
| SNP_100994_A_237467 | NW_004516956.1 | scaffold1867 | 237467                  | CC                              | TT                 | TT               | INTRON          | 101494999     | diacylglycerol kinase 4-like |                    |
| SNP_100995_A_237476 | NW_004516956.1 | scaffold1867 | 237476                  | AA                              | GG                 | GG               | INTRON          | 101494999     | diacylglycerol kinase 4-like |                    |
| SNP_100996_A_237494 | NW_004516956.1 | scaffold1867 | 237494                  | CC                              | TT                 | TT               | INTRON          | 101494999     | diacylglycerol kinase 4-like |                    |
| SNP_100997_A_237506 | NW_004516956.1 | scaffold1867 | 237506                  | AA                              | CC                 | CC               | INTRON          | 101494999     | diacylglycerol kinase 4-like |                    |
| SNP_100998_A_237510 | NW_004516956.1 | scaffold1867 | 237510                  | CC                              | TT                 | TT               | INTRON          | 101494999     | diacylglycerol kinase 4-like |                    |

| SNPs IDs            | Chromosome IDs | Chromosomes  | Physical positions (bp) | CDC Frontier (Reference genome) | (Pusa 1103 & HPNB) | (ILWC 46 & LPNB) | Sequence Components of genome | Gene accession IDs | Putative functions                   |
|---------------------|----------------|--------------|-------------------------|---------------------------------|--------------------|------------------|-------------------------------|--------------------|--------------------------------------|
| SNP_100999_A_237512 | NW_004516956.1 | scaffold1867 | 237512                  | TT                              | CC                 | CC               | INTRON                        | 101494999          | diacylglycerol kinase 4-like         |
| SNP_101000_A_237520 | NW_004516956.1 | scaffold1867 | 237520                  | TT                              | CC                 | CC               | INTRON                        | 101494999          | diacylglycerol kinase 4-like         |
| SNP_101001_A_237521 | NW_004516956.1 | scaffold1867 | 237521                  | CC                              | TT                 | TT               | INTRON                        | 101494999          | diacylglycerol kinase 4-like         |
| SNP_101002_A_237539 | NW_004516956.1 | scaffold1867 | 237539                  | TT                              | CC                 | CC               | INTRON                        | 101494999          | diacylglycerol kinase 4-like         |
| SNP_101003_A_237566 | NW_004516956.1 | scaffold1867 | 237566                  | CC                              | TT                 | TT               | INTRON                        | 101494999          | diacylglycerol kinase 4-like         |
| SNP_101004_A_237644 | NW_004516956.1 | scaffold1867 | 237644                  | AA                              | GG                 | GG               | INTRON                        | 101494999          | diacylglycerol kinase 4-like         |
| SNP_101005_A_237650 | NW_004516956.1 | scaffold1867 | 237650                  | TT                              | CC                 | CC               | INTRON                        | 101494999          | diacylglycerol kinase 4-like         |
| SNP_101006_A_237661 | NW_004516956.1 | scaffold1867 | 237661                  | AA                              | GG                 | GG               | INTRON                        | 101494999          | diacylglycerol kinase 4-like         |
| SNP_101007_A_237662 | NW_004516956.1 | scaffold1867 | 237662                  | TT                              | AA                 | AA               | INTRON                        | 101494999          | diacylglycerol kinase 4-like         |
| SNP_101008_A_237713 | NW_004516956.1 | scaffold1867 | 237713                  | TT                              | CC                 | CC               | INTRON                        | 101494999          | diacylglycerol kinase 4-like         |
| SNP_101009_A_237715 | NW_004516956.1 | scaffold1867 | 237715                  | AA                              | CC                 | CC               | INTRON                        | 101494999          | diacylglycerol kinase 4-like         |
| SNP_101010_A_255959 | NW_004516956.1 | scaffold1867 | 255959                  | CC                              | AA                 | AA               | INTRON                        | 101494999          | diacylglycerol kinase 4-like         |
| SNP_101011_A_255967 | NW_004516956.1 | scaffold1867 | 255967                  | TT                              | CC                 | CC               | INTRON                        | 101494999          | diacylglycerol kinase 4-like         |
| SNP_101012_A_257111 | NW_004516956.1 | scaffold1867 | 257111                  | AA                              | TT                 | TT               | INTRON                        | 101494999          | diacylglycerol kinase 4-like         |
| SNP_101013_A_262480 | NW_004516956.1 | scaffold1867 | 262480                  | AA                              | GG                 | GG               | INTRON                        | 101494999          | diacylglycerol kinase 4-like         |
| SNP_101014_A_310647 | NW_004516956.1 | scaffold1867 | 310647                  | TT                              | CC                 | CC               | INTERGENIC                    |                    |                                      |
| SNP_101015_A_314805 | NW_004516956.1 | scaffold1867 | 314805                  | AA                              | GG                 | GG               | INTERGENIC                    |                    |                                      |
| SNP_101016_A_314824 | NW_004516956.1 | scaffold1867 | 314824                  | TT                              | CC                 | CC               | INTERGENIC                    |                    |                                      |
| SNP_101017_A_314826 | NW_004516956.1 | scaffold1867 | 314826                  | GG                              | TT                 | TT               | INTERGENIC                    |                    |                                      |
| SNP_101018_A_336779 | NW_004516956.1 | scaffold1867 | 336779                  | AA                              | GG                 | GG               | INTERGENIC                    |                    |                                      |
| SNP_101019_A_468    | NW_004516957.1 | scaffold1868 | 468                     | GG                              | TT                 | TT               | INTRON                        | 101496959          | ATP-dependent DNA helicase RRM3-like |
| SNP_101020_A_175    | NW_004516958.1 | scaffold1869 | 175                     | TT                              | CC                 | CC               | INTERGENIC                    |                    |                                      |

| SNPs IDs           | Chromosome IDs | Chromosomes  | Physical positions (bp) | CDC Frontier (Reference genome) | (Pusa 1103 & HPNB) | (ILWC 46 & LPNB) | Sequence genome | Components of | Gene accession IDs | Putative functions |
|--------------------|----------------|--------------|-------------------------|---------------------------------|--------------------|------------------|-----------------|---------------|--------------------|--------------------|
| SNP_101021_A_419   | NW_004516958.1 | scaffold1869 | 419                     | TT                              | GG                 | GG               | INTERGENIC      |               |                    |                    |
| SNP_101022_A_625   | NW_004516958.1 | scaffold1869 | 625                     | GG                              | CC                 | CC               | INTERGENIC      |               |                    |                    |
| SNP_101023_A_666   | NW_004516958.1 | scaffold1869 | 666                     | CC                              | TT                 | TT               | INTERGENIC      |               |                    |                    |
| SNP_101024_A_808   | NW_004516958.1 | scaffold1869 | 808                     | AA                              | TT                 | TT               | INTERGENIC      |               |                    |                    |
| SNP_101025_A_840   | NW_004516958.1 | scaffold1869 | 840                     | AA                              | GG                 | GG               | INTERGENIC      |               |                    |                    |
| SNP_101026_A_2083  | NW_004516958.1 | scaffold1869 | 2083                    | AA                              | GG                 | GG               | INTERGENIC      |               |                    |                    |
| SNP_101027_A_12223 | NW_004516958.1 | scaffold1869 | 12223                   | GG                              | CC                 | CC               | INTERGENIC      |               |                    |                    |
| SNP_101028_A_12518 | NW_004516958.1 | scaffold1869 | 12518                   | GG                              | AA                 | AA               | INTERGENIC      |               |                    |                    |
| SNP_101029_A_12532 | NW_004516958.1 | scaffold1869 | 12532                   | TT                              | CC                 | CC               | INTERGENIC      |               |                    |                    |
| SNP_101030_A_12533 | NW_004516958.1 | scaffold1869 | 12533                   | CC                              | GG                 | GG               | INTERGENIC      |               |                    |                    |
| SNP_101032_A_14200 | NW_004516958.1 | scaffold1869 | 14200                   | GG                              | AA                 | AA               | INTERGENIC      |               |                    |                    |
| SNP_101033_A_14315 | NW_004516958.1 | scaffold1869 | 14315                   | CC                              | AA                 | AA               | INTERGENIC      |               |                    |                    |
| SNP_101034_A_16230 | NW_004516958.1 | scaffold1869 | 16230                   | AA                              | TT                 | TT               | INTERGENIC      |               |                    |                    |
| SNP_101035_A_16245 | NW_004516958.1 | scaffold1869 | 16245                   | TT                              | CC                 | CC               | INTERGENIC      |               |                    |                    |
| SNP_101036_A_16642 | NW_004516958.1 | scaffold1869 | 16642                   | AA                              | GG                 | GG               | INTERGENIC      |               |                    |                    |
| SNP_101037_A_16690 | NW_004516958.1 | scaffold1869 | 16690                   | AA                              | GG                 | GG               | INTERGENIC      |               |                    |                    |
| SNP_101038_A_16756 | NW_004516958.1 | scaffold1869 | 16756                   | AA                              | GG                 | GG               | INTERGENIC      |               |                    |                    |
| SNP_101039_A_16786 | NW_004516958.1 | scaffold1869 | 16786                   | CC                              | TT                 | TT               | INTERGENIC      |               |                    |                    |
| SNP_101040_A_17012 | NW_004516958.1 | scaffold1869 | 17012                   | CC                              | TT                 | TT               | INTERGENIC      |               |                    |                    |
| SNP_101041_A_18846 | NW_004516958.1 | scaffold1869 | 18846                   | CC                              | GG                 | GG               | INTERGENIC      |               |                    |                    |
| SNP_101042_A_18883 | NW_004516958.1 | scaffold1869 | 18883                   | TT                              | GG                 | GG               | INTERGENIC      |               |                    |                    |
| SNP_101043_A_18929 | NW_004516958.1 | scaffold1869 | 18929                   | AA                              | CC                 | CC               | INTERGENIC      |               |                    |                    |

| SNPs IDs           | Chromosome IDs | Chromosomes  | Physical positions (bp) | CDC Frontier genome (Reference genome) | (Pusa 1103 & HPNB) | (ILWC 46 & LPNB) | Sequence genome | Components of | Gene accession IDs | Putative functions |
|--------------------|----------------|--------------|-------------------------|----------------------------------------|--------------------|------------------|-----------------|---------------|--------------------|--------------------|
| SNP_101044_A_18973 | NW_004516958.1 | scaffold1869 | 18973                   | CC                                     | TT                 | TT               | INTERGENIC      |               |                    |                    |
| SNP_101045_A_18985 | NW_004516958.1 | scaffold1869 | 18985                   | CC                                     | TT                 | TT               | INTERGENIC      |               |                    |                    |
| SNP_101047_A_19154 | NW_004516958.1 | scaffold1869 | 19154                   | GG                                     | AA                 | AA               | INTERGENIC      |               |                    |                    |
| SNP_101048_A_19167 | NW_004516958.1 | scaffold1869 | 19167                   | TT                                     | CC                 | CC               | INTERGENIC      |               |                    |                    |
| SNP_101049_A_19278 | NW_004516958.1 | scaffold1869 | 19278                   | GG                                     | AA                 | AA               | INTERGENIC      |               |                    |                    |
| SNP_101050_A_19302 | NW_004516958.1 | scaffold1869 | 19302                   | AA                                     | GG                 | GG               | INTERGENIC      |               |                    |                    |
| SNP_101051_A_19380 | NW_004516958.1 | scaffold1869 | 19380                   | CC                                     | TT                 | TT               | INTERGENIC      |               |                    |                    |
| SNP_101052_A_19603 | NW_004516958.1 | scaffold1869 | 19603                   | CC                                     | TT                 | TT               | INTERGENIC      |               |                    |                    |
| SNP_101053_A_19609 | NW_004516958.1 | scaffold1869 | 19609                   | TT                                     | CC                 | CC               | INTERGENIC      |               |                    |                    |
| SNP_101054_A_19757 | NW_004516958.1 | scaffold1869 | 19757                   | CC                                     | AA                 | AA               | INTERGENIC      |               |                    |                    |
| SNP_101055_A_19811 | NW_004516958.1 | scaffold1869 | 19811                   | GG                                     | AA                 | AA               | INTERGENIC      |               |                    |                    |
| SNP_101056_A_19847 | NW_004516958.1 | scaffold1869 | 19847                   | CC                                     | AA                 | AA               | INTERGENIC      |               |                    |                    |
| SNP_101057_A_19950 | NW_004516958.1 | scaffold1869 | 19950                   | CC                                     | AA                 | AA               | INTERGENIC      |               |                    |                    |
| SNP_101058_A_19962 | NW_004516958.1 | scaffold1869 | 19962                   | AA                                     | TT                 | TT               | INTERGENIC      |               |                    |                    |
| SNP_101060_A_20064 | NW_004516958.1 | scaffold1869 | 20064                   | TT                                     | GG                 | GG               | INTERGENIC      |               |                    |                    |
| SNP_101061_A_20228 | NW_004516958.1 | scaffold1869 | 20228                   | AA                                     | CC                 | CC               | INTERGENIC      |               |                    |                    |
| SNP_101062_A_20356 | NW_004516958.1 | scaffold1869 | 20356                   | AA                                     | GG                 | GG               | INTERGENIC      |               |                    |                    |
| SNP_101063_A_20419 | NW_004516958.1 | scaffold1869 | 20419                   | TT                                     | CC                 | CC               | INTERGENIC      |               |                    |                    |
| SNP_101064_A_21103 | NW_004516958.1 | scaffold1869 | 21103                   | TT                                     | GG                 | GG               | INTERGENIC      |               |                    |                    |
| SNP_101065_A_21538 | NW_004516958.1 | scaffold1869 | 21538                   | GG                                     | AA                 | AA               | INTERGENIC      |               |                    |                    |
| SNP_101066_A_21555 | NW_004516958.1 | scaffold1869 | 21555                   | TT                                     | AA                 | AA               | INTERGENIC      |               |                    |                    |
| SNP_101067_A_24480 | NW_004516958.1 | scaffold1869 | 24480                   | AA                                     | GG                 | GG               | INTERGENIC      |               |                    |                    |



| SNPs IDs           | Chromosome IDs | Chromosomes  | Physical positions (bp) | CDC Frontier (Reference genome) | (Pusa 1103 & HPNB) | (ILWC 46 & LPNB) | Sequence genome | Components of | Gene accession IDs | Putative functions |
|--------------------|----------------|--------------|-------------------------|---------------------------------|--------------------|------------------|-----------------|---------------|--------------------|--------------------|
| SNP_101068_A_24516 | NW_004516958.1 | scaffold1869 | 24516                   | GG                              | AA                 | AA               | INTERGENIC      |               |                    |                    |
| SNP_101069_A_24564 | NW_004516958.1 | scaffold1869 | 24564                   | TT                              | CC                 | CC               | INTERGENIC      |               |                    |                    |
| SNP_101070_A_11200 | NW_004516959.1 | scaffold1870 | 11200                   | CC                              | TT                 | TT               | INTERGENIC      |               |                    |                    |
| SNP_101071_A_13614 | NW_004516959.1 | scaffold1870 | 13614                   | CC                              | TT                 | TT               | INTERGENIC      |               |                    |                    |
| SNP_101072_A_13621 | NW_004516959.1 | scaffold1870 | 13621                   | GG                              | AA                 | AA               | INTERGENIC      |               |                    |                    |
| SNP_101073_A_13624 | NW_004516959.1 | scaffold1870 | 13624                   | GG                              | AA                 | AA               | INTERGENIC      |               |                    |                    |
| SNP_101074_A_13636 | NW_004516959.1 | scaffold1870 | 13636                   | AA                              | GG                 | GG               | INTERGENIC      |               |                    |                    |
| SNP_101075_A_20986 | NW_004516959.1 | scaffold1870 | 20986                   | TT                              | CC                 | CC               | INTERGENIC      |               |                    |                    |
| SNP_101077_A_21982 | NW_004516960.1 | scaffold1872 | 21982                   | GG                              | TT                 | TT               | INTERGENIC      |               |                    |                    |
| SNP_101078_A_22004 | NW_004516960.1 | scaffold1872 | 22004                   | CC                              | TT                 | TT               | INTERGENIC      |               |                    |                    |
| SNP_101079_A_22536 | NW_004516960.1 | scaffold1872 | 22536                   | TT                              | CC                 | CC               | INTERGENIC      |               |                    |                    |
| SNP_101080_A_22556 | NW_004516960.1 | scaffold1872 | 22556                   | CC                              | TT                 | TT               | INTERGENIC      |               |                    |                    |
| SNP_101081_A_22564 | NW_004516960.1 | scaffold1872 | 22564                   | TT                              | AA                 | AA               | INTERGENIC      |               |                    |                    |
| SNP_101082_A_2518  | NW_004516961.1 | scaffold1874 | 2518                    | GG                              | TT                 | TT               | INTERGENIC      |               |                    |                    |
| SNP_101083_A_4968  | NW_004516962.1 | scaffold1878 | 4968                    | AA                              | GG                 | GG               | INTERGENIC      |               |                    |                    |
| SNP_101084_A_5839  | NW_004516962.1 | scaffold1878 | 5839                    | AA                              | TT                 | TT               | INTERGENIC      |               |                    |                    |
| SNP_101085_A_6242  | NW_004516962.1 | scaffold1878 | 6242                    | TT                              | AA                 | AA               | INTERGENIC      |               |                    |                    |
| SNP_101087_A_8994  | NW_004516962.1 | scaffold1878 | 8994                    | TT                              | AA                 | AA               | INTERGENIC      |               |                    |                    |
| SNP_101088_A_11565 | NW_004516962.1 | scaffold1878 | 11565                   | GG                              | CC                 | CC               | INTERGENIC      |               |                    |                    |
| SNP_101089_A_11941 | NW_004516962.1 | scaffold1878 | 11941                   | AA                              | CC                 | CC               | INTERGENIC      |               |                    |                    |
| SNP_101090_A_16944 | NW_004516962.1 | scaffold1878 | 16944                   | TT                              | GG                 | GG               | INTERGENIC      |               |                    |                    |
| SNP_101091_A_20180 | NW_004516962.1 | scaffold1878 | 20180                   | AA                              | GG                 | GG               | INTERGENIC      |               |                    |                    |

| SNPs IDs           | Chromosome IDs | Chromosomes  | Physical positions (bp) | CDC Frontier (Reference genome) | (Pusa 1103 & HPNB) | (ILWC 46 & LPNB) | Sequence genome | Components of | Gene accession IDs | Putative functions |
|--------------------|----------------|--------------|-------------------------|---------------------------------|--------------------|------------------|-----------------|---------------|--------------------|--------------------|
| SNP_101092_A_21733 | NW_004516962.1 | scaffold1878 | 21733                   | TT                              | CC                 | CC               | INTERGENIC      |               |                    |                    |
| SNP_101093_A_26232 | NW_004516962.1 | scaffold1878 | 26232                   | CC                              | TT                 | TT               | INTERGENIC      |               |                    |                    |
| SNP_101094_A_26582 | NW_004516962.1 | scaffold1878 | 26582                   | AA                              | GG                 | GG               | INTERGENIC      |               |                    |                    |
| SNP_101095_A_26758 | NW_004516962.1 | scaffold1878 | 26758                   | GG                              | TT                 | TT               | INTERGENIC      |               |                    |                    |
| SNP_101096_A_28978 | NW_004516962.1 | scaffold1878 | 28978                   | GG                              | AA                 | AA               | INTERGENIC      |               |                    |                    |
| SNP_101097_A_32839 | NW_004516962.1 | scaffold1878 | 32839                   | CC                              | TT                 | TT               | INTERGENIC      |               |                    |                    |
| SNP_101098_A_33579 | NW_004516962.1 | scaffold1878 | 33579                   | AA                              | GG                 | GG               | INTERGENIC      |               |                    |                    |
| SNP_101099_A_40201 | NW_004516962.1 | scaffold1878 | 40201                   | TT                              | CC                 | CC               | INTERGENIC      |               |                    |                    |
| SNP_101101_A_40520 | NW_004516962.1 | scaffold1878 | 40520                   | TT                              | CC                 | CC               | INTERGENIC      |               |                    |                    |
| SNP_101102_A_40549 | NW_004516962.1 | scaffold1878 | 40549                   | CC                              | GG                 | GG               | INTERGENIC      |               |                    |                    |
| SNP_101103_A_40558 | NW_004516962.1 | scaffold1878 | 40558                   | AA                              | CC                 | CC               | INTERGENIC      |               |                    |                    |
| SNP_101104_A_40603 | NW_004516962.1 | scaffold1878 | 40603                   | CC                              | TT                 | TT               | INTERGENIC      |               |                    |                    |
| SNP_101105_A_40607 | NW_004516962.1 | scaffold1878 | 40607                   | GG                              | AA                 | AA               | INTERGENIC      |               |                    |                    |
| SNP_101106_A_40614 | NW_004516962.1 | scaffold1878 | 40614                   | TT                              | CC                 | CC               | INTERGENIC      |               |                    |                    |
| SNP_101107_A_40624 | NW_004516962.1 | scaffold1878 | 40624                   | AA                              | GG                 | GG               | INTERGENIC      |               |                    |                    |
| SNP_101108_A_40645 | NW_004516962.1 | scaffold1878 | 40645                   | AA                              | GG                 | GG               | INTERGENIC      |               |                    |                    |
| SNP_101110_A_40686 | NW_004516962.1 | scaffold1878 | 40686                   | AA                              | GG                 | GG               | INTERGENIC      |               |                    |                    |
| SNP_101111_A_40768 | NW_004516962.1 | scaffold1878 | 40768                   | AA                              | GG                 | GG               | INTERGENIC      |               |                    |                    |
| SNP_101112_A_44851 | NW_004516962.1 | scaffold1878 | 44851                   | CC                              | TT                 | TT               | INTERGENIC      |               |                    |                    |
| SNP_101113_A_44949 | NW_004516962.1 | scaffold1878 | 44949                   | GG                              | TT                 | TT               | INTERGENIC      |               |                    |                    |
| SNP_101115_A_45231 | NW_004516962.1 | scaffold1878 | 45231                   | GG                              | AA                 | AA               | INTERGENIC      |               |                    |                    |
| SNP_101116_A_48200 | NW_004516962.1 | scaffold1878 | 48200                   | AA                              | GG                 | GG               | INTERGENIC      |               |                    |                    |

| SNPs IDs           | Chromosome IDs | Chromosomes  | Physical positions (bp) | CDC Frontier (Reference genome) | (Pusa 1103 & HPNB) | (ILWC 46 & LPNB) | Sequence genome | Components of | Gene accession IDs | Putative functions |
|--------------------|----------------|--------------|-------------------------|---------------------------------|--------------------|------------------|-----------------|---------------|--------------------|--------------------|
| SNP_101117_A_48336 | NW_004516962.1 | scaffold1878 | 48336                   | CC                              | TT                 | TT               | INTERGENIC      |               |                    |                    |
| SNP_101118_A_48621 | NW_004516962.1 | scaffold1878 | 48621                   | TT                              | GG                 | GG               | INTERGENIC      |               |                    |                    |
| SNP_101119_A_49242 | NW_004516962.1 | scaffold1878 | 49242                   | GG                              | AA                 | AA               | INTERGENIC      |               |                    |                    |
| SNP_101120_A_52440 | NW_004516962.1 | scaffold1878 | 52440                   | TT                              | CC                 | CC               | INTERGENIC      |               |                    |                    |
| SNP_101121_A_52441 | NW_004516962.1 | scaffold1878 | 52441                   | AA                              | TT                 | TT               | INTERGENIC      |               |                    |                    |
| SNP_101122_A_55649 | NW_004516962.1 | scaffold1878 | 55649                   | AA                              | TT                 | TT               | INTERGENIC      |               |                    |                    |
| SNP_101124_A_69347 | NW_004516962.1 | scaffold1878 | 69347                   | GG                              | TT                 | TT               | INTERGENIC      |               |                    |                    |
| SNP_101125_A_69565 | NW_004516962.1 | scaffold1878 | 69565                   | TT                              | CC                 | CC               | INTERGENIC      |               |                    |                    |
| SNP_101127_A_76669 | NW_004516962.1 | scaffold1878 | 76669                   | AA                              | GG                 | GG               | INTERGENIC      |               |                    |                    |
| SNP_101129_A_77999 | NW_004516962.1 | scaffold1878 | 77999                   | AA                              | GG                 | GG               | INTERGENIC      |               |                    |                    |
| SNP_101130_A_237   | NW_004516967.1 | scaffold1885 | 237                     | TT                              | AA                 | AA               | INTERGENIC      |               |                    |                    |
| SNP_101131_A_500   | NW_004516967.1 | scaffold1885 | 500                     | AA                              | TT                 | TT               | INTERGENIC      |               |                    |                    |
| SNP_101132_A_501   | NW_004516967.1 | scaffold1885 | 501                     | TT                              | AA                 | AA               | INTERGENIC      |               |                    |                    |
| SNP_101133_A_521   | NW_004516967.1 | scaffold1885 | 521                     | TT                              | CC                 | CC               | INTERGENIC      |               |                    |                    |
| SNP_101134_A_538   | NW_004516967.1 | scaffold1885 | 538                     | GG                              | TT                 | TT               | INTERGENIC      |               |                    |                    |
| SNP_101135_A_559   | NW_004516967.1 | scaffold1885 | 559                     | AA                              | CC                 | CC               | INTERGENIC      |               |                    |                    |
| SNP_101136_A_618   | NW_004516967.1 | scaffold1885 | 618                     | TT                              | GG                 | GG               | INTERGENIC      |               |                    |                    |
| SNP_101137_A_965   | NW_004516967.1 | scaffold1885 | 965                     | TT                              | CC                 | CC               | INTERGENIC      |               |                    |                    |
| SNP_101138_A_2006  | NW_004516967.1 | scaffold1885 | 2006                    | TT                              | GG                 | GG               | INTERGENIC      |               |                    |                    |
| SNP_101139_A_2043  | NW_004516967.1 | scaffold1885 | 2043                    | GG                              | CC                 | CC               | INTERGENIC      |               |                    |                    |
| SNP_101140_A_2093  | NW_004516967.1 | scaffold1885 | 2093                    | CC                              | AA                 | AA               | INTERGENIC      |               |                    |                    |
| SNP_101141_A_2107  | NW_004516967.1 | scaffold1885 | 2107                    | AA                              | TT                 | TT               | INTERGENIC      |               |                    |                    |

| SNPs IDs           | Chromosome IDs | Chromosomes  | Physical positions (bp) | CDC Frontier (Reference genome) | (Pusa 1103 & HPNB) | (ILWC 46 & LPNB) | Sequence genome | Components of | Gene accession IDs | Putative functions |
|--------------------|----------------|--------------|-------------------------|---------------------------------|--------------------|------------------|-----------------|---------------|--------------------|--------------------|
| SNP_101142_A_2267  | NW_004516967.1 | scaffold1885 | 2267                    | CC                              | GG                 | GG               | INTERGENIC      |               |                    |                    |
| SNP_101143_A_2319  | NW_004516967.1 | scaffold1885 | 2319                    | AA                              | CC                 | CC               | INTERGENIC      |               |                    |                    |
| SNP_101144_A_2325  | NW_004516967.1 | scaffold1885 | 2325                    | TT                              | GG                 | GG               | INTERGENIC      |               |                    |                    |
| SNP_101145_A_2541  | NW_004516967.1 | scaffold1885 | 2541                    | TT                              | CC                 | CC               | INTERGENIC      |               |                    |                    |
| SNP_101146_A_2555  | NW_004516967.1 | scaffold1885 | 2555                    | AA                              | TT                 | TT               | INTERGENIC      |               |                    |                    |
| SNP_101147_A_2683  | NW_004516967.1 | scaffold1885 | 2683                    | AA                              | GG                 | GG               | INTERGENIC      |               |                    |                    |
| SNP_101148_A_2695  | NW_004516967.1 | scaffold1885 | 2695                    | TT                              | AA                 | AA               | INTERGENIC      |               |                    |                    |
| SNP_101149_A_2763  | NW_004516967.1 | scaffold1885 | 2763                    | GG                              | TT                 | TT               | INTERGENIC      |               |                    |                    |
| SNP_101150_A_2963  | NW_004516967.1 | scaffold1885 | 2963                    | TT                              | CC                 | CC               | INTERGENIC      |               |                    |                    |
| SNP_101151_A_3086  | NW_004516967.1 | scaffold1885 | 3086                    | CC                              | TT                 | TT               | INTERGENIC      |               |                    |                    |
| SNP_101152_A_5279  | NW_004516967.1 | scaffold1885 | 5279                    | TT                              | AA                 | AA               | INTERGENIC      |               |                    |                    |
| SNP_101153_A_8073  | NW_004516967.1 | scaffold1885 | 8073                    | AA                              | TT                 | TT               | INTERGENIC      |               |                    |                    |
| SNP_101155_A_12764 | NW_004516967.1 | scaffold1885 | 12764                   | TT                              | CC                 | CC               | INTERGENIC      |               |                    |                    |
| SNP_101156_A_13114 | NW_004516967.1 | scaffold1885 | 13114                   | AA                              | CC                 | CC               | INTERGENIC      |               |                    |                    |
| SNP_101157_A_13120 | NW_004516967.1 | scaffold1885 | 13120                   | TT                              | CC                 | CC               | INTERGENIC      |               |                    |                    |
| SNP_101158_A_13142 | NW_004516967.1 | scaffold1885 | 13142                   | AA                              | GG                 | GG               | INTERGENIC      |               |                    |                    |
| SNP_101159_A_13543 | NW_004516967.1 | scaffold1885 | 13543                   | TT                              | CC                 | CC               | INTERGENIC      |               |                    |                    |
| SNP_101160_A_21516 | NW_004516967.1 | scaffold1885 | 21516                   | AA                              | TT                 | TT               | INTERGENIC      |               |                    |                    |
| SNP_101161_A_21672 | NW_004516967.1 | scaffold1885 | 21672                   | CC                              | AA                 | AA               | INTERGENIC      |               |                    |                    |
| SNP_101162_A_30407 | NW_004516967.1 | scaffold1885 | 30407                   | TT                              | CC                 | CC               | INTERGENIC      |               |                    |                    |
| SNP_101163_A_39606 | NW_004516967.1 | scaffold1885 | 39606                   | AA                              | CC                 | CC               | INTERGENIC      |               |                    |                    |
| SNP_101164_A_39783 | NW_004516967.1 | scaffold1885 | 39783                   | AA                              | CC                 | CC               | INTERGENIC      |               |                    |                    |

| SNPs IDs           | Chromosome IDs | Chromosomes  | Physical positions (bp) | CDC Frontier (Reference genome) | (Pusa 1103 & HPNB) | (ILWC 46 & LPNB) | Sequence genome | Components of | Gene accession IDs | Putative functions |
|--------------------|----------------|--------------|-------------------------|---------------------------------|--------------------|------------------|-----------------|---------------|--------------------|--------------------|
| SNP_101165_A_40614 | NW_004516967.1 | scaffold1885 | 40614                   | CC                              | AA                 | AA               | INTERGENIC      |               |                    |                    |
| SNP_101167_A_42432 | NW_004516967.1 | scaffold1885 | 42432                   | AA                              | GG                 | GG               | INTERGENIC      |               |                    |                    |
| SNP_101168_A_42540 | NW_004516967.1 | scaffold1885 | 42540                   | TT                              | CC                 | CC               | INTERGENIC      |               |                    |                    |
| SNP_101169_A_42833 | NW_004516967.1 | scaffold1885 | 42833                   | TT                              | CC                 | CC               | INTERGENIC      |               |                    |                    |
| SNP_101170_A_43818 | NW_004516967.1 | scaffold1885 | 43818                   | AA                              | GG                 | GG               | INTERGENIC      |               |                    |                    |
| SNP_101171_A_45434 | NW_004516967.1 | scaffold1885 | 45434                   | TT                              | GG                 | GG               | INTERGENIC      |               |                    |                    |
| SNP_101172_A_46767 | NW_004516967.1 | scaffold1885 | 46767                   | GG                              | AA                 | AA               | INTERGENIC      |               |                    |                    |
| SNP_101173_A_46787 | NW_004516967.1 | scaffold1885 | 46787                   | AA                              | TT                 | TT               | INTERGENIC      |               |                    |                    |
| SNP_101174_A_46818 | NW_004516967.1 | scaffold1885 | 46818                   | TT                              | GG                 | GG               | INTERGENIC      |               |                    |                    |
| SNP_101175_A_47190 | NW_004516967.1 | scaffold1885 | 47190                   | TT                              | CC                 | CC               | INTERGENIC      |               |                    |                    |
| SNP_101178_A_48131 | NW_004516967.1 | scaffold1885 | 48131                   | CC                              | AA                 | AA               | INTERGENIC      |               |                    |                    |
| SNP_101179_A_3420  | NW_004516968.1 | scaffold1886 | 3420                    | CC                              | TT                 | TT               | INTERGENIC      |               |                    |                    |
| SNP_101182_A_18289 | NW_004516968.1 | scaffold1886 | 18289                   | CC                              | TT                 | TT               | INTERGENIC      |               |                    |                    |
| SNP_101183_A_64    | NW_004516969.1 | scaffold1888 | 64                      | GG                              | AA                 | AA               | INTERGENIC      |               |                    |                    |
| SNP_101184_A_67    | NW_004516969.1 | scaffold1888 | 67                      | GG                              | AA                 | AA               | INTERGENIC      |               |                    |                    |
| SNP_101185_A_71    | NW_004516969.1 | scaffold1888 | 71                      | TT                              | CC                 | CC               | INTERGENIC      |               |                    |                    |
| SNP_101186_A_94    | NW_004516969.1 | scaffold1888 | 94                      | CC                              | AA                 | AA               | INTERGENIC      |               |                    |                    |
| SNP_101187_A_228   | NW_004516969.1 | scaffold1888 | 228                     | GG                              | AA                 | AA               | INTERGENIC      |               |                    |                    |
| SNP_101188_A_383   | NW_004516969.1 | scaffold1888 | 383                     | TT                              | CC                 | CC               | INTERGENIC      |               |                    |                    |
| SNP_101190_A_533   | NW_004516969.1 | scaffold1888 | 533                     | AA                              | CC                 | CC               | INTERGENIC      |               |                    |                    |
| SNP_101191_A_588   | NW_004516969.1 | scaffold1888 | 588                     | AA                              | GG                 | GG               | INTERGENIC      |               |                    |                    |
| SNP_101192_A_658   | NW_004516969.1 | scaffold1888 | 658                     | GG                              | TT                 | TT               | INTERGENIC      |               |                    |                    |

| SNPs IDs           | Chromosome IDs | Chromosomes  | Physical positions (bp) | CDC Frontier (Reference genome) | (Pusa 1103 & HPNB) | (ILWC 46 & LPNB) | Sequence genome | Components of | Gene accession IDs | Putative functions |
|--------------------|----------------|--------------|-------------------------|---------------------------------|--------------------|------------------|-----------------|---------------|--------------------|--------------------|
| SNP_101193_A_835   | NW_004516969.1 | scaffold1888 | 835                     | AA                              | GG                 | GG               | INTERGENIC      |               |                    |                    |
| SNP_101195_A_9353  | NW_004516970.1 | scaffold1891 | 9353                    | GG                              | CC                 | CC               | INTERGENIC      |               |                    |                    |
| SNP_101196_A_101   | NW_004516972.1 | scaffold1893 | 101                     | CC                              | TT                 | TT               | INTERGENIC      |               |                    |                    |
| SNP_101197_A_130   | NW_004516972.1 | scaffold1893 | 130                     | CC                              | GG                 | GG               | INTERGENIC      |               |                    |                    |
| SNP_101198_A_151   | NW_004516972.1 | scaffold1893 | 151                     | CC                              | GG                 | GG               | INTERGENIC      |               |                    |                    |
| SNP_101199_A_183   | NW_004516972.1 | scaffold1893 | 183                     | CC                              | TT                 | TT               | INTERGENIC      |               |                    |                    |
| SNP_101200_A_506   | NW_004516972.1 | scaffold1893 | 506                     | CC                              | TT                 | TT               | INTERGENIC      |               |                    |                    |
| SNP_101201_A_2452  | NW_004516972.1 | scaffold1893 | 2452                    | TT                              | GG                 | GG               | INTERGENIC      |               |                    |                    |
| SNP_101202_A_15271 | NW_004516972.1 | scaffold1893 | 15271                   | GG                              | AA                 | AA               | INTERGENIC      |               |                    |                    |
| SNP_101203_A_15793 | NW_004516972.1 | scaffold1893 | 15793                   | TT                              | GG                 | GG               | INTERGENIC      |               |                    |                    |
| SNP_101204_A_15796 | NW_004516972.1 | scaffold1893 | 15796                   | TT                              | AA                 | AA               | INTERGENIC      |               |                    |                    |
| SNP_101205_A_15812 | NW_004516972.1 | scaffold1893 | 15812                   | GG                              | AA                 | AA               | INTERGENIC      |               |                    |                    |
| SNP_101206_A_16055 | NW_004516972.1 | scaffold1893 | 16055                   | AA                              | GG                 | GG               | INTERGENIC      |               |                    |                    |
| SNP_101207_A_16857 | NW_004516972.1 | scaffold1893 | 16857                   | GG                              | AA                 | AA               | INTERGENIC      |               |                    |                    |
| SNP_101208_A_17454 | NW_004516972.1 | scaffold1893 | 17454                   | TT                              | AA                 | AA               | INTERGENIC      |               |                    |                    |
| SNP_101209_A_1530  | NW_004516973.1 | scaffold1894 | 1530                    | AA                              | CC                 | CC               | INTERGENIC      |               |                    |                    |
| SNP_101210_A_1879  | NW_004516973.1 | scaffold1894 | 1879                    | TT                              | CC                 | CC               | INTERGENIC      |               |                    |                    |
| SNP_101211_A_2685  | NW_004516973.1 | scaffold1894 | 2685                    | CC                              | GG                 | GG               | INTERGENIC      |               |                    |                    |
| SNP_101212_A_9960  | NW_004516973.1 | scaffold1894 | 9960                    | AA                              | GG                 | GG               | INTERGENIC      |               |                    |                    |
| SNP_101213_A_10165 | NW_004516974.1 | scaffold1896 | 10165                   | CC                              | GG                 | GG               | INTERGENIC      |               |                    |                    |
| SNP_101214_A_13796 | NW_004516974.1 | scaffold1896 | 13796                   | GG                              | CC                 | CC               | INTERGENIC      |               |                    |                    |
| SNP_101215_A_18633 | NW_004516974.1 | scaffold1896 | 18633                   | GG                              | CC                 | CC               | INTERGENIC      |               |                    |                    |

| SNPs IDs           | Chromosome IDs | Chromosomes  | Physical positions (bp) | CDC Frontier (Reference genome) | (Pusa 1103 & HPNB) | (ILWC 46 & LPNB) | Sequence genome | Components of | Gene accession IDs | Putative functions |
|--------------------|----------------|--------------|-------------------------|---------------------------------|--------------------|------------------|-----------------|---------------|--------------------|--------------------|
| SNP_101216_A_11738 | NW_004516975.1 | scaffold1897 | 11738                   | TT                              | GG                 | GG               | INTERGENIC      |               |                    |                    |
| SNP_101217_A_2784  | NW_004516977.1 | scaffold1899 | 2784                    | CC                              | TT                 | TT               | INTERGENIC      |               |                    |                    |
| SNP_101219_A_33568 | NW_004516977.1 | scaffold1899 | 33568                   | AA                              | GG                 | GG               | INTERGENIC      |               |                    |                    |
| SNP_101220_A_33816 | NW_004516977.1 | scaffold1899 | 33816                   | TT                              | CC                 | CC               | INTERGENIC      |               |                    |                    |
| SNP_101221_A_64    | NW_004516981.1 | scaffold1903 | 64                      | AA                              | GG                 | GG               | INTERGENIC      |               |                    |                    |
| SNP_101222_A_128   | NW_004516981.1 | scaffold1903 | 128                     | GG                              | CC                 | CC               | INTERGENIC      |               |                    |                    |
| SNP_101224_A_1739  | NW_004516981.1 | scaffold1903 | 1739                    | GG                              | AA                 | AA               | INTERGENIC      |               |                    |                    |
| SNP_101225_A_2071  | NW_004516981.1 | scaffold1903 | 2071                    | GG                              | CC                 | CC               | INTERGENIC      |               |                    |                    |
| SNP_101226_A_2115  | NW_004516981.1 | scaffold1903 | 2115                    | CC                              | GG                 | GG               | INTERGENIC      |               |                    |                    |
| SNP_101227_A_2206  | NW_004516981.1 | scaffold1903 | 2206                    | AA                              | TT                 | TT               | INTERGENIC      |               |                    |                    |
| SNP_101228_A_1107  | NW_004516982.1 | scaffold1904 | 1107                    | TT                              | CC                 | CC               | INTERGENIC      |               |                    |                    |
| SNP_101229_A_1109  | NW_004516982.1 | scaffold1904 | 1109                    | TT                              | GG                 | GG               | INTERGENIC      |               |                    |                    |
| SNP_101230_A_1116  | NW_004516982.1 | scaffold1904 | 1116                    | AA                              | GG                 | GG               | INTERGENIC      |               |                    |                    |
| SNP_101231_A_1134  | NW_004516982.1 | scaffold1904 | 1134                    | CC                              | TT                 | TT               | INTERGENIC      |               |                    |                    |
| SNP_101232_A_1149  | NW_004516982.1 | scaffold1904 | 1149                    | AA                              | TT                 | TT               | INTERGENIC      |               |                    |                    |
| SNP_101233_A_1173  | NW_004516982.1 | scaffold1904 | 1173                    | AA                              | GG                 | GG               | INTERGENIC      |               |                    |                    |
| SNP_101234_A_1215  | NW_004516982.1 | scaffold1904 | 1215                    | AA                              | TT                 | TT               | INTERGENIC      |               |                    |                    |
| SNP_101235_A_1487  | NW_004516982.1 | scaffold1904 | 1487                    | CC                              | GG                 | GG               | INTERGENIC      |               |                    |                    |
| SNP_101236_A_1527  | NW_004516982.1 | scaffold1904 | 1527                    | GG                              | AA                 | AA               | INTERGENIC      |               |                    |                    |
| SNP_101237_A_1575  | NW_004516982.1 | scaffold1904 | 1575                    | TT                              | CC                 | CC               | INTERGENIC      |               |                    |                    |
| SNP_101238_A_6413  | NW_004516982.1 | scaffold1904 | 6413                    | TT                              | CC                 | CC               | INTERGENIC      |               |                    |                    |
| SNP_101239_A_6430  | NW_004516982.1 | scaffold1904 | 6430                    | GG                              | TT                 | TT               | INTERGENIC      |               |                    |                    |

| SNPs IDs           | Chromosome IDs | Chromosomes  | Physical positions (bp) | CDC Frontier (Reference genome) | (Pusa 1103 & HPNB) | (ILWC 46 & LPNB) | Sequence genome | Components of | Gene accession IDs | Putative functions |
|--------------------|----------------|--------------|-------------------------|---------------------------------|--------------------|------------------|-----------------|---------------|--------------------|--------------------|
| SNP_101240_A_6433  | NW_004516982.1 | scaffold1904 | 6433                    | TT                              | AA                 | AA               | INTERGENIC      |               |                    |                    |
| SNP_101241_A_338   | NW_004516983.1 | scaffold1905 | 338                     | AA                              | GG                 | GG               | INTERGENIC      |               |                    |                    |
| SNP_101243_A_1763  | NW_004516983.1 | scaffold1905 | 1763                    | CC                              | GG                 | GG               | INTERGENIC      |               |                    |                    |
| SNP_101244_A_1803  | NW_004516983.1 | scaffold1905 | 1803                    | CC                              | TT                 | TT               | INTERGENIC      |               |                    |                    |
| SNP_101245_A_1844  | NW_004516983.1 | scaffold1905 | 1844                    | AA                              | CC                 | CC               | INTERGENIC      |               |                    |                    |
| SNP_101246_A_1909  | NW_004516983.1 | scaffold1905 | 1909                    | AA                              | GG                 | GG               | INTERGENIC      |               |                    |                    |
| SNP_101247_A_1988  | NW_004516983.1 | scaffold1905 | 1988                    | TT                              | GG                 | GG               | INTERGENIC      |               |                    |                    |
| SNP_101248_A_2002  | NW_004516983.1 | scaffold1905 | 2002                    | AA                              | CC                 | CC               | INTERGENIC      |               |                    |                    |
| SNP_101249_A_2077  | NW_004516983.1 | scaffold1905 | 2077                    | TT                              | AA                 | AA               | INTERGENIC      |               |                    |                    |
| SNP_101251_A_14710 | NW_004516983.1 | scaffold1905 | 14710                   | CC                              | AA                 | AA               | INTERGENIC      |               |                    |                    |
| SNP_101252_A_14739 | NW_004516983.1 | scaffold1905 | 14739                   | TT                              | CC                 | CC               | INTERGENIC      |               |                    |                    |
| SNP_101253_A_16560 | NW_004516983.1 | scaffold1905 | 16560                   | TT                              | CC                 | CC               | INTERGENIC      |               |                    |                    |
| SNP_101254_A_16756 | NW_004516983.1 | scaffold1905 | 16756                   | AA                              | CC                 | CC               | INTERGENIC      |               |                    |                    |
| SNP_101255_A_16816 | NW_004516983.1 | scaffold1905 | 16816                   | TT                              | AA                 | AA               | INTERGENIC      |               |                    |                    |
| SNP_101256_A_16880 | NW_004516983.1 | scaffold1905 | 16880                   | AA                              | GG                 | GG               | INTERGENIC      |               |                    |                    |
| SNP_101257_A_16886 | NW_004516983.1 | scaffold1905 | 16886                   | TT                              | CC                 | CC               | INTERGENIC      |               |                    |                    |
| SNP_101258_A_16927 | NW_004516983.1 | scaffold1905 | 16927                   | TT                              | CC                 | CC               | INTERGENIC      |               |                    |                    |
| SNP_101259_A_16946 | NW_004516983.1 | scaffold1905 | 16946                   | TT                              | CC                 | CC               | INTERGENIC      |               |                    |                    |
| SNP_101260_A_16966 | NW_004516983.1 | scaffold1905 | 16966                   | CC                              | AA                 | AA               | INTERGENIC      |               |                    |                    |
| SNP_101261_A_31672 | NW_004516983.1 | scaffold1905 | 31672                   | GG                              | AA                 | AA               | INTERGENIC      |               |                    |                    |
| SNP_101262_A_31971 | NW_004516983.1 | scaffold1905 | 31971                   | TT                              | GG                 | GG               | INTERGENIC      |               |                    |                    |
| SNP_101263_A_32295 | NW_004516983.1 | scaffold1905 | 32295                   | GG                              | CC                 | CC               | INTERGENIC      |               |                    |                    |



| SNPs IDs           | Chromosome IDs | Chromosomes  | Physical positions (bp) | CDC Frontier (Reference genome) | (Pusa 1103 & HPNB) | (ILWC 46 & LPNB) | Sequence genome | Components of | Gene accession IDs | Putative functions |
|--------------------|----------------|--------------|-------------------------|---------------------------------|--------------------|------------------|-----------------|---------------|--------------------|--------------------|
| SNP_101264_A_1760  | NW_004516984.1 | scaffold1907 | 1760                    | CC                              | TT                 | TT               | INTERGENIC      |               |                    |                    |
| SNP_101265_A_18778 | NW_004516984.1 | scaffold1907 | 18778                   | GG                              | CC                 | CC               | INTERGENIC      |               |                    |                    |
| SNP_101266_A_23722 | NW_004516984.1 | scaffold1907 | 23722                   | TT                              | GG                 | GG               | INTERGENIC      |               |                    |                    |
| SNP_101267_A_23733 | NW_004516984.1 | scaffold1907 | 23733                   | TT                              | GG                 | GG               | INTERGENIC      |               |                    |                    |
| SNP_101268_A_24075 | NW_004516984.1 | scaffold1907 | 24075                   | TT                              | GG                 | GG               | INTERGENIC      |               |                    |                    |
| SNP_101269_A_55873 | NW_004516984.1 | scaffold1907 | 55873                   | GG                              | TT                 | TT               | INTERGENIC      |               |                    |                    |
| SNP_101270_A_56958 | NW_004516984.1 | scaffold1907 | 56958                   | CC                              | TT                 | TT               | INTERGENIC      |               |                    |                    |
| SNP_101271_A_60665 | NW_004516984.1 | scaffold1907 | 60665                   | TT                              | GG                 | GG               | INTERGENIC      |               |                    |                    |
| SNP_101272_A_61664 | NW_004516984.1 | scaffold1907 | 61664                   | AA                              | TT                 | TT               | INTERGENIC      |               |                    |                    |
| SNP_101273_A_62842 | NW_004516984.1 | scaffold1907 | 62842                   | AA                              | GG                 | GG               | INTERGENIC      |               |                    |                    |
| SNP_101274_A_63180 | NW_004516984.1 | scaffold1907 | 63180                   | AA                              | GG                 | GG               | INTERGENIC      |               |                    |                    |
| SNP_101275_A_64821 | NW_004516984.1 | scaffold1907 | 64821                   | TT                              | CC                 | CC               | INTERGENIC      |               |                    |                    |
| SNP_101276_A_264   | NW_004516987.1 | scaffold1910 | 264                     | GG                              | AA                 | AA               | INTERGENIC      |               |                    |                    |
| SNP_101277_A_303   | NW_004516987.1 | scaffold1910 | 303                     | AA                              | GG                 | GG               | INTERGENIC      |               |                    |                    |
| SNP_101278_A_306   | NW_004516987.1 | scaffold1910 | 306                     | CC                              | TT                 | TT               | INTERGENIC      |               |                    |                    |
| SNP_101279_A_307   | NW_004516987.1 | scaffold1910 | 307                     | TT                              | CC                 | CC               | INTERGENIC      |               |                    |                    |
| SNP_101280_A_309   | NW_004516987.1 | scaffold1910 | 309                     | TT                              | CC                 | CC               | INTERGENIC      |               |                    |                    |
| SNP_101281_A_6509  | NW_004516987.1 | scaffold1910 | 6509                    | AA                              | TT                 | TT               | INTERGENIC      |               |                    |                    |
| SNP_101282_A_6552  | NW_004516987.1 | scaffold1910 | 6552                    | AA                              | GG                 | GG               | INTERGENIC      |               |                    |                    |
| SNP_101283_A_6612  | NW_004516987.1 | scaffold1910 | 6612                    | GG                              | AA                 | AA               | INTERGENIC      |               |                    |                    |
| SNP_101284_A_6619  | NW_004516987.1 | scaffold1910 | 6619                    | CC                              | TT                 | TT               | INTERGENIC      |               |                    |                    |
| SNP_101285_A_6620  | NW_004516987.1 | scaffold1910 | 6620                    | CC                              | TT                 | TT               | INTERGENIC      |               |                    |                    |

| SNPs IDs           | Chromosome IDs | Chromosomes  | Physical positions (bp) | CDC Frontier (Reference genome) | (Pusa 1103 & HPNB) | (ILWC 46 & LPNB) | Sequence genome | Components of | Gene accession IDs | Putative functions |
|--------------------|----------------|--------------|-------------------------|---------------------------------|--------------------|------------------|-----------------|---------------|--------------------|--------------------|
| SNP_101286_A_6621  | NW_004516987.1 | scaffold1910 | 6621                    | AA                              | TT                 | TT               | INTERGENIC      |               |                    |                    |
| SNP_101287_A_6622  | NW_004516987.1 | scaffold1910 | 6622                    | TT                              | GG                 | GG               | INTERGENIC      |               |                    |                    |
| SNP_101288_A_6680  | NW_004516987.1 | scaffold1910 | 6680                    | GG                              | CC                 | CC               | INTERGENIC      |               |                    |                    |
| SNP_101289_A_6681  | NW_004516987.1 | scaffold1910 | 6681                    | AA                              | TT                 | TT               | INTERGENIC      |               |                    |                    |
| SNP_101290_A_6781  | NW_004516987.1 | scaffold1910 | 6781                    | GG                              | TT                 | TT               | INTERGENIC      |               |                    |                    |
| SNP_101291_A_6852  | NW_004516987.1 | scaffold1910 | 6852                    | CC                              | TT                 | TT               | INTERGENIC      |               |                    |                    |
| SNP_101292_A_7009  | NW_004516987.1 | scaffold1910 | 7009                    | TT                              | GG                 | GG               | INTERGENIC      |               |                    |                    |
| SNP_101293_A_7010  | NW_004516987.1 | scaffold1910 | 7010                    | GG                              | CC                 | CC               | INTERGENIC      |               |                    |                    |
| SNP_101294_A_7050  | NW_004516987.1 | scaffold1910 | 7050                    | CC                              | TT                 | TT               | INTERGENIC      |               |                    |                    |
| SNP_101295_A_7058  | NW_004516987.1 | scaffold1910 | 7058                    | CC                              | TT                 | TT               | INTERGENIC      |               |                    |                    |
| SNP_101296_A_7081  | NW_004516987.1 | scaffold1910 | 7081                    | AA                              | GG                 | GG               | INTERGENIC      |               |                    |                    |
| SNP_101297_A_7142  | NW_004516987.1 | scaffold1910 | 7142                    | CC                              | GG                 | GG               | INTERGENIC      |               |                    |                    |
| SNP_101298_A_8937  | NW_004516987.1 | scaffold1910 | 8937                    | GG                              | TT                 | TT               | INTERGENIC      |               |                    |                    |
| SNP_101299_A_13505 | NW_004516987.1 | scaffold1910 | 13505                   | TT                              | CC                 | CC               | INTERGENIC      |               |                    |                    |
| SNP_101300_A_13695 | NW_004516987.1 | scaffold1910 | 13695                   | GG                              | AA                 | AA               | INTERGENIC      |               |                    |                    |
| SNP_101301_A_14057 | NW_004516987.1 | scaffold1910 | 14057                   | TT                              | CC                 | CC               | INTERGENIC      |               |                    |                    |
| SNP_101302_A_23400 | NW_004516987.1 | scaffold1910 | 23400                   | GG                              | AA                 | AA               | INTERGENIC      |               |                    |                    |
| SNP_101303_A_23464 | NW_004516987.1 | scaffold1910 | 23464                   | CC                              | AA                 | AA               | INTERGENIC      |               |                    |                    |
| SNP_101305_A_36679 | NW_004516987.1 | scaffold1910 | 36679                   | GG                              | TT                 | TT               | INTERGENIC      |               |                    |                    |
| SNP_101306_A_36680 | NW_004516987.1 | scaffold1910 | 36680                   | TT                              | CC                 | CC               | INTERGENIC      |               |                    |                    |
| SNP_101307_A_36710 | NW_004516987.1 | scaffold1910 | 36710                   | CC                              | TT                 | TT               | INTERGENIC      |               |                    |                    |
| SNP_101308_A_36746 | NW_004516987.1 | scaffold1910 | 36746                   | GG                              | AA                 | AA               | INTERGENIC      |               |                    |                    |

| SNPs IDs           | Chromosome IDs | Chromosomes  | Physical positions (bp) | CDC Frontier (Reference genome) | (Pusa 1103 & HPNB) | (ILWC 46 & LPNB) | Sequence genome | Components of | Gene accession IDs | Putative functions |
|--------------------|----------------|--------------|-------------------------|---------------------------------|--------------------|------------------|-----------------|---------------|--------------------|--------------------|
| SNP_101309_A_36788 | NW_004516987.1 | scaffold1910 | 36788                   | TT                              | CC                 | CC               | INTERGENIC      |               |                    |                    |
| SNP_101310_A_37079 | NW_004516987.1 | scaffold1910 | 37079                   | TT                              | CC                 | CC               | INTERGENIC      |               |                    |                    |
| SNP_101311_A_37089 | NW_004516987.1 | scaffold1910 | 37089                   | AA                              | GG                 | GG               | INTERGENIC      |               |                    |                    |
| SNP_101312_A_37111 | NW_004516987.1 | scaffold1910 | 37111                   | AA                              | CC                 | CC               | INTERGENIC      |               |                    |                    |
| SNP_101313_A_37137 | NW_004516987.1 | scaffold1910 | 37137                   | TT                              | CC                 | CC               | INTERGENIC      |               |                    |                    |
| SNP_101314_A_37173 | NW_004516987.1 | scaffold1910 | 37173                   | TT                              | CC                 | CC               | INTERGENIC      |               |                    |                    |
| SNP_101315_A_39179 | NW_004516987.1 | scaffold1910 | 39179                   | TT                              | CC                 | CC               | INTERGENIC      |               |                    |                    |
| SNP_101316_A_2815  | NW_004516988.1 | scaffold1911 | 2815                    | TT                              | AA                 | AA               | INTERGENIC      |               |                    |                    |
| SNP_101317_A_2843  | NW_004516988.1 | scaffold1911 | 2843                    | GG                              | TT                 | TT               | INTERGENIC      |               |                    |                    |
| SNP_101318_A_2905  | NW_004516988.1 | scaffold1911 | 2905                    | TT                              | GG                 | GG               | INTERGENIC      |               |                    |                    |
| SNP_101319_A_2943  | NW_004516988.1 | scaffold1911 | 2943                    | CC                              | AA                 | AA               | INTERGENIC      |               |                    |                    |
| SNP_101320_A_3010  | NW_004516988.1 | scaffold1911 | 3010                    | TT                              | CC                 | CC               | INTERGENIC      |               |                    |                    |
| SNP_101321_A_3017  | NW_004516988.1 | scaffold1911 | 3017                    | CC                              | TT                 | TT               | INTERGENIC      |               |                    |                    |
| SNP_101322_A_3146  | NW_004516988.1 | scaffold1911 | 3146                    | TT                              | CC                 | CC               | INTERGENIC      |               |                    |                    |
| SNP_101323_A_3210  | NW_004516988.1 | scaffold1911 | 3210                    | GG                              | CC                 | CC               | INTERGENIC      |               |                    |                    |
| SNP_101324_A_3275  | NW_004516988.1 | scaffold1911 | 3275                    | CC                              | TT                 | TT               | INTERGENIC      |               |                    |                    |
| SNP_101325_A_12254 | NW_004516988.1 | scaffold1911 | 12254                   | GG                              | AA                 | AA               | INTERGENIC      |               |                    |                    |
| SNP_101326_A_12329 | NW_004516988.1 | scaffold1911 | 12329                   | GG                              | AA                 | AA               | INTERGENIC      |               |                    |                    |
| SNP_101327_A_12368 | NW_004516988.1 | scaffold1911 | 12368                   | TT                              | AA                 | AA               | INTERGENIC      |               |                    |                    |
| SNP_101328_A_12650 | NW_004516988.1 | scaffold1911 | 12650                   | AA                              | TT                 | TT               | INTERGENIC      |               |                    |                    |
| SNP_101329_A_12733 | NW_004516988.1 | scaffold1911 | 12733                   | TT                              | AA                 | GG               | INTERGENIC      |               |                    |                    |
| SNP_101330_A_12755 | NW_004516988.1 | scaffold1911 | 12755                   | TT                              | CC                 | CC               | INTERGENIC      |               |                    |                    |

| SNPs IDs           | Chromosome IDs | Chromosomes  | Physical positions (bp) | CDC Frontier (Reference genome) | (Pusa 1103 & HPNB) | (ILWC 46 & LPNB) | Sequence genome       | Components of | Gene accession IDs | Putative functions            |
|--------------------|----------------|--------------|-------------------------|---------------------------------|--------------------|------------------|-----------------------|---------------|--------------------|-------------------------------|
| SNP_101332_A_13322 | NW_004516988.1 | scaffold1911 | 13322                   | TT                              | CC                 | CC               | INTERGENIC            |               |                    |                               |
| SNP_101333_A_15193 | NW_004516988.1 | scaffold1911 | 15193                   | GG                              | AA                 | AA               | INTERGENIC            |               |                    |                               |
| SNP_101334_A_16689 | NW_004516988.1 | scaffold1911 | 16689                   | TT                              | CC                 | CC               | INTERGENIC            |               |                    |                               |
| SNP_101335_A_16781 | NW_004516988.1 | scaffold1911 | 16781                   | TT                              | CC                 | CC               | INTERGENIC            |               |                    |                               |
| SNP_101336_A_16842 | NW_004516988.1 | scaffold1911 | 16842                   | GG                              | TT                 | TT               | INTERGENIC            |               |                    |                               |
| SNP_101337_A_16954 | NW_004516988.1 | scaffold1911 | 16954                   | AA                              | TT                 | TT               | INTERGENIC            |               |                    |                               |
| SNP_101338_A_16955 | NW_004516988.1 | scaffold1911 | 16955                   | GG                              | AA                 | AA               | INTERGENIC            |               |                    |                               |
| SNP_101339_A_16958 | NW_004516988.1 | scaffold1911 | 16958                   | AA                              | TT                 | TT               | INTERGENIC            |               |                    |                               |
| SNP_101340_A_16959 | NW_004516988.1 | scaffold1911 | 16959                   | TT                              | CC                 | CC               | INTERGENIC            |               |                    |                               |
| SNP_101341_A_17143 | NW_004516988.1 | scaffold1911 | 17143                   | AA                              | CC                 | CC               | INTERGENIC            |               |                    |                               |
| SNP_101343_A_17224 | NW_004516988.1 | scaffold1911 | 17224                   | AA                              | GG                 | GG               | INTERGENIC            |               |                    |                               |
| SNP_101344_A_2453  | NW_004516989.1 | scaffold1912 | 2453                    | CC                              | TT                 | TT               | INTERGENIC            |               |                    |                               |
| SNP_101345_A_3108  | NW_004516989.1 | scaffold1912 | 3108                    | AA                              | GG                 | GG               | INTERGENIC            |               |                    |                               |
| SNP_101346_A_8024  | NW_004516989.1 | scaffold1912 | 8024                    | AA                              | GG                 | GG               | INTERGENIC            |               |                    |                               |
| SNP_101347_A_11831 | NW_004516989.1 | scaffold1912 | 11831                   | GG                              | AA                 | AA               | INTERGENIC            |               |                    |                               |
| SNP_101348_A_4940  | NW_004516990.1 | scaffold1913 | 4940                    | GG                              | AA                 | AA               | NON_SYNONYMOUS_CODING | 101498604     |                    | Unknown function              |
| SNP_101349_A_16099 | NW_004516994.1 | scaffold1918 | 16099                   | TT                              | CC                 | CC               | URR                   | 101506958     |                    | zinc finger protein ZAT1-like |
| SNP_101351_A_18940 | NW_004516994.1 | scaffold1918 | 18940                   | TT                              | AA                 | AA               | INTERGENIC            |               |                    |                               |
| SNP_101352_A_20051 | NW_004516994.1 | scaffold1918 | 20051                   | TT                              | CC                 | CC               | INTERGENIC            |               |                    |                               |
| SNP_101353_A_20327 | NW_004516994.1 | scaffold1918 | 20327                   | TT                              | CC                 | CC               | INTERGENIC            |               |                    |                               |
| SNP_101354_A_20353 | NW_004516994.1 | scaffold1918 | 20353                   | CC                              | AA                 | AA               | INTERGENIC            |               |                    |                               |
| SNP_101355_A_22185 | NW_004516994.1 | scaffold1918 | 22185                   | CC                              | TT                 | TT               | INTERGENIC            |               |                    |                               |

| SNPs IDs           | Chromosome IDs | Chromosomes  | Physical positions (bp) | CDC Frontier (Reference genome) | (Pusa 1103 & HPNB) | (ILWC 46 & LPNB) | Sequence Components of genome | Gene accession IDs | Putative functions                                                        |
|--------------------|----------------|--------------|-------------------------|---------------------------------|--------------------|------------------|-------------------------------|--------------------|---------------------------------------------------------------------------|
| SNP_101357_A_26567 | NW_004516994.1 | scaffold1918 | 26567                   | GG                              | TT                 | TT               | INTERGENIC                    |                    |                                                                           |
| SNP_101358_A_27223 | NW_004516994.1 | scaffold1918 | 27223                   | AA                              | TT                 | TT               | INTERGENIC                    |                    |                                                                           |
| SNP_101359_A_27410 | NW_004516994.1 | scaffold1918 | 27410                   | CC                              | GG                 | GG               | INTERGENIC                    |                    |                                                                           |
| SNP_101360_A_29755 | NW_004516994.1 | scaffold1918 | 29755                   | CC                              | TT                 | TT               | INTERGENIC                    |                    |                                                                           |
| SNP_101361_A_31242 | NW_004516994.1 | scaffold1918 | 31242                   | TT                              | AA                 | AA               | INTERGENIC                    |                    |                                                                           |
| SNP_101362_A_31585 | NW_004516994.1 | scaffold1918 | 31585                   | GG                              | AA                 | AA               | INTERGENIC                    |                    |                                                                           |
| SNP_101363_A_31750 | NW_004516994.1 | scaffold1918 | 31750                   | TT                              | CC                 | CC               | INTERGENIC                    |                    |                                                                           |
| SNP_101364_A_31797 | NW_004516994.1 | scaffold1918 | 31797                   | GG                              | TT                 | TT               | INTERGENIC                    |                    |                                                                           |
| SNP_101365_A_31821 | NW_004516994.1 | scaffold1918 | 31821                   | GG                              | TT                 | TT               | INTERGENIC                    |                    |                                                                           |
| SNP_101367_A_32210 | NW_004516994.1 | scaffold1918 | 32210                   | AA                              | GG                 | GG               | INTERGENIC                    |                    |                                                                           |
| SNP_101368_A_38330 | NW_004516994.1 | scaffold1918 | 38330                   | TT                              | GG                 | GG               | INTERGENIC                    |                    |                                                                           |
| SNP_101369_A_38965 | NW_004516994.1 | scaffold1918 | 38965                   | CC                              | TT                 | TT               | URR                           | 101498935          | F-box protein At5g07670-like                                              |
| SNP_101370_A_39755 | NW_004516994.1 | scaffold1918 | 39755                   | TT                              | CC                 | CC               | DRR                           | 101507282          | pentatricopeptide repeat-containing protein At3g18970                     |
| SNP_101371_A_39768 | NW_004516994.1 | scaffold1918 | 39768                   | GG                              | CC                 | CC               | DRR                           | 101507282          | pentatricopeptide repeat-containing protein At3g18970                     |
| SNP_101372_A_40629 | NW_004516994.1 | scaffold1918 | 40629                   | TT                              | CC                 | CC               | INTERGENIC                    |                    |                                                                           |
| SNP_101373_A_40638 | NW_004516994.1 | scaffold1918 | 40638                   | TT                              | GG                 | GG               | INTERGENIC                    |                    |                                                                           |
| SNP_101374_A_44039 | NW_004516994.1 | scaffold1918 | 44039                   | TT                              | AA                 | AA               | DRR                           | 101499260          | pentatricopeptide repeat-containing protein At2g13420, mitochondrial-like |
| SNP_101375_A_45896 | NW_004516994.1 | scaffold1918 | 45896                   | AA                              | TT                 | TT               | INTERGENIC                    |                    |                                                                           |
| SNP_101376_A_48990 | NW_004516994.1 | scaffold1918 | 48990                   | GG                              | AA                 | AA               | URR                           | 101499260          | pentatricopeptide repeat-containing protein At2g13420, mitochondrial-like |
| SNP_101377_A_51641 | NW_004516994.1 | scaffold1918 | 51641                   | TT                              | CC                 | CC               | INTERGENIC                    |                    |                                                                           |
| SNP_101378_A_59467 | NW_004516994.1 | scaffold1918 | 59467                   | GG                              | AA                 | AA               | INTERGENIC                    |                    |                                                                           |
| SNP_101379_A_63455 | NW_004516994.1 | scaffold1918 | 63455                   | TT                              | CC                 | CC               | INTERGENIC                    |                    |                                                                           |

| SNPs IDs            | Chromosome IDs | Chromosomes  | Physical positions (bp) | CDC Frontier genome (Reference genome) | (Pusa 1103 & HPNB) | (ILWC 46 & LPNB) | Sequence Components of genome | Gene accession IDs | Putative functions                                                            |
|---------------------|----------------|--------------|-------------------------|----------------------------------------|--------------------|------------------|-------------------------------|--------------------|-------------------------------------------------------------------------------|
| SNP_101380_A_73889  | NW_004516994.1 | scaffold1918 | 73889                   | CC                                     | AA                 | AA               | NON_SYNONYMOUS_CODING         | 101499985          | putative pentatricopeptide repeat-containing protein At1g12700, mitochondrial |
| SNP_101381_A_75827  | NW_004516994.1 | scaffold1918 | 75827                   | GG                                     | AA                 | AA               | URR                           | 101499985          | putative pentatricopeptide repeat-containing protein At1g12700, mitochondrial |
| SNP_101383_A_79275  | NW_004516994.1 | scaffold1918 | 79275                   | AA                                     | GG                 | GG               | INTERGENIC                    |                    |                                                                               |
| SNP_101384_A_82315  | NW_004516994.1 | scaffold1918 | 82315                   | GG                                     | AA                 | AA               | INTERGENIC                    |                    |                                                                               |
| SNP_101385_A_102129 | NW_004516994.1 | scaffold1918 | 102129                  | CC                                     | AA                 | AA               | INTERGENIC                    |                    |                                                                               |
| SNP_101386_A_104021 | NW_004516994.1 | scaffold1918 | 104021                  | AA                                     | GG                 | GG               | INTRON                        | 101502233          | 1-aminocyclopropane-1-carboxylate oxidase homolog 1-like                      |
| SNP_101387_A_126159 | NW_004516994.1 | scaffold1918 | 126159                  | TT                                     | CC                 | CC               | INTERGENIC                    |                    |                                                                               |
| SNP_101388_A_152507 | NW_004516994.1 | scaffold1918 | 152507                  | CC                                     | TT                 | TT               | INTERGENIC                    |                    |                                                                               |
| SNP_101389_A_152709 | NW_004516994.1 | scaffold1918 | 152709                  | TT                                     | CC                 | CC               | INTERGENIC                    |                    |                                                                               |
| SNP_101390_A_152758 | NW_004516994.1 | scaffold1918 | 152758                  | CC                                     | TT                 | TT               | INTERGENIC                    |                    |                                                                               |
| SNP_101391_A_153070 | NW_004516994.1 | scaffold1918 | 153070                  | TT                                     | CC                 | CC               | INTERGENIC                    |                    |                                                                               |
| SNP_101392_A_155588 | NW_004516994.1 | scaffold1918 | 155588                  | CC                                     | TT                 | TT               | INTERGENIC                    |                    |                                                                               |
| SNP_101393_A_158209 | NW_004516994.1 | scaffold1918 | 158209                  | CC                                     | GG                 | GG               | DRR                           | 101503390          | pentatricopeptide repeat-containing protein At3g22470, mitochondrial-like     |
| SNP_101394_A_161607 | NW_004516994.1 | scaffold1918 | 161607                  | AA                                     | GG                 | GG               | URR                           | 101503390          | pentatricopeptide repeat-containing protein At3g22470, mitochondrial-like     |
| SNP_101395_A_161610 | NW_004516994.1 | scaffold1918 | 161610                  | GG                                     | AA                 | AA               | URR                           | 101503390          | pentatricopeptide repeat-containing protein At3g22470, mitochondrial-like     |
| SNP_101396_A_161655 | NW_004516994.1 | scaffold1918 | 161655                  | TT                                     | AA                 | AA               | URR                           | 101503390          | pentatricopeptide repeat-containing protein At3g22470, mitochondrial-like     |
| SNP_101397_A_161972 | NW_004516994.1 | scaffold1918 | 161972                  | AA                                     | GG                 | GG               | URR                           | 101503390          | pentatricopeptide repeat-containing protein At3g22470, mitochondrial-like     |
| SNP_101398_A_167403 | NW_004516994.1 | scaffold1918 | 167403                  | CC                                     | TT                 | TT               | INTERGENIC                    |                    |                                                                               |
| SNP_101399_A_172995 | NW_004516994.1 | scaffold1918 | 172995                  | AA                                     | GG                 | GG               | INTERGENIC                    |                    |                                                                               |
| SNP_101400_A_173204 | NW_004516994.1 | scaffold1918 | 173204                  | GG                                     | AA                 | AA               | INTERGENIC                    |                    |                                                                               |
| SNP_101401_A_173330 | NW_004516994.1 | scaffold1918 | 173330                  | TT                                     | CC                 | CC               | INTERGENIC                    |                    |                                                                               |
| SNP_101402_A_181162 | NW_004516994.1 | scaffold1918 | 181162                  | CC                                     | TT                 | TT               | URR                           | 101508224          | short-chain dehydrogenase TIC 32, chloroplastic-like                          |

| SNPs IDs            | Chromosome IDs | Chromosomes  | Physical positions (bp) | CDC Frontier (Reference genome) | (Pusa 1103 & HPNB) | (ILWC 46 & LPNB) | Sequence Components of genome | Gene accession IDs | Putative functions                                                            |
|---------------------|----------------|--------------|-------------------------|---------------------------------|--------------------|------------------|-------------------------------|--------------------|-------------------------------------------------------------------------------|
| SNP_101403_A_182092 | NW_004516994.1 | scaffold1918 | 182092                  | CC                              | GG                 | GG               | URR                           | 101508224          | short-chain dehydrogenase TIC 32, chloroplastic-like                          |
| SNP_101404_A_182819 | NW_004516994.1 | scaffold1918 | 182819                  | AA                              | GG                 | GG               | INTERGENIC                    |                    |                                                                               |
| SNP_101405_A_185947 | NW_004516994.1 | scaffold1918 | 185947                  | TT                              | AA                 | AA               | URR                           | 101504364          | RNA-binding protein pno1-like                                                 |
| SNP_101406_A_186020 | NW_004516994.1 | scaffold1918 | 186020                  | GG                              | CC                 | CC               | URR                           | 101504364          | RNA-binding protein pno1-like                                                 |
| SNP_101408_A_194223 | NW_004516994.1 | scaffold1918 | 194223                  | TT                              | CC                 | CC               | INTERGENIC                    |                    |                                                                               |
| SNP_101409_A_197128 | NW_004516994.1 | scaffold1918 | 197128                  | AA                              | GG                 | GG               | INTERGENIC                    |                    |                                                                               |
| SNP_101410_A_205722 | NW_004516994.1 | scaffold1918 | 205722                  | CC                              | TT                 | TT               | URR                           | 101504908          | putative pentatricopeptide repeat-containing protein At1g12700, mitochondrial |
| SNP_101411_A_205729 | NW_004516994.1 | scaffold1918 | 205729                  | GG                              | AA                 | AA               | URR                           | 101504908          | putative pentatricopeptide repeat-containing protein At1g12700, mitochondrial |
| SNP_101412_A_205730 | NW_004516994.1 | scaffold1918 | 205730                  | TT                              | CC                 | CC               | URR                           | 101504908          | putative pentatricopeptide repeat-containing protein At1g12700, mitochondrial |
| SNP_101413_A_213693 | NW_004516994.1 | scaffold1918 | 213693                  | TT                              | CC                 | CC               | INTERGENIC                    |                    |                                                                               |
| SNP_101414_A_213722 | NW_004516994.1 | scaffold1918 | 213722                  | TT                              | GG                 | GG               | INTERGENIC                    |                    |                                                                               |
| SNP_101415_A_224631 | NW_004516994.1 | scaffold1918 | 224631                  | AA                              | GG                 | GG               | INTERGENIC                    |                    |                                                                               |
| SNP_101416_A_226049 | NW_004516994.1 | scaffold1918 | 226049                  | AA                              | GG                 | GG               | INTERGENIC                    |                    |                                                                               |
| SNP_101417_A_229558 | NW_004516994.1 | scaffold1918 | 229558                  | AA                              | GG                 | GG               | INTERGENIC                    |                    |                                                                               |
| SNP_101418_A_244704 | NW_004516994.1 | scaffold1918 | 244704                  | CC                              | TT                 | TT               | INTRON                        | 101506623          | trehalose-phosphate phosphatase A-like                                        |
| SNP_101420_A_245739 | NW_004516994.1 | scaffold1918 | 245739                  | AA                              | GG                 | GG               | INTRON                        | 101506623          | trehalose-phosphate phosphatase A-like                                        |
| SNP_101421_A_245917 | NW_004516994.1 | scaffold1918 | 245917                  | CC                              | TT                 | TT               | SYNONYMOUS_CODING             | 101506623          | trehalose-phosphate phosphatase A-like                                        |
| SNP_101422_A_245953 | NW_004516994.1 | scaffold1918 | 245953                  | TT                              | CC                 | CC               | SYNONYMOUS_CODING             | 101506623          | trehalose-phosphate phosphatase A-like                                        |
| SNP_101423_A_245968 | NW_004516994.1 | scaffold1918 | 245968                  | TT                              | CC                 | CC               | SYNONYMOUS_CODING             | 101506623          | trehalose-phosphate phosphatase A-like                                        |
| SNP_101424_A_247101 | NW_004516994.1 | scaffold1918 | 247101                  | AA                              | CC                 | CC               | INTRON                        | 101506623          | trehalose-phosphate phosphatase A-like                                        |
| SNP_101425_A_247861 | NW_004516994.1 | scaffold1918 | 247861                  | TT                              | CC                 | CC               | SYNONYMOUS_CODING             | 101506623          | trehalose-phosphate phosphatase A-like                                        |
| SNP_101426_A_1925   | NW_004516995.1 | scaffold1919 | 1925                    | GG                              | TT                 | TT               | INTERGENIC                    |                    |                                                                               |

| SNPs IDs           | Chromosome IDs | Chromosomes  | Physical positions (bp) | CDC Frontier (Reference genome) | (Pusa 1103 & HPNB) | (ILWC 46 & LPNB) | Sequence genome | Components of | Gene accession IDs | Putative functions |
|--------------------|----------------|--------------|-------------------------|---------------------------------|--------------------|------------------|-----------------|---------------|--------------------|--------------------|
| SNP_101427_A_2451  | NW_004516995.1 | scaffold1919 | 2451                    | TT                              | CC                 | CC               | INTERGENIC      |               |                    |                    |
| SNP_101428_A_2463  | NW_004516995.1 | scaffold1919 | 2463                    | AA                              | CC                 | CC               | INTERGENIC      |               |                    |                    |
| SNP_101429_A_5162  | NW_004516995.1 | scaffold1919 | 5162                    | GG                              | AA                 | AA               | INTERGENIC      |               |                    |                    |
| SNP_101430_A_4900  | NW_004516996.1 | scaffold1920 | 4900                    | AA                              | CC                 | CC               | INTERGENIC      |               |                    |                    |
| SNP_101431_A_4943  | NW_004516996.1 | scaffold1920 | 4943                    | TT                              | CC                 | CC               | INTERGENIC      |               |                    |                    |
| SNP_101432_A_8492  | NW_004516996.1 | scaffold1920 | 8492                    | AA                              | CC                 | CC               | INTERGENIC      |               |                    |                    |
| SNP_101433_A_8573  | NW_004516996.1 | scaffold1920 | 8573                    | CC                              | AA                 | AA               | INTERGENIC      |               |                    |                    |
| SNP_101434_A_8574  | NW_004516996.1 | scaffold1920 | 8574                    | CC                              | AA                 | AA               | INTERGENIC      |               |                    |                    |
| SNP_101435_A_8730  | NW_004516996.1 | scaffold1920 | 8730                    | CC                              | AA                 | AA               | INTERGENIC      |               |                    |                    |
| SNP_101436_A_8733  | NW_004516996.1 | scaffold1920 | 8733                    | GG                              | CC                 | CC               | INTERGENIC      |               |                    |                    |
| SNP_101437_A_8741  | NW_004516996.1 | scaffold1920 | 8741                    | GG                              | AA                 | AA               | INTERGENIC      |               |                    |                    |
| SNP_101438_A_8749  | NW_004516996.1 | scaffold1920 | 8749                    | CC                              | AA                 | AA               | INTERGENIC      |               |                    |                    |
| SNP_101439_A_8751  | NW_004516996.1 | scaffold1920 | 8751                    | AA                              | TT                 | TT               | INTERGENIC      |               |                    |                    |
| SNP_101440_A_8859  | NW_004516996.1 | scaffold1920 | 8859                    | AA                              | TT                 | TT               | INTERGENIC      |               |                    |                    |
| SNP_101441_A_8872  | NW_004516996.1 | scaffold1920 | 8872                    | TT                              | AA                 | AA               | INTERGENIC      |               |                    |                    |
| SNP_101442_A_8885  | NW_004516996.1 | scaffold1920 | 8885                    | GG                              | AA                 | AA               | INTERGENIC      |               |                    |                    |
| SNP_101443_A_10232 | NW_004516996.1 | scaffold1920 | 10232                   | TT                              | AA                 | AA               | INTERGENIC      |               |                    |                    |
| SNP_101444_A_10261 | NW_004516996.1 | scaffold1920 | 10261                   | AA                              | GG                 | GG               | INTERGENIC      |               |                    |                    |
| SNP_101445_A_10407 | NW_004516996.1 | scaffold1920 | 10407                   | CC                              | TT                 | TT               | INTERGENIC      |               |                    |                    |
| SNP_101446_A_14881 | NW_004516996.1 | scaffold1920 | 14881                   | CC                              | AA                 | AA               | INTERGENIC      |               |                    |                    |
| SNP_101447_A_14907 | NW_004516996.1 | scaffold1920 | 14907                   | GG                              | TT                 | TT               | INTERGENIC      |               |                    |                    |
| SNP_101448_A_14948 | NW_004516996.1 | scaffold1920 | 14948                   | CC                              | GG                 | GG               | INTERGENIC      |               |                    |                    |



| SNPs IDs           | Chromosome IDs | Chromosomes  | Physical positions (bp) | CDC Frontier (Reference genome) | (Pusa 1103 & HPNB) | (ILWC 46 & LPNB) | Sequence genome | Components of | Gene accession IDs | Putative functions |
|--------------------|----------------|--------------|-------------------------|---------------------------------|--------------------|------------------|-----------------|---------------|--------------------|--------------------|
| SNP_101449_A_20842 | NW_004516996.1 | scaffold1920 | 20842                   | GG                              | CC                 | CC               | INTERGENIC      |               |                    |                    |
| SNP_101450_A_21290 | NW_004516996.1 | scaffold1920 | 21290                   | AA                              | CC                 | CC               | INTERGENIC      |               |                    |                    |
| SNP_101451_A_21302 | NW_004516996.1 | scaffold1920 | 21302                   | AA                              | GG                 | GG               | INTERGENIC      |               |                    |                    |
| SNP_101452_A_25458 | NW_004516996.1 | scaffold1920 | 25458                   | CC                              | TT                 | TT               | INTERGENIC      |               |                    |                    |
| SNP_101453_A_212   | NW_004516997.1 | scaffold1922 | 212                     | AA                              | CC                 | CC               | INTERGENIC      |               |                    |                    |
| SNP_101454_A_1437  | NW_004516998.1 | scaffold1923 | 1437                    | CC                              | TT                 | TT               | INTERGENIC      |               |                    |                    |
| SNP_101455_A_1815  | NW_004516998.1 | scaffold1923 | 1815                    | CC                              | TT                 | TT               | INTERGENIC      |               |                    |                    |
| SNP_101456_A_2780  | NW_004516998.1 | scaffold1923 | 2780                    | CC                              | AA                 | AA               | INTERGENIC      |               |                    |                    |
| SNP_101457_A_10394 | NW_004516998.1 | scaffold1923 | 10394                   | AA                              | TT                 | TT               | INTERGENIC      |               |                    |                    |
| SNP_101458_A_10433 | NW_004516998.1 | scaffold1923 | 10433                   | CC                              | TT                 | TT               | INTERGENIC      |               |                    |                    |
| SNP_101459_A_10669 | NW_004516998.1 | scaffold1923 | 10669                   | GG                              | AA                 | AA               | INTERGENIC      |               |                    |                    |
| SNP_101461_A_3661  | NW_004517001.1 | scaffold1928 | 3661                    | CC                              | GG                 | GG               | INTERGENIC      |               |                    |                    |
| SNP_101462_A_3666  | NW_004517001.1 | scaffold1928 | 3666                    | TT                              | AA                 | AA               | INTERGENIC      |               |                    |                    |
| SNP_101464_A_3916  | NW_004517001.1 | scaffold1928 | 3916                    | CC                              | TT                 | TT               | INTERGENIC      |               |                    |                    |
| SNP_101465_A_3932  | NW_004517001.1 | scaffold1928 | 3932                    | CC                              | TT                 | TT               | INTERGENIC      |               |                    |                    |
| SNP_101466_A_3995  | NW_004517001.1 | scaffold1928 | 3995                    | AA                              | CC                 | CC               | INTERGENIC      |               |                    |                    |
| SNP_101469_A_50514 | NW_004517001.1 | scaffold1928 | 50514                   | AA                              | GG                 | GG               | INTERGENIC      |               |                    |                    |
| SNP_101470_A_62150 | NW_004517001.1 | scaffold1928 | 62150                   | GG                              | CC                 | CC               | INTERGENIC      |               |                    |                    |
| SNP_101471_A_78296 | NW_004517001.1 | scaffold1928 | 78296                   | GG                              | AA                 | AA               | INTERGENIC      |               |                    |                    |
| SNP_101472_A_78429 | NW_004517001.1 | scaffold1928 | 78429                   | TT                              | AA                 | AA               | INTERGENIC      |               |                    |                    |
| SNP_101473_A_79403 | NW_004517001.1 | scaffold1928 | 79403                   | CC                              | AA                 | AA               | INTERGENIC      |               |                    |                    |
| SNP_101474_A_79425 | NW_004517001.1 | scaffold1928 | 79425                   | CC                              | TT                 | TT               | INTERGENIC      |               |                    |                    |

| SNPs IDs           | Chromosome IDs | Chromosomes  | Physical positions (bp) | CDC Frontier (Reference genome) | (Pusa 1103 & HPNB) | (ILWC 46 & LPNB) | Sequence genome | Components of | Gene accession IDs | Putative functions |
|--------------------|----------------|--------------|-------------------------|---------------------------------|--------------------|------------------|-----------------|---------------|--------------------|--------------------|
| SNP_101475_A_80739 | NW_004517001.1 | scaffold1928 | 80739                   | AA                              | GG                 | GG               | INTERGENIC      |               |                    |                    |
| SNP_101476_A_80783 | NW_004517001.1 | scaffold1928 | 80783                   | TT                              | GG                 | GG               | INTERGENIC      |               |                    |                    |
| SNP_101477_A_80786 | NW_004517001.1 | scaffold1928 | 80786                   | CC                              | AA                 | AA               | INTERGENIC      |               |                    |                    |
| SNP_101478_A_1693  | NW_004517003.1 | scaffold1930 | 1693                    | CC                              | TT                 | TT               | INTERGENIC      |               |                    |                    |
| SNP_101479_A_1705  | NW_004517003.1 | scaffold1930 | 1705                    | GG                              | AA                 | AA               | INTERGENIC      |               |                    |                    |
| SNP_101480_A_22475 | NW_004517003.1 | scaffold1930 | 22475                   | AA                              | TT                 | TT               | INTERGENIC      |               |                    |                    |
| SNP_101481_A_32450 | NW_004517003.1 | scaffold1930 | 32450                   | AA                              | TT                 | TT               | INTERGENIC      |               |                    |                    |
| SNP_101482_A_32685 | NW_004517003.1 | scaffold1930 | 32685                   | AA                              | GG                 | GG               | INTERGENIC      |               |                    |                    |
| SNP_101483_A_32696 | NW_004517003.1 | scaffold1930 | 32696                   | GG                              | TT                 | TT               | INTERGENIC      |               |                    |                    |
| SNP_101484_A_34850 | NW_004517003.1 | scaffold1930 | 34850                   | GG                              | AA                 | AA               | INTERGENIC      |               |                    |                    |
| SNP_101485_A_34878 | NW_004517003.1 | scaffold1930 | 34878                   | CC                              | TT                 | TT               | INTERGENIC      |               |                    |                    |
| SNP_101486_A_37276 | NW_004517003.1 | scaffold1930 | 37276                   | TT                              | CC                 | CC               | INTERGENIC      |               |                    |                    |
| SNP_101487_A_37332 | NW_004517003.1 | scaffold1930 | 37332                   | GG                              | TT                 | TT               | INTERGENIC      |               |                    |                    |
| SNP_101488_A_37421 | NW_004517003.1 | scaffold1930 | 37421                   | TT                              | CC                 | CC               | INTERGENIC      |               |                    |                    |
| SNP_101489_A_37508 | NW_004517003.1 | scaffold1930 | 37508                   | TT                              | AA                 | AA               | INTERGENIC      |               |                    |                    |
| SNP_101490_A_37509 | NW_004517003.1 | scaffold1930 | 37509                   | AA                              | GG                 | GG               | INTERGENIC      |               |                    |                    |
| SNP_101491_A_37596 | NW_004517003.1 | scaffold1930 | 37596                   | TT                              | CC                 | CC               | INTERGENIC      |               |                    |                    |
| SNP_101492_A_37623 | NW_004517003.1 | scaffold1930 | 37623                   | TT                              | AA                 | AA               | INTERGENIC      |               |                    |                    |
| SNP_101493_A_37738 | NW_004517003.1 | scaffold1930 | 37738                   | AA                              | TT                 | TT               | INTERGENIC      |               |                    |                    |
| SNP_101494_A_37762 | NW_004517003.1 | scaffold1930 | 37762                   | TT                              | CC                 | CC               | INTERGENIC      |               |                    |                    |
| SNP_101495_A_37811 | NW_004517003.1 | scaffold1930 | 37811                   | TT                              | GG                 | GG               | INTERGENIC      |               |                    |                    |
| SNP_101496_A_37822 | NW_004517003.1 | scaffold1930 | 37822                   | TT                              | CC                 | CC               | INTERGENIC      |               |                    |                    |

| SNPs IDs           | Chromosome IDs | Chromosomes  | Physical positions (bp) | CDC Frontier (Reference genome) | (Pusa 1103 & HPNB) | (ILWC 46 & LPNB) | Sequence genome | Components of | Gene accession IDs | Putative functions |
|--------------------|----------------|--------------|-------------------------|---------------------------------|--------------------|------------------|-----------------|---------------|--------------------|--------------------|
| SNP_101497_A_37824 | NW_004517003.1 | scaffold1930 | 37824                   | AA                              | GG                 | GG               | INTERGENIC      |               |                    |                    |
| SNP_101498_A_37861 | NW_004517003.1 | scaffold1930 | 37861                   | AA                              | CC                 | CC               | INTERGENIC      |               |                    |                    |
| SNP_101499_A_37862 | NW_004517003.1 | scaffold1930 | 37862                   | TT                              | GG                 | GG               | INTERGENIC      |               |                    |                    |
| SNP_101500_A_37898 | NW_004517003.1 | scaffold1930 | 37898                   | GG                              | AA                 | AA               | INTERGENIC      |               |                    |                    |
| SNP_101501_A_38061 | NW_004517003.1 | scaffold1930 | 38061                   | GG                              | CC                 | CC               | INTERGENIC      |               |                    |                    |
| SNP_101502_A_38481 | NW_004517003.1 | scaffold1930 | 38481                   | GG                              | TT                 | TT               | INTERGENIC      |               |                    |                    |
| SNP_101503_A_38552 | NW_004517003.1 | scaffold1930 | 38552                   | GG                              | CC                 | CC               | INTERGENIC      |               |                    |                    |
| SNP_101504_A_39297 | NW_004517003.1 | scaffold1930 | 39297                   | GG                              | AA                 | AA               | INTERGENIC      |               |                    |                    |
| SNP_101505_A_40096 | NW_004517003.1 | scaffold1930 | 40096                   | GG                              | CC                 | CC               | INTERGENIC      |               |                    |                    |
| SNP_101506_A_40169 | NW_004517003.1 | scaffold1930 | 40169                   | CC                              | TT                 | TT               | INTERGENIC      |               |                    |                    |
| SNP_101507_A_40244 | NW_004517003.1 | scaffold1930 | 40244                   | AA                              | GG                 | GG               | INTERGENIC      |               |                    |                    |
| SNP_101508_A_40272 | NW_004517003.1 | scaffold1930 | 40272                   | GG                              | AA                 | AA               | INTERGENIC      |               |                    |                    |
| SNP_101510_A_40381 | NW_004517003.1 | scaffold1930 | 40381                   | TT                              | GG                 | GG               | INTERGENIC      |               |                    |                    |
| SNP_101511_A_40407 | NW_004517003.1 | scaffold1930 | 40407                   | GG                              | TT                 | TT               | INTERGENIC      |               |                    |                    |
| SNP_101512_A_40485 | NW_004517003.1 | scaffold1930 | 40485                   | CC                              | GG                 | GG               | INTERGENIC      |               |                    |                    |
| SNP_101513_A_40583 | NW_004517003.1 | scaffold1930 | 40583                   | CC                              | TT                 | TT               | INTERGENIC      |               |                    |                    |
| SNP_101514_A_41515 | NW_004517003.1 | scaffold1930 | 41515                   | TT                              | AA                 | AA               | INTERGENIC      |               |                    |                    |
| SNP_101515_A_41531 | NW_004517003.1 | scaffold1930 | 41531                   | TT                              | CC                 | CC               | INTERGENIC      |               |                    |                    |
| SNP_101516_A_41718 | NW_004517003.1 | scaffold1930 | 41718                   | GG                              | TT                 | TT               | INTERGENIC      |               |                    |                    |
| SNP_101517_A_41846 | NW_004517003.1 | scaffold1930 | 41846                   | TT                              | CC                 | CC               | INTERGENIC      |               |                    |                    |
| SNP_101518_A_41973 | NW_004517003.1 | scaffold1930 | 41973                   | GG                              | AA                 | AA               | INTERGENIC      |               |                    |                    |
| SNP_101519_A_41998 | NW_004517003.1 | scaffold1930 | 41998                   | GG                              | TT                 | TT               | INTERGENIC      |               |                    |                    |

| SNPs IDs           | Chromosome IDs | Chromosomes  | Physical positions (bp) | CDC Frontier (Reference genome) | (Pusa 1103 & HPNB) | (ILWC 46 & LPNB) | Sequence genome | Components of | Gene accession IDs | Putative functions |
|--------------------|----------------|--------------|-------------------------|---------------------------------|--------------------|------------------|-----------------|---------------|--------------------|--------------------|
| SNP_101520_A_43862 | NW_004517003.1 | scaffold1930 | 43862                   | AA                              | GG                 | GG               | INTERGENIC      |               |                    |                    |
| SNP_101521_A_45178 | NW_004517003.1 | scaffold1930 | 45178                   | TT                              | GG                 | GG               | INTERGENIC      |               |                    |                    |
| SNP_101522_A_45365 | NW_004517003.1 | scaffold1930 | 45365                   | AA                              | CC                 | CC               | INTERGENIC      |               |                    |                    |
| SNP_101523_A_59920 | NW_004517003.1 | scaffold1930 | 59920                   | AA                              | TT                 | TT               | INTERGENIC      |               |                    |                    |
| SNP_101524_A_24598 | NW_004517005.1 | scaffold1932 | 24598                   | GG                              | AA                 | AA               | INTERGENIC      |               |                    |                    |
| SNP_101525_A_24611 | NW_004517005.1 | scaffold1932 | 24611                   | CC                              | TT                 | TT               | INTERGENIC      |               |                    |                    |
| SNP_101526_A_77656 | NW_004517005.1 | scaffold1932 | 77656                   | TT                              | AA                 | AA               | INTERGENIC      |               |                    |                    |
| SNP_101527_A_77659 | NW_004517005.1 | scaffold1932 | 77659                   | TT                              | GG                 | GG               | INTERGENIC      |               |                    |                    |
| SNP_101528_A_82728 | NW_004517005.1 | scaffold1932 | 82728                   | GG                              | AA                 | AA               | INTERGENIC      |               |                    |                    |
| SNP_101529_A_82769 | NW_004517005.1 | scaffold1932 | 82769                   | AA                              | GG                 | GG               | INTERGENIC      |               |                    |                    |
| SNP_101530_A_83153 | NW_004517005.1 | scaffold1932 | 83153                   | AA                              | GG                 | GG               | INTERGENIC      |               |                    |                    |
| SNP_101531_A_83183 | NW_004517005.1 | scaffold1932 | 83183                   | AA                              | GG                 | GG               | INTERGENIC      |               |                    |                    |
| SNP_101532_A_83209 | NW_004517005.1 | scaffold1932 | 83209                   | CC                              | AA                 | AA               | INTERGENIC      |               |                    |                    |
| SNP_101533_A_83220 | NW_004517005.1 | scaffold1932 | 83220                   | CC                              | AA                 | AA               | INTERGENIC      |               |                    |                    |
| SNP_101534_A_83241 | NW_004517005.1 | scaffold1932 | 83241                   | TT                              | CC                 | CC               | INTERGENIC      |               |                    |                    |
| SNP_101535_A_4060  | NW_004517010.1 | scaffold1937 | 4060                    | TT                              | GG                 | GG               | INTERGENIC      |               |                    |                    |
| SNP_101536_A_7206  | NW_004517010.1 | scaffold1937 | 7206                    | CC                              | AA                 | AA               | INTERGENIC      |               |                    |                    |
| SNP_101538_A_5143  | NW_004517015.1 | scaffold1942 | 5143                    | GG                              | AA                 | AA               | INTERGENIC      |               |                    |                    |
| SNP_101539_A_5334  | NW_004517015.1 | scaffold1942 | 5334                    | GG                              | AA                 | AA               | INTERGENIC      |               |                    |                    |
| SNP_101540_A_121   | NW_004517016.1 | scaffold1943 | 121                     | CC                              | TT                 | TT               | INTERGENIC      |               |                    |                    |
| SNP_101541_A_218   | NW_004517016.1 | scaffold1943 | 218                     | GG                              | CC                 | CC               | INTERGENIC      |               |                    |                    |
| SNP_101542_A_2329  | NW_004517016.1 | scaffold1943 | 2329                    | GG                              | AA                 | AA               | INTERGENIC      |               |                    |                    |

| SNPs IDs            | Chromosome IDs | Chromosomes  | Physical positions (bp) | CDC Frontier (Reference genome) | (Pusa 1103 & HPNB) | (ILWC 46 & LPNB) | Sequence genome | Components of | Gene accession IDs                                      | Putative functions |
|---------------------|----------------|--------------|-------------------------|---------------------------------|--------------------|------------------|-----------------|---------------|---------------------------------------------------------|--------------------|
| SNP_101543_A_2350   | NW_004517016.1 | scaffold1943 | 2350                    | AA                              | CC                 | CC               | INTERGENIC      |               |                                                         |                    |
| SNP_101544_A_2417   | NW_004517016.1 | scaffold1943 | 2417                    | TT                              | GG                 | GG               | INTERGENIC      |               |                                                         |                    |
| SNP_101545_A_2421   | NW_004517016.1 | scaffold1943 | 2421                    | TT                              | CC                 | CC               | INTERGENIC      |               |                                                         |                    |
| SNP_101546_A_2450   | NW_004517016.1 | scaffold1943 | 2450                    | TT                              | CC                 | CC               | INTERGENIC      |               |                                                         |                    |
| SNP_101547_A_2451   | NW_004517016.1 | scaffold1943 | 2451                    | CC                              | TT                 | TT               | INTERGENIC      |               |                                                         |                    |
| SNP_101548_A_2457   | NW_004517016.1 | scaffold1943 | 2457                    | TT                              | AA                 | AA               | INTERGENIC      |               |                                                         |                    |
| SNP_101549_A_2497   | NW_004517016.1 | scaffold1943 | 2497                    | CC                              | TT                 | TT               | INTERGENIC      |               |                                                         |                    |
| SNP_101550_A_2541   | NW_004517016.1 | scaffold1943 | 2541                    | GG                              | CC                 | CC               | INTERGENIC      |               |                                                         |                    |
| SNP_101551_A_2555   | NW_004517016.1 | scaffold1943 | 2555                    | TT                              | GG                 | GG               | INTERGENIC      |               |                                                         |                    |
| SNP_101552_A_2556   | NW_004517016.1 | scaffold1943 | 2556                    | TT                              | CC                 | CC               | INTERGENIC      |               |                                                         |                    |
| SNP_101553_A_2564   | NW_004517016.1 | scaffold1943 | 2564                    | AA                              | TT                 | TT               | INTERGENIC      |               |                                                         |                    |
| SNP_101554_A_2942   | NW_004517016.1 | scaffold1943 | 2942                    | CC                              | TT                 | TT               | INTERGENIC      |               |                                                         |                    |
| SNP_101556_A_3008   | NW_004517016.1 | scaffold1943 | 3008                    | CC                              | AA                 | AA               | INTERGENIC      |               |                                                         |                    |
| SNP_101558_A_12930  | NW_004517016.1 | scaffold1943 | 12930                   | AA                              | CC                 | CC               | INTERGENIC      |               |                                                         |                    |
| SNP_101559_A_13194  | NW_004517016.1 | scaffold1943 | 13194                   | AA                              | GG                 | GG               | INTERGENIC      |               |                                                         |                    |
| SNP_101560_A_18023  | NW_004517016.1 | scaffold1943 | 18023                   | CC                              | TT                 | TT               | INTERGENIC      |               |                                                         |                    |
| SNP_101561_A_59775  | NW_004517016.1 | scaffold1943 | 59775                   | GG                              | AA                 | AA               | URR             | 101511647     | U4/U6 small nuclear ribonucleoprotein PRP4-like protein |                    |
| SNP_101563_A_83560  | NW_004517016.1 | scaffold1943 | 83560                   | GG                              | AA                 | AA               | DRR             | 101514897     | uncharacterized LOC101514897                            |                    |
| SNP_101565_A_109960 | NW_004517016.1 | scaffold1943 | 109960                  | CC                              | GG                 | GG               | INTERGENIC      |               |                                                         |                    |
| SNP_101566_A_120764 | NW_004517016.1 | scaffold1943 | 120764                  | GG                              | CC                 | CC               | INTERGENIC      |               |                                                         |                    |
| SNP_101567_A_120825 | NW_004517016.1 | scaffold1943 | 120825                  | AA                              | TT                 | TT               | INTERGENIC      |               |                                                         |                    |
| SNP_101568_A_121178 | NW_004517016.1 | scaffold1943 | 121178                  | GG                              | AA                 | AA               | INTERGENIC      |               |                                                         |                    |

| SNPs IDs            | Chromosome IDs | Chromosomes  | Physical positions (bp) | CDC Frontier genome (Reference genome) | (Pusa 1103 & HPNB) | (ILWC 46 & LPNB) | Sequence genome | Components of | Gene accession IDs | Putative functions |
|---------------------|----------------|--------------|-------------------------|----------------------------------------|--------------------|------------------|-----------------|---------------|--------------------|--------------------|
| SNP_101569_A_121193 | NW_004517016.1 | scaffold1943 | 121193                  | CC                                     | TT                 | TT               | INTERGENIC      |               |                    |                    |
| SNP_101570_A_121195 | NW_004517016.1 | scaffold1943 | 121195                  | GG                                     | TT                 | TT               | INTERGENIC      |               |                    |                    |
| SNP_101571_A_121198 | NW_004517016.1 | scaffold1943 | 121198                  | TT                                     | GG                 | GG               | INTERGENIC      |               |                    |                    |
| SNP_101572_A_121228 | NW_004517016.1 | scaffold1943 | 121228                  | CC                                     | AA                 | AA               | INTERGENIC      |               |                    |                    |
| SNP_101573_A_121231 | NW_004517016.1 | scaffold1943 | 121231                  | TT                                     | CC                 | CC               | INTERGENIC      |               |                    |                    |
| SNP_101575_A_121458 | NW_004517016.1 | scaffold1943 | 121458                  | AA                                     | GG                 | GG               | INTERGENIC      |               |                    |                    |
| SNP_101576_A_121482 | NW_004517016.1 | scaffold1943 | 121482                  | TT                                     | CC                 | CC               | INTERGENIC      |               |                    |                    |
| SNP_101577_A_121531 | NW_004517016.1 | scaffold1943 | 121531                  | TT                                     | CC                 | CC               | INTERGENIC      |               |                    |                    |
| SNP_101578_A_121587 | NW_004517016.1 | scaffold1943 | 121587                  | AA                                     | GG                 | GG               | INTERGENIC      |               |                    |                    |
| SNP_101579_A_121633 | NW_004517016.1 | scaffold1943 | 121633                  | TT                                     | CC                 | CC               | INTERGENIC      |               |                    |                    |
| SNP_101580_A_121642 | NW_004517016.1 | scaffold1943 | 121642                  | GG                                     | AA                 | AA               | INTERGENIC      |               |                    |                    |
| SNP_101581_A_123259 | NW_004517016.1 | scaffold1943 | 123259                  | TT                                     | GG                 | GG               | INTERGENIC      |               |                    |                    |
| SNP_101582_A_123427 | NW_004517016.1 | scaffold1943 | 123427                  | GG                                     | AA                 | AA               | INTERGENIC      |               |                    |                    |
| SNP_101583_A_123439 | NW_004517016.1 | scaffold1943 | 123439                  | CC                                     | TT                 | TT               | INTERGENIC      |               |                    |                    |
| SNP_101584_A_123472 | NW_004517016.1 | scaffold1943 | 123472                  | GG                                     | AA                 | AA               | INTERGENIC      |               |                    |                    |
| SNP_101585_A_123495 | NW_004517016.1 | scaffold1943 | 123495                  | AA                                     | GG                 | GG               | INTERGENIC      |               |                    |                    |
| SNP_101586_A_123496 | NW_004517016.1 | scaffold1943 | 123496                  | GG                                     | AA                 | AA               | INTERGENIC      |               |                    |                    |
| SNP_101587_A_123524 | NW_004517016.1 | scaffold1943 | 123524                  | TT                                     | CC                 | CC               | INTERGENIC      |               |                    |                    |
| SNP_101588_A_123535 | NW_004517016.1 | scaffold1943 | 123535                  | AA                                     | GG                 | GG               | INTERGENIC      |               |                    |                    |
| SNP_101589_A_123583 | NW_004517016.1 | scaffold1943 | 123583                  | TT                                     | GG                 | GG               | INTERGENIC      |               |                    |                    |
| SNP_101590_A_127048 | NW_004517016.1 | scaffold1943 | 127048                  | GG                                     | AA                 | AA               | INTERGENIC      |               |                    |                    |
| SNP_101591_A_127056 | NW_004517016.1 | scaffold1943 | 127056                  | CC                                     | TT                 | TT               | INTERGENIC      |               |                    |                    |

| SNPs IDs            | Chromosome IDs | Chromosomes  | Physical positions (bp) | CDC Frontier (Reference genome) | (Pusa 1103 & HPNB) | (ILWC 46 & LPNB) | Sequence Components of genome | Gene accession IDs | Putative functions           |
|---------------------|----------------|--------------|-------------------------|---------------------------------|--------------------|------------------|-------------------------------|--------------------|------------------------------|
| SNP_101592_A_127385 | NW_004517016.1 | scaffold1943 | 127385                  | CC                              | TT                 | TT               | INTERGENIC                    |                    |                              |
| SNP_101593_A_128136 | NW_004517016.1 | scaffold1943 | 128136                  | TT                              | CC                 | CC               | INTERGENIC                    |                    |                              |
| SNP_101594_A_132028 | NW_004517016.1 | scaffold1943 | 132028                  | GG                              | TT                 | TT               | INTERGENIC                    |                    |                              |
| SNP_101595_A_132062 | NW_004517016.1 | scaffold1943 | 132062                  | AA                              | GG                 | GG               | INTERGENIC                    |                    |                              |
| SNP_101596_A_136928 | NW_004517016.1 | scaffold1943 | 136928                  | TT                              | CC                 | CC               | INTERGENIC                    |                    |                              |
| SNP_101597_A_147600 | NW_004517016.1 | scaffold1943 | 147600                  | CC                              | AA                 | AA               | INTERGENIC                    |                    |                              |
| SNP_101598_A_150509 | NW_004517016.1 | scaffold1943 | 150509                  | AA                              | TT                 | TT               | INTERGENIC                    |                    |                              |
| SNP_101599_A_151027 | NW_004517016.1 | scaffold1943 | 151027                  | AA                              | TT                 | TT               | INTERGENIC                    |                    |                              |
| SNP_101600_A_163701 | NW_004517016.1 | scaffold1943 | 163701                  | AA                              | GG                 | GG               | INTERGENIC                    |                    |                              |
| SNP_101601_A_163876 | NW_004517016.1 | scaffold1943 | 163876                  | TT                              | AA                 | AA               | INTERGENIC                    |                    |                              |
| SNP_101602_A_171758 | NW_004517016.1 | scaffold1943 | 171758                  | GG                              | TT                 | TT               | STOP_GAINED                   | 101488624          | uncharacterized LOC101488624 |
| SNP_101603_A_171930 | NW_004517016.1 | scaffold1943 | 171930                  | GG                              | AA                 | AA               | NON_SYNONYMOUS_CODING         | 101488624          | uncharacterized LOC101488624 |
| SNP_101604_A_171934 | NW_004517016.1 | scaffold1943 | 171934                  | AA                              | GG                 | GG               | SYNONYMOUS_CODING             | 101488624          | uncharacterized LOC101488624 |
| SNP_101605_A_171946 | NW_004517016.1 | scaffold1943 | 171946                  | AA                              | GG                 | GG               | SYNONYMOUS_STOP               | 101488624          | uncharacterized LOC101488624 |
| SNP_101606_A_179650 | NW_004517016.1 | scaffold1943 | 179650                  | TT                              | AA                 | AA               | INTERGENIC                    |                    |                              |
| SNP_101607_A_193959 | NW_004517016.1 | scaffold1943 | 193959                  | AA                              | GG                 | GG               | INTERGENIC                    |                    |                              |
| SNP_101608_A_197639 | NW_004517016.1 | scaffold1943 | 197639                  | AA                              | CC                 | CC               | INTERGENIC                    |                    |                              |
| SNP_101610_A_281594 | NW_004517016.1 | scaffold1943 | 281594                  | AA                              | GG                 | GG               | INTERGENIC                    |                    |                              |
| SNP_101611_A_281599 | NW_004517016.1 | scaffold1943 | 281599                  | AA                              | GG                 | GG               | INTERGENIC                    |                    |                              |
| SNP_101612_A_281629 | NW_004517016.1 | scaffold1943 | 281629                  | GG                              | TT                 | TT               | INTERGENIC                    |                    |                              |
| SNP_101613_A_281925 | NW_004517016.1 | scaffold1943 | 281925                  | GG                              | AA                 | AA               | INTERGENIC                    |                    |                              |
| SNP_101614_A_281955 | NW_004517016.1 | scaffold1943 | 281955                  | TT                              | AA                 | AA               | INTERGENIC                    |                    |                              |

| SNPs IDs            | Chromosome IDs | Chromosomes  | Physical positions (bp) | CDC Frontier (Reference genome) | (Pusa 1103 & HPNB) | (ILWC 46 & LPNB) | Sequence Components of genome | Gene accession IDs | Putative functions                     |
|---------------------|----------------|--------------|-------------------------|---------------------------------|--------------------|------------------|-------------------------------|--------------------|----------------------------------------|
| SNP_101615_A_300108 | NW_004517016.1 | scaffold1943 | 300108                  | GG                              | AA                 | AA               | INTERGENIC                    |                    |                                        |
| SNP_101618_A_353158 | NW_004517016.1 | scaffold1943 | 353158                  | TT                              | CC                 | CC               | INTERGENIC                    |                    |                                        |
| SNP_101619_A_361905 | NW_004517016.1 | scaffold1943 | 361905                  | AA                              | GG                 | GG               | INTERGENIC                    |                    |                                        |
| SNP_101620_A_372342 | NW_004517016.1 | scaffold1943 | 372342                  | CC                              | TT                 | TT               | INTERGENIC                    |                    |                                        |
| SNP_101621_A_373700 | NW_004517016.1 | scaffold1943 | 373700                  | GG                              | AA                 | AA               | INTERGENIC                    |                    |                                        |
| SNP_101623_A_377184 | NW_004517016.1 | scaffold1943 | 377184                  | TT                              | CC                 | CC               | INTERGENIC                    |                    |                                        |
| SNP_101624_A_381088 | NW_004517016.1 | scaffold1943 | 381088                  | CC                              | TT                 | TT               | INTERGENIC                    |                    |                                        |
| SNP_101625_A_385843 | NW_004517016.1 | scaffold1943 | 385843                  | TT                              | CC                 | CC               | INTRON                        | 101514574          | probable calcium-binding protein CML49 |
| SNP_101626_A_392407 | NW_004517016.1 | scaffold1943 | 392407                  | GG                              | AA                 | AA               | INTERGENIC                    |                    |                                        |
| SNP_101627_A_392578 | NW_004517016.1 | scaffold1943 | 392578                  | TT                              | CC                 | CC               | INTERGENIC                    |                    |                                        |
| SNP_101628_A_392606 | NW_004517016.1 | scaffold1943 | 392606                  | AA                              | GG                 | GG               | INTERGENIC                    |                    |                                        |
| SNP_101629_A_392609 | NW_004517016.1 | scaffold1943 | 392609                  | TT                              | AA                 | AA               | INTERGENIC                    |                    |                                        |
| SNP_101630_A_393161 | NW_004517016.1 | scaffold1943 | 393161                  | TT                              | GG                 | GG               | INTERGENIC                    |                    |                                        |
| SNP_101631_A_393163 | NW_004517016.1 | scaffold1943 | 393163                  | TT                              | AA                 | AA               | INTERGENIC                    |                    |                                        |
| SNP_101632_A_393343 | NW_004517016.1 | scaffold1943 | 393343                  | GG                              | AA                 | AA               | INTERGENIC                    |                    |                                        |
| SNP_101633_A_393359 | NW_004517016.1 | scaffold1943 | 393359                  | CC                              | TT                 | TT               | INTERGENIC                    |                    |                                        |
| SNP_101635_A_394099 | NW_004517016.1 | scaffold1943 | 394099                  | AA                              | CC                 | CC               | INTERGENIC                    |                    |                                        |
| SNP_101636_A_394196 | NW_004517016.1 | scaffold1943 | 394196                  | TT                              | CC                 | CC               | INTERGENIC                    |                    |                                        |
| SNP_101637_A_394240 | NW_004517016.1 | scaffold1943 | 394240                  | CC                              | TT                 | TT               | INTERGENIC                    |                    |                                        |
| SNP_101638_A_394299 | NW_004517016.1 | scaffold1943 | 394299                  | CC                              | TT                 | TT               | INTERGENIC                    |                    |                                        |
| SNP_101639_A_394392 | NW_004517016.1 | scaffold1943 | 394392                  | CC                              | TT                 | TT               | INTERGENIC                    |                    |                                        |
| SNP_101640_A_394450 | NW_004517016.1 | scaffold1943 | 394450                  | TT                              | AA                 | AA               | INTERGENIC                    |                    |                                        |



| SNPs IDs            | Chromosome IDs | Chromosomes  | Physical positions (bp) | CDC Frontier (Reference genome) | (Pusa 1103 & HPNB) | (ILWC 46 & LPNB) | Sequence genome | Components of | Gene accession IDs | Putative functions |
|---------------------|----------------|--------------|-------------------------|---------------------------------|--------------------|------------------|-----------------|---------------|--------------------|--------------------|
| SNP_101641_A_394748 | NW_004517016.1 | scaffold1943 | 394748                  | CC                              | AA                 | AA               | INTERGENIC      |               |                    |                    |
| SNP_101642_A_394887 | NW_004517016.1 | scaffold1943 | 394887                  | AA                              | TT                 | TT               | INTERGENIC      |               |                    |                    |
| SNP_101643_A_395066 | NW_004517016.1 | scaffold1943 | 395066                  | AA                              | GG                 | GG               | INTERGENIC      |               |                    |                    |
| SNP_101644_A_395254 | NW_004517016.1 | scaffold1943 | 395254                  | TT                              | CC                 | CC               | INTERGENIC      |               |                    |                    |
| SNP_101645_A_395385 | NW_004517016.1 | scaffold1943 | 395385                  | AA                              | TT                 | TT               | INTERGENIC      |               |                    |                    |
| SNP_101646_A_395401 | NW_004517016.1 | scaffold1943 | 395401                  | AA                              | GG                 | GG               | INTERGENIC      |               |                    |                    |
| SNP_101647_A_395493 | NW_004517016.1 | scaffold1943 | 395493                  | TT                              | CC                 | CC               | INTERGENIC      |               |                    |                    |
| SNP_101648_A_395531 | NW_004517016.1 | scaffold1943 | 395531                  | AA                              | TT                 | TT               | INTERGENIC      |               |                    |                    |
| SNP_101649_A_395540 | NW_004517016.1 | scaffold1943 | 395540                  | GG                              | AA                 | AA               | INTERGENIC      |               |                    |                    |
| SNP_101650_A_395627 | NW_004517016.1 | scaffold1943 | 395627                  | GG                              | AA                 | AA               | INTERGENIC      |               |                    |                    |
| SNP_101651_A_395654 | NW_004517016.1 | scaffold1943 | 395654                  | CC                              | TT                 | TT               | INTERGENIC      |               |                    |                    |
| SNP_101652_A_395842 | NW_004517016.1 | scaffold1943 | 395842                  | GG                              | TT                 | TT               | INTERGENIC      |               |                    |                    |
| SNP_101653_A_396042 | NW_004517016.1 | scaffold1943 | 396042                  | AA                              | CC                 | CC               | INTERGENIC      |               |                    |                    |
| SNP_101654_A_396043 | NW_004517016.1 | scaffold1943 | 396043                  | CC                              | AA                 | AA               | INTERGENIC      |               |                    |                    |
| SNP_101655_A_696    | NW_004517018.1 | scaffold1945 | 696                     | CC                              | TT                 | TT               | INTERGENIC      |               |                    |                    |
| SNP_101656_A_825    | NW_004517018.1 | scaffold1945 | 825                     | AA                              | TT                 | TT               | INTERGENIC      |               |                    |                    |
| SNP_101657_A_841    | NW_004517018.1 | scaffold1945 | 841                     | AA                              | GG                 | GG               | INTERGENIC      |               |                    |                    |
| SNP_101658_A_1023   | NW_004517018.1 | scaffold1945 | 1023                    | TT                              | GG                 | GG               | INTERGENIC      |               |                    |                    |
| SNP_101662_A_11645  | NW_004517018.1 | scaffold1945 | 11645                   | CC                              | TT                 | TT               | INTERGENIC      |               |                    |                    |
| SNP_101663_A_11719  | NW_004517018.1 | scaffold1945 | 11719                   | CC                              | TT                 | TT               | INTERGENIC      |               |                    |                    |
| SNP_101664_A_11725  | NW_004517018.1 | scaffold1945 | 11725                   | AA                              | GG                 | GG               | INTERGENIC      |               |                    |                    |
| SNP_101665_A_11900  | NW_004517018.1 | scaffold1945 | 11900                   | GG                              | AA                 | AA               | INTERGENIC      |               |                    |                    |

| SNPs IDs            | Chromosome IDs | Chromosomes  | Physical positions (bp) | CDC Frontier (Reference genome) | (Pusa 1103 & HPNB) | (ILWC 46 & LPNB) | Sequence genome | Components of | Gene accession IDs               | Putative functions |
|---------------------|----------------|--------------|-------------------------|---------------------------------|--------------------|------------------|-----------------|---------------|----------------------------------|--------------------|
| SNP_101666_A_12029  | NW_004517018.1 | scaffold1945 | 12029                   | AA                              | GG                 | GG               | INTERGENIC      |               |                                  |                    |
| SNP_101667_A_40943  | NW_004517018.1 | scaffold1945 | 40943                   | AA                              | GG                 | GG               | INTERGENIC      |               |                                  |                    |
| SNP_101668_A_166917 | NW_004517018.1 | scaffold1945 | 166917                  | AA                              | TT                 | TT               | INTERGENIC      |               |                                  |                    |
| SNP_101670_A_1400   | NW_004517019.1 | scaffold1946 | 1400                    | TT                              | CC                 | CC               | INTERGENIC      |               |                                  |                    |
| SNP_101671_A_1649   | NW_004517019.1 | scaffold1946 | 1649                    | TT                              | CC                 | CC               | INTERGENIC      |               |                                  |                    |
| SNP_101672_A_1887   | NW_004517019.1 | scaffold1946 | 1887                    | TT                              | CC                 | CC               | INTERGENIC      |               |                                  |                    |
| SNP_101673_A_5513   | NW_004517019.1 | scaffold1946 | 5513                    | CC                              | TT                 | TT               | INTERGENIC      |               |                                  |                    |
| SNP_101674_A_6511   | NW_004517019.1 | scaffold1946 | 6511                    | AA                              | TT                 | TT               | INTERGENIC      |               |                                  |                    |
| SNP_101675_A_9783   | NW_004517019.1 | scaffold1946 | 9783                    | AA                              | TT                 | TT               | INTERGENIC      |               |                                  |                    |
| SNP_101676_A_33638  | NW_004517019.1 | scaffold1946 | 33638                   | GG                              | TT                 | TT               | INTERGENIC      |               |                                  |                    |
| SNP_101677_A_33798  | NW_004517019.1 | scaffold1946 | 33798                   | GG                              | AA                 | AA               | INTERGENIC      |               |                                  |                    |
| SNP_101679_A_48796  | NW_004517019.1 | scaffold1946 | 48796                   | TT                              | CC                 | CC               | INTRON          | 101490588     | subtilisin-like protease SBT4.14 |                    |
| SNP_101680_A_74833  | NW_004517019.1 | scaffold1946 | 74833                   | AA                              | GG                 | GG               | INTERGENIC      |               |                                  |                    |
| SNP_101681_A_75106  | NW_004517019.1 | scaffold1946 | 75106                   | GG                              | AA                 | AA               | INTERGENIC      |               |                                  |                    |
| SNP_101682_A_75109  | NW_004517019.1 | scaffold1946 | 75109                   | AA                              | GG                 | GG               | INTERGENIC      |               |                                  |                    |
| SNP_101683_A_75562  | NW_004517019.1 | scaffold1946 | 75562                   | TT                              | CC                 | CC               | INTERGENIC      |               |                                  |                    |
| SNP_101684_A_75596  | NW_004517019.1 | scaffold1946 | 75596                   | TT                              | CC                 | CC               | INTERGENIC      |               |                                  |                    |
| SNP_101685_A_1465   | NW_004517021.1 | scaffold1949 | 1465                    | TT                              | AA                 | AA               | INTERGENIC      |               |                                  |                    |
| SNP_101686_A_1466   | NW_004517021.1 | scaffold1949 | 1466                    | AA                              | TT                 | TT               | INTERGENIC      |               |                                  |                    |
| SNP_101687_A_1914   | NW_004517021.1 | scaffold1949 | 1914                    | GG                              | TT                 | TT               | INTERGENIC      |               |                                  |                    |
| SNP_101688_A_22388  | NW_004517022.1 | scaffold1950 | 22388                   | TT                              | AA                 | AA               | INTERGENIC      |               |                                  |                    |
| SNP_101689_A_22393  | NW_004517022.1 | scaffold1950 | 22393                   | AA                              | TT                 | TT               | INTERGENIC      |               |                                  |                    |

| SNPs IDs           | Chromosome IDs | Chromosomes  | Physical positions (bp) | CDC Frontier (Reference genome) | (Pusa 1103 & HPNB) | (ILWC 46 & LPNB) | Sequence genome | Components of | Gene accession IDs | Putative functions |
|--------------------|----------------|--------------|-------------------------|---------------------------------|--------------------|------------------|-----------------|---------------|--------------------|--------------------|
| SNP_101690_A_22436 | NW_004517022.1 | scaffold1950 | 22436                   | GG                              | TT                 | TT               | INTERGENIC      |               |                    |                    |
| SNP_101691_A_22437 | NW_004517022.1 | scaffold1950 | 22437                   | AA                              | CC                 | CC               | INTERGENIC      |               |                    |                    |
| SNP_101692_A_22438 | NW_004517022.1 | scaffold1950 | 22438                   | GG                              | AA                 | AA               | INTERGENIC      |               |                    |                    |
| SNP_101693_A_22454 | NW_004517022.1 | scaffold1950 | 22454                   | TT                              | GG                 | GG               | INTERGENIC      |               |                    |                    |
| SNP_101694_A_22498 | NW_004517022.1 | scaffold1950 | 22498                   | CC                              | AA                 | AA               | INTERGENIC      |               |                    |                    |
| SNP_101696_A_22793 | NW_004517022.1 | scaffold1950 | 22793                   | GG                              | TT                 | TT               | INTERGENIC      |               |                    |                    |
| SNP_101697_A_5730  | NW_004517024.1 | scaffold1952 | 5730                    | GG                              | TT                 | TT               | INTERGENIC      |               |                    |                    |
| SNP_101698_A_5752  | NW_004517024.1 | scaffold1952 | 5752                    | CC                              | TT                 | TT               | INTERGENIC      |               |                    |                    |
| SNP_101699_A_799   | NW_004517026.1 | scaffold1954 | 799                     | CC                              | TT                 | TT               | INTERGENIC      |               |                    |                    |
| SNP_101700_A_908   | NW_004517026.1 | scaffold1954 | 908                     | GG                              | AA                 | AA               | INTERGENIC      |               |                    |                    |
| SNP_101701_A_931   | NW_004517026.1 | scaffold1954 | 931                     | AA                              | CC                 | CC               | INTERGENIC      |               |                    |                    |
| SNP_101702_A_1054  | NW_004517026.1 | scaffold1954 | 1054                    | TT                              | AA                 | AA               | INTERGENIC      |               |                    |                    |
| SNP_101703_A_1062  | NW_004517026.1 | scaffold1954 | 1062                    | TT                              | CC                 | CC               | INTERGENIC      |               |                    |                    |
| SNP_101704_A_1155  | NW_004517026.1 | scaffold1954 | 1155                    | TT                              | CC                 | CC               | INTERGENIC      |               |                    |                    |
| SNP_101705_A_1164  | NW_004517026.1 | scaffold1954 | 1164                    | AA                              | TT                 | TT               | INTERGENIC      |               |                    |                    |
| SNP_101706_A_1202  | NW_004517026.1 | scaffold1954 | 1202                    | TT                              | CC                 | CC               | INTERGENIC      |               |                    |                    |
| SNP_101707_A_1293  | NW_004517026.1 | scaffold1954 | 1293                    | AA                              | TT                 | TT               | INTERGENIC      |               |                    |                    |
| SNP_101708_A_1351  | NW_004517026.1 | scaffold1954 | 1351                    | TT                              | GG                 | GG               | INTERGENIC      |               |                    |                    |
| SNP_101710_A_1503  | NW_004517026.1 | scaffold1954 | 1503                    | AA                              | TT                 | TT               | INTERGENIC      |               |                    |                    |
| SNP_101711_A_2307  | NW_004517026.1 | scaffold1954 | 2307                    | AA                              | GG                 | GG               | INTERGENIC      |               |                    |                    |
| SNP_101712_A_2332  | NW_004517026.1 | scaffold1954 | 2332                    | GG                              | AA                 | AA               | INTERGENIC      |               |                    |                    |
| SNP_101713_A_2569  | NW_004517026.1 | scaffold1954 | 2569                    | TT                              | AA                 | AA               | INTERGENIC      |               |                    |                    |

| SNPs IDs           | Chromosome IDs | Chromosomes  | Physical positions (bp) | CDC Frontier (Reference genome) | (Pusa 1103 & HPNB) | (ILWC 46 & LPNB) | Sequence genome | Components of | Gene accession IDs | Putative functions |
|--------------------|----------------|--------------|-------------------------|---------------------------------|--------------------|------------------|-----------------|---------------|--------------------|--------------------|
| SNP_101714_A_2581  | NW_004517026.1 | scaffold1954 | 2581                    | AA                              | CC                 | CC               | INTERGENIC      |               |                    |                    |
| SNP_101715_A_4837  | NW_004517026.1 | scaffold1954 | 4837                    | TT                              | AA                 | AA               | INTERGENIC      |               |                    |                    |
| SNP_101716_A_4852  | NW_004517026.1 | scaffold1954 | 4852                    | TT                              | CC                 | CC               | INTERGENIC      |               |                    |                    |
| SNP_101717_A_4860  | NW_004517026.1 | scaffold1954 | 4860                    | GG                              | TT                 | TT               | INTERGENIC      |               |                    |                    |
| SNP_101718_A_4879  | NW_004517026.1 | scaffold1954 | 4879                    | AA                              | GG                 | GG               | INTERGENIC      |               |                    |                    |
| SNP_101719_A_4933  | NW_004517026.1 | scaffold1954 | 4933                    | CC                              | TT                 | TT               | INTERGENIC      |               |                    |                    |
| SNP_101720_A_4949  | NW_004517026.1 | scaffold1954 | 4949                    | TT                              | GG                 | GG               | INTERGENIC      |               |                    |                    |
| SNP_101721_A_4974  | NW_004517026.1 | scaffold1954 | 4974                    | CC                              | TT                 | TT               | INTERGENIC      |               |                    |                    |
| SNP_101722_A_9462  | NW_004517028.1 | scaffold1956 | 9462                    | CC                              | TT                 | TT               | INTERGENIC      |               |                    |                    |
| SNP_101723_A_9716  | NW_004517028.1 | scaffold1956 | 9716                    | TT                              | CC                 | CC               | INTERGENIC      |               |                    |                    |
| SNP_101724_A_9826  | NW_004517028.1 | scaffold1956 | 9826                    | CC                              | TT                 | TT               | INTERGENIC      |               |                    |                    |
| SNP_101725_A_9910  | NW_004517028.1 | scaffold1956 | 9910                    | GG                              | AA                 | AA               | INTERGENIC      |               |                    |                    |
| SNP_101726_A_9935  | NW_004517028.1 | scaffold1956 | 9935                    | AA                              | GG                 | GG               | INTERGENIC      |               |                    |                    |
| SNP_101727_A_10129 | NW_004517028.1 | scaffold1956 | 10129                   | AA                              | GG                 | GG               | INTERGENIC      |               |                    |                    |
| SNP_101728_A_14129 | NW_004517028.1 | scaffold1956 | 14129                   | TT                              | GG                 | GG               | INTERGENIC      |               |                    |                    |
| SNP_101729_A_14223 | NW_004517028.1 | scaffold1956 | 14223                   | CC                              | TT                 | TT               | INTERGENIC      |               |                    |                    |
| SNP_101730_A_14271 | NW_004517028.1 | scaffold1956 | 14271                   | TT                              | GG                 | GG               | INTERGENIC      |               |                    |                    |
| SNP_101731_A_14276 | NW_004517028.1 | scaffold1956 | 14276                   | AA                              | GG                 | GG               | INTERGENIC      |               |                    |                    |
| SNP_101732_A_14296 | NW_004517028.1 | scaffold1956 | 14296                   | GG                              | AA                 | AA               | INTERGENIC      |               |                    |                    |
| SNP_101733_A_15974 | NW_004517028.1 | scaffold1956 | 15974                   | AA                              | GG                 | GG               | INTERGENIC      |               |                    |                    |
| SNP_101734_A_15982 | NW_004517028.1 | scaffold1956 | 15982                   | GG                              | CC                 | CC               | INTERGENIC      |               |                    |                    |
| SNP_101735_A_16500 | NW_004517028.1 | scaffold1956 | 16500                   | CC                              | TT                 | TT               | INTERGENIC      |               |                    |                    |

| SNPs IDs           | Chromosome IDs | Chromosomes  | Physical positions (bp) | CDC Frontier (Reference genome) | (Pusa 1103 & HPNB) | (ILWC 46 & LPNB) | Sequence genome | Components of | Gene accession IDs | Putative functions |
|--------------------|----------------|--------------|-------------------------|---------------------------------|--------------------|------------------|-----------------|---------------|--------------------|--------------------|
| SNP_101736_A_16866 | NW_004517028.1 | scaffold1956 | 16866                   | GG                              | CC                 | CC               | INTERGENIC      |               |                    |                    |
| SNP_101737_A_17279 | NW_004517028.1 | scaffold1956 | 17279                   | CC                              | GG                 | GG               | INTERGENIC      |               |                    |                    |
| SNP_101738_A_18393 | NW_004517028.1 | scaffold1956 | 18393                   | CC                              | AA                 | AA               | INTERGENIC      |               |                    |                    |
| SNP_101739_A_18425 | NW_004517028.1 | scaffold1956 | 18425                   | CC                              | TT                 | TT               | INTERGENIC      |               |                    |                    |
| SNP_101740_A_22730 | NW_004517028.1 | scaffold1956 | 22730                   | GG                              | AA                 | AA               | INTERGENIC      |               |                    |                    |
| SNP_101741_A_27681 | NW_004517028.1 | scaffold1956 | 27681                   | TT                              | AA                 | AA               | INTERGENIC      |               |                    |                    |
| SNP_101742_A_27791 | NW_004517028.1 | scaffold1956 | 27791                   | AA                              | GG                 | GG               | INTERGENIC      |               |                    |                    |
| SNP_101743_A_27974 | NW_004517028.1 | scaffold1956 | 27974                   | GG                              | AA                 | AA               | INTERGENIC      |               |                    |                    |
| SNP_101744_A_28022 | NW_004517028.1 | scaffold1956 | 28022                   | AA                              | GG                 | GG               | INTERGENIC      |               |                    |                    |
| SNP_101745_A_28043 | NW_004517028.1 | scaffold1956 | 28043                   | TT                              | GG                 | GG               | INTERGENIC      |               |                    |                    |
| SNP_101746_A_30794 | NW_004517028.1 | scaffold1956 | 30794                   | TT                              | CC                 | CC               | INTERGENIC      |               |                    |                    |
| SNP_101747_A_30858 | NW_004517028.1 | scaffold1956 | 30858                   | TT                              | GG                 | GG               | INTERGENIC      |               |                    |                    |
| SNP_101749_A_40829 | NW_004517028.1 | scaffold1956 | 40829                   | TT                              | CC                 | CC               | INTERGENIC      |               |                    |                    |
| SNP_101750_A_40898 | NW_004517028.1 | scaffold1956 | 40898                   | GG                              | AA                 | AA               | INTERGENIC      |               |                    |                    |
| SNP_101751_A_40962 | NW_004517028.1 | scaffold1956 | 40962                   | GG                              | AA                 | AA               | INTERGENIC      |               |                    |                    |
| SNP_101752_A_40996 | NW_004517028.1 | scaffold1956 | 40996                   | TT                              | AA                 | AA               | INTERGENIC      |               |                    |                    |
| SNP_101753_A_41803 | NW_004517028.1 | scaffold1956 | 41803                   | CC                              | TT                 | TT               | INTERGENIC      |               |                    |                    |
| SNP_101754_A_46868 | NW_004517028.1 | scaffold1956 | 46868                   | TT                              | CC                 | CC               | INTERGENIC      |               |                    |                    |
| SNP_101755_A_52596 | NW_004517028.1 | scaffold1956 | 52596                   | TT                              | AA                 | AA               | INTERGENIC      |               |                    |                    |
| SNP_101756_A_52620 | NW_004517028.1 | scaffold1956 | 52620                   | CC                              | TT                 | TT               | INTERGENIC      |               |                    |                    |
| SNP_101757_A_63356 | NW_004517028.1 | scaffold1956 | 63356                   | CC                              | AA                 | AA               | INTERGENIC      |               |                    |                    |
| SNP_101758_A_63443 | NW_004517028.1 | scaffold1956 | 63443                   | TT                              | CC                 | CC               | INTERGENIC      |               |                    |                    |

| SNPs IDs           | Chromosome IDs | Chromosomes  | Physical positions (bp) | CDC Frontier (Reference genome) | (Pusa 1103 & HPNB) | (ILWC 46 & LPNB) | Sequence Components of genome | Gene accession IDs | Putative functions                      |
|--------------------|----------------|--------------|-------------------------|---------------------------------|--------------------|------------------|-------------------------------|--------------------|-----------------------------------------|
| SNP_101759_A_63701 | NW_004517028.1 | scaffold1956 | 63701                   | CC                              | TT                 | TT               | INTERGENIC                    |                    |                                         |
| SNP_101762_A_72186 | NW_004517028.1 | scaffold1956 | 72186                   | AA                              | TT                 | TT               | INTERGENIC                    |                    |                                         |
| SNP_101763_A_72478 | NW_004517028.1 | scaffold1956 | 72478                   | AA                              | GG                 | GG               | INTERGENIC                    |                    |                                         |
| SNP_101764_A_72491 | NW_004517028.1 | scaffold1956 | 72491                   | TT                              | GG                 | GG               | INTERGENIC                    |                    |                                         |
| SNP_101765_A_72497 | NW_004517028.1 | scaffold1956 | 72497                   | AA                              | GG                 | GG               | INTERGENIC                    |                    |                                         |
| SNP_101766_A_72498 | NW_004517028.1 | scaffold1956 | 72498                   | GG                              | AA                 | AA               | INTERGENIC                    |                    |                                         |
| SNP_101767_A_72517 | NW_004517028.1 | scaffold1956 | 72517                   | TT                              | AA                 | AA               | INTERGENIC                    |                    |                                         |
| SNP_101768_A_72526 | NW_004517028.1 | scaffold1956 | 72526                   | GG                              | TT                 | TT               | INTERGENIC                    |                    |                                         |
| SNP_101769_A_72593 | NW_004517028.1 | scaffold1956 | 72593                   | AA                              | CC                 | CC               | INTERGENIC                    |                    |                                         |
| SNP_101770_A_78755 | NW_004517028.1 | scaffold1956 | 78755                   | CC                              | TT                 | TT               | INTERGENIC                    |                    |                                         |
| SNP_101771_A_81656 | NW_004517028.1 | scaffold1956 | 81656                   | CC                              | AA                 | AA               | URR                           | 101410586          | transfer RNA asparagine (anticodon GUU) |
| SNP_101772_A_85717 | NW_004517028.1 | scaffold1956 | 85717                   | CC                              | TT                 | TT               | INTERGENIC                    |                    |                                         |
| SNP_101773_A_85880 | NW_004517028.1 | scaffold1956 | 85880                   | AA                              | TT                 | TT               | INTERGENIC                    |                    |                                         |
| SNP_101775_A_86053 | NW_004517028.1 | scaffold1956 | 86053                   | AA                              | CC                 | CC               | INTERGENIC                    |                    |                                         |
| SNP_101776_A_88025 | NW_004517028.1 | scaffold1956 | 88025                   | GG                              | AA                 | AA               | INTERGENIC                    |                    |                                         |
| SNP_101777_A_88040 | NW_004517028.1 | scaffold1956 | 88040                   | AA                              | CC                 | CC               | INTERGENIC                    |                    |                                         |
| SNP_101778_A_88263 | NW_004517028.1 | scaffold1956 | 88263                   | GG                              | TT                 | TT               | INTERGENIC                    |                    |                                         |
| SNP_101779_A_88432 | NW_004517028.1 | scaffold1956 | 88432                   | AA                              | GG                 | GG               | INTERGENIC                    |                    |                                         |
| SNP_101780_A_88531 | NW_004517028.1 | scaffold1956 | 88531                   | CC                              | AA                 | AA               | INTERGENIC                    |                    |                                         |
| SNP_101781_A_88625 | NW_004517028.1 | scaffold1956 | 88625                   | CC                              | GG                 | GG               | INTERGENIC                    |                    |                                         |
| SNP_101782_A_88636 | NW_004517028.1 | scaffold1956 | 88636                   | AA                              | TT                 | TT               | INTERGENIC                    |                    |                                         |
| SNP_101783_A_88777 | NW_004517028.1 | scaffold1956 | 88777                   | CC                              | GG                 | GG               | INTERGENIC                    |                    |                                         |

| SNPs IDs            | Chromosome IDs | Chromosomes  | Physical positions (bp) | CDC Frontier (Reference genome) | (Pusa 1103 & HPNB) | (ILWC 46 & LPNB) | Sequence genome       | Components of | Gene accession IDs                          | Putative functions |
|---------------------|----------------|--------------|-------------------------|---------------------------------|--------------------|------------------|-----------------------|---------------|---------------------------------------------|--------------------|
| SNP_101784_A_93563  | NW_004517028.1 | scaffold1956 | 93563                   | TT                              | CC                 | CC               | INTERGENIC            |               |                                             |                    |
| SNP_101785_A_93685  | NW_004517028.1 | scaffold1956 | 93685                   | GG                              | TT                 | TT               | INTERGENIC            |               |                                             |                    |
| SNP_101786_A_96666  | NW_004517028.1 | scaffold1956 | 96666                   | CC                              | AA                 | AA               | INTERGENIC            |               |                                             |                    |
| SNP_101787_A_96667  | NW_004517028.1 | scaffold1956 | 96667                   | TT                              | GG                 | GG               | INTERGENIC            |               |                                             |                    |
| SNP_101788_A_96732  | NW_004517028.1 | scaffold1956 | 96732                   | GG                              | TT                 | TT               | INTERGENIC            |               |                                             |                    |
| SNP_101789_A_96733  | NW_004517028.1 | scaffold1956 | 96733                   | AA                              | TT                 | TT               | INTERGENIC            |               |                                             |                    |
| SNP_101790_A_119806 | NW_004517028.1 | scaffold1956 | 119806                  | CC                              | TT                 | TT               | INTERGENIC            |               |                                             |                    |
| SNP_101791_A_120035 | NW_004517028.1 | scaffold1956 | 120035                  | CC                              | GG                 | GG               | INTERGENIC            |               |                                             |                    |
| SNP_101792_A_120038 | NW_004517028.1 | scaffold1956 | 120038                  | CC                              | TT                 | TT               | INTERGENIC            |               |                                             |                    |
| SNP_101793_A_18964  | NW_004517029.1 | scaffold1959 | 18964                   | CC                              | TT                 | TT               | INTERGENIC            |               |                                             |                    |
| SNP_101794_A_19209  | NW_004517029.1 | scaffold1959 | 19209                   | TT                              | GG                 | GG               | INTERGENIC            |               |                                             |                    |
| SNP_101795_A_32620  | NW_004517029.1 | scaffold1959 | 32620                   | GG                              | CC                 | CC               | INTERGENIC            |               |                                             |                    |
| SNP_101796_A_32628  | NW_004517029.1 | scaffold1959 | 32628                   | GG                              | TT                 | TT               | INTERGENIC            |               |                                             |                    |
| SNP_101797_A_33312  | NW_004517029.1 | scaffold1959 | 33312                   | GG                              | AA                 | AA               | INTERGENIC            |               |                                             |                    |
| SNP_101798_A_33453  | NW_004517029.1 | scaffold1959 | 33453                   | GG                              | AA                 | AA               | INTERGENIC            |               |                                             |                    |
| SNP_101799_A_33467  | NW_004517029.1 | scaffold1959 | 33467                   | AA                              | GG                 | GG               | INTERGENIC            |               |                                             |                    |
| SNP_101800_A_44984  | NW_004517029.1 | scaffold1959 | 44984                   | GG                              | AA                 | AA               | INTRON                | 101491975     | two-component response regulator ARR10-like |                    |
| SNP_101801_A_45265  | NW_004517029.1 | scaffold1959 | 45265                   | AA                              | TT                 | TT               | NON_SYNONYMOUS_CODING | 101491975     | two-component response regulator ARR10-like |                    |
| SNP_101802_A_45333  | NW_004517029.1 | scaffold1959 | 45333                   | CC                              | TT                 | TT               | SYNONYMOUS_CODING     | 101491975     | two-component response regulator ARR10-like |                    |
| SNP_101803_A_46567  | NW_004517029.1 | scaffold1959 | 46567                   | CC                              | TT                 | TT               | URR                   | 101491975     | two-component response regulator ARR10-like |                    |
| SNP_101804_A_46569  | NW_004517029.1 | scaffold1959 | 46569                   | AA                              | GG                 | GG               | URR                   | 101491975     | two-component response regulator ARR10-like |                    |
| SNP_101805_A_46647  | NW_004517029.1 | scaffold1959 | 46647                   | GG                              | TT                 | TT               | URR                   | 101491975     | two-component response regulator ARR10-like |                    |

| SNPs IDs           | Chromosome IDs | Chromosomes  | Physical positions (bp) | CDC Frontier (Reference genome) | (Pusa 1103 & HPNB) | (ILWC 46 & LPNB) | Sequence Components of genome | Gene accession IDs | Putative functions                          |
|--------------------|----------------|--------------|-------------------------|---------------------------------|--------------------|------------------|-------------------------------|--------------------|---------------------------------------------|
| SNP_101806_A_46694 | NW_004517029.1 | scaffold1959 | 46694                   | AA                              | CC                 | CC               | URR                           | 101491975          | two-component response regulator ARR10-like |
| SNP_101807_A_46936 | NW_004517029.1 | scaffold1959 | 46936                   | CC                              | AA                 | AA               | URR                           | 101491975          | two-component response regulator ARR10-like |
| SNP_101808_A_47215 | NW_004517029.1 | scaffold1959 | 47215                   | TT                              | CC                 | CC               | URR                           | 101491975          | two-component response regulator ARR10-like |
| SNP_101810_A_47298 | NW_004517029.1 | scaffold1959 | 47298                   | CC                              | TT                 | TT               | URR                           | 101491975          | two-component response regulator ARR10-like |
| SNP_101811_A_47522 | NW_004517029.1 | scaffold1959 | 47522                   | TT                              | GG                 | GG               | URR                           | 101491975          | two-component response regulator ARR10-like |
| SNP_101812_A_47525 | NW_004517029.1 | scaffold1959 | 47525                   | GG                              | CC                 | CC               | URR                           | 101491975          | two-component response regulator ARR10-like |
| SNP_101813_A_47589 | NW_004517029.1 | scaffold1959 | 47589                   | AA                              | GG                 | GG               | URR                           | 101491975          | two-component response regulator ARR10-like |
| SNP_101814_A_47654 | NW_004517029.1 | scaffold1959 | 47654                   | TT                              | CC                 | GG               | INTERGENIC                    |                    |                                             |
| SNP_101815_A_50288 | NW_004517029.1 | scaffold1959 | 50288                   | GG                              | AA                 | AA               | DRR                           | 101491134          | Unknown function                            |
| SNP_101816_A_56695 | NW_004517029.1 | scaffold1959 | 56695                   | CC                              | TT                 | TT               | INTERGENIC                    |                    |                                             |
| SNP_101817_A_59169 | NW_004517029.1 | scaffold1959 | 59169                   | AA                              | GG                 | GG               | INTERGENIC                    |                    |                                             |
| SNP_101818_A_64316 | NW_004517029.1 | scaffold1959 | 64316                   | AA                              | TT                 | TT               | URR                           | 101492309          | Unknown function                            |
| SNP_101819_A_64319 | NW_004517029.1 | scaffold1959 | 64319                   | AA                              | GG                 | GG               | URR                           | 101492309          | Unknown function                            |
| SNP_101820_A_64335 | NW_004517029.1 | scaffold1959 | 64335                   | AA                              | GG                 | GG               | URR                           | 101492309          | Unknown function                            |
| SNP_101821_A_64342 | NW_004517029.1 | scaffold1959 | 64342                   | CC                              | TT                 | TT               | URR                           | 101492309          | Unknown function                            |
| SNP_101822_A_64546 | NW_004517029.1 | scaffold1959 | 64546                   | GG                              | AA                 | AA               | URR                           | 101492309          | Unknown function                            |
| SNP_101823_A_64631 | NW_004517029.1 | scaffold1959 | 64631                   | TT                              | CC                 | CC               | URR                           | 101492309          | Unknown function                            |
| SNP_101825_A_67732 | NW_004517029.1 | scaffold1959 | 67732                   | GG                              | AA                 | AA               | INTERGENIC                    |                    |                                             |
| SNP_101826_A_68268 | NW_004517029.1 | scaffold1959 | 68268                   | AA                              | GG                 | GG               | INTERGENIC                    |                    |                                             |
| SNP_101827_A_68274 | NW_004517029.1 | scaffold1959 | 68274                   | GG                              | CC                 | CC               | INTERGENIC                    |                    |                                             |
| SNP_101828_A_83810 | NW_004517029.1 | scaffold1959 | 83810                   | GG                              | AA                 | AA               | INTERGENIC                    |                    |                                             |
| SNP_101829_A_84997 | NW_004517029.1 | scaffold1959 | 84997                   | TT                              | GG                 | GG               | INTERGENIC                    |                    |                                             |



| SNPs IDs            | Chromosome IDs | Chromosomes  | Physical positions (bp) | CDC Frontier (Reference genome) | (Pusa 1103 & HPNB) | (ILWC 46 & LPNB) | Sequence Components of genome | Gene accession IDs | Putative functions           |
|---------------------|----------------|--------------|-------------------------|---------------------------------|--------------------|------------------|-------------------------------|--------------------|------------------------------|
| SNP_101831_A_120312 | NW_004517029.1 | scaffold1959 | 120312                  | CC                              | TT                 | TT               | URR                           | 101492974          | Unknown function             |
| SNP_101832_A_120316 | NW_004517029.1 | scaffold1959 | 120316                  | TT                              | CC                 | CC               | URR                           | 101492974          | Unknown function             |
| SNP_101833_A_120687 | NW_004517029.1 | scaffold1959 | 120687                  | CC                              | TT                 | TT               | URR                           | 101492974          | Unknown function             |
| SNP_101834_A_124962 | NW_004517029.1 | scaffold1959 | 124962                  | AA                              | GG                 | GG               | INTERGENIC                    |                    |                              |
| SNP_101835_A_125024 | NW_004517029.1 | scaffold1959 | 125024                  | TT                              | GG                 | GG               | INTERGENIC                    |                    |                              |
| SNP_101836_A_125033 | NW_004517029.1 | scaffold1959 | 125033                  | TT                              | CC                 | CC               | INTERGENIC                    |                    |                              |
| SNP_101837_A_125323 | NW_004517029.1 | scaffold1959 | 125323                  | CC                              | TT                 | TT               | INTERGENIC                    |                    |                              |
| SNP_101838_A_125336 | NW_004517029.1 | scaffold1959 | 125336                  | CC                              | GG                 | GG               | INTERGENIC                    |                    |                              |
| SNP_101839_A_125363 | NW_004517029.1 | scaffold1959 | 125363                  | TT                              | CC                 | CC               | INTERGENIC                    |                    |                              |
| SNP_101840_A_125374 | NW_004517029.1 | scaffold1959 | 125374                  | TT                              | CC                 | CC               | INTERGENIC                    |                    |                              |
| SNP_101841_A_125379 | NW_004517029.1 | scaffold1959 | 125379                  | AA                              | GG                 | GG               | INTERGENIC                    |                    |                              |
| SNP_101842_A_125460 | NW_004517029.1 | scaffold1959 | 125460                  | CC                              | TT                 | TT               | INTERGENIC                    |                    |                              |
| SNP_101843_A_31665  | NW_004517032.1 | scaffold1962 | 31665                   | AA                              | TT                 | TT               | INTERGENIC                    |                    |                              |
| SNP_101844_A_33141  | NW_004517032.1 | scaffold1962 | 33141                   | CC                              | AA                 | AA               | INTERGENIC                    |                    |                              |
| SNP_101845_A_33502  | NW_004517032.1 | scaffold1962 | 33502                   | TT                              | CC                 | CC               | INTERGENIC                    |                    |                              |
| SNP_101846_A_33520  | NW_004517032.1 | scaffold1962 | 33520                   | TT                              | CC                 | CC               | INTERGENIC                    |                    |                              |
| SNP_101847_A_44277  | NW_004517032.1 | scaffold1962 | 44277                   | TT                              | CC                 | CC               | INTERGENIC                    |                    |                              |
| SNP_101848_A_44279  | NW_004517032.1 | scaffold1962 | 44279                   | TT                              | GG                 | GG               | INTERGENIC                    |                    |                              |
| SNP_101849_A_44482  | NW_004517032.1 | scaffold1962 | 44482                   | TT                              | GG                 | GG               | INTERGENIC                    |                    |                              |
| SNP_101850_A_44490  | NW_004517032.1 | scaffold1962 | 44490                   | GG                              | AA                 | AA               | INTERGENIC                    |                    |                              |
| SNP_101851_A_50174  | NW_004517032.1 | scaffold1962 | 50174                   | GG                              | TT                 | TT               | DRR                           | 101495222          | uncharacterized LOC101495222 |
| SNP_101852_A_74997  | NW_004517032.1 | scaffold1962 | 74997                   | AA                              | GG                 | GG               | INTERGENIC                    |                    |                              |

| SNPs IDs            | Chromosome IDs | Chromosomes  | Physical positions (bp) | CDC Frontier (Reference genome) | (Pusa 1103 & HPNB) | (ILWC 46 & LPNB) | Sequence genome | Components of | Gene accession IDs | Putative functions |
|---------------------|----------------|--------------|-------------------------|---------------------------------|--------------------|------------------|-----------------|---------------|--------------------|--------------------|
| SNP_101853_A_92289  | NW_004517032.1 | scaffold1962 | 92289                   | TT                              | CC                 | CC               | INTERGENIC      |               |                    |                    |
| SNP_101856_A_136201 | NW_004517032.1 | scaffold1962 | 136201                  | AA                              | TT                 | TT               | INTERGENIC      |               |                    |                    |
| SNP_101858_A_170135 | NW_004517032.1 | scaffold1962 | 170135                  | CC                              | TT                 | TT               | INTERGENIC      |               |                    |                    |
| SNP_101859_A_170303 | NW_004517032.1 | scaffold1962 | 170303                  | TT                              | GG                 | GG               | INTERGENIC      |               |                    |                    |
| SNP_101860_A_170314 | NW_004517032.1 | scaffold1962 | 170314                  | CC                              | TT                 | TT               | INTERGENIC      |               |                    |                    |
| SNP_101861_A_170553 | NW_004517032.1 | scaffold1962 | 170553                  | CC                              | TT                 | TT               | INTERGENIC      |               |                    |                    |
| SNP_101862_A_170687 | NW_004517032.1 | scaffold1962 | 170687                  | CC                              | TT                 | TT               | INTERGENIC      |               |                    |                    |
| SNP_101864_A_170743 | NW_004517032.1 | scaffold1962 | 170743                  | TT                              | CC                 | CC               | INTERGENIC      |               |                    |                    |
| SNP_101865_A_170953 | NW_004517032.1 | scaffold1962 | 170953                  | GG                              | AA                 | AA               | INTERGENIC      |               |                    |                    |
| SNP_101866_A_171057 | NW_004517032.1 | scaffold1962 | 171057                  | AA                              | TT                 | TT               | INTERGENIC      |               |                    |                    |
| SNP_101867_A_2198   | NW_004517033.1 | scaffold1963 | 2198                    | AA                              | TT                 | TT               | INTERGENIC      |               |                    |                    |
| SNP_101868_A_7258   | NW_004517034.1 | scaffold1964 | 7258                    | AA                              | GG                 | GG               | INTERGENIC      |               |                    |                    |
| SNP_101869_A_7550   | NW_004517034.1 | scaffold1964 | 7550                    | TT                              | CC                 | CC               | INTERGENIC      |               |                    |                    |
| SNP_101870_A_7736   | NW_004517034.1 | scaffold1964 | 7736                    | CC                              | TT                 | TT               | INTERGENIC      |               |                    |                    |
| SNP_101871_A_7839   | NW_004517034.1 | scaffold1964 | 7839                    | GG                              | AA                 | AA               | INTERGENIC      |               |                    |                    |
| SNP_101872_A_8291   | NW_004517034.1 | scaffold1964 | 8291                    | CC                              | TT                 | TT               | INTERGENIC      |               |                    |                    |
| SNP_101873_A_8908   | NW_004517034.1 | scaffold1964 | 8908                    | AA                              | GG                 | GG               | INTERGENIC      |               |                    |                    |
| SNP_101874_A_9086   | NW_004517034.1 | scaffold1964 | 9086                    | CC                              | GG                 | GG               | INTERGENIC      |               |                    |                    |
| SNP_101875_A_9087   | NW_004517034.1 | scaffold1964 | 9087                    | TT                              | GG                 | GG               | INTERGENIC      |               |                    |                    |
| SNP_101876_A_9088   | NW_004517034.1 | scaffold1964 | 9088                    | CC                              | AA                 | AA               | INTERGENIC      |               |                    |                    |
| SNP_101877_A_9089   | NW_004517034.1 | scaffold1964 | 9089                    | CC                              | GG                 | GG               | INTERGENIC      |               |                    |                    |
| SNP_101878_A_9348   | NW_004517034.1 | scaffold1964 | 9348                    | TT                              | AA                 | AA               | INTERGENIC      |               |                    |                    |

| SNPs IDs           | Chromosome IDs | Chromosomes  | Physical positions (bp) | CDC Frontier (Reference genome) | (Pusa 1103 & HPNB) | (ILWC 46 & LPNB) | Sequence Components of genome | Gene accession IDs | Putative functions           |
|--------------------|----------------|--------------|-------------------------|---------------------------------|--------------------|------------------|-------------------------------|--------------------|------------------------------|
| SNP_101879_A_9550  | NW_004517034.1 | scaffold1964 | 9550                    | CC                              | GG                 | GG               | INTERGENIC                    |                    |                              |
| SNP_101880_A_10009 | NW_004517034.1 | scaffold1964 | 10009                   | GG                              | AA                 | AA               | INTERGENIC                    |                    |                              |
| SNP_101881_A_10272 | NW_004517034.1 | scaffold1964 | 10272                   | TT                              | CC                 | CC               | DRR                           | 101496202          | uncharacterized LOC101496202 |
| SNP_101882_A_10279 | NW_004517034.1 | scaffold1964 | 10279                   | GG                              | AA                 | AA               | DRR                           | 101496202          | uncharacterized LOC101496202 |
| SNP_101883_A_10442 | NW_004517034.1 | scaffold1964 | 10442                   | GG                              | AA                 | AA               | DRR                           | 101496202          | uncharacterized LOC101496202 |
| SNP_101884_A_10529 | NW_004517034.1 | scaffold1964 | 10529                   | AA                              | GG                 | GG               | DRR                           | 101496202          | uncharacterized LOC101496202 |
| SNP_101885_A_10764 | NW_004517034.1 | scaffold1964 | 10764                   | TT                              | CC                 | CC               | DRR                           | 101496202          | uncharacterized LOC101496202 |
| SNP_101886_A_10821 | NW_004517034.1 | scaffold1964 | 10821                   | AA                              | GG                 | GG               | DRR                           | 101496202          | uncharacterized LOC101496202 |
| SNP_101887_A_10842 | NW_004517034.1 | scaffold1964 | 10842                   | TT                              | GG                 | GG               | DRR                           | 101496202          | uncharacterized LOC101496202 |
| SNP_101889_A_11016 | NW_004517034.1 | scaffold1964 | 11016                   | GG                              | AA                 | AA               | DRR                           | 101496202          | uncharacterized LOC101496202 |
| SNP_101892_A_20246 | NW_004517034.1 | scaffold1964 | 20246                   | CC                              | TT                 | TT               | INTERGENIC                    |                    |                              |
| SNP_101893_A_20248 | NW_004517034.1 | scaffold1964 | 20248                   | CC                              | TT                 | TT               | INTERGENIC                    |                    |                              |
| SNP_101894_A_20257 | NW_004517034.1 | scaffold1964 | 20257                   | CC                              | AA                 | AA               | INTERGENIC                    |                    |                              |
| SNP_101896_A_20368 | NW_004517034.1 | scaffold1964 | 20368                   | TT                              | CC                 | CC               | INTERGENIC                    |                    |                              |
| SNP_101897_A_20394 | NW_004517034.1 | scaffold1964 | 20394                   | TT                              | AA                 | AA               | INTERGENIC                    |                    |                              |
| SNP_101898_A_20422 | NW_004517034.1 | scaffold1964 | 20422                   | GG                              | AA                 | AA               | INTERGENIC                    |                    |                              |
| SNP_101899_A_20442 | NW_004517034.1 | scaffold1964 | 20442                   | CC                              | TT                 | TT               | INTERGENIC                    |                    |                              |
| SNP_101900_A_20601 | NW_004517034.1 | scaffold1964 | 20601                   | AA                              | CC                 | CC               | INTERGENIC                    |                    |                              |
| SNP_101901_A_20811 | NW_004517034.1 | scaffold1964 | 20811                   | TT                              | CC                 | CC               | INTERGENIC                    |                    |                              |
| SNP_101902_A_20884 | NW_004517034.1 | scaffold1964 | 20884                   | GG                              | AA                 | AA               | INTERGENIC                    |                    |                              |
| SNP_101903_A_20885 | NW_004517034.1 | scaffold1964 | 20885                   | CC                              | TT                 | TT               | INTERGENIC                    |                    |                              |
| SNP_101904_A_21130 | NW_004517034.1 | scaffold1964 | 21130                   | TT                              | CC                 | CC               | INTERGENIC                    |                    |                              |

| SNPs IDs            | Chromosome IDs | Chromosomes  | Physical positions (bp) | CDC Frontier (Reference genome) | (Pusa 1103 & HPNB) | (ILWC 46 & LPNB) | Sequence genome | Components of | Gene accession IDs | Putative functions |
|---------------------|----------------|--------------|-------------------------|---------------------------------|--------------------|------------------|-----------------|---------------|--------------------|--------------------|
| SNP_101905_A_21191  | NW_004517034.1 | scaffold1964 | 21191                   | AA                              | GG                 | GG               | INTERGENIC      |               |                    |                    |
| SNP_101907_A_21717  | NW_004517034.1 | scaffold1964 | 21717                   | TT                              | CC                 | CC               | INTERGENIC      |               |                    |                    |
| SNP_101908_A_21847  | NW_004517034.1 | scaffold1964 | 21847                   | AA                              | CC                 | CC               | INTERGENIC      |               |                    |                    |
| SNP_101909_A_22615  | NW_004517034.1 | scaffold1964 | 22615                   | GG                              | CC                 | CC               | INTERGENIC      |               |                    |                    |
| SNP_101910_A_22887  | NW_004517034.1 | scaffold1964 | 22887                   | AA                              | GG                 | GG               | INTERGENIC      |               |                    |                    |
| SNP_101911_A_96919  | NW_004517034.1 | scaffold1964 | 96919                   | TT                              | CC                 | CC               | INTERGENIC      |               |                    |                    |
| SNP_101912_A_112857 | NW_004517034.1 | scaffold1964 | 112857                  | AA                              | GG                 | GG               | INTERGENIC      |               |                    |                    |
| SNP_101913_A_113306 | NW_004517034.1 | scaffold1964 | 113306                  | CC                              | TT                 | TT               | INTERGENIC      |               |                    |                    |
| SNP_101915_A_143488 | NW_004517034.1 | scaffold1964 | 143488                  | AA                              | GG                 | GG               | INTERGENIC      |               |                    |                    |
| SNP_101916_A_149407 | NW_004517034.1 | scaffold1964 | 149407                  | TT                              | AA                 | AA               | INTERGENIC      |               |                    |                    |
| SNP_101917_A_171915 | NW_004517034.1 | scaffold1964 | 171915                  | TT                              | CC                 | CC               | INTERGENIC      |               |                    |                    |
| SNP_101918_A_172096 | NW_004517034.1 | scaffold1964 | 172096                  | TT                              | CC                 | CC               | INTERGENIC      |               |                    |                    |
| SNP_101920_A_172293 | NW_004517034.1 | scaffold1964 | 172293                  | AA                              | GG                 | GG               | INTERGENIC      |               |                    |                    |
| SNP_101921_A_4056   | NW_004517040.1 | scaffold1971 | 4056                    | TT                              | CC                 | CC               | INTERGENIC      |               |                    |                    |
| SNP_101922_A_4292   | NW_004517040.1 | scaffold1971 | 4292                    | TT                              | CC                 | CC               | INTERGENIC      |               |                    |                    |
| SNP_101923_A_4445   | NW_004517040.1 | scaffold1971 | 4445                    | TT                              | CC                 | CC               | INTERGENIC      |               |                    |                    |
| SNP_101924_A_1055   | NW_004517042.1 | scaffold1974 | 1055                    | AA                              | GG                 | GG               | INTERGENIC      |               |                    |                    |
| SNP_101925_A_1180   | NW_004517042.1 | scaffold1974 | 1180                    | AA                              | TT                 | TT               | INTERGENIC      |               |                    |                    |
| SNP_101926_A_1206   | NW_004517042.1 | scaffold1974 | 1206                    | GG                              | AA                 | AA               | INTERGENIC      |               |                    |                    |
| SNP_101927_A_5339   | NW_004517044.1 | scaffold1976 | 5339                    | GG                              | CC                 | CC               | INTERGENIC      |               |                    |                    |
| SNP_101928_A_5395   | NW_004517044.1 | scaffold1976 | 5395                    | CC                              | TT                 | TT               | INTERGENIC      |               |                    |                    |
| SNP_101929_A_5613   | NW_004517044.1 | scaffold1976 | 5613                    | TT                              | AA                 | AA               | INTERGENIC      |               |                    |                    |

| SNPs IDs           | Chromosome IDs | Chromosomes  | Physical positions (bp) | CDC Frontier (Reference genome) | (Pusa 1103 & HPNB) | (ILWC 46 & LPNB) | Sequence genome | Components of | Gene accession IDs | Putative functions |
|--------------------|----------------|--------------|-------------------------|---------------------------------|--------------------|------------------|-----------------|---------------|--------------------|--------------------|
| SNP_101930_A_9298  | NW_004517044.1 | scaffold1976 | 9298                    | AA                              | GG                 | GG               | INTERGENIC      |               |                    |                    |
| SNP_101931_A_9381  | NW_004517044.1 | scaffold1976 | 9381                    | AA                              | GG                 | GG               | INTERGENIC      |               |                    |                    |
| SNP_101932_A_9421  | NW_004517044.1 | scaffold1976 | 9421                    | AA                              | GG                 | GG               | INTERGENIC      |               |                    |                    |
| SNP_101933_A_9479  | NW_004517044.1 | scaffold1976 | 9479                    | TT                              | CC                 | CC               | INTERGENIC      |               |                    |                    |
| SNP_101934_A_9511  | NW_004517044.1 | scaffold1976 | 9511                    | AA                              | GG                 | GG               | INTERGENIC      |               |                    |                    |
| SNP_101935_A_10596 | NW_004517044.1 | scaffold1976 | 10596                   | CC                              | AA                 | AA               | INTERGENIC      |               |                    |                    |
| SNP_101936_A_10738 | NW_004517044.1 | scaffold1976 | 10738                   | CC                              | TT                 | TT               | INTERGENIC      |               |                    |                    |
| SNP_101937_A_10841 | NW_004517044.1 | scaffold1976 | 10841                   | GG                              | AA                 | AA               | INTERGENIC      |               |                    |                    |
| SNP_101938_A_10858 | NW_004517044.1 | scaffold1976 | 10858                   | CC                              | AA                 | AA               | INTERGENIC      |               |                    |                    |
| SNP_101939_A_10866 | NW_004517044.1 | scaffold1976 | 10866                   | GG                              | AA                 | AA               | INTERGENIC      |               |                    |                    |
| SNP_101940_A_10876 | NW_004517044.1 | scaffold1976 | 10876                   | TT                              | CC                 | CC               | INTERGENIC      |               |                    |                    |
| SNP_101941_A_10886 | NW_004517044.1 | scaffold1976 | 10886                   | TT                              | CC                 | CC               | INTERGENIC      |               |                    |                    |
| SNP_101942_A_17113 | NW_004517044.1 | scaffold1976 | 17113                   | CC                              | TT                 | TT               | INTERGENIC      |               |                    |                    |
| SNP_101943_A_21242 | NW_004517044.1 | scaffold1976 | 21242                   | AA                              | GG                 | GG               | INTERGENIC      |               |                    |                    |
| SNP_101944_A_26169 | NW_004517044.1 | scaffold1976 | 26169                   | CC                              | TT                 | TT               | INTERGENIC      |               |                    |                    |
| SNP_101945_A_26197 | NW_004517044.1 | scaffold1976 | 26197                   | CC                              | AA                 | AA               | INTERGENIC      |               |                    |                    |
| SNP_101946_A_26216 | NW_004517044.1 | scaffold1976 | 26216                   | TT                              | CC                 | CC               | INTERGENIC      |               |                    |                    |
| SNP_101947_A_26420 | NW_004517044.1 | scaffold1976 | 26420                   | CC                              | TT                 | TT               | INTERGENIC      |               |                    |                    |
| SNP_101948_A_26490 | NW_004517044.1 | scaffold1976 | 26490                   | AA                              | GG                 | GG               | INTERGENIC      |               |                    |                    |
| SNP_101949_A_27109 | NW_004517044.1 | scaffold1976 | 27109                   | AA                              | GG                 | GG               | INTERGENIC      |               |                    |                    |
| SNP_101950_A_27139 | NW_004517044.1 | scaffold1976 | 27139                   | GG                              | AA                 | AA               | INTERGENIC      |               |                    |                    |
| SNP_101951_A_27174 | NW_004517044.1 | scaffold1976 | 27174                   | GG                              | TT                 | TT               | INTERGENIC      |               |                    |                    |

| SNPs IDs            | Chromosome IDs | Chromosomes  | Physical positions (bp) | CDC Frontier (Reference genome) | (Pusa 1103 & HPNB) | (ILWC 46 & LPNB) | Sequence genome | Components of | Gene accession IDs | Putative functions |
|---------------------|----------------|--------------|-------------------------|---------------------------------|--------------------|------------------|-----------------|---------------|--------------------|--------------------|
| SNP_101952_A_27175  | NW_004517044.1 | scaffold1976 | 27175                   | TT                              | CC                 | CC               | INTERGENIC      |               |                    |                    |
| SNP_101953_A_27433  | NW_004517044.1 | scaffold1976 | 27433                   | AA                              | TT                 | TT               | INTERGENIC      |               |                    |                    |
| SNP_101954_A_28209  | NW_004517044.1 | scaffold1976 | 28209                   | GG                              | AA                 | AA               | INTERGENIC      |               |                    |                    |
| SNP_101955_A_28618  | NW_004517044.1 | scaffold1976 | 28618                   | AA                              | GG                 | GG               | INTERGENIC      |               |                    |                    |
| SNP_101956_A_31214  | NW_004517044.1 | scaffold1976 | 31214                   | AA                              | GG                 | GG               | INTERGENIC      |               |                    |                    |
| SNP_101957_A_31270  | NW_004517044.1 | scaffold1976 | 31270                   | TT                              | GG                 | GG               | INTERGENIC      |               |                    |                    |
| SNP_101958_A_31612  | NW_004517044.1 | scaffold1976 | 31612                   | GG                              | AA                 | AA               | INTERGENIC      |               |                    |                    |
| SNP_101959_A_50679  | NW_004517046.1 | scaffold1981 | 50679                   | AA                              | GG                 | GG               | INTERGENIC      |               |                    |                    |
| SNP_101960_A_50824  | NW_004517046.1 | scaffold1981 | 50824                   | CC                              | TT                 | TT               | INTERGENIC      |               |                    |                    |
| SNP_101961_A_82710  | NW_004517046.1 | scaffold1981 | 82710                   | AA                              | TT                 | TT               | INTERGENIC      |               |                    |                    |
| SNP_101962_A_82774  | NW_004517046.1 | scaffold1981 | 82774                   | AA                              | TT                 | TT               | INTERGENIC      |               |                    |                    |
| SNP_101963_A_83085  | NW_004517046.1 | scaffold1981 | 83085                   | CC                              | TT                 | TT               | INTERGENIC      |               |                    |                    |
| SNP_101964_A_100200 | NW_004517046.1 | scaffold1981 | 100200                  | GG                              | AA                 | AA               | INTERGENIC      |               |                    |                    |
| SNP_101966_A_100621 | NW_004517046.1 | scaffold1981 | 100621                  | GG                              | AA                 | AA               | INTERGENIC      |               |                    |                    |
| SNP_101967_A_117404 | NW_004517046.1 | scaffold1981 | 117404                  | TT                              | AA                 | AA               | INTERGENIC      |               |                    |                    |
| SNP_101970_A_126422 | NW_004517046.1 | scaffold1981 | 126422                  | AA                              | CC                 | CC               | INTERGENIC      |               |                    |                    |
| SNP_101971_A_131434 | NW_004517046.1 | scaffold1981 | 131434                  | TT                              | CC                 | CC               | INTERGENIC      |               |                    |                    |
| SNP_101972_A_145999 | NW_004517046.1 | scaffold1981 | 145999                  | TT                              | CC                 | CC               | INTERGENIC      |               |                    |                    |
| SNP_101973_A_158928 | NW_004517046.1 | scaffold1981 | 158928                  | AA                              | CC                 | CC               | INTERGENIC      |               |                    |                    |
| SNP_101974_A_159267 | NW_004517046.1 | scaffold1981 | 159267                  | AA                              | CC                 | CC               | INTERGENIC      |               |                    |                    |
| SNP_101975_A_159315 | NW_004517046.1 | scaffold1981 | 159315                  | AA                              | CC                 | CC               | INTERGENIC      |               |                    |                    |
| SNP_101976_A_164922 | NW_004517046.1 | scaffold1981 | 164922                  | CC                              | AA                 | AA               | INTERGENIC      |               |                    |                    |

| SNPs IDs            | Chromosome IDs | Chromosomes  | Physical positions (bp) | CDC Frontier (Reference genome) | (Pusa 1103 & HPNB) | (ILWC 46 & LPNB) | Sequence Components of genome | Gene accession IDs | Putative functions                             |
|---------------------|----------------|--------------|-------------------------|---------------------------------|--------------------|------------------|-------------------------------|--------------------|------------------------------------------------|
| SNP_101977_A_164958 | NW_004517046.1 | scaffold1981 | 164958                  | CC                              | AA                 | AA               | INTERGENIC                    |                    |                                                |
| SNP_101978_A_182639 | NW_004517046.1 | scaffold1981 | 182639                  | TT                              | CC                 | CC               | INTERGENIC                    |                    |                                                |
| SNP_101980_A_193531 | NW_004517046.1 | scaffold1981 | 193531                  | TT                              | CC                 | CC               | INTERGENIC                    |                    |                                                |
| SNP_101981_A_234468 | NW_004517046.1 | scaffold1981 | 234468                  | GG                              | AA                 | AA               | INTERGENIC                    |                    |                                                |
| SNP_101983_A_240669 | NW_004517046.1 | scaffold1981 | 240669                  | AA                              | TT                 | TT               | DRR                           | 101502333          | uncharacterized LOC101502333                   |
| SNP_101984_A_240890 | NW_004517046.1 | scaffold1981 | 240890                  | TT                              | AA                 | AA               | NON_SYNONYMOUS_CODING         | id216115           | Unknown function                               |
| SNP_101985_A_242067 | NW_004517046.1 | scaffold1981 | 242067                  | TT                              | CC                 | CC               | NON_SYNONYMOUS_CODING         | id216115           | Unknown function                               |
| SNP_101986_A_243116 | NW_004517046.1 | scaffold1981 | 243116                  | TT                              | AA                 | AA               | INTRON                        | id216115           | Unknown function                               |
| SNP_101987_A_243491 | NW_004517046.1 | scaffold1981 | 243491                  | GG                              | AA                 | AA               | INTRON                        | id216115           | Unknown function                               |
| SNP_101988_A_244294 | NW_004517046.1 | scaffold1981 | 244294                  | TT                              | AA                 | AA               | URR                           | 101502333          | uncharacterized LOC101502333                   |
| SNP_101989_A_276788 | NW_004517046.1 | scaffold1981 | 276788                  | AA                              | CC                 | CC               | INTERGENIC                    |                    |                                                |
| SNP_101990_A_277055 | NW_004517046.1 | scaffold1981 | 277055                  | GG                              | AA                 | AA               | INTERGENIC                    |                    |                                                |
| SNP_101991_A_277095 | NW_004517046.1 | scaffold1981 | 277095                  | TT                              | CC                 | CC               | INTERGENIC                    |                    |                                                |
| SNP_101992_A_277372 | NW_004517046.1 | scaffold1981 | 277372                  | GG                              | AA                 | AA               | INTERGENIC                    |                    |                                                |
| SNP_101994_A_304137 | NW_004517046.1 | scaffold1981 | 304137                  | GG                              | AA                 | AA               | INTRON                        | 101503391          | histone H3-like centromeric protein HTR12-like |
| SNP_101995_A_310315 | NW_004517046.1 | scaffold1981 | 310315                  | GG                              | AA                 | AA               | INTERGENIC                    |                    |                                                |
| SNP_101996_A_313094 | NW_004517046.1 | scaffold1981 | 313094                  | CC                              | TT                 | TT               | INTERGENIC                    |                    |                                                |
| SNP_101998_A_320612 | NW_004517046.1 | scaffold1981 | 320612                  | GG                              | AA                 | AA               | DRR                           | 101507909          | uncharacterized LOC101507909                   |
| SNP_101999_A_320635 | NW_004517046.1 | scaffold1981 | 320635                  | CC                              | TT                 | TT               | DRR                           | 101507909          | uncharacterized LOC101507909                   |
| SNP_102000_A_320667 | NW_004517046.1 | scaffold1981 | 320667                  | TT                              | CC                 | CC               | DRR                           | 101507909          | uncharacterized LOC101507909                   |
| SNP_102001_A_320672 | NW_004517046.1 | scaffold1981 | 320672                  | TT                              | CC                 | CC               | DRR                           | 101507909          | uncharacterized LOC101507909                   |
| SNP_102002_A_320688 | NW_004517046.1 | scaffold1981 | 320688                  | AA                              | GG                 | GG               | DRR                           | 101507909          | uncharacterized LOC101507909                   |

| SNPs IDs            | Chromosome IDs | Chromosomes  | Physical positions (bp) | CDC Frontier (Reference genome) | (Pusa 1103 & HPNB) | (ILWC 46 & LPNB) | Sequence Components of genome | Gene accession IDs | Putative functions                                                   |
|---------------------|----------------|--------------|-------------------------|---------------------------------|--------------------|------------------|-------------------------------|--------------------|----------------------------------------------------------------------|
| SNP_102003_A_320734 | NW_004517046.1 | scaffold1981 | 320734                  | TT                              | GG                 | GG               | DRR                           | 101507909          | uncharacterized LOC101507909                                         |
| SNP_102004_A_320780 | NW_004517046.1 | scaffold1981 | 320780                  | GG                              | AA                 | AA               | SYNONYMOUS_CODING             | 101507909          | uncharacterized LOC101507909                                         |
| SNP_102005_A_320933 | NW_004517046.1 | scaffold1981 | 320933                  | TT                              | CC                 | CC               | INTERGENIC                    |                    |                                                                      |
| SNP_102006_A_320942 | NW_004517046.1 | scaffold1981 | 320942                  | AA                              | GG                 | GG               | INTERGENIC                    |                    |                                                                      |
| SNP_102007_A_320958 | NW_004517046.1 | scaffold1981 | 320958                  | CC                              | TT                 | TT               | INTERGENIC                    |                    |                                                                      |
| SNP_102008_A_321072 | NW_004517046.1 | scaffold1981 | 321072                  | GG                              | AA                 | AA               | INTERGENIC                    |                    |                                                                      |
| SNP_102009_A_336033 | NW_004517046.1 | scaffold1981 | 336033                  | AA                              | TT                 | TT               | URR                           | 101504054          | uncharacterized LOC101504054                                         |
| SNP_102010_A_336037 | NW_004517046.1 | scaffold1981 | 336037                  | TT                              | CC                 | CC               | URR                           | 101504054          | uncharacterized LOC101504054                                         |
| SNP_102011_A_336040 | NW_004517046.1 | scaffold1981 | 336040                  | TT                              | CC                 | CC               | URR                           | 101504054          | uncharacterized LOC101504054                                         |
| SNP_102012_A_341140 | NW_004517046.1 | scaffold1981 | 341140                  | AA                              | TT                 | TT               | URR                           | 101504909          | pentatricopeptide repeat-containing protein At4g01030, mitochondrial |
| SNP_102013_A_341947 | NW_004517046.1 | scaffold1981 | 341947                  | TT                              | CC                 | CC               | DRR                           | 101504365          | abscisic acid receptor PYL9-like                                     |
| SNP_102015_A_348178 | NW_004517046.1 | scaffold1981 | 348178                  | AA                              | TT                 | TT               | INTERGENIC                    |                    |                                                                      |
| SNP_102016_A_348555 | NW_004517046.1 | scaffold1981 | 348555                  | GG                              | AA                 | AA               | INTERGENIC                    |                    |                                                                      |
| SNP_102017_A_349229 | NW_004517046.1 | scaffold1981 | 349229                  | TT                              | AA                 | AA               | INTERGENIC                    |                    |                                                                      |
| SNP_102018_A_349308 | NW_004517046.1 | scaffold1981 | 349308                  | CC                              | TT                 | TT               | INTERGENIC                    |                    |                                                                      |
| SNP_102019_A_352031 | NW_004517046.1 | scaffold1981 | 352031                  | GG                              | AA                 | AA               | INTERGENIC                    |                    |                                                                      |
| SNP_102020_A_352035 | NW_004517046.1 | scaffold1981 | 352035                  | TT                              | AA                 | AA               | INTERGENIC                    |                    |                                                                      |
| SNP_102022_A_355139 | NW_004517046.1 | scaffold1981 | 355139                  | TT                              | GG                 | GG               | INTERGENIC                    |                    |                                                                      |
| SNP_102023_A_355286 | NW_004517046.1 | scaffold1981 | 355286                  | TT                              | CC                 | CC               | INTERGENIC                    |                    |                                                                      |
| SNP_102024_A_355336 | NW_004517046.1 | scaffold1981 | 355336                  | GG                              | AA                 | AA               | INTERGENIC                    |                    |                                                                      |
| SNP_102026_A_355798 | NW_004517046.1 | scaffold1981 | 355798                  | AA                              | TT                 | TT               | INTERGENIC                    |                    |                                                                      |
| SNP_102027_A_355807 | NW_004517046.1 | scaffold1981 | 355807                  | AA                              | GG                 | GG               | INTERGENIC                    |                    |                                                                      |



| SNPs IDs            | Chromosome IDs | Chromosomes  | Physical positions (bp) | CDC Frontier (Reference genome) | (Pusa 1103 & HPNB) | (ILWC 46 & LPNB) | Sequence genome | Components of | Gene accession IDs | Putative functions |
|---------------------|----------------|--------------|-------------------------|---------------------------------|--------------------|------------------|-----------------|---------------|--------------------|--------------------|
| SNP_102028_A_356967 | NW_004517046.1 | scaffold1981 | 356967                  | CC                              | AA                 | AA               | INTERGENIC      |               |                    |                    |
| SNP_102029_A_356968 | NW_004517046.1 | scaffold1981 | 356968                  | TT                              | CC                 | CC               | INTERGENIC      |               |                    |                    |
| SNP_102030_A_356979 | NW_004517046.1 | scaffold1981 | 356979                  | CC                              | AA                 | AA               | INTERGENIC      |               |                    |                    |
| SNP_102031_A_356989 | NW_004517046.1 | scaffold1981 | 356989                  | CC                              | TT                 | TT               | INTERGENIC      |               |                    |                    |
| SNP_102032_A_357001 | NW_004517046.1 | scaffold1981 | 357001                  | CC                              | AA                 | AA               | INTERGENIC      |               |                    |                    |
| SNP_102033_A_357128 | NW_004517046.1 | scaffold1981 | 357128                  | AA                              | TT                 | TT               | INTERGENIC      |               |                    |                    |
| SNP_102036_A_359269 | NW_004517046.1 | scaffold1981 | 359269                  | AA                              | CC                 | CC               | INTERGENIC      |               |                    |                    |
| SNP_102037_A_359745 | NW_004517046.1 | scaffold1981 | 359745                  | TT                              | GG                 | GG               | INTERGENIC      |               |                    |                    |
| SNP_102038_A_366460 | NW_004517046.1 | scaffold1981 | 366460                  | GG                              | AA                 | AA               | INTERGENIC      |               |                    |                    |
| SNP_102040_A_368007 | NW_004517046.1 | scaffold1981 | 368007                  | TT                              | CC                 | CC               | INTERGENIC      |               |                    |                    |
| SNP_102042_A_370566 | NW_004517046.1 | scaffold1981 | 370566                  | CC                              | TT                 | TT               | INTERGENIC      |               |                    |                    |
| SNP_102043_A_370587 | NW_004517046.1 | scaffold1981 | 370587                  | AA                              | CC                 | CC               | INTERGENIC      |               |                    |                    |
| SNP_102044_A_371393 | NW_004517046.1 | scaffold1981 | 371393                  | GG                              | AA                 | AA               | INTERGENIC      |               |                    |                    |
| SNP_102045_A_371421 | NW_004517046.1 | scaffold1981 | 371421                  | TT                              | CC                 | CC               | INTERGENIC      |               |                    |                    |
| SNP_102047_A_372630 | NW_004517046.1 | scaffold1981 | 372630                  | CC                              | AA                 | AA               | INTERGENIC      |               |                    |                    |
| SNP_102048_A_375016 | NW_004517046.1 | scaffold1981 | 375016                  | AA                              | GG                 | GG               | INTERGENIC      |               |                    |                    |
| SNP_102049_A_375018 | NW_004517046.1 | scaffold1981 | 375018                  | TT                              | CC                 | CC               | INTERGENIC      |               |                    |                    |
| SNP_102050_A_375033 | NW_004517046.1 | scaffold1981 | 375033                  | CC                              | TT                 | TT               | INTERGENIC      |               |                    |                    |
| SNP_102051_A_376270 | NW_004517046.1 | scaffold1981 | 376270                  | TT                              | CC                 | CC               | INTERGENIC      |               |                    |                    |
| SNP_102052_A_376287 | NW_004517046.1 | scaffold1981 | 376287                  | TT                              | CC                 | CC               | INTERGENIC      |               |                    |                    |
| SNP_102053_A_376291 | NW_004517046.1 | scaffold1981 | 376291                  | CC                              | TT                 | TT               | INTERGENIC      |               |                    |                    |
| SNP_102054_A_377093 | NW_004517046.1 | scaffold1981 | 377093                  | AA                              | GG                 | GG               | INTERGENIC      |               |                    |                    |

| SNPs IDs            | Chromosome IDs | Chromosomes  | Physical positions (bp) | CDC Frontier (Reference genome) | (Pusa 1103 & HPNB) | (ILWC 46 & LPNB) | Sequence Components of genome | Gene accession IDs | Putative functions                          |
|---------------------|----------------|--------------|-------------------------|---------------------------------|--------------------|------------------|-------------------------------|--------------------|---------------------------------------------|
| SNP_102055_A_378579 | NW_004517046.1 | scaffold1981 | 378579                  | GG                              | TT                 | TT               | INTERGENIC                    |                    |                                             |
| SNP_102056_A_378603 | NW_004517046.1 | scaffold1981 | 378603                  | CC                              | TT                 | TT               | INTERGENIC                    |                    |                                             |
| SNP_102057_A_385947 | NW_004517046.1 | scaffold1981 | 385947                  | CC                              | TT                 | TT               | INTERGENIC                    |                    |                                             |
| SNP_102058_A_387273 | NW_004517046.1 | scaffold1981 | 387273                  | CC                              | TT                 | TT               | INTERGENIC                    |                    |                                             |
| SNP_102059_A_390240 | NW_004517046.1 | scaffold1981 | 390240                  | GG                              | CC                 | CC               | DRR                           | 101505990          | DEAD-box ATP-dependent RNA helicase 31-like |
| SNP_102060_A_390316 | NW_004517046.1 | scaffold1981 | 390316                  | GG                              | TT                 | TT               | DRR                           | 101505990          | DEAD-box ATP-dependent RNA helicase 31-like |
| SNP_102061_A_390453 | NW_004517046.1 | scaffold1981 | 390453                  | CC                              | TT                 | TT               | DRR                           | 101505990          | DEAD-box ATP-dependent RNA helicase 31-like |
| SNP_102062_A_390797 | NW_004517046.1 | scaffold1981 | 390797                  | AA                              | CC                 | CC               | DRR                           | 101505990          | DEAD-box ATP-dependent RNA helicase 31-like |
| SNP_102063_A_390807 | NW_004517046.1 | scaffold1981 | 390807                  | CC                              | TT                 | TT               | DRR                           | 101505990          | DEAD-box ATP-dependent RNA helicase 31-like |
| SNP_102064_A_392999 | NW_004517046.1 | scaffold1981 | 392999                  | TT                              | CC                 | CC               | INTERGENIC                    |                    |                                             |
| SNP_102065_A_393560 | NW_004517046.1 | scaffold1981 | 393560                  | TT                              | CC                 | CC               | INTRON                        | 101505990          | DEAD-box ATP-dependent RNA helicase 31-like |
| SNP_102066_A_401141 | NW_004517046.1 | scaffold1981 | 401141                  | GG                              | AA                 | AA               | INTRON                        | 101508225          | probable trehalose-phosphate phosphatase 1  |
| SNP_102067_A_401178 | NW_004517046.1 | scaffold1981 | 401178                  | TT                              | CC                 | CC               | INTRON                        | 101508225          | probable trehalose-phosphate phosphatase 1  |
| SNP_102068_A_401186 | NW_004517046.1 | scaffold1981 | 401186                  | TT                              | CC                 | CC               | INTRON                        | 101508225          | probable trehalose-phosphate phosphatase 1  |
| SNP_102069_A_401894 | NW_004517046.1 | scaffold1981 | 401894                  | AA                              | GG                 | GG               | INTRON                        | 101508225          | probable trehalose-phosphate phosphatase 1  |
| SNP_102070_A_402246 | NW_004517046.1 | scaffold1981 | 402246                  | AA                              | CC                 | CC               | INTRON                        | 101508225          | probable trehalose-phosphate phosphatase 1  |
| SNP_102071_A_408456 | NW_004517046.1 | scaffold1981 | 408456                  | AA                              | GG                 | GG               | INTERGENIC                    |                    |                                             |
| SNP_102072_A_408457 | NW_004517046.1 | scaffold1981 | 408457                  | AA                              | TT                 | TT               | INTERGENIC                    |                    |                                             |
| SNP_102073_A_408460 | NW_004517046.1 | scaffold1981 | 408460                  | TT                              | AA                 | AA               | INTERGENIC                    |                    |                                             |
| SNP_102074_A_408823 | NW_004517046.1 | scaffold1981 | 408823                  | AA                              | GG                 | GG               | INTERGENIC                    |                    |                                             |
| SNP_102075_A_411492 | NW_004517046.1 | scaffold1981 | 411492                  | CC                              | TT                 | TT               | INTERGENIC                    |                    |                                             |
| SNP_102076_A_411501 | NW_004517046.1 | scaffold1981 | 411501                  | GG                              | AA                 | AA               | INTERGENIC                    |                    |                                             |

| SNPs IDs            | Chromosome IDs | Chromosomes  | Physical positions (bp) | CDC Frontier (Reference genome) | (Pusa 1103 & HPNB) | (ILWC 46 & LPNB) | Sequence genome | Components of | Gene accession IDs | Putative functions |
|---------------------|----------------|--------------|-------------------------|---------------------------------|--------------------|------------------|-----------------|---------------|--------------------|--------------------|
| SNP_102077_A_411506 | NW_004517046.1 | scaffold1981 | 411506                  | AA                              | GG                 | GG               | INTERGENIC      |               |                    |                    |
| SNP_102078_A_418427 | NW_004517046.1 | scaffold1981 | 418427                  | TT                              | CC                 | CC               | INTERGENIC      |               |                    |                    |
| SNP_102081_A_421717 | NW_004517046.1 | scaffold1981 | 421717                  | AA                              | GG                 | GG               | INTERGENIC      |               |                    |                    |
| SNP_102082_A_423031 | NW_004517046.1 | scaffold1981 | 423031                  | CC                              | TT                 | TT               | INTERGENIC      |               |                    |                    |
| SNP_102083_A_423035 | NW_004517046.1 | scaffold1981 | 423035                  | TT                              | CC                 | CC               | INTERGENIC      |               |                    |                    |
| SNP_102084_A_423078 | NW_004517046.1 | scaffold1981 | 423078                  | GG                              | AA                 | AA               | INTERGENIC      |               |                    |                    |
| SNP_102085_A_423096 | NW_004517046.1 | scaffold1981 | 423096                  | TT                              | CC                 | CC               | INTERGENIC      |               |                    |                    |
| SNP_102086_A_423103 | NW_004517046.1 | scaffold1981 | 423103                  | AA                              | GG                 | GG               | INTERGENIC      |               |                    |                    |
| SNP_102087_A_423126 | NW_004517046.1 | scaffold1981 | 423126                  | GG                              | TT                 | TT               | INTERGENIC      |               |                    |                    |
| SNP_102088_A_431458 | NW_004517046.1 | scaffold1981 | 431458                  | AA                              | TT                 | TT               | INTERGENIC      |               |                    |                    |
| SNP_102089_A_431472 | NW_004517046.1 | scaffold1981 | 431472                  | GG                              | AA                 | AA               | INTERGENIC      |               |                    |                    |
| SNP_102090_A_5246   | NW_004517048.1 | scaffold1983 | 5246                    | GG                              | CC                 | CC               | INTERGENIC      |               |                    |                    |
| SNP_102092_A_29059  | NW_004517048.1 | scaffold1983 | 29059                   | TT                              | GG                 | GG               | INTERGENIC      |               |                    |                    |
| SNP_102093_A_48137  | NW_004517048.1 | scaffold1983 | 48137                   | TT                              | AA                 | AA               | INTERGENIC      |               |                    |                    |
| SNP_102094_A_48293  | NW_004517048.1 | scaffold1983 | 48293                   | AA                              | GG                 | GG               | INTERGENIC      |               |                    |                    |
| SNP_102095_A_62770  | NW_004517048.1 | scaffold1983 | 62770                   | TT                              | AA                 | AA               | INTERGENIC      |               |                    |                    |
| SNP_102096_A_62806  | NW_004517048.1 | scaffold1983 | 62806                   | AA                              | GG                 | GG               | INTERGENIC      |               |                    |                    |
| SNP_102097_A_62824  | NW_004517048.1 | scaffold1983 | 62824                   | TT                              | CC                 | CC               | INTERGENIC      |               |                    |                    |
| SNP_102099_A_63409  | NW_004517048.1 | scaffold1983 | 63409                   | TT                              | AA                 | AA               | INTERGENIC      |               |                    |                    |
| SNP_102100_A_63502  | NW_004517048.1 | scaffold1983 | 63502                   | TT                              | AA                 | AA               | INTERGENIC      |               |                    |                    |
| SNP_102101_A_9988   | NW_004517049.1 | scaffold1984 | 9988                    | TT                              | CC                 | CC               | INTERGENIC      |               |                    |                    |
| SNP_102102_A_30958  | NW_004517049.1 | scaffold1984 | 30958                   | TT                              | GG                 | GG               | INTERGENIC      |               |                    |                    |

| SNPs IDs            | Chromosome IDs | Chromosomes  | Physical positions (bp) | CDC Frontier (Reference genome) | (Pusa 1103 & HPNB) | (ILWC 46 & LPNB) | Sequence Components of genome | Gene accession IDs | Putative functions           |
|---------------------|----------------|--------------|-------------------------|---------------------------------|--------------------|------------------|-------------------------------|--------------------|------------------------------|
| SNP_102103_A_63840  | NW_004517049.1 | scaffold1984 | 63840                   | CC                              | TT                 | TT               | INTERGENIC                    |                    |                              |
| SNP_102104_A_68422  | NW_004517049.1 | scaffold1984 | 68422                   | AA                              | GG                 | GG               | URR                           | 101509721          | Unknown function             |
| SNP_102105_A_88473  | NW_004517049.1 | scaffold1984 | 88473                   | AA                              | GG                 | GG               | INTERGENIC                    |                    |                              |
| SNP_102106_A_88476  | NW_004517049.1 | scaffold1984 | 88476                   | TT                              | CC                 | CC               | INTERGENIC                    |                    |                              |
| SNP_102107_A_96555  | NW_004517049.1 | scaffold1984 | 96555                   | TT                              | GG                 | GG               | INTERGENIC                    |                    |                              |
| SNP_102109_A_135980 | NW_004517049.1 | scaffold1984 | 135980                  | TT                              | CC                 | CC               | INTERGENIC                    |                    |                              |
| SNP_102110_A_136144 | NW_004517049.1 | scaffold1984 | 136144                  | AA                              | TT                 | TT               | INTERGENIC                    |                    |                              |
| SNP_102111_A_138110 | NW_004517049.1 | scaffold1984 | 138110                  | TT                              | CC                 | CC               | INTERGENIC                    |                    |                              |
| SNP_102112_A_171935 | NW_004517049.1 | scaffold1984 | 171935                  | GG                              | AA                 | AA               | INTERGENIC                    |                    |                              |
| SNP_102113_A_172470 | NW_004517049.1 | scaffold1984 | 172470                  | TT                              | GG                 | GG               | INTERGENIC                    |                    |                              |
| SNP_102114_A_237150 | NW_004517049.1 | scaffold1984 | 237150                  | TT                              | AA                 | AA               | INTERGENIC                    |                    |                              |
| SNP_102115_A_243882 | NW_004517049.1 | scaffold1984 | 243882                  | TT                              | GG                 | GG               | SYNONYMOUS_CODING             | 101510042          | uncharacterized LOC101510042 |
| SNP_102116_A_243891 | NW_004517049.1 | scaffold1984 | 243891                  | AA                              | TT                 | TT               | SYNONYMOUS_CODING             | 101510042          | uncharacterized LOC101510042 |
| SNP_102117_A_243949 | NW_004517049.1 | scaffold1984 | 243949                  | TT                              | GG                 | GG               | NON_SYNONYMOUS_CODING         | 101510042          | uncharacterized LOC101510042 |
| SNP_102118_A_243972 | NW_004517049.1 | scaffold1984 | 243972                  | GG                              | TT                 | TT               | NON_SYNONYMOUS_CODING         | 101510042          | uncharacterized LOC101510042 |
| SNP_102119_A_243997 | NW_004517049.1 | scaffold1984 | 243997                  | AA                              | GG                 | GG               | NON_SYNONYMOUS_CODING         | 101510042          | uncharacterized LOC101510042 |
| SNP_102120_A_244006 | NW_004517049.1 | scaffold1984 | 244006                  | TT                              | GG                 | GG               | NON_SYNONYMOUS_CODING         | 101510042          | uncharacterized LOC101510042 |
| SNP_102121_A_244125 | NW_004517049.1 | scaffold1984 | 244125                  | TT                              | AA                 | AA               | NON_SYNONYMOUS_CODING         | 101510042          | uncharacterized LOC101510042 |
| SNP_102122_A_244344 | NW_004517049.1 | scaffold1984 | 244344                  | TT                              | GG                 | GG               | NON_SYNONYMOUS_CODING         | 101510042          | uncharacterized LOC101510042 |
| SNP_102123_A_244461 | NW_004517049.1 | scaffold1984 | 244461                  | AA                              | GG                 | GG               | NON_SYNONYMOUS_CODING         | 101510042          | uncharacterized LOC101510042 |
| SNP_102124_A_244511 | NW_004517049.1 | scaffold1984 | 244511                  | AA                              | GG                 | GG               | NON_SYNONYMOUS_CODING         | 101510042          | uncharacterized LOC101510042 |
| SNP_102125_A_244513 | NW_004517049.1 | scaffold1984 | 244513                  | AA                              | GG                 | GG               | SYNONYMOUS_CODING             | 101510042          | uncharacterized LOC101510042 |

| SNPs IDs            | Chromosome IDs | Chromosomes  | Physical positions (bp) | CDC Frontier (Reference genome) | (Pusa 1103 & HPNB) | (ILWC 46 & LPNB) | Sequence Components of genome | Gene accession IDs | Putative functions           |
|---------------------|----------------|--------------|-------------------------|---------------------------------|--------------------|------------------|-------------------------------|--------------------|------------------------------|
| SNP_102126_A_247046 | NW_004517049.1 | scaffold1984 | 247046                  | GG                              | AA                 | AA               | INTERGENIC                    |                    |                              |
| SNP_102127_A_251618 | NW_004517049.1 | scaffold1984 | 251618                  | CC                              | GG                 | GG               | INTRON                        | 101510369          | uncharacterized LOC101510369 |
| SNP_102128_A_251622 | NW_004517049.1 | scaffold1984 | 251622                  | TT                              | CC                 | CC               | INTRON                        | 101510369          | uncharacterized LOC101510369 |
| SNP_102129_A_251651 | NW_004517049.1 | scaffold1984 | 251651                  | TT                              | CC                 | CC               | INTRON                        | 101510369          | uncharacterized LOC101510369 |
| SNP_102130_A_251798 | NW_004517049.1 | scaffold1984 | 251798                  | AA                              | GG                 | GG               | INTRON                        | 101510369          | uncharacterized LOC101510369 |
| SNP_102131_A_251801 | NW_004517049.1 | scaffold1984 | 251801                  | CC                              | TT                 | TT               | INTRON                        | 101510369          | uncharacterized LOC101510369 |
| SNP_102132_A_251978 | NW_004517049.1 | scaffold1984 | 251978                  | AA                              | CC                 | CC               | INTRON                        | 101510369          | uncharacterized LOC101510369 |
| SNP_102133_A_252033 | NW_004517049.1 | scaffold1984 | 252033                  | GG                              | AA                 | AA               | INTRON                        | 101510369          | uncharacterized LOC101510369 |
| SNP_102134_A_253206 | NW_004517049.1 | scaffold1984 | 253206                  | TT                              | GG                 | GG               | INTRON                        | 101510369          | uncharacterized LOC101510369 |
| SNP_102135_A_253263 | NW_004517049.1 | scaffold1984 | 253263                  | GG                              | AA                 | AA               | INTRON                        | 101510369          | uncharacterized LOC101510369 |
| SNP_102136_A_253317 | NW_004517049.1 | scaffold1984 | 253317                  | AA                              | GG                 | GG               | INTRON                        | 101510369          | uncharacterized LOC101510369 |
| SNP_102137_A_253565 | NW_004517049.1 | scaffold1984 | 253565                  | TT                              | AA                 | AA               | INTRON                        | 101510369          | uncharacterized LOC101510369 |
| SNP_102138_A_253837 | NW_004517049.1 | scaffold1984 | 253837                  | GG                              | CC                 | CC               | SYNONYMOUS_CODING             | 101510369          | uncharacterized LOC101510369 |
| SNP_102139_A_255335 | NW_004517049.1 | scaffold1984 | 255335                  | TT                              | CC                 | CC               | NON_SYNONYMOUS_CODING         | 101510369          | uncharacterized LOC101510369 |
| SNP_102140_A_255673 | NW_004517049.1 | scaffold1984 | 255673                  | AA                              | GG                 | GG               | NON_SYNONYMOUS_CODING         | 101510369          | uncharacterized LOC101510369 |
| SNP_102141_A_255682 | NW_004517049.1 | scaffold1984 | 255682                  | TT                              | GG                 | GG               | NON_SYNONYMOUS_CODING         | 101510369          | uncharacterized LOC101510369 |
| SNP_102142_A_255706 | NW_004517049.1 | scaffold1984 | 255706                  | AA                              | CC                 | CC               | NON_SYNONYMOUS_CODING         | 101510369          | uncharacterized LOC101510369 |
| SNP_102143_A_255749 | NW_004517049.1 | scaffold1984 | 255749                  | TT                              | CC                 | CC               | SYNONYMOUS_CODING             | 101510369          | uncharacterized LOC101510369 |
| SNP_102145_A_323144 | NW_004517049.1 | scaffold1984 | 323144                  | TT                              | AA                 | AA               | INTERGENIC                    |                    |                              |
| SNP_102146_A_323400 | NW_004517049.1 | scaffold1984 | 323400                  | AA                              | GG                 | GG               | INTERGENIC                    |                    |                              |
| SNP_102147_A_323527 | NW_004517049.1 | scaffold1984 | 323527                  | TT                              | AA                 | AA               | INTERGENIC                    |                    |                              |
| SNP_102148_A_323575 | NW_004517049.1 | scaffold1984 | 323575                  | CC                              | TT                 | TT               | INTERGENIC                    |                    |                              |

| SNPs IDs            | Chromosome IDs | Chromosomes  | Physical positions (bp) | CDC Frontier (Reference genome) | (Pusa 1103 & HPNB) | (ILWC 46 & LPNB) | Sequence genome | Components of | Gene accession IDs | Putative functions |
|---------------------|----------------|--------------|-------------------------|---------------------------------|--------------------|------------------|-----------------|---------------|--------------------|--------------------|
| SNP_102149_A_323593 | NW_004517049.1 | scaffold1984 | 323593                  | TT                              | CC                 | CC               | INTERGENIC      |               |                    |                    |
| SNP_102150_A_323614 | NW_004517049.1 | scaffold1984 | 323614                  | CC                              | TT                 | TT               | INTERGENIC      |               |                    |                    |
| SNP_102152_A_323802 | NW_004517049.1 | scaffold1984 | 323802                  | TT                              | CC                 | CC               | INTERGENIC      |               |                    |                    |
| SNP_102153_A_323805 | NW_004517049.1 | scaffold1984 | 323805                  | AA                              | GG                 | GG               | INTERGENIC      |               |                    |                    |
| SNP_102154_A_323847 | NW_004517049.1 | scaffold1984 | 323847                  | AA                              | GG                 | GG               | INTERGENIC      |               |                    |                    |
| SNP_102155_A_323868 | NW_004517049.1 | scaffold1984 | 323868                  | CC                              | TT                 | TT               | INTERGENIC      |               |                    |                    |
| SNP_102156_A_325206 | NW_004517049.1 | scaffold1984 | 325206                  | GG                              | AA                 | AA               | INTERGENIC      |               |                    |                    |
| SNP_102157_A_325320 | NW_004517049.1 | scaffold1984 | 325320                  | AA                              | GG                 | GG               | INTERGENIC      |               |                    |                    |
| SNP_102158_A_325346 | NW_004517049.1 | scaffold1984 | 325346                  | AA                              | GG                 | GG               | INTERGENIC      |               |                    |                    |
| SNP_102159_A_325392 | NW_004517049.1 | scaffold1984 | 325392                  | TT                              | CC                 | CC               | INTERGENIC      |               |                    |                    |
| SNP_102160_A_325529 | NW_004517049.1 | scaffold1984 | 325529                  | TT                              | AA                 | AA               | INTERGENIC      |               |                    |                    |
| SNP_102161_A_325550 | NW_004517049.1 | scaffold1984 | 325550                  | TT                              | CC                 | CC               | INTERGENIC      |               |                    |                    |
| SNP_102162_A_325559 | NW_004517049.1 | scaffold1984 | 325559                  | TT                              | CC                 | CC               | INTERGENIC      |               |                    |                    |
| SNP_102163_A_325586 | NW_004517049.1 | scaffold1984 | 325586                  | GG                              | AA                 | AA               | INTERGENIC      |               |                    |                    |
| SNP_102164_A_325685 | NW_004517049.1 | scaffold1984 | 325685                  | GG                              | AA                 | AA               | INTERGENIC      |               |                    |                    |
| SNP_102165_A_325713 | NW_004517049.1 | scaffold1984 | 325713                  | GG                              | AA                 | AA               | INTERGENIC      |               |                    |                    |
| SNP_102166_A_325744 | NW_004517049.1 | scaffold1984 | 325744                  | TT                              | AA                 | AA               | INTERGENIC      |               |                    |                    |
| SNP_102167_A_325754 | NW_004517049.1 | scaffold1984 | 325754                  | AA                              | GG                 | GG               | INTERGENIC      |               |                    |                    |
| SNP_102168_A_325761 | NW_004517049.1 | scaffold1984 | 325761                  | AA                              | CC                 | CC               | INTERGENIC      |               |                    |                    |
| SNP_102169_A_325784 | NW_004517049.1 | scaffold1984 | 325784                  | GG                              | AA                 | AA               | INTERGENIC      |               |                    |                    |
| SNP_102170_A_325790 | NW_004517049.1 | scaffold1984 | 325790                  | GG                              | AA                 | AA               | INTERGENIC      |               |                    |                    |
| SNP_102171_A_325808 | NW_004517049.1 | scaffold1984 | 325808                  | CC                              | TT                 | TT               | INTERGENIC      |               |                    |                    |

| SNPs IDs            | Chromosome IDs | Chromosomes  | Physical positions (bp) | CDC Frontier (Reference genome) | (Pusa 1103 & HPNB) | (ILWC 46 & LPNB) | Sequence genome | Components of | Gene accession IDs | Putative functions |
|---------------------|----------------|--------------|-------------------------|---------------------------------|--------------------|------------------|-----------------|---------------|--------------------|--------------------|
| SNP_102172_A_325871 | NW_004517049.1 | scaffold1984 | 325871                  | AA                              | GG                 | GG               | INTERGENIC      |               |                    |                    |
| SNP_102173_A_337904 | NW_004517049.1 | scaffold1984 | 337904                  | CC                              | TT                 | TT               | INTERGENIC      |               |                    |                    |
| SNP_102174_A_342607 | NW_004517049.1 | scaffold1984 | 342607                  | CC                              | AA                 | AA               | INTERGENIC      |               |                    |                    |
| SNP_102175_A_351213 | NW_004517049.1 | scaffold1984 | 351213                  | CC                              | TT                 | TT               | INTERGENIC      |               |                    |                    |
| SNP_102176_A_359332 | NW_004517049.1 | scaffold1984 | 359332                  | TT                              | CC                 | CC               | INTERGENIC      |               |                    |                    |
| SNP_102177_A_359978 | NW_004517049.1 | scaffold1984 | 359978                  | AA                              | GG                 | GG               | INTERGENIC      |               |                    |                    |
| SNP_102178_A_360007 | NW_004517049.1 | scaffold1984 | 360007                  | AA                              | GG                 | GG               | INTERGENIC      |               |                    |                    |
| SNP_102179_A_360316 | NW_004517049.1 | scaffold1984 | 360316                  | AA                              | GG                 | GG               | INTERGENIC      |               |                    |                    |
| SNP_102180_A_362646 | NW_004517049.1 | scaffold1984 | 362646                  | AA                              | CC                 | CC               | INTERGENIC      |               |                    |                    |
| SNP_102181_A_363077 | NW_004517049.1 | scaffold1984 | 363077                  | CC                              | TT                 | TT               | INTERGENIC      |               |                    |                    |
| SNP_102182_A_363281 | NW_004517049.1 | scaffold1984 | 363281                  | TT                              | CC                 | CC               | INTERGENIC      |               |                    |                    |
| SNP_102183_A_378057 | NW_004517049.1 | scaffold1984 | 378057                  | TT                              | AA                 | AA               | INTERGENIC      |               |                    |                    |
| SNP_102184_A_384374 | NW_004517049.1 | scaffold1984 | 384374                  | CC                              | AA                 | AA               | INTERGENIC      |               |                    |                    |
| SNP_102185_A_384375 | NW_004517049.1 | scaffold1984 | 384375                  | AA                              | TT                 | TT               | INTERGENIC      |               |                    |                    |
| SNP_102186_A_384722 | NW_004517049.1 | scaffold1984 | 384722                  | AA                              | GG                 | GG               | INTERGENIC      |               |                    |                    |
| SNP_102187_A_384744 | NW_004517049.1 | scaffold1984 | 384744                  | TT                              | GG                 | GG               | INTERGENIC      |               |                    |                    |
| SNP_102188_A_384861 | NW_004517049.1 | scaffold1984 | 384861                  | AA                              | CC                 | CC               | INTERGENIC      |               |                    |                    |
| SNP_102189_A_386604 | NW_004517049.1 | scaffold1984 | 386604                  | AA                              | TT                 | TT               | INTERGENIC      |               |                    |                    |
| SNP_102191_A_386714 | NW_004517049.1 | scaffold1984 | 386714                  | GG                              | AA                 | AA               | INTERGENIC      |               |                    |                    |
| SNP_102192_A_386835 | NW_004517049.1 | scaffold1984 | 386835                  | AA                              | GG                 | GG               | INTERGENIC      |               |                    |                    |
| SNP_102193_A_386943 | NW_004517049.1 | scaffold1984 | 386943                  | TT                              | CC                 | CC               | INTERGENIC      |               |                    |                    |
| SNP_102194_A_386963 | NW_004517049.1 | scaffold1984 | 386963                  | CC                              | TT                 | TT               | INTERGENIC      |               |                    |                    |

| SNPs IDs            | Chromosome IDs | Chromosomes  | Physical positions (bp) | CDC Frontier (Reference genome) | (Pusa 1103 & HPNB) | (ILWC 46 & LPNB) | Sequence genome | Components of | Gene accession IDs | Putative functions |
|---------------------|----------------|--------------|-------------------------|---------------------------------|--------------------|------------------|-----------------|---------------|--------------------|--------------------|
| SNP_102195_A_387057 | NW_004517049.1 | scaffold1984 | 387057                  | GG                              | AA                 | AA               | INTERGENIC      |               |                    |                    |
| SNP_102196_A_387105 | NW_004517049.1 | scaffold1984 | 387105                  | CC                              | TT                 | TT               | INTERGENIC      |               |                    |                    |
| SNP_102197_A_387139 | NW_004517049.1 | scaffold1984 | 387139                  | TT                              | CC                 | CC               | INTERGENIC      |               |                    |                    |
| SNP_102198_A_387239 | NW_004517049.1 | scaffold1984 | 387239                  | TT                              | AA                 | AA               | INTERGENIC      |               |                    |                    |
| SNP_102200_A_29943  | NW_004517050.1 | scaffold1985 | 29943                   | TT                              | GG                 | GG               | INTERGENIC      |               |                    |                    |
| SNP_102201_A_61636  | NW_004517050.1 | scaffold1985 | 61636                   | GG                              | AA                 | AA               | INTERGENIC      |               |                    |                    |
| SNP_102202_A_109538 | NW_004517050.1 | scaffold1985 | 109538                  | AA                              | GG                 | GG               | INTERGENIC      |               |                    |                    |
| SNP_102203_A_109805 | NW_004517050.1 | scaffold1985 | 109805                  | AA                              | GG                 | GG               | INTERGENIC      |               |                    |                    |
| SNP_102204_A_109834 | NW_004517050.1 | scaffold1985 | 109834                  | AA                              | GG                 | GG               | INTERGENIC      |               |                    |                    |
| SNP_102205_A_110115 | NW_004517050.1 | scaffold1985 | 110115                  | AA                              | TT                 | TT               | INTERGENIC      |               |                    |                    |
| SNP_102206_A_110299 | NW_004517050.1 | scaffold1985 | 110299                  | TT                              | AA                 | AA               | INTERGENIC      |               |                    |                    |
| SNP_102207_A_110305 | NW_004517050.1 | scaffold1985 | 110305                  | AA                              | GG                 | GG               | INTERGENIC      |               |                    |                    |
| SNP_102208_A_142093 | NW_004517050.1 | scaffold1985 | 142093                  | TT                              | CC                 | CC               | INTERGENIC      |               |                    |                    |
| SNP_102209_A_3744   | NW_004517052.1 | scaffold1987 | 3744                    | TT                              | CC                 | CC               | INTERGENIC      |               |                    |                    |
| SNP_102210_A_3745   | NW_004517052.1 | scaffold1987 | 3745                    | TT                              | AA                 | AA               | INTERGENIC      |               |                    |                    |
| SNP_102211_A_4737   | NW_004517053.1 | scaffold1988 | 4737                    | TT                              | CC                 | CC               | INTERGENIC      |               |                    |                    |
| SNP_102212_A_4794   | NW_004517053.1 | scaffold1988 | 4794                    | AA                              | GG                 | GG               | INTERGENIC      |               |                    |                    |
| SNP_102213_A_4798   | NW_004517053.1 | scaffold1988 | 4798                    | GG                              | CC                 | CC               | INTERGENIC      |               |                    |                    |
| SNP_102214_A_4965   | NW_004517053.1 | scaffold1988 | 4965                    | CC                              | GG                 | GG               | INTERGENIC      |               |                    |                    |
| SNP_102215_A_4988   | NW_004517053.1 | scaffold1988 | 4988                    | GG                              | AA                 | AA               | INTERGENIC      |               |                    |                    |
| SNP_102216_A_5207   | NW_004517053.1 | scaffold1988 | 5207                    | CC                              | TT                 | TT               | INTERGENIC      |               |                    |                    |
| SNP_102217_A_5307   | NW_004517053.1 | scaffold1988 | 5307                    | AA                              | GG                 | GG               | INTERGENIC      |               |                    |                    |



| SNPs IDs            | Chromosome IDs | Chromosomes  | Physical positions (bp) | CDC Frontier (Reference genome) | (Pusa 1103 & HPNB) | (ILWC 46 & LPNB) | Sequence genome | Components of | Gene accession IDs | Putative functions |
|---------------------|----------------|--------------|-------------------------|---------------------------------|--------------------|------------------|-----------------|---------------|--------------------|--------------------|
| SNP_102218_A_7515   | NW_004517053.1 | scaffold1988 | 7515                    | TT                              | AA                 | AA               | INTERGENIC      |               |                    |                    |
| SNP_102219_A_7756   | NW_004517053.1 | scaffold1988 | 7756                    | TT                              | GG                 | GG               | INTERGENIC      |               |                    |                    |
| SNP_102221_A_13837  | NW_004517053.1 | scaffold1988 | 13837                   | TT                              | CC                 | CC               | INTERGENIC      |               |                    |                    |
| SNP_102222_A_14100  | NW_004517053.1 | scaffold1988 | 14100                   | CC                              | TT                 | TT               | INTERGENIC      |               |                    |                    |
| SNP_102223_A_4399   | NW_004517055.1 | scaffold1990 | 4399                    | AA                              | GG                 | GG               | INTERGENIC      |               |                    |                    |
| SNP_102224_A_4406   | NW_004517055.1 | scaffold1990 | 4406                    | TT                              | CC                 | CC               | INTERGENIC      |               |                    |                    |
| SNP_102225_A_4473   | NW_004517055.1 | scaffold1990 | 4473                    | AA                              | GG                 | GG               | INTERGENIC      |               |                    |                    |
| SNP_102227_A_22655  | NW_004517055.1 | scaffold1990 | 22655                   | CC                              | TT                 | TT               | INTERGENIC      |               |                    |                    |
| SNP_102228_A_92472  | NW_004517056.1 | scaffold1991 | 92472                   | AA                              | TT                 | TT               | URR             | 101513686     | Unknown function   |                    |
| SNP_102229_A_92475  | NW_004517056.1 | scaffold1991 | 92475                   | TT                              | AA                 | AA               | URR             | 101513686     | Unknown function   |                    |
| SNP_102230_A_100123 | NW_004517056.1 | scaffold1991 | 100123                  | TT                              | CC                 | CC               | INTERGENIC      |               |                    |                    |
| SNP_102231_A_113487 | NW_004517056.1 | scaffold1991 | 113487                  | CC                              | AA                 | AA               | INTERGENIC      |               |                    |                    |
| SNP_102232_A_113518 | NW_004517056.1 | scaffold1991 | 113518                  | AA                              | GG                 | GG               | INTERGENIC      |               |                    |                    |
| SNP_102233_A_113915 | NW_004517056.1 | scaffold1991 | 113915                  | TT                              | CC                 | CC               | INTERGENIC      |               |                    |                    |
| SNP_102234_A_113975 | NW_004517056.1 | scaffold1991 | 113975                  | GG                              | AA                 | AA               | INTERGENIC      |               |                    |                    |
| SNP_102235_A_113988 | NW_004517056.1 | scaffold1991 | 113988                  | AA                              | GG                 | GG               | INTERGENIC      |               |                    |                    |
| SNP_102236_A_113998 | NW_004517056.1 | scaffold1991 | 113998                  | GG                              | AA                 | AA               | INTERGENIC      |               |                    |                    |
| SNP_102237_A_114003 | NW_004517056.1 | scaffold1991 | 114003                  | CC                              | TT                 | TT               | INTERGENIC      |               |                    |                    |
| SNP_102238_A_114007 | NW_004517056.1 | scaffold1991 | 114007                  | TT                              | CC                 | CC               | INTERGENIC      |               |                    |                    |
| SNP_102239_A_114008 | NW_004517056.1 | scaffold1991 | 114008                  | CC                              | TT                 | TT               | INTERGENIC      |               |                    |                    |
| SNP_102240_A_632    | NW_004517061.1 | scaffold1996 | 632                     | GG                              | AA                 | AA               | INTERGENIC      |               |                    |                    |
| SNP_102241_A_744    | NW_004517061.1 | scaffold1996 | 744                     | GG                              | AA                 | AA               | INTERGENIC      |               |                    |                    |

| SNPs IDs           | Chromosome IDs | Chromosomes  | Physical positions (bp) | CDC Frontier (Reference genome) | (Pusa 1103 & HPNB) | (ILWC 46 & LPNB) | Sequence Components of genome | Gene accession IDs | Putative functions           |
|--------------------|----------------|--------------|-------------------------|---------------------------------|--------------------|------------------|-------------------------------|--------------------|------------------------------|
| SNP_102242_A_895   | NW_004517061.1 | scaffold1996 | 895                     | CC                              | TT                 | TT               | INTERGENIC                    |                    |                              |
| SNP_102243_A_1036  | NW_004517061.1 | scaffold1996 | 1036                    | CC                              | TT                 | TT               | INTERGENIC                    |                    |                              |
| SNP_102244_A_1039  | NW_004517061.1 | scaffold1996 | 1039                    | CC                              | TT                 | TT               | INTERGENIC                    |                    |                              |
| SNP_102245_A_1041  | NW_004517061.1 | scaffold1996 | 1041                    | GG                              | AA                 | AA               | INTERGENIC                    |                    |                              |
| SNP_102246_A_1057  | NW_004517061.1 | scaffold1996 | 1057                    | GG                              | AA                 | AA               | INTERGENIC                    |                    |                              |
| SNP_102247_A_1084  | NW_004517061.1 | scaffold1996 | 1084                    | CC                              | TT                 | TT               | INTERGENIC                    |                    |                              |
| SNP_102248_A_1099  | NW_004517061.1 | scaffold1996 | 1099                    | CC                              | AA                 | AA               | INTERGENIC                    |                    |                              |
| SNP_102250_A_5502  | NW_004517061.1 | scaffold1996 | 5502                    | GG                              | AA                 | AA               | INTERGENIC                    |                    |                              |
| SNP_102251_A_5518  | NW_004517061.1 | scaffold1996 | 5518                    | GG                              | TT                 | TT               | INTERGENIC                    |                    |                              |
| SNP_102252_A_5563  | NW_004517061.1 | scaffold1996 | 5563                    | AA                              | GG                 | GG               | INTERGENIC                    |                    |                              |
| SNP_102253_A_5631  | NW_004517061.1 | scaffold1996 | 5631                    | CC                              | TT                 | TT               | INTERGENIC                    |                    |                              |
| SNP_102255_A_5863  | NW_004517061.1 | scaffold1996 | 5863                    | GG                              | AA                 | AA               | INTERGENIC                    |                    |                              |
| SNP_102256_A_5866  | NW_004517061.1 | scaffold1996 | 5866                    | TT                              | CC                 | CC               | INTERGENIC                    |                    |                              |
| SNP_102257_A_5902  | NW_004517061.1 | scaffold1996 | 5902                    | TT                              | AA                 | AA               | INTERGENIC                    |                    |                              |
| SNP_102258_A_5947  | NW_004517061.1 | scaffold1996 | 5947                    | CC                              | TT                 | TT               | INTERGENIC                    |                    |                              |
| SNP_102260_A_6048  | NW_004517061.1 | scaffold1996 | 6048                    | GG                              | AA                 | AA               | INTERGENIC                    |                    |                              |
| SNP_102261_A_6059  | NW_004517061.1 | scaffold1996 | 6059                    | CC                              | TT                 | TT               | INTERGENIC                    |                    |                              |
| SNP_102262_A_6074  | NW_004517061.1 | scaffold1996 | 6074                    | AA                              | GG                 | GG               | INTERGENIC                    |                    |                              |
| SNP_102263_A_15196 | NW_004517062.1 | scaffold1997 | 15196                   | TT                              | GG                 | GG               | DRR                           | 101515006          | uncharacterized LOC101515006 |
| SNP_102264_A_15572 | NW_004517062.1 | scaffold1997 | 15572                   | TT                              | CC                 | CC               | INTERGENIC                    |                    |                              |
| SNP_102265_A_22262 | NW_004517062.1 | scaffold1997 | 22262                   | CC                              | TT                 | TT               | URR                           | 101515333          | uncharacterized LOC101515333 |
| SNP_102266_A_3035  | NW_004517063.1 | scaffold1999 | 3035                    | GG                              | AA                 | AA               | INTERGENIC                    |                    |                              |

| SNPs IDs           | Chromosome IDs | Chromosomes  | Physical positions (bp) | CDC Frontier (Reference genome) | (Pusa 1103 & HPNB) | (ILWC 46 & LPNB) | Sequence genome | Components of | Gene accession IDs | Putative functions |
|--------------------|----------------|--------------|-------------------------|---------------------------------|--------------------|------------------|-----------------|---------------|--------------------|--------------------|
| SNP_102267_A_3092  | NW_004517063.1 | scaffold1999 | 3092                    | TT                              | CC                 | CC               | INTERGENIC      |               |                    |                    |
| SNP_102268_A_4026  | NW_004517063.1 | scaffold1999 | 4026                    | TT                              | CC                 | CC               | INTERGENIC      |               |                    |                    |
| SNP_102269_A_7088  | NW_004517063.1 | scaffold1999 | 7088                    | GG                              | AA                 | AA               | INTERGENIC      |               |                    |                    |
| SNP_102270_A_7310  | NW_004517063.1 | scaffold1999 | 7310                    | CC                              | AA                 | AA               | INTERGENIC      |               |                    |                    |
| SNP_102272_A_9986  | NW_004517063.1 | scaffold1999 | 9986                    | CC                              | TT                 | TT               | INTERGENIC      |               |                    |                    |
| SNP_102274_A_25076 | NW_004517063.1 | scaffold1999 | 25076                   | TT                              | CC                 | CC               | INTERGENIC      |               |                    |                    |
| SNP_102275_A_25728 | NW_004517063.1 | scaffold1999 | 25728                   | AA                              | TT                 | TT               | INTERGENIC      |               |                    |                    |
| SNP_102276_A_25931 | NW_004517063.1 | scaffold1999 | 25931                   | GG                              | TT                 | TT               | INTERGENIC      |               |                    |                    |
| SNP_102277_A_26052 | NW_004517063.1 | scaffold1999 | 26052                   | TT                              | AA                 | AA               | INTERGENIC      |               |                    |                    |
| SNP_102278_A_27769 | NW_004517063.1 | scaffold1999 | 27769                   | GG                              | AA                 | AA               | INTERGENIC      |               |                    |                    |
| SNP_102280_A_28230 | NW_004517063.1 | scaffold1999 | 28230                   | GG                              | AA                 | AA               | INTERGENIC      |               |                    |                    |
| SNP_102283_A_29969 | NW_004517063.1 | scaffold1999 | 29969                   | AA                              | GG                 | GG               | INTERGENIC      |               |                    |                    |
| SNP_102286_A_30133 | NW_004517063.1 | scaffold1999 | 30133                   | CC                              | TT                 | TT               | INTERGENIC      |               |                    |                    |
| SNP_102287_A_30249 | NW_004517063.1 | scaffold1999 | 30249                   | GG                              | AA                 | AA               | INTERGENIC      |               |                    |                    |
| SNP_102288_A_30319 | NW_004517063.1 | scaffold1999 | 30319                   | TT                              | AA                 | AA               | INTERGENIC      |               |                    |                    |
| SNP_102289_A_30490 | NW_004517063.1 | scaffold1999 | 30490                   | CC                              | TT                 | TT               | INTERGENIC      |               |                    |                    |
| SNP_102290_A_30698 | NW_004517063.1 | scaffold1999 | 30698                   | TT                              | AA                 | AA               | INTERGENIC      |               |                    |                    |
| SNP_102291_A_30719 | NW_004517063.1 | scaffold1999 | 30719                   | AA                              | GG                 | GG               | INTERGENIC      |               |                    |                    |
| SNP_102292_A_30741 | NW_004517063.1 | scaffold1999 | 30741                   | CC                              | TT                 | TT               | INTERGENIC      |               |                    |                    |
| SNP_102293_A_31052 | NW_004517063.1 | scaffold1999 | 31052                   | CC                              | AA                 | AA               | INTERGENIC      |               |                    |                    |
| SNP_102294_A_31134 | NW_004517063.1 | scaffold1999 | 31134                   | AA                              | TT                 | TT               | INTERGENIC      |               |                    |                    |
| SNP_102295_A_31258 | NW_004517063.1 | scaffold1999 | 31258                   | GG                              | AA                 | AA               | INTERGENIC      |               |                    |                    |

| SNPs IDs           | Chromosome IDs | Chromosomes  | Physical positions (bp) | CDC Frontier (Reference genome) | (Pusa 1103 & HPNB) | (ILWC 46 & LPNB) | Sequence genome | Components of | Gene accession IDs | Putative functions |
|--------------------|----------------|--------------|-------------------------|---------------------------------|--------------------|------------------|-----------------|---------------|--------------------|--------------------|
| SNP_102296_A_31902 | NW_004517063.1 | scaffold1999 | 31902                   | CC                              | GG                 | GG               | INTERGENIC      |               |                    |                    |
| SNP_102297_A_31963 | NW_004517063.1 | scaffold1999 | 31963                   | CC                              | TT                 | TT               | INTERGENIC      |               |                    |                    |
| SNP_102298_A_31975 | NW_004517063.1 | scaffold1999 | 31975                   | CC                              | AA                 | AA               | INTERGENIC      |               |                    |                    |
| SNP_102299_A_32111 | NW_004517063.1 | scaffold1999 | 32111                   | TT                              | AA                 | AA               | INTERGENIC      |               |                    |                    |
| SNP_102300_A_32312 | NW_004517063.1 | scaffold1999 | 32312                   | TT                              | CC                 | CC               | INTERGENIC      |               |                    |                    |
| SNP_102301_A_32326 | NW_004517063.1 | scaffold1999 | 32326                   | CC                              | GG                 | GG               | INTERGENIC      |               |                    |                    |
| SNP_102302_A_32374 | NW_004517063.1 | scaffold1999 | 32374                   | GG                              | AA                 | AA               | INTERGENIC      |               |                    |                    |
| SNP_102303_A_32470 | NW_004517063.1 | scaffold1999 | 32470                   | AA                              | GG                 | GG               | INTERGENIC      |               |                    |                    |
| SNP_102304_A_32503 | NW_004517063.1 | scaffold1999 | 32503                   | TT                              | GG                 | GG               | INTERGENIC      |               |                    |                    |
| SNP_102305_A_32602 | NW_004517063.1 | scaffold1999 | 32602                   | GG                              | TT                 | TT               | INTERGENIC      |               |                    |                    |
| SNP_102306_A_1127  | NW_004517064.1 | scaffold2000 | 1127                    | CC                              | TT                 | TT               | INTERGENIC      |               |                    |                    |
| SNP_102307_A_1140  | NW_004517064.1 | scaffold2000 | 1140                    | TT                              | CC                 | CC               | INTERGENIC      |               |                    |                    |
| SNP_102308_A_1164  | NW_004517064.1 | scaffold2000 | 1164                    | GG                              | AA                 | AA               | INTERGENIC      |               |                    |                    |
| SNP_102309_A_1245  | NW_004517064.1 | scaffold2000 | 1245                    | AA                              | GG                 | GG               | INTERGENIC      |               |                    |                    |
| SNP_102310_A_1376  | NW_004517064.1 | scaffold2000 | 1376                    | CC                              | TT                 | TT               | INTERGENIC      |               |                    |                    |
| SNP_102311_A_1444  | NW_004517064.1 | scaffold2000 | 1444                    | GG                              | AA                 | AA               | INTERGENIC      |               |                    |                    |
| SNP_102312_A_1523  | NW_004517064.1 | scaffold2000 | 1523                    | CC                              | GG                 | GG               | INTERGENIC      |               |                    |                    |
| SNP_102314_A_1565  | NW_004517064.1 | scaffold2000 | 1565                    | AA                              | GG                 | GG               | INTERGENIC      |               |                    |                    |
| SNP_102315_A_1606  | NW_004517064.1 | scaffold2000 | 1606                    | AA                              | CC                 | CC               | INTERGENIC      |               |                    |                    |
| SNP_102316_A_1613  | NW_004517064.1 | scaffold2000 | 1613                    | TT                              | GG                 | GG               | INTERGENIC      |               |                    |                    |
| SNP_102317_A_1625  | NW_004517064.1 | scaffold2000 | 1625                    | CC                              | AA                 | AA               | INTERGENIC      |               |                    |                    |
| SNP_102318_A_1627  | NW_004517064.1 | scaffold2000 | 1627                    | AA                              | TT                 | TT               | INTERGENIC      |               |                    |                    |

| SNPs IDs          | Chromosome IDs | Chromosomes  | Physical positions (bp) | CDC Frontier (Reference genome) | (Pusa 1103 & HPNB) | (ILWC 46 & LPNB) | Sequence genome | Components of | Gene accession IDs | Putative functions |
|-------------------|----------------|--------------|-------------------------|---------------------------------|--------------------|------------------|-----------------|---------------|--------------------|--------------------|
| SNP_102319_A_1671 | NW_004517064.1 | scaffold2000 | 1671                    | TT                              | GG                 | GG               | INTERGENIC      |               |                    |                    |
| SNP_102320_A_1686 | NW_004517064.1 | scaffold2000 | 1686                    | GG                              | CC                 | CC               | INTERGENIC      |               |                    |                    |
| SNP_102321_A_1709 | NW_004517064.1 | scaffold2000 | 1709                    | GG                              | AA                 | AA               | INTERGENIC      |               |                    |                    |
| SNP_102322_A_1746 | NW_004517064.1 | scaffold2000 | 1746                    | TT                              | CC                 | CC               | INTERGENIC      |               |                    |                    |
| SNP_102323_A_1750 | NW_004517064.1 | scaffold2000 | 1750                    | TT                              | AA                 | AA               | INTERGENIC      |               |                    |                    |
| SNP_102324_A_1754 | NW_004517064.1 | scaffold2000 | 1754                    | TT                              | AA                 | AA               | INTERGENIC      |               |                    |                    |
| SNP_102325_A_1765 | NW_004517064.1 | scaffold2000 | 1765                    | TT                              | CC                 | CC               | INTERGENIC      |               |                    |                    |
| SNP_102326_A_2158 | NW_004517064.1 | scaffold2000 | 2158                    | GG                              | TT                 | TT               | INTERGENIC      |               |                    |                    |
| SNP_102327_A_2163 | NW_004517064.1 | scaffold2000 | 2163                    | CC                              | AA                 | AA               | INTERGENIC      |               |                    |                    |
| SNP_102328_A_2251 | NW_004517064.1 | scaffold2000 | 2251                    | TT                              | AA                 | AA               | INTERGENIC      |               |                    |                    |
| SNP_102329_A_2351 | NW_004517064.1 | scaffold2000 | 2351                    | TT                              | AA                 | AA               | INTERGENIC      |               |                    |                    |
| SNP_102330_A_2382 | NW_004517064.1 | scaffold2000 | 2382                    | CC                              | AA                 | AA               | INTERGENIC      |               |                    |                    |
| SNP_102331_A_2396 | NW_004517064.1 | scaffold2000 | 2396                    | AA                              | GG                 | GG               | INTERGENIC      |               |                    |                    |
| SNP_102332_A_2418 | NW_004517064.1 | scaffold2000 | 2418                    | GG                              | TT                 | TT               | INTERGENIC      |               |                    |                    |
| SNP_102333_A_2530 | NW_004517064.1 | scaffold2000 | 2530                    | AA                              | CC                 | CC               | INTERGENIC      |               |                    |                    |
| SNP_102334_A_2557 | NW_004517064.1 | scaffold2000 | 2557                    | AA                              | GG                 | GG               | INTERGENIC      |               |                    |                    |
| SNP_102335_A_2560 | NW_004517064.1 | scaffold2000 | 2560                    | CC                              | AA                 | AA               | INTERGENIC      |               |                    |                    |
| SNP_102336_A_2577 | NW_004517064.1 | scaffold2000 | 2577                    | GG                              | TT                 | TT               | INTERGENIC      |               |                    |                    |
| SNP_102337_A_2580 | NW_004517064.1 | scaffold2000 | 2580                    | AA                              | TT                 | TT               | INTERGENIC      |               |                    |                    |
| SNP_102338_A_2641 | NW_004517064.1 | scaffold2000 | 2641                    | GG                              | CC                 | CC               | INTERGENIC      |               |                    |                    |
| SNP_102339_A_2678 | NW_004517064.1 | scaffold2000 | 2678                    | CC                              | AA                 | AA               | INTERGENIC      |               |                    |                    |
| SNP_102340_A_2730 | NW_004517064.1 | scaffold2000 | 2730                    | AA                              | TT                 | TT               | INTERGENIC      |               |                    |                    |

| SNPs IDs           | Chromosome IDs | Chromosomes  | Physical positions (bp) | CDC Frontier (Reference genome) | (Pusa 1103 & HPNB) | (ILWC 46 & LPNB) | Sequence genome | Components of | Gene accession IDs | Putative functions |
|--------------------|----------------|--------------|-------------------------|---------------------------------|--------------------|------------------|-----------------|---------------|--------------------|--------------------|
| SNP_102341_A_2811  | NW_004517064.1 | scaffold2000 | 2811                    | AA                              | CC                 | CC               | INTERGENIC      |               |                    |                    |
| SNP_102342_A_2852  | NW_004517064.1 | scaffold2000 | 2852                    | GG                              | AA                 | AA               | INTERGENIC      |               |                    |                    |
| SNP_102343_A_2878  | NW_004517064.1 | scaffold2000 | 2878                    | CC                              | AA                 | AA               | INTERGENIC      |               |                    |                    |
| SNP_102344_A_2917  | NW_004517064.1 | scaffold2000 | 2917                    | AA                              | GG                 | GG               | INTERGENIC      |               |                    |                    |
| SNP_102345_A_2922  | NW_004517064.1 | scaffold2000 | 2922                    | TT                              | AA                 | AA               | INTERGENIC      |               |                    |                    |
| SNP_102346_A_2937  | NW_004517064.1 | scaffold2000 | 2937                    | CC                              | TT                 | TT               | INTERGENIC      |               |                    |                    |
| SNP_102347_A_2944  | NW_004517064.1 | scaffold2000 | 2944                    | TT                              | AA                 | AA               | INTERGENIC      |               |                    |                    |
| SNP_102348_A_2965  | NW_004517064.1 | scaffold2000 | 2965                    | CC                              | AA                 | AA               | INTERGENIC      |               |                    |                    |
| SNP_102349_A_2971  | NW_004517064.1 | scaffold2000 | 2971                    | CC                              | AA                 | AA               | INTERGENIC      |               |                    |                    |
| SNP_102350_A_3027  | NW_004517064.1 | scaffold2000 | 3027                    | GG                              | CC                 | CC               | INTERGENIC      |               |                    |                    |
| SNP_102351_A_3039  | NW_004517064.1 | scaffold2000 | 3039                    | AA                              | GG                 | GG               | INTERGENIC      |               |                    |                    |
| SNP_102352_A_9452  | NW_004517064.1 | scaffold2000 | 9452                    | CC                              | TT                 | TT               | INTERGENIC      |               |                    |                    |
| SNP_102353_A_9516  | NW_004517064.1 | scaffold2000 | 9516                    | TT                              | AA                 | AA               | INTERGENIC      |               |                    |                    |
| SNP_102354_A_9867  | NW_004517064.1 | scaffold2000 | 9867                    | AA                              | GG                 | GG               | INTERGENIC      |               |                    |                    |
| SNP_102355_A_9933  | NW_004517064.1 | scaffold2000 | 9933                    | AA                              | GG                 | GG               | INTERGENIC      |               |                    |                    |
| SNP_102356_A_10811 | NW_004517064.1 | scaffold2000 | 10811                   | GG                              | AA                 | AA               | INTERGENIC      |               |                    |                    |
| SNP_102358_A_10890 | NW_004517064.1 | scaffold2000 | 10890                   | TT                              | CC                 | CC               | INTERGENIC      |               |                    |                    |
| SNP_102360_A_11166 | NW_004517064.1 | scaffold2000 | 11166                   | TT                              | CC                 | CC               | INTERGENIC      |               |                    |                    |
| SNP_102361_A_11238 | NW_004517064.1 | scaffold2000 | 11238                   | GG                              | CC                 | CC               | INTERGENIC      |               |                    |                    |
| SNP_102362_A_11259 | NW_004517064.1 | scaffold2000 | 11259                   | CC                              | GG                 | GG               | INTERGENIC      |               |                    |                    |
| SNP_102363_A_11276 | NW_004517064.1 | scaffold2000 | 11276                   | GG                              | AA                 | AA               | INTERGENIC      |               |                    |                    |
| SNP_102364_A_11302 | NW_004517064.1 | scaffold2000 | 11302                   | CC                              | TT                 | TT               | INTERGENIC      |               |                    |                    |

| SNPs IDs           | Chromosome IDs | Chromosomes  | Physical positions (bp) | CDC Frontier (Reference genome) | (Pusa 1103 & HPNB) | (ILWC 46 & LPNB) | Sequence genome | Components of | Gene accession IDs | Putative functions |
|--------------------|----------------|--------------|-------------------------|---------------------------------|--------------------|------------------|-----------------|---------------|--------------------|--------------------|
| SNP_102365_A_11341 | NW_004517064.1 | scaffold2000 | 11341                   | AA                              | GG                 | GG               | INTERGENIC      |               |                    |                    |
| SNP_102366_A_11365 | NW_004517064.1 | scaffold2000 | 11365                   | CC                              | TT                 | TT               | INTERGENIC      |               |                    |                    |
| SNP_102367_A_11411 | NW_004517064.1 | scaffold2000 | 11411                   | CC                              | GG                 | GG               | INTERGENIC      |               |                    |                    |
| SNP_102368_A_11425 | NW_004517064.1 | scaffold2000 | 11425                   | TT                              | GG                 | GG               | INTERGENIC      |               |                    |                    |
| SNP_102369_A_11544 | NW_004517064.1 | scaffold2000 | 11544                   | AA                              | GG                 | GG               | INTERGENIC      |               |                    |                    |
| SNP_102370_A_11569 | NW_004517064.1 | scaffold2000 | 11569                   | CC                              | GG                 | GG               | INTERGENIC      |               |                    |                    |
| SNP_102371_A_11735 | NW_004517064.1 | scaffold2000 | 11735                   | CC                              | GG                 | GG               | INTERGENIC      |               |                    |                    |
| SNP_102372_A_13866 | NW_004517064.1 | scaffold2000 | 13866                   | AA                              | GG                 | GG               | INTERGENIC      |               |                    |                    |
| SNP_102374_A_13894 | NW_004517064.1 | scaffold2000 | 13894                   | TT                              | GG                 | GG               | INTERGENIC      |               |                    |                    |
| SNP_102375_A_13948 | NW_004517064.1 | scaffold2000 | 13948                   | CC                              | AA                 | AA               | INTERGENIC      |               |                    |                    |
| SNP_102376_A_13950 | NW_004517064.1 | scaffold2000 | 13950                   | CC                              | TT                 | TT               | INTERGENIC      |               |                    |                    |
| SNP_102377_A_14156 | NW_004517064.1 | scaffold2000 | 14156                   | AA                              | CC                 | CC               | INTERGENIC      |               |                    |                    |
| SNP_102379_A_14240 | NW_004517064.1 | scaffold2000 | 14240                   | AA                              | GG                 | GG               | INTERGENIC      |               |                    |                    |
| SNP_102380_A_14241 | NW_004517064.1 | scaffold2000 | 14241                   | CC                              | TT                 | TT               | INTERGENIC      |               |                    |                    |
| SNP_102381_A_14266 | NW_004517064.1 | scaffold2000 | 14266                   | TT                              | CC                 | CC               | INTERGENIC      |               |                    |                    |
| SNP_102382_A_18454 | NW_004517064.1 | scaffold2000 | 18454                   | AA                              | CC                 | CC               | INTERGENIC      |               |                    |                    |
| SNP_102383_A_18504 | NW_004517064.1 | scaffold2000 | 18504                   | TT                              | CC                 | CC               | INTERGENIC      |               |                    |                    |
| SNP_102384_A_18818 | NW_004517064.1 | scaffold2000 | 18818                   | TT                              | GG                 | GG               | INTERGENIC      |               |                    |                    |
| SNP_102385_A_20118 | NW_004517064.1 | scaffold2000 | 20118                   | TT                              | AA                 | AA               | INTERGENIC      |               |                    |                    |
| SNP_102386_A_20419 | NW_004517064.1 | scaffold2000 | 20419                   | GG                              | TT                 | TT               | INTERGENIC      |               |                    |                    |
| SNP_102387_A_21397 | NW_004517064.1 | scaffold2000 | 21397                   | CC                              | TT                 | TT               | INTERGENIC      |               |                    |                    |
| SNP_102388_A_21414 | NW_004517064.1 | scaffold2000 | 21414                   | AA                              | CC                 | CC               | INTERGENIC      |               |                    |                    |

| SNPs IDs           | Chromosome IDs | Chromosomes  | Physical positions (bp) | CDC Frontier (Reference genome) | (Pusa 1103 & HPNB) | (ILWC 46 & LPNB) | Sequence genome | Components of | Gene accession IDs | Putative functions |
|--------------------|----------------|--------------|-------------------------|---------------------------------|--------------------|------------------|-----------------|---------------|--------------------|--------------------|
| SNP_102389_A_21423 | NW_004517064.1 | scaffold2000 | 21423                   | TT                              | CC                 | CC               | INTERGENIC      |               |                    |                    |
| SNP_102390_A_21424 | NW_004517064.1 | scaffold2000 | 21424                   | AA                              | CC                 | CC               | INTERGENIC      |               |                    |                    |
| SNP_102391_A_21425 | NW_004517064.1 | scaffold2000 | 21425                   | TT                              | AA                 | AA               | INTERGENIC      |               |                    |                    |
| SNP_102392_A_21435 | NW_004517064.1 | scaffold2000 | 21435                   | GG                              | AA                 | AA               | INTERGENIC      |               |                    |                    |
| SNP_102394_A_21517 | NW_004517064.1 | scaffold2000 | 21517                   | AA                              | CC                 | CC               | INTERGENIC      |               |                    |                    |
| SNP_102395_A_21555 | NW_004517064.1 | scaffold2000 | 21555                   | AA                              | TT                 | TT               | INTERGENIC      |               |                    |                    |
| SNP_102396_A_21557 | NW_004517064.1 | scaffold2000 | 21557                   | CC                              | AA                 | AA               | INTERGENIC      |               |                    |                    |
| SNP_102397_A_21718 | NW_004517064.1 | scaffold2000 | 21718                   | GG                              | CC                 | CC               | INTERGENIC      |               |                    |                    |
| SNP_102399_A_26646 | NW_004517064.1 | scaffold2000 | 26646                   | TT                              | AA                 | AA               | INTERGENIC      |               |                    |                    |
| SNP_102400_A_26885 | NW_004517064.1 | scaffold2000 | 26885                   | AA                              | TT                 | TT               | INTERGENIC      |               |                    |                    |
| SNP_102401_A_26888 | NW_004517064.1 | scaffold2000 | 26888                   | AA                              | CC                 | CC               | INTERGENIC      |               |                    |                    |
| SNP_102402_A_3604  | NW_004517066.1 | scaffold2003 | 3604                    | TT                              | CC                 | CC               | INTERGENIC      |               |                    |                    |
| SNP_102403_A_3606  | NW_004517066.1 | scaffold2003 | 3606                    | AA                              | TT                 | TT               | INTERGENIC      |               |                    |                    |
| SNP_102404_A_3643  | NW_004517066.1 | scaffold2003 | 3643                    | TT                              | GG                 | GG               | INTERGENIC      |               |                    |                    |
| SNP_102405_A_3688  | NW_004517066.1 | scaffold2003 | 3688                    | CC                              | GG                 | GG               | INTERGENIC      |               |                    |                    |
| SNP_102406_A_3704  | NW_004517066.1 | scaffold2003 | 3704                    | GG                              | CC                 | CC               | INTERGENIC      |               |                    |                    |
| SNP_102407_A_3713  | NW_004517066.1 | scaffold2003 | 3713                    | TT                              | CC                 | CC               | INTERGENIC      |               |                    |                    |
| SNP_102408_A_3719  | NW_004517066.1 | scaffold2003 | 3719                    | GG                              | TT                 | TT               | INTERGENIC      |               |                    |                    |
| SNP_102409_A_3727  | NW_004517066.1 | scaffold2003 | 3727                    | CC                              | TT                 | TT               | INTERGENIC      |               |                    |                    |
| SNP_102410_A_3740  | NW_004517066.1 | scaffold2003 | 3740                    | CC                              | AA                 | AA               | INTERGENIC      |               |                    |                    |
| SNP_102411_A_3771  | NW_004517066.1 | scaffold2003 | 3771                    | GG                              | AA                 | AA               | INTERGENIC      |               |                    |                    |
| SNP_102412_A_3774  | NW_004517066.1 | scaffold2003 | 3774                    | GG                              | TT                 | TT               | INTERGENIC      |               |                    |                    |



| SNPs IDs           | Chromosome IDs | Chromosomes  | Physical positions (bp) | CDC Frontier (Reference genome) | (Pusa 1103 & HPNB) | (ILWC 46 & LPNB) | Sequence genome | Components of | Gene accession IDs | Putative functions |
|--------------------|----------------|--------------|-------------------------|---------------------------------|--------------------|------------------|-----------------|---------------|--------------------|--------------------|
| SNP_102413_A_3778  | NW_004517066.1 | scaffold2003 | 3778                    | CC                              | TT                 | TT               | INTERGENIC      |               |                    |                    |
| SNP_102414_A_3789  | NW_004517066.1 | scaffold2003 | 3789                    | AA                              | GG                 | GG               | INTERGENIC      |               |                    |                    |
| SNP_102415_A_7157  | NW_004517066.1 | scaffold2003 | 7157                    | CC                              | TT                 | TT               | INTERGENIC      |               |                    |                    |
| SNP_102416_A_7505  | NW_004517066.1 | scaffold2003 | 7505                    | GG                              | TT                 | TT               | INTERGENIC      |               |                    |                    |
| SNP_102418_A_12480 | NW_004517066.1 | scaffold2003 | 12480                   | AA                              | GG                 | GG               | INTERGENIC      |               |                    |                    |
| SNP_102419_A_12500 | NW_004517066.1 | scaffold2003 | 12500                   | AA                              | TT                 | TT               | INTERGENIC      |               |                    |                    |
| SNP_102420_A_12525 | NW_004517066.1 | scaffold2003 | 12525                   | TT                              | AA                 | AA               | INTERGENIC      |               |                    |                    |
| SNP_102422_A_13297 | NW_004517066.1 | scaffold2003 | 13297                   | TT                              | CC                 | CC               | INTERGENIC      |               |                    |                    |
| SNP_102423_A_14420 | NW_004517066.1 | scaffold2003 | 14420                   | TT                              | AA                 | AA               | INTERGENIC      |               |                    |                    |
| SNP_102424_A_14644 | NW_004517066.1 | scaffold2003 | 14644                   | AA                              | TT                 | TT               | INTERGENIC      |               |                    |                    |
| SNP_102425_A_19133 | NW_004517066.1 | scaffold2003 | 19133                   | AA                              | GG                 | GG               | INTERGENIC      |               |                    |                    |
| SNP_102426_A_19539 | NW_004517066.1 | scaffold2003 | 19539                   | AA                              | TT                 | TT               | INTERGENIC      |               |                    |                    |
| SNP_102427_A_19544 | NW_004517066.1 | scaffold2003 | 19544                   | GG                              | TT                 | TT               | INTERGENIC      |               |                    |                    |
| SNP_102428_A_19894 | NW_004517066.1 | scaffold2003 | 19894                   | TT                              | CC                 | CC               | INTERGENIC      |               |                    |                    |
| SNP_102429_A_19909 | NW_004517066.1 | scaffold2003 | 19909                   | CC                              | AA                 | AA               | INTERGENIC      |               |                    |                    |
| SNP_102430_A_22637 | NW_004517066.1 | scaffold2003 | 22637                   | CC                              | AA                 | AA               | INTERGENIC      |               |                    |                    |
| SNP_102431_A_22924 | NW_004517066.1 | scaffold2003 | 22924                   | CC                              | AA                 | AA               | INTERGENIC      |               |                    |                    |
| SNP_102432_A_23263 | NW_004517066.1 | scaffold2003 | 23263                   | CC                              | TT                 | TT               | INTERGENIC      |               |                    |                    |
| SNP_102433_A_23376 | NW_004517066.1 | scaffold2003 | 23376                   | AA                              | TT                 | TT               | INTERGENIC      |               |                    |                    |
| SNP_102434_A_23414 | NW_004517066.1 | scaffold2003 | 23414                   | TT                              | CC                 | CC               | INTERGENIC      |               |                    |                    |
| SNP_102435_A_23473 | NW_004517066.1 | scaffold2003 | 23473                   | GG                              | CC                 | CC               | INTERGENIC      |               |                    |                    |
| SNP_102436_A_23554 | NW_004517066.1 | scaffold2003 | 23554                   | CC                              | AA                 | AA               | INTERGENIC      |               |                    |                    |

| SNPs IDs           | Chromosome IDs | Chromosomes  | Physical positions (bp) | CDC Frontier (Reference genome) | (Pusa 1103 & HPNB) | (ILWC 46 & LPNB) | Sequence genome | Components of | Gene accession IDs | Putative functions |
|--------------------|----------------|--------------|-------------------------|---------------------------------|--------------------|------------------|-----------------|---------------|--------------------|--------------------|
| SNP_102437_A_23555 | NW_004517066.1 | scaffold2003 | 23555                   | CC                              | TT                 | TT               | INTERGENIC      |               |                    |                    |
| SNP_102438_A_23621 | NW_004517066.1 | scaffold2003 | 23621                   | CC                              | TT                 | TT               | INTERGENIC      |               |                    |                    |
| SNP_102441_A_10866 | NW_004517067.1 | scaffold2004 | 10866                   | CC                              | TT                 | TT               | INTERGENIC      |               |                    |                    |
| SNP_102442_A_3132  | NW_004517068.1 | scaffold2005 | 3132                    | CC                              | TT                 | TT               | INTERGENIC      |               |                    |                    |
| SNP_102443_A_3150  | NW_004517068.1 | scaffold2005 | 3150                    | AA                              | GG                 | GG               | INTERGENIC      |               |                    |                    |
| SNP_102444_A_3282  | NW_004517068.1 | scaffold2005 | 3282                    | TT                              | CC                 | CC               | INTERGENIC      |               |                    |                    |
| SNP_102446_A_5557  | NW_004517068.1 | scaffold2005 | 5557                    | AA                              | GG                 | GG               | INTERGENIC      |               |                    |                    |
| SNP_102447_A_5916  | NW_004517068.1 | scaffold2005 | 5916                    | AA                              | CC                 | CC               | INTERGENIC      |               |                    |                    |
| SNP_102448_A_9185  | NW_004517068.1 | scaffold2005 | 9185                    | TT                              | CC                 | CC               | INTERGENIC      |               |                    |                    |
| SNP_102449_A_11968 | NW_004517068.1 | scaffold2005 | 11968                   | CC                              | GG                 | GG               | INTERGENIC      |               |                    |                    |
| SNP_102450_A_12947 | NW_004517068.1 | scaffold2005 | 12947                   | TT                              | CC                 | CC               | INTERGENIC      |               |                    |                    |
| SNP_102451_A_13036 | NW_004517068.1 | scaffold2005 | 13036                   | TT                              | CC                 | CC               | INTERGENIC      |               |                    |                    |
| SNP_102453_A_22845 | NW_004517068.1 | scaffold2005 | 22845                   | TT                              | AA                 | AA               | INTERGENIC      |               |                    |                    |
| SNP_102454_A_22850 | NW_004517068.1 | scaffold2005 | 22850                   | AA                              | CC                 | CC               | INTERGENIC      |               |                    |                    |
| SNP_102455_A_23279 | NW_004517068.1 | scaffold2005 | 23279                   | AA                              | GG                 | GG               | INTERGENIC      |               |                    |                    |
| SNP_102456_A_23885 | NW_004517068.1 | scaffold2005 | 23885                   | TT                              | AA                 | AA               | INTERGENIC      |               |                    |                    |
| SNP_102457_A_25260 | NW_004517068.1 | scaffold2005 | 25260                   | TT                              | GG                 | GG               | INTERGENIC      |               |                    |                    |
| SNP_102458_A_32384 | NW_004517068.1 | scaffold2005 | 32384                   | TT                              | CC                 | CC               | INTERGENIC      |               |                    |                    |
| SNP_102460_A_1158  | NW_004517069.1 | scaffold2006 | 1158                    | CC                              | TT                 | TT               | INTERGENIC      |               |                    |                    |
| SNP_102461_A_1194  | NW_004517069.1 | scaffold2006 | 1194                    | AA                              | TT                 | TT               | INTERGENIC      |               |                    |                    |
| SNP_102462_A_1201  | NW_004517069.1 | scaffold2006 | 1201                    | CC                              | TT                 | TT               | INTERGENIC      |               |                    |                    |
| SNP_102463_A_449   | NW_004517070.1 | scaffold2008 | 449                     | AA                              | GG                 | GG               | INTERGENIC      |               |                    |                    |

| SNPs IDs          | Chromosome IDs | Chromosomes  | Physical positions (bp) | CDC Frontier (Reference genome) | (Pusa 1103 & HPNB) | (ILWC 46 & LPNB) | Sequence genome | Components of | Gene accession IDs | Putative functions |
|-------------------|----------------|--------------|-------------------------|---------------------------------|--------------------|------------------|-----------------|---------------|--------------------|--------------------|
| SNP_102464_A_96   | NW_004517072.1 | scaffold2010 | 96                      | GG                              | TT                 | TT               | INTERGENIC      |               |                    |                    |
| SNP_102465_A_2916 | NW_004517072.1 | scaffold2010 | 2916                    | AA                              | GG                 | GG               | INTERGENIC      |               |                    |                    |
| SNP_102466_A_3314 | NW_004517072.1 | scaffold2010 | 3314                    | GG                              | TT                 | TT               | INTERGENIC      |               |                    |                    |
| SNP_102467_A_3505 | NW_004517072.1 | scaffold2010 | 3505                    | AA                              | GG                 | GG               | INTERGENIC      |               |                    |                    |
| SNP_102468_A_3620 | NW_004517072.1 | scaffold2010 | 3620                    | TT                              | CC                 | CC               | INTERGENIC      |               |                    |                    |
| SNP_102470_A_3696 | NW_004517072.1 | scaffold2010 | 3696                    | TT                              | GG                 | GG               | INTERGENIC      |               |                    |                    |
| SNP_102471_A_3711 | NW_004517072.1 | scaffold2010 | 3711                    | AA                              | TT                 | TT               | INTERGENIC      |               |                    |                    |
| SNP_102472_A_3748 | NW_004517072.1 | scaffold2010 | 3748                    | TT                              | AA                 | AA               | INTERGENIC      |               |                    |                    |
| SNP_102473_A_3755 | NW_004517072.1 | scaffold2010 | 3755                    | GG                              | AA                 | AA               | INTERGENIC      |               |                    |                    |
| SNP_102474_A_3765 | NW_004517072.1 | scaffold2010 | 3765                    | CC                              | TT                 | TT               | INTERGENIC      |               |                    |                    |
| SNP_102475_A_3766 | NW_004517072.1 | scaffold2010 | 3766                    | TT                              | AA                 | AA               | INTERGENIC      |               |                    |                    |
| SNP_102476_A_3768 | NW_004517072.1 | scaffold2010 | 3768                    | TT                              | CC                 | CC               | INTERGENIC      |               |                    |                    |
| SNP_102477_A_3769 | NW_004517072.1 | scaffold2010 | 3769                    | TT                              | AA                 | AA               | INTERGENIC      |               |                    |                    |
| SNP_102478_A_3771 | NW_004517072.1 | scaffold2010 | 3771                    | AA                              | CC                 | CC               | INTERGENIC      |               |                    |                    |
| SNP_102479_A_3772 | NW_004517072.1 | scaffold2010 | 3772                    | CC                              | TT                 | TT               | INTERGENIC      |               |                    |                    |
| SNP_102480_A_3776 | NW_004517072.1 | scaffold2010 | 3776                    | AA                              | GG                 | GG               | INTERGENIC      |               |                    |                    |
| SNP_102481_A_3798 | NW_004517072.1 | scaffold2010 | 3798                    | TT                              | AA                 | AA               | INTERGENIC      |               |                    |                    |
| SNP_102482_A_3803 | NW_004517072.1 | scaffold2010 | 3803                    | GG                              | AA                 | AA               | INTERGENIC      |               |                    |                    |
| SNP_102483_A_4168 | NW_004517072.1 | scaffold2010 | 4168                    | TT                              | CC                 | CC               | INTERGENIC      |               |                    |                    |
| SNP_102484_A_5403 | NW_004517072.1 | scaffold2010 | 5403                    | TT                              | CC                 | CC               | INTERGENIC      |               |                    |                    |
| SNP_102485_A_5819 | NW_004517072.1 | scaffold2010 | 5819                    | CC                              | AA                 | AA               | INTERGENIC      |               |                    |                    |
| SNP_102486_A_6079 | NW_004517072.1 | scaffold2010 | 6079                    | AA                              | GG                 | GG               | INTERGENIC      |               |                    |                    |

| SNPs IDs          | Chromosome IDs | Chromosomes  | Physical positions (bp) | CDC Frontier (Reference genome) | (Pusa 1103 & HPNB) | (ILWC 46 & LPNB) | Sequence Components of genome | Gene accession IDs | Putative functions |
|-------------------|----------------|--------------|-------------------------|---------------------------------|--------------------|------------------|-------------------------------|--------------------|--------------------|
| SNP_102487_A_6403 | NW_004517072.1 | scaffold2010 | 6403                    | GG                              | AA                 | AA               | INTERGENIC                    |                    |                    |
| SNP_102488_A_6507 | NW_004517072.1 | scaffold2010 | 6507                    | AA                              | CC                 | CC               | INTERGENIC                    |                    |                    |
| SNP_102489_A_6544 | NW_004517072.1 | scaffold2010 | 6544                    | GG                              | AA                 | AA               | INTERGENIC                    |                    |                    |
| SNP_102491_A_6879 | NW_004517072.1 | scaffold2010 | 6879                    | CC                              | AA                 | AA               | INTERGENIC                    |                    |                    |
| SNP_102492_A_6917 | NW_004517072.1 | scaffold2010 | 6917                    | CC                              | TT                 | TT               | INTERGENIC                    |                    |                    |
| SNP_102493_A_7016 | NW_004517072.1 | scaffold2010 | 7016                    | TT                              | GG                 | GG               | INTERGENIC                    |                    |                    |
| SNP_102494_A_7254 | NW_004517072.1 | scaffold2010 | 7254                    | TT                              | CC                 | CC               | INTERGENIC                    |                    |                    |
| SNP_102495_A_7484 | NW_004517072.1 | scaffold2010 | 7484                    | GG                              | AA                 | AA               | INTERGENIC                    |                    |                    |
| SNP_102496_A_7532 | NW_004517072.1 | scaffold2010 | 7532                    | CC                              | AA                 | AA               | INTERGENIC                    |                    |                    |
| SNP_102497_A_7575 | NW_004517072.1 | scaffold2010 | 7575                    | AA                              | CC                 | CC               | INTERGENIC                    |                    |                    |
| SNP_102499_A_8148 | NW_004517072.1 | scaffold2010 | 8148                    | CC                              | TT                 | TT               | INTERGENIC                    |                    |                    |
| SNP_102500_A_8235 | NW_004517072.1 | scaffold2010 | 8235                    | TT                              | CC                 | CC               | INTERGENIC                    |                    |                    |
| SNP_102501_A_8336 | NW_004517072.1 | scaffold2010 | 8336                    | AA                              | GG                 | GG               | INTERGENIC                    |                    |                    |
| SNP_102502_A_8348 | NW_004517072.1 | scaffold2010 | 8348                    | TT                              | CC                 | CC               | INTERGENIC                    |                    |                    |
| SNP_102503_A_8411 | NW_004517072.1 | scaffold2010 | 8411                    | GG                              | TT                 | TT               | INTERGENIC                    |                    |                    |
| SNP_102504_A_1589 | NW_004517078.1 | scaffold2017 | 1589                    | AA                              | GG                 | GG               | INTERGENIC                    |                    |                    |
| SNP_102505_A_1708 | NW_004517078.1 | scaffold2017 | 1708                    | GG                              | TT                 | TT               | INTERGENIC                    |                    |                    |
| SNP_102506_A_1719 | NW_004517078.1 | scaffold2017 | 1719                    | TT                              | GG                 | GG               | INTERGENIC                    |                    |                    |
| SNP_102507_A_1895 | NW_004517078.1 | scaffold2017 | 1895                    | CC                              | TT                 | TT               | INTERGENIC                    |                    |                    |
| SNP_102508_A_1156 | NW_004517079.1 | scaffold2018 | 1156                    | CC                              | AA                 | AA               | INTRON                        | 101488518          | Unknown function   |
| SNP_102509_A_2520 | NW_004517079.1 | scaffold2018 | 2520                    | AA                              | GG                 | GG               | URR                           | 101488518          | Unknown function   |
| SNP_102510_A_2802 | NW_004517079.1 | scaffold2018 | 2802                    | TT                              | GG                 | GG               | URR                           | 101488518          | Unknown function   |

| SNPs IDs           | Chromosome IDs | Chromosomes  | Physical positions (bp) | CDC Frontier (Reference genome) | (Pusa 1103 & HPNB) | (ILWC 46 & LPNB) | Sequence Components of genome | Gene accession IDs | Putative functions           |
|--------------------|----------------|--------------|-------------------------|---------------------------------|--------------------|------------------|-------------------------------|--------------------|------------------------------|
| SNP_102511_A_4172  | NW_004517079.1 | scaffold2018 | 4172                    | AA                              | GG                 | GG               | URR                           | 101488518          | Unknown function             |
| SNP_102513_A_5396  | NW_004517079.1 | scaffold2018 | 5396                    | CC                              | TT                 | TT               | INTERGENIC                    |                    |                              |
| SNP_102514_A_5538  | NW_004517079.1 | scaffold2018 | 5538                    | TT                              | AA                 | AA               | INTERGENIC                    |                    |                              |
| SNP_102515_A_5832  | NW_004517079.1 | scaffold2018 | 5832                    | AA                              | CC                 | CC               | DRR                           | 101515657          | Unknown function             |
| SNP_102516_A_6384  | NW_004517079.1 | scaffold2018 | 6384                    | CC                              | TT                 | TT               | DRR                           | 101515657          | Unknown function             |
| SNP_102517_A_13979 | NW_004517079.1 | scaffold2018 | 13979                   | TT                              | AA                 | AA               | INTERGENIC                    |                    |                              |
| SNP_102519_A_18029 | NW_004517079.1 | scaffold2018 | 18029                   | TT                              | CC                 | CC               | INTERGENIC                    |                    |                              |
| SNP_102520_A_18262 | NW_004517079.1 | scaffold2018 | 18262                   | TT                              | CC                 | CC               | INTERGENIC                    |                    |                              |
| SNP_102521_A_18723 | NW_004517079.1 | scaffold2018 | 18723                   | AA                              | TT                 | TT               | INTERGENIC                    |                    |                              |
| SNP_102522_A_19823 | NW_004517079.1 | scaffold2018 | 19823                   | AA                              | GG                 | GG               | INTERGENIC                    |                    |                              |
| SNP_102523_A_21454 | NW_004517079.1 | scaffold2018 | 21454                   | CC                              | AA                 | AA               | INTERGENIC                    |                    |                              |
| SNP_102524_A_21455 | NW_004517079.1 | scaffold2018 | 21455                   | TT                              | CC                 | CC               | INTERGENIC                    |                    |                              |
| SNP_102525_A_21997 | NW_004517079.1 | scaffold2018 | 21997                   | AA                              | TT                 | TT               | INTERGENIC                    |                    |                              |
| SNP_102526_A_22004 | NW_004517079.1 | scaffold2018 | 22004                   | GG                              | AA                 | AA               | INTERGENIC                    |                    |                              |
| SNP_102527_A_22020 | NW_004517079.1 | scaffold2018 | 22020                   | TT                              | GG                 | GG               | INTERGENIC                    |                    |                              |
| SNP_102528_A_22028 | NW_004517079.1 | scaffold2018 | 22028                   | AA                              | GG                 | GG               | INTERGENIC                    |                    |                              |
| SNP_102529_A_22937 | NW_004517079.1 | scaffold2018 | 22937                   | CC                              | TT                 | TT               | INTERGENIC                    |                    |                              |
| SNP_102530_A_23357 | NW_004517079.1 | scaffold2018 | 23357                   | CC                              | AA                 | AA               | DRR                           | 101488299          | uncharacterized LOC101488299 |
| SNP_102531_A_23807 | NW_004517079.1 | scaffold2018 | 23807                   | GG                              | AA                 | AA               | DRR                           | 101488299          | uncharacterized LOC101488299 |
| SNP_102532_A_25652 | NW_004517079.1 | scaffold2018 | 25652                   | CC                              | TT                 | TT               | URR                           | 101488299          | uncharacterized LOC101488299 |
| SNP_102533_A_27539 | NW_004517079.1 | scaffold2018 | 27539                   | CC                              | TT                 | TT               | INTERGENIC                    |                    |                              |
| SNP_102534_A_27551 | NW_004517079.1 | scaffold2018 | 27551                   | GG                              | AA                 | AA               | INTERGENIC                    |                    |                              |

| SNPs IDs           | Chromosome IDs | Chromosomes  | Physical positions (bp) | CDC Frontier (Reference genome) | (Pusa 1103 & HPNB) | (ILWC 46 & LPNB) | Sequence genome | Components of | Gene accession IDs | Putative functions |
|--------------------|----------------|--------------|-------------------------|---------------------------------|--------------------|------------------|-----------------|---------------|--------------------|--------------------|
| SNP_102535_A_27579 | NW_004517079.1 | scaffold2018 | 27579                   | GG                              | TT                 | TT               | INTERGENIC      |               |                    |                    |
| SNP_102536_A_27584 | NW_004517079.1 | scaffold2018 | 27584                   | CC                              | GG                 | GG               | INTERGENIC      |               |                    |                    |
| SNP_102537_A_27587 | NW_004517079.1 | scaffold2018 | 27587                   | AA                              | GG                 | GG               | INTERGENIC      |               |                    |                    |
| SNP_102538_A_27749 | NW_004517079.1 | scaffold2018 | 27749                   | TT                              | CC                 | CC               | INTERGENIC      |               |                    |                    |
| SNP_102539_A_27752 | NW_004517079.1 | scaffold2018 | 27752                   | GG                              | CC                 | CC               | INTERGENIC      |               |                    |                    |
| SNP_102540_A_27816 | NW_004517079.1 | scaffold2018 | 27816                   | TT                              | CC                 | CC               | INTERGENIC      |               |                    |                    |
| SNP_102542_A_28385 | NW_004517079.1 | scaffold2018 | 28385                   | CC                              | TT                 | TT               | INTERGENIC      |               |                    |                    |
| SNP_102543_A_28388 | NW_004517079.1 | scaffold2018 | 28388                   | GG                              | TT                 | TT               | INTERGENIC      |               |                    |                    |
| SNP_102544_A_28488 | NW_004517079.1 | scaffold2018 | 28488                   | AA                              | TT                 | TT               | INTERGENIC      |               |                    |                    |
| SNP_102545_A_28571 | NW_004517079.1 | scaffold2018 | 28571                   | GG                              | TT                 | TT               | INTERGENIC      |               |                    |                    |
| SNP_102546_A_28607 | NW_004517079.1 | scaffold2018 | 28607                   | TT                              | CC                 | CC               | INTERGENIC      |               |                    |                    |
| SNP_102547_A_6383  | NW_004517080.1 | scaffold2020 | 6383                    | AA                              | TT                 | TT               | INTERGENIC      |               |                    |                    |
| SNP_102548_A_6391  | NW_004517080.1 | scaffold2020 | 6391                    | TT                              | CC                 | CC               | INTERGENIC      |               |                    |                    |
| SNP_102549_A_6913  | NW_004517080.1 | scaffold2020 | 6913                    | AA                              | GG                 | GG               | INTERGENIC      |               |                    |                    |
| SNP_102550_A_6944  | NW_004517080.1 | scaffold2020 | 6944                    | TT                              | AA                 | AA               | INTERGENIC      |               |                    |                    |
| SNP_102551_A_7375  | NW_004517080.1 | scaffold2020 | 7375                    | GG                              | AA                 | AA               | INTERGENIC      |               |                    |                    |
| SNP_102552_A_7383  | NW_004517080.1 | scaffold2020 | 7383                    | TT                              | AA                 | AA               | INTERGENIC      |               |                    |                    |
| SNP_102553_A_7409  | NW_004517080.1 | scaffold2020 | 7409                    | TT                              | CC                 | CC               | INTERGENIC      |               |                    |                    |
| SNP_102554_A_7416  | NW_004517080.1 | scaffold2020 | 7416                    | GG                              | AA                 | AA               | INTERGENIC      |               |                    |                    |
| SNP_102555_A_7459  | NW_004517080.1 | scaffold2020 | 7459                    | CC                              | AA                 | AA               | INTERGENIC      |               |                    |                    |
| SNP_102556_A_7495  | NW_004517080.1 | scaffold2020 | 7495                    | GG                              | TT                 | TT               | INTERGENIC      |               |                    |                    |
| SNP_102558_A_7507  | NW_004517080.1 | scaffold2020 | 7507                    | CC                              | GG                 | GG               | INTERGENIC      |               |                    |                    |

| SNPs IDs            | Chromosome IDs | Chromosomes  | Physical positions (bp) | CDC Frontier (Reference genome) | (Pusa 1103 & HPNB) | (ILWC 46 & LPNB) | Sequence genome       | Components of | Gene accession IDs | Putative functions |
|---------------------|----------------|--------------|-------------------------|---------------------------------|--------------------|------------------|-----------------------|---------------|--------------------|--------------------|
| SNP_102559_A_7565   | NW_004517080.1 | scaffold2020 | 7565                    | AA                              | CC                 | CC               | INTERGENIC            |               |                    |                    |
| SNP_102560_A_7579   | NW_004517080.1 | scaffold2020 | 7579                    | CC                              | TT                 | TT               | INTERGENIC            |               |                    |                    |
| SNP_102561_A_7582   | NW_004517080.1 | scaffold2020 | 7582                    | TT                              | AA                 | AA               | INTERGENIC            |               |                    |                    |
| SNP_102562_A_7616   | NW_004517080.1 | scaffold2020 | 7616                    | TT                              | GG                 | GG               | INTERGENIC            |               |                    |                    |
| SNP_102563_A_7668   | NW_004517080.1 | scaffold2020 | 7668                    | TT                              | CC                 | CC               | INTERGENIC            |               |                    |                    |
| SNP_102564_A_7687   | NW_004517080.1 | scaffold2020 | 7687                    | AA                              | GG                 | GG               | INTERGENIC            |               |                    |                    |
| SNP_102565_A_7697   | NW_004517080.1 | scaffold2020 | 7697                    | AA                              | CC                 | CC               | INTERGENIC            |               |                    |                    |
| SNP_102566_A_7859   | NW_004517080.1 | scaffold2020 | 7859                    | CC                              | TT                 | TT               | INTERGENIC            |               |                    |                    |
| SNP_102567_A_7863   | NW_004517080.1 | scaffold2020 | 7863                    | TT                              | AA                 | AA               | INTERGENIC            |               |                    |                    |
| SNP_102568_A_11910  | NW_004517080.1 | scaffold2020 | 11910                   | AA                              | TT                 | TT               | INTERGENIC            |               |                    |                    |
| SNP_102569_A_13584  | NW_004517080.1 | scaffold2020 | 13584                   | TT                              | AA                 | AA               | INTERGENIC            |               |                    |                    |
| SNP_102570_A_13716  | NW_004517080.1 | scaffold2020 | 13716                   | CC                              | TT                 | TT               | INTERGENIC            |               |                    |                    |
| SNP_102571_A_1399   | NW_004517082.1 | scaffold2022 | 1399                    | CC                              | GG                 | GG               | INTERGENIC            |               |                    |                    |
| SNP_102572_A_61333  | NW_004517082.1 | scaffold2022 | 61333                   | TT                              | GG                 | GG               | INTERGENIC            |               |                    |                    |
| SNP_102573_A_66734  | NW_004517082.1 | scaffold2022 | 66734                   | AA                              | TT                 | TT               | NON_SYNONYMOUS_CODING | 101489188     | Unknown function   |                    |
| SNP_102574_A_83111  | NW_004517082.1 | scaffold2022 | 83111                   | TT                              | CC                 | CC               | INTERGENIC            |               |                    |                    |
| SNP_102575_A_110529 | NW_004517082.1 | scaffold2022 | 110529                  | TT                              | CC                 | CC               | INTERGENIC            |               |                    |                    |
| SNP_102576_A_110761 | NW_004517082.1 | scaffold2022 | 110761                  | AA                              | TT                 | TT               | INTERGENIC            |               |                    |                    |
| SNP_102577_A_110790 | NW_004517082.1 | scaffold2022 | 110790                  | AA                              | GG                 | GG               | INTERGENIC            |               |                    |                    |
| SNP_102578_A_110809 | NW_004517082.1 | scaffold2022 | 110809                  | TT                              | CC                 | CC               | INTERGENIC            |               |                    |                    |
| SNP_102579_A_110823 | NW_004517082.1 | scaffold2022 | 110823                  | TT                              | CC                 | CC               | INTERGENIC            |               |                    |                    |
| SNP_102580_A_116183 | NW_004517082.1 | scaffold2022 | 116183                  | TT                              | CC                 | CC               | INTERGENIC            |               |                    |                    |

| SNPs IDs            | Chromosome IDs | Chromosomes  | Physical positions (bp) | CDC Frontier (Reference genome) | (Pusa 1103 & HPNB) | (ILWC 46 & LPNB) | Sequence genome       | Components of | Gene accession IDs           | Putative functions |
|---------------------|----------------|--------------|-------------------------|---------------------------------|--------------------|------------------|-----------------------|---------------|------------------------------|--------------------|
| SNP_102581_A_116269 | NW_004517082.1 | scaffold2022 | 116269                  | AA                              | CC                 | CC               | INTERGENIC            |               |                              |                    |
| SNP_102582_A_132097 | NW_004517082.1 | scaffold2022 | 132097                  | CC                              | AA                 | AA               | INTERGENIC            |               |                              |                    |
| SNP_102583_A_132676 | NW_004517082.1 | scaffold2022 | 132676                  | CC                              | TT                 | TT               | INTERGENIC            |               |                              |                    |
| SNP_102584_A_132693 | NW_004517082.1 | scaffold2022 | 132693                  | CC                              | TT                 | TT               | INTERGENIC            |               |                              |                    |
| SNP_102585_A_136212 | NW_004517082.1 | scaffold2022 | 136212                  | GG                              | AA                 | AA               | INTERGENIC            |               |                              |                    |
| SNP_102586_A_136215 | NW_004517082.1 | scaffold2022 | 136215                  | CC                              | TT                 | TT               | INTERGENIC            |               |                              |                    |
| SNP_102587_A_136221 | NW_004517082.1 | scaffold2022 | 136221                  | CC                              | AA                 | AA               | INTERGENIC            |               |                              |                    |
| SNP_102588_A_136299 | NW_004517082.1 | scaffold2022 | 136299                  | GG                              | AA                 | AA               | INTERGENIC            |               |                              |                    |
| SNP_102589_A_136522 | NW_004517082.1 | scaffold2022 | 136522                  | TT                              | CC                 | CC               | INTERGENIC            |               |                              |                    |
| SNP_102590_A_136540 | NW_004517082.1 | scaffold2022 | 136540                  | AA                              | GG                 | GG               | INTERGENIC            |               |                              |                    |
| SNP_102591_A_136640 | NW_004517082.1 | scaffold2022 | 136640                  | AA                              | GG                 | GG               | INTERGENIC            |               |                              |                    |
| SNP_102592_A_136756 | NW_004517082.1 | scaffold2022 | 136756                  | CC                              | TT                 | TT               | INTERGENIC            |               |                              |                    |
| SNP_102593_A_136765 | NW_004517082.1 | scaffold2022 | 136765                  | TT                              | GG                 | GG               | INTERGENIC            |               |                              |                    |
| SNP_102594_A_136772 | NW_004517082.1 | scaffold2022 | 136772                  | TT                              | CC                 | CC               | INTERGENIC            |               |                              |                    |
| SNP_102595_A_136798 | NW_004517082.1 | scaffold2022 | 136798                  | CC                              | TT                 | TT               | INTERGENIC            |               |                              |                    |
| SNP_102596_A_139032 | NW_004517082.1 | scaffold2022 | 139032                  | TT                              | CC                 | CC               | INTERGENIC            |               |                              |                    |
| SNP_102597_A_139045 | NW_004517082.1 | scaffold2022 | 139045                  | CC                              | TT                 | TT               | INTERGENIC            |               |                              |                    |
| SNP_102598_A_139052 | NW_004517082.1 | scaffold2022 | 139052                  | GG                              | AA                 | AA               | INTERGENIC            |               |                              |                    |
| SNP_102599_A_139059 | NW_004517082.1 | scaffold2022 | 139059                  | AA                              | GG                 | GG               | INTERGENIC            |               |                              |                    |
| SNP_102600_A_155545 | NW_004517082.1 | scaffold2022 | 155545                  | AA                              | CC                 | CC               | NON_SYNONYMOUS_CODING | 101489517     | uncharacterized LOC101489517 |                    |
| SNP_102601_A_155561 | NW_004517082.1 | scaffold2022 | 155561                  | CC                              | TT                 | AA               | SYNONYMOUS_CODING     | 101489517     | uncharacterized LOC101489517 |                    |
| SNP_102602_A_155636 | NW_004517082.1 | scaffold2022 | 155636                  | TT                              | AA                 | AA               | INTRON                | 101489517     | uncharacterized LOC101489517 |                    |



| SNPs IDs            | Chromosome IDs | Chromosomes  | Physical positions (bp) | CDC Frontier (Reference genome) | (Pusa 1103 & HPNB) | (ILWC 46 & LPNB) | Sequence Components of genome | Gene accession IDs | Putative functions           |
|---------------------|----------------|--------------|-------------------------|---------------------------------|--------------------|------------------|-------------------------------|--------------------|------------------------------|
| SNP_102603_A_155654 | NW_004517082.1 | scaffold2022 | 155654                  | GG                              | AA                 | AA               | INTRON                        | 101489517          | uncharacterized LOC101489517 |
| SNP_102604_A_155731 | NW_004517082.1 | scaffold2022 | 155731                  | AA                              | CC                 | CC               | NON_SYNONYMOUS_CODING         | 101489517          | uncharacterized LOC101489517 |
| SNP_102605_A_155873 | NW_004517082.1 | scaffold2022 | 155873                  | TT                              | CC                 | CC               | NON_SYNONYMOUS_CODING         | 101489517          | uncharacterized LOC101489517 |
| SNP_102606_A_156053 | NW_004517082.1 | scaffold2022 | 156053                  | GG                              | AA                 | AA               | NON_SYNONYMOUS_CODING         | 101489517          | uncharacterized LOC101489517 |
| SNP_102607_A_156061 | NW_004517082.1 | scaffold2022 | 156061                  | CC                              | TT                 | TT               | SYNONYMOUS_CODING             | 101489517          | uncharacterized LOC101489517 |
| SNP_102608_A_158923 | NW_004517082.1 | scaffold2022 | 158923                  | AA                              | TT                 | TT               | URR                           | 101489517          | uncharacterized LOC101489517 |
| SNP_102609_A_158928 | NW_004517082.1 | scaffold2022 | 158928                  | TT                              | GG                 | GG               | URR                           | 101489517          | uncharacterized LOC101489517 |
| SNP_102610_A_158982 | NW_004517082.1 | scaffold2022 | 158982                  | CC                              | TT                 | TT               | URR                           | 101489517          | uncharacterized LOC101489517 |
| SNP_102611_A_769    | NW_004517084.1 | scaffold2024 | 769                     | TT                              | CC                 | CC               | INTERGENIC                    |                    |                              |
| SNP_102612_A_1623   | NW_004517084.1 | scaffold2024 | 1623                    | GG                              | AA                 | AA               | INTERGENIC                    |                    |                              |
| SNP_102613_A_1839   | NW_004517084.1 | scaffold2024 | 1839                    | TT                              | CC                 | CC               | INTERGENIC                    |                    |                              |
| SNP_102615_A_1987   | NW_004517084.1 | scaffold2024 | 1987                    | TT                              | CC                 | CC               | INTERGENIC                    |                    |                              |
| SNP_102616_A_2218   | NW_004517084.1 | scaffold2024 | 2218                    | GG                              | TT                 | TT               | INTERGENIC                    |                    |                              |
| SNP_102617_A_2246   | NW_004517084.1 | scaffold2024 | 2246                    | TT                              | GG                 | GG               | INTERGENIC                    |                    |                              |
| SNP_102618_A_2285   | NW_004517084.1 | scaffold2024 | 2285                    | AA                              | TT                 | TT               | INTERGENIC                    |                    |                              |
| SNP_102619_A_2301   | NW_004517084.1 | scaffold2024 | 2301                    | TT                              | CC                 | CC               | INTERGENIC                    |                    |                              |
| SNP_102620_A_4000   | NW_004517084.1 | scaffold2024 | 4000                    | CC                              | TT                 | TT               | INTERGENIC                    |                    |                              |
| SNP_102621_A_4213   | NW_004517084.1 | scaffold2024 | 4213                    | TT                              | GG                 | GG               | INTERGENIC                    |                    |                              |
| SNP_102622_A_4815   | NW_004517084.1 | scaffold2024 | 4815                    | CC                              | GG                 | GG               | INTERGENIC                    |                    |                              |
| SNP_102623_A_1889   | NW_004517086.1 | scaffold2026 | 1889                    | AA                              | GG                 | GG               | INTERGENIC                    |                    |                              |
| SNP_102624_A_4466   | NW_004517086.1 | scaffold2026 | 4466                    | TT                              | CC                 | CC               | INTERGENIC                    |                    |                              |
| SNP_102625_A_4485   | NW_004517086.1 | scaffold2026 | 4485                    | AA                              | GG                 | GG               | INTERGENIC                    |                    |                              |

| SNPs IDs            | Chromosome IDs | Chromosomes  | Physical positions (bp) | CDC Frontier (Reference genome) | (Pusa 1103 & HPNB) | (ILWC 46 & LPNB) | Sequence genome | Components of | Gene accession IDs | Putative functions |
|---------------------|----------------|--------------|-------------------------|---------------------------------|--------------------|------------------|-----------------|---------------|--------------------|--------------------|
| SNP_102626_A_4491   | NW_004517086.1 | scaffold2026 | 4491                    | GG                              | AA                 | AA               | INTERGENIC      |               |                    |                    |
| SNP_102627_A_4783   | NW_004517086.1 | scaffold2026 | 4783                    | GG                              | AA                 | AA               | INTERGENIC      |               |                    |                    |
| SNP_102628_A_5188   | NW_004517086.1 | scaffold2026 | 5188                    | AA                              | CC                 | CC               | INTERGENIC      |               |                    |                    |
| SNP_102629_A_5192   | NW_004517086.1 | scaffold2026 | 5192                    | AA                              | GG                 | GG               | INTERGENIC      |               |                    |                    |
| SNP_102630_A_5220   | NW_004517086.1 | scaffold2026 | 5220                    | CC                              | TT                 | TT               | INTERGENIC      |               |                    |                    |
| SNP_102631_A_711    | NW_004517087.1 | scaffold2027 | 711                     | TT                              | AA                 | AA               | INTERGENIC      |               |                    |                    |
| SNP_102633_A_2854   | NW_004517087.1 | scaffold2027 | 2854                    | AA                              | TT                 | TT               | INTERGENIC      |               |                    |                    |
| SNP_102634_A_3025   | NW_004517087.1 | scaffold2027 | 3025                    | GG                              | AA                 | AA               | INTERGENIC      |               |                    |                    |
| SNP_102635_A_49733  | NW_004517087.1 | scaffold2027 | 49733                   | AA                              | GG                 | GG               | INTERGENIC      |               |                    |                    |
| SNP_102636_A_52230  | NW_004517087.1 | scaffold2027 | 52230                   | CC                              | TT                 | TT               | INTERGENIC      |               |                    |                    |
| SNP_102637_A_52647  | NW_004517087.1 | scaffold2027 | 52647                   | CC                              | AA                 | AA               | INTERGENIC      |               |                    |                    |
| SNP_102638_A_54597  | NW_004517087.1 | scaffold2027 | 54597                   | CC                              | GG                 | GG               | INTERGENIC      |               |                    |                    |
| SNP_102639_A_55625  | NW_004517087.1 | scaffold2027 | 55625                   | AA                              | GG                 | GG               | INTERGENIC      |               |                    |                    |
| SNP_102640_A_56181  | NW_004517087.1 | scaffold2027 | 56181                   | AA                              | GG                 | GG               | INTERGENIC      |               |                    |                    |
| SNP_102641_A_56276  | NW_004517087.1 | scaffold2027 | 56276                   | TT                              | AA                 | AA               | INTERGENIC      |               |                    |                    |
| SNP_102642_A_56301  | NW_004517087.1 | scaffold2027 | 56301                   | AA                              | TT                 | TT               | INTERGENIC      |               |                    |                    |
| SNP_102643_A_56310  | NW_004517087.1 | scaffold2027 | 56310                   | CC                              | TT                 | TT               | INTERGENIC      |               |                    |                    |
| SNP_102644_A_56312  | NW_004517087.1 | scaffold2027 | 56312                   | TT                              | GG                 | GG               | INTERGENIC      |               |                    |                    |
| SNP_102645_A_119528 | NW_004517087.1 | scaffold2027 | 119528                  | TT                              | GG                 | GG               | INTERGENIC      |               |                    |                    |
| SNP_102646_A_119641 | NW_004517087.1 | scaffold2027 | 119641                  | AA                              | TT                 | TT               | INTERGENIC      |               |                    |                    |
| SNP_102647_A_119721 | NW_004517087.1 | scaffold2027 | 119721                  | GG                              | AA                 | AA               | INTERGENIC      |               |                    |                    |
| SNP_102648_A_160045 | NW_004517087.1 | scaffold2027 | 160045                  | TT                              | CC                 | CC               | INTERGENIC      |               |                    |                    |

| SNPs IDs            | Chromosome IDs | Chromosomes  | Physical positions (bp) | CDC Frontier (Reference genome) | (Pusa 1103 & HPNB) | (ILWC 46 & LPNB) | Sequence genome | Components of | Gene accession IDs | Putative functions |
|---------------------|----------------|--------------|-------------------------|---------------------------------|--------------------|------------------|-----------------|---------------|--------------------|--------------------|
| SNP_102649_A_160048 | NW_004517087.1 | scaffold2027 | 160048                  | TT                              | CC                 | CC               | INTERGENIC      |               |                    |                    |
| SNP_102650_A_160057 | NW_004517087.1 | scaffold2027 | 160057                  | AA                              | TT                 | TT               | INTERGENIC      |               |                    |                    |
| SNP_102651_A_160116 | NW_004517087.1 | scaffold2027 | 160116                  | AA                              | GG                 | GG               | INTERGENIC      |               |                    |                    |
| SNP_102652_A_160654 | NW_004517087.1 | scaffold2027 | 160654                  | AA                              | GG                 | GG               | INTERGENIC      |               |                    |                    |
| SNP_102653_A_160734 | NW_004517087.1 | scaffold2027 | 160734                  | TT                              | CC                 | CC               | INTERGENIC      |               |                    |                    |
| SNP_102655_A_161    | NW_004517090.1 | scaffold2030 | 161                     | AA                              | GG                 | GG               | INTERGENIC      |               |                    |                    |
| SNP_102656_A_468    | NW_004517090.1 | scaffold2030 | 468                     | AA                              | GG                 | GG               | INTERGENIC      |               |                    |                    |
| SNP_102657_A_470    | NW_004517090.1 | scaffold2030 | 470                     | GG                              | TT                 | TT               | INTERGENIC      |               |                    |                    |
| SNP_102658_A_3425   | NW_004517090.1 | scaffold2030 | 3425                    | TT                              | CC                 | CC               | INTERGENIC      |               |                    |                    |
| SNP_102659_A_3572   | NW_004517090.1 | scaffold2030 | 3572                    | AA                              | TT                 | TT               | INTERGENIC      |               |                    |                    |
| SNP_102661_A_4574   | NW_004517090.1 | scaffold2030 | 4574                    | GG                              | CC                 | CC               | INTERGENIC      |               |                    |                    |
| SNP_102663_A_4609   | NW_004517090.1 | scaffold2030 | 4609                    | AA                              | GG                 | GG               | INTERGENIC      |               |                    |                    |
| SNP_102664_A_5024   | NW_004517090.1 | scaffold2030 | 5024                    | AA                              | GG                 | GG               | INTERGENIC      |               |                    |                    |
| SNP_102665_A_15500  | NW_004517092.1 | scaffold2033 | 15500                   | CC                              | AA                 | AA               | INTERGENIC      |               |                    |                    |
| SNP_102666_A_15880  | NW_004517092.1 | scaffold2033 | 15880                   | GG                              | AA                 | AA               | INTERGENIC      |               |                    |                    |
| SNP_102667_A_66311  | NW_004517092.1 | scaffold2033 | 66311                   | GG                              | AA                 | AA               | INTERGENIC      |               |                    |                    |
| SNP_102668_A_66315  | NW_004517092.1 | scaffold2033 | 66315                   | AA                              | GG                 | GG               | INTERGENIC      |               |                    |                    |
| SNP_102669_A_66321  | NW_004517092.1 | scaffold2033 | 66321                   | GG                              | AA                 | AA               | INTERGENIC      |               |                    |                    |
| SNP_102670_A_66352  | NW_004517092.1 | scaffold2033 | 66352                   | AA                              | GG                 | GG               | INTERGENIC      |               |                    |                    |
| SNP_102671_A_66380  | NW_004517092.1 | scaffold2033 | 66380                   | CC                              | TT                 | TT               | INTERGENIC      |               |                    |                    |
| SNP_102672_A_66429  | NW_004517092.1 | scaffold2033 | 66429                   | AA                              | TT                 | TT               | INTERGENIC      |               |                    |                    |
| SNP_102673_A_66446  | NW_004517092.1 | scaffold2033 | 66446                   | GG                              | AA                 | AA               | INTERGENIC      |               |                    |                    |

| SNPs IDs            | Chromosome IDs | Chromosomes  | Physical positions (bp) | CDC Frontier (Reference genome) | (Pusa 1103 & HPNB) | (ILWC 46 & LPNB) | Sequence Components of genome | Gene accession IDs | Putative functions                  |
|---------------------|----------------|--------------|-------------------------|---------------------------------|--------------------|------------------|-------------------------------|--------------------|-------------------------------------|
| SNP_102674_A_66457  | NW_004517092.1 | scaffold2033 | 66457                   | TT                              | AA                 | AA               | INTERGENIC                    |                    |                                     |
| SNP_102675_A_66629  | NW_004517092.1 | scaffold2033 | 66629                   | AA                              | CC                 | CC               | INTERGENIC                    |                    |                                     |
| SNP_102676_A_67741  | NW_004517092.1 | scaffold2033 | 67741                   | TT                              | GG                 | GG               | INTERGENIC                    |                    |                                     |
| SNP_102677_A_78585  | NW_004517092.1 | scaffold2033 | 78585                   | AA                              | GG                 | GG               | INTERGENIC                    |                    |                                     |
| SNP_102678_A_89482  | NW_004517092.1 | scaffold2033 | 89482                   | AA                              | CC                 | CC               | INTERGENIC                    |                    |                                     |
| SNP_102680_A_108476 | NW_004517092.1 | scaffold2033 | 108476                  | GG                              | AA                 | AA               | INTERGENIC                    |                    |                                     |
| SNP_102681_A_165495 | NW_004517092.1 | scaffold2033 | 165495                  | GG                              | TT                 | TT               | INTERGENIC                    |                    |                                     |
| SNP_102682_A_181353 | NW_004517092.1 | scaffold2033 | 181353                  | TT                              | CC                 | CC               | NON_SYNONYMOUS_CODING         | 101495114          | GDSL esterase/lipase At5g45910-like |
| SNP_102683_A_182501 | NW_004517092.1 | scaffold2033 | 182501                  | TT                              | CC                 | CC               | SYNONYMOUS_CODING             | 101495114          | GDSL esterase/lipase At5g45910-like |
| SNP_102684_A_183740 | NW_004517092.1 | scaffold2033 | 183740                  | GG                              | AA                 | AA               | URR                           | 101495114          | GDSL esterase/lipase At5g45910-like |
| SNP_102686_A_183898 | NW_004517092.1 | scaffold2033 | 183898                  | CC                              | GG                 | GG               | URR                           | 101495114          | GDSL esterase/lipase At5g45910-like |
| SNP_102687_A_183963 | NW_004517092.1 | scaffold2033 | 183963                  | GG                              | TT                 | TT               | URR                           | 101495114          | GDSL esterase/lipase At5g45910-like |
| SNP_102688_A_184007 | NW_004517092.1 | scaffold2033 | 184007                  | GG                              | AA                 | AA               | URR                           | 101495114          | GDSL esterase/lipase At5g45910-like |
| SNP_102689_A_184160 | NW_004517092.1 | scaffold2033 | 184160                  | AA                              | TT                 | TT               | URR                           | 101495114          | GDSL esterase/lipase At5g45910-like |
| SNP_102690_A_184231 | NW_004517092.1 | scaffold2033 | 184231                  | AA                              | GG                 | GG               | URR                           | 101495114          | GDSL esterase/lipase At5g45910-like |
| SNP_102691_A_184279 | NW_004517092.1 | scaffold2033 | 184279                  | AA                              | GG                 | GG               | URR                           | 101495114          | GDSL esterase/lipase At5g45910-like |
| SNP_102692_A_184280 | NW_004517092.1 | scaffold2033 | 184280                  | AA                              | GG                 | GG               | URR                           | 101495114          | GDSL esterase/lipase At5g45910-like |
| SNP_102693_A_184304 | NW_004517092.1 | scaffold2033 | 184304                  | CC                              | GG                 | GG               | URR                           | 101495114          | GDSL esterase/lipase At5g45910-like |
| SNP_102694_A_184338 | NW_004517092.1 | scaffold2033 | 184338                  | TT                              | GG                 | GG               | URR                           | 101495114          | GDSL esterase/lipase At5g45910-like |
| SNP_102695_A_184424 | NW_004517092.1 | scaffold2033 | 184424                  | TT                              | AA                 | AA               | URR                           | 101495114          | GDSL esterase/lipase At5g45910-like |
| SNP_102697_A_8947   | NW_004517095.1 | scaffold2036 | 8947                    | GG                              | AA                 | AA               | INTERGENIC                    |                    |                                     |
| SNP_102698_A_8993   | NW_004517095.1 | scaffold2036 | 8993                    | AA                              | TT                 | TT               | INTERGENIC                    |                    |                                     |

| SNPs IDs           | Chromosome IDs | Chromosomes  | Physical positions (bp) | CDC Frontier (Reference genome) | (Pusa 1103 & HPNB) | (ILWC 46 & LPNB) | Sequence genome | Components of | Gene accession IDs | Putative functions |
|--------------------|----------------|--------------|-------------------------|---------------------------------|--------------------|------------------|-----------------|---------------|--------------------|--------------------|
| SNP_102699_A_9168  | NW_004517095.1 | scaffold2036 | 9168                    | CC                              | AA                 | AA               | INTERGENIC      |               |                    |                    |
| SNP_102700_A_9177  | NW_004517095.1 | scaffold2036 | 9177                    | AA                              | GG                 | GG               | INTERGENIC      |               |                    |                    |
| SNP_102701_A_14749 | NW_004517095.1 | scaffold2036 | 14749                   | CC                              | TT                 | TT               | INTERGENIC      |               |                    |                    |
| SNP_102702_A_14791 | NW_004517095.1 | scaffold2036 | 14791                   | CC                              | TT                 | TT               | INTERGENIC      |               |                    |                    |
| SNP_102703_A_14826 | NW_004517095.1 | scaffold2036 | 14826                   | GG                              | AA                 | AA               | INTERGENIC      |               |                    |                    |
| SNP_102704_A_15087 | NW_004517095.1 | scaffold2036 | 15087                   | CC                              | GG                 | GG               | INTERGENIC      |               |                    |                    |
| SNP_102705_A_15095 | NW_004517095.1 | scaffold2036 | 15095                   | CC                              | TT                 | TT               | INTERGENIC      |               |                    |                    |
| SNP_102706_A_37883 | NW_004517095.1 | scaffold2036 | 37883                   | AA                              | GG                 | GG               | INTERGENIC      |               |                    |                    |
| SNP_102707_A_43511 | NW_004517095.1 | scaffold2036 | 43511                   | AA                              | CC                 | CC               | INTERGENIC      |               |                    |                    |
| SNP_102708_A_43538 | NW_004517095.1 | scaffold2036 | 43538                   | GG                              | AA                 | AA               | INTERGENIC      |               |                    |                    |
| SNP_102709_A_43929 | NW_004517095.1 | scaffold2036 | 43929                   | CC                              | TT                 | TT               | INTERGENIC      |               |                    |                    |
| SNP_102710_A_48006 | NW_004517095.1 | scaffold2036 | 48006                   | AA                              | GG                 | GG               | INTERGENIC      |               |                    |                    |
| SNP_102711_A_48018 | NW_004517095.1 | scaffold2036 | 48018                   | AA                              | GG                 | GG               | INTERGENIC      |               |                    |                    |
| SNP_102712_A_48047 | NW_004517095.1 | scaffold2036 | 48047                   | TT                              | CC                 | CC               | INTERGENIC      |               |                    |                    |
| SNP_102713_A_48057 | NW_004517095.1 | scaffold2036 | 48057                   | AA                              | GG                 | GG               | INTERGENIC      |               |                    |                    |
| SNP_102714_A_48069 | NW_004517095.1 | scaffold2036 | 48069                   | GG                              | AA                 | AA               | INTERGENIC      |               |                    |                    |
| SNP_102715_A_48090 | NW_004517095.1 | scaffold2036 | 48090                   | GG                              | AA                 | AA               | INTERGENIC      |               |                    |                    |
| SNP_102716_A_48096 | NW_004517095.1 | scaffold2036 | 48096                   | TT                              | CC                 | CC               | INTERGENIC      |               |                    |                    |
| SNP_102717_A_48108 | NW_004517095.1 | scaffold2036 | 48108                   | GG                              | AA                 | AA               | INTERGENIC      |               |                    |                    |
| SNP_102718_A_48113 | NW_004517095.1 | scaffold2036 | 48113                   | GG                              | AA                 | AA               | INTERGENIC      |               |                    |                    |
| SNP_102719_A_48117 | NW_004517095.1 | scaffold2036 | 48117                   | GG                              | AA                 | AA               | INTERGENIC      |               |                    |                    |
| SNP_102720_A_51536 | NW_004517095.1 | scaffold2036 | 51536                   | TT                              | CC                 | CC               | INTERGENIC      |               |                    |                    |

| SNPs IDs            | Chromosome IDs | Chromosomes  | Physical positions (bp) | CDC Frontier (Reference genome) | (Pusa 1103 & HPNB) | (ILWC 46 & LPNB) | Sequence genome | Components of | Gene accession IDs | Putative functions |
|---------------------|----------------|--------------|-------------------------|---------------------------------|--------------------|------------------|-----------------|---------------|--------------------|--------------------|
| SNP_102721_A_51542  | NW_004517095.1 | scaffold2036 | 51542                   | GG                              | AA                 | AA               | INTERGENIC      |               |                    |                    |
| SNP_102722_A_51555  | NW_004517095.1 | scaffold2036 | 51555                   | TT                              | CC                 | CC               | INTERGENIC      |               |                    |                    |
| SNP_102723_A_57296  | NW_004517095.1 | scaffold2036 | 57296                   | TT                              | CC                 | CC               | INTERGENIC      |               |                    |                    |
| SNP_102724_A_57604  | NW_004517095.1 | scaffold2036 | 57604                   | TT                              | AA                 | GG               | INTERGENIC      |               |                    |                    |
| SNP_102725_A_57639  | NW_004517095.1 | scaffold2036 | 57639                   | AA                              | GG                 | GG               | INTERGENIC      |               |                    |                    |
| SNP_102726_A_73197  | NW_004517095.1 | scaffold2036 | 73197                   | AA                              | GG                 | GG               | INTERGENIC      |               |                    |                    |
| SNP_102727_A_73353  | NW_004517095.1 | scaffold2036 | 73353                   | TT                              | CC                 | CC               | INTERGENIC      |               |                    |                    |
| SNP_102728_A_73380  | NW_004517095.1 | scaffold2036 | 73380                   | TT                              | AA                 | AA               | INTERGENIC      |               |                    |                    |
| SNP_102729_A_73449  | NW_004517095.1 | scaffold2036 | 73449                   | CC                              | AA                 | AA               | INTERGENIC      |               |                    |                    |
| SNP_102730_A_73453  | NW_004517095.1 | scaffold2036 | 73453                   | TT                              | GG                 | GG               | INTERGENIC      |               |                    |                    |
| SNP_102731_A_73476  | NW_004517095.1 | scaffold2036 | 73476                   | TT                              | CC                 | CC               | INTERGENIC      |               |                    |                    |
| SNP_102732_A_73486  | NW_004517095.1 | scaffold2036 | 73486                   | GG                              | AA                 | AA               | INTERGENIC      |               |                    |                    |
| SNP_102733_A_73501  | NW_004517095.1 | scaffold2036 | 73501                   | AA                              | CC                 | CC               | INTERGENIC      |               |                    |                    |
| SNP_102734_A_73502  | NW_004517095.1 | scaffold2036 | 73502                   | AA                              | CC                 | CC               | INTERGENIC      |               |                    |                    |
| SNP_102735_A_73504  | NW_004517095.1 | scaffold2036 | 73504                   | CC                              | TT                 | TT               | INTERGENIC      |               |                    |                    |
| SNP_102736_A_73561  | NW_004517095.1 | scaffold2036 | 73561                   | AA                              | CC                 | CC               | INTERGENIC      |               |                    |                    |
| SNP_102739_A_157689 | NW_004517095.1 | scaffold2036 | 157689                  | CC                              | TT                 | TT               | INTERGENIC      |               |                    |                    |
| SNP_102740_A_157971 | NW_004517095.1 | scaffold2036 | 157971                  | CC                              | TT                 | TT               | INTERGENIC      |               |                    |                    |
| SNP_102741_A_158079 | NW_004517095.1 | scaffold2036 | 158079                  | AA                              | CC                 | CC               | INTERGENIC      |               |                    |                    |
| SNP_102742_A_158112 | NW_004517095.1 | scaffold2036 | 158112                  | TT                              | CC                 | CC               | INTERGENIC      |               |                    |                    |
| SNP_102743_A_182687 | NW_004517095.1 | scaffold2036 | 182687                  | AA                              | GG                 | GG               | INTERGENIC      |               |                    |                    |
| SNP_102744_A_215475 | NW_004517095.1 | scaffold2036 | 215475                  | AA                              | TT                 | TT               | INTERGENIC      |               |                    |                    |

| SNPs IDs            | Chromosome IDs | Chromosomes  | Physical positions (bp) | CDC Frontier (Reference genome) | (Pusa 1103 & HPNB) | (ILWC 46 & LPNB) | Sequence Components of genome | Gene accession IDs | Putative functions                          |
|---------------------|----------------|--------------|-------------------------|---------------------------------|--------------------|------------------|-------------------------------|--------------------|---------------------------------------------|
| SNP_102746_A_8288   | NW_004517096.1 | scaffold2037 | 8288                    | TT                              | CC                 | CC               | INTERGENIC                    |                    |                                             |
| SNP_102747_A_20326  | NW_004517096.1 | scaffold2037 | 20326                   | CC                              | AA                 | AA               | INTERGENIC                    |                    |                                             |
| SNP_102748_A_43497  | NW_004517096.1 | scaffold2037 | 43497                   | GG                              | TT                 | TT               | INTERGENIC                    |                    |                                             |
| SNP_102749_A_43744  | NW_004517096.1 | scaffold2037 | 43744                   | CC                              | TT                 | TT               | INTERGENIC                    |                    |                                             |
| SNP_102752_A_20670  | NW_004517097.1 | scaffold2039 | 20670                   | AA                              | GG                 | GG               | INTERGENIC                    |                    |                                             |
| SNP_102753_A_26789  | NW_004517097.1 | scaffold2039 | 26789                   | AA                              | GG                 | GG               | INTERGENIC                    |                    |                                             |
| SNP_102754_A_32328  | NW_004517097.1 | scaffold2039 | 32328                   | AA                              | TT                 | TT               | INTERGENIC                    |                    |                                             |
| SNP_102758_A_202371 | NW_004517097.1 | scaffold2039 | 202371                  | AA                              | GG                 | GG               | INTRON                        | 101500522          | glycerol-3-phosphate acyltransferase 1-like |
| SNP_102759_A_14515  | NW_004517098.1 | scaffold2040 | 14515                   | AA                              | GG                 | GG               | INTERGENIC                    |                    |                                             |
| SNP_102760_A_14538  | NW_004517098.1 | scaffold2040 | 14538                   | AA                              | GG                 | GG               | INTERGENIC                    |                    |                                             |
| SNP_102761_A_14906  | NW_004517098.1 | scaffold2040 | 14906                   | AA                              | GG                 | GG               | INTERGENIC                    |                    |                                             |
| SNP_102762_A_19799  | NW_004517098.1 | scaffold2040 | 19799                   | CC                              | TT                 | TT               | INTERGENIC                    |                    |                                             |
| SNP_102763_A_20124  | NW_004517098.1 | scaffold2040 | 20124                   | TT                              | GG                 | GG               | INTERGENIC                    |                    |                                             |
| SNP_102764_A_20391  | NW_004517098.1 | scaffold2040 | 20391                   | CC                              | TT                 | TT               | INTERGENIC                    |                    |                                             |
| SNP_102765_A_20587  | NW_004517098.1 | scaffold2040 | 20587                   | GG                              | AA                 | AA               | INTERGENIC                    |                    |                                             |
| SNP_102766_A_20819  | NW_004517098.1 | scaffold2040 | 20819                   | CC                              | TT                 | TT               | INTERGENIC                    |                    |                                             |
| SNP_102767_A_35197  | NW_004517098.1 | scaffold2040 | 35197                   | AA                              | GG                 | GG               | INTERGENIC                    |                    |                                             |
| SNP_102768_A_35230  | NW_004517098.1 | scaffold2040 | 35230                   | TT                              | CC                 | CC               | INTERGENIC                    |                    |                                             |
| SNP_102769_A_35255  | NW_004517098.1 | scaffold2040 | 35255                   | GG                              | TT                 | TT               | INTERGENIC                    |                    |                                             |
| SNP_102770_A_60751  | NW_004517098.1 | scaffold2040 | 60751                   | GG                              | AA                 | AA               | INTERGENIC                    |                    |                                             |
| SNP_102771_A_69734  | NW_004517098.1 | scaffold2040 | 69734                   | GG                              | TT                 | TT               | INTERGENIC                    |                    |                                             |
| SNP_102772_A_69764  | NW_004517098.1 | scaffold2040 | 69764                   | GG                              | TT                 | TT               | INTERGENIC                    |                    |                                             |

| SNPs IDs            | Chromosome IDs | Chromosomes  | Physical positions (bp) | CDC Frontier (Reference genome) | (Pusa 1103 & HPNB) | (ILWC 46 & LPNB) | Sequence genome | Components of | Gene accession IDs | Putative functions |
|---------------------|----------------|--------------|-------------------------|---------------------------------|--------------------|------------------|-----------------|---------------|--------------------|--------------------|
| SNP_102773_A_71437  | NW_004517098.1 | scaffold2040 | 71437                   | AA                              | GG                 | GG               | INTERGENIC      |               |                    |                    |
| SNP_102774_A_71481  | NW_004517098.1 | scaffold2040 | 71481                   | AA                              | GG                 | GG               | INTERGENIC      |               |                    |                    |
| SNP_102775_A_82962  | NW_004517098.1 | scaffold2040 | 82962                   | CC                              | GG                 | GG               | INTERGENIC      |               |                    |                    |
| SNP_102777_A_115498 | NW_004517098.1 | scaffold2040 | 115498                  | TT                              | AA                 | AA               | INTERGENIC      |               |                    |                    |
| SNP_102778_A_115916 | NW_004517098.1 | scaffold2040 | 115916                  | TT                              | CC                 | CC               | INTERGENIC      |               |                    |                    |
| SNP_102779_A_115945 | NW_004517098.1 | scaffold2040 | 115945                  | TT                              | CC                 | CC               | INTERGENIC      |               |                    |                    |
| SNP_102780_A_115950 | NW_004517098.1 | scaffold2040 | 115950                  | CC                              | TT                 | TT               | INTERGENIC      |               |                    |                    |
| SNP_102781_A_127225 | NW_004517098.1 | scaffold2040 | 127225                  | AA                              | GG                 | GG               | INTERGENIC      |               |                    |                    |
| SNP_102782_A_127949 | NW_004517098.1 | scaffold2040 | 127949                  | GG                              | AA                 | AA               | INTERGENIC      |               |                    |                    |
| SNP_102783_A_138283 | NW_004517098.1 | scaffold2040 | 138283                  | GG                              | AA                 | AA               | INTERGENIC      |               |                    |                    |
| SNP_102784_A_139085 | NW_004517098.1 | scaffold2040 | 139085                  | CC                              | GG                 | GG               | INTERGENIC      |               |                    |                    |
| SNP_102785_A_139776 | NW_004517098.1 | scaffold2040 | 139776                  | AA                              | GG                 | GG               | INTERGENIC      |               |                    |                    |
| SNP_102786_A_139927 | NW_004517098.1 | scaffold2040 | 139927                  | CC                              | TT                 | TT               | INTERGENIC      |               |                    |                    |
| SNP_102787_A_139945 | NW_004517098.1 | scaffold2040 | 139945                  | TT                              | GG                 | GG               | INTERGENIC      |               |                    |                    |
| SNP_102788_A_140004 | NW_004517098.1 | scaffold2040 | 140004                  | AA                              | GG                 | GG               | INTERGENIC      |               |                    |                    |
| SNP_102789_A_140027 | NW_004517098.1 | scaffold2040 | 140027                  | TT                              | CC                 | CC               | INTERGENIC      |               |                    |                    |
| SNP_102791_A_158157 | NW_004517098.1 | scaffold2040 | 158157                  | TT                              | CC                 | CC               | INTERGENIC      |               |                    |                    |
| SNP_102793_A_159630 | NW_004517098.1 | scaffold2040 | 159630                  | AA                              | GG                 | GG               | INTERGENIC      |               |                    |                    |
| SNP_102794_A_163384 | NW_004517098.1 | scaffold2040 | 163384                  | AA                              | GG                 | GG               | INTERGENIC      |               |                    |                    |
| SNP_102795_A_163448 | NW_004517098.1 | scaffold2040 | 163448                  | GG                              | AA                 | AA               | INTERGENIC      |               |                    |                    |
| SNP_102796_A_163496 | NW_004517098.1 | scaffold2040 | 163496                  | CC                              | TT                 | TT               | INTERGENIC      |               |                    |                    |
| SNP_102797_A_163824 | NW_004517098.1 | scaffold2040 | 163824                  | TT                              | AA                 | AA               | INTERGENIC      |               |                    |                    |



| SNPs IDs            | Chromosome IDs | Chromosomes  | Physical positions (bp) | CDC Frontier (Reference genome) | (Pusa 1103 & HPNB) | (ILWC 46 & LPNB) | Sequence Components of genome | Gene accession IDs | Putative functions                     |
|---------------------|----------------|--------------|-------------------------|---------------------------------|--------------------|------------------|-------------------------------|--------------------|----------------------------------------|
| SNP_102798_A_172714 | NW_004517098.1 | scaffold2040 | 172714                  | CC                              | GG                 | GG               | INTERGENIC                    |                    |                                        |
| SNP_102799_A_174316 | NW_004517098.1 | scaffold2040 | 174316                  | TT                              | GG                 | GG               | INTERGENIC                    |                    |                                        |
| SNP_102800_A_181076 | NW_004517098.1 | scaffold2040 | 181076                  | CC                              | AA                 | AA               | URR                           | 101502234          | protein RESTRICTED TEV MOVEMENT 2-like |
| SNP_102801_A_181087 | NW_004517098.1 | scaffold2040 | 181087                  | AA                              | TT                 | TT               | URR                           | 101502234          | protein RESTRICTED TEV MOVEMENT 2-like |
| SNP_102802_A_181135 | NW_004517098.1 | scaffold2040 | 181135                  | AA                              | GG                 | GG               | URR                           | 101502234          | protein RESTRICTED TEV MOVEMENT 2-like |
| SNP_102803_A_200649 | NW_004517098.1 | scaffold2040 | 200649                  | AA                              | GG                 | GG               | INTERGENIC                    |                    |                                        |
| SNP_102804_A_200951 | NW_004517098.1 | scaffold2040 | 200951                  | TT                              | CC                 | CC               | INTERGENIC                    |                    |                                        |
| SNP_102805_A_200977 | NW_004517098.1 | scaffold2040 | 200977                  | TT                              | AA                 | AA               | INTERGENIC                    |                    |                                        |
| SNP_102806_A_212670 | NW_004517098.1 | scaffold2040 | 212670                  | CC                              | GG                 | GG               | INTERGENIC                    |                    |                                        |
| SNP_102807_A_243953 | NW_004517098.1 | scaffold2040 | 243953                  | AA                              | TT                 | TT               | INTERGENIC                    |                    |                                        |
| SNP_102808_A_243971 | NW_004517098.1 | scaffold2040 | 243971                  | CC                              | GG                 | GG               | INTERGENIC                    |                    |                                        |
| SNP_102809_A_244057 | NW_004517098.1 | scaffold2040 | 244057                  | TT                              | CC                 | CC               | INTERGENIC                    |                    |                                        |
| SNP_102810_A_413    | NW_004517104.1 | scaffold2050 | 413                     | GG                              | CC                 | CC               | INTERGENIC                    |                    |                                        |
| SNP_102811_A_481    | NW_004517104.1 | scaffold2050 | 481                     | TT                              | CC                 | CC               | INTERGENIC                    |                    |                                        |
| SNP_102812_A_6040   | NW_004517105.1 | scaffold2051 | 6040                    | CC                              | TT                 | TT               | INTERGENIC                    |                    |                                        |
| SNP_102813_A_6498   | NW_004517105.1 | scaffold2051 | 6498                    | CC                              | AA                 | AA               | INTERGENIC                    |                    |                                        |
| SNP_102815_A_8291   | NW_004517105.1 | scaffold2051 | 8291                    | GG                              | AA                 | AA               | INTERGENIC                    |                    |                                        |
| SNP_102816_A_9558   | NW_004517105.1 | scaffold2051 | 9558                    | CC                              | TT                 | TT               | INTERGENIC                    |                    |                                        |
| SNP_102817_A_9584   | NW_004517105.1 | scaffold2051 | 9584                    | TT                              | AA                 | AA               | INTERGENIC                    |                    |                                        |
| SNP_102818_A_9757   | NW_004517105.1 | scaffold2051 | 9757                    | CC                              | TT                 | TT               | INTERGENIC                    |                    |                                        |
| SNP_102819_A_9906   | NW_004517105.1 | scaffold2051 | 9906                    | GG                              | TT                 | TT               | INTERGENIC                    |                    |                                        |
| SNP_102821_A_11946  | NW_004517105.1 | scaffold2051 | 11946                   | TT                              | GG                 | GG               | NON_SYNONYMOUS_CODING         | 101505113          | sugar transport protein 10-like        |

| SNPs IDs            | Chromosome IDs | Chromosomes  | Physical positions (bp) | CDC Frontier (Reference genome) | (Pusa 1103 & HPNB) | (ILWC 46 & LPNB) | Sequence Components of genome | Gene accession IDs | Putative functions              |
|---------------------|----------------|--------------|-------------------------|---------------------------------|--------------------|------------------|-------------------------------|--------------------|---------------------------------|
| SNP_102822_A_12017  | NW_004517105.1 | scaffold2051 | 12017                   | AA                              | CC                 | CC               | SYNONYMOUS_CODING             | 101505113          | sugar transport protein 10-like |
| SNP_102823_A_12041  | NW_004517105.1 | scaffold2051 | 12041                   | TT                              | CC                 | CC               | SYNONYMOUS_CODING             | 101505113          | sugar transport protein 10-like |
| SNP_102824_A_12115  | NW_004517105.1 | scaffold2051 | 12115                   | AA                              | CC                 | CC               | STOP_LOST                     | 101505113          | sugar transport protein 10-like |
| SNP_102825_A_12244  | NW_004517105.1 | scaffold2051 | 12244                   | GG                              | AA                 | AA               | NON_SYNONYMOUS_CODING         | 101505113          | sugar transport protein 10-like |
| SNP_102826_A_12420  | NW_004517105.1 | scaffold2051 | 12420                   | TT                              | CC                 | CC               | NON_SYNONYMOUS_CODING         | 101505113          | sugar transport protein 10-like |
| SNP_102827_A_24811  | NW_004517105.1 | scaffold2051 | 24811                   | AA                              | GG                 | GG               | INTERGENIC                    |                    |                                 |
| SNP_102828_A_24843  | NW_004517105.1 | scaffold2051 | 24843                   | GG                              | TT                 | TT               | INTERGENIC                    |                    |                                 |
| SNP_102829_A_32531  | NW_004517105.1 | scaffold2051 | 32531                   | AA                              | TT                 | TT               | INTERGENIC                    |                    |                                 |
| SNP_102830_A_40629  | NW_004517105.1 | scaffold2051 | 40629                   | CC                              | GG                 | GG               | INTERGENIC                    |                    |                                 |
| SNP_102831_A_40656  | NW_004517105.1 | scaffold2051 | 40656                   | TT                              | CC                 | CC               | INTERGENIC                    |                    |                                 |
| SNP_102832_A_40679  | NW_004517105.1 | scaffold2051 | 40679                   | GG                              | AA                 | AA               | INTERGENIC                    |                    |                                 |
| SNP_102833_A_40759  | NW_004517105.1 | scaffold2051 | 40759                   | TT                              | CC                 | CC               | INTERGENIC                    |                    |                                 |
| SNP_102834_A_40787  | NW_004517105.1 | scaffold2051 | 40787                   | AA                              | GG                 | GG               | INTERGENIC                    |                    |                                 |
| SNP_102835_A_40789  | NW_004517105.1 | scaffold2051 | 40789                   | TT                              | CC                 | CC               | INTERGENIC                    |                    |                                 |
| SNP_102836_A_40800  | NW_004517105.1 | scaffold2051 | 40800                   | AA                              | GG                 | GG               | INTERGENIC                    |                    |                                 |
| SNP_102837_A_93408  | NW_004517105.1 | scaffold2051 | 93408                   | TT                              | AA                 | AA               | INTERGENIC                    |                    |                                 |
| SNP_102838_A_93485  | NW_004517105.1 | scaffold2051 | 93485                   | TT                              | CC                 | CC               | INTERGENIC                    |                    |                                 |
| SNP_102839_A_114393 | NW_004517105.1 | scaffold2051 | 114393                  | TT                              | AA                 | AA               | INTERGENIC                    |                    |                                 |
| SNP_102840_A_141663 | NW_004517105.1 | scaffold2051 | 141663                  | CC                              | GG                 | GG               | INTERGENIC                    |                    |                                 |
| SNP_102841_A_141711 | NW_004517105.1 | scaffold2051 | 141711                  | TT                              | CC                 | CC               | INTERGENIC                    |                    |                                 |
| SNP_102842_A_141730 | NW_004517105.1 | scaffold2051 | 141730                  | CC                              | GG                 | GG               | INTERGENIC                    |                    |                                 |
| SNP_102843_A_141984 | NW_004517105.1 | scaffold2051 | 141984                  | AA                              | GG                 | GG               | INTERGENIC                    |                    |                                 |

| SNPs IDs            | Chromosome IDs | Chromosomes  | Physical positions (bp) | CDC Frontier (Reference genome) | (Pusa 1103 & HPNB) | (ILWC 46 & LPNB) | Sequence genome | Components of | Gene accession IDs | Putative functions |
|---------------------|----------------|--------------|-------------------------|---------------------------------|--------------------|------------------|-----------------|---------------|--------------------|--------------------|
| SNP_102844_A_142076 | NW_004517105.1 | scaffold2051 | 142076                  | AA                              | GG                 | GG               | INTERGENIC      |               |                    |                    |
| SNP_102845_A_142077 | NW_004517105.1 | scaffold2051 | 142077                  | TT                              | GG                 | GG               | INTERGENIC      |               |                    |                    |
| SNP_102846_A_189050 | NW_004517105.1 | scaffold2051 | 189050                  | GG                              | AA                 | AA               | INTERGENIC      |               |                    |                    |
| SNP_102847_A_189069 | NW_004517105.1 | scaffold2051 | 189069                  | CC                              | AA                 | AA               | INTERGENIC      |               |                    |                    |
| SNP_102848_A_189080 | NW_004517105.1 | scaffold2051 | 189080                  | GG                              | AA                 | AA               | INTERGENIC      |               |                    |                    |
| SNP_102849_A_191296 | NW_004517105.1 | scaffold2051 | 191296                  | GG                              | AA                 | AA               | INTERGENIC      |               |                    |                    |
| SNP_102850_A_204797 | NW_004517105.1 | scaffold2051 | 204797                  | CC                              | GG                 | GG               | INTERGENIC      |               |                    |                    |
| SNP_102851_A_170    | NW_004517107.1 | scaffold2054 | 170                     | TT                              | CC                 | CC               | INTERGENIC      |               |                    |                    |
| SNP_102852_A_1939   | NW_004517109.1 | scaffold2056 | 1939                    | AA                              | TT                 | TT               | INTERGENIC      |               |                    |                    |
| SNP_102853_A_3457   | NW_004517109.1 | scaffold2056 | 3457                    | GG                              | AA                 | AA               | INTERGENIC      |               |                    |                    |
| SNP_102854_A_3472   | NW_004517109.1 | scaffold2056 | 3472                    | CC                              | TT                 | TT               | INTERGENIC      |               |                    |                    |
| SNP_102855_A_3479   | NW_004517109.1 | scaffold2056 | 3479                    | TT                              | GG                 | GG               | INTERGENIC      |               |                    |                    |
| SNP_102856_A_3492   | NW_004517109.1 | scaffold2056 | 3492                    | TT                              | GG                 | GG               | INTERGENIC      |               |                    |                    |
| SNP_102857_A_3729   | NW_004517109.1 | scaffold2056 | 3729                    | AA                              | TT                 | TT               | INTERGENIC      |               |                    |                    |
| SNP_102858_A_3730   | NW_004517109.1 | scaffold2056 | 3730                    | CC                              | TT                 | TT               | INTERGENIC      |               |                    |                    |
| SNP_102859_A_3757   | NW_004517109.1 | scaffold2056 | 3757                    | TT                              | GG                 | GG               | INTERGENIC      |               |                    |                    |
| SNP_102860_A_4154   | NW_004517109.1 | scaffold2056 | 4154                    | TT                              | GG                 | GG               | INTERGENIC      |               |                    |                    |
| SNP_102861_A_782    | NW_004517112.1 | scaffold2063 | 782                     | CC                              | TT                 | TT               | INTERGENIC      |               |                    |                    |
| SNP_102862_A_1321   | NW_004517113.1 | scaffold2064 | 1321                    | TT                              | CC                 | CC               | INTERGENIC      |               |                    |                    |
| SNP_102863_A_1565   | NW_004517113.1 | scaffold2064 | 1565                    | GG                              | TT                 | TT               | INTERGENIC      |               |                    |                    |
| SNP_102864_A_1620   | NW_004517113.1 | scaffold2064 | 1620                    | AA                              | TT                 | TT               | INTERGENIC      |               |                    |                    |
| SNP_102865_A_7287   | NW_004517113.1 | scaffold2064 | 7287                    | AA                              | GG                 | GG               | INTERGENIC      |               |                    |                    |

| SNPs IDs           | Chromosome IDs | Chromosomes  | Physical positions (bp) | CDC Frontier (Reference genome) | (Pusa 1103 & HPNB) | (ILWC 46 & LPNB) | Sequence genome | Components of | Gene accession IDs | Putative functions |
|--------------------|----------------|--------------|-------------------------|---------------------------------|--------------------|------------------|-----------------|---------------|--------------------|--------------------|
| SNP_102866_A_7302  | NW_004517113.1 | scaffold2064 | 7302                    | AA                              | CC                 | CC               | INTERGENIC      |               |                    |                    |
| SNP_102867_A_7303  | NW_004517113.1 | scaffold2064 | 7303                    | GG                              | AA                 | AA               | INTERGENIC      |               |                    |                    |
| SNP_102868_A_7321  | NW_004517113.1 | scaffold2064 | 7321                    | TT                              | CC                 | CC               | INTERGENIC      |               |                    |                    |
| SNP_102869_A_9146  | NW_004517113.1 | scaffold2064 | 9146                    | AA                              | GG                 | GG               | INTERGENIC      |               |                    |                    |
| SNP_102870_A_9173  | NW_004517113.1 | scaffold2064 | 9173                    | GG                              | AA                 | AA               | INTERGENIC      |               |                    |                    |
| SNP_102871_A_9178  | NW_004517113.1 | scaffold2064 | 9178                    | GG                              | TT                 | TT               | INTERGENIC      |               |                    |                    |
| SNP_102872_A_2703  | NW_004517115.1 | scaffold2066 | 2703                    | TT                              | CC                 | CC               | INTERGENIC      |               |                    |                    |
| SNP_102873_A_3236  | NW_004517118.1 | scaffold2072 | 3236                    | GG                              | AA                 | AA               | INTERGENIC      |               |                    |                    |
| SNP_102874_A_3239  | NW_004517118.1 | scaffold2072 | 3239                    | AA                              | GG                 | GG               | INTERGENIC      |               |                    |                    |
| SNP_102875_A_4777  | NW_004517118.1 | scaffold2072 | 4777                    | TT                              | AA                 | AA               | INTERGENIC      |               |                    |                    |
| SNP_102876_A_5071  | NW_004517118.1 | scaffold2072 | 5071                    | AA                              | GG                 | GG               | INTERGENIC      |               |                    |                    |
| SNP_102877_A_5303  | NW_004517118.1 | scaffold2072 | 5303                    | GG                              | AA                 | AA               | INTERGENIC      |               |                    |                    |
| SNP_102878_A_6810  | NW_004517118.1 | scaffold2072 | 6810                    | GG                              | AA                 | AA               | INTERGENIC      |               |                    |                    |
| SNP_102879_A_6985  | NW_004517118.1 | scaffold2072 | 6985                    | AA                              | GG                 | GG               | INTERGENIC      |               |                    |                    |
| SNP_102880_A_10638 | NW_004517118.1 | scaffold2072 | 10638                   | TT                              | CC                 | CC               | INTERGENIC      |               |                    |                    |
| SNP_102881_A_11522 | NW_004517118.1 | scaffold2072 | 11522                   | CC                              | TT                 | TT               | INTERGENIC      |               |                    |                    |
| SNP_102882_A_11531 | NW_004517118.1 | scaffold2072 | 11531                   | TT                              | CC                 | CC               | INTERGENIC      |               |                    |                    |
| SNP_102883_A_11679 | NW_004517118.1 | scaffold2072 | 11679                   | AA                              | CC                 | CC               | INTERGENIC      |               |                    |                    |
| SNP_102884_A_11840 | NW_004517118.1 | scaffold2072 | 11840                   | CC                              | TT                 | TT               | INTERGENIC      |               |                    |                    |
| SNP_102885_A_16203 | NW_004517118.1 | scaffold2072 | 16203                   | CC                              | GG                 | GG               | INTERGENIC      |               |                    |                    |
| SNP_102886_A_36504 | NW_004517118.1 | scaffold2072 | 36504                   | CC                              | AA                 | AA               | INTERGENIC      |               |                    |                    |
| SNP_102887_A_38202 | NW_004517118.1 | scaffold2072 | 38202                   | CC                              | TT                 | TT               | INTERGENIC      |               |                    |                    |

| SNPs IDs           | Chromosome IDs | Chromosomes  | Physical positions (bp) | CDC Frontier (Reference genome) | (Pusa 1103 & HPNB) | (ILWC 46 & LPNB) | Sequence genome | Components of | Gene accession IDs | Putative functions |
|--------------------|----------------|--------------|-------------------------|---------------------------------|--------------------|------------------|-----------------|---------------|--------------------|--------------------|
| SNP_102888_A_38241 | NW_004517118.1 | scaffold2072 | 38241                   | CC                              | GG                 | GG               | INTERGENIC      |               |                    |                    |
| SNP_102889_A_38262 | NW_004517118.1 | scaffold2072 | 38262                   | GG                              | TT                 | TT               | INTERGENIC      |               |                    |                    |
| SNP_102890_A_38288 | NW_004517118.1 | scaffold2072 | 38288                   | TT                              | GG                 | GG               | INTERGENIC      |               |                    |                    |
| SNP_102891_A_38375 | NW_004517118.1 | scaffold2072 | 38375                   | TT                              | CC                 | CC               | INTERGENIC      |               |                    |                    |
| SNP_102892_A_39039 | NW_004517118.1 | scaffold2072 | 39039                   | TT                              | AA                 | AA               | INTERGENIC      |               |                    |                    |
| SNP_102893_A_39139 | NW_004517118.1 | scaffold2072 | 39139                   | AA                              | GG                 | GG               | INTERGENIC      |               |                    |                    |
| SNP_102894_A_39337 | NW_004517118.1 | scaffold2072 | 39337                   | AA                              | GG                 | GG               | INTERGENIC      |               |                    |                    |
| SNP_102895_A_16990 | NW_004517119.1 | scaffold2074 | 16990                   | GG                              | TT                 | TT               | INTERGENIC      |               |                    |                    |
| SNP_102896_A_16997 | NW_004517119.1 | scaffold2074 | 16997                   | AA                              | TT                 | TT               | INTERGENIC      |               |                    |                    |
| SNP_102897_A_17276 | NW_004517119.1 | scaffold2074 | 17276                   | GG                              | AA                 | AA               | INTERGENIC      |               |                    |                    |
| SNP_102898_A_17282 | NW_004517119.1 | scaffold2074 | 17282                   | AA                              | GG                 | GG               | INTERGENIC      |               |                    |                    |
| SNP_102899_A_17402 | NW_004517119.1 | scaffold2074 | 17402                   | CC                              | TT                 | TT               | INTERGENIC      |               |                    |                    |
| SNP_102900_A_3774  | NW_004517120.1 | scaffold2075 | 3774                    | TT                              | GG                 | GG               | INTERGENIC      |               |                    |                    |
| SNP_102901_A_3832  | NW_004517120.1 | scaffold2075 | 3832                    | AA                              | GG                 | GG               | INTERGENIC      |               |                    |                    |
| SNP_102902_A_4183  | NW_004517120.1 | scaffold2075 | 4183                    | GG                              | TT                 | TT               | INTERGENIC      |               |                    |                    |
| SNP_102903_A_913   | NW_004517121.1 | scaffold2076 | 913                     | CC                              | TT                 | TT               | INTERGENIC      |               |                    |                    |
| SNP_102904_A_928   | NW_004517121.1 | scaffold2076 | 928                     | CC                              | TT                 | TT               | INTERGENIC      |               |                    |                    |
| SNP_102905_A_1012  | NW_004517121.1 | scaffold2076 | 1012                    | AA                              | GG                 | GG               | INTERGENIC      |               |                    |                    |
| SNP_102906_A_1287  | NW_004517121.1 | scaffold2076 | 1287                    | CC                              | AA                 | AA               | INTERGENIC      |               |                    |                    |
| SNP_102907_A_1482  | NW_004517121.1 | scaffold2076 | 1482                    | AA                              | GG                 | GG               | INTERGENIC      |               |                    |                    |
| SNP_102908_A_1617  | NW_004517121.1 | scaffold2076 | 1617                    | TT                              | AA                 | AA               | INTERGENIC      |               |                    |                    |
| SNP_102909_A_11266 | NW_004517121.1 | scaffold2076 | 11266                   | AA                              | CC                 | CC               | INTERGENIC      |               |                    |                    |

| SNPs IDs           | Chromosome IDs | Chromosomes  | Physical positions (bp) | CDC Frontier (Reference genome) | (Pusa 1103 & HPNB) | (ILWC 46 & LPNB) | Sequence genome | Components of | Gene accession IDs | Putative functions |
|--------------------|----------------|--------------|-------------------------|---------------------------------|--------------------|------------------|-----------------|---------------|--------------------|--------------------|
| SNP_102910_A_11288 | NW_004517121.1 | scaffold2076 | 11288                   | GG                              | TT                 | TT               | INTERGENIC      |               |                    |                    |
| SNP_102911_A_11626 | NW_004517121.1 | scaffold2076 | 11626                   | TT                              | GG                 | GG               | INTERGENIC      |               |                    |                    |
| SNP_102912_A_12219 | NW_004517121.1 | scaffold2076 | 12219                   | TT                              | AA                 | AA               | INTERGENIC      |               |                    |                    |
| SNP_102913_A_20973 | NW_004517121.1 | scaffold2076 | 20973                   | AA                              | GG                 | GG               | INTERGENIC      |               |                    |                    |
| SNP_102914_A_20987 | NW_004517121.1 | scaffold2076 | 20987                   | AA                              | GG                 | GG               | INTERGENIC      |               |                    |                    |
| SNP_102915_A_21113 | NW_004517121.1 | scaffold2076 | 21113                   | TT                              | CC                 | CC               | INTERGENIC      |               |                    |                    |
| SNP_102916_A_21251 | NW_004517121.1 | scaffold2076 | 21251                   | TT                              | CC                 | CC               | INTERGENIC      |               |                    |                    |
| SNP_102917_A_21428 | NW_004517121.1 | scaffold2076 | 21428                   | CC                              | AA                 | AA               | INTERGENIC      |               |                    |                    |
| SNP_102918_A_21436 | NW_004517121.1 | scaffold2076 | 21436                   | CC                              | TT                 | TT               | INTERGENIC      |               |                    |                    |
| SNP_102919_A_21465 | NW_004517121.1 | scaffold2076 | 21465                   | GG                              | TT                 | TT               | INTERGENIC      |               |                    |                    |
| SNP_102920_A_21467 | NW_004517121.1 | scaffold2076 | 21467                   | GG                              | TT                 | TT               | INTERGENIC      |               |                    |                    |
| SNP_102921_A_21766 | NW_004517121.1 | scaffold2076 | 21766                   | AA                              | TT                 | TT               | INTERGENIC      |               |                    |                    |
| SNP_102922_A_21782 | NW_004517121.1 | scaffold2076 | 21782                   | CC                              | TT                 | TT               | INTERGENIC      |               |                    |                    |
| SNP_102923_A_2903  | NW_004517124.1 | scaffold2081 | 2903                    | AA                              | TT                 | TT               | INTERGENIC      |               |                    |                    |
| SNP_102924_A_2923  | NW_004517124.1 | scaffold2081 | 2923                    | TT                              | AA                 | AA               | INTERGENIC      |               |                    |                    |
| SNP_102925_A_7804  | NW_004517125.1 | scaffold2082 | 7804                    | AA                              | TT                 | TT               | INTERGENIC      |               |                    |                    |
| SNP_102926_A_27475 | NW_004517125.1 | scaffold2082 | 27475                   | TT                              | CC                 | CC               | INTERGENIC      |               |                    |                    |
| SNP_102927_A_27568 | NW_004517125.1 | scaffold2082 | 27568                   | AA                              | CC                 | CC               | INTERGENIC      |               |                    |                    |
| SNP_102928_A_29573 | NW_004517125.1 | scaffold2082 | 29573                   | AA                              | TT                 | TT               | INTERGENIC      |               |                    |                    |
| SNP_102929_A_29622 | NW_004517125.1 | scaffold2082 | 29622                   | AA                              | TT                 | TT               | INTERGENIC      |               |                    |                    |
| SNP_102930_A_29684 | NW_004517125.1 | scaffold2082 | 29684                   | GG                              | AA                 | AA               | INTERGENIC      |               |                    |                    |
| SNP_102931_A_44765 | NW_004517125.1 | scaffold2082 | 44765                   | AA                              | CC                 | CC               | INTERGENIC      |               |                    |                    |

| SNPs IDs           | Chromosome IDs | Chromosomes  | Physical positions (bp) | CDC Frontier (Reference genome) | (Pusa 1103 & HPNB) | (ILWC 46 & LPNB) | Sequence genome | Components of | Gene accession IDs | Putative functions |
|--------------------|----------------|--------------|-------------------------|---------------------------------|--------------------|------------------|-----------------|---------------|--------------------|--------------------|
| SNP_102932_A_44766 | NW_004517125.1 | scaffold2082 | 44766                   | AA                              | GG                 | GG               | INTERGENIC      |               |                    |                    |
| SNP_102933_A_44932 | NW_004517125.1 | scaffold2082 | 44932                   | GG                              | AA                 | AA               | INTERGENIC      |               |                    |                    |
| SNP_102934_A_56456 | NW_004517125.1 | scaffold2082 | 56456                   | GG                              | AA                 | AA               | INTERGENIC      |               |                    |                    |
| SNP_102935_A_58367 | NW_004517125.1 | scaffold2082 | 58367                   | TT                              | CC                 | CC               | INTERGENIC      |               |                    |                    |
| SNP_102936_A_58373 | NW_004517125.1 | scaffold2082 | 58373                   | TT                              | CC                 | CC               | INTERGENIC      |               |                    |                    |
| SNP_102937_A_58396 | NW_004517125.1 | scaffold2082 | 58396                   | GG                              | AA                 | AA               | INTERGENIC      |               |                    |                    |
| SNP_102938_A_58402 | NW_004517125.1 | scaffold2082 | 58402                   | TT                              | CC                 | CC               | INTERGENIC      |               |                    |                    |
| SNP_102939_A_58410 | NW_004517125.1 | scaffold2082 | 58410                   | CC                              | TT                 | TT               | INTERGENIC      |               |                    |                    |
| SNP_102941_A_4540  | NW_004517126.1 | scaffold2083 | 4540                    | AA                              | TT                 | TT               | INTERGENIC      |               |                    |                    |
| SNP_102942_A_4564  | NW_004517126.1 | scaffold2083 | 4564                    | AA                              | GG                 | GG               | INTERGENIC      |               |                    |                    |
| SNP_102943_A_4643  | NW_004517126.1 | scaffold2083 | 4643                    | CC                              | TT                 | TT               | INTERGENIC      |               |                    |                    |
| SNP_102944_A_4731  | NW_004517126.1 | scaffold2083 | 4731                    | AA                              | TT                 | TT               | INTERGENIC      |               |                    |                    |
| SNP_102945_A_4834  | NW_004517126.1 | scaffold2083 | 4834                    | CC                              | TT                 | TT               | INTERGENIC      |               |                    |                    |
| SNP_102946_A_5238  | NW_004517126.1 | scaffold2083 | 5238                    | TT                              | CC                 | CC               | INTERGENIC      |               |                    |                    |
| SNP_102947_A_1514  | NW_004517129.1 | scaffold2087 | 1514                    | AA                              | GG                 | GG               | INTERGENIC      |               |                    |                    |
| SNP_102948_A_1739  | NW_004517129.1 | scaffold2087 | 1739                    | AA                              | GG                 | GG               | INTERGENIC      |               |                    |                    |
| SNP_102949_A_3317  | NW_004517129.1 | scaffold2087 | 3317                    | TT                              | CC                 | CC               | INTERGENIC      |               |                    |                    |
| SNP_102950_A_3448  | NW_004517129.1 | scaffold2087 | 3448                    | GG                              | AA                 | AA               | INTERGENIC      |               |                    |                    |
| SNP_102951_A_3523  | NW_004517129.1 | scaffold2087 | 3523                    | GG                              | AA                 | AA               | INTERGENIC      |               |                    |                    |
| SNP_102952_A_3560  | NW_004517129.1 | scaffold2087 | 3560                    | AA                              | GG                 | GG               | INTERGENIC      |               |                    |                    |
| SNP_102953_A_3585  | NW_004517129.1 | scaffold2087 | 3585                    | AA                              | GG                 | GG               | INTERGENIC      |               |                    |                    |
| SNP_102954_A_3652  | NW_004517129.1 | scaffold2087 | 3652                    | AA                              | GG                 | GG               | INTERGENIC      |               |                    |                    |

| SNPs IDs          | Chromosome IDs | Chromosomes  | Physical positions (bp) | CDC Frontier genome (Reference genome) | (Pusa 1103 & HPNB) | (ILWC 46 & LPNB) | Sequence genome | Components of | Gene accession IDs | Putative functions |
|-------------------|----------------|--------------|-------------------------|----------------------------------------|--------------------|------------------|-----------------|---------------|--------------------|--------------------|
| SNP_102955_A_3719 | NW_004517129.1 | scaffold2087 | 3719                    | CC                                     | AA                 | AA               | INTERGENIC      |               |                    |                    |
| SNP_102956_A_3768 | NW_004517129.1 | scaffold2087 | 3768                    | TT                                     | CC                 | CC               | INTERGENIC      |               |                    |                    |
| SNP_102957_A_5635 | NW_004517129.1 | scaffold2087 | 5635                    | TT                                     | AA                 | AA               | INTERGENIC      |               |                    |                    |
| SNP_102958_A_9613 | NW_004517129.1 | scaffold2087 | 9613                    | AA                                     | CC                 | CC               | INTERGENIC      |               |                    |                    |
| SNP_102959_A_9986 | NW_004517129.1 | scaffold2087 | 9986                    | TT                                     | CC                 | CC               | INTERGENIC      |               |                    |                    |
| SNP_102960_A_444  | NW_004517131.1 | scaffold2089 | 444                     | AA                                     | CC                 | CC               | INTERGENIC      |               |                    |                    |
| SNP_102961_A_526  | NW_004517131.1 | scaffold2089 | 526                     | TT                                     | GG                 | GG               | INTERGENIC      |               |                    |                    |
| SNP_102962_A_691  | NW_004517131.1 | scaffold2089 | 691                     | AA                                     | GG                 | GG               | INTERGENIC      |               |                    |                    |
| SNP_102963_A_736  | NW_004517131.1 | scaffold2089 | 736                     | AA                                     | GG                 | GG               | INTERGENIC      |               |                    |                    |
| SNP_102964_A_756  | NW_004517131.1 | scaffold2089 | 756                     | AA                                     | TT                 | TT               | INTERGENIC      |               |                    |                    |
| SNP_102965_A_827  | NW_004517131.1 | scaffold2089 | 827                     | GG                                     | AA                 | AA               | INTERGENIC      |               |                    |                    |
| SNP_102966_A_899  | NW_004517131.1 | scaffold2089 | 899                     | AA                                     | GG                 | GG               | INTERGENIC      |               |                    |                    |
| SNP_102967_A_920  | NW_004517131.1 | scaffold2089 | 920                     | AA                                     | TT                 | TT               | INTERGENIC      |               |                    |                    |
| SNP_102968_A_947  | NW_004517131.1 | scaffold2089 | 947                     | GG                                     | TT                 | TT               | INTERGENIC      |               |                    |                    |
| SNP_102969_A_1077 | NW_004517131.1 | scaffold2089 | 1077                    | TT                                     | GG                 | GG               | INTERGENIC      |               |                    |                    |
| SNP_102970_A_1099 | NW_004517131.1 | scaffold2089 | 1099                    | TT                                     | GG                 | GG               | INTERGENIC      |               |                    |                    |
| SNP_102971_A_5545 | NW_004517131.1 | scaffold2089 | 5545                    | TT                                     | CC                 | CC               | INTERGENIC      |               |                    |                    |
| SNP_102972_A_5547 | NW_004517131.1 | scaffold2089 | 5547                    | AA                                     | TT                 | TT               | INTERGENIC      |               |                    |                    |
| SNP_102973_A_7213 | NW_004517134.1 | scaffold2095 | 7213                    | GG                                     | AA                 | AA               | INTRON          | 101507075     | Unknown function   |                    |
| SNP_102974_A_7214 | NW_004517134.1 | scaffold2095 | 7214                    | TT                                     | AA                 | AA               | INTRON          | 101507075     | Unknown function   |                    |
| SNP_102975_A_7219 | NW_004517134.1 | scaffold2095 | 7219                    | AA                                     | TT                 | TT               | INTRON          | 101507075     | Unknown function   |                    |
| SNP_102976_A_7272 | NW_004517134.1 | scaffold2095 | 7272                    | TT                                     | CC                 | CC               | INTRON          | 101507075     | Unknown function   |                    |



| SNPs IDs           | Chromosome IDs | Chromosomes  | Physical positions (bp) | CDC Frontier genome (Reference genome) | (Pusa 1103 & HPNB) | (ILWC 46 & LPNB) | Sequence Components of genome | Gene accession IDs | Putative functions |
|--------------------|----------------|--------------|-------------------------|----------------------------------------|--------------------|------------------|-------------------------------|--------------------|--------------------|
| SNP_102977_A_7334  | NW_004517134.1 | scaffold2095 | 7334                    | TT                                     | CC                 | CC               | INTRON                        | 101507075          | Unknown function   |
| SNP_102978_A_7439  | NW_004517134.1 | scaffold2095 | 7439                    | TT                                     | CC                 | CC               | INTRON                        | 101507075          | Unknown function   |
| SNP_102979_A_7596  | NW_004517134.1 | scaffold2095 | 7596                    | AA                                     | TT                 | TT               | INTRON                        | 101507075          | Unknown function   |
| SNP_102980_A_7917  | NW_004517134.1 | scaffold2095 | 7917                    | TT                                     | GG                 | GG               | INTRON                        | 101507075          | Unknown function   |
| SNP_102981_A_7991  | NW_004517134.1 | scaffold2095 | 7991                    | GG                                     | AA                 | AA               | INTRON                        | 101507075          | Unknown function   |
| SNP_102982_A_13554 | NW_004517134.1 | scaffold2095 | 13554                   | TT                                     | AA                 | AA               | INTERGENIC                    |                    |                    |
| SNP_102983_A_24068 | NW_004517134.1 | scaffold2095 | 24068                   | TT                                     | AA                 | AA               | INTERGENIC                    |                    |                    |
| SNP_102984_A_5025  | NW_004517136.1 | scaffold2097 | 5025                    | TT                                     | CC                 | CC               | INTERGENIC                    |                    |                    |
| SNP_102985_A_6717  | NW_004517136.1 | scaffold2097 | 6717                    | TT                                     | CC                 | CC               | INTERGENIC                    |                    |                    |
| SNP_102986_A_20611 | NW_004517136.1 | scaffold2097 | 20611                   | CC                                     | TT                 | TT               | INTERGENIC                    |                    |                    |
| SNP_102987_A_29520 | NW_004517136.1 | scaffold2097 | 29520                   | GG                                     | AA                 | AA               | INTERGENIC                    |                    |                    |
| SNP_102988_A_31601 | NW_004517136.1 | scaffold2097 | 31601                   | TT                                     | CC                 | CC               | INTERGENIC                    |                    |                    |
| SNP_102989_A_31731 | NW_004517136.1 | scaffold2097 | 31731                   | CC                                     | TT                 | TT               | INTERGENIC                    |                    |                    |
| SNP_102990_A_31751 | NW_004517136.1 | scaffold2097 | 31751                   | AA                                     | GG                 | GG               | INTERGENIC                    |                    |                    |
| SNP_102991_A_31784 | NW_004517136.1 | scaffold2097 | 31784                   | TT                                     | GG                 | GG               | INTERGENIC                    |                    |                    |
| SNP_102992_A_31826 | NW_004517136.1 | scaffold2097 | 31826                   | TT                                     | CC                 | CC               | INTERGENIC                    |                    |                    |
| SNP_102993_A_31829 | NW_004517136.1 | scaffold2097 | 31829                   | CC                                     | GG                 | GG               | INTERGENIC                    |                    |                    |
| SNP_102994_A_36475 | NW_004517136.1 | scaffold2097 | 36475                   | CC                                     | GG                 | GG               | INTERGENIC                    |                    |                    |
| SNP_102995_A_41187 | NW_004517136.1 | scaffold2097 | 41187                   | AA                                     | GG                 | GG               | INTERGENIC                    |                    |                    |
| SNP_102996_A_1210  | NW_004517140.1 | scaffold2103 | 1210                    | TT                                     | CC                 | CC               | INTERGENIC                    |                    |                    |
| SNP_102997_A_1218  | NW_004517140.1 | scaffold2103 | 1218                    | TT                                     | AA                 | AA               | INTERGENIC                    |                    |                    |
| SNP_102998_A_4769  | NW_004517140.1 | scaffold2103 | 4769                    | GG                                     | CC                 | CC               | INTERGENIC                    |                    |                    |

| SNPs IDs            | Chromosome IDs | Chromosomes  | Physical positions (bp) | CDC Frontier (Reference genome) | (Pusa 1103 & HPNB) | (ILWC 46 & LPNB) | Sequence genome | Components of | Gene accession IDs | Putative functions |
|---------------------|----------------|--------------|-------------------------|---------------------------------|--------------------|------------------|-----------------|---------------|--------------------|--------------------|
| SNP_102999_A_42697  | NW_004517140.1 | scaffold2103 | 42697                   | TT                              | CC                 | CC               | INTERGENIC      |               |                    |                    |
| SNP_103000_A_103996 | NW_004517140.1 | scaffold2103 | 103996                  | CC                              | AA                 | AA               | INTERGENIC      |               |                    |                    |
| SNP_103001_A_119375 | NW_004517140.1 | scaffold2103 | 119375                  | TT                              | GG                 | GG               | INTERGENIC      |               |                    |                    |
| SNP_103002_A_119388 | NW_004517140.1 | scaffold2103 | 119388                  | GG                              | AA                 | AA               | INTERGENIC      |               |                    |                    |
| SNP_103003_A_119390 | NW_004517140.1 | scaffold2103 | 119390                  | TT                              | CC                 | CC               | INTERGENIC      |               |                    |                    |
| SNP_103004_A_119399 | NW_004517140.1 | scaffold2103 | 119399                  | TT                              | AA                 | AA               | INTERGENIC      |               |                    |                    |
| SNP_103005_A_119417 | NW_004517140.1 | scaffold2103 | 119417                  | AA                              | GG                 | GG               | INTERGENIC      |               |                    |                    |
| SNP_103006_A_119424 | NW_004517140.1 | scaffold2103 | 119424                  | AA                              | GG                 | GG               | INTERGENIC      |               |                    |                    |
| SNP_103007_A_123849 | NW_004517140.1 | scaffold2103 | 123849                  | AA                              | TT                 | TT               | INTERGENIC      |               |                    |                    |
| SNP_103008_A_123875 | NW_004517140.1 | scaffold2103 | 123875                  | CC                              | GG                 | GG               | INTERGENIC      |               |                    |                    |
| SNP_103009_A_123948 | NW_004517140.1 | scaffold2103 | 123948                  | GG                              | AA                 | AA               | INTERGENIC      |               |                    |                    |
| SNP_103010_A_124049 | NW_004517140.1 | scaffold2103 | 124049                  | GG                              | TT                 | TT               | INTERGENIC      |               |                    |                    |
| SNP_103011_A_124064 | NW_004517140.1 | scaffold2103 | 124064                  | AA                              | GG                 | GG               | INTERGENIC      |               |                    |                    |
| SNP_103012_A_124074 | NW_004517140.1 | scaffold2103 | 124074                  | GG                              | AA                 | AA               | INTERGENIC      |               |                    |                    |
| SNP_103013_A_124161 | NW_004517140.1 | scaffold2103 | 124161                  | TT                              | CC                 | CC               | INTERGENIC      |               |                    |                    |
| SNP_103014_A_124165 | NW_004517140.1 | scaffold2103 | 124165                  | TT                              | CC                 | CC               | INTERGENIC      |               |                    |                    |
| SNP_103016_A_124563 | NW_004517140.1 | scaffold2103 | 124563                  | GG                              | TT                 | TT               | INTERGENIC      |               |                    |                    |
| SNP_103017_A_134207 | NW_004517140.1 | scaffold2103 | 134207                  | GG                              | CC                 | CC               | INTERGENIC      |               |                    |                    |
| SNP_103018_A_134236 | NW_004517140.1 | scaffold2103 | 134236                  | AA                              | GG                 | GG               | INTERGENIC      |               |                    |                    |
| SNP_103019_A_134269 | NW_004517140.1 | scaffold2103 | 134269                  | CC                              | TT                 | TT               | INTERGENIC      |               |                    |                    |
| SNP_103020_A_135804 | NW_004517140.1 | scaffold2103 | 135804                  | GG                              | AA                 | AA               | INTERGENIC      |               |                    |                    |
| SNP_103021_A_135816 | NW_004517140.1 | scaffold2103 | 135816                  | GG                              | TT                 | TT               | INTERGENIC      |               |                    |                    |

| SNPs IDs            | Chromosome IDs | Chromosomes  | Physical positions (bp) | CDC Frontier (Reference genome) | (Pusa 1103 & HPNB) | (ILWC 46 & LPNB) | Sequence Components of genome | Gene accession IDs | Putative functions           |
|---------------------|----------------|--------------|-------------------------|---------------------------------|--------------------|------------------|-------------------------------|--------------------|------------------------------|
| SNP_103022_A_135826 | NW_004517140.1 | scaffold2103 | 135826                  | TT                              | CC                 | CC               | INTERGENIC                    |                    |                              |
| SNP_103023_A_135837 | NW_004517140.1 | scaffold2103 | 135837                  | AA                              | GG                 | GG               | INTERGENIC                    |                    |                              |
| SNP_103025_A_4568   | NW_004517141.1 | scaffold2104 | 4568                    | GG                              | AA                 | AA               | URR                           | 101510256          | uncharacterized LOC101510256 |
| SNP_103026_A_5479   | NW_004517141.1 | scaffold2104 | 5479                    | TT                              | GG                 | GG               | URR                           | 101510256          | uncharacterized LOC101510256 |
| SNP_103027_A_5637   | NW_004517141.1 | scaffold2104 | 5637                    | CC                              | GG                 | GG               | INTERGENIC                    |                    |                              |
| SNP_103028_A_5719   | NW_004517141.1 | scaffold2104 | 5719                    | CC                              | GG                 | GG               | INTERGENIC                    |                    |                              |
| SNP_103029_A_6003   | NW_004517141.1 | scaffold2104 | 6003                    | CC                              | TT                 | TT               | INTERGENIC                    |                    |                              |
| SNP_103030_A_6404   | NW_004517141.1 | scaffold2104 | 6404                    | GG                              | TT                 | TT               | INTERGENIC                    |                    |                              |
| SNP_103031_A_6559   | NW_004517141.1 | scaffold2104 | 6559                    | TT                              | CC                 | CC               | INTERGENIC                    |                    |                              |
| SNP_103032_A_9443   | NW_004517141.1 | scaffold2104 | 9443                    | CC                              | TT                 | TT               | INTERGENIC                    |                    |                              |
| SNP_103033_A_9444   | NW_004517141.1 | scaffold2104 | 9444                    | CC                              | AA                 | AA               | INTERGENIC                    |                    |                              |
| SNP_103034_A_18267  | NW_004517141.1 | scaffold2104 | 18267                   | AA                              | GG                 | GG               | INTERGENIC                    |                    |                              |
| SNP_103035_A_18407  | NW_004517141.1 | scaffold2104 | 18407                   | CC                              | TT                 | TT               | INTERGENIC                    |                    |                              |
| SNP_103036_A_25347  | NW_004517141.1 | scaffold2104 | 25347                   | TT                              | CC                 | CC               | INTERGENIC                    |                    |                              |
| SNP_103038_A_35544  | NW_004517141.1 | scaffold2104 | 35544                   | GG                              | AA                 | AA               | INTERGENIC                    |                    |                              |
| SNP_103039_A_35548  | NW_004517141.1 | scaffold2104 | 35548                   | CC                              | TT                 | TT               | INTERGENIC                    |                    |                              |
| SNP_103040_A_60568  | NW_004517141.1 | scaffold2104 | 60568                   | AA                              | GG                 | GG               | INTERGENIC                    |                    |                              |
| SNP_103041_A_60949  | NW_004517141.1 | scaffold2104 | 60949                   | AA                              | GG                 | GG               | INTERGENIC                    |                    |                              |
| SNP_103042_A_60999  | NW_004517141.1 | scaffold2104 | 60999                   | AA                              | TT                 | TT               | INTERGENIC                    |                    |                              |
| SNP_103043_A_61003  | NW_004517141.1 | scaffold2104 | 61003                   | AA                              | GG                 | GG               | INTERGENIC                    |                    |                              |
| SNP_103044_A_243    | NW_004517143.1 | scaffold2106 | 243                     | TT                              | AA                 | AA               | INTERGENIC                    |                    |                              |
| SNP_103045_A_251    | NW_004517143.1 | scaffold2106 | 251                     | AA                              | TT                 | TT               | INTERGENIC                    |                    |                              |

| SNPs IDs           | Chromosome IDs | Chromosomes  | Physical positions (bp) | CDC Frontier (Reference genome) | (Pusa 1103 & HPNB) | (ILWC 46 & LPNB) | Sequence genome | Components of | Gene accession IDs | Putative functions |
|--------------------|----------------|--------------|-------------------------|---------------------------------|--------------------|------------------|-----------------|---------------|--------------------|--------------------|
| SNP_103046_A_275   | NW_004517143.1 | scaffold2106 | 275                     | TT                              | CC                 | CC               | INTERGENIC      |               |                    |                    |
| SNP_103047_A_278   | NW_004517143.1 | scaffold2106 | 278                     | TT                              | CC                 | CC               | INTERGENIC      |               |                    |                    |
| SNP_103048_A_284   | NW_004517143.1 | scaffold2106 | 284                     | CC                              | TT                 | TT               | INTERGENIC      |               |                    |                    |
| SNP_103049_A_286   | NW_004517143.1 | scaffold2106 | 286                     | AA                              | GG                 | GG               | INTERGENIC      |               |                    |                    |
| SNP_103050_A_586   | NW_004517143.1 | scaffold2106 | 586                     | TT                              | AA                 | AA               | INTERGENIC      |               |                    |                    |
| SNP_103051_A_689   | NW_004517143.1 | scaffold2106 | 689                     | AA                              | GG                 | GG               | INTERGENIC      |               |                    |                    |
| SNP_103052_A_970   | NW_004517143.1 | scaffold2106 | 970                     | GG                              | AA                 | AA               | INTERGENIC      |               |                    |                    |
| SNP_103053_A_1665  | NW_004517144.1 | scaffold2108 | 1665                    | TT                              | CC                 | CC               | INTERGENIC      |               |                    |                    |
| SNP_103054_A_1713  | NW_004517144.1 | scaffold2108 | 1713                    | TT                              | CC                 | CC               | INTERGENIC      |               |                    |                    |
| SNP_103055_A_1714  | NW_004517144.1 | scaffold2108 | 1714                    | GG                              | AA                 | AA               | INTERGENIC      |               |                    |                    |
| SNP_103056_A_1902  | NW_004517144.1 | scaffold2108 | 1902                    | CC                              | AA                 | AA               | INTERGENIC      |               |                    |                    |
| SNP_103057_A_2208  | NW_004517144.1 | scaffold2108 | 2208                    | GG                              | CC                 | CC               | INTERGENIC      |               |                    |                    |
| SNP_103058_A_2346  | NW_004517144.1 | scaffold2108 | 2346                    | GG                              | AA                 | AA               | INTERGENIC      |               |                    |                    |
| SNP_103059_A_2903  | NW_004517144.1 | scaffold2108 | 2903                    | CC                              | AA                 | AA               | INTERGENIC      |               |                    |                    |
| SNP_103060_A_4205  | NW_004517146.1 | scaffold2113 | 4205                    | AA                              | GG                 | GG               | INTERGENIC      |               |                    |                    |
| SNP_103061_A_1354  | NW_004517152.1 | scaffold2122 | 1354                    | TT                              | CC                 | CC               | INTERGENIC      |               |                    |                    |
| SNP_103062_A_1363  | NW_004517152.1 | scaffold2122 | 1363                    | GG                              | AA                 | AA               | INTERGENIC      |               |                    |                    |
| SNP_103064_A_5296  | NW_004517153.1 | scaffold2124 | 5296                    | TT                              | AA                 | AA               | INTERGENIC      |               |                    |                    |
| SNP_103065_A_9962  | NW_004517153.1 | scaffold2124 | 9962                    | AA                              | TT                 | TT               | INTERGENIC      |               |                    |                    |
| SNP_103066_A_11246 | NW_004517153.1 | scaffold2124 | 11246                   | AA                              | TT                 | TT               | INTERGENIC      |               |                    |                    |
| SNP_103067_A_14739 | NW_004517154.1 | scaffold2125 | 14739                   | AA                              | GG                 | GG               | INTERGENIC      |               |                    |                    |
| SNP_103069_A_5425  | NW_004517155.1 | scaffold2126 | 5425                    | AA                              | GG                 | GG               | INTERGENIC      |               |                    |                    |

| SNPs IDs           | Chromosome IDs | Chromosomes  | Physical positions (bp) | CDC Frontier (Reference genome) | (Pusa 1103 & HPNB) | (ILWC 46 & LPNB) | Sequence genome | Components of | Gene accession IDs | Putative functions |
|--------------------|----------------|--------------|-------------------------|---------------------------------|--------------------|------------------|-----------------|---------------|--------------------|--------------------|
| SNP_103070_A_5429  | NW_004517155.1 | scaffold2126 | 5429                    | GG                              | AA                 | AA               | INTERGENIC      |               |                    |                    |
| SNP_103071_A_5433  | NW_004517155.1 | scaffold2126 | 5433                    | AA                              | TT                 | TT               | INTERGENIC      |               |                    |                    |
| SNP_103072_A_5474  | NW_004517155.1 | scaffold2126 | 5474                    | TT                              | AA                 | AA               | INTERGENIC      |               |                    |                    |
| SNP_103073_A_5724  | NW_004517155.1 | scaffold2126 | 5724                    | AA                              | GG                 | GG               | INTERGENIC      |               |                    |                    |
| SNP_103074_A_5725  | NW_004517155.1 | scaffold2126 | 5725                    | GG                              | TT                 | TT               | INTERGENIC      |               |                    |                    |
| SNP_103075_A_6069  | NW_004517155.1 | scaffold2126 | 6069                    | AA                              | GG                 | GG               | INTERGENIC      |               |                    |                    |
| SNP_103076_A_8903  | NW_004517155.1 | scaffold2126 | 8903                    | TT                              | CC                 | CC               | INTERGENIC      |               |                    |                    |
| SNP_103077_A_10749 | NW_004517155.1 | scaffold2126 | 10749                   | CC                              | TT                 | TT               | INTERGENIC      |               |                    |                    |
| SNP_103078_A_10863 | NW_004517155.1 | scaffold2126 | 10863                   | CC                              | TT                 | TT               | INTERGENIC      |               |                    |                    |
| SNP_103079_A_10866 | NW_004517155.1 | scaffold2126 | 10866                   | AA                              | GG                 | GG               | INTERGENIC      |               |                    |                    |
| SNP_103080_A_13808 | NW_004517155.1 | scaffold2126 | 13808                   | AA                              | GG                 | GG               | INTERGENIC      |               |                    |                    |
| SNP_103081_A_14168 | NW_004517155.1 | scaffold2126 | 14168                   | TT                              | AA                 | AA               | INTERGENIC      |               |                    |                    |
| SNP_103082_A_14180 | NW_004517155.1 | scaffold2126 | 14180                   | GG                              | CC                 | CC               | INTERGENIC      |               |                    |                    |
| SNP_103083_A_14185 | NW_004517155.1 | scaffold2126 | 14185                   | AA                              | TT                 | TT               | INTERGENIC      |               |                    |                    |
| SNP_103084_A_18654 | NW_004517155.1 | scaffold2126 | 18654                   | TT                              | CC                 | CC               | INTERGENIC      |               |                    |                    |
| SNP_103085_A_31205 | NW_004517156.1 | scaffold2127 | 31205                   | AA                              | GG                 | GG               | INTERGENIC      |               |                    |                    |
| SNP_103086_A_41003 | NW_004517156.1 | scaffold2127 | 41003                   | TT                              | CC                 | CC               | INTERGENIC      |               |                    |                    |
| SNP_103087_A_14311 | NW_004517157.1 | scaffold2128 | 14311                   | TT                              | CC                 | CC               | INTERGENIC      |               |                    |                    |
| SNP_103088_A_14579 | NW_004517157.1 | scaffold2128 | 14579                   | AA                              | GG                 | GG               | INTERGENIC      |               |                    |                    |
| SNP_103089_A_14838 | NW_004517157.1 | scaffold2128 | 14838                   | CC                              | TT                 | TT               | INTERGENIC      |               |                    |                    |
| SNP_103090_A_14879 | NW_004517157.1 | scaffold2128 | 14879                   | CC                              | TT                 | TT               | INTERGENIC      |               |                    |                    |
| SNP_103091_A_15025 | NW_004517157.1 | scaffold2128 | 15025                   | GG                              | AA                 | AA               | INTERGENIC      |               |                    |                    |

| SNPs IDs          | Chromosome IDs | Chromosomes  | Physical positions (bp) | CDC Frontier (Reference genome) | (Pusa 1103 & HPNB) | (ILWC 46 & LPNB) | Sequence genome | Components of | Gene accession IDs | Putative functions |
|-------------------|----------------|--------------|-------------------------|---------------------------------|--------------------|------------------|-----------------|---------------|--------------------|--------------------|
| SNP_103092_A_1313 | NW_004517160.1 | scaffold2132 | 1313                    | TT                              | CC                 | CC               | INTERGENIC      |               |                    |                    |
| SNP_103093_A_1342 | NW_004517160.1 | scaffold2132 | 1342                    | TT                              | AA                 | AA               | INTERGENIC      |               |                    |                    |
| SNP_103094_A_1427 | NW_004517160.1 | scaffold2132 | 1427                    | TT                              | GG                 | GG               | INTERGENIC      |               |                    |                    |
| SNP_103095_A_3877 | NW_004517162.1 | scaffold2134 | 3877                    | AA                              | CC                 | CC               | INTERGENIC      |               |                    |                    |
| SNP_103096_A_3880 | NW_004517162.1 | scaffold2134 | 3880                    | TT                              | AA                 | AA               | INTERGENIC      |               |                    |                    |
| SNP_103097_A_3881 | NW_004517162.1 | scaffold2134 | 3881                    | AA                              | TT                 | TT               | INTERGENIC      |               |                    |                    |
| SNP_103098_A_3897 | NW_004517162.1 | scaffold2134 | 3897                    | CC                              | TT                 | TT               | INTERGENIC      |               |                    |                    |
| SNP_103099_A_3901 | NW_004517162.1 | scaffold2134 | 3901                    | GG                              | CC                 | CC               | INTERGENIC      |               |                    |                    |
| SNP_103100_A_3905 | NW_004517162.1 | scaffold2134 | 3905                    | TT                              | GG                 | GG               | INTERGENIC      |               |                    |                    |
| SNP_103101_A_5251 | NW_004517162.1 | scaffold2134 | 5251                    | GG                              | AA                 | AA               | INTERGENIC      |               |                    |                    |
| SNP_103102_A_5252 | NW_004517162.1 | scaffold2134 | 5252                    | AA                              | GG                 | GG               | INTERGENIC      |               |                    |                    |
| SNP_103103_A_5294 | NW_004517162.1 | scaffold2134 | 5294                    | CC                              | GG                 | GG               | INTERGENIC      |               |                    |                    |
| SNP_103104_A_5364 | NW_004517162.1 | scaffold2134 | 5364                    | TT                              | CC                 | CC               | INTERGENIC      |               |                    |                    |
| SNP_103106_A_5541 | NW_004517162.1 | scaffold2134 | 5541                    | GG                              | AA                 | AA               | INTERGENIC      |               |                    |                    |
| SNP_103107_A_5686 | NW_004517162.1 | scaffold2134 | 5686                    | CC                              | TT                 | TT               | INTERGENIC      |               |                    |                    |
| SNP_103108_A_5764 | NW_004517162.1 | scaffold2134 | 5764                    | TT                              | CC                 | CC               | INTERGENIC      |               |                    |                    |
| SNP_103109_A_5783 | NW_004517162.1 | scaffold2134 | 5783                    | TT                              | CC                 | CC               | INTERGENIC      |               |                    |                    |
| SNP_103110_A_5802 | NW_004517162.1 | scaffold2134 | 5802                    | CC                              | TT                 | TT               | INTERGENIC      |               |                    |                    |
| SNP_103111_A_5821 | NW_004517162.1 | scaffold2134 | 5821                    | CC                              | TT                 | TT               | INTERGENIC      |               |                    |                    |
| SNP_103112_A_5830 | NW_004517162.1 | scaffold2134 | 5830                    | TT                              | CC                 | CC               | INTERGENIC      |               |                    |                    |
| SNP_103113_A_5891 | NW_004517162.1 | scaffold2134 | 5891                    | AA                              | GG                 | GG               | INTERGENIC      |               |                    |                    |
| SNP_103114_A_5912 | NW_004517162.1 | scaffold2134 | 5912                    | CC                              | TT                 | TT               | INTERGENIC      |               |                    |                    |

| SNPs IDs           | Chromosome IDs | Chromosomes  | Physical positions (bp) | CDC Frontier (Reference genome) | (Pusa 1103 & HPNB) | (ILWC 46 & LPNB) | Sequence Components of genome | Gene accession IDs | Putative functions |
|--------------------|----------------|--------------|-------------------------|---------------------------------|--------------------|------------------|-------------------------------|--------------------|--------------------|
| SNP_103115_A_5936  | NW_004517162.1 | scaffold2134 | 5936                    | AA                              | GG                 | GG               | INTERGENIC                    |                    |                    |
| SNP_103116_A_7275  | NW_004517163.1 | scaffold2135 | 7275                    | TT                              | CC                 | CC               | INTERGENIC                    |                    |                    |
| SNP_103117_A_7279  | NW_004517163.1 | scaffold2135 | 7279                    | TT                              | CC                 | CC               | INTERGENIC                    |                    |                    |
| SNP_103118_A_7337  | NW_004517163.1 | scaffold2135 | 7337                    | TT                              | CC                 | CC               | INTERGENIC                    |                    |                    |
| SNP_103119_A_7443  | NW_004517163.1 | scaffold2135 | 7443                    | GG                              | AA                 | AA               | INTERGENIC                    |                    |                    |
| SNP_103120_A_87    | NW_004517164.1 | scaffold2138 | 87                      | GG                              | AA                 | AA               | INTERGENIC                    |                    |                    |
| SNP_103121_A_148   | NW_004517164.1 | scaffold2138 | 148                     | AA                              | GG                 | GG               | INTERGENIC                    |                    |                    |
| SNP_103122_A_325   | NW_004517164.1 | scaffold2138 | 325                     | AA                              | TT                 | TT               | INTERGENIC                    |                    |                    |
| SNP_103123_A_337   | NW_004517164.1 | scaffold2138 | 337                     | GG                              | TT                 | TT               | INTERGENIC                    |                    |                    |
| SNP_103124_A_375   | NW_004517164.1 | scaffold2138 | 375                     | AA                              | CC                 | CC               | INTERGENIC                    |                    |                    |
| SNP_103125_A_463   | NW_004517166.1 | scaffold2140 | 463                     | AA                              | CC                 | CC               | INTERGENIC                    |                    |                    |
| SNP_103126_A_550   | NW_004517166.1 | scaffold2140 | 550                     | TT                              | CC                 | CC               | INTERGENIC                    |                    |                    |
| SNP_103127_A_563   | NW_004517166.1 | scaffold2140 | 563                     | AA                              | TT                 | TT               | INTERGENIC                    |                    |                    |
| SNP_103129_A_910   | NW_004517166.1 | scaffold2140 | 910                     | AA                              | GG                 | GG               | INTERGENIC                    |                    |                    |
| SNP_103130_A_14586 | NW_004517167.1 | scaffold2141 | 14586                   | CC                              | TT                 | TT               | SYNONYMOUS_CODING             | 101511546          | Unknown function   |
| SNP_103131_A_14735 | NW_004517167.1 | scaffold2141 | 14735                   | CC                              | TT                 | TT               | URR                           | 101511546          | Unknown function   |
| SNP_103132_A_14818 | NW_004517167.1 | scaffold2141 | 14818                   | CC                              | TT                 | TT               | URR                           | 101511546          | Unknown function   |
| SNP_103133_A_14963 | NW_004517167.1 | scaffold2141 | 14963                   | CC                              | GG                 | GG               | URR                           | 101511546          | Unknown function   |
| SNP_103134_A_15238 | NW_004517167.1 | scaffold2141 | 15238                   | TT                              | CC                 | CC               | URR                           | 101511546          | Unknown function   |
| SNP_103135_A_15538 | NW_004517167.1 | scaffold2141 | 15538                   | GG                              | TT                 | TT               | URR                           | 101511546          | Unknown function   |
| SNP_103136_A_16639 | NW_004517167.1 | scaffold2141 | 16639                   | AA                              | GG                 | GG               | URR                           | 101511546          | Unknown function   |
| SNP_103137_A_16705 | NW_004517167.1 | scaffold2141 | 16705                   | GG                              | TT                 | TT               | INTERGENIC                    |                    |                    |

| SNPs IDs           | Chromosome IDs | Chromosomes  | Physical positions (bp) | CDC Frontier (Reference genome) | (Pusa 1103 & HPNB) | (ILWC 46 & LPNB) | Sequence genome | Components of | Gene accession IDs | Putative functions |
|--------------------|----------------|--------------|-------------------------|---------------------------------|--------------------|------------------|-----------------|---------------|--------------------|--------------------|
| SNP_103138_A_17538 | NW_004517167.1 | scaffold2141 | 17538                   | GG                              | AA                 | AA               | INTERGENIC      |               |                    |                    |
| SNP_103139_A_17541 | NW_004517167.1 | scaffold2141 | 17541                   | CC                              | TT                 | TT               | INTERGENIC      |               |                    |                    |
| SNP_103140_A_17926 | NW_004517167.1 | scaffold2141 | 17926                   | GG                              | AA                 | AA               | INTERGENIC      |               |                    |                    |
| SNP_103141_A_699   | NW_004517168.1 | scaffold2142 | 699                     | CC                              | GG                 | GG               | INTERGENIC      |               |                    |                    |
| SNP_103142_A_799   | NW_004517168.1 | scaffold2142 | 799                     | CC                              | TT                 | TT               | INTERGENIC      |               |                    |                    |
| SNP_103143_A_927   | NW_004517168.1 | scaffold2142 | 927                     | GG                              | CC                 | CC               | INTERGENIC      |               |                    |                    |
| SNP_103144_A_1167  | NW_004517170.1 | scaffold2146 | 1167                    | CC                              | TT                 | TT               | INTERGENIC      |               |                    |                    |
| SNP_103145_A_1062  | NW_004517171.1 | scaffold2147 | 1062                    | GG                              | TT                 | TT               | INTERGENIC      |               |                    |                    |
| SNP_103146_A_5252  | NW_004517171.1 | scaffold2147 | 5252                    | TT                              | CC                 | CC               | INTERGENIC      |               |                    |                    |
| SNP_103147_A_5578  | NW_004517171.1 | scaffold2147 | 5578                    | AA                              | GG                 | GG               | INTERGENIC      |               |                    |                    |
| SNP_103148_A_6058  | NW_004517171.1 | scaffold2147 | 6058                    | TT                              | GG                 | GG               | INTERGENIC      |               |                    |                    |
| SNP_103149_A_6130  | NW_004517171.1 | scaffold2147 | 6130                    | TT                              | AA                 | AA               | INTERGENIC      |               |                    |                    |
| SNP_103150_A_6139  | NW_004517171.1 | scaffold2147 | 6139                    | AA                              | GG                 | GG               | INTERGENIC      |               |                    |                    |
| SNP_103151_A_6453  | NW_004517171.1 | scaffold2147 | 6453                    | AA                              | GG                 | GG               | INTERGENIC      |               |                    |                    |
| SNP_103152_A_21438 | NW_004517171.1 | scaffold2147 | 21438                   | GG                              | AA                 | AA               | INTERGENIC      |               |                    |                    |
| SNP_103153_A_21489 | NW_004517171.1 | scaffold2147 | 21489                   | GG                              | AA                 | AA               | INTERGENIC      |               |                    |                    |
| SNP_103154_A_22383 | NW_004517171.1 | scaffold2147 | 22383                   | TT                              | AA                 | AA               | INTERGENIC      |               |                    |                    |
| SNP_103155_A_22514 | NW_004517171.1 | scaffold2147 | 22514                   | CC                              | AA                 | AA               | INTERGENIC      |               |                    |                    |
| SNP_103156_A_22689 | NW_004517171.1 | scaffold2147 | 22689                   | GG                              | TT                 | TT               | INTERGENIC      |               |                    |                    |
| SNP_103157_A_22692 | NW_004517171.1 | scaffold2147 | 22692                   | GG                              | AA                 | AA               | INTERGENIC      |               |                    |                    |
| SNP_103158_A_22914 | NW_004517171.1 | scaffold2147 | 22914                   | AA                              | CC                 | CC               | INTERGENIC      |               |                    |                    |
| SNP_103159_A_22931 | NW_004517171.1 | scaffold2147 | 22931                   | CC                              | GG                 | GG               | INTERGENIC      |               |                    |                    |



| SNPs IDs           | Chromosome IDs | Chromosomes  | Physical positions (bp) | CDC Frontier (Reference genome) | (Pusa 1103 & HPNB) | (ILWC 46 & LPNB) | Sequence Components of genome | Gene accession IDs | Putative functions                |
|--------------------|----------------|--------------|-------------------------|---------------------------------|--------------------|------------------|-------------------------------|--------------------|-----------------------------------|
| SNP_103160_A_23253 | NW_004517171.1 | scaffold2147 | 23253                   | TT                              | AA                 | AA               | INTERGENIC                    |                    |                                   |
| SNP_103161_A_23406 | NW_004517171.1 | scaffold2147 | 23406                   | AA                              | GG                 | GG               | INTERGENIC                    |                    |                                   |
| SNP_103162_A_23625 | NW_004517171.1 | scaffold2147 | 23625                   | AA                              | TT                 | TT               | INTERGENIC                    |                    |                                   |
| SNP_103163_A_24520 | NW_004517171.1 | scaffold2147 | 24520                   | TT                              | GG                 | GG               | INTERGENIC                    |                    |                                   |
| SNP_103165_A_856   | NW_004517174.1 | scaffold2151 | 856                     | TT                              | CC                 | CC               | INTERGENIC                    |                    |                                   |
| SNP_103166_A_868   | NW_004517174.1 | scaffold2151 | 868                     | GG                              | AA                 | AA               | INTERGENIC                    |                    |                                   |
| SNP_103167_A_15054 | NW_004517175.1 | scaffold2152 | 15054                   | AA                              | GG                 | GG               | DRR                           | 101514899          | DNA damage-binding protein 1-like |
| SNP_103168_A_20987 | NW_004517175.1 | scaffold2152 | 20987                   | GG                              | CC                 | CC               | URR                           | 101514899          | DNA damage-binding protein 1-like |
| SNP_103169_A_21274 | NW_004517175.1 | scaffold2152 | 21274                   | GG                              | CC                 | CC               | URR                           | 101514899          | DNA damage-binding protein 1-like |
| SNP_103170_A_21408 | NW_004517175.1 | scaffold2152 | 21408                   | TT                              | GG                 | GG               | URR                           | 101514899          | DNA damage-binding protein 1-like |
| SNP_103171_A_22290 | NW_004517175.1 | scaffold2152 | 22290                   | AA                              | GG                 | GG               | URR                           | 101514899          | DNA damage-binding protein 1-like |
| SNP_103172_A_22472 | NW_004517175.1 | scaffold2152 | 22472                   | AA                              | GG                 | GG               | URR                           | 101514899          | DNA damage-binding protein 1-like |
| SNP_103173_A_22492 | NW_004517175.1 | scaffold2152 | 22492                   | TT                              | CC                 | CC               | URR                           | 101514899          | DNA damage-binding protein 1-like |
| SNP_103175_A_34119 | NW_004517175.1 | scaffold2152 | 34119                   | AA                              | CC                 | CC               | INTERGENIC                    |                    |                                   |
| SNP_103176_A_41720 | NW_004517175.1 | scaffold2152 | 41720                   | AA                              | GG                 | GG               | INTERGENIC                    |                    |                                   |
| SNP_103177_A_41751 | NW_004517175.1 | scaffold2152 | 41751                   | TT                              | CC                 | CC               | INTERGENIC                    |                    |                                   |
| SNP_103178_A_41758 | NW_004517175.1 | scaffold2152 | 41758                   | GG                              | CC                 | CC               | INTERGENIC                    |                    |                                   |
| SNP_103179_A_41769 | NW_004517175.1 | scaffold2152 | 41769                   | AA                              | GG                 | GG               | INTERGENIC                    |                    |                                   |
| SNP_103180_A_41783 | NW_004517175.1 | scaffold2152 | 41783                   | CC                              | GG                 | GG               | INTERGENIC                    |                    |                                   |
| SNP_103181_A_41787 | NW_004517175.1 | scaffold2152 | 41787                   | TT                              | CC                 | CC               | INTERGENIC                    |                    |                                   |
| SNP_103182_A_41941 | NW_004517175.1 | scaffold2152 | 41941                   | GG                              | AA                 | AA               | INTERGENIC                    |                    |                                   |
| SNP_103183_A_42202 | NW_004517175.1 | scaffold2152 | 42202                   | GG                              | AA                 | AA               | INTERGENIC                    |                    |                                   |

| SNPs IDs            | Chromosome IDs | Chromosomes  | Physical positions (bp) | CDC Frontier (Reference genome) | (Pusa 1103 & HPNB) | (ILWC 46 & LPNB) | Sequence Components of genome | Gene accession IDs | Putative functions                          |
|---------------------|----------------|--------------|-------------------------|---------------------------------|--------------------|------------------|-------------------------------|--------------------|---------------------------------------------|
| SNP_103184_A_42702  | NW_004517175.1 | scaffold2152 | 42702                   | CC                              | TT                 | TT               | INTERGENIC                    |                    |                                             |
| SNP_103185_A_42880  | NW_004517175.1 | scaffold2152 | 42880                   | CC                              | TT                 | TT               | INTERGENIC                    |                    |                                             |
| SNP_103186_A_42923  | NW_004517175.1 | scaffold2152 | 42923                   | AA                              | GG                 | GG               | INTERGENIC                    |                    |                                             |
| SNP_103187_A_43158  | NW_004517175.1 | scaffold2152 | 43158                   | GG                              | AA                 | AA               | INTERGENIC                    |                    |                                             |
| SNP_103188_A_43252  | NW_004517175.1 | scaffold2152 | 43252                   | GG                              | AA                 | AA               | INTERGENIC                    |                    |                                             |
| SNP_103189_A_67604  | NW_004517175.1 | scaffold2152 | 67604                   | TT                              | CC                 | CC               | INTERGENIC                    |                    |                                             |
| SNP_103190_A_67682  | NW_004517175.1 | scaffold2152 | 67682                   | AA                              | TT                 | TT               | INTERGENIC                    |                    |                                             |
| SNP_103191_A_67845  | NW_004517175.1 | scaffold2152 | 67845                   | AA                              | CC                 | CC               | INTERGENIC                    |                    |                                             |
| SNP_103194_A_76785  | NW_004517175.1 | scaffold2152 | 76785                   | AA                              | GG                 | GG               | URR                           | 101488301          | two-component response regulator ARR12-like |
| SNP_103195_A_88697  | NW_004517175.1 | scaffold2152 | 88697                   | TT                              | CC                 | CC               | DRR                           | 101488626          | Unknown function                            |
| SNP_103196_A_88722  | NW_004517175.1 | scaffold2152 | 88722                   | CC                              | AA                 | AA               | DRR                           | 101488626          | Unknown function                            |
| SNP_103197_A_88832  | NW_004517175.1 | scaffold2152 | 88832                   | GG                              | CC                 | CC               | DRR                           | 101488626          | Unknown function                            |
| SNP_103198_A_88890  | NW_004517175.1 | scaffold2152 | 88890                   | CC                              | AA                 | AA               | DRR                           | 101488626          | Unknown function                            |
| SNP_103199_A_88956  | NW_004517175.1 | scaffold2152 | 88956                   | AA                              | CC                 | CC               | DRR                           | 101488626          | Unknown function                            |
| SNP_103200_A_88999  | NW_004517175.1 | scaffold2152 | 88999                   | GG                              | TT                 | TT               | DRR                           | 101488626          | Unknown function                            |
| SNP_103201_A_89232  | NW_004517175.1 | scaffold2152 | 89232                   | AA                              | TT                 | TT               | INTRON                        | 101488626          | Unknown function                            |
| SNP_103202_A_91306  | NW_004517175.1 | scaffold2152 | 91306                   | AA                              | CC                 | CC               | INTRON                        | 101488626          | Unknown function                            |
| SNP_103203_A_95455  | NW_004517175.1 | scaffold2152 | 95455                   | GG                              | TT                 | TT               | INTRON                        | 101488626          | Unknown function                            |
| SNP_103204_A_95660  | NW_004517175.1 | scaffold2152 | 95660                   | AA                              | GG                 | GG               | INTRON                        | 101488626          | Unknown function                            |
| SNP_103205_A_95824  | NW_004517175.1 | scaffold2152 | 95824                   | CC                              | AA                 | AA               | INTRON                        | 101488626          | Unknown function                            |
| SNP_103206_A_95889  | NW_004517175.1 | scaffold2152 | 95889                   | CC                              | TT                 | TT               | INTRON                        | 101488626          | Unknown function                            |
| SNP_103207_A_108205 | NW_004517175.1 | scaffold2152 | 108205                  | CC                              | AA                 | AA               | INTERGENIC                    |                    |                                             |

| SNPs IDs            | Chromosome IDs | Chromosomes  | Physical positions (bp) | CDC Frontier (Reference genome) | (Pusa 1103 & HPNB) | (ILWC 46 & LPNB) | Sequence Components of genome | Gene accession IDs | Putative functions      |
|---------------------|----------------|--------------|-------------------------|---------------------------------|--------------------|------------------|-------------------------------|--------------------|-------------------------|
| SNP_103209_A_108713 | NW_004517175.1 | scaffold2152 | 108713                  | GG                              | AA                 | AA               | INTERGENIC                    |                    |                         |
| SNP_103210_A_108807 | NW_004517175.1 | scaffold2152 | 108807                  | CC                              | TT                 | TT               | INTERGENIC                    |                    |                         |
| SNP_103211_A_108824 | NW_004517175.1 | scaffold2152 | 108824                  | AA                              | GG                 | GG               | INTERGENIC                    |                    |                         |
| SNP_103212_A_109002 | NW_004517175.1 | scaffold2152 | 109002                  | GG                              | TT                 | TT               | INTERGENIC                    |                    |                         |
| SNP_103213_A_162877 | NW_004517175.1 | scaffold2152 | 162877                  | TT                              | CC                 | CC               | URR                           | 101489943          | Unknown function        |
| SNP_103214_A_162980 | NW_004517175.1 | scaffold2152 | 162980                  | TT                              | CC                 | CC               | URR                           | 101489943          | Unknown function        |
| SNP_103215_A_281823 | NW_004517175.1 | scaffold2152 | 281823                  | AA                              | GG                 | GG               | INTERGENIC                    |                    |                         |
| SNP_103216_A_283314 | NW_004517175.1 | scaffold2152 | 283314                  | TT                              | CC                 | CC               | INTERGENIC                    |                    |                         |
| SNP_103217_A_283424 | NW_004517175.1 | scaffold2152 | 283424                  | AA                              | GG                 | GG               | INTERGENIC                    |                    |                         |
| SNP_103218_A_304611 | NW_004517175.1 | scaffold2152 | 304611                  | TT                              | GG                 | GG               | DRR                           | 101513371          | romboid-like protease 2 |
| SNP_103219_A_312652 | NW_004517175.1 | scaffold2152 | 312652                  | CC                              | TT                 | TT               | INTERGENIC                    |                    |                         |
| SNP_103220_A_324904 | NW_004517175.1 | scaffold2152 | 324904                  | AA                              | TT                 | TT               | INTERGENIC                    |                    |                         |
| SNP_103221_A_325075 | NW_004517175.1 | scaffold2152 | 325075                  | GG                              | AA                 | AA               | INTERGENIC                    |                    |                         |
| SNP_103222_A_336569 | NW_004517175.1 | scaffold2152 | 336569                  | TT                              | CC                 | CC               | INTERGENIC                    |                    |                         |
| SNP_103223_A_336657 | NW_004517175.1 | scaffold2152 | 336657                  | TT                              | CC                 | CC               | INTERGENIC                    |                    |                         |
| SNP_103224_A_379485 | NW_004517175.1 | scaffold2152 | 379485                  | AA                              | GG                 | GG               | INTERGENIC                    |                    |                         |
| SNP_103225_A_379695 | NW_004517175.1 | scaffold2152 | 379695                  | TT                              | CC                 | CC               | INTERGENIC                    |                    |                         |
| SNP_103226_A_379906 | NW_004517175.1 | scaffold2152 | 379906                  | GG                              | AA                 | AA               | INTERGENIC                    |                    |                         |
| SNP_103227_A_379932 | NW_004517175.1 | scaffold2152 | 379932                  | TT                              | GG                 | GG               | INTERGENIC                    |                    |                         |
| SNP_103228_A_380096 | NW_004517175.1 | scaffold2152 | 380096                  | AA                              | GG                 | GG               | INTERGENIC                    |                    |                         |
| SNP_103230_A_8250   | NW_004517176.1 | scaffold2153 | 8250                    | CC                              | TT                 | TT               | INTERGENIC                    |                    |                         |
| SNP_103231_A_8570   | NW_004517176.1 | scaffold2153 | 8570                    | CC                              | TT                 | TT               | INTERGENIC                    |                    |                         |

| SNPs IDs           | Chromosome IDs | Chromosomes  | Physical positions (bp) | CDC Frontier (Reference genome) | (Pusa 1103 & HPNB) | (ILWC 46 & LPNB) | Sequence genome | Components of | Gene accession IDs | Putative functions |
|--------------------|----------------|--------------|-------------------------|---------------------------------|--------------------|------------------|-----------------|---------------|--------------------|--------------------|
| SNP_103233_A_19786 | NW_004517176.1 | scaffold2153 | 19786                   | TT                              | CC                 | CC               | INTERGENIC      |               |                    |                    |
| SNP_103234_A_19856 | NW_004517176.1 | scaffold2153 | 19856                   | AA                              | GG                 | GG               | INTERGENIC      |               |                    |                    |
| SNP_103235_A_32554 | NW_004517176.1 | scaffold2153 | 32554                   | AA                              | GG                 | GG               | INTERGENIC      |               |                    |                    |
| SNP_103236_A_32803 | NW_004517176.1 | scaffold2153 | 32803                   | TT                              | GG                 | GG               | INTERGENIC      |               |                    |                    |
| SNP_103237_A_32879 | NW_004517176.1 | scaffold2153 | 32879                   | GG                              | AA                 | AA               | INTERGENIC      |               |                    |                    |
| SNP_103238_A_32901 | NW_004517176.1 | scaffold2153 | 32901                   | TT                              | CC                 | CC               | INTERGENIC      |               |                    |                    |
| SNP_103239_A_120   | NW_004517177.1 | scaffold2155 | 120                     | CC                              | TT                 | TT               | INTERGENIC      |               |                    |                    |
| SNP_103241_A_595   | NW_004517177.1 | scaffold2155 | 595                     | AA                              | TT                 | TT               | INTERGENIC      |               |                    |                    |
| SNP_103242_A_19438 | NW_004517177.1 | scaffold2155 | 19438                   | TT                              | GG                 | GG               | INTERGENIC      |               |                    |                    |
| SNP_103243_A_39384 | NW_004517177.1 | scaffold2155 | 39384                   | AA                              | TT                 | TT               | INTERGENIC      |               |                    |                    |
| SNP_103244_A_598   | NW_004517178.1 | scaffold2157 | 598                     | TT                              | CC                 | CC               | INTERGENIC      |               |                    |                    |
| SNP_103245_A_252   | NW_004517179.1 | scaffold2158 | 252                     | AA                              | GG                 | GG               | INTERGENIC      |               |                    |                    |
| SNP_103246_A_312   | NW_004517179.1 | scaffold2158 | 312                     | TT                              | CC                 | CC               | INTERGENIC      |               |                    |                    |
| SNP_103247_A_316   | NW_004517179.1 | scaffold2158 | 316                     | AA                              | TT                 | TT               | INTERGENIC      |               |                    |                    |
| SNP_103248_A_577   | NW_004517179.1 | scaffold2158 | 577                     | CC                              | TT                 | TT               | INTERGENIC      |               |                    |                    |
| SNP_103249_A_619   | NW_004517179.1 | scaffold2158 | 619                     | GG                              | TT                 | TT               | INTERGENIC      |               |                    |                    |
| SNP_103250_A_24904 | NW_004517179.1 | scaffold2158 | 24904                   | AA                              | GG                 | GG               | INTERGENIC      |               |                    |                    |
| SNP_103251_A_52268 | NW_004517179.1 | scaffold2158 | 52268                   | GG                              | TT                 | TT               | INTERGENIC      |               |                    |                    |
| SNP_103252_A_52289 | NW_004517179.1 | scaffold2158 | 52289                   | AA                              | GG                 | GG               | INTERGENIC      |               |                    |                    |
| SNP_103253_A_64441 | NW_004517179.1 | scaffold2158 | 64441                   | AA                              | GG                 | GG               | INTERGENIC      |               |                    |                    |
| SNP_103254_A_64514 | NW_004517179.1 | scaffold2158 | 64514                   | AA                              | GG                 | GG               | INTERGENIC      |               |                    |                    |
| SNP_103255_A_64623 | NW_004517179.1 | scaffold2158 | 64623                   | GG                              | TT                 | TT               | INTERGENIC      |               |                    |                    |

| SNPs IDs            | Chromosome IDs | Chromosomes  | Physical positions (bp) | CDC Frontier (Reference genome) | (Pusa 1103 & HPNB) | (ILWC 46 & LPNB) | Sequence genome       | Components of | Gene accession IDs           | Putative functions |
|---------------------|----------------|--------------|-------------------------|---------------------------------|--------------------|------------------|-----------------------|---------------|------------------------------|--------------------|
| SNP_103256_A_64624  | NW_004517179.1 | scaffold2158 | 64624                   | TT                              | GG                 | GG               | INTERGENIC            |               |                              |                    |
| SNP_103257_A_64691  | NW_004517179.1 | scaffold2158 | 64691                   | GG                              | TT                 | TT               | INTERGENIC            |               |                              |                    |
| SNP_103258_A_64776  | NW_004517179.1 | scaffold2158 | 64776                   | GG                              | AA                 | AA               | INTERGENIC            |               |                              |                    |
| SNP_103260_A_106105 | NW_004517179.1 | scaffold2158 | 106105                  | TT                              | GG                 | GG               | INTERGENIC            |               |                              |                    |
| SNP_103261_A_113668 | NW_004517179.1 | scaffold2158 | 113668                  | CC                              | GG                 | GG               | INTERGENIC            |               |                              |                    |
| SNP_103262_A_117066 | NW_004517179.1 | scaffold2158 | 117066                  | AA                              | GG                 | GG               | INTERGENIC            |               |                              |                    |
| SNP_103263_A_125131 | NW_004517179.1 | scaffold2158 | 125131                  | AA                              | GG                 | GG               | INTERGENIC            |               |                              |                    |
| SNP_103264_A_125319 | NW_004517179.1 | scaffold2158 | 125319                  | CC                              | AA                 | AA               | INTERGENIC            |               |                              |                    |
| SNP_103265_A_125403 | NW_004517179.1 | scaffold2158 | 125403                  | TT                              | AA                 | AA               | INTERGENIC            |               |                              |                    |
| SNP_103266_A_125610 | NW_004517179.1 | scaffold2158 | 125610                  | TT                              | CC                 | CC               | INTERGENIC            |               |                              |                    |
| SNP_103267_A_127238 | NW_004517179.1 | scaffold2158 | 127238                  | TT                              | GG                 | GG               | INTERGENIC            |               |                              |                    |
| SNP_103268_A_127639 | NW_004517179.1 | scaffold2158 | 127639                  | TT                              | GG                 | GG               | INTERGENIC            |               |                              |                    |
| SNP_103269_A_127647 | NW_004517179.1 | scaffold2158 | 127647                  | TT                              | CC                 | CC               | INTERGENIC            |               |                              |                    |
| SNP_103271_A_150540 | NW_004517179.1 | scaffold2158 | 150540                  | AA                              | GG                 | GG               | URR                   | 101492535     | urease accessory protein D   |                    |
| SNP_103272_A_150696 | NW_004517179.1 | scaffold2158 | 150696                  | GG                              | AA                 | AA               | URR                   | 101492535     | urease accessory protein D   |                    |
| SNP_103275_A_186468 | NW_004517179.1 | scaffold2158 | 186468                  | TT                              | CC                 | CC               | NON_SYNONYMOUS_CODING | 101493512     | uncharacterized LOC101493512 |                    |
| SNP_103276_A_188998 | NW_004517179.1 | scaffold2158 | 188998                  | GG                              | AA                 | AA               | URR                   | 101493512     | uncharacterized LOC101493512 |                    |
| SNP_103277_A_195952 | NW_004517179.1 | scaffold2158 | 195952                  | CC                              | TT                 | TT               | INTERGENIC            |               |                              |                    |
| SNP_103278_A_197820 | NW_004517179.1 | scaffold2158 | 197820                  | AA                              | CC                 | CC               | INTERGENIC            |               |                              |                    |
| SNP_103279_A_201597 | NW_004517179.1 | scaffold2158 | 201597                  | TT                              | CC                 | CC               | INTERGENIC            |               |                              |                    |
| SNP_103280_A_204568 | NW_004517179.1 | scaffold2158 | 204568                  | AA                              | GG                 | GG               | INTERGENIC            |               |                              |                    |
| SNP_103281_A_218955 | NW_004517179.1 | scaffold2158 | 218955                  | TT                              | CC                 | CC               | INTERGENIC            |               |                              |                    |

| SNPs IDs            | Chromosome IDs | Chromosomes  | Physical positions (bp) | CDC Frontier (Reference genome) | (Pusa 1103 & HPNB) | (ILWC 46 & LPNB) | Sequence Components of genome | Gene accession IDs | Putative functions |
|---------------------|----------------|--------------|-------------------------|---------------------------------|--------------------|------------------|-------------------------------|--------------------|--------------------|
| SNP_103282_A_219297 | NW_004517179.1 | scaffold2158 | 219297                  | AA                              | TT                 | TT               | INTERGENIC                    |                    |                    |
| SNP_103283_A_219316 | NW_004517179.1 | scaffold2158 | 219316                  | GG                              | AA                 | AA               | INTERGENIC                    |                    |                    |
| SNP_103284_A_219358 | NW_004517179.1 | scaffold2158 | 219358                  | TT                              | CC                 | CC               | INTERGENIC                    |                    |                    |
| SNP_103285_A_4813   | NW_004517180.1 | scaffold2160 | 4813                    | TT                              | CC                 | CC               | INTERGENIC                    |                    |                    |
| SNP_103286_A_4859   | NW_004517180.1 | scaffold2160 | 4859                    | AA                              | GG                 | GG               | INTERGENIC                    |                    |                    |
| SNP_103287_A_20697  | NW_004517180.1 | scaffold2160 | 20697                   | GG                              | TT                 | TT               | INTERGENIC                    |                    |                    |
| SNP_103288_A_20946  | NW_004517180.1 | scaffold2160 | 20946                   | AA                              | GG                 | GG               | INTERGENIC                    |                    |                    |
| SNP_103290_A_28456  | NW_004517180.1 | scaffold2160 | 28456                   | GG                              | AA                 | AA               | INTERGENIC                    |                    |                    |
| SNP_103291_A_28681  | NW_004517180.1 | scaffold2160 | 28681                   | GG                              | TT                 | TT               | INTERGENIC                    |                    |                    |
| SNP_103292_A_28694  | NW_004517180.1 | scaffold2160 | 28694                   | AA                              | TT                 | TT               | INTERGENIC                    |                    |                    |
| SNP_103293_A_28720  | NW_004517180.1 | scaffold2160 | 28720                   | AA                              | GG                 | GG               | INTERGENIC                    |                    |                    |
| SNP_103294_A_33465  | NW_004517180.1 | scaffold2160 | 33465                   | CC                              | GG                 | GG               | INTERGENIC                    |                    |                    |
| SNP_103295_A_33780  | NW_004517180.1 | scaffold2160 | 33780                   | AA                              | CC                 | CC               | INTERGENIC                    |                    |                    |
| SNP_103296_A_33827  | NW_004517180.1 | scaffold2160 | 33827                   | GG                              | CC                 | CC               | INTERGENIC                    |                    |                    |
| SNP_103297_A_33861  | NW_004517180.1 | scaffold2160 | 33861                   | AA                              | GG                 | GG               | INTERGENIC                    |                    |                    |
| SNP_103298_A_63     | NW_004517181.1 | scaffold2161 | 63                      | TT                              | CC                 | CC               | INTERGENIC                    |                    |                    |
| SNP_103299_A_64     | NW_004517181.1 | scaffold2161 | 64                      | AA                              | GG                 | GG               | INTERGENIC                    |                    |                    |
| SNP_103301_A_4006   | NW_004517181.1 | scaffold2161 | 4006                    | TT                              | AA                 | AA               | DRR                           | 101495329          | Unknown function   |
| SNP_103302_A_5047   | NW_004517181.1 | scaffold2161 | 5047                    | TT                              | CC                 | CC               | INTERGENIC                    |                    |                    |
| SNP_103303_A_5053   | NW_004517181.1 | scaffold2161 | 5053                    | AA                              | CC                 | CC               | INTERGENIC                    |                    |                    |
| SNP_103305_A_7438   | NW_004517181.1 | scaffold2161 | 7438                    | TT                              | CC                 | CC               | URR                           | 101495329          | Unknown function   |
| SNP_103306_A_7491   | NW_004517181.1 | scaffold2161 | 7491                    | GG                              | TT                 | TT               | URR                           | 101495329          | Unknown function   |

| SNPs IDs            | Chromosome IDs | Chromosomes  | Physical positions (bp) | CDC Frontier (Reference genome) | (Pusa 1103 & HPNB) | (ILWC 46 & LPNB) | Sequence Components of genome | Gene accession IDs | Putative functions              |
|---------------------|----------------|--------------|-------------------------|---------------------------------|--------------------|------------------|-------------------------------|--------------------|---------------------------------|
| SNP_103307_A_8706   | NW_004517181.1 | scaffold2161 | 8706                    | GG                              | AA                 | AA               | URR                           | 101495329          | Unknown function                |
| SNP_103308_A_9083   | NW_004517181.1 | scaffold2161 | 9083                    | CC                              | TT                 | TT               | INTERGENIC                    |                    |                                 |
| SNP_103309_A_10550  | NW_004517181.1 | scaffold2161 | 10550                   | AA                              | TT                 | TT               | URR                           | 101494156          | folypolyglutamate synthase-like |
| SNP_103311_A_27233  | NW_004517181.1 | scaffold2161 | 27233                   | GG                              | TT                 | TT               | INTERGENIC                    |                    |                                 |
| SNP_103313_A_58411  | NW_004517181.1 | scaffold2161 | 58411                   | GG                              | TT                 | TT               | INTERGENIC                    |                    |                                 |
| SNP_103314_A_58420  | NW_004517181.1 | scaffold2161 | 58420                   | AA                              | TT                 | TT               | INTERGENIC                    |                    |                                 |
| SNP_103315_A_58424  | NW_004517181.1 | scaffold2161 | 58424                   | GG                              | AA                 | AA               | INTERGENIC                    |                    |                                 |
| SNP_103316_A_58425  | NW_004517181.1 | scaffold2161 | 58425                   | TT                              | AA                 | AA               | INTERGENIC                    |                    |                                 |
| SNP_103317_A_58427  | NW_004517181.1 | scaffold2161 | 58427                   | TT                              | GG                 | GG               | INTERGENIC                    |                    |                                 |
| SNP_103318_A_68047  | NW_004517181.1 | scaffold2161 | 68047                   | AA                              | GG                 | GG               | INTERGENIC                    |                    |                                 |
| SNP_103319_A_106432 | NW_004517181.1 | scaffold2161 | 106432                  | TT                              | CC                 | CC               | DRR                           | 101495977          | pectinesterase-like             |
| SNP_103320_A_106508 | NW_004517181.1 | scaffold2161 | 106508                  | TT                              | CC                 | CC               | DRR                           | 101495977          | pectinesterase-like             |
| SNP_103321_A_106775 | NW_004517181.1 | scaffold2161 | 106775                  | AA                              | GG                 | GG               | SYNONYMOUS_CODING             | 101495977          | pectinesterase-like             |
| SNP_103322_A_106865 | NW_004517181.1 | scaffold2161 | 106865                  | GG                              | AA                 | AA               | SYNONYMOUS_CODING             | 101495977          | pectinesterase-like             |
| SNP_103323_A_106882 | NW_004517181.1 | scaffold2161 | 106882                  | TT                              | CC                 | CC               | NON_SYNONYMOUS_CODING         | 101495977          | pectinesterase-like             |
| SNP_103324_A_111326 | NW_004517181.1 | scaffold2161 | 111326                  | GG                              | AA                 | AA               | INTRON                        | 101495977          | pectinesterase-like             |
| SNP_103325_A_111372 | NW_004517181.1 | scaffold2161 | 111372                  | AA                              | GG                 | GG               | INTRON                        | 101495977          | pectinesterase-like             |
| SNP_103326_A_111673 | NW_004517181.1 | scaffold2161 | 111673                  | TT                              | CC                 | CC               | INTRON                        | 101495977          | pectinesterase-like             |
| SNP_103327_A_111729 | NW_004517181.1 | scaffold2161 | 111729                  | AA                              | TT                 | TT               | INTRON                        | 101495977          | pectinesterase-like             |
| SNP_103328_A_128537 | NW_004517181.1 | scaffold2161 | 128537                  | TT                              | AA                 | AA               | INTRON                        | 101495977          | pectinesterase-like             |
| SNP_103329_A_134337 | NW_004517181.1 | scaffold2161 | 134337                  | AA                              | CC                 | CC               | DRR                           | 101496314          | Unknown function                |
| SNP_103330_A_160242 | NW_004517181.1 | scaffold2161 | 160242                  | AA                              | TT                 | TT               | INTERGENIC                    |                    |                                 |

| SNPs IDs            | Chromosome IDs | Chromosomes  | Physical positions (bp) | CDC Frontier (Reference genome) | (Pusa 1103 & HPNB) | (ILWC 46 & LPNB) | Sequence genome | Components of | Gene accession IDs | Putative functions |
|---------------------|----------------|--------------|-------------------------|---------------------------------|--------------------|------------------|-----------------|---------------|--------------------|--------------------|
| SNP_103331_A_168078 | NW_004517181.1 | scaffold2161 | 168078                  | CC                              | TT                 | TT               | INTERGENIC      |               |                    |                    |
| SNP_103332_A_171920 | NW_004517181.1 | scaffold2161 | 171920                  | AA                              | GG                 | GG               | INTERGENIC      |               |                    |                    |
| SNP_103334_A_196631 | NW_004517181.1 | scaffold2161 | 196631                  | AA                              | GG                 | GG               | INTERGENIC      |               |                    |                    |
| SNP_103335_A_196736 | NW_004517181.1 | scaffold2161 | 196736                  | TT                              | GG                 | GG               | INTERGENIC      |               |                    |                    |
| SNP_103336_A_196773 | NW_004517181.1 | scaffold2161 | 196773                  | GG                              | AA                 | AA               | INTERGENIC      |               |                    |                    |
| SNP_103337_A_203511 | NW_004517181.1 | scaffold2161 | 203511                  | GG                              | CC                 | CC               | INTERGENIC      |               |                    |                    |
| SNP_103338_A_216110 | NW_004517181.1 | scaffold2161 | 216110                  | AA                              | GG                 | GG               | INTERGENIC      |               |                    |                    |
| SNP_103339_A_249592 | NW_004517181.1 | scaffold2161 | 249592                  | GG                              | AA                 | AA               | INTERGENIC      |               |                    |                    |
| SNP_103340_A_249647 | NW_004517181.1 | scaffold2161 | 249647                  | AA                              | TT                 | TT               | INTERGENIC      |               |                    |                    |
| SNP_103341_A_271949 | NW_004517181.1 | scaffold2161 | 271949                  | CC                              | TT                 | TT               | INTERGENIC      |               |                    |                    |
| SNP_103342_A_579    | NW_004517182.1 | scaffold2163 | 579                     | TT                              | GG                 | GG               | INTERGENIC      |               |                    |                    |
| SNP_103343_A_28578  | NW_004517182.1 | scaffold2163 | 28578                   | AA                              | TT                 | TT               | INTERGENIC      |               |                    |                    |
| SNP_103344_A_51029  | NW_004517182.1 | scaffold2163 | 51029                   | TT                              | AA                 | AA               | INTERGENIC      |               |                    |                    |
| SNP_103345_A_69485  | NW_004517182.1 | scaffold2163 | 69485                   | TT                              | AA                 | AA               | INTERGENIC      |               |                    |                    |
| SNP_103346_A_69690  | NW_004517182.1 | scaffold2163 | 69690                   | AA                              | TT                 | TT               | INTERGENIC      |               |                    |                    |
| SNP_103347_A_69706  | NW_004517182.1 | scaffold2163 | 69706                   | TT                              | GG                 | GG               | INTERGENIC      |               |                    |                    |
| SNP_103348_A_69747  | NW_004517182.1 | scaffold2163 | 69747                   | GG                              | AA                 | AA               | INTERGENIC      |               |                    |                    |
| SNP_103349_A_69775  | NW_004517182.1 | scaffold2163 | 69775                   | AA                              | GG                 | GG               | INTERGENIC      |               |                    |                    |
| SNP_103350_A_71191  | NW_004517182.1 | scaffold2163 | 71191                   | TT                              | GG                 | GG               | INTERGENIC      |               |                    |                    |
| SNP_103351_A_71434  | NW_004517182.1 | scaffold2163 | 71434                   | CC                              | AA                 | AA               | INTERGENIC      |               |                    |                    |
| SNP_103352_A_71469  | NW_004517182.1 | scaffold2163 | 71469                   | TT                              | AA                 | AA               | INTERGENIC      |               |                    |                    |
| SNP_103353_A_71491  | NW_004517182.1 | scaffold2163 | 71491                   | TT                              | GG                 | GG               | INTERGENIC      |               |                    |                    |



| SNPs IDs           | Chromosome IDs | Chromosomes  | Physical positions (bp) | CDC Frontier (Reference genome) | (Pusa 1103 & HPNB) | (ILWC 46 & LPNB) | Sequence genome | Components of | Gene accession IDs | Putative functions |
|--------------------|----------------|--------------|-------------------------|---------------------------------|--------------------|------------------|-----------------|---------------|--------------------|--------------------|
| SNP_103354_A_71570 | NW_004517182.1 | scaffold2163 | 71570                   | AA                              | TT                 | TT               | INTERGENIC      |               |                    |                    |
| SNP_103355_A_71576 | NW_004517182.1 | scaffold2163 | 71576                   | AA                              | TT                 | TT               | INTERGENIC      |               |                    |                    |
| SNP_103356_A_74072 | NW_004517182.1 | scaffold2163 | 74072                   | TT                              | CC                 | CC               | INTERGENIC      |               |                    |                    |
| SNP_103357_A_74263 | NW_004517182.1 | scaffold2163 | 74263                   | TT                              | CC                 | CC               | INTERGENIC      |               |                    |                    |
| SNP_103358_A_74274 | NW_004517182.1 | scaffold2163 | 74274                   | AA                              | CC                 | CC               | INTERGENIC      |               |                    |                    |
| SNP_103359_A_78336 | NW_004517182.1 | scaffold2163 | 78336                   | TT                              | AA                 | AA               | INTERGENIC      |               |                    |                    |
| SNP_103360_A_78497 | NW_004517182.1 | scaffold2163 | 78497                   | TT                              | CC                 | CC               | INTERGENIC      |               |                    |                    |
| SNP_103361_A_78546 | NW_004517182.1 | scaffold2163 | 78546                   | TT                              | GG                 | GG               | INTERGENIC      |               |                    |                    |
| SNP_103362_A_78589 | NW_004517182.1 | scaffold2163 | 78589                   | AA                              | TT                 | TT               | INTERGENIC      |               |                    |                    |
| SNP_103363_A_78614 | NW_004517182.1 | scaffold2163 | 78614                   | CC                              | TT                 | TT               | INTERGENIC      |               |                    |                    |
| SNP_103365_A_78691 | NW_004517182.1 | scaffold2163 | 78691                   | AA                              | TT                 | TT               | INTERGENIC      |               |                    |                    |
| SNP_103366_A_78744 | NW_004517182.1 | scaffold2163 | 78744                   | GG                              | AA                 | AA               | INTERGENIC      |               |                    |                    |
| SNP_103367_A_5583  | NW_004517183.1 | scaffold2164 | 5583                    | GG                              | AA                 | AA               | INTERGENIC      |               |                    |                    |
| SNP_103368_A_6464  | NW_004517183.1 | scaffold2164 | 6464                    | CC                              | AA                 | AA               | INTERGENIC      |               |                    |                    |
| SNP_103369_A_17925 | NW_004517183.1 | scaffold2164 | 17925                   | GG                              | AA                 | AA               | INTERGENIC      |               |                    |                    |
| SNP_103370_A_23188 | NW_004517183.1 | scaffold2164 | 23188                   | GG                              | AA                 | AA               | INTERGENIC      |               |                    |                    |
| SNP_103371_A_23427 | NW_004517183.1 | scaffold2164 | 23427                   | TT                              | AA                 | AA               | INTERGENIC      |               |                    |                    |
| SNP_103372_A_38915 | NW_004517183.1 | scaffold2164 | 38915                   | TT                              | CC                 | CC               | INTERGENIC      |               |                    |                    |
| SNP_103373_A_38962 | NW_004517183.1 | scaffold2164 | 38962                   | TT                              | GG                 | GG               | INTERGENIC      |               |                    |                    |
| SNP_103374_A_39220 | NW_004517183.1 | scaffold2164 | 39220                   | GG                              | AA                 | AA               | INTERGENIC      |               |                    |                    |
| SNP_103375_A_39341 | NW_004517183.1 | scaffold2164 | 39341                   | TT                              | GG                 | GG               | INTERGENIC      |               |                    |                    |
| SNP_103376_A_62887 | NW_004517183.1 | scaffold2164 | 62887                   | AA                              | CC                 | CC               | INTERGENIC      |               |                    |                    |

| SNPs IDs            | Chromosome IDs | Chromosomes  | Physical positions (bp) | CDC Frontier (Reference genome) | (Pusa 1103 & HPNB) | (ILWC 46 & LPNB) | Sequence genome | Components of | Gene accession IDs           | Putative functions |
|---------------------|----------------|--------------|-------------------------|---------------------------------|--------------------|------------------|-----------------|---------------|------------------------------|--------------------|
| SNP_103377_A_62980  | NW_004517183.1 | scaffold2164 | 62980                   | GG                              | AA                 | AA               | INTERGENIC      |               |                              |                    |
| SNP_103378_A_63353  | NW_004517183.1 | scaffold2164 | 63353                   | GG                              | TT                 | TT               | INTERGENIC      |               |                              |                    |
| SNP_103379_A_67737  | NW_004517183.1 | scaffold2164 | 67737                   | AA                              | CC                 | CC               | INTERGENIC      |               |                              |                    |
| SNP_103380_A_67751  | NW_004517183.1 | scaffold2164 | 67751                   | AA                              | GG                 | GG               | INTERGENIC      |               |                              |                    |
| SNP_103382_A_71575  | NW_004517183.1 | scaffold2164 | 71575                   | TT                              | AA                 | AA               | INTERGENIC      |               |                              |                    |
| SNP_103383_A_71609  | NW_004517183.1 | scaffold2164 | 71609                   | TT                              | AA                 | AA               | INTERGENIC      |               |                              |                    |
| SNP_103384_A_88683  | NW_004517183.1 | scaffold2164 | 88683                   | CC                              | AA                 | AA               | INTERGENIC      |               |                              |                    |
| SNP_103385_A_90383  | NW_004517183.1 | scaffold2164 | 90383                   | CC                              | TT                 | TT               | INTERGENIC      |               |                              |                    |
| SNP_103386_A_770    | NW_004517184.1 | scaffold2166 | 770                     | TT                              | CC                 | CC               | INTERGENIC      |               |                              |                    |
| SNP_103387_A_792    | NW_004517184.1 | scaffold2166 | 792                     | AA                              | GG                 | GG               | INTERGENIC      |               |                              |                    |
| SNP_103388_A_831    | NW_004517184.1 | scaffold2166 | 831                     | TT                              | AA                 | AA               | INTERGENIC      |               |                              |                    |
| SNP_103391_A_72512  | NW_004517184.1 | scaffold2166 | 72512                   | TT                              | CC                 | CC               | URR             | 101498396     | uncharacterized LOC101498396 |                    |
| SNP_103393_A_101513 | NW_004517184.1 | scaffold2166 | 101513                  | AA                              | TT                 | TT               | INTERGENIC      |               |                              |                    |
| SNP_103394_A_101514 | NW_004517184.1 | scaffold2166 | 101514                  | AA                              | TT                 | TT               | INTERGENIC      |               |                              |                    |
| SNP_103395_A_102067 | NW_004517184.1 | scaffold2166 | 102067                  | TT                              | AA                 | AA               | INTERGENIC      |               |                              |                    |
| SNP_103396_A_125161 | NW_004517184.1 | scaffold2166 | 125161                  | GG                              | AA                 | AA               | INTERGENIC      |               |                              |                    |
| SNP_103397_A_194205 | NW_004517184.1 | scaffold2166 | 194205                  | AA                              | GG                 | GG               | INTERGENIC      |               |                              |                    |
| SNP_103398_A_194525 | NW_004517184.1 | scaffold2166 | 194525                  | GG                              | TT                 | TT               | INTERGENIC      |               |                              |                    |
| SNP_103399_A_204117 | NW_004517184.1 | scaffold2166 | 204117                  | TT                              | CC                 | CC               | INTERGENIC      |               |                              |                    |
| SNP_103400_A_10887  | NW_004517185.1 | scaffold2168 | 10887                   | AA                              | CC                 | CC               | INTERGENIC      |               |                              |                    |
| SNP_103401_A_12761  | NW_004517185.1 | scaffold2168 | 12761                   | AA                              | TT                 | TT               | INTERGENIC      |               |                              |                    |
| SNP_103402_A_12841  | NW_004517185.1 | scaffold2168 | 12841                   | CC                              | AA                 | AA               | INTERGENIC      |               |                              |                    |

| SNPs IDs           | Chromosome IDs | Chromosomes  | Physical positions (bp) | CDC Frontier (Reference genome) | (Pusa 1103 & HPNB) | (ILWC 46 & LPNB) | Sequence Components of genome | Gene accession IDs | Putative functions           |
|--------------------|----------------|--------------|-------------------------|---------------------------------|--------------------|------------------|-------------------------------|--------------------|------------------------------|
| SNP_103403_A_13087 | NW_004517185.1 | scaffold2168 | 13087                   | AA                              | CC                 | CC               | INTERGENIC                    |                    |                              |
| SNP_103404_A_13089 | NW_004517185.1 | scaffold2168 | 13089                   | CC                              | AA                 | AA               | INTERGENIC                    |                    |                              |
| SNP_103405_A_13170 | NW_004517185.1 | scaffold2168 | 13170                   | CC                              | AA                 | AA               | INTERGENIC                    |                    |                              |
| SNP_103406_A_13188 | NW_004517185.1 | scaffold2168 | 13188                   | GG                              | AA                 | AA               | INTERGENIC                    |                    |                              |
| SNP_103407_A_13206 | NW_004517185.1 | scaffold2168 | 13206                   | AA                              | GG                 | GG               | INTERGENIC                    |                    |                              |
| SNP_103408_A_330   | NW_004517186.1 | scaffold2169 | 330                     | TT                              | AA                 | AA               | INTERGENIC                    |                    |                              |
| SNP_103409_A_1092  | NW_004517186.1 | scaffold2169 | 1092                    | AA                              | TT                 | TT               | INTERGENIC                    |                    |                              |
| SNP_103410_A_1106  | NW_004517186.1 | scaffold2169 | 1106                    | AA                              | GG                 | GG               | INTERGENIC                    |                    |                              |
| SNP_103411_A_1107  | NW_004517186.1 | scaffold2169 | 1107                    | AA                              | GG                 | GG               | INTERGENIC                    |                    |                              |
| SNP_103412_A_2469  | NW_004517187.1 | scaffold2170 | 2469                    | TT                              | CC                 | CC               | INTERGENIC                    |                    |                              |
| SNP_103413_A_2727  | NW_004517187.1 | scaffold2170 | 2727                    | TT                              | CC                 | CC               | INTERGENIC                    |                    |                              |
| SNP_103414_A_2919  | NW_004517187.1 | scaffold2170 | 2919                    | CC                              | GG                 | GG               | INTERGENIC                    |                    |                              |
| SNP_103415_A_3185  | NW_004517187.1 | scaffold2170 | 3185                    | CC                              | TT                 | TT               | INTERGENIC                    |                    |                              |
| SNP_103416_A_3187  | NW_004517187.1 | scaffold2170 | 3187                    | CC                              | TT                 | TT               | INTERGENIC                    |                    |                              |
| SNP_103417_A_3249  | NW_004517187.1 | scaffold2170 | 3249                    | GG                              | AA                 | AA               | INTERGENIC                    |                    |                              |
| SNP_103418_A_3307  | NW_004517187.1 | scaffold2170 | 3307                    | GG                              | AA                 | AA               | INTERGENIC                    |                    |                              |
| SNP_103419_A_3349  | NW_004517187.1 | scaffold2170 | 3349                    | AA                              | GG                 | GG               | INTERGENIC                    |                    |                              |
| SNP_103420_A_3512  | NW_004517187.1 | scaffold2170 | 3512                    | AA                              | GG                 | GG               | INTERGENIC                    |                    |                              |
| SNP_103421_A_3579  | NW_004517187.1 | scaffold2170 | 3579                    | GG                              | AA                 | AA               | INTERGENIC                    |                    |                              |
| SNP_103422_A_3817  | NW_004517187.1 | scaffold2170 | 3817                    | GG                              | AA                 | AA               | DRR                           | 101503191          | tripeptidyl-peptidase 2-like |
| SNP_103423_A_3999  | NW_004517187.1 | scaffold2170 | 3999                    | TT                              | CC                 | CC               | DRR                           | 101503191          | tripeptidyl-peptidase 2-like |
| SNP_103425_A_4279  | NW_004517187.1 | scaffold2170 | 4279                    | CC                              | GG                 | GG               | DRR                           | 101503191          | tripeptidyl-peptidase 2-like |

| SNPs IDs           | Chromosome IDs | Chromosomes  | Physical positions (bp) | CDC Frontier (Reference genome) | (Pusa 1103 & HPNB) | (ILWC 46 & LPNB) | Sequence Components of genome | Gene accession IDs | Putative functions           |
|--------------------|----------------|--------------|-------------------------|---------------------------------|--------------------|------------------|-------------------------------|--------------------|------------------------------|
| SNP_103426_A_4498  | NW_004517187.1 | scaffold2170 | 4498                    | GG                              | AA                 | AA               | DRR                           | 101503191          | tripeptidyl-peptidase 2-like |
| SNP_103427_A_4672  | NW_004517187.1 | scaffold2170 | 4672                    | GG                              | CC                 | CC               | DRR                           | 101503191          | tripeptidyl-peptidase 2-like |
| SNP_103428_A_4761  | NW_004517187.1 | scaffold2170 | 4761                    | GG                              | AA                 | AA               | INTERGENIC                    |                    |                              |
| SNP_103429_A_4821  | NW_004517187.1 | scaffold2170 | 4821                    | AA                              | GG                 | GG               | INTERGENIC                    |                    |                              |
| SNP_103432_A_5788  | NW_004517187.1 | scaffold2170 | 5788                    | CC                              | TT                 | TT               | INTRON                        | 101503191          | tripeptidyl-peptidase 2-like |
| SNP_103433_A_6265  | NW_004517187.1 | scaffold2170 | 6265                    | TT                              | CC                 | CC               | NON_SYNONYMOUS_CODING         | 101503191          | tripeptidyl-peptidase 2-like |
| SNP_103434_A_6409  | NW_004517187.1 | scaffold2170 | 6409                    | TT                              | GG                 | GG               | INTRON                        | 101503191          | tripeptidyl-peptidase 2-like |
| SNP_103435_A_6558  | NW_004517187.1 | scaffold2170 | 6558                    | GG                              | AA                 | AA               | INTRON                        | 101503191          | tripeptidyl-peptidase 2-like |
| SNP_103436_A_6576  | NW_004517187.1 | scaffold2170 | 6576                    | TT                              | CC                 | CC               | INTRON                        | 101503191          | tripeptidyl-peptidase 2-like |
| SNP_103437_A_6593  | NW_004517187.1 | scaffold2170 | 6593                    | AA                              | GG                 | GG               | INTRON                        | 101503191          | tripeptidyl-peptidase 2-like |
| SNP_103438_A_6597  | NW_004517187.1 | scaffold2170 | 6597                    | GG                              | CC                 | CC               | INTRON                        | 101503191          | tripeptidyl-peptidase 2-like |
| SNP_103439_A_6599  | NW_004517187.1 | scaffold2170 | 6599                    | AA                              | GG                 | GG               | INTRON                        | 101503191          | tripeptidyl-peptidase 2-like |
| SNP_103440_A_6653  | NW_004517187.1 | scaffold2170 | 6653                    | AA                              | GG                 | GG               | INTRON                        | 101503191          | tripeptidyl-peptidase 2-like |
| SNP_103441_A_7055  | NW_004517187.1 | scaffold2170 | 7055                    | GG                              | TT                 | TT               | INTRON                        | 101503191          | tripeptidyl-peptidase 2-like |
| SNP_103442_A_7161  | NW_004517187.1 | scaffold2170 | 7161                    | AA                              | GG                 | GG               | INTRON                        | 101503191          | tripeptidyl-peptidase 2-like |
| SNP_103443_A_7287  | NW_004517187.1 | scaffold2170 | 7287                    | AA                              | GG                 | GG               | INTRON                        | 101503191          | tripeptidyl-peptidase 2-like |
| SNP_103444_A_7691  | NW_004517187.1 | scaffold2170 | 7691                    | CC                              | TT                 | TT               | INTRON                        | 101503191          | tripeptidyl-peptidase 2-like |
| SNP_103445_A_7947  | NW_004517187.1 | scaffold2170 | 7947                    | AA                              | CC                 | CC               | INTRON                        | 101503191          | tripeptidyl-peptidase 2-like |
| SNP_103446_A_9667  | NW_004517187.1 | scaffold2170 | 9667                    | TT                              | AA                 | AA               | INTRON                        | 101503191          | tripeptidyl-peptidase 2-like |
| SNP_103447_A_10006 | NW_004517187.1 | scaffold2170 | 10006                   | AA                              | GG                 | GG               | INTRON                        | 101503191          | tripeptidyl-peptidase 2-like |
| SNP_103448_A_11824 | NW_004517187.1 | scaffold2170 | 11824                   | CC                              | TT                 | TT               | INTRON                        | 101503191          | tripeptidyl-peptidase 2-like |
| SNP_103449_A_12252 | NW_004517187.1 | scaffold2170 | 12252                   | CC                              | TT                 | TT               | INTRON                        | 101503191          | tripeptidyl-peptidase 2-like |

| SNPs IDs           | Chromosome IDs | Chromosomes  | Physical positions (bp) | CDC Frontier genome (Reference genome) | (Pusa 1103 & HPNB) | (ILWC 46 & LPNB) | Sequence Components of genome | Gene accession IDs | Putative functions           |
|--------------------|----------------|--------------|-------------------------|----------------------------------------|--------------------|------------------|-------------------------------|--------------------|------------------------------|
| SNP_103451_A_12356 | NW_004517187.1 | scaffold2170 | 12356                   | AA                                     | GG                 | GG               | INTRON                        | 101503191          | tripeptidyl-peptidase 2-like |
| SNP_103452_A_12433 | NW_004517187.1 | scaffold2170 | 12433                   | CC                                     | TT                 | TT               | INTRON                        | 101503191          | tripeptidyl-peptidase 2-like |
| SNP_103454_A_13232 | NW_004517187.1 | scaffold2170 | 13232                   | AA                                     | GG                 | GG               | INTRON                        | 101503191          | tripeptidyl-peptidase 2-like |
| SNP_103455_A_14090 | NW_004517187.1 | scaffold2170 | 14090                   | CC                                     | TT                 | TT               | INTRON                        | 101503191          | tripeptidyl-peptidase 2-like |
| SNP_103457_A_14545 | NW_004517187.1 | scaffold2170 | 14545                   | GG                                     | AA                 | AA               | INTRON                        | 101503191          | tripeptidyl-peptidase 2-like |
| SNP_103458_A_37914 | NW_004517187.1 | scaffold2170 | 37914                   | CC                                     | TT                 | TT               | URR                           | 101505437          | Unknown function             |
| SNP_103459_A_37978 | NW_004517187.1 | scaffold2170 | 37978                   | AA                                     | CC                 | CC               | URR                           | 101505437          | Unknown function             |
| SNP_103460_A_38031 | NW_004517187.1 | scaffold2170 | 38031                   | CC                                     | TT                 | TT               | URR                           | 101505437          | Unknown function             |
| SNP_103461_A_38051 | NW_004517187.1 | scaffold2170 | 38051                   | TT                                     | GG                 | GG               | URR                           | 101505437          | Unknown function             |
| SNP_103462_A_38441 | NW_004517187.1 | scaffold2170 | 38441                   | CC                                     | GG                 | GG               | URR                           | 101505437          | Unknown function             |
| SNP_103463_A_1810  | NW_004517189.1 | scaffold2173 | 1810                    | CC                                     | AA                 | AA               | INTERGENIC                    |                    |                              |
| SNP_103464_A_1838  | NW_004517189.1 | scaffold2173 | 1838                    | TT                                     | AA                 | AA               | INTERGENIC                    |                    |                              |
| SNP_103465_A_1847  | NW_004517189.1 | scaffold2173 | 1847                    | GG                                     | TT                 | TT               | INTERGENIC                    |                    |                              |
| SNP_103466_A_2040  | NW_004517189.1 | scaffold2173 | 2040                    | GG                                     | AA                 | AA               | INTERGENIC                    |                    |                              |
| SNP_103467_A_2099  | NW_004517189.1 | scaffold2173 | 2099                    | CC                                     | AA                 | AA               | INTERGENIC                    |                    |                              |
| SNP_103468_A_6634  | NW_004517189.1 | scaffold2173 | 6634                    | GG                                     | TT                 | TT               | INTERGENIC                    |                    |                              |
| SNP_103469_A_6639  | NW_004517189.1 | scaffold2173 | 6639                    | AA                                     | CC                 | CC               | INTERGENIC                    |                    |                              |
| SNP_103470_A_6774  | NW_004517189.1 | scaffold2173 | 6774                    | CC                                     | TT                 | TT               | INTERGENIC                    |                    |                              |
| SNP_103471_A_6787  | NW_004517189.1 | scaffold2173 | 6787                    | CC                                     | TT                 | TT               | INTERGENIC                    |                    |                              |
| SNP_103472_A_7008  | NW_004517189.1 | scaffold2173 | 7008                    | AA                                     | TT                 | TT               | INTERGENIC                    |                    |                              |
| SNP_103473_A_7024  | NW_004517189.1 | scaffold2173 | 7024                    | CC                                     | TT                 | TT               | INTERGENIC                    |                    |                              |
| SNP_103474_A_7077  | NW_004517189.1 | scaffold2173 | 7077                    | AA                                     | TT                 | TT               | INTERGENIC                    |                    |                              |

| SNPs IDs           | Chromosome IDs | Chromosomes  | Physical positions (bp) | CDC Frontier (Reference genome) | (Pusa 1103 & HPNB) | (ILWC 46 & LPNB) | Sequence genome | Components of | Gene accession IDs | Putative functions |
|--------------------|----------------|--------------|-------------------------|---------------------------------|--------------------|------------------|-----------------|---------------|--------------------|--------------------|
| SNP_103475_A_7157  | NW_004517189.1 | scaffold2173 | 7157                    | AA                              | CC                 | CC               | INTERGENIC      |               |                    |                    |
| SNP_103476_A_7441  | NW_004517189.1 | scaffold2173 | 7441                    | AA                              | GG                 | GG               | INTERGENIC      |               |                    |                    |
| SNP_103477_A_7748  | NW_004517189.1 | scaffold2173 | 7748                    | AA                              | TT                 | TT               | INTERGENIC      |               |                    |                    |
| SNP_103478_A_16570 | NW_004517189.1 | scaffold2173 | 16570                   | TT                              | AA                 | AA               | INTERGENIC      |               |                    |                    |
| SNP_103479_A_18368 | NW_004517189.1 | scaffold2173 | 18368                   | AA                              | GG                 | GG               | INTERGENIC      |               |                    |                    |
| SNP_103480_A_18377 | NW_004517189.1 | scaffold2173 | 18377                   | AA                              | GG                 | GG               | INTERGENIC      |               |                    |                    |
| SNP_103481_A_18383 | NW_004517189.1 | scaffold2173 | 18383                   | GG                              | AA                 | AA               | INTERGENIC      |               |                    |                    |
| SNP_103482_A_18397 | NW_004517189.1 | scaffold2173 | 18397                   | GG                              | TT                 | TT               | INTERGENIC      |               |                    |                    |
| SNP_103483_A_18406 | NW_004517189.1 | scaffold2173 | 18406                   | GG                              | AA                 | AA               | INTERGENIC      |               |                    |                    |
| SNP_103484_A_18460 | NW_004517189.1 | scaffold2173 | 18460                   | CC                              | AA                 | AA               | INTERGENIC      |               |                    |                    |
| SNP_103485_A_18490 | NW_004517189.1 | scaffold2173 | 18490                   | CC                              | TT                 | TT               | INTERGENIC      |               |                    |                    |
| SNP_103486_A_18529 | NW_004517189.1 | scaffold2173 | 18529                   | GG                              | CC                 | CC               | INTERGENIC      |               |                    |                    |
| SNP_103487_A_18585 | NW_004517189.1 | scaffold2173 | 18585                   | GG                              | CC                 | CC               | INTERGENIC      |               |                    |                    |
| SNP_103488_A_18603 | NW_004517189.1 | scaffold2173 | 18603                   | CC                              | AA                 | AA               | INTERGENIC      |               |                    |                    |
| SNP_103489_A_18875 | NW_004517189.1 | scaffold2173 | 18875                   | TT                              | CC                 | CC               | INTERGENIC      |               |                    |                    |
| SNP_103490_A_18914 | NW_004517189.1 | scaffold2173 | 18914                   | AA                              | GG                 | GG               | INTERGENIC      |               |                    |                    |
| SNP_103491_A_18941 | NW_004517189.1 | scaffold2173 | 18941                   | CC                              | GG                 | GG               | INTERGENIC      |               |                    |                    |
| SNP_103492_A_19112 | NW_004517189.1 | scaffold2173 | 19112                   | CC                              | GG                 | GG               | INTERGENIC      |               |                    |                    |
| SNP_103493_A_19130 | NW_004517189.1 | scaffold2173 | 19130                   | AA                              | GG                 | GG               | INTERGENIC      |               |                    |                    |
| SNP_103494_A_19254 | NW_004517189.1 | scaffold2173 | 19254                   | AA                              | GG                 | GG               | INTERGENIC      |               |                    |                    |
| SNP_103495_A_19273 | NW_004517189.1 | scaffold2173 | 19273                   | GG                              | CC                 | CC               | INTERGENIC      |               |                    |                    |
| SNP_103496_A_19284 | NW_004517189.1 | scaffold2173 | 19284                   | TT                              | CC                 | CC               | INTERGENIC      |               |                    |                    |

| SNPs IDs           | Chromosome IDs | Chromosomes  | Physical positions (bp) | CDC Frontier (Reference genome) | (Pusa 1103 & HPNB) | (ILWC 46 & LPNB) | Sequence genome | Components of | Gene accession IDs | Putative functions |
|--------------------|----------------|--------------|-------------------------|---------------------------------|--------------------|------------------|-----------------|---------------|--------------------|--------------------|
| SNP_103498_A_19597 | NW_004517189.1 | scaffold2173 | 19597                   | GG                              | CC                 | CC               | INTERGENIC      |               |                    |                    |
| SNP_103500_A_19633 | NW_004517189.1 | scaffold2173 | 19633                   | TT                              | AA                 | AA               | INTERGENIC      |               |                    |                    |
| SNP_103501_A_19731 | NW_004517189.1 | scaffold2173 | 19731                   | AA                              | GG                 | GG               | INTERGENIC      |               |                    |                    |
| SNP_103502_A_19749 | NW_004517189.1 | scaffold2173 | 19749                   | AA                              | TT                 | TT               | INTERGENIC      |               |                    |                    |
| SNP_103503_A_19754 | NW_004517189.1 | scaffold2173 | 19754                   | AA                              | TT                 | TT               | INTERGENIC      |               |                    |                    |
| SNP_103504_A_19763 | NW_004517189.1 | scaffold2173 | 19763                   | AA                              | GG                 | GG               | INTERGENIC      |               |                    |                    |
| SNP_103505_A_19816 | NW_004517189.1 | scaffold2173 | 19816                   | TT                              | AA                 | AA               | INTERGENIC      |               |                    |                    |
| SNP_103506_A_19817 | NW_004517189.1 | scaffold2173 | 19817                   | TT                              | GG                 | GG               | INTERGENIC      |               |                    |                    |
| SNP_103508_A_19918 | NW_004517189.1 | scaffold2173 | 19918                   | AA                              | GG                 | GG               | INTERGENIC      |               |                    |                    |
| SNP_103509_A_19947 | NW_004517189.1 | scaffold2173 | 19947                   | CC                              | TT                 | TT               | INTERGENIC      |               |                    |                    |
| SNP_103510_A_19953 | NW_004517189.1 | scaffold2173 | 19953                   | AA                              | CC                 | CC               | INTERGENIC      |               |                    |                    |
| SNP_103511_A_19990 | NW_004517189.1 | scaffold2173 | 19990                   | AA                              | GG                 | GG               | INTERGENIC      |               |                    |                    |
| SNP_103512_A_20246 | NW_004517189.1 | scaffold2173 | 20246                   | CC                              | AA                 | AA               | INTERGENIC      |               |                    |                    |
| SNP_103513_A_20272 | NW_004517189.1 | scaffold2173 | 20272                   | AA                              | GG                 | GG               | INTERGENIC      |               |                    |                    |
| SNP_103514_A_20293 | NW_004517189.1 | scaffold2173 | 20293                   | CC                              | AA                 | AA               | INTERGENIC      |               |                    |                    |
| SNP_103515_A_20325 | NW_004517189.1 | scaffold2173 | 20325                   | CC                              | TT                 | TT               | INTERGENIC      |               |                    |                    |
| SNP_103516_A_20416 | NW_004517189.1 | scaffold2173 | 20416                   | TT                              | GG                 | GG               | INTERGENIC      |               |                    |                    |
| SNP_103517_A_20461 | NW_004517189.1 | scaffold2173 | 20461                   | AA                              | TT                 | TT               | INTERGENIC      |               |                    |                    |
| SNP_103518_A_20468 | NW_004517189.1 | scaffold2173 | 20468                   | TT                              | AA                 | AA               | INTERGENIC      |               |                    |                    |
| SNP_103519_A_20575 | NW_004517189.1 | scaffold2173 | 20575                   | TT                              | AA                 | AA               | INTERGENIC      |               |                    |                    |
| SNP_103520_A_20584 | NW_004517189.1 | scaffold2173 | 20584                   | TT                              | CC                 | CC               | INTERGENIC      |               |                    |                    |
| SNP_103521_A_20586 | NW_004517189.1 | scaffold2173 | 20586                   | CC                              | GG                 | GG               | INTERGENIC      |               |                    |                    |

| SNPs IDs           | Chromosome IDs | Chromosomes  | Physical positions (bp) | CDC Frontier (Reference genome) | (Pusa 1103 & HPNB) | (ILWC 46 & LPNB) | Sequence genome | Components of | Gene accession IDs | Putative functions |
|--------------------|----------------|--------------|-------------------------|---------------------------------|--------------------|------------------|-----------------|---------------|--------------------|--------------------|
| SNP_103522_A_20597 | NW_004517189.1 | scaffold2173 | 20597                   | TT                              | AA                 | AA               | INTERGENIC      |               |                    |                    |
| SNP_103523_A_20600 | NW_004517189.1 | scaffold2173 | 20600                   | TT                              | AA                 | AA               | INTERGENIC      |               |                    |                    |
| SNP_103524_A_20605 | NW_004517189.1 | scaffold2173 | 20605                   | TT                              | CC                 | CC               | INTERGENIC      |               |                    |                    |
| SNP_103525_A_20675 | NW_004517189.1 | scaffold2173 | 20675                   | AA                              | GG                 | GG               | INTERGENIC      |               |                    |                    |
| SNP_103526_A_20760 | NW_004517189.1 | scaffold2173 | 20760                   | GG                              | TT                 | TT               | INTERGENIC      |               |                    |                    |
| SNP_103527_A_21006 | NW_004517189.1 | scaffold2173 | 21006                   | AA                              | GG                 | GG               | INTERGENIC      |               |                    |                    |
| SNP_103528_A_54816 | NW_004517189.1 | scaffold2173 | 54816                   | GG                              | TT                 | TT               | INTERGENIC      |               |                    |                    |
| SNP_103529_A_54862 | NW_004517189.1 | scaffold2173 | 54862                   | TT                              | CC                 | CC               | INTERGENIC      |               |                    |                    |
| SNP_103530_A_55981 | NW_004517189.1 | scaffold2173 | 55981                   | GG                              | CC                 | CC               | INTERGENIC      |               |                    |                    |
| SNP_103531_A_56189 | NW_004517189.1 | scaffold2173 | 56189                   | AA                              | GG                 | GG               | INTERGENIC      |               |                    |                    |
| SNP_103533_A_56289 | NW_004517189.1 | scaffold2173 | 56289                   | AA                              | GG                 | GG               | INTERGENIC      |               |                    |                    |
| SNP_103534_A_56428 | NW_004517189.1 | scaffold2173 | 56428                   | GG                              | TT                 | TT               | INTERGENIC      |               |                    |                    |
| SNP_103535_A_56504 | NW_004517189.1 | scaffold2173 | 56504                   | GG                              | TT                 | TT               | INTERGENIC      |               |                    |                    |
| SNP_103537_A_56594 | NW_004517189.1 | scaffold2173 | 56594                   | GG                              | CC                 | CC               | INTERGENIC      |               |                    |                    |
| SNP_103538_A_78853 | NW_004517189.1 | scaffold2173 | 78853                   | CC                              | TT                 | TT               | INTERGENIC      |               |                    |                    |
| SNP_103539_A_78855 | NW_004517189.1 | scaffold2173 | 78855                   | TT                              | AA                 | AA               | INTERGENIC      |               |                    |                    |
| SNP_103540_A_78857 | NW_004517189.1 | scaffold2173 | 78857                   | AA                              | CC                 | CC               | INTERGENIC      |               |                    |                    |
| SNP_103541_A_80393 | NW_004517189.1 | scaffold2173 | 80393                   | AA                              | GG                 | GG               | INTERGENIC      |               |                    |                    |
| SNP_103542_A_80425 | NW_004517189.1 | scaffold2173 | 80425                   | AA                              | GG                 | GG               | INTERGENIC      |               |                    |                    |
| SNP_103543_A_80427 | NW_004517189.1 | scaffold2173 | 80427                   | AA                              | GG                 | GG               | INTERGENIC      |               |                    |                    |
| SNP_103544_A_80433 | NW_004517189.1 | scaffold2173 | 80433                   | TT                              | CC                 | CC               | INTERGENIC      |               |                    |                    |
| SNP_103545_A_80778 | NW_004517189.1 | scaffold2173 | 80778                   | TT                              | CC                 | CC               | INTERGENIC      |               |                    |                    |



| SNPs IDs           | Chromosome IDs | Chromosomes  | Physical positions (bp) | CDC Frontier (Reference genome) | (Pusa 1103 & HPNB) | (ILWC 46 & LPNB) | Sequence genome | Components of | Gene accession IDs | Putative functions |
|--------------------|----------------|--------------|-------------------------|---------------------------------|--------------------|------------------|-----------------|---------------|--------------------|--------------------|
| SNP_103546_A_84561 | NW_004517189.1 | scaffold2173 | 84561                   | TT                              | GG                 | GG               | INTERGENIC      |               |                    |                    |
| SNP_103547_A_87158 | NW_004517189.1 | scaffold2173 | 87158                   | GG                              | AA                 | AA               | INTERGENIC      |               |                    |                    |
| SNP_103548_A_87166 | NW_004517189.1 | scaffold2173 | 87166                   | GG                              | AA                 | AA               | INTERGENIC      |               |                    |                    |
| SNP_103549_A_1177  | NW_004517190.1 | scaffold2174 | 1177                    | AA                              | CC                 | CC               | INTERGENIC      |               |                    |                    |
| SNP_103550_A_6138  | NW_004517192.1 | scaffold2176 | 6138                    | AA                              | GG                 | GG               | INTERGENIC      |               |                    |                    |
| SNP_103551_A_6352  | NW_004517192.1 | scaffold2176 | 6352                    | AA                              | TT                 | TT               | INTERGENIC      |               |                    |                    |
| SNP_103552_A_6564  | NW_004517192.1 | scaffold2176 | 6564                    | TT                              | GG                 | GG               | INTERGENIC      |               |                    |                    |
| SNP_103553_A_11232 | NW_004517192.1 | scaffold2176 | 11232                   | TT                              | AA                 | AA               | INTERGENIC      |               |                    |                    |
| SNP_103554_A_24291 | NW_004517192.1 | scaffold2176 | 24291                   | GG                              | AA                 | AA               | INTERGENIC      |               |                    |                    |
| SNP_103555_A_24906 | NW_004517192.1 | scaffold2176 | 24906                   | GG                              | TT                 | TT               | INTERGENIC      |               |                    |                    |
| SNP_103556_A_26447 | NW_004517192.1 | scaffold2176 | 26447                   | GG                              | TT                 | TT               | INTERGENIC      |               |                    |                    |
| SNP_103557_A_26600 | NW_004517192.1 | scaffold2176 | 26600                   | AA                              | GG                 | GG               | INTERGENIC      |               |                    |                    |
| SNP_103558_A_27141 | NW_004517192.1 | scaffold2176 | 27141                   | CC                              | GG                 | GG               | INTERGENIC      |               |                    |                    |
| SNP_103559_A_27196 | NW_004517192.1 | scaffold2176 | 27196                   | GG                              | AA                 | AA               | INTERGENIC      |               |                    |                    |
| SNP_103560_A_27408 | NW_004517192.1 | scaffold2176 | 27408                   | CC                              | AA                 | AA               | INTERGENIC      |               |                    |                    |
| SNP_103561_A_28909 | NW_004517192.1 | scaffold2176 | 28909                   | TT                              | AA                 | AA               | INTERGENIC      |               |                    |                    |
| SNP_103562_A_28942 | NW_004517192.1 | scaffold2176 | 28942                   | CC                              | AA                 | AA               | INTERGENIC      |               |                    |                    |
| SNP_103563_A_29076 | NW_004517192.1 | scaffold2176 | 29076                   | GG                              | AA                 | AA               | INTERGENIC      |               |                    |                    |
| SNP_103564_A_1911  | NW_004517193.1 | scaffold2177 | 1911                    | TT                              | CC                 | CC               | INTERGENIC      |               |                    |                    |
| SNP_103565_A_2034  | NW_004517193.1 | scaffold2177 | 2034                    | TT                              | AA                 | AA               | INTERGENIC      |               |                    |                    |
| SNP_103566_A_2055  | NW_004517193.1 | scaffold2177 | 2055                    | TT                              | AA                 | AA               | INTERGENIC      |               |                    |                    |
| SNP_103569_A_113   | NW_004517195.1 | scaffold2179 | 113                     | AA                              | TT                 | TT               | INTERGENIC      |               |                    |                    |

| SNPs IDs           | Chromosome IDs | Chromosomes  | Physical positions (bp) | CDC Frontier (Reference genome) | (Pusa 1103 & HPNB) | (ILWC 46 & LPNB) | Sequence Components of genome | Gene accession IDs | Putative functions           |
|--------------------|----------------|--------------|-------------------------|---------------------------------|--------------------|------------------|-------------------------------|--------------------|------------------------------|
| SNP_103570_A_121   | NW_004517195.1 | scaffold2179 | 121                     | GG                              | AA                 | AA               | INTERGENIC                    |                    |                              |
| SNP_103571_A_441   | NW_004517195.1 | scaffold2179 | 441                     | TT                              | CC                 | CC               | INTERGENIC                    |                    |                              |
| SNP_103572_A_465   | NW_004517195.1 | scaffold2179 | 465                     | TT                              | CC                 | CC               | INTERGENIC                    |                    |                              |
| SNP_103573_A_513   | NW_004517195.1 | scaffold2179 | 513                     | CC                              | TT                 | TT               | INTERGENIC                    |                    |                              |
| SNP_103576_A_24584 | NW_004517195.1 | scaffold2179 | 24584                   | TT                              | CC                 | CC               | INTERGENIC                    |                    |                              |
| SNP_103577_A_24605 | NW_004517195.1 | scaffold2179 | 24605                   | TT                              | CC                 | CC               | INTERGENIC                    |                    |                              |
| SNP_103578_A_24613 | NW_004517195.1 | scaffold2179 | 24613                   | AA                              | GG                 | GG               | INTERGENIC                    |                    |                              |
| SNP_103579_A_24943 | NW_004517195.1 | scaffold2179 | 24943                   | CC                              | TT                 | TT               | INTERGENIC                    |                    |                              |
| SNP_103580_A_26252 | NW_004517195.1 | scaffold2179 | 26252                   | AA                              | GG                 | GG               | INTERGENIC                    |                    |                              |
| SNP_103581_A_26270 | NW_004517195.1 | scaffold2179 | 26270                   | AA                              | GG                 | GG               | INTERGENIC                    |                    |                              |
| SNP_103582_A_26273 | NW_004517195.1 | scaffold2179 | 26273                   | AA                              | GG                 | GG               | INTERGENIC                    |                    |                              |
| SNP_103583_A_26303 | NW_004517195.1 | scaffold2179 | 26303                   | AA                              | GG                 | GG               | INTERGENIC                    |                    |                              |
| SNP_103584_A_26321 | NW_004517195.1 | scaffold2179 | 26321                   | TT                              | CC                 | CC               | INTERGENIC                    |                    |                              |
| SNP_103585_A_26324 | NW_004517195.1 | scaffold2179 | 26324                   | GG                              | TT                 | TT               | INTERGENIC                    |                    |                              |
| SNP_103586_A_33466 | NW_004517195.1 | scaffold2179 | 33466                   | AA                              | GG                 | GG               | SYNONYMOUS_CODING             | 101506409          | uncharacterized LOC101506409 |
| SNP_103587_A_35703 | NW_004517195.1 | scaffold2179 | 35703                   | AA                              | TT                 | TT               | INTERGENIC                    |                    |                              |
| SNP_103588_A_35730 | NW_004517195.1 | scaffold2179 | 35730                   | AA                              | GG                 | GG               | INTERGENIC                    |                    |                              |
| SNP_103589_A_35893 | NW_004517195.1 | scaffold2179 | 35893                   | AA                              | GG                 | GG               | INTERGENIC                    |                    |                              |
| SNP_103592_A_36022 | NW_004517195.1 | scaffold2179 | 36022                   | GG                              | AA                 | AA               | INTERGENIC                    |                    |                              |
| SNP_103593_A_36034 | NW_004517195.1 | scaffold2179 | 36034                   | TT                              | CC                 | CC               | INTERGENIC                    |                    |                              |
| SNP_103594_A_36044 | NW_004517195.1 | scaffold2179 | 36044                   | AA                              | GG                 | GG               | INTERGENIC                    |                    |                              |
| SNP_103596_A_36100 | NW_004517195.1 | scaffold2179 | 36100                   | GG                              | AA                 | AA               | INTERGENIC                    |                    |                              |

| SNPs IDs           | Chromosome IDs | Chromosomes  | Physical positions (bp) | CDC Frontier (Reference genome) | (Pusa 1103 & HPNB) | (ILWC 46 & LPNB) | Sequence Components of genome | Gene accession IDs | Putative functions                       |
|--------------------|----------------|--------------|-------------------------|---------------------------------|--------------------|------------------|-------------------------------|--------------------|------------------------------------------|
| SNP_103597_A_36166 | NW_004517195.1 | scaffold2179 | 36166                   | AA                              | GG                 | GG               | INTERGENIC                    |                    |                                          |
| SNP_103598_A_36177 | NW_004517195.1 | scaffold2179 | 36177                   | AA                              | GG                 | GG               | INTERGENIC                    |                    |                                          |
| SNP_103599_A_36362 | NW_004517195.1 | scaffold2179 | 36362                   | AA                              | GG                 | GG               | INTERGENIC                    |                    |                                          |
| SNP_103600_A_36371 | NW_004517195.1 | scaffold2179 | 36371                   | AA                              | GG                 | GG               | INTERGENIC                    |                    |                                          |
| SNP_103601_A_36392 | NW_004517195.1 | scaffold2179 | 36392                   | CC                              | TT                 | TT               | INTERGENIC                    |                    |                                          |
| SNP_103602_A_36466 | NW_004517195.1 | scaffold2179 | 36466                   | CC                              | TT                 | TT               | INTERGENIC                    |                    |                                          |
| SNP_103603_A_36475 | NW_004517195.1 | scaffold2179 | 36475                   | TT                              | CC                 | CC               | INTERGENIC                    |                    |                                          |
| SNP_103604_A_36517 | NW_004517195.1 | scaffold2179 | 36517                   | TT                              | CC                 | CC               | INTERGENIC                    |                    |                                          |
| SNP_103605_A_54928 | NW_004517195.1 | scaffold2179 | 54928                   | AA                              | TT                 | TT               | DRR                           | 101505773          | 18.2 kDa class I heat shock protein-like |
| SNP_103606_A_57189 | NW_004517195.1 | scaffold2179 | 57189                   | TT                              | CC                 | CC               | URR                           | 101505773          | 18.2 kDa class I heat shock protein-like |
| SNP_103607_A_57265 | NW_004517195.1 | scaffold2179 | 57265                   | TT                              | CC                 | CC               | URR                           | 101505773          | 18.2 kDa class I heat shock protein-like |
| SNP_103608_A_57297 | NW_004517195.1 | scaffold2179 | 57297                   | AA                              | GG                 | GG               | URR                           | 101505773          | 18.2 kDa class I heat shock protein-like |
| SNP_103609_A_60789 | NW_004517195.1 | scaffold2179 | 60789                   | GG                              | AA                 | AA               | INTERGENIC                    |                    |                                          |
| SNP_103610_A_94891 | NW_004517195.1 | scaffold2179 | 94891                   | TT                              | CC                 | CC               | INTERGENIC                    |                    |                                          |
| SNP_103611_A_94903 | NW_004517195.1 | scaffold2179 | 94903                   | CC                              | TT                 | TT               | INTERGENIC                    |                    |                                          |
| SNP_103612_A_128   | NW_004517199.1 | scaffold2183 | 128                     | AA                              | GG                 | GG               | INTERGENIC                    |                    |                                          |
| SNP_103613_A_164   | NW_004517199.1 | scaffold2183 | 164                     | GG                              | AA                 | AA               | INTERGENIC                    |                    |                                          |
| SNP_103614_A_173   | NW_004517199.1 | scaffold2183 | 173                     | CC                              | TT                 | TT               | INTERGENIC                    |                    |                                          |
| SNP_103615_A_363   | NW_004517199.1 | scaffold2183 | 363                     | AA                              | GG                 | GG               | INTERGENIC                    |                    |                                          |
| SNP_103616_A_378   | NW_004517199.1 | scaffold2183 | 378                     | TT                              | GG                 | GG               | INTERGENIC                    |                    |                                          |
| SNP_103617_A_559   | NW_004517199.1 | scaffold2183 | 559                     | TT                              | CC                 | CC               | INTERGENIC                    |                    |                                          |
| SNP_103618_A_623   | NW_004517199.1 | scaffold2183 | 623                     | AA                              | CC                 | CC               | INTERGENIC                    |                    |                                          |

| SNPs IDs           | Chromosome IDs | Chromosomes  | Physical positions (bp) | CDC Frontier (Reference genome) | (Pusa 1103 & HPNB) | (ILWC 46 & LPNB) | Sequence genome | Components of | Gene accession IDs | Putative functions |
|--------------------|----------------|--------------|-------------------------|---------------------------------|--------------------|------------------|-----------------|---------------|--------------------|--------------------|
| SNP_103619_A_650   | NW_004517199.1 | scaffold2183 | 650                     | AA                              | GG                 | GG               | INTERGENIC      |               |                    |                    |
| SNP_103621_A_5934  | NW_004517199.1 | scaffold2183 | 5934                    | AA                              | GG                 | GG               | INTERGENIC      |               |                    |                    |
| SNP_103622_A_6478  | NW_004517199.1 | scaffold2183 | 6478                    | CC                              | AA                 | AA               | INTERGENIC      |               |                    |                    |
| SNP_103623_A_6727  | NW_004517199.1 | scaffold2183 | 6727                    | GG                              | CC                 | CC               | INTERGENIC      |               |                    |                    |
| SNP_103624_A_6772  | NW_004517199.1 | scaffold2183 | 6772                    | TT                              | CC                 | CC               | INTERGENIC      |               |                    |                    |
| SNP_103625_A_7213  | NW_004517199.1 | scaffold2183 | 7213                    | TT                              | CC                 | CC               | INTERGENIC      |               |                    |                    |
| SNP_103626_A_12281 | NW_004517199.1 | scaffold2183 | 12281                   | GG                              | AA                 | AA               | INTERGENIC      |               |                    |                    |
| SNP_103627_A_15907 | NW_004517199.1 | scaffold2183 | 15907                   | GG                              | TT                 | TT               | INTERGENIC      |               |                    |                    |
| SNP_103628_A_16420 | NW_004517199.1 | scaffold2183 | 16420                   | AA                              | CC                 | CC               | INTERGENIC      |               |                    |                    |
| SNP_103629_A_16796 | NW_004517199.1 | scaffold2183 | 16796                   | GG                              | AA                 | AA               | INTERGENIC      |               |                    |                    |
| SNP_103630_A_18171 | NW_004517199.1 | scaffold2183 | 18171                   | AA                              | GG                 | GG               | INTERGENIC      |               |                    |                    |
| SNP_103631_A_18189 | NW_004517199.1 | scaffold2183 | 18189                   | CC                              | TT                 | TT               | INTERGENIC      |               |                    |                    |
| SNP_103632_A_19156 | NW_004517199.1 | scaffold2183 | 19156                   | GG                              | CC                 | CC               | INTERGENIC      |               |                    |                    |
| SNP_103633_A_19201 | NW_004517199.1 | scaffold2183 | 19201                   | CC                              | TT                 | TT               | INTERGENIC      |               |                    |                    |
| SNP_103634_A_19440 | NW_004517199.1 | scaffold2183 | 19440                   | GG                              | AA                 | AA               | INTERGENIC      |               |                    |                    |
| SNP_103635_A_19500 | NW_004517199.1 | scaffold2183 | 19500                   | TT                              | AA                 | AA               | INTERGENIC      |               |                    |                    |
| SNP_103636_A_19526 | NW_004517199.1 | scaffold2183 | 19526                   | AA                              | TT                 | TT               | INTERGENIC      |               |                    |                    |
| SNP_103637_A_19625 | NW_004517199.1 | scaffold2183 | 19625                   | GG                              | TT                 | TT               | INTERGENIC      |               |                    |                    |
| SNP_103638_A_19740 | NW_004517199.1 | scaffold2183 | 19740                   | AA                              | CC                 | CC               | INTERGENIC      |               |                    |                    |
| SNP_103639_A_19774 | NW_004517199.1 | scaffold2183 | 19774                   | GG                              | AA                 | AA               | INTERGENIC      |               |                    |                    |
| SNP_103641_A_19977 | NW_004517199.1 | scaffold2183 | 19977                   | CC                              | TT                 | TT               | INTERGENIC      |               |                    |                    |
| SNP_103642_A_20103 | NW_004517199.1 | scaffold2183 | 20103                   | CC                              | TT                 | TT               | INTERGENIC      |               |                    |                    |

| SNPs IDs           | Chromosome IDs | Chromosomes  | Physical positions (bp) | CDC Frontier (Reference genome) | (Pusa 1103 & HPNB) | (ILWC 46 & LPNB) | Sequence genome | Components of | Gene accession IDs | Putative functions |
|--------------------|----------------|--------------|-------------------------|---------------------------------|--------------------|------------------|-----------------|---------------|--------------------|--------------------|
| SNP_103643_A_20164 | NW_004517199.1 | scaffold2183 | 20164                   | AA                              | GG                 | GG               | INTERGENIC      |               |                    |                    |
| SNP_103644_A_20167 | NW_004517199.1 | scaffold2183 | 20167                   | GG                              | AA                 | AA               | INTERGENIC      |               |                    |                    |
| SNP_103645_A_20170 | NW_004517199.1 | scaffold2183 | 20170                   | AA                              | CC                 | CC               | INTERGENIC      |               |                    |                    |
| SNP_103646_A_20178 | NW_004517199.1 | scaffold2183 | 20178                   | CC                              | TT                 | TT               | INTERGENIC      |               |                    |                    |
| SNP_103647_A_20359 | NW_004517199.1 | scaffold2183 | 20359                   | GG                              | AA                 | AA               | INTERGENIC      |               |                    |                    |
| SNP_103648_A_23716 | NW_004517199.1 | scaffold2183 | 23716                   | CC                              | TT                 | TT               | INTERGENIC      |               |                    |                    |
| SNP_103649_A_23721 | NW_004517199.1 | scaffold2183 | 23721                   | AA                              | CC                 | CC               | INTERGENIC      |               |                    |                    |
| SNP_103650_A_23730 | NW_004517199.1 | scaffold2183 | 23730                   | AA                              | CC                 | CC               | INTERGENIC      |               |                    |                    |
| SNP_103651_A_23757 | NW_004517199.1 | scaffold2183 | 23757                   | TT                              | CC                 | CC               | INTERGENIC      |               |                    |                    |
| SNP_103652_A_23760 | NW_004517199.1 | scaffold2183 | 23760                   | TT                              | AA                 | AA               | INTERGENIC      |               |                    |                    |
| SNP_103653_A_23762 | NW_004517199.1 | scaffold2183 | 23762                   | AA                              | TT                 | TT               | INTERGENIC      |               |                    |                    |
| SNP_103654_A_23766 | NW_004517199.1 | scaffold2183 | 23766                   | AA                              | TT                 | TT               | INTERGENIC      |               |                    |                    |
| SNP_103655_A_23796 | NW_004517199.1 | scaffold2183 | 23796                   | CC                              | GG                 | GG               | INTERGENIC      |               |                    |                    |
| SNP_103656_A_23907 | NW_004517199.1 | scaffold2183 | 23907                   | GG                              | TT                 | TT               | INTERGENIC      |               |                    |                    |
| SNP_103657_A_27852 | NW_004517199.1 | scaffold2183 | 27852                   | GG                              | AA                 | AA               | INTERGENIC      |               |                    |                    |
| SNP_103658_A_28476 | NW_004517199.1 | scaffold2183 | 28476                   | TT                              | CC                 | CC               | INTERGENIC      |               |                    |                    |
| SNP_103659_A_28514 | NW_004517199.1 | scaffold2183 | 28514                   | TT                              | AA                 | AA               | INTERGENIC      |               |                    |                    |
| SNP_103660_A_30195 | NW_004517199.1 | scaffold2183 | 30195                   | CC                              | TT                 | TT               | INTERGENIC      |               |                    |                    |
| SNP_103661_A_31807 | NW_004517199.1 | scaffold2183 | 31807                   | TT                              | AA                 | AA               | INTERGENIC      |               |                    |                    |
| SNP_103662_A_31925 | NW_004517199.1 | scaffold2183 | 31925                   | TT                              | AA                 | AA               | INTERGENIC      |               |                    |                    |
| SNP_103663_A_31972 | NW_004517199.1 | scaffold2183 | 31972                   | GG                              | AA                 | AA               | INTERGENIC      |               |                    |                    |
| SNP_103664_A_32748 | NW_004517199.1 | scaffold2183 | 32748                   | TT                              | CC                 | CC               | INTERGENIC      |               |                    |                    |

| SNPs IDs           | Chromosome IDs | Chromosomes  | Physical positions (bp) | CDC Frontier (Reference genome) | (Pusa 1103 & HPNB) | (ILWC 46 & LPNB) | Sequence genome | Components of | Gene accession IDs | Putative functions |
|--------------------|----------------|--------------|-------------------------|---------------------------------|--------------------|------------------|-----------------|---------------|--------------------|--------------------|
| SNP_103665_A_32754 | NW_004517199.1 | scaffold2183 | 32754                   | GG                              | AA                 | AA               | INTERGENIC      |               |                    |                    |
| SNP_103666_A_32935 | NW_004517199.1 | scaffold2183 | 32935                   | TT                              | CC                 | CC               | INTERGENIC      |               |                    |                    |
| SNP_103667_A_33266 | NW_004517199.1 | scaffold2183 | 33266                   | CC                              | AA                 | AA               | INTERGENIC      |               |                    |                    |
| SNP_103668_A_39170 | NW_004517199.1 | scaffold2183 | 39170                   | CC                              | TT                 | TT               | INTERGENIC      |               |                    |                    |
| SNP_103669_A_39186 | NW_004517199.1 | scaffold2183 | 39186                   | GG                              | AA                 | AA               | INTERGENIC      |               |                    |                    |
| SNP_103670_A_39407 | NW_004517199.1 | scaffold2183 | 39407                   | AA                              | CC                 | CC               | INTERGENIC      |               |                    |                    |
| SNP_103671_A_40099 | NW_004517199.1 | scaffold2183 | 40099                   | GG                              | TT                 | TT               | INTERGENIC      |               |                    |                    |
| SNP_103672_A_41263 | NW_004517199.1 | scaffold2183 | 41263                   | AA                              | GG                 | GG               | INTERGENIC      |               |                    |                    |
| SNP_103673_A_41294 | NW_004517199.1 | scaffold2183 | 41294                   | AA                              | GG                 | GG               | INTERGENIC      |               |                    |                    |
| SNP_103674_A_44006 | NW_004517199.1 | scaffold2183 | 44006                   | TT                              | GG                 | GG               | INTERGENIC      |               |                    |                    |
| SNP_103675_A_44114 | NW_004517199.1 | scaffold2183 | 44114                   | TT                              | CC                 | CC               | INTERGENIC      |               |                    |                    |
| SNP_103676_A_44178 | NW_004517199.1 | scaffold2183 | 44178                   | CC                              | TT                 | TT               | INTERGENIC      |               |                    |                    |
| SNP_103677_A_44515 | NW_004517199.1 | scaffold2183 | 44515                   | CC                              | TT                 | TT               | INTERGENIC      |               |                    |                    |
| SNP_103678_A_44606 | NW_004517199.1 | scaffold2183 | 44606                   | CC                              | TT                 | TT               | INTERGENIC      |               |                    |                    |
| SNP_103679_A_46570 | NW_004517199.1 | scaffold2183 | 46570                   | TT                              | CC                 | CC               | INTERGENIC      |               |                    |                    |
| SNP_103680_A_46656 | NW_004517199.1 | scaffold2183 | 46656                   | CC                              | TT                 | TT               | INTERGENIC      |               |                    |                    |
| SNP_103681_A_46671 | NW_004517199.1 | scaffold2183 | 46671                   | AA                              | GG                 | GG               | INTERGENIC      |               |                    |                    |
| SNP_103682_A_47671 | NW_004517199.1 | scaffold2183 | 47671                   | AA                              | GG                 | GG               | INTERGENIC      |               |                    |                    |
| SNP_103683_A_47906 | NW_004517199.1 | scaffold2183 | 47906                   | CC                              | TT                 | TT               | INTERGENIC      |               |                    |                    |
| SNP_103684_A_48092 | NW_004517199.1 | scaffold2183 | 48092                   | AA                              | GG                 | GG               | INTERGENIC      |               |                    |                    |
| SNP_103685_A_48423 | NW_004517199.1 | scaffold2183 | 48423                   | AA                              | GG                 | GG               | INTERGENIC      |               |                    |                    |
| SNP_103686_A_48424 | NW_004517199.1 | scaffold2183 | 48424                   | AA                              | GG                 | GG               | INTERGENIC      |               |                    |                    |

| SNPs IDs           | Chromosome IDs | Chromosomes  | Physical positions (bp) | CDC Frontier (Reference genome) | (Pusa 1103 & HPNB) | (ILWC 46 & LPNB) | Sequence genome | Components of | Gene accession IDs | Putative functions |
|--------------------|----------------|--------------|-------------------------|---------------------------------|--------------------|------------------|-----------------|---------------|--------------------|--------------------|
| SNP_103687_A_48709 | NW_004517199.1 | scaffold2183 | 48709                   | TT                              | GG                 | GG               | INTERGENIC      |               |                    |                    |
| SNP_103688_A_48735 | NW_004517199.1 | scaffold2183 | 48735                   | CC                              | AA                 | AA               | INTERGENIC      |               |                    |                    |
| SNP_103689_A_49792 | NW_004517199.1 | scaffold2183 | 49792                   | CC                              | AA                 | AA               | INTERGENIC      |               |                    |                    |
| SNP_103690_A_52222 | NW_004517199.1 | scaffold2183 | 52222                   | AA                              | TT                 | TT               | INTERGENIC      |               |                    |                    |
| SNP_103691_A_52289 | NW_004517199.1 | scaffold2183 | 52289                   | CC                              | TT                 | TT               | INTERGENIC      |               |                    |                    |
| SNP_103692_A_59384 | NW_004517199.1 | scaffold2183 | 59384                   | TT                              | CC                 | CC               | INTERGENIC      |               |                    |                    |
| SNP_103693_A_59424 | NW_004517199.1 | scaffold2183 | 59424                   | TT                              | AA                 | AA               | INTERGENIC      |               |                    |                    |
| SNP_103694_A_63900 | NW_004517199.1 | scaffold2183 | 63900                   | GG                              | CC                 | CC               | INTERGENIC      |               |                    |                    |
| SNP_103695_A_63926 | NW_004517199.1 | scaffold2183 | 63926                   | CC                              | GG                 | GG               | INTERGENIC      |               |                    |                    |
| SNP_103696_A_64503 | NW_004517199.1 | scaffold2183 | 64503                   | CC                              | TT                 | TT               | INTERGENIC      |               |                    |                    |
| SNP_103697_A_65062 | NW_004517199.1 | scaffold2183 | 65062                   | AA                              | GG                 | GG               | INTERGENIC      |               |                    |                    |
| SNP_103698_A_65769 | NW_004517199.1 | scaffold2183 | 65769                   | AA                              | GG                 | GG               | INTERGENIC      |               |                    |                    |
| SNP_103699_A_65794 | NW_004517199.1 | scaffold2183 | 65794                   | AA                              | GG                 | GG               | INTERGENIC      |               |                    |                    |
| SNP_103700_A_65866 | NW_004517199.1 | scaffold2183 | 65866                   | CC                              | GG                 | GG               | INTERGENIC      |               |                    |                    |
| SNP_103701_A_66047 | NW_004517199.1 | scaffold2183 | 66047                   | AA                              | TT                 | TT               | INTERGENIC      |               |                    |                    |
| SNP_103702_A_66428 | NW_004517199.1 | scaffold2183 | 66428                   | AA                              | GG                 | GG               | INTERGENIC      |               |                    |                    |
| SNP_103703_A_66469 | NW_004517199.1 | scaffold2183 | 66469                   | AA                              | GG                 | GG               | INTERGENIC      |               |                    |                    |
| SNP_103704_A_66733 | NW_004517199.1 | scaffold2183 | 66733                   | AA                              | CC                 | CC               | INTERGENIC      |               |                    |                    |
| SNP_103705_A_66800 | NW_004517199.1 | scaffold2183 | 66800                   | TT                              | AA                 | AA               | INTERGENIC      |               |                    |                    |
| SNP_103706_A_67007 | NW_004517199.1 | scaffold2183 | 67007                   | GG                              | TT                 | TT               | INTERGENIC      |               |                    |                    |
| SNP_103707_A_67052 | NW_004517199.1 | scaffold2183 | 67052                   | AA                              | GG                 | GG               | INTERGENIC      |               |                    |                    |
| SNP_103708_A_67107 | NW_004517199.1 | scaffold2183 | 67107                   | GG                              | AA                 | AA               | INTERGENIC      |               |                    |                    |

| SNPs IDs           | Chromosome IDs | Chromosomes  | Physical positions (bp) | CDC Frontier (Reference genome) | (Pusa 1103 & HPNB) | (ILWC 46 & LPNB) | Sequence genome | Components of | Gene accession IDs | Putative functions |
|--------------------|----------------|--------------|-------------------------|---------------------------------|--------------------|------------------|-----------------|---------------|--------------------|--------------------|
| SNP_103709_A_67126 | NW_004517199.1 | scaffold2183 | 67126                   | AA                              | GG                 | GG               | INTERGENIC      |               |                    |                    |
| SNP_103710_A_67268 | NW_004517199.1 | scaffold2183 | 67268                   | GG                              | AA                 | AA               | INTERGENIC      |               |                    |                    |
| SNP_103711_A_67320 | NW_004517199.1 | scaffold2183 | 67320                   | CC                              | TT                 | TT               | INTERGENIC      |               |                    |                    |
| SNP_103712_A_67385 | NW_004517199.1 | scaffold2183 | 67385                   | CC                              | TT                 | TT               | INTERGENIC      |               |                    |                    |
| SNP_103714_A_67662 | NW_004517199.1 | scaffold2183 | 67662                   | TT                              | AA                 | AA               | INTERGENIC      |               |                    |                    |
| SNP_103715_A_67677 | NW_004517199.1 | scaffold2183 | 67677                   | CC                              | AA                 | AA               | INTERGENIC      |               |                    |                    |
| SNP_103716_A_67684 | NW_004517199.1 | scaffold2183 | 67684                   | AA                              | TT                 | TT               | INTERGENIC      |               |                    |                    |
| SNP_103717_A_67699 | NW_004517199.1 | scaffold2183 | 67699                   | AA                              | GG                 | GG               | INTERGENIC      |               |                    |                    |
| SNP_103718_A_67769 | NW_004517199.1 | scaffold2183 | 67769                   | CC                              | GG                 | GG               | INTERGENIC      |               |                    |                    |
| SNP_103719_A_67902 | NW_004517199.1 | scaffold2183 | 67902                   | AA                              | GG                 | GG               | INTERGENIC      |               |                    |                    |
| SNP_103720_A_67962 | NW_004517199.1 | scaffold2183 | 67962                   | AA                              | TT                 | TT               | INTERGENIC      |               |                    |                    |
| SNP_103721_A_68000 | NW_004517199.1 | scaffold2183 | 68000                   | AA                              | TT                 | TT               | INTERGENIC      |               |                    |                    |
| SNP_103722_A_68053 | NW_004517199.1 | scaffold2183 | 68053                   | TT                              | CC                 | CC               | INTERGENIC      |               |                    |                    |
| SNP_103723_A_68095 | NW_004517199.1 | scaffold2183 | 68095                   | AA                              | GG                 | GG               | INTERGENIC      |               |                    |                    |
| SNP_103724_A_68164 | NW_004517199.1 | scaffold2183 | 68164                   | GG                              | CC                 | CC               | INTERGENIC      |               |                    |                    |
| SNP_103725_A_68238 | NW_004517199.1 | scaffold2183 | 68238                   | AA                              | GG                 | GG               | INTERGENIC      |               |                    |                    |
| SNP_103726_A_68271 | NW_004517199.1 | scaffold2183 | 68271                   | GG                              | AA                 | AA               | INTERGENIC      |               |                    |                    |
| SNP_103727_A_68276 | NW_004517199.1 | scaffold2183 | 68276                   | CC                              | TT                 | TT               | INTERGENIC      |               |                    |                    |
| SNP_103728_A_68288 | NW_004517199.1 | scaffold2183 | 68288                   | CC                              | TT                 | TT               | INTERGENIC      |               |                    |                    |
| SNP_103729_A_68350 | NW_004517199.1 | scaffold2183 | 68350                   | CC                              | GG                 | GG               | INTERGENIC      |               |                    |                    |
| SNP_103730_A_68357 | NW_004517199.1 | scaffold2183 | 68357                   | AA                              | GG                 | GG               | INTERGENIC      |               |                    |                    |
| SNP_103731_A_68384 | NW_004517199.1 | scaffold2183 | 68384                   | AA                              | TT                 | TT               | INTERGENIC      |               |                    |                    |



| SNPs IDs           | Chromosome IDs | Chromosomes  | Physical positions (bp) | CDC Frontier (Reference genome) | (Pusa 1103 & HPNB) | (ILWC 46 & LPNB) | Sequence genome | Components of | Gene accession IDs | Putative functions |
|--------------------|----------------|--------------|-------------------------|---------------------------------|--------------------|------------------|-----------------|---------------|--------------------|--------------------|
| SNP_103732_A_68510 | NW_004517199.1 | scaffold2183 | 68510                   | TT                              | AA                 | AA               | INTERGENIC      |               |                    |                    |
| SNP_103733_A_68512 | NW_004517199.1 | scaffold2183 | 68512                   | CC                              | TT                 | TT               | INTERGENIC      |               |                    |                    |
| SNP_103734_A_68521 | NW_004517199.1 | scaffold2183 | 68521                   | AA                              | GG                 | GG               | INTERGENIC      |               |                    |                    |
| SNP_103735_A_68535 | NW_004517199.1 | scaffold2183 | 68535                   | GG                              | AA                 | AA               | INTERGENIC      |               |                    |                    |
| SNP_103736_A_68599 | NW_004517199.1 | scaffold2183 | 68599                   | AA                              | GG                 | GG               | INTERGENIC      |               |                    |                    |
| SNP_103737_A_68654 | NW_004517199.1 | scaffold2183 | 68654                   | AA                              | TT                 | TT               | INTERGENIC      |               |                    |                    |
| SNP_103738_A_68808 | NW_004517199.1 | scaffold2183 | 68808                   | CC                              | AA                 | AA               | INTERGENIC      |               |                    |                    |
| SNP_103739_A_68819 | NW_004517199.1 | scaffold2183 | 68819                   | AA                              | GG                 | GG               | INTERGENIC      |               |                    |                    |
| SNP_103740_A_68828 | NW_004517199.1 | scaffold2183 | 68828                   | TT                              | AA                 | AA               | INTERGENIC      |               |                    |                    |
| SNP_103741_A_68856 | NW_004517199.1 | scaffold2183 | 68856                   | CC                              | TT                 | TT               | INTERGENIC      |               |                    |                    |
| SNP_103742_A_68881 | NW_004517199.1 | scaffold2183 | 68881                   | CC                              | TT                 | TT               | INTERGENIC      |               |                    |                    |
| SNP_103743_A_69127 | NW_004517199.1 | scaffold2183 | 69127                   | TT                              | CC                 | CC               | INTERGENIC      |               |                    |                    |
| SNP_103744_A_69142 | NW_004517199.1 | scaffold2183 | 69142                   | CC                              | TT                 | TT               | INTERGENIC      |               |                    |                    |
| SNP_103745_A_69165 | NW_004517199.1 | scaffold2183 | 69165                   | GG                              | AA                 | AA               | INTERGENIC      |               |                    |                    |
| SNP_103746_A_69166 | NW_004517199.1 | scaffold2183 | 69166                   | CC                              | GG                 | GG               | INTERGENIC      |               |                    |                    |
| SNP_103747_A_69179 | NW_004517199.1 | scaffold2183 | 69179                   | AA                              | TT                 | TT               | INTERGENIC      |               |                    |                    |
| SNP_103748_A_69225 | NW_004517199.1 | scaffold2183 | 69225                   | TT                              | GG                 | GG               | INTERGENIC      |               |                    |                    |
| SNP_103749_A_69248 | NW_004517199.1 | scaffold2183 | 69248                   | TT                              | CC                 | CC               | INTERGENIC      |               |                    |                    |
| SNP_103750_A_69331 | NW_004517199.1 | scaffold2183 | 69331                   | GG                              | CC                 | CC               | INTERGENIC      |               |                    |                    |
| SNP_103751_A_69334 | NW_004517199.1 | scaffold2183 | 69334                   | AA                              | GG                 | GG               | INTERGENIC      |               |                    |                    |
| SNP_103752_A_69430 | NW_004517199.1 | scaffold2183 | 69430                   | CC                              | TT                 | TT               | INTERGENIC      |               |                    |                    |
| SNP_103753_A_69495 | NW_004517199.1 | scaffold2183 | 69495                   | CC                              | TT                 | TT               | INTERGENIC      |               |                    |                    |

| SNPs IDs           | Chromosome IDs | Chromosomes  | Physical positions (bp) | CDC Frontier (Reference genome) | (Pusa 1103 & HPNB) | (ILWC 46 & LPNB) | Sequence genome | Components of | Gene accession IDs | Putative functions |
|--------------------|----------------|--------------|-------------------------|---------------------------------|--------------------|------------------|-----------------|---------------|--------------------|--------------------|
| SNP_103754_A_69509 | NW_004517199.1 | scaffold2183 | 69509                   | TT                              | AA                 | AA               | INTERGENIC      |               |                    |                    |
| SNP_103755_A_69539 | NW_004517199.1 | scaffold2183 | 69539                   | TT                              | CC                 | CC               | INTERGENIC      |               |                    |                    |
| SNP_103756_A_69651 | NW_004517199.1 | scaffold2183 | 69651                   | CC                              | TT                 | TT               | INTERGENIC      |               |                    |                    |
| SNP_103757_A_69657 | NW_004517199.1 | scaffold2183 | 69657                   | CC                              | TT                 | TT               | INTERGENIC      |               |                    |                    |
| SNP_103758_A_69677 | NW_004517199.1 | scaffold2183 | 69677                   | AA                              | TT                 | TT               | INTERGENIC      |               |                    |                    |
| SNP_103759_A_69688 | NW_004517199.1 | scaffold2183 | 69688                   | GG                              | AA                 | AA               | INTERGENIC      |               |                    |                    |
| SNP_103760_A_69724 | NW_004517199.1 | scaffold2183 | 69724                   | GG                              | AA                 | AA               | INTERGENIC      |               |                    |                    |
| SNP_103761_A_69814 | NW_004517199.1 | scaffold2183 | 69814                   | TT                              | CC                 | CC               | INTERGENIC      |               |                    |                    |
| SNP_103762_A_69857 | NW_004517199.1 | scaffold2183 | 69857                   | TT                              | AA                 | AA               | INTERGENIC      |               |                    |                    |
| SNP_103764_A_69926 | NW_004517199.1 | scaffold2183 | 69926                   | AA                              | GG                 | GG               | INTERGENIC      |               |                    |                    |
| SNP_103765_A_69963 | NW_004517199.1 | scaffold2183 | 69963                   | CC                              | AA                 | AA               | INTERGENIC      |               |                    |                    |
| SNP_103766_A_69978 | NW_004517199.1 | scaffold2183 | 69978                   | TT                              | CC                 | CC               | INTERGENIC      |               |                    |                    |
| SNP_103768_A_70082 | NW_004517199.1 | scaffold2183 | 70082                   | AA                              | GG                 | GG               | INTERGENIC      |               |                    |                    |
| SNP_103769_A_70140 | NW_004517199.1 | scaffold2183 | 70140                   | CC                              | TT                 | TT               | INTERGENIC      |               |                    |                    |
| SNP_103770_A_70191 | NW_004517199.1 | scaffold2183 | 70191                   | CC                              | TT                 | TT               | INTERGENIC      |               |                    |                    |
| SNP_103771_A_70192 | NW_004517199.1 | scaffold2183 | 70192                   | GG                              | AA                 | AA               | INTERGENIC      |               |                    |                    |
| SNP_103772_A_70370 | NW_004517199.1 | scaffold2183 | 70370                   | CC                              | AA                 | AA               | INTERGENIC      |               |                    |                    |
| SNP_103773_A_70388 | NW_004517199.1 | scaffold2183 | 70388                   | CC                              | TT                 | TT               | INTERGENIC      |               |                    |                    |
| SNP_103774_A_70413 | NW_004517199.1 | scaffold2183 | 70413                   | GG                              | CC                 | CC               | INTERGENIC      |               |                    |                    |
| SNP_103775_A_70455 | NW_004517199.1 | scaffold2183 | 70455                   | CC                              | TT                 | TT               | INTERGENIC      |               |                    |                    |
| SNP_103776_A_70751 | NW_004517199.1 | scaffold2183 | 70751                   | GG                              | AA                 | AA               | INTERGENIC      |               |                    |                    |
| SNP_103777_A_71151 | NW_004517199.1 | scaffold2183 | 71151                   | GG                              | AA                 | AA               | INTERGENIC      |               |                    |                    |

| SNPs IDs            | Chromosome IDs | Chromosomes  | Physical positions (bp) | CDC Frontier (Reference genome) | (Pusa 1103 & HPNB) | (ILWC 46 & LPNB) | Sequence Components of genome | Gene accession IDs | Putative functions                           |
|---------------------|----------------|--------------|-------------------------|---------------------------------|--------------------|------------------|-------------------------------|--------------------|----------------------------------------------|
| SNP_103778_A_71937  | NW_004517199.1 | scaffold2183 | 71937                   | GG                              | CC                 | CC               | INTERGENIC                    |                    |                                              |
| SNP_103779_A_71952  | NW_004517199.1 | scaffold2183 | 71952                   | TT                              | GG                 | GG               | INTERGENIC                    |                    |                                              |
| SNP_103780_A_73957  | NW_004517199.1 | scaffold2183 | 73957                   | AA                              | TT                 | TT               | INTERGENIC                    |                    |                                              |
| SNP_103781_A_74329  | NW_004517199.1 | scaffold2183 | 74329                   | GG                              | AA                 | AA               | INTERGENIC                    |                    |                                              |
| SNP_103782_A_74392  | NW_004517199.1 | scaffold2183 | 74392                   | TT                              | CC                 | CC               | INTERGENIC                    |                    |                                              |
| SNP_103783_A_74424  | NW_004517199.1 | scaffold2183 | 74424                   | GG                              | AA                 | AA               | INTERGENIC                    |                    |                                              |
| SNP_103784_A_74425  | NW_004517199.1 | scaffold2183 | 74425                   | TT                              | GG                 | GG               | INTERGENIC                    |                    |                                              |
| SNP_103785_A_74444  | NW_004517199.1 | scaffold2183 | 74444                   | AA                              | CC                 | CC               | INTERGENIC                    |                    |                                              |
| SNP_103786_A_74532  | NW_004517199.1 | scaffold2183 | 74532                   | TT                              | CC                 | CC               | INTERGENIC                    |                    |                                              |
| SNP_103787_A_75061  | NW_004517199.1 | scaffold2183 | 75061                   | AA                              | GG                 | GG               | INTERGENIC                    |                    |                                              |
| SNP_103788_A_75077  | NW_004517199.1 | scaffold2183 | 75077                   | AA                              | TT                 | TT               | INTERGENIC                    |                    |                                              |
| SNP_103789_A_75079  | NW_004517199.1 | scaffold2183 | 75079                   | AA                              | TT                 | TT               | INTERGENIC                    |                    |                                              |
| SNP_103791_A_18454  | NW_004517205.1 | scaffold2192 | 18454                   | AA                              | GG                 | GG               | INTERGENIC                    |                    |                                              |
| SNP_103792_A_28109  | NW_004517205.1 | scaffold2192 | 28109                   | AA                              | GG                 | GG               | INTERGENIC                    |                    |                                              |
| SNP_103793_A_55891  | NW_004517205.1 | scaffold2192 | 55891                   | CC                              | TT                 | TT               | INTRON                        | 101507396          | protein ZINC INDUCED FACILITATOR-LIKE 1-like |
| SNP_103794_A_55953  | NW_004517205.1 | scaffold2192 | 55953                   | AA                              | TT                 | TT               | INTRON                        | 101507396          | protein ZINC INDUCED FACILITATOR-LIKE 1-like |
| SNP_103795_A_75180  | NW_004517205.1 | scaffold2192 | 75180                   | GG                              | TT                 | TT               | INTERGENIC                    |                    |                                              |
| SNP_103796_A_91747  | NW_004517205.1 | scaffold2192 | 91747                   | CC                              | AA                 | AA               | INTERGENIC                    |                    |                                              |
| SNP_103797_A_91748  | NW_004517205.1 | scaffold2192 | 91748                   | TT                              | GG                 | GG               | INTERGENIC                    |                    |                                              |
| SNP_103798_A_107996 | NW_004517205.1 | scaffold2192 | 107996                  | GG                              | TT                 | TT               | INTERGENIC                    |                    |                                              |
| SNP_103799_A_108089 | NW_004517205.1 | scaffold2192 | 108089                  | GG                              | CC                 | CC               | INTERGENIC                    |                    |                                              |
| SNP_103800_A_108373 | NW_004517205.1 | scaffold2192 | 108373                  | GG                              | TT                 | TT               | INTERGENIC                    |                    |                                              |

| SNPs IDs            | Chromosome IDs | Chromosomes  | Physical positions (bp) | CDC Frontier (Reference genome) | (Pusa 1103 & HPNB) | (ILWC 46 & LPNB) | Sequence Components of genome | Gene accession IDs | Putative functions                           |
|---------------------|----------------|--------------|-------------------------|---------------------------------|--------------------|------------------|-------------------------------|--------------------|----------------------------------------------|
| SNP_103801_A_108406 | NW_004517205.1 | scaffold2192 | 108406                  | GG                              | AA                 | AA               | INTERGENIC                    |                    |                                              |
| SNP_103802_A_108424 | NW_004517205.1 | scaffold2192 | 108424                  | TT                              | CC                 | CC               | INTERGENIC                    |                    |                                              |
| SNP_103803_A_108705 | NW_004517205.1 | scaffold2192 | 108705                  | TT                              | CC                 | CC               | INTERGENIC                    |                    |                                              |
| SNP_103804_A_108912 | NW_004517205.1 | scaffold2192 | 108912                  | AA                              | TT                 | TT               | INTERGENIC                    |                    |                                              |
| SNP_103805_A_108947 | NW_004517205.1 | scaffold2192 | 108947                  | TT                              | CC                 | CC               | INTERGENIC                    |                    |                                              |
| SNP_103806_A_108951 | NW_004517205.1 | scaffold2192 | 108951                  | AA                              | GG                 | GG               | INTERGENIC                    |                    |                                              |
| SNP_103807_A_108996 | NW_004517205.1 | scaffold2192 | 108996                  | TT                              | CC                 | CC               | INTERGENIC                    |                    |                                              |
| SNP_103808_A_109272 | NW_004517205.1 | scaffold2192 | 109272                  | CC                              | TT                 | TT               | INTERGENIC                    |                    |                                              |
| SNP_103809_A_111048 | NW_004517205.1 | scaffold2192 | 111048                  | CC                              | TT                 | TT               | INTERGENIC                    |                    |                                              |
| SNP_103810_A_130859 | NW_004517205.1 | scaffold2192 | 130859                  | TT                              | GG                 | GG               | INTERGENIC                    |                    |                                              |
| SNP_103811_A_153875 | NW_004517205.1 | scaffold2192 | 153875                  | TT                              | CC                 | CC               | INTERGENIC                    |                    |                                              |
| SNP_103812_A_160825 | NW_004517205.1 | scaffold2192 | 160825                  | TT                              | CC                 | CC               | INTERGENIC                    |                    |                                              |
| SNP_103813_A_160856 | NW_004517205.1 | scaffold2192 | 160856                  | GG                              | AA                 | AA               | INTERGENIC                    |                    |                                              |
| SNP_103814_A_164000 | NW_004517205.1 | scaffold2192 | 164000                  | AA                              | TT                 | TT               | INTERGENIC                    |                    |                                              |
| SNP_103815_A_170748 | NW_004517205.1 | scaffold2192 | 170748                  | CC                              | TT                 | TT               | INTERGENIC                    |                    |                                              |
| SNP_103816_A_182729 | NW_004517205.1 | scaffold2192 | 182729                  | TT                              | AA                 | AA               | INTRON                        | 101508975          | protein ZINC INDUCED FACILITATOR-LIKE 1-like |
| SNP_103817_A_182740 | NW_004517205.1 | scaffold2192 | 182740                  | TT                              | AA                 | AA               | INTRON                        | 101508975          | protein ZINC INDUCED FACILITATOR-LIKE 1-like |
| SNP_103818_A_182757 | NW_004517205.1 | scaffold2192 | 182757                  | GG                              | AA                 | AA               | SYNONYMOUS_CODING             | 101508975          | protein ZINC INDUCED FACILITATOR-LIKE 1-like |
| SNP_103819_A_182765 | NW_004517205.1 | scaffold2192 | 182765                  | TT                              | CC                 | CC               | NON_SYNONYMOUS_CODING         | 101508975          | protein ZINC INDUCED FACILITATOR-LIKE 1-like |
| SNP_103820_A_182777 | NW_004517205.1 | scaffold2192 | 182777                  | TT                              | CC                 | CC               | NON_SYNONYMOUS_CODING         | 101508975          | protein ZINC INDUCED FACILITATOR-LIKE 1-like |
| SNP_103821_A_182823 | NW_004517205.1 | scaffold2192 | 182823                  | TT                              | CC                 | CC               | SPLICE_SITE_REGION            | 101508975          | protein ZINC INDUCED FACILITATOR-LIKE 1-like |
| SNP_103822_A_182891 | NW_004517205.1 | scaffold2192 | 182891                  | AA                              | CC                 | CC               | INTRON                        | 101508975          | protein ZINC INDUCED FACILITATOR-LIKE 1-like |

| SNPs IDs            | Chromosome IDs | Chromosomes  | Physical positions (bp) | CDC Frontier (Reference genome) | (Pusa 1103 & HPNB) | (ILWC 46 & LPNB) | Sequence Components of genome | Gene accession IDs | Putative functions                           |
|---------------------|----------------|--------------|-------------------------|---------------------------------|--------------------|------------------|-------------------------------|--------------------|----------------------------------------------|
| SNP_103823_A_182953 | NW_004517205.1 | scaffold2192 | 182953                  | GG                              | AA                 | AA               | SYNONYMOUS_CODING             | 101508975          | protein ZINC INDUCED FACILITATOR-LIKE 1-like |
| SNP_103824_A_182965 | NW_004517205.1 | scaffold2192 | 182965                  | TT                              | CC                 | CC               | SPLICE_SITE_REGION            | 101508975          | protein ZINC INDUCED FACILITATOR-LIKE 1-like |
| SNP_103825_A_182997 | NW_004517205.1 | scaffold2192 | 182997                  | AA                              | TT                 | TT               | INTRON                        | 101508975          | protein ZINC INDUCED FACILITATOR-LIKE 1-like |
| SNP_103826_A_183109 | NW_004517205.1 | scaffold2192 | 183109                  | GG                              | TT                 | TT               | INTRON                        | 101508975          | protein ZINC INDUCED FACILITATOR-LIKE 1-like |
| SNP_103827_A_183117 | NW_004517205.1 | scaffold2192 | 183117                  | CC                              | AA                 | AA               | INTRON                        | 101508975          | protein ZINC INDUCED FACILITATOR-LIKE 1-like |
| SNP_103828_A_183170 | NW_004517205.1 | scaffold2192 | 183170                  | TT                              | CC                 | CC               | INTRON                        | 101508975          | protein ZINC INDUCED FACILITATOR-LIKE 1-like |
| SNP_103829_A_183188 | NW_004517205.1 | scaffold2192 | 183188                  | AA                              | GG                 | GG               | INTRON                        | 101508975          | protein ZINC INDUCED FACILITATOR-LIKE 1-like |
| SNP_103830_A_183194 | NW_004517205.1 | scaffold2192 | 183194                  | CC                              | TT                 | TT               | INTRON                        | 101508975          | protein ZINC INDUCED FACILITATOR-LIKE 1-like |
| SNP_103831_A_183216 | NW_004517205.1 | scaffold2192 | 183216                  | CC                              | AA                 | AA               | INTRON                        | 101508975          | protein ZINC INDUCED FACILITATOR-LIKE 1-like |
| SNP_103832_A_183220 | NW_004517205.1 | scaffold2192 | 183220                  | TT                              | CC                 | CC               | INTRON                        | 101508975          | protein ZINC INDUCED FACILITATOR-LIKE 1-like |
| SNP_103833_A_195896 | NW_004517205.1 | scaffold2192 | 195896                  | GG                              | AA                 | AA               | INTERGENIC                    |                    |                                              |
| SNP_103834_A_217447 | NW_004517205.1 | scaffold2192 | 217447                  | AA                              | GG                 | GG               | INTERGENIC                    |                    |                                              |
| SNP_103835_A_218425 | NW_004517205.1 | scaffold2192 | 218425                  | GG                              | AA                 | AA               | INTERGENIC                    |                    |                                              |
| SNP_103836_A_3006   | NW_004517206.1 | scaffold2193 | 3006                    | GG                              | TT                 | TT               | INTERGENIC                    |                    |                                              |
| SNP_103837_A_12550  | NW_004517206.1 | scaffold2193 | 12550                   | AA                              | CC                 | CC               | INTERGENIC                    |                    |                                              |
| SNP_103838_A_12559  | NW_004517206.1 | scaffold2193 | 12559                   | GG                              | TT                 | TT               | INTERGENIC                    |                    |                                              |
| SNP_103839_A_12826  | NW_004517206.1 | scaffold2193 | 12826                   | GG                              | AA                 | AA               | INTERGENIC                    |                    |                                              |
| SNP_103840_A_12845  | NW_004517206.1 | scaffold2193 | 12845                   | CC                              | TT                 | TT               | INTERGENIC                    |                    |                                              |
| SNP_103841_A_13003  | NW_004517206.1 | scaffold2193 | 13003                   | CC                              | GG                 | GG               | INTERGENIC                    |                    |                                              |
| SNP_103842_A_13085  | NW_004517206.1 | scaffold2193 | 13085                   | TT                              | CC                 | CC               | INTERGENIC                    |                    |                                              |
| SNP_103843_A_13118  | NW_004517206.1 | scaffold2193 | 13118                   | AA                              | CC                 | CC               | INTERGENIC                    |                    |                                              |
| SNP_103844_A_31259  | NW_004517206.1 | scaffold2193 | 31259                   | GG                              | AA                 | AA               | INTERGENIC                    |                    |                                              |

| SNPs IDs            | Chromosome IDs | Chromosomes  | Physical positions (bp) | CDC Frontier (Reference genome) | (Pusa 1103 & HPNB) | (ILWC 46 & LPNB) | Sequence genome | Components of | Gene accession IDs | Putative functions |
|---------------------|----------------|--------------|-------------------------|---------------------------------|--------------------|------------------|-----------------|---------------|--------------------|--------------------|
| SNP_103845_A_31407  | NW_004517206.1 | scaffold2193 | 31407                   | TT                              | GG                 | GG               | INTERGENIC      |               |                    |                    |
| SNP_103846_A_31478  | NW_004517206.1 | scaffold2193 | 31478                   | AA                              | GG                 | GG               | INTERGENIC      |               |                    |                    |
| SNP_103847_A_31490  | NW_004517206.1 | scaffold2193 | 31490                   | TT                              | GG                 | GG               | INTERGENIC      |               |                    |                    |
| SNP_103849_A_31702  | NW_004517206.1 | scaffold2193 | 31702                   | TT                              | CC                 | CC               | INTERGENIC      |               |                    |                    |
| SNP_103850_A_31771  | NW_004517206.1 | scaffold2193 | 31771                   | CC                              | TT                 | TT               | INTERGENIC      |               |                    |                    |
| SNP_103851_A_31793  | NW_004517206.1 | scaffold2193 | 31793                   | GG                              | TT                 | TT               | INTERGENIC      |               |                    |                    |
| SNP_103852_A_31804  | NW_004517206.1 | scaffold2193 | 31804                   | AA                              | GG                 | GG               | INTERGENIC      |               |                    |                    |
| SNP_103853_A_31864  | NW_004517206.1 | scaffold2193 | 31864                   | AA                              | GG                 | GG               | INTERGENIC      |               |                    |                    |
| SNP_103854_A_51109  | NW_004517206.1 | scaffold2193 | 51109                   | GG                              | AA                 | AA               | INTERGENIC      |               |                    |                    |
| SNP_103855_A_51138  | NW_004517206.1 | scaffold2193 | 51138                   | CC                              | GG                 | GG               | INTERGENIC      |               |                    |                    |
| SNP_103856_A_51181  | NW_004517206.1 | scaffold2193 | 51181                   | TT                              | CC                 | CC               | INTERGENIC      |               |                    |                    |
| SNP_103857_A_52494  | NW_004517206.1 | scaffold2193 | 52494                   | TT                              | CC                 | CC               | INTERGENIC      |               |                    |                    |
| SNP_103858_A_55520  | NW_004517206.1 | scaffold2193 | 55520                   | TT                              | CC                 | CC               | INTERGENIC      |               |                    |                    |
| SNP_103859_A_58867  | NW_004517206.1 | scaffold2193 | 58867                   | TT                              | AA                 | AA               | INTERGENIC      |               |                    |                    |
| SNP_103860_A_59046  | NW_004517206.1 | scaffold2193 | 59046                   | AA                              | GG                 | GG               | INTERGENIC      |               |                    |                    |
| SNP_103861_A_59154  | NW_004517206.1 | scaffold2193 | 59154                   | GG                              | TT                 | TT               | INTERGENIC      |               |                    |                    |
| SNP_103862_A_59432  | NW_004517206.1 | scaffold2193 | 59432                   | AA                              | GG                 | GG               | INTERGENIC      |               |                    |                    |
| SNP_103863_A_59853  | NW_004517206.1 | scaffold2193 | 59853                   | CC                              | TT                 | TT               | INTERGENIC      |               |                    |                    |
| SNP_103864_A_123605 | NW_004517206.1 | scaffold2193 | 123605                  | AA                              | GG                 | GG               | INTERGENIC      |               |                    |                    |
| SNP_103865_A_123626 | NW_004517206.1 | scaffold2193 | 123626                  | TT                              | AA                 | AA               | INTERGENIC      |               |                    |                    |
| SNP_103866_A_123632 | NW_004517206.1 | scaffold2193 | 123632                  | AA                              | GG                 | GG               | INTERGENIC      |               |                    |                    |
| SNP_103867_A_123682 | NW_004517206.1 | scaffold2193 | 123682                  | TT                              | CC                 | CC               | INTERGENIC      |               |                    |                    |

| SNPs IDs            | Chromosome IDs | Chromosomes  | Physical positions (bp) | CDC Frontier (Reference genome) | (Pusa 1103 & HPNB) | (ILWC 46 & LPNB) | Sequence genome | Components of | Gene accession IDs | Putative functions |
|---------------------|----------------|--------------|-------------------------|---------------------------------|--------------------|------------------|-----------------|---------------|--------------------|--------------------|
| SNP_103868_A_123685 | NW_004517206.1 | scaffold2193 | 123685                  | TT                              | CC                 | CC               | INTERGENIC      |               |                    |                    |
| SNP_103869_A_124811 | NW_004517206.1 | scaffold2193 | 124811                  | AA                              | GG                 | GG               | INTERGENIC      |               |                    |                    |
| SNP_103870_A_128010 | NW_004517206.1 | scaffold2193 | 128010                  | GG                              | AA                 | AA               | INTERGENIC      |               |                    |                    |
| SNP_103871_A_128077 | NW_004517206.1 | scaffold2193 | 128077                  | CC                              | TT                 | TT               | INTERGENIC      |               |                    |                    |
| SNP_103873_A_164741 | NW_004517206.1 | scaffold2193 | 164741                  | CC                              | TT                 | TT               | INTERGENIC      |               |                    |                    |
| SNP_103874_A_165015 | NW_004517206.1 | scaffold2193 | 165015                  | CC                              | AA                 | AA               | INTERGENIC      |               |                    |                    |
| SNP_103875_A_165028 | NW_004517206.1 | scaffold2193 | 165028                  | CC                              | AA                 | AA               | INTERGENIC      |               |                    |                    |
| SNP_103876_A_165245 | NW_004517206.1 | scaffold2193 | 165245                  | AA                              | CC                 | CC               | INTERGENIC      |               |                    |                    |
| SNP_103877_A_1064   | NW_004517207.1 | scaffold2194 | 1064                    | GG                              | TT                 | TT               | INTERGENIC      |               |                    |                    |
| SNP_103878_A_9287   | NW_004517207.1 | scaffold2194 | 9287                    | TT                              | GG                 | GG               | INTERGENIC      |               |                    |                    |
| SNP_103879_A_12762  | NW_004517207.1 | scaffold2194 | 12762                   | CC                              | GG                 | GG               | INTERGENIC      |               |                    |                    |
| SNP_103880_A_19402  | NW_004517207.1 | scaffold2194 | 19402                   | TT                              | CC                 | CC               | INTERGENIC      |               |                    |                    |
| SNP_103881_A_19409  | NW_004517207.1 | scaffold2194 | 19409                   | GG                              | AA                 | AA               | INTERGENIC      |               |                    |                    |
| SNP_103882_A_19416  | NW_004517207.1 | scaffold2194 | 19416                   | TT                              | CC                 | CC               | INTERGENIC      |               |                    |                    |
| SNP_103883_A_24099  | NW_004517207.1 | scaffold2194 | 24099                   | GG                              | TT                 | TT               | INTERGENIC      |               |                    |                    |
| SNP_103884_A_24963  | NW_004517207.1 | scaffold2194 | 24963                   | AA                              | GG                 | GG               | INTERGENIC      |               |                    |                    |
| SNP_103885_A_26469  | NW_004517207.1 | scaffold2194 | 26469                   | CC                              | TT                 | TT               | INTERGENIC      |               |                    |                    |
| SNP_103886_A_26508  | NW_004517207.1 | scaffold2194 | 26508                   | TT                              | GG                 | GG               | INTERGENIC      |               |                    |                    |
| SNP_103888_A_736    | NW_004517208.1 | scaffold2195 | 736                     | TT                              | AA                 | AA               | INTERGENIC      |               |                    |                    |
| SNP_103889_A_1584   | NW_004517208.1 | scaffold2195 | 1584                    | TT                              | CC                 | CC               | INTERGENIC      |               |                    |                    |
| SNP_103890_A_1590   | NW_004517208.1 | scaffold2195 | 1590                    | TT                              | CC                 | CC               | INTERGENIC      |               |                    |                    |
| SNP_103891_A_1591   | NW_004517208.1 | scaffold2195 | 1591                    | GG                              | TT                 | TT               | INTERGENIC      |               |                    |                    |

| SNPs IDs           | Chromosome IDs | Chromosomes  | Physical positions (bp) | CDC Frontier genome (Reference genome) | (Pusa 1103 & HPNB) | (ILWC 46 & LPNB) | Sequence genome | Components of | Gene accession IDs | Putative functions |
|--------------------|----------------|--------------|-------------------------|----------------------------------------|--------------------|------------------|-----------------|---------------|--------------------|--------------------|
| SNP_103893_A_1975  | NW_004517208.1 | scaffold2195 | 1975                    | GG                                     | AA                 | AA               | INTERGENIC      |               |                    |                    |
| SNP_103894_A_1982  | NW_004517208.1 | scaffold2195 | 1982                    | GG                                     | TT                 | TT               | INTERGENIC      |               |                    |                    |
| SNP_103895_A_2062  | NW_004517208.1 | scaffold2195 | 2062                    | GG                                     | AA                 | AA               | INTERGENIC      |               |                    |                    |
| SNP_103896_A_2066  | NW_004517208.1 | scaffold2195 | 2066                    | AA                                     | CC                 | CC               | INTERGENIC      |               |                    |                    |
| SNP_103897_A_909   | NW_004517210.1 | scaffold2199 | 909                     | AA                                     | GG                 | GG               | INTERGENIC      |               |                    |                    |
| SNP_103898_A_6963  | NW_004517214.1 | scaffold2203 | 6963                    | TT                                     | CC                 | CC               | INTERGENIC      |               |                    |                    |
| SNP_103899_A_727   | NW_004517215.1 | scaffold2205 | 727                     | AA                                     | GG                 | GG               | INTERGENIC      |               |                    |                    |
| SNP_103900_A_1028  | NW_004517215.1 | scaffold2205 | 1028                    | TT                                     | GG                 | GG               | INTERGENIC      |               |                    |                    |
| SNP_103901_A_1047  | NW_004517215.1 | scaffold2205 | 1047                    | AA                                     | GG                 | GG               | INTERGENIC      |               |                    |                    |
| SNP_103902_A_3374  | NW_004517215.1 | scaffold2205 | 3374                    | GG                                     | CC                 | CC               | INTERGENIC      |               |                    |                    |
| SNP_103903_A_3539  | NW_004517215.1 | scaffold2205 | 3539                    | AA                                     | GG                 | GG               | INTERGENIC      |               |                    |                    |
| SNP_103904_A_3550  | NW_004517215.1 | scaffold2205 | 3550                    | AA                                     | CC                 | CC               | INTERGENIC      |               |                    |                    |
| SNP_103905_A_3551  | NW_004517215.1 | scaffold2205 | 3551                    | GG                                     | AA                 | AA               | INTERGENIC      |               |                    |                    |
| SNP_103906_A_10233 | NW_004517215.1 | scaffold2205 | 10233                   | TT                                     | GG                 | GG               | INTERGENIC      |               |                    |                    |
| SNP_103907_A_10487 | NW_004517215.1 | scaffold2205 | 10487                   | TT                                     | GG                 | GG               | INTERGENIC      |               |                    |                    |
| SNP_103908_A_10618 | NW_004517215.1 | scaffold2205 | 10618                   | TT                                     | AA                 | AA               | INTERGENIC      |               |                    |                    |
| SNP_103909_A_21259 | NW_004517215.1 | scaffold2205 | 21259                   | AA                                     | TT                 | TT               | INTERGENIC      |               |                    |                    |
| SNP_103910_A_23801 | NW_004517215.1 | scaffold2205 | 23801                   | CC                                     | TT                 | TT               | INTERGENIC      |               |                    |                    |
| SNP_103911_A_24159 | NW_004517215.1 | scaffold2205 | 24159                   | GG                                     | AA                 | AA               | INTERGENIC      |               |                    |                    |
| SNP_103912_A_24164 | NW_004517215.1 | scaffold2205 | 24164                   | AA                                     | TT                 | TT               | INTERGENIC      |               |                    |                    |
| SNP_103913_A_24194 | NW_004517215.1 | scaffold2205 | 24194                   | CC                                     | TT                 | TT               | INTERGENIC      |               |                    |                    |
| SNP_103914_A_24848 | NW_004517215.1 | scaffold2205 | 24848                   | TT                                     | CC                 | CC               | INTERGENIC      |               |                    |                    |



| SNPs IDs           | Chromosome IDs | Chromosomes  | Physical positions (bp) | CDC Frontier (Reference genome) | (Pusa 1103 & HPNB) | (ILWC 46 & LPNB) | Sequence genome | Components of | Gene accession IDs | Putative functions |
|--------------------|----------------|--------------|-------------------------|---------------------------------|--------------------|------------------|-----------------|---------------|--------------------|--------------------|
| SNP_103915_A_24849 | NW_004517215.1 | scaffold2205 | 24849                   | AA                              | GG                 | GG               | INTERGENIC      |               |                    |                    |
| SNP_103916_A_27556 | NW_004517215.1 | scaffold2205 | 27556                   | GG                              | CC                 | CC               | INTERGENIC      |               |                    |                    |
| SNP_103917_A_36991 | NW_004517215.1 | scaffold2205 | 36991                   | CC                              | TT                 | TT               | INTERGENIC      |               |                    |                    |
| SNP_103918_A_37805 | NW_004517215.1 | scaffold2205 | 37805                   | AA                              | TT                 | TT               | INTERGENIC      |               |                    |                    |
| SNP_103919_A_37827 | NW_004517215.1 | scaffold2205 | 37827                   | AA                              | CC                 | CC               | INTERGENIC      |               |                    |                    |
| SNP_103921_A_38136 | NW_004517215.1 | scaffold2205 | 38136                   | AA                              | TT                 | TT               | INTERGENIC      |               |                    |                    |
| SNP_103922_A_38229 | NW_004517215.1 | scaffold2205 | 38229                   | TT                              | CC                 | CC               | INTERGENIC      |               |                    |                    |
| SNP_103923_A_38409 | NW_004517215.1 | scaffold2205 | 38409                   | CC                              | GG                 | GG               | INTERGENIC      |               |                    |                    |
| SNP_103924_A_38959 | NW_004517215.1 | scaffold2205 | 38959                   | TT                              | GG                 | GG               | INTERGENIC      |               |                    |                    |
| SNP_103925_A_43534 | NW_004517215.1 | scaffold2205 | 43534                   | AA                              | CC                 | CC               | INTERGENIC      |               |                    |                    |
| SNP_103926_A_48027 | NW_004517215.1 | scaffold2205 | 48027                   | GG                              | AA                 | AA               | INTERGENIC      |               |                    |                    |
| SNP_103927_A_48440 | NW_004517215.1 | scaffold2205 | 48440                   | CC                              | TT                 | TT               | INTERGENIC      |               |                    |                    |
| SNP_103928_A_48458 | NW_004517215.1 | scaffold2205 | 48458                   | AA                              | TT                 | TT               | INTERGENIC      |               |                    |                    |
| SNP_103929_A_48485 | NW_004517215.1 | scaffold2205 | 48485                   | AA                              | GG                 | GG               | INTERGENIC      |               |                    |                    |
| SNP_103930_A_48679 | NW_004517215.1 | scaffold2205 | 48679                   | CC                              | TT                 | TT               | INTERGENIC      |               |                    |                    |
| SNP_103931_A_48756 | NW_004517215.1 | scaffold2205 | 48756                   | AA                              | GG                 | GG               | INTERGENIC      |               |                    |                    |
| SNP_103932_A_48860 | NW_004517215.1 | scaffold2205 | 48860                   | GG                              | AA                 | AA               | INTERGENIC      |               |                    |                    |
| SNP_103933_A_49044 | NW_004517215.1 | scaffold2205 | 49044                   | CC                              | GG                 | GG               | INTERGENIC      |               |                    |                    |
| SNP_103934_A_49070 | NW_004517215.1 | scaffold2205 | 49070                   | TT                              | CC                 | CC               | INTERGENIC      |               |                    |                    |
| SNP_103935_A_49093 | NW_004517215.1 | scaffold2205 | 49093                   | TT                              | CC                 | CC               | INTERGENIC      |               |                    |                    |
| SNP_103936_A_49096 | NW_004517215.1 | scaffold2205 | 49096                   | TT                              | CC                 | CC               | INTERGENIC      |               |                    |                    |
| SNP_103938_A_49167 | NW_004517215.1 | scaffold2205 | 49167                   | TT                              | CC                 | CC               | INTERGENIC      |               |                    |                    |

| SNPs IDs           | Chromosome IDs | Chromosomes  | Physical positions (bp) | CDC Frontier (Reference genome) | (Pusa 1103 & HPNB) | (ILWC 46 & LPNB) | Sequence genome | Components of | Gene accession IDs | Putative functions |
|--------------------|----------------|--------------|-------------------------|---------------------------------|--------------------|------------------|-----------------|---------------|--------------------|--------------------|
| SNP_103939_A_49205 | NW_004517215.1 | scaffold2205 | 49205                   | CC                              | AA                 | AA               | INTERGENIC      |               |                    |                    |
| SNP_103940_A_49476 | NW_004517215.1 | scaffold2205 | 49476                   | AA                              | TT                 | TT               | INTERGENIC      |               |                    |                    |
| SNP_103942_A_669   | NW_004517217.1 | scaffold2207 | 669                     | CC                              | GG                 | GG               | INTERGENIC      |               |                    |                    |
| SNP_103943_A_711   | NW_004517217.1 | scaffold2207 | 711                     | TT                              | AA                 | AA               | INTERGENIC      |               |                    |                    |
| SNP_103944_A_715   | NW_004517217.1 | scaffold2207 | 715                     | TT                              | AA                 | AA               | INTERGENIC      |               |                    |                    |
| SNP_103945_A_786   | NW_004517217.1 | scaffold2207 | 786                     | GG                              | CC                 | CC               | INTERGENIC      |               |                    |                    |
| SNP_103946_A_824   | NW_004517217.1 | scaffold2207 | 824                     | AA                              | GG                 | GG               | INTERGENIC      |               |                    |                    |
| SNP_103947_A_830   | NW_004517217.1 | scaffold2207 | 830                     | GG                              | TT                 | TT               | INTERGENIC      |               |                    |                    |
| SNP_103948_A_834   | NW_004517217.1 | scaffold2207 | 834                     | CC                              | TT                 | TT               | INTERGENIC      |               |                    |                    |
| SNP_103949_A_835   | NW_004517217.1 | scaffold2207 | 835                     | AA                              | GG                 | GG               | INTERGENIC      |               |                    |                    |
| SNP_103950_A_1056  | NW_004517217.1 | scaffold2207 | 1056                    | TT                              | CC                 | CC               | INTERGENIC      |               |                    |                    |
| SNP_103951_A_1929  | NW_004517217.1 | scaffold2207 | 1929                    | GG                              | AA                 | AA               | INTERGENIC      |               |                    |                    |
| SNP_103952_A_4745  | NW_004517218.1 | scaffold2208 | 4745                    | TT                              | CC                 | CC               | INTERGENIC      |               |                    |                    |
| SNP_103953_A_4805  | NW_004517218.1 | scaffold2208 | 4805                    | GG                              | AA                 | AA               | INTERGENIC      |               |                    |                    |
| SNP_103954_A_5008  | NW_004517218.1 | scaffold2208 | 5008                    | TT                              | CC                 | CC               | INTERGENIC      |               |                    |                    |
| SNP_103955_A_5278  | NW_004517218.1 | scaffold2208 | 5278                    | CC                              | TT                 | TT               | INTERGENIC      |               |                    |                    |
| SNP_103956_A_5292  | NW_004517218.1 | scaffold2208 | 5292                    | TT                              | GG                 | GG               | INTERGENIC      |               |                    |                    |
| SNP_103957_A_5943  | NW_004517218.1 | scaffold2208 | 5943                    | GG                              | CC                 | CC               | INTERGENIC      |               |                    |                    |
| SNP_103958_A_5955  | NW_004517218.1 | scaffold2208 | 5955                    | CC                              | AA                 | AA               | INTERGENIC      |               |                    |                    |
| SNP_103959_A_6102  | NW_004517218.1 | scaffold2208 | 6102                    | AA                              | GG                 | GG               | INTERGENIC      |               |                    |                    |
| SNP_103960_A_6104  | NW_004517218.1 | scaffold2208 | 6104                    | CC                              | TT                 | TT               | INTERGENIC      |               |                    |                    |
| SNP_103961_A_6187  | NW_004517218.1 | scaffold2208 | 6187                    | AA                              | TT                 | TT               | INTERGENIC      |               |                    |                    |

| SNPs IDs           | Chromosome IDs | Chromosomes  | Physical positions (bp) | CDC Frontier (Reference genome) | (Pusa 1103 & HPNB) | (ILWC 46 & LPNB) | Sequence genome | Components of | Gene accession IDs | Putative functions |
|--------------------|----------------|--------------|-------------------------|---------------------------------|--------------------|------------------|-----------------|---------------|--------------------|--------------------|
| SNP_103962_A_6371  | NW_004517218.1 | scaffold2208 | 6371                    | TT                              | AA                 | AA               | INTERGENIC      |               |                    |                    |
| SNP_103963_A_6712  | NW_004517218.1 | scaffold2208 | 6712                    | TT                              | CC                 | CC               | INTERGENIC      |               |                    |                    |
| SNP_103964_A_6907  | NW_004517218.1 | scaffold2208 | 6907                    | AA                              | GG                 | GG               | INTERGENIC      |               |                    |                    |
| SNP_103965_A_7089  | NW_004517218.1 | scaffold2208 | 7089                    | GG                              | CC                 | CC               | INTERGENIC      |               |                    |                    |
| SNP_103967_A_7192  | NW_004517218.1 | scaffold2208 | 7192                    | GG                              | CC                 | CC               | INTERGENIC      |               |                    |                    |
| SNP_103968_A_7200  | NW_004517218.1 | scaffold2208 | 7200                    | TT                              | GG                 | GG               | INTERGENIC      |               |                    |                    |
| SNP_103969_A_8114  | NW_004517218.1 | scaffold2208 | 8114                    | AA                              | CC                 | CC               | INTERGENIC      |               |                    |                    |
| SNP_103970_A_8289  | NW_004517218.1 | scaffold2208 | 8289                    | AA                              | TT                 | TT               | INTERGENIC      |               |                    |                    |
| SNP_103971_A_8352  | NW_004517218.1 | scaffold2208 | 8352                    | CC                              | TT                 | TT               | INTERGENIC      |               |                    |                    |
| SNP_103972_A_8432  | NW_004517218.1 | scaffold2208 | 8432                    | AA                              | CC                 | CC               | INTERGENIC      |               |                    |                    |
| SNP_103973_A_8447  | NW_004517218.1 | scaffold2208 | 8447                    | TT                              | CC                 | CC               | INTERGENIC      |               |                    |                    |
| SNP_103974_A_9424  | NW_004517218.1 | scaffold2208 | 9424                    | TT                              | AA                 | AA               | INTERGENIC      |               |                    |                    |
| SNP_103975_A_9693  | NW_004517218.1 | scaffold2208 | 9693                    | AA                              | CC                 | CC               | INTERGENIC      |               |                    |                    |
| SNP_103976_A_9893  | NW_004517218.1 | scaffold2208 | 9893                    | GG                              | TT                 | TT               | INTERGENIC      |               |                    |                    |
| SNP_103977_A_9986  | NW_004517218.1 | scaffold2208 | 9986                    | GG                              | AA                 | AA               | INTERGENIC      |               |                    |                    |
| SNP_103978_A_9994  | NW_004517218.1 | scaffold2208 | 9994                    | AA                              | CC                 | CC               | INTERGENIC      |               |                    |                    |
| SNP_103979_A_10099 | NW_004517218.1 | scaffold2208 | 10099                   | CC                              | TT                 | TT               | INTERGENIC      |               |                    |                    |
| SNP_103981_A_10287 | NW_004517218.1 | scaffold2208 | 10287                   | TT                              | AA                 | AA               | INTERGENIC      |               |                    |                    |
| SNP_103982_A_10298 | NW_004517218.1 | scaffold2208 | 10298                   | TT                              | CC                 | CC               | INTERGENIC      |               |                    |                    |
| SNP_103983_A_10470 | NW_004517218.1 | scaffold2208 | 10470                   | CC                              | AA                 | AA               | INTERGENIC      |               |                    |                    |
| SNP_103984_A_10560 | NW_004517218.1 | scaffold2208 | 10560                   | CC                              | GG                 | GG               | INTERGENIC      |               |                    |                    |
| SNP_103985_A_16019 | NW_004517218.1 | scaffold2208 | 16019                   | GG                              | CC                 | CC               | INTERGENIC      |               |                    |                    |

| SNPs IDs           | Chromosome IDs | Chromosomes  | Physical positions (bp) | CDC Frontier (Reference genome) | (Pusa 1103 & HPNB) | (ILWC 46 & LPNB) | Sequence genome | Components of | Gene accession IDs | Putative functions |
|--------------------|----------------|--------------|-------------------------|---------------------------------|--------------------|------------------|-----------------|---------------|--------------------|--------------------|
| SNP_103986_A_16561 | NW_004517218.1 | scaffold2208 | 16561                   | AA                              | GG                 | GG               | INTERGENIC      |               |                    |                    |
| SNP_103987_A_19085 | NW_004517218.1 | scaffold2208 | 19085                   | TT                              | CC                 | CC               | INTERGENIC      |               |                    |                    |
| SNP_103988_A_19687 | NW_004517218.1 | scaffold2208 | 19687                   | AA                              | CC                 | CC               | INTERGENIC      |               |                    |                    |
| SNP_103989_A_19894 | NW_004517218.1 | scaffold2208 | 19894                   | AA                              | GG                 | GG               | INTERGENIC      |               |                    |                    |
| SNP_103991_A_20387 | NW_004517218.1 | scaffold2208 | 20387                   | AA                              | TT                 | TT               | INTERGENIC      |               |                    |                    |
| SNP_103992_A_20798 | NW_004517218.1 | scaffold2208 | 20798                   | GG                              | TT                 | TT               | INTERGENIC      |               |                    |                    |
| SNP_103993_A_20929 | NW_004517218.1 | scaffold2208 | 20929                   | AA                              | GG                 | GG               | INTERGENIC      |               |                    |                    |
| SNP_103994_A_20963 | NW_004517218.1 | scaffold2208 | 20963                   | TT                              | AA                 | AA               | INTERGENIC      |               |                    |                    |
| SNP_103995_A_21019 | NW_004517218.1 | scaffold2208 | 21019                   | TT                              | CC                 | CC               | INTERGENIC      |               |                    |                    |
| SNP_103996_A_21036 | NW_004517218.1 | scaffold2208 | 21036                   | TT                              | AA                 | AA               | INTERGENIC      |               |                    |                    |
| SNP_103997_A_21037 | NW_004517218.1 | scaffold2208 | 21037                   | AA                              | CC                 | CC               | INTERGENIC      |               |                    |                    |
| SNP_103998_A_21263 | NW_004517218.1 | scaffold2208 | 21263                   | CC                              | AA                 | AA               | INTERGENIC      |               |                    |                    |
| SNP_103999_A_21264 | NW_004517218.1 | scaffold2208 | 21264                   | CC                              | TT                 | TT               | INTERGENIC      |               |                    |                    |
| SNP_104000_A_21411 | NW_004517218.1 | scaffold2208 | 21411                   | GG                              | AA                 | AA               | INTERGENIC      |               |                    |                    |
| SNP_104001_A_21484 | NW_004517218.1 | scaffold2208 | 21484                   | TT                              | CC                 | CC               | INTERGENIC      |               |                    |                    |
| SNP_104002_A_21637 | NW_004517218.1 | scaffold2208 | 21637                   | GG                              | AA                 | AA               | INTERGENIC      |               |                    |                    |
| SNP_104003_A_23889 | NW_004517218.1 | scaffold2208 | 23889                   | GG                              | AA                 | AA               | INTERGENIC      |               |                    |                    |
| SNP_104004_A_27773 | NW_004517218.1 | scaffold2208 | 27773                   | GG                              | TT                 | TT               | INTERGENIC      |               |                    |                    |
| SNP_104005_A_232   | NW_004517219.1 | scaffold2209 | 232                     | GG                              | TT                 | TT               | INTERGENIC      |               |                    |                    |
| SNP_104006_A_64    | NW_004517220.1 | scaffold2210 | 64                      | AA                              | TT                 | TT               | INTERGENIC      |               |                    |                    |
| SNP_104007_A_434   | NW_004517220.1 | scaffold2210 | 434                     | CC                              | TT                 | TT               | INTERGENIC      |               |                    |                    |
| SNP_104008_A_1236  | NW_004517220.1 | scaffold2210 | 1236                    | AA                              | GG                 | GG               | INTERGENIC      |               |                    |                    |

| SNPs IDs           | Chromosome IDs | Chromosomes  | Physical positions (bp) | CDC Frontier (Reference genome) | (Pusa 1103 & HPNB) | (ILWC 46 & LPNB) | Sequence genome | Components of | Gene accession IDs | Putative functions |
|--------------------|----------------|--------------|-------------------------|---------------------------------|--------------------|------------------|-----------------|---------------|--------------------|--------------------|
| SNP_104009_A_7205  | NW_004517220.1 | scaffold2210 | 7205                    | GG                              | AA                 | AA               | INTERGENIC      |               |                    |                    |
| SNP_104010_A_7551  | NW_004517220.1 | scaffold2210 | 7551                    | GG                              | AA                 | AA               | INTERGENIC      |               |                    |                    |
| SNP_104011_A_7654  | NW_004517220.1 | scaffold2210 | 7654                    | AA                              | GG                 | GG               | INTERGENIC      |               |                    |                    |
| SNP_104012_A_7742  | NW_004517220.1 | scaffold2210 | 7742                    | GG                              | CC                 | CC               | INTERGENIC      |               |                    |                    |
| SNP_104013_A_8048  | NW_004517220.1 | scaffold2210 | 8048                    | TT                              | GG                 | GG               | INTERGENIC      |               |                    |                    |
| SNP_104014_A_8079  | NW_004517220.1 | scaffold2210 | 8079                    | TT                              | AA                 | AA               | INTERGENIC      |               |                    |                    |
| SNP_104015_A_8122  | NW_004517220.1 | scaffold2210 | 8122                    | TT                              | CC                 | CC               | INTERGENIC      |               |                    |                    |
| SNP_104016_A_15011 | NW_004517220.1 | scaffold2210 | 15011                   | GG                              | TT                 | TT               | INTERGENIC      |               |                    |                    |
| SNP_104017_A_15142 | NW_004517220.1 | scaffold2210 | 15142                   | AA                              | GG                 | GG               | INTERGENIC      |               |                    |                    |
| SNP_104019_A_15240 | NW_004517220.1 | scaffold2210 | 15240                   | AA                              | CC                 | CC               | INTERGENIC      |               |                    |                    |
| SNP_104020_A_15281 | NW_004517220.1 | scaffold2210 | 15281                   | AA                              | GG                 | GG               | INTERGENIC      |               |                    |                    |
| SNP_104021_A_15498 | NW_004517220.1 | scaffold2210 | 15498                   | TT                              | CC                 | CC               | INTERGENIC      |               |                    |                    |
| SNP_104022_A_22315 | NW_004517220.1 | scaffold2210 | 22315                   | AA                              | GG                 | GG               | INTERGENIC      |               |                    |                    |
| SNP_104023_A_22317 | NW_004517220.1 | scaffold2210 | 22317                   | AA                              | TT                 | TT               | INTERGENIC      |               |                    |                    |
| SNP_104024_A_22593 | NW_004517220.1 | scaffold2210 | 22593                   | CC                              | TT                 | TT               | INTERGENIC      |               |                    |                    |
| SNP_104025_A_22713 | NW_004517220.1 | scaffold2210 | 22713                   | CC                              | TT                 | TT               | INTERGENIC      |               |                    |                    |
| SNP_104026_A_22716 | NW_004517220.1 | scaffold2210 | 22716                   | TT                              | GG                 | GG               | INTERGENIC      |               |                    |                    |
| SNP_104027_A_22805 | NW_004517220.1 | scaffold2210 | 22805                   | GG                              | AA                 | AA               | INTERGENIC      |               |                    |                    |
| SNP_104028_A_22850 | NW_004517220.1 | scaffold2210 | 22850                   | CC                              | GG                 | GG               | INTERGENIC      |               |                    |                    |
| SNP_104029_A_22909 | NW_004517220.1 | scaffold2210 | 22909                   | CC                              | TT                 | TT               | INTERGENIC      |               |                    |                    |
| SNP_104030_A_22979 | NW_004517220.1 | scaffold2210 | 22979                   | AA                              | GG                 | GG               | INTERGENIC      |               |                    |                    |
| SNP_104031_A_22982 | NW_004517220.1 | scaffold2210 | 22982                   | TT                              | AA                 | AA               | INTERGENIC      |               |                    |                    |

| SNPs IDs           | Chromosome IDs | Chromosomes  | Physical positions (bp) | CDC Frontier (Reference genome) | (Pusa 1103 & HPNB) | (ILWC 46 & LPNB) | Sequence genome | Components of | Gene accession IDs | Putative functions |
|--------------------|----------------|--------------|-------------------------|---------------------------------|--------------------|------------------|-----------------|---------------|--------------------|--------------------|
| SNP_104032_A_23125 | NW_004517220.1 | scaffold2210 | 23125                   | GG                              | AA                 | AA               | INTERGENIC      |               |                    |                    |
| SNP_104033_A_23147 | NW_004517220.1 | scaffold2210 | 23147                   | TT                              | AA                 | AA               | INTERGENIC      |               |                    |                    |
| SNP_104034_A_23152 | NW_004517220.1 | scaffold2210 | 23152                   | GG                              | CC                 | CC               | INTERGENIC      |               |                    |                    |
| SNP_104035_A_27831 | NW_004517220.1 | scaffold2210 | 27831                   | TT                              | CC                 | CC               | INTERGENIC      |               |                    |                    |
| SNP_104036_A_27838 | NW_004517220.1 | scaffold2210 | 27838                   | AA                              | CC                 | CC               | INTERGENIC      |               |                    |                    |
| SNP_104037_A_27940 | NW_004517220.1 | scaffold2210 | 27940                   | CC                              | GG                 | GG               | INTERGENIC      |               |                    |                    |
| SNP_104038_A_28711 | NW_004517220.1 | scaffold2210 | 28711                   | AA                              | TT                 | TT               | INTERGENIC      |               |                    |                    |
| SNP_104039_A_28870 | NW_004517220.1 | scaffold2210 | 28870                   | CC                              | TT                 | TT               | INTERGENIC      |               |                    |                    |
| SNP_104040_A_31289 | NW_004517220.1 | scaffold2210 | 31289                   | AA                              | GG                 | GG               | INTERGENIC      |               |                    |                    |
| SNP_104041_A_31348 | NW_004517220.1 | scaffold2210 | 31348                   | AA                              | CC                 | CC               | INTERGENIC      |               |                    |                    |
| SNP_104042_A_31383 | NW_004517220.1 | scaffold2210 | 31383                   | AA                              | TT                 | TT               | INTERGENIC      |               |                    |                    |
| SNP_104043_A_31397 | NW_004517220.1 | scaffold2210 | 31397                   | AA                              | GG                 | GG               | INTERGENIC      |               |                    |                    |
| SNP_104044_A_31439 | NW_004517220.1 | scaffold2210 | 31439                   | CC                              | AA                 | AA               | INTERGENIC      |               |                    |                    |
| SNP_104045_A_31451 | NW_004517220.1 | scaffold2210 | 31451                   | TT                              | GG                 | GG               | INTERGENIC      |               |                    |                    |
| SNP_104046_A_31456 | NW_004517220.1 | scaffold2210 | 31456                   | CC                              | GG                 | GG               | INTERGENIC      |               |                    |                    |
| SNP_104047_A_31533 | NW_004517220.1 | scaffold2210 | 31533                   | TT                              | CC                 | CC               | INTERGENIC      |               |                    |                    |
| SNP_104048_A_31555 | NW_004517220.1 | scaffold2210 | 31555                   | TT                              | AA                 | AA               | INTERGENIC      |               |                    |                    |
| SNP_104049_A_34687 | NW_004517220.1 | scaffold2210 | 34687                   | AA                              | CC                 | CC               | INTERGENIC      |               |                    |                    |
| SNP_104050_A_34704 | NW_004517220.1 | scaffold2210 | 34704                   | GG                              | TT                 | TT               | INTERGENIC      |               |                    |                    |
| SNP_104051_A_35034 | NW_004517220.1 | scaffold2210 | 35034                   | AA                              | GG                 | GG               | INTERGENIC      |               |                    |                    |
| SNP_104052_A_36016 | NW_004517220.1 | scaffold2210 | 36016                   | GG                              | AA                 | AA               | INTERGENIC      |               |                    |                    |
| SNP_104053_A_36082 | NW_004517220.1 | scaffold2210 | 36082                   | AA                              | CC                 | CC               | INTERGENIC      |               |                    |                    |

| SNPs IDs           | Chromosome IDs | Chromosomes  | Physical positions (bp) | CDC Frontier (Reference genome) | (Pusa 1103 & HPNB) | (ILWC 46 & LPNB) | Sequence genome | Components of | Gene accession IDs | Putative functions |
|--------------------|----------------|--------------|-------------------------|---------------------------------|--------------------|------------------|-----------------|---------------|--------------------|--------------------|
| SNP_104055_A_36207 | NW_004517220.1 | scaffold2210 | 36207                   | TT                              | AA                 | AA               | INTERGENIC      |               |                    |                    |
| SNP_104056_A_36381 | NW_004517220.1 | scaffold2210 | 36381                   | TT                              | GG                 | GG               | INTERGENIC      |               |                    |                    |
| SNP_104057_A_36415 | NW_004517220.1 | scaffold2210 | 36415                   | CC                              | TT                 | TT               | INTERGENIC      |               |                    |                    |
| SNP_104058_A_42034 | NW_004517220.1 | scaffold2210 | 42034                   | CC                              | TT                 | TT               | INTERGENIC      |               |                    |                    |
| SNP_104059_A_47413 | NW_004517220.1 | scaffold2210 | 47413                   | AA                              | CC                 | CC               | INTERGENIC      |               |                    |                    |
| SNP_104060_A_47429 | NW_004517220.1 | scaffold2210 | 47429                   | TT                              | CC                 | CC               | INTERGENIC      |               |                    |                    |
| SNP_104061_A_47449 | NW_004517220.1 | scaffold2210 | 47449                   | AA                              | GG                 | GG               | INTERGENIC      |               |                    |                    |
| SNP_104062_A_55641 | NW_004517220.1 | scaffold2210 | 55641                   | AA                              | TT                 | TT               | INTERGENIC      |               |                    |                    |
| SNP_104063_A_55647 | NW_004517220.1 | scaffold2210 | 55647                   | AA                              | CC                 | CC               | INTERGENIC      |               |                    |                    |
| SNP_104064_A_55649 | NW_004517220.1 | scaffold2210 | 55649                   | AA                              | CC                 | CC               | INTERGENIC      |               |                    |                    |
| SNP_104065_A_55664 | NW_004517220.1 | scaffold2210 | 55664                   | AA                              | GG                 | GG               | INTERGENIC      |               |                    |                    |
| SNP_104066_A_55668 | NW_004517220.1 | scaffold2210 | 55668                   | AA                              | TT                 | TT               | INTERGENIC      |               |                    |                    |
| SNP_104067_A_55817 | NW_004517220.1 | scaffold2210 | 55817                   | AA                              | GG                 | GG               | INTERGENIC      |               |                    |                    |
| SNP_104068_A_55922 | NW_004517220.1 | scaffold2210 | 55922                   | AA                              | CC                 | CC               | INTERGENIC      |               |                    |                    |
| SNP_104069_A_55984 | NW_004517220.1 | scaffold2210 | 55984                   | TT                              | AA                 | AA               | INTERGENIC      |               |                    |                    |
| SNP_104070_A_57307 | NW_004517220.1 | scaffold2210 | 57307                   | TT                              | AA                 | AA               | INTERGENIC      |               |                    |                    |
| SNP_104071_A_57308 | NW_004517220.1 | scaffold2210 | 57308                   | AA                              | CC                 | CC               | INTERGENIC      |               |                    |                    |
| SNP_104072_A_57331 | NW_004517220.1 | scaffold2210 | 57331                   | TT                              | CC                 | CC               | INTERGENIC      |               |                    |                    |
| SNP_104073_A_57352 | NW_004517220.1 | scaffold2210 | 57352                   | CC                              | TT                 | TT               | INTERGENIC      |               |                    |                    |
| SNP_104074_A_57416 | NW_004517220.1 | scaffold2210 | 57416                   | CC                              | AA                 | AA               | INTERGENIC      |               |                    |                    |
| SNP_104075_A_57543 | NW_004517220.1 | scaffold2210 | 57543                   | GG                              | AA                 | AA               | INTERGENIC      |               |                    |                    |
| SNP_104076_A_57579 | NW_004517220.1 | scaffold2210 | 57579                   | CC                              | TT                 | TT               | INTERGENIC      |               |                    |                    |

| SNPs IDs           | Chromosome IDs | Chromosomes  | Physical positions (bp) | CDC Frontier (Reference genome) | (Pusa 1103 & HPNB) | (ILWC 46 & LPNB) | Sequence genome | Components of | Gene accession IDs | Putative functions |
|--------------------|----------------|--------------|-------------------------|---------------------------------|--------------------|------------------|-----------------|---------------|--------------------|--------------------|
| SNP_104077_A_57645 | NW_004517220.1 | scaffold2210 | 57645                   | AA                              | GG                 | GG               | INTERGENIC      |               |                    |                    |
| SNP_104078_A_57682 | NW_004517220.1 | scaffold2210 | 57682                   | TT                              | GG                 | GG               | INTERGENIC      |               |                    |                    |
| SNP_104079_A_57953 | NW_004517220.1 | scaffold2210 | 57953                   | AA                              | GG                 | GG               | INTERGENIC      |               |                    |                    |
| SNP_104080_A_57961 | NW_004517220.1 | scaffold2210 | 57961                   | TT                              | AA                 | AA               | INTERGENIC      |               |                    |                    |
| SNP_104081_A_58008 | NW_004517220.1 | scaffold2210 | 58008                   | AA                              | GG                 | GG               | INTERGENIC      |               |                    |                    |
| SNP_104082_A_60143 | NW_004517220.1 | scaffold2210 | 60143                   | TT                              | GG                 | GG               | INTERGENIC      |               |                    |                    |
| SNP_104083_A_60177 | NW_004517220.1 | scaffold2210 | 60177                   | AA                              | GG                 | GG               | INTERGENIC      |               |                    |                    |
| SNP_104084_A_60184 | NW_004517220.1 | scaffold2210 | 60184                   | AA                              | GG                 | GG               | INTERGENIC      |               |                    |                    |
| SNP_104085_A_60894 | NW_004517220.1 | scaffold2210 | 60894                   | GG                              | AA                 | AA               | INTERGENIC      |               |                    |                    |
| SNP_104086_A_60897 | NW_004517220.1 | scaffold2210 | 60897                   | AA                              | GG                 | GG               | INTERGENIC      |               |                    |                    |
| SNP_104087_A_61219 | NW_004517220.1 | scaffold2210 | 61219                   | CC                              | GG                 | GG               | INTERGENIC      |               |                    |                    |
| SNP_104088_A_62567 | NW_004517220.1 | scaffold2210 | 62567                   | TT                              | AA                 | AA               | INTERGENIC      |               |                    |                    |
| SNP_104089_A_62879 | NW_004517220.1 | scaffold2210 | 62879                   | AA                              | CC                 | CC               | INTERGENIC      |               |                    |                    |
| SNP_104090_A_63018 | NW_004517220.1 | scaffold2210 | 63018                   | GG                              | TT                 | TT               | INTERGENIC      |               |                    |                    |
| SNP_104091_A_63171 | NW_004517220.1 | scaffold2210 | 63171                   | TT                              | CC                 | CC               | INTERGENIC      |               |                    |                    |
| SNP_104092_A_63262 | NW_004517220.1 | scaffold2210 | 63262                   | GG                              | AA                 | AA               | INTERGENIC      |               |                    |                    |
| SNP_104093_A_63789 | NW_004517220.1 | scaffold2210 | 63789                   | CC                              | TT                 | TT               | INTERGENIC      |               |                    |                    |
| SNP_104094_A_63802 | NW_004517220.1 | scaffold2210 | 63802                   | TT                              | CC                 | CC               | INTERGENIC      |               |                    |                    |
| SNP_104095_A_65428 | NW_004517220.1 | scaffold2210 | 65428                   | AA                              | GG                 | GG               | INTERGENIC      |               |                    |                    |
| SNP_104096_A_65462 | NW_004517220.1 | scaffold2210 | 65462                   | GG                              | CC                 | CC               | INTERGENIC      |               |                    |                    |
| SNP_104097_A_65672 | NW_004517220.1 | scaffold2210 | 65672                   | TT                              | CC                 | CC               | INTERGENIC      |               |                    |                    |
| SNP_104098_A_65684 | NW_004517220.1 | scaffold2210 | 65684                   | CC                              | TT                 | TT               | INTERGENIC      |               |                    |                    |



| SNPs IDs           | Chromosome IDs | Chromosomes  | Physical positions (bp) | CDC Frontier (Reference genome) | (Pusa 1103 & HPNB) | (ILWC 46 & LPNB) | Sequence genome | Components of | Gene accession IDs | Putative functions |
|--------------------|----------------|--------------|-------------------------|---------------------------------|--------------------|------------------|-----------------|---------------|--------------------|--------------------|
| SNP_104099_A_65748 | NW_004517220.1 | scaffold2210 | 65748                   | TT                              | GG                 | GG               | INTERGENIC      |               |                    |                    |
| SNP_104100_A_65998 | NW_004517220.1 | scaffold2210 | 65998                   | TT                              | CC                 | CC               | INTERGENIC      |               |                    |                    |
| SNP_104101_A_66038 | NW_004517220.1 | scaffold2210 | 66038                   | TT                              | AA                 | AA               | INTERGENIC      |               |                    |                    |
| SNP_104102_A_66076 | NW_004517220.1 | scaffold2210 | 66076                   | GG                              | AA                 | AA               | INTERGENIC      |               |                    |                    |
| SNP_104103_A_66083 | NW_004517220.1 | scaffold2210 | 66083                   | GG                              | CC                 | CC               | INTERGENIC      |               |                    |                    |
| SNP_104104_A_66094 | NW_004517220.1 | scaffold2210 | 66094                   | GG                              | TT                 | TT               | INTERGENIC      |               |                    |                    |
| SNP_104105_A_66201 | NW_004517220.1 | scaffold2210 | 66201                   | TT                              | AA                 | AA               | INTERGENIC      |               |                    |                    |
| SNP_104106_A_66247 | NW_004517220.1 | scaffold2210 | 66247                   | TT                              | AA                 | AA               | INTERGENIC      |               |                    |                    |
| SNP_104107_A_66398 | NW_004517220.1 | scaffold2210 | 66398                   | GG                              | AA                 | AA               | INTERGENIC      |               |                    |                    |
| SNP_104108_A_70162 | NW_004517220.1 | scaffold2210 | 70162                   | CC                              | TT                 | TT               | INTERGENIC      |               |                    |                    |
| SNP_104109_A_71594 | NW_004517220.1 | scaffold2210 | 71594                   | GG                              | AA                 | AA               | INTERGENIC      |               |                    |                    |
| SNP_104110_A_71758 | NW_004517220.1 | scaffold2210 | 71758                   | GG                              | AA                 | AA               | INTERGENIC      |               |                    |                    |
| SNP_104111_A_72110 | NW_004517220.1 | scaffold2210 | 72110                   | TT                              | CC                 | CC               | INTERGENIC      |               |                    |                    |
| SNP_104112_A_72610 | NW_004517220.1 | scaffold2210 | 72610                   | AA                              | GG                 | GG               | INTERGENIC      |               |                    |                    |
| SNP_104113_A_72684 | NW_004517220.1 | scaffold2210 | 72684                   | AA                              | GG                 | GG               | INTERGENIC      |               |                    |                    |
| SNP_104114_A_72698 | NW_004517220.1 | scaffold2210 | 72698                   | TT                              | CC                 | CC               | INTERGENIC      |               |                    |                    |
| SNP_104115_A_10814 | NW_004517223.1 | scaffold2214 | 10814                   | AA                              | CC                 | CC               | INTERGENIC      |               |                    |                    |
| SNP_104116_A_17306 | NW_004517223.1 | scaffold2214 | 17306                   | AA                              | CC                 | CC               | INTERGENIC      |               |                    |                    |
| SNP_104117_A_18881 | NW_004517223.1 | scaffold2214 | 18881                   | GG                              | AA                 | AA               | INTERGENIC      |               |                    |                    |
| SNP_104118_A_9527  | NW_004517224.1 | scaffold2216 | 9527                    | CC                              | GG                 | GG               | INTERGENIC      |               |                    |                    |
| SNP_104120_A_42650 | NW_004517224.1 | scaffold2216 | 42650                   | TT                              | CC                 | CC               | INTERGENIC      |               |                    |                    |
| SNP_104121_A_1346  | NW_004517225.1 | scaffold2217 | 1346                    | AA                              | GG                 | GG               | INTERGENIC      |               |                    |                    |

| SNPs IDs           | Chromosome IDs | Chromosomes  | Physical positions (bp) | CDC Frontier (Reference genome) | (Pusa 1103 & HPNB) | (ILWC 46 & LPNB) | Sequence genome | Components of | Gene accession IDs | Putative functions |
|--------------------|----------------|--------------|-------------------------|---------------------------------|--------------------|------------------|-----------------|---------------|--------------------|--------------------|
| SNP_104122_A_1354  | NW_004517226.1 | scaffold2218 | 1354                    | TT                              | AA                 | AA               | INTERGENIC      |               |                    |                    |
| SNP_104123_A_1608  | NW_004517226.1 | scaffold2218 | 1608                    | CC                              | TT                 | TT               | INTERGENIC      |               |                    |                    |
| SNP_104124_A_10536 | NW_004517226.1 | scaffold2218 | 10536                   | CC                              | AA                 | AA               | INTERGENIC      |               |                    |                    |
| SNP_104125_A_10571 | NW_004517226.1 | scaffold2218 | 10571                   | TT                              | CC                 | CC               | INTERGENIC      |               |                    |                    |
| SNP_104126_A_10606 | NW_004517226.1 | scaffold2218 | 10606                   | GG                              | AA                 | AA               | INTERGENIC      |               |                    |                    |
| SNP_104127_A_10834 | NW_004517226.1 | scaffold2218 | 10834                   | AA                              | TT                 | TT               | INTERGENIC      |               |                    |                    |
| SNP_104128_A_12575 | NW_004517226.1 | scaffold2218 | 12575                   | GG                              | AA                 | AA               | INTERGENIC      |               |                    |                    |
| SNP_104129_A_1204  | NW_004517228.1 | scaffold2222 | 1204                    | CC                              | GG                 | GG               | INTERGENIC      |               |                    |                    |
| SNP_104131_A_701   | NW_004517230.1 | scaffold2225 | 701                     | AA                              | GG                 | GG               | INTERGENIC      |               |                    |                    |
| SNP_104132_A_702   | NW_004517230.1 | scaffold2225 | 702                     | GG                              | AA                 | AA               | INTERGENIC      |               |                    |                    |
| SNP_104135_A_1830  | NW_004517232.1 | scaffold2227 | 1830                    | AA                              | CC                 | CC               | INTERGENIC      |               |                    |                    |
| SNP_104136_A_5545  | NW_004517232.1 | scaffold2227 | 5545                    | CC                              | TT                 | TT               | INTERGENIC      |               |                    |                    |
| SNP_104137_A_6441  | NW_004517232.1 | scaffold2227 | 6441                    | AA                              | GG                 | GG               | INTERGENIC      |               |                    |                    |
| SNP_104139_A_16742 | NW_004517232.1 | scaffold2227 | 16742                   | TT                              | CC                 | CC               | INTERGENIC      |               |                    |                    |
| SNP_104141_A_28202 | NW_004517232.1 | scaffold2227 | 28202                   | GG                              | TT                 | TT               | INTERGENIC      |               |                    |                    |
| SNP_104142_A_28335 | NW_004517232.1 | scaffold2227 | 28335                   | CC                              | AA                 | AA               | INTERGENIC      |               |                    |                    |
| SNP_104143_A_29242 | NW_004517232.1 | scaffold2227 | 29242                   | AA                              | GG                 | GG               | INTERGENIC      |               |                    |                    |
| SNP_104144_A_29258 | NW_004517232.1 | scaffold2227 | 29258                   | CC                              | AA                 | AA               | INTERGENIC      |               |                    |                    |
| SNP_104145_A_29271 | NW_004517232.1 | scaffold2227 | 29271                   | TT                              | CC                 | CC               | INTERGENIC      |               |                    |                    |
| SNP_104146_A_29276 | NW_004517232.1 | scaffold2227 | 29276                   | CC                              | GG                 | GG               | INTERGENIC      |               |                    |                    |
| SNP_104147_A_29299 | NW_004517232.1 | scaffold2227 | 29299                   | CC                              | TT                 | TT               | INTERGENIC      |               |                    |                    |
| SNP_104148_A_29312 | NW_004517232.1 | scaffold2227 | 29312                   | TT                              | CC                 | CC               | INTERGENIC      |               |                    |                    |

| SNPs IDs           | Chromosome IDs | Chromosomes  | Physical positions (bp) | CDC Frontier (Reference genome) | (Pusa 1103 & HPNB) | (ILWC 46 & LPNB) | Sequence genome | Components of | Gene accession IDs | Putative functions |
|--------------------|----------------|--------------|-------------------------|---------------------------------|--------------------|------------------|-----------------|---------------|--------------------|--------------------|
| SNP_104149_A_29338 | NW_004517232.1 | scaffold2227 | 29338                   | AA                              | GG                 | GG               | INTERGENIC      |               |                    |                    |
| SNP_104150_A_29458 | NW_004517232.1 | scaffold2227 | 29458                   | GG                              | AA                 | AA               | INTERGENIC      |               |                    |                    |
| SNP_104151_A_29464 | NW_004517232.1 | scaffold2227 | 29464                   | TT                              | CC                 | CC               | INTERGENIC      |               |                    |                    |
| SNP_104152_A_29467 | NW_004517232.1 | scaffold2227 | 29467                   | TT                              | CC                 | CC               | INTERGENIC      |               |                    |                    |
| SNP_104153_A_29500 | NW_004517232.1 | scaffold2227 | 29500                   | AA                              | TT                 | TT               | INTERGENIC      |               |                    |                    |
| SNP_104154_A_29503 | NW_004517232.1 | scaffold2227 | 29503                   | GG                              | AA                 | AA               | INTERGENIC      |               |                    |                    |
| SNP_104155_A_29524 | NW_004517232.1 | scaffold2227 | 29524                   | TT                              | AA                 | AA               | INTERGENIC      |               |                    |                    |
| SNP_104156_A_29530 | NW_004517232.1 | scaffold2227 | 29530                   | AA                              | CC                 | CC               | INTERGENIC      |               |                    |                    |
| SNP_104157_A_29793 | NW_004517232.1 | scaffold2227 | 29793                   | GG                              | AA                 | AA               | INTERGENIC      |               |                    |                    |
| SNP_104159_A_31926 | NW_004517232.1 | scaffold2227 | 31926                   | TT                              | CC                 | CC               | INTERGENIC      |               |                    |                    |
| SNP_104160_A_40989 | NW_004517232.1 | scaffold2227 | 40989                   | TT                              | CC                 | CC               | INTERGENIC      |               |                    |                    |
| SNP_104161_A_581   | NW_004517236.1 | scaffold2233 | 581                     | TT                              | AA                 | AA               | INTERGENIC      |               |                    |                    |
| SNP_104162_A_870   | NW_004517236.1 | scaffold2233 | 870                     | TT                              | AA                 | AA               | INTERGENIC      |               |                    |                    |
| SNP_104164_A_1811  | NW_004517238.1 | scaffold2235 | 1811                    | GG                              | AA                 | AA               | INTERGENIC      |               |                    |                    |
| SNP_104165_A_1950  | NW_004517238.1 | scaffold2235 | 1950                    | TT                              | CC                 | CC               | INTERGENIC      |               |                    |                    |
| SNP_104166_A_1542  | NW_004517240.1 | scaffold2238 | 1542                    | AA                              | CC                 | CC               | INTERGENIC      |               |                    |                    |
| SNP_104167_A_720   | NW_004517241.1 | scaffold2239 | 720                     | AA                              | CC                 | CC               | INTERGENIC      |               |                    |                    |
| SNP_104168_A_815   | NW_004517241.1 | scaffold2239 | 815                     | GG                              | AA                 | AA               | INTERGENIC      |               |                    |                    |
| SNP_104169_A_1475  | NW_004517241.1 | scaffold2239 | 1475                    | CC                              | TT                 | TT               | INTERGENIC      |               |                    |                    |
| SNP_104170_A_5857  | NW_004517243.1 | scaffold2241 | 5857                    | GG                              | AA                 | AA               | INTERGENIC      |               |                    |                    |
| SNP_104171_A_5916  | NW_004517243.1 | scaffold2241 | 5916                    | CC                              | GG                 | GG               | INTERGENIC      |               |                    |                    |
| SNP_104172_A_6226  | NW_004517243.1 | scaffold2241 | 6226                    | AA                              | TT                 | TT               | INTERGENIC      |               |                    |                    |

| SNPs IDs           | Chromosome IDs | Chromosomes  | Physical positions (bp) | CDC Frontier (Reference genome) | (Pusa 1103 & HPNB) | (ILWC 46 & LPNB) | Sequence genome | Components of | Gene accession IDs | Putative functions |
|--------------------|----------------|--------------|-------------------------|---------------------------------|--------------------|------------------|-----------------|---------------|--------------------|--------------------|
| SNP_104173_A_6260  | NW_004517243.1 | scaffold2241 | 6260                    | GG                              | CC                 | CC               | INTERGENIC      |               |                    |                    |
| SNP_104174_A_6285  | NW_004517243.1 | scaffold2241 | 6285                    | TT                              | CC                 | CC               | INTERGENIC      |               |                    |                    |
| SNP_104175_A_6529  | NW_004517243.1 | scaffold2241 | 6529                    | CC                              | TT                 | TT               | DRR             | 101512197     | Unknown function   |                    |
| SNP_104176_A_6550  | NW_004517243.1 | scaffold2241 | 6550                    | TT                              | AA                 | AA               | DRR             | 101512197     | Unknown function   |                    |
| SNP_104177_A_24860 | NW_004517243.1 | scaffold2241 | 24860                   | AA                              | GG                 | GG               | INTERGENIC      |               |                    |                    |
| SNP_104178_A_647   | NW_004517244.1 | scaffold2243 | 647                     | AA                              | CC                 | CC               | INTERGENIC      |               |                    |                    |
| SNP_104179_A_648   | NW_004517244.1 | scaffold2243 | 648                     | TT                              | CC                 | CC               | INTERGENIC      |               |                    |                    |
| SNP_104180_A_678   | NW_004517244.1 | scaffold2243 | 678                     | CC                              | AA                 | AA               | INTERGENIC      |               |                    |                    |
| SNP_104181_A_5818  | NW_004517245.1 | scaffold2244 | 5818                    | GG                              | CC                 | CC               | INTERGENIC      |               |                    |                    |
| SNP_104182_A_6035  | NW_004517245.1 | scaffold2244 | 6035                    | TT                              | CC                 | CC               | INTERGENIC      |               |                    |                    |
| SNP_104183_A_6071  | NW_004517245.1 | scaffold2244 | 6071                    | CC                              | AA                 | AA               | INTERGENIC      |               |                    |                    |
| SNP_104184_A_6156  | NW_004517245.1 | scaffold2244 | 6156                    | AA                              | GG                 | GG               | INTERGENIC      |               |                    |                    |
| SNP_104185_A_6162  | NW_004517245.1 | scaffold2244 | 6162                    | CC                              | TT                 | TT               | INTERGENIC      |               |                    |                    |
| SNP_104186_A_6173  | NW_004517245.1 | scaffold2244 | 6173                    | TT                              | CC                 | CC               | INTERGENIC      |               |                    |                    |
| SNP_104187_A_316   | NW_004517247.1 | scaffold2247 | 316                     | GG                              | AA                 | AA               | INTERGENIC      |               |                    |                    |
| SNP_104188_A_377   | NW_004517247.1 | scaffold2247 | 377                     | TT                              | CC                 | CC               | INTERGENIC      |               |                    |                    |
| SNP_104189_A_257   | NW_004517249.1 | scaffold2249 | 257                     | TT                              | CC                 | CC               | INTERGENIC      |               |                    |                    |
| SNP_104190_A_334   | NW_004517249.1 | scaffold2249 | 334                     | AA                              | GG                 | GG               | INTERGENIC      |               |                    |                    |
| SNP_104191_A_413   | NW_004517249.1 | scaffold2249 | 413                     | GG                              | TT                 | TT               | INTERGENIC      |               |                    |                    |
| SNP_104192_A_436   | NW_004517249.1 | scaffold2249 | 436                     | GG                              | TT                 | TT               | INTERGENIC      |               |                    |                    |
| SNP_104193_A_450   | NW_004517249.1 | scaffold2249 | 450                     | CC                              | TT                 | TT               | INTERGENIC      |               |                    |                    |
| SNP_104194_A_567   | NW_004517249.1 | scaffold2249 | 567                     | CC                              | TT                 | TT               | INTERGENIC      |               |                    |                    |

| SNPs IDs           | Chromosome IDs | Chromosomes  | Physical positions (bp) | CDC Frontier (Reference genome) | (Pusa 1103 & HPNB) | (ILWC 46 & LPNB) | Sequence genome | Components of | Gene accession IDs | Putative functions |
|--------------------|----------------|--------------|-------------------------|---------------------------------|--------------------|------------------|-----------------|---------------|--------------------|--------------------|
| SNP_104195_A_587   | NW_004517249.1 | scaffold2249 | 587                     | TT                              | CC                 | CC               | INTERGENIC      |               |                    |                    |
| SNP_104196_A_609   | NW_004517249.1 | scaffold2249 | 609                     | CC                              | TT                 | TT               | INTERGENIC      |               |                    |                    |
| SNP_104197_A_627   | NW_004517249.1 | scaffold2249 | 627                     | CC                              | TT                 | TT               | INTERGENIC      |               |                    |                    |
| SNP_104198_A_699   | NW_004517249.1 | scaffold2249 | 699                     | TT                              | CC                 | CC               | INTERGENIC      |               |                    |                    |
| SNP_104199_A_776   | NW_004517249.1 | scaffold2249 | 776                     | TT                              | AA                 | AA               | INTERGENIC      |               |                    |                    |
| SNP_104200_A_793   | NW_004517249.1 | scaffold2249 | 793                     | CC                              | TT                 | TT               | INTERGENIC      |               |                    |                    |
| SNP_104201_A_930   | NW_004517249.1 | scaffold2249 | 930                     | CC                              | TT                 | TT               | INTERGENIC      |               |                    |                    |
| SNP_104202_A_945   | NW_004517249.1 | scaffold2249 | 945                     | AA                              | GG                 | GG               | INTERGENIC      |               |                    |                    |
| SNP_104204_A_1168  | NW_004517249.1 | scaffold2249 | 1168                    | AA                              | GG                 | GG               | INTERGENIC      |               |                    |                    |
| SNP_104205_A_1200  | NW_004517249.1 | scaffold2249 | 1200                    | AA                              | TT                 | TT               | INTERGENIC      |               |                    |                    |
| SNP_104206_A_1210  | NW_004517249.1 | scaffold2249 | 1210                    | AA                              | GG                 | GG               | INTERGENIC      |               |                    |                    |
| SNP_104207_A_1329  | NW_004517249.1 | scaffold2249 | 1329                    | AA                              | CC                 | CC               | INTERGENIC      |               |                    |                    |
| SNP_104209_A_29424 | NW_004517249.1 | scaffold2249 | 29424                   | TT                              | CC                 | CC               | INTERGENIC      |               |                    |                    |
| SNP_104210_A_31344 | NW_004517249.1 | scaffold2249 | 31344                   | GG                              | TT                 | TT               | INTERGENIC      |               |                    |                    |
| SNP_104211_A_34020 | NW_004517249.1 | scaffold2249 | 34020                   | TT                              | CC                 | CC               | INTERGENIC      |               |                    |                    |
| SNP_104212_A_36210 | NW_004517249.1 | scaffold2249 | 36210                   | TT                              | CC                 | CC               | INTERGENIC      |               |                    |                    |
| SNP_104213_A_49029 | NW_004517249.1 | scaffold2249 | 49029                   | TT                              | GG                 | GG               | INTERGENIC      |               |                    |                    |
| SNP_104214_A_49091 | NW_004517249.1 | scaffold2249 | 49091                   | TT                              | GG                 | GG               | INTERGENIC      |               |                    |                    |
| SNP_104215_A_49148 | NW_004517249.1 | scaffold2249 | 49148                   | CC                              | GG                 | GG               | INTERGENIC      |               |                    |                    |
| SNP_104216_A_49280 | NW_004517249.1 | scaffold2249 | 49280                   | TT                              | GG                 | GG               | INTERGENIC      |               |                    |                    |
| SNP_104217_A_49395 | NW_004517249.1 | scaffold2249 | 49395                   | AA                              | TT                 | TT               | INTERGENIC      |               |                    |                    |
| SNP_104218_A_49401 | NW_004517249.1 | scaffold2249 | 49401                   | TT                              | AA                 | AA               | INTERGENIC      |               |                    |                    |

| SNPs IDs           | Chromosome IDs | Chromosomes  | Physical positions (bp) | CDC Frontier (Reference genome) | (Pusa 1103 & HPNB) | (ILWC 46 & LPNB) | Sequence genome | Components of | Gene accession IDs | Putative functions |
|--------------------|----------------|--------------|-------------------------|---------------------------------|--------------------|------------------|-----------------|---------------|--------------------|--------------------|
| SNP_104219_A_49406 | NW_004517249.1 | scaffold2249 | 49406                   | GG                              | AA                 | AA               | INTERGENIC      |               |                    |                    |
| SNP_104220_A_53756 | NW_004517249.1 | scaffold2249 | 53756                   | AA                              | GG                 | GG               | INTERGENIC      |               |                    |                    |
| SNP_104221_A_54266 | NW_004517249.1 | scaffold2249 | 54266                   | TT                              | GG                 | GG               | INTERGENIC      |               |                    |                    |
| SNP_104222_A_54298 | NW_004517249.1 | scaffold2249 | 54298                   | AA                              | TT                 | TT               | INTERGENIC      |               |                    |                    |
| SNP_104223_A_80854 | NW_004517249.1 | scaffold2249 | 80854                   | TT                              | AA                 | AA               | INTERGENIC      |               |                    |                    |
| SNP_104224_A_80858 | NW_004517249.1 | scaffold2249 | 80858                   | TT                              | GG                 | GG               | INTERGENIC      |               |                    |                    |
| SNP_104225_A_80879 | NW_004517249.1 | scaffold2249 | 80879                   | TT                              | GG                 | GG               | INTERGENIC      |               |                    |                    |
| SNP_104226_A_82914 | NW_004517249.1 | scaffold2249 | 82914                   | AA                              | GG                 | GG               | INTERGENIC      |               |                    |                    |
| SNP_104227_A_83478 | NW_004517249.1 | scaffold2249 | 83478                   | AA                              | GG                 | GG               | INTERGENIC      |               |                    |                    |
| SNP_104228_A_83501 | NW_004517249.1 | scaffold2249 | 83501                   | TT                              | CC                 | CC               | INTERGENIC      |               |                    |                    |
| SNP_104229_A_83539 | NW_004517249.1 | scaffold2249 | 83539                   | TT                              | GG                 | GG               | INTERGENIC      |               |                    |                    |
| SNP_104230_A_383   | NW_004517253.1 | scaffold2254 | 383                     | AA                              | CC                 | CC               | INTERGENIC      |               |                    |                    |
| SNP_104231_A_437   | NW_004517253.1 | scaffold2254 | 437                     | AA                              | TT                 | TT               | INTERGENIC      |               |                    |                    |
| SNP_104232_A_462   | NW_004517253.1 | scaffold2254 | 462                     | AA                              | TT                 | TT               | INTERGENIC      |               |                    |                    |
| SNP_104233_A_491   | NW_004517254.1 | scaffold2256 | 491                     | GG                              | AA                 | AA               | INTERGENIC      |               |                    |                    |
| SNP_104234_A_707   | NW_004517254.1 | scaffold2256 | 707                     | CC                              | TT                 | TT               | INTERGENIC      |               |                    |                    |
| SNP_104235_A_1033  | NW_004517254.1 | scaffold2256 | 1033                    | CC                              | TT                 | TT               | INTERGENIC      |               |                    |                    |
| SNP_104236_A_1247  | NW_004517254.1 | scaffold2256 | 1247                    | AA                              | GG                 | GG               | INTERGENIC      |               |                    |                    |
| SNP_104237_A_1468  | NW_004517254.1 | scaffold2256 | 1468                    | GG                              | AA                 | AA               | INTERGENIC      |               |                    |                    |
| SNP_104238_A_1621  | NW_004517254.1 | scaffold2256 | 1621                    | AA                              | TT                 | TT               | INTERGENIC      |               |                    |                    |
| SNP_104239_A_1947  | NW_004517254.1 | scaffold2256 | 1947                    | TT                              | CC                 | CC               | INTERGENIC      |               |                    |                    |
| SNP_104240_A_2350  | NW_004517254.1 | scaffold2256 | 2350                    | GG                              | AA                 | AA               | INTERGENIC      |               |                    |                    |

| SNPs IDs          | Chromosome IDs | Chromosomes  | Physical positions (bp) | CDC Frontier (Reference genome) | (Pusa 1103 & HPNB) | (ILWC 46 & LPNB) | Sequence genome | Components of | Gene accession IDs | Putative functions |
|-------------------|----------------|--------------|-------------------------|---------------------------------|--------------------|------------------|-----------------|---------------|--------------------|--------------------|
| SNP_104241_A_2900 | NW_004517254.1 | scaffold2256 | 2900                    | GG                              | CC                 | CC               | INTERGENIC      |               |                    |                    |
| SNP_104242_A_2934 | NW_004517254.1 | scaffold2256 | 2934                    | AA                              | GG                 | GG               | INTERGENIC      |               |                    |                    |
| SNP_104243_A_3248 | NW_004517254.1 | scaffold2256 | 3248                    | TT                              | CC                 | CC               | INTERGENIC      |               |                    |                    |
| SNP_104244_A_3470 | NW_004517254.1 | scaffold2256 | 3470                    | CC                              | TT                 | TT               | INTERGENIC      |               |                    |                    |
| SNP_104245_A_5347 | NW_004517254.1 | scaffold2256 | 5347                    | CC                              | AA                 | AA               | INTERGENIC      |               |                    |                    |
| SNP_104246_A_5361 | NW_004517254.1 | scaffold2256 | 5361                    | GG                              | AA                 | AA               | INTERGENIC      |               |                    |                    |
| SNP_104247_A_5698 | NW_004517254.1 | scaffold2256 | 5698                    | AA                              | TT                 | TT               | INTERGENIC      |               |                    |                    |
| SNP_104248_A_5880 | NW_004517254.1 | scaffold2256 | 5880                    | CC                              | TT                 | TT               | INTERGENIC      |               |                    |                    |
| SNP_104249_A_829  | NW_004517256.1 | scaffold2258 | 829                     | TT                              | CC                 | CC               | INTERGENIC      |               |                    |                    |
| SNP_104250_A_2155 | NW_004517256.1 | scaffold2258 | 2155                    | AA                              | GG                 | GG               | INTERGENIC      |               |                    |                    |
| SNP_104251_A_2311 | NW_004517256.1 | scaffold2258 | 2311                    | AA                              | GG                 | GG               | INTERGENIC      |               |                    |                    |
| SNP_104252_A_2393 | NW_004517256.1 | scaffold2258 | 2393                    | CC                              | TT                 | TT               | INTERGENIC      |               |                    |                    |
| SNP_104253_A_1465 | NW_004517259.1 | scaffold2263 | 1465                    | AA                              | CC                 | CC               | INTERGENIC      |               |                    |                    |
| SNP_104254_A_1485 | NW_004517259.1 | scaffold2263 | 1485                    | CC                              | GG                 | GG               | INTERGENIC      |               |                    |                    |
| SNP_104255_A_1517 | NW_004517259.1 | scaffold2263 | 1517                    | TT                              | AA                 | AA               | INTERGENIC      |               |                    |                    |
| SNP_104256_A_1912 | NW_004517259.1 | scaffold2263 | 1912                    | CC                              | TT                 | TT               | INTERGENIC      |               |                    |                    |
| SNP_104257_A_1921 | NW_004517259.1 | scaffold2263 | 1921                    | TT                              | CC                 | CC               | INTERGENIC      |               |                    |                    |
| SNP_104258_A_1990 | NW_004517259.1 | scaffold2263 | 1990                    | AA                              | CC                 | CC               | INTERGENIC      |               |                    |                    |
| SNP_104259_A_2101 | NW_004517259.1 | scaffold2263 | 2101                    | TT                              | AA                 | AA               | INTERGENIC      |               |                    |                    |
| SNP_104260_A_1057 | NW_004517262.1 | scaffold2268 | 1057                    | TT                              | AA                 | AA               | INTERGENIC      |               |                    |                    |
| SNP_104261_A_1077 | NW_004517262.1 | scaffold2268 | 1077                    | TT                              | CC                 | CC               | INTERGENIC      |               |                    |                    |
| SNP_104262_A_7122 | NW_004517262.1 | scaffold2268 | 7122                    | AA                              | GG                 | GG               | INTERGENIC      |               |                    |                    |

| SNPs IDs            | Chromosome IDs | Chromosomes  | Physical positions (bp) | CDC Frontier (Reference genome) | (Pusa 1103 & HPNB) | (ILWC 46 & LPNB) | Sequence genome | Components of | Gene accession IDs | Putative functions |
|---------------------|----------------|--------------|-------------------------|---------------------------------|--------------------|------------------|-----------------|---------------|--------------------|--------------------|
| SNP_104263_A_7231   | NW_004517262.1 | scaffold2268 | 7231                    | AA                              | GG                 | GG               | INTERGENIC      |               |                    |                    |
| SNP_104264_A_7253   | NW_004517262.1 | scaffold2268 | 7253                    | GG                              | AA                 | AA               | INTERGENIC      |               |                    |                    |
| SNP_104266_A_1664   | NW_004517263.1 | scaffold2269 | 1664                    | CC                              | TT                 | TT               | INTERGENIC      |               |                    |                    |
| SNP_104267_A_2205   | NW_004517263.1 | scaffold2269 | 2205                    | CC                              | GG                 | GG               | INTERGENIC      |               |                    |                    |
| SNP_104268_A_5000   | NW_004517263.1 | scaffold2269 | 5000                    | TT                              | AA                 | AA               | INTERGENIC      |               |                    |                    |
| SNP_104269_A_6106   | NW_004517263.1 | scaffold2269 | 6106                    | TT                              | AA                 | AA               | INTERGENIC      |               |                    |                    |
| SNP_104270_A_20143  | NW_004517263.1 | scaffold2269 | 20143                   | TT                              | AA                 | AA               | INTERGENIC      |               |                    |                    |
| SNP_104271_A_20399  | NW_004517263.1 | scaffold2269 | 20399                   | AA                              | CC                 | CC               | INTERGENIC      |               |                    |                    |
| SNP_104272_A_29235  | NW_004517263.1 | scaffold2269 | 29235                   | CC                              | TT                 | TT               | INTERGENIC      |               |                    |                    |
| SNP_104273_A_43053  | NW_004517263.1 | scaffold2269 | 43053                   | AA                              | GG                 | GG               | INTERGENIC      |               |                    |                    |
| SNP_104274_A_43093  | NW_004517263.1 | scaffold2269 | 43093                   | TT                              | GG                 | GG               | INTERGENIC      |               |                    |                    |
| SNP_104275_A_43131  | NW_004517263.1 | scaffold2269 | 43131                   | AA                              | GG                 | GG               | INTERGENIC      |               |                    |                    |
| SNP_104276_A_43136  | NW_004517263.1 | scaffold2269 | 43136                   | AA                              | GG                 | GG               | INTERGENIC      |               |                    |                    |
| SNP_104277_A_43194  | NW_004517263.1 | scaffold2269 | 43194                   | AA                              | CC                 | CC               | INTERGENIC      |               |                    |                    |
| SNP_104278_A_43242  | NW_004517263.1 | scaffold2269 | 43242                   | TT                              | GG                 | GG               | INTERGENIC      |               |                    |                    |
| SNP_104280_A_43296  | NW_004517263.1 | scaffold2269 | 43296                   | GG                              | AA                 | AA               | INTERGENIC      |               |                    |                    |
| SNP_104281_A_43396  | NW_004517263.1 | scaffold2269 | 43396                   | TT                              | CC                 | CC               | INTERGENIC      |               |                    |                    |
| SNP_104282_A_43406  | NW_004517263.1 | scaffold2269 | 43406                   | AA                              | GG                 | GG               | INTERGENIC      |               |                    |                    |
| SNP_104283_A_43447  | NW_004517263.1 | scaffold2269 | 43447                   | TT                              | CC                 | CC               | INTERGENIC      |               |                    |                    |
| SNP_104284_A_43451  | NW_004517263.1 | scaffold2269 | 43451                   | CC                              | TT                 | TT               | INTERGENIC      |               |                    |                    |
| SNP_104286_A_96731  | NW_004517263.1 | scaffold2269 | 96731                   | CC                              | TT                 | TT               | INTERGENIC      |               |                    |                    |
| SNP_104287_A_118378 | NW_004517263.1 | scaffold2269 | 118378                  | TT                              | AA                 | AA               | INTERGENIC      |               |                    |                    |



| SNPs IDs            | Chromosome IDs | Chromosomes  | Physical positions (bp) | CDC Frontier (Reference genome) | (Pusa 1103 & HPNB) | (ILWC 46 & LPNB) | Sequence genome | Components of | Gene accession IDs | Putative functions |
|---------------------|----------------|--------------|-------------------------|---------------------------------|--------------------|------------------|-----------------|---------------|--------------------|--------------------|
| SNP_104288_A_118405 | NW_004517263.1 | scaffold2269 | 118405                  | TT                              | AA                 | AA               | INTERGENIC      |               |                    |                    |
| SNP_104290_A_138865 | NW_004517263.1 | scaffold2269 | 138865                  | CC                              | GG                 | GG               | INTERGENIC      |               |                    |                    |
| SNP_104291_A_138906 | NW_004517263.1 | scaffold2269 | 138906                  | GG                              | TT                 | TT               | INTERGENIC      |               |                    |                    |
| SNP_104292_A_138977 | NW_004517263.1 | scaffold2269 | 138977                  | TT                              | CC                 | CC               | INTERGENIC      |               |                    |                    |
| SNP_104293_A_139916 | NW_004517263.1 | scaffold2269 | 139916                  | AA                              | GG                 | GG               | INTERGENIC      |               |                    |                    |
| SNP_104294_A_139956 | NW_004517263.1 | scaffold2269 | 139956                  | AA                              | GG                 | GG               | INTERGENIC      |               |                    |                    |
| SNP_104295_A_139965 | NW_004517263.1 | scaffold2269 | 139965                  | GG                              | AA                 | AA               | INTERGENIC      |               |                    |                    |
| SNP_104296_A_139976 | NW_004517263.1 | scaffold2269 | 139976                  | AA                              | GG                 | GG               | INTERGENIC      |               |                    |                    |
| SNP_104297_A_158302 | NW_004517263.1 | scaffold2269 | 158302                  | CC                              | AA                 | AA               | INTERGENIC      |               |                    |                    |
| SNP_104298_A_167061 | NW_004517263.1 | scaffold2269 | 167061                  | CC                              | GG                 | GG               | INTERGENIC      |               |                    |                    |
| SNP_104299_A_167112 | NW_004517263.1 | scaffold2269 | 167112                  | TT                              | AA                 | AA               | INTERGENIC      |               |                    |                    |
| SNP_104300_A_167113 | NW_004517263.1 | scaffold2269 | 167113                  | GG                              | TT                 | TT               | INTERGENIC      |               |                    |                    |
| SNP_104301_A_167114 | NW_004517263.1 | scaffold2269 | 167114                  | TT                              | GG                 | GG               | INTERGENIC      |               |                    |                    |
| SNP_104302_A_167161 | NW_004517263.1 | scaffold2269 | 167161                  | CC                              | TT                 | TT               | INTERGENIC      |               |                    |                    |
| SNP_104303_A_173755 | NW_004517263.1 | scaffold2269 | 173755                  | TT                              | CC                 | CC               | INTERGENIC      |               |                    |                    |
| SNP_104304_A_1499   | NW_004517265.1 | scaffold2273 | 1499                    | AA                              | GG                 | GG               | INTERGENIC      |               |                    |                    |
| SNP_104305_A_1544   | NW_004517265.1 | scaffold2273 | 1544                    | AA                              | TT                 | TT               | INTERGENIC      |               |                    |                    |
| SNP_104306_A_1589   | NW_004517265.1 | scaffold2273 | 1589                    | GG                              | AA                 | AA               | INTERGENIC      |               |                    |                    |
| SNP_104307_A_1592   | NW_004517265.1 | scaffold2273 | 1592                    | CC                              | GG                 | GG               | INTERGENIC      |               |                    |                    |
| SNP_104308_A_1616   | NW_004517265.1 | scaffold2273 | 1616                    | CC                              | GG                 | GG               | INTERGENIC      |               |                    |                    |
| SNP_104309_A_2665   | NW_004517265.1 | scaffold2273 | 2665                    | GG                              | TT                 | TT               | INTERGENIC      |               |                    |                    |
| SNP_104310_A_2714   | NW_004517265.1 | scaffold2273 | 2714                    | GG                              | AA                 | AA               | INTERGENIC      |               |                    |                    |

| SNPs IDs           | Chromosome IDs | Chromosomes  | Physical positions (bp) | CDC Frontier (Reference genome) | (Pusa 1103 & HPNB) | (ILWC 46 & LPNB) | Sequence genome | Components of | Gene accession IDs | Putative functions |
|--------------------|----------------|--------------|-------------------------|---------------------------------|--------------------|------------------|-----------------|---------------|--------------------|--------------------|
| SNP_104311_A_2951  | NW_004517265.1 | scaffold2273 | 2951                    | TT                              | CC                 | CC               | INTERGENIC      |               |                    |                    |
| SNP_104312_A_3043  | NW_004517265.1 | scaffold2273 | 3043                    | GG                              | AA                 | AA               | INTERGENIC      |               |                    |                    |
| SNP_104313_A_3058  | NW_004517265.1 | scaffold2273 | 3058                    | CC                              | AA                 | AA               | INTERGENIC      |               |                    |                    |
| SNP_104314_A_3234  | NW_004517265.1 | scaffold2273 | 3234                    | CC                              | TT                 | TT               | INTERGENIC      |               |                    |                    |
| SNP_104315_A_12285 | NW_004517265.1 | scaffold2273 | 12285                   | AA                              | GG                 | GG               | INTERGENIC      |               |                    |                    |
| SNP_104316_A_22598 | NW_004517265.1 | scaffold2273 | 22598                   | CC                              | TT                 | TT               | INTERGENIC      |               |                    |                    |
| SNP_104317_A_22606 | NW_004517265.1 | scaffold2273 | 22606                   | TT                              | GG                 | GG               | INTERGENIC      |               |                    |                    |
| SNP_104318_A_24428 | NW_004517265.1 | scaffold2273 | 24428                   | GG                              | TT                 | TT               | INTERGENIC      |               |                    |                    |
| SNP_104319_A_24444 | NW_004517265.1 | scaffold2273 | 24444                   | GG                              | AA                 | AA               | INTERGENIC      |               |                    |                    |
| SNP_104320_A_24795 | NW_004517265.1 | scaffold2273 | 24795                   | TT                              | GG                 | GG               | INTERGENIC      |               |                    |                    |
| SNP_104321_A_24808 | NW_004517265.1 | scaffold2273 | 24808                   | AA                              | GG                 | GG               | INTERGENIC      |               |                    |                    |
| SNP_104322_A_24962 | NW_004517265.1 | scaffold2273 | 24962                   | AA                              | TT                 | TT               | INTERGENIC      |               |                    |                    |
| SNP_104324_A_26210 | NW_004517265.1 | scaffold2273 | 26210                   | GG                              | TT                 | TT               | INTERGENIC      |               |                    |                    |
| SNP_104325_A_32872 | NW_004517265.1 | scaffold2273 | 32872                   | CC                              | TT                 | TT               | INTERGENIC      |               |                    |                    |
| SNP_104326_A_32935 | NW_004517265.1 | scaffold2273 | 32935                   | GG                              | TT                 | TT               | INTERGENIC      |               |                    |                    |
| SNP_104327_A_33128 | NW_004517265.1 | scaffold2273 | 33128                   | GG                              | TT                 | TT               | INTERGENIC      |               |                    |                    |
| SNP_104328_A_33158 | NW_004517265.1 | scaffold2273 | 33158                   | AA                              | TT                 | GG               | INTERGENIC      |               |                    |                    |
| SNP_104329_A_33172 | NW_004517265.1 | scaffold2273 | 33172                   | CC                              | GG                 | GG               | INTERGENIC      |               |                    |                    |
| SNP_104330_A_33186 | NW_004517265.1 | scaffold2273 | 33186                   | TT                              | GG                 | GG               | INTERGENIC      |               |                    |                    |
| SNP_104331_A_33227 | NW_004517265.1 | scaffold2273 | 33227                   | AA                              | GG                 | GG               | INTERGENIC      |               |                    |                    |
| SNP_104332_A_33230 | NW_004517265.1 | scaffold2273 | 33230                   | CC                              | TT                 | TT               | INTERGENIC      |               |                    |                    |
| SNP_104333_A_33231 | NW_004517265.1 | scaffold2273 | 33231                   | CC                              | TT                 | TT               | INTERGENIC      |               |                    |                    |

| SNPs IDs           | Chromosome IDs | Chromosomes  | Physical positions (bp) | CDC Frontier (Reference genome) | (Pusa 1103 & HPNB) | (ILWC 46 & LPNB) | Sequence genome | Components of | Gene accession IDs | Putative functions |
|--------------------|----------------|--------------|-------------------------|---------------------------------|--------------------|------------------|-----------------|---------------|--------------------|--------------------|
| SNP_104334_A_55296 | NW_004517265.1 | scaffold2273 | 55296                   | CC                              | AA                 | AA               | INTERGENIC      |               |                    |                    |
| SNP_104335_A_2937  | NW_004517266.1 | scaffold2275 | 2937                    | GG                              | AA                 | AA               | INTERGENIC      |               |                    |                    |
| SNP_104337_A_8047  | NW_004517271.1 | scaffold2282 | 8047                    | TT                              | GG                 | GG               | INTERGENIC      |               |                    |                    |
| SNP_104338_A_8079  | NW_004517271.1 | scaffold2282 | 8079                    | TT                              | AA                 | AA               | INTERGENIC      |               |                    |                    |
| SNP_104339_A_8080  | NW_004517271.1 | scaffold2282 | 8080                    | GG                              | AA                 | AA               | INTERGENIC      |               |                    |                    |
| SNP_104340_A_8096  | NW_004517271.1 | scaffold2282 | 8096                    | TT                              | GG                 | GG               | INTERGENIC      |               |                    |                    |
| SNP_104341_A_8113  | NW_004517271.1 | scaffold2282 | 8113                    | TT                              | AA                 | AA               | INTERGENIC      |               |                    |                    |
| SNP_104342_A_8465  | NW_004517271.1 | scaffold2282 | 8465                    | GG                              | AA                 | AA               | INTERGENIC      |               |                    |                    |
| SNP_104343_A_2684  | NW_004517272.1 | scaffold2285 | 2684                    | TT                              | CC                 | CC               | INTERGENIC      |               |                    |                    |
| SNP_104344_A_2699  | NW_004517272.1 | scaffold2285 | 2699                    | TT                              | CC                 | CC               | INTERGENIC      |               |                    |                    |
| SNP_104345_A_2815  | NW_004517272.1 | scaffold2285 | 2815                    | GG                              | AA                 | AA               | INTERGENIC      |               |                    |                    |
| SNP_104346_A_3067  | NW_004517272.1 | scaffold2285 | 3067                    | GG                              | TT                 | TT               | INTERGENIC      |               |                    |                    |
| SNP_104347_A_3094  | NW_004517272.1 | scaffold2285 | 3094                    | TT                              | AA                 | AA               | INTERGENIC      |               |                    |                    |
| SNP_104348_A_3157  | NW_004517272.1 | scaffold2285 | 3157                    | AA                              | TT                 | TT               | INTERGENIC      |               |                    |                    |
| SNP_104349_A_59    | NW_004517274.1 | scaffold2287 | 59                      | GG                              | AA                 | AA               | INTERGENIC      |               |                    |                    |
| SNP_104350_A_64    | NW_004517274.1 | scaffold2287 | 64                      | CC                              | GG                 | GG               | INTERGENIC      |               |                    |                    |
| SNP_104351_A_93    | NW_004517274.1 | scaffold2287 | 93                      | AA                              | CC                 | CC               | INTERGENIC      |               |                    |                    |
| SNP_104352_A_123   | NW_004517274.1 | scaffold2287 | 123                     | GG                              | TT                 | TT               | INTERGENIC      |               |                    |                    |
| SNP_104353_A_231   | NW_004517274.1 | scaffold2287 | 231                     | CC                              | GG                 | GG               | INTERGENIC      |               |                    |                    |
| SNP_104354_A_326   | NW_004517274.1 | scaffold2287 | 326                     | AA                              | GG                 | GG               | INTERGENIC      |               |                    |                    |
| SNP_104355_A_399   | NW_004517274.1 | scaffold2287 | 399                     | GG                              | CC                 | CC               | INTERGENIC      |               |                    |                    |
| SNP_104356_A_506   | NW_004517274.1 | scaffold2287 | 506                     | GG                              | AA                 | AA               | INTERGENIC      |               |                    |                    |

| SNPs IDs           | Chromosome IDs | Chromosomes  | Physical positions (bp) | CDC Frontier (Reference genome) | (Pusa 1103 & HPNB) | (ILWC 46 & LPNB) | Sequence genome | Components of | Gene accession IDs | Putative functions |
|--------------------|----------------|--------------|-------------------------|---------------------------------|--------------------|------------------|-----------------|---------------|--------------------|--------------------|
| SNP_104357_A_528   | NW_004517274.1 | scaffold2287 | 528                     | CC                              | TT                 | TT               | INTERGENIC      |               |                    |                    |
| SNP_104358_A_591   | NW_004517274.1 | scaffold2287 | 591                     | TT                              | CC                 | CC               | INTERGENIC      |               |                    |                    |
| SNP_104359_A_630   | NW_004517274.1 | scaffold2287 | 630                     | TT                              | GG                 | GG               | INTERGENIC      |               |                    |                    |
| SNP_104360_A_659   | NW_004517274.1 | scaffold2287 | 659                     | GG                              | AA                 | AA               | INTERGENIC      |               |                    |                    |
| SNP_104361_A_675   | NW_004517274.1 | scaffold2287 | 675                     | TT                              | GG                 | GG               | INTERGENIC      |               |                    |                    |
| SNP_104362_A_789   | NW_004517274.1 | scaffold2287 | 789                     | GG                              | AA                 | AA               | INTERGENIC      |               |                    |                    |
| SNP_104363_A_797   | NW_004517274.1 | scaffold2287 | 797                     | GG                              | AA                 | AA               | INTERGENIC      |               |                    |                    |
| SNP_104364_A_885   | NW_004517274.1 | scaffold2287 | 885                     | CC                              | TT                 | TT               | INTERGENIC      |               |                    |                    |
| SNP_104365_A_1086  | NW_004517274.1 | scaffold2287 | 1086                    | AA                              | TT                 | TT               | INTERGENIC      |               |                    |                    |
| SNP_104366_A_1101  | NW_004517274.1 | scaffold2287 | 1101                    | CC                              | TT                 | TT               | INTERGENIC      |               |                    |                    |
| SNP_104367_A_1125  | NW_004517274.1 | scaffold2287 | 1125                    | AA                              | GG                 | GG               | INTERGENIC      |               |                    |                    |
| SNP_104368_A_2912  | NW_004517275.1 | scaffold2289 | 2912                    | AA                              | CC                 | CC               | INTERGENIC      |               |                    |                    |
| SNP_104369_A_3278  | NW_004517275.1 | scaffold2289 | 3278                    | TT                              | AA                 | AA               | INTERGENIC      |               |                    |                    |
| SNP_104370_A_3580  | NW_004517275.1 | scaffold2289 | 3580                    | AA                              | GG                 | GG               | INTERGENIC      |               |                    |                    |
| SNP_104371_A_10640 | NW_004517275.1 | scaffold2289 | 10640                   | GG                              | TT                 | TT               | INTERGENIC      |               |                    |                    |
| SNP_104372_A_12701 | NW_004517275.1 | scaffold2289 | 12701                   | GG                              | CC                 | CC               | INTERGENIC      |               |                    |                    |
| SNP_104373_A_12817 | NW_004517275.1 | scaffold2289 | 12817                   | GG                              | AA                 | AA               | INTERGENIC      |               |                    |                    |
| SNP_104375_A_15611 | NW_004517275.1 | scaffold2289 | 15611                   | AA                              | GG                 | GG               | INTERGENIC      |               |                    |                    |
| SNP_104376_A_17153 | NW_004517275.1 | scaffold2289 | 17153                   | GG                              | AA                 | AA               | INTERGENIC      |               |                    |                    |
| SNP_104377_A_1979  | NW_004517277.1 | scaffold2291 | 1979                    | AA                              | GG                 | GG               | INTERGENIC      |               |                    |                    |
| SNP_104379_A_2047  | NW_004517277.1 | scaffold2291 | 2047                    | AA                              | GG                 | GG               | INTERGENIC      |               |                    |                    |
| SNP_104380_A_391   | NW_004517284.1 | scaffold2300 | 391                     | TT                              | CC                 | CC               | INTERGENIC      |               |                    |                    |

| SNPs IDs          | Chromosome IDs | Chromosomes  | Physical positions (bp) | CDC Frontier (Reference genome) | (Pusa 1103 & HPNB) | (ILWC 46 & LPNB) | Sequence genome | Components of | Gene accession IDs | Putative functions |
|-------------------|----------------|--------------|-------------------------|---------------------------------|--------------------|------------------|-----------------|---------------|--------------------|--------------------|
| SNP_104382_A_1628 | NW_004517285.1 | scaffold2301 | 1628                    | AA                              | GG                 | GG               | INTERGENIC      |               |                    |                    |
| SNP_104383_A_1754 | NW_004517285.1 | scaffold2301 | 1754                    | TT                              | GG                 | GG               | INTERGENIC      |               |                    |                    |
| SNP_104384_A_1765 | NW_004517285.1 | scaffold2301 | 1765                    | TT                              | CC                 | CC               | INTERGENIC      |               |                    |                    |
| SNP_104385_A_1788 | NW_004517285.1 | scaffold2301 | 1788                    | CC                              | GG                 | GG               | INTERGENIC      |               |                    |                    |
| SNP_104386_A_1800 | NW_004517285.1 | scaffold2301 | 1800                    | CC                              | TT                 | TT               | INTERGENIC      |               |                    |                    |
| SNP_104387_A_2072 | NW_004517285.1 | scaffold2301 | 2072                    | CC                              | TT                 | TT               | INTERGENIC      |               |                    |                    |
| SNP_104388_A_2298 | NW_004517285.1 | scaffold2301 | 2298                    | AA                              | GG                 | GG               | INTERGENIC      |               |                    |                    |
| SNP_104389_A_2316 | NW_004517285.1 | scaffold2301 | 2316                    | AA                              | GG                 | GG               | INTERGENIC      |               |                    |                    |
| SNP_104390_A_2400 | NW_004517285.1 | scaffold2301 | 2400                    | GG                              | CC                 | CC               | INTERGENIC      |               |                    |                    |
| SNP_104391_A_2422 | NW_004517285.1 | scaffold2301 | 2422                    | CC                              | GG                 | GG               | INTERGENIC      |               |                    |                    |
| SNP_104392_A_2450 | NW_004517285.1 | scaffold2301 | 2450                    | CC                              | TT                 | TT               | INTERGENIC      |               |                    |                    |
| SNP_104393_A_2457 | NW_004517285.1 | scaffold2301 | 2457                    | AA                              | GG                 | GG               | INTERGENIC      |               |                    |                    |
| SNP_104394_A_3306 | NW_004517285.1 | scaffold2301 | 3306                    | AA                              | TT                 | TT               | INTERGENIC      |               |                    |                    |
| SNP_104396_A_3509 | NW_004517285.1 | scaffold2301 | 3509                    | TT                              | CC                 | CC               | INTERGENIC      |               |                    |                    |
| SNP_104397_A_6019 | NW_004517285.1 | scaffold2301 | 6019                    | GG                              | TT                 | TT               | INTERGENIC      |               |                    |                    |
| SNP_104398_A_6055 | NW_004517285.1 | scaffold2301 | 6055                    | CC                              | GG                 | GG               | INTERGENIC      |               |                    |                    |
| SNP_104399_A_6062 | NW_004517285.1 | scaffold2301 | 6062                    | TT                              | CC                 | CC               | INTERGENIC      |               |                    |                    |
| SNP_104400_A_6124 | NW_004517285.1 | scaffold2301 | 6124                    | TT                              | AA                 | AA               | INTERGENIC      |               |                    |                    |
| SNP_104401_A_6258 | NW_004517285.1 | scaffold2301 | 6258                    | GG                              | TT                 | TT               | INTERGENIC      |               |                    |                    |
| SNP_104402_A_8048 | NW_004517285.1 | scaffold2301 | 8048                    | TT                              | CC                 | CC               | INTERGENIC      |               |                    |                    |
| SNP_104403_A_8102 | NW_004517285.1 | scaffold2301 | 8102                    | TT                              | CC                 | CC               | INTERGENIC      |               |                    |                    |
| SNP_104404_A_8120 | NW_004517285.1 | scaffold2301 | 8120                    | CC                              | TT                 | TT               | INTERGENIC      |               |                    |                    |

| SNPs IDs           | Chromosome IDs | Chromosomes  | Physical positions (bp) | CDC Frontier (Reference genome) | (Pusa 1103 & HPNB) | (ILWC 46 & LPNB) | Sequence genome | Components of | Gene accession IDs | Putative functions |
|--------------------|----------------|--------------|-------------------------|---------------------------------|--------------------|------------------|-----------------|---------------|--------------------|--------------------|
| SNP_104405_A_8131  | NW_004517285.1 | scaffold2301 | 8131                    | AA                              | GG                 | GG               | INTERGENIC      |               |                    |                    |
| SNP_104406_A_8252  | NW_004517285.1 | scaffold2301 | 8252                    | TT                              | CC                 | CC               | INTERGENIC      |               |                    |                    |
| SNP_104407_A_8287  | NW_004517285.1 | scaffold2301 | 8287                    | TT                              | CC                 | CC               | INTERGENIC      |               |                    |                    |
| SNP_104408_A_8330  | NW_004517285.1 | scaffold2301 | 8330                    | GG                              | TT                 | TT               | INTERGENIC      |               |                    |                    |
| SNP_104409_A_8357  | NW_004517285.1 | scaffold2301 | 8357                    | TT                              | CC                 | CC               | INTERGENIC      |               |                    |                    |
| SNP_104410_A_8396  | NW_004517285.1 | scaffold2301 | 8396                    | AA                              | GG                 | GG               | INTERGENIC      |               |                    |                    |
| SNP_104411_A_8416  | NW_004517285.1 | scaffold2301 | 8416                    | CC                              | GG                 | GG               | INTERGENIC      |               |                    |                    |
| SNP_104412_A_8429  | NW_004517285.1 | scaffold2301 | 8429                    | CC                              | AA                 | AA               | INTERGENIC      |               |                    |                    |
| SNP_104413_A_8495  | NW_004517285.1 | scaffold2301 | 8495                    | AA                              | GG                 | GG               | INTERGENIC      |               |                    |                    |
| SNP_104414_A_10651 | NW_004517285.1 | scaffold2301 | 10651                   | GG                              | CC                 | CC               | INTERGENIC      |               |                    |                    |
| SNP_104415_A_13605 | NW_004517285.1 | scaffold2301 | 13605                   | AA                              | GG                 | GG               | INTERGENIC      |               |                    |                    |
| SNP_104416_A_18241 | NW_004517285.1 | scaffold2301 | 18241                   | CC                              | TT                 | TT               | INTERGENIC      |               |                    |                    |
| SNP_104417_A_18265 | NW_004517285.1 | scaffold2301 | 18265                   | CC                              | TT                 | TT               | INTERGENIC      |               |                    |                    |
| SNP_104418_A_18491 | NW_004517285.1 | scaffold2301 | 18491                   | TT                              | GG                 | GG               | INTERGENIC      |               |                    |                    |
| SNP_104419_A_18515 | NW_004517285.1 | scaffold2301 | 18515                   | TT                              | GG                 | GG               | INTERGENIC      |               |                    |                    |
| SNP_104420_A_18552 | NW_004517285.1 | scaffold2301 | 18552                   | TT                              | CC                 | CC               | INTERGENIC      |               |                    |                    |
| SNP_104421_A_18609 | NW_004517285.1 | scaffold2301 | 18609                   | AA                              | GG                 | GG               | INTERGENIC      |               |                    |                    |
| SNP_104422_A_18611 | NW_004517285.1 | scaffold2301 | 18611                   | GG                              | CC                 | CC               | INTERGENIC      |               |                    |                    |
| SNP_104423_A_18663 | NW_004517285.1 | scaffold2301 | 18663                   | GG                              | AA                 | AA               | INTERGENIC      |               |                    |                    |
| SNP_104424_A_18687 | NW_004517285.1 | scaffold2301 | 18687                   | AA                              | GG                 | GG               | INTERGENIC      |               |                    |                    |
| SNP_104425_A_18693 | NW_004517285.1 | scaffold2301 | 18693                   | CC                              | TT                 | TT               | INTERGENIC      |               |                    |                    |
| SNP_104427_A_18732 | NW_004517285.1 | scaffold2301 | 18732                   | TT                              | AA                 | AA               | INTERGENIC      |               |                    |                    |

| SNPs IDs           | Chromosome IDs | Chromosomes  | Physical positions (bp) | CDC Frontier (Reference genome) | (Pusa 1103 & HPNB) | (ILWC 46 & LPNB) | Sequence genome | Components of | Gene accession IDs | Putative functions |
|--------------------|----------------|--------------|-------------------------|---------------------------------|--------------------|------------------|-----------------|---------------|--------------------|--------------------|
| SNP_104428_A_22532 | NW_004517285.1 | scaffold2301 | 22532                   | TT                              | AA                 | AA               | INTERGENIC      |               |                    |                    |
| SNP_104429_A_22613 | NW_004517285.1 | scaffold2301 | 22613                   | AA                              | CC                 | CC               | INTERGENIC      |               |                    |                    |
| SNP_104430_A_22670 | NW_004517285.1 | scaffold2301 | 22670                   | CC                              | TT                 | TT               | INTERGENIC      |               |                    |                    |
| SNP_104431_A_22715 | NW_004517285.1 | scaffold2301 | 22715                   | TT                              | GG                 | GG               | INTERGENIC      |               |                    |                    |
| SNP_104433_A_22891 | NW_004517285.1 | scaffold2301 | 22891                   | CC                              | TT                 | TT               | INTERGENIC      |               |                    |                    |
| SNP_104434_A_29829 | NW_004517285.1 | scaffold2301 | 29829                   | TT                              | CC                 | CC               | INTERGENIC      |               |                    |                    |
| SNP_104435_A_29842 | NW_004517285.1 | scaffold2301 | 29842                   | GG                              | AA                 | AA               | INTERGENIC      |               |                    |                    |
| SNP_104436_A_30310 | NW_004517285.1 | scaffold2301 | 30310                   | GG                              | AA                 | AA               | INTERGENIC      |               |                    |                    |
| SNP_104437_A_30333 | NW_004517285.1 | scaffold2301 | 30333                   | GG                              | CC                 | CC               | INTERGENIC      |               |                    |                    |
| SNP_104438_A_30344 | NW_004517285.1 | scaffold2301 | 30344                   | AA                              | GG                 | GG               | INTERGENIC      |               |                    |                    |
| SNP_104439_A_30492 | NW_004517285.1 | scaffold2301 | 30492                   | GG                              | CC                 | CC               | INTERGENIC      |               |                    |                    |
| SNP_104440_A_32024 | NW_004517285.1 | scaffold2301 | 32024                   | GG                              | AA                 | AA               | INTERGENIC      |               |                    |                    |
| SNP_104441_A_32044 | NW_004517285.1 | scaffold2301 | 32044                   | GG                              | AA                 | AA               | INTERGENIC      |               |                    |                    |
| SNP_104442_A_32049 | NW_004517285.1 | scaffold2301 | 32049                   | GG                              | AA                 | AA               | INTERGENIC      |               |                    |                    |
| SNP_104443_A_32162 | NW_004517285.1 | scaffold2301 | 32162                   | CC                              | TT                 | TT               | INTERGENIC      |               |                    |                    |
| SNP_104444_A_32179 | NW_004517285.1 | scaffold2301 | 32179                   | CC                              | TT                 | TT               | INTERGENIC      |               |                    |                    |
| SNP_104445_A_32192 | NW_004517285.1 | scaffold2301 | 32192                   | AA                              | GG                 | GG               | INTERGENIC      |               |                    |                    |
| SNP_104446_A_32231 | NW_004517285.1 | scaffold2301 | 32231                   | TT                              | CC                 | CC               | INTERGENIC      |               |                    |                    |
| SNP_104447_A_32237 | NW_004517285.1 | scaffold2301 | 32237                   | TT                              | GG                 | GG               | INTERGENIC      |               |                    |                    |
| SNP_104448_A_32243 | NW_004517285.1 | scaffold2301 | 32243                   | CC                              | TT                 | TT               | INTERGENIC      |               |                    |                    |
| SNP_104449_A_32309 | NW_004517285.1 | scaffold2301 | 32309                   | TT                              | CC                 | CC               | INTERGENIC      |               |                    |                    |
| SNP_104450_A_32456 | NW_004517285.1 | scaffold2301 | 32456                   | CC                              | TT                 | TT               | INTERGENIC      |               |                    |                    |

| SNPs IDs           | Chromosome IDs | Chromosomes  | Physical positions (bp) | CDC Frontier (Reference genome) | (Pusa 1103 & HPNB) | (ILWC 46 & LPNB) | Sequence genome | Components of | Gene accession IDs | Putative functions |
|--------------------|----------------|--------------|-------------------------|---------------------------------|--------------------|------------------|-----------------|---------------|--------------------|--------------------|
| SNP_104451_A_32533 | NW_004517285.1 | scaffold2301 | 32533                   | GG                              | AA                 | AA               | INTERGENIC      |               |                    |                    |
| SNP_104452_A_32682 | NW_004517285.1 | scaffold2301 | 32682                   | GG                              | CC                 | CC               | INTERGENIC      |               |                    |                    |
| SNP_104453_A_32687 | NW_004517285.1 | scaffold2301 | 32687                   | GG                              | TT                 | TT               | INTERGENIC      |               |                    |                    |
| SNP_104454_A_32710 | NW_004517285.1 | scaffold2301 | 32710                   | AA                              | GG                 | GG               | INTERGENIC      |               |                    |                    |
| SNP_104455_A_34638 | NW_004517285.1 | scaffold2301 | 34638                   | AA                              | GG                 | GG               | INTERGENIC      |               |                    |                    |
| SNP_104456_A_35155 | NW_004517285.1 | scaffold2301 | 35155                   | GG                              | AA                 | AA               | INTERGENIC      |               |                    |                    |
| SNP_104457_A_35264 | NW_004517285.1 | scaffold2301 | 35264                   | AA                              | GG                 | GG               | INTERGENIC      |               |                    |                    |
| SNP_104458_A_35320 | NW_004517285.1 | scaffold2301 | 35320                   | AA                              | GG                 | GG               | INTERGENIC      |               |                    |                    |
| SNP_104459_A_35332 | NW_004517285.1 | scaffold2301 | 35332                   | AA                              | GG                 | GG               | INTERGENIC      |               |                    |                    |
| SNP_104460_A_35542 | NW_004517285.1 | scaffold2301 | 35542                   | TT                              | AA                 | AA               | INTERGENIC      |               |                    |                    |
| SNP_104461_A_35551 | NW_004517285.1 | scaffold2301 | 35551                   | CC                              | TT                 | TT               | INTERGENIC      |               |                    |                    |
| SNP_104462_A_35634 | NW_004517285.1 | scaffold2301 | 35634                   | AA                              | TT                 | TT               | INTERGENIC      |               |                    |                    |
| SNP_104463_A_35650 | NW_004517285.1 | scaffold2301 | 35650                   | CC                              | TT                 | TT               | INTERGENIC      |               |                    |                    |
| SNP_104464_A_35762 | NW_004517285.1 | scaffold2301 | 35762                   | AA                              | CC                 | CC               | INTERGENIC      |               |                    |                    |
| SNP_104465_A_35770 | NW_004517285.1 | scaffold2301 | 35770                   | CC                              | TT                 | TT               | INTERGENIC      |               |                    |                    |
| SNP_104466_A_35775 | NW_004517285.1 | scaffold2301 | 35775                   | CC                              | TT                 | TT               | INTERGENIC      |               |                    |                    |
| SNP_104467_A_35850 | NW_004517285.1 | scaffold2301 | 35850                   | GG                              | TT                 | TT               | INTERGENIC      |               |                    |                    |
| SNP_104468_A_36028 | NW_004517285.1 | scaffold2301 | 36028                   | TT                              | CC                 | CC               | INTERGENIC      |               |                    |                    |
| SNP_104469_A_36069 | NW_004517285.1 | scaffold2301 | 36069                   | GG                              | CC                 | CC               | INTERGENIC      |               |                    |                    |
| SNP_104470_A_36073 | NW_004517285.1 | scaffold2301 | 36073                   | TT                              | GG                 | GG               | INTERGENIC      |               |                    |                    |
| SNP_104471_A_36152 | NW_004517285.1 | scaffold2301 | 36152                   | CC                              | GG                 | GG               | INTERGENIC      |               |                    |                    |
| SNP_104472_A_40831 | NW_004517285.1 | scaffold2301 | 40831                   | AA                              | GG                 | TT               | INTERGENIC      |               |                    |                    |



| SNPs IDs           | Chromosome IDs | Chromosomes  | Physical positions (bp) | CDC Frontier (Reference genome) | (Pusa 1103 & HPNB) | (ILWC 46 & LPNB) | Sequence genome | Components of | Gene accession IDs | Putative functions |
|--------------------|----------------|--------------|-------------------------|---------------------------------|--------------------|------------------|-----------------|---------------|--------------------|--------------------|
| SNP_104473_A_40858 | NW_004517285.1 | scaffold2301 | 40858                   | GG                              | AA                 | AA               | INTERGENIC      |               |                    |                    |
| SNP_104474_A_43171 | NW_004517285.1 | scaffold2301 | 43171                   | AA                              | TT                 | TT               | INTERGENIC      |               |                    |                    |
| SNP_104475_A_43195 | NW_004517285.1 | scaffold2301 | 43195                   | CC                              | AA                 | AA               | INTERGENIC      |               |                    |                    |
| SNP_104477_A_43509 | NW_004517285.1 | scaffold2301 | 43509                   | TT                              | GG                 | GG               | INTERGENIC      |               |                    |                    |
| SNP_104478_A_43539 | NW_004517285.1 | scaffold2301 | 43539                   | TT                              | CC                 | CC               | INTERGENIC      |               |                    |                    |
| SNP_104479_A_53367 | NW_004517285.1 | scaffold2301 | 53367                   | AA                              | GG                 | GG               | INTERGENIC      |               |                    |                    |
| SNP_104480_A_53627 | NW_004517285.1 | scaffold2301 | 53627                   | GG                              | AA                 | AA               | INTERGENIC      |               |                    |                    |
| SNP_104481_A_53654 | NW_004517285.1 | scaffold2301 | 53654                   | TT                              | AA                 | AA               | INTERGENIC      |               |                    |                    |
| SNP_104482_A_53663 | NW_004517285.1 | scaffold2301 | 53663                   | AA                              | GG                 | GG               | INTERGENIC      |               |                    |                    |
| SNP_104484_A_53964 | NW_004517285.1 | scaffold2301 | 53964                   | GG                              | AA                 | AA               | INTERGENIC      |               |                    |                    |
| SNP_104485_A_53985 | NW_004517285.1 | scaffold2301 | 53985                   | GG                              | TT                 | TT               | INTERGENIC      |               |                    |                    |
| SNP_104486_A_54032 | NW_004517285.1 | scaffold2301 | 54032                   | AA                              | CC                 | CC               | INTERGENIC      |               |                    |                    |
| SNP_104488_A_54458 | NW_004517285.1 | scaffold2301 | 54458                   | TT                              | GG                 | GG               | INTERGENIC      |               |                    |                    |
| SNP_104489_A_54462 | NW_004517285.1 | scaffold2301 | 54462                   | GG                              | AA                 | AA               | INTERGENIC      |               |                    |                    |
| SNP_104491_A_55716 | NW_004517285.1 | scaffold2301 | 55716                   | TT                              | CC                 | CC               | INTERGENIC      |               |                    |                    |
| SNP_104493_A_57427 | NW_004517285.1 | scaffold2301 | 57427                   | AA                              | GG                 | GG               | INTERGENIC      |               |                    |                    |
| SNP_104494_A_57484 | NW_004517285.1 | scaffold2301 | 57484                   | CC                              | TT                 | TT               | INTERGENIC      |               |                    |                    |
| SNP_104495_A_57514 | NW_004517285.1 | scaffold2301 | 57514                   | AA                              | TT                 | TT               | INTERGENIC      |               |                    |                    |
| SNP_104496_A_60542 | NW_004517285.1 | scaffold2301 | 60542                   | CC                              | TT                 | TT               | INTERGENIC      |               |                    |                    |
| SNP_104497_A_61420 | NW_004517285.1 | scaffold2301 | 61420                   | TT                              | CC                 | CC               | INTERGENIC      |               |                    |                    |
| SNP_104498_A_61465 | NW_004517285.1 | scaffold2301 | 61465                   | TT                              | AA                 | AA               | INTERGENIC      |               |                    |                    |
| SNP_104499_A_61535 | NW_004517285.1 | scaffold2301 | 61535                   | GG                              | AA                 | AA               | INTERGENIC      |               |                    |                    |

| SNPs IDs           | Chromosome IDs | Chromosomes  | Physical positions (bp) | CDC Frontier (Reference genome) | (Pusa 1103 & HPNB) | (ILWC 46 & LPNB) | Sequence Components of genome | Gene accession IDs | Putative functions           |
|--------------------|----------------|--------------|-------------------------|---------------------------------|--------------------|------------------|-------------------------------|--------------------|------------------------------|
| SNP_104500_A_61556 | NW_004517285.1 | scaffold2301 | 61556                   | AA                              | GG                 | GG               | INTERGENIC                    |                    |                              |
| SNP_104501_A_61612 | NW_004517285.1 | scaffold2301 | 61612                   | CC                              | GG                 | GG               | INTERGENIC                    |                    |                              |
| SNP_104502_A_61660 | NW_004517285.1 | scaffold2301 | 61660                   | TT                              | CC                 | CC               | INTERGENIC                    |                    |                              |
| SNP_104503_A_61832 | NW_004517285.1 | scaffold2301 | 61832                   | TT                              | CC                 | CC               | INTERGENIC                    |                    |                              |
| SNP_104504_A_64822 | NW_004517285.1 | scaffold2301 | 64822                   | GG                              | TT                 | TT               | INTERGENIC                    |                    |                              |
| SNP_104505_A_65036 | NW_004517285.1 | scaffold2301 | 65036                   | TT                              | GG                 | GG               | INTERGENIC                    |                    |                              |
| SNP_104506_A_65163 | NW_004517285.1 | scaffold2301 | 65163                   | AA                              | TT                 | TT               | INTERGENIC                    |                    |                              |
| SNP_104507_A_65232 | NW_004517285.1 | scaffold2301 | 65232                   | TT                              | GG                 | GG               | INTERGENIC                    |                    |                              |
| SNP_104508_A_65266 | NW_004517285.1 | scaffold2301 | 65266                   | AA                              | GG                 | GG               | INTERGENIC                    |                    |                              |
| SNP_104509_A_65354 | NW_004517285.1 | scaffold2301 | 65354                   | TT                              | AA                 | AA               | INTERGENIC                    |                    |                              |
| SNP_104510_A_65427 | NW_004517285.1 | scaffold2301 | 65427                   | AA                              | TT                 | TT               | INTERGENIC                    |                    |                              |
| SNP_104511_A_65436 | NW_004517285.1 | scaffold2301 | 65436                   | AA                              | TT                 | TT               | INTERGENIC                    |                    |                              |
| SNP_104512_A_69173 | NW_004517285.1 | scaffold2301 | 69173                   | AA                              | TT                 | TT               | DRR                           | 101489080          | uncharacterized LOC101489080 |
| SNP_104513_A_794   | NW_004517288.1 | scaffold2304 | 794                     | AA                              | GG                 | GG               | INTERGENIC                    |                    |                              |
| SNP_104514_A_46577 | NW_004517293.1 | scaffold2311 | 46577                   | AA                              | TT                 | TT               | INTERGENIC                    |                    |                              |
| SNP_104515_A_46597 | NW_004517293.1 | scaffold2311 | 46597                   | TT                              | CC                 | CC               | INTERGENIC                    |                    |                              |
| SNP_104516_A_46922 | NW_004517293.1 | scaffold2311 | 46922                   | CC                              | AA                 | AA               | INTERGENIC                    |                    |                              |
| SNP_104517_A_46940 | NW_004517293.1 | scaffold2311 | 46940                   | CC                              | TT                 | TT               | INTERGENIC                    |                    |                              |
| SNP_104518_A_95317 | NW_004517293.1 | scaffold2311 | 95317                   | AA                              | CC                 | CC               | INTERGENIC                    |                    |                              |
| SNP_104519_A_95346 | NW_004517293.1 | scaffold2311 | 95346                   | AA                              | CC                 | CC               | INTERGENIC                    |                    |                              |
| SNP_104520_A_16491 | NW_004517294.1 | scaffold2312 | 16491                   | CC                              | TT                 | TT               | INTERGENIC                    |                    |                              |
| SNP_104521_A_636   | NW_004517297.1 | scaffold2319 | 636                     | AA                              | TT                 | TT               | INTERGENIC                    |                    |                              |

| SNPs IDs           | Chromosome IDs | Chromosomes  | Physical positions (bp) | CDC Frontier (Reference genome) | (Pusa 1103 & HPNB) | (ILWC 46 & LPNB) | Sequence genome | Components of | Gene accession IDs | Putative functions |
|--------------------|----------------|--------------|-------------------------|---------------------------------|--------------------|------------------|-----------------|---------------|--------------------|--------------------|
| SNP_104522_A_648   | NW_004517297.1 | scaffold2319 | 648                     | AA                              | GG                 | GG               | INTERGENIC      |               |                    |                    |
| SNP_104523_A_677   | NW_004517297.1 | scaffold2319 | 677                     | AA                              | TT                 | TT               | INTERGENIC      |               |                    |                    |
| SNP_104524_A_14784 | NW_004517298.1 | scaffold2320 | 14784                   | AA                              | GG                 | GG               | INTERGENIC      |               |                    |                    |
| SNP_104525_A_1666  | NW_004517300.1 | scaffold2322 | 1666                    | AA                              | TT                 | TT               | INTERGENIC      |               |                    |                    |
| SNP_104526_A_6308  | NW_004517300.1 | scaffold2322 | 6308                    | GG                              | TT                 | TT               | INTERGENIC      |               |                    |                    |
| SNP_104527_A_6313  | NW_004517300.1 | scaffold2322 | 6313                    | TT                              | CC                 | CC               | INTERGENIC      |               |                    |                    |
| SNP_104528_A_6369  | NW_004517300.1 | scaffold2322 | 6369                    | TT                              | AA                 | AA               | INTERGENIC      |               |                    |                    |
| SNP_104529_A_6488  | NW_004517300.1 | scaffold2322 | 6488                    | GG                              | AA                 | AA               | INTERGENIC      |               |                    |                    |
| SNP_104530_A_6946  | NW_004517300.1 | scaffold2322 | 6946                    | AA                              | GG                 | GG               | INTERGENIC      |               |                    |                    |
| SNP_104531_A_8972  | NW_004517300.1 | scaffold2322 | 8972                    | AA                              | TT                 | TT               | INTERGENIC      |               |                    |                    |
| SNP_104532_A_2606  | NW_004517302.1 | scaffold2325 | 2606                    | AA                              | GG                 | GG               | INTERGENIC      |               |                    |                    |
| SNP_104534_A_51337 | NW_004517302.1 | scaffold2325 | 51337                   | GG                              | AA                 | AA               | INTERGENIC      |               |                    |                    |
| SNP_104535_A_51562 | NW_004517302.1 | scaffold2325 | 51562                   | TT                              | CC                 | CC               | INTERGENIC      |               |                    |                    |
| SNP_104536_A_51567 | NW_004517302.1 | scaffold2325 | 51567                   | AA                              | CC                 | CC               | INTERGENIC      |               |                    |                    |
| SNP_104537_A_51667 | NW_004517302.1 | scaffold2325 | 51667                   | AA                              | GG                 | GG               | INTERGENIC      |               |                    |                    |
| SNP_104538_A_51723 | NW_004517302.1 | scaffold2325 | 51723                   | AA                              | GG                 | GG               | INTERGENIC      |               |                    |                    |
| SNP_104539_A_51867 | NW_004517302.1 | scaffold2325 | 51867                   | AA                              | GG                 | GG               | INTERGENIC      |               |                    |                    |
| SNP_104540_A_52091 | NW_004517302.1 | scaffold2325 | 52091                   | TT                              | GG                 | GG               | INTERGENIC      |               |                    |                    |
| SNP_104541_A_52098 | NW_004517302.1 | scaffold2325 | 52098                   | AA                              | GG                 | GG               | INTERGENIC      |               |                    |                    |
| SNP_104542_A_58199 | NW_004517302.1 | scaffold2325 | 58199                   | GG                              | TT                 | TT               | INTERGENIC      |               |                    |                    |
| SNP_104543_A_58431 | NW_004517302.1 | scaffold2325 | 58431                   | TT                              | AA                 | AA               | INTERGENIC      |               |                    |                    |
| SNP_104545_A_58557 | NW_004517302.1 | scaffold2325 | 58557                   | AA                              | TT                 | TT               | INTERGENIC      |               |                    |                    |

| SNPs IDs           | Chromosome IDs | Chromosomes  | Physical positions (bp) | CDC Frontier (Reference genome) | (Pusa 1103 & HPNB) | (ILWC 46 & LPNB) | Sequence genome | Components of | Gene accession IDs | Putative functions |
|--------------------|----------------|--------------|-------------------------|---------------------------------|--------------------|------------------|-----------------|---------------|--------------------|--------------------|
| SNP_104546_A_58791 | NW_004517302.1 | scaffold2325 | 58791                   | TT                              | CC                 | CC               | INTERGENIC      |               |                    |                    |
| SNP_104547_A_58793 | NW_004517302.1 | scaffold2325 | 58793                   | GG                              | CC                 | CC               | INTERGENIC      |               |                    |                    |
| SNP_104548_A_58880 | NW_004517302.1 | scaffold2325 | 58880                   | AA                              | TT                 | TT               | INTERGENIC      |               |                    |                    |
| SNP_104549_A_58908 | NW_004517302.1 | scaffold2325 | 58908                   | AA                              | CC                 | CC               | INTERGENIC      |               |                    |                    |
| SNP_104550_A_59987 | NW_004517302.1 | scaffold2325 | 59987                   | CC                              | GG                 | GG               | INTERGENIC      |               |                    |                    |
| SNP_104551_A_60057 | NW_004517302.1 | scaffold2325 | 60057                   | CC                              | TT                 | TT               | INTERGENIC      |               |                    |                    |
| SNP_104552_A_60422 | NW_004517302.1 | scaffold2325 | 60422                   | CC                              | TT                 | TT               | INTERGENIC      |               |                    |                    |
| SNP_104553_A_60508 | NW_004517302.1 | scaffold2325 | 60508                   | AA                              | TT                 | TT               | INTERGENIC      |               |                    |                    |
| SNP_104554_A_60620 | NW_004517302.1 | scaffold2325 | 60620                   | GG                              | AA                 | AA               | INTERGENIC      |               |                    |                    |
| SNP_104555_A_60673 | NW_004517302.1 | scaffold2325 | 60673                   | CC                              | AA                 | AA               | INTERGENIC      |               |                    |                    |
| SNP_104556_A_60788 | NW_004517302.1 | scaffold2325 | 60788                   | CC                              | TT                 | TT               | INTERGENIC      |               |                    |                    |
| SNP_104557_A_13146 | NW_004517303.1 | scaffold2328 | 13146                   | TT                              | AA                 | AA               | INTERGENIC      |               |                    |                    |
| SNP_104558_A_13392 | NW_004517303.1 | scaffold2328 | 13392                   | TT                              | CC                 | CC               | INTERGENIC      |               |                    |                    |
| SNP_104559_A_13432 | NW_004517303.1 | scaffold2328 | 13432                   | GG                              | TT                 | TT               | INTERGENIC      |               |                    |                    |
| SNP_104560_A_13454 | NW_004517303.1 | scaffold2328 | 13454                   | TT                              | CC                 | CC               | INTERGENIC      |               |                    |                    |
| SNP_104561_A_13458 | NW_004517303.1 | scaffold2328 | 13458                   | AA                              | CC                 | CC               | INTERGENIC      |               |                    |                    |
| SNP_104562_A_13459 | NW_004517303.1 | scaffold2328 | 13459                   | TT                              | CC                 | CC               | INTERGENIC      |               |                    |                    |
| SNP_104563_A_13503 | NW_004517303.1 | scaffold2328 | 13503                   | CC                              | GG                 | GG               | INTERGENIC      |               |                    |                    |
| SNP_104564_A_13573 | NW_004517303.1 | scaffold2328 | 13573                   | CC                              | TT                 | TT               | INTERGENIC      |               |                    |                    |
| SNP_104566_A_13782 | NW_004517303.1 | scaffold2328 | 13782                   | AA                              | GG                 | GG               | INTERGENIC      |               |                    |                    |
| SNP_104567_A_13939 | NW_004517303.1 | scaffold2328 | 13939                   | TT                              | GG                 | GG               | INTERGENIC      |               |                    |                    |
| SNP_104568_A_13956 | NW_004517303.1 | scaffold2328 | 13956                   | TT                              | CC                 | CC               | INTERGENIC      |               |                    |                    |

| SNPs IDs           | Chromosome IDs | Chromosomes  | Physical positions (bp) | CDC Frontier (Reference genome) | (Pusa 1103 & HPNB) | (ILWC 46 & LPNB) | Sequence Components of genome | Gene accession IDs | Putative functions           |
|--------------------|----------------|--------------|-------------------------|---------------------------------|--------------------|------------------|-------------------------------|--------------------|------------------------------|
| SNP_104569_A_44530 | NW_004517305.1 | scaffold2330 | 44530                   | GG                              | AA                 | AA               | URR                           | 101493090          | sialidase-like               |
| SNP_104570_A_44839 | NW_004517305.1 | scaffold2330 | 44839                   | AA                              | GG                 | GG               | URR                           | 101493090          | sialidase-like               |
| SNP_104571_A_73235 | NW_004517305.1 | scaffold2330 | 73235                   | GG                              | AA                 | AA               | URR                           | 101491757          | uncharacterized LOC101491757 |
| SNP_104572_A_94925 | NW_004517305.1 | scaffold2330 | 94925                   | AA                              | TT                 | TT               | INTERGENIC                    |                    |                              |
| SNP_104573_A_94933 | NW_004517305.1 | scaffold2330 | 94933                   | TT                              | AA                 | AA               | INTERGENIC                    |                    |                              |
| SNP_104574_A_95033 | NW_004517305.1 | scaffold2330 | 95033                   | CC                              | TT                 | TT               | INTERGENIC                    |                    |                              |
| SNP_104575_A_46    | NW_004517306.1 | scaffold2331 | 46                      | TT                              | CC                 | CC               | INTERGENIC                    |                    |                              |
| SNP_104577_A_627   | NW_004517308.1 | scaffold2334 | 627                     | AA                              | TT                 | TT               | INTERGENIC                    |                    |                              |
| SNP_104578_A_844   | NW_004517308.1 | scaffold2334 | 844                     | TT                              | CC                 | CC               | INTERGENIC                    |                    |                              |
| SNP_104579_A_64    | NW_004517309.1 | scaffold2337 | 64                      | GG                              | TT                 | TT               | INTERGENIC                    |                    |                              |
| SNP_104580_A_122   | NW_004517309.1 | scaffold2337 | 122                     | AA                              | GG                 | GG               | INTERGENIC                    |                    |                              |
| SNP_104581_A_2135  | NW_004517309.1 | scaffold2337 | 2135                    | AA                              | TT                 | TT               | INTERGENIC                    |                    |                              |
| SNP_104582_A_745   | NW_004517313.1 | scaffold2342 | 745                     | CC                              | TT                 | TT               | INTERGENIC                    |                    |                              |
| SNP_104583_A_981   | NW_004517313.1 | scaffold2342 | 981                     | CC                              | TT                 | TT               | INTERGENIC                    |                    |                              |
| SNP_104584_A_1020  | NW_004517313.1 | scaffold2342 | 1020                    | TT                              | AA                 | AA               | INTERGENIC                    |                    |                              |
| SNP_104585_A_12768 | NW_004517313.1 | scaffold2342 | 12768                   | AA                              | TT                 | TT               | INTERGENIC                    |                    |                              |
| SNP_104586_A_24252 | NW_004517314.1 | scaffold2343 | 24252                   | TT                              | CC                 | CC               | INTERGENIC                    |                    |                              |
| SNP_104587_A_32933 | NW_004517314.1 | scaffold2343 | 32933                   | CC                              | AA                 | AA               | INTERGENIC                    |                    |                              |
| SNP_104588_A_45823 | NW_004517314.1 | scaffold2343 | 45823                   | AA                              | GG                 | GG               | INTERGENIC                    |                    |                              |
| SNP_104589_A_948   | NW_004517315.1 | scaffold2344 | 948                     | TT                              | AA                 | AA               | INTERGENIC                    |                    |                              |
| SNP_104590_A_949   | NW_004517315.1 | scaffold2344 | 949                     | GG                              | TT                 | TT               | INTERGENIC                    |                    |                              |
| SNP_104591_A_1359  | NW_004517315.1 | scaffold2344 | 1359                    | TT                              | AA                 | AA               | INTERGENIC                    |                    |                              |

| SNPs IDs           | Chromosome IDs | Chromosomes  | Physical positions (bp) | CDC Frontier (Reference genome) | (Pusa 1103 & HPNB) | (ILWC 46 & LPNB) | Sequence genome | Components of | Gene accession IDs | Putative functions |
|--------------------|----------------|--------------|-------------------------|---------------------------------|--------------------|------------------|-----------------|---------------|--------------------|--------------------|
| SNP_104592_A_1369  | NW_004517315.1 | scaffold2344 | 1369                    | TT                              | CC                 | CC               | INTERGENIC      |               |                    |                    |
| SNP_104593_A_1521  | NW_004517315.1 | scaffold2344 | 1521                    | TT                              | CC                 | CC               | INTERGENIC      |               |                    |                    |
| SNP_104595_A_529   | NW_004517316.1 | scaffold2345 | 529                     | CC                              | TT                 | TT               | INTERGENIC      |               |                    |                    |
| SNP_104597_A_732   | NW_004517316.1 | scaffold2345 | 732                     | CC                              | GG                 | GG               | INTERGENIC      |               |                    |                    |
| SNP_104598_A_796   | NW_004517316.1 | scaffold2345 | 796                     | AA                              | CC                 | CC               | INTERGENIC      |               |                    |                    |
| SNP_104599_A_1655  | NW_004517316.1 | scaffold2345 | 1655                    | CC                              | TT                 | TT               | INTERGENIC      |               |                    |                    |
| SNP_104600_A_1734  | NW_004517316.1 | scaffold2345 | 1734                    | TT                              | AA                 | AA               | INTERGENIC      |               |                    |                    |
| SNP_104601_A_2862  | NW_004517316.1 | scaffold2345 | 2862                    | TT                              | AA                 | AA               | INTERGENIC      |               |                    |                    |
| SNP_104602_A_11231 | NW_004517316.1 | scaffold2345 | 11231                   | CC                              | AA                 | AA               | INTERGENIC      |               |                    |                    |
| SNP_104603_A_11515 | NW_004517316.1 | scaffold2345 | 11515                   | TT                              | CC                 | CC               | INTERGENIC      |               |                    |                    |
| SNP_104605_A_20779 | NW_004517316.1 | scaffold2345 | 20779                   | CC                              | TT                 | TT               | INTERGENIC      |               |                    |                    |
| SNP_104606_A_20895 | NW_004517316.1 | scaffold2345 | 20895                   | CC                              | TT                 | TT               | INTERGENIC      |               |                    |                    |
| SNP_104607_A_21288 | NW_004517316.1 | scaffold2345 | 21288                   | TT                              | AA                 | AA               | INTERGENIC      |               |                    |                    |
| SNP_104608_A_21335 | NW_004517316.1 | scaffold2345 | 21335                   | CC                              | AA                 | TT               | INTERGENIC      |               |                    |                    |
| SNP_104610_A_433   | NW_004517317.1 | scaffold2346 | 433                     | TT                              | GG                 | GG               | INTERGENIC      |               |                    |                    |
| SNP_104611_A_501   | NW_004517317.1 | scaffold2346 | 501                     | CC                              | AA                 | AA               | INTERGENIC      |               |                    |                    |
| SNP_104612_A_569   | NW_004517317.1 | scaffold2346 | 569                     | AA                              | TT                 | TT               | INTERGENIC      |               |                    |                    |
| SNP_104613_A_630   | NW_004517317.1 | scaffold2346 | 630                     | GG                              | AA                 | AA               | INTERGENIC      |               |                    |                    |
| SNP_104614_A_700   | NW_004517317.1 | scaffold2346 | 700                     | TT                              | CC                 | CC               | INTERGENIC      |               |                    |                    |
| SNP_104615_A_870   | NW_004517317.1 | scaffold2346 | 870                     | CC                              | AA                 | AA               | INTERGENIC      |               |                    |                    |
| SNP_104616_A_898   | NW_004517317.1 | scaffold2346 | 898                     | TT                              | AA                 | AA               | INTERGENIC      |               |                    |                    |
| SNP_104617_A_917   | NW_004517317.1 | scaffold2346 | 917                     | AA                              | GG                 | GG               | INTERGENIC      |               |                    |                    |

| SNPs IDs           | Chromosome IDs | Chromosomes  | Physical positions (bp) | CDC Frontier (Reference genome) | (Pusa 1103 & HPNB) | (ILWC 46 & LPNB) | Sequence genome | Components of | Gene accession IDs | Putative functions |
|--------------------|----------------|--------------|-------------------------|---------------------------------|--------------------|------------------|-----------------|---------------|--------------------|--------------------|
| SNP_104618_A_952   | NW_004517317.1 | scaffold2346 | 952                     | AA                              | TT                 | TT               | INTERGENIC      |               |                    |                    |
| SNP_104619_A_972   | NW_004517317.1 | scaffold2346 | 972                     | CC                              | TT                 | TT               | INTERGENIC      |               |                    |                    |
| SNP_104620_A_974   | NW_004517317.1 | scaffold2346 | 974                     | AA                              | GG                 | GG               | INTERGENIC      |               |                    |                    |
| SNP_104621_A_989   | NW_004517317.1 | scaffold2346 | 989                     | CC                              | AA                 | AA               | INTERGENIC      |               |                    |                    |
| SNP_104622_A_1008  | NW_004517317.1 | scaffold2346 | 1008                    | CC                              | TT                 | TT               | INTERGENIC      |               |                    |                    |
| SNP_104623_A_1050  | NW_004517317.1 | scaffold2346 | 1050                    | GG                              | AA                 | AA               | INTERGENIC      |               |                    |                    |
| SNP_104624_A_1137  | NW_004517317.1 | scaffold2346 | 1137                    | CC                              | TT                 | TT               | INTERGENIC      |               |                    |                    |
| SNP_104625_A_1245  | NW_004517317.1 | scaffold2346 | 1245                    | TT                              | CC                 | CC               | INTERGENIC      |               |                    |                    |
| SNP_104626_A_1254  | NW_004517317.1 | scaffold2346 | 1254                    | CC                              | TT                 | TT               | INTERGENIC      |               |                    |                    |
| SNP_104627_A_1517  | NW_004517317.1 | scaffold2346 | 1517                    | TT                              | GG                 | GG               | INTERGENIC      |               |                    |                    |
| SNP_104628_A_1524  | NW_004517317.1 | scaffold2346 | 1524                    | CC                              | TT                 | TT               | INTERGENIC      |               |                    |                    |
| SNP_104629_A_3398  | NW_004517317.1 | scaffold2346 | 3398                    | CC                              | GG                 | GG               | INTERGENIC      |               |                    |                    |
| SNP_104630_A_7457  | NW_004517317.1 | scaffold2346 | 7457                    | TT                              | CC                 | CC               | INTERGENIC      |               |                    |                    |
| SNP_104631_A_7620  | NW_004517317.1 | scaffold2346 | 7620                    | AA                              | GG                 | GG               | INTERGENIC      |               |                    |                    |
| SNP_104632_A_7627  | NW_004517317.1 | scaffold2346 | 7627                    | GG                              | AA                 | AA               | INTERGENIC      |               |                    |                    |
| SNP_104633_A_26329 | NW_004517317.1 | scaffold2346 | 26329                   | TT                              | CC                 | CC               | INTERGENIC      |               |                    |                    |
| SNP_104634_A_26336 | NW_004517317.1 | scaffold2346 | 26336                   | TT                              | GG                 | GG               | INTERGENIC      |               |                    |                    |
| SNP_104635_A_26555 | NW_004517317.1 | scaffold2346 | 26555                   | GG                              | AA                 | AA               | INTERGENIC      |               |                    |                    |
| SNP_104636_A_26591 | NW_004517317.1 | scaffold2346 | 26591                   | AA                              | CC                 | CC               | INTERGENIC      |               |                    |                    |
| SNP_104637_A_26803 | NW_004517317.1 | scaffold2346 | 26803                   | AA                              | GG                 | GG               | INTERGENIC      |               |                    |                    |
| SNP_104638_A_27704 | NW_004517317.1 | scaffold2346 | 27704                   | AA                              | GG                 | GG               | INTERGENIC      |               |                    |                    |
| SNP_104639_A_27952 | NW_004517317.1 | scaffold2346 | 27952                   | TT                              | GG                 | GG               | INTERGENIC      |               |                    |                    |

| SNPs IDs           | Chromosome IDs | Chromosomes  | Physical positions (bp) | CDC Frontier (Reference genome) | (Pusa 1103 & HPNB) | (ILWC 46 & LPNB) | Sequence genome | Components of | Gene accession IDs | Putative functions |
|--------------------|----------------|--------------|-------------------------|---------------------------------|--------------------|------------------|-----------------|---------------|--------------------|--------------------|
| SNP_104640_A_28152 | NW_004517317.1 | scaffold2346 | 28152                   | CC                              | TT                 | TT               | INTERGENIC      |               |                    |                    |
| SNP_104641_A_28160 | NW_004517317.1 | scaffold2346 | 28160                   | CC                              | TT                 | TT               | INTERGENIC      |               |                    |                    |
| SNP_104642_A_28282 | NW_004517317.1 | scaffold2346 | 28282                   | AA                              | TT                 | TT               | INTERGENIC      |               |                    |                    |
| SNP_104643_A_28378 | NW_004517317.1 | scaffold2346 | 28378                   | TT                              | GG                 | GG               | INTERGENIC      |               |                    |                    |
| SNP_104645_A_28564 | NW_004517317.1 | scaffold2346 | 28564                   | GG                              | AA                 | AA               | INTERGENIC      |               |                    |                    |
| SNP_104646_A_28574 | NW_004517317.1 | scaffold2346 | 28574                   | AA                              | GG                 | GG               | INTERGENIC      |               |                    |                    |
| SNP_104647_A_28656 | NW_004517317.1 | scaffold2346 | 28656                   | CC                              | GG                 | GG               | INTERGENIC      |               |                    |                    |
| SNP_104648_A_30471 | NW_004517317.1 | scaffold2346 | 30471                   | CC                              | TT                 | TT               | INTERGENIC      |               |                    |                    |
| SNP_104649_A_30542 | NW_004517317.1 | scaffold2346 | 30542                   | GG                              | AA                 | AA               | INTERGENIC      |               |                    |                    |
| SNP_104650_A_30637 | NW_004517317.1 | scaffold2346 | 30637                   | TT                              | AA                 | AA               | INTERGENIC      |               |                    |                    |
| SNP_104651_A_30788 | NW_004517317.1 | scaffold2346 | 30788                   | TT                              | GG                 | GG               | INTERGENIC      |               |                    |                    |
| SNP_104652_A_30811 | NW_004517317.1 | scaffold2346 | 30811                   | GG                              | TT                 | TT               | INTERGENIC      |               |                    |                    |
| SNP_104653_A_30815 | NW_004517317.1 | scaffold2346 | 30815                   | TT                              | CC                 | CC               | INTERGENIC      |               |                    |                    |
| SNP_104654_A_30816 | NW_004517317.1 | scaffold2346 | 30816                   | CC                              | TT                 | TT               | INTERGENIC      |               |                    |                    |
| SNP_104655_A_30834 | NW_004517317.1 | scaffold2346 | 30834                   | CC                              | TT                 | TT               | INTERGENIC      |               |                    |                    |
| SNP_104656_A_30880 | NW_004517317.1 | scaffold2346 | 30880                   | TT                              | CC                 | CC               | INTERGENIC      |               |                    |                    |
| SNP_104657_A_31038 | NW_004517317.1 | scaffold2346 | 31038                   | AA                              | TT                 | TT               | INTERGENIC      |               |                    |                    |
| SNP_104658_A_31142 | NW_004517317.1 | scaffold2346 | 31142                   | GG                              | AA                 | AA               | INTERGENIC      |               |                    |                    |
| SNP_104659_A_31166 | NW_004517317.1 | scaffold2346 | 31166                   | TT                              | CC                 | CC               | INTERGENIC      |               |                    |                    |
| SNP_104660_A_31206 | NW_004517317.1 | scaffold2346 | 31206                   | CC                              | TT                 | TT               | INTERGENIC      |               |                    |                    |
| SNP_104661_A_31236 | NW_004517317.1 | scaffold2346 | 31236                   | TT                              | GG                 | GG               | INTERGENIC      |               |                    |                    |
| SNP_104662_A_31281 | NW_004517317.1 | scaffold2346 | 31281                   | AA                              | GG                 | GG               | INTERGENIC      |               |                    |                    |



| SNPs IDs           | Chromosome IDs | Chromosomes  | Physical positions (bp) | CDC Frontier (Reference genome) | (Pusa 1103 & HPNB) | (ILWC 46 & LPNB) | Sequence genome | Components of | Gene accession IDs | Putative functions |
|--------------------|----------------|--------------|-------------------------|---------------------------------|--------------------|------------------|-----------------|---------------|--------------------|--------------------|
| SNP_104663_A_31286 | NW_004517317.1 | scaffold2346 | 31286                   | AA                              | GG                 | GG               | INTERGENIC      |               |                    |                    |
| SNP_104664_A_31346 | NW_004517317.1 | scaffold2346 | 31346                   | CC                              | AA                 | AA               | INTERGENIC      |               |                    |                    |
| SNP_104665_A_31369 | NW_004517317.1 | scaffold2346 | 31369                   | AA                              | GG                 | GG               | INTERGENIC      |               |                    |                    |
| SNP_104666_A_1587  | NW_004517319.1 | scaffold2348 | 1587                    | TT                              | AA                 | AA               | INTERGENIC      |               |                    |                    |
| SNP_104667_A_1911  | NW_004517319.1 | scaffold2348 | 1911                    | TT                              | CC                 | CC               | INTERGENIC      |               |                    |                    |
| SNP_104668_A_2464  | NW_004517319.1 | scaffold2348 | 2464                    | GG                              | AA                 | AA               | INTERGENIC      |               |                    |                    |
| SNP_104669_A_10033 | NW_004517319.1 | scaffold2348 | 10033                   | TT                              | GG                 | GG               | INTERGENIC      |               |                    |                    |
| SNP_104670_A_10398 | NW_004517319.1 | scaffold2348 | 10398                   | GG                              | AA                 | AA               | INTERGENIC      |               |                    |                    |
| SNP_104671_A_10412 | NW_004517319.1 | scaffold2348 | 10412                   | CC                              | TT                 | TT               | INTERGENIC      |               |                    |                    |
| SNP_104672_A_10430 | NW_004517319.1 | scaffold2348 | 10430                   | TT                              | GG                 | GG               | INTERGENIC      |               |                    |                    |
| SNP_104673_A_45836 | NW_004517319.1 | scaffold2348 | 45836                   | AA                              | GG                 | GG               | INTERGENIC      |               |                    |                    |
| SNP_104674_A_45891 | NW_004517319.1 | scaffold2348 | 45891                   | TT                              | GG                 | GG               | INTERGENIC      |               |                    |                    |
| SNP_104675_A_45898 | NW_004517319.1 | scaffold2348 | 45898                   | AA                              | GG                 | GG               | INTERGENIC      |               |                    |                    |
| SNP_104676_A_45920 | NW_004517319.1 | scaffold2348 | 45920                   | CC                              | TT                 | TT               | INTERGENIC      |               |                    |                    |
| SNP_104677_A_51978 | NW_004517319.1 | scaffold2348 | 51978                   | TT                              | AA                 | AA               | INTERGENIC      |               |                    |                    |
| SNP_104678_A_52306 | NW_004517319.1 | scaffold2348 | 52306                   | GG                              | AA                 | AA               | INTERGENIC      |               |                    |                    |
| SNP_104679_A_52329 | NW_004517319.1 | scaffold2348 | 52329                   | GG                              | AA                 | AA               | INTERGENIC      |               |                    |                    |
| SNP_104680_A_63877 | NW_004517319.1 | scaffold2348 | 63877                   | TT                              | GG                 | GG               | INTERGENIC      |               |                    |                    |
| SNP_104681_A_63988 | NW_004517319.1 | scaffold2348 | 63988                   | AA                              | CC                 | CC               | INTERGENIC      |               |                    |                    |
| SNP_104682_A_64017 | NW_004517319.1 | scaffold2348 | 64017                   | CC                              | AA                 | AA               | INTERGENIC      |               |                    |                    |
| SNP_104683_A_64181 | NW_004517319.1 | scaffold2348 | 64181                   | TT                              | AA                 | AA               | INTERGENIC      |               |                    |                    |
| SNP_104684_A_64223 | NW_004517319.1 | scaffold2348 | 64223                   | AA                              | GG                 | GG               | INTERGENIC      |               |                    |                    |

| SNPs IDs            | Chromosome IDs | Chromosomes  | Physical positions (bp) | CDC Frontier (Reference genome) | (Pusa 1103 & HPNB) | (ILWC 46 & LPNB) | Sequence genome | Components of | Gene accession IDs | Putative functions |
|---------------------|----------------|--------------|-------------------------|---------------------------------|--------------------|------------------|-----------------|---------------|--------------------|--------------------|
| SNP_104685_A_64237  | NW_004517319.1 | scaffold2348 | 64237                   | GG                              | TT                 | TT               | INTERGENIC      |               |                    |                    |
| SNP_104686_A_64280  | NW_004517319.1 | scaffold2348 | 64280                   | TT                              | CC                 | CC               | INTERGENIC      |               |                    |                    |
| SNP_104687_A_64412  | NW_004517319.1 | scaffold2348 | 64412                   | GG                              | AA                 | AA               | INTERGENIC      |               |                    |                    |
| SNP_104688_A_64493  | NW_004517319.1 | scaffold2348 | 64493                   | GG                              | CC                 | CC               | INTERGENIC      |               |                    |                    |
| SNP_104689_A_64561  | NW_004517319.1 | scaffold2348 | 64561                   | GG                              | CC                 | CC               | INTERGENIC      |               |                    |                    |
| SNP_104690_A_64564  | NW_004517319.1 | scaffold2348 | 64564                   | AA                              | GG                 | GG               | INTERGENIC      |               |                    |                    |
| SNP_104691_A_64596  | NW_004517319.1 | scaffold2348 | 64596                   | GG                              | AA                 | AA               | INTERGENIC      |               |                    |                    |
| SNP_104692_A_64610  | NW_004517319.1 | scaffold2348 | 64610                   | AA                              | CC                 | CC               | INTERGENIC      |               |                    |                    |
| SNP_104693_A_64651  | NW_004517319.1 | scaffold2348 | 64651                   | AA                              | GG                 | GG               | INTERGENIC      |               |                    |                    |
| SNP_104694_A_105736 | NW_004517319.1 | scaffold2348 | 105736                  | TT                              | CC                 | CC               | INTERGENIC      |               |                    |                    |
| SNP_104695_A_105772 | NW_004517319.1 | scaffold2348 | 105772                  | TT                              | GG                 | GG               | INTERGENIC      |               |                    |                    |
| SNP_104696_A_105783 | NW_004517319.1 | scaffold2348 | 105783                  | TT                              | CC                 | CC               | INTERGENIC      |               |                    |                    |
| SNP_104697_A_105803 | NW_004517319.1 | scaffold2348 | 105803                  | AA                              | CC                 | CC               | INTERGENIC      |               |                    |                    |
| SNP_104698_A_105804 | NW_004517319.1 | scaffold2348 | 105804                  | TT                              | AA                 | AA               | INTERGENIC      |               |                    |                    |
| SNP_104699_A_111599 | NW_004517319.1 | scaffold2348 | 111599                  | TT                              | GG                 | GG               | INTERGENIC      |               |                    |                    |
| SNP_104700_A_111651 | NW_004517319.1 | scaffold2348 | 111651                  | TT                              | AA                 | AA               | INTERGENIC      |               |                    |                    |
| SNP_104701_A_113217 | NW_004517319.1 | scaffold2348 | 113217                  | CC                              | TT                 | TT               | INTERGENIC      |               |                    |                    |
| SNP_104702_A_592    | NW_004517320.1 | scaffold2349 | 592                     | AA                              | GG                 | GG               | INTERGENIC      |               |                    |                    |
| SNP_104703_A_641    | NW_004517320.1 | scaffold2349 | 641                     | TT                              | AA                 | AA               | INTERGENIC      |               |                    |                    |
| SNP_104704_A_668    | NW_004517320.1 | scaffold2349 | 668                     | TT                              | AA                 | AA               | INTERGENIC      |               |                    |                    |
| SNP_104705_A_1012   | NW_004517320.1 | scaffold2349 | 1012                    | TT                              | CC                 | CC               | INTERGENIC      |               |                    |                    |
| SNP_104706_A_830    | NW_004517323.1 | scaffold2352 | 830                     | TT                              | CC                 | CC               | DRR             | 101495978     | Unknown function   |                    |

| SNPs IDs          | Chromosome IDs | Chromosomes  | Physical positions (bp) | CDC Frontier (Reference genome) | (Pusa 1103 & HPNB) | (ILWC 46 & LPNB) | Sequence Components of genome | Gene accession IDs | Putative functions |
|-------------------|----------------|--------------|-------------------------|---------------------------------|--------------------|------------------|-------------------------------|--------------------|--------------------|
| SNP_104707_A_891  | NW_004517323.1 | scaffold2352 | 891                     | TT                              | CC                 | CC               | DRR                           | 101495978          | Unknown function   |
| SNP_104708_A_955  | NW_004517323.1 | scaffold2352 | 955                     | AA                              | CC                 | CC               | DRR                           | 101495978          | Unknown function   |
| SNP_104709_A_962  | NW_004517323.1 | scaffold2352 | 962                     | GG                              | AA                 | AA               | DRR                           | 101495978          | Unknown function   |
| SNP_104710_A_977  | NW_004517323.1 | scaffold2352 | 977                     | TT                              | GG                 | GG               | DRR                           | 101495978          | Unknown function   |
| SNP_104711_A_1028 | NW_004517323.1 | scaffold2352 | 1028                    | CC                              | AA                 | AA               | DRR                           | 101495978          | Unknown function   |
| SNP_104712_A_1050 | NW_004517323.1 | scaffold2352 | 1050                    | AA                              | GG                 | GG               | DRR                           | 101495978          | Unknown function   |
| SNP_104713_A_1076 | NW_004517323.1 | scaffold2352 | 1076                    | AA                              | GG                 | GG               | DRR                           | 101495978          | Unknown function   |
| SNP_104714_A_1094 | NW_004517323.1 | scaffold2352 | 1094                    | AA                              | GG                 | GG               | DRR                           | 101495978          | Unknown function   |
| SNP_104715_A_1095 | NW_004517323.1 | scaffold2352 | 1095                    | AA                              | GG                 | GG               | DRR                           | 101495978          | Unknown function   |
| SNP_104716_A_1153 | NW_004517323.1 | scaffold2352 | 1153                    | CC                              | GG                 | GG               | NON_SYNONYMOUS_CODING         | 101495978          | Unknown function   |
| SNP_104717_A_1175 | NW_004517323.1 | scaffold2352 | 1175                    | GG                              | AA                 | AA               | SYNONYMOUS_CODING             | 101495978          | Unknown function   |
| SNP_104718_A_1201 | NW_004517323.1 | scaffold2352 | 1201                    | AA                              | GG                 | GG               | NON_SYNONYMOUS_CODING         | 101495978          | Unknown function   |
| SNP_104719_A_1246 | NW_004517323.1 | scaffold2352 | 1246                    | GG                              | CC                 | CC               | NON_SYNONYMOUS_CODING         | 101495978          | Unknown function   |
| SNP_104720_A_4199 | NW_004517324.1 | scaffold2354 | 4199                    | GG                              | AA                 | AA               | INTERGENIC                    |                    |                    |
| SNP_104721_A_4202 | NW_004517324.1 | scaffold2354 | 4202                    | TT                              | AA                 | AA               | INTERGENIC                    |                    |                    |
| SNP_104722_A_4220 | NW_004517324.1 | scaffold2354 | 4220                    | TT                              | AA                 | AA               | INTERGENIC                    |                    |                    |
| SNP_104723_A_4333 | NW_004517324.1 | scaffold2354 | 4333                    | TT                              | GG                 | GG               | INTERGENIC                    |                    |                    |
| SNP_104724_A_4349 | NW_004517324.1 | scaffold2354 | 4349                    | TT                              | AA                 | AA               | INTERGENIC                    |                    |                    |
| SNP_104725_A_4424 | NW_004517324.1 | scaffold2354 | 4424                    | GG                              | CC                 | CC               | INTERGENIC                    |                    |                    |
| SNP_104726_A_4434 | NW_004517324.1 | scaffold2354 | 4434                    | AA                              | TT                 | TT               | INTERGENIC                    |                    |                    |
| SNP_104727_A_6636 | NW_004517324.1 | scaffold2354 | 6636                    | GG                              | AA                 | AA               | INTERGENIC                    |                    |                    |
| SNP_104728_A_6663 | NW_004517324.1 | scaffold2354 | 6663                    | AA                              | TT                 | TT               | INTERGENIC                    |                    |                    |

| SNPs IDs            | Chromosome IDs | Chromosomes  | Physical positions (bp) | CDC Frontier (Reference genome) | (Pusa 1103 & HPNB) | (ILWC 46 & LPNB) | Sequence genome | Components of | Gene accession IDs | Putative functions |
|---------------------|----------------|--------------|-------------------------|---------------------------------|--------------------|------------------|-----------------|---------------|--------------------|--------------------|
| SNP_104729_A_10653  | NW_004517324.1 | scaffold2354 | 10653                   | GG                              | AA                 | AA               | INTERGENIC      |               |                    |                    |
| SNP_104730_A_10958  | NW_004517324.1 | scaffold2354 | 10958                   | AA                              | GG                 | GG               | INTERGENIC      |               |                    |                    |
| SNP_104731_A_11328  | NW_004517324.1 | scaffold2354 | 11328                   | GG                              | CC                 | CC               | INTERGENIC      |               |                    |                    |
| SNP_104732_A_12296  | NW_004517324.1 | scaffold2354 | 12296                   | AA                              | CC                 | CC               | INTERGENIC      |               |                    |                    |
| SNP_104733_A_12452  | NW_004517324.1 | scaffold2354 | 12452                   | AA                              | CC                 | CC               | INTERGENIC      |               |                    |                    |
| SNP_104734_A_12567  | NW_004517324.1 | scaffold2354 | 12567                   | AA                              | GG                 | GG               | INTERGENIC      |               |                    |                    |
| SNP_104735_A_15347  | NW_004517324.1 | scaffold2354 | 15347                   | AA                              | TT                 | TT               | INTERGENIC      |               |                    |                    |
| SNP_104736_A_15392  | NW_004517324.1 | scaffold2354 | 15392                   | GG                              | CC                 | CC               | INTERGENIC      |               |                    |                    |
| SNP_104737_A_2959   | NW_004517326.1 | scaffold2356 | 2959                    | CC                              | TT                 | TT               | INTERGENIC      |               |                    |                    |
| SNP_104738_A_3164   | NW_004517326.1 | scaffold2356 | 3164                    | TT                              | CC                 | CC               | INTERGENIC      |               |                    |                    |
| SNP_104739_A_5746   | NW_004517326.1 | scaffold2356 | 5746                    | CC                              | TT                 | TT               | INTERGENIC      |               |                    |                    |
| SNP_104740_A_24436  | NW_004517326.1 | scaffold2356 | 24436                   | GG                              | TT                 | TT               | INTERGENIC      |               |                    |                    |
| SNP_104741_A_42586  | NW_004517326.1 | scaffold2356 | 42586                   | CC                              | AA                 | AA               | INTERGENIC      |               |                    |                    |
| SNP_104742_A_45403  | NW_004517326.1 | scaffold2356 | 45403                   | AA                              | GG                 | GG               | INTERGENIC      |               |                    |                    |
| SNP_104743_A_45425  | NW_004517326.1 | scaffold2356 | 45425                   | CC                              | TT                 | TT               | INTERGENIC      |               |                    |                    |
| SNP_104744_A_45440  | NW_004517326.1 | scaffold2356 | 45440                   | TT                              | CC                 | CC               | INTERGENIC      |               |                    |                    |
| SNP_104745_A_45445  | NW_004517326.1 | scaffold2356 | 45445                   | CC                              | TT                 | TT               | INTERGENIC      |               |                    |                    |
| SNP_104746_A_45454  | NW_004517326.1 | scaffold2356 | 45454                   | AA                              | GG                 | GG               | INTERGENIC      |               |                    |                    |
| SNP_104747_A_66161  | NW_004517326.1 | scaffold2356 | 66161                   | CC                              | AA                 | AA               | INTERGENIC      |               |                    |                    |
| SNP_104748_A_66162  | NW_004517326.1 | scaffold2356 | 66162                   | TT                              | CC                 | CC               | INTERGENIC      |               |                    |                    |
| SNP_104749_A_76885  | NW_004517326.1 | scaffold2356 | 76885                   | CC                              | GG                 | GG               | INTERGENIC      |               |                    |                    |
| SNP_104751_A_135084 | NW_004517326.1 | scaffold2356 | 135084                  | TT                              | CC                 | CC               | INTERGENIC      |               |                    |                    |

| SNPs IDs            | Chromosome IDs | Chromosomes  | Physical positions (bp) | CDC Frontier (Reference genome) | (Pusa 1103 & HPNB) | (ILWC 46 & LPNB) | Sequence Components of genome | Gene accession IDs | Putative functions           |
|---------------------|----------------|--------------|-------------------------|---------------------------------|--------------------|------------------|-------------------------------|--------------------|------------------------------|
| SNP_104752_A_135147 | NW_004517326.1 | scaffold2356 | 135147                  | TT                              | CC                 | CC               | INTERGENIC                    |                    |                              |
| SNP_104753_A_135162 | NW_004517326.1 | scaffold2356 | 135162                  | CC                              | TT                 | TT               | INTERGENIC                    |                    |                              |
| SNP_104755_A_136169 | NW_004517326.1 | scaffold2356 | 136169                  | CC                              | TT                 | TT               | DRR                           | 101496861          | alcohol dehydrogenase-like 5 |
| SNP_104756_A_136214 | NW_004517326.1 | scaffold2356 | 136214                  | AA                              | GG                 | GG               | DRR                           | 101496861          | alcohol dehydrogenase-like 5 |
| SNP_104757_A_136363 | NW_004517326.1 | scaffold2356 | 136363                  | TT                              | AA                 | AA               | DRR                           | 101496861          | alcohol dehydrogenase-like 5 |
| SNP_104758_A_136475 | NW_004517326.1 | scaffold2356 | 136475                  | GG                              | TT                 | TT               | NON_SYNONYMOUS_CODING         | 101496861          | alcohol dehydrogenase-like 5 |
| SNP_104759_A_136767 | NW_004517326.1 | scaffold2356 | 136767                  | TT                              | GG                 | GG               | INTRON                        | 101496861          | alcohol dehydrogenase-like 5 |
| SNP_104760_A_136822 | NW_004517326.1 | scaffold2356 | 136822                  | TT                              | CC                 | CC               | INTRON                        | 101496861          | alcohol dehydrogenase-like 5 |
| SNP_104761_A_136835 | NW_004517326.1 | scaffold2356 | 136835                  | CC                              | TT                 | TT               | INTRON                        | 101496861          | alcohol dehydrogenase-like 5 |
| SNP_104762_A_136847 | NW_004517326.1 | scaffold2356 | 136847                  | GG                              | AA                 | AA               | INTRON                        | 101496861          | alcohol dehydrogenase-like 5 |
| SNP_104763_A_137025 | NW_004517326.1 | scaffold2356 | 137025                  | GG                              | AA                 | AA               | NON_SYNONYMOUS_CODING         | 101496861          | alcohol dehydrogenase-like 5 |
| SNP_104764_A_138154 | NW_004517326.1 | scaffold2356 | 138154                  | TT                              | CC                 | CC               | INTRON                        | 101496861          | alcohol dehydrogenase-like 5 |
| SNP_104766_A_138664 | NW_004517326.1 | scaffold2356 | 138664                  | TT                              | GG                 | GG               | INTRON                        | 101496861          | alcohol dehydrogenase-like 5 |
| SNP_104767_A_138714 | NW_004517326.1 | scaffold2356 | 138714                  | CC                              | TT                 | TT               | INTRON                        | 101496861          | alcohol dehydrogenase-like 5 |
| SNP_104768_A_138729 | NW_004517326.1 | scaffold2356 | 138729                  | GG                              | AA                 | AA               | INTRON                        | 101496861          | alcohol dehydrogenase-like 5 |
| SNP_104771_A_147622 | NW_004517326.1 | scaffold2356 | 147622                  | GG                              | AA                 | AA               | INTERGENIC                    |                    |                              |
| SNP_104772_A_147994 | NW_004517326.1 | scaffold2356 | 147994                  | GG                              | TT                 | TT               | INTERGENIC                    |                    |                              |
| SNP_104773_A_181010 | NW_004517326.1 | scaffold2356 | 181010                  | AA                              | TT                 | TT               | INTERGENIC                    |                    |                              |
| SNP_104774_A_205643 | NW_004517326.1 | scaffold2356 | 205643                  | AA                              | CC                 | CC               | INTRON                        | 101498398          | Unknown function             |
| SNP_104775_A_205878 | NW_004517326.1 | scaffold2356 | 205878                  | AA                              | CC                 | CC               | INTRON                        | 101498398          | Unknown function             |
| SNP_104776_A_245039 | NW_004517326.1 | scaffold2356 | 245039                  | TT                              | CC                 | CC               | INTRON                        | 101498398          | Unknown function             |
| SNP_104777_A_257466 | NW_004517326.1 | scaffold2356 | 257466                  | TT                              | CC                 | CC               | INTERGENIC                    |                    |                              |

| SNPs IDs            | Chromosome IDs | Chromosomes  | Physical positions (bp) | CDC Frontier (Reference genome) | (Pusa 1103 & HPNB) | (ILWC 46 & LPNB) | Sequence genome | Components of | Gene accession IDs | Putative functions |
|---------------------|----------------|--------------|-------------------------|---------------------------------|--------------------|------------------|-----------------|---------------|--------------------|--------------------|
| SNP_104778_A_269082 | NW_004517326.1 | scaffold2356 | 269082                  | GG                              | AA                 | AA               | INTERGENIC      |               |                    |                    |
| SNP_104779_A_294255 | NW_004517326.1 | scaffold2356 | 294255                  | AA                              | GG                 | GG               | INTERGENIC      |               |                    |                    |
| SNP_104780_A_294408 | NW_004517326.1 | scaffold2356 | 294408                  | GG                              | TT                 | TT               | INTERGENIC      |               |                    |                    |
| SNP_104781_A_294696 | NW_004517326.1 | scaffold2356 | 294696                  | AA                              | GG                 | GG               | INTERGENIC      |               |                    |                    |
| SNP_104782_A_294700 | NW_004517326.1 | scaffold2356 | 294700                  | TT                              | CC                 | CC               | INTERGENIC      |               |                    |                    |
| SNP_104783_A_308325 | NW_004517326.1 | scaffold2356 | 308325                  | AA                              | GG                 | GG               | INTERGENIC      |               |                    |                    |
| SNP_104784_A_308328 | NW_004517326.1 | scaffold2356 | 308328                  | GG                              | AA                 | AA               | INTERGENIC      |               |                    |                    |
| SNP_104785_A_31021  | NW_004517327.1 | scaffold2357 | 31021                   | CC                              | TT                 | TT               | INTERGENIC      |               |                    |                    |
| SNP_104786_A_159    | NW_004517328.1 | scaffold2358 | 159                     | TT                              | AA                 | AA               | INTERGENIC      |               |                    |                    |
| SNP_104787_A_215    | NW_004517328.1 | scaffold2358 | 215                     | TT                              | CC                 | CC               | INTERGENIC      |               |                    |                    |
| SNP_104788_A_259    | NW_004517328.1 | scaffold2358 | 259                     | GG                              | AA                 | AA               | INTERGENIC      |               |                    |                    |
| SNP_104789_A_601    | NW_004517328.1 | scaffold2358 | 601                     | CC                              | AA                 | AA               | INTERGENIC      |               |                    |                    |
| SNP_104790_A_662    | NW_004517328.1 | scaffold2358 | 662                     | AA                              | GG                 | GG               | INTERGENIC      |               |                    |                    |
| SNP_104791_A_799    | NW_004517328.1 | scaffold2358 | 799                     | AA                              | GG                 | GG               | INTERGENIC      |               |                    |                    |
| SNP_104792_A_873    | NW_004517328.1 | scaffold2358 | 873                     | AA                              | GG                 | GG               | INTERGENIC      |               |                    |                    |
| SNP_104793_A_892    | NW_004517328.1 | scaffold2358 | 892                     | AA                              | GG                 | GG               | INTERGENIC      |               |                    |                    |
| SNP_104794_A_921    | NW_004517328.1 | scaffold2358 | 921                     | TT                              | CC                 | CC               | INTERGENIC      |               |                    |                    |
| SNP_104795_A_1010   | NW_004517328.1 | scaffold2358 | 1010                    | TT                              | CC                 | CC               | INTERGENIC      |               |                    |                    |
| SNP_104796_A_1143   | NW_004517328.1 | scaffold2358 | 1143                    | TT                              | CC                 | CC               | INTERGENIC      |               |                    |                    |
| SNP_104797_A_1171   | NW_004517328.1 | scaffold2358 | 1171                    | GG                              | CC                 | CC               | INTERGENIC      |               |                    |                    |
| SNP_104799_A_1443   | NW_004517328.1 | scaffold2358 | 1443                    | AA                              | TT                 | TT               | INTERGENIC      |               |                    |                    |
| SNP_104800_A_1508   | NW_004517328.1 | scaffold2358 | 1508                    | AA                              | GG                 | GG               | INTERGENIC      |               |                    |                    |

| SNPs IDs           | Chromosome IDs | Chromosomes  | Physical positions (bp) | CDC Frontier (Reference genome) | (Pusa 1103 & HPNB) | (ILWC 46 & LPNB) | Sequence genome | Components of | Gene accession IDs | Putative functions |
|--------------------|----------------|--------------|-------------------------|---------------------------------|--------------------|------------------|-----------------|---------------|--------------------|--------------------|
| SNP_104801_A_1521  | NW_004517328.1 | scaffold2358 | 1521                    | TT                              | AA                 | AA               | INTERGENIC      |               |                    |                    |
| SNP_104802_A_1792  | NW_004517328.1 | scaffold2358 | 1792                    | CC                              | TT                 | TT               | INTERGENIC      |               |                    |                    |
| SNP_104803_A_2249  | NW_004517328.1 | scaffold2358 | 2249                    | GG                              | TT                 | TT               | INTERGENIC      |               |                    |                    |
| SNP_104804_A_2368  | NW_004517328.1 | scaffold2358 | 2368                    | TT                              | CC                 | CC               | INTERGENIC      |               |                    |                    |
| SNP_104805_A_2384  | NW_004517328.1 | scaffold2358 | 2384                    | CC                              | TT                 | TT               | INTERGENIC      |               |                    |                    |
| SNP_104806_A_2469  | NW_004517328.1 | scaffold2358 | 2469                    | AA                              | GG                 | GG               | INTERGENIC      |               |                    |                    |
| SNP_104807_A_2500  | NW_004517328.1 | scaffold2358 | 2500                    | TT                              | CC                 | CC               | INTERGENIC      |               |                    |                    |
| SNP_104808_A_2575  | NW_004517328.1 | scaffold2358 | 2575                    | AA                              | GG                 | GG               | INTERGENIC      |               |                    |                    |
| SNP_104809_A_2748  | NW_004517328.1 | scaffold2358 | 2748                    | TT                              | CC                 | CC               | INTERGENIC      |               |                    |                    |
| SNP_104810_A_13877 | NW_004517328.1 | scaffold2358 | 13877                   | CC                              | TT                 | TT               | INTERGENIC      |               |                    |                    |
| SNP_104811_A_13885 | NW_004517328.1 | scaffold2358 | 13885                   | AA                              | GG                 | GG               | INTERGENIC      |               |                    |                    |
| SNP_104812_A_16164 | NW_004517328.1 | scaffold2358 | 16164                   | TT                              | AA                 | AA               | INTERGENIC      |               |                    |                    |
| SNP_104813_A_16274 | NW_004517328.1 | scaffold2358 | 16274                   | TT                              | CC                 | CC               | INTERGENIC      |               |                    |                    |
| SNP_104814_A_16437 | NW_004517328.1 | scaffold2358 | 16437                   | GG                              | CC                 | CC               | INTERGENIC      |               |                    |                    |
| SNP_104815_A_16446 | NW_004517328.1 | scaffold2358 | 16446                   | GG                              | AA                 | AA               | INTERGENIC      |               |                    |                    |
| SNP_104816_A_16613 | NW_004517328.1 | scaffold2358 | 16613                   | TT                              | CC                 | CC               | INTERGENIC      |               |                    |                    |
| SNP_104817_A_16646 | NW_004517328.1 | scaffold2358 | 16646                   | GG                              | CC                 | CC               | INTERGENIC      |               |                    |                    |
| SNP_104818_A_16659 | NW_004517328.1 | scaffold2358 | 16659                   | TT                              | CC                 | CC               | INTERGENIC      |               |                    |                    |
| SNP_104819_A_16678 | NW_004517328.1 | scaffold2358 | 16678                   | GG                              | AA                 | AA               | INTERGENIC      |               |                    |                    |
| SNP_104820_A_16686 | NW_004517328.1 | scaffold2358 | 16686                   | AA                              | TT                 | TT               | INTERGENIC      |               |                    |                    |
| SNP_104821_A_16688 | NW_004517328.1 | scaffold2358 | 16688                   | TT                              | CC                 | CC               | INTERGENIC      |               |                    |                    |
| SNP_104822_A_16805 | NW_004517328.1 | scaffold2358 | 16805                   | CC                              | AA                 | AA               | INTERGENIC      |               |                    |                    |

| SNPs IDs           | Chromosome IDs | Chromosomes  | Physical positions (bp) | CDC Frontier (Reference genome) | (Pusa 1103 & HPNB) | (ILWC 46 & LPNB) | Sequence Components of genome | Gene accession IDs | Putative functions           |
|--------------------|----------------|--------------|-------------------------|---------------------------------|--------------------|------------------|-------------------------------|--------------------|------------------------------|
| SNP_104823_A_16828 | NW_004517328.1 | scaffold2358 | 16828                   | CC                              | TT                 | TT               | INTERGENIC                    |                    |                              |
| SNP_104824_A_17474 | NW_004517328.1 | scaffold2358 | 17474                   | CC                              | GG                 | GG               | INTERGENIC                    |                    |                              |
| SNP_104825_A_17527 | NW_004517328.1 | scaffold2358 | 17527                   | AA                              | GG                 | GG               | INTERGENIC                    |                    |                              |
| SNP_104826_A_19696 | NW_004517328.1 | scaffold2358 | 19696                   | CC                              | TT                 | TT               | INTERGENIC                    |                    |                              |
| SNP_104827_A_19731 | NW_004517328.1 | scaffold2358 | 19731                   | TT                              | CC                 | CC               | INTERGENIC                    |                    |                              |
| SNP_104828_A_19782 | NW_004517328.1 | scaffold2358 | 19782                   | AA                              | CC                 | CC               | INTERGENIC                    |                    |                              |
| SNP_104829_A_19877 | NW_004517328.1 | scaffold2358 | 19877                   | AA                              | TT                 | TT               | INTERGENIC                    |                    |                              |
| SNP_104830_A_19878 | NW_004517328.1 | scaffold2358 | 19878                   | TT                              | GG                 | GG               | INTERGENIC                    |                    |                              |
| SNP_104831_A_20003 | NW_004517328.1 | scaffold2358 | 20003                   | TT                              | GG                 | GG               | INTERGENIC                    |                    |                              |
| SNP_104832_A_20744 | NW_004517328.1 | scaffold2358 | 20744                   | AA                              | TT                 | TT               | INTERGENIC                    |                    |                              |
| SNP_104833_A_36173 | NW_004517328.1 | scaffold2358 | 36173                   | AA                              | TT                 | TT               | INTERGENIC                    |                    |                              |
| SNP_104834_A_36223 | NW_004517328.1 | scaffold2358 | 36223                   | CC                              | AA                 | AA               | INTERGENIC                    |                    |                              |
| SNP_104835_A_36635 | NW_004517328.1 | scaffold2358 | 36635                   | GG                              | AA                 | AA               | INTERGENIC                    |                    |                              |
| SNP_104837_A_55127 | NW_004517328.1 | scaffold2358 | 55127                   | AA                              | GG                 | GG               | DRR                           | 101499986          | uncharacterized LOC101499986 |
| SNP_104838_A_55478 | NW_004517328.1 | scaffold2358 | 55478                   | TT                              | CC                 | CC               | NON_SYNONYMOUS_CODING         | 101499986          | uncharacterized LOC101499986 |
| SNP_104839_A_13639 | NW_004517330.1 | scaffold2361 | 13639                   | AA                              | CC                 | CC               | INTERGENIC                    |                    |                              |
| SNP_104840_A_19123 | NW_004517330.1 | scaffold2361 | 19123                   | AA                              | TT                 | TT               | INTERGENIC                    |                    |                              |
| SNP_104841_A_19124 | NW_004517330.1 | scaffold2361 | 19124                   | AA                              | TT                 | TT               | INTERGENIC                    |                    |                              |
| SNP_104842_A_23619 | NW_004517330.1 | scaffold2361 | 23619                   | GG                              | AA                 | AA               | INTERGENIC                    |                    |                              |
| SNP_104843_A_40121 | NW_004517330.1 | scaffold2361 | 40121                   | AA                              | TT                 | TT               | INTERGENIC                    |                    |                              |
| SNP_104844_A_42220 | NW_004517330.1 | scaffold2361 | 42220                   | TT                              | CC                 | CC               | INTERGENIC                    |                    |                              |
| SNP_104845_A_45365 | NW_004517330.1 | scaffold2361 | 45365                   | AA                              | GG                 | GG               | INTERGENIC                    |                    |                              |



| SNPs IDs           | Chromosome IDs | Chromosomes  | Physical positions (bp) | CDC Frontier (Reference genome) | (Pusa 1103 & HPNB) | (ILWC 46 & LPNB) | Sequence genome | Components of | Gene accession IDs | Putative functions |
|--------------------|----------------|--------------|-------------------------|---------------------------------|--------------------|------------------|-----------------|---------------|--------------------|--------------------|
| SNP_104846_A_45398 | NW_004517330.1 | scaffold2361 | 45398                   | AA                              | GG                 | GG               | INTERGENIC      |               |                    |                    |
| SNP_104847_A_45471 | NW_004517330.1 | scaffold2361 | 45471                   | TT                              | CC                 | CC               | INTERGENIC      |               |                    |                    |
| SNP_104848_A_45481 | NW_004517330.1 | scaffold2361 | 45481                   | CC                              | GG                 | GG               | INTERGENIC      |               |                    |                    |
| SNP_104849_A_778   | NW_004517333.1 | scaffold2366 | 778                     | GG                              | AA                 | AA               | INTERGENIC      |               |                    |                    |
| SNP_104850_A_19567 | NW_004517333.1 | scaffold2366 | 19567                   | GG                              | CC                 | CC               | INTERGENIC      |               |                    |                    |
| SNP_104851_A_19626 | NW_004517333.1 | scaffold2366 | 19626                   | GG                              | AA                 | AA               | INTERGENIC      |               |                    |                    |
| SNP_104852_A_19653 | NW_004517333.1 | scaffold2366 | 19653                   | CC                              | AA                 | AA               | INTERGENIC      |               |                    |                    |
| SNP_104853_A_19774 | NW_004517333.1 | scaffold2366 | 19774                   | GG                              | AA                 | AA               | INTERGENIC      |               |                    |                    |
| SNP_104854_A_19783 | NW_004517333.1 | scaffold2366 | 19783                   | GG                              | AA                 | AA               | INTERGENIC      |               |                    |                    |
| SNP_104855_A_19807 | NW_004517333.1 | scaffold2366 | 19807                   | CC                              | TT                 | TT               | INTERGENIC      |               |                    |                    |
| SNP_104856_A_19816 | NW_004517333.1 | scaffold2366 | 19816                   | GG                              | AA                 | AA               | INTERGENIC      |               |                    |                    |
| SNP_104857_A_19848 | NW_004517333.1 | scaffold2366 | 19848                   | GG                              | AA                 | AA               | INTERGENIC      |               |                    |                    |
| SNP_104858_A_19852 | NW_004517333.1 | scaffold2366 | 19852                   | GG                              | AA                 | AA               | INTERGENIC      |               |                    |                    |
| SNP_104859_A_19870 | NW_004517333.1 | scaffold2366 | 19870                   | AA                              | GG                 | GG               | INTERGENIC      |               |                    |                    |
| SNP_104860_A_19893 | NW_004517333.1 | scaffold2366 | 19893                   | AA                              | CC                 | CC               | INTERGENIC      |               |                    |                    |
| SNP_104861_A_19960 | NW_004517333.1 | scaffold2366 | 19960                   | CC                              | TT                 | TT               | INTERGENIC      |               |                    |                    |
| SNP_104862_A_21011 | NW_004517333.1 | scaffold2366 | 21011                   | AA                              | CC                 | CC               | INTERGENIC      |               |                    |                    |
| SNP_104863_A_21040 | NW_004517333.1 | scaffold2366 | 21040                   | AA                              | CC                 | CC               | INTERGENIC      |               |                    |                    |
| SNP_104864_A_21095 | NW_004517333.1 | scaffold2366 | 21095                   | GG                              | TT                 | TT               | INTERGENIC      |               |                    |                    |
| SNP_104865_A_21243 | NW_004517333.1 | scaffold2366 | 21243                   | CC                              | TT                 | TT               | INTERGENIC      |               |                    |                    |
| SNP_104866_A_21251 | NW_004517333.1 | scaffold2366 | 21251                   | GG                              | TT                 | TT               | INTERGENIC      |               |                    |                    |
| SNP_104867_A_21252 | NW_004517333.1 | scaffold2366 | 21252                   | GG                              | AA                 | AA               | INTERGENIC      |               |                    |                    |

| SNPs IDs           | Chromosome IDs | Chromosomes  | Physical positions (bp) | CDC Frontier (Reference genome) | (Pusa 1103 & HPNB) | (ILWC 46 & LPNB) | Sequence genome | Components of | Gene accession IDs | Putative functions |
|--------------------|----------------|--------------|-------------------------|---------------------------------|--------------------|------------------|-----------------|---------------|--------------------|--------------------|
| SNP_104868_A_21258 | NW_004517333.1 | scaffold2366 | 21258                   | TT                              | CC                 | CC               | INTERGENIC      |               |                    |                    |
| SNP_104869_A_21332 | NW_004517333.1 | scaffold2366 | 21332                   | TT                              | GG                 | GG               | INTERGENIC      |               |                    |                    |
| SNP_104870_A_21370 | NW_004517333.1 | scaffold2366 | 21370                   | AA                              | GG                 | GG               | INTERGENIC      |               |                    |                    |
| SNP_104871_A_21383 | NW_004517333.1 | scaffold2366 | 21383                   | TT                              | CC                 | CC               | INTERGENIC      |               |                    |                    |
| SNP_104872_A_21730 | NW_004517333.1 | scaffold2366 | 21730                   | TT                              | GG                 | GG               | INTERGENIC      |               |                    |                    |
| SNP_104873_A_24368 | NW_004517333.1 | scaffold2366 | 24368                   | GG                              | CC                 | CC               | INTERGENIC      |               |                    |                    |
| SNP_104874_A_730   | NW_004517334.1 | scaffold2367 | 730                     | TT                              | AA                 | AA               | INTERGENIC      |               |                    |                    |
| SNP_104875_A_745   | NW_004517334.1 | scaffold2367 | 745                     | AA                              | CC                 | CC               | INTERGENIC      |               |                    |                    |
| SNP_104876_A_777   | NW_004517334.1 | scaffold2367 | 777                     | CC                              | GG                 | GG               | INTERGENIC      |               |                    |                    |
| SNP_104877_A_823   | NW_004517334.1 | scaffold2367 | 823                     | AA                              | CC                 | CC               | INTERGENIC      |               |                    |                    |
| SNP_104878_A_1872  | NW_004517334.1 | scaffold2367 | 1872                    | TT                              | AA                 | AA               | INTERGENIC      |               |                    |                    |
| SNP_104879_A_6270  | NW_004517334.1 | scaffold2367 | 6270                    | TT                              | CC                 | CC               | INTERGENIC      |               |                    |                    |
| SNP_104880_A_6521  | NW_004517334.1 | scaffold2367 | 6521                    | TT                              | GG                 | GG               | INTERGENIC      |               |                    |                    |
| SNP_104881_A_2135  | NW_004517335.1 | scaffold2368 | 2135                    | TT                              | AA                 | AA               | INTERGENIC      |               |                    |                    |
| SNP_104882_A_2804  | NW_004517335.1 | scaffold2368 | 2804                    | CC                              | GG                 | GG               | INTERGENIC      |               |                    |                    |
| SNP_104883_A_25806 | NW_004517335.1 | scaffold2368 | 25806                   | TT                              | AA                 | AA               | INTERGENIC      |               |                    |                    |
| SNP_104884_A_25842 | NW_004517335.1 | scaffold2368 | 25842                   | AA                              | CC                 | CC               | INTERGENIC      |               |                    |                    |
| SNP_104885_A_25846 | NW_004517335.1 | scaffold2368 | 25846                   | TT                              | CC                 | CC               | INTERGENIC      |               |                    |                    |
| SNP_104886_A_26085 | NW_004517335.1 | scaffold2368 | 26085                   | GG                              | TT                 | TT               | INTERGENIC      |               |                    |                    |
| SNP_104887_A_26193 | NW_004517335.1 | scaffold2368 | 26193                   | AA                              | TT                 | TT               | INTERGENIC      |               |                    |                    |
| SNP_104888_A_26287 | NW_004517335.1 | scaffold2368 | 26287                   | CC                              | TT                 | TT               | INTERGENIC      |               |                    |                    |
| SNP_104889_A_26361 | NW_004517335.1 | scaffold2368 | 26361                   | GG                              | AA                 | AA               | INTERGENIC      |               |                    |                    |

| SNPs IDs           | Chromosome IDs | Chromosomes  | Physical positions (bp) | CDC Frontier (Reference genome) | (Pusa 1103 & HPNB) | (ILWC 46 & LPNB) | Sequence Components of genome | Gene accession IDs | Putative functions           |
|--------------------|----------------|--------------|-------------------------|---------------------------------|--------------------|------------------|-------------------------------|--------------------|------------------------------|
| SNP_104890_A_26376 | NW_004517335.1 | scaffold2368 | 26376                   | CC                              | GG                 | GG               | INTERGENIC                    |                    |                              |
| SNP_104891_A_26401 | NW_004517335.1 | scaffold2368 | 26401                   | TT                              | GG                 | GG               | INTERGENIC                    |                    |                              |
| SNP_104892_A_26413 | NW_004517335.1 | scaffold2368 | 26413                   | AA                              | GG                 | GG               | INTERGENIC                    |                    |                              |
| SNP_104893_A_26458 | NW_004517335.1 | scaffold2368 | 26458                   | AA                              | TT                 | TT               | INTERGENIC                    |                    |                              |
| SNP_104894_A_40509 | NW_004517335.1 | scaffold2368 | 40509                   | CC                              | TT                 | TT               | INTERGENIC                    |                    |                              |
| SNP_104895_A_40511 | NW_004517335.1 | scaffold2368 | 40511                   | TT                              | AA                 | AA               | INTERGENIC                    |                    |                              |
| SNP_104897_A_53734 | NW_004517335.1 | scaffold2368 | 53734                   | GG                              | AA                 | AA               | DRR                           | 101500331          | uncharacterized LOC101500331 |
| SNP_104898_A_53761 | NW_004517335.1 | scaffold2368 | 53761                   | TT                              | AA                 | AA               | DRR                           | 101500331          | uncharacterized LOC101500331 |
| SNP_104899_A_53778 | NW_004517335.1 | scaffold2368 | 53778                   | GG                              | AA                 | AA               | DRR                           | 101500331          | uncharacterized LOC101500331 |
| SNP_104900_A_53790 | NW_004517335.1 | scaffold2368 | 53790                   | TT                              | CC                 | CC               | DRR                           | 101500331          | uncharacterized LOC101500331 |
| SNP_104901_A_53983 | NW_004517335.1 | scaffold2368 | 53983                   | AA                              | GG                 | GG               | DRR                           | 101500331          | uncharacterized LOC101500331 |
| SNP_104902_A_53988 | NW_004517335.1 | scaffold2368 | 53988                   | AA                              | CC                 | CC               | DRR                           | 101500331          | uncharacterized LOC101500331 |
| SNP_104903_A_53989 | NW_004517335.1 | scaffold2368 | 53989                   | CC                              | TT                 | TT               | DRR                           | 101500331          | uncharacterized LOC101500331 |
| SNP_104904_A_53990 | NW_004517335.1 | scaffold2368 | 53990                   | AA                              | TT                 | TT               | DRR                           | 101500331          | uncharacterized LOC101500331 |
| SNP_104905_A_54043 | NW_004517335.1 | scaffold2368 | 54043                   | GG                              | CC                 | CC               | DRR                           | 101500331          | uncharacterized LOC101500331 |
| SNP_104906_A_54045 | NW_004517335.1 | scaffold2368 | 54045                   | CC                              | GG                 | GG               | DRR                           | 101500331          | uncharacterized LOC101500331 |
| SNP_104907_A_54058 | NW_004517335.1 | scaffold2368 | 54058                   | CC                              | AA                 | AA               | DRR                           | 101500331          | uncharacterized LOC101500331 |
| SNP_104908_A_54089 | NW_004517335.1 | scaffold2368 | 54089                   | TT                              | CC                 | CC               | DRR                           | 101500331          | uncharacterized LOC101500331 |
| SNP_104911_A_54500 | NW_004517335.1 | scaffold2368 | 54500                   | GG                              | AA                 | AA               | INTRON                        | id217744           | Unknown function             |
| SNP_104912_A_54563 | NW_004517335.1 | scaffold2368 | 54563                   | TT                              | CC                 | CC               | INTRON                        | id217744           | Unknown function             |
| SNP_104913_A_54818 | NW_004517335.1 | scaffold2368 | 54818                   | AA                              | GG                 | GG               | INTRON                        | id217744           | Unknown function             |
| SNP_104914_A_54829 | NW_004517335.1 | scaffold2368 | 54829                   | GG                              | TT                 | TT               | INTRON                        | id217744           | Unknown function             |

| SNPs IDs           | Chromosome IDs | Chromosomes  | Physical positions (bp) | CDC Frontier (Reference genome) | (Pusa 1103 & HPNB) | (ILWC 46 & LPNB) | Sequence Components of genome | Gene accession IDs | Putative functions           |
|--------------------|----------------|--------------|-------------------------|---------------------------------|--------------------|------------------|-------------------------------|--------------------|------------------------------|
| SNP_104915_A_55139 | NW_004517335.1 | scaffold2368 | 55139                   | CC                              | TT                 | TT               | INTRON                        | id217744           | Unknown function             |
| SNP_104916_A_55975 | NW_004517335.1 | scaffold2368 | 55975                   | CC                              | TT                 | TT               | URR                           | 101500331          | uncharacterized LOC101500331 |
| SNP_104918_A_60250 | NW_004517335.1 | scaffold2368 | 60250                   | CC                              | TT                 | TT               | UPSTREAM                      | id217744           | Unknown function             |
| SNP_104919_A_72607 | NW_004517338.1 | scaffold2371 | 72607                   | TT                              | CC                 | CC               | INTERGENIC                    |                    |                              |
| SNP_104920_A_72643 | NW_004517338.1 | scaffold2371 | 72643                   | TT                              | CC                 | CC               | INTERGENIC                    |                    |                              |
| SNP_104921_A_72757 | NW_004517338.1 | scaffold2371 | 72757                   | GG                              | CC                 | CC               | INTERGENIC                    |                    |                              |
| SNP_104922_A_73060 | NW_004517338.1 | scaffold2371 | 73060                   | GG                              | AA                 | AA               | INTERGENIC                    |                    |                              |
| SNP_104924_A_73172 | NW_004517338.1 | scaffold2371 | 73172                   | TT                              | CC                 | CC               | INTERGENIC                    |                    |                              |
| SNP_104925_A_73258 | NW_004517338.1 | scaffold2371 | 73258                   | CC                              | TT                 | TT               | INTERGENIC                    |                    |                              |
| SNP_104926_A_73260 | NW_004517338.1 | scaffold2371 | 73260                   | GG                              | AA                 | AA               | INTERGENIC                    |                    |                              |
| SNP_104927_A_73264 | NW_004517338.1 | scaffold2371 | 73264                   | AA                              | GG                 | GG               | INTERGENIC                    |                    |                              |
| SNP_104928_A_73277 | NW_004517338.1 | scaffold2371 | 73277                   | AA                              | GG                 | GG               | INTERGENIC                    |                    |                              |
| SNP_104929_A_73289 | NW_004517338.1 | scaffold2371 | 73289                   | TT                              | CC                 | CC               | INTERGENIC                    |                    |                              |
| SNP_104930_A_73300 | NW_004517338.1 | scaffold2371 | 73300                   | AA                              | GG                 | TT               | INTERGENIC                    |                    |                              |
| SNP_104931_A_73320 | NW_004517338.1 | scaffold2371 | 73320                   | CC                              | TT                 | TT               | INTERGENIC                    |                    |                              |
| SNP_104933_A_73388 | NW_004517338.1 | scaffold2371 | 73388                   | TT                              | GG                 | GG               | INTERGENIC                    |                    |                              |
| SNP_104934_A_73517 | NW_004517338.1 | scaffold2371 | 73517                   | AA                              | CC                 | CC               | INTERGENIC                    |                    |                              |
| SNP_104935_A_73646 | NW_004517338.1 | scaffold2371 | 73646                   | GG                              | AA                 | AA               | INTERGENIC                    |                    |                              |
| SNP_104936_A_73724 | NW_004517338.1 | scaffold2371 | 73724                   | AA                              | GG                 | GG               | INTERGENIC                    |                    |                              |
| SNP_104937_A_73750 | NW_004517338.1 | scaffold2371 | 73750                   | GG                              | TT                 | TT               | INTERGENIC                    |                    |                              |
| SNP_104938_A_73751 | NW_004517338.1 | scaffold2371 | 73751                   | GG                              | CC                 | CC               | INTERGENIC                    |                    |                              |
| SNP_104940_A_73874 | NW_004517338.1 | scaffold2371 | 73874                   | TT                              | AA                 | AA               | INTERGENIC                    |                    |                              |

| SNPs IDs            | Chromosome IDs | Chromosomes  | Physical positions (bp) | CDC Frontier (Reference genome) | (Pusa 1103 & HPNB) | (ILWC 46 & LPNB) | Sequence genome | Components of | Gene accession IDs | Putative functions |
|---------------------|----------------|--------------|-------------------------|---------------------------------|--------------------|------------------|-----------------|---------------|--------------------|--------------------|
| SNP_104941_A_73878  | NW_004517338.1 | scaffold2371 | 73878                   | CC                              | AA                 | AA               | INTERGENIC      |               |                    |                    |
| SNP_104942_A_74041  | NW_004517338.1 | scaffold2371 | 74041                   | TT                              | AA                 | AA               | INTERGENIC      |               |                    |                    |
| SNP_104943_A_74125  | NW_004517338.1 | scaffold2371 | 74125                   | AA                              | GG                 | GG               | INTERGENIC      |               |                    |                    |
| SNP_104944_A_74252  | NW_004517338.1 | scaffold2371 | 74252                   | AA                              | TT                 | TT               | INTERGENIC      |               |                    |                    |
| SNP_104945_A_74269  | NW_004517338.1 | scaffold2371 | 74269                   | CC                              | TT                 | TT               | INTERGENIC      |               |                    |                    |
| SNP_104946_A_74386  | NW_004517338.1 | scaffold2371 | 74386                   | AA                              | GG                 | GG               | INTERGENIC      |               |                    |                    |
| SNP_104947_A_74447  | NW_004517338.1 | scaffold2371 | 74447                   | GG                              | AA                 | AA               | INTERGENIC      |               |                    |                    |
| SNP_104948_A_74493  | NW_004517338.1 | scaffold2371 | 74493                   | GG                              | AA                 | AA               | INTERGENIC      |               |                    |                    |
| SNP_104949_A_74605  | NW_004517338.1 | scaffold2371 | 74605                   | TT                              | AA                 | AA               | INTERGENIC      |               |                    |                    |
| SNP_104950_A_74606  | NW_004517338.1 | scaffold2371 | 74606                   | TT                              | AA                 | AA               | INTERGENIC      |               |                    |                    |
| SNP_104951_A_74729  | NW_004517338.1 | scaffold2371 | 74729                   | TT                              | GG                 | GG               | INTERGENIC      |               |                    |                    |
| SNP_104952_A_79815  | NW_004517338.1 | scaffold2371 | 79815                   | GG                              | AA                 | AA               | INTERGENIC      |               |                    |                    |
| SNP_104953_A_92252  | NW_004517338.1 | scaffold2371 | 92252                   | GG                              | TT                 | TT               | INTERGENIC      |               |                    |                    |
| SNP_104954_A_92297  | NW_004517338.1 | scaffold2371 | 92297                   | TT                              | GG                 | GG               | INTERGENIC      |               |                    |                    |
| SNP_104955_A_92441  | NW_004517338.1 | scaffold2371 | 92441                   | CC                              | AA                 | AA               | INTERGENIC      |               |                    |                    |
| SNP_104956_A_92822  | NW_004517338.1 | scaffold2371 | 92822                   | GG                              | CC                 | CC               | INTERGENIC      |               |                    |                    |
| SNP_104957_A_92898  | NW_004517338.1 | scaffold2371 | 92898                   | AA                              | GG                 | GG               | INTERGENIC      |               |                    |                    |
| SNP_104958_A_92962  | NW_004517338.1 | scaffold2371 | 92962                   | CC                              | GG                 | GG               | INTERGENIC      |               |                    |                    |
| SNP_104959_A_125173 | NW_004517338.1 | scaffold2371 | 125173                  | AA                              | GG                 | GG               | INTERGENIC      |               |                    |                    |
| SNP_104960_A_127786 | NW_004517338.1 | scaffold2371 | 127786                  | TT                              | CC                 | CC               | INTERGENIC      |               |                    |                    |
| SNP_104961_A_127816 | NW_004517338.1 | scaffold2371 | 127816                  | TT                              | CC                 | CC               | INTERGENIC      |               |                    |                    |
| SNP_104962_A_149904 | NW_004517338.1 | scaffold2371 | 149904                  | AA                              | GG                 | GG               | INTERGENIC      |               |                    |                    |

| SNPs IDs            | Chromosome IDs | Chromosomes  | Physical positions (bp) | CDC Frontier (Reference genome) | (Pusa 1103 & HPNB) | (ILWC 46 & LPNB) | Sequence genome | Components of | Gene accession IDs | Putative functions |
|---------------------|----------------|--------------|-------------------------|---------------------------------|--------------------|------------------|-----------------|---------------|--------------------|--------------------|
| SNP_104964_A_150100 | NW_004517338.1 | scaffold2371 | 150100                  | AA                              | TT                 | TT               | INTERGENIC      |               |                    |                    |
| SNP_104965_A_150233 | NW_004517338.1 | scaffold2371 | 150233                  | TT                              | AA                 | AA               | INTERGENIC      |               |                    |                    |
| SNP_104966_A_150237 | NW_004517338.1 | scaffold2371 | 150237                  | TT                              | AA                 | AA               | INTERGENIC      |               |                    |                    |
| SNP_104967_A_150240 | NW_004517338.1 | scaffold2371 | 150240                  | TT                              | AA                 | AA               | INTERGENIC      |               |                    |                    |
| SNP_104968_A_150289 | NW_004517338.1 | scaffold2371 | 150289                  | AA                              | GG                 | GG               | INTERGENIC      |               |                    |                    |
| SNP_104969_A_150308 | NW_004517338.1 | scaffold2371 | 150308                  | TT                              | AA                 | AA               | INTERGENIC      |               |                    |                    |
| SNP_104970_A_150319 | NW_004517338.1 | scaffold2371 | 150319                  | AA                              | GG                 | GG               | INTERGENIC      |               |                    |                    |
| SNP_104971_A_150493 | NW_004517338.1 | scaffold2371 | 150493                  | AA                              | TT                 | TT               | INTERGENIC      |               |                    |                    |
| SNP_104972_A_162522 | NW_004517338.1 | scaffold2371 | 162522                  | GG                              | AA                 | AA               | INTERGENIC      |               |                    |                    |
| SNP_104973_A_162526 | NW_004517338.1 | scaffold2371 | 162526                  | GG                              | AA                 | AA               | INTERGENIC      |               |                    |                    |
| SNP_104974_A_168235 | NW_004517338.1 | scaffold2371 | 168235                  | AA                              | GG                 | GG               | INTERGENIC      |               |                    |                    |
| SNP_104975_A_171998 | NW_004517338.1 | scaffold2371 | 171998                  | AA                              | GG                 | GG               | INTERGENIC      |               |                    |                    |
| SNP_104976_A_172026 | NW_004517338.1 | scaffold2371 | 172026                  | AA                              | GG                 | GG               | INTERGENIC      |               |                    |                    |
| SNP_104977_A_174298 | NW_004517338.1 | scaffold2371 | 174298                  | AA                              | GG                 | GG               | INTERGENIC      |               |                    |                    |
| SNP_104978_A_199557 | NW_004517338.1 | scaffold2371 | 199557                  | TT                              | GG                 | GG               | INTERGENIC      |               |                    |                    |
| SNP_104979_A_199579 | NW_004517338.1 | scaffold2371 | 199579                  | TT                              | CC                 | CC               | INTERGENIC      |               |                    |                    |
| SNP_104980_A_199825 | NW_004517338.1 | scaffold2371 | 199825                  | GG                              | AA                 | AA               | INTERGENIC      |               |                    |                    |
| SNP_104981_A_224528 | NW_004517338.1 | scaffold2371 | 224528                  | AA                              | GG                 | GG               | INTERGENIC      |               |                    |                    |
| SNP_104982_A_224570 | NW_004517338.1 | scaffold2371 | 224570                  | GG                              | AA                 | AA               | INTERGENIC      |               |                    |                    |
| SNP_104983_A_224572 | NW_004517338.1 | scaffold2371 | 224572                  | AA                              | GG                 | GG               | INTERGENIC      |               |                    |                    |
| SNP_104984_A_244973 | NW_004517338.1 | scaffold2371 | 244973                  | AA                              | TT                 | TT               | INTERGENIC      |               |                    |                    |
| SNP_104985_A_262113 | NW_004517338.1 | scaffold2371 | 262113                  | CC                              | AA                 | AA               | INTERGENIC      |               |                    |                    |

| SNPs IDs            | Chromosome IDs | Chromosomes  | Physical positions (bp) | CDC Frontier genome (Reference genome) | (Pusa 1103 & HPNB) | (ILWC 46 & LPNB) | Sequence Components of genome | Gene accession IDs | Putative functions           |
|---------------------|----------------|--------------|-------------------------|----------------------------------------|--------------------|------------------|-------------------------------|--------------------|------------------------------|
| SNP_104986_A_262114 | NW_004517338.1 | scaffold2371 | 262114                  | CC                                     | TT                 | TT               | INTERGENIC                    |                    |                              |
| SNP_104987_A_276900 | NW_004517338.1 | scaffold2371 | 276900                  | CC                                     | TT                 | TT               | INTERGENIC                    |                    |                              |
| SNP_104989_A_288777 | NW_004517338.1 | scaffold2371 | 288777                  | CC                                     | TT                 | TT               | INTERGENIC                    |                    |                              |
| SNP_104990_A_290041 | NW_004517338.1 | scaffold2371 | 290041                  | GG                                     | TT                 | TT               | INTERGENIC                    |                    |                              |
| SNP_104991_A_290225 | NW_004517338.1 | scaffold2371 | 290225                  | TT                                     | AA                 | AA               | INTERGENIC                    |                    |                              |
| SNP_104992_A_291054 | NW_004517338.1 | scaffold2371 | 291054                  | AA                                     | CC                 | CC               | INTERGENIC                    |                    |                              |
| SNP_104993_A_291505 | NW_004517338.1 | scaffold2371 | 291505                  | AA                                     | GG                 | GG               | INTERGENIC                    |                    |                              |
| SNP_104994_A_292110 | NW_004517338.1 | scaffold2371 | 292110                  | CC                                     | TT                 | TT               | INTERGENIC                    |                    |                              |
| SNP_104995_A_292854 | NW_004517338.1 | scaffold2371 | 292854                  | GG                                     | AA                 | AA               | INTERGENIC                    |                    |                              |
| SNP_104996_A_294881 | NW_004517338.1 | scaffold2371 | 294881                  | GG                                     | AA                 | AA               | INTERGENIC                    |                    |                              |
| SNP_104998_A_340426 | NW_004517338.1 | scaffold2371 | 340426                  | AA                                     | GG                 | GG               | DRR                           | 101503063          | Unknown function             |
| SNP_104999_A_342022 | NW_004517338.1 | scaffold2371 | 342022                  | GG                                     | TT                 | TT               | URR                           | 101503063          | Unknown function             |
| SNP_105000_A_342034 | NW_004517338.1 | scaffold2371 | 342034                  | TT                                     | CC                 | CC               | URR                           | 101503063          | Unknown function             |
| SNP_105001_A_342041 | NW_004517338.1 | scaffold2371 | 342041                  | GG                                     | AA                 | AA               | URR                           | 101503063          | Unknown function             |
| SNP_105002_A_363618 | NW_004517338.1 | scaffold2371 | 363618                  | CC                                     | TT                 | TT               | INTERGENIC                    |                    |                              |
| SNP_105003_A_363868 | NW_004517338.1 | scaffold2371 | 363868                  | AA                                     | GG                 | GG               | INTERGENIC                    |                    |                              |
| SNP_105005_A_1847   | NW_004517339.1 | scaffold2372 | 1847                    | TT                                     | CC                 | CC               | INTERGENIC                    |                    |                              |
| SNP_105006_A_1860   | NW_004517339.1 | scaffold2372 | 1860                    | CC                                     | TT                 | TT               | INTERGENIC                    |                    |                              |
| SNP_105007_A_1862   | NW_004517339.1 | scaffold2372 | 1862                    | AA                                     | TT                 | TT               | INTERGENIC                    |                    |                              |
| SNP_105008_A_1880   | NW_004517339.1 | scaffold2372 | 1880                    | GG                                     | CC                 | CC               | INTERGENIC                    |                    |                              |
| SNP_105009_A_1991   | NW_004517339.1 | scaffold2372 | 1991                    | AA                                     | TT                 | TT               | INTERGENIC                    |                    |                              |
| SNP_105010_A_1901   | NW_004517340.1 | scaffold2373 | 1901                    | AA                                     | GG                 | GG               | DRR                           | 101506626          | uncharacterized LOC101506626 |

| SNPs IDs            | Chromosome IDs | Chromosomes  | Physical positions (bp) | CDC Frontier (Reference genome) | (Pusa 1103 & HPNB) | (ILWC 46 & LPNB) | Sequence Components of genome | Gene accession IDs | Putative functions                  |
|---------------------|----------------|--------------|-------------------------|---------------------------------|--------------------|------------------|-------------------------------|--------------------|-------------------------------------|
| SNP_105011_A_2109   | NW_004517340.1 | scaffold2373 | 2109                    | TT                              | CC                 | CC               | DRR                           | 101506626          | uncharacterized LOC101506626        |
| SNP_105013_A_28669  | NW_004517340.1 | scaffold2373 | 28669                   | GG                              | CC                 | CC               | URR                           | 101504482          | agamous-like MADS-box protein AGL17 |
| SNP_105014_A_28746  | NW_004517340.1 | scaffold2373 | 28746                   | GG                              | AA                 | AA               | URR                           | 101504482          | agamous-like MADS-box protein AGL17 |
| SNP_105015_A_34337  | NW_004517340.1 | scaffold2373 | 34337                   | GG                              | TT                 | TT               | INTRON                        | 101506626          | uncharacterized LOC101506626        |
| SNP_105016_A_39436  | NW_004517340.1 | scaffold2373 | 39436                   | GG                              | AA                 | AA               | INTRON                        | 101506626          | uncharacterized LOC101506626        |
| SNP_105017_A_39464  | NW_004517340.1 | scaffold2373 | 39464                   | GG                              | TT                 | TT               | INTRON                        | 101506626          | uncharacterized LOC101506626        |
| SNP_105018_A_39643  | NW_004517340.1 | scaffold2373 | 39643                   | CC                              | GG                 | GG               | INTRON                        | 101506626          | uncharacterized LOC101506626        |
| SNP_105020_A_39723  | NW_004517340.1 | scaffold2373 | 39723                   | TT                              | CC                 | CC               | INTRON                        | 101506626          | uncharacterized LOC101506626        |
| SNP_105021_A_39967  | NW_004517340.1 | scaffold2373 | 39967                   | GG                              | TT                 | TT               | INTRON                        | 101506626          | uncharacterized LOC101506626        |
| SNP_105023_A_41866  | NW_004517340.1 | scaffold2373 | 41866                   | GG                              | AA                 | AA               | INTRON                        | 101506626          | uncharacterized LOC101506626        |
| SNP_105025_A_64194  | NW_004517340.1 | scaffold2373 | 64194                   | GG                              | AA                 | AA               | URR                           | 101506626          | uncharacterized LOC101506626        |
| SNP_105026_A_64304  | NW_004517340.1 | scaffold2373 | 64304                   | GG                              | TT                 | TT               | URR                           | 101506626          | uncharacterized LOC101506626        |
| SNP_105027_A_64320  | NW_004517340.1 | scaffold2373 | 64320                   | AA                              | CC                 | CC               | URR                           | 101506626          | uncharacterized LOC101506626        |
| SNP_105028_A_64359  | NW_004517340.1 | scaffold2373 | 64359                   | CC                              | GG                 | GG               | URR                           | 101506626          | uncharacterized LOC101506626        |
| SNP_105029_A_64706  | NW_004517340.1 | scaffold2373 | 64706                   | AA                              | GG                 | GG               | URR                           | 101506626          | uncharacterized LOC101506626        |
| SNP_105031_A_69636  | NW_004517340.1 | scaffold2373 | 69636                   | CC                              | TT                 | TT               | INTERGENIC                    |                    |                                     |
| SNP_105032_A_69681  | NW_004517340.1 | scaffold2373 | 69681                   | AA                              | TT                 | TT               | INTERGENIC                    |                    |                                     |
| SNP_105033_A_69733  | NW_004517340.1 | scaffold2373 | 69733                   | TT                              | CC                 | CC               | INTERGENIC                    |                    |                                     |
| SNP_105034_A_81340  | NW_004517340.1 | scaffold2373 | 81340                   | GG                              | AA                 | AA               | INTERGENIC                    |                    |                                     |
| SNP_105037_A_115573 | NW_004517340.1 | scaffold2373 | 115573                  | TT                              | CC                 | CC               | INTERGENIC                    |                    |                                     |
| SNP_105038_A_115600 | NW_004517340.1 | scaffold2373 | 115600                  | CC                              | AA                 | AA               | INTERGENIC                    |                    |                                     |
| SNP_105039_A_122318 | NW_004517340.1 | scaffold2373 | 122318                  | CC                              | TT                 | TT               | INTRON                        | 101507593          | uncharacterized LOC101507593        |



| SNPs IDs            | Chromosome IDs | Chromosomes  | Physical positions (bp) | CDC Frontier (Reference genome) | (Pusa 1103 & HPNB) | (ILWC 46 & LPNB) | Sequence Components of genome | Gene accession IDs | Putative functions           |
|---------------------|----------------|--------------|-------------------------|---------------------------------|--------------------|------------------|-------------------------------|--------------------|------------------------------|
| SNP_105040_A_124551 | NW_004517340.1 | scaffold2373 | 124551                  | AA                              | GG                 | GG               | INTRON                        | 101507593          | uncharacterized LOC101507593 |
| SNP_105041_A_124556 | NW_004517340.1 | scaffold2373 | 124556                  | GG                              | AA                 | AA               | INTRON                        | 101507593          | uncharacterized LOC101507593 |
| SNP_105042_A_124577 | NW_004517340.1 | scaffold2373 | 124577                  | TT                              | AA                 | AA               | INTRON                        | 101507593          | uncharacterized LOC101507593 |
| SNP_105043_A_124593 | NW_004517340.1 | scaffold2373 | 124593                  | TT                              | CC                 | CC               | INTRON                        | 101507593          | uncharacterized LOC101507593 |
| SNP_105044_A_124599 | NW_004517340.1 | scaffold2373 | 124599                  | TT                              | CC                 | CC               | INTRON                        | 101507593          | uncharacterized LOC101507593 |
| SNP_105045_A_124769 | NW_004517340.1 | scaffold2373 | 124769                  | AA                              | GG                 | GG               | INTRON                        | 101507593          | uncharacterized LOC101507593 |
| SNP_105046_A_124780 | NW_004517340.1 | scaffold2373 | 124780                  | CC                              | AA                 | AA               | INTRON                        | 101507593          | uncharacterized LOC101507593 |
| SNP_105047_A_124788 | NW_004517340.1 | scaffold2373 | 124788                  | CC                              | AA                 | AA               | INTRON                        | 101507593          | uncharacterized LOC101507593 |
| SNP_105048_A_124798 | NW_004517340.1 | scaffold2373 | 124798                  | GG                              | TT                 | TT               | INTRON                        | 101507593          | uncharacterized LOC101507593 |
| SNP_105049_A_124802 | NW_004517340.1 | scaffold2373 | 124802                  | TT                              | CC                 | CC               | INTRON                        | 101507593          | uncharacterized LOC101507593 |
| SNP_105050_A_124841 | NW_004517340.1 | scaffold2373 | 124841                  | CC                              | TT                 | TT               | INTRON                        | 101507593          | uncharacterized LOC101507593 |
| SNP_105051_A_124853 | NW_004517340.1 | scaffold2373 | 124853                  | GG                              | AA                 | AA               | INTRON                        | 101507593          | uncharacterized LOC101507593 |
| SNP_105052_A_124865 | NW_004517340.1 | scaffold2373 | 124865                  | CC                              | TT                 | TT               | INTRON                        | 101507593          | uncharacterized LOC101507593 |
| SNP_105053_A_124930 | NW_004517340.1 | scaffold2373 | 124930                  | TT                              | CC                 | CC               | INTRON                        | 101507593          | uncharacterized LOC101507593 |
| SNP_105054_A_149123 | NW_004517340.1 | scaffold2373 | 149123                  | TT                              | GG                 | GG               | INTERGENIC                    |                    |                              |
| SNP_105055_A_149285 | NW_004517340.1 | scaffold2373 | 149285                  | CC                              | TT                 | TT               | INTERGENIC                    |                    |                              |
| SNP_105056_A_149329 | NW_004517340.1 | scaffold2373 | 149329                  | CC                              | TT                 | TT               | INTERGENIC                    |                    |                              |
| SNP_105057_A_149367 | NW_004517340.1 | scaffold2373 | 149367                  | GG                              | TT                 | TT               | INTERGENIC                    |                    |                              |
| SNP_105058_A_149408 | NW_004517340.1 | scaffold2373 | 149408                  | GG                              | AA                 | AA               | INTERGENIC                    |                    |                              |
| SNP_105059_A_149578 | NW_004517340.1 | scaffold2373 | 149578                  | AA                              | GG                 | GG               | INTERGENIC                    |                    |                              |
| SNP_105060_A_149652 | NW_004517340.1 | scaffold2373 | 149652                  | AA                              | GG                 | GG               | INTERGENIC                    |                    |                              |
| SNP_105061_A_149716 | NW_004517340.1 | scaffold2373 | 149716                  | AA                              | CC                 | CC               | INTERGENIC                    |                    |                              |

| SNPs IDs            | Chromosome IDs | Chromosomes  | Physical positions (bp) | CDC Frontier (Reference genome) | (Pusa 1103 & HPNB) | (ILWC 46 & LPNB) | Sequence genome | Components of | Gene accession IDs | Putative functions |
|---------------------|----------------|--------------|-------------------------|---------------------------------|--------------------|------------------|-----------------|---------------|--------------------|--------------------|
| SNP_105062_A_149971 | NW_004517340.1 | scaffold2373 | 149971                  | TT                              | CC                 | CC               | INTERGENIC      |               |                    |                    |
| SNP_105063_A_150053 | NW_004517340.1 | scaffold2373 | 150053                  | TT                              | CC                 | CC               | INTERGENIC      |               |                    |                    |
| SNP_105064_A_150122 | NW_004517340.1 | scaffold2373 | 150122                  | CC                              | TT                 | TT               | INTERGENIC      |               |                    |                    |
| SNP_105065_A_150146 | NW_004517340.1 | scaffold2373 | 150146                  | TT                              | CC                 | CC               | INTERGENIC      |               |                    |                    |
| SNP_105066_A_150184 | NW_004517340.1 | scaffold2373 | 150184                  | TT                              | CC                 | CC               | INTERGENIC      |               |                    |                    |
| SNP_105067_A_151019 | NW_004517340.1 | scaffold2373 | 151019                  | AA                              | GG                 | GG               | INTERGENIC      |               |                    |                    |
| SNP_105068_A_151064 | NW_004517340.1 | scaffold2373 | 151064                  | TT                              | CC                 | CC               | INTERGENIC      |               |                    |                    |
| SNP_105069_A_151068 | NW_004517340.1 | scaffold2373 | 151068                  | GG                              | TT                 | TT               | INTERGENIC      |               |                    |                    |
| SNP_105070_A_151070 | NW_004517340.1 | scaffold2373 | 151070                  | CC                              | TT                 | TT               | INTERGENIC      |               |                    |                    |
| SNP_105071_A_151085 | NW_004517340.1 | scaffold2373 | 151085                  | TT                              | CC                 | CC               | INTERGENIC      |               |                    |                    |
| SNP_105072_A_151327 | NW_004517340.1 | scaffold2373 | 151327                  | TT                              | CC                 | CC               | INTERGENIC      |               |                    |                    |
| SNP_105073_A_151456 | NW_004517340.1 | scaffold2373 | 151456                  | TT                              | CC                 | CC               | INTERGENIC      |               |                    |                    |
| SNP_105074_A_151833 | NW_004517340.1 | scaffold2373 | 151833                  | GG                              | AA                 | AA               | INTERGENIC      |               |                    |                    |
| SNP_105075_A_152333 | NW_004517340.1 | scaffold2373 | 152333                  | TT                              | GG                 | GG               | INTERGENIC      |               |                    |                    |
| SNP_105076_A_152521 | NW_004517340.1 | scaffold2373 | 152521                  | TT                              | CC                 | CC               | INTERGENIC      |               |                    |                    |
| SNP_105077_A_152620 | NW_004517340.1 | scaffold2373 | 152620                  | GG                              | AA                 | AA               | INTERGENIC      |               |                    |                    |
| SNP_105078_A_152704 | NW_004517340.1 | scaffold2373 | 152704                  | CC                              | GG                 | GG               | INTERGENIC      |               |                    |                    |
| SNP_105079_A_152772 | NW_004517340.1 | scaffold2373 | 152772                  | AA                              | CC                 | CC               | INTERGENIC      |               |                    |                    |
| SNP_105080_A_152870 | NW_004517340.1 | scaffold2373 | 152870                  | AA                              | CC                 | CC               | INTERGENIC      |               |                    |                    |
| SNP_105081_A_2703   | NW_004517342.1 | scaffold2375 | 2703                    | AA                              | GG                 | GG               | INTERGENIC      |               |                    |                    |
| SNP_105082_A_3377   | NW_004517342.1 | scaffold2375 | 3377                    | AA                              | GG                 | GG               | INTERGENIC      |               |                    |                    |
| SNP_105083_A_3733   | NW_004517342.1 | scaffold2375 | 3733                    | TT                              | CC                 | CC               | INTERGENIC      |               |                    |                    |

| SNPs IDs           | Chromosome IDs | Chromosomes  | Physical positions (bp) | CDC Frontier (Reference genome) | (Pusa 1103 & HPNB) | (ILWC 46 & LPNB) | Sequence genome | Components of | Gene accession IDs | Putative functions |
|--------------------|----------------|--------------|-------------------------|---------------------------------|--------------------|------------------|-----------------|---------------|--------------------|--------------------|
| SNP_105084_A_1553  | NW_004517343.1 | scaffold2376 | 1553                    | AA                              | GG                 | GG               | INTERGENIC      |               |                    |                    |
| SNP_105085_A_6496  | NW_004517343.1 | scaffold2376 | 6496                    | CC                              | AA                 | AA               | INTERGENIC      |               |                    |                    |
| SNP_105086_A_9057  | NW_004517343.1 | scaffold2376 | 9057                    | CC                              | AA                 | AA               | INTERGENIC      |               |                    |                    |
| SNP_105087_A_9343  | NW_004517343.1 | scaffold2376 | 9343                    | GG                              | CC                 | CC               | INTERGENIC      |               |                    |                    |
| SNP_105088_A_9425  | NW_004517343.1 | scaffold2376 | 9425                    | AA                              | TT                 | TT               | INTERGENIC      |               |                    |                    |
| SNP_105089_A_9426  | NW_004517343.1 | scaffold2376 | 9426                    | AA                              | CC                 | CC               | INTERGENIC      |               |                    |                    |
| SNP_105090_A_12557 | NW_004517343.1 | scaffold2376 | 12557                   | GG                              | CC                 | CC               | INTERGENIC      |               |                    |                    |
| SNP_105091_A_15614 | NW_004517343.1 | scaffold2376 | 15614                   | AA                              | CC                 | CC               | INTERGENIC      |               |                    |                    |
| SNP_105092_A_15632 | NW_004517343.1 | scaffold2376 | 15632                   | AA                              | TT                 | TT               | INTERGENIC      |               |                    |                    |
| SNP_105093_A_15889 | NW_004517343.1 | scaffold2376 | 15889                   | CC                              | GG                 | GG               | INTERGENIC      |               |                    |                    |
| SNP_105094_A_15971 | NW_004517343.1 | scaffold2376 | 15971                   | CC                              | AA                 | AA               | INTERGENIC      |               |                    |                    |
| SNP_105095_A_1000  | NW_004517345.1 | scaffold2378 | 1000                    | TT                              | AA                 | AA               | INTERGENIC      |               |                    |                    |
| SNP_105096_A_1057  | NW_004517345.1 | scaffold2378 | 1057                    | CC                              | TT                 | TT               | INTERGENIC      |               |                    |                    |
| SNP_105097_A_6436  | NW_004517345.1 | scaffold2378 | 6436                    | AA                              | GG                 | GG               | INTERGENIC      |               |                    |                    |
| SNP_105098_A_17162 | NW_004517345.1 | scaffold2378 | 17162                   | CC                              | TT                 | TT               | INTERGENIC      |               |                    |                    |
| SNP_105099_A_17197 | NW_004517345.1 | scaffold2378 | 17197                   | TT                              | CC                 | CC               | INTERGENIC      |               |                    |                    |
| SNP_105101_A_17431 | NW_004517345.1 | scaffold2378 | 17431                   | CC                              | TT                 | TT               | INTERGENIC      |               |                    |                    |
| SNP_105102_A_17459 | NW_004517345.1 | scaffold2378 | 17459                   | AA                              | TT                 | TT               | INTERGENIC      |               |                    |                    |
| SNP_105103_A_17477 | NW_004517345.1 | scaffold2378 | 17477                   | GG                              | AA                 | AA               | INTERGENIC      |               |                    |                    |
| SNP_105104_A_17524 | NW_004517345.1 | scaffold2378 | 17524                   | CC                              | TT                 | TT               | INTERGENIC      |               |                    |                    |
| SNP_105105_A_17550 | NW_004517345.1 | scaffold2378 | 17550                   | TT                              | CC                 | CC               | INTERGENIC      |               |                    |                    |
| SNP_105106_A_17579 | NW_004517345.1 | scaffold2378 | 17579                   | AA                              | GG                 | GG               | INTERGENIC      |               |                    |                    |

| SNPs IDs           | Chromosome IDs | Chromosomes  | Physical positions (bp) | CDC Frontier (Reference genome) | (Pusa 1103 & HPNB) | (ILWC 46 & LPNB) | Sequence genome       | Components of | Gene accession IDs                   | Putative functions |
|--------------------|----------------|--------------|-------------------------|---------------------------------|--------------------|------------------|-----------------------|---------------|--------------------------------------|--------------------|
| SNP_105107_A_17637 | NW_004517345.1 | scaffold2378 | 17637                   | TT                              | CC                 | CC               | INTERGENIC            |               |                                      |                    |
| SNP_105108_A_17689 | NW_004517345.1 | scaffold2378 | 17689                   | TT                              | CC                 | CC               | INTERGENIC            |               |                                      |                    |
| SNP_105109_A_17706 | NW_004517345.1 | scaffold2378 | 17706                   | GG                              | TT                 | TT               | INTERGENIC            |               |                                      |                    |
| SNP_105110_A_17716 | NW_004517345.1 | scaffold2378 | 17716                   | GG                              | AA                 | AA               | INTERGENIC            |               |                                      |                    |
| SNP_105111_A_23149 | NW_004517345.1 | scaffold2378 | 23149                   | TT                              | CC                 | CC               | INTERGENIC            |               |                                      |                    |
| SNP_105112_A_23276 | NW_004517345.1 | scaffold2378 | 23276                   | AA                              | GG                 | GG               | INTERGENIC            |               |                                      |                    |
| SNP_105114_A_30241 | NW_004517345.1 | scaffold2378 | 30241                   | AA                              | TT                 | TT               | INTERGENIC            |               |                                      |                    |
| SNP_105115_A_30350 | NW_004517345.1 | scaffold2378 | 30350                   | AA                              | CC                 | CC               | INTERGENIC            |               |                                      |                    |
| SNP_105116_A_30396 | NW_004517345.1 | scaffold2378 | 30396                   | AA                              | GG                 | GG               | INTERGENIC            |               |                                      |                    |
| SNP_105117_A_37149 | NW_004517345.1 | scaffold2378 | 37149                   | GG                              | CC                 | CC               | INTERGENIC            |               |                                      |                    |
| SNP_105119_A_43065 | NW_004517345.1 | scaffold2378 | 43065                   | AA                              | GG                 | GG               | INTERGENIC            |               |                                      |                    |
| SNP_105120_A_985   | NW_004517346.1 | scaffold2380 | 985                     | AA                              | GG                 | GG               | INTERGENIC            |               |                                      |                    |
| SNP_105121_A_11672 | NW_004517348.1 | scaffold2382 | 11672                   | AA                              | GG                 | GG               | INTERGENIC            |               |                                      |                    |
| SNP_105122_A_11717 | NW_004517348.1 | scaffold2382 | 11717                   | AA                              | GG                 | GG               | INTERGENIC            |               |                                      |                    |
| SNP_105123_A_27024 | NW_004517348.1 | scaffold2382 | 27024                   | TT                              | AA                 | AA               | INTERGENIC            |               |                                      |                    |
| SNP_105124_A_28291 | NW_004517348.1 | scaffold2382 | 28291                   | GG                              | AA                 | AA               | INTERGENIC            |               |                                      |                    |
| SNP_105125_A_28297 | NW_004517348.1 | scaffold2382 | 28297                   | TT                              | AA                 | AA               | INTERGENIC            |               |                                      |                    |
| SNP_105126_A_28301 | NW_004517348.1 | scaffold2382 | 28301                   | TT                              | CC                 | CC               | INTERGENIC            |               |                                      |                    |
| SNP_105127_A_28495 | NW_004517348.1 | scaffold2382 | 28495                   | CC                              | TT                 | TT               | NON_SYNONYMOUS_CODING | 101508865     | probable polygalacturonase At3g15720 |                    |
| SNP_105128_A_476   | NW_004517349.1 | scaffold2383 | 476                     | GG                              | TT                 | TT               | INTERGENIC            |               |                                      |                    |
| SNP_105129_A_2259  | NW_004517350.1 | scaffold2385 | 2259                    | TT                              | GG                 | GG               | INTERGENIC            |               |                                      |                    |
| SNP_105130_A_2274  | NW_004517350.1 | scaffold2385 | 2274                    | TT                              | CC                 | CC               | INTERGENIC            |               |                                      |                    |

| SNPs IDs            | Chromosome IDs | Chromosomes  | Physical positions (bp) | CDC Frontier (Reference genome) | (Pusa 1103 & HPNB) | (ILWC 46 & LPNB) | Sequence genome | Components of | Gene accession IDs | Putative functions |
|---------------------|----------------|--------------|-------------------------|---------------------------------|--------------------|------------------|-----------------|---------------|--------------------|--------------------|
| SNP_105131_A_2337   | NW_004517350.1 | scaffold2385 | 2337                    | AA                              | CC                 | CC               | INTERGENIC      |               |                    |                    |
| SNP_105132_A_2393   | NW_004517350.1 | scaffold2385 | 2393                    | CC                              | AA                 | AA               | INTERGENIC      |               |                    |                    |
| SNP_105133_A_2418   | NW_004517350.1 | scaffold2385 | 2418                    | CC                              | TT                 | TT               | INTERGENIC      |               |                    |                    |
| SNP_105134_A_2724   | NW_004517350.1 | scaffold2385 | 2724                    | GG                              | AA                 | AA               | INTERGENIC      |               |                    |                    |
| SNP_105135_A_2818   | NW_004517350.1 | scaffold2385 | 2818                    | GG                              | AA                 | AA               | INTERGENIC      |               |                    |                    |
| SNP_105136_A_3415   | NW_004517350.1 | scaffold2385 | 3415                    | GG                              | AA                 | AA               | INTERGENIC      |               |                    |                    |
| SNP_105137_A_3419   | NW_004517350.1 | scaffold2385 | 3419                    | TT                              | CC                 | CC               | INTERGENIC      |               |                    |                    |
| SNP_105138_A_3476   | NW_004517350.1 | scaffold2385 | 3476                    | TT                              | AA                 | AA               | INTERGENIC      |               |                    |                    |
| SNP_105139_A_3588   | NW_004517350.1 | scaffold2385 | 3588                    | AA                              | GG                 | GG               | INTERGENIC      |               |                    |                    |
| SNP_105140_A_3696   | NW_004517350.1 | scaffold2385 | 3696                    | AA                              | CC                 | CC               | INTERGENIC      |               |                    |                    |
| SNP_105143_A_5885   | NW_004517350.1 | scaffold2385 | 5885                    | TT                              | CC                 | CC               | INTERGENIC      |               |                    |                    |
| SNP_105144_A_44499  | NW_004517351.1 | scaffold2386 | 44499                   | AA                              | GG                 | GG               | INTERGENIC      |               |                    |                    |
| SNP_105145_A_44663  | NW_004517351.1 | scaffold2386 | 44663                   | GG                              | AA                 | AA               | INTERGENIC      |               |                    |                    |
| SNP_105146_A_59654  | NW_004517351.1 | scaffold2386 | 59654                   | CC                              | GG                 | GG               | INTERGENIC      |               |                    |                    |
| SNP_105147_A_178774 | NW_004517351.1 | scaffold2386 | 178774                  | CC                              | GG                 | GG               | INTERGENIC      |               |                    |                    |
| SNP_105148_A_178796 | NW_004517351.1 | scaffold2386 | 178796                  | AA                              | GG                 | GG               | INTERGENIC      |               |                    |                    |
| SNP_105149_A_178805 | NW_004517351.1 | scaffold2386 | 178805                  | AA                              | GG                 | GG               | INTERGENIC      |               |                    |                    |
| SNP_105150_A_178809 | NW_004517351.1 | scaffold2386 | 178809                  | TT                              | CC                 | CC               | INTERGENIC      |               |                    |                    |
| SNP_105151_A_178811 | NW_004517351.1 | scaffold2386 | 178811                  | AA                              | TT                 | TT               | INTERGENIC      |               |                    |                    |
| SNP_105152_A_178873 | NW_004517351.1 | scaffold2386 | 178873                  | TT                              | GG                 | GG               | INTERGENIC      |               |                    |                    |
| SNP_105153_A_179107 | NW_004517351.1 | scaffold2386 | 179107                  | TT                              | CC                 | CC               | INTERGENIC      |               |                    |                    |
| SNP_105154_A_179145 | NW_004517351.1 | scaffold2386 | 179145                  | CC                              | TT                 | TT               | INTERGENIC      |               |                    |                    |

| SNPs IDs            | Chromosome IDs | Chromosomes  | Physical positions (bp) | CDC Frontier (Reference genome) | (Pusa 1103 & HPNB) | (ILWC 46 & LPNB) | Sequence Components of genome | Gene accession IDs | Putative functions                    |
|---------------------|----------------|--------------|-------------------------|---------------------------------|--------------------|------------------|-------------------------------|--------------------|---------------------------------------|
| SNP_105155_A_179149 | NW_004517351.1 | scaffold2386 | 179149                  | CC                              | GG                 | GG               | INTERGENIC                    |                    |                                       |
| SNP_105156_A_179340 | NW_004517351.1 | scaffold2386 | 179340                  | AA                              | CC                 | CC               | INTERGENIC                    |                    |                                       |
| SNP_105157_A_193951 | NW_004517351.1 | scaffold2386 | 193951                  | AA                              | GG                 | GG               | NON_SYNONYMOUS_CODING         | 101510914          | glucan endo-1,3-beta-glucosidase-like |
| SNP_105158_A_196852 | NW_004517351.1 | scaffold2386 | 196852                  | AA                              | GG                 | GG               | INTRON                        | 101510914          | glucan endo-1,3-beta-glucosidase-like |
| SNP_105159_A_197012 | NW_004517351.1 | scaffold2386 | 197012                  | TT                              | GG                 | GG               | INTRON                        | 101510914          | glucan endo-1,3-beta-glucosidase-like |
| SNP_105160_A_197036 | NW_004517351.1 | scaffold2386 | 197036                  | TT                              | CC                 | CC               | INTRON                        | 101510914          | glucan endo-1,3-beta-glucosidase-like |
| SNP_105161_A_197229 | NW_004517351.1 | scaffold2386 | 197229                  | TT                              | CC                 | CC               | INTRON                        | 101510914          | glucan endo-1,3-beta-glucosidase-like |
| SNP_105162_A_213183 | NW_004517351.1 | scaffold2386 | 213183                  | GG                              | AA                 | AA               | INTERGENIC                    |                    |                                       |
| SNP_105163_A_213293 | NW_004517351.1 | scaffold2386 | 213293                  | AA                              | GG                 | GG               | INTERGENIC                    |                    |                                       |
| SNP_105164_A_213781 | NW_004517351.1 | scaffold2386 | 213781                  | CC                              | TT                 | TT               | INTERGENIC                    |                    |                                       |
| SNP_105165_A_214299 | NW_004517351.1 | scaffold2386 | 214299                  | GG                              | CC                 | CC               | INTERGENIC                    |                    |                                       |
| SNP_105166_A_5824   | NW_004517352.1 | scaffold2388 | 5824                    | AA                              | GG                 | GG               | INTERGENIC                    |                    |                                       |
| SNP_105167_A_7717   | NW_004517352.1 | scaffold2388 | 7717                    | CC                              | TT                 | TT               | INTERGENIC                    |                    |                                       |
| SNP_105168_A_27769  | NW_004517352.1 | scaffold2388 | 27769                   | TT                              | GG                 | GG               | INTERGENIC                    |                    |                                       |
| SNP_105169_A_377    | NW_004517355.1 | scaffold2392 | 377                     | CC                              | TT                 | TT               | INTERGENIC                    |                    |                                       |
| SNP_105170_A_1515   | NW_004517355.1 | scaffold2392 | 1515                    | AA                              | CC                 | CC               | INTERGENIC                    |                    |                                       |
| SNP_105171_A_1519   | NW_004517355.1 | scaffold2392 | 1519                    | AA                              | GG                 | GG               | INTERGENIC                    |                    |                                       |
| SNP_105172_A_1588   | NW_004517355.1 | scaffold2392 | 1588                    | TT                              | AA                 | AA               | INTERGENIC                    |                    |                                       |
| SNP_105173_A_1760   | NW_004517355.1 | scaffold2392 | 1760                    | AA                              | CC                 | CC               | INTERGENIC                    |                    |                                       |
| SNP_105175_A_10908  | NW_004517355.1 | scaffold2392 | 10908                   | GG                              | AA                 | AA               | INTERGENIC                    |                    |                                       |
| SNP_105176_A_10981  | NW_004517355.1 | scaffold2392 | 10981                   | CC                              | TT                 | TT               | INTERGENIC                    |                    |                                       |
| SNP_105177_A_11214  | NW_004517355.1 | scaffold2392 | 11214                   | CC                              | GG                 | GG               | INTERGENIC                    |                    |                                       |

| SNPs IDs           | Chromosome IDs | Chromosomes  | Physical positions (bp) | CDC Frontier (Reference genome) | (Pusa 1103 & HPNB) | (ILWC 46 & LPNB) | Sequence genome | Components of | Gene accession IDs | Putative functions |
|--------------------|----------------|--------------|-------------------------|---------------------------------|--------------------|------------------|-----------------|---------------|--------------------|--------------------|
| SNP_105178_A_11327 | NW_004517355.1 | scaffold2392 | 11327                   | TT                              | GG                 | GG               | INTERGENIC      |               |                    |                    |
| SNP_105179_A_17806 | NW_004517355.1 | scaffold2392 | 17806                   | CC                              | TT                 | TT               | INTERGENIC      |               |                    |                    |
| SNP_105180_A_17812 | NW_004517355.1 | scaffold2392 | 17812                   | TT                              | CC                 | CC               | INTERGENIC      |               |                    |                    |
| SNP_105181_A_17860 | NW_004517355.1 | scaffold2392 | 17860                   | GG                              | CC                 | CC               | INTERGENIC      |               |                    |                    |
| SNP_105182_A_18007 | NW_004517355.1 | scaffold2392 | 18007                   | GG                              | CC                 | CC               | INTERGENIC      |               |                    |                    |
| SNP_105184_A_18113 | NW_004517355.1 | scaffold2392 | 18113                   | AA                              | TT                 | TT               | INTERGENIC      |               |                    |                    |
| SNP_105185_A_18795 | NW_004517355.1 | scaffold2392 | 18795                   | CC                              | TT                 | TT               | INTERGENIC      |               |                    |                    |
| SNP_105186_A_18797 | NW_004517355.1 | scaffold2392 | 18797                   | TT                              | GG                 | GG               | INTERGENIC      |               |                    |                    |
| SNP_105187_A_18811 | NW_004517355.1 | scaffold2392 | 18811                   | TT                              | AA                 | AA               | INTERGENIC      |               |                    |                    |
| SNP_105188_A_18866 | NW_004517355.1 | scaffold2392 | 18866                   | AA                              | GG                 | GG               | INTERGENIC      |               |                    |                    |
| SNP_105189_A_18873 | NW_004517355.1 | scaffold2392 | 18873                   | TT                              | CC                 | CC               | INTERGENIC      |               |                    |                    |
| SNP_105190_A_18900 | NW_004517355.1 | scaffold2392 | 18900                   | TT                              | CC                 | CC               | INTERGENIC      |               |                    |                    |
| SNP_105191_A_18950 | NW_004517355.1 | scaffold2392 | 18950                   | AA                              | GG                 | GG               | INTERGENIC      |               |                    |                    |
| SNP_105192_A_19080 | NW_004517355.1 | scaffold2392 | 19080                   | TT                              | AA                 | AA               | INTERGENIC      |               |                    |                    |
| SNP_105193_A_19455 | NW_004517355.1 | scaffold2392 | 19455                   | TT                              | AA                 | AA               | INTERGENIC      |               |                    |                    |
| SNP_105194_A_19543 | NW_004517355.1 | scaffold2392 | 19543                   | GG                              | TT                 | TT               | INTERGENIC      |               |                    |                    |
| SNP_105195_A_19592 | NW_004517355.1 | scaffold2392 | 19592                   | GG                              | AA                 | AA               | INTERGENIC      |               |                    |                    |
| SNP_105196_A_19629 | NW_004517355.1 | scaffold2392 | 19629                   | AA                              | TT                 | TT               | INTERGENIC      |               |                    |                    |
| SNP_105197_A_19702 | NW_004517355.1 | scaffold2392 | 19702                   | AA                              | TT                 | TT               | INTERGENIC      |               |                    |                    |
| SNP_105198_A_19733 | NW_004517355.1 | scaffold2392 | 19733                   | GG                              | CC                 | CC               | INTERGENIC      |               |                    |                    |
| SNP_105200_A_61088 | NW_004517355.1 | scaffold2392 | 61088                   | GG                              | AA                 | AA               | INTERGENIC      |               |                    |                    |
| SNP_105202_A_96360 | NW_004517355.1 | scaffold2392 | 96360                   | TT                              | GG                 | GG               | INTERGENIC      |               |                    |                    |

| SNPs IDs            | Chromosome IDs | Chromosomes  | Physical positions (bp) | CDC Frontier (Reference genome) | (Pusa 1103 & HPNB) | (ILWC 46 & LPNB) | Sequence Components of genome | Gene accession IDs | Putative functions              |
|---------------------|----------------|--------------|-------------------------|---------------------------------|--------------------|------------------|-------------------------------|--------------------|---------------------------------|
| SNP_105203_A_96376  | NW_004517355.1 | scaffold2392 | 96376                   | CC                              | AA                 | AA               | INTERGENIC                    |                    |                                 |
| SNP_105204_A_190520 | NW_004517355.1 | scaffold2392 | 190520                  | AA                              | GG                 | GG               | URR                           | 101488303          | transcription factor TCP19-like |
| SNP_105205_A_193345 | NW_004517355.1 | scaffold2392 | 193345                  | CC                              | TT                 | TT               | INTERGENIC                    |                    |                                 |
| SNP_105206_A_193348 | NW_004517355.1 | scaffold2392 | 193348                  | AA                              | GG                 | GG               | INTERGENIC                    |                    |                                 |
| SNP_105207_A_280516 | NW_004517355.1 | scaffold2392 | 280516                  | AA                              | TT                 | TT               | INTERGENIC                    |                    |                                 |
| SNP_105208_A_283586 | NW_004517355.1 | scaffold2392 | 283586                  | AA                              | GG                 | GG               | INTERGENIC                    |                    |                                 |
| SNP_105210_A_322865 | NW_004517355.1 | scaffold2392 | 322865                  | GG                              | AA                 | AA               | INTERGENIC                    |                    |                                 |
| SNP_105211_A_323193 | NW_004517355.1 | scaffold2392 | 323193                  | GG                              | CC                 | CC               | INTERGENIC                    |                    |                                 |
| SNP_105212_A_325998 | NW_004517355.1 | scaffold2392 | 325998                  | CC                              | AA                 | AA               | INTERGENIC                    |                    |                                 |
| SNP_105213_A_326017 | NW_004517355.1 | scaffold2392 | 326017                  | TT                              | GG                 | GG               | INTERGENIC                    |                    |                                 |
| SNP_105215_A_326235 | NW_004517355.1 | scaffold2392 | 326235                  | CC                              | GG                 | GG               | INTERGENIC                    |                    |                                 |
| SNP_105216_A_326260 | NW_004517355.1 | scaffold2392 | 326260                  | AA                              | CC                 | CC               | INTERGENIC                    |                    |                                 |
| SNP_105217_A_354133 | NW_004517355.1 | scaffold2392 | 354133                  | AA                              | GG                 | GG               | URR                           | 101515105          | DNA repair helicase UVH6        |
| SNP_105219_A_354893 | NW_004517355.1 | scaffold2392 | 354893                  | GG                              | CC                 | CC               | URR                           | 101515105          | DNA repair helicase UVH6        |
| SNP_105223_A_355392 | NW_004517355.1 | scaffold2392 | 355392                  | TT                              | AA                 | AA               | INTERGENIC                    |                    |                                 |
| SNP_105224_A_3755   | NW_004517356.1 | scaffold2394 | 3755                    | GG                              | TT                 | TT               | INTERGENIC                    |                    |                                 |
| SNP_105225_A_3807   | NW_004517356.1 | scaffold2394 | 3807                    | GG                              | AA                 | AA               | INTERGENIC                    |                    |                                 |
| SNP_105226_A_3927   | NW_004517356.1 | scaffold2394 | 3927                    | GG                              | AA                 | AA               | INTERGENIC                    |                    |                                 |
| SNP_105227_A_1813   | NW_004517358.1 | scaffold2396 | 1813                    | AA                              | CC                 | CC               | INTERGENIC                    |                    |                                 |
| SNP_105228_A_768    | NW_004517359.1 | scaffold2397 | 768                     | GG                              | CC                 | CC               | INTERGENIC                    |                    |                                 |
| SNP_105229_A_790    | NW_004517359.1 | scaffold2397 | 790                     | TT                              | AA                 | AA               | INTERGENIC                    |                    |                                 |
| SNP_105230_A_1136   | NW_004517359.1 | scaffold2397 | 1136                    | CC                              | GG                 | GG               | INTERGENIC                    |                    |                                 |



| SNPs IDs           | Chromosome IDs | Chromosomes  | Physical positions (bp) | CDC Frontier (Reference genome) | (Pusa 1103 & HPNB) | (ILWC 46 & LPNB) | Sequence genome | Components of | Gene accession IDs | Putative functions |
|--------------------|----------------|--------------|-------------------------|---------------------------------|--------------------|------------------|-----------------|---------------|--------------------|--------------------|
| SNP_105231_A_2612  | NW_004517359.1 | scaffold2397 | 2612                    | TT                              | CC                 | CC               | INTERGENIC      |               |                    |                    |
| SNP_105233_A_558   | NW_004517366.1 | scaffold2409 | 558                     | GG                              | AA                 | AA               | INTERGENIC      |               |                    |                    |
| SNP_105234_A_578   | NW_004517367.1 | scaffold2410 | 578                     | GG                              | AA                 | AA               | INTERGENIC      |               |                    |                    |
| SNP_105235_A_7280  | NW_004517367.1 | scaffold2410 | 7280                    | CC                              | GG                 | GG               | INTERGENIC      |               |                    |                    |
| SNP_105236_A_7597  | NW_004517367.1 | scaffold2410 | 7597                    | CC                              | AA                 | AA               | INTERGENIC      |               |                    |                    |
| SNP_105237_A_7617  | NW_004517367.1 | scaffold2410 | 7617                    | AA                              | GG                 | GG               | INTERGENIC      |               |                    |                    |
| SNP_105238_A_7622  | NW_004517367.1 | scaffold2410 | 7622                    | AA                              | GG                 | GG               | INTERGENIC      |               |                    |                    |
| SNP_105239_A_7647  | NW_004517367.1 | scaffold2410 | 7647                    | TT                              | AA                 | AA               | INTERGENIC      |               |                    |                    |
| SNP_105240_A_7698  | NW_004517367.1 | scaffold2410 | 7698                    | AA                              | TT                 | TT               | INTERGENIC      |               |                    |                    |
| SNP_105241_A_7757  | NW_004517367.1 | scaffold2410 | 7757                    | TT                              | CC                 | CC               | INTERGENIC      |               |                    |                    |
| SNP_105242_A_8044  | NW_004517367.1 | scaffold2410 | 8044                    | TT                              | CC                 | CC               | INTERGENIC      |               |                    |                    |
| SNP_105243_A_12242 | NW_004517367.1 | scaffold2410 | 12242                   | AA                              | GG                 | GG               | INTERGENIC      |               |                    |                    |
| SNP_105244_A_15354 | NW_004517367.1 | scaffold2410 | 15354                   | TT                              | AA                 | AA               | INTERGENIC      |               |                    |                    |
| SNP_105245_A_16156 | NW_004517367.1 | scaffold2410 | 16156                   | CC                              | TT                 | TT               | INTERGENIC      |               |                    |                    |
| SNP_105246_A_19369 | NW_004517367.1 | scaffold2410 | 19369                   | GG                              | AA                 | AA               | INTERGENIC      |               |                    |                    |
| SNP_105247_A_33042 | NW_004517367.1 | scaffold2410 | 33042                   | AA                              | CC                 | CC               | INTERGENIC      |               |                    |                    |
| SNP_105248_A_34524 | NW_004517367.1 | scaffold2410 | 34524                   | CC                              | TT                 | TT               | INTERGENIC      |               |                    |                    |
| SNP_105249_A_8919  | NW_004517369.1 | scaffold2412 | 8919                    | AA                              | GG                 | GG               | INTERGENIC      |               |                    |                    |
| SNP_105250_A_9232  | NW_004517369.1 | scaffold2412 | 9232                    | CC                              | TT                 | TT               | INTERGENIC      |               |                    |                    |
| SNP_105251_A_9247  | NW_004517369.1 | scaffold2412 | 9247                    | AA                              | CC                 | CC               | INTERGENIC      |               |                    |                    |
| SNP_105252_A_12836 | NW_004517369.1 | scaffold2412 | 12836                   | TT                              | CC                 | CC               | INTERGENIC      |               |                    |                    |
| SNP_105253_A_12864 | NW_004517369.1 | scaffold2412 | 12864                   | TT                              | CC                 | CC               | INTERGENIC      |               |                    |                    |

| SNPs IDs           | Chromosome IDs | Chromosomes  | Physical positions (bp) | CDC Frontier (Reference genome) | (Pusa 1103 & HPNB) | (ILWC 46 & LPNB) | Sequence genome | Components of | Gene accession IDs | Putative functions |
|--------------------|----------------|--------------|-------------------------|---------------------------------|--------------------|------------------|-----------------|---------------|--------------------|--------------------|
| SNP_105254_A_12866 | NW_004517369.1 | scaffold2412 | 12866                   | GG                              | AA                 | AA               | INTERGENIC      |               |                    |                    |
| SNP_105255_A_13184 | NW_004517369.1 | scaffold2412 | 13184                   | TT                              | CC                 | CC               | INTERGENIC      |               |                    |                    |
| SNP_105256_A_18814 | NW_004517369.1 | scaffold2412 | 18814                   | TT                              | AA                 | AA               | INTERGENIC      |               |                    |                    |
| SNP_105257_A_64258 | NW_004517369.1 | scaffold2412 | 64258                   | AA                              | GG                 | GG               | INTERGENIC      |               |                    |                    |
| SNP_105258_A_66965 | NW_004517369.1 | scaffold2412 | 66965                   | CC                              | GG                 | GG               | INTERGENIC      |               |                    |                    |
| SNP_105259_A_159   | NW_004517370.1 | scaffold2413 | 159                     | TT                              | GG                 | GG               | INTERGENIC      |               |                    |                    |
| SNP_105260_A_500   | NW_004517370.1 | scaffold2413 | 500                     | AA                              | GG                 | GG               | INTERGENIC      |               |                    |                    |
| SNP_105261_A_12575 | NW_004517370.1 | scaffold2413 | 12575                   | TT                              | GG                 | GG               | INTERGENIC      |               |                    |                    |
| SNP_105262_A_12778 | NW_004517370.1 | scaffold2413 | 12778                   | GG                              | TT                 | TT               | INTERGENIC      |               |                    |                    |
| SNP_105263_A_12791 | NW_004517370.1 | scaffold2413 | 12791                   | AA                              | TT                 | TT               | INTERGENIC      |               |                    |                    |
| SNP_105264_A_12934 | NW_004517370.1 | scaffold2413 | 12934                   | AA                              | GG                 | GG               | INTERGENIC      |               |                    |                    |
| SNP_105265_A_187   | NW_004517371.1 | scaffold2415 | 187                     | TT                              | CC                 | CC               | INTERGENIC      |               |                    |                    |
| SNP_105266_A_221   | NW_004517371.1 | scaffold2415 | 221                     | TT                              | CC                 | CC               | INTERGENIC      |               |                    |                    |
| SNP_105267_A_73099 | NW_004517371.1 | scaffold2415 | 73099                   | GG                              | AA                 | AA               | INTERGENIC      |               |                    |                    |
| SNP_105268_A_73131 | NW_004517371.1 | scaffold2415 | 73131                   | CC                              | TT                 | TT               | INTERGENIC      |               |                    |                    |
| SNP_105269_A_88977 | NW_004517371.1 | scaffold2415 | 88977                   | TT                              | CC                 | CC               | INTERGENIC      |               |                    |                    |
| SNP_105273_A_8411  | NW_004517375.1 | scaffold2421 | 8411                    | AA                              | TT                 | TT               | INTERGENIC      |               |                    |                    |
| SNP_105274_A_8519  | NW_004517375.1 | scaffold2421 | 8519                    | TT                              | CC                 | CC               | INTERGENIC      |               |                    |                    |
| SNP_105275_A_24823 | NW_004517375.1 | scaffold2421 | 24823                   | AA                              | GG                 | GG               | INTERGENIC      |               |                    |                    |
| SNP_105276_A_24843 | NW_004517375.1 | scaffold2421 | 24843                   | TT                              | CC                 | CC               | INTERGENIC      |               |                    |                    |
| SNP_105277_A_24919 | NW_004517375.1 | scaffold2421 | 24919                   | CC                              | GG                 | GG               | INTERGENIC      |               |                    |                    |
| SNP_105278_A_25154 | NW_004517375.1 | scaffold2421 | 25154                   | TT                              | CC                 | CC               | INTERGENIC      |               |                    |                    |

| SNPs IDs           | Chromosome IDs | Chromosomes  | Physical positions (bp) | CDC Frontier (Reference genome) | (Pusa 1103 & HPNB) | (ILWC 46 & LPNB) | Sequence genome | Components of | Gene accession IDs | Putative functions |
|--------------------|----------------|--------------|-------------------------|---------------------------------|--------------------|------------------|-----------------|---------------|--------------------|--------------------|
| SNP_105279_A_25239 | NW_004517375.1 | scaffold2421 | 25239                   | TT                              | AA                 | AA               | INTERGENIC      |               |                    |                    |
| SNP_105280_A_25396 | NW_004517375.1 | scaffold2421 | 25396                   | CC                              | AA                 | AA               | INTERGENIC      |               |                    |                    |
| SNP_105281_A_33789 | NW_004517375.1 | scaffold2421 | 33789                   | GG                              | AA                 | AA               | INTERGENIC      |               |                    |                    |
| SNP_105282_A_34345 | NW_004517375.1 | scaffold2421 | 34345                   | GG                              | AA                 | AA               | INTERGENIC      |               |                    |                    |
| SNP_105283_A_34347 | NW_004517375.1 | scaffold2421 | 34347                   | AA                              | CC                 | CC               | INTERGENIC      |               |                    |                    |
| SNP_105284_A_34403 | NW_004517375.1 | scaffold2421 | 34403                   | TT                              | AA                 | AA               | INTERGENIC      |               |                    |                    |
| SNP_105285_A_34411 | NW_004517375.1 | scaffold2421 | 34411                   | CC                              | GG                 | GG               | INTERGENIC      |               |                    |                    |
| SNP_105286_A_34517 | NW_004517375.1 | scaffold2421 | 34517                   | TT                              | AA                 | AA               | INTERGENIC      |               |                    |                    |
| SNP_105287_A_34563 | NW_004517375.1 | scaffold2421 | 34563                   | CC                              | GG                 | GG               | INTERGENIC      |               |                    |                    |
| SNP_105288_A_34638 | NW_004517375.1 | scaffold2421 | 34638                   | TT                              | AA                 | AA               | INTERGENIC      |               |                    |                    |
| SNP_105289_A_34843 | NW_004517375.1 | scaffold2421 | 34843                   | CC                              | GG                 | GG               | INTERGENIC      |               |                    |                    |
| SNP_105290_A_39827 | NW_004517375.1 | scaffold2421 | 39827                   | AA                              | GG                 | GG               | INTERGENIC      |               |                    |                    |
| SNP_105291_A_39829 | NW_004517375.1 | scaffold2421 | 39829                   | AA                              | CC                 | CC               | INTERGENIC      |               |                    |                    |
| SNP_105292_A_39836 | NW_004517375.1 | scaffold2421 | 39836                   | CC                              | AA                 | AA               | INTERGENIC      |               |                    |                    |
| SNP_105293_A_40198 | NW_004517375.1 | scaffold2421 | 40198                   | TT                              | CC                 | CC               | INTERGENIC      |               |                    |                    |
| SNP_105294_A_40199 | NW_004517375.1 | scaffold2421 | 40199                   | CC                              | AA                 | AA               | INTERGENIC      |               |                    |                    |
| SNP_105295_A_40288 | NW_004517375.1 | scaffold2421 | 40288                   | CC                              | TT                 | TT               | INTERGENIC      |               |                    |                    |
| SNP_105296_A_40305 | NW_004517375.1 | scaffold2421 | 40305                   | GG                              | AA                 | AA               | INTERGENIC      |               |                    |                    |
| SNP_105297_A_40407 | NW_004517375.1 | scaffold2421 | 40407                   | TT                              | CC                 | CC               | INTERGENIC      |               |                    |                    |
| SNP_105298_A_40451 | NW_004517375.1 | scaffold2421 | 40451                   | GG                              | AA                 | AA               | INTERGENIC      |               |                    |                    |
| SNP_105299_A_46567 | NW_004517375.1 | scaffold2421 | 46567                   | CC                              | GG                 | GG               | INTERGENIC      |               |                    |                    |
| SNP_105300_A_47638 | NW_004517375.1 | scaffold2421 | 47638                   | AA                              | CC                 | CC               | INTERGENIC      |               |                    |                    |

| SNPs IDs           | Chromosome IDs | Chromosomes  | Physical positions (bp) | CDC Frontier (Reference genome) | (Pusa 1103 & HPNB) | (ILWC 46 & LPNB) | Sequence genome | Components of | Gene accession IDs | Putative functions |
|--------------------|----------------|--------------|-------------------------|---------------------------------|--------------------|------------------|-----------------|---------------|--------------------|--------------------|
| SNP_105301_A_47655 | NW_004517375.1 | scaffold2421 | 47655                   | TT                              | AA                 | AA               | INTERGENIC      |               |                    |                    |
| SNP_105302_A_48511 | NW_004517375.1 | scaffold2421 | 48511                   | CC                              | TT                 | TT               | INTERGENIC      |               |                    |                    |
| SNP_105303_A_48748 | NW_004517375.1 | scaffold2421 | 48748                   | AA                              | TT                 | TT               | INTERGENIC      |               |                    |                    |
| SNP_105304_A_48774 | NW_004517375.1 | scaffold2421 | 48774                   | CC                              | AA                 | AA               | INTERGENIC      |               |                    |                    |
| SNP_105305_A_48858 | NW_004517375.1 | scaffold2421 | 48858                   | AA                              | GG                 | GG               | INTERGENIC      |               |                    |                    |
| SNP_105306_A_48893 | NW_004517375.1 | scaffold2421 | 48893                   | CC                              | TT                 | TT               | INTERGENIC      |               |                    |                    |
| SNP_105307_A_49149 | NW_004517375.1 | scaffold2421 | 49149                   | GG                              | AA                 | AA               | INTERGENIC      |               |                    |                    |
| SNP_105308_A_49273 | NW_004517375.1 | scaffold2421 | 49273                   | TT                              | CC                 | CC               | INTERGENIC      |               |                    |                    |
| SNP_105309_A_49440 | NW_004517375.1 | scaffold2421 | 49440                   | GG                              | TT                 | TT               | INTERGENIC      |               |                    |                    |
| SNP_105310_A_49444 | NW_004517375.1 | scaffold2421 | 49444                   | GG                              | TT                 | TT               | INTERGENIC      |               |                    |                    |
| SNP_105311_A_50175 | NW_004517375.1 | scaffold2421 | 50175                   | AA                              | GG                 | GG               | INTERGENIC      |               |                    |                    |
| SNP_105312_A_50288 | NW_004517375.1 | scaffold2421 | 50288                   | TT                              | AA                 | AA               | INTERGENIC      |               |                    |                    |
| SNP_105313_A_50300 | NW_004517375.1 | scaffold2421 | 50300                   | CC                              | TT                 | TT               | INTERGENIC      |               |                    |                    |
| SNP_105314_A_59419 | NW_004517375.1 | scaffold2421 | 59419                   | TT                              | AA                 | AA               | INTERGENIC      |               |                    |                    |
| SNP_105315_A_60418 | NW_004517375.1 | scaffold2421 | 60418                   | TT                              | CC                 | CC               | INTERGENIC      |               |                    |                    |
| SNP_105316_A_60462 | NW_004517375.1 | scaffold2421 | 60462                   | AA                              | CC                 | CC               | INTERGENIC      |               |                    |                    |
| SNP_105317_A_60465 | NW_004517375.1 | scaffold2421 | 60465                   | TT                              | AA                 | AA               | INTERGENIC      |               |                    |                    |
| SNP_105318_A_60467 | NW_004517375.1 | scaffold2421 | 60467                   | TT                              | AA                 | AA               | INTERGENIC      |               |                    |                    |
| SNP_105319_A_60468 | NW_004517375.1 | scaffold2421 | 60468                   | TT                              | CC                 | CC               | INTERGENIC      |               |                    |                    |
| SNP_105320_A_60471 | NW_004517375.1 | scaffold2421 | 60471                   | AA                              | GG                 | GG               | INTERGENIC      |               |                    |                    |
| SNP_105321_A_60543 | NW_004517375.1 | scaffold2421 | 60543                   | CC                              | TT                 | TT               | INTERGENIC      |               |                    |                    |
| SNP_105322_A_60563 | NW_004517375.1 | scaffold2421 | 60563                   | GG                              | AA                 | AA               | INTERGENIC      |               |                    |                    |

| SNPs IDs           | Chromosome IDs | Chromosomes  | Physical positions (bp) | CDC Frontier (Reference genome) | (Pusa 1103 & HPNB) | (ILWC 46 & LPNB) | Sequence genome | Components of | Gene accession IDs | Putative functions |
|--------------------|----------------|--------------|-------------------------|---------------------------------|--------------------|------------------|-----------------|---------------|--------------------|--------------------|
| SNP_105323_A_60600 | NW_004517375.1 | scaffold2421 | 60600                   | TT                              | CC                 | CC               | INTERGENIC      |               |                    |                    |
| SNP_105324_A_60656 | NW_004517375.1 | scaffold2421 | 60656                   | AA                              | CC                 | CC               | INTERGENIC      |               |                    |                    |
| SNP_105325_A_60832 | NW_004517375.1 | scaffold2421 | 60832                   | CC                              | TT                 | TT               | INTERGENIC      |               |                    |                    |
| SNP_105326_A_60977 | NW_004517375.1 | scaffold2421 | 60977                   | AA                              | GG                 | GG               | INTERGENIC      |               |                    |                    |
| SNP_105327_A_61070 | NW_004517375.1 | scaffold2421 | 61070                   | CC                              | AA                 | AA               | INTERGENIC      |               |                    |                    |
| SNP_105328_A_2977  | NW_004517380.1 | scaffold2430 | 2977                    | AA                              | GG                 | GG               | INTERGENIC      |               |                    |                    |
| SNP_105329_A_2985  | NW_004517380.1 | scaffold2430 | 2985                    | TT                              | AA                 | AA               | INTERGENIC      |               |                    |                    |
| SNP_105330_A_3027  | NW_004517380.1 | scaffold2430 | 3027                    | GG                              | TT                 | TT               | INTERGENIC      |               |                    |                    |
| SNP_105331_A_1641  | NW_004517383.1 | scaffold2433 | 1641                    | AA                              | GG                 | GG               | INTERGENIC      |               |                    |                    |
| SNP_105332_A_1935  | NW_004517383.1 | scaffold2433 | 1935                    | AA                              | GG                 | GG               | INTERGENIC      |               |                    |                    |
| SNP_105333_A_2145  | NW_004517383.1 | scaffold2433 | 2145                    | AA                              | GG                 | GG               | INTERGENIC      |               |                    |                    |
| SNP_105334_A_2458  | NW_004517383.1 | scaffold2433 | 2458                    | CC                              | TT                 | TT               | INTERGENIC      |               |                    |                    |
| SNP_105336_A_2535  | NW_004517383.1 | scaffold2433 | 2535                    | GG                              | AA                 | AA               | INTERGENIC      |               |                    |                    |
| SNP_105337_A_3309  | NW_004517383.1 | scaffold2433 | 3309                    | GG                              | AA                 | AA               | INTERGENIC      |               |                    |                    |
| SNP_105338_A_16673 | NW_004517383.1 | scaffold2433 | 16673                   | GG                              | AA                 | AA               | INTERGENIC      |               |                    |                    |
| SNP_105339_A_16706 | NW_004517383.1 | scaffold2433 | 16706                   | AA                              | GG                 | GG               | INTERGENIC      |               |                    |                    |
| SNP_105340_A_16761 | NW_004517383.1 | scaffold2433 | 16761                   | CC                              | TT                 | TT               | INTERGENIC      |               |                    |                    |
| SNP_105341_A_16830 | NW_004517383.1 | scaffold2433 | 16830                   | AA                              | GG                 | GG               | INTERGENIC      |               |                    |                    |
| SNP_105342_A_16922 | NW_004517383.1 | scaffold2433 | 16922                   | AA                              | GG                 | GG               | INTERGENIC      |               |                    |                    |
| SNP_105343_A_17050 | NW_004517383.1 | scaffold2433 | 17050                   | CC                              | TT                 | TT               | INTERGENIC      |               |                    |                    |
| SNP_105344_A_2939  | NW_004517384.1 | scaffold2434 | 2939                    | GG                              | AA                 | AA               | INTERGENIC      |               |                    |                    |
| SNP_105345_A_3352  | NW_004517384.1 | scaffold2434 | 3352                    | GG                              | TT                 | TT               | INTERGENIC      |               |                    |                    |

| SNPs IDs           | Chromosome IDs | Chromosomes  | Physical positions (bp) | CDC Frontier (Reference genome) | (Pusa 1103 & HPNB) | (ILWC 46 & LPNB) | Sequence genome | Components of | Gene accession IDs | Putative functions |
|--------------------|----------------|--------------|-------------------------|---------------------------------|--------------------|------------------|-----------------|---------------|--------------------|--------------------|
| SNP_105346_A_6705  | NW_004517384.1 | scaffold2434 | 6705                    | CC                              | AA                 | AA               | INTERGENIC      |               |                    |                    |
| SNP_105347_A_6778  | NW_004517384.1 | scaffold2434 | 6778                    | CC                              | AA                 | AA               | INTERGENIC      |               |                    |                    |
| SNP_105348_A_6789  | NW_004517384.1 | scaffold2434 | 6789                    | AA                              | TT                 | TT               | INTERGENIC      |               |                    |                    |
| SNP_105349_A_13033 | NW_004517384.1 | scaffold2434 | 13033                   | AA                              | TT                 | TT               | INTERGENIC      |               |                    |                    |
| SNP_105350_A_13054 | NW_004517384.1 | scaffold2434 | 13054                   | TT                              | CC                 | CC               | INTERGENIC      |               |                    |                    |
| SNP_105351_A_13056 | NW_004517384.1 | scaffold2434 | 13056                   | GG                              | AA                 | AA               | INTERGENIC      |               |                    |                    |
| SNP_105352_A_15789 | NW_004517384.1 | scaffold2434 | 15789                   | AA                              | TT                 | TT               | INTERGENIC      |               |                    |                    |
| SNP_105353_A_17996 | NW_004517384.1 | scaffold2434 | 17996                   | CC                              | TT                 | TT               | INTERGENIC      |               |                    |                    |
| SNP_105354_A_18089 | NW_004517384.1 | scaffold2434 | 18089                   | TT                              | CC                 | CC               | INTERGENIC      |               |                    |                    |
| SNP_105355_A_18341 | NW_004517384.1 | scaffold2434 | 18341                   | TT                              | CC                 | CC               | INTERGENIC      |               |                    |                    |
| SNP_105356_A_18346 | NW_004517384.1 | scaffold2434 | 18346                   | CC                              | TT                 | TT               | INTERGENIC      |               |                    |                    |
| SNP_105357_A_28794 | NW_004517384.1 | scaffold2434 | 28794                   | CC                              | TT                 | TT               | INTERGENIC      |               |                    |                    |
| SNP_105358_A_28811 | NW_004517384.1 | scaffold2434 | 28811                   | GG                              | TT                 | TT               | INTERGENIC      |               |                    |                    |
| SNP_105359_A_29448 | NW_004517384.1 | scaffold2434 | 29448                   | TT                              | AA                 | AA               | INTERGENIC      |               |                    |                    |
| SNP_105360_A_29472 | NW_004517384.1 | scaffold2434 | 29472                   | TT                              | GG                 | GG               | INTERGENIC      |               |                    |                    |
| SNP_105361_A_29490 | NW_004517384.1 | scaffold2434 | 29490                   | AA                              | TT                 | TT               | INTERGENIC      |               |                    |                    |
| SNP_105362_A_29700 | NW_004517384.1 | scaffold2434 | 29700                   | TT                              | CC                 | CC               | INTERGENIC      |               |                    |                    |
| SNP_105363_A_29727 | NW_004517384.1 | scaffold2434 | 29727                   | TT                              | CC                 | CC               | INTERGENIC      |               |                    |                    |
| SNP_105364_A_29914 | NW_004517384.1 | scaffold2434 | 29914                   | CC                              | TT                 | TT               | INTERGENIC      |               |                    |                    |
| SNP_105365_A_44876 | NW_004517384.1 | scaffold2434 | 44876                   | GG                              | AA                 | AA               | INTERGENIC      |               |                    |                    |
| SNP_105366_A_44908 | NW_004517384.1 | scaffold2434 | 44908                   | TT                              | AA                 | AA               | INTERGENIC      |               |                    |                    |
| SNP_105367_A_44955 | NW_004517384.1 | scaffold2434 | 44955                   | TT                              | CC                 | CC               | INTERGENIC      |               |                    |                    |

| SNPs IDs           | Chromosome IDs | Chromosomes  | Physical positions (bp) | CDC Frontier (Reference genome) | (Pusa 1103 & HPNB) | (ILWC 46 & LPNB) | Sequence genome | Components of | Gene accession IDs | Putative functions |
|--------------------|----------------|--------------|-------------------------|---------------------------------|--------------------|------------------|-----------------|---------------|--------------------|--------------------|
| SNP_105368_A_45100 | NW_004517384.1 | scaffold2434 | 45100                   | AA                              | TT                 | TT               | INTERGENIC      |               |                    |                    |
| SNP_105369_A_45356 | NW_004517384.1 | scaffold2434 | 45356                   | TT                              | AA                 | AA               | INTERGENIC      |               |                    |                    |
| SNP_105370_A_45399 | NW_004517384.1 | scaffold2434 | 45399                   | AA                              | TT                 | TT               | INTERGENIC      |               |                    |                    |
| SNP_105371_A_45410 | NW_004517384.1 | scaffold2434 | 45410                   | TT                              | AA                 | AA               | INTERGENIC      |               |                    |                    |
| SNP_105372_A_45745 | NW_004517384.1 | scaffold2434 | 45745                   | AA                              | GG                 | GG               | INTERGENIC      |               |                    |                    |
| SNP_105373_A_66655 | NW_004517384.1 | scaffold2434 | 66655                   | GG                              | AA                 | AA               | INTERGENIC      |               |                    |                    |
| SNP_105374_A_71522 | NW_004517384.1 | scaffold2434 | 71522                   | TT                              | CC                 | CC               | INTERGENIC      |               |                    |                    |
| SNP_105375_A_71524 | NW_004517384.1 | scaffold2434 | 71524                   | AA                              | GG                 | GG               | INTERGENIC      |               |                    |                    |
| SNP_105376_A_71539 | NW_004517384.1 | scaffold2434 | 71539                   | TT                              | AA                 | AA               | INTERGENIC      |               |                    |                    |
| SNP_105377_A_71671 | NW_004517384.1 | scaffold2434 | 71671                   | TT                              | GG                 | GG               | INTERGENIC      |               |                    |                    |
| SNP_105378_A_72120 | NW_004517384.1 | scaffold2434 | 72120                   | AA                              | GG                 | GG               | INTERGENIC      |               |                    |                    |
| SNP_105379_A_72149 | NW_004517384.1 | scaffold2434 | 72149                   | CC                              | TT                 | TT               | INTERGENIC      |               |                    |                    |
| SNP_105380_A_72165 | NW_004517384.1 | scaffold2434 | 72165                   | TT                              | CC                 | CC               | INTERGENIC      |               |                    |                    |
| SNP_105381_A_72188 | NW_004517384.1 | scaffold2434 | 72188                   | AA                              | TT                 | TT               | INTERGENIC      |               |                    |                    |
| SNP_105384_A_76785 | NW_004517384.1 | scaffold2434 | 76785                   | GG                              | TT                 | TT               | INTERGENIC      |               |                    |                    |
| SNP_105385_A_119   | NW_004517388.1 | scaffold2440 | 119                     | TT                              | AA                 | AA               | INTERGENIC      |               |                    |                    |
| SNP_105386_A_1048  | NW_004517388.1 | scaffold2440 | 1048                    | AA                              | CC                 | CC               | INTERGENIC      |               |                    |                    |
| SNP_105387_A_1196  | NW_004517388.1 | scaffold2440 | 1196                    | AA                              | GG                 | GG               | INTERGENIC      |               |                    |                    |
| SNP_105388_A_1207  | NW_004517388.1 | scaffold2440 | 1207                    | AA                              | TT                 | TT               | INTERGENIC      |               |                    |                    |
| SNP_105389_A_3335  | NW_004517389.1 | scaffold2441 | 3335                    | GG                              | CC                 | CC               | INTERGENIC      |               |                    |                    |
| SNP_105390_A_10873 | NW_004517392.1 | scaffold2445 | 10873                   | CC                              | TT                 | TT               | INTERGENIC      |               |                    |                    |
| SNP_105391_A_10976 | NW_004517392.1 | scaffold2445 | 10976                   | CC                              | TT                 | TT               | INTERGENIC      |               |                    |                    |

| SNPs IDs           | Chromosome IDs | Chromosomes  | Physical positions (bp) | CDC Frontier (Reference genome) | (Pusa 1103 & HPNB) | (ILWC 46 & LPNB) | Sequence Components of genome | Gene accession IDs | Putative functions |
|--------------------|----------------|--------------|-------------------------|---------------------------------|--------------------|------------------|-------------------------------|--------------------|--------------------|
| SNP_105392_A_10989 | NW_004517392.1 | scaffold2445 | 10989                   | TT                              | AA                 | AA               | INTERGENIC                    |                    |                    |
| SNP_105393_A_1488  | NW_004517393.1 | scaffold2446 | 1488                    | GG                              | AA                 | AA               | INTERGENIC                    |                    |                    |
| SNP_105394_A_5151  | NW_004517393.1 | scaffold2446 | 5151                    | AA                              | TT                 | TT               | DRR                           | 101491978          | Unknown function   |
| SNP_105395_A_6003  | NW_004517393.1 | scaffold2446 | 6003                    | GG                              | AA                 | AA               | INTRON                        | 101491978          | Unknown function   |
| SNP_105396_A_6023  | NW_004517393.1 | scaffold2446 | 6023                    | TT                              | CC                 | CC               | INTRON                        | 101491978          | Unknown function   |
| SNP_105397_A_6229  | NW_004517393.1 | scaffold2446 | 6229                    | CC                              | AA                 | AA               | INTRON                        | 101491978          | Unknown function   |
| SNP_105398_A_6466  | NW_004517393.1 | scaffold2446 | 6466                    | TT                              | CC                 | CC               | INTRON                        | 101491978          | Unknown function   |
| SNP_105399_A_6517  | NW_004517393.1 | scaffold2446 | 6517                    | AA                              | CC                 | CC               | INTRON                        | 101491978          | Unknown function   |
| SNP_105400_A_6857  | NW_004517393.1 | scaffold2446 | 6857                    | GG                              | AA                 | AA               | INTRON                        | 101491978          | Unknown function   |
| SNP_105401_A_6872  | NW_004517393.1 | scaffold2446 | 6872                    | CC                              | AA                 | AA               | INTRON                        | 101491978          | Unknown function   |
| SNP_105402_A_7221  | NW_004517393.1 | scaffold2446 | 7221                    | TT                              | CC                 | CC               | INTRON                        | 101491978          | Unknown function   |
| SNP_105404_A_9237  | NW_004517393.1 | scaffold2446 | 9237                    | CC                              | TT                 | TT               | INTRON                        | 101491978          | Unknown function   |
| SNP_105405_A_10077 | NW_004517393.1 | scaffold2446 | 10077                   | TT                              | AA                 | AA               | INTRON                        | 101491978          | Unknown function   |
| SNP_105406_A_1790  | NW_004517398.1 | scaffold2456 | 1790                    | CC                              | TT                 | TT               | INTERGENIC                    |                    |                    |
| SNP_105407_A_1800  | NW_004517398.1 | scaffold2456 | 1800                    | GG                              | AA                 | AA               | INTERGENIC                    |                    |                    |
| SNP_105408_A_5785  | NW_004517398.1 | scaffold2456 | 5785                    | AA                              | TT                 | TT               | INTERGENIC                    |                    |                    |
| SNP_105409_A_20092 | NW_004517401.1 | scaffold2459 | 20092                   | CC                              | TT                 | TT               | INTERGENIC                    |                    |                    |
| SNP_105410_A_20166 | NW_004517401.1 | scaffold2459 | 20166                   | TT                              | CC                 | CC               | INTERGENIC                    |                    |                    |
| SNP_105411_A_20180 | NW_004517401.1 | scaffold2459 | 20180                   | AA                              | CC                 | CC               | INTERGENIC                    |                    |                    |
| SNP_105412_A_35616 | NW_004517401.1 | scaffold2459 | 35616                   | AA                              | GG                 | GG               | INTERGENIC                    |                    |                    |
| SNP_105413_A_37693 | NW_004517401.1 | scaffold2459 | 37693                   | AA                              | GG                 | GG               | INTERGENIC                    |                    |                    |
| SNP_105414_A_37823 | NW_004517401.1 | scaffold2459 | 37823                   | AA                              | GG                 | GG               | INTERGENIC                    |                    |                    |



| SNPs IDs           | Chromosome IDs | Chromosomes  | Physical positions (bp) | CDC Frontier genome (Reference genome) | (Pusa 1103 & HPNB) | (ILWC 46 & LPNB) | Sequence genome | Components of | Gene accession IDs | Putative functions |
|--------------------|----------------|--------------|-------------------------|----------------------------------------|--------------------|------------------|-----------------|---------------|--------------------|--------------------|
| SNP_105415_A_42218 | NW_004517401.1 | scaffold2459 | 42218                   | AA                                     | CC                 | CC               | INTERGENIC      |               |                    |                    |
| SNP_105416_A_42356 | NW_004517401.1 | scaffold2459 | 42356                   | TT                                     | GG                 | GG               | INTERGENIC      |               |                    |                    |
| SNP_105417_A_42397 | NW_004517401.1 | scaffold2459 | 42397                   | AA                                     | CC                 | CC               | INTERGENIC      |               |                    |                    |
| SNP_105418_A_46427 | NW_004517401.1 | scaffold2459 | 46427                   | TT                                     | CC                 | CC               | INTERGENIC      |               |                    |                    |
| SNP_105419_A_50880 | NW_004517401.1 | scaffold2459 | 50880                   | GG                                     | AA                 | AA               | INTERGENIC      |               |                    |                    |
| SNP_105420_A_59386 | NW_004517401.1 | scaffold2459 | 59386                   | CC                                     | TT                 | TT               | INTERGENIC      |               |                    |                    |
| SNP_105421_A_59448 | NW_004517401.1 | scaffold2459 | 59448                   | TT                                     | GG                 | GG               | INTERGENIC      |               |                    |                    |
| SNP_105422_A_65579 | NW_004517401.1 | scaffold2459 | 65579                   | TT                                     | CC                 | CC               | INTERGENIC      |               |                    |                    |
| SNP_105423_A_66095 | NW_004517401.1 | scaffold2459 | 66095                   | TT                                     | CC                 | CC               | INTERGENIC      |               |                    |                    |
| SNP_105424_A_66342 | NW_004517401.1 | scaffold2459 | 66342                   | AA                                     | GG                 | GG               | INTERGENIC      |               |                    |                    |
| SNP_105425_A_66397 | NW_004517401.1 | scaffold2459 | 66397                   | CC                                     | TT                 | TT               | INTERGENIC      |               |                    |                    |
| SNP_105426_A_72240 | NW_004517401.1 | scaffold2459 | 72240                   | CC                                     | AA                 | AA               | INTERGENIC      |               |                    |                    |
| SNP_105427_A_72242 | NW_004517401.1 | scaffold2459 | 72242                   | GG                                     | TT                 | TT               | INTERGENIC      |               |                    |                    |
| SNP_105428_A_72611 | NW_004517401.1 | scaffold2459 | 72611                   | CC                                     | TT                 | TT               | INTERGENIC      |               |                    |                    |
| SNP_105429_A_190   | NW_004517406.1 | scaffold2467 | 190                     | AA                                     | GG                 | GG               | INTERGENIC      |               |                    |                    |
| SNP_105430_A_11297 | NW_004517408.1 | scaffold2470 | 11297                   | AA                                     | TT                 | TT               | INTERGENIC      |               |                    |                    |
| SNP_105431_A_11325 | NW_004517408.1 | scaffold2470 | 11325                   | TT                                     | CC                 | CC               | INTERGENIC      |               |                    |                    |
| SNP_105432_A_251   | NW_004517409.1 | scaffold2471 | 251                     | TT                                     | GG                 | GG               | INTERGENIC      |               |                    |                    |
| SNP_105433_A_281   | NW_004517409.1 | scaffold2471 | 281                     | CC                                     | AA                 | AA               | INTERGENIC      |               |                    |                    |
| SNP_105434_A_403   | NW_004517409.1 | scaffold2471 | 403                     | CC                                     | TT                 | TT               | INTERGENIC      |               |                    |                    |
| SNP_105435_A_952   | NW_004517409.1 | scaffold2471 | 952                     | CC                                     | TT                 | TT               | INTERGENIC      |               |                    |                    |
| SNP_105436_A_959   | NW_004517409.1 | scaffold2471 | 959                     | CC                                     | TT                 | TT               | INTERGENIC      |               |                    |                    |

| SNPs IDs           | Chromosome IDs | Chromosomes  | Physical positions (bp) | CDC Frontier (Reference genome) | (Pusa 1103 & HPNB) | (ILWC 46 & LPNB) | Sequence genome | Components of | Gene accession IDs | Putative functions |
|--------------------|----------------|--------------|-------------------------|---------------------------------|--------------------|------------------|-----------------|---------------|--------------------|--------------------|
| SNP_105437_A_1322  | NW_004517409.1 | scaffold2471 | 1322                    | TT                              | AA                 | AA               | INTERGENIC      |               |                    |                    |
| SNP_105438_A_966   | NW_004517410.1 | scaffold2472 | 966                     | AA                              | CC                 | CC               | INTERGENIC      |               |                    |                    |
| SNP_105439_A_1020  | NW_004517410.1 | scaffold2472 | 1020                    | AA                              | GG                 | GG               | INTERGENIC      |               |                    |                    |
| SNP_105440_A_2731  | NW_004517411.1 | scaffold2473 | 2731                    | GG                              | CC                 | CC               | INTERGENIC      |               |                    |                    |
| SNP_105441_A_6417  | NW_004517411.1 | scaffold2473 | 6417                    | CC                              | TT                 | TT               | URR             | 101492976     | Unknown function   |                    |
| SNP_105442_A_6439  | NW_004517411.1 | scaffold2473 | 6439                    | GG                              | AA                 | AA               | URR             | 101492976     | Unknown function   |                    |
| SNP_105443_A_6674  | NW_004517411.1 | scaffold2473 | 6674                    | TT                              | CC                 | CC               | INTERGENIC      |               |                    |                    |
| SNP_105444_A_6734  | NW_004517411.1 | scaffold2473 | 6734                    | GG                              | AA                 | AA               | INTERGENIC      |               |                    |                    |
| SNP_105445_A_7588  | NW_004517411.1 | scaffold2473 | 7588                    | GG                              | CC                 | CC               | INTERGENIC      |               |                    |                    |
| SNP_105446_A_15587 | NW_004517413.1 | scaffold2477 | 15587                   | TT                              | AA                 | AA               | INTERGENIC      |               |                    |                    |
| SNP_105447_A_15666 | NW_004517413.1 | scaffold2477 | 15666                   | AA                              | TT                 | TT               | INTERGENIC      |               |                    |                    |
| SNP_105448_A_15727 | NW_004517413.1 | scaffold2477 | 15727                   | CC                              | TT                 | TT               | INTERGENIC      |               |                    |                    |
| SNP_105449_A_15880 | NW_004517413.1 | scaffold2477 | 15880                   | TT                              | AA                 | AA               | INTERGENIC      |               |                    |                    |
| SNP_105450_A_1073  | NW_004517415.1 | scaffold2482 | 1073                    | AA                              | TT                 | TT               | INTERGENIC      |               |                    |                    |
| SNP_105451_A_8299  | NW_004517415.1 | scaffold2482 | 8299                    | TT                              | GG                 | GG               | INTERGENIC      |               |                    |                    |
| SNP_105452_A_9061  | NW_004517415.1 | scaffold2482 | 9061                    | AA                              | GG                 | GG               | INTERGENIC      |               |                    |                    |
| SNP_105453_A_9062  | NW_004517415.1 | scaffold2482 | 9062                    | AA                              | GG                 | GG               | INTERGENIC      |               |                    |                    |
| SNP_105454_A_11671 | NW_004517415.1 | scaffold2482 | 11671                   | AA                              | CC                 | CC               | INTERGENIC      |               |                    |                    |
| SNP_105455_A_11749 | NW_004517415.1 | scaffold2482 | 11749                   | CC                              | TT                 | TT               | INTERGENIC      |               |                    |                    |
| SNP_105456_A_11751 | NW_004517415.1 | scaffold2482 | 11751                   | TT                              | GG                 | GG               | INTERGENIC      |               |                    |                    |
| SNP_105457_A_11761 | NW_004517415.1 | scaffold2482 | 11761                   | TT                              | GG                 | GG               | INTERGENIC      |               |                    |                    |
| SNP_105458_A_11806 | NW_004517415.1 | scaffold2482 | 11806                   | CC                              | AA                 | AA               | INTERGENIC      |               |                    |                    |

| SNPs IDs          | Chromosome IDs | Chromosomes  | Physical positions (bp) | CDC Frontier (Reference genome) | (Pusa 1103 & HPNB) | (ILWC 46 & LPNB) | Sequence genome | Components of | Gene accession IDs | Putative functions |
|-------------------|----------------|--------------|-------------------------|---------------------------------|--------------------|------------------|-----------------|---------------|--------------------|--------------------|
| SNP_105459_A_755  | NW_004517416.1 | scaffold2483 | 755                     | TT                              | AA                 | AA               | INTERGENIC      |               |                    |                    |
| SNP_105460_A_1090 | NW_004517416.1 | scaffold2483 | 1090                    | GG                              | TT                 | TT               | INTERGENIC      |               |                    |                    |
| SNP_105461_A_1138 | NW_004517416.1 | scaffold2483 | 1138                    | AA                              | TT                 | TT               | INTERGENIC      |               |                    |                    |
| SNP_105462_A_343  | NW_004517417.1 | scaffold2484 | 343                     | GG                              | TT                 | TT               | INTERGENIC      |               |                    |                    |
| SNP_105463_A_344  | NW_004517417.1 | scaffold2484 | 344                     | AA                              | TT                 | TT               | INTERGENIC      |               |                    |                    |
| SNP_105464_A_356  | NW_004517417.1 | scaffold2484 | 356                     | TT                              | CC                 | CC               | INTERGENIC      |               |                    |                    |
| SNP_105466_A_2718 | NW_004517419.1 | scaffold2486 | 2718                    | AA                              | TT                 | TT               | INTERGENIC      |               |                    |                    |
| SNP_105467_A_2929 | NW_004517419.1 | scaffold2486 | 2929                    | GG                              | CC                 | CC               | INTERGENIC      |               |                    |                    |
| SNP_105468_A_6869 | NW_004517419.1 | scaffold2486 | 6869                    | CC                              | TT                 | TT               | INTERGENIC      |               |                    |                    |
| SNP_105469_A_7837 | NW_004517419.1 | scaffold2486 | 7837                    | AA                              | CC                 | CC               | INTERGENIC      |               |                    |                    |
| SNP_105470_A_8099 | NW_004517419.1 | scaffold2486 | 8099                    | GG                              | CC                 | CC               | INTERGENIC      |               |                    |                    |
| SNP_105471_A_8298 | NW_004517419.1 | scaffold2486 | 8298                    | GG                              | AA                 | AA               | INTERGENIC      |               |                    |                    |
| SNP_105472_A_8696 | NW_004517419.1 | scaffold2486 | 8696                    | AA                              | TT                 | TT               | INTERGENIC      |               |                    |                    |
| SNP_105473_A_8714 | NW_004517419.1 | scaffold2486 | 8714                    | CC                              | AA                 | AA               | INTERGENIC      |               |                    |                    |
| SNP_105474_A_8966 | NW_004517419.1 | scaffold2486 | 8966                    | CC                              | TT                 | TT               | INTERGENIC      |               |                    |                    |
| SNP_105475_A_524  | NW_004517420.1 | scaffold2487 | 524                     | AA                              | CC                 | CC               | INTERGENIC      |               |                    |                    |
| SNP_105476_A_931  | NW_004517420.1 | scaffold2487 | 931                     | TT                              | CC                 | CC               | INTERGENIC      |               |                    |                    |
| SNP_105477_A_1614 | NW_004517420.1 | scaffold2487 | 1614                    | AA                              | CC                 | CC               | INTERGENIC      |               |                    |                    |
| SNP_105478_A_1909 | NW_004517420.1 | scaffold2487 | 1909                    | AA                              | GG                 | GG               | INTERGENIC      |               |                    |                    |
| SNP_105479_A_2027 | NW_004517420.1 | scaffold2487 | 2027                    | CC                              | TT                 | TT               | INTERGENIC      |               |                    |                    |
| SNP_105480_A_2034 | NW_004517420.1 | scaffold2487 | 2034                    | GG                              | AA                 | AA               | INTERGENIC      |               |                    |                    |
| SNP_105481_A_2080 | NW_004517420.1 | scaffold2487 | 2080                    | CC                              | TT                 | TT               | INTERGENIC      |               |                    |                    |

| SNPs IDs          | Chromosome IDs | Chromosomes  | Physical positions (bp) | CDC Frontier (Reference genome) | (Pusa 1103 & HPNB) | (ILWC 46 & LPNB) | Sequence genome | Components of | Gene accession IDs | Putative functions |
|-------------------|----------------|--------------|-------------------------|---------------------------------|--------------------|------------------|-----------------|---------------|--------------------|--------------------|
| SNP_105482_A_3069 | NW_004517420.1 | scaffold2487 | 3069                    | GG                              | AA                 | AA               | INTERGENIC      |               |                    |                    |
| SNP_105483_A_5908 | NW_004517420.1 | scaffold2487 | 5908                    | AA                              | CC                 | CC               | INTERGENIC      |               |                    |                    |
| SNP_105484_A_5958 | NW_004517420.1 | scaffold2487 | 5958                    | AA                              | CC                 | CC               | INTERGENIC      |               |                    |                    |
| SNP_105485_A_6023 | NW_004517420.1 | scaffold2487 | 6023                    | AA                              | TT                 | TT               | INTERGENIC      |               |                    |                    |
| SNP_105486_A_6071 | NW_004517420.1 | scaffold2487 | 6071                    | TT                              | CC                 | CC               | INTERGENIC      |               |                    |                    |
| SNP_105487_A_6084 | NW_004517420.1 | scaffold2487 | 6084                    | CC                              | TT                 | TT               | INTERGENIC      |               |                    |                    |
| SNP_105488_A_6117 | NW_004517420.1 | scaffold2487 | 6117                    | TT                              | CC                 | CC               | INTERGENIC      |               |                    |                    |
| SNP_105489_A_6244 | NW_004517420.1 | scaffold2487 | 6244                    | GG                              | TT                 | TT               | INTERGENIC      |               |                    |                    |
| SNP_105490_A_6256 | NW_004517420.1 | scaffold2487 | 6256                    | AA                              | CC                 | CC               | INTERGENIC      |               |                    |                    |
| SNP_105491_A_6422 | NW_004517420.1 | scaffold2487 | 6422                    | TT                              | CC                 | CC               | INTERGENIC      |               |                    |                    |
| SNP_105492_A_64   | NW_004517422.1 | scaffold2489 | 64                      | CC                              | TT                 | TT               | INTERGENIC      |               |                    |                    |
| SNP_105493_A_66   | NW_004517422.1 | scaffold2489 | 66                      | CC                              | GG                 | GG               | INTERGENIC      |               |                    |                    |
| SNP_105494_A_2123 | NW_004517422.1 | scaffold2489 | 2123                    | AA                              | GG                 | GG               | INTERGENIC      |               |                    |                    |
| SNP_105495_A_3989 | NW_004517422.1 | scaffold2489 | 3989                    | CC                              | GG                 | GG               | INTERGENIC      |               |                    |                    |
| SNP_105496_A_3997 | NW_004517422.1 | scaffold2489 | 3997                    | TT                              | GG                 | GG               | INTERGENIC      |               |                    |                    |
| SNP_105498_A_6495 | NW_004517424.1 | scaffold2491 | 6495                    | GG                              | TT                 | TT               | INTERGENIC      |               |                    |                    |
| SNP_105499_A_6501 | NW_004517424.1 | scaffold2491 | 6501                    | GG                              | AA                 | AA               | INTERGENIC      |               |                    |                    |
| SNP_105500_A_6504 | NW_004517424.1 | scaffold2491 | 6504                    | AA                              | CC                 | CC               | INTERGENIC      |               |                    |                    |
| SNP_105501_A_6937 | NW_004517424.1 | scaffold2491 | 6937                    | AA                              | TT                 | TT               | INTERGENIC      |               |                    |                    |
| SNP_105502_A_6939 | NW_004517424.1 | scaffold2491 | 6939                    | AA                              | CC                 | CC               | INTERGENIC      |               |                    |                    |
| SNP_105503_A_7363 | NW_004517424.1 | scaffold2491 | 7363                    | TT                              | CC                 | CC               | INTERGENIC      |               |                    |                    |
| SNP_105504_A_7406 | NW_004517424.1 | scaffold2491 | 7406                    | CC                              | GG                 | GG               | INTERGENIC      |               |                    |                    |

| SNPs IDs           | Chromosome IDs | Chromosomes  | Physical positions (bp) | CDC Frontier (Reference genome) | (Pusa 1103 & HPNB) | (ILWC 46 & LPNB) | Sequence genome | Components of | Gene accession IDs | Putative functions |
|--------------------|----------------|--------------|-------------------------|---------------------------------|--------------------|------------------|-----------------|---------------|--------------------|--------------------|
| SNP_105505_A_8109  | NW_004517424.1 | scaffold2491 | 8109                    | AA                              | TT                 | TT               | INTERGENIC      |               |                    |                    |
| SNP_105506_A_239   | NW_004517425.1 | scaffold2492 | 239                     | CC                              | TT                 | TT               | INTERGENIC      |               |                    |                    |
| SNP_105507_A_297   | NW_004517425.1 | scaffold2492 | 297                     | CC                              | TT                 | TT               | INTERGENIC      |               |                    |                    |
| SNP_105508_A_628   | NW_004517425.1 | scaffold2492 | 628                     | GG                              | TT                 | TT               | INTERGENIC      |               |                    |                    |
| SNP_105509_A_21560 | NW_004517429.1 | scaffold2496 | 21560                   | GG                              | AA                 | AA               | INTERGENIC      |               |                    |                    |
| SNP_105510_A_645   | NW_004517430.1 | scaffold2497 | 645                     | AA                              | CC                 | CC               | INTERGENIC      |               |                    |                    |
| SNP_105511_A_665   | NW_004517430.1 | scaffold2497 | 665                     | CC                              | GG                 | GG               | INTERGENIC      |               |                    |                    |
| SNP_105512_A_947   | NW_004517430.1 | scaffold2497 | 947                     | AA                              | GG                 | GG               | INTERGENIC      |               |                    |                    |
| SNP_105513_A_963   | NW_004517430.1 | scaffold2497 | 963                     | TT                              | AA                 | AA               | INTERGENIC      |               |                    |                    |
| SNP_105514_A_712   | NW_004517431.1 | scaffold2498 | 712                     | AA                              | GG                 | GG               | INTERGENIC      |               |                    |                    |
| SNP_105515_A_1133  | NW_004517431.1 | scaffold2498 | 1133                    | AA                              | GG                 | GG               | INTERGENIC      |               |                    |                    |
| SNP_105516_A_1402  | NW_004517431.1 | scaffold2498 | 1402                    | CC                              | TT                 | TT               | INTERGENIC      |               |                    |                    |
| SNP_105517_A_1602  | NW_004517431.1 | scaffold2498 | 1602                    | AA                              | GG                 | GG               | INTERGENIC      |               |                    |                    |
| SNP_105518_A_2797  | NW_004517431.1 | scaffold2498 | 2797                    | TT                              | CC                 | CC               | INTERGENIC      |               |                    |                    |
| SNP_105520_A_509   | NW_004517436.1 | scaffold2505 | 509                     | GG                              | TT                 | TT               | INTERGENIC      |               |                    |                    |
| SNP_105521_A_721   | NW_004517436.1 | scaffold2505 | 721                     | AA                              | GG                 | GG               | INTERGENIC      |               |                    |                    |
| SNP_105522_A_748   | NW_004517436.1 | scaffold2505 | 748                     | CC                              | TT                 | TT               | INTERGENIC      |               |                    |                    |
| SNP_105523_A_787   | NW_004517436.1 | scaffold2505 | 787                     | AA                              | GG                 | GG               | INTERGENIC      |               |                    |                    |
| SNP_105524_A_796   | NW_004517436.1 | scaffold2505 | 796                     | AA                              | GG                 | GG               | INTERGENIC      |               |                    |                    |
| SNP_105525_A_1056  | NW_004517436.1 | scaffold2505 | 1056                    | TT                              | GG                 | GG               | INTERGENIC      |               |                    |                    |
| SNP_105526_A_1272  | NW_004517436.1 | scaffold2505 | 1272                    | AA                              | GG                 | GG               | INTERGENIC      |               |                    |                    |
| SNP_105528_A_1785  | NW_004517436.1 | scaffold2505 | 1785                    | TT                              | AA                 | AA               | INTERGENIC      |               |                    |                    |

| SNPs IDs          | Chromosome IDs | Chromosomes  | Physical positions (bp) | CDC Frontier (Reference genome) | (Pusa 1103 & HPNB) | (ILWC 46 & LPNB) | Sequence genome | Components of | Gene accession IDs | Putative functions |
|-------------------|----------------|--------------|-------------------------|---------------------------------|--------------------|------------------|-----------------|---------------|--------------------|--------------------|
| SNP_105530_A_1924 | NW_004517436.1 | scaffold2505 | 1924                    | TT                              | AA                 | AA               | INTERGENIC      |               |                    |                    |
| SNP_105531_A_2133 | NW_004517436.1 | scaffold2505 | 2133                    | AA                              | CC                 | CC               | INTERGENIC      |               |                    |                    |
| SNP_105532_A_2196 | NW_004517436.1 | scaffold2505 | 2196                    | TT                              | CC                 | CC               | INTERGENIC      |               |                    |                    |
| SNP_105533_A_2231 | NW_004517436.1 | scaffold2505 | 2231                    | CC                              | TT                 | TT               | INTERGENIC      |               |                    |                    |
| SNP_105534_A_2314 | NW_004517436.1 | scaffold2505 | 2314                    | AA                              | GG                 | GG               | INTERGENIC      |               |                    |                    |
| SNP_105535_A_2315 | NW_004517436.1 | scaffold2505 | 2315                    | CC                              | GG                 | GG               | INTERGENIC      |               |                    |                    |
| SNP_105536_A_2540 | NW_004517436.1 | scaffold2505 | 2540                    | CC                              | AA                 | AA               | INTERGENIC      |               |                    |                    |
| SNP_105537_A_2542 | NW_004517436.1 | scaffold2505 | 2542                    | TT                              | CC                 | CC               | INTERGENIC      |               |                    |                    |
| SNP_105538_A_2727 | NW_004517436.1 | scaffold2505 | 2727                    | AA                              | GG                 | GG               | INTERGENIC      |               |                    |                    |
| SNP_105539_A_1230 | NW_004517439.1 | scaffold2511 | 1230                    | AA                              | GG                 | GG               | INTERGENIC      |               |                    |                    |
| SNP_105541_A_1564 | NW_004517439.1 | scaffold2511 | 1564                    | GG                              | TT                 | TT               | INTERGENIC      |               |                    |                    |
| SNP_105542_A_1565 | NW_004517439.1 | scaffold2511 | 1565                    | AA                              | GG                 | GG               | INTERGENIC      |               |                    |                    |
| SNP_105543_A_1888 | NW_004517439.1 | scaffold2511 | 1888                    | CC                              | GG                 | GG               | INTERGENIC      |               |                    |                    |
| SNP_105544_A_1900 | NW_004517439.1 | scaffold2511 | 1900                    | AA                              | GG                 | GG               | INTERGENIC      |               |                    |                    |
| SNP_105545_A_2008 | NW_004517439.1 | scaffold2511 | 2008                    | TT                              | CC                 | CC               | INTERGENIC      |               |                    |                    |
| SNP_105546_A_2605 | NW_004517439.1 | scaffold2511 | 2605                    | CC                              | TT                 | TT               | INTERGENIC      |               |                    |                    |
| SNP_105547_A_2966 | NW_004517439.1 | scaffold2511 | 2966                    | GG                              | AA                 | AA               | INTERGENIC      |               |                    |                    |
| SNP_105548_A_3048 | NW_004517439.1 | scaffold2511 | 3048                    | CC                              | TT                 | TT               | INTERGENIC      |               |                    |                    |
| SNP_105549_A_3204 | NW_004517439.1 | scaffold2511 | 3204                    | AA                              | GG                 | GG               | INTERGENIC      |               |                    |                    |
| SNP_105550_A_3234 | NW_004517439.1 | scaffold2511 | 3234                    | CC                              | GG                 | GG               | INTERGENIC      |               |                    |                    |
| SNP_105551_A_3419 | NW_004517439.1 | scaffold2511 | 3419                    | TT                              | GG                 | GG               | INTERGENIC      |               |                    |                    |
| SNP_105552_A_3878 | NW_004517439.1 | scaffold2511 | 3878                    | CC                              | TT                 | TT               | INTERGENIC      |               |                    |                    |

| SNPs IDs           | Chromosome IDs | Chromosomes  | Physical positions (bp) | CDC Frontier (Reference genome) | (Pusa 1103 & HPNB) | (ILWC 46 & LPNB) | Sequence genome | Components of | Gene accession IDs | Putative functions |
|--------------------|----------------|--------------|-------------------------|---------------------------------|--------------------|------------------|-----------------|---------------|--------------------|--------------------|
| SNP_105553_A_4473  | NW_004517439.1 | scaffold2511 | 4473                    | TT                              | CC                 | CC               | INTERGENIC      |               |                    |                    |
| SNP_105554_A_4674  | NW_004517439.1 | scaffold2511 | 4674                    | AA                              | GG                 | GG               | INTERGENIC      |               |                    |                    |
| SNP_105555_A_4683  | NW_004517439.1 | scaffold2511 | 4683                    | GG                              | TT                 | TT               | INTERGENIC      |               |                    |                    |
| SNP_105556_A_4760  | NW_004517439.1 | scaffold2511 | 4760                    | AA                              | GG                 | GG               | INTERGENIC      |               |                    |                    |
| SNP_105557_A_4878  | NW_004517439.1 | scaffold2511 | 4878                    | CC                              | TT                 | TT               | INTERGENIC      |               |                    |                    |
| SNP_105558_A_4917  | NW_004517439.1 | scaffold2511 | 4917                    | GG                              | CC                 | CC               | INTERGENIC      |               |                    |                    |
| SNP_105559_A_4932  | NW_004517439.1 | scaffold2511 | 4932                    | CC                              | AA                 | AA               | INTERGENIC      |               |                    |                    |
| SNP_105560_A_5036  | NW_004517439.1 | scaffold2511 | 5036                    | GG                              | AA                 | AA               | INTERGENIC      |               |                    |                    |
| SNP_105561_A_5266  | NW_004517439.1 | scaffold2511 | 5266                    | TT                              | CC                 | CC               | INTERGENIC      |               |                    |                    |
| SNP_105562_A_5286  | NW_004517439.1 | scaffold2511 | 5286                    | CC                              | TT                 | TT               | INTERGENIC      |               |                    |                    |
| SNP_105563_A_5287  | NW_004517439.1 | scaffold2511 | 5287                    | TT                              | CC                 | CC               | INTERGENIC      |               |                    |                    |
| SNP_105564_A_5401  | NW_004517439.1 | scaffold2511 | 5401                    | TT                              | CC                 | CC               | INTERGENIC      |               |                    |                    |
| SNP_105565_A_5735  | NW_004517439.1 | scaffold2511 | 5735                    | CC                              | TT                 | TT               | INTERGENIC      |               |                    |                    |
| SNP_105566_A_5740  | NW_004517439.1 | scaffold2511 | 5740                    | AA                              | TT                 | TT               | INTERGENIC      |               |                    |                    |
| SNP_105567_A_5955  | NW_004517439.1 | scaffold2511 | 5955                    | GG                              | AA                 | AA               | INTERGENIC      |               |                    |                    |
| SNP_105568_A_6247  | NW_004517439.1 | scaffold2511 | 6247                    | AA                              | TT                 | TT               | INTERGENIC      |               |                    |                    |
| SNP_105569_A_6385  | NW_004517439.1 | scaffold2511 | 6385                    | GG                              | TT                 | TT               | INTERGENIC      |               |                    |                    |
| SNP_105570_A_6509  | NW_004517439.1 | scaffold2511 | 6509                    | TT                              | CC                 | CC               | INTERGENIC      |               |                    |                    |
| SNP_105571_A_7366  | NW_004517439.1 | scaffold2511 | 7366                    | AA                              | GG                 | GG               | INTERGENIC      |               |                    |                    |
| SNP_105573_A_16566 | NW_004517439.1 | scaffold2511 | 16566                   | TT                              | CC                 | CC               | INTERGENIC      |               |                    |                    |
| SNP_105574_A_16914 | NW_004517439.1 | scaffold2511 | 16914                   | GG                              | AA                 | AA               | INTERGENIC      |               |                    |                    |
| SNP_105575_A_24730 | NW_004517439.1 | scaffold2511 | 24730                   | AA                              | GG                 | GG               | INTERGENIC      |               |                    |                    |

| SNPs IDs           | Chromosome IDs | Chromosomes  | Physical positions (bp) | CDC Frontier (Reference genome) | (Pusa 1103 & HPNB) | (ILWC 46 & LPNB) | Sequence genome | Components of | Gene accession IDs | Putative functions |
|--------------------|----------------|--------------|-------------------------|---------------------------------|--------------------|------------------|-----------------|---------------|--------------------|--------------------|
| SNP_105576_A_24950 | NW_004517439.1 | scaffold2511 | 24950                   | GG                              | TT                 | TT               | INTERGENIC      |               |                    |                    |
| SNP_105577_A_24999 | NW_004517439.1 | scaffold2511 | 24999                   | AA                              | GG                 | GG               | INTERGENIC      |               |                    |                    |
| SNP_105578_A_25029 | NW_004517439.1 | scaffold2511 | 25029                   | AA                              | GG                 | GG               | INTERGENIC      |               |                    |                    |
| SNP_105579_A_29572 | NW_004517439.1 | scaffold2511 | 29572                   | AA                              | GG                 | GG               | INTERGENIC      |               |                    |                    |
| SNP_105580_A_60505 | NW_004517439.1 | scaffold2511 | 60505                   | GG                              | AA                 | AA               | INTERGENIC      |               |                    |                    |
| SNP_105581_A_60654 | NW_004517439.1 | scaffold2511 | 60654                   | AA                              | GG                 | GG               | INTERGENIC      |               |                    |                    |
| SNP_105582_A_60875 | NW_004517439.1 | scaffold2511 | 60875                   | AA                              | GG                 | GG               | INTERGENIC      |               |                    |                    |
| SNP_105583_A_60893 | NW_004517439.1 | scaffold2511 | 60893                   | TT                              | GG                 | GG               | INTERGENIC      |               |                    |                    |
| SNP_105584_A_60912 | NW_004517439.1 | scaffold2511 | 60912                   | AA                              | CC                 | CC               | INTERGENIC      |               |                    |                    |
| SNP_105585_A_60978 | NW_004517439.1 | scaffold2511 | 60978                   | CC                              | GG                 | GG               | INTERGENIC      |               |                    |                    |
| SNP_105586_A_61703 | NW_004517439.1 | scaffold2511 | 61703                   | GG                              | TT                 | TT               | INTERGENIC      |               |                    |                    |
| SNP_105587_A_61830 | NW_004517439.1 | scaffold2511 | 61830                   | GG                              | CC                 | CC               | INTERGENIC      |               |                    |                    |
| SNP_105588_A_61853 | NW_004517439.1 | scaffold2511 | 61853                   | TT                              | CC                 | CC               | INTERGENIC      |               |                    |                    |
| SNP_105589_A_61894 | NW_004517439.1 | scaffold2511 | 61894                   | CC                              | AA                 | AA               | INTERGENIC      |               |                    |                    |
| SNP_105590_A_62086 | NW_004517439.1 | scaffold2511 | 62086                   | AA                              | GG                 | GG               | INTERGENIC      |               |                    |                    |
| SNP_105591_A_62101 | NW_004517439.1 | scaffold2511 | 62101                   | TT                              | GG                 | GG               | INTERGENIC      |               |                    |                    |
| SNP_105592_A_62163 | NW_004517439.1 | scaffold2511 | 62163                   | TT                              | AA                 | AA               | INTERGENIC      |               |                    |                    |
| SNP_105593_A_62276 | NW_004517439.1 | scaffold2511 | 62276                   | TT                              | AA                 | AA               | INTERGENIC      |               |                    |                    |
| SNP_105594_A_62523 | NW_004517439.1 | scaffold2511 | 62523                   | TT                              | CC                 | CC               | INTERGENIC      |               |                    |                    |
| SNP_105595_A_64315 | NW_004517439.1 | scaffold2511 | 64315                   | TT                              | AA                 | AA               | INTERGENIC      |               |                    |                    |
| SNP_105596_A_64330 | NW_004517439.1 | scaffold2511 | 64330                   | CC                              | GG                 | GG               | INTERGENIC      |               |                    |                    |
| SNP_105597_A_64345 | NW_004517439.1 | scaffold2511 | 64345                   | CC                              | GG                 | GG               | INTERGENIC      |               |                    |                    |



| SNPs IDs           | Chromosome IDs | Chromosomes  | Physical positions (bp) | CDC Frontier (Reference genome) | (Pusa 1103 & HPNB) | (ILWC 46 & LPNB) | Sequence genome | Components of | Gene accession IDs | Putative functions |
|--------------------|----------------|--------------|-------------------------|---------------------------------|--------------------|------------------|-----------------|---------------|--------------------|--------------------|
| SNP_105598_A_64370 | NW_004517439.1 | scaffold2511 | 64370                   | CC                              | TT                 | TT               | INTERGENIC      |               |                    |                    |
| SNP_105599_A_65252 | NW_004517439.1 | scaffold2511 | 65252                   | CC                              | TT                 | TT               | INTERGENIC      |               |                    |                    |
| SNP_105600_A_65376 | NW_004517439.1 | scaffold2511 | 65376                   | TT                              | CC                 | CC               | INTERGENIC      |               |                    |                    |
| SNP_105601_A_65457 | NW_004517439.1 | scaffold2511 | 65457                   | AA                              | GG                 | GG               | INTERGENIC      |               |                    |                    |
| SNP_105602_A_65526 | NW_004517439.1 | scaffold2511 | 65526                   | AA                              | CC                 | CC               | INTERGENIC      |               |                    |                    |
| SNP_105603_A_65963 | NW_004517439.1 | scaffold2511 | 65963                   | TT                              | GG                 | GG               | INTERGENIC      |               |                    |                    |
| SNP_105604_A_66316 | NW_004517439.1 | scaffold2511 | 66316                   | GG                              | AA                 | AA               | INTERGENIC      |               |                    |                    |
| SNP_105605_A_424   | NW_004517440.1 | scaffold2512 | 424                     | TT                              | AA                 | AA               | INTERGENIC      |               |                    |                    |
| SNP_105606_A_445   | NW_004517440.1 | scaffold2512 | 445                     | AA                              | TT                 | TT               | INTERGENIC      |               |                    |                    |
| SNP_105607_A_448   | NW_004517440.1 | scaffold2512 | 448                     | AA                              | GG                 | GG               | INTERGENIC      |               |                    |                    |
| SNP_105608_A_753   | NW_004517440.1 | scaffold2512 | 753                     | GG                              | TT                 | TT               | INTERGENIC      |               |                    |                    |
| SNP_105609_A_87347 | NW_004517442.1 | scaffold2516 | 87347                   | TT                              | CC                 | CC               | INTERGENIC      |               |                    |                    |
| SNP_105611_A_87419 | NW_004517442.1 | scaffold2516 | 87419                   | AA                              | GG                 | GG               | INTERGENIC      |               |                    |                    |
| SNP_105612_A_87679 | NW_004517442.1 | scaffold2516 | 87679                   | TT                              | CC                 | CC               | INTERGENIC      |               |                    |                    |
| SNP_105613_A_87727 | NW_004517442.1 | scaffold2516 | 87727                   | TT                              | CC                 | CC               | INTERGENIC      |               |                    |                    |
| SNP_105614_A_2182  | NW_004517445.1 | scaffold2519 | 2182                    | CC                              | TT                 | TT               | INTERGENIC      |               |                    |                    |
| SNP_105615_A_58071 | NW_004517446.1 | scaffold2521 | 58071                   | GG                              | AA                 | AA               | INTERGENIC      |               |                    |                    |
| SNP_105616_A_58107 | NW_004517446.1 | scaffold2521 | 58107                   | TT                              | AA                 | AA               | INTERGENIC      |               |                    |                    |
| SNP_105617_A_23774 | NW_004517447.1 | scaffold2522 | 23774                   | GG                              | AA                 | AA               | INTERGENIC      |               |                    |                    |
| SNP_105619_A_24148 | NW_004517447.1 | scaffold2522 | 24148                   | AA                              | GG                 | GG               | INTERGENIC      |               |                    |                    |
| SNP_105621_A_5161  | NW_004517452.1 | scaffold2528 | 5161                    | TT                              | CC                 | CC               | INTERGENIC      |               |                    |                    |
| SNP_105622_A_5172  | NW_004517452.1 | scaffold2528 | 5172                    | GG                              | TT                 | TT               | INTERGENIC      |               |                    |                    |

| SNPs IDs           | Chromosome IDs | Chromosomes  | Physical positions (bp) | CDC Frontier (Reference genome) | (Pusa 1103 & HPNB) | (ILWC 46 & LPNB) | Sequence genome | Components of | Gene accession IDs           | Putative functions |
|--------------------|----------------|--------------|-------------------------|---------------------------------|--------------------|------------------|-----------------|---------------|------------------------------|--------------------|
| SNP_105623_A_13125 | NW_004517452.1 | scaffold2528 | 13125                   | AA                              | TT                 | TT               | INTERGENIC      |               |                              |                    |
| SNP_105624_A_19221 | NW_004517452.1 | scaffold2528 | 19221                   | TT                              | GG                 | GG               | INTERGENIC      |               |                              |                    |
| SNP_105625_A_19307 | NW_004517452.1 | scaffold2528 | 19307                   | CC                              | TT                 | TT               | INTERGENIC      |               |                              |                    |
| SNP_105626_A_19411 | NW_004517452.1 | scaffold2528 | 19411                   | TT                              | CC                 | CC               | INTERGENIC      |               |                              |                    |
| SNP_105627_A_19477 | NW_004517452.1 | scaffold2528 | 19477                   | GG                              | AA                 | AA               | INTERGENIC      |               |                              |                    |
| SNP_105629_A_19662 | NW_004517452.1 | scaffold2528 | 19662                   | AA                              | CC                 | CC               | INTERGENIC      |               |                              |                    |
| SNP_105630_A_19679 | NW_004517452.1 | scaffold2528 | 19679                   | AA                              | TT                 | TT               | INTERGENIC      |               |                              |                    |
| SNP_105631_A_19710 | NW_004517452.1 | scaffold2528 | 19710                   | AA                              | CC                 | CC               | INTERGENIC      |               |                              |                    |
| SNP_105632_A_19711 | NW_004517452.1 | scaffold2528 | 19711                   | TT                              | AA                 | AA               | INTERGENIC      |               |                              |                    |
| SNP_105633_A_19898 | NW_004517452.1 | scaffold2528 | 19898                   | AA                              | GG                 | GG               | INTERGENIC      |               |                              |                    |
| SNP_105634_A_19932 | NW_004517452.1 | scaffold2528 | 19932                   | TT                              | GG                 | GG               | INTERGENIC      |               |                              |                    |
| SNP_105635_A_25872 | NW_004517456.1 | scaffold2534 | 25872                   | AA                              | GG                 | GG               | URR             | 101496316     | uncharacterized LOC101496316 |                    |
| SNP_105636_A_27725 | NW_004517456.1 | scaffold2534 | 27725                   | CC                              | TT                 | TT               | INTERGENIC      |               |                              |                    |
| SNP_105637_A_27999 | NW_004517456.1 | scaffold2534 | 27999                   | AA                              | TT                 | TT               | INTERGENIC      |               |                              |                    |
| SNP_105638_A_28008 | NW_004517456.1 | scaffold2534 | 28008                   | TT                              | CC                 | CC               | INTERGENIC      |               |                              |                    |
| SNP_105639_A_28104 | NW_004517456.1 | scaffold2534 | 28104                   | TT                              | CC                 | CC               | INTERGENIC      |               |                              |                    |
| SNP_105640_A_28147 | NW_004517456.1 | scaffold2534 | 28147                   | CC                              | GG                 | GG               | INTERGENIC      |               |                              |                    |
| SNP_105641_A_28150 | NW_004517456.1 | scaffold2534 | 28150                   | AA                              | GG                 | GG               | INTERGENIC      |               |                              |                    |
| SNP_105642_A_28188 | NW_004517456.1 | scaffold2534 | 28188                   | TT                              | CC                 | CC               | INTERGENIC      |               |                              |                    |
| SNP_105643_A_31721 | NW_004517456.1 | scaffold2534 | 31721                   | AA                              | TT                 | TT               | INTERGENIC      |               |                              |                    |
| SNP_105644_A_31724 | NW_004517456.1 | scaffold2534 | 31724                   | AA                              | GG                 | GG               | INTERGENIC      |               |                              |                    |
| SNP_105645_A_46163 | NW_004517456.1 | scaffold2534 | 46163                   | CC                              | TT                 | TT               | INTERGENIC      |               |                              |                    |

| SNPs IDs           | Chromosome IDs | Chromosomes  | Physical positions (bp) | CDC Frontier (Reference genome) | (Pusa 1103 & HPNB) | (ILWC 46 & LPNB) | Sequence genome | Components of | Gene accession IDs | Putative functions |
|--------------------|----------------|--------------|-------------------------|---------------------------------|--------------------|------------------|-----------------|---------------|--------------------|--------------------|
| SNP_105646_A_46192 | NW_004517456.1 | scaffold2534 | 46192                   | CC                              | TT                 | TT               | INTERGENIC      |               |                    |                    |
| SNP_105647_A_46202 | NW_004517456.1 | scaffold2534 | 46202                   | AA                              | GG                 | GG               | INTERGENIC      |               |                    |                    |
| SNP_105648_A_46228 | NW_004517456.1 | scaffold2534 | 46228                   | TT                              | CC                 | CC               | INTERGENIC      |               |                    |                    |
| SNP_105649_A_46240 | NW_004517456.1 | scaffold2534 | 46240                   | AA                              | CC                 | CC               | INTERGENIC      |               |                    |                    |
| SNP_105651_A_46319 | NW_004517456.1 | scaffold2534 | 46319                   | CC                              | AA                 | AA               | INTERGENIC      |               |                    |                    |
| SNP_105652_A_46590 | NW_004517456.1 | scaffold2534 | 46590                   | GG                              | AA                 | AA               | INTERGENIC      |               |                    |                    |
| SNP_105653_A_9872  | NW_004517457.1 | scaffold2535 | 9872                    | GG                              | TT                 | TT               | INTERGENIC      |               |                    |                    |
| SNP_105654_A_20028 | NW_004517457.1 | scaffold2535 | 20028                   | AA                              | GG                 | GG               | INTERGENIC      |               |                    |                    |
| SNP_105655_A_27874 | NW_004517457.1 | scaffold2535 | 27874                   | AA                              | CC                 | CC               | INTERGENIC      |               |                    |                    |
| SNP_105656_A_27929 | NW_004517457.1 | scaffold2535 | 27929                   | GG                              | AA                 | AA               | INTERGENIC      |               |                    |                    |
| SNP_105657_A_27942 | NW_004517457.1 | scaffold2535 | 27942                   | TT                              | GG                 | GG               | INTERGENIC      |               |                    |                    |
| SNP_105658_A_30543 | NW_004517457.1 | scaffold2535 | 30543                   | AA                              | GG                 | GG               | INTERGENIC      |               |                    |                    |
| SNP_105659_A_30760 | NW_004517457.1 | scaffold2535 | 30760                   | AA                              | GG                 | GG               | INTERGENIC      |               |                    |                    |
| SNP_105660_A_2201  | NW_004517461.1 | scaffold2542 | 2201                    | CC                              | TT                 | TT               | INTERGENIC      |               |                    |                    |
| SNP_105662_A_2318  | NW_004517461.1 | scaffold2542 | 2318                    | TT                              | AA                 | AA               | INTERGENIC      |               |                    |                    |
| SNP_105663_A_2531  | NW_004517461.1 | scaffold2542 | 2531                    | GG                              | TT                 | TT               | INTERGENIC      |               |                    |                    |
| SNP_105664_A_2537  | NW_004517461.1 | scaffold2542 | 2537                    | GG                              | AA                 | AA               | INTERGENIC      |               |                    |                    |
| SNP_105665_A_2686  | NW_004517461.1 | scaffold2542 | 2686                    | GG                              | AA                 | AA               | INTERGENIC      |               |                    |                    |
| SNP_105666_A_9204  | NW_004517461.1 | scaffold2542 | 9204                    | TT                              | CC                 | CC               | INTERGENIC      |               |                    |                    |
| SNP_105667_A_9208  | NW_004517461.1 | scaffold2542 | 9208                    | AA                              | GG                 | GG               | INTERGENIC      |               |                    |                    |
| SNP_105668_A_9216  | NW_004517461.1 | scaffold2542 | 9216                    | TT                              | CC                 | CC               | INTERGENIC      |               |                    |                    |
| SNP_105669_A_11389 | NW_004517461.1 | scaffold2542 | 11389                   | AA                              | GG                 | GG               | INTERGENIC      |               |                    |                    |

| SNPs IDs           | Chromosome IDs | Chromosomes  | Physical positions (bp) | CDC Frontier (Reference genome) | (Pusa 1103 & HPNB) | (ILWC 46 & LPNB) | Sequence genome | Components of | Gene accession IDs | Putative functions |
|--------------------|----------------|--------------|-------------------------|---------------------------------|--------------------|------------------|-----------------|---------------|--------------------|--------------------|
| SNP_105670_A_14611 | NW_004517461.1 | scaffold2542 | 14611                   | TT                              | CC                 | CC               | INTERGENIC      |               |                    |                    |
| SNP_105671_A_26189 | NW_004517461.1 | scaffold2542 | 26189                   | GG                              | AA                 | AA               | INTERGENIC      |               |                    |                    |
| SNP_105672_A_26238 | NW_004517461.1 | scaffold2542 | 26238                   | AA                              | GG                 | GG               | INTERGENIC      |               |                    |                    |
| SNP_105673_A_26434 | NW_004517461.1 | scaffold2542 | 26434                   | CC                              | TT                 | TT               | INTERGENIC      |               |                    |                    |
| SNP_105674_A_3407  | NW_004517464.1 | scaffold2547 | 3407                    | AA                              | GG                 | GG               | INTERGENIC      |               |                    |                    |
| SNP_105675_A_709   | NW_004517465.1 | scaffold2548 | 709                     | AA                              | GG                 | GG               | INTERGENIC      |               |                    |                    |
| SNP_105676_A_711   | NW_004517465.1 | scaffold2548 | 711                     | TT                              | GG                 | GG               | INTERGENIC      |               |                    |                    |
| SNP_105677_A_720   | NW_004517465.1 | scaffold2548 | 720                     | CC                              | GG                 | GG               | INTERGENIC      |               |                    |                    |
| SNP_105678_A_724   | NW_004517465.1 | scaffold2548 | 724                     | AA                              | TT                 | TT               | INTERGENIC      |               |                    |                    |
| SNP_105679_A_752   | NW_004517465.1 | scaffold2548 | 752                     | TT                              | GG                 | GG               | INTERGENIC      |               |                    |                    |
| SNP_105680_A_760   | NW_004517465.1 | scaffold2548 | 760                     | TT                              | CC                 | CC               | INTERGENIC      |               |                    |                    |
| SNP_105681_A_766   | NW_004517465.1 | scaffold2548 | 766                     | TT                              | CC                 | CC               | INTERGENIC      |               |                    |                    |
| SNP_105682_A_875   | NW_004517465.1 | scaffold2548 | 875                     | CC                              | TT                 | TT               | INTERGENIC      |               |                    |                    |
| SNP_105683_A_883   | NW_004517465.1 | scaffold2548 | 883                     | AA                              | TT                 | TT               | INTERGENIC      |               |                    |                    |
| SNP_105684_A_885   | NW_004517465.1 | scaffold2548 | 885                     | TT                              | GG                 | GG               | INTERGENIC      |               |                    |                    |
| SNP_105685_A_886   | NW_004517465.1 | scaffold2548 | 886                     | AA                              | GG                 | GG               | INTERGENIC      |               |                    |                    |
| SNP_105686_A_905   | NW_004517465.1 | scaffold2548 | 905                     | AA                              | GG                 | GG               | INTERGENIC      |               |                    |                    |
| SNP_105687_A_1063  | NW_004517465.1 | scaffold2548 | 1063                    | AA                              | TT                 | TT               | INTERGENIC      |               |                    |                    |
| SNP_105688_A_1172  | NW_004517465.1 | scaffold2548 | 1172                    | GG                              | TT                 | TT               | INTERGENIC      |               |                    |                    |
| SNP_105689_A_1342  | NW_004517465.1 | scaffold2548 | 1342                    | AA                              | TT                 | TT               | INTERGENIC      |               |                    |                    |
| SNP_105690_A_1349  | NW_004517465.1 | scaffold2548 | 1349                    | CC                              | TT                 | TT               | INTERGENIC      |               |                    |                    |
| SNP_105691_A_1357  | NW_004517465.1 | scaffold2548 | 1357                    | AA                              | TT                 | TT               | INTERGENIC      |               |                    |                    |

| SNPs IDs           | Chromosome IDs | Chromosomes  | Physical positions (bp) | CDC Frontier (Reference genome) | (Pusa 1103 & HPNB) | (ILWC 46 & LPNB) | Sequence Components of genome | Gene accession IDs | Putative functions                           |
|--------------------|----------------|--------------|-------------------------|---------------------------------|--------------------|------------------|-------------------------------|--------------------|----------------------------------------------|
| SNP_105692_A_1396  | NW_004517465.1 | scaffold2548 | 1396                    | GG                              | AA                 | AA               | INTERGENIC                    |                    |                                              |
| SNP_105693_A_1401  | NW_004517465.1 | scaffold2548 | 1401                    | TT                              | AA                 | AA               | INTERGENIC                    |                    |                                              |
| SNP_105694_A_1402  | NW_004517465.1 | scaffold2548 | 1402                    | GG                              | TT                 | TT               | INTERGENIC                    |                    |                                              |
| SNP_105695_A_1431  | NW_004517465.1 | scaffold2548 | 1431                    | TT                              | AA                 | AA               | INTERGENIC                    |                    |                                              |
| SNP_105696_A_1434  | NW_004517465.1 | scaffold2548 | 1434                    | TT                              | CC                 | CC               | INTERGENIC                    |                    |                                              |
| SNP_105697_A_1442  | NW_004517465.1 | scaffold2548 | 1442                    | AA                              | TT                 | TT               | INTERGENIC                    |                    |                                              |
| SNP_105698_A_2521  | NW_004517465.1 | scaffold2548 | 2521                    | CC                              | TT                 | TT               | INTERGENIC                    |                    |                                              |
| SNP_105699_A_1726  | NW_004517468.1 | scaffold2555 | 1726                    | CC                              | TT                 | TT               | INTERGENIC                    |                    |                                              |
| SNP_105700_A_16157 | NW_004517468.1 | scaffold2555 | 16157                   | CC                              | TT                 | TT               | INTERGENIC                    |                    |                                              |
| SNP_105701_A_19934 | NW_004517468.1 | scaffold2555 | 19934                   | AA                              | TT                 | TT               | INTRON                        | 101496960          | PLASMODESMATA CALLOSE-BINDING PROTEIN 3-like |
| SNP_105702_A_21680 | NW_004517468.1 | scaffold2555 | 21680                   | AA                              | TT                 | TT               | URR                           | 101496960          | PLASMODESMATA CALLOSE-BINDING PROTEIN 3-like |
| SNP_105703_A_21902 | NW_004517468.1 | scaffold2555 | 21902                   | CC                              | AA                 | AA               | URR                           | 101496960          | PLASMODESMATA CALLOSE-BINDING PROTEIN 3-like |
| SNP_105704_A_915   | NW_004517469.1 | scaffold2556 | 915                     | CC                              | GG                 | GG               | INTERGENIC                    |                    |                                              |
| SNP_105705_A_922   | NW_004517469.1 | scaffold2556 | 922                     | CC                              | TT                 | TT               | INTERGENIC                    |                    |                                              |
| SNP_105706_A_9152  | NW_004517470.1 | scaffold2557 | 9152                    | AA                              | GG                 | GG               | INTERGENIC                    |                    |                                              |
| SNP_105707_A_14726 | NW_004517470.1 | scaffold2557 | 14726                   | TT                              | AA                 | AA               | INTERGENIC                    |                    |                                              |
| SNP_105708_A_23212 | NW_004517470.1 | scaffold2557 | 23212                   | AA                              | CC                 | CC               | INTERGENIC                    |                    |                                              |
| SNP_105709_A_47643 | NW_004517470.1 | scaffold2557 | 47643                   | TT                              | GG                 | GG               | INTERGENIC                    |                    |                                              |
| SNP_105710_A_47656 | NW_004517470.1 | scaffold2557 | 47656                   | AA                              | CC                 | CC               | INTERGENIC                    |                    |                                              |
| SNP_105711_A_47682 | NW_004517470.1 | scaffold2557 | 47682                   | CC                              | AA                 | AA               | INTERGENIC                    |                    |                                              |
| SNP_105712_A_47752 | NW_004517470.1 | scaffold2557 | 47752                   | AA                              | TT                 | TT               | INTERGENIC                    |                    |                                              |
| SNP_105714_A_49995 | NW_004517470.1 | scaffold2557 | 49995                   | AA                              | GG                 | GG               | INTERGENIC                    |                    |                                              |

| SNPs IDs           | Chromosome IDs | Chromosomes  | Physical positions (bp) | CDC Frontier (Reference genome) | (Pusa 1103 & HPNB) | (ILWC 46 & LPNB) | Sequence genome | Components of | Gene accession IDs | Putative functions |
|--------------------|----------------|--------------|-------------------------|---------------------------------|--------------------|------------------|-----------------|---------------|--------------------|--------------------|
| SNP_105715_A_50047 | NW_004517470.1 | scaffold2557 | 50047                   | AA                              | GG                 | GG               | INTERGENIC      |               |                    |                    |
| SNP_105716_A_50060 | NW_004517470.1 | scaffold2557 | 50060                   | GG                              | AA                 | AA               | INTERGENIC      |               |                    |                    |
| SNP_105717_A_50074 | NW_004517470.1 | scaffold2557 | 50074                   | AA                              | GG                 | GG               | INTERGENIC      |               |                    |                    |
| SNP_105718_A_50305 | NW_004517470.1 | scaffold2557 | 50305                   | AA                              | TT                 | TT               | INTERGENIC      |               |                    |                    |
| SNP_105719_A_50326 | NW_004517470.1 | scaffold2557 | 50326                   | GG                              | AA                 | AA               | INTERGENIC      |               |                    |                    |
| SNP_105720_A_50386 | NW_004517470.1 | scaffold2557 | 50386                   | CC                              | GG                 | GG               | INTERGENIC      |               |                    |                    |
| SNP_105721_A_51731 | NW_004517470.1 | scaffold2557 | 51731                   | AA                              | GG                 | GG               | INTERGENIC      |               |                    |                    |
| SNP_105722_A_51753 | NW_004517470.1 | scaffold2557 | 51753                   | AA                              | TT                 | TT               | INTERGENIC      |               |                    |                    |
| SNP_105723_A_51938 | NW_004517470.1 | scaffold2557 | 51938                   | TT                              | CC                 | CC               | INTERGENIC      |               |                    |                    |
| SNP_105724_A_52074 | NW_004517470.1 | scaffold2557 | 52074                   | AA                              | TT                 | TT               | INTERGENIC      |               |                    |                    |
| SNP_105725_A_56329 | NW_004517470.1 | scaffold2557 | 56329                   | CC                              | TT                 | TT               | INTERGENIC      |               |                    |                    |
| SNP_105726_A_56380 | NW_004517470.1 | scaffold2557 | 56380                   | AA                              | CC                 | CC               | INTERGENIC      |               |                    |                    |
| SNP_105727_A_56406 | NW_004517470.1 | scaffold2557 | 56406                   | CC                              | TT                 | TT               | INTERGENIC      |               |                    |                    |
| SNP_105728_A_56631 | NW_004517470.1 | scaffold2557 | 56631                   | TT                              | CC                 | CC               | INTERGENIC      |               |                    |                    |
| SNP_105729_A_56662 | NW_004517470.1 | scaffold2557 | 56662                   | AA                              | GG                 | GG               | INTERGENIC      |               |                    |                    |
| SNP_105730_A_56728 | NW_004517470.1 | scaffold2557 | 56728                   | AA                              | GG                 | GG               | INTERGENIC      |               |                    |                    |
| SNP_105731_A_61460 | NW_004517470.1 | scaffold2557 | 61460                   | AA                              | GG                 | GG               | INTERGENIC      |               |                    |                    |
| SNP_105732_A_61494 | NW_004517470.1 | scaffold2557 | 61494                   | CC                              | AA                 | AA               | INTERGENIC      |               |                    |                    |
| SNP_105733_A_61504 | NW_004517470.1 | scaffold2557 | 61504                   | TT                              | AA                 | AA               | INTERGENIC      |               |                    |                    |
| SNP_105734_A_61506 | NW_004517470.1 | scaffold2557 | 61506                   | TT                              | CC                 | CC               | INTERGENIC      |               |                    |                    |
| SNP_105735_A_61569 | NW_004517470.1 | scaffold2557 | 61569                   | TT                              | CC                 | CC               | INTERGENIC      |               |                    |                    |
| SNP_105736_A_61570 | NW_004517470.1 | scaffold2557 | 61570                   | GG                              | AA                 | AA               | INTERGENIC      |               |                    |                    |

| SNPs IDs            | Chromosome IDs | Chromosomes  | Physical positions (bp) | CDC Frontier genome (Reference genome) | (Pusa 1103 & HPNB) | (ILWC 46 & LPNB) | Sequence Components of genome | Gene accession IDs | Putative functions                |
|---------------------|----------------|--------------|-------------------------|----------------------------------------|--------------------|------------------|-------------------------------|--------------------|-----------------------------------|
| SNP_105737_A_61585  | NW_004517470.1 | scaffold2557 | 61585                   | AA                                     | GG                 | GG               | INTERGENIC                    |                    |                                   |
| SNP_105738_A_61833  | NW_004517470.1 | scaffold2557 | 61833                   | CC                                     | GG                 | GG               | INTERGENIC                    |                    |                                   |
| SNP_105739_A_61882  | NW_004517470.1 | scaffold2557 | 61882                   | TT                                     | CC                 | CC               | INTERGENIC                    |                    |                                   |
| SNP_105740_A_62284  | NW_004517470.1 | scaffold2557 | 62284                   | AA                                     | GG                 | GG               | INTERGENIC                    |                    |                                   |
| SNP_105741_A_62573  | NW_004517470.1 | scaffold2557 | 62573                   | AA                                     | GG                 | GG               | DRR                           | 101498495          | folypolyglutamate synthase-like   |
| SNP_105742_A_62677  | NW_004517470.1 | scaffold2557 | 62677                   | TT                                     | AA                 | AA               | DRR                           | 101498495          | folypolyglutamate synthase-like   |
| SNP_105743_A_85950  | NW_004517470.1 | scaffold2557 | 85950                   | AA                                     | GG                 | GG               | INTERGENIC                    |                    |                                   |
| SNP_105744_A_85979  | NW_004517470.1 | scaffold2557 | 85979                   | TT                                     | AA                 | AA               | INTERGENIC                    |                    |                                   |
| SNP_105745_A_86074  | NW_004517470.1 | scaffold2557 | 86074                   | CC                                     | TT                 | TT               | INTERGENIC                    |                    |                                   |
| SNP_105746_A_86328  | NW_004517470.1 | scaffold2557 | 86328                   | AA                                     | CC                 | CC               | INTERGENIC                    |                    |                                   |
| SNP_105747_A_86363  | NW_004517470.1 | scaffold2557 | 86363                   | AA                                     | CC                 | CC               | INTERGENIC                    |                    |                                   |
| SNP_105748_A_86373  | NW_004517470.1 | scaffold2557 | 86373                   | CC                                     | TT                 | TT               | INTERGENIC                    |                    |                                   |
| SNP_105752_A_172007 | NW_004517470.1 | scaffold2557 | 172007                  | GG                                     | AA                 | AA               | INTERGENIC                    |                    |                                   |
| SNP_105753_A_172010 | NW_004517470.1 | scaffold2557 | 172010                  | AA                                     | GG                 | GG               | INTERGENIC                    |                    |                                   |
| SNP_105754_A_172061 | NW_004517470.1 | scaffold2557 | 172061                  | AA                                     | GG                 | GG               | INTERGENIC                    |                    |                                   |
| SNP_105755_A_172086 | NW_004517470.1 | scaffold2557 | 172086                  | AA                                     | GG                 | GG               | INTERGENIC                    |                    |                                   |
| SNP_105756_A_172354 | NW_004517470.1 | scaffold2557 | 172354                  | CC                                     | GG                 | GG               | INTERGENIC                    |                    |                                   |
| SNP_105757_A_172484 | NW_004517470.1 | scaffold2557 | 172484                  | AA                                     | GG                 | GG               | INTERGENIC                    |                    |                                   |
| SNP_105758_A_27913  | NW_004517471.1 | scaffold2558 | 27913                   | CC                                     | AA                 | AA               | INTERGENIC                    |                    |                                   |
| SNP_105759_A_8410   | NW_004517473.1 | scaffold2560 | 8410                    | TT                                     | GG                 | GG               | NON_SYNONYMOUS_CODING         | 101500102          | UDP-glycosyltransferase 74B1-like |
| SNP_105760_A_19897  | NW_004517473.1 | scaffold2560 | 19897                   | GG                                     | AA                 | AA               | INTERGENIC                    |                    |                                   |
| SNP_105761_A_19898  | NW_004517473.1 | scaffold2560 | 19898                   | GG                                     | AA                 | AA               | INTERGENIC                    |                    |                                   |

| SNPs IDs           | Chromosome IDs | Chromosomes  | Physical positions (bp) | CDC Frontier (Reference genome) | (Pusa 1103 & HPNB) | (ILWC 46 & LPNB) | Sequence genome | Components of | Gene accession IDs | Putative functions |
|--------------------|----------------|--------------|-------------------------|---------------------------------|--------------------|------------------|-----------------|---------------|--------------------|--------------------|
| SNP_105762_A_19935 | NW_004517473.1 | scaffold2560 | 19935                   | TT                              | CC                 | CC               | INTERGENIC      |               |                    |                    |
| SNP_105763_A_60585 | NW_004517473.1 | scaffold2560 | 60585                   | AA                              | GG                 | GG               | INTERGENIC      |               |                    |                    |
| SNP_105765_A_60679 | NW_004517473.1 | scaffold2560 | 60679                   | CC                              | TT                 | TT               | INTERGENIC      |               |                    |                    |
| SNP_105766_A_60728 | NW_004517473.1 | scaffold2560 | 60728                   | GG                              | TT                 | TT               | INTERGENIC      |               |                    |                    |
| SNP_105768_A_61291 | NW_004517473.1 | scaffold2560 | 61291                   | TT                              | GG                 | GG               | INTERGENIC      |               |                    |                    |
| SNP_105769_A_61393 | NW_004517473.1 | scaffold2560 | 61393                   | GG                              | AA                 | AA               | INTERGENIC      |               |                    |                    |
| SNP_105770_A_61608 | NW_004517473.1 | scaffold2560 | 61608                   | AA                              | GG                 | GG               | INTERGENIC      |               |                    |                    |
| SNP_105771_A_61703 | NW_004517473.1 | scaffold2560 | 61703                   | CC                              | AA                 | AA               | INTERGENIC      |               |                    |                    |
| SNP_105773_A_61776 | NW_004517473.1 | scaffold2560 | 61776                   | AA                              | TT                 | TT               | INTERGENIC      |               |                    |                    |
| SNP_105774_A_61788 | NW_004517473.1 | scaffold2560 | 61788                   | AA                              | GG                 | GG               | INTERGENIC      |               |                    |                    |
| SNP_105775_A_62020 | NW_004517473.1 | scaffold2560 | 62020                   | AA                              | TT                 | TT               | INTERGENIC      |               |                    |                    |
| SNP_105776_A_62329 | NW_004517473.1 | scaffold2560 | 62329                   | GG                              | CC                 | CC               | INTERGENIC      |               |                    |                    |
| SNP_105777_A_62599 | NW_004517473.1 | scaffold2560 | 62599                   | GG                              | TT                 | TT               | INTERGENIC      |               |                    |                    |
| SNP_105778_A_63522 | NW_004517473.1 | scaffold2560 | 63522                   | AA                              | CC                 | CC               | INTERGENIC      |               |                    |                    |
| SNP_105779_A_11211 | NW_004517476.1 | scaffold2564 | 11211                   | TT                              | CC                 | CC               | INTERGENIC      |               |                    |                    |
| SNP_105780_A_11352 | NW_004517476.1 | scaffold2564 | 11352                   | CC                              | AA                 | AA               | INTERGENIC      |               |                    |                    |
| SNP_105781_A_28477 | NW_004517476.1 | scaffold2564 | 28477                   | GG                              | CC                 | CC               | INTERGENIC      |               |                    |                    |
| SNP_105782_A_28485 | NW_004517476.1 | scaffold2564 | 28485                   | AA                              | TT                 | TT               | INTERGENIC      |               |                    |                    |
| SNP_105783_A_28701 | NW_004517476.1 | scaffold2564 | 28701                   | GG                              | AA                 | AA               | INTERGENIC      |               |                    |                    |
| SNP_105784_A_28725 | NW_004517476.1 | scaffold2564 | 28725                   | TT                              | GG                 | GG               | INTERGENIC      |               |                    |                    |
| SNP_105785_A_411   | NW_004517479.1 | scaffold2568 | 411                     | AA                              | CC                 | CC               | INTERGENIC      |               |                    |                    |
| SNP_105786_A_804   | NW_004517479.1 | scaffold2568 | 804                     | CC                              | TT                 | TT               | INTERGENIC      |               |                    |                    |



| SNPs IDs            | Chromosome IDs | Chromosomes  | Physical positions (bp) | CDC Frontier (Reference genome) | (Pusa 1103 & HPNB) | (ILWC 46 & LPNB) | Sequence genome   | Components of | Gene accession IDs | Putative functions |
|---------------------|----------------|--------------|-------------------------|---------------------------------|--------------------|------------------|-------------------|---------------|--------------------|--------------------|
| SNP_105787_A_22283  | NW_004517480.1 | scaffold2569 | 22283                   | AA                              | CC                 | CC               | INTERGENIC        |               |                    |                    |
| SNP_105788_A_22419  | NW_004517480.1 | scaffold2569 | 22419                   | TT                              | CC                 | CC               | INTERGENIC        |               |                    |                    |
| SNP_105789_A_22556  | NW_004517480.1 | scaffold2569 | 22556                   | AA                              | GG                 | GG               | INTERGENIC        |               |                    |                    |
| SNP_105790_A_22590  | NW_004517480.1 | scaffold2569 | 22590                   | CC                              | TT                 | TT               | INTERGENIC        |               |                    |                    |
| SNP_105791_A_23276  | NW_004517480.1 | scaffold2569 | 23276                   | TT                              | AA                 | AA               | INTERGENIC        |               |                    |                    |
| SNP_105792_A_23279  | NW_004517480.1 | scaffold2569 | 23279                   | AA                              | GG                 | GG               | INTERGENIC        |               |                    |                    |
| SNP_105793_A_23299  | NW_004517480.1 | scaffold2569 | 23299                   | GG                              | AA                 | AA               | INTERGENIC        |               |                    |                    |
| SNP_105794_A_46544  | NW_004517480.1 | scaffold2569 | 46544                   | GG                              | AA                 | AA               | INTERGENIC        |               |                    |                    |
| SNP_105796_A_99326  | NW_004517480.1 | scaffold2569 | 99326                   | AA                              | GG                 | GG               | INTERGENIC        |               |                    |                    |
| SNP_105797_A_99363  | NW_004517480.1 | scaffold2569 | 99363                   | AA                              | GG                 | GG               | INTERGENIC        |               |                    |                    |
| SNP_105798_A_99369  | NW_004517480.1 | scaffold2569 | 99369                   | GG                              | AA                 | AA               | INTERGENIC        |               |                    |                    |
| SNP_105799_A_99381  | NW_004517480.1 | scaffold2569 | 99381                   | AA                              | CC                 | CC               | INTERGENIC        |               |                    |                    |
| SNP_105800_A_106306 | NW_004517480.1 | scaffold2569 | 106306                  | TT                              | AA                 | AA               | INTERGENIC        |               |                    |                    |
| SNP_105801_A_106824 | NW_004517480.1 | scaffold2569 | 106824                  | GG                              | AA                 | AA               | INTERGENIC        |               |                    |                    |
| SNP_105802_A_106826 | NW_004517480.1 | scaffold2569 | 106826                  | TT                              | AA                 | AA               | INTERGENIC        |               |                    |                    |
| SNP_105803_A_106975 | NW_004517480.1 | scaffold2569 | 106975                  | CC                              | GG                 | GG               | INTERGENIC        |               |                    |                    |
| SNP_105804_A_959    | NW_004517482.1 | scaffold2571 | 959                     | TT                              | AA                 | AA               | INTERGENIC        |               |                    |                    |
| SNP_105805_A_4839   | NW_004517485.1 | scaffold2574 | 4839                    | TT                              | GG                 | GG               | INTERGENIC        |               |                    |                    |
| SNP_105806_A_5042   | NW_004517485.1 | scaffold2574 | 5042                    | TT                              | CC                 | CC               | INTERGENIC        |               |                    |                    |
| SNP_105807_A_15397  | NW_004517485.1 | scaffold2574 | 15397                   | GG                              | CC                 | CC               | INTERGENIC        |               |                    |                    |
| SNP_105808_A_51068  | NW_004517485.1 | scaffold2574 | 51068                   | TT                              | CC                 | CC               | SYNONYMOUS_CODING | 101503616     | Unknown function   |                    |
| SNP_105809_A_51101  | NW_004517485.1 | scaffold2574 | 51101                   | AA                              | GG                 | GG               | SYNONYMOUS_CODING | 101503616     | Unknown function   |                    |

| SNPs IDs            | Chromosome IDs | Chromosomes  | Physical positions (bp) | CDC Frontier (Reference genome) | (Pusa 1103 & HPNB) | (ILWC 46 & LPNB) | Sequence Components of genome | Gene accession IDs | Putative functions                    |
|---------------------|----------------|--------------|-------------------------|---------------------------------|--------------------|------------------|-------------------------------|--------------------|---------------------------------------|
| SNP_105810_A_51355  | NW_004517485.1 | scaffold2574 | 51355                   | GG                              | AA                 | AA               | URR                           | 101503616          | Unknown function                      |
| SNP_105812_A_51473  | NW_004517485.1 | scaffold2574 | 51473                   | TT                              | AA                 | AA               | URR                           | 101503616          | Unknown function                      |
| SNP_105813_A_51474  | NW_004517485.1 | scaffold2574 | 51474                   | TT                              | AA                 | AA               | URR                           | 101503616          | Unknown function                      |
| SNP_105814_A_65994  | NW_004517486.1 | scaffold2575 | 65994                   | TT                              | GG                 | GG               | DRR                           | 101511549          | MADS-box transcription factor 20-like |
| SNP_105815_A_65996  | NW_004517486.1 | scaffold2575 | 65996                   | AA                              | CC                 | CC               | DRR                           | 101511549          | MADS-box transcription factor 20-like |
| SNP_105816_A_114526 | NW_004517486.1 | scaffold2575 | 114526                  | AA                              | TT                 | TT               | INTERGENIC                    |                    |                                       |
| SNP_105817_A_114530 | NW_004517486.1 | scaffold2575 | 114530                  | AA                              | CC                 | CC               | INTERGENIC                    |                    |                                       |
| SNP_105818_A_127543 | NW_004517486.1 | scaffold2575 | 127543                  | AA                              | GG                 | GG               | INTERGENIC                    |                    |                                       |
| SNP_105819_A_127544 | NW_004517486.1 | scaffold2575 | 127544                  | AA                              | CC                 | CC               | INTERGENIC                    |                    |                                       |
| SNP_105820_A_193391 | NW_004517486.1 | scaffold2575 | 193391                  | AA                              | GG                 | GG               | INTERGENIC                    |                    |                                       |
| SNP_105821_A_193403 | NW_004517486.1 | scaffold2575 | 193403                  | AA                              | GG                 | GG               | INTERGENIC                    |                    |                                       |
| SNP_105822_A_193439 | NW_004517486.1 | scaffold2575 | 193439                  | TT                              | CC                 | CC               | INTERGENIC                    |                    |                                       |
| SNP_105823_A_193466 | NW_004517486.1 | scaffold2575 | 193466                  | AA                              | GG                 | GG               | INTERGENIC                    |                    |                                       |
| SNP_105824_A_193518 | NW_004517486.1 | scaffold2575 | 193518                  | TT                              | GG                 | GG               | INTERGENIC                    |                    |                                       |
| SNP_105825_A_193529 | NW_004517486.1 | scaffold2575 | 193529                  | TT                              | CC                 | CC               | INTERGENIC                    |                    |                                       |
| SNP_105826_A_193584 | NW_004517486.1 | scaffold2575 | 193584                  | TT                              | AA                 | AA               | INTERGENIC                    |                    |                                       |
| SNP_105827_A_193677 | NW_004517486.1 | scaffold2575 | 193677                  | AA                              | GG                 | GG               | INTERGENIC                    |                    |                                       |
| SNP_105828_A_193718 | NW_004517486.1 | scaffold2575 | 193718                  | AA                              | GG                 | GG               | INTERGENIC                    |                    |                                       |
| SNP_105829_A_195813 | NW_004517486.1 | scaffold2575 | 195813                  | TT                              | CC                 | CC               | INTERGENIC                    |                    |                                       |
| SNP_105830_A_195914 | NW_004517486.1 | scaffold2575 | 195914                  | TT                              | CC                 | CC               | INTERGENIC                    |                    |                                       |
| SNP_105831_A_195944 | NW_004517486.1 | scaffold2575 | 195944                  | TT                              | GG                 | GG               | INTERGENIC                    |                    |                                       |
| SNP_105832_A_195961 | NW_004517486.1 | scaffold2575 | 195961                  | CC                              | TT                 | TT               | INTERGENIC                    |                    |                                       |

| SNPs IDs            | Chromosome IDs | Chromosomes  | Physical positions (bp) | CDC Frontier (Reference genome) | (Pusa 1103 & HPNB) | (ILWC 46 & LPNB) | Sequence Components of genome | Gene accession IDs | Putative functions          |
|---------------------|----------------|--------------|-------------------------|---------------------------------|--------------------|------------------|-------------------------------|--------------------|-----------------------------|
| SNP_105833_A_195973 | NW_004517486.1 | scaffold2575 | 195973                  | CC                              | TT                 | TT               | INTERGENIC                    |                    |                             |
| SNP_105834_A_196077 | NW_004517486.1 | scaffold2575 | 196077                  | GG                              | AA                 | AA               | INTERGENIC                    |                    |                             |
| SNP_105836_A_196160 | NW_004517486.1 | scaffold2575 | 196160                  | AA                              | GG                 | GG               | INTERGENIC                    |                    |                             |
| SNP_105837_A_196169 | NW_004517486.1 | scaffold2575 | 196169                  | AA                              | GG                 | GG               | INTERGENIC                    |                    |                             |
| SNP_105838_A_196188 | NW_004517486.1 | scaffold2575 | 196188                  | TT                              | CC                 | CC               | INTERGENIC                    |                    |                             |
| SNP_105839_A_197206 | NW_004517486.1 | scaffold2575 | 197206                  | AA                              | CC                 | CC               | INTERGENIC                    |                    |                             |
| SNP_105840_A_197209 | NW_004517486.1 | scaffold2575 | 197209                  | AA                              | GG                 | GG               | INTERGENIC                    |                    |                             |
| SNP_105841_A_208711 | NW_004517486.1 | scaffold2575 | 208711                  | AA                              | CC                 | CC               | INTERGENIC                    |                    |                             |
| SNP_105842_A_208726 | NW_004517486.1 | scaffold2575 | 208726                  | AA                              | GG                 | GG               | INTERGENIC                    |                    |                             |
| SNP_105843_A_231200 | NW_004517486.1 | scaffold2575 | 231200                  | CC                              | AA                 | AA               | INTRON                        | 101510258          | O-acyltransferase WSD1-like |
| SNP_105844_A_231208 | NW_004517486.1 | scaffold2575 | 231208                  | TT                              | CC                 | CC               | INTRON                        | 101510258          | O-acyltransferase WSD1-like |
| SNP_105845_A_231213 | NW_004517486.1 | scaffold2575 | 231213                  | AA                              | GG                 | GG               | INTRON                        | 101510258          | O-acyltransferase WSD1-like |
| SNP_105846_A_231219 | NW_004517486.1 | scaffold2575 | 231219                  | TT                              | GG                 | GG               | INTRON                        | 101510258          | O-acyltransferase WSD1-like |
| SNP_105847_A_231291 | NW_004517486.1 | scaffold2575 | 231291                  | CC                              | TT                 | TT               | INTRON                        | 101510258          | O-acyltransferase WSD1-like |
| SNP_105848_A_231315 | NW_004517486.1 | scaffold2575 | 231315                  | TT                              | GG                 | GG               | INTRON                        | 101510258          | O-acyltransferase WSD1-like |
| SNP_105849_A_231382 | NW_004517486.1 | scaffold2575 | 231382                  | TT                              | AA                 | AA               | INTRON                        | 101510258          | O-acyltransferase WSD1-like |
| SNP_105850_A_231496 | NW_004517486.1 | scaffold2575 | 231496                  | TT                              | CC                 | CC               | INTRON                        | 101510258          | O-acyltransferase WSD1-like |
| SNP_105851_A_231514 | NW_004517486.1 | scaffold2575 | 231514                  | GG                              | CC                 | CC               | INTRON                        | 101510258          | O-acyltransferase WSD1-like |
| SNP_105852_A_245112 | NW_004517486.1 | scaffold2575 | 245112                  | TT                              | GG                 | GG               | INTERGENIC                    |                    |                             |
| SNP_105854_A_269310 | NW_004517486.1 | scaffold2575 | 269310                  | GG                              | TT                 | TT               | INTERGENIC                    |                    |                             |
| SNP_105855_A_271206 | NW_004517486.1 | scaffold2575 | 271206                  | GG                              | AA                 | AA               | INTERGENIC                    |                    |                             |
| SNP_105856_A_271237 | NW_004517486.1 | scaffold2575 | 271237                  | TT                              | CC                 | CC               | INTERGENIC                    |                    |                             |

| SNPs IDs            | Chromosome IDs | Chromosomes  | Physical positions (bp) | CDC Frontier (Reference genome) | (Pusa 1103 & HPNB) | (ILWC 46 & LPNB) | Sequence genome | Components of | Gene accession IDs | Putative functions |
|---------------------|----------------|--------------|-------------------------|---------------------------------|--------------------|------------------|-----------------|---------------|--------------------|--------------------|
| SNP_105858_A_271390 | NW_004517486.1 | scaffold2575 | 271390                  | TT                              | GG                 | GG               | INTERGENIC      |               |                    |                    |
| SNP_105859_A_271402 | NW_004517486.1 | scaffold2575 | 271402                  | CC                              | TT                 | TT               | INTERGENIC      |               |                    |                    |
| SNP_105860_A_271464 | NW_004517486.1 | scaffold2575 | 271464                  | TT                              | GG                 | GG               | INTERGENIC      |               |                    |                    |
| SNP_105861_A_271673 | NW_004517486.1 | scaffold2575 | 271673                  | CC                              | TT                 | TT               | INTERGENIC      |               |                    |                    |
| SNP_105862_A_271682 | NW_004517486.1 | scaffold2575 | 271682                  | TT                              | CC                 | CC               | INTERGENIC      |               |                    |                    |
| SNP_105863_A_271709 | NW_004517486.1 | scaffold2575 | 271709                  | TT                              | CC                 | CC               | INTERGENIC      |               |                    |                    |
| SNP_105865_A_271727 | NW_004517486.1 | scaffold2575 | 271727                  | TT                              | CC                 | CC               | INTERGENIC      |               |                    |                    |
| SNP_105866_A_278436 | NW_004517486.1 | scaffold2575 | 278436                  | CC                              | TT                 | TT               | INTERGENIC      |               |                    |                    |
| SNP_105867_A_278441 | NW_004517486.1 | scaffold2575 | 278441                  | TT                              | CC                 | CC               | INTERGENIC      |               |                    |                    |
| SNP_105868_A_278455 | NW_004517486.1 | scaffold2575 | 278455                  | AA                              | GG                 | GG               | INTERGENIC      |               |                    |                    |
| SNP_105869_A_278496 | NW_004517486.1 | scaffold2575 | 278496                  | AA                              | TT                 | TT               | INTERGENIC      |               |                    |                    |
| SNP_105870_A_278503 | NW_004517486.1 | scaffold2575 | 278503                  | CC                              | TT                 | TT               | INTERGENIC      |               |                    |                    |
| SNP_105871_A_278551 | NW_004517486.1 | scaffold2575 | 278551                  | CC                              | AA                 | AA               | INTERGENIC      |               |                    |                    |
| SNP_105872_A_278561 | NW_004517486.1 | scaffold2575 | 278561                  | TT                              | CC                 | CC               | INTERGENIC      |               |                    |                    |
| SNP_105873_A_278565 | NW_004517486.1 | scaffold2575 | 278565                  | CC                              | AA                 | AA               | INTERGENIC      |               |                    |                    |
| SNP_105874_A_278590 | NW_004517486.1 | scaffold2575 | 278590                  | AA                              | TT                 | TT               | INTERGENIC      |               |                    |                    |
| SNP_105875_A_278605 | NW_004517486.1 | scaffold2575 | 278605                  | GG                              | AA                 | AA               | INTERGENIC      |               |                    |                    |
| SNP_105876_A_278673 | NW_004517486.1 | scaffold2575 | 278673                  | AA                              | TT                 | TT               | INTERGENIC      |               |                    |                    |
| SNP_105877_A_278685 | NW_004517486.1 | scaffold2575 | 278685                  | TT                              | AA                 | AA               | INTERGENIC      |               |                    |                    |
| SNP_105878_A_278725 | NW_004517486.1 | scaffold2575 | 278725                  | TT                              | AA                 | AA               | INTERGENIC      |               |                    |                    |
| SNP_105880_A_278783 | NW_004517486.1 | scaffold2575 | 278783                  | TT                              | CC                 | CC               | INTERGENIC      |               |                    |                    |
| SNP_105881_A_278787 | NW_004517486.1 | scaffold2575 | 278787                  | AA                              | CC                 | CC               | INTERGENIC      |               |                    |                    |

| SNPs IDs            | Chromosome IDs | Chromosomes  | Physical positions (bp) | CDC Frontier (Reference genome) | (Pusa 1103 & HPNB) | (ILWC 46 & LPNB) | Sequence genome | Components of | Gene accession IDs | Putative functions |
|---------------------|----------------|--------------|-------------------------|---------------------------------|--------------------|------------------|-----------------|---------------|--------------------|--------------------|
| SNP_105882_A_278827 | NW_004517486.1 | scaffold2575 | 278827                  | CC                              | TT                 | TT               | INTERGENIC      |               |                    |                    |
| SNP_105883_A_278849 | NW_004517486.1 | scaffold2575 | 278849                  | CC                              | TT                 | TT               | INTERGENIC      |               |                    |                    |
| SNP_105884_A_278869 | NW_004517486.1 | scaffold2575 | 278869                  | TT                              | CC                 | CC               | INTERGENIC      |               |                    |                    |
| SNP_105885_A_278916 | NW_004517486.1 | scaffold2575 | 278916                  | CC                              | AA                 | AA               | INTERGENIC      |               |                    |                    |
| SNP_105886_A_278962 | NW_004517486.1 | scaffold2575 | 278962                  | CC                              | AA                 | AA               | INTERGENIC      |               |                    |                    |
| SNP_105887_A_278966 | NW_004517486.1 | scaffold2575 | 278966                  | GG                              | AA                 | AA               | INTERGENIC      |               |                    |                    |
| SNP_105888_A_279043 | NW_004517486.1 | scaffold2575 | 279043                  | GG                              | AA                 | AA               | INTERGENIC      |               |                    |                    |
| SNP_105889_A_279110 | NW_004517486.1 | scaffold2575 | 279110                  | CC                              | TT                 | TT               | INTERGENIC      |               |                    |                    |
| SNP_105890_A_279130 | NW_004517486.1 | scaffold2575 | 279130                  | TT                              | CC                 | CC               | INTERGENIC      |               |                    |                    |
| SNP_105891_A_279153 | NW_004517486.1 | scaffold2575 | 279153                  | GG                              | TT                 | TT               | INTERGENIC      |               |                    |                    |
| SNP_105892_A_279162 | NW_004517486.1 | scaffold2575 | 279162                  | GG                              | AA                 | AA               | INTERGENIC      |               |                    |                    |
| SNP_105894_A_279240 | NW_004517486.1 | scaffold2575 | 279240                  | CC                              | AA                 | AA               | INTERGENIC      |               |                    |                    |
| SNP_105895_A_279281 | NW_004517486.1 | scaffold2575 | 279281                  | AA                              | GG                 | GG               | INTERGENIC      |               |                    |                    |
| SNP_105897_A_279374 | NW_004517486.1 | scaffold2575 | 279374                  | TT                              | GG                 | GG               | INTERGENIC      |               |                    |                    |
| SNP_105898_A_279381 | NW_004517486.1 | scaffold2575 | 279381                  | GG                              | AA                 | AA               | INTERGENIC      |               |                    |                    |
| SNP_105899_A_279388 | NW_004517486.1 | scaffold2575 | 279388                  | AA                              | GG                 | GG               | INTERGENIC      |               |                    |                    |
| SNP_105900_A_279409 | NW_004517486.1 | scaffold2575 | 279409                  | GG                              | AA                 | AA               | INTERGENIC      |               |                    |                    |
| SNP_105901_A_279633 | NW_004517486.1 | scaffold2575 | 279633                  | AA                              | TT                 | TT               | INTERGENIC      |               |                    |                    |
| SNP_105902_A_279836 | NW_004517486.1 | scaffold2575 | 279836                  | TT                              | AA                 | AA               | INTERGENIC      |               |                    |                    |
| SNP_105903_A_279938 | NW_004517486.1 | scaffold2575 | 279938                  | CC                              | AA                 | AA               | INTERGENIC      |               |                    |                    |
| SNP_105904_A_280037 | NW_004517486.1 | scaffold2575 | 280037                  | TT                              | GG                 | GG               | INTERGENIC      |               |                    |                    |
| SNP_105906_A_280089 | NW_004517486.1 | scaffold2575 | 280089                  | CC                              | TT                 | TT               | INTERGENIC      |               |                    |                    |

| SNPs IDs            | Chromosome IDs | Chromosomes  | Physical positions (bp) | CDC Frontier (Reference genome) | (Pusa 1103 & HPNB) | (ILWC 46 & LPNB) | Sequence genome | Components of | Gene accession IDs | Putative functions |
|---------------------|----------------|--------------|-------------------------|---------------------------------|--------------------|------------------|-----------------|---------------|--------------------|--------------------|
| SNP_105907_A_280120 | NW_004517486.1 | scaffold2575 | 280120                  | CC                              | TT                 | TT               | INTERGENIC      |               |                    |                    |
| SNP_105908_A_280143 | NW_004517486.1 | scaffold2575 | 280143                  | TT                              | CC                 | CC               | INTERGENIC      |               |                    |                    |
| SNP_105910_A_280221 | NW_004517486.1 | scaffold2575 | 280221                  | GG                              | CC                 | CC               | INTERGENIC      |               |                    |                    |
| SNP_105911_A_280224 | NW_004517486.1 | scaffold2575 | 280224                  | TT                              | CC                 | CC               | INTERGENIC      |               |                    |                    |
| SNP_105912_A_280284 | NW_004517486.1 | scaffold2575 | 280284                  | CC                              | TT                 | TT               | INTERGENIC      |               |                    |                    |
| SNP_105913_A_280317 | NW_004517486.1 | scaffold2575 | 280317                  | TT                              | CC                 | CC               | INTERGENIC      |               |                    |                    |
| SNP_105914_A_280358 | NW_004517486.1 | scaffold2575 | 280358                  | AA                              | CC                 | CC               | INTERGENIC      |               |                    |                    |
| SNP_105915_A_280432 | NW_004517486.1 | scaffold2575 | 280432                  | CC                              | TT                 | TT               | INTERGENIC      |               |                    |                    |
| SNP_105916_A_280467 | NW_004517486.1 | scaffold2575 | 280467                  | GG                              | AA                 | AA               | INTERGENIC      |               |                    |                    |
| SNP_105917_A_280562 | NW_004517486.1 | scaffold2575 | 280562                  | CC                              | GG                 | GG               | INTERGENIC      |               |                    |                    |
| SNP_105918_A_280587 | NW_004517486.1 | scaffold2575 | 280587                  | CC                              | TT                 | TT               | INTERGENIC      |               |                    |                    |
| SNP_105919_A_280626 | NW_004517486.1 | scaffold2575 | 280626                  | GG                              | AA                 | AA               | INTERGENIC      |               |                    |                    |
| SNP_105920_A_280639 | NW_004517486.1 | scaffold2575 | 280639                  | TT                              | CC                 | CC               | INTERGENIC      |               |                    |                    |
| SNP_105921_A_280646 | NW_004517486.1 | scaffold2575 | 280646                  | AA                              | TT                 | TT               | INTERGENIC      |               |                    |                    |
| SNP_105922_A_280669 | NW_004517486.1 | scaffold2575 | 280669                  | AA                              | GG                 | GG               | INTERGENIC      |               |                    |                    |
| SNP_105923_A_280673 | NW_004517486.1 | scaffold2575 | 280673                  | TT                              | CC                 | CC               | INTERGENIC      |               |                    |                    |
| SNP_105924_A_280761 | NW_004517486.1 | scaffold2575 | 280761                  | CC                              | TT                 | TT               | INTERGENIC      |               |                    |                    |
| SNP_105925_A_280810 | NW_004517486.1 | scaffold2575 | 280810                  | GG                              | CC                 | CC               | INTERGENIC      |               |                    |                    |
| SNP_105926_A_281667 | NW_004517486.1 | scaffold2575 | 281667                  | TT                              | AA                 | AA               | INTERGENIC      |               |                    |                    |
| SNP_105927_A_281699 | NW_004517486.1 | scaffold2575 | 281699                  | CC                              | TT                 | TT               | INTERGENIC      |               |                    |                    |
| SNP_105928_A_281724 | NW_004517486.1 | scaffold2575 | 281724                  | AA                              | CC                 | CC               | INTERGENIC      |               |                    |                    |
| SNP_105929_A_281733 | NW_004517486.1 | scaffold2575 | 281733                  | GG                              | AA                 | AA               | INTERGENIC      |               |                    |                    |

| SNPs IDs            | Chromosome IDs | Chromosomes  | Physical positions (bp) | CDC Frontier (Reference genome) | (Pusa 1103 & HPNB) | (ILWC 46 & LPNB) | Sequence Components of genome | Gene accession IDs | Putative functions           |
|---------------------|----------------|--------------|-------------------------|---------------------------------|--------------------|------------------|-------------------------------|--------------------|------------------------------|
| SNP_105930_A_281947 | NW_004517486.1 | scaffold2575 | 281947                  | GG                              | TT                 | TT               | INTERGENIC                    |                    |                              |
| SNP_105931_A_281958 | NW_004517486.1 | scaffold2575 | 281958                  | AA                              | GG                 | GG               | INTERGENIC                    |                    |                              |
| SNP_105932_A_281978 | NW_004517486.1 | scaffold2575 | 281978                  | AA                              | TT                 | TT               | INTERGENIC                    |                    |                              |
| SNP_105934_A_282053 | NW_004517486.1 | scaffold2575 | 282053                  | AA                              | GG                 | GG               | INTERGENIC                    |                    |                              |
| SNP_105935_A_282077 | NW_004517486.1 | scaffold2575 | 282077                  | CC                              | AA                 | AA               | INTERGENIC                    |                    |                              |
| SNP_105936_A_282275 | NW_004517486.1 | scaffold2575 | 282275                  | TT                              | GG                 | GG               | INTERGENIC                    |                    |                              |
| SNP_105937_A_282294 | NW_004517486.1 | scaffold2575 | 282294                  | AA                              | CC                 | CC               | INTERGENIC                    |                    |                              |
| SNP_105938_A_282383 | NW_004517486.1 | scaffold2575 | 282383                  | GG                              | AA                 | AA               | INTERGENIC                    |                    |                              |
| SNP_105939_A_282390 | NW_004517486.1 | scaffold2575 | 282390                  | CC                              | TT                 | TT               | INTERGENIC                    |                    |                              |
| SNP_105940_A_282396 | NW_004517486.1 | scaffold2575 | 282396                  | GG                              | AA                 | AA               | INTERGENIC                    |                    |                              |
| SNP_105941_A_282428 | NW_004517486.1 | scaffold2575 | 282428                  | GG                              | AA                 | AA               | INTERGENIC                    |                    |                              |
| SNP_105942_A_282451 | NW_004517486.1 | scaffold2575 | 282451                  | CC                              | TT                 | TT               | INTERGENIC                    |                    |                              |
| SNP_105943_A_282466 | NW_004517486.1 | scaffold2575 | 282466                  | CC                              | GG                 | GG               | INTERGENIC                    |                    |                              |
| SNP_105944_A_2874   | NW_004517491.1 | scaffold2583 | 2874                    | GG                              | AA                 | AA               | INTERGENIC                    |                    |                              |
| SNP_105945_A_1116   | NW_004517493.1 | scaffold2585 | 1116                    | TT                              | CC                 | CC               | INTERGENIC                    |                    |                              |
| SNP_105946_A_2062   | NW_004517495.1 | scaffold2587 | 2062                    | TT                              | CC                 | CC               | INTERGENIC                    |                    |                              |
| SNP_105947_A_35117  | NW_004517495.1 | scaffold2587 | 35117                   | GG                              | AA                 | AA               | INTERGENIC                    |                    |                              |
| SNP_105948_A_47709  | NW_004517495.1 | scaffold2587 | 47709                   | CC                              | TT                 | TT               | URR                           | 101514781          | uncharacterized LOC101514781 |
| SNP_105949_A_1883   | NW_004517496.1 | scaffold2591 | 1883                    | CC                              | GG                 | GG               | INTERGENIC                    |                    |                              |
| SNP_105950_A_1974   | NW_004517496.1 | scaffold2591 | 1974                    | GG                              | AA                 | AA               | INTERGENIC                    |                    |                              |
| SNP_105951_A_1976   | NW_004517496.1 | scaffold2591 | 1976                    | AA                              | CC                 | CC               | INTERGENIC                    |                    |                              |
| SNP_105952_A_2034   | NW_004517496.1 | scaffold2591 | 2034                    | AA                              | CC                 | CC               | INTERGENIC                    |                    |                              |

| SNPs IDs           | Chromosome IDs | Chromosomes  | Physical positions (bp) | CDC Frontier (Reference genome) | (Pusa 1103 & HPNB) | (ILWC 46 & LPNB) | Sequence genome | Components of | Gene accession IDs | Putative functions |
|--------------------|----------------|--------------|-------------------------|---------------------------------|--------------------|------------------|-----------------|---------------|--------------------|--------------------|
| SNP_105953_A_2105  | NW_004517496.1 | scaffold2591 | 2105                    | AA                              | GG                 | GG               | INTERGENIC      |               |                    |                    |
| SNP_105954_A_2194  | NW_004517496.1 | scaffold2591 | 2194                    | AA                              | CC                 | CC               | INTERGENIC      |               |                    |                    |
| SNP_105955_A_5337  | NW_004517496.1 | scaffold2591 | 5337                    | TT                              | GG                 | GG               | INTERGENIC      |               |                    |                    |
| SNP_105956_A_64    | NW_004517498.1 | scaffold2594 | 64                      | AA                              | TT                 | TT               | INTERGENIC      |               |                    |                    |
| SNP_105957_A_222   | NW_004517498.1 | scaffold2594 | 222                     | AA                              | TT                 | TT               | INTERGENIC      |               |                    |                    |
| SNP_105958_A_31936 | NW_004517498.1 | scaffold2594 | 31936                   | CC                              | TT                 | TT               | INTERGENIC      |               |                    |                    |
| SNP_105959_A_35724 | NW_004517498.1 | scaffold2594 | 35724                   | CC                              | TT                 | TT               | INTERGENIC      |               |                    |                    |
| SNP_105961_A_1555  | NW_004517500.1 | scaffold2596 | 1555                    | TT                              | CC                 | CC               | INTERGENIC      |               |                    |                    |
| SNP_105962_A_1558  | NW_004517500.1 | scaffold2596 | 1558                    | GG                              | AA                 | AA               | INTERGENIC      |               |                    |                    |
| SNP_105963_A_4411  | NW_004517501.1 | scaffold2598 | 4411                    | GG                              | AA                 | AA               | INTERGENIC      |               |                    |                    |
| SNP_105964_A_6585  | NW_004517502.1 | scaffold2599 | 6585                    | TT                              | CC                 | CC               | INTERGENIC      |               |                    |                    |
| SNP_105965_A_6905  | NW_004517502.1 | scaffold2599 | 6905                    | GG                              | AA                 | AA               | INTERGENIC      |               |                    |                    |
| SNP_105966_A_6971  | NW_004517502.1 | scaffold2599 | 6971                    | AA                              | GG                 | GG               | INTERGENIC      |               |                    |                    |
| SNP_105967_A_7023  | NW_004517502.1 | scaffold2599 | 7023                    | AA                              | GG                 | GG               | INTERGENIC      |               |                    |                    |
| SNP_105969_A_19033 | NW_004517502.1 | scaffold2599 | 19033                   | AA                              | TT                 | TT               | INTERGENIC      |               |                    |                    |
| SNP_105970_A_19607 | NW_004517502.1 | scaffold2599 | 19607                   | GG                              | CC                 | CC               | INTERGENIC      |               |                    |                    |
| SNP_105971_A_1961  | NW_004517503.1 | scaffold2600 | 1961                    | TT                              | GG                 | GG               | INTERGENIC      |               |                    |                    |
| SNP_105972_A_1970  | NW_004517503.1 | scaffold2600 | 1970                    | GG                              | AA                 | AA               | INTERGENIC      |               |                    |                    |
| SNP_105973_A_2217  | NW_004517503.1 | scaffold2600 | 2217                    | AA                              | GG                 | GG               | INTERGENIC      |               |                    |                    |
| SNP_105974_A_9415  | NW_004517503.1 | scaffold2600 | 9415                    | TT                              | GG                 | GG               | INTERGENIC      |               |                    |                    |
| SNP_105975_A_9478  | NW_004517503.1 | scaffold2600 | 9478                    | TT                              | CC                 | CC               | INTERGENIC      |               |                    |                    |
| SNP_105976_A_13839 | NW_004517503.1 | scaffold2600 | 13839                   | TT                              | AA                 | AA               | INTERGENIC      |               |                    |                    |



| SNPs IDs           | Chromosome IDs | Chromosomes  | Physical positions (bp) | CDC Frontier (Reference genome) | (Pusa 1103 & HPNB) | (ILWC 46 & LPNB) | Sequence Components of genome | Gene accession IDs | Putative functions |
|--------------------|----------------|--------------|-------------------------|---------------------------------|--------------------|------------------|-------------------------------|--------------------|--------------------|
| SNP_105977_A_13888 | NW_004517503.1 | scaffold2600 | 13888                   | CC                              | TT                 | TT               | INTERGENIC                    |                    |                    |
| SNP_105978_A_4956  | NW_004517506.1 | scaffold2603 | 4956                    | TT                              | GG                 | GG               | INTERGENIC                    |                    |                    |
| SNP_105979_A_6254  | NW_004517506.1 | scaffold2603 | 6254                    | AA                              | TT                 | TT               | INTERGENIC                    |                    |                    |
| SNP_105980_A_6269  | NW_004517506.1 | scaffold2603 | 6269                    | CC                              | TT                 | TT               | INTERGENIC                    |                    |                    |
| SNP_105982_A_6607  | NW_004517506.1 | scaffold2603 | 6607                    | CC                              | TT                 | TT               | INTERGENIC                    |                    |                    |
| SNP_105983_A_6909  | NW_004517506.1 | scaffold2603 | 6909                    | AA                              | TT                 | TT               | INTERGENIC                    |                    |                    |
| SNP_105985_A_17492 | NW_004517506.1 | scaffold2603 | 17492                   | GG                              | AA                 | AA               | INTERGENIC                    |                    |                    |
| SNP_105986_A_17519 | NW_004517506.1 | scaffold2603 | 17519                   | TT                              | CC                 | CC               | INTERGENIC                    |                    |                    |
| SNP_105988_A_41131 | NW_004517506.1 | scaffold2603 | 41131                   | GG                              | AA                 | AA               | INTERGENIC                    |                    |                    |
| SNP_105989_A_53720 | NW_004517506.1 | scaffold2603 | 53720                   | AA                              | GG                 | GG               | INTERGENIC                    |                    |                    |
| SNP_105990_A_67082 | NW_004517506.1 | scaffold2603 | 67082                   | GG                              | AA                 | AA               | INTRON                        | 101515759          | Unknown function   |
| SNP_105991_A_67352 | NW_004517506.1 | scaffold2603 | 67352                   | TT                              | CC                 | CC               | INTRON                        | 101515759          | Unknown function   |
| SNP_105993_A_67475 | NW_004517506.1 | scaffold2603 | 67475                   | AA                              | TT                 | TT               | INTRON                        | 101515759          | Unknown function   |
| SNP_105994_A_67491 | NW_004517506.1 | scaffold2603 | 67491                   | AA                              | TT                 | TT               | INTRON                        | 101515759          | Unknown function   |
| SNP_105995_A_67573 | NW_004517506.1 | scaffold2603 | 67573                   | CC                              | TT                 | TT               | INTRON                        | 101515759          | Unknown function   |
| SNP_105996_A_67642 | NW_004517506.1 | scaffold2603 | 67642                   | TT                              | AA                 | AA               | SYNONYMOUS_CODING             | 101515759          | Unknown function   |
| SNP_105997_A_67652 | NW_004517506.1 | scaffold2603 | 67652                   | GG                              | AA                 | AA               | NON_SYNONYMOUS_CODING         | 101515759          | Unknown function   |
| SNP_105998_A_67654 | NW_004517506.1 | scaffold2603 | 67654                   | CC                              | TT                 | TT               | SYNONYMOUS_CODING             | 101515759          | Unknown function   |
| SNP_105999_A_67677 | NW_004517506.1 | scaffold2603 | 67677                   | TT                              | CC                 | CC               | NON_SYNONYMOUS_CODING         | 101515759          | Unknown function   |
| SNP_106000_A_67716 | NW_004517506.1 | scaffold2603 | 67716                   | GG                              | CC                 | CC               | NON_SYNONYMOUS_CODING         | 101515759          | Unknown function   |
| SNP_106001_A_67741 | NW_004517506.1 | scaffold2603 | 67741                   | AA                              | CC                 | CC               | NON_SYNONYMOUS_CODING         | 101515759          | Unknown function   |
| SNP_106002_A_67828 | NW_004517506.1 | scaffold2603 | 67828                   | AA                              | GG                 | GG               | URR                           | 101515759          | Unknown function   |

| SNPs IDs           | Chromosome IDs | Chromosomes  | Physical positions (bp) | CDC Frontier genome (Reference genome) | (Pusa 1103 & HPNB) | (ILWC 46 & LPNB) | Sequence genome | Components of | Gene accession IDs | Putative functions |
|--------------------|----------------|--------------|-------------------------|----------------------------------------|--------------------|------------------|-----------------|---------------|--------------------|--------------------|
| SNP_106003_A_67851 | NW_004517506.1 | scaffold2603 | 67851                   | TT                                     | AA                 | AA               | URR             |               | 101515759          | Unknown function   |
| SNP_106004_A_67858 | NW_004517506.1 | scaffold2603 | 67858                   | TT                                     | CC                 | CC               | URR             |               | 101515759          | Unknown function   |
| SNP_106005_A_67860 | NW_004517506.1 | scaffold2603 | 67860                   | AA                                     | GG                 | GG               | URR             |               | 101515759          | Unknown function   |
| SNP_106006_A_67870 | NW_004517506.1 | scaffold2603 | 67870                   | AA                                     | GG                 | GG               | URR             |               | 101515759          | Unknown function   |
| SNP_106007_A_67889 | NW_004517506.1 | scaffold2603 | 67889                   | TT                                     | AA                 | AA               | URR             |               | 101515759          | Unknown function   |
| SNP_106008_A_67927 | NW_004517506.1 | scaffold2603 | 67927                   | AA                                     | GG                 | GG               | URR             |               | 101515759          | Unknown function   |
| SNP_106009_A_4357  | NW_004517507.1 | scaffold2604 | 4357                    | GG                                     | CC                 | CC               | INTERGENIC      |               |                    |                    |
| SNP_106010_A_1408  | NW_004517509.1 | scaffold2606 | 1408                    | TT                                     | CC                 | CC               | INTERGENIC      |               |                    |                    |
| SNP_106011_A_1449  | NW_004517509.1 | scaffold2606 | 1449                    | TT                                     | GG                 | GG               | INTERGENIC      |               |                    |                    |
| SNP_106012_A_4195  | NW_004517509.1 | scaffold2606 | 4195                    | TT                                     | CC                 | CC               | INTERGENIC      |               |                    |                    |
| SNP_106013_A_4201  | NW_004517509.1 | scaffold2606 | 4201                    | CC                                     | TT                 | TT               | INTERGENIC      |               |                    |                    |
| SNP_106014_A_4267  | NW_004517509.1 | scaffold2606 | 4267                    | CC                                     | TT                 | TT               | INTERGENIC      |               |                    |                    |
| SNP_106015_A_4329  | NW_004517509.1 | scaffold2606 | 4329                    | CC                                     | TT                 | TT               | INTERGENIC      |               |                    |                    |
| SNP_106016_A_22261 | NW_004517509.1 | scaffold2606 | 22261                   | TT                                     | CC                 | CC               | INTERGENIC      |               |                    |                    |
| SNP_106017_A_22318 | NW_004517509.1 | scaffold2606 | 22318                   | AA                                     | TT                 | TT               | INTERGENIC      |               |                    |                    |
| SNP_106018_A_27760 | NW_004517509.1 | scaffold2606 | 27760                   | TT                                     | GG                 | GG               | INTERGENIC      |               |                    |                    |
| SNP_106019_A_27785 | NW_004517509.1 | scaffold2606 | 27785                   | TT                                     | CC                 | CC               | INTERGENIC      |               |                    |                    |
| SNP_106020_A_28753 | NW_004517509.1 | scaffold2606 | 28753                   | TT                                     | CC                 | CC               | INTERGENIC      |               |                    |                    |
| SNP_106021_A_28777 | NW_004517509.1 | scaffold2606 | 28777                   | AA                                     | GG                 | GG               | INTERGENIC      |               |                    |                    |
| SNP_106022_A_28853 | NW_004517509.1 | scaffold2606 | 28853                   | AA                                     | GG                 | GG               | INTERGENIC      |               |                    |                    |
| SNP_106023_A_438   | NW_004517510.1 | scaffold2607 | 438                     | TT                                     | GG                 | GG               | INTERGENIC      |               |                    |                    |
| SNP_106024_A_465   | NW_004517510.1 | scaffold2607 | 465                     | AA                                     | GG                 | GG               | INTERGENIC      |               |                    |                    |

| SNPs IDs            | Chromosome IDs | Chromosomes  | Physical positions (bp) | CDC Frontier (Reference genome) | (Pusa 1103 & HPNB) | (ILWC 46 & LPNB) | Sequence Components of genome | Gene accession IDs | Putative functions                                 |
|---------------------|----------------|--------------|-------------------------|---------------------------------|--------------------|------------------|-------------------------------|--------------------|----------------------------------------------------|
| SNP_106025_A_5886   | NW_004517514.1 | scaffold2612 | 5886                    | AA                              | GG                 | GG               | NON_SYNONYMOUS_CODING         | 101488519          | iron-regulated transcriptional activator AFT2-like |
| SNP_106026_A_5944   | NW_004517514.1 | scaffold2612 | 5944                    | CC                              | TT                 | TT               | NON_SYNONYMOUS_CODING         | 101488519          | iron-regulated transcriptional activator AFT2-like |
| SNP_106027_A_5981   | NW_004517514.1 | scaffold2612 | 5981                    | CC                              | TT                 | TT               | SYNONYMOUS_CODING             | 101488519          | iron-regulated transcriptional activator AFT2-like |
| SNP_106028_A_6091   | NW_004517514.1 | scaffold2612 | 6091                    | TT                              | AA                 | AA               | NON_SYNONYMOUS_CODING         | 101488519          | iron-regulated transcriptional activator AFT2-like |
| SNP_106029_A_6165   | NW_004517514.1 | scaffold2612 | 6165                    | TT                              | AA                 | AA               | NON_SYNONYMOUS_CODING         | 101488519          | iron-regulated transcriptional activator AFT2-like |
| SNP_106030_A_6531   | NW_004517514.1 | scaffold2612 | 6531                    | CC                              | TT                 | TT               | URR                           | 101488519          | iron-regulated transcriptional activator AFT2-like |
| SNP_106031_A_6640   | NW_004517514.1 | scaffold2612 | 6640                    | GG                              | CC                 | CC               | URR                           | 101488519          | iron-regulated transcriptional activator AFT2-like |
| SNP_106032_A_8021   | NW_004517514.1 | scaffold2612 | 8021                    | CC                              | TT                 | TT               | URR                           | 101488519          | iron-regulated transcriptional activator AFT2-like |
| SNP_106033_A_5857   | NW_004517515.1 | scaffold2613 | 5857                    | CC                              | TT                 | TT               | INTERGENIC                    |                    |                                                    |
| SNP_106034_A_487    | NW_004517518.1 | scaffold2616 | 487                     | TT                              | AA                 | AA               | INTERGENIC                    |                    |                                                    |
| SNP_106035_A_29742  | NW_004517519.1 | scaffold2617 | 29742                   | GG                              | AA                 | AA               | INTERGENIC                    |                    |                                                    |
| SNP_106036_A_29771  | NW_004517519.1 | scaffold2617 | 29771                   | CC                              | AA                 | AA               | INTERGENIC                    |                    |                                                    |
| SNP_106038_A_30029  | NW_004517519.1 | scaffold2617 | 30029                   | GG                              | AA                 | AA               | INTERGENIC                    |                    |                                                    |
| SNP_106039_A_30035  | NW_004517519.1 | scaffold2617 | 30035                   | GG                              | AA                 | AA               | INTERGENIC                    |                    |                                                    |
| SNP_106040_A_31769  | NW_004517519.1 | scaffold2617 | 31769                   | AA                              | GG                 | GG               | INTERGENIC                    |                    |                                                    |
| SNP_106042_A_110076 | NW_004517519.1 | scaffold2617 | 110076                  | GG                              | TT                 | TT               | INTERGENIC                    |                    |                                                    |
| SNP_106043_A_110173 | NW_004517519.1 | scaffold2617 | 110173                  | AA                              | CC                 | CC               | INTERGENIC                    |                    |                                                    |
| SNP_106044_A_110377 | NW_004517519.1 | scaffold2617 | 110377                  | TT                              | GG                 | GG               | INTERGENIC                    |                    |                                                    |
| SNP_106048_A_110579 | NW_004517519.1 | scaffold2617 | 110579                  | TT                              | CC                 | CC               | INTERGENIC                    |                    |                                                    |
| SNP_106049_A_111540 | NW_004517519.1 | scaffold2617 | 111540                  | AA                              | GG                 | GG               | INTERGENIC                    |                    |                                                    |
| SNP_106050_A_111603 | NW_004517519.1 | scaffold2617 | 111603                  | TT                              | AA                 | AA               | INTERGENIC                    |                    |                                                    |
| SNP_106051_A_111665 | NW_004517519.1 | scaffold2617 | 111665                  | AA                              | GG                 | GG               | INTERGENIC                    |                    |                                                    |

| SNPs IDs            | Chromosome IDs | Chromosomes  | Physical positions (bp) | CDC Frontier (Reference genome) | (Pusa 1103 & HPNB) | (ILWC 46 & LPNB) | Sequence genome | Components of | Gene accession IDs                    | Putative functions |
|---------------------|----------------|--------------|-------------------------|---------------------------------|--------------------|------------------|-----------------|---------------|---------------------------------------|--------------------|
| SNP_106052_A_111704 | NW_004517519.1 | scaffold2617 | 111704                  | AA                              | GG                 | GG               | INTERGENIC      |               |                                       |                    |
| SNP_106053_A_111767 | NW_004517519.1 | scaffold2617 | 111767                  | GG                              | AA                 | AA               | INTERGENIC      |               |                                       |                    |
| SNP_106054_A_111878 | NW_004517519.1 | scaffold2617 | 111878                  | TT                              | CC                 | CC               | INTERGENIC      |               |                                       |                    |
| SNP_106055_A_111940 | NW_004517519.1 | scaffold2617 | 111940                  | TT                              | CC                 | CC               | INTERGENIC      |               |                                       |                    |
| SNP_106056_A_112006 | NW_004517519.1 | scaffold2617 | 112006                  | TT                              | CC                 | CC               | INTERGENIC      |               |                                       |                    |
| SNP_106057_A_112050 | NW_004517519.1 | scaffold2617 | 112050                  | AA                              | GG                 | GG               | INTERGENIC      |               |                                       |                    |
| SNP_106058_A_112057 | NW_004517519.1 | scaffold2617 | 112057                  | CC                              | TT                 | TT               | INTERGENIC      |               |                                       |                    |
| SNP_106059_A_112268 | NW_004517519.1 | scaffold2617 | 112268                  | CC                              | AA                 | AA               | INTERGENIC      |               |                                       |                    |
| SNP_106060_A_112284 | NW_004517519.1 | scaffold2617 | 112284                  | GG                              | TT                 | TT               | INTERGENIC      |               |                                       |                    |
| SNP_106061_A_112285 | NW_004517519.1 | scaffold2617 | 112285                  | TT                              | CC                 | CC               | INTERGENIC      |               |                                       |                    |
| SNP_106062_A_112338 | NW_004517519.1 | scaffold2617 | 112338                  | TT                              | CC                 | CC               | INTERGENIC      |               |                                       |                    |
| SNP_106063_A_112383 | NW_004517519.1 | scaffold2617 | 112383                  | GG                              | AA                 | AA               | INTERGENIC      |               |                                       |                    |
| SNP_106064_A_150643 | NW_004517519.1 | scaffold2617 | 150643                  | TT                              | CC                 | CC               | INTERGENIC      |               |                                       |                    |
| SNP_106065_A_195189 | NW_004517519.1 | scaffold2617 | 195189                  | TT                              | CC                 | CC               | INTERGENIC      |               |                                       |                    |
| SNP_106066_A_195282 | NW_004517519.1 | scaffold2617 | 195282                  | CC                              | TT                 | TT               | INTERGENIC      |               |                                       |                    |
| SNP_106067_A_195301 | NW_004517519.1 | scaffold2617 | 195301                  | GG                              | TT                 | TT               | INTERGENIC      |               |                                       |                    |
| SNP_106070_A_249153 | NW_004517519.1 | scaffold2617 | 249153                  | AA                              | TT                 | TT               | INTERGENIC      |               |                                       |                    |
| SNP_106071_A_320743 | NW_004517519.1 | scaffold2617 | 320743                  | GG                              | AA                 | AA               | INTERGENIC      |               |                                       |                    |
| SNP_106072_A_320833 | NW_004517519.1 | scaffold2617 | 320833                  | GG                              | TT                 | TT               | INTERGENIC      |               |                                       |                    |
| SNP_106074_A_321162 | NW_004517519.1 | scaffold2617 | 321162                  | GG                              | TT                 | TT               | DRR             | 101497190     | probable WRKY transcription factor 26 |                    |
| SNP_106075_A_321247 | NW_004517519.1 | scaffold2617 | 321247                  | CC                              | AA                 | AA               | DRR             | 101497190     | probable WRKY transcription factor 26 |                    |
| SNP_106076_A_321424 | NW_004517519.1 | scaffold2617 | 321424                  | TT                              | GG                 | GG               | DRR             | 101497190     | probable WRKY transcription factor 26 |                    |

| SNPs IDs            | Chromosome IDs | Chromosomes  | Physical positions (bp) | CDC Frontier (Reference genome) | (Pusa 1103 & HPNB) | (ILWC 46 & LPNB) | Sequence Components of genome | Gene accession IDs | Putative functions                    |
|---------------------|----------------|--------------|-------------------------|---------------------------------|--------------------|------------------|-------------------------------|--------------------|---------------------------------------|
| SNP_106077_A_321495 | NW_004517519.1 | scaffold2617 | 321495                  | CC                              | AA                 | AA               | DRR                           | 101497190          | probable WRKY transcription factor 26 |
| SNP_106078_A_321773 | NW_004517519.1 | scaffold2617 | 321773                  | TT                              | CC                 | CC               | DRR                           | 101497190          | probable WRKY transcription factor 26 |
| SNP_106080_A_321846 | NW_004517519.1 | scaffold2617 | 321846                  | AA                              | TT                 | TT               | DRR                           | 101497190          | probable WRKY transcription factor 26 |
| SNP_106081_A_321848 | NW_004517519.1 | scaffold2617 | 321848                  | TT                              | AA                 | AA               | DRR                           | 101497190          | probable WRKY transcription factor 26 |
| SNP_106082_A_322065 | NW_004517519.1 | scaffold2617 | 322065                  | GG                              | TT                 | TT               | DRR                           | 101497190          | probable WRKY transcription factor 26 |
| SNP_106083_A_322080 | NW_004517519.1 | scaffold2617 | 322080                  | TT                              | AA                 | AA               | DRR                           | 101497190          | probable WRKY transcription factor 26 |
| SNP_106084_A_322085 | NW_004517519.1 | scaffold2617 | 322085                  | GG                              | AA                 | AA               | DRR                           | 101497190          | probable WRKY transcription factor 26 |
| SNP_106085_A_322219 | NW_004517519.1 | scaffold2617 | 322219                  | TT                              | CC                 | CC               | NON_SYNONYMOUS_CODING         | 101497190          | probable WRKY transcription factor 26 |
| SNP_106086_A_322284 | NW_004517519.1 | scaffold2617 | 322284                  | CC                              | TT                 | TT               | NON_SYNONYMOUS_CODING         | 101497190          | probable WRKY transcription factor 26 |
| SNP_106087_A_322392 | NW_004517519.1 | scaffold2617 | 322392                  | GG                              | AA                 | AA               | NON_SYNONYMOUS_CODING         | 101497190          | probable WRKY transcription factor 26 |
| SNP_106088_A_322401 | NW_004517519.1 | scaffold2617 | 322401                  | GG                              | TT                 | TT               | NON_SYNONYMOUS_CODING         | 101497190          | probable WRKY transcription factor 26 |
| SNP_106089_A_322430 | NW_004517519.1 | scaffold2617 | 322430                  | GG                              | AA                 | AA               | SYNONYMOUS_CODING             | 101497190          | probable WRKY transcription factor 26 |
| SNP_106090_A_322540 | NW_004517519.1 | scaffold2617 | 322540                  | CC                              | TT                 | TT               | NON_SYNONYMOUS_CODING         | 101497190          | probable WRKY transcription factor 26 |
| SNP_106091_A_322576 | NW_004517519.1 | scaffold2617 | 322576                  | AA                              | CC                 | CC               | INTRON                        | 101497190          | probable WRKY transcription factor 26 |
| SNP_106092_A_322616 | NW_004517519.1 | scaffold2617 | 322616                  | CC                              | TT                 | TT               | INTRON                        | 101497190          | probable WRKY transcription factor 26 |
| SNP_106093_A_322626 | NW_004517519.1 | scaffold2617 | 322626                  | GG                              | AA                 | AA               | INTRON                        | 101497190          | probable WRKY transcription factor 26 |
| SNP_106094_A_322643 | NW_004517519.1 | scaffold2617 | 322643                  | GG                              | AA                 | AA               | INTRON                        | 101497190          | probable WRKY transcription factor 26 |
| SNP_106095_A_322858 | NW_004517519.1 | scaffold2617 | 322858                  | AA                              | GG                 | GG               | INTRON                        | 101497190          | probable WRKY transcription factor 26 |
| SNP_106096_A_322894 | NW_004517519.1 | scaffold2617 | 322894                  | TT                              | CC                 | CC               | INTRON                        | 101497190          | probable WRKY transcription factor 26 |
| SNP_106097_A_322934 | NW_004517519.1 | scaffold2617 | 322934                  | CC                              | GG                 | GG               | INTRON                        | 101497190          | probable WRKY transcription factor 26 |
| SNP_106098_A_322937 | NW_004517519.1 | scaffold2617 | 322937                  | AA                              | TT                 | TT               | INTRON                        | 101497190          | probable WRKY transcription factor 26 |
| SNP_106099_A_322943 | NW_004517519.1 | scaffold2617 | 322943                  | CC                              | TT                 | TT               | INTRON                        | 101497190          | probable WRKY transcription factor 26 |

| SNPs IDs            | Chromosome IDs | Chromosomes  | Physical positions (bp) | CDC Frontier (Reference genome) | (Pusa 1103 & HPNB) | (ILWC 46 & LPNB) | Sequence Components of genome | Gene accession IDs | Putative functions                    |
|---------------------|----------------|--------------|-------------------------|---------------------------------|--------------------|------------------|-------------------------------|--------------------|---------------------------------------|
| SNP_106100_A_322970 | NW_004517519.1 | scaffold2617 | 322970                  | TT                              | CC                 | CC               | INTRON                        | 101497190          | probable WRKY transcription factor 26 |
| SNP_106101_A_323015 | NW_004517519.1 | scaffold2617 | 323015                  | TT                              | AA                 | AA               | INTRON                        | 101497190          | probable WRKY transcription factor 26 |
| SNP_106102_A_323030 | NW_004517519.1 | scaffold2617 | 323030                  | AA                              | GG                 | GG               | INTRON                        | 101497190          | probable WRKY transcription factor 26 |
| SNP_106103_A_323067 | NW_004517519.1 | scaffold2617 | 323067                  | GG                              | TT                 | TT               | INTRON                        | 101497190          | probable WRKY transcription factor 26 |
| SNP_106104_A_323077 | NW_004517519.1 | scaffold2617 | 323077                  | AA                              | GG                 | GG               | INTRON                        | 101497190          | probable WRKY transcription factor 26 |
| SNP_106105_A_323247 | NW_004517519.1 | scaffold2617 | 323247                  | GG                              | TT                 | TT               | INTRON                        | 101497190          | probable WRKY transcription factor 26 |
| SNP_106106_A_323891 | NW_004517519.1 | scaffold2617 | 323891                  | TT                              | CC                 | CC               | NON_SYNONYMOUS_CODING         | 101497190          | probable WRKY transcription factor 26 |
| SNP_106107_A_323920 | NW_004517519.1 | scaffold2617 | 323920                  | AA                              | GG                 | GG               | SYNONYMOUS_CODING             | 101497190          | probable WRKY transcription factor 26 |
| SNP_106109_A_339019 | NW_004517519.1 | scaffold2617 | 339019                  | AA                              | TT                 | TT               | INTERGENIC                    |                    |                                       |
| SNP_106110_A_353570 | NW_004517519.1 | scaffold2617 | 353570                  | GG                              | AA                 | AA               | INTERGENIC                    |                    |                                       |
| SNP_106111_A_371466 | NW_004517519.1 | scaffold2617 | 371466                  | TT                              | GG                 | GG               | INTERGENIC                    |                    |                                       |
| SNP_106112_A_371480 | NW_004517519.1 | scaffold2617 | 371480                  | TT                              | CC                 | CC               | INTERGENIC                    |                    |                                       |
| SNP_106113_A_382303 | NW_004517519.1 | scaffold2617 | 382303                  | GG                              | AA                 | AA               | INTERGENIC                    |                    |                                       |
| SNP_106114_A_402214 | NW_004517519.1 | scaffold2617 | 402214                  | AA                              | GG                 | GG               | NON_SYNONYMOUS_CODING         | id218629           | Unknown function                      |
| SNP_106115_A_402425 | NW_004517519.1 | scaffold2617 | 402425                  | AA                              | TT                 | TT               | NON_SYNONYMOUS_CODING         | id218629           | Unknown function                      |
| SNP_106118_A_402545 | NW_004517519.1 | scaffold2617 | 402545                  | AA                              | TT                 | TT               | URR                           | 101491031          | uncharacterized LOC101491031          |
| SNP_106119_A_402577 | NW_004517519.1 | scaffold2617 | 402577                  | GG                              | AA                 | AA               | URR                           | 101491031          | uncharacterized LOC101491031          |
| SNP_106120_A_402678 | NW_004517519.1 | scaffold2617 | 402678                  | CC                              | AA                 | AA               | URR                           | 101491031          | uncharacterized LOC101491031          |
| SNP_106121_A_402796 | NW_004517519.1 | scaffold2617 | 402796                  | CC                              | TT                 | TT               | URR                           | 101491031          | uncharacterized LOC101491031          |
| SNP_106122_A_402803 | NW_004517519.1 | scaffold2617 | 402803                  | AA                              | GG                 | GG               | URR                           | 101491031          | uncharacterized LOC101491031          |
| SNP_106123_A_406944 | NW_004517519.1 | scaffold2617 | 406944                  | TT                              | CC                 | CC               | INTERGENIC                    |                    |                                       |
| SNP_106124_A_444472 | NW_004517519.1 | scaffold2617 | 444472                  | TT                              | CC                 | CC               | NON_SYNONYMOUS_CODING         | 101497854          | probable WRKY transcription factor 27 |

| SNPs IDs            | Chromosome IDs | Chromosomes  | Physical positions (bp) | CDC Frontier (Reference genome) | (Pusa 1103 & HPNB) | (ILWC 46 & LPNB) | Sequence Components of genome | Gene accession IDs | Putative functions                    |
|---------------------|----------------|--------------|-------------------------|---------------------------------|--------------------|------------------|-------------------------------|--------------------|---------------------------------------|
| SNP_106125_A_444491 | NW_004517519.1 | scaffold2617 | 444491                  | AA                              | GG                 | GG               | SYNONYMOUS_CODING             | 101497854          | probable WRKY transcription factor 27 |
| SNP_106127_A_472319 | NW_004517519.1 | scaffold2617 | 472319                  | CC                              | TT                 | TT               | INTERGENIC                    |                    |                                       |
| SNP_106128_A_474648 | NW_004517519.1 | scaffold2617 | 474648                  | AA                              | TT                 | TT               | INTERGENIC                    |                    |                                       |
| SNP_106129_A_506635 | NW_004517519.1 | scaffold2617 | 506635                  | CC                              | TT                 | TT               | URR                           | 101498168          | Unknown function                      |
| SNP_106130_A_513562 | NW_004517519.1 | scaffold2617 | 513562                  | CC                              | AA                 | AA               | INTERGENIC                    |                    |                                       |
| SNP_106131_A_513744 | NW_004517519.1 | scaffold2617 | 513744                  | GG                              | CC                 | CC               | INTERGENIC                    |                    |                                       |
| SNP_106132_A_513931 | NW_004517519.1 | scaffold2617 | 513931                  | AA                              | GG                 | GG               | INTERGENIC                    |                    |                                       |
| SNP_106133_A_514123 | NW_004517519.1 | scaffold2617 | 514123                  | AA                              | CC                 | CC               | INTERGENIC                    |                    |                                       |
| SNP_106134_A_514151 | NW_004517519.1 | scaffold2617 | 514151                  | TT                              | GG                 | GG               | INTERGENIC                    |                    |                                       |
| SNP_106135_A_514197 | NW_004517519.1 | scaffold2617 | 514197                  | TT                              | GG                 | GG               | INTERGENIC                    |                    |                                       |
| SNP_106136_A_514273 | NW_004517519.1 | scaffold2617 | 514273                  | AA                              | TT                 | TT               | INTERGENIC                    |                    |                                       |
| SNP_106137_A_4263   | NW_004517520.1 | scaffold2618 | 4263                    | AA                              | CC                 | CC               | INTERGENIC                    |                    |                                       |
| SNP_106138_A_4268   | NW_004517520.1 | scaffold2618 | 4268                    | GG                              | TT                 | TT               | INTERGENIC                    |                    |                                       |
| SNP_106139_A_4337   | NW_004517520.1 | scaffold2618 | 4337                    | GG                              | AA                 | AA               | INTERGENIC                    |                    |                                       |
| SNP_106140_A_4837   | NW_004517520.1 | scaffold2618 | 4837                    | TT                              | CC                 | CC               | INTERGENIC                    |                    |                                       |
| SNP_106141_A_25650  | NW_004517521.1 | scaffold2620 | 25650                   | AA                              | GG                 | GG               | INTERGENIC                    |                    |                                       |
| SNP_106142_A_26652  | NW_004517521.1 | scaffold2620 | 26652                   | CC                              | TT                 | TT               | INTERGENIC                    |                    |                                       |
| SNP_106143_A_26680  | NW_004517521.1 | scaffold2620 | 26680                   | GG                              | AA                 | AA               | INTERGENIC                    |                    |                                       |
| SNP_106144_A_26704  | NW_004517521.1 | scaffold2620 | 26704                   | AA                              | GG                 | GG               | INTERGENIC                    |                    |                                       |
| SNP_106145_A_27939  | NW_004517521.1 | scaffold2620 | 27939                   | AA                              | GG                 | GG               | INTERGENIC                    |                    |                                       |
| SNP_106146_A_27978  | NW_004517521.1 | scaffold2620 | 27978                   | AA                              | GG                 | GG               | INTERGENIC                    |                    |                                       |
| SNP_106147_A_28041  | NW_004517521.1 | scaffold2620 | 28041                   | AA                              | TT                 | TT               | INTERGENIC                    |                    |                                       |

| SNPs IDs           | Chromosome IDs | Chromosomes  | Physical positions (bp) | CDC Frontier (Reference genome) | (Pusa 1103 & HPNB) | (ILWC 46 & LPNB) | Sequence genome | Components of | Gene accession IDs | Putative functions |
|--------------------|----------------|--------------|-------------------------|---------------------------------|--------------------|------------------|-----------------|---------------|--------------------|--------------------|
| SNP_106148_A_28071 | NW_004517521.1 | scaffold2620 | 28071                   | AA                              | GG                 | GG               | INTERGENIC      |               |                    |                    |
| SNP_106149_A_28072 | NW_004517521.1 | scaffold2620 | 28072                   | CC                              | TT                 | TT               | INTERGENIC      |               |                    |                    |
| SNP_106150_A_28231 | NW_004517521.1 | scaffold2620 | 28231                   | CC                              | TT                 | TT               | INTERGENIC      |               |                    |                    |
| SNP_106151_A_28235 | NW_004517521.1 | scaffold2620 | 28235                   | AA                              | TT                 | TT               | INTERGENIC      |               |                    |                    |
| SNP_106152_A_28239 | NW_004517521.1 | scaffold2620 | 28239                   | TT                              | CC                 | CC               | INTERGENIC      |               |                    |                    |
| SNP_106153_A_28240 | NW_004517521.1 | scaffold2620 | 28240                   | CC                              | AA                 | AA               | INTERGENIC      |               |                    |                    |
| SNP_106154_A_28309 | NW_004517521.1 | scaffold2620 | 28309                   | CC                              | TT                 | TT               | INTERGENIC      |               |                    |                    |
| SNP_106155_A_28387 | NW_004517521.1 | scaffold2620 | 28387                   | TT                              | CC                 | CC               | INTERGENIC      |               |                    |                    |
| SNP_106156_A_28388 | NW_004517521.1 | scaffold2620 | 28388                   | AA                              | CC                 | CC               | INTERGENIC      |               |                    |                    |
| SNP_106157_A_28390 | NW_004517521.1 | scaffold2620 | 28390                   | AA                              | GG                 | GG               | INTERGENIC      |               |                    |                    |
| SNP_106158_A_28401 | NW_004517521.1 | scaffold2620 | 28401                   | CC                              | GG                 | GG               | INTERGENIC      |               |                    |                    |
| SNP_106159_A_28412 | NW_004517521.1 | scaffold2620 | 28412                   | GG                              | TT                 | TT               | INTERGENIC      |               |                    |                    |
| SNP_106160_A_28484 | NW_004517521.1 | scaffold2620 | 28484                   | GG                              | TT                 | TT               | INTERGENIC      |               |                    |                    |
| SNP_106161_A_30755 | NW_004517521.1 | scaffold2620 | 30755                   | GG                              | CC                 | CC               | INTERGENIC      |               |                    |                    |
| SNP_106162_A_34031 | NW_004517521.1 | scaffold2620 | 34031                   | GG                              | TT                 | TT               | INTERGENIC      |               |                    |                    |
| SNP_106163_A_5619  | NW_004517522.1 | scaffold2621 | 5619                    | TT                              | CC                 | CC               | INTERGENIC      |               |                    |                    |
| SNP_106164_A_5630  | NW_004517522.1 | scaffold2621 | 5630                    | AA                              | GG                 | GG               | INTERGENIC      |               |                    |                    |
| SNP_106165_A_5653  | NW_004517522.1 | scaffold2621 | 5653                    | GG                              | AA                 | AA               | INTERGENIC      |               |                    |                    |
| SNP_106166_A_5677  | NW_004517522.1 | scaffold2621 | 5677                    | AA                              | TT                 | TT               | INTERGENIC      |               |                    |                    |
| SNP_106167_A_5699  | NW_004517522.1 | scaffold2621 | 5699                    | TT                              | CC                 | CC               | INTERGENIC      |               |                    |                    |
| SNP_106168_A_5760  | NW_004517522.1 | scaffold2621 | 5760                    | GG                              | CC                 | CC               | INTERGENIC      |               |                    |                    |
| SNP_106169_A_6469  | NW_004517522.1 | scaffold2621 | 6469                    | TT                              | CC                 | CC               | INTERGENIC      |               |                    |                    |



| SNPs IDs           | Chromosome IDs | Chromosomes  | Physical positions (bp) | CDC Frontier (Reference genome) | (Pusa 1103 & HPNB) | (ILWC 46 & LPNB) | Sequence genome | Components of | Gene accession IDs | Putative functions |
|--------------------|----------------|--------------|-------------------------|---------------------------------|--------------------|------------------|-----------------|---------------|--------------------|--------------------|
| SNP_106170_A_6520  | NW_004517522.1 | scaffold2621 | 6520                    | GG                              | TT                 | TT               | INTERGENIC      |               |                    |                    |
| SNP_106172_A_6928  | NW_004517522.1 | scaffold2621 | 6928                    | TT                              | CC                 | CC               | INTERGENIC      |               |                    |                    |
| SNP_106173_A_723   | NW_004517523.1 | scaffold2623 | 723                     | AA                              | TT                 | TT               | INTERGENIC      |               |                    |                    |
| SNP_106174_A_824   | NW_004517523.1 | scaffold2623 | 824                     | GG                              | TT                 | TT               | INTERGENIC      |               |                    |                    |
| SNP_106175_A_1208  | NW_004517524.1 | scaffold2624 | 1208                    | TT                              | AA                 | AA               | INTERGENIC      |               |                    |                    |
| SNP_106176_A_9932  | NW_004517524.1 | scaffold2624 | 9932                    | TT                              | CC                 | CC               | INTERGENIC      |               |                    |                    |
| SNP_106177_A_13967 | NW_004517524.1 | scaffold2624 | 13967                   | CC                              | AA                 | AA               | INTERGENIC      |               |                    |                    |
| SNP_106178_A_14073 | NW_004517524.1 | scaffold2624 | 14073                   | CC                              | GG                 | GG               | INTERGENIC      |               |                    |                    |
| SNP_106179_A_14536 | NW_004517524.1 | scaffold2624 | 14536                   | TT                              | CC                 | CC               | INTERGENIC      |               |                    |                    |
| SNP_106180_A_16424 | NW_004517524.1 | scaffold2624 | 16424                   | TT                              | AA                 | AA               | INTERGENIC      |               |                    |                    |
| SNP_106181_A_17469 | NW_004517525.1 | scaffold2625 | 17469                   | AA                              | TT                 | TT               | INTERGENIC      |               |                    |                    |
| SNP_106182_A_671   | NW_004517526.1 | scaffold2626 | 671                     | TT                              | GG                 | GG               | INTERGENIC      |               |                    |                    |
| SNP_106183_A_984   | NW_004517526.1 | scaffold2626 | 984                     | AA                              | GG                 | GG               | INTERGENIC      |               |                    |                    |
| SNP_106184_A_990   | NW_004517526.1 | scaffold2626 | 990                     | AA                              | GG                 | GG               | INTERGENIC      |               |                    |                    |
| SNP_106185_A_1104  | NW_004517526.1 | scaffold2626 | 1104                    | CC                              | AA                 | AA               | INTERGENIC      |               |                    |                    |
| SNP_106186_A_538   | NW_004517529.1 | scaffold2632 | 538                     | TT                              | CC                 | CC               | INTERGENIC      |               |                    |                    |
| SNP_106187_A_442   | NW_004517530.1 | scaffold2633 | 442                     | GG                              | CC                 | CC               | INTERGENIC      |               |                    |                    |
| SNP_106188_A_449   | NW_004517530.1 | scaffold2633 | 449                     | TT                              | AA                 | AA               | INTERGENIC      |               |                    |                    |
| SNP_106189_A_17534 | NW_004517530.1 | scaffold2633 | 17534                   | AA                              | GG                 | GG               | INTERGENIC      |               |                    |                    |
| SNP_106190_A_17549 | NW_004517530.1 | scaffold2633 | 17549                   | TT                              | CC                 | CC               | INTERGENIC      |               |                    |                    |
| SNP_106191_A_21558 | NW_004517530.1 | scaffold2633 | 21558                   | AA                              | TT                 | TT               | INTERGENIC      |               |                    |                    |
| SNP_106192_A_21603 | NW_004517530.1 | scaffold2633 | 21603                   | TT                              | CC                 | CC               | INTERGENIC      |               |                    |                    |

| SNPs IDs           | Chromosome IDs | Chromosomes  | Physical positions (bp) | CDC Frontier genome (Reference genome) | (Pusa 1103 & HPNB) | (ILWC 46 & LPNB) | Sequence genome | Components of | Gene accession IDs | Putative functions |
|--------------------|----------------|--------------|-------------------------|----------------------------------------|--------------------|------------------|-----------------|---------------|--------------------|--------------------|
| SNP_106193_A_21622 | NW_004517530.1 | scaffold2633 | 21622                   | GG                                     | AA                 | AA               | INTERGENIC      |               |                    |                    |
| SNP_106194_A_3030  | NW_004517533.1 | scaffold2637 | 3030                    | TT                                     | GG                 | GG               | INTERGENIC      |               |                    |                    |
| SNP_106195_A_3125  | NW_004517533.1 | scaffold2637 | 3125                    | AA                                     | TT                 | TT               | INTERGENIC      |               |                    |                    |
| SNP_106196_A_1299  | NW_004517537.1 | scaffold2644 | 1299                    | CC                                     | TT                 | TT               | INTERGENIC      |               |                    |                    |
| SNP_106197_A_11984 | NW_004517537.1 | scaffold2644 | 11984                   | CC                                     | TT                 | TT               | INTERGENIC      |               |                    |                    |
| SNP_106198_A_12112 | NW_004517537.1 | scaffold2644 | 12112                   | AA                                     | GG                 | GG               | INTERGENIC      |               |                    |                    |
| SNP_106199_A_12136 | NW_004517537.1 | scaffold2644 | 12136                   | TT                                     | AA                 | AA               | INTERGENIC      |               |                    |                    |
| SNP_106200_A_21483 | NW_004517537.1 | scaffold2644 | 21483                   | GG                                     | TT                 | TT               | INTERGENIC      |               |                    |                    |
| SNP_106201_A_21573 | NW_004517537.1 | scaffold2644 | 21573                   | AA                                     | GG                 | GG               | INTERGENIC      |               |                    |                    |
| SNP_106202_A_21621 | NW_004517537.1 | scaffold2644 | 21621                   | AA                                     | GG                 | GG               | INTERGENIC      |               |                    |                    |
| SNP_106203_A_22801 | NW_004517537.1 | scaffold2644 | 22801                   | GG                                     | AA                 | AA               | INTERGENIC      |               |                    |                    |
| SNP_106204_A_23115 | NW_004517537.1 | scaffold2644 | 23115                   | AA                                     | GG                 | GG               | INTERGENIC      |               |                    |                    |
| SNP_106205_A_23616 | NW_004517537.1 | scaffold2644 | 23616                   | CC                                     | AA                 | AA               | INTERGENIC      |               |                    |                    |
| SNP_106206_A_24948 | NW_004517537.1 | scaffold2644 | 24948                   | CC                                     | TT                 | TT               | INTERGENIC      |               |                    |                    |
| SNP_106207_A_26901 | NW_004517541.1 | scaffold2649 | 26901                   | TT                                     | AA                 | AA               | INTERGENIC      |               |                    |                    |
| SNP_106209_A_27733 | NW_004517541.1 | scaffold2649 | 27733                   | AA                                     | GG                 | GG               | INTERGENIC      |               |                    |                    |
| SNP_106210_A_27784 | NW_004517541.1 | scaffold2649 | 27784                   | TT                                     | CC                 | CC               | INTERGENIC      |               |                    |                    |
| SNP_106211_A_134   | NW_004517542.1 | scaffold2650 | 134                     | GG                                     | AA                 | AA               | INTERGENIC      |               |                    |                    |
| SNP_106213_A_187   | NW_004517543.1 | scaffold2651 | 187                     | TT                                     | AA                 | AA               | INTERGENIC      |               |                    |                    |
| SNP_106214_A_464   | NW_004517543.1 | scaffold2651 | 464                     | AA                                     | CC                 | CC               | INTERGENIC      |               |                    |                    |
| SNP_106215_A_506   | NW_004517543.1 | scaffold2651 | 506                     | TT                                     | CC                 | CC               | INTERGENIC      |               |                    |                    |
| SNP_106217_A_4304  | NW_004517543.1 | scaffold2651 | 4304                    | CC                                     | GG                 | GG               | INTERGENIC      |               |                    |                    |

| SNPs IDs           | Chromosome IDs | Chromosomes  | Physical positions (bp) | CDC Frontier (Reference genome) | (Pusa 1103 & HPNB) | (ILWC 46 & LPNB) | Sequence Components of genome | Gene accession IDs | Putative functions           |
|--------------------|----------------|--------------|-------------------------|---------------------------------|--------------------|------------------|-------------------------------|--------------------|------------------------------|
| SNP_106218_A_4329  | NW_004517543.1 | scaffold2651 | 4329                    | AA                              | GG                 | GG               | INTERGENIC                    |                    |                              |
| SNP_106219_A_4448  | NW_004517543.1 | scaffold2651 | 4448                    | TT                              | AA                 | AA               | INTERGENIC                    |                    |                              |
| SNP_106220_A_4551  | NW_004517543.1 | scaffold2651 | 4551                    | TT                              | AA                 | AA               | INTERGENIC                    |                    |                              |
| SNP_106221_A_4567  | NW_004517543.1 | scaffold2651 | 4567                    | TT                              | AA                 | AA               | INTERGENIC                    |                    |                              |
| SNP_106222_A_4689  | NW_004517543.1 | scaffold2651 | 4689                    | GG                              | CC                 | CC               | INTERGENIC                    |                    |                              |
| SNP_106223_A_12982 | NW_004517543.1 | scaffold2651 | 12982                   | TT                              | AA                 | AA               | INTERGENIC                    |                    |                              |
| SNP_106224_A_17656 | NW_004517543.1 | scaffold2651 | 17656                   | CC                              | AA                 | AA               | INTERGENIC                    |                    |                              |
| SNP_106225_A_32457 | NW_004517543.1 | scaffold2651 | 32457                   | AA                              | TT                 | TT               | INTERGENIC                    |                    |                              |
| SNP_106226_A_32560 | NW_004517543.1 | scaffold2651 | 32560                   | CC                              | GG                 | GG               | INTERGENIC                    |                    |                              |
| SNP_106227_A_32649 | NW_004517543.1 | scaffold2651 | 32649                   | AA                              | CC                 | CC               | INTERGENIC                    |                    |                              |
| SNP_106228_A_13994 | NW_004517544.1 | scaffold2653 | 13994                   | CC                              | AA                 | AA               | INTRON                        | 101499578          | Unknown function             |
| SNP_106229_A_14155 | NW_004517544.1 | scaffold2653 | 14155                   | GG                              | CC                 | CC               | INTRON                        | 101499578          | Unknown function             |
| SNP_106230_A_14194 | NW_004517544.1 | scaffold2653 | 14194                   | AA                              | GG                 | GG               | INTRON                        | 101499578          | Unknown function             |
| SNP_106231_A_14357 | NW_004517544.1 | scaffold2653 | 14357                   | AA                              | CC                 | CC               | INTRON                        | 101499578          | Unknown function             |
| SNP_106232_A_14381 | NW_004517544.1 | scaffold2653 | 14381                   | GG                              | AA                 | AA               | INTRON                        | 101499578          | Unknown function             |
| SNP_106233_A_14742 | NW_004517544.1 | scaffold2653 | 14742                   | TT                              | CC                 | CC               | INTERGENIC                    |                    |                              |
| SNP_106234_A_25423 | NW_004517544.1 | scaffold2653 | 25423                   | TT                              | GG                 | GG               | URR                           | 101499055          | uncharacterized LOC101499055 |
| SNP_106235_A_1674  | NW_004517547.1 | scaffold2660 | 1674                    | CC                              | AA                 | AA               | INTERGENIC                    |                    |                              |
| SNP_106236_A_3820  | NW_004517547.1 | scaffold2660 | 3820                    | AA                              | TT                 | TT               | INTERGENIC                    |                    |                              |
| SNP_106238_A_12300 | NW_004517547.1 | scaffold2660 | 12300                   | TT                              | AA                 | AA               | INTERGENIC                    |                    |                              |
| SNP_106240_A_690   | NW_004517548.1 | scaffold2662 | 690                     | AA                              | GG                 | GG               | INTERGENIC                    |                    |                              |
| SNP_106241_A_825   | NW_004517548.1 | scaffold2662 | 825                     | CC                              | AA                 | AA               | INTERGENIC                    |                    |                              |

| SNPs IDs           | Chromosome IDs | Chromosomes  | Physical positions (bp) | CDC Frontier (Reference genome) | (Pusa 1103 & HPNB) | (ILWC 46 & LPNB) | Sequence genome | Components of | Gene accession IDs | Putative functions |
|--------------------|----------------|--------------|-------------------------|---------------------------------|--------------------|------------------|-----------------|---------------|--------------------|--------------------|
| SNP_106242_A_1284  | NW_004517548.1 | scaffold2662 | 1284                    | TT                              | GG                 | GG               | INTERGENIC      |               |                    |                    |
| SNP_106244_A_1557  | NW_004517548.1 | scaffold2662 | 1557                    | TT                              | CC                 | CC               | INTERGENIC      |               |                    |                    |
| SNP_106246_A_25622 | NW_004517548.1 | scaffold2662 | 25622                   | GG                              | TT                 | TT               | INTERGENIC      |               |                    |                    |
| SNP_106247_A_25841 | NW_004517548.1 | scaffold2662 | 25841                   | GG                              | TT                 | TT               | INTERGENIC      |               |                    |                    |
| SNP_106249_A_26414 | NW_004517548.1 | scaffold2662 | 26414                   | TT                              | GG                 | GG               | INTERGENIC      |               |                    |                    |
| SNP_106251_A_31436 | NW_004517548.1 | scaffold2662 | 31436                   | CC                              | TT                 | TT               | INTERGENIC      |               |                    |                    |
| SNP_106252_A_34098 | NW_004517548.1 | scaffold2662 | 34098                   | GG                              | AA                 | AA               | INTERGENIC      |               |                    |                    |
| SNP_106253_A_34380 | NW_004517548.1 | scaffold2662 | 34380                   | TT                              | CC                 | CC               | INTERGENIC      |               |                    |                    |
| SNP_106254_A_34402 | NW_004517548.1 | scaffold2662 | 34402                   | AA                              | CC                 | CC               | INTERGENIC      |               |                    |                    |
| SNP_106255_A_34532 | NW_004517548.1 | scaffold2662 | 34532                   | GG                              | CC                 | CC               | INTERGENIC      |               |                    |                    |
| SNP_106256_A_47678 | NW_004517548.1 | scaffold2662 | 47678                   | GG                              | AA                 | AA               | INTERGENIC      |               |                    |                    |
| SNP_106257_A_47707 | NW_004517548.1 | scaffold2662 | 47707                   | TT                              | GG                 | GG               | INTERGENIC      |               |                    |                    |
| SNP_106258_A_2015  | NW_004517549.1 | scaffold2663 | 2015                    | CC                              | AA                 | AA               | INTERGENIC      |               |                    |                    |
| SNP_106259_A_13231 | NW_004517553.1 | scaffold2668 | 13231                   | CC                              | TT                 | TT               | INTERGENIC      |               |                    |                    |
| SNP_106260_A_13317 | NW_004517553.1 | scaffold2668 | 13317                   | TT                              | GG                 | GG               | INTERGENIC      |               |                    |                    |
| SNP_106262_A_4299  | NW_004517554.1 | scaffold2669 | 4299                    | CC                              | TT                 | TT               | INTERGENIC      |               |                    |                    |
| SNP_106263_A_4341  | NW_004517554.1 | scaffold2669 | 4341                    | CC                              | AA                 | AA               | INTERGENIC      |               |                    |                    |
| SNP_106264_A_11927 | NW_004517554.1 | scaffold2669 | 11927                   | CC                              | GG                 | GG               | URR             | 101500217     | Unknown function   |                    |
| SNP_106265_A_11960 | NW_004517554.1 | scaffold2669 | 11960                   | GG                              | CC                 | CC               | URR             | 101500217     | Unknown function   |                    |
| SNP_106266_A_11991 | NW_004517554.1 | scaffold2669 | 11991                   | GG                              | TT                 | TT               | URR             | 101500217     | Unknown function   |                    |
| SNP_106267_A_12041 | NW_004517554.1 | scaffold2669 | 12041                   | TT                              | CC                 | CC               | URR             | 101500217     | Unknown function   |                    |
| SNP_106268_A_12103 | NW_004517554.1 | scaffold2669 | 12103                   | CC                              | TT                 | TT               | URR             | 101500217     | Unknown function   |                    |

| SNPs IDs           | Chromosome IDs | Chromosomes  | Physical positions (bp) | CDC Frontier genome (Reference genome) | (Pusa 1103 & HPNB) | (ILWC 46 & LPNB) | Sequence Components of genome | Gene accession IDs | Putative functions |
|--------------------|----------------|--------------|-------------------------|----------------------------------------|--------------------|------------------|-------------------------------|--------------------|--------------------|
| SNP_106269_A_12116 | NW_004517554.1 | scaffold2669 | 12116                   | TT                                     | CC                 | CC               | URR                           | 101500217          | Unknown function   |
| SNP_106270_A_12203 | NW_004517554.1 | scaffold2669 | 12203                   | CC                                     | GG                 | GG               | URR                           | 101500217          | Unknown function   |
| SNP_106271_A_12256 | NW_004517554.1 | scaffold2669 | 12256                   | TT                                     | CC                 | CC               | URR                           | 101500217          | Unknown function   |
| SNP_106272_A_12316 | NW_004517554.1 | scaffold2669 | 12316                   | CC                                     | TT                 | TT               | URR                           | 101500217          | Unknown function   |
| SNP_106273_A_12341 | NW_004517554.1 | scaffold2669 | 12341                   | AA                                     | GG                 | GG               | URR                           | 101500217          | Unknown function   |
| SNP_106274_A_12364 | NW_004517554.1 | scaffold2669 | 12364                   | TT                                     | GG                 | GG               | URR                           | 101500217          | Unknown function   |
| SNP_106275_A_12666 | NW_004517554.1 | scaffold2669 | 12666                   | TT                                     | CC                 | CC               | INTRON                        | 101500528          | Unknown function   |
| SNP_106276_A_15556 | NW_004517554.1 | scaffold2669 | 15556                   | TT                                     | GG                 | GG               | URR                           | 101500528          | Unknown function   |
| SNP_106277_A_15928 | NW_004517554.1 | scaffold2669 | 15928                   | TT                                     | CC                 | CC               | URR                           | 101500528          | Unknown function   |
| SNP_106278_A_15941 | NW_004517554.1 | scaffold2669 | 15941                   | CC                                     | TT                 | TT               | URR                           | 101500528          | Unknown function   |
| SNP_106279_A_15950 | NW_004517554.1 | scaffold2669 | 15950                   | AA                                     | CC                 | CC               | URR                           | 101500528          | Unknown function   |
| SNP_106281_A_1224  | NW_004517555.1 | scaffold2670 | 1224                    | CC                                     | GG                 | GG               | INTERGENIC                    |                    |                    |
| SNP_106282_A_1262  | NW_004517555.1 | scaffold2670 | 1262                    | CC                                     | TT                 | TT               | INTERGENIC                    |                    |                    |
| SNP_106283_A_1351  | NW_004517555.1 | scaffold2670 | 1351                    | AA                                     | GG                 | GG               | INTERGENIC                    |                    |                    |
| SNP_106284_A_1367  | NW_004517555.1 | scaffold2670 | 1367                    | AA                                     | GG                 | GG               | INTERGENIC                    |                    |                    |
| SNP_106285_A_1443  | NW_004517555.1 | scaffold2670 | 1443                    | TT                                     | CC                 | CC               | INTERGENIC                    |                    |                    |
| SNP_106286_A_1469  | NW_004517555.1 | scaffold2670 | 1469                    | AA                                     | TT                 | TT               | INTERGENIC                    |                    |                    |
| SNP_106287_A_1584  | NW_004517555.1 | scaffold2670 | 1584                    | AA                                     | TT                 | TT               | INTERGENIC                    |                    |                    |
| SNP_106288_A_1585  | NW_004517555.1 | scaffold2670 | 1585                    | TT                                     | CC                 | CC               | INTERGENIC                    |                    |                    |
| SNP_106289_A_1686  | NW_004517555.1 | scaffold2670 | 1686                    | TT                                     | GG                 | GG               | INTERGENIC                    |                    |                    |
| SNP_106290_A_1692  | NW_004517555.1 | scaffold2670 | 1692                    | TT                                     | CC                 | CC               | INTERGENIC                    |                    |                    |
| SNP_106291_A_1706  | NW_004517555.1 | scaffold2670 | 1706                    | AA                                     | TT                 | TT               | INTERGENIC                    |                    |                    |

| SNPs IDs           | Chromosome IDs | Chromosomes  | Physical positions (bp) | CDC Frontier (Reference genome) | (Pusa 1103 & HPNB) | (ILWC 46 & LPNB) | Sequence genome | Components of | Gene accession IDs | Putative functions |
|--------------------|----------------|--------------|-------------------------|---------------------------------|--------------------|------------------|-----------------|---------------|--------------------|--------------------|
| SNP_106292_A_1710  | NW_004517555.1 | scaffold2670 | 1710                    | TT                              | CC                 | CC               | INTERGENIC      |               |                    |                    |
| SNP_106293_A_1711  | NW_004517555.1 | scaffold2670 | 1711                    | CC                              | AA                 | AA               | INTERGENIC      |               |                    |                    |
| SNP_106294_A_1712  | NW_004517555.1 | scaffold2670 | 1712                    | GG                              | AA                 | AA               | INTERGENIC      |               |                    |                    |
| SNP_106295_A_8126  | NW_004517555.1 | scaffold2670 | 8126                    | CC                              | AA                 | AA               | INTERGENIC      |               |                    |                    |
| SNP_106296_A_11858 | NW_004517555.1 | scaffold2670 | 11858                   | AA                              | GG                 | GG               | INTERGENIC      |               |                    |                    |
| SNP_106297_A_26154 | NW_004517555.1 | scaffold2670 | 26154                   | TT                              | CC                 | CC               | INTERGENIC      |               |                    |                    |
| SNP_106298_A_26215 | NW_004517555.1 | scaffold2670 | 26215                   | AA                              | GG                 | GG               | INTERGENIC      |               |                    |                    |
| SNP_106299_A_26219 | NW_004517555.1 | scaffold2670 | 26219                   | AA                              | CC                 | CC               | INTERGENIC      |               |                    |                    |
| SNP_106300_A_26220 | NW_004517555.1 | scaffold2670 | 26220                   | AA                              | TT                 | TT               | INTERGENIC      |               |                    |                    |
| SNP_106301_A_26227 | NW_004517555.1 | scaffold2670 | 26227                   | AA                              | TT                 | TT               | INTERGENIC      |               |                    |                    |
| SNP_106302_A_26271 | NW_004517555.1 | scaffold2670 | 26271                   | AA                              | CC                 | CC               | INTERGENIC      |               |                    |                    |
| SNP_106303_A_26326 | NW_004517555.1 | scaffold2670 | 26326                   | TT                              | AA                 | AA               | INTERGENIC      |               |                    |                    |
| SNP_106304_A_26510 | NW_004517555.1 | scaffold2670 | 26510                   | CC                              | TT                 | TT               | INTERGENIC      |               |                    |                    |
| SNP_106305_A_26569 | NW_004517555.1 | scaffold2670 | 26569                   | TT                              | CC                 | CC               | INTERGENIC      |               |                    |                    |
| SNP_106306_A_26634 | NW_004517555.1 | scaffold2670 | 26634                   | AA                              | CC                 | CC               | INTERGENIC      |               |                    |                    |
| SNP_106307_A_26643 | NW_004517555.1 | scaffold2670 | 26643                   | CC                              | AA                 | AA               | INTERGENIC      |               |                    |                    |
| SNP_106308_A_26650 | NW_004517555.1 | scaffold2670 | 26650                   | CC                              | AA                 | AA               | INTERGENIC      |               |                    |                    |
| SNP_106309_A_26812 | NW_004517555.1 | scaffold2670 | 26812                   | AA                              | GG                 | GG               | INTERGENIC      |               |                    |                    |
| SNP_106310_A_26836 | NW_004517555.1 | scaffold2670 | 26836                   | AA                              | GG                 | GG               | INTERGENIC      |               |                    |                    |
| SNP_106311_A_26851 | NW_004517555.1 | scaffold2670 | 26851                   | AA                              | CC                 | CC               | INTERGENIC      |               |                    |                    |
| SNP_106312_A_26865 | NW_004517555.1 | scaffold2670 | 26865                   | AA                              | TT                 | TT               | INTERGENIC      |               |                    |                    |
| SNP_106313_A_26881 | NW_004517555.1 | scaffold2670 | 26881                   | AA                              | CC                 | CC               | INTERGENIC      |               |                    |                    |

| SNPs IDs           | Chromosome IDs | Chromosomes  | Physical positions (bp) | CDC Frontier (Reference genome) | (Pusa 1103 & HPNB) | (ILWC 46 & LPNB) | Sequence genome | Components of | Gene accession IDs | Putative functions |
|--------------------|----------------|--------------|-------------------------|---------------------------------|--------------------|------------------|-----------------|---------------|--------------------|--------------------|
| SNP_106314_A_34890 | NW_004517555.1 | scaffold2670 | 34890                   | CC                              | GG                 | GG               | INTERGENIC      |               |                    |                    |
| SNP_106315_A_34923 | NW_004517555.1 | scaffold2670 | 34923                   | TT                              | CC                 | CC               | INTERGENIC      |               |                    |                    |
| SNP_106316_A_36699 | NW_004517555.1 | scaffold2670 | 36699                   | CC                              | GG                 | GG               | INTERGENIC      |               |                    |                    |
| SNP_106317_A_36771 | NW_004517555.1 | scaffold2670 | 36771                   | TT                              | CC                 | CC               | INTERGENIC      |               |                    |                    |
| SNP_106318_A_36792 | NW_004517555.1 | scaffold2670 | 36792                   | TT                              | CC                 | CC               | INTERGENIC      |               |                    |                    |
| SNP_106319_A_36865 | NW_004517555.1 | scaffold2670 | 36865                   | CC                              | TT                 | TT               | INTERGENIC      |               |                    |                    |
| SNP_106321_A_37018 | NW_004517555.1 | scaffold2670 | 37018                   | TT                              | CC                 | CC               | INTERGENIC      |               |                    |                    |
| SNP_106322_A_37040 | NW_004517555.1 | scaffold2670 | 37040                   | CC                              | TT                 | TT               | INTERGENIC      |               |                    |                    |
| SNP_106323_A_37041 | NW_004517555.1 | scaffold2670 | 37041                   | CC                              | AA                 | AA               | INTERGENIC      |               |                    |                    |
| SNP_106324_A_37077 | NW_004517555.1 | scaffold2670 | 37077                   | CC                              | TT                 | TT               | INTERGENIC      |               |                    |                    |
| SNP_106325_A_37228 | NW_004517555.1 | scaffold2670 | 37228                   | AA                              | GG                 | GG               | INTERGENIC      |               |                    |                    |
| SNP_106326_A_42769 | NW_004517555.1 | scaffold2670 | 42769                   | AA                              | GG                 | GG               | INTERGENIC      |               |                    |                    |
| SNP_106327_A_42787 | NW_004517555.1 | scaffold2670 | 42787                   | AA                              | GG                 | GG               | INTERGENIC      |               |                    |                    |
| SNP_106328_A_42835 | NW_004517555.1 | scaffold2670 | 42835                   | CC                              | GG                 | GG               | INTERGENIC      |               |                    |                    |
| SNP_106329_A_43022 | NW_004517555.1 | scaffold2670 | 43022                   | GG                              | CC                 | CC               | INTERGENIC      |               |                    |                    |
| SNP_106330_A_43458 | NW_004517555.1 | scaffold2670 | 43458                   | AA                              | TT                 | TT               | INTERGENIC      |               |                    |                    |
| SNP_106331_A_43468 | NW_004517555.1 | scaffold2670 | 43468                   | GG                              | TT                 | TT               | INTERGENIC      |               |                    |                    |
| SNP_106332_A_43534 | NW_004517555.1 | scaffold2670 | 43534                   | TT                              | AA                 | AA               | INTERGENIC      |               |                    |                    |
| SNP_106333_A_43544 | NW_004517555.1 | scaffold2670 | 43544                   | GG                              | AA                 | AA               | INTERGENIC      |               |                    |                    |
| SNP_106334_A_43550 | NW_004517555.1 | scaffold2670 | 43550                   | AA                              | GG                 | GG               | INTERGENIC      |               |                    |                    |
| SNP_106335_A_43835 | NW_004517555.1 | scaffold2670 | 43835                   | CC                              | TT                 | TT               | INTERGENIC      |               |                    |                    |
| SNP_106336_A_43838 | NW_004517555.1 | scaffold2670 | 43838                   | GG                              | AA                 | AA               | INTERGENIC      |               |                    |                    |

| SNPs IDs            | Chromosome IDs | Chromosomes  | Physical positions (bp) | CDC Frontier (Reference genome) | (Pusa 1103 & HPNB) | (ILWC 46 & LPNB) | Sequence genome | Components of | Gene accession IDs | Putative functions |
|---------------------|----------------|--------------|-------------------------|---------------------------------|--------------------|------------------|-----------------|---------------|--------------------|--------------------|
| SNP_106337_A_43854  | NW_004517555.1 | scaffold2670 | 43854                   | AA                              | TT                 | TT               | INTERGENIC      |               |                    |                    |
| SNP_106338_A_43859  | NW_004517555.1 | scaffold2670 | 43859                   | TT                              | GG                 | GG               | INTERGENIC      |               |                    |                    |
| SNP_106339_A_43942  | NW_004517555.1 | scaffold2670 | 43942                   | CC                              | TT                 | TT               | INTERGENIC      |               |                    |                    |
| SNP_106340_A_43997  | NW_004517555.1 | scaffold2670 | 43997                   | AA                              | CC                 | CC               | INTERGENIC      |               |                    |                    |
| SNP_106341_A_44072  | NW_004517555.1 | scaffold2670 | 44072                   | TT                              | GG                 | GG               | INTERGENIC      |               |                    |                    |
| SNP_106342_A_44074  | NW_004517555.1 | scaffold2670 | 44074                   | CC                              | GG                 | GG               | INTERGENIC      |               |                    |                    |
| SNP_106343_A_44885  | NW_004517555.1 | scaffold2670 | 44885                   | AA                              | TT                 | TT               | INTERGENIC      |               |                    |                    |
| SNP_106344_A_45748  | NW_004517555.1 | scaffold2670 | 45748                   | TT                              | CC                 | CC               | INTERGENIC      |               |                    |                    |
| SNP_106345_A_45778  | NW_004517555.1 | scaffold2670 | 45778                   | CC                              | AA                 | AA               | INTERGENIC      |               |                    |                    |
| SNP_106346_A_62447  | NW_004517555.1 | scaffold2670 | 62447                   | AA                              | CC                 | CC               | INTERGENIC      |               |                    |                    |
| SNP_106347_A_63154  | NW_004517555.1 | scaffold2670 | 63154                   | AA                              | GG                 | GG               | INTERGENIC      |               |                    |                    |
| SNP_106348_A_63196  | NW_004517555.1 | scaffold2670 | 63196                   | CC                              | TT                 | TT               | INTERGENIC      |               |                    |                    |
| SNP_106349_A_67189  | NW_004517555.1 | scaffold2670 | 67189                   | TT                              | GG                 | GG               | INTERGENIC      |               |                    |                    |
| SNP_106350_A_67240  | NW_004517555.1 | scaffold2670 | 67240                   | AA                              | GG                 | GG               | INTERGENIC      |               |                    |                    |
| SNP_106351_A_73787  | NW_004517555.1 | scaffold2670 | 73787                   | CC                              | TT                 | TT               | INTERGENIC      |               |                    |                    |
| SNP_106352_A_73789  | NW_004517555.1 | scaffold2670 | 73789                   | CC                              | GG                 | GG               | INTERGENIC      |               |                    |                    |
| SNP_106353_A_84120  | NW_004517555.1 | scaffold2670 | 84120                   | AA                              | TT                 | TT               | INTERGENIC      |               |                    |                    |
| SNP_106354_A_98119  | NW_004517555.1 | scaffold2670 | 98119                   | GG                              | TT                 | TT               | INTERGENIC      |               |                    |                    |
| SNP_106355_A_130064 | NW_004517555.1 | scaffold2670 | 130064                  | CC                              | AA                 | AA               | INTERGENIC      |               |                    |                    |
| SNP_106356_A_133327 | NW_004517555.1 | scaffold2670 | 133327                  | AA                              | GG                 | GG               | INTERGENIC      |               |                    |                    |
| SNP_106357_A_140565 | NW_004517555.1 | scaffold2670 | 140565                  | AA                              | GG                 | GG               | INTERGENIC      |               |                    |                    |
| SNP_106359_A_149154 | NW_004517555.1 | scaffold2670 | 149154                  | TT                              | CC                 | CC               | INTERGENIC      |               |                    |                    |



| SNPs IDs            | Chromosome IDs | Chromosomes  | Physical positions (bp) | CDC Frontier (Reference genome) | (Pusa 1103 & HPNB) | (ILWC 46 & LPNB) | Sequence genome | Components of | Gene accession IDs           | Putative functions |
|---------------------|----------------|--------------|-------------------------|---------------------------------|--------------------|------------------|-----------------|---------------|------------------------------|--------------------|
| SNP_106360_A_149198 | NW_004517555.1 | scaffold2670 | 149198                  | TT                              | CC                 | CC               | INTERGENIC      |               |                              |                    |
| SNP_106361_A_149426 | NW_004517555.1 | scaffold2670 | 149426                  | AA                              | CC                 | CC               | INTERGENIC      |               |                              |                    |
| SNP_106362_A_149429 | NW_004517555.1 | scaffold2670 | 149429                  | CC                              | TT                 | TT               | INTERGENIC      |               |                              |                    |
| SNP_106363_A_149468 | NW_004517555.1 | scaffold2670 | 149468                  | CC                              | AA                 | AA               | INTERGENIC      |               |                              |                    |
| SNP_106364_A_149501 | NW_004517555.1 | scaffold2670 | 149501                  | GG                              | CC                 | CC               | INTERGENIC      |               |                              |                    |
| SNP_106365_A_149606 | NW_004517555.1 | scaffold2670 | 149606                  | AA                              | GG                 | GG               | INTERGENIC      |               |                              |                    |
| SNP_106366_A_149653 | NW_004517555.1 | scaffold2670 | 149653                  | CC                              | TT                 | TT               | INTERGENIC      |               |                              |                    |
| SNP_106367_A_149661 | NW_004517555.1 | scaffold2670 | 149661                  | CC                              | AA                 | AA               | INTERGENIC      |               |                              |                    |
| SNP_106369_A_4330   | NW_004517556.1 | scaffold2672 | 4330                    | GG                              | AA                 | AA               | INTERGENIC      |               |                              |                    |
| SNP_106370_A_4363   | NW_004517556.1 | scaffold2672 | 4363                    | AA                              | TT                 | TT               | INTERGENIC      |               |                              |                    |
| SNP_106371_A_4435   | NW_004517556.1 | scaffold2672 | 4435                    | TT                              | CC                 | CC               | INTERGENIC      |               |                              |                    |
| SNP_106372_A_4512   | NW_004517556.1 | scaffold2672 | 4512                    | TT                              | GG                 | GG               | INTERGENIC      |               |                              |                    |
| SNP_106373_A_4649   | NW_004517556.1 | scaffold2672 | 4649                    | GG                              | TT                 | TT               | INTERGENIC      |               |                              |                    |
| SNP_106374_A_4654   | NW_004517556.1 | scaffold2672 | 4654                    | AA                              | CC                 | CC               | INTERGENIC      |               |                              |                    |
| SNP_106375_A_4980   | NW_004517556.1 | scaffold2672 | 4980                    | CC                              | TT                 | TT               | INTERGENIC      |               |                              |                    |
| SNP_106376_A_1477   | NW_004517557.1 | scaffold2675 | 1477                    | CC                              | TT                 | TT               | INTERGENIC      |               |                              |                    |
| SNP_106377_A_1491   | NW_004517557.1 | scaffold2675 | 1491                    | CC                              | AA                 | AA               | INTERGENIC      |               |                              |                    |
| SNP_106378_A_1492   | NW_004517557.1 | scaffold2675 | 1492                    | TT                              | GG                 | GG               | INTERGENIC      |               |                              |                    |
| SNP_106379_A_3462   | NW_004517559.1 | scaffold2678 | 3462                    | AA                              | GG                 | GG               | INTERGENIC      |               |                              |                    |
| SNP_106380_A_37418  | NW_004517559.1 | scaffold2678 | 37418                   | GG                              | TT                 | TT               | DRR             | 101501489     | uncharacterized LOC101501489 |                    |
| SNP_106381_A_53899  | NW_004517559.1 | scaffold2678 | 53899                   | TT                              | CC                 | CC               | INTERGENIC      |               |                              |                    |
| SNP_106382_A_68825  | NW_004517559.1 | scaffold2678 | 68825                   | CC                              | TT                 | TT               | INTERGENIC      |               |                              |                    |

| SNPs IDs            | Chromosome IDs | Chromosomes  | Physical positions (bp) | CDC Frontier (Reference genome) | (Pusa 1103 & HPNB) | (ILWC 46 & LPNB) | Sequence genome | Components of | Gene accession IDs | Putative functions |
|---------------------|----------------|--------------|-------------------------|---------------------------------|--------------------|------------------|-----------------|---------------|--------------------|--------------------|
| SNP_106383_A_88652  | NW_004517559.1 | scaffold2678 | 88652                   | AA                              | CC                 | CC               | INTERGENIC      |               |                    |                    |
| SNP_106384_A_101332 | NW_004517559.1 | scaffold2678 | 101332                  | CC                              | TT                 | TT               | INTERGENIC      |               |                    |                    |
| SNP_106385_A_1775   | NW_004517562.1 | scaffold2684 | 1775                    | AA                              | CC                 | CC               | INTERGENIC      |               |                    |                    |
| SNP_106386_A_595    | NW_004517568.1 | scaffold2691 | 595                     | TT                              | AA                 | AA               | INTERGENIC      |               |                    |                    |
| SNP_106387_A_628    | NW_004517568.1 | scaffold2691 | 628                     | CC                              | TT                 | TT               | INTERGENIC      |               |                    |                    |
| SNP_106388_A_672    | NW_004517568.1 | scaffold2691 | 672                     | AA                              | TT                 | TT               | INTERGENIC      |               |                    |                    |
| SNP_106389_A_718    | NW_004517568.1 | scaffold2691 | 718                     | TT                              | CC                 | CC               | INTERGENIC      |               |                    |                    |
| SNP_106390_A_748    | NW_004517568.1 | scaffold2691 | 748                     | CC                              | TT                 | TT               | INTERGENIC      |               |                    |                    |
| SNP_106391_A_934    | NW_004517568.1 | scaffold2691 | 934                     | GG                              | TT                 | TT               | INTERGENIC      |               |                    |                    |
| SNP_106392_A_955    | NW_004517568.1 | scaffold2691 | 955                     | CC                              | TT                 | TT               | INTERGENIC      |               |                    |                    |
| SNP_106393_A_854    | NW_004517569.1 | scaffold2692 | 854                     | CC                              | TT                 | TT               | INTERGENIC      |               |                    |                    |
| SNP_106394_A_903    | NW_004517569.1 | scaffold2692 | 903                     | CC                              | GG                 | GG               | INTERGENIC      |               |                    |                    |
| SNP_106395_A_1057   | NW_004517569.1 | scaffold2692 | 1057                    | AA                              | TT                 | TT               | INTERGENIC      |               |                    |                    |
| SNP_106396_A_1202   | NW_004517569.1 | scaffold2692 | 1202                    | CC                              | TT                 | TT               | INTERGENIC      |               |                    |                    |
| SNP_106397_A_1216   | NW_004517569.1 | scaffold2692 | 1216                    | TT                              | CC                 | CC               | INTERGENIC      |               |                    |                    |
| SNP_106398_A_1228   | NW_004517569.1 | scaffold2692 | 1228                    | GG                              | TT                 | TT               | INTERGENIC      |               |                    |                    |
| SNP_106399_A_1245   | NW_004517569.1 | scaffold2692 | 1245                    | TT                              | AA                 | AA               | INTERGENIC      |               |                    |                    |
| SNP_106400_A_1335   | NW_004517569.1 | scaffold2692 | 1335                    | CC                              | GG                 | GG               | INTERGENIC      |               |                    |                    |
| SNP_106401_A_8819   | NW_004517569.1 | scaffold2692 | 8819                    | GG                              | AA                 | AA               | INTERGENIC      |               |                    |                    |
| SNP_106402_A_11154  | NW_004517569.1 | scaffold2692 | 11154                   | GG                              | TT                 | TT               | INTERGENIC      |               |                    |                    |
| SNP_106403_A_12655  | NW_004517569.1 | scaffold2692 | 12655                   | AA                              | TT                 | TT               | INTERGENIC      |               |                    |                    |
| SNP_106404_A_12715  | NW_004517569.1 | scaffold2692 | 12715                   | TT                              | GG                 | GG               | INTERGENIC      |               |                    |                    |

| SNPs IDs           | Chromosome IDs | Chromosomes  | Physical positions (bp) | CDC Frontier (Reference genome) | (Pusa 1103 & HPNB) | (ILWC 46 & LPNB) | Sequence genome | Components of | Gene accession IDs | Putative functions |
|--------------------|----------------|--------------|-------------------------|---------------------------------|--------------------|------------------|-----------------|---------------|--------------------|--------------------|
| SNP_106405_A_12725 | NW_004517569.1 | scaffold2692 | 12725                   | CC                              | TT                 | TT               | INTERGENIC      |               |                    |                    |
| SNP_106406_A_12829 | NW_004517569.1 | scaffold2692 | 12829                   | AA                              | GG                 | GG               | INTERGENIC      |               |                    |                    |
| SNP_106407_A_12846 | NW_004517569.1 | scaffold2692 | 12846                   | CC                              | TT                 | TT               | INTERGENIC      |               |                    |                    |
| SNP_106408_A_12861 | NW_004517569.1 | scaffold2692 | 12861                   | TT                              | CC                 | CC               | INTERGENIC      |               |                    |                    |
| SNP_106409_A_12974 | NW_004517569.1 | scaffold2692 | 12974                   | AA                              | TT                 | TT               | INTERGENIC      |               |                    |                    |
| SNP_106411_A_13939 | NW_004517569.1 | scaffold2692 | 13939                   | TT                              | CC                 | CC               | INTERGENIC      |               |                    |                    |
| SNP_106413_A_14283 | NW_004517569.1 | scaffold2692 | 14283                   | CC                              | TT                 | TT               | INTERGENIC      |               |                    |                    |
| SNP_106414_A_14453 | NW_004517569.1 | scaffold2692 | 14453                   | CC                              | GG                 | GG               | INTERGENIC      |               |                    |                    |
| SNP_106416_A_14651 | NW_004517569.1 | scaffold2692 | 14651                   | TT                              | CC                 | CC               | INTERGENIC      |               |                    |                    |
| SNP_106417_A_14743 | NW_004517569.1 | scaffold2692 | 14743                   | CC                              | TT                 | TT               | INTERGENIC      |               |                    |                    |
| SNP_106419_A_14900 | NW_004517569.1 | scaffold2692 | 14900                   | TT                              | GG                 | GG               | INTERGENIC      |               |                    |                    |
| SNP_106420_A_14906 | NW_004517569.1 | scaffold2692 | 14906                   | AA                              | TT                 | TT               | INTERGENIC      |               |                    |                    |
| SNP_106421_A_15088 | NW_004517569.1 | scaffold2692 | 15088                   | AA                              | TT                 | TT               | INTERGENIC      |               |                    |                    |
| SNP_106422_A_65    | NW_004517571.1 | scaffold2695 | 65                      | TT                              | AA                 | AA               | INTERGENIC      |               |                    |                    |
| SNP_106423_A_386   | NW_004517571.1 | scaffold2695 | 386                     | TT                              | GG                 | GG               | INTERGENIC      |               |                    |                    |
| SNP_106424_A_7440  | NW_004517571.1 | scaffold2695 | 7440                    | GG                              | AA                 | AA               | INTERGENIC      |               |                    |                    |
| SNP_106425_A_7451  | NW_004517571.1 | scaffold2695 | 7451                    | GG                              | TT                 | TT               | INTERGENIC      |               |                    |                    |
| SNP_106426_A_7512  | NW_004517571.1 | scaffold2695 | 7512                    | AA                              | GG                 | GG               | INTERGENIC      |               |                    |                    |
| SNP_106427_A_7672  | NW_004517571.1 | scaffold2695 | 7672                    | TT                              | CC                 | CC               | INTERGENIC      |               |                    |                    |
| SNP_106428_A_7984  | NW_004517571.1 | scaffold2695 | 7984                    | GG                              | CC                 | CC               | INTERGENIC      |               |                    |                    |
| SNP_106429_A_7995  | NW_004517571.1 | scaffold2695 | 7995                    | TT                              | GG                 | GG               | INTERGENIC      |               |                    |                    |
| SNP_106430_A_8003  | NW_004517571.1 | scaffold2695 | 8003                    | AA                              | GG                 | GG               | INTERGENIC      |               |                    |                    |

| SNPs IDs           | Chromosome IDs | Chromosomes  | Physical positions (bp) | CDC Frontier (Reference genome) | (Pusa 1103 & HPNB) | (ILWC 46 & LPNB) | Sequence Components of genome | Gene accession IDs | Putative functions |
|--------------------|----------------|--------------|-------------------------|---------------------------------|--------------------|------------------|-------------------------------|--------------------|--------------------|
| SNP_106431_A_12404 | NW_004517571.1 | scaffold2695 | 12404                   | TT                              | AA                 | AA               | INTERGENIC                    |                    |                    |
| SNP_106432_A_4034  | NW_004517575.1 | scaffold2700 | 4034                    | CC                              | TT                 | TT               | URR                           | 101502649          | Unknown function   |
| SNP_106433_A_4183  | NW_004517575.1 | scaffold2700 | 4183                    | CC                              | AA                 | AA               | URR                           | 101502649          | Unknown function   |
| SNP_106434_A_10303 | NW_004517575.1 | scaffold2700 | 10303                   | GG                              | AA                 | AA               | INTERGENIC                    |                    |                    |
| SNP_106435_A_10348 | NW_004517575.1 | scaffold2700 | 10348                   | AA                              | GG                 | GG               | INTERGENIC                    |                    |                    |
| SNP_106436_A_10606 | NW_004517575.1 | scaffold2700 | 10606                   | GG                              | TT                 | TT               | INTERGENIC                    |                    |                    |
| SNP_106437_A_10622 | NW_004517575.1 | scaffold2700 | 10622                   | GG                              | AA                 | AA               | INTERGENIC                    |                    |                    |
| SNP_106438_A_10642 | NW_004517575.1 | scaffold2700 | 10642                   | TT                              | CC                 | CC               | INTERGENIC                    |                    |                    |
| SNP_106439_A_10649 | NW_004517575.1 | scaffold2700 | 10649                   | TT                              | GG                 | GG               | INTERGENIC                    |                    |                    |
| SNP_106440_A_11067 | NW_004517575.1 | scaffold2700 | 11067                   | AA                              | CC                 | CC               | INTERGENIC                    |                    |                    |
| SNP_106441_A_749   | NW_004517577.1 | scaffold2703 | 749                     | CC                              | TT                 | TT               | INTERGENIC                    |                    |                    |
| SNP_106442_A_335   | NW_004517578.1 | scaffold2705 | 335                     | CC                              | AA                 | AA               | INTERGENIC                    |                    |                    |
| SNP_106443_A_409   | NW_004517578.1 | scaffold2705 | 409                     | TT                              | AA                 | AA               | INTERGENIC                    |                    |                    |
| SNP_106444_A_436   | NW_004517578.1 | scaffold2705 | 436                     | CC                              | AA                 | AA               | INTERGENIC                    |                    |                    |
| SNP_106445_A_459   | NW_004517578.1 | scaffold2705 | 459                     | GG                              | CC                 | CC               | INTERGENIC                    |                    |                    |
| SNP_106446_A_519   | NW_004517578.1 | scaffold2705 | 519                     | AA                              | GG                 | GG               | INTERGENIC                    |                    |                    |
| SNP_106447_A_566   | NW_004517578.1 | scaffold2705 | 566                     | GG                              | TT                 | TT               | INTERGENIC                    |                    |                    |
| SNP_106448_A_653   | NW_004517578.1 | scaffold2705 | 653                     | AA                              | GG                 | GG               | INTERGENIC                    |                    |                    |
| SNP_106449_A_738   | NW_004517578.1 | scaffold2705 | 738                     | AA                              | GG                 | GG               | INTERGENIC                    |                    |                    |
| SNP_106450_A_799   | NW_004517578.1 | scaffold2705 | 799                     | CC                              | GG                 | GG               | INTERGENIC                    |                    |                    |
| SNP_106451_A_920   | NW_004517578.1 | scaffold2705 | 920                     | TT                              | CC                 | CC               | INTERGENIC                    |                    |                    |
| SNP_106452_A_1158  | NW_004517578.1 | scaffold2705 | 1158                    | AA                              | TT                 | TT               | INTERGENIC                    |                    |                    |

| SNPs IDs           | Chromosome IDs | Chromosomes  | Physical positions (bp) | CDC Frontier (Reference genome) | (Pusa 1103 & HPNB) | (ILWC 46 & LPNB) | Sequence genome | Components of | Gene accession IDs | Putative functions |
|--------------------|----------------|--------------|-------------------------|---------------------------------|--------------------|------------------|-----------------|---------------|--------------------|--------------------|
| SNP_106453_A_1160  | NW_004517578.1 | scaffold2705 | 1160                    | TT                              | CC                 | CC               | INTERGENIC      |               |                    |                    |
| SNP_106454_A_1179  | NW_004517578.1 | scaffold2705 | 1179                    | AA                              | CC                 | CC               | INTERGENIC      |               |                    |                    |
| SNP_106455_A_1376  | NW_004517578.1 | scaffold2705 | 1376                    | TT                              | CC                 | CC               | INTERGENIC      |               |                    |                    |
| SNP_106456_A_1599  | NW_004517578.1 | scaffold2705 | 1599                    | TT                              | AA                 | AA               | INTERGENIC      |               |                    |                    |
| SNP_106457_A_5603  | NW_004517579.1 | scaffold2706 | 5603                    | TT                              | CC                 | CC               | INTERGENIC      |               |                    |                    |
| SNP_106458_A_5934  | NW_004517579.1 | scaffold2706 | 5934                    | CC                              | TT                 | TT               | INTERGENIC      |               |                    |                    |
| SNP_106459_A_17749 | NW_004517580.1 | scaffold2707 | 17749                   | TT                              | CC                 | CC               | INTERGENIC      |               |                    |                    |
| SNP_106460_A_17784 | NW_004517580.1 | scaffold2707 | 17784                   | TT                              | CC                 | CC               | INTERGENIC      |               |                    |                    |
| SNP_106461_A_17785 | NW_004517580.1 | scaffold2707 | 17785                   | GG                              | AA                 | AA               | INTERGENIC      |               |                    |                    |
| SNP_106462_A_17810 | NW_004517580.1 | scaffold2707 | 17810                   | AA                              | GG                 | GG               | INTERGENIC      |               |                    |                    |
| SNP_106463_A_17836 | NW_004517580.1 | scaffold2707 | 17836                   | AA                              | TT                 | TT               | INTERGENIC      |               |                    |                    |
| SNP_106464_A_18549 | NW_004517580.1 | scaffold2707 | 18549                   | AA                              | GG                 | GG               | INTERGENIC      |               |                    |                    |
| SNP_106465_A_5083  | NW_004517581.1 | scaffold2709 | 5083                    | TT                              | CC                 | CC               | INTERGENIC      |               |                    |                    |
| SNP_106466_A_9149  | NW_004517581.1 | scaffold2709 | 9149                    | TT                              | AA                 | AA               | INTERGENIC      |               |                    |                    |
| SNP_106467_A_9538  | NW_004517581.1 | scaffold2709 | 9538                    | TT                              | CC                 | CC               | INTERGENIC      |               |                    |                    |
| SNP_106468_A_9564  | NW_004517581.1 | scaffold2709 | 9564                    | CC                              | AA                 | AA               | INTERGENIC      |               |                    |                    |
| SNP_106469_A_28794 | NW_004517581.1 | scaffold2709 | 28794                   | TT                              | AA                 | AA               | INTERGENIC      |               |                    |                    |
| SNP_106470_A_705   | NW_004517582.1 | scaffold2710 | 705                     | GG                              | TT                 | TT               | INTERGENIC      |               |                    |                    |
| SNP_106471_A_730   | NW_004517582.1 | scaffold2710 | 730                     | AA                              | GG                 | GG               | INTERGENIC      |               |                    |                    |
| SNP_106472_A_19072 | NW_004517582.1 | scaffold2710 | 19072                   | CC                              | TT                 | TT               | INTERGENIC      |               |                    |                    |
| SNP_106473_A_20451 | NW_004517583.1 | scaffold2711 | 20451                   | AA                              | GG                 | GG               | INTERGENIC      |               |                    |                    |
| SNP_106474_A_20469 | NW_004517583.1 | scaffold2711 | 20469                   | TT                              | CC                 | CC               | INTERGENIC      |               |                    |                    |

| SNPs IDs           | Chromosome IDs | Chromosomes  | Physical positions (bp) | CDC Frontier (Reference genome) | (Pusa 1103 & HPNB) | (ILWC 46 & LPNB) | Sequence genome | Components of | Gene accession IDs | Putative functions |
|--------------------|----------------|--------------|-------------------------|---------------------------------|--------------------|------------------|-----------------|---------------|--------------------|--------------------|
| SNP_106475_A_20496 | NW_004517583.1 | scaffold2711 | 20496                   | AA                              | TT                 | TT               | INTERGENIC      |               |                    |                    |
| SNP_106476_A_20510 | NW_004517583.1 | scaffold2711 | 20510                   | GG                              | AA                 | AA               | INTERGENIC      |               |                    |                    |
| SNP_106477_A_20525 | NW_004517583.1 | scaffold2711 | 20525                   | TT                              | CC                 | CC               | INTERGENIC      |               |                    |                    |
| SNP_106478_A_25581 | NW_004517586.1 | scaffold2715 | 25581                   | CC                              | TT                 | TT               | INTERGENIC      |               |                    |                    |
| SNP_106479_A_26162 | NW_004517586.1 | scaffold2715 | 26162                   | TT                              | CC                 | CC               | INTERGENIC      |               |                    |                    |
| SNP_106480_A_33874 | NW_004517586.1 | scaffold2715 | 33874                   | CC                              | GG                 | GG               | INTERGENIC      |               |                    |                    |
| SNP_106481_A_35644 | NW_004517586.1 | scaffold2715 | 35644                   | GG                              | AA                 | AA               | INTERGENIC      |               |                    |                    |
| SNP_106482_A_36678 | NW_004517586.1 | scaffold2715 | 36678                   | AA                              | GG                 | GG               | INTERGENIC      |               |                    |                    |
| SNP_106483_A_39965 | NW_004517586.1 | scaffold2715 | 39965                   | AA                              | TT                 | TT               | INTERGENIC      |               |                    |                    |
| SNP_106484_A_39984 | NW_004517586.1 | scaffold2715 | 39984                   | TT                              | CC                 | CC               | INTERGENIC      |               |                    |                    |
| SNP_106485_A_39997 | NW_004517586.1 | scaffold2715 | 39997                   | GG                              | AA                 | AA               | INTERGENIC      |               |                    |                    |
| SNP_106486_A_39998 | NW_004517586.1 | scaffold2715 | 39998                   | GG                              | AA                 | AA               | INTERGENIC      |               |                    |                    |
| SNP_106487_A_40007 | NW_004517586.1 | scaffold2715 | 40007                   | TT                              | CC                 | CC               | INTERGENIC      |               |                    |                    |
| SNP_106488_A_41791 | NW_004517586.1 | scaffold2715 | 41791                   | CC                              | TT                 | TT               | INTERGENIC      |               |                    |                    |
| SNP_106489_A_41800 | NW_004517586.1 | scaffold2715 | 41800                   | TT                              | GG                 | GG               | INTERGENIC      |               |                    |                    |
| SNP_106490_A_41832 | NW_004517586.1 | scaffold2715 | 41832                   | TT                              | AA                 | AA               | INTERGENIC      |               |                    |                    |
| SNP_106491_A_42208 | NW_004517586.1 | scaffold2715 | 42208                   | AA                              | GG                 | GG               | INTERGENIC      |               |                    |                    |
| SNP_106492_A_42305 | NW_004517586.1 | scaffold2715 | 42305                   | GG                              | AA                 | AA               | INTERGENIC      |               |                    |                    |
| SNP_106493_A_233   | NW_004517589.1 | scaffold2719 | 233                     | GG                              | CC                 | CC               | INTERGENIC      |               |                    |                    |
| SNP_106494_A_2494  | NW_004517590.1 | scaffold2720 | 2494                    | CC                              | TT                 | TT               | INTERGENIC      |               |                    |                    |
| SNP_106495_A_17548 | NW_004517590.1 | scaffold2720 | 17548                   | TT                              | CC                 | CC               | INTERGENIC      |               |                    |                    |
| SNP_106496_A_17686 | NW_004517590.1 | scaffold2720 | 17686                   | AA                              | TT                 | TT               | INTERGENIC      |               |                    |                    |

| SNPs IDs            | Chromosome IDs | Chromosomes  | Physical positions (bp) | CDC Frontier (Reference genome) | (Pusa 1103 & HPNB) | (ILWC 46 & LPNB) | Sequence genome | Components of | Gene accession IDs | Putative functions |
|---------------------|----------------|--------------|-------------------------|---------------------------------|--------------------|------------------|-----------------|---------------|--------------------|--------------------|
| SNP_106497_A_19268  | NW_004517590.1 | scaffold2720 | 19268                   | GG                              | TT                 | TT               | INTERGENIC      |               |                    |                    |
| SNP_106498_A_26424  | NW_004517590.1 | scaffold2720 | 26424                   | CC                              | TT                 | TT               | INTERGENIC      |               |                    |                    |
| SNP_106499_A_26603  | NW_004517590.1 | scaffold2720 | 26603                   | AA                              | CC                 | CC               | INTERGENIC      |               |                    |                    |
| SNP_106500_A_26698  | NW_004517590.1 | scaffold2720 | 26698                   | CC                              | AA                 | AA               | INTERGENIC      |               |                    |                    |
| SNP_106501_A_26700  | NW_004517590.1 | scaffold2720 | 26700                   | GG                              | AA                 | AA               | INTERGENIC      |               |                    |                    |
| SNP_106502_A_27349  | NW_004517590.1 | scaffold2720 | 27349                   | CC                              | TT                 | TT               | INTERGENIC      |               |                    |                    |
| SNP_106503_A_28326  | NW_004517590.1 | scaffold2720 | 28326                   | AA                              | TT                 | TT               | INTERGENIC      |               |                    |                    |
| SNP_106504_A_28595  | NW_004517590.1 | scaffold2720 | 28595                   | GG                              | TT                 | TT               | INTERGENIC      |               |                    |                    |
| SNP_106505_A_28647  | NW_004517590.1 | scaffold2720 | 28647                   | GG                              | CC                 | CC               | INTERGENIC      |               |                    |                    |
| SNP_106506_A_29026  | NW_004517590.1 | scaffold2720 | 29026                   | AA                              | GG                 | GG               | INTERGENIC      |               |                    |                    |
| SNP_106507_A_80431  | NW_004517590.1 | scaffold2720 | 80431                   | TT                              | CC                 | CC               | INTERGENIC      |               |                    |                    |
| SNP_106508_A_80433  | NW_004517590.1 | scaffold2720 | 80433                   | AA                              | GG                 | GG               | INTERGENIC      |               |                    |                    |
| SNP_106509_A_120125 | NW_004517590.1 | scaffold2720 | 120125                  | TT                              | GG                 | GG               | INTERGENIC      |               |                    |                    |
| SNP_106510_A_120244 | NW_004517590.1 | scaffold2720 | 120244                  | CC                              | TT                 | TT               | INTERGENIC      |               |                    |                    |
| SNP_106511_A_120287 | NW_004517590.1 | scaffold2720 | 120287                  | TT                              | CC                 | CC               | INTERGENIC      |               |                    |                    |
| SNP_106512_A_123891 | NW_004517590.1 | scaffold2720 | 123891                  | CC                              | TT                 | TT               | INTERGENIC      |               |                    |                    |
| SNP_106513_A_125635 | NW_004517590.1 | scaffold2720 | 125635                  | TT                              | CC                 | CC               | INTERGENIC      |               |                    |                    |
| SNP_106514_A_125637 | NW_004517590.1 | scaffold2720 | 125637                  | AA                              | TT                 | TT               | INTERGENIC      |               |                    |                    |
| SNP_106515_A_126647 | NW_004517590.1 | scaffold2720 | 126647                  | TT                              | GG                 | GG               | INTERGENIC      |               |                    |                    |
| SNP_106516_A_126681 | NW_004517590.1 | scaffold2720 | 126681                  | TT                              | CC                 | CC               | INTERGENIC      |               |                    |                    |
| SNP_106517_A_126683 | NW_004517590.1 | scaffold2720 | 126683                  | AA                              | CC                 | CC               | INTERGENIC      |               |                    |                    |
| SNP_106518_A_127026 | NW_004517590.1 | scaffold2720 | 127026                  | TT                              | CC                 | CC               | INTERGENIC      |               |                    |                    |

| SNPs IDs            | Chromosome IDs | Chromosomes  | Physical positions (bp) | CDC Frontier (Reference genome) | (Pusa 1103 & HPNB) | (ILWC 46 & LPNB) | Sequence genome | Components of | Gene accession IDs | Putative functions |
|---------------------|----------------|--------------|-------------------------|---------------------------------|--------------------|------------------|-----------------|---------------|--------------------|--------------------|
| SNP_106519_A_127128 | NW_004517590.1 | scaffold2720 | 127128                  | TT                              | CC                 | CC               | INTERGENIC      |               |                    |                    |
| SNP_106520_A_131739 | NW_004517590.1 | scaffold2720 | 131739                  | CC                              | TT                 | TT               | INTERGENIC      |               |                    |                    |
| SNP_106521_A_131882 | NW_004517590.1 | scaffold2720 | 131882                  | AA                              | GG                 | GG               | INTERGENIC      |               |                    |                    |
| SNP_106522_A_131951 | NW_004517590.1 | scaffold2720 | 131951                  | AA                              | GG                 | GG               | INTERGENIC      |               |                    |                    |
| SNP_106523_A_132007 | NW_004517590.1 | scaffold2720 | 132007                  | AA                              | GG                 | GG               | INTERGENIC      |               |                    |                    |
| SNP_106524_A_132021 | NW_004517590.1 | scaffold2720 | 132021                  | CC                              | GG                 | GG               | INTERGENIC      |               |                    |                    |
| SNP_106525_A_132032 | NW_004517590.1 | scaffold2720 | 132032                  | CC                              | TT                 | TT               | INTERGENIC      |               |                    |                    |
| SNP_106526_A_132062 | NW_004517590.1 | scaffold2720 | 132062                  | TT                              | CC                 | CC               | INTERGENIC      |               |                    |                    |
| SNP_106527_A_132111 | NW_004517590.1 | scaffold2720 | 132111                  | AA                              | GG                 | GG               | INTERGENIC      |               |                    |                    |
| SNP_106528_A_174053 | NW_004517590.1 | scaffold2720 | 174053                  | AA                              | CC                 | CC               | INTERGENIC      |               |                    |                    |
| SNP_106529_A_174285 | NW_004517590.1 | scaffold2720 | 174285                  | CC                              | TT                 | TT               | INTERGENIC      |               |                    |                    |
| SNP_106530_A_174293 | NW_004517590.1 | scaffold2720 | 174293                  | GG                              | AA                 | AA               | INTERGENIC      |               |                    |                    |
| SNP_106531_A_174297 | NW_004517590.1 | scaffold2720 | 174297                  | AA                              | GG                 | GG               | INTERGENIC      |               |                    |                    |
| SNP_106532_A_174419 | NW_004517590.1 | scaffold2720 | 174419                  | TT                              | CC                 | CC               | INTERGENIC      |               |                    |                    |
| SNP_106533_A_174485 | NW_004517590.1 | scaffold2720 | 174485                  | AA                              | GG                 | GG               | INTERGENIC      |               |                    |                    |
| SNP_106534_A_176082 | NW_004517590.1 | scaffold2720 | 176082                  | GG                              | AA                 | AA               | INTERGENIC      |               |                    |                    |
| SNP_106535_A_182820 | NW_004517590.1 | scaffold2720 | 182820                  | GG                              | CC                 | CC               | INTERGENIC      |               |                    |                    |
| SNP_106536_A_182827 | NW_004517590.1 | scaffold2720 | 182827                  | TT                              | CC                 | CC               | INTERGENIC      |               |                    |                    |
| SNP_106537_A_182884 | NW_004517590.1 | scaffold2720 | 182884                  | TT                              | CC                 | CC               | INTERGENIC      |               |                    |                    |
| SNP_106538_A_182906 | NW_004517590.1 | scaffold2720 | 182906                  | AA                              | GG                 | GG               | INTERGENIC      |               |                    |                    |
| SNP_106539_A_182931 | NW_004517590.1 | scaffold2720 | 182931                  | AA                              | GG                 | GG               | INTERGENIC      |               |                    |                    |
| SNP_106540_A_182952 | NW_004517590.1 | scaffold2720 | 182952                  | AA                              | GG                 | GG               | INTERGENIC      |               |                    |                    |



| SNPs IDs            | Chromosome IDs | Chromosomes  | Physical positions (bp) | CDC Frontier (Reference genome) | (Pusa 1103 & HPNB) | (ILWC 46 & LPNB) | Sequence genome | Components of | Gene accession IDs | Putative functions |
|---------------------|----------------|--------------|-------------------------|---------------------------------|--------------------|------------------|-----------------|---------------|--------------------|--------------------|
| SNP_106541_A_182966 | NW_004517590.1 | scaffold2720 | 182966                  | TT                              | CC                 | CC               | INTERGENIC      |               |                    |                    |
| SNP_106542_A_183280 | NW_004517590.1 | scaffold2720 | 183280                  | TT                              | CC                 | CC               | INTERGENIC      |               |                    |                    |
| SNP_106543_A_223949 | NW_004517590.1 | scaffold2720 | 223949                  | CC                              | TT                 | TT               | INTERGENIC      |               |                    |                    |
| SNP_106544_A_223974 | NW_004517590.1 | scaffold2720 | 223974                  | CC                              | AA                 | AA               | INTERGENIC      |               |                    |                    |
| SNP_106545_A_224015 | NW_004517590.1 | scaffold2720 | 224015                  | CC                              | TT                 | TT               | INTERGENIC      |               |                    |                    |
| SNP_106546_A_224257 | NW_004517590.1 | scaffold2720 | 224257                  | TT                              | CC                 | CC               | INTERGENIC      |               |                    |                    |
| SNP_106547_A_224444 | NW_004517590.1 | scaffold2720 | 224444                  | AA                              | GG                 | GG               | INTERGENIC      |               |                    |                    |
| SNP_106548_A_224456 | NW_004517590.1 | scaffold2720 | 224456                  | AA                              | TT                 | TT               | INTERGENIC      |               |                    |                    |
| SNP_106549_A_740    | NW_004517591.1 | scaffold2722 | 740                     | AA                              | GG                 | GG               | INTERGENIC      |               |                    |                    |
| SNP_106550_A_752    | NW_004517591.1 | scaffold2722 | 752                     | TT                              | CC                 | CC               | INTERGENIC      |               |                    |                    |
| SNP_106551_A_754    | NW_004517591.1 | scaffold2722 | 754                     | GG                              | AA                 | AA               | INTERGENIC      |               |                    |                    |
| SNP_106552_A_759    | NW_004517591.1 | scaffold2722 | 759                     | GG                              | AA                 | AA               | INTERGENIC      |               |                    |                    |
| SNP_106553_A_790    | NW_004517591.1 | scaffold2722 | 790                     | GG                              | CC                 | CC               | INTERGENIC      |               |                    |                    |
| SNP_106554_A_804    | NW_004517591.1 | scaffold2722 | 804                     | GG                              | TT                 | TT               | INTERGENIC      |               |                    |                    |
| SNP_106555_A_951    | NW_004517591.1 | scaffold2722 | 951                     | AA                              | GG                 | GG               | INTERGENIC      |               |                    |                    |
| SNP_106556_A_1949   | NW_004517591.1 | scaffold2722 | 1949                    | CC                              | AA                 | AA               | INTERGENIC      |               |                    |                    |
| SNP_106557_A_18165  | NW_004517591.1 | scaffold2722 | 18165                   | CC                              | AA                 | AA               | INTERGENIC      |               |                    |                    |
| SNP_106558_A_27153  | NW_004517591.1 | scaffold2722 | 27153                   | TT                              | AA                 | AA               | INTERGENIC      |               |                    |                    |
| SNP_106559_A_27154  | NW_004517591.1 | scaffold2722 | 27154                   | CC                              | AA                 | AA               | INTERGENIC      |               |                    |                    |
| SNP_106560_A_52676  | NW_004517591.1 | scaffold2722 | 52676                   | AA                              | TT                 | TT               | INTERGENIC      |               |                    |                    |
| SNP_106562_A_77478  | NW_004517591.1 | scaffold2722 | 77478                   | CC                              | AA                 | AA               | INTERGENIC      |               |                    |                    |
| SNP_106564_A_18853  | NW_004517592.1 | scaffold2724 | 18853                   | GG                              | CC                 | CC               | INTERGENIC      |               |                    |                    |

| SNPs IDs          | Chromosome IDs | Chromosomes  | Physical positions (bp) | CDC Frontier (Reference genome) | (Pusa 1103 & HPNB) | (ILWC 46 & LPNB) | Sequence genome | Components of | Gene accession IDs | Putative functions |
|-------------------|----------------|--------------|-------------------------|---------------------------------|--------------------|------------------|-----------------|---------------|--------------------|--------------------|
| SNP_106565_A_1033 | NW_004517593.1 | scaffold2725 | 1033                    | TT                              | CC                 | CC               | INTERGENIC      |               |                    |                    |
| SNP_106566_A_3015 | NW_004517593.1 | scaffold2725 | 3015                    | GG                              | AA                 | AA               | INTERGENIC      |               |                    |                    |
| SNP_106567_A_3043 | NW_004517593.1 | scaffold2725 | 3043                    | AA                              | GG                 | GG               | INTERGENIC      |               |                    |                    |
| SNP_106568_A_3069 | NW_004517593.1 | scaffold2725 | 3069                    | TT                              | GG                 | GG               | INTERGENIC      |               |                    |                    |
| SNP_106569_A_3115 | NW_004517593.1 | scaffold2725 | 3115                    | GG                              | AA                 | AA               | INTERGENIC      |               |                    |                    |
| SNP_106570_A_3601 | NW_004517593.1 | scaffold2725 | 3601                    | AA                              | TT                 | TT               | INTERGENIC      |               |                    |                    |
| SNP_106571_A_3603 | NW_004517593.1 | scaffold2725 | 3603                    | AA                              | GG                 | GG               | INTERGENIC      |               |                    |                    |
| SNP_106572_A_3269 | NW_004517594.1 | scaffold2726 | 3269                    | TT                              | GG                 | GG               | INTERGENIC      |               |                    |                    |
| SNP_106573_A_3276 | NW_004517594.1 | scaffold2726 | 3276                    | AA                              | CC                 | CC               | INTERGENIC      |               |                    |                    |
| SNP_106574_A_4389 | NW_004517594.1 | scaffold2726 | 4389                    | CC                              | AA                 | AA               | INTERGENIC      |               |                    |                    |
| SNP_106576_A_1509 | NW_004517595.1 | scaffold2727 | 1509                    | TT                              | CC                 | CC               | INTERGENIC      |               |                    |                    |
| SNP_106577_A_1720 | NW_004517595.1 | scaffold2727 | 1720                    | CC                              | GG                 | GG               | INTERGENIC      |               |                    |                    |
| SNP_106578_A_1760 | NW_004517595.1 | scaffold2727 | 1760                    | AA                              | GG                 | GG               | INTERGENIC      |               |                    |                    |
| SNP_106579_A_1819 | NW_004517595.1 | scaffold2727 | 1819                    | GG                              | AA                 | AA               | INTERGENIC      |               |                    |                    |
| SNP_106580_A_902  | NW_004517596.1 | scaffold2728 | 902                     | AA                              | GG                 | GG               | INTERGENIC      |               |                    |                    |
| SNP_106581_A_920  | NW_004517596.1 | scaffold2728 | 920                     | TT                              | GG                 | GG               | INTERGENIC      |               |                    |                    |
| SNP_106582_A_966  | NW_004517596.1 | scaffold2728 | 966                     | AA                              | CC                 | CC               | INTERGENIC      |               |                    |                    |
| SNP_106583_A_935  | NW_004517597.1 | scaffold2729 | 935                     | TT                              | GG                 | GG               | INTERGENIC      |               |                    |                    |
| SNP_106585_A_1285 | NW_004517597.1 | scaffold2729 | 1285                    | AA                              | GG                 | GG               | INTERGENIC      |               |                    |                    |
| SNP_106586_A_1313 | NW_004517597.1 | scaffold2729 | 1313                    | TT                              | CC                 | CC               | INTERGENIC      |               |                    |                    |
| SNP_106587_A_3233 | NW_004517597.1 | scaffold2729 | 3233                    | TT                              | CC                 | CC               | INTERGENIC      |               |                    |                    |
| SNP_106588_A_3286 | NW_004517597.1 | scaffold2729 | 3286                    | CC                              | TT                 | TT               | INTERGENIC      |               |                    |                    |

| SNPs IDs           | Chromosome IDs | Chromosomes  | Physical positions (bp) | CDC Frontier (Reference genome) | (Pusa 1103 & HPNB) | (ILWC 46 & LPNB) | Sequence genome | Components of | Gene accession IDs | Putative functions |
|--------------------|----------------|--------------|-------------------------|---------------------------------|--------------------|------------------|-----------------|---------------|--------------------|--------------------|
| SNP_106589_A_3306  | NW_004517597.1 | scaffold2729 | 3306                    | CC                              | AA                 | AA               | INTERGENIC      |               |                    |                    |
| SNP_106591_A_5820  | NW_004517597.1 | scaffold2729 | 5820                    | GG                              | AA                 | AA               | INTERGENIC      |               |                    |                    |
| SNP_106592_A_5831  | NW_004517597.1 | scaffold2729 | 5831                    | GG                              | AA                 | AA               | INTERGENIC      |               |                    |                    |
| SNP_106593_A_5848  | NW_004517597.1 | scaffold2729 | 5848                    | TT                              | CC                 | CC               | INTERGENIC      |               |                    |                    |
| SNP_106594_A_5850  | NW_004517597.1 | scaffold2729 | 5850                    | GG                              | AA                 | AA               | INTERGENIC      |               |                    |                    |
| SNP_106595_A_5861  | NW_004517597.1 | scaffold2729 | 5861                    | CC                              | TT                 | TT               | INTERGENIC      |               |                    |                    |
| SNP_106597_A_5927  | NW_004517597.1 | scaffold2729 | 5927                    | GG                              | AA                 | AA               | INTERGENIC      |               |                    |                    |
| SNP_106598_A_5946  | NW_004517597.1 | scaffold2729 | 5946                    | GG                              | AA                 | AA               | INTERGENIC      |               |                    |                    |
| SNP_106599_A_5961  | NW_004517597.1 | scaffold2729 | 5961                    | TT                              | CC                 | CC               | INTERGENIC      |               |                    |                    |
| SNP_106600_A_6531  | NW_004517597.1 | scaffold2729 | 6531                    | AA                              | GG                 | GG               | INTERGENIC      |               |                    |                    |
| SNP_106601_A_6836  | NW_004517597.1 | scaffold2729 | 6836                    | AA                              | GG                 | GG               | INTERGENIC      |               |                    |                    |
| SNP_106602_A_6838  | NW_004517597.1 | scaffold2729 | 6838                    | CC                              | TT                 | TT               | INTERGENIC      |               |                    |                    |
| SNP_106603_A_6855  | NW_004517597.1 | scaffold2729 | 6855                    | TT                              | GG                 | GG               | INTERGENIC      |               |                    |                    |
| SNP_106604_A_6905  | NW_004517597.1 | scaffold2729 | 6905                    | GG                              | AA                 | AA               | INTERGENIC      |               |                    |                    |
| SNP_106606_A_6936  | NW_004517597.1 | scaffold2729 | 6936                    | GG                              | AA                 | AA               | INTERGENIC      |               |                    |                    |
| SNP_106607_A_6973  | NW_004517597.1 | scaffold2729 | 6973                    | CC                              | GG                 | GG               | INTERGENIC      |               |                    |                    |
| SNP_106608_A_6987  | NW_004517597.1 | scaffold2729 | 6987                    | GG                              | AA                 | AA               | INTERGENIC      |               |                    |                    |
| SNP_106609_A_6988  | NW_004517597.1 | scaffold2729 | 6988                    | CC                              | TT                 | TT               | INTERGENIC      |               |                    |                    |
| SNP_106610_A_7911  | NW_004517597.1 | scaffold2729 | 7911                    | TT                              | CC                 | CC               | INTERGENIC      |               |                    |                    |
| SNP_106611_A_8646  | NW_004517597.1 | scaffold2729 | 8646                    | TT                              | AA                 | AA               | INTERGENIC      |               |                    |                    |
| SNP_106612_A_12143 | NW_004517597.1 | scaffold2729 | 12143                   | TT                              | AA                 | AA               | INTERGENIC      |               |                    |                    |
| SNP_106613_A_12146 | NW_004517597.1 | scaffold2729 | 12146                   | TT                              | CC                 | CC               | INTERGENIC      |               |                    |                    |

| SNPs IDs            | Chromosome IDs | Chromosomes  | Physical positions (bp) | CDC Frontier (Reference genome) | (Pusa 1103 & HPNB) | (ILWC 46 & LPNB) | Sequence genome | Components of | Gene accession IDs | Putative functions |
|---------------------|----------------|--------------|-------------------------|---------------------------------|--------------------|------------------|-----------------|---------------|--------------------|--------------------|
| SNP_106614_A_326    | NW_004517601.1 | scaffold2734 | 326                     | CC                              | AA                 | AA               | INTERGENIC      |               |                    |                    |
| SNP_106615_A_415    | NW_004517601.1 | scaffold2734 | 415                     | CC                              | GG                 | GG               | INTERGENIC      |               |                    |                    |
| SNP_106616_A_428    | NW_004517601.1 | scaffold2734 | 428                     | AA                              | TT                 | TT               | INTERGENIC      |               |                    |                    |
| SNP_106617_A_508    | NW_004517601.1 | scaffold2734 | 508                     | AA                              | GG                 | GG               | INTERGENIC      |               |                    |                    |
| SNP_106619_A_657    | NW_004517601.1 | scaffold2734 | 657                     | TT                              | GG                 | GG               | INTERGENIC      |               |                    |                    |
| SNP_106620_A_716    | NW_004517601.1 | scaffold2734 | 716                     | CC                              | TT                 | TT               | INTERGENIC      |               |                    |                    |
| SNP_106621_A_722    | NW_004517601.1 | scaffold2734 | 722                     | AA                              | CC                 | CC               | INTERGENIC      |               |                    |                    |
| SNP_106622_A_771    | NW_004517601.1 | scaffold2734 | 771                     | TT                              | CC                 | CC               | INTERGENIC      |               |                    |                    |
| SNP_106623_A_1046   | NW_004517601.1 | scaffold2734 | 1046                    | TT                              | CC                 | CC               | INTERGENIC      |               |                    |                    |
| SNP_106624_A_1431   | NW_004517601.1 | scaffold2734 | 1431                    | AA                              | GG                 | GG               | INTERGENIC      |               |                    |                    |
| SNP_106625_A_1478   | NW_004517601.1 | scaffold2734 | 1478                    | AA                              | CC                 | CC               | INTERGENIC      |               |                    |                    |
| SNP_106626_A_1482   | NW_004517601.1 | scaffold2734 | 1482                    | TT                              | CC                 | CC               | INTERGENIC      |               |                    |                    |
| SNP_106627_A_1489   | NW_004517601.1 | scaffold2734 | 1489                    | CC                              | TT                 | TT               | INTERGENIC      |               |                    |                    |
| SNP_106628_A_16792  | NW_004517601.1 | scaffold2734 | 16792                   | CC                              | GG                 | GG               | INTERGENIC      |               |                    |                    |
| SNP_106629_A_16800  | NW_004517601.1 | scaffold2734 | 16800                   | GG                              | AA                 | AA               | INTERGENIC      |               |                    |                    |
| SNP_106630_A_98804  | NW_004517601.1 | scaffold2734 | 98804                   | AA                              | GG                 | GG               | INTERGENIC      |               |                    |                    |
| SNP_106631_A_106719 | NW_004517601.1 | scaffold2734 | 106719                  | GG                              | AA                 | AA               | INTERGENIC      |               |                    |                    |
| SNP_106632_A_3058   | NW_004517602.1 | scaffold2736 | 3058                    | GG                              | CC                 | CC               | INTERGENIC      |               |                    |                    |
| SNP_106633_A_3205   | NW_004517602.1 | scaffold2736 | 3205                    | GG                              | AA                 | AA               | INTERGENIC      |               |                    |                    |
| SNP_106634_A_3336   | NW_004517602.1 | scaffold2736 | 3336                    | AA                              | GG                 | GG               | INTERGENIC      |               |                    |                    |
| SNP_106636_A_3424   | NW_004517602.1 | scaffold2736 | 3424                    | TT                              | GG                 | GG               | INTERGENIC      |               |                    |                    |
| SNP_106638_A_3645   | NW_004517602.1 | scaffold2736 | 3645                    | AA                              | GG                 | GG               | INTERGENIC      |               |                    |                    |

| SNPs IDs          | Chromosome IDs | Chromosomes  | Physical positions (bp) | CDC Frontier (Reference genome) | (Pusa 1103 & HPNB) | (ILWC 46 & LPNB) | Sequence genome | Components of | Gene accession IDs | Putative functions |
|-------------------|----------------|--------------|-------------------------|---------------------------------|--------------------|------------------|-----------------|---------------|--------------------|--------------------|
| SNP_106639_A_3659 | NW_004517602.1 | scaffold2736 | 3659                    | AA                              | GG                 | GG               | INTERGENIC      |               |                    |                    |
| SNP_106640_A_3808 | NW_004517602.1 | scaffold2736 | 3808                    | TT                              | GG                 | GG               | INTERGENIC      |               |                    |                    |
| SNP_106641_A_3817 | NW_004517602.1 | scaffold2736 | 3817                    | GG                              | TT                 | TT               | INTERGENIC      |               |                    |                    |
| SNP_106642_A_4146 | NW_004517602.1 | scaffold2736 | 4146                    | GG                              | AA                 | AA               | INTERGENIC      |               |                    |                    |
| SNP_106643_A_4193 | NW_004517602.1 | scaffold2736 | 4193                    | CC                              | TT                 | TT               | INTERGENIC      |               |                    |                    |
| SNP_106644_A_4287 | NW_004517602.1 | scaffold2736 | 4287                    | TT                              | CC                 | CC               | INTERGENIC      |               |                    |                    |
| SNP_106645_A_4298 | NW_004517602.1 | scaffold2736 | 4298                    | CC                              | TT                 | TT               | INTERGENIC      |               |                    |                    |
| SNP_106646_A_4512 | NW_004517602.1 | scaffold2736 | 4512                    | CC                              | AA                 | AA               | INTERGENIC      |               |                    |                    |
| SNP_106647_A_4541 | NW_004517602.1 | scaffold2736 | 4541                    | TT                              | CC                 | CC               | INTERGENIC      |               |                    |                    |
| SNP_106648_A_2654 | NW_004517603.1 | scaffold2737 | 2654                    | CC                              | AA                 | AA               | INTERGENIC      |               |                    |                    |
| SNP_106649_A_3641 | NW_004517603.1 | scaffold2737 | 3641                    | AA                              | GG                 | GG               | INTERGENIC      |               |                    |                    |
| SNP_106650_A_3642 | NW_004517603.1 | scaffold2737 | 3642                    | GG                              | AA                 | AA               | INTERGENIC      |               |                    |                    |
| SNP_106651_A_3685 | NW_004517603.1 | scaffold2737 | 3685                    | TT                              | GG                 | GG               | INTERGENIC      |               |                    |                    |
| SNP_106652_A_3913 | NW_004517603.1 | scaffold2737 | 3913                    | AA                              | GG                 | GG               | INTERGENIC      |               |                    |                    |
| SNP_106653_A_4167 | NW_004517603.1 | scaffold2737 | 4167                    | TT                              | AA                 | AA               | INTERGENIC      |               |                    |                    |
| SNP_106654_A_9085 | NW_004517603.1 | scaffold2737 | 9085                    | TT                              | AA                 | AA               | INTERGENIC      |               |                    |                    |
| SNP_106655_A_9342 | NW_004517603.1 | scaffold2737 | 9342                    | TT                              | AA                 | AA               | INTERGENIC      |               |                    |                    |
| SNP_106656_A_9361 | NW_004517603.1 | scaffold2737 | 9361                    | AA                              | CC                 | CC               | INTERGENIC      |               |                    |                    |
| SNP_106658_A_9544 | NW_004517603.1 | scaffold2737 | 9544                    | GG                              | AA                 | AA               | INTERGENIC      |               |                    |                    |
| SNP_106659_A_9636 | NW_004517603.1 | scaffold2737 | 9636                    | AA                              | TT                 | TT               | INTERGENIC      |               |                    |                    |
| SNP_106660_A_2448 | NW_004517604.1 | scaffold2738 | 2448                    | AA                              | GG                 | GG               | INTERGENIC      |               |                    |                    |
| SNP_106661_A_2463 | NW_004517604.1 | scaffold2738 | 2463                    | GG                              | AA                 | AA               | INTERGENIC      |               |                    |                    |

| SNPs IDs           | Chromosome IDs | Chromosomes  | Physical positions (bp) | CDC Frontier (Reference genome) | (Pusa 1103 & HPNB) | (ILWC 46 & LPNB) | Sequence genome | Components of | Gene accession IDs | Putative functions |
|--------------------|----------------|--------------|-------------------------|---------------------------------|--------------------|------------------|-----------------|---------------|--------------------|--------------------|
| SNP_106662_A_3979  | NW_004517604.1 | scaffold2738 | 3979                    | AA                              | TT                 | TT               | INTERGENIC      |               |                    |                    |
| SNP_106664_A_7951  | NW_004517604.1 | scaffold2738 | 7951                    | CC                              | TT                 | TT               | INTERGENIC      |               |                    |                    |
| SNP_106665_A_7963  | NW_004517604.1 | scaffold2738 | 7963                    | TT                              | CC                 | CC               | INTERGENIC      |               |                    |                    |
| SNP_106666_A_9412  | NW_004517604.1 | scaffold2738 | 9412                    | TT                              | AA                 | AA               | INTERGENIC      |               |                    |                    |
| SNP_106667_A_10067 | NW_004517604.1 | scaffold2738 | 10067                   | AA                              | CC                 | CC               | INTERGENIC      |               |                    |                    |
| SNP_106668_A_10126 | NW_004517604.1 | scaffold2738 | 10126                   | GG                              | AA                 | AA               | INTERGENIC      |               |                    |                    |
| SNP_106669_A_10165 | NW_004517604.1 | scaffold2738 | 10165                   | TT                              | CC                 | CC               | INTERGENIC      |               |                    |                    |
| SNP_106670_A_10556 | NW_004517604.1 | scaffold2738 | 10556                   | CC                              | TT                 | TT               | INTERGENIC      |               |                    |                    |
| SNP_106671_A_10598 | NW_004517604.1 | scaffold2738 | 10598                   | GG                              | CC                 | CC               | INTERGENIC      |               |                    |                    |
| SNP_106672_A_10601 | NW_004517604.1 | scaffold2738 | 10601                   | AA                              | TT                 | TT               | INTERGENIC      |               |                    |                    |
| SNP_106673_A_12098 | NW_004517604.1 | scaffold2738 | 12098                   | AA                              | GG                 | GG               | INTERGENIC      |               |                    |                    |
| SNP_106674_A_12228 | NW_004517604.1 | scaffold2738 | 12228                   | GG                              | AA                 | AA               | INTERGENIC      |               |                    |                    |
| SNP_106675_A_12413 | NW_004517604.1 | scaffold2738 | 12413                   | CC                              | GG                 | GG               | INTERGENIC      |               |                    |                    |
| SNP_106677_A_27466 | NW_004517604.1 | scaffold2738 | 27466                   | TT                              | CC                 | CC               | INTERGENIC      |               |                    |                    |
| SNP_106678_A_27485 | NW_004517604.1 | scaffold2738 | 27485                   | GG                              | TT                 | TT               | INTERGENIC      |               |                    |                    |
| SNP_106680_A_28445 | NW_004517604.1 | scaffold2738 | 28445                   | AA                              | GG                 | GG               | INTERGENIC      |               |                    |                    |
| SNP_106681_A_28886 | NW_004517604.1 | scaffold2738 | 28886                   | GG                              | AA                 | AA               | INTERGENIC      |               |                    |                    |
| SNP_106682_A_29181 | NW_004517604.1 | scaffold2738 | 29181                   | GG                              | AA                 | AA               | INTERGENIC      |               |                    |                    |
| SNP_106683_A_29552 | NW_004517604.1 | scaffold2738 | 29552                   | CC                              | TT                 | TT               | INTERGENIC      |               |                    |                    |
| SNP_106684_A_29827 | NW_004517604.1 | scaffold2738 | 29827                   | AA                              | CC                 | CC               | INTERGENIC      |               |                    |                    |
| SNP_106685_A_29989 | NW_004517604.1 | scaffold2738 | 29989                   | GG                              | AA                 | AA               | INTERGENIC      |               |                    |                    |
| SNP_106686_A_30045 | NW_004517604.1 | scaffold2738 | 30045                   | TT                              | CC                 | CC               | INTERGENIC      |               |                    |                    |

| SNPs IDs           | Chromosome IDs | Chromosomes  | Physical positions (bp) | CDC Frontier (Reference genome) | (Pusa 1103 & HPNB) | (ILWC 46 & LPNB) | Sequence genome | Components of | Gene accession IDs | Putative functions |
|--------------------|----------------|--------------|-------------------------|---------------------------------|--------------------|------------------|-----------------|---------------|--------------------|--------------------|
| SNP_106687_A_30551 | NW_004517604.1 | scaffold2738 | 30551                   | GG                              | AA                 | AA               | INTERGENIC      |               |                    |                    |
| SNP_106688_A_31627 | NW_004517604.1 | scaffold2738 | 31627                   | TT                              | GG                 | GG               | INTERGENIC      |               |                    |                    |
| SNP_106689_A_31725 | NW_004517604.1 | scaffold2738 | 31725                   | TT                              | CC                 | CC               | INTERGENIC      |               |                    |                    |
| SNP_106690_A_31732 | NW_004517604.1 | scaffold2738 | 31732                   | AA                              | TT                 | TT               | INTERGENIC      |               |                    |                    |
| SNP_106691_A_31914 | NW_004517604.1 | scaffold2738 | 31914                   | AA                              | TT                 | TT               | INTERGENIC      |               |                    |                    |
| SNP_106692_A_32386 | NW_004517604.1 | scaffold2738 | 32386                   | AA                              | GG                 | GG               | INTERGENIC      |               |                    |                    |
| SNP_106693_A_32395 | NW_004517604.1 | scaffold2738 | 32395                   | CC                              | TT                 | TT               | INTERGENIC      |               |                    |                    |
| SNP_106694_A_20223 | NW_004517605.1 | scaffold2739 | 20223                   | GG                              | CC                 | CC               | INTERGENIC      |               |                    |                    |
| SNP_106695_A_20326 | NW_004517605.1 | scaffold2739 | 20326                   | CC                              | AA                 | AA               | INTERGENIC      |               |                    |                    |
| SNP_106696_A_20351 | NW_004517605.1 | scaffold2739 | 20351                   | CC                              | AA                 | AA               | INTERGENIC      |               |                    |                    |
| SNP_106697_A_20504 | NW_004517605.1 | scaffold2739 | 20504                   | TT                              | AA                 | AA               | INTERGENIC      |               |                    |                    |
| SNP_106698_A_20510 | NW_004517605.1 | scaffold2739 | 20510                   | CC                              | AA                 | AA               | INTERGENIC      |               |                    |                    |
| SNP_106699_A_21607 | NW_004517605.1 | scaffold2739 | 21607                   | TT                              | GG                 | GG               | INTERGENIC      |               |                    |                    |
| SNP_106700_A_4609  | NW_004517607.1 | scaffold2742 | 4609                    | GG                              | AA                 | AA               | INTERGENIC      |               |                    |                    |
| SNP_106701_A_17603 | NW_004517607.1 | scaffold2742 | 17603                   | TT                              | CC                 | CC               | INTERGENIC      |               |                    |                    |
| SNP_106702_A_17622 | NW_004517607.1 | scaffold2742 | 17622                   | AA                              | GG                 | GG               | INTERGENIC      |               |                    |                    |
| SNP_106703_A_17779 | NW_004517607.1 | scaffold2742 | 17779                   | TT                              | CC                 | CC               | INTERGENIC      |               |                    |                    |
| SNP_106704_A_1267  | NW_004517608.1 | scaffold2743 | 1267                    | TT                              | GG                 | GG               | INTERGENIC      |               |                    |                    |
| SNP_106705_A_1292  | NW_004517608.1 | scaffold2743 | 1292                    | AA                              | GG                 | GG               | INTERGENIC      |               |                    |                    |
| SNP_106706_A_3677  | NW_004517609.1 | scaffold2744 | 3677                    | GG                              | AA                 | AA               | INTERGENIC      |               |                    |                    |
| SNP_106707_A_3689  | NW_004517609.1 | scaffold2744 | 3689                    | TT                              | CC                 | CC               | INTERGENIC      |               |                    |                    |
| SNP_106708_A_3692  | NW_004517609.1 | scaffold2744 | 3692                    | CC                              | TT                 | TT               | INTERGENIC      |               |                    |                    |

| SNPs IDs           | Chromosome IDs | Chromosomes  | Physical positions (bp) | CDC Frontier (Reference genome) | (Pusa 1103 & HPNB) | (ILWC 46 & LPNB) | Sequence genome | Components of | Gene accession IDs | Putative functions |
|--------------------|----------------|--------------|-------------------------|---------------------------------|--------------------|------------------|-----------------|---------------|--------------------|--------------------|
| SNP_106709_A_3713  | NW_004517609.1 | scaffold2744 | 3713                    | CC                              | TT                 | TT               | INTERGENIC      |               |                    |                    |
| SNP_106710_A_10220 | NW_004517609.1 | scaffold2744 | 10220                   | TT                              | CC                 | CC               | INTERGENIC      |               |                    |                    |
| SNP_106711_A_28633 | NW_004517609.1 | scaffold2744 | 28633                   | CC                              | TT                 | TT               | INTERGENIC      |               |                    |                    |
| SNP_106713_A_31117 | NW_004517609.1 | scaffold2744 | 31117                   | GG                              | AA                 | AA               | INTERGENIC      |               |                    |                    |
| SNP_106714_A_31123 | NW_004517609.1 | scaffold2744 | 31123                   | CC                              | TT                 | TT               | INTERGENIC      |               |                    |                    |
| SNP_106715_A_31153 | NW_004517609.1 | scaffold2744 | 31153                   | TT                              | CC                 | CC               | INTERGENIC      |               |                    |                    |
| SNP_106716_A_31163 | NW_004517609.1 | scaffold2744 | 31163                   | TT                              | CC                 | CC               | INTERGENIC      |               |                    |                    |
| SNP_106717_A_31164 | NW_004517609.1 | scaffold2744 | 31164                   | TT                              | CC                 | CC               | INTERGENIC      |               |                    |                    |
| SNP_106718_A_31165 | NW_004517609.1 | scaffold2744 | 31165                   | TT                              | CC                 | CC               | INTERGENIC      |               |                    |                    |
| SNP_106719_A_31177 | NW_004517609.1 | scaffold2744 | 31177                   | AA                              | GG                 | GG               | INTERGENIC      |               |                    |                    |
| SNP_106720_A_31213 | NW_004517609.1 | scaffold2744 | 31213                   | TT                              | CC                 | CC               | INTERGENIC      |               |                    |                    |
| SNP_106721_A_31222 | NW_004517609.1 | scaffold2744 | 31222                   | CC                              | TT                 | TT               | INTERGENIC      |               |                    |                    |
| SNP_106722_A_31240 | NW_004517609.1 | scaffold2744 | 31240                   | AA                              | TT                 | TT               | INTERGENIC      |               |                    |                    |
| SNP_106723_A_31261 | NW_004517609.1 | scaffold2744 | 31261                   | AA                              | CC                 | CC               | INTERGENIC      |               |                    |                    |
| SNP_106724_A_42032 | NW_004517609.1 | scaffold2744 | 42032                   | CC                              | AA                 | AA               | INTERGENIC      |               |                    |                    |
| SNP_106725_A_42039 | NW_004517609.1 | scaffold2744 | 42039                   | CC                              | AA                 | AA               | INTERGENIC      |               |                    |                    |
| SNP_106726_A_42046 | NW_004517609.1 | scaffold2744 | 42046                   | CC                              | AA                 | AA               | INTERGENIC      |               |                    |                    |
| SNP_106727_A_42048 | NW_004517609.1 | scaffold2744 | 42048                   | CC                              | TT                 | TT               | INTERGENIC      |               |                    |                    |
| SNP_106728_A_42312 | NW_004517609.1 | scaffold2744 | 42312                   | CC                              | AA                 | AA               | INTERGENIC      |               |                    |                    |
| SNP_106729_A_47025 | NW_004517609.1 | scaffold2744 | 47025                   | TT                              | GG                 | GG               | INTERGENIC      |               |                    |                    |
| SNP_106730_A_47253 | NW_004517609.1 | scaffold2744 | 47253                   | TT                              | CC                 | CC               | INTERGENIC      |               |                    |                    |
| SNP_106731_A_48390 | NW_004517609.1 | scaffold2744 | 48390                   | CC                              | TT                 | TT               | INTERGENIC      |               |                    |                    |



| SNPs IDs           | Chromosome IDs | Chromosomes  | Physical positions (bp) | CDC Frontier genome (Reference genome) | (Pusa 1103 & HPNB) | (ILWC 46 & LPNB) | Sequence genome | Components of | Gene accession IDs | Putative functions |
|--------------------|----------------|--------------|-------------------------|----------------------------------------|--------------------|------------------|-----------------|---------------|--------------------|--------------------|
| SNP_106732_A_48732 | NW_004517609.1 | scaffold2744 | 48732                   | CC                                     | TT                 | TT               | INTERGENIC      |               |                    |                    |
| SNP_106733_A_48824 | NW_004517609.1 | scaffold2744 | 48824                   | GG                                     | AA                 | AA               | INTERGENIC      |               |                    |                    |
| SNP_106735_A_48866 | NW_004517609.1 | scaffold2744 | 48866                   | CC                                     | TT                 | TT               | INTERGENIC      |               |                    |                    |
| SNP_106736_A_49011 | NW_004517609.1 | scaffold2744 | 49011                   | AA                                     | CC                 | CC               | INTERGENIC      |               |                    |                    |
| SNP_106737_A_65703 | NW_004517609.1 | scaffold2744 | 65703                   | TT                                     | AA                 | AA               | INTERGENIC      |               |                    |                    |
| SNP_106738_A_87655 | NW_004517609.1 | scaffold2744 | 87655                   | TT                                     | CC                 | CC               | INTERGENIC      |               |                    |                    |
| SNP_106739_A_87703 | NW_004517609.1 | scaffold2744 | 87703                   | GG                                     | AA                 | AA               | INTERGENIC      |               |                    |                    |
| SNP_106740_A_87895 | NW_004517609.1 | scaffold2744 | 87895                   | GG                                     | AA                 | AA               | INTERGENIC      |               |                    |                    |
| SNP_106742_A_341   | NW_004517611.1 | scaffold2746 | 341                     | GG                                     | TT                 | TT               | INTERGENIC      |               |                    |                    |
| SNP_106743_A_353   | NW_004517611.1 | scaffold2746 | 353                     | CC                                     | GG                 | GG               | INTERGENIC      |               |                    |                    |
| SNP_106744_A_544   | NW_004517611.1 | scaffold2746 | 544                     | CC                                     | TT                 | TT               | INTERGENIC      |               |                    |                    |
| SNP_106745_A_711   | NW_004517613.1 | scaffold2748 | 711                     | AA                                     | GG                 | GG               | INTERGENIC      |               |                    |                    |
| SNP_106746_A_1227  | NW_004517613.1 | scaffold2748 | 1227                    | CC                                     | AA                 | AA               | INTERGENIC      |               |                    |                    |
| SNP_106747_A_1346  | NW_004517613.1 | scaffold2748 | 1346                    | TT                                     | AA                 | AA               | INTERGENIC      |               |                    |                    |
| SNP_106748_A_1349  | NW_004517613.1 | scaffold2748 | 1349                    | TT                                     | CC                 | CC               | INTERGENIC      |               |                    |                    |
| SNP_106749_A_1362  | NW_004517613.1 | scaffold2748 | 1362                    | GG                                     | AA                 | AA               | INTERGENIC      |               |                    |                    |
| SNP_106750_A_1367  | NW_004517613.1 | scaffold2748 | 1367                    | AA                                     | TT                 | TT               | INTERGENIC      |               |                    |                    |
| SNP_106751_A_1433  | NW_004517613.1 | scaffold2748 | 1433                    | TT                                     | CC                 | CC               | INTERGENIC      |               |                    |                    |
| SNP_106752_A_19864 | NW_004517613.1 | scaffold2748 | 19864                   | GG                                     | AA                 | AA               | INTERGENIC      |               |                    |                    |
| SNP_106753_A_19884 | NW_004517613.1 | scaffold2748 | 19884                   | GG                                     | CC                 | CC               | INTERGENIC      |               |                    |                    |
| SNP_106754_A_19985 | NW_004517613.1 | scaffold2748 | 19985                   | CC                                     | TT                 | TT               | INTERGENIC      |               |                    |                    |
| SNP_106755_A_20041 | NW_004517613.1 | scaffold2748 | 20041                   | AA                                     | GG                 | GG               | INTERGENIC      |               |                    |                    |

| SNPs IDs           | Chromosome IDs | Chromosomes  | Physical positions (bp) | CDC Frontier (Reference genome) | (Pusa 1103 & HPNB) | (ILWC 46 & LPNB) | Sequence genome | Components of | Gene accession IDs | Putative functions |
|--------------------|----------------|--------------|-------------------------|---------------------------------|--------------------|------------------|-----------------|---------------|--------------------|--------------------|
| SNP_106756_A_20057 | NW_004517613.1 | scaffold2748 | 20057                   | TT                              | GG                 | GG               | INTERGENIC      |               |                    |                    |
| SNP_106757_A_20447 | NW_004517613.1 | scaffold2748 | 20447                   | AA                              | TT                 | TT               | INTERGENIC      |               |                    |                    |
| SNP_106758_A_20515 | NW_004517613.1 | scaffold2748 | 20515                   | TT                              | CC                 | CC               | INTERGENIC      |               |                    |                    |
| SNP_106759_A_23219 | NW_004517613.1 | scaffold2748 | 23219                   | AA                              | TT                 | TT               | INTERGENIC      |               |                    |                    |
| SNP_106760_A_23620 | NW_004517613.1 | scaffold2748 | 23620                   | TT                              | GG                 | GG               | INTERGENIC      |               |                    |                    |
| SNP_106761_A_23765 | NW_004517613.1 | scaffold2748 | 23765                   | AA                              | GG                 | GG               | INTERGENIC      |               |                    |                    |
| SNP_106762_A_23959 | NW_004517613.1 | scaffold2748 | 23959                   | GG                              | AA                 | AA               | INTERGENIC      |               |                    |                    |
| SNP_106763_A_24316 | NW_004517613.1 | scaffold2748 | 24316                   | TT                              | CC                 | CC               | INTERGENIC      |               |                    |                    |
| SNP_106764_A_24518 | NW_004517613.1 | scaffold2748 | 24518                   | CC                              | TT                 | TT               | INTERGENIC      |               |                    |                    |
| SNP_106765_A_24534 | NW_004517613.1 | scaffold2748 | 24534                   | GG                              | AA                 | AA               | INTERGENIC      |               |                    |                    |
| SNP_106766_A_24582 | NW_004517613.1 | scaffold2748 | 24582                   | GG                              | TT                 | TT               | INTERGENIC      |               |                    |                    |
| SNP_106767_A_24803 | NW_004517613.1 | scaffold2748 | 24803                   | AA                              | TT                 | TT               | INTERGENIC      |               |                    |                    |
| SNP_106768_A_24982 | NW_004517613.1 | scaffold2748 | 24982                   | TT                              | GG                 | GG               | INTERGENIC      |               |                    |                    |
| SNP_106769_A_25063 | NW_004517613.1 | scaffold2748 | 25063                   | AA                              | TT                 | TT               | INTERGENIC      |               |                    |                    |
| SNP_106770_A_25414 | NW_004517613.1 | scaffold2748 | 25414                   | TT                              | AA                 | AA               | INTERGENIC      |               |                    |                    |
| SNP_106771_A_25418 | NW_004517613.1 | scaffold2748 | 25418                   | AA                              | TT                 | TT               | INTERGENIC      |               |                    |                    |
| SNP_106772_A_27677 | NW_004517613.1 | scaffold2748 | 27677                   | CC                              | AA                 | AA               | INTERGENIC      |               |                    |                    |
| SNP_106774_A_27893 | NW_004517613.1 | scaffold2748 | 27893                   | TT                              | CC                 | CC               | INTERGENIC      |               |                    |                    |
| SNP_106775_A_2233  | NW_004517615.1 | scaffold2751 | 2233                    | TT                              | GG                 | GG               | INTERGENIC      |               |                    |                    |
| SNP_106776_A_2277  | NW_004517615.1 | scaffold2751 | 2277                    | CC                              | TT                 | TT               | INTERGENIC      |               |                    |                    |
| SNP_106777_A_2279  | NW_004517615.1 | scaffold2751 | 2279                    | TT                              | GG                 | GG               | INTERGENIC      |               |                    |                    |
| SNP_106778_A_3777  | NW_004517615.1 | scaffold2751 | 3777                    | AA                              | TT                 | TT               | INTERGENIC      |               |                    |                    |

| SNPs IDs            | Chromosome IDs | Chromosomes  | Physical positions (bp) | CDC Frontier (Reference genome) | (Pusa 1103 & HPNB) | (ILWC 46 & LPNB) | Sequence Components of genome | Gene accession IDs | Putative functions                  |
|---------------------|----------------|--------------|-------------------------|---------------------------------|--------------------|------------------|-------------------------------|--------------------|-------------------------------------|
| SNP_106779_A_367    | NW_004517623.1 | scaffold2763 | 367                     | TT                              | CC                 | CC               | INTERGENIC                    |                    |                                     |
| SNP_106780_A_808    | NW_004517623.1 | scaffold2763 | 808                     | GG                              | CC                 | CC               | INTERGENIC                    |                    |                                     |
| SNP_106781_A_9470   | NW_004517623.1 | scaffold2763 | 9470                    | TT                              | CC                 | CC               | INTERGENIC                    |                    |                                     |
| SNP_106782_A_9481   | NW_004517623.1 | scaffold2763 | 9481                    | AA                              | GG                 | GG               | INTERGENIC                    |                    |                                     |
| SNP_106784_A_13479  | NW_004517623.1 | scaffold2763 | 13479                   | TT                              | CC                 | CC               | SYNONYMOUS_CODING             | 101513047          | zinc finger MYM-type protein 1-like |
| SNP_106785_A_74442  | NW_004517623.1 | scaffold2763 | 74442                   | CC                              | AA                 | AA               | INTERGENIC                    |                    |                                     |
| SNP_106786_A_74909  | NW_004517623.1 | scaffold2763 | 74909                   | AA                              | GG                 | GG               | INTERGENIC                    |                    |                                     |
| SNP_106788_A_140404 | NW_004517623.1 | scaffold2763 | 140404                  | TT                              | GG                 | GG               | INTERGENIC                    |                    |                                     |
| SNP_106789_A_151026 | NW_004517623.1 | scaffold2763 | 151026                  | AA                              | TT                 | TT               | INTERGENIC                    |                    |                                     |
| SNP_106790_A_152832 | NW_004517623.1 | scaffold2763 | 152832                  | GG                              | TT                 | TT               | INTERGENIC                    |                    |                                     |
| SNP_106791_A_154145 | NW_004517623.1 | scaffold2763 | 154145                  | AA                              | GG                 | GG               | INTERGENIC                    |                    |                                     |
| SNP_106792_A_171725 | NW_004517623.1 | scaffold2763 | 171725                  | AA                              | GG                 | GG               | INTERGENIC                    |                    |                                     |
| SNP_106793_A_171747 | NW_004517623.1 | scaffold2763 | 171747                  | AA                              | GG                 | GG               | INTERGENIC                    |                    |                                     |
| SNP_106794_A_171894 | NW_004517623.1 | scaffold2763 | 171894                  | AA                              | GG                 | GG               | INTERGENIC                    |                    |                                     |
| SNP_106795_A_182636 | NW_004517623.1 | scaffold2763 | 182636                  | CC                              | TT                 | TT               | INTERGENIC                    |                    |                                     |
| SNP_106796_A_79     | NW_004517625.1 | scaffold2766 | 79                      | GG                              | AA                 | AA               | INTERGENIC                    |                    |                                     |
| SNP_106797_A_140    | NW_004517625.1 | scaffold2766 | 140                     | AA                              | CC                 | CC               | INTERGENIC                    |                    |                                     |
| SNP_106798_A_405    | NW_004517625.1 | scaffold2766 | 405                     | GG                              | AA                 | AA               | INTERGENIC                    |                    |                                     |
| SNP_106800_A_6041   | NW_004517625.1 | scaffold2766 | 6041                    | AA                              | CC                 | CC               | INTERGENIC                    |                    |                                     |
| SNP_106802_A_13472  | NW_004517625.1 | scaffold2766 | 13472                   | TT                              | GG                 | GG               | INTERGENIC                    |                    |                                     |
| SNP_106803_A_13496  | NW_004517625.1 | scaffold2766 | 13496                   | AA                              | GG                 | GG               | INTERGENIC                    |                    |                                     |
| SNP_106804_A_17970  | NW_004517625.1 | scaffold2766 | 17970                   | CC                              | AA                 | AA               | INTERGENIC                    |                    |                                     |

| SNPs IDs           | Chromosome IDs | Chromosomes  | Physical positions (bp) | CDC Frontier (Reference genome) | (Pusa 1103 & HPNB) | (ILWC 46 & LPNB) | Sequence genome | Components of | Gene accession IDs | Putative functions |
|--------------------|----------------|--------------|-------------------------|---------------------------------|--------------------|------------------|-----------------|---------------|--------------------|--------------------|
| SNP_106806_A_1762  | NW_004517631.1 | scaffold2777 | 1762                    | CC                              | TT                 | TT               | INTERGENIC      |               |                    |                    |
| SNP_106807_A_2062  | NW_004517631.1 | scaffold2777 | 2062                    | GG                              | AA                 | AA               | INTERGENIC      |               |                    |                    |
| SNP_106808_A_2390  | NW_004517631.1 | scaffold2777 | 2390                    | GG                              | AA                 | AA               | INTERGENIC      |               |                    |                    |
| SNP_106809_A_2496  | NW_004517631.1 | scaffold2777 | 2496                    | AA                              | GG                 | GG               | INTERGENIC      |               |                    |                    |
| SNP_106810_A_2827  | NW_004517631.1 | scaffold2777 | 2827                    | TT                              | CC                 | CC               | INTERGENIC      |               |                    |                    |
| SNP_106812_A_4487  | NW_004517631.1 | scaffold2777 | 4487                    | AA                              | TT                 | TT               | INTERGENIC      |               |                    |                    |
| SNP_106813_A_5418  | NW_004517631.1 | scaffold2777 | 5418                    | CC                              | GG                 | GG               | INTERGENIC      |               |                    |                    |
| SNP_106814_A_4249  | NW_004517632.1 | scaffold2778 | 4249                    | GG                              | AA                 | AA               | INTERGENIC      |               |                    |                    |
| SNP_106815_A_4348  | NW_004517632.1 | scaffold2778 | 4348                    | TT                              | GG                 | GG               | INTERGENIC      |               |                    |                    |
| SNP_106816_A_5220  | NW_004517632.1 | scaffold2778 | 5220                    | TT                              | AA                 | AA               | INTERGENIC      |               |                    |                    |
| SNP_106817_A_5366  | NW_004517632.1 | scaffold2778 | 5366                    | GG                              | AA                 | AA               | INTERGENIC      |               |                    |                    |
| SNP_106818_A_6674  | NW_004517632.1 | scaffold2778 | 6674                    | TT                              | GG                 | GG               | INTERGENIC      |               |                    |                    |
| SNP_106819_A_6901  | NW_004517632.1 | scaffold2778 | 6901                    | CC                              | TT                 | TT               | INTERGENIC      |               |                    |                    |
| SNP_106820_A_6912  | NW_004517632.1 | scaffold2778 | 6912                    | AA                              | TT                 | TT               | INTERGENIC      |               |                    |                    |
| SNP_106821_A_7036  | NW_004517632.1 | scaffold2778 | 7036                    | GG                              | CC                 | CC               | INTERGENIC      |               |                    |                    |
| SNP_106822_A_7239  | NW_004517632.1 | scaffold2778 | 7239                    | TT                              | CC                 | CC               | INTERGENIC      |               |                    |                    |
| SNP_106823_A_7252  | NW_004517632.1 | scaffold2778 | 7252                    | TT                              | GG                 | GG               | INTERGENIC      |               |                    |                    |
| SNP_106824_A_7349  | NW_004517632.1 | scaffold2778 | 7349                    | GG                              | AA                 | AA               | INTERGENIC      |               |                    |                    |
| SNP_106825_A_7732  | NW_004517632.1 | scaffold2778 | 7732                    | TT                              | CC                 | CC               | INTERGENIC      |               |                    |                    |
| SNP_106826_A_11302 | NW_004517632.1 | scaffold2778 | 11302                   | CC                              | AA                 | AA               | INTERGENIC      |               |                    |                    |
| SNP_106827_A_11367 | NW_004517632.1 | scaffold2778 | 11367                   | TT                              | AA                 | AA               | INTERGENIC      |               |                    |                    |
| SNP_106828_A_12153 | NW_004517632.1 | scaffold2778 | 12153                   | TT                              | CC                 | CC               | INTERGENIC      |               |                    |                    |

| SNPs IDs           | Chromosome IDs | Chromosomes  | Physical positions (bp) | CDC Frontier genome (Reference genome) | (Pusa 1103 & HPNB) | (ILWC 46 & LPNB) | Sequence genome | Components of | Gene accession IDs | Putative functions |
|--------------------|----------------|--------------|-------------------------|----------------------------------------|--------------------|------------------|-----------------|---------------|--------------------|--------------------|
| SNP_106829_A_12386 | NW_004517632.1 | scaffold2778 | 12386                   | AA                                     | CC                 | CC               | INTERGENIC      |               |                    |                    |
| SNP_106830_A_12526 | NW_004517632.1 | scaffold2778 | 12526                   | CC                                     | TT                 | TT               | INTERGENIC      |               |                    |                    |
| SNP_106831_A_12556 | NW_004517632.1 | scaffold2778 | 12556                   | AA                                     | GG                 | GG               | INTERGENIC      |               |                    |                    |
| SNP_106832_A_12587 | NW_004517632.1 | scaffold2778 | 12587                   | GG                                     | AA                 | AA               | INTERGENIC      |               |                    |                    |
| SNP_106833_A_12656 | NW_004517632.1 | scaffold2778 | 12656                   | AA                                     | GG                 | GG               | INTERGENIC      |               |                    |                    |
| SNP_106834_A_1909  | NW_004517633.1 | scaffold2779 | 1909                    | GG                                     | AA                 | AA               | INTERGENIC      |               |                    |                    |
| SNP_106835_A_1957  | NW_004517633.1 | scaffold2779 | 1957                    | TT                                     | AA                 | AA               | INTERGENIC      |               |                    |                    |
| SNP_106836_A_1986  | NW_004517633.1 | scaffold2779 | 1986                    | AA                                     | TT                 | TT               | INTERGENIC      |               |                    |                    |
| SNP_106837_A_2408  | NW_004517633.1 | scaffold2779 | 2408                    | AA                                     | GG                 | GG               | INTERGENIC      |               |                    |                    |
| SNP_106838_A_2440  | NW_004517633.1 | scaffold2779 | 2440                    | AA                                     | TT                 | TT               | INTERGENIC      |               |                    |                    |
| SNP_106839_A_6273  | NW_004517633.1 | scaffold2779 | 6273                    | GG                                     | AA                 | AA               | INTERGENIC      |               |                    |                    |
| SNP_106840_A_6474  | NW_004517633.1 | scaffold2779 | 6474                    | TT                                     | GG                 | GG               | INTERGENIC      |               |                    |                    |
| SNP_106841_A_6480  | NW_004517633.1 | scaffold2779 | 6480                    | GG                                     | AA                 | AA               | INTERGENIC      |               |                    |                    |
| SNP_106842_A_6622  | NW_004517633.1 | scaffold2779 | 6622                    | TT                                     | AA                 | AA               | INTERGENIC      |               |                    |                    |
| SNP_106843_A_9410  | NW_004517633.1 | scaffold2779 | 9410                    | TT                                     | CC                 | CC               | INTERGENIC      |               |                    |                    |
| SNP_106844_A_11285 | NW_004517633.1 | scaffold2779 | 11285                   | GG                                     | AA                 | AA               | INTERGENIC      |               |                    |                    |
| SNP_106845_A_13126 | NW_004517633.1 | scaffold2779 | 13126                   | TT                                     | CC                 | CC               | INTERGENIC      |               |                    |                    |
| SNP_106846_A_14380 | NW_004517633.1 | scaffold2779 | 14380                   | GG                                     | TT                 | TT               | INTERGENIC      |               |                    |                    |
| SNP_106847_A_16633 | NW_004517633.1 | scaffold2779 | 16633                   | GG                                     | CC                 | CC               | INTERGENIC      |               |                    |                    |
| SNP_106848_A_16680 | NW_004517633.1 | scaffold2779 | 16680                   | TT                                     | GG                 | GG               | INTERGENIC      |               |                    |                    |
| SNP_106849_A_17725 | NW_004517633.1 | scaffold2779 | 17725                   | TT                                     | CC                 | CC               | INTERGENIC      |               |                    |                    |
| SNP_106850_A_17761 | NW_004517633.1 | scaffold2779 | 17761                   | GG                                     | AA                 | AA               | INTERGENIC      |               |                    |                    |

| SNPs IDs           | Chromosome IDs | Chromosomes  | Physical positions (bp) | CDC Frontier (Reference genome) | (Pusa 1103 & HPNB) | (ILWC 46 & LPNB) | Sequence genome | Components of | Gene accession IDs | Putative functions |
|--------------------|----------------|--------------|-------------------------|---------------------------------|--------------------|------------------|-----------------|---------------|--------------------|--------------------|
| SNP_106851_A_17823 | NW_004517633.1 | scaffold2779 | 17823                   | TT                              | CC                 | CC               | INTERGENIC      |               |                    |                    |
| SNP_106852_A_17835 | NW_004517633.1 | scaffold2779 | 17835                   | TT                              | CC                 | CC               | INTERGENIC      |               |                    |                    |
| SNP_106853_A_17983 | NW_004517633.1 | scaffold2779 | 17983                   | GG                              | TT                 | TT               | INTERGENIC      |               |                    |                    |
| SNP_106854_A_25569 | NW_004517633.1 | scaffold2779 | 25569                   | TT                              | AA                 | AA               | INTERGENIC      |               |                    |                    |
| SNP_106855_A_715   | NW_004517635.1 | scaffold2782 | 715                     | CC                              | TT                 | TT               | INTERGENIC      |               |                    |                    |
| SNP_106856_A_921   | NW_004517635.1 | scaffold2782 | 921                     | CC                              | TT                 | TT               | INTERGENIC      |               |                    |                    |
| SNP_106857_A_1014  | NW_004517635.1 | scaffold2782 | 1014                    | CC                              | AA                 | AA               | INTERGENIC      |               |                    |                    |
| SNP_106858_A_4342  | NW_004517635.1 | scaffold2782 | 4342                    | CC                              | TT                 | TT               | INTERGENIC      |               |                    |                    |
| SNP_106859_A_4719  | NW_004517635.1 | scaffold2782 | 4719                    | CC                              | GG                 | GG               | INTERGENIC      |               |                    |                    |
| SNP_106860_A_6158  | NW_004517635.1 | scaffold2782 | 6158                    | AA                              | GG                 | GG               | INTERGENIC      |               |                    |                    |
| SNP_106861_A_6204  | NW_004517635.1 | scaffold2782 | 6204                    | CC                              | TT                 | TT               | INTERGENIC      |               |                    |                    |
| SNP_106863_A_7273  | NW_004517635.1 | scaffold2782 | 7273                    | GG                              | CC                 | CC               | INTERGENIC      |               |                    |                    |
| SNP_106864_A_7380  | NW_004517635.1 | scaffold2782 | 7380                    | CC                              | GG                 | GG               | INTERGENIC      |               |                    |                    |
| SNP_106865_A_7392  | NW_004517635.1 | scaffold2782 | 7392                    | CC                              | GG                 | GG               | INTERGENIC      |               |                    |                    |
| SNP_106866_A_8852  | NW_004517635.1 | scaffold2782 | 8852                    | TT                              | GG                 | GG               | INTERGENIC      |               |                    |                    |
| SNP_106867_A_8866  | NW_004517635.1 | scaffold2782 | 8866                    | CC                              | TT                 | TT               | INTERGENIC      |               |                    |                    |
| SNP_106868_A_8899  | NW_004517635.1 | scaffold2782 | 8899                    | CC                              | TT                 | TT               | INTERGENIC      |               |                    |                    |
| SNP_106869_A_8993  | NW_004517635.1 | scaffold2782 | 8993                    | TT                              | GG                 | GG               | INTERGENIC      |               |                    |                    |
| SNP_106870_A_10892 | NW_004517635.1 | scaffold2782 | 10892                   | AA                              | GG                 | GG               | INTERGENIC      |               |                    |                    |
| SNP_106871_A_26904 | NW_004517635.1 | scaffold2782 | 26904                   | CC                              | AA                 | AA               | INTERGENIC      |               |                    |                    |
| SNP_106872_A_26910 | NW_004517635.1 | scaffold2782 | 26910                   | TT                              | AA                 | AA               | INTERGENIC      |               |                    |                    |
| SNP_106873_A_26939 | NW_004517635.1 | scaffold2782 | 26939                   | TT                              | CC                 | CC               | INTERGENIC      |               |                    |                    |

| SNPs IDs           | Chromosome IDs | Chromosomes  | Physical positions (bp) | CDC Frontier (Reference genome) | (Pusa 1103 & HPNB) | (ILWC 46 & LPNB) | Sequence genome | Components of | Gene accession IDs | Putative functions |
|--------------------|----------------|--------------|-------------------------|---------------------------------|--------------------|------------------|-----------------|---------------|--------------------|--------------------|
| SNP_106875_A_39946 | NW_004517635.1 | scaffold2782 | 39946                   | TT                              | GG                 | GG               | INTERGENIC      |               |                    |                    |
| SNP_106876_A_40001 | NW_004517635.1 | scaffold2782 | 40001                   | CC                              | TT                 | TT               | INTERGENIC      |               |                    |                    |
| SNP_106877_A_40070 | NW_004517635.1 | scaffold2782 | 40070                   | GG                              | TT                 | TT               | INTERGENIC      |               |                    |                    |
| SNP_106878_A_40326 | NW_004517635.1 | scaffold2782 | 40326                   | GG                              | AA                 | AA               | INTERGENIC      |               |                    |                    |
| SNP_106879_A_41980 | NW_004517635.1 | scaffold2782 | 41980                   | AA                              | TT                 | TT               | INTERGENIC      |               |                    |                    |
| SNP_106880_A_41985 | NW_004517635.1 | scaffold2782 | 41985                   | TT                              | AA                 | AA               | INTERGENIC      |               |                    |                    |
| SNP_106881_A_42756 | NW_004517635.1 | scaffold2782 | 42756                   | CC                              | TT                 | TT               | INTERGENIC      |               |                    |                    |
| SNP_106882_A_51010 | NW_004517635.1 | scaffold2782 | 51010                   | TT                              | AA                 | AA               | INTERGENIC      |               |                    |                    |
| SNP_106883_A_51228 | NW_004517635.1 | scaffold2782 | 51228                   | GG                              | AA                 | AA               | INTERGENIC      |               |                    |                    |
| SNP_106884_A_60330 | NW_004517635.1 | scaffold2782 | 60330                   | CC                              | AA                 | AA               | INTERGENIC      |               |                    |                    |
| SNP_106885_A_60366 | NW_004517635.1 | scaffold2782 | 60366                   | GG                              | AA                 | AA               | INTERGENIC      |               |                    |                    |
| SNP_106886_A_60446 | NW_004517635.1 | scaffold2782 | 60446                   | TT                              | AA                 | AA               | INTERGENIC      |               |                    |                    |
| SNP_106887_A_60447 | NW_004517635.1 | scaffold2782 | 60447                   | AA                              | TT                 | TT               | INTERGENIC      |               |                    |                    |
| SNP_106888_A_60564 | NW_004517635.1 | scaffold2782 | 60564                   | CC                              | TT                 | TT               | INTERGENIC      |               |                    |                    |
| SNP_106889_A_60579 | NW_004517635.1 | scaffold2782 | 60579                   | AA                              | CC                 | CC               | INTERGENIC      |               |                    |                    |
| SNP_106890_A_60606 | NW_004517635.1 | scaffold2782 | 60606                   | GG                              | AA                 | AA               | INTERGENIC      |               |                    |                    |
| SNP_106891_A_67839 | NW_004517635.1 | scaffold2782 | 67839                   | TT                              | AA                 | AA               | INTERGENIC      |               |                    |                    |
| SNP_106892_A_80321 | NW_004517635.1 | scaffold2782 | 80321                   | CC                              | TT                 | TT               | INTERGENIC      |               |                    |                    |
| SNP_106893_A_80337 | NW_004517635.1 | scaffold2782 | 80337                   | TT                              | GG                 | GG               | INTERGENIC      |               |                    |                    |
| SNP_106894_A_80414 | NW_004517635.1 | scaffold2782 | 80414                   | TT                              | GG                 | GG               | INTERGENIC      |               |                    |                    |
| SNP_106895_A_80580 | NW_004517635.1 | scaffold2782 | 80580                   | CC                              | TT                 | TT               | INTERGENIC      |               |                    |                    |
| SNP_106896_A_80988 | NW_004517635.1 | scaffold2782 | 80988                   | GG                              | AA                 | AA               | INTERGENIC      |               |                    |                    |

| SNPs IDs            | Chromosome IDs | Chromosomes  | Physical positions (bp) | CDC Frontier (Reference genome) | (Pusa 1103 & HPNB) | (ILWC 46 & LPNB) | Sequence genome | Components of | Gene accession IDs | Putative functions |
|---------------------|----------------|--------------|-------------------------|---------------------------------|--------------------|------------------|-----------------|---------------|--------------------|--------------------|
| SNP_106897_A_81034  | NW_004517635.1 | scaffold2782 | 81034                   | CC                              | TT                 | TT               | INTERGENIC      |               |                    |                    |
| SNP_106898_A_86312  | NW_004517635.1 | scaffold2782 | 86312                   | GG                              | CC                 | CC               | INTERGENIC      |               |                    |                    |
| SNP_106899_A_86348  | NW_004517635.1 | scaffold2782 | 86348                   | TT                              | AA                 | AA               | INTERGENIC      |               |                    |                    |
| SNP_106900_A_86603  | NW_004517635.1 | scaffold2782 | 86603                   | AA                              | GG                 | GG               | INTERGENIC      |               |                    |                    |
| SNP_106901_A_86610  | NW_004517635.1 | scaffold2782 | 86610                   | TT                              | CC                 | CC               | INTERGENIC      |               |                    |                    |
| SNP_106902_A_86742  | NW_004517635.1 | scaffold2782 | 86742                   | GG                              | AA                 | AA               | INTERGENIC      |               |                    |                    |
| SNP_106903_A_86946  | NW_004517635.1 | scaffold2782 | 86946                   | GG                              | AA                 | AA               | INTERGENIC      |               |                    |                    |
| SNP_106904_A_87065  | NW_004517635.1 | scaffold2782 | 87065                   | TT                              | CC                 | CC               | INTERGENIC      |               |                    |                    |
| SNP_106905_A_89762  | NW_004517635.1 | scaffold2782 | 89762                   | GG                              | AA                 | AA               | INTERGENIC      |               |                    |                    |
| SNP_106906_A_105935 | NW_004517635.1 | scaffold2782 | 105935                  | AA                              | GG                 | GG               | INTERGENIC      |               |                    |                    |
| SNP_106907_A_106025 | NW_004517635.1 | scaffold2782 | 106025                  | AA                              | TT                 | TT               | INTERGENIC      |               |                    |                    |
| SNP_106908_A_108902 | NW_004517635.1 | scaffold2782 | 108902                  | GG                              | CC                 | CC               | INTERGENIC      |               |                    |                    |
| SNP_106909_A_109199 | NW_004517635.1 | scaffold2782 | 109199                  | TT                              | CC                 | CC               | INTERGENIC      |               |                    |                    |
| SNP_106910_A_109306 | NW_004517635.1 | scaffold2782 | 109306                  | AA                              | CC                 | CC               | INTERGENIC      |               |                    |                    |
| SNP_106911_A_109421 | NW_004517635.1 | scaffold2782 | 109421                  | GG                              | AA                 | AA               | INTERGENIC      |               |                    |                    |
| SNP_106912_A_109479 | NW_004517635.1 | scaffold2782 | 109479                  | TT                              | GG                 | GG               | INTERGENIC      |               |                    |                    |
| SNP_106913_A_109552 | NW_004517635.1 | scaffold2782 | 109552                  | CC                              | GG                 | GG               | INTERGENIC      |               |                    |                    |
| SNP_106914_A_109667 | NW_004517635.1 | scaffold2782 | 109667                  | GG                              | AA                 | AA               | INTERGENIC      |               |                    |                    |
| SNP_106915_A_109693 | NW_004517635.1 | scaffold2782 | 109693                  | AA                              | CC                 | CC               | INTERGENIC      |               |                    |                    |
| SNP_106916_A_109740 | NW_004517635.1 | scaffold2782 | 109740                  | CC                              | AA                 | AA               | INTERGENIC      |               |                    |                    |
| SNP_106917_A_109772 | NW_004517635.1 | scaffold2782 | 109772                  | TT                              | CC                 | CC               | INTERGENIC      |               |                    |                    |
| SNP_106918_A_109893 | NW_004517635.1 | scaffold2782 | 109893                  | AA                              | TT                 | TT               | INTERGENIC      |               |                    |                    |



| SNPs IDs            | Chromosome IDs | Chromosomes  | Physical positions (bp) | CDC Frontier (Reference genome) | (Pusa 1103 & HPNB) | (ILWC 46 & LPNB) | Sequence genome | Components of | Gene accession IDs | Putative functions |
|---------------------|----------------|--------------|-------------------------|---------------------------------|--------------------|------------------|-----------------|---------------|--------------------|--------------------|
| SNP_106919_A_109908 | NW_004517635.1 | scaffold2782 | 109908                  | TT                              | CC                 | CC               | INTERGENIC      |               |                    |                    |
| SNP_106920_A_109920 | NW_004517635.1 | scaffold2782 | 109920                  | AA                              | TT                 | TT               | INTERGENIC      |               |                    |                    |
| SNP_106921_A_109950 | NW_004517635.1 | scaffold2782 | 109950                  | CC                              | AA                 | AA               | INTERGENIC      |               |                    |                    |
| SNP_106922_A_111792 | NW_004517635.1 | scaffold2782 | 111792                  | CC                              | AA                 | AA               | INTERGENIC      |               |                    |                    |
| SNP_106923_A_111796 | NW_004517635.1 | scaffold2782 | 111796                  | AA                              | CC                 | CC               | INTERGENIC      |               |                    |                    |
| SNP_106924_A_111846 | NW_004517635.1 | scaffold2782 | 111846                  | AA                              | GG                 | GG               | INTERGENIC      |               |                    |                    |
| SNP_106925_A_111852 | NW_004517635.1 | scaffold2782 | 111852                  | TT                              | CC                 | CC               | INTERGENIC      |               |                    |                    |
| SNP_106926_A_111868 | NW_004517635.1 | scaffold2782 | 111868                  | GG                              | TT                 | TT               | INTERGENIC      |               |                    |                    |
| SNP_106927_A_111869 | NW_004517635.1 | scaffold2782 | 111869                  | AA                              | TT                 | TT               | INTERGENIC      |               |                    |                    |
| SNP_106928_A_111903 | NW_004517635.1 | scaffold2782 | 111903                  | TT                              | GG                 | GG               | INTERGENIC      |               |                    |                    |
| SNP_106929_A_112033 | NW_004517635.1 | scaffold2782 | 112033                  | AA                              | CC                 | CC               | INTERGENIC      |               |                    |                    |
| SNP_106930_A_112034 | NW_004517635.1 | scaffold2782 | 112034                  | GG                              | AA                 | AA               | INTERGENIC      |               |                    |                    |
| SNP_106931_A_112147 | NW_004517635.1 | scaffold2782 | 112147                  | GG                              | TT                 | TT               | INTERGENIC      |               |                    |                    |
| SNP_106932_A_112954 | NW_004517635.1 | scaffold2782 | 112954                  | GG                              | AA                 | AA               | INTERGENIC      |               |                    |                    |
| SNP_106933_A_112966 | NW_004517635.1 | scaffold2782 | 112966                  | AA                              | GG                 | GG               | INTERGENIC      |               |                    |                    |
| SNP_106934_A_113031 | NW_004517635.1 | scaffold2782 | 113031                  | AA                              | TT                 | TT               | INTERGENIC      |               |                    |                    |
| SNP_106935_A_113242 | NW_004517635.1 | scaffold2782 | 113242                  | TT                              | CC                 | CC               | INTERGENIC      |               |                    |                    |
| SNP_106936_A_113343 | NW_004517635.1 | scaffold2782 | 113343                  | AA                              | TT                 | TT               | INTERGENIC      |               |                    |                    |
| SNP_106937_A_2447   | NW_004517637.1 | scaffold2784 | 2447                    | TT                              | AA                 | AA               | INTERGENIC      |               |                    |                    |
| SNP_106938_A_2697   | NW_004517637.1 | scaffold2784 | 2697                    | CC                              | GG                 | GG               | INTERGENIC      |               |                    |                    |
| SNP_106939_A_2723   | NW_004517637.1 | scaffold2784 | 2723                    | TT                              | GG                 | GG               | INTERGENIC      |               |                    |                    |
| SNP_106940_A_2728   | NW_004517637.1 | scaffold2784 | 2728                    | CC                              | TT                 | TT               | INTERGENIC      |               |                    |                    |

| SNPs IDs           | Chromosome IDs | Chromosomes  | Physical positions (bp) | CDC Frontier (Reference genome) | (Pusa 1103 & HPNB) | (ILWC 46 & LPNB) | Sequence genome | Components of | Gene accession IDs | Putative functions |
|--------------------|----------------|--------------|-------------------------|---------------------------------|--------------------|------------------|-----------------|---------------|--------------------|--------------------|
| SNP_106941_A_2800  | NW_004517637.1 | scaffold2784 | 2800                    | GG                              | AA                 | AA               | INTERGENIC      |               |                    |                    |
| SNP_106942_A_3741  | NW_004517637.1 | scaffold2784 | 3741                    | AA                              | TT                 | TT               | INTERGENIC      |               |                    |                    |
| SNP_106943_A_3754  | NW_004517637.1 | scaffold2784 | 3754                    | CC                              | AA                 | AA               | INTERGENIC      |               |                    |                    |
| SNP_106944_A_13954 | NW_004517637.1 | scaffold2784 | 13954                   | GG                              | CC                 | CC               | INTERGENIC      |               |                    |                    |
| SNP_106945_A_14216 | NW_004517637.1 | scaffold2784 | 14216                   | CC                              | TT                 | TT               | INTERGENIC      |               |                    |                    |
| SNP_106946_A_14275 | NW_004517637.1 | scaffold2784 | 14275                   | AA                              | CC                 | CC               | INTERGENIC      |               |                    |                    |
| SNP_106947_A_14334 | NW_004517637.1 | scaffold2784 | 14334                   | AA                              | GG                 | GG               | INTERGENIC      |               |                    |                    |
| SNP_106948_A_14370 | NW_004517637.1 | scaffold2784 | 14370                   | AA                              | GG                 | GG               | INTERGENIC      |               |                    |                    |
| SNP_106949_A_14386 | NW_004517637.1 | scaffold2784 | 14386                   | AA                              | TT                 | TT               | INTERGENIC      |               |                    |                    |
| SNP_106950_A_15868 | NW_004517637.1 | scaffold2784 | 15868                   | AA                              | GG                 | GG               | INTERGENIC      |               |                    |                    |
| SNP_106951_A_11044 | NW_004517641.1 | scaffold2790 | 11044                   | GG                              | CC                 | CC               | INTERGENIC      |               |                    |                    |
| SNP_106952_A_2729  | NW_004517642.1 | scaffold2792 | 2729                    | TT                              | CC                 | CC               | INTERGENIC      |               |                    |                    |
| SNP_106953_A_2902  | NW_004517642.1 | scaffold2792 | 2902                    | AA                              | TT                 | TT               | INTERGENIC      |               |                    |                    |
| SNP_106954_A_2903  | NW_004517642.1 | scaffold2792 | 2903                    | AA                              | CC                 | CC               | INTERGENIC      |               |                    |                    |
| SNP_106955_A_2943  | NW_004517642.1 | scaffold2792 | 2943                    | GG                              | AA                 | AA               | INTERGENIC      |               |                    |                    |
| SNP_106956_A_7770  | NW_004517642.1 | scaffold2792 | 7770                    | GG                              | TT                 | TT               | INTERGENIC      |               |                    |                    |
| SNP_106957_A_12812 | NW_004517642.1 | scaffold2792 | 12812                   | TT                              | GG                 | GG               | INTERGENIC      |               |                    |                    |
| SNP_106958_A_13161 | NW_004517642.1 | scaffold2792 | 13161                   | CC                              | TT                 | TT               | INTERGENIC      |               |                    |                    |
| SNP_106959_A_13700 | NW_004517642.1 | scaffold2792 | 13700                   | TT                              | CC                 | CC               | INTERGENIC      |               |                    |                    |
| SNP_106960_A_13901 | NW_004517642.1 | scaffold2792 | 13901                   | AA                              | GG                 | GG               | INTERGENIC      |               |                    |                    |
| SNP_106961_A_13975 | NW_004517642.1 | scaffold2792 | 13975                   | AA                              | GG                 | GG               | INTERGENIC      |               |                    |                    |
| SNP_106962_A_14020 | NW_004517642.1 | scaffold2792 | 14020                   | TT                              | GG                 | GG               | INTERGENIC      |               |                    |                    |

| SNPs IDs           | Chromosome IDs | Chromosomes  | Physical positions (bp) | CDC Frontier (Reference genome) | (Pusa 1103 & HPNB) | (ILWC 46 & LPNB) | Sequence genome | Components of | Gene accession IDs | Putative functions |
|--------------------|----------------|--------------|-------------------------|---------------------------------|--------------------|------------------|-----------------|---------------|--------------------|--------------------|
| SNP_106963_A_14070 | NW_004517642.1 | scaffold2792 | 14070                   | TT                              | GG                 | GG               | INTERGENIC      |               |                    |                    |
| SNP_106964_A_14148 | NW_004517642.1 | scaffold2792 | 14148                   | TT                              | CC                 | CC               | INTERGENIC      |               |                    |                    |
| SNP_106965_A_14157 | NW_004517642.1 | scaffold2792 | 14157                   | AA                              | TT                 | TT               | INTERGENIC      |               |                    |                    |
| SNP_106967_A_14427 | NW_004517642.1 | scaffold2792 | 14427                   | TT                              | AA                 | AA               | INTERGENIC      |               |                    |                    |
| SNP_106968_A_14788 | NW_004517642.1 | scaffold2792 | 14788                   | GG                              | CC                 | CC               | INTERGENIC      |               |                    |                    |
| SNP_106969_A_1847  | NW_004517645.1 | scaffold2795 | 1847                    | TT                              | CC                 | CC               | INTERGENIC      |               |                    |                    |
| SNP_106970_A_1869  | NW_004517645.1 | scaffold2795 | 1869                    | TT                              | GG                 | GG               | INTERGENIC      |               |                    |                    |
| SNP_106971_A_2261  | NW_004517645.1 | scaffold2795 | 2261                    | AA                              | GG                 | GG               | INTERGENIC      |               |                    |                    |
| SNP_106972_A_2595  | NW_004517645.1 | scaffold2795 | 2595                    | TT                              | CC                 | CC               | INTERGENIC      |               |                    |                    |
| SNP_106973_A_2646  | NW_004517645.1 | scaffold2795 | 2646                    | AA                              | GG                 | GG               | INTERGENIC      |               |                    |                    |
| SNP_106974_A_2882  | NW_004517645.1 | scaffold2795 | 2882                    | GG                              | CC                 | CC               | INTERGENIC      |               |                    |                    |
| SNP_106975_A_2912  | NW_004517645.1 | scaffold2795 | 2912                    | TT                              | CC                 | CC               | INTERGENIC      |               |                    |                    |
| SNP_106976_A_3071  | NW_004517645.1 | scaffold2795 | 3071                    | CC                              | GG                 | GG               | INTERGENIC      |               |                    |                    |
| SNP_106977_A_3072  | NW_004517645.1 | scaffold2795 | 3072                    | TT                              | AA                 | AA               | INTERGENIC      |               |                    |                    |
| SNP_106978_A_3085  | NW_004517645.1 | scaffold2795 | 3085                    | CC                              | GG                 | GG               | INTERGENIC      |               |                    |                    |
| SNP_106979_A_3087  | NW_004517645.1 | scaffold2795 | 3087                    | CC                              | AA                 | AA               | INTERGENIC      |               |                    |                    |
| SNP_106980_A_6472  | NW_004517645.1 | scaffold2795 | 6472                    | AA                              | CC                 | CC               | INTERGENIC      |               |                    |                    |
| SNP_106981_A_791   | NW_004517648.1 | scaffold2799 | 791                     | CC                              | AA                 | AA               | INTERGENIC      |               |                    |                    |
| SNP_106982_A_800   | NW_004517648.1 | scaffold2799 | 800                     | GG                              | CC                 | CC               | INTERGENIC      |               |                    |                    |
| SNP_106983_A_876   | NW_004517648.1 | scaffold2799 | 876                     | CC                              | GG                 | GG               | INTERGENIC      |               |                    |                    |
| SNP_106984_A_900   | NW_004517648.1 | scaffold2799 | 900                     | CC                              | TT                 | TT               | INTERGENIC      |               |                    |                    |
| SNP_106985_A_1059  | NW_004517648.1 | scaffold2799 | 1059                    | AA                              | TT                 | TT               | INTERGENIC      |               |                    |                    |

| SNPs IDs           | Chromosome IDs | Chromosomes  | Physical positions (bp) | CDC Frontier (Reference genome) | (Pusa 1103 & HPNB) | (ILWC 46 & LPNB) | Sequence genome | Components of | Gene accession IDs | Putative functions |
|--------------------|----------------|--------------|-------------------------|---------------------------------|--------------------|------------------|-----------------|---------------|--------------------|--------------------|
| SNP_106986_A_1102  | NW_004517648.1 | scaffold2799 | 1102                    | AA                              | GG                 | GG               | INTERGENIC      |               |                    |                    |
| SNP_106987_A_1123  | NW_004517648.1 | scaffold2799 | 1123                    | TT                              | AA                 | AA               | INTERGENIC      |               |                    |                    |
| SNP_106988_A_19681 | NW_004517648.1 | scaffold2799 | 19681                   | CC                              | TT                 | TT               | INTERGENIC      |               |                    |                    |
| SNP_106989_A_34729 | NW_004517648.1 | scaffold2799 | 34729                   | AA                              | GG                 | GG               | INTERGENIC      |               |                    |                    |
| SNP_106990_A_34736 | NW_004517648.1 | scaffold2799 | 34736                   | CC                              | TT                 | TT               | INTERGENIC      |               |                    |                    |
| SNP_106991_A_45911 | NW_004517648.1 | scaffold2799 | 45911                   | AA                              | GG                 | GG               | INTERGENIC      |               |                    |                    |
| SNP_106992_A_45912 | NW_004517648.1 | scaffold2799 | 45912                   | AA                              | GG                 | GG               | INTERGENIC      |               |                    |                    |
| SNP_106993_A_45948 | NW_004517648.1 | scaffold2799 | 45948                   | CC                              | AA                 | AA               | INTERGENIC      |               |                    |                    |
| SNP_106994_A_46020 | NW_004517648.1 | scaffold2799 | 46020                   | AA                              | GG                 | GG               | INTERGENIC      |               |                    |                    |
| SNP_106995_A_46055 | NW_004517648.1 | scaffold2799 | 46055                   | GG                              | AA                 | AA               | INTERGENIC      |               |                    |                    |
| SNP_106996_A_46062 | NW_004517648.1 | scaffold2799 | 46062                   | AA                              | GG                 | GG               | INTERGENIC      |               |                    |                    |
| SNP_106997_A_46077 | NW_004517648.1 | scaffold2799 | 46077                   | AA                              | GG                 | GG               | INTERGENIC      |               |                    |                    |
| SNP_106998_A_46086 | NW_004517648.1 | scaffold2799 | 46086                   | TT                              | CC                 | CC               | INTERGENIC      |               |                    |                    |
| SNP_106999_A_46098 | NW_004517648.1 | scaffold2799 | 46098                   | TT                              | CC                 | CC               | INTERGENIC      |               |                    |                    |
| SNP_107000_A_64    | NW_004517650.1 | scaffold2801 | 64                      | AA                              | CC                 | CC               | INTERGENIC      |               |                    |                    |
| SNP_107001_A_81    | NW_004517650.1 | scaffold2801 | 81                      | TT                              | CC                 | CC               | INTERGENIC      |               |                    |                    |
| SNP_107002_A_214   | NW_004517652.1 | scaffold2803 | 214                     | AA                              | GG                 | GG               | INTERGENIC      |               |                    |                    |
| SNP_107003_A_693   | NW_004517656.1 | scaffold2810 | 693                     | AA                              | TT                 | TT               | INTERGENIC      |               |                    |                    |
| SNP_107004_A_12240 | NW_004517657.1 | scaffold2812 | 12240                   | GG                              | AA                 | AA               | INTERGENIC      |               |                    |                    |
| SNP_107005_A_16123 | NW_004517657.1 | scaffold2812 | 16123                   | TT                              | CC                 | CC               | INTERGENIC      |               |                    |                    |
| SNP_107006_A_16896 | NW_004517657.1 | scaffold2812 | 16896                   | AA                              | TT                 | TT               | INTERGENIC      |               |                    |                    |
| SNP_107007_A_17100 | NW_004517657.1 | scaffold2812 | 17100                   | AA                              | GG                 | GG               | INTERGENIC      |               |                    |                    |

| SNPs IDs           | Chromosome IDs | Chromosomes  | Physical positions (bp) | CDC Frontier (Reference genome) | (Pusa 1103 & HPNB) | (ILWC 46 & LPNB) | Sequence Components of genome | Gene accession IDs | Putative functions                                                      |
|--------------------|----------------|--------------|-------------------------|---------------------------------|--------------------|------------------|-------------------------------|--------------------|-------------------------------------------------------------------------|
| SNP_107008_A_17492 | NW_004517657.1 | scaffold2812 | 17492                   | GG                              | CC                 | CC               | DRR                           | 101489619          | G-type lectin S-receptor-like serine/threonine-protein kinase At1g11300 |
| SNP_107009_A_18098 | NW_004517657.1 | scaffold2812 | 18098                   | AA                              | TT                 | TT               | DRR                           | 101489619          | G-type lectin S-receptor-like serine/threonine-protein kinase At1g11300 |
| SNP_107010_A_18408 | NW_004517657.1 | scaffold2812 | 18408                   | TT                              | CC                 | CC               | DRR                           | 101489619          | G-type lectin S-receptor-like serine/threonine-protein kinase At1g11300 |
| SNP_107011_A_19128 | NW_004517657.1 | scaffold2812 | 19128                   | CC                              | TT                 | TT               | INTRON                        | 101489619          | G-type lectin S-receptor-like serine/threonine-protein kinase At1g11300 |
| SNP_107012_A_19448 | NW_004517657.1 | scaffold2812 | 19448                   | TT                              | AA                 | AA               | INTRON                        | 101489619          | G-type lectin S-receptor-like serine/threonine-protein kinase At1g11300 |
| SNP_107014_A_21202 | NW_004517657.1 | scaffold2812 | 21202                   | AA                              | TT                 | TT               | URR                           | 101489619          | G-type lectin S-receptor-like serine/threonine-protein kinase At1g11300 |
| SNP_107015_A_23769 | NW_004517657.1 | scaffold2812 | 23769                   | CC                              | AA                 | AA               | URR                           | 101515659          | Unknown function                                                        |
| SNP_107016_A_25417 | NW_004517657.1 | scaffold2812 | 25417                   | CC                              | AA                 | AA               | URR                           | 101515659          | Unknown function                                                        |
| SNP_107017_A_27981 | NW_004517657.1 | scaffold2812 | 27981                   | AA                              | GG                 | GG               | INTERGENIC                    |                    |                                                                         |
| SNP_107018_A_37919 | NW_004517657.1 | scaffold2812 | 37919                   | AA                              | TT                 | TT               | INTERGENIC                    |                    |                                                                         |
| SNP_107019_A_42948 | NW_004517657.1 | scaffold2812 | 42948                   | TT                              | CC                 | CC               | INTERGENIC                    |                    |                                                                         |
| SNP_107020_A_60183 | NW_004517657.1 | scaffold2812 | 60183                   | CC                              | TT                 | TT               | INTERGENIC                    |                    |                                                                         |
| SNP_107021_A_60185 | NW_004517657.1 | scaffold2812 | 60185                   | AA                              | GG                 | GG               | INTERGENIC                    |                    |                                                                         |
| SNP_107022_A_60190 | NW_004517657.1 | scaffold2812 | 60190                   | AA                              | GG                 | GG               | INTERGENIC                    |                    |                                                                         |
| SNP_107023_A_60636 | NW_004517657.1 | scaffold2812 | 60636                   | CC                              | TT                 | TT               | INTERGENIC                    |                    |                                                                         |
| SNP_107024_A_60643 | NW_004517657.1 | scaffold2812 | 60643                   | GG                              | AA                 | AA               | INTERGENIC                    |                    |                                                                         |
| SNP_107025_A_60683 | NW_004517657.1 | scaffold2812 | 60683                   | AA                              | GG                 | GG               | INTERGENIC                    |                    |                                                                         |
| SNP_107026_A_95955 | NW_004517657.1 | scaffold2812 | 95955                   | AA                              | TT                 | TT               | INTERGENIC                    |                    |                                                                         |
| SNP_107027_A_2877  | NW_004517658.1 | scaffold2813 | 2877                    | CC                              | TT                 | TT               | INTERGENIC                    |                    |                                                                         |
| SNP_107028_A_3773  | NW_004517658.1 | scaffold2813 | 3773                    | GG                              | AA                 | AA               | INTERGENIC                    |                    |                                                                         |
| SNP_107029_A_4417  | NW_004517658.1 | scaffold2813 | 4417                    | GG                              | AA                 | AA               | INTERGENIC                    |                    |                                                                         |
| SNP_107030_A_4667  | NW_004517658.1 | scaffold2813 | 4667                    | TT                              | CC                 | CC               | INTERGENIC                    |                    |                                                                         |

| SNPs IDs           | Chromosome IDs | Chromosomes  | Physical positions (bp) | CDC Frontier (Reference genome) | (Pusa 1103 & HPNB) | (ILWC 46 & LPNB) | Sequence genome   | Components of | Gene accession IDs | Putative functions |
|--------------------|----------------|--------------|-------------------------|---------------------------------|--------------------|------------------|-------------------|---------------|--------------------|--------------------|
| SNP_107031_A_4747  | NW_004517658.1 | scaffold2813 | 4747                    | GG                              | TT                 | TT               | INTERGENIC        |               |                    |                    |
| SNP_107032_A_1148  | NW_004517659.1 | scaffold2815 | 1148                    | AA                              | TT                 | TT               | INTERGENIC        |               |                    |                    |
| SNP_107033_A_1162  | NW_004517659.1 | scaffold2815 | 1162                    | GG                              | AA                 | AA               | INTERGENIC        |               |                    |                    |
| SNP_107034_A_1167  | NW_004517659.1 | scaffold2815 | 1167                    | CC                              | TT                 | TT               | INTERGENIC        |               |                    |                    |
| SNP_107035_A_28525 | NW_004517659.1 | scaffold2815 | 28525                   | AA                              | TT                 | TT               | INTERGENIC        |               |                    |                    |
| SNP_107036_A_29211 | NW_004517659.1 | scaffold2815 | 29211                   | GG                              | TT                 | TT               | INTERGENIC        |               |                    |                    |
| SNP_107037_A_42894 | NW_004517659.1 | scaffold2815 | 42894                   | GG                              | CC                 | CC               | SYNONYMOUS_CODING | 101490918     | Unknown function   |                    |
| SNP_107038_A_70895 | NW_004517659.1 | scaffold2815 | 70895                   | TT                              | CC                 | CC               | INTERGENIC        |               |                    |                    |
| SNP_107039_A_70986 | NW_004517659.1 | scaffold2815 | 70986                   | TT                              | AA                 | AA               | INTERGENIC        |               |                    |                    |
| SNP_107040_A_71066 | NW_004517659.1 | scaffold2815 | 71066                   | TT                              | CC                 | CC               | INTERGENIC        |               |                    |                    |
| SNP_107041_A_71085 | NW_004517659.1 | scaffold2815 | 71085                   | AA                              | CC                 | CC               | INTERGENIC        |               |                    |                    |
| SNP_107042_A_71157 | NW_004517659.1 | scaffold2815 | 71157                   | CC                              | TT                 | TT               | INTERGENIC        |               |                    |                    |
| SNP_107043_A_71411 | NW_004517659.1 | scaffold2815 | 71411                   | TT                              | CC                 | CC               | INTERGENIC        |               |                    |                    |
| SNP_107044_A_71439 | NW_004517659.1 | scaffold2815 | 71439                   | CC                              | TT                 | TT               | INTERGENIC        |               |                    |                    |
| SNP_107046_A_71459 | NW_004517659.1 | scaffold2815 | 71459                   | CC                              | TT                 | TT               | INTERGENIC        |               |                    |                    |
| SNP_107047_A_71533 | NW_004517659.1 | scaffold2815 | 71533                   | TT                              | CC                 | CC               | INTERGENIC        |               |                    |                    |
| SNP_107048_A_71846 | NW_004517659.1 | scaffold2815 | 71846                   | CC                              | TT                 | TT               | INTERGENIC        |               |                    |                    |
| SNP_107049_A_83193 | NW_004517659.1 | scaffold2815 | 83193                   | GG                              | AA                 | AA               | INTERGENIC        |               |                    |                    |
| SNP_107050_A_855   | NW_004517661.1 | scaffold2817 | 855                     | AA                              | GG                 | GG               | INTERGENIC        |               |                    |                    |
| SNP_107051_A_882   | NW_004517661.1 | scaffold2817 | 882                     | GG                              | AA                 | AA               | INTERGENIC        |               |                    |                    |
| SNP_107052_A_895   | NW_004517661.1 | scaffold2817 | 895                     | AA                              | GG                 | GG               | INTERGENIC        |               |                    |                    |
| SNP_107053_A_926   | NW_004517661.1 | scaffold2817 | 926                     | AA                              | GG                 | GG               | INTERGENIC        |               |                    |                    |

| SNPs IDs           | Chromosome IDs | Chromosomes  | Physical positions (bp) | CDC Frontier (Reference genome) | (Pusa 1103 & HPNB) | (ILWC 46 & LPNB) | Sequence genome | Components of | Gene accession IDs | Putative functions |
|--------------------|----------------|--------------|-------------------------|---------------------------------|--------------------|------------------|-----------------|---------------|--------------------|--------------------|
| SNP_107054_A_1173  | NW_004517662.1 | scaffold2818 | 1173                    | TT                              | GG                 | GG               | INTERGENIC      |               |                    |                    |
| SNP_107055_A_12314 | NW_004517663.1 | scaffold2819 | 12314                   | AA                              | GG                 | GG               | INTERGENIC      |               |                    |                    |
| SNP_107056_A_12519 | NW_004517663.1 | scaffold2819 | 12519                   | AA                              | CC                 | CC               | INTERGENIC      |               |                    |                    |
| SNP_107057_A_12551 | NW_004517663.1 | scaffold2819 | 12551                   | TT                              | AA                 | AA               | INTERGENIC      |               |                    |                    |
| SNP_107058_A_12615 | NW_004517663.1 | scaffold2819 | 12615                   | CC                              | AA                 | AA               | INTERGENIC      |               |                    |                    |
| SNP_107059_A_12680 | NW_004517663.1 | scaffold2819 | 12680                   | AA                              | TT                 | TT               | INTERGENIC      |               |                    |                    |
| SNP_107060_A_12689 | NW_004517663.1 | scaffold2819 | 12689                   | TT                              | CC                 | CC               | INTERGENIC      |               |                    |                    |
| SNP_107061_A_12825 | NW_004517663.1 | scaffold2819 | 12825                   | AA                              | GG                 | GG               | INTERGENIC      |               |                    |                    |
| SNP_107062_A_12833 | NW_004517663.1 | scaffold2819 | 12833                   | TT                              | CC                 | CC               | INTERGENIC      |               |                    |                    |
| SNP_107063_A_12935 | NW_004517663.1 | scaffold2819 | 12935                   | TT                              | CC                 | CC               | INTERGENIC      |               |                    |                    |
| SNP_107064_A_13008 | NW_004517663.1 | scaffold2819 | 13008                   | GG                              | AA                 | AA               | INTERGENIC      |               |                    |                    |
| SNP_107065_A_13026 | NW_004517663.1 | scaffold2819 | 13026                   | AA                              | GG                 | GG               | INTERGENIC      |               |                    |                    |
| SNP_107066_A_13082 | NW_004517663.1 | scaffold2819 | 13082                   | AA                              | GG                 | GG               | INTERGENIC      |               |                    |                    |
| SNP_107067_A_13085 | NW_004517663.1 | scaffold2819 | 13085                   | AA                              | TT                 | TT               | INTERGENIC      |               |                    |                    |
| SNP_107068_A_13098 | NW_004517663.1 | scaffold2819 | 13098                   | CC                              | TT                 | TT               | INTERGENIC      |               |                    |                    |
| SNP_107069_A_13126 | NW_004517663.1 | scaffold2819 | 13126                   | TT                              | CC                 | CC               | INTERGENIC      |               |                    |                    |
| SNP_107070_A_13437 | NW_004517663.1 | scaffold2819 | 13437                   | CC                              | TT                 | TT               | INTERGENIC      |               |                    |                    |
| SNP_107071_A_18468 | NW_004517663.1 | scaffold2819 | 18468                   | GG                              | CC                 | CC               | INTERGENIC      |               |                    |                    |
| SNP_107072_A_18505 | NW_004517663.1 | scaffold2819 | 18505                   | AA                              | GG                 | GG               | INTERGENIC      |               |                    |                    |
| SNP_107073_A_18836 | NW_004517663.1 | scaffold2819 | 18836                   | AA                              | GG                 | GG               | INTERGENIC      |               |                    |                    |
| SNP_107074_A_18917 | NW_004517663.1 | scaffold2819 | 18917                   | TT                              | CC                 | CC               | INTERGENIC      |               |                    |                    |
| SNP_107075_A_18919 | NW_004517663.1 | scaffold2819 | 18919                   | AA                              | GG                 | GG               | INTERGENIC      |               |                    |                    |

| SNPs IDs           | Chromosome IDs | Chromosomes  | Physical positions (bp) | CDC Frontier (Reference genome) | (Pusa 1103 & HPNB) | (ILWC 46 & LPNB) | Sequence genome | Components of | Gene accession IDs | Putative functions |
|--------------------|----------------|--------------|-------------------------|---------------------------------|--------------------|------------------|-----------------|---------------|--------------------|--------------------|
| SNP_107076_A_3309  | NW_004517666.1 | scaffold2823 | 3309                    | GG                              | AA                 | AA               | INTERGENIC      |               |                    |                    |
| SNP_107077_A_6350  | NW_004517666.1 | scaffold2823 | 6350                    | TT                              | GG                 | GG               | INTERGENIC      |               |                    |                    |
| SNP_107078_A_6617  | NW_004517666.1 | scaffold2823 | 6617                    | CC                              | TT                 | TT               | INTERGENIC      |               |                    |                    |
| SNP_107079_A_7884  | NW_004517666.1 | scaffold2823 | 7884                    | AA                              | GG                 | GG               | INTERGENIC      |               |                    |                    |
| SNP_107080_A_4702  | NW_004517667.1 | scaffold2824 | 4702                    | TT                              | AA                 | AA               | INTERGENIC      |               |                    |                    |
| SNP_107081_A_4790  | NW_004517667.1 | scaffold2824 | 4790                    | TT                              | AA                 | AA               | INTERGENIC      |               |                    |                    |
| SNP_107082_A_4897  | NW_004517667.1 | scaffold2824 | 4897                    | GG                              | AA                 | AA               | INTERGENIC      |               |                    |                    |
| SNP_107083_A_5689  | NW_004517667.1 | scaffold2824 | 5689                    | TT                              | CC                 | CC               | INTERGENIC      |               |                    |                    |
| SNP_107084_A_5779  | NW_004517667.1 | scaffold2824 | 5779                    | CC                              | AA                 | AA               | INTERGENIC      |               |                    |                    |
| SNP_107085_A_5793  | NW_004517667.1 | scaffold2824 | 5793                    | TT                              | CC                 | CC               | INTERGENIC      |               |                    |                    |
| SNP_107086_A_5805  | NW_004517667.1 | scaffold2824 | 5805                    | AA                              | GG                 | GG               | INTERGENIC      |               |                    |                    |
| SNP_107087_A_8982  | NW_004517667.1 | scaffold2824 | 8982                    | GG                              | AA                 | AA               | INTERGENIC      |               |                    |                    |
| SNP_107088_A_3683  | NW_004517670.1 | scaffold2829 | 3683                    | AA                              | CC                 | CC               | INTERGENIC      |               |                    |                    |
| SNP_107089_A_349   | NW_004517672.1 | scaffold2833 | 349                     | GG                              | AA                 | AA               | INTERGENIC      |               |                    |                    |
| SNP_107090_A_735   | NW_004517672.1 | scaffold2833 | 735                     | GG                              | AA                 | AA               | INTERGENIC      |               |                    |                    |
| SNP_107091_A_736   | NW_004517672.1 | scaffold2833 | 736                     | AA                              | GG                 | GG               | INTERGENIC      |               |                    |                    |
| SNP_107092_A_749   | NW_004517672.1 | scaffold2833 | 749                     | CC                              | AA                 | AA               | INTERGENIC      |               |                    |                    |
| SNP_107093_A_2676  | NW_004517674.1 | scaffold2835 | 2676                    | CC                              | TT                 | TT               | INTERGENIC      |               |                    |                    |
| SNP_107094_A_978   | NW_004517676.1 | scaffold2837 | 978                     | TT                              | CC                 | CC               | URR             | 101491560     | Unknown function   |                    |
| SNP_107095_A_980   | NW_004517676.1 | scaffold2837 | 980                     | GG                              | TT                 | TT               | URR             | 101491560     | Unknown function   |                    |
| SNP_107096_A_27955 | NW_004517676.1 | scaffold2837 | 27955                   | AA                              | CC                 | CC               | INTERGENIC      |               |                    |                    |
| SNP_107097_A_61839 | NW_004517676.1 | scaffold2837 | 61839                   | GG                              | AA                 | AA               | INTERGENIC      |               |                    |                    |



| SNPs IDs           | Chromosome IDs | Chromosomes  | Physical positions (bp) | CDC Frontier (Reference genome) | (Pusa 1103 & HPNB) | (ILWC 46 & LPNB) | Sequence genome | Components of | Gene accession IDs | Putative functions |
|--------------------|----------------|--------------|-------------------------|---------------------------------|--------------------|------------------|-----------------|---------------|--------------------|--------------------|
| SNP_107098_A_62397 | NW_004517676.1 | scaffold2837 | 62397                   | CC                              | TT                 | TT               | INTERGENIC      |               |                    |                    |
| SNP_107099_A_62410 | NW_004517676.1 | scaffold2837 | 62410                   | AA                              | GG                 | GG               | INTERGENIC      |               |                    |                    |
| SNP_107100_A_444   | NW_004517681.1 | scaffold2842 | 444                     | CC                              | TT                 | TT               | INTERGENIC      |               |                    |                    |
| SNP_107101_A_445   | NW_004517681.1 | scaffold2842 | 445                     | AA                              | CC                 | CC               | INTERGENIC      |               |                    |                    |
| SNP_107102_A_488   | NW_004517681.1 | scaffold2842 | 488                     | TT                              | AA                 | AA               | INTERGENIC      |               |                    |                    |
| SNP_107103_A_716   | NW_004517681.1 | scaffold2842 | 716                     | CC                              | AA                 | AA               | INTERGENIC      |               |                    |                    |
| SNP_107104_A_914   | NW_004517681.1 | scaffold2842 | 914                     | CC                              | AA                 | AA               | INTERGENIC      |               |                    |                    |
| SNP_107105_A_981   | NW_004517681.1 | scaffold2842 | 981                     | GG                              | TT                 | TT               | INTERGENIC      |               |                    |                    |
| SNP_107106_A_1019  | NW_004517681.1 | scaffold2842 | 1019                    | AA                              | GG                 | GG               | INTERGENIC      |               |                    |                    |
| SNP_107107_A_26860 | NW_004517683.1 | scaffold2845 | 26860                   | GG                              | AA                 | AA               | INTERGENIC      |               |                    |                    |
| SNP_107108_A_26864 | NW_004517683.1 | scaffold2845 | 26864                   | CC                              | AA                 | AA               | INTERGENIC      |               |                    |                    |
| SNP_107109_A_26897 | NW_004517683.1 | scaffold2845 | 26897                   | CC                              | TT                 | TT               | INTERGENIC      |               |                    |                    |
| SNP_107110_A_26898 | NW_004517683.1 | scaffold2845 | 26898                   | AA                              | GG                 | GG               | INTERGENIC      |               |                    |                    |
| SNP_107111_A_26908 | NW_004517683.1 | scaffold2845 | 26908                   | CC                              | GG                 | GG               | INTERGENIC      |               |                    |                    |
| SNP_107112_A_26951 | NW_004517683.1 | scaffold2845 | 26951                   | CC                              | TT                 | TT               | INTERGENIC      |               |                    |                    |
| SNP_107114_A_2822  | NW_004517685.1 | scaffold2847 | 2822                    | CC                              | TT                 | TT               | INTERGENIC      |               |                    |                    |
| SNP_107116_A_2505  | NW_004517686.1 | scaffold2848 | 2505                    | AA                              | GG                 | GG               | INTERGENIC      |               |                    |                    |
| SNP_107117_A_12246 | NW_004517686.1 | scaffold2848 | 12246                   | AA                              | GG                 | GG               | INTERGENIC      |               |                    |                    |
| SNP_107118_A_34350 | NW_004517686.1 | scaffold2848 | 34350                   | AA                              | GG                 | GG               | INTERGENIC      |               |                    |                    |
| SNP_107119_A_40331 | NW_004517686.1 | scaffold2848 | 40331                   | CC                              | TT                 | TT               | INTERGENIC      |               |                    |                    |
| SNP_107120_A_44742 | NW_004517686.1 | scaffold2848 | 44742                   | CC                              | TT                 | TT               | INTERGENIC      |               |                    |                    |
| SNP_107121_A_54164 | NW_004517686.1 | scaffold2848 | 54164                   | AA                              | GG                 | GG               | INTERGENIC      |               |                    |                    |

| SNPs IDs           | Chromosome IDs | Chromosomes  | Physical positions (bp) | CDC Frontier (Reference genome) | (Pusa 1103 & HPNB) | (ILWC 46 & LPNB) | Sequence Components of genome | Gene accession IDs | Putative functions           |
|--------------------|----------------|--------------|-------------------------|---------------------------------|--------------------|------------------|-------------------------------|--------------------|------------------------------|
| SNP_107122_A_27463 | NW_004517687.1 | scaffold2850 | 27463                   | TT                              | GG                 | GG               | DRR                           | 101494062          | uncharacterized LOC101494062 |
| SNP_107123_A_27844 | NW_004517687.1 | scaffold2850 | 27844                   | AA                              | GG                 | GG               | DRR                           | 101494062          | uncharacterized LOC101494062 |
| SNP_107124_A_28114 | NW_004517687.1 | scaffold2850 | 28114                   | AA                              | TT                 | TT               | DRR                           | 101494062          | uncharacterized LOC101494062 |
| SNP_107125_A_28149 | NW_004517687.1 | scaffold2850 | 28149                   | AA                              | TT                 | TT               | DRR                           | 101494062          | uncharacterized LOC101494062 |
| SNP_107126_A_657   | NW_004517688.1 | scaffold2851 | 657                     | GG                              | AA                 | AA               | INTERGENIC                    |                    |                              |
| SNP_107127_A_1431  | NW_004517688.1 | scaffold2851 | 1431                    | CC                              | TT                 | TT               | INTERGENIC                    |                    |                              |
| SNP_107128_A_1433  | NW_004517688.1 | scaffold2851 | 1433                    | AA                              | GG                 | GG               | INTERGENIC                    |                    |                              |
| SNP_107129_A_1752  | NW_004517688.1 | scaffold2851 | 1752                    | TT                              | GG                 | GG               | INTERGENIC                    |                    |                              |
| SNP_107130_A_3672  | NW_004517689.1 | scaffold2852 | 3672                    | CC                              | AA                 | AA               | INTERGENIC                    |                    |                              |
| SNP_107131_A_3673  | NW_004517689.1 | scaffold2852 | 3673                    | CC                              | TT                 | TT               | INTERGENIC                    |                    |                              |
| SNP_107132_A_3732  | NW_004517689.1 | scaffold2852 | 3732                    | CC                              | TT                 | TT               | INTERGENIC                    |                    |                              |
| SNP_107133_A_3739  | NW_004517689.1 | scaffold2852 | 3739                    | GG                              | AA                 | AA               | INTERGENIC                    |                    |                              |
| SNP_107134_A_4094  | NW_004517689.1 | scaffold2852 | 4094                    | CC                              | AA                 | AA               | INTERGENIC                    |                    |                              |
| SNP_107135_A_4178  | NW_004517689.1 | scaffold2852 | 4178                    | CC                              | TT                 | TT               | INTERGENIC                    |                    |                              |
| SNP_107136_A_387   | NW_004517690.1 | scaffold2853 | 387                     | CC                              | GG                 | GG               | INTERGENIC                    |                    |                              |
| SNP_107137_A_6636  | NW_004517690.1 | scaffold2853 | 6636                    | GG                              | AA                 | AA               | INTERGENIC                    |                    |                              |
| SNP_107138_A_12052 | NW_004517690.1 | scaffold2853 | 12052                   | CC                              | GG                 | GG               | INTERGENIC                    |                    |                              |
| SNP_107139_A_12143 | NW_004517690.1 | scaffold2853 | 12143                   | AA                              | TT                 | TT               | INTERGENIC                    |                    |                              |
| SNP_107140_A_12176 | NW_004517690.1 | scaffold2853 | 12176                   | AA                              | CC                 | CC               | INTERGENIC                    |                    |                              |
| SNP_107141_A_12202 | NW_004517690.1 | scaffold2853 | 12202                   | TT                              | GG                 | GG               | INTERGENIC                    |                    |                              |
| SNP_107142_A_12275 | NW_004517690.1 | scaffold2853 | 12275                   | GG                              | TT                 | TT               | INTERGENIC                    |                    |                              |
| SNP_107143_A_12276 | NW_004517690.1 | scaffold2853 | 12276                   | TT                              | GG                 | GG               | INTERGENIC                    |                    |                              |

| SNPs IDs           | Chromosome IDs | Chromosomes  | Physical positions (bp) | CDC Frontier (Reference genome) | (Pusa 1103 & HPNB) | (ILWC 46 & LPNB) | Sequence genome | Components of | Gene accession IDs              | Putative functions |
|--------------------|----------------|--------------|-------------------------|---------------------------------|--------------------|------------------|-----------------|---------------|---------------------------------|--------------------|
| SNP_107144_A_12349 | NW_004517690.1 | scaffold2853 | 12349                   | CC                              | TT                 | TT               | INTERGENIC      |               |                                 |                    |
| SNP_107145_A_15953 | NW_004517690.1 | scaffold2853 | 15953                   | GG                              | AA                 | AA               | INTERGENIC      |               |                                 |                    |
| SNP_107146_A_16204 | NW_004517690.1 | scaffold2853 | 16204                   | GG                              | AA                 | AA               | INTERGENIC      |               |                                 |                    |
| SNP_107147_A_16287 | NW_004517690.1 | scaffold2853 | 16287                   | AA                              | GG                 | GG               | INTERGENIC      |               |                                 |                    |
| SNP_107148_A_16311 | NW_004517690.1 | scaffold2853 | 16311                   | CC                              | TT                 | TT               | INTERGENIC      |               |                                 |                    |
| SNP_107149_A_16459 | NW_004517690.1 | scaffold2853 | 16459                   | TT                              | GG                 | GG               | INTERGENIC      |               |                                 |                    |
| SNP_107150_A_16471 | NW_004517690.1 | scaffold2853 | 16471                   | TT                              | GG                 | GG               | INTERGENIC      |               |                                 |                    |
| SNP_107151_A_16478 | NW_004517690.1 | scaffold2853 | 16478                   | TT                              | GG                 | GG               | INTERGENIC      |               |                                 |                    |
| SNP_107152_A_16485 | NW_004517690.1 | scaffold2853 | 16485                   | TT                              | GG                 | GG               | INTERGENIC      |               |                                 |                    |
| SNP_107153_A_16499 | NW_004517690.1 | scaffold2853 | 16499                   | TT                              | GG                 | GG               | INTERGENIC      |               |                                 |                    |
| SNP_107154_A_16541 | NW_004517690.1 | scaffold2853 | 16541                   | AA                              | GG                 | GG               | INTERGENIC      |               |                                 |                    |
| SNP_107155_A_16569 | NW_004517690.1 | scaffold2853 | 16569                   | TT                              | CC                 | CC               | INTERGENIC      |               |                                 |                    |
| SNP_107156_A_16795 | NW_004517690.1 | scaffold2853 | 16795                   | CC                              | TT                 | TT               | INTERGENIC      |               |                                 |                    |
| SNP_107157_A_16806 | NW_004517690.1 | scaffold2853 | 16806                   | AA                              | CC                 | CC               | INTERGENIC      |               |                                 |                    |
| SNP_107158_A_16829 | NW_004517690.1 | scaffold2853 | 16829                   | TT                              | GG                 | GG               | INTERGENIC      |               |                                 |                    |
| SNP_107159_A_21576 | NW_004517690.1 | scaffold2853 | 21576                   | AA                              | TT                 | TT               | INTERGENIC      |               |                                 |                    |
| SNP_107160_A_25918 | NW_004517690.1 | scaffold2853 | 25918                   | AA                              | GG                 | GG               | INTERGENIC      |               |                                 |                    |
| SNP_107161_A_26294 | NW_004517690.1 | scaffold2853 | 26294                   | CC                              | TT                 | TT               | INTERGENIC      |               |                                 |                    |
| SNP_107162_A_530   | NW_004517694.1 | scaffold2859 | 530                     | TT                              | AA                 | AA               | INTERGENIC      |               |                                 |                    |
| SNP_107163_A_9616  | NW_004517695.1 | scaffold2861 | 9616                    | TT                              | CC                 | CC               | INTERGENIC      |               |                                 |                    |
| SNP_107164_A_9624  | NW_004517695.1 | scaffold2861 | 9624                    | AA                              | TT                 | TT               | INTERGENIC      |               |                                 |                    |
| SNP_107165_A_29991 | NW_004517700.1 | scaffold2869 | 29991                   | TT                              | GG                 | GG               | URR             | 101494274     | serine carboxypeptidase-like 45 |                    |

| SNPs IDs           | Chromosome IDs | Chromosomes  | Physical positions (bp) | CDC Frontier (Reference genome) | (Pusa 1103 & HPNB) | (ILWC 46 & LPNB) | Sequence Components of genome | Gene accession IDs | Putative functions              |
|--------------------|----------------|--------------|-------------------------|---------------------------------|--------------------|------------------|-------------------------------|--------------------|---------------------------------|
| SNP_107166_A_30212 | NW_004517700.1 | scaffold2869 | 30212                   | GG                              | AA                 | AA               | URR                           | 101494274          | serine carboxypeptidase-like 45 |
| SNP_107167_A_30241 | NW_004517700.1 | scaffold2869 | 30241                   | AA                              | GG                 | GG               | URR                           | 101494274          | serine carboxypeptidase-like 45 |
| SNP_107168_A_272   | NW_004517701.1 | scaffold2870 | 272                     | CC                              | TT                 | TT               | INTERGENIC                    |                    |                                 |
| SNP_107169_A_522   | NW_004517701.1 | scaffold2870 | 522                     | TT                              | CC                 | CC               | INTERGENIC                    |                    |                                 |
| SNP_107170_A_558   | NW_004517701.1 | scaffold2870 | 558                     | CC                              | TT                 | TT               | INTERGENIC                    |                    |                                 |
| SNP_107171_A_561   | NW_004517701.1 | scaffold2870 | 561                     | GG                              | AA                 | AA               | INTERGENIC                    |                    |                                 |
| SNP_107172_A_18618 | NW_004517702.1 | scaffold2871 | 18618                   | CC                              | GG                 | GG               | INTERGENIC                    |                    |                                 |
| SNP_107173_A_23421 | NW_004517702.1 | scaffold2871 | 23421                   | GG                              | TT                 | TT               | INTERGENIC                    |                    |                                 |
| SNP_107174_A_23422 | NW_004517702.1 | scaffold2871 | 23422                   | CC                              | TT                 | TT               | INTERGENIC                    |                    |                                 |
| SNP_107175_A_30409 | NW_004517702.1 | scaffold2871 | 30409                   | CC                              | TT                 | TT               | INTERGENIC                    |                    |                                 |
| SNP_107177_A_30425 | NW_004517702.1 | scaffold2871 | 30425                   | TT                              | CC                 | CC               | INTERGENIC                    |                    |                                 |
| SNP_107180_A_34575 | NW_004517702.1 | scaffold2871 | 34575                   | GG                              | CC                 | CC               | INTERGENIC                    |                    |                                 |
| SNP_107181_A_34809 | NW_004517702.1 | scaffold2871 | 34809                   | CC                              | AA                 | AA               | INTERGENIC                    |                    |                                 |
| SNP_107182_A_663   | NW_004517708.1 | scaffold2878 | 663                     | CC                              | AA                 | AA               | INTERGENIC                    |                    |                                 |
| SNP_107183_A_962   | NW_004517708.1 | scaffold2878 | 962                     | CC                              | GG                 | GG               | INTERGENIC                    |                    |                                 |
| SNP_107184_A_998   | NW_004517708.1 | scaffold2878 | 998                     | GG                              | AA                 | AA               | INTERGENIC                    |                    |                                 |
| SNP_107185_A_1053  | NW_004517708.1 | scaffold2878 | 1053                    | GG                              | AA                 | AA               | INTERGENIC                    |                    |                                 |
| SNP_107187_A_13117 | NW_004517712.1 | scaffold2882 | 13117                   | TT                              | AA                 | AA               | INTERGENIC                    |                    |                                 |
| SNP_107188_A_25342 | NW_004517712.1 | scaffold2882 | 25342                   | AA                              | CC                 | CC               | INTERGENIC                    |                    |                                 |
| SNP_107189_A_25343 | NW_004517712.1 | scaffold2882 | 25343                   | TT                              | AA                 | AA               | INTERGENIC                    |                    |                                 |
| SNP_107190_A_26058 | NW_004517712.1 | scaffold2882 | 26058                   | GG                              | AA                 | AA               | INTERGENIC                    |                    |                                 |
| SNP_107191_A_26072 | NW_004517712.1 | scaffold2882 | 26072                   | AA                              | CC                 | CC               | INTERGENIC                    |                    |                                 |

| SNPs IDs           | Chromosome IDs | Chromosomes  | Physical positions (bp) | CDC Frontier (Reference genome) | (Pusa 1103 & HPNB) | (ILWC 46 & LPNB) | Sequence Components of genome | Gene accession IDs | Putative functions           |
|--------------------|----------------|--------------|-------------------------|---------------------------------|--------------------|------------------|-------------------------------|--------------------|------------------------------|
| SNP_107192_A_26077 | NW_004517712.1 | scaffold2882 | 26077                   | TT                              | CC                 | CC               | INTERGENIC                    |                    |                              |
| SNP_107193_A_26118 | NW_004517712.1 | scaffold2882 | 26118                   | AA                              | TT                 | TT               | INTERGENIC                    |                    |                              |
| SNP_107194_A_26184 | NW_004517712.1 | scaffold2882 | 26184                   | CC                              | AA                 | AA               | INTERGENIC                    |                    |                              |
| SNP_107195_A_26193 | NW_004517712.1 | scaffold2882 | 26193                   | TT                              | GG                 | GG               | INTERGENIC                    |                    |                              |
| SNP_107196_A_26194 | NW_004517712.1 | scaffold2882 | 26194                   | AA                              | TT                 | TT               | INTERGENIC                    |                    |                              |
| SNP_107197_A_377   | NW_004517717.1 | scaffold2887 | 377                     | TT                              | GG                 | GG               | INTERGENIC                    |                    |                              |
| SNP_107198_A_7017  | NW_004517717.1 | scaffold2887 | 7017                    | AA                              | GG                 | GG               | INTERGENIC                    |                    |                              |
| SNP_107199_A_7388  | NW_004517717.1 | scaffold2887 | 7388                    | AA                              | TT                 | TT               | INTERGENIC                    |                    |                              |
| SNP_107200_A_7403  | NW_004517717.1 | scaffold2887 | 7403                    | TT                              | AA                 | AA               | INTERGENIC                    |                    |                              |
| SNP_107201_A_29770 | NW_004517717.1 | scaffold2887 | 29770                   | GG                              | AA                 | AA               | INTERGENIC                    |                    |                              |
| SNP_107202_A_29924 | NW_004517717.1 | scaffold2887 | 29924                   | AA                              | GG                 | GG               | INTERGENIC                    |                    |                              |
| SNP_107203_A_29933 | NW_004517717.1 | scaffold2887 | 29933                   | TT                              | AA                 | AA               | INTERGENIC                    |                    |                              |
| SNP_107204_A_29971 | NW_004517717.1 | scaffold2887 | 29971                   | GG                              | AA                 | AA               | INTERGENIC                    |                    |                              |
| SNP_107205_A_3476  | NW_004517718.1 | scaffold2888 | 3476                    | GG                              | CC                 | CC               | URR                           | 101496645          | uncharacterized LOC101496645 |
| SNP_107206_A_3639  | NW_004517718.1 | scaffold2888 | 3639                    | TT                              | CC                 | CC               | URR                           | 101496645          | uncharacterized LOC101496645 |
| SNP_107207_A_5199  | NW_004517718.1 | scaffold2888 | 5199                    | CC                              | GG                 | GG               | INTERGENIC                    |                    |                              |
| SNP_107208_A_10381 | NW_004517721.1 | scaffold2893 | 10381                   | AA                              | GG                 | GG               | INTERGENIC                    |                    |                              |
| SNP_107209_A_10639 | NW_004517721.1 | scaffold2893 | 10639                   | CC                              | TT                 | TT               | INTERGENIC                    |                    |                              |
| SNP_107211_A_10722 | NW_004517721.1 | scaffold2893 | 10722                   | AA                              | GG                 | GG               | INTERGENIC                    |                    |                              |
| SNP_107212_A_17908 | NW_004517721.1 | scaffold2893 | 17908                   | TT                              | AA                 | AA               | INTERGENIC                    |                    |                              |
| SNP_107213_A_25997 | NW_004517721.1 | scaffold2893 | 25997                   | TT                              | CC                 | CC               | INTERGENIC                    |                    |                              |
| SNP_107214_A_26026 | NW_004517721.1 | scaffold2893 | 26026                   | CC                              | TT                 | TT               | INTERGENIC                    |                    |                              |

| SNPs IDs           | Chromosome IDs | Chromosomes  | Physical positions (bp) | CDC Frontier (Reference genome) | (Pusa 1103 & HPNB) | (ILWC 46 & LPNB) | Sequence Components of genome | Gene accession IDs | Putative functions           |
|--------------------|----------------|--------------|-------------------------|---------------------------------|--------------------|------------------|-------------------------------|--------------------|------------------------------|
| SNP_107215_A_26057 | NW_004517721.1 | scaffold2893 | 26057                   | AA                              | GG                 | GG               | INTERGENIC                    |                    |                              |
| SNP_107216_A_26125 | NW_004517721.1 | scaffold2893 | 26125                   | GG                              | AA                 | AA               | INTERGENIC                    |                    |                              |
| SNP_107217_A_26286 | NW_004517721.1 | scaffold2893 | 26286                   | AA                              | TT                 | TT               | INTERGENIC                    |                    |                              |
| SNP_107218_A_26344 | NW_004517721.1 | scaffold2893 | 26344                   | TT                              | AA                 | AA               | INTERGENIC                    |                    |                              |
| SNP_107219_A_26371 | NW_004517721.1 | scaffold2893 | 26371                   | GG                              | AA                 | AA               | INTERGENIC                    |                    |                              |
| SNP_107220_A_26544 | NW_004517721.1 | scaffold2893 | 26544                   | TT                              | CC                 | CC               | INTERGENIC                    |                    |                              |
| SNP_107221_A_26582 | NW_004517721.1 | scaffold2893 | 26582                   | AA                              | TT                 | TT               | INTERGENIC                    |                    |                              |
| SNP_107222_A_26663 | NW_004517721.1 | scaffold2893 | 26663                   | TT                              | GG                 | GG               | INTERGENIC                    |                    |                              |
| SNP_107223_A_26704 | NW_004517721.1 | scaffold2893 | 26704                   | TT                              | GG                 | GG               | INTERGENIC                    |                    |                              |
| SNP_107224_A_26926 | NW_004517721.1 | scaffold2893 | 26926                   | CC                              | AA                 | AA               | INTERGENIC                    |                    |                              |
| SNP_107225_A_26963 | NW_004517721.1 | scaffold2893 | 26963                   | CC                              | TT                 | TT               | INTERGENIC                    |                    |                              |
| SNP_107226_A_27176 | NW_004517721.1 | scaffold2893 | 27176                   | GG                              | CC                 | CC               | INTERGENIC                    |                    |                              |
| SNP_107227_A_27191 | NW_004517721.1 | scaffold2893 | 27191                   | GG                              | TT                 | TT               | INTERGENIC                    |                    |                              |
| SNP_107228_A_27237 | NW_004517721.1 | scaffold2893 | 27237                   | CC                              | TT                 | TT               | INTERGENIC                    |                    |                              |
| SNP_107229_A_27538 | NW_004517721.1 | scaffold2893 | 27538                   | TT                              | CC                 | CC               | DRR                           | 101497293          | uncharacterized LOC101497293 |
| SNP_107230_A_27598 | NW_004517721.1 | scaffold2893 | 27598                   | AA                              | GG                 | GG               | DRR                           | 101497293          | uncharacterized LOC101497293 |
| SNP_107231_A_27761 | NW_004517721.1 | scaffold2893 | 27761                   | CC                              | AA                 | AA               | DRR                           | 101497293          | uncharacterized LOC101497293 |
| SNP_107232_A_27838 | NW_004517721.1 | scaffold2893 | 27838                   | CC                              | GG                 | GG               | DRR                           | 101497293          | uncharacterized LOC101497293 |
| SNP_107233_A_2789  | NW_004517723.1 | scaffold2896 | 2789                    | AA                              | GG                 | GG               | INTERGENIC                    |                    |                              |
| SNP_107234_A_19747 | NW_004517723.1 | scaffold2896 | 19747                   | AA                              | GG                 | GG               | INTERGENIC                    |                    |                              |
| SNP_107235_A_30452 | NW_004517723.1 | scaffold2896 | 30452                   | AA                              | GG                 | GG               | INTERGENIC                    |                    |                              |
| SNP_107237_A_32806 | NW_004517723.1 | scaffold2896 | 32806                   | AA                              | GG                 | GG               | INTERGENIC                    |                    |                              |

| SNPs IDs           | Chromosome IDs | Chromosomes  | Physical positions (bp) | CDC Frontier (Reference genome) | (Pusa 1103 & HPNB) | (ILWC 46 & LPNB) | Sequence genome | Components of | Gene accession IDs | Putative functions |
|--------------------|----------------|--------------|-------------------------|---------------------------------|--------------------|------------------|-----------------|---------------|--------------------|--------------------|
| SNP_107238_A_32818 | NW_004517723.1 | scaffold2896 | 32818                   | TT                              | GG                 | GG               | INTERGENIC      |               |                    |                    |
| SNP_107239_A_32843 | NW_004517723.1 | scaffold2896 | 32843                   | CC                              | TT                 | TT               | INTERGENIC      |               |                    |                    |
| SNP_107240_A_32893 | NW_004517723.1 | scaffold2896 | 32893                   | TT                              | CC                 | CC               | INTERGENIC      |               |                    |                    |
| SNP_107241_A_33014 | NW_004517723.1 | scaffold2896 | 33014                   | GG                              | AA                 | AA               | INTERGENIC      |               |                    |                    |
| SNP_107242_A_33885 | NW_004517723.1 | scaffold2896 | 33885                   | CC                              | TT                 | TT               | INTERGENIC      |               |                    |                    |
| SNP_107243_A_1067  | NW_004517727.1 | scaffold2900 | 1067                    | CC                              | GG                 | GG               | INTERGENIC      |               |                    |                    |
| SNP_107244_A_1343  | NW_004517727.1 | scaffold2900 | 1343                    | AA                              | TT                 | TT               | INTERGENIC      |               |                    |                    |
| SNP_107245_A_1596  | NW_004517727.1 | scaffold2900 | 1596                    | GG                              | AA                 | AA               | INTERGENIC      |               |                    |                    |
| SNP_107246_A_1837  | NW_004517727.1 | scaffold2900 | 1837                    | TT                              | AA                 | AA               | INTERGENIC      |               |                    |                    |
| SNP_107247_A_2134  | NW_004517727.1 | scaffold2900 | 2134                    | GG                              | CC                 | CC               | INTERGENIC      |               |                    |                    |
| SNP_107248_A_5179  | NW_004517727.1 | scaffold2900 | 5179                    | TT                              | AA                 | AA               | INTERGENIC      |               |                    |                    |
| SNP_107249_A_5298  | NW_004517727.1 | scaffold2900 | 5298                    | AA                              | CC                 | CC               | INTERGENIC      |               |                    |                    |
| SNP_107250_A_5453  | NW_004517727.1 | scaffold2900 | 5453                    | GG                              | AA                 | AA               | INTERGENIC      |               |                    |                    |
| SNP_107251_A_5570  | NW_004517727.1 | scaffold2900 | 5570                    | CC                              | TT                 | TT               | INTERGENIC      |               |                    |                    |
| SNP_107252_A_7046  | NW_004517727.1 | scaffold2900 | 7046                    | GG                              | AA                 | AA               | INTERGENIC      |               |                    |                    |
| SNP_107253_A_7330  | NW_004517727.1 | scaffold2900 | 7330                    | CC                              | TT                 | TT               | INTERGENIC      |               |                    |                    |
| SNP_107254_A_7429  | NW_004517727.1 | scaffold2900 | 7429                    | GG                              | AA                 | AA               | INTERGENIC      |               |                    |                    |
| SNP_107255_A_7480  | NW_004517727.1 | scaffold2900 | 7480                    | CC                              | AA                 | AA               | INTERGENIC      |               |                    |                    |
| SNP_107256_A_7681  | NW_004517727.1 | scaffold2900 | 7681                    | TT                              | GG                 | GG               | INTERGENIC      |               |                    |                    |
| SNP_107258_A_8196  | NW_004517727.1 | scaffold2900 | 8196                    | AA                              | GG                 | GG               | INTERGENIC      |               |                    |                    |
| SNP_107259_A_8214  | NW_004517727.1 | scaffold2900 | 8214                    | CC                              | GG                 | GG               | INTERGENIC      |               |                    |                    |
| SNP_107260_A_8418  | NW_004517727.1 | scaffold2900 | 8418                    | AA                              | TT                 | TT               | INTERGENIC      |               |                    |                    |

| SNPs IDs           | Chromosome IDs | Chromosomes  | Physical positions (bp) | CDC Frontier (Reference genome) | (Pusa 1103 & HPNB) | (ILWC 46 & LPNB) | Sequence genome | Components of | Gene accession IDs | Putative functions |
|--------------------|----------------|--------------|-------------------------|---------------------------------|--------------------|------------------|-----------------|---------------|--------------------|--------------------|
| SNP_107261_A_9514  | NW_004517727.1 | scaffold2900 | 9514                    | GG                              | AA                 | AA               | INTERGENIC      |               |                    |                    |
| SNP_107262_A_9568  | NW_004517727.1 | scaffold2900 | 9568                    | TT                              | CC                 | CC               | INTERGENIC      |               |                    |                    |
| SNP_107263_A_9570  | NW_004517727.1 | scaffold2900 | 9570                    | CC                              | TT                 | TT               | INTERGENIC      |               |                    |                    |
| SNP_107264_A_13360 | NW_004517727.1 | scaffold2900 | 13360                   | CC                              | GG                 | GG               | INTERGENIC      |               |                    |                    |
| SNP_107265_A_13488 | NW_004517727.1 | scaffold2900 | 13488                   | GG                              | TT                 | TT               | INTERGENIC      |               |                    |                    |
| SNP_107266_A_382   | NW_004517729.1 | scaffold2903 | 382                     | CC                              | TT                 | TT               | INTERGENIC      |               |                    |                    |
| SNP_107268_A_4258  | NW_004517730.1 | scaffold2904 | 4258                    | CC                              | AA                 | AA               | INTERGENIC      |               |                    |                    |
| SNP_107269_A_6058  | NW_004517730.1 | scaffold2904 | 6058                    | AA                              | GG                 | GG               | INTERGENIC      |               |                    |                    |
| SNP_107270_A_6070  | NW_004517730.1 | scaffold2904 | 6070                    | AA                              | GG                 | GG               | INTERGENIC      |               |                    |                    |
| SNP_107271_A_6154  | NW_004517730.1 | scaffold2904 | 6154                    | TT                              | AA                 | AA               | INTERGENIC      |               |                    |                    |
| SNP_107272_A_6190  | NW_004517730.1 | scaffold2904 | 6190                    | GG                              | TT                 | TT               | INTERGENIC      |               |                    |                    |
| SNP_107273_A_6196  | NW_004517730.1 | scaffold2904 | 6196                    | GG                              | AA                 | AA               | INTERGENIC      |               |                    |                    |
| SNP_107274_A_6268  | NW_004517730.1 | scaffold2904 | 6268                    | GG                              | AA                 | AA               | INTERGENIC      |               |                    |                    |
| SNP_107275_A_6487  | NW_004517730.1 | scaffold2904 | 6487                    | AA                              | GG                 | GG               | INTERGENIC      |               |                    |                    |
| SNP_107276_A_863   | NW_004517731.1 | scaffold2905 | 863                     | GG                              | AA                 | AA               | INTERGENIC      |               |                    |                    |
| SNP_107279_A_30837 | NW_004517733.1 | scaffold2907 | 30837                   | CC                              | GG                 | GG               | INTERGENIC      |               |                    |                    |
| SNP_107280_A_4051  | NW_004517737.1 | scaffold2914 | 4051                    | TT                              | CC                 | CC               | INTERGENIC      |               |                    |                    |
| SNP_107281_A_4281  | NW_004517737.1 | scaffold2914 | 4281                    | AA                              | CC                 | CC               | INTERGENIC      |               |                    |                    |
| SNP_107282_A_4300  | NW_004517737.1 | scaffold2914 | 4300                    | AA                              | GG                 | GG               | INTERGENIC      |               |                    |                    |
| SNP_107283_A_4352  | NW_004517737.1 | scaffold2914 | 4352                    | AA                              | GG                 | GG               | INTERGENIC      |               |                    |                    |
| SNP_107284_A_4358  | NW_004517737.1 | scaffold2914 | 4358                    | AA                              | GG                 | GG               | INTERGENIC      |               |                    |                    |
| SNP_107285_A_4369  | NW_004517737.1 | scaffold2914 | 4369                    | AA                              | TT                 | TT               | INTERGENIC      |               |                    |                    |



| SNPs IDs           | Chromosome IDs | Chromosomes  | Physical positions (bp) | CDC Frontier (Reference genome) | (Pusa 1103 & HPNB) | (ILWC 46 & LPNB) | Sequence genome | Components of | Gene accession IDs           | Putative functions |
|--------------------|----------------|--------------|-------------------------|---------------------------------|--------------------|------------------|-----------------|---------------|------------------------------|--------------------|
| SNP_107286_A_4381  | NW_004517737.1 | scaffold2914 | 4381                    | AA                              | GG                 | GG               | INTERGENIC      |               |                              |                    |
| SNP_107287_A_4384  | NW_004517737.1 | scaffold2914 | 4384                    | AA                              | GG                 | GG               | INTERGENIC      |               |                              |                    |
| SNP_107288_A_4397  | NW_004517737.1 | scaffold2914 | 4397                    | AA                              | GG                 | GG               | INTERGENIC      |               |                              |                    |
| SNP_107289_A_4400  | NW_004517737.1 | scaffold2914 | 4400                    | AA                              | GG                 | GG               | INTERGENIC      |               |                              |                    |
| SNP_107290_A_4459  | NW_004517737.1 | scaffold2914 | 4459                    | AA                              | GG                 | GG               | INTERGENIC      |               |                              |                    |
| SNP_107291_A_4462  | NW_004517737.1 | scaffold2914 | 4462                    | AA                              | GG                 | GG               | INTERGENIC      |               |                              |                    |
| SNP_107292_A_4468  | NW_004517737.1 | scaffold2914 | 4468                    | GG                              | AA                 | AA               | INTERGENIC      |               |                              |                    |
| SNP_107293_A_4473  | NW_004517737.1 | scaffold2914 | 4473                    | AA                              | GG                 | GG               | INTERGENIC      |               |                              |                    |
| SNP_107294_A_4480  | NW_004517737.1 | scaffold2914 | 4480                    | TT                              | CC                 | CC               | INTERGENIC      |               |                              |                    |
| SNP_107295_A_4490  | NW_004517737.1 | scaffold2914 | 4490                    | AA                              | CC                 | CC               | INTERGENIC      |               |                              |                    |
| SNP_107296_A_4803  | NW_004517737.1 | scaffold2914 | 4803                    | AA                              | GG                 | GG               | INTERGENIC      |               |                              |                    |
| SNP_107297_A_4865  | NW_004517737.1 | scaffold2914 | 4865                    | AA                              | CC                 | CC               | INTERGENIC      |               |                              |                    |
| SNP_107298_A_16282 | NW_004517738.1 | scaffold2915 | 16282                   | AA                              | CC                 | CC               | INTERGENIC      |               |                              |                    |
| SNP_107299_A_15830 | NW_004517739.1 | scaffold2916 | 15830                   | CC                              | TT                 | TT               | INTERGENIC      |               |                              |                    |
| SNP_107300_A_16059 | NW_004517739.1 | scaffold2916 | 16059                   | AA                              | GG                 | GG               | INTERGENIC      |               |                              |                    |
| SNP_107301_A_16069 | NW_004517739.1 | scaffold2916 | 16069                   | GG                              | AA                 | AA               | INTERGENIC      |               |                              |                    |
| SNP_107302_A_19658 | NW_004517739.1 | scaffold2916 | 19658                   | TT                              | CC                 | CC               | INTERGENIC      |               |                              |                    |
| SNP_107304_A_55758 | NW_004517739.1 | scaffold2916 | 55758                   | AA                              | GG                 | GG               | INTERGENIC      |               |                              |                    |
| SNP_107305_A_55803 | NW_004517739.1 | scaffold2916 | 55803                   | TT                              | CC                 | CC               | INTERGENIC      |               |                              |                    |
| SNP_107306_A_64653 | NW_004517739.1 | scaffold2916 | 64653                   | CC                              | TT                 | TT               | INTRON          | 101499057     | uncharacterized LOC101499057 |                    |
| SNP_107307_A_8588  | NW_004517742.1 | scaffold2919 | 8588                    | GG                              | AA                 | AA               | INTERGENIC      |               |                              |                    |
| SNP_107308_A_8641  | NW_004517742.1 | scaffold2919 | 8641                    | GG                              | AA                 | AA               | INTERGENIC      |               |                              |                    |

| SNPs IDs           | Chromosome IDs | Chromosomes  | Physical positions (bp) | CDC Frontier (Reference genome) | (Pusa 1103 & HPNB) | (ILWC 46 & LPNB) | Sequence genome | Components of | Gene accession IDs | Putative functions |
|--------------------|----------------|--------------|-------------------------|---------------------------------|--------------------|------------------|-----------------|---------------|--------------------|--------------------|
| SNP_107309_A_1640  | NW_004517744.1 | scaffold2921 | 1640                    | CC                              | TT                 | TT               | INTERGENIC      |               |                    |                    |
| SNP_107310_A_2082  | NW_004517744.1 | scaffold2921 | 2082                    | AA                              | GG                 | GG               | INTERGENIC      |               |                    |                    |
| SNP_107311_A_8507  | NW_004517744.1 | scaffold2921 | 8507                    | GG                              | CC                 | CC               | INTERGENIC      |               |                    |                    |
| SNP_107312_A_8519  | NW_004517744.1 | scaffold2921 | 8519                    | TT                              | CC                 | CC               | INTERGENIC      |               |                    |                    |
| SNP_107313_A_8521  | NW_004517744.1 | scaffold2921 | 8521                    | CC                              | TT                 | TT               | INTERGENIC      |               |                    |                    |
| SNP_107314_A_8523  | NW_004517744.1 | scaffold2921 | 8523                    | AA                              | GG                 | GG               | INTERGENIC      |               |                    |                    |
| SNP_107315_A_8529  | NW_004517744.1 | scaffold2921 | 8529                    | TT                              | AA                 | AA               | INTERGENIC      |               |                    |                    |
| SNP_107316_A_11467 | NW_004517744.1 | scaffold2921 | 11467                   | GG                              | TT                 | TT               | INTERGENIC      |               |                    |                    |
| SNP_107317_A_11494 | NW_004517744.1 | scaffold2921 | 11494                   | CC                              | TT                 | TT               | INTERGENIC      |               |                    |                    |
| SNP_107318_A_11786 | NW_004517744.1 | scaffold2921 | 11786                   | TT                              | AA                 | AA               | INTERGENIC      |               |                    |                    |
| SNP_107319_A_11789 | NW_004517744.1 | scaffold2921 | 11789                   | CC                              | AA                 | TT               | INTERGENIC      |               |                    |                    |
| SNP_107320_A_248   | NW_004517745.1 | scaffold2922 | 248                     | AA                              | GG                 | GG               | INTERGENIC      |               |                    |                    |
| SNP_107321_A_253   | NW_004517745.1 | scaffold2922 | 253                     | CC                              | TT                 | TT               | INTERGENIC      |               |                    |                    |
| SNP_107322_A_2335  | NW_004517745.1 | scaffold2922 | 2335                    | GG                              | AA                 | AA               | INTERGENIC      |               |                    |                    |
| SNP_107323_A_2377  | NW_004517745.1 | scaffold2922 | 2377                    | AA                              | GG                 | GG               | INTERGENIC      |               |                    |                    |
| SNP_107324_A_2507  | NW_004517745.1 | scaffold2922 | 2507                    | AA                              | GG                 | GG               | INTERGENIC      |               |                    |                    |
| SNP_107325_A_5554  | NW_004517745.1 | scaffold2922 | 5554                    | GG                              | AA                 | AA               | INTERGENIC      |               |                    |                    |
| SNP_107326_A_5780  | NW_004517745.1 | scaffold2922 | 5780                    | TT                              | CC                 | CC               | INTERGENIC      |               |                    |                    |
| SNP_107327_A_5820  | NW_004517745.1 | scaffold2922 | 5820                    | TT                              | GG                 | GG               | INTERGENIC      |               |                    |                    |
| SNP_107328_A_5851  | NW_004517745.1 | scaffold2922 | 5851                    | TT                              | CC                 | CC               | INTERGENIC      |               |                    |                    |
| SNP_107329_A_5982  | NW_004517745.1 | scaffold2922 | 5982                    | TT                              | GG                 | GG               | INTERGENIC      |               |                    |                    |
| SNP_107330_A_5997  | NW_004517745.1 | scaffold2922 | 5997                    | CC                              | TT                 | TT               | INTERGENIC      |               |                    |                    |

| SNPs IDs           | Chromosome IDs | Chromosomes  | Physical positions (bp) | CDC Frontier (Reference genome) | (Pusa 1103 & HPNB) | (ILWC 46 & LPNB) | Sequence genome | Components of | Gene accession IDs | Putative functions |
|--------------------|----------------|--------------|-------------------------|---------------------------------|--------------------|------------------|-----------------|---------------|--------------------|--------------------|
| SNP_107331_A_6003  | NW_004517745.1 | scaffold2922 | 6003                    | AA                              | TT                 | TT               | INTERGENIC      |               |                    |                    |
| SNP_107332_A_6486  | NW_004517745.1 | scaffold2922 | 6486                    | GG                              | AA                 | AA               | INTERGENIC      |               |                    |                    |
| SNP_107333_A_6656  | NW_004517745.1 | scaffold2922 | 6656                    | GG                              | AA                 | AA               | INTERGENIC      |               |                    |                    |
| SNP_107334_A_6937  | NW_004517745.1 | scaffold2922 | 6937                    | TT                              | CC                 | CC               | INTERGENIC      |               |                    |                    |
| SNP_107335_A_6993  | NW_004517745.1 | scaffold2922 | 6993                    | CC                              | TT                 | TT               | INTERGENIC      |               |                    |                    |
| SNP_107336_A_7102  | NW_004517745.1 | scaffold2922 | 7102                    | TT                              | CC                 | CC               | INTERGENIC      |               |                    |                    |
| SNP_107337_A_7461  | NW_004517745.1 | scaffold2922 | 7461                    | TT                              | CC                 | CC               | INTERGENIC      |               |                    |                    |
| SNP_107338_A_7852  | NW_004517745.1 | scaffold2922 | 7852                    | GG                              | AA                 | AA               | INTERGENIC      |               |                    |                    |
| SNP_107339_A_7919  | NW_004517745.1 | scaffold2922 | 7919                    | GG                              | AA                 | AA               | INTERGENIC      |               |                    |                    |
| SNP_107340_A_8048  | NW_004517745.1 | scaffold2922 | 8048                    | CC                              | TT                 | TT               | INTERGENIC      |               |                    |                    |
| SNP_107341_A_8142  | NW_004517745.1 | scaffold2922 | 8142                    | AA                              | GG                 | GG               | INTERGENIC      |               |                    |                    |
| SNP_107342_A_8407  | NW_004517745.1 | scaffold2922 | 8407                    | AA                              | CC                 | CC               | INTERGENIC      |               |                    |                    |
| SNP_107343_A_8419  | NW_004517745.1 | scaffold2922 | 8419                    | CC                              | TT                 | TT               | INTERGENIC      |               |                    |                    |
| SNP_107344_A_8526  | NW_004517745.1 | scaffold2922 | 8526                    | CC                              | AA                 | AA               | INTERGENIC      |               |                    |                    |
| SNP_107345_A_8545  | NW_004517745.1 | scaffold2922 | 8545                    | TT                              | CC                 | CC               | INTERGENIC      |               |                    |                    |
| SNP_107346_A_8566  | NW_004517745.1 | scaffold2922 | 8566                    | GG                              | TT                 | TT               | INTERGENIC      |               |                    |                    |
| SNP_107347_A_8664  | NW_004517745.1 | scaffold2922 | 8664                    | AA                              | CC                 | CC               | INTERGENIC      |               |                    |                    |
| SNP_107348_A_11353 | NW_004517745.1 | scaffold2922 | 11353                   | TT                              | CC                 | CC               | INTERGENIC      |               |                    |                    |
| SNP_107349_A_11380 | NW_004517745.1 | scaffold2922 | 11380                   | GG                              | AA                 | AA               | INTERGENIC      |               |                    |                    |
| SNP_107350_A_11381 | NW_004517745.1 | scaffold2922 | 11381                   | AA                              | CC                 | CC               | INTERGENIC      |               |                    |                    |
| SNP_107351_A_13895 | NW_004517745.1 | scaffold2922 | 13895                   | GG                              | AA                 | AA               | INTERGENIC      |               |                    |                    |
| SNP_107352_A_143   | NW_004517746.1 | scaffold2924 | 143                     | CC                              | AA                 | AA               | INTERGENIC      |               |                    |                    |

| SNPs IDs           | Chromosome IDs | Chromosomes  | Physical positions (bp) | CDC Frontier (Reference genome) | (Pusa 1103 & HPNB) | (ILWC 46 & LPNB) | Sequence genome | Components of | Gene accession IDs | Putative functions |
|--------------------|----------------|--------------|-------------------------|---------------------------------|--------------------|------------------|-----------------|---------------|--------------------|--------------------|
| SNP_107353_A_152   | NW_004517746.1 | scaffold2924 | 152                     | AA                              | GG                 | GG               | INTERGENIC      |               |                    |                    |
| SNP_107354_A_168   | NW_004517746.1 | scaffold2924 | 168                     | AA                              | CC                 | CC               | INTERGENIC      |               |                    |                    |
| SNP_107355_A_11979 | NW_004517746.1 | scaffold2924 | 11979                   | AA                              | TT                 | TT               | INTERGENIC      |               |                    |                    |
| SNP_107356_A_12042 | NW_004517746.1 | scaffold2924 | 12042                   | TT                              | CC                 | CC               | INTERGENIC      |               |                    |                    |
| SNP_107357_A_12273 | NW_004517746.1 | scaffold2924 | 12273                   | CC                              | TT                 | TT               | INTERGENIC      |               |                    |                    |
| SNP_107358_A_12279 | NW_004517746.1 | scaffold2924 | 12279                   | TT                              | GG                 | GG               | INTERGENIC      |               |                    |                    |
| SNP_107359_A_16326 | NW_004517746.1 | scaffold2924 | 16326                   | CC                              | AA                 | AA               | INTERGENIC      |               |                    |                    |
| SNP_107361_A_27004 | NW_004517746.1 | scaffold2924 | 27004                   | CC                              | TT                 | TT               | INTERGENIC      |               |                    |                    |
| SNP_107362_A_27355 | NW_004517746.1 | scaffold2924 | 27355                   | AA                              | CC                 | CC               | INTERGENIC      |               |                    |                    |
| SNP_107363_A_27364 | NW_004517746.1 | scaffold2924 | 27364                   | TT                              | CC                 | CC               | INTERGENIC      |               |                    |                    |
| SNP_107364_A_1853  | NW_004517749.1 | scaffold2928 | 1853                    | AA                              | TT                 | TT               | INTERGENIC      |               |                    |                    |
| SNP_107365_A_1871  | NW_004517749.1 | scaffold2928 | 1871                    | CC                              | AA                 | AA               | INTERGENIC      |               |                    |                    |
| SNP_107366_A_1958  | NW_004517749.1 | scaffold2928 | 1958                    | AA                              | CC                 | CC               | INTERGENIC      |               |                    |                    |
| SNP_107367_A_2314  | NW_004517749.1 | scaffold2928 | 2314                    | CC                              | TT                 | TT               | INTERGENIC      |               |                    |                    |
| SNP_107368_A_7084  | NW_004517749.1 | scaffold2928 | 7084                    | CC                              | TT                 | TT               | INTERGENIC      |               |                    |                    |
| SNP_107369_A_7090  | NW_004517749.1 | scaffold2928 | 7090                    | TT                              | CC                 | CC               | INTERGENIC      |               |                    |                    |
| SNP_107370_A_7123  | NW_004517749.1 | scaffold2928 | 7123                    | TT                              | AA                 | AA               | INTERGENIC      |               |                    |                    |
| SNP_107371_A_7126  | NW_004517749.1 | scaffold2928 | 7126                    | AA                              | TT                 | TT               | INTERGENIC      |               |                    |                    |
| SNP_107372_A_7132  | NW_004517749.1 | scaffold2928 | 7132                    | GG                              | AA                 | AA               | INTERGENIC      |               |                    |                    |
| SNP_107373_A_7164  | NW_004517749.1 | scaffold2928 | 7164                    | TT                              | AA                 | AA               | INTERGENIC      |               |                    |                    |
| SNP_107374_A_7183  | NW_004517749.1 | scaffold2928 | 7183                    | GG                              | AA                 | AA               | INTERGENIC      |               |                    |                    |
| SNP_107375_A_7189  | NW_004517749.1 | scaffold2928 | 7189                    | GG                              | AA                 | AA               | INTERGENIC      |               |                    |                    |

| SNPs IDs           | Chromosome IDs | Chromosomes  | Physical positions (bp) | CDC Frontier (Reference genome) | (Pusa 1103 & HPNB) | (ILWC 46 & LPNB) | Sequence genome | Components of | Gene accession IDs | Putative functions |
|--------------------|----------------|--------------|-------------------------|---------------------------------|--------------------|------------------|-----------------|---------------|--------------------|--------------------|
| SNP_107376_A_7201  | NW_004517749.1 | scaffold2928 | 7201                    | CC                              | TT                 | TT               | INTERGENIC      |               |                    |                    |
| SNP_107377_A_8143  | NW_004517749.1 | scaffold2928 | 8143                    | GG                              | TT                 | TT               | INTERGENIC      |               |                    |                    |
| SNP_107378_A_9539  | NW_004517749.1 | scaffold2928 | 9539                    | TT                              | CC                 | CC               | INTERGENIC      |               |                    |                    |
| SNP_107379_A_9594  | NW_004517749.1 | scaffold2928 | 9594                    | AA                              | TT                 | TT               | INTERGENIC      |               |                    |                    |
| SNP_107380_A_10290 | NW_004517749.1 | scaffold2928 | 10290                   | CC                              | AA                 | AA               | INTERGENIC      |               |                    |                    |
| SNP_107381_A_10476 | NW_004517749.1 | scaffold2928 | 10476                   | TT                              | GG                 | GG               | INTERGENIC      |               |                    |                    |
| SNP_107382_A_10500 | NW_004517749.1 | scaffold2928 | 10500                   | CC                              | TT                 | TT               | INTERGENIC      |               |                    |                    |
| SNP_107384_A_12996 | NW_004517749.1 | scaffold2928 | 12996                   | GG                              | CC                 | CC               | INTERGENIC      |               |                    |                    |
| SNP_107385_A_13023 | NW_004517749.1 | scaffold2928 | 13023                   | TT                              | GG                 | GG               | INTERGENIC      |               |                    |                    |
| SNP_107386_A_13328 | NW_004517749.1 | scaffold2928 | 13328                   | CC                              | AA                 | AA               | INTERGENIC      |               |                    |                    |
| SNP_107387_A_13339 | NW_004517749.1 | scaffold2928 | 13339                   | TT                              | CC                 | CC               | INTERGENIC      |               |                    |                    |
| SNP_107388_A_16246 | NW_004517749.1 | scaffold2928 | 16246                   | TT                              | CC                 | CC               | INTERGENIC      |               |                    |                    |
| SNP_107389_A_20529 | NW_004517749.1 | scaffold2928 | 20529                   | TT                              | AA                 | AA               | INTERGENIC      |               |                    |                    |
| SNP_107391_A_22961 | NW_004517749.1 | scaffold2928 | 22961                   | CC                              | TT                 | TT               | INTERGENIC      |               |                    |                    |
| SNP_107392_A_22984 | NW_004517749.1 | scaffold2928 | 22984                   | AA                              | GG                 | GG               | INTERGENIC      |               |                    |                    |
| SNP_107393_A_23024 | NW_004517749.1 | scaffold2928 | 23024                   | GG                              | AA                 | AA               | INTERGENIC      |               |                    |                    |
| SNP_107394_A_23054 | NW_004517749.1 | scaffold2928 | 23054                   | AA                              | TT                 | TT               | INTERGENIC      |               |                    |                    |
| SNP_107395_A_23061 | NW_004517749.1 | scaffold2928 | 23061                   | TT                              | GG                 | GG               | INTERGENIC      |               |                    |                    |
| SNP_107396_A_23156 | NW_004517749.1 | scaffold2928 | 23156                   | AA                              | TT                 | TT               | INTERGENIC      |               |                    |                    |
| SNP_107397_A_23179 | NW_004517749.1 | scaffold2928 | 23179                   | GG                              | CC                 | CC               | INTERGENIC      |               |                    |                    |
| SNP_107398_A_23192 | NW_004517749.1 | scaffold2928 | 23192                   | AA                              | GG                 | GG               | INTERGENIC      |               |                    |                    |
| SNP_107399_A_23349 | NW_004517749.1 | scaffold2928 | 23349                   | AA                              | CC                 | CC               | INTERGENIC      |               |                    |                    |

| SNPs IDs           | Chromosome IDs | Chromosomes  | Physical positions (bp) | CDC Frontier (Reference genome) | (Pusa 1103 & HPNB) | (ILWC 46 & LPNB) | Sequence genome | Components of | Gene accession IDs | Putative functions |
|--------------------|----------------|--------------|-------------------------|---------------------------------|--------------------|------------------|-----------------|---------------|--------------------|--------------------|
| SNP_107400_A_23474 | NW_004517749.1 | scaffold2928 | 23474                   | TT                              | AA                 | AA               | INTERGENIC      |               |                    |                    |
| SNP_107401_A_23510 | NW_004517749.1 | scaffold2928 | 23510                   | GG                              | TT                 | TT               | INTERGENIC      |               |                    |                    |
| SNP_107402_A_23520 | NW_004517749.1 | scaffold2928 | 23520                   | TT                              | AA                 | AA               | INTERGENIC      |               |                    |                    |
| SNP_107403_A_23631 | NW_004517749.1 | scaffold2928 | 23631                   | AA                              | CC                 | CC               | INTERGENIC      |               |                    |                    |
| SNP_107404_A_23661 | NW_004517749.1 | scaffold2928 | 23661                   | GG                              | AA                 | AA               | INTERGENIC      |               |                    |                    |
| SNP_107406_A_23739 | NW_004517749.1 | scaffold2928 | 23739                   | TT                              | CC                 | CC               | INTERGENIC      |               |                    |                    |
| SNP_107407_A_23745 | NW_004517749.1 | scaffold2928 | 23745                   | TT                              | CC                 | CC               | INTERGENIC      |               |                    |                    |
| SNP_107408_A_23809 | NW_004517749.1 | scaffold2928 | 23809                   | GG                              | TT                 | TT               | INTERGENIC      |               |                    |                    |
| SNP_107409_A_23816 | NW_004517749.1 | scaffold2928 | 23816                   | TT                              | CC                 | CC               | INTERGENIC      |               |                    |                    |
| SNP_107410_A_23839 | NW_004517749.1 | scaffold2928 | 23839                   | GG                              | CC                 | CC               | INTERGENIC      |               |                    |                    |
| SNP_107411_A_23850 | NW_004517749.1 | scaffold2928 | 23850                   | GG                              | CC                 | CC               | INTERGENIC      |               |                    |                    |
| SNP_107412_A_23880 | NW_004517749.1 | scaffold2928 | 23880                   | GG                              | AA                 | AA               | INTERGENIC      |               |                    |                    |
| SNP_107413_A_23900 | NW_004517749.1 | scaffold2928 | 23900                   | TT                              | CC                 | CC               | INTERGENIC      |               |                    |                    |
| SNP_107414_A_23946 | NW_004517749.1 | scaffold2928 | 23946                   | AA                              | TT                 | TT               | INTERGENIC      |               |                    |                    |
| SNP_107415_A_24034 | NW_004517749.1 | scaffold2928 | 24034                   | TT                              | AA                 | AA               | INTERGENIC      |               |                    |                    |
| SNP_107416_A_24299 | NW_004517749.1 | scaffold2928 | 24299                   | GG                              | TT                 | TT               | INTERGENIC      |               |                    |                    |
| SNP_107417_A_24323 | NW_004517749.1 | scaffold2928 | 24323                   | TT                              | CC                 | CC               | INTERGENIC      |               |                    |                    |
| SNP_107418_A_24401 | NW_004517749.1 | scaffold2928 | 24401                   | GG                              | AA                 | AA               | INTERGENIC      |               |                    |                    |
| SNP_107419_A_24487 | NW_004517749.1 | scaffold2928 | 24487                   | AA                              | GG                 | GG               | INTERGENIC      |               |                    |                    |
| SNP_107420_A_24615 | NW_004517749.1 | scaffold2928 | 24615                   | TT                              | AA                 | AA               | INTERGENIC      |               |                    |                    |
| SNP_107421_A_24661 | NW_004517749.1 | scaffold2928 | 24661                   | GG                              | AA                 | AA               | INTERGENIC      |               |                    |                    |
| SNP_107422_A_24696 | NW_004517749.1 | scaffold2928 | 24696                   | GG                              | TT                 | TT               | INTERGENIC      |               |                    |                    |

| SNPs IDs           | Chromosome IDs | Chromosomes  | Physical positions (bp) | CDC Frontier (Reference genome) | (Pusa 1103 & HPNB) | (ILWC 46 & LPNB) | Sequence genome | Components of | Gene accession IDs | Putative functions |
|--------------------|----------------|--------------|-------------------------|---------------------------------|--------------------|------------------|-----------------|---------------|--------------------|--------------------|
| SNP_107423_A_24762 | NW_004517749.1 | scaffold2928 | 24762                   | GG                              | TT                 | TT               | INTERGENIC      |               |                    |                    |
| SNP_107424_A_24783 | NW_004517749.1 | scaffold2928 | 24783                   | GG                              | TT                 | TT               | INTERGENIC      |               |                    |                    |
| SNP_107425_A_24829 | NW_004517749.1 | scaffold2928 | 24829                   | CC                              | TT                 | TT               | INTERGENIC      |               |                    |                    |
| SNP_107426_A_24830 | NW_004517749.1 | scaffold2928 | 24830                   | GG                              | AA                 | AA               | INTERGENIC      |               |                    |                    |
| SNP_107427_A_24912 | NW_004517749.1 | scaffold2928 | 24912                   | AA                              | GG                 | GG               | INTERGENIC      |               |                    |                    |
| SNP_107428_A_24987 | NW_004517749.1 | scaffold2928 | 24987                   | AA                              | TT                 | TT               | INTERGENIC      |               |                    |                    |
| SNP_107429_A_25005 | NW_004517749.1 | scaffold2928 | 25005                   | TT                              | AA                 | AA               | INTERGENIC      |               |                    |                    |
| SNP_107430_A_25018 | NW_004517749.1 | scaffold2928 | 25018                   | CC                              | TT                 | TT               | INTERGENIC      |               |                    |                    |
| SNP_107431_A_25372 | NW_004517749.1 | scaffold2928 | 25372                   | CC                              | AA                 | AA               | INTERGENIC      |               |                    |                    |
| SNP_107432_A_25574 | NW_004517749.1 | scaffold2928 | 25574                   | GG                              | CC                 | CC               | INTERGENIC      |               |                    |                    |
| SNP_107433_A_30936 | NW_004517749.1 | scaffold2928 | 30936                   | CC                              | TT                 | TT               | INTERGENIC      |               |                    |                    |
| SNP_107434_A_30990 | NW_004517749.1 | scaffold2928 | 30990                   | AA                              | GG                 | GG               | INTERGENIC      |               |                    |                    |
| SNP_107435_A_31210 | NW_004517749.1 | scaffold2928 | 31210                   | AA                              | TT                 | TT               | INTERGENIC      |               |                    |                    |
| SNP_107436_A_31339 | NW_004517749.1 | scaffold2928 | 31339                   | TT                              | CC                 | CC               | INTERGENIC      |               |                    |                    |
| SNP_107437_A_34636 | NW_004517749.1 | scaffold2928 | 34636                   | AA                              | CC                 | CC               | INTERGENIC      |               |                    |                    |
| SNP_107438_A_35666 | NW_004517749.1 | scaffold2928 | 35666                   | AA                              | GG                 | GG               | INTERGENIC      |               |                    |                    |
| SNP_107439_A_36931 | NW_004517749.1 | scaffold2928 | 36931                   | AA                              | CC                 | CC               | INTERGENIC      |               |                    |                    |
| SNP_107440_A_38660 | NW_004517749.1 | scaffold2928 | 38660                   | GG                              | AA                 | AA               | INTERGENIC      |               |                    |                    |
| SNP_107441_A_38891 | NW_004517749.1 | scaffold2928 | 38891                   | CC                              | TT                 | TT               | INTERGENIC      |               |                    |                    |
| SNP_107443_A_43472 | NW_004517749.1 | scaffold2928 | 43472                   | AA                              | TT                 | TT               | INTERGENIC      |               |                    |                    |
| SNP_107444_A_43952 | NW_004517749.1 | scaffold2928 | 43952                   | AA                              | CC                 | CC               | INTERGENIC      |               |                    |                    |
| SNP_107445_A_44186 | NW_004517749.1 | scaffold2928 | 44186                   | CC                              | TT                 | TT               | INTERGENIC      |               |                    |                    |

| SNPs IDs           | Chromosome IDs | Chromosomes  | Physical positions (bp) | CDC Frontier (Reference genome) | (Pusa 1103 & HPNB) | (ILWC 46 & LPNB) | Sequence genome | Components of | Gene accession IDs | Putative functions |
|--------------------|----------------|--------------|-------------------------|---------------------------------|--------------------|------------------|-----------------|---------------|--------------------|--------------------|
| SNP_107446_A_44257 | NW_004517749.1 | scaffold2928 | 44257                   | TT                              | CC                 | CC               | INTERGENIC      |               |                    |                    |
| SNP_107448_A_44571 | NW_004517749.1 | scaffold2928 | 44571                   | GG                              | AA                 | AA               | INTERGENIC      |               |                    |                    |
| SNP_107449_A_44587 | NW_004517749.1 | scaffold2928 | 44587                   | TT                              | AA                 | AA               | INTERGENIC      |               |                    |                    |
| SNP_107450_A_44595 | NW_004517749.1 | scaffold2928 | 44595                   | AA                              | GG                 | GG               | INTERGENIC      |               |                    |                    |
| SNP_107451_A_44685 | NW_004517749.1 | scaffold2928 | 44685                   | CC                              | TT                 | TT               | INTERGENIC      |               |                    |                    |
| SNP_107452_A_640   | NW_004517751.1 | scaffold2931 | 640                     | TT                              | CC                 | CC               | INTERGENIC      |               |                    |                    |
| SNP_107453_A_10672 | NW_004517751.1 | scaffold2931 | 10672                   | CC                              | AA                 | AA               | INTERGENIC      |               |                    |                    |
| SNP_107454_A_1869  | NW_004517752.1 | scaffold2932 | 1869                    | GG                              | TT                 | TT               | INTERGENIC      |               |                    |                    |
| SNP_107456_A_2665  | NW_004517752.1 | scaffold2932 | 2665                    | AA                              | CC                 | CC               | INTERGENIC      |               |                    |                    |
| SNP_107457_A_3014  | NW_004517752.1 | scaffold2932 | 3014                    | GG                              | AA                 | AA               | INTERGENIC      |               |                    |                    |
| SNP_107458_A_3079  | NW_004517752.1 | scaffold2932 | 3079                    | TT                              | CC                 | CC               | INTERGENIC      |               |                    |                    |
| SNP_107459_A_3428  | NW_004517752.1 | scaffold2932 | 3428                    | CC                              | AA                 | AA               | INTERGENIC      |               |                    |                    |
| SNP_107460_A_3471  | NW_004517752.1 | scaffold2932 | 3471                    | GG                              | AA                 | AA               | INTERGENIC      |               |                    |                    |
| SNP_107461_A_3613  | NW_004517752.1 | scaffold2932 | 3613                    | CC                              | GG                 | GG               | INTERGENIC      |               |                    |                    |
| SNP_107462_A_3619  | NW_004517752.1 | scaffold2932 | 3619                    | AA                              | TT                 | TT               | INTERGENIC      |               |                    |                    |
| SNP_107463_A_3870  | NW_004517752.1 | scaffold2932 | 3870                    | CC                              | TT                 | TT               | INTERGENIC      |               |                    |                    |
| SNP_107465_A_4780  | NW_004517752.1 | scaffold2932 | 4780                    | TT                              | AA                 | AA               | INTERGENIC      |               |                    |                    |
| SNP_107466_A_4983  | NW_004517752.1 | scaffold2932 | 4983                    | AA                              | GG                 | GG               | INTERGENIC      |               |                    |                    |
| SNP_107467_A_6407  | NW_004517752.1 | scaffold2932 | 6407                    | CC                              | AA                 | AA               | INTERGENIC      |               |                    |                    |
| SNP_107468_A_6493  | NW_004517752.1 | scaffold2932 | 6493                    | TT                              | AA                 | AA               | INTERGENIC      |               |                    |                    |
| SNP_107469_A_6538  | NW_004517752.1 | scaffold2932 | 6538                    | TT                              | AA                 | AA               | INTERGENIC      |               |                    |                    |
| SNP_107470_A_10368 | NW_004517752.1 | scaffold2932 | 10368                   | TT                              | AA                 | AA               | INTERGENIC      |               |                    |                    |



| SNPs IDs           | Chromosome IDs | Chromosomes  | Physical positions (bp) | CDC Frontier (Reference genome) | (Pusa 1103 & HPNB) | (ILWC 46 & LPNB) | Sequence genome | Components of | Gene accession IDs | Putative functions |
|--------------------|----------------|--------------|-------------------------|---------------------------------|--------------------|------------------|-----------------|---------------|--------------------|--------------------|
| SNP_107471_A_10717 | NW_004517752.1 | scaffold2932 | 10717                   | AA                              | TT                 | TT               | INTERGENIC      |               |                    |                    |
| SNP_107472_A_10847 | NW_004517752.1 | scaffold2932 | 10847                   | GG                              | AA                 | AA               | INTERGENIC      |               |                    |                    |
| SNP_107473_A_12605 | NW_004517752.1 | scaffold2932 | 12605                   | CC                              | AA                 | AA               | INTERGENIC      |               |                    |                    |
| SNP_107474_A_12813 | NW_004517752.1 | scaffold2932 | 12813                   | TT                              | AA                 | AA               | INTERGENIC      |               |                    |                    |
| SNP_107475_A_12835 | NW_004517752.1 | scaffold2932 | 12835                   | GG                              | AA                 | AA               | INTERGENIC      |               |                    |                    |
| SNP_107476_A_13156 | NW_004517752.1 | scaffold2932 | 13156                   | TT                              | CC                 | CC               | INTERGENIC      |               |                    |                    |
| SNP_107477_A_13313 | NW_004517752.1 | scaffold2932 | 13313                   | GG                              | AA                 | AA               | INTERGENIC      |               |                    |                    |
| SNP_107478_A_16997 | NW_004517752.1 | scaffold2932 | 16997                   | CC                              | GG                 | GG               | INTERGENIC      |               |                    |                    |
| SNP_107479_A_17173 | NW_004517752.1 | scaffold2932 | 17173                   | AA                              | TT                 | TT               | INTERGENIC      |               |                    |                    |
| SNP_107480_A_18612 | NW_004517752.1 | scaffold2932 | 18612                   | GG                              | TT                 | TT               | INTERGENIC      |               |                    |                    |
| SNP_107481_A_19932 | NW_004517752.1 | scaffold2932 | 19932                   | AA                              | CC                 | CC               | INTERGENIC      |               |                    |                    |
| SNP_107482_A_25106 | NW_004517752.1 | scaffold2932 | 25106                   | CC                              | AA                 | AA               | INTERGENIC      |               |                    |                    |
| SNP_107483_A_25226 | NW_004517752.1 | scaffold2932 | 25226                   | AA                              | GG                 | GG               | INTERGENIC      |               |                    |                    |
| SNP_107484_A_25438 | NW_004517752.1 | scaffold2932 | 25438                   | TT                              | CC                 | CC               | INTERGENIC      |               |                    |                    |
| SNP_107485_A_26155 | NW_004517752.1 | scaffold2932 | 26155                   | GG                              | AA                 | AA               | INTERGENIC      |               |                    |                    |
| SNP_107486_A_64    | NW_004517753.1 | scaffold2933 | 64                      | TT                              | AA                 | AA               | INTERGENIC      |               |                    |                    |
| SNP_107487_A_69    | NW_004517753.1 | scaffold2933 | 69                      | GG                              | AA                 | AA               | INTERGENIC      |               |                    |                    |
| SNP_107488_A_94    | NW_004517753.1 | scaffold2933 | 94                      | TT                              | CC                 | CC               | INTERGENIC      |               |                    |                    |
| SNP_107489_A_1143  | NW_004517753.1 | scaffold2933 | 1143                    | TT                              | GG                 | GG               | INTERGENIC      |               |                    |                    |
| SNP_107490_A_1533  | NW_004517753.1 | scaffold2933 | 1533                    | CC                              | GG                 | GG               | INTERGENIC      |               |                    |                    |
| SNP_107491_A_1535  | NW_004517753.1 | scaffold2933 | 1535                    | AA                              | TT                 | TT               | INTERGENIC      |               |                    |                    |
| SNP_107492_A_1699  | NW_004517754.1 | scaffold2934 | 1699                    | CC                              | GG                 | GG               | INTERGENIC      |               |                    |                    |

| SNPs IDs           | Chromosome IDs | Chromosomes  | Physical positions (bp) | CDC Frontier (Reference genome) | (Pusa 1103 & HPNB) | (ILWC 46 & LPNB) | Sequence genome | Components of | Gene accession IDs | Putative functions |
|--------------------|----------------|--------------|-------------------------|---------------------------------|--------------------|------------------|-----------------|---------------|--------------------|--------------------|
| SNP_107494_A_1744  | NW_004517754.1 | scaffold2934 | 1744                    | AA                              | CC                 | CC               | INTERGENIC      |               |                    |                    |
| SNP_107496_A_75    | NW_004517757.1 | scaffold2937 | 75                      | AA                              | GG                 | GG               | INTERGENIC      |               |                    |                    |
| SNP_107497_A_64    | NW_004517760.1 | scaffold2940 | 64                      | GG                              | TT                 | TT               | INTERGENIC      |               |                    |                    |
| SNP_107498_A_118   | NW_004517760.1 | scaffold2940 | 118                     | CC                              | TT                 | TT               | INTERGENIC      |               |                    |                    |
| SNP_107499_A_378   | NW_004517760.1 | scaffold2940 | 378                     | CC                              | TT                 | TT               | INTERGENIC      |               |                    |                    |
| SNP_107500_A_710   | NW_004517760.1 | scaffold2940 | 710                     | TT                              | CC                 | CC               | INTERGENIC      |               |                    |                    |
| SNP_107501_A_890   | NW_004517760.1 | scaffold2940 | 890                     | AA                              | CC                 | CC               | INTERGENIC      |               |                    |                    |
| SNP_107502_A_909   | NW_004517760.1 | scaffold2940 | 909                     | GG                              | AA                 | AA               | INTERGENIC      |               |                    |                    |
| SNP_107503_A_976   | NW_004517760.1 | scaffold2940 | 976                     | CC                              | TT                 | TT               | INTERGENIC      |               |                    |                    |
| SNP_107504_A_989   | NW_004517760.1 | scaffold2940 | 989                     | GG                              | CC                 | CC               | INTERGENIC      |               |                    |                    |
| SNP_107505_A_1031  | NW_004517760.1 | scaffold2940 | 1031                    | GG                              | AA                 | AA               | INTERGENIC      |               |                    |                    |
| SNP_107506_A_1039  | NW_004517760.1 | scaffold2940 | 1039                    | AA                              | GG                 | GG               | INTERGENIC      |               |                    |                    |
| SNP_107507_A_1055  | NW_004517760.1 | scaffold2940 | 1055                    | TT                              | AA                 | AA               | INTERGENIC      |               |                    |                    |
| SNP_107508_A_1089  | NW_004517760.1 | scaffold2940 | 1089                    | CC                              | GG                 | GG               | INTERGENIC      |               |                    |                    |
| SNP_107509_A_1100  | NW_004517760.1 | scaffold2940 | 1100                    | AA                              | GG                 | GG               | INTERGENIC      |               |                    |                    |
| SNP_107510_A_1101  | NW_004517760.1 | scaffold2940 | 1101                    | TT                              | CC                 | CC               | INTERGENIC      |               |                    |                    |
| SNP_107511_A_3297  | NW_004517760.1 | scaffold2940 | 3297                    | CC                              | GG                 | GG               | INTERGENIC      |               |                    |                    |
| SNP_107512_A_7777  | NW_004517760.1 | scaffold2940 | 7777                    | GG                              | AA                 | AA               | INTERGENIC      |               |                    |                    |
| SNP_107513_A_7820  | NW_004517760.1 | scaffold2940 | 7820                    | CC                              | TT                 | TT               | INTERGENIC      |               |                    |                    |
| SNP_107514_A_25438 | NW_004517760.1 | scaffold2940 | 25438                   | TT                              | AA                 | AA               | INTERGENIC      |               |                    |                    |
| SNP_107515_A_25453 | NW_004517760.1 | scaffold2940 | 25453                   | TT                              | CC                 | CC               | INTERGENIC      |               |                    |                    |
| SNP_107516_A_25499 | NW_004517760.1 | scaffold2940 | 25499                   | TT                              | GG                 | GG               | INTERGENIC      |               |                    |                    |

| SNPs IDs           | Chromosome IDs | Chromosomes  | Physical positions (bp) | CDC Frontier (Reference genome) | (Pusa 1103 & HPNB) | (ILWC 46 & LPNB) | Sequence genome | Components of | Gene accession IDs                | Putative functions |
|--------------------|----------------|--------------|-------------------------|---------------------------------|--------------------|------------------|-----------------|---------------|-----------------------------------|--------------------|
| SNP_107517_A_25863 | NW_004517760.1 | scaffold2940 | 25863                   | CC                              | AA                 | AA               | INTERGENIC      |               |                                   |                    |
| SNP_107518_A_7864  | NW_004517763.1 | scaffold2946 | 7864                    | GG                              | CC                 | CC               | INTERGENIC      |               |                                   |                    |
| SNP_107519_A_8679  | NW_004517763.1 | scaffold2946 | 8679                    | AA                              | GG                 | GG               | INTERGENIC      |               |                                   |                    |
| SNP_107520_A_22271 | NW_004517763.1 | scaffold2946 | 22271                   | GG                              | CC                 | CC               | INTERGENIC      |               |                                   |                    |
| SNP_107521_A_22486 | NW_004517763.1 | scaffold2946 | 22486                   | CC                              | TT                 | TT               | INTERGENIC      |               |                                   |                    |
| SNP_107522_A_25613 | NW_004517763.1 | scaffold2946 | 25613                   | AA                              | GG                 | GG               | INTERGENIC      |               |                                   |                    |
| SNP_107523_A_31270 | NW_004517763.1 | scaffold2946 | 31270                   | TT                              | CC                 | CC               | INTERGENIC      |               |                                   |                    |
| SNP_107524_A_340   | NW_004517764.1 | scaffold2947 | 340                     | AA                              | TT                 | TT               | INTERGENIC      |               |                                   |                    |
| SNP_107525_A_453   | NW_004517764.1 | scaffold2947 | 453                     | AA                              | TT                 | TT               | INTERGENIC      |               |                                   |                    |
| SNP_107526_A_542   | NW_004517764.1 | scaffold2947 | 542                     | TT                              | CC                 | CC               | INTERGENIC      |               |                                   |                    |
| SNP_107527_A_488   | NW_004517765.1 | scaffold2950 | 488                     | AA                              | GG                 | GG               | INTERGENIC      |               |                                   |                    |
| SNP_107528_A_507   | NW_004517765.1 | scaffold2950 | 507                     | TT                              | CC                 | CC               | INTERGENIC      |               |                                   |                    |
| SNP_107530_A_583   | NW_004517765.1 | scaffold2950 | 583                     | AA                              | GG                 | GG               | INTERGENIC      |               |                                   |                    |
| SNP_107531_A_615   | NW_004517765.1 | scaffold2950 | 615                     | CC                              | TT                 | TT               | INTERGENIC      |               |                                   |                    |
| SNP_107532_A_634   | NW_004517765.1 | scaffold2950 | 634                     | CC                              | TT                 | TT               | INTERGENIC      |               |                                   |                    |
| SNP_107533_A_636   | NW_004517765.1 | scaffold2950 | 636                     | TT                              | CC                 | CC               | INTERGENIC      |               |                                   |                    |
| SNP_107535_A_1266  | NW_004517765.1 | scaffold2950 | 1266                    | GG                              | AA                 | AA               | DRR             | 101499370     | UDP-glycosyltransferase 74B1-like |                    |
| SNP_107537_A_1469  | NW_004517765.1 | scaffold2950 | 1469                    | CC                              | TT                 | TT               | DRR             | 101499370     | UDP-glycosyltransferase 74B1-like |                    |
| SNP_107538_A_4281  | NW_004517765.1 | scaffold2950 | 4281                    | CC                              | TT                 | TT               | URR             | 101499370     | UDP-glycosyltransferase 74B1-like |                    |
| SNP_107541_A_6930  | NW_004517765.1 | scaffold2950 | 6930                    | TT                              | AA                 | AA               | INTERGENIC      |               |                                   |                    |
| SNP_107542_A_7738  | NW_004517765.1 | scaffold2950 | 7738                    | CC                              | TT                 | TT               | INTERGENIC      |               |                                   |                    |
| SNP_107544_A_7793  | NW_004517765.1 | scaffold2950 | 7793                    | CC                              | TT                 | TT               | INTERGENIC      |               |                                   |                    |

| SNPs IDs           | Chromosome IDs | Chromosomes  | Physical positions (bp) | CDC Frontier (Reference genome) | (Pusa 1103 & HPNB) | (ILWC 46 & LPNB) | Sequence Components of genome | Gene accession IDs | Putative functions  |
|--------------------|----------------|--------------|-------------------------|---------------------------------|--------------------|------------------|-------------------------------|--------------------|---------------------|
| SNP_107545_A_8111  | NW_004517765.1 | scaffold2950 | 8111                    | TT                              | CC                 | CC               | INTERGENIC                    |                    |                     |
| SNP_107546_A_8183  | NW_004517765.1 | scaffold2950 | 8183                    | TT                              | CC                 | CC               | INTERGENIC                    |                    |                     |
| SNP_107548_A_8404  | NW_004517765.1 | scaffold2950 | 8404                    | TT                              | CC                 | CC               | NON_SYNONYMOUS_CODING         | id219392           | Unknown function    |
| SNP_107549_A_8516  | NW_004517765.1 | scaffold2950 | 8516                    | CC                              | GG                 | GG               | NON_SYNONYMOUS_CODING         | 101499677          | DNA polymerase beta |
| SNP_107550_A_8524  | NW_004517765.1 | scaffold2950 | 8524                    | CC                              | GG                 | GG               | NON_SYNONYMOUS_CODING         | id219392           | Unknown function    |
| SNP_107551_A_8534  | NW_004517765.1 | scaffold2950 | 8534                    | GG                              | AA                 | AA               | NON_SYNONYMOUS_CODING         | id219392           | Unknown function    |
| SNP_107552_A_8609  | NW_004517765.1 | scaffold2950 | 8609                    | TT                              | CC                 | CC               | INTRON                        | 101499677          | DNA polymerase beta |
| SNP_107553_A_8613  | NW_004517765.1 | scaffold2950 | 8613                    | AA                              | CC                 | CC               | INTRON                        | 101499677          | DNA polymerase beta |
| SNP_107554_A_10103 | NW_004517765.1 | scaffold2950 | 10103                   | GG                              | AA                 | AA               | INTRON                        | 101499677          | DNA polymerase beta |
| SNP_107556_A_10218 | NW_004517765.1 | scaffold2950 | 10218                   | GG                              | TT                 | TT               | INTRON                        | 101499677          | DNA polymerase beta |
| SNP_107557_A_10318 | NW_004517765.1 | scaffold2950 | 10318                   | GG                              | CC                 | CC               | INTRON                        | 101499677          | DNA polymerase beta |
| SNP_107558_A_10370 | NW_004517765.1 | scaffold2950 | 10370                   | CC                              | GG                 | GG               | NON_SYNONYMOUS_CODING         | id219392           | Unknown function    |
| SNP_107559_A_10559 | NW_004517765.1 | scaffold2950 | 10559                   | AA                              | GG                 | GG               | INTRON                        | 101499677          | DNA polymerase beta |
| SNP_107561_A_10710 | NW_004517765.1 | scaffold2950 | 10710                   | TT                              | GG                 | GG               | INTRON                        | 101499677          | DNA polymerase beta |
| SNP_107562_A_10713 | NW_004517765.1 | scaffold2950 | 10713                   | CC                              | TT                 | TT               | INTRON                        | 101499677          | DNA polymerase beta |
| SNP_107563_A_10717 | NW_004517765.1 | scaffold2950 | 10717                   | AA                              | CC                 | CC               | INTRON                        | 101499677          | DNA polymerase beta |
| SNP_107564_A_10798 | NW_004517765.1 | scaffold2950 | 10798                   | CC                              | AA                 | AA               | INTRON                        | 101499677          | DNA polymerase beta |
| SNP_107565_A_10957 | NW_004517765.1 | scaffold2950 | 10957                   | TT                              | CC                 | CC               | INTRON                        | 101499677          | DNA polymerase beta |
| SNP_107566_A_11035 | NW_004517765.1 | scaffold2950 | 11035                   | GG                              | TT                 | TT               | NON_SYNONYMOUS_CODING         | 101499677          | DNA polymerase beta |
| SNP_107567_A_11159 | NW_004517765.1 | scaffold2950 | 11159                   | TT                              | GG                 | GG               | INTRON                        | 101499677          | DNA polymerase beta |
| SNP_107568_A_11353 | NW_004517765.1 | scaffold2950 | 11353                   | GG                              | AA                 | AA               | NON_SYNONYMOUS_CODING         | id219392           | Unknown function    |
| SNP_107569_A_11372 | NW_004517765.1 | scaffold2950 | 11372                   | CC                              | TT                 | TT               | NON_SYNONYMOUS_CODING         | id219392           | Unknown function    |

| SNPs IDs           | Chromosome IDs | Chromosomes  | Physical positions (bp) | CDC Frontier (Reference genome) | (Pusa 1103 & HPNB) | (ILWC 46 & LPNB) | Sequence Components of genome | Gene accession IDs | Putative functions                                                        |
|--------------------|----------------|--------------|-------------------------|---------------------------------|--------------------|------------------|-------------------------------|--------------------|---------------------------------------------------------------------------|
| SNP_107570_A_11415 | NW_004517765.1 | scaffold2950 | 11415                   | AA                              | TT                 | TT               | INTRON                        | 101499677          | DNA polymerase beta                                                       |
| SNP_107571_A_11610 | NW_004517765.1 | scaffold2950 | 11610                   | AA                              | GG                 | GG               | INTRON                        | 101499677          | DNA polymerase beta                                                       |
| SNP_107572_A_11663 | NW_004517765.1 | scaffold2950 | 11663                   | GG                              | AA                 | AA               | INTRON                        | 101499677          | DNA polymerase beta                                                       |
| SNP_107573_A_11675 | NW_004517765.1 | scaffold2950 | 11675                   | CC                              | TT                 | TT               | INTRON                        | 101499677          | DNA polymerase beta                                                       |
| SNP_107574_A_11906 | NW_004517765.1 | scaffold2950 | 11906                   | AA                              | TT                 | TT               | INTRON                        | 101499677          | DNA polymerase beta                                                       |
| SNP_107575_A_12126 | NW_004517765.1 | scaffold2950 | 12126                   | AA                              | GG                 | GG               | INTRON                        | 101499677          | DNA polymerase beta                                                       |
| SNP_107576_A_12292 | NW_004517765.1 | scaffold2950 | 12292                   | CC                              | AA                 | AA               | SYNONYMOUS_CODING             | id219392           | Unknown function                                                          |
| SNP_107577_A_66    | NW_004517766.1 | scaffold2951 | 66                      | GG                              | AA                 | AA               | INTERGENIC                    |                    |                                                                           |
| SNP_107578_A_12841 | NW_004517767.1 | scaffold2954 | 12841                   | CC                              | TT                 | TT               | INTERGENIC                    |                    |                                                                           |
| SNP_107579_A_12853 | NW_004517767.1 | scaffold2954 | 12853                   | CC                              | TT                 | TT               | INTERGENIC                    |                    |                                                                           |
| SNP_107580_A_902   | NW_004517768.1 | scaffold2955 | 902                     | GG                              | AA                 | AA               | INTERGENIC                    |                    |                                                                           |
| SNP_107581_A_5767  | NW_004517768.1 | scaffold2955 | 5767                    | TT                              | CC                 | CC               | INTERGENIC                    |                    |                                                                           |
| SNP_107582_A_5831  | NW_004517768.1 | scaffold2955 | 5831                    | TT                              | CC                 | CC               | INTERGENIC                    |                    |                                                                           |
| SNP_107583_A_6064  | NW_004517768.1 | scaffold2955 | 6064                    | TT                              | CC                 | CC               | INTERGENIC                    |                    |                                                                           |
| SNP_107585_A_8000  | NW_004517768.1 | scaffold2955 | 8000                    | TT                              | CC                 | CC               | NON_SYNONYMOUS_CODING         | 101500529          | pentatricopeptide repeat-containing protein mitochondrial-like At1g12775, |
| SNP_107586_A_8068  | NW_004517768.1 | scaffold2955 | 8068                    | GG                              | TT                 | TT               | NON_SYNONYMOUS_CODING         | 101500529          | pentatricopeptide repeat-containing protein mitochondrial-like At1g12775, |
| SNP_107587_A_8104  | NW_004517768.1 | scaffold2955 | 8104                    | CC                              | TT                 | TT               | SYNONYMOUS_CODING             | 101500529          | pentatricopeptide repeat-containing protein mitochondrial-like At1g12775, |
| SNP_107588_A_9114  | NW_004517768.1 | scaffold2955 | 9114                    | AA                              | CC                 | CC               | NON_SYNONYMOUS_CODING         | 101500529          | pentatricopeptide repeat-containing protein mitochondrial-like At1g12775, |
| SNP_107589_A_9449  | NW_004517768.1 | scaffold2955 | 9449                    | CC                              | GG                 | GG               | NON_SYNONYMOUS_CODING         | 101500529          | pentatricopeptide repeat-containing protein mitochondrial-like At1g12775, |
| SNP_107590_A_9511  | NW_004517768.1 | scaffold2955 | 9511                    | AA                              | GG                 | GG               | NON_SYNONYMOUS_CODING         | 101500529          | pentatricopeptide repeat-containing protein mitochondrial-like At1g12775, |
| SNP_107591_A_9554  | NW_004517768.1 | scaffold2955 | 9554                    | AA                              | GG                 | GG               | NON_SYNONYMOUS_CODING         | 101500529          | pentatricopeptide repeat-containing protein mitochondrial-like At1g12775, |
| SNP_107592_A_9563  | NW_004517768.1 | scaffold2955 | 9563                    | GG                              | AA                 | AA               | NON_SYNONYMOUS_CODING         | 101500529          | pentatricopeptide repeat-containing protein mitochondrial-like At1g12775, |

| SNPs IDs           | Chromosome IDs | Chromosomes  | Physical positions (bp) | CDC Frontier (Reference genome) | (Pusa 1103 & HPNB) | (ILWC 46 & LPNB) | Sequence Components of genome | Gene accession IDs | Putative functions                                                        |
|--------------------|----------------|--------------|-------------------------|---------------------------------|--------------------|------------------|-------------------------------|--------------------|---------------------------------------------------------------------------|
| SNP_107593_A_9623  | NW_004517768.1 | scaffold2955 | 9623                    | AA                              | GG                 | GG               | NON_SYNONYMOUS_CODING         | 101500529          | pentatricopeptide repeat-containing protein mitochondrial-like At1g12775, |
| SNP_107595_A_9761  | NW_004517768.1 | scaffold2955 | 9761                    | TT                              | CC                 | CC               | DRR                           | 101500529          | pentatricopeptide repeat-containing protein mitochondrial-like At1g12775, |
| SNP_107597_A_10096 | NW_004517768.1 | scaffold2955 | 10096                   | TT                              | CC                 | CC               | DRR                           | 101500529          | pentatricopeptide repeat-containing protein mitochondrial-like At1g12775, |
| SNP_107598_A_10157 | NW_004517768.1 | scaffold2955 | 10157                   | GG                              | AA                 | AA               | DRR                           | 101500529          | pentatricopeptide repeat-containing protein mitochondrial-like At1g12775, |
| SNP_107600_A_11439 | NW_004517768.1 | scaffold2955 | 11439                   | CC                              | GG                 | GG               | URR                           | 101500529          | pentatricopeptide repeat-containing protein mitochondrial-like At1g12775, |
| SNP_107601_A_11650 | NW_004517768.1 | scaffold2955 | 11650                   | CC                              | TT                 | TT               | URR                           | 101500529          | pentatricopeptide repeat-containing protein mitochondrial-like At1g12775, |
| SNP_107602_A_11697 | NW_004517768.1 | scaffold2955 | 11697                   | AA                              | CC                 | CC               | URR                           | 101500529          | pentatricopeptide repeat-containing protein mitochondrial-like At1g12775, |
| SNP_107603_A_11700 | NW_004517768.1 | scaffold2955 | 11700                   | AA                              | TT                 | TT               | URR                           | 101500529          | pentatricopeptide repeat-containing protein mitochondrial-like At1g12775, |
| SNP_107605_A_11736 | NW_004517768.1 | scaffold2955 | 11736                   | TT                              | CC                 | CC               | URR                           | 101500529          | pentatricopeptide repeat-containing protein mitochondrial-like At1g12775, |
| SNP_107606_A_11949 | NW_004517768.1 | scaffold2955 | 11949                   | TT                              | CC                 | CC               | URR                           | 101500529          | pentatricopeptide repeat-containing protein mitochondrial-like At1g12775, |
| SNP_107607_A_11980 | NW_004517768.1 | scaffold2955 | 11980                   | CC                              | TT                 | TT               | URR                           | 101500529          | pentatricopeptide repeat-containing protein mitochondrial-like At1g12775, |
| SNP_107608_A_22130 | NW_004517768.1 | scaffold2955 | 22130                   | TT                              | AA                 | AA               | INTERGENIC                    |                    |                                                                           |
| SNP_107609_A_22478 | NW_004517768.1 | scaffold2955 | 22478                   | CC                              | TT                 | TT               | INTERGENIC                    |                    |                                                                           |
| SNP_107610_A_23103 | NW_004517768.1 | scaffold2955 | 23103                   | TT                              | AA                 | AA               | INTERGENIC                    |                    |                                                                           |
| SNP_107611_A_29861 | NW_004517768.1 | scaffold2955 | 29861                   | GG                              | TT                 | TT               | INTRON                        | 101500847          | uncharacterized LOC101500847                                              |
| SNP_107612_A_33676 | NW_004517768.1 | scaffold2955 | 33676                   | TT                              | CC                 | CC               | INTRON                        | 101500847          | uncharacterized LOC101500847                                              |
| SNP_107614_A_37377 | NW_004517768.1 | scaffold2955 | 37377                   | CC                              | TT                 | TT               | URR                           | 101500847          | uncharacterized LOC101500847                                              |
| SNP_107615_A_37727 | NW_004517768.1 | scaffold2955 | 37727                   | CC                              | TT                 | TT               | URR                           | 101501173          | uncharacterized LOC101501173                                              |
| SNP_107616_A_41741 | NW_004517768.1 | scaffold2955 | 41741                   | GG                              | TT                 | TT               | INTERGENIC                    |                    |                                                                           |
| SNP_107617_A_41747 | NW_004517768.1 | scaffold2955 | 41747                   | GG                              | AA                 | AA               | INTERGENIC                    |                    |                                                                           |
| SNP_107618_A_41756 | NW_004517768.1 | scaffold2955 | 41756                   | AA                              | GG                 | GG               | INTERGENIC                    |                    |                                                                           |
| SNP_107619_A_43518 | NW_004517768.1 | scaffold2955 | 43518                   | TT                              | CC                 | CC               | INTERGENIC                    |                    |                                                                           |

| SNPs IDs           | Chromosome IDs | Chromosomes  | Physical positions (bp) | CDC Frontier (Reference genome) | (Pusa 1103 & HPNB) | (ILWC 46 & LPNB) | Sequence genome | Components of | Gene accession IDs | Putative functions |
|--------------------|----------------|--------------|-------------------------|---------------------------------|--------------------|------------------|-----------------|---------------|--------------------|--------------------|
| SNP_107620_A_43615 | NW_004517768.1 | scaffold2955 | 43615                   | GG                              | AA                 | AA               | INTERGENIC      |               |                    |                    |
| SNP_107621_A_43632 | NW_004517768.1 | scaffold2955 | 43632                   | TT                              | GG                 | GG               | INTERGENIC      |               |                    |                    |
| SNP_107622_A_1404  | NW_004517770.1 | scaffold2957 | 1404                    | CC                              | GG                 | GG               | INTERGENIC      |               |                    |                    |
| SNP_107623_A_2652  | NW_004517770.1 | scaffold2957 | 2652                    | GG                              | TT                 | TT               | INTERGENIC      |               |                    |                    |
| SNP_107624_A_9523  | NW_004517770.1 | scaffold2957 | 9523                    | AA                              | TT                 | TT               | INTERGENIC      |               |                    |                    |
| SNP_107625_A_9956  | NW_004517770.1 | scaffold2957 | 9956                    | AA                              | CC                 | CC               | INTERGENIC      |               |                    |                    |
| SNP_107626_A_13669 | NW_004517772.1 | scaffold2959 | 13669                   | CC                              | GG                 | GG               | INTERGENIC      |               |                    |                    |
| SNP_107627_A_13862 | NW_004517772.1 | scaffold2959 | 13862                   | TT                              | CC                 | CC               | INTERGENIC      |               |                    |                    |
| SNP_107628_A_13962 | NW_004517772.1 | scaffold2959 | 13962                   | CC                              | TT                 | TT               | INTERGENIC      |               |                    |                    |
| SNP_107629_A_13963 | NW_004517772.1 | scaffold2959 | 13963                   | AA                              | GG                 | GG               | INTERGENIC      |               |                    |                    |
| SNP_107630_A_16048 | NW_004517772.1 | scaffold2959 | 16048                   | TT                              | GG                 | GG               | INTERGENIC      |               |                    |                    |
| SNP_107631_A_16382 | NW_004517772.1 | scaffold2959 | 16382                   | TT                              | GG                 | GG               | INTERGENIC      |               |                    |                    |
| SNP_107632_A_465   | NW_004517773.1 | scaffold2960 | 465                     | GG                              | AA                 | AA               | INTERGENIC      |               |                    |                    |
| SNP_107634_A_208   | NW_004517775.1 | scaffold2964 | 208                     | GG                              | CC                 | CC               | INTERGENIC      |               |                    |                    |
| SNP_107635_A_209   | NW_004517775.1 | scaffold2964 | 209                     | AA                              | TT                 | TT               | INTERGENIC      |               |                    |                    |
| SNP_107636_A_239   | NW_004517775.1 | scaffold2964 | 239                     | GG                              | CC                 | CC               | INTERGENIC      |               |                    |                    |
| SNP_107637_A_311   | NW_004517775.1 | scaffold2964 | 311                     | GG                              | AA                 | AA               | INTERGENIC      |               |                    |                    |
| SNP_107638_A_503   | NW_004517775.1 | scaffold2964 | 503                     | CC                              | AA                 | AA               | INTERGENIC      |               |                    |                    |
| SNP_107639_A_629   | NW_004517775.1 | scaffold2964 | 629                     | TT                              | GG                 | GG               | INTERGENIC      |               |                    |                    |
| SNP_107640_A_1079  | NW_004517778.1 | scaffold2967 | 1079                    | AA                              | GG                 | GG               | INTERGENIC      |               |                    |                    |
| SNP_107641_A_22066 | NW_004517779.1 | scaffold2968 | 22066                   | TT                              | AA                 | AA               | INTERGENIC      |               |                    |                    |
| SNP_107642_A_22115 | NW_004517779.1 | scaffold2968 | 22115                   | CC                              | TT                 | TT               | INTERGENIC      |               |                    |                    |

| SNPs IDs           | Chromosome IDs | Chromosomes  | Physical positions (bp) | CDC Frontier (Reference genome) | (Pusa 1103 & HPNB) | (ILWC 46 & LPNB) | Sequence Components of genome | Gene accession IDs | Putative functions                           |
|--------------------|----------------|--------------|-------------------------|---------------------------------|--------------------|------------------|-------------------------------|--------------------|----------------------------------------------|
| SNP_107643_A_5222  | NW_004517780.1 | scaffold2969 | 5222                    | CC                              | TT                 | TT               | INTERGENIC                    |                    |                                              |
| SNP_107644_A_23683 | NW_004517780.1 | scaffold2969 | 23683                   | TT                              | CC                 | CC               | INTERGENIC                    |                    |                                              |
| SNP_107645_A_23685 | NW_004517780.1 | scaffold2969 | 23685                   | CC                              | TT                 | TT               | INTERGENIC                    |                    |                                              |
| SNP_107646_A_23701 | NW_004517780.1 | scaffold2969 | 23701                   | CC                              | GG                 | GG               | INTERGENIC                    |                    |                                              |
| SNP_107647_A_23717 | NW_004517780.1 | scaffold2969 | 23717                   | GG                              | TT                 | TT               | INTERGENIC                    |                    |                                              |
| SNP_107648_A_23738 | NW_004517780.1 | scaffold2969 | 23738                   | AA                              | GG                 | GG               | INTERGENIC                    |                    |                                              |
| SNP_107649_A_23747 | NW_004517780.1 | scaffold2969 | 23747                   | TT                              | GG                 | GG               | INTERGENIC                    |                    |                                              |
| SNP_107650_A_23752 | NW_004517780.1 | scaffold2969 | 23752                   | CC                              | TT                 | TT               | INTERGENIC                    |                    |                                              |
| SNP_107651_A_23753 | NW_004517780.1 | scaffold2969 | 23753                   | CC                              | TT                 | TT               | INTERGENIC                    |                    |                                              |
| SNP_107652_A_23756 | NW_004517780.1 | scaffold2969 | 23756                   | TT                              | GG                 | GG               | INTERGENIC                    |                    |                                              |
| SNP_107653_A_23761 | NW_004517780.1 | scaffold2969 | 23761                   | GG                              | TT                 | TT               | INTERGENIC                    |                    |                                              |
| SNP_107654_A_25801 | NW_004517780.1 | scaffold2969 | 25801                   | GG                              | AA                 | AA               | INTERGENIC                    |                    |                                              |
| SNP_107655_A_25860 | NW_004517780.1 | scaffold2969 | 25860                   | GG                              | TT                 | TT               | INTERGENIC                    |                    |                                              |
| SNP_107656_A_46357 | NW_004517780.1 | scaffold2969 | 46357                   | TT                              | CC                 | CC               | INTERGENIC                    |                    |                                              |
| SNP_107657_A_46398 | NW_004517780.1 | scaffold2969 | 46398                   | GG                              | TT                 | TT               | INTERGENIC                    |                    |                                              |
| SNP_107658_A_46661 | NW_004517780.1 | scaffold2969 | 46661                   | AA                              | GG                 | GG               | INTERGENIC                    |                    |                                              |
| SNP_107659_A_50489 | NW_004517780.1 | scaffold2969 | 50489                   | TT                              | CC                 | CC               | INTRON                        | 101501803          | protein ZINC INDUCED FACILITATOR-LIKE 1-like |
| SNP_107660_A_52000 | NW_004517780.1 | scaffold2969 | 52000                   | GG                              | AA                 | AA               | INTRON                        | 101501803          | protein ZINC INDUCED FACILITATOR-LIKE 1-like |
| SNP_107661_A_416   | NW_004517782.1 | scaffold2974 | 416                     | TT                              | CC                 | CC               | INTERGENIC                    |                    |                                              |
| SNP_107662_A_1391  | NW_004517782.1 | scaffold2974 | 1391                    | AA                              | TT                 | TT               | INTERGENIC                    |                    |                                              |
| SNP_107663_A_1475  | NW_004517782.1 | scaffold2974 | 1475                    | CC                              | TT                 | TT               | INTERGENIC                    |                    |                                              |
| SNP_107664_A_583   | NW_004517785.1 | scaffold2979 | 583                     | GG                              | TT                 | TT               | INTERGENIC                    |                    |                                              |



| SNPs IDs           | Chromosome IDs | Chromosomes  | Physical positions (bp) | CDC Frontier (Reference genome) | (Pusa 1103 & HPNB) | (ILWC 46 & LPNB) | Sequence genome | Components of | Gene accession IDs | Putative functions |
|--------------------|----------------|--------------|-------------------------|---------------------------------|--------------------|------------------|-----------------|---------------|--------------------|--------------------|
| SNP_107665_A_1923  | NW_004517787.1 | scaffold2981 | 1923                    | TT                              | CC                 | CC               | INTERGENIC      |               |                    |                    |
| SNP_107666_A_11062 | NW_004517787.1 | scaffold2981 | 11062                   | CC                              | TT                 | TT               | INTERGENIC      |               |                    |                    |
| SNP_107668_A_17559 | NW_004517787.1 | scaffold2981 | 17559                   | AA                              | GG                 | GG               | INTERGENIC      |               |                    |                    |
| SNP_107669_A_21864 | NW_004517787.1 | scaffold2981 | 21864                   | GG                              | TT                 | TT               | INTERGENIC      |               |                    |                    |
| SNP_107670_A_25616 | NW_004517787.1 | scaffold2981 | 25616                   | AA                              | GG                 | GG               | INTERGENIC      |               |                    |                    |
| SNP_107671_A_25636 | NW_004517787.1 | scaffold2981 | 25636                   | GG                              | TT                 | TT               | INTERGENIC      |               |                    |                    |
| SNP_107672_A_32612 | NW_004517787.1 | scaffold2981 | 32612                   | GG                              | AA                 | AA               | INTERGENIC      |               |                    |                    |
| SNP_107673_A_32613 | NW_004517787.1 | scaffold2981 | 32613                   | TT                              | CC                 | CC               | INTERGENIC      |               |                    |                    |
| SNP_107674_A_32635 | NW_004517787.1 | scaffold2981 | 32635                   | CC                              | TT                 | TT               | INTERGENIC      |               |                    |                    |
| SNP_107675_A_32818 | NW_004517787.1 | scaffold2981 | 32818                   | TT                              | GG                 | GG               | INTERGENIC      |               |                    |                    |
| SNP_107676_A_33066 | NW_004517787.1 | scaffold2981 | 33066                   | TT                              | CC                 | CC               | INTERGENIC      |               |                    |                    |
| SNP_107677_A_33082 | NW_004517787.1 | scaffold2981 | 33082                   | TT                              | GG                 | GG               | INTERGENIC      |               |                    |                    |
| SNP_107678_A_33104 | NW_004517787.1 | scaffold2981 | 33104                   | TT                              | CC                 | CC               | INTERGENIC      |               |                    |                    |
| SNP_107679_A_33159 | NW_004517787.1 | scaffold2981 | 33159                   | GG                              | TT                 | TT               | INTERGENIC      |               |                    |                    |
| SNP_107680_A_33160 | NW_004517787.1 | scaffold2981 | 33160                   | AA                              | TT                 | TT               | INTERGENIC      |               |                    |                    |
| SNP_107681_A_33251 | NW_004517787.1 | scaffold2981 | 33251                   | GG                              | AA                 | AA               | INTERGENIC      |               |                    |                    |
| SNP_107682_A_33260 | NW_004517787.1 | scaffold2981 | 33260                   | AA                              | GG                 | GG               | INTERGENIC      |               |                    |                    |
| SNP_107683_A_33331 | NW_004517787.1 | scaffold2981 | 33331                   | TT                              | GG                 | GG               | INTERGENIC      |               |                    |                    |
| SNP_107684_A_33437 | NW_004517787.1 | scaffold2981 | 33437                   | TT                              | GG                 | GG               | INTERGENIC      |               |                    |                    |
| SNP_107685_A_33635 | NW_004517787.1 | scaffold2981 | 33635                   | CC                              | TT                 | TT               | INTERGENIC      |               |                    |                    |
| SNP_107686_A_14751 | NW_004517789.1 | scaffold2984 | 14751                   | TT                              | CC                 | CC               | INTERGENIC      |               |                    |                    |
| SNP_107687_A_14964 | NW_004517789.1 | scaffold2984 | 14964                   | TT                              | AA                 | AA               | INTERGENIC      |               |                    |                    |

| SNPs IDs           | Chromosome IDs | Chromosomes  | Physical positions (bp) | CDC Frontier genome (Reference genome) | (Pusa 1103 & HPNB) | (ILWC 46 & LPNB) | Sequence genome | Components of | Gene accession IDs | Putative functions |
|--------------------|----------------|--------------|-------------------------|----------------------------------------|--------------------|------------------|-----------------|---------------|--------------------|--------------------|
| SNP_107688_A_19446 | NW_004517789.1 | scaffold2984 | 19446                   | CC                                     | TT                 | TT               | INTERGENIC      |               |                    |                    |
| SNP_107689_A_19473 | NW_004517789.1 | scaffold2984 | 19473                   | CC                                     | GG                 | GG               | INTERGENIC      |               |                    |                    |
| SNP_107690_A_20948 | NW_004517789.1 | scaffold2984 | 20948                   | TT                                     | CC                 | CC               | INTERGENIC      |               |                    |                    |
| SNP_107691_A_21560 | NW_004517789.1 | scaffold2984 | 21560                   | CC                                     | TT                 | TT               | INTERGENIC      |               |                    |                    |
| SNP_107692_A_22074 | NW_004517789.1 | scaffold2984 | 22074                   | CC                                     | GG                 | GG               | INTERGENIC      |               |                    |                    |
| SNP_107693_A_22156 | NW_004517789.1 | scaffold2984 | 22156                   | TT                                     | CC                 | CC               | INTERGENIC      |               |                    |                    |
| SNP_107694_A_22391 | NW_004517789.1 | scaffold2984 | 22391                   | TT                                     | GG                 | GG               | INTERGENIC      |               |                    |                    |
| SNP_107695_A_22717 | NW_004517789.1 | scaffold2984 | 22717                   | GG                                     | AA                 | AA               | INTERGENIC      |               |                    |                    |
| SNP_107696_A_23023 | NW_004517789.1 | scaffold2984 | 23023                   | TT                                     | CC                 | CC               | INTERGENIC      |               |                    |                    |
| SNP_107697_A_23138 | NW_004517789.1 | scaffold2984 | 23138                   | GG                                     | AA                 | AA               | INTERGENIC      |               |                    |                    |
| SNP_107698_A_23234 | NW_004517789.1 | scaffold2984 | 23234                   | GG                                     | AA                 | AA               | INTERGENIC      |               |                    |                    |
| SNP_107699_A_24345 | NW_004517789.1 | scaffold2984 | 24345                   | GG                                     | TT                 | TT               | INTERGENIC      |               |                    |                    |
| SNP_107700_A_24499 | NW_004517789.1 | scaffold2984 | 24499                   | TT                                     | CC                 | CC               | INTERGENIC      |               |                    |                    |
| SNP_107701_A_24625 | NW_004517789.1 | scaffold2984 | 24625                   | TT                                     | GG                 | GG               | INTERGENIC      |               |                    |                    |
| SNP_107702_A_24678 | NW_004517789.1 | scaffold2984 | 24678                   | GG                                     | AA                 | AA               | INTERGENIC      |               |                    |                    |
| SNP_107703_A_24998 | NW_004517789.1 | scaffold2984 | 24998                   | CC                                     | TT                 | TT               | INTERGENIC      |               |                    |                    |
| SNP_107704_A_25048 | NW_004517789.1 | scaffold2984 | 25048                   | CC                                     | TT                 | TT               | INTERGENIC      |               |                    |                    |
| SNP_107705_A_25065 | NW_004517789.1 | scaffold2984 | 25065                   | TT                                     | AA                 | AA               | INTERGENIC      |               |                    |                    |
| SNP_107706_A_25371 | NW_004517789.1 | scaffold2984 | 25371                   | AA                                     | GG                 | GG               | INTERGENIC      |               |                    |                    |
| SNP_107707_A_25845 | NW_004517789.1 | scaffold2984 | 25845                   | TT                                     | GG                 | GG               | INTERGENIC      |               |                    |                    |
| SNP_107708_A_15503 | NW_004517792.1 | scaffold2988 | 15503                   | TT                                     | CC                 | CC               | INTERGENIC      |               |                    |                    |
| SNP_107709_A_15621 | NW_004517792.1 | scaffold2988 | 15621                   | TT                                     | CC                 | CC               | INTERGENIC      |               |                    |                    |

| SNPs IDs           | Chromosome IDs | Chromosomes  | Physical positions (bp) | CDC Frontier (Reference genome) | (Pusa 1103 & HPNB) | (ILWC 46 & LPNB) | Sequence genome | Components of | Gene accession IDs | Putative functions |
|--------------------|----------------|--------------|-------------------------|---------------------------------|--------------------|------------------|-----------------|---------------|--------------------|--------------------|
| SNP_107710_A_15731 | NW_004517792.1 | scaffold2988 | 15731                   | AA                              | GG                 | GG               | INTERGENIC      |               |                    |                    |
| SNP_107711_A_15733 | NW_004517792.1 | scaffold2988 | 15733                   | CC                              | TT                 | TT               | INTERGENIC      |               |                    |                    |
| SNP_107713_A_16363 | NW_004517792.1 | scaffold2988 | 16363                   | CC                              | AA                 | AA               | INTERGENIC      |               |                    |                    |
| SNP_107714_A_16864 | NW_004517792.1 | scaffold2988 | 16864                   | AA                              | TT                 | TT               | INTERGENIC      |               |                    |                    |
| SNP_107715_A_23155 | NW_004517792.1 | scaffold2988 | 23155                   | AA                              | CC                 | CC               | INTERGENIC      |               |                    |                    |
| SNP_107716_A_23458 | NW_004517792.1 | scaffold2988 | 23458                   | AA                              | GG                 | GG               | INTERGENIC      |               |                    |                    |
| SNP_107717_A_23486 | NW_004517792.1 | scaffold2988 | 23486                   | GG                              | AA                 | AA               | INTERGENIC      |               |                    |                    |
| SNP_107718_A_23493 | NW_004517792.1 | scaffold2988 | 23493                   | AA                              | CC                 | CC               | INTERGENIC      |               |                    |                    |
| SNP_107719_A_23508 | NW_004517792.1 | scaffold2988 | 23508                   | GG                              | AA                 | AA               | INTERGENIC      |               |                    |                    |
| SNP_107720_A_23543 | NW_004517792.1 | scaffold2988 | 23543                   | TT                              | CC                 | CC               | INTERGENIC      |               |                    |                    |
| SNP_107721_A_23580 | NW_004517792.1 | scaffold2988 | 23580                   | AA                              | GG                 | GG               | INTERGENIC      |               |                    |                    |
| SNP_107722_A_39637 | NW_004517792.1 | scaffold2988 | 39637                   | GG                              | AA                 | AA               | INTERGENIC      |               |                    |                    |
| SNP_107723_A_39649 | NW_004517792.1 | scaffold2988 | 39649                   | CC                              | GG                 | GG               | INTERGENIC      |               |                    |                    |
| SNP_107725_A_39660 | NW_004517792.1 | scaffold2988 | 39660                   | CC                              | TT                 | TT               | INTERGENIC      |               |                    |                    |
| SNP_107726_A_47529 | NW_004517792.1 | scaffold2988 | 47529                   | TT                              | AA                 | AA               | INTERGENIC      |               |                    |                    |
| SNP_107727_A_58648 | NW_004517792.1 | scaffold2988 | 58648                   | CC                              | TT                 | TT               | INTERGENIC      |               |                    |                    |
| SNP_107728_A_58744 | NW_004517792.1 | scaffold2988 | 58744                   | CC                              | AA                 | AA               | INTERGENIC      |               |                    |                    |
| SNP_107729_A_59176 | NW_004517792.1 | scaffold2988 | 59176                   | CC                              | TT                 | TT               | INTERGENIC      |               |                    |                    |
| SNP_107730_A_59224 | NW_004517792.1 | scaffold2988 | 59224                   | TT                              | AA                 | AA               | INTERGENIC      |               |                    |                    |
| SNP_107731_A_9809  | NW_004517793.1 | scaffold2989 | 9809                    | GG                              | AA                 | AA               | INTERGENIC      |               |                    |                    |
| SNP_107732_A_14764 | NW_004517793.1 | scaffold2989 | 14764                   | AA                              | CC                 | CC               | INTERGENIC      |               |                    |                    |
| SNP_107733_A_15652 | NW_004517793.1 | scaffold2989 | 15652                   | TT                              | CC                 | CC               | INTERGENIC      |               |                    |                    |

| SNPs IDs           | Chromosome IDs | Chromosomes  | Physical positions (bp) | CDC Frontier (Reference genome) | (Pusa 1103 & HPNB) | (ILWC 46 & LPNB) | Sequence genome | Components of | Gene accession IDs | Putative functions |
|--------------------|----------------|--------------|-------------------------|---------------------------------|--------------------|------------------|-----------------|---------------|--------------------|--------------------|
| SNP_107734_A_6172  | NW_004517794.1 | scaffold2990 | 6172                    | AA                              | GG                 | GG               | INTERGENIC      |               |                    |                    |
| SNP_107735_A_6304  | NW_004517794.1 | scaffold2990 | 6304                    | GG                              | AA                 | AA               | INTERGENIC      |               |                    |                    |
| SNP_107736_A_6334  | NW_004517794.1 | scaffold2990 | 6334                    | AA                              | CC                 | CC               | INTERGENIC      |               |                    |                    |
| SNP_107737_A_6505  | NW_004517794.1 | scaffold2990 | 6505                    | AA                              | TT                 | TT               | INTERGENIC      |               |                    |                    |
| SNP_107738_A_6563  | NW_004517794.1 | scaffold2990 | 6563                    | AA                              | TT                 | TT               | INTERGENIC      |               |                    |                    |
| SNP_107739_A_6570  | NW_004517794.1 | scaffold2990 | 6570                    | TT                              | CC                 | CC               | INTERGENIC      |               |                    |                    |
| SNP_107740_A_6597  | NW_004517794.1 | scaffold2990 | 6597                    | TT                              | GG                 | GG               | INTERGENIC      |               |                    |                    |
| SNP_107741_A_6645  | NW_004517794.1 | scaffold2990 | 6645                    | CC                              | AA                 | AA               | INTERGENIC      |               |                    |                    |
| SNP_107742_A_6647  | NW_004517794.1 | scaffold2990 | 6647                    | AA                              | GG                 | GG               | INTERGENIC      |               |                    |                    |
| SNP_107743_A_6682  | NW_004517794.1 | scaffold2990 | 6682                    | TT                              | GG                 | GG               | INTERGENIC      |               |                    |                    |
| SNP_107744_A_6703  | NW_004517794.1 | scaffold2990 | 6703                    | AA                              | GG                 | GG               | INTERGENIC      |               |                    |                    |
| SNP_107745_A_6719  | NW_004517794.1 | scaffold2990 | 6719                    | GG                              | TT                 | TT               | INTERGENIC      |               |                    |                    |
| SNP_107746_A_10243 | NW_004517794.1 | scaffold2990 | 10243                   | CC                              | AA                 | AA               | INTERGENIC      |               |                    |                    |
| SNP_107747_A_4565  | NW_004517798.1 | scaffold2996 | 4565                    | AA                              | GG                 | GG               | INTERGENIC      |               |                    |                    |
| SNP_107748_A_4582  | NW_004517798.1 | scaffold2996 | 4582                    | CC                              | TT                 | TT               | INTERGENIC      |               |                    |                    |
| SNP_107749_A_4692  | NW_004517798.1 | scaffold2996 | 4692                    | TT                              | CC                 | CC               | INTERGENIC      |               |                    |                    |
| SNP_107750_A_4756  | NW_004517798.1 | scaffold2996 | 4756                    | GG                              | TT                 | TT               | INTERGENIC      |               |                    |                    |
| SNP_107751_A_5020  | NW_004517800.1 | scaffold2998 | 5020                    | GG                              | AA                 | AA               | INTERGENIC      |               |                    |                    |
| SNP_107752_A_5411  | NW_004517800.1 | scaffold2998 | 5411                    | CC                              | TT                 | TT               | INTERGENIC      |               |                    |                    |
| SNP_107753_A_5684  | NW_004517800.1 | scaffold2998 | 5684                    | GG                              | AA                 | AA               | INTERGENIC      |               |                    |                    |
| SNP_107754_A_581   | NW_004517802.1 | scaffold3002 | 581                     | TT                              | GG                 | GG               | INTERGENIC      |               |                    |                    |
| SNP_107755_A_633   | NW_004517802.1 | scaffold3002 | 633                     | GG                              | AA                 | AA               | INTERGENIC      |               |                    |                    |

| SNPs IDs           | Chromosome IDs | Chromosomes  | Physical positions (bp) | CDC Frontier (Reference genome) | (Pusa 1103 & HPNB) | (ILWC 46 & LPNB) | Sequence Components of genome | Gene accession IDs | Putative functions |
|--------------------|----------------|--------------|-------------------------|---------------------------------|--------------------|------------------|-------------------------------|--------------------|--------------------|
| SNP_107756_A_2623  | NW_004517802.1 | scaffold3002 | 2623                    | GG                              | TT                 | TT               | INTERGENIC                    |                    |                    |
| SNP_107757_A_2629  | NW_004517802.1 | scaffold3002 | 2629                    | GG                              | AA                 | AA               | INTERGENIC                    |                    |                    |
| SNP_107758_A_2631  | NW_004517802.1 | scaffold3002 | 2631                    | TT                              | CC                 | CC               | INTERGENIC                    |                    |                    |
| SNP_107759_A_2641  | NW_004517802.1 | scaffold3002 | 2641                    | GG                              | AA                 | AA               | INTERGENIC                    |                    |                    |
| SNP_107760_A_2944  | NW_004517802.1 | scaffold3002 | 2944                    | GG                              | TT                 | TT               | INTERGENIC                    |                    |                    |
| SNP_107761_A_478   | NW_004517807.1 | scaffold3008 | 478                     | CC                              | TT                 | TT               | INTERGENIC                    |                    |                    |
| SNP_107762_A_545   | NW_004517807.1 | scaffold3008 | 545                     | AA                              | GG                 | GG               | INTERGENIC                    |                    |                    |
| SNP_107764_A_363   | NW_004517809.1 | scaffold3011 | 363                     | TT                              | CC                 | CC               | INTERGENIC                    |                    |                    |
| SNP_107765_A_632   | NW_004517809.1 | scaffold3011 | 632                     | GG                              | AA                 | AA               | INTERGENIC                    |                    |                    |
| SNP_107766_A_21829 | NW_004517813.1 | scaffold3015 | 21829                   | CC                              | AA                 | AA               | INTERGENIC                    |                    |                    |
| SNP_107767_A_56053 | NW_004517813.1 | scaffold3015 | 56053                   | TT                              | AA                 | AA               | DRR                           | 101502129          | Unknown function   |
| SNP_107768_A_56088 | NW_004517813.1 | scaffold3015 | 56088                   | AA                              | GG                 | GG               | DRR                           | 101502129          | Unknown function   |
| SNP_107769_A_59984 | NW_004517813.1 | scaffold3015 | 59984                   | GG                              | AA                 | AA               | URR                           | 101502129          | Unknown function   |
| SNP_107770_A_60049 | NW_004517813.1 | scaffold3015 | 60049                   | AA                              | TT                 | TT               | URR                           | 101502129          | Unknown function   |
| SNP_107771_A_60266 | NW_004517813.1 | scaffold3015 | 60266                   | GG                              | AA                 | AA               | URR                           | 101502129          | Unknown function   |
| SNP_107772_A_60285 | NW_004517813.1 | scaffold3015 | 60285                   | CC                              | TT                 | TT               | URR                           | 101502129          | Unknown function   |
| SNP_107773_A_60288 | NW_004517813.1 | scaffold3015 | 60288                   | CC                              | AA                 | AA               | URR                           | 101502129          | Unknown function   |
| SNP_107774_A_60431 | NW_004517813.1 | scaffold3015 | 60431                   | GG                              | AA                 | AA               | URR                           | 101502129          | Unknown function   |
| SNP_107775_A_68142 | NW_004517813.1 | scaffold3015 | 68142                   | CC                              | TT                 | TT               | INTERGENIC                    |                    |                    |
| SNP_107776_A_68346 | NW_004517813.1 | scaffold3015 | 68346                   | CC                              | TT                 | TT               | INTERGENIC                    |                    |                    |
| SNP_107777_A_68465 | NW_004517813.1 | scaffold3015 | 68465                   | TT                              | GG                 | GG               | INTERGENIC                    |                    |                    |
| SNP_107778_A_68471 | NW_004517813.1 | scaffold3015 | 68471                   | CC                              | AA                 | AA               | INTERGENIC                    |                    |                    |

| SNPs IDs           | Chromosome IDs | Chromosomes  | Physical positions (bp) | CDC Frontier (Reference genome) | (Pusa 1103 & HPNB) | (ILWC 46 & LPNB) | Sequence genome | Components of | Gene accession IDs | Putative functions |
|--------------------|----------------|--------------|-------------------------|---------------------------------|--------------------|------------------|-----------------|---------------|--------------------|--------------------|
| SNP_107780_A_68531 | NW_004517813.1 | scaffold3015 | 68531                   | CC                              | TT                 | TT               | INTERGENIC      |               |                    |                    |
| SNP_107781_A_68555 | NW_004517813.1 | scaffold3015 | 68555                   | GG                              | AA                 | AA               | INTERGENIC      |               |                    |                    |
| SNP_107782_A_68559 | NW_004517813.1 | scaffold3015 | 68559                   | TT                              | AA                 | AA               | INTERGENIC      |               |                    |                    |
| SNP_107783_A_68581 | NW_004517813.1 | scaffold3015 | 68581                   | AA                              | TT                 | TT               | INTERGENIC      |               |                    |                    |
| SNP_107784_A_68621 | NW_004517813.1 | scaffold3015 | 68621                   | GG                              | AA                 | AA               | INTERGENIC      |               |                    |                    |
| SNP_107785_A_68642 | NW_004517813.1 | scaffold3015 | 68642                   | CC                              | AA                 | AA               | INTERGENIC      |               |                    |                    |
| SNP_107787_A_68672 | NW_004517813.1 | scaffold3015 | 68672                   | TT                              | GG                 | GG               | INTERGENIC      |               |                    |                    |
| SNP_107788_A_68707 | NW_004517813.1 | scaffold3015 | 68707                   | TT                              | AA                 | AA               | INTERGENIC      |               |                    |                    |
| SNP_107789_A_68832 | NW_004517813.1 | scaffold3015 | 68832                   | AA                              | TT                 | TT               | INTERGENIC      |               |                    |                    |
| SNP_107790_A_68897 | NW_004517813.1 | scaffold3015 | 68897                   | AA                              | TT                 | TT               | INTERGENIC      |               |                    |                    |
| SNP_107791_A_68940 | NW_004517813.1 | scaffold3015 | 68940                   | AA                              | CC                 | CC               | INTERGENIC      |               |                    |                    |
| SNP_107792_A_69035 | NW_004517813.1 | scaffold3015 | 69035                   | AA                              | TT                 | TT               | INTERGENIC      |               |                    |                    |
| SNP_107793_A_69151 | NW_004517813.1 | scaffold3015 | 69151                   | TT                              | CC                 | CC               | INTERGENIC      |               |                    |                    |
| SNP_107795_A_73150 | NW_004517813.1 | scaffold3015 | 73150                   | AA                              | GG                 | GG               | INTERGENIC      |               |                    |                    |
| SNP_107796_A_73196 | NW_004517813.1 | scaffold3015 | 73196                   | AA                              | TT                 | TT               | INTERGENIC      |               |                    |                    |
| SNP_107797_A_73212 | NW_004517813.1 | scaffold3015 | 73212                   | AA                              | GG                 | GG               | INTERGENIC      |               |                    |                    |
| SNP_107799_A_73409 | NW_004517813.1 | scaffold3015 | 73409                   | AA                              | CC                 | CC               | INTERGENIC      |               |                    |                    |
| SNP_107800_A_73430 | NW_004517813.1 | scaffold3015 | 73430                   | AA                              | GG                 | GG               | INTERGENIC      |               |                    |                    |
| SNP_107802_A_73610 | NW_004517813.1 | scaffold3015 | 73610                   | CC                              | TT                 | TT               | INTERGENIC      |               |                    |                    |
| SNP_107803_A_73612 | NW_004517813.1 | scaffold3015 | 73612                   | CC                              | TT                 | TT               | INTERGENIC      |               |                    |                    |
| SNP_107804_A_73639 | NW_004517813.1 | scaffold3015 | 73639                   | AA                              | GG                 | GG               | INTERGENIC      |               |                    |                    |
| SNP_107805_A_73688 | NW_004517813.1 | scaffold3015 | 73688                   | AA                              | GG                 | GG               | INTERGENIC      |               |                    |                    |

| SNPs IDs           | Chromosome IDs | Chromosomes  | Physical positions (bp) | CDC Frontier (Reference genome) | (Pusa 1103 & HPNB) | (ILWC 46 & LPNB) | Sequence genome | Components of | Gene accession IDs | Putative functions |
|--------------------|----------------|--------------|-------------------------|---------------------------------|--------------------|------------------|-----------------|---------------|--------------------|--------------------|
| SNP_107806_A_73809 | NW_004517813.1 | scaffold3015 | 73809                   | CC                              | TT                 | TT               | INTERGENIC      |               |                    |                    |
| SNP_107807_A_73838 | NW_004517813.1 | scaffold3015 | 73838                   | GG                              | CC                 | CC               | INTERGENIC      |               |                    |                    |
| SNP_107808_A_73930 | NW_004517813.1 | scaffold3015 | 73930                   | TT                              | CC                 | CC               | INTERGENIC      |               |                    |                    |
| SNP_107810_A_73988 | NW_004517813.1 | scaffold3015 | 73988                   | AA                              | GG                 | GG               | INTERGENIC      |               |                    |                    |
| SNP_107812_A_74121 | NW_004517813.1 | scaffold3015 | 74121                   | CC                              | GG                 | GG               | INTERGENIC      |               |                    |                    |
| SNP_107814_A_74191 | NW_004517813.1 | scaffold3015 | 74191                   | CC                              | GG                 | GG               | INTERGENIC      |               |                    |                    |
| SNP_107815_A_74229 | NW_004517813.1 | scaffold3015 | 74229                   | TT                              | CC                 | CC               | INTERGENIC      |               |                    |                    |
| SNP_107816_A_74263 | NW_004517813.1 | scaffold3015 | 74263                   | GG                              | CC                 | CC               | INTERGENIC      |               |                    |                    |
| SNP_107817_A_74335 | NW_004517813.1 | scaffold3015 | 74335                   | AA                              | GG                 | GG               | INTERGENIC      |               |                    |                    |
| SNP_107818_A_74488 | NW_004517813.1 | scaffold3015 | 74488                   | TT                              | CC                 | CC               | INTERGENIC      |               |                    |                    |
| SNP_107819_A_76863 | NW_004517813.1 | scaffold3015 | 76863                   | CC                              | TT                 | TT               | INTERGENIC      |               |                    |                    |
| SNP_107820_A_77055 | NW_004517813.1 | scaffold3015 | 77055                   | CC                              | TT                 | TT               | INTERGENIC      |               |                    |                    |
| SNP_107821_A_80389 | NW_004517813.1 | scaffold3015 | 80389                   | GG                              | AA                 | AA               | INTERGENIC      |               |                    |                    |
| SNP_107822_A_80418 | NW_004517813.1 | scaffold3015 | 80418                   | GG                              | AA                 | AA               | INTERGENIC      |               |                    |                    |
| SNP_107823_A_80540 | NW_004517813.1 | scaffold3015 | 80540                   | CC                              | TT                 | TT               | INTERGENIC      |               |                    |                    |
| SNP_107824_A_80542 | NW_004517813.1 | scaffold3015 | 80542                   | CC                              | TT                 | TT               | INTERGENIC      |               |                    |                    |
| SNP_107825_A_80585 | NW_004517813.1 | scaffold3015 | 80585                   | GG                              | AA                 | AA               | INTERGENIC      |               |                    |                    |
| SNP_107826_A_80616 | NW_004517813.1 | scaffold3015 | 80616                   | CC                              | AA                 | AA               | INTERGENIC      |               |                    |                    |
| SNP_107827_A_80842 | NW_004517813.1 | scaffold3015 | 80842                   | AA                              | GG                 | GG               | INTERGENIC      |               |                    |                    |
| SNP_107828_A_80890 | NW_004517813.1 | scaffold3015 | 80890                   | GG                              | AA                 | AA               | INTERGENIC      |               |                    |                    |
| SNP_107829_A_80893 | NW_004517813.1 | scaffold3015 | 80893                   | TT                              | CC                 | CC               | INTERGENIC      |               |                    |                    |
| SNP_107830_A_80944 | NW_004517813.1 | scaffold3015 | 80944                   | TT                              | CC                 | CC               | INTERGENIC      |               |                    |                    |

| SNPs IDs            | Chromosome IDs | Chromosomes  | Physical positions (bp) | CDC Frontier genome (Reference genome) | (Pusa 1103 & HPNB) | (ILWC 46 & LPNB) | Sequence genome | Components of | Gene accession IDs                             | Putative functions |
|---------------------|----------------|--------------|-------------------------|----------------------------------------|--------------------|------------------|-----------------|---------------|------------------------------------------------|--------------------|
| SNP_107831_A_80984  | NW_004517813.1 | scaffold3015 | 80984                   | GG                                     | AA                 | AA               | INTERGENIC      |               |                                                |                    |
| SNP_107832_A_81230  | NW_004517813.1 | scaffold3015 | 81230                   | TT                                     | CC                 | CC               | INTERGENIC      |               |                                                |                    |
| SNP_107833_A_81554  | NW_004517813.1 | scaffold3015 | 81554                   | GG                                     | TT                 | TT               | INTERGENIC      |               |                                                |                    |
| SNP_107834_A_81559  | NW_004517813.1 | scaffold3015 | 81559                   | AA                                     | GG                 | GG               | INTERGENIC      |               |                                                |                    |
| SNP_107835_A_81620  | NW_004517813.1 | scaffold3015 | 81620                   | TT                                     | CC                 | CC               | INTERGENIC      |               |                                                |                    |
| SNP_107836_A_81648  | NW_004517813.1 | scaffold3015 | 81648                   | TT                                     | AA                 | AA               | INTERGENIC      |               |                                                |                    |
| SNP_107837_A_39404  | NW_004517814.1 | scaffold3016 | 39404                   | TT                                     | AA                 | AA               | INTERGENIC      |               |                                                |                    |
| SNP_107838_A_39556  | NW_004517814.1 | scaffold3016 | 39556                   | CC                                     | AA                 | AA               | INTERGENIC      |               |                                                |                    |
| SNP_107839_A_57133  | NW_004517814.1 | scaffold3016 | 57133                   | CC                                     | TT                 | TT               | INTERGENIC      |               |                                                |                    |
| SNP_107840_A_57341  | NW_004517814.1 | scaffold3016 | 57341                   | TT                                     | CC                 | CC               | INTERGENIC      |               |                                                |                    |
| SNP_107841_A_120326 | NW_004517814.1 | scaffold3016 | 120326                  | TT                                     | CC                 | CC               | INTRON          | 101505541     | zinc finger MYM-type protein 1-like            |                    |
| SNP_107842_A_120348 | NW_004517814.1 | scaffold3016 | 120348                  | TT                                     | CC                 | CC               | INTRON          | 101505541     | zinc finger MYM-type protein 1-like            |                    |
| SNP_107843_A_1762   | NW_004517816.1 | scaffold3018 | 1762                    | TT                                     | CC                 | CC               | INTERGENIC      |               |                                                |                    |
| SNP_107845_A_893    | NW_004517817.1 | scaffold3019 | 893                     | TT                                     | CC                 | CC               | INTERGENIC      |               |                                                |                    |
| SNP_107846_A_17705  | NW_004517817.1 | scaffold3019 | 17705                   | CC                                     | AA                 | AA               | INTERGENIC      |               |                                                |                    |
| SNP_107848_A_18321  | NW_004517817.1 | scaffold3019 | 18321                   | CC                                     | GG                 | GG               | INTRON          | 101505873     | protein SUPPRESSOR OF GENE SILENCING 3 homolog |                    |
| SNP_107849_A_18501  | NW_004517817.1 | scaffold3019 | 18501                   | TT                                     | CC                 | CC               | INTRON          | 101505873     | protein SUPPRESSOR OF GENE SILENCING 3 homolog |                    |
| SNP_107850_A_18668  | NW_004517817.1 | scaffold3019 | 18668                   | CC                                     | AA                 | AA               | INTRON          | 101505873     | protein SUPPRESSOR OF GENE SILENCING 3 homolog |                    |
| SNP_107852_A_18808  | NW_004517817.1 | scaffold3019 | 18808                   | GG                                     | AA                 | AA               | INTRON          | 101505873     | protein SUPPRESSOR OF GENE SILENCING 3 homolog |                    |
| SNP_107853_A_18892  | NW_004517817.1 | scaffold3019 | 18892                   | GG                                     | AA                 | AA               | INTRON          | 101505873     | protein SUPPRESSOR OF GENE SILENCING 3 homolog |                    |
| SNP_107854_A_18937  | NW_004517817.1 | scaffold3019 | 18937                   | AA                                     | CC                 | CC               | INTRON          | 101505873     | protein SUPPRESSOR OF GENE SILENCING 3 homolog |                    |
| SNP_107855_A_19620  | NW_004517817.1 | scaffold3019 | 19620                   | GG                                     | AA                 | AA               | INTRON          | 101505873     | protein SUPPRESSOR OF GENE SILENCING 3 homolog |                    |



| SNPs IDs           | Chromosome IDs | Chromosomes  | Physical positions (bp) | CDC Frontier (Reference genome) | (Pusa 1103 & HPNB) | (ILWC 46 & LPNB) | Sequence Components of genome | Gene accession IDs | Putative functions                             |
|--------------------|----------------|--------------|-------------------------|---------------------------------|--------------------|------------------|-------------------------------|--------------------|------------------------------------------------|
| SNP_107856_A_19966 | NW_004517817.1 | scaffold3019 | 19966                   | AA                              | TT                 | TT               | URR                           | 101505873          | protein SUPPRESSOR OF GENE SILENCING 3 homolog |
| SNP_107857_A_19975 | NW_004517817.1 | scaffold3019 | 19975                   | AA                              | CC                 | CC               | URR                           | 101505873          | protein SUPPRESSOR OF GENE SILENCING 3 homolog |
| SNP_107858_A_20115 | NW_004517817.1 | scaffold3019 | 20115                   | CC                              | TT                 | TT               | URR                           | 101505873          | protein SUPPRESSOR OF GENE SILENCING 3 homolog |
| SNP_107859_A_20131 | NW_004517817.1 | scaffold3019 | 20131                   | CC                              | TT                 | TT               | URR                           | 101505873          | protein SUPPRESSOR OF GENE SILENCING 3 homolog |
| SNP_107860_A_20303 | NW_004517817.1 | scaffold3019 | 20303                   | CC                              | AA                 | AA               | URR                           | 101505873          | protein SUPPRESSOR OF GENE SILENCING 3 homolog |
| SNP_107861_A_20406 | NW_004517817.1 | scaffold3019 | 20406                   | CC                              | TT                 | TT               | URR                           | 101505873          | protein SUPPRESSOR OF GENE SILENCING 3 homolog |
| SNP_107862_A_20408 | NW_004517817.1 | scaffold3019 | 20408                   | GG                              | TT                 | TT               | URR                           | 101505873          | protein SUPPRESSOR OF GENE SILENCING 3 homolog |
| SNP_107863_A_20499 | NW_004517817.1 | scaffold3019 | 20499                   | TT                              | GG                 | GG               | URR                           | 101505873          | protein SUPPRESSOR OF GENE SILENCING 3 homolog |
| SNP_107864_A_20510 | NW_004517817.1 | scaffold3019 | 20510                   | AA                              | GG                 | GG               | URR                           | 101505873          | protein SUPPRESSOR OF GENE SILENCING 3 homolog |
| SNP_107865_A_20607 | NW_004517817.1 | scaffold3019 | 20607                   | GG                              | TT                 | TT               | URR                           | 101505873          | protein SUPPRESSOR OF GENE SILENCING 3 homolog |
| SNP_107866_A_20611 | NW_004517817.1 | scaffold3019 | 20611                   | AA                              | CC                 | CC               | URR                           | 101505873          | protein SUPPRESSOR OF GENE SILENCING 3 homolog |
| SNP_107867_A_20792 | NW_004517817.1 | scaffold3019 | 20792                   | TT                              | CC                 | CC               | URR                           | 101505873          | protein SUPPRESSOR OF GENE SILENCING 3 homolog |
| SNP_107869_A_20918 | NW_004517817.1 | scaffold3019 | 20918                   | CC                              | TT                 | TT               | URR                           | 101505873          | protein SUPPRESSOR OF GENE SILENCING 3 homolog |
| SNP_107870_A_21235 | NW_004517817.1 | scaffold3019 | 21235                   | GG                              | AA                 | AA               | URR                           | 101505873          | protein SUPPRESSOR OF GENE SILENCING 3 homolog |
| SNP_107871_A_21243 | NW_004517817.1 | scaffold3019 | 21243                   | TT                              | AA                 | AA               | URR                           | 101505873          | protein SUPPRESSOR OF GENE SILENCING 3 homolog |
| SNP_107873_A_21329 | NW_004517817.1 | scaffold3019 | 21329                   | AA                              | GG                 | GG               | URR                           | 101505873          | protein SUPPRESSOR OF GENE SILENCING 3 homolog |
| SNP_107874_A_21343 | NW_004517817.1 | scaffold3019 | 21343                   | TT                              | AA                 | AA               | URR                           | 101505873          | protein SUPPRESSOR OF GENE SILENCING 3 homolog |
| SNP_107875_A_21395 | NW_004517817.1 | scaffold3019 | 21395                   | AA                              | GG                 | GG               | URR                           | 101505873          | protein SUPPRESSOR OF GENE SILENCING 3 homolog |
| SNP_107876_A_21432 | NW_004517817.1 | scaffold3019 | 21432                   | CC                              | TT                 | TT               | URR                           | 101505873          | protein SUPPRESSOR OF GENE SILENCING 3 homolog |
| SNP_107877_A_21502 | NW_004517817.1 | scaffold3019 | 21502                   | CC                              | AA                 | AA               | URR                           | 101505873          | protein SUPPRESSOR OF GENE SILENCING 3 homolog |
| SNP_107878_A_6784  | NW_004517820.1 | scaffold3022 | 6784                    | CC                              | TT                 | TT               | INTERGENIC                    |                    |                                                |
| SNP_107879_A_6806  | NW_004517820.1 | scaffold3022 | 6806                    | GG                              | AA                 | AA               | INTERGENIC                    |                    |                                                |

| SNPs IDs           | Chromosome IDs | Chromosomes  | Physical positions (bp) | CDC Frontier (Reference genome) | (Pusa 1103 & HPNB) | (ILWC 46 & LPNB) | Sequence genome | Components of | Gene accession IDs | Putative functions |
|--------------------|----------------|--------------|-------------------------|---------------------------------|--------------------|------------------|-----------------|---------------|--------------------|--------------------|
| SNP_107880_A_6877  | NW_004517820.1 | scaffold3022 | 6877                    | AA                              | GG                 | GG               | INTERGENIC      |               |                    |                    |
| SNP_107881_A_6904  | NW_004517820.1 | scaffold3022 | 6904                    | GG                              | AA                 | AA               | INTERGENIC      |               |                    |                    |
| SNP_107882_A_7088  | NW_004517820.1 | scaffold3022 | 7088                    | GG                              | TT                 | TT               | INTERGENIC      |               |                    |                    |
| SNP_107883_A_7431  | NW_004517820.1 | scaffold3022 | 7431                    | TT                              | CC                 | CC               | INTERGENIC      |               |                    |                    |
| SNP_107884_A_7438  | NW_004517820.1 | scaffold3022 | 7438                    | TT                              | GG                 | GG               | INTERGENIC      |               |                    |                    |
| SNP_107886_A_10589 | NW_004517820.1 | scaffold3022 | 10589                   | AA                              | GG                 | GG               | INTERGENIC      |               |                    |                    |
| SNP_107887_A_10623 | NW_004517820.1 | scaffold3022 | 10623                   | GG                              | AA                 | AA               | INTERGENIC      |               |                    |                    |
| SNP_107888_A_14171 | NW_004517820.1 | scaffold3022 | 14171                   | CC                              | TT                 | TT               | INTERGENIC      |               |                    |                    |
| SNP_107889_A_14210 | NW_004517820.1 | scaffold3022 | 14210                   | AA                              | TT                 | TT               | INTERGENIC      |               |                    |                    |
| SNP_107890_A_20201 | NW_004517820.1 | scaffold3022 | 20201                   | TT                              | AA                 | AA               | INTERGENIC      |               |                    |                    |
| SNP_107891_A_20899 | NW_004517820.1 | scaffold3022 | 20899                   | AA                              | GG                 | GG               | INTERGENIC      |               |                    |                    |
| SNP_107892_A_5101  | NW_004517822.1 | scaffold3026 | 5101                    | GG                              | AA                 | AA               | INTERGENIC      |               |                    |                    |
| SNP_107893_A_5478  | NW_004517822.1 | scaffold3026 | 5478                    | TT                              | AA                 | AA               | INTERGENIC      |               |                    |                    |
| SNP_107894_A_9199  | NW_004517822.1 | scaffold3026 | 9199                    | AA                              | TT                 | TT               | INTERGENIC      |               |                    |                    |
| SNP_107895_A_9583  | NW_004517822.1 | scaffold3026 | 9583                    | GG                              | AA                 | AA               | INTERGENIC      |               |                    |                    |
| SNP_107896_A_9591  | NW_004517822.1 | scaffold3026 | 9591                    | AA                              | GG                 | GG               | INTERGENIC      |               |                    |                    |
| SNP_107897_A_3364  | NW_004517823.1 | scaffold3028 | 3364                    | TT                              | AA                 | AA               | INTERGENIC      |               |                    |                    |
| SNP_107898_A_3405  | NW_004517823.1 | scaffold3028 | 3405                    | TT                              | AA                 | AA               | INTERGENIC      |               |                    |                    |
| SNP_107899_A_3469  | NW_004517823.1 | scaffold3028 | 3469                    | TT                              | CC                 | CC               | INTERGENIC      |               |                    |                    |
| SNP_107900_A_3717  | NW_004517823.1 | scaffold3028 | 3717                    | CC                              | AA                 | AA               | INTERGENIC      |               |                    |                    |
| SNP_107901_A_7564  | NW_004517823.1 | scaffold3028 | 7564                    | GG                              | AA                 | AA               | INTERGENIC      |               |                    |                    |
| SNP_107903_A_64    | NW_004517824.1 | scaffold3029 | 64                      | TT                              | AA                 | AA               | INTERGENIC      |               |                    |                    |

| SNPs IDs           | Chromosome IDs | Chromosomes  | Physical positions (bp) | CDC Frontier (Reference genome) | (Pusa 1103 & HPNB) | (ILWC 46 & LPNB) | Sequence genome | Components of | Gene accession IDs | Putative functions |
|--------------------|----------------|--------------|-------------------------|---------------------------------|--------------------|------------------|-----------------|---------------|--------------------|--------------------|
| SNP_107904_A_131   | NW_004517824.1 | scaffold3029 | 131                     | GG                              | AA                 | AA               | INTERGENIC      |               |                    |                    |
| SNP_107906_A_582   | NW_004517824.1 | scaffold3029 | 582                     | GG                              | CC                 | CC               | INTERGENIC      |               |                    |                    |
| SNP_107907_A_585   | NW_004517824.1 | scaffold3029 | 585                     | AA                              | TT                 | TT               | INTERGENIC      |               |                    |                    |
| SNP_107909_A_596   | NW_004517824.1 | scaffold3029 | 596                     | TT                              | AA                 | AA               | INTERGENIC      |               |                    |                    |
| SNP_107910_A_10466 | NW_004517824.1 | scaffold3029 | 10466                   | CC                              | AA                 | AA               | INTERGENIC      |               |                    |                    |
| SNP_107911_A_14640 | NW_004517824.1 | scaffold3029 | 14640                   | CC                              | AA                 | AA               | INTERGENIC      |               |                    |                    |
| SNP_107912_A_14672 | NW_004517824.1 | scaffold3029 | 14672                   | AA                              | GG                 | GG               | INTERGENIC      |               |                    |                    |
| SNP_107913_A_14674 | NW_004517824.1 | scaffold3029 | 14674                   | TT                              | GG                 | GG               | INTERGENIC      |               |                    |                    |
| SNP_107914_A_14677 | NW_004517824.1 | scaffold3029 | 14677                   | TT                              | GG                 | GG               | INTERGENIC      |               |                    |                    |
| SNP_107915_A_14752 | NW_004517824.1 | scaffold3029 | 14752                   | GG                              | CC                 | CC               | INTERGENIC      |               |                    |                    |
| SNP_107916_A_153   | NW_004517825.1 | scaffold3030 | 153                     | CC                              | TT                 | TT               | INTERGENIC      |               |                    |                    |
| SNP_107918_A_7952  | NW_004517827.1 | scaffold3032 | 7952                    | TT                              | AA                 | AA               | INTERGENIC      |               |                    |                    |
| SNP_107919_A_10672 | NW_004517827.1 | scaffold3032 | 10672                   | CC                              | TT                 | TT               | INTERGENIC      |               |                    |                    |
| SNP_107920_A_11182 | NW_004517827.1 | scaffold3032 | 11182                   | CC                              | TT                 | TT               | INTERGENIC      |               |                    |                    |
| SNP_107922_A_11604 | NW_004517827.1 | scaffold3032 | 11604                   | TT                              | AA                 | AA               | INTERGENIC      |               |                    |                    |
| SNP_107923_A_12033 | NW_004517827.1 | scaffold3032 | 12033                   | GG                              | AA                 | AA               | INTERGENIC      |               |                    |                    |
| SNP_107924_A_12148 | NW_004517827.1 | scaffold3032 | 12148                   | GG                              | AA                 | AA               | INTERGENIC      |               |                    |                    |
| SNP_107925_A_12381 | NW_004517827.1 | scaffold3032 | 12381                   | CC                              | TT                 | TT               | INTERGENIC      |               |                    |                    |
| SNP_107926_A_894   | NW_004517828.1 | scaffold3033 | 894                     | CC                              | AA                 | AA               | INTERGENIC      |               |                    |                    |
| SNP_107929_A_12362 | NW_004517831.1 | scaffold3038 | 12362                   | GG                              | TT                 | TT               | INTERGENIC      |               |                    |                    |
| SNP_107930_A_12398 | NW_004517831.1 | scaffold3038 | 12398                   | TT                              | AA                 | AA               | INTERGENIC      |               |                    |                    |
| SNP_107931_A_17666 | NW_004517831.1 | scaffold3038 | 17666                   | GG                              | TT                 | TT               | INTERGENIC      |               |                    |                    |

| SNPs IDs           | Chromosome IDs | Chromosomes  | Physical positions (bp) | CDC Frontier genome (Reference genome) | (Pusa 1103 & HPNB) | (ILWC 46 & LPNB) | Sequence genome | Components of | Gene accession IDs | Putative functions |
|--------------------|----------------|--------------|-------------------------|----------------------------------------|--------------------|------------------|-----------------|---------------|--------------------|--------------------|
| SNP_107932_A_17759 | NW_004517831.1 | scaffold3038 | 17759                   | AA                                     | TT                 | TT               | INTERGENIC      |               |                    |                    |
| SNP_107934_A_17936 | NW_004517831.1 | scaffold3038 | 17936                   | GG                                     | AA                 | AA               | INTERGENIC      |               |                    |                    |
| SNP_107935_A_18900 | NW_004517831.1 | scaffold3038 | 18900                   | TT                                     | CC                 | CC               | INTERGENIC      |               |                    |                    |
| SNP_107936_A_19085 | NW_004517831.1 | scaffold3038 | 19085                   | CC                                     | TT                 | TT               | INTERGENIC      |               |                    |                    |
| SNP_107937_A_19202 | NW_004517831.1 | scaffold3038 | 19202                   | GG                                     | AA                 | AA               | INTERGENIC      |               |                    |                    |
| SNP_107938_A_21490 | NW_004517831.1 | scaffold3038 | 21490                   | TT                                     | CC                 | CC               | INTERGENIC      |               |                    |                    |
| SNP_107939_A_21549 | NW_004517831.1 | scaffold3038 | 21549                   | TT                                     | GG                 | GG               | INTERGENIC      |               |                    |                    |
| SNP_107940_A_21646 | NW_004517831.1 | scaffold3038 | 21646                   | GG                                     | CC                 | CC               | INTERGENIC      |               |                    |                    |
| SNP_107941_A_23999 | NW_004517831.1 | scaffold3038 | 23999                   | CC                                     | TT                 | TT               | INTERGENIC      |               |                    |                    |
| SNP_107942_A_25027 | NW_004517831.1 | scaffold3038 | 25027                   | GG                                     | AA                 | AA               | INTERGENIC      |               |                    |                    |
| SNP_107943_A_28773 | NW_004517831.1 | scaffold3038 | 28773                   | TT                                     | AA                 | AA               | INTERGENIC      |               |                    |                    |
| SNP_107944_A_30001 | NW_004517831.1 | scaffold3038 | 30001                   | TT                                     | GG                 | GG               | INTERGENIC      |               |                    |                    |
| SNP_107945_A_39046 | NW_004517831.1 | scaffold3038 | 39046                   | TT                                     | AA                 | AA               | INTERGENIC      |               |                    |                    |
| SNP_107946_A_14422 | NW_004517836.1 | scaffold3046 | 14422                   | CC                                     | TT                 | TT               | INTERGENIC      |               |                    |                    |
| SNP_107948_A_14477 | NW_004517836.1 | scaffold3046 | 14477                   | CC                                     | GG                 | GG               | INTERGENIC      |               |                    |                    |
| SNP_107949_A_14501 | NW_004517836.1 | scaffold3046 | 14501                   | CC                                     | AA                 | AA               | INTERGENIC      |               |                    |                    |
| SNP_107950_A_14517 | NW_004517836.1 | scaffold3046 | 14517                   | TT                                     | GG                 | GG               | INTERGENIC      |               |                    |                    |
| SNP_107951_A_417   | NW_004517839.1 | scaffold3049 | 417                     | TT                                     | CC                 | CC               | INTERGENIC      |               |                    |                    |
| SNP_107952_A_501   | NW_004517839.1 | scaffold3049 | 501                     | AA                                     | GG                 | GG               | INTERGENIC      |               |                    |                    |
| SNP_107953_A_878   | NW_004517839.1 | scaffold3049 | 878                     | GG                                     | AA                 | AA               | INTERGENIC      |               |                    |                    |
| SNP_107954_A_178   | NW_004517840.1 | scaffold3050 | 178                     | CC                                     | TT                 | TT               | INTERGENIC      |               |                    |                    |
| SNP_107955_A_229   | NW_004517840.1 | scaffold3050 | 229                     | AA                                     | GG                 | GG               | INTERGENIC      |               |                    |                    |

| SNPs IDs           | Chromosome IDs | Chromosomes  | Physical positions (bp) | CDC Frontier (Reference genome) | (Pusa 1103 & HPNB) | (ILWC 46 & LPNB) | Sequence genome | Components of | Gene accession IDs | Putative functions |
|--------------------|----------------|--------------|-------------------------|---------------------------------|--------------------|------------------|-----------------|---------------|--------------------|--------------------|
| SNP_107956_A_458   | NW_004517840.1 | scaffold3050 | 458                     | TT                              | AA                 | AA               | INTERGENIC      |               |                    |                    |
| SNP_107957_A_520   | NW_004517840.1 | scaffold3050 | 520                     | TT                              | AA                 | AA               | INTERGENIC      |               |                    |                    |
| SNP_107958_A_4729  | NW_004517841.1 | scaffold3051 | 4729                    | TT                              | CC                 | CC               | INTERGENIC      |               |                    |                    |
| SNP_107959_A_4771  | NW_004517841.1 | scaffold3051 | 4771                    | GG                              | AA                 | AA               | INTERGENIC      |               |                    |                    |
| SNP_107960_A_4814  | NW_004517841.1 | scaffold3051 | 4814                    | AA                              | TT                 | TT               | INTERGENIC      |               |                    |                    |
| SNP_107962_A_4874  | NW_004517841.1 | scaffold3051 | 4874                    | GG                              | CC                 | CC               | INTERGENIC      |               |                    |                    |
| SNP_107963_A_4877  | NW_004517841.1 | scaffold3051 | 4877                    | TT                              | CC                 | CC               | INTERGENIC      |               |                    |                    |
| SNP_107964_A_4964  | NW_004517841.1 | scaffold3051 | 4964                    | GG                              | CC                 | CC               | INTERGENIC      |               |                    |                    |
| SNP_107965_A_4994  | NW_004517841.1 | scaffold3051 | 4994                    | AA                              | GG                 | GG               | INTERGENIC      |               |                    |                    |
| SNP_107966_A_5093  | NW_004517841.1 | scaffold3051 | 5093                    | CC                              | TT                 | TT               | INTERGENIC      |               |                    |                    |
| SNP_107967_A_5209  | NW_004517841.1 | scaffold3051 | 5209                    | GG                              | CC                 | CC               | INTERGENIC      |               |                    |                    |
| SNP_107968_A_5236  | NW_004517841.1 | scaffold3051 | 5236                    | CC                              | TT                 | TT               | INTERGENIC      |               |                    |                    |
| SNP_107969_A_5282  | NW_004517841.1 | scaffold3051 | 5282                    | AA                              | GG                 | GG               | INTERGENIC      |               |                    |                    |
| SNP_107970_A_5292  | NW_004517841.1 | scaffold3051 | 5292                    | GG                              | AA                 | AA               | INTERGENIC      |               |                    |                    |
| SNP_107971_A_5301  | NW_004517841.1 | scaffold3051 | 5301                    | GG                              | AA                 | AA               | INTERGENIC      |               |                    |                    |
| SNP_107972_A_5547  | NW_004517841.1 | scaffold3051 | 5547                    | CC                              | TT                 | TT               | INTERGENIC      |               |                    |                    |
| SNP_107973_A_5595  | NW_004517841.1 | scaffold3051 | 5595                    | TT                              | GG                 | GG               | INTERGENIC      |               |                    |                    |
| SNP_107974_A_5664  | NW_004517841.1 | scaffold3051 | 5664                    | AA                              | CC                 | CC               | INTERGENIC      |               |                    |                    |
| SNP_107975_A_5677  | NW_004517841.1 | scaffold3051 | 5677                    | CC                              | GG                 | GG               | INTERGENIC      |               |                    |                    |
| SNP_107976_A_17321 | NW_004517841.1 | scaffold3051 | 17321                   | AA                              | GG                 | GG               | INTERGENIC      |               |                    |                    |
| SNP_107977_A_18443 | NW_004517841.1 | scaffold3051 | 18443                   | TT                              | CC                 | CC               | INTERGENIC      |               |                    |                    |
| SNP_107978_A_18526 | NW_004517841.1 | scaffold3051 | 18526                   | TT                              | GG                 | GG               | INTERGENIC      |               |                    |                    |

| SNPs IDs           | Chromosome IDs | Chromosomes  | Physical positions (bp) | CDC Frontier genome (Reference genome) | (Pusa 1103 & HPNB) | (ILWC 46 & LPNB) | Sequence genome | Components of | Gene accession IDs | Putative functions |
|--------------------|----------------|--------------|-------------------------|----------------------------------------|--------------------|------------------|-----------------|---------------|--------------------|--------------------|
| SNP_107979_A_18573 | NW_004517841.1 | scaffold3051 | 18573                   | TT                                     | CC                 | CC               | INTERGENIC      |               |                    |                    |
| SNP_107980_A_18644 | NW_004517841.1 | scaffold3051 | 18644                   | CC                                     | AA                 | AA               | INTERGENIC      |               |                    |                    |
| SNP_107981_A_18835 | NW_004517841.1 | scaffold3051 | 18835                   | GG                                     | AA                 | AA               | INTERGENIC      |               |                    |                    |
| SNP_107982_A_18862 | NW_004517841.1 | scaffold3051 | 18862                   | GG                                     | TT                 | TT               | INTERGENIC      |               |                    |                    |
| SNP_107983_A_19009 | NW_004517841.1 | scaffold3051 | 19009                   | GG                                     | AA                 | AA               | INTERGENIC      |               |                    |                    |
| SNP_107984_A_7262  | NW_004517842.1 | scaffold3052 | 7262                    | AA                                     | CC                 | CC               | INTERGENIC      |               |                    |                    |
| SNP_107985_A_7521  | NW_004517842.1 | scaffold3052 | 7521                    | CC                                     | GG                 | GG               | INTERGENIC      |               |                    |                    |
| SNP_107986_A_9375  | NW_004517842.1 | scaffold3052 | 9375                    | GG                                     | AA                 | AA               | INTERGENIC      |               |                    |                    |
| SNP_107987_A_6283  | NW_004517845.1 | scaffold3058 | 6283                    | CC                                     | TT                 | TT               | INTERGENIC      |               |                    |                    |
| SNP_107988_A_27811 | NW_004517845.1 | scaffold3058 | 27811                   | AA                                     | CC                 | CC               | INTERGENIC      |               |                    |                    |
| SNP_107989_A_27813 | NW_004517845.1 | scaffold3058 | 27813                   | CC                                     | AA                 | AA               | INTERGENIC      |               |                    |                    |
| SNP_107990_A_27819 | NW_004517845.1 | scaffold3058 | 27819                   | AA                                     | GG                 | GG               | INTERGENIC      |               |                    |                    |
| SNP_107991_A_28063 | NW_004517845.1 | scaffold3058 | 28063                   | CC                                     | GG                 | GG               | INTERGENIC      |               |                    |                    |
| SNP_107992_A_28092 | NW_004517845.1 | scaffold3058 | 28092                   | GG                                     | TT                 | TT               | INTERGENIC      |               |                    |                    |
| SNP_107993_A_28179 | NW_004517845.1 | scaffold3058 | 28179                   | GG                                     | AA                 | AA               | INTERGENIC      |               |                    |                    |
| SNP_107994_A_1388  | NW_004517846.1 | scaffold3059 | 1388                    | GG                                     | AA                 | AA               | INTERGENIC      |               |                    |                    |
| SNP_107995_A_1390  | NW_004517846.1 | scaffold3059 | 1390                    | CC                                     | TT                 | TT               | INTERGENIC      |               |                    |                    |
| SNP_107996_A_1411  | NW_004517846.1 | scaffold3059 | 1411                    | TT                                     | CC                 | CC               | INTERGENIC      |               |                    |                    |
| SNP_107997_A_2128  | NW_004517846.1 | scaffold3059 | 2128                    | GG                                     | AA                 | AA               | INTERGENIC      |               |                    |                    |
| SNP_107998_A_2405  | NW_004517846.1 | scaffold3059 | 2405                    | TT                                     | AA                 | AA               | INTERGENIC      |               |                    |                    |
| SNP_107999_A_3019  | NW_004517846.1 | scaffold3059 | 3019                    | AA                                     | GG                 | GG               | INTERGENIC      |               |                    |                    |
| SNP_108000_A_3057  | NW_004517846.1 | scaffold3059 | 3057                    | AA                                     | GG                 | GG               | INTERGENIC      |               |                    |                    |

| SNPs IDs          | Chromosome IDs | Chromosomes  | Physical positions (bp) | CDC Frontier (Reference genome) | (Pusa 1103 & HPNB) | (ILWC 46 & LPNB) | Sequence genome | Components of | Gene accession IDs | Putative functions |
|-------------------|----------------|--------------|-------------------------|---------------------------------|--------------------|------------------|-----------------|---------------|--------------------|--------------------|
| SNP_108001_A_3687 | NW_004517846.1 | scaffold3059 | 3687                    | AA                              | GG                 | GG               | INTERGENIC      |               |                    |                    |
| SNP_108002_A_4008 | NW_004517846.1 | scaffold3059 | 4008                    | GG                              | TT                 | TT               | INTERGENIC      |               |                    |                    |
| SNP_108003_A_4204 | NW_004517846.1 | scaffold3059 | 4204                    | CC                              | TT                 | TT               | INTERGENIC      |               |                    |                    |
| SNP_108004_A_4469 | NW_004517846.1 | scaffold3059 | 4469                    | GG                              | AA                 | AA               | INTERGENIC      |               |                    |                    |
| SNP_108005_A_64   | NW_004517848.1 | scaffold3061 | 64                      | AA                              | GG                 | GG               | INTERGENIC      |               |                    |                    |
| SNP_108006_A_94   | NW_004517848.1 | scaffold3061 | 94                      | TT                              | CC                 | CC               | INTERGENIC      |               |                    |                    |
| SNP_108007_A_148  | NW_004517848.1 | scaffold3061 | 148                     | TT                              | AA                 | AA               | INTERGENIC      |               |                    |                    |
| SNP_108008_A_192  | NW_004517848.1 | scaffold3061 | 192                     | AA                              | GG                 | GG               | INTERGENIC      |               |                    |                    |
| SNP_108009_A_512  | NW_004517848.1 | scaffold3061 | 512                     | CC                              | TT                 | TT               | INTERGENIC      |               |                    |                    |
| SNP_108010_A_548  | NW_004517848.1 | scaffold3061 | 548                     | TT                              | CC                 | CC               | INTERGENIC      |               |                    |                    |
| SNP_108011_A_574  | NW_004517848.1 | scaffold3061 | 574                     | AA                              | GG                 | GG               | INTERGENIC      |               |                    |                    |
| SNP_108012_A_620  | NW_004517848.1 | scaffold3061 | 620                     | GG                              | CC                 | CC               | INTERGENIC      |               |                    |                    |
| SNP_108013_A_682  | NW_004517848.1 | scaffold3061 | 682                     | AA                              | GG                 | GG               | INTERGENIC      |               |                    |                    |
| SNP_108014_A_689  | NW_004517848.1 | scaffold3061 | 689                     | TT                              | CC                 | CC               | INTERGENIC      |               |                    |                    |
| SNP_108015_A_718  | NW_004517848.1 | scaffold3061 | 718                     | CC                              | TT                 | TT               | INTERGENIC      |               |                    |                    |
| SNP_108016_A_750  | NW_004517848.1 | scaffold3061 | 750                     | CC                              | AA                 | AA               | INTERGENIC      |               |                    |                    |
| SNP_108017_A_779  | NW_004517848.1 | scaffold3061 | 779                     | AA                              | GG                 | GG               | INTERGENIC      |               |                    |                    |
| SNP_108018_A_794  | NW_004517848.1 | scaffold3061 | 794                     | TT                              | CC                 | CC               | INTERGENIC      |               |                    |                    |
| SNP_108019_A_820  | NW_004517848.1 | scaffold3061 | 820                     | AA                              | GG                 | GG               | INTERGENIC      |               |                    |                    |
| SNP_108020_A_2028 | NW_004517851.1 | scaffold3067 | 2028                    | AA                              | GG                 | GG               | INTERGENIC      |               |                    |                    |
| SNP_108022_A_679  | NW_004517856.1 | scaffold3074 | 679                     | TT                              | AA                 | AA               | INTERGENIC      |               |                    |                    |
| SNP_108023_A_686  | NW_004517856.1 | scaffold3074 | 686                     | TT                              | AA                 | AA               | INTERGENIC      |               |                    |                    |

| SNPs IDs           | Chromosome IDs | Chromosomes  | Physical positions (bp) | CDC Frontier (Reference genome) | (Pusa 1103 & HPNB) | (ILWC 46 & LPNB) | Sequence genome | Components of | Gene accession IDs | Putative functions |
|--------------------|----------------|--------------|-------------------------|---------------------------------|--------------------|------------------|-----------------|---------------|--------------------|--------------------|
| SNP_108024_A_588   | NW_004517858.1 | scaffold3076 | 588                     | GG                              | TT                 | TT               | INTERGENIC      |               |                    |                    |
| SNP_108025_A_641   | NW_004517858.1 | scaffold3076 | 641                     | CC                              | TT                 | TT               | INTERGENIC      |               |                    |                    |
| SNP_108026_A_705   | NW_004517858.1 | scaffold3076 | 705                     | AA                              | GG                 | GG               | INTERGENIC      |               |                    |                    |
| SNP_108027_A_1655  | NW_004517858.1 | scaffold3076 | 1655                    | CC                              | TT                 | TT               | INTERGENIC      |               |                    |                    |
| SNP_108028_A_2013  | NW_004517858.1 | scaffold3076 | 2013                    | AA                              | TT                 | TT               | INTERGENIC      |               |                    |                    |
| SNP_108029_A_11178 | NW_004517858.1 | scaffold3076 | 11178                   | CC                              | AA                 | AA               | INTERGENIC      |               |                    |                    |
| SNP_108030_A_11232 | NW_004517858.1 | scaffold3076 | 11232                   | CC                              | TT                 | TT               | INTERGENIC      |               |                    |                    |
| SNP_108031_A_11233 | NW_004517858.1 | scaffold3076 | 11233                   | CC                              | TT                 | TT               | INTERGENIC      |               |                    |                    |
| SNP_108032_A_11522 | NW_004517858.1 | scaffold3076 | 11522                   | GG                              | TT                 | TT               | INTERGENIC      |               |                    |                    |
| SNP_108033_A_5703  | NW_004517860.1 | scaffold3079 | 5703                    | TT                              | CC                 | CC               | INTERGENIC      |               |                    |                    |
| SNP_108034_A_5774  | NW_004517860.1 | scaffold3079 | 5774                    | AA                              | CC                 | CC               | INTERGENIC      |               |                    |                    |
| SNP_108035_A_6290  | NW_004517860.1 | scaffold3079 | 6290                    | AA                              | GG                 | GG               | INTERGENIC      |               |                    |                    |
| SNP_108036_A_6413  | NW_004517860.1 | scaffold3079 | 6413                    | GG                              | AA                 | AA               | INTERGENIC      |               |                    |                    |
| SNP_108037_A_6533  | NW_004517860.1 | scaffold3079 | 6533                    | GG                              | AA                 | AA               | INTERGENIC      |               |                    |                    |
| SNP_108038_A_6767  | NW_004517860.1 | scaffold3079 | 6767                    | CC                              | GG                 | GG               | INTERGENIC      |               |                    |                    |
| SNP_108039_A_6808  | NW_004517860.1 | scaffold3079 | 6808                    | CC                              | TT                 | TT               | INTERGENIC      |               |                    |                    |
| SNP_108040_A_2839  | NW_004517862.1 | scaffold3082 | 2839                    | TT                              | AA                 | AA               | INTERGENIC      |               |                    |                    |
| SNP_108041_A_7413  | NW_004517862.1 | scaffold3082 | 7413                    | AA                              | CC                 | CC               | INTERGENIC      |               |                    |                    |
| SNP_108042_A_7539  | NW_004517862.1 | scaffold3082 | 7539                    | AA                              | TT                 | TT               | INTERGENIC      |               |                    |                    |
| SNP_108044_A_19377 | NW_004517869.1 | scaffold3093 | 19377                   | AA                              | GG                 | GG               | INTERGENIC      |               |                    |                    |
| SNP_108046_A_19792 | NW_004517869.1 | scaffold3093 | 19792                   | AA                              | GG                 | GG               | INTERGENIC      |               |                    |                    |
| SNP_108047_A_886   | NW_004517870.1 | scaffold3094 | 886                     | AA                              | TT                 | TT               | INTERGENIC      |               |                    |                    |



| SNPs IDs           | Chromosome IDs | Chromosomes  | Physical positions (bp) | CDC Frontier (Reference genome) | (Pusa 1103 & HPNB) | (ILWC 46 & LPNB) | Sequence genome | Components of | Gene accession IDs | Putative functions |
|--------------------|----------------|--------------|-------------------------|---------------------------------|--------------------|------------------|-----------------|---------------|--------------------|--------------------|
| SNP_108048_A_918   | NW_004517870.1 | scaffold3094 | 918                     | AA                              | CC                 | CC               | INTERGENIC      |               |                    |                    |
| SNP_108049_A_949   | NW_004517870.1 | scaffold3094 | 949                     | CC                              | GG                 | GG               | INTERGENIC      |               |                    |                    |
| SNP_108050_A_572   | NW_004517871.1 | scaffold3095 | 572                     | CC                              | TT                 | TT               | INTERGENIC      |               |                    |                    |
| SNP_108051_A_684   | NW_004517871.1 | scaffold3095 | 684                     | TT                              | GG                 | GG               | INTERGENIC      |               |                    |                    |
| SNP_108052_A_799   | NW_004517871.1 | scaffold3095 | 799                     | GG                              | CC                 | CC               | INTERGENIC      |               |                    |                    |
| SNP_108053_A_837   | NW_004517871.1 | scaffold3095 | 837                     | GG                              | AA                 | AA               | INTERGENIC      |               |                    |                    |
| SNP_108054_A_948   | NW_004517871.1 | scaffold3095 | 948                     | TT                              | AA                 | AA               | INTERGENIC      |               |                    |                    |
| SNP_108055_A_1001  | NW_004517871.1 | scaffold3095 | 1001                    | AA                              | GG                 | GG               | INTERGENIC      |               |                    |                    |
| SNP_108056_A_1111  | NW_004517871.1 | scaffold3095 | 1111                    | GG                              | CC                 | CC               | INTERGENIC      |               |                    |                    |
| SNP_108057_A_1133  | NW_004517871.1 | scaffold3095 | 1133                    | AA                              | TT                 | TT               | INTERGENIC      |               |                    |                    |
| SNP_108058_A_1357  | NW_004517871.1 | scaffold3095 | 1357                    | TT                              | CC                 | CC               | INTERGENIC      |               |                    |                    |
| SNP_108059_A_14225 | NW_004517871.1 | scaffold3095 | 14225                   | CC                              | TT                 | TT               | INTERGENIC      |               |                    |                    |
| SNP_108060_A_14246 | NW_004517871.1 | scaffold3095 | 14246                   | TT                              | CC                 | CC               | INTERGENIC      |               |                    |                    |
| SNP_108061_A_14471 | NW_004517871.1 | scaffold3095 | 14471                   | AA                              | TT                 | TT               | INTERGENIC      |               |                    |                    |
| SNP_108062_A_14528 | NW_004517871.1 | scaffold3095 | 14528                   | CC                              | TT                 | TT               | INTERGENIC      |               |                    |                    |
| SNP_108063_A_14756 | NW_004517871.1 | scaffold3095 | 14756                   | AA                              | GG                 | GG               | INTERGENIC      |               |                    |                    |
| SNP_108064_A_14761 | NW_004517871.1 | scaffold3095 | 14761                   | CC                              | AA                 | AA               | INTERGENIC      |               |                    |                    |
| SNP_108065_A_14794 | NW_004517871.1 | scaffold3095 | 14794                   | GG                              | AA                 | AA               | INTERGENIC      |               |                    |                    |
| SNP_108066_A_14807 | NW_004517871.1 | scaffold3095 | 14807                   | TT                              | CC                 | CC               | INTERGENIC      |               |                    |                    |
| SNP_108067_A_14922 | NW_004517871.1 | scaffold3095 | 14922                   | AA                              | CC                 | CC               | INTERGENIC      |               |                    |                    |
| SNP_108068_A_14968 | NW_004517871.1 | scaffold3095 | 14968                   | TT                              | AA                 | AA               | INTERGENIC      |               |                    |                    |
| SNP_108069_A_15091 | NW_004517871.1 | scaffold3095 | 15091                   | AA                              | GG                 | GG               | INTERGENIC      |               |                    |                    |

| SNPs IDs           | Chromosome IDs | Chromosomes  | Physical positions (bp) | CDC Frontier (Reference genome) | (Pusa 1103 & HPNB) | (ILWC 46 & LPNB) | Sequence genome | Components of | Gene accession IDs | Putative functions |
|--------------------|----------------|--------------|-------------------------|---------------------------------|--------------------|------------------|-----------------|---------------|--------------------|--------------------|
| SNP_108070_A_15253 | NW_004517871.1 | scaffold3095 | 15253                   | GG                              | AA                 | AA               | INTERGENIC      |               |                    |                    |
| SNP_108071_A_15290 | NW_004517871.1 | scaffold3095 | 15290                   | AA                              | CC                 | CC               | INTERGENIC      |               |                    |                    |
| SNP_108072_A_15752 | NW_004517871.1 | scaffold3095 | 15752                   | GG                              | AA                 | AA               | INTERGENIC      |               |                    |                    |
| SNP_108073_A_15776 | NW_004517871.1 | scaffold3095 | 15776                   | TT                              | CC                 | CC               | INTERGENIC      |               |                    |                    |
| SNP_108074_A_15800 | NW_004517871.1 | scaffold3095 | 15800                   | TT                              | GG                 | GG               | INTERGENIC      |               |                    |                    |
| SNP_108075_A_15946 | NW_004517871.1 | scaffold3095 | 15946                   | CC                              | GG                 | GG               | INTERGENIC      |               |                    |                    |
| SNP_108076_A_5006  | NW_004517873.1 | scaffold3097 | 5006                    | CC                              | TT                 | TT               | INTERGENIC      |               |                    |                    |
| SNP_108077_A_5061  | NW_004517873.1 | scaffold3097 | 5061                    | CC                              | AA                 | AA               | INTERGENIC      |               |                    |                    |
| SNP_108078_A_5094  | NW_004517873.1 | scaffold3097 | 5094                    | TT                              | CC                 | CC               | INTERGENIC      |               |                    |                    |
| SNP_108079_A_5183  | NW_004517873.1 | scaffold3097 | 5183                    | TT                              | GG                 | GG               | INTERGENIC      |               |                    |                    |
| SNP_108080_A_5268  | NW_004517873.1 | scaffold3097 | 5268                    | AA                              | CC                 | CC               | INTERGENIC      |               |                    |                    |
| SNP_108081_A_5295  | NW_004517873.1 | scaffold3097 | 5295                    | GG                              | AA                 | AA               | INTERGENIC      |               |                    |                    |
| SNP_108082_A_6850  | NW_004517873.1 | scaffold3097 | 6850                    | GG                              | TT                 | TT               | INTERGENIC      |               |                    |                    |
| SNP_108083_A_6934  | NW_004517873.1 | scaffold3097 | 6934                    | AA                              | GG                 | GG               | INTERGENIC      |               |                    |                    |
| SNP_108084_A_7263  | NW_004517873.1 | scaffold3097 | 7263                    | GG                              | AA                 | AA               | INTERGENIC      |               |                    |                    |
| SNP_108085_A_7309  | NW_004517873.1 | scaffold3097 | 7309                    | GG                              | AA                 | AA               | INTERGENIC      |               |                    |                    |
| SNP_108086_A_7314  | NW_004517873.1 | scaffold3097 | 7314                    | GG                              | AA                 | AA               | INTERGENIC      |               |                    |                    |
| SNP_108087_A_7367  | NW_004517873.1 | scaffold3097 | 7367                    | CC                              | TT                 | TT               | INTERGENIC      |               |                    |                    |
| SNP_108088_A_7552  | NW_004517873.1 | scaffold3097 | 7552                    | GG                              | AA                 | AA               | INTERGENIC      |               |                    |                    |
| SNP_108089_A_7630  | NW_004517873.1 | scaffold3097 | 7630                    | GG                              | AA                 | AA               | INTERGENIC      |               |                    |                    |
| SNP_108090_A_7710  | NW_004517873.1 | scaffold3097 | 7710                    | TT                              | CC                 | CC               | INTERGENIC      |               |                    |                    |
| SNP_108091_A_7724  | NW_004517873.1 | scaffold3097 | 7724                    | GG                              | CC                 | CC               | INTERGENIC      |               |                    |                    |

| SNPs IDs           | Chromosome IDs | Chromosomes  | Physical positions (bp) | CDC Frontier (Reference genome) | (Pusa 1103 & HPNB) | (ILWC 46 & LPNB) | Sequence genome | Components of | Gene accession IDs | Putative functions |
|--------------------|----------------|--------------|-------------------------|---------------------------------|--------------------|------------------|-----------------|---------------|--------------------|--------------------|
| SNP_108092_A_9858  | NW_004517873.1 | scaffold3097 | 9858                    | AA                              | GG                 | GG               | INTERGENIC      |               |                    |                    |
| SNP_108093_A_10435 | NW_004517873.1 | scaffold3097 | 10435                   | CC                              | GG                 | GG               | INTERGENIC      |               |                    |                    |
| SNP_108094_A_10610 | NW_004517873.1 | scaffold3097 | 10610                   | TT                              | GG                 | GG               | INTERGENIC      |               |                    |                    |
| SNP_108095_A_10680 | NW_004517873.1 | scaffold3097 | 10680                   | GG                              | CC                 | CC               | INTERGENIC      |               |                    |                    |
| SNP_108096_A_10687 | NW_004517873.1 | scaffold3097 | 10687                   | AA                              | CC                 | CC               | INTERGENIC      |               |                    |                    |
| SNP_108097_A_11037 | NW_004517873.1 | scaffold3097 | 11037                   | GG                              | AA                 | AA               | INTERGENIC      |               |                    |                    |
| SNP_108098_A_11287 | NW_004517873.1 | scaffold3097 | 11287                   | TT                              | GG                 | GG               | INTERGENIC      |               |                    |                    |
| SNP_108099_A_11455 | NW_004517873.1 | scaffold3097 | 11455                   | TT                              | CC                 | CC               | INTERGENIC      |               |                    |                    |
| SNP_108100_A_11474 | NW_004517873.1 | scaffold3097 | 11474                   | AA                              | CC                 | CC               | INTERGENIC      |               |                    |                    |
| SNP_108101_A_1206  | NW_004517876.1 | scaffold3100 | 1206                    | GG                              | CC                 | CC               | INTERGENIC      |               |                    |                    |
| SNP_108104_A_472   | NW_004517879.1 | scaffold3106 | 472                     | CC                              | TT                 | TT               | INTERGENIC      |               |                    |                    |
| SNP_108105_A_526   | NW_004517879.1 | scaffold3106 | 526                     | TT                              | CC                 | CC               | INTERGENIC      |               |                    |                    |
| SNP_108106_A_535   | NW_004517879.1 | scaffold3106 | 535                     | GG                              | AA                 | AA               | INTERGENIC      |               |                    |                    |
| SNP_108107_A_538   | NW_004517879.1 | scaffold3106 | 538                     | AA                              | CC                 | CC               | INTERGENIC      |               |                    |                    |
| SNP_108108_A_540   | NW_004517879.1 | scaffold3106 | 540                     | CC                              | TT                 | TT               | INTERGENIC      |               |                    |                    |
| SNP_108109_A_698   | NW_004517879.1 | scaffold3106 | 698                     | AA                              | CC                 | CC               | INTERGENIC      |               |                    |                    |
| SNP_108110_A_705   | NW_004517879.1 | scaffold3106 | 705                     | GG                              | AA                 | AA               | INTERGENIC      |               |                    |                    |
| SNP_108111_A_722   | NW_004517879.1 | scaffold3106 | 722                     | GG                              | CC                 | CC               | INTERGENIC      |               |                    |                    |
| SNP_108112_A_754   | NW_004517879.1 | scaffold3106 | 754                     | CC                              | AA                 | AA               | INTERGENIC      |               |                    |                    |
| SNP_108113_A_815   | NW_004517879.1 | scaffold3106 | 815                     | AA                              | GG                 | GG               | INTERGENIC      |               |                    |                    |
| SNP_108114_A_1197  | NW_004517879.1 | scaffold3106 | 1197                    | GG                              | TT                 | TT               | INTERGENIC      |               |                    |                    |
| SNP_108116_A_6149  | NW_004517882.1 | scaffold3111 | 6149                    | TT                              | GG                 | GG               | INTERGENIC      |               |                    |                    |

| SNPs IDs           | Chromosome IDs | Chromosomes  | Physical positions (bp) | CDC Frontier (Reference genome) | (Pusa 1103 & HPNB) | (ILWC 46 & LPNB) | Sequence Components of genome | Gene accession IDs | Putative functions                               |
|--------------------|----------------|--------------|-------------------------|---------------------------------|--------------------|------------------|-------------------------------|--------------------|--------------------------------------------------|
| SNP_108117_A_6231  | NW_004517882.1 | scaffold3111 | 6231                    | AA                              | TT                 | TT               | DRR                           | 101508035          | serine/arginine repetitive matrix protein 1-like |
| SNP_108118_A_6296  | NW_004517882.1 | scaffold3111 | 6296                    | GG                              | AA                 | AA               | DRR                           | 101508035          | serine/arginine repetitive matrix protein 1-like |
| SNP_108119_A_6343  | NW_004517882.1 | scaffold3111 | 6343                    | CC                              | TT                 | TT               | DRR                           | 101508035          | serine/arginine repetitive matrix protein 1-like |
| SNP_108120_A_6433  | NW_004517882.1 | scaffold3111 | 6433                    | AA                              | TT                 | TT               | DRR                           | 101508035          | serine/arginine repetitive matrix protein 1-like |
| SNP_108121_A_6455  | NW_004517882.1 | scaffold3111 | 6455                    | GG                              | TT                 | TT               | DRR                           | 101508035          | serine/arginine repetitive matrix protein 1-like |
| SNP_108122_A_7883  | NW_004517882.1 | scaffold3111 | 7883                    | TT                              | CC                 | CC               | NON_SYNONYMOUS_CODING         | 101508035          | serine/arginine repetitive matrix protein 1-like |
| SNP_108123_A_8026  | NW_004517882.1 | scaffold3111 | 8026                    | CC                              | AA                 | AA               | INTRON                        | 101508035          | serine/arginine repetitive matrix protein 1-like |
| SNP_108124_A_8078  | NW_004517882.1 | scaffold3111 | 8078                    | AA                              | GG                 | GG               | INTRON                        | 101508035          | serine/arginine repetitive matrix protein 1-like |
| SNP_108125_A_8121  | NW_004517882.1 | scaffold3111 | 8121                    | TT                              | CC                 | CC               | INTRON                        | 101508035          | serine/arginine repetitive matrix protein 1-like |
| SNP_108126_A_2089  | NW_004517884.1 | scaffold3115 | 2089                    | AA                              | GG                 | GG               | INTERGENIC                    |                    |                                                  |
| SNP_108127_A_27702 | NW_004517884.1 | scaffold3115 | 27702                   | TT                              | AA                 | AA               | INTERGENIC                    |                    |                                                  |
| SNP_108128_A_27928 | NW_004517884.1 | scaffold3115 | 27928                   | AA                              | GG                 | GG               | INTERGENIC                    |                    |                                                  |
| SNP_108129_A_28063 | NW_004517884.1 | scaffold3115 | 28063                   | AA                              | GG                 | GG               | INTERGENIC                    |                    |                                                  |
| SNP_108130_A_28139 | NW_004517884.1 | scaffold3115 | 28139                   | TT                              | GG                 | GG               | INTERGENIC                    |                    |                                                  |
| SNP_108131_A_28270 | NW_004517884.1 | scaffold3115 | 28270                   | CC                              | GG                 | GG               | INTERGENIC                    |                    |                                                  |
| SNP_108133_A_47044 | NW_004517884.1 | scaffold3115 | 47044                   | GG                              | AA                 | AA               | INTERGENIC                    |                    |                                                  |
| SNP_108134_A_47086 | NW_004517884.1 | scaffold3115 | 47086                   | CC                              | AA                 | AA               | INTERGENIC                    |                    |                                                  |
| SNP_108135_A_47121 | NW_004517884.1 | scaffold3115 | 47121                   | GG                              | AA                 | AA               | INTERGENIC                    |                    |                                                  |
| SNP_108136_A_47158 | NW_004517884.1 | scaffold3115 | 47158                   | AA                              | TT                 | TT               | INTERGENIC                    |                    |                                                  |
| SNP_108137_A_48885 | NW_004517884.1 | scaffold3115 | 48885                   | CC                              | AA                 | AA               | INTERGENIC                    |                    |                                                  |
| SNP_108138_A_48892 | NW_004517884.1 | scaffold3115 | 48892                   | CC                              | TT                 | TT               | INTERGENIC                    |                    |                                                  |
| SNP_108139_A_52961 | NW_004517884.1 | scaffold3115 | 52961                   | AA                              | GG                 | GG               | INTERGENIC                    |                    |                                                  |

| SNPs IDs           | Chromosome IDs | Chromosomes  | Physical positions (bp) | CDC Frontier (Reference genome) | (Pusa 1103 & HPNB) | (ILWC 46 & LPNB) | Sequence genome | Components of | Gene accession IDs              | Putative functions |
|--------------------|----------------|--------------|-------------------------|---------------------------------|--------------------|------------------|-----------------|---------------|---------------------------------|--------------------|
| SNP_108141_A_61879 | NW_004517884.1 | scaffold3115 | 61879                   | CC                              | GG                 | GG               | INTERGENIC      |               |                                 |                    |
| SNP_108142_A_62021 | NW_004517884.1 | scaffold3115 | 62021                   | GG                              | AA                 | AA               | INTERGENIC      |               |                                 |                    |
| SNP_108143_A_62226 | NW_004517884.1 | scaffold3115 | 62226                   | AA                              | GG                 | GG               | INTERGENIC      |               |                                 |                    |
| SNP_108144_A_62572 | NW_004517884.1 | scaffold3115 | 62572                   | CC                              | TT                 | TT               | INTERGENIC      |               |                                 |                    |
| SNP_108148_A_63828 | NW_004517884.1 | scaffold3115 | 63828                   | CC                              | TT                 | TT               | INTERGENIC      |               |                                 |                    |
| SNP_108149_A_63876 | NW_004517884.1 | scaffold3115 | 63876                   | CC                              | AA                 | AA               | INTERGENIC      |               |                                 |                    |
| SNP_108150_A_63939 | NW_004517884.1 | scaffold3115 | 63939                   | TT                              | CC                 | CC               | INTERGENIC      |               |                                 |                    |
| SNP_108152_A_64037 | NW_004517884.1 | scaffold3115 | 64037                   | GG                              | TT                 | TT               | INTERGENIC      |               |                                 |                    |
| SNP_108153_A_65738 | NW_004517884.1 | scaffold3115 | 65738                   | GG                              | AA                 | AA               | INTERGENIC      |               |                                 |                    |
| SNP_108154_A_76995 | NW_004517884.1 | scaffold3115 | 76995                   | GG                              | AA                 | AA               | INTERGENIC      |               |                                 |                    |
| SNP_108155_A_77015 | NW_004517884.1 | scaffold3115 | 77015                   | TT                              | GG                 | GG               | INTERGENIC      |               |                                 |                    |
| SNP_108156_A_77055 | NW_004517884.1 | scaffold3115 | 77055                   | AA                              | TT                 | TT               | INTERGENIC      |               |                                 |                    |
| SNP_108157_A_77076 | NW_004517884.1 | scaffold3115 | 77076                   | TT                              | AA                 | AA               | INTERGENIC      |               |                                 |                    |
| SNP_108158_A_77235 | NW_004517884.1 | scaffold3115 | 77235                   | CC                              | TT                 | TT               | INTERGENIC      |               |                                 |                    |
| SNP_108159_A_83623 | NW_004517884.1 | scaffold3115 | 83623                   | CC                              | TT                 | TT               | INTRON          | 101508980     | 40S ribosomal protein S8-2-like |                    |
| SNP_108161_A_23493 | NW_004517885.1 | scaffold3116 | 23493                   | TT                              | GG                 | GG               | INTERGENIC      |               |                                 |                    |
| SNP_108166_A_2015  | NW_004517887.1 | scaffold3118 | 2015                    | CC                              | AA                 | AA               | INTERGENIC      |               |                                 |                    |
| SNP_108167_A_3690  | NW_004517887.1 | scaffold3118 | 3690                    | TT                              | CC                 | CC               | INTERGENIC      |               |                                 |                    |
| SNP_108168_A_6824  | NW_004517887.1 | scaffold3118 | 6824                    | AA                              | GG                 | GG               | INTERGENIC      |               |                                 |                    |
| SNP_108169_A_6888  | NW_004517887.1 | scaffold3118 | 6888                    | AA                              | TT                 | TT               | INTERGENIC      |               |                                 |                    |
| SNP_108171_A_7895  | NW_004517890.1 | scaffold3121 | 7895                    | AA                              | CC                 | CC               | INTRON          | 101509606     | Unknown function                |                    |
| SNP_108172_A_8063  | NW_004517890.1 | scaffold3121 | 8063                    | TT                              | CC                 | CC               | INTRON          | 101509606     | Unknown function                |                    |

| SNPs IDs           | Chromosome IDs | Chromosomes  | Physical positions (bp) | CDC Frontier (Reference genome) | (Pusa 1103 & HPNB) | (ILWC 46 & LPNB) | Sequence Components of genome | Gene accession IDs | Putative functions |
|--------------------|----------------|--------------|-------------------------|---------------------------------|--------------------|------------------|-------------------------------|--------------------|--------------------|
| SNP_108173_A_8064  | NW_004517890.1 | scaffold3121 | 8064                    | AA                              | CC                 | CC               | INTRON                        | 101509606          | Unknown function   |
| SNP_108174_A_8868  | NW_004517890.1 | scaffold3121 | 8868                    | CC                              | GG                 | GG               | INTRON                        | 101509606          | Unknown function   |
| SNP_108175_A_8883  | NW_004517890.1 | scaffold3121 | 8883                    | CC                              | TT                 | TT               | INTRON                        | 101509606          | Unknown function   |
| SNP_108176_A_8932  | NW_004517890.1 | scaffold3121 | 8932                    | TT                              | CC                 | CC               | INTRON                        | 101509606          | Unknown function   |
| SNP_108177_A_8942  | NW_004517890.1 | scaffold3121 | 8942                    | TT                              | AA                 | AA               | INTRON                        | 101509606          | Unknown function   |
| SNP_108178_A_8952  | NW_004517890.1 | scaffold3121 | 8952                    | GG                              | TT                 | TT               | INTRON                        | 101509606          | Unknown function   |
| SNP_108179_A_9080  | NW_004517890.1 | scaffold3121 | 9080                    | AA                              | TT                 | TT               | INTRON                        | 101509606          | Unknown function   |
| SNP_108180_A_9084  | NW_004517890.1 | scaffold3121 | 9084                    | GG                              | AA                 | AA               | INTRON                        | 101509606          | Unknown function   |
| SNP_108181_A_14294 | NW_004517890.1 | scaffold3121 | 14294                   | AA                              | GG                 | GG               | INTERGENIC                    |                    |                    |
| SNP_108183_A_3745  | NW_004517892.1 | scaffold3124 | 3745                    | GG                              | AA                 | AA               | INTERGENIC                    |                    |                    |
| SNP_108184_A_3919  | NW_004517892.1 | scaffold3124 | 3919                    | CC                              | TT                 | TT               | INTERGENIC                    |                    |                    |
| SNP_108185_A_4001  | NW_004517892.1 | scaffold3124 | 4001                    | GG                              | AA                 | AA               | INTERGENIC                    |                    |                    |
| SNP_108186_A_4020  | NW_004517892.1 | scaffold3124 | 4020                    | TT                              | CC                 | CC               | INTERGENIC                    |                    |                    |
| SNP_108187_A_4040  | NW_004517892.1 | scaffold3124 | 4040                    | CC                              | GG                 | GG               | INTERGENIC                    |                    |                    |
| SNP_108188_A_4058  | NW_004517892.1 | scaffold3124 | 4058                    | GG                              | TT                 | TT               | INTERGENIC                    |                    |                    |
| SNP_108189_A_4186  | NW_004517892.1 | scaffold3124 | 4186                    | TT                              | GG                 | GG               | INTERGENIC                    |                    |                    |
| SNP_108190_A_1759  | NW_004517893.1 | scaffold3125 | 1759                    | AA                              | TT                 | TT               | INTERGENIC                    |                    |                    |
| SNP_108191_A_20311 | NW_004517894.1 | scaffold3126 | 20311                   | AA                              | GG                 | GG               | INTERGENIC                    |                    |                    |
| SNP_108192_A_20327 | NW_004517894.1 | scaffold3126 | 20327                   | CC                              | TT                 | TT               | INTERGENIC                    |                    |                    |
| SNP_108193_A_20355 | NW_004517894.1 | scaffold3126 | 20355                   | AA                              | GG                 | GG               | INTERGENIC                    |                    |                    |
| SNP_108194_A_20360 | NW_004517894.1 | scaffold3126 | 20360                   | CC                              | TT                 | TT               | INTERGENIC                    |                    |                    |
| SNP_108195_A_20369 | NW_004517894.1 | scaffold3126 | 20369                   | CC                              | TT                 | TT               | INTERGENIC                    |                    |                    |

| SNPs IDs           | Chromosome IDs | Chromosomes  | Physical positions (bp) | CDC Frontier (Reference genome) | (Pusa 1103 & HPNB) | (ILWC 46 & LPNB) | Sequence genome | Components of | Gene accession IDs | Putative functions |
|--------------------|----------------|--------------|-------------------------|---------------------------------|--------------------|------------------|-----------------|---------------|--------------------|--------------------|
| SNP_108196_A_20390 | NW_004517894.1 | scaffold3126 | 20390                   | CC                              | TT                 | TT               | INTERGENIC      |               |                    |                    |
| SNP_108197_A_20399 | NW_004517894.1 | scaffold3126 | 20399                   | AA                              | GG                 | GG               | INTERGENIC      |               |                    |                    |
| SNP_108198_A_20420 | NW_004517894.1 | scaffold3126 | 20420                   | AA                              | GG                 | GG               | INTERGENIC      |               |                    |                    |
| SNP_108199_A_20704 | NW_004517894.1 | scaffold3126 | 20704                   | TT                              | CC                 | CC               | INTERGENIC      |               |                    |                    |
| SNP_108200_A_83    | NW_004517895.1 | scaffold3127 | 83                      | TT                              | AA                 | AA               | INTERGENIC      |               |                    |                    |
| SNP_108201_A_279   | NW_004517895.1 | scaffold3127 | 279                     | GG                              | TT                 | TT               | INTERGENIC      |               |                    |                    |
| SNP_108202_A_349   | NW_004517895.1 | scaffold3127 | 349                     | TT                              | AA                 | AA               | INTERGENIC      |               |                    |                    |
| SNP_108203_A_986   | NW_004517895.1 | scaffold3127 | 986                     | TT                              | CC                 | CC               | INTERGENIC      |               |                    |                    |
| SNP_108204_A_1020  | NW_004517895.1 | scaffold3127 | 1020                    | AA                              | TT                 | TT               | INTERGENIC      |               |                    |                    |
| SNP_108205_A_1060  | NW_004517895.1 | scaffold3127 | 1060                    | CC                              | TT                 | TT               | INTERGENIC      |               |                    |                    |
| SNP_108206_A_2239  | NW_004517895.1 | scaffold3127 | 2239                    | GG                              | TT                 | TT               | INTERGENIC      |               |                    |                    |
| SNP_108207_A_2774  | NW_004517895.1 | scaffold3127 | 2774                    | GG                              | CC                 | CC               | INTERGENIC      |               |                    |                    |
| SNP_108208_A_2781  | NW_004517895.1 | scaffold3127 | 2781                    | CC                              | TT                 | TT               | INTERGENIC      |               |                    |                    |
| SNP_108209_A_2892  | NW_004517895.1 | scaffold3127 | 2892                    | AA                              | CC                 | CC               | INTERGENIC      |               |                    |                    |
| SNP_108210_A_3239  | NW_004517895.1 | scaffold3127 | 3239                    | AA                              | GG                 | GG               | INTERGENIC      |               |                    |                    |
| SNP_108211_A_3240  | NW_004517895.1 | scaffold3127 | 3240                    | TT                              | AA                 | AA               | INTERGENIC      |               |                    |                    |
| SNP_108212_A_3272  | NW_004517895.1 | scaffold3127 | 3272                    | CC                              | TT                 | TT               | INTERGENIC      |               |                    |                    |
| SNP_108213_A_3579  | NW_004517895.1 | scaffold3127 | 3579                    | TT                              | GG                 | GG               | INTERGENIC      |               |                    |                    |
| SNP_108214_A_3596  | NW_004517895.1 | scaffold3127 | 3596                    | CC                              | GG                 | GG               | INTERGENIC      |               |                    |                    |
| SNP_108215_A_3647  | NW_004517895.1 | scaffold3127 | 3647                    | TT                              | GG                 | GG               | INTERGENIC      |               |                    |                    |
| SNP_108216_A_3867  | NW_004517895.1 | scaffold3127 | 3867                    | AA                              | TT                 | TT               | INTERGENIC      |               |                    |                    |
| SNP_108217_A_4088  | NW_004517895.1 | scaffold3127 | 4088                    | AA                              | CC                 | CC               | INTERGENIC      |               |                    |                    |

| SNPs IDs           | Chromosome IDs | Chromosomes  | Physical positions (bp) | CDC Frontier (Reference genome) | (Pusa 1103 & HPNB) | (ILWC 46 & LPNB) | Sequence genome | Components of | Gene accession IDs | Putative functions |
|--------------------|----------------|--------------|-------------------------|---------------------------------|--------------------|------------------|-----------------|---------------|--------------------|--------------------|
| SNP_108218_A_4140  | NW_004517895.1 | scaffold3127 | 4140                    | AA                              | CC                 | CC               | INTERGENIC      |               |                    |                    |
| SNP_108220_A_8755  | NW_004517895.1 | scaffold3127 | 8755                    | CC                              | GG                 | GG               | INTERGENIC      |               |                    |                    |
| SNP_108221_A_8765  | NW_004517895.1 | scaffold3127 | 8765                    | AA                              | TT                 | TT               | INTERGENIC      |               |                    |                    |
| SNP_108222_A_8767  | NW_004517895.1 | scaffold3127 | 8767                    | TT                              | GG                 | GG               | INTERGENIC      |               |                    |                    |
| SNP_108223_A_8774  | NW_004517895.1 | scaffold3127 | 8774                    | CC                              | TT                 | TT               | INTERGENIC      |               |                    |                    |
| SNP_108225_A_8834  | NW_004517895.1 | scaffold3127 | 8834                    | GG                              | CC                 | CC               | INTERGENIC      |               |                    |                    |
| SNP_108227_A_8880  | NW_004517895.1 | scaffold3127 | 8880                    | GG                              | AA                 | AA               | INTERGENIC      |               |                    |                    |
| SNP_108228_A_8890  | NW_004517895.1 | scaffold3127 | 8890                    | TT                              | GG                 | GG               | INTERGENIC      |               |                    |                    |
| SNP_108229_A_8984  | NW_004517895.1 | scaffold3127 | 8984                    | GG                              | AA                 | AA               | INTERGENIC      |               |                    |                    |
| SNP_108230_A_9175  | NW_004517895.1 | scaffold3127 | 9175                    | AA                              | TT                 | TT               | INTERGENIC      |               |                    |                    |
| SNP_108231_A_9484  | NW_004517895.1 | scaffold3127 | 9484                    | TT                              | CC                 | CC               | INTERGENIC      |               |                    |                    |
| SNP_108232_A_9700  | NW_004517895.1 | scaffold3127 | 9700                    | AA                              | GG                 | GG               | INTERGENIC      |               |                    |                    |
| SNP_108233_A_9838  | NW_004517895.1 | scaffold3127 | 9838                    | CC                              | AA                 | AA               | INTERGENIC      |               |                    |                    |
| SNP_108234_A_9876  | NW_004517895.1 | scaffold3127 | 9876                    | TT                              | AA                 | AA               | INTERGENIC      |               |                    |                    |
| SNP_108235_A_9878  | NW_004517895.1 | scaffold3127 | 9878                    | GG                              | TT                 | TT               | INTERGENIC      |               |                    |                    |
| SNP_108236_A_9885  | NW_004517895.1 | scaffold3127 | 9885                    | AA                              | GG                 | GG               | INTERGENIC      |               |                    |                    |
| SNP_108237_A_9919  | NW_004517895.1 | scaffold3127 | 9919                    | GG                              | CC                 | CC               | INTERGENIC      |               |                    |                    |
| SNP_108238_A_11917 | NW_004517895.1 | scaffold3127 | 11917                   | AA                              | CC                 | CC               | INTERGENIC      |               |                    |                    |
| SNP_108239_A_12016 | NW_004517895.1 | scaffold3127 | 12016                   | AA                              | CC                 | CC               | INTERGENIC      |               |                    |                    |
| SNP_108240_A_12161 | NW_004517895.1 | scaffold3127 | 12161                   | AA                              | CC                 | CC               | INTERGENIC      |               |                    |                    |
| SNP_108241_A_12170 | NW_004517895.1 | scaffold3127 | 12170                   | TT                              | GG                 | GG               | INTERGENIC      |               |                    |                    |
| SNP_108242_A_12264 | NW_004517895.1 | scaffold3127 | 12264                   | CC                              | AA                 | AA               | INTERGENIC      |               |                    |                    |



| SNPs IDs           | Chromosome IDs | Chromosomes  | Physical positions (bp) | CDC Frontier (Reference genome) | (Pusa 1103 & HPNB) | (ILWC 46 & LPNB) | Sequence genome | Components of | Gene accession IDs | Putative functions |
|--------------------|----------------|--------------|-------------------------|---------------------------------|--------------------|------------------|-----------------|---------------|--------------------|--------------------|
| SNP_108243_A_12265 | NW_004517895.1 | scaffold3127 | 12265                   | TT                              | AA                 | AA               | INTERGENIC      |               |                    |                    |
| SNP_108244_A_12743 | NW_004517895.1 | scaffold3127 | 12743                   | AA                              | CC                 | CC               | INTERGENIC      |               |                    |                    |
| SNP_108245_A_12803 | NW_004517895.1 | scaffold3127 | 12803                   | TT                              | CC                 | CC               | INTERGENIC      |               |                    |                    |
| SNP_108246_A_13086 | NW_004517895.1 | scaffold3127 | 13086                   | AA                              | GG                 | GG               | INTERGENIC      |               |                    |                    |
| SNP_108247_A_15289 | NW_004517895.1 | scaffold3127 | 15289                   | TT                              | GG                 | GG               | INTERGENIC      |               |                    |                    |
| SNP_108248_A_17738 | NW_004517895.1 | scaffold3127 | 17738                   | CC                              | GG                 | GG               | INTERGENIC      |               |                    |                    |
| SNP_108249_A_17795 | NW_004517895.1 | scaffold3127 | 17795                   | GG                              | TT                 | TT               | INTERGENIC      |               |                    |                    |
| SNP_108250_A_18969 | NW_004517895.1 | scaffold3127 | 18969                   | AA                              | GG                 | GG               | INTERGENIC      |               |                    |                    |
| SNP_108251_A_19239 | NW_004517895.1 | scaffold3127 | 19239                   | TT                              | AA                 | AA               | INTERGENIC      |               |                    |                    |
| SNP_108252_A_19245 | NW_004517895.1 | scaffold3127 | 19245                   | AA                              | GG                 | GG               | INTERGENIC      |               |                    |                    |
| SNP_108253_A_19472 | NW_004517895.1 | scaffold3127 | 19472                   | CC                              | AA                 | AA               | INTERGENIC      |               |                    |                    |
| SNP_108254_A_21867 | NW_004517895.1 | scaffold3127 | 21867                   | AA                              | CC                 | CC               | INTERGENIC      |               |                    |                    |
| SNP_108255_A_22037 | NW_004517895.1 | scaffold3127 | 22037                   | CC                              | TT                 | TT               | INTERGENIC      |               |                    |                    |
| SNP_108256_A_485   | NW_004517899.1 | scaffold3131 | 485                     | AA                              | CC                 | CC               | INTERGENIC      |               |                    |                    |
| SNP_108257_A_534   | NW_004517899.1 | scaffold3131 | 534                     | GG                              | AA                 | AA               | INTERGENIC      |               |                    |                    |
| SNP_108258_A_527   | NW_004517902.1 | scaffold3134 | 527                     | CC                              | TT                 | TT               | INTERGENIC      |               |                    |                    |
| SNP_108259_A_4429  | NW_004517902.1 | scaffold3134 | 4429                    | CC                              | TT                 | TT               | INTERGENIC      |               |                    |                    |
| SNP_108260_A_4455  | NW_004517902.1 | scaffold3134 | 4455                    | AA                              | TT                 | TT               | INTERGENIC      |               |                    |                    |
| SNP_108261_A_4461  | NW_004517902.1 | scaffold3134 | 4461                    | AA                              | GG                 | GG               | INTERGENIC      |               |                    |                    |
| SNP_108262_A_4515  | NW_004517902.1 | scaffold3134 | 4515                    | CC                              | TT                 | TT               | INTERGENIC      |               |                    |                    |
| SNP_108263_A_4585  | NW_004517902.1 | scaffold3134 | 4585                    | AA                              | CC                 | CC               | INTERGENIC      |               |                    |                    |
| SNP_108264_A_4805  | NW_004517902.1 | scaffold3134 | 4805                    | AA                              | TT                 | TT               | INTERGENIC      |               |                    |                    |

| SNPs IDs           | Chromosome IDs | Chromosomes  | Physical positions (bp) | CDC Frontier genome (Reference genome) | (Pusa 1103 & HPNB) | (ILWC 46 & LPNB) | Sequence genome | Components of | Gene accession IDs                 | Putative functions |
|--------------------|----------------|--------------|-------------------------|----------------------------------------|--------------------|------------------|-----------------|---------------|------------------------------------|--------------------|
| SNP_108265_A_4821  | NW_004517902.1 | scaffold3134 | 4821                    | AA                                     | CC                 | CC               | INTERGENIC      |               |                                    |                    |
| SNP_108266_A_5447  | NW_004517902.1 | scaffold3134 | 5447                    | TT                                     | CC                 | CC               | INTERGENIC      |               |                                    |                    |
| SNP_108267_A_5522  | NW_004517902.1 | scaffold3134 | 5522                    | TT                                     | GG                 | GG               | INTERGENIC      |               |                                    |                    |
| SNP_108268_A_5543  | NW_004517902.1 | scaffold3134 | 5543                    | TT                                     | AA                 | AA               | INTERGENIC      |               |                                    |                    |
| SNP_108269_A_5544  | NW_004517902.1 | scaffold3134 | 5544                    | TT                                     | AA                 | AA               | INTERGENIC      |               |                                    |                    |
| SNP_108270_A_5552  | NW_004517902.1 | scaffold3134 | 5552                    | AA                                     | TT                 | TT               | INTERGENIC      |               |                                    |                    |
| SNP_108271_A_5591  | NW_004517902.1 | scaffold3134 | 5591                    | CC                                     | AA                 | AA               | INTERGENIC      |               |                                    |                    |
| SNP_108272_A_5790  | NW_004517902.1 | scaffold3134 | 5790                    | TT                                     | AA                 | AA               | INTERGENIC      |               |                                    |                    |
| SNP_108273_A_10893 | NW_004517902.1 | scaffold3134 | 10893                   | TT                                     | AA                 | AA               | INTERGENIC      |               |                                    |                    |
| SNP_108274_A_12117 | NW_004517902.1 | scaffold3134 | 12117                   | AA                                     | GG                 | GG               | INTERGENIC      |               |                                    |                    |
| SNP_108276_A_12518 | NW_004517902.1 | scaffold3134 | 12518                   | CC                                     | AA                 | AA               | INTERGENIC      |               |                                    |                    |
| SNP_108277_A_12544 | NW_004517902.1 | scaffold3134 | 12544                   | AA                                     | GG                 | GG               | INTERGENIC      |               |                                    |                    |
| SNP_108278_A_12559 | NW_004517902.1 | scaffold3134 | 12559                   | TT                                     | GG                 | GG               | INTERGENIC      |               |                                    |                    |
| SNP_108279_A_12567 | NW_004517902.1 | scaffold3134 | 12567                   | TT                                     | CC                 | CC               | INTERGENIC      |               |                                    |                    |
| SNP_108280_A_12682 | NW_004517902.1 | scaffold3134 | 12682                   | TT                                     | CC                 | CC               | DRR             | 101510260     | aspartic proteinase-like protein 2 |                    |
| SNP_108281_A_12939 | NW_004517902.1 | scaffold3134 | 12939                   | AA                                     | GG                 | GG               | DRR             | 101510260     | aspartic proteinase-like protein 2 |                    |
| SNP_108282_A_12955 | NW_004517902.1 | scaffold3134 | 12955                   | GG                                     | AA                 | AA               | DRR             | 101510260     | aspartic proteinase-like protein 2 |                    |
| SNP_108283_A_12977 | NW_004517902.1 | scaffold3134 | 12977                   | CC                                     | TT                 | TT               | DRR             | 101510260     | aspartic proteinase-like protein 2 |                    |
| SNP_108284_A_13012 | NW_004517902.1 | scaffold3134 | 13012                   | TT                                     | CC                 | CC               | DRR             | 101510260     | aspartic proteinase-like protein 2 |                    |
| SNP_108285_A_13047 | NW_004517902.1 | scaffold3134 | 13047                   | GG                                     | AA                 | AA               | DRR             | 101510260     | aspartic proteinase-like protein 2 |                    |
| SNP_108286_A_13263 | NW_004517902.1 | scaffold3134 | 13263                   | AA                                     | GG                 | GG               | DRR             | 101510260     | aspartic proteinase-like protein 2 |                    |
| SNP_108287_A_13535 | NW_004517902.1 | scaffold3134 | 13535                   | CC                                     | AA                 | AA               | DRR             | 101510260     | aspartic proteinase-like protein 2 |                    |

| SNPs IDs           | Chromosome IDs | Chromosomes  | Physical positions (bp) | CDC Frontier (Reference genome) | (Pusa 1103 & HPNB) | (ILWC 46 & LPNB) | Sequence Components of genome | Gene accession IDs | Putative functions                 |
|--------------------|----------------|--------------|-------------------------|---------------------------------|--------------------|------------------|-------------------------------|--------------------|------------------------------------|
| SNP_108288_A_13544 | NW_004517902.1 | scaffold3134 | 13544                   | AA                              | GG                 | GG               | DRR                           | 101510260          | aspartic proteinase-like protein 2 |
| SNP_108289_A_13549 | NW_004517902.1 | scaffold3134 | 13549                   | TT                              | CC                 | CC               | DRR                           | 101510260          | aspartic proteinase-like protein 2 |
| SNP_108291_A_13683 | NW_004517902.1 | scaffold3134 | 13683                   | AA                              | GG                 | GG               | DRR                           | 101510260          | aspartic proteinase-like protein 2 |
| SNP_108292_A_13688 | NW_004517902.1 | scaffold3134 | 13688                   | TT                              | CC                 | CC               | DRR                           | 101510260          | aspartic proteinase-like protein 2 |
| SNP_108293_A_13697 | NW_004517902.1 | scaffold3134 | 13697                   | AA                              | TT                 | TT               | DRR                           | 101510260          | aspartic proteinase-like protein 2 |
| SNP_108294_A_13925 | NW_004517902.1 | scaffold3134 | 13925                   | AA                              | TT                 | TT               | INTRON                        | 101510260          | aspartic proteinase-like protein 2 |
| SNP_108295_A_14024 | NW_004517902.1 | scaffold3134 | 14024                   | AA                              | GG                 | GG               | SYNONYMOUS_CODING             | 101510260          | aspartic proteinase-like protein 2 |
| SNP_108296_A_14042 | NW_004517902.1 | scaffold3134 | 14042                   | AA                              | GG                 | GG               | SYNONYMOUS_CODING             | 101510260          | aspartic proteinase-like protein 2 |
| SNP_108297_A_14470 | NW_004517902.1 | scaffold3134 | 14470                   | GG                              | CC                 | CC               | SYNONYMOUS_CODING             | 101510260          | aspartic proteinase-like protein 2 |
| SNP_108298_A_14681 | NW_004517902.1 | scaffold3134 | 14681                   | GG                              | AA                 | AA               | SYNONYMOUS_CODING             | 101510260          | aspartic proteinase-like protein 2 |
| SNP_108300_A_15510 | NW_004517902.1 | scaffold3134 | 15510                   | TT                              | CC                 | CC               | INTRON                        | 101510260          | aspartic proteinase-like protein 2 |
| SNP_108301_A_15554 | NW_004517902.1 | scaffold3134 | 15554                   | TT                              | AA                 | AA               | INTRON                        | 101510260          | aspartic proteinase-like protein 2 |
| SNP_108302_A_38712 | NW_004517902.1 | scaffold3134 | 38712                   | TT                              | GG                 | GG               | INTERGENIC                    |                    |                                    |
| SNP_108303_A_66975 | NW_004517902.1 | scaffold3134 | 66975                   | AA                              | TT                 | TT               | INTERGENIC                    |                    |                                    |
| SNP_108304_A_67007 | NW_004517902.1 | scaffold3134 | 67007                   | TT                              | CC                 | CC               | INTERGENIC                    |                    |                                    |
| SNP_108305_A_67090 | NW_004517902.1 | scaffold3134 | 67090                   | TT                              | CC                 | CC               | INTERGENIC                    |                    |                                    |
| SNP_108306_A_67103 | NW_004517902.1 | scaffold3134 | 67103                   | TT                              | GG                 | GG               | INTERGENIC                    |                    |                                    |
| SNP_108307_A_67216 | NW_004517902.1 | scaffold3134 | 67216                   | TT                              | CC                 | CC               | INTERGENIC                    |                    |                                    |
| SNP_108308_A_67270 | NW_004517902.1 | scaffold3134 | 67270                   | CC                              | AA                 | AA               | INTERGENIC                    |                    |                                    |
| SNP_108309_A_67316 | NW_004517902.1 | scaffold3134 | 67316                   | CC                              | AA                 | AA               | INTERGENIC                    |                    |                                    |
| SNP_108310_A_67387 | NW_004517902.1 | scaffold3134 | 67387                   | AA                              | CC                 | CC               | INTERGENIC                    |                    |                                    |
| SNP_108311_A_67399 | NW_004517902.1 | scaffold3134 | 67399                   | CC                              | TT                 | TT               | INTERGENIC                    |                    |                                    |

| SNPs IDs           | Chromosome IDs | Chromosomes  | Physical positions (bp) | CDC Frontier (Reference genome) | (Pusa 1103 & HPNB) | (ILWC 46 & LPNB) | Sequence genome | Components of | Gene accession IDs | Putative functions |
|--------------------|----------------|--------------|-------------------------|---------------------------------|--------------------|------------------|-----------------|---------------|--------------------|--------------------|
| SNP_108312_A_67402 | NW_004517902.1 | scaffold3134 | 67402                   | AA                              | CC                 | CC               | INTERGENIC      |               |                    |                    |
| SNP_108313_A_76268 | NW_004517902.1 | scaffold3134 | 76268                   | GG                              | TT                 | TT               | INTERGENIC      |               |                    |                    |
| SNP_108314_A_76292 | NW_004517902.1 | scaffold3134 | 76292                   | AA                              | GG                 | GG               | INTERGENIC      |               |                    |                    |
| SNP_108315_A_80617 | NW_004517902.1 | scaffold3134 | 80617                   | AA                              | CC                 | CC               | INTERGENIC      |               |                    |                    |
| SNP_108318_A_4815  | NW_004517903.1 | scaffold3135 | 4815                    | GG                              | AA                 | AA               | INTERGENIC      |               |                    |                    |
| SNP_108319_A_988   | NW_004517904.1 | scaffold3136 | 988                     | GG                              | AA                 | AA               | INTERGENIC      |               |                    |                    |
| SNP_108321_A_965   | NW_004517907.1 | scaffold3139 | 965                     | TT                              | CC                 | CC               | INTERGENIC      |               |                    |                    |
| SNP_108322_A_966   | NW_004517907.1 | scaffold3139 | 966                     | GG                              | AA                 | AA               | INTERGENIC      |               |                    |                    |
| SNP_108323_A_986   | NW_004517907.1 | scaffold3139 | 986                     | TT                              | GG                 | GG               | INTERGENIC      |               |                    |                    |
| SNP_108324_A_594   | NW_004517913.1 | scaffold3147 | 594                     | GG                              | TT                 | TT               | INTERGENIC      |               |                    |                    |
| SNP_108325_A_599   | NW_004517913.1 | scaffold3147 | 599                     | GG                              | AA                 | AA               | INTERGENIC      |               |                    |                    |
| SNP_108326_A_4540  | NW_004517914.1 | scaffold3148 | 4540                    | GG                              | CC                 | CC               | INTERGENIC      |               |                    |                    |
| SNP_108327_A_4561  | NW_004517914.1 | scaffold3148 | 4561                    | AA                              | CC                 | CC               | INTERGENIC      |               |                    |                    |
| SNP_108328_A_4562  | NW_004517914.1 | scaffold3148 | 4562                    | TT                              | AA                 | AA               | INTERGENIC      |               |                    |                    |
| SNP_108329_A_4565  | NW_004517914.1 | scaffold3148 | 4565                    | GG                              | AA                 | AA               | INTERGENIC      |               |                    |                    |
| SNP_108330_A_2489  | NW_004517915.1 | scaffold3149 | 2489                    | AA                              | TT                 | TT               | INTERGENIC      |               |                    |                    |
| SNP_108331_A_3498  | NW_004517915.1 | scaffold3149 | 3498                    | GG                              | AA                 | AA               | INTERGENIC      |               |                    |                    |
| SNP_108332_A_3576  | NW_004517915.1 | scaffold3149 | 3576                    | CC                              | AA                 | AA               | INTERGENIC      |               |                    |                    |
| SNP_108333_A_3867  | NW_004517915.1 | scaffold3149 | 3867                    | TT                              | AA                 | AA               | INTERGENIC      |               |                    |                    |
| SNP_108334_A_3882  | NW_004517915.1 | scaffold3149 | 3882                    | AA                              | GG                 | GG               | INTERGENIC      |               |                    |                    |
| SNP_108335_A_4800  | NW_004517915.1 | scaffold3149 | 4800                    | TT                              | CC                 | CC               | INTERGENIC      |               |                    |                    |
| SNP_108336_A_4807  | NW_004517915.1 | scaffold3149 | 4807                    | CC                              | TT                 | TT               | INTERGENIC      |               |                    |                    |

| SNPs IDs          | Chromosome IDs | Chromosomes  | Physical positions (bp) | CDC Frontier (Reference genome) | (Pusa 1103 & HPNB) | (ILWC 46 & LPNB) | Sequence genome | Components of | Gene accession IDs | Putative functions |
|-------------------|----------------|--------------|-------------------------|---------------------------------|--------------------|------------------|-----------------|---------------|--------------------|--------------------|
| SNP_108337_A_4861 | NW_004517915.1 | scaffold3149 | 4861                    | CC                              | AA                 | AA               | INTERGENIC      |               |                    |                    |
| SNP_108338_A_5048 | NW_004517915.1 | scaffold3149 | 5048                    | CC                              | GG                 | GG               | INTERGENIC      |               |                    |                    |
| SNP_108339_A_5143 | NW_004517915.1 | scaffold3149 | 5143                    | TT                              | GG                 | GG               | INTERGENIC      |               |                    |                    |
| SNP_108340_A_5152 | NW_004517915.1 | scaffold3149 | 5152                    | GG                              | AA                 | AA               | INTERGENIC      |               |                    |                    |
| SNP_108341_A_5157 | NW_004517915.1 | scaffold3149 | 5157                    | GG                              | AA                 | CC               | INTERGENIC      |               |                    |                    |
| SNP_108342_A_5162 | NW_004517915.1 | scaffold3149 | 5162                    | AA                              | GG                 | GG               | INTERGENIC      |               |                    |                    |
| SNP_108343_A_5214 | NW_004517915.1 | scaffold3149 | 5214                    | TT                              | CC                 | CC               | INTERGENIC      |               |                    |                    |
| SNP_108344_A_5283 | NW_004517915.1 | scaffold3149 | 5283                    | AA                              | GG                 | GG               | INTERGENIC      |               |                    |                    |
| SNP_108345_A_5291 | NW_004517915.1 | scaffold3149 | 5291                    | TT                              | CC                 | CC               | INTERGENIC      |               |                    |                    |
| SNP_108346_A_5317 | NW_004517915.1 | scaffold3149 | 5317                    | CC                              | TT                 | TT               | INTERGENIC      |               |                    |                    |
| SNP_108347_A_5434 | NW_004517915.1 | scaffold3149 | 5434                    | TT                              | GG                 | GG               | INTERGENIC      |               |                    |                    |
| SNP_108348_A_5536 | NW_004517915.1 | scaffold3149 | 5536                    | TT                              | AA                 | AA               | INTERGENIC      |               |                    |                    |
| SNP_108349_A_5570 | NW_004517915.1 | scaffold3149 | 5570                    | TT                              | CC                 | CC               | INTERGENIC      |               |                    |                    |
| SNP_108350_A_6454 | NW_004517915.1 | scaffold3149 | 6454                    | CC                              | AA                 | AA               | INTERGENIC      |               |                    |                    |
| SNP_108351_A_9130 | NW_004517915.1 | scaffold3149 | 9130                    | AA                              | TT                 | TT               | INTERGENIC      |               |                    |                    |
| SNP_108352_A_9184 | NW_004517915.1 | scaffold3149 | 9184                    | TT                              | GG                 | GG               | INTERGENIC      |               |                    |                    |
| SNP_108353_A_9251 | NW_004517915.1 | scaffold3149 | 9251                    | CC                              | AA                 | AA               | INTERGENIC      |               |                    |                    |
| SNP_108354_A_9283 | NW_004517915.1 | scaffold3149 | 9283                    | GG                              | AA                 | AA               | INTERGENIC      |               |                    |                    |
| SNP_108355_A_9450 | NW_004517915.1 | scaffold3149 | 9450                    | CC                              | TT                 | TT               | INTERGENIC      |               |                    |                    |
| SNP_108356_A_9487 | NW_004517915.1 | scaffold3149 | 9487                    | AA                              | TT                 | TT               | INTERGENIC      |               |                    |                    |
| SNP_108357_A_9513 | NW_004517915.1 | scaffold3149 | 9513                    | AA                              | GG                 | GG               | INTERGENIC      |               |                    |                    |
| SNP_108359_A_9736 | NW_004517915.1 | scaffold3149 | 9736                    | GG                              | AA                 | AA               | INTERGENIC      |               |                    |                    |

| SNPs IDs           | Chromosome IDs | Chromosomes  | Physical positions (bp) | CDC Frontier (Reference genome) | (Pusa 1103 & HPNB) | (ILWC 46 & LPNB) | Sequence genome | Components of | Gene accession IDs | Putative functions |
|--------------------|----------------|--------------|-------------------------|---------------------------------|--------------------|------------------|-----------------|---------------|--------------------|--------------------|
| SNP_108360_A_9787  | NW_004517915.1 | scaffold3149 | 9787                    | CC                              | GG                 | GG               | INTERGENIC      |               |                    |                    |
| SNP_108361_A_9850  | NW_004517915.1 | scaffold3149 | 9850                    | TT                              | GG                 | GG               | INTERGENIC      |               |                    |                    |
| SNP_108362_A_9870  | NW_004517915.1 | scaffold3149 | 9870                    | AA                              | GG                 | GG               | INTERGENIC      |               |                    |                    |
| SNP_108363_A_9945  | NW_004517915.1 | scaffold3149 | 9945                    | CC                              | TT                 | TT               | INTERGENIC      |               |                    |                    |
| SNP_108364_A_9960  | NW_004517915.1 | scaffold3149 | 9960                    | CC                              | TT                 | TT               | INTERGENIC      |               |                    |                    |
| SNP_108365_A_10184 | NW_004517915.1 | scaffold3149 | 10184                   | AA                              | CC                 | CC               | INTERGENIC      |               |                    |                    |
| SNP_108366_A_10335 | NW_004517915.1 | scaffold3149 | 10335                   | AA                              | GG                 | GG               | INTERGENIC      |               |                    |                    |
| SNP_108367_A_10525 | NW_004517915.1 | scaffold3149 | 10525                   | GG                              | AA                 | AA               | INTERGENIC      |               |                    |                    |
| SNP_108368_A_10527 | NW_004517915.1 | scaffold3149 | 10527                   | TT                              | CC                 | CC               | INTERGENIC      |               |                    |                    |
| SNP_108369_A_10544 | NW_004517915.1 | scaffold3149 | 10544                   | TT                              | AA                 | AA               | INTERGENIC      |               |                    |                    |
| SNP_108370_A_351   | NW_004517917.1 | scaffold3155 | 351                     | AA                              | GG                 | GG               | INTERGENIC      |               |                    |                    |
| SNP_108371_A_367   | NW_004517917.1 | scaffold3155 | 367                     | GG                              | AA                 | AA               | INTERGENIC      |               |                    |                    |
| SNP_108372_A_489   | NW_004517917.1 | scaffold3155 | 489                     | TT                              | AA                 | GG               | INTERGENIC      |               |                    |                    |
| SNP_108373_A_583   | NW_004517917.1 | scaffold3155 | 583                     | AA                              | GG                 | GG               | INTERGENIC      |               |                    |                    |
| SNP_108374_A_5550  | NW_004517917.1 | scaffold3155 | 5550                    | CC                              | AA                 | AA               | DRR             | 101511428     | Unknown function   |                    |
| SNP_108375_A_5558  | NW_004517917.1 | scaffold3155 | 5558                    | TT                              | CC                 | CC               | DRR             | 101511428     | Unknown function   |                    |
| SNP_108376_A_5559  | NW_004517917.1 | scaffold3155 | 5559                    | GG                              | CC                 | CC               | DRR             | 101511428     | Unknown function   |                    |
| SNP_108377_A_5579  | NW_004517917.1 | scaffold3155 | 5579                    | TT                              | CC                 | CC               | DRR             | 101511428     | Unknown function   |                    |
| SNP_108378_A_5580  | NW_004517917.1 | scaffold3155 | 5580                    | GG                              | CC                 | CC               | DRR             | 101511428     | Unknown function   |                    |
| SNP_108379_A_5609  | NW_004517917.1 | scaffold3155 | 5609                    | CC                              | GG                 | GG               | DRR             | 101511428     | Unknown function   |                    |
| SNP_108380_A_5610  | NW_004517917.1 | scaffold3155 | 5610                    | TT                              | CC                 | CC               | DRR             | 101511428     | Unknown function   |                    |
| SNP_108382_A_5697  | NW_004517917.1 | scaffold3155 | 5697                    | GG                              | TT                 | TT               | DRR             | 101511428     | Unknown function   |                    |

| SNPs IDs          | Chromosome IDs | Chromosomes  | Physical positions (bp) | CDC Frontier (Reference genome) | (Pusa 1103 & HPNB) | (ILWC 46 & LPNB) | Sequence Components of genome | Gene accession IDs | Putative functions |
|-------------------|----------------|--------------|-------------------------|---------------------------------|--------------------|------------------|-------------------------------|--------------------|--------------------|
| SNP_108383_A_5735 | NW_004517917.1 | scaffold3155 | 5735                    | AA                              | GG                 | GG               | DRR                           | 101511428          | Unknown function   |
| SNP_108384_A_5748 | NW_004517917.1 | scaffold3155 | 5748                    | AA                              | GG                 | GG               | DRR                           | 101511428          | Unknown function   |
| SNP_108385_A_5773 | NW_004517917.1 | scaffold3155 | 5773                    | AA                              | GG                 | GG               | DRR                           | 101511428          | Unknown function   |
| SNP_108387_A_1920 | NW_004517918.1 | scaffold3156 | 1920                    | CC                              | GG                 | GG               | INTERGENIC                    |                    |                    |
| SNP_108388_A_1660 | NW_004517920.1 | scaffold3159 | 1660                    | AA                              | TT                 | TT               | INTERGENIC                    |                    |                    |
| SNP_108389_A_1748 | NW_004517920.1 | scaffold3159 | 1748                    | TT                              | CC                 | CC               | INTERGENIC                    |                    |                    |
| SNP_108390_A_5878 | NW_004517921.1 | scaffold3160 | 5878                    | TT                              | CC                 | CC               | INTERGENIC                    |                    |                    |
| SNP_108391_A_5898 | NW_004517921.1 | scaffold3160 | 5898                    | CC                              | TT                 | TT               | INTERGENIC                    |                    |                    |
| SNP_108392_A_5938 | NW_004517921.1 | scaffold3160 | 5938                    | GG                              | TT                 | TT               | INTERGENIC                    |                    |                    |
| SNP_108393_A_5971 | NW_004517921.1 | scaffold3160 | 5971                    | GG                              | AA                 | AA               | INTERGENIC                    |                    |                    |
| SNP_108394_A_5978 | NW_004517921.1 | scaffold3160 | 5978                    | AA                              | GG                 | GG               | INTERGENIC                    |                    |                    |
| SNP_108395_A_6023 | NW_004517921.1 | scaffold3160 | 6023                    | GG                              | CC                 | CC               | INTERGENIC                    |                    |                    |
| SNP_108396_A_6153 | NW_004517921.1 | scaffold3160 | 6153                    | CC                              | TT                 | TT               | INTERGENIC                    |                    |                    |
| SNP_108397_A_7730 | NW_004517921.1 | scaffold3160 | 7730                    | GG                              | TT                 | TT               | INTERGENIC                    |                    |                    |
| SNP_108398_A_7914 | NW_004517921.1 | scaffold3160 | 7914                    | GG                              | AA                 | AA               | INTERGENIC                    |                    |                    |
| SNP_108399_A_7946 | NW_004517921.1 | scaffold3160 | 7946                    | GG                              | AA                 | AA               | INTERGENIC                    |                    |                    |
| SNP_108400_A_7965 | NW_004517921.1 | scaffold3160 | 7965                    | TT                              | AA                 | AA               | INTERGENIC                    |                    |                    |
| SNP_108401_A_7996 | NW_004517921.1 | scaffold3160 | 7996                    | AA                              | TT                 | TT               | INTERGENIC                    |                    |                    |
| SNP_108402_A_7997 | NW_004517921.1 | scaffold3160 | 7997                    | AA                              | TT                 | TT               | INTERGENIC                    |                    |                    |
| SNP_108403_A_7999 | NW_004517921.1 | scaffold3160 | 7999                    | TT                              | GG                 | GG               | INTERGENIC                    |                    |                    |
| SNP_108404_A_8075 | NW_004517921.1 | scaffold3160 | 8075                    | AA                              | GG                 | GG               | INTERGENIC                    |                    |                    |
| SNP_108405_A_8342 | NW_004517921.1 | scaffold3160 | 8342                    | TT                              | AA                 | AA               | INTERGENIC                    |                    |                    |

| SNPs IDs          | Chromosome IDs | Chromosomes  | Physical positions (bp) | CDC Frontier (Reference genome) | (Pusa 1103 & HPNB) | (ILWC 46 & LPNB) | Sequence genome | Components of | Gene accession IDs | Putative functions |
|-------------------|----------------|--------------|-------------------------|---------------------------------|--------------------|------------------|-----------------|---------------|--------------------|--------------------|
| SNP_108406_A_8396 | NW_004517921.1 | scaffold3160 | 8396                    | AA                              | GG                 | GG               | INTERGENIC      |               |                    |                    |
| SNP_108407_A_8607 | NW_004517921.1 | scaffold3160 | 8607                    | AA                              | TT                 | TT               | INTERGENIC      |               |                    |                    |
| SNP_108408_A_8763 | NW_004517921.1 | scaffold3160 | 8763                    | CC                              | GG                 | GG               | INTERGENIC      |               |                    |                    |
| SNP_108409_A_8841 | NW_004517921.1 | scaffold3160 | 8841                    | CC                              | TT                 | TT               | INTERGENIC      |               |                    |                    |
| SNP_108410_A_8852 | NW_004517921.1 | scaffold3160 | 8852                    | CC                              | TT                 | TT               | INTERGENIC      |               |                    |                    |
| SNP_108411_A_8896 | NW_004517921.1 | scaffold3160 | 8896                    | GG                              | CC                 | CC               | INTERGENIC      |               |                    |                    |
| SNP_108412_A_8965 | NW_004517921.1 | scaffold3160 | 8965                    | GG                              | CC                 | CC               | INTERGENIC      |               |                    |                    |
| SNP_108413_A_8991 | NW_004517921.1 | scaffold3160 | 8991                    | TT                              | CC                 | CC               | INTERGENIC      |               |                    |                    |
| SNP_108414_A_9066 | NW_004517921.1 | scaffold3160 | 9066                    | TT                              | GG                 | GG               | INTERGENIC      |               |                    |                    |
| SNP_108415_A_9093 | NW_004517921.1 | scaffold3160 | 9093                    | GG                              | AA                 | AA               | INTERGENIC      |               |                    |                    |
| SNP_108416_A_9267 | NW_004517921.1 | scaffold3160 | 9267                    | GG                              | AA                 | AA               | INTERGENIC      |               |                    |                    |
| SNP_108417_A_9321 | NW_004517921.1 | scaffold3160 | 9321                    | GG                              | CC                 | CC               | INTERGENIC      |               |                    |                    |
| SNP_108418_A_9361 | NW_004517921.1 | scaffold3160 | 9361                    | TT                              | GG                 | GG               | INTERGENIC      |               |                    |                    |
| SNP_108419_A_9423 | NW_004517921.1 | scaffold3160 | 9423                    | AA                              | CC                 | CC               | INTERGENIC      |               |                    |                    |
| SNP_108420_A_9454 | NW_004517921.1 | scaffold3160 | 9454                    | CC                              | AA                 | AA               | INTERGENIC      |               |                    |                    |
| SNP_108421_A_9495 | NW_004517921.1 | scaffold3160 | 9495                    | TT                              | CC                 | CC               | INTERGENIC      |               |                    |                    |
| SNP_108422_A_9522 | NW_004517921.1 | scaffold3160 | 9522                    | TT                              | CC                 | CC               | INTERGENIC      |               |                    |                    |
| SNP_108423_A_9760 | NW_004517921.1 | scaffold3160 | 9760                    | CC                              | TT                 | TT               | INTERGENIC      |               |                    |                    |
| SNP_108424_A_9778 | NW_004517921.1 | scaffold3160 | 9778                    | CC                              | TT                 | TT               | INTERGENIC      |               |                    |                    |
| SNP_108425_A_9790 | NW_004517921.1 | scaffold3160 | 9790                    | AA                              | GG                 | GG               | INTERGENIC      |               |                    |                    |
| SNP_108427_A_9844 | NW_004517921.1 | scaffold3160 | 9844                    | AA                              | GG                 | GG               | INTERGENIC      |               |                    |                    |
| SNP_108428_A_9864 | NW_004517921.1 | scaffold3160 | 9864                    | TT                              | AA                 | AA               | INTERGENIC      |               |                    |                    |



| SNPs IDs           | Chromosome IDs | Chromosomes  | Physical positions (bp) | CDC Frontier (Reference genome) | (Pusa 1103 & HPNB) | (ILWC 46 & LPNB) | Sequence genome | Components of | Gene accession IDs | Putative functions |
|--------------------|----------------|--------------|-------------------------|---------------------------------|--------------------|------------------|-----------------|---------------|--------------------|--------------------|
| SNP_108429_A_9895  | NW_004517921.1 | scaffold3160 | 9895                    | AA                              | GG                 | GG               | INTERGENIC      |               |                    |                    |
| SNP_108430_A_9947  | NW_004517921.1 | scaffold3160 | 9947                    | AA                              | GG                 | GG               | INTERGENIC      |               |                    |                    |
| SNP_108431_A_10033 | NW_004517921.1 | scaffold3160 | 10033                   | AA                              | CC                 | CC               | INTERGENIC      |               |                    |                    |
| SNP_108432_A_10075 | NW_004517921.1 | scaffold3160 | 10075                   | TT                              | AA                 | AA               | INTERGENIC      |               |                    |                    |
| SNP_108433_A_10166 | NW_004517921.1 | scaffold3160 | 10166                   | AA                              | GG                 | GG               | INTERGENIC      |               |                    |                    |
| SNP_108434_A_10196 | NW_004517921.1 | scaffold3160 | 10196                   | AA                              | GG                 | GG               | INTERGENIC      |               |                    |                    |
| SNP_108435_A_10232 | NW_004517921.1 | scaffold3160 | 10232                   | TT                              | AA                 | AA               | INTERGENIC      |               |                    |                    |
| SNP_108436_A_10349 | NW_004517921.1 | scaffold3160 | 10349                   | CC                              | TT                 | TT               | INTERGENIC      |               |                    |                    |
| SNP_108437_A_10361 | NW_004517921.1 | scaffold3160 | 10361                   | CC                              | AA                 | AA               | INTERGENIC      |               |                    |                    |
| SNP_108438_A_10408 | NW_004517921.1 | scaffold3160 | 10408                   | AA                              | GG                 | GG               | INTERGENIC      |               |                    |                    |
| SNP_108440_A_10588 | NW_004517921.1 | scaffold3160 | 10588                   | TT                              | CC                 | CC               | INTERGENIC      |               |                    |                    |
| SNP_108441_A_10633 | NW_004517921.1 | scaffold3160 | 10633                   | CC                              | TT                 | TT               | INTERGENIC      |               |                    |                    |
| SNP_108442_A_10695 | NW_004517921.1 | scaffold3160 | 10695                   | TT                              | AA                 | AA               | INTERGENIC      |               |                    |                    |
| SNP_108443_A_10754 | NW_004517921.1 | scaffold3160 | 10754                   | TT                              | GG                 | GG               | INTERGENIC      |               |                    |                    |
| SNP_108444_A_11035 | NW_004517921.1 | scaffold3160 | 11035                   | GG                              | TT                 | TT               | INTERGENIC      |               |                    |                    |
| SNP_108445_A_11583 | NW_004517921.1 | scaffold3160 | 11583                   | GG                              | AA                 | AA               | INTERGENIC      |               |                    |                    |
| SNP_108446_A_22945 | NW_004517921.1 | scaffold3160 | 22945                   | TT                              | GG                 | GG               | INTERGENIC      |               |                    |                    |
| SNP_108447_A_22966 | NW_004517921.1 | scaffold3160 | 22966                   | CC                              | TT                 | TT               | INTERGENIC      |               |                    |                    |
| SNP_108448_A_830   | NW_004517922.1 | scaffold3161 | 830                     | CC                              | AA                 | AA               | INTERGENIC      |               |                    |                    |
| SNP_108449_A_909   | NW_004517922.1 | scaffold3161 | 909                     | TT                              | AA                 | AA               | INTERGENIC      |               |                    |                    |
| SNP_108450_A_4269  | NW_004517922.1 | scaffold3161 | 4269                    | TT                              | AA                 | AA               | INTERGENIC      |               |                    |                    |
| SNP_108451_A_5799  | NW_004517922.1 | scaffold3161 | 5799                    | TT                              | GG                 | GG               | INTERGENIC      |               |                    |                    |

| SNPs IDs          | Chromosome IDs | Chromosomes  | Physical positions (bp) | CDC Frontier (Reference genome) | (Pusa 1103 & HPNB) | (ILWC 46 & LPNB) | Sequence genome | Components of | Gene accession IDs | Putative functions |
|-------------------|----------------|--------------|-------------------------|---------------------------------|--------------------|------------------|-----------------|---------------|--------------------|--------------------|
| SNP_108452_A_5813 | NW_004517922.1 | scaffold3161 | 5813                    | TT                              | CC                 | CC               | INTERGENIC      |               |                    |                    |
| SNP_108453_A_369  | NW_004517923.1 | scaffold3163 | 369                     | TT                              | AA                 | AA               | INTERGENIC      |               |                    |                    |
| SNP_108454_A_455  | NW_004517923.1 | scaffold3163 | 455                     | TT                              | CC                 | CC               | INTERGENIC      |               |                    |                    |
| SNP_108455_A_468  | NW_004517923.1 | scaffold3163 | 468                     | CC                              | TT                 | TT               | INTERGENIC      |               |                    |                    |
| SNP_108456_A_582  | NW_004517923.1 | scaffold3163 | 582                     | CC                              | TT                 | TT               | INTERGENIC      |               |                    |                    |
| SNP_108457_A_583  | NW_004517923.1 | scaffold3163 | 583                     | GG                              | AA                 | AA               | INTERGENIC      |               |                    |                    |
| SNP_108458_A_586  | NW_004517923.1 | scaffold3163 | 586                     | GG                              | AA                 | AA               | INTERGENIC      |               |                    |                    |
| SNP_108459_A_614  | NW_004517923.1 | scaffold3163 | 614                     | GG                              | TT                 | TT               | INTERGENIC      |               |                    |                    |
| SNP_108460_A_670  | NW_004517923.1 | scaffold3163 | 670                     | AA                              | GG                 | GG               | INTERGENIC      |               |                    |                    |
| SNP_108461_A_686  | NW_004517923.1 | scaffold3163 | 686                     | CC                              | TT                 | TT               | INTERGENIC      |               |                    |                    |
| SNP_108462_A_705  | NW_004517923.1 | scaffold3163 | 705                     | AA                              | GG                 | GG               | INTERGENIC      |               |                    |                    |
| SNP_108463_A_973  | NW_004517923.1 | scaffold3163 | 973                     | CC                              | TT                 | TT               | INTERGENIC      |               |                    |                    |
| SNP_108464_A_1083 | NW_004517923.1 | scaffold3163 | 1083                    | AA                              | CC                 | CC               | INTERGENIC      |               |                    |                    |
| SNP_108465_A_1111 | NW_004517923.1 | scaffold3163 | 1111                    | AA                              | TT                 | TT               | INTERGENIC      |               |                    |                    |
| SNP_108467_A_6894 | NW_004517924.1 | scaffold3164 | 6894                    | AA                              | GG                 | GG               | INTERGENIC      |               |                    |                    |
| SNP_108468_A_64   | NW_004517926.1 | scaffold3168 | 64                      | GG                              | AA                 | AA               | INTERGENIC      |               |                    |                    |
| SNP_108469_A_110  | NW_004517926.1 | scaffold3168 | 110                     | AA                              | CC                 | CC               | INTERGENIC      |               |                    |                    |
| SNP_108470_A_307  | NW_004517926.1 | scaffold3168 | 307                     | CC                              | TT                 | TT               | INTERGENIC      |               |                    |                    |
| SNP_108471_A_497  | NW_004517926.1 | scaffold3168 | 497                     | AA                              | GG                 | GG               | INTERGENIC      |               |                    |                    |
| SNP_108472_A_524  | NW_004517926.1 | scaffold3168 | 524                     | AA                              | TT                 | TT               | INTERGENIC      |               |                    |                    |
| SNP_108473_A_606  | NW_004517926.1 | scaffold3168 | 606                     | AA                              | GG                 | GG               | INTERGENIC      |               |                    |                    |
| SNP_108474_A_689  | NW_004517926.1 | scaffold3168 | 689                     | AA                              | GG                 | GG               | INTERGENIC      |               |                    |                    |

| SNPs IDs           | Chromosome IDs | Chromosomes  | Physical positions (bp) | CDC Frontier (Reference genome) | (Pusa 1103 & HPNB) | (ILWC 46 & LPNB) | Sequence genome | Components of | Gene accession IDs | Putative functions |
|--------------------|----------------|--------------|-------------------------|---------------------------------|--------------------|------------------|-----------------|---------------|--------------------|--------------------|
| SNP_108475_A_705   | NW_004517926.1 | scaffold3168 | 705                     | TT                              | CC                 | CC               | INTERGENIC      |               |                    |                    |
| SNP_108476_A_753   | NW_004517926.1 | scaffold3168 | 753                     | TT                              | AA                 | AA               | INTERGENIC      |               |                    |                    |
| SNP_108477_A_812   | NW_004517926.1 | scaffold3168 | 812                     | TT                              | CC                 | CC               | INTERGENIC      |               |                    |                    |
| SNP_108478_A_976   | NW_004517926.1 | scaffold3168 | 976                     | CC                              | TT                 | TT               | INTERGENIC      |               |                    |                    |
| SNP_108479_A_1364  | NW_004517926.1 | scaffold3168 | 1364                    | TT                              | AA                 | AA               | INTERGENIC      |               |                    |                    |
| SNP_108480_A_1427  | NW_004517926.1 | scaffold3168 | 1427                    | AA                              | GG                 | GG               | INTERGENIC      |               |                    |                    |
| SNP_108481_A_1459  | NW_004517926.1 | scaffold3168 | 1459                    | CC                              | AA                 | AA               | INTERGENIC      |               |                    |                    |
| SNP_108482_A_1487  | NW_004517926.1 | scaffold3168 | 1487                    | TT                              | CC                 | CC               | INTERGENIC      |               |                    |                    |
| SNP_108483_A_1489  | NW_004517926.1 | scaffold3168 | 1489                    | TT                              | CC                 | CC               | INTERGENIC      |               |                    |                    |
| SNP_108484_A_1507  | NW_004517926.1 | scaffold3168 | 1507                    | AA                              | GG                 | GG               | INTERGENIC      |               |                    |                    |
| SNP_108485_A_1717  | NW_004517926.1 | scaffold3168 | 1717                    | CC                              | TT                 | TT               | INTERGENIC      |               |                    |                    |
| SNP_108486_A_1829  | NW_004517926.1 | scaffold3168 | 1829                    | TT                              | CC                 | CC               | INTERGENIC      |               |                    |                    |
| SNP_108487_A_1871  | NW_004517926.1 | scaffold3168 | 1871                    | AA                              | TT                 | TT               | INTERGENIC      |               |                    |                    |
| SNP_108488_A_1872  | NW_004517926.1 | scaffold3168 | 1872                    | TT                              | CC                 | CC               | INTERGENIC      |               |                    |                    |
| SNP_108489_A_1887  | NW_004517926.1 | scaffold3168 | 1887                    | CC                              | TT                 | TT               | INTERGENIC      |               |                    |                    |
| SNP_108490_A_1895  | NW_004517926.1 | scaffold3168 | 1895                    | GG                              | AA                 | AA               | INTERGENIC      |               |                    |                    |
| SNP_108491_A_1907  | NW_004517926.1 | scaffold3168 | 1907                    | CC                              | TT                 | TT               | INTERGENIC      |               |                    |                    |
| SNP_108492_A_2016  | NW_004517926.1 | scaffold3168 | 2016                    | AA                              | GG                 | GG               | INTERGENIC      |               |                    |                    |
| SNP_108493_A_2036  | NW_004517926.1 | scaffold3168 | 2036                    | CC                              | AA                 | AA               | INTERGENIC      |               |                    |                    |
| SNP_108494_A_12764 | NW_004517928.1 | scaffold3170 | 12764                   | TT                              | GG                 | GG               | INTERGENIC      |               |                    |                    |
| SNP_108495_A_16450 | NW_004517928.1 | scaffold3170 | 16450                   | TT                              | GG                 | GG               | INTERGENIC      |               |                    |                    |
| SNP_108496_A_17014 | NW_004517928.1 | scaffold3170 | 17014                   | GG                              | AA                 | AA               | INTERGENIC      |               |                    |                    |

| SNPs IDs            | Chromosome IDs | Chromosomes  | Physical positions (bp) | CDC Frontier (Reference genome) | (Pusa 1103 & HPNB) | (ILWC 46 & LPNB) | Sequence genome | Components of | Gene accession IDs                  | Putative functions |
|---------------------|----------------|--------------|-------------------------|---------------------------------|--------------------|------------------|-----------------|---------------|-------------------------------------|--------------------|
| SNP_108497_A_32686  | NW_004517928.1 | scaffold3170 | 32686                   | TT                              | CC                 | CC               | INTERGENIC      |               |                                     |                    |
| SNP_108498_A_32687  | NW_004517928.1 | scaffold3170 | 32687                   | TT                              | AA                 | AA               | INTERGENIC      |               |                                     |                    |
| SNP_108500_A_72889  | NW_004517928.1 | scaffold3170 | 72889                   | TT                              | AA                 | AA               | INTERGENIC      |               |                                     |                    |
| SNP_108501_A_72971  | NW_004517928.1 | scaffold3170 | 72971                   | AA                              | GG                 | GG               | INTERGENIC      |               |                                     |                    |
| SNP_108502_A_73006  | NW_004517928.1 | scaffold3170 | 73006                   | TT                              | GG                 | GG               | INTERGENIC      |               |                                     |                    |
| SNP_108503_A_73345  | NW_004517928.1 | scaffold3170 | 73345                   | AA                              | CC                 | CC               | INTERGENIC      |               |                                     |                    |
| SNP_108504_A_73737  | NW_004517928.1 | scaffold3170 | 73737                   | CC                              | TT                 | TT               | INTERGENIC      |               |                                     |                    |
| SNP_108505_A_76890  | NW_004517928.1 | scaffold3170 | 76890                   | GG                              | AA                 | AA               | INTERGENIC      |               |                                     |                    |
| SNP_108506_A_77463  | NW_004517928.1 | scaffold3170 | 77463                   | CC                              | TT                 | TT               | INTERGENIC      |               |                                     |                    |
| SNP_108507_A_119300 | NW_004517928.1 | scaffold3170 | 119300                  | CC                              | TT                 | TT               | INTERGENIC      |               |                                     |                    |
| SNP_108508_A_121522 | NW_004517928.1 | scaffold3170 | 121522                  | CC                              | TT                 | TT               | INTERGENIC      |               |                                     |                    |
| SNP_108509_A_162141 | NW_004517928.1 | scaffold3170 | 162141                  | GG                              | AA                 | AA               | DRR             | 101488629     | agamous-like MADS-box protein AGL62 |                    |
| SNP_108510_A_182675 | NW_004517928.1 | scaffold3170 | 182675                  | AA                              | GG                 | GG               | INTERGENIC      |               |                                     |                    |
| SNP_108511_A_191821 | NW_004517928.1 | scaffold3170 | 191821                  | CC                              | TT                 | TT               | INTERGENIC      |               |                                     |                    |
| SNP_108512_A_197458 | NW_004517928.1 | scaffold3170 | 197458                  | AA                              | GG                 | GG               | INTERGENIC      |               |                                     |                    |
| SNP_108513_A_204936 | NW_004517928.1 | scaffold3170 | 204936                  | AA                              | GG                 | GG               | INTERGENIC      |               |                                     |                    |
| SNP_108514_A_205077 | NW_004517928.1 | scaffold3170 | 205077                  | AA                              | GG                 | GG               | INTERGENIC      |               |                                     |                    |
| SNP_108515_A_205109 | NW_004517928.1 | scaffold3170 | 205109                  | GG                              | TT                 | TT               | INTERGENIC      |               |                                     |                    |
| SNP_108517_A_205208 | NW_004517928.1 | scaffold3170 | 205208                  | CC                              | TT                 | TT               | INTERGENIC      |               |                                     |                    |
| SNP_108518_A_205210 | NW_004517928.1 | scaffold3170 | 205210                  | AA                              | CC                 | CC               | INTERGENIC      |               |                                     |                    |
| SNP_108519_A_205218 | NW_004517928.1 | scaffold3170 | 205218                  | TT                              | AA                 | AA               | INTERGENIC      |               |                                     |                    |
| SNP_108520_A_205240 | NW_004517928.1 | scaffold3170 | 205240                  | AA                              | GG                 | GG               | INTERGENIC      |               |                                     |                    |

| SNPs IDs            | Chromosome IDs | Chromosomes  | Physical positions (bp) | CDC Frontier (Reference genome) | (Pusa 1103 & HPNB) | (ILWC 46 & LPNB) | Sequence genome | Components of | Gene accession IDs | Putative functions |
|---------------------|----------------|--------------|-------------------------|---------------------------------|--------------------|------------------|-----------------|---------------|--------------------|--------------------|
| SNP_108521_A_205251 | NW_004517928.1 | scaffold3170 | 205251                  | TT                              | CC                 | CC               | INTERGENIC      |               |                    |                    |
| SNP_108522_A_205266 | NW_004517928.1 | scaffold3170 | 205266                  | TT                              | CC                 | CC               | INTERGENIC      |               |                    |                    |
| SNP_108523_A_212102 | NW_004517928.1 | scaffold3170 | 212102                  | GG                              | CC                 | CC               | INTERGENIC      |               |                    |                    |
| SNP_108525_A_1240   | NW_004517929.1 | scaffold3171 | 1240                    | AA                              | GG                 | GG               | INTERGENIC      |               |                    |                    |
| SNP_108526_A_1258   | NW_004517929.1 | scaffold3171 | 1258                    | TT                              | AA                 | AA               | INTERGENIC      |               |                    |                    |
| SNP_108527_A_1998   | NW_004517929.1 | scaffold3171 | 1998                    | AA                              | GG                 | GG               | INTERGENIC      |               |                    |                    |
| SNP_108528_A_2006   | NW_004517929.1 | scaffold3171 | 2006                    | TT                              | GG                 | GG               | INTERGENIC      |               |                    |                    |
| SNP_108529_A_2103   | NW_004517929.1 | scaffold3171 | 2103                    | GG                              | TT                 | TT               | INTERGENIC      |               |                    |                    |
| SNP_108530_A_2148   | NW_004517929.1 | scaffold3171 | 2148                    | GG                              | AA                 | AA               | INTERGENIC      |               |                    |                    |
| SNP_108531_A_2157   | NW_004517929.1 | scaffold3171 | 2157                    | AA                              | GG                 | GG               | INTERGENIC      |               |                    |                    |
| SNP_108532_A_2180   | NW_004517929.1 | scaffold3171 | 2180                    | AA                              | GG                 | GG               | INTERGENIC      |               |                    |                    |
| SNP_108533_A_2235   | NW_004517929.1 | scaffold3171 | 2235                    | GG                              | AA                 | AA               | INTERGENIC      |               |                    |                    |
| SNP_108534_A_2298   | NW_004517929.1 | scaffold3171 | 2298                    | CC                              | GG                 | GG               | INTERGENIC      |               |                    |                    |
| SNP_108535_A_2375   | NW_004517929.1 | scaffold3171 | 2375                    | CC                              | TT                 | TT               | INTERGENIC      |               |                    |                    |
| SNP_108536_A_2391   | NW_004517929.1 | scaffold3171 | 2391                    | GG                              | TT                 | TT               | INTERGENIC      |               |                    |                    |
| SNP_108538_A_2435   | NW_004517929.1 | scaffold3171 | 2435                    | AA                              | TT                 | TT               | INTERGENIC      |               |                    |                    |
| SNP_108539_A_2441   | NW_004517929.1 | scaffold3171 | 2441                    | TT                              | GG                 | GG               | INTERGENIC      |               |                    |                    |
| SNP_108541_A_2765   | NW_004517929.1 | scaffold3171 | 2765                    | TT                              | GG                 | GG               | INTERGENIC      |               |                    |                    |
| SNP_108542_A_2770   | NW_004517929.1 | scaffold3171 | 2770                    | TT                              | AA                 | AA               | INTERGENIC      |               |                    |                    |
| SNP_108543_A_64     | NW_004517930.1 | scaffold3172 | 64                      | AA                              | GG                 | GG               | INTERGENIC      |               |                    |                    |
| SNP_108544_A_66     | NW_004517930.1 | scaffold3172 | 66                      | TT                              | CC                 | CC               | INTERGENIC      |               |                    |                    |
| SNP_108545_A_359    | NW_004517930.1 | scaffold3172 | 359                     | CC                              | GG                 | GG               | INTERGENIC      |               |                    |                    |

| SNPs IDs           | Chromosome IDs | Chromosomes  | Physical positions (bp) | CDC Frontier (Reference genome) | (Pusa 1103 & HPNB) | (ILWC 46 & LPNB) | Sequence genome | Components of | Gene accession IDs | Putative functions |
|--------------------|----------------|--------------|-------------------------|---------------------------------|--------------------|------------------|-----------------|---------------|--------------------|--------------------|
| SNP_108546_A_7239  | NW_004517932.1 | scaffold3174 | 7239                    | TT                              | AA                 | AA               | INTERGENIC      |               |                    |                    |
| SNP_108547_A_7246  | NW_004517932.1 | scaffold3174 | 7246                    | GG                              | TT                 | TT               | INTERGENIC      |               |                    |                    |
| SNP_108548_A_11583 | NW_004517933.1 | scaffold3175 | 11583                   | GG                              | AA                 | AA               | INTERGENIC      |               |                    |                    |
| SNP_108549_A_11651 | NW_004517933.1 | scaffold3175 | 11651                   | AA                              | GG                 | GG               | INTERGENIC      |               |                    |                    |
| SNP_108551_A_12258 | NW_004517933.1 | scaffold3175 | 12258                   | AA                              | GG                 | GG               | INTERGENIC      |               |                    |                    |
| SNP_108552_A_17099 | NW_004517933.1 | scaffold3175 | 17099                   | AA                              | GG                 | GG               | INTERGENIC      |               |                    |                    |
| SNP_108553_A_17333 | NW_004517933.1 | scaffold3175 | 17333                   | AA                              | CC                 | CC               | INTERGENIC      |               |                    |                    |
| SNP_108554_A_17346 | NW_004517933.1 | scaffold3175 | 17346                   | TT                              | CC                 | CC               | INTERGENIC      |               |                    |                    |
| SNP_108555_A_18895 | NW_004517933.1 | scaffold3175 | 18895                   | CC                              | TT                 | TT               | INTERGENIC      |               |                    |                    |
| SNP_108556_A_18902 | NW_004517933.1 | scaffold3175 | 18902                   | CC                              | AA                 | AA               | INTERGENIC      |               |                    |                    |
| SNP_108557_A_18914 | NW_004517933.1 | scaffold3175 | 18914                   | TT                              | CC                 | CC               | INTERGENIC      |               |                    |                    |
| SNP_108558_A_18920 | NW_004517933.1 | scaffold3175 | 18920                   | GG                              | AA                 | AA               | INTERGENIC      |               |                    |                    |
| SNP_108559_A_19002 | NW_004517933.1 | scaffold3175 | 19002                   | AA                              | GG                 | GG               | INTERGENIC      |               |                    |                    |
| SNP_108560_A_19021 | NW_004517933.1 | scaffold3175 | 19021                   | AA                              | CC                 | CC               | INTERGENIC      |               |                    |                    |
| SNP_108561_A_19116 | NW_004517933.1 | scaffold3175 | 19116                   | TT                              | CC                 | CC               | INTERGENIC      |               |                    |                    |
| SNP_108562_A_1325  | NW_004517934.1 | scaffold3176 | 1325                    | TT                              | GG                 | GG               | INTERGENIC      |               |                    |                    |
| SNP_108563_A_1373  | NW_004517934.1 | scaffold3176 | 1373                    | AA                              | GG                 | GG               | INTERGENIC      |               |                    |                    |
| SNP_108564_A_1606  | NW_004517934.1 | scaffold3176 | 1606                    | GG                              | CC                 | CC               | INTERGENIC      |               |                    |                    |
| SNP_108565_A_941   | NW_004517939.1 | scaffold3181 | 941                     | AA                              | TT                 | TT               | INTERGENIC      |               |                    |                    |
| SNP_108566_A_430   | NW_004517941.1 | scaffold3183 | 430                     | CC                              | TT                 | TT               | INTERGENIC      |               |                    |                    |
| SNP_108567_A_466   | NW_004517941.1 | scaffold3183 | 466                     | AA                              | TT                 | TT               | INTERGENIC      |               |                    |                    |
| SNP_108568_A_2632  | NW_004517943.1 | scaffold3187 | 2632                    | AA                              | TT                 | TT               | INTERGENIC      |               |                    |                    |

| SNPs IDs           | Chromosome IDs | Chromosomes  | Physical positions (bp) | CDC Frontier (Reference genome) | (Pusa 1103 & HPNB) | (ILWC 46 & LPNB) | Sequence genome | Components of | Gene accession IDs | Putative functions |
|--------------------|----------------|--------------|-------------------------|---------------------------------|--------------------|------------------|-----------------|---------------|--------------------|--------------------|
| SNP_108569_A_2684  | NW_004517943.1 | scaffold3187 | 2684                    | TT                              | GG                 | GG               | INTERGENIC      |               |                    |                    |
| SNP_108570_A_2700  | NW_004517943.1 | scaffold3187 | 2700                    | AA                              | GG                 | GG               | INTERGENIC      |               |                    |                    |
| SNP_108571_A_5697  | NW_004517943.1 | scaffold3187 | 5697                    | CC                              | TT                 | TT               | INTERGENIC      |               |                    |                    |
| SNP_108572_A_6031  | NW_004517943.1 | scaffold3187 | 6031                    | AA                              | GG                 | GG               | INTERGENIC      |               |                    |                    |
| SNP_108573_A_6210  | NW_004517943.1 | scaffold3187 | 6210                    | GG                              | TT                 | TT               | INTERGENIC      |               |                    |                    |
| SNP_108574_A_7304  | NW_004517943.1 | scaffold3187 | 7304                    | CC                              | TT                 | TT               | INTERGENIC      |               |                    |                    |
| SNP_108575_A_7585  | NW_004517943.1 | scaffold3187 | 7585                    | GG                              | AA                 | AA               | INTERGENIC      |               |                    |                    |
| SNP_108576_A_9264  | NW_004517943.1 | scaffold3187 | 9264                    | GG                              | AA                 | AA               | INTERGENIC      |               |                    |                    |
| SNP_108577_A_24881 | NW_004517947.1 | scaffold3191 | 24881                   | TT                              | CC                 | CC               | INTERGENIC      |               |                    |                    |
| SNP_108578_A_25148 | NW_004517947.1 | scaffold3191 | 25148                   | GG                              | TT                 | TT               | INTERGENIC      |               |                    |                    |
| SNP_108579_A_25158 | NW_004517947.1 | scaffold3191 | 25158                   | AA                              | GG                 | GG               | INTERGENIC      |               |                    |                    |
| SNP_108580_A_25293 | NW_004517947.1 | scaffold3191 | 25293                   | AA                              | GG                 | GG               | INTERGENIC      |               |                    |                    |
| SNP_108581_A_25423 | NW_004517947.1 | scaffold3191 | 25423                   | TT                              | AA                 | AA               | INTERGENIC      |               |                    |                    |
| SNP_108582_A_25430 | NW_004517947.1 | scaffold3191 | 25430                   | AA                              | CC                 | CC               | INTERGENIC      |               |                    |                    |
| SNP_108583_A_25477 | NW_004517947.1 | scaffold3191 | 25477                   | TT                              | AA                 | AA               | INTERGENIC      |               |                    |                    |
| SNP_108584_A_25482 | NW_004517947.1 | scaffold3191 | 25482                   | GG                              | AA                 | AA               | INTERGENIC      |               |                    |                    |
| SNP_108585_A_25537 | NW_004517947.1 | scaffold3191 | 25537                   | TT                              | CC                 | CC               | INTERGENIC      |               |                    |                    |
| SNP_108586_A_25569 | NW_004517947.1 | scaffold3191 | 25569                   | AA                              | GG                 | GG               | INTERGENIC      |               |                    |                    |
| SNP_108587_A_25722 | NW_004517947.1 | scaffold3191 | 25722                   | GG                              | AA                 | AA               | INTERGENIC      |               |                    |                    |
| SNP_108588_A_25864 | NW_004517947.1 | scaffold3191 | 25864                   | CC                              | GG                 | GG               | INTERGENIC      |               |                    |                    |
| SNP_108591_A_167   | NW_004517953.1 | scaffold3199 | 167                     | CC                              | TT                 | TT               | INTERGENIC      |               |                    |                    |
| SNP_108592_A_606   | NW_004517953.1 | scaffold3199 | 606                     | GG                              | CC                 | CC               | INTERGENIC      |               |                    |                    |

| SNPs IDs          | Chromosome IDs | Chromosomes  | Physical positions (bp) | CDC Frontier (Reference genome) | (Pusa 1103 & HPNB) | (ILWC 46 & LPNB) | Sequence genome | Components of | Gene accession IDs | Putative functions |
|-------------------|----------------|--------------|-------------------------|---------------------------------|--------------------|------------------|-----------------|---------------|--------------------|--------------------|
| SNP_108593_A_673  | NW_004517953.1 | scaffold3199 | 673                     | TT                              | GG                 | GG               | INTERGENIC      |               |                    |                    |
| SNP_108594_A_803  | NW_004517953.1 | scaffold3199 | 803                     | GG                              | AA                 | AA               | INTERGENIC      |               |                    |                    |
| SNP_108595_A_637  | NW_004517958.1 | scaffold3204 | 637                     | AA                              | TT                 | TT               | INTERGENIC      |               |                    |                    |
| SNP_108596_A_639  | NW_004517958.1 | scaffold3204 | 639                     | TT                              | GG                 | GG               | INTERGENIC      |               |                    |                    |
| SNP_108597_A_647  | NW_004517958.1 | scaffold3204 | 647                     | AA                              | TT                 | TT               | INTERGENIC      |               |                    |                    |
| SNP_108598_A_483  | NW_004517961.1 | scaffold3208 | 483                     | CC                              | TT                 | TT               | INTERGENIC      |               |                    |                    |
| SNP_108599_A_673  | NW_004517961.1 | scaffold3208 | 673                     | AA                              | GG                 | GG               | INTERGENIC      |               |                    |                    |
| SNP_108600_A_771  | NW_004517961.1 | scaffold3208 | 771                     | GG                              | AA                 | AA               | INTERGENIC      |               |                    |                    |
| SNP_108601_A_802  | NW_004517961.1 | scaffold3208 | 802                     | CC                              | TT                 | TT               | INTERGENIC      |               |                    |                    |
| SNP_108602_A_1189 | NW_004517961.1 | scaffold3208 | 1189                    | GG                              | AA                 | AA               | INTERGENIC      |               |                    |                    |
| SNP_108603_A_1281 | NW_004517961.1 | scaffold3208 | 1281                    | GG                              | AA                 | AA               | INTERGENIC      |               |                    |                    |
| SNP_108604_A_1429 | NW_004517961.1 | scaffold3208 | 1429                    | AA                              | GG                 | GG               | INTERGENIC      |               |                    |                    |
| SNP_108605_A_1536 | NW_004517961.1 | scaffold3208 | 1536                    | AA                              | TT                 | TT               | INTERGENIC      |               |                    |                    |
| SNP_108606_A_64   | NW_004517962.1 | scaffold3209 | 64                      | CC                              | AA                 | AA               | INTERGENIC      |               |                    |                    |
| SNP_108607_A_66   | NW_004517962.1 | scaffold3209 | 66                      | AA                              | CC                 | CC               | INTERGENIC      |               |                    |                    |
| SNP_108609_A_5599 | NW_004517963.1 | scaffold3210 | 5599                    | CC                              | GG                 | GG               | INTERGENIC      |               |                    |                    |
| SNP_108610_A_5614 | NW_004517963.1 | scaffold3210 | 5614                    | TT                              | CC                 | CC               | INTERGENIC      |               |                    |                    |
| SNP_108611_A_5729 | NW_004517963.1 | scaffold3210 | 5729                    | GG                              | TT                 | TT               | INTERGENIC      |               |                    |                    |
| SNP_108612_A_5732 | NW_004517963.1 | scaffold3210 | 5732                    | TT                              | CC                 | CC               | INTERGENIC      |               |                    |                    |
| SNP_108613_A_5768 | NW_004517963.1 | scaffold3210 | 5768                    | TT                              | CC                 | CC               | INTERGENIC      |               |                    |                    |
| SNP_108614_A_5792 | NW_004517963.1 | scaffold3210 | 5792                    | CC                              | TT                 | TT               | INTERGENIC      |               |                    |                    |
| SNP_108615_A_5946 | NW_004517963.1 | scaffold3210 | 5946                    | TT                              | GG                 | GG               | INTERGENIC      |               |                    |                    |



| SNPs IDs          | Chromosome IDs | Chromosomes  | Physical positions (bp) | CDC Frontier (Reference genome) | (Pusa 1103 & HPNB) | (ILWC 46 & LPNB) | Sequence genome | Components of | Gene accession IDs | Putative functions |
|-------------------|----------------|--------------|-------------------------|---------------------------------|--------------------|------------------|-----------------|---------------|--------------------|--------------------|
| SNP_108616_A_5971 | NW_004517963.1 | scaffold3210 | 5971                    | AA                              | GG                 | GG               | INTERGENIC      |               |                    |                    |
| SNP_108617_A_5998 | NW_004517963.1 | scaffold3210 | 5998                    | CC                              | TT                 | TT               | INTERGENIC      |               |                    |                    |
| SNP_108618_A_6029 | NW_004517963.1 | scaffold3210 | 6029                    | AA                              | GG                 | GG               | INTERGENIC      |               |                    |                    |
| SNP_108619_A_6053 | NW_004517963.1 | scaffold3210 | 6053                    | GG                              | CC                 | CC               | INTERGENIC      |               |                    |                    |
| SNP_108620_A_246  | NW_004517965.1 | scaffold3212 | 246                     | AA                              | GG                 | GG               | INTERGENIC      |               |                    |                    |
| SNP_108621_A_286  | NW_004517965.1 | scaffold3212 | 286                     | AA                              | TT                 | TT               | INTERGENIC      |               |                    |                    |
| SNP_108622_A_373  | NW_004517965.1 | scaffold3212 | 373                     | TT                              | CC                 | CC               | INTERGENIC      |               |                    |                    |
| SNP_108623_A_628  | NW_004517965.1 | scaffold3212 | 628                     | TT                              | AA                 | AA               | INTERGENIC      |               |                    |                    |
| SNP_108624_A_697  | NW_004517965.1 | scaffold3212 | 697                     | GG                              | TT                 | TT               | INTERGENIC      |               |                    |                    |
| SNP_108626_A_762  | NW_004517965.1 | scaffold3212 | 762                     | CC                              | AA                 | AA               | INTERGENIC      |               |                    |                    |
| SNP_108627_A_774  | NW_004517965.1 | scaffold3212 | 774                     | AA                              | GG                 | GG               | INTERGENIC      |               |                    |                    |
| SNP_108628_A_1333 | NW_004517965.1 | scaffold3212 | 1333                    | CC                              | GG                 | GG               | INTERGENIC      |               |                    |                    |
| SNP_108630_A_1577 | NW_004517965.1 | scaffold3212 | 1577                    | CC                              | TT                 | TT               | INTERGENIC      |               |                    |                    |
| SNP_108631_A_1637 | NW_004517965.1 | scaffold3212 | 1637                    | AA                              | GG                 | GG               | INTERGENIC      |               |                    |                    |
| SNP_108633_A_1883 | NW_004517965.1 | scaffold3212 | 1883                    | GG                              | CC                 | CC               | INTERGENIC      |               |                    |                    |
| SNP_108634_A_2174 | NW_004517965.1 | scaffold3212 | 2174                    | TT                              | GG                 | GG               | INTERGENIC      |               |                    |                    |
| SNP_108635_A_2224 | NW_004517965.1 | scaffold3212 | 2224                    | AA                              | TT                 | TT               | INTERGENIC      |               |                    |                    |
| SNP_108636_A_2225 | NW_004517965.1 | scaffold3212 | 2225                    | TT                              | AA                 | AA               | INTERGENIC      |               |                    |                    |
| SNP_108637_A_2369 | NW_004517965.1 | scaffold3212 | 2369                    | GG                              | AA                 | AA               | INTERGENIC      |               |                    |                    |
| SNP_108638_A_2412 | NW_004517965.1 | scaffold3212 | 2412                    | CC                              | TT                 | TT               | INTERGENIC      |               |                    |                    |
| SNP_108639_A_2416 | NW_004517965.1 | scaffold3212 | 2416                    | GG                              | AA                 | AA               | INTERGENIC      |               |                    |                    |
| SNP_108640_A_2488 | NW_004517965.1 | scaffold3212 | 2488                    | CC                              | AA                 | AA               | INTERGENIC      |               |                    |                    |

| SNPs IDs          | Chromosome IDs | Chromosomes  | Physical positions (bp) | CDC Frontier (Reference genome) | (Pusa 1103 & HPNB) | (ILWC 46 & LPNB) | Sequence genome | Components of | Gene accession IDs | Putative functions |
|-------------------|----------------|--------------|-------------------------|---------------------------------|--------------------|------------------|-----------------|---------------|--------------------|--------------------|
| SNP_108641_A_2536 | NW_004517965.1 | scaffold3212 | 2536                    | AA                              | TT                 | TT               | INTERGENIC      |               |                    |                    |
| SNP_108642_A_2548 | NW_004517965.1 | scaffold3212 | 2548                    | CC                              | TT                 | TT               | INTERGENIC      |               |                    |                    |
| SNP_108644_A_2578 | NW_004517965.1 | scaffold3212 | 2578                    | CC                              | TT                 | TT               | INTERGENIC      |               |                    |                    |
| SNP_108645_A_2664 | NW_004517965.1 | scaffold3212 | 2664                    | CC                              | GG                 | GG               | INTERGENIC      |               |                    |                    |
| SNP_108646_A_2707 | NW_004517965.1 | scaffold3212 | 2707                    | AA                              | GG                 | GG               | INTERGENIC      |               |                    |                    |
| SNP_108647_A_2711 | NW_004517965.1 | scaffold3212 | 2711                    | CC                              | TT                 | TT               | INTERGENIC      |               |                    |                    |
| SNP_108648_A_2796 | NW_004517965.1 | scaffold3212 | 2796                    | GG                              | TT                 | TT               | INTERGENIC      |               |                    |                    |
| SNP_108649_A_2830 | NW_004517965.1 | scaffold3212 | 2830                    | GG                              | CC                 | CC               | INTERGENIC      |               |                    |                    |
| SNP_108650_A_2935 | NW_004517965.1 | scaffold3212 | 2935                    | TT                              | AA                 | AA               | INTERGENIC      |               |                    |                    |
| SNP_108651_A_3032 | NW_004517965.1 | scaffold3212 | 3032                    | GG                              | CC                 | CC               | INTERGENIC      |               |                    |                    |
| SNP_108652_A_3057 | NW_004517965.1 | scaffold3212 | 3057                    | CC                              | GG                 | GG               | INTERGENIC      |               |                    |                    |
| SNP_108653_A_3076 | NW_004517965.1 | scaffold3212 | 3076                    | AA                              | CC                 | CC               | INTERGENIC      |               |                    |                    |
| SNP_108654_A_3127 | NW_004517965.1 | scaffold3212 | 3127                    | GG                              | CC                 | CC               | INTERGENIC      |               |                    |                    |
| SNP_108655_A_3487 | NW_004517965.1 | scaffold3212 | 3487                    | AA                              | GG                 | GG               | INTERGENIC      |               |                    |                    |
| SNP_108656_A_3558 | NW_004517965.1 | scaffold3212 | 3558                    | CC                              | AA                 | AA               | INTERGENIC      |               |                    |                    |
| SNP_108657_A_3599 | NW_004517965.1 | scaffold3212 | 3599                    | TT                              | CC                 | CC               | INTERGENIC      |               |                    |                    |
| SNP_108658_A_3669 | NW_004517965.1 | scaffold3212 | 3669                    | AA                              | TT                 | TT               | INTERGENIC      |               |                    |                    |
| SNP_108659_A_3681 | NW_004517965.1 | scaffold3212 | 3681                    | TT                              | AA                 | AA               | INTERGENIC      |               |                    |                    |
| SNP_108660_A_3929 | NW_004517965.1 | scaffold3212 | 3929                    | AA                              | TT                 | TT               | INTERGENIC      |               |                    |                    |
| SNP_108661_A_3953 | NW_004517965.1 | scaffold3212 | 3953                    | TT                              | CC                 | CC               | INTERGENIC      |               |                    |                    |
| SNP_108662_A_3996 | NW_004517965.1 | scaffold3212 | 3996                    | CC                              | TT                 | TT               | INTERGENIC      |               |                    |                    |
| SNP_108663_A_4038 | NW_004517965.1 | scaffold3212 | 4038                    | TT                              | CC                 | CC               | INTERGENIC      |               |                    |                    |

| SNPs IDs          | Chromosome IDs | Chromosomes  | Physical positions (bp) | CDC Frontier (Reference genome) | (Pusa 1103 & HPNB) | (ILWC 46 & LPNB) | Sequence genome | Components of | Gene accession IDs | Putative functions |
|-------------------|----------------|--------------|-------------------------|---------------------------------|--------------------|------------------|-----------------|---------------|--------------------|--------------------|
| SNP_108664_A_4166 | NW_004517965.1 | scaffold3212 | 4166                    | AA                              | TT                 | TT               | INTERGENIC      |               |                    |                    |
| SNP_108665_A_4399 | NW_004517965.1 | scaffold3212 | 4399                    | AA                              | CC                 | CC               | INTERGENIC      |               |                    |                    |
| SNP_108666_A_4495 | NW_004517965.1 | scaffold3212 | 4495                    | AA                              | CC                 | CC               | INTERGENIC      |               |                    |                    |
| SNP_108667_A_5586 | NW_004517965.1 | scaffold3212 | 5586                    | AA                              | GG                 | GG               | INTERGENIC      |               |                    |                    |
| SNP_108668_A_5589 | NW_004517965.1 | scaffold3212 | 5589                    | GG                              | AA                 | AA               | INTERGENIC      |               |                    |                    |
| SNP_108669_A_5837 | NW_004517965.1 | scaffold3212 | 5837                    | AA                              | CC                 | CC               | INTERGENIC      |               |                    |                    |
| SNP_108670_A_5865 | NW_004517965.1 | scaffold3212 | 5865                    | TT                              | GG                 | GG               | INTERGENIC      |               |                    |                    |
| SNP_108671_A_5944 | NW_004517965.1 | scaffold3212 | 5944                    | AA                              | GG                 | GG               | INTERGENIC      |               |                    |                    |
| SNP_108672_A_5945 | NW_004517965.1 | scaffold3212 | 5945                    | GG                              | TT                 | TT               | INTERGENIC      |               |                    |                    |
| SNP_108673_A_5951 | NW_004517965.1 | scaffold3212 | 5951                    | TT                              | CC                 | CC               | INTERGENIC      |               |                    |                    |
| SNP_108674_A_6060 | NW_004517965.1 | scaffold3212 | 6060                    | GG                              | TT                 | TT               | INTERGENIC      |               |                    |                    |
| SNP_108675_A_6141 | NW_004517965.1 | scaffold3212 | 6141                    | GG                              | CC                 | CC               | INTERGENIC      |               |                    |                    |
| SNP_108677_A_6400 | NW_004517965.1 | scaffold3212 | 6400                    | AA                              | CC                 | CC               | INTERGENIC      |               |                    |                    |
| SNP_108678_A_6451 | NW_004517965.1 | scaffold3212 | 6451                    | TT                              | CC                 | CC               | INTERGENIC      |               |                    |                    |
| SNP_108679_A_6469 | NW_004517965.1 | scaffold3212 | 6469                    | GG                              | TT                 | TT               | INTERGENIC      |               |                    |                    |
| SNP_108680_A_6597 | NW_004517965.1 | scaffold3212 | 6597                    | CC                              | TT                 | TT               | INTERGENIC      |               |                    |                    |
| SNP_108681_A_6598 | NW_004517965.1 | scaffold3212 | 6598                    | GG                              | AA                 | AA               | INTERGENIC      |               |                    |                    |
| SNP_108682_A_6755 | NW_004517965.1 | scaffold3212 | 6755                    | GG                              | CC                 | CC               | INTERGENIC      |               |                    |                    |
| SNP_108683_A_6845 | NW_004517965.1 | scaffold3212 | 6845                    | CC                              | AA                 | AA               | INTERGENIC      |               |                    |                    |
| SNP_108684_A_6849 | NW_004517965.1 | scaffold3212 | 6849                    | TT                              | GG                 | GG               | INTERGENIC      |               |                    |                    |
| SNP_108685_A_7065 | NW_004517965.1 | scaffold3212 | 7065                    | AA                              | GG                 | GG               | INTERGENIC      |               |                    |                    |
| SNP_108686_A_7293 | NW_004517965.1 | scaffold3212 | 7293                    | GG                              | AA                 | AA               | INTERGENIC      |               |                    |                    |

| SNPs IDs           | Chromosome IDs | Chromosomes  | Physical positions (bp) | CDC Frontier (Reference genome) | (Pusa 1103 & HPNB) | (ILWC 46 & LPNB) | Sequence genome | Components of | Gene accession IDs | Putative functions |
|--------------------|----------------|--------------|-------------------------|---------------------------------|--------------------|------------------|-----------------|---------------|--------------------|--------------------|
| SNP_108687_A_7996  | NW_004517965.1 | scaffold3212 | 7996                    | GG                              | TT                 | TT               | INTERGENIC      |               |                    |                    |
| SNP_108688_A_8159  | NW_004517965.1 | scaffold3212 | 8159                    | AA                              | GG                 | GG               | INTERGENIC      |               |                    |                    |
| SNP_108689_A_8262  | NW_004517965.1 | scaffold3212 | 8262                    | CC                              | GG                 | GG               | INTERGENIC      |               |                    |                    |
| SNP_108690_A_8274  | NW_004517965.1 | scaffold3212 | 8274                    | CC                              | TT                 | TT               | INTERGENIC      |               |                    |                    |
| SNP_108691_A_8455  | NW_004517965.1 | scaffold3212 | 8455                    | CC                              | TT                 | TT               | INTERGENIC      |               |                    |                    |
| SNP_108692_A_8457  | NW_004517965.1 | scaffold3212 | 8457                    | AA                              | GG                 | GG               | INTERGENIC      |               |                    |                    |
| SNP_108693_A_8749  | NW_004517965.1 | scaffold3212 | 8749                    | CC                              | TT                 | TT               | INTERGENIC      |               |                    |                    |
| SNP_108694_A_8947  | NW_004517965.1 | scaffold3212 | 8947                    | GG                              | TT                 | TT               | INTERGENIC      |               |                    |                    |
| SNP_108695_A_9000  | NW_004517965.1 | scaffold3212 | 9000                    | GG                              | TT                 | TT               | INTERGENIC      |               |                    |                    |
| SNP_108696_A_9541  | NW_004517965.1 | scaffold3212 | 9541                    | TT                              | AA                 | AA               | INTERGENIC      |               |                    |                    |
| SNP_108697_A_9672  | NW_004517965.1 | scaffold3212 | 9672                    | AA                              | TT                 | TT               | INTERGENIC      |               |                    |                    |
| SNP_108698_A_9696  | NW_004517965.1 | scaffold3212 | 9696                    | TT                              | CC                 | CC               | INTERGENIC      |               |                    |                    |
| SNP_108699_A_9767  | NW_004517965.1 | scaffold3212 | 9767                    | GG                              | AA                 | AA               | INTERGENIC      |               |                    |                    |
| SNP_108700_A_9830  | NW_004517965.1 | scaffold3212 | 9830                    | CC                              | GG                 | GG               | INTERGENIC      |               |                    |                    |
| SNP_108701_A_9889  | NW_004517965.1 | scaffold3212 | 9889                    | TT                              | CC                 | CC               | INTERGENIC      |               |                    |                    |
| SNP_108702_A_9890  | NW_004517965.1 | scaffold3212 | 9890                    | GG                              | AA                 | AA               | INTERGENIC      |               |                    |                    |
| SNP_108703_A_10050 | NW_004517965.1 | scaffold3212 | 10050                   | TT                              | CC                 | CC               | INTERGENIC      |               |                    |                    |
| SNP_108704_A_10080 | NW_004517965.1 | scaffold3212 | 10080                   | CC                              | AA                 | AA               | INTERGENIC      |               |                    |                    |
| SNP_108705_A_10105 | NW_004517965.1 | scaffold3212 | 10105                   | GG                              | TT                 | TT               | INTERGENIC      |               |                    |                    |
| SNP_108706_A_10114 | NW_004517965.1 | scaffold3212 | 10114                   | CC                              | AA                 | AA               | INTERGENIC      |               |                    |                    |
| SNP_108707_A_10183 | NW_004517965.1 | scaffold3212 | 10183                   | TT                              | CC                 | CC               | INTERGENIC      |               |                    |                    |
| SNP_108708_A_10307 | NW_004517965.1 | scaffold3212 | 10307                   | CC                              | TT                 | TT               | INTERGENIC      |               |                    |                    |

| SNPs IDs           | Chromosome IDs | Chromosomes  | Physical positions (bp) | CDC Frontier (Reference genome) | (Pusa 1103 & HPNB) | (ILWC 46 & LPNB) | Sequence Components of genome | Gene accession IDs | Putative functions    |
|--------------------|----------------|--------------|-------------------------|---------------------------------|--------------------|------------------|-------------------------------|--------------------|-----------------------|
| SNP_108709_A_10372 | NW_004517965.1 | scaffold3212 | 10372                   | GG                              | AA                 | AA               | INTERGENIC                    |                    |                       |
| SNP_108710_A_10738 | NW_004517965.1 | scaffold3212 | 10738                   | TT                              | AA                 | AA               | INTERGENIC                    |                    |                       |
| SNP_108711_A_10794 | NW_004517965.1 | scaffold3212 | 10794                   | AA                              | GG                 | GG               | INTERGENIC                    |                    |                       |
| SNP_108712_A_11463 | NW_004517965.1 | scaffold3212 | 11463                   | GG                              | TT                 | TT               | INTERGENIC                    |                    |                       |
| SNP_108713_A_18200 | NW_004517966.1 | scaffold3213 | 18200                   | TT                              | AA                 | AA               | INTERGENIC                    |                    |                       |
| SNP_108714_A_800   | NW_004517968.1 | scaffold3215 | 800                     | CC                              | TT                 | TT               | INTERGENIC                    |                    |                       |
| SNP_108715_A_1063  | NW_004517968.1 | scaffold3215 | 1063                    | GG                              | TT                 | TT               | INTERGENIC                    |                    |                       |
| SNP_108716_A_1074  | NW_004517968.1 | scaffold3215 | 1074                    | CC                              | AA                 | AA               | INTERGENIC                    |                    |                       |
| SNP_108717_A_1077  | NW_004517968.1 | scaffold3215 | 1077                    | TT                              | CC                 | CC               | INTERGENIC                    |                    |                       |
| SNP_108718_A_1340  | NW_004517968.1 | scaffold3215 | 1340                    | GG                              | TT                 | TT               | INTERGENIC                    |                    |                       |
| SNP_108719_A_1872  | NW_004517969.1 | scaffold3216 | 1872                    | TT                              | AA                 | AA               | INTRON                        | 101490594          | pectinesterase 4-like |
| SNP_108720_A_1904  | NW_004517969.1 | scaffold3216 | 1904                    | AA                              | CC                 | CC               | INTRON                        | 101490594          | pectinesterase 4-like |
| SNP_108721_A_9011  | NW_004517969.1 | scaffold3216 | 9011                    | AA                              | TT                 | TT               | INTRON                        | 101490594          | pectinesterase 4-like |
| SNP_108722_A_4107  | NW_004517970.1 | scaffold3217 | 4107                    | AA                              | GG                 | GG               | INTERGENIC                    |                    |                       |
| SNP_108723_A_4117  | NW_004517970.1 | scaffold3217 | 4117                    | AA                              | GG                 | GG               | INTERGENIC                    |                    |                       |
| SNP_108724_A_4275  | NW_004517970.1 | scaffold3217 | 4275                    | CC                              | TT                 | TT               | INTERGENIC                    |                    |                       |
| SNP_108725_A_4343  | NW_004517970.1 | scaffold3217 | 4343                    | CC                              | AA                 | AA               | INTERGENIC                    |                    |                       |
| SNP_108726_A_4364  | NW_004517970.1 | scaffold3217 | 4364                    | AA                              | GG                 | GG               | INTERGENIC                    |                    |                       |
| SNP_108727_A_4412  | NW_004517970.1 | scaffold3217 | 4412                    | TT                              | GG                 | GG               | INTERGENIC                    |                    |                       |
| SNP_108728_A_4422  | NW_004517970.1 | scaffold3217 | 4422                    | AA                              | GG                 | GG               | INTERGENIC                    |                    |                       |
| SNP_108729_A_4490  | NW_004517970.1 | scaffold3217 | 4490                    | TT                              | CC                 | CC               | INTERGENIC                    |                    |                       |
| SNP_108730_A_4584  | NW_004517970.1 | scaffold3217 | 4584                    | CC                              | AA                 | AA               | INTERGENIC                    |                    |                       |

| SNPs IDs           | Chromosome IDs | Chromosomes  | Physical positions (bp) | CDC Frontier (Reference genome) | (Pusa 1103 & HPNB) | (ILWC 46 & LPNB) | Sequence genome | Components of | Gene accession IDs | Putative functions |
|--------------------|----------------|--------------|-------------------------|---------------------------------|--------------------|------------------|-----------------|---------------|--------------------|--------------------|
| SNP_108732_A_4724  | NW_004517970.1 | scaffold3217 | 4724                    | AA                              | GG                 | GG               | INTERGENIC      |               |                    |                    |
| SNP_108733_A_4767  | NW_004517970.1 | scaffold3217 | 4767                    | AA                              | CC                 | CC               | INTERGENIC      |               |                    |                    |
| SNP_108734_A_4882  | NW_004517970.1 | scaffold3217 | 4882                    | GG                              | AA                 | AA               | INTERGENIC      |               |                    |                    |
| SNP_108735_A_13734 | NW_004517970.1 | scaffold3217 | 13734                   | AA                              | GG                 | GG               | INTERGENIC      |               |                    |                    |
| SNP_108736_A_13849 | NW_004517970.1 | scaffold3217 | 13849                   | CC                              | TT                 | TT               | INTERGENIC      |               |                    |                    |
| SNP_108737_A_14160 | NW_004517970.1 | scaffold3217 | 14160                   | AA                              | GG                 | GG               | INTERGENIC      |               |                    |                    |
| SNP_108738_A_15277 | NW_004517970.1 | scaffold3217 | 15277                   | AA                              | GG                 | GG               | INTERGENIC      |               |                    |                    |
| SNP_108739_A_15304 | NW_004517970.1 | scaffold3217 | 15304                   | AA                              | CC                 | CC               | INTERGENIC      |               |                    |                    |
| SNP_108740_A_15341 | NW_004517970.1 | scaffold3217 | 15341                   | TT                              | CC                 | CC               | INTERGENIC      |               |                    |                    |
| SNP_108741_A_15838 | NW_004517970.1 | scaffold3217 | 15838                   | AA                              | GG                 | GG               | INTERGENIC      |               |                    |                    |
| SNP_108742_A_20534 | NW_004517970.1 | scaffold3217 | 20534                   | AA                              | TT                 | TT               | INTERGENIC      |               |                    |                    |
| SNP_108743_A_36238 | NW_004517970.1 | scaffold3217 | 36238                   | AA                              | GG                 | GG               | INTERGENIC      |               |                    |                    |
| SNP_108744_A_36291 | NW_004517970.1 | scaffold3217 | 36291                   | AA                              | CC                 | CC               | INTERGENIC      |               |                    |                    |
| SNP_108745_A_36603 | NW_004517970.1 | scaffold3217 | 36603                   | TT                              | AA                 | AA               | INTERGENIC      |               |                    |                    |
| SNP_108746_A_766   | NW_004517976.1 | scaffold3225 | 766                     | AA                              | GG                 | GG               | INTERGENIC      |               |                    |                    |
| SNP_108747_A_5514  | NW_004517976.1 | scaffold3225 | 5514                    | TT                              | CC                 | CC               | INTERGENIC      |               |                    |                    |
| SNP_108748_A_5713  | NW_004517976.1 | scaffold3225 | 5713                    | CC                              | TT                 | TT               | INTERGENIC      |               |                    |                    |
| SNP_108749_A_8616  | NW_004517976.1 | scaffold3225 | 8616                    | TT                              | CC                 | CC               | INTERGENIC      |               |                    |                    |
| SNP_108750_A_8635  | NW_004517976.1 | scaffold3225 | 8635                    | AA                              | GG                 | GG               | INTERGENIC      |               |                    |                    |
| SNP_108752_A_8668  | NW_004517976.1 | scaffold3225 | 8668                    | CC                              | AA                 | AA               | INTERGENIC      |               |                    |                    |
| SNP_108753_A_8682  | NW_004517976.1 | scaffold3225 | 8682                    | TT                              | CC                 | CC               | INTERGENIC      |               |                    |                    |
| SNP_108754_A_8718  | NW_004517976.1 | scaffold3225 | 8718                    | TT                              | CC                 | CC               | INTERGENIC      |               |                    |                    |

| SNPs IDs           | Chromosome IDs | Chromosomes  | Physical positions (bp) | CDC Frontier (Reference genome) | (Pusa 1103 & HPNB) | (ILWC 46 & LPNB) | Sequence genome | Components of | Gene accession IDs          | Putative functions |
|--------------------|----------------|--------------|-------------------------|---------------------------------|--------------------|------------------|-----------------|---------------|-----------------------------|--------------------|
| SNP_108755_A_8743  | NW_004517976.1 | scaffold3225 | 8743                    | AA                              | GG                 | GG               | INTERGENIC      |               |                             |                    |
| SNP_108756_A_10032 | NW_004517976.1 | scaffold3225 | 10032                   | TT                              | GG                 | GG               | INTERGENIC      |               |                             |                    |
| SNP_108758_A_21865 | NW_004517976.1 | scaffold3225 | 21865                   | AA                              | GG                 | GG               | INTERGENIC      |               |                             |                    |
| SNP_108759_A_21955 | NW_004517976.1 | scaffold3225 | 21955                   | AA                              | GG                 | GG               | INTERGENIC      |               |                             |                    |
| SNP_108760_A_22316 | NW_004517976.1 | scaffold3225 | 22316                   | GG                              | AA                 | AA               | INTERGENIC      |               |                             |                    |
| SNP_108763_A_1920  | NW_004517979.1 | scaffold3228 | 1920                    | CC                              | TT                 | TT               | INTERGENIC      |               |                             |                    |
| SNP_108764_A_1953  | NW_004517979.1 | scaffold3228 | 1953                    | TT                              | GG                 | GG               | INTERGENIC      |               |                             |                    |
| SNP_108765_A_4799  | NW_004517979.1 | scaffold3228 | 4799                    | CC                              | TT                 | TT               | INTERGENIC      |               |                             |                    |
| SNP_108766_A_5239  | NW_004517979.1 | scaffold3228 | 5239                    | CC                              | GG                 | GG               | INTERGENIC      |               |                             |                    |
| SNP_108767_A_8028  | NW_004517979.1 | scaffold3228 | 8028                    | GG                              | CC                 | CC               | INTERGENIC      |               |                             |                    |
| SNP_108768_A_8510  | NW_004517979.1 | scaffold3228 | 8510                    | AA                              | GG                 | GG               | INTERGENIC      |               |                             |                    |
| SNP_108769_A_8518  | NW_004517979.1 | scaffold3228 | 8518                    | AA                              | GG                 | GG               | INTERGENIC      |               |                             |                    |
| SNP_108770_A_8534  | NW_004517979.1 | scaffold3228 | 8534                    | AA                              | GG                 | GG               | INTERGENIC      |               |                             |                    |
| SNP_108771_A_10144 | NW_004517979.1 | scaffold3228 | 10144                   | AA                              | GG                 | GG               | INTERGENIC      |               |                             |                    |
| SNP_108772_A_16980 | NW_004517979.1 | scaffold3228 | 16980                   | TT                              | AA                 | AA               | INTERGENIC      |               |                             |                    |
| SNP_108773_A_20869 | NW_004517979.1 | scaffold3228 | 20869                   | CC                              | GG                 | GG               | URR             | 101490919     | inositol transporter 1-like |                    |
| SNP_108774_A_21255 | NW_004517979.1 | scaffold3228 | 21255                   | TT                              | CC                 | CC               | URR             | 101490919     | inositol transporter 1-like |                    |
| SNP_108775_A_22173 | NW_004517979.1 | scaffold3228 | 22173                   | TT                              | CC                 | CC               | INTERGENIC      |               |                             |                    |
| SNP_108776_A_23711 | NW_004517979.1 | scaffold3228 | 23711                   | TT                              | AA                 | AA               | INTERGENIC      |               |                             |                    |
| SNP_108777_A_43196 | NW_004517979.1 | scaffold3228 | 43196                   | GG                              | AA                 | AA               | INTERGENIC      |               |                             |                    |
| SNP_108780_A_48653 | NW_004517979.1 | scaffold3228 | 48653                   | TT                              | AA                 | AA               | INTERGENIC      |               |                             |                    |
| SNP_108781_A_54394 | NW_004517979.1 | scaffold3228 | 54394                   | TT                              | CC                 | CC               | INTERGENIC      |               |                             |                    |

| SNPs IDs           | Chromosome IDs | Chromosomes  | Physical positions (bp) | CDC Frontier genome (Reference genome) | (Pusa 1103 & HPNB) | (ILWC 46 & LPNB) | Sequence genome | Components of | Gene accession IDs | Putative functions |
|--------------------|----------------|--------------|-------------------------|----------------------------------------|--------------------|------------------|-----------------|---------------|--------------------|--------------------|
| SNP_108782_A_54441 | NW_004517979.1 | scaffold3228 | 54441                   | CC                                     | TT                 | TT               | INTERGENIC      |               |                    |                    |
| SNP_108783_A_54667 | NW_004517979.1 | scaffold3228 | 54667                   | TT                                     | AA                 | AA               | INTERGENIC      |               |                    |                    |
| SNP_108784_A_54668 | NW_004517979.1 | scaffold3228 | 54668                   | AA                                     | TT                 | TT               | INTERGENIC      |               |                    |                    |
| SNP_108785_A_59092 | NW_004517979.1 | scaffold3228 | 59092                   | CC                                     | GG                 | GG               | INTERGENIC      |               |                    |                    |
| SNP_108786_A_1072  | NW_004517980.1 | scaffold3229 | 1072                    | GG                                     | AA                 | AA               | INTERGENIC      |               |                    |                    |
| SNP_108787_A_1381  | NW_004517980.1 | scaffold3229 | 1381                    | GG                                     | CC                 | CC               | INTERGENIC      |               |                    |                    |
| SNP_108788_A_1450  | NW_004517980.1 | scaffold3229 | 1450                    | GG                                     | AA                 | AA               | INTERGENIC      |               |                    |                    |
| SNP_108789_A_1568  | NW_004517980.1 | scaffold3229 | 1568                    | CC                                     | AA                 | AA               | INTERGENIC      |               |                    |                    |
| SNP_108790_A_1594  | NW_004517980.1 | scaffold3229 | 1594                    | TT                                     | CC                 | CC               | INTERGENIC      |               |                    |                    |
| SNP_108791_A_4880  | NW_004517980.1 | scaffold3229 | 4880                    | CC                                     | AA                 | AA               | INTERGENIC      |               |                    |                    |
| SNP_108792_A_4918  | NW_004517980.1 | scaffold3229 | 4918                    | AA                                     | GG                 | GG               | INTERGENIC      |               |                    |                    |
| SNP_108793_A_4932  | NW_004517980.1 | scaffold3229 | 4932                    | AA                                     | GG                 | GG               | INTERGENIC      |               |                    |                    |
| SNP_108794_A_4987  | NW_004517980.1 | scaffold3229 | 4987                    | GG                                     | AA                 | AA               | INTERGENIC      |               |                    |                    |
| SNP_108795_A_5012  | NW_004517980.1 | scaffold3229 | 5012                    | GG                                     | AA                 | AA               | INTERGENIC      |               |                    |                    |
| SNP_108796_A_5108  | NW_004517980.1 | scaffold3229 | 5108                    | AA                                     | CC                 | CC               | INTERGENIC      |               |                    |                    |
| SNP_108797_A_5141  | NW_004517980.1 | scaffold3229 | 5141                    | AA                                     | GG                 | GG               | INTERGENIC      |               |                    |                    |
| SNP_108798_A_5160  | NW_004517980.1 | scaffold3229 | 5160                    | CC                                     | TT                 | TT               | INTERGENIC      |               |                    |                    |
| SNP_108799_A_5178  | NW_004517980.1 | scaffold3229 | 5178                    | TT                                     | GG                 | GG               | INTERGENIC      |               |                    |                    |
| SNP_108800_A_5273  | NW_004517980.1 | scaffold3229 | 5273                    | TT                                     | AA                 | AA               | INTERGENIC      |               |                    |                    |
| SNP_108801_A_5281  | NW_004517980.1 | scaffold3229 | 5281                    | AA                                     | TT                 | TT               | INTERGENIC      |               |                    |                    |
| SNP_108802_A_5287  | NW_004517980.1 | scaffold3229 | 5287                    | TT                                     | AA                 | AA               | INTERGENIC      |               |                    |                    |
| SNP_108804_A_5410  | NW_004517980.1 | scaffold3229 | 5410                    | AA                                     | CC                 | CC               | INTERGENIC      |               |                    |                    |



| SNPs IDs          | Chromosome IDs | Chromosomes  | Physical positions (bp) | CDC Frontier (Reference genome) | (Pusa 1103 & HPNB) | (ILWC 46 & LPNB) | Sequence genome | Components of | Gene accession IDs | Putative functions |
|-------------------|----------------|--------------|-------------------------|---------------------------------|--------------------|------------------|-----------------|---------------|--------------------|--------------------|
| SNP_108805_A_5412 | NW_004517980.1 | scaffold3229 | 5412                    | CC                              | AA                 | AA               | INTERGENIC      |               |                    |                    |
| SNP_108806_A_5419 | NW_004517980.1 | scaffold3229 | 5419                    | AA                              | TT                 | TT               | INTERGENIC      |               |                    |                    |
| SNP_108807_A_5421 | NW_004517980.1 | scaffold3229 | 5421                    | AA                              | CC                 | CC               | INTERGENIC      |               |                    |                    |
| SNP_108808_A_5500 | NW_004517980.1 | scaffold3229 | 5500                    | CC                              | TT                 | TT               | INTERGENIC      |               |                    |                    |
| SNP_108809_A_5555 | NW_004517980.1 | scaffold3229 | 5555                    | TT                              | AA                 | AA               | INTERGENIC      |               |                    |                    |
| SNP_108810_A_5667 | NW_004517980.1 | scaffold3229 | 5667                    | GG                              | AA                 | AA               | INTERGENIC      |               |                    |                    |
| SNP_108811_A_5802 | NW_004517980.1 | scaffold3229 | 5802                    | TT                              | CC                 | CC               | INTERGENIC      |               |                    |                    |
| SNP_108813_A_5805 | NW_004517980.1 | scaffold3229 | 5805                    | TT                              | AA                 | AA               | INTERGENIC      |               |                    |                    |
| SNP_108814_A_5806 | NW_004517980.1 | scaffold3229 | 5806                    | CC                              | AA                 | AA               | INTERGENIC      |               |                    |                    |
| SNP_108816_A_5968 | NW_004517980.1 | scaffold3229 | 5968                    | GG                              | AA                 | AA               | INTERGENIC      |               |                    |                    |
| SNP_108817_A_5977 | NW_004517980.1 | scaffold3229 | 5977                    | CC                              | AA                 | AA               | INTERGENIC      |               |                    |                    |
| SNP_108818_A_6024 | NW_004517980.1 | scaffold3229 | 6024                    | AA                              | GG                 | GG               | INTERGENIC      |               |                    |                    |
| SNP_108819_A_6102 | NW_004517980.1 | scaffold3229 | 6102                    | CC                              | AA                 | AA               | INTERGENIC      |               |                    |                    |
| SNP_108820_A_6167 | NW_004517980.1 | scaffold3229 | 6167                    | CC                              | TT                 | TT               | INTERGENIC      |               |                    |                    |
| SNP_108821_A_6288 | NW_004517980.1 | scaffold3229 | 6288                    | AA                              | GG                 | GG               | INTERGENIC      |               |                    |                    |
| SNP_108822_A_6290 | NW_004517980.1 | scaffold3229 | 6290                    | AA                              | GG                 | GG               | INTERGENIC      |               |                    |                    |
| SNP_108823_A_6303 | NW_004517980.1 | scaffold3229 | 6303                    | GG                              | AA                 | AA               | INTERGENIC      |               |                    |                    |
| SNP_108824_A_6389 | NW_004517980.1 | scaffold3229 | 6389                    | TT                              | CC                 | CC               | INTERGENIC      |               |                    |                    |
| SNP_108825_A_6400 | NW_004517980.1 | scaffold3229 | 6400                    | AA                              | GG                 | GG               | INTERGENIC      |               |                    |                    |
| SNP_108826_A_6410 | NW_004517980.1 | scaffold3229 | 6410                    | CC                              | TT                 | TT               | INTERGENIC      |               |                    |                    |
| SNP_108827_A_6424 | NW_004517980.1 | scaffold3229 | 6424                    | AA                              | TT                 | TT               | INTERGENIC      |               |                    |                    |
| SNP_108828_A_6464 | NW_004517980.1 | scaffold3229 | 6464                    | TT                              | AA                 | AA               | INTERGENIC      |               |                    |                    |

| SNPs IDs           | Chromosome IDs | Chromosomes  | Physical positions (bp) | CDC Frontier (Reference genome) | (Pusa 1103 & HPNB) | (ILWC 46 & LPNB) | Sequence genome | Components of | Gene accession IDs | Putative functions |
|--------------------|----------------|--------------|-------------------------|---------------------------------|--------------------|------------------|-----------------|---------------|--------------------|--------------------|
| SNP_108829_A_6607  | NW_004517980.1 | scaffold3229 | 6607                    | TT                              | CC                 | CC               | INTERGENIC      |               |                    |                    |
| SNP_108830_A_6671  | NW_004517980.1 | scaffold3229 | 6671                    | TT                              | GG                 | GG               | INTERGENIC      |               |                    |                    |
| SNP_108831_A_6672  | NW_004517980.1 | scaffold3229 | 6672                    | TT                              | CC                 | CC               | INTERGENIC      |               |                    |                    |
| SNP_108832_A_6690  | NW_004517980.1 | scaffold3229 | 6690                    | AA                              | TT                 | TT               | INTERGENIC      |               |                    |                    |
| SNP_108834_A_6729  | NW_004517980.1 | scaffold3229 | 6729                    | TT                              | CC                 | CC               | INTERGENIC      |               |                    |                    |
| SNP_108835_A_6974  | NW_004517980.1 | scaffold3229 | 6974                    | AA                              | TT                 | TT               | INTERGENIC      |               |                    |                    |
| SNP_108836_A_7719  | NW_004517980.1 | scaffold3229 | 7719                    | TT                              | GG                 | GG               | INTERGENIC      |               |                    |                    |
| SNP_108837_A_7751  | NW_004517980.1 | scaffold3229 | 7751                    | AA                              | CC                 | CC               | INTERGENIC      |               |                    |                    |
| SNP_108838_A_7752  | NW_004517980.1 | scaffold3229 | 7752                    | TT                              | AA                 | AA               | INTERGENIC      |               |                    |                    |
| SNP_108839_A_8460  | NW_004517980.1 | scaffold3229 | 8460                    | CC                              | TT                 | TT               | INTERGENIC      |               |                    |                    |
| SNP_108840_A_8887  | NW_004517980.1 | scaffold3229 | 8887                    | CC                              | GG                 | GG               | INTERGENIC      |               |                    |                    |
| SNP_108841_A_8920  | NW_004517980.1 | scaffold3229 | 8920                    | TT                              | CC                 | CC               | INTERGENIC      |               |                    |                    |
| SNP_108843_A_1564  | NW_004517981.1 | scaffold3230 | 1564                    | GG                              | TT                 | TT               | INTERGENIC      |               |                    |                    |
| SNP_108844_A_1887  | NW_004517982.1 | scaffold3233 | 1887                    | TT                              | CC                 | CC               | INTERGENIC      |               |                    |                    |
| SNP_108845_A_233   | NW_004517983.1 | scaffold3234 | 233                     | CC                              | AA                 | AA               | INTERGENIC      |               |                    |                    |
| SNP_108846_A_247   | NW_004517983.1 | scaffold3234 | 247                     | GG                              | AA                 | AA               | INTERGENIC      |               |                    |                    |
| SNP_108847_A_328   | NW_004517983.1 | scaffold3234 | 328                     | TT                              | CC                 | CC               | INTERGENIC      |               |                    |                    |
| SNP_108848_A_672   | NW_004517983.1 | scaffold3234 | 672                     | AA                              | TT                 | TT               | INTERGENIC      |               |                    |                    |
| SNP_108850_A_8486  | NW_004517983.1 | scaffold3234 | 8486                    | CC                              | AA                 | AA               | INTERGENIC      |               |                    |                    |
| SNP_108851_A_8498  | NW_004517983.1 | scaffold3234 | 8498                    | TT                              | AA                 | AA               | INTERGENIC      |               |                    |                    |
| SNP_108852_A_8535  | NW_004517983.1 | scaffold3234 | 8535                    | CC                              | TT                 | TT               | INTERGENIC      |               |                    |                    |
| SNP_108853_A_11327 | NW_004517983.1 | scaffold3234 | 11327                   | TT                              | CC                 | CC               | INTERGENIC      |               |                    |                    |

| SNPs IDs           | Chromosome IDs | Chromosomes  | Physical positions (bp) | CDC Frontier (Reference genome) | (Pusa 1103 & HPNB) | (ILWC 46 & LPNB) | Sequence genome | Components of | Gene accession IDs | Putative functions |
|--------------------|----------------|--------------|-------------------------|---------------------------------|--------------------|------------------|-----------------|---------------|--------------------|--------------------|
| SNP_108854_A_11509 | NW_004517983.1 | scaffold3234 | 11509                   | AA                              | GG                 | GG               | INTERGENIC      |               |                    |                    |
| SNP_108855_A_12185 | NW_004517983.1 | scaffold3234 | 12185                   | CC                              | TT                 | TT               | INTERGENIC      |               |                    |                    |
| SNP_108856_A_686   | NW_004517984.1 | scaffold3235 | 686                     | TT                              | CC                 | CC               | INTERGENIC      |               |                    |                    |
| SNP_108857_A_712   | NW_004517984.1 | scaffold3235 | 712                     | CC                              | TT                 | TT               | INTERGENIC      |               |                    |                    |
| SNP_108858_A_906   | NW_004517984.1 | scaffold3235 | 906                     | GG                              | AA                 | AA               | INTERGENIC      |               |                    |                    |
| SNP_108859_A_930   | NW_004517984.1 | scaffold3235 | 930                     | TT                              | CC                 | CC               | INTERGENIC      |               |                    |                    |
| SNP_108860_A_1013  | NW_004517984.1 | scaffold3235 | 1013                    | GG                              | TT                 | TT               | INTERGENIC      |               |                    |                    |
| SNP_108861_A_1266  | NW_004517984.1 | scaffold3235 | 1266                    | TT                              | AA                 | AA               | INTERGENIC      |               |                    |                    |
| SNP_108862_A_1192  | NW_004517986.1 | scaffold3237 | 1192                    | AA                              | GG                 | GG               | INTERGENIC      |               |                    |                    |
| SNP_108863_A_1232  | NW_004517986.1 | scaffold3237 | 1232                    | TT                              | CC                 | CC               | INTERGENIC      |               |                    |                    |
| SNP_108864_A_1261  | NW_004517986.1 | scaffold3237 | 1261                    | TT                              | CC                 | CC               | INTERGENIC      |               |                    |                    |
| SNP_108865_A_170   | NW_004517989.1 | scaffold3241 | 170                     | GG                              | AA                 | AA               | INTERGENIC      |               |                    |                    |
| SNP_108866_A_536   | NW_004517989.1 | scaffold3241 | 536                     | GG                              | AA                 | AA               | INTERGENIC      |               |                    |                    |
| SNP_108867_A_552   | NW_004517989.1 | scaffold3241 | 552                     | CC                              | TT                 | TT               | INTERGENIC      |               |                    |                    |
| SNP_108868_A_611   | NW_004517989.1 | scaffold3241 | 611                     | GG                              | AA                 | AA               | INTERGENIC      |               |                    |                    |
| SNP_108869_A_682   | NW_004517989.1 | scaffold3241 | 682                     | TT                              | CC                 | CC               | INTERGENIC      |               |                    |                    |
| SNP_108870_A_751   | NW_004517989.1 | scaffold3241 | 751                     | AA                              | GG                 | GG               | INTERGENIC      |               |                    |                    |
| SNP_108871_A_753   | NW_004517989.1 | scaffold3241 | 753                     | TT                              | GG                 | GG               | INTERGENIC      |               |                    |                    |
| SNP_108872_A_879   | NW_004517989.1 | scaffold3241 | 879                     | GG                              | AA                 | AA               | INTERGENIC      |               |                    |                    |
| SNP_108873_A_943   | NW_004517989.1 | scaffold3241 | 943                     | CC                              | TT                 | TT               | INTERGENIC      |               |                    |                    |
| SNP_108875_A_1082  | NW_004517989.1 | scaffold3241 | 1082                    | GG                              | CC                 | CC               | INTERGENIC      |               |                    |                    |
| SNP_108876_A_1084  | NW_004517989.1 | scaffold3241 | 1084                    | GG                              | AA                 | AA               | INTERGENIC      |               |                    |                    |

| SNPs IDs           | Chromosome IDs | Chromosomes  | Physical positions (bp) | CDC Frontier (Reference genome) | (Pusa 1103 & HPNB) | (ILWC 46 & LPNB) | Sequence genome | Components of | Gene accession IDs | Putative functions |
|--------------------|----------------|--------------|-------------------------|---------------------------------|--------------------|------------------|-----------------|---------------|--------------------|--------------------|
| SNP_108877_A_1135  | NW_004517989.1 | scaffold3241 | 1135                    | AA                              | TT                 | TT               | INTERGENIC      |               |                    |                    |
| SNP_108878_A_2849  | NW_004517990.1 | scaffold3242 | 2849                    | TT                              | CC                 | CC               | INTERGENIC      |               |                    |                    |
| SNP_108879_A_3434  | NW_004517990.1 | scaffold3242 | 3434                    | GG                              | AA                 | AA               | INTERGENIC      |               |                    |                    |
| SNP_108880_A_3512  | NW_004517990.1 | scaffold3242 | 3512                    | GG                              | AA                 | AA               | INTERGENIC      |               |                    |                    |
| SNP_108881_A_3517  | NW_004517990.1 | scaffold3242 | 3517                    | TT                              | GG                 | GG               | INTERGENIC      |               |                    |                    |
| SNP_108882_A_3552  | NW_004517990.1 | scaffold3242 | 3552                    | TT                              | GG                 | GG               | INTERGENIC      |               |                    |                    |
| SNP_108883_A_3558  | NW_004517990.1 | scaffold3242 | 3558                    | AA                              | GG                 | GG               | INTERGENIC      |               |                    |                    |
| SNP_108884_A_3579  | NW_004517990.1 | scaffold3242 | 3579                    | GG                              | CC                 | CC               | INTERGENIC      |               |                    |                    |
| SNP_108885_A_6157  | NW_004517990.1 | scaffold3242 | 6157                    | CC                              | AA                 | AA               | INTERGENIC      |               |                    |                    |
| SNP_108886_A_6170  | NW_004517990.1 | scaffold3242 | 6170                    | CC                              | AA                 | AA               | INTERGENIC      |               |                    |                    |
| SNP_108887_A_6511  | NW_004517990.1 | scaffold3242 | 6511                    | TT                              | CC                 | CC               | INTERGENIC      |               |                    |                    |
| SNP_108888_A_6521  | NW_004517990.1 | scaffold3242 | 6521                    | AA                              | GG                 | GG               | INTERGENIC      |               |                    |                    |
| SNP_108889_A_6560  | NW_004517990.1 | scaffold3242 | 6560                    | CC                              | TT                 | TT               | INTERGENIC      |               |                    |                    |
| SNP_108890_A_6666  | NW_004517990.1 | scaffold3242 | 6666                    | TT                              | CC                 | CC               | INTERGENIC      |               |                    |                    |
| SNP_108891_A_6705  | NW_004517990.1 | scaffold3242 | 6705                    | TT                              | AA                 | AA               | INTERGENIC      |               |                    |                    |
| SNP_108892_A_6711  | NW_004517990.1 | scaffold3242 | 6711                    | CC                              | TT                 | TT               | INTERGENIC      |               |                    |                    |
| SNP_108893_A_9692  | NW_004517990.1 | scaffold3242 | 9692                    | TT                              | AA                 | AA               | INTERGENIC      |               |                    |                    |
| SNP_108894_A_11931 | NW_004517991.1 | scaffold3243 | 11931                   | TT                              | CC                 | CC               | INTERGENIC      |               |                    |                    |
| SNP_108895_A_19633 | NW_004517991.1 | scaffold3243 | 19633                   | AA                              | TT                 | TT               | DRR             | 101491561     | chitinase 2-like   |                    |
| SNP_108896_A_19651 | NW_004517991.1 | scaffold3243 | 19651                   | CC                              | TT                 | TT               | DRR             | 101491561     | chitinase 2-like   |                    |
| SNP_108897_A_19657 | NW_004517991.1 | scaffold3243 | 19657                   | CC                              | TT                 | TT               | DRR             | 101491561     | chitinase 2-like   |                    |
| SNP_108899_A_20470 | NW_004517991.1 | scaffold3243 | 20470                   | GG                              | AA                 | AA               | URR             | 101491561     | chitinase 2-like   |                    |

| SNPs IDs           | Chromosome IDs | Chromosomes  | Physical positions (bp) | CDC Frontier (Reference genome) | (Pusa 1103 & HPNB) | (ILWC 46 & LPNB) | Sequence Components of genome | Gene accession IDs | Putative functions |
|--------------------|----------------|--------------|-------------------------|---------------------------------|--------------------|------------------|-------------------------------|--------------------|--------------------|
| SNP_108900_A_20490 | NW_004517991.1 | scaffold3243 | 20490                   | AA                              | GG                 | GG               | URR                           | 101491561          | chitinase 2-like   |
| SNP_108901_A_20654 | NW_004517991.1 | scaffold3243 | 20654                   | AA                              | TT                 | TT               | URR                           | 101491561          | chitinase 2-like   |
| SNP_108902_A_20675 | NW_004517991.1 | scaffold3243 | 20675                   | CC                              | GG                 | GG               | URR                           | 101491561          | chitinase 2-like   |
| SNP_108903_A_20695 | NW_004517991.1 | scaffold3243 | 20695                   | AA                              | CC                 | CC               | URR                           | 101491561          | chitinase 2-like   |
| SNP_108904_A_20782 | NW_004517991.1 | scaffold3243 | 20782                   | CC                              | TT                 | TT               | URR                           | 101491561          | chitinase 2-like   |
| SNP_108905_A_13483 | NW_004517992.1 | scaffold3245 | 13483                   | AA                              | GG                 | GG               | INTERGENIC                    |                    |                    |
| SNP_108906_A_13520 | NW_004517992.1 | scaffold3245 | 13520                   | AA                              | TT                 | TT               | INTERGENIC                    |                    |                    |
| SNP_108907_A_13650 | NW_004517992.1 | scaffold3245 | 13650                   | GG                              | AA                 | AA               | INTERGENIC                    |                    |                    |
| SNP_108908_A_13677 | NW_004517992.1 | scaffold3245 | 13677                   | GG                              | AA                 | AA               | INTERGENIC                    |                    |                    |
| SNP_108909_A_13680 | NW_004517992.1 | scaffold3245 | 13680                   | TT                              | CC                 | CC               | INTERGENIC                    |                    |                    |
| SNP_108910_A_13690 | NW_004517992.1 | scaffold3245 | 13690                   | TT                              | CC                 | CC               | INTERGENIC                    |                    |                    |
| SNP_108911_A_13744 | NW_004517992.1 | scaffold3245 | 13744                   | CC                              | TT                 | TT               | INTERGENIC                    |                    |                    |
| SNP_108912_A_13867 | NW_004517992.1 | scaffold3245 | 13867                   | TT                              | AA                 | AA               | INTERGENIC                    |                    |                    |
| SNP_108913_A_13874 | NW_004517992.1 | scaffold3245 | 13874                   | GG                              | AA                 | AA               | INTERGENIC                    |                    |                    |
| SNP_108914_A_523   | NW_004517995.1 | scaffold3251 | 523                     | CC                              | AA                 | AA               | INTERGENIC                    |                    |                    |
| SNP_108915_A_762   | NW_004517995.1 | scaffold3251 | 762                     | AA                              | GG                 | GG               | INTERGENIC                    |                    |                    |
| SNP_108916_A_2756  | NW_004517995.1 | scaffold3251 | 2756                    | GG                              | TT                 | TT               | INTERGENIC                    |                    |                    |
| SNP_108917_A_2772  | NW_004517995.1 | scaffold3251 | 2772                    | AA                              | GG                 | GG               | INTERGENIC                    |                    |                    |
| SNP_108918_A_6936  | NW_004517995.1 | scaffold3251 | 6936                    | AA                              | GG                 | GG               | INTERGENIC                    |                    |                    |
| SNP_108919_A_8533  | NW_004517995.1 | scaffold3251 | 8533                    | GG                              | CC                 | CC               | INTERGENIC                    |                    |                    |
| SNP_108920_A_9075  | NW_004517995.1 | scaffold3251 | 9075                    | TT                              | CC                 | CC               | INTERGENIC                    |                    |                    |
| SNP_108921_A_9436  | NW_004517995.1 | scaffold3251 | 9436                    | GG                              | AA                 | AA               | INTERGENIC                    |                    |                    |

| SNPs IDs           | Chromosome IDs | Chromosomes    | Physical positions (bp) | CDC Frontier genome (Reference genome) | (Pusa 1103 & HPNB) | (ILWC 46 & LPNB) | Sequence Components of genome | Gene accession IDs | Putative functions                       |
|--------------------|----------------|----------------|-------------------------|----------------------------------------|--------------------|------------------|-------------------------------|--------------------|------------------------------------------|
| SNP_108922_A_9677  | NW_004517995.1 | scaffold3251   | 9677                    | CC                                     | GG                 | GG               | INTERGENIC                    |                    |                                          |
| SNP_108923_A_9991  | NW_004517995.1 | scaffold3251   | 9991                    | GG                                     | CC                 | CC               | INTERGENIC                    |                    |                                          |
| SNP_108924_A_10358 | NW_004517995.1 | scaffold3251   | 10358                   | GG                                     | AA                 | AA               | INTERGENIC                    |                    |                                          |
| SNP_108925_A_13360 | NW_004517995.1 | scaffold3251   | 13360                   | CC                                     | AA                 | AA               | INTERGENIC                    |                    |                                          |
| SNP_108926_A_14842 | NW_004517995.1 | scaffold3251   | 14842                   | TT                                     | AA                 | AA               | INTERGENIC                    |                    |                                          |
| SNP_108927_A_14843 | NW_004517995.1 | scaffold3251   | 14843                   | CC                                     | TT                 | TT               | INTERGENIC                    |                    |                                          |
| SNP_108928_A_15320 | NW_004517995.1 | scaffold3251   | 15320                   | AA                                     | GG                 | GG               | INTERGENIC                    |                    |                                          |
| SNP_108932_A_2395  | NW_004517997.1 | scaffold3254_2 | 2395                    | AA                                     | GG                 | GG               | INTERGENIC                    |                    |                                          |
| SNP_108933_A_5281  | NW_004517997.1 | scaffold3254_2 | 5281                    | GG                                     | AA                 | AA               | SYNONYMOUS_CODING             | 101491869          | protein arginine N-methyltransferase 1.6 |
| SNP_108934_A_8084  | NW_004517997.1 | scaffold3254_2 | 8084                    | TT                                     | CC                 | CC               | URR                           | 101491869          | protein arginine N-methyltransferase 1.6 |
| SNP_108935_A_8322  | NW_004517997.1 | scaffold3254_2 | 8322                    | GG                                     | TT                 | TT               | URR                           | 101491869          | protein arginine N-methyltransferase 1.6 |
| SNP_108936_A_15551 | NW_004517997.1 | scaffold3254_2 | 15551                   | GG                                     | TT                 | TT               | NON_SYNONYMOUS_CODING         | 101492425          | aspartic proteinase CDR1-like            |
| SNP_108938_A_18340 | NW_004517997.1 | scaffold3254_2 | 18340                   | CC                                     | TT                 | TT               | INTERGENIC                    |                    |                                          |
| SNP_108939_A_18447 | NW_004517997.1 | scaffold3254_2 | 18447                   | TT                                     | AA                 | AA               | INTERGENIC                    |                    |                                          |
| SNP_108941_A_22966 | NW_004517997.1 | scaffold3254_2 | 22966                   | AA                                     | GG                 | GG               | DRR                           | 101492757          | vesicle-associated protein 1-2-like      |
| SNP_108943_A_29621 | NW_004517997.1 | scaffold3254_2 | 29621                   | GG                                     | TT                 | TT               | URR                           | 101492757          | vesicle-associated protein 1-2-like      |
| SNP_108944_A_29939 | NW_004517997.1 | scaffold3254_2 | 29939                   | TT                                     | AA                 | AA               | URR                           | 101492757          | vesicle-associated protein 1-2-like      |
| SNP_108946_A_40364 | NW_004517997.1 | scaffold3254_2 | 40364                   | CC                                     | GG                 | GG               | INTRON                        | 101493421          | uncharacterized LOC101493421             |
| SNP_108947_A_40396 | NW_004517997.1 | scaffold3254_2 | 40396                   | GG                                     | AA                 | AA               | INTRON                        | 101493421          | uncharacterized LOC101493421             |
| SNP_108948_A_40439 | NW_004517997.1 | scaffold3254_2 | 40439                   | CC                                     | TT                 | TT               | INTRON                        | 101493421          | uncharacterized LOC101493421             |
| SNP_108949_A_41093 | NW_004517997.1 | scaffold3254_2 | 41093                   | GG                                     | TT                 | TT               | NON_SYNONYMOUS_CODING         | 101493421          | uncharacterized LOC101493421             |
| SNP_108950_A_45279 | NW_004517997.1 | scaffold3254_2 | 45279                   | GG                                     | TT                 | TT               | DRR                           | 101493744          | uncharacterized LOC101493744             |

| SNPs IDs           | Chromosome IDs | Chromosomes    | Physical positions (bp) | CDC Frontier (Reference genome) | (Pusa 1103 & HPNB) | (ILWC 46 & LPNB) | Sequence Components of genome | Gene accession IDs | Putative functions                                                         |
|--------------------|----------------|----------------|-------------------------|---------------------------------|--------------------|------------------|-------------------------------|--------------------|----------------------------------------------------------------------------|
| SNP_108951_A_47864 | NW_004517997.1 | scaffold3254_2 | 47864                   | GG                              | AA                 | AA               | DRR                           | 101493744          | uncharacterized LOC101493744                                               |
| SNP_108952_A_48604 | NW_004517997.1 | scaffold3254_2 | 48604                   | AA                              | CC                 | CC               | URR                           | 101493744          | uncharacterized LOC101493744                                               |
| SNP_108953_A_48884 | NW_004517997.1 | scaffold3254_2 | 48884                   | CC                              | AA                 | AA               | URR                           | 101493744          | uncharacterized LOC101493744                                               |
| SNP_108954_A_50858 | NW_004517997.1 | scaffold3254_2 | 50858                   | AA                              | GG                 | GG               | INTERGENIC                    |                    |                                                                            |
| SNP_108955_A_52022 | NW_004517997.1 | scaffold3254_2 | 52022                   | TT                              | CC                 | CC               | INTERGENIC                    |                    |                                                                            |
| SNP_108956_A_52023 | NW_004517997.1 | scaffold3254_2 | 52023                   | GG                              | AA                 | AA               | INTERGENIC                    |                    |                                                                            |
| SNP_108957_A_52983 | NW_004517997.1 | scaffold3254_2 | 52983                   | AA                              | GG                 | GG               | INTERGENIC                    |                    |                                                                            |
| SNP_108958_A_53054 | NW_004517997.1 | scaffold3254_2 | 53054                   | TT                              | CC                 | CC               | INTERGENIC                    |                    |                                                                            |
| SNP_108959_A_53069 | NW_004517997.1 | scaffold3254_2 | 53069                   | CC                              | TT                 | TT               | INTERGENIC                    |                    |                                                                            |
| SNP_108960_A_53081 | NW_004517997.1 | scaffold3254_2 | 53081                   | TT                              | CC                 | CC               | INTERGENIC                    |                    |                                                                            |
| SNP_108961_A_53099 | NW_004517997.1 | scaffold3254_2 | 53099                   | AA                              | CC                 | CC               | INTERGENIC                    |                    |                                                                            |
| SNP_108962_A_53105 | NW_004517997.1 | scaffold3254_2 | 53105                   | TT                              | AA                 | AA               | INTERGENIC                    |                    |                                                                            |
| SNP_108963_A_53125 | NW_004517997.1 | scaffold3254_2 | 53125                   | AA                              | GG                 | GG               | INTERGENIC                    |                    |                                                                            |
| SNP_108964_A_53514 | NW_004517997.1 | scaffold3254_2 | 53514                   | CC                              | TT                 | TT               | INTERGENIC                    |                    |                                                                            |
| SNP_108965_A_54631 | NW_004517997.1 | scaffold3254_2 | 54631                   | TT                              | AA                 | AA               | INTERGENIC                    |                    |                                                                            |
| SNP_108966_A_74352 | NW_004517997.1 | scaffold3254_2 | 74352                   | AA                              | GG                 | GG               | INTRON                        | 101495118          | L-lactate dehydrogenase A-like                                             |
| SNP_108968_A_77623 | NW_004517997.1 | scaffold3254_2 | 77623                   | AA                              | GG                 | GG               | DRR                           | 101495446          | NADH dehydrogenase [ubiquinone] 1 beta subcomplex subunit 8, mitochondrial |
| SNP_108969_A_82944 | NW_004517997.1 | scaffold3254_2 | 82944                   | AA                              | GG                 | GG               | URR                           | 101495446          | NADH dehydrogenase [ubiquinone] 1 beta subcomplex subunit 8, mitochondrial |
| SNP_108970_A_84810 | NW_004517997.1 | scaffold3254_2 | 84810                   | GG                              | AA                 | AA               | INTERGENIC                    |                    |                                                                            |
| SNP_108971_A_84826 | NW_004517997.1 | scaffold3254_2 | 84826                   | AA                              | GG                 | GG               | INTERGENIC                    |                    |                                                                            |
| SNP_108972_A_88804 | NW_004517997.1 | scaffold3254_2 | 88804                   | TT                              | CC                 | CC               | INTERGENIC                    |                    |                                                                            |
| SNP_108973_A_88955 | NW_004517997.1 | scaffold3254_2 | 88955                   | TT                              | CC                 | CC               | INTERGENIC                    |                    |                                                                            |

| SNPs IDs            | Chromosome IDs | Chromosomes    | Physical positions (bp) | CDC Frontier (Reference genome) | (Pusa 1103 & HPNB) | (ILWC 46 & LPNB) | Sequence Components of genome | Gene accession IDs | Putative functions                  |
|---------------------|----------------|----------------|-------------------------|---------------------------------|--------------------|------------------|-------------------------------|--------------------|-------------------------------------|
| SNP_108974_A_88994  | NW_004517997.1 | scaffold3254_2 | 88994                   | GG                              | TT                 | TT               | INTERGENIC                    |                    |                                     |
| SNP_108975_A_89502  | NW_004517997.1 | scaffold3254_2 | 89502                   | AA                              | GG                 | GG               | INTERGENIC                    |                    |                                     |
| SNP_108976_A_89807  | NW_004517997.1 | scaffold3254_2 | 89807                   | TT                              | CC                 | CC               | INTERGENIC                    |                    |                                     |
| SNP_108978_A_108709 | NW_004517997.1 | scaffold3254_2 | 108709                  | TT                              | CC                 | CC               | URR                           | 101496425          | 14 kDa proline-rich protein DC2.15  |
| SNP_108979_A_108746 | NW_004517997.1 | scaffold3254_2 | 108746                  | AA                              | GG                 | GG               | URR                           | 101496425          | 14 kDa proline-rich protein DC2.15  |
| SNP_108980_A_109284 | NW_004517997.1 | scaffold3254_2 | 109284                  | GG                              | AA                 | AA               | URR                           | 101496425          | 14 kDa proline-rich protein DC2.15  |
| SNP_108981_A_109757 | NW_004517997.1 | scaffold3254_2 | 109757                  | AA                              | GG                 | GG               | INTERGENIC                    |                    |                                     |
| SNP_108983_A_111037 | NW_004517997.1 | scaffold3254_2 | 111037                  | TT                              | CC                 | CC               | DRR                           | 101496757          | 36.4 kDa proline-rich protein-like  |
| SNP_108984_A_111081 | NW_004517997.1 | scaffold3254_2 | 111081                  | CC                              | AA                 | AA               | DRR                           | 101496757          | 36.4 kDa proline-rich protein-like  |
| SNP_108985_A_111102 | NW_004517997.1 | scaffold3254_2 | 111102                  | CC                              | GG                 | GG               | DRR                           | 101496757          | 36.4 kDa proline-rich protein-like  |
| SNP_108987_A_119312 | NW_004517997.1 | scaffold3254_2 | 119312                  | AA                              | GG                 | GG               | URR                           | 101497066          | lipid transfer protein EARLI 1-like |
| SNP_108988_A_119323 | NW_004517997.1 | scaffold3254_2 | 119323                  | TT                              | CC                 | CC               | URR                           | 101497066          | lipid transfer protein EARLI 1-like |
| SNP_108989_A_119397 | NW_004517997.1 | scaffold3254_2 | 119397                  | CC                              | TT                 | TT               | URR                           | 101497066          | lipid transfer protein EARLI 1-like |
| SNP_108990_A_119524 | NW_004517997.1 | scaffold3254_2 | 119524                  | AA                              | CC                 | CC               | INTERGENIC                    |                    |                                     |
| SNP_108991_A_119573 | NW_004517997.1 | scaffold3254_2 | 119573                  | TT                              | GG                 | GG               | INTERGENIC                    |                    |                                     |
| SNP_108992_A_119579 | NW_004517997.1 | scaffold3254_2 | 119579                  | CC                              | TT                 | TT               | INTERGENIC                    |                    |                                     |
| SNP_108993_A_119588 | NW_004517997.1 | scaffold3254_2 | 119588                  | AA                              | GG                 | GG               | INTERGENIC                    |                    |                                     |
| SNP_108994_A_119596 | NW_004517997.1 | scaffold3254_2 | 119596                  | CC                              | AA                 | AA               | INTERGENIC                    |                    |                                     |
| SNP_108995_A_119609 | NW_004517997.1 | scaffold3254_2 | 119609                  | GG                              | TT                 | TT               | INTERGENIC                    |                    |                                     |
| SNP_108996_A_119610 | NW_004517997.1 | scaffold3254_2 | 119610                  | TT                              | GG                 | GG               | INTERGENIC                    |                    |                                     |
| SNP_108997_A_120343 | NW_004517997.1 | scaffold3254_2 | 120343                  | TT                              | CC                 | CC               | INTERGENIC                    |                    |                                     |
| SNP_108998_A_120381 | NW_004517997.1 | scaffold3254_2 | 120381                  | CC                              | AA                 | AA               | INTERGENIC                    |                    |                                     |



| SNPs IDs            | Chromosome IDs | Chromosomes    | Physical positions (bp) | CDC Frontier (Reference genome) | (Pusa 1103 & HPNB) | (ILWC 46 & LPNB) | Sequence Components of genome | Gene accession IDs | Putative functions                      |
|---------------------|----------------|----------------|-------------------------|---------------------------------|--------------------|------------------|-------------------------------|--------------------|-----------------------------------------|
| SNP_108999_A_120469 | NW_004517997.1 | scaffold3254_2 | 120469                  | GG                              | AA                 | AA               | INTERGENIC                    |                    |                                         |
| SNP_109000_A_121459 | NW_004517997.1 | scaffold3254_2 | 121459                  | GG                              | TT                 | TT               | INTERGENIC                    |                    |                                         |
| SNP_109001_A_121464 | NW_004517997.1 | scaffold3254_2 | 121464                  | CC                              | AA                 | AA               | INTERGENIC                    |                    |                                         |
| SNP_109005_A_125606 | NW_004517997.1 | scaffold3254_2 | 125606                  | GG                              | AA                 | AA               | INTERGENIC                    |                    |                                         |
| SNP_109006_A_126403 | NW_004517997.1 | scaffold3254_2 | 126403                  | CC                              | AA                 | AA               | INTERGENIC                    |                    |                                         |
| SNP_109008_A_127333 | NW_004517997.1 | scaffold3254_2 | 127333                  | TT                              | CC                 | CC               | INTERGENIC                    |                    |                                         |
| SNP_109009_A_132663 | NW_004517997.1 | scaffold3254_2 | 132663                  | AA                              | GG                 | GG               | DRR                           | 101497736          | 14 kDa proline-rich protein DC2.15-like |
| SNP_109010_A_132721 | NW_004517997.1 | scaffold3254_2 | 132721                  | TT                              | AA                 | AA               | DRR                           | 101497736          | 14 kDa proline-rich protein DC2.15-like |
| SNP_109011_A_132805 | NW_004517997.1 | scaffold3254_2 | 132805                  | CC                              | AA                 | AA               | DRR                           | 101497736          | 14 kDa proline-rich protein DC2.15-like |
| SNP_109012_A_132902 | NW_004517997.1 | scaffold3254_2 | 132902                  | TT                              | AA                 | AA               | DRR                           | 101497736          | 14 kDa proline-rich protein DC2.15-like |
| SNP_109013_A_133063 | NW_004517997.1 | scaffold3254_2 | 133063                  | TT                              | AA                 | AA               | DRR                           | 101497736          | 14 kDa proline-rich protein DC2.15-like |
| SNP_109014_A_134798 | NW_004517997.1 | scaffold3254_2 | 134798                  | GG                              | TT                 | TT               | URR                           | 101497736          | 14 kDa proline-rich protein DC2.15-like |
| SNP_109015_A_134842 | NW_004517997.1 | scaffold3254_2 | 134842                  | TT                              | GG                 | GG               | URR                           | 101497736          | 14 kDa proline-rich protein DC2.15-like |
| SNP_109016_A_138444 | NW_004517997.1 | scaffold3254_2 | 138444                  | GG                              | TT                 | TT               | INTERGENIC                    |                    |                                         |
| SNP_109017_A_138445 | NW_004517997.1 | scaffold3254_2 | 138445                  | CC                              | TT                 | TT               | INTERGENIC                    |                    |                                         |
| SNP_109018_A_138459 | NW_004517997.1 | scaffold3254_2 | 138459                  | AA                              | GG                 | GG               | INTERGENIC                    |                    |                                         |
| SNP_109019_A_140169 | NW_004517997.1 | scaffold3254_2 | 140169                  | AA                              | TT                 | TT               | INTERGENIC                    |                    |                                         |
| SNP_109020_A_140632 | NW_004517997.1 | scaffold3254_2 | 140632                  | TT                              | GG                 | GG               | INTERGENIC                    |                    |                                         |
| SNP_109021_A_140827 | NW_004517997.1 | scaffold3254_2 | 140827                  | AA                              | TT                 | TT               | INTERGENIC                    |                    |                                         |
| SNP_109022_A_141201 | NW_004517997.1 | scaffold3254_2 | 141201                  | TT                              | GG                 | GG               | INTERGENIC                    |                    |                                         |
| SNP_109023_A_143645 | NW_004517997.1 | scaffold3254_2 | 143645                  | TT                              | AA                 | AA               | INTERGENIC                    |                    |                                         |
| SNP_109024_A_147417 | NW_004517997.1 | scaffold3254_2 | 147417                  | GG                              | AA                 | AA               | INTERGENIC                    |                    |                                         |

| SNPs IDs            | Chromosome IDs | Chromosomes    | Physical positions (bp) | CDC Frontier (Reference genome) | (Pusa 1103 & HPNB) | (ILWC 46 & LPNB) | Sequence Components of genome | Gene accession IDs | Putative functions                           |
|---------------------|----------------|----------------|-------------------------|---------------------------------|--------------------|------------------|-------------------------------|--------------------|----------------------------------------------|
| SNP_109025_A_147484 | NW_004517997.1 | scaffold3254_2 | 147484                  | GG                              | AA                 | AA               | INTERGENIC                    |                    |                                              |
| SNP_109026_A_147642 | NW_004517997.1 | scaffold3254_2 | 147642                  | CC                              | TT                 | TT               | INTERGENIC                    |                    |                                              |
| SNP_109028_A_150171 | NW_004517997.1 | scaffold3254_2 | 150171                  | TT                              | CC                 | CC               | INTERGENIC                    |                    |                                              |
| SNP_109029_A_150183 | NW_004517997.1 | scaffold3254_2 | 150183                  | CC                              | TT                 | TT               | INTERGENIC                    |                    |                                              |
| SNP_109030_A_150196 | NW_004517997.1 | scaffold3254_2 | 150196                  | CC                              | TT                 | TT               | INTERGENIC                    |                    |                                              |
| SNP_109031_A_150202 | NW_004517997.1 | scaffold3254_2 | 150202                  | AA                              | GG                 | GG               | INTERGENIC                    |                    |                                              |
| SNP_109032_A_150240 | NW_004517997.1 | scaffold3254_2 | 150240                  | CC                              | AA                 | AA               | INTERGENIC                    |                    |                                              |
| SNP_109033_A_150321 | NW_004517997.1 | scaffold3254_2 | 150321                  | GG                              | TT                 | TT               | INTERGENIC                    |                    |                                              |
| SNP_109034_A_150377 | NW_004517997.1 | scaffold3254_2 | 150377                  | CC                              | TT                 | TT               | INTERGENIC                    |                    |                                              |
| SNP_109035_A_150380 | NW_004517997.1 | scaffold3254_2 | 150380                  | GG                              | AA                 | AA               | INTERGENIC                    |                    |                                              |
| SNP_109036_A_153591 | NW_004517997.1 | scaffold3254_2 | 153591                  | TT                              | CC                 | CC               | INTERGENIC                    |                    |                                              |
| SNP_109037_A_154502 | NW_004517997.1 | scaffold3254_2 | 154502                  | TT                              | CC                 | CC               | INTERGENIC                    |                    |                                              |
| SNP_109038_A_158125 | NW_004517997.1 | scaffold3254_2 | 158125                  | GG                              | AA                 | AA               | INTRON                        | 101498062          | protein NRT1/ PTR FAMILY 6.3                 |
| SNP_109039_A_159036 | NW_004517997.1 | scaffold3254_2 | 159036                  | CC                              | GG                 | GG               | NON_SYNONYMOUS_CODING         | 101498062          | protein NRT1/ PTR FAMILY 6.3                 |
| SNP_109040_A_162527 | NW_004517997.1 | scaffold3254_2 | 162527                  | CC                              | TT                 | TT               | INTRON                        | 101498062          | protein NRT1/ PTR FAMILY 6.3                 |
| SNP_109041_A_168822 | NW_004517997.1 | scaffold3254_2 | 168822                  | AA                              | GG                 | GG               | INTERGENIC                    |                    |                                              |
| SNP_109042_A_168856 | NW_004517997.1 | scaffold3254_2 | 168856                  | TT                              | CC                 | CC               | INTERGENIC                    |                    |                                              |
| SNP_109043_A_168897 | NW_004517997.1 | scaffold3254_2 | 168897                  | AA                              | GG                 | GG               | INTERGENIC                    |                    |                                              |
| SNP_109044_A_169205 | NW_004517997.1 | scaffold3254_2 | 169205                  | CC                              | TT                 | TT               | INTERGENIC                    |                    |                                              |
| SNP_109046_A_176561 | NW_004517997.1 | scaffold3254_2 | 176561                  | CC                              | GG                 | GG               | INTRON                        | 101498399          | oxysterol-binding protein-related protein 2A |
| SNP_109047_A_176632 | NW_004517997.1 | scaffold3254_2 | 176632                  | CC                              | TT                 | TT               | INTRON                        | 101498399          | oxysterol-binding protein-related protein 2A |
| SNP_109048_A_176966 | NW_004517997.1 | scaffold3254_2 | 176966                  | GG                              | TT                 | TT               | INTRON                        | 101498399          | oxysterol-binding protein-related protein 2A |

| SNPs IDs            | Chromosome IDs | Chromosomes    | Physical positions (bp) | CDC Frontier (Reference genome) | (Pusa 1103 & HPNB) | (ILWC 46 & LPNB) | Sequence Components of genome | Gene accession IDs | Putative functions                           |
|---------------------|----------------|----------------|-------------------------|---------------------------------|--------------------|------------------|-------------------------------|--------------------|----------------------------------------------|
| SNP_109049_A_178196 | NW_004517997.1 | scaffold3254_2 | 178196                  | AA                              | TT                 | TT               | INTRON                        | 101498399          | oxysterol-binding protein-related protein 2A |
| SNP_109050_A_180936 | NW_004517997.1 | scaffold3254_2 | 180936                  | CC                              | TT                 | TT               | INTRON                        | 101498399          | oxysterol-binding protein-related protein 2A |
| SNP_109051_A_181942 | NW_004517997.1 | scaffold3254_2 | 181942                  | TT                              | AA                 | AA               | INTRON                        | 101498399          | oxysterol-binding protein-related protein 2A |
| SNP_109053_A_186522 | NW_004517997.1 | scaffold3254_2 | 186522                  | CC                              | AA                 | AA               | URR                           | 101498399          | oxysterol-binding protein-related protein 2A |
| SNP_109054_A_189858 | NW_004517997.1 | scaffold3254_2 | 189858                  | CC                              | AA                 | AA               | INTERGENIC                    |                    |                                              |
| SNP_109055_A_194369 | NW_004517997.1 | scaffold3254_2 | 194369                  | TT                              | CC                 | CC               | INTERGENIC                    |                    |                                              |
| SNP_109056_A_194753 | NW_004517997.1 | scaffold3254_2 | 194753                  | GG                              | TT                 | TT               | INTERGENIC                    |                    |                                              |
| SNP_109057_A_194839 | NW_004517997.1 | scaffold3254_2 | 194839                  | TT                              | CC                 | CC               | INTERGENIC                    |                    |                                              |
| SNP_109058_A_195887 | NW_004517997.1 | scaffold3254_2 | 195887                  | AA                              | TT                 | TT               | INTERGENIC                    |                    |                                              |
| SNP_109059_A_195891 | NW_004517997.1 | scaffold3254_2 | 195891                  | CC                              | TT                 | TT               | INTERGENIC                    |                    |                                              |
| SNP_109060_A_195901 | NW_004517997.1 | scaffold3254_2 | 195901                  | CC                              | TT                 | TT               | INTERGENIC                    |                    |                                              |
| SNP_109062_A_197128 | NW_004517997.1 | scaffold3254_2 | 197128                  | CC                              | TT                 | TT               | INTERGENIC                    |                    |                                              |
| SNP_109063_A_198569 | NW_004517997.1 | scaffold3254_2 | 198569                  | AA                              | GG                 | GG               | INTERGENIC                    |                    |                                              |
| SNP_109064_A_198772 | NW_004517997.1 | scaffold3254_2 | 198772                  | AA                              | CC                 | CC               | INTERGENIC                    |                    |                                              |
| SNP_109065_A_198978 | NW_004517997.1 | scaffold3254_2 | 198978                  | TT                              | CC                 | CC               | INTERGENIC                    |                    |                                              |
| SNP_109066_A_202790 | NW_004517997.1 | scaffold3254_2 | 202790                  | TT                              | CC                 | CC               | INTERGENIC                    |                    |                                              |
| SNP_109069_A_203365 | NW_004517997.1 | scaffold3254_2 | 203365                  | CC                              | GG                 | GG               | INTERGENIC                    |                    |                                              |
| SNP_109071_A_204992 | NW_004517997.1 | scaffold3254_2 | 204992                  | AA                              | TT                 | TT               | INTERGENIC                    |                    |                                              |
| SNP_109072_A_205043 | NW_004517997.1 | scaffold3254_2 | 205043                  | AA                              | TT                 | TT               | INTERGENIC                    |                    |                                              |
| SNP_109073_A_205119 | NW_004517997.1 | scaffold3254_2 | 205119                  | TT                              | GG                 | GG               | INTERGENIC                    |                    |                                              |
| SNP_109074_A_205136 | NW_004517997.1 | scaffold3254_2 | 205136                  | GG                              | TT                 | TT               | INTERGENIC                    |                    |                                              |
| SNP_109075_A_205328 | NW_004517997.1 | scaffold3254_2 | 205328                  | GG                              | AA                 | AA               | INTERGENIC                    |                    |                                              |

| SNPs IDs            | Chromosome IDs | Chromosomes    | Physical positions (bp) | CDC Frontier (Reference genome) | (Pusa 1103 & HPNB) | (ILWC 46 & LPNB) | Sequence Components of genome | Gene accession IDs | Putative functions                         |
|---------------------|----------------|----------------|-------------------------|---------------------------------|--------------------|------------------|-------------------------------|--------------------|--------------------------------------------|
| SNP_109077_A_215443 | NW_004517997.1 | scaffold3254_2 | 215443                  | AA                              | TT                 | TT               | INTERGENIC                    |                    |                                            |
| SNP_109078_A_222931 | NW_004517997.1 | scaffold3254_2 | 222931                  | AA                              | CC                 | CC               | INTERGENIC                    |                    |                                            |
| SNP_109079_A_223150 | NW_004517997.1 | scaffold3254_2 | 223150                  | CC                              | TT                 | TT               | INTERGENIC                    |                    |                                            |
| SNP_109080_A_223191 | NW_004517997.1 | scaffold3254_2 | 223191                  | TT                              | CC                 | CC               | INTERGENIC                    |                    |                                            |
| SNP_109081_A_223435 | NW_004517997.1 | scaffold3254_2 | 223435                  | AA                              | GG                 | GG               | INTERGENIC                    |                    |                                            |
| SNP_109082_A_225451 | NW_004517997.1 | scaffold3254_2 | 225451                  | TT                              | CC                 | CC               | URR                           | 101499678          | adenine phosphoribosyltransferase 3        |
| SNP_109083_A_225647 | NW_004517997.1 | scaffold3254_2 | 225647                  | AA                              | TT                 | TT               | URR                           | 101499678          | adenine phosphoribosyltransferase 3        |
| SNP_109084_A_225653 | NW_004517997.1 | scaffold3254_2 | 225653                  | GG                              | AA                 | AA               | URR                           | 101499678          | adenine phosphoribosyltransferase 3        |
| SNP_109085_A_225663 | NW_004517997.1 | scaffold3254_2 | 225663                  | TT                              | CC                 | CC               | URR                           | 101499678          | adenine phosphoribosyltransferase 3        |
| SNP_109086_A_225678 | NW_004517997.1 | scaffold3254_2 | 225678                  | TT                              | CC                 | CC               | URR                           | 101499678          | adenine phosphoribosyltransferase 3        |
| SNP_109087_A_225777 | NW_004517997.1 | scaffold3254_2 | 225777                  | AA                              | GG                 | GG               | URR                           | 101499678          | adenine phosphoribosyltransferase 3        |
| SNP_109088_A_225781 | NW_004517997.1 | scaffold3254_2 | 225781                  | AA                              | TT                 | TT               | URR                           | 101499678          | adenine phosphoribosyltransferase 3        |
| SNP_109089_A_225966 | NW_004517997.1 | scaffold3254_2 | 225966                  | CC                              | AA                 | AA               | URR                           | 101499678          | adenine phosphoribosyltransferase 3        |
| SNP_109090_A_234005 | NW_004517997.1 | scaffold3254_2 | 234005                  | CC                              | TT                 | TT               | INTERGENIC                    |                    |                                            |
| SNP_109091_A_234384 | NW_004517997.1 | scaffold3254_2 | 234384                  | CC                              | TT                 | TT               | INTERGENIC                    |                    |                                            |
| SNP_109092_A_238708 | NW_004517997.1 | scaffold3254_2 | 238708                  | GG                              | AA                 | AA               | INTRON                        | 101499987          | probable trehalose-phosphate phosphatase F |
| SNP_109093_A_241996 | NW_004517997.1 | scaffold3254_2 | 241996                  | GG                              | AA                 | AA               | INTRON                        | 101499987          | probable trehalose-phosphate phosphatase F |
| SNP_109094_A_244187 | NW_004517997.1 | scaffold3254_2 | 244187                  | CC                              | AA                 | AA               | DRR                           | 101500332          | probable transaldolase                     |
| SNP_109095_A_244199 | NW_004517997.1 | scaffold3254_2 | 244199                  | AA                              | CC                 | CC               | DRR                           | 101500332          | probable transaldolase                     |
| SNP_109097_A_244873 | NW_004517997.1 | scaffold3254_2 | 244873                  | CC                              | TT                 | TT               | DRR                           | 101500332          | probable transaldolase                     |
| SNP_109099_A_251289 | NW_004517997.1 | scaffold3254_2 | 251289                  | AA                              | CC                 | CC               | URR                           | 101500332          | probable transaldolase                     |
| SNP_109100_A_19467  | NW_004518000.1 | scaffold3258   | 19467                   | GG                              | AA                 | AA               | INTERGENIC                    |                    |                                            |

| SNPs IDs           | Chromosome IDs | Chromosomes  | Physical positions (bp) | CDC Frontier (Reference genome) | (Pusa 1103 & HPNB) | (ILWC 46 & LPNB) | Sequence genome | Components of | Gene accession IDs | Putative functions |
|--------------------|----------------|--------------|-------------------------|---------------------------------|--------------------|------------------|-----------------|---------------|--------------------|--------------------|
| SNP_109101_A_19506 | NW_004518000.1 | scaffold3258 | 19506                   | TT                              | CC                 | CC               | INTERGENIC      |               |                    |                    |
| SNP_109102_A_29991 | NW_004518000.1 | scaffold3258 | 29991                   | AA                              | CC                 | CC               | INTERGENIC      |               |                    |                    |
| SNP_109103_A_30321 | NW_004518000.1 | scaffold3258 | 30321                   | GG                              | TT                 | TT               | INTERGENIC      |               |                    |                    |
| SNP_109104_A_33163 | NW_004518000.1 | scaffold3258 | 33163                   | AA                              | TT                 | TT               | INTERGENIC      |               |                    |                    |
| SNP_109105_A_33172 | NW_004518000.1 | scaffold3258 | 33172                   | CC                              | AA                 | AA               | INTERGENIC      |               |                    |                    |
| SNP_109106_A_33848 | NW_004518000.1 | scaffold3258 | 33848                   | TT                              | AA                 | AA               | INTERGENIC      |               |                    |                    |
| SNP_109109_A_34532 | NW_004518000.1 | scaffold3258 | 34532                   | CC                              | GG                 | GG               | INTERGENIC      |               |                    |                    |
| SNP_109111_A_34962 | NW_004518000.1 | scaffold3258 | 34962                   | GG                              | TT                 | TT               | INTERGENIC      |               |                    |                    |
| SNP_109112_A_35548 | NW_004518000.1 | scaffold3258 | 35548                   | CC                              | TT                 | TT               | INTERGENIC      |               |                    |                    |
| SNP_109113_A_35645 | NW_004518000.1 | scaffold3258 | 35645                   | CC                              | GG                 | GG               | INTERGENIC      |               |                    |                    |
| SNP_109114_A_35853 | NW_004518000.1 | scaffold3258 | 35853                   | GG                              | TT                 | TT               | INTERGENIC      |               |                    |                    |
| SNP_109115_A_35971 | NW_004518000.1 | scaffold3258 | 35971                   | TT                              | CC                 | CC               | INTERGENIC      |               |                    |                    |
| SNP_109116_A_37354 | NW_004518000.1 | scaffold3258 | 37354                   | TT                              | CC                 | CC               | INTERGENIC      |               |                    |                    |
| SNP_109117_A_37653 | NW_004518000.1 | scaffold3258 | 37653                   | GG                              | AA                 | AA               | INTERGENIC      |               |                    |                    |
| SNP_109118_A_37765 | NW_004518000.1 | scaffold3258 | 37765                   | TT                              | CC                 | CC               | INTERGENIC      |               |                    |                    |
| SNP_109119_A_37949 | NW_004518000.1 | scaffold3258 | 37949                   | TT                              | AA                 | AA               | INTERGENIC      |               |                    |                    |
| SNP_109120_A_37950 | NW_004518000.1 | scaffold3258 | 37950                   | TT                              | AA                 | AA               | INTERGENIC      |               |                    |                    |
| SNP_109121_A_39777 | NW_004518000.1 | scaffold3258 | 39777                   | TT                              | CC                 | CC               | INTERGENIC      |               |                    |                    |
| SNP_109122_A_40324 | NW_004518000.1 | scaffold3258 | 40324                   | CC                              | AA                 | AA               | INTERGENIC      |               |                    |                    |
| SNP_109123_A_41261 | NW_004518000.1 | scaffold3258 | 41261                   | TT                              | CC                 | CC               | INTERGENIC      |               |                    |                    |
| SNP_109124_A_41387 | NW_004518000.1 | scaffold3258 | 41387                   | AA                              | GG                 | GG               | INTERGENIC      |               |                    |                    |
| SNP_109126_A_41507 | NW_004518000.1 | scaffold3258 | 41507                   | CC                              | TT                 | TT               | INTERGENIC      |               |                    |                    |

| SNPs IDs           | Chromosome IDs | Chromosomes  | Physical positions (bp) | CDC Frontier (Reference genome) | (Pusa 1103 & HPNB) | (ILWC 46 & LPNB) | Sequence genome | Components of | Gene accession IDs | Putative functions |
|--------------------|----------------|--------------|-------------------------|---------------------------------|--------------------|------------------|-----------------|---------------|--------------------|--------------------|
| SNP_109127_A_41840 | NW_004518000.1 | scaffold3258 | 41840                   | AA                              | GG                 | GG               | INTERGENIC      |               |                    |                    |
| SNP_109128_A_41841 | NW_004518000.1 | scaffold3258 | 41841                   | TT                              | AA                 | AA               | INTERGENIC      |               |                    |                    |
| SNP_109129_A_42948 | NW_004518000.1 | scaffold3258 | 42948                   | AA                              | GG                 | GG               | INTERGENIC      |               |                    |                    |
| SNP_109130_A_43898 | NW_004518000.1 | scaffold3258 | 43898                   | GG                              | TT                 | TT               | INTERGENIC      |               |                    |                    |
| SNP_109131_A_45551 | NW_004518000.1 | scaffold3258 | 45551                   | GG                              | AA                 | AA               | INTERGENIC      |               |                    |                    |
| SNP_109132_A_45976 | NW_004518000.1 | scaffold3258 | 45976                   | TT                              | GG                 | GG               | INTERGENIC      |               |                    |                    |
| SNP_109133_A_46494 | NW_004518000.1 | scaffold3258 | 46494                   | CC                              | TT                 | TT               | INTERGENIC      |               |                    |                    |
| SNP_109135_A_46975 | NW_004518000.1 | scaffold3258 | 46975                   | CC                              | AA                 | AA               | INTERGENIC      |               |                    |                    |
| SNP_109136_A_47285 | NW_004518000.1 | scaffold3258 | 47285                   | CC                              | TT                 | TT               | INTERGENIC      |               |                    |                    |
| SNP_109137_A_47685 | NW_004518000.1 | scaffold3258 | 47685                   | GG                              | TT                 | TT               | INTERGENIC      |               |                    |                    |
| SNP_109138_A_47686 | NW_004518000.1 | scaffold3258 | 47686                   | CC                              | TT                 | TT               | INTERGENIC      |               |                    |                    |
| SNP_109139_A_48327 | NW_004518000.1 | scaffold3258 | 48327                   | AA                              | CC                 | CC               | INTERGENIC      |               |                    |                    |
| SNP_109140_A_48607 | NW_004518000.1 | scaffold3258 | 48607                   | GG                              | AA                 | AA               | INTERGENIC      |               |                    |                    |
| SNP_109141_A_48687 | NW_004518000.1 | scaffold3258 | 48687                   | GG                              | AA                 | AA               | INTERGENIC      |               |                    |                    |
| SNP_109142_A_48806 | NW_004518000.1 | scaffold3258 | 48806                   | TT                              | AA                 | AA               | INTERGENIC      |               |                    |                    |
| SNP_109144_A_48971 | NW_004518000.1 | scaffold3258 | 48971                   | GG                              | AA                 | AA               | INTERGENIC      |               |                    |                    |
| SNP_109146_A_52403 | NW_004518000.1 | scaffold3258 | 52403                   | AA                              | CC                 | CC               | INTERGENIC      |               |                    |                    |
| SNP_109147_A_52453 | NW_004518000.1 | scaffold3258 | 52453                   | TT                              | GG                 | GG               | INTERGENIC      |               |                    |                    |
| SNP_109148_A_52740 | NW_004518000.1 | scaffold3258 | 52740                   | TT                              | CC                 | CC               | INTERGENIC      |               |                    |                    |
| SNP_109149_A_54397 | NW_004518000.1 | scaffold3258 | 54397                   | TT                              | AA                 | AA               | INTERGENIC      |               |                    |                    |
| SNP_109150_A_55436 | NW_004518000.1 | scaffold3258 | 55436                   | GG                              | AA                 | AA               | INTERGENIC      |               |                    |                    |
| SNP_109151_A_55923 | NW_004518000.1 | scaffold3258 | 55923                   | TT                              | CC                 | CC               | INTERGENIC      |               |                    |                    |

| SNPs IDs           | Chromosome IDs | Chromosomes  | Physical positions (bp) | CDC Frontier (Reference genome) | (Pusa 1103 & HPNB) | (ILWC 46 & LPNB) | Sequence genome | Components of | Gene accession IDs | Putative functions |
|--------------------|----------------|--------------|-------------------------|---------------------------------|--------------------|------------------|-----------------|---------------|--------------------|--------------------|
| SNP_109152_A_55924 | NW_004518000.1 | scaffold3258 | 55924                   | AA                              | TT                 | TT               | INTERGENIC      |               |                    |                    |
| SNP_109153_A_58295 | NW_004518000.1 | scaffold3258 | 58295                   | CC                              | TT                 | TT               | INTERGENIC      |               |                    |                    |
| SNP_109154_A_58359 | NW_004518000.1 | scaffold3258 | 58359                   | GG                              | AA                 | AA               | INTERGENIC      |               |                    |                    |
| SNP_109155_A_58755 | NW_004518000.1 | scaffold3258 | 58755                   | TT                              | CC                 | CC               | INTERGENIC      |               |                    |                    |
| SNP_109156_A_59048 | NW_004518000.1 | scaffold3258 | 59048                   | AA                              | GG                 | GG               | INTERGENIC      |               |                    |                    |
| SNP_109157_A_66087 | NW_004518000.1 | scaffold3258 | 66087                   | AA                              | GG                 | GG               | INTERGENIC      |               |                    |                    |
| SNP_109158_A_66521 | NW_004518000.1 | scaffold3258 | 66521                   | AA                              | GG                 | GG               | INTERGENIC      |               |                    |                    |
| SNP_109160_A_68069 | NW_004518000.1 | scaffold3258 | 68069                   | AA                              | GG                 | GG               | INTERGENIC      |               |                    |                    |
| SNP_109161_A_68820 | NW_004518000.1 | scaffold3258 | 68820                   | TT                              | CC                 | CC               | INTERGENIC      |               |                    |                    |
| SNP_109162_A_69007 | NW_004518000.1 | scaffold3258 | 69007                   | GG                              | AA                 | AA               | INTERGENIC      |               |                    |                    |
| SNP_109163_A_69138 | NW_004518000.1 | scaffold3258 | 69138                   | TT                              | AA                 | AA               | INTERGENIC      |               |                    |                    |
| SNP_109164_A_69711 | NW_004518000.1 | scaffold3258 | 69711                   | AA                              | GG                 | GG               | INTERGENIC      |               |                    |                    |
| SNP_109165_A_70440 | NW_004518000.1 | scaffold3258 | 70440                   | GG                              | AA                 | AA               | INTERGENIC      |               |                    |                    |
| SNP_109166_A_70787 | NW_004518000.1 | scaffold3258 | 70787                   | AA                              | GG                 | GG               | INTERGENIC      |               |                    |                    |
| SNP_109167_A_71125 | NW_004518000.1 | scaffold3258 | 71125                   | GG                              | AA                 | AA               | INTERGENIC      |               |                    |                    |
| SNP_109168_A_71495 | NW_004518000.1 | scaffold3258 | 71495                   | TT                              | AA                 | AA               | INTERGENIC      |               |                    |                    |
| SNP_109169_A_71849 | NW_004518000.1 | scaffold3258 | 71849                   | TT                              | AA                 | AA               | INTERGENIC      |               |                    |                    |
| SNP_109170_A_73983 | NW_004518000.1 | scaffold3258 | 73983                   | AA                              | GG                 | GG               | INTERGENIC      |               |                    |                    |
| SNP_109172_A_74077 | NW_004518000.1 | scaffold3258 | 74077                   | CC                              | TT                 | TT               | INTERGENIC      |               |                    |                    |
| SNP_109173_A_74258 | NW_004518000.1 | scaffold3258 | 74258                   | GG                              | AA                 | AA               | INTERGENIC      |               |                    |                    |
| SNP_109174_A_74576 | NW_004518000.1 | scaffold3258 | 74576                   | CC                              | TT                 | TT               | INTERGENIC      |               |                    |                    |
| SNP_109176_A_75855 | NW_004518000.1 | scaffold3258 | 75855                   | AA                              | CC                 | CC               | INTERGENIC      |               |                    |                    |

| SNPs IDs           | Chromosome IDs | Chromosomes  | Physical positions (bp) | CDC Frontier (Reference genome) | (Pusa 1103 & HPNB) | (ILWC 46 & LPNB) | Sequence genome | Components of | Gene accession IDs | Putative functions |
|--------------------|----------------|--------------|-------------------------|---------------------------------|--------------------|------------------|-----------------|---------------|--------------------|--------------------|
| SNP_109177_A_76160 | NW_004518000.1 | scaffold3258 | 76160                   | CC                              | TT                 | TT               | INTERGENIC      |               |                    |                    |
| SNP_109178_A_76996 | NW_004518000.1 | scaffold3258 | 76996                   | GG                              | AA                 | AA               | INTERGENIC      |               |                    |                    |
| SNP_109180_A_77245 | NW_004518000.1 | scaffold3258 | 77245                   | AA                              | GG                 | GG               | INTERGENIC      |               |                    |                    |
| SNP_109181_A_77348 | NW_004518000.1 | scaffold3258 | 77348                   | CC                              | TT                 | TT               | INTERGENIC      |               |                    |                    |
| SNP_109183_A_77742 | NW_004518000.1 | scaffold3258 | 77742                   | GG                              | AA                 | AA               | INTERGENIC      |               |                    |                    |
| SNP_109184_A_78286 | NW_004518000.1 | scaffold3258 | 78286                   | AA                              | GG                 | GG               | INTERGENIC      |               |                    |                    |
| SNP_109185_A_79437 | NW_004518000.1 | scaffold3258 | 79437                   | TT                              | CC                 | CC               | INTERGENIC      |               |                    |                    |
| SNP_109186_A_79458 | NW_004518000.1 | scaffold3258 | 79458                   | CC                              | GG                 | GG               | INTERGENIC      |               |                    |                    |
| SNP_109187_A_79462 | NW_004518000.1 | scaffold3258 | 79462                   | GG                              | TT                 | TT               | INTERGENIC      |               |                    |                    |
| SNP_109188_A_79513 | NW_004518000.1 | scaffold3258 | 79513                   | AA                              | GG                 | GG               | INTERGENIC      |               |                    |                    |
| SNP_109189_A_79516 | NW_004518000.1 | scaffold3258 | 79516                   | TT                              | AA                 | AA               | INTERGENIC      |               |                    |                    |
| SNP_109190_A_79520 | NW_004518000.1 | scaffold3258 | 79520                   | GG                              | CC                 | CC               | INTERGENIC      |               |                    |                    |
| SNP_109191_A_79544 | NW_004518000.1 | scaffold3258 | 79544                   | TT                              | CC                 | CC               | INTERGENIC      |               |                    |                    |
| SNP_109192_A_79585 | NW_004518000.1 | scaffold3258 | 79585                   | CC                              | TT                 | TT               | INTERGENIC      |               |                    |                    |
| SNP_109193_A_79588 | NW_004518000.1 | scaffold3258 | 79588                   | TT                              | GG                 | GG               | INTERGENIC      |               |                    |                    |
| SNP_109194_A_79607 | NW_004518000.1 | scaffold3258 | 79607                   | AA                              | TT                 | TT               | INTERGENIC      |               |                    |                    |
| SNP_109195_A_79618 | NW_004518000.1 | scaffold3258 | 79618                   | AA                              | GG                 | GG               | INTERGENIC      |               |                    |                    |
| SNP_109196_A_79630 | NW_004518000.1 | scaffold3258 | 79630                   | TT                              | GG                 | GG               | INTERGENIC      |               |                    |                    |
| SNP_109197_A_79649 | NW_004518000.1 | scaffold3258 | 79649                   | AA                              | TT                 | TT               | INTERGENIC      |               |                    |                    |
| SNP_109198_A_79651 | NW_004518000.1 | scaffold3258 | 79651                   | AA                              | CC                 | CC               | INTERGENIC      |               |                    |                    |
| SNP_109199_A_79663 | NW_004518000.1 | scaffold3258 | 79663                   | CC                              | TT                 | TT               | INTERGENIC      |               |                    |                    |
| SNP_109200_A_79821 | NW_004518000.1 | scaffold3258 | 79821                   | AA                              | TT                 | TT               | INTERGENIC      |               |                    |                    |



| SNPs IDs           | Chromosome IDs | Chromosomes  | Physical positions (bp) | CDC Frontier genome (Reference genome) | (Pusa 1103 & HPNB) | (ILWC 46 & LPNB) | Sequence genome | Components of | Gene accession IDs                         | Putative functions |
|--------------------|----------------|--------------|-------------------------|----------------------------------------|--------------------|------------------|-----------------|---------------|--------------------------------------------|--------------------|
| SNP_109201_A_80273 | NW_004518000.1 | scaffold3258 | 80273                   | GG                                     | AA                 | AA               | INTERGENIC      |               |                                            |                    |
| SNP_109202_A_80657 | NW_004518000.1 | scaffold3258 | 80657                   | TT                                     | AA                 | AA               | INTERGENIC      |               |                                            |                    |
| SNP_109203_A_81266 | NW_004518000.1 | scaffold3258 | 81266                   | TT                                     | CC                 | CC               | INTERGENIC      |               |                                            |                    |
| SNP_109204_A_81385 | NW_004518000.1 | scaffold3258 | 81385                   | AA                                     | TT                 | TT               | INTERGENIC      |               |                                            |                    |
| SNP_109206_A_81518 | NW_004518000.1 | scaffold3258 | 81518                   | TT                                     | GG                 | GG               | INTERGENIC      |               |                                            |                    |
| SNP_109207_A_81857 | NW_004518000.1 | scaffold3258 | 81857                   | TT                                     | CC                 | CC               | INTERGENIC      |               |                                            |                    |
| SNP_109208_A_82528 | NW_004518000.1 | scaffold3258 | 82528                   | TT                                     | AA                 | AA               | INTERGENIC      |               |                                            |                    |
| SNP_109209_A_82907 | NW_004518000.1 | scaffold3258 | 82907                   | GG                                     | TT                 | TT               | INTERGENIC      |               |                                            |                    |
| SNP_109210_A_83145 | NW_004518000.1 | scaffold3258 | 83145                   | AA                                     | GG                 | GG               | INTERGENIC      |               |                                            |                    |
| SNP_109211_A_83180 | NW_004518000.1 | scaffold3258 | 83180                   | AA                                     | GG                 | GG               | INTERGENIC      |               |                                            |                    |
| SNP_109212_A_84134 | NW_004518000.1 | scaffold3258 | 84134                   | TT                                     | CC                 | CC               | INTERGENIC      |               |                                            |                    |
| SNP_109213_A_84286 | NW_004518000.1 | scaffold3258 | 84286                   | TT                                     | GG                 | GG               | INTERGENIC      |               |                                            |                    |
| SNP_109214_A_84387 | NW_004518000.1 | scaffold3258 | 84387                   | AA                                     | CC                 | CC               | INTERGENIC      |               |                                            |                    |
| SNP_109215_A_85585 | NW_004518000.1 | scaffold3258 | 85585                   | GG                                     | CC                 | CC               | INTERGENIC      |               |                                            |                    |
| SNP_109216_A_86275 | NW_004518000.1 | scaffold3258 | 86275                   | AA                                     | TT                 | TT               | INTERGENIC      |               |                                            |                    |
| SNP_109217_A_87911 | NW_004518000.1 | scaffold3258 | 87911                   | TT                                     | AA                 | AA               | INTERGENIC      |               |                                            |                    |
| SNP_109218_A_88172 | NW_004518000.1 | scaffold3258 | 88172                   | CC                                     | GG                 | GG               | INTERGENIC      |               |                                            |                    |
| SNP_109219_A_89097 | NW_004518000.1 | scaffold3258 | 89097                   | TT                                     | GG                 | GG               | INTERGENIC      |               |                                            |                    |
| SNP_109220_A_89509 | NW_004518000.1 | scaffold3258 | 89509                   | AA                                     | GG                 | GG               | INTERGENIC      |               |                                            |                    |
| SNP_109221_A_89784 | NW_004518000.1 | scaffold3258 | 89784                   | TT                                     | GG                 | GG               | INTERGENIC      |               |                                            |                    |
| SNP_109222_A_92093 | NW_004518000.1 | scaffold3258 | 92093                   | AA                                     | CC                 | CC               | DRR             | 101501596     | tropinone reductase homolog At5g06060-like |                    |
| SNP_109223_A_92310 | NW_004518000.1 | scaffold3258 | 92310                   | CC                                     | GG                 | GG               | DRR             | 101501596     | tropinone reductase homolog At5g06060-like |                    |

| SNPs IDs           | Chromosome IDs | Chromosomes  | Physical positions (bp) | CDC Frontier (Reference genome) | (Pusa 1103 & HPNB) | (ILWC 46 & LPNB) | Sequence Components of genome | Gene accession IDs | Putative functions                         |
|--------------------|----------------|--------------|-------------------------|---------------------------------|--------------------|------------------|-------------------------------|--------------------|--------------------------------------------|
| SNP_109224_A_93007 | NW_004518000.1 | scaffold3258 | 93007                   | TT                              | GG                 | GG               | DRR                           | 101501907          | Unknown function                           |
| SNP_109225_A_93271 | NW_004518000.1 | scaffold3258 | 93271                   | AA                              | TT                 | TT               | URR                           | 101501596          | tropinone reductase homolog At5g06060-like |
| SNP_109226_A_1091  | NW_004518001.1 | scaffold3259 | 1091                    | TT                              | GG                 | GG               | INTERGENIC                    |                    |                                            |
| SNP_109227_A_2569  | NW_004518005.1 | scaffold3272 | 2569                    | AA                              | GG                 | GG               | INTERGENIC                    |                    |                                            |
| SNP_109228_A_2775  | NW_004518005.1 | scaffold3272 | 2775                    | TT                              | GG                 | GG               | INTERGENIC                    |                    |                                            |
| SNP_109229_A_554   | NW_004518009.1 | scaffold3276 | 554                     | TT                              | CC                 | CC               | INTERGENIC                    |                    |                                            |
| SNP_109230_A_2157  | NW_004518010.1 | scaffold3277 | 2157                    | GG                              | AA                 | AA               | INTERGENIC                    |                    |                                            |
| SNP_109231_A_2172  | NW_004518010.1 | scaffold3277 | 2172                    | GG                              | AA                 | AA               | INTERGENIC                    |                    |                                            |
| SNP_109232_A_2223  | NW_004518010.1 | scaffold3277 | 2223                    | CC                              | TT                 | TT               | INTERGENIC                    |                    |                                            |
| SNP_109233_A_2411  | NW_004518010.1 | scaffold3277 | 2411                    | AA                              | GG                 | GG               | INTERGENIC                    |                    |                                            |
| SNP_109234_A_2414  | NW_004518010.1 | scaffold3277 | 2414                    | GG                              | AA                 | AA               | INTERGENIC                    |                    |                                            |
| SNP_109236_A_17587 | NW_004518013.1 | scaffold3280 | 17587                   | TT                              | GG                 | GG               | INTERGENIC                    |                    |                                            |
| SNP_109237_A_17597 | NW_004518013.1 | scaffold3280 | 17597                   | TT                              | CC                 | CC               | INTERGENIC                    |                    |                                            |
| SNP_109238_A_19478 | NW_004518013.1 | scaffold3280 | 19478                   | CC                              | TT                 | TT               | INTERGENIC                    |                    |                                            |
| SNP_109239_A_20294 | NW_004518013.1 | scaffold3280 | 20294                   | AA                              | GG                 | GG               | INTERGENIC                    |                    |                                            |
| SNP_109240_A_20322 | NW_004518013.1 | scaffold3280 | 20322                   | TT                              | CC                 | CC               | INTERGENIC                    |                    |                                            |
| SNP_109241_A_23269 | NW_004518013.1 | scaffold3280 | 23269                   | CC                              | AA                 | AA               | INTRON                        | 101502235          | uncharacterized LOC101502235               |
| SNP_109242_A_30670 | NW_004518013.1 | scaffold3280 | 30670                   | GG                              | AA                 | AA               | INTERGENIC                    |                    |                                            |
| SNP_109243_A_36812 | NW_004518013.1 | scaffold3280 | 36812                   | AA                              | CC                 | CC               | INTERGENIC                    |                    |                                            |
| SNP_109244_A_37048 | NW_004518013.1 | scaffold3280 | 37048                   | TT                              | CC                 | CC               | INTERGENIC                    |                    |                                            |
| SNP_109245_A_37231 | NW_004518013.1 | scaffold3280 | 37231                   | CC                              | AA                 | AA               | INTERGENIC                    |                    |                                            |
| SNP_109246_A_37385 | NW_004518013.1 | scaffold3280 | 37385                   | GG                              | TT                 | TT               | INTERGENIC                    |                    |                                            |

| SNPs IDs            | Chromosome IDs | Chromosomes  | Physical positions (bp) | CDC Frontier (Reference genome) | (Pusa 1103 & HPNB) | (ILWC 46 & LPNB) | Sequence Components of genome | Gene accession IDs | Putative functions           |
|---------------------|----------------|--------------|-------------------------|---------------------------------|--------------------|------------------|-------------------------------|--------------------|------------------------------|
| SNP_109247_A_42839  | NW_004518013.1 | scaffold3280 | 42839                   | TT                              | CC                 | CC               | INTERGENIC                    |                    |                              |
| SNP_109248_A_65062  | NW_004518013.1 | scaffold3280 | 65062                   | AA                              | GG                 | GG               | INTERGENIC                    |                    |                              |
| SNP_109249_A_65120  | NW_004518013.1 | scaffold3280 | 65120                   | AA                              | GG                 | GG               | INTERGENIC                    |                    |                              |
| SNP_109250_A_65143  | NW_004518013.1 | scaffold3280 | 65143                   | CC                              | TT                 | TT               | INTERGENIC                    |                    |                              |
| SNP_109251_A_116633 | NW_004518013.1 | scaffold3280 | 116633                  | AA                              | GG                 | GG               | INTERGENIC                    |                    |                              |
| SNP_109252_A_116980 | NW_004518013.1 | scaffold3280 | 116980                  | TT                              | CC                 | CC               | INTERGENIC                    |                    |                              |
| SNP_109253_A_116982 | NW_004518013.1 | scaffold3280 | 116982                  | AA                              | TT                 | TT               | INTERGENIC                    |                    |                              |
| SNP_109254_A_981    | NW_004518014.1 | scaffold3281 | 981                     | CC                              | GG                 | GG               | INTERGENIC                    |                    |                              |
| SNP_109255_A_1237   | NW_004518016.1 | scaffold3283 | 1237                    | GG                              | AA                 | AA               | INTERGENIC                    |                    |                              |
| SNP_109256_A_28783  | NW_004518016.1 | scaffold3283 | 28783                   | TT                              | AA                 | AA               | INTERGENIC                    |                    |                              |
| SNP_109257_A_45740  | NW_004518016.1 | scaffold3283 | 45740                   | AA                              | GG                 | GG               | INTERGENIC                    |                    |                              |
| SNP_109258_A_76923  | NW_004518016.1 | scaffold3283 | 76923                   | TT                              | CC                 | CC               | DRR                           | 101502868          | uncharacterized LOC101502868 |
| SNP_109259_A_77218  | NW_004518016.1 | scaffold3283 | 77218                   | GG                              | AA                 | AA               | DRR                           | 101502868          | uncharacterized LOC101502868 |
| SNP_109260_A_77226  | NW_004518016.1 | scaffold3283 | 77226                   | CC                              | TT                 | TT               | DRR                           | 101502868          | uncharacterized LOC101502868 |
| SNP_109261_A_500    | NW_004518017.1 | scaffold3284 | 500                     | AA                              | GG                 | GG               | DRR                           | 101503849          | uncharacterized LOC101503849 |
| SNP_109262_A_546    | NW_004518017.1 | scaffold3284 | 546                     | GG                              | TT                 | TT               | DRR                           | 101503849          | uncharacterized LOC101503849 |
| SNP_109263_A_739    | NW_004518017.1 | scaffold3284 | 739                     | TT                              | GG                 | GG               | DRR                           | 101503849          | uncharacterized LOC101503849 |
| SNP_109264_A_767    | NW_004518017.1 | scaffold3284 | 767                     | CC                              | AA                 | AA               | DRR                           | 101503849          | uncharacterized LOC101503849 |
| SNP_109265_A_784    | NW_004518017.1 | scaffold3284 | 784                     | TT                              | CC                 | CC               | DRR                           | 101503849          | uncharacterized LOC101503849 |
| SNP_109266_A_845    | NW_004518017.1 | scaffold3284 | 845                     | TT                              | CC                 | CC               | SYNONYMOUS_CODING             | 101503849          | uncharacterized LOC101503849 |
| SNP_109267_A_900    | NW_004518017.1 | scaffold3284 | 900                     | AA                              | CC                 | CC               | NON_SYNONYMOUS_CODING         | 101503849          | uncharacterized LOC101503849 |
| SNP_109268_A_2705   | NW_004518017.1 | scaffold3284 | 2705                    | CC                              | TT                 | TT               | NON_SYNONYMOUS_CODING         | 101503849          | uncharacterized LOC101503849 |

| SNPs IDs           | Chromosome IDs | Chromosomes  | Physical positions (bp) | CDC Frontier (Reference genome) | (Pusa 1103 & HPNB) | (ILWC 46 & LPNB) | Sequence Components of genome | Gene accession IDs | Putative functions           |
|--------------------|----------------|--------------|-------------------------|---------------------------------|--------------------|------------------|-------------------------------|--------------------|------------------------------|
| SNP_109269_A_2723  | NW_004518017.1 | scaffold3284 | 2723                    | CC                              | TT                 | TT               | STOP_GAINED                   | 101503849          | uncharacterized LOC101503849 |
| SNP_109270_A_7296  | NW_004518023.1 | scaffold3293 | 7296                    | TT                              | CC                 | CC               | INTERGENIC                    |                    |                              |
| SNP_109271_A_7340  | NW_004518023.1 | scaffold3293 | 7340                    | AA                              | GG                 | GG               | INTERGENIC                    |                    |                              |
| SNP_109272_A_7699  | NW_004518023.1 | scaffold3293 | 7699                    | CC                              | TT                 | TT               | INTERGENIC                    |                    |                              |
| SNP_109273_A_9990  | NW_004518023.1 | scaffold3293 | 9990                    | TT                              | AA                 | AA               | INTERGENIC                    |                    |                              |
| SNP_109274_A_9993  | NW_004518023.1 | scaffold3293 | 9993                    | AA                              | TT                 | TT               | INTERGENIC                    |                    |                              |
| SNP_109275_A_9999  | NW_004518023.1 | scaffold3293 | 9999                    | GG                              | AA                 | AA               | INTERGENIC                    |                    |                              |
| SNP_109276_A_14032 | NW_004518023.1 | scaffold3293 | 14032                   | AA                              | GG                 | GG               | INTERGENIC                    |                    |                              |
| SNP_109277_A_14445 | NW_004518023.1 | scaffold3293 | 14445                   | CC                              | TT                 | TT               | INTERGENIC                    |                    |                              |
| SNP_109278_A_1069  | NW_004518024.1 | scaffold3297 | 1069                    | GG                              | AA                 | AA               | INTERGENIC                    |                    |                              |
| SNP_109279_A_382   | NW_004518031.1 | scaffold3307 | 382                     | GG                              | TT                 | TT               | INTERGENIC                    |                    |                              |
| SNP_109280_A_416   | NW_004518031.1 | scaffold3307 | 416                     | AA                              | TT                 | TT               | INTERGENIC                    |                    |                              |
| SNP_109281_A_694   | NW_004518031.1 | scaffold3307 | 694                     | AA                              | GG                 | GG               | INTERGENIC                    |                    |                              |
| SNP_109282_A_726   | NW_004518031.1 | scaffold3307 | 726                     | AA                              | GG                 | GG               | INTERGENIC                    |                    |                              |
| SNP_109283_A_2451  | NW_004518031.1 | scaffold3307 | 2451                    | AA                              | CC                 | CC               | INTERGENIC                    |                    |                              |
| SNP_109284_A_3810  | NW_004518031.1 | scaffold3307 | 3810                    | GG                              | AA                 | AA               | INTERGENIC                    |                    |                              |
| SNP_109285_A_3918  | NW_004518031.1 | scaffold3307 | 3918                    | TT                              | CC                 | CC               | INTERGENIC                    |                    |                              |
| SNP_109286_A_5125  | NW_004518031.1 | scaffold3307 | 5125                    | AA                              | GG                 | GG               | INTERGENIC                    |                    |                              |
| SNP_109287_A_5221  | NW_004518031.1 | scaffold3307 | 5221                    | GG                              | TT                 | TT               | INTERGENIC                    |                    |                              |
| SNP_109288_A_5222  | NW_004518031.1 | scaffold3307 | 5222                    | AA                              | TT                 | TT               | INTERGENIC                    |                    |                              |
| SNP_109289_A_5257  | NW_004518031.1 | scaffold3307 | 5257                    | CC                              | TT                 | TT               | INTERGENIC                    |                    |                              |
| SNP_109290_A_5282  | NW_004518031.1 | scaffold3307 | 5282                    | TT                              | AA                 | AA               | INTERGENIC                    |                    |                              |

| SNPs IDs           | Chromosome IDs | Chromosomes  | Physical positions (bp) | CDC Frontier (Reference genome) | (Pusa 1103 & HPNB) | (ILWC 46 & LPNB) | Sequence genome | Components of | Gene accession IDs | Putative functions |
|--------------------|----------------|--------------|-------------------------|---------------------------------|--------------------|------------------|-----------------|---------------|--------------------|--------------------|
| SNP_109291_A_5309  | NW_004518031.1 | scaffold3307 | 5309                    | GG                              | CC                 | CC               | INTERGENIC      |               |                    |                    |
| SNP_109292_A_5349  | NW_004518031.1 | scaffold3307 | 5349                    | CC                              | TT                 | TT               | INTERGENIC      |               |                    |                    |
| SNP_109293_A_9886  | NW_004518031.1 | scaffold3307 | 9886                    | AA                              | GG                 | GG               | INTERGENIC      |               |                    |                    |
| SNP_109294_A_9958  | NW_004518031.1 | scaffold3307 | 9958                    | TT                              | AA                 | AA               | INTERGENIC      |               |                    |                    |
| SNP_109295_A_10379 | NW_004518031.1 | scaffold3307 | 10379                   | CC                              | TT                 | TT               | INTERGENIC      |               |                    |                    |
| SNP_109296_A_10394 | NW_004518031.1 | scaffold3307 | 10394                   | TT                              | CC                 | CC               | INTERGENIC      |               |                    |                    |
| SNP_109297_A_10666 | NW_004518031.1 | scaffold3307 | 10666                   | AA                              | GG                 | GG               | INTERGENIC      |               |                    |                    |
| SNP_109298_A_10678 | NW_004518031.1 | scaffold3307 | 10678                   | TT                              | GG                 | GG               | INTERGENIC      |               |                    |                    |
| SNP_109299_A_10996 | NW_004518031.1 | scaffold3307 | 10996                   | CC                              | TT                 | TT               | INTERGENIC      |               |                    |                    |
| SNP_109300_A_11029 | NW_004518031.1 | scaffold3307 | 11029                   | CC                              | TT                 | TT               | INTERGENIC      |               |                    |                    |
| SNP_109301_A_11030 | NW_004518031.1 | scaffold3307 | 11030                   | TT                              | GG                 | GG               | INTERGENIC      |               |                    |                    |
| SNP_109302_A_11057 | NW_004518031.1 | scaffold3307 | 11057                   | CC                              | TT                 | TT               | INTERGENIC      |               |                    |                    |
| SNP_109303_A_11339 | NW_004518031.1 | scaffold3307 | 11339                   | TT                              | CC                 | CC               | INTERGENIC      |               |                    |                    |
| SNP_109304_A_13017 | NW_004518031.1 | scaffold3307 | 13017                   | TT                              | GG                 | GG               | INTERGENIC      |               |                    |                    |
| SNP_109305_A_13110 | NW_004518031.1 | scaffold3307 | 13110                   | AA                              | GG                 | GG               | INTERGENIC      |               |                    |                    |
| SNP_109306_A_13366 | NW_004518031.1 | scaffold3307 | 13366                   | GG                              | AA                 | AA               | INTERGENIC      |               |                    |                    |
| SNP_109307_A_13413 | NW_004518031.1 | scaffold3307 | 13413                   | GG                              | AA                 | AA               | INTERGENIC      |               |                    |                    |
| SNP_109308_A_17799 | NW_004518031.1 | scaffold3307 | 17799                   | CC                              | GG                 | GG               | INTERGENIC      |               |                    |                    |
| SNP_109309_A_17905 | NW_004518031.1 | scaffold3307 | 17905                   | GG                              | TT                 | TT               | INTERGENIC      |               |                    |                    |
| SNP_109310_A_17907 | NW_004518031.1 | scaffold3307 | 17907                   | CC                              | GG                 | GG               | INTERGENIC      |               |                    |                    |
| SNP_109311_A_17990 | NW_004518031.1 | scaffold3307 | 17990                   | TT                              | AA                 | AA               | INTERGENIC      |               |                    |                    |
| SNP_109312_A_18292 | NW_004518031.1 | scaffold3307 | 18292                   | TT                              | CC                 | CC               | INTERGENIC      |               |                    |                    |

| SNPs IDs           | Chromosome IDs | Chromosomes  | Physical positions (bp) | CDC Frontier (Reference genome) | (Pusa 1103 & HPNB) | (ILWC 46 & LPNB) | Sequence genome | Components of | Gene accession IDs | Putative functions |
|--------------------|----------------|--------------|-------------------------|---------------------------------|--------------------|------------------|-----------------|---------------|--------------------|--------------------|
| SNP_109313_A_18346 | NW_004518031.1 | scaffold3307 | 18346                   | AA                              | GG                 | GG               | INTERGENIC      |               |                    |                    |
| SNP_109314_A_22132 | NW_004518031.1 | scaffold3307 | 22132                   | GG                              | AA                 | AA               | INTERGENIC      |               |                    |                    |
| SNP_109315_A_22208 | NW_004518031.1 | scaffold3307 | 22208                   | CC                              | TT                 | TT               | INTERGENIC      |               |                    |                    |
| SNP_109316_A_22264 | NW_004518031.1 | scaffold3307 | 22264                   | AA                              | GG                 | GG               | INTERGENIC      |               |                    |                    |
| SNP_109317_A_22343 | NW_004518031.1 | scaffold3307 | 22343                   | AA                              | GG                 | GG               | INTERGENIC      |               |                    |                    |
| SNP_109318_A_22367 | NW_004518031.1 | scaffold3307 | 22367                   | CC                              | TT                 | TT               | INTERGENIC      |               |                    |                    |
| SNP_109319_A_22453 | NW_004518031.1 | scaffold3307 | 22453                   | TT                              | CC                 | CC               | INTERGENIC      |               |                    |                    |
| SNP_109320_A_22542 | NW_004518031.1 | scaffold3307 | 22542                   | TT                              | AA                 | AA               | INTERGENIC      |               |                    |                    |
| SNP_109321_A_22629 | NW_004518031.1 | scaffold3307 | 22629                   | GG                              | AA                 | AA               | INTERGENIC      |               |                    |                    |
| SNP_109322_A_5603  | NW_004518038.1 | scaffold3314 | 5603                    | GG                              | AA                 | AA               | INTERGENIC      |               |                    |                    |
| SNP_109323_A_5660  | NW_004518038.1 | scaffold3314 | 5660                    | GG                              | AA                 | AA               | INTERGENIC      |               |                    |                    |
| SNP_109325_A_5829  | NW_004518038.1 | scaffold3314 | 5829                    | CC                              | TT                 | TT               | INTERGENIC      |               |                    |                    |
| SNP_109326_A_5832  | NW_004518038.1 | scaffold3314 | 5832                    | CC                              | GG                 | GG               | INTERGENIC      |               |                    |                    |
| SNP_109327_A_5883  | NW_004518038.1 | scaffold3314 | 5883                    | TT                              | AA                 | AA               | INTERGENIC      |               |                    |                    |
| SNP_109328_A_6667  | NW_004518038.1 | scaffold3314 | 6667                    | CC                              | TT                 | TT               | INTERGENIC      |               |                    |                    |
| SNP_109329_A_7068  | NW_004518038.1 | scaffold3314 | 7068                    | TT                              | CC                 | CC               | INTERGENIC      |               |                    |                    |
| SNP_109330_A_7135  | NW_004518038.1 | scaffold3314 | 7135                    | TT                              | CC                 | CC               | INTERGENIC      |               |                    |                    |
| SNP_109331_A_7348  | NW_004518038.1 | scaffold3314 | 7348                    | AA                              | TT                 | TT               | INTERGENIC      |               |                    |                    |
| SNP_109333_A_7435  | NW_004518038.1 | scaffold3314 | 7435                    | CC                              | TT                 | TT               | INTERGENIC      |               |                    |                    |
| SNP_109334_A_7452  | NW_004518038.1 | scaffold3314 | 7452                    | TT                              | CC                 | CC               | INTERGENIC      |               |                    |                    |
| SNP_109335_A_7453  | NW_004518038.1 | scaffold3314 | 7453                    | AA                              | GG                 | GG               | INTERGENIC      |               |                    |                    |
| SNP_109336_A_7540  | NW_004518038.1 | scaffold3314 | 7540                    | TT                              | GG                 | GG               | INTERGENIC      |               |                    |                    |

| SNPs IDs           | Chromosome IDs | Chromosomes  | Physical positions (bp) | CDC Frontier (Reference genome) | (Pusa 1103 & HPNB) | (ILWC 46 & LPNB) | Sequence Components of genome | Gene accession IDs | Putative functions                                       |
|--------------------|----------------|--------------|-------------------------|---------------------------------|--------------------|------------------|-------------------------------|--------------------|----------------------------------------------------------|
| SNP_109337_A_7588  | NW_004518038.1 | scaffold3314 | 7588                    | GG                              | TT                 | TT               | INTERGENIC                    |                    |                                                          |
| SNP_109338_A_7717  | NW_004518038.1 | scaffold3314 | 7717                    | AA                              | GG                 | GG               | INTERGENIC                    |                    |                                                          |
| SNP_109339_A_7797  | NW_004518038.1 | scaffold3314 | 7797                    | TT                              | CC                 | CC               | INTERGENIC                    |                    |                                                          |
| SNP_109340_A_7801  | NW_004518038.1 | scaffold3314 | 7801                    | AA                              | TT                 | TT               | INTERGENIC                    |                    |                                                          |
| SNP_109341_A_7809  | NW_004518038.1 | scaffold3314 | 7809                    | TT                              | CC                 | CC               | INTERGENIC                    |                    |                                                          |
| SNP_109342_A_7919  | NW_004518038.1 | scaffold3314 | 7919                    | AA                              | GG                 | GG               | INTERGENIC                    |                    |                                                          |
| SNP_109343_A_7986  | NW_004518038.1 | scaffold3314 | 7986                    | TT                              | CC                 | CC               | INTERGENIC                    |                    |                                                          |
| SNP_109344_A_7995  | NW_004518038.1 | scaffold3314 | 7995                    | AA                              | CC                 | CC               | INTERGENIC                    |                    |                                                          |
| SNP_109345_A_287   | NW_004518041.1 | scaffold3317 | 287                     | CC                              | GG                 | GG               | INTERGENIC                    |                    |                                                          |
| SNP_109346_A_294   | NW_004518041.1 | scaffold3317 | 294                     | AA                              | CC                 | CC               | INTERGENIC                    |                    |                                                          |
| SNP_109347_A_299   | NW_004518041.1 | scaffold3317 | 299                     | TT                              | GG                 | GG               | INTERGENIC                    |                    |                                                          |
| SNP_109348_A_325   | NW_004518041.1 | scaffold3317 | 325                     | AA                              | CC                 | CC               | INTERGENIC                    |                    |                                                          |
| SNP_109350_A_773   | NW_004518041.1 | scaffold3317 | 773                     | CC                              | TT                 | TT               | INTERGENIC                    |                    |                                                          |
| SNP_109351_A_3329  | NW_004518041.1 | scaffold3317 | 3329                    | GG                              | TT                 | TT               | INTERGENIC                    |                    |                                                          |
| SNP_109353_A_24071 | NW_004518043.1 | scaffold3321 | 24071                   | GG                              | AA                 | AA               | INTERGENIC                    |                    |                                                          |
| SNP_109354_A_25863 | NW_004518043.1 | scaffold3321 | 25863                   | AA                              | GG                 | GG               | NON_SYNONYMOUS_CODING         | 101504162          | 1-aminocyclopropane-1-carboxylate oxidase homolog 1-like |
| SNP_109355_A_26431 | NW_004518043.1 | scaffold3321 | 26431                   | GG                              | CC                 | CC               | INTRON                        | 101504162          | 1-aminocyclopropane-1-carboxylate oxidase homolog 1-like |
| SNP_109356_A_26464 | NW_004518043.1 | scaffold3321 | 26464                   | GG                              | AA                 | AA               | INTRON                        | 101504162          | 1-aminocyclopropane-1-carboxylate oxidase homolog 1-like |
| SNP_109357_A_26496 | NW_004518043.1 | scaffold3321 | 26496                   | CC                              | AA                 | AA               | INTRON                        | 101504162          | 1-aminocyclopropane-1-carboxylate oxidase homolog 1-like |
| SNP_109358_A_26734 | NW_004518043.1 | scaffold3321 | 26734                   | TT                              | CC                 | CC               | INTRON                        | 101504162          | 1-aminocyclopropane-1-carboxylate oxidase homolog 1-like |
| SNP_109359_A_26760 | NW_004518043.1 | scaffold3321 | 26760                   | TT                              | GG                 | GG               | INTRON                        | 101504162          | 1-aminocyclopropane-1-carboxylate oxidase homolog 1-like |
| SNP_109360_A_26776 | NW_004518043.1 | scaffold3321 | 26776                   | GG                              | AA                 | AA               | INTRON                        | 101504162          | 1-aminocyclopropane-1-carboxylate oxidase homolog 1-like |

| SNPs IDs           | Chromosome IDs | Chromosomes  | Physical positions (bp) | CDC Frontier (Reference genome) | (Pusa 1103 & HPNB) | (ILWC 46 & LPNB) | Sequence Components of genome | Gene accession IDs | Putative functions                                       |
|--------------------|----------------|--------------|-------------------------|---------------------------------|--------------------|------------------|-------------------------------|--------------------|----------------------------------------------------------|
| SNP_109361_A_26783 | NW_004518043.1 | scaffold3321 | 26783                   | TT                              | CC                 | CC               | INTRON                        | 101504162          | 1-aminocyclopropane-1-carboxylate oxidase homolog 1-like |
| SNP_109362_A_26791 | NW_004518043.1 | scaffold3321 | 26791                   | AA                              | GG                 | GG               | INTRON                        | 101504162          | 1-aminocyclopropane-1-carboxylate oxidase homolog 1-like |
| SNP_109363_A_33129 | NW_004518043.1 | scaffold3321 | 33129                   | AA                              | GG                 | GG               | NON_SYNONYMOUS_CODING         | 101504486          | vacuolar protein-sorting-associated protein 11 homolog   |
| SNP_109364_A_34383 | NW_004518043.1 | scaffold3321 | 34383                   | AA                              | GG                 | GG               | INTRON                        | 101504486          | vacuolar protein-sorting-associated protein 11 homolog   |
| SNP_109365_A_35278 | NW_004518043.1 | scaffold3321 | 35278                   | AA                              | GG                 | GG               | SYNONYMOUS_CODING             | 101504486          | vacuolar protein-sorting-associated protein 11 homolog   |
| SNP_109366_A_35281 | NW_004518043.1 | scaffold3321 | 35281                   | GG                              | AA                 | AA               | SYNONYMOUS_CODING             | 101504486          | vacuolar protein-sorting-associated protein 11 homolog   |
| SNP_109367_A_35421 | NW_004518043.1 | scaffold3321 | 35421                   | AA                              | GG                 | GG               | INTERGENIC                    |                    |                                                          |
| SNP_109369_A_37036 | NW_004518043.1 | scaffold3321 | 37036                   | AA                              | GG                 | GG               | DRR                           | 101504804          | uncharacterized LOC101504804                             |
| SNP_109370_A_43220 | NW_004518043.1 | scaffold3321 | 43220                   | GG                              | TT                 | TT               | INTRON                        | 101504804          | uncharacterized LOC101504804                             |
| SNP_109371_A_46258 | NW_004518043.1 | scaffold3321 | 46258                   | AA                              | GG                 | GG               | INTRON                        | 101504804          | uncharacterized LOC101504804                             |
| SNP_109372_A_46887 | NW_004518043.1 | scaffold3321 | 46887                   | AA                              | CC                 | CC               | INTRON                        | 101504804          | uncharacterized LOC101504804                             |
| SNP_109373_A_48834 | NW_004518043.1 | scaffold3321 | 48834                   | GG                              | TT                 | TT               | INTRON                        | 101504804          | uncharacterized LOC101504804                             |
| SNP_109374_A_54699 | NW_004518043.1 | scaffold3321 | 54699                   | GG                              | AA                 | AA               | INTRON                        | 101504804          | uncharacterized LOC101504804                             |
| SNP_109375_A_55074 | NW_004518043.1 | scaffold3321 | 55074                   | GG                              | TT                 | TT               | INTRON                        | 101504804          | uncharacterized LOC101504804                             |
| SNP_109376_A_56188 | NW_004518043.1 | scaffold3321 | 56188                   | CC                              | TT                 | TT               | SYNONYMOUS_CODING             | 101504804          | uncharacterized LOC101504804                             |
| SNP_109377_A_57246 | NW_004518043.1 | scaffold3321 | 57246                   | TT                              | CC                 | CC               | INTRON                        | 101504804          | uncharacterized LOC101504804                             |
| SNP_109379_A_60090 | NW_004518043.1 | scaffold3321 | 60090                   | CC                              | AA                 | AA               | URR                           | 101504804          | uncharacterized LOC101504804                             |
| SNP_109380_A_60112 | NW_004518043.1 | scaffold3321 | 60112                   | TT                              | GG                 | GG               | URR                           | 101504804          | uncharacterized LOC101504804                             |
| SNP_109381_A_60554 | NW_004518043.1 | scaffold3321 | 60554                   | AA                              | GG                 | GG               | URR                           | 101504804          | uncharacterized LOC101504804                             |
| SNP_109382_A_61106 | NW_004518043.1 | scaffold3321 | 61106                   | CC                              | TT                 | TT               | URR                           | 101504804          | uncharacterized LOC101504804                             |
| SNP_109384_A_64106 | NW_004518043.1 | scaffold3321 | 64106                   | TT                              | CC                 | CC               | INTERGENIC                    |                    |                                                          |
| SNP_109386_A_69353 | NW_004518043.1 | scaffold3321 | 69353                   | AA                              | GG                 | GG               | INTERGENIC                    |                    |                                                          |



| SNPs IDs           | Chromosome IDs | Chromosomes  | Physical positions (bp) | CDC Frontier (Reference genome) | (Pusa 1103 & HPNB) | (ILWC 46 & LPNB) | Sequence genome | Components of | Gene accession IDs | Putative functions |
|--------------------|----------------|--------------|-------------------------|---------------------------------|--------------------|------------------|-----------------|---------------|--------------------|--------------------|
| SNP_109387_A_69576 | NW_004518043.1 | scaffold3321 | 69576                   | AA                              | GG                 | GG               | INTERGENIC      |               |                    |                    |
| SNP_109388_A_69609 | NW_004518043.1 | scaffold3321 | 69609                   | GG                              | AA                 | AA               | INTERGENIC      |               |                    |                    |
| SNP_109391_A_69836 | NW_004518043.1 | scaffold3321 | 69836                   | GG                              | AA                 | AA               | INTERGENIC      |               |                    |                    |
| SNP_109392_A_69876 | NW_004518043.1 | scaffold3321 | 69876                   | GG                              | AA                 | AA               | INTERGENIC      |               |                    |                    |
| SNP_109393_A_69884 | NW_004518043.1 | scaffold3321 | 69884                   | GG                              | AA                 | AA               | INTERGENIC      |               |                    |                    |
| SNP_109395_A_5025  | NW_004518044.1 | scaffold3322 | 5025                    | CC                              | AA                 | AA               | INTERGENIC      |               |                    |                    |
| SNP_109396_A_5370  | NW_004518044.1 | scaffold3322 | 5370                    | AA                              | TT                 | TT               | INTERGENIC      |               |                    |                    |
| SNP_109397_A_8706  | NW_004518045.1 | scaffold3323 | 8706                    | GG                              | CC                 | CC               | INTERGENIC      |               |                    |                    |
| SNP_109398_A_9373  | NW_004518045.1 | scaffold3323 | 9373                    | TT                              | CC                 | CC               | INTERGENIC      |               |                    |                    |
| SNP_109399_A_3966  | NW_004518050.1 | scaffold3329 | 3966                    | TT                              | CC                 | CC               | INTERGENIC      |               |                    |                    |
| SNP_109400_A_4203  | NW_004518050.1 | scaffold3329 | 4203                    | GG                              | AA                 | AA               | INTERGENIC      |               |                    |                    |
| SNP_109401_A_31    | NW_004518055.1 | scaffold3336 | 31                      | CC                              | TT                 | TT               | INTERGENIC      |               |                    |                    |
| SNP_109402_A_64    | NW_004518055.1 | scaffold3336 | 64                      | GG                              | AA                 | AA               | INTERGENIC      |               |                    |                    |
| SNP_109403_A_99    | NW_004518055.1 | scaffold3336 | 99                      | GG                              | AA                 | AA               | INTERGENIC      |               |                    |                    |
| SNP_109404_A_125   | NW_004518055.1 | scaffold3336 | 125                     | GG                              | AA                 | AA               | INTERGENIC      |               |                    |                    |
| SNP_109405_A_131   | NW_004518055.1 | scaffold3336 | 131                     | TT                              | CC                 | CC               | INTERGENIC      |               |                    |                    |
| SNP_109406_A_814   | NW_004518055.1 | scaffold3336 | 814                     | CC                              | TT                 | TT               | INTERGENIC      |               |                    |                    |
| SNP_109407_A_850   | NW_004518055.1 | scaffold3336 | 850                     | AA                              | GG                 | GG               | INTERGENIC      |               |                    |                    |
| SNP_109408_A_947   | NW_004518055.1 | scaffold3336 | 947                     | GG                              | AA                 | AA               | INTERGENIC      |               |                    |                    |
| SNP_109411_A_63956 | NW_004518055.1 | scaffold3336 | 63956                   | AA                              | TT                 | TT               | INTERGENIC      |               |                    |                    |
| SNP_109412_A_66813 | NW_004518055.1 | scaffold3336 | 66813                   | TT                              | AA                 | AA               | INTERGENIC      |               |                    |                    |
| SNP_109413_A_2094  | NW_004518064.1 | scaffold3347 | 2094                    | AA                              | CC                 | CC               | INTERGENIC      |               |                    |                    |

| SNPs IDs          | Chromosome IDs | Chromosomes  | Physical positions (bp) | CDC Frontier (Reference genome) | (Pusa 1103 & HPNB) | (ILWC 46 & LPNB) | Sequence genome | Components of | Gene accession IDs | Putative functions |
|-------------------|----------------|--------------|-------------------------|---------------------------------|--------------------|------------------|-----------------|---------------|--------------------|--------------------|
| SNP_109414_A_2121 | NW_004518064.1 | scaffold3347 | 2121                    | CC                              | TT                 | TT               | INTERGENIC      |               |                    |                    |
| SNP_109415_A_2142 | NW_004518064.1 | scaffold3347 | 2142                    | CC                              | TT                 | TT               | INTERGENIC      |               |                    |                    |
| SNP_109416_A_2155 | NW_004518064.1 | scaffold3347 | 2155                    | CC                              | GG                 | GG               | INTERGENIC      |               |                    |                    |
| SNP_109417_A_2161 | NW_004518064.1 | scaffold3347 | 2161                    | TT                              | AA                 | CC               | INTERGENIC      |               |                    |                    |
| SNP_109418_A_2178 | NW_004518064.1 | scaffold3347 | 2178                    | AA                              | TT                 | TT               | INTERGENIC      |               |                    |                    |
| SNP_109419_A_2179 | NW_004518064.1 | scaffold3347 | 2179                    | AA                              | TT                 | TT               | INTERGENIC      |               |                    |                    |
| SNP_109420_A_2210 | NW_004518064.1 | scaffold3347 | 2210                    | AA                              | TT                 | TT               | INTERGENIC      |               |                    |                    |
| SNP_109421_A_2340 | NW_004518064.1 | scaffold3347 | 2340                    | CC                              | TT                 | TT               | INTERGENIC      |               |                    |                    |
| SNP_109422_A_2474 | NW_004518064.1 | scaffold3347 | 2474                    | TT                              | CC                 | CC               | INTERGENIC      |               |                    |                    |
| SNP_109423_A_2477 | NW_004518064.1 | scaffold3347 | 2477                    | CC                              | GG                 | GG               | INTERGENIC      |               |                    |                    |
| SNP_109424_A_2828 | NW_004518064.1 | scaffold3347 | 2828                    | GG                              | CC                 | CC               | INTERGENIC      |               |                    |                    |
| SNP_109425_A_2875 | NW_004518064.1 | scaffold3347 | 2875                    | TT                              | GG                 | GG               | INTERGENIC      |               |                    |                    |
| SNP_109426_A_823  | NW_004518065.1 | scaffold3348 | 823                     | TT                              | GG                 | GG               | INTERGENIC      |               |                    |                    |
| SNP_109427_A_833  | NW_004518065.1 | scaffold3348 | 833                     | TT                              | AA                 | AA               | INTERGENIC      |               |                    |                    |
| SNP_109428_A_457  | NW_004518069.1 | scaffold3353 | 457                     | AA                              | GG                 | GG               | INTERGENIC      |               |                    |                    |
| SNP_109429_A_7218 | NW_004518069.1 | scaffold3353 | 7218                    | TT                              | GG                 | GG               | INTERGENIC      |               |                    |                    |
| SNP_109430_A_7276 | NW_004518069.1 | scaffold3353 | 7276                    | TT                              | GG                 | GG               | INTERGENIC      |               |                    |                    |
| SNP_109431_A_7313 | NW_004518069.1 | scaffold3353 | 7313                    | CC                              | TT                 | TT               | INTERGENIC      |               |                    |                    |
| SNP_109432_A_7337 | NW_004518069.1 | scaffold3353 | 7337                    | GG                              | CC                 | CC               | INTERGENIC      |               |                    |                    |
| SNP_109433_A_7403 | NW_004518069.1 | scaffold3353 | 7403                    | TT                              | CC                 | CC               | INTERGENIC      |               |                    |                    |
| SNP_109434_A_159  | NW_004518070.1 | scaffold3354 | 159                     | TT                              | CC                 | CC               | INTERGENIC      |               |                    |                    |
| SNP_109435_A_523  | NW_004518070.1 | scaffold3354 | 523                     | GG                              | TT                 | TT               | INTERGENIC      |               |                    |                    |

| SNPs IDs          | Chromosome IDs | Chromosomes  | Physical positions (bp) | CDC Frontier (Reference genome) | (Pusa 1103 & HPNB) | (ILWC 46 & LPNB) | Sequence genome | Components of | Gene accession IDs | Putative functions |
|-------------------|----------------|--------------|-------------------------|---------------------------------|--------------------|------------------|-----------------|---------------|--------------------|--------------------|
| SNP_109437_A_714  | NW_004518070.1 | scaffold3354 | 714                     | CC                              | TT                 | TT               | INTERGENIC      |               |                    |                    |
| SNP_109438_A_1337 | NW_004518070.1 | scaffold3354 | 1337                    | GG                              | AA                 | AA               | INTERGENIC      |               |                    |                    |
| SNP_109439_A_2197 | NW_004518070.1 | scaffold3354 | 2197                    | TT                              | AA                 | AA               | INTERGENIC      |               |                    |                    |
| SNP_109440_A_2372 | NW_004518070.1 | scaffold3354 | 2372                    | AA                              | TT                 | TT               | INTERGENIC      |               |                    |                    |
| SNP_109441_A_2373 | NW_004518070.1 | scaffold3354 | 2373                    | AA                              | TT                 | TT               | INTERGENIC      |               |                    |                    |
| SNP_109442_A_2374 | NW_004518070.1 | scaffold3354 | 2374                    | TT                              | AA                 | AA               | INTERGENIC      |               |                    |                    |
| SNP_109444_A_2709 | NW_004518070.1 | scaffold3354 | 2709                    | AA                              | GG                 | GG               | INTERGENIC      |               |                    |                    |
| SNP_109445_A_2068 | NW_004518073.1 | scaffold3357 | 2068                    | TT                              | CC                 | CC               | INTERGENIC      |               |                    |                    |
| SNP_109446_A_2205 | NW_004518073.1 | scaffold3357 | 2205                    | AA                              | CC                 | CC               | INTERGENIC      |               |                    |                    |
| SNP_109447_A_2400 | NW_004518073.1 | scaffold3357 | 2400                    | GG                              | AA                 | AA               | INTERGENIC      |               |                    |                    |
| SNP_109448_A_2499 | NW_004518073.1 | scaffold3357 | 2499                    | GG                              | CC                 | CC               | INTERGENIC      |               |                    |                    |
| SNP_109449_A_95   | NW_004518074.1 | scaffold3359 | 95                      | GG                              | AA                 | AA               | INTERGENIC      |               |                    |                    |
| SNP_109450_A_164  | NW_004518074.1 | scaffold3359 | 164                     | AA                              | TT                 | TT               | INTERGENIC      |               |                    |                    |
| SNP_109451_A_197  | NW_004518074.1 | scaffold3359 | 197                     | AA                              | GG                 | GG               | INTERGENIC      |               |                    |                    |
| SNP_109452_A_294  | NW_004518074.1 | scaffold3359 | 294                     | AA                              | GG                 | GG               | INTERGENIC      |               |                    |                    |
| SNP_109453_A_296  | NW_004518074.1 | scaffold3359 | 296                     | CC                              | TT                 | TT               | INTERGENIC      |               |                    |                    |
| SNP_109454_A_360  | NW_004518074.1 | scaffold3359 | 360                     | AA                              | CC                 | CC               | INTERGENIC      |               |                    |                    |
| SNP_109455_A_371  | NW_004518074.1 | scaffold3359 | 371                     | AA                              | GG                 | GG               | INTERGENIC      |               |                    |                    |
| SNP_109456_A_376  | NW_004518074.1 | scaffold3359 | 376                     | CC                              | GG                 | GG               | INTERGENIC      |               |                    |                    |
| SNP_109457_A_450  | NW_004518074.1 | scaffold3359 | 450                     | AA                              | CC                 | CC               | INTERGENIC      |               |                    |                    |
| SNP_109458_A_536  | NW_004518074.1 | scaffold3359 | 536                     | CC                              | TT                 | TT               | INTERGENIC      |               |                    |                    |
| SNP_109459_A_605  | NW_004518074.1 | scaffold3359 | 605                     | GG                              | AA                 | AA               | INTERGENIC      |               |                    |                    |

| SNPs IDs            | Chromosome IDs | Chromosomes  | Physical positions (bp) | CDC Frontier (Reference genome) | (Pusa 1103 & HPNB) | (ILWC 46 & LPNB) | Sequence genome | Components of | Gene accession IDs | Putative functions |
|---------------------|----------------|--------------|-------------------------|---------------------------------|--------------------|------------------|-----------------|---------------|--------------------|--------------------|
| SNP_109460_A_607    | NW_004518074.1 | scaffold3359 | 607                     | TT                              | CC                 | CC               | INTERGENIC      |               |                    |                    |
| SNP_109461_A_649    | NW_004518074.1 | scaffold3359 | 649                     | AA                              | GG                 | GG               | INTERGENIC      |               |                    |                    |
| SNP_109462_A_1218   | NW_004518076.1 | scaffold3362 | 1218                    | TT                              | GG                 | GG               | INTERGENIC      |               |                    |                    |
| SNP_109463_A_1255   | NW_004518076.1 | scaffold3362 | 1255                    | TT                              | CC                 | CC               | INTERGENIC      |               |                    |                    |
| SNP_109464_A_1288   | NW_004518076.1 | scaffold3362 | 1288                    | AA                              | GG                 | GG               | INTERGENIC      |               |                    |                    |
| SNP_109465_A_1312   | NW_004518076.1 | scaffold3362 | 1312                    | TT                              | GG                 | GG               | INTERGENIC      |               |                    |                    |
| SNP_109466_A_1343   | NW_004518076.1 | scaffold3362 | 1343                    | TT                              | CC                 | CC               | INTERGENIC      |               |                    |                    |
| SNP_109467_A_1356   | NW_004518076.1 | scaffold3362 | 1356                    | TT                              | GG                 | GG               | INTERGENIC      |               |                    |                    |
| SNP_109468_A_1417   | NW_004518076.1 | scaffold3362 | 1417                    | CC                              | TT                 | TT               | INTERGENIC      |               |                    |                    |
| SNP_109469_A_84251  | NW_004518076.1 | scaffold3362 | 84251                   | GG                              | AA                 | AA               | INTERGENIC      |               |                    |                    |
| SNP_109470_A_88630  | NW_004518076.1 | scaffold3362 | 88630                   | AA                              | GG                 | GG               | INTERGENIC      |               |                    |                    |
| SNP_109471_A_95682  | NW_004518076.1 | scaffold3362 | 95682                   | CC                              | TT                 | TT               | INTERGENIC      |               |                    |                    |
| SNP_109472_A_109740 | NW_004518076.1 | scaffold3362 | 109740                  | CC                              | TT                 | TT               | INTERGENIC      |               |                    |                    |
| SNP_109473_A_109838 | NW_004518076.1 | scaffold3362 | 109838                  | GG                              | AA                 | AA               | INTERGENIC      |               |                    |                    |
| SNP_109474_A_109850 | NW_004518076.1 | scaffold3362 | 109850                  | AA                              | TT                 | TT               | INTERGENIC      |               |                    |                    |
| SNP_109475_A_111817 | NW_004518076.1 | scaffold3362 | 111817                  | CC                              | TT                 | TT               | INTERGENIC      |               |                    |                    |
| SNP_109476_A_111821 | NW_004518076.1 | scaffold3362 | 111821                  | TT                              | GG                 | GG               | INTERGENIC      |               |                    |                    |
| SNP_109477_A_111865 | NW_004518076.1 | scaffold3362 | 111865                  | GG                              | TT                 | TT               | INTERGENIC      |               |                    |                    |
| SNP_109478_A_110    | NW_004518078.1 | scaffold3364 | 110                     | TT                              | CC                 | CC               | INTERGENIC      |               |                    |                    |
| SNP_109479_A_199    | NW_004518078.1 | scaffold3364 | 199                     | TT                              | CC                 | CC               | INTERGENIC      |               |                    |                    |
| SNP_109480_A_213    | NW_004518078.1 | scaffold3364 | 213                     | GG                              | TT                 | TT               | INTERGENIC      |               |                    |                    |
| SNP_109481_A_293    | NW_004518078.1 | scaffold3364 | 293                     | CC                              | GG                 | GG               | INTERGENIC      |               |                    |                    |

| SNPs IDs           | Chromosome IDs | Chromosomes  | Physical positions (bp) | CDC Frontier (Reference genome) | (Pusa 1103 & HPNB) | (ILWC 46 & LPNB) | Sequence genome | Components of | Gene accession IDs | Putative functions |
|--------------------|----------------|--------------|-------------------------|---------------------------------|--------------------|------------------|-----------------|---------------|--------------------|--------------------|
| SNP_109482_A_331   | NW_004518078.1 | scaffold3364 | 331                     | CC                              | TT                 | TT               | INTERGENIC      |               |                    |                    |
| SNP_109483_A_551   | NW_004518078.1 | scaffold3364 | 551                     | CC                              | GG                 | GG               | INTERGENIC      |               |                    |                    |
| SNP_109484_A_588   | NW_004518078.1 | scaffold3364 | 588                     | TT                              | AA                 | AA               | INTERGENIC      |               |                    |                    |
| SNP_109485_A_649   | NW_004518078.1 | scaffold3364 | 649                     | AA                              | TT                 | TT               | INTERGENIC      |               |                    |                    |
| SNP_109486_A_656   | NW_004518078.1 | scaffold3364 | 656                     | CC                              | TT                 | TT               | INTERGENIC      |               |                    |                    |
| SNP_109487_A_691   | NW_004518078.1 | scaffold3364 | 691                     | AA                              | GG                 | GG               | INTERGENIC      |               |                    |                    |
| SNP_109488_A_692   | NW_004518078.1 | scaffold3364 | 692                     | GG                              | TT                 | TT               | INTERGENIC      |               |                    |                    |
| SNP_109489_A_11523 | NW_004518078.1 | scaffold3364 | 11523                   | AA                              | GG                 | GG               | INTERGENIC      |               |                    |                    |
| SNP_109490_A_33070 | NW_004518078.1 | scaffold3364 | 33070                   | CC                              | AA                 | AA               | INTERGENIC      |               |                    |                    |
| SNP_109492_A_35077 | NW_004518078.1 | scaffold3364 | 35077                   | AA                              | GG                 | GG               | INTERGENIC      |               |                    |                    |
| SNP_109493_A_36001 | NW_004518078.1 | scaffold3364 | 36001                   | GG                              | AA                 | AA               | INTERGENIC      |               |                    |                    |
| SNP_109494_A_37634 | NW_004518078.1 | scaffold3364 | 37634                   | GG                              | AA                 | AA               | INTERGENIC      |               |                    |                    |
| SNP_109495_A_37911 | NW_004518078.1 | scaffold3364 | 37911                   | AA                              | GG                 | GG               | INTERGENIC      |               |                    |                    |
| SNP_109496_A_38131 | NW_004518078.1 | scaffold3364 | 38131                   | AA                              | GG                 | GG               | INTERGENIC      |               |                    |                    |
| SNP_109497_A_38334 | NW_004518078.1 | scaffold3364 | 38334                   | AA                              | GG                 | GG               | INTERGENIC      |               |                    |                    |
| SNP_109498_A_42777 | NW_004518078.1 | scaffold3364 | 42777                   | CC                              | GG                 | GG               | INTERGENIC      |               |                    |                    |
| SNP_109500_A_46962 | NW_004518078.1 | scaffold3364 | 46962                   | AA                              | TT                 | TT               | INTERGENIC      |               |                    |                    |
| SNP_109501_A_48341 | NW_004518078.1 | scaffold3364 | 48341                   | GG                              | AA                 | AA               | INTERGENIC      |               |                    |                    |
| SNP_109502_A_48945 | NW_004518078.1 | scaffold3364 | 48945                   | TT                              | CC                 | CC               | INTERGENIC      |               |                    |                    |
| SNP_109503_A_50074 | NW_004518078.1 | scaffold3364 | 50074                   | TT                              | CC                 | CC               | INTERGENIC      |               |                    |                    |
| SNP_109504_A_50106 | NW_004518078.1 | scaffold3364 | 50106                   | CC                              | TT                 | TT               | INTERGENIC      |               |                    |                    |
| SNP_109505_A_50107 | NW_004518078.1 | scaffold3364 | 50107                   | GG                              | AA                 | AA               | INTERGENIC      |               |                    |                    |

| SNPs IDs           | Chromosome IDs | Chromosomes  | Physical positions (bp) | CDC Frontier (Reference genome) | (Pusa 1103 & HPNB) | (ILWC 46 & LPNB) | Sequence genome | Components of | Gene accession IDs | Putative functions |
|--------------------|----------------|--------------|-------------------------|---------------------------------|--------------------|------------------|-----------------|---------------|--------------------|--------------------|
| SNP_109506_A_50116 | NW_004518078.1 | scaffold3364 | 50116                   | GG                              | TT                 | TT               | INTERGENIC      |               |                    |                    |
| SNP_109507_A_51108 | NW_004518078.1 | scaffold3364 | 51108                   | CC                              | AA                 | AA               | INTERGENIC      |               |                    |                    |
| SNP_109508_A_5213  | NW_004518079.1 | scaffold3366 | 5213                    | GG                              | AA                 | AA               | INTERGENIC      |               |                    |                    |
| SNP_109509_A_2597  | NW_004518080.1 | scaffold3368 | 2597                    | AA                              | CC                 | CC               | INTERGENIC      |               |                    |                    |
| SNP_109510_A_2680  | NW_004518080.1 | scaffold3368 | 2680                    | TT                              | AA                 | AA               | INTERGENIC      |               |                    |                    |
| SNP_109511_A_2988  | NW_004518080.1 | scaffold3368 | 2988                    | TT                              | AA                 | AA               | INTERGENIC      |               |                    |                    |
| SNP_109512_A_3046  | NW_004518080.1 | scaffold3368 | 3046                    | GG                              | CC                 | CC               | INTERGENIC      |               |                    |                    |
| SNP_109513_A_3060  | NW_004518080.1 | scaffold3368 | 3060                    | CC                              | TT                 | TT               | INTERGENIC      |               |                    |                    |
| SNP_109514_A_16845 | NW_004518081.1 | scaffold3369 | 16845                   | CC                              | AA                 | AA               | INTERGENIC      |               |                    |                    |
| SNP_109515_A_16874 | NW_004518081.1 | scaffold3369 | 16874                   | AA                              | GG                 | GG               | INTERGENIC      |               |                    |                    |
| SNP_109516_A_17329 | NW_004518081.1 | scaffold3369 | 17329                   | GG                              | AA                 | AA               | INTERGENIC      |               |                    |                    |
| SNP_109517_A_17686 | NW_004518081.1 | scaffold3369 | 17686                   | TT                              | AA                 | AA               | INTERGENIC      |               |                    |                    |
| SNP_109518_A_17748 | NW_004518081.1 | scaffold3369 | 17748                   | TT                              | CC                 | CC               | INTERGENIC      |               |                    |                    |
| SNP_109519_A_17845 | NW_004518081.1 | scaffold3369 | 17845                   | AA                              | CC                 | CC               | INTERGENIC      |               |                    |                    |
| SNP_109520_A_17857 | NW_004518081.1 | scaffold3369 | 17857                   | AA                              | GG                 | GG               | INTERGENIC      |               |                    |                    |
| SNP_109521_A_18098 | NW_004518081.1 | scaffold3369 | 18098                   | TT                              | CC                 | CC               | INTERGENIC      |               |                    |                    |
| SNP_109522_A_18224 | NW_004518081.1 | scaffold3369 | 18224                   | CC                              | TT                 | TT               | INTERGENIC      |               |                    |                    |
| SNP_109523_A_18555 | NW_004518081.1 | scaffold3369 | 18555                   | TT                              | CC                 | CC               | INTERGENIC      |               |                    |                    |
| SNP_109525_A_19339 | NW_004518081.1 | scaffold3369 | 19339                   | GG                              | TT                 | TT               | INTERGENIC      |               |                    |                    |
| SNP_109526_A_20416 | NW_004518081.1 | scaffold3369 | 20416                   | AA                              | GG                 | GG               | INTERGENIC      |               |                    |                    |
| SNP_109527_A_20758 | NW_004518081.1 | scaffold3369 | 20758                   | AA                              | GG                 | GG               | INTERGENIC      |               |                    |                    |
| SNP_109528_A_20912 | NW_004518081.1 | scaffold3369 | 20912                   | CC                              | TT                 | TT               | INTERGENIC      |               |                    |                    |

| SNPs IDs           | Chromosome IDs | Chromosomes  | Physical positions (bp) | CDC Frontier (Reference genome) | (Pusa 1103 & HPNB) | (ILWC 46 & LPNB) | Sequence genome   | Components of | Gene accession IDs | Putative functions |
|--------------------|----------------|--------------|-------------------------|---------------------------------|--------------------|------------------|-------------------|---------------|--------------------|--------------------|
| SNP_109529_A_21020 | NW_004518081.1 | scaffold3369 | 21020                   | CC                              | TT                 | TT               | INTERGENIC        |               |                    |                    |
| SNP_109532_A_19778 | NW_004518082.1 | scaffold3371 | 19778                   | TT                              | AA                 | AA               | INTERGENIC        |               |                    |                    |
| SNP_109534_A_27906 | NW_004518082.1 | scaffold3371 | 27906                   | AA                              | CC                 | CC               | INTERGENIC        |               |                    |                    |
| SNP_109535_A_27925 | NW_004518082.1 | scaffold3371 | 27925                   | AA                              | GG                 | GG               | INTERGENIC        |               |                    |                    |
| SNP_109536_A_33641 | NW_004518082.1 | scaffold3371 | 33641                   | AA                              | GG                 | GG               | INTERGENIC        |               |                    |                    |
| SNP_109537_A_33701 | NW_004518082.1 | scaffold3371 | 33701                   | AA                              | CC                 | CC               | INTERGENIC        |               |                    |                    |
| SNP_109538_A_33812 | NW_004518082.1 | scaffold3371 | 33812                   | CC                              | TT                 | TT               | INTERGENIC        |               |                    |                    |
| SNP_109539_A_33839 | NW_004518082.1 | scaffold3371 | 33839                   | GG                              | CC                 | CC               | INTERGENIC        |               |                    |                    |
| SNP_109541_A_33907 | NW_004518082.1 | scaffold3371 | 33907                   | GG                              | TT                 | TT               | INTERGENIC        |               |                    |                    |
| SNP_109542_A_33909 | NW_004518082.1 | scaffold3371 | 33909                   | CC                              | TT                 | TT               | INTERGENIC        |               |                    |                    |
| SNP_109543_A_33910 | NW_004518082.1 | scaffold3371 | 33910                   | AA                              | GG                 | GG               | INTERGENIC        |               |                    |                    |
| SNP_109544_A_33922 | NW_004518082.1 | scaffold3371 | 33922                   | TT                              | CC                 | CC               | INTERGENIC        |               |                    |                    |
| SNP_109545_A_33926 | NW_004518082.1 | scaffold3371 | 33926                   | AA                              | GG                 | GG               | INTERGENIC        |               |                    |                    |
| SNP_109546_A_33945 | NW_004518082.1 | scaffold3371 | 33945                   | CC                              | AA                 | AA               | INTERGENIC        |               |                    |                    |
| SNP_109547_A_34156 | NW_004518082.1 | scaffold3371 | 34156                   | GG                              | AA                 | AA               | INTERGENIC        |               |                    |                    |
| SNP_109548_A_34167 | NW_004518082.1 | scaffold3371 | 34167                   | TT                              | AA                 | AA               | INTERGENIC        |               |                    |                    |
| SNP_109549_A_34205 | NW_004518082.1 | scaffold3371 | 34205                   | TT                              | CC                 | CC               | INTERGENIC        |               |                    |                    |
| SNP_109550_A_34207 | NW_004518082.1 | scaffold3371 | 34207                   | TT                              | CC                 | CC               | INTERGENIC        |               |                    |                    |
| SNP_109551_A_34243 | NW_004518082.1 | scaffold3371 | 34243                   | TT                              | CC                 | CC               | INTERGENIC        |               |                    |                    |
| SNP_109552_A_34253 | NW_004518082.1 | scaffold3371 | 34253                   | GG                              | CC                 | CC               | INTERGENIC        |               |                    |                    |
| SNP_109553_A_1085  | NW_004518085.1 | scaffold3377 | 1085                    | TT                              | GG                 | GG               | INTERGENIC        |               |                    |                    |
| SNP_109554_A_1914  | NW_004518088.1 | scaffold3380 | 1914                    | TT                              | CC                 | CC               | SYNONYMOUS_CODING | 101507706     | Unknown function   |                    |

| SNPs IDs          | Chromosome IDs | Chromosomes  | Physical positions (bp) | CDC Frontier (Reference genome) | (Pusa 1103 & HPNB) | (ILWC 46 & LPNB) | Sequence Components of genome | Gene accession IDs | Putative functions |
|-------------------|----------------|--------------|-------------------------|---------------------------------|--------------------|------------------|-------------------------------|--------------------|--------------------|
| SNP_109555_A_1945 | NW_004518088.1 | scaffold3380 | 1945                    | AA                              | GG                 | GG               | NON_SYNONYMOUS_CODING         | 101507706          | Unknown function   |
| SNP_109556_A_1984 | NW_004518088.1 | scaffold3380 | 1984                    | AA                              | CC                 | CC               | NON_SYNONYMOUS_CODING         | 101507706          | Unknown function   |
| SNP_109557_A_2026 | NW_004518088.1 | scaffold3380 | 2026                    | AA                              | GG                 | GG               | NON_SYNONYMOUS_CODING         | 101507706          | Unknown function   |
| SNP_109558_A_2309 | NW_004518088.1 | scaffold3380 | 2309                    | TT                              | CC                 | CC               | NON_SYNONYMOUS_CODING         | 101507706          | Unknown function   |
| SNP_109559_A_2310 | NW_004518088.1 | scaffold3380 | 2310                    | TT                              | CC                 | CC               | SYNONYMOUS_CODING             | 101507706          | Unknown function   |
| SNP_109560_A_2313 | NW_004518088.1 | scaffold3380 | 2313                    | AA                              | GG                 | GG               | SYNONYMOUS_CODING             | 101507706          | Unknown function   |
| SNP_109561_A_2344 | NW_004518088.1 | scaffold3380 | 2344                    | AA                              | GG                 | GG               | NON_SYNONYMOUS_CODING         | 101507706          | Unknown function   |
| SNP_109562_A_2392 | NW_004518088.1 | scaffold3380 | 2392                    | AA                              | GG                 | GG               | NON_SYNONYMOUS_CODING         | 101507706          | Unknown function   |
| SNP_109563_A_2406 | NW_004518088.1 | scaffold3380 | 2406                    | GG                              | AA                 | AA               | SYNONYMOUS_CODING             | 101507706          | Unknown function   |
| SNP_109564_A_2426 | NW_004518088.1 | scaffold3380 | 2426                    | TT                              | CC                 | CC               | NON_SYNONYMOUS_CODING         | 101507706          | Unknown function   |
| SNP_109565_A_2439 | NW_004518088.1 | scaffold3380 | 2439                    | CC                              | TT                 | TT               | SYNONYMOUS_CODING             | 101507706          | Unknown function   |
| SNP_109566_A_2509 | NW_004518088.1 | scaffold3380 | 2509                    | AA                              | GG                 | GG               | NON_SYNONYMOUS_CODING         | 101507706          | Unknown function   |
| SNP_109567_A_2516 | NW_004518088.1 | scaffold3380 | 2516                    | AA                              | CC                 | CC               | NON_SYNONYMOUS_CODING         | 101507706          | Unknown function   |
| SNP_109568_A_3920 | NW_004518088.1 | scaffold3380 | 3920                    | TT                              | CC                 | CC               | URR                           | 101507706          | Unknown function   |
| SNP_109569_A_3933 | NW_004518088.1 | scaffold3380 | 3933                    | AA                              | GG                 | GG               | URR                           | 101507706          | Unknown function   |
| SNP_109570_A_4005 | NW_004518088.1 | scaffold3380 | 4005                    | CC                              | TT                 | TT               | URR                           | 101507706          | Unknown function   |
| SNP_109571_A_4123 | NW_004518088.1 | scaffold3380 | 4123                    | GG                              | AA                 | AA               | URR                           | 101507706          | Unknown function   |
| SNP_109572_A_4226 | NW_004518088.1 | scaffold3380 | 4226                    | GG                              | TT                 | TT               | URR                           | 101507706          | Unknown function   |
| SNP_109573_A_4334 | NW_004518088.1 | scaffold3380 | 4334                    | AA                              | GG                 | GG               | URR                           | 101507706          | Unknown function   |
| SNP_109574_A_4375 | NW_004518088.1 | scaffold3380 | 4375                    | CC                              | TT                 | TT               | URR                           | 101507706          | Unknown function   |
| SNP_109575_A_649  | NW_004518089.1 | scaffold3381 | 649                     | CC                              | AA                 | AA               | INTERGENIC                    |                    |                    |
| SNP_109576_A_1022 | NW_004518089.1 | scaffold3381 | 1022                    | AA                              | GG                 | GG               | INTERGENIC                    |                    |                    |



| SNPs IDs           | Chromosome IDs | Chromosomes  | Physical positions (bp) | CDC Frontier (Reference genome) | (Pusa 1103 & HPNB) | (ILWC 46 & LPNB) | Sequence genome | Components of | Gene accession IDs | Putative functions |
|--------------------|----------------|--------------|-------------------------|---------------------------------|--------------------|------------------|-----------------|---------------|--------------------|--------------------|
| SNP_109577_A_1025  | NW_004518089.1 | scaffold3381 | 1025                    | TT                              | AA                 | AA               | INTERGENIC      |               |                    |                    |
| SNP_109578_A_1093  | NW_004518089.1 | scaffold3381 | 1093                    | TT                              | CC                 | CC               | INTERGENIC      |               |                    |                    |
| SNP_109579_A_1121  | NW_004518089.1 | scaffold3381 | 1121                    | TT                              | GG                 | GG               | INTERGENIC      |               |                    |                    |
| SNP_109580_A_1181  | NW_004518089.1 | scaffold3381 | 1181                    | TT                              | CC                 | CC               | INTERGENIC      |               |                    |                    |
| SNP_109581_A_1353  | NW_004518089.1 | scaffold3381 | 1353                    | TT                              | AA                 | AA               | INTERGENIC      |               |                    |                    |
| SNP_109582_A_1544  | NW_004518089.1 | scaffold3381 | 1544                    | CC                              | GG                 | GG               | INTERGENIC      |               |                    |                    |
| SNP_109583_A_1576  | NW_004518089.1 | scaffold3381 | 1576                    | TT                              | AA                 | AA               | INTERGENIC      |               |                    |                    |
| SNP_109584_A_1662  | NW_004518089.1 | scaffold3381 | 1662                    | CC                              | AA                 | AA               | INTERGENIC      |               |                    |                    |
| SNP_109585_A_1663  | NW_004518089.1 | scaffold3381 | 1663                    | GG                              | AA                 | AA               | INTERGENIC      |               |                    |                    |
| SNP_109586_A_1667  | NW_004518089.1 | scaffold3381 | 1667                    | AA                              | TT                 | TT               | INTERGENIC      |               |                    |                    |
| SNP_109587_A_1669  | NW_004518089.1 | scaffold3381 | 1669                    | GG                              | TT                 | TT               | INTERGENIC      |               |                    |                    |
| SNP_109588_A_1684  | NW_004518089.1 | scaffold3381 | 1684                    | CC                              | TT                 | TT               | INTERGENIC      |               |                    |                    |
| SNP_109589_A_1685  | NW_004518089.1 | scaffold3381 | 1685                    | CC                              | TT                 | TT               | INTERGENIC      |               |                    |                    |
| SNP_109590_A_224   | NW_004518095.1 | scaffold3389 | 224                     | GG                              | TT                 | TT               | INTERGENIC      |               |                    |                    |
| SNP_109591_A_714   | NW_004518098.1 | scaffold3392 | 714                     | AA                              | TT                 | TT               | INTERGENIC      |               |                    |                    |
| SNP_109592_A_830   | NW_004518098.1 | scaffold3392 | 830                     | AA                              | GG                 | GG               | INTERGENIC      |               |                    |                    |
| SNP_109593_A_1013  | NW_004518098.1 | scaffold3392 | 1013                    | CC                              | AA                 | AA               | INTERGENIC      |               |                    |                    |
| SNP_109594_A_1635  | NW_004518102.1 | scaffold3396 | 1635                    | GG                              | AA                 | AA               | INTERGENIC      |               |                    |                    |
| SNP_109595_A_2628  | NW_004518102.1 | scaffold3396 | 2628                    | AA                              | TT                 | TT               | INTERGENIC      |               |                    |                    |
| SNP_109596_A_15144 | NW_004518102.1 | scaffold3396 | 15144                   | TT                              | CC                 | CC               | INTERGENIC      |               |                    |                    |
| SNP_109597_A_15181 | NW_004518102.1 | scaffold3396 | 15181                   | GG                              | TT                 | TT               | INTERGENIC      |               |                    |                    |
| SNP_109599_A_15203 | NW_004518102.1 | scaffold3396 | 15203                   | CC                              | TT                 | TT               | INTERGENIC      |               |                    |                    |

| SNPs IDs            | Chromosome IDs | Chromosomes  | Physical positions (bp) | CDC Frontier (Reference genome) | (Pusa 1103 & HPNB) | (ILWC 46 & LPNB) | Sequence Components of genome | Gene accession IDs | Putative functions                                    |
|---------------------|----------------|--------------|-------------------------|---------------------------------|--------------------|------------------|-------------------------------|--------------------|-------------------------------------------------------|
| SNP_109600_A_15561  | NW_004518102.1 | scaffold3396 | 15561                   | GG                              | TT                 | TT               | INTERGENIC                    |                    |                                                       |
| SNP_109601_A_17973  | NW_004518102.1 | scaffold3396 | 17973                   | AA                              | TT                 | TT               | INTERGENIC                    |                    |                                                       |
| SNP_109602_A_21906  | NW_004518102.1 | scaffold3396 | 21906                   | CC                              | TT                 | TT               | INTERGENIC                    |                    |                                                       |
| SNP_109603_A_21934  | NW_004518102.1 | scaffold3396 | 21934                   | CC                              | TT                 | TT               | INTERGENIC                    |                    |                                                       |
| SNP_109604_A_21963  | NW_004518102.1 | scaffold3396 | 21963                   | CC                              | TT                 | TT               | INTERGENIC                    |                    |                                                       |
| SNP_109605_A_22007  | NW_004518102.1 | scaffold3396 | 22007                   | CC                              | TT                 | TT               | INTERGENIC                    |                    |                                                       |
| SNP_109606_A_4549   | NW_004518103.1 | scaffold3397 | 4549                    | GG                              | AA                 | AA               | INTERGENIC                    |                    |                                                       |
| SNP_109608_A_7956   | NW_004518103.1 | scaffold3397 | 7956                    | TT                              | CC                 | CC               | INTERGENIC                    |                    |                                                       |
| SNP_109610_A_18163  | NW_004518103.1 | scaffold3397 | 18163                   | TT                              | CC                 | CC               | INTERGENIC                    |                    |                                                       |
| SNP_109611_A_28299  | NW_004518103.1 | scaffold3397 | 28299                   | GG                              | AA                 | AA               | INTERGENIC                    |                    |                                                       |
| SNP_109612_A_28303  | NW_004518103.1 | scaffold3397 | 28303                   | GG                              | TT                 | TT               | INTERGENIC                    |                    |                                                       |
| SNP_109613_A_50699  | NW_004518103.1 | scaffold3397 | 50699                   | TT                              | CC                 | CC               | INTERGENIC                    |                    |                                                       |
| SNP_109614_A_50899  | NW_004518103.1 | scaffold3397 | 50899                   | AA                              | TT                 | TT               | INTERGENIC                    |                    |                                                       |
| SNP_109615_A_55196  | NW_004518103.1 | scaffold3397 | 55196                   | GG                              | AA                 | AA               | INTERGENIC                    |                    |                                                       |
| SNP_109616_A_56546  | NW_004518103.1 | scaffold3397 | 56546                   | TT                              | CC                 | CC               | INTERGENIC                    |                    |                                                       |
| SNP_109617_A_62768  | NW_004518103.1 | scaffold3397 | 62768                   | GG                              | AA                 | AA               | NON_SYNONYMOUS_CODING         | 101508661          | uncharacterized LOC101508661                          |
| SNP_109618_A_88839  | NW_004518103.1 | scaffold3397 | 88839                   | AA                              | TT                 | TT               | URR                           | 101509188          | pentatricopeptide repeat-containing protein At1g18485 |
| SNP_109619_A_97807  | NW_004518103.1 | scaffold3397 | 97807                   | CC                              | AA                 | AA               | NON_SYNONYMOUS_CODING         | 101509514          | uncharacterized LOC101509514                          |
| SNP_109620_A_107768 | NW_004518103.1 | scaffold3397 | 107768                  | TT                              | GG                 | GG               | URR                           | 101509835          | uridine 5'-monophosphate synthase-like                |
| SNP_109621_A_108057 | NW_004518103.1 | scaffold3397 | 108057                  | AA                              | GG                 | GG               | URR                           | 101509835          | uridine 5'-monophosphate synthase-like                |
| SNP_109622_A_108564 | NW_004518103.1 | scaffold3397 | 108564                  | AA                              | GG                 | GG               | INTERGENIC                    |                    |                                                       |
| SNP_109623_A_951    | NW_004518105.1 | scaffold3403 | 951                     | TT                              | AA                 | AA               | INTERGENIC                    |                    |                                                       |

| SNPs IDs           | Chromosome IDs | Chromosomes  | Physical positions (bp) | CDC Frontier (Reference genome) | (Pusa 1103 & HPNB) | (ILWC 46 & LPNB) | Sequence genome | Components of | Gene accession IDs | Putative functions |
|--------------------|----------------|--------------|-------------------------|---------------------------------|--------------------|------------------|-----------------|---------------|--------------------|--------------------|
| SNP_109625_A_1297  | NW_004518106.1 | scaffold3404 | 1297                    | GG                              | AA                 | AA               | INTERGENIC      |               |                    |                    |
| SNP_109626_A_1705  | NW_004518106.1 | scaffold3404 | 1705                    | TT                              | CC                 | CC               | INTERGENIC      |               |                    |                    |
| SNP_109627_A_1933  | NW_004518106.1 | scaffold3404 | 1933                    | TT                              | GG                 | GG               | INTERGENIC      |               |                    |                    |
| SNP_109628_A_2035  | NW_004518106.1 | scaffold3404 | 2035                    | CC                              | AA                 | AA               | INTERGENIC      |               |                    |                    |
| SNP_109629_A_2136  | NW_004518106.1 | scaffold3404 | 2136                    | CC                              | GG                 | GG               | INTERGENIC      |               |                    |                    |
| SNP_109630_A_2300  | NW_004518106.1 | scaffold3404 | 2300                    | TT                              | AA                 | AA               | INTERGENIC      |               |                    |                    |
| SNP_109631_A_1359  | NW_004518108.1 | scaffold3406 | 1359                    | AA                              | TT                 | TT               | INTERGENIC      |               |                    |                    |
| SNP_109633_A_1852  | NW_004518108.1 | scaffold3406 | 1852                    | TT                              | AA                 | AA               | INTERGENIC      |               |                    |                    |
| SNP_109635_A_463   | NW_004518109.1 | scaffold3407 | 463                     | GG                              | AA                 | AA               | INTERGENIC      |               |                    |                    |
| SNP_109636_A_278   | NW_004518111.1 | scaffold3410 | 278                     | GG                              | CC                 | CC               | INTERGENIC      |               |                    |                    |
| SNP_109637_A_538   | NW_004518111.1 | scaffold3410 | 538                     | CC                              | TT                 | TT               | INTERGENIC      |               |                    |                    |
| SNP_109638_A_6148  | NW_004518112.1 | scaffold3411 | 6148                    | TT                              | CC                 | CC               | INTERGENIC      |               |                    |                    |
| SNP_109639_A_6218  | NW_004518112.1 | scaffold3411 | 6218                    | TT                              | AA                 | AA               | INTERGENIC      |               |                    |                    |
| SNP_109641_A_6241  | NW_004518112.1 | scaffold3411 | 6241                    | AA                              | CC                 | CC               | INTERGENIC      |               |                    |                    |
| SNP_109642_A_6255  | NW_004518112.1 | scaffold3411 | 6255                    | AA                              | TT                 | TT               | INTERGENIC      |               |                    |                    |
| SNP_109643_A_6274  | NW_004518112.1 | scaffold3411 | 6274                    | AA                              | TT                 | TT               | INTERGENIC      |               |                    |                    |
| SNP_109644_A_689   | NW_004518113.1 | scaffold3412 | 689                     | AA                              | TT                 | TT               | INTERGENIC      |               |                    |                    |
| SNP_109645_A_707   | NW_004518113.1 | scaffold3412 | 707                     | TT                              | CC                 | CC               | INTERGENIC      |               |                    |                    |
| SNP_109646_A_973   | NW_004518113.1 | scaffold3412 | 973                     | CC                              | AA                 | AA               | INTERGENIC      |               |                    |                    |
| SNP_109647_A_23506 | NW_004518119.1 | scaffold3422 | 23506                   | TT                              | CC                 | CC               | INTERGENIC      |               |                    |                    |
| SNP_109648_A_23515 | NW_004518119.1 | scaffold3422 | 23515                   | CC                              | TT                 | TT               | INTERGENIC      |               |                    |                    |
| SNP_109650_A_82    | NW_004518120.1 | scaffold3423 | 82                      | TT                              | GG                 | GG               | INTERGENIC      |               |                    |                    |

| SNPs IDs          | Chromosome IDs | Chromosomes  | Physical positions (bp) | CDC Frontier (Reference genome) | (Pusa 1103 & HPNB) | (ILWC 46 & LPNB) | Sequence genome | Components of | Gene accession IDs | Putative functions |
|-------------------|----------------|--------------|-------------------------|---------------------------------|--------------------|------------------|-----------------|---------------|--------------------|--------------------|
| SNP_109651_A_196  | NW_004518120.1 | scaffold3423 | 196                     | GG                              | TT                 | TT               | INTERGENIC      |               |                    |                    |
| SNP_109652_A_316  | NW_004518120.1 | scaffold3423 | 316                     | CC                              | AA                 | AA               | INTERGENIC      |               |                    |                    |
| SNP_109653_A_343  | NW_004518120.1 | scaffold3423 | 343                     | CC                              | TT                 | TT               | INTERGENIC      |               |                    |                    |
| SNP_109654_A_356  | NW_004518120.1 | scaffold3423 | 356                     | CC                              | TT                 | TT               | INTERGENIC      |               |                    |                    |
| SNP_109655_A_378  | NW_004518120.1 | scaffold3423 | 378                     | AA                              | CC                 | CC               | INTERGENIC      |               |                    |                    |
| SNP_109656_A_399  | NW_004518120.1 | scaffold3423 | 399                     | TT                              | CC                 | CC               | INTERGENIC      |               |                    |                    |
| SNP_109657_A_475  | NW_004518120.1 | scaffold3423 | 475                     | CC                              | TT                 | TT               | INTERGENIC      |               |                    |                    |
| SNP_109658_A_479  | NW_004518120.1 | scaffold3423 | 479                     | GG                              | CC                 | CC               | INTERGENIC      |               |                    |                    |
| SNP_109659_A_482  | NW_004518120.1 | scaffold3423 | 482                     | AA                              | TT                 | TT               | INTERGENIC      |               |                    |                    |
| SNP_109660_A_503  | NW_004518120.1 | scaffold3423 | 503                     | CC                              | GG                 | GG               | INTERGENIC      |               |                    |                    |
| SNP_109661_A_530  | NW_004518120.1 | scaffold3423 | 530                     | AA                              | GG                 | GG               | INTERGENIC      |               |                    |                    |
| SNP_109662_A_561  | NW_004518120.1 | scaffold3423 | 561                     | TT                              | CC                 | CC               | INTERGENIC      |               |                    |                    |
| SNP_109663_A_563  | NW_004518120.1 | scaffold3423 | 563                     | TT                              | AA                 | AA               | INTERGENIC      |               |                    |                    |
| SNP_109664_A_571  | NW_004518120.1 | scaffold3423 | 571                     | TT                              | AA                 | AA               | INTERGENIC      |               |                    |                    |
| SNP_109665_A_682  | NW_004518120.1 | scaffold3423 | 682                     | TT                              | CC                 | CC               | INTERGENIC      |               |                    |                    |
| SNP_109666_A_1022 | NW_004518120.1 | scaffold3423 | 1022                    | AA                              | TT                 | TT               | INTERGENIC      |               |                    |                    |
| SNP_109667_A_1040 | NW_004518120.1 | scaffold3423 | 1040                    | AA                              | GG                 | GG               | INTERGENIC      |               |                    |                    |
| SNP_109668_A_1041 | NW_004518120.1 | scaffold3423 | 1041                    | AA                              | TT                 | TT               | INTERGENIC      |               |                    |                    |
| SNP_109669_A_1164 | NW_004518120.1 | scaffold3423 | 1164                    | TT                              | AA                 | AA               | INTERGENIC      |               |                    |                    |
| SNP_109670_A_760  | NW_004518121.1 | scaffold3424 | 760                     | TT                              | GG                 | GG               | INTERGENIC      |               |                    |                    |
| SNP_109671_A_323  | NW_004518122.1 | scaffold3426 | 323                     | AA                              | GG                 | GG               | INTERGENIC      |               |                    |                    |
| SNP_109672_A_405  | NW_004518122.1 | scaffold3426 | 405                     | AA                              | GG                 | GG               | INTERGENIC      |               |                    |                    |

| SNPs IDs           | Chromosome IDs | Chromosomes  | Physical positions (bp) | CDC Frontier (Reference genome) | (Pusa 1103 & HPNB) | (ILWC 46 & LPNB) | Sequence genome | Components of | Gene accession IDs | Putative functions |
|--------------------|----------------|--------------|-------------------------|---------------------------------|--------------------|------------------|-----------------|---------------|--------------------|--------------------|
| SNP_109673_A_412   | NW_004518122.1 | scaffold3426 | 412                     | AA                              | GG                 | GG               | INTERGENIC      |               |                    |                    |
| SNP_109674_A_422   | NW_004518122.1 | scaffold3426 | 422                     | AA                              | TT                 | TT               | INTERGENIC      |               |                    |                    |
| SNP_109675_A_424   | NW_004518122.1 | scaffold3426 | 424                     | AA                              | TT                 | TT               | INTERGENIC      |               |                    |                    |
| SNP_109676_A_11065 | NW_004518125.1 | scaffold3429 | 11065                   | AA                              | GG                 | GG               | INTERGENIC      |               |                    |                    |
| SNP_109677_A_11224 | NW_004518125.1 | scaffold3429 | 11224                   | AA                              | GG                 | GG               | INTERGENIC      |               |                    |                    |
| SNP_109678_A_359   | NW_004518127.1 | scaffold3432 | 359                     | GG                              | TT                 | TT               | INTERGENIC      |               |                    |                    |
| SNP_109679_A_469   | NW_004518127.1 | scaffold3432 | 469                     | GG                              | AA                 | AA               | INTERGENIC      |               |                    |                    |
| SNP_109680_A_14149 | NW_004518127.1 | scaffold3432 | 14149                   | AA                              | CC                 | CC               | INTERGENIC      |               |                    |                    |
| SNP_109681_A_23889 | NW_004518127.1 | scaffold3432 | 23889                   | CC                              | AA                 | AA               | INTERGENIC      |               |                    |                    |
| SNP_109683_A_24352 | NW_004518127.1 | scaffold3432 | 24352                   | AA                              | TT                 | TT               | INTERGENIC      |               |                    |                    |
| SNP_109684_A_24365 | NW_004518127.1 | scaffold3432 | 24365                   | CC                              | TT                 | TT               | INTERGENIC      |               |                    |                    |
| SNP_109685_A_24709 | NW_004518127.1 | scaffold3432 | 24709                   | AA                              | TT                 | TT               | INTERGENIC      |               |                    |                    |
| SNP_109686_A_25064 | NW_004518127.1 | scaffold3432 | 25064                   | TT                              | CC                 | CC               | INTERGENIC      |               |                    |                    |
| SNP_109687_A_25071 | NW_004518127.1 | scaffold3432 | 25071                   | TT                              | CC                 | CC               | INTERGENIC      |               |                    |                    |
| SNP_109688_A_25076 | NW_004518127.1 | scaffold3432 | 25076                   | GG                              | TT                 | TT               | INTERGENIC      |               |                    |                    |
| SNP_109689_A_26441 | NW_004518127.1 | scaffold3432 | 26441                   | AA                              | GG                 | GG               | INTERGENIC      |               |                    |                    |
| SNP_109690_A_35508 | NW_004518127.1 | scaffold3432 | 35508                   | TT                              | CC                 | CC               | INTRON          | 101514264     | Unknown function   |                    |
| SNP_109691_A_35515 | NW_004518127.1 | scaffold3432 | 35515                   | TT                              | CC                 | CC               | INTRON          | 101514264     | Unknown function   |                    |
| SNP_109692_A_35684 | NW_004518127.1 | scaffold3432 | 35684                   | AA                              | TT                 | TT               | INTRON          | 101514264     | Unknown function   |                    |
| SNP_109693_A_35708 | NW_004518127.1 | scaffold3432 | 35708                   | CC                              | TT                 | TT               | INTRON          | 101514264     | Unknown function   |                    |
| SNP_109694_A_35714 | NW_004518127.1 | scaffold3432 | 35714                   | CC                              | TT                 | TT               | INTRON          | 101514264     | Unknown function   |                    |
| SNP_109695_A_35716 | NW_004518127.1 | scaffold3432 | 35716                   | TT                              | AA                 | AA               | INTRON          | 101514264     | Unknown function   |                    |

| SNPs IDs           | Chromosome IDs | Chromosomes  | Physical positions (bp) | CDC Frontier (Reference genome) | (Pusa 1103 & HPNB) | (ILWC 46 & LPNB) | Sequence Components of genome | Gene accession IDs | Putative functions |
|--------------------|----------------|--------------|-------------------------|---------------------------------|--------------------|------------------|-------------------------------|--------------------|--------------------|
| SNP_109696_A_67982 | NW_004518127.1 | scaffold3432 | 67982                   | TT                              | CC                 | CC               | INTERGENIC                    |                    |                    |
| SNP_109697_A_68054 | NW_004518127.1 | scaffold3432 | 68054                   | CC                              | TT                 | TT               | INTERGENIC                    |                    |                    |
| SNP_109698_A_68252 | NW_004518127.1 | scaffold3432 | 68252                   | CC                              | TT                 | TT               | INTERGENIC                    |                    |                    |
| SNP_109699_A_68405 | NW_004518127.1 | scaffold3432 | 68405                   | AA                              | CC                 | CC               | INTERGENIC                    |                    |                    |
| SNP_109700_A_79273 | NW_004518127.1 | scaffold3432 | 79273                   | GG                              | TT                 | TT               | INTERGENIC                    |                    |                    |
| SNP_109701_A_79541 | NW_004518127.1 | scaffold3432 | 79541                   | AA                              | TT                 | TT               | INTERGENIC                    |                    |                    |
| SNP_109702_A_79584 | NW_004518127.1 | scaffold3432 | 79584                   | TT                              | CC                 | CC               | INTERGENIC                    |                    |                    |
| SNP_109703_A_79585 | NW_004518127.1 | scaffold3432 | 79585                   | TT                              | GG                 | GG               | INTERGENIC                    |                    |                    |
| SNP_109704_A_79604 | NW_004518127.1 | scaffold3432 | 79604                   | CC                              | TT                 | TT               | INTERGENIC                    |                    |                    |
| SNP_109705_A_79869 | NW_004518127.1 | scaffold3432 | 79869                   | GG                              | TT                 | TT               | INTERGENIC                    |                    |                    |
| SNP_109706_A_96449 | NW_004518127.1 | scaffold3432 | 96449                   | AA                              | GG                 | GG               | INTRON                        | 101514579          | Unknown function   |
| SNP_109707_A_96505 | NW_004518127.1 | scaffold3432 | 96505                   | GG                              | CC                 | CC               | INTRON                        | 101514579          | Unknown function   |
| SNP_109709_A_7685  | NW_004518129.1 | scaffold3434 | 7685                    | TT                              | AA                 | AA               | INTERGENIC                    |                    |                    |
| SNP_109710_A_7686  | NW_004518129.1 | scaffold3434 | 7686                    | AA                              | TT                 | TT               | INTERGENIC                    |                    |                    |
| SNP_109711_A_11005 | NW_004518129.1 | scaffold3434 | 11005                   | AA                              | GG                 | GG               | INTERGENIC                    |                    |                    |
| SNP_109712_A_11107 | NW_004518129.1 | scaffold3434 | 11107                   | AA                              | TT                 | TT               | INTERGENIC                    |                    |                    |
| SNP_109714_A_11770 | NW_004518129.1 | scaffold3434 | 11770                   | TT                              | CC                 | CC               | INTERGENIC                    |                    |                    |
| SNP_109715_A_11868 | NW_004518129.1 | scaffold3434 | 11868                   | GG                              | TT                 | TT               | INTERGENIC                    |                    |                    |
| SNP_109716_A_11920 | NW_004518129.1 | scaffold3434 | 11920                   | CC                              | TT                 | TT               | INTERGENIC                    |                    |                    |
| SNP_109717_A_5733  | NW_004518130.1 | scaffold3435 | 5733                    | AA                              | TT                 | TT               | INTERGENIC                    |                    |                    |
| SNP_109718_A_10605 | NW_004518130.1 | scaffold3435 | 10605                   | AA                              | GG                 | GG               | INTERGENIC                    |                    |                    |
| SNP_109719_A_10710 | NW_004518130.1 | scaffold3435 | 10710                   | CC                              | TT                 | TT               | INTERGENIC                    |                    |                    |

| SNPs IDs           | Chromosome IDs | Chromosomes  | Physical positions (bp) | CDC Frontier (Reference genome) | (Pusa 1103 & HPNB) | (ILWC 46 & LPNB) | Sequence genome | Components of | Gene accession IDs | Putative functions |
|--------------------|----------------|--------------|-------------------------|---------------------------------|--------------------|------------------|-----------------|---------------|--------------------|--------------------|
| SNP_109720_A_10722 | NW_004518130.1 | scaffold3435 | 10722                   | TT                              | CC                 | CC               | INTERGENIC      |               |                    |                    |
| SNP_109721_A_10736 | NW_004518130.1 | scaffold3435 | 10736                   | TT                              | CC                 | CC               | INTERGENIC      |               |                    |                    |
| SNP_109722_A_16157 | NW_004518130.1 | scaffold3435 | 16157                   | GG                              | TT                 | TT               | INTERGENIC      |               |                    |                    |
| SNP_109723_A_16168 | NW_004518130.1 | scaffold3435 | 16168                   | CC                              | AA                 | AA               | INTERGENIC      |               |                    |                    |
| SNP_109724_A_16190 | NW_004518130.1 | scaffold3435 | 16190                   | TT                              | CC                 | CC               | INTERGENIC      |               |                    |                    |
| SNP_109725_A_16385 | NW_004518130.1 | scaffold3435 | 16385                   | GG                              | AA                 | AA               | INTERGENIC      |               |                    |                    |
| SNP_109726_A_33320 | NW_004518130.1 | scaffold3435 | 33320                   | CC                              | TT                 | TT               | INTERGENIC      |               |                    |                    |
| SNP_109727_A_33335 | NW_004518130.1 | scaffold3435 | 33335                   | CC                              | TT                 | TT               | INTERGENIC      |               |                    |                    |
| SNP_109728_A_1645  | NW_004518131.1 | scaffold3436 | 1645                    | CC                              | TT                 | TT               | INTERGENIC      |               |                    |                    |
| SNP_109729_A_8881  | NW_004518131.1 | scaffold3436 | 8881                    | TT                              | AA                 | AA               | INTERGENIC      |               |                    |                    |
| SNP_109731_A_9569  | NW_004518131.1 | scaffold3436 | 9569                    | TT                              | GG                 | GG               | INTERGENIC      |               |                    |                    |
| SNP_109732_A_9668  | NW_004518131.1 | scaffold3436 | 9668                    | AA                              | TT                 | TT               | INTERGENIC      |               |                    |                    |
| SNP_109735_A_13048 | NW_004518131.1 | scaffold3436 | 13048                   | GG                              | AA                 | AA               | INTERGENIC      |               |                    |                    |
| SNP_109736_A_13094 | NW_004518131.1 | scaffold3436 | 13094                   | CC                              | TT                 | TT               | INTERGENIC      |               |                    |                    |
| SNP_109737_A_13098 | NW_004518131.1 | scaffold3436 | 13098                   | GG                              | AA                 | AA               | INTERGENIC      |               |                    |                    |
| SNP_109738_A_13182 | NW_004518131.1 | scaffold3436 | 13182                   | GG                              | AA                 | AA               | INTERGENIC      |               |                    |                    |
| SNP_109739_A_13195 | NW_004518131.1 | scaffold3436 | 13195                   | GG                              | TT                 | TT               | INTERGENIC      |               |                    |                    |
| SNP_109740_A_13208 | NW_004518131.1 | scaffold3436 | 13208                   | AA                              | GG                 | GG               | INTERGENIC      |               |                    |                    |
| SNP_109741_A_13213 | NW_004518131.1 | scaffold3436 | 13213                   | GG                              | AA                 | AA               | INTERGENIC      |               |                    |                    |
| SNP_109742_A_13263 | NW_004518131.1 | scaffold3436 | 13263                   | CC                              | AA                 | AA               | INTERGENIC      |               |                    |                    |
| SNP_109743_A_13296 | NW_004518131.1 | scaffold3436 | 13296                   | AA                              | GG                 | GG               | INTERGENIC      |               |                    |                    |
| SNP_109744_A_13355 | NW_004518131.1 | scaffold3436 | 13355                   | TT                              | CC                 | CC               | INTERGENIC      |               |                    |                    |

| SNPs IDs           | Chromosome IDs | Chromosomes  | Physical positions (bp) | CDC Frontier (Reference genome) | (Pusa 1103 & HPNB) | (ILWC 46 & LPNB) | Sequence genome | Components of | Gene accession IDs | Putative functions |
|--------------------|----------------|--------------|-------------------------|---------------------------------|--------------------|------------------|-----------------|---------------|--------------------|--------------------|
| SNP_109745_A_13376 | NW_004518131.1 | scaffold3436 | 13376                   | TT                              | AA                 | AA               | INTERGENIC      |               |                    |                    |
| SNP_109746_A_13523 | NW_004518131.1 | scaffold3436 | 13523                   | GG                              | CC                 | CC               | INTERGENIC      |               |                    |                    |
| SNP_109747_A_13563 | NW_004518131.1 | scaffold3436 | 13563                   | TT                              | AA                 | AA               | INTERGENIC      |               |                    |                    |
| SNP_109748_A_13773 | NW_004518131.1 | scaffold3436 | 13773                   | CC                              | TT                 | TT               | INTERGENIC      |               |                    |                    |
| SNP_109749_A_1629  | NW_004518132.1 | scaffold3437 | 1629                    | AA                              | TT                 | TT               | INTERGENIC      |               |                    |                    |
| SNP_109750_A_1670  | NW_004518132.1 | scaffold3437 | 1670                    | AA                              | TT                 | TT               | INTERGENIC      |               |                    |                    |
| SNP_109751_A_2947  | NW_004518133.1 | scaffold3438 | 2947                    | AA                              | TT                 | TT               | INTERGENIC      |               |                    |                    |
| SNP_109752_A_2961  | NW_004518133.1 | scaffold3438 | 2961                    | AA                              | TT                 | TT               | INTERGENIC      |               |                    |                    |
| SNP_109753_A_9363  | NW_004518133.1 | scaffold3438 | 9363                    | CC                              | TT                 | TT               | INTERGENIC      |               |                    |                    |
| SNP_109754_A_11661 | NW_004518133.1 | scaffold3438 | 11661                   | TT                              | AA                 | AA               | INTERGENIC      |               |                    |                    |
| SNP_109755_A_11943 | NW_004518133.1 | scaffold3438 | 11943                   | CC                              | AA                 | AA               | INTERGENIC      |               |                    |                    |
| SNP_109756_A_12038 | NW_004518133.1 | scaffold3438 | 12038                   | TT                              | AA                 | AA               | INTERGENIC      |               |                    |                    |
| SNP_109757_A_12193 | NW_004518133.1 | scaffold3438 | 12193                   | CC                              | TT                 | TT               | INTERGENIC      |               |                    |                    |
| SNP_109758_A_12384 | NW_004518133.1 | scaffold3438 | 12384                   | TT                              | AA                 | AA               | INTERGENIC      |               |                    |                    |
| SNP_109759_A_12392 | NW_004518133.1 | scaffold3438 | 12392                   | TT                              | AA                 | AA               | INTERGENIC      |               |                    |                    |
| SNP_109760_A_12393 | NW_004518133.1 | scaffold3438 | 12393                   | GG                              | TT                 | TT               | INTERGENIC      |               |                    |                    |
| SNP_109761_A_12419 | NW_004518133.1 | scaffold3438 | 12419                   | GG                              | TT                 | TT               | INTERGENIC      |               |                    |                    |
| SNP_109762_A_12441 | NW_004518133.1 | scaffold3438 | 12441                   | CC                              | TT                 | TT               | INTERGENIC      |               |                    |                    |
| SNP_109763_A_12596 | NW_004518133.1 | scaffold3438 | 12596                   | TT                              | AA                 | AA               | INTERGENIC      |               |                    |                    |
| SNP_109764_A_12609 | NW_004518133.1 | scaffold3438 | 12609                   | TT                              | AA                 | AA               | INTERGENIC      |               |                    |                    |
| SNP_109765_A_12611 | NW_004518133.1 | scaffold3438 | 12611                   | CC                              | AA                 | AA               | INTERGENIC      |               |                    |                    |
| SNP_109766_A_12636 | NW_004518133.1 | scaffold3438 | 12636                   | CC                              | TT                 | TT               | INTERGENIC      |               |                    |                    |



| SNPs IDs           | Chromosome IDs | Chromosomes  | Physical positions (bp) | CDC Frontier (Reference genome) | (Pusa 1103 & HPNB) | (ILWC 46 & LPNB) | Sequence Components of genome | Gene accession IDs | Putative functions |
|--------------------|----------------|--------------|-------------------------|---------------------------------|--------------------|------------------|-------------------------------|--------------------|--------------------|
| SNP_109767_A_12645 | NW_004518133.1 | scaffold3438 | 12645                   | TT                              | CC                 | CC               | INTERGENIC                    |                    |                    |
| SNP_109769_A_12870 | NW_004518133.1 | scaffold3438 | 12870                   | CC                              | TT                 | TT               | INTERGENIC                    |                    |                    |
| SNP_109770_A_12877 | NW_004518133.1 | scaffold3438 | 12877                   | AA                              | GG                 | GG               | INTERGENIC                    |                    |                    |
| SNP_109771_A_12916 | NW_004518133.1 | scaffold3438 | 12916                   | GG                              | AA                 | AA               | INTERGENIC                    |                    |                    |
| SNP_109772_A_12947 | NW_004518133.1 | scaffold3438 | 12947                   | TT                              | AA                 | AA               | INTERGENIC                    |                    |                    |
| SNP_109773_A_12960 | NW_004518133.1 | scaffold3438 | 12960                   | CC                              | TT                 | TT               | INTERGENIC                    |                    |                    |
| SNP_109774_A_22761 | NW_004518133.1 | scaffold3438 | 22761                   | CC                              | TT                 | TT               | DRR                           | 101515552          | Unknown function   |
| SNP_109775_A_22790 | NW_004518133.1 | scaffold3438 | 22790                   | GG                              | TT                 | TT               | DRR                           | 101515552          | Unknown function   |
| SNP_109776_A_22966 | NW_004518133.1 | scaffold3438 | 22966                   | GG                              | AA                 | AA               | SYNONYMOUS_CODING             | 101515552          | Unknown function   |
| SNP_109777_A_23067 | NW_004518133.1 | scaffold3438 | 23067                   | AA                              | GG                 | GG               | SYNONYMOUS_CODING             | 101515552          | Unknown function   |
| SNP_109778_A_17152 | NW_004518141.1 | scaffold3447 | 17152                   | GG                              | AA                 | AA               | INTERGENIC                    |                    |                    |
| SNP_109779_A_22379 | NW_004518141.1 | scaffold3447 | 22379                   | CC                              | TT                 | TT               | URR                           | 101488307          | expansin-B15-like  |
| SNP_109780_A_22414 | NW_004518141.1 | scaffold3447 | 22414                   | CC                              | TT                 | TT               | URR                           | 101488307          | expansin-B15-like  |
| SNP_109781_A_34589 | NW_004518141.1 | scaffold3447 | 34589                   | AA                              | TT                 | TT               | INTERGENIC                    |                    |                    |
| SNP_109782_A_5096  | NW_004518142.1 | scaffold3448 | 5096                    | CC                              | TT                 | TT               | INTERGENIC                    |                    |                    |
| SNP_109783_A_5227  | NW_004518142.1 | scaffold3448 | 5227                    | AA                              | CC                 | CC               | INTERGENIC                    |                    |                    |
| SNP_109784_A_5308  | NW_004518142.1 | scaffold3448 | 5308                    | AA                              | GG                 | GG               | INTERGENIC                    |                    |                    |
| SNP_109785_A_5485  | NW_004518142.1 | scaffold3448 | 5485                    | GG                              | AA                 | AA               | INTERGENIC                    |                    |                    |
| SNP_109786_A_5489  | NW_004518142.1 | scaffold3448 | 5489                    | CC                              | TT                 | TT               | INTERGENIC                    |                    |                    |
| SNP_109787_A_5618  | NW_004518142.1 | scaffold3448 | 5618                    | TT                              | CC                 | CC               | INTERGENIC                    |                    |                    |
| SNP_109788_A_5796  | NW_004518142.1 | scaffold3448 | 5796                    | CC                              | TT                 | TT               | INTERGENIC                    |                    |                    |
| SNP_109789_A_5836  | NW_004518142.1 | scaffold3448 | 5836                    | TT                              | CC                 | CC               | INTERGENIC                    |                    |                    |

| SNPs IDs           | Chromosome IDs | Chromosomes  | Physical positions (bp) | CDC Frontier (Reference genome) | (Pusa 1103 & HPNB) | (ILWC 46 & LPNB) | Sequence genome | Components of | Gene accession IDs | Putative functions |
|--------------------|----------------|--------------|-------------------------|---------------------------------|--------------------|------------------|-----------------|---------------|--------------------|--------------------|
| SNP_109790_A_2515  | NW_004518143.1 | scaffold3450 | 2515                    | TT                              | AA                 | AA               | INTERGENIC      |               |                    |                    |
| SNP_109791_A_3205  | NW_004518143.1 | scaffold3450 | 3205                    | AA                              | GG                 | GG               | INTERGENIC      |               |                    |                    |
| SNP_109792_A_3206  | NW_004518143.1 | scaffold3450 | 3206                    | TT                              | AA                 | AA               | INTERGENIC      |               |                    |                    |
| SNP_109793_A_3211  | NW_004518143.1 | scaffold3450 | 3211                    | GG                              | TT                 | TT               | INTERGENIC      |               |                    |                    |
| SNP_109794_A_13478 | NW_004518143.1 | scaffold3450 | 13478                   | TT                              | CC                 | CC               | INTERGENIC      |               |                    |                    |
| SNP_109796_A_1178  | NW_004518145.1 | scaffold3453 | 1178                    | TT                              | GG                 | GG               | INTERGENIC      |               |                    |                    |
| SNP_109797_A_1922  | NW_004518145.1 | scaffold3453 | 1922                    | TT                              | CC                 | CC               | INTERGENIC      |               |                    |                    |
| SNP_109798_A_2035  | NW_004518145.1 | scaffold3453 | 2035                    | TT                              | CC                 | CC               | INTERGENIC      |               |                    |                    |
| SNP_109799_A_2157  | NW_004518145.1 | scaffold3453 | 2157                    | AA                              | TT                 | TT               | INTERGENIC      |               |                    |                    |
| SNP_109800_A_2158  | NW_004518145.1 | scaffold3453 | 2158                    | TT                              | GG                 | GG               | INTERGENIC      |               |                    |                    |
| SNP_109801_A_299   | NW_004518147.1 | scaffold3455 | 299                     | TT                              | CC                 | CC               | INTERGENIC      |               |                    |                    |
| SNP_109802_A_413   | NW_004518147.1 | scaffold3455 | 413                     | CC                              | AA                 | AA               | INTERGENIC      |               |                    |                    |
| SNP_109803_A_447   | NW_004518147.1 | scaffold3455 | 447                     | AA                              | CC                 | CC               | INTERGENIC      |               |                    |                    |
| SNP_109804_A_675   | NW_004518147.1 | scaffold3455 | 675                     | AA                              | GG                 | GG               | INTERGENIC      |               |                    |                    |
| SNP_109805_A_676   | NW_004518147.1 | scaffold3455 | 676                     | AA                              | TT                 | TT               | INTERGENIC      |               |                    |                    |
| SNP_109806_A_709   | NW_004518147.1 | scaffold3455 | 709                     | TT                              | CC                 | CC               | INTERGENIC      |               |                    |                    |
| SNP_109807_A_761   | NW_004518147.1 | scaffold3455 | 761                     | AA                              | GG                 | GG               | INTERGENIC      |               |                    |                    |
| SNP_109808_A_769   | NW_004518147.1 | scaffold3455 | 769                     | AA                              | TT                 | TT               | INTERGENIC      |               |                    |                    |
| SNP_109809_A_902   | NW_004518147.1 | scaffold3455 | 902                     | GG                              | AA                 | AA               | INTERGENIC      |               |                    |                    |
| SNP_109810_A_903   | NW_004518147.1 | scaffold3455 | 903                     | AA                              | GG                 | GG               | INTERGENIC      |               |                    |                    |
| SNP_109811_A_1165  | NW_004518147.1 | scaffold3455 | 1165                    | AA                              | GG                 | GG               | INTERGENIC      |               |                    |                    |
| SNP_109812_A_718   | NW_004518148.1 | scaffold3457 | 718                     | TT                              | GG                 | GG               | INTERGENIC      |               |                    |                    |

| SNPs IDs           | Chromosome IDs | Chromosomes  | Physical positions (bp) | CDC Frontier (Reference genome) | (Pusa 1103 & HPNB) | (ILWC 46 & LPNB) | Sequence genome | Components of | Gene accession IDs | Putative functions |
|--------------------|----------------|--------------|-------------------------|---------------------------------|--------------------|------------------|-----------------|---------------|--------------------|--------------------|
| SNP_109814_A_2113  | NW_004518148.1 | scaffold3457 | 2113                    | AA                              | TT                 | TT               | INTERGENIC      |               |                    |                    |
| SNP_109815_A_4804  | NW_004518148.1 | scaffold3457 | 4804                    | AA                              | GG                 | GG               | INTERGENIC      |               |                    |                    |
| SNP_109816_A_4854  | NW_004518148.1 | scaffold3457 | 4854                    | CC                              | TT                 | TT               | INTERGENIC      |               |                    |                    |
| SNP_109817_A_4855  | NW_004518148.1 | scaffold3457 | 4855                    | GG                              | TT                 | TT               | INTERGENIC      |               |                    |                    |
| SNP_109818_A_4898  | NW_004518148.1 | scaffold3457 | 4898                    | CC                              | TT                 | TT               | INTERGENIC      |               |                    |                    |
| SNP_109819_A_4920  | NW_004518148.1 | scaffold3457 | 4920                    | TT                              | CC                 | CC               | INTERGENIC      |               |                    |                    |
| SNP_109820_A_7361  | NW_004518149.1 | scaffold3458 | 7361                    | TT                              | CC                 | CC               | INTERGENIC      |               |                    |                    |
| SNP_109821_A_9964  | NW_004518149.1 | scaffold3458 | 9964                    | CC                              | TT                 | TT               | INTERGENIC      |               |                    |                    |
| SNP_109822_A_10016 | NW_004518149.1 | scaffold3458 | 10016                   | AA                              | TT                 | TT               | INTERGENIC      |               |                    |                    |
| SNP_109823_A_10045 | NW_004518149.1 | scaffold3458 | 10045                   | AA                              | GG                 | GG               | INTERGENIC      |               |                    |                    |
| SNP_109824_A_12048 | NW_004518149.1 | scaffold3458 | 12048                   | AA                              | CC                 | CC               | INTERGENIC      |               |                    |                    |
| SNP_109825_A_8993  | NW_004518154.1 | scaffold3463 | 8993                    | TT                              | GG                 | GG               | INTERGENIC      |               |                    |                    |
| SNP_109826_A_9043  | NW_004518154.1 | scaffold3463 | 9043                    | TT                              | AA                 | AA               | INTERGENIC      |               |                    |                    |
| SNP_109827_A_9079  | NW_004518154.1 | scaffold3463 | 9079                    | TT                              | CC                 | CC               | INTERGENIC      |               |                    |                    |
| SNP_109828_A_9181  | NW_004518154.1 | scaffold3463 | 9181                    | GG                              | TT                 | TT               | INTERGENIC      |               |                    |                    |
| SNP_109829_A_9227  | NW_004518154.1 | scaffold3463 | 9227                    | GG                              | AA                 | AA               | INTERGENIC      |               |                    |                    |
| SNP_109830_A_9460  | NW_004518154.1 | scaffold3463 | 9460                    | TT                              | GG                 | GG               | INTERGENIC      |               |                    |                    |
| SNP_109831_A_10724 | NW_004518154.1 | scaffold3463 | 10724                   | TT                              | CC                 | CC               | INTERGENIC      |               |                    |                    |
| SNP_109832_A_10731 | NW_004518154.1 | scaffold3463 | 10731                   | AA                              | GG                 | GG               | INTERGENIC      |               |                    |                    |
| SNP_109833_A_12265 | NW_004518154.1 | scaffold3463 | 12265                   | CC                              | TT                 | TT               | INTERGENIC      |               |                    |                    |
| SNP_109834_A_12501 | NW_004518154.1 | scaffold3463 | 12501                   | AA                              | GG                 | GG               | INTERGENIC      |               |                    |                    |
| SNP_109835_A_12574 | NW_004518154.1 | scaffold3463 | 12574                   | TT                              | AA                 | AA               | INTERGENIC      |               |                    |                    |

| SNPs IDs           | Chromosome IDs | Chromosomes  | Physical positions (bp) | CDC Frontier (Reference genome) | (Pusa 1103 & HPNB) | (ILWC 46 & LPNB) | Sequence genome | Components of | Gene accession IDs       | Putative functions |
|--------------------|----------------|--------------|-------------------------|---------------------------------|--------------------|------------------|-----------------|---------------|--------------------------|--------------------|
| SNP_109836_A_12848 | NW_004518154.1 | scaffold3463 | 12848                   | AA                              | GG                 | GG               | INTERGENIC      |               |                          |                    |
| SNP_109837_A_15862 | NW_004518154.1 | scaffold3463 | 15862                   | CC                              | AA                 | AA               | INTERGENIC      |               |                          |                    |
| SNP_109838_A_15876 | NW_004518154.1 | scaffold3463 | 15876                   | AA                              | TT                 | TT               | INTERGENIC      |               |                          |                    |
| SNP_109839_A_15907 | NW_004518154.1 | scaffold3463 | 15907                   | AA                              | TT                 | TT               | INTERGENIC      |               |                          |                    |
| SNP_109840_A_15948 | NW_004518154.1 | scaffold3463 | 15948                   | TT                              | CC                 | CC               | INTERGENIC      |               |                          |                    |
| SNP_109841_A_8549  | NW_004518155.1 | scaffold3464 | 8549                    | GG                              | AA                 | AA               | URR             | 101488630     | F-box protein CPR30-like |                    |
| SNP_109842_A_11243 | NW_004518155.1 | scaffold3464 | 11243                   | TT                              | CC                 | CC               | INTERGENIC      |               |                          |                    |
| SNP_109843_A_13369 | NW_004518155.1 | scaffold3464 | 13369                   | AA                              | GG                 | GG               | INTERGENIC      |               |                          |                    |
| SNP_109844_A_13499 | NW_004518155.1 | scaffold3464 | 13499                   | TT                              | CC                 | CC               | INTERGENIC      |               |                          |                    |
| SNP_109845_A_13525 | NW_004518155.1 | scaffold3464 | 13525                   | GG                              | AA                 | AA               | INTERGENIC      |               |                          |                    |
| SNP_109846_A_17027 | NW_004518155.1 | scaffold3464 | 17027                   | CC                              | TT                 | TT               | INTERGENIC      |               |                          |                    |
| SNP_109847_A_17082 | NW_004518155.1 | scaffold3464 | 17082                   | CC                              | TT                 | TT               | INTERGENIC      |               |                          |                    |
| SNP_109848_A_17139 | NW_004518155.1 | scaffold3464 | 17139                   | CC                              | AA                 | AA               | INTERGENIC      |               |                          |                    |
| SNP_109849_A_17340 | NW_004518155.1 | scaffold3464 | 17340                   | CC                              | AA                 | AA               | INTERGENIC      |               |                          |                    |
| SNP_109850_A_64    | NW_004518159.1 | scaffold3468 | 64                      | TT                              | GG                 | GG               | INTERGENIC      |               |                          |                    |
| SNP_109851_A_67    | NW_004518159.1 | scaffold3468 | 67                      | TT                              | GG                 | GG               | INTERGENIC      |               |                          |                    |
| SNP_109852_A_108   | NW_004518159.1 | scaffold3468 | 108                     | CC                              | TT                 | TT               | INTERGENIC      |               |                          |                    |
| SNP_109853_A_331   | NW_004518159.1 | scaffold3468 | 331                     | TT                              | AA                 | AA               | INTERGENIC      |               |                          |                    |
| SNP_109854_A_379   | NW_004518159.1 | scaffold3468 | 379                     | AA                              | GG                 | GG               | INTERGENIC      |               |                          |                    |
| SNP_109855_A_1580  | NW_004518159.1 | scaffold3468 | 1580                    | GG                              | AA                 | AA               | INTERGENIC      |               |                          |                    |
| SNP_109856_A_1791  | NW_004518159.1 | scaffold3468 | 1791                    | GG                              | AA                 | AA               | INTERGENIC      |               |                          |                    |
| SNP_109857_A_2133  | NW_004518160.1 | scaffold3470 | 2133                    | TT                              | CC                 | CC               | INTERGENIC      |               |                          |                    |

| SNPs IDs           | Chromosome IDs | Chromosomes  | Physical positions (bp) | CDC Frontier (Reference genome) | (Pusa 1103 & HPNB) | (ILWC 46 & LPNB) | Sequence genome | Components of | Gene accession IDs | Putative functions |
|--------------------|----------------|--------------|-------------------------|---------------------------------|--------------------|------------------|-----------------|---------------|--------------------|--------------------|
| SNP_109858_A_2161  | NW_004518160.1 | scaffold3470 | 2161                    | GG                              | AA                 | AA               | INTERGENIC      |               |                    |                    |
| SNP_109859_A_27971 | NW_004518160.1 | scaffold3470 | 27971                   | GG                              | CC                 | CC               | INTERGENIC      |               |                    |                    |
| SNP_109860_A_37734 | NW_004518160.1 | scaffold3470 | 37734                   | CC                              | AA                 | AA               | INTERGENIC      |               |                    |                    |
| SNP_109861_A_37769 | NW_004518160.1 | scaffold3470 | 37769                   | AA                              | TT                 | TT               | INTERGENIC      |               |                    |                    |
| SNP_109862_A_41910 | NW_004518160.1 | scaffold3470 | 41910                   | TT                              | GG                 | GG               | INTERGENIC      |               |                    |                    |
| SNP_109863_A_43024 | NW_004518160.1 | scaffold3470 | 43024                   | GG                              | AA                 | AA               | INTERGENIC      |               |                    |                    |
| SNP_109864_A_52847 | NW_004518160.1 | scaffold3470 | 52847                   | GG                              | AA                 | AA               | INTERGENIC      |               |                    |                    |
| SNP_109865_A_52852 | NW_004518160.1 | scaffold3470 | 52852                   | AA                              | GG                 | GG               | INTERGENIC      |               |                    |                    |
| SNP_109866_A_64803 | NW_004518160.1 | scaffold3470 | 64803                   | GG                              | AA                 | AA               | INTERGENIC      |               |                    |                    |
| SNP_109867_A_75266 | NW_004518160.1 | scaffold3470 | 75266                   | TT                              | CC                 | CC               | INTERGENIC      |               |                    |                    |
| SNP_109868_A_78744 | NW_004518160.1 | scaffold3470 | 78744                   | TT                              | AA                 | AA               | INTERGENIC      |               |                    |                    |
| SNP_109869_A_78751 | NW_004518160.1 | scaffold3470 | 78751                   | TT                              | GG                 | GG               | INTERGENIC      |               |                    |                    |
| SNP_109870_A_78754 | NW_004518160.1 | scaffold3470 | 78754                   | CC                              | TT                 | TT               | INTERGENIC      |               |                    |                    |
| SNP_109871_A_78760 | NW_004518160.1 | scaffold3470 | 78760                   | AA                              | TT                 | TT               | INTERGENIC      |               |                    |                    |
| SNP_109872_A_81465 | NW_004518160.1 | scaffold3470 | 81465                   | AA                              | TT                 | TT               | INTERGENIC      |               |                    |                    |
| SNP_109873_A_81467 | NW_004518160.1 | scaffold3470 | 81467                   | CC                              | AA                 | AA               | INTERGENIC      |               |                    |                    |
| SNP_109874_A_82184 | NW_004518160.1 | scaffold3470 | 82184                   | GG                              | CC                 | CC               | INTERGENIC      |               |                    |                    |
| SNP_109875_A_82609 | NW_004518160.1 | scaffold3470 | 82609                   | TT                              | CC                 | CC               | INTERGENIC      |               |                    |                    |
| SNP_109876_A_82631 | NW_004518160.1 | scaffold3470 | 82631                   | AA                              | GG                 | GG               | INTERGENIC      |               |                    |                    |
| SNP_109877_A_82636 | NW_004518160.1 | scaffold3470 | 82636                   | AA                              | GG                 | GG               | INTERGENIC      |               |                    |                    |
| SNP_109878_A_82641 | NW_004518160.1 | scaffold3470 | 82641                   | GG                              | AA                 | AA               | INTERGENIC      |               |                    |                    |
| SNP_109879_A_82646 | NW_004518160.1 | scaffold3470 | 82646                   | AA                              | TT                 | TT               | INTERGENIC      |               |                    |                    |

| SNPs IDs           | Chromosome IDs | Chromosomes  | Physical positions (bp) | CDC Frontier (Reference genome) | (Pusa 1103 & HPNB) | (ILWC 46 & LPNB) | Sequence genome | Components of | Gene accession IDs | Putative functions |
|--------------------|----------------|--------------|-------------------------|---------------------------------|--------------------|------------------|-----------------|---------------|--------------------|--------------------|
| SNP_109880_A_82651 | NW_004518160.1 | scaffold3470 | 82651                   | TT                              | GG                 | GG               | INTERGENIC      |               |                    |                    |
| SNP_109881_A_82653 | NW_004518160.1 | scaffold3470 | 82653                   | CC                              | AA                 | AA               | INTERGENIC      |               |                    |                    |
| SNP_109882_A_4799  | NW_004518162.1 | scaffold3472 | 4799                    | CC                              | GG                 | GG               | INTERGENIC      |               |                    |                    |
| SNP_109884_A_6967  | NW_004518162.1 | scaffold3472 | 6967                    | GG                              | TT                 | TT               | INTERGENIC      |               |                    |                    |
| SNP_109885_A_7131  | NW_004518162.1 | scaffold3472 | 7131                    | TT                              | CC                 | CC               | INTERGENIC      |               |                    |                    |
| SNP_109887_A_7278  | NW_004518162.1 | scaffold3472 | 7278                    | GG                              | AA                 | AA               | INTERGENIC      |               |                    |                    |
| SNP_109888_A_7499  | NW_004518162.1 | scaffold3472 | 7499                    | TT                              | CC                 | CC               | INTERGENIC      |               |                    |                    |
| SNP_109890_A_8837  | NW_004518162.1 | scaffold3472 | 8837                    | CC                              | TT                 | TT               | INTERGENIC      |               |                    |                    |
| SNP_109891_A_8876  | NW_004518162.1 | scaffold3472 | 8876                    | TT                              | CC                 | CC               | INTERGENIC      |               |                    |                    |
| SNP_109892_A_8894  | NW_004518162.1 | scaffold3472 | 8894                    | AA                              | GG                 | GG               | INTERGENIC      |               |                    |                    |
| SNP_109893_A_8990  | NW_004518162.1 | scaffold3472 | 8990                    | GG                              | AA                 | AA               | INTERGENIC      |               |                    |                    |
| SNP_109895_A_9135  | NW_004518162.1 | scaffold3472 | 9135                    | AA                              | GG                 | GG               | INTERGENIC      |               |                    |                    |
| SNP_109896_A_9238  | NW_004518162.1 | scaffold3472 | 9238                    | AA                              | GG                 | GG               | INTERGENIC      |               |                    |                    |
| SNP_109897_A_9305  | NW_004518162.1 | scaffold3472 | 9305                    | CC                              | TT                 | TT               | INTERGENIC      |               |                    |                    |
| SNP_109899_A_9533  | NW_004518162.1 | scaffold3472 | 9533                    | GG                              | AA                 | AA               | INTERGENIC      |               |                    |                    |
| SNP_109900_A_9573  | NW_004518162.1 | scaffold3472 | 9573                    | CC                              | TT                 | TT               | INTERGENIC      |               |                    |                    |
| SNP_109901_A_9583  | NW_004518162.1 | scaffold3472 | 9583                    | AA                              | CC                 | CC               | INTERGENIC      |               |                    |                    |
| SNP_109902_A_9627  | NW_004518162.1 | scaffold3472 | 9627                    | CC                              | GG                 | GG               | INTERGENIC      |               |                    |                    |
| SNP_109903_A_9837  | NW_004518162.1 | scaffold3472 | 9837                    | CC                              | TT                 | TT               | INTERGENIC      |               |                    |                    |
| SNP_109904_A_9902  | NW_004518162.1 | scaffold3472 | 9902                    | CC                              | TT                 | TT               | INTERGENIC      |               |                    |                    |
| SNP_109905_A_9919  | NW_004518162.1 | scaffold3472 | 9919                    | CC                              | TT                 | TT               | INTERGENIC      |               |                    |                    |
| SNP_109906_A_9959  | NW_004518162.1 | scaffold3472 | 9959                    | CC                              | TT                 | TT               | INTERGENIC      |               |                    |                    |

| SNPs IDs           | Chromosome IDs | Chromosomes  | Physical positions (bp) | CDC Frontier (Reference genome) | (Pusa 1103 & HPNB) | (ILWC 46 & LPNB) | Sequence genome | Components of | Gene accession IDs | Putative functions |
|--------------------|----------------|--------------|-------------------------|---------------------------------|--------------------|------------------|-----------------|---------------|--------------------|--------------------|
| SNP_109907_A_10072 | NW_004518162.1 | scaffold3472 | 10072                   | TT                              | CC                 | CC               | INTERGENIC      |               |                    |                    |
| SNP_109908_A_48722 | NW_004518162.1 | scaffold3472 | 48722                   | GG                              | AA                 | AA               | INTERGENIC      |               |                    |                    |
| SNP_109910_A_76846 | NW_004518162.1 | scaffold3472 | 76846                   | CC                              | TT                 | TT               | INTERGENIC      |               |                    |                    |
| SNP_109911_A_76892 | NW_004518162.1 | scaffold3472 | 76892                   | AA                              | GG                 | GG               | INTERGENIC      |               |                    |                    |
| SNP_109912_A_76893 | NW_004518162.1 | scaffold3472 | 76893                   | GG                              | AA                 | AA               | INTERGENIC      |               |                    |                    |
| SNP_109913_A_526   | NW_004518163.1 | scaffold3473 | 526                     | TT                              | CC                 | CC               | INTERGENIC      |               |                    |                    |
| SNP_109914_A_592   | NW_004518163.1 | scaffold3473 | 592                     | AA                              | TT                 | TT               | INTERGENIC      |               |                    |                    |
| SNP_109915_A_636   | NW_004518163.1 | scaffold3473 | 636                     | AA                              | GG                 | GG               | INTERGENIC      |               |                    |                    |
| SNP_109916_A_674   | NW_004518163.1 | scaffold3473 | 674                     | CC                              | TT                 | TT               | INTERGENIC      |               |                    |                    |
| SNP_109917_A_734   | NW_004518163.1 | scaffold3473 | 734                     | TT                              | GG                 | GG               | INTERGENIC      |               |                    |                    |
| SNP_109918_A_741   | NW_004518163.1 | scaffold3473 | 741                     | CC                              | TT                 | TT               | INTERGENIC      |               |                    |                    |
| SNP_109919_A_764   | NW_004518163.1 | scaffold3473 | 764                     | TT                              | CC                 | CC               | INTERGENIC      |               |                    |                    |
| SNP_109920_A_827   | NW_004518164.1 | scaffold3474 | 827                     | AA                              | GG                 | GG               | INTERGENIC      |               |                    |                    |
| SNP_109921_A_923   | NW_004518164.1 | scaffold3474 | 923                     | TT                              | AA                 | AA               | INTERGENIC      |               |                    |                    |
| SNP_109922_A_931   | NW_004518164.1 | scaffold3474 | 931                     | GG                              | TT                 | TT               | INTERGENIC      |               |                    |                    |
| SNP_109923_A_993   | NW_004518164.1 | scaffold3474 | 993                     | GG                              | AA                 | AA               | INTERGENIC      |               |                    |                    |
| SNP_109924_A_1009  | NW_004518164.1 | scaffold3474 | 1009                    | TT                              | CC                 | CC               | INTERGENIC      |               |                    |                    |
| SNP_109925_A_1015  | NW_004518164.1 | scaffold3474 | 1015                    | AA                              | GG                 | GG               | INTERGENIC      |               |                    |                    |
| SNP_109926_A_1048  | NW_004518164.1 | scaffold3474 | 1048                    | TT                              | AA                 | AA               | INTERGENIC      |               |                    |                    |
| SNP_109927_A_1050  | NW_004518164.1 | scaffold3474 | 1050                    | CC                              | AA                 | AA               | INTERGENIC      |               |                    |                    |
| SNP_109928_A_580   | NW_004518165.1 | scaffold3475 | 580                     | CC                              | TT                 | TT               | INTERGENIC      |               |                    |                    |
| SNP_109929_A_1417  | NW_004518165.1 | scaffold3475 | 1417                    | AA                              | GG                 | GG               | INTERGENIC      |               |                    |                    |

| SNPs IDs          | Chromosome IDs | Chromosomes  | Physical positions (bp) | CDC Frontier (Reference genome) | (Pusa 1103 & HPNB) | (ILWC 46 & LPNB) | Sequence genome | Components of | Gene accession IDs | Putative functions |
|-------------------|----------------|--------------|-------------------------|---------------------------------|--------------------|------------------|-----------------|---------------|--------------------|--------------------|
| SNP_109930_A_1478 | NW_004518165.1 | scaffold3475 | 1478                    | CC                              | GG                 | GG               | INTERGENIC      |               |                    |                    |
| SNP_109931_A_1507 | NW_004518165.1 | scaffold3475 | 1507                    | AA                              | GG                 | GG               | INTERGENIC      |               |                    |                    |
| SNP_109932_A_5534 | NW_004518165.1 | scaffold3475 | 5534                    | TT                              | AA                 | AA               | INTERGENIC      |               |                    |                    |
| SNP_109933_A_5535 | NW_004518165.1 | scaffold3475 | 5535                    | CC                              | AA                 | AA               | INTERGENIC      |               |                    |                    |
| SNP_109934_A_5735 | NW_004518165.1 | scaffold3475 | 5735                    | GG                              | AA                 | AA               | INTERGENIC      |               |                    |                    |
| SNP_109935_A_5809 | NW_004518165.1 | scaffold3475 | 5809                    | TT                              | CC                 | CC               | INTERGENIC      |               |                    |                    |
| SNP_109936_A_5896 | NW_004518165.1 | scaffold3475 | 5896                    | CC                              | TT                 | TT               | INTERGENIC      |               |                    |                    |
| SNP_109937_A_6046 | NW_004518165.1 | scaffold3475 | 6046                    | GG                              | AA                 | AA               | INTERGENIC      |               |                    |                    |
| SNP_109938_A_6047 | NW_004518165.1 | scaffold3475 | 6047                    | TT                              | CC                 | CC               | INTERGENIC      |               |                    |                    |
| SNP_109940_A_6191 | NW_004518165.1 | scaffold3475 | 6191                    | GG                              | AA                 | AA               | INTERGENIC      |               |                    |                    |
| SNP_109942_A_6237 | NW_004518165.1 | scaffold3475 | 6237                    | CC                              | TT                 | TT               | INTERGENIC      |               |                    |                    |
| SNP_109943_A_6256 | NW_004518165.1 | scaffold3475 | 6256                    | GG                              | CC                 | CC               | INTERGENIC      |               |                    |                    |
| SNP_109944_A_6294 | NW_004518165.1 | scaffold3475 | 6294                    | GG                              | AA                 | AA               | INTERGENIC      |               |                    |                    |
| SNP_109945_A_6299 | NW_004518165.1 | scaffold3475 | 6299                    | GG                              | AA                 | AA               | INTERGENIC      |               |                    |                    |
| SNP_109946_A_6357 | NW_004518165.1 | scaffold3475 | 6357                    | CC                              | TT                 | TT               | INTERGENIC      |               |                    |                    |
| SNP_109947_A_6516 | NW_004518165.1 | scaffold3475 | 6516                    | AA                              | GG                 | GG               | INTERGENIC      |               |                    |                    |
| SNP_109948_A_7438 | NW_004518165.1 | scaffold3475 | 7438                    | TT                              | CC                 | CC               | INTERGENIC      |               |                    |                    |
| SNP_109949_A_7623 | NW_004518165.1 | scaffold3475 | 7623                    | AA                              | TT                 | TT               | INTERGENIC      |               |                    |                    |
| SNP_109950_A_7721 | NW_004518165.1 | scaffold3475 | 7721                    | GG                              | AA                 | AA               | INTERGENIC      |               |                    |                    |
| SNP_109951_A_7878 | NW_004518165.1 | scaffold3475 | 7878                    | GG                              | AA                 | AA               | INTERGENIC      |               |                    |                    |
| SNP_109952_A_7998 | NW_004518165.1 | scaffold3475 | 7998                    | GG                              | CC                 | CC               | INTERGENIC      |               |                    |                    |
| SNP_109953_A_8101 | NW_004518165.1 | scaffold3475 | 8101                    | CC                              | GG                 | GG               | INTERGENIC      |               |                    |                    |



| SNPs IDs           | Chromosome IDs | Chromosomes  | Physical positions (bp) | CDC Frontier (Reference genome) | (Pusa 1103 & HPNB) | (ILWC 46 & LPNB) | Sequence genome | Components of | Gene accession IDs | Putative functions |
|--------------------|----------------|--------------|-------------------------|---------------------------------|--------------------|------------------|-----------------|---------------|--------------------|--------------------|
| SNP_109954_A_8124  | NW_004518165.1 | scaffold3475 | 8124                    | TT                              | CC                 | CC               | INTERGENIC      |               |                    |                    |
| SNP_109955_A_8254  | NW_004518165.1 | scaffold3475 | 8254                    | CC                              | TT                 | TT               | INTERGENIC      |               |                    |                    |
| SNP_109956_A_9898  | NW_004518165.1 | scaffold3475 | 9898                    | GG                              | AA                 | AA               | INTERGENIC      |               |                    |                    |
| SNP_109957_A_9912  | NW_004518165.1 | scaffold3475 | 9912                    | AA                              | CC                 | CC               | INTERGENIC      |               |                    |                    |
| SNP_109958_A_10158 | NW_004518165.1 | scaffold3475 | 10158                   | AA                              | GG                 | GG               | INTERGENIC      |               |                    |                    |
| SNP_109959_A_10273 | NW_004518165.1 | scaffold3475 | 10273                   | CC                              | TT                 | TT               | INTERGENIC      |               |                    |                    |
| SNP_109960_A_10326 | NW_004518165.1 | scaffold3475 | 10326                   | AA                              | CC                 | CC               | INTERGENIC      |               |                    |                    |
| SNP_109961_A_10429 | NW_004518165.1 | scaffold3475 | 10429                   | TT                              | CC                 | CC               | INTERGENIC      |               |                    |                    |
| SNP_109962_A_10498 | NW_004518165.1 | scaffold3475 | 10498                   | GG                              | AA                 | AA               | INTERGENIC      |               |                    |                    |
| SNP_109963_A_10594 | NW_004518165.1 | scaffold3475 | 10594                   | AA                              | GG                 | GG               | INTERGENIC      |               |                    |                    |
| SNP_109964_A_16319 | NW_004518165.1 | scaffold3475 | 16319                   | TT                              | GG                 | GG               | INTERGENIC      |               |                    |                    |
| SNP_109965_A_22514 | NW_004518165.1 | scaffold3475 | 22514                   | GG                              | TT                 | TT               | INTERGENIC      |               |                    |                    |
| SNP_109966_A_27184 | NW_004518165.1 | scaffold3475 | 27184                   | TT                              | AA                 | AA               | INTERGENIC      |               |                    |                    |
| SNP_109967_A_27260 | NW_004518165.1 | scaffold3475 | 27260                   | TT                              | AA                 | AA               | INTERGENIC      |               |                    |                    |
| SNP_109968_A_27318 | NW_004518165.1 | scaffold3475 | 27318                   | AA                              | GG                 | GG               | INTERGENIC      |               |                    |                    |
| SNP_109969_A_27397 | NW_004518165.1 | scaffold3475 | 27397                   | TT                              | CC                 | CC               | INTERGENIC      |               |                    |                    |
| SNP_109970_A_27400 | NW_004518165.1 | scaffold3475 | 27400                   | AA                              | GG                 | GG               | INTERGENIC      |               |                    |                    |
| SNP_109971_A_27509 | NW_004518165.1 | scaffold3475 | 27509                   | CC                              | GG                 | GG               | INTERGENIC      |               |                    |                    |
| SNP_109972_A_27708 | NW_004518165.1 | scaffold3475 | 27708                   | TT                              | AA                 | AA               | INTERGENIC      |               |                    |                    |
| SNP_109973_A_27755 | NW_004518165.1 | scaffold3475 | 27755                   | CC                              | TT                 | TT               | INTERGENIC      |               |                    |                    |
| SNP_109974_A_29290 | NW_004518165.1 | scaffold3475 | 29290                   | GG                              | TT                 | TT               | INTERGENIC      |               |                    |                    |
| SNP_109975_A_29332 | NW_004518165.1 | scaffold3475 | 29332                   | TT                              | GG                 | GG               | INTERGENIC      |               |                    |                    |

| SNPs IDs           | Chromosome IDs | Chromosomes  | Physical positions (bp) | CDC Frontier (Reference genome) | (Pusa 1103 & HPNB) | (ILWC 46 & LPNB) | Sequence genome | Components of | Gene accession IDs | Putative functions |
|--------------------|----------------|--------------|-------------------------|---------------------------------|--------------------|------------------|-----------------|---------------|--------------------|--------------------|
| SNP_109976_A_29909 | NW_004518165.1 | scaffold3475 | 29909                   | AA                              | GG                 | GG               | INTERGENIC      |               |                    |                    |
| SNP_109977_A_29946 | NW_004518165.1 | scaffold3475 | 29946                   | TT                              | GG                 | GG               | INTERGENIC      |               |                    |                    |
| SNP_109978_A_30039 | NW_004518165.1 | scaffold3475 | 30039                   | GG                              | AA                 | AA               | INTERGENIC      |               |                    |                    |
| SNP_109979_A_30047 | NW_004518165.1 | scaffold3475 | 30047                   | AA                              | GG                 | GG               | INTERGENIC      |               |                    |                    |
| SNP_109980_A_30356 | NW_004518165.1 | scaffold3475 | 30356                   | GG                              | AA                 | AA               | INTERGENIC      |               |                    |                    |
| SNP_109981_A_30396 | NW_004518165.1 | scaffold3475 | 30396                   | AA                              | CC                 | CC               | INTERGENIC      |               |                    |                    |
| SNP_109982_A_30602 | NW_004518165.1 | scaffold3475 | 30602                   | GG                              | AA                 | AA               | INTERGENIC      |               |                    |                    |
| SNP_109983_A_30751 | NW_004518165.1 | scaffold3475 | 30751                   | AA                              | CC                 | CC               | INTERGENIC      |               |                    |                    |
| SNP_109984_A_30934 | NW_004518165.1 | scaffold3475 | 30934                   | CC                              | TT                 | TT               | INTERGENIC      |               |                    |                    |
| SNP_109985_A_30970 | NW_004518165.1 | scaffold3475 | 30970                   | CC                              | TT                 | TT               | INTERGENIC      |               |                    |                    |
| SNP_109986_A_30985 | NW_004518165.1 | scaffold3475 | 30985                   | GG                              | AA                 | AA               | INTERGENIC      |               |                    |                    |
| SNP_109987_A_31159 | NW_004518165.1 | scaffold3475 | 31159                   | AA                              | GG                 | GG               | INTERGENIC      |               |                    |                    |
| SNP_109988_A_31172 | NW_004518165.1 | scaffold3475 | 31172                   | AA                              | GG                 | GG               | INTERGENIC      |               |                    |                    |
| SNP_109989_A_31251 | NW_004518165.1 | scaffold3475 | 31251                   | GG                              | AA                 | AA               | INTERGENIC      |               |                    |                    |
| SNP_109991_A_31337 | NW_004518165.1 | scaffold3475 | 31337                   | CC                              | AA                 | AA               | INTERGENIC      |               |                    |                    |
| SNP_109992_A_31658 | NW_004518165.1 | scaffold3475 | 31658                   | GG                              | AA                 | AA               | INTERGENIC      |               |                    |                    |
| SNP_109993_A_34735 | NW_004518165.1 | scaffold3475 | 34735                   | CC                              | TT                 | TT               | INTERGENIC      |               |                    |                    |
| SNP_109994_A_36895 | NW_004518165.1 | scaffold3475 | 36895                   | TT                              | AA                 | AA               | INTERGENIC      |               |                    |                    |
| SNP_109995_A_36902 | NW_004518165.1 | scaffold3475 | 36902                   | CC                              | GG                 | GG               | INTERGENIC      |               |                    |                    |
| SNP_109996_A_36935 | NW_004518165.1 | scaffold3475 | 36935                   | CC                              | GG                 | GG               | INTERGENIC      |               |                    |                    |
| SNP_109997_A_37129 | NW_004518165.1 | scaffold3475 | 37129                   | TT                              | CC                 | CC               | INTERGENIC      |               |                    |                    |
| SNP_109998_A_38584 | NW_004518165.1 | scaffold3475 | 38584                   | AA                              | GG                 | GG               | INTERGENIC      |               |                    |                    |

| SNPs IDs           | Chromosome IDs | Chromosomes  | Physical positions (bp) | CDC Frontier (Reference genome) | (Pusa 1103 & HPNB) | (ILWC 46 & LPNB) | Sequence genome | Components of | Gene accession IDs | Putative functions |
|--------------------|----------------|--------------|-------------------------|---------------------------------|--------------------|------------------|-----------------|---------------|--------------------|--------------------|
| SNP_109999_A_38624 | NW_004518165.1 | scaffold3475 | 38624                   | TT                              | AA                 | AA               | INTERGENIC      |               |                    |                    |
| SNP_110000_A_38888 | NW_004518165.1 | scaffold3475 | 38888                   | GG                              | TT                 | TT               | INTERGENIC      |               |                    |                    |
| SNP_110001_A_38963 | NW_004518165.1 | scaffold3475 | 38963                   | TT                              | CC                 | CC               | INTERGENIC      |               |                    |                    |
| SNP_110002_A_38973 | NW_004518165.1 | scaffold3475 | 38973                   | AA                              | GG                 | GG               | INTERGENIC      |               |                    |                    |
| SNP_110003_A_39169 | NW_004518165.1 | scaffold3475 | 39169                   | GG                              | AA                 | AA               | INTERGENIC      |               |                    |                    |
| SNP_110004_A_43008 | NW_004518165.1 | scaffold3475 | 43008                   | TT                              | CC                 | CC               | INTERGENIC      |               |                    |                    |
| SNP_110005_A_43050 | NW_004518165.1 | scaffold3475 | 43050                   | TT                              | CC                 | CC               | INTERGENIC      |               |                    |                    |
| SNP_110006_A_43194 | NW_004518165.1 | scaffold3475 | 43194                   | AA                              | GG                 | GG               | INTERGENIC      |               |                    |                    |
| SNP_110007_A_43275 | NW_004518165.1 | scaffold3475 | 43275                   | AA                              | GG                 | GG               | INTERGENIC      |               |                    |                    |
| SNP_110008_A_56242 | NW_004518165.1 | scaffold3475 | 56242                   | CC                              | TT                 | TT               | INTERGENIC      |               |                    |                    |
| SNP_110009_A_56373 | NW_004518165.1 | scaffold3475 | 56373                   | GG                              | TT                 | TT               | INTERGENIC      |               |                    |                    |
| SNP_110010_A_56774 | NW_004518165.1 | scaffold3475 | 56774                   | TT                              | GG                 | GG               | INTERGENIC      |               |                    |                    |
| SNP_110011_A_60418 | NW_004518165.1 | scaffold3475 | 60418                   | CC                              | GG                 | GG               | INTERGENIC      |               |                    |                    |
| SNP_110012_A_65958 | NW_004518165.1 | scaffold3475 | 65958                   | AA                              | GG                 | GG               | INTERGENIC      |               |                    |                    |
| SNP_110013_A_73581 | NW_004518165.1 | scaffold3475 | 73581                   | TT                              | CC                 | CC               | INTERGENIC      |               |                    |                    |
| SNP_110014_A_74276 | NW_004518165.1 | scaffold3475 | 74276                   | AA                              | TT                 | TT               | INTERGENIC      |               |                    |                    |
| SNP_110015_A_71    | NW_004518172.1 | scaffold3485 | 71                      | AA                              | CC                 | CC               | INTERGENIC      |               |                    |                    |
| SNP_110016_A_418   | NW_004518172.1 | scaffold3485 | 418                     | TT                              | AA                 | AA               | INTERGENIC      |               |                    |                    |
| SNP_110017_A_467   | NW_004518172.1 | scaffold3485 | 467                     | AA                              | TT                 | TT               | INTERGENIC      |               |                    |                    |
| SNP_110018_A_504   | NW_004518172.1 | scaffold3485 | 504                     | GG                              | AA                 | AA               | INTERGENIC      |               |                    |                    |
| SNP_110019_A_1642  | NW_004518172.1 | scaffold3485 | 1642                    | CC                              | TT                 | TT               | INTERGENIC      |               |                    |                    |
| SNP_110020_A_1717  | NW_004518172.1 | scaffold3485 | 1717                    | AA                              | TT                 | TT               | INTERGENIC      |               |                    |                    |

| SNPs IDs           | Chromosome IDs | Chromosomes  | Physical positions (bp) | CDC Frontier (Reference genome) | (Pusa 1103 & HPNB) | (ILWC 46 & LPNB) | Sequence genome | Components of | Gene accession IDs | Putative functions |
|--------------------|----------------|--------------|-------------------------|---------------------------------|--------------------|------------------|-----------------|---------------|--------------------|--------------------|
| SNP_110021_A_1779  | NW_004518172.1 | scaffold3485 | 1779                    | AA                              | GG                 | GG               | INTERGENIC      |               |                    |                    |
| SNP_110022_A_1992  | NW_004518172.1 | scaffold3485 | 1992                    | GG                              | CC                 | CC               | INTERGENIC      |               |                    |                    |
| SNP_110023_A_2153  | NW_004518172.1 | scaffold3485 | 2153                    | TT                              | CC                 | CC               | INTERGENIC      |               |                    |                    |
| SNP_110024_A_4729  | NW_004518172.1 | scaffold3485 | 4729                    | CC                              | TT                 | TT               | INTERGENIC      |               |                    |                    |
| SNP_110025_A_4768  | NW_004518172.1 | scaffold3485 | 4768                    | TT                              | AA                 | AA               | INTERGENIC      |               |                    |                    |
| SNP_110026_A_5064  | NW_004518172.1 | scaffold3485 | 5064                    | TT                              | AA                 | AA               | INTERGENIC      |               |                    |                    |
| SNP_110027_A_5080  | NW_004518172.1 | scaffold3485 | 5080                    | AA                              | CC                 | CC               | INTERGENIC      |               |                    |                    |
| SNP_110028_A_5098  | NW_004518172.1 | scaffold3485 | 5098                    | TT                              | CC                 | CC               | INTERGENIC      |               |                    |                    |
| SNP_110029_A_5105  | NW_004518172.1 | scaffold3485 | 5105                    | AA                              | TT                 | TT               | INTERGENIC      |               |                    |                    |
| SNP_110030_A_5386  | NW_004518172.1 | scaffold3485 | 5386                    | AA                              | GG                 | GG               | INTERGENIC      |               |                    |                    |
| SNP_110032_A_6311  | NW_004518172.1 | scaffold3485 | 6311                    | AA                              | TT                 | TT               | INTERGENIC      |               |                    |                    |
| SNP_110033_A_6369  | NW_004518172.1 | scaffold3485 | 6369                    | AA                              | TT                 | TT               | INTERGENIC      |               |                    |                    |
| SNP_110034_A_21204 | NW_004518173.1 | scaffold3486 | 21204                   | TT                              | CC                 | CC               | INTERGENIC      |               |                    |                    |
| SNP_110035_A_23758 | NW_004518173.1 | scaffold3486 | 23758                   | CC                              | GG                 | GG               | INTERGENIC      |               |                    |                    |
| SNP_110037_A_2296  | NW_004518176.1 | scaffold3489 | 2296                    | AA                              | TT                 | TT               | INTERGENIC      |               |                    |                    |
| SNP_110038_A_2321  | NW_004518176.1 | scaffold3489 | 2321                    | AA                              | GG                 | GG               | INTERGENIC      |               |                    |                    |
| SNP_110039_A_2364  | NW_004518176.1 | scaffold3489 | 2364                    | GG                              | AA                 | AA               | INTERGENIC      |               |                    |                    |
| SNP_110040_A_2385  | NW_004518176.1 | scaffold3489 | 2385                    | AA                              | TT                 | TT               | INTERGENIC      |               |                    |                    |
| SNP_110041_A_2444  | NW_004518176.1 | scaffold3489 | 2444                    | CC                              | TT                 | TT               | INTERGENIC      |               |                    |                    |
| SNP_110042_A_2574  | NW_004518176.1 | scaffold3489 | 2574                    | TT                              | GG                 | GG               | INTERGENIC      |               |                    |                    |
| SNP_110044_A_3557  | NW_004518176.1 | scaffold3489 | 3557                    | TT                              | CC                 | CC               | INTERGENIC      |               |                    |                    |
| SNP_110045_A_3563  | NW_004518176.1 | scaffold3489 | 3563                    | AA                              | TT                 | TT               | INTERGENIC      |               |                    |                    |

| SNPs IDs           | Chromosome IDs | Chromosomes  | Physical positions (bp) | CDC Frontier (Reference genome) | (Pusa 1103 & HPNB) | (ILWC 46 & LPNB) | Sequence genome | Components of | Gene accession IDs | Putative functions |
|--------------------|----------------|--------------|-------------------------|---------------------------------|--------------------|------------------|-----------------|---------------|--------------------|--------------------|
| SNP_110046_A_4760  | NW_004518176.1 | scaffold3489 | 4760                    | AA                              | CC                 | CC               | INTERGENIC      |               |                    |                    |
| SNP_110047_A_4954  | NW_004518176.1 | scaffold3489 | 4954                    | AA                              | TT                 | TT               | INTERGENIC      |               |                    |                    |
| SNP_110048_A_314   | NW_004518180.1 | scaffold3494 | 314                     | TT                              | CC                 | CC               | INTERGENIC      |               |                    |                    |
| SNP_110049_A_330   | NW_004518180.1 | scaffold3494 | 330                     | CC                              | TT                 | TT               | INTERGENIC      |               |                    |                    |
| SNP_110050_A_503   | NW_004518180.1 | scaffold3494 | 503                     | GG                              | CC                 | CC               | INTERGENIC      |               |                    |                    |
| SNP_110051_A_634   | NW_004518180.1 | scaffold3494 | 634                     | TT                              | GG                 | GG               | INTERGENIC      |               |                    |                    |
| SNP_110052_A_649   | NW_004518180.1 | scaffold3494 | 649                     | GG                              | TT                 | TT               | INTERGENIC      |               |                    |                    |
| SNP_110053_A_650   | NW_004518180.1 | scaffold3494 | 650                     | GG                              | TT                 | TT               | INTERGENIC      |               |                    |                    |
| SNP_110054_A_664   | NW_004518180.1 | scaffold3494 | 664                     | TT                              | GG                 | GG               | INTERGENIC      |               |                    |                    |
| SNP_110055_A_928   | NW_004518181.1 | scaffold3496 | 928                     | GG                              | CC                 | CC               | INTERGENIC      |               |                    |                    |
| SNP_110056_A_1169  | NW_004518182.1 | scaffold3497 | 1169                    | AA                              | GG                 | GG               | INTERGENIC      |               |                    |                    |
| SNP_110057_A_1178  | NW_004518182.1 | scaffold3497 | 1178                    | TT                              | CC                 | CC               | INTERGENIC      |               |                    |                    |
| SNP_110058_A_9423  | NW_004518182.1 | scaffold3497 | 9423                    | GG                              | AA                 | AA               | INTERGENIC      |               |                    |                    |
| SNP_110059_A_13450 | NW_004518182.1 | scaffold3497 | 13450                   | GG                              | AA                 | AA               | INTERGENIC      |               |                    |                    |
| SNP_110060_A_13461 | NW_004518182.1 | scaffold3497 | 13461                   | TT                              | CC                 | CC               | INTERGENIC      |               |                    |                    |
| SNP_110061_A_13545 | NW_004518182.1 | scaffold3497 | 13545                   | AA                              | GG                 | GG               | INTERGENIC      |               |                    |                    |
| SNP_110062_A_13557 | NW_004518182.1 | scaffold3497 | 13557                   | AA                              | CC                 | CC               | INTERGENIC      |               |                    |                    |
| SNP_110063_A_13558 | NW_004518182.1 | scaffold3497 | 13558                   | AA                              | CC                 | CC               | INTERGENIC      |               |                    |                    |
| SNP_110064_A_13586 | NW_004518182.1 | scaffold3497 | 13586                   | CC                              | TT                 | TT               | INTERGENIC      |               |                    |                    |
| SNP_110065_A_13604 | NW_004518182.1 | scaffold3497 | 13604                   | TT                              | AA                 | AA               | INTERGENIC      |               |                    |                    |
| SNP_110066_A_13804 | NW_004518182.1 | scaffold3497 | 13804                   | GG                              | AA                 | AA               | INTERGENIC      |               |                    |                    |
| SNP_110067_A_1924  | NW_004518183.1 | scaffold3498 | 1924                    | AA                              | CC                 | CC               | INTERGENIC      |               |                    |                    |

| SNPs IDs           | Chromosome IDs | Chromosomes  | Physical positions (bp) | CDC Frontier (Reference genome) | (Pusa 1103 & HPNB) | (ILWC 46 & LPNB) | Sequence Components of genome | Gene accession IDs | Putative functions          |
|--------------------|----------------|--------------|-------------------------|---------------------------------|--------------------|------------------|-------------------------------|--------------------|-----------------------------|
| SNP_110069_A_6182  | NW_004518184.1 | scaffold3500 | 6182                    | TT                              | CC                 | CC               | DRR                           | 101490280          | probable terpene synthase 2 |
| SNP_110070_A_6206  | NW_004518184.1 | scaffold3500 | 6206                    | GG                              | AA                 | AA               | DRR                           | 101490280          | probable terpene synthase 2 |
| SNP_110071_A_14273 | NW_004518184.1 | scaffold3500 | 14273                   | AA                              | GG                 | GG               | INTRON                        | 101490280          | probable terpene synthase 2 |
| SNP_110072_A_16431 | NW_004518184.1 | scaffold3500 | 16431                   | AA                              | GG                 | GG               | URR                           | 101490280          | probable terpene synthase 2 |
| SNP_110074_A_371   | NW_004518186.1 | scaffold3502 | 371                     | AA                              | CC                 | CC               | INTERGENIC                    |                    |                             |
| SNP_110075_A_367   | NW_004518188.1 | scaffold3504 | 367                     | GG                              | AA                 | AA               | INTERGENIC                    |                    |                             |
| SNP_110076_A_414   | NW_004518188.1 | scaffold3504 | 414                     | TT                              | AA                 | AA               | INTERGENIC                    |                    |                             |
| SNP_110077_A_436   | NW_004518188.1 | scaffold3504 | 436                     | CC                              | TT                 | TT               | INTERGENIC                    |                    |                             |
| SNP_110078_A_431   | NW_004518193.1 | scaffold3512 | 431                     | AA                              | GG                 | GG               | INTERGENIC                    |                    |                             |
| SNP_110079_A_1086  | NW_004518193.1 | scaffold3512 | 1086                    | GG                              | AA                 | AA               | INTERGENIC                    |                    |                             |
| SNP_110080_A_2448  | NW_004518193.1 | scaffold3512 | 2448                    | AA                              | GG                 | GG               | INTERGENIC                    |                    |                             |
| SNP_110081_A_348   | NW_004518194.1 | scaffold3513 | 348                     | AA                              | CC                 | CC               | INTERGENIC                    |                    |                             |
| SNP_110082_A_351   | NW_004518194.1 | scaffold3513 | 351                     | TT                              | AA                 | AA               | INTERGENIC                    |                    |                             |
| SNP_110083_A_19440 | NW_004518194.1 | scaffold3513 | 19440                   | CC                              | AA                 | AA               | INTERGENIC                    |                    |                             |
| SNP_110084_A_19585 | NW_004518194.1 | scaffold3513 | 19585                   | CC                              | GG                 | GG               | INTERGENIC                    |                    |                             |
| SNP_110085_A_19615 | NW_004518194.1 | scaffold3513 | 19615                   | GG                              | AA                 | AA               | INTERGENIC                    |                    |                             |
| SNP_110086_A_19738 | NW_004518194.1 | scaffold3513 | 19738                   | CC                              | AA                 | AA               | INTERGENIC                    |                    |                             |
| SNP_110087_A_19760 | NW_004518194.1 | scaffold3513 | 19760                   | AA                              | GG                 | GG               | INTERGENIC                    |                    |                             |
| SNP_110088_A_19830 | NW_004518194.1 | scaffold3513 | 19830                   | GG                              | TT                 | TT               | INTERGENIC                    |                    |                             |
| SNP_110089_A_19862 | NW_004518194.1 | scaffold3513 | 19862                   | AA                              | TT                 | TT               | INTERGENIC                    |                    |                             |
| SNP_110090_A_19874 | NW_004518194.1 | scaffold3513 | 19874                   | CC                              | GG                 | GG               | INTERGENIC                    |                    |                             |
| SNP_110091_A_20687 | NW_004518194.1 | scaffold3513 | 20687                   | AA                              | GG                 | GG               | INTERGENIC                    |                    |                             |

| SNPs IDs           | Chromosome IDs | Chromosomes  | Physical positions (bp) | CDC Frontier (Reference genome) | (Pusa 1103 & HPNB) | (ILWC 46 & LPNB) | Sequence genome | Components of | Gene accession IDs | Putative functions |
|--------------------|----------------|--------------|-------------------------|---------------------------------|--------------------|------------------|-----------------|---------------|--------------------|--------------------|
| SNP_110092_A_20888 | NW_004518194.1 | scaffold3513 | 20888                   | TT                              | CC                 | CC               | INTERGENIC      |               |                    |                    |
| SNP_110093_A_20915 | NW_004518194.1 | scaffold3513 | 20915                   | GG                              | AA                 | AA               | INTERGENIC      |               |                    |                    |
| SNP_110094_A_20977 | NW_004518194.1 | scaffold3513 | 20977                   | AA                              | GG                 | GG               | INTERGENIC      |               |                    |                    |
| SNP_110095_A_21056 | NW_004518194.1 | scaffold3513 | 21056                   | TT                              | GG                 | GG               | INTERGENIC      |               |                    |                    |
| SNP_110096_A_21068 | NW_004518194.1 | scaffold3513 | 21068                   | CC                              | TT                 | TT               | INTERGENIC      |               |                    |                    |
| SNP_110097_A_21124 | NW_004518194.1 | scaffold3513 | 21124                   | AA                              | GG                 | GG               | INTERGENIC      |               |                    |                    |
| SNP_110098_A_21155 | NW_004518194.1 | scaffold3513 | 21155                   | GG                              | AA                 | AA               | INTERGENIC      |               |                    |                    |
| SNP_110099_A_21171 | NW_004518194.1 | scaffold3513 | 21171                   | AA                              | TT                 | TT               | INTERGENIC      |               |                    |                    |
| SNP_110100_A_21173 | NW_004518194.1 | scaffold3513 | 21173                   | CC                              | GG                 | GG               | INTERGENIC      |               |                    |                    |
| SNP_110101_A_21206 | NW_004518194.1 | scaffold3513 | 21206                   | GG                              | CC                 | CC               | INTERGENIC      |               |                    |                    |
| SNP_110102_A_21480 | NW_004518194.1 | scaffold3513 | 21480                   | CC                              | TT                 | TT               | INTERGENIC      |               |                    |                    |
| SNP_110103_A_21540 | NW_004518194.1 | scaffold3513 | 21540                   | GG                              | CC                 | CC               | INTERGENIC      |               |                    |                    |
| SNP_110104_A_21545 | NW_004518194.1 | scaffold3513 | 21545                   | AA                              | CC                 | CC               | INTERGENIC      |               |                    |                    |
| SNP_110105_A_21650 | NW_004518194.1 | scaffold3513 | 21650                   | CC                              | AA                 | AA               | INTERGENIC      |               |                    |                    |
| SNP_110106_A_21671 | NW_004518194.1 | scaffold3513 | 21671                   | GG                              | TT                 | TT               | INTERGENIC      |               |                    |                    |
| SNP_110107_A_21727 | NW_004518194.1 | scaffold3513 | 21727                   | AA                              | TT                 | TT               | INTERGENIC      |               |                    |                    |
| SNP_110108_A_21859 | NW_004518194.1 | scaffold3513 | 21859                   | CC                              | AA                 | AA               | INTERGENIC      |               |                    |                    |
| SNP_110109_A_21957 | NW_004518194.1 | scaffold3513 | 21957                   | GG                              | TT                 | TT               | INTERGENIC      |               |                    |                    |
| SNP_110110_A_21973 | NW_004518194.1 | scaffold3513 | 21973                   | AA                              | GG                 | GG               | INTERGENIC      |               |                    |                    |
| SNP_110111_A_21975 | NW_004518194.1 | scaffold3513 | 21975                   | GG                              | TT                 | TT               | INTERGENIC      |               |                    |                    |
| SNP_110112_A_22029 | NW_004518194.1 | scaffold3513 | 22029                   | TT                              | GG                 | GG               | INTERGENIC      |               |                    |                    |
| SNP_110113_A_22054 | NW_004518194.1 | scaffold3513 | 22054                   | AA                              | GG                 | GG               | INTERGENIC      |               |                    |                    |

| SNPs IDs           | Chromosome IDs | Chromosomes  | Physical positions (bp) | CDC Frontier (Reference genome) | (Pusa 1103 & HPNB) | (ILWC 46 & LPNB) | Sequence Components of genome | Gene accession IDs | Putative functions                  |
|--------------------|----------------|--------------|-------------------------|---------------------------------|--------------------|------------------|-------------------------------|--------------------|-------------------------------------|
| SNP_110114_A_22058 | NW_004518194.1 | scaffold3513 | 22058                   | TT                              | CC                 | CC               | INTERGENIC                    |                    |                                     |
| SNP_110115_A_22246 | NW_004518194.1 | scaffold3513 | 22246                   | AA                              | GG                 | GG               | INTERGENIC                    |                    |                                     |
| SNP_110116_A_22272 | NW_004518194.1 | scaffold3513 | 22272                   | CC                              | TT                 | TT               | INTERGENIC                    |                    |                                     |
| SNP_110117_A_22301 | NW_004518194.1 | scaffold3513 | 22301                   | TT                              | AA                 | AA               | INTERGENIC                    |                    |                                     |
| SNP_110118_A_22345 | NW_004518194.1 | scaffold3513 | 22345                   | TT                              | CC                 | CC               | INTERGENIC                    |                    |                                     |
| SNP_110119_A_22490 | NW_004518194.1 | scaffold3513 | 22490                   | TT                              | CC                 | CC               | INTERGENIC                    |                    |                                     |
| SNP_110120_A_22663 | NW_004518194.1 | scaffold3513 | 22663                   | AA                              | CC                 | CC               | INTERGENIC                    |                    |                                     |
| SNP_110121_A_22741 | NW_004518194.1 | scaffold3513 | 22741                   | TT                              | CC                 | CC               | INTERGENIC                    |                    |                                     |
| SNP_110122_A_22761 | NW_004518194.1 | scaffold3513 | 22761                   | AA                              | GG                 | GG               | INTERGENIC                    |                    |                                     |
| SNP_110123_A_22763 | NW_004518194.1 | scaffold3513 | 22763                   | AA                              | CC                 | CC               | INTERGENIC                    |                    |                                     |
| SNP_110125_A_550   | NW_004518195.1 | scaffold3514 | 550                     | CC                              | TT                 | TT               | INTERGENIC                    |                    |                                     |
| SNP_110126_A_774   | NW_004518195.1 | scaffold3514 | 774                     | GG                              | TT                 | TT               | INTERGENIC                    |                    |                                     |
| SNP_110127_A_2159  | NW_004518195.1 | scaffold3514 | 2159                    | TT                              | AA                 | AA               | INTERGENIC                    |                    |                                     |
| SNP_110128_A_8923  | NW_004518195.1 | scaffold3514 | 8923                    | TT                              | GG                 | GG               | URR                           | 101493093          | GDSL esterase/lipase At1g73610-like |
| SNP_110129_A_17411 | NW_004518195.1 | scaffold3514 | 17411                   | CC                              | TT                 | TT               | INTERGENIC                    |                    |                                     |
| SNP_110130_A_19063 | NW_004518195.1 | scaffold3514 | 19063                   | TT                              | CC                 | CC               | INTERGENIC                    |                    |                                     |
| SNP_110132_A_19640 | NW_004518195.1 | scaffold3514 | 19640                   | AA                              | TT                 | TT               | INTERGENIC                    |                    |                                     |
| SNP_110133_A_19793 | NW_004518195.1 | scaffold3514 | 19793                   | AA                              | CC                 | CC               | INTERGENIC                    |                    |                                     |
| SNP_110134_A_24006 | NW_004518195.1 | scaffold3514 | 24006                   | CC                              | TT                 | TT               | SYNONYMOUS_CODING             | 101492426          | GDSL esterase/lipase At5g63170-like |
| SNP_110135_A_40258 | NW_004518195.1 | scaffold3514 | 40258                   | AA                              | TT                 | TT               | DRR                           | 101492758          | GDSL esterase/lipase At1g23500-like |
| SNP_110136_A_40310 | NW_004518195.1 | scaffold3514 | 40310                   | CC                              | TT                 | TT               | DRR                           | 101492758          | GDSL esterase/lipase At1g23500-like |
| SNP_110137_A_40387 | NW_004518195.1 | scaffold3514 | 40387                   | TT                              | GG                 | GG               | DRR                           | 101492758          | GDSL esterase/lipase At1g23500-like |



| SNPs IDs           | Chromosome IDs | Chromosomes  | Physical positions (bp) | CDC Frontier (Reference genome) | (Pusa 1103 & HPNB) | (ILWC 46 & LPNB) | Sequence Components of genome | Gene accession IDs | Putative functions                  |
|--------------------|----------------|--------------|-------------------------|---------------------------------|--------------------|------------------|-------------------------------|--------------------|-------------------------------------|
| SNP_110138_A_40405 | NW_004518195.1 | scaffold3514 | 40405                   | TT                              | AA                 | AA               | DRR                           | 101492758          | GDSL esterase/lipase At1g23500-like |
| SNP_110139_A_40406 | NW_004518195.1 | scaffold3514 | 40406                   | TT                              | AA                 | AA               | DRR                           | 101492758          | GDSL esterase/lipase At1g23500-like |
| SNP_110140_A_40469 | NW_004518195.1 | scaffold3514 | 40469                   | AA                              | GG                 | GG               | DRR                           | 101492758          | GDSL esterase/lipase At1g23500-like |
| SNP_110141_A_40644 | NW_004518195.1 | scaffold3514 | 40644                   | AA                              | GG                 | GG               | DRR                           | 101492758          | GDSL esterase/lipase At1g23500-like |
| SNP_110143_A_41061 | NW_004518195.1 | scaffold3514 | 41061                   | CC                              | TT                 | TT               | NON_SYNONYMOUS_CODING         | 101492758          | GDSL esterase/lipase At1g23500-like |
| SNP_110144_A_41258 | NW_004518195.1 | scaffold3514 | 41258                   | AA                              | GG                 | GG               | INTRON                        | 101492758          | GDSL esterase/lipase At1g23500-like |
| SNP_110145_A_41317 | NW_004518195.1 | scaffold3514 | 41317                   | GG                              | AA                 | AA               | INTRON                        | 101492758          | GDSL esterase/lipase At1g23500-like |
| SNP_110146_A_41337 | NW_004518195.1 | scaffold3514 | 41337                   | TT                              | GG                 | GG               | INTRON                        | 101492758          | GDSL esterase/lipase At1g23500-like |
| SNP_110148_A_47732 | NW_004518195.1 | scaffold3514 | 47732                   | GG                              | AA                 | AA               | URR                           | 101492758          | GDSL esterase/lipase At1g23500-like |
| SNP_110149_A_47894 | NW_004518195.1 | scaffold3514 | 47894                   | AA                              | GG                 | GG               | URR                           | 101492758          | GDSL esterase/lipase At1g23500-like |
| SNP_110150_A_47969 | NW_004518195.1 | scaffold3514 | 47969                   | CC                              | TT                 | TT               | URR                           | 101492758          | GDSL esterase/lipase At1g23500-like |
| SNP_110151_A_47992 | NW_004518195.1 | scaffold3514 | 47992                   | CC                              | TT                 | TT               | URR                           | 101492758          | GDSL esterase/lipase At1g23500-like |
| SNP_110152_A_48163 | NW_004518195.1 | scaffold3514 | 48163                   | AA                              | GG                 | GG               | URR                           | 101492758          | GDSL esterase/lipase At1g23500-like |
| SNP_110153_A_48342 | NW_004518195.1 | scaffold3514 | 48342                   | GG                              | AA                 | AA               | URR                           | 101492758          | GDSL esterase/lipase At1g23500-like |
| SNP_110154_A_48363 | NW_004518195.1 | scaffold3514 | 48363                   | CC                              | TT                 | TT               | URR                           | 101492758          | GDSL esterase/lipase At1g23500-like |
| SNP_110155_A_48429 | NW_004518195.1 | scaffold3514 | 48429                   | CC                              | TT                 | TT               | URR                           | 101492758          | GDSL esterase/lipase At1g23500-like |
| SNP_110156_A_48444 | NW_004518195.1 | scaffold3514 | 48444                   | AA                              | GG                 | GG               | URR                           | 101492758          | GDSL esterase/lipase At1g23500-like |
| SNP_110157_A_48454 | NW_004518195.1 | scaffold3514 | 48454                   | GG                              | TT                 | TT               | URR                           | 101492758          | GDSL esterase/lipase At1g23500-like |
| SNP_110158_A_48515 | NW_004518195.1 | scaffold3514 | 48515                   | GG                              | TT                 | TT               | URR                           | 101492758          | GDSL esterase/lipase At1g23500-like |
| SNP_110159_A_48747 | NW_004518195.1 | scaffold3514 | 48747                   | CC                              | TT                 | TT               | INTERGENIC                    |                    |                                     |
| SNP_110160_A_52543 | NW_004518195.1 | scaffold3514 | 52543                   | AA                              | GG                 | GG               | INTERGENIC                    |                    |                                     |
| SNP_110161_A_52558 | NW_004518195.1 | scaffold3514 | 52558                   | GG                              | CC                 | CC               | INTERGENIC                    |                    |                                     |

| SNPs IDs           | Chromosome IDs | Chromosomes  | Physical positions (bp) | CDC Frontier (Reference genome) | (Pusa 1103 & HPNB) | (ILWC 46 & LPNB) | Sequence Components of genome | Gene accession IDs | Putative functions           |
|--------------------|----------------|--------------|-------------------------|---------------------------------|--------------------|------------------|-------------------------------|--------------------|------------------------------|
| SNP_110162_A_52561 | NW_004518195.1 | scaffold3514 | 52561                   | GG                              | TT                 | TT               | INTERGENIC                    |                    |                              |
| SNP_110163_A_454   | NW_004518197.1 | scaffold3516 | 454                     | AA                              | GG                 | GG               | DRR                           | 101493422          | uncharacterized LOC101493422 |
| SNP_110164_A_582   | NW_004518197.1 | scaffold3516 | 582                     | AA                              | GG                 | GG               | DRR                           | 101493422          | uncharacterized LOC101493422 |
| SNP_110165_A_602   | NW_004518198.1 | scaffold3517 | 602                     | TT                              | CC                 | CC               | INTERGENIC                    |                    |                              |
| SNP_110166_A_595   | NW_004518200.1 | scaffold3520 | 595                     | CC                              | AA                 | AA               | INTERGENIC                    |                    |                              |
| SNP_110167_A_602   | NW_004518200.1 | scaffold3520 | 602                     | CC                              | GG                 | GG               | INTERGENIC                    |                    |                              |
| SNP_110168_A_837   | NW_004518200.1 | scaffold3520 | 837                     | AA                              | GG                 | GG               | INTERGENIC                    |                    |                              |
| SNP_110169_A_1550  | NW_004518200.1 | scaffold3520 | 1550                    | GG                              | TT                 | TT               | INTERGENIC                    |                    |                              |
| SNP_110170_A_1856  | NW_004518200.1 | scaffold3520 | 1856                    | AA                              | TT                 | TT               | INTERGENIC                    |                    |                              |
| SNP_110171_A_2466  | NW_004518200.1 | scaffold3520 | 2466                    | TT                              | CC                 | CC               | INTERGENIC                    |                    |                              |
| SNP_110172_A_3254  | NW_004518200.1 | scaffold3520 | 3254                    | AA                              | TT                 | TT               | INTERGENIC                    |                    |                              |
| SNP_110173_A_4333  | NW_004518200.1 | scaffold3520 | 4333                    | AA                              | GG                 | GG               | INTERGENIC                    |                    |                              |
| SNP_110174_A_4374  | NW_004518200.1 | scaffold3520 | 4374                    | AA                              | CC                 | CC               | INTERGENIC                    |                    |                              |
| SNP_110175_A_4379  | NW_004518200.1 | scaffold3520 | 4379                    | TT                              | AA                 | AA               | INTERGENIC                    |                    |                              |
| SNP_110176_A_4505  | NW_004518200.1 | scaffold3520 | 4505                    | GG                              | AA                 | AA               | INTERGENIC                    |                    |                              |
| SNP_110177_A_4821  | NW_004518200.1 | scaffold3520 | 4821                    | TT                              | AA                 | AA               | INTERGENIC                    |                    |                              |
| SNP_110178_A_4861  | NW_004518200.1 | scaffold3520 | 4861                    | AA                              | TT                 | TT               | INTERGENIC                    |                    |                              |
| SNP_110179_A_5411  | NW_004518200.1 | scaffold3520 | 5411                    | GG                              | TT                 | TT               | INTERGENIC                    |                    |                              |
| SNP_110180_A_5744  | NW_004518200.1 | scaffold3520 | 5744                    | AA                              | CC                 | CC               | INTERGENIC                    |                    |                              |
| SNP_110181_A_5898  | NW_004518200.1 | scaffold3520 | 5898                    | CC                              | TT                 | TT               | INTERGENIC                    |                    |                              |
| SNP_110182_A_6112  | NW_004518200.1 | scaffold3520 | 6112                    | GG                              | AA                 | AA               | INTERGENIC                    |                    |                              |
| SNP_110183_A_7558  | NW_004518200.1 | scaffold3520 | 7558                    | CC                              | TT                 | TT               | INTERGENIC                    |                    |                              |

| SNPs IDs           | Chromosome IDs | Chromosomes  | Physical positions (bp) | CDC Frontier genome (Reference genome) | (Pusa 1103 & HPNB) | (ILWC 46 & LPNB) | Sequence genome | Components of | Gene accession IDs | Putative functions |
|--------------------|----------------|--------------|-------------------------|----------------------------------------|--------------------|------------------|-----------------|---------------|--------------------|--------------------|
| SNP_110184_A_7596  | NW_004518200.1 | scaffold3520 | 7596                    | GG                                     | AA                 | AA               | INTERGENIC      |               |                    |                    |
| SNP_110185_A_10136 | NW_004518200.1 | scaffold3520 | 10136                   | GG                                     | AA                 | AA               | INTERGENIC      |               |                    |                    |
| SNP_110187_A_37658 | NW_004518200.1 | scaffold3520 | 37658                   | GG                                     | CC                 | CC               | INTERGENIC      |               |                    |                    |
| SNP_110188_A_51544 | NW_004518200.1 | scaffold3520 | 51544                   | TT                                     | AA                 | AA               | INTERGENIC      |               |                    |                    |
| SNP_110189_A_51566 | NW_004518200.1 | scaffold3520 | 51566                   | AA                                     | GG                 | GG               | INTERGENIC      |               |                    |                    |
| SNP_110190_A_51577 | NW_004518200.1 | scaffold3520 | 51577                   | GG                                     | AA                 | AA               | INTERGENIC      |               |                    |                    |
| SNP_110191_A_57645 | NW_004518200.1 | scaffold3520 | 57645                   | GG                                     | AA                 | AA               | INTERGENIC      |               |                    |                    |
| SNP_110192_A_804   | NW_004518206.1 | scaffold3527 | 804                     | GG                                     | TT                 | TT               | INTERGENIC      |               |                    |                    |
| SNP_110193_A_834   | NW_004518206.1 | scaffold3527 | 834                     | AA                                     | TT                 | TT               | INTERGENIC      |               |                    |                    |
| SNP_110194_A_1149  | NW_004518206.1 | scaffold3527 | 1149                    | TT                                     | GG                 | GG               | INTERGENIC      |               |                    |                    |
| SNP_110195_A_2856  | NW_004518208.1 | scaffold3529 | 2856                    | CC                                     | GG                 | GG               | INTERGENIC      |               |                    |                    |
| SNP_110198_A_3507  | NW_004518208.1 | scaffold3529 | 3507                    | AA                                     | CC                 | CC               | INTERGENIC      |               |                    |                    |
| SNP_110199_A_3512  | NW_004518208.1 | scaffold3529 | 3512                    | TT                                     | GG                 | GG               | INTERGENIC      |               |                    |                    |
| SNP_110200_A_12363 | NW_004518208.1 | scaffold3529 | 12363                   | CC                                     | GG                 | GG               | INTERGENIC      |               |                    |                    |
| SNP_110201_A_20742 | NW_004518208.1 | scaffold3529 | 20742                   | TT                                     | GG                 | GG               | INTERGENIC      |               |                    |                    |
| SNP_110202_A_20777 | NW_004518208.1 | scaffold3529 | 20777                   | TT                                     | CC                 | CC               | INTERGENIC      |               |                    |                    |
| SNP_110203_A_20779 | NW_004518208.1 | scaffold3529 | 20779                   | AA                                     | GG                 | GG               | INTERGENIC      |               |                    |                    |
| SNP_110204_A_20991 | NW_004518208.1 | scaffold3529 | 20991                   | GG                                     | AA                 | AA               | INTERGENIC      |               |                    |                    |
| SNP_110205_A_21005 | NW_004518208.1 | scaffold3529 | 21005                   | GG                                     | AA                 | AA               | INTERGENIC      |               |                    |                    |
| SNP_110206_A_21018 | NW_004518208.1 | scaffold3529 | 21018                   | GG                                     | CC                 | CC               | INTERGENIC      |               |                    |                    |
| SNP_110207_A_22835 | NW_004518208.1 | scaffold3529 | 22835                   | CC                                     | TT                 | TT               | INTERGENIC      |               |                    |                    |
| SNP_110208_A_23176 | NW_004518208.1 | scaffold3529 | 23176                   | CC                                     | TT                 | TT               | INTERGENIC      |               |                    |                    |

| SNPs IDs           | Chromosome IDs | Chromosomes  | Physical positions (bp) | CDC Frontier (Reference genome) | (Pusa 1103 & HPNB) | (ILWC 46 & LPNB) | Sequence Components of genome | Gene accession IDs | Putative functions |
|--------------------|----------------|--------------|-------------------------|---------------------------------|--------------------|------------------|-------------------------------|--------------------|--------------------|
| SNP_110209_A_23198 | NW_004518208.1 | scaffold3529 | 23198                   | GG                              | AA                 | AA               | INTERGENIC                    |                    |                    |
| SNP_110210_A_23328 | NW_004518208.1 | scaffold3529 | 23328                   | TT                              | AA                 | AA               | INTERGENIC                    |                    |                    |
| SNP_110211_A_23952 | NW_004518208.1 | scaffold3529 | 23952                   | AA                              | GG                 | GG               | INTERGENIC                    |                    |                    |
| SNP_110212_A_5431  | NW_004518216.1 | scaffold3539 | 5431                    | CC                              | TT                 | TT               | INTERGENIC                    |                    |                    |
| SNP_110215_A_720   | NW_004518219.1 | scaffold3542 | 720                     | AA                              | TT                 | TT               | INTERGENIC                    |                    |                    |
| SNP_110216_A_7137  | NW_004518219.1 | scaffold3542 | 7137                    | GG                              | AA                 | AA               | INTERGENIC                    |                    |                    |
| SNP_110217_A_21000 | NW_004518219.1 | scaffold3542 | 21000                   | TT                              | CC                 | CC               | URR                           | 101494275          | Unknown function   |
| SNP_110218_A_21086 | NW_004518219.1 | scaffold3542 | 21086                   | TT                              | CC                 | CC               | URR                           | 101494275          | Unknown function   |
| SNP_110219_A_21087 | NW_004518219.1 | scaffold3542 | 21087                   | TT                              | CC                 | CC               | URR                           | 101494275          | Unknown function   |
| SNP_110220_A_21093 | NW_004518219.1 | scaffold3542 | 21093                   | AA                              | GG                 | GG               | URR                           | 101494275          | Unknown function   |
| SNP_110221_A_21124 | NW_004518219.1 | scaffold3542 | 21124                   | AA                              | CC                 | CC               | URR                           | 101494275          | Unknown function   |
| SNP_110222_A_21353 | NW_004518219.1 | scaffold3542 | 21353                   | TT                              | CC                 | CC               | DRR                           | 101494585          | Unknown function   |
| SNP_110223_A_21365 | NW_004518219.1 | scaffold3542 | 21365                   | TT                              | CC                 | CC               | DRR                           | 101494585          | Unknown function   |
| SNP_110224_A_21420 | NW_004518219.1 | scaffold3542 | 21420                   | TT                              | CC                 | CC               | DRR                           | 101494585          | Unknown function   |
| SNP_110225_A_21439 | NW_004518219.1 | scaffold3542 | 21439                   | TT                              | CC                 | CC               | DRR                           | 101494585          | Unknown function   |
| SNP_110226_A_21453 | NW_004518219.1 | scaffold3542 | 21453                   | AA                              | GG                 | GG               | DRR                           | 101494585          | Unknown function   |
| SNP_110227_A_21458 | NW_004518219.1 | scaffold3542 | 21458                   | TT                              | CC                 | CC               | DRR                           | 101494585          | Unknown function   |
| SNP_110228_A_21526 | NW_004518219.1 | scaffold3542 | 21526                   | AA                              | TT                 | TT               | DRR                           | 101494585          | Unknown function   |
| SNP_110229_A_21609 | NW_004518219.1 | scaffold3542 | 21609                   | AA                              | TT                 | TT               | DRR                           | 101494585          | Unknown function   |
| SNP_110230_A_21634 | NW_004518219.1 | scaffold3542 | 21634                   | GG                              | AA                 | AA               | DRR                           | 101494585          | Unknown function   |
| SNP_110231_A_21699 | NW_004518219.1 | scaffold3542 | 21699                   | CC                              | AA                 | AA               | DRR                           | 101494585          | Unknown function   |
| SNP_110232_A_21716 | NW_004518219.1 | scaffold3542 | 21716                   | GG                              | AA                 | AA               | DRR                           | 101494585          | Unknown function   |

| SNPs IDs           | Chromosome IDs | Chromosomes  | Physical positions (bp) | CDC Frontier genome (Reference genome) | (Pusa 1103 & HPNB) | (ILWC 46 & LPNB) | Sequence Components of genome | Gene accession IDs | Putative functions    |
|--------------------|----------------|--------------|-------------------------|----------------------------------------|--------------------|------------------|-------------------------------|--------------------|-----------------------|
| SNP_110233_A_21748 | NW_004518219.1 | scaffold3542 | 21748                   | AA                                     | GG                 | GG               | DRR                           | 101494585          | Unknown function      |
| SNP_110234_A_21802 | NW_004518219.1 | scaffold3542 | 21802                   | GG                                     | AA                 | AA               | DRR                           | 101494585          | Unknown function      |
| SNP_110235_A_21840 | NW_004518219.1 | scaffold3542 | 21840                   | GG                                     | AA                 | AA               | DRR                           | 101494585          | Unknown function      |
| SNP_110236_A_21872 | NW_004518219.1 | scaffold3542 | 21872                   | TT                                     | AA                 | AA               | DRR                           | 101494585          | Unknown function      |
| SNP_110237_A_22033 | NW_004518219.1 | scaffold3542 | 22033                   | CC                                     | AA                 | AA               | DRR                           | 101494585          | Unknown function      |
| SNP_110238_A_22048 | NW_004518219.1 | scaffold3542 | 22048                   | GG                                     | TT                 | TT               | DRR                           | 101494585          | Unknown function      |
| SNP_110239_A_22086 | NW_004518219.1 | scaffold3542 | 22086                   | TT                                     | CC                 | CC               | DRR                           | 101494585          | Unknown function      |
| SNP_110241_A_22157 | NW_004518219.1 | scaffold3542 | 22157                   | GG                                     | CC                 | CC               | DRR                           | 101494585          | Unknown function      |
| SNP_110242_A_24378 | NW_004518219.1 | scaffold3542 | 24378                   | TT                                     | GG                 | GG               | DRR                           | 101496866          | Unknown function      |
| SNP_110243_A_24827 | NW_004518219.1 | scaffold3542 | 24827                   | TT                                     | CC                 | CC               | DRR                           | 101496534          | Unknown function      |
| SNP_110245_A_24874 | NW_004518219.1 | scaffold3542 | 24874                   | AA                                     | CC                 | CC               | DRR                           | 101496534          | Unknown function      |
| SNP_110246_A_24875 | NW_004518219.1 | scaffold3542 | 24875                   | AA                                     | GG                 | GG               | DRR                           | 101496534          | Unknown function      |
| SNP_110247_A_24882 | NW_004518219.1 | scaffold3542 | 24882                   | TT                                     | CC                 | CC               | DRR                           | 101496534          | Unknown function      |
| SNP_110248_A_24941 | NW_004518219.1 | scaffold3542 | 24941                   | TT                                     | CC                 | CC               | DRR                           | 101496534          | Unknown function      |
| SNP_110249_A_24992 | NW_004518219.1 | scaffold3542 | 24992                   | GG                                     | CC                 | CC               | DRR                           | 101496534          | Unknown function      |
| SNP_110250_A_33954 | NW_004518219.1 | scaffold3542 | 33954                   | TT                                     | CC                 | CC               | URR                           | 101495226          | ribosomal protein S18 |
| SNP_110251_A_33956 | NW_004518219.1 | scaffold3542 | 33956                   | TT                                     | CC                 | CC               | URR                           | 101495226          | ribosomal protein S18 |
| SNP_110252_A_34278 | NW_004518219.1 | scaffold3542 | 34278                   | CC                                     | AA                 | AA               | URR                           | 101495226          | ribosomal protein S18 |
| SNP_110253_A_34334 | NW_004518219.1 | scaffold3542 | 34334                   | TT                                     | GG                 | GG               | URR                           | 101495226          | ribosomal protein S18 |
| SNP_110254_A_34337 | NW_004518219.1 | scaffold3542 | 34337                   | AA                                     | GG                 | GG               | URR                           | 101495226          | ribosomal protein S18 |
| SNP_110255_A_34366 | NW_004518219.1 | scaffold3542 | 34366                   | AA                                     | GG                 | GG               | URR                           | 101495226          | ribosomal protein S18 |
| SNP_110256_A_34385 | NW_004518219.1 | scaffold3542 | 34385                   | AA                                     | GG                 | GG               | URR                           | 101495545          | Unknown function      |

| SNPs IDs           | Chromosome IDs | Chromosomes  | Physical positions (bp) | CDC Frontier (Reference genome) | (Pusa 1103 & HPNB) | (ILWC 46 & LPNB) | Sequence Components of genome | Gene accession IDs | Putative functions |
|--------------------|----------------|--------------|-------------------------|---------------------------------|--------------------|------------------|-------------------------------|--------------------|--------------------|
| SNP_110257_A_34683 | NW_004518219.1 | scaffold3542 | 34683                   | AA                              | CC                 | CC               | URR                           | 101495545          | Unknown function   |
| SNP_110258_A_34687 | NW_004518219.1 | scaffold3542 | 34687                   | TT                              | GG                 | GG               | URR                           | 101495545          | Unknown function   |
| SNP_110259_A_64    | NW_004518220.1 | scaffold3543 | 64                      | AA                              | TT                 | TT               | INTERGENIC                    |                    |                    |
| SNP_110260_A_199   | NW_004518222.1 | scaffold3545 | 199                     | TT                              | AA                 | AA               | INTERGENIC                    |                    |                    |
| SNP_110261_A_346   | NW_004518222.1 | scaffold3545 | 346                     | TT                              | AA                 | AA               | INTERGENIC                    |                    |                    |
| SNP_110262_A_367   | NW_004518222.1 | scaffold3545 | 367                     | TT                              | CC                 | CC               | INTERGENIC                    |                    |                    |
| SNP_110263_A_374   | NW_004518222.1 | scaffold3545 | 374                     | TT                              | CC                 | CC               | INTERGENIC                    |                    |                    |
| SNP_110264_A_349   | NW_004518225.1 | scaffold3549 | 349                     | AA                              | CC                 | CC               | INTERGENIC                    |                    |                    |
| SNP_110265_A_469   | NW_004518228.1 | scaffold3555 | 469                     | AA                              | GG                 | GG               | INTERGENIC                    |                    |                    |
| SNP_110266_A_549   | NW_004518228.1 | scaffold3555 | 549                     | AA                              | GG                 | GG               | INTERGENIC                    |                    |                    |
| SNP_110267_A_633   | NW_004518228.1 | scaffold3555 | 633                     | AA                              | TT                 | TT               | INTERGENIC                    |                    |                    |
| SNP_110268_A_665   | NW_004518228.1 | scaffold3555 | 665                     | GG                              | AA                 | AA               | INTERGENIC                    |                    |                    |
| SNP_110269_A_979   | NW_004518228.1 | scaffold3555 | 979                     | GG                              | AA                 | AA               | INTERGENIC                    |                    |                    |
| SNP_110270_A_5525  | NW_004518229.1 | scaffold3557 | 5525                    | TT                              | AA                 | AA               | INTERGENIC                    |                    |                    |
| SNP_110272_A_966   | NW_004518235.1 | scaffold3565 | 966                     | TT                              | CC                 | CC               | INTERGENIC                    |                    |                    |
| SNP_110273_A_983   | NW_004518235.1 | scaffold3565 | 983                     | TT                              | CC                 | CC               | INTERGENIC                    |                    |                    |
| SNP_110274_A_994   | NW_004518235.1 | scaffold3565 | 994                     | AA                              | CC                 | CC               | INTERGENIC                    |                    |                    |
| SNP_110276_A_1029  | NW_004518235.1 | scaffold3565 | 1029                    | TT                              | CC                 | CC               | INTERGENIC                    |                    |                    |
| SNP_110277_A_1106  | NW_004518235.1 | scaffold3565 | 1106                    | AA                              | GG                 | GG               | INTERGENIC                    |                    |                    |
| SNP_110278_A_1113  | NW_004518235.1 | scaffold3565 | 1113                    | CC                              | AA                 | AA               | INTERGENIC                    |                    |                    |
| SNP_110279_A_1119  | NW_004518235.1 | scaffold3565 | 1119                    | GG                              | TT                 | TT               | INTERGENIC                    |                    |                    |
| SNP_110280_A_228   | NW_004518240.1 | scaffold3575 | 228                     | GG                              | AA                 | AA               | INTERGENIC                    |                    |                    |

| SNPs IDs           | Chromosome IDs | Chromosomes  | Physical positions (bp) | CDC Frontier (Reference genome) | (Pusa 1103 & HPNB) | (ILWC 46 & LPNB) | Sequence genome | Components of | Gene accession IDs | Putative functions |
|--------------------|----------------|--------------|-------------------------|---------------------------------|--------------------|------------------|-----------------|---------------|--------------------|--------------------|
| SNP_110281_A_215   | NW_004518244.1 | scaffold3581 | 215                     | TT                              | CC                 | CC               | INTERGENIC      |               |                    |                    |
| SNP_110282_A_306   | NW_004518244.1 | scaffold3581 | 306                     | AA                              | TT                 | TT               | INTERGENIC      |               |                    |                    |
| SNP_110283_A_308   | NW_004518244.1 | scaffold3581 | 308                     | TT                              | GG                 | GG               | INTERGENIC      |               |                    |                    |
| SNP_110284_A_1490  | NW_004518244.1 | scaffold3581 | 1490                    | AA                              | CC                 | CC               | INTERGENIC      |               |                    |                    |
| SNP_110285_A_64    | NW_004518247.1 | scaffold3585 | 64                      | AA                              | TT                 | TT               | INTERGENIC      |               |                    |                    |
| SNP_110286_A_67    | NW_004518247.1 | scaffold3585 | 67                      | TT                              | GG                 | GG               | INTERGENIC      |               |                    |                    |
| SNP_110287_A_121   | NW_004518247.1 | scaffold3585 | 121                     | TT                              | CC                 | CC               | INTERGENIC      |               |                    |                    |
| SNP_110288_A_136   | NW_004518247.1 | scaffold3585 | 136                     | TT                              | GG                 | GG               | INTERGENIC      |               |                    |                    |
| SNP_110289_A_156   | NW_004518247.1 | scaffold3585 | 156                     | TT                              | AA                 | AA               | INTERGENIC      |               |                    |                    |
| SNP_110290_A_1777  | NW_004518249.1 | scaffold3588 | 1777                    | AA                              | CC                 | CC               | INTERGENIC      |               |                    |                    |
| SNP_110291_A_228   | NW_004518250.1 | scaffold3589 | 228                     | TT                              | GG                 | GG               | INTERGENIC      |               |                    |                    |
| SNP_110292_A_505   | NW_004518250.1 | scaffold3589 | 505                     | AA                              | GG                 | GG               | INTERGENIC      |               |                    |                    |
| SNP_110293_A_579   | NW_004518250.1 | scaffold3589 | 579                     | CC                              | TT                 | TT               | INTERGENIC      |               |                    |                    |
| SNP_110295_A_937   | NW_004518250.1 | scaffold3589 | 937                     | AA                              | CC                 | CC               | INTERGENIC      |               |                    |                    |
| SNP_110296_A_14607 | NW_004518252.1 | scaffold3593 | 14607                   | CC                              | TT                 | TT               | INTERGENIC      |               |                    |                    |
| SNP_110298_A_679   | NW_004518253.1 | scaffold3594 | 679                     | GG                              | CC                 | CC               | INTERGENIC      |               |                    |                    |
| SNP_110299_A_773   | NW_004518253.1 | scaffold3594 | 773                     | GG                              | CC                 | CC               | INTERGENIC      |               |                    |                    |
| SNP_110300_A_776   | NW_004518253.1 | scaffold3594 | 776                     | TT                              | GG                 | GG               | INTERGENIC      |               |                    |                    |
| SNP_110301_A_779   | NW_004518253.1 | scaffold3594 | 779                     | AA                              | GG                 | GG               | INTERGENIC      |               |                    |                    |
| SNP_110302_A_809   | NW_004518253.1 | scaffold3594 | 809                     | GG                              | AA                 | AA               | INTERGENIC      |               |                    |                    |
| SNP_110303_A_815   | NW_004518253.1 | scaffold3594 | 815                     | AA                              | GG                 | GG               | INTERGENIC      |               |                    |                    |
| SNP_110304_A_868   | NW_004518253.1 | scaffold3594 | 868                     | AA                              | CC                 | CC               | INTERGENIC      |               |                    |                    |

| SNPs IDs          | Chromosome IDs | Chromosomes  | Physical positions (bp) | CDC Frontier (Reference genome) | (Pusa 1103 & HPNB) | (ILWC 46 & LPNB) | Sequence genome | Components of | Gene accession IDs | Putative functions |
|-------------------|----------------|--------------|-------------------------|---------------------------------|--------------------|------------------|-----------------|---------------|--------------------|--------------------|
| SNP_110305_A_870  | NW_004518253.1 | scaffold3594 | 870                     | AA                              | GG                 | GG               | INTERGENIC      |               |                    |                    |
| SNP_110306_A_931  | NW_004518253.1 | scaffold3594 | 931                     | AA                              | CC                 | CC               | INTERGENIC      |               |                    |                    |
| SNP_110308_A_1108 | NW_004518253.1 | scaffold3594 | 1108                    | GG                              | AA                 | AA               | INTERGENIC      |               |                    |                    |
| SNP_110309_A_1251 | NW_004518253.1 | scaffold3594 | 1251                    | TT                              | AA                 | AA               | INTERGENIC      |               |                    |                    |
| SNP_110310_A_1332 | NW_004518253.1 | scaffold3594 | 1332                    | CC                              | GG                 | GG               | INTERGENIC      |               |                    |                    |
| SNP_110311_A_1376 | NW_004518253.1 | scaffold3594 | 1376                    | TT                              | AA                 | AA               | INTERGENIC      |               |                    |                    |
| SNP_110312_A_1548 | NW_004518253.1 | scaffold3594 | 1548                    | TT                              | CC                 | CC               | INTERGENIC      |               |                    |                    |
| SNP_110313_A_1798 | NW_004518253.1 | scaffold3594 | 1798                    | TT                              | CC                 | CC               | INTERGENIC      |               |                    |                    |
| SNP_110314_A_1822 | NW_004518253.1 | scaffold3594 | 1822                    | TT                              | AA                 | AA               | INTERGENIC      |               |                    |                    |
| SNP_110315_A_6775 | NW_004518253.1 | scaffold3594 | 6775                    | TT                              | GG                 | GG               | INTERGENIC      |               |                    |                    |
| SNP_110316_A_7787 | NW_004518253.1 | scaffold3594 | 7787                    | CC                              | AA                 | AA               | INTERGENIC      |               |                    |                    |
| SNP_110317_A_64   | NW_004518254.1 | scaffold3596 | 64                      | GG                              | CC                 | CC               | INTERGENIC      |               |                    |                    |
| SNP_110318_A_137  | NW_004518254.1 | scaffold3596 | 137                     | AA                              | GG                 | GG               | INTERGENIC      |               |                    |                    |
| SNP_110319_A_1430 | NW_004518254.1 | scaffold3596 | 1430                    | AA                              | GG                 | GG               | INTERGENIC      |               |                    |                    |
| SNP_110320_A_1522 | NW_004518254.1 | scaffold3596 | 1522                    | TT                              | GG                 | GG               | INTERGENIC      |               |                    |                    |
| SNP_110321_A_1559 | NW_004518254.1 | scaffold3596 | 1559                    | TT                              | CC                 | CC               | INTERGENIC      |               |                    |                    |
| SNP_110322_A_1739 | NW_004518254.1 | scaffold3596 | 1739                    | AA                              | GG                 | GG               | INTERGENIC      |               |                    |                    |
| SNP_110323_A_1882 | NW_004518254.1 | scaffold3596 | 1882                    | GG                              | AA                 | AA               | INTERGENIC      |               |                    |                    |
| SNP_110324_A_1894 | NW_004518254.1 | scaffold3596 | 1894                    | CC                              | AA                 | AA               | INTERGENIC      |               |                    |                    |
| SNP_110325_A_1895 | NW_004518254.1 | scaffold3596 | 1895                    | AA                              | TT                 | TT               | INTERGENIC      |               |                    |                    |
| SNP_110326_A_2260 | NW_004518254.1 | scaffold3596 | 2260                    | TT                              | AA                 | AA               | INTERGENIC      |               |                    |                    |
| SNP_110327_A_2267 | NW_004518254.1 | scaffold3596 | 2267                    | AA                              | GG                 | GG               | INTERGENIC      |               |                    |                    |



| SNPs IDs          | Chromosome IDs | Chromosomes  | Physical positions (bp) | CDC Frontier (Reference genome) | (Pusa 1103 & HPNB) | (ILWC 46 & LPNB) | Sequence genome | Components of | Gene accession IDs | Putative functions |
|-------------------|----------------|--------------|-------------------------|---------------------------------|--------------------|------------------|-----------------|---------------|--------------------|--------------------|
| SNP_110328_A_2399 | NW_004518254.1 | scaffold3596 | 2399                    | GG                              | AA                 | AA               | INTERGENIC      |               |                    |                    |
| SNP_110329_A_2584 | NW_004518254.1 | scaffold3596 | 2584                    | AA                              | TT                 | TT               | INTERGENIC      |               |                    |                    |
| SNP_110330_A_374  | NW_004518258.1 | scaffold3600 | 374                     | GG                              | AA                 | AA               | INTERGENIC      |               |                    |                    |
| SNP_110331_A_430  | NW_004518258.1 | scaffold3600 | 430                     | TT                              | CC                 | CC               | INTERGENIC      |               |                    |                    |
| SNP_110332_A_517  | NW_004518258.1 | scaffold3600 | 517                     | GG                              | AA                 | AA               | INTERGENIC      |               |                    |                    |
| SNP_110333_A_631  | NW_004518258.1 | scaffold3600 | 631                     | CC                              | TT                 | TT               | INTERGENIC      |               |                    |                    |
| SNP_110334_A_813  | NW_004518258.1 | scaffold3600 | 813                     | TT                              | CC                 | CC               | INTERGENIC      |               |                    |                    |
| SNP_110335_A_821  | NW_004518258.1 | scaffold3600 | 821                     | AA                              | CC                 | CC               | INTERGENIC      |               |                    |                    |
| SNP_110336_A_885  | NW_004518258.1 | scaffold3600 | 885                     | TT                              | GG                 | GG               | INTERGENIC      |               |                    |                    |
| SNP_110337_A_930  | NW_004518258.1 | scaffold3600 | 930                     | TT                              | GG                 | GG               | INTERGENIC      |               |                    |                    |
| SNP_110338_A_1191 | NW_004518258.1 | scaffold3600 | 1191                    | GG                              | AA                 | AA               | INTERGENIC      |               |                    |                    |
| SNP_110339_A_1192 | NW_004518258.1 | scaffold3600 | 1192                    | AA                              | TT                 | TT               | INTERGENIC      |               |                    |                    |
| SNP_110340_A_1203 | NW_004518258.1 | scaffold3600 | 1203                    | AA                              | CC                 | CC               | INTERGENIC      |               |                    |                    |
| SNP_110341_A_3515 | NW_004518258.1 | scaffold3600 | 3515                    | GG                              | CC                 | CC               | INTERGENIC      |               |                    |                    |
| SNP_110342_A_3647 | NW_004518258.1 | scaffold3600 | 3647                    | AA                              | GG                 | GG               | INTERGENIC      |               |                    |                    |
| SNP_110343_A_3685 | NW_004518258.1 | scaffold3600 | 3685                    | GG                              | AA                 | AA               | INTERGENIC      |               |                    |                    |
| SNP_110344_A_3747 | NW_004518258.1 | scaffold3600 | 3747                    | GG                              | AA                 | AA               | INTERGENIC      |               |                    |                    |
| SNP_110345_A_3927 | NW_004518258.1 | scaffold3600 | 3927                    | AA                              | GG                 | GG               | INTERGENIC      |               |                    |                    |
| SNP_110346_A_3964 | NW_004518258.1 | scaffold3600 | 3964                    | GG                              | CC                 | CC               | INTERGENIC      |               |                    |                    |
| SNP_110347_A_4185 | NW_004518258.1 | scaffold3600 | 4185                    | TT                              | CC                 | CC               | INTERGENIC      |               |                    |                    |
| SNP_110348_A_2012 | NW_004518260.1 | scaffold3602 | 2012                    | AA                              | GG                 | GG               | INTERGENIC      |               |                    |                    |
| SNP_110349_A_2026 | NW_004518260.1 | scaffold3602 | 2026                    | GG                              | TT                 | TT               | INTERGENIC      |               |                    |                    |

| SNPs IDs          | Chromosome IDs | Chromosomes  | Physical positions (bp) | CDC Frontier (Reference genome) | (Pusa 1103 & HPNB) | (ILWC 46 & LPNB) | Sequence genome | Components of | Gene accession IDs | Putative functions |
|-------------------|----------------|--------------|-------------------------|---------------------------------|--------------------|------------------|-----------------|---------------|--------------------|--------------------|
| SNP_110350_A_211  | NW_004518262.1 | scaffold3604 | 211                     | AA                              | GG                 | GG               | INTERGENIC      |               |                    |                    |
| SNP_110352_A_237  | NW_004518264.1 | scaffold3606 | 237                     | GG                              | AA                 | AA               | INTERGENIC      |               |                    |                    |
| SNP_110353_A_185  | NW_004518271.1 | scaffold3615 | 185                     | AA                              | GG                 | GG               | INTERGENIC      |               |                    |                    |
| SNP_110354_A_204  | NW_004518271.1 | scaffold3615 | 204                     | CC                              | TT                 | TT               | INTERGENIC      |               |                    |                    |
| SNP_110355_A_242  | NW_004518271.1 | scaffold3615 | 242                     | AA                              | CC                 | CC               | INTERGENIC      |               |                    |                    |
| SNP_110356_A_724  | NW_004518271.1 | scaffold3615 | 724                     | AA                              | TT                 | TT               | INTERGENIC      |               |                    |                    |
| SNP_110357_A_218  | NW_004518272.1 | scaffold3616 | 218                     | AA                              | GG                 | GG               | INTERGENIC      |               |                    |                    |
| SNP_110358_A_504  | NW_004518272.1 | scaffold3616 | 504                     | AA                              | GG                 | GG               | INTERGENIC      |               |                    |                    |
| SNP_110359_A_570  | NW_004518272.1 | scaffold3616 | 570                     | AA                              | GG                 | GG               | INTERGENIC      |               |                    |                    |
| SNP_110360_A_711  | NW_004518272.1 | scaffold3616 | 711                     | AA                              | TT                 | TT               | INTERGENIC      |               |                    |                    |
| SNP_110361_A_756  | NW_004518272.1 | scaffold3616 | 756                     | CC                              | TT                 | TT               | INTERGENIC      |               |                    |                    |
| SNP_110362_A_2141 | NW_004518275.1 | scaffold3619 | 2141                    | TT                              | CC                 | CC               | INTERGENIC      |               |                    |                    |
| SNP_110363_A_2144 | NW_004518275.1 | scaffold3619 | 2144                    | AA                              | GG                 | GG               | INTERGENIC      |               |                    |                    |
| SNP_110364_A_379  | NW_004518282.1 | scaffold3628 | 379                     | TT                              | CC                 | CC               | INTERGENIC      |               |                    |                    |
| SNP_110365_A_931  | NW_004518282.1 | scaffold3628 | 931                     | TT                              | CC                 | CC               | INTERGENIC      |               |                    |                    |
| SNP_110366_A_935  | NW_004518282.1 | scaffold3628 | 935                     | AA                              | TT                 | TT               | INTERGENIC      |               |                    |                    |
| SNP_110367_A_956  | NW_004518282.1 | scaffold3628 | 956                     | CC                              | TT                 | TT               | INTERGENIC      |               |                    |                    |
| SNP_110368_A_1066 | NW_004518282.1 | scaffold3628 | 1066                    | CC                              | GG                 | GG               | INTERGENIC      |               |                    |                    |
| SNP_110369_A_1105 | NW_004518282.1 | scaffold3628 | 1105                    | AA                              | GG                 | GG               | INTERGENIC      |               |                    |                    |
| SNP_110370_A_1199 | NW_004518282.1 | scaffold3628 | 1199                    | TT                              | CC                 | CC               | INTERGENIC      |               |                    |                    |
| SNP_110371_A_1974 | NW_004518282.1 | scaffold3628 | 1974                    | TT                              | CC                 | CC               | INTERGENIC      |               |                    |                    |
| SNP_110372_A_1975 | NW_004518282.1 | scaffold3628 | 1975                    | AA                              | TT                 | TT               | INTERGENIC      |               |                    |                    |

| SNPs IDs           | Chromosome IDs | Chromosomes  | Physical positions (bp) | CDC Frontier (Reference genome) | (Pusa 1103 & HPNB) | (ILWC 46 & LPNB) | Sequence genome | Components of | Gene accession IDs | Putative functions |
|--------------------|----------------|--------------|-------------------------|---------------------------------|--------------------|------------------|-----------------|---------------|--------------------|--------------------|
| SNP_110373_A_1981  | NW_004518282.1 | scaffold3628 | 1981                    | TT                              | CC                 | CC               | INTERGENIC      |               |                    |                    |
| SNP_110374_A_2251  | NW_004518282.1 | scaffold3628 | 2251                    | CC                              | TT                 | TT               | INTERGENIC      |               |                    |                    |
| SNP_110375_A_397   | NW_004518283.1 | scaffold3631 | 397                     | GG                              | TT                 | TT               | INTERGENIC      |               |                    |                    |
| SNP_110376_A_9395  | NW_004518283.1 | scaffold3631 | 9395                    | AA                              | TT                 | TT               | INTERGENIC      |               |                    |                    |
| SNP_110377_A_9448  | NW_004518283.1 | scaffold3631 | 9448                    | CC                              | GG                 | GG               | INTERGENIC      |               |                    |                    |
| SNP_110378_A_9540  | NW_004518283.1 | scaffold3631 | 9540                    | AA                              | TT                 | TT               | INTERGENIC      |               |                    |                    |
| SNP_110379_A_9611  | NW_004518283.1 | scaffold3631 | 9611                    | AA                              | CC                 | CC               | INTERGENIC      |               |                    |                    |
| SNP_110380_A_9626  | NW_004518283.1 | scaffold3631 | 9626                    | TT                              | AA                 | AA               | INTERGENIC      |               |                    |                    |
| SNP_110381_A_11589 | NW_004518283.1 | scaffold3631 | 11589                   | AA                              | GG                 | GG               | INTERGENIC      |               |                    |                    |
| SNP_110382_A_12098 | NW_004518283.1 | scaffold3631 | 12098                   | CC                              | TT                 | TT               | INTERGENIC      |               |                    |                    |
| SNP_110384_A_12198 | NW_004518283.1 | scaffold3631 | 12198                   | CC                              | GG                 | GG               | INTERGENIC      |               |                    |                    |
| SNP_110385_A_13028 | NW_004518283.1 | scaffold3631 | 13028                   | AA                              | GG                 | GG               | INTERGENIC      |               |                    |                    |
| SNP_110386_A_13283 | NW_004518283.1 | scaffold3631 | 13283                   | GG                              | AA                 | AA               | INTERGENIC      |               |                    |                    |
| SNP_110387_A_11061 | NW_004518286.1 | scaffold3637 | 11061                   | TT                              | CC                 | CC               | INTERGENIC      |               |                    |                    |
| SNP_110388_A_11075 | NW_004518286.1 | scaffold3637 | 11075                   | AA                              | TT                 | TT               | INTERGENIC      |               |                    |                    |
| SNP_110389_A_11092 | NW_004518286.1 | scaffold3637 | 11092                   | TT                              | AA                 | AA               | INTERGENIC      |               |                    |                    |
| SNP_110390_A_1004  | NW_004518288.1 | scaffold3640 | 1004                    | GG                              | CC                 | CC               | INTERGENIC      |               |                    |                    |
| SNP_110391_A_1132  | NW_004518288.1 | scaffold3640 | 1132                    | CC                              | TT                 | TT               | INTERGENIC      |               |                    |                    |
| SNP_110392_A_1140  | NW_004518289.1 | scaffold3643 | 1140                    | GG                              | AA                 | AA               | INTERGENIC      |               |                    |                    |
| SNP_110393_A_1456  | NW_004518289.1 | scaffold3643 | 1456                    | GG                              | CC                 | CC               | INTERGENIC      |               |                    |                    |
| SNP_110394_A_1473  | NW_004518289.1 | scaffold3643 | 1473                    | TT                              | CC                 | CC               | INTERGENIC      |               |                    |                    |
| SNP_110395_A_22120 | NW_004518289.1 | scaffold3643 | 22120                   | GG                              | CC                 | CC               | INTERGENIC      |               |                    |                    |

| SNPs IDs           | Chromosome IDs | Chromosomes  | Physical positions (bp) | CDC Frontier (Reference genome) | (Pusa 1103 & HPNB) | (ILWC 46 & LPNB) | Sequence genome | Components of | Gene accession IDs | Putative functions |
|--------------------|----------------|--------------|-------------------------|---------------------------------|--------------------|------------------|-----------------|---------------|--------------------|--------------------|
| SNP_110396_A_22286 | NW_004518289.1 | scaffold3643 | 22286                   | AA                              | GG                 | GG               | INTERGENIC      |               |                    |                    |
| SNP_110397_A_22322 | NW_004518289.1 | scaffold3643 | 22322                   | AA                              | TT                 | TT               | INTERGENIC      |               |                    |                    |
| SNP_110398_A_22449 | NW_004518289.1 | scaffold3643 | 22449                   | GG                              | AA                 | AA               | INTERGENIC      |               |                    |                    |
| SNP_110399_A_22476 | NW_004518289.1 | scaffold3643 | 22476                   | CC                              | TT                 | TT               | INTERGENIC      |               |                    |                    |
| SNP_110401_A_22595 | NW_004518289.1 | scaffold3643 | 22595                   | GG                              | AA                 | AA               | INTERGENIC      |               |                    |                    |
| SNP_110402_A_22602 | NW_004518289.1 | scaffold3643 | 22602                   | TT                              | AA                 | AA               | INTERGENIC      |               |                    |                    |
| SNP_110404_A_22979 | NW_004518289.1 | scaffold3643 | 22979                   | GG                              | AA                 | AA               | INTERGENIC      |               |                    |                    |
| SNP_110405_A_24126 | NW_004518289.1 | scaffold3643 | 24126                   | GG                              | TT                 | TT               | INTERGENIC      |               |                    |                    |
| SNP_110406_A_24464 | NW_004518289.1 | scaffold3643 | 24464                   | AA                              | GG                 | GG               | INTERGENIC      |               |                    |                    |
| SNP_110407_A_502   | NW_004518290.1 | scaffold3644 | 502                     | GG                              | TT                 | TT               | INTERGENIC      |               |                    |                    |
| SNP_110408_A_764   | NW_004518290.1 | scaffold3644 | 764                     | GG                              | AA                 | AA               | INTERGENIC      |               |                    |                    |
| SNP_110409_A_774   | NW_004518290.1 | scaffold3644 | 774                     | GG                              | AA                 | AA               | INTERGENIC      |               |                    |                    |
| SNP_110410_A_776   | NW_004518290.1 | scaffold3644 | 776                     | CC                              | TT                 | TT               | INTERGENIC      |               |                    |                    |
| SNP_110411_A_879   | NW_004518290.1 | scaffold3644 | 879                     | GG                              | AA                 | AA               | INTERGENIC      |               |                    |                    |
| SNP_110412_A_933   | NW_004518290.1 | scaffold3644 | 933                     | TT                              | GG                 | GG               | INTERGENIC      |               |                    |                    |
| SNP_110413_A_988   | NW_004518290.1 | scaffold3644 | 988                     | GG                              | CC                 | CC               | INTERGENIC      |               |                    |                    |
| SNP_110414_A_1031  | NW_004518290.1 | scaffold3644 | 1031                    | TT                              | AA                 | AA               | INTERGENIC      |               |                    |                    |
| SNP_110415_A_1065  | NW_004518290.1 | scaffold3644 | 1065                    | TT                              | AA                 | AA               | INTERGENIC      |               |                    |                    |
| SNP_110416_A_1225  | NW_004518290.1 | scaffold3644 | 1225                    | CC                              | GG                 | GG               | INTERGENIC      |               |                    |                    |
| SNP_110417_A_1226  | NW_004518290.1 | scaffold3644 | 1226                    | CC                              | TT                 | TT               | INTERGENIC      |               |                    |                    |
| SNP_110418_A_1323  | NW_004518290.1 | scaffold3644 | 1323                    | TT                              | AA                 | AA               | INTERGENIC      |               |                    |                    |
| SNP_110419_A_1978  | NW_004518290.1 | scaffold3644 | 1978                    | CC                              | AA                 | AA               | INTERGENIC      |               |                    |                    |

| SNPs IDs           | Chromosome IDs | Chromosomes  | Physical positions (bp) | CDC Frontier (Reference genome) | (Pusa 1103 & HPNB) | (ILWC 46 & LPNB) | Sequence genome | Components of | Gene accession IDs | Putative functions |
|--------------------|----------------|--------------|-------------------------|---------------------------------|--------------------|------------------|-----------------|---------------|--------------------|--------------------|
| SNP_110420_A_1983  | NW_004518290.1 | scaffold3644 | 1983                    | TT                              | CC                 | CC               | INTERGENIC      |               |                    |                    |
| SNP_110421_A_1991  | NW_004518290.1 | scaffold3644 | 1991                    | TT                              | CC                 | CC               | INTERGENIC      |               |                    |                    |
| SNP_110422_A_2004  | NW_004518290.1 | scaffold3644 | 2004                    | AA                              | CC                 | CC               | INTERGENIC      |               |                    |                    |
| SNP_110423_A_2020  | NW_004518290.1 | scaffold3644 | 2020                    | AA                              | TT                 | TT               | INTERGENIC      |               |                    |                    |
| SNP_110424_A_2027  | NW_004518290.1 | scaffold3644 | 2027                    | TT                              | GG                 | GG               | INTERGENIC      |               |                    |                    |
| SNP_110425_A_2037  | NW_004518290.1 | scaffold3644 | 2037                    | AA                              | CC                 | CC               | INTERGENIC      |               |                    |                    |
| SNP_110426_A_2062  | NW_004518290.1 | scaffold3644 | 2062                    | AA                              | CC                 | CC               | INTERGENIC      |               |                    |                    |
| SNP_110427_A_2068  | NW_004518290.1 | scaffold3644 | 2068                    | CC                              | AA                 | AA               | INTERGENIC      |               |                    |                    |
| SNP_110428_A_2069  | NW_004518290.1 | scaffold3644 | 2069                    | TT                              | CC                 | CC               | INTERGENIC      |               |                    |                    |
| SNP_110429_A_2096  | NW_004518290.1 | scaffold3644 | 2096                    | TT                              | GG                 | GG               | INTERGENIC      |               |                    |                    |
| SNP_110430_A_2149  | NW_004518290.1 | scaffold3644 | 2149                    | GG                              | TT                 | TT               | INTERGENIC      |               |                    |                    |
| SNP_110431_A_472   | NW_004518291.1 | scaffold3645 | 472                     | AA                              | GG                 | GG               | INTERGENIC      |               |                    |                    |
| SNP_110432_A_7607  | NW_004518291.1 | scaffold3645 | 7607                    | CC                              | TT                 | TT               | INTERGENIC      |               |                    |                    |
| SNP_110433_A_19400 | NW_004518291.1 | scaffold3645 | 19400                   | CC                              | TT                 | TT               | INTERGENIC      |               |                    |                    |
| SNP_110434_A_23638 | NW_004518291.1 | scaffold3645 | 23638                   | AA                              | GG                 | GG               | INTERGENIC      |               |                    |                    |
| SNP_110435_A_5353  | NW_004518292.1 | scaffold3651 | 5353                    | CC                              | TT                 | TT               | INTERGENIC      |               |                    |                    |
| SNP_110436_A_6123  | NW_004518292.1 | scaffold3651 | 6123                    | CC                              | TT                 | TT               | INTERGENIC      |               |                    |                    |
| SNP_110437_A_6126  | NW_004518292.1 | scaffold3651 | 6126                    | CC                              | TT                 | TT               | INTERGENIC      |               |                    |                    |
| SNP_110438_A_6136  | NW_004518292.1 | scaffold3651 | 6136                    | CC                              | TT                 | TT               | INTERGENIC      |               |                    |                    |
| SNP_110439_A_6165  | NW_004518292.1 | scaffold3651 | 6165                    | CC                              | AA                 | AA               | INTERGENIC      |               |                    |                    |
| SNP_110440_A_6228  | NW_004518292.1 | scaffold3651 | 6228                    | TT                              | CC                 | CC               | INTERGENIC      |               |                    |                    |
| SNP_110441_A_6238  | NW_004518292.1 | scaffold3651 | 6238                    | GG                              | TT                 | TT               | INTERGENIC      |               |                    |                    |

| SNPs IDs          | Chromosome IDs | Chromosomes  | Physical positions (bp) | CDC Frontier genome (Reference genome) | (Pusa 1103 & HPNB) | (ILWC 46 & LPNB) | Sequence genome | Components of | Gene accession IDs | Putative functions |
|-------------------|----------------|--------------|-------------------------|----------------------------------------|--------------------|------------------|-----------------|---------------|--------------------|--------------------|
| SNP_110442_A_6310 | NW_004518292.1 | scaffold3651 | 6310                    | CC                                     | TT                 | TT               | INTERGENIC      |               |                    |                    |
| SNP_110443_A_6663 | NW_004518292.1 | scaffold3651 | 6663                    | TT                                     | CC                 | CC               | INTERGENIC      |               |                    |                    |
| SNP_110444_A_6749 | NW_004518292.1 | scaffold3651 | 6749                    | TT                                     | CC                 | CC               | INTERGENIC      |               |                    |                    |
| SNP_110445_A_6750 | NW_004518292.1 | scaffold3651 | 6750                    | TT                                     | CC                 | CC               | INTERGENIC      |               |                    |                    |
| SNP_110447_A_1821 | NW_004518299.1 | scaffold3658 | 1821                    | TT                                     | AA                 | AA               | INTERGENIC      |               |                    |                    |
| SNP_110448_A_2465 | NW_004518299.1 | scaffold3658 | 2465                    | CC                                     | TT                 | TT               | INTERGENIC      |               |                    |                    |
| SNP_110449_A_2649 | NW_004518299.1 | scaffold3658 | 2649                    | CC                                     | TT                 | TT               | INTERGENIC      |               |                    |                    |
| SNP_110450_A_1381 | NW_004518300.1 | scaffold3659 | 1381                    | AA                                     | TT                 | TT               | INTERGENIC      |               |                    |                    |
| SNP_110451_A_1414 | NW_004518300.1 | scaffold3659 | 1414                    | CC                                     | TT                 | TT               | INTERGENIC      |               |                    |                    |
| SNP_110453_A_1768 | NW_004518300.1 | scaffold3659 | 1768                    | AA                                     | GG                 | GG               | INTERGENIC      |               |                    |                    |
| SNP_110455_A_6924 | NW_004518300.1 | scaffold3659 | 6924                    | GG                                     | AA                 | AA               | INTERGENIC      |               |                    |                    |
| SNP_110456_A_6938 | NW_004518300.1 | scaffold3659 | 6938                    | TT                                     | GG                 | GG               | INTERGENIC      |               |                    |                    |
| SNP_110457_A_6953 | NW_004518300.1 | scaffold3659 | 6953                    | CC                                     | TT                 | TT               | INTERGENIC      |               |                    |                    |
| SNP_110458_A_7146 | NW_004518300.1 | scaffold3659 | 7146                    | CC                                     | TT                 | TT               | INTERGENIC      |               |                    |                    |
| SNP_110459_A_7194 | NW_004518300.1 | scaffold3659 | 7194                    | AA                                     | CC                 | CC               | INTERGENIC      |               |                    |                    |
| SNP_110460_A_7350 | NW_004518300.1 | scaffold3659 | 7350                    | TT                                     | GG                 | GG               | INTERGENIC      |               |                    |                    |
| SNP_110461_A_7385 | NW_004518300.1 | scaffold3659 | 7385                    | GG                                     | AA                 | AA               | INTERGENIC      |               |                    |                    |
| SNP_110462_A_7453 | NW_004518300.1 | scaffold3659 | 7453                    | TT                                     | AA                 | AA               | INTERGENIC      |               |                    |                    |
| SNP_110463_A_7529 | NW_004518300.1 | scaffold3659 | 7529                    | GG                                     | CC                 | CC               | INTERGENIC      |               |                    |                    |
| SNP_110464_A_7644 | NW_004518300.1 | scaffold3659 | 7644                    | TT                                     | AA                 | AA               | INTERGENIC      |               |                    |                    |
| SNP_110465_A_7675 | NW_004518300.1 | scaffold3659 | 7675                    | GG                                     | CC                 | CC               | INTERGENIC      |               |                    |                    |
| SNP_110466_A_7693 | NW_004518300.1 | scaffold3659 | 7693                    | CC                                     | AA                 | AA               | INTERGENIC      |               |                    |                    |

| SNPs IDs           | Chromosome IDs | Chromosomes  | Physical positions (bp) | CDC Frontier (Reference genome) | (Pusa 1103 & HPNB) | (ILWC 46 & LPNB) | Sequence genome | Components of | Gene accession IDs | Putative functions |
|--------------------|----------------|--------------|-------------------------|---------------------------------|--------------------|------------------|-----------------|---------------|--------------------|--------------------|
| SNP_110467_A_404   | NW_004518301.1 | scaffold3660 | 404                     | CC                              | GG                 | GG               | INTERGENIC      |               |                    |                    |
| SNP_110468_A_481   | NW_004518301.1 | scaffold3660 | 481                     | AA                              | CC                 | CC               | INTERGENIC      |               |                    |                    |
| SNP_110469_A_589   | NW_004518301.1 | scaffold3660 | 589                     | CC                              | GG                 | GG               | INTERGENIC      |               |                    |                    |
| SNP_110470_A_631   | NW_004518301.1 | scaffold3660 | 631                     | TT                              | CC                 | CC               | INTERGENIC      |               |                    |                    |
| SNP_110471_A_635   | NW_004518301.1 | scaffold3660 | 635                     | TT                              | AA                 | AA               | INTERGENIC      |               |                    |                    |
| SNP_110472_A_723   | NW_004518301.1 | scaffold3660 | 723                     | GG                              | AA                 | AA               | INTERGENIC      |               |                    |                    |
| SNP_110473_A_962   | NW_004518301.1 | scaffold3660 | 962                     | TT                              | CC                 | CC               | INTERGENIC      |               |                    |                    |
| SNP_110474_A_967   | NW_004518301.1 | scaffold3660 | 967                     | TT                              | CC                 | CC               | INTERGENIC      |               |                    |                    |
| SNP_110475_A_1017  | NW_004518301.1 | scaffold3660 | 1017                    | TT                              | CC                 | CC               | INTERGENIC      |               |                    |                    |
| SNP_110476_A_1039  | NW_004518301.1 | scaffold3660 | 1039                    | CC                              | GG                 | GG               | INTERGENIC      |               |                    |                    |
| SNP_110477_A_3946  | NW_004518304.1 | scaffold3663 | 3946                    | TT                              | AA                 | AA               | INTERGENIC      |               |                    |                    |
| SNP_110479_A_4144  | NW_004518304.1 | scaffold3663 | 4144                    | TT                              | AA                 | AA               | INTERGENIC      |               |                    |                    |
| SNP_110480_A_4197  | NW_004518304.1 | scaffold3663 | 4197                    | TT                              | CC                 | CC               | INTERGENIC      |               |                    |                    |
| SNP_110481_A_4238  | NW_004518304.1 | scaffold3663 | 4238                    | TT                              | AA                 | AA               | INTERGENIC      |               |                    |                    |
| SNP_110482_A_4345  | NW_004518304.1 | scaffold3663 | 4345                    | TT                              | GG                 | GG               | INTERGENIC      |               |                    |                    |
| SNP_110483_A_4421  | NW_004518304.1 | scaffold3663 | 4421                    | AA                              | TT                 | TT               | INTERGENIC      |               |                    |                    |
| SNP_110485_A_4509  | NW_004518304.1 | scaffold3663 | 4509                    | AA                              | TT                 | TT               | INTERGENIC      |               |                    |                    |
| SNP_110486_A_7431  | NW_004518304.1 | scaffold3663 | 7431                    | AA                              | TT                 | TT               | INTERGENIC      |               |                    |                    |
| SNP_110487_A_13885 | NW_004518304.1 | scaffold3663 | 13885                   | CC                              | AA                 | AA               | INTERGENIC      |               |                    |                    |
| SNP_110488_A_13952 | NW_004518304.1 | scaffold3663 | 13952                   | TT                              | GG                 | GG               | INTERGENIC      |               |                    |                    |
| SNP_110489_A_14335 | NW_004518304.1 | scaffold3663 | 14335                   | TT                              | CC                 | CC               | INTERGENIC      |               |                    |                    |
| SNP_110490_A_14369 | NW_004518304.1 | scaffold3663 | 14369                   | AA                              | GG                 | GG               | INTERGENIC      |               |                    |                    |

| SNPs IDs          | Chromosome IDs | Chromosomes  | Physical positions (bp) | CDC Frontier (Reference genome) | (Pusa 1103 & HPNB) | (ILWC 46 & LPNB) | Sequence genome | Components of | Gene accession IDs | Putative functions |
|-------------------|----------------|--------------|-------------------------|---------------------------------|--------------------|------------------|-----------------|---------------|--------------------|--------------------|
| SNP_110491_A_3290 | NW_004518305.1 | scaffold3664 | 3290                    | CC                              | GG                 | GG               | INTERGENIC      |               |                    |                    |
| SNP_110493_A_832  | NW_004518307.1 | scaffold3666 | 832                     | GG                              | AA                 | AA               | INTERGENIC      |               |                    |                    |
| SNP_110494_A_2091 | NW_004518307.1 | scaffold3666 | 2091                    | GG                              | AA                 | AA               | INTERGENIC      |               |                    |                    |
| SNP_110495_A_2238 | NW_004518307.1 | scaffold3666 | 2238                    | TT                              | AA                 | AA               | INTERGENIC      |               |                    |                    |
| SNP_110496_A_2240 | NW_004518307.1 | scaffold3666 | 2240                    | AA                              | TT                 | TT               | INTERGENIC      |               |                    |                    |
| SNP_110497_A_2599 | NW_004518307.1 | scaffold3666 | 2599                    | CC                              | TT                 | TT               | INTERGENIC      |               |                    |                    |
| SNP_110499_A_3393 | NW_004518307.1 | scaffold3666 | 3393                    | GG                              | AA                 | AA               | INTERGENIC      |               |                    |                    |
| SNP_110500_A_3395 | NW_004518307.1 | scaffold3666 | 3395                    | AA                              | GG                 | GG               | INTERGENIC      |               |                    |                    |
| SNP_110502_A_4073 | NW_004518307.1 | scaffold3666 | 4073                    | AA                              | TT                 | TT               | INTERGENIC      |               |                    |                    |
| SNP_110503_A_6281 | NW_004518307.1 | scaffold3666 | 6281                    | CC                              | TT                 | TT               | INTERGENIC      |               |                    |                    |
| SNP_110504_A_1116 | NW_004518308.1 | scaffold3668 | 1116                    | CC                              | GG                 | GG               | INTERGENIC      |               |                    |                    |
| SNP_110506_A_707  | NW_004518311.1 | scaffold3672 | 707                     | AA                              | GG                 | GG               | INTERGENIC      |               |                    |                    |
| SNP_110507_A_1614 | NW_004518312.1 | scaffold3673 | 1614                    | TT                              | CC                 | CC               | INTERGENIC      |               |                    |                    |
| SNP_110509_A_298  | NW_004518315.1 | scaffold3676 | 298                     | GG                              | CC                 | CC               | INTERGENIC      |               |                    |                    |
| SNP_110510_A_558  | NW_004518315.1 | scaffold3676 | 558                     | GG                              | AA                 | AA               | INTERGENIC      |               |                    |                    |
| SNP_110511_A_602  | NW_004518315.1 | scaffold3676 | 602                     | GG                              | AA                 | AA               | INTERGENIC      |               |                    |                    |
| SNP_110512_A_3600 | NW_004518315.1 | scaffold3676 | 3600                    | GG                              | CC                 | CC               | INTERGENIC      |               |                    |                    |
| SNP_110513_A_4111 | NW_004518315.1 | scaffold3676 | 4111                    | AA                              | CC                 | CC               | INTERGENIC      |               |                    |                    |
| SNP_110514_A_4718 | NW_004518315.1 | scaffold3676 | 4718                    | AA                              | GG                 | GG               | INTERGENIC      |               |                    |                    |
| SNP_110515_A_4915 | NW_004518315.1 | scaffold3676 | 4915                    | TT                              | AA                 | AA               | INTERGENIC      |               |                    |                    |
| SNP_110516_A_5071 | NW_004518315.1 | scaffold3676 | 5071                    | CC                              | TT                 | TT               | INTERGENIC      |               |                    |                    |
| SNP_110517_A_5183 | NW_004518315.1 | scaffold3676 | 5183                    | GG                              | CC                 | CC               | INTERGENIC      |               |                    |                    |



| SNPs IDs           | Chromosome IDs | Chromosomes  | Physical positions (bp) | CDC Frontier genome (Reference genome) | (Pusa 1103 & HPNB) | (ILWC 46 & LPNB) | Sequence genome | Components of | Gene accession IDs | Putative functions |
|--------------------|----------------|--------------|-------------------------|----------------------------------------|--------------------|------------------|-----------------|---------------|--------------------|--------------------|
| SNP_110518_A_5217  | NW_004518315.1 | scaffold3676 | 5217                    | AA                                     | TT                 | TT               | INTERGENIC      |               |                    |                    |
| SNP_110519_A_5323  | NW_004518315.1 | scaffold3676 | 5323                    | AA                                     | CC                 | CC               | INTERGENIC      |               |                    |                    |
| SNP_110520_A_6820  | NW_004518315.1 | scaffold3676 | 6820                    | AA                                     | TT                 | TT               | INTERGENIC      |               |                    |                    |
| SNP_110521_A_7400  | NW_004518315.1 | scaffold3676 | 7400                    | CC                                     | AA                 | AA               | INTERGENIC      |               |                    |                    |
| SNP_110522_A_8263  | NW_004518315.1 | scaffold3676 | 8263                    | TT                                     | CC                 | CC               | INTERGENIC      |               |                    |                    |
| SNP_110523_A_9393  | NW_004518315.1 | scaffold3676 | 9393                    | AA                                     | TT                 | TT               | INTERGENIC      |               |                    |                    |
| SNP_110524_A_9688  | NW_004518315.1 | scaffold3676 | 9688                    | CC                                     | AA                 | AA               | INTERGENIC      |               |                    |                    |
| SNP_110525_A_9692  | NW_004518315.1 | scaffold3676 | 9692                    | TT                                     | AA                 | AA               | INTERGENIC      |               |                    |                    |
| SNP_110526_A_9780  | NW_004518315.1 | scaffold3676 | 9780                    | AA                                     | GG                 | GG               | INTERGENIC      |               |                    |                    |
| SNP_110527_A_12109 | NW_004518315.1 | scaffold3676 | 12109                   | CC                                     | TT                 | TT               | INTERGENIC      |               |                    |                    |
| SNP_110528_A_12640 | NW_004518315.1 | scaffold3676 | 12640                   | TT                                     | AA                 | AA               | INTERGENIC      |               |                    |                    |
| SNP_110529_A_12722 | NW_004518315.1 | scaffold3676 | 12722                   | GG                                     | TT                 | TT               | INTERGENIC      |               |                    |                    |
| SNP_110530_A_12787 | NW_004518315.1 | scaffold3676 | 12787                   | TT                                     | GG                 | GG               | INTERGENIC      |               |                    |                    |
| SNP_110531_A_13028 | NW_004518315.1 | scaffold3676 | 13028                   | TT                                     | CC                 | CC               | INTERGENIC      |               |                    |                    |
| SNP_110532_A_13043 | NW_004518315.1 | scaffold3676 | 13043                   | CC                                     | AA                 | AA               | INTERGENIC      |               |                    |                    |
| SNP_110533_A_13087 | NW_004518315.1 | scaffold3676 | 13087                   | AA                                     | GG                 | GG               | INTERGENIC      |               |                    |                    |
| SNP_110534_A_13171 | NW_004518315.1 | scaffold3676 | 13171                   | GG                                     | CC                 | CC               | INTERGENIC      |               |                    |                    |
| SNP_110535_A_13272 | NW_004518315.1 | scaffold3676 | 13272                   | AA                                     | GG                 | GG               | INTERGENIC      |               |                    |                    |
| SNP_110536_A_13286 | NW_004518315.1 | scaffold3676 | 13286                   | CC                                     | TT                 | TT               | INTERGENIC      |               |                    |                    |
| SNP_110537_A_277   | NW_004518318.1 | scaffold3681 | 277                     | CC                                     | TT                 | TT               | INTERGENIC      |               |                    |                    |
| SNP_110538_A_421   | NW_004518318.1 | scaffold3681 | 421                     | AA                                     | TT                 | TT               | INTERGENIC      |               |                    |                    |
| SNP_110539_A_520   | NW_004518318.1 | scaffold3681 | 520                     | AA                                     | CC                 | CC               | INTERGENIC      |               |                    |                    |

| SNPs IDs            | Chromosome IDs | Chromosomes  | Physical positions (bp) | CDC Frontier genome (Reference genome) | (Pusa 1103 & HPNB) | (ILWC 46 & LPNB) | Sequence genome | Components of | Gene accession IDs | Putative functions |
|---------------------|----------------|--------------|-------------------------|----------------------------------------|--------------------|------------------|-----------------|---------------|--------------------|--------------------|
| SNP_110540_A_627    | NW_004518318.1 | scaffold3681 | 627                     | TT                                     | CC                 | CC               | INTERGENIC      |               |                    |                    |
| SNP_110541_A_523    | NW_004518322.1 | scaffold3685 | 523                     | CC                                     | GG                 | GG               | INTERGENIC      |               |                    |                    |
| SNP_110542_A_570    | NW_004518322.1 | scaffold3685 | 570                     | TT                                     | CC                 | CC               | INTERGENIC      |               |                    |                    |
| SNP_110543_A_571    | NW_004518322.1 | scaffold3685 | 571                     | AA                                     | CC                 | CC               | INTERGENIC      |               |                    |                    |
| SNP_110544_A_839    | NW_004518322.1 | scaffold3685 | 839                     | TT                                     | AA                 | AA               | INTERGENIC      |               |                    |                    |
| SNP_110545_A_847    | NW_004518322.1 | scaffold3685 | 847                     | AA                                     | GG                 | GG               | INTERGENIC      |               |                    |                    |
| SNP_110546_A_856    | NW_004518322.1 | scaffold3685 | 856                     | CC                                     | GG                 | GG               | INTERGENIC      |               |                    |                    |
| SNP_110547_A_65449  | NW_004518323.1 | scaffold3687 | 65449                   | GG                                     | TT                 | TT               | INTERGENIC      |               |                    |                    |
| SNP_110548_A_132037 | NW_004518323.1 | scaffold3687 | 132037                  | GG                                     | AA                 | AA               | INTERGENIC      |               |                    |                    |
| SNP_110549_A_132043 | NW_004518323.1 | scaffold3687 | 132043                  | AA                                     | GG                 | GG               | INTERGENIC      |               |                    |                    |
| SNP_110550_A_132048 | NW_004518323.1 | scaffold3687 | 132048                  | CC                                     | AA                 | AA               | INTERGENIC      |               |                    |                    |
| SNP_110551_A_132100 | NW_004518323.1 | scaffold3687 | 132100                  | TT                                     | CC                 | CC               | INTERGENIC      |               |                    |                    |
| SNP_110552_A_132123 | NW_004518323.1 | scaffold3687 | 132123                  | GG                                     | AA                 | AA               | INTERGENIC      |               |                    |                    |
| SNP_110553_A_132136 | NW_004518323.1 | scaffold3687 | 132136                  | CC                                     | TT                 | TT               | INTERGENIC      |               |                    |                    |
| SNP_110554_A_132283 | NW_004518323.1 | scaffold3687 | 132283                  | TT                                     | CC                 | CC               | INTERGENIC      |               |                    |                    |
| SNP_110555_A_140626 | NW_004518323.1 | scaffold3687 | 140626                  | GG                                     | TT                 | TT               | INTERGENIC      |               |                    |                    |
| SNP_110556_A_140695 | NW_004518323.1 | scaffold3687 | 140695                  | TT                                     | GG                 | GG               | INTERGENIC      |               |                    |                    |
| SNP_110557_A_140724 | NW_004518323.1 | scaffold3687 | 140724                  | GG                                     | AA                 | AA               | INTERGENIC      |               |                    |                    |
| SNP_110558_A_140799 | NW_004518323.1 | scaffold3687 | 140799                  | GG                                     | AA                 | AA               | INTERGENIC      |               |                    |                    |
| SNP_110559_A_140806 | NW_004518323.1 | scaffold3687 | 140806                  | TT                                     | CC                 | CC               | INTERGENIC      |               |                    |                    |
| SNP_110560_A_140922 | NW_004518323.1 | scaffold3687 | 140922                  | CC                                     | AA                 | AA               | INTERGENIC      |               |                    |                    |
| SNP_110561_A_140994 | NW_004518323.1 | scaffold3687 | 140994                  | TT                                     | GG                 | GG               | INTERGENIC      |               |                    |                    |

| SNPs IDs            | Chromosome IDs | Chromosomes  | Physical positions (bp) | CDC Frontier (Reference genome) | (Pusa 1103 & HPNB) | (ILWC 46 & LPNB) | Sequence genome | Components of | Gene accession IDs | Putative functions |
|---------------------|----------------|--------------|-------------------------|---------------------------------|--------------------|------------------|-----------------|---------------|--------------------|--------------------|
| SNP_110562_A_141032 | NW_004518323.1 | scaffold3687 | 141032                  | TT                              | CC                 | CC               | INTERGENIC      |               |                    |                    |
| SNP_110563_A_443    | NW_004518325.1 | scaffold3689 | 443                     | TT                              | AA                 | AA               | INTERGENIC      |               |                    |                    |
| SNP_110564_A_635    | NW_004518325.1 | scaffold3689 | 635                     | AA                              | GG                 | GG               | INTERGENIC      |               |                    |                    |
| SNP_110565_A_15592  | NW_004518325.1 | scaffold3689 | 15592                   | GG                              | CC                 | CC               | INTERGENIC      |               |                    |                    |
| SNP_110566_A_15659  | NW_004518325.1 | scaffold3689 | 15659                   | CC                              | AA                 | AA               | INTERGENIC      |               |                    |                    |
| SNP_110567_A_15787  | NW_004518325.1 | scaffold3689 | 15787                   | CC                              | TT                 | TT               | INTERGENIC      |               |                    |                    |
| SNP_110568_A_16055  | NW_004518325.1 | scaffold3689 | 16055                   | GG                              | AA                 | AA               | INTERGENIC      |               |                    |                    |
| SNP_110569_A_16103  | NW_004518325.1 | scaffold3689 | 16103                   | TT                              | CC                 | CC               | INTERGENIC      |               |                    |                    |
| SNP_110570_A_16157  | NW_004518325.1 | scaffold3689 | 16157                   | CC                              | GG                 | GG               | INTERGENIC      |               |                    |                    |
| SNP_110572_A_1000   | NW_004518329.1 | scaffold3693 | 1000                    | CC                              | TT                 | TT               | INTERGENIC      |               |                    |                    |
| SNP_110573_A_1037   | NW_004518329.1 | scaffold3693 | 1037                    | TT                              | CC                 | CC               | INTERGENIC      |               |                    |                    |
| SNP_110574_A_1076   | NW_004518329.1 | scaffold3693 | 1076                    | AA                              | GG                 | GG               | INTERGENIC      |               |                    |                    |
| SNP_110575_A_20673  | NW_004518329.1 | scaffold3693 | 20673                   | TT                              | CC                 | CC               | INTERGENIC      |               |                    |                    |
| SNP_110576_A_27019  | NW_004518329.1 | scaffold3693 | 27019                   | GG                              | AA                 | AA               | INTERGENIC      |               |                    |                    |
| SNP_110577_A_35159  | NW_004518329.1 | scaffold3693 | 35159                   | AA                              | GG                 | GG               | INTERGENIC      |               |                    |                    |
| SNP_110578_A_35163  | NW_004518329.1 | scaffold3693 | 35163                   | AA                              | GG                 | GG               | INTERGENIC      |               |                    |                    |
| SNP_110579_A_35185  | NW_004518329.1 | scaffold3693 | 35185                   | CC                              | TT                 | TT               | INTERGENIC      |               |                    |                    |
| SNP_110580_A_35206  | NW_004518329.1 | scaffold3693 | 35206                   | TT                              | GG                 | GG               | INTERGENIC      |               |                    |                    |
| SNP_110581_A_35215  | NW_004518329.1 | scaffold3693 | 35215                   | CC                              | TT                 | TT               | INTERGENIC      |               |                    |                    |
| SNP_110582_A_35221  | NW_004518329.1 | scaffold3693 | 35221                   | TT                              | CC                 | CC               | INTERGENIC      |               |                    |                    |
| SNP_110583_A_35253  | NW_004518329.1 | scaffold3693 | 35253                   | GG                              | TT                 | TT               | INTERGENIC      |               |                    |                    |
| SNP_110584_A_35349  | NW_004518329.1 | scaffold3693 | 35349                   | CC                              | TT                 | TT               | INTERGENIC      |               |                    |                    |

| SNPs IDs           | Chromosome IDs | Chromosomes  | Physical positions (bp) | CDC Frontier genome (Reference genome) | (Pusa 1103 & HPNB) | (ILWC 46 & LPNB) | Sequence genome | Components of | Gene accession IDs | Putative functions |
|--------------------|----------------|--------------|-------------------------|----------------------------------------|--------------------|------------------|-----------------|---------------|--------------------|--------------------|
| SNP_110586_A_35495 | NW_004518329.1 | scaffold3693 | 35495                   | GG                                     | AA                 | AA               | INTERGENIC      |               |                    |                    |
| SNP_110587_A_35650 | NW_004518329.1 | scaffold3693 | 35650                   | GG                                     | AA                 | AA               | INTERGENIC      |               |                    |                    |
| SNP_110588_A_41497 | NW_004518329.1 | scaffold3693 | 41497                   | AA                                     | CC                 | CC               | INTERGENIC      |               |                    |                    |
| SNP_110589_A_81068 | NW_004518329.1 | scaffold3693 | 81068                   | CC                                     | TT                 | TT               | INTERGENIC      |               |                    |                    |
| SNP_110590_A_426   | NW_004518335.1 | scaffold3700 | 426                     | CC                                     | TT                 | TT               | INTERGENIC      |               |                    |                    |
| SNP_110592_A_739   | NW_004518335.1 | scaffold3700 | 739                     | TT                                     | AA                 | AA               | INTERGENIC      |               |                    |                    |
| SNP_110593_A_1065  | NW_004518335.1 | scaffold3700 | 1065                    | TT                                     | AA                 | AA               | INTERGENIC      |               |                    |                    |
| SNP_110594_A_1111  | NW_004518335.1 | scaffold3700 | 1111                    | TT                                     | AA                 | AA               | INTERGENIC      |               |                    |                    |
| SNP_110595_A_1121  | NW_004518335.1 | scaffold3700 | 1121                    | CC                                     | TT                 | TT               | INTERGENIC      |               |                    |                    |
| SNP_110596_A_395   | NW_004518339.1 | scaffold3705 | 395                     | GG                                     | TT                 | TT               | INTERGENIC      |               |                    |                    |
| SNP_110597_A_558   | NW_004518339.1 | scaffold3705 | 558                     | GG                                     | AA                 | AA               | INTERGENIC      |               |                    |                    |
| SNP_110598_A_673   | NW_004518339.1 | scaffold3705 | 673                     | AA                                     | GG                 | GG               | INTERGENIC      |               |                    |                    |
| SNP_110599_A_675   | NW_004518339.1 | scaffold3705 | 675                     | GG                                     | AA                 | AA               | INTERGENIC      |               |                    |                    |
| SNP_110600_A_719   | NW_004518339.1 | scaffold3705 | 719                     | TT                                     | CC                 | CC               | INTERGENIC      |               |                    |                    |
| SNP_110601_A_739   | NW_004518339.1 | scaffold3705 | 739                     | CC                                     | AA                 | AA               | INTERGENIC      |               |                    |                    |
| SNP_110603_A_4125  | NW_004518339.1 | scaffold3705 | 4125                    | AA                                     | TT                 | TT               | STOP_GAINED     | 101501804     | DNA ligase 1-like  |                    |
| SNP_110604_A_238   | NW_004518341.1 | scaffold3707 | 238                     | TT                                     | CC                 | CC               | INTERGENIC      |               |                    |                    |
| SNP_110605_A_297   | NW_004518341.1 | scaffold3707 | 297                     | AA                                     | GG                 | GG               | INTERGENIC      |               |                    |                    |
| SNP_110606_A_307   | NW_004518341.1 | scaffold3707 | 307                     | GG                                     | AA                 | AA               | INTERGENIC      |               |                    |                    |
| SNP_110607_A_1087  | NW_004518341.1 | scaffold3707 | 1087                    | TT                                     | AA                 | AA               | INTERGENIC      |               |                    |                    |
| SNP_110608_A_1693  | NW_004518341.1 | scaffold3707 | 1693                    | CC                                     | TT                 | TT               | INTERGENIC      |               |                    |                    |
| SNP_110609_A_1715  | NW_004518341.1 | scaffold3707 | 1715                    | GG                                     | AA                 | AA               | INTERGENIC      |               |                    |                    |

| SNPs IDs           | Chromosome IDs | Chromosomes  | Physical positions (bp) | CDC Frontier (Reference genome) | (Pusa 1103 & HPNB) | (ILWC 46 & LPNB) | Sequence genome | Components of | Gene accession IDs | Putative functions |
|--------------------|----------------|--------------|-------------------------|---------------------------------|--------------------|------------------|-----------------|---------------|--------------------|--------------------|
| SNP_110610_A_1733  | NW_004518341.1 | scaffold3707 | 1733                    | GG                              | TT                 | TT               | INTERGENIC      |               |                    |                    |
| SNP_110611_A_1807  | NW_004518341.1 | scaffold3707 | 1807                    | AA                              | CC                 | CC               | INTERGENIC      |               |                    |                    |
| SNP_110612_A_642   | NW_004518344.1 | scaffold3714 | 642                     | TT                              | CC                 | CC               | INTERGENIC      |               |                    |                    |
| SNP_110613_A_669   | NW_004518344.1 | scaffold3714 | 669                     | AA                              | CC                 | CC               | INTERGENIC      |               |                    |                    |
| SNP_110614_A_687   | NW_004518344.1 | scaffold3714 | 687                     | TT                              | GG                 | GG               | INTERGENIC      |               |                    |                    |
| SNP_110615_A_696   | NW_004518344.1 | scaffold3714 | 696                     | AA                              | GG                 | GG               | INTERGENIC      |               |                    |                    |
| SNP_110616_A_699   | NW_004518344.1 | scaffold3714 | 699                     | AA                              | CC                 | CC               | INTERGENIC      |               |                    |                    |
| SNP_110617_A_879   | NW_004518344.1 | scaffold3714 | 879                     | TT                              | CC                 | CC               | INTERGENIC      |               |                    |                    |
| SNP_110618_A_887   | NW_004518344.1 | scaffold3714 | 887                     | TT                              | AA                 | AA               | INTERGENIC      |               |                    |                    |
| SNP_110619_A_896   | NW_004518344.1 | scaffold3714 | 896                     | CC                              | AA                 | AA               | INTERGENIC      |               |                    |                    |
| SNP_110621_A_84411 | NW_004518353.1 | scaffold3724 | 84411                   | CC                              | AA                 | AA               | INTERGENIC      |               |                    |                    |
| SNP_110622_A_90971 | NW_004518353.1 | scaffold3724 | 90971                   | TT                              | AA                 | AA               | INTERGENIC      |               |                    |                    |
| SNP_110623_A_90972 | NW_004518353.1 | scaffold3724 | 90972                   | TT                              | GG                 | GG               | INTERGENIC      |               |                    |                    |
| SNP_110624_A_465   | NW_004518357.1 | scaffold3728 | 465                     | GG                              | AA                 | AA               | INTERGENIC      |               |                    |                    |
| SNP_110625_A_489   | NW_004518357.1 | scaffold3728 | 489                     | GG                              | AA                 | AA               | INTERGENIC      |               |                    |                    |
| SNP_110626_A_499   | NW_004518357.1 | scaffold3728 | 499                     | GG                              | TT                 | TT               | INTERGENIC      |               |                    |                    |
| SNP_110627_A_502   | NW_004518359.1 | scaffold3731 | 502                     | CC                              | TT                 | TT               | INTERGENIC      |               |                    |                    |
| SNP_110628_A_792   | NW_004518359.1 | scaffold3731 | 792                     | TT                              | CC                 | CC               | INTERGENIC      |               |                    |                    |
| SNP_110629_A_834   | NW_004518359.1 | scaffold3731 | 834                     | GG                              | TT                 | TT               | INTERGENIC      |               |                    |                    |
| SNP_110630_A_846   | NW_004518359.1 | scaffold3731 | 846                     | TT                              | GG                 | GG               | INTERGENIC      |               |                    |                    |
| SNP_110631_A_852   | NW_004518359.1 | scaffold3731 | 852                     | AA                              | TT                 | TT               | INTERGENIC      |               |                    |                    |
| SNP_110632_A_879   | NW_004518359.1 | scaffold3731 | 879                     | CC                              | TT                 | TT               | INTERGENIC      |               |                    |                    |

| SNPs IDs         | Chromosome IDs | Chromosomes  | Physical positions (bp) | CDC Frontier (Reference genome) | (Pusa 1103 & HPNB) | (ILWC 46 & LPNB) | Sequence genome | Components of | Gene accession IDs | Putative functions |
|------------------|----------------|--------------|-------------------------|---------------------------------|--------------------|------------------|-----------------|---------------|--------------------|--------------------|
| SNP_110634_A_894 | NW_004518359.1 | scaffold3731 | 894                     | TT                              | AA                 | AA               | INTERGENIC      |               |                    |                    |
| SNP_110635_A_897 | NW_004518359.1 | scaffold3731 | 897                     | GG                              | TT                 | TT               | INTERGENIC      |               |                    |                    |
| SNP_110636_A_915 | NW_004518359.1 | scaffold3731 | 915                     | TT                              | GG                 | GG               | INTERGENIC      |               |                    |                    |
| SNP_110637_A_921 | NW_004518359.1 | scaffold3731 | 921                     | GG                              | AA                 | AA               | INTERGENIC      |               |                    |                    |
| SNP_110638_A_930 | NW_004518359.1 | scaffold3731 | 930                     | GG                              | TT                 | TT               | INTERGENIC      |               |                    |                    |
| SNP_110639_A_945 | NW_004518359.1 | scaffold3731 | 945                     | AA                              | TT                 | TT               | INTERGENIC      |               |                    |                    |
| SNP_110640_A_951 | NW_004518359.1 | scaffold3731 | 951                     | GG                              | AA                 | AA               | INTERGENIC      |               |                    |                    |
| SNP_110641_A_966 | NW_004518359.1 | scaffold3731 | 966                     | TT                              | GG                 | GG               | INTERGENIC      |               |                    |                    |
| SNP_110642_A_976 | NW_004518359.1 | scaffold3731 | 976                     | GG                              | AA                 | AA               | INTERGENIC      |               |                    |                    |
| SNP_110643_A_977 | NW_004518359.1 | scaffold3731 | 977                     | TT                              | CC                 | CC               | INTERGENIC      |               |                    |                    |
| SNP_110645_A_984 | NW_004518359.1 | scaffold3731 | 984                     | AA                              | GG                 | GG               | INTERGENIC      |               |                    |                    |
| SNP_110646_A_988 | NW_004518359.1 | scaffold3731 | 988                     | TT                              | AA                 | AA               | INTERGENIC      |               |                    |                    |
| SNP_110647_A_102 | NW_004518366.1 | scaffold3742 | 102                     | GG                              | CC                 | CC               | INTERGENIC      |               |                    |                    |
| SNP_110648_A_207 | NW_004518366.1 | scaffold3742 | 207                     | TT                              | AA                 | AA               | INTERGENIC      |               |                    |                    |
| SNP_110649_A_374 | NW_004518366.1 | scaffold3742 | 374                     | TT                              | CC                 | CC               | INTERGENIC      |               |                    |                    |
| SNP_110650_A_405 | NW_004518366.1 | scaffold3742 | 405                     | AA                              | TT                 | TT               | INTERGENIC      |               |                    |                    |
| SNP_110651_A_439 | NW_004518366.1 | scaffold3742 | 439                     | AA                              | GG                 | GG               | INTERGENIC      |               |                    |                    |
| SNP_110653_A_603 | NW_004518366.1 | scaffold3742 | 603                     | CC                              | TT                 | TT               | INTERGENIC      |               |                    |                    |
| SNP_110654_A_643 | NW_004518366.1 | scaffold3742 | 643                     | CC                              | GG                 | GG               | INTERGENIC      |               |                    |                    |
| SNP_110655_A_665 | NW_004518366.1 | scaffold3742 | 665                     | CC                              | TT                 | TT               | INTERGENIC      |               |                    |                    |
| SNP_110656_A_688 | NW_004518366.1 | scaffold3742 | 688                     | TT                              | CC                 | CC               | INTERGENIC      |               |                    |                    |
| SNP_110657_A_732 | NW_004518366.1 | scaffold3742 | 732                     | AA                              | TT                 | TT               | INTERGENIC      |               |                    |                    |

| SNPs IDs           | Chromosome IDs | Chromosomes  | Physical positions (bp) | CDC Frontier (Reference genome) | (Pusa 1103 & HPNB) | (ILWC 46 & LPNB) | Sequence genome | Components of | Gene accession IDs | Putative functions |
|--------------------|----------------|--------------|-------------------------|---------------------------------|--------------------|------------------|-----------------|---------------|--------------------|--------------------|
| SNP_110658_A_3733  | NW_004518366.1 | scaffold3742 | 3733                    | CC                              | AA                 | AA               | INTERGENIC      |               |                    |                    |
| SNP_110660_A_4088  | NW_004518366.1 | scaffold3742 | 4088                    | GG                              | TT                 | TT               | INTERGENIC      |               |                    |                    |
| SNP_110661_A_6425  | NW_004518366.1 | scaffold3742 | 6425                    | CC                              | TT                 | TT               | INTERGENIC      |               |                    |                    |
| SNP_110662_A_6756  | NW_004518366.1 | scaffold3742 | 6756                    | CC                              | TT                 | TT               | INTERGENIC      |               |                    |                    |
| SNP_110663_A_10167 | NW_004518366.1 | scaffold3742 | 10167                   | GG                              | AA                 | AA               | INTERGENIC      |               |                    |                    |
| SNP_110664_A_10510 | NW_004518366.1 | scaffold3742 | 10510                   | AA                              | TT                 | TT               | INTERGENIC      |               |                    |                    |
| SNP_110665_A_10575 | NW_004518366.1 | scaffold3742 | 10575                   | AA                              | GG                 | GG               | INTERGENIC      |               |                    |                    |
| SNP_110666_A_10655 | NW_004518366.1 | scaffold3742 | 10655                   | GG                              | CC                 | CC               | INTERGENIC      |               |                    |                    |
| SNP_110667_A_11065 | NW_004518366.1 | scaffold3742 | 11065                   | AA                              | CC                 | CC               | INTERGENIC      |               |                    |                    |
| SNP_110668_A_11362 | NW_004518366.1 | scaffold3742 | 11362                   | TT                              | CC                 | CC               | INTERGENIC      |               |                    |                    |
| SNP_110669_A_11373 | NW_004518366.1 | scaffold3742 | 11373                   | AA                              | GG                 | GG               | INTERGENIC      |               |                    |                    |
| SNP_110670_A_11469 | NW_004518366.1 | scaffold3742 | 11469                   | TT                              | AA                 | AA               | INTERGENIC      |               |                    |                    |
| SNP_110671_A_11563 | NW_004518366.1 | scaffold3742 | 11563                   | CC                              | TT                 | TT               | INTERGENIC      |               |                    |                    |
| SNP_110672_A_11682 | NW_004518366.1 | scaffold3742 | 11682                   | TT                              | AA                 | AA               | INTERGENIC      |               |                    |                    |
| SNP_110674_A_4666  | NW_004518368.1 | scaffold3744 | 4666                    | TT                              | GG                 | GG               | INTERGENIC      |               |                    |                    |
| SNP_110675_A_10248 | NW_004518368.1 | scaffold3744 | 10248                   | AA                              | GG                 | GG               | INTERGENIC      |               |                    |                    |
| SNP_110676_A_10304 | NW_004518368.1 | scaffold3744 | 10304                   | TT                              | GG                 | GG               | INTERGENIC      |               |                    |                    |
| SNP_110677_A_3275  | NW_004518369.1 | scaffold3745 | 3275                    | CC                              | TT                 | TT               | INTERGENIC      |               |                    |                    |
| SNP_110678_A_6305  | NW_004518373.1 | scaffold3750 | 6305                    | TT                              | CC                 | CC               | INTERGENIC      |               |                    |                    |
| SNP_110679_A_64    | NW_004518379.1 | scaffold3757 | 64                      | TT                              | CC                 | CC               | INTERGENIC      |               |                    |                    |
| SNP_110680_A_116   | NW_004518379.1 | scaffold3757 | 116                     | TT                              | AA                 | AA               | INTERGENIC      |               |                    |                    |
| SNP_110681_A_222   | NW_004518379.1 | scaffold3757 | 222                     | CC                              | TT                 | TT               | INTERGENIC      |               |                    |                    |

| SNPs IDs          | Chromosome IDs | Chromosomes  | Physical positions (bp) | CDC Frontier (Reference genome) | (Pusa 1103 & HPNB) | (ILWC 46 & LPNB) | Sequence genome | Components of | Gene accession IDs | Putative functions |
|-------------------|----------------|--------------|-------------------------|---------------------------------|--------------------|------------------|-----------------|---------------|--------------------|--------------------|
| SNP_110682_A_234  | NW_004518379.1 | scaffold3757 | 234                     | AA                              | GG                 | GG               | INTERGENIC      |               |                    |                    |
| SNP_110683_A_258  | NW_004518379.1 | scaffold3757 | 258                     | AA                              | CC                 | CC               | INTERGENIC      |               |                    |                    |
| SNP_110684_A_537  | NW_004518379.1 | scaffold3757 | 537                     | CC                              | AA                 | AA               | INTERGENIC      |               |                    |                    |
| SNP_110685_A_627  | NW_004518379.1 | scaffold3757 | 627                     | GG                              | TT                 | TT               | INTERGENIC      |               |                    |                    |
| SNP_110686_A_3265 | NW_004518379.1 | scaffold3757 | 3265                    | CC                              | GG                 | GG               | INTERGENIC      |               |                    |                    |
| SNP_110688_A_3427 | NW_004518379.1 | scaffold3757 | 3427                    | TT                              | GG                 | GG               | INTERGENIC      |               |                    |                    |
| SNP_110689_A_3489 | NW_004518379.1 | scaffold3757 | 3489                    | GG                              | CC                 | CC               | INTERGENIC      |               |                    |                    |
| SNP_110690_A_4006 | NW_004518379.1 | scaffold3757 | 4006                    | TT                              | GG                 | GG               | INTERGENIC      |               |                    |                    |
| SNP_110691_A_4046 | NW_004518379.1 | scaffold3757 | 4046                    | GG                              | AA                 | AA               | INTERGENIC      |               |                    |                    |
| SNP_110692_A_4076 | NW_004518379.1 | scaffold3757 | 4076                    | AA                              | GG                 | GG               | INTERGENIC      |               |                    |                    |
| SNP_110693_A_4211 | NW_004518379.1 | scaffold3757 | 4211                    | AA                              | GG                 | GG               | INTERGENIC      |               |                    |                    |
| SNP_110694_A_4278 | NW_004518379.1 | scaffold3757 | 4278                    | TT                              | AA                 | AA               | INTERGENIC      |               |                    |                    |
| SNP_110695_A_4426 | NW_004518379.1 | scaffold3757 | 4426                    | AA                              | CC                 | CC               | INTERGENIC      |               |                    |                    |
| SNP_110696_A_4454 | NW_004518379.1 | scaffold3757 | 4454                    | GG                              | AA                 | AA               | INTERGENIC      |               |                    |                    |
| SNP_110697_A_4457 | NW_004518379.1 | scaffold3757 | 4457                    | AA                              | GG                 | GG               | INTERGENIC      |               |                    |                    |
| SNP_110698_A_4473 | NW_004518379.1 | scaffold3757 | 4473                    | AA                              | GG                 | GG               | INTERGENIC      |               |                    |                    |
| SNP_110699_A_4475 | NW_004518379.1 | scaffold3757 | 4475                    | CC                              | TT                 | TT               | INTERGENIC      |               |                    |                    |
| SNP_110700_A_4500 | NW_004518379.1 | scaffold3757 | 4500                    | CC                              | TT                 | TT               | INTERGENIC      |               |                    |                    |
| SNP_110701_A_4717 | NW_004518379.1 | scaffold3757 | 4717                    | TT                              | CC                 | CC               | INTERGENIC      |               |                    |                    |
| SNP_110702_A_4722 | NW_004518379.1 | scaffold3757 | 4722                    | AA                              | GG                 | GG               | INTERGENIC      |               |                    |                    |
| SNP_110703_A_4875 | NW_004518379.1 | scaffold3757 | 4875                    | CC                              | TT                 | TT               | INTERGENIC      |               |                    |                    |
| SNP_110704_A_5073 | NW_004518379.1 | scaffold3757 | 5073                    | CC                              | TT                 | TT               | INTERGENIC      |               |                    |                    |



| SNPs IDs           | Chromosome IDs | Chromosomes  | Physical positions (bp) | CDC Frontier (Reference genome) | (Pusa 1103 & HPNB) | (ILWC 46 & LPNB) | Sequence genome | Components of | Gene accession IDs | Putative functions |
|--------------------|----------------|--------------|-------------------------|---------------------------------|--------------------|------------------|-----------------|---------------|--------------------|--------------------|
| SNP_110705_A_5188  | NW_004518379.1 | scaffold3757 | 5188                    | GG                              | AA                 | AA               | INTERGENIC      |               |                    |                    |
| SNP_110706_A_5315  | NW_004518379.1 | scaffold3757 | 5315                    | AA                              | GG                 | GG               | INTERGENIC      |               |                    |                    |
| SNP_110707_A_5389  | NW_004518379.1 | scaffold3757 | 5389                    | CC                              | AA                 | AA               | INTERGENIC      |               |                    |                    |
| SNP_110708_A_6774  | NW_004518379.1 | scaffold3757 | 6774                    | CC                              | TT                 | TT               | INTERGENIC      |               |                    |                    |
| SNP_110709_A_6944  | NW_004518379.1 | scaffold3757 | 6944                    | TT                              | CC                 | CC               | INTERGENIC      |               |                    |                    |
| SNP_110710_A_7043  | NW_004518379.1 | scaffold3757 | 7043                    | TT                              | CC                 | CC               | INTERGENIC      |               |                    |                    |
| SNP_110711_A_7663  | NW_004518379.1 | scaffold3757 | 7663                    | AA                              | CC                 | CC               | INTERGENIC      |               |                    |                    |
| SNP_110712_A_7677  | NW_004518379.1 | scaffold3757 | 7677                    | TT                              | GG                 | GG               | INTERGENIC      |               |                    |                    |
| SNP_110713_A_7897  | NW_004518379.1 | scaffold3757 | 7897                    | AA                              | GG                 | GG               | INTERGENIC      |               |                    |                    |
| SNP_110714_A_7967  | NW_004518379.1 | scaffold3757 | 7967                    | AA                              | GG                 | GG               | INTERGENIC      |               |                    |                    |
| SNP_110715_A_9601  | NW_004518379.1 | scaffold3757 | 9601                    | AA                              | TT                 | TT               | INTERGENIC      |               |                    |                    |
| SNP_110716_A_618   | NW_004518383.1 | scaffold3765 | 618                     | CC                              | TT                 | TT               | INTERGENIC      |               |                    |                    |
| SNP_110717_A_6621  | NW_004518388.1 | scaffold3771 | 6621                    | TT                              | AA                 | AA               | INTERGENIC      |               |                    |                    |
| SNP_110718_A_11360 | NW_004518388.1 | scaffold3771 | 11360                   | CC                              | TT                 | TT               | INTERGENIC      |               |                    |                    |
| SNP_110719_A_11640 | NW_004518388.1 | scaffold3771 | 11640                   | AA                              | GG                 | GG               | INTERGENIC      |               |                    |                    |
| SNP_110720_A_12777 | NW_004518388.1 | scaffold3771 | 12777                   | GG                              | AA                 | AA               | INTERGENIC      |               |                    |                    |
| SNP_110721_A_7463  | NW_004518392.1 | scaffold3780 | 7463                    | AA                              | TT                 | TT               | INTERGENIC      |               |                    |                    |
| SNP_110722_A_7553  | NW_004518392.1 | scaffold3780 | 7553                    | GG                              | CC                 | CC               | INTERGENIC      |               |                    |                    |
| SNP_110723_A_7586  | NW_004518392.1 | scaffold3780 | 7586                    | GG                              | CC                 | CC               | INTERGENIC      |               |                    |                    |
| SNP_110724_A_7667  | NW_004518392.1 | scaffold3780 | 7667                    | CC                              | TT                 | TT               | INTERGENIC      |               |                    |                    |
| SNP_110725_A_7902  | NW_004518392.1 | scaffold3780 | 7902                    | AA                              | GG                 | GG               | INTERGENIC      |               |                    |                    |
| SNP_110726_A_8469  | NW_004518392.1 | scaffold3780 | 8469                    | GG                              | AA                 | AA               | INTERGENIC      |               |                    |                    |

| SNPs IDs           | Chromosome IDs | Chromosomes  | Physical positions (bp) | CDC Frontier (Reference genome) | (Pusa 1103 & HPNB) | (ILWC 46 & LPNB) | Sequence genome | Components of | Gene accession IDs | Putative functions |
|--------------------|----------------|--------------|-------------------------|---------------------------------|--------------------|------------------|-----------------|---------------|--------------------|--------------------|
| SNP_110727_A_9405  | NW_004518392.1 | scaffold3780 | 9405                    | CC                              | AA                 | AA               | INTERGENIC      |               |                    |                    |
| SNP_110728_A_9717  | NW_004518392.1 | scaffold3780 | 9717                    | AA                              | TT                 | TT               | INTERGENIC      |               |                    |                    |
| SNP_110729_A_9746  | NW_004518392.1 | scaffold3780 | 9746                    | AA                              | TT                 | TT               | INTERGENIC      |               |                    |                    |
| SNP_110730_A_20694 | NW_004518392.1 | scaffold3780 | 20694                   | AA                              | GG                 | GG               | INTERGENIC      |               |                    |                    |
| SNP_110731_A_21224 | NW_004518392.1 | scaffold3780 | 21224                   | TT                              | CC                 | CC               | INTERGENIC      |               |                    |                    |
| SNP_110732_A_21225 | NW_004518392.1 | scaffold3780 | 21225                   | AA                              | CC                 | CC               | INTERGENIC      |               |                    |                    |
| SNP_110733_A_21451 | NW_004518392.1 | scaffold3780 | 21451                   | AA                              | TT                 | TT               | INTERGENIC      |               |                    |                    |
| SNP_110734_A_21490 | NW_004518392.1 | scaffold3780 | 21490                   | GG                              | AA                 | AA               | INTERGENIC      |               |                    |                    |
| SNP_110735_A_2010  | NW_004518394.1 | scaffold3784 | 2010                    | AA                              | CC                 | CC               | INTERGENIC      |               |                    |                    |
| SNP_110736_A_2031  | NW_004518394.1 | scaffold3784 | 2031                    | TT                              | CC                 | CC               | INTERGENIC      |               |                    |                    |
| SNP_110737_A_2239  | NW_004518394.1 | scaffold3784 | 2239                    | GG                              | TT                 | TT               | INTERGENIC      |               |                    |                    |
| SNP_110739_A_2894  | NW_004518395.1 | scaffold3789 | 2894                    | GG                              | AA                 | AA               | INTERGENIC      |               |                    |                    |
| SNP_110740_A_3329  | NW_004518395.1 | scaffold3789 | 3329                    | CC                              | AA                 | AA               | INTERGENIC      |               |                    |                    |
| SNP_110741_A_3940  | NW_004518395.1 | scaffold3789 | 3940                    | GG                              | TT                 | TT               | INTERGENIC      |               |                    |                    |
| SNP_110742_A_5064  | NW_004518395.1 | scaffold3789 | 5064                    | GG                              | AA                 | AA               | INTERGENIC      |               |                    |                    |
| SNP_110743_A_5599  | NW_004518395.1 | scaffold3789 | 5599                    | GG                              | AA                 | AA               | INTERGENIC      |               |                    |                    |
| SNP_110744_A_5782  | NW_004518395.1 | scaffold3789 | 5782                    | GG                              | AA                 | AA               | INTERGENIC      |               |                    |                    |
| SNP_110745_A_5815  | NW_004518395.1 | scaffold3789 | 5815                    | GG                              | AA                 | AA               | INTERGENIC      |               |                    |                    |
| SNP_110746_A_5821  | NW_004518395.1 | scaffold3789 | 5821                    | AA                              | TT                 | TT               | INTERGENIC      |               |                    |                    |
| SNP_110747_A_5823  | NW_004518395.1 | scaffold3789 | 5823                    | AA                              | CC                 | CC               | INTERGENIC      |               |                    |                    |
| SNP_110749_A_5900  | NW_004518395.1 | scaffold3789 | 5900                    | CC                              | TT                 | TT               | INTERGENIC      |               |                    |                    |
| SNP_110750_A_5928  | NW_004518395.1 | scaffold3789 | 5928                    | TT                              | CC                 | CC               | INTERGENIC      |               |                    |                    |

| SNPs IDs           | Chromosome IDs | Chromosomes  | Physical positions (bp) | CDC Frontier (Reference genome) | (Pusa 1103 & HPNB) | (ILWC 46 & LPNB) | Sequence Components of genome | Gene accession IDs | Putative functions            |
|--------------------|----------------|--------------|-------------------------|---------------------------------|--------------------|------------------|-------------------------------|--------------------|-------------------------------|
| SNP_110751_A_6081  | NW_004518395.1 | scaffold3789 | 6081                    | CC                              | AA                 | AA               | INTERGENIC                    |                    |                               |
| SNP_110752_A_6165  | NW_004518395.1 | scaffold3789 | 6165                    | AA                              | GG                 | GG               | INTERGENIC                    |                    |                               |
| SNP_110753_A_6189  | NW_004518395.1 | scaffold3789 | 6189                    | AA                              | GG                 | GG               | INTERGENIC                    |                    |                               |
| SNP_110754_A_6409  | NW_004518395.1 | scaffold3789 | 6409                    | CC                              | AA                 | AA               | INTERGENIC                    |                    |                               |
| SNP_110755_A_6868  | NW_004518395.1 | scaffold3789 | 6868                    | AA                              | CC                 | CC               | INTERGENIC                    |                    |                               |
| SNP_110756_A_6871  | NW_004518395.1 | scaffold3789 | 6871                    | TT                              | CC                 | CC               | INTERGENIC                    |                    |                               |
| SNP_110757_A_3095  | NW_004518397.1 | scaffold3794 | 3095                    | TT                              | CC                 | CC               | URR                           | 101503514          | GDSL esterase/lipase APG-like |
| SNP_110758_A_3107  | NW_004518397.1 | scaffold3794 | 3107                    | GG                              | AA                 | AA               | URR                           | 101503514          | GDSL esterase/lipase APG-like |
| SNP_110759_A_6972  | NW_004518397.1 | scaffold3794 | 6972                    | CC                              | TT                 | TT               | INTERGENIC                    |                    |                               |
| SNP_110760_A_11208 | NW_004518397.1 | scaffold3794 | 11208                   | TT                              | CC                 | CC               | INTRON                        | 101504367          | uncharacterized LOC101504367  |
| SNP_110761_A_16261 | NW_004518397.1 | scaffold3794 | 16261                   | GG                              | AA                 | AA               | INTRON                        | 101504367          | uncharacterized LOC101504367  |
| SNP_110762_A_16525 | NW_004518397.1 | scaffold3794 | 16525                   | GG                              | AA                 | AA               | INTRON                        | 101504367          | uncharacterized LOC101504367  |
| SNP_110764_A_22597 | NW_004518397.1 | scaffold3794 | 22597                   | TT                              | CC                 | CC               | INTRON                        | 101504367          | uncharacterized LOC101504367  |
| SNP_110765_A_30922 | NW_004518397.1 | scaffold3794 | 30922                   | GG                              | AA                 | AA               | INTRON                        | 101504367          | uncharacterized LOC101504367  |
| SNP_110766_A_32049 | NW_004518397.1 | scaffold3794 | 32049                   | AA                              | TT                 | TT               | INTRON                        | 101504367          | uncharacterized LOC101504367  |
| SNP_110767_A_32064 | NW_004518397.1 | scaffold3794 | 32064                   | TT                              | AA                 | AA               | INTRON                        | 101504367          | uncharacterized LOC101504367  |
| SNP_110768_A_32242 | NW_004518397.1 | scaffold3794 | 32242                   | AA                              | TT                 | TT               | INTRON                        | 101504367          | uncharacterized LOC101504367  |
| SNP_110769_A_37234 | NW_004518397.1 | scaffold3794 | 37234                   | AA                              | GG                 | GG               | INTRON                        | 101504367          | uncharacterized LOC101504367  |
| SNP_110770_A_37347 | NW_004518397.1 | scaffold3794 | 37347                   | CC                              | TT                 | TT               | INTRON                        | 101504367          | uncharacterized LOC101504367  |
| SNP_110772_A_56676 | NW_004518397.1 | scaffold3794 | 56676                   | TT                              | CC                 | CC               | INTERGENIC                    |                    |                               |
| SNP_110773_A_56714 | NW_004518397.1 | scaffold3794 | 56714                   | AA                              | TT                 | TT               | INTERGENIC                    |                    |                               |
| SNP_110774_A_56946 | NW_004518397.1 | scaffold3794 | 56946                   | CC                              | TT                 | TT               | INTERGENIC                    |                    |                               |

| SNPs IDs           | Chromosome IDs | Chromosomes  | Physical positions (bp) | CDC Frontier (Reference genome) | (Pusa 1103 & HPNB) | (ILWC 46 & LPNB) | Sequence Components of genome | Gene accession IDs | Putative functions           |
|--------------------|----------------|--------------|-------------------------|---------------------------------|--------------------|------------------|-------------------------------|--------------------|------------------------------|
| SNP_110776_A_59910 | NW_004518397.1 | scaffold3794 | 59910                   | TT                              | CC                 | CC               | INTERGENIC                    |                    |                              |
| SNP_110777_A_60605 | NW_004518397.1 | scaffold3794 | 60605                   | CC                              | TT                 | TT               | INTERGENIC                    |                    |                              |
| SNP_110778_A_61721 | NW_004518397.1 | scaffold3794 | 61721                   | TT                              | AA                 | AA               | INTERGENIC                    |                    |                              |
| SNP_110780_A_63950 | NW_004518397.1 | scaffold3794 | 63950                   | GG                              | AA                 | AA               | DRR                           | 101503851          | uncharacterized LOC101503851 |
| SNP_110781_A_64097 | NW_004518397.1 | scaffold3794 | 64097                   | GG                              | AA                 | AA               | DRR                           | 101503851          | uncharacterized LOC101503851 |
| SNP_110782_A_70911 | NW_004518397.1 | scaffold3794 | 70911                   | CC                              | GG                 | GG               | INTRON                        | 101503851          | uncharacterized LOC101503851 |
| SNP_110783_A_71853 | NW_004518397.1 | scaffold3794 | 71853                   | AA                              | GG                 | GG               | INTRON                        | 101503851          | uncharacterized LOC101503851 |
| SNP_110785_A_77287 | NW_004518397.1 | scaffold3794 | 77287                   | GG                              | AA                 | AA               | INTERGENIC                    |                    |                              |
| SNP_110786_A_77546 | NW_004518397.1 | scaffold3794 | 77546                   | TT                              | CC                 | CC               | INTERGENIC                    |                    |                              |
| SNP_110789_A_82525 | NW_004518397.1 | scaffold3794 | 82525                   | AA                              | GG                 | GG               | INTERGENIC                    |                    |                              |
| SNP_110790_A_17808 | NW_004518406.1 | scaffold3810 | 17808                   | TT                              | CC                 | CC               | INTERGENIC                    |                    |                              |
| SNP_110791_A_17851 | NW_004518406.1 | scaffold3810 | 17851                   | CC                              | AA                 | AA               | INTERGENIC                    |                    |                              |
| SNP_110792_A_21444 | NW_004518406.1 | scaffold3810 | 21444                   | AA                              | CC                 | CC               | INTERGENIC                    |                    |                              |
| SNP_110793_A_21478 | NW_004518406.1 | scaffold3810 | 21478                   | AA                              | GG                 | GG               | INTERGENIC                    |                    |                              |
| SNP_110794_A_21555 | NW_004518406.1 | scaffold3810 | 21555                   | GG                              | CC                 | CC               | INTERGENIC                    |                    |                              |
| SNP_110795_A_21574 | NW_004518406.1 | scaffold3810 | 21574                   | TT                              | CC                 | CC               | INTERGENIC                    |                    |                              |
| SNP_110796_A_21647 | NW_004518406.1 | scaffold3810 | 21647                   | TT                              | GG                 | GG               | INTERGENIC                    |                    |                              |
| SNP_110798_A_24578 | NW_004518407.1 | scaffold3811 | 24578                   | TT                              | CC                 | CC               | INTERGENIC                    |                    |                              |
| SNP_110799_A_24597 | NW_004518407.1 | scaffold3811 | 24597                   | AA                              | GG                 | GG               | INTERGENIC                    |                    |                              |
| SNP_110800_A_24632 | NW_004518407.1 | scaffold3811 | 24632                   | TT                              | AA                 | AA               | INTERGENIC                    |                    |                              |
| SNP_110801_A_24707 | NW_004518407.1 | scaffold3811 | 24707                   | AA                              | TT                 | TT               | INTERGENIC                    |                    |                              |
| SNP_110803_A_25040 | NW_004518407.1 | scaffold3811 | 25040                   | AA                              | GG                 | GG               | INTERGENIC                    |                    |                              |

| SNPs IDs           | Chromosome IDs | Chromosomes  | Physical positions (bp) | CDC Frontier (Reference genome) | (Pusa 1103 & HPNB) | (ILWC 46 & LPNB) | Sequence genome | Components of | Gene accession IDs | Putative functions |
|--------------------|----------------|--------------|-------------------------|---------------------------------|--------------------|------------------|-----------------|---------------|--------------------|--------------------|
| SNP_110804_A_25060 | NW_004518407.1 | scaffold3811 | 25060                   | TT                              | CC                 | CC               | INTERGENIC      |               |                    |                    |
| SNP_110805_A_789   | NW_004518408.1 | scaffold3812 | 789                     | AA                              | GG                 | GG               | INTERGENIC      |               |                    |                    |
| SNP_110806_A_1650  | NW_004518409.1 | scaffold3813 | 1650                    | TT                              | GG                 | GG               | INTERGENIC      |               |                    |                    |
| SNP_110807_A_2977  | NW_004518410.1 | scaffold3815 | 2977                    | TT                              | AA                 | AA               | INTERGENIC      |               |                    |                    |
| SNP_110808_A_560   | NW_004518411.1 | scaffold3816 | 560                     | AA                              | CC                 | CC               | INTERGENIC      |               |                    |                    |
| SNP_110809_A_2700  | NW_004518415.1 | scaffold3823 | 2700                    | AA                              | GG                 | GG               | INTERGENIC      |               |                    |                    |
| SNP_110810_A_2727  | NW_004518415.1 | scaffold3823 | 2727                    | AA                              | GG                 | GG               | INTERGENIC      |               |                    |                    |
| SNP_110811_A_3709  | NW_004518415.1 | scaffold3823 | 3709                    | TT                              | GG                 | GG               | INTERGENIC      |               |                    |                    |
| SNP_110813_A_8977  | NW_004518416.1 | scaffold3824 | 8977                    | GG                              | TT                 | TT               | INTERGENIC      |               |                    |                    |
| SNP_110814_A_9338  | NW_004518416.1 | scaffold3824 | 9338                    | AA                              | GG                 | GG               | INTERGENIC      |               |                    |                    |
| SNP_110815_A_21663 | NW_004518416.1 | scaffold3824 | 21663                   | GG                              | AA                 | AA               | INTERGENIC      |               |                    |                    |
| SNP_110816_A_21710 | NW_004518416.1 | scaffold3824 | 21710                   | AA                              | GG                 | GG               | INTERGENIC      |               |                    |                    |
| SNP_110817_A_21888 | NW_004518416.1 | scaffold3824 | 21888                   | TT                              | GG                 | GG               | INTERGENIC      |               |                    |                    |
| SNP_110819_A_22047 | NW_004518416.1 | scaffold3824 | 22047                   | TT                              | GG                 | GG               | INTERGENIC      |               |                    |                    |
| SNP_110820_A_22250 | NW_004518416.1 | scaffold3824 | 22250                   | TT                              | CC                 | CC               | INTERGENIC      |               |                    |                    |
| SNP_110821_A_22456 | NW_004518416.1 | scaffold3824 | 22456                   | GG                              | AA                 | AA               | INTERGENIC      |               |                    |                    |
| SNP_110822_A_676   | NW_004518419.1 | scaffold3830 | 676                     | TT                              | CC                 | CC               | INTERGENIC      |               |                    |                    |
| SNP_110823_A_2103  | NW_004518423.1 | scaffold3837 | 2103                    | TT                              | CC                 | CC               | INTERGENIC      |               |                    |                    |
| SNP_110824_A_2139  | NW_004518423.1 | scaffold3837 | 2139                    | CC                              | GG                 | GG               | INTERGENIC      |               |                    |                    |
| SNP_110825_A_2185  | NW_004518423.1 | scaffold3837 | 2185                    | TT                              | CC                 | CC               | INTERGENIC      |               |                    |                    |
| SNP_110826_A_2211  | NW_004518423.1 | scaffold3837 | 2211                    | GG                              | AA                 | AA               | INTERGENIC      |               |                    |                    |
| SNP_110828_A_2548  | NW_004518423.1 | scaffold3837 | 2548                    | AA                              | TT                 | TT               | INTERGENIC      |               |                    |                    |

| SNPs IDs          | Chromosome IDs | Chromosomes  | Physical positions (bp) | CDC Frontier (Reference genome) | (Pusa 1103 & HPNB) | (ILWC 46 & LPNB) | Sequence genome | Components of | Gene accession IDs | Putative functions |
|-------------------|----------------|--------------|-------------------------|---------------------------------|--------------------|------------------|-----------------|---------------|--------------------|--------------------|
| SNP_110829_A_2604 | NW_004518423.1 | scaffold3837 | 2604                    | AA                              | GG                 | GG               | INTERGENIC      |               |                    |                    |
| SNP_110830_A_2606 | NW_004518423.1 | scaffold3837 | 2606                    | GG                              | TT                 | TT               | INTERGENIC      |               |                    |                    |
| SNP_110831_A_2623 | NW_004518423.1 | scaffold3837 | 2623                    | CC                              | TT                 | TT               | INTERGENIC      |               |                    |                    |
| SNP_110832_A_2708 | NW_004518423.1 | scaffold3837 | 2708                    | TT                              | CC                 | CC               | INTERGENIC      |               |                    |                    |
| SNP_110833_A_2718 | NW_004518423.1 | scaffold3837 | 2718                    | TT                              | AA                 | AA               | INTERGENIC      |               |                    |                    |
| SNP_110834_A_4989 | NW_004518423.1 | scaffold3837 | 4989                    | TT                              | CC                 | CC               | INTERGENIC      |               |                    |                    |
| SNP_110835_A_5403 | NW_004518423.1 | scaffold3837 | 5403                    | CC                              | TT                 | TT               | INTERGENIC      |               |                    |                    |
| SNP_110836_A_5421 | NW_004518423.1 | scaffold3837 | 5421                    | CC                              | TT                 | TT               | INTERGENIC      |               |                    |                    |
| SNP_110837_A_5429 | NW_004518423.1 | scaffold3837 | 5429                    | CC                              | TT                 | TT               | INTERGENIC      |               |                    |                    |
| SNP_110838_A_5443 | NW_004518423.1 | scaffold3837 | 5443                    | TT                              | CC                 | CC               | INTERGENIC      |               |                    |                    |
| SNP_110839_A_5477 | NW_004518423.1 | scaffold3837 | 5477                    | CC                              | TT                 | TT               | INTERGENIC      |               |                    |                    |
| SNP_110840_A_5480 | NW_004518423.1 | scaffold3837 | 5480                    | TT                              | AA                 | AA               | INTERGENIC      |               |                    |                    |
| SNP_110841_A_5633 | NW_004518423.1 | scaffold3837 | 5633                    | GG                              | AA                 | AA               | INTERGENIC      |               |                    |                    |
| SNP_110842_A_5641 | NW_004518423.1 | scaffold3837 | 5641                    | TT                              | CC                 | CC               | INTERGENIC      |               |                    |                    |
| SNP_110844_A_5689 | NW_004518423.1 | scaffold3837 | 5689                    | TT                              | CC                 | CC               | INTERGENIC      |               |                    |                    |
| SNP_110845_A_5704 | NW_004518423.1 | scaffold3837 | 5704                    | CC                              | TT                 | TT               | INTERGENIC      |               |                    |                    |
| SNP_110846_A_5716 | NW_004518423.1 | scaffold3837 | 5716                    | TT                              | GG                 | GG               | INTERGENIC      |               |                    |                    |
| SNP_110847_A_5747 | NW_004518423.1 | scaffold3837 | 5747                    | CC                              | GG                 | GG               | INTERGENIC      |               |                    |                    |
| SNP_110848_A_5837 | NW_004518423.1 | scaffold3837 | 5837                    | TT                              | CC                 | CC               | INTERGENIC      |               |                    |                    |
| SNP_110849_A_5849 | NW_004518423.1 | scaffold3837 | 5849                    | CC                              | TT                 | TT               | INTERGENIC      |               |                    |                    |
| SNP_110850_A_5875 | NW_004518423.1 | scaffold3837 | 5875                    | GG                              | TT                 | TT               | INTERGENIC      |               |                    |                    |
| SNP_110852_A_5989 | NW_004518423.1 | scaffold3837 | 5989                    | CC                              | TT                 | TT               | INTERGENIC      |               |                    |                    |

| SNPs IDs           | Chromosome IDs | Chromosomes  | Physical positions (bp) | CDC Frontier (Reference genome) | (Pusa 1103 & HPNB) | (ILWC 46 & LPNB) | Sequence genome | Components of | Gene accession IDs | Putative functions |
|--------------------|----------------|--------------|-------------------------|---------------------------------|--------------------|------------------|-----------------|---------------|--------------------|--------------------|
| SNP_110853_A_6410  | NW_004518423.1 | scaffold3837 | 6410                    | TT                              | GG                 | GG               | INTERGENIC      |               |                    |                    |
| SNP_110854_A_6416  | NW_004518423.1 | scaffold3837 | 6416                    | AA                              | GG                 | GG               | INTERGENIC      |               |                    |                    |
| SNP_110855_A_6431  | NW_004518423.1 | scaffold3837 | 6431                    | AA                              | GG                 | GG               | INTERGENIC      |               |                    |                    |
| SNP_110856_A_6505  | NW_004518423.1 | scaffold3837 | 6505                    | AA                              | GG                 | GG               | INTERGENIC      |               |                    |                    |
| SNP_110857_A_6512  | NW_004518423.1 | scaffold3837 | 6512                    | CC                              | TT                 | TT               | INTERGENIC      |               |                    |                    |
| SNP_110858_A_6541  | NW_004518423.1 | scaffold3837 | 6541                    | TT                              | CC                 | CC               | INTERGENIC      |               |                    |                    |
| SNP_110859_A_6577  | NW_004518423.1 | scaffold3837 | 6577                    | AA                              | GG                 | GG               | INTERGENIC      |               |                    |                    |
| SNP_110860_A_6612  | NW_004518423.1 | scaffold3837 | 6612                    | GG                              | CC                 | CC               | INTERGENIC      |               |                    |                    |
| SNP_110861_A_6675  | NW_004518423.1 | scaffold3837 | 6675                    | TT                              | CC                 | CC               | INTERGENIC      |               |                    |                    |
| SNP_110862_A_6751  | NW_004518423.1 | scaffold3837 | 6751                    | TT                              | CC                 | CC               | INTERGENIC      |               |                    |                    |
| SNP_110863_A_6916  | NW_004518423.1 | scaffold3837 | 6916                    | AA                              | GG                 | GG               | INTERGENIC      |               |                    |                    |
| SNP_110864_A_6927  | NW_004518423.1 | scaffold3837 | 6927                    | GG                              | AA                 | AA               | INTERGENIC      |               |                    |                    |
| SNP_110865_A_7089  | NW_004518423.1 | scaffold3837 | 7089                    | TT                              | AA                 | AA               | INTERGENIC      |               |                    |                    |
| SNP_110866_A_10431 | NW_004518423.1 | scaffold3837 | 10431                   | AA                              | CC                 | CC               | INTERGENIC      |               |                    |                    |
| SNP_110867_A_10609 | NW_004518423.1 | scaffold3837 | 10609                   | TT                              | CC                 | CC               | INTERGENIC      |               |                    |                    |
| SNP_110868_A_2138  | NW_004518426.1 | scaffold3842 | 2138                    | CC                              | TT                 | TT               | INTERGENIC      |               |                    |                    |
| SNP_110869_A_4500  | NW_004518431.1 | scaffold3849 | 4500                    | AA                              | CC                 | CC               | INTERGENIC      |               |                    |                    |
| SNP_110870_A_4503  | NW_004518431.1 | scaffold3849 | 4503                    | CC                              | TT                 | TT               | INTERGENIC      |               |                    |                    |
| SNP_110872_A_4886  | NW_004518432.1 | scaffold3850 | 4886                    | AA                              | GG                 | GG               | INTERGENIC      |               |                    |                    |
| SNP_110873_A_12626 | NW_004518432.1 | scaffold3850 | 12626                   | AA                              | TT                 | TT               | INTERGENIC      |               |                    |                    |
| SNP_110874_A_13175 | NW_004518432.1 | scaffold3850 | 13175                   | TT                              | AA                 | AA               | INTERGENIC      |               |                    |                    |
| SNP_110875_A_674   | NW_004518433.1 | scaffold3851 | 674                     | TT                              | AA                 | AA               | INTERGENIC      |               |                    |                    |

| SNPs IDs           | Chromosome IDs | Chromosomes  | Physical positions (bp) | CDC Frontier (Reference genome) | (Pusa 1103 & HPNB) | (ILWC 46 & LPNB) | Sequence Components of genome | Gene accession IDs | Putative functions                                       |
|--------------------|----------------|--------------|-------------------------|---------------------------------|--------------------|------------------|-------------------------------|--------------------|----------------------------------------------------------|
| SNP_110876_A_1407  | NW_004518433.1 | scaffold3851 | 1407                    | AA                              | CC                 | CC               | INTERGENIC                    |                    |                                                          |
| SNP_110877_A_3315  | NW_004518434.1 | scaffold3852 | 3315                    | TT                              | AA                 | AA               | INTERGENIC                    |                    |                                                          |
| SNP_110879_A_424   | NW_004518436.1 | scaffold3856 | 424                     | AA                              | TT                 | TT               | INTERGENIC                    |                    |                                                          |
| SNP_110880_A_571   | NW_004518436.1 | scaffold3856 | 571                     | GG                              | TT                 | TT               | INTERGENIC                    |                    |                                                          |
| SNP_110881_A_615   | NW_004518436.1 | scaffold3856 | 615                     | AA                              | GG                 | GG               | INTERGENIC                    |                    |                                                          |
| SNP_110882_A_5566  | NW_004518436.1 | scaffold3856 | 5566                    | TT                              | CC                 | CC               | INTERGENIC                    |                    |                                                          |
| SNP_110883_A_5768  | NW_004518436.1 | scaffold3856 | 5768                    | AA                              | CC                 | CC               | INTERGENIC                    |                    |                                                          |
| SNP_110884_A_5784  | NW_004518436.1 | scaffold3856 | 5784                    | TT                              | CC                 | CC               | INTERGENIC                    |                    |                                                          |
| SNP_110885_A_6157  | NW_004518436.1 | scaffold3856 | 6157                    | GG                              | TT                 | TT               | INTERGENIC                    |                    |                                                          |
| SNP_110886_A_6786  | NW_004518436.1 | scaffold3856 | 6786                    | TT                              | CC                 | CC               | INTERGENIC                    |                    |                                                          |
| SNP_110887_A_6826  | NW_004518436.1 | scaffold3856 | 6826                    | TT                              | GG                 | GG               | INTERGENIC                    |                    |                                                          |
| SNP_110888_A_13692 | NW_004518444.1 | scaffold3865 | 13692                   | AA                              | TT                 | TT               | INTRON                        | 101506962          | sulfate transporter 4.1, chloroplastic-like              |
| SNP_110889_A_63464 | NW_004518444.1 | scaffold3865 | 63464                   | AA                              | TT                 | TT               | URR                           | 101508228          | serine/threonine-protein phosphatase 7 long form homolog |
| SNP_110890_A_64361 | NW_004518444.1 | scaffold3865 | 64361                   | TT                              | CC                 | CC               | URR                           | 101508228          | serine/threonine-protein phosphatase 7 long form homolog |
| SNP_110891_A_64376 | NW_004518444.1 | scaffold3865 | 64376                   | AA                              | GG                 | GG               | URR                           | 101508228          | serine/threonine-protein phosphatase 7 long form homolog |
| SNP_110892_A_64385 | NW_004518444.1 | scaffold3865 | 64385                   | AA                              | GG                 | GG               | URR                           | 101508228          | serine/threonine-protein phosphatase 7 long form homolog |
| SNP_110893_A_2531  | NW_004518450.1 | scaffold3874 | 2531                    | TT                              | CC                 | CC               | INTERGENIC                    |                    |                                                          |
| SNP_110895_A_7854  | NW_004518450.1 | scaffold3874 | 7854                    | TT                              | CC                 | CC               | INTERGENIC                    |                    |                                                          |
| SNP_110897_A_8013  | NW_004518450.1 | scaffold3874 | 8013                    | AA                              | GG                 | GG               | INTERGENIC                    |                    |                                                          |
| SNP_110898_A_11626 | NW_004518450.1 | scaffold3874 | 11626                   | GG                              | AA                 | AA               | INTERGENIC                    |                    |                                                          |
| SNP_110899_A_11627 | NW_004518450.1 | scaffold3874 | 11627                   | TT                              | AA                 | AA               | INTERGENIC                    |                    |                                                          |
| SNP_110900_A_11666 | NW_004518450.1 | scaffold3874 | 11666                   | CC                              | TT                 | TT               | INTERGENIC                    |                    |                                                          |



| SNPs IDs           | Chromosome IDs | Chromosomes  | Physical positions (bp) | CDC Frontier (Reference genome) | (Pusa 1103 & HPNB) | (ILWC 46 & LPNB) | Sequence genome | Components of | Gene accession IDs | Putative functions |
|--------------------|----------------|--------------|-------------------------|---------------------------------|--------------------|------------------|-----------------|---------------|--------------------|--------------------|
| SNP_110901_A_16124 | NW_004518450.1 | scaffold3874 | 16124                   | TT                              | CC                 | CC               | INTERGENIC      |               |                    |                    |
| SNP_110902_A_16226 | NW_004518450.1 | scaffold3874 | 16226                   | GG                              | TT                 | TT               | INTERGENIC      |               |                    |                    |
| SNP_110903_A_19847 | NW_004518451.1 | scaffold3876 | 19847                   | AA                              | CC                 | CC               | INTERGENIC      |               |                    |                    |
| SNP_110904_A_29430 | NW_004518451.1 | scaffold3876 | 29430                   | TT                              | CC                 | CC               | INTERGENIC      |               |                    |                    |
| SNP_110905_A_29869 | NW_004518451.1 | scaffold3876 | 29869                   | AA                              | GG                 | GG               | INTERGENIC      |               |                    |                    |
| SNP_110906_A_29884 | NW_004518451.1 | scaffold3876 | 29884                   | TT                              | CC                 | CC               | INTERGENIC      |               |                    |                    |
| SNP_110907_A_5777  | NW_004518455.1 | scaffold3881 | 5777                    | GG                              | CC                 | CC               | INTERGENIC      |               |                    |                    |
| SNP_110908_A_1744  | NW_004518456.1 | scaffold3882 | 1744                    | CC                              | AA                 | AA               | INTERGENIC      |               |                    |                    |
| SNP_110909_A_1960  | NW_004518456.1 | scaffold3882 | 1960                    | TT                              | CC                 | CC               | INTERGENIC      |               |                    |                    |
| SNP_110910_A_2001  | NW_004518456.1 | scaffold3882 | 2001                    | TT                              | GG                 | GG               | INTERGENIC      |               |                    |                    |
| SNP_110911_A_849   | NW_004518457.1 | scaffold3883 | 849                     | TT                              | AA                 | AA               | INTERGENIC      |               |                    |                    |
| SNP_110912_A_499   | NW_004518460.1 | scaffold3887 | 499                     | CC                              | GG                 | GG               | INTERGENIC      |               |                    |                    |
| SNP_110913_A_5534  | NW_004518463.1 | scaffold3890 | 5534                    | TT                              | CC                 | CC               | INTERGENIC      |               |                    |                    |
| SNP_110914_A_5635  | NW_004518463.1 | scaffold3890 | 5635                    | TT                              | CC                 | CC               | INTERGENIC      |               |                    |                    |
| SNP_110915_A_5708  | NW_004518463.1 | scaffold3890 | 5708                    | TT                              | AA                 | AA               | INTERGENIC      |               |                    |                    |
| SNP_110916_A_9147  | NW_004518463.1 | scaffold3890 | 9147                    | TT                              | GG                 | GG               | INTERGENIC      |               |                    |                    |
| SNP_110917_A_9157  | NW_004518463.1 | scaffold3890 | 9157                    | CC                              | AA                 | AA               | INTERGENIC      |               |                    |                    |
| SNP_110918_A_784   | NW_004518466.1 | scaffold3896 | 784                     | CC                              | TT                 | TT               | INTERGENIC      |               |                    |                    |
| SNP_110919_A_1116  | NW_004518466.1 | scaffold3896 | 1116                    | CC                              | AA                 | AA               | INTERGENIC      |               |                    |                    |
| SNP_110920_A_2552  | NW_004518466.1 | scaffold3896 | 2552                    | AA                              | TT                 | TT               | INTERGENIC      |               |                    |                    |
| SNP_110921_A_4746  | NW_004518469.1 | scaffold3900 | 4746                    | AA                              | TT                 | TT               | INTERGENIC      |               |                    |                    |
| SNP_110922_A_5338  | NW_004518469.1 | scaffold3900 | 5338                    | TT                              | AA                 | AA               | INTERGENIC      |               |                    |                    |

| SNPs IDs           | Chromosome IDs | Chromosomes  | Physical positions (bp) | CDC Frontier (Reference genome) | (Pusa 1103 & HPNB) | (ILWC 46 & LPNB) | Sequence genome | Components of | Gene accession IDs | Putative functions |
|--------------------|----------------|--------------|-------------------------|---------------------------------|--------------------|------------------|-----------------|---------------|--------------------|--------------------|
| SNP_110923_A_5952  | NW_004518469.1 | scaffold3900 | 5952                    | CC                              | TT                 | TT               | INTERGENIC      |               |                    |                    |
| SNP_110924_A_6422  | NW_004518469.1 | scaffold3900 | 6422                    | CC                              | GG                 | GG               | INTERGENIC      |               |                    |                    |
| SNP_110925_A_6990  | NW_004518469.1 | scaffold3900 | 6990                    | GG                              | AA                 | AA               | INTERGENIC      |               |                    |                    |
| SNP_110926_A_7355  | NW_004518469.1 | scaffold3900 | 7355                    | AA                              | CC                 | CC               | INTERGENIC      |               |                    |                    |
| SNP_110927_A_7358  | NW_004518469.1 | scaffold3900 | 7358                    | GG                              | TT                 | TT               | INTERGENIC      |               |                    |                    |
| SNP_110928_A_7552  | NW_004518469.1 | scaffold3900 | 7552                    | AA                              | TT                 | TT               | INTERGENIC      |               |                    |                    |
| SNP_110929_A_7704  | NW_004518469.1 | scaffold3900 | 7704                    | GG                              | AA                 | AA               | INTERGENIC      |               |                    |                    |
| SNP_110930_A_7811  | NW_004518469.1 | scaffold3900 | 7811                    | AA                              | GG                 | GG               | INTERGENIC      |               |                    |                    |
| SNP_110931_A_7900  | NW_004518469.1 | scaffold3900 | 7900                    | GG                              | TT                 | TT               | INTERGENIC      |               |                    |                    |
| SNP_110932_A_11007 | NW_004518469.1 | scaffold3900 | 11007                   | AA                              | TT                 | TT               | INTERGENIC      |               |                    |                    |
| SNP_110933_A_13822 | NW_004518469.1 | scaffold3900 | 13822                   | AA                              | TT                 | TT               | INTERGENIC      |               |                    |                    |
| SNP_110934_A_13855 | NW_004518469.1 | scaffold3900 | 13855                   | AA                              | GG                 | GG               | INTERGENIC      |               |                    |                    |
| SNP_110935_A_13891 | NW_004518469.1 | scaffold3900 | 13891                   | TT                              | GG                 | GG               | INTERGENIC      |               |                    |                    |
| SNP_110936_A_13944 | NW_004518469.1 | scaffold3900 | 13944                   | AA                              | CC                 | CC               | INTERGENIC      |               |                    |                    |
| SNP_110937_A_14140 | NW_004518469.1 | scaffold3900 | 14140                   | TT                              | CC                 | CC               | INTERGENIC      |               |                    |                    |
| SNP_110938_A_14504 | NW_004518469.1 | scaffold3900 | 14504                   | AA                              | CC                 | CC               | INTERGENIC      |               |                    |                    |
| SNP_110939_A_14544 | NW_004518469.1 | scaffold3900 | 14544                   | GG                              | AA                 | AA               | INTERGENIC      |               |                    |                    |
| SNP_110940_A_14583 | NW_004518469.1 | scaffold3900 | 14583                   | CC                              | GG                 | GG               | INTERGENIC      |               |                    |                    |
| SNP_110941_A_14586 | NW_004518469.1 | scaffold3900 | 14586                   | GG                              | TT                 | TT               | INTERGENIC      |               |                    |                    |
| SNP_110942_A_3202  | NW_004518471.1 | scaffold3902 | 3202                    | AA                              | GG                 | GG               | INTERGENIC      |               |                    |                    |
| SNP_110943_A_3205  | NW_004518471.1 | scaffold3902 | 3205                    | GG                              | AA                 | AA               | INTERGENIC      |               |                    |                    |
| SNP_110944_A_3247  | NW_004518471.1 | scaffold3902 | 3247                    | TT                              | CC                 | CC               | INTERGENIC      |               |                    |                    |

| SNPs IDs          | Chromosome IDs | Chromosomes  | Physical positions (bp) | CDC Frontier (Reference genome) | (Pusa 1103 & HPNB) | (ILWC 46 & LPNB) | Sequence genome | Components of | Gene accession IDs | Putative functions |
|-------------------|----------------|--------------|-------------------------|---------------------------------|--------------------|------------------|-----------------|---------------|--------------------|--------------------|
| SNP_110945_A_3477 | NW_004518471.1 | scaffold3902 | 3477                    | AA                              | CC                 | CC               | INTERGENIC      |               |                    |                    |
| SNP_110946_A_3487 | NW_004518471.1 | scaffold3902 | 3487                    | GG                              | AA                 | AA               | INTERGENIC      |               |                    |                    |
| SNP_110947_A_3495 | NW_004518471.1 | scaffold3902 | 3495                    | TT                              | CC                 | CC               | INTERGENIC      |               |                    |                    |
| SNP_110948_A_3537 | NW_004518471.1 | scaffold3902 | 3537                    | CC                              | AA                 | AA               | INTERGENIC      |               |                    |                    |
| SNP_110949_A_3546 | NW_004518471.1 | scaffold3902 | 3546                    | CC                              | GG                 | GG               | INTERGENIC      |               |                    |                    |
| SNP_110950_A_3597 | NW_004518471.1 | scaffold3902 | 3597                    | AA                              | GG                 | GG               | INTERGENIC      |               |                    |                    |
| SNP_110951_A_3872 | NW_004518471.1 | scaffold3902 | 3872                    | TT                              | AA                 | AA               | INTERGENIC      |               |                    |                    |
| SNP_110953_A_730  | NW_004518474.1 | scaffold3906 | 730                     | TT                              | CC                 | CC               | INTERGENIC      |               |                    |                    |
| SNP_110954_A_469  | NW_004518475.1 | scaffold3907 | 469                     | CC                              | TT                 | TT               | INTERGENIC      |               |                    |                    |
| SNP_110955_A_529  | NW_004518475.1 | scaffold3907 | 529                     | TT                              | CC                 | CC               | INTERGENIC      |               |                    |                    |
| SNP_110956_A_3548 | NW_004518475.1 | scaffold3907 | 3548                    | TT                              | CC                 | CC               | INTERGENIC      |               |                    |                    |
| SNP_110957_A_6527 | NW_004518475.1 | scaffold3907 | 6527                    | AA                              | GG                 | GG               | INTERGENIC      |               |                    |                    |
| SNP_110958_A_4335 | NW_004518477.1 | scaffold3909 | 4335                    | TT                              | AA                 | AA               | INTERGENIC      |               |                    |                    |
| SNP_110959_A_8085 | NW_004518477.1 | scaffold3909 | 8085                    | CC                              | TT                 | TT               | INTERGENIC      |               |                    |                    |
| SNP_110960_A_8151 | NW_004518477.1 | scaffold3909 | 8151                    | GG                              | CC                 | CC               | INTERGENIC      |               |                    |                    |
| SNP_110961_A_8603 | NW_004518477.1 | scaffold3909 | 8603                    | TT                              | AA                 | AA               | INTERGENIC      |               |                    |                    |
| SNP_110962_A_8604 | NW_004518477.1 | scaffold3909 | 8604                    | AA                              | TT                 | TT               | INTERGENIC      |               |                    |                    |
| SNP_110963_A_1352 | NW_004518482.1 | scaffold3915 | 1352                    | TT                              | AA                 | AA               | INTERGENIC      |               |                    |                    |
| SNP_110964_A_7263 | NW_004518482.1 | scaffold3915 | 7263                    | GG                              | AA                 | AA               | INTERGENIC      |               |                    |                    |
| SNP_110965_A_7413 | NW_004518482.1 | scaffold3915 | 7413                    | CC                              | TT                 | TT               | INTERGENIC      |               |                    |                    |
| SNP_110966_A_7816 | NW_004518482.1 | scaffold3915 | 7816                    | AA                              | GG                 | GG               | INTERGENIC      |               |                    |                    |
| SNP_110967_A_2106 | NW_004518484.1 | scaffold3917 | 2106                    | GG                              | TT                 | TT               | INTERGENIC      |               |                    |                    |

| SNPs IDs          | Chromosome IDs | Chromosomes  | Physical positions (bp) | CDC Frontier (Reference genome) | (Pusa 1103 & HPNB) | (ILWC 46 & LPNB) | Sequence genome | Components of | Gene accession IDs | Putative functions |
|-------------------|----------------|--------------|-------------------------|---------------------------------|--------------------|------------------|-----------------|---------------|--------------------|--------------------|
| SNP_110968_A_2111 | NW_004518484.1 | scaffold3917 | 2111                    | CC                              | TT                 | TT               | INTERGENIC      |               |                    |                    |
| SNP_110969_A_2192 | NW_004518484.1 | scaffold3917 | 2192                    | CC                              | AA                 | AA               | INTERGENIC      |               |                    |                    |
| SNP_110970_A_2222 | NW_004518484.1 | scaffold3917 | 2222                    | GG                              | AA                 | AA               | INTERGENIC      |               |                    |                    |
| SNP_110971_A_2298 | NW_004518484.1 | scaffold3917 | 2298                    | GG                              | AA                 | AA               | INTERGENIC      |               |                    |                    |
| SNP_110972_A_2465 | NW_004518484.1 | scaffold3917 | 2465                    | CC                              | GG                 | GG               | INTERGENIC      |               |                    |                    |
| SNP_110973_A_2526 | NW_004518484.1 | scaffold3917 | 2526                    | CC                              | AA                 | AA               | INTERGENIC      |               |                    |                    |
| SNP_110974_A_2604 | NW_004518484.1 | scaffold3917 | 2604                    | AA                              | GG                 | GG               | INTERGENIC      |               |                    |                    |
| SNP_110975_A_2664 | NW_004518484.1 | scaffold3917 | 2664                    | CC                              | TT                 | TT               | INTERGENIC      |               |                    |                    |
| SNP_110976_A_3121 | NW_004518484.1 | scaffold3917 | 3121                    | CC                              | TT                 | TT               | INTERGENIC      |               |                    |                    |
| SNP_110977_A_3128 | NW_004518484.1 | scaffold3917 | 3128                    | TT                              | CC                 | CC               | INTERGENIC      |               |                    |                    |
| SNP_110978_A_3183 | NW_004518484.1 | scaffold3917 | 3183                    | AA                              | GG                 | GG               | INTERGENIC      |               |                    |                    |
| SNP_110979_A_3251 | NW_004518484.1 | scaffold3917 | 3251                    | AA                              | CC                 | CC               | INTERGENIC      |               |                    |                    |
| SNP_110980_A_3304 | NW_004518484.1 | scaffold3917 | 3304                    | TT                              | CC                 | CC               | INTERGENIC      |               |                    |                    |
| SNP_110981_A_3319 | NW_004518484.1 | scaffold3917 | 3319                    | TT                              | AA                 | AA               | INTERGENIC      |               |                    |                    |
| SNP_110982_A_3356 | NW_004518484.1 | scaffold3917 | 3356                    | TT                              | CC                 | CC               | INTERGENIC      |               |                    |                    |
| SNP_110983_A_3375 | NW_004518484.1 | scaffold3917 | 3375                    | CC                              | AA                 | AA               | INTERGENIC      |               |                    |                    |
| SNP_110984_A_3468 | NW_004518484.1 | scaffold3917 | 3468                    | GG                              | TT                 | TT               | INTERGENIC      |               |                    |                    |
| SNP_110985_A_3557 | NW_004518484.1 | scaffold3917 | 3557                    | TT                              | AA                 | AA               | INTERGENIC      |               |                    |                    |
| SNP_110986_A_3765 | NW_004518484.1 | scaffold3917 | 3765                    | CC                              | AA                 | AA               | INTERGENIC      |               |                    |                    |
| SNP_110987_A_3768 | NW_004518484.1 | scaffold3917 | 3768                    | GG                              | TT                 | TT               | INTERGENIC      |               |                    |                    |
| SNP_110988_A_3843 | NW_004518484.1 | scaffold3917 | 3843                    | TT                              | CC                 | CC               | INTERGENIC      |               |                    |                    |
| SNP_110989_A_3890 | NW_004518484.1 | scaffold3917 | 3890                    | AA                              | TT                 | TT               | INTERGENIC      |               |                    |                    |

| SNPs IDs          | Chromosome IDs | Chromosomes  | Physical positions (bp) | CDC Frontier (Reference genome) | (Pusa 1103 & HPNB) | (ILWC 46 & LPNB) | Sequence genome | Components of | Gene accession IDs | Putative functions |
|-------------------|----------------|--------------|-------------------------|---------------------------------|--------------------|------------------|-----------------|---------------|--------------------|--------------------|
| SNP_110990_A_4043 | NW_004518484.1 | scaffold3917 | 4043                    | GG                              | AA                 | AA               | INTERGENIC      |               |                    |                    |
| SNP_110991_A_4167 | NW_004518484.1 | scaffold3917 | 4167                    | CC                              | AA                 | AA               | INTERGENIC      |               |                    |                    |
| SNP_110992_A_4233 | NW_004518484.1 | scaffold3917 | 4233                    | TT                              | CC                 | CC               | INTERGENIC      |               |                    |                    |
| SNP_110994_A_4373 | NW_004518484.1 | scaffold3917 | 4373                    | TT                              | CC                 | CC               | INTERGENIC      |               |                    |                    |
| SNP_110995_A_4423 | NW_004518484.1 | scaffold3917 | 4423                    | CC                              | TT                 | TT               | INTERGENIC      |               |                    |                    |
| SNP_110996_A_4440 | NW_004518484.1 | scaffold3917 | 4440                    | CC                              | TT                 | TT               | INTERGENIC      |               |                    |                    |
| SNP_110997_A_4483 | NW_004518484.1 | scaffold3917 | 4483                    | GG                              | AA                 | AA               | INTERGENIC      |               |                    |                    |
| SNP_110998_A_4512 | NW_004518484.1 | scaffold3917 | 4512                    | AA                              | GG                 | GG               | INTERGENIC      |               |                    |                    |
| SNP_110999_A_4909 | NW_004518484.1 | scaffold3917 | 4909                    | AA                              | GG                 | GG               | INTERGENIC      |               |                    |                    |
| SNP_111000_A_4982 | NW_004518484.1 | scaffold3917 | 4982                    | GG                              | AA                 | AA               | INTERGENIC      |               |                    |                    |
| SNP_111001_A_3942 | NW_004518485.1 | scaffold3918 | 3942                    | TT                              | CC                 | CC               | INTERGENIC      |               |                    |                    |
| SNP_111002_A_3987 | NW_004518485.1 | scaffold3918 | 3987                    | AA                              | GG                 | GG               | INTERGENIC      |               |                    |                    |
| SNP_111003_A_4003 | NW_004518485.1 | scaffold3918 | 4003                    | TT                              | GG                 | GG               | INTERGENIC      |               |                    |                    |
| SNP_111004_A_4012 | NW_004518485.1 | scaffold3918 | 4012                    | AA                              | GG                 | GG               | INTERGENIC      |               |                    |                    |
| SNP_111005_A_4073 | NW_004518485.1 | scaffold3918 | 4073                    | AA                              | TT                 | TT               | INTERGENIC      |               |                    |                    |
| SNP_111006_A_4139 | NW_004518485.1 | scaffold3918 | 4139                    | AA                              | TT                 | TT               | INTERGENIC      |               |                    |                    |
| SNP_111007_A_4242 | NW_004518485.1 | scaffold3918 | 4242                    | AA                              | CC                 | CC               | INTERGENIC      |               |                    |                    |
| SNP_111009_A_4390 | NW_004518485.1 | scaffold3918 | 4390                    | AA                              | TT                 | TT               | INTERGENIC      |               |                    |                    |
| SNP_111010_A_4405 | NW_004518485.1 | scaffold3918 | 4405                    | AA                              | GG                 | GG               | INTERGENIC      |               |                    |                    |
| SNP_111012_A_4654 | NW_004518485.1 | scaffold3918 | 4654                    | CC                              | AA                 | AA               | INTERGENIC      |               |                    |                    |
| SNP_111013_A_4655 | NW_004518485.1 | scaffold3918 | 4655                    | GG                              | AA                 | AA               | INTERGENIC      |               |                    |                    |
| SNP_111014_A_4696 | NW_004518485.1 | scaffold3918 | 4696                    | AA                              | TT                 | TT               | INTERGENIC      |               |                    |                    |

| SNPs IDs          | Chromosome IDs | Chromosomes  | Physical positions (bp) | CDC Frontier (Reference genome) | (Pusa 1103 & HPNB) | (ILWC 46 & LPNB) | Sequence genome | Components of | Gene accession IDs | Putative functions |
|-------------------|----------------|--------------|-------------------------|---------------------------------|--------------------|------------------|-----------------|---------------|--------------------|--------------------|
| SNP_111015_A_4836 | NW_004518485.1 | scaffold3918 | 4836                    | CC                              | AA                 | AA               | INTERGENIC      |               |                    |                    |
| SNP_111016_A_4852 | NW_004518485.1 | scaffold3918 | 4852                    | GG                              | AA                 | AA               | INTERGENIC      |               |                    |                    |
| SNP_111017_A_4860 | NW_004518485.1 | scaffold3918 | 4860                    | GG                              | CC                 | CC               | INTERGENIC      |               |                    |                    |
| SNP_111018_A_4915 | NW_004518485.1 | scaffold3918 | 4915                    | AA                              | CC                 | CC               | INTERGENIC      |               |                    |                    |
| SNP_111019_A_4984 | NW_004518485.1 | scaffold3918 | 4984                    | TT                              | CC                 | CC               | INTERGENIC      |               |                    |                    |
| SNP_111020_A_5065 | NW_004518485.1 | scaffold3918 | 5065                    | CC                              | TT                 | TT               | INTERGENIC      |               |                    |                    |
| SNP_111021_A_5085 | NW_004518485.1 | scaffold3918 | 5085                    | TT                              | AA                 | AA               | INTERGENIC      |               |                    |                    |
| SNP_111022_A_5112 | NW_004518485.1 | scaffold3918 | 5112                    | AA                              | GG                 | GG               | INTERGENIC      |               |                    |                    |
| SNP_111023_A_5129 | NW_004518485.1 | scaffold3918 | 5129                    | CC                              | TT                 | TT               | INTERGENIC      |               |                    |                    |
| SNP_111024_A_5143 | NW_004518485.1 | scaffold3918 | 5143                    | AA                              | CC                 | CC               | INTERGENIC      |               |                    |                    |
| SNP_111025_A_5199 | NW_004518485.1 | scaffold3918 | 5199                    | TT                              | CC                 | CC               | INTERGENIC      |               |                    |                    |
| SNP_111026_A_5267 | NW_004518485.1 | scaffold3918 | 5267                    | TT                              | CC                 | CC               | INTERGENIC      |               |                    |                    |
| SNP_111027_A_5385 | NW_004518485.1 | scaffold3918 | 5385                    | TT                              | CC                 | CC               | INTERGENIC      |               |                    |                    |
| SNP_111028_A_5398 | NW_004518485.1 | scaffold3918 | 5398                    | AA                              | CC                 | CC               | INTERGENIC      |               |                    |                    |
| SNP_111029_A_5409 | NW_004518485.1 | scaffold3918 | 5409                    | TT                              | CC                 | CC               | INTERGENIC      |               |                    |                    |
| SNP_111030_A_5442 | NW_004518485.1 | scaffold3918 | 5442                    | TT                              | CC                 | CC               | INTERGENIC      |               |                    |                    |
| SNP_111031_A_5460 | NW_004518485.1 | scaffold3918 | 5460                    | CC                              | TT                 | TT               | INTERGENIC      |               |                    |                    |
| SNP_111032_A_5481 | NW_004518485.1 | scaffold3918 | 5481                    | GG                              | TT                 | TT               | INTERGENIC      |               |                    |                    |
| SNP_111033_A_5521 | NW_004518485.1 | scaffold3918 | 5521                    | GG                              | CC                 | CC               | INTERGENIC      |               |                    |                    |
| SNP_111034_A_5582 | NW_004518485.1 | scaffold3918 | 5582                    | TT                              | AA                 | AA               | INTERGENIC      |               |                    |                    |
| SNP_111035_A_5597 | NW_004518485.1 | scaffold3918 | 5597                    | TT                              | AA                 | AA               | INTERGENIC      |               |                    |                    |
| SNP_111036_A_5632 | NW_004518485.1 | scaffold3918 | 5632                    | CC                              | GG                 | GG               | INTERGENIC      |               |                    |                    |

| SNPs IDs           | Chromosome IDs | Chromosomes  | Physical positions (bp) | CDC Frontier (Reference genome) | (Pusa 1103 & HPNB) | (ILWC 46 & LPNB) | Sequence genome | Components of | Gene accession IDs | Putative functions |
|--------------------|----------------|--------------|-------------------------|---------------------------------|--------------------|------------------|-----------------|---------------|--------------------|--------------------|
| SNP_111037_A_5650  | NW_004518485.1 | scaffold3918 | 5650                    | TT                              | CC                 | CC               | INTERGENIC      |               |                    |                    |
| SNP_111038_A_5696  | NW_004518485.1 | scaffold3918 | 5696                    | TT                              | AA                 | AA               | INTERGENIC      |               |                    |                    |
| SNP_111039_A_5833  | NW_004518485.1 | scaffold3918 | 5833                    | CC                              | TT                 | TT               | INTERGENIC      |               |                    |                    |
| SNP_111040_A_5834  | NW_004518485.1 | scaffold3918 | 5834                    | AA                              | GG                 | GG               | INTERGENIC      |               |                    |                    |
| SNP_111041_A_6080  | NW_004518485.1 | scaffold3918 | 6080                    | GG                              | AA                 | AA               | INTERGENIC      |               |                    |                    |
| SNP_111042_A_6086  | NW_004518485.1 | scaffold3918 | 6086                    | TT                              | GG                 | GG               | INTERGENIC      |               |                    |                    |
| SNP_111043_A_6225  | NW_004518485.1 | scaffold3918 | 6225                    | AA                              | TT                 | TT               | INTERGENIC      |               |                    |                    |
| SNP_111044_A_6307  | NW_004518485.1 | scaffold3918 | 6307                    | TT                              | AA                 | AA               | INTERGENIC      |               |                    |                    |
| SNP_111045_A_6356  | NW_004518485.1 | scaffold3918 | 6356                    | TT                              | CC                 | CC               | INTERGENIC      |               |                    |                    |
| SNP_111046_A_6421  | NW_004518485.1 | scaffold3918 | 6421                    | AA                              | TT                 | TT               | INTERGENIC      |               |                    |                    |
| SNP_111047_A_6494  | NW_004518485.1 | scaffold3918 | 6494                    | AA                              | CC                 | CC               | INTERGENIC      |               |                    |                    |
| SNP_111048_A_6502  | NW_004518485.1 | scaffold3918 | 6502                    | GG                              | AA                 | AA               | INTERGENIC      |               |                    |                    |
| SNP_111049_A_6535  | NW_004518485.1 | scaffold3918 | 6535                    | TT                              | CC                 | CC               | INTERGENIC      |               |                    |                    |
| SNP_111050_A_6548  | NW_004518485.1 | scaffold3918 | 6548                    | TT                              | CC                 | CC               | INTERGENIC      |               |                    |                    |
| SNP_111051_A_6602  | NW_004518485.1 | scaffold3918 | 6602                    | AA                              | CC                 | CC               | INTERGENIC      |               |                    |                    |
| SNP_111052_A_6909  | NW_004518485.1 | scaffold3918 | 6909                    | CC                              | AA                 | AA               | INTERGENIC      |               |                    |                    |
| SNP_111053_A_10275 | NW_004518485.1 | scaffold3918 | 10275                   | GG                              | AA                 | AA               | INTERGENIC      |               |                    |                    |
| SNP_111054_A_475   | NW_004518487.1 | scaffold3920 | 475                     | GG                              | AA                 | AA               | INTERGENIC      |               |                    |                    |
| SNP_111055_A_207   | NW_004518489.1 | scaffold3923 | 207                     | TT                              | CC                 | CC               | INTERGENIC      |               |                    |                    |
| SNP_111056_A_1704  | NW_004518489.1 | scaffold3923 | 1704                    | AA                              | GG                 | GG               | INTERGENIC      |               |                    |                    |
| SNP_111057_A_1859  | NW_004518489.1 | scaffold3923 | 1859                    | GG                              | AA                 | AA               | INTERGENIC      |               |                    |                    |
| SNP_111058_A_1862  | NW_004518489.1 | scaffold3923 | 1862                    | TT                              | CC                 | CC               | INTERGENIC      |               |                    |                    |

| SNPs IDs          | Chromosome IDs | Chromosomes  | Physical positions (bp) | CDC Frontier (Reference genome) | (Pusa 1103 & HPNB) | (ILWC 46 & LPNB) | Sequence genome | Components of | Gene accession IDs | Putative functions |
|-------------------|----------------|--------------|-------------------------|---------------------------------|--------------------|------------------|-----------------|---------------|--------------------|--------------------|
| SNP_111059_A_1924 | NW_004518489.1 | scaffold3923 | 1924                    | AA                              | GG                 | GG               | INTERGENIC      |               |                    |                    |
| SNP_111060_A_1928 | NW_004518489.1 | scaffold3923 | 1928                    | AA                              | GG                 | GG               | INTERGENIC      |               |                    |                    |
| SNP_111061_A_1943 | NW_004518489.1 | scaffold3923 | 1943                    | GG                              | TT                 | TT               | INTERGENIC      |               |                    |                    |
| SNP_111062_A_1945 | NW_004518489.1 | scaffold3923 | 1945                    | TT                              | CC                 | CC               | INTERGENIC      |               |                    |                    |
| SNP_111063_A_1963 | NW_004518489.1 | scaffold3923 | 1963                    | AA                              | GG                 | GG               | INTERGENIC      |               |                    |                    |
| SNP_111064_A_1964 | NW_004518489.1 | scaffold3923 | 1964                    | GG                              | AA                 | AA               | INTERGENIC      |               |                    |                    |
| SNP_111065_A_1972 | NW_004518489.1 | scaffold3923 | 1972                    | TT                              | GG                 | GG               | INTERGENIC      |               |                    |                    |
| SNP_111066_A_2003 | NW_004518489.1 | scaffold3923 | 2003                    | GG                              | TT                 | TT               | INTERGENIC      |               |                    |                    |
| SNP_111067_A_2018 | NW_004518489.1 | scaffold3923 | 2018                    | AA                              | GG                 | GG               | INTERGENIC      |               |                    |                    |
| SNP_111068_A_2246 | NW_004518489.1 | scaffold3923 | 2246                    | CC                              | AA                 | AA               | INTERGENIC      |               |                    |                    |
| SNP_111070_A_3256 | NW_004518489.1 | scaffold3923 | 3256                    | AA                              | GG                 | GG               | INTERGENIC      |               |                    |                    |
| SNP_111071_A_3295 | NW_004518489.1 | scaffold3923 | 3295                    | AA                              | GG                 | GG               | INTERGENIC      |               |                    |                    |
| SNP_111073_A_4239 | NW_004518489.1 | scaffold3923 | 4239                    | TT                              | CC                 | CC               | INTERGENIC      |               |                    |                    |
| SNP_111076_A_732  | NW_004518495.1 | scaffold3932 | 732                     | AA                              | GG                 | GG               | INTERGENIC      |               |                    |                    |
| SNP_111077_A_742  | NW_004518495.1 | scaffold3932 | 742                     | GG                              | TT                 | TT               | INTERGENIC      |               |                    |                    |
| SNP_111078_A_2251 | NW_004518495.1 | scaffold3932 | 2251                    | AA                              | TT                 | TT               | INTERGENIC      |               |                    |                    |
| SNP_111079_A_4700 | NW_004518495.1 | scaffold3932 | 4700                    | CC                              | TT                 | TT               | INTERGENIC      |               |                    |                    |
| SNP_111080_A_4716 | NW_004518495.1 | scaffold3932 | 4716                    | CC                              | AA                 | AA               | INTERGENIC      |               |                    |                    |
| SNP_111081_A_1387 | NW_004518496.1 | scaffold3933 | 1387                    | CC                              | AA                 | AA               | INTERGENIC      |               |                    |                    |
| SNP_111082_A_1013 | NW_004518497.1 | scaffold3934 | 1013                    | TT                              | AA                 | AA               | INTERGENIC      |               |                    |                    |
| SNP_111083_A_3804 | NW_004518497.1 | scaffold3934 | 3804                    | TT                              | CC                 | CC               | INTERGENIC      |               |                    |                    |
| SNP_111084_A_3842 | NW_004518497.1 | scaffold3934 | 3842                    | CC                              | TT                 | TT               | INTERGENIC      |               |                    |                    |



| SNPs IDs           | Chromosome IDs | Chromosomes  | Physical positions (bp) | CDC Frontier (Reference genome) | (Pusa 1103 & HPNB) | (ILWC 46 & LPNB) | Sequence Components of genome | Gene accession IDs | Putative functions                                                 |
|--------------------|----------------|--------------|-------------------------|---------------------------------|--------------------|------------------|-------------------------------|--------------------|--------------------------------------------------------------------|
| SNP_111085_A_3851  | NW_004518497.1 | scaffold3934 | 3851                    | GG                              | AA                 | AA               | INTERGENIC                    |                    |                                                                    |
| SNP_111086_A_4641  | NW_004518497.1 | scaffold3934 | 4641                    | GG                              | TT                 | TT               | INTERGENIC                    |                    |                                                                    |
| SNP_111087_A_5295  | NW_004518497.1 | scaffold3934 | 5295                    | AA                              | GG                 | GG               | INTERGENIC                    |                    |                                                                    |
| SNP_111088_A_10130 | NW_004518497.1 | scaffold3934 | 10130                   | AA                              | CC                 | CC               | INTERGENIC                    |                    |                                                                    |
| SNP_111089_A_14138 | NW_004518497.1 | scaffold3934 | 14138                   | TT                              | GG                 | GG               | INTERGENIC                    |                    |                                                                    |
| SNP_111090_A_17400 | NW_004518497.1 | scaffold3934 | 17400                   | GG                              | TT                 | TT               | INTERGENIC                    |                    |                                                                    |
| SNP_111092_A_4806  | NW_004518504.1 | scaffold3942 | 4806                    | TT                              | GG                 | GG               | INTERGENIC                    |                    |                                                                    |
| SNP_111093_A_4835  | NW_004518504.1 | scaffold3942 | 4835                    | AA                              | TT                 | TT               | INTERGENIC                    |                    |                                                                    |
| SNP_111094_A_4844  | NW_004518504.1 | scaffold3942 | 4844                    | CC                              | TT                 | TT               | INTERGENIC                    |                    |                                                                    |
| SNP_111095_A_5021  | NW_004518504.1 | scaffold3942 | 5021                    | CC                              | TT                 | TT               | INTERGENIC                    |                    |                                                                    |
| SNP_111096_A_5029  | NW_004518504.1 | scaffold3942 | 5029                    | TT                              | CC                 | CC               | INTERGENIC                    |                    |                                                                    |
| SNP_111097_A_5077  | NW_004518504.1 | scaffold3942 | 5077                    | GG                              | CC                 | CC               | INTERGENIC                    |                    |                                                                    |
| SNP_111098_A_5079  | NW_004518504.1 | scaffold3942 | 5079                    | TT                              | GG                 | GG               | INTERGENIC                    |                    |                                                                    |
| SNP_111099_A_2866  | NW_004518507.1 | scaffold3945 | 2866                    | GG                              | TT                 | TT               | URR                           | 101410595          | transfer RNA tryptophan (anticodon CCA)                            |
| SNP_111100_A_5216  | NW_004518507.1 | scaffold3945 | 5216                    | GG                              | CC                 | CC               | INTERGENIC                    |                    |                                                                    |
| SNP_111101_A_11332 | NW_004518507.1 | scaffold3945 | 11332                   | TT                              | GG                 | GG               | URR                           | 101508867          | cytochrome c biogenesis CcmF C-terminal-like mitochondrial protein |
| SNP_111102_A_11391 | NW_004518507.1 | scaffold3945 | 11391                   | TT                              | GG                 | GG               | URR                           | 101508867          | cytochrome c biogenesis CcmF C-terminal-like mitochondrial protein |
| SNP_111103_A_11541 | NW_004518507.1 | scaffold3945 | 11541                   | AA                              | CC                 | CC               | URR                           | 101508867          | cytochrome c biogenesis CcmF C-terminal-like mitochondrial protein |
| SNP_111104_A_11597 | NW_004518507.1 | scaffold3945 | 11597                   | GG                              | CC                 | CC               | URR                           | 101508867          | cytochrome c biogenesis CcmF C-terminal-like mitochondrial protein |
| SNP_111105_A_13004 | NW_004518507.1 | scaffold3945 | 13004                   | TT                              | CC                 | CC               | DRR                           | 101509189          | NADH-ubiquinone oxidoreductase chain 6                             |
| SNP_111106_A_28624 | NW_004518507.1 | scaffold3945 | 28624                   | GG                              | TT                 | TT               | DRR                           | 101509836          | NADH-ubiquinone oxidoreductase chain 3                             |
| SNP_111107_A_28629 | NW_004518507.1 | scaffold3945 | 28629                   | TT                              | CC                 | CC               | INTERGENIC                    |                    |                                                                    |

| SNPs IDs           | Chromosome IDs | Chromosomes  | Physical positions (bp) | CDC Frontier (Reference genome) | (Pusa 1103 & HPNB) | (ILWC 46 & LPNB) | Sequence genome | Components of | Gene accession IDs | Putative functions |
|--------------------|----------------|--------------|-------------------------|---------------------------------|--------------------|------------------|-----------------|---------------|--------------------|--------------------|
| SNP_111108_A_31783 | NW_004518507.1 | scaffold3945 | 31783                   | AA                              | TT                 | TT               | INTERGENIC      |               |                    |                    |
| SNP_111112_A_10744 | NW_004518509.1 | scaffold3947 | 10744                   | TT                              | GG                 | GG               | INTERGENIC      |               |                    |                    |
| SNP_111113_A_10746 | NW_004518509.1 | scaffold3947 | 10746                   | AA                              | TT                 | TT               | INTERGENIC      |               |                    |                    |
| SNP_111114_A_11486 | NW_004518509.1 | scaffold3947 | 11486                   | TT                              | GG                 | GG               | INTERGENIC      |               |                    |                    |
| SNP_111115_A_12395 | NW_004518509.1 | scaffold3947 | 12395                   | TT                              | AA                 | AA               | INTERGENIC      |               |                    |                    |
| SNP_111116_A_13031 | NW_004518509.1 | scaffold3947 | 13031                   | CC                              | TT                 | TT               | INTERGENIC      |               |                    |                    |
| SNP_111117_A_19940 | NW_004518509.1 | scaffold3947 | 19940                   | CC                              | AA                 | AA               | INTERGENIC      |               |                    |                    |
| SNP_111118_A_19962 | NW_004518509.1 | scaffold3947 | 19962                   | GG                              | AA                 | AA               | INTERGENIC      |               |                    |                    |
| SNP_111119_A_109   | NW_004518510.1 | scaffold3948 | 109                     | TT                              | AA                 | AA               | INTERGENIC      |               |                    |                    |
| SNP_111120_A_111   | NW_004518510.1 | scaffold3948 | 111                     | CC                              | GG                 | GG               | INTERGENIC      |               |                    |                    |
| SNP_111121_A_1740  | NW_004518511.1 | scaffold3950 | 1740                    | GG                              | TT                 | TT               | INTERGENIC      |               |                    |                    |
| SNP_111122_A_1747  | NW_004518511.1 | scaffold3950 | 1747                    | TT                              | AA                 | AA               | INTERGENIC      |               |                    |                    |
| SNP_111123_A_1882  | NW_004518511.1 | scaffold3950 | 1882                    | TT                              | AA                 | AA               | INTERGENIC      |               |                    |                    |
| SNP_111124_A_4094  | NW_004518511.1 | scaffold3950 | 4094                    | GG                              | AA                 | AA               | INTERGENIC      |               |                    |                    |
| SNP_111125_A_4211  | NW_004518511.1 | scaffold3950 | 4211                    | AA                              | GG                 | GG               | INTERGENIC      |               |                    |                    |
| SNP_111126_A_4326  | NW_004518511.1 | scaffold3950 | 4326                    | AA                              | GG                 | GG               | INTERGENIC      |               |                    |                    |
| SNP_111127_A_4421  | NW_004518511.1 | scaffold3950 | 4421                    | TT                              | CC                 | CC               | INTERGENIC      |               |                    |                    |
| SNP_111128_A_4565  | NW_004518511.1 | scaffold3950 | 4565                    | AA                              | GG                 | GG               | INTERGENIC      |               |                    |                    |
| SNP_111129_A_4588  | NW_004518511.1 | scaffold3950 | 4588                    | CC                              | TT                 | TT               | INTERGENIC      |               |                    |                    |
| SNP_111130_A_4713  | NW_004518511.1 | scaffold3950 | 4713                    | TT                              | CC                 | CC               | INTERGENIC      |               |                    |                    |
| SNP_111131_A_4766  | NW_004518511.1 | scaffold3950 | 4766                    | CC                              | TT                 | TT               | INTERGENIC      |               |                    |                    |
| SNP_111132_A_4886  | NW_004518511.1 | scaffold3950 | 4886                    | AA                              | GG                 | GG               | INTERGENIC      |               |                    |                    |

| SNPs IDs          | Chromosome IDs | Chromosomes  | Physical positions (bp) | CDC Frontier (Reference genome) | (Pusa 1103 & HPNB) | (ILWC 46 & LPNB) | Sequence genome | Components of | Gene accession IDs | Putative functions |
|-------------------|----------------|--------------|-------------------------|---------------------------------|--------------------|------------------|-----------------|---------------|--------------------|--------------------|
| SNP_111133_A_6177 | NW_004518511.1 | scaffold3950 | 6177                    | CC                              | AA                 | AA               | INTERGENIC      |               |                    |                    |
| SNP_111134_A_6181 | NW_004518511.1 | scaffold3950 | 6181                    | AA                              | CC                 | CC               | INTERGENIC      |               |                    |                    |
| SNP_111135_A_6821 | NW_004518511.1 | scaffold3950 | 6821                    | TT                              | CC                 | CC               | INTERGENIC      |               |                    |                    |
| SNP_111136_A_6958 | NW_004518511.1 | scaffold3950 | 6958                    | TT                              | GG                 | GG               | INTERGENIC      |               |                    |                    |
| SNP_111137_A_7005 | NW_004518511.1 | scaffold3950 | 7005                    | CC                              | TT                 | TT               | INTERGENIC      |               |                    |                    |
| SNP_111138_A_7026 | NW_004518511.1 | scaffold3950 | 7026                    | CC                              | TT                 | TT               | INTERGENIC      |               |                    |                    |
| SNP_111139_A_7073 | NW_004518511.1 | scaffold3950 | 7073                    | GG                              | CC                 | CC               | INTERGENIC      |               |                    |                    |
| SNP_111140_A_7107 | NW_004518511.1 | scaffold3950 | 7107                    | TT                              | CC                 | CC               | INTERGENIC      |               |                    |                    |
| SNP_111141_A_7114 | NW_004518511.1 | scaffold3950 | 7114                    | TT                              | GG                 | GG               | INTERGENIC      |               |                    |                    |
| SNP_111143_A_7432 | NW_004518511.1 | scaffold3950 | 7432                    | TT                              | CC                 | CC               | INTERGENIC      |               |                    |                    |
| SNP_111144_A_7497 | NW_004518511.1 | scaffold3950 | 7497                    | TT                              | AA                 | AA               | INTERGENIC      |               |                    |                    |
| SNP_111145_A_7543 | NW_004518511.1 | scaffold3950 | 7543                    | AA                              | GG                 | GG               | INTERGENIC      |               |                    |                    |
| SNP_111146_A_7620 | NW_004518511.1 | scaffold3950 | 7620                    | GG                              | TT                 | TT               | INTERGENIC      |               |                    |                    |
| SNP_111149_A_7838 | NW_004518511.1 | scaffold3950 | 7838                    | AA                              | GG                 | GG               | INTERGENIC      |               |                    |                    |
| SNP_111150_A_8033 | NW_004518511.1 | scaffold3950 | 8033                    | AA                              | GG                 | GG               | INTERGENIC      |               |                    |                    |
| SNP_111151_A_8132 | NW_004518511.1 | scaffold3950 | 8132                    | AA                              | GG                 | GG               | INTERGENIC      |               |                    |                    |
| SNP_111153_A_8203 | NW_004518511.1 | scaffold3950 | 8203                    | TT                              | CC                 | CC               | INTERGENIC      |               |                    |                    |
| SNP_111154_A_8206 | NW_004518511.1 | scaffold3950 | 8206                    | TT                              | AA                 | AA               | INTERGENIC      |               |                    |                    |
| SNP_111155_A_8336 | NW_004518511.1 | scaffold3950 | 8336                    | CC                              | TT                 | TT               | INTERGENIC      |               |                    |                    |
| SNP_111156_A_8434 | NW_004518511.1 | scaffold3950 | 8434                    | TT                              | CC                 | CC               | INTERGENIC      |               |                    |                    |
| SNP_111158_A_8554 | NW_004518511.1 | scaffold3950 | 8554                    | CC                              | TT                 | TT               | INTERGENIC      |               |                    |                    |
| SNP_111160_A_8707 | NW_004518511.1 | scaffold3950 | 8707                    | GG                              | TT                 | TT               | INTERGENIC      |               |                    |                    |

| SNPs IDs           | Chromosome IDs | Chromosomes  | Physical positions (bp) | CDC Frontier (Reference genome) | (Pusa 1103 & HPNB) | (ILWC 46 & LPNB) | Sequence Components of genome | Gene accession IDs | Putative functions           |
|--------------------|----------------|--------------|-------------------------|---------------------------------|--------------------|------------------|-------------------------------|--------------------|------------------------------|
| SNP_111161_A_8750  | NW_004518511.1 | scaffold3950 | 8750                    | AA                              | CC                 | CC               | INTERGENIC                    |                    |                              |
| SNP_111162_A_8906  | NW_004518511.1 | scaffold3950 | 8906                    | CC                              | TT                 | TT               | INTERGENIC                    |                    |                              |
| SNP_111163_A_8942  | NW_004518511.1 | scaffold3950 | 8942                    | AA                              | TT                 | TT               | INTERGENIC                    |                    |                              |
| SNP_111164_A_8944  | NW_004518511.1 | scaffold3950 | 8944                    | TT                              | CC                 | CC               | INTERGENIC                    |                    |                              |
| SNP_111165_A_8965  | NW_004518511.1 | scaffold3950 | 8965                    | GG                              | AA                 | AA               | INTERGENIC                    |                    |                              |
| SNP_111166_A_9105  | NW_004518511.1 | scaffold3950 | 9105                    | AA                              | GG                 | GG               | INTERGENIC                    |                    |                              |
| SNP_111167_A_9124  | NW_004518511.1 | scaffold3950 | 9124                    | TT                              | GG                 | GG               | INTERGENIC                    |                    |                              |
| SNP_111168_A_9139  | NW_004518511.1 | scaffold3950 | 9139                    | CC                              | TT                 | TT               | INTERGENIC                    |                    |                              |
| SNP_111169_A_9164  | NW_004518511.1 | scaffold3950 | 9164                    | AA                              | GG                 | GG               | INTERGENIC                    |                    |                              |
| SNP_111170_A_9217  | NW_004518511.1 | scaffold3950 | 9217                    | AA                              | GG                 | GG               | INTERGENIC                    |                    |                              |
| SNP_111172_A_12849 | NW_004518511.1 | scaffold3950 | 12849                   | TT                              | CC                 | CC               | DRR                           | 101510918          | uncharacterized LOC101510918 |
| SNP_111173_A_13049 | NW_004518511.1 | scaffold3950 | 13049                   | CC                              | AA                 | AA               | DRR                           | 101510918          | uncharacterized LOC101510918 |
| SNP_111174_A_15029 | NW_004518511.1 | scaffold3950 | 15029                   | CC                              | GG                 | GG               | NON_SYNONYMOUS_CODING         | 101510918          | uncharacterized LOC101510918 |
| SNP_111175_A_15393 | NW_004518511.1 | scaffold3950 | 15393                   | AA                              | CC                 | CC               | URR                           | 101510918          | uncharacterized LOC101510918 |
| SNP_111176_A_1132  | NW_004518512.1 | scaffold3951 | 1132                    | TT                              | AA                 | AA               | INTERGENIC                    |                    |                              |
| SNP_111177_A_1133  | NW_004518512.1 | scaffold3951 | 1133                    | TT                              | GG                 | GG               | INTERGENIC                    |                    |                              |
| SNP_111178_A_1136  | NW_004518512.1 | scaffold3951 | 1136                    | TT                              | AA                 | AA               | INTERGENIC                    |                    |                              |
| SNP_111179_A_1156  | NW_004518512.1 | scaffold3951 | 1156                    | AA                              | GG                 | GG               | INTERGENIC                    |                    |                              |
| SNP_111180_A_1828  | NW_004518512.1 | scaffold3951 | 1828                    | AA                              | TT                 | TT               | INTERGENIC                    |                    |                              |
| SNP_111182_A_1923  | NW_004518512.1 | scaffold3951 | 1923                    | CC                              | TT                 | TT               | INTERGENIC                    |                    |                              |
| SNP_111183_A_2866  | NW_004518512.1 | scaffold3951 | 2866                    | AA                              | GG                 | GG               | INTERGENIC                    |                    |                              |
| SNP_111184_A_2870  | NW_004518512.1 | scaffold3951 | 2870                    | GG                              | AA                 | AA               | INTERGENIC                    |                    |                              |

| SNPs IDs           | Chromosome IDs | Chromosomes  | Physical positions (bp) | CDC Frontier (Reference genome) | (Pusa 1103 & HPNB) | (ILWC 46 & LPNB) | Sequence genome | Components of | Gene accession IDs | Putative functions |
|--------------------|----------------|--------------|-------------------------|---------------------------------|--------------------|------------------|-----------------|---------------|--------------------|--------------------|
| SNP_111186_A_2911  | NW_004518512.1 | scaffold3951 | 2911                    | GG                              | CC                 | CC               | INTERGENIC      |               |                    |                    |
| SNP_111188_A_809   | NW_004518513.1 | scaffold3952 | 809                     | AA                              | GG                 | GG               | INTERGENIC      |               |                    |                    |
| SNP_111189_A_1058  | NW_004518513.1 | scaffold3952 | 1058                    | TT                              | CC                 | CC               | INTERGENIC      |               |                    |                    |
| SNP_111190_A_1104  | NW_004518513.1 | scaffold3952 | 1104                    | AA                              | GG                 | GG               | INTERGENIC      |               |                    |                    |
| SNP_111191_A_1174  | NW_004518513.1 | scaffold3952 | 1174                    | AA                              | GG                 | GG               | INTERGENIC      |               |                    |                    |
| SNP_111192_A_1253  | NW_004518513.1 | scaffold3952 | 1253                    | TT                              | CC                 | CC               | INTERGENIC      |               |                    |                    |
| SNP_111193_A_397   | NW_004518514.1 | scaffold3953 | 397                     | CC                              | TT                 | TT               | INTERGENIC      |               |                    |                    |
| SNP_111195_A_485   | NW_004518514.1 | scaffold3953 | 485                     | CC                              | TT                 | TT               | INTERGENIC      |               |                    |                    |
| SNP_111196_A_64    | NW_004518519.1 | scaffold3962 | 64                      | TT                              | GG                 | GG               | INTERGENIC      |               |                    |                    |
| SNP_111197_A_388   | NW_004518519.1 | scaffold3962 | 388                     | AA                              | CC                 | CC               | INTERGENIC      |               |                    |                    |
| SNP_111198_A_389   | NW_004518519.1 | scaffold3962 | 389                     | CC                              | TT                 | TT               | INTERGENIC      |               |                    |                    |
| SNP_111199_A_3774  | NW_004518523.1 | scaffold3967 | 3774                    | GG                              | AA                 | AA               | INTERGENIC      |               |                    |                    |
| SNP_111200_A_3796  | NW_004518523.1 | scaffold3967 | 3796                    | CC                              | TT                 | TT               | INTERGENIC      |               |                    |                    |
| SNP_111201_A_3896  | NW_004518523.1 | scaffold3967 | 3896                    | AA                              | CC                 | CC               | INTERGENIC      |               |                    |                    |
| SNP_111202_A_4948  | NW_004518525.1 | scaffold3970 | 4948                    | CC                              | AA                 | AA               | INTERGENIC      |               |                    |                    |
| SNP_111203_A_4980  | NW_004518525.1 | scaffold3970 | 4980                    | CC                              | AA                 | AA               | INTERGENIC      |               |                    |                    |
| SNP_111204_A_635   | NW_004518528.1 | scaffold3973 | 635                     | TT                              | CC                 | CC               | INTERGENIC      |               |                    |                    |
| SNP_111205_A_35    | NW_004518533.1 | scaffold3979 | 35                      | CC                              | TT                 | TT               | INTERGENIC      |               |                    |                    |
| SNP_111206_A_64    | NW_004518533.1 | scaffold3979 | 64                      | TT                              | GG                 | GG               | INTERGENIC      |               |                    |                    |
| SNP_111207_A_76    | NW_004518533.1 | scaffold3979 | 76                      | CC                              | AA                 | AA               | INTERGENIC      |               |                    |                    |
| SNP_111208_A_673   | NW_004518533.1 | scaffold3979 | 673                     | TT                              | AA                 | AA               | INTERGENIC      |               |                    |                    |
| SNP_111209_A_15754 | NW_004518537.1 | scaffold3985 | 15754                   | AA                              | CC                 | CC               | INTERGENIC      |               |                    |                    |

| SNPs IDs           | Chromosome IDs | Chromosomes  | Physical positions (bp) | CDC Frontier (Reference genome) | (Pusa 1103 & HPNB) | (ILWC 46 & LPNB) | Sequence genome | Components of | Gene accession IDs | Putative functions |
|--------------------|----------------|--------------|-------------------------|---------------------------------|--------------------|------------------|-----------------|---------------|--------------------|--------------------|
| SNP_111210_A_1016  | NW_004518541.1 | scaffold3989 | 1016                    | TT                              | GG                 | GG               | INTERGENIC      |               |                    |                    |
| SNP_111211_A_580   | NW_004518547.1 | scaffold3996 | 580                     | CC                              | TT                 | TT               | INTERGENIC      |               |                    |                    |
| SNP_111212_A_665   | NW_004518547.1 | scaffold3996 | 665                     | TT                              | GG                 | GG               | INTERGENIC      |               |                    |                    |
| SNP_111213_A_870   | NW_004518550.1 | scaffold4002 | 870                     | AA                              | GG                 | GG               | INTERGENIC      |               |                    |                    |
| SNP_111214_A_1120  | NW_004518550.1 | scaffold4002 | 1120                    | CC                              | AA                 | AA               | INTERGENIC      |               |                    |                    |
| SNP_111215_A_2949  | NW_004518550.1 | scaffold4002 | 2949                    | GG                              | AA                 | AA               | INTERGENIC      |               |                    |                    |
| SNP_111216_A_2952  | NW_004518550.1 | scaffold4002 | 2952                    | AA                              | CC                 | CC               | INTERGENIC      |               |                    |                    |
| SNP_111217_A_22467 | NW_004518551.1 | scaffold4003 | 22467                   | TT                              | CC                 | CC               | INTERGENIC      |               |                    |                    |
| SNP_111218_A_22891 | NW_004518551.1 | scaffold4003 | 22891                   | GG                              | TT                 | TT               | INTERGENIC      |               |                    |                    |
| SNP_111219_A_23772 | NW_004518551.1 | scaffold4003 | 23772                   | GG                              | CC                 | CC               | INTERGENIC      |               |                    |                    |
| SNP_111220_A_23780 | NW_004518551.1 | scaffold4003 | 23780                   | GG                              | AA                 | AA               | INTERGENIC      |               |                    |                    |
| SNP_111221_A_64    | NW_004518554.1 | scaffold4007 | 64                      | GG                              | AA                 | AA               | INTERGENIC      |               |                    |                    |
| SNP_111222_A_68    | NW_004518554.1 | scaffold4007 | 68                      | CC                              | AA                 | AA               | INTERGENIC      |               |                    |                    |
| SNP_111223_A_1423  | NW_004518554.1 | scaffold4007 | 1423                    | AA                              | GG                 | GG               | INTERGENIC      |               |                    |                    |
| SNP_111225_A_32079 | NW_004518557.1 | scaffold4011 | 32079                   | GG                              | TT                 | TT               | INTERGENIC      |               |                    |                    |
| SNP_111226_A_65207 | NW_004518557.1 | scaffold4011 | 65207                   | AA                              | GG                 | GG               | INTERGENIC      |               |                    |                    |
| SNP_111229_A_1092  | NW_004518559.1 | scaffold4014 | 1092                    | CC                              | AA                 | AA               | INTERGENIC      |               |                    |                    |
| SNP_111230_A_1012  | NW_004518561.1 | scaffold4017 | 1012                    | CC                              | TT                 | TT               | INTERGENIC      |               |                    |                    |
| SNP_111231_A_1040  | NW_004518561.1 | scaffold4017 | 1040                    | AA                              | TT                 | TT               | INTERGENIC      |               |                    |                    |
| SNP_111232_A_1042  | NW_004518561.1 | scaffold4017 | 1042                    | CC                              | TT                 | TT               | INTERGENIC      |               |                    |                    |
| SNP_111233_A_467   | NW_004518563.1 | scaffold4020 | 467                     | AA                              | TT                 | TT               | INTERGENIC      |               |                    |                    |
| SNP_111235_A_10919 | NW_004518563.1 | scaffold4020 | 10919                   | CC                              | GG                 | GG               | INTERGENIC      |               |                    |                    |

| SNPs IDs           | Chromosome IDs | Chromosomes  | Physical positions (bp) | CDC Frontier (Reference genome) | (Pusa 1103 & HPNB) | (ILWC 46 & LPNB) | Sequence genome | Components of | Gene accession IDs | Putative functions |
|--------------------|----------------|--------------|-------------------------|---------------------------------|--------------------|------------------|-----------------|---------------|--------------------|--------------------|
| SNP_111236_A_3734  | NW_004518565.1 | scaffold4024 | 3734                    | GG                              | TT                 | TT               | INTERGENIC      |               |                    |                    |
| SNP_111237_A_3827  | NW_004518565.1 | scaffold4024 | 3827                    | AA                              | GG                 | GG               | INTERGENIC      |               |                    |                    |
| SNP_111238_A_5985  | NW_004518565.1 | scaffold4024 | 5985                    | CC                              | TT                 | TT               | INTERGENIC      |               |                    |                    |
| SNP_111239_A_365   | NW_004518567.1 | scaffold4026 | 365                     | TT                              | AA                 | AA               | INTERGENIC      |               |                    |                    |
| SNP_111240_A_8238  | NW_004518568.1 | scaffold4028 | 8238                    | AA                              | GG                 | GG               | INTERGENIC      |               |                    |                    |
| SNP_111241_A_8377  | NW_004518568.1 | scaffold4028 | 8377                    | TT                              | CC                 | CC               | INTERGENIC      |               |                    |                    |
| SNP_111242_A_8677  | NW_004518568.1 | scaffold4028 | 8677                    | AA                              | TT                 | TT               | INTERGENIC      |               |                    |                    |
| SNP_111243_A_8690  | NW_004518568.1 | scaffold4028 | 8690                    | TT                              | CC                 | CC               | INTERGENIC      |               |                    |                    |
| SNP_111244_A_14598 | NW_004518568.1 | scaffold4028 | 14598                   | TT                              | CC                 | CC               | INTERGENIC      |               |                    |                    |
| SNP_111245_A_25263 | NW_004518568.1 | scaffold4028 | 25263                   | TT                              | CC                 | CC               | INTERGENIC      |               |                    |                    |
| SNP_111246_A_27055 | NW_004518568.1 | scaffold4028 | 27055                   | AA                              | TT                 | TT               | INTERGENIC      |               |                    |                    |
| SNP_111247_A_27121 | NW_004518568.1 | scaffold4028 | 27121                   | GG                              | AA                 | AA               | INTERGENIC      |               |                    |                    |
| SNP_111248_A_27129 | NW_004518568.1 | scaffold4028 | 27129                   | GG                              | AA                 | AA               | INTERGENIC      |               |                    |                    |
| SNP_111250_A_27608 | NW_004518568.1 | scaffold4028 | 27608                   | GG                              | AA                 | AA               | INTERGENIC      |               |                    |                    |
| SNP_111251_A_27654 | NW_004518568.1 | scaffold4028 | 27654                   | GG                              | TT                 | TT               | INTERGENIC      |               |                    |                    |
| SNP_111252_A_38444 | NW_004518568.1 | scaffold4028 | 38444                   | AA                              | CC                 | CC               | INTERGENIC      |               |                    |                    |
| SNP_111253_A_42401 | NW_004518568.1 | scaffold4028 | 42401                   | AA                              | CC                 | CC               | INTERGENIC      |               |                    |                    |
| SNP_111254_A_44136 | NW_004518568.1 | scaffold4028 | 44136                   | AA                              | TT                 | TT               | INTERGENIC      |               |                    |                    |
| SNP_111255_A_532   | NW_004518570.1 | scaffold4031 | 532                     | TT                              | CC                 | CC               | INTERGENIC      |               |                    |                    |
| SNP_111256_A_730   | NW_004518570.1 | scaffold4031 | 730                     | AA                              | GG                 | GG               | INTERGENIC      |               |                    |                    |
| SNP_111257_A_732   | NW_004518570.1 | scaffold4031 | 732                     | AA                              | CC                 | CC               | INTERGENIC      |               |                    |                    |
| SNP_111258_A_900   | NW_004518570.1 | scaffold4031 | 900                     | AA                              | CC                 | CC               | INTERGENIC      |               |                    |                    |

| SNPs IDs          | Chromosome IDs | Chromosomes  | Physical positions (bp) | CDC Frontier (Reference genome) | (Pusa 1103 & HPNB) | (ILWC 46 & LPNB) | Sequence genome | Components of | Gene accession IDs | Putative functions |
|-------------------|----------------|--------------|-------------------------|---------------------------------|--------------------|------------------|-----------------|---------------|--------------------|--------------------|
| SNP_111259_A_1058 | NW_004518570.1 | scaffold4031 | 1058                    | AA                              | GG                 | GG               | INTERGENIC      |               |                    |                    |
| SNP_111260_A_1087 | NW_004518570.1 | scaffold4031 | 1087                    | GG                              | AA                 | AA               | INTERGENIC      |               |                    |                    |
| SNP_111261_A_2185 | NW_004518571.1 | scaffold4032 | 2185                    | CC                              | TT                 | TT               | INTERGENIC      |               |                    |                    |
| SNP_111262_A_2218 | NW_004518571.1 | scaffold4032 | 2218                    | TT                              | AA                 | AA               | INTERGENIC      |               |                    |                    |
| SNP_111263_A_2250 | NW_004518571.1 | scaffold4032 | 2250                    | TT                              | AA                 | AA               | INTERGENIC      |               |                    |                    |
| SNP_111264_A_2287 | NW_004518571.1 | scaffold4032 | 2287                    | AA                              | CC                 | CC               | INTERGENIC      |               |                    |                    |
| SNP_111265_A_2518 | NW_004518571.1 | scaffold4032 | 2518                    | GG                              | AA                 | AA               | INTERGENIC      |               |                    |                    |
| SNP_111266_A_2553 | NW_004518571.1 | scaffold4032 | 2553                    | TT                              | CC                 | CC               | INTERGENIC      |               |                    |                    |
| SNP_111267_A_2556 | NW_004518571.1 | scaffold4032 | 2556                    | GG                              | AA                 | AA               | INTERGENIC      |               |                    |                    |
| SNP_111268_A_2586 | NW_004518571.1 | scaffold4032 | 2586                    | AA                              | CC                 | CC               | INTERGENIC      |               |                    |                    |
| SNP_111269_A_2640 | NW_004518571.1 | scaffold4032 | 2640                    | CC                              | GG                 | GG               | INTERGENIC      |               |                    |                    |
| SNP_111270_A_2704 | NW_004518571.1 | scaffold4032 | 2704                    | AA                              | CC                 | CC               | INTERGENIC      |               |                    |                    |
| SNP_111271_A_6843 | NW_004518571.1 | scaffold4032 | 6843                    | TT                              | AA                 | AA               | INTERGENIC      |               |                    |                    |
| SNP_111272_A_6846 | NW_004518571.1 | scaffold4032 | 6846                    | CC                              | AA                 | AA               | INTERGENIC      |               |                    |                    |
| SNP_111273_A_6851 | NW_004518571.1 | scaffold4032 | 6851                    | GG                              | AA                 | AA               | INTERGENIC      |               |                    |                    |
| SNP_111274_A_2964 | NW_004518572.1 | scaffold4034 | 2964                    | TT                              | CC                 | CC               | INTERGENIC      |               |                    |                    |
| SNP_111275_A_3154 | NW_004518572.1 | scaffold4034 | 3154                    | TT                              | CC                 | CC               | INTERGENIC      |               |                    |                    |
| SNP_111276_A_3162 | NW_004518572.1 | scaffold4034 | 3162                    | AA                              | GG                 | GG               | INTERGENIC      |               |                    |                    |
| SNP_111277_A_3396 | NW_004518572.1 | scaffold4034 | 3396                    | AA                              | GG                 | GG               | INTERGENIC      |               |                    |                    |
| SNP_111278_A_798  | NW_004518575.1 | scaffold4038 | 798                     | TT                              | GG                 | GG               | INTERGENIC      |               |                    |                    |
| SNP_111279_A_813  | NW_004518575.1 | scaffold4038 | 813                     | AA                              | GG                 | GG               | INTERGENIC      |               |                    |                    |
| SNP_111281_A_874  | NW_004518575.1 | scaffold4038 | 874                     | AA                              | GG                 | GG               | INTERGENIC      |               |                    |                    |



| SNPs IDs           | Chromosome IDs | Chromosomes  | Physical positions (bp) | CDC Frontier genome (Reference genome) | (Pusa 1103 & HPNB) | (ILWC 46 & LPNB) | Sequence genome | Components of | Gene accession IDs | Putative functions |
|--------------------|----------------|--------------|-------------------------|----------------------------------------|--------------------|------------------|-----------------|---------------|--------------------|--------------------|
| SNP_111282_A_994   | NW_004518575.1 | scaffold4038 | 994                     | AA                                     | CC                 | CC               | INTERGENIC      |               |                    |                    |
| SNP_111283_A_1057  | NW_004518575.1 | scaffold4038 | 1057                    | GG                                     | TT                 | TT               | INTERGENIC      |               |                    |                    |
| SNP_111285_A_1145  | NW_004518575.1 | scaffold4038 | 1145                    | TT                                     | GG                 | GG               | INTERGENIC      |               |                    |                    |
| SNP_111286_A_64    | NW_004518578.1 | scaffold4041 | 64                      | TT                                     | AA                 | AA               | INTERGENIC      |               |                    |                    |
| SNP_111287_A_99    | NW_004518578.1 | scaffold4041 | 99                      | CC                                     | AA                 | AA               | INTERGENIC      |               |                    |                    |
| SNP_111288_A_150   | NW_004518578.1 | scaffold4041 | 150                     | TT                                     | GG                 | GG               | INTERGENIC      |               |                    |                    |
| SNP_111289_A_249   | NW_004518578.1 | scaffold4041 | 249                     | GG                                     | CC                 | CC               | INTERGENIC      |               |                    |                    |
| SNP_111291_A_971   | NW_004518578.1 | scaffold4041 | 971                     | GG                                     | TT                 | TT               | INTERGENIC      |               |                    |                    |
| SNP_111293_A_15330 | NW_004518578.1 | scaffold4041 | 15330                   | AA                                     | GG                 | GG               | INTERGENIC      |               |                    |                    |
| SNP_111294_A_15454 | NW_004518578.1 | scaffold4041 | 15454                   | TT                                     | CC                 | CC               | INTERGENIC      |               |                    |                    |
| SNP_111295_A_15501 | NW_004518578.1 | scaffold4041 | 15501                   | GG                                     | CC                 | CC               | INTERGENIC      |               |                    |                    |
| SNP_111296_A_15539 | NW_004518578.1 | scaffold4041 | 15539                   | TT                                     | AA                 | AA               | INTERGENIC      |               |                    |                    |
| SNP_111297_A_15666 | NW_004518578.1 | scaffold4041 | 15666                   | TT                                     | CC                 | CC               | INTERGENIC      |               |                    |                    |
| SNP_111298_A_15667 | NW_004518578.1 | scaffold4041 | 15667                   | TT                                     | AA                 | AA               | INTERGENIC      |               |                    |                    |
| SNP_111300_A_15746 | NW_004518578.1 | scaffold4041 | 15746                   | TT                                     | CC                 | CC               | INTERGENIC      |               |                    |                    |
| SNP_111302_A_15777 | NW_004518578.1 | scaffold4041 | 15777                   | CC                                     | GG                 | GG               | INTERGENIC      |               |                    |                    |
| SNP_111303_A_15784 | NW_004518578.1 | scaffold4041 | 15784                   | GG                                     | CC                 | CC               | INTERGENIC      |               |                    |                    |
| SNP_111304_A_15847 | NW_004518578.1 | scaffold4041 | 15847                   | CC                                     | TT                 | TT               | INTERGENIC      |               |                    |                    |
| SNP_111306_A_15873 | NW_004518578.1 | scaffold4041 | 15873                   | TT                                     | CC                 | CC               | INTERGENIC      |               |                    |                    |
| SNP_111307_A_15905 | NW_004518578.1 | scaffold4041 | 15905                   | AA                                     | TT                 | TT               | INTERGENIC      |               |                    |                    |
| SNP_111309_A_16001 | NW_004518578.1 | scaffold4041 | 16001                   | CC                                     | TT                 | TT               | INTERGENIC      |               |                    |                    |
| SNP_111310_A_16018 | NW_004518578.1 | scaffold4041 | 16018                   | CC                                     | TT                 | TT               | INTERGENIC      |               |                    |                    |

| SNPs IDs           | Chromosome IDs | Chromosomes  | Physical positions (bp) | CDC Frontier (Reference genome) | (Pusa 1103 & HPNB) | (ILWC 46 & LPNB) | Sequence Components of genome | Gene accession IDs | Putative functions                 |
|--------------------|----------------|--------------|-------------------------|---------------------------------|--------------------|------------------|-------------------------------|--------------------|------------------------------------|
| SNP_111311_A_16116 | NW_004518578.1 | scaffold4041 | 16116                   | TT                              | AA                 | AA               | INTERGENIC                    |                    |                                    |
| SNP_111312_A_16142 | NW_004518578.1 | scaffold4041 | 16142                   | AA                              | CC                 | CC               | INTERGENIC                    |                    |                                    |
| SNP_111313_A_16146 | NW_004518578.1 | scaffold4041 | 16146                   | AA                              | GG                 | GG               | INTERGENIC                    |                    |                                    |
| SNP_111314_A_16148 | NW_004518578.1 | scaffold4041 | 16148                   | CC                              | TT                 | TT               | INTERGENIC                    |                    |                                    |
| SNP_111316_A_16221 | NW_004518578.1 | scaffold4041 | 16221                   | TT                              | AA                 | AA               | INTERGENIC                    |                    |                                    |
| SNP_111317_A_16346 | NW_004518578.1 | scaffold4041 | 16346                   | GG                              | AA                 | AA               | INTERGENIC                    |                    |                                    |
| SNP_111318_A_16399 | NW_004518578.1 | scaffold4041 | 16399                   | GG                              | AA                 | AA               | INTERGENIC                    |                    |                                    |
| SNP_111319_A_16403 | NW_004518578.1 | scaffold4041 | 16403                   | TT                              | AA                 | AA               | INTERGENIC                    |                    |                                    |
| SNP_111320_A_38289 | NW_004518578.1 | scaffold4041 | 38289                   | TT                              | CC                 | CC               | URR                           | 101488520          | peroxisome biogenesis protein 22   |
| SNP_111321_A_39693 | NW_004518578.1 | scaffold4041 | 39693                   | GG                              | AA                 | AA               | INTERGENIC                    |                    |                                    |
| SNP_111322_A_39819 | NW_004518578.1 | scaffold4041 | 39819                   | CC                              | TT                 | TT               | INTERGENIC                    |                    |                                    |
| SNP_111323_A_239   | NW_004518580.1 | scaffold4045 | 239                     | AA                              | CC                 | CC               | INTERGENIC                    |                    |                                    |
| SNP_111324_A_240   | NW_004518580.1 | scaffold4045 | 240                     | CC                              | AA                 | AA               | INTERGENIC                    |                    |                                    |
| SNP_111325_A_567   | NW_004518580.1 | scaffold4045 | 567                     | TT                              | CC                 | CC               | INTERGENIC                    |                    |                                    |
| SNP_111326_A_590   | NW_004518580.1 | scaffold4045 | 590                     | AA                              | GG                 | GG               | INTERGENIC                    |                    |                                    |
| SNP_111327_A_1560  | NW_004518580.1 | scaffold4045 | 1560                    | CC                              | AA                 | AA               | INTERGENIC                    |                    |                                    |
| SNP_111331_A_6630  | NW_004518588.1 | scaffold4057 | 6630                    | CC                              | TT                 | TT               | INTERGENIC                    |                    |                                    |
| SNP_111332_A_7565  | NW_004518588.1 | scaffold4057 | 7565                    | AA                              | GG                 | GG               | DRR                           | 101490281          | uncharacterized LOC101490281       |
| SNP_111333_A_18988 | NW_004518588.1 | scaffold4057 | 18988                   | TT                              | AA                 | AA               | INTRON                        | 101490598          | aspartic proteinase-like protein 2 |
| SNP_111334_A_34319 | NW_004518588.1 | scaffold4057 | 34319                   | AA                              | CC                 | CC               | INTERGENIC                    |                    |                                    |
| SNP_111336_A_2736  | NW_004518590.1 | scaffold4061 | 2736                    | AA                              | TT                 | TT               | INTERGENIC                    |                    |                                    |
| SNP_111337_A_2772  | NW_004518590.1 | scaffold4061 | 2772                    | AA                              | CC                 | CC               | INTERGENIC                    |                    |                                    |

| SNPs IDs           | Chromosome IDs | Chromosomes  | Physical positions (bp) | CDC Frontier (Reference genome) | (Pusa 1103 & HPNB) | (ILWC 46 & LPNB) | Sequence genome | Components of | Gene accession IDs | Putative functions |
|--------------------|----------------|--------------|-------------------------|---------------------------------|--------------------|------------------|-----------------|---------------|--------------------|--------------------|
| SNP_111338_A_7205  | NW_004518590.1 | scaffold4061 | 7205                    | TT                              | GG                 | GG               | INTERGENIC      |               |                    |                    |
| SNP_111339_A_8180  | NW_004518590.1 | scaffold4061 | 8180                    | AA                              | CC                 | CC               | INTERGENIC      |               |                    |                    |
| SNP_111340_A_8203  | NW_004518590.1 | scaffold4061 | 8203                    | GG                              | AA                 | AA               | INTERGENIC      |               |                    |                    |
| SNP_111341_A_8205  | NW_004518590.1 | scaffold4061 | 8205                    | TT                              | AA                 | AA               | INTERGENIC      |               |                    |                    |
| SNP_111343_A_8246  | NW_004518590.1 | scaffold4061 | 8246                    | AA                              | GG                 | GG               | INTERGENIC      |               |                    |                    |
| SNP_111344_A_8255  | NW_004518590.1 | scaffold4061 | 8255                    | AA                              | GG                 | GG               | INTERGENIC      |               |                    |                    |
| SNP_111345_A_12172 | NW_004518590.1 | scaffold4061 | 12172                   | CC                              | TT                 | TT               | INTERGENIC      |               |                    |                    |
| SNP_111346_A_556   | NW_004518592.1 | scaffold4064 | 556                     | TT                              | GG                 | GG               | INTERGENIC      |               |                    |                    |
| SNP_111347_A_601   | NW_004518592.1 | scaffold4064 | 601                     | CC                              | GG                 | GG               | INTERGENIC      |               |                    |                    |
| SNP_111348_A_694   | NW_004518592.1 | scaffold4064 | 694                     | AA                              | GG                 | GG               | INTERGENIC      |               |                    |                    |
| SNP_111350_A_912   | NW_004518592.1 | scaffold4064 | 912                     | AA                              | GG                 | GG               | INTERGENIC      |               |                    |                    |
| SNP_111351_A_987   | NW_004518592.1 | scaffold4064 | 987                     | TT                              | GG                 | GG               | INTERGENIC      |               |                    |                    |
| SNP_111352_A_1018  | NW_004518592.1 | scaffold4064 | 1018                    | AA                              | GG                 | GG               | INTERGENIC      |               |                    |                    |
| SNP_111353_A_1349  | NW_004518592.1 | scaffold4064 | 1349                    | CC                              | GG                 | GG               | INTERGENIC      |               |                    |                    |
| SNP_111355_A_1498  | NW_004518592.1 | scaffold4064 | 1498                    | AA                              | GG                 | GG               | INTERGENIC      |               |                    |                    |
| SNP_111356_A_1662  | NW_004518592.1 | scaffold4064 | 1662                    | AA                              | TT                 | TT               | INTERGENIC      |               |                    |                    |
| SNP_111357_A_1688  | NW_004518592.1 | scaffold4064 | 1688                    | GG                              | AA                 | AA               | INTERGENIC      |               |                    |                    |
| SNP_111358_A_1967  | NW_004518592.1 | scaffold4064 | 1967                    | CC                              | AA                 | AA               | INTERGENIC      |               |                    |                    |
| SNP_111359_A_2014  | NW_004518592.1 | scaffold4064 | 2014                    | GG                              | TT                 | TT               | INTERGENIC      |               |                    |                    |
| SNP_111360_A_2548  | NW_004518592.1 | scaffold4064 | 2548                    | TT                              | AA                 | AA               | INTERGENIC      |               |                    |                    |
| SNP_111361_A_2750  | NW_004518592.1 | scaffold4064 | 2750                    | GG                              | TT                 | TT               | INTERGENIC      |               |                    |                    |
| SNP_111362_A_2806  | NW_004518592.1 | scaffold4064 | 2806                    | AA                              | GG                 | GG               | INTERGENIC      |               |                    |                    |

| SNPs IDs          | Chromosome IDs | Chromosomes  | Physical positions (bp) | CDC Frontier (Reference genome) | (Pusa 1103 & HPNB) | (ILWC 46 & LPNB) | Sequence genome | Components of | Gene accession IDs | Putative functions |
|-------------------|----------------|--------------|-------------------------|---------------------------------|--------------------|------------------|-----------------|---------------|--------------------|--------------------|
| SNP_111363_A_3215 | NW_004518592.1 | scaffold4064 | 3215                    | TT                              | AA                 | AA               | INTERGENIC      |               |                    |                    |
| SNP_111364_A_3255 | NW_004518592.1 | scaffold4064 | 3255                    | CC                              | TT                 | TT               | INTERGENIC      |               |                    |                    |
| SNP_111365_A_3338 | NW_004518592.1 | scaffold4064 | 3338                    | CC                              | AA                 | AA               | INTERGENIC      |               |                    |                    |
| SNP_111366_A_3520 | NW_004518592.1 | scaffold4064 | 3520                    | GG                              | AA                 | AA               | INTERGENIC      |               |                    |                    |
| SNP_111367_A_3533 | NW_004518592.1 | scaffold4064 | 3533                    | TT                              | GG                 | GG               | INTERGENIC      |               |                    |                    |
| SNP_111368_A_3562 | NW_004518592.1 | scaffold4064 | 3562                    | CC                              | TT                 | TT               | INTERGENIC      |               |                    |                    |
| SNP_111369_A_3581 | NW_004518592.1 | scaffold4064 | 3581                    | GG                              | AA                 | AA               | INTERGENIC      |               |                    |                    |
| SNP_111370_A_3700 | NW_004518592.1 | scaffold4064 | 3700                    | AA                              | TT                 | TT               | INTERGENIC      |               |                    |                    |
| SNP_111371_A_3733 | NW_004518592.1 | scaffold4064 | 3733                    | CC                              | TT                 | TT               | INTERGENIC      |               |                    |                    |
| SNP_111372_A_3841 | NW_004518592.1 | scaffold4064 | 3841                    | CC                              | TT                 | TT               | INTERGENIC      |               |                    |                    |
| SNP_111373_A_3883 | NW_004518592.1 | scaffold4064 | 3883                    | GG                              | TT                 | TT               | INTERGENIC      |               |                    |                    |
| SNP_111374_A_3944 | NW_004518592.1 | scaffold4064 | 3944                    | GG                              | TT                 | TT               | INTERGENIC      |               |                    |                    |
| SNP_111375_A_3984 | NW_004518592.1 | scaffold4064 | 3984                    | CC                              | TT                 | TT               | INTERGENIC      |               |                    |                    |
| SNP_111376_A_4025 | NW_004518592.1 | scaffold4064 | 4025                    | TT                              | CC                 | CC               | INTERGENIC      |               |                    |                    |
| SNP_111377_A_4034 | NW_004518592.1 | scaffold4064 | 4034                    | TT                              | CC                 | CC               | INTERGENIC      |               |                    |                    |
| SNP_111378_A_4091 | NW_004518592.1 | scaffold4064 | 4091                    | GG                              | TT                 | TT               | INTERGENIC      |               |                    |                    |
| SNP_111379_A_4212 | NW_004518592.1 | scaffold4064 | 4212                    | AA                              | GG                 | GG               | INTERGENIC      |               |                    |                    |
| SNP_111380_A_4307 | NW_004518592.1 | scaffold4064 | 4307                    | TT                              | CC                 | CC               | INTERGENIC      |               |                    |                    |
| SNP_111381_A_4633 | NW_004518592.1 | scaffold4064 | 4633                    | AA                              | TT                 | TT               | INTERGENIC      |               |                    |                    |
| SNP_111382_A_4670 | NW_004518592.1 | scaffold4064 | 4670                    | AA                              | GG                 | GG               | INTERGENIC      |               |                    |                    |
| SNP_111383_A_4781 | NW_004518592.1 | scaffold4064 | 4781                    | AA                              | GG                 | GG               | INTERGENIC      |               |                    |                    |
| SNP_111384_A_4791 | NW_004518592.1 | scaffold4064 | 4791                    | GG                              | AA                 | AA               | INTERGENIC      |               |                    |                    |

| SNPs IDs           | Chromosome IDs | Chromosomes  | Physical positions (bp) | CDC Frontier (Reference genome) | (Pusa 1103 & HPNB) | (ILWC 46 & LPNB) | Sequence genome | Components of | Gene accession IDs | Putative functions |
|--------------------|----------------|--------------|-------------------------|---------------------------------|--------------------|------------------|-----------------|---------------|--------------------|--------------------|
| SNP_111385_A_4816  | NW_004518592.1 | scaffold4064 | 4816                    | TT                              | AA                 | AA               | INTERGENIC      |               |                    |                    |
| SNP_111386_A_5052  | NW_004518592.1 | scaffold4064 | 5052                    | TT                              | CC                 | CC               | INTERGENIC      |               |                    |                    |
| SNP_111387_A_5147  | NW_004518592.1 | scaffold4064 | 5147                    | CC                              | TT                 | TT               | INTERGENIC      |               |                    |                    |
| SNP_111388_A_5268  | NW_004518592.1 | scaffold4064 | 5268                    | TT                              | CC                 | CC               | INTERGENIC      |               |                    |                    |
| SNP_111389_A_5331  | NW_004518592.1 | scaffold4064 | 5331                    | TT                              | CC                 | CC               | INTERGENIC      |               |                    |                    |
| SNP_111391_A_5435  | NW_004518592.1 | scaffold4064 | 5435                    | AA                              | CC                 | CC               | INTERGENIC      |               |                    |                    |
| SNP_111393_A_64    | NW_004518605.1 | scaffold4081 | 64                      | CC                              | TT                 | TT               | INTERGENIC      |               |                    |                    |
| SNP_111394_A_84    | NW_004518605.1 | scaffold4081 | 84                      | TT                              | CC                 | CC               | INTERGENIC      |               |                    |                    |
| SNP_111395_A_292   | NW_004518605.1 | scaffold4081 | 292                     | TT                              | GG                 | GG               | INTERGENIC      |               |                    |                    |
| SNP_111396_A_373   | NW_004518605.1 | scaffold4081 | 373                     | GG                              | TT                 | TT               | INTERGENIC      |               |                    |                    |
| SNP_111397_A_378   | NW_004518605.1 | scaffold4081 | 378                     | GG                              | AA                 | AA               | INTERGENIC      |               |                    |                    |
| SNP_111398_A_505   | NW_004518605.1 | scaffold4081 | 505                     | TT                              | AA                 | AA               | INTERGENIC      |               |                    |                    |
| SNP_111399_A_608   | NW_004518605.1 | scaffold4081 | 608                     | GG                              | AA                 | AA               | INTERGENIC      |               |                    |                    |
| SNP_111400_A_119   | NW_004518607.1 | scaffold4083 | 119                     | GG                              | TT                 | TT               | INTERGENIC      |               |                    |                    |
| SNP_111401_A_5213  | NW_004518611.1 | scaffold4088 | 5213                    | GG                              | AA                 | AA               | INTERGENIC      |               |                    |                    |
| SNP_111403_A_5688  | NW_004518611.1 | scaffold4088 | 5688                    | CC                              | TT                 | TT               | INTERGENIC      |               |                    |                    |
| SNP_111404_A_5741  | NW_004518611.1 | scaffold4088 | 5741                    | GG                              | TT                 | TT               | INTERGENIC      |               |                    |                    |
| SNP_111405_A_5947  | NW_004518611.1 | scaffold4088 | 5947                    | GG                              | AA                 | AA               | INTERGENIC      |               |                    |                    |
| SNP_111406_A_11533 | NW_004518611.1 | scaffold4088 | 11533                   | GG                              | AA                 | AA               | INTERGENIC      |               |                    |                    |
| SNP_111407_A_11569 | NW_004518611.1 | scaffold4088 | 11569                   | TT                              | CC                 | CC               | INTERGENIC      |               |                    |                    |
| SNP_111408_A_14801 | NW_004518611.1 | scaffold4088 | 14801                   | CC                              | TT                 | TT               | INTERGENIC      |               |                    |                    |
| SNP_111409_A_14922 | NW_004518611.1 | scaffold4088 | 14922                   | AA                              | GG                 | GG               | INTERGENIC      |               |                    |                    |

| SNPs IDs           | Chromosome IDs | Chromosomes  | Physical positions (bp) | CDC Frontier (Reference genome) | (Pusa 1103 & HPNB) | (ILWC 46 & LPNB) | Sequence genome | Components of | Gene accession IDs | Putative functions |
|--------------------|----------------|--------------|-------------------------|---------------------------------|--------------------|------------------|-----------------|---------------|--------------------|--------------------|
| SNP_111410_A_14953 | NW_004518611.1 | scaffold4088 | 14953                   | TT                              | CC                 | CC               | INTERGENIC      |               |                    |                    |
| SNP_111411_A_15090 | NW_004518611.1 | scaffold4088 | 15090                   | AA                              | CC                 | CC               | INTERGENIC      |               |                    |                    |
| SNP_111412_A_16469 | NW_004518611.1 | scaffold4088 | 16469                   | TT                              | CC                 | CC               | INTERGENIC      |               |                    |                    |
| SNP_111413_A_16482 | NW_004518611.1 | scaffold4088 | 16482                   | CC                              | GG                 | GG               | INTERGENIC      |               |                    |                    |
| SNP_111414_A_17165 | NW_004518611.1 | scaffold4088 | 17165                   | AA                              | TT                 | TT               | INTERGENIC      |               |                    |                    |
| SNP_111415_A_17468 | NW_004518611.1 | scaffold4088 | 17468                   | CC                              | GG                 | GG               | INTERGENIC      |               |                    |                    |
| SNP_111416_A_17469 | NW_004518611.1 | scaffold4088 | 17469                   | CC                              | TT                 | TT               | INTERGENIC      |               |                    |                    |
| SNP_111418_A_17564 | NW_004518611.1 | scaffold4088 | 17564                   | CC                              | TT                 | TT               | INTERGENIC      |               |                    |                    |
| SNP_111419_A_17565 | NW_004518611.1 | scaffold4088 | 17565                   | AA                              | GG                 | GG               | INTERGENIC      |               |                    |                    |
| SNP_111420_A_17642 | NW_004518611.1 | scaffold4088 | 17642                   | TT                              | CC                 | CC               | INTERGENIC      |               |                    |                    |
| SNP_111421_A_17682 | NW_004518611.1 | scaffold4088 | 17682                   | CC                              | TT                 | TT               | INTERGENIC      |               |                    |                    |
| SNP_111422_A_17814 | NW_004518611.1 | scaffold4088 | 17814                   | CC                              | TT                 | TT               | INTERGENIC      |               |                    |                    |
| SNP_111423_A_17816 | NW_004518611.1 | scaffold4088 | 17816                   | TT                              | GG                 | GG               | INTERGENIC      |               |                    |                    |
| SNP_111424_A_17818 | NW_004518611.1 | scaffold4088 | 17818                   | AA                              | TT                 | TT               | INTERGENIC      |               |                    |                    |
| SNP_111425_A_17980 | NW_004518611.1 | scaffold4088 | 17980                   | AA                              | GG                 | GG               | INTERGENIC      |               |                    |                    |
| SNP_111426_A_18198 | NW_004518611.1 | scaffold4088 | 18198                   | CC                              | TT                 | TT               | INTERGENIC      |               |                    |                    |
| SNP_111427_A_19484 | NW_004518612.1 | scaffold4089 | 19484                   | GG                              | TT                 | TT               | INTERGENIC      |               |                    |                    |
| SNP_111428_A_255   | NW_004518620.1 | scaffold4100 | 255                     | CC                              | AA                 | AA               | INTERGENIC      |               |                    |                    |
| SNP_111429_A_499   | NW_004518620.1 | scaffold4100 | 499                     | TT                              | GG                 | GG               | INTERGENIC      |               |                    |                    |
| SNP_111430_A_722   | NW_004518620.1 | scaffold4100 | 722                     | TT                              | AA                 | AA               | INTERGENIC      |               |                    |                    |
| SNP_111431_A_748   | NW_004518620.1 | scaffold4100 | 748                     | AA                              | TT                 | TT               | INTERGENIC      |               |                    |                    |
| SNP_111432_A_1358  | NW_004518623.1 | scaffold4106 | 1358                    | CC                              | AA                 | AA               | INTERGENIC      |               |                    |                    |

| SNPs IDs           | Chromosome IDs | Chromosomes  | Physical positions (bp) | CDC Frontier (Reference genome) | (Pusa 1103 & HPNB) | (ILWC 46 & LPNB) | Sequence genome | Components of | Gene accession IDs | Putative functions |
|--------------------|----------------|--------------|-------------------------|---------------------------------|--------------------|------------------|-----------------|---------------|--------------------|--------------------|
| SNP_111433_A_9593  | NW_004518624.1 | scaffold4107 | 9593                    | AA                              | TT                 | TT               | INTERGENIC      |               |                    |                    |
| SNP_111434_A_9621  | NW_004518624.1 | scaffold4107 | 9621                    | AA                              | TT                 | TT               | INTERGENIC      |               |                    |                    |
| SNP_111436_A_4968  | NW_004518625.1 | scaffold4108 | 4968                    | GG                              | AA                 | AA               | INTERGENIC      |               |                    |                    |
| SNP_111437_A_5169  | NW_004518625.1 | scaffold4108 | 5169                    | CC                              | GG                 | GG               | INTERGENIC      |               |                    |                    |
| SNP_111438_A_5261  | NW_004518625.1 | scaffold4108 | 5261                    | AA                              | GG                 | GG               | INTERGENIC      |               |                    |                    |
| SNP_111439_A_5320  | NW_004518625.1 | scaffold4108 | 5320                    | GG                              | AA                 | AA               | INTERGENIC      |               |                    |                    |
| SNP_111440_A_5465  | NW_004518625.1 | scaffold4108 | 5465                    | GG                              | AA                 | AA               | INTERGENIC      |               |                    |                    |
| SNP_111441_A_6309  | NW_004518625.1 | scaffold4108 | 6309                    | AA                              | TT                 | TT               | INTERGENIC      |               |                    |                    |
| SNP_111442_A_6591  | NW_004518625.1 | scaffold4108 | 6591                    | AA                              | TT                 | TT               | INTERGENIC      |               |                    |                    |
| SNP_111443_A_8156  | NW_004518625.1 | scaffold4108 | 8156                    | TT                              | CC                 | CC               | INTERGENIC      |               |                    |                    |
| SNP_111444_A_8226  | NW_004518625.1 | scaffold4108 | 8226                    | GG                              | CC                 | CC               | INTERGENIC      |               |                    |                    |
| SNP_111445_A_8514  | NW_004518625.1 | scaffold4108 | 8514                    | GG                              | AA                 | AA               | INTERGENIC      |               |                    |                    |
| SNP_111446_A_8521  | NW_004518625.1 | scaffold4108 | 8521                    | TT                              | AA                 | AA               | INTERGENIC      |               |                    |                    |
| SNP_111447_A_8659  | NW_004518625.1 | scaffold4108 | 8659                    | TT                              | CC                 | CC               | INTERGENIC      |               |                    |                    |
| SNP_111448_A_8728  | NW_004518625.1 | scaffold4108 | 8728                    | AA                              | TT                 | TT               | INTERGENIC      |               |                    |                    |
| SNP_111450_A_9576  | NW_004518625.1 | scaffold4108 | 9576                    | GG                              | AA                 | AA               | INTERGENIC      |               |                    |                    |
| SNP_111451_A_11197 | NW_004518625.1 | scaffold4108 | 11197                   | TT                              | GG                 | GG               | INTERGENIC      |               |                    |                    |
| SNP_111452_A_11919 | NW_004518633.1 | scaffold4118 | 11919                   | AA                              | GG                 | GG               | INTERGENIC      |               |                    |                    |
| SNP_111453_A_15390 | NW_004518633.1 | scaffold4118 | 15390                   | CC                              | GG                 | GG               | INTERGENIC      |               |                    |                    |
| SNP_111454_A_15617 | NW_004518633.1 | scaffold4118 | 15617                   | TT                              | AA                 | AA               | INTERGENIC      |               |                    |                    |
| SNP_111455_A_15900 | NW_004518633.1 | scaffold4118 | 15900                   | AA                              | TT                 | TT               | INTERGENIC      |               |                    |                    |
| SNP_111456_A_15910 | NW_004518633.1 | scaffold4118 | 15910                   | TT                              | AA                 | AA               | INTERGENIC      |               |                    |                    |

| SNPs IDs           | Chromosome IDs | Chromosomes  | Physical positions (bp) | CDC Frontier (Reference genome) | (Pusa 1103 & HPNB) | (ILWC 46 & LPNB) | Sequence genome | Components of | Gene accession IDs | Putative functions |
|--------------------|----------------|--------------|-------------------------|---------------------------------|--------------------|------------------|-----------------|---------------|--------------------|--------------------|
| SNP_111457_A_16070 | NW_004518633.1 | scaffold4118 | 16070                   | GG                              | TT                 | TT               | INTERGENIC      |               |                    |                    |
| SNP_111458_A_22091 | NW_004518633.1 | scaffold4118 | 22091                   | AA                              | GG                 | GG               | INTERGENIC      |               |                    |                    |
| SNP_111459_A_22175 | NW_004518633.1 | scaffold4118 | 22175                   | TT                              | AA                 | AA               | INTERGENIC      |               |                    |                    |
| SNP_111460_A_22263 | NW_004518633.1 | scaffold4118 | 22263                   | CC                              | TT                 | TT               | INTERGENIC      |               |                    |                    |
| SNP_111461_A_22264 | NW_004518633.1 | scaffold4118 | 22264                   | AA                              | GG                 | GG               | INTERGENIC      |               |                    |                    |
| SNP_111462_A_26645 | NW_004518633.1 | scaffold4118 | 26645                   | CC                              | AA                 | AA               | INTERGENIC      |               |                    |                    |
| SNP_111463_A_430   | NW_004518640.1 | scaffold4127 | 430                     | GG                              | AA                 | AA               | INTERGENIC      |               |                    |                    |
| SNP_111464_A_642   | NW_004518647.1 | scaffold4141 | 642                     | AA                              | GG                 | GG               | INTERGENIC      |               |                    |                    |
| SNP_111465_A_654   | NW_004518647.1 | scaffold4141 | 654                     | AA                              | GG                 | GG               | INTERGENIC      |               |                    |                    |
| SNP_111466_A_2130  | NW_004518648.1 | scaffold4142 | 2130                    | GG                              | AA                 | AA               | INTERGENIC      |               |                    |                    |
| SNP_111467_A_2184  | NW_004518648.1 | scaffold4142 | 2184                    | AA                              | CC                 | CC               | INTERGENIC      |               |                    |                    |
| SNP_111468_A_2240  | NW_004518648.1 | scaffold4142 | 2240                    | TT                              | AA                 | AA               | INTERGENIC      |               |                    |                    |
| SNP_111469_A_2505  | NW_004518648.1 | scaffold4142 | 2505                    | AA                              | CC                 | CC               | INTERGENIC      |               |                    |                    |
| SNP_111470_A_2566  | NW_004518648.1 | scaffold4142 | 2566                    | TT                              | GG                 | GG               | INTERGENIC      |               |                    |                    |
| SNP_111471_A_2584  | NW_004518648.1 | scaffold4142 | 2584                    | TT                              | CC                 | CC               | INTERGENIC      |               |                    |                    |
| SNP_111472_A_2785  | NW_004518648.1 | scaffold4142 | 2785                    | GG                              | AA                 | AA               | INTERGENIC      |               |                    |                    |
| SNP_111473_A_2806  | NW_004518648.1 | scaffold4142 | 2806                    | GG                              | AA                 | AA               | INTERGENIC      |               |                    |                    |
| SNP_111474_A_2895  | NW_004518648.1 | scaffold4142 | 2895                    | AA                              | GG                 | GG               | INTERGENIC      |               |                    |                    |
| SNP_111475_A_10703 | NW_004518648.1 | scaffold4142 | 10703                   | CC                              | AA                 | AA               | INTERGENIC      |               |                    |                    |
| SNP_111476_A_10708 | NW_004518648.1 | scaffold4142 | 10708                   | GG                              | AA                 | AA               | INTERGENIC      |               |                    |                    |
| SNP_111477_A_12814 | NW_004518648.1 | scaffold4142 | 12814                   | GG                              | AA                 | AA               | INTERGENIC      |               |                    |                    |
| SNP_111478_A_12893 | NW_004518648.1 | scaffold4142 | 12893                   | AA                              | GG                 | GG               | INTERGENIC      |               |                    |                    |



| SNPs IDs           | Chromosome IDs | Chromosomes  | Physical positions (bp) | CDC Frontier (Reference genome) | (Pusa 1103 & HPNB) | (ILWC 46 & LPNB) | Sequence Components of genome | Gene accession IDs | Putative functions           |
|--------------------|----------------|--------------|-------------------------|---------------------------------|--------------------|------------------|-------------------------------|--------------------|------------------------------|
| SNP_111479_A_13191 | NW_004518648.1 | scaffold4142 | 13191                   | CC                              | TT                 | TT               | INTERGENIC                    |                    |                              |
| SNP_111480_A_13344 | NW_004518648.1 | scaffold4142 | 13344                   | CC                              | TT                 | TT               | INTERGENIC                    |                    |                              |
| SNP_111481_A_13767 | NW_004518648.1 | scaffold4142 | 13767                   | TT                              | CC                 | CC               | INTERGENIC                    |                    |                              |
| SNP_111482_A_11341 | NW_004518652.1 | scaffold4149 | 11341                   | AA                              | GG                 | GG               | INTERGENIC                    |                    |                              |
| SNP_111483_A_11349 | NW_004518652.1 | scaffold4149 | 11349                   | TT                              | AA                 | AA               | INTERGENIC                    |                    |                              |
| SNP_111484_A_11430 | NW_004518652.1 | scaffold4149 | 11430                   | GG                              | AA                 | AA               | INTERGENIC                    |                    |                              |
| SNP_111485_A_11638 | NW_004518652.1 | scaffold4149 | 11638                   | CC                              | TT                 | TT               | INTERGENIC                    |                    |                              |
| SNP_111486_A_11723 | NW_004518652.1 | scaffold4149 | 11723                   | CC                              | TT                 | TT               | INTERGENIC                    |                    |                              |
| SNP_111487_A_12428 | NW_004518652.1 | scaffold4149 | 12428                   | AA                              | GG                 | GG               | INTERGENIC                    |                    |                              |
| SNP_111488_A_12474 | NW_004518652.1 | scaffold4149 | 12474                   | GG                              | CC                 | CC               | INTERGENIC                    |                    |                              |
| SNP_111489_A_12507 | NW_004518652.1 | scaffold4149 | 12507                   | AA                              | GG                 | GG               | INTERGENIC                    |                    |                              |
| SNP_111490_A_12805 | NW_004518652.1 | scaffold4149 | 12805                   | AA                              | GG                 | GG               | INTERGENIC                    |                    |                              |
| SNP_111491_A_12849 | NW_004518652.1 | scaffold4149 | 12849                   | TT                              | CC                 | CC               | INTERGENIC                    |                    |                              |
| SNP_111492_A_978   | NW_004518654.1 | scaffold4155 | 978                     | TT                              | AA                 | AA               | INTERGENIC                    |                    |                              |
| SNP_111494_A_8708  | NW_004518654.1 | scaffold4155 | 8708                    | CC                              | TT                 | TT               | NON_SYNONYMOUS_CODING         | 101491563          | uncharacterized LOC101491563 |
| SNP_111495_A_11394 | NW_004518654.1 | scaffold4155 | 11394                   | AA                              | CC                 | CC               | URR                           | 101491563          | uncharacterized LOC101491563 |
| SNP_111496_A_11575 | NW_004518654.1 | scaffold4155 | 11575                   | AA                              | CC                 | CC               | URR                           | 101491563          | uncharacterized LOC101491563 |
| SNP_111497_A_11576 | NW_004518654.1 | scaffold4155 | 11576                   | TT                              | CC                 | CC               | URR                           | 101491563          | uncharacterized LOC101491563 |
| SNP_111498_A_12060 | NW_004518654.1 | scaffold4155 | 12060                   | CC                              | GG                 | GG               | URR                           | 101491563          | uncharacterized LOC101491563 |
| SNP_111499_A_12194 | NW_004518654.1 | scaffold4155 | 12194                   | AA                              | CC                 | CC               | INTERGENIC                    |                    |                              |
| SNP_111500_A_12281 | NW_004518654.1 | scaffold4155 | 12281                   | AA                              | TT                 | TT               | INTERGENIC                    |                    |                              |
| SNP_111501_A_12312 | NW_004518654.1 | scaffold4155 | 12312                   | TT                              | AA                 | AA               | INTERGENIC                    |                    |                              |

| SNPs IDs           | Chromosome IDs | Chromosomes  | Physical positions (bp) | CDC Frontier (Reference genome) | (Pusa 1103 & HPNB) | (ILWC 46 & LPNB) | Sequence genome | Components of | Gene accession IDs | Putative functions |
|--------------------|----------------|--------------|-------------------------|---------------------------------|--------------------|------------------|-----------------|---------------|--------------------|--------------------|
| SNP_111502_A_12384 | NW_004518654.1 | scaffold4155 | 12384                   | TT                              | CC                 | CC               | INTERGENIC      |               |                    |                    |
| SNP_111503_A_12385 | NW_004518654.1 | scaffold4155 | 12385                   | AA                              | CC                 | CC               | INTERGENIC      |               |                    |                    |
| SNP_111504_A_21890 | NW_004518654.1 | scaffold4155 | 21890                   | CC                              | TT                 | TT               | INTERGENIC      |               |                    |                    |
| SNP_111505_A_21891 | NW_004518654.1 | scaffold4155 | 21891                   | TT                              | AA                 | AA               | INTERGENIC      |               |                    |                    |
| SNP_111506_A_21911 | NW_004518654.1 | scaffold4155 | 21911                   | TT                              | GG                 | GG               | INTERGENIC      |               |                    |                    |
| SNP_111507_A_21919 | NW_004518654.1 | scaffold4155 | 21919                   | GG                              | AA                 | AA               | INTERGENIC      |               |                    |                    |
| SNP_111508_A_1288  | NW_004518655.1 | scaffold4156 | 1288                    | GG                              | TT                 | TT               | INTERGENIC      |               |                    |                    |
| SNP_111509_A_1425  | NW_004518655.1 | scaffold4156 | 1425                    | AA                              | GG                 | GG               | INTERGENIC      |               |                    |                    |
| SNP_111511_A_8294  | NW_004518656.1 | scaffold4157 | 8294                    | TT                              | AA                 | AA               | INTERGENIC      |               |                    |                    |
| SNP_111512_A_8398  | NW_004518656.1 | scaffold4157 | 8398                    | CC                              | AA                 | AA               | INTERGENIC      |               |                    |                    |
| SNP_111513_A_8427  | NW_004518656.1 | scaffold4157 | 8427                    | CC                              | GG                 | GG               | INTERGENIC      |               |                    |                    |
| SNP_111514_A_8624  | NW_004518656.1 | scaffold4157 | 8624                    | CC                              | TT                 | TT               | INTERGENIC      |               |                    |                    |
| SNP_111515_A_8810  | NW_004518656.1 | scaffold4157 | 8810                    | CC                              | TT                 | TT               | INTERGENIC      |               |                    |                    |
| SNP_111516_A_8839  | NW_004518656.1 | scaffold4157 | 8839                    | TT                              | GG                 | GG               | INTERGENIC      |               |                    |                    |
| SNP_111517_A_8866  | NW_004518656.1 | scaffold4157 | 8866                    | GG                              | AA                 | AA               | INTERGENIC      |               |                    |                    |
| SNP_111518_A_10215 | NW_004518656.1 | scaffold4157 | 10215                   | AA                              | GG                 | GG               | INTERGENIC      |               |                    |                    |
| SNP_111519_A_10487 | NW_004518656.1 | scaffold4157 | 10487                   | AA                              | TT                 | TT               | INTERGENIC      |               |                    |                    |
| SNP_111520_A_11816 | NW_004518656.1 | scaffold4157 | 11816                   | GG                              | TT                 | TT               | INTERGENIC      |               |                    |                    |
| SNP_111521_A_754   | NW_004518657.1 | scaffold4158 | 754                     | AA                              | TT                 | TT               | INTERGENIC      |               |                    |                    |
| SNP_111522_A_975   | NW_004518657.1 | scaffold4158 | 975                     | TT                              | AA                 | AA               | INTERGENIC      |               |                    |                    |
| SNP_111523_A_1690  | NW_004518665.1 | scaffold4167 | 1690                    | GG                              | AA                 | AA               | INTERGENIC      |               |                    |                    |
| SNP_111524_A_3767  | NW_004518665.1 | scaffold4167 | 3767                    | GG                              | AA                 | AA               | INTERGENIC      |               |                    |                    |

| SNPs IDs           | Chromosome IDs | Chromosomes  | Physical positions (bp) | CDC Frontier (Reference genome) | (Pusa 1103 & HPNB) | (ILWC 46 & LPNB) | Sequence genome | Components of | Gene accession IDs | Putative functions |
|--------------------|----------------|--------------|-------------------------|---------------------------------|--------------------|------------------|-----------------|---------------|--------------------|--------------------|
| SNP_111525_A_4033  | NW_004518665.1 | scaffold4167 | 4033                    | AA                              | GG                 | GG               | INTERGENIC      |               |                    |                    |
| SNP_111526_A_4069  | NW_004518665.1 | scaffold4167 | 4069                    | AA                              | GG                 | GG               | INTERGENIC      |               |                    |                    |
| SNP_111527_A_4109  | NW_004518665.1 | scaffold4167 | 4109                    | TT                              | CC                 | CC               | INTERGENIC      |               |                    |                    |
| SNP_111528_A_4112  | NW_004518665.1 | scaffold4167 | 4112                    | AA                              | CC                 | CC               | INTERGENIC      |               |                    |                    |
| SNP_111529_A_4133  | NW_004518665.1 | scaffold4167 | 4133                    | TT                              | CC                 | CC               | INTERGENIC      |               |                    |                    |
| SNP_111530_A_4152  | NW_004518665.1 | scaffold4167 | 4152                    | CC                              | TT                 | TT               | INTERGENIC      |               |                    |                    |
| SNP_111531_A_4221  | NW_004518665.1 | scaffold4167 | 4221                    | TT                              | AA                 | AA               | INTERGENIC      |               |                    |                    |
| SNP_111532_A_4246  | NW_004518665.1 | scaffold4167 | 4246                    | TT                              | GG                 | GG               | INTERGENIC      |               |                    |                    |
| SNP_111533_A_11259 | NW_004518665.1 | scaffold4167 | 11259                   | AA                              | GG                 | GG               | INTERGENIC      |               |                    |                    |
| SNP_111534_A_20723 | NW_004518665.1 | scaffold4167 | 20723                   | AA                              | GG                 | GG               | INTERGENIC      |               |                    |                    |
| SNP_111535_A_30951 | NW_004518665.1 | scaffold4167 | 30951                   | CC                              | TT                 | TT               | INTERGENIC      |               |                    |                    |
| SNP_111536_A_30952 | NW_004518665.1 | scaffold4167 | 30952                   | AA                              | GG                 | GG               | INTERGENIC      |               |                    |                    |
| SNP_111537_A_33066 | NW_004518665.1 | scaffold4167 | 33066                   | TT                              | GG                 | GG               | INTERGENIC      |               |                    |                    |
| SNP_111538_A_33399 | NW_004518665.1 | scaffold4167 | 33399                   | TT                              | GG                 | GG               | INTERGENIC      |               |                    |                    |
| SNP_111539_A_33511 | NW_004518665.1 | scaffold4167 | 33511                   | TT                              | CC                 | CC               | INTERGENIC      |               |                    |                    |
| SNP_111540_A_33547 | NW_004518665.1 | scaffold4167 | 33547                   | AA                              | GG                 | GG               | INTERGENIC      |               |                    |                    |
| SNP_111541_A_33557 | NW_004518665.1 | scaffold4167 | 33557                   | GG                              | TT                 | TT               | INTERGENIC      |               |                    |                    |
| SNP_111542_A_33628 | NW_004518665.1 | scaffold4167 | 33628                   | CC                              | TT                 | TT               | INTERGENIC      |               |                    |                    |
| SNP_111544_A_585   | NW_004518669.1 | scaffold4171 | 585                     | AA                              | GG                 | GG               | INTERGENIC      |               |                    |                    |
| SNP_111545_A_651   | NW_004518669.1 | scaffold4171 | 651                     | TT                              | CC                 | CC               | INTERGENIC      |               |                    |                    |
| SNP_111547_A_1015  | NW_004518669.1 | scaffold4171 | 1015                    | AA                              | GG                 | GG               | INTERGENIC      |               |                    |                    |
| SNP_111548_A_692   | NW_004518672.1 | scaffold4176 | 692                     | GG                              | TT                 | TT               | INTERGENIC      |               |                    |                    |

| SNPs IDs          | Chromosome IDs | Chromosomes  | Physical positions (bp) | CDC Frontier (Reference genome) | (Pusa 1103 & HPNB) | (ILWC 46 & LPNB) | Sequence genome | Components of | Gene accession IDs | Putative functions |
|-------------------|----------------|--------------|-------------------------|---------------------------------|--------------------|------------------|-----------------|---------------|--------------------|--------------------|
| SNP_111549_A_718  | NW_004518672.1 | scaffold4176 | 718                     | AA                              | GG                 | GG               | INTERGENIC      |               |                    |                    |
| SNP_111550_A_1014 | NW_004518672.1 | scaffold4176 | 1014                    | TT                              | CC                 | CC               | INTERGENIC      |               |                    |                    |
| SNP_111551_A_1051 | NW_004518672.1 | scaffold4176 | 1051                    | GG                              | AA                 | AA               | INTERGENIC      |               |                    |                    |
| SNP_111552_A_4062 | NW_004518672.1 | scaffold4176 | 4062                    | AA                              | GG                 | GG               | INTERGENIC      |               |                    |                    |
| SNP_111553_A_4148 | NW_004518672.1 | scaffold4176 | 4148                    | AA                              | TT                 | TT               | INTERGENIC      |               |                    |                    |
| SNP_111554_A_4195 | NW_004518672.1 | scaffold4176 | 4195                    | AA                              | TT                 | TT               | INTERGENIC      |               |                    |                    |
| SNP_111555_A_4360 | NW_004518672.1 | scaffold4176 | 4360                    | GG                              | AA                 | AA               | INTERGENIC      |               |                    |                    |
| SNP_111556_A_4382 | NW_004518672.1 | scaffold4176 | 4382                    | CC                              | GG                 | GG               | INTERGENIC      |               |                    |                    |
| SNP_111557_A_4383 | NW_004518672.1 | scaffold4176 | 4383                    | GG                              | AA                 | AA               | INTERGENIC      |               |                    |                    |
| SNP_111558_A_4448 | NW_004518672.1 | scaffold4176 | 4448                    | AA                              | TT                 | TT               | INTERGENIC      |               |                    |                    |
| SNP_111559_A_4688 | NW_004518672.1 | scaffold4176 | 4688                    | TT                              | CC                 | CC               | INTERGENIC      |               |                    |                    |
| SNP_111560_A_4735 | NW_004518672.1 | scaffold4176 | 4735                    | AA                              | CC                 | CC               | INTERGENIC      |               |                    |                    |
| SNP_111561_A_6555 | NW_004518672.1 | scaffold4176 | 6555                    | AA                              | GG                 | GG               | INTERGENIC      |               |                    |                    |
| SNP_111562_A_6740 | NW_004518672.1 | scaffold4176 | 6740                    | CC                              | TT                 | TT               | INTERGENIC      |               |                    |                    |
| SNP_111563_A_6780 | NW_004518672.1 | scaffold4176 | 6780                    | AA                              | TT                 | TT               | INTERGENIC      |               |                    |                    |
| SNP_111564_A_7671 | NW_004518672.1 | scaffold4176 | 7671                    | AA                              | GG                 | GG               | INTERGENIC      |               |                    |                    |
| SNP_111565_A_7775 | NW_004518672.1 | scaffold4176 | 7775                    | GG                              | AA                 | AA               | INTERGENIC      |               |                    |                    |
| SNP_111566_A_7810 | NW_004518672.1 | scaffold4176 | 7810                    | GG                              | AA                 | AA               | INTERGENIC      |               |                    |                    |
| SNP_111567_A_7882 | NW_004518672.1 | scaffold4176 | 7882                    | CC                              | TT                 | TT               | INTERGENIC      |               |                    |                    |
| SNP_111568_A_7903 | NW_004518672.1 | scaffold4176 | 7903                    | CC                              | TT                 | TT               | INTERGENIC      |               |                    |                    |
| SNP_111569_A_7928 | NW_004518672.1 | scaffold4176 | 7928                    | CC                              | AA                 | AA               | INTERGENIC      |               |                    |                    |
| SNP_111570_A_7987 | NW_004518672.1 | scaffold4176 | 7987                    | GG                              | AA                 | AA               | INTERGENIC      |               |                    |                    |

| SNPs IDs           | Chromosome IDs | Chromosomes  | Physical positions (bp) | CDC Frontier (Reference genome) | (Pusa 1103 & HPNB) | (ILWC 46 & LPNB) | Sequence genome | Components of | Gene accession IDs | Putative functions |
|--------------------|----------------|--------------|-------------------------|---------------------------------|--------------------|------------------|-----------------|---------------|--------------------|--------------------|
| SNP_111571_A_8005  | NW_004518672.1 | scaffold4176 | 8005                    | AA                              | GG                 | GG               | INTERGENIC      |               |                    |                    |
| SNP_111572_A_8045  | NW_004518672.1 | scaffold4176 | 8045                    | AA                              | CC                 | CC               | INTERGENIC      |               |                    |                    |
| SNP_111573_A_10828 | NW_004518672.1 | scaffold4176 | 10828                   | AA                              | CC                 | CC               | INTERGENIC      |               |                    |                    |
| SNP_111574_A_17278 | NW_004518672.1 | scaffold4176 | 17278                   | AA                              | TT                 | TT               | INTERGENIC      |               |                    |                    |
| SNP_111575_A_17516 | NW_004518672.1 | scaffold4176 | 17516                   | TT                              | CC                 | CC               | INTERGENIC      |               |                    |                    |
| SNP_111576_A_19328 | NW_004518672.1 | scaffold4176 | 19328                   | CC                              | TT                 | TT               | INTERGENIC      |               |                    |                    |
| SNP_111577_A_19613 | NW_004518672.1 | scaffold4176 | 19613                   | TT                              | AA                 | AA               | INTERGENIC      |               |                    |                    |
| SNP_111578_A_997   | NW_004518673.1 | scaffold4178 | 997                     | AA                              | GG                 | GG               | INTERGENIC      |               |                    |                    |
| SNP_111579_A_1008  | NW_004518673.1 | scaffold4178 | 1008                    | AA                              | GG                 | GG               | INTERGENIC      |               |                    |                    |
| SNP_111580_A_7316  | NW_004518676.1 | scaffold4182 | 7316                    | TT                              | GG                 | GG               | INTERGENIC      |               |                    |                    |
| SNP_111581_A_7546  | NW_004518676.1 | scaffold4182 | 7546                    | CC                              | GG                 | GG               | INTERGENIC      |               |                    |                    |
| SNP_111582_A_7889  | NW_004518676.1 | scaffold4182 | 7889                    | TT                              | CC                 | CC               | INTERGENIC      |               |                    |                    |
| SNP_111583_A_7913  | NW_004518676.1 | scaffold4182 | 7913                    | AA                              | GG                 | GG               | INTERGENIC      |               |                    |                    |
| SNP_111584_A_7939  | NW_004518676.1 | scaffold4182 | 7939                    | TT                              | CC                 | CC               | INTERGENIC      |               |                    |                    |
| SNP_111585_A_7945  | NW_004518676.1 | scaffold4182 | 7945                    | AA                              | GG                 | GG               | INTERGENIC      |               |                    |                    |
| SNP_111586_A_8395  | NW_004518676.1 | scaffold4182 | 8395                    | TT                              | AA                 | AA               | INTERGENIC      |               |                    |                    |
| SNP_111587_A_9104  | NW_004518676.1 | scaffold4182 | 9104                    | GG                              | TT                 | TT               | INTERGENIC      |               |                    |                    |
| SNP_111588_A_9108  | NW_004518676.1 | scaffold4182 | 9108                    | TT                              | CC                 | CC               | INTERGENIC      |               |                    |                    |
| SNP_111589_A_9118  | NW_004518676.1 | scaffold4182 | 9118                    | AA                              | GG                 | GG               | INTERGENIC      |               |                    |                    |
| SNP_111590_A_9194  | NW_004518676.1 | scaffold4182 | 9194                    | CC                              | TT                 | TT               | INTERGENIC      |               |                    |                    |
| SNP_111591_A_22067 | NW_004518681.1 | scaffold4189 | 22067                   | GG                              | AA                 | AA               | INTERGENIC      |               |                    |                    |
| SNP_111592_A_22091 | NW_004518681.1 | scaffold4189 | 22091                   | TT                              | CC                 | CC               | INTERGENIC      |               |                    |                    |

| SNPs IDs           | Chromosome IDs | Chromosomes  | Physical positions (bp) | CDC Frontier (Reference genome) | (Pusa 1103 & HPNB) | (ILWC 46 & LPNB) | Sequence genome | Components of | Gene accession IDs | Putative functions |
|--------------------|----------------|--------------|-------------------------|---------------------------------|--------------------|------------------|-----------------|---------------|--------------------|--------------------|
| SNP_111593_A_22154 | NW_004518681.1 | scaffold4189 | 22154                   | TT                              | CC                 | CC               | INTERGENIC      |               |                    |                    |
| SNP_111594_A_22155 | NW_004518681.1 | scaffold4189 | 22155                   | CC                              | TT                 | TT               | INTERGENIC      |               |                    |                    |
| SNP_111595_A_22173 | NW_004518681.1 | scaffold4189 | 22173                   | GG                              | AA                 | AA               | INTERGENIC      |               |                    |                    |
| SNP_111596_A_22179 | NW_004518681.1 | scaffold4189 | 22179                   | GG                              | TT                 | TT               | INTERGENIC      |               |                    |                    |
| SNP_111597_A_22260 | NW_004518681.1 | scaffold4189 | 22260                   | CC                              | TT                 | TT               | INTERGENIC      |               |                    |                    |
| SNP_111598_A_22466 | NW_004518681.1 | scaffold4189 | 22466                   | GG                              | CC                 | CC               | INTERGENIC      |               |                    |                    |
| SNP_111599_A_2843  | NW_004518683.1 | scaffold4192 | 2843                    | CC                              | AA                 | AA               | INTERGENIC      |               |                    |                    |
| SNP_111600_A_3116  | NW_004518683.1 | scaffold4192 | 3116                    | CC                              | TT                 | TT               | INTERGENIC      |               |                    |                    |
| SNP_111601_A_3189  | NW_004518683.1 | scaffold4192 | 3189                    | AA                              | GG                 | GG               | INTERGENIC      |               |                    |                    |
| SNP_111602_A_3221  | NW_004518683.1 | scaffold4192 | 3221                    | AA                              | GG                 | GG               | INTERGENIC      |               |                    |                    |
| SNP_111604_A_3452  | NW_004518683.1 | scaffold4192 | 3452                    | AA                              | GG                 | GG               | INTERGENIC      |               |                    |                    |
| SNP_111605_A_3526  | NW_004518683.1 | scaffold4192 | 3526                    | AA                              | CC                 | CC               | INTERGENIC      |               |                    |                    |
| SNP_111606_A_3607  | NW_004518683.1 | scaffold4192 | 3607                    | TT                              | GG                 | GG               | INTERGENIC      |               |                    |                    |
| SNP_111607_A_3608  | NW_004518683.1 | scaffold4192 | 3608                    | GG                              | AA                 | AA               | INTERGENIC      |               |                    |                    |
| SNP_111608_A_3615  | NW_004518683.1 | scaffold4192 | 3615                    | AA                              | GG                 | GG               | INTERGENIC      |               |                    |                    |
| SNP_111609_A_3649  | NW_004518683.1 | scaffold4192 | 3649                    | GG                              | AA                 | AA               | INTERGENIC      |               |                    |                    |
| SNP_111611_A_3821  | NW_004518683.1 | scaffold4192 | 3821                    | AA                              | CC                 | CC               | INTERGENIC      |               |                    |                    |
| SNP_111612_A_4001  | NW_004518683.1 | scaffold4192 | 4001                    | AA                              | CC                 | CC               | INTERGENIC      |               |                    |                    |
| SNP_111613_A_4019  | NW_004518683.1 | scaffold4192 | 4019                    | GG                              | TT                 | TT               | INTERGENIC      |               |                    |                    |
| SNP_111614_A_4029  | NW_004518683.1 | scaffold4192 | 4029                    | GG                              | TT                 | TT               | INTERGENIC      |               |                    |                    |
| SNP_111615_A_4054  | NW_004518683.1 | scaffold4192 | 4054                    | AA                              | TT                 | TT               | INTERGENIC      |               |                    |                    |
| SNP_111616_A_4075  | NW_004518683.1 | scaffold4192 | 4075                    | TT                              | AA                 | AA               | INTERGENIC      |               |                    |                    |

| SNPs IDs           | Chromosome IDs | Chromosomes  | Physical positions (bp) | CDC Frontier (Reference genome) | (Pusa 1103 & HPNB) | (ILWC 46 & LPNB) | Sequence genome | Components of | Gene accession IDs | Putative functions |
|--------------------|----------------|--------------|-------------------------|---------------------------------|--------------------|------------------|-----------------|---------------|--------------------|--------------------|
| SNP_111617_A_4098  | NW_004518683.1 | scaffold4192 | 4098                    | CC                              | AA                 | AA               | INTERGENIC      |               |                    |                    |
| SNP_111618_A_4283  | NW_004518683.1 | scaffold4192 | 4283                    | TT                              | GG                 | GG               | INTERGENIC      |               |                    |                    |
| SNP_111619_A_4340  | NW_004518683.1 | scaffold4192 | 4340                    | GG                              | AA                 | AA               | INTERGENIC      |               |                    |                    |
| SNP_111620_A_4360  | NW_004518683.1 | scaffold4192 | 4360                    | AA                              | GG                 | GG               | INTERGENIC      |               |                    |                    |
| SNP_111621_A_4365  | NW_004518683.1 | scaffold4192 | 4365                    | CC                              | TT                 | TT               | INTERGENIC      |               |                    |                    |
| SNP_111622_A_4406  | NW_004518683.1 | scaffold4192 | 4406                    | CC                              | TT                 | TT               | INTERGENIC      |               |                    |                    |
| SNP_111623_A_4500  | NW_004518683.1 | scaffold4192 | 4500                    | AA                              | GG                 | GG               | INTERGENIC      |               |                    |                    |
| SNP_111624_A_4550  | NW_004518683.1 | scaffold4192 | 4550                    | GG                              | AA                 | AA               | INTERGENIC      |               |                    |                    |
| SNP_111625_A_4836  | NW_004518683.1 | scaffold4192 | 4836                    | AA                              | TT                 | TT               | INTERGENIC      |               |                    |                    |
| SNP_111626_A_4848  | NW_004518683.1 | scaffold4192 | 4848                    | CC                              | TT                 | TT               | INTERGENIC      |               |                    |                    |
| SNP_111627_A_4864  | NW_004518683.1 | scaffold4192 | 4864                    | TT                              | CC                 | CC               | INTERGENIC      |               |                    |                    |
| SNP_111628_A_9087  | NW_004518687.1 | scaffold4197 | 9087                    | TT                              | CC                 | CC               | INTERGENIC      |               |                    |                    |
| SNP_111630_A_16414 | NW_004518687.1 | scaffold4197 | 16414                   | GG                              | TT                 | TT               | INTERGENIC      |               |                    |                    |
| SNP_111631_A_16416 | NW_004518687.1 | scaffold4197 | 16416                   | TT                              | GG                 | GG               | INTERGENIC      |               |                    |                    |
| SNP_111632_A_16488 | NW_004518687.1 | scaffold4197 | 16488                   | TT                              | CC                 | CC               | INTERGENIC      |               |                    |                    |
| SNP_111633_A_22400 | NW_004518687.1 | scaffold4197 | 22400                   | TT                              | CC                 | CC               | INTERGENIC      |               |                    |                    |
| SNP_111634_A_22406 | NW_004518687.1 | scaffold4197 | 22406                   | AA                              | CC                 | CC               | INTERGENIC      |               |                    |                    |
| SNP_111635_A_22430 | NW_004518687.1 | scaffold4197 | 22430                   | TT                              | CC                 | CC               | INTERGENIC      |               |                    |                    |
| SNP_111636_A_35479 | NW_004518687.1 | scaffold4197 | 35479                   | CC                              | GG                 | GG               | INTERGENIC      |               |                    |                    |
| SNP_111637_A_37054 | NW_004518687.1 | scaffold4197 | 37054                   | CC                              | GG                 | GG               | INTERGENIC      |               |                    |                    |
| SNP_111638_A_37177 | NW_004518687.1 | scaffold4197 | 37177                   | GG                              | TT                 | TT               | INTERGENIC      |               |                    |                    |
| SNP_111641_A_70416 | NW_004518687.1 | scaffold4197 | 70416                   | CC                              | TT                 | TT               | INTERGENIC      |               |                    |                    |

| SNPs IDs           | Chromosome IDs | Chromosomes  | Physical positions (bp) | CDC Frontier (Reference genome) | (Pusa 1103 & HPNB) | (ILWC 46 & LPNB) | Sequence Components of genome | Gene accession IDs | Putative functions           |
|--------------------|----------------|--------------|-------------------------|---------------------------------|--------------------|------------------|-------------------------------|--------------------|------------------------------|
| SNP_111642_A_79231 | NW_004518687.1 | scaffold4197 | 79231                   | AA                              | GG                 | GG               | INTERGENIC                    |                    |                              |
| SNP_111644_A_82131 | NW_004518687.1 | scaffold4197 | 82131                   | AA                              | TT                 | TT               | INTERGENIC                    |                    |                              |
| SNP_111645_A_181   | NW_004518695.1 | scaffold4210 | 181                     | AA                              | CC                 | CC               | INTERGENIC                    |                    |                              |
| SNP_111646_A_182   | NW_004518695.1 | scaffold4210 | 182                     | AA                              | TT                 | TT               | INTERGENIC                    |                    |                              |
| SNP_111647_A_297   | NW_004518695.1 | scaffold4210 | 297                     | AA                              | CC                 | CC               | INTERGENIC                    |                    |                              |
| SNP_111648_A_9072  | NW_004518696.1 | scaffold4211 | 9072                    | GG                              | AA                 | AA               | URR                           | 101493202          | uncharacterized LOC101493202 |
| SNP_111649_A_9176  | NW_004518696.1 | scaffold4211 | 9176                    | TT                              | CC                 | CC               | URR                           | 101493202          | uncharacterized LOC101493202 |
| SNP_111650_A_9268  | NW_004518696.1 | scaffold4211 | 9268                    | CC                              | TT                 | TT               | URR                           | 101493202          | uncharacterized LOC101493202 |
| SNP_111652_A_627   | NW_004518697.1 | scaffold4212 | 627                     | CC                              | GG                 | GG               | INTERGENIC                    |                    |                              |
| SNP_111654_A_2437  | NW_004518698.1 | scaffold4213 | 2437                    | CC                              | TT                 | TT               | INTERGENIC                    |                    |                              |
| SNP_111655_A_2473  | NW_004518698.1 | scaffold4213 | 2473                    | CC                              | GG                 | GG               | INTERGENIC                    |                    |                              |
| SNP_111656_A_2776  | NW_004518698.1 | scaffold4213 | 2776                    | AA                              | GG                 | GG               | INTERGENIC                    |                    |                              |
| SNP_111657_A_2836  | NW_004518698.1 | scaffold4213 | 2836                    | CC                              | AA                 | AA               | INTERGENIC                    |                    |                              |
| SNP_111658_A_5495  | NW_004518701.1 | scaffold4219 | 5495                    | GG                              | AA                 | AA               | INTERGENIC                    |                    |                              |
| SNP_111659_A_5507  | NW_004518701.1 | scaffold4219 | 5507                    | CC                              | TT                 | TT               | INTERGENIC                    |                    |                              |
| SNP_111660_A_5515  | NW_004518701.1 | scaffold4219 | 5515                    | AA                              | GG                 | GG               | INTERGENIC                    |                    |                              |
| SNP_111661_A_70    | NW_004518702.1 | scaffold4220 | 70                      | TT                              | CC                 | CC               | INTERGENIC                    |                    |                              |
| SNP_111662_A_1125  | NW_004518702.1 | scaffold4220 | 1125                    | GG                              | TT                 | TT               | INTERGENIC                    |                    |                              |
| SNP_111663_A_64    | NW_004518703.1 | scaffold4221 | 64                      | CC                              | TT                 | TT               | INTERGENIC                    |                    |                              |
| SNP_111664_A_74    | NW_004518703.1 | scaffold4221 | 74                      | AA                              | CC                 | CC               | INTERGENIC                    |                    |                              |
| SNP_111665_A_76    | NW_004518703.1 | scaffold4221 | 76                      | TT                              | CC                 | CC               | INTERGENIC                    |                    |                              |
| SNP_111666_A_105   | NW_004518703.1 | scaffold4221 | 105                     | GG                              | AA                 | AA               | INTERGENIC                    |                    |                              |



| SNPs IDs          | Chromosome IDs | Chromosomes  | Physical positions (bp) | CDC Frontier (Reference genome) | (Pusa 1103 & HPNB) | (ILWC 46 & LPNB) | Sequence genome | Components of | Gene accession IDs                                        | Putative functions |
|-------------------|----------------|--------------|-------------------------|---------------------------------|--------------------|------------------|-----------------|---------------|-----------------------------------------------------------|--------------------|
| SNP_111667_A_111  | NW_004518703.1 | scaffold4221 | 111                     | AA                              | GG                 | GG               | INTERGENIC      |               |                                                           |                    |
| SNP_111668_A_116  | NW_004518703.1 | scaffold4221 | 116                     | CC                              | TT                 | TT               | INTERGENIC      |               |                                                           |                    |
| SNP_111669_A_173  | NW_004518703.1 | scaffold4221 | 173                     | CC                              | TT                 | TT               | INTERGENIC      |               |                                                           |                    |
| SNP_111670_A_211  | NW_004518703.1 | scaffold4221 | 211                     | GG                              | AA                 | AA               | INTERGENIC      |               |                                                           |                    |
| SNP_111671_A_282  | NW_004518703.1 | scaffold4221 | 282                     | TT                              | CC                 | CC               | INTERGENIC      |               |                                                           |                    |
| SNP_111672_A_304  | NW_004518703.1 | scaffold4221 | 304                     | TT                              | GG                 | GG               | INTERGENIC      |               |                                                           |                    |
| SNP_111673_A_323  | NW_004518703.1 | scaffold4221 | 323                     | GG                              | TT                 | TT               | INTERGENIC      |               |                                                           |                    |
| SNP_111674_A_345  | NW_004518703.1 | scaffold4221 | 345                     | TT                              | AA                 | AA               | INTERGENIC      |               |                                                           |                    |
| SNP_111675_A_369  | NW_004518703.1 | scaffold4221 | 369                     | GG                              | AA                 | AA               | INTERGENIC      |               |                                                           |                    |
| SNP_111676_A_371  | NW_004518703.1 | scaffold4221 | 371                     | GG                              | TT                 | TT               | INTERGENIC      |               |                                                           |                    |
| SNP_111678_A_530  | NW_004518703.1 | scaffold4221 | 530                     | GG                              | TT                 | TT               | INTERGENIC      |               |                                                           |                    |
| SNP_111679_A_540  | NW_004518703.1 | scaffold4221 | 540                     | CC                              | GG                 | GG               | INTERGENIC      |               |                                                           |                    |
| SNP_111681_A_622  | NW_004518703.1 | scaffold4221 | 622                     | CC                              | TT                 | TT               | INTERGENIC      |               |                                                           |                    |
| SNP_111682_A_644  | NW_004518703.1 | scaffold4221 | 644                     | AA                              | GG                 | GG               | INTERGENIC      |               |                                                           |                    |
| SNP_111683_A_669  | NW_004518703.1 | scaffold4221 | 669                     | TT                              | GG                 | GG               | INTERGENIC      |               |                                                           |                    |
| SNP_111685_A_712  | NW_004518703.1 | scaffold4221 | 712                     | TT                              | GG                 | GG               | INTERGENIC      |               |                                                           |                    |
| SNP_111686_A_748  | NW_004518703.1 | scaffold4221 | 748                     | TT                              | CC                 | CC               | INTERGENIC      |               |                                                           |                    |
| SNP_111687_A_794  | NW_004518703.1 | scaffold4221 | 794                     | CC                              | TT                 | TT               | INTERGENIC      |               |                                                           |                    |
| SNP_111688_A_857  | NW_004518703.1 | scaffold4221 | 857                     | AA                              | TT                 | TT               | DRR             | 101493518     | L-type lectin-domain containing receptor kinase IX.1-like |                    |
| SNP_111689_A_870  | NW_004518703.1 | scaffold4221 | 870                     | GG                              | TT                 | TT               | DRR             | 101493518     | L-type lectin-domain containing receptor kinase IX.1-like |                    |
| SNP_111690_A_994  | NW_004518703.1 | scaffold4221 | 994                     | TT                              | CC                 | CC               | DRR             | 101493518     | L-type lectin-domain containing receptor kinase IX.1-like |                    |
| SNP_111691_A_1002 | NW_004518703.1 | scaffold4221 | 1002                    | AA                              | CC                 | CC               | DRR             | 101493518     | L-type lectin-domain containing receptor kinase IX.1-like |                    |

| SNPs IDs           | Chromosome IDs | Chromosomes  | Physical positions (bp) | CDC Frontier (Reference genome) | (Pusa 1103 & HPNB) | (ILWC 46 & LPNB) | Sequence Components of genome | Gene accession IDs | Putative functions                                        |
|--------------------|----------------|--------------|-------------------------|---------------------------------|--------------------|------------------|-------------------------------|--------------------|-----------------------------------------------------------|
| SNP_111692_A_1026  | NW_004518703.1 | scaffold4221 | 1026                    | CC                              | AA                 | AA               | DRR                           | 101493518          | L-type lectin-domain containing receptor kinase IX.1-like |
| SNP_111693_A_1054  | NW_004518703.1 | scaffold4221 | 1054                    | AA                              | GG                 | GG               | DRR                           | 101493518          | L-type lectin-domain containing receptor kinase IX.1-like |
| SNP_111695_A_2024  | NW_004518703.1 | scaffold4221 | 2024                    | AA                              | GG                 | GG               | NON_SYNONYMOUS_CODING         | 101493518          | L-type lectin-domain containing receptor kinase IX.1-like |
| SNP_111696_A_2053  | NW_004518703.1 | scaffold4221 | 2053                    | AA                              | GG                 | GG               | SYNONYMOUS_CODING             | 101493518          | L-type lectin-domain containing receptor kinase IX.1-like |
| SNP_111698_A_7774  | NW_004518703.1 | scaffold4221 | 7774                    | AA                              | GG                 | GG               | INTERGENIC                    |                    |                                                           |
| SNP_111699_A_7845  | NW_004518703.1 | scaffold4221 | 7845                    | AA                              | GG                 | GG               | INTERGENIC                    |                    |                                                           |
| SNP_111700_A_8768  | NW_004518703.1 | scaffold4221 | 8768                    | GG                              | AA                 | AA               | INTERGENIC                    |                    |                                                           |
| SNP_111701_A_14246 | NW_004518703.1 | scaffold4221 | 14246                   | GG                              | AA                 | AA               | INTERGENIC                    |                    |                                                           |
| SNP_111702_A_27458 | NW_004518703.1 | scaffold4221 | 27458                   | CC                              | TT                 | TT               | INTERGENIC                    |                    |                                                           |
| SNP_111703_A_40684 | NW_004518703.1 | scaffold4221 | 40684                   | AA                              | CC                 | CC               | INTERGENIC                    |                    |                                                           |
| SNP_111704_A_40926 | NW_004518703.1 | scaffold4221 | 40926                   | GG                              | AA                 | AA               | INTERGENIC                    |                    |                                                           |
| SNP_111705_A_40948 | NW_004518703.1 | scaffold4221 | 40948                   | AA                              | GG                 | GG               | INTERGENIC                    |                    |                                                           |
| SNP_111706_A_40961 | NW_004518703.1 | scaffold4221 | 40961                   | GG                              | CC                 | CC               | INTERGENIC                    |                    |                                                           |
| SNP_111707_A_40966 | NW_004518703.1 | scaffold4221 | 40966                   | CC                              | TT                 | TT               | INTERGENIC                    |                    |                                                           |
| SNP_111708_A_40996 | NW_004518703.1 | scaffold4221 | 40996                   | AA                              | GG                 | GG               | INTERGENIC                    |                    |                                                           |
| SNP_111709_A_41019 | NW_004518703.1 | scaffold4221 | 41019                   | AA                              | GG                 | GG               | INTERGENIC                    |                    |                                                           |
| SNP_111710_A_41198 | NW_004518703.1 | scaffold4221 | 41198                   | GG                              | TT                 | TT               | INTERGENIC                    |                    |                                                           |
| SNP_111711_A_41214 | NW_004518703.1 | scaffold4221 | 41214                   | CC                              | GG                 | GG               | INTERGENIC                    |                    |                                                           |
| SNP_111712_A_41459 | NW_004518703.1 | scaffold4221 | 41459                   | TT                              | CC                 | CC               | INTERGENIC                    |                    |                                                           |
| SNP_111713_A_41501 | NW_004518703.1 | scaffold4221 | 41501                   | CC                              | AA                 | AA               | INTERGENIC                    |                    |                                                           |
| SNP_111714_A_41502 | NW_004518703.1 | scaffold4221 | 41502                   | AA                              | CC                 | CC               | INTERGENIC                    |                    |                                                           |
| SNP_111715_A_41513 | NW_004518703.1 | scaffold4221 | 41513                   | TT                              | AA                 | AA               | INTERGENIC                    |                    |                                                           |

| SNPs IDs           | Chromosome IDs | Chromosomes  | Physical positions (bp) | CDC Frontier (Reference genome) | (Pusa 1103 & HPNB) | (ILWC 46 & LPNB) | Sequence genome | Components of | Gene accession IDs | Putative functions |
|--------------------|----------------|--------------|-------------------------|---------------------------------|--------------------|------------------|-----------------|---------------|--------------------|--------------------|
| SNP_111716_A_41521 | NW_004518703.1 | scaffold4221 | 41521                   | AA                              | CC                 | CC               | INTERGENIC      |               |                    |                    |
| SNP_111717_A_41722 | NW_004518703.1 | scaffold4221 | 41722                   | TT                              | CC                 | CC               | INTERGENIC      |               |                    |                    |
| SNP_111718_A_42094 | NW_004518703.1 | scaffold4221 | 42094                   | TT                              | CC                 | CC               | INTERGENIC      |               |                    |                    |
| SNP_111719_A_42540 | NW_004518703.1 | scaffold4221 | 42540                   | CC                              | AA                 | AA               | INTERGENIC      |               |                    |                    |
| SNP_111720_A_48094 | NW_004518703.1 | scaffold4221 | 48094                   | CC                              | TT                 | TT               | INTERGENIC      |               |                    |                    |
| SNP_111721_A_48114 | NW_004518703.1 | scaffold4221 | 48114                   | CC                              | TT                 | TT               | INTERGENIC      |               |                    |                    |
| SNP_111722_A_48187 | NW_004518703.1 | scaffold4221 | 48187                   | TT                              | GG                 | GG               | INTERGENIC      |               |                    |                    |
| SNP_111723_A_48196 | NW_004518703.1 | scaffold4221 | 48196                   | CC                              | TT                 | TT               | INTERGENIC      |               |                    |                    |
| SNP_111724_A_48199 | NW_004518703.1 | scaffold4221 | 48199                   | TT                              | CC                 | CC               | INTERGENIC      |               |                    |                    |
| SNP_111725_A_48354 | NW_004518703.1 | scaffold4221 | 48354                   | TT                              | GG                 | GG               | INTERGENIC      |               |                    |                    |
| SNP_111726_A_48413 | NW_004518703.1 | scaffold4221 | 48413                   | TT                              | CC                 | CC               | INTERGENIC      |               |                    |                    |
| SNP_111727_A_48439 | NW_004518703.1 | scaffold4221 | 48439                   | GG                              | AA                 | AA               | INTERGENIC      |               |                    |                    |
| SNP_111728_A_48470 | NW_004518703.1 | scaffold4221 | 48470                   | AA                              | GG                 | GG               | INTERGENIC      |               |                    |                    |
| SNP_111729_A_48473 | NW_004518703.1 | scaffold4221 | 48473                   | TT                              | CC                 | CC               | INTERGENIC      |               |                    |                    |
| SNP_111730_A_48560 | NW_004518703.1 | scaffold4221 | 48560                   | AA                              | GG                 | GG               | INTERGENIC      |               |                    |                    |
| SNP_111731_A_52884 | NW_004518703.1 | scaffold4221 | 52884                   | AA                              | TT                 | TT               | INTERGENIC      |               |                    |                    |
| SNP_111732_A_52885 | NW_004518703.1 | scaffold4221 | 52885                   | TT                              | CC                 | CC               | INTERGENIC      |               |                    |                    |
| SNP_111733_A_53317 | NW_004518703.1 | scaffold4221 | 53317                   | CC                              | AA                 | AA               | INTERGENIC      |               |                    |                    |
| SNP_111734_A_53474 | NW_004518703.1 | scaffold4221 | 53474                   | AA                              | GG                 | GG               | INTERGENIC      |               |                    |                    |
| SNP_111735_A_53780 | NW_004518703.1 | scaffold4221 | 53780                   | CC                              | GG                 | GG               | INTERGENIC      |               |                    |                    |
| SNP_111736_A_53861 | NW_004518703.1 | scaffold4221 | 53861                   | GG                              | TT                 | TT               | INTERGENIC      |               |                    |                    |
| SNP_111737_A_53868 | NW_004518703.1 | scaffold4221 | 53868                   | AA                              | TT                 | TT               | INTERGENIC      |               |                    |                    |

| SNPs IDs           | Chromosome IDs | Chromosomes  | Physical positions (bp) | CDC Frontier genome (Reference genome) | (Pusa 1103 & HPNB) | (ILWC 46 & LPNB) | Sequence genome | Components of | Gene accession IDs | Putative functions |
|--------------------|----------------|--------------|-------------------------|----------------------------------------|--------------------|------------------|-----------------|---------------|--------------------|--------------------|
| SNP_111738_A_54164 | NW_004518703.1 | scaffold4221 | 54164                   | CC                                     | TT                 | TT               | INTERGENIC      |               |                    |                    |
| SNP_111739_A_54387 | NW_004518703.1 | scaffold4221 | 54387                   | TT                                     | CC                 | CC               | INTERGENIC      |               |                    |                    |
| SNP_111741_A_54499 | NW_004518703.1 | scaffold4221 | 54499                   | AA                                     | GG                 | GG               | INTERGENIC      |               |                    |                    |
| SNP_111743_A_54867 | NW_004518703.1 | scaffold4221 | 54867                   | TT                                     | CC                 | CC               | INTERGENIC      |               |                    |                    |
| SNP_111744_A_54899 | NW_004518703.1 | scaffold4221 | 54899                   | CC                                     | AA                 | AA               | INTERGENIC      |               |                    |                    |
| SNP_111745_A_54900 | NW_004518703.1 | scaffold4221 | 54900                   | AA                                     | TT                 | TT               | INTERGENIC      |               |                    |                    |
| SNP_111746_A_55361 | NW_004518703.1 | scaffold4221 | 55361                   | TT                                     | GG                 | GG               | INTERGENIC      |               |                    |                    |
| SNP_111747_A_14235 | NW_004518706.1 | scaffold4225 | 14235                   | CC                                     | TT                 | TT               | INTERGENIC      |               |                    |                    |
| SNP_111748_A_14346 | NW_004518706.1 | scaffold4225 | 14346                   | AA                                     | TT                 | TT               | INTERGENIC      |               |                    |                    |
| SNP_111749_A_14740 | NW_004518706.1 | scaffold4225 | 14740                   | AA                                     | CC                 | CC               | INTERGENIC      |               |                    |                    |
| SNP_111750_A_8075  | NW_004518713.1 | scaffold4236 | 8075                    | CC                                     | AA                 | AA               | INTERGENIC      |               |                    |                    |
| SNP_111751_A_8104  | NW_004518713.1 | scaffold4236 | 8104                    | TT                                     | CC                 | CC               | INTERGENIC      |               |                    |                    |
| SNP_111752_A_8182  | NW_004518713.1 | scaffold4236 | 8182                    | GG                                     | AA                 | AA               | INTERGENIC      |               |                    |                    |
| SNP_111753_A_8195  | NW_004518713.1 | scaffold4236 | 8195                    | TT                                     | CC                 | CC               | INTERGENIC      |               |                    |                    |
| SNP_111754_A_8235  | NW_004518713.1 | scaffold4236 | 8235                    | TT                                     | CC                 | CC               | INTERGENIC      |               |                    |                    |
| SNP_111755_A_8259  | NW_004518713.1 | scaffold4236 | 8259                    | AA                                     | TT                 | TT               | INTERGENIC      |               |                    |                    |
| SNP_111756_A_8392  | NW_004518713.1 | scaffold4236 | 8392                    | TT                                     | CC                 | CC               | INTERGENIC      |               |                    |                    |
| SNP_111757_A_8421  | NW_004518713.1 | scaffold4236 | 8421                    | GG                                     | CC                 | CC               | INTERGENIC      |               |                    |                    |
| SNP_111758_A_8443  | NW_004518713.1 | scaffold4236 | 8443                    | GG                                     | CC                 | CC               | INTERGENIC      |               |                    |                    |
| SNP_111759_A_8485  | NW_004518713.1 | scaffold4236 | 8485                    | CC                                     | TT                 | TT               | INTERGENIC      |               |                    |                    |
| SNP_111760_A_8519  | NW_004518713.1 | scaffold4236 | 8519                    | TT                                     | CC                 | CC               | INTERGENIC      |               |                    |                    |
| SNP_111761_A_8782  | NW_004518713.1 | scaffold4236 | 8782                    | CC                                     | TT                 | TT               | INTERGENIC      |               |                    |                    |

| SNPs IDs           | Chromosome IDs | Chromosomes  | Physical positions (bp) | CDC Frontier (Reference genome) | (Pusa 1103 & HPNB) | (ILWC 46 & LPNB) | Sequence genome | Components of | Gene accession IDs | Putative functions |
|--------------------|----------------|--------------|-------------------------|---------------------------------|--------------------|------------------|-----------------|---------------|--------------------|--------------------|
| SNP_111762_A_1613  | NW_004518717.1 | scaffold4241 | 1613                    | TT                              | GG                 | GG               | INTERGENIC      |               |                    |                    |
| SNP_111763_A_1640  | NW_004518717.1 | scaffold4241 | 1640                    | GG                              | CC                 | CC               | INTERGENIC      |               |                    |                    |
| SNP_111764_A_1672  | NW_004518717.1 | scaffold4241 | 1672                    | GG                              | TT                 | TT               | INTERGENIC      |               |                    |                    |
| SNP_111765_A_817   | NW_004518718.1 | scaffold4243 | 817                     | AA                              | TT                 | TT               | INTERGENIC      |               |                    |                    |
| SNP_111766_A_912   | NW_004518718.1 | scaffold4243 | 912                     | GG                              | AA                 | AA               | INTERGENIC      |               |                    |                    |
| SNP_111768_A_1341  | NW_004518718.1 | scaffold4243 | 1341                    | TT                              | AA                 | AA               | INTERGENIC      |               |                    |                    |
| SNP_111769_A_1550  | NW_004518718.1 | scaffold4243 | 1550                    | TT                              | CC                 | CC               | INTERGENIC      |               |                    |                    |
| SNP_111770_A_4777  | NW_004518718.1 | scaffold4243 | 4777                    | CC                              | TT                 | TT               | INTERGENIC      |               |                    |                    |
| SNP_111771_A_5412  | NW_004518718.1 | scaffold4243 | 5412                    | AA                              | TT                 | TT               | INTERGENIC      |               |                    |                    |
| SNP_111772_A_5805  | NW_004518718.1 | scaffold4243 | 5805                    | TT                              | AA                 | AA               | INTERGENIC      |               |                    |                    |
| SNP_111773_A_7278  | NW_004518718.1 | scaffold4243 | 7278                    | GG                              | TT                 | TT               | INTERGENIC      |               |                    |                    |
| SNP_111774_A_7290  | NW_004518718.1 | scaffold4243 | 7290                    | TT                              | AA                 | AA               | INTERGENIC      |               |                    |                    |
| SNP_111775_A_7303  | NW_004518718.1 | scaffold4243 | 7303                    | CC                              | TT                 | TT               | INTERGENIC      |               |                    |                    |
| SNP_111776_A_7467  | NW_004518718.1 | scaffold4243 | 7467                    | CC                              | TT                 | TT               | INTERGENIC      |               |                    |                    |
| SNP_111777_A_7548  | NW_004518718.1 | scaffold4243 | 7548                    | TT                              | CC                 | CC               | INTERGENIC      |               |                    |                    |
| SNP_111778_A_7552  | NW_004518718.1 | scaffold4243 | 7552                    | GG                              | AA                 | AA               | INTERGENIC      |               |                    |                    |
| SNP_111779_A_7606  | NW_004518718.1 | scaffold4243 | 7606                    | GG                              | AA                 | AA               | INTERGENIC      |               |                    |                    |
| SNP_111780_A_14533 | NW_004518718.1 | scaffold4243 | 14533                   | AA                              | TT                 | TT               | INTERGENIC      |               |                    |                    |
| SNP_111781_A_14559 | NW_004518718.1 | scaffold4243 | 14559                   | TT                              | CC                 | CC               | INTERGENIC      |               |                    |                    |
| SNP_111782_A_14585 | NW_004518718.1 | scaffold4243 | 14585                   | AA                              | CC                 | CC               | INTERGENIC      |               |                    |                    |
| SNP_111783_A_14633 | NW_004518718.1 | scaffold4243 | 14633                   | TT                              | CC                 | CC               | INTERGENIC      |               |                    |                    |
| SNP_111785_A_14926 | NW_004518718.1 | scaffold4243 | 14926                   | GG                              | AA                 | AA               | INTERGENIC      |               |                    |                    |

| SNPs IDs           | Chromosome IDs | Chromosomes  | Physical positions (bp) | CDC Frontier genome (Reference genome) | (Pusa 1103 & HPNB) | (ILWC 46 & LPNB) | Sequence genome | Components of | Gene accession IDs | Putative functions |
|--------------------|----------------|--------------|-------------------------|----------------------------------------|--------------------|------------------|-----------------|---------------|--------------------|--------------------|
| SNP_111786_A_14937 | NW_004518718.1 | scaffold4243 | 14937                   | CC                                     | TT                 | TT               | INTERGENIC      |               |                    |                    |
| SNP_111787_A_16090 | NW_004518718.1 | scaffold4243 | 16090                   | GG                                     | AA                 | AA               | INTERGENIC      |               |                    |                    |
| SNP_111788_A_16745 | NW_004518718.1 | scaffold4243 | 16745                   | AA                                     | GG                 | GG               | INTERGENIC      |               |                    |                    |
| SNP_111790_A_17295 | NW_004518718.1 | scaffold4243 | 17295                   | AA                                     | CC                 | CC               | INTERGENIC      |               |                    |                    |
| SNP_111791_A_17724 | NW_004518718.1 | scaffold4243 | 17724                   | CC                                     | TT                 | TT               | INTERGENIC      |               |                    |                    |
| SNP_111792_A_17831 | NW_004518718.1 | scaffold4243 | 17831                   | TT                                     | CC                 | CC               | INTERGENIC      |               |                    |                    |
| SNP_111793_A_17840 | NW_004518718.1 | scaffold4243 | 17840                   | CC                                     | TT                 | TT               | INTERGENIC      |               |                    |                    |
| SNP_111794_A_23426 | NW_004518718.1 | scaffold4243 | 23426                   | CC                                     | TT                 | TT               | INTERGENIC      |               |                    |                    |
| SNP_111795_A_23439 | NW_004518718.1 | scaffold4243 | 23439                   | GG                                     | AA                 | AA               | INTERGENIC      |               |                    |                    |
| SNP_111796_A_23450 | NW_004518718.1 | scaffold4243 | 23450                   | CC                                     | TT                 | TT               | INTERGENIC      |               |                    |                    |
| SNP_111797_A_23465 | NW_004518718.1 | scaffold4243 | 23465                   | AA                                     | GG                 | GG               | INTERGENIC      |               |                    |                    |
| SNP_111798_A_23523 | NW_004518718.1 | scaffold4243 | 23523                   | TT                                     | CC                 | CC               | INTERGENIC      |               |                    |                    |
| SNP_111799_A_23671 | NW_004518718.1 | scaffold4243 | 23671                   | GG                                     | TT                 | TT               | INTERGENIC      |               |                    |                    |
| SNP_111800_A_23693 | NW_004518718.1 | scaffold4243 | 23693                   | AA                                     | CC                 | CC               | INTERGENIC      |               |                    |                    |
| SNP_111801_A_23742 | NW_004518718.1 | scaffold4243 | 23742                   | TT                                     | CC                 | CC               | INTERGENIC      |               |                    |                    |
| SNP_111802_A_23752 | NW_004518718.1 | scaffold4243 | 23752                   | CC                                     | TT                 | TT               | INTERGENIC      |               |                    |                    |
| SNP_111803_A_26781 | NW_004518718.1 | scaffold4243 | 26781                   | GG                                     | TT                 | TT               | INTERGENIC      |               |                    |                    |
| SNP_111804_A_508   | NW_004518719.1 | scaffold4244 | 508                     | AA                                     | CC                 | CC               | INTERGENIC      |               |                    |                    |
| SNP_111806_A_333   | NW_004518721.1 | scaffold4247 | 333                     | TT                                     | CC                 | CC               | INTERGENIC      |               |                    |                    |
| SNP_111807_A_360   | NW_004518721.1 | scaffold4247 | 360                     | AA                                     | GG                 | GG               | INTERGENIC      |               |                    |                    |
| SNP_111808_A_454   | NW_004518721.1 | scaffold4247 | 454                     | GG                                     | AA                 | AA               | INTERGENIC      |               |                    |                    |
| SNP_111809_A_614   | NW_004518721.1 | scaffold4247 | 614                     | AA                                     | CC                 | CC               | INTERGENIC      |               |                    |                    |

| SNPs IDs          | Chromosome IDs | Chromosomes  | Physical positions (bp) | CDC Frontier (Reference genome) | (Pusa 1103 & HPNB) | (ILWC 46 & LPNB) | Sequence genome | Components of | Gene accession IDs | Putative functions |
|-------------------|----------------|--------------|-------------------------|---------------------------------|--------------------|------------------|-----------------|---------------|--------------------|--------------------|
| SNP_111810_A_671  | NW_004518721.1 | scaffold4247 | 671                     | GG                              | AA                 | AA               | INTERGENIC      |               |                    |                    |
| SNP_111811_A_932  | NW_004518721.1 | scaffold4247 | 932                     | CC                              | TT                 | TT               | INTERGENIC      |               |                    |                    |
| SNP_111812_A_970  | NW_004518721.1 | scaffold4247 | 970                     | GG                              | TT                 | TT               | INTERGENIC      |               |                    |                    |
| SNP_111813_A_1329 | NW_004518721.1 | scaffold4247 | 1329                    | CC                              | GG                 | GG               | INTERGENIC      |               |                    |                    |
| SNP_111814_A_1361 | NW_004518721.1 | scaffold4247 | 1361                    | CC                              | AA                 | AA               | INTERGENIC      |               |                    |                    |
| SNP_111815_A_1379 | NW_004518721.1 | scaffold4247 | 1379                    | AA                              | GG                 | GG               | INTERGENIC      |               |                    |                    |
| SNP_111816_A_1443 | NW_004518721.1 | scaffold4247 | 1443                    | TT                              | AA                 | AA               | INTERGENIC      |               |                    |                    |
| SNP_111817_A_1025 | NW_004518722.1 | scaffold4248 | 1025                    | TT                              | CC                 | CC               | INTERGENIC      |               |                    |                    |
| SNP_111818_A_1448 | NW_004518723.1 | scaffold4250 | 1448                    | TT                              | AA                 | AA               | INTERGENIC      |               |                    |                    |
| SNP_111819_A_445  | NW_004518724.1 | scaffold4251 | 445                     | CC                              | AA                 | AA               | INTERGENIC      |               |                    |                    |
| SNP_111820_A_494  | NW_004518724.1 | scaffold4251 | 494                     | AA                              | GG                 | GG               | INTERGENIC      |               |                    |                    |
| SNP_111821_A_424  | NW_004518726.1 | scaffold4254 | 424                     | TT                              | CC                 | CC               | INTERGENIC      |               |                    |                    |
| SNP_111822_A_428  | NW_004518726.1 | scaffold4254 | 428                     | CC                              | TT                 | TT               | INTERGENIC      |               |                    |                    |
| SNP_111823_A_3633 | NW_004518727.1 | scaffold4255 | 3633                    | AA                              | GG                 | GG               | INTERGENIC      |               |                    |                    |
| SNP_111824_A_3634 | NW_004518727.1 | scaffold4255 | 3634                    | CC                              | TT                 | TT               | INTERGENIC      |               |                    |                    |
| SNP_111825_A_3783 | NW_004518727.1 | scaffold4255 | 3783                    | AA                              | CC                 | CC               | INTERGENIC      |               |                    |                    |
| SNP_111826_A_3794 | NW_004518727.1 | scaffold4255 | 3794                    | CC                              | TT                 | TT               | INTERGENIC      |               |                    |                    |
| SNP_111827_A_4022 | NW_004518727.1 | scaffold4255 | 4022                    | TT                              | GG                 | GG               | INTERGENIC      |               |                    |                    |
| SNP_111828_A_4287 | NW_004518727.1 | scaffold4255 | 4287                    | GG                              | TT                 | TT               | INTERGENIC      |               |                    |                    |
| SNP_111829_A_4643 | NW_004518727.1 | scaffold4255 | 4643                    | TT                              | AA                 | AA               | INTERGENIC      |               |                    |                    |
| SNP_111830_A_4793 | NW_004518727.1 | scaffold4255 | 4793                    | CC                              | TT                 | TT               | INTERGENIC      |               |                    |                    |
| SNP_111831_A_4864 | NW_004518727.1 | scaffold4255 | 4864                    | GG                              | AA                 | AA               | INTERGENIC      |               |                    |                    |

| SNPs IDs           | Chromosome IDs | Chromosomes  | Physical positions (bp) | CDC Frontier (Reference genome) | (Pusa 1103 & HPNB) | (ILWC 46 & LPNB) | Sequence genome | Components of | Gene accession IDs | Putative functions |
|--------------------|----------------|--------------|-------------------------|---------------------------------|--------------------|------------------|-----------------|---------------|--------------------|--------------------|
| SNP_111832_A_5137  | NW_004518727.1 | scaffold4255 | 5137                    | CC                              | AA                 | AA               | INTERGENIC      |               |                    |                    |
| SNP_111833_A_5202  | NW_004518727.1 | scaffold4255 | 5202                    | CC                              | AA                 | AA               | INTERGENIC      |               |                    |                    |
| SNP_111834_A_5588  | NW_004518727.1 | scaffold4255 | 5588                    | TT                              | CC                 | CC               | INTERGENIC      |               |                    |                    |
| SNP_111836_A_3393  | NW_004518728.1 | scaffold4256 | 3393                    | AA                              | CC                 | CC               | INTERGENIC      |               |                    |                    |
| SNP_111837_A_4522  | NW_004518729.1 | scaffold4257 | 4522                    | CC                              | TT                 | TT               | INTERGENIC      |               |                    |                    |
| SNP_111838_A_4816  | NW_004518729.1 | scaffold4257 | 4816                    | AA                              | GG                 | GG               | INTERGENIC      |               |                    |                    |
| SNP_111839_A_719   | NW_004518730.1 | scaffold4259 | 719                     | TT                              | CC                 | CC               | INTERGENIC      |               |                    |                    |
| SNP_111840_A_769   | NW_004518730.1 | scaffold4259 | 769                     | TT                              | AA                 | AA               | INTERGENIC      |               |                    |                    |
| SNP_111841_A_7077  | NW_004518731.1 | scaffold4260 | 7077                    | GG                              | TT                 | TT               | INTERGENIC      |               |                    |                    |
| SNP_111842_A_7100  | NW_004518731.1 | scaffold4260 | 7100                    | TT                              | AA                 | AA               | INTERGENIC      |               |                    |                    |
| SNP_111843_A_7101  | NW_004518731.1 | scaffold4260 | 7101                    | AA                              | TT                 | TT               | INTERGENIC      |               |                    |                    |
| SNP_111844_A_7561  | NW_004518731.1 | scaffold4260 | 7561                    | TT                              | AA                 | AA               | INTERGENIC      |               |                    |                    |
| SNP_111845_A_7562  | NW_004518731.1 | scaffold4260 | 7562                    | CC                              | AA                 | AA               | INTERGENIC      |               |                    |                    |
| SNP_111846_A_10230 | NW_004518731.1 | scaffold4260 | 10230                   | GG                              | AA                 | AA               | INTERGENIC      |               |                    |                    |
| SNP_111847_A_10255 | NW_004518731.1 | scaffold4260 | 10255                   | TT                              | AA                 | AA               | INTERGENIC      |               |                    |                    |
| SNP_111848_A_10363 | NW_004518731.1 | scaffold4260 | 10363                   | TT                              | CC                 | CC               | INTERGENIC      |               |                    |                    |
| SNP_111849_A_10379 | NW_004518731.1 | scaffold4260 | 10379                   | TT                              | AA                 | AA               | INTERGENIC      |               |                    |                    |
| SNP_111850_A_10405 | NW_004518731.1 | scaffold4260 | 10405                   | CC                              | AA                 | AA               | INTERGENIC      |               |                    |                    |
| SNP_111851_A_11799 | NW_004518731.1 | scaffold4260 | 11799                   | GG                              | AA                 | AA               | INTERGENIC      |               |                    |                    |
| SNP_111852_A_11928 | NW_004518731.1 | scaffold4260 | 11928                   | CC                              | GG                 | GG               | INTERGENIC      |               |                    |                    |
| SNP_111854_A_101   | NW_004518733.1 | scaffold4263 | 101                     | TT                              | CC                 | CC               | INTERGENIC      |               |                    |                    |
| SNP_111855_A_106   | NW_004518733.1 | scaffold4263 | 106                     | TT                              | GG                 | GG               | INTERGENIC      |               |                    |                    |



| SNPs IDs           | Chromosome IDs | Chromosomes  | Physical positions (bp) | CDC Frontier (Reference genome) | (Pusa 1103 & HPNB) | (ILWC 46 & LPNB) | Sequence Components of genome | Gene accession IDs | Putative functions                              |
|--------------------|----------------|--------------|-------------------------|---------------------------------|--------------------|------------------|-------------------------------|--------------------|-------------------------------------------------|
| SNP_111856_A_429   | NW_004518733.1 | scaffold4263 | 429                     | GG                              | AA                 | AA               | INTERGENIC                    |                    |                                                 |
| SNP_111857_A_4261  | NW_004518733.1 | scaffold4263 | 4261                    | AA                              | CC                 | CC               | INTERGENIC                    |                    |                                                 |
| SNP_111858_A_4266  | NW_004518733.1 | scaffold4263 | 4266                    | GG                              | CC                 | CC               | INTERGENIC                    |                    |                                                 |
| SNP_111859_A_4901  | NW_004518733.1 | scaffold4263 | 4901                    | AA                              | CC                 | CC               | INTERGENIC                    |                    |                                                 |
| SNP_111860_A_4902  | NW_004518733.1 | scaffold4263 | 4902                    | CC                              | AA                 | AA               | INTERGENIC                    |                    |                                                 |
| SNP_111861_A_6772  | NW_004518733.1 | scaffold4263 | 6772                    | AA                              | GG                 | GG               | INTERGENIC                    |                    |                                                 |
| SNP_111862_A_27058 | NW_004518733.1 | scaffold4263 | 27058                   | CC                              | TT                 | TT               | URR                           | 101494790          | putative F-box/FBD/LRR-repeat protein At5g44950 |
| SNP_111863_A_29429 | NW_004518733.1 | scaffold4263 | 29429                   | CC                              | GG                 | GG               | INTERGENIC                    |                    |                                                 |
| SNP_111864_A_7122  | NW_004518734.1 | scaffold4265 | 7122                    | CC                              | AA                 | AA               | INTERGENIC                    |                    |                                                 |
| SNP_111865_A_7599  | NW_004518734.1 | scaffold4265 | 7599                    | AA                              | GG                 | GG               | INTERGENIC                    |                    |                                                 |
| SNP_111866_A_11732 | NW_004518736.1 | scaffold4269 | 11732                   | CC                              | TT                 | TT               | INTERGENIC                    |                    |                                                 |
| SNP_111867_A_22485 | NW_004518736.1 | scaffold4269 | 22485                   | AA                              | CC                 | CC               | INTERGENIC                    |                    |                                                 |
| SNP_111868_A_22488 | NW_004518736.1 | scaffold4269 | 22488                   | GG                              | AA                 | AA               | INTERGENIC                    |                    |                                                 |
| SNP_111869_A_22662 | NW_004518736.1 | scaffold4269 | 22662                   | AA                              | CC                 | CC               | INTERGENIC                    |                    |                                                 |
| SNP_111870_A_15297 | NW_004518741.1 | scaffold4277 | 15297                   | CC                              | GG                 | GG               | INTERGENIC                    |                    |                                                 |
| SNP_111871_A_18445 | NW_004518741.1 | scaffold4277 | 18445                   | TT                              | CC                 | CC               | INTERGENIC                    |                    |                                                 |
| SNP_111872_A_18486 | NW_004518741.1 | scaffold4277 | 18486                   | AA                              | GG                 | GG               | INTERGENIC                    |                    |                                                 |
| SNP_111873_A_18534 | NW_004518741.1 | scaffold4277 | 18534                   | AA                              | CC                 | CC               | INTERGENIC                    |                    |                                                 |
| SNP_111874_A_18639 | NW_004518741.1 | scaffold4277 | 18639                   | TT                              | CC                 | CC               | INTERGENIC                    |                    |                                                 |
| SNP_111875_A_18656 | NW_004518741.1 | scaffold4277 | 18656                   | GG                              | AA                 | AA               | INTERGENIC                    |                    |                                                 |
| SNP_111876_A_18674 | NW_004518741.1 | scaffold4277 | 18674                   | GG                              | TT                 | TT               | INTERGENIC                    |                    |                                                 |
| SNP_111877_A_18678 | NW_004518741.1 | scaffold4277 | 18678                   | TT                              | GG                 | GG               | INTERGENIC                    |                    |                                                 |

| SNPs IDs          | Chromosome IDs | Chromosomes  | Physical positions (bp) | CDC Frontier (Reference genome) | (Pusa 1103 & HPNB) | (ILWC 46 & LPNB) | Sequence Components of genome | Gene accession IDs | Putative functions                      |
|-------------------|----------------|--------------|-------------------------|---------------------------------|--------------------|------------------|-------------------------------|--------------------|-----------------------------------------|
| SNP_111878_A_5136 | NW_004518747.1 | scaffold4287 | 5136                    | CC                              | AA                 | AA               | URR                           | 101410595          | transfer RNA tryptophan (anticodon CCA) |
| SNP_111879_A_5685 | NW_004518751.1 | scaffold4291 | 5685                    | GG                              | AA                 | AA               | INTERGENIC                    |                    |                                         |
| SNP_111880_A_2650 | NW_004518753.1 | scaffold4293 | 2650                    | AA                              | TT                 | TT               | INTERGENIC                    |                    |                                         |
| SNP_111881_A_1898 | NW_004518754.1 | scaffold4294 | 1898                    | CC                              | TT                 | TT               | INTERGENIC                    |                    |                                         |
| SNP_111882_A_1933 | NW_004518754.1 | scaffold4294 | 1933                    | GG                              | AA                 | AA               | INTERGENIC                    |                    |                                         |
| SNP_111883_A_493  | NW_004518755.1 | scaffold4295 | 493                     | CC                              | TT                 | TT               | INTERGENIC                    |                    |                                         |
| SNP_111884_A_503  | NW_004518755.1 | scaffold4295 | 503                     | AA                              | CC                 | CC               | INTERGENIC                    |                    |                                         |
| SNP_111885_A_572  | NW_004518755.1 | scaffold4295 | 572                     | AA                              | TT                 | TT               | INTERGENIC                    |                    |                                         |
| SNP_111887_A_1906 | NW_004518756.1 | scaffold4296 | 1906                    | TT                              | GG                 | GG               | INTERGENIC                    |                    |                                         |
| SNP_111888_A_1909 | NW_004518756.1 | scaffold4296 | 1909                    | CC                              | TT                 | TT               | INTERGENIC                    |                    |                                         |
| SNP_111889_A_2061 | NW_004518756.1 | scaffold4296 | 2061                    | GG                              | CC                 | CC               | INTERGENIC                    |                    |                                         |
| SNP_111890_A_2066 | NW_004518756.1 | scaffold4296 | 2066                    | AA                              | CC                 | CC               | INTERGENIC                    |                    |                                         |
| SNP_111891_A_2072 | NW_004518756.1 | scaffold4296 | 2072                    | AA                              | GG                 | GG               | INTERGENIC                    |                    |                                         |
| SNP_111892_A_2081 | NW_004518756.1 | scaffold4296 | 2081                    | TT                              | CC                 | CC               | INTERGENIC                    |                    |                                         |
| SNP_111893_A_2094 | NW_004518756.1 | scaffold4296 | 2094                    | GG                              | AA                 | AA               | INTERGENIC                    |                    |                                         |
| SNP_111894_A_2096 | NW_004518756.1 | scaffold4296 | 2096                    | AA                              | GG                 | GG               | INTERGENIC                    |                    |                                         |
| SNP_111895_A_2149 | NW_004518756.1 | scaffold4296 | 2149                    | TT                              | AA                 | AA               | INTERGENIC                    |                    |                                         |
| SNP_111896_A_2180 | NW_004518756.1 | scaffold4296 | 2180                    | AA                              | GG                 | GG               | INTERGENIC                    |                    |                                         |
| SNP_111897_A_2238 | NW_004518756.1 | scaffold4296 | 2238                    | AA                              | GG                 | GG               | INTERGENIC                    |                    |                                         |
| SNP_111898_A_2328 | NW_004518756.1 | scaffold4296 | 2328                    | AA                              | CC                 | CC               | INTERGENIC                    |                    |                                         |
| SNP_111899_A_2403 | NW_004518756.1 | scaffold4296 | 2403                    | AA                              | TT                 | TT               | INTERGENIC                    |                    |                                         |
| SNP_111900_A_2430 | NW_004518756.1 | scaffold4296 | 2430                    | TT                              | CC                 | CC               | INTERGENIC                    |                    |                                         |

| SNPs IDs           | Chromosome IDs | Chromosomes  | Physical positions (bp) | CDC Frontier (Reference genome) | (Pusa 1103 & HPNB) | (ILWC 46 & LPNB) | Sequence genome | Components of | Gene accession IDs           | Putative functions |
|--------------------|----------------|--------------|-------------------------|---------------------------------|--------------------|------------------|-----------------|---------------|------------------------------|--------------------|
| SNP_111901_A_2437  | NW_004518756.1 | scaffold4296 | 2437                    | TT                              | AA                 | AA               | INTERGENIC      |               |                              |                    |
| SNP_111902_A_261   | NW_004518758.1 | scaffold4300 | 261                     | TT                              | CC                 | CC               | INTERGENIC      |               |                              |                    |
| SNP_111903_A_476   | NW_004518758.1 | scaffold4300 | 476                     | TT                              | GG                 | GG               | INTERGENIC      |               |                              |                    |
| SNP_111904_A_1117  | NW_004518758.1 | scaffold4300 | 1117                    | TT                              | GG                 | GG               | INTERGENIC      |               |                              |                    |
| SNP_111905_A_5708  | NW_004518765.1 | scaffold4316 | 5708                    | AA                              | TT                 | TT               | INTERGENIC      |               |                              |                    |
| SNP_111906_A_943   | NW_004518767.1 | scaffold4319 | 943                     | GG                              | AA                 | AA               | INTERGENIC      |               |                              |                    |
| SNP_111907_A_970   | NW_004518767.1 | scaffold4319 | 970                     | CC                              | TT                 | TT               | INTERGENIC      |               |                              |                    |
| SNP_111909_A_1074  | NW_004518767.1 | scaffold4319 | 1074                    | AA                              | GG                 | GG               | INTERGENIC      |               |                              |                    |
| SNP_111910_A_1105  | NW_004518767.1 | scaffold4319 | 1105                    | AA                              | CC                 | CC               | INTERGENIC      |               |                              |                    |
| SNP_111914_A_1492  | NW_004518767.1 | scaffold4319 | 1492                    | CC                              | TT                 | TT               | INTERGENIC      |               |                              |                    |
| SNP_111915_A_1493  | NW_004518767.1 | scaffold4319 | 1493                    | CC                              | GG                 | GG               | INTERGENIC      |               |                              |                    |
| SNP_111917_A_859   | NW_004518777.1 | scaffold4330 | 859                     | CC                              | GG                 | GG               | INTERGENIC      |               |                              |                    |
| SNP_111918_A_865   | NW_004518777.1 | scaffold4330 | 865                     | AA                              | GG                 | GG               | INTERGENIC      |               |                              |                    |
| SNP_111919_A_884   | NW_004518777.1 | scaffold4330 | 884                     | TT                              | CC                 | CC               | INTERGENIC      |               |                              |                    |
| SNP_111920_A_1637  | NW_004518778.1 | scaffold4331 | 1637                    | GG                              | TT                 | TT               | URR             | 101495658     | uncharacterized LOC101495658 |                    |
| SNP_111921_A_1651  | NW_004518778.1 | scaffold4331 | 1651                    | GG                              | TT                 | TT               | URR             | 101495658     | uncharacterized LOC101495658 |                    |
| SNP_111923_A_4917  | NW_004518778.1 | scaffold4331 | 4917                    | GG                              | AA                 | AA               | UPSTREAM        | id221371      | Unknown function             |                    |
| SNP_111924_A_37097 | NW_004518778.1 | scaffold4331 | 37097                   | GG                              | AA                 | AA               | INTERGENIC      |               |                              |                    |
| SNP_111925_A_43    | NW_004518779.1 | scaffold4333 | 43                      | AA                              | TT                 | TT               | INTERGENIC      |               |                              |                    |
| SNP_111926_A_69    | NW_004518779.1 | scaffold4333 | 69                      | GG                              | TT                 | TT               | INTERGENIC      |               |                              |                    |
| SNP_111927_A_75    | NW_004518779.1 | scaffold4333 | 75                      | AA                              | TT                 | TT               | INTERGENIC      |               |                              |                    |
| SNP_111928_A_80    | NW_004518779.1 | scaffold4333 | 80                      | GG                              | AA                 | AA               | INTERGENIC      |               |                              |                    |

| SNPs IDs          | Chromosome IDs | Chromosomes  | Physical positions (bp) | CDC Frontier (Reference genome) | (Pusa 1103 & HPNB) | (ILWC 46 & LPNB) | Sequence genome | Components of | Gene accession IDs | Putative functions |
|-------------------|----------------|--------------|-------------------------|---------------------------------|--------------------|------------------|-----------------|---------------|--------------------|--------------------|
| SNP_111929_A_2524 | NW_004518781.1 | scaffold4335 | 2524                    | GG                              | TT                 | TT               | INTERGENIC      |               |                    |                    |
| SNP_111930_A_2533 | NW_004518781.1 | scaffold4335 | 2533                    | AA                              | TT                 | TT               | INTERGENIC      |               |                    |                    |
| SNP_111931_A_2770 | NW_004518781.1 | scaffold4335 | 2770                    | TT                              | GG                 | GG               | INTERGENIC      |               |                    |                    |
| SNP_111932_A_124  | NW_004518782.1 | scaffold4336 | 124                     | TT                              | GG                 | GG               | INTERGENIC      |               |                    |                    |
| SNP_111933_A_2994 | NW_004518782.1 | scaffold4336 | 2994                    | GG                              | AA                 | AA               | INTERGENIC      |               |                    |                    |
| SNP_111934_A_3250 | NW_004518782.1 | scaffold4336 | 3250                    | AA                              | GG                 | GG               | INTERGENIC      |               |                    |                    |
| SNP_111935_A_3311 | NW_004518782.1 | scaffold4336 | 3311                    | CC                              | TT                 | TT               | INTERGENIC      |               |                    |                    |
| SNP_111936_A_3321 | NW_004518782.1 | scaffold4336 | 3321                    | CC                              | TT                 | TT               | INTERGENIC      |               |                    |                    |
| SNP_111937_A_3330 | NW_004518782.1 | scaffold4336 | 3330                    | CC                              | TT                 | TT               | INTERGENIC      |               |                    |                    |
| SNP_111938_A_1205 | NW_004518786.1 | scaffold4347 | 1205                    | TT                              | AA                 | AA               | INTERGENIC      |               |                    |                    |
| SNP_111939_A_484  | NW_004518787.1 | scaffold4348 | 484                     | AA                              | TT                 | TT               | INTERGENIC      |               |                    |                    |
| SNP_111940_A_821  | NW_004518787.1 | scaffold4348 | 821                     | TT                              | AA                 | AA               | INTERGENIC      |               |                    |                    |
| SNP_111941_A_822  | NW_004518787.1 | scaffold4348 | 822                     | TT                              | CC                 | CC               | INTERGENIC      |               |                    |                    |
| SNP_111942_A_1169 | NW_004518787.1 | scaffold4348 | 1169                    | TT                              | CC                 | CC               | INTERGENIC      |               |                    |                    |
| SNP_111943_A_1733 | NW_004518788.1 | scaffold4349 | 1733                    | AA                              | TT                 | TT               | INTERGENIC      |               |                    |                    |
| SNP_111944_A_1764 | NW_004518788.1 | scaffold4349 | 1764                    | GG                              | TT                 | TT               | INTERGENIC      |               |                    |                    |
| SNP_111946_A_1855 | NW_004518788.1 | scaffold4349 | 1855                    | GG                              | TT                 | TT               | INTERGENIC      |               |                    |                    |
| SNP_111947_A_246  | NW_004518791.1 | scaffold4354 | 246                     | TT                              | AA                 | AA               | INTERGENIC      |               |                    |                    |
| SNP_111948_A_914  | NW_004518793.1 | scaffold4357 | 914                     | GG                              | AA                 | AA               | INTERGENIC      |               |                    |                    |
| SNP_111949_A_919  | NW_004518793.1 | scaffold4357 | 919                     | GG                              | AA                 | AA               | INTERGENIC      |               |                    |                    |
| SNP_111950_A_1035 | NW_004518793.1 | scaffold4357 | 1035                    | CC                              | TT                 | TT               | INTERGENIC      |               |                    |                    |
| SNP_111953_A_388  | NW_004518799.1 | scaffold4367 | 388                     | AA                              | GG                 | GG               | INTERGENIC      |               |                    |                    |

| SNPs IDs           | Chromosome IDs | Chromosomes  | Physical positions (bp) | CDC Frontier (Reference genome) | (Pusa 1103 & HPNB) | (ILWC 46 & LPNB) | Sequence genome | Components of | Gene accession IDs | Putative functions |
|--------------------|----------------|--------------|-------------------------|---------------------------------|--------------------|------------------|-----------------|---------------|--------------------|--------------------|
| SNP_111954_A_624   | NW_004518799.1 | scaffold4367 | 624                     | AA                              | GG                 | GG               | INTERGENIC      |               |                    |                    |
| SNP_111955_A_921   | NW_004518799.1 | scaffold4367 | 921                     | GG                              | TT                 | TT               | INTERGENIC      |               |                    |                    |
| SNP_111956_A_951   | NW_004518799.1 | scaffold4367 | 951                     | TT                              | AA                 | AA               | INTERGENIC      |               |                    |                    |
| SNP_111957_A_2565  | NW_004518799.1 | scaffold4367 | 2565                    | TT                              | AA                 | AA               | INTERGENIC      |               |                    |                    |
| SNP_111958_A_2598  | NW_004518799.1 | scaffold4367 | 2598                    | TT                              | CC                 | CC               | INTERGENIC      |               |                    |                    |
| SNP_111959_A_4564  | NW_004518799.1 | scaffold4367 | 4564                    | CC                              | TT                 | TT               | INTERGENIC      |               |                    |                    |
| SNP_111960_A_4574  | NW_004518799.1 | scaffold4367 | 4574                    | TT                              | CC                 | CC               | INTERGENIC      |               |                    |                    |
| SNP_111961_A_5099  | NW_004518799.1 | scaffold4367 | 5099                    | AA                              | GG                 | GG               | INTERGENIC      |               |                    |                    |
| SNP_111962_A_5110  | NW_004518799.1 | scaffold4367 | 5110                    | TT                              | AA                 | AA               | INTERGENIC      |               |                    |                    |
| SNP_111963_A_6321  | NW_004518799.1 | scaffold4367 | 6321                    | CC                              | GG                 | GG               | INTERGENIC      |               |                    |                    |
| SNP_111964_A_6846  | NW_004518799.1 | scaffold4367 | 6846                    | AA                              | TT                 | TT               | INTERGENIC      |               |                    |                    |
| SNP_111965_A_6970  | NW_004518799.1 | scaffold4367 | 6970                    | TT                              | AA                 | AA               | INTERGENIC      |               |                    |                    |
| SNP_111966_A_7873  | NW_004518799.1 | scaffold4367 | 7873                    | TT                              | GG                 | GG               | INTERGENIC      |               |                    |                    |
| SNP_111967_A_7995  | NW_004518799.1 | scaffold4367 | 7995                    | CC                              | AA                 | AA               | INTERGENIC      |               |                    |                    |
| SNP_111968_A_9226  | NW_004518799.1 | scaffold4367 | 9226                    | TT                              | AA                 | AA               | INTERGENIC      |               |                    |                    |
| SNP_111969_A_9264  | NW_004518799.1 | scaffold4367 | 9264                    | AA                              | CC                 | CC               | INTERGENIC      |               |                    |                    |
| SNP_111970_A_9777  | NW_004518799.1 | scaffold4367 | 9777                    | CC                              | AA                 | AA               | INTERGENIC      |               |                    |                    |
| SNP_111971_A_11170 | NW_004518799.1 | scaffold4367 | 11170                   | GG                              | AA                 | AA               | INTERGENIC      |               |                    |                    |
| SNP_111972_A_11205 | NW_004518799.1 | scaffold4367 | 11205                   | GG                              | AA                 | AA               | INTERGENIC      |               |                    |                    |
| SNP_111973_A_11217 | NW_004518799.1 | scaffold4367 | 11217                   | AA                              | CC                 | CC               | INTERGENIC      |               |                    |                    |
| SNP_111974_A_11218 | NW_004518799.1 | scaffold4367 | 11218                   | CC                              | GG                 | GG               | INTERGENIC      |               |                    |                    |
| SNP_111976_A_12561 | NW_004518799.1 | scaffold4367 | 12561                   | CC                              | GG                 | GG               | INTERGENIC      |               |                    |                    |

| SNPs IDs           | Chromosome IDs | Chromosomes  | Physical positions (bp) | CDC Frontier (Reference genome) | (Pusa 1103 & HPNB) | (ILWC 46 & LPNB) | Sequence genome | Components of | Gene accession IDs | Putative functions |
|--------------------|----------------|--------------|-------------------------|---------------------------------|--------------------|------------------|-----------------|---------------|--------------------|--------------------|
| SNP_111977_A_12961 | NW_004518799.1 | scaffold4367 | 12961                   | AA                              | CC                 | CC               | INTERGENIC      |               |                    |                    |
| SNP_111978_A_16171 | NW_004518799.1 | scaffold4367 | 16171                   | CC                              | GG                 | GG               | INTERGENIC      |               |                    |                    |
| SNP_111979_A_30180 | NW_004518799.1 | scaffold4367 | 30180                   | AA                              | GG                 | GG               | INTERGENIC      |               |                    |                    |
| SNP_111980_A_30564 | NW_004518799.1 | scaffold4367 | 30564                   | TT                              | GG                 | GG               | INTERGENIC      |               |                    |                    |
| SNP_111981_A_30719 | NW_004518799.1 | scaffold4367 | 30719                   | GG                              | CC                 | CC               | INTERGENIC      |               |                    |                    |
| SNP_111982_A_30755 | NW_004518799.1 | scaffold4367 | 30755                   | CC                              | TT                 | TT               | INTERGENIC      |               |                    |                    |
| SNP_111983_A_30803 | NW_004518799.1 | scaffold4367 | 30803                   | TT                              | GG                 | GG               | INTERGENIC      |               |                    |                    |
| SNP_111984_A_31124 | NW_004518799.1 | scaffold4367 | 31124                   | GG                              | AA                 | AA               | INTERGENIC      |               |                    |                    |
| SNP_111985_A_36154 | NW_004518799.1 | scaffold4367 | 36154                   | TT                              | AA                 | AA               | INTERGENIC      |               |                    |                    |
| SNP_111986_A_36254 | NW_004518799.1 | scaffold4367 | 36254                   | GG                              | AA                 | AA               | INTERGENIC      |               |                    |                    |
| SNP_111987_A_37231 | NW_004518799.1 | scaffold4367 | 37231                   | TT                              | GG                 | GG               | INTERGENIC      |               |                    |                    |
| SNP_111988_A_1111  | NW_004518801.1 | scaffold4371 | 1111                    | GG                              | TT                 | TT               | INTERGENIC      |               |                    |                    |
| SNP_111989_A_212   | NW_004518803.1 | scaffold4373 | 212                     | TT                              | CC                 | CC               | INTERGENIC      |               |                    |                    |
| SNP_111990_A_465   | NW_004518803.1 | scaffold4373 | 465                     | GG                              | AA                 | AA               | INTERGENIC      |               |                    |                    |
| SNP_111991_A_69    | NW_004518804.1 | scaffold4374 | 69                      | CC                              | AA                 | AA               | INTERGENIC      |               |                    |                    |
| SNP_111992_A_209   | NW_004518804.1 | scaffold4374 | 209                     | GG                              | TT                 | TT               | INTERGENIC      |               |                    |                    |
| SNP_111993_A_386   | NW_004518804.1 | scaffold4374 | 386                     | CC                              | AA                 | AA               | INTERGENIC      |               |                    |                    |
| SNP_111994_A_405   | NW_004518804.1 | scaffold4374 | 405                     | TT                              | CC                 | CC               | INTERGENIC      |               |                    |                    |
| SNP_111995_A_424   | NW_004518804.1 | scaffold4374 | 424                     | TT                              | CC                 | CC               | INTERGENIC      |               |                    |                    |
| SNP_111996_A_502   | NW_004518804.1 | scaffold4374 | 502                     | CC                              | AA                 | AA               | INTERGENIC      |               |                    |                    |
| SNP_111997_A_526   | NW_004518804.1 | scaffold4374 | 526                     | TT                              | AA                 | AA               | INTERGENIC      |               |                    |                    |
| SNP_111998_A_587   | NW_004518804.1 | scaffold4374 | 587                     | AA                              | GG                 | GG               | INTERGENIC      |               |                    |                    |

| SNPs IDs           | Chromosome IDs | Chromosomes  | Physical positions (bp) | CDC Frontier (Reference genome) | (Pusa 1103 & HPNB) | (ILWC 46 & LPNB) | Sequence genome | Components of | Gene accession IDs | Putative functions |
|--------------------|----------------|--------------|-------------------------|---------------------------------|--------------------|------------------|-----------------|---------------|--------------------|--------------------|
| SNP_111999_A_713   | NW_004518804.1 | scaffold4374 | 713                     | AA                              | CC                 | CC               | INTERGENIC      |               |                    |                    |
| SNP_112001_A_772   | NW_004518804.1 | scaffold4374 | 772                     | TT                              | CC                 | CC               | INTERGENIC      |               |                    |                    |
| SNP_112002_A_808   | NW_004518804.1 | scaffold4374 | 808                     | CC                              | TT                 | TT               | INTERGENIC      |               |                    |                    |
| SNP_112003_A_1000  | NW_004518804.1 | scaffold4374 | 1000                    | CC                              | AA                 | AA               | INTERGENIC      |               |                    |                    |
| SNP_112004_A_1007  | NW_004518804.1 | scaffold4374 | 1007                    | CC                              | AA                 | AA               | INTERGENIC      |               |                    |                    |
| SNP_112005_A_1137  | NW_004518804.1 | scaffold4374 | 1137                    | AA                              | CC                 | CC               | INTERGENIC      |               |                    |                    |
| SNP_112007_A_1905  | NW_004518804.1 | scaffold4374 | 1905                    | AA                              | GG                 | GG               | INTERGENIC      |               |                    |                    |
| SNP_112008_A_1947  | NW_004518804.1 | scaffold4374 | 1947                    | TT                              | CC                 | CC               | INTERGENIC      |               |                    |                    |
| SNP_112010_A_1804  | NW_004518806.1 | scaffold4377 | 1804                    | AA                              | GG                 | GG               | INTERGENIC      |               |                    |                    |
| SNP_112011_A_1809  | NW_004518806.1 | scaffold4377 | 1809                    | GG                              | AA                 | AA               | INTERGENIC      |               |                    |                    |
| SNP_112013_A_27324 | NW_004518806.1 | scaffold4377 | 27324                   | TT                              | AA                 | AA               | INTERGENIC      |               |                    |                    |
| SNP_112014_A_27419 | NW_004518806.1 | scaffold4377 | 27419                   | AA                              | TT                 | TT               | INTERGENIC      |               |                    |                    |
| SNP_112015_A_33802 | NW_004518806.1 | scaffold4377 | 33802                   | GG                              | CC                 | CC               | INTERGENIC      |               |                    |                    |
| SNP_112016_A_46804 | NW_004518806.1 | scaffold4377 | 46804                   | GG                              | TT                 | TT               | INTERGENIC      |               |                    |                    |
| SNP_112017_A_47106 | NW_004518806.1 | scaffold4377 | 47106                   | TT                              | AA                 | AA               | INTERGENIC      |               |                    |                    |
| SNP_112018_A_47137 | NW_004518806.1 | scaffold4377 | 47137                   | TT                              | AA                 | AA               | INTERGENIC      |               |                    |                    |
| SNP_112019_A_47190 | NW_004518806.1 | scaffold4377 | 47190                   | CC                              | TT                 | TT               | INTERGENIC      |               |                    |                    |
| SNP_112020_A_47840 | NW_004518806.1 | scaffold4377 | 47840                   | TT                              | CC                 | CC               | INTERGENIC      |               |                    |                    |
| SNP_112021_A_47942 | NW_004518806.1 | scaffold4377 | 47942                   | TT                              | CC                 | CC               | INTERGENIC      |               |                    |                    |
| SNP_112022_A_48233 | NW_004518806.1 | scaffold4377 | 48233                   | TT                              | CC                 | CC               | INTERGENIC      |               |                    |                    |
| SNP_112023_A_48332 | NW_004518806.1 | scaffold4377 | 48332                   | AA                              | CC                 | CC               | INTERGENIC      |               |                    |                    |
| SNP_112024_A_48711 | NW_004518806.1 | scaffold4377 | 48711                   | TT                              | CC                 | CC               | INTERGENIC      |               |                    |                    |

| SNPs IDs           | Chromosome IDs | Chromosomes  | Physical positions (bp) | CDC Frontier (Reference genome) | (Pusa 1103 & HPNB) | (ILWC 46 & LPNB) | Sequence genome | Components of | Gene accession IDs | Putative functions |
|--------------------|----------------|--------------|-------------------------|---------------------------------|--------------------|------------------|-----------------|---------------|--------------------|--------------------|
| SNP_112025_A_50990 | NW_004518806.1 | scaffold4377 | 50990                   | TT                              | AA                 | AA               | INTERGENIC      |               |                    |                    |
| SNP_112026_A_51053 | NW_004518806.1 | scaffold4377 | 51053                   | GG                              | CC                 | CC               | INTERGENIC      |               |                    |                    |
| SNP_112027_A_51068 | NW_004518806.1 | scaffold4377 | 51068                   | GG                              | TT                 | TT               | INTERGENIC      |               |                    |                    |
| SNP_112028_A_51086 | NW_004518806.1 | scaffold4377 | 51086                   | GG                              | AA                 | AA               | INTERGENIC      |               |                    |                    |
| SNP_112029_A_19461 | NW_004518807.1 | scaffold4379 | 19461                   | GG                              | AA                 | AA               | INTERGENIC      |               |                    |                    |
| SNP_112030_A_761   | NW_004518810.1 | scaffold4383 | 761                     | TT                              | GG                 | GG               | INTERGENIC      |               |                    |                    |
| SNP_112031_A_763   | NW_004518810.1 | scaffold4383 | 763                     | AA                              | CC                 | CC               | INTERGENIC      |               |                    |                    |
| SNP_112032_A_22496 | NW_004518810.1 | scaffold4383 | 22496                   | GG                              | CC                 | CC               | INTERGENIC      |               |                    |                    |
| SNP_112033_A_22613 | NW_004518810.1 | scaffold4383 | 22613                   | TT                              | CC                 | CC               | INTERGENIC      |               |                    |                    |
| SNP_112034_A_22638 | NW_004518810.1 | scaffold4383 | 22638                   | AA                              | CC                 | CC               | INTERGENIC      |               |                    |                    |
| SNP_112035_A_22639 | NW_004518810.1 | scaffold4383 | 22639                   | CC                              | AA                 | AA               | INTERGENIC      |               |                    |                    |
| SNP_112036_A_22640 | NW_004518810.1 | scaffold4383 | 22640                   | TT                              | CC                 | CC               | INTERGENIC      |               |                    |                    |
| SNP_112037_A_22882 | NW_004518810.1 | scaffold4383 | 22882                   | AA                              | GG                 | GG               | INTERGENIC      |               |                    |                    |
| SNP_112038_A_22889 | NW_004518810.1 | scaffold4383 | 22889                   | AA                              | GG                 | GG               | INTERGENIC      |               |                    |                    |
| SNP_112039_A_24877 | NW_004518810.1 | scaffold4383 | 24877                   | CC                              | TT                 | TT               | INTERGENIC      |               |                    |                    |
| SNP_112040_A_24884 | NW_004518810.1 | scaffold4383 | 24884                   | TT                              | GG                 | GG               | INTERGENIC      |               |                    |                    |
| SNP_112041_A_24971 | NW_004518810.1 | scaffold4383 | 24971                   | CC                              | TT                 | TT               | INTERGENIC      |               |                    |                    |
| SNP_112042_A_25008 | NW_004518810.1 | scaffold4383 | 25008                   | GG                              | CC                 | CC               | INTERGENIC      |               |                    |                    |
| SNP_112043_A_885   | NW_004518811.1 | scaffold4385 | 885                     | CC                              | AA                 | AA               | INTERGENIC      |               |                    |                    |
| SNP_112044_A_6419  | NW_004518811.1 | scaffold4385 | 6419                    | GG                              | CC                 | CC               | INTERGENIC      |               |                    |                    |
| SNP_112045_A_6442  | NW_004518811.1 | scaffold4385 | 6442                    | TT                              | CC                 | CC               | INTERGENIC      |               |                    |                    |
| SNP_112046_A_6478  | NW_004518811.1 | scaffold4385 | 6478                    | AA                              | GG                 | GG               | INTERGENIC      |               |                    |                    |



| SNPs IDs          | Chromosome IDs | Chromosomes  | Physical positions (bp) | CDC Frontier (Reference genome) | (Pusa 1103 & HPNB) | (ILWC 46 & LPNB) | Sequence Components of genome | Gene accession IDs | Putative functions              |
|-------------------|----------------|--------------|-------------------------|---------------------------------|--------------------|------------------|-------------------------------|--------------------|---------------------------------|
| SNP_112047_A_6479 | NW_004518811.1 | scaffold4385 | 6479                    | AA                              | GG                 | GG               | INTERGENIC                    |                    |                                 |
| SNP_112048_A_7669 | NW_004518811.1 | scaffold4385 | 7669                    | TT                              | CC                 | CC               | INTERGENIC                    |                    |                                 |
| SNP_112051_A_7735 | NW_004518811.1 | scaffold4385 | 7735                    | TT                              | AA                 | AA               | INTERGENIC                    |                    |                                 |
| SNP_112052_A_699  | NW_004518813.1 | scaffold4387 | 699                     | TT                              | CC                 | CC               | INTERGENIC                    |                    |                                 |
| SNP_112053_A_807  | NW_004518813.1 | scaffold4387 | 807                     | AA                              | TT                 | TT               | INTERGENIC                    |                    |                                 |
| SNP_112054_A_1056 | NW_004518813.1 | scaffold4387 | 1056                    | GG                              | AA                 | AA               | INTERGENIC                    |                    |                                 |
| SNP_112055_A_5019 | NW_004518813.1 | scaffold4387 | 5019                    | GG                              | AA                 | AA               | DRR                           | 101496427          | AP-3 complex subunit delta-like |
| SNP_112056_A_5232 | NW_004518813.1 | scaffold4387 | 5232                    | TT                              | CC                 | CC               | DRR                           | 101496427          | AP-3 complex subunit delta-like |
| SNP_112057_A_5351 | NW_004518813.1 | scaffold4387 | 5351                    | GG                              | AA                 | AA               | DRR                           | 101496427          | AP-3 complex subunit delta-like |
| SNP_112058_A_5407 | NW_004518813.1 | scaffold4387 | 5407                    | TT                              | GG                 | GG               | DRR                           | 101496427          | AP-3 complex subunit delta-like |
| SNP_112059_A_5452 | NW_004518813.1 | scaffold4387 | 5452                    | AA                              | TT                 | TT               | DRR                           | 101496427          | AP-3 complex subunit delta-like |
| SNP_112060_A_5483 | NW_004518813.1 | scaffold4387 | 5483                    | AA                              | TT                 | TT               | DRR                           | 101496427          | AP-3 complex subunit delta-like |
| SNP_112062_A_5538 | NW_004518813.1 | scaffold4387 | 5538                    | TT                              | CC                 | CC               | DRR                           | 101496427          | AP-3 complex subunit delta-like |
| SNP_112063_A_5560 | NW_004518813.1 | scaffold4387 | 5560                    | TT                              | CC                 | CC               | DRR                           | 101496427          | AP-3 complex subunit delta-like |
| SNP_112064_A_5570 | NW_004518813.1 | scaffold4387 | 5570                    | GG                              | AA                 | AA               | DRR                           | 101496427          | AP-3 complex subunit delta-like |
| SNP_112065_A_5886 | NW_004518813.1 | scaffold4387 | 5886                    | CC                              | GG                 | GG               | NON_SYNONYMOUS_CODING         | 101496427          | AP-3 complex subunit delta-like |
| SNP_112066_A_5944 | NW_004518813.1 | scaffold4387 | 5944                    | GG                              | TT                 | TT               | STOP_LOST                     | 101496427          | AP-3 complex subunit delta-like |
| SNP_112067_A_6583 | NW_004518813.1 | scaffold4387 | 6583                    | CC                              | TT                 | TT               | URR                           | 101496427          | AP-3 complex subunit delta-like |
| SNP_112068_A_400  | NW_004518814.1 | scaffold4388 | 400                     | AA                              | CC                 | CC               | INTERGENIC                    |                    |                                 |
| SNP_112069_A_404  | NW_004518814.1 | scaffold4388 | 404                     | AA                              | CC                 | CC               | INTERGENIC                    |                    |                                 |
| SNP_112070_A_422  | NW_004518814.1 | scaffold4388 | 422                     | GG                              | AA                 | AA               | INTERGENIC                    |                    |                                 |
| SNP_112072_A_500  | NW_004518814.1 | scaffold4388 | 500                     | CC                              | TT                 | TT               | INTERGENIC                    |                    |                                 |

| SNPs IDs          | Chromosome IDs | Chromosomes  | Physical positions (bp) | CDC Frontier (Reference genome) | (Pusa 1103 & HPNB) | (ILWC 46 & LPNB) | Sequence genome | Components of | Gene accession IDs | Putative functions |
|-------------------|----------------|--------------|-------------------------|---------------------------------|--------------------|------------------|-----------------|---------------|--------------------|--------------------|
| SNP_112073_A_521  | NW_004518814.1 | scaffold4388 | 521                     | TT                              | CC                 | CC               | INTERGENIC      |               |                    |                    |
| SNP_112074_A_543  | NW_004518814.1 | scaffold4388 | 543                     | TT                              | GG                 | GG               | INTERGENIC      |               |                    |                    |
| SNP_112075_A_832  | NW_004518814.1 | scaffold4388 | 832                     | GG                              | AA                 | AA               | INTERGENIC      |               |                    |                    |
| SNP_112076_A_627  | NW_004518816.1 | scaffold4390 | 627                     | AA                              | GG                 | GG               | INTERGENIC      |               |                    |                    |
| SNP_112078_A_2463 | NW_004518820.1 | scaffold4397 | 2463                    | CC                              | TT                 | TT               | INTERGENIC      |               |                    |                    |
| SNP_112079_A_283  | NW_004518821.1 | scaffold4398 | 283                     | GG                              | CC                 | CC               | INTERGENIC      |               |                    |                    |
| SNP_112081_A_483  | NW_004518821.1 | scaffold4398 | 483                     | AA                              | TT                 | TT               | INTERGENIC      |               |                    |                    |
| SNP_112082_A_115  | NW_004518823.1 | scaffold4402 | 115                     | AA                              | TT                 | TT               | INTERGENIC      |               |                    |                    |
| SNP_112083_A_198  | NW_004518823.1 | scaffold4402 | 198                     | AA                              | GG                 | GG               | INTERGENIC      |               |                    |                    |
| SNP_112084_A_264  | NW_004518823.1 | scaffold4402 | 264                     | CC                              | TT                 | TT               | INTERGENIC      |               |                    |                    |
| SNP_112085_A_402  | NW_004518823.1 | scaffold4402 | 402                     | AA                              | GG                 | GG               | INTERGENIC      |               |                    |                    |
| SNP_112086_A_403  | NW_004518823.1 | scaffold4402 | 403                     | GG                              | TT                 | TT               | INTERGENIC      |               |                    |                    |
| SNP_112087_A_454  | NW_004518823.1 | scaffold4402 | 454                     | CC                              | TT                 | TT               | INTERGENIC      |               |                    |                    |
| SNP_112088_A_69   | NW_004518824.1 | scaffold4404 | 69                      | TT                              | AA                 | AA               | INTERGENIC      |               |                    |                    |
| SNP_112089_A_563  | NW_004518832.1 | scaffold4417 | 563                     | TT                              | CC                 | CC               | INTERGENIC      |               |                    |                    |
| SNP_112090_A_852  | NW_004518832.1 | scaffold4417 | 852                     | GG                              | AA                 | AA               | INTERGENIC      |               |                    |                    |
| SNP_112091_A_881  | NW_004518832.1 | scaffold4417 | 881                     | TT                              | AA                 | AA               | INTERGENIC      |               |                    |                    |
| SNP_112092_A_1151 | NW_004518832.1 | scaffold4417 | 1151                    | GG                              | CC                 | CC               | INTERGENIC      |               |                    |                    |
| SNP_112094_A_931  | NW_004518837.1 | scaffold4426 | 931                     | GG                              | CC                 | CC               | INTERGENIC      |               |                    |                    |
| SNP_112095_A_953  | NW_004518837.1 | scaffold4426 | 953                     | TT                              | AA                 | AA               | INTERGENIC      |               |                    |                    |
| SNP_112096_A_962  | NW_004518837.1 | scaffold4426 | 962                     | GG                              | TT                 | TT               | INTERGENIC      |               |                    |                    |
| SNP_112097_A_981  | NW_004518837.1 | scaffold4426 | 981                     | TT                              | GG                 | GG               | INTERGENIC      |               |                    |                    |

| SNPs IDs          | Chromosome IDs | Chromosomes  | Physical positions (bp) | CDC Frontier (Reference genome) | (Pusa 1103 & HPNB) | (ILWC 46 & LPNB) | Sequence genome | Components of | Gene accession IDs | Putative functions |
|-------------------|----------------|--------------|-------------------------|---------------------------------|--------------------|------------------|-----------------|---------------|--------------------|--------------------|
| SNP_112098_A_994  | NW_004518837.1 | scaffold4426 | 994                     | GG                              | AA                 | AA               | INTERGENIC      |               |                    |                    |
| SNP_112099_A_405  | NW_004518838.1 | scaffold4427 | 405                     | AA                              | TT                 | TT               | INTERGENIC      |               |                    |                    |
| SNP_112100_A_413  | NW_004518838.1 | scaffold4427 | 413                     | GG                              | CC                 | CC               | INTERGENIC      |               |                    |                    |
| SNP_112101_A_658  | NW_004518838.1 | scaffold4427 | 658                     | AA                              | TT                 | TT               | INTERGENIC      |               |                    |                    |
| SNP_112102_A_565  | NW_004518839.1 | scaffold4430 | 565                     | AA                              | GG                 | GG               | INTERGENIC      |               |                    |                    |
| SNP_112103_A_615  | NW_004518840.1 | scaffold4431 | 615                     | GG                              | AA                 | AA               | INTERGENIC      |               |                    |                    |
| SNP_112104_A_3296 | NW_004518843.1 | scaffold4436 | 3296                    | TT                              | GG                 | GG               | INTERGENIC      |               |                    |                    |
| SNP_112105_A_3435 | NW_004518843.1 | scaffold4436 | 3435                    | AA                              | GG                 | GG               | INTERGENIC      |               |                    |                    |
| SNP_112106_A_3437 | NW_004518843.1 | scaffold4436 | 3437                    | AA                              | GG                 | GG               | INTERGENIC      |               |                    |                    |
| SNP_112107_A_3450 | NW_004518843.1 | scaffold4436 | 3450                    | AA                              | GG                 | GG               | INTERGENIC      |               |                    |                    |
| SNP_112108_A_3452 | NW_004518843.1 | scaffold4436 | 3452                    | TT                              | CC                 | CC               | INTERGENIC      |               |                    |                    |
| SNP_112109_A_3488 | NW_004518843.1 | scaffold4436 | 3488                    | AA                              | TT                 | TT               | INTERGENIC      |               |                    |                    |
| SNP_112110_A_3491 | NW_004518843.1 | scaffold4436 | 3491                    | TT                              | GG                 | GG               | INTERGENIC      |               |                    |                    |
| SNP_112111_A_3517 | NW_004518843.1 | scaffold4436 | 3517                    | AA                              | CC                 | CC               | INTERGENIC      |               |                    |                    |
| SNP_112112_A_3573 | NW_004518843.1 | scaffold4436 | 3573                    | AA                              | TT                 | TT               | INTERGENIC      |               |                    |                    |
| SNP_112113_A_3598 | NW_004518843.1 | scaffold4436 | 3598                    | GG                              | AA                 | AA               | INTERGENIC      |               |                    |                    |
| SNP_112114_A_3602 | NW_004518843.1 | scaffold4436 | 3602                    | TT                              | AA                 | AA               | INTERGENIC      |               |                    |                    |
| SNP_112115_A_3606 | NW_004518843.1 | scaffold4436 | 3606                    | AA                              | GG                 | GG               | INTERGENIC      |               |                    |                    |
| SNP_112116_A_3631 | NW_004518843.1 | scaffold4436 | 3631                    | AA                              | GG                 | GG               | INTERGENIC      |               |                    |                    |
| SNP_112117_A_927  | NW_004518844.1 | scaffold4437 | 927                     | GG                              | CC                 | CC               | INTERGENIC      |               |                    |                    |
| SNP_112118_A_945  | NW_004518844.1 | scaffold4437 | 945                     | AA                              | CC                 | CC               | INTERGENIC      |               |                    |                    |
| SNP_112119_A_963  | NW_004518844.1 | scaffold4437 | 963                     | GG                              | AA                 | AA               | INTERGENIC      |               |                    |                    |

| SNPs IDs           | Chromosome IDs | Chromosomes  | Physical positions (bp) | CDC Frontier (Reference genome) | (Pusa 1103 & HPNB) | (ILWC 46 & LPNB) | Sequence genome | Components of | Gene accession IDs | Putative functions |
|--------------------|----------------|--------------|-------------------------|---------------------------------|--------------------|------------------|-----------------|---------------|--------------------|--------------------|
| SNP_112120_A_965   | NW_004518844.1 | scaffold4437 | 965                     | AA                              | CC                 | CC               | INTERGENIC      |               |                    |                    |
| SNP_112121_A_1253  | NW_004518844.1 | scaffold4437 | 1253                    | TT                              | CC                 | CC               | INTERGENIC      |               |                    |                    |
| SNP_112122_A_5594  | NW_004518845.1 | scaffold4439 | 5594                    | CC                              | GG                 | GG               | INTERGENIC      |               |                    |                    |
| SNP_112123_A_6052  | NW_004518845.1 | scaffold4439 | 6052                    | TT                              | AA                 | AA               | INTERGENIC      |               |                    |                    |
| SNP_112124_A_6207  | NW_004518845.1 | scaffold4439 | 6207                    | GG                              | TT                 | TT               | INTERGENIC      |               |                    |                    |
| SNP_112125_A_6324  | NW_004518845.1 | scaffold4439 | 6324                    | AA                              | TT                 | TT               | INTERGENIC      |               |                    |                    |
| SNP_112126_A_6391  | NW_004518845.1 | scaffold4439 | 6391                    | AA                              | TT                 | TT               | INTERGENIC      |               |                    |                    |
| SNP_112127_A_6392  | NW_004518845.1 | scaffold4439 | 6392                    | AA                              | GG                 | GG               | INTERGENIC      |               |                    |                    |
| SNP_112128_A_6503  | NW_004518845.1 | scaffold4439 | 6503                    | AA                              | GG                 | GG               | INTERGENIC      |               |                    |                    |
| SNP_112129_A_6588  | NW_004518845.1 | scaffold4439 | 6588                    | GG                              | CC                 | CC               | INTERGENIC      |               |                    |                    |
| SNP_112130_A_6632  | NW_004518845.1 | scaffold4439 | 6632                    | TT                              | AA                 | AA               | INTERGENIC      |               |                    |                    |
| SNP_112131_A_6677  | NW_004518845.1 | scaffold4439 | 6677                    | TT                              | GG                 | GG               | INTERGENIC      |               |                    |                    |
| SNP_112132_A_6695  | NW_004518845.1 | scaffold4439 | 6695                    | GG                              | TT                 | TT               | INTERGENIC      |               |                    |                    |
| SNP_112133_A_6713  | NW_004518845.1 | scaffold4439 | 6713                    | TT                              | GG                 | GG               | INTERGENIC      |               |                    |                    |
| SNP_112134_A_6849  | NW_004518845.1 | scaffold4439 | 6849                    | TT                              | CC                 | CC               | INTERGENIC      |               |                    |                    |
| SNP_112135_A_1816  | NW_004518849.1 | scaffold4443 | 1816                    | GG                              | AA                 | AA               | INTERGENIC      |               |                    |                    |
| SNP_112136_A_3310  | NW_004518855.1 | scaffold4452 | 3310                    | GG                              | AA                 | AA               | INTERGENIC      |               |                    |                    |
| SNP_112137_A_5119  | NW_004518855.1 | scaffold4452 | 5119                    | TT                              | CC                 | CC               | INTERGENIC      |               |                    |                    |
| SNP_112138_A_5332  | NW_004518855.1 | scaffold4452 | 5332                    | AA                              | GG                 | GG               | INTERGENIC      |               |                    |                    |
| SNP_112139_A_12965 | NW_004518855.1 | scaffold4452 | 12965                   | GG                              | TT                 | TT               | INTERGENIC      |               |                    |                    |
| SNP_112140_A_12971 | NW_004518855.1 | scaffold4452 | 12971                   | TT                              | CC                 | CC               | INTERGENIC      |               |                    |                    |
| SNP_112141_A_13778 | NW_004518855.1 | scaffold4452 | 13778                   | CC                              | TT                 | TT               | INTERGENIC      |               |                    |                    |

| SNPs IDs            | Chromosome IDs | Chromosomes  | Physical positions (bp) | CDC Frontier (Reference genome) | (Pusa 1103 & HPNB) | (ILWC 46 & LPNB) | Sequence Components of genome | Gene accession IDs | Putative functions                                       |
|---------------------|----------------|--------------|-------------------------|---------------------------------|--------------------|------------------|-------------------------------|--------------------|----------------------------------------------------------|
| SNP_112142_A_13803  | NW_004518855.1 | scaffold4452 | 13803                   | GG                              | AA                 | AA               | INTERGENIC                    |                    |                                                          |
| SNP_112143_A_13816  | NW_004518855.1 | scaffold4452 | 13816                   | TT                              | CC                 | CC               | INTERGENIC                    |                    |                                                          |
| SNP_112144_A_13947  | NW_004518855.1 | scaffold4452 | 13947                   | TT                              | CC                 | CC               | INTERGENIC                    |                    |                                                          |
| SNP_112145_A_14387  | NW_004518855.1 | scaffold4452 | 14387                   | CC                              | TT                 | TT               | INTERGENIC                    |                    |                                                          |
| SNP_112146_A_14394  | NW_004518855.1 | scaffold4452 | 14394                   | GG                              | CC                 | CC               | INTERGENIC                    |                    |                                                          |
| SNP_112147_A_14536  | NW_004518855.1 | scaffold4452 | 14536                   | TT                              | GG                 | GG               | INTERGENIC                    |                    |                                                          |
| SNP_112148_A_14551  | NW_004518855.1 | scaffold4452 | 14551                   | AA                              | GG                 | GG               | INTERGENIC                    |                    |                                                          |
| SNP_112149_A_14567  | NW_004518855.1 | scaffold4452 | 14567                   | CC                              | TT                 | TT               | INTERGENIC                    |                    |                                                          |
| SNP_112150_A_15891  | NW_004518855.1 | scaffold4452 | 15891                   | CC                              | TT                 | TT               | INTERGENIC                    |                    |                                                          |
| SNP_112151_A_21073  | NW_004518855.1 | scaffold4452 | 21073                   | AA                              | TT                 | TT               | INTRON                        | 101498400          | serine/threonine-protein phosphatase 7 long form homolog |
| SNP_112152_A_21093  | NW_004518855.1 | scaffold4452 | 21093                   | AA                              | GG                 | GG               | INTRON                        | 101498400          | serine/threonine-protein phosphatase 7 long form homolog |
| SNP_112153_A_125871 | NW_004518855.1 | scaffold4452 | 125871                  | AA                              | GG                 | GG               | INTERGENIC                    |                    |                                                          |
| SNP_112154_A_125890 | NW_004518855.1 | scaffold4452 | 125890                  | CC                              | AA                 | AA               | INTERGENIC                    |                    |                                                          |
| SNP_112155_A_126016 | NW_004518855.1 | scaffold4452 | 126016                  | AA                              | GG                 | GG               | INTERGENIC                    |                    |                                                          |
| SNP_112156_A_126046 | NW_004518855.1 | scaffold4452 | 126046                  | CC                              | AA                 | AA               | INTERGENIC                    |                    |                                                          |
| SNP_112157_A_126117 | NW_004518855.1 | scaffold4452 | 126117                  | AA                              | TT                 | TT               | INTERGENIC                    |                    |                                                          |
| SNP_112158_A_126121 | NW_004518855.1 | scaffold4452 | 126121                  | GG                              | AA                 | AA               | INTERGENIC                    |                    |                                                          |
| SNP_112159_A_126144 | NW_004518855.1 | scaffold4452 | 126144                  | AA                              | TT                 | TT               | INTERGENIC                    |                    |                                                          |
| SNP_112161_A_126205 | NW_004518855.1 | scaffold4452 | 126205                  | GG                              | AA                 | AA               | INTERGENIC                    |                    |                                                          |
| SNP_112162_A_126206 | NW_004518855.1 | scaffold4452 | 126206                  | AA                              | CC                 | CC               | INTERGENIC                    |                    |                                                          |
| SNP_112163_A_640    | NW_004518857.1 | scaffold4455 | 640                     | CC                              | TT                 | TT               | INTERGENIC                    |                    |                                                          |
| SNP_112164_A_1351   | NW_004518857.1 | scaffold4455 | 1351                    | CC                              | GG                 | GG               | INTERGENIC                    |                    |                                                          |

| SNPs IDs           | Chromosome IDs | Chromosomes  | Physical positions (bp) | CDC Frontier (Reference genome) | (Pusa 1103 & HPNB) | (ILWC 46 & LPNB) | Sequence Components of genome | Gene accession IDs | Putative functions               |
|--------------------|----------------|--------------|-------------------------|---------------------------------|--------------------|------------------|-------------------------------|--------------------|----------------------------------|
| SNP_112165_A_604   | NW_004518858.1 | scaffold4456 | 604                     | TT                              | AA                 | AA               | INTERGENIC                    |                    |                                  |
| SNP_112166_A_2833  | NW_004518861.1 | scaffold4462 | 2833                    | TT                              | CC                 | CC               | URR                           | 101499371          | GDP-mannose 3,5-epimerase 1-like |
| SNP_112167_A_3035  | NW_004518861.1 | scaffold4462 | 3035                    | GG                              | AA                 | AA               | URR                           | 101499371          | GDP-mannose 3,5-epimerase 1-like |
| SNP_112168_A_3059  | NW_004518861.1 | scaffold4462 | 3059                    | AA                              | GG                 | GG               | URR                           | 101499371          | GDP-mannose 3,5-epimerase 1-like |
| SNP_112169_A_3064  | NW_004518861.1 | scaffold4462 | 3064                    | GG                              | TT                 | TT               | URR                           | 101499371          | GDP-mannose 3,5-epimerase 1-like |
| SNP_112170_A_3065  | NW_004518861.1 | scaffold4462 | 3065                    | AA                              | GG                 | GG               | URR                           | 101499371          | GDP-mannose 3,5-epimerase 1-like |
| SNP_112171_A_3358  | NW_004518861.1 | scaffold4462 | 3358                    | GG                              | CC                 | CC               | URR                           | 101499371          | GDP-mannose 3,5-epimerase 1-like |
| SNP_112172_A_3392  | NW_004518861.1 | scaffold4462 | 3392                    | GG                              | AA                 | AA               | URR                           | 101499371          | GDP-mannose 3,5-epimerase 1-like |
| SNP_112173_A_600   | NW_004518862.1 | scaffold4465 | 600                     | GG                              | TT                 | TT               | INTERGENIC                    |                    |                                  |
| SNP_112174_A_662   | NW_004518862.1 | scaffold4465 | 662                     | GG                              | AA                 | AA               | INTERGENIC                    |                    |                                  |
| SNP_112175_A_2369  | NW_004518862.1 | scaffold4465 | 2369                    | TT                              | GG                 | GG               | INTERGENIC                    |                    |                                  |
| SNP_112176_A_2437  | NW_004518862.1 | scaffold4465 | 2437                    | TT                              | AA                 | AA               | INTERGENIC                    |                    |                                  |
| SNP_112177_A_650   | NW_004518869.1 | scaffold4475 | 650                     | GG                              | CC                 | CC               | INTERGENIC                    |                    |                                  |
| SNP_112178_A_10363 | NW_004518873.1 | scaffold4481 | 10363                   | AA                              | TT                 | TT               | INTERGENIC                    |                    |                                  |
| SNP_112179_A_159   | NW_004518878.1 | scaffold4488 | 159                     | TT                              | AA                 | AA               | INTERGENIC                    |                    |                                  |
| SNP_112180_A_195   | NW_004518878.1 | scaffold4488 | 195                     | CC                              | AA                 | AA               | INTERGENIC                    |                    |                                  |
| SNP_112181_A_391   | NW_004518882.1 | scaffold4494 | 391                     | TT                              | AA                 | AA               | INTERGENIC                    |                    |                                  |
| SNP_112182_A_104   | NW_004518883.1 | scaffold4495 | 104                     | AA                              | TT                 | TT               | INTERGENIC                    |                    |                                  |
| SNP_112183_A_1357  | NW_004518888.1 | scaffold4503 | 1357                    | TT                              | CC                 | CC               | INTERGENIC                    |                    |                                  |
| SNP_112184_A_1581  | NW_004518888.1 | scaffold4503 | 1581                    | TT                              | AA                 | AA               | INTERGENIC                    |                    |                                  |
| SNP_112185_A_1611  | NW_004518890.1 | scaffold4505 | 1611                    | CC                              | GG                 | GG               | INTERGENIC                    |                    |                                  |
| SNP_112186_A_1651  | NW_004518890.1 | scaffold4505 | 1651                    | GG                              | TT                 | TT               | INTERGENIC                    |                    |                                  |

| SNPs IDs           | Chromosome IDs | Chromosomes  | Physical positions (bp) | CDC Frontier (Reference genome) | (Pusa 1103 & HPNB) | (ILWC 46 & LPNB) | Sequence genome | Components of | Gene accession IDs | Putative functions |
|--------------------|----------------|--------------|-------------------------|---------------------------------|--------------------|------------------|-----------------|---------------|--------------------|--------------------|
| SNP_112187_A_1756  | NW_004518890.1 | scaffold4505 | 1756                    | GG                              | CC                 | CC               | INTERGENIC      |               |                    |                    |
| SNP_112189_A_442   | NW_004518892.1 | scaffold4507 | 442                     | GG                              | AA                 | AA               | INTERGENIC      |               |                    |                    |
| SNP_112190_A_2985  | NW_004518893.1 | scaffold4508 | 2985                    | TT                              | AA                 | AA               | INTERGENIC      |               |                    |                    |
| SNP_112192_A_33633 | NW_004518893.1 | scaffold4508 | 33633                   | TT                              | AA                 | AA               | INTERGENIC      |               |                    |                    |
| SNP_112193_A_33639 | NW_004518893.1 | scaffold4508 | 33639                   | AA                              | TT                 | TT               | INTERGENIC      |               |                    |                    |
| SNP_112194_A_33640 | NW_004518893.1 | scaffold4508 | 33640                   | TT                              | GG                 | GG               | INTERGENIC      |               |                    |                    |
| SNP_112195_A_33669 | NW_004518893.1 | scaffold4508 | 33669                   | CC                              | TT                 | TT               | INTERGENIC      |               |                    |                    |
| SNP_112196_A_33696 | NW_004518893.1 | scaffold4508 | 33696                   | AA                              | CC                 | CC               | INTERGENIC      |               |                    |                    |
| SNP_112198_A_36775 | NW_004518893.1 | scaffold4508 | 36775                   | TT                              | AA                 | AA               | INTERGENIC      |               |                    |                    |
| SNP_112199_A_36840 | NW_004518893.1 | scaffold4508 | 36840                   | GG                              | CC                 | CC               | INTERGENIC      |               |                    |                    |
| SNP_112200_A_37003 | NW_004518893.1 | scaffold4508 | 37003                   | CC                              | TT                 | TT               | INTERGENIC      |               |                    |                    |
| SNP_112201_A_37079 | NW_004518893.1 | scaffold4508 | 37079                   | CC                              | TT                 | TT               | INTERGENIC      |               |                    |                    |
| SNP_112202_A_37098 | NW_004518893.1 | scaffold4508 | 37098                   | AA                              | GG                 | GG               | INTERGENIC      |               |                    |                    |
| SNP_112203_A_37152 | NW_004518893.1 | scaffold4508 | 37152                   | GG                              | AA                 | AA               | INTERGENIC      |               |                    |                    |
| SNP_112204_A_512   | NW_004518894.1 | scaffold4509 | 512                     | TT                              | CC                 | CC               | INTERGENIC      |               |                    |                    |
| SNP_112205_A_527   | NW_004518894.1 | scaffold4509 | 527                     | GG                              | AA                 | AA               | INTERGENIC      |               |                    |                    |
| SNP_112206_A_555   | NW_004518894.1 | scaffold4509 | 555                     | AA                              | CC                 | CC               | INTERGENIC      |               |                    |                    |
| SNP_112207_A_767   | NW_004518894.1 | scaffold4509 | 767                     | GG                              | CC                 | CC               | INTERGENIC      |               |                    |                    |
| SNP_112208_A_802   | NW_004518894.1 | scaffold4509 | 802                     | AA                              | TT                 | TT               | INTERGENIC      |               |                    |                    |
| SNP_112209_A_1235  | NW_004518894.1 | scaffold4509 | 1235                    | GG                              | AA                 | AA               | INTERGENIC      |               |                    |                    |
| SNP_112210_A_1636  | NW_004518894.1 | scaffold4509 | 1636                    | GG                              | AA                 | AA               | INTERGENIC      |               |                    |                    |
| SNP_112212_A_11671 | NW_004518896.1 | scaffold4511 | 11671                   | CC                              | TT                 | TT               | INTERGENIC      |               |                    |                    |

| SNPs IDs           | Chromosome IDs | Chromosomes  | Physical positions (bp) | CDC Frontier (Reference genome) | (Pusa 1103 & HPNB) | (ILWC 46 & LPNB) | Sequence genome | Components of | Gene accession IDs | Putative functions |
|--------------------|----------------|--------------|-------------------------|---------------------------------|--------------------|------------------|-----------------|---------------|--------------------|--------------------|
| SNP_112213_A_12899 | NW_004518896.1 | scaffold4511 | 12899                   | AA                              | TT                 | TT               | INTERGENIC      |               |                    |                    |
| SNP_112214_A_22734 | NW_004518896.1 | scaffold4511 | 22734                   | AA                              | TT                 | TT               | INTERGENIC      |               |                    |                    |
| SNP_112215_A_22828 | NW_004518896.1 | scaffold4511 | 22828                   | AA                              | GG                 | GG               | INTERGENIC      |               |                    |                    |
| SNP_112217_A_22937 | NW_004518896.1 | scaffold4511 | 22937                   | TT                              | AA                 | AA               | INTERGENIC      |               |                    |                    |
| SNP_112218_A_22942 | NW_004518896.1 | scaffold4511 | 22942                   | CC                              | TT                 | TT               | INTERGENIC      |               |                    |                    |
| SNP_112220_A_23071 | NW_004518896.1 | scaffold4511 | 23071                   | TT                              | CC                 | CC               | INTERGENIC      |               |                    |                    |
| SNP_112221_A_23188 | NW_004518896.1 | scaffold4511 | 23188                   | AA                              | GG                 | GG               | INTERGENIC      |               |                    |                    |
| SNP_112222_A_23267 | NW_004518896.1 | scaffold4511 | 23267                   | CC                              | TT                 | TT               | INTERGENIC      |               |                    |                    |
| SNP_112223_A_23391 | NW_004518896.1 | scaffold4511 | 23391                   | TT                              | CC                 | CC               | INTERGENIC      |               |                    |                    |
| SNP_112224_A_23510 | NW_004518896.1 | scaffold4511 | 23510                   | AA                              | GG                 | GG               | INTERGENIC      |               |                    |                    |
| SNP_112226_A_70    | NW_004518898.1 | scaffold4513 | 70                      | AA                              | GG                 | GG               | INTERGENIC      |               |                    |                    |
| SNP_112227_A_79    | NW_004518898.1 | scaffold4513 | 79                      | GG                              | TT                 | TT               | INTERGENIC      |               |                    |                    |
| SNP_112228_A_226   | NW_004518898.1 | scaffold4513 | 226                     | TT                              | GG                 | GG               | INTERGENIC      |               |                    |                    |
| SNP_112229_A_371   | NW_004518898.1 | scaffold4513 | 371                     | GG                              | AA                 | AA               | INTERGENIC      |               |                    |                    |
| SNP_112230_A_3101  | NW_004518898.1 | scaffold4513 | 3101                    | GG                              | TT                 | TT               | INTERGENIC      |               |                    |                    |
| SNP_112231_A_3112  | NW_004518898.1 | scaffold4513 | 3112                    | GG                              | TT                 | TT               | INTERGENIC      |               |                    |                    |
| SNP_112232_A_3140  | NW_004518898.1 | scaffold4513 | 3140                    | TT                              | AA                 | AA               | INTERGENIC      |               |                    |                    |
| SNP_112233_A_3208  | NW_004518898.1 | scaffold4513 | 3208                    | AA                              | GG                 | GG               | INTERGENIC      |               |                    |                    |
| SNP_112234_A_3257  | NW_004518898.1 | scaffold4513 | 3257                    | GG                              | AA                 | AA               | INTERGENIC      |               |                    |                    |
| SNP_112235_A_3265  | NW_004518898.1 | scaffold4513 | 3265                    | TT                              | AA                 | AA               | INTERGENIC      |               |                    |                    |
| SNP_112236_A_3271  | NW_004518898.1 | scaffold4513 | 3271                    | TT                              | CC                 | CC               | INTERGENIC      |               |                    |                    |
| SNP_112237_A_3363  | NW_004518898.1 | scaffold4513 | 3363                    | TT                              | CC                 | CC               | INTERGENIC      |               |                    |                    |



| SNPs IDs           | Chromosome IDs | Chromosomes  | Physical positions (bp) | CDC Frontier (Reference genome) | (Pusa 1103 & HPNB) | (ILWC 46 & LPNB) | Sequence genome | Components of | Gene accession IDs | Putative functions |
|--------------------|----------------|--------------|-------------------------|---------------------------------|--------------------|------------------|-----------------|---------------|--------------------|--------------------|
| SNP_112238_A_3512  | NW_004518898.1 | scaffold4513 | 3512                    | TT                              | CC                 | CC               | INTERGENIC      |               |                    |                    |
| SNP_112239_A_3540  | NW_004518898.1 | scaffold4513 | 3540                    | GG                              | AA                 | AA               | INTERGENIC      |               |                    |                    |
| SNP_112240_A_3571  | NW_004518898.1 | scaffold4513 | 3571                    | TT                              | CC                 | CC               | INTERGENIC      |               |                    |                    |
| SNP_112241_A_475   | NW_004518900.1 | scaffold4515 | 475                     | GG                              | AA                 | AA               | INTERGENIC      |               |                    |                    |
| SNP_112243_A_756   | NW_004518900.1 | scaffold4515 | 756                     | GG                              | CC                 | CC               | INTERGENIC      |               |                    |                    |
| SNP_112244_A_450   | NW_004518904.1 | scaffold4521 | 450                     | GG                              | AA                 | AA               | INTERGENIC      |               |                    |                    |
| SNP_112245_A_479   | NW_004518904.1 | scaffold4521 | 479                     | GG                              | AA                 | AA               | INTERGENIC      |               |                    |                    |
| SNP_112246_A_2288  | NW_004518906.1 | scaffold4524 | 2288                    | TT                              | CC                 | CC               | INTERGENIC      |               |                    |                    |
| SNP_112247_A_400   | NW_004518907.1 | scaffold4525 | 400                     | AA                              | TT                 | TT               | INTERGENIC      |               |                    |                    |
| SNP_112248_A_687   | NW_004518907.1 | scaffold4525 | 687                     | GG                              | TT                 | TT               | INTERGENIC      |               |                    |                    |
| SNP_112249_A_790   | NW_004518907.1 | scaffold4525 | 790                     | CC                              | TT                 | TT               | INTERGENIC      |               |                    |                    |
| SNP_112250_A_819   | NW_004518907.1 | scaffold4525 | 819                     | AA                              | GG                 | GG               | INTERGENIC      |               |                    |                    |
| SNP_112251_A_822   | NW_004518907.1 | scaffold4525 | 822                     | TT                              | GG                 | GG               | INTERGENIC      |               |                    |                    |
| SNP_112252_A_942   | NW_004518907.1 | scaffold4525 | 942                     | AA                              | GG                 | GG               | INTERGENIC      |               |                    |                    |
| SNP_112253_A_536   | NW_004518910.1 | scaffold4528 | 536                     | TT                              | CC                 | CC               | INTERGENIC      |               |                    |                    |
| SNP_112254_A_545   | NW_004518910.1 | scaffold4528 | 545                     | CC                              | AA                 | AA               | INTERGENIC      |               |                    |                    |
| SNP_112255_A_15118 | NW_004518915.1 | scaffold4533 | 15118                   | AA                              | GG                 | GG               | INTERGENIC      |               |                    |                    |
| SNP_112256_A_155   | NW_004518916.1 | scaffold4534 | 155                     | GG                              | AA                 | AA               | INTERGENIC      |               |                    |                    |
| SNP_112257_A_175   | NW_004518916.1 | scaffold4534 | 175                     | TT                              | AA                 | AA               | INTERGENIC      |               |                    |                    |
| SNP_112258_A_178   | NW_004518916.1 | scaffold4534 | 178                     | AA                              | GG                 | GG               | INTERGENIC      |               |                    |                    |
| SNP_112259_A_190   | NW_004518916.1 | scaffold4534 | 190                     | GG                              | AA                 | AA               | INTERGENIC      |               |                    |                    |
| SNP_112260_A_191   | NW_004518916.1 | scaffold4534 | 191                     | GG                              | TT                 | TT               | INTERGENIC      |               |                    |                    |

| SNPs IDs          | Chromosome IDs | Chromosomes  | Physical positions (bp) | CDC Frontier (Reference genome) | (Pusa 1103 & HPNB) | (ILWC 46 & LPNB) | Sequence genome | Components of | Gene accession IDs | Putative functions |
|-------------------|----------------|--------------|-------------------------|---------------------------------|--------------------|------------------|-----------------|---------------|--------------------|--------------------|
| SNP_112261_A_194  | NW_004518916.1 | scaffold4534 | 194                     | CC                              | TT                 | TT               | INTERGENIC      |               |                    |                    |
| SNP_112262_A_208  | NW_004518916.1 | scaffold4534 | 208                     | AA                              | TT                 | TT               | INTERGENIC      |               |                    |                    |
| SNP_112263_A_212  | NW_004518916.1 | scaffold4534 | 212                     | AA                              | GG                 | GG               | INTERGENIC      |               |                    |                    |
| SNP_112264_A_403  | NW_004518916.1 | scaffold4534 | 403                     | AA                              | CC                 | CC               | INTERGENIC      |               |                    |                    |
| SNP_112265_A_476  | NW_004518916.1 | scaffold4534 | 476                     | TT                              | AA                 | AA               | INTERGENIC      |               |                    |                    |
| SNP_112266_A_681  | NW_004518916.1 | scaffold4534 | 681                     | CC                              | TT                 | TT               | INTERGENIC      |               |                    |                    |
| SNP_112267_A_702  | NW_004518916.1 | scaffold4534 | 702                     | GG                              | AA                 | AA               | INTERGENIC      |               |                    |                    |
| SNP_112268_A_710  | NW_004518916.1 | scaffold4534 | 710                     | AA                              | TT                 | TT               | INTERGENIC      |               |                    |                    |
| SNP_112269_A_731  | NW_004518916.1 | scaffold4534 | 731                     | GG                              | AA                 | AA               | INTERGENIC      |               |                    |                    |
| SNP_112270_A_734  | NW_004518916.1 | scaffold4534 | 734                     | CC                              | TT                 | TT               | INTERGENIC      |               |                    |                    |
| SNP_112271_A_2840 | NW_004518916.1 | scaffold4534 | 2840                    | TT                              | GG                 | GG               | INTERGENIC      |               |                    |                    |
| SNP_112272_A_3046 | NW_004518916.1 | scaffold4534 | 3046                    | TT                              | AA                 | AA               | INTERGENIC      |               |                    |                    |
| SNP_112273_A_1402 | NW_004518919.1 | scaffold4538 | 1402                    | AA                              | CC                 | CC               | INTERGENIC      |               |                    |                    |
| SNP_112274_A_1439 | NW_004518919.1 | scaffold4538 | 1439                    | GG                              | AA                 | AA               | INTERGENIC      |               |                    |                    |
| SNP_112275_A_1603 | NW_004518919.1 | scaffold4538 | 1603                    | GG                              | AA                 | AA               | INTERGENIC      |               |                    |                    |
| SNP_112276_A_1635 | NW_004518919.1 | scaffold4538 | 1635                    | TT                              | CC                 | CC               | INTERGENIC      |               |                    |                    |
| SNP_112277_A_1638 | NW_004518919.1 | scaffold4538 | 1638                    | TT                              | AA                 | AA               | INTERGENIC      |               |                    |                    |
| SNP_112278_A_1656 | NW_004518919.1 | scaffold4538 | 1656                    | AA                              | CC                 | CC               | INTERGENIC      |               |                    |                    |
| SNP_112279_A_1729 | NW_004518919.1 | scaffold4538 | 1729                    | GG                              | TT                 | TT               | INTERGENIC      |               |                    |                    |
| SNP_112280_A_1738 | NW_004518919.1 | scaffold4538 | 1738                    | AA                              | GG                 | GG               | INTERGENIC      |               |                    |                    |
| SNP_112281_A_3380 | NW_004518919.1 | scaffold4538 | 3380                    | CC                              | TT                 | TT               | INTERGENIC      |               |                    |                    |
| SNP_112282_A_3382 | NW_004518919.1 | scaffold4538 | 3382                    | GG                              | AA                 | AA               | INTERGENIC      |               |                    |                    |

| SNPs IDs           | Chromosome IDs | Chromosomes  | Physical positions (bp) | CDC Frontier (Reference genome) | (Pusa 1103 & HPNB) | (ILWC 46 & LPNB) | Sequence genome | Components of | Gene accession IDs | Putative functions |
|--------------------|----------------|--------------|-------------------------|---------------------------------|--------------------|------------------|-----------------|---------------|--------------------|--------------------|
| SNP_112283_A_5773  | NW_004518919.1 | scaffold4538 | 5773                    | GG                              | AA                 | AA               | INTERGENIC      |               |                    |                    |
| SNP_112284_A_1460  | NW_004518922.1 | scaffold4543 | 1460                    | TT                              | GG                 | GG               | INTERGENIC      |               |                    |                    |
| SNP_112285_A_1470  | NW_004518922.1 | scaffold4543 | 1470                    | TT                              | AA                 | AA               | INTERGENIC      |               |                    |                    |
| SNP_112287_A_4566  | NW_004518922.1 | scaffold4543 | 4566                    | TT                              | CC                 | CC               | INTERGENIC      |               |                    |                    |
| SNP_112289_A_69    | NW_004518924.1 | scaffold4549 | 69                      | TT                              | AA                 | AA               | INTERGENIC      |               |                    |                    |
| SNP_112290_A_84    | NW_004518924.1 | scaffold4549 | 84                      | AA                              | CC                 | CC               | INTERGENIC      |               |                    |                    |
| SNP_112291_A_91    | NW_004518924.1 | scaffold4549 | 91                      | AA                              | GG                 | GG               | INTERGENIC      |               |                    |                    |
| SNP_112292_A_103   | NW_004518924.1 | scaffold4549 | 103                     | AA                              | GG                 | GG               | INTERGENIC      |               |                    |                    |
| SNP_112294_A_190   | NW_004518924.1 | scaffold4549 | 190                     | CC                              | TT                 | TT               | INTERGENIC      |               |                    |                    |
| SNP_112295_A_196   | NW_004518924.1 | scaffold4549 | 196                     | GG                              | AA                 | AA               | INTERGENIC      |               |                    |                    |
| SNP_112297_A_472   | NW_004518924.1 | scaffold4549 | 472                     | AA                              | TT                 | TT               | INTERGENIC      |               |                    |                    |
| SNP_112298_A_483   | NW_004518924.1 | scaffold4549 | 483                     | GG                              | AA                 | AA               | INTERGENIC      |               |                    |                    |
| SNP_112299_A_2681  | NW_004518926.1 | scaffold4551 | 2681                    | TT                              | AA                 | AA               | INTERGENIC      |               |                    |                    |
| SNP_112300_A_2686  | NW_004518926.1 | scaffold4551 | 2686                    | CC                              | GG                 | GG               | INTERGENIC      |               |                    |                    |
| SNP_112301_A_2713  | NW_004518926.1 | scaffold4551 | 2713                    | AA                              | GG                 | GG               | INTERGENIC      |               |                    |                    |
| SNP_112302_A_2751  | NW_004518926.1 | scaffold4551 | 2751                    | GG                              | CC                 | CC               | INTERGENIC      |               |                    |                    |
| SNP_112303_A_2780  | NW_004518926.1 | scaffold4551 | 2780                    | AA                              | TT                 | TT               | INTERGENIC      |               |                    |                    |
| SNP_112304_A_3920  | NW_004518926.1 | scaffold4551 | 3920                    | AA                              | TT                 | TT               | INTERGENIC      |               |                    |                    |
| SNP_112305_A_6094  | NW_004518926.1 | scaffold4551 | 6094                    | CC                              | AA                 | AA               | INTERGENIC      |               |                    |                    |
| SNP_112306_A_6439  | NW_004518926.1 | scaffold4551 | 6439                    | AA                              | TT                 | TT               | INTERGENIC      |               |                    |                    |
| SNP_112307_A_15317 | NW_004518926.1 | scaffold4551 | 15317                   | GG                              | CC                 | CC               | INTERGENIC      |               |                    |                    |
| SNP_112308_A_18710 | NW_004518926.1 | scaffold4551 | 18710                   | CC                              | GG                 | GG               | INTERGENIC      |               |                    |                    |

| SNPs IDs           | Chromosome IDs | Chromosomes  | Physical positions (bp) | CDC Frontier (Reference genome) | (Pusa 1103 & HPNB) | (ILWC 46 & LPNB) | Sequence genome | Components of | Gene accession IDs | Putative functions |
|--------------------|----------------|--------------|-------------------------|---------------------------------|--------------------|------------------|-----------------|---------------|--------------------|--------------------|
| SNP_112309_A_18832 | NW_004518926.1 | scaffold4551 | 18832                   | TT                              | GG                 | GG               | INTERGENIC      |               |                    |                    |
| SNP_112310_A_18895 | NW_004518926.1 | scaffold4551 | 18895                   | TT                              | AA                 | AA               | INTERGENIC      |               |                    |                    |
| SNP_112311_A_18902 | NW_004518926.1 | scaffold4551 | 18902                   | TT                              | AA                 | AA               | INTERGENIC      |               |                    |                    |
| SNP_112312_A_18994 | NW_004518926.1 | scaffold4551 | 18994                   | CC                              | TT                 | TT               | INTERGENIC      |               |                    |                    |
| SNP_112313_A_19001 | NW_004518926.1 | scaffold4551 | 19001                   | TT                              | AA                 | AA               | INTERGENIC      |               |                    |                    |
| SNP_112314_A_19006 | NW_004518926.1 | scaffold4551 | 19006                   | AA                              | GG                 | GG               | INTERGENIC      |               |                    |                    |
| SNP_112315_A_19020 | NW_004518926.1 | scaffold4551 | 19020                   | GG                              | TT                 | TT               | INTERGENIC      |               |                    |                    |
| SNP_112316_A_19065 | NW_004518926.1 | scaffold4551 | 19065                   | GG                              | AA                 | AA               | INTERGENIC      |               |                    |                    |
| SNP_112317_A_19066 | NW_004518926.1 | scaffold4551 | 19066                   | AA                              | CC                 | CC               | INTERGENIC      |               |                    |                    |
| SNP_112318_A_19076 | NW_004518926.1 | scaffold4551 | 19076                   | AA                              | TT                 | TT               | INTERGENIC      |               |                    |                    |
| SNP_112319_A_19122 | NW_004518926.1 | scaffold4551 | 19122                   | CC                              | TT                 | TT               | INTERGENIC      |               |                    |                    |
| SNP_112320_A_19154 | NW_004518926.1 | scaffold4551 | 19154                   | GG                              | TT                 | TT               | INTERGENIC      |               |                    |                    |
| SNP_112322_A_19193 | NW_004518926.1 | scaffold4551 | 19193                   | AA                              | TT                 | TT               | INTERGENIC      |               |                    |                    |
| SNP_112324_A_19407 | NW_004518926.1 | scaffold4551 | 19407                   | TT                              | AA                 | AA               | INTERGENIC      |               |                    |                    |
| SNP_112325_A_19409 | NW_004518926.1 | scaffold4551 | 19409                   | AA                              | TT                 | TT               | INTERGENIC      |               |                    |                    |
| SNP_112326_A_19441 | NW_004518926.1 | scaffold4551 | 19441                   | GG                              | AA                 | AA               | INTERGENIC      |               |                    |                    |
| SNP_112327_A_566   | NW_004518930.1 | scaffold4557 | 566                     | TT                              | CC                 | CC               | INTERGENIC      |               |                    |                    |
| SNP_112328_A_807   | NW_004518930.1 | scaffold4557 | 807                     | TT                              | AA                 | AA               | INTERGENIC      |               |                    |                    |
| SNP_112329_A_823   | NW_004518930.1 | scaffold4557 | 823                     | TT                              | GG                 | GG               | INTERGENIC      |               |                    |                    |
| SNP_112330_A_10540 | NW_004518938.1 | scaffold4570 | 10540                   | GG                              | CC                 | CC               | INTERGENIC      |               |                    |                    |
| SNP_112331_A_10601 | NW_004518938.1 | scaffold4570 | 10601                   | TT                              | CC                 | CC               | INTERGENIC      |               |                    |                    |
| SNP_112332_A_10686 | NW_004518938.1 | scaffold4570 | 10686                   | AA                              | GG                 | GG               | INTERGENIC      |               |                    |                    |

| SNPs IDs           | Chromosome IDs | Chromosomes  | Physical positions (bp) | CDC Frontier (Reference genome) | (Pusa 1103 & HPNB) | (ILWC 46 & LPNB) | Sequence genome | Components of | Gene accession IDs | Putative functions |
|--------------------|----------------|--------------|-------------------------|---------------------------------|--------------------|------------------|-----------------|---------------|--------------------|--------------------|
| SNP_112333_A_378   | NW_004518939.1 | scaffold4572 | 378                     | AA                              | TT                 | TT               | INTERGENIC      |               |                    |                    |
| SNP_112334_A_1227  | NW_004518939.1 | scaffold4572 | 1227                    | CC                              | TT                 | TT               | INTERGENIC      |               |                    |                    |
| SNP_112335_A_1951  | NW_004518939.1 | scaffold4572 | 1951                    | CC                              | AA                 | AA               | INTERGENIC      |               |                    |                    |
| SNP_112336_A_2000  | NW_004518939.1 | scaffold4572 | 2000                    | TT                              | CC                 | CC               | INTERGENIC      |               |                    |                    |
| SNP_112337_A_2009  | NW_004518939.1 | scaffold4572 | 2009                    | GG                              | TT                 | TT               | INTERGENIC      |               |                    |                    |
| SNP_112338_A_2115  | NW_004518939.1 | scaffold4572 | 2115                    | GG                              | AA                 | AA               | INTERGENIC      |               |                    |                    |
| SNP_112339_A_2116  | NW_004518939.1 | scaffold4572 | 2116                    | GG                              | AA                 | AA               | INTERGENIC      |               |                    |                    |
| SNP_112340_A_2337  | NW_004518939.1 | scaffold4572 | 2337                    | GG                              | CC                 | CC               | INTERGENIC      |               |                    |                    |
| SNP_112341_A_2344  | NW_004518939.1 | scaffold4572 | 2344                    | CC                              | AA                 | AA               | INTERGENIC      |               |                    |                    |
| SNP_112342_A_2422  | NW_004518939.1 | scaffold4572 | 2422                    | GG                              | AA                 | AA               | INTERGENIC      |               |                    |                    |
| SNP_112343_A_2438  | NW_004518939.1 | scaffold4572 | 2438                    | AA                              | TT                 | TT               | INTERGENIC      |               |                    |                    |
| SNP_112344_A_8916  | NW_004518939.1 | scaffold4572 | 8916                    | TT                              | CC                 | CC               | INTERGENIC      |               |                    |                    |
| SNP_112345_A_8952  | NW_004518939.1 | scaffold4572 | 8952                    | AA                              | TT                 | TT               | INTERGENIC      |               |                    |                    |
| SNP_112346_A_8979  | NW_004518939.1 | scaffold4572 | 8979                    | GG                              | CC                 | CC               | INTERGENIC      |               |                    |                    |
| SNP_112347_A_8987  | NW_004518939.1 | scaffold4572 | 8987                    | TT                              | GG                 | GG               | INTERGENIC      |               |                    |                    |
| SNP_112348_A_9811  | NW_004518939.1 | scaffold4572 | 9811                    | TT                              | AA                 | AA               | INTERGENIC      |               |                    |                    |
| SNP_112349_A_10445 | NW_004518939.1 | scaffold4572 | 10445                   | TT                              | GG                 | GG               | INTERGENIC      |               |                    |                    |
| SNP_112350_A_10463 | NW_004518939.1 | scaffold4572 | 10463                   | AA                              | TT                 | TT               | INTERGENIC      |               |                    |                    |
| SNP_112351_A_11172 | NW_004518940.1 | scaffold4573 | 11172                   | GG                              | AA                 | AA               | INTERGENIC      |               |                    |                    |
| SNP_112352_A_11180 | NW_004518940.1 | scaffold4573 | 11180                   | CC                              | GG                 | GG               | INTERGENIC      |               |                    |                    |
| SNP_112353_A_11210 | NW_004518940.1 | scaffold4573 | 11210                   | GG                              | TT                 | TT               | INTERGENIC      |               |                    |                    |
| SNP_112354_A_566   | NW_004518945.1 | scaffold4578 | 566                     | GG                              | CC                 | CC               | INTERGENIC      |               |                    |                    |

| SNPs IDs          | Chromosome IDs | Chromosomes  | Physical positions (bp) | CDC Frontier (Reference genome) | (Pusa 1103 & HPNB) | (ILWC 46 & LPNB) | Sequence genome | Components of | Gene accession IDs | Putative functions |
|-------------------|----------------|--------------|-------------------------|---------------------------------|--------------------|------------------|-----------------|---------------|--------------------|--------------------|
| SNP_112355_A_840  | NW_004518945.1 | scaffold4578 | 840                     | TT                              | GG                 | GG               | INTERGENIC      |               |                    |                    |
| SNP_112356_A_875  | NW_004518945.1 | scaffold4578 | 875                     | GG                              | AA                 | AA               | INTERGENIC      |               |                    |                    |
| SNP_112358_A_1070 | NW_004518947.1 | scaffold4582 | 1070                    | GG                              | TT                 | TT               | INTERGENIC      |               |                    |                    |
| SNP_112359_A_1097 | NW_004518947.1 | scaffold4582 | 1097                    | AA                              | TT                 | TT               | INTERGENIC      |               |                    |                    |
| SNP_112360_A_5888 | NW_004518947.1 | scaffold4582 | 5888                    | AA                              | GG                 | GG               | INTERGENIC      |               |                    |                    |
| SNP_112361_A_6078 | NW_004518947.1 | scaffold4582 | 6078                    | GG                              | CC                 | CC               | INTERGENIC      |               |                    |                    |
| SNP_112362_A_6119 | NW_004518947.1 | scaffold4582 | 6119                    | TT                              | CC                 | CC               | INTERGENIC      |               |                    |                    |
| SNP_112363_A_6371 | NW_004518947.1 | scaffold4582 | 6371                    | AA                              | CC                 | CC               | INTERGENIC      |               |                    |                    |
| SNP_112364_A_6407 | NW_004518947.1 | scaffold4582 | 6407                    | AA                              | GG                 | GG               | INTERGENIC      |               |                    |                    |
| SNP_112365_A_7072 | NW_004518947.1 | scaffold4582 | 7072                    | CC                              | TT                 | TT               | INTERGENIC      |               |                    |                    |
| SNP_112366_A_7218 | NW_004518947.1 | scaffold4582 | 7218                    | AA                              | GG                 | GG               | INTERGENIC      |               |                    |                    |
| SNP_112367_A_7220 | NW_004518947.1 | scaffold4582 | 7220                    | CC                              | AA                 | AA               | INTERGENIC      |               |                    |                    |
| SNP_112368_A_7249 | NW_004518947.1 | scaffold4582 | 7249                    | CC                              | AA                 | AA               | INTERGENIC      |               |                    |                    |
| SNP_112369_A_7488 | NW_004518947.1 | scaffold4582 | 7488                    | TT                              | AA                 | AA               | INTERGENIC      |               |                    |                    |
| SNP_112370_A_7492 | NW_004518947.1 | scaffold4582 | 7492                    | TT                              | CC                 | CC               | INTERGENIC      |               |                    |                    |
| SNP_112371_A_7570 | NW_004518947.1 | scaffold4582 | 7570                    | TT                              | CC                 | CC               | INTERGENIC      |               |                    |                    |
| SNP_112373_A_7685 | NW_004518947.1 | scaffold4582 | 7685                    | TT                              | CC                 | CC               | INTERGENIC      |               |                    |                    |
| SNP_112374_A_7692 | NW_004518947.1 | scaffold4582 | 7692                    | CC                              | TT                 | TT               | INTERGENIC      |               |                    |                    |
| SNP_112375_A_7724 | NW_004518947.1 | scaffold4582 | 7724                    | TT                              | CC                 | CC               | INTERGENIC      |               |                    |                    |
| SNP_112376_A_7732 | NW_004518947.1 | scaffold4582 | 7732                    | GG                              | AA                 | AA               | INTERGENIC      |               |                    |                    |
| SNP_112377_A_7803 | NW_004518947.1 | scaffold4582 | 7803                    | TT                              | CC                 | CC               | INTERGENIC      |               |                    |                    |
| SNP_112378_A_7952 | NW_004518947.1 | scaffold4582 | 7952                    | AA                              | GG                 | GG               | INTERGENIC      |               |                    |                    |

| SNPs IDs           | Chromosome IDs | Chromosomes  | Physical positions (bp) | CDC Frontier (Reference genome) | (Pusa 1103 & HPNB) | (ILWC 46 & LPNB) | Sequence genome | Components of | Gene accession IDs | Putative functions |
|--------------------|----------------|--------------|-------------------------|---------------------------------|--------------------|------------------|-----------------|---------------|--------------------|--------------------|
| SNP_112379_A_7970  | NW_004518947.1 | scaffold4582 | 7970                    | CC                              | TT                 | TT               | INTERGENIC      |               |                    |                    |
| SNP_112380_A_7979  | NW_004518947.1 | scaffold4582 | 7979                    | TT                              | CC                 | CC               | INTERGENIC      |               |                    |                    |
| SNP_112381_A_11346 | NW_004518947.1 | scaffold4582 | 11346                   | GG                              | TT                 | TT               | INTERGENIC      |               |                    |                    |
| SNP_112382_A_3729  | NW_004518949.1 | scaffold4585 | 3729                    | TT                              | CC                 | CC               | INTERGENIC      |               |                    |                    |
| SNP_112383_A_2715  | NW_004518955.1 | scaffold4591 | 2715                    | GG                              | TT                 | TT               | INTERGENIC      |               |                    |                    |
| SNP_112384_A_5389  | NW_004518955.1 | scaffold4591 | 5389                    | GG                              | CC                 | CC               | INTERGENIC      |               |                    |                    |
| SNP_112385_A_5761  | NW_004518955.1 | scaffold4591 | 5761                    | CC                              | AA                 | AA               | INTERGENIC      |               |                    |                    |
| SNP_112386_A_6259  | NW_004518955.1 | scaffold4591 | 6259                    | CC                              | GG                 | GG               | INTERGENIC      |               |                    |                    |
| SNP_112387_A_6267  | NW_004518955.1 | scaffold4591 | 6267                    | AA                              | CC                 | CC               | INTERGENIC      |               |                    |                    |
| SNP_112388_A_6397  | NW_004518955.1 | scaffold4591 | 6397                    | AA                              | TT                 | TT               | INTERGENIC      |               |                    |                    |
| SNP_112389_A_7048  | NW_004518955.1 | scaffold4591 | 7048                    | TT                              | CC                 | CC               | INTERGENIC      |               |                    |                    |
| SNP_112390_A_1341  | NW_004518956.1 | scaffold4592 | 1341                    | AA                              | TT                 | TT               | INTERGENIC      |               |                    |                    |
| SNP_112391_A_905   | NW_004518962.1 | scaffold4600 | 905                     | AA                              | TT                 | TT               | INTERGENIC      |               |                    |                    |
| SNP_112392_A_1074  | NW_004518962.1 | scaffold4600 | 1074                    | AA                              | GG                 | GG               | INTERGENIC      |               |                    |                    |
| SNP_112394_A_1495  | NW_004518962.1 | scaffold4600 | 1495                    | CC                              | TT                 | TT               | INTERGENIC      |               |                    |                    |
| SNP_112395_A_1650  | NW_004518962.1 | scaffold4600 | 1650                    | AA                              | GG                 | GG               | INTERGENIC      |               |                    |                    |
| SNP_112396_A_1825  | NW_004518962.1 | scaffold4600 | 1825                    | GG                              | TT                 | TT               | INTERGENIC      |               |                    |                    |
| SNP_112397_A_7400  | NW_004518963.1 | scaffold4602 | 7400                    | GG                              | AA                 | AA               | INTERGENIC      |               |                    |                    |
| SNP_112398_A_7744  | NW_004518963.1 | scaffold4602 | 7744                    | AA                              | GG                 | GG               | INTERGENIC      |               |                    |                    |
| SNP_112399_A_7761  | NW_004518963.1 | scaffold4602 | 7761                    | TT                              | GG                 | GG               | INTERGENIC      |               |                    |                    |
| SNP_112400_A_7776  | NW_004518963.1 | scaffold4602 | 7776                    | AA                              | CC                 | CC               | INTERGENIC      |               |                    |                    |
| SNP_112401_A_7826  | NW_004518963.1 | scaffold4602 | 7826                    | TT                              | CC                 | CC               | INTERGENIC      |               |                    |                    |

| SNPs IDs           | Chromosome IDs | Chromosomes  | Physical positions (bp) | CDC Frontier (Reference genome) | (Pusa 1103 & HPNB) | (ILWC 46 & LPNB) | Sequence genome | Components of | Gene accession IDs | Putative functions |
|--------------------|----------------|--------------|-------------------------|---------------------------------|--------------------|------------------|-----------------|---------------|--------------------|--------------------|
| SNP_112402_A_7878  | NW_004518963.1 | scaffold4602 | 7878                    | AA                              | GG                 | GG               | INTERGENIC      |               |                    |                    |
| SNP_112403_A_7896  | NW_004518963.1 | scaffold4602 | 7896                    | TT                              | GG                 | GG               | INTERGENIC      |               |                    |                    |
| SNP_112404_A_7947  | NW_004518963.1 | scaffold4602 | 7947                    | AA                              | CC                 | CC               | INTERGENIC      |               |                    |                    |
| SNP_112405_A_8256  | NW_004518963.1 | scaffold4602 | 8256                    | GG                              | AA                 | AA               | INTERGENIC      |               |                    |                    |
| SNP_112406_A_19323 | NW_004518963.1 | scaffold4602 | 19323                   | TT                              | AA                 | AA               | INTERGENIC      |               |                    |                    |
| SNP_112407_A_19339 | NW_004518963.1 | scaffold4602 | 19339                   | CC                              | GG                 | GG               | INTERGENIC      |               |                    |                    |
| SNP_112408_A_19361 | NW_004518963.1 | scaffold4602 | 19361                   | AA                              | GG                 | GG               | INTERGENIC      |               |                    |                    |
| SNP_112409_A_17063 | NW_004518965.1 | scaffold4605 | 17063                   | TT                              | AA                 | AA               | INTERGENIC      |               |                    |                    |
| SNP_112410_A_21853 | NW_004518965.1 | scaffold4605 | 21853                   | TT                              | GG                 | GG               | INTERGENIC      |               |                    |                    |
| SNP_112411_A_22248 | NW_004518965.1 | scaffold4605 | 22248                   | GG                              | CC                 | CC               | INTERGENIC      |               |                    |                    |
| SNP_112412_A_23232 | NW_004518965.1 | scaffold4605 | 23232                   | GG                              | CC                 | CC               | INTERGENIC      |               |                    |                    |
| SNP_112413_A_24378 | NW_004518965.1 | scaffold4605 | 24378                   | TT                              | GG                 | GG               | INTERGENIC      |               |                    |                    |
| SNP_112414_A_24417 | NW_004518965.1 | scaffold4605 | 24417                   | GG                              | AA                 | AA               | INTERGENIC      |               |                    |                    |
| SNP_112415_A_24611 | NW_004518965.1 | scaffold4605 | 24611                   | CC                              | GG                 | GG               | INTERGENIC      |               |                    |                    |
| SNP_112416_A_24769 | NW_004518965.1 | scaffold4605 | 24769                   | AA                              | GG                 | GG               | INTERGENIC      |               |                    |                    |
| SNP_112418_A_24879 | NW_004518965.1 | scaffold4605 | 24879                   | TT                              | AA                 | AA               | INTERGENIC      |               |                    |                    |
| SNP_112419_A_24934 | NW_004518965.1 | scaffold4605 | 24934                   | TT                              | AA                 | AA               | INTERGENIC      |               |                    |                    |
| SNP_112420_A_24970 | NW_004518965.1 | scaffold4605 | 24970                   | CC                              | AA                 | AA               | INTERGENIC      |               |                    |                    |
| SNP_112421_A_25139 | NW_004518965.1 | scaffold4605 | 25139                   | TT                              | GG                 | GG               | INTERGENIC      |               |                    |                    |
| SNP_112422_A_25353 | NW_004518965.1 | scaffold4605 | 25353                   | AA                              | CC                 | CC               | INTERGENIC      |               |                    |                    |
| SNP_112423_A_4381  | NW_004518966.1 | scaffold4607 | 4381                    | TT                              | CC                 | CC               | INTERGENIC      |               |                    |                    |
| SNP_112424_A_321   | NW_004518978.1 | scaffold4628 | 321                     | TT                              | CC                 | CC               | INTERGENIC      |               |                    |                    |



| SNPs IDs          | Chromosome IDs | Chromosomes  | Physical positions (bp) | CDC Frontier (Reference genome) | (Pusa 1103 & HPNB) | (ILWC 46 & LPNB) | Sequence genome | Components of | Gene accession IDs | Putative functions |
|-------------------|----------------|--------------|-------------------------|---------------------------------|--------------------|------------------|-----------------|---------------|--------------------|--------------------|
| SNP_112425_A_511  | NW_004518978.1 | scaffold4628 | 511                     | GG                              | TT                 | TT               | INTERGENIC      |               |                    |                    |
| SNP_112426_A_560  | NW_004518978.1 | scaffold4628 | 560                     | TT                              | CC                 | CC               | INTERGENIC      |               |                    |                    |
| SNP_112427_A_5947 | NW_004518979.1 | scaffold4629 | 5947                    | CC                              | TT                 | TT               | INTERGENIC      |               |                    |                    |
| SNP_112428_A_5975 | NW_004518979.1 | scaffold4629 | 5975                    | GG                              | AA                 | AA               | INTERGENIC      |               |                    |                    |
| SNP_112429_A_6055 | NW_004518979.1 | scaffold4629 | 6055                    | GG                              | AA                 | AA               | INTERGENIC      |               |                    |                    |
| SNP_112430_A_6093 | NW_004518979.1 | scaffold4629 | 6093                    | GG                              | AA                 | AA               | INTERGENIC      |               |                    |                    |
| SNP_112431_A_6094 | NW_004518979.1 | scaffold4629 | 6094                    | CC                              | TT                 | TT               | INTERGENIC      |               |                    |                    |
| SNP_112432_A_6133 | NW_004518979.1 | scaffold4629 | 6133                    | GG                              | CC                 | CC               | INTERGENIC      |               |                    |                    |
| SNP_112433_A_6140 | NW_004518979.1 | scaffold4629 | 6140                    | AA                              | GG                 | GG               | INTERGENIC      |               |                    |                    |
| SNP_112434_A_6395 | NW_004518979.1 | scaffold4629 | 6395                    | CC                              | TT                 | TT               | INTERGENIC      |               |                    |                    |
| SNP_112435_A_6397 | NW_004518979.1 | scaffold4629 | 6397                    | AA                              | GG                 | GG               | INTERGENIC      |               |                    |                    |
| SNP_112436_A_1284 | NW_004518981.1 | scaffold4633 | 1284                    | CC                              | TT                 | TT               | INTERGENIC      |               |                    |                    |
| SNP_112437_A_1618 | NW_004518981.1 | scaffold4633 | 1618                    | AA                              | GG                 | GG               | INTERGENIC      |               |                    |                    |
| SNP_112438_A_1887 | NW_004518981.1 | scaffold4633 | 1887                    | AA                              | CC                 | CC               | INTERGENIC      |               |                    |                    |
| SNP_112439_A_1910 | NW_004518981.1 | scaffold4633 | 1910                    | GG                              | AA                 | AA               | INTERGENIC      |               |                    |                    |
| SNP_112441_A_3935 | NW_004518983.1 | scaffold4635 | 3935                    | GG                              | TT                 | TT               | INTERGENIC      |               |                    |                    |
| SNP_112442_A_729  | NW_004518986.1 | scaffold4638 | 729                     | AA                              | TT                 | TT               | INTERGENIC      |               |                    |                    |
| SNP_112443_A_774  | NW_004518986.1 | scaffold4638 | 774                     | GG                              | AA                 | AA               | INTERGENIC      |               |                    |                    |
| SNP_112444_A_913  | NW_004518986.1 | scaffold4638 | 913                     | GG                              | TT                 | TT               | INTERGENIC      |               |                    |                    |
| SNP_112445_A_927  | NW_004518986.1 | scaffold4638 | 927                     | AA                              | TT                 | TT               | INTERGENIC      |               |                    |                    |
| SNP_112446_A_510  | NW_004518989.1 | scaffold4642 | 510                     | GG                              | AA                 | AA               | INTERGENIC      |               |                    |                    |
| SNP_112447_A_1037 | NW_004518989.1 | scaffold4642 | 1037                    | CC                              | TT                 | TT               | INTERGENIC      |               |                    |                    |

| SNPs IDs           | Chromosome IDs | Chromosomes  | Physical positions (bp) | CDC Frontier (Reference genome) | (Pusa 1103 & HPNB) | (ILWC 46 & LPNB) | Sequence Components of genome | Gene accession IDs | Putative functions                          |
|--------------------|----------------|--------------|-------------------------|---------------------------------|--------------------|------------------|-------------------------------|--------------------|---------------------------------------------|
| SNP_112448_A_1070  | NW_004518989.1 | scaffold4642 | 1070                    | GG                              | CC                 | CC               | INTERGENIC                    |                    |                                             |
| SNP_112449_A_1276  | NW_004518989.1 | scaffold4642 | 1276                    | CC                              | TT                 | TT               | INTERGENIC                    |                    |                                             |
| SNP_112450_A_1295  | NW_004518989.1 | scaffold4642 | 1295                    | AA                              | CC                 | CC               | INTERGENIC                    |                    |                                             |
| SNP_112451_A_1977  | NW_004518989.1 | scaffold4642 | 1977                    | AA                              | TT                 | TT               | INTERGENIC                    |                    |                                             |
| SNP_112452_A_24561 | NW_004518990.1 | scaffold4643 | 24561                   | AA                              | TT                 | TT               | INTERGENIC                    |                    |                                             |
| SNP_112453_A_24581 | NW_004518990.1 | scaffold4643 | 24581                   | TT                              | CC                 | CC               | INTERGENIC                    |                    |                                             |
| SNP_112454_A_24629 | NW_004518990.1 | scaffold4643 | 24629                   | CC                              | TT                 | TT               | INTERGENIC                    |                    |                                             |
| SNP_112456_A_360   | NW_004518992.1 | scaffold4647 | 360                     | AA                              | TT                 | TT               | INTERGENIC                    |                    |                                             |
| SNP_112457_A_361   | NW_004518992.1 | scaffold4647 | 361                     | CC                              | TT                 | TT               | INTERGENIC                    |                    |                                             |
| SNP_112458_A_371   | NW_004518992.1 | scaffold4647 | 371                     | CC                              | AA                 | AA               | INTERGENIC                    |                    |                                             |
| SNP_112459_A_376   | NW_004518992.1 | scaffold4647 | 376                     | TT                              | AA                 | AA               | INTERGENIC                    |                    |                                             |
| SNP_112460_A_1464  | NW_004518992.1 | scaffold4647 | 1464                    | CC                              | TT                 | TT               | INTERGENIC                    |                    |                                             |
| SNP_112461_A_1485  | NW_004518992.1 | scaffold4647 | 1485                    | AA                              | GG                 | GG               | INTERGENIC                    |                    |                                             |
| SNP_112462_A_1765  | NW_004518992.1 | scaffold4647 | 1765                    | TT                              | GG                 | GG               | INTERGENIC                    |                    |                                             |
| SNP_112463_A_2040  | NW_004518992.1 | scaffold4647 | 2040                    | TT                              | AA                 | AA               | INTERGENIC                    |                    |                                             |
| SNP_112464_A_2494  | NW_004518992.1 | scaffold4647 | 2494                    | AA                              | TT                 | TT               | INTERGENIC                    |                    |                                             |
| SNP_112465_A_2502  | NW_004518992.1 | scaffold4647 | 2502                    | GG                              | AA                 | AA               | INTERGENIC                    |                    |                                             |
| SNP_112466_A_2823  | NW_004518992.1 | scaffold4647 | 2823                    | CC                              | TT                 | TT               | INTERGENIC                    |                    |                                             |
| SNP_112467_A_5492  | NW_004518992.1 | scaffold4647 | 5492                    | AA                              | TT                 | TT               | INTERGENIC                    |                    |                                             |
| SNP_112468_A_595   | NW_004518994.1 | scaffold4651 | 595                     | AA                              | GG                 | GG               | INTRON                        | 101502653          | F-box/FBD/LRR-repeat protein At3g26920-like |
| SNP_112469_A_926   | NW_004518994.1 | scaffold4651 | 926                     | TT                              | CC                 | CC               | INTRON                        | 101502653          | F-box/FBD/LRR-repeat protein At3g26920-like |
| SNP_112470_A_28460 | NW_004519000.1 | scaffold4662 | 28460                   | TT                              | GG                 | GG               | INTERGENIC                    |                    |                                             |

| SNPs IDs           | Chromosome IDs | Chromosomes  | Physical positions (bp) | CDC Frontier (Reference genome) | (Pusa 1103 & HPNB) | (ILWC 46 & LPNB) | Sequence Components of genome | Gene accession IDs | Putative functions                          |
|--------------------|----------------|--------------|-------------------------|---------------------------------|--------------------|------------------|-------------------------------|--------------------|---------------------------------------------|
| SNP_112471_A_29233 | NW_004519000.1 | scaffold4662 | 29233                   | TT                              | CC                 | CC               | INTERGENIC                    |                    |                                             |
| SNP_112472_A_29249 | NW_004519000.1 | scaffold4662 | 29249                   | TT                              | CC                 | CC               | INTERGENIC                    |                    |                                             |
| SNP_112473_A_30025 | NW_004519000.1 | scaffold4662 | 30025                   | AA                              | GG                 | GG               | INTERGENIC                    |                    |                                             |
| SNP_112474_A_30084 | NW_004519000.1 | scaffold4662 | 30084                   | TT                              | CC                 | CC               | INTERGENIC                    |                    |                                             |
| SNP_112475_A_30148 | NW_004519000.1 | scaffold4662 | 30148                   | GG                              | CC                 | CC               | INTERGENIC                    |                    |                                             |
| SNP_112476_A_4831  | NW_004519004.1 | scaffold4668 | 4831                    | TT                              | CC                 | CC               | DRR                           | 101502967          | uncharacterized LOC101502967                |
| SNP_112477_A_4909  | NW_004519004.1 | scaffold4668 | 4909                    | AA                              | GG                 | GG               | DRR                           | 101502967          | uncharacterized LOC101502967                |
| SNP_112478_A_5123  | NW_004519004.1 | scaffold4668 | 5123                    | CC                              | GG                 | GG               | DRR                           | 101503290          | cold shock domain-containing protein 3-like |
| SNP_112479_A_5205  | NW_004519004.1 | scaffold4668 | 5205                    | GG                              | CC                 | CC               | DRR                           | 101503290          | cold shock domain-containing protein 3-like |
| SNP_112480_A_8374  | NW_004519008.1 | scaffold4673 | 8374                    | CC                              | TT                 | TT               | INTERGENIC                    |                    |                                             |
| SNP_112481_A_8386  | NW_004519008.1 | scaffold4673 | 8386                    | CC                              | TT                 | TT               | INTERGENIC                    |                    |                                             |
| SNP_112482_A_8978  | NW_004519008.1 | scaffold4673 | 8978                    | AA                              | GG                 | GG               | INTERGENIC                    |                    |                                             |
| SNP_112483_A_13304 | NW_004519008.1 | scaffold4673 | 13304                   | TT                              | CC                 | CC               | INTERGENIC                    |                    |                                             |
| SNP_112484_A_13340 | NW_004519008.1 | scaffold4673 | 13340                   | GG                              | AA                 | AA               | INTERGENIC                    |                    |                                             |
| SNP_112485_A_20155 | NW_004519008.1 | scaffold4673 | 20155                   | AA                              | GG                 | GG               | URR                           | 101503620          | S-type anion channel SLAH1-like             |
| SNP_112486_A_20787 | NW_004519008.1 | scaffold4673 | 20787                   | AA                              | GG                 | GG               | URR                           | 101503620          | S-type anion channel SLAH1-like             |
| SNP_112487_A_20806 | NW_004519008.1 | scaffold4673 | 20806                   | GG                              | AA                 | AA               | URR                           | 101503620          | S-type anion channel SLAH1-like             |
| SNP_112488_A_978   | NW_004519011.1 | scaffold4679 | 978                     | AA                              | GG                 | GG               | INTERGENIC                    |                    |                                             |
| SNP_112489_A_982   | NW_004519011.1 | scaffold4679 | 982                     | CC                              | TT                 | TT               | INTERGENIC                    |                    |                                             |
| SNP_112490_A_1076  | NW_004519011.1 | scaffold4679 | 1076                    | AA                              | GG                 | GG               | INTERGENIC                    |                    |                                             |
| SNP_112491_A_64    | NW_004519018.1 | scaffold4692 | 64                      | GG                              | AA                 | AA               | INTERGENIC                    |                    |                                             |
| SNP_112492_A_69    | NW_004519018.1 | scaffold4692 | 69                      | GG                              | AA                 | AA               | INTERGENIC                    |                    |                                             |

| SNPs IDs          | Chromosome IDs | Chromosomes  | Physical positions (bp) | CDC Frontier (Reference genome) | (Pusa 1103 & HPNB) | (ILWC 46 & LPNB) | Sequence genome | Components of | Gene accession IDs | Putative functions |
|-------------------|----------------|--------------|-------------------------|---------------------------------|--------------------|------------------|-----------------|---------------|--------------------|--------------------|
| SNP_112493_A_168  | NW_004519018.1 | scaffold4692 | 168                     | AA                              | TT                 | TT               | INTERGENIC      |               |                    |                    |
| SNP_112494_A_399  | NW_004519018.1 | scaffold4692 | 399                     | AA                              | TT                 | TT               | INTERGENIC      |               |                    |                    |
| SNP_112495_A_456  | NW_004519018.1 | scaffold4692 | 456                     | AA                              | GG                 | GG               | INTERGENIC      |               |                    |                    |
| SNP_112496_A_529  | NW_004519018.1 | scaffold4692 | 529                     | CC                              | GG                 | GG               | INTERGENIC      |               |                    |                    |
| SNP_112498_A_434  | NW_004519019.1 | scaffold4693 | 434                     | TT                              | AA                 | AA               | INTERGENIC      |               |                    |                    |
| SNP_112499_A_435  | NW_004519019.1 | scaffold4693 | 435                     | GG                              | AA                 | AA               | INTERGENIC      |               |                    |                    |
| SNP_112500_A_448  | NW_004519019.1 | scaffold4693 | 448                     | GG                              | AA                 | AA               | INTERGENIC      |               |                    |                    |
| SNP_112501_A_475  | NW_004519019.1 | scaffold4693 | 475                     | CC                              | TT                 | TT               | INTERGENIC      |               |                    |                    |
| SNP_112502_A_435  | NW_004519020.1 | scaffold4695 | 435                     | CC                              | TT                 | TT               | INTERGENIC      |               |                    |                    |
| SNP_112503_A_602  | NW_004519020.1 | scaffold4695 | 602                     | CC                              | AA                 | AA               | INTERGENIC      |               |                    |                    |
| SNP_112504_A_640  | NW_004519020.1 | scaffold4695 | 640                     | AA                              | GG                 | GG               | INTERGENIC      |               |                    |                    |
| SNP_112505_A_676  | NW_004519020.1 | scaffold4695 | 676                     | TT                              | CC                 | CC               | INTERGENIC      |               |                    |                    |
| SNP_112506_A_5600 | NW_004519020.1 | scaffold4695 | 5600                    | AA                              | GG                 | GG               | INTERGENIC      |               |                    |                    |
| SNP_112507_A_5643 | NW_004519020.1 | scaffold4695 | 5643                    | TT                              | GG                 | GG               | INTERGENIC      |               |                    |                    |
| SNP_112508_A_5681 | NW_004519020.1 | scaffold4695 | 5681                    | TT                              | GG                 | GG               | INTERGENIC      |               |                    |                    |
| SNP_112510_A_400  | NW_004519025.1 | scaffold4702 | 400                     | GG                              | TT                 | TT               | INTERGENIC      |               |                    |                    |
| SNP_112511_A_428  | NW_004519025.1 | scaffold4702 | 428                     | AA                              | TT                 | TT               | INTERGENIC      |               |                    |                    |
| SNP_112512_A_1072 | NW_004519025.1 | scaffold4702 | 1072                    | CC                              | AA                 | AA               | INTERGENIC      |               |                    |                    |
| SNP_112513_A_1081 | NW_004519025.1 | scaffold4702 | 1081                    | TT                              | CC                 | CC               | INTERGENIC      |               |                    |                    |
| SNP_112514_A_346  | NW_004519028.1 | scaffold4708 | 346                     | TT                              | GG                 | GG               | INTERGENIC      |               |                    |                    |
| SNP_112515_A_708  | NW_004519028.1 | scaffold4708 | 708                     | TT                              | CC                 | CC               | INTERGENIC      |               |                    |                    |
| SNP_112516_A_938  | NW_004519028.1 | scaffold4708 | 938                     | CC                              | TT                 | TT               | INTERGENIC      |               |                    |                    |

| SNPs IDs           | Chromosome IDs | Chromosomes  | Physical positions (bp) | CDC Frontier (Reference genome) | (Pusa 1103 & HPNB) | (ILWC 46 & LPNB) | Sequence genome | Components of | Gene accession IDs | Putative functions |
|--------------------|----------------|--------------|-------------------------|---------------------------------|--------------------|------------------|-----------------|---------------|--------------------|--------------------|
| SNP_112517_A_3223  | NW_004519028.1 | scaffold4708 | 3223                    | CC                              | GG                 | GG               | INTERGENIC      |               |                    |                    |
| SNP_112518_A_3428  | NW_004519028.1 | scaffold4708 | 3428                    | CC                              | TT                 | TT               | INTERGENIC      |               |                    |                    |
| SNP_112519_A_3435  | NW_004519028.1 | scaffold4708 | 3435                    | AA                              | CC                 | CC               | INTERGENIC      |               |                    |                    |
| SNP_112520_A_6624  | NW_004519028.1 | scaffold4708 | 6624                    | TT                              | AA                 | AA               | INTERGENIC      |               |                    |                    |
| SNP_112521_A_6882  | NW_004519028.1 | scaffold4708 | 6882                    | TT                              | AA                 | AA               | INTERGENIC      |               |                    |                    |
| SNP_112522_A_14533 | NW_004519028.1 | scaffold4708 | 14533                   | TT                              | CC                 | CC               | INTERGENIC      |               |                    |                    |
| SNP_112523_A_14628 | NW_004519028.1 | scaffold4708 | 14628                   | TT                              | CC                 | CC               | INTERGENIC      |               |                    |                    |
| SNP_112524_A_14687 | NW_004519028.1 | scaffold4708 | 14687                   | CC                              | GG                 | GG               | INTERGENIC      |               |                    |                    |
| SNP_112525_A_14850 | NW_004519028.1 | scaffold4708 | 14850                   | TT                              | GG                 | GG               | INTERGENIC      |               |                    |                    |
| SNP_112526_A_15063 | NW_004519028.1 | scaffold4708 | 15063                   | CC                              | TT                 | TT               | INTERGENIC      |               |                    |                    |
| SNP_112527_A_15172 | NW_004519028.1 | scaffold4708 | 15172                   | CC                              | TT                 | TT               | INTERGENIC      |               |                    |                    |
| SNP_112528_A_17627 | NW_004519028.1 | scaffold4708 | 17627                   | TT                              | CC                 | CC               | INTERGENIC      |               |                    |                    |
| SNP_112529_A_17817 | NW_004519028.1 | scaffold4708 | 17817                   | TT                              | CC                 | CC               | INTERGENIC      |               |                    |                    |
| SNP_112530_A_17830 | NW_004519028.1 | scaffold4708 | 17830                   | TT                              | AA                 | AA               | INTERGENIC      |               |                    |                    |
| SNP_112531_A_19333 | NW_004519028.1 | scaffold4708 | 19333                   | TT                              | CC                 | CC               | INTERGENIC      |               |                    |                    |
| SNP_112532_A_19807 | NW_004519028.1 | scaffold4708 | 19807                   | TT                              | AA                 | AA               | INTERGENIC      |               |                    |                    |
| SNP_112533_A_19966 | NW_004519028.1 | scaffold4708 | 19966                   | TT                              | AA                 | AA               | INTERGENIC      |               |                    |                    |
| SNP_112534_A_20812 | NW_004519028.1 | scaffold4708 | 20812                   | TT                              | GG                 | GG               | INTERGENIC      |               |                    |                    |
| SNP_112535_A_20860 | NW_004519028.1 | scaffold4708 | 20860                   | TT                              | CC                 | CC               | INTERGENIC      |               |                    |                    |
| SNP_112537_A_21034 | NW_004519028.1 | scaffold4708 | 21034                   | AA                              | GG                 | GG               | INTERGENIC      |               |                    |                    |
| SNP_112538_A_21049 | NW_004519028.1 | scaffold4708 | 21049                   | AA                              | GG                 | GG               | INTERGENIC      |               |                    |                    |
| SNP_112539_A_21098 | NW_004519028.1 | scaffold4708 | 21098                   | GG                              | AA                 | AA               | INTERGENIC      |               |                    |                    |

| SNPs IDs           | Chromosome IDs | Chromosomes  | Physical positions (bp) | CDC Frontier (Reference genome) | (Pusa 1103 & HPNB) | (ILWC 46 & LPNB) | Sequence genome | Components of | Gene accession IDs | Putative functions |
|--------------------|----------------|--------------|-------------------------|---------------------------------|--------------------|------------------|-----------------|---------------|--------------------|--------------------|
| SNP_112540_A_21500 | NW_004519028.1 | scaffold4708 | 21500                   | AA                              | GG                 | GG               | INTERGENIC      |               |                    |                    |
| SNP_112541_A_21554 | NW_004519028.1 | scaffold4708 | 21554                   | TT                              | CC                 | CC               | INTERGENIC      |               |                    |                    |
| SNP_112542_A_21582 | NW_004519028.1 | scaffold4708 | 21582                   | TT                              | CC                 | CC               | INTERGENIC      |               |                    |                    |
| SNP_112543_A_22095 | NW_004519028.1 | scaffold4708 | 22095                   | TT                              | CC                 | CC               | INTERGENIC      |               |                    |                    |
| SNP_112544_A_22615 | NW_004519028.1 | scaffold4708 | 22615                   | AA                              | GG                 | GG               | INTERGENIC      |               |                    |                    |
| SNP_112545_A_22616 | NW_004519028.1 | scaffold4708 | 22616                   | GG                              | AA                 | AA               | INTERGENIC      |               |                    |                    |
| SNP_112546_A_22625 | NW_004519028.1 | scaffold4708 | 22625                   | GG                              | AA                 | AA               | INTERGENIC      |               |                    |                    |
| SNP_112547_A_28606 | NW_004519028.1 | scaffold4708 | 28606                   | CC                              | TT                 | TT               | INTERGENIC      |               |                    |                    |
| SNP_112548_A_28737 | NW_004519028.1 | scaffold4708 | 28737                   | TT                              | GG                 | GG               | INTERGENIC      |               |                    |                    |
| SNP_112549_A_446   | NW_004519031.1 | scaffold4711 | 446                     | TT                              | GG                 | GG               | INTERGENIC      |               |                    |                    |
| SNP_112550_A_505   | NW_004519031.1 | scaffold4711 | 505                     | AA                              | TT                 | TT               | INTERGENIC      |               |                    |                    |
| SNP_112551_A_1423  | NW_004519031.1 | scaffold4711 | 1423                    | TT                              | CC                 | CC               | INTERGENIC      |               |                    |                    |
| SNP_112552_A_1499  | NW_004519031.1 | scaffold4711 | 1499                    | AA                              | GG                 | GG               | INTERGENIC      |               |                    |                    |
| SNP_112553_A_1838  | NW_004519031.1 | scaffold4711 | 1838                    | CC                              | AA                 | AA               | INTERGENIC      |               |                    |                    |
| SNP_112554_A_2532  | NW_004519031.1 | scaffold4711 | 2532                    | TT                              | CC                 | CC               | INTERGENIC      |               |                    |                    |
| SNP_112555_A_2977  | NW_004519031.1 | scaffold4711 | 2977                    | GG                              | AA                 | AA               | INTERGENIC      |               |                    |                    |
| SNP_112556_A_3005  | NW_004519031.1 | scaffold4711 | 3005                    | CC                              | GG                 | GG               | INTERGENIC      |               |                    |                    |
| SNP_112557_A_3637  | NW_004519031.1 | scaffold4711 | 3637                    | GG                              | AA                 | AA               | INTERGENIC      |               |                    |                    |
| SNP_112558_A_3638  | NW_004519031.1 | scaffold4711 | 3638                    | TT                              | AA                 | AA               | INTERGENIC      |               |                    |                    |
| SNP_112559_A_3653  | NW_004519031.1 | scaffold4711 | 3653                    | TT                              | GG                 | GG               | INTERGENIC      |               |                    |                    |
| SNP_112560_A_4854  | NW_004519031.1 | scaffold4711 | 4854                    | TT                              | AA                 | AA               | INTERGENIC      |               |                    |                    |
| SNP_112562_A_5841  | NW_004519031.1 | scaffold4711 | 5841                    | TT                              | AA                 | AA               | INTERGENIC      |               |                    |                    |

| SNPs IDs           | Chromosome IDs | Chromosomes  | Physical positions (bp) | CDC Frontier (Reference genome) | (Pusa 1103 & HPNB) | (ILWC 46 & LPNB) | Sequence genome | Components of | Gene accession IDs           | Putative functions |
|--------------------|----------------|--------------|-------------------------|---------------------------------|--------------------|------------------|-----------------|---------------|------------------------------|--------------------|
| SNP_112563_A_5845  | NW_004519031.1 | scaffold4711 | 5845                    | GG                              | TT                 | TT               | INTERGENIC      |               |                              |                    |
| SNP_112564_A_5997  | NW_004519031.1 | scaffold4711 | 5997                    | CC                              | AA                 | AA               | INTERGENIC      |               |                              |                    |
| SNP_112565_A_6115  | NW_004519031.1 | scaffold4711 | 6115                    | GG                              | TT                 | TT               | INTERGENIC      |               |                              |                    |
| SNP_112567_A_6510  | NW_004519031.1 | scaffold4711 | 6510                    | CC                              | GG                 | GG               | INTERGENIC      |               |                              |                    |
| SNP_112568_A_6560  | NW_004519031.1 | scaffold4711 | 6560                    | TT                              | AA                 | AA               | INTERGENIC      |               |                              |                    |
| SNP_112569_A_8226  | NW_004519031.1 | scaffold4711 | 8226                    | CC                              | TT                 | TT               | INTERGENIC      |               |                              |                    |
| SNP_112570_A_8227  | NW_004519031.1 | scaffold4711 | 8227                    | AA                              | GG                 | GG               | INTERGENIC      |               |                              |                    |
| SNP_112571_A_8998  | NW_004519031.1 | scaffold4711 | 8998                    | TT                              | GG                 | GG               | INTERGENIC      |               |                              |                    |
| SNP_112573_A_9284  | NW_004519031.1 | scaffold4711 | 9284                    | GG                              | CC                 | CC               | INTERGENIC      |               |                              |                    |
| SNP_112574_A_9292  | NW_004519031.1 | scaffold4711 | 9292                    | TT                              | GG                 | GG               | INTERGENIC      |               |                              |                    |
| SNP_112575_A_9416  | NW_004519031.1 | scaffold4711 | 9416                    | AA                              | GG                 | GG               | INTERGENIC      |               |                              |                    |
| SNP_112576_A_9512  | NW_004519031.1 | scaffold4711 | 9512                    | CC                              | GG                 | GG               | INTERGENIC      |               |                              |                    |
| SNP_112577_A_9551  | NW_004519031.1 | scaffold4711 | 9551                    | AA                              | GG                 | GG               | INTERGENIC      |               |                              |                    |
| SNP_112578_A_9557  | NW_004519031.1 | scaffold4711 | 9557                    | TT                              | CC                 | CC               | INTERGENIC      |               |                              |                    |
| SNP_112579_A_10907 | NW_004519031.1 | scaffold4711 | 10907                   | CC                              | TT                 | TT               | INTERGENIC      |               |                              |                    |
| SNP_112581_A_554   | NW_004519037.1 | scaffold4718 | 554                     | TT                              | GG                 | GG               | INTERGENIC      |               |                              |                    |
| SNP_112582_A_985   | NW_004519039.1 | scaffold4720 | 985                     | TT                              | GG                 | GG               | INTERGENIC      |               |                              |                    |
| SNP_112583_A_239   | NW_004519044.1 | scaffold4726 | 239                     | GG                              | TT                 | TT               | INTERGENIC      |               |                              |                    |
| SNP_112585_A_546   | NW_004519044.1 | scaffold4726 | 546                     | TT                              | CC                 | CC               | INTERGENIC      |               |                              |                    |
| SNP_112586_A_550   | NW_004519044.1 | scaffold4726 | 550                     | AA                              | TT                 | TT               | INTERGENIC      |               |                              |                    |
| SNP_112587_A_566   | NW_004519044.1 | scaffold4726 | 566                     | CC                              | TT                 | TT               | INTERGENIC      |               |                              |                    |
| SNP_112588_A_664   | NW_004519048.1 | scaffold4731 | 664                     | TT                              | CC                 | CC               | INTRON          | 101504488     | uncharacterized LOC101504488 |                    |

| SNPs IDs           | Chromosome IDs | Chromosomes  | Physical positions (bp) | CDC Frontier (Reference genome) | (Pusa 1103 & HPNB) | (ILWC 46 & LPNB) | Sequence Components of genome | Gene accession IDs | Putative functions           |
|--------------------|----------------|--------------|-------------------------|---------------------------------|--------------------|------------------|-------------------------------|--------------------|------------------------------|
| SNP_112589_A_852   | NW_004519048.1 | scaffold4731 | 852                     | TT                              | AA                 | AA               | SYNONYMOUS_CODING             | 101504488          | uncharacterized LOC101504488 |
| SNP_112590_A_924   | NW_004519048.1 | scaffold4731 | 924                     | CC                              | TT                 | TT               | SYNONYMOUS_CODING             | 101504488          | uncharacterized LOC101504488 |
| SNP_112591_A_1215  | NW_004519048.1 | scaffold4731 | 1215                    | GG                              | CC                 | CC               | URR                           | 101504488          | uncharacterized LOC101504488 |
| SNP_112592_A_180   | NW_004519049.1 | scaffold4733 | 180                     | TT                              | CC                 | CC               | INTERGENIC                    |                    |                              |
| SNP_112593_A_240   | NW_004519049.1 | scaffold4733 | 240                     | TT                              | CC                 | CC               | INTERGENIC                    |                    |                              |
| SNP_112594_A_441   | NW_004519049.1 | scaffold4733 | 441                     | TT                              | CC                 | CC               | INTERGENIC                    |                    |                              |
| SNP_112595_A_457   | NW_004519049.1 | scaffold4733 | 457                     | CC                              | TT                 | TT               | INTERGENIC                    |                    |                              |
| SNP_112597_A_543   | NW_004519049.1 | scaffold4733 | 543                     | AA                              | GG                 | GG               | INTERGENIC                    |                    |                              |
| SNP_112598_A_624   | NW_004519049.1 | scaffold4733 | 624                     | CC                              | TT                 | TT               | INTERGENIC                    |                    |                              |
| SNP_112600_A_1911  | NW_004519055.1 | scaffold4740 | 1911                    | CC                              | TT                 | TT               | INTERGENIC                    |                    |                              |
| SNP_112601_A_1975  | NW_004519055.1 | scaffold4740 | 1975                    | AA                              | TT                 | TT               | INTERGENIC                    |                    |                              |
| SNP_112602_A_2047  | NW_004519055.1 | scaffold4740 | 2047                    | GG                              | AA                 | AA               | INTERGENIC                    |                    |                              |
| SNP_112603_A_2131  | NW_004519055.1 | scaffold4740 | 2131                    | AA                              | GG                 | GG               | INTERGENIC                    |                    |                              |
| SNP_112604_A_2624  | NW_004519055.1 | scaffold4740 | 2624                    | AA                              | CC                 | CC               | INTERGENIC                    |                    |                              |
| SNP_112605_A_2688  | NW_004519055.1 | scaffold4740 | 2688                    | TT                              | AA                 | AA               | INTERGENIC                    |                    |                              |
| SNP_112606_A_2737  | NW_004519055.1 | scaffold4740 | 2737                    | AA                              | GG                 | GG               | INTERGENIC                    |                    |                              |
| SNP_112607_A_2811  | NW_004519055.1 | scaffold4740 | 2811                    | GG                              | TT                 | TT               | INTERGENIC                    |                    |                              |
| SNP_112608_A_2825  | NW_004519055.1 | scaffold4740 | 2825                    | CC                              | GG                 | GG               | INTERGENIC                    |                    |                              |
| SNP_112609_A_2970  | NW_004519055.1 | scaffold4740 | 2970                    | GG                              | AA                 | AA               | INTERGENIC                    |                    |                              |
| SNP_112610_A_4816  | NW_004519055.1 | scaffold4740 | 4816                    | AA                              | TT                 | TT               | INTERGENIC                    |                    |                              |
| SNP_112611_A_11247 | NW_004519055.1 | scaffold4740 | 11247                   | TT                              | AA                 | AA               | INTERGENIC                    |                    |                              |
| SNP_112612_A_11643 | NW_004519055.1 | scaffold4740 | 11643                   | AA                              | CC                 | CC               | INTERGENIC                    |                    |                              |



| SNPs IDs           | Chromosome IDs | Chromosomes  | Physical positions (bp) | CDC Frontier (Reference genome) | (Pusa 1103 & HPNB) | (ILWC 46 & LPNB) | Sequence Components of genome | Gene accession IDs | Putative functions                       |
|--------------------|----------------|--------------|-------------------------|---------------------------------|--------------------|------------------|-------------------------------|--------------------|------------------------------------------|
| SNP_112613_A_11672 | NW_004519055.1 | scaffold4740 | 11672                   | TT                              | CC                 | CC               | INTERGENIC                    |                    |                                          |
| SNP_112614_A_11756 | NW_004519055.1 | scaffold4740 | 11756                   | CC                              | TT                 | TT               | INTERGENIC                    |                    |                                          |
| SNP_112615_A_11825 | NW_004519055.1 | scaffold4740 | 11825                   | TT                              | AA                 | AA               | INTERGENIC                    |                    |                                          |
| SNP_112616_A_20131 | NW_004519057.1 | scaffold4745 | 20131                   | TT                              | CC                 | CC               | INTERGENIC                    |                    |                                          |
| SNP_112617_A_22542 | NW_004519057.1 | scaffold4745 | 22542                   | GG                              | AA                 | AA               | INTERGENIC                    |                    |                                          |
| SNP_112618_A_22570 | NW_004519057.1 | scaffold4745 | 22570                   | AA                              | GG                 | GG               | INTERGENIC                    |                    |                                          |
| SNP_112619_A_22578 | NW_004519057.1 | scaffold4745 | 22578                   | TT                              | CC                 | CC               | INTERGENIC                    |                    |                                          |
| SNP_112620_A_429   | NW_004519065.1 | scaffold4759 | 429                     | CC                              | TT                 | TT               | DRR                           | 101505018          | putative cysteine proteinase inhibitor 7 |
| SNP_112621_A_452   | NW_004519065.1 | scaffold4759 | 452                     | CC                              | TT                 | TT               | DRR                           | 101505018          | putative cysteine proteinase inhibitor 7 |
| SNP_112623_A_30697 | NW_004519065.1 | scaffold4759 | 30697                   | TT                              | GG                 | GG               | INTERGENIC                    |                    |                                          |
| SNP_112625_A_4932  | NW_004519071.1 | scaffold4769 | 4932                    | AA                              | CC                 | CC               | INTERGENIC                    |                    |                                          |
| SNP_112627_A_5492  | NW_004519071.1 | scaffold4769 | 5492                    | AA                              | CC                 | CC               | INTERGENIC                    |                    |                                          |
| SNP_112628_A_5498  | NW_004519071.1 | scaffold4769 | 5498                    | TT                              | AA                 | AA               | INTERGENIC                    |                    |                                          |
| SNP_112629_A_703   | NW_004519072.1 | scaffold4771 | 703                     | TT                              | GG                 | GG               | INTERGENIC                    |                    |                                          |
| SNP_112630_A_943   | NW_004519072.1 | scaffold4771 | 943                     | AA                              | CC                 | CC               | INTERGENIC                    |                    |                                          |
| SNP_112631_A_955   | NW_004519072.1 | scaffold4771 | 955                     | TT                              | GG                 | GG               | INTERGENIC                    |                    |                                          |
| SNP_112632_A_4485  | NW_004519072.1 | scaffold4771 | 4485                    | CC                              | TT                 | TT               | INTERGENIC                    |                    |                                          |
| SNP_112633_A_501   | NW_004519073.1 | scaffold4773 | 501                     | TT                              | CC                 | CC               | INTERGENIC                    |                    |                                          |
| SNP_112634_A_622   | NW_004519073.1 | scaffold4773 | 622                     | AA                              | GG                 | GG               | INTERGENIC                    |                    |                                          |
| SNP_112635_A_728   | NW_004519073.1 | scaffold4773 | 728                     | TT                              | CC                 | CC               | INTERGENIC                    |                    |                                          |
| SNP_112636_A_760   | NW_004519073.1 | scaffold4773 | 760                     | TT                              | CC                 | CC               | INTERGENIC                    |                    |                                          |
| SNP_112637_A_1032  | NW_004519073.1 | scaffold4773 | 1032                    | AA                              | GG                 | GG               | INTERGENIC                    |                    |                                          |

| SNPs IDs           | Chromosome IDs | Chromosomes  | Physical positions (bp) | CDC Frontier (Reference genome) | (Pusa 1103 & HPNB) | (ILWC 46 & LPNB) | Sequence genome | Components of | Gene accession IDs | Putative functions |
|--------------------|----------------|--------------|-------------------------|---------------------------------|--------------------|------------------|-----------------|---------------|--------------------|--------------------|
| SNP_112638_A_1285  | NW_004519073.1 | scaffold4773 | 1285                    | TT                              | CC                 | CC               | INTERGENIC      |               |                    |                    |
| SNP_112639_A_1864  | NW_004519073.1 | scaffold4773 | 1864                    | AA                              | GG                 | GG               | INTERGENIC      |               |                    |                    |
| SNP_112642_A_13184 | NW_004519073.1 | scaffold4773 | 13184                   | CC                              | AA                 | AA               | INTERGENIC      |               |                    |                    |
| SNP_112643_A_13257 | NW_004519073.1 | scaffold4773 | 13257                   | GG                              | AA                 | AA               | INTERGENIC      |               |                    |                    |
| SNP_112645_A_14035 | NW_004519073.1 | scaffold4773 | 14035                   | GG                              | AA                 | AA               | INTERGENIC      |               |                    |                    |
| SNP_112646_A_14095 | NW_004519073.1 | scaffold4773 | 14095                   | GG                              | TT                 | TT               | INTERGENIC      |               |                    |                    |
| SNP_112647_A_14098 | NW_004519073.1 | scaffold4773 | 14098                   | AA                              | TT                 | TT               | INTERGENIC      |               |                    |                    |
| SNP_112648_A_14110 | NW_004519073.1 | scaffold4773 | 14110                   | TT                              | AA                 | AA               | INTERGENIC      |               |                    |                    |
| SNP_112649_A_14661 | NW_004519073.1 | scaffold4773 | 14661                   | CC                              | GG                 | GG               | INTERGENIC      |               |                    |                    |
| SNP_112650_A_14747 | NW_004519073.1 | scaffold4773 | 14747                   | AA                              | CC                 | CC               | INTERGENIC      |               |                    |                    |
| SNP_112652_A_15025 | NW_004519073.1 | scaffold4773 | 15025                   | AA                              | GG                 | GG               | INTERGENIC      |               |                    |                    |
| SNP_112653_A_15085 | NW_004519073.1 | scaffold4773 | 15085                   | CC                              | AA                 | AA               | INTERGENIC      |               |                    |                    |
| SNP_112654_A_15417 | NW_004519073.1 | scaffold4773 | 15417                   | AA                              | GG                 | GG               | INTERGENIC      |               |                    |                    |
| SNP_112655_A_15992 | NW_004519073.1 | scaffold4773 | 15992                   | GG                              | AA                 | AA               | INTERGENIC      |               |                    |                    |
| SNP_112656_A_16145 | NW_004519073.1 | scaffold4773 | 16145                   | TT                              | CC                 | CC               | INTERGENIC      |               |                    |                    |
| SNP_112657_A_16265 | NW_004519073.1 | scaffold4773 | 16265                   | CC                              | TT                 | TT               | INTERGENIC      |               |                    |                    |
| SNP_112658_A_16688 | NW_004519073.1 | scaffold4773 | 16688                   | GG                              | TT                 | TT               | INTERGENIC      |               |                    |                    |
| SNP_112659_A_16708 | NW_004519073.1 | scaffold4773 | 16708                   | CC                              | AA                 | AA               | INTERGENIC      |               |                    |                    |
| SNP_112661_A_16945 | NW_004519073.1 | scaffold4773 | 16945                   | AA                              | GG                 | GG               | INTERGENIC      |               |                    |                    |
| SNP_112662_A_17246 | NW_004519073.1 | scaffold4773 | 17246                   | CC                              | TT                 | TT               | INTERGENIC      |               |                    |                    |
| SNP_112663_A_17259 | NW_004519073.1 | scaffold4773 | 17259                   | CC                              | GG                 | GG               | INTERGENIC      |               |                    |                    |
| SNP_112664_A_17570 | NW_004519073.1 | scaffold4773 | 17570                   | GG                              | AA                 | AA               | INTERGENIC      |               |                    |                    |

| SNPs IDs           | Chromosome IDs | Chromosomes  | Physical positions (bp) | CDC Frontier (Reference genome) | (Pusa 1103 & HPNB) | (ILWC 46 & LPNB) | Sequence genome | Components of | Gene accession IDs | Putative functions |
|--------------------|----------------|--------------|-------------------------|---------------------------------|--------------------|------------------|-----------------|---------------|--------------------|--------------------|
| SNP_112665_A_17779 | NW_004519073.1 | scaffold4773 | 17779                   | AA                              | CC                 | CC               | INTERGENIC      |               |                    |                    |
| SNP_112666_A_17995 | NW_004519073.1 | scaffold4773 | 17995                   | CC                              | TT                 | TT               | INTERGENIC      |               |                    |                    |
| SNP_112667_A_18204 | NW_004519073.1 | scaffold4773 | 18204                   | CC                              | AA                 | AA               | INTERGENIC      |               |                    |                    |
| SNP_112669_A_18557 | NW_004519073.1 | scaffold4773 | 18557                   | TT                              | CC                 | CC               | INTERGENIC      |               |                    |                    |
| SNP_112670_A_18643 | NW_004519073.1 | scaffold4773 | 18643                   | CC                              | TT                 | TT               | INTERGENIC      |               |                    |                    |
| SNP_112671_A_18649 | NW_004519073.1 | scaffold4773 | 18649                   | CC                              | TT                 | TT               | INTERGENIC      |               |                    |                    |
| SNP_112672_A_18664 | NW_004519073.1 | scaffold4773 | 18664                   | GG                              | AA                 | AA               | INTERGENIC      |               |                    |                    |
| SNP_112673_A_18691 | NW_004519073.1 | scaffold4773 | 18691                   | GG                              | AA                 | AA               | INTERGENIC      |               |                    |                    |
| SNP_112674_A_18880 | NW_004519073.1 | scaffold4773 | 18880                   | AA                              | GG                 | GG               | INTERGENIC      |               |                    |                    |
| SNP_112676_A_19591 | NW_004519073.1 | scaffold4773 | 19591                   | AA                              | TT                 | TT               | INTERGENIC      |               |                    |                    |
| SNP_112678_A_19763 | NW_004519073.1 | scaffold4773 | 19763                   | GG                              | AA                 | AA               | INTERGENIC      |               |                    |                    |
| SNP_112679_A_19785 | NW_004519073.1 | scaffold4773 | 19785                   | TT                              | CC                 | CC               | INTERGENIC      |               |                    |                    |
| SNP_112681_A_20057 | NW_004519073.1 | scaffold4773 | 20057                   | TT                              | CC                 | CC               | INTERGENIC      |               |                    |                    |
| SNP_112682_A_20841 | NW_004519073.1 | scaffold4773 | 20841                   | TT                              | CC                 | CC               | INTERGENIC      |               |                    |                    |
| SNP_112683_A_21291 | NW_004519073.1 | scaffold4773 | 21291                   | AA                              | TT                 | TT               | INTERGENIC      |               |                    |                    |
| SNP_112684_A_21689 | NW_004519073.1 | scaffold4773 | 21689                   | CC                              | TT                 | TT               | INTERGENIC      |               |                    |                    |
| SNP_112685_A_21696 | NW_004519073.1 | scaffold4773 | 21696                   | CC                              | AA                 | AA               | INTERGENIC      |               |                    |                    |
| SNP_112686_A_22993 | NW_004519073.1 | scaffold4773 | 22993                   | CC                              | TT                 | TT               | INTERGENIC      |               |                    |                    |
| SNP_112687_A_23810 | NW_004519073.1 | scaffold4773 | 23810                   | CC                              | TT                 | TT               | INTERGENIC      |               |                    |                    |
| SNP_112688_A_24794 | NW_004519073.1 | scaffold4773 | 24794                   | AA                              | GG                 | GG               | INTERGENIC      |               |                    |                    |
| SNP_112689_A_25298 | NW_004519073.1 | scaffold4773 | 25298                   | TT                              | CC                 | CC               | INTERGENIC      |               |                    |                    |
| SNP_112690_A_25556 | NW_004519073.1 | scaffold4773 | 25556                   | AA                              | TT                 | TT               | INTERGENIC      |               |                    |                    |

| SNPs IDs           | Chromosome IDs | Chromosomes  | Physical positions (bp) | CDC Frontier (Reference genome) | (Pusa 1103 & HPNB) | (ILWC 46 & LPNB) | Sequence genome | Components of | Gene accession IDs | Putative functions |
|--------------------|----------------|--------------|-------------------------|---------------------------------|--------------------|------------------|-----------------|---------------|--------------------|--------------------|
| SNP_112691_A_25565 | NW_004519073.1 | scaffold4773 | 25565                   | TT                              | AA                 | AA               | INTERGENIC      |               |                    |                    |
| SNP_112692_A_25570 | NW_004519073.1 | scaffold4773 | 25570                   | GG                              | AA                 | AA               | INTERGENIC      |               |                    |                    |
| SNP_112693_A_25628 | NW_004519073.1 | scaffold4773 | 25628                   | AA                              | GG                 | GG               | INTERGENIC      |               |                    |                    |
| SNP_112694_A_25637 | NW_004519073.1 | scaffold4773 | 25637                   | AA                              | CC                 | CC               | INTERGENIC      |               |                    |                    |
| SNP_112695_A_26568 | NW_004519073.1 | scaffold4773 | 26568                   | GG                              | AA                 | AA               | INTERGENIC      |               |                    |                    |
| SNP_112696_A_27426 | NW_004519073.1 | scaffold4773 | 27426                   | AA                              | CC                 | CC               | INTERGENIC      |               |                    |                    |
| SNP_112697_A_27608 | NW_004519073.1 | scaffold4773 | 27608                   | AA                              | TT                 | TT               | INTERGENIC      |               |                    |                    |
| SNP_112698_A_27656 | NW_004519073.1 | scaffold4773 | 27656                   | TT                              | CC                 | CC               | INTERGENIC      |               |                    |                    |
| SNP_112699_A_27733 | NW_004519073.1 | scaffold4773 | 27733                   | TT                              | CC                 | CC               | INTERGENIC      |               |                    |                    |
| SNP_112700_A_27896 | NW_004519073.1 | scaffold4773 | 27896                   | GG                              | AA                 | AA               | INTERGENIC      |               |                    |                    |
| SNP_112701_A_27903 | NW_004519073.1 | scaffold4773 | 27903                   | CC                              | AA                 | AA               | INTERGENIC      |               |                    |                    |
| SNP_112702_A_28719 | NW_004519073.1 | scaffold4773 | 28719                   | AA                              | GG                 | GG               | INTERGENIC      |               |                    |                    |
| SNP_112703_A_28786 | NW_004519073.1 | scaffold4773 | 28786                   | GG                              | TT                 | TT               | INTERGENIC      |               |                    |                    |
| SNP_112704_A_29495 | NW_004519073.1 | scaffold4773 | 29495                   | GG                              | AA                 | AA               | INTERGENIC      |               |                    |                    |
| SNP_112706_A_29926 | NW_004519073.1 | scaffold4773 | 29926                   | GG                              | AA                 | AA               | INTERGENIC      |               |                    |                    |
| SNP_112708_A_30364 | NW_004519073.1 | scaffold4773 | 30364                   | GG                              | AA                 | AA               | INTERGENIC      |               |                    |                    |
| SNP_112709_A_30837 | NW_004519073.1 | scaffold4773 | 30837                   | CC                              | TT                 | TT               | INTERGENIC      |               |                    |                    |
| SNP_112710_A_31049 | NW_004519073.1 | scaffold4773 | 31049                   | CC                              | TT                 | TT               | INTERGENIC      |               |                    |                    |
| SNP_112711_A_32161 | NW_004519073.1 | scaffold4773 | 32161                   | CC                              | TT                 | TT               | INTERGENIC      |               |                    |                    |
| SNP_112713_A_33758 | NW_004519073.1 | scaffold4773 | 33758                   | AA                              | GG                 | GG               | INTERGENIC      |               |                    |                    |
| SNP_112714_A_33862 | NW_004519073.1 | scaffold4773 | 33862                   | CC                              | AA                 | AA               | INTERGENIC      |               |                    |                    |
| SNP_112715_A_33871 | NW_004519073.1 | scaffold4773 | 33871                   | TT                              | CC                 | CC               | INTERGENIC      |               |                    |                    |

| SNPs IDs           | Chromosome IDs | Chromosomes  | Physical positions (bp) | CDC Frontier (Reference genome) | (Pusa 1103 & HPNB) | (ILWC 46 & LPNB) | Sequence genome | Components of | Gene accession IDs | Putative functions |
|--------------------|----------------|--------------|-------------------------|---------------------------------|--------------------|------------------|-----------------|---------------|--------------------|--------------------|
| SNP_112716_A_33958 | NW_004519073.1 | scaffold4773 | 33958                   | AA                              | GG                 | GG               | INTERGENIC      |               |                    |                    |
| SNP_112717_A_35279 | NW_004519073.1 | scaffold4773 | 35279                   | CC                              | TT                 | TT               | INTERGENIC      |               |                    |                    |
| SNP_112718_A_35427 | NW_004519073.1 | scaffold4773 | 35427                   | GG                              | AA                 | AA               | INTERGENIC      |               |                    |                    |
| SNP_112719_A_35463 | NW_004519073.1 | scaffold4773 | 35463                   | TT                              | CC                 | CC               | INTERGENIC      |               |                    |                    |
| SNP_112720_A_35523 | NW_004519073.1 | scaffold4773 | 35523                   | TT                              | CC                 | CC               | INTERGENIC      |               |                    |                    |
| SNP_112721_A_35946 | NW_004519073.1 | scaffold4773 | 35946                   | GG                              | AA                 | AA               | INTERGENIC      |               |                    |                    |
| SNP_112722_A_36038 | NW_004519073.1 | scaffold4773 | 36038                   | GG                              | AA                 | AA               | INTERGENIC      |               |                    |                    |
| SNP_112725_A_36244 | NW_004519073.1 | scaffold4773 | 36244                   | CC                              | TT                 | TT               | INTERGENIC      |               |                    |                    |
| SNP_112726_A_36657 | NW_004519073.1 | scaffold4773 | 36657                   | CC                              | AA                 | AA               | INTERGENIC      |               |                    |                    |
| SNP_112727_A_36685 | NW_004519073.1 | scaffold4773 | 36685                   | GG                              | AA                 | AA               | INTERGENIC      |               |                    |                    |
| SNP_112728_A_37074 | NW_004519073.1 | scaffold4773 | 37074                   | TT                              | CC                 | CC               | INTERGENIC      |               |                    |                    |
| SNP_112729_A_37237 | NW_004519073.1 | scaffold4773 | 37237                   | GG                              | AA                 | AA               | INTERGENIC      |               |                    |                    |
| SNP_112730_A_37266 | NW_004519073.1 | scaffold4773 | 37266                   | GG                              | AA                 | AA               | INTERGENIC      |               |                    |                    |
| SNP_112731_A_52463 | NW_004519073.1 | scaffold4773 | 52463                   | AA                              | GG                 | GG               | INTERGENIC      |               |                    |                    |
| SNP_112733_A_52898 | NW_004519073.1 | scaffold4773 | 52898                   | TT                              | CC                 | CC               | INTERGENIC      |               |                    |                    |
| SNP_112734_A_53022 | NW_004519073.1 | scaffold4773 | 53022                   | AA                              | GG                 | GG               | INTERGENIC      |               |                    |                    |
| SNP_112735_A_54041 | NW_004519073.1 | scaffold4773 | 54041                   | GG                              | TT                 | TT               | INTERGENIC      |               |                    |                    |
| SNP_112736_A_54525 | NW_004519073.1 | scaffold4773 | 54525                   | TT                              | CC                 | CC               | INTERGENIC      |               |                    |                    |
| SNP_112737_A_54619 | NW_004519073.1 | scaffold4773 | 54619                   | AA                              | TT                 | TT               | INTERGENIC      |               |                    |                    |
| SNP_112738_A_54758 | NW_004519073.1 | scaffold4773 | 54758                   | GG                              | AA                 | AA               | INTERGENIC      |               |                    |                    |
| SNP_112739_A_54789 | NW_004519073.1 | scaffold4773 | 54789                   | AA                              | GG                 | GG               | INTERGENIC      |               |                    |                    |
| SNP_112740_A_55006 | NW_004519073.1 | scaffold4773 | 55006                   | CC                              | TT                 | TT               | INTERGENIC      |               |                    |                    |

| SNPs IDs            | Chromosome IDs | Chromosomes  | Physical positions (bp) | CDC Frontier (Reference genome) | (Pusa 1103 & HPNB) | (ILWC 46 & LPNB) | Sequence genome | Components of | Gene accession IDs                                    | Putative functions |
|---------------------|----------------|--------------|-------------------------|---------------------------------|--------------------|------------------|-----------------|---------------|-------------------------------------------------------|--------------------|
| SNP_112741_A_55029  | NW_004519073.1 | scaffold4773 | 55029                   | CC                              | TT                 | TT               | INTERGENIC      |               |                                                       |                    |
| SNP_112742_A_55036  | NW_004519073.1 | scaffold4773 | 55036                   | TT                              | CC                 | CC               | INTERGENIC      |               |                                                       |                    |
| SNP_112743_A_55065  | NW_004519073.1 | scaffold4773 | 55065                   | TT                              | CC                 | CC               | INTERGENIC      |               |                                                       |                    |
| SNP_112744_A_55103  | NW_004519073.1 | scaffold4773 | 55103                   | CC                              | AA                 | AA               | INTERGENIC      |               |                                                       |                    |
| SNP_112746_A_55665  | NW_004519073.1 | scaffold4773 | 55665                   | CC                              | AA                 | AA               | INTERGENIC      |               |                                                       |                    |
| SNP_112747_A_58288  | NW_004519073.1 | scaffold4773 | 58288                   | AA                              | TT                 | TT               | INTERGENIC      |               |                                                       |                    |
| SNP_112748_A_58326  | NW_004519073.1 | scaffold4773 | 58326                   | CC                              | AA                 | AA               | INTERGENIC      |               |                                                       |                    |
| SNP_112749_A_441    | NW_004519074.1 | scaffold4775 | 441                     | TT                              | GG                 | GG               | INTERGENIC      |               |                                                       |                    |
| SNP_112750_A_471    | NW_004519074.1 | scaffold4775 | 471                     | TT                              | GG                 | GG               | INTERGENIC      |               |                                                       |                    |
| SNP_112752_A_34975  | NW_004519076.1 | scaffold4777 | 34975                   | TT                              | GG                 | GG               | INTERGENIC      |               |                                                       |                    |
| SNP_112753_A_48207  | NW_004519076.1 | scaffold4777 | 48207                   | AA                              | GG                 | GG               | INTERGENIC      |               |                                                       |                    |
| SNP_112754_A_48231  | NW_004519076.1 | scaffold4777 | 48231                   | TT                              | CC                 | CC               | INTERGENIC      |               |                                                       |                    |
| SNP_112755_A_48250  | NW_004519076.1 | scaffold4777 | 48250                   | CC                              | AA                 | AA               | INTERGENIC      |               |                                                       |                    |
| SNP_112756_A_48280  | NW_004519076.1 | scaffold4777 | 48280                   | TT                              | CC                 | CC               | INTERGENIC      |               |                                                       |                    |
| SNP_112757_A_97922  | NW_004519076.1 | scaffold4777 | 97922                   | TT                              | CC                 | CC               | INTERGENIC      |               |                                                       |                    |
| SNP_112758_A_112496 | NW_004519076.1 | scaffold4777 | 112496                  | AA                              | CC                 | CC               | INTRON          | 101508451     | suppressor of mec-8 and unc-52 protein homolog 1-like |                    |
| SNP_112759_A_112507 | NW_004519076.1 | scaffold4777 | 112507                  | AA                              | CC                 | CC               | INTRON          | 101508451     | suppressor of mec-8 and unc-52 protein homolog 1-like |                    |
| SNP_112760_A_112792 | NW_004519076.1 | scaffold4777 | 112792                  | GG                              | TT                 | TT               | INTRON          | 101508451     | suppressor of mec-8 and unc-52 protein homolog 1-like |                    |
| SNP_112761_A_112886 | NW_004519076.1 | scaffold4777 | 112886                  | CC                              | AA                 | AA               | INTRON          | 101508451     | suppressor of mec-8 and unc-52 protein homolog 1-like |                    |
| SNP_112762_A_113115 | NW_004519076.1 | scaffold4777 | 113115                  | CC                              | TT                 | TT               | INTRON          | 101508451     | suppressor of mec-8 and unc-52 protein homolog 1-like |                    |
| SNP_112763_A_113447 | NW_004519076.1 | scaffold4777 | 113447                  | AA                              | TT                 | TT               | INTRON          | 101508451     | suppressor of mec-8 and unc-52 protein homolog 1-like |                    |
| SNP_112764_A_113547 | NW_004519076.1 | scaffold4777 | 113547                  | AA                              | GG                 | GG               | INTRON          | 101508451     | suppressor of mec-8 and unc-52 protein homolog 1-like |                    |

| SNPs IDs            | Chromosome IDs | Chromosomes  | Physical positions (bp) | CDC Frontier (Reference genome) | (Pusa 1103 & HPNB) | (ILWC 46 & LPNB) | Sequence Components of genome | Gene accession IDs | Putative functions                                    |
|---------------------|----------------|--------------|-------------------------|---------------------------------|--------------------|------------------|-------------------------------|--------------------|-------------------------------------------------------|
| SNP_112765_A_113601 | NW_004519076.1 | scaffold4777 | 113601                  | CC                              | TT                 | TT               | INTRON                        | 101508451          | suppressor of mec-8 and unc-52 protein homolog 1-like |
| SNP_112766_A_113923 | NW_004519076.1 | scaffold4777 | 113923                  | CC                              | TT                 | TT               | INTRON                        | 101508451          | suppressor of mec-8 and unc-52 protein homolog 1-like |
| SNP_112767_A_114190 | NW_004519076.1 | scaffold4777 | 114190                  | CC                              | AA                 | AA               | INTRON                        | 101508451          | suppressor of mec-8 and unc-52 protein homolog 1-like |
| SNP_112768_A_114267 | NW_004519076.1 | scaffold4777 | 114267                  | AA                              | TT                 | TT               | INTRON                        | 101508451          | suppressor of mec-8 and unc-52 protein homolog 1-like |
| SNP_112769_A_114274 | NW_004519076.1 | scaffold4777 | 114274                  | GG                              | AA                 | AA               | INTRON                        | 101508451          | suppressor of mec-8 and unc-52 protein homolog 1-like |
| SNP_112770_A_117869 | NW_004519076.1 | scaffold4777 | 117869                  | CC                              | AA                 | AA               | INTRON                        | 101508451          | suppressor of mec-8 and unc-52 protein homolog 1-like |
| SNP_112771_A_118507 | NW_004519076.1 | scaffold4777 | 118507                  | CC                              | TT                 | TT               | INTRON                        | 101508451          | suppressor of mec-8 and unc-52 protein homolog 1-like |
| SNP_112772_A_118549 | NW_004519076.1 | scaffold4777 | 118549                  | GG                              | AA                 | AA               | INTRON                        | 101508451          | suppressor of mec-8 and unc-52 protein homolog 1-like |
| SNP_112773_A_118569 | NW_004519076.1 | scaffold4777 | 118569                  | TT                              | CC                 | CC               | INTRON                        | 101508451          | suppressor of mec-8 and unc-52 protein homolog 1-like |
| SNP_112774_A_118683 | NW_004519076.1 | scaffold4777 | 118683                  | GG                              | AA                 | AA               | INTRON                        | 101508451          | suppressor of mec-8 and unc-52 protein homolog 1-like |
| SNP_112776_A_118769 | NW_004519076.1 | scaffold4777 | 118769                  | TT                              | CC                 | CC               | INTRON                        | 101508451          | suppressor of mec-8 and unc-52 protein homolog 1-like |
| SNP_112777_A_119123 | NW_004519076.1 | scaffold4777 | 119123                  | TT                              | AA                 | AA               | INTRON                        | 101508451          | suppressor of mec-8 and unc-52 protein homolog 1-like |
| SNP_112778_A_119329 | NW_004519076.1 | scaffold4777 | 119329                  | GG                              | AA                 | AA               | NON_SYNONYMOUS_CODING         | 101508451          | suppressor of mec-8 and unc-52 protein homolog 1-like |
| SNP_112779_A_119356 | NW_004519076.1 | scaffold4777 | 119356                  | GG                              | AA                 | AA               | NON_SYNONYMOUS_CODING         | 101508451          | suppressor of mec-8 and unc-52 protein homolog 1-like |
| SNP_112780_A_119368 | NW_004519076.1 | scaffold4777 | 119368                  | CC                              | AA                 | AA               | NON_SYNONYMOUS_CODING         | 101508451          | suppressor of mec-8 and unc-52 protein homolog 1-like |
| SNP_112781_A_119372 | NW_004519076.1 | scaffold4777 | 119372                  | CC                              | TT                 | TT               | SYNONYMOUS_CODING             | 101508451          | suppressor of mec-8 and unc-52 protein homolog 1-like |
| SNP_112782_A_119558 | NW_004519076.1 | scaffold4777 | 119558                  | GG                              | CC                 | CC               | DRR                           | 101508451          | suppressor of mec-8 and unc-52 protein homolog 1-like |
| SNP_112783_A_119589 | NW_004519076.1 | scaffold4777 | 119589                  | AA                              | TT                 | TT               | URR                           | 101508451          | suppressor of mec-8 and unc-52 protein homolog 1-like |
| SNP_112784_A_119620 | NW_004519076.1 | scaffold4777 | 119620                  | GG                              | CC                 | CC               | URR                           | 101508451          | suppressor of mec-8 and unc-52 protein homolog 1-like |
| SNP_112785_A_119638 | NW_004519076.1 | scaffold4777 | 119638                  | AA                              | CC                 | CC               | URR                           | 101508451          | suppressor of mec-8 and unc-52 protein homolog 1-like |
| SNP_112786_A_119735 | NW_004519076.1 | scaffold4777 | 119735                  | TT                              | CC                 | CC               | URR                           | 101508451          | suppressor of mec-8 and unc-52 protein homolog 1-like |
| SNP_112787_A_119762 | NW_004519076.1 | scaffold4777 | 119762                  | TT                              | CC                 | CC               | URR                           | 101508451          | suppressor of mec-8 and unc-52 protein homolog 1-like |

| SNPs IDs          | Chromosome IDs | Chromosomes  | Physical positions (bp) | CDC Frontier (Reference genome) | (Pusa 1103 & HPNB) | (ILWC 46 & LPNB) | Sequence genome | Components of | Gene accession IDs | Putative functions |
|-------------------|----------------|--------------|-------------------------|---------------------------------|--------------------|------------------|-----------------|---------------|--------------------|--------------------|
| SNP_112788_A_538  | NW_004519079.1 | scaffold4781 | 538                     | TT                              | CC                 | CC               | INTERGENIC      |               |                    |                    |
| SNP_112789_A_1434 | NW_004519080.1 | scaffold4782 | 1434                    | AA                              | GG                 | GG               | INTERGENIC      |               |                    |                    |
| SNP_112790_A_1554 | NW_004519080.1 | scaffold4782 | 1554                    | GG                              | TT                 | TT               | INTERGENIC      |               |                    |                    |
| SNP_112791_A_1779 | NW_004519080.1 | scaffold4782 | 1779                    | TT                              | CC                 | CC               | INTERGENIC      |               |                    |                    |
| SNP_112792_A_1782 | NW_004519080.1 | scaffold4782 | 1782                    | CC                              | TT                 | TT               | INTERGENIC      |               |                    |                    |
| SNP_112793_A_1788 | NW_004519080.1 | scaffold4782 | 1788                    | GG                              | AA                 | AA               | INTERGENIC      |               |                    |                    |
| SNP_112794_A_1834 | NW_004519080.1 | scaffold4782 | 1834                    | CC                              | GG                 | GG               | INTERGENIC      |               |                    |                    |
| SNP_112795_A_181  | NW_004519082.1 | scaffold4784 | 181                     | AA                              | TT                 | TT               | INTERGENIC      |               |                    |                    |
| SNP_112796_A_224  | NW_004519082.1 | scaffold4784 | 224                     | GG                              | AA                 | AA               | INTERGENIC      |               |                    |                    |
| SNP_112797_A_247  | NW_004519082.1 | scaffold4784 | 247                     | CC                              | AA                 | AA               | INTERGENIC      |               |                    |                    |
| SNP_112798_A_253  | NW_004519082.1 | scaffold4784 | 253                     | GG                              | AA                 | AA               | INTERGENIC      |               |                    |                    |
| SNP_112799_A_298  | NW_004519082.1 | scaffold4784 | 298                     | TT                              | CC                 | CC               | INTERGENIC      |               |                    |                    |
| SNP_112800_A_313  | NW_004519082.1 | scaffold4784 | 313                     | AA                              | GG                 | GG               | INTERGENIC      |               |                    |                    |
| SNP_112801_A_441  | NW_004519082.1 | scaffold4784 | 441                     | CC                              | TT                 | TT               | INTERGENIC      |               |                    |                    |
| SNP_112802_A_571  | NW_004519082.1 | scaffold4784 | 571                     | GG                              | AA                 | AA               | INTERGENIC      |               |                    |                    |
| SNP_112803_A_616  | NW_004519082.1 | scaffold4784 | 616                     | GG                              | AA                 | AA               | INTERGENIC      |               |                    |                    |
| SNP_112804_A_626  | NW_004519082.1 | scaffold4784 | 626                     | CC                              | TT                 | TT               | INTERGENIC      |               |                    |                    |
| SNP_112805_A_638  | NW_004519082.1 | scaffold4784 | 638                     | AA                              | GG                 | GG               | INTERGENIC      |               |                    |                    |
| SNP_112807_A_865  | NW_004519082.1 | scaffold4784 | 865                     | TT                              | CC                 | CC               | INTERGENIC      |               |                    |                    |
| SNP_112808_A_1001 | NW_004519082.1 | scaffold4784 | 1001                    | TT                              | AA                 | AA               | INTERGENIC      |               |                    |                    |
| SNP_112809_A_2300 | NW_004519083.1 | scaffold4787 | 2300                    | GG                              | CC                 | CC               | INTERGENIC      |               |                    |                    |
| SNP_112810_A_340  | NW_004519087.1 | scaffold4791 | 340                     | AA                              | CC                 | CC               | INTERGENIC      |               |                    |                    |



| SNPs IDs          | Chromosome IDs | Chromosomes  | Physical positions (bp) | CDC Frontier (Reference genome) | (Pusa 1103 & HPNB) | (ILWC 46 & LPNB) | Sequence genome | Components of | Gene accession IDs | Putative functions |
|-------------------|----------------|--------------|-------------------------|---------------------------------|--------------------|------------------|-----------------|---------------|--------------------|--------------------|
| SNP_112811_A_341  | NW_004519087.1 | scaffold4791 | 341                     | CC                              | AA                 | AA               | INTERGENIC      |               |                    |                    |
| SNP_112812_A_342  | NW_004519087.1 | scaffold4791 | 342                     | CC                              | TT                 | TT               | INTERGENIC      |               |                    |                    |
| SNP_112813_A_346  | NW_004519087.1 | scaffold4791 | 346                     | TT                              | CC                 | CC               | INTERGENIC      |               |                    |                    |
| SNP_112814_A_666  | NW_004519087.1 | scaffold4791 | 666                     | AA                              | GG                 | GG               | INTERGENIC      |               |                    |                    |
| SNP_112815_A_1045 | NW_004519088.1 | scaffold4792 | 1045                    | CC                              | AA                 | AA               | INTERGENIC      |               |                    |                    |
| SNP_112816_A_5362 | NW_004519088.1 | scaffold4792 | 5362                    | AA                              | CC                 | CC               | INTERGENIC      |               |                    |                    |
| SNP_112817_A_5365 | NW_004519088.1 | scaffold4792 | 5365                    | CC                              | TT                 | TT               | INTERGENIC      |               |                    |                    |
| SNP_112818_A_5366 | NW_004519088.1 | scaffold4792 | 5366                    | TT                              | AA                 | AA               | INTERGENIC      |               |                    |                    |
| SNP_112819_A_5786 | NW_004519088.1 | scaffold4792 | 5786                    | TT                              | GG                 | GG               | INTERGENIC      |               |                    |                    |
| SNP_112820_A_64   | NW_004519090.1 | scaffold4795 | 64                      | AA                              | TT                 | TT               | INTERGENIC      |               |                    |                    |
| SNP_112821_A_285  | NW_004519092.1 | scaffold4797 | 285                     | AA                              | GG                 | GG               | INTERGENIC      |               |                    |                    |
| SNP_112822_A_5596 | NW_004519092.1 | scaffold4797 | 5596                    | AA                              | TT                 | TT               | INTERGENIC      |               |                    |                    |
| SNP_112823_A_6459 | NW_004519092.1 | scaffold4797 | 6459                    | TT                              | CC                 | CC               | INTERGENIC      |               |                    |                    |
| SNP_112824_A_6668 | NW_004519092.1 | scaffold4797 | 6668                    | AA                              | GG                 | GG               | INTERGENIC      |               |                    |                    |
| SNP_112825_A_2128 | NW_004519093.1 | scaffold4798 | 2128                    | TT                              | GG                 | GG               | INTERGENIC      |               |                    |                    |
| SNP_112826_A_723  | NW_004519096.1 | scaffold4804 | 723                     | AA                              | TT                 | TT               | INTERGENIC      |               |                    |                    |
| SNP_112827_A_789  | NW_004519096.1 | scaffold4804 | 789                     | AA                              | TT                 | TT               | INTERGENIC      |               |                    |                    |
| SNP_112828_A_793  | NW_004519096.1 | scaffold4804 | 793                     | TT                              | GG                 | GG               | INTERGENIC      |               |                    |                    |
| SNP_112829_A_854  | NW_004519096.1 | scaffold4804 | 854                     | GG                              | CC                 | CC               | INTERGENIC      |               |                    |                    |
| SNP_112831_A_1027 | NW_004519096.1 | scaffold4804 | 1027                    | GG                              | AA                 | AA               | INTERGENIC      |               |                    |                    |
| SNP_112832_A_1028 | NW_004519096.1 | scaffold4804 | 1028                    | GG                              | AA                 | AA               | INTERGENIC      |               |                    |                    |
| SNP_112833_A_1133 | NW_004519096.1 | scaffold4804 | 1133                    | GG                              | AA                 | AA               | INTERGENIC      |               |                    |                    |

| SNPs IDs           | Chromosome IDs | Chromosomes  | Physical positions (bp) | CDC Frontier (Reference genome) | (Pusa 1103 & HPNB) | (ILWC 46 & LPNB) | Sequence genome | Components of | Gene accession IDs | Putative functions |
|--------------------|----------------|--------------|-------------------------|---------------------------------|--------------------|------------------|-----------------|---------------|--------------------|--------------------|
| SNP_112834_A_1159  | NW_004519096.1 | scaffold4804 | 1159                    | AA                              | CC                 | CC               | INTERGENIC      |               |                    |                    |
| SNP_112835_A_1832  | NW_004519096.1 | scaffold4804 | 1832                    | CC                              | GG                 | GG               | INTERGENIC      |               |                    |                    |
| SNP_112836_A_1886  | NW_004519096.1 | scaffold4804 | 1886                    | CC                              | GG                 | GG               | INTERGENIC      |               |                    |                    |
| SNP_112837_A_1888  | NW_004519096.1 | scaffold4804 | 1888                    | CC                              | TT                 | TT               | INTERGENIC      |               |                    |                    |
| SNP_112839_A_3049  | NW_004519096.1 | scaffold4804 | 3049                    | CC                              | GG                 | GG               | INTERGENIC      |               |                    |                    |
| SNP_112840_A_3051  | NW_004519096.1 | scaffold4804 | 3051                    | TT                              | AA                 | AA               | INTERGENIC      |               |                    |                    |
| SNP_112841_A_3056  | NW_004519096.1 | scaffold4804 | 3056                    | AA                              | CC                 | CC               | INTERGENIC      |               |                    |                    |
| SNP_112842_A_3058  | NW_004519096.1 | scaffold4804 | 3058                    | TT                              | CC                 | CC               | INTERGENIC      |               |                    |                    |
| SNP_112843_A_3117  | NW_004519096.1 | scaffold4804 | 3117                    | AA                              | TT                 | TT               | INTERGENIC      |               |                    |                    |
| SNP_112844_A_3264  | NW_004519096.1 | scaffold4804 | 3264                    | TT                              | AA                 | AA               | INTERGENIC      |               |                    |                    |
| SNP_112845_A_3419  | NW_004519096.1 | scaffold4804 | 3419                    | AA                              | GG                 | GG               | INTERGENIC      |               |                    |                    |
| SNP_112846_A_3519  | NW_004519096.1 | scaffold4804 | 3519                    | AA                              | GG                 | GG               | INTERGENIC      |               |                    |                    |
| SNP_112847_A_8727  | NW_004519096.1 | scaffold4804 | 8727                    | GG                              | CC                 | CC               | INTERGENIC      |               |                    |                    |
| SNP_112848_A_8845  | NW_004519096.1 | scaffold4804 | 8845                    | TT                              | AA                 | AA               | INTERGENIC      |               |                    |                    |
| SNP_112849_A_8859  | NW_004519096.1 | scaffold4804 | 8859                    | TT                              | AA                 | AA               | INTERGENIC      |               |                    |                    |
| SNP_112851_A_9109  | NW_004519096.1 | scaffold4804 | 9109                    | CC                              | TT                 | TT               | INTERGENIC      |               |                    |                    |
| SNP_112852_A_9132  | NW_004519096.1 | scaffold4804 | 9132                    | AA                              | TT                 | TT               | INTERGENIC      |               |                    |                    |
| SNP_112854_A_9535  | NW_004519096.1 | scaffold4804 | 9535                    | TT                              | AA                 | AA               | INTERGENIC      |               |                    |                    |
| SNP_112855_A_9874  | NW_004519096.1 | scaffold4804 | 9874                    | GG                              | CC                 | CC               | INTERGENIC      |               |                    |                    |
| SNP_112856_A_10082 | NW_004519096.1 | scaffold4804 | 10082                   | AA                              | CC                 | CC               | INTERGENIC      |               |                    |                    |
| SNP_112857_A_10227 | NW_004519096.1 | scaffold4804 | 10227                   | AA                              | CC                 | CC               | INTERGENIC      |               |                    |                    |
| SNP_112858_A_10531 | NW_004519096.1 | scaffold4804 | 10531                   | CC                              | AA                 | AA               | INTERGENIC      |               |                    |                    |

| SNPs IDs           | Chromosome IDs | Chromosomes  | Physical positions (bp) | CDC Frontier (Reference genome) | (Pusa 1103 & HPNB) | (ILWC 46 & LPNB) | Sequence Components of genome | Gene accession IDs | Putative functions           |
|--------------------|----------------|--------------|-------------------------|---------------------------------|--------------------|------------------|-------------------------------|--------------------|------------------------------|
| SNP_112859_A_10540 | NW_004519096.1 | scaffold4804 | 10540                   | CC                              | GG                 | GG               | INTERGENIC                    |                    |                              |
| SNP_112860_A_10545 | NW_004519096.1 | scaffold4804 | 10545                   | CC                              | TT                 | TT               | INTERGENIC                    |                    |                              |
| SNP_112861_A_10553 | NW_004519096.1 | scaffold4804 | 10553                   | AA                              | CC                 | CC               | INTERGENIC                    |                    |                              |
| SNP_112862_A_11809 | NW_004519096.1 | scaffold4804 | 11809                   | CC                              | TT                 | TT               | INTERGENIC                    |                    |                              |
| SNP_112863_A_11812 | NW_004519096.1 | scaffold4804 | 11812                   | GG                              | AA                 | AA               | INTERGENIC                    |                    |                              |
| SNP_112864_A_11820 | NW_004519096.1 | scaffold4804 | 11820                   | TT                              | GG                 | GG               | INTERGENIC                    |                    |                              |
| SNP_112865_A_11888 | NW_004519096.1 | scaffold4804 | 11888                   | AA                              | CC                 | CC               | INTERGENIC                    |                    |                              |
| SNP_112866_A_11903 | NW_004519096.1 | scaffold4804 | 11903                   | AA                              | GG                 | GG               | INTERGENIC                    |                    |                              |
| SNP_112867_A_11947 | NW_004519096.1 | scaffold4804 | 11947                   | AA                              | CC                 | CC               | INTERGENIC                    |                    |                              |
| SNP_112868_A_17111 | NW_004519096.1 | scaffold4804 | 17111                   | GG                              | TT                 | TT               | INTERGENIC                    |                    |                              |
| SNP_112869_A_17235 | NW_004519096.1 | scaffold4804 | 17235                   | AA                              | GG                 | GG               | INTERGENIC                    |                    |                              |
| SNP_112870_A_17385 | NW_004519096.1 | scaffold4804 | 17385                   | GG                              | AA                 | AA               | INTERGENIC                    |                    |                              |
| SNP_112871_A_17506 | NW_004519096.1 | scaffold4804 | 17506                   | TT                              | CC                 | CC               | INTERGENIC                    |                    |                              |
| SNP_112872_A_17793 | NW_004519096.1 | scaffold4804 | 17793                   | AA                              | GG                 | GG               | INTERGENIC                    |                    |                              |
| SNP_112873_A_17838 | NW_004519096.1 | scaffold4804 | 17838                   | GG                              | CC                 | CC               | INTERGENIC                    |                    |                              |
| SNP_112874_A_17870 | NW_004519096.1 | scaffold4804 | 17870                   | CC                              | TT                 | TT               | INTERGENIC                    |                    |                              |
| SNP_112875_A_5749  | NW_004519097.1 | scaffold4805 | 5749                    | TT                              | CC                 | CC               | INTERGENIC                    |                    |                              |
| SNP_112876_A_10948 | NW_004519097.1 | scaffold4805 | 10948                   | AA                              | GG                 | GG               | URR                           | 101509072          | uncharacterized LOC101509072 |
| SNP_112877_A_11030 | NW_004519097.1 | scaffold4805 | 11030                   | TT                              | CC                 | CC               | URR                           | 101509072          | uncharacterized LOC101509072 |
| SNP_112878_A_11061 | NW_004519097.1 | scaffold4805 | 11061                   | TT                              | CC                 | CC               | URR                           | 101509072          | uncharacterized LOC101509072 |
| SNP_112879_A_11278 | NW_004519097.1 | scaffold4805 | 11278                   | AA                              | TT                 | TT               | URR                           | 101509072          | uncharacterized LOC101509072 |
| SNP_112880_A_64    | NW_004519100.1 | scaffold4808 | 64                      | CC                              | AA                 | AA               | INTERGENIC                    |                    |                              |

| SNPs IDs          | Chromosome IDs | Chromosomes  | Physical positions (bp) | CDC Frontier (Reference genome) | (Pusa 1103 & HPNB) | (ILWC 46 & LPNB) | Sequence genome | Components of | Gene accession IDs | Putative functions |
|-------------------|----------------|--------------|-------------------------|---------------------------------|--------------------|------------------|-----------------|---------------|--------------------|--------------------|
| SNP_112881_A_508  | NW_004519100.1 | scaffold4808 | 508                     | GG                              | CC                 | CC               | INTERGENIC      |               |                    |                    |
| SNP_112882_A_668  | NW_004519100.1 | scaffold4808 | 668                     | AA                              | CC                 | CC               | INTERGENIC      |               |                    |                    |
| SNP_112883_A_747  | NW_004519100.1 | scaffold4808 | 747                     | GG                              | TT                 | TT               | INTERGENIC      |               |                    |                    |
| SNP_112884_A_760  | NW_004519100.1 | scaffold4808 | 760                     | TT                              | CC                 | CC               | INTERGENIC      |               |                    |                    |
| SNP_112886_A_922  | NW_004519100.1 | scaffold4808 | 922                     | TT                              | GG                 | GG               | INTERGENIC      |               |                    |                    |
| SNP_112888_A_725  | NW_004519106.1 | scaffold4817 | 725                     | CC                              | AA                 | AA               | INTERGENIC      |               |                    |                    |
| SNP_112889_A_781  | NW_004519106.1 | scaffold4817 | 781                     | CC                              | TT                 | TT               | INTERGENIC      |               |                    |                    |
| SNP_112890_A_876  | NW_004519106.1 | scaffold4817 | 876                     | TT                              | AA                 | AA               | INTERGENIC      |               |                    |                    |
| SNP_112891_A_878  | NW_004519106.1 | scaffold4817 | 878                     | CC                              | TT                 | TT               | INTERGENIC      |               |                    |                    |
| SNP_112892_A_1781 | NW_004519108.1 | scaffold4820 | 1781                    | TT                              | CC                 | CC               | INTERGENIC      |               |                    |                    |
| SNP_112894_A_1741 | NW_004519115.1 | scaffold4828 | 1741                    | AA                              | GG                 | GG               | INTERGENIC      |               |                    |                    |
| SNP_112895_A_1742 | NW_004519115.1 | scaffold4828 | 1742                    | TT                              | CC                 | CC               | INTERGENIC      |               |                    |                    |
| SNP_112896_A_1333 | NW_004519116.1 | scaffold4829 | 1333                    | GG                              | AA                 | AA               | INTERGENIC      |               |                    |                    |
| SNP_112897_A_1380 | NW_004519116.1 | scaffold4829 | 1380                    | GG                              | AA                 | AA               | INTERGENIC      |               |                    |                    |
| SNP_112898_A_1387 | NW_004519116.1 | scaffold4829 | 1387                    | TT                              | AA                 | AA               | INTERGENIC      |               |                    |                    |
| SNP_112899_A_1437 | NW_004519116.1 | scaffold4829 | 1437                    | AA                              | GG                 | GG               | INTERGENIC      |               |                    |                    |
| SNP_112900_A_1518 | NW_004519116.1 | scaffold4829 | 1518                    | CC                              | TT                 | TT               | INTERGENIC      |               |                    |                    |
| SNP_112901_A_1551 | NW_004519116.1 | scaffold4829 | 1551                    | TT                              | GG                 | GG               | INTERGENIC      |               |                    |                    |
| SNP_112902_A_5960 | NW_004519116.1 | scaffold4829 | 5960                    | TT                              | GG                 | GG               | INTERGENIC      |               |                    |                    |
| SNP_112903_A_6211 | NW_004519116.1 | scaffold4829 | 6211                    | TT                              | GG                 | GG               | INTERGENIC      |               |                    |                    |
| SNP_112904_A_6231 | NW_004519116.1 | scaffold4829 | 6231                    | GG                              | AA                 | AA               | INTERGENIC      |               |                    |                    |
| SNP_112906_A_6366 | NW_004519116.1 | scaffold4829 | 6366                    | TT                              | CC                 | CC               | INTERGENIC      |               |                    |                    |

| SNPs IDs          | Chromosome IDs | Chromosomes  | Physical positions (bp) | CDC Frontier (Reference genome) | (Pusa 1103 & HPNB) | (ILWC 46 & LPNB) | Sequence genome | Components of | Gene accession IDs | Putative functions |
|-------------------|----------------|--------------|-------------------------|---------------------------------|--------------------|------------------|-----------------|---------------|--------------------|--------------------|
| SNP_112907_A_6382 | NW_004519116.1 | scaffold4829 | 6382                    | GG                              | AA                 | AA               | INTERGENIC      |               |                    |                    |
| SNP_112908_A_6420 | NW_004519116.1 | scaffold4829 | 6420                    | TT                              | CC                 | CC               | INTERGENIC      |               |                    |                    |
| SNP_112909_A_6456 | NW_004519116.1 | scaffold4829 | 6456                    | CC                              | GG                 | GG               | INTERGENIC      |               |                    |                    |
| SNP_112911_A_6654 | NW_004519116.1 | scaffold4829 | 6654                    | TT                              | AA                 | AA               | INTERGENIC      |               |                    |                    |
| SNP_112912_A_6666 | NW_004519116.1 | scaffold4829 | 6666                    | CC                              | GG                 | GG               | INTERGENIC      |               |                    |                    |
| SNP_112913_A_6693 | NW_004519116.1 | scaffold4829 | 6693                    | TT                              | CC                 | CC               | INTERGENIC      |               |                    |                    |
| SNP_112914_A_6699 | NW_004519116.1 | scaffold4829 | 6699                    | CC                              | TT                 | TT               | INTERGENIC      |               |                    |                    |
| SNP_112915_A_6734 | NW_004519116.1 | scaffold4829 | 6734                    | TT                              | CC                 | CC               | INTERGENIC      |               |                    |                    |
| SNP_112916_A_6751 | NW_004519116.1 | scaffold4829 | 6751                    | CC                              | TT                 | TT               | INTERGENIC      |               |                    |                    |
| SNP_112918_A_8277 | NW_004519116.1 | scaffold4829 | 8277                    | AA                              | GG                 | GG               | INTERGENIC      |               |                    |                    |
| SNP_112919_A_8285 | NW_004519116.1 | scaffold4829 | 8285                    | CC                              | TT                 | TT               | INTERGENIC      |               |                    |                    |
| SNP_112920_A_8328 | NW_004519116.1 | scaffold4829 | 8328                    | TT                              | AA                 | AA               | INTERGENIC      |               |                    |                    |
| SNP_112921_A_8471 | NW_004519116.1 | scaffold4829 | 8471                    | AA                              | CC                 | CC               | INTERGENIC      |               |                    |                    |
| SNP_112922_A_580  | NW_004519118.1 | scaffold4833 | 580                     | AA                              | GG                 | GG               | INTERGENIC      |               |                    |                    |
| SNP_112923_A_675  | NW_004519118.1 | scaffold4833 | 675                     | TT                              | AA                 | AA               | INTERGENIC      |               |                    |                    |
| SNP_112925_A_1060 | NW_004519118.1 | scaffold4833 | 1060                    | AA                              | CC                 | CC               | INTERGENIC      |               |                    |                    |
| SNP_112926_A_1187 | NW_004519118.1 | scaffold4833 | 1187                    | AA                              | TT                 | TT               | INTERGENIC      |               |                    |                    |
| SNP_112927_A_3275 | NW_004519118.1 | scaffold4833 | 3275                    | TT                              | CC                 | CC               | INTERGENIC      |               |                    |                    |
| SNP_112928_A_3484 | NW_004519118.1 | scaffold4833 | 3484                    | CC                              | AA                 | AA               | INTERGENIC      |               |                    |                    |
| SNP_112929_A_3499 | NW_004519118.1 | scaffold4833 | 3499                    | CC                              | AA                 | AA               | INTERGENIC      |               |                    |                    |
| SNP_112930_A_3755 | NW_004519118.1 | scaffold4833 | 3755                    | GG                              | TT                 | TT               | INTERGENIC      |               |                    |                    |
| SNP_112933_A_3946 | NW_004519118.1 | scaffold4833 | 3946                    | CC                              | TT                 | TT               | INTERGENIC      |               |                    |                    |

| SNPs IDs           | Chromosome IDs | Chromosomes  | Physical positions (bp) | CDC Frontier (Reference genome) | (Pusa 1103 & HPNB) | (ILWC 46 & LPNB) | Sequence genome | Components of | Gene accession IDs | Putative functions |
|--------------------|----------------|--------------|-------------------------|---------------------------------|--------------------|------------------|-----------------|---------------|--------------------|--------------------|
| SNP_112934_A_5851  | NW_004519118.1 | scaffold4833 | 5851                    | GG                              | TT                 | TT               | INTERGENIC      |               |                    |                    |
| SNP_112935_A_279   | NW_004519122.1 | scaffold4837 | 279                     | CC                              | TT                 | TT               | INTERGENIC      |               |                    |                    |
| SNP_112937_A_13249 | NW_004519122.1 | scaffold4837 | 13249                   | GG                              | CC                 | CC               | INTERGENIC      |               |                    |                    |
| SNP_112938_A_5798  | NW_004519126.1 | scaffold4846 | 5798                    | TT                              | CC                 | CC               | INTERGENIC      |               |                    |                    |
| SNP_112939_A_5799  | NW_004519126.1 | scaffold4846 | 5799                    | TT                              | AA                 | AA               | INTERGENIC      |               |                    |                    |
| SNP_112940_A_5886  | NW_004519126.1 | scaffold4846 | 5886                    | GG                              | CC                 | CC               | INTERGENIC      |               |                    |                    |
| SNP_112941_A_6285  | NW_004519126.1 | scaffold4846 | 6285                    | GG                              | CC                 | CC               | INTERGENIC      |               |                    |                    |
| SNP_112942_A_2204  | NW_004519130.1 | scaffold4850 | 2204                    | AA                              | GG                 | GG               | INTERGENIC      |               |                    |                    |
| SNP_112943_A_2211  | NW_004519130.1 | scaffold4850 | 2211                    | AA                              | GG                 | GG               | INTERGENIC      |               |                    |                    |
| SNP_112944_A_2988  | NW_004519131.1 | scaffold4851 | 2988                    | TT                              | CC                 | CC               | INTERGENIC      |               |                    |                    |
| SNP_112946_A_3130  | NW_004519131.1 | scaffold4851 | 3130                    | GG                              | TT                 | TT               | INTERGENIC      |               |                    |                    |
| SNP_112947_A_3224  | NW_004519131.1 | scaffold4851 | 3224                    | CC                              | AA                 | AA               | INTERGENIC      |               |                    |                    |
| SNP_112948_A_3268  | NW_004519131.1 | scaffold4851 | 3268                    | GG                              | AA                 | AA               | INTERGENIC      |               |                    |                    |
| SNP_112949_A_3333  | NW_004519131.1 | scaffold4851 | 3333                    | TT                              | AA                 | AA               | INTERGENIC      |               |                    |                    |
| SNP_112950_A_3363  | NW_004519131.1 | scaffold4851 | 3363                    | TT                              | AA                 | AA               | INTERGENIC      |               |                    |                    |
| SNP_112951_A_3405  | NW_004519131.1 | scaffold4851 | 3405                    | AA                              | GG                 | GG               | INTERGENIC      |               |                    |                    |
| SNP_112952_A_3578  | NW_004519131.1 | scaffold4851 | 3578                    | AA                              | GG                 | GG               | INTERGENIC      |               |                    |                    |
| SNP_112953_A_3588  | NW_004519131.1 | scaffold4851 | 3588                    | TT                              | AA                 | AA               | INTERGENIC      |               |                    |                    |
| SNP_112954_A_3601  | NW_004519131.1 | scaffold4851 | 3601                    | AA                              | CC                 | CC               | INTERGENIC      |               |                    |                    |
| SNP_112956_A_3639  | NW_004519131.1 | scaffold4851 | 3639                    | GG                              | AA                 | AA               | INTERGENIC      |               |                    |                    |
| SNP_112957_A_3806  | NW_004519131.1 | scaffold4851 | 3806                    | AA                              | GG                 | GG               | INTERGENIC      |               |                    |                    |
| SNP_112958_A_5151  | NW_004519136.1 | scaffold4859 | 5151                    | CC                              | TT                 | TT               | INTERGENIC      |               |                    |                    |

| SNPs IDs          | Chromosome IDs | Chromosomes  | Physical positions (bp) | CDC Frontier (Reference genome) | (Pusa 1103 & HPNB) | (ILWC 46 & LPNB) | Sequence genome | Components of | Gene accession IDs | Putative functions |
|-------------------|----------------|--------------|-------------------------|---------------------------------|--------------------|------------------|-----------------|---------------|--------------------|--------------------|
| SNP_112959_A_5584 | NW_004519136.1 | scaffold4859 | 5584                    | CC                              | TT                 | TT               | INTERGENIC      |               |                    |                    |
| SNP_112960_A_6970 | NW_004519136.1 | scaffold4859 | 6970                    | CC                              | AA                 | AA               | INTERGENIC      |               |                    |                    |
| SNP_112962_A_1855 | NW_004519140.1 | scaffold4863 | 1855                    | TT                              | CC                 | CC               | INTERGENIC      |               |                    |                    |
| SNP_112963_A_1911 | NW_004519140.1 | scaffold4863 | 1911                    | CC                              | TT                 | TT               | INTERGENIC      |               |                    |                    |
| SNP_112964_A_796  | NW_004519142.1 | scaffold4865 | 796                     | CC                              | TT                 | TT               | INTERGENIC      |               |                    |                    |
| SNP_112965_A_1113 | NW_004519142.1 | scaffold4865 | 1113                    | AA                              | GG                 | GG               | INTERGENIC      |               |                    |                    |
| SNP_112966_A_1221 | NW_004519142.1 | scaffold4865 | 1221                    | CC                              | TT                 | TT               | INTERGENIC      |               |                    |                    |
| SNP_112967_A_402  | NW_004519146.1 | scaffold4869 | 402                     | CC                              | AA                 | AA               | INTERGENIC      |               |                    |                    |
| SNP_112968_A_607  | NW_004519146.1 | scaffold4869 | 607                     | CC                              | GG                 | GG               | INTERGENIC      |               |                    |                    |
| SNP_112969_A_633  | NW_004519146.1 | scaffold4869 | 633                     | CC                              | AA                 | AA               | INTERGENIC      |               |                    |                    |
| SNP_112970_A_640  | NW_004519146.1 | scaffold4869 | 640                     | GG                              | AA                 | AA               | INTERGENIC      |               |                    |                    |
| SNP_112971_A_751  | NW_004519146.1 | scaffold4869 | 751                     | TT                              | CC                 | CC               | INTERGENIC      |               |                    |                    |
| SNP_112972_A_770  | NW_004519146.1 | scaffold4869 | 770                     | TT                              | AA                 | AA               | INTERGENIC      |               |                    |                    |
| SNP_112974_A_921  | NW_004519146.1 | scaffold4869 | 921                     | GG                              | AA                 | AA               | INTERGENIC      |               |                    |                    |
| SNP_112975_A_1221 | NW_004519146.1 | scaffold4869 | 1221                    | TT                              | AA                 | AA               | INTERGENIC      |               |                    |                    |
| SNP_112976_A_1240 | NW_004519146.1 | scaffold4869 | 1240                    | AA                              | TT                 | TT               | INTERGENIC      |               |                    |                    |
| SNP_112978_A_7755 | NW_004519148.1 | scaffold4874 | 7755                    | GG                              | TT                 | TT               | INTERGENIC      |               |                    |                    |
| SNP_112979_A_7769 | NW_004519148.1 | scaffold4874 | 7769                    | AA                              | GG                 | GG               | INTERGENIC      |               |                    |                    |
| SNP_112980_A_7827 | NW_004519148.1 | scaffold4874 | 7827                    | AA                              | GG                 | GG               | INTERGENIC      |               |                    |                    |
| SNP_112981_A_8015 | NW_004519148.1 | scaffold4874 | 8015                    | TT                              | AA                 | AA               | INTERGENIC      |               |                    |                    |
| SNP_112982_A_8022 | NW_004519148.1 | scaffold4874 | 8022                    | GG                              | AA                 | AA               | INTERGENIC      |               |                    |                    |
| SNP_112983_A_8031 | NW_004519148.1 | scaffold4874 | 8031                    | AA                              | GG                 | GG               | INTERGENIC      |               |                    |                    |

| SNPs IDs           | Chromosome IDs | Chromosomes  | Physical positions (bp) | CDC Frontier (Reference genome) | (Pusa 1103 & HPNB) | (ILWC 46 & LPNB) | Sequence genome       | Components of | Gene accession IDs                              | Putative functions |
|--------------------|----------------|--------------|-------------------------|---------------------------------|--------------------|------------------|-----------------------|---------------|-------------------------------------------------|--------------------|
| SNP_112984_A_8032  | NW_004519148.1 | scaffold4874 | 8032                    | AA                              | GG                 | GG               | INTERGENIC            |               |                                                 |                    |
| SNP_112985_A_8131  | NW_004519148.1 | scaffold4874 | 8131                    | CC                              | AA                 | AA               | INTERGENIC            |               |                                                 |                    |
| SNP_112986_A_8146  | NW_004519148.1 | scaffold4874 | 8146                    | AA                              | GG                 | GG               | INTERGENIC            |               |                                                 |                    |
| SNP_112987_A_3762  | NW_004519150.1 | scaffold4879 | 3762                    | TT                              | GG                 | GG               | INTERGENIC            |               |                                                 |                    |
| SNP_112988_A_799   | NW_004519153.1 | scaffold4884 | 799                     | TT                              | CC                 | CC               | INTERGENIC            |               |                                                 |                    |
| SNP_112989_A_943   | NW_004519153.1 | scaffold4884 | 943                     | TT                              | GG                 | GG               | INTERGENIC            |               |                                                 |                    |
| SNP_112990_A_1077  | NW_004519153.1 | scaffold4884 | 1077                    | AA                              | GG                 | GG               | INTERGENIC            |               |                                                 |                    |
| SNP_112991_A_1096  | NW_004519153.1 | scaffold4884 | 1096                    | TT                              | CC                 | CC               | INTERGENIC            |               |                                                 |                    |
| SNP_112992_A_1733  | NW_004519153.1 | scaffold4884 | 1733                    | TT                              | GG                 | GG               | INTERGENIC            |               |                                                 |                    |
| SNP_112993_A_1859  | NW_004519153.1 | scaffold4884 | 1859                    | TT                              | AA                 | AA               | INTERGENIC            |               |                                                 |                    |
| SNP_112994_A_1876  | NW_004519153.1 | scaffold4884 | 1876                    | AA                              | GG                 | GG               | INTERGENIC            |               |                                                 |                    |
| SNP_112995_A_1921  | NW_004519153.1 | scaffold4884 | 1921                    | AA                              | TT                 | TT               | INTERGENIC            |               |                                                 |                    |
| SNP_112996_A_1966  | NW_004519153.1 | scaffold4884 | 1966                    | AA                              | GG                 | GG               | INTERGENIC            |               |                                                 |                    |
| SNP_112997_A_1755  | NW_004519156.1 | scaffold4889 | 1755                    | TT                              | CC                 | CC               | INTERGENIC            |               |                                                 |                    |
| SNP_112998_A_2121  | NW_004519158.1 | scaffold4892 | 2121                    | CC                              | TT                 | TT               | INTERGENIC            |               |                                                 |                    |
| SNP_112999_A_97    | NW_004519160.1 | scaffold4894 | 97                      | TT                              | GG                 | GG               | INTERGENIC            |               |                                                 |                    |
| SNP_113000_A_64    | NW_004519161.1 | scaffold4895 | 64                      | AA                              | GG                 | GG               | INTERGENIC            |               |                                                 |                    |
| SNP_113001_A_70    | NW_004519161.1 | scaffold4895 | 70                      | GG                              | CC                 | CC               | INTERGENIC            |               |                                                 |                    |
| SNP_113002_A_11368 | NW_004519166.1 | scaffold4902 | 11368                   | GG                              | AA                 | AA               | NON_SYNONYMOUS_CODING | 101511022     | probable receptor-like protein kinase At5g47070 |                    |
| SNP_113003_A_15034 | NW_004519166.1 | scaffold4902 | 15034                   | AA                              | GG                 | GG               | URR                   | 101511022     | probable receptor-like protein kinase At5g47070 |                    |
| SNP_113004_A_15265 | NW_004519166.1 | scaffold4902 | 15265                   | CC                              | TT                 | TT               | URR                   | 101511022     | probable receptor-like protein kinase At5g47070 |                    |
| SNP_113005_A_16049 | NW_004519166.1 | scaffold4902 | 16049                   | GG                              | AA                 | AA               | URR                   | 101511022     | probable receptor-like protein kinase At5g47070 |                    |



| SNPs IDs           | Chromosome IDs | Chromosomes  | Physical positions (bp) | CDC Frontier (Reference genome) | (Pusa 1103 & HPNB) | (ILWC 46 & LPNB) | Sequence Components of genome | Gene accession IDs | Putative functions                   |
|--------------------|----------------|--------------|-------------------------|---------------------------------|--------------------|------------------|-------------------------------|--------------------|--------------------------------------|
| SNP_113006_A_16735 | NW_004519166.1 | scaffold4902 | 16735                   | GG                              | AA                 | AA               | INTERGENIC                    |                    |                                      |
| SNP_113007_A_16737 | NW_004519166.1 | scaffold4902 | 16737                   | CC                              | TT                 | TT               | INTERGENIC                    |                    |                                      |
| SNP_113008_A_16819 | NW_004519166.1 | scaffold4902 | 16819                   | CC                              | GG                 | GG               | INTERGENIC                    |                    |                                      |
| SNP_113009_A_18743 | NW_004519166.1 | scaffold4902 | 18743                   | AA                              | CC                 | CC               | INTERGENIC                    |                    |                                      |
| SNP_113010_A_19646 | NW_004519166.1 | scaffold4902 | 19646                   | CC                              | TT                 | TT               | INTERGENIC                    |                    |                                      |
| SNP_113011_A_20853 | NW_004519166.1 | scaffold4902 | 20853                   | CC                              | TT                 | TT               | DRR                           | 101511328          | uncharacterized LOC101511328         |
| SNP_113012_A_23121 | NW_004519166.1 | scaffold4902 | 23121                   | GG                              | TT                 | TT               | URR                           | 101511328          | uncharacterized LOC101511328         |
| SNP_113015_A_40702 | NW_004519166.1 | scaffold4902 | 40702                   | TT                              | CC                 | CC               | INTERGENIC                    |                    |                                      |
| SNP_113016_A_45488 | NW_004519166.1 | scaffold4902 | 45488                   | CC                              | GG                 | GG               | DRR                           | 101512524          | protein ENHANCED DOWNY MILDEW 2-like |
| SNP_113017_A_45505 | NW_004519166.1 | scaffold4902 | 45505                   | AA                              | TT                 | TT               | INTERGENIC                    |                    |                                      |
| SNP_113018_A_57614 | NW_004519166.1 | scaffold4902 | 57614                   | TT                              | GG                 | GG               | INTRON                        | 101513600          | cytochrome P450 714C2-like           |
| SNP_113019_A_65214 | NW_004519166.1 | scaffold4902 | 65214                   | CC                              | AA                 | AA               | INTRON                        | 101513925          | uncharacterized LOC101513925         |
| SNP_113021_A_66045 | NW_004519166.1 | scaffold4902 | 66045                   | CC                              | TT                 | TT               | NON_SYNONYMOUS_CODING         | 101513925          | uncharacterized LOC101513925         |
| SNP_113022_A_66460 | NW_004519166.1 | scaffold4902 | 66460                   | AA                              | CC                 | CC               | SYNONYMOUS_CODING             | 101513925          | uncharacterized LOC101513925         |
| SNP_113023_A_66818 | NW_004519166.1 | scaffold4902 | 66818                   | CC                              | TT                 | TT               | URR                           | 101513925          | uncharacterized LOC101513925         |
| SNP_113024_A_66857 | NW_004519166.1 | scaffold4902 | 66857                   | AA                              | TT                 | TT               | URR                           | 101513925          | uncharacterized LOC101513925         |
| SNP_113025_A_71090 | NW_004519166.1 | scaffold4902 | 71090                   | TT                              | AA                 | AA               | INTERGENIC                    |                    |                                      |
| SNP_113026_A_72792 | NW_004519166.1 | scaffold4902 | 72792                   | TT                              | AA                 | AA               | INTERGENIC                    |                    |                                      |
| SNP_113027_A_72849 | NW_004519166.1 | scaffold4902 | 72849                   | CC                              | TT                 | TT               | INTERGENIC                    |                    |                                      |
| SNP_113029_A_73002 | NW_004519166.1 | scaffold4902 | 73002                   | TT                              | CC                 | CC               | INTERGENIC                    |                    |                                      |
| SNP_113031_A_73096 | NW_004519166.1 | scaffold4902 | 73096                   | AA                              | CC                 | CC               | INTERGENIC                    |                    |                                      |
| SNP_113032_A_73117 | NW_004519166.1 | scaffold4902 | 73117                   | CC                              | TT                 | TT               | INTERGENIC                    |                    |                                      |

| SNPs IDs           | Chromosome IDs | Chromosomes  | Physical positions (bp) | CDC Frontier (Reference genome) | (Pusa 1103 & HPNB) | (ILWC 46 & LPNB) | Sequence genome | Components of | Gene accession IDs           | Putative functions |
|--------------------|----------------|--------------|-------------------------|---------------------------------|--------------------|------------------|-----------------|---------------|------------------------------|--------------------|
| SNP_113033_A_73191 | NW_004519166.1 | scaffold4902 | 73191                   | CC                              | TT                 | TT               | INTERGENIC      |               |                              |                    |
| SNP_113034_A_73338 | NW_004519166.1 | scaffold4902 | 73338                   | GG                              | AA                 | AA               | INTERGENIC      |               |                              |                    |
| SNP_113035_A_73350 | NW_004519166.1 | scaffold4902 | 73350                   | CC                              | TT                 | TT               | INTERGENIC      |               |                              |                    |
| SNP_113036_A_73370 | NW_004519166.1 | scaffold4902 | 73370                   | TT                              | CC                 | CC               | INTERGENIC      |               |                              |                    |
| SNP_113037_A_73523 | NW_004519166.1 | scaffold4902 | 73523                   | CC                              | TT                 | TT               | INTERGENIC      |               |                              |                    |
| SNP_113038_A_73544 | NW_004519166.1 | scaffold4902 | 73544                   | CC                              | TT                 | TT               | INTERGENIC      |               |                              |                    |
| SNP_113039_A_73692 | NW_004519166.1 | scaffold4902 | 73692                   | TT                              | GG                 | GG               | INTERGENIC      |               |                              |                    |
| SNP_113040_A_73707 | NW_004519166.1 | scaffold4902 | 73707                   | CC                              | AA                 | AA               | INTERGENIC      |               |                              |                    |
| SNP_113041_A_73779 | NW_004519166.1 | scaffold4902 | 73779                   | AA                              | GG                 | GG               | INTERGENIC      |               |                              |                    |
| SNP_113044_A_74418 | NW_004519166.1 | scaffold4902 | 74418                   | GG                              | AA                 | AA               | INTERGENIC      |               |                              |                    |
| SNP_113045_A_74609 | NW_004519166.1 | scaffold4902 | 74609                   | CC                              | TT                 | TT               | INTERGENIC      |               |                              |                    |
| SNP_113046_A_74835 | NW_004519166.1 | scaffold4902 | 74835                   | CC                              | TT                 | TT               | INTERGENIC      |               |                              |                    |
| SNP_113047_A_74904 | NW_004519166.1 | scaffold4902 | 74904                   | GG                              | AA                 | AA               | INTERGENIC      |               |                              |                    |
| SNP_113049_A_75722 | NW_004519166.1 | scaffold4902 | 75722                   | AA                              | CC                 | CC               | INTERGENIC      |               |                              |                    |
| SNP_113050_A_80328 | NW_004519166.1 | scaffold4902 | 80328                   | AA                              | GG                 | GG               | INTRON          | 101513051     | uncharacterized LOC101513051 |                    |
| SNP_113052_A_82660 | NW_004519166.1 | scaffold4902 | 82660                   | CC                              | TT                 | TT               | URR             | 101513051     | uncharacterized LOC101513051 |                    |
| SNP_113053_A_82783 | NW_004519166.1 | scaffold4902 | 82783                   | TT                              | CC                 | CC               | URR             | 101513051     | uncharacterized LOC101513051 |                    |
| SNP_113055_A_83315 | NW_004519166.1 | scaffold4902 | 83315                   | GG                              | TT                 | TT               | DRR             | 101513377     | Unknown function             |                    |
| SNP_113056_A_91772 | NW_004519166.1 | scaffold4902 | 91772                   | TT                              | CC                 | CC               | INTERGENIC      |               |                              |                    |
| SNP_113057_A_92058 | NW_004519166.1 | scaffold4902 | 92058                   | GG                              | TT                 | TT               | INTERGENIC      |               |                              |                    |
| SNP_113058_A_382   | NW_004519169.1 | scaffold4905 | 382                     | AA                              | GG                 | GG               | INTERGENIC      |               |                              |                    |
| SNP_113059_A_1145  | NW_004519173.1 | scaffold4912 | 1145                    | AA                              | GG                 | GG               | INTERGENIC      |               |                              |                    |

| SNPs IDs           | Chromosome IDs | Chromosomes  | Physical positions (bp) | CDC Frontier (Reference genome) | (Pusa 1103 & HPNB) | (ILWC 46 & LPNB) | Sequence genome | Components of | Gene accession IDs | Putative functions |
|--------------------|----------------|--------------|-------------------------|---------------------------------|--------------------|------------------|-----------------|---------------|--------------------|--------------------|
| SNP_113060_A_4207  | NW_004519175.1 | scaffold4917 | 4207                    | AA                              | GG                 | GG               | INTERGENIC      |               |                    |                    |
| SNP_113061_A_4244  | NW_004519175.1 | scaffold4917 | 4244                    | CC                              | AA                 | AA               | INTERGENIC      |               |                    |                    |
| SNP_113062_A_4254  | NW_004519175.1 | scaffold4917 | 4254                    | TT                              | AA                 | AA               | INTERGENIC      |               |                    |                    |
| SNP_113063_A_4745  | NW_004519175.1 | scaffold4917 | 4745                    | TT                              | AA                 | AA               | INTERGENIC      |               |                    |                    |
| SNP_113064_A_4778  | NW_004519175.1 | scaffold4917 | 4778                    | TT                              | AA                 | AA               | INTERGENIC      |               |                    |                    |
| SNP_113065_A_4959  | NW_004519175.1 | scaffold4917 | 4959                    | AA                              | TT                 | TT               | INTERGENIC      |               |                    |                    |
| SNP_113066_A_4992  | NW_004519175.1 | scaffold4917 | 4992                    | AA                              | TT                 | TT               | INTERGENIC      |               |                    |                    |
| SNP_113067_A_5036  | NW_004519175.1 | scaffold4917 | 5036                    | TT                              | AA                 | AA               | INTERGENIC      |               |                    |                    |
| SNP_113068_A_5288  | NW_004519175.1 | scaffold4917 | 5288                    | GG                              | AA                 | AA               | INTERGENIC      |               |                    |                    |
| SNP_113069_A_5309  | NW_004519175.1 | scaffold4917 | 5309                    | GG                              | TT                 | TT               | INTERGENIC      |               |                    |                    |
| SNP_113070_A_5472  | NW_004519175.1 | scaffold4917 | 5472                    | CC                              | GG                 | GG               | INTERGENIC      |               |                    |                    |
| SNP_113072_A_5558  | NW_004519175.1 | scaffold4917 | 5558                    | TT                              | GG                 | GG               | INTERGENIC      |               |                    |                    |
| SNP_113073_A_5583  | NW_004519175.1 | scaffold4917 | 5583                    | AA                              | CC                 | CC               | INTERGENIC      |               |                    |                    |
| SNP_113074_A_5637  | NW_004519175.1 | scaffold4917 | 5637                    | TT                              | AA                 | AA               | INTERGENIC      |               |                    |                    |
| SNP_113076_A_19335 | NW_004519177.1 | scaffold4920 | 19335                   | TT                              | CC                 | CC               | INTERGENIC      |               |                    |                    |
| SNP_113077_A_19337 | NW_004519177.1 | scaffold4920 | 19337                   | GG                              | AA                 | AA               | INTERGENIC      |               |                    |                    |
| SNP_113078_A_19450 | NW_004519177.1 | scaffold4920 | 19450                   | AA                              | GG                 | GG               | INTERGENIC      |               |                    |                    |
| SNP_113079_A_19462 | NW_004519177.1 | scaffold4920 | 19462                   | TT                              | AA                 | AA               | INTERGENIC      |               |                    |                    |
| SNP_113080_A_21029 | NW_004519177.1 | scaffold4920 | 21029                   | GG                              | CC                 | CC               | INTERGENIC      |               |                    |                    |
| SNP_113081_A_3902  | NW_004519180.1 | scaffold4923 | 3902                    | AA                              | GG                 | GG               | INTERGENIC      |               |                    |                    |
| SNP_113082_A_10342 | NW_004519180.1 | scaffold4923 | 10342                   | TT                              | GG                 | GG               | INTERGENIC      |               |                    |                    |
| SNP_113083_A_10778 | NW_004519180.1 | scaffold4923 | 10778                   | GG                              | CC                 | CC               | INTERGENIC      |               |                    |                    |

| SNPs IDs           | Chromosome IDs | Chromosomes  | Physical positions (bp) | CDC Frontier (Reference genome) | (Pusa 1103 & HPNB) | (ILWC 46 & LPNB) | Sequence genome | Components of | Gene accession IDs | Putative functions |
|--------------------|----------------|--------------|-------------------------|---------------------------------|--------------------|------------------|-----------------|---------------|--------------------|--------------------|
| SNP_113084_A_10819 | NW_004519180.1 | scaffold4923 | 10819                   | CC                              | TT                 | TT               | INTERGENIC      |               |                    |                    |
| SNP_113085_A_10862 | NW_004519180.1 | scaffold4923 | 10862                   | CC                              | GG                 | GG               | INTERGENIC      |               |                    |                    |
| SNP_113086_A_10875 | NW_004519180.1 | scaffold4923 | 10875                   | CC                              | TT                 | TT               | INTERGENIC      |               |                    |                    |
| SNP_113087_A_11028 | NW_004519180.1 | scaffold4923 | 11028                   | CC                              | GG                 | GG               | INTERGENIC      |               |                    |                    |
| SNP_113088_A_11086 | NW_004519180.1 | scaffold4923 | 11086                   | AA                              | GG                 | GG               | INTERGENIC      |               |                    |                    |
| SNP_113089_A_11116 | NW_004519180.1 | scaffold4923 | 11116                   | CC                              | GG                 | GG               | INTERGENIC      |               |                    |                    |
| SNP_113090_A_11136 | NW_004519180.1 | scaffold4923 | 11136                   | CC                              | AA                 | AA               | INTERGENIC      |               |                    |                    |
| SNP_113092_A_19692 | NW_004519180.1 | scaffold4923 | 19692                   | TT                              | CC                 | CC               | INTERGENIC      |               |                    |                    |
| SNP_113093_A_19729 | NW_004519180.1 | scaffold4923 | 19729                   | AA                              | GG                 | GG               | INTERGENIC      |               |                    |                    |
| SNP_113094_A_19828 | NW_004519180.1 | scaffold4923 | 19828                   | AA                              | GG                 | GG               | INTERGENIC      |               |                    |                    |
| SNP_113095_A_19865 | NW_004519180.1 | scaffold4923 | 19865                   | TT                              | AA                 | AA               | INTERGENIC      |               |                    |                    |
| SNP_113096_A_20006 | NW_004519180.1 | scaffold4923 | 20006                   | AA                              | TT                 | TT               | INTERGENIC      |               |                    |                    |
| SNP_113097_A_537   | NW_004519192.1 | scaffold4937 | 537                     | TT                              | AA                 | AA               | INTERGENIC      |               |                    |                    |
| SNP_113098_A_379   | NW_004519196.1 | scaffold4941 | 379                     | GG                              | AA                 | AA               | INTERGENIC      |               |                    |                    |
| SNP_113100_A_1024  | NW_004519197.1 | scaffold4943 | 1024                    | GG                              | TT                 | TT               | INTERGENIC      |               |                    |                    |
| SNP_113102_A_1380  | NW_004519197.1 | scaffold4943 | 1380                    | TT                              | CC                 | CC               | INTERGENIC      |               |                    |                    |
| SNP_113103_A_1501  | NW_004519197.1 | scaffold4943 | 1501                    | AA                              | TT                 | TT               | INTERGENIC      |               |                    |                    |
| SNP_113104_A_649   | NW_004519200.1 | scaffold4946 | 649                     | TT                              | AA                 | AA               | INTERGENIC      |               |                    |                    |
| SNP_113105_A_842   | NW_004519200.1 | scaffold4946 | 842                     | AA                              | GG                 | GG               | INTERGENIC      |               |                    |                    |
| SNP_113106_A_1011  | NW_004519207.1 | scaffold4954 | 1011                    | GG                              | CC                 | CC               | INTERGENIC      |               |                    |                    |
| SNP_113107_A_792   | NW_004519210.1 | scaffold4957 | 792                     | TT                              | AA                 | AA               | INTERGENIC      |               |                    |                    |
| SNP_113108_A_794   | NW_004519210.1 | scaffold4957 | 794                     | TT                              | GG                 | GG               | INTERGENIC      |               |                    |                    |

| SNPs IDs           | Chromosome IDs | Chromosomes  | Physical positions (bp) | CDC Frontier (Reference genome) | (Pusa 1103 & HPNB) | (ILWC 46 & LPNB) | Sequence genome | Components of | Gene accession IDs | Putative functions |
|--------------------|----------------|--------------|-------------------------|---------------------------------|--------------------|------------------|-----------------|---------------|--------------------|--------------------|
| SNP_113109_A_796   | NW_004519210.1 | scaffold4957 | 796                     | AA                              | TT                 | TT               | INTERGENIC      |               |                    |                    |
| SNP_113110_A_841   | NW_004519210.1 | scaffold4957 | 841                     | GG                              | AA                 | AA               | INTERGENIC      |               |                    |                    |
| SNP_113111_A_843   | NW_004519211.1 | scaffold4958 | 843                     | GG                              | TT                 | TT               | INTERGENIC      |               |                    |                    |
| SNP_113112_A_857   | NW_004519211.1 | scaffold4958 | 857                     | AA                              | GG                 | GG               | INTERGENIC      |               |                    |                    |
| SNP_113113_A_858   | NW_004519211.1 | scaffold4958 | 858                     | AA                              | GG                 | GG               | INTERGENIC      |               |                    |                    |
| SNP_113114_A_1096  | NW_004519212.1 | scaffold4960 | 1096                    | CC                              | AA                 | AA               | INTERGENIC      |               |                    |                    |
| SNP_113115_A_1345  | NW_004519218.1 | scaffold4970 | 1345                    | AA                              | GG                 | GG               | INTERGENIC      |               |                    |                    |
| SNP_113116_A_1383  | NW_004519220.1 | scaffold4972 | 1383                    | GG                              | AA                 | AA               | INTERGENIC      |               |                    |                    |
| SNP_113117_A_1400  | NW_004519220.1 | scaffold4972 | 1400                    | TT                              | GG                 | GG               | INTERGENIC      |               |                    |                    |
| SNP_113118_A_1463  | NW_004519220.1 | scaffold4972 | 1463                    | AA                              | TT                 | TT               | INTERGENIC      |               |                    |                    |
| SNP_113119_A_4915  | NW_004519222.1 | scaffold4975 | 4915                    | CC                              | AA                 | AA               | INTERGENIC      |               |                    |                    |
| SNP_113120_A_868   | NW_004519225.1 | scaffold4978 | 868                     | TT                              | AA                 | AA               | INTERGENIC      |               |                    |                    |
| SNP_113121_A_904   | NW_004519225.1 | scaffold4978 | 904                     | AA                              | GG                 | GG               | INTERGENIC      |               |                    |                    |
| SNP_113122_A_1199  | NW_004519225.1 | scaffold4978 | 1199                    | GG                              | TT                 | TT               | INTERGENIC      |               |                    |                    |
| SNP_113123_A_1302  | NW_004519225.1 | scaffold4978 | 1302                    | TT                              | CC                 | CC               | INTERGENIC      |               |                    |                    |
| SNP_113125_A_755   | NW_004519226.1 | scaffold4979 | 755                     | TT                              | CC                 | CC               | INTERGENIC      |               |                    |                    |
| SNP_113126_A_1186  | NW_004519229.1 | scaffold4982 | 1186                    | GG                              | TT                 | TT               | INTERGENIC      |               |                    |                    |
| SNP_113127_A_129   | NW_004519230.1 | scaffold4983 | 129                     | GG                              | AA                 | AA               | INTERGENIC      |               |                    |                    |
| SNP_113128_A_1049  | NW_004519230.1 | scaffold4983 | 1049                    | AA                              | CC                 | CC               | INTERGENIC      |               |                    |                    |
| SNP_113129_A_1166  | NW_004519230.1 | scaffold4983 | 1166                    | TT                              | CC                 | CC               | INTERGENIC      |               |                    |                    |
| SNP_113130_A_20198 | NW_004519230.1 | scaffold4983 | 20198                   | TT                              | GG                 | GG               | URR             | 101514265     | Unknown function   |                    |
| SNP_113131_A_20850 | NW_004519230.1 | scaffold4983 | 20850                   | TT                              | GG                 | GG               | URR             | 101514265     | Unknown function   |                    |

| SNPs IDs           | Chromosome IDs | Chromosomes  | Physical positions (bp) | CDC Frontier (Reference genome) | (Pusa 1103 & HPNB) | (ILWC 46 & LPNB) | Sequence genome | Components of | Gene accession IDs | Putative functions |
|--------------------|----------------|--------------|-------------------------|---------------------------------|--------------------|------------------|-----------------|---------------|--------------------|--------------------|
| SNP_113132_A_20853 | NW_004519230.1 | scaffold4983 | 20853                   | CC                              | GG                 | GG               | URR             |               | 101514265          | Unknown function   |
| SNP_113133_A_20901 | NW_004519230.1 | scaffold4983 | 20901                   | AA                              | CC                 | CC               | URR             |               | 101514265          | Unknown function   |
| SNP_113134_A_21187 | NW_004519230.1 | scaffold4983 | 21187                   | GG                              | TT                 | TT               | URR             |               | 101514265          | Unknown function   |
| SNP_113135_A_21208 | NW_004519230.1 | scaffold4983 | 21208                   | AA                              | GG                 | GG               | URR             |               | 101514265          | Unknown function   |
| SNP_113136_A_21230 | NW_004519230.1 | scaffold4983 | 21230                   | GG                              | AA                 | AA               | URR             |               | 101514265          | Unknown function   |
| SNP_113137_A_21256 | NW_004519230.1 | scaffold4983 | 21256                   | AA                              | CC                 | CC               | URR             |               | 101514265          | Unknown function   |
| SNP_113138_A_23642 | NW_004519230.1 | scaffold4983 | 23642                   | TT                              | GG                 | GG               | INTERGENIC      |               |                    |                    |
| SNP_113139_A_26981 | NW_004519230.1 | scaffold4983 | 26981                   | TT                              | CC                 | CC               | INTERGENIC      |               |                    |                    |
| SNP_113140_A_27039 | NW_004519230.1 | scaffold4983 | 27039                   | GG                              | AA                 | AA               | INTERGENIC      |               |                    |                    |
| SNP_113142_A_27491 | NW_004519230.1 | scaffold4983 | 27491                   | AA                              | TT                 | TT               | INTERGENIC      |               |                    |                    |
| SNP_113143_A_27914 | NW_004519230.1 | scaffold4983 | 27914                   | AA                              | GG                 | GG               | INTERGENIC      |               |                    |                    |
| SNP_113144_A_27976 | NW_004519230.1 | scaffold4983 | 27976                   | TT                              | CC                 | CC               | INTERGENIC      |               |                    |                    |
| SNP_113145_A_64    | NW_004519231.1 | scaffold4984 | 64                      | TT                              | AA                 | AA               | INTERGENIC      |               |                    |                    |
| SNP_113146_A_117   | NW_004519231.1 | scaffold4984 | 117                     | TT                              | GG                 | GG               | INTERGENIC      |               |                    |                    |
| SNP_113147_A_354   | NW_004519231.1 | scaffold4984 | 354                     | TT                              | AA                 | AA               | INTERGENIC      |               |                    |                    |
| SNP_113148_A_516   | NW_004519231.1 | scaffold4984 | 516                     | GG                              | TT                 | TT               | INTERGENIC      |               |                    |                    |
| SNP_113149_A_865   | NW_004519231.1 | scaffold4984 | 865                     | TT                              | CC                 | CC               | INTERGENIC      |               |                    |                    |
| SNP_113150_A_999   | NW_004519231.1 | scaffold4984 | 999                     | AA                              | GG                 | GG               | INTERGENIC      |               |                    |                    |
| SNP_113151_A_1012  | NW_004519231.1 | scaffold4984 | 1012                    | AA                              | GG                 | GG               | INTERGENIC      |               |                    |                    |
| SNP_113152_A_1966  | NW_004519234.1 | scaffold4989 | 1966                    | AA                              | CC                 | CC               | INTERGENIC      |               |                    |                    |
| SNP_113153_A_7095  | NW_004519234.1 | scaffold4989 | 7095                    | TT                              | GG                 | GG               | INTERGENIC      |               |                    |                    |
| SNP_113154_A_976   | NW_004519238.1 | scaffold4994 | 976                     | TT                              | GG                 | GG               | INTERGENIC      |               |                    |                    |

| SNPs IDs          | Chromosome IDs | Chromosomes  | Physical positions (bp) | CDC Frontier (Reference genome) | (Pusa 1103 & HPNB) | (ILWC 46 & LPNB) | Sequence genome | Components of | Gene accession IDs | Putative functions |
|-------------------|----------------|--------------|-------------------------|---------------------------------|--------------------|------------------|-----------------|---------------|--------------------|--------------------|
| SNP_113155_A_403  | NW_004519239.1 | scaffold4996 | 403                     | TT                              | AA                 | AA               | INTERGENIC      |               |                    |                    |
| SNP_113156_A_405  | NW_004519239.1 | scaffold4996 | 405                     | GG                              | TT                 | TT               | INTERGENIC      |               |                    |                    |
| SNP_113157_A_408  | NW_004519239.1 | scaffold4996 | 408                     | CC                              | TT                 | TT               | INTERGENIC      |               |                    |                    |
| SNP_113158_A_1689 | NW_004519239.1 | scaffold4996 | 1689                    | CC                              | TT                 | TT               | INTERGENIC      |               |                    |                    |
| SNP_113159_A_1734 | NW_004519239.1 | scaffold4996 | 1734                    | TT                              | CC                 | CC               | INTERGENIC      |               |                    |                    |
| SNP_113160_A_872  | NW_004519242.1 | scaffold5001 | 872                     | AA                              | CC                 | CC               | INTERGENIC      |               |                    |                    |
| SNP_113161_A_1021 | NW_004519242.1 | scaffold5001 | 1021                    | AA                              | GG                 | GG               | INTERGENIC      |               |                    |                    |
| SNP_113162_A_1091 | NW_004519242.1 | scaffold5001 | 1091                    | TT                              | GG                 | GG               | INTERGENIC      |               |                    |                    |
| SNP_113164_A_551  | NW_004519249.1 | scaffold5013 | 551                     | TT                              | GG                 | GG               | INTERGENIC      |               |                    |                    |
| SNP_113165_A_108  | NW_004519250.1 | scaffold5014 | 108                     | CC                              | GG                 | GG               | INTERGENIC      |               |                    |                    |
| SNP_113166_A_4230 | NW_004519251.1 | scaffold5016 | 4230                    | TT                              | AA                 | AA               | INTERGENIC      |               |                    |                    |
| SNP_113167_A_4328 | NW_004519251.1 | scaffold5016 | 4328                    | TT                              | CC                 | CC               | INTERGENIC      |               |                    |                    |
| SNP_113168_A_4690 | NW_004519251.1 | scaffold5016 | 4690                    | GG                              | TT                 | TT               | INTERGENIC      |               |                    |                    |
| SNP_113169_A_4925 | NW_004519251.1 | scaffold5016 | 4925                    | TT                              | CC                 | CC               | INTERGENIC      |               |                    |                    |
| SNP_113170_A_955  | NW_004519254.1 | scaffold5023 | 955                     | GG                              | AA                 | AA               | INTERGENIC      |               |                    |                    |
| SNP_113171_A_1467 | NW_004519254.1 | scaffold5023 | 1467                    | CC                              | TT                 | TT               | INTERGENIC      |               |                    |                    |
| SNP_113172_A_8231 | NW_004519254.1 | scaffold5023 | 8231                    | TT                              | CC                 | CC               | INTERGENIC      |               |                    |                    |
| SNP_113173_A_8971 | NW_004519254.1 | scaffold5023 | 8971                    | TT                              | GG                 | GG               | INTERGENIC      |               |                    |                    |
| SNP_113174_A_9028 | NW_004519254.1 | scaffold5023 | 9028                    | AA                              | CC                 | CC               | INTERGENIC      |               |                    |                    |
| SNP_113175_A_9124 | NW_004519254.1 | scaffold5023 | 9124                    | TT                              | GG                 | GG               | INTERGENIC      |               |                    |                    |
| SNP_113176_A_9130 | NW_004519254.1 | scaffold5023 | 9130                    | TT                              | CC                 | CC               | INTERGENIC      |               |                    |                    |
| SNP_113177_A_9193 | NW_004519254.1 | scaffold5023 | 9193                    | CC                              | TT                 | TT               | INTERGENIC      |               |                    |                    |

| SNPs IDs           | Chromosome IDs | Chromosomes  | Physical positions (bp) | CDC Frontier (Reference genome) | (Pusa 1103 & HPNB) | (ILWC 46 & LPNB) | Sequence genome | Components of | Gene accession IDs | Putative functions |
|--------------------|----------------|--------------|-------------------------|---------------------------------|--------------------|------------------|-----------------|---------------|--------------------|--------------------|
| SNP_113179_A_9259  | NW_004519254.1 | scaffold5023 | 9259                    | TT                              | CC                 | CC               | INTERGENIC      |               |                    |                    |
| SNP_113180_A_9504  | NW_004519254.1 | scaffold5023 | 9504                    | AA                              | TT                 | TT               | INTERGENIC      |               |                    |                    |
| SNP_113181_A_734   | NW_004519256.1 | scaffold5025 | 734                     | CC                              | AA                 | AA               | INTERGENIC      |               |                    |                    |
| SNP_113182_A_670   | NW_004519258.1 | scaffold5028 | 670                     | GG                              | CC                 | CC               | INTERGENIC      |               |                    |                    |
| SNP_113183_A_781   | NW_004519258.1 | scaffold5028 | 781                     | AA                              | GG                 | GG               | INTERGENIC      |               |                    |                    |
| SNP_113184_A_960   | NW_004519258.1 | scaffold5028 | 960                     | GG                              | AA                 | AA               | INTERGENIC      |               |                    |                    |
| SNP_113185_A_981   | NW_004519258.1 | scaffold5028 | 981                     | AA                              | GG                 | GG               | INTERGENIC      |               |                    |                    |
| SNP_113186_A_1039  | NW_004519258.1 | scaffold5028 | 1039                    | AA                              | GG                 | GG               | INTERGENIC      |               |                    |                    |
| SNP_113187_A_1054  | NW_004519258.1 | scaffold5028 | 1054                    | TT                              | GG                 | GG               | INTERGENIC      |               |                    |                    |
| SNP_113188_A_1075  | NW_004519258.1 | scaffold5028 | 1075                    | AA                              | CC                 | CC               | INTERGENIC      |               |                    |                    |
| SNP_113189_A_403   | NW_004519260.1 | scaffold5030 | 403                     | GG                              | AA                 | AA               | INTERGENIC      |               |                    |                    |
| SNP_113190_A_527   | NW_004519260.1 | scaffold5030 | 527                     | GG                              | CC                 | CC               | INTERGENIC      |               |                    |                    |
| SNP_113191_A_803   | NW_004519260.1 | scaffold5030 | 803                     | GG                              | AA                 | AA               | INTERGENIC      |               |                    |                    |
| SNP_113193_A_985   | NW_004519260.1 | scaffold5030 | 985                     | GG                              | TT                 | TT               | INTERGENIC      |               |                    |                    |
| SNP_113194_A_1011  | NW_004519260.1 | scaffold5030 | 1011                    | GG                              | TT                 | TT               | INTERGENIC      |               |                    |                    |
| SNP_113195_A_1121  | NW_004519260.1 | scaffold5030 | 1121                    | GG                              | AA                 | AA               | INTERGENIC      |               |                    |                    |
| SNP_113196_A_2886  | NW_004519260.1 | scaffold5030 | 2886                    | AA                              | TT                 | TT               | INTERGENIC      |               |                    |                    |
| SNP_113197_A_9552  | NW_004519260.1 | scaffold5030 | 9552                    | AA                              | GG                 | GG               | INTERGENIC      |               |                    |                    |
| SNP_113198_A_18514 | NW_004519260.1 | scaffold5030 | 18514                   | CC                              | TT                 | TT               | INTERGENIC      |               |                    |                    |
| SNP_113199_A_18551 | NW_004519260.1 | scaffold5030 | 18551                   | TT                              | CC                 | CC               | INTERGENIC      |               |                    |                    |
| SNP_113200_A_18693 | NW_004519260.1 | scaffold5030 | 18693                   | AA                              | GG                 | GG               | INTERGENIC      |               |                    |                    |
| SNP_113201_A_18885 | NW_004519260.1 | scaffold5030 | 18885                   | TT                              | CC                 | CC               | INTERGENIC      |               |                    |                    |



| SNPs IDs           | Chromosome IDs | Chromosomes  | Physical positions (bp) | CDC Frontier (Reference genome) | (Pusa 1103 & HPNB) | (ILWC 46 & LPNB) | Sequence genome | Components of | Gene accession IDs | Putative functions |
|--------------------|----------------|--------------|-------------------------|---------------------------------|--------------------|------------------|-----------------|---------------|--------------------|--------------------|
| SNP_113202_A_20198 | NW_004519260.1 | scaffold5030 | 20198                   | TT                              | CC                 | CC               | INTERGENIC      |               |                    |                    |
| SNP_113203_A_138   | NW_004519261.1 | scaffold5031 | 138                     | AA                              | GG                 | GG               | INTERGENIC      |               |                    |                    |
| SNP_113204_A_468   | NW_004519261.1 | scaffold5031 | 468                     | GG                              | AA                 | AA               | INTERGENIC      |               |                    |                    |
| SNP_113205_A_2151  | NW_004519263.1 | scaffold5033 | 2151                    | CC                              | TT                 | TT               | INTERGENIC      |               |                    |                    |
| SNP_113206_A_2176  | NW_004519263.1 | scaffold5033 | 2176                    | AA                              | TT                 | TT               | INTERGENIC      |               |                    |                    |
| SNP_113207_A_157   | NW_004519278.1 | scaffold5059 | 157                     | GG                              | AA                 | AA               | INTERGENIC      |               |                    |                    |
| SNP_113208_A_223   | NW_004519278.1 | scaffold5059 | 223                     | AA                              | GG                 | GG               | INTERGENIC      |               |                    |                    |
| SNP_113211_A_480   | NW_004519278.1 | scaffold5059 | 480                     | AA                              | CC                 | CC               | INTERGENIC      |               |                    |                    |
| SNP_113212_A_1447  | NW_004519281.1 | scaffold5065 | 1447                    | CC                              | GG                 | GG               | INTERGENIC      |               |                    |                    |
| SNP_113213_A_222   | NW_004519286.1 | scaffold5072 | 222                     | GG                              | AA                 | AA               | INTERGENIC      |               |                    |                    |
| SNP_113214_A_256   | NW_004519286.1 | scaffold5072 | 256                     | TT                              | GG                 | GG               | INTERGENIC      |               |                    |                    |
| SNP_113215_A_519   | NW_004519286.1 | scaffold5072 | 519                     | TT                              | AA                 | AA               | INTERGENIC      |               |                    |                    |
| SNP_113216_A_5655  | NW_004519286.1 | scaffold5072 | 5655                    | AA                              | TT                 | TT               | INTERGENIC      |               |                    |                    |
| SNP_113217_A_5668  | NW_004519286.1 | scaffold5072 | 5668                    | TT                              | CC                 | CC               | INTERGENIC      |               |                    |                    |
| SNP_113218_A_5687  | NW_004519286.1 | scaffold5072 | 5687                    | AA                              | GG                 | GG               | INTERGENIC      |               |                    |                    |
| SNP_113219_A_5716  | NW_004519286.1 | scaffold5072 | 5716                    | CC                              | TT                 | TT               | INTERGENIC      |               |                    |                    |
| SNP_113220_A_5746  | NW_004519286.1 | scaffold5072 | 5746                    | CC                              | AA                 | AA               | INTERGENIC      |               |                    |                    |
| SNP_113221_A_5896  | NW_004519286.1 | scaffold5072 | 5896                    | CC                              | TT                 | TT               | INTERGENIC      |               |                    |                    |
| SNP_113222_A_6028  | NW_004519286.1 | scaffold5072 | 6028                    | TT                              | CC                 | CC               | INTERGENIC      |               |                    |                    |
| SNP_113223_A_6109  | NW_004519286.1 | scaffold5072 | 6109                    | AA                              | CC                 | CC               | INTERGENIC      |               |                    |                    |
| SNP_113224_A_6235  | NW_004519286.1 | scaffold5072 | 6235                    | GG                              | AA                 | AA               | INTERGENIC      |               |                    |                    |
| SNP_113225_A_6272  | NW_004519286.1 | scaffold5072 | 6272                    | CC                              | TT                 | TT               | INTERGENIC      |               |                    |                    |

| SNPs IDs          | Chromosome IDs | Chromosomes  | Physical positions (bp) | CDC Frontier (Reference genome) | (Pusa 1103 & HPNB) | (ILWC 46 & LPNB) | Sequence genome | Components of | Gene accession IDs | Putative functions |
|-------------------|----------------|--------------|-------------------------|---------------------------------|--------------------|------------------|-----------------|---------------|--------------------|--------------------|
| SNP_113227_A_5532 | NW_004519289.1 | scaffold5075 | 5532                    | TT                              | AA                 | AA               | INTERGENIC      |               |                    |                    |
| SNP_113228_A_1396 | NW_004519290.1 | scaffold5076 | 1396                    | AA                              | GG                 | GG               | INTERGENIC      |               |                    |                    |
| SNP_113229_A_64   | NW_004519295.1 | scaffold5083 | 64                      | CC                              | TT                 | TT               | INTERGENIC      |               |                    |                    |
| SNP_113230_A_101  | NW_004519295.1 | scaffold5083 | 101                     | AA                              | GG                 | GG               | INTERGENIC      |               |                    |                    |
| SNP_113231_A_613  | NW_004519295.1 | scaffold5083 | 613                     | AA                              | TT                 | TT               | INTERGENIC      |               |                    |                    |
| SNP_113232_A_787  | NW_004519295.1 | scaffold5083 | 787                     | CC                              | AA                 | AA               | INTERGENIC      |               |                    |                    |
| SNP_113234_A_2415 | NW_004519295.1 | scaffold5083 | 2415                    | AA                              | TT                 | TT               | INTERGENIC      |               |                    |                    |
| SNP_113235_A_3917 | NW_004519295.1 | scaffold5083 | 3917                    | CC                              | TT                 | TT               | INTERGENIC      |               |                    |                    |
| SNP_113236_A_6072 | NW_004519295.1 | scaffold5083 | 6072                    | CC                              | TT                 | TT               | INTERGENIC      |               |                    |                    |
| SNP_113237_A_6219 | NW_004519295.1 | scaffold5083 | 6219                    | TT                              | CC                 | CC               | INTERGENIC      |               |                    |                    |
| SNP_113238_A_6251 | NW_004519295.1 | scaffold5083 | 6251                    | GG                              | AA                 | AA               | INTERGENIC      |               |                    |                    |
| SNP_113239_A_6314 | NW_004519295.1 | scaffold5083 | 6314                    | AA                              | GG                 | GG               | INTERGENIC      |               |                    |                    |
| SNP_113240_A_6448 | NW_004519295.1 | scaffold5083 | 6448                    | CC                              | AA                 | AA               | INTERGENIC      |               |                    |                    |
| SNP_113241_A_6545 | NW_004519295.1 | scaffold5083 | 6545                    | TT                              | GG                 | GG               | INTERGENIC      |               |                    |                    |
| SNP_113242_A_3459 | NW_004519297.1 | scaffold5086 | 3459                    | AA                              | TT                 | TT               | INTERGENIC      |               |                    |                    |
| SNP_113244_A_3185 | NW_004519298.1 | scaffold5089 | 3185                    | TT                              | CC                 | CC               | INTERGENIC      |               |                    |                    |
| SNP_113245_A_3213 | NW_004519298.1 | scaffold5089 | 3213                    | GG                              | AA                 | AA               | INTERGENIC      |               |                    |                    |
| SNP_113246_A_3271 | NW_004519298.1 | scaffold5089 | 3271                    | CC                              | TT                 | TT               | INTERGENIC      |               |                    |                    |
| SNP_113247_A_3286 | NW_004519298.1 | scaffold5089 | 3286                    | AA                              | GG                 | GG               | INTERGENIC      |               |                    |                    |
| SNP_113248_A_3383 | NW_004519298.1 | scaffold5089 | 3383                    | GG                              | AA                 | AA               | INTERGENIC      |               |                    |                    |
| SNP_113249_A_3421 | NW_004519298.1 | scaffold5089 | 3421                    | TT                              | CC                 | CC               | INTERGENIC      |               |                    |                    |
| SNP_113250_A_3432 | NW_004519298.1 | scaffold5089 | 3432                    | CC                              | TT                 | TT               | INTERGENIC      |               |                    |                    |

| SNPs IDs           | Chromosome IDs | Chromosomes  | Physical positions (bp) | CDC Frontier (Reference genome) | (Pusa 1103 & HPNB) | (ILWC 46 & LPNB) | Sequence genome | Components of | Gene accession IDs | Putative functions |
|--------------------|----------------|--------------|-------------------------|---------------------------------|--------------------|------------------|-----------------|---------------|--------------------|--------------------|
| SNP_113251_A_3483  | NW_004519298.1 | scaffold5089 | 3483                    | CC                              | AA                 | AA               | INTERGENIC      |               |                    |                    |
| SNP_113252_A_3489  | NW_004519298.1 | scaffold5089 | 3489                    | AA                              | GG                 | GG               | INTERGENIC      |               |                    |                    |
| SNP_113253_A_3530  | NW_004519298.1 | scaffold5089 | 3530                    | AA                              | GG                 | GG               | INTERGENIC      |               |                    |                    |
| SNP_113255_A_3735  | NW_004519298.1 | scaffold5089 | 3735                    | TT                              | GG                 | GG               | INTERGENIC      |               |                    |                    |
| SNP_113256_A_5962  | NW_004519298.1 | scaffold5089 | 5962                    | CC                              | TT                 | TT               | INTERGENIC      |               |                    |                    |
| SNP_113257_A_6062  | NW_004519298.1 | scaffold5089 | 6062                    | TT                              | GG                 | GG               | INTERGENIC      |               |                    |                    |
| SNP_113258_A_7358  | NW_004519298.1 | scaffold5089 | 7358                    | AA                              | GG                 | GG               | INTERGENIC      |               |                    |                    |
| SNP_113259_A_1044  | NW_004519300.1 | scaffold5094 | 1044                    | CC                              | TT                 | TT               | INTERGENIC      |               |                    |                    |
| SNP_113261_A_70    | NW_004519305.1 | scaffold5103 | 70                      | TT                              | AA                 | AA               | INTERGENIC      |               |                    |                    |
| SNP_113263_A_168   | NW_004519305.1 | scaffold5103 | 168                     | TT                              | CC                 | CC               | INTERGENIC      |               |                    |                    |
| SNP_113264_A_181   | NW_004519305.1 | scaffold5103 | 181                     | GG                              | TT                 | TT               | INTERGENIC      |               |                    |                    |
| SNP_113265_A_1454  | NW_004519306.1 | scaffold5105 | 1454                    | AA                              | GG                 | GG               | INTERGENIC      |               |                    |                    |
| SNP_113266_A_1965  | NW_004519306.1 | scaffold5105 | 1965                    | GG                              | TT                 | TT               | INTERGENIC      |               |                    |                    |
| SNP_113267_A_2088  | NW_004519306.1 | scaffold5105 | 2088                    | GG                              | AA                 | AA               | INTERGENIC      |               |                    |                    |
| SNP_113268_A_512   | NW_004519308.1 | scaffold5111 | 512                     | CC                              | GG                 | GG               | INTERGENIC      |               |                    |                    |
| SNP_113269_A_603   | NW_004519308.1 | scaffold5111 | 603                     | CC                              | AA                 | AA               | INTERGENIC      |               |                    |                    |
| SNP_113270_A_808   | NW_004519308.1 | scaffold5111 | 808                     | AA                              | TT                 | TT               | INTERGENIC      |               |                    |                    |
| SNP_113271_A_919   | NW_004519308.1 | scaffold5111 | 919                     | TT                              | CC                 | CC               | INTERGENIC      |               |                    |                    |
| SNP_113272_A_20422 | NW_004519311.1 | scaffold5115 | 20422                   | GG                              | TT                 | TT               | INTERGENIC      |               |                    |                    |
| SNP_113273_A_20628 | NW_004519311.1 | scaffold5115 | 20628                   | GG                              | TT                 | TT               | INTERGENIC      |               |                    |                    |
| SNP_113274_A_20669 | NW_004519311.1 | scaffold5115 | 20669                   | CC                              | AA                 | AA               | INTERGENIC      |               |                    |                    |
| SNP_113275_A_20681 | NW_004519311.1 | scaffold5115 | 20681                   | GG                              | CC                 | CC               | INTERGENIC      |               |                    |                    |

| SNPs IDs           | Chromosome IDs | Chromosomes  | Physical positions (bp) | CDC Frontier (Reference genome) | (Pusa 1103 & HPNB) | (ILWC 46 & LPNB) | Sequence Components of genome | Gene accession IDs | Putative functions |
|--------------------|----------------|--------------|-------------------------|---------------------------------|--------------------|------------------|-------------------------------|--------------------|--------------------|
| SNP_113276_A_20707 | NW_004519311.1 | scaffold5115 | 20707                   | GG                              | AA                 | AA               | INTERGENIC                    |                    |                    |
| SNP_113277_A_20709 | NW_004519311.1 | scaffold5115 | 20709                   | GG                              | AA                 | AA               | INTERGENIC                    |                    |                    |
| SNP_113278_A_23830 | NW_004519311.1 | scaffold5115 | 23830                   | AA                              | GG                 | GG               | INTERGENIC                    |                    |                    |
| SNP_113279_A_1243  | NW_004519314.1 | scaffold5120 | 1243                    | GG                              | TT                 | TT               | INTERGENIC                    |                    |                    |
| SNP_113280_A_1244  | NW_004519314.1 | scaffold5120 | 1244                    | CC                              | AA                 | AA               | INTERGENIC                    |                    |                    |
| SNP_113282_A_15237 | NW_004519314.1 | scaffold5120 | 15237                   | CC                              | TT                 | TT               | INTERGENIC                    |                    |                    |
| SNP_113284_A_15563 | NW_004519314.1 | scaffold5120 | 15563                   | TT                              | CC                 | CC               | DRR                           | 101514904          | Unknown function   |
| SNP_113285_A_16593 | NW_004519314.1 | scaffold5120 | 16593                   | GG                              | AA                 | AA               | SYNONYMOUS_CODING             | 101514904          | Unknown function   |
| SNP_113286_A_22187 | NW_004519314.1 | scaffold5120 | 22187                   | GG                              | AA                 | AA               | URR                           | 101514904          | Unknown function   |
| SNP_113287_A_617   | NW_004519318.1 | scaffold5125 | 617                     | GG                              | TT                 | TT               | INTERGENIC                    |                    |                    |
| SNP_113288_A_653   | NW_004519318.1 | scaffold5125 | 653                     | AA                              | GG                 | GG               | INTERGENIC                    |                    |                    |
| SNP_113289_A_9466  | NW_004519319.1 | scaffold5126 | 9466                    | CC                              | TT                 | TT               | INTERGENIC                    |                    |                    |
| SNP_113290_A_1596  | NW_004519322.1 | scaffold5129 | 1596                    | TT                              | CC                 | CC               | INTERGENIC                    |                    |                    |
| SNP_113291_A_1604  | NW_004519322.1 | scaffold5129 | 1604                    | AA                              | GG                 | GG               | INTERGENIC                    |                    |                    |
| SNP_113292_A_1728  | NW_004519322.1 | scaffold5129 | 1728                    | TT                              | CC                 | CC               | INTERGENIC                    |                    |                    |
| SNP_113293_A_118   | NW_004519324.1 | scaffold5135 | 118                     | AA                              | TT                 | TT               | INTERGENIC                    |                    |                    |
| SNP_113294_A_3260  | NW_004519324.1 | scaffold5135 | 3260                    | AA                              | GG                 | GG               | INTERGENIC                    |                    |                    |
| SNP_113295_A_146   | NW_004519328.1 | scaffold5143 | 146                     | CC                              | TT                 | TT               | INTERGENIC                    |                    |                    |
| SNP_113296_A_152   | NW_004519328.1 | scaffold5143 | 152                     | GG                              | TT                 | TT               | INTERGENIC                    |                    |                    |
| SNP_113298_A_264   | NW_004519331.1 | scaffold5146 | 264                     | TT                              | GG                 | GG               | INTERGENIC                    |                    |                    |
| SNP_113299_A_1995  | NW_004519331.1 | scaffold5146 | 1995                    | GG                              | AA                 | AA               | INTERGENIC                    |                    |                    |
| SNP_113301_A_2061  | NW_004519337.1 | scaffold5155 | 2061                    | GG                              | CC                 | CC               | INTERGENIC                    |                    |                    |

| SNPs IDs           | Chromosome IDs | Chromosomes  | Physical positions (bp) | CDC Frontier (Reference genome) | (Pusa 1103 & HPNB) | (ILWC 46 & LPNB) | Sequence Components of genome | Gene accession IDs | Putative functions               |
|--------------------|----------------|--------------|-------------------------|---------------------------------|--------------------|------------------|-------------------------------|--------------------|----------------------------------|
| SNP_113302_A_2109  | NW_004519337.1 | scaffold5155 | 2109                    | AA                              | TT                 | TT               | INTERGENIC                    |                    |                                  |
| SNP_113303_A_2121  | NW_004519337.1 | scaffold5155 | 2121                    | AA                              | TT                 | TT               | INTERGENIC                    |                    |                                  |
| SNP_113304_A_2141  | NW_004519337.1 | scaffold5155 | 2141                    | GG                              | AA                 | AA               | INTERGENIC                    |                    |                                  |
| SNP_113305_A_2146  | NW_004519337.1 | scaffold5155 | 2146                    | TT                              | AA                 | AA               | INTERGENIC                    |                    |                                  |
| SNP_113306_A_2155  | NW_004519337.1 | scaffold5155 | 2155                    | GG                              | AA                 | AA               | INTERGENIC                    |                    |                                  |
| SNP_113307_A_2167  | NW_004519337.1 | scaffold5155 | 2167                    | AA                              | GG                 | GG               | INTERGENIC                    |                    |                                  |
| SNP_113308_A_2179  | NW_004519337.1 | scaffold5155 | 2179                    | AA                              | CC                 | CC               | INTERGENIC                    |                    |                                  |
| SNP_113309_A_2390  | NW_004519337.1 | scaffold5155 | 2390                    | GG                              | AA                 | AA               | INTERGENIC                    |                    |                                  |
| SNP_113310_A_847   | NW_004519338.1 | scaffold5156 | 847                     | GG                              | AA                 | AA               | INTERGENIC                    |                    |                                  |
| SNP_113311_A_4734  | NW_004519339.1 | scaffold5157 | 4734                    | TT                              | AA                 | AA               | INTERGENIC                    |                    |                                  |
| SNP_113312_A_22155 | NW_004519339.1 | scaffold5157 | 22155                   | CC                              | GG                 | GG               | INTERGENIC                    |                    |                                  |
| SNP_113314_A_6473  | NW_004519340.1 | scaffold5158 | 6473                    | TT                              | CC                 | CC               | INTERGENIC                    |                    |                                  |
| SNP_113315_A_6597  | NW_004519340.1 | scaffold5158 | 6597                    | TT                              | CC                 | CC               | DRR                           | 101488631          | putative F-box protein At3g16210 |
| SNP_113316_A_6620  | NW_004519340.1 | scaffold5158 | 6620                    | GG                              | TT                 | TT               | DRR                           | 101488631          | putative F-box protein At3g16210 |
| SNP_113317_A_6808  | NW_004519340.1 | scaffold5158 | 6808                    | TT                              | AA                 | AA               | DRR                           | 101488631          | putative F-box protein At3g16210 |
| SNP_113318_A_6846  | NW_004519340.1 | scaffold5158 | 6846                    | TT                              | AA                 | AA               | DRR                           | 101488631          | putative F-box protein At3g16210 |
| SNP_113319_A_6955  | NW_004519340.1 | scaffold5158 | 6955                    | CC                              | AA                 | AA               | DRR                           | 101488631          | putative F-box protein At3g16210 |
| SNP_113320_A_8320  | NW_004519340.1 | scaffold5158 | 8320                    | GG                              | AA                 | AA               | SYNONYMOUS_CODING             | 101488631          | putative F-box protein At3g16210 |
| SNP_113321_A_8538  | NW_004519340.1 | scaffold5158 | 8538                    | GG                              | TT                 | TT               | NON_SYNONYMOUS_CODING         | 101488631          | putative F-box protein At3g16210 |
| SNP_113322_A_8552  | NW_004519340.1 | scaffold5158 | 8552                    | GG                              | TT                 | TT               | NON_SYNONYMOUS_CODING         | 101488631          | putative F-box protein At3g16210 |
| SNP_113323_A_10075 | NW_004519340.1 | scaffold5158 | 10075                   | AA                              | CC                 | CC               | URR                           | 101488631          | putative F-box protein At3g16210 |
| SNP_113324_A_13302 | NW_004519340.1 | scaffold5158 | 13302                   | GG                              | CC                 | CC               | INTERGENIC                    |                    |                                  |

| SNPs IDs           | Chromosome IDs | Chromosomes  | Physical positions (bp) | CDC Frontier (Reference genome) | (Pusa 1103 & HPNB) | (ILWC 46 & LPNB) | Sequence genome | Components of | Gene accession IDs | Putative functions |
|--------------------|----------------|--------------|-------------------------|---------------------------------|--------------------|------------------|-----------------|---------------|--------------------|--------------------|
| SNP_113325_A_13314 | NW_004519340.1 | scaffold5158 | 13314                   | AA                              | GG                 | GG               | INTERGENIC      |               |                    |                    |
| SNP_113326_A_13365 | NW_004519340.1 | scaffold5158 | 13365                   | GG                              | AA                 | AA               | INTERGENIC      |               |                    |                    |
| SNP_113327_A_13376 | NW_004519340.1 | scaffold5158 | 13376                   | AA                              | CC                 | CC               | INTERGENIC      |               |                    |                    |
| SNP_113328_A_13557 | NW_004519340.1 | scaffold5158 | 13557                   | GG                              | TT                 | TT               | INTERGENIC      |               |                    |                    |
| SNP_113329_A_13766 | NW_004519340.1 | scaffold5158 | 13766                   | CC                              | TT                 | TT               | INTERGENIC      |               |                    |                    |
| SNP_113330_A_14304 | NW_004519340.1 | scaffold5158 | 14304                   | AA                              | GG                 | GG               | INTERGENIC      |               |                    |                    |
| SNP_113331_A_14316 | NW_004519340.1 | scaffold5158 | 14316                   | GG                              | TT                 | TT               | INTERGENIC      |               |                    |                    |
| SNP_113332_A_14494 | NW_004519340.1 | scaffold5158 | 14494                   | GG                              | TT                 | TT               | INTERGENIC      |               |                    |                    |
| SNP_113333_A_14610 | NW_004519340.1 | scaffold5158 | 14610                   | GG                              | AA                 | AA               | INTERGENIC      |               |                    |                    |
| SNP_113334_A_14615 | NW_004519340.1 | scaffold5158 | 14615                   | TT                              | AA                 | AA               | INTERGENIC      |               |                    |                    |
| SNP_113335_A_16673 | NW_004519340.1 | scaffold5158 | 16673                   | CC                              | TT                 | TT               | INTERGENIC      |               |                    |                    |
| SNP_113336_A_16702 | NW_004519340.1 | scaffold5158 | 16702                   | TT                              | CC                 | CC               | INTERGENIC      |               |                    |                    |
| SNP_113337_A_16746 | NW_004519340.1 | scaffold5158 | 16746                   | CC                              | TT                 | TT               | INTERGENIC      |               |                    |                    |
| SNP_113338_A_16793 | NW_004519340.1 | scaffold5158 | 16793                   | TT                              | CC                 | CC               | INTERGENIC      |               |                    |                    |
| SNP_113339_A_16812 | NW_004519340.1 | scaffold5158 | 16812                   | GG                              | AA                 | AA               | INTERGENIC      |               |                    |                    |
| SNP_113340_A_16843 | NW_004519340.1 | scaffold5158 | 16843                   | AA                              | GG                 | GG               | INTERGENIC      |               |                    |                    |
| SNP_113341_A_16941 | NW_004519340.1 | scaffold5158 | 16941                   | GG                              | AA                 | AA               | INTERGENIC      |               |                    |                    |
| SNP_113342_A_17025 | NW_004519340.1 | scaffold5158 | 17025                   | AA                              | GG                 | GG               | INTERGENIC      |               |                    |                    |
| SNP_113343_A_17115 | NW_004519340.1 | scaffold5158 | 17115                   | TT                              | CC                 | CC               | INTERGENIC      |               |                    |                    |
| SNP_113344_A_17138 | NW_004519340.1 | scaffold5158 | 17138                   | CC                              | AA                 | AA               | INTERGENIC      |               |                    |                    |
| SNP_113345_A_17140 | NW_004519340.1 | scaffold5158 | 17140                   | GG                              | AA                 | AA               | INTERGENIC      |               |                    |                    |
| SNP_113346_A_17208 | NW_004519340.1 | scaffold5158 | 17208                   | AA                              | GG                 | GG               | INTERGENIC      |               |                    |                    |

| SNPs IDs           | Chromosome IDs | Chromosomes  | Physical positions (bp) | CDC Frontier (Reference genome) | (Pusa 1103 & HPNB) | (ILWC 46 & LPNB) | Sequence genome | Components of | Gene accession IDs | Putative functions |
|--------------------|----------------|--------------|-------------------------|---------------------------------|--------------------|------------------|-----------------|---------------|--------------------|--------------------|
| SNP_113347_A_17289 | NW_004519340.1 | scaffold5158 | 17289                   | AA                              | GG                 | GG               | INTERGENIC      |               |                    |                    |
| SNP_113348_A_17298 | NW_004519340.1 | scaffold5158 | 17298                   | TT                              | GG                 | GG               | INTERGENIC      |               |                    |                    |
| SNP_113349_A_17347 | NW_004519340.1 | scaffold5158 | 17347                   | TT                              | CC                 | CC               | INTERGENIC      |               |                    |                    |
| SNP_113350_A_17405 | NW_004519340.1 | scaffold5158 | 17405                   | GG                              | AA                 | AA               | INTERGENIC      |               |                    |                    |
| SNP_113351_A_17410 | NW_004519340.1 | scaffold5158 | 17410                   | TT                              | CC                 | CC               | INTERGENIC      |               |                    |                    |
| SNP_113352_A_17436 | NW_004519340.1 | scaffold5158 | 17436                   | GG                              | AA                 | AA               | INTERGENIC      |               |                    |                    |
| SNP_113353_A_17490 | NW_004519340.1 | scaffold5158 | 17490                   | AA                              | GG                 | GG               | INTERGENIC      |               |                    |                    |
| SNP_113354_A_17631 | NW_004519340.1 | scaffold5158 | 17631                   | GG                              | AA                 | AA               | INTERGENIC      |               |                    |                    |
| SNP_113355_A_17794 | NW_004519340.1 | scaffold5158 | 17794                   | CC                              | TT                 | TT               | INTERGENIC      |               |                    |                    |
| SNP_113356_A_17850 | NW_004519340.1 | scaffold5158 | 17850                   | TT                              | CC                 | CC               | INTERGENIC      |               |                    |                    |
| SNP_113358_A_18216 | NW_004519340.1 | scaffold5158 | 18216                   | TT                              | CC                 | CC               | INTERGENIC      |               |                    |                    |
| SNP_113359_A_18689 | NW_004519340.1 | scaffold5158 | 18689                   | AA                              | GG                 | GG               | INTERGENIC      |               |                    |                    |
| SNP_113360_A_18937 | NW_004519340.1 | scaffold5158 | 18937                   | TT                              | CC                 | CC               | INTERGENIC      |               |                    |                    |
| SNP_113361_A_19012 | NW_004519340.1 | scaffold5158 | 19012                   | AA                              | GG                 | GG               | INTERGENIC      |               |                    |                    |
| SNP_113362_A_19046 | NW_004519340.1 | scaffold5158 | 19046                   | AA                              | TT                 | TT               | INTERGENIC      |               |                    |                    |
| SNP_113363_A_19047 | NW_004519340.1 | scaffold5158 | 19047                   | AA                              | GG                 | GG               | INTERGENIC      |               |                    |                    |
| SNP_113364_A_21446 | NW_004519340.1 | scaffold5158 | 21446                   | GG                              | AA                 | AA               | INTERGENIC      |               |                    |                    |
| SNP_113365_A_21492 | NW_004519340.1 | scaffold5158 | 21492                   | CC                              | TT                 | TT               | INTERGENIC      |               |                    |                    |
| SNP_113366_A_21584 | NW_004519340.1 | scaffold5158 | 21584                   | TT                              | CC                 | CC               | INTERGENIC      |               |                    |                    |
| SNP_113367_A_1174  | NW_004519343.1 | scaffold5161 | 1174                    | TT                              | GG                 | GG               | INTERGENIC      |               |                    |                    |
| SNP_113368_A_1208  | NW_004519343.1 | scaffold5161 | 1208                    | GG                              | AA                 | AA               | INTERGENIC      |               |                    |                    |
| SNP_113369_A_1278  | NW_004519343.1 | scaffold5161 | 1278                    | TT                              | CC                 | CC               | INTERGENIC      |               |                    |                    |

| SNPs IDs          | Chromosome IDs | Chromosomes  | Physical positions (bp) | CDC Frontier (Reference genome) | (Pusa 1103 & HPNB) | (ILWC 46 & LPNB) | Sequence Components of genome | Gene accession IDs | Putative functions |
|-------------------|----------------|--------------|-------------------------|---------------------------------|--------------------|------------------|-------------------------------|--------------------|--------------------|
| SNP_113370_A_1098 | NW_004519347.1 | scaffold5165 | 1098                    | TT                              | CC                 | CC               | INTERGENIC                    |                    |                    |
| SNP_113371_A_1127 | NW_004519347.1 | scaffold5165 | 1127                    | AA                              | TT                 | TT               | INTERGENIC                    |                    |                    |
| SNP_113372_A_1141 | NW_004519347.1 | scaffold5165 | 1141                    | CC                              | AA                 | AA               | INTERGENIC                    |                    |                    |
| SNP_113373_A_1429 | NW_004519347.1 | scaffold5165 | 1429                    | TT                              | AA                 | AA               | INTERGENIC                    |                    |                    |
| SNP_113374_A_1431 | NW_004519347.1 | scaffold5165 | 1431                    | GG                              | TT                 | TT               | INTERGENIC                    |                    |                    |
| SNP_113375_A_1434 | NW_004519347.1 | scaffold5165 | 1434                    | GG                              | CC                 | CC               | INTERGENIC                    |                    |                    |
| SNP_113377_A_1639 | NW_004519347.1 | scaffold5165 | 1639                    | AA                              | TT                 | TT               | INTERGENIC                    |                    |                    |
| SNP_113378_A_1684 | NW_004519347.1 | scaffold5165 | 1684                    | CC                              | TT                 | TT               | INTERGENIC                    |                    |                    |
| SNP_113379_A_1689 | NW_004519347.1 | scaffold5165 | 1689                    | GG                              | TT                 | TT               | INTERGENIC                    |                    |                    |
| SNP_113380_A_1763 | NW_004519347.1 | scaffold5165 | 1763                    | TT                              | CC                 | CC               | INTERGENIC                    |                    |                    |
| SNP_113381_A_5141 | NW_004519358.1 | scaffold5185 | 5141                    | CC                              | GG                 | GG               | URR                           | 101489297          | Unknown function   |
| SNP_113382_A_5145 | NW_004519358.1 | scaffold5185 | 5145                    | CC                              | TT                 | TT               | URR                           | 101489297          | Unknown function   |
| SNP_113383_A_5418 | NW_004519358.1 | scaffold5185 | 5418                    | AA                              | CC                 | CC               | URR                           | 101489297          | Unknown function   |
| SNP_113384_A_5427 | NW_004519358.1 | scaffold5185 | 5427                    | GG                              | CC                 | CC               | URR                           | 101489297          | Unknown function   |
| SNP_113385_A_5428 | NW_004519358.1 | scaffold5185 | 5428                    | GG                              | AA                 | AA               | URR                           | 101489297          | Unknown function   |
| SNP_113386_A_5793 | NW_004519358.1 | scaffold5185 | 5793                    | TT                              | GG                 | GG               | URR                           | 101489297          | Unknown function   |
| SNP_113387_A_6028 | NW_004519358.1 | scaffold5185 | 6028                    | AA                              | GG                 | GG               | URR                           | 101489297          | Unknown function   |
| SNP_113389_A_7460 | NW_004519359.1 | scaffold5186 | 7460                    | CC                              | TT                 | TT               | INTERGENIC                    |                    |                    |
| SNP_113390_A_7606 | NW_004519359.1 | scaffold5186 | 7606                    | CC                              | AA                 | AA               | INTERGENIC                    |                    |                    |
| SNP_113391_A_7643 | NW_004519359.1 | scaffold5186 | 7643                    | AA                              | TT                 | TT               | INTERGENIC                    |                    |                    |
| SNP_113392_A_7717 | NW_004519359.1 | scaffold5186 | 7717                    | TT                              | CC                 | CC               | INTERGENIC                    |                    |                    |
| SNP_113393_A_7880 | NW_004519359.1 | scaffold5186 | 7880                    | TT                              | GG                 | GG               | INTERGENIC                    |                    |                    |



| SNPs IDs           | Chromosome IDs | Chromosomes  | Physical positions (bp) | CDC Frontier (Reference genome) | (Pusa 1103 & HPNB) | (ILWC 46 & LPNB) | Sequence genome | Components of | Gene accession IDs | Putative functions |
|--------------------|----------------|--------------|-------------------------|---------------------------------|--------------------|------------------|-----------------|---------------|--------------------|--------------------|
| SNP_113394_A_8015  | NW_004519359.1 | scaffold5186 | 8015                    | TT                              | CC                 | CC               | INTERGENIC      |               |                    |                    |
| SNP_113395_A_8461  | NW_004519359.1 | scaffold5186 | 8461                    | CC                              | AA                 | AA               | INTERGENIC      |               |                    |                    |
| SNP_113396_A_8469  | NW_004519359.1 | scaffold5186 | 8469                    | TT                              | CC                 | CC               | INTERGENIC      |               |                    |                    |
| SNP_113398_A_9706  | NW_004519359.1 | scaffold5186 | 9706                    | AA                              | GG                 | GG               | INTERGENIC      |               |                    |                    |
| SNP_113399_A_10093 | NW_004519359.1 | scaffold5186 | 10093                   | TT                              | CC                 | CC               | INTERGENIC      |               |                    |                    |
| SNP_113400_A_10263 | NW_004519359.1 | scaffold5186 | 10263                   | TT                              | CC                 | CC               | INTERGENIC      |               |                    |                    |
| SNP_113401_A_10577 | NW_004519359.1 | scaffold5186 | 10577                   | TT                              | GG                 | GG               | INTERGENIC      |               |                    |                    |
| SNP_113402_A_10782 | NW_004519359.1 | scaffold5186 | 10782                   | TT                              | CC                 | CC               | INTERGENIC      |               |                    |                    |
| SNP_113403_A_10793 | NW_004519359.1 | scaffold5186 | 10793                   | TT                              | CC                 | CC               | INTERGENIC      |               |                    |                    |
| SNP_113404_A_10794 | NW_004519359.1 | scaffold5186 | 10794                   | AA                              | GG                 | GG               | INTERGENIC      |               |                    |                    |
| SNP_113405_A_10863 | NW_004519359.1 | scaffold5186 | 10863                   | AA                              | TT                 | TT               | INTERGENIC      |               |                    |                    |
| SNP_113406_A_10898 | NW_004519359.1 | scaffold5186 | 10898                   | CC                              | TT                 | TT               | INTERGENIC      |               |                    |                    |
| SNP_113407_A_11545 | NW_004519359.1 | scaffold5186 | 11545                   | GG                              | AA                 | AA               | INTERGENIC      |               |                    |                    |
| SNP_113408_A_11695 | NW_004519359.1 | scaffold5186 | 11695                   | CC                              | TT                 | TT               | INTERGENIC      |               |                    |                    |
| SNP_113409_A_11746 | NW_004519359.1 | scaffold5186 | 11746                   | TT                              | CC                 | CC               | INTERGENIC      |               |                    |                    |
| SNP_113410_A_12137 | NW_004519359.1 | scaffold5186 | 12137                   | TT                              | AA                 | AA               | INTERGENIC      |               |                    |                    |
| SNP_113411_A_12422 | NW_004519359.1 | scaffold5186 | 12422                   | CC                              | GG                 | GG               | INTERGENIC      |               |                    |                    |
| SNP_113412_A_12966 | NW_004519359.1 | scaffold5186 | 12966                   | TT                              | AA                 | AA               | INTERGENIC      |               |                    |                    |
| SNP_113413_A_13008 | NW_004519359.1 | scaffold5186 | 13008                   | TT                              | GG                 | GG               | INTERGENIC      |               |                    |                    |
| SNP_113414_A_13266 | NW_004519359.1 | scaffold5186 | 13266                   | AA                              | TT                 | TT               | INTERGENIC      |               |                    |                    |
| SNP_113415_A_13533 | NW_004519359.1 | scaffold5186 | 13533                   | TT                              | CC                 | CC               | INTERGENIC      |               |                    |                    |
| SNP_113416_A_13933 | NW_004519359.1 | scaffold5186 | 13933                   | GG                              | AA                 | AA               | INTERGENIC      |               |                    |                    |

| SNPs IDs           | Chromosome IDs | Chromosomes  | Physical positions (bp) | CDC Frontier (Reference genome) | (Pusa 1103 & HPNB) | (ILWC 46 & LPNB) | Sequence genome | Components of | Gene accession IDs | Putative functions |
|--------------------|----------------|--------------|-------------------------|---------------------------------|--------------------|------------------|-----------------|---------------|--------------------|--------------------|
| SNP_113417_A_14296 | NW_004519359.1 | scaffold5186 | 14296                   | CC                              | GG                 | GG               | INTERGENIC      |               |                    |                    |
| SNP_113418_A_14796 | NW_004519359.1 | scaffold5186 | 14796                   | TT                              | CC                 | CC               | INTERGENIC      |               |                    |                    |
| SNP_113419_A_14932 | NW_004519359.1 | scaffold5186 | 14932                   | TT                              | CC                 | CC               | INTERGENIC      |               |                    |                    |
| SNP_113420_A_15096 | NW_004519359.1 | scaffold5186 | 15096                   | GG                              | AA                 | AA               | INTERGENIC      |               |                    |                    |
| SNP_113421_A_15165 | NW_004519359.1 | scaffold5186 | 15165                   | GG                              | TT                 | TT               | INTERGENIC      |               |                    |                    |
| SNP_113422_A_15295 | NW_004519359.1 | scaffold5186 | 15295                   | GG                              | CC                 | CC               | INTERGENIC      |               |                    |                    |
| SNP_113423_A_15449 | NW_004519359.1 | scaffold5186 | 15449                   | CC                              | TT                 | TT               | INTERGENIC      |               |                    |                    |
| SNP_113424_A_15492 | NW_004519359.1 | scaffold5186 | 15492                   | TT                              | GG                 | GG               | INTERGENIC      |               |                    |                    |
| SNP_113425_A_15573 | NW_004519359.1 | scaffold5186 | 15573                   | CC                              | TT                 | TT               | INTERGENIC      |               |                    |                    |
| SNP_113426_A_15678 | NW_004519359.1 | scaffold5186 | 15678                   | AA                              | CC                 | CC               | INTERGENIC      |               |                    |                    |
| SNP_113427_A_15817 | NW_004519359.1 | scaffold5186 | 15817                   | TT                              | CC                 | CC               | INTERGENIC      |               |                    |                    |
| SNP_113428_A_15842 | NW_004519359.1 | scaffold5186 | 15842                   | CC                              | TT                 | TT               | INTERGENIC      |               |                    |                    |
| SNP_113429_A_15863 | NW_004519359.1 | scaffold5186 | 15863                   | GG                              | AA                 | AA               | INTERGENIC      |               |                    |                    |
| SNP_113430_A_15952 | NW_004519359.1 | scaffold5186 | 15952                   | CC                              | GG                 | GG               | INTERGENIC      |               |                    |                    |
| SNP_113431_A_16040 | NW_004519359.1 | scaffold5186 | 16040                   | CC                              | GG                 | GG               | INTERGENIC      |               |                    |                    |
| SNP_113432_A_16108 | NW_004519359.1 | scaffold5186 | 16108                   | CC                              | TT                 | TT               | INTERGENIC      |               |                    |                    |
| SNP_113433_A_16226 | NW_004519359.1 | scaffold5186 | 16226                   | CC                              | GG                 | GG               | INTERGENIC      |               |                    |                    |
| SNP_113434_A_16236 | NW_004519359.1 | scaffold5186 | 16236                   | CC                              | AA                 | AA               | INTERGENIC      |               |                    |                    |
| SNP_113435_A_16634 | NW_004519359.1 | scaffold5186 | 16634                   | AA                              | TT                 | TT               | INTERGENIC      |               |                    |                    |
| SNP_113436_A_16884 | NW_004519359.1 | scaffold5186 | 16884                   | TT                              | CC                 | CC               | INTERGENIC      |               |                    |                    |
| SNP_113437_A_16956 | NW_004519359.1 | scaffold5186 | 16956                   | AA                              | GG                 | GG               | INTERGENIC      |               |                    |                    |
| SNP_113438_A_16969 | NW_004519359.1 | scaffold5186 | 16969                   | TT                              | CC                 | CC               | INTERGENIC      |               |                    |                    |

| SNPs IDs           | Chromosome IDs | Chromosomes  | Physical positions (bp) | CDC Frontier (Reference genome) | (Pusa 1103 & HPNB) | (ILWC 46 & LPNB) | Sequence genome | Components of | Gene accession IDs                      | Putative functions |
|--------------------|----------------|--------------|-------------------------|---------------------------------|--------------------|------------------|-----------------|---------------|-----------------------------------------|--------------------|
| SNP_113439_A_17122 | NW_004519359.1 | scaffold5186 | 17122                   | TT                              | CC                 | CC               | INTERGENIC      |               |                                         |                    |
| SNP_113440_A_17277 | NW_004519359.1 | scaffold5186 | 17277                   | CC                              | GG                 | GG               | INTERGENIC      |               |                                         |                    |
| SNP_113441_A_19307 | NW_004519359.1 | scaffold5186 | 19307                   | AA                              | TT                 | TT               | INTERGENIC      |               |                                         |                    |
| SNP_113442_A_19656 | NW_004519359.1 | scaffold5186 | 19656                   | TT                              | CC                 | CC               | INTERGENIC      |               |                                         |                    |
| SNP_113443_A_19942 | NW_004519359.1 | scaffold5186 | 19942                   | AA                              | CC                 | CC               | INTERGENIC      |               |                                         |                    |
| SNP_113444_A_20213 | NW_004519359.1 | scaffold5186 | 20213                   | TT                              | AA                 | AA               | INTERGENIC      |               |                                         |                    |
| SNP_113445_A_20312 | NW_004519359.1 | scaffold5186 | 20312                   | GG                              | AA                 | AA               | INTERGENIC      |               |                                         |                    |
| SNP_113446_A_20338 | NW_004519359.1 | scaffold5186 | 20338                   | AA                              | GG                 | GG               | INTERGENIC      |               |                                         |                    |
| SNP_113447_A_20452 | NW_004519359.1 | scaffold5186 | 20452                   | AA                              | CC                 | CC               | INTERGENIC      |               |                                         |                    |
| SNP_113448_A_20601 | NW_004519359.1 | scaffold5186 | 20601                   | AA                              | GG                 | GG               | INTERGENIC      |               |                                         |                    |
| SNP_113449_A_20646 | NW_004519359.1 | scaffold5186 | 20646                   | GG                              | CC                 | CC               | INTERGENIC      |               |                                         |                    |
| SNP_113450_A_20752 | NW_004519359.1 | scaffold5186 | 20752                   | CC                              | TT                 | TT               | INTERGENIC      |               |                                         |                    |
| SNP_113451_A_20804 | NW_004519359.1 | scaffold5186 | 20804                   | AA                              | TT                 | TT               | INTERGENIC      |               |                                         |                    |
| SNP_113452_A_21198 | NW_004519359.1 | scaffold5186 | 21198                   | TT                              | GG                 | GG               | INTERGENIC      |               |                                         |                    |
| SNP_113453_A_21300 | NW_004519359.1 | scaffold5186 | 21300                   | AA                              | CC                 | CC               | INTERGENIC      |               |                                         |                    |
| SNP_113454_A_23550 | NW_004519359.1 | scaffold5186 | 23550                   | CC                              | AA                 | AA               | INTERGENIC      |               |                                         |                    |
| SNP_113455_A_23576 | NW_004519359.1 | scaffold5186 | 23576                   | GG                              | TT                 | TT               | INTERGENIC      |               |                                         |                    |
| SNP_113456_A_23868 | NW_004519359.1 | scaffold5186 | 23868                   | TT                              | CC                 | CC               | INTERGENIC      |               |                                         |                    |
| SNP_113457_A_26816 | NW_004519359.1 | scaffold5186 | 26816                   | AA                              | GG                 | GG               | INTERGENIC      |               |                                         |                    |
| SNP_113458_A_27014 | NW_004519359.1 | scaffold5186 | 27014                   | AA                              | GG                 | GG               | INTERGENIC      |               |                                         |                    |
| SNP_113459_A_27055 | NW_004519359.1 | scaffold5186 | 27055                   | CC                              | TT                 | TT               | INTERGENIC      |               |                                         |                    |
| SNP_113461_A_5234  | NW_004519364.1 | scaffold5195 | 5234                    | AA                              | GG                 | GG               | DRR             | 101410586     | transfer RNA asparagine (anticodon GUU) |                    |

| SNPs IDs          | Chromosome IDs | Chromosomes  | Physical positions (bp) | CDC Frontier (Reference genome) | (Pusa 1103 & HPNB) | (ILWC 46 & LPNB) | Sequence Components of genome | Gene accession IDs | Putative functions                      |
|-------------------|----------------|--------------|-------------------------|---------------------------------|--------------------|------------------|-------------------------------|--------------------|-----------------------------------------|
| SNP_113462_A_5274 | NW_004519364.1 | scaffold5195 | 5274                    | TT                              | CC                 | CC               | DRR                           | 101410586          | transfer RNA asparagine (anticodon GUU) |
| SNP_113463_A_5332 | NW_004519364.1 | scaffold5195 | 5332                    | TT                              | CC                 | CC               | DRR                           | 101410586          | transfer RNA asparagine (anticodon GUU) |
| SNP_113464_A_5333 | NW_004519364.1 | scaffold5195 | 5333                    | TT                              | AA                 | AA               | DRR                           | 101410586          | transfer RNA asparagine (anticodon GUU) |
| SNP_113465_A_6370 | NW_004519364.1 | scaffold5195 | 6370                    | CC                              | AA                 | AA               | URR                           | 101410586          | transfer RNA asparagine (anticodon GUU) |
| SNP_113466_A_6374 | NW_004519364.1 | scaffold5195 | 6374                    | CC                              | GG                 | GG               | URR                           | 101410586          | transfer RNA asparagine (anticodon GUU) |
| SNP_113468_A_1243 | NW_004519365.1 | scaffold5198 | 1243                    | GG                              | TT                 | TT               | INTERGENIC                    |                    |                                         |
| SNP_113469_A_4038 | NW_004519365.1 | scaffold5198 | 4038                    | CC                              | TT                 | TT               | INTERGENIC                    |                    |                                         |
| SNP_113470_A_4039 | NW_004519365.1 | scaffold5198 | 4039                    | GG                              | AA                 | AA               | INTERGENIC                    |                    |                                         |
| SNP_113471_A_4043 | NW_004519365.1 | scaffold5198 | 4043                    | CC                              | GG                 | GG               | INTERGENIC                    |                    |                                         |
| SNP_113472_A_4044 | NW_004519365.1 | scaffold5198 | 4044                    | AA                              | TT                 | TT               | INTERGENIC                    |                    |                                         |
| SNP_113474_A_385  | NW_004519366.1 | scaffold5199 | 385                     | TT                              | CC                 | CC               | INTERGENIC                    |                    |                                         |
| SNP_113475_A_451  | NW_004519366.1 | scaffold5199 | 451                     | TT                              | GG                 | GG               | INTERGENIC                    |                    |                                         |
| SNP_113476_A_829  | NW_004519366.1 | scaffold5199 | 829                     | AA                              | TT                 | TT               | INTERGENIC                    |                    |                                         |
| SNP_113477_A_312  | NW_004519367.1 | scaffold5200 | 312                     | AA                              | GG                 | GG               | INTERGENIC                    |                    |                                         |
| SNP_113478_A_2081 | NW_004519368.1 | scaffold5201 | 2081                    | CC                              | GG                 | GG               | INTERGENIC                    |                    |                                         |
| SNP_113479_A_106  | NW_004519369.1 | scaffold5202 | 106                     | AA                              | GG                 | GG               | INTERGENIC                    |                    |                                         |
| SNP_113480_A_209  | NW_004519369.1 | scaffold5202 | 209                     | TT                              | CC                 | CC               | INTERGENIC                    |                    |                                         |
| SNP_113482_A_375  | NW_004519369.1 | scaffold5202 | 375                     | GG                              | TT                 | TT               | INTERGENIC                    |                    |                                         |
| SNP_113483_A_491  | NW_004519370.1 | scaffold5204 | 491                     | AA                              | GG                 | GG               | INTERGENIC                    |                    |                                         |
| SNP_113484_A_987  | NW_004519370.1 | scaffold5204 | 987                     | TT                              | AA                 | AA               | INTERGENIC                    |                    |                                         |
| SNP_113485_A_1000 | NW_004519370.1 | scaffold5204 | 1000                    | TT                              | AA                 | AA               | INTERGENIC                    |                    |                                         |
| SNP_113486_A_1039 | NW_004519370.1 | scaffold5204 | 1039                    | CC                              | AA                 | AA               | INTERGENIC                    |                    |                                         |

| SNPs IDs          | Chromosome IDs | Chromosomes  | Physical positions (bp) | CDC Frontier (Reference genome) | (Pusa 1103 & HPNB) | (ILWC 46 & LPNB) | Sequence genome | Components of | Gene accession IDs | Putative functions |
|-------------------|----------------|--------------|-------------------------|---------------------------------|--------------------|------------------|-----------------|---------------|--------------------|--------------------|
| SNP_113487_A_1048 | NW_004519370.1 | scaffold5204 | 1048                    | AA                              | CC                 | CC               | INTERGENIC      |               |                    |                    |
| SNP_113488_A_1057 | NW_004519370.1 | scaffold5204 | 1057                    | GG                              | AA                 | AA               | INTERGENIC      |               |                    |                    |
| SNP_113489_A_1270 | NW_004519370.1 | scaffold5204 | 1270                    | AA                              | GG                 | GG               | INTERGENIC      |               |                    |                    |
| SNP_113490_A_1317 | NW_004519370.1 | scaffold5204 | 1317                    | AA                              | GG                 | GG               | INTERGENIC      |               |                    |                    |
| SNP_113491_A_161  | NW_004519372.1 | scaffold5207 | 161                     | CC                              | TT                 | TT               | INTERGENIC      |               |                    |                    |
| SNP_113492_A_621  | NW_004519372.1 | scaffold5207 | 621                     | TT                              | GG                 | GG               | INTERGENIC      |               |                    |                    |
| SNP_113493_A_749  | NW_004519372.1 | scaffold5207 | 749                     | CC                              | TT                 | TT               | INTERGENIC      |               |                    |                    |
| SNP_113494_A_751  | NW_004519372.1 | scaffold5207 | 751                     | TT                              | CC                 | CC               | INTERGENIC      |               |                    |                    |
| SNP_113495_A_1240 | NW_004519374.1 | scaffold5209 | 1240                    | TT                              | CC                 | CC               | INTERGENIC      |               |                    |                    |
| SNP_113496_A_1268 | NW_004519374.1 | scaffold5209 | 1268                    | CC                              | TT                 | TT               | INTERGENIC      |               |                    |                    |
| SNP_113497_A_1279 | NW_004519374.1 | scaffold5209 | 1279                    | AA                              | TT                 | TT               | INTERGENIC      |               |                    |                    |
| SNP_113498_A_948  | NW_004519376.1 | scaffold5211 | 948                     | AA                              | TT                 | TT               | INTERGENIC      |               |                    |                    |
| SNP_113499_A_1179 | NW_004519376.1 | scaffold5211 | 1179                    | GG                              | TT                 | TT               | INTERGENIC      |               |                    |                    |
| SNP_113500_A_1281 | NW_004519376.1 | scaffold5211 | 1281                    | CC                              | TT                 | TT               | INTERGENIC      |               |                    |                    |
| SNP_113501_A_1357 | NW_004519376.1 | scaffold5211 | 1357                    | CC                              | AA                 | AA               | INTERGENIC      |               |                    |                    |
| SNP_113502_A_1659 | NW_004519376.1 | scaffold5211 | 1659                    | CC                              | TT                 | TT               | INTERGENIC      |               |                    |                    |
| SNP_113503_A_1804 | NW_004519376.1 | scaffold5211 | 1804                    | TT                              | CC                 | CC               | INTERGENIC      |               |                    |                    |
| SNP_113504_A_1869 | NW_004519376.1 | scaffold5211 | 1869                    | CC                              | TT                 | TT               | INTERGENIC      |               |                    |                    |
| SNP_113505_A_2216 | NW_004519376.1 | scaffold5211 | 2216                    | AA                              | GG                 | GG               | INTERGENIC      |               |                    |                    |
| SNP_113506_A_2317 | NW_004519376.1 | scaffold5211 | 2317                    | TT                              | CC                 | CC               | INTERGENIC      |               |                    |                    |
| SNP_113507_A_2386 | NW_004519376.1 | scaffold5211 | 2386                    | AA                              | GG                 | GG               | INTERGENIC      |               |                    |                    |
| SNP_113508_A_2545 | NW_004519376.1 | scaffold5211 | 2545                    | GG                              | AA                 | AA               | INTERGENIC      |               |                    |                    |

| SNPs IDs          | Chromosome IDs | Chromosomes  | Physical positions (bp) | CDC Frontier (Reference genome) | (Pusa 1103 & HPNB) | (ILWC 46 & LPNB) | Sequence genome | Components of | Gene accession IDs | Putative functions |
|-------------------|----------------|--------------|-------------------------|---------------------------------|--------------------|------------------|-----------------|---------------|--------------------|--------------------|
| SNP_113509_A_2738 | NW_004519376.1 | scaffold5211 | 2738                    | GG                              | TT                 | TT               | INTERGENIC      |               |                    |                    |
| SNP_113510_A_2782 | NW_004519376.1 | scaffold5211 | 2782                    | CC                              | AA                 | AA               | INTERGENIC      |               |                    |                    |
| SNP_113511_A_2893 | NW_004519376.1 | scaffold5211 | 2893                    | GG                              | AA                 | AA               | INTERGENIC      |               |                    |                    |
| SNP_113512_A_2928 | NW_004519376.1 | scaffold5211 | 2928                    | CC                              | GG                 | GG               | INTERGENIC      |               |                    |                    |
| SNP_113513_A_3088 | NW_004519376.1 | scaffold5211 | 3088                    | AA                              | GG                 | GG               | INTERGENIC      |               |                    |                    |
| SNP_113514_A_3382 | NW_004519376.1 | scaffold5211 | 3382                    | TT                              | CC                 | CC               | INTERGENIC      |               |                    |                    |
| SNP_113515_A_3522 | NW_004519376.1 | scaffold5211 | 3522                    | GG                              | AA                 | AA               | INTERGENIC      |               |                    |                    |
| SNP_113516_A_3657 | NW_004519376.1 | scaffold5211 | 3657                    | CC                              | TT                 | TT               | INTERGENIC      |               |                    |                    |
| SNP_113518_A_3778 | NW_004519376.1 | scaffold5211 | 3778                    | GG                              | TT                 | TT               | INTERGENIC      |               |                    |                    |
| SNP_113519_A_3789 | NW_004519376.1 | scaffold5211 | 3789                    | AA                              | CC                 | CC               | INTERGENIC      |               |                    |                    |
| SNP_113520_A_3816 | NW_004519376.1 | scaffold5211 | 3816                    | CC                              | AA                 | AA               | INTERGENIC      |               |                    |                    |
| SNP_113521_A_3850 | NW_004519376.1 | scaffold5211 | 3850                    | CC                              | TT                 | TT               | INTERGENIC      |               |                    |                    |
| SNP_113522_A_3869 | NW_004519376.1 | scaffold5211 | 3869                    | AA                              | CC                 | CC               | INTERGENIC      |               |                    |                    |
| SNP_113523_A_4013 | NW_004519376.1 | scaffold5211 | 4013                    | GG                              | AA                 | AA               | INTERGENIC      |               |                    |                    |
| SNP_113524_A_4094 | NW_004519376.1 | scaffold5211 | 4094                    | GG                              | AA                 | AA               | INTERGENIC      |               |                    |                    |
| SNP_113525_A_4104 | NW_004519376.1 | scaffold5211 | 4104                    | TT                              | CC                 | CC               | INTERGENIC      |               |                    |                    |
| SNP_113526_A_4565 | NW_004519376.1 | scaffold5211 | 4565                    | AA                              | GG                 | GG               | INTERGENIC      |               |                    |                    |
| SNP_113527_A_4900 | NW_004519376.1 | scaffold5211 | 4900                    | GG                              | AA                 | AA               | INTERGENIC      |               |                    |                    |
| SNP_113528_A_4971 | NW_004519376.1 | scaffold5211 | 4971                    | AA                              | GG                 | GG               | INTERGENIC      |               |                    |                    |
| SNP_113529_A_5329 | NW_004519376.1 | scaffold5211 | 5329                    | AA                              | GG                 | GG               | INTERGENIC      |               |                    |                    |
| SNP_113530_A_5474 | NW_004519376.1 | scaffold5211 | 5474                    | TT                              | CC                 | CC               | INTERGENIC      |               |                    |                    |
| SNP_113531_A_5720 | NW_004519376.1 | scaffold5211 | 5720                    | TT                              | GG                 | GG               | INTERGENIC      |               |                    |                    |

| SNPs IDs          | Chromosome IDs | Chromosomes  | Physical positions (bp) | CDC Frontier (Reference genome) | (Pusa 1103 & HPNB) | (ILWC 46 & LPNB) | Sequence genome | Components of | Gene accession IDs | Putative functions |
|-------------------|----------------|--------------|-------------------------|---------------------------------|--------------------|------------------|-----------------|---------------|--------------------|--------------------|
| SNP_113532_A_5808 | NW_004519376.1 | scaffold5211 | 5808                    | CC                              | GG                 | GG               | INTERGENIC      |               |                    |                    |
| SNP_113533_A_499  | NW_004519381.1 | scaffold5222 | 499                     | AA                              | TT                 | TT               | INTERGENIC      |               |                    |                    |
| SNP_113534_A_546  | NW_004519381.1 | scaffold5222 | 546                     | CC                              | TT                 | TT               | INTERGENIC      |               |                    |                    |
| SNP_113535_A_569  | NW_004519381.1 | scaffold5222 | 569                     | CC                              | GG                 | GG               | INTERGENIC      |               |                    |                    |
| SNP_113536_A_62   | NW_004519388.1 | scaffold5229 | 62                      | GG                              | CC                 | CC               | INTERGENIC      |               |                    |                    |
| SNP_113537_A_119  | NW_004519390.1 | scaffold5234 | 119                     | TT                              | CC                 | CC               | INTERGENIC      |               |                    |                    |
| SNP_113538_A_444  | NW_004519390.1 | scaffold5234 | 444                     | GG                              | TT                 | TT               | INTERGENIC      |               |                    |                    |
| SNP_113540_A_461  | NW_004519390.1 | scaffold5234 | 461                     | GG                              | AA                 | AA               | INTERGENIC      |               |                    |                    |
| SNP_113541_A_755  | NW_004519390.1 | scaffold5234 | 755                     | GG                              | TT                 | TT               | INTERGENIC      |               |                    |                    |
| SNP_113542_A_800  | NW_004519390.1 | scaffold5234 | 800                     | GG                              | AA                 | AA               | INTERGENIC      |               |                    |                    |
| SNP_113543_A_814  | NW_004519390.1 | scaffold5234 | 814                     | AA                              | GG                 | GG               | INTERGENIC      |               |                    |                    |
| SNP_113544_A_821  | NW_004519390.1 | scaffold5234 | 821                     | AA                              | CC                 | CC               | INTERGENIC      |               |                    |                    |
| SNP_113545_A_1448 | NW_004519393.1 | scaffold5238 | 1448                    | CC                              | TT                 | TT               | INTERGENIC      |               |                    |                    |
| SNP_113546_A_1759 | NW_004519393.1 | scaffold5238 | 1759                    | CC                              | TT                 | TT               | INTERGENIC      |               |                    |                    |
| SNP_113547_A_3686 | NW_004519394.1 | scaffold5239 | 3686                    | AA                              | CC                 | CC               | INTERGENIC      |               |                    |                    |
| SNP_113548_A_3687 | NW_004519394.1 | scaffold5239 | 3687                    | TT                              | CC                 | CC               | INTERGENIC      |               |                    |                    |
| SNP_113549_A_6352 | NW_004519394.1 | scaffold5239 | 6352                    | TT                              | CC                 | CC               | INTERGENIC      |               |                    |                    |
| SNP_113550_A_210  | NW_004519398.1 | scaffold5251 | 210                     | GG                              | AA                 | AA               | INTERGENIC      |               |                    |                    |
| SNP_113551_A_261  | NW_004519398.1 | scaffold5251 | 261                     | CC                              | TT                 | TT               | INTERGENIC      |               |                    |                    |
| SNP_113552_A_265  | NW_004519398.1 | scaffold5251 | 265                     | AA                              | CC                 | CC               | INTERGENIC      |               |                    |                    |
| SNP_113553_A_311  | NW_004519398.1 | scaffold5251 | 311                     | CC                              | TT                 | TT               | INTERGENIC      |               |                    |                    |
| SNP_113554_A_454  | NW_004519398.1 | scaffold5251 | 454                     | AA                              | GG                 | GG               | INTERGENIC      |               |                    |                    |

| SNPs IDs           | Chromosome IDs | Chromosomes  | Physical positions (bp) | CDC Frontier (Reference genome) | (Pusa 1103 & HPNB) | (ILWC 46 & LPNB) | Sequence genome | Components of | Gene accession IDs | Putative functions |
|--------------------|----------------|--------------|-------------------------|---------------------------------|--------------------|------------------|-----------------|---------------|--------------------|--------------------|
| SNP_113555_A_489   | NW_004519398.1 | scaffold5251 | 489                     | CC                              | TT                 | TT               | INTERGENIC      |               |                    |                    |
| SNP_113556_A_620   | NW_004519398.1 | scaffold5251 | 620                     | CC                              | TT                 | TT               | INTERGENIC      |               |                    |                    |
| SNP_113557_A_665   | NW_004519398.1 | scaffold5251 | 665                     | TT                              | CC                 | CC               | INTERGENIC      |               |                    |                    |
| SNP_113558_A_804   | NW_004519398.1 | scaffold5251 | 804                     | CC                              | TT                 | TT               | INTERGENIC      |               |                    |                    |
| SNP_113559_A_875   | NW_004519398.1 | scaffold5251 | 875                     | GG                              | AA                 | AA               | INTERGENIC      |               |                    |                    |
| SNP_113560_A_1054  | NW_004519398.1 | scaffold5251 | 1054                    | GG                              | AA                 | AA               | INTERGENIC      |               |                    |                    |
| SNP_113561_A_1173  | NW_004519398.1 | scaffold5251 | 1173                    | TT                              | CC                 | CC               | INTERGENIC      |               |                    |                    |
| SNP_113563_A_1207  | NW_004519398.1 | scaffold5251 | 1207                    | CC                              | GG                 | GG               | INTERGENIC      |               |                    |                    |
| SNP_113564_A_1249  | NW_004519398.1 | scaffold5251 | 1249                    | CC                              | AA                 | AA               | INTERGENIC      |               |                    |                    |
| SNP_113565_A_2185  | NW_004519398.1 | scaffold5251 | 2185                    | AA                              | GG                 | GG               | INTERGENIC      |               |                    |                    |
| SNP_113566_A_2220  | NW_004519398.1 | scaffold5251 | 2220                    | GG                              | CC                 | CC               | INTERGENIC      |               |                    |                    |
| SNP_113567_A_2225  | NW_004519398.1 | scaffold5251 | 2225                    | AA                              | GG                 | GG               | INTERGENIC      |               |                    |                    |
| SNP_113568_A_2226  | NW_004519398.1 | scaffold5251 | 2226                    | CC                              | TT                 | TT               | INTERGENIC      |               |                    |                    |
| SNP_113569_A_2281  | NW_004519398.1 | scaffold5251 | 2281                    | TT                              | GG                 | GG               | INTERGENIC      |               |                    |                    |
| SNP_113570_A_1827  | NW_004519402.1 | scaffold5258 | 1827                    | GG                              | CC                 | CC               | INTERGENIC      |               |                    |                    |
| SNP_113571_A_1459  | NW_004519403.1 | scaffold5259 | 1459                    | AA                              | CC                 | CC               | INTERGENIC      |               |                    |                    |
| SNP_113572_A_1514  | NW_004519403.1 | scaffold5259 | 1514                    | TT                              | GG                 | GG               | INTERGENIC      |               |                    |                    |
| SNP_113573_A_1724  | NW_004519403.1 | scaffold5259 | 1724                    | GG                              | TT                 | TT               | INTERGENIC      |               |                    |                    |
| SNP_113574_A_179   | NW_004519404.1 | scaffold5261 | 179                     | AA                              | CC                 | CC               | INTERGENIC      |               |                    |                    |
| SNP_113575_A_10220 | NW_004519404.1 | scaffold5261 | 10220                   | TT                              | CC                 | CC               | INTERGENIC      |               |                    |                    |
| SNP_113576_A_10221 | NW_004519404.1 | scaffold5261 | 10221                   | AA                              | GG                 | GG               | INTERGENIC      |               |                    |                    |
| SNP_113577_A_457   | NW_004519405.1 | scaffold5262 | 457                     | GG                              | AA                 | AA               | INTERGENIC      |               |                    |                    |



| SNPs IDs           | Chromosome IDs | Chromosomes  | Physical positions (bp) | CDC Frontier genome (Reference genome) | (Pusa 1103 & HPNB) | (ILWC 46 & LPNB) | Sequence genome | Components of | Gene accession IDs | Putative functions |
|--------------------|----------------|--------------|-------------------------|----------------------------------------|--------------------|------------------|-----------------|---------------|--------------------|--------------------|
| SNP_113578_A_868   | NW_004519405.1 | scaffold5262 | 868                     | CC                                     | TT                 | TT               | INTERGENIC      |               |                    |                    |
| SNP_113579_A_981   | NW_004519405.1 | scaffold5262 | 981                     | AA                                     | GG                 | GG               | INTERGENIC      |               |                    |                    |
| SNP_113580_A_1010  | NW_004519405.1 | scaffold5262 | 1010                    | AA                                     | GG                 | GG               | INTERGENIC      |               |                    |                    |
| SNP_113581_A_1089  | NW_004519405.1 | scaffold5262 | 1089                    | AA                                     | GG                 | GG               | INTERGENIC      |               |                    |                    |
| SNP_113582_A_1152  | NW_004519405.1 | scaffold5262 | 1152                    | TT                                     | CC                 | CC               | INTERGENIC      |               |                    |                    |
| SNP_113583_A_1274  | NW_004519405.1 | scaffold5262 | 1274                    | AA                                     | GG                 | GG               | INTERGENIC      |               |                    |                    |
| SNP_113584_A_1300  | NW_004519405.1 | scaffold5262 | 1300                    | GG                                     | AA                 | AA               | INTERGENIC      |               |                    |                    |
| SNP_113585_A_1326  | NW_004519405.1 | scaffold5262 | 1326                    | AA                                     | CC                 | CC               | INTERGENIC      |               |                    |                    |
| SNP_113586_A_1595  | NW_004519405.1 | scaffold5262 | 1595                    | AA                                     | GG                 | GG               | INTERGENIC      |               |                    |                    |
| SNP_113587_A_4729  | NW_004519405.1 | scaffold5262 | 4729                    | CC                                     | AA                 | AA               | INTERGENIC      |               |                    |                    |
| SNP_113588_A_4776  | NW_004519405.1 | scaffold5262 | 4776                    | TT                                     | AA                 | AA               | INTERGENIC      |               |                    |                    |
| SNP_113589_A_4990  | NW_004519405.1 | scaffold5262 | 4990                    | AA                                     | CC                 | CC               | INTERGENIC      |               |                    |                    |
| SNP_113590_A_25619 | NW_004519406.1 | scaffold5263 | 25619                   | TT                                     | CC                 | CC               | INTERGENIC      |               |                    |                    |
| SNP_113591_A_25627 | NW_004519406.1 | scaffold5263 | 25627                   | GG                                     | CC                 | CC               | INTERGENIC      |               |                    |                    |
| SNP_113592_A_25629 | NW_004519406.1 | scaffold5263 | 25629                   | CC                                     | TT                 | TT               | INTERGENIC      |               |                    |                    |
| SNP_113593_A_25645 | NW_004519406.1 | scaffold5263 | 25645                   | AA                                     | TT                 | TT               | INTERGENIC      |               |                    |                    |
| SNP_113594_A_25667 | NW_004519406.1 | scaffold5263 | 25667                   | CC                                     | TT                 | TT               | INTERGENIC      |               |                    |                    |
| SNP_113595_A_26072 | NW_004519406.1 | scaffold5263 | 26072                   | AA                                     | GG                 | GG               | INTERGENIC      |               |                    |                    |
| SNP_113596_A_26105 | NW_004519406.1 | scaffold5263 | 26105                   | AA                                     | GG                 | GG               | INTERGENIC      |               |                    |                    |
| SNP_113597_A_26421 | NW_004519406.1 | scaffold5263 | 26421                   | AA                                     | GG                 | GG               | INTERGENIC      |               |                    |                    |
| SNP_113598_A_26511 | NW_004519406.1 | scaffold5263 | 26511                   | CC                                     | TT                 | TT               | INTERGENIC      |               |                    |                    |
| SNP_113599_A_26682 | NW_004519406.1 | scaffold5263 | 26682                   | AA                                     | GG                 | GG               | INTERGENIC      |               |                    |                    |

| SNPs IDs           | Chromosome IDs | Chromosomes  | Physical positions (bp) | CDC Frontier (Reference genome) | (Pusa 1103 & HPNB) | (ILWC 46 & LPNB) | Sequence genome | Components of | Gene accession IDs | Putative functions |
|--------------------|----------------|--------------|-------------------------|---------------------------------|--------------------|------------------|-----------------|---------------|--------------------|--------------------|
| SNP_113600_A_26914 | NW_004519406.1 | scaffold5263 | 26914                   | CC                              | TT                 | TT               | INTERGENIC      |               |                    |                    |
| SNP_113601_A_27039 | NW_004519406.1 | scaffold5263 | 27039                   | TT                              | CC                 | CC               | INTERGENIC      |               |                    |                    |
| SNP_113602_A_27401 | NW_004519406.1 | scaffold5263 | 27401                   | AA                              | GG                 | GG               | INTERGENIC      |               |                    |                    |
| SNP_113603_A_27543 | NW_004519406.1 | scaffold5263 | 27543                   | AA                              | TT                 | TT               | INTERGENIC      |               |                    |                    |
| SNP_113604_A_27663 | NW_004519406.1 | scaffold5263 | 27663                   | CC                              | GG                 | GG               | INTERGENIC      |               |                    |                    |
| SNP_113605_A_27873 | NW_004519406.1 | scaffold5263 | 27873                   | AA                              | GG                 | GG               | INTERGENIC      |               |                    |                    |
| SNP_113606_A_311   | NW_004519410.1 | scaffold5269 | 311                     | TT                              | CC                 | CC               | INTERGENIC      |               |                    |                    |
| SNP_113607_A_3913  | NW_004519413.1 | scaffold5272 | 3913                    | TT                              | AA                 | AA               | INTERGENIC      |               |                    |                    |
| SNP_113608_A_3914  | NW_004519413.1 | scaffold5272 | 3914                    | TT                              | CC                 | CC               | INTERGENIC      |               |                    |                    |
| SNP_113609_A_417   | NW_004519416.1 | scaffold5275 | 417                     | AA                              | GG                 | GG               | INTERGENIC      |               |                    |                    |
| SNP_113611_A_437   | NW_004519416.1 | scaffold5275 | 437                     | TT                              | CC                 | CC               | INTERGENIC      |               |                    |                    |
| SNP_113612_A_466   | NW_004519416.1 | scaffold5275 | 466                     | CC                              | AA                 | AA               | INTERGENIC      |               |                    |                    |
| SNP_113613_A_467   | NW_004519416.1 | scaffold5275 | 467                     | AA                              | GG                 | GG               | INTERGENIC      |               |                    |                    |
| SNP_113614_A_490   | NW_004519416.1 | scaffold5275 | 490                     | AA                              | CC                 | CC               | INTERGENIC      |               |                    |                    |
| SNP_113615_A_517   | NW_004519416.1 | scaffold5275 | 517                     | CC                              | AA                 | AA               | INTERGENIC      |               |                    |                    |
| SNP_113616_A_679   | NW_004519416.1 | scaffold5275 | 679                     | AA                              | GG                 | GG               | INTERGENIC      |               |                    |                    |
| SNP_113617_A_691   | NW_004519416.1 | scaffold5275 | 691                     | AA                              | GG                 | GG               | INTERGENIC      |               |                    |                    |
| SNP_113618_A_962   | NW_004519416.1 | scaffold5275 | 962                     | AA                              | GG                 | GG               | INTERGENIC      |               |                    |                    |
| SNP_113619_A_973   | NW_004519416.1 | scaffold5275 | 973                     | TT                              | AA                 | AA               | INTERGENIC      |               |                    |                    |
| SNP_113620_A_982   | NW_004519416.1 | scaffold5275 | 982                     | CC                              | AA                 | AA               | INTERGENIC      |               |                    |                    |
| SNP_113621_A_1022  | NW_004519416.1 | scaffold5275 | 1022                    | TT                              | CC                 | CC               | INTERGENIC      |               |                    |                    |
| SNP_113622_A_1068  | NW_004519416.1 | scaffold5275 | 1068                    | TT                              | CC                 | CC               | INTERGENIC      |               |                    |                    |

| SNPs IDs          | Chromosome IDs | Chromosomes  | Physical positions (bp) | CDC Frontier (Reference genome) | (Pusa 1103 & HPNB) | (ILWC 46 & LPNB) | Sequence genome | Components of | Gene accession IDs | Putative functions |
|-------------------|----------------|--------------|-------------------------|---------------------------------|--------------------|------------------|-----------------|---------------|--------------------|--------------------|
| SNP_113623_A_1182 | NW_004519416.1 | scaffold5275 | 1182                    | GG                              | TT                 | TT               | INTERGENIC      |               |                    |                    |
| SNP_113624_A_762  | NW_004519421.1 | scaffold5280 | 762                     | TT                              | CC                 | CC               | INTERGENIC      |               |                    |                    |
| SNP_113625_A_775  | NW_004519421.1 | scaffold5280 | 775                     | TT                              | AA                 | AA               | INTERGENIC      |               |                    |                    |
| SNP_113626_A_5735 | NW_004519421.1 | scaffold5280 | 5735                    | CC                              | AA                 | AA               | INTERGENIC      |               |                    |                    |
| SNP_113627_A_5988 | NW_004519421.1 | scaffold5280 | 5988                    | AA                              | GG                 | GG               | INTERGENIC      |               |                    |                    |
| SNP_113628_A_6007 | NW_004519421.1 | scaffold5280 | 6007                    | TT                              | CC                 | CC               | INTERGENIC      |               |                    |                    |
| SNP_113629_A_6290 | NW_004519421.1 | scaffold5280 | 6290                    | TT                              | AA                 | AA               | INTERGENIC      |               |                    |                    |
| SNP_113630_A_6373 | NW_004519421.1 | scaffold5280 | 6373                    | AA                              | GG                 | GG               | INTERGENIC      |               |                    |                    |
| SNP_113631_A_6425 | NW_004519421.1 | scaffold5280 | 6425                    | GG                              | CC                 | CC               | INTERGENIC      |               |                    |                    |
| SNP_113632_A_6473 | NW_004519421.1 | scaffold5280 | 6473                    | CC                              | TT                 | TT               | INTERGENIC      |               |                    |                    |
| SNP_113633_A_6602 | NW_004519421.1 | scaffold5280 | 6602                    | TT                              | CC                 | CC               | INTERGENIC      |               |                    |                    |
| SNP_113634_A_6628 | NW_004519421.1 | scaffold5280 | 6628                    | TT                              | CC                 | CC               | INTERGENIC      |               |                    |                    |
| SNP_113635_A_6664 | NW_004519421.1 | scaffold5280 | 6664                    | GG                              | AA                 | AA               | INTERGENIC      |               |                    |                    |
| SNP_113636_A_6677 | NW_004519421.1 | scaffold5280 | 6677                    | CC                              | TT                 | TT               | INTERGENIC      |               |                    |                    |
| SNP_113637_A_6679 | NW_004519421.1 | scaffold5280 | 6679                    | CC                              | GG                 | GG               | INTERGENIC      |               |                    |                    |
| SNP_113638_A_6704 | NW_004519421.1 | scaffold5280 | 6704                    | AA                              | TT                 | TT               | INTERGENIC      |               |                    |                    |
| SNP_113639_A_6746 | NW_004519421.1 | scaffold5280 | 6746                    | AA                              | GG                 | GG               | INTERGENIC      |               |                    |                    |
| SNP_113640_A_6816 | NW_004519421.1 | scaffold5280 | 6816                    | TT                              | AA                 | AA               | INTERGENIC      |               |                    |                    |
| SNP_113641_A_6857 | NW_004519421.1 | scaffold5280 | 6857                    | CC                              | GG                 | GG               | INTERGENIC      |               |                    |                    |
| SNP_113642_A_7015 | NW_004519421.1 | scaffold5280 | 7015                    | TT                              | CC                 | CC               | INTERGENIC      |               |                    |                    |
| SNP_113643_A_7032 | NW_004519421.1 | scaffold5280 | 7032                    | AA                              | CC                 | CC               | INTERGENIC      |               |                    |                    |
| SNP_113644_A_101  | NW_004519424.1 | scaffold5285 | 101                     | TT                              | AA                 | AA               | INTERGENIC      |               |                    |                    |

| SNPs IDs           | Chromosome IDs | Chromosomes  | Physical positions (bp) | CDC Frontier genome (Reference genome) | (Pusa 1103 & HPNB) | (ILWC 46 & LPNB) | Sequence genome | Components of | Gene accession IDs                    | Putative functions |
|--------------------|----------------|--------------|-------------------------|----------------------------------------|--------------------|------------------|-----------------|---------------|---------------------------------------|--------------------|
| SNP_113645_A_4788  | NW_004519428.1 | scaffold5291 | 4788                    | GG                                     | AA                 | AA               | INTERGENIC      |               |                                       |                    |
| SNP_113646_A_6767  | NW_004519433.1 | scaffold5297 | 6767                    | TT                                     | CC                 | CC               | INTERGENIC      |               |                                       |                    |
| SNP_113647_A_7613  | NW_004519433.1 | scaffold5297 | 7613                    | CC                                     | TT                 | TT               | INTERGENIC      |               |                                       |                    |
| SNP_113649_A_7864  | NW_004519433.1 | scaffold5297 | 7864                    | CC                                     | AA                 | AA               | INTERGENIC      |               |                                       |                    |
| SNP_113650_A_7968  | NW_004519433.1 | scaffold5297 | 7968                    | AA                                     | GG                 | GG               | INTERGENIC      |               |                                       |                    |
| SNP_113651_A_71    | NW_004519436.1 | scaffold5302 | 71                      | TT                                     | GG                 | GG               | INTERGENIC      |               |                                       |                    |
| SNP_113652_A_74    | NW_004519436.1 | scaffold5302 | 74                      | AA                                     | GG                 | GG               | INTERGENIC      |               |                                       |                    |
| SNP_113653_A_424   | NW_004519436.1 | scaffold5302 | 424                     | CC                                     | TT                 | TT               | INTERGENIC      |               |                                       |                    |
| SNP_113654_A_857   | NW_004519439.1 | scaffold5305 | 857                     | CC                                     | TT                 | TT               | INTERGENIC      |               |                                       |                    |
| SNP_113655_A_7043  | NW_004519440.1 | scaffold5306 | 7043                    | TT                                     | CC                 | CC               | INTERGENIC      |               |                                       |                    |
| SNP_113656_A_7055  | NW_004519440.1 | scaffold5306 | 7055                    | TT                                     | CC                 | CC               | INTERGENIC      |               |                                       |                    |
| SNP_113657_A_7073  | NW_004519440.1 | scaffold5306 | 7073                    | CC                                     | GG                 | GG               | INTERGENIC      |               |                                       |                    |
| SNP_113658_A_7348  | NW_004519440.1 | scaffold5306 | 7348                    | GG                                     | AA                 | AA               | INTERGENIC      |               |                                       |                    |
| SNP_113660_A_11044 | NW_004519440.1 | scaffold5306 | 11044                   | TT                                     | CC                 | CC               | DRR             | 101492084     | E3 ubiquitin-protein ligase RLIM-like |                    |
| SNP_113661_A_11047 | NW_004519440.1 | scaffold5306 | 11047                   | AA                                     | CC                 | CC               | DRR             | 101492084     | E3 ubiquitin-protein ligase RLIM-like |                    |
| SNP_113662_A_11228 | NW_004519440.1 | scaffold5306 | 11228                   | CC                                     | AA                 | AA               | DRR             | 101492084     | E3 ubiquitin-protein ligase RLIM-like |                    |
| SNP_113663_A_14668 | NW_004519440.1 | scaffold5306 | 14668                   | CC                                     | TT                 | TT               | INTERGENIC      |               |                                       |                    |
| SNP_113664_A_14966 | NW_004519440.1 | scaffold5306 | 14966                   | GG                                     | AA                 | AA               | INTERGENIC      |               |                                       |                    |
| SNP_113665_A_15002 | NW_004519440.1 | scaffold5306 | 15002                   | GG                                     | AA                 | AA               | INTERGENIC      |               |                                       |                    |
| SNP_113666_A_15062 | NW_004519440.1 | scaffold5306 | 15062                   | AA                                     | GG                 | GG               | INTERGENIC      |               |                                       |                    |
| SNP_113667_A_15101 | NW_004519440.1 | scaffold5306 | 15101                   | GG                                     | AA                 | AA               | INTERGENIC      |               |                                       |                    |
| SNP_113668_A_15106 | NW_004519440.1 | scaffold5306 | 15106                   | TT                                     | CC                 | CC               | INTERGENIC      |               |                                       |                    |

| SNPs IDs          | Chromosome IDs | Chromosomes  | Physical positions (bp) | CDC Frontier (Reference genome) | (Pusa 1103 & HPNB) | (ILWC 46 & LPNB) | Sequence genome | Components of | Gene accession IDs | Putative functions |
|-------------------|----------------|--------------|-------------------------|---------------------------------|--------------------|------------------|-----------------|---------------|--------------------|--------------------|
| SNP_113669_A_2002 | NW_004519441.1 | scaffold5307 | 2002                    | AA                              | GG                 | GG               | INTERGENIC      |               |                    |                    |
| SNP_113670_A_2062 | NW_004519441.1 | scaffold5307 | 2062                    | AA                              | GG                 | GG               | INTERGENIC      |               |                    |                    |
| SNP_113671_A_2441 | NW_004519441.1 | scaffold5307 | 2441                    | CC                              | GG                 | GG               | INTERGENIC      |               |                    |                    |
| SNP_113672_A_2448 | NW_004519441.1 | scaffold5307 | 2448                    | GG                              | CC                 | CC               | INTERGENIC      |               |                    |                    |
| SNP_113673_A_2618 | NW_004519441.1 | scaffold5307 | 2618                    | CC                              | GG                 | GG               | INTERGENIC      |               |                    |                    |
| SNP_113674_A_3931 | NW_004519441.1 | scaffold5307 | 3931                    | GG                              | CC                 | CC               | INTERGENIC      |               |                    |                    |
| SNP_113675_A_4459 | NW_004519441.1 | scaffold5307 | 4459                    | AA                              | GG                 | GG               | INTERGENIC      |               |                    |                    |
| SNP_113676_A_4949 | NW_004519441.1 | scaffold5307 | 4949                    | AA                              | CC                 | CC               | INTERGENIC      |               |                    |                    |
| SNP_113677_A_4966 | NW_004519441.1 | scaffold5307 | 4966                    | AA                              | GG                 | GG               | INTERGENIC      |               |                    |                    |
| SNP_113678_A_4968 | NW_004519441.1 | scaffold5307 | 4968                    | TT                              | AA                 | AA               | INTERGENIC      |               |                    |                    |
| SNP_113679_A_5241 | NW_004519441.1 | scaffold5307 | 5241                    | TT                              | CC                 | CC               | INTERGENIC      |               |                    |                    |
| SNP_113680_A_5302 | NW_004519441.1 | scaffold5307 | 5302                    | AA                              | GG                 | GG               | INTERGENIC      |               |                    |                    |
| SNP_113681_A_5321 | NW_004519441.1 | scaffold5307 | 5321                    | CC                              | TT                 | TT               | INTERGENIC      |               |                    |                    |
| SNP_113682_A_5381 | NW_004519441.1 | scaffold5307 | 5381                    | AA                              | GG                 | GG               | INTERGENIC      |               |                    |                    |
| SNP_113683_A_6219 | NW_004519441.1 | scaffold5307 | 6219                    | AA                              | GG                 | GG               | INTERGENIC      |               |                    |                    |
| SNP_113684_A_6233 | NW_004519441.1 | scaffold5307 | 6233                    | TT                              | CC                 | CC               | INTERGENIC      |               |                    |                    |
| SNP_113685_A_6550 | NW_004519441.1 | scaffold5307 | 6550                    | GG                              | AA                 | AA               | INTERGENIC      |               |                    |                    |
| SNP_113686_A_6575 | NW_004519441.1 | scaffold5307 | 6575                    | AA                              | GG                 | GG               | INTERGENIC      |               |                    |                    |
| SNP_113687_A_6616 | NW_004519441.1 | scaffold5307 | 6616                    | AA                              | TT                 | TT               | INTERGENIC      |               |                    |                    |
| SNP_113688_A_396  | NW_004519446.1 | scaffold5313 | 396                     | AA                              | GG                 | GG               | INTERGENIC      |               |                    |                    |
| SNP_113689_A_637  | NW_004519446.1 | scaffold5313 | 637                     | AA                              | GG                 | GG               | INTERGENIC      |               |                    |                    |
| SNP_113690_A_644  | NW_004519446.1 | scaffold5313 | 644                     | TT                              | AA                 | AA               | INTERGENIC      |               |                    |                    |

| SNPs IDs           | Chromosome IDs | Chromosomes  | Physical positions (bp) | CDC Frontier (Reference genome) | (Pusa 1103 & HPNB) | (ILWC 46 & LPNB) | Sequence genome | Components of | Gene accession IDs | Putative functions |
|--------------------|----------------|--------------|-------------------------|---------------------------------|--------------------|------------------|-----------------|---------------|--------------------|--------------------|
| SNP_113691_A_22096 | NW_004519448.1 | scaffold5321 | 22096                   | TT                              | CC                 | CC               | INTERGENIC      |               |                    |                    |
| SNP_113693_A_43908 | NW_004519448.1 | scaffold5321 | 43908                   | TT                              | GG                 | GG               | INTERGENIC      |               |                    |                    |
| SNP_113694_A_425   | NW_004519452.1 | scaffold5326 | 425                     | AA                              | GG                 | GG               | INTERGENIC      |               |                    |                    |
| SNP_113695_A_466   | NW_004519452.1 | scaffold5326 | 466                     | CC                              | TT                 | TT               | INTERGENIC      |               |                    |                    |
| SNP_113696_A_484   | NW_004519452.1 | scaffold5326 | 484                     | TT                              | AA                 | AA               | INTERGENIC      |               |                    |                    |
| SNP_113697_A_500   | NW_004519452.1 | scaffold5326 | 500                     | CC                              | TT                 | TT               | INTERGENIC      |               |                    |                    |
| SNP_113698_A_810   | NW_004519456.1 | scaffold5331 | 810                     | TT                              | AA                 | AA               | INTERGENIC      |               |                    |                    |
| SNP_113699_A_1152  | NW_004519457.1 | scaffold5333 | 1152                    | TT                              | AA                 | AA               | INTERGENIC      |               |                    |                    |
| SNP_113700_A_259   | NW_004519459.1 | scaffold5335 | 259                     | CC                              | AA                 | AA               | INTERGENIC      |               |                    |                    |
| SNP_113701_A_614   | NW_004519460.1 | scaffold5338 | 614                     | CC                              | TT                 | TT               | INTERGENIC      |               |                    |                    |
| SNP_113702_A_663   | NW_004519460.1 | scaffold5338 | 663                     | GG                              | TT                 | TT               | INTERGENIC      |               |                    |                    |
| SNP_113703_A_772   | NW_004519460.1 | scaffold5338 | 772                     | CC                              | TT                 | TT               | INTERGENIC      |               |                    |                    |
| SNP_113704_A_839   | NW_004519460.1 | scaffold5338 | 839                     | GG                              | TT                 | TT               | INTERGENIC      |               |                    |                    |
| SNP_113705_A_985   | NW_004519461.1 | scaffold5340 | 985                     | TT                              | CC                 | CC               | INTERGENIC      |               |                    |                    |
| SNP_113706_A_1285  | NW_004519461.1 | scaffold5340 | 1285                    | AA                              | GG                 | GG               | INTERGENIC      |               |                    |                    |
| SNP_113708_A_1314  | NW_004519461.1 | scaffold5340 | 1314                    | TT                              | CC                 | CC               | INTERGENIC      |               |                    |                    |
| SNP_113710_A_1357  | NW_004519461.1 | scaffold5340 | 1357                    | CC                              | TT                 | TT               | INTERGENIC      |               |                    |                    |
| SNP_113711_A_1366  | NW_004519461.1 | scaffold5340 | 1366                    | CC                              | TT                 | TT               | INTERGENIC      |               |                    |                    |
| SNP_113712_A_1384  | NW_004519461.1 | scaffold5340 | 1384                    | AA                              | GG                 | GG               | INTERGENIC      |               |                    |                    |
| SNP_113713_A_1414  | NW_004519461.1 | scaffold5340 | 1414                    | TT                              | CC                 | CC               | INTERGENIC      |               |                    |                    |
| SNP_113714_A_1420  | NW_004519461.1 | scaffold5340 | 1420                    | GG                              | AA                 | AA               | INTERGENIC      |               |                    |                    |
| SNP_113715_A_1424  | NW_004519461.1 | scaffold5340 | 1424                    | GG                              | CC                 | CC               | INTERGENIC      |               |                    |                    |

| SNPs IDs           | Chromosome IDs | Chromosomes  | Physical positions (bp) | CDC Frontier (Reference genome) | (Pusa 1103 & HPNB) | (ILWC 46 & LPNB) | Sequence genome | Components of | Gene accession IDs | Putative functions |
|--------------------|----------------|--------------|-------------------------|---------------------------------|--------------------|------------------|-----------------|---------------|--------------------|--------------------|
| SNP_113716_A_1438  | NW_004519461.1 | scaffold5340 | 1438                    | AA                              | GG                 | GG               | INTERGENIC      |               |                    |                    |
| SNP_113717_A_90    | NW_004519470.1 | scaffold5360 | 90                      | TT                              | GG                 | GG               | INTERGENIC      |               |                    |                    |
| SNP_113718_A_272   | NW_004519470.1 | scaffold5360 | 272                     | TT                              | GG                 | GG               | INTERGENIC      |               |                    |                    |
| SNP_113719_A_280   | NW_004519470.1 | scaffold5360 | 280                     | CC                              | AA                 | AA               | INTERGENIC      |               |                    |                    |
| SNP_113721_A_676   | NW_004519470.1 | scaffold5360 | 676                     | CC                              | AA                 | AA               | INTERGENIC      |               |                    |                    |
| SNP_113722_A_724   | NW_004519470.1 | scaffold5360 | 724                     | AA                              | GG                 | GG               | INTERGENIC      |               |                    |                    |
| SNP_113723_A_739   | NW_004519470.1 | scaffold5360 | 739                     | CC                              | TT                 | TT               | INTERGENIC      |               |                    |                    |
| SNP_113724_A_751   | NW_004519471.1 | scaffold5361 | 751                     | AA                              | TT                 | TT               | INTERGENIC      |               |                    |                    |
| SNP_113725_A_122   | NW_004519479.1 | scaffold5375 | 122                     | AA                              | TT                 | TT               | INTERGENIC      |               |                    |                    |
| SNP_113726_A_5897  | NW_004519481.1 | scaffold5377 | 5897                    | AA                              | GG                 | GG               | INTERGENIC      |               |                    |                    |
| SNP_113727_A_5926  | NW_004519481.1 | scaffold5377 | 5926                    | CC                              | TT                 | TT               | INTERGENIC      |               |                    |                    |
| SNP_113728_A_5933  | NW_004519481.1 | scaffold5377 | 5933                    | TT                              | CC                 | CC               | INTERGENIC      |               |                    |                    |
| SNP_113729_A_6181  | NW_004519481.1 | scaffold5377 | 6181                    | GG                              | AA                 | AA               | INTERGENIC      |               |                    |                    |
| SNP_113730_A_6193  | NW_004519481.1 | scaffold5377 | 6193                    | AA                              | TT                 | TT               | INTERGENIC      |               |                    |                    |
| SNP_113731_A_6224  | NW_004519481.1 | scaffold5377 | 6224                    | GG                              | TT                 | TT               | INTERGENIC      |               |                    |                    |
| SNP_113732_A_6230  | NW_004519481.1 | scaffold5377 | 6230                    | AA                              | CC                 | CC               | INTERGENIC      |               |                    |                    |
| SNP_113733_A_560   | NW_004519486.1 | scaffold5385 | 560                     | CC                              | TT                 | TT               | INTERGENIC      |               |                    |                    |
| SNP_113734_A_570   | NW_004519486.1 | scaffold5385 | 570                     | TT                              | CC                 | CC               | INTERGENIC      |               |                    |                    |
| SNP_113735_A_1061  | NW_004519499.1 | scaffold5409 | 1061                    | AA                              | GG                 | GG               | INTERGENIC      |               |                    |                    |
| SNP_113737_A_399   | NW_004519500.1 | scaffold5412 | 399                     | TT                              | AA                 | AA               | INTERGENIC      |               |                    |                    |
| SNP_113738_A_405   | NW_004519500.1 | scaffold5412 | 405                     | AA                              | GG                 | GG               | INTERGENIC      |               |                    |                    |
| SNP_113739_A_10630 | NW_004519501.1 | scaffold5413 | 10630                   | CC                              | AA                 | AA               | INTERGENIC      |               |                    |                    |

| SNPs IDs          | Chromosome IDs | Chromosomes  | Physical positions (bp) | CDC Frontier (Reference genome) | (Pusa 1103 & HPNB) | (ILWC 46 & LPNB) | Sequence genome | Components of | Gene accession IDs | Putative functions |
|-------------------|----------------|--------------|-------------------------|---------------------------------|--------------------|------------------|-----------------|---------------|--------------------|--------------------|
| SNP_113740_A_661  | NW_004519503.1 | scaffold5416 | 661                     | CC                              | TT                 | TT               | INTERGENIC      |               |                    |                    |
| SNP_113741_A_688  | NW_004519503.1 | scaffold5416 | 688                     | TT                              | AA                 | AA               | INTERGENIC      |               |                    |                    |
| SNP_113742_A_706  | NW_004519503.1 | scaffold5416 | 706                     | CC                              | AA                 | AA               | INTERGENIC      |               |                    |                    |
| SNP_113743_A_710  | NW_004519503.1 | scaffold5416 | 710                     | AA                              | CC                 | CC               | INTERGENIC      |               |                    |                    |
| SNP_113744_A_724  | NW_004519503.1 | scaffold5416 | 724                     | GG                              | AA                 | AA               | INTERGENIC      |               |                    |                    |
| SNP_113745_A_760  | NW_004519503.1 | scaffold5416 | 760                     | AA                              | GG                 | GG               | INTERGENIC      |               |                    |                    |
| SNP_113746_A_766  | NW_004519503.1 | scaffold5416 | 766                     | TT                              | CC                 | CC               | INTERGENIC      |               |                    |                    |
| SNP_113747_A_785  | NW_004519503.1 | scaffold5416 | 785                     | AA                              | CC                 | CC               | INTERGENIC      |               |                    |                    |
| SNP_113748_A_1764 | NW_004519504.1 | scaffold5418 | 1764                    | TT                              | CC                 | CC               | INTERGENIC      |               |                    |                    |
| SNP_113749_A_1785 | NW_004519504.1 | scaffold5418 | 1785                    | AA                              | GG                 | GG               | INTERGENIC      |               |                    |                    |
| SNP_113750_A_1820 | NW_004519504.1 | scaffold5418 | 1820                    | TT                              | GG                 | GG               | INTERGENIC      |               |                    |                    |
| SNP_113751_A_347  | NW_004519505.1 | scaffold5420 | 347                     | AA                              | TT                 | TT               | INTERGENIC      |               |                    |                    |
| SNP_113752_A_490  | NW_004519505.1 | scaffold5420 | 490                     | AA                              | TT                 | TT               | INTERGENIC      |               |                    |                    |
| SNP_113753_A_608  | NW_004519505.1 | scaffold5420 | 608                     | AA                              | TT                 | TT               | INTERGENIC      |               |                    |                    |
| SNP_113754_A_660  | NW_004519505.1 | scaffold5420 | 660                     | TT                              | AA                 | AA               | INTERGENIC      |               |                    |                    |
| SNP_113756_A_705  | NW_004519505.1 | scaffold5420 | 705                     | AA                              | GG                 | GG               | INTERGENIC      |               |                    |                    |
| SNP_113757_A_867  | NW_004519505.1 | scaffold5420 | 867                     | TT                              | CC                 | CC               | INTERGENIC      |               |                    |                    |
| SNP_113758_A_918  | NW_004519505.1 | scaffold5420 | 918                     | AA                              | GG                 | GG               | INTERGENIC      |               |                    |                    |
| SNP_113759_A_960  | NW_004519505.1 | scaffold5420 | 960                     | GG                              | TT                 | TT               | INTERGENIC      |               |                    |                    |
| SNP_113760_A_1013 | NW_004519505.1 | scaffold5420 | 1013                    | TT                              | AA                 | AA               | INTERGENIC      |               |                    |                    |
| SNP_113761_A_1332 | NW_004519505.1 | scaffold5420 | 1332                    | TT                              | GG                 | GG               | INTERGENIC      |               |                    |                    |
| SNP_113762_A_1345 | NW_004519505.1 | scaffold5420 | 1345                    | TT                              | CC                 | CC               | INTERGENIC      |               |                    |                    |



| SNPs IDs          | Chromosome IDs | Chromosomes  | Physical positions (bp) | CDC Frontier (Reference genome) | (Pusa 1103 & HPNB) | (ILWC 46 & LPNB) | Sequence genome | Components of | Gene accession IDs | Putative functions |
|-------------------|----------------|--------------|-------------------------|---------------------------------|--------------------|------------------|-----------------|---------------|--------------------|--------------------|
| SNP_113763_A_1431 | NW_004519505.1 | scaffold5420 | 1431                    | TT                              | GG                 | GG               | INTERGENIC      |               |                    |                    |
| SNP_113764_A_235  | NW_004519511.1 | scaffold5434 | 235                     | GG                              | TT                 | TT               | INTERGENIC      |               |                    |                    |
| SNP_113765_A_252  | NW_004519511.1 | scaffold5434 | 252                     | TT                              | CC                 | CC               | INTERGENIC      |               |                    |                    |
| SNP_113766_A_288  | NW_004519511.1 | scaffold5434 | 288                     | AA                              | CC                 | CC               | INTERGENIC      |               |                    |                    |
| SNP_113767_A_570  | NW_004519511.1 | scaffold5434 | 570                     | TT                              | GG                 | GG               | INTERGENIC      |               |                    |                    |
| SNP_113768_A_818  | NW_004519513.1 | scaffold5438 | 818                     | GG                              | TT                 | TT               | INTERGENIC      |               |                    |                    |
| SNP_113769_A_1185 | NW_004519513.1 | scaffold5438 | 1185                    | AA                              | TT                 | TT               | INTERGENIC      |               |                    |                    |
| SNP_113770_A_1238 | NW_004519513.1 | scaffold5438 | 1238                    | GG                              | AA                 | AA               | INTERGENIC      |               |                    |                    |
| SNP_113771_A_1276 | NW_004519513.1 | scaffold5438 | 1276                    | TT                              | CC                 | CC               | INTERGENIC      |               |                    |                    |
| SNP_113772_A_2128 | NW_004519520.1 | scaffold5449 | 2128                    | AA                              | TT                 | TT               | INTERGENIC      |               |                    |                    |
| SNP_113773_A_2199 | NW_004519520.1 | scaffold5449 | 2199                    | TT                              | GG                 | GG               | INTERGENIC      |               |                    |                    |
| SNP_113774_A_2219 | NW_004519520.1 | scaffold5449 | 2219                    | GG                              | AA                 | AA               | INTERGENIC      |               |                    |                    |
| SNP_113775_A_2265 | NW_004519520.1 | scaffold5449 | 2265                    | AA                              | GG                 | GG               | INTERGENIC      |               |                    |                    |
| SNP_113776_A_499  | NW_004519523.1 | scaffold5452 | 499                     | TT                              | AA                 | AA               | INTERGENIC      |               |                    |                    |
| SNP_113777_A_593  | NW_004519523.1 | scaffold5452 | 593                     | AA                              | GG                 | GG               | INTERGENIC      |               |                    |                    |
| SNP_113778_A_626  | NW_004519523.1 | scaffold5452 | 626                     | GG                              | AA                 | AA               | INTERGENIC      |               |                    |                    |
| SNP_113779_A_864  | NW_004519523.1 | scaffold5452 | 864                     | CC                              | TT                 | TT               | INTERGENIC      |               |                    |                    |
| SNP_113780_A_880  | NW_004519523.1 | scaffold5452 | 880                     | AA                              | GG                 | GG               | INTERGENIC      |               |                    |                    |
| SNP_113781_A_907  | NW_004519523.1 | scaffold5452 | 907                     | AA                              | GG                 | GG               | INTERGENIC      |               |                    |                    |
| SNP_113782_A_1017 | NW_004519523.1 | scaffold5452 | 1017                    | AA                              | GG                 | GG               | INTERGENIC      |               |                    |                    |
| SNP_113783_A_1040 | NW_004519523.1 | scaffold5452 | 1040                    | TT                              | AA                 | AA               | INTERGENIC      |               |                    |                    |
| SNP_113784_A_1134 | NW_004519523.1 | scaffold5452 | 1134                    | GG                              | AA                 | AA               | INTERGENIC      |               |                    |                    |

| SNPs IDs          | Chromosome IDs | Chromosomes  | Physical positions (bp) | CDC Frontier (Reference genome) | (Pusa 1103 & HPNB) | (ILWC 46 & LPNB) | Sequence genome | Components of | Gene accession IDs | Putative functions |
|-------------------|----------------|--------------|-------------------------|---------------------------------|--------------------|------------------|-----------------|---------------|--------------------|--------------------|
| SNP_113785_A_1191 | NW_004519523.1 | scaffold5452 | 1191                    | GG                              | AA                 | AA               | INTERGENIC      |               |                    |                    |
| SNP_113786_A_1325 | NW_004519523.1 | scaffold5452 | 1325                    | CC                              | TT                 | TT               | INTERGENIC      |               |                    |                    |
| SNP_113787_A_1475 | NW_004519523.1 | scaffold5452 | 1475                    | TT                              | CC                 | CC               | INTERGENIC      |               |                    |                    |
| SNP_113788_A_1593 | NW_004519523.1 | scaffold5452 | 1593                    | AA                              | CC                 | CC               | INTERGENIC      |               |                    |                    |
| SNP_113789_A_5541 | NW_004519533.1 | scaffold5465 | 5541                    | CC                              | GG                 | GG               | INTERGENIC      |               |                    |                    |
| SNP_113790_A_479  | NW_004519535.1 | scaffold5472 | 479                     | CC                              | TT                 | TT               | INTERGENIC      |               |                    |                    |
| SNP_113791_A_658  | NW_004519535.1 | scaffold5472 | 658                     | AA                              | GG                 | GG               | INTERGENIC      |               |                    |                    |
| SNP_113792_A_673  | NW_004519535.1 | scaffold5472 | 673                     | AA                              | CC                 | CC               | INTERGENIC      |               |                    |                    |
| SNP_113793_A_684  | NW_004519535.1 | scaffold5472 | 684                     | GG                              | TT                 | TT               | INTERGENIC      |               |                    |                    |
| SNP_113794_A_825  | NW_004519535.1 | scaffold5472 | 825                     | TT                              | CC                 | CC               | INTERGENIC      |               |                    |                    |
| SNP_113795_A_1022 | NW_004519535.1 | scaffold5472 | 1022                    | GG                              | AA                 | AA               | INTERGENIC      |               |                    |                    |
| SNP_113796_A_981  | NW_004519544.1 | scaffold5484 | 981                     | TT                              | AA                 | AA               | INTERGENIC      |               |                    |                    |
| SNP_113797_A_1086 | NW_004519544.1 | scaffold5484 | 1086                    | AA                              | GG                 | GG               | INTERGENIC      |               |                    |                    |
| SNP_113799_A_1179 | NW_004519544.1 | scaffold5484 | 1179                    | TT                              | AA                 | AA               | INTERGENIC      |               |                    |                    |
| SNP_113800_A_1222 | NW_004519544.1 | scaffold5484 | 1222                    | AA                              | TT                 | TT               | INTERGENIC      |               |                    |                    |
| SNP_113801_A_1247 | NW_004519544.1 | scaffold5484 | 1247                    | AA                              | GG                 | GG               | INTERGENIC      |               |                    |                    |
| SNP_113802_A_1262 | NW_004519544.1 | scaffold5484 | 1262                    | TT                              | CC                 | CC               | INTERGENIC      |               |                    |                    |
| SNP_113803_A_3782 | NW_004519544.1 | scaffold5484 | 3782                    | TT                              | GG                 | GG               | INTERGENIC      |               |                    |                    |
| SNP_113804_A_465  | NW_004519553.1 | scaffold5497 | 465                     | GG                              | AA                 | AA               | INTERGENIC      |               |                    |                    |
| SNP_113805_A_590  | NW_004519553.1 | scaffold5497 | 590                     | CC                              | TT                 | TT               | INTERGENIC      |               |                    |                    |
| SNP_113806_A_933  | NW_004519553.1 | scaffold5497 | 933                     | AA                              | GG                 | GG               | INTERGENIC      |               |                    |                    |
| SNP_113807_A_948  | NW_004519553.1 | scaffold5497 | 948                     | CC                              | TT                 | TT               | INTERGENIC      |               |                    |                    |

| SNPs IDs           | Chromosome IDs | Chromosomes  | Physical positions (bp) | CDC Frontier (Reference genome) | (Pusa 1103 & HPNB) | (ILWC 46 & LPNB) | Sequence genome | Components of | Gene accession IDs | Putative functions |
|--------------------|----------------|--------------|-------------------------|---------------------------------|--------------------|------------------|-----------------|---------------|--------------------|--------------------|
| SNP_113809_A_1410  | NW_004519558.1 | scaffold5504 | 1410                    | TT                              | CC                 | CC               | INTERGENIC      |               |                    |                    |
| SNP_113810_A_1421  | NW_004519558.1 | scaffold5504 | 1421                    | GG                              | CC                 | CC               | INTERGENIC      |               |                    |                    |
| SNP_113811_A_1448  | NW_004519558.1 | scaffold5504 | 1448                    | CC                              | TT                 | TT               | INTERGENIC      |               |                    |                    |
| SNP_113812_A_1482  | NW_004519558.1 | scaffold5504 | 1482                    | TT                              | AA                 | AA               | INTERGENIC      |               |                    |                    |
| SNP_113813_A_672   | NW_004519561.1 | scaffold5509 | 672                     | AA                              | GG                 | GG               | INTERGENIC      |               |                    |                    |
| SNP_113814_A_1272  | NW_004519561.1 | scaffold5509 | 1272                    | GG                              | TT                 | TT               | INTERGENIC      |               |                    |                    |
| SNP_113815_A_12855 | NW_004519562.1 | scaffold5511 | 12855                   | GG                              | TT                 | TT               | INTERGENIC      |               |                    |                    |
| SNP_113816_A_541   | NW_004519565.1 | scaffold5514 | 541                     | CC                              | TT                 | TT               | INTERGENIC      |               |                    |                    |
| SNP_113817_A_3590  | NW_004519565.1 | scaffold5514 | 3590                    | AA                              | CC                 | CC               | INTERGENIC      |               |                    |                    |
| SNP_113818_A_3843  | NW_004519565.1 | scaffold5514 | 3843                    | AA                              | CC                 | CC               | INTERGENIC      |               |                    |                    |
| SNP_113819_A_3865  | NW_004519565.1 | scaffold5514 | 3865                    | AA                              | GG                 | GG               | INTERGENIC      |               |                    |                    |
| SNP_113820_A_3897  | NW_004519565.1 | scaffold5514 | 3897                    | TT                              | CC                 | CC               | INTERGENIC      |               |                    |                    |
| SNP_113822_A_3928  | NW_004519565.1 | scaffold5514 | 3928                    | TT                              | AA                 | AA               | INTERGENIC      |               |                    |                    |
| SNP_113823_A_3966  | NW_004519565.1 | scaffold5514 | 3966                    | CC                              | TT                 | TT               | INTERGENIC      |               |                    |                    |
| SNP_113824_A_3975  | NW_004519565.1 | scaffold5514 | 3975                    | AA                              | CC                 | CC               | INTERGENIC      |               |                    |                    |
| SNP_113825_A_4026  | NW_004519565.1 | scaffold5514 | 4026                    | CC                              | TT                 | TT               | INTERGENIC      |               |                    |                    |
| SNP_113826_A_5924  | NW_004519565.1 | scaffold5514 | 5924                    | AA                              | GG                 | GG               | INTERGENIC      |               |                    |                    |
| SNP_113827_A_595   | NW_004519571.1 | scaffold5527 | 595                     | TT                              | AA                 | AA               | INTERGENIC      |               |                    |                    |
| SNP_113828_A_471   | NW_004519572.1 | scaffold5528 | 471                     | GG                              | TT                 | TT               | INTERGENIC      |               |                    |                    |
| SNP_113829_A_64    | NW_004519579.1 | scaffold5538 | 64                      | TT                              | CC                 | CC               | INTERGENIC      |               |                    |                    |
| SNP_113830_A_97    | NW_004519579.1 | scaffold5538 | 97                      | TT                              | CC                 | CC               | INTERGENIC      |               |                    |                    |
| SNP_113831_A_102   | NW_004519579.1 | scaffold5538 | 102                     | AA                              | GG                 | GG               | INTERGENIC      |               |                    |                    |

| SNPs IDs          | Chromosome IDs | Chromosomes  | Physical positions (bp) | CDC Frontier (Reference genome) | (Pusa 1103 & HPNB) | (ILWC 46 & LPNB) | Sequence genome | Components of | Gene accession IDs | Putative functions |
|-------------------|----------------|--------------|-------------------------|---------------------------------|--------------------|------------------|-----------------|---------------|--------------------|--------------------|
| SNP_113832_A_178  | NW_004519579.1 | scaffold5538 | 178                     | GG                              | AA                 | AA               | INTERGENIC      |               |                    |                    |
| SNP_113833_A_224  | NW_004519579.1 | scaffold5538 | 224                     | TT                              | AA                 | AA               | INTERGENIC      |               |                    |                    |
| SNP_113834_A_232  | NW_004519579.1 | scaffold5538 | 232                     | AA                              | TT                 | TT               | INTERGENIC      |               |                    |                    |
| SNP_113835_A_1111 | NW_004519579.1 | scaffold5538 | 1111                    | AA                              | GG                 | GG               | INTERGENIC      |               |                    |                    |
| SNP_113836_A_1112 | NW_004519579.1 | scaffold5538 | 1112                    | AA                              | TT                 | TT               | INTERGENIC      |               |                    |                    |
| SNP_113837_A_1163 | NW_004519579.1 | scaffold5538 | 1163                    | GG                              | AA                 | AA               | INTERGENIC      |               |                    |                    |
| SNP_113838_A_1206 | NW_004519579.1 | scaffold5538 | 1206                    | AA                              | TT                 | TT               | INTERGENIC      |               |                    |                    |
| SNP_113839_A_1319 | NW_004519579.1 | scaffold5538 | 1319                    | AA                              | TT                 | TT               | INTERGENIC      |               |                    |                    |
| SNP_113840_A_1994 | NW_004519579.1 | scaffold5538 | 1994                    | AA                              | TT                 | TT               | INTERGENIC      |               |                    |                    |
| SNP_113841_A_35   | NW_004519580.1 | scaffold5541 | 35                      | CC                              | TT                 | TT               | INTERGENIC      |               |                    |                    |
| SNP_113843_A_131  | NW_004519580.1 | scaffold5541 | 131                     | TT                              | CC                 | CC               | INTERGENIC      |               |                    |                    |
| SNP_113844_A_142  | NW_004519580.1 | scaffold5541 | 142                     | GG                              | CC                 | CC               | INTERGENIC      |               |                    |                    |
| SNP_113845_A_153  | NW_004519580.1 | scaffold5541 | 153                     | GG                              | TT                 | TT               | INTERGENIC      |               |                    |                    |
| SNP_113846_A_388  | NW_004519580.1 | scaffold5541 | 388                     | GG                              | TT                 | TT               | INTERGENIC      |               |                    |                    |
| SNP_113847_A_723  | NW_004519580.1 | scaffold5541 | 723                     | GG                              | TT                 | TT               | INTERGENIC      |               |                    |                    |
| SNP_113848_A_729  | NW_004519580.1 | scaffold5541 | 729                     | AA                              | GG                 | GG               | INTERGENIC      |               |                    |                    |
| SNP_113849_A_760  | NW_004519580.1 | scaffold5541 | 760                     | GG                              | AA                 | AA               | INTERGENIC      |               |                    |                    |
| SNP_113850_A_778  | NW_004519580.1 | scaffold5541 | 778                     | TT                              | AA                 | AA               | INTERGENIC      |               |                    |                    |
| SNP_113851_A_792  | NW_004519580.1 | scaffold5541 | 792                     | AA                              | GG                 | GG               | INTERGENIC      |               |                    |                    |
| SNP_113852_A_807  | NW_004519580.1 | scaffold5541 | 807                     | AA                              | TT                 | TT               | INTERGENIC      |               |                    |                    |
| SNP_113853_A_819  | NW_004519580.1 | scaffold5541 | 819                     | TT                              | CC                 | CC               | INTERGENIC      |               |                    |                    |
| SNP_113854_A_875  | NW_004519580.1 | scaffold5541 | 875                     | TT                              | CC                 | CC               | INTERGENIC      |               |                    |                    |

| SNPs IDs          | Chromosome IDs | Chromosomes  | Physical positions (bp) | CDC Frontier (Reference genome) | (Pusa 1103 & HPNB) | (ILWC 46 & LPNB) | Sequence genome | Components of | Gene accession IDs | Putative functions |
|-------------------|----------------|--------------|-------------------------|---------------------------------|--------------------|------------------|-----------------|---------------|--------------------|--------------------|
| SNP_113855_A_913  | NW_004519580.1 | scaffold5541 | 913                     | GG                              | AA                 | AA               | INTERGENIC      |               |                    |                    |
| SNP_113856_A_986  | NW_004519580.1 | scaffold5541 | 986                     | CC                              | AA                 | AA               | INTERGENIC      |               |                    |                    |
| SNP_113857_A_1051 | NW_004519580.1 | scaffold5541 | 1051                    | AA                              | GG                 | GG               | INTERGENIC      |               |                    |                    |
| SNP_113858_A_1070 | NW_004519580.1 | scaffold5541 | 1070                    | GG                              | TT                 | TT               | INTERGENIC      |               |                    |                    |
| SNP_113859_A_1228 | NW_004519580.1 | scaffold5541 | 1228                    | AA                              | TT                 | TT               | INTERGENIC      |               |                    |                    |
| SNP_113860_A_1332 | NW_004519580.1 | scaffold5541 | 1332                    | AA                              | CC                 | CC               | INTERGENIC      |               |                    |                    |
| SNP_113861_A_64   | NW_004519586.1 | scaffold5549 | 64                      | TT                              | CC                 | CC               | INTERGENIC      |               |                    |                    |
| SNP_113862_A_111  | NW_004519586.1 | scaffold5549 | 111                     | GG                              | AA                 | AA               | INTERGENIC      |               |                    |                    |
| SNP_113863_A_466  | NW_004519586.1 | scaffold5549 | 466                     | GG                              | TT                 | TT               | INTERGENIC      |               |                    |                    |
| SNP_113864_A_503  | NW_004519586.1 | scaffold5549 | 503                     | AA                              | TT                 | TT               | INTERGENIC      |               |                    |                    |
| SNP_113866_A_116  | NW_004519587.1 | scaffold5551 | 116                     | AA                              | CC                 | CC               | INTERGENIC      |               |                    |                    |
| SNP_113867_A_144  | NW_004519587.1 | scaffold5551 | 144                     | AA                              | GG                 | GG               | INTERGENIC      |               |                    |                    |
| SNP_113868_A_301  | NW_004519587.1 | scaffold5551 | 301                     | GG                              | AA                 | AA               | INTERGENIC      |               |                    |                    |
| SNP_113869_A_307  | NW_004519587.1 | scaffold5551 | 307                     | CC                              | GG                 | GG               | INTERGENIC      |               |                    |                    |
| SNP_113870_A_357  | NW_004519587.1 | scaffold5551 | 357                     | AA                              | CC                 | CC               | INTERGENIC      |               |                    |                    |
| SNP_113871_A_368  | NW_004519587.1 | scaffold5551 | 368                     | AA                              | GG                 | GG               | INTERGENIC      |               |                    |                    |
| SNP_113872_A_376  | NW_004519587.1 | scaffold5551 | 376                     | AA                              | CC                 | CC               | INTERGENIC      |               |                    |                    |
| SNP_113873_A_410  | NW_004519587.1 | scaffold5551 | 410                     | CC                              | TT                 | TT               | INTERGENIC      |               |                    |                    |
| SNP_113874_A_507  | NW_004519587.1 | scaffold5551 | 507                     | TT                              | CC                 | CC               | INTERGENIC      |               |                    |                    |
| SNP_113875_A_510  | NW_004519587.1 | scaffold5551 | 510                     | GG                              | CC                 | CC               | INTERGENIC      |               |                    |                    |
| SNP_113876_A_512  | NW_004519587.1 | scaffold5551 | 512                     | CC                              | AA                 | AA               | INTERGENIC      |               |                    |                    |
| SNP_113878_A_670  | NW_004519587.1 | scaffold5551 | 670                     | CC                              | TT                 | TT               | INTERGENIC      |               |                    |                    |

| SNPs IDs           | Chromosome IDs | Chromosomes  | Physical positions (bp) | CDC Frontier (Reference genome) | (Pusa 1103 & HPNB) | (ILWC 46 & LPNB) | Sequence genome | Components of | Gene accession IDs | Putative functions |
|--------------------|----------------|--------------|-------------------------|---------------------------------|--------------------|------------------|-----------------|---------------|--------------------|--------------------|
| SNP_113879_A_721   | NW_004519587.1 | scaffold5551 | 721                     | CC                              | GG                 | GG               | INTERGENIC      |               |                    |                    |
| SNP_113881_A_843   | NW_004519587.1 | scaffold5551 | 843                     | AA                              | GG                 | GG               | INTERGENIC      |               |                    |                    |
| SNP_113882_A_194   | NW_004519589.1 | scaffold5553 | 194                     | GG                              | AA                 | AA               | INTERGENIC      |               |                    |                    |
| SNP_113883_A_232   | NW_004519589.1 | scaffold5553 | 232                     | TT                              | CC                 | CC               | INTERGENIC      |               |                    |                    |
| SNP_113884_A_413   | NW_004519589.1 | scaffold5553 | 413                     | AA                              | CC                 | CC               | INTERGENIC      |               |                    |                    |
| SNP_113885_A_457   | NW_004519589.1 | scaffold5553 | 457                     | GG                              | TT                 | TT               | INTERGENIC      |               |                    |                    |
| SNP_113886_A_467   | NW_004519589.1 | scaffold5553 | 467                     | GG                              | AA                 | AA               | INTERGENIC      |               |                    |                    |
| SNP_113887_A_521   | NW_004519589.1 | scaffold5553 | 521                     | TT                              | CC                 | CC               | INTERGENIC      |               |                    |                    |
| SNP_113888_A_571   | NW_004519589.1 | scaffold5553 | 571                     | TT                              | GG                 | GG               | INTERGENIC      |               |                    |                    |
| SNP_113889_A_582   | NW_004519589.1 | scaffold5553 | 582                     | AA                              | TT                 | TT               | INTERGENIC      |               |                    |                    |
| SNP_113890_A_619   | NW_004519589.1 | scaffold5553 | 619                     | AA                              | TT                 | TT               | INTERGENIC      |               |                    |                    |
| SNP_113891_A_630   | NW_004519589.1 | scaffold5553 | 630                     | CC                              | TT                 | TT               | INTERGENIC      |               |                    |                    |
| SNP_113892_A_694   | NW_004519589.1 | scaffold5553 | 694                     | AA                              | GG                 | GG               | INTERGENIC      |               |                    |                    |
| SNP_113893_A_709   | NW_004519589.1 | scaffold5553 | 709                     | TT                              | GG                 | GG               | INTERGENIC      |               |                    |                    |
| SNP_113894_A_720   | NW_004519589.1 | scaffold5553 | 720                     | AA                              | TT                 | TT               | INTERGENIC      |               |                    |                    |
| SNP_113895_A_1988  | NW_004519589.1 | scaffold5553 | 1988                    | AA                              | GG                 | GG               | INTERGENIC      |               |                    |                    |
| SNP_113896_A_6838  | NW_004519589.1 | scaffold5553 | 6838                    | GG                              | TT                 | TT               | INTERGENIC      |               |                    |                    |
| SNP_113897_A_10880 | NW_004519589.1 | scaffold5553 | 10880                   | AA                              | CC                 | CC               | INTERGENIC      |               |                    |                    |
| SNP_113898_A_11711 | NW_004519589.1 | scaffold5553 | 11711                   | TT                              | AA                 | AA               | INTERGENIC      |               |                    |                    |
| SNP_113899_A_11719 | NW_004519589.1 | scaffold5553 | 11719                   | CC                              | TT                 | TT               | INTERGENIC      |               |                    |                    |
| SNP_113900_A_12385 | NW_004519589.1 | scaffold5553 | 12385                   | CC                              | TT                 | TT               | INTERGENIC      |               |                    |                    |
| SNP_113901_A_439   | NW_004519591.1 | scaffold5556 | 439                     | GG                              | AA                 | AA               | INTERGENIC      |               |                    |                    |

| SNPs IDs          | Chromosome IDs | Chromosomes  | Physical positions (bp) | CDC Frontier (Reference genome) | (Pusa 1103 & HPNB) | (ILWC 46 & LPNB) | Sequence genome | Components of | Gene accession IDs | Putative functions |
|-------------------|----------------|--------------|-------------------------|---------------------------------|--------------------|------------------|-----------------|---------------|--------------------|--------------------|
| SNP_113902_A_482  | NW_004519591.1 | scaffold5556 | 482                     | AA                              | CC                 | CC               | INTERGENIC      |               |                    |                    |
| SNP_113903_A_891  | NW_004519599.1 | scaffold5569 | 891                     | AA                              | CC                 | CC               | INTERGENIC      |               |                    |                    |
| SNP_113904_A_471  | NW_004519601.1 | scaffold5574 | 471                     | GG                              | AA                 | AA               | INTERGENIC      |               |                    |                    |
| SNP_113905_A_938  | NW_004519605.1 | scaffold5580 | 938                     | TT                              | GG                 | GG               | INTERGENIC      |               |                    |                    |
| SNP_113906_A_1062 | NW_004519605.1 | scaffold5580 | 1062                    | AA                              | GG                 | GG               | INTERGENIC      |               |                    |                    |
| SNP_113908_A_1403 | NW_004519605.1 | scaffold5580 | 1403                    | GG                              | AA                 | AA               | INTERGENIC      |               |                    |                    |
| SNP_113909_A_330  | NW_004519615.1 | scaffold5593 | 330                     | AA                              | CC                 | CC               | INTERGENIC      |               |                    |                    |
| SNP_113910_A_338  | NW_004519615.1 | scaffold5593 | 338                     | GG                              | CC                 | CC               | INTERGENIC      |               |                    |                    |
| SNP_113911_A_340  | NW_004519615.1 | scaffold5593 | 340                     | TT                              | CC                 | CC               | INTERGENIC      |               |                    |                    |
| SNP_113912_A_418  | NW_004519615.1 | scaffold5593 | 418                     | AA                              | GG                 | GG               | INTERGENIC      |               |                    |                    |
| SNP_113913_A_477  | NW_004519615.1 | scaffold5593 | 477                     | TT                              | CC                 | CC               | INTERGENIC      |               |                    |                    |
| SNP_113914_A_482  | NW_004519615.1 | scaffold5593 | 482                     | CC                              | TT                 | TT               | INTERGENIC      |               |                    |                    |
| SNP_113915_A_513  | NW_004519615.1 | scaffold5593 | 513                     | GG                              | CC                 | CC               | INTERGENIC      |               |                    |                    |
| SNP_113916_A_527  | NW_004519615.1 | scaffold5593 | 527                     | CC                              | TT                 | TT               | INTERGENIC      |               |                    |                    |
| SNP_113917_A_529  | NW_004519615.1 | scaffold5593 | 529                     | GG                              | AA                 | AA               | INTERGENIC      |               |                    |                    |
| SNP_113918_A_543  | NW_004519615.1 | scaffold5593 | 543                     | TT                              | CC                 | CC               | INTERGENIC      |               |                    |                    |
| SNP_113919_A_706  | NW_004519615.1 | scaffold5593 | 706                     | CC                              | TT                 | TT               | INTERGENIC      |               |                    |                    |
| SNP_113920_A_358  | NW_004519617.1 | scaffold5596 | 358                     | AA                              | GG                 | GG               | INTERGENIC      |               |                    |                    |
| SNP_113921_A_3081 | NW_004519618.1 | scaffold5598 | 3081                    | TT                              | CC                 | CC               | INTERGENIC      |               |                    |                    |
| SNP_113922_A_3147 | NW_004519618.1 | scaffold5598 | 3147                    | TT                              | GG                 | GG               | INTERGENIC      |               |                    |                    |
| SNP_113923_A_3177 | NW_004519618.1 | scaffold5598 | 3177                    | AA                              | TT                 | TT               | INTERGENIC      |               |                    |                    |
| SNP_113924_A_3254 | NW_004519618.1 | scaffold5598 | 3254                    | AA                              | TT                 | TT               | INTERGENIC      |               |                    |                    |

| SNPs IDs          | Chromosome IDs | Chromosomes  | Physical positions (bp) | CDC Frontier (Reference genome) | (Pusa 1103 & HPNB) | (ILWC 46 & LPNB) | Sequence genome | Components of | Gene accession IDs | Putative functions |
|-------------------|----------------|--------------|-------------------------|---------------------------------|--------------------|------------------|-----------------|---------------|--------------------|--------------------|
| SNP_113925_A_3276 | NW_004519618.1 | scaffold5598 | 3276                    | TT                              | GG                 | GG               | INTERGENIC      |               |                    |                    |
| SNP_113926_A_3492 | NW_004519618.1 | scaffold5598 | 3492                    | TT                              | CC                 | CC               | INTERGENIC      |               |                    |                    |
| SNP_113927_A_3773 | NW_004519618.1 | scaffold5598 | 3773                    | AA                              | CC                 | CC               | INTERGENIC      |               |                    |                    |
| SNP_113928_A_4564 | NW_004519618.1 | scaffold5598 | 4564                    | AA                              | TT                 | TT               | INTERGENIC      |               |                    |                    |
| SNP_113929_A_4582 | NW_004519618.1 | scaffold5598 | 4582                    | TT                              | CC                 | CC               | INTERGENIC      |               |                    |                    |
| SNP_113930_A_4892 | NW_004519618.1 | scaffold5598 | 4892                    | CC                              | GG                 | GG               | INTERGENIC      |               |                    |                    |
| SNP_113931_A_5005 | NW_004519618.1 | scaffold5598 | 5005                    | TT                              | CC                 | CC               | INTERGENIC      |               |                    |                    |
| SNP_113932_A_5065 | NW_004519618.1 | scaffold5598 | 5065                    | GG                              | CC                 | CC               | INTERGENIC      |               |                    |                    |
| SNP_113933_A_5097 | NW_004519618.1 | scaffold5598 | 5097                    | AA                              | GG                 | GG               | INTERGENIC      |               |                    |                    |
| SNP_113934_A_5142 | NW_004519618.1 | scaffold5598 | 5142                    | CC                              | TT                 | TT               | INTERGENIC      |               |                    |                    |
| SNP_113935_A_5189 | NW_004519618.1 | scaffold5598 | 5189                    | AA                              | CC                 | CC               | INTERGENIC      |               |                    |                    |
| SNP_113936_A_5240 | NW_004519618.1 | scaffold5598 | 5240                    | GG                              | CC                 | CC               | INTERGENIC      |               |                    |                    |
| SNP_113937_A_5305 | NW_004519618.1 | scaffold5598 | 5305                    | GG                              | AA                 | AA               | INTERGENIC      |               |                    |                    |
| SNP_113938_A_5316 | NW_004519618.1 | scaffold5598 | 5316                    | CC                              | AA                 | AA               | INTERGENIC      |               |                    |                    |
| SNP_113939_A_5411 | NW_004519618.1 | scaffold5598 | 5411                    | CC                              | AA                 | AA               | INTERGENIC      |               |                    |                    |
| SNP_113940_A_5499 | NW_004519618.1 | scaffold5598 | 5499                    | CC                              | AA                 | AA               | INTERGENIC      |               |                    |                    |
| SNP_113941_A_5920 | NW_004519618.1 | scaffold5598 | 5920                    | CC                              | TT                 | TT               | INTERGENIC      |               |                    |                    |
| SNP_113942_A_6165 | NW_004519618.1 | scaffold5598 | 6165                    | CC                              | TT                 | TT               | INTERGENIC      |               |                    |                    |
| SNP_113943_A_6433 | NW_004519618.1 | scaffold5598 | 6433                    | AA                              | CC                 | CC               | INTERGENIC      |               |                    |                    |
| SNP_113944_A_6518 | NW_004519618.1 | scaffold5598 | 6518                    | CC                              | TT                 | TT               | INTERGENIC      |               |                    |                    |
| SNP_113945_A_6645 | NW_004519618.1 | scaffold5598 | 6645                    | AA                              | GG                 | GG               | INTERGENIC      |               |                    |                    |
| SNP_113946_A_6739 | NW_004519618.1 | scaffold5598 | 6739                    | TT                              | CC                 | CC               | INTERGENIC      |               |                    |                    |



| SNPs IDs           | Chromosome IDs | Chromosomes  | Physical positions (bp) | CDC Frontier (Reference genome) | (Pusa 1103 & HPNB) | (ILWC 46 & LPNB) | Sequence genome | Components of | Gene accession IDs | Putative functions |
|--------------------|----------------|--------------|-------------------------|---------------------------------|--------------------|------------------|-----------------|---------------|--------------------|--------------------|
| SNP_113947_A_7281  | NW_004519618.1 | scaffold5598 | 7281                    | GG                              | AA                 | AA               | INTERGENIC      |               |                    |                    |
| SNP_113948_A_7383  | NW_004519618.1 | scaffold5598 | 7383                    | GG                              | AA                 | AA               | INTERGENIC      |               |                    |                    |
| SNP_113949_A_7404  | NW_004519618.1 | scaffold5598 | 7404                    | AA                              | CC                 | CC               | INTERGENIC      |               |                    |                    |
| SNP_113950_A_7421  | NW_004519618.1 | scaffold5598 | 7421                    | TT                              | AA                 | AA               | INTERGENIC      |               |                    |                    |
| SNP_113951_A_7524  | NW_004519618.1 | scaffold5598 | 7524                    | GG                              | AA                 | AA               | INTERGENIC      |               |                    |                    |
| SNP_113952_A_7530  | NW_004519618.1 | scaffold5598 | 7530                    | AA                              | CC                 | CC               | INTERGENIC      |               |                    |                    |
| SNP_113953_A_7887  | NW_004519618.1 | scaffold5598 | 7887                    | GG                              | CC                 | CC               | INTERGENIC      |               |                    |                    |
| SNP_113954_A_7987  | NW_004519618.1 | scaffold5598 | 7987                    | GG                              | CC                 | CC               | INTERGENIC      |               |                    |                    |
| SNP_113955_A_8291  | NW_004519618.1 | scaffold5598 | 8291                    | GG                              | AA                 | AA               | INTERGENIC      |               |                    |                    |
| SNP_113956_A_8809  | NW_004519618.1 | scaffold5598 | 8809                    | TT                              | AA                 | AA               | INTERGENIC      |               |                    |                    |
| SNP_113957_A_8893  | NW_004519618.1 | scaffold5598 | 8893                    | CC                              | AA                 | AA               | INTERGENIC      |               |                    |                    |
| SNP_113958_A_9450  | NW_004519618.1 | scaffold5598 | 9450                    | TT                              | AA                 | AA               | INTERGENIC      |               |                    |                    |
| SNP_113960_A_11178 | NW_004519618.1 | scaffold5598 | 11178                   | AA                              | GG                 | GG               | INTERGENIC      |               |                    |                    |
| SNP_113961_A_11909 | NW_004519618.1 | scaffold5598 | 11909                   | AA                              | GG                 | GG               | INTERGENIC      |               |                    |                    |
| SNP_113962_A_13174 | NW_004519618.1 | scaffold5598 | 13174                   | AA                              | GG                 | GG               | INTERGENIC      |               |                    |                    |
| SNP_113963_A_13189 | NW_004519618.1 | scaffold5598 | 13189                   | TT                              | AA                 | AA               | INTERGENIC      |               |                    |                    |
| SNP_113964_A_13207 | NW_004519618.1 | scaffold5598 | 13207                   | TT                              | GG                 | GG               | INTERGENIC      |               |                    |                    |
| SNP_113965_A_13222 | NW_004519618.1 | scaffold5598 | 13222                   | AA                              | GG                 | GG               | INTERGENIC      |               |                    |                    |
| SNP_113966_A_13377 | NW_004519618.1 | scaffold5598 | 13377                   | CC                              | GG                 | GG               | INTERGENIC      |               |                    |                    |
| SNP_113968_A_13730 | NW_004519618.1 | scaffold5598 | 13730                   | CC                              | TT                 | TT               | INTERGENIC      |               |                    |                    |
| SNP_113969_A_13798 | NW_004519618.1 | scaffold5598 | 13798                   | GG                              | AA                 | AA               | INTERGENIC      |               |                    |                    |
| SNP_113970_A_13814 | NW_004519618.1 | scaffold5598 | 13814                   | GG                              | AA                 | AA               | INTERGENIC      |               |                    |                    |

| SNPs IDs          | Chromosome IDs | Chromosomes  | Physical positions (bp) | CDC Frontier (Reference genome) | (Pusa 1103 & HPNB) | (ILWC 46 & LPNB) | Sequence Components of genome | Gene accession IDs | Putative functions           |
|-------------------|----------------|--------------|-------------------------|---------------------------------|--------------------|------------------|-------------------------------|--------------------|------------------------------|
| SNP_113972_A_5322 | NW_004519619.1 | scaffold5599 | 5322                    | GG                              | AA                 | AA               | INTERGENIC                    |                    |                              |
| SNP_113973_A_5497 | NW_004519619.1 | scaffold5599 | 5497                    | AA                              | TT                 | TT               | INTERGENIC                    |                    |                              |
| SNP_113974_A_5636 | NW_004519619.1 | scaffold5599 | 5636                    | CC                              | GG                 | GG               | INTERGENIC                    |                    |                              |
| SNP_113975_A_635  | NW_004519620.1 | scaffold5600 | 635                     | CC                              | TT                 | TT               | DRR                           | 101496319          | Unknown function             |
| SNP_113976_A_935  | NW_004519620.1 | scaffold5600 | 935                     | AA                              | TT                 | TT               | SYNONYMOUS_CODING             | 101496319          | Unknown function             |
| SNP_113977_A_1029 | NW_004519620.1 | scaffold5600 | 1029                    | AA                              | CC                 | CC               | URR                           | 101496319          | Unknown function             |
| SNP_113978_A_1030 | NW_004519620.1 | scaffold5600 | 1030                    | TT                              | AA                 | AA               | URR                           | 101496319          | Unknown function             |
| SNP_113979_A_4140 | NW_004519622.1 | scaffold5602 | 4140                    | AA                              | GG                 | GG               | NON_SYNONYMOUS_CODING         | 101496646          | uncharacterized LOC101496646 |
| SNP_113981_A_481  | NW_004519625.1 | scaffold5606 | 481                     | CC                              | TT                 | TT               | INTERGENIC                    |                    |                              |
| SNP_113982_A_321  | NW_004519631.1 | scaffold5614 | 321                     | AA                              | GG                 | GG               | INTERGENIC                    |                    |                              |
| SNP_113983_A_905  | NW_004519631.1 | scaffold5614 | 905                     | GG                              | CC                 | CC               | INTERGENIC                    |                    |                              |
| SNP_113984_A_1147 | NW_004519631.1 | scaffold5614 | 1147                    | TT                              | AA                 | AA               | INTERGENIC                    |                    |                              |
| SNP_113985_A_3432 | NW_004519631.1 | scaffold5614 | 3432                    | GG                              | AA                 | AA               | INTERGENIC                    |                    |                              |
| SNP_113986_A_3931 | NW_004519631.1 | scaffold5614 | 3931                    | AA                              | TT                 | TT               | INTERGENIC                    |                    |                              |
| SNP_113988_A_4164 | NW_004519631.1 | scaffold5614 | 4164                    | TT                              | AA                 | AA               | INTERGENIC                    |                    |                              |
| SNP_113989_A_4170 | NW_004519631.1 | scaffold5614 | 4170                    | AA                              | TT                 | TT               | INTERGENIC                    |                    |                              |
| SNP_113990_A_5150 | NW_004519631.1 | scaffold5614 | 5150                    | GG                              | AA                 | AA               | INTERGENIC                    |                    |                              |
| SNP_113991_A_5494 | NW_004519631.1 | scaffold5614 | 5494                    | TT                              | AA                 | AA               | INTERGENIC                    |                    |                              |
| SNP_113992_A_5626 | NW_004519631.1 | scaffold5614 | 5626                    | GG                              | CC                 | CC               | INTERGENIC                    |                    |                              |
| SNP_113993_A_989  | NW_004519634.1 | scaffold5617 | 989                     | TT                              | CC                 | CC               | INTERGENIC                    |                    |                              |
| SNP_113994_A_998  | NW_004519634.1 | scaffold5617 | 998                     | AA                              | GG                 | GG               | INTERGENIC                    |                    |                              |
| SNP_113995_A_1091 | NW_004519634.1 | scaffold5617 | 1091                    | GG                              | TT                 | TT               | INTERGENIC                    |                    |                              |

| SNPs IDs          | Chromosome IDs | Chromosomes  | Physical positions (bp) | CDC Frontier (Reference genome) | (Pusa 1103 & HPNB) | (ILWC 46 & LPNB) | Sequence genome | Components of | Gene accession IDs | Putative functions |
|-------------------|----------------|--------------|-------------------------|---------------------------------|--------------------|------------------|-----------------|---------------|--------------------|--------------------|
| SNP_113996_A_1344 | NW_004519634.1 | scaffold5617 | 1344                    | AA                              | CC                 | CC               | INTERGENIC      |               |                    |                    |
| SNP_113997_A_1365 | NW_004519634.1 | scaffold5617 | 1365                    | TT                              | CC                 | CC               | INTERGENIC      |               |                    |                    |
| SNP_113998_A_1398 | NW_004519634.1 | scaffold5617 | 1398                    | TT                              | CC                 | CC               | INTERGENIC      |               |                    |                    |
| SNP_113999_A_1434 | NW_004519634.1 | scaffold5617 | 1434                    | AA                              | GG                 | GG               | INTERGENIC      |               |                    |                    |
| SNP_114000_A_1456 | NW_004519634.1 | scaffold5617 | 1456                    | TT                              | GG                 | GG               | INTERGENIC      |               |                    |                    |
| SNP_114001_A_1462 | NW_004519634.1 | scaffold5617 | 1462                    | TT                              | AA                 | AA               | INTERGENIC      |               |                    |                    |
| SNP_114002_A_1467 | NW_004519634.1 | scaffold5617 | 1467                    | TT                              | AA                 | AA               | INTERGENIC      |               |                    |                    |
| SNP_114003_A_1485 | NW_004519634.1 | scaffold5617 | 1485                    | TT                              | CC                 | CC               | INTERGENIC      |               |                    |                    |
| SNP_114005_A_72   | NW_004519635.1 | scaffold5619 | 72                      | TT                              | CC                 | CC               | INTERGENIC      |               |                    |                    |
| SNP_114006_A_463  | NW_004519635.1 | scaffold5619 | 463                     | TT                              | CC                 | CC               | INTERGENIC      |               |                    |                    |
| SNP_114007_A_493  | NW_004519635.1 | scaffold5619 | 493                     | AA                              | CC                 | CC               | INTERGENIC      |               |                    |                    |
| SNP_114008_A_555  | NW_004519635.1 | scaffold5619 | 555                     | GG                              | CC                 | CC               | INTERGENIC      |               |                    |                    |
| SNP_114009_A_658  | NW_004519635.1 | scaffold5619 | 658                     | AA                              | CC                 | CC               | INTERGENIC      |               |                    |                    |
| SNP_114010_A_1210 | NW_004519635.1 | scaffold5619 | 1210                    | TT                              | CC                 | CC               | INTERGENIC      |               |                    |                    |
| SNP_114011_A_1359 | NW_004519635.1 | scaffold5619 | 1359                    | TT                              | AA                 | AA               | INTERGENIC      |               |                    |                    |
| SNP_114012_A_69   | NW_004519638.1 | scaffold5627 | 69                      | TT                              | GG                 | GG               | INTERGENIC      |               |                    |                    |
| SNP_114013_A_80   | NW_004519638.1 | scaffold5627 | 80                      | CC                              | GG                 | GG               | INTERGENIC      |               |                    |                    |
| SNP_114014_A_113  | NW_004519638.1 | scaffold5627 | 113                     | TT                              | CC                 | CC               | INTERGENIC      |               |                    |                    |
| SNP_114015_A_118  | NW_004519638.1 | scaffold5627 | 118                     | TT                              | CC                 | CC               | INTERGENIC      |               |                    |                    |
| SNP_114016_A_164  | NW_004519638.1 | scaffold5627 | 164                     | AA                              | GG                 | GG               | INTERGENIC      |               |                    |                    |
| SNP_114017_A_375  | NW_004519638.1 | scaffold5627 | 375                     | AA                              | GG                 | GG               | INTERGENIC      |               |                    |                    |
| SNP_114018_A_4631 | NW_004519638.1 | scaffold5627 | 4631                    | GG                              | AA                 | AA               | INTERGENIC      |               |                    |                    |

| SNPs IDs           | Chromosome IDs | Chromosomes  | Physical positions (bp) | CDC Frontier (Reference genome) | (Pusa 1103 & HPNB) | (ILWC 46 & LPNB) | Sequence genome | Components of | Gene accession IDs | Putative functions |
|--------------------|----------------|--------------|-------------------------|---------------------------------|--------------------|------------------|-----------------|---------------|--------------------|--------------------|
| SNP_114019_A_4699  | NW_004519638.1 | scaffold5627 | 4699                    | CC                              | AA                 | AA               | INTERGENIC      |               |                    |                    |
| SNP_114020_A_4705  | NW_004519638.1 | scaffold5627 | 4705                    | CC                              | TT                 | TT               | INTERGENIC      |               |                    |                    |
| SNP_114021_A_10362 | NW_004519638.1 | scaffold5627 | 10362                   | GG                              | AA                 | AA               | INTERGENIC      |               |                    |                    |
| SNP_114022_A_1201  | NW_004519641.1 | scaffold5634 | 1201                    | AA                              | TT                 | TT               | INTERGENIC      |               |                    |                    |
| SNP_114023_A_869   | NW_004519649.1 | scaffold5647 | 869                     | TT                              | CC                 | CC               | INTERGENIC      |               |                    |                    |
| SNP_114024_A_872   | NW_004519649.1 | scaffold5647 | 872                     | GG                              | TT                 | TT               | INTERGENIC      |               |                    |                    |
| SNP_114025_A_2774  | NW_004519652.1 | scaffold5650 | 2774                    | CC                              | AA                 | AA               | INTERGENIC      |               |                    |                    |
| SNP_114026_A_2913  | NW_004519652.1 | scaffold5650 | 2913                    | TT                              | GG                 | GG               | INTERGENIC      |               |                    |                    |
| SNP_114027_A_1470  | NW_004519654.1 | scaffold5653 | 1470                    | CC                              | GG                 | GG               | INTERGENIC      |               |                    |                    |
| SNP_114028_A_1528  | NW_004519654.1 | scaffold5653 | 1528                    | AA                              | TT                 | TT               | INTERGENIC      |               |                    |                    |
| SNP_114029_A_1601  | NW_004519654.1 | scaffold5653 | 1601                    | AA                              | CC                 | CC               | INTERGENIC      |               |                    |                    |
| SNP_114030_A_30027 | NW_004519654.1 | scaffold5653 | 30027                   | AA                              | GG                 | GG               | INTERGENIC      |               |                    |                    |
| SNP_114031_A_30305 | NW_004519654.1 | scaffold5653 | 30305                   | TT                              | CC                 | CC               | INTERGENIC      |               |                    |                    |
| SNP_114032_A_30307 | NW_004519654.1 | scaffold5653 | 30307                   | GG                              | AA                 | AA               | INTERGENIC      |               |                    |                    |
| SNP_114033_A_30515 | NW_004519654.1 | scaffold5653 | 30515                   | CC                              | TT                 | TT               | INTERGENIC      |               |                    |                    |
| SNP_114034_A_30546 | NW_004519654.1 | scaffold5653 | 30546                   | TT                              | GG                 | GG               | INTERGENIC      |               |                    |                    |
| SNP_114035_A_30623 | NW_004519654.1 | scaffold5653 | 30623                   | TT                              | GG                 | GG               | INTERGENIC      |               |                    |                    |
| SNP_114036_A_612   | NW_004519657.1 | scaffold5656 | 612                     | GG                              | AA                 | AA               | INTERGENIC      |               |                    |                    |
| SNP_114037_A_807   | NW_004519664.1 | scaffold5666 | 807                     | AA                              | GG                 | GG               | INTERGENIC      |               |                    |                    |
| SNP_114038_A_973   | NW_004519664.1 | scaffold5666 | 973                     | GG                              | AA                 | AA               | INTERGENIC      |               |                    |                    |
| SNP_114039_A_998   | NW_004519664.1 | scaffold5666 | 998                     | TT                              | CC                 | CC               | INTERGENIC      |               |                    |                    |
| SNP_114040_A_1089  | NW_004519664.1 | scaffold5666 | 1089                    | TT                              | CC                 | CC               | INTERGENIC      |               |                    |                    |

| SNPs IDs           | Chromosome IDs | Chromosomes  | Physical positions (bp) | CDC Frontier (Reference genome) | (Pusa 1103 & HPNB) | (ILWC 46 & LPNB) | Sequence Components of genome | Gene accession IDs | Putative functions |
|--------------------|----------------|--------------|-------------------------|---------------------------------|--------------------|------------------|-------------------------------|--------------------|--------------------|
| SNP_114041_A_1110  | NW_004519664.1 | scaffold5666 | 1110                    | CC                              | TT                 | TT               | INTERGENIC                    |                    |                    |
| SNP_114042_A_1262  | NW_004519664.1 | scaffold5666 | 1262                    | CC                              | GG                 | GG               | INTERGENIC                    |                    |                    |
| SNP_114043_A_1305  | NW_004519664.1 | scaffold5666 | 1305                    | CC                              | AA                 | AA               | INTERGENIC                    |                    |                    |
| SNP_114044_A_2088  | NW_004519667.1 | scaffold5671 | 2088                    | AA                              | GG                 | GG               | INTERGENIC                    |                    |                    |
| SNP_114045_A_2296  | NW_004519667.1 | scaffold5671 | 2296                    | TT                              | CC                 | CC               | INTERGENIC                    |                    |                    |
| SNP_114046_A_2426  | NW_004519667.1 | scaffold5671 | 2426                    | CC                              | GG                 | GG               | INTERGENIC                    |                    |                    |
| SNP_114047_A_15745 | NW_004519670.1 | scaffold5674 | 15745                   | AA                              | CC                 | CC               | INTRON                        | 101497944          | expansin-A15-like  |
| SNP_114048_A_287   | NW_004519673.1 | scaffold5679 | 287                     | AA                              | GG                 | GG               | INTERGENIC                    |                    |                    |
| SNP_114049_A_350   | NW_004519673.1 | scaffold5679 | 350                     | AA                              | TT                 | TT               | INTERGENIC                    |                    |                    |
| SNP_114050_A_395   | NW_004519673.1 | scaffold5679 | 395                     | CC                              | TT                 | TT               | INTERGENIC                    |                    |                    |
| SNP_114051_A_424   | NW_004519673.1 | scaffold5679 | 424                     | GG                              | CC                 | CC               | INTERGENIC                    |                    |                    |
| SNP_114052_A_441   | NW_004519673.1 | scaffold5679 | 441                     | TT                              | GG                 | GG               | INTERGENIC                    |                    |                    |
| SNP_114053_A_456   | NW_004519673.1 | scaffold5679 | 456                     | CC                              | TT                 | TT               | INTERGENIC                    |                    |                    |
| SNP_114054_A_476   | NW_004519673.1 | scaffold5679 | 476                     | GG                              | AA                 | AA               | INTERGENIC                    |                    |                    |
| SNP_114055_A_525   | NW_004519673.1 | scaffold5679 | 525                     | GG                              | AA                 | AA               | INTERGENIC                    |                    |                    |
| SNP_114056_A_944   | NW_004519678.1 | scaffold5687 | 944                     | CC                              | GG                 | GG               | INTERGENIC                    |                    |                    |
| SNP_114057_A_1480  | NW_004519682.1 | scaffold5694 | 1480                    | TT                              | CC                 | CC               | INTERGENIC                    |                    |                    |
| SNP_114058_A_1774  | NW_004519684.1 | scaffold5698 | 1774                    | GG                              | AA                 | AA               | INTERGENIC                    |                    |                    |
| SNP_114059_A_3245  | NW_004519684.1 | scaffold5698 | 3245                    | GG                              | CC                 | CC               | INTERGENIC                    |                    |                    |
| SNP_114060_A_3904  | NW_004519684.1 | scaffold5698 | 3904                    | AA                              | CC                 | CC               | INTERGENIC                    |                    |                    |
| SNP_114061_A_4034  | NW_004519684.1 | scaffold5698 | 4034                    | CC                              | TT                 | TT               | INTERGENIC                    |                    |                    |
| SNP_114063_A_8079  | NW_004519686.1 | scaffold5700 | 8079                    | GG                              | AA                 | AA               | INTERGENIC                    |                    |                    |

| SNPs IDs           | Chromosome IDs | Chromosomes  | Physical positions (bp) | CDC Frontier (Reference genome) | (Pusa 1103 & HPNB) | (ILWC 46 & LPNB) | Sequence genome | Components of | Gene accession IDs | Putative functions |
|--------------------|----------------|--------------|-------------------------|---------------------------------|--------------------|------------------|-----------------|---------------|--------------------|--------------------|
| SNP_114064_A_8197  | NW_004519686.1 | scaffold5700 | 8197                    | AA                              | CC                 | CC               | INTERGENIC      |               |                    |                    |
| SNP_114065_A_8225  | NW_004519686.1 | scaffold5700 | 8225                    | TT                              | AA                 | AA               | INTERGENIC      |               |                    |                    |
| SNP_114066_A_8236  | NW_004519686.1 | scaffold5700 | 8236                    | GG                              | TT                 | TT               | INTERGENIC      |               |                    |                    |
| SNP_114067_A_103   | NW_004519689.1 | scaffold5703 | 103                     | CC                              | AA                 | AA               | INTERGENIC      |               |                    |                    |
| SNP_114068_A_134   | NW_004519689.1 | scaffold5703 | 134                     | AA                              | GG                 | GG               | INTERGENIC      |               |                    |                    |
| SNP_114069_A_155   | NW_004519689.1 | scaffold5703 | 155                     | TT                              | AA                 | AA               | INTERGENIC      |               |                    |                    |
| SNP_114070_A_54058 | NW_004519693.1 | scaffold5714 | 54058                   | AA                              | TT                 | TT               | INTERGENIC      |               |                    |                    |
| SNP_114071_A_4291  | NW_004519694.1 | scaffold5715 | 4291                    | CC                              | TT                 | TT               | INTERGENIC      |               |                    |                    |
| SNP_114072_A_538   | NW_004519695.1 | scaffold5717 | 538                     | CC                              | AA                 | AA               | INTERGENIC      |               |                    |                    |
| SNP_114073_A_240   | NW_004519699.1 | scaffold5721 | 240                     | GG                              | TT                 | TT               | INTERGENIC      |               |                    |                    |
| SNP_114074_A_260   | NW_004519699.1 | scaffold5721 | 260                     | TT                              | AA                 | AA               | INTERGENIC      |               |                    |                    |
| SNP_114075_A_382   | NW_004519699.1 | scaffold5721 | 382                     | GG                              | AA                 | AA               | INTERGENIC      |               |                    |                    |
| SNP_114076_A_7914  | NW_004519699.1 | scaffold5721 | 7914                    | TT                              | CC                 | CC               | INTERGENIC      |               |                    |                    |
| SNP_114077_A_192   | NW_004519704.1 | scaffold5730 | 192                     | AA                              | GG                 | GG               | INTERGENIC      |               |                    |                    |
| SNP_114078_A_239   | NW_004519704.1 | scaffold5730 | 239                     | GG                              | AA                 | AA               | INTERGENIC      |               |                    |                    |
| SNP_114079_A_240   | NW_004519704.1 | scaffold5730 | 240                     | CC                              | TT                 | TT               | INTERGENIC      |               |                    |                    |
| SNP_114080_A_345   | NW_004519704.1 | scaffold5730 | 345                     | CC                              | TT                 | TT               | INTERGENIC      |               |                    |                    |
| SNP_114081_A_421   | NW_004519704.1 | scaffold5730 | 421                     | GG                              | AA                 | AA               | INTERGENIC      |               |                    |                    |
| SNP_114082_A_425   | NW_004519704.1 | scaffold5730 | 425                     | GG                              | TT                 | TT               | INTERGENIC      |               |                    |                    |
| SNP_114083_A_459   | NW_004519704.1 | scaffold5730 | 459                     | AA                              | GG                 | GG               | INTERGENIC      |               |                    |                    |
| SNP_114084_A_470   | NW_004519704.1 | scaffold5730 | 470                     | TT                              | AA                 | AA               | INTERGENIC      |               |                    |                    |
| SNP_114086_A_711   | NW_004519704.1 | scaffold5730 | 711                     | AA                              | CC                 | CC               | INTERGENIC      |               |                    |                    |

| SNPs IDs          | Chromosome IDs | Chromosomes  | Physical positions (bp) | CDC Frontier (Reference genome) | (Pusa 1103 & HPNB) | (ILWC 46 & LPNB) | Sequence genome | Components of | Gene accession IDs | Putative functions |
|-------------------|----------------|--------------|-------------------------|---------------------------------|--------------------|------------------|-----------------|---------------|--------------------|--------------------|
| SNP_114087_A_722  | NW_004519704.1 | scaffold5730 | 722                     | TT                              | CC                 | CC               | INTERGENIC      |               |                    |                    |
| SNP_114088_A_805  | NW_004519704.1 | scaffold5730 | 805                     | TT                              | AA                 | AA               | INTERGENIC      |               |                    |                    |
| SNP_114089_A_808  | NW_004519704.1 | scaffold5730 | 808                     | CC                              | TT                 | TT               | INTERGENIC      |               |                    |                    |
| SNP_114090_A_914  | NW_004519704.1 | scaffold5730 | 914                     | CC                              | TT                 | TT               | INTERGENIC      |               |                    |                    |
| SNP_114091_A_892  | NW_004519705.1 | scaffold5734 | 892                     | CC                              | TT                 | TT               | INTERGENIC      |               |                    |                    |
| SNP_114092_A_1329 | NW_004519706.1 | scaffold5735 | 1329                    | TT                              | CC                 | CC               | INTERGENIC      |               |                    |                    |
| SNP_114093_A_1236 | NW_004519707.1 | scaffold5737 | 1236                    | TT                              | AA                 | AA               | INTERGENIC      |               |                    |                    |
| SNP_114094_A_542  | NW_004519709.1 | scaffold5739 | 542                     | TT                              | CC                 | CC               | INTERGENIC      |               |                    |                    |
| SNP_114095_A_720  | NW_004519709.1 | scaffold5739 | 720                     | TT                              | CC                 | CC               | INTERGENIC      |               |                    |                    |
| SNP_114096_A_792  | NW_004519709.1 | scaffold5739 | 792                     | CC                              | TT                 | TT               | INTERGENIC      |               |                    |                    |
| SNP_114097_A_866  | NW_004519709.1 | scaffold5739 | 866                     | CC                              | TT                 | TT               | INTERGENIC      |               |                    |                    |
| SNP_114098_A_946  | NW_004519709.1 | scaffold5739 | 946                     | CC                              | AA                 | AA               | INTERGENIC      |               |                    |                    |
| SNP_114099_A_947  | NW_004519709.1 | scaffold5739 | 947                     | TT                              | CC                 | CC               | INTERGENIC      |               |                    |                    |
| SNP_114100_A_954  | NW_004519709.1 | scaffold5739 | 954                     | AA                              | GG                 | GG               | INTERGENIC      |               |                    |                    |
| SNP_114101_A_958  | NW_004519709.1 | scaffold5739 | 958                     | CC                              | TT                 | TT               | INTERGENIC      |               |                    |                    |
| SNP_114102_A_1021 | NW_004519709.1 | scaffold5739 | 1021                    | TT                              | GG                 | GG               | INTERGENIC      |               |                    |                    |
| SNP_114103_A_1075 | NW_004519709.1 | scaffold5739 | 1075                    | AA                              | GG                 | GG               | INTERGENIC      |               |                    |                    |
| SNP_114104_A_1091 | NW_004519709.1 | scaffold5739 | 1091                    | AA                              | CC                 | CC               | INTERGENIC      |               |                    |                    |
| SNP_114105_A_1122 | NW_004519709.1 | scaffold5739 | 1122                    | TT                              | GG                 | GG               | INTERGENIC      |               |                    |                    |
| SNP_114106_A_1124 | NW_004519709.1 | scaffold5739 | 1124                    | CC                              | TT                 | TT               | INTERGENIC      |               |                    |                    |
| SNP_114107_A_1172 | NW_004519709.1 | scaffold5739 | 1172                    | CC                              | TT                 | TT               | INTERGENIC      |               |                    |                    |
| SNP_114108_A_1198 | NW_004519709.1 | scaffold5739 | 1198                    | AA                              | GG                 | GG               | INTERGENIC      |               |                    |                    |

| SNPs IDs           | Chromosome IDs | Chromosomes  | Physical positions (bp) | CDC Frontier (Reference genome) | (Pusa 1103 & HPNB) | (ILWC 46 & LPNB) | Sequence genome | Components of | Gene accession IDs | Putative functions |
|--------------------|----------------|--------------|-------------------------|---------------------------------|--------------------|------------------|-----------------|---------------|--------------------|--------------------|
| SNP_114109_A_1219  | NW_004519709.1 | scaffold5739 | 1219                    | CC                              | TT                 | TT               | INTERGENIC      |               |                    |                    |
| SNP_114110_A_1878  | NW_004519713.1 | scaffold5744 | 1878                    | AA                              | GG                 | GG               | INTERGENIC      |               |                    |                    |
| SNP_114111_A_3297  | NW_004519713.1 | scaffold5744 | 3297                    | CC                              | GG                 | GG               | INTERGENIC      |               |                    |                    |
| SNP_114112_A_3326  | NW_004519713.1 | scaffold5744 | 3326                    | AA                              | TT                 | TT               | INTERGENIC      |               |                    |                    |
| SNP_114113_A_15423 | NW_004519713.1 | scaffold5744 | 15423                   | AA                              | GG                 | GG               | INTERGENIC      |               |                    |                    |
| SNP_114114_A_15698 | NW_004519713.1 | scaffold5744 | 15698                   | TT                              | AA                 | AA               | INTERGENIC      |               |                    |                    |
| SNP_114115_A_17047 | NW_004519713.1 | scaffold5744 | 17047                   | TT                              | CC                 | CC               | INTERGENIC      |               |                    |                    |
| SNP_114116_A_17527 | NW_004519713.1 | scaffold5744 | 17527                   | TT                              | CC                 | CC               | INTERGENIC      |               |                    |                    |
| SNP_114117_A_17696 | NW_004519713.1 | scaffold5744 | 17696                   | TT                              | AA                 | AA               | INTERGENIC      |               |                    |                    |
| SNP_114118_A_17774 | NW_004519713.1 | scaffold5744 | 17774                   | GG                              | CC                 | CC               | INTERGENIC      |               |                    |                    |
| SNP_114119_A_17793 | NW_004519713.1 | scaffold5744 | 17793                   | CC                              | TT                 | TT               | INTERGENIC      |               |                    |                    |
| SNP_114120_A_17808 | NW_004519713.1 | scaffold5744 | 17808                   | GG                              | CC                 | CC               | INTERGENIC      |               |                    |                    |
| SNP_114121_A_17838 | NW_004519713.1 | scaffold5744 | 17838                   | TT                              | CC                 | CC               | INTERGENIC      |               |                    |                    |
| SNP_114122_A_17853 | NW_004519713.1 | scaffold5744 | 17853                   | TT                              | CC                 | CC               | INTERGENIC      |               |                    |                    |
| SNP_114123_A_17858 | NW_004519713.1 | scaffold5744 | 17858                   | TT                              | CC                 | CC               | INTERGENIC      |               |                    |                    |
| SNP_114124_A_18088 | NW_004519713.1 | scaffold5744 | 18088                   | GG                              | TT                 | TT               | INTERGENIC      |               |                    |                    |
| SNP_114125_A_18174 | NW_004519713.1 | scaffold5744 | 18174                   | GG                              | TT                 | TT               | INTERGENIC      |               |                    |                    |
| SNP_114126_A_18227 | NW_004519713.1 | scaffold5744 | 18227                   | TT                              | CC                 | CC               | INTERGENIC      |               |                    |                    |
| SNP_114127_A_320   | NW_004519715.1 | scaffold5746 | 320                     | AA                              | GG                 | GG               | INTERGENIC      |               |                    |                    |
| SNP_114128_A_388   | NW_004519715.1 | scaffold5746 | 388                     | TT                              | CC                 | CC               | INTERGENIC      |               |                    |                    |
| SNP_114129_A_450   | NW_004519715.1 | scaffold5746 | 450                     | GG                              | CC                 | CC               | INTERGENIC      |               |                    |                    |
| SNP_114130_A_656   | NW_004519715.1 | scaffold5746 | 656                     | CC                              | TT                 | GG               | INTERGENIC      |               |                    |                    |



| SNPs IDs          | Chromosome IDs | Chromosomes  | Physical positions (bp) | CDC Frontier (Reference genome) | (Pusa 1103 & HPNB) | (ILWC 46 & LPNB) | Sequence genome | Components of | Gene accession IDs | Putative functions |
|-------------------|----------------|--------------|-------------------------|---------------------------------|--------------------|------------------|-----------------|---------------|--------------------|--------------------|
| SNP_114131_A_1304 | NW_004519715.1 | scaffold5746 | 1304                    | TT                              | GG                 | GG               | INTERGENIC      |               |                    |                    |
| SNP_114132_A_1400 | NW_004519715.1 | scaffold5746 | 1400                    | CC                              | TT                 | TT               | INTERGENIC      |               |                    |                    |
| SNP_114133_A_1470 | NW_004519715.1 | scaffold5746 | 1470                    | AA                              | CC                 | CC               | INTERGENIC      |               |                    |                    |
| SNP_114134_A_1712 | NW_004519715.1 | scaffold5746 | 1712                    | GG                              | AA                 | AA               | INTERGENIC      |               |                    |                    |
| SNP_114135_A_1724 | NW_004519715.1 | scaffold5746 | 1724                    | AA                              | TT                 | TT               | INTERGENIC      |               |                    |                    |
| SNP_114136_A_1877 | NW_004519715.1 | scaffold5746 | 1877                    | GG                              | AA                 | AA               | INTERGENIC      |               |                    |                    |
| SNP_114137_A_1194 | NW_004519718.1 | scaffold5750 | 1194                    | TT                              | AA                 | AA               | INTERGENIC      |               |                    |                    |
| SNP_114138_A_203  | NW_004519719.1 | scaffold5753 | 203                     | AA                              | CC                 | CC               | INTERGENIC      |               |                    |                    |
| SNP_114139_A_130  | NW_004519722.1 | scaffold5758 | 130                     | GG                              | TT                 | TT               | INTERGENIC      |               |                    |                    |
| SNP_114140_A_671  | NW_004519723.1 | scaffold5759 | 671                     | AA                              | CC                 | CC               | INTERGENIC      |               |                    |                    |
| SNP_114141_A_780  | NW_004519724.1 | scaffold5761 | 780                     | CC                              | AA                 | AA               | INTERGENIC      |               |                    |                    |
| SNP_114142_A_790  | NW_004519724.1 | scaffold5761 | 790                     | AA                              | GG                 | GG               | INTERGENIC      |               |                    |                    |
| SNP_114144_A_857  | NW_004519724.1 | scaffold5761 | 857                     | CC                              | AA                 | AA               | INTERGENIC      |               |                    |                    |
| SNP_114145_A_984  | NW_004519724.1 | scaffold5761 | 984                     | GG                              | AA                 | AA               | INTERGENIC      |               |                    |                    |
| SNP_114146_A_1005 | NW_004519724.1 | scaffold5761 | 1005                    | TT                              | AA                 | AA               | INTERGENIC      |               |                    |                    |
| SNP_114148_A_1224 | NW_004519724.1 | scaffold5761 | 1224                    | AA                              | CC                 | CC               | INTERGENIC      |               |                    |                    |
| SNP_114149_A_1486 | NW_004519724.1 | scaffold5761 | 1486                    | CC                              | AA                 | AA               | INTERGENIC      |               |                    |                    |
| SNP_114150_A_1530 | NW_004519724.1 | scaffold5761 | 1530                    | CC                              | TT                 | TT               | INTERGENIC      |               |                    |                    |
| SNP_114151_A_1677 | NW_004519724.1 | scaffold5761 | 1677                    | AA                              | CC                 | CC               | INTERGENIC      |               |                    |                    |
| SNP_114152_A_1798 | NW_004519724.1 | scaffold5761 | 1798                    | GG                              | AA                 | AA               | INTERGENIC      |               |                    |                    |
| SNP_114153_A_6671 | NW_004519724.1 | scaffold5761 | 6671                    | TT                              | AA                 | AA               | INTERGENIC      |               |                    |                    |
| SNP_114154_A_6875 | NW_004519724.1 | scaffold5761 | 6875                    | GG                              | CC                 | CC               | INTERGENIC      |               |                    |                    |

| SNPs IDs          | Chromosome IDs | Chromosomes  | Physical positions (bp) | CDC Frontier (Reference genome) | (Pusa 1103 & HPNB) | (ILWC 46 & LPNB) | Sequence genome | Components of | Gene accession IDs | Putative functions |
|-------------------|----------------|--------------|-------------------------|---------------------------------|--------------------|------------------|-----------------|---------------|--------------------|--------------------|
| SNP_114155_A_6985 | NW_004519724.1 | scaffold5761 | 6985                    | TT                              | GG                 | GG               | INTERGENIC      |               |                    |                    |
| SNP_114156_A_322  | NW_004519727.1 | scaffold5765 | 322                     | GG                              | AA                 | AA               | INTERGENIC      |               |                    |                    |
| SNP_114157_A_381  | NW_004519727.1 | scaffold5765 | 381                     | CC                              | AA                 | AA               | INTERGENIC      |               |                    |                    |
| SNP_114158_A_382  | NW_004519727.1 | scaffold5765 | 382                     | CC                              | TT                 | TT               | INTERGENIC      |               |                    |                    |
| SNP_114159_A_458  | NW_004519727.1 | scaffold5765 | 458                     | TT                              | AA                 | AA               | INTERGENIC      |               |                    |                    |
| SNP_114161_A_632  | NW_004519727.1 | scaffold5765 | 632                     | GG                              | AA                 | AA               | INTERGENIC      |               |                    |                    |
| SNP_114162_A_2177 | NW_004519728.1 | scaffold5766 | 2177                    | TT                              | GG                 | GG               | INTERGENIC      |               |                    |                    |
| SNP_114163_A_2178 | NW_004519728.1 | scaffold5766 | 2178                    | GG                              | TT                 | TT               | INTERGENIC      |               |                    |                    |
| SNP_114164_A_2235 | NW_004519728.1 | scaffold5766 | 2235                    | AA                              | TT                 | TT               | INTERGENIC      |               |                    |                    |
| SNP_114165_A_2257 | NW_004519728.1 | scaffold5766 | 2257                    | CC                              | GG                 | GG               | INTERGENIC      |               |                    |                    |
| SNP_114166_A_970  | NW_004519731.1 | scaffold5775 | 970                     | GG                              | AA                 | AA               | INTERGENIC      |               |                    |                    |
| SNP_114167_A_1022 | NW_004519731.1 | scaffold5775 | 1022                    | TT                              | AA                 | AA               | INTERGENIC      |               |                    |                    |
| SNP_114168_A_1122 | NW_004519731.1 | scaffold5775 | 1122                    | CC                              | TT                 | TT               | INTERGENIC      |               |                    |                    |
| SNP_114169_A_1132 | NW_004519731.1 | scaffold5775 | 1132                    | TT                              | CC                 | CC               | INTERGENIC      |               |                    |                    |
| SNP_114170_A_2653 | NW_004519733.1 | scaffold5777 | 2653                    | AA                              | CC                 | CC               | INTERGENIC      |               |                    |                    |
| SNP_114171_A_2974 | NW_004519733.1 | scaffold5777 | 2974                    | TT                              | CC                 | CC               | INTERGENIC      |               |                    |                    |
| SNP_114172_A_3289 | NW_004519733.1 | scaffold5777 | 3289                    | GG                              | TT                 | TT               | INTERGENIC      |               |                    |                    |
| SNP_114173_A_3359 | NW_004519733.1 | scaffold5777 | 3359                    | TT                              | GG                 | GG               | INTERGENIC      |               |                    |                    |
| SNP_114174_A_3421 | NW_004519733.1 | scaffold5777 | 3421                    | AA                              | TT                 | TT               | INTERGENIC      |               |                    |                    |
| SNP_114175_A_3439 | NW_004519733.1 | scaffold5777 | 3439                    | GG                              | AA                 | AA               | INTERGENIC      |               |                    |                    |
| SNP_114176_A_3660 | NW_004519733.1 | scaffold5777 | 3660                    | GG                              | AA                 | AA               | INTERGENIC      |               |                    |                    |
| SNP_114177_A_7372 | NW_004519733.1 | scaffold5777 | 7372                    | TT                              | GG                 | GG               | INTERGENIC      |               |                    |                    |

| SNPs IDs           | Chromosome IDs | Chromosomes  | Physical positions (bp) | CDC Frontier (Reference genome) | (Pusa 1103 & HPNB) | (ILWC 46 & LPNB) | Sequence Components of genome | Gene accession IDs | Putative functions           |
|--------------------|----------------|--------------|-------------------------|---------------------------------|--------------------|------------------|-------------------------------|--------------------|------------------------------|
| SNP_114178_A_7598  | NW_004519733.1 | scaffold5777 | 7598                    | CC                              | TT                 | TT               | INTERGENIC                    |                    |                              |
| SNP_114179_A_7831  | NW_004519733.1 | scaffold5777 | 7831                    | CC                              | TT                 | TT               | INTERGENIC                    |                    |                              |
| SNP_114180_A_7891  | NW_004519733.1 | scaffold5777 | 7891                    | AA                              | GG                 | GG               | INTERGENIC                    |                    |                              |
| SNP_114181_A_7908  | NW_004519733.1 | scaffold5777 | 7908                    | CC                              | TT                 | TT               | INTERGENIC                    |                    |                              |
| SNP_114182_A_8355  | NW_004519733.1 | scaffold5777 | 8355                    | TT                              | CC                 | CC               | INTERGENIC                    |                    |                              |
| SNP_114183_A_8504  | NW_004519733.1 | scaffold5777 | 8504                    | TT                              | GG                 | GG               | INTERGENIC                    |                    |                              |
| SNP_114184_A_8911  | NW_004519733.1 | scaffold5777 | 8911                    | CC                              | TT                 | TT               | INTERGENIC                    |                    |                              |
| SNP_114185_A_8934  | NW_004519733.1 | scaffold5777 | 8934                    | TT                              | CC                 | CC               | INTERGENIC                    |                    |                              |
| SNP_114186_A_9122  | NW_004519733.1 | scaffold5777 | 9122                    | CC                              | TT                 | TT               | INTERGENIC                    |                    |                              |
| SNP_114187_A_9240  | NW_004519733.1 | scaffold5777 | 9240                    | AA                              | GG                 | GG               | INTERGENIC                    |                    |                              |
| SNP_114188_A_9258  | NW_004519733.1 | scaffold5777 | 9258                    | CC                              | TT                 | TT               | INTERGENIC                    |                    |                              |
| SNP_114189_A_10039 | NW_004519733.1 | scaffold5777 | 10039                   | TT                              | CC                 | CC               | INTERGENIC                    |                    |                              |
| SNP_114190_A_10070 | NW_004519733.1 | scaffold5777 | 10070                   | TT                              | GG                 | GG               | INTERGENIC                    |                    |                              |
| SNP_114191_A_10130 | NW_004519733.1 | scaffold5777 | 10130                   | TT                              | AA                 | AA               | INTERGENIC                    |                    |                              |
| SNP_114192_A_10337 | NW_004519733.1 | scaffold5777 | 10337                   | AA                              | GG                 | GG               | INTERGENIC                    |                    |                              |
| SNP_114193_A_10345 | NW_004519733.1 | scaffold5777 | 10345                   | AA                              | GG                 | GG               | INTERGENIC                    |                    |                              |
| SNP_114194_A_10348 | NW_004519733.1 | scaffold5777 | 10348                   | AA                              | GG                 | GG               | INTERGENIC                    |                    |                              |
| SNP_114195_A_10453 | NW_004519733.1 | scaffold5777 | 10453                   | CC                              | TT                 | TT               | INTERGENIC                    |                    |                              |
| SNP_114196_A_10572 | NW_004519733.1 | scaffold5777 | 10572                   | AA                              | CC                 | CC               | INTERGENIC                    |                    |                              |
| SNP_114197_A_16313 | NW_004519733.1 | scaffold5777 | 16313                   | GG                              | CC                 | CC               | URR                           | 101501177          | uncharacterized LOC101501177 |
| SNP_114199_A_16532 | NW_004519733.1 | scaffold5777 | 16532                   | GG                              | CC                 | CC               | URR                           | 101501177          | uncharacterized LOC101501177 |
| SNP_114201_A_16798 | NW_004519733.1 | scaffold5777 | 16798                   | TT                              | AA                 | AA               | URR                           | 101501177          | uncharacterized LOC101501177 |

| SNPs IDs           | Chromosome IDs | Chromosomes  | Physical positions (bp) | CDC Frontier (Reference genome) | (Pusa 1103 & HPNB) | (ILWC 46 & LPNB) | Sequence Components of genome | Gene accession IDs | Putative functions           |
|--------------------|----------------|--------------|-------------------------|---------------------------------|--------------------|------------------|-------------------------------|--------------------|------------------------------|
| SNP_114202_A_17078 | NW_004519733.1 | scaffold5777 | 17078                   | CC                              | TT                 | TT               | URR                           | 101501177          | uncharacterized LOC101501177 |
| SNP_114203_A_17165 | NW_004519733.1 | scaffold5777 | 17165                   | TT                              | CC                 | CC               | URR                           | 101501177          | uncharacterized LOC101501177 |
| SNP_114204_A_17207 | NW_004519733.1 | scaffold5777 | 17207                   | CC                              | GG                 | GG               | URR                           | 101501177          | uncharacterized LOC101501177 |
| SNP_114205_A_2849  | NW_004519735.1 | scaffold5780 | 2849                    | CC                              | AA                 | AA               | INTERGENIC                    |                    |                              |
| SNP_114207_A_2923  | NW_004519735.1 | scaffold5780 | 2923                    | GG                              | AA                 | AA               | INTERGENIC                    |                    |                              |
| SNP_114208_A_3039  | NW_004519735.1 | scaffold5780 | 3039                    | TT                              | CC                 | CC               | INTERGENIC                    |                    |                              |
| SNP_114209_A_3234  | NW_004519735.1 | scaffold5780 | 3234                    | GG                              | TT                 | TT               | INTERGENIC                    |                    |                              |
| SNP_114210_A_3286  | NW_004519735.1 | scaffold5780 | 3286                    | TT                              | GG                 | GG               | INTERGENIC                    |                    |                              |
| SNP_114211_A_3357  | NW_004519735.1 | scaffold5780 | 3357                    | TT                              | CC                 | CC               | INTERGENIC                    |                    |                              |
| SNP_114212_A_4549  | NW_004519735.1 | scaffold5780 | 4549                    | GG                              | AA                 | AA               | INTERGENIC                    |                    |                              |
| SNP_114213_A_4628  | NW_004519735.1 | scaffold5780 | 4628                    | GG                              | AA                 | AA               | INTERGENIC                    |                    |                              |
| SNP_114214_A_4792  | NW_004519735.1 | scaffold5780 | 4792                    | AA                              | GG                 | GG               | INTERGENIC                    |                    |                              |
| SNP_114215_A_4990  | NW_004519735.1 | scaffold5780 | 4990                    | AA                              | GG                 | GG               | INTERGENIC                    |                    |                              |
| SNP_114216_A_5013  | NW_004519735.1 | scaffold5780 | 5013                    | GG                              | AA                 | AA               | INTERGENIC                    |                    |                              |
| SNP_114217_A_5022  | NW_004519735.1 | scaffold5780 | 5022                    | CC                              | TT                 | TT               | INTERGENIC                    |                    |                              |
| SNP_114218_A_5223  | NW_004519735.1 | scaffold5780 | 5223                    | TT                              | CC                 | CC               | INTERGENIC                    |                    |                              |
| SNP_114219_A_5230  | NW_004519735.1 | scaffold5780 | 5230                    | AA                              | GG                 | GG               | INTERGENIC                    |                    |                              |
| SNP_114220_A_5242  | NW_004519735.1 | scaffold5780 | 5242                    | GG                              | AA                 | AA               | INTERGENIC                    |                    |                              |
| SNP_114221_A_5344  | NW_004519735.1 | scaffold5780 | 5344                    | AA                              | GG                 | GG               | INTERGENIC                    |                    |                              |
| SNP_114224_A_5505  | NW_004519735.1 | scaffold5780 | 5505                    | AA                              | TT                 | TT               | INTERGENIC                    |                    |                              |
| SNP_114225_A_5506  | NW_004519735.1 | scaffold5780 | 5506                    | AA                              | CC                 | CC               | INTERGENIC                    |                    |                              |
| SNP_114226_A_5564  | NW_004519735.1 | scaffold5780 | 5564                    | GG                              | TT                 | TT               | INTERGENIC                    |                    |                              |

| SNPs IDs          | Chromosome IDs | Chromosomes  | Physical positions (bp) | CDC Frontier (Reference genome) | (Pusa 1103 & HPNB) | (ILWC 46 & LPNB) | Sequence genome | Components of | Gene accession IDs | Putative functions |
|-------------------|----------------|--------------|-------------------------|---------------------------------|--------------------|------------------|-----------------|---------------|--------------------|--------------------|
| SNP_114227_A_5649 | NW_004519735.1 | scaffold5780 | 5649                    | TT                              | CC                 | CC               | INTERGENIC      |               |                    |                    |
| SNP_114228_A_5663 | NW_004519735.1 | scaffold5780 | 5663                    | GG                              | AA                 | AA               | INTERGENIC      |               |                    |                    |
| SNP_114229_A_5673 | NW_004519735.1 | scaffold5780 | 5673                    | AA                              | GG                 | GG               | INTERGENIC      |               |                    |                    |
| SNP_114230_A_5680 | NW_004519735.1 | scaffold5780 | 5680                    | TT                              | CC                 | CC               | INTERGENIC      |               |                    |                    |
| SNP_114231_A_5689 | NW_004519735.1 | scaffold5780 | 5689                    | TT                              | CC                 | CC               | INTERGENIC      |               |                    |                    |
| SNP_114232_A_5690 | NW_004519735.1 | scaffold5780 | 5690                    | GG                              | AA                 | AA               | INTERGENIC      |               |                    |                    |
| SNP_114233_A_5726 | NW_004519735.1 | scaffold5780 | 5726                    | CC                              | AA                 | AA               | INTERGENIC      |               |                    |                    |
| SNP_114234_A_5731 | NW_004519735.1 | scaffold5780 | 5731                    | AA                              | GG                 | GG               | INTERGENIC      |               |                    |                    |
| SNP_114235_A_5733 | NW_004519735.1 | scaffold5780 | 5733                    | AA                              | TT                 | TT               | INTERGENIC      |               |                    |                    |
| SNP_114236_A_5746 | NW_004519735.1 | scaffold5780 | 5746                    | TT                              | GG                 | GG               | INTERGENIC      |               |                    |                    |
| SNP_114237_A_5852 | NW_004519735.1 | scaffold5780 | 5852                    | AA                              | GG                 | GG               | INTERGENIC      |               |                    |                    |
| SNP_114239_A_6033 | NW_004519735.1 | scaffold5780 | 6033                    | TT                              | CC                 | CC               | INTERGENIC      |               |                    |                    |
| SNP_114240_A_6098 | NW_004519735.1 | scaffold5780 | 6098                    | GG                              | AA                 | AA               | INTERGENIC      |               |                    |                    |
| SNP_114241_A_6100 | NW_004519735.1 | scaffold5780 | 6100                    | GG                              | TT                 | TT               | INTERGENIC      |               |                    |                    |
| SNP_114242_A_6142 | NW_004519735.1 | scaffold5780 | 6142                    | GG                              | AA                 | AA               | INTERGENIC      |               |                    |                    |
| SNP_114243_A_6195 | NW_004519735.1 | scaffold5780 | 6195                    | AA                              | GG                 | GG               | INTERGENIC      |               |                    |                    |
| SNP_114244_A_6288 | NW_004519735.1 | scaffold5780 | 6288                    | AA                              | GG                 | GG               | INTERGENIC      |               |                    |                    |
| SNP_114245_A_6292 | NW_004519735.1 | scaffold5780 | 6292                    | TT                              | CC                 | CC               | INTERGENIC      |               |                    |                    |
| SNP_114246_A_6308 | NW_004519735.1 | scaffold5780 | 6308                    | TT                              | CC                 | CC               | INTERGENIC      |               |                    |                    |
| SNP_114247_A_6315 | NW_004519735.1 | scaffold5780 | 6315                    | AA                              | GG                 | GG               | INTERGENIC      |               |                    |                    |
| SNP_114248_A_6515 | NW_004519735.1 | scaffold5780 | 6515                    | AA                              | TT                 | TT               | INTERGENIC      |               |                    |                    |
| SNP_114249_A_6516 | NW_004519735.1 | scaffold5780 | 6516                    | TT                              | CC                 | CC               | INTERGENIC      |               |                    |                    |

| SNPs IDs           | Chromosome IDs | Chromosomes  | Physical positions (bp) | CDC Frontier (Reference genome) | (Pusa 1103 & HPNB) | (ILWC 46 & LPNB) | Sequence genome | Components of | Gene accession IDs | Putative functions |
|--------------------|----------------|--------------|-------------------------|---------------------------------|--------------------|------------------|-----------------|---------------|--------------------|--------------------|
| SNP_114250_A_6662  | NW_004519735.1 | scaffold5780 | 6662                    | TT                              | GG                 | GG               | INTERGENIC      |               |                    |                    |
| SNP_114251_A_6692  | NW_004519735.1 | scaffold5780 | 6692                    | CC                              | TT                 | TT               | INTERGENIC      |               |                    |                    |
| SNP_114252_A_6694  | NW_004519735.1 | scaffold5780 | 6694                    | TT                              | CC                 | CC               | INTERGENIC      |               |                    |                    |
| SNP_114253_A_6736  | NW_004519735.1 | scaffold5780 | 6736                    | GG                              | AA                 | AA               | INTERGENIC      |               |                    |                    |
| SNP_114254_A_6790  | NW_004519735.1 | scaffold5780 | 6790                    | CC                              | TT                 | TT               | INTERGENIC      |               |                    |                    |
| SNP_114255_A_8654  | NW_004519735.1 | scaffold5780 | 8654                    | AA                              | GG                 | GG               | INTERGENIC      |               |                    |                    |
| SNP_114256_A_8727  | NW_004519735.1 | scaffold5780 | 8727                    | CC                              | AA                 | AA               | INTERGENIC      |               |                    |                    |
| SNP_114258_A_8753  | NW_004519735.1 | scaffold5780 | 8753                    | GG                              | AA                 | AA               | INTERGENIC      |               |                    |                    |
| SNP_114259_A_8984  | NW_004519735.1 | scaffold5780 | 8984                    | GG                              | AA                 | AA               | INTERGENIC      |               |                    |                    |
| SNP_114261_A_9464  | NW_004519735.1 | scaffold5780 | 9464                    | TT                              | AA                 | AA               | INTERGENIC      |               |                    |                    |
| SNP_114262_A_9651  | NW_004519735.1 | scaffold5780 | 9651                    | CC                              | GG                 | GG               | INTERGENIC      |               |                    |                    |
| SNP_114263_A_9668  | NW_004519735.1 | scaffold5780 | 9668                    | TT                              | CC                 | CC               | INTERGENIC      |               |                    |                    |
| SNP_114264_A_9834  | NW_004519735.1 | scaffold5780 | 9834                    | TT                              | CC                 | CC               | INTERGENIC      |               |                    |                    |
| SNP_114265_A_9976  | NW_004519735.1 | scaffold5780 | 9976                    | GG                              | TT                 | TT               | INTERGENIC      |               |                    |                    |
| SNP_114266_A_9990  | NW_004519735.1 | scaffold5780 | 9990                    | AA                              | CC                 | CC               | INTERGENIC      |               |                    |                    |
| SNP_114267_A_10024 | NW_004519735.1 | scaffold5780 | 10024                   | TT                              | CC                 | CC               | INTERGENIC      |               |                    |                    |
| SNP_114268_A_10128 | NW_004519735.1 | scaffold5780 | 10128                   | CC                              | TT                 | TT               | INTERGENIC      |               |                    |                    |
| SNP_114269_A_10130 | NW_004519735.1 | scaffold5780 | 10130                   | GG                              | AA                 | AA               | INTERGENIC      |               |                    |                    |
| SNP_114270_A_10333 | NW_004519735.1 | scaffold5780 | 10333                   | AA                              | CC                 | CC               | INTERGENIC      |               |                    |                    |
| SNP_114271_A_10359 | NW_004519735.1 | scaffold5780 | 10359                   | CC                              | TT                 | TT               | INTERGENIC      |               |                    |                    |
| SNP_114272_A_10585 | NW_004519735.1 | scaffold5780 | 10585                   | GG                              | CC                 | CC               | INTERGENIC      |               |                    |                    |
| SNP_114273_A_10600 | NW_004519735.1 | scaffold5780 | 10600                   | TT                              | CC                 | CC               | INTERGENIC      |               |                    |                    |

| SNPs IDs           | Chromosome IDs | Chromosomes  | Physical positions (bp) | CDC Frontier (Reference genome) | (Pusa 1103 & HPNB) | (ILWC 46 & LPNB) | Sequence genome | Components of | Gene accession IDs | Putative functions |
|--------------------|----------------|--------------|-------------------------|---------------------------------|--------------------|------------------|-----------------|---------------|--------------------|--------------------|
| SNP_114274_A_10773 | NW_004519735.1 | scaffold5780 | 10773                   | GG                              | AA                 | AA               | INTERGENIC      |               |                    |                    |
| SNP_114275_A_10910 | NW_004519735.1 | scaffold5780 | 10910                   | CC                              | TT                 | TT               | INTERGENIC      |               |                    |                    |
| SNP_114276_A_11020 | NW_004519735.1 | scaffold5780 | 11020                   | AA                              | GG                 | GG               | INTERGENIC      |               |                    |                    |
| SNP_114277_A_17043 | NW_004519735.1 | scaffold5780 | 17043                   | CC                              | TT                 | TT               | INTERGENIC      |               |                    |                    |
| SNP_114278_A_17050 | NW_004519735.1 | scaffold5780 | 17050                   | CC                              | TT                 | TT               | INTERGENIC      |               |                    |                    |
| SNP_114279_A_17146 | NW_004519735.1 | scaffold5780 | 17146                   | CC                              | TT                 | TT               | INTERGENIC      |               |                    |                    |
| SNP_114280_A_17408 | NW_004519735.1 | scaffold5780 | 17408                   | GG                              | AA                 | AA               | INTERGENIC      |               |                    |                    |
| SNP_114281_A_17428 | NW_004519735.1 | scaffold5780 | 17428                   | AA                              | TT                 | TT               | INTERGENIC      |               |                    |                    |
| SNP_114282_A_2167  | NW_004519736.1 | scaffold5781 | 2167                    | AA                              | TT                 | TT               | INTERGENIC      |               |                    |                    |
| SNP_114283_A_2968  | NW_004519736.1 | scaffold5781 | 2968                    | AA                              | GG                 | GG               | INTERGENIC      |               |                    |                    |
| SNP_114284_A_3043  | NW_004519736.1 | scaffold5781 | 3043                    | TT                              | AA                 | AA               | INTERGENIC      |               |                    |                    |
| SNP_114285_A_3050  | NW_004519736.1 | scaffold5781 | 3050                    | AA                              | GG                 | GG               | INTERGENIC      |               |                    |                    |
| SNP_114286_A_3113  | NW_004519736.1 | scaffold5781 | 3113                    | CC                              | GG                 | GG               | INTERGENIC      |               |                    |                    |
| SNP_114287_A_3171  | NW_004519736.1 | scaffold5781 | 3171                    | AA                              | CC                 | CC               | INTERGENIC      |               |                    |                    |
| SNP_114288_A_3189  | NW_004519736.1 | scaffold5781 | 3189                    | CC                              | TT                 | TT               | INTERGENIC      |               |                    |                    |
| SNP_114289_A_3354  | NW_004519736.1 | scaffold5781 | 3354                    | AA                              | GG                 | GG               | INTERGENIC      |               |                    |                    |
| SNP_114290_A_3430  | NW_004519736.1 | scaffold5781 | 3430                    | AA                              | GG                 | GG               | INTERGENIC      |               |                    |                    |
| SNP_114291_A_3522  | NW_004519736.1 | scaffold5781 | 3522                    | GG                              | AA                 | AA               | INTERGENIC      |               |                    |                    |
| SNP_114292_A_3544  | NW_004519736.1 | scaffold5781 | 3544                    | AA                              | TT                 | TT               | INTERGENIC      |               |                    |                    |
| SNP_114293_A_3631  | NW_004519736.1 | scaffold5781 | 3631                    | GG                              | TT                 | TT               | INTERGENIC      |               |                    |                    |
| SNP_114294_A_3911  | NW_004519736.1 | scaffold5781 | 3911                    | TT                              | CC                 | CC               | INTERGENIC      |               |                    |                    |
| SNP_114295_A_4015  | NW_004519736.1 | scaffold5781 | 4015                    | AA                              | TT                 | TT               | INTERGENIC      |               |                    |                    |

| SNPs IDs           | Chromosome IDs | Chromosomes  | Physical positions (bp) | CDC Frontier (Reference genome) | (Pusa 1103 & HPNB) | (ILWC 46 & LPNB) | Sequence genome | Components of | Gene accession IDs | Putative functions |
|--------------------|----------------|--------------|-------------------------|---------------------------------|--------------------|------------------|-----------------|---------------|--------------------|--------------------|
| SNP_114296_A_12151 | NW_004519736.1 | scaffold5781 | 12151                   | CC                              | TT                 | TT               | INTERGENIC      |               |                    |                    |
| SNP_114298_A_12552 | NW_004519736.1 | scaffold5781 | 12552                   | TT                              | CC                 | CC               | INTERGENIC      |               |                    |                    |
| SNP_114299_A_12587 | NW_004519736.1 | scaffold5781 | 12587                   | CC                              | TT                 | TT               | INTERGENIC      |               |                    |                    |
| SNP_114300_A_12596 | NW_004519736.1 | scaffold5781 | 12596                   | AA                              | GG                 | GG               | INTERGENIC      |               |                    |                    |
| SNP_114301_A_12603 | NW_004519736.1 | scaffold5781 | 12603                   | GG                              | AA                 | AA               | INTERGENIC      |               |                    |                    |
| SNP_114302_A_12653 | NW_004519736.1 | scaffold5781 | 12653                   | GG                              | AA                 | AA               | INTERGENIC      |               |                    |                    |
| SNP_114303_A_12828 | NW_004519736.1 | scaffold5781 | 12828                   | TT                              | CC                 | CC               | INTERGENIC      |               |                    |                    |
| SNP_114304_A_324   | NW_004519737.1 | scaffold5782 | 324                     | AA                              | GG                 | GG               | INTERGENIC      |               |                    |                    |
| SNP_114305_A_329   | NW_004519737.1 | scaffold5782 | 329                     | GG                              | CC                 | CC               | INTERGENIC      |               |                    |                    |
| SNP_114306_A_1046  | NW_004519737.1 | scaffold5782 | 1046                    | AA                              | GG                 | GG               | INTERGENIC      |               |                    |                    |
| SNP_114307_A_1104  | NW_004519737.1 | scaffold5782 | 1104                    | TT                              | CC                 | CC               | INTERGENIC      |               |                    |                    |
| SNP_114308_A_681   | NW_004519738.1 | scaffold5783 | 681                     | GG                              | AA                 | AA               | INTERGENIC      |               |                    |                    |
| SNP_114309_A_713   | NW_004519738.1 | scaffold5783 | 713                     | CC                              | TT                 | TT               | INTERGENIC      |               |                    |                    |
| SNP_114310_A_723   | NW_004519738.1 | scaffold5783 | 723                     | TT                              | CC                 | CC               | INTERGENIC      |               |                    |                    |
| SNP_114311_A_1271  | NW_004519738.1 | scaffold5783 | 1271                    | CC                              | TT                 | TT               | INTERGENIC      |               |                    |                    |
| SNP_114312_A_1597  | NW_004519738.1 | scaffold5783 | 1597                    | TT                              | CC                 | CC               | INTERGENIC      |               |                    |                    |
| SNP_114313_A_365   | NW_004519742.1 | scaffold5790 | 365                     | TT                              | CC                 | CC               | INTERGENIC      |               |                    |                    |
| SNP_114314_A_16845 | NW_004519744.1 | scaffold5792 | 16845                   | TT                              | CC                 | CC               | INTERGENIC      |               |                    |                    |
| SNP_114316_A_77558 | NW_004519744.1 | scaffold5792 | 77558                   | TT                              | CC                 | CC               | INTERGENIC      |               |                    |                    |
| SNP_114317_A_92343 | NW_004519744.1 | scaffold5792 | 92343                   | GG                              | AA                 | AA               | INTERGENIC      |               |                    |                    |
| SNP_114318_A_5880  | NW_004519746.1 | scaffold5794 | 5880                    | AA                              | GG                 | GG               | INTERGENIC      |               |                    |                    |
| SNP_114319_A_5888  | NW_004519746.1 | scaffold5794 | 5888                    | AA                              | TT                 | CC               | INTERGENIC      |               |                    |                    |



| SNPs IDs          | Chromosome IDs | Chromosomes  | Physical positions (bp) | CDC Frontier (Reference genome) | (Pusa 1103 & HPNB) | (ILWC 46 & LPNB) | Sequence genome | Components of | Gene accession IDs | Putative functions |
|-------------------|----------------|--------------|-------------------------|---------------------------------|--------------------|------------------|-----------------|---------------|--------------------|--------------------|
| SNP_114320_A_8247 | NW_004519746.1 | scaffold5794 | 8247                    | AA                              | TT                 | TT               | INTERGENIC      |               |                    |                    |
| SNP_114321_A_8638 | NW_004519746.1 | scaffold5794 | 8638                    | CC                              | GG                 | GG               | INTERGENIC      |               |                    |                    |
| SNP_114322_A_8707 | NW_004519746.1 | scaffold5794 | 8707                    | CC                              | GG                 | GG               | INTERGENIC      |               |                    |                    |
| SNP_114323_A_1440 | NW_004519747.1 | scaffold5795 | 1440                    | CC                              | AA                 | AA               | INTERGENIC      |               |                    |                    |
| SNP_114324_A_1446 | NW_004519747.1 | scaffold5795 | 1446                    | CC                              | TT                 | TT               | INTERGENIC      |               |                    |                    |
| SNP_114325_A_1519 | NW_004519747.1 | scaffold5795 | 1519                    | GG                              | AA                 | AA               | INTERGENIC      |               |                    |                    |
| SNP_114326_A_1520 | NW_004519747.1 | scaffold5795 | 1520                    | CC                              | TT                 | TT               | INTERGENIC      |               |                    |                    |
| SNP_114327_A_5391 | NW_004519749.1 | scaffold5797 | 5391                    | CC                              | GG                 | GG               | INTERGENIC      |               |                    |                    |
| SNP_114328_A_5392 | NW_004519749.1 | scaffold5797 | 5392                    | AA                              | GG                 | GG               | INTERGENIC      |               |                    |                    |
| SNP_114329_A_5408 | NW_004519749.1 | scaffold5797 | 5408                    | GG                              | AA                 | AA               | INTERGENIC      |               |                    |                    |
| SNP_114330_A_5438 | NW_004519749.1 | scaffold5797 | 5438                    | AA                              | GG                 | GG               | INTERGENIC      |               |                    |                    |
| SNP_114331_A_5474 | NW_004519749.1 | scaffold5797 | 5474                    | CC                              | TT                 | TT               | INTERGENIC      |               |                    |                    |
| SNP_114332_A_5480 | NW_004519749.1 | scaffold5797 | 5480                    | TT                              | GG                 | GG               | INTERGENIC      |               |                    |                    |
| SNP_114333_A_5488 | NW_004519749.1 | scaffold5797 | 5488                    | AA                              | GG                 | GG               | INTERGENIC      |               |                    |                    |
| SNP_114334_A_5514 | NW_004519749.1 | scaffold5797 | 5514                    | CC                              | TT                 | TT               | INTERGENIC      |               |                    |                    |
| SNP_114335_A_5631 | NW_004519749.1 | scaffold5797 | 5631                    | AA                              | TT                 | TT               | INTERGENIC      |               |                    |                    |
| SNP_114336_A_5709 | NW_004519749.1 | scaffold5797 | 5709                    | CC                              | AA                 | AA               | INTERGENIC      |               |                    |                    |
| SNP_114337_A_5778 | NW_004519749.1 | scaffold5797 | 5778                    | AA                              | CC                 | CC               | INTERGENIC      |               |                    |                    |
| SNP_114338_A_6000 | NW_004519749.1 | scaffold5797 | 6000                    | AA                              | GG                 | GG               | INTERGENIC      |               |                    |                    |
| SNP_114339_A_6394 | NW_004519749.1 | scaffold5797 | 6394                    | AA                              | TT                 | TT               | INTERGENIC      |               |                    |                    |
| SNP_114340_A_8658 | NW_004519749.1 | scaffold5797 | 8658                    | CC                              | AA                 | AA               | INTERGENIC      |               |                    |                    |
| SNP_114341_A_8678 | NW_004519749.1 | scaffold5797 | 8678                    | AA                              | CC                 | CC               | INTERGENIC      |               |                    |                    |

| SNPs IDs           | Chromosome IDs | Chromosomes  | Physical positions (bp) | CDC Frontier (Reference genome) | (Pusa 1103 & HPNB) | (ILWC 46 & LPNB) | Sequence Components of genome | Gene accession IDs | Putative functions                   |
|--------------------|----------------|--------------|-------------------------|---------------------------------|--------------------|------------------|-------------------------------|--------------------|--------------------------------------|
| SNP_114342_A_8922  | NW_004519749.1 | scaffold5797 | 8922                    | CC                              | AA                 | AA               | INTERGENIC                    |                    |                                      |
| SNP_114343_A_9015  | NW_004519749.1 | scaffold5797 | 9015                    | CC                              | TT                 | TT               | INTERGENIC                    |                    |                                      |
| SNP_114344_A_9017  | NW_004519749.1 | scaffold5797 | 9017                    | GG                              | TT                 | TT               | INTERGENIC                    |                    |                                      |
| SNP_114345_A_9029  | NW_004519749.1 | scaffold5797 | 9029                    | AA                              | GG                 | GG               | INTERGENIC                    |                    |                                      |
| SNP_114346_A_9069  | NW_004519749.1 | scaffold5797 | 9069                    | AA                              | GG                 | GG               | INTERGENIC                    |                    |                                      |
| SNP_114347_A_9180  | NW_004519749.1 | scaffold5797 | 9180                    | GG                              | CC                 | CC               | INTERGENIC                    |                    |                                      |
| SNP_114348_A_9532  | NW_004519749.1 | scaffold5797 | 9532                    | CC                              | TT                 | TT               | INTERGENIC                    |                    |                                      |
| SNP_114349_A_9792  | NW_004519749.1 | scaffold5797 | 9792                    | TT                              | CC                 | CC               | INTERGENIC                    |                    |                                      |
| SNP_114350_A_9819  | NW_004519749.1 | scaffold5797 | 9819                    | TT                              | CC                 | CC               | INTERGENIC                    |                    |                                      |
| SNP_114351_A_9820  | NW_004519749.1 | scaffold5797 | 9820                    | TT                              | CC                 | CC               | INTERGENIC                    |                    |                                      |
| SNP_114352_A_492   | NW_004519750.1 | scaffold5801 | 492                     | TT                              | CC                 | CC               | INTERGENIC                    |                    |                                      |
| SNP_114353_A_812   | NW_004519750.1 | scaffold5801 | 812                     | GG                              | AA                 | AA               | INTERGENIC                    |                    |                                      |
| SNP_114354_A_1043  | NW_004519750.1 | scaffold5801 | 1043                    | AA                              | CC                 | CC               | INTERGENIC                    |                    |                                      |
| SNP_114355_A_2332  | NW_004519750.1 | scaffold5801 | 2332                    | GG                              | AA                 | AA               | INTERGENIC                    |                    |                                      |
| SNP_114356_A_2387  | NW_004519750.1 | scaffold5801 | 2387                    | TT                              | GG                 | GG               | INTERGENIC                    |                    |                                      |
| SNP_114357_A_2504  | NW_004519750.1 | scaffold5801 | 2504                    | CC                              | TT                 | TT               | INTERGENIC                    |                    |                                      |
| SNP_114358_A_307   | NW_004519755.1 | scaffold5812 | 307                     | AA                              | GG                 | GG               | INTERGENIC                    |                    |                                      |
| SNP_114359_A_6570  | NW_004519755.1 | scaffold5812 | 6570                    | GG                              | AA                 | AA               | INTRON                        | 101504055          | probable polygalacturonase At3g15720 |
| SNP_114360_A_16675 | NW_004519755.1 | scaffold5812 | 16675                   | GG                              | AA                 | AA               | INTERGENIC                    |                    |                                      |
| SNP_114361_A_18430 | NW_004519755.1 | scaffold5812 | 18430                   | TT                              | CC                 | CC               | INTERGENIC                    |                    |                                      |
| SNP_114362_A_30214 | NW_004519755.1 | scaffold5812 | 30214                   | TT                              | AA                 | AA               | INTRON                        | 101503726          | uncharacterized LOC101503726         |
| SNP_114363_A_30292 | NW_004519755.1 | scaffold5812 | 30292                   | CC                              | TT                 | TT               | INTRON                        | 101503726          | uncharacterized LOC101503726         |

| SNPs IDs           | Chromosome IDs | Chromosomes  | Physical positions (bp) | CDC Frontier (Reference genome) | (Pusa 1103 & HPNB) | (ILWC 46 & LPNB) | Sequence Components of genome | Gene accession IDs | Putative functions           |
|--------------------|----------------|--------------|-------------------------|---------------------------------|--------------------|------------------|-------------------------------|--------------------|------------------------------|
| SNP_114364_A_30299 | NW_004519755.1 | scaffold5812 | 30299                   | TT                              | AA                 | AA               | INTRON                        | 101503726          | uncharacterized LOC101503726 |
| SNP_114366_A_45382 | NW_004519755.1 | scaffold5812 | 45382                   | AA                              | GG                 | GG               | INTERGENIC                    |                    |                              |
| SNP_114367_A_45404 | NW_004519755.1 | scaffold5812 | 45404                   | TT                              | CC                 | CC               | INTERGENIC                    |                    |                              |
| SNP_114368_A_45748 | NW_004519755.1 | scaffold5812 | 45748                   | TT                              | CC                 | CC               | INTERGENIC                    |                    |                              |
| SNP_114369_A_47443 | NW_004519755.1 | scaffold5812 | 47443                   | CC                              | TT                 | TT               | INTERGENIC                    |                    |                              |
| SNP_114370_A_47464 | NW_004519755.1 | scaffold5812 | 47464                   | AA                              | TT                 | TT               | INTERGENIC                    |                    |                              |
| SNP_114371_A_47512 | NW_004519755.1 | scaffold5812 | 47512                   | AA                              | GG                 | GG               | INTERGENIC                    |                    |                              |
| SNP_114372_A_47758 | NW_004519755.1 | scaffold5812 | 47758                   | GG                              | AA                 | AA               | INTERGENIC                    |                    |                              |
| SNP_114373_A_73    | NW_004519756.1 | scaffold5813 | 73                      | TT                              | AA                 | AA               | DRR                           | 101504368          | Unknown function             |
| SNP_114374_A_2756  | NW_004519756.1 | scaffold5813 | 2756                    | GG                              | TT                 | TT               | URR                           | 101504368          | Unknown function             |
| SNP_114375_A_2776  | NW_004519756.1 | scaffold5813 | 2776                    | CC                              | AA                 | AA               | URR                           | 101504368          | Unknown function             |
| SNP_114376_A_4509  | NW_004519756.1 | scaffold5813 | 4509                    | AA                              | CC                 | CC               | INTERGENIC                    |                    |                              |
| SNP_114377_A_1220  | NW_004519758.1 | scaffold5815 | 1220                    | AA                              | GG                 | GG               | INTERGENIC                    |                    |                              |
| SNP_114378_A_1466  | NW_004519758.1 | scaffold5815 | 1466                    | AA                              | CC                 | CC               | INTERGENIC                    |                    |                              |
| SNP_114379_A_1550  | NW_004519758.1 | scaffold5815 | 1550                    | CC                              | GG                 | GG               | INTERGENIC                    |                    |                              |
| SNP_114380_A_1798  | NW_004519758.1 | scaffold5815 | 1798                    | AA                              | GG                 | GG               | INTERGENIC                    |                    |                              |
| SNP_114381_A_1816  | NW_004519758.1 | scaffold5815 | 1816                    | TT                              | CC                 | CC               | INTERGENIC                    |                    |                              |
| SNP_114382_A_1827  | NW_004519758.1 | scaffold5815 | 1827                    | CC                              | AA                 | AA               | INTERGENIC                    |                    |                              |
| SNP_114383_A_5548  | NW_004519759.1 | scaffold5816 | 5548                    | CC                              | TT                 | TT               | INTERGENIC                    |                    |                              |
| SNP_114384_A_498   | NW_004519760.1 | scaffold5817 | 498                     | AA                              | CC                 | CC               | INTERGENIC                    |                    |                              |
| SNP_114385_A_646   | NW_004519760.1 | scaffold5817 | 646                     | TT                              | GG                 | GG               | INTERGENIC                    |                    |                              |
| SNP_114386_A_793   | NW_004519760.1 | scaffold5817 | 793                     | GG                              | TT                 | TT               | INTERGENIC                    |                    |                              |

| SNPs IDs          | Chromosome IDs | Chromosomes  | Physical positions (bp) | CDC Frontier (Reference genome) | (Pusa 1103 & HPNB) | (ILWC 46 & LPNB) | Sequence genome | Components of | Gene accession IDs | Putative functions |
|-------------------|----------------|--------------|-------------------------|---------------------------------|--------------------|------------------|-----------------|---------------|--------------------|--------------------|
| SNP_114387_A_841  | NW_004519760.1 | scaffold5817 | 841                     | TT                              | CC                 | CC               | INTERGENIC      |               |                    |                    |
| SNP_114388_A_992  | NW_004519760.1 | scaffold5817 | 992                     | TT                              | AA                 | AA               | INTERGENIC      |               |                    |                    |
| SNP_114389_A_113  | NW_004519764.1 | scaffold5823 | 113                     | CC                              | AA                 | AA               | INTERGENIC      |               |                    |                    |
| SNP_114390_A_339  | NW_004519764.1 | scaffold5823 | 339                     | GG                              | TT                 | TT               | INTERGENIC      |               |                    |                    |
| SNP_114391_A_624  | NW_004519764.1 | scaffold5823 | 624                     | CC                              | TT                 | TT               | INTERGENIC      |               |                    |                    |
| SNP_114393_A_1529 | NW_004519764.1 | scaffold5823 | 1529                    | AA                              | GG                 | GG               | INTERGENIC      |               |                    |                    |
| SNP_114394_A_1534 | NW_004519764.1 | scaffold5823 | 1534                    | AA                              | TT                 | TT               | INTERGENIC      |               |                    |                    |
| SNP_114395_A_1542 | NW_004519764.1 | scaffold5823 | 1542                    | CC                              | GG                 | GG               | INTERGENIC      |               |                    |                    |
| SNP_114396_A_1544 | NW_004519764.1 | scaffold5823 | 1544                    | AA                              | CC                 | CC               | INTERGENIC      |               |                    |                    |
| SNP_114397_A_671  | NW_004519772.1 | scaffold5831 | 671                     | CC                              | AA                 | AA               | INTERGENIC      |               |                    |                    |
| SNP_114399_A_729  | NW_004519772.1 | scaffold5831 | 729                     | TT                              | AA                 | AA               | INTERGENIC      |               |                    |                    |
| SNP_114400_A_924  | NW_004519776.1 | scaffold5836 | 924                     | GG                              | AA                 | AA               | INTERGENIC      |               |                    |                    |
| SNP_114401_A_5486 | NW_004519778.1 | scaffold5839 | 5486                    | GG                              | CC                 | CC               | INTERGENIC      |               |                    |                    |
| SNP_114402_A_6976 | NW_004519778.1 | scaffold5839 | 6976                    | GG                              | TT                 | TT               | INTERGENIC      |               |                    |                    |
| SNP_114403_A_6979 | NW_004519778.1 | scaffold5839 | 6979                    | TT                              | AA                 | AA               | INTERGENIC      |               |                    |                    |
| SNP_114404_A_7229 | NW_004519778.1 | scaffold5839 | 7229                    | CC                              | GG                 | GG               | INTERGENIC      |               |                    |                    |
| SNP_114405_A_7339 | NW_004519778.1 | scaffold5839 | 7339                    | AA                              | GG                 | GG               | INTERGENIC      |               |                    |                    |
| SNP_114406_A_7403 | NW_004519778.1 | scaffold5839 | 7403                    | GG                              | TT                 | TT               | INTERGENIC      |               |                    |                    |
| SNP_114407_A_7409 | NW_004519778.1 | scaffold5839 | 7409                    | GG                              | AA                 | AA               | INTERGENIC      |               |                    |                    |
| SNP_114408_A_7743 | NW_004519778.1 | scaffold5839 | 7743                    | TT                              | CC                 | CC               | INTERGENIC      |               |                    |                    |
| SNP_114409_A_7747 | NW_004519778.1 | scaffold5839 | 7747                    | AA                              | TT                 | TT               | INTERGENIC      |               |                    |                    |
| SNP_114410_A_7791 | NW_004519778.1 | scaffold5839 | 7791                    | CC                              | AA                 | AA               | INTERGENIC      |               |                    |                    |

| SNPs IDs           | Chromosome IDs | Chromosomes  | Physical positions (bp) | CDC Frontier (Reference genome) | (Pusa 1103 & HPNB) | (ILWC 46 & LPNB) | Sequence genome | Components of | Gene accession IDs | Putative functions |
|--------------------|----------------|--------------|-------------------------|---------------------------------|--------------------|------------------|-----------------|---------------|--------------------|--------------------|
| SNP_114411_A_7823  | NW_004519778.1 | scaffold5839 | 7823                    | TT                              | AA                 | AA               | INTERGENIC      |               |                    |                    |
| SNP_114412_A_7849  | NW_004519778.1 | scaffold5839 | 7849                    | CC                              | TT                 | TT               | INTERGENIC      |               |                    |                    |
| SNP_114413_A_7859  | NW_004519778.1 | scaffold5839 | 7859                    | AA                              | GG                 | GG               | INTERGENIC      |               |                    |                    |
| SNP_114414_A_7898  | NW_004519778.1 | scaffold5839 | 7898                    | AA                              | GG                 | GG               | INTERGENIC      |               |                    |                    |
| SNP_114415_A_7925  | NW_004519778.1 | scaffold5839 | 7925                    | CC                              | GG                 | GG               | INTERGENIC      |               |                    |                    |
| SNP_114416_A_7975  | NW_004519778.1 | scaffold5839 | 7975                    | TT                              | GG                 | GG               | INTERGENIC      |               |                    |                    |
| SNP_114417_A_8009  | NW_004519778.1 | scaffold5839 | 8009                    | GG                              | AA                 | AA               | INTERGENIC      |               |                    |                    |
| SNP_114418_A_8025  | NW_004519778.1 | scaffold5839 | 8025                    | GG                              | TT                 | TT               | INTERGENIC      |               |                    |                    |
| SNP_114419_A_8145  | NW_004519778.1 | scaffold5839 | 8145                    | AA                              | GG                 | GG               | INTERGENIC      |               |                    |                    |
| SNP_114420_A_8192  | NW_004519778.1 | scaffold5839 | 8192                    | GG                              | AA                 | AA               | INTERGENIC      |               |                    |                    |
| SNP_114421_A_8284  | NW_004519778.1 | scaffold5839 | 8284                    | TT                              | CC                 | CC               | INTERGENIC      |               |                    |                    |
| SNP_114422_A_8285  | NW_004519778.1 | scaffold5839 | 8285                    | TT                              | CC                 | CC               | INTERGENIC      |               |                    |                    |
| SNP_114423_A_8321  | NW_004519778.1 | scaffold5839 | 8321                    | AA                              | CC                 | CC               | INTERGENIC      |               |                    |                    |
| SNP_114424_A_8327  | NW_004519778.1 | scaffold5839 | 8327                    | AA                              | GG                 | GG               | INTERGENIC      |               |                    |                    |
| SNP_114425_A_8333  | NW_004519778.1 | scaffold5839 | 8333                    | CC                              | TT                 | TT               | INTERGENIC      |               |                    |                    |
| SNP_114426_A_8375  | NW_004519778.1 | scaffold5839 | 8375                    | CC                              | TT                 | TT               | INTERGENIC      |               |                    |                    |
| SNP_114427_A_22714 | NW_004519778.1 | scaffold5839 | 22714                   | CC                              | GG                 | GG               | INTERGENIC      |               |                    |                    |
| SNP_114428_A_418   | NW_004519780.1 | scaffold5841 | 418                     | CC                              | TT                 | TT               | INTERGENIC      |               |                    |                    |
| SNP_114429_A_427   | NW_004519780.1 | scaffold5841 | 427                     | TT                              | GG                 | GG               | INTERGENIC      |               |                    |                    |
| SNP_114430_A_948   | NW_004519780.1 | scaffold5841 | 948                     | CC                              | TT                 | TT               | INTERGENIC      |               |                    |                    |
| SNP_114431_A_1052  | NW_004519780.1 | scaffold5841 | 1052                    | AA                              | GG                 | GG               | INTERGENIC      |               |                    |                    |
| SNP_114432_A_205   | NW_004519782.1 | scaffold5843 | 205                     | AA                              | GG                 | GG               | INTERGENIC      |               |                    |                    |

| SNPs IDs          | Chromosome IDs | Chromosomes  | Physical positions (bp) | CDC Frontier (Reference genome) | (Pusa 1103 & HPNB) | (ILWC 46 & LPNB) | Sequence genome | Components of | Gene accession IDs | Putative functions |
|-------------------|----------------|--------------|-------------------------|---------------------------------|--------------------|------------------|-----------------|---------------|--------------------|--------------------|
| SNP_114433_A_223  | NW_004519782.1 | scaffold5843 | 223                     | GG                              | AA                 | AA               | INTERGENIC      |               |                    |                    |
| SNP_114434_A_226  | NW_004519782.1 | scaffold5843 | 226                     | AA                              | GG                 | GG               | INTERGENIC      |               |                    |                    |
| SNP_114435_A_251  | NW_004519782.1 | scaffold5843 | 251                     | AA                              | TT                 | TT               | INTERGENIC      |               |                    |                    |
| SNP_114436_A_288  | NW_004519782.1 | scaffold5843 | 288                     | CC                              | TT                 | TT               | INTERGENIC      |               |                    |                    |
| SNP_114438_A_364  | NW_004519782.1 | scaffold5843 | 364                     | GG                              | TT                 | TT               | INTERGENIC      |               |                    |                    |
| SNP_114439_A_739  | NW_004519782.1 | scaffold5843 | 739                     | AA                              | GG                 | GG               | INTERGENIC      |               |                    |                    |
| SNP_114440_A_762  | NW_004519782.1 | scaffold5843 | 762                     | AA                              | GG                 | GG               | INTERGENIC      |               |                    |                    |
| SNP_114441_A_401  | NW_004519795.1 | scaffold5863 | 401                     | TT                              | GG                 | GG               | INTERGENIC      |               |                    |                    |
| SNP_114442_A_1260 | NW_004519796.1 | scaffold5864 | 1260                    | TT                              | CC                 | CC               | INTERGENIC      |               |                    |                    |
| SNP_114443_A_1433 | NW_004519796.1 | scaffold5864 | 1433                    | TT                              | CC                 | CC               | INTERGENIC      |               |                    |                    |
| SNP_114444_A_1436 | NW_004519796.1 | scaffold5864 | 1436                    | CC                              | GG                 | GG               | INTERGENIC      |               |                    |                    |
| SNP_114445_A_490  | NW_004519797.1 | scaffold5867 | 490                     | AA                              | GG                 | GG               | INTERGENIC      |               |                    |                    |
| SNP_114446_A_660  | NW_004519797.1 | scaffold5867 | 660                     | CC                              | GG                 | GG               | INTERGENIC      |               |                    |                    |
| SNP_114447_A_696  | NW_004519797.1 | scaffold5867 | 696                     | CC                              | AA                 | AA               | INTERGENIC      |               |                    |                    |
| SNP_114448_A_769  | NW_004519797.1 | scaffold5867 | 769                     | AA                              | GG                 | GG               | INTERGENIC      |               |                    |                    |
| SNP_114450_A_905  | NW_004519797.1 | scaffold5867 | 905                     | TT                              | GG                 | GG               | INTERGENIC      |               |                    |                    |
| SNP_114451_A_948  | NW_004519797.1 | scaffold5867 | 948                     | GG                              | CC                 | CC               | INTERGENIC      |               |                    |                    |
| SNP_114452_A_957  | NW_004519797.1 | scaffold5867 | 957                     | GG                              | CC                 | CC               | INTERGENIC      |               |                    |                    |
| SNP_114453_A_961  | NW_004519797.1 | scaffold5867 | 961                     | TT                              | CC                 | CC               | INTERGENIC      |               |                    |                    |
| SNP_114454_A_1008 | NW_004519797.1 | scaffold5867 | 1008                    | GG                              | AA                 | AA               | INTERGENIC      |               |                    |                    |
| SNP_114455_A_371  | NW_004519798.1 | scaffold5869 | 371                     | TT                              | CC                 | CC               | INTERGENIC      |               |                    |                    |
| SNP_114456_A_732  | NW_004519798.1 | scaffold5869 | 732                     | AA                              | GG                 | GG               | INTERGENIC      |               |                    |                    |

| SNPs IDs           | Chromosome IDs | Chromosomes  | Physical positions (bp) | CDC Frontier (Reference genome) | (Pusa 1103 & HPNB) | (ILWC 46 & LPNB) | Sequence Components of genome | Gene accession IDs | Putative functions  |
|--------------------|----------------|--------------|-------------------------|---------------------------------|--------------------|------------------|-------------------------------|--------------------|---------------------|
| SNP_114457_A_817   | NW_004519798.1 | scaffold5869 | 817                     | CC                              | AA                 | AA               | INTERGENIC                    |                    |                     |
| SNP_114458_A_4559  | NW_004519798.1 | scaffold5869 | 4559                    | CC                              | GG                 | GG               | INTERGENIC                    |                    |                     |
| SNP_114459_A_5277  | NW_004519798.1 | scaffold5869 | 5277                    | GG                              | AA                 | AA               | INTERGENIC                    |                    |                     |
| SNP_114460_A_5474  | NW_004519798.1 | scaffold5869 | 5474                    | GG                              | AA                 | AA               | INTERGENIC                    |                    |                     |
| SNP_114461_A_5496  | NW_004519798.1 | scaffold5869 | 5496                    | CC                              | TT                 | TT               | INTERGENIC                    |                    |                     |
| SNP_114462_A_7772  | NW_004519798.1 | scaffold5869 | 7772                    | AA                              | GG                 | GG               | INTERGENIC                    |                    |                     |
| SNP_114463_A_7811  | NW_004519798.1 | scaffold5869 | 7811                    | GG                              | AA                 | AA               | INTERGENIC                    |                    |                     |
| SNP_114464_A_7815  | NW_004519798.1 | scaffold5869 | 7815                    | AA                              | GG                 | GG               | INTERGENIC                    |                    |                     |
| SNP_114465_A_8044  | NW_004519798.1 | scaffold5869 | 8044                    | AA                              | GG                 | GG               | INTERGENIC                    |                    |                     |
| SNP_114466_A_8068  | NW_004519798.1 | scaffold5869 | 8068                    | TT                              | CC                 | CC               | INTERGENIC                    |                    |                     |
| SNP_114467_A_8085  | NW_004519798.1 | scaffold5869 | 8085                    | GG                              | AA                 | AA               | INTERGENIC                    |                    |                     |
| SNP_114468_A_8116  | NW_004519798.1 | scaffold5869 | 8116                    | CC                              | TT                 | TT               | INTERGENIC                    |                    |                     |
| SNP_114469_A_8143  | NW_004519798.1 | scaffold5869 | 8143                    | AA                              | GG                 | GG               | INTERGENIC                    |                    |                     |
| SNP_114470_A_8153  | NW_004519798.1 | scaffold5869 | 8153                    | TT                              | CC                 | CC               | INTERGENIC                    |                    |                     |
| SNP_114471_A_12565 | NW_004519798.1 | scaffold5869 | 12565                   | AA                              | GG                 | GG               | SYNONYMOUS_CODING             | 101504694          | pectinesterase-like |
| SNP_114472_A_12591 | NW_004519798.1 | scaffold5869 | 12591                   | TT                              | GG                 | GG               | NON_SYNONYMOUS_CODING         | 101504694          | pectinesterase-like |
| SNP_114473_A_17897 | NW_004519798.1 | scaffold5869 | 17897                   | CC                              | TT                 | TT               | INTERGENIC                    |                    |                     |
| SNP_114474_A_17953 | NW_004519798.1 | scaffold5869 | 17953                   | AA                              | TT                 | TT               | INTERGENIC                    |                    |                     |
| SNP_114475_A_17992 | NW_004519798.1 | scaffold5869 | 17992                   | AA                              | TT                 | TT               | INTERGENIC                    |                    |                     |
| SNP_114476_A_18147 | NW_004519798.1 | scaffold5869 | 18147                   | CC                              | TT                 | TT               | INTERGENIC                    |                    |                     |
| SNP_114477_A_865   | NW_004519799.1 | scaffold5871 | 865                     | CC                              | GG                 | GG               | INTERGENIC                    |                    |                     |
| SNP_114478_A_380   | NW_004519800.1 | scaffold5872 | 380                     | CC                              | AA                 | AA               | INTERGENIC                    |                    |                     |

| SNPs IDs           | Chromosome IDs | Chromosomes  | Physical positions (bp) | CDC Frontier (Reference genome) | (Pusa 1103 & HPNB) | (ILWC 46 & LPNB) | Sequence genome | Components of | Gene accession IDs | Putative functions |
|--------------------|----------------|--------------|-------------------------|---------------------------------|--------------------|------------------|-----------------|---------------|--------------------|--------------------|
| SNP_114479_A_861   | NW_004519806.1 | scaffold5880 | 861                     | CC                              | TT                 | TT               | INTERGENIC      |               |                    |                    |
| SNP_114480_A_717   | NW_004519809.1 | scaffold5883 | 717                     | TT                              | GG                 | GG               | INTERGENIC      |               |                    |                    |
| SNP_114481_A_726   | NW_004519809.1 | scaffold5883 | 726                     | TT                              | CC                 | CC               | INTERGENIC      |               |                    |                    |
| SNP_114482_A_774   | NW_004519812.1 | scaffold5889 | 774                     | AA                              | GG                 | GG               | INTERGENIC      |               |                    |                    |
| SNP_114483_A_814   | NW_004519812.1 | scaffold5889 | 814                     | GG                              | AA                 | AA               | INTERGENIC      |               |                    |                    |
| SNP_114484_A_819   | NW_004519812.1 | scaffold5889 | 819                     | CC                              | TT                 | TT               | INTERGENIC      |               |                    |                    |
| SNP_114485_A_827   | NW_004519812.1 | scaffold5889 | 827                     | AA                              | TT                 | TT               | INTERGENIC      |               |                    |                    |
| SNP_114486_A_1154  | NW_004519812.1 | scaffold5889 | 1154                    | GG                              | TT                 | TT               | INTERGENIC      |               |                    |                    |
| SNP_114487_A_1155  | NW_004519812.1 | scaffold5889 | 1155                    | AA                              | GG                 | GG               | INTERGENIC      |               |                    |                    |
| SNP_114488_A_1581  | NW_004519812.1 | scaffold5889 | 1581                    | GG                              | AA                 | AA               | INTERGENIC      |               |                    |                    |
| SNP_114489_A_20417 | NW_004519812.1 | scaffold5889 | 20417                   | CC                              | TT                 | TT               | INTERGENIC      |               |                    |                    |
| SNP_114490_A_20890 | NW_004519812.1 | scaffold5889 | 20890                   | TT                              | CC                 | CC               | INTERGENIC      |               |                    |                    |
| SNP_114491_A_21033 | NW_004519812.1 | scaffold5889 | 21033                   | TT                              | GG                 | GG               | INTERGENIC      |               |                    |                    |
| SNP_114492_A_895   | NW_004519813.1 | scaffold5891 | 895                     | GG                              | AA                 | AA               | INTERGENIC      |               |                    |                    |
| SNP_114494_A_4961  | NW_004519813.1 | scaffold5891 | 4961                    | AA                              | TT                 | TT               | INTERGENIC      |               |                    |                    |
| SNP_114495_A_4975  | NW_004519813.1 | scaffold5891 | 4975                    | TT                              | AA                 | AA               | INTERGENIC      |               |                    |                    |
| SNP_114497_A_5893  | NW_004519813.1 | scaffold5891 | 5893                    | GG                              | TT                 | TT               | INTERGENIC      |               |                    |                    |
| SNP_114498_A_6516  | NW_004519813.1 | scaffold5891 | 6516                    | TT                              | AA                 | AA               | INTERGENIC      |               |                    |                    |
| SNP_114499_A_184   | NW_004519820.1 | scaffold5900 | 184                     | AA                              | GG                 | GG               | INTERGENIC      |               |                    |                    |
| SNP_114500_A_332   | NW_004519820.1 | scaffold5900 | 332                     | AA                              | GG                 | GG               | INTERGENIC      |               |                    |                    |
| SNP_114501_A_489   | NW_004519820.1 | scaffold5900 | 489                     | TT                              | AA                 | AA               | INTERGENIC      |               |                    |                    |
| SNP_114502_A_539   | NW_004519820.1 | scaffold5900 | 539                     | AA                              | GG                 | GG               | INTERGENIC      |               |                    |                    |



| SNPs IDs           | Chromosome IDs | Chromosomes  | Physical positions (bp) | CDC Frontier (Reference genome) | (Pusa 1103 & HPNB) | (ILWC 46 & LPNB) | Sequence genome | Components of | Gene accession IDs | Putative functions |
|--------------------|----------------|--------------|-------------------------|---------------------------------|--------------------|------------------|-----------------|---------------|--------------------|--------------------|
| SNP_114503_A_591   | NW_004519820.1 | scaffold5900 | 591                     | AA                              | GG                 | GG               | INTERGENIC      |               |                    |                    |
| SNP_114504_A_593   | NW_004519820.1 | scaffold5900 | 593                     | TT                              | CC                 | CC               | INTERGENIC      |               |                    |                    |
| SNP_114505_A_654   | NW_004519820.1 | scaffold5900 | 654                     | TT                              | CC                 | CC               | INTERGENIC      |               |                    |                    |
| SNP_114506_A_661   | NW_004519820.1 | scaffold5900 | 661                     | AA                              | GG                 | GG               | INTERGENIC      |               |                    |                    |
| SNP_114507_A_693   | NW_004519820.1 | scaffold5900 | 693                     | AA                              | CC                 | CC               | INTERGENIC      |               |                    |                    |
| SNP_114508_A_4968  | NW_004519821.1 | scaffold5901 | 4968                    | TT                              | CC                 | CC               | INTERGENIC      |               |                    |                    |
| SNP_114509_A_4993  | NW_004519821.1 | scaffold5901 | 4993                    | CC                              | TT                 | TT               | INTERGENIC      |               |                    |                    |
| SNP_114510_A_5006  | NW_004519821.1 | scaffold5901 | 5006                    | TT                              | CC                 | CC               | INTERGENIC      |               |                    |                    |
| SNP_114511_A_5034  | NW_004519821.1 | scaffold5901 | 5034                    | GG                              | AA                 | AA               | INTERGENIC      |               |                    |                    |
| SNP_114513_A_5103  | NW_004519821.1 | scaffold5901 | 5103                    | GG                              | AA                 | AA               | INTERGENIC      |               |                    |                    |
| SNP_114514_A_5114  | NW_004519821.1 | scaffold5901 | 5114                    | CC                              | TT                 | TT               | INTERGENIC      |               |                    |                    |
| SNP_114515_A_214   | NW_004519823.1 | scaffold5904 | 214                     | TT                              | CC                 | CC               | INTERGENIC      |               |                    |                    |
| SNP_114516_A_14778 | NW_004519823.1 | scaffold5904 | 14778                   | AA                              | CC                 | CC               | INTERGENIC      |               |                    |                    |
| SNP_114517_A_15169 | NW_004519823.1 | scaffold5904 | 15169                   | AA                              | GG                 | GG               | INTERGENIC      |               |                    |                    |
| SNP_114518_A_17151 | NW_004519823.1 | scaffold5904 | 17151                   | AA                              | GG                 | GG               | INTERGENIC      |               |                    |                    |
| SNP_114519_A_17254 | NW_004519823.1 | scaffold5904 | 17254                   | TT                              | GG                 | GG               | INTERGENIC      |               |                    |                    |
| SNP_114521_A_17408 | NW_004519823.1 | scaffold5904 | 17408                   | AA                              | TT                 | TT               | INTERGENIC      |               |                    |                    |
| SNP_114522_A_17430 | NW_004519823.1 | scaffold5904 | 17430                   | TT                              | AA                 | AA               | INTERGENIC      |               |                    |                    |
| SNP_114523_A_17455 | NW_004519823.1 | scaffold5904 | 17455                   | GG                              | AA                 | AA               | INTERGENIC      |               |                    |                    |
| SNP_114524_A_17582 | NW_004519823.1 | scaffold5904 | 17582                   | TT                              | CC                 | CC               | INTERGENIC      |               |                    |                    |
| SNP_114525_A_17679 | NW_004519823.1 | scaffold5904 | 17679                   | TT                              | AA                 | AA               | INTERGENIC      |               |                    |                    |
| SNP_114526_A_17966 | NW_004519823.1 | scaffold5904 | 17966                   | AA                              | GG                 | GG               | INTERGENIC      |               |                    |                    |

| SNPs IDs           | Chromosome IDs | Chromosomes  | Physical positions (bp) | CDC Frontier (Reference genome) | (Pusa 1103 & HPNB) | (ILWC 46 & LPNB) | Sequence genome | Components of | Gene accession IDs | Putative functions |
|--------------------|----------------|--------------|-------------------------|---------------------------------|--------------------|------------------|-----------------|---------------|--------------------|--------------------|
| SNP_114527_A_22251 | NW_004519823.1 | scaffold5904 | 22251                   | TT                              | GG                 | GG               | INTERGENIC      |               |                    |                    |
| SNP_114528_A_22377 | NW_004519823.1 | scaffold5904 | 22377                   | TT                              | AA                 | AA               | INTERGENIC      |               |                    |                    |
| SNP_114529_A_22469 | NW_004519823.1 | scaffold5904 | 22469                   | AA                              | CC                 | CC               | INTERGENIC      |               |                    |                    |
| SNP_114530_A_22565 | NW_004519823.1 | scaffold5904 | 22565                   | CC                              | AA                 | AA               | INTERGENIC      |               |                    |                    |
| SNP_114531_A_22683 | NW_004519823.1 | scaffold5904 | 22683                   | TT                              | CC                 | CC               | INTERGENIC      |               |                    |                    |
| SNP_114532_A_22727 | NW_004519823.1 | scaffold5904 | 22727                   | CC                              | TT                 | TT               | INTERGENIC      |               |                    |                    |
| SNP_114533_A_23293 | NW_004519823.1 | scaffold5904 | 23293                   | AA                              | TT                 | TT               | INTERGENIC      |               |                    |                    |
| SNP_114535_A_23440 | NW_004519823.1 | scaffold5904 | 23440                   | CC                              | AA                 | AA               | INTERGENIC      |               |                    |                    |
| SNP_114536_A_2326  | NW_004519827.1 | scaffold5909 | 2326                    | TT                              | AA                 | AA               | INTERGENIC      |               |                    |                    |
| SNP_114537_A_2336  | NW_004519827.1 | scaffold5909 | 2336                    | AA                              | CC                 | CC               | INTERGENIC      |               |                    |                    |
| SNP_114538_A_2503  | NW_004519827.1 | scaffold5909 | 2503                    | GG                              | CC                 | CC               | INTERGENIC      |               |                    |                    |
| SNP_114539_A_1070  | NW_004519829.1 | scaffold5913 | 1070                    | TT                              | AA                 | AA               | INTERGENIC      |               |                    |                    |
| SNP_114540_A_1098  | NW_004519829.1 | scaffold5913 | 1098                    | GG                              | TT                 | TT               | INTERGENIC      |               |                    |                    |
| SNP_114541_A_776   | NW_004519830.1 | scaffold5914 | 776                     | CC                              | TT                 | TT               | INTERGENIC      |               |                    |                    |
| SNP_114542_A_789   | NW_004519830.1 | scaffold5914 | 789                     | AA                              | CC                 | CC               | INTERGENIC      |               |                    |                    |
| SNP_114543_A_1223  | NW_004519830.1 | scaffold5914 | 1223                    | AA                              | CC                 | CC               | INTERGENIC      |               |                    |                    |
| SNP_114544_A_830   | NW_004519832.1 | scaffold5916 | 830                     | AA                              | TT                 | TT               | INTERGENIC      |               |                    |                    |
| SNP_114545_A_835   | NW_004519832.1 | scaffold5916 | 835                     | GG                              | AA                 | AA               | INTERGENIC      |               |                    |                    |
| SNP_114546_A_877   | NW_004519832.1 | scaffold5916 | 877                     | GG                              | AA                 | AA               | INTERGENIC      |               |                    |                    |
| SNP_114547_A_894   | NW_004519832.1 | scaffold5916 | 894                     | CC                              | GG                 | GG               | INTERGENIC      |               |                    |                    |
| SNP_114548_A_911   | NW_004519832.1 | scaffold5916 | 911                     | AA                              | GG                 | GG               | INTERGENIC      |               |                    |                    |
| SNP_114549_A_918   | NW_004519832.1 | scaffold5916 | 918                     | TT                              | CC                 | CC               | INTERGENIC      |               |                    |                    |

| SNPs IDs          | Chromosome IDs | Chromosomes  | Physical positions (bp) | CDC Frontier (Reference genome) | (Pusa 1103 & HPNB) | (ILWC 46 & LPNB) | Sequence genome | Components of | Gene accession IDs | Putative functions |
|-------------------|----------------|--------------|-------------------------|---------------------------------|--------------------|------------------|-----------------|---------------|--------------------|--------------------|
| SNP_114550_A_957  | NW_004519832.1 | scaffold5916 | 957                     | TT                              | CC                 | CC               | INTERGENIC      |               |                    |                    |
| SNP_114551_A_962  | NW_004519832.1 | scaffold5916 | 962                     | CC                              | AA                 | AA               | INTERGENIC      |               |                    |                    |
| SNP_114552_A_971  | NW_004519832.1 | scaffold5916 | 971                     | CC                              | AA                 | AA               | INTERGENIC      |               |                    |                    |
| SNP_114553_A_1080 | NW_004519832.1 | scaffold5916 | 1080                    | TT                              | GG                 | GG               | INTERGENIC      |               |                    |                    |
| SNP_114555_A_1331 | NW_004519832.1 | scaffold5916 | 1331                    | CC                              | TT                 | TT               | INTERGENIC      |               |                    |                    |
| SNP_114556_A_731  | NW_004519833.1 | scaffold5917 | 731                     | TT                              | CC                 | CC               | INTERGENIC      |               |                    |                    |
| SNP_114557_A_868  | NW_004519833.1 | scaffold5917 | 868                     | GG                              | TT                 | TT               | INTERGENIC      |               |                    |                    |
| SNP_114558_A_46   | NW_004519834.1 | scaffold5918 | 46                      | AA                              | GG                 | GG               | INTERGENIC      |               |                    |                    |
| SNP_114559_A_64   | NW_004519834.1 | scaffold5918 | 64                      | CC                              | AA                 | AA               | INTERGENIC      |               |                    |                    |
| SNP_114560_A_91   | NW_004519834.1 | scaffold5918 | 91                      | AA                              | TT                 | TT               | INTERGENIC      |               |                    |                    |
| SNP_114561_A_116  | NW_004519834.1 | scaffold5918 | 116                     | CC                              | TT                 | TT               | INTERGENIC      |               |                    |                    |
| SNP_114562_A_118  | NW_004519834.1 | scaffold5918 | 118                     | AA                              | CC                 | CC               | INTERGENIC      |               |                    |                    |
| SNP_114563_A_132  | NW_004519834.1 | scaffold5918 | 132                     | AA                              | GG                 | GG               | INTERGENIC      |               |                    |                    |
| SNP_114564_A_133  | NW_004519834.1 | scaffold5918 | 133                     | AA                              | GG                 | GG               | INTERGENIC      |               |                    |                    |
| SNP_114565_A_285  | NW_004519834.1 | scaffold5918 | 285                     | AA                              | CC                 | CC               | INTERGENIC      |               |                    |                    |
| SNP_114566_A_310  | NW_004519834.1 | scaffold5918 | 310                     | GG                              | AA                 | AA               | INTERGENIC      |               |                    |                    |
| SNP_114567_A_312  | NW_004519834.1 | scaffold5918 | 312                     | GG                              | TT                 | TT               | INTERGENIC      |               |                    |                    |
| SNP_114568_A_338  | NW_004519834.1 | scaffold5918 | 338                     | CC                              | AA                 | AA               | INTERGENIC      |               |                    |                    |
| SNP_114569_A_340  | NW_004519834.1 | scaffold5918 | 340                     | AA                              | TT                 | TT               | INTERGENIC      |               |                    |                    |
| SNP_114570_A_500  | NW_004519834.1 | scaffold5918 | 500                     | AA                              | CC                 | CC               | INTERGENIC      |               |                    |                    |
| SNP_114571_A_522  | NW_004519834.1 | scaffold5918 | 522                     | GG                              | AA                 | AA               | INTERGENIC      |               |                    |                    |
| SNP_114572_A_540  | NW_004519834.1 | scaffold5918 | 540                     | GG                              | AA                 | AA               | INTERGENIC      |               |                    |                    |

| SNPs IDs          | Chromosome IDs | Chromosomes  | Physical positions (bp) | CDC Frontier (Reference genome) | (Pusa 1103 & HPNB) | (ILWC 46 & LPNB) | Sequence genome | Components of | Gene accession IDs | Putative functions |
|-------------------|----------------|--------------|-------------------------|---------------------------------|--------------------|------------------|-----------------|---------------|--------------------|--------------------|
| SNP_114573_A_591  | NW_004519834.1 | scaffold5918 | 591                     | TT                              | CC                 | CC               | INTERGENIC      |               |                    |                    |
| SNP_114574_A_616  | NW_004519834.1 | scaffold5918 | 616                     | AA                              | TT                 | TT               | INTERGENIC      |               |                    |                    |
| SNP_114575_A_617  | NW_004519834.1 | scaffold5918 | 617                     | CC                              | TT                 | TT               | INTERGENIC      |               |                    |                    |
| SNP_114576_A_659  | NW_004519834.1 | scaffold5918 | 659                     | AA                              | TT                 | TT               | INTERGENIC      |               |                    |                    |
| SNP_114577_A_812  | NW_004519834.1 | scaffold5918 | 812                     | TT                              | GG                 | GG               | INTERGENIC      |               |                    |                    |
| SNP_114578_A_829  | NW_004519834.1 | scaffold5918 | 829                     | GG                              | TT                 | TT               | INTERGENIC      |               |                    |                    |
| SNP_114579_A_845  | NW_004519834.1 | scaffold5918 | 845                     | AA                              | GG                 | GG               | INTERGENIC      |               |                    |                    |
| SNP_114580_A_871  | NW_004519834.1 | scaffold5918 | 871                     | GG                              | AA                 | AA               | INTERGENIC      |               |                    |                    |
| SNP_114581_A_896  | NW_004519834.1 | scaffold5918 | 896                     | CC                              | TT                 | TT               | INTERGENIC      |               |                    |                    |
| SNP_114582_A_899  | NW_004519834.1 | scaffold5918 | 899                     | CC                              | AA                 | AA               | INTERGENIC      |               |                    |                    |
| SNP_114583_A_1066 | NW_004519834.1 | scaffold5918 | 1066                    | TT                              | CC                 | CC               | INTERGENIC      |               |                    |                    |
| SNP_114584_A_1088 | NW_004519834.1 | scaffold5918 | 1088                    | GG                              | AA                 | AA               | INTERGENIC      |               |                    |                    |
| SNP_114585_A_1119 | NW_004519834.1 | scaffold5918 | 1119                    | TT                              | CC                 | CC               | INTERGENIC      |               |                    |                    |
| SNP_114586_A_840  | NW_004519836.1 | scaffold5920 | 840                     | CC                              | TT                 | TT               | INTERGENIC      |               |                    |                    |
| SNP_114588_A_573  | NW_004519837.1 | scaffold5921 | 573                     | TT                              | CC                 | CC               | INTERGENIC      |               |                    |                    |
| SNP_114589_A_588  | NW_004519837.1 | scaffold5921 | 588                     | AA                              | CC                 | CC               | INTERGENIC      |               |                    |                    |
| SNP_114590_A_647  | NW_004519837.1 | scaffold5921 | 647                     | AA                              | CC                 | CC               | INTERGENIC      |               |                    |                    |
| SNP_114591_A_687  | NW_004519837.1 | scaffold5921 | 687                     | GG                              | CC                 | CC               | INTERGENIC      |               |                    |                    |
| SNP_114592_A_389  | NW_004519839.1 | scaffold5923 | 389                     | GG                              | AA                 | AA               | INTERGENIC      |               |                    |                    |
| SNP_114594_A_489  | NW_004519839.1 | scaffold5923 | 489                     | GG                              | CC                 | CC               | INTERGENIC      |               |                    |                    |
| SNP_114595_A_1840 | NW_004519840.1 | scaffold5925 | 1840                    | TT                              | CC                 | CC               | INTERGENIC      |               |                    |                    |
| SNP_114596_A_1915 | NW_004519840.1 | scaffold5925 | 1915                    | GG                              | AA                 | AA               | INTERGENIC      |               |                    |                    |

| SNPs IDs          | Chromosome IDs | Chromosomes  | Physical positions (bp) | CDC Frontier (Reference genome) | (Pusa 1103 & HPNB) | (ILWC 46 & LPNB) | Sequence genome | Components of | Gene accession IDs | Putative functions |
|-------------------|----------------|--------------|-------------------------|---------------------------------|--------------------|------------------|-----------------|---------------|--------------------|--------------------|
| SNP_114597_A_2114 | NW_004519840.1 | scaffold5925 | 2114                    | GG                              | AA                 | AA               | INTERGENIC      |               |                    |                    |
| SNP_114598_A_850  | NW_004519843.1 | scaffold5928 | 850                     | AA                              | CC                 | CC               | INTERGENIC      |               |                    |                    |
| SNP_114599_A_1074 | NW_004519843.1 | scaffold5928 | 1074                    | GG                              | CC                 | CC               | INTERGENIC      |               |                    |                    |
| SNP_114600_A_1312 | NW_004519843.1 | scaffold5928 | 1312                    | GG                              | AA                 | AA               | INTERGENIC      |               |                    |                    |
| SNP_114601_A_1358 | NW_004519843.1 | scaffold5928 | 1358                    | CC                              | TT                 | TT               | INTERGENIC      |               |                    |                    |
| SNP_114602_A_1365 | NW_004519843.1 | scaffold5928 | 1365                    | GG                              | AA                 | AA               | INTERGENIC      |               |                    |                    |
| SNP_114603_A_1372 | NW_004519843.1 | scaffold5928 | 1372                    | GG                              | CC                 | CC               | INTERGENIC      |               |                    |                    |
| SNP_114604_A_1388 | NW_004519843.1 | scaffold5928 | 1388                    | TT                              | CC                 | CC               | INTERGENIC      |               |                    |                    |
| SNP_114605_A_1411 | NW_004519843.1 | scaffold5928 | 1411                    | TT                              | AA                 | AA               | INTERGENIC      |               |                    |                    |
| SNP_114606_A_1501 | NW_004519843.1 | scaffold5928 | 1501                    | TT                              | CC                 | CC               | INTERGENIC      |               |                    |                    |
| SNP_114607_A_1810 | NW_004519843.1 | scaffold5928 | 1810                    | TT                              | GG                 | GG               | INTERGENIC      |               |                    |                    |
| SNP_114608_A_1836 | NW_004519843.1 | scaffold5928 | 1836                    | AA                              | GG                 | GG               | INTERGENIC      |               |                    |                    |
| SNP_114609_A_1924 | NW_004519843.1 | scaffold5928 | 1924                    | AA                              | TT                 | TT               | INTERGENIC      |               |                    |                    |
| SNP_114610_A_2022 | NW_004519843.1 | scaffold5928 | 2022                    | AA                              | GG                 | GG               | INTERGENIC      |               |                    |                    |
| SNP_114611_A_2070 | NW_004519843.1 | scaffold5928 | 2070                    | AA                              | GG                 | GG               | INTERGENIC      |               |                    |                    |
| SNP_114612_A_2076 | NW_004519843.1 | scaffold5928 | 2076                    | TT                              | GG                 | GG               | INTERGENIC      |               |                    |                    |
| SNP_114613_A_2409 | NW_004519843.1 | scaffold5928 | 2409                    | AA                              | GG                 | GG               | INTERGENIC      |               |                    |                    |
| SNP_114614_A_2422 | NW_004519843.1 | scaffold5928 | 2422                    | CC                              | AA                 | AA               | INTERGENIC      |               |                    |                    |
| SNP_114615_A_2428 | NW_004519843.1 | scaffold5928 | 2428                    | AA                              | CC                 | CC               | INTERGENIC      |               |                    |                    |
| SNP_114616_A_2437 | NW_004519843.1 | scaffold5928 | 2437                    | GG                              | AA                 | AA               | INTERGENIC      |               |                    |                    |
| SNP_114617_A_2489 | NW_004519843.1 | scaffold5928 | 2489                    | TT                              | CC                 | CC               | INTERGENIC      |               |                    |                    |
| SNP_114618_A_2563 | NW_004519843.1 | scaffold5928 | 2563                    | AA                              | GG                 | GG               | INTERGENIC      |               |                    |                    |

| SNPs IDs          | Chromosome IDs | Chromosomes  | Physical positions (bp) | CDC Frontier (Reference genome) | (Pusa 1103 & HPNB) | (ILWC 46 & LPNB) | Sequence genome | Components of | Gene accession IDs | Putative functions |
|-------------------|----------------|--------------|-------------------------|---------------------------------|--------------------|------------------|-----------------|---------------|--------------------|--------------------|
| SNP_114619_A_2697 | NW_004519843.1 | scaffold5928 | 2697                    | TT                              | GG                 | GG               | INTERGENIC      |               |                    |                    |
| SNP_114620_A_2732 | NW_004519843.1 | scaffold5928 | 2732                    | TT                              | CC                 | CC               | INTERGENIC      |               |                    |                    |
| SNP_114621_A_2803 | NW_004519843.1 | scaffold5928 | 2803                    | GG                              | AA                 | AA               | INTERGENIC      |               |                    |                    |
| SNP_114622_A_2901 | NW_004519843.1 | scaffold5928 | 2901                    | CC                              | TT                 | TT               | INTERGENIC      |               |                    |                    |
| SNP_114623_A_2939 | NW_004519843.1 | scaffold5928 | 2939                    | CC                              | TT                 | TT               | INTERGENIC      |               |                    |                    |
| SNP_114624_A_2980 | NW_004519843.1 | scaffold5928 | 2980                    | TT                              | CC                 | CC               | INTERGENIC      |               |                    |                    |
| SNP_114625_A_3205 | NW_004519843.1 | scaffold5928 | 3205                    | CC                              | GG                 | GG               | INTERGENIC      |               |                    |                    |
| SNP_114626_A_3823 | NW_004519843.1 | scaffold5928 | 3823                    | GG                              | AA                 | AA               | INTERGENIC      |               |                    |                    |
| SNP_114628_A_4135 | NW_004519843.1 | scaffold5928 | 4135                    | CC                              | TT                 | TT               | INTERGENIC      |               |                    |                    |
| SNP_114629_A_4374 | NW_004519843.1 | scaffold5928 | 4374                    | AA                              | TT                 | TT               | INTERGENIC      |               |                    |                    |
| SNP_114630_A_8268 | NW_004519843.1 | scaffold5928 | 8268                    | AA                              | TT                 | TT               | INTERGENIC      |               |                    |                    |
| SNP_114631_A_8276 | NW_004519843.1 | scaffold5928 | 8276                    | CC                              | TT                 | TT               | INTERGENIC      |               |                    |                    |
| SNP_114632_A_8280 | NW_004519843.1 | scaffold5928 | 8280                    | AA                              | CC                 | CC               | INTERGENIC      |               |                    |                    |
| SNP_114633_A_8285 | NW_004519843.1 | scaffold5928 | 8285                    | TT                              | CC                 | CC               | INTERGENIC      |               |                    |                    |
| SNP_114634_A_8291 | NW_004519843.1 | scaffold5928 | 8291                    | TT                              | AA                 | AA               | INTERGENIC      |               |                    |                    |
| SNP_114635_A_8300 | NW_004519843.1 | scaffold5928 | 8300                    | AA                              | GG                 | GG               | INTERGENIC      |               |                    |                    |
| SNP_114636_A_8355 | NW_004519843.1 | scaffold5928 | 8355                    | CC                              | GG                 | GG               | INTERGENIC      |               |                    |                    |
| SNP_114637_A_8382 | NW_004519843.1 | scaffold5928 | 8382                    | GG                              | AA                 | AA               | INTERGENIC      |               |                    |                    |
| SNP_114638_A_8402 | NW_004519843.1 | scaffold5928 | 8402                    | TT                              | GG                 | GG               | INTERGENIC      |               |                    |                    |
| SNP_114639_A_8424 | NW_004519843.1 | scaffold5928 | 8424                    | TT                              | GG                 | AA               | INTERGENIC      |               |                    |                    |
| SNP_114640_A_8662 | NW_004519843.1 | scaffold5928 | 8662                    | TT                              | GG                 | GG               | INTERGENIC      |               |                    |                    |
| SNP_114641_A_8676 | NW_004519843.1 | scaffold5928 | 8676                    | AA                              | CC                 | CC               | INTERGENIC      |               |                    |                    |

| SNPs IDs           | Chromosome IDs | Chromosomes  | Physical positions (bp) | CDC Frontier (Reference genome) | (Pusa 1103 & HPNB) | (ILWC 46 & LPNB) | Sequence Components of genome | Gene accession IDs | Putative functions           |
|--------------------|----------------|--------------|-------------------------|---------------------------------|--------------------|------------------|-------------------------------|--------------------|------------------------------|
| SNP_114642_A_8857  | NW_004519843.1 | scaffold5928 | 8857                    | AA                              | TT                 | TT               | INTERGENIC                    |                    |                              |
| SNP_114643_A_8916  | NW_004519843.1 | scaffold5928 | 8916                    | AA                              | CC                 | CC               | INTERGENIC                    |                    |                              |
| SNP_114644_A_1674  | NW_004519844.1 | scaffold5929 | 1674                    | AA                              | CC                 | CC               | INTERGENIC                    |                    |                              |
| SNP_114645_A_20565 | NW_004519846.1 | scaffold5932 | 20565                   | CC                              | TT                 | TT               | SYNONYMOUS_CODING             | 101505019          | uncharacterized LOC101505019 |
| SNP_114646_A_28938 | NW_004519848.1 | scaffold5934 | 28938                   | CC                              | TT                 | TT               | INTERGENIC                    |                    |                              |
| SNP_114647_A_28971 | NW_004519848.1 | scaffold5934 | 28971                   | TT                              | CC                 | CC               | INTERGENIC                    |                    |                              |
| SNP_114648_A_28983 | NW_004519848.1 | scaffold5934 | 28983                   | AA                              | GG                 | GG               | INTERGENIC                    |                    |                              |
| SNP_114649_A_28998 | NW_004519848.1 | scaffold5934 | 28998                   | AA                              | GG                 | GG               | INTERGENIC                    |                    |                              |
| SNP_114650_A_29057 | NW_004519848.1 | scaffold5934 | 29057                   | AA                              | CC                 | CC               | INTERGENIC                    |                    |                              |
| SNP_114651_A_64    | NW_004519852.1 | scaffold5938 | 64                      | TT                              | GG                 | GG               | INTERGENIC                    |                    |                              |
| SNP_114652_A_105   | NW_004519852.1 | scaffold5938 | 105                     | CC                              | TT                 | TT               | INTERGENIC                    |                    |                              |
| SNP_114653_A_64    | NW_004519853.1 | scaffold5939 | 64                      | TT                              | GG                 | GG               | INTERGENIC                    |                    |                              |
| SNP_114654_A_65    | NW_004519853.1 | scaffold5939 | 65                      | TT                              | CC                 | CC               | INTERGENIC                    |                    |                              |
| SNP_114655_A_90    | NW_004519853.1 | scaffold5939 | 90                      | CC                              | TT                 | TT               | INTERGENIC                    |                    |                              |
| SNP_114656_A_91    | NW_004519853.1 | scaffold5939 | 91                      | GG                              | TT                 | TT               | INTERGENIC                    |                    |                              |
| SNP_114657_A_415   | NW_004519853.1 | scaffold5939 | 415                     | AA                              | GG                 | GG               | INTERGENIC                    |                    |                              |
| SNP_114658_A_486   | NW_004519856.1 | scaffold5945 | 486                     | TT                              | AA                 | AA               | DRR                           | 101505339          | Unknown function             |
| SNP_114659_A_1043  | NW_004519856.1 | scaffold5945 | 1043                    | CC                              | TT                 | TT               | DRR                           | 101505339          | Unknown function             |
| SNP_114660_A_1055  | NW_004519856.1 | scaffold5945 | 1055                    | GG                              | AA                 | AA               | DRR                           | 101505339          | Unknown function             |
| SNP_114661_A_1132  | NW_004519856.1 | scaffold5945 | 1132                    | CC                              | TT                 | TT               | DRR                           | 101505339          | Unknown function             |
| SNP_114662_A_1149  | NW_004519856.1 | scaffold5945 | 1149                    | TT                              | GG                 | GG               | DRR                           | 101505339          | Unknown function             |
| SNP_114663_A_1150  | NW_004519856.1 | scaffold5945 | 1150                    | GG                              | TT                 | TT               | DRR                           | 101505339          | Unknown function             |

| SNPs IDs          | Chromosome IDs | Chromosomes  | Physical positions (bp) | CDC Frontier (Reference genome) | (Pusa 1103 & HPNB) | (ILWC 46 & LPNB) | Sequence Components of genome | Gene accession IDs | Putative functions |
|-------------------|----------------|--------------|-------------------------|---------------------------------|--------------------|------------------|-------------------------------|--------------------|--------------------|
| SNP_114664_A_1181 | NW_004519856.1 | scaffold5945 | 1181                    | CC                              | AA                 | AA               | DRR                           | 101505339          | Unknown function   |
| SNP_114665_A_1310 | NW_004519856.1 | scaffold5945 | 1310                    | TT                              | CC                 | CC               | SYNONYMOUS_CODING             | 101505339          | Unknown function   |
| SNP_114667_A_1779 | NW_004519859.1 | scaffold5952 | 1779                    | GG                              | TT                 | TT               | INTERGENIC                    |                    |                    |
| SNP_114668_A_1783 | NW_004519859.1 | scaffold5952 | 1783                    | TT                              | CC                 | CC               | INTERGENIC                    |                    |                    |
| SNP_114669_A_1993 | NW_004519859.1 | scaffold5952 | 1993                    | CC                              | AA                 | AA               | INTERGENIC                    |                    |                    |
| SNP_114670_A_2066 | NW_004519859.1 | scaffold5952 | 2066                    | AA                              | TT                 | TT               | INTERGENIC                    |                    |                    |
| SNP_114671_A_2119 | NW_004519859.1 | scaffold5952 | 2119                    | TT                              | GG                 | GG               | INTERGENIC                    |                    |                    |
| SNP_114672_A_2126 | NW_004519859.1 | scaffold5952 | 2126                    | AA                              | TT                 | TT               | INTERGENIC                    |                    |                    |
| SNP_114673_A_745  | NW_004519861.1 | scaffold5954 | 745                     | AA                              | GG                 | GG               | INTERGENIC                    |                    |                    |
| SNP_114674_A_755  | NW_004519861.1 | scaffold5954 | 755                     | GG                              | AA                 | AA               | INTERGENIC                    |                    |                    |
| SNP_114675_A_840  | NW_004519861.1 | scaffold5954 | 840                     | AA                              | TT                 | TT               | INTERGENIC                    |                    |                    |
| SNP_114676_A_1097 | NW_004519861.1 | scaffold5954 | 1097                    | AA                              | TT                 | TT               | INTERGENIC                    |                    |                    |
| SNP_114677_A_1213 | NW_004519861.1 | scaffold5954 | 1213                    | TT                              | AA                 | AA               | INTERGENIC                    |                    |                    |
| SNP_114678_A_1267 | NW_004519861.1 | scaffold5954 | 1267                    | GG                              | AA                 | AA               | INTERGENIC                    |                    |                    |
| SNP_114679_A_1282 | NW_004519861.1 | scaffold5954 | 1282                    | TT                              | AA                 | AA               | INTERGENIC                    |                    |                    |
| SNP_114680_A_1318 | NW_004519861.1 | scaffold5954 | 1318                    | CC                              | TT                 | TT               | INTERGENIC                    |                    |                    |
| SNP_114681_A_1406 | NW_004519861.1 | scaffold5954 | 1406                    | GG                              | AA                 | AA               | INTERGENIC                    |                    |                    |
| SNP_114683_A_1448 | NW_004519861.1 | scaffold5954 | 1448                    | AA                              | TT                 | TT               | INTERGENIC                    |                    |                    |
| SNP_114684_A_762  | NW_004519862.1 | scaffold5955 | 762                     | AA                              | GG                 | GG               | INTERGENIC                    |                    |                    |
| SNP_114685_A_902  | NW_004519862.1 | scaffold5955 | 902                     | CC                              | AA                 | AA               | INTERGENIC                    |                    |                    |
| SNP_114686_A_907  | NW_004519862.1 | scaffold5955 | 907                     | CC                              | AA                 | AA               | INTERGENIC                    |                    |                    |
| SNP_114688_A_1437 | NW_004519862.1 | scaffold5955 | 1437                    | TT                              | CC                 | CC               | INTERGENIC                    |                    |                    |



| SNPs IDs          | Chromosome IDs | Chromosomes  | Physical positions (bp) | CDC Frontier (Reference genome) | (Pusa 1103 & HPNB) | (ILWC 46 & LPNB) | Sequence genome | Components of | Gene accession IDs | Putative functions |
|-------------------|----------------|--------------|-------------------------|---------------------------------|--------------------|------------------|-----------------|---------------|--------------------|--------------------|
| SNP_114689_A_1445 | NW_004519862.1 | scaffold5955 | 1445                    | TT                              | GG                 | GG               | INTERGENIC      |               |                    |                    |
| SNP_114690_A_1475 | NW_004519862.1 | scaffold5955 | 1475                    | TT                              | GG                 | GG               | INTERGENIC      |               |                    |                    |
| SNP_114691_A_1492 | NW_004519862.1 | scaffold5955 | 1492                    | AA                              | GG                 | GG               | INTERGENIC      |               |                    |                    |
| SNP_114692_A_1503 | NW_004519862.1 | scaffold5955 | 1503                    | TT                              | CC                 | CC               | INTERGENIC      |               |                    |                    |
| SNP_114693_A_1508 | NW_004519862.1 | scaffold5955 | 1508                    | AA                              | GG                 | GG               | INTERGENIC      |               |                    |                    |
| SNP_114694_A_1509 | NW_004519862.1 | scaffold5955 | 1509                    | TT                              | CC                 | CC               | INTERGENIC      |               |                    |                    |
| SNP_114695_A_1543 | NW_004519862.1 | scaffold5955 | 1543                    | AA                              | CC                 | CC               | INTERGENIC      |               |                    |                    |
| SNP_114696_A_1585 | NW_004519862.1 | scaffold5955 | 1585                    | TT                              | CC                 | CC               | INTERGENIC      |               |                    |                    |
| SNP_114697_A_1630 | NW_004519862.1 | scaffold5955 | 1630                    | TT                              | CC                 | CC               | INTERGENIC      |               |                    |                    |
| SNP_114698_A_1642 | NW_004519862.1 | scaffold5955 | 1642                    | AA                              | GG                 | GG               | INTERGENIC      |               |                    |                    |
| SNP_114699_A_1645 | NW_004519862.1 | scaffold5955 | 1645                    | AA                              | CC                 | CC               | INTERGENIC      |               |                    |                    |
| SNP_114700_A_1655 | NW_004519862.1 | scaffold5955 | 1655                    | AA                              | GG                 | GG               | INTERGENIC      |               |                    |                    |
| SNP_114701_A_749  | NW_004519867.1 | scaffold5960 | 749                     | TT                              | CC                 | CC               | INTERGENIC      |               |                    |                    |
| SNP_114702_A_819  | NW_004519867.1 | scaffold5960 | 819                     | TT                              | AA                 | AA               | INTERGENIC      |               |                    |                    |
| SNP_114703_A_878  | NW_004519867.1 | scaffold5960 | 878                     | TT                              | CC                 | CC               | INTERGENIC      |               |                    |                    |
| SNP_114704_A_1096 | NW_004519867.1 | scaffold5960 | 1096                    | GG                              | AA                 | AA               | INTERGENIC      |               |                    |                    |
| SNP_114705_A_1273 | NW_004519867.1 | scaffold5960 | 1273                    | TT                              | CC                 | CC               | INTERGENIC      |               |                    |                    |
| SNP_114706_A_1331 | NW_004519867.1 | scaffold5960 | 1331                    | AA                              | TT                 | TT               | INTERGENIC      |               |                    |                    |
| SNP_114707_A_544  | NW_004519868.1 | scaffold5963 | 544                     | CC                              | AA                 | AA               | INTERGENIC      |               |                    |                    |
| SNP_114708_A_545  | NW_004519868.1 | scaffold5963 | 545                     | AA                              | CC                 | CC               | INTERGENIC      |               |                    |                    |
| SNP_114709_A_572  | NW_004519868.1 | scaffold5963 | 572                     | AA                              | CC                 | CC               | INTERGENIC      |               |                    |                    |
| SNP_114710_A_171  | NW_004519876.1 | scaffold5977 | 171                     | CC                              | GG                 | GG               | INTERGENIC      |               |                    |                    |

| SNPs IDs           | Chromosome IDs | Chromosomes  | Physical positions (bp) | CDC Frontier genome (Reference genome) | (Pusa 1103 & HPNB) | (ILWC 46 & LPNB) | Sequence genome | Components of | Gene accession IDs | Putative functions |
|--------------------|----------------|--------------|-------------------------|----------------------------------------|--------------------|------------------|-----------------|---------------|--------------------|--------------------|
| SNP_114712_A_747   | NW_004519876.1 | scaffold5977 | 747                     | GG                                     | CC                 | CC               | INTERGENIC      |               |                    |                    |
| SNP_114713_A_841   | NW_004519876.1 | scaffold5977 | 841                     | CC                                     | TT                 | TT               | INTERGENIC      |               |                    |                    |
| SNP_114714_A_1207  | NW_004519876.1 | scaffold5977 | 1207                    | CC                                     | TT                 | TT               | INTERGENIC      |               |                    |                    |
| SNP_114715_A_3269  | NW_004519876.1 | scaffold5977 | 3269                    | TT                                     | CC                 | CC               | INTERGENIC      |               |                    |                    |
| SNP_114717_A_4552  | NW_004519876.1 | scaffold5977 | 4552                    | CC                                     | TT                 | TT               | INTERGENIC      |               |                    |                    |
| SNP_114718_A_4595  | NW_004519876.1 | scaffold5977 | 4595                    | GG                                     | TT                 | TT               | INTERGENIC      |               |                    |                    |
| SNP_114720_A_4703  | NW_004519876.1 | scaffold5977 | 4703                    | GG                                     | TT                 | TT               | INTERGENIC      |               |                    |                    |
| SNP_114721_A_4712  | NW_004519876.1 | scaffold5977 | 4712                    | GG                                     | AA                 | AA               | INTERGENIC      |               |                    |                    |
| SNP_114722_A_4717  | NW_004519876.1 | scaffold5977 | 4717                    | CC                                     | AA                 | AA               | INTERGENIC      |               |                    |                    |
| SNP_114723_A_4786  | NW_004519876.1 | scaffold5977 | 4786                    | GG                                     | AA                 | AA               | INTERGENIC      |               |                    |                    |
| SNP_114724_A_4825  | NW_004519876.1 | scaffold5977 | 4825                    | GG                                     | AA                 | AA               | INTERGENIC      |               |                    |                    |
| SNP_114725_A_4887  | NW_004519876.1 | scaffold5977 | 4887                    | AA                                     | GG                 | GG               | INTERGENIC      |               |                    |                    |
| SNP_114726_A_6801  | NW_004519876.1 | scaffold5977 | 6801                    | CC                                     | TT                 | TT               | INTERGENIC      |               |                    |                    |
| SNP_114727_A_7790  | NW_004519876.1 | scaffold5977 | 7790                    | GG                                     | AA                 | AA               | INTERGENIC      |               |                    |                    |
| SNP_114729_A_14513 | NW_004519876.1 | scaffold5977 | 14513                   | AA                                     | CC                 | CC               | INTERGENIC      |               |                    |                    |
| SNP_114730_A_14528 | NW_004519876.1 | scaffold5977 | 14528                   | TT                                     | AA                 | AA               | INTERGENIC      |               |                    |                    |
| SNP_114732_A_14829 | NW_004519876.1 | scaffold5977 | 14829                   | TT                                     | CC                 | CC               | INTERGENIC      |               |                    |                    |
| SNP_114733_A_364   | NW_004519877.1 | scaffold5979 | 364                     | CC                                     | AA                 | AA               | INTERGENIC      |               |                    |                    |
| SNP_114734_A_569   | NW_004519877.1 | scaffold5979 | 569                     | TT                                     | CC                 | CC               | INTERGENIC      |               |                    |                    |
| SNP_114735_A_622   | NW_004519877.1 | scaffold5979 | 622                     | TT                                     | GG                 | GG               | INTERGENIC      |               |                    |                    |
| SNP_114736_A_117   | NW_004519878.1 | scaffold5982 | 117                     | AA                                     | GG                 | GG               | INTERGENIC      |               |                    |                    |
| SNP_114737_A_1286  | NW_004519878.1 | scaffold5982 | 1286                    | AA                                     | GG                 | GG               | INTERGENIC      |               |                    |                    |

| SNPs IDs           | Chromosome IDs | Chromosomes  | Physical positions (bp) | CDC Frontier (Reference genome) | (Pusa 1103 & HPNB) | (ILWC 46 & LPNB) | Sequence genome | Components of | Gene accession IDs         | Putative functions |
|--------------------|----------------|--------------|-------------------------|---------------------------------|--------------------|------------------|-----------------|---------------|----------------------------|--------------------|
| SNP_114738_A_1287  | NW_004519878.1 | scaffold5982 | 1287                    | CC                              | TT                 | TT               | INTERGENIC      |               |                            |                    |
| SNP_114739_A_1309  | NW_004519878.1 | scaffold5982 | 1309                    | GG                              | TT                 | TT               | INTERGENIC      |               |                            |                    |
| SNP_114740_A_409   | NW_004519882.1 | scaffold5988 | 409                     | CC                              | TT                 | TT               | INTERGENIC      |               |                            |                    |
| SNP_114741_A_150   | NW_004519884.1 | scaffold5992 | 150                     | TT                              | AA                 | AA               | INTERGENIC      |               |                            |                    |
| SNP_114742_A_534   | NW_004519884.1 | scaffold5992 | 534                     | TT                              | GG                 | GG               | INTERGENIC      |               |                            |                    |
| SNP_114743_A_556   | NW_004519884.1 | scaffold5992 | 556                     | GG                              | AA                 | AA               | INTERGENIC      |               |                            |                    |
| SNP_114745_A_1516  | NW_004519884.1 | scaffold5992 | 1516                    | GG                              | AA                 | AA               | INTERGENIC      |               |                            |                    |
| SNP_114747_A_17898 | NW_004519885.1 | scaffold5993 | 17898                   | TT                              | AA                 | AA               | INTERGENIC      |               |                            |                    |
| SNP_114748_A_17912 | NW_004519885.1 | scaffold5993 | 17912                   | GG                              | TT                 | TT               | INTERGENIC      |               |                            |                    |
| SNP_114749_A_18022 | NW_004519885.1 | scaffold5993 | 18022                   | TT                              | CC                 | CC               | INTERGENIC      |               |                            |                    |
| SNP_114750_A_18092 | NW_004519885.1 | scaffold5993 | 18092                   | AA                              | GG                 | GG               | INTERGENIC      |               |                            |                    |
| SNP_114751_A_18120 | NW_004519885.1 | scaffold5993 | 18120                   | AA                              | TT                 | TT               | INTERGENIC      |               |                            |                    |
| SNP_114752_A_18167 | NW_004519885.1 | scaffold5993 | 18167                   | AA                              | TT                 | TT               | INTERGENIC      |               |                            |                    |
| SNP_114753_A_18320 | NW_004519885.1 | scaffold5993 | 18320                   | CC                              | TT                 | TT               | INTERGENIC      |               |                            |                    |
| SNP_114754_A_18394 | NW_004519885.1 | scaffold5993 | 18394                   | TT                              | CC                 | CC               | INTERGENIC      |               |                            |                    |
| SNP_114755_A_18534 | NW_004519885.1 | scaffold5993 | 18534                   | CC                              | TT                 | TT               | DRR             | 101505993     | amino acid permease 6-like |                    |
| SNP_114758_A_18677 | NW_004519885.1 | scaffold5993 | 18677                   | GG                              | AA                 | AA               | DRR             | 101505993     | amino acid permease 6-like |                    |
| SNP_114759_A_18720 | NW_004519885.1 | scaffold5993 | 18720                   | TT                              | GG                 | GG               | DRR             | 101505993     | amino acid permease 6-like |                    |
| SNP_114760_A_4448  | NW_004519886.1 | scaffold5994 | 4448                    | GG                              | AA                 | AA               | INTERGENIC      |               |                            |                    |
| SNP_114761_A_4644  | NW_004519886.1 | scaffold5994 | 4644                    | TT                              | GG                 | GG               | INTERGENIC      |               |                            |                    |
| SNP_114762_A_7311  | NW_004519886.1 | scaffold5994 | 7311                    | GG                              | AA                 | AA               | INTERGENIC      |               |                            |                    |
| SNP_114763_A_7315  | NW_004519886.1 | scaffold5994 | 7315                    | AA                              | TT                 | TT               | INTERGENIC      |               |                            |                    |

| SNPs IDs           | Chromosome IDs | Chromosomes  | Physical positions (bp) | CDC Frontier (Reference genome) | (Pusa 1103 & HPNB) | (ILWC 46 & LPNB) | Sequence genome | Components of | Gene accession IDs | Putative functions |
|--------------------|----------------|--------------|-------------------------|---------------------------------|--------------------|------------------|-----------------|---------------|--------------------|--------------------|
| SNP_114764_A_745   | NW_004519889.1 | scaffold5997 | 745                     | CC                              | AA                 | AA               | INTERGENIC      |               |                    |                    |
| SNP_114765_A_1061  | NW_004519889.1 | scaffold5997 | 1061                    | GG                              | TT                 | TT               | INTERGENIC      |               |                    |                    |
| SNP_114766_A_1118  | NW_004519889.1 | scaffold5997 | 1118                    | GG                              | AA                 | AA               | INTERGENIC      |               |                    |                    |
| SNP_114767_A_2215  | NW_004519889.1 | scaffold5997 | 2215                    | AA                              | TT                 | TT               | INTERGENIC      |               |                    |                    |
| SNP_114768_A_2239  | NW_004519889.1 | scaffold5997 | 2239                    | AA                              | GG                 | GG               | INTERGENIC      |               |                    |                    |
| SNP_114769_A_1137  | NW_004519891.1 | scaffold5999 | 1137                    | AA                              | CC                 | CC               | INTERGENIC      |               |                    |                    |
| SNP_114770_A_2467  | NW_004519895.1 | scaffold6005 | 2467                    | AA                              | CC                 | CC               | INTERGENIC      |               |                    |                    |
| SNP_114771_A_3151  | NW_004519895.1 | scaffold6005 | 3151                    | AA                              | GG                 | GG               | INTERGENIC      |               |                    |                    |
| SNP_114772_A_688   | NW_004519901.1 | scaffold6012 | 688                     | GG                              | TT                 | TT               | INTERGENIC      |               |                    |                    |
| SNP_114773_A_6122  | NW_004519901.1 | scaffold6012 | 6122                    | GG                              | AA                 | AA               | INTERGENIC      |               |                    |                    |
| SNP_114774_A_6251  | NW_004519901.1 | scaffold6012 | 6251                    | CC                              | TT                 | TT               | INTERGENIC      |               |                    |                    |
| SNP_114775_A_22115 | NW_004519901.1 | scaffold6012 | 22115                   | TT                              | AA                 | AA               | INTERGENIC      |               |                    |                    |
| SNP_114776_A_22463 | NW_004519901.1 | scaffold6012 | 22463                   | TT                              | AA                 | AA               | INTERGENIC      |               |                    |                    |
| SNP_114777_A_1876  | NW_004519905.1 | scaffold6017 | 1876                    | GG                              | CC                 | CC               | INTERGENIC      |               |                    |                    |
| SNP_114778_A_64    | NW_004519907.1 | scaffold6020 | 64                      | TT                              | CC                 | CC               | INTERGENIC      |               |                    |                    |
| SNP_114779_A_77    | NW_004519907.1 | scaffold6020 | 77                      | TT                              | GG                 | GG               | INTERGENIC      |               |                    |                    |
| SNP_114780_A_102   | NW_004519907.1 | scaffold6020 | 102                     | AA                              | GG                 | GG               | INTERGENIC      |               |                    |                    |
| SNP_114781_A_138   | NW_004519907.1 | scaffold6020 | 138                     | TT                              | CC                 | CC               | INTERGENIC      |               |                    |                    |
| SNP_114782_A_461   | NW_004519907.1 | scaffold6020 | 461                     | TT                              | AA                 | AA               | INTERGENIC      |               |                    |                    |
| SNP_114783_A_468   | NW_004519907.1 | scaffold6020 | 468                     | TT                              | AA                 | AA               | INTERGENIC      |               |                    |                    |
| SNP_114784_A_1420  | NW_004519907.1 | scaffold6020 | 1420                    | TT                              | GG                 | GG               | INTERGENIC      |               |                    |                    |
| SNP_114785_A_1444  | NW_004519907.1 | scaffold6020 | 1444                    | TT                              | CC                 | CC               | INTERGENIC      |               |                    |                    |

| SNPs IDs           | Chromosome IDs | Chromosomes  | Physical positions (bp) | CDC Frontier (Reference genome) | (Pusa 1103 & HPNB) | (ILWC 46 & LPNB) | Sequence genome | Components of | Gene accession IDs | Putative functions |
|--------------------|----------------|--------------|-------------------------|---------------------------------|--------------------|------------------|-----------------|---------------|--------------------|--------------------|
| SNP_114786_A_18830 | NW_004519909.1 | scaffold6022 | 18830                   | AA                              | GG                 | GG               | INTERGENIC      |               |                    |                    |
| SNP_114787_A_18860 | NW_004519909.1 | scaffold6022 | 18860                   | GG                              | TT                 | TT               | INTERGENIC      |               |                    |                    |
| SNP_114788_A_18915 | NW_004519909.1 | scaffold6022 | 18915                   | CC                              | AA                 | AA               | INTERGENIC      |               |                    |                    |
| SNP_114789_A_18916 | NW_004519909.1 | scaffold6022 | 18916                   | CC                              | AA                 | AA               | INTERGENIC      |               |                    |                    |
| SNP_114790_A_19902 | NW_004519909.1 | scaffold6022 | 19902                   | TT                              | CC                 | CC               | INTERGENIC      |               |                    |                    |
| SNP_114791_A_19930 | NW_004519909.1 | scaffold6022 | 19930                   | GG                              | AA                 | AA               | INTERGENIC      |               |                    |                    |
| SNP_114792_A_19940 | NW_004519909.1 | scaffold6022 | 19940                   | TT                              | CC                 | CC               | INTERGENIC      |               |                    |                    |
| SNP_114793_A_19941 | NW_004519909.1 | scaffold6022 | 19941                   | AA                              | TT                 | TT               | INTERGENIC      |               |                    |                    |
| SNP_114794_A_19955 | NW_004519909.1 | scaffold6022 | 19955                   | TT                              | GG                 | GG               | INTERGENIC      |               |                    |                    |
| SNP_114795_A_19988 | NW_004519909.1 | scaffold6022 | 19988                   | AA                              | GG                 | GG               | INTERGENIC      |               |                    |                    |
| SNP_114796_A_19998 | NW_004519909.1 | scaffold6022 | 19998                   | TT                              | CC                 | CC               | INTERGENIC      |               |                    |                    |
| SNP_114797_A_20018 | NW_004519909.1 | scaffold6022 | 20018                   | GG                              | CC                 | CC               | INTERGENIC      |               |                    |                    |
| SNP_114798_A_20022 | NW_004519909.1 | scaffold6022 | 20022                   | GG                              | TT                 | TT               | INTERGENIC      |               |                    |                    |
| SNP_114799_A_20025 | NW_004519909.1 | scaffold6022 | 20025                   | TT                              | AA                 | AA               | INTERGENIC      |               |                    |                    |
| SNP_114800_A_20059 | NW_004519909.1 | scaffold6022 | 20059                   | TT                              | CC                 | CC               | INTERGENIC      |               |                    |                    |
| SNP_114801_A_20067 | NW_004519909.1 | scaffold6022 | 20067                   | GG                              | AA                 | AA               | INTERGENIC      |               |                    |                    |
| SNP_114802_A_20069 | NW_004519909.1 | scaffold6022 | 20069                   | AA                              | GG                 | GG               | INTERGENIC      |               |                    |                    |
| SNP_114803_A_20081 | NW_004519909.1 | scaffold6022 | 20081                   | TT                              | AA                 | AA               | INTERGENIC      |               |                    |                    |
| SNP_114804_A_2173  | NW_004519915.1 | scaffold6034 | 2173                    | GG                              | TT                 | TT               | INTERGENIC      |               |                    |                    |
| SNP_114805_A_6806  | NW_004519927.1 | scaffold6055 | 6806                    | GG                              | AA                 | AA               | INTERGENIC      |               |                    |                    |
| SNP_114806_A_8845  | NW_004519927.1 | scaffold6055 | 8845                    | GG                              | TT                 | TT               | INTERGENIC      |               |                    |                    |
| SNP_114807_A_704   | NW_004519932.1 | scaffold6063 | 704                     | TT                              | CC                 | CC               | INTERGENIC      |               |                    |                    |

| SNPs IDs           | Chromosome IDs | Chromosomes  | Physical positions (bp) | CDC Frontier (Reference genome) | (Pusa 1103 & HPNB) | (ILWC 46 & LPNB) | Sequence genome | Components of | Gene accession IDs | Putative functions |
|--------------------|----------------|--------------|-------------------------|---------------------------------|--------------------|------------------|-----------------|---------------|--------------------|--------------------|
| SNP_114808_A_1334  | NW_004519933.1 | scaffold6064 | 1334                    | GG                              | AA                 | AA               | INTERGENIC      |               |                    |                    |
| SNP_114809_A_1665  | NW_004519933.1 | scaffold6064 | 1665                    | GG                              | TT                 | TT               | INTERGENIC      |               |                    |                    |
| SNP_114810_A_2419  | NW_004519935.1 | scaffold6066 | 2419                    | CC                              | TT                 | TT               | INTERGENIC      |               |                    |                    |
| SNP_114811_A_2697  | NW_004519935.1 | scaffold6066 | 2697                    | GG                              | AA                 | AA               | INTERGENIC      |               |                    |                    |
| SNP_114812_A_2749  | NW_004519935.1 | scaffold6066 | 2749                    | GG                              | AA                 | AA               | INTERGENIC      |               |                    |                    |
| SNP_114813_A_2775  | NW_004519935.1 | scaffold6066 | 2775                    | TT                              | GG                 | GG               | INTERGENIC      |               |                    |                    |
| SNP_114814_A_2777  | NW_004519935.1 | scaffold6066 | 2777                    | AA                              | GG                 | GG               | INTERGENIC      |               |                    |                    |
| SNP_114816_A_2866  | NW_004519935.1 | scaffold6066 | 2866                    | CC                              | TT                 | TT               | INTERGENIC      |               |                    |                    |
| SNP_114817_A_2986  | NW_004519935.1 | scaffold6066 | 2986                    | TT                              | AA                 | AA               | INTERGENIC      |               |                    |                    |
| SNP_114818_A_2995  | NW_004519935.1 | scaffold6066 | 2995                    | TT                              | AA                 | AA               | INTERGENIC      |               |                    |                    |
| SNP_114819_A_2999  | NW_004519935.1 | scaffold6066 | 2999                    | GG                              | AA                 | AA               | INTERGENIC      |               |                    |                    |
| SNP_114820_A_133   | NW_004519939.1 | scaffold6071 | 133                     | CC                              | TT                 | TT               | INTERGENIC      |               |                    |                    |
| SNP_114821_A_1956  | NW_004519942.1 | scaffold6075 | 1956                    | AA                              | CC                 | CC               | INTERGENIC      |               |                    |                    |
| SNP_114822_A_927   | NW_004519943.1 | scaffold6077 | 927                     | AA                              | TT                 | TT               | INTERGENIC      |               |                    |                    |
| SNP_114823_A_195   | NW_004519948.1 | scaffold6085 | 195                     | TT                              | CC                 | CC               | INTERGENIC      |               |                    |                    |
| SNP_114825_A_16418 | NW_004519951.1 | scaffold6091 | 16418                   | AA                              | TT                 | TT               | INTERGENIC      |               |                    |                    |
| SNP_114826_A_16433 | NW_004519951.1 | scaffold6091 | 16433                   | GG                              | TT                 | TT               | INTERGENIC      |               |                    |                    |
| SNP_114827_A_105   | NW_004519952.1 | scaffold6092 | 105                     | CC                              | AA                 | AA               | INTERGENIC      |               |                    |                    |
| SNP_114828_A_123   | NW_004519952.1 | scaffold6092 | 123                     | GG                              | AA                 | AA               | INTERGENIC      |               |                    |                    |
| SNP_114829_A_133   | NW_004519952.1 | scaffold6092 | 133                     | GG                              | AA                 | AA               | INTERGENIC      |               |                    |                    |
| SNP_114830_A_160   | NW_004519952.1 | scaffold6092 | 160                     | CC                              | TT                 | TT               | INTERGENIC      |               |                    |                    |
| SNP_114831_A_265   | NW_004519952.1 | scaffold6092 | 265                     | AA                              | CC                 | CC               | INTERGENIC      |               |                    |                    |

| SNPs IDs          | Chromosome IDs | Chromosomes  | Physical positions (bp) | CDC Frontier (Reference genome) | (Pusa 1103 & HPNB) | (ILWC 46 & LPNB) | Sequence genome | Components of | Gene accession IDs | Putative functions |
|-------------------|----------------|--------------|-------------------------|---------------------------------|--------------------|------------------|-----------------|---------------|--------------------|--------------------|
| SNP_114832_A_351  | NW_004519952.1 | scaffold6092 | 351                     | GG                              | AA                 | AA               | INTERGENIC      |               |                    |                    |
| SNP_114833_A_363  | NW_004519952.1 | scaffold6092 | 363                     | AA                              | GG                 | GG               | INTERGENIC      |               |                    |                    |
| SNP_114834_A_372  | NW_004519952.1 | scaffold6092 | 372                     | TT                              | CC                 | CC               | INTERGENIC      |               |                    |                    |
| SNP_114835_A_407  | NW_004519952.1 | scaffold6092 | 407                     | AA                              | GG                 | GG               | INTERGENIC      |               |                    |                    |
| SNP_114836_A_460  | NW_004519952.1 | scaffold6092 | 460                     | AA                              | GG                 | GG               | INTERGENIC      |               |                    |                    |
| SNP_114837_A_700  | NW_004519952.1 | scaffold6092 | 700                     | GG                              | TT                 | TT               | INTERGENIC      |               |                    |                    |
| SNP_114838_A_710  | NW_004519952.1 | scaffold6092 | 710                     | AA                              | GG                 | GG               | INTERGENIC      |               |                    |                    |
| SNP_114840_A_1184 | NW_004519952.1 | scaffold6092 | 1184                    | AA                              | GG                 | GG               | INTERGENIC      |               |                    |                    |
| SNP_114841_A_903  | NW_004519954.1 | scaffold6095 | 903                     | AA                              | CC                 | CC               | INTERGENIC      |               |                    |                    |
| SNP_114842_A_1135 | NW_004519965.1 | scaffold6113 | 1135                    | CC                              | TT                 | TT               | INTERGENIC      |               |                    |                    |
| SNP_114843_A_1154 | NW_004519965.1 | scaffold6113 | 1154                    | TT                              | AA                 | AA               | INTERGENIC      |               |                    |                    |
| SNP_114844_A_1379 | NW_004519965.1 | scaffold6113 | 1379                    | TT                              | CC                 | CC               | INTERGENIC      |               |                    |                    |
| SNP_114845_A_1428 | NW_004519965.1 | scaffold6113 | 1428                    | CC                              | TT                 | TT               | INTERGENIC      |               |                    |                    |
| SNP_114847_A_1749 | NW_004519965.1 | scaffold6113 | 1749                    | TT                              | AA                 | AA               | INTERGENIC      |               |                    |                    |
| SNP_114848_A_1750 | NW_004519965.1 | scaffold6113 | 1750                    | AA                              | CC                 | CC               | INTERGENIC      |               |                    |                    |
| SNP_114849_A_1776 | NW_004519965.1 | scaffold6113 | 1776                    | TT                              | AA                 | AA               | INTERGENIC      |               |                    |                    |
| SNP_114850_A_5344 | NW_004519969.1 | scaffold6117 | 5344                    | AA                              | TT                 | TT               | INTERGENIC      |               |                    |                    |
| SNP_114851_A_5499 | NW_004519969.1 | scaffold6117 | 5499                    | GG                              | TT                 | TT               | INTERGENIC      |               |                    |                    |
| SNP_114852_A_2013 | NW_004519970.1 | scaffold6120 | 2013                    | CC                              | TT                 | TT               | INTERGENIC      |               |                    |                    |
| SNP_114854_A_2322 | NW_004519970.1 | scaffold6120 | 2322                    | AA                              | TT                 | TT               | INTERGENIC      |               |                    |                    |
| SNP_114855_A_2549 | NW_004519970.1 | scaffold6120 | 2549                    | TT                              | GG                 | GG               | INTERGENIC      |               |                    |                    |
| SNP_114857_A_3813 | NW_004519970.1 | scaffold6120 | 3813                    | AA                              | GG                 | GG               | INTERGENIC      |               |                    |                    |

| SNPs IDs           | Chromosome IDs | Chromosomes  | Physical positions (bp) | CDC Frontier (Reference genome) | (Pusa 1103 & HPNB) | (ILWC 46 & LPNB) | Sequence genome | Components of | Gene accession IDs | Putative functions |
|--------------------|----------------|--------------|-------------------------|---------------------------------|--------------------|------------------|-----------------|---------------|--------------------|--------------------|
| SNP_114858_A_4083  | NW_004519970.1 | scaffold6120 | 4083                    | AA                              | GG                 | GG               | INTERGENIC      |               |                    |                    |
| SNP_114859_A_4094  | NW_004519970.1 | scaffold6120 | 4094                    | GG                              | CC                 | CC               | INTERGENIC      |               |                    |                    |
| SNP_114861_A_16182 | NW_004519971.1 | scaffold6121 | 16182                   | AA                              | CC                 | CC               | INTERGENIC      |               |                    |                    |
| SNP_114862_A_16395 | NW_004519971.1 | scaffold6121 | 16395                   | GG                              | AA                 | AA               | INTERGENIC      |               |                    |                    |
| SNP_114863_A_5103  | NW_004519973.1 | scaffold6123 | 5103                    | CC                              | TT                 | TT               | INTERGENIC      |               |                    |                    |
| SNP_114864_A_5116  | NW_004519973.1 | scaffold6123 | 5116                    | GG                              | AA                 | AA               | INTERGENIC      |               |                    |                    |
| SNP_114865_A_439   | NW_004519975.1 | scaffold6125 | 439                     | GG                              | AA                 | AA               | INTERGENIC      |               |                    |                    |
| SNP_114866_A_494   | NW_004519975.1 | scaffold6125 | 494                     | GG                              | TT                 | TT               | INTERGENIC      |               |                    |                    |
| SNP_114867_A_1034  | NW_004519975.1 | scaffold6125 | 1034                    | AA                              | TT                 | TT               | INTERGENIC      |               |                    |                    |
| SNP_114868_A_1106  | NW_004519975.1 | scaffold6125 | 1106                    | CC                              | TT                 | TT               | INTERGENIC      |               |                    |                    |
| SNP_114869_A_1183  | NW_004519975.1 | scaffold6125 | 1183                    | AA                              | GG                 | GG               | INTERGENIC      |               |                    |                    |
| SNP_114870_A_1323  | NW_004519975.1 | scaffold6125 | 1323                    | TT                              | AA                 | AA               | INTERGENIC      |               |                    |                    |
| SNP_114871_A_1402  | NW_004519975.1 | scaffold6125 | 1402                    | AA                              | GG                 | GG               | INTERGENIC      |               |                    |                    |
| SNP_114873_A_1563  | NW_004519975.1 | scaffold6125 | 1563                    | CC                              | AA                 | AA               | INTERGENIC      |               |                    |                    |
| SNP_114874_A_1568  | NW_004519975.1 | scaffold6125 | 1568                    | AA                              | GG                 | GG               | INTERGENIC      |               |                    |                    |
| SNP_114875_A_1620  | NW_004519975.1 | scaffold6125 | 1620                    | TT                              | GG                 | GG               | INTERGENIC      |               |                    |                    |
| SNP_114876_A_1647  | NW_004519975.1 | scaffold6125 | 1647                    | TT                              | CC                 | CC               | INTERGENIC      |               |                    |                    |
| SNP_114877_A_1724  | NW_004519975.1 | scaffold6125 | 1724                    | CC                              | TT                 | TT               | INTERGENIC      |               |                    |                    |
| SNP_114878_A_23027 | NW_004519977.1 | scaffold6127 | 23027                   | TT                              | GG                 | GG               | INTERGENIC      |               |                    |                    |
| SNP_114879_A_91    | NW_004519978.1 | scaffold6128 | 91                      | CC                              | GG                 | GG               | INTERGENIC      |               |                    |                    |
| SNP_114880_A_134   | NW_004519978.1 | scaffold6128 | 134                     | AA                              | GG                 | GG               | INTERGENIC      |               |                    |                    |
| SNP_114881_A_460   | NW_004519978.1 | scaffold6128 | 460                     | AA                              | TT                 | TT               | INTERGENIC      |               |                    |                    |



| SNPs IDs           | Chromosome IDs | Chromosomes  | Physical positions (bp) | CDC Frontier (Reference genome) | (Pusa 1103 & HPNB) | (ILWC 46 & LPNB) | Sequence genome | Components of | Gene accession IDs | Putative functions |
|--------------------|----------------|--------------|-------------------------|---------------------------------|--------------------|------------------|-----------------|---------------|--------------------|--------------------|
| SNP_114882_A_64    | NW_004519980.1 | scaffold6131 | 64                      | GG                              | AA                 | AA               | INTERGENIC      |               |                    |                    |
| SNP_114883_A_5453  | NW_004519980.1 | scaffold6131 | 5453                    | TT                              | GG                 | GG               | INTERGENIC      |               |                    |                    |
| SNP_114884_A_5470  | NW_004519980.1 | scaffold6131 | 5470                    | CC                              | AA                 | AA               | INTERGENIC      |               |                    |                    |
| SNP_114885_A_9553  | NW_004519980.1 | scaffold6131 | 9553                    | TT                              | AA                 | AA               | INTERGENIC      |               |                    |                    |
| SNP_114886_A_9862  | NW_004519980.1 | scaffold6131 | 9862                    | AA                              | TT                 | TT               | INTERGENIC      |               |                    |                    |
| SNP_114887_A_10768 | NW_004519980.1 | scaffold6131 | 10768                   | TT                              | CC                 | CC               | INTERGENIC      |               |                    |                    |
| SNP_114888_A_1360  | NW_004519981.1 | scaffold6133 | 1360                    | AA                              | CC                 | CC               | INTERGENIC      |               |                    |                    |
| SNP_114889_A_177   | NW_004519983.1 | scaffold6135 | 177                     | AA                              | GG                 | GG               | INTERGENIC      |               |                    |                    |
| SNP_114890_A_635   | NW_004519985.1 | scaffold6137 | 635                     | AA                              | TT                 | TT               | INTERGENIC      |               |                    |                    |
| SNP_114891_A_3616  | NW_004519985.1 | scaffold6137 | 3616                    | CC                              | TT                 | TT               | INTERGENIC      |               |                    |                    |
| SNP_114892_A_3673  | NW_004519985.1 | scaffold6137 | 3673                    | TT                              | GG                 | GG               | INTERGENIC      |               |                    |                    |
| SNP_114893_A_3823  | NW_004519985.1 | scaffold6137 | 3823                    | TT                              | CC                 | CC               | INTERGENIC      |               |                    |                    |
| SNP_114894_A_629   | NW_004519989.1 | scaffold6149 | 629                     | GG                              | TT                 | TT               | INTERGENIC      |               |                    |                    |
| SNP_114895_A_816   | NW_004519989.1 | scaffold6149 | 816                     | AA                              | CC                 | CC               | INTERGENIC      |               |                    |                    |
| SNP_114896_A_20381 | NW_004519992.1 | scaffold6153 | 20381                   | CC                              | AA                 | AA               | INTERGENIC      |               |                    |                    |
| SNP_114898_A_20425 | NW_004519992.1 | scaffold6153 | 20425                   | TT                              | AA                 | AA               | INTERGENIC      |               |                    |                    |
| SNP_114899_A_153   | NW_004519993.1 | scaffold6154 | 153                     | AA                              | GG                 | GG               | INTERGENIC      |               |                    |                    |
| SNP_114900_A_225   | NW_004519993.1 | scaffold6154 | 225                     | CC                              | AA                 | AA               | INTERGENIC      |               |                    |                    |
| SNP_114901_A_295   | NW_004519993.1 | scaffold6154 | 295                     | CC                              | TT                 | TT               | INTERGENIC      |               |                    |                    |
| SNP_114902_A_426   | NW_004519993.1 | scaffold6154 | 426                     | GG                              | AA                 | AA               | INTERGENIC      |               |                    |                    |
| SNP_114903_A_436   | NW_004519993.1 | scaffold6154 | 436                     | TT                              | CC                 | CC               | INTERGENIC      |               |                    |                    |
| SNP_114904_A_490   | NW_004519993.1 | scaffold6154 | 490                     | CC                              | AA                 | AA               | INTERGENIC      |               |                    |                    |

| SNPs IDs          | Chromosome IDs | Chromosomes  | Physical positions (bp) | CDC Frontier (Reference genome) | (Pusa 1103 & HPNB) | (ILWC 46 & LPNB) | Sequence genome | Components of | Gene accession IDs | Putative functions |
|-------------------|----------------|--------------|-------------------------|---------------------------------|--------------------|------------------|-----------------|---------------|--------------------|--------------------|
| SNP_114905_A_507  | NW_004519993.1 | scaffold6154 | 507                     | GG                              | TT                 | TT               | INTERGENIC      |               |                    |                    |
| SNP_114906_A_510  | NW_004519993.1 | scaffold6154 | 510                     | GG                              | AA                 | AA               | INTERGENIC      |               |                    |                    |
| SNP_114908_A_563  | NW_004519993.1 | scaffold6154 | 563                     | CC                              | AA                 | AA               | INTERGENIC      |               |                    |                    |
| SNP_114909_A_565  | NW_004519993.1 | scaffold6154 | 565                     | GG                              | AA                 | AA               | INTERGENIC      |               |                    |                    |
| SNP_114910_A_670  | NW_004519993.1 | scaffold6154 | 670                     | CC                              | TT                 | TT               | INTERGENIC      |               |                    |                    |
| SNP_114911_A_680  | NW_004519993.1 | scaffold6154 | 680                     | AA                              | TT                 | TT               | INTERGENIC      |               |                    |                    |
| SNP_114912_A_682  | NW_004519993.1 | scaffold6154 | 682                     | TT                              | CC                 | CC               | INTERGENIC      |               |                    |                    |
| SNP_114913_A_168  | NW_004519994.1 | scaffold6155 | 168                     | CC                              | TT                 | TT               | INTERGENIC      |               |                    |                    |
| SNP_114914_A_1680 | NW_004519995.1 | scaffold6157 | 1680                    | TT                              | AA                 | AA               | INTERGENIC      |               |                    |                    |
| SNP_114915_A_1714 | NW_004519995.1 | scaffold6157 | 1714                    | GG                              | TT                 | TT               | INTERGENIC      |               |                    |                    |
| SNP_114916_A_284  | NW_004519996.1 | scaffold6158 | 284                     | CC                              | TT                 | TT               | INTERGENIC      |               |                    |                    |
| SNP_114918_A_599  | NW_004519996.1 | scaffold6158 | 599                     | TT                              | CC                 | CC               | INTERGENIC      |               |                    |                    |
| SNP_114919_A_716  | NW_004519996.1 | scaffold6158 | 716                     | CC                              | AA                 | AA               | INTERGENIC      |               |                    |                    |
| SNP_114920_A_726  | NW_004519996.1 | scaffold6158 | 726                     | AA                              | GG                 | GG               | INTERGENIC      |               |                    |                    |
| SNP_114921_A_1124 | NW_004519996.1 | scaffold6158 | 1124                    | AA                              | CC                 | CC               | INTERGENIC      |               |                    |                    |
| SNP_114922_A_1300 | NW_004519996.1 | scaffold6158 | 1300                    | AA                              | TT                 | TT               | INTERGENIC      |               |                    |                    |
| SNP_114923_A_1812 | NW_004519996.1 | scaffold6158 | 1812                    | GG                              | CC                 | CC               | INTERGENIC      |               |                    |                    |
| SNP_114924_A_1861 | NW_004519996.1 | scaffold6158 | 1861                    | GG                              | AA                 | AA               | INTERGENIC      |               |                    |                    |
| SNP_114925_A_1879 | NW_004519996.1 | scaffold6158 | 1879                    | AA                              | GG                 | GG               | INTERGENIC      |               |                    |                    |
| SNP_114926_A_1947 | NW_004519996.1 | scaffold6158 | 1947                    | GG                              | CC                 | CC               | INTERGENIC      |               |                    |                    |
| SNP_114927_A_598  | NW_004520003.1 | scaffold6169 | 598                     | GG                              | TT                 | TT               | INTERGENIC      |               |                    |                    |
| SNP_114928_A_830  | NW_004520003.1 | scaffold6169 | 830                     | TT                              | AA                 | AA               | INTERGENIC      |               |                    |                    |

| SNPs IDs           | Chromosome IDs | Chromosomes  | Physical positions (bp) | CDC Frontier (Reference genome) | (Pusa 1103 & HPNB) | (ILWC 46 & LPNB) | Sequence genome | Components of | Gene accession IDs | Putative functions |
|--------------------|----------------|--------------|-------------------------|---------------------------------|--------------------|------------------|-----------------|---------------|--------------------|--------------------|
| SNP_114929_A_931   | NW_004520003.1 | scaffold6169 | 931                     | TT                              | GG                 | GG               | INTERGENIC      |               |                    |                    |
| SNP_114930_A_1204  | NW_004520003.1 | scaffold6169 | 1204                    | CC                              | TT                 | TT               | INTERGENIC      |               |                    |                    |
| SNP_114931_A_962   | NW_004520005.1 | scaffold6171 | 962                     | TT                              | CC                 | CC               | INTERGENIC      |               |                    |                    |
| SNP_114932_A_18956 | NW_004520006.1 | scaffold6172 | 18956                   | TT                              | AA                 | AA               | INTERGENIC      |               |                    |                    |
| SNP_114933_A_19022 | NW_004520006.1 | scaffold6172 | 19022                   | TT                              | AA                 | AA               | INTERGENIC      |               |                    |                    |
| SNP_114934_A_19048 | NW_004520006.1 | scaffold6172 | 19048                   | GG                              | AA                 | AA               | INTERGENIC      |               |                    |                    |
| SNP_114935_A_19086 | NW_004520006.1 | scaffold6172 | 19086                   | AA                              | GG                 | GG               | INTERGENIC      |               |                    |                    |
| SNP_114936_A_19128 | NW_004520006.1 | scaffold6172 | 19128                   | TT                              | AA                 | AA               | INTERGENIC      |               |                    |                    |
| SNP_114937_A_19469 | NW_004520006.1 | scaffold6172 | 19469                   | GG                              | TT                 | TT               | INTERGENIC      |               |                    |                    |
| SNP_114938_A_19480 | NW_004520006.1 | scaffold6172 | 19480                   | TT                              | GG                 | GG               | INTERGENIC      |               |                    |                    |
| SNP_114939_A_19808 | NW_004520006.1 | scaffold6172 | 19808                   | TT                              | AA                 | AA               | INTERGENIC      |               |                    |                    |
| SNP_114940_A_19934 | NW_004520006.1 | scaffold6172 | 19934                   | AA                              | CC                 | CC               | INTERGENIC      |               |                    |                    |
| SNP_114941_A_20145 | NW_004520006.1 | scaffold6172 | 20145                   | CC                              | TT                 | TT               | INTERGENIC      |               |                    |                    |
| SNP_114942_A_20234 | NW_004520006.1 | scaffold6172 | 20234                   | AA                              | GG                 | GG               | INTERGENIC      |               |                    |                    |
| SNP_114943_A_20729 | NW_004520006.1 | scaffold6172 | 20729                   | GG                              | AA                 | AA               | INTERGENIC      |               |                    |                    |
| SNP_114944_A_20898 | NW_004520006.1 | scaffold6172 | 20898                   | CC                              | AA                 | AA               | INTERGENIC      |               |                    |                    |
| SNP_114945_A_20955 | NW_004520006.1 | scaffold6172 | 20955                   | TT                              | CC                 | CC               | INTERGENIC      |               |                    |                    |
| SNP_114946_A_24055 | NW_004520006.1 | scaffold6172 | 24055                   | TT                              | CC                 | CC               | INTERGENIC      |               |                    |                    |
| SNP_114947_A_27912 | NW_004520006.1 | scaffold6172 | 27912                   | AA                              | GG                 | GG               | INTERGENIC      |               |                    |                    |
| SNP_114948_A_30113 | NW_004520006.1 | scaffold6172 | 30113                   | AA                              | CC                 | CC               | INTERGENIC      |               |                    |                    |
| SNP_114949_A_37206 | NW_004520006.1 | scaffold6172 | 37206                   | GG                              | TT                 | TT               | INTERGENIC      |               |                    |                    |
| SNP_114950_A_37233 | NW_004520006.1 | scaffold6172 | 37233                   | CC                              | AA                 | AA               | INTERGENIC      |               |                    |                    |

| SNPs IDs           | Chromosome IDs | Chromosomes  | Physical positions (bp) | CDC Frontier (Reference genome) | (Pusa 1103 & HPNB) | (ILWC 46 & LPNB) | Sequence genome | Components of | Gene accession IDs | Putative functions |
|--------------------|----------------|--------------|-------------------------|---------------------------------|--------------------|------------------|-----------------|---------------|--------------------|--------------------|
| SNP_114951_A_37290 | NW_004520006.1 | scaffold6172 | 37290                   | AA                              | GG                 | GG               | INTERGENIC      |               |                    |                    |
| SNP_114952_A_37295 | NW_004520006.1 | scaffold6172 | 37295                   | AA                              | CC                 | CC               | INTERGENIC      |               |                    |                    |
| SNP_114953_A_37311 | NW_004520006.1 | scaffold6172 | 37311                   | AA                              | TT                 | TT               | INTERGENIC      |               |                    |                    |
| SNP_114954_A_37312 | NW_004520006.1 | scaffold6172 | 37312                   | AA                              | GG                 | GG               | INTERGENIC      |               |                    |                    |
| SNP_114955_A_37394 | NW_004520006.1 | scaffold6172 | 37394                   | TT                              | CC                 | CC               | INTERGENIC      |               |                    |                    |
| SNP_114956_A_37395 | NW_004520006.1 | scaffold6172 | 37395                   | TT                              | AA                 | AA               | INTERGENIC      |               |                    |                    |
| SNP_114957_A_37415 | NW_004520006.1 | scaffold6172 | 37415                   | CC                              | AA                 | AA               | INTERGENIC      |               |                    |                    |
| SNP_114958_A_37991 | NW_004520006.1 | scaffold6172 | 37991                   | TT                              | GG                 | GG               | INTERGENIC      |               |                    |                    |
| SNP_114959_A_39066 | NW_004520006.1 | scaffold6172 | 39066                   | TT                              | GG                 | GG               | INTERGENIC      |               |                    |                    |
| SNP_114961_A_448   | NW_004520007.1 | scaffold6173 | 448                     | TT                              | AA                 | AA               | INTERGENIC      |               |                    |                    |
| SNP_114962_A_487   | NW_004520007.1 | scaffold6173 | 487                     | CC                              | GG                 | GG               | INTERGENIC      |               |                    |                    |
| SNP_114963_A_684   | NW_004520008.1 | scaffold6174 | 684                     | AA                              | GG                 | GG               | INTERGENIC      |               |                    |                    |
| SNP_114964_A_704   | NW_004520008.1 | scaffold6174 | 704                     | GG                              | AA                 | AA               | INTERGENIC      |               |                    |                    |
| SNP_114965_A_749   | NW_004520008.1 | scaffold6174 | 749                     | TT                              | GG                 | GG               | INTERGENIC      |               |                    |                    |
| SNP_114966_A_758   | NW_004520008.1 | scaffold6174 | 758                     | TT                              | GG                 | GG               | INTERGENIC      |               |                    |                    |
| SNP_114967_A_776   | NW_004520008.1 | scaffold6174 | 776                     | AA                              | GG                 | GG               | INTERGENIC      |               |                    |                    |
| SNP_114968_A_981   | NW_004520008.1 | scaffold6174 | 981                     | TT                              | AA                 | AA               | INTERGENIC      |               |                    |                    |
| SNP_114969_A_982   | NW_004520008.1 | scaffold6174 | 982                     | AA                              | TT                 | TT               | INTERGENIC      |               |                    |                    |
| SNP_114970_A_3365  | NW_004520011.1 | scaffold6177 | 3365                    | AA                              | TT                 | TT               | INTERGENIC      |               |                    |                    |
| SNP_114972_A_3725  | NW_004520011.1 | scaffold6177 | 3725                    | GG                              | AA                 | AA               | INTERGENIC      |               |                    |                    |
| SNP_114973_A_3833  | NW_004520011.1 | scaffold6177 | 3833                    | GG                              | TT                 | TT               | INTERGENIC      |               |                    |                    |
| SNP_114974_A_4331  | NW_004520011.1 | scaffold6177 | 4331                    | GG                              | AA                 | AA               | INTERGENIC      |               |                    |                    |

| SNPs IDs          | Chromosome IDs | Chromosomes  | Physical positions (bp) | CDC Frontier (Reference genome) | (Pusa 1103 & HPNB) | (ILWC 46 & LPNB) | Sequence genome | Components of | Gene accession IDs | Putative functions |
|-------------------|----------------|--------------|-------------------------|---------------------------------|--------------------|------------------|-----------------|---------------|--------------------|--------------------|
| SNP_114975_A_4805 | NW_004520011.1 | scaffold6177 | 4805                    | TT                              | GG                 | GG               | INTERGENIC      |               |                    |                    |
| SNP_114976_A_912  | NW_004520013.1 | scaffold6179 | 912                     | GG                              | CC                 | CC               | INTERGENIC      |               |                    |                    |
| SNP_114978_A_1394 | NW_004520017.1 | scaffold6184 | 1394                    | AA                              | GG                 | GG               | INTERGENIC      |               |                    |                    |
| SNP_114979_A_77   | NW_004520018.1 | scaffold6185 | 77                      | TT                              | GG                 | GG               | INTERGENIC      |               |                    |                    |
| SNP_114980_A_123  | NW_004520018.1 | scaffold6185 | 123                     | AA                              | TT                 | TT               | INTERGENIC      |               |                    |                    |
| SNP_114981_A_381  | NW_004520018.1 | scaffold6185 | 381                     | AA                              | GG                 | GG               | INTERGENIC      |               |                    |                    |
| SNP_114982_A_383  | NW_004520018.1 | scaffold6185 | 383                     | CC                              | AA                 | AA               | INTERGENIC      |               |                    |                    |
| SNP_114984_A_542  | NW_004520018.1 | scaffold6185 | 542                     | AA                              | CC                 | CC               | INTERGENIC      |               |                    |                    |
| SNP_114985_A_559  | NW_004520018.1 | scaffold6185 | 559                     | TT                              | CC                 | CC               | INTERGENIC      |               |                    |                    |
| SNP_114986_A_617  | NW_004520018.1 | scaffold6185 | 617                     | GG                              | AA                 | AA               | INTERGENIC      |               |                    |                    |
| SNP_114987_A_745  | NW_004520018.1 | scaffold6185 | 745                     | TT                              | CC                 | CC               | INTERGENIC      |               |                    |                    |
| SNP_114988_A_774  | NW_004520018.1 | scaffold6185 | 774                     | GG                              | AA                 | AA               | INTERGENIC      |               |                    |                    |
| SNP_114989_A_799  | NW_004520018.1 | scaffold6185 | 799                     | AA                              | GG                 | GG               | INTERGENIC      |               |                    |                    |
| SNP_114990_A_846  | NW_004520018.1 | scaffold6185 | 846                     | CC                              | TT                 | TT               | INTERGENIC      |               |                    |                    |
| SNP_114991_A_856  | NW_004520018.1 | scaffold6185 | 856                     | CC                              | AA                 | AA               | INTERGENIC      |               |                    |                    |
| SNP_114992_A_866  | NW_004520018.1 | scaffold6185 | 866                     | CC                              | TT                 | TT               | INTERGENIC      |               |                    |                    |
| SNP_114993_A_959  | NW_004520018.1 | scaffold6185 | 959                     | GG                              | AA                 | AA               | INTERGENIC      |               |                    |                    |
| SNP_114994_A_989  | NW_004520018.1 | scaffold6185 | 989                     | TT                              | AA                 | AA               | INTERGENIC      |               |                    |                    |
| SNP_114995_A_1021 | NW_004520018.1 | scaffold6185 | 1021                    | CC                              | AA                 | AA               | INTERGENIC      |               |                    |                    |
| SNP_114996_A_1042 | NW_004520018.1 | scaffold6185 | 1042                    | GG                              | AA                 | AA               | INTERGENIC      |               |                    |                    |
| SNP_114997_A_1045 | NW_004520018.1 | scaffold6185 | 1045                    | TT                              | GG                 | GG               | INTERGENIC      |               |                    |                    |
| SNP_114998_A_1048 | NW_004520018.1 | scaffold6185 | 1048                    | CC                              | TT                 | TT               | INTERGENIC      |               |                    |                    |

| SNPs IDs          | Chromosome IDs | Chromosomes  | Physical positions (bp) | CDC Frontier (Reference genome) | (Pusa 1103 & HPNB) | (ILWC 46 & LPNB) | Sequence Components of genome | Gene accession IDs | Putative functions                  |
|-------------------|----------------|--------------|-------------------------|---------------------------------|--------------------|------------------|-------------------------------|--------------------|-------------------------------------|
| SNP_114999_A_1055 | NW_004520018.1 | scaffold6185 | 1055                    | CC                              | TT                 | TT               | INTERGENIC                    |                    |                                     |
| SNP_115000_A_1100 | NW_004520018.1 | scaffold6185 | 1100                    | GG                              | AA                 | AA               | INTERGENIC                    |                    |                                     |
| SNP_115001_A_1140 | NW_004520018.1 | scaffold6185 | 1140                    | AA                              | CC                 | CC               | INTERGENIC                    |                    |                                     |
| SNP_115002_A_1144 | NW_004520018.1 | scaffold6185 | 1144                    | TT                              | CC                 | CC               | INTERGENIC                    |                    |                                     |
| SNP_115003_A_1194 | NW_004520018.1 | scaffold6185 | 1194                    | TT                              | AA                 | AA               | INTERGENIC                    |                    |                                     |
| SNP_115004_A_1296 | NW_004520018.1 | scaffold6185 | 1296                    | AA                              | CC                 | CC               | INTERGENIC                    |                    |                                     |
| SNP_115005_A_1438 | NW_004520018.1 | scaffold6185 | 1438                    | GG                              | CC                 | CC               | INTERGENIC                    |                    |                                     |
| SNP_115006_A_2220 | NW_004520018.1 | scaffold6185 | 2220                    | GG                              | TT                 | TT               | INTERGENIC                    |                    |                                     |
| SNP_115008_A_3058 | NW_004520018.1 | scaffold6185 | 3058                    | TT                              | CC                 | CC               | DRR                           | 101507289          | GDSL esterase/lipase At5g45960-like |
| SNP_115009_A_3060 | NW_004520018.1 | scaffold6185 | 3060                    | AA                              | GG                 | GG               | DRR                           | 101507289          | GDSL esterase/lipase At5g45960-like |
| SNP_115010_A_3087 | NW_004520018.1 | scaffold6185 | 3087                    | AA                              | TT                 | TT               | DRR                           | 101507289          | GDSL esterase/lipase At5g45960-like |
| SNP_115011_A_3108 | NW_004520018.1 | scaffold6185 | 3108                    | CC                              | AA                 | AA               | DRR                           | 101507289          | GDSL esterase/lipase At5g45960-like |
| SNP_115012_A_3139 | NW_004520018.1 | scaffold6185 | 3139                    | GG                              | AA                 | AA               | DRR                           | 101507289          | GDSL esterase/lipase At5g45960-like |
| SNP_115013_A_3419 | NW_004520018.1 | scaffold6185 | 3419                    | TT                              | AA                 | AA               | DRR                           | 101507289          | GDSL esterase/lipase At5g45960-like |
| SNP_115014_A_3488 | NW_004520018.1 | scaffold6185 | 3488                    | CC                              | AA                 | AA               | DRR                           | 101507289          | GDSL esterase/lipase At5g45960-like |
| SNP_115015_A_3856 | NW_004520018.1 | scaffold6185 | 3856                    | GG                              | TT                 | TT               | SYNONYMOUS_CODING             | 101507289          | GDSL esterase/lipase At5g45960-like |
| SNP_115017_A_498  | NW_004520019.1 | scaffold6187 | 498                     | AA                              | TT                 | TT               | INTERGENIC                    |                    |                                     |
| SNP_115018_A_531  | NW_004520019.1 | scaffold6187 | 531                     | TT                              | CC                 | CC               | INTERGENIC                    |                    |                                     |
| SNP_115019_A_623  | NW_004520019.1 | scaffold6187 | 623                     | AA                              | CC                 | CC               | INTERGENIC                    |                    |                                     |
| SNP_115020_A_728  | NW_004520019.1 | scaffold6187 | 728                     | GG                              | AA                 | AA               | INTERGENIC                    |                    |                                     |
| SNP_115021_A_889  | NW_004520019.1 | scaffold6187 | 889                     | AA                              | GG                 | GG               | INTERGENIC                    |                    |                                     |
| SNP_115022_A_1025 | NW_004520019.1 | scaffold6187 | 1025                    | TT                              | GG                 | GG               | INTERGENIC                    |                    |                                     |

| SNPs IDs          | Chromosome IDs | Chromosomes  | Physical positions (bp) | CDC Frontier (Reference genome) | (Pusa 1103 & HPNB) | (ILWC 46 & LPNB) | Sequence genome | Components of | Gene accession IDs | Putative functions |
|-------------------|----------------|--------------|-------------------------|---------------------------------|--------------------|------------------|-----------------|---------------|--------------------|--------------------|
| SNP_115023_A_447  | NW_004520024.1 | scaffold6193 | 447                     | TT                              | GG                 | GG               | INTERGENIC      |               |                    |                    |
| SNP_115024_A_1290 | NW_004520024.1 | scaffold6193 | 1290                    | AA                              | CC                 | CC               | INTERGENIC      |               |                    |                    |
| SNP_115025_A_659  | NW_004520025.1 | scaffold6194 | 659                     | AA                              | TT                 | TT               | INTERGENIC      |               |                    |                    |
| SNP_115026_A_696  | NW_004520025.1 | scaffold6194 | 696                     | AA                              | GG                 | GG               | INTERGENIC      |               |                    |                    |
| SNP_115027_A_697  | NW_004520025.1 | scaffold6194 | 697                     | AA                              | CC                 | CC               | INTERGENIC      |               |                    |                    |
| SNP_115028_A_561  | NW_004520030.1 | scaffold6199 | 561                     | TT                              | AA                 | AA               | INTERGENIC      |               |                    |                    |
| SNP_115029_A_612  | NW_004520030.1 | scaffold6199 | 612                     | AA                              | CC                 | CC               | INTERGENIC      |               |                    |                    |
| SNP_115030_A_654  | NW_004520030.1 | scaffold6199 | 654                     | TT                              | GG                 | GG               | INTERGENIC      |               |                    |                    |
| SNP_115031_A_1814 | NW_004520032.1 | scaffold6202 | 1814                    | AA                              | TT                 | TT               | INTERGENIC      |               |                    |                    |
| SNP_115032_A_5624 | NW_004520039.1 | scaffold6214 | 5624                    | CC                              | GG                 | GG               | INTERGENIC      |               |                    |                    |
| SNP_115033_A_451  | NW_004520040.1 | scaffold6215 | 451                     | AA                              | GG                 | GG               | INTERGENIC      |               |                    |                    |
| SNP_115034_A_718  | NW_004520045.1 | scaffold6225 | 718                     | CC                              | AA                 | AA               | INTERGENIC      |               |                    |                    |
| SNP_115035_A_722  | NW_004520045.1 | scaffold6225 | 722                     | CC                              | GG                 | GG               | INTERGENIC      |               |                    |                    |
| SNP_115036_A_726  | NW_004520045.1 | scaffold6225 | 726                     | TT                              | GG                 | GG               | INTERGENIC      |               |                    |                    |
| SNP_115037_A_731  | NW_004520045.1 | scaffold6225 | 731                     | AA                              | TT                 | TT               | INTERGENIC      |               |                    |                    |
| SNP_115039_A_97   | NW_004520050.1 | scaffold6232 | 97                      | CC                              | TT                 | TT               | INTERGENIC      |               |                    |                    |
| SNP_115040_A_129  | NW_004520050.1 | scaffold6232 | 129                     | CC                              | TT                 | TT               | INTERGENIC      |               |                    |                    |
| SNP_115041_A_141  | NW_004520050.1 | scaffold6232 | 141                     | TT                              | CC                 | CC               | INTERGENIC      |               |                    |                    |
| SNP_115042_A_64   | NW_004520060.1 | scaffold6256 | 64                      | TT                              | CC                 | CC               | INTERGENIC      |               |                    |                    |
| SNP_115043_A_110  | NW_004520060.1 | scaffold6256 | 110                     | AA                              | GG                 | GG               | INTERGENIC      |               |                    |                    |
| SNP_115044_A_131  | NW_004520060.1 | scaffold6256 | 131                     | AA                              | CC                 | CC               | INTERGENIC      |               |                    |                    |
| SNP_115045_A_239  | NW_004520060.1 | scaffold6256 | 239                     | AA                              | GG                 | GG               | INTERGENIC      |               |                    |                    |

| SNPs IDs          | Chromosome IDs | Chromosomes  | Physical positions (bp) | CDC Frontier (Reference genome) | (Pusa 1103 & HPNB) | (ILWC 46 & LPNB) | Sequence genome | Components of | Gene accession IDs | Putative functions |
|-------------------|----------------|--------------|-------------------------|---------------------------------|--------------------|------------------|-----------------|---------------|--------------------|--------------------|
| SNP_115046_A_684  | NW_004520078.1 | scaffold6288 | 684                     | TT                              | GG                 | GG               | INTERGENIC      |               |                    |                    |
| SNP_115047_A_1033 | NW_004520078.1 | scaffold6288 | 1033                    | GG                              | TT                 | TT               | INTERGENIC      |               |                    |                    |
| SNP_115048_A_1054 | NW_004520078.1 | scaffold6288 | 1054                    | TT                              | GG                 | GG               | INTERGENIC      |               |                    |                    |
| SNP_115049_A_890  | NW_004520087.1 | scaffold6300 | 890                     | GG                              | CC                 | CC               | INTERGENIC      |               |                    |                    |
| SNP_115050_A_1143 | NW_004520087.1 | scaffold6300 | 1143                    | AA                              | TT                 | TT               | INTERGENIC      |               |                    |                    |
| SNP_115051_A_1240 | NW_004520087.1 | scaffold6300 | 1240                    | TT                              | CC                 | CC               | INTERGENIC      |               |                    |                    |
| SNP_115052_A_1246 | NW_004520087.1 | scaffold6300 | 1246                    | TT                              | AA                 | AA               | INTERGENIC      |               |                    |                    |
| SNP_115053_A_1289 | NW_004520087.1 | scaffold6300 | 1289                    | TT                              | AA                 | AA               | INTERGENIC      |               |                    |                    |
| SNP_115054_A_1550 | NW_004520087.1 | scaffold6300 | 1550                    | TT                              | CC                 | CC               | INTERGENIC      |               |                    |                    |
| SNP_115055_A_1884 | NW_004520087.1 | scaffold6300 | 1884                    | CC                              | TT                 | TT               | INTERGENIC      |               |                    |                    |
| SNP_115057_A_2530 | NW_004520087.1 | scaffold6300 | 2530                    | GG                              | CC                 | CC               | INTERGENIC      |               |                    |                    |
| SNP_115058_A_2634 | NW_004520087.1 | scaffold6300 | 2634                    | GG                              | AA                 | AA               | INTERGENIC      |               |                    |                    |
| SNP_115059_A_3051 | NW_004520087.1 | scaffold6300 | 3051                    | AA                              | TT                 | TT               | INTERGENIC      |               |                    |                    |
| SNP_115060_A_3270 | NW_004520087.1 | scaffold6300 | 3270                    | AA                              | TT                 | TT               | INTERGENIC      |               |                    |                    |
| SNP_115061_A_3341 | NW_004520087.1 | scaffold6300 | 3341                    | AA                              | TT                 | TT               | INTERGENIC      |               |                    |                    |
| SNP_115062_A_3343 | NW_004520087.1 | scaffold6300 | 3343                    | GG                              | TT                 | TT               | INTERGENIC      |               |                    |                    |
| SNP_115063_A_3385 | NW_004520087.1 | scaffold6300 | 3385                    | AA                              | GG                 | GG               | INTERGENIC      |               |                    |                    |
| SNP_115064_A_3429 | NW_004520087.1 | scaffold6300 | 3429                    | GG                              | CC                 | CC               | INTERGENIC      |               |                    |                    |
| SNP_115065_A_3500 | NW_004520087.1 | scaffold6300 | 3500                    | AA                              | GG                 | GG               | INTERGENIC      |               |                    |                    |
| SNP_115066_A_4412 | NW_004520087.1 | scaffold6300 | 4412                    | AA                              | CC                 | CC               | INTERGENIC      |               |                    |                    |
| SNP_115067_A_4966 | NW_004520087.1 | scaffold6300 | 4966                    | AA                              | TT                 | TT               | INTERGENIC      |               |                    |                    |
| SNP_115068_A_4984 | NW_004520087.1 | scaffold6300 | 4984                    | CC                              | AA                 | AA               | INTERGENIC      |               |                    |                    |



| SNPs IDs           | Chromosome IDs | Chromosomes  | Physical positions (bp) | CDC Frontier (Reference genome) | (Pusa 1103 & HPNB) | (ILWC 46 & LPNB) | Sequence genome | Components of | Gene accession IDs | Putative functions |
|--------------------|----------------|--------------|-------------------------|---------------------------------|--------------------|------------------|-----------------|---------------|--------------------|--------------------|
| SNP_115069_A_11044 | NW_004520087.1 | scaffold6300 | 11044                   | TT                              | GG                 | GG               | INTERGENIC      |               |                    |                    |
| SNP_115070_A_11240 | NW_004520087.1 | scaffold6300 | 11240                   | GG                              | CC                 | CC               | INTERGENIC      |               |                    |                    |
| SNP_115071_A_11251 | NW_004520087.1 | scaffold6300 | 11251                   | TT                              | CC                 | CC               | INTERGENIC      |               |                    |                    |
| SNP_115072_A_11266 | NW_004520087.1 | scaffold6300 | 11266                   | GG                              | AA                 | AA               | INTERGENIC      |               |                    |                    |
| SNP_115073_A_11334 | NW_004520087.1 | scaffold6300 | 11334                   | AA                              | GG                 | GG               | INTERGENIC      |               |                    |                    |
| SNP_115074_A_303   | NW_004520088.1 | scaffold6301 | 303                     | CC                              | GG                 | GG               | INTERGENIC      |               |                    |                    |
| SNP_115075_A_460   | NW_004520091.1 | scaffold6304 | 460                     | AA                              | GG                 | GG               | INTERGENIC      |               |                    |                    |
| SNP_115076_A_515   | NW_004520091.1 | scaffold6304 | 515                     | AA                              | GG                 | GG               | INTERGENIC      |               |                    |                    |
| SNP_115077_A_535   | NW_004520093.1 | scaffold6307 | 535                     | GG                              | AA                 | AA               | INTERGENIC      |               |                    |                    |
| SNP_115078_A_706   | NW_004520096.1 | scaffold6314 | 706                     | CC                              | TT                 | TT               | INTERGENIC      |               |                    |                    |
| SNP_115079_A_661   | NW_004520097.1 | scaffold6317 | 661                     | CC                              | TT                 | TT               | INTERGENIC      |               |                    |                    |
| SNP_115080_A_734   | NW_004520097.1 | scaffold6317 | 734                     | AA                              | TT                 | TT               | INTERGENIC      |               |                    |                    |
| SNP_115081_A_16670 | NW_004520098.1 | scaffold6318 | 16670                   | CC                              | TT                 | TT               | INTERGENIC      |               |                    |                    |
| SNP_115082_A_16857 | NW_004520098.1 | scaffold6318 | 16857                   | GG                              | AA                 | AA               | INTERGENIC      |               |                    |                    |
| SNP_115083_A_16960 | NW_004520098.1 | scaffold6318 | 16960                   | GG                              | TT                 | TT               | INTERGENIC      |               |                    |                    |
| SNP_115084_A_17190 | NW_004520098.1 | scaffold6318 | 17190                   | CC                              | AA                 | AA               | INTERGENIC      |               |                    |                    |
| SNP_115085_A_17409 | NW_004520098.1 | scaffold6318 | 17409                   | GG                              | AA                 | AA               | INTERGENIC      |               |                    |                    |
| SNP_115086_A_17883 | NW_004520098.1 | scaffold6318 | 17883                   | TT                              | GG                 | GG               | INTERGENIC      |               |                    |                    |
| SNP_115087_A_17888 | NW_004520098.1 | scaffold6318 | 17888                   | GG                              | AA                 | AA               | INTERGENIC      |               |                    |                    |
| SNP_115088_A_791   | NW_004520099.1 | scaffold6321 | 791                     | AA                              | CC                 | CC               | INTERGENIC      |               |                    |                    |
| SNP_115089_A_1017  | NW_004520100.1 | scaffold6322 | 1017                    | GG                              | CC                 | CC               | INTERGENIC      |               |                    |                    |
| SNP_115090_A_4373  | NW_004520100.1 | scaffold6322 | 4373                    | CC                              | AA                 | AA               | INTERGENIC      |               |                    |                    |

| SNPs IDs           | Chromosome IDs | Chromosomes  | Physical positions (bp) | CDC Frontier (Reference genome) | (Pusa 1103 & HPNB) | (ILWC 46 & LPNB) | Sequence genome | Components of | Gene accession IDs                            | Putative functions |
|--------------------|----------------|--------------|-------------------------|---------------------------------|--------------------|------------------|-----------------|---------------|-----------------------------------------------|--------------------|
| SNP_115091_A_4374  | NW_004520100.1 | scaffold6322 | 4374                    | TT                              | CC                 | CC               | INTERGENIC      |               |                                               |                    |
| SNP_115092_A_4426  | NW_004520100.1 | scaffold6322 | 4426                    | AA                              | GG                 | GG               | INTERGENIC      |               |                                               |                    |
| SNP_115093_A_4483  | NW_004520100.1 | scaffold6322 | 4483                    | AA                              | GG                 | GG               | INTERGENIC      |               |                                               |                    |
| SNP_115094_A_4485  | NW_004520100.1 | scaffold6322 | 4485                    | TT                              | AA                 | AA               | INTERGENIC      |               |                                               |                    |
| SNP_115095_A_579   | NW_004520101.1 | scaffold6324 | 579                     | GG                              | AA                 | AA               | INTERGENIC      |               |                                               |                    |
| SNP_115096_A_694   | NW_004520101.1 | scaffold6324 | 694                     | TT                              | GG                 | GG               | INTERGENIC      |               |                                               |                    |
| SNP_115097_A_709   | NW_004520101.1 | scaffold6324 | 709                     | GG                              | AA                 | AA               | INTERGENIC      |               |                                               |                    |
| SNP_115098_A_240   | NW_004520104.1 | scaffold6327 | 240                     | AA                              | CC                 | CC               | INTERGENIC      |               |                                               |                    |
| SNP_115099_A_242   | NW_004520104.1 | scaffold6327 | 242                     | AA                              | TT                 | TT               | INTERGENIC      |               |                                               |                    |
| SNP_115100_A_245   | NW_004520104.1 | scaffold6327 | 245                     | AA                              | TT                 | TT               | INTERGENIC      |               |                                               |                    |
| SNP_115101_A_246   | NW_004520104.1 | scaffold6327 | 246                     | AA                              | TT                 | TT               | INTERGENIC      |               |                                               |                    |
| SNP_115102_A_247   | NW_004520104.1 | scaffold6327 | 247                     | TT                              | GG                 | GG               | INTERGENIC      |               |                                               |                    |
| SNP_115103_A_439   | NW_004520108.1 | scaffold6332 | 439                     | CC                              | TT                 | TT               | INTERGENIC      |               |                                               |                    |
| SNP_115104_A_871   | NW_004520111.1 | scaffold6335 | 871                     | GG                              | TT                 | TT               | INTERGENIC      |               |                                               |                    |
| SNP_115105_A_873   | NW_004520111.1 | scaffold6335 | 873                     | AA                              | GG                 | GG               | INTERGENIC      |               |                                               |                    |
| SNP_115106_A_889   | NW_004520111.1 | scaffold6335 | 889                     | AA                              | GG                 | GG               | INTERGENIC      |               |                                               |                    |
| SNP_115107_A_919   | NW_004520111.1 | scaffold6335 | 919                     | TT                              | CC                 | CC               | INTERGENIC      |               |                                               |                    |
| SNP_115108_A_983   | NW_004520111.1 | scaffold6335 | 983                     | GG                              | AA                 | AA               | INTERGENIC      |               |                                               |                    |
| SNP_115109_A_990   | NW_004520111.1 | scaffold6335 | 990                     | TT                              | GG                 | GG               | INTERGENIC      |               |                                               |                    |
| SNP_115110_A_997   | NW_004520111.1 | scaffold6335 | 997                     | AA                              | GG                 | GG               | INTERGENIC      |               |                                               |                    |
| SNP_115111_A_2421  | NW_004520114.1 | scaffold6343 | 2421                    | CC                              | TT                 | TT               | INTERGENIC      |               |                                               |                    |
| SNP_115112_A_32215 | NW_004520126.1 | scaffold6367 | 32215                   | TT                              | CC                 | CC               | URR             | 101509837     | probable disease resistance protein At1g52660 |                    |

| SNPs IDs           | Chromosome IDs | Chromosomes  | Physical positions (bp) | CDC Frontier (Reference genome) | (Pusa 1103 & HPNB) | (ILWC 46 & LPNB) | Sequence Components of genome | Gene accession IDs | Putative functions                            |
|--------------------|----------------|--------------|-------------------------|---------------------------------|--------------------|------------------|-------------------------------|--------------------|-----------------------------------------------|
| SNP_115113_A_32228 | NW_004520126.1 | scaffold6367 | 32228                   | GG                              | AA                 | AA               | URR                           | 101509837          | probable disease resistance protein At1g52660 |
| SNP_115114_A_32239 | NW_004520126.1 | scaffold6367 | 32239                   | GG                              | AA                 | AA               | URR                           | 101509837          | probable disease resistance protein At1g52660 |
| SNP_115115_A_32367 | NW_004520126.1 | scaffold6367 | 32367                   | AA                              | GG                 | GG               | URR                           | 101509837          | probable disease resistance protein At1g52660 |
| SNP_115116_A_32385 | NW_004520126.1 | scaffold6367 | 32385                   | GG                              | AA                 | AA               | URR                           | 101509837          | probable disease resistance protein At1g52660 |
| SNP_115117_A_32411 | NW_004520126.1 | scaffold6367 | 32411                   | CC                              | AA                 | AA               | URR                           | 101509837          | probable disease resistance protein At1g52660 |
| SNP_115118_A_32462 | NW_004520126.1 | scaffold6367 | 32462                   | AA                              | TT                 | TT               | URR                           | 101509837          | probable disease resistance protein At1g52660 |
| SNP_115119_A_32465 | NW_004520126.1 | scaffold6367 | 32465                   | CC                              | TT                 | TT               | URR                           | 101509837          | probable disease resistance protein At1g52660 |
| SNP_115120_A_32467 | NW_004520126.1 | scaffold6367 | 32467                   | TT                              | CC                 | CC               | URR                           | 101509837          | probable disease resistance protein At1g52660 |
| SNP_115121_A_32469 | NW_004520126.1 | scaffold6367 | 32469                   | AA                              | TT                 | TT               | URR                           | 101509837          | probable disease resistance protein At1g52660 |
| SNP_115122_A_32501 | NW_004520126.1 | scaffold6367 | 32501                   | GG                              | CC                 | CC               | URR                           | 101509837          | probable disease resistance protein At1g52660 |
| SNP_115123_A_32553 | NW_004520126.1 | scaffold6367 | 32553                   | TT                              | AA                 | AA               | URR                           | 101509837          | probable disease resistance protein At1g52660 |
| SNP_115124_A_32630 | NW_004520126.1 | scaffold6367 | 32630                   | GG                              | AA                 | AA               | URR                           | 101509837          | probable disease resistance protein At1g52660 |
| SNP_115125_A_32651 | NW_004520126.1 | scaffold6367 | 32651                   | AA                              | TT                 | TT               | URR                           | 101509837          | probable disease resistance protein At1g52660 |
| SNP_115126_A_32653 | NW_004520126.1 | scaffold6367 | 32653                   | GG                              | AA                 | AA               | URR                           | 101509837          | probable disease resistance protein At1g52660 |
| SNP_115127_A_32727 | NW_004520126.1 | scaffold6367 | 32727                   | AA                              | GG                 | GG               | URR                           | 101509837          | probable disease resistance protein At1g52660 |
| SNP_115128_A_32731 | NW_004520126.1 | scaffold6367 | 32731                   | CC                              | TT                 | TT               | URR                           | 101509837          | probable disease resistance protein At1g52660 |
| SNP_115129_A_32733 | NW_004520126.1 | scaffold6367 | 32733                   | GG                              | AA                 | AA               | URR                           | 101509837          | probable disease resistance protein At1g52660 |
| SNP_115130_A_32831 | NW_004520126.1 | scaffold6367 | 32831                   | AA                              | GG                 | GG               | URR                           | 101509837          | probable disease resistance protein At1g52660 |
| SNP_115131_A_32856 | NW_004520126.1 | scaffold6367 | 32856                   | CC                              | GG                 | GG               | URR                           | 101509837          | probable disease resistance protein At1g52660 |
| SNP_115132_A_32902 | NW_004520126.1 | scaffold6367 | 32902                   | TT                              | GG                 | GG               | URR                           | 101509837          | probable disease resistance protein At1g52660 |
| SNP_115133_A_32966 | NW_004520126.1 | scaffold6367 | 32966                   | CC                              | TT                 | TT               | URR                           | 101509837          | probable disease resistance protein At1g52660 |
| SNP_115134_A_32985 | NW_004520126.1 | scaffold6367 | 32985                   | AA                              | GG                 | GG               | URR                           | 101509837          | probable disease resistance protein At1g52660 |

| SNPs IDs           | Chromosome IDs | Chromosomes  | Physical positions (bp) | CDC Frontier (Reference genome) | (Pusa 1103 & HPNB) | (ILWC 46 & LPNB) | Sequence Components of genome | Gene accession IDs | Putative functions                            |
|--------------------|----------------|--------------|-------------------------|---------------------------------|--------------------|------------------|-------------------------------|--------------------|-----------------------------------------------|
| SNP_115135_A_33029 | NW_004520126.1 | scaffold6367 | 33029                   | GG                              | TT                 | TT               | URR                           | 101509837          | probable disease resistance protein At1g52660 |
| SNP_115136_A_33053 | NW_004520126.1 | scaffold6367 | 33053                   | GG                              | AA                 | AA               | INTERGENIC                    |                    |                                               |
| SNP_115137_A_33068 | NW_004520126.1 | scaffold6367 | 33068                   | TT                              | CC                 | CC               | INTERGENIC                    |                    |                                               |
| SNP_115138_A_33175 | NW_004520126.1 | scaffold6367 | 33175                   | CC                              | TT                 | TT               | INTERGENIC                    |                    |                                               |
| SNP_115139_A_33179 | NW_004520126.1 | scaffold6367 | 33179                   | GG                              | AA                 | AA               | INTERGENIC                    |                    |                                               |
| SNP_115140_A_33186 | NW_004520126.1 | scaffold6367 | 33186                   | GG                              | AA                 | AA               | INTERGENIC                    |                    |                                               |
| SNP_115141_A_817   | NW_004520129.1 | scaffold6375 | 817                     | AA                              | GG                 | GG               | INTERGENIC                    |                    |                                               |
| SNP_115142_A_900   | NW_004520129.1 | scaffold6375 | 900                     | AA                              | TT                 | TT               | INTERGENIC                    |                    |                                               |
| SNP_115143_A_155   | NW_004520130.1 | scaffold6376 | 155                     | TT                              | CC                 | CC               | INTERGENIC                    |                    |                                               |
| SNP_115144_A_531   | NW_004520130.1 | scaffold6376 | 531                     | TT                              | CC                 | CC               | INTERGENIC                    |                    |                                               |
| SNP_115145_A_579   | NW_004520130.1 | scaffold6376 | 579                     | AA                              | CC                 | CC               | INTERGENIC                    |                    |                                               |
| SNP_115146_A_1220  | NW_004520130.1 | scaffold6376 | 1220                    | AA                              | GG                 | GG               | INTERGENIC                    |                    |                                               |
| SNP_115147_A_2972  | NW_004520131.1 | scaffold6377 | 2972                    | GG                              | AA                 | AA               | INTERGENIC                    |                    |                                               |
| SNP_115148_A_3050  | NW_004520131.1 | scaffold6377 | 3050                    | TT                              | CC                 | CC               | INTERGENIC                    |                    |                                               |
| SNP_115149_A_1295  | NW_004520134.1 | scaffold6382 | 1295                    | AA                              | TT                 | TT               | INTERGENIC                    |                    |                                               |
| SNP_115151_A_3124  | NW_004520136.1 | scaffold6391 | 3124                    | AA                              | GG                 | GG               | INTERGENIC                    |                    |                                               |
| SNP_115152_A_3220  | NW_004520136.1 | scaffold6391 | 3220                    | AA                              | TT                 | TT               | INTERGENIC                    |                    |                                               |
| SNP_115153_A_1201  | NW_004520138.1 | scaffold6394 | 1201                    | AA                              | GG                 | GG               | INTERGENIC                    |                    |                                               |
| SNP_115154_A_18295 | NW_004520138.1 | scaffold6394 | 18295                   | GG                              | AA                 | AA               | INTERGENIC                    |                    |                                               |
| SNP_115155_A_18299 | NW_004520138.1 | scaffold6394 | 18299                   | AA                              | CC                 | CC               | INTERGENIC                    |                    |                                               |
| SNP_115157_A_184   | NW_004520144.1 | scaffold6403 | 184                     | AA                              | GG                 | GG               | INTERGENIC                    |                    |                                               |
| SNP_115158_A_512   | NW_004520144.1 | scaffold6403 | 512                     | AA                              | GG                 | GG               | INTERGENIC                    |                    |                                               |

| SNPs IDs          | Chromosome IDs | Chromosomes  | Physical positions (bp) | CDC Frontier genome (Reference genome) | (Pusa 1103 & HPNB) | (ILWC 46 & LPNB) | Sequence genome | Components of | Gene accession IDs | Putative functions |
|-------------------|----------------|--------------|-------------------------|----------------------------------------|--------------------|------------------|-----------------|---------------|--------------------|--------------------|
| SNP_115159_A_526  | NW_004520144.1 | scaffold6403 | 526                     | CC                                     | AA                 | AA               | INTERGENIC      |               |                    |                    |
| SNP_115160_A_535  | NW_004520144.1 | scaffold6403 | 535                     | AA                                     | GG                 | GG               | INTERGENIC      |               |                    |                    |
| SNP_115161_A_1314 | NW_004520145.1 | scaffold6404 | 1314                    | CC                                     | AA                 | AA               | INTERGENIC      |               |                    |                    |
| SNP_115162_A_1558 | NW_004520145.1 | scaffold6404 | 1558                    | TT                                     | AA                 | AA               | INTERGENIC      |               |                    |                    |
| SNP_115163_A_1837 | NW_004520145.1 | scaffold6404 | 1837                    | AA                                     | TT                 | TT               | INTERGENIC      |               |                    |                    |
| SNP_115164_A_2060 | NW_004520145.1 | scaffold6404 | 2060                    | AA                                     | TT                 | TT               | INTERGENIC      |               |                    |                    |
| SNP_115165_A_2245 | NW_004520145.1 | scaffold6404 | 2245                    | AA                                     | CC                 | CC               | INTERGENIC      |               |                    |                    |
| SNP_115166_A_2285 | NW_004520145.1 | scaffold6404 | 2285                    | GG                                     | AA                 | AA               | INTERGENIC      |               |                    |                    |
| SNP_115167_A_1917 | NW_004520148.1 | scaffold6410 | 1917                    | CC                                     | TT                 | TT               | INTERGENIC      |               |                    |                    |
| SNP_115168_A_1944 | NW_004520148.1 | scaffold6410 | 1944                    | GG                                     | AA                 | AA               | INTERGENIC      |               |                    |                    |
| SNP_115169_A_1949 | NW_004520148.1 | scaffold6410 | 1949                    | TT                                     | AA                 | AA               | INTERGENIC      |               |                    |                    |
| SNP_115170_A_2142 | NW_004520148.1 | scaffold6410 | 2142                    | AA                                     | TT                 | TT               | INTERGENIC      |               |                    |                    |
| SNP_115171_A_2160 | NW_004520148.1 | scaffold6410 | 2160                    | GG                                     | AA                 | AA               | INTERGENIC      |               |                    |                    |
| SNP_115172_A_2169 | NW_004520148.1 | scaffold6410 | 2169                    | TT                                     | AA                 | AA               | INTERGENIC      |               |                    |                    |
| SNP_115173_A_2203 | NW_004520148.1 | scaffold6410 | 2203                    | TT                                     | CC                 | CC               | INTERGENIC      |               |                    |                    |
| SNP_115174_A_3806 | NW_004520148.1 | scaffold6410 | 3806                    | TT                                     | AA                 | AA               | INTERGENIC      |               |                    |                    |
| SNP_115175_A_3832 | NW_004520148.1 | scaffold6410 | 3832                    | TT                                     | CC                 | CC               | INTERGENIC      |               |                    |                    |
| SNP_115176_A_3889 | NW_004520148.1 | scaffold6410 | 3889                    | AA                                     | GG                 | GG               | INTERGENIC      |               |                    |                    |
| SNP_115177_A_3910 | NW_004520148.1 | scaffold6410 | 3910                    | CC                                     | TT                 | TT               | INTERGENIC      |               |                    |                    |
| SNP_115178_A_3919 | NW_004520148.1 | scaffold6410 | 3919                    | TT                                     | GG                 | GG               | INTERGENIC      |               |                    |                    |
| SNP_115179_A_3975 | NW_004520148.1 | scaffold6410 | 3975                    | GG                                     | AA                 | AA               | INTERGENIC      |               |                    |                    |
| SNP_115180_A_3976 | NW_004520148.1 | scaffold6410 | 3976                    | AA                                     | GG                 | GG               | INTERGENIC      |               |                    |                    |

| SNPs IDs          | Chromosome IDs | Chromosomes  | Physical positions (bp) | CDC Frontier (Reference genome) | (Pusa 1103 & HPNB) | (ILWC 46 & LPNB) | Sequence genome | Components of | Gene accession IDs | Putative functions |
|-------------------|----------------|--------------|-------------------------|---------------------------------|--------------------|------------------|-----------------|---------------|--------------------|--------------------|
| SNP_115181_A_3990 | NW_004520148.1 | scaffold6410 | 3990                    | TT                              | GG                 | GG               | INTERGENIC      |               |                    |                    |
| SNP_115182_A_3999 | NW_004520148.1 | scaffold6410 | 3999                    | GG                              | TT                 | TT               | INTERGENIC      |               |                    |                    |
| SNP_115183_A_4018 | NW_004520148.1 | scaffold6410 | 4018                    | CC                              | GG                 | GG               | INTERGENIC      |               |                    |                    |
| SNP_115184_A_4028 | NW_004520148.1 | scaffold6410 | 4028                    | GG                              | AA                 | AA               | INTERGENIC      |               |                    |                    |
| SNP_115185_A_4069 | NW_004520148.1 | scaffold6410 | 4069                    | GG                              | AA                 | AA               | INTERGENIC      |               |                    |                    |
| SNP_115186_A_4135 | NW_004520148.1 | scaffold6410 | 4135                    | TT                              | AA                 | AA               | INTERGENIC      |               |                    |                    |
| SNP_115187_A_4146 | NW_004520148.1 | scaffold6410 | 4146                    | GG                              | CC                 | CC               | INTERGENIC      |               |                    |                    |
| SNP_115188_A_4198 | NW_004520148.1 | scaffold6410 | 4198                    | AA                              | TT                 | TT               | INTERGENIC      |               |                    |                    |
| SNP_115189_A_4236 | NW_004520148.1 | scaffold6410 | 4236                    | CC                              | TT                 | TT               | INTERGENIC      |               |                    |                    |
| SNP_115190_A_4340 | NW_004520148.1 | scaffold6410 | 4340                    | AA                              | GG                 | GG               | INTERGENIC      |               |                    |                    |
| SNP_115191_A_680  | NW_004520151.1 | scaffold6414 | 680                     | TT                              | CC                 | CC               | INTERGENIC      |               |                    |                    |
| SNP_115192_A_244  | NW_004520157.1 | scaffold6429 | 244                     | AA                              | GG                 | GG               | INTERGENIC      |               |                    |                    |
| SNP_115193_A_361  | NW_004520157.1 | scaffold6429 | 361                     | GG                              | TT                 | TT               | INTERGENIC      |               |                    |                    |
| SNP_115194_A_670  | NW_004520157.1 | scaffold6429 | 670                     | GG                              | CC                 | CC               | INTERGENIC      |               |                    |                    |
| SNP_115195_A_4267 | NW_004520157.1 | scaffold6429 | 4267                    | AA                              | TT                 | TT               | INTERGENIC      |               |                    |                    |
| SNP_115196_A_4281 | NW_004520157.1 | scaffold6429 | 4281                    | AA                              | GG                 | GG               | INTERGENIC      |               |                    |                    |
| SNP_115198_A_5730 | NW_004520157.1 | scaffold6429 | 5730                    | CC                              | TT                 | TT               | INTERGENIC      |               |                    |                    |
| SNP_115199_A_5822 | NW_004520157.1 | scaffold6429 | 5822                    | TT                              | AA                 | AA               | INTERGENIC      |               |                    |                    |
| SNP_115200_A_550  | NW_004520159.1 | scaffold6432 | 550                     | GG                              | AA                 | AA               | INTERGENIC      |               |                    |                    |
| SNP_115201_A_3188 | NW_004520159.1 | scaffold6432 | 3188                    | GG                              | AA                 | AA               | INTERGENIC      |               |                    |                    |
| SNP_115202_A_3406 | NW_004520159.1 | scaffold6432 | 3406                    | CC                              | AA                 | AA               | INTERGENIC      |               |                    |                    |
| SNP_115203_A_3413 | NW_004520159.1 | scaffold6432 | 3413                    | TT                              | CC                 | CC               | INTERGENIC      |               |                    |                    |

| SNPs IDs           | Chromosome IDs | Chromosomes  | Physical positions (bp) | CDC Frontier (Reference genome) | (Pusa 1103 & HPNB) | (ILWC 46 & LPNB) | Sequence genome | Components of | Gene accession IDs | Putative functions |
|--------------------|----------------|--------------|-------------------------|---------------------------------|--------------------|------------------|-----------------|---------------|--------------------|--------------------|
| SNP_115204_A_3532  | NW_004520159.1 | scaffold6432 | 3532                    | GG                              | TT                 | TT               | INTERGENIC      |               |                    |                    |
| SNP_115205_A_3582  | NW_004520159.1 | scaffold6432 | 3582                    | CC                              | TT                 | TT               | INTERGENIC      |               |                    |                    |
| SNP_115206_A_3592  | NW_004520159.1 | scaffold6432 | 3592                    | AA                              | TT                 | TT               | INTERGENIC      |               |                    |                    |
| SNP_115207_A_406   | NW_004520164.1 | scaffold6437 | 406                     | TT                              | GG                 | GG               | INTERGENIC      |               |                    |                    |
| SNP_115208_A_483   | NW_004520164.1 | scaffold6437 | 483                     | GG                              | AA                 | AA               | INTERGENIC      |               |                    |                    |
| SNP_115209_A_560   | NW_004520164.1 | scaffold6437 | 560                     | AA                              | GG                 | GG               | INTERGENIC      |               |                    |                    |
| SNP_115210_A_643   | NW_004520164.1 | scaffold6437 | 643                     | AA                              | TT                 | TT               | INTERGENIC      |               |                    |                    |
| SNP_115211_A_931   | NW_004520166.1 | scaffold6440 | 931                     | TT                              | CC                 | CC               | INTERGENIC      |               |                    |                    |
| SNP_115212_A_365   | NW_004520171.1 | scaffold6449 | 365                     | AA                              | CC                 | CC               | INTERGENIC      |               |                    |                    |
| SNP_115213_A_377   | NW_004520171.1 | scaffold6449 | 377                     | AA                              | TT                 | TT               | INTERGENIC      |               |                    |                    |
| SNP_115214_A_449   | NW_004520172.1 | scaffold6451 | 449                     | AA                              | GG                 | GG               | INTERGENIC      |               |                    |                    |
| SNP_115215_A_2451  | NW_004520174.1 | scaffold6456 | 2451                    | CC                              | TT                 | TT               | INTERGENIC      |               |                    |                    |
| SNP_115216_A_2455  | NW_004520174.1 | scaffold6456 | 2455                    | TT                              | AA                 | AA               | INTERGENIC      |               |                    |                    |
| SNP_115217_A_2618  | NW_004520174.1 | scaffold6456 | 2618                    | TT                              | CC                 | CC               | INTERGENIC      |               |                    |                    |
| SNP_115218_A_7952  | NW_004520175.1 | scaffold6458 | 7952                    | CC                              | TT                 | TT               | INTERGENIC      |               |                    |                    |
| SNP_115219_A_8277  | NW_004520175.1 | scaffold6458 | 8277                    | AA                              | GG                 | GG               | INTERGENIC      |               |                    |                    |
| SNP_115220_A_8297  | NW_004520175.1 | scaffold6458 | 8297                    | AA                              | CC                 | CC               | INTERGENIC      |               |                    |                    |
| SNP_115221_A_14289 | NW_004520175.1 | scaffold6458 | 14289                   | GG                              | AA                 | AA               | INTERGENIC      |               |                    |                    |
| SNP_115222_A_14295 | NW_004520175.1 | scaffold6458 | 14295                   | GG                              | CC                 | CC               | INTERGENIC      |               |                    |                    |
| SNP_115223_A_17609 | NW_004520175.1 | scaffold6458 | 17609                   | AA                              | GG                 | GG               | INTERGENIC      |               |                    |                    |
| SNP_115224_A_17618 | NW_004520175.1 | scaffold6458 | 17618                   | AA                              | GG                 | GG               | INTERGENIC      |               |                    |                    |
| SNP_115225_A_21808 | NW_004520175.1 | scaffold6458 | 21808                   | AA                              | TT                 | TT               | INTERGENIC      |               |                    |                    |

| SNPs IDs           | Chromosome IDs | Chromosomes  | Physical positions (bp) | CDC Frontier (Reference genome) | (Pusa 1103 & HPNB) | (ILWC 46 & LPNB) | Sequence genome | Components of | Gene accession IDs | Putative functions |
|--------------------|----------------|--------------|-------------------------|---------------------------------|--------------------|------------------|-----------------|---------------|--------------------|--------------------|
| SNP_115227_A_1083  | NW_004520181.1 | scaffold6469 | 1083                    | GG                              | CC                 | CC               | INTERGENIC      |               |                    |                    |
| SNP_115228_A_443   | NW_004520185.1 | scaffold6478 | 443                     | TT                              | GG                 | GG               | INTERGENIC      |               |                    |                    |
| SNP_115229_A_954   | NW_004520185.1 | scaffold6478 | 954                     | TT                              | CC                 | CC               | INTERGENIC      |               |                    |                    |
| SNP_115230_A_994   | NW_004520185.1 | scaffold6478 | 994                     | GG                              | TT                 | TT               | INTERGENIC      |               |                    |                    |
| SNP_115231_A_1167  | NW_004520185.1 | scaffold6478 | 1167                    | AA                              | TT                 | TT               | INTERGENIC      |               |                    |                    |
| SNP_115232_A_1263  | NW_004520185.1 | scaffold6478 | 1263                    | AA                              | GG                 | GG               | INTERGENIC      |               |                    |                    |
| SNP_115233_A_1293  | NW_004520185.1 | scaffold6478 | 1293                    | AA                              | GG                 | GG               | INTERGENIC      |               |                    |                    |
| SNP_115234_A_22006 | NW_004520185.1 | scaffold6478 | 22006                   | AA                              | GG                 | GG               | INTERGENIC      |               |                    |                    |
| SNP_115235_A_64    | NW_004520187.1 | scaffold6480 | 64                      | TT                              | CC                 | CC               | INTERGENIC      |               |                    |                    |
| SNP_115236_A_122   | NW_004520187.1 | scaffold6480 | 122                     | GG                              | AA                 | AA               | INTERGENIC      |               |                    |                    |
| SNP_115237_A_143   | NW_004520187.1 | scaffold6480 | 143                     | CC                              | GG                 | GG               | INTERGENIC      |               |                    |                    |
| SNP_115238_A_158   | NW_004520187.1 | scaffold6480 | 158                     | AA                              | GG                 | GG               | INTERGENIC      |               |                    |                    |
| SNP_115239_A_160   | NW_004520187.1 | scaffold6480 | 160                     | AA                              | GG                 | GG               | INTERGENIC      |               |                    |                    |
| SNP_115240_A_299   | NW_004520187.1 | scaffold6480 | 299                     | CC                              | TT                 | TT               | INTERGENIC      |               |                    |                    |
| SNP_115242_A_436   | NW_004520187.1 | scaffold6480 | 436                     | TT                              | CC                 | CC               | INTERGENIC      |               |                    |                    |
| SNP_115243_A_444   | NW_004520187.1 | scaffold6480 | 444                     | AA                              | TT                 | TT               | INTERGENIC      |               |                    |                    |
| SNP_115244_A_446   | NW_004520187.1 | scaffold6480 | 446                     | GG                              | AA                 | AA               | INTERGENIC      |               |                    |                    |
| SNP_115246_A_569   | NW_004520187.1 | scaffold6480 | 569                     | CC                              | TT                 | TT               | INTERGENIC      |               |                    |                    |
| SNP_115247_A_585   | NW_004520187.1 | scaffold6480 | 585                     | AA                              | TT                 | TT               | INTERGENIC      |               |                    |                    |
| SNP_115248_A_607   | NW_004520187.1 | scaffold6480 | 607                     | GG                              | AA                 | AA               | INTERGENIC      |               |                    |                    |
| SNP_115249_A_638   | NW_004520187.1 | scaffold6480 | 638                     | AA                              | TT                 | TT               | INTERGENIC      |               |                    |                    |
| SNP_115251_A_751   | NW_004520187.1 | scaffold6480 | 751                     | CC                              | TT                 | TT               | INTERGENIC      |               |                    |                    |



| SNPs IDs          | Chromosome IDs | Chromosomes  | Physical positions (bp) | CDC Frontier (Reference genome) | (Pusa 1103 & HPNB) | (ILWC 46 & LPNB) | Sequence genome | Components of | Gene accession IDs | Putative functions |
|-------------------|----------------|--------------|-------------------------|---------------------------------|--------------------|------------------|-----------------|---------------|--------------------|--------------------|
| SNP_115252_A_878  | NW_004520187.1 | scaffold6480 | 878                     | GG                              | CC                 | CC               | INTERGENIC      |               |                    |                    |
| SNP_115253_A_967  | NW_004520187.1 | scaffold6480 | 967                     | CC                              | TT                 | TT               | INTERGENIC      |               |                    |                    |
| SNP_115254_A_993  | NW_004520187.1 | scaffold6480 | 993                     | GG                              | AA                 | AA               | INTERGENIC      |               |                    |                    |
| SNP_115255_A_1013 | NW_004520187.1 | scaffold6480 | 1013                    | TT                              | CC                 | CC               | INTERGENIC      |               |                    |                    |
| SNP_115256_A_1144 | NW_004520187.1 | scaffold6480 | 1144                    | TT                              | CC                 | CC               | INTERGENIC      |               |                    |                    |
| SNP_115257_A_1185 | NW_004520187.1 | scaffold6480 | 1185                    | TT                              | CC                 | CC               | INTERGENIC      |               |                    |                    |
| SNP_115258_A_1217 | NW_004520187.1 | scaffold6480 | 1217                    | AA                              | GG                 | GG               | INTERGENIC      |               |                    |                    |
| SNP_115259_A_1218 | NW_004520187.1 | scaffold6480 | 1218                    | AA                              | GG                 | GG               | INTERGENIC      |               |                    |                    |
| SNP_115260_A_791  | NW_004520188.1 | scaffold6483 | 791                     | CC                              | TT                 | TT               | INTERGENIC      |               |                    |                    |
| SNP_115261_A_1337 | NW_004520192.1 | scaffold6489 | 1337                    | AA                              | GG                 | GG               | INTERGENIC      |               |                    |                    |
| SNP_115263_A_1441 | NW_004520192.1 | scaffold6489 | 1441                    | GG                              | AA                 | AA               | INTERGENIC      |               |                    |                    |
| SNP_115264_A_1725 | NW_004520194.1 | scaffold6491 | 1725                    | TT                              | AA                 | AA               | INTERGENIC      |               |                    |                    |
| SNP_115265_A_412  | NW_004520195.1 | scaffold6492 | 412                     | CC                              | TT                 | TT               | INTERGENIC      |               |                    |                    |
| SNP_115266_A_815  | NW_004520195.1 | scaffold6492 | 815                     | CC                              | TT                 | TT               | INTERGENIC      |               |                    |                    |
| SNP_115267_A_848  | NW_004520195.1 | scaffold6492 | 848                     | GG                              | TT                 | TT               | INTERGENIC      |               |                    |                    |
| SNP_115268_A_4322 | NW_004520196.1 | scaffold6493 | 4322                    | GG                              | AA                 | AA               | INTERGENIC      |               |                    |                    |
| SNP_115269_A_4936 | NW_004520196.1 | scaffold6493 | 4936                    | AA                              | GG                 | GG               | INTERGENIC      |               |                    |                    |
| SNP_115270_A_6009 | NW_004520196.1 | scaffold6493 | 6009                    | GG                              | CC                 | CC               | INTERGENIC      |               |                    |                    |
| SNP_115271_A_1577 | NW_004520197.1 | scaffold6494 | 1577                    | AA                              | GG                 | GG               | INTERGENIC      |               |                    |                    |
| SNP_115272_A_94   | NW_004520199.1 | scaffold6496 | 94                      | AA                              | GG                 | GG               | INTERGENIC      |               |                    |                    |
| SNP_115273_A_98   | NW_004520199.1 | scaffold6496 | 98                      | CC                              | TT                 | TT               | INTERGENIC      |               |                    |                    |
| SNP_115274_A_162  | NW_004520199.1 | scaffold6496 | 162                     | AA                              | TT                 | TT               | INTERGENIC      |               |                    |                    |

| SNPs IDs          | Chromosome IDs | Chromosomes  | Physical positions (bp) | CDC Frontier (Reference genome) | (Pusa 1103 & HPNB) | (ILWC 46 & LPNB) | Sequence genome | Components of | Gene accession IDs | Putative functions |
|-------------------|----------------|--------------|-------------------------|---------------------------------|--------------------|------------------|-----------------|---------------|--------------------|--------------------|
| SNP_115275_A_174  | NW_004520199.1 | scaffold6496 | 174                     | AA                              | GG                 | GG               | INTERGENIC      |               |                    |                    |
| SNP_115276_A_763  | NW_004520199.1 | scaffold6496 | 763                     | TT                              | CC                 | CC               | INTERGENIC      |               |                    |                    |
| SNP_115277_A_816  | NW_004520199.1 | scaffold6496 | 816                     | CC                              | TT                 | TT               | INTERGENIC      |               |                    |                    |
| SNP_115279_A_932  | NW_004520199.1 | scaffold6496 | 932                     | AA                              | GG                 | GG               | INTERGENIC      |               |                    |                    |
| SNP_115280_A_955  | NW_004520199.1 | scaffold6496 | 955                     | GG                              | TT                 | TT               | INTERGENIC      |               |                    |                    |
| SNP_115281_A_959  | NW_004520199.1 | scaffold6496 | 959                     | CC                              | GG                 | GG               | INTERGENIC      |               |                    |                    |
| SNP_115282_A_972  | NW_004520199.1 | scaffold6496 | 972                     | CC                              | TT                 | TT               | INTERGENIC      |               |                    |                    |
| SNP_115283_A_978  | NW_004520199.1 | scaffold6496 | 978                     | CC                              | TT                 | TT               | INTERGENIC      |               |                    |                    |
| SNP_115284_A_990  | NW_004520199.1 | scaffold6496 | 990                     | GG                              | AA                 | AA               | INTERGENIC      |               |                    |                    |
| SNP_115285_A_1014 | NW_004520199.1 | scaffold6496 | 1014                    | GG                              | AA                 | AA               | INTERGENIC      |               |                    |                    |
| SNP_115286_A_1029 | NW_004520199.1 | scaffold6496 | 1029                    | CC                              | GG                 | GG               | INTERGENIC      |               |                    |                    |
| SNP_115287_A_1044 | NW_004520199.1 | scaffold6496 | 1044                    | TT                              | AA                 | AA               | INTERGENIC      |               |                    |                    |
| SNP_115288_A_1165 | NW_004520199.1 | scaffold6496 | 1165                    | TT                              | AA                 | AA               | INTERGENIC      |               |                    |                    |
| SNP_115290_A_545  | NW_004520200.1 | scaffold6497 | 545                     | GG                              | AA                 | AA               | INTERGENIC      |               |                    |                    |
| SNP_115291_A_993  | NW_004520200.1 | scaffold6497 | 993                     | CC                              | GG                 | GG               | INTERGENIC      |               |                    |                    |
| SNP_115292_A_1070 | NW_004520201.1 | scaffold6498 | 1070                    | AA                              | GG                 | GG               | INTERGENIC      |               |                    |                    |
| SNP_115293_A_1082 | NW_004520201.1 | scaffold6498 | 1082                    | CC                              | TT                 | TT               | INTERGENIC      |               |                    |                    |
| SNP_115294_A_1083 | NW_004520201.1 | scaffold6498 | 1083                    | CC                              | AA                 | AA               | INTERGENIC      |               |                    |                    |
| SNP_115295_A_1132 | NW_004520201.1 | scaffold6498 | 1132                    | GG                              | AA                 | AA               | INTERGENIC      |               |                    |                    |
| SNP_115296_A_1185 | NW_004520201.1 | scaffold6498 | 1185                    | CC                              | GG                 | GG               | INTERGENIC      |               |                    |                    |
| SNP_115297_A_1397 | NW_004520201.1 | scaffold6498 | 1397                    | AA                              | GG                 | GG               | INTERGENIC      |               |                    |                    |
| SNP_115298_A_1414 | NW_004520201.1 | scaffold6498 | 1414                    | AA                              | GG                 | GG               | INTERGENIC      |               |                    |                    |

| SNPs IDs          | Chromosome IDs | Chromosomes  | Physical positions (bp) | CDC Frontier genome (Reference genome) | (Pusa 1103 & HPNB) | (ILWC 46 & LPNB) | Sequence genome | Components of | Gene accession IDs | Putative functions |
|-------------------|----------------|--------------|-------------------------|----------------------------------------|--------------------|------------------|-----------------|---------------|--------------------|--------------------|
| SNP_115299_A_1449 | NW_004520201.1 | scaffold6498 | 1449                    | GG                                     | CC                 | CC               | INTERGENIC      |               |                    |                    |
| SNP_115300_A_122  | NW_004520204.1 | scaffold6505 | 122                     | GG                                     | AA                 | AA               | INTERGENIC      |               |                    |                    |
| SNP_115301_A_246  | NW_004520204.1 | scaffold6505 | 246                     | AA                                     | TT                 | TT               | INTERGENIC      |               |                    |                    |
| SNP_115302_A_342  | NW_004520204.1 | scaffold6505 | 342                     | CC                                     | GG                 | GG               | INTERGENIC      |               |                    |                    |
| SNP_115303_A_435  | NW_004520204.1 | scaffold6505 | 435                     | CC                                     | GG                 | GG               | INTERGENIC      |               |                    |                    |
| SNP_115304_A_833  | NW_004520212.1 | scaffold6521 | 833                     | TT                                     | GG                 | GG               | INTERGENIC      |               |                    |                    |
| SNP_115305_A_744  | NW_004520213.1 | scaffold6522 | 744                     | CC                                     | AA                 | AA               | INTERGENIC      |               |                    |                    |
| SNP_115306_A_753  | NW_004520213.1 | scaffold6522 | 753                     | CC                                     | TT                 | TT               | INTERGENIC      |               |                    |                    |
| SNP_115307_A_305  | NW_004520214.1 | scaffold6525 | 305                     | CC                                     | GG                 | GG               | INTERGENIC      |               |                    |                    |
| SNP_115308_A_461  | NW_004520214.1 | scaffold6525 | 461                     | TT                                     | CC                 | CC               | INTERGENIC      |               |                    |                    |
| SNP_115309_A_945  | NW_004520214.1 | scaffold6525 | 945                     | CC                                     | AA                 | AA               | INTERGENIC      |               |                    |                    |
| SNP_115310_A_1822 | NW_004520214.1 | scaffold6525 | 1822                    | TT                                     | CC                 | CC               | INTERGENIC      |               |                    |                    |
| SNP_115311_A_458  | NW_004520215.1 | scaffold6527 | 458                     | AA                                     | GG                 | GG               | INTERGENIC      |               |                    |                    |
| SNP_115312_A_680  | NW_004520215.1 | scaffold6527 | 680                     | GG                                     | TT                 | TT               | INTERGENIC      |               |                    |                    |
| SNP_115313_A_524  | NW_004520221.1 | scaffold6537 | 524                     | AA                                     | CC                 | CC               | INTERGENIC      |               |                    |                    |
| SNP_115314_A_532  | NW_004520221.1 | scaffold6537 | 532                     | TT                                     | GG                 | GG               | INTERGENIC      |               |                    |                    |
| SNP_115315_A_595  | NW_004520221.1 | scaffold6537 | 595                     | AA                                     | GG                 | GG               | INTERGENIC      |               |                    |                    |
| SNP_115316_A_1264 | NW_004520221.1 | scaffold6537 | 1264                    | GG                                     | CC                 | CC               | INTERGENIC      |               |                    |                    |
| SNP_115317_A_1319 | NW_004520221.1 | scaffold6537 | 1319                    | TT                                     | GG                 | GG               | INTERGENIC      |               |                    |                    |
| SNP_115318_A_1388 | NW_004520221.1 | scaffold6537 | 1388                    | TT                                     | GG                 | GG               | INTERGENIC      |               |                    |                    |
| SNP_115319_A_1417 | NW_004520221.1 | scaffold6537 | 1417                    | TT                                     | AA                 | AA               | INTERGENIC      |               |                    |                    |
| SNP_115320_A_1608 | NW_004520221.1 | scaffold6537 | 1608                    | CC                                     | AA                 | AA               | INTERGENIC      |               |                    |                    |

| SNPs IDs          | Chromosome IDs | Chromosomes  | Physical positions (bp) | CDC Frontier (Reference genome) | (Pusa 1103 & HPNB) | (ILWC 46 & LPNB) | Sequence genome | Components of | Gene accession IDs | Putative functions |
|-------------------|----------------|--------------|-------------------------|---------------------------------|--------------------|------------------|-----------------|---------------|--------------------|--------------------|
| SNP_115321_A_1681 | NW_004520221.1 | scaffold6537 | 1681                    | AA                              | GG                 | GG               | INTERGENIC      |               |                    |                    |
| SNP_115322_A_1741 | NW_004520221.1 | scaffold6537 | 1741                    | GG                              | TT                 | TT               | INTERGENIC      |               |                    |                    |
| SNP_115323_A_1879 | NW_004520221.1 | scaffold6537 | 1879                    | GG                              | AA                 | AA               | INTERGENIC      |               |                    |                    |
| SNP_115324_A_2058 | NW_004520221.1 | scaffold6537 | 2058                    | AA                              | GG                 | GG               | INTERGENIC      |               |                    |                    |
| SNP_115325_A_2087 | NW_004520221.1 | scaffold6537 | 2087                    | AA                              | GG                 | GG               | INTERGENIC      |               |                    |                    |
| SNP_115326_A_2161 | NW_004520221.1 | scaffold6537 | 2161                    | TT                              | GG                 | GG               | INTERGENIC      |               |                    |                    |
| SNP_115327_A_2221 | NW_004520221.1 | scaffold6537 | 2221                    | TT                              | CC                 | CC               | INTERGENIC      |               |                    |                    |
| SNP_115328_A_2250 | NW_004520221.1 | scaffold6537 | 2250                    | TT                              | GG                 | GG               | INTERGENIC      |               |                    |                    |
| SNP_115329_A_2355 | NW_004520221.1 | scaffold6537 | 2355                    | CC                              | GG                 | GG               | INTERGENIC      |               |                    |                    |
| SNP_115330_A_2501 | NW_004520221.1 | scaffold6537 | 2501                    | CC                              | AA                 | AA               | INTERGENIC      |               |                    |                    |
| SNP_115331_A_2538 | NW_004520221.1 | scaffold6537 | 2538                    | CC                              | GG                 | GG               | INTERGENIC      |               |                    |                    |
| SNP_115332_A_2635 | NW_004520221.1 | scaffold6537 | 2635                    | GG                              | AA                 | AA               | INTERGENIC      |               |                    |                    |
| SNP_115333_A_2753 | NW_004520221.1 | scaffold6537 | 2753                    | AA                              | GG                 | GG               | INTERGENIC      |               |                    |                    |
| SNP_115334_A_2755 | NW_004520221.1 | scaffold6537 | 2755                    | CC                              | AA                 | AA               | INTERGENIC      |               |                    |                    |
| SNP_115335_A_2756 | NW_004520221.1 | scaffold6537 | 2756                    | CC                              | AA                 | AA               | INTERGENIC      |               |                    |                    |
| SNP_115336_A_2758 | NW_004520221.1 | scaffold6537 | 2758                    | CC                              | TT                 | TT               | INTERGENIC      |               |                    |                    |
| SNP_115337_A_2853 | NW_004520221.1 | scaffold6537 | 2853                    | CC                              | TT                 | TT               | INTERGENIC      |               |                    |                    |
| SNP_115338_A_2875 | NW_004520221.1 | scaffold6537 | 2875                    | TT                              | CC                 | AA               | INTERGENIC      |               |                    |                    |
| SNP_115339_A_2921 | NW_004520221.1 | scaffold6537 | 2921                    | CC                              | GG                 | GG               | INTERGENIC      |               |                    |                    |
| SNP_115340_A_3002 | NW_004520221.1 | scaffold6537 | 3002                    | GG                              | AA                 | AA               | INTERGENIC      |               |                    |                    |
| SNP_115341_A_817  | NW_004520224.1 | scaffold6540 | 817                     | GG                              | CC                 | CC               | INTERGENIC      |               |                    |                    |
| SNP_115342_A_935  | NW_004520224.1 | scaffold6540 | 935                     | AA                              | GG                 | GG               | INTERGENIC      |               |                    |                    |

| SNPs IDs          | Chromosome IDs | Chromosomes  | Physical positions (bp) | CDC Frontier (Reference genome) | (Pusa 1103 & HPNB) | (ILWC 46 & LPNB) | Sequence genome | Components of | Gene accession IDs | Putative functions |
|-------------------|----------------|--------------|-------------------------|---------------------------------|--------------------|------------------|-----------------|---------------|--------------------|--------------------|
| SNP_115343_A_1216 | NW_004520224.1 | scaffold6540 | 1216                    | AA                              | GG                 | GG               | INTERGENIC      |               |                    |                    |
| SNP_115344_A_1248 | NW_004520224.1 | scaffold6540 | 1248                    | TT                              | CC                 | CC               | INTERGENIC      |               |                    |                    |
| SNP_115345_A_691  | NW_004520226.1 | scaffold6543 | 691                     | TT                              | GG                 | GG               | INTERGENIC      |               |                    |                    |
| SNP_115346_A_2251 | NW_004520228.1 | scaffold6546 | 2251                    | CC                              | TT                 | TT               | INTERGENIC      |               |                    |                    |
| SNP_115347_A_3247 | NW_004520228.1 | scaffold6546 | 3247                    | CC                              | TT                 | TT               | INTERGENIC      |               |                    |                    |
| SNP_115348_A_3573 | NW_004520228.1 | scaffold6546 | 3573                    | GG                              | AA                 | AA               | INTERGENIC      |               |                    |                    |
| SNP_115349_A_7604 | NW_004520228.1 | scaffold6546 | 7604                    | CC                              | GG                 | GG               | INTERGENIC      |               |                    |                    |
| SNP_115350_A_7792 | NW_004520228.1 | scaffold6546 | 7792                    | AA                              | GG                 | GG               | INTERGENIC      |               |                    |                    |
| SNP_115351_A_7866 | NW_004520228.1 | scaffold6546 | 7866                    | TT                              | GG                 | GG               | INTERGENIC      |               |                    |                    |
| SNP_115352_A_8006 | NW_004520228.1 | scaffold6546 | 8006                    | GG                              | AA                 | AA               | INTERGENIC      |               |                    |                    |
| SNP_115353_A_8081 | NW_004520228.1 | scaffold6546 | 8081                    | AA                              | CC                 | CC               | INTERGENIC      |               |                    |                    |
| SNP_115354_A_8145 | NW_004520228.1 | scaffold6546 | 8145                    | GG                              | TT                 | TT               | INTERGENIC      |               |                    |                    |
| SNP_115356_A_308  | NW_004520236.1 | scaffold6561 | 308                     | CC                              | GG                 | GG               | INTERGENIC      |               |                    |                    |
| SNP_115357_A_560  | NW_004520236.1 | scaffold6561 | 560                     | AA                              | GG                 | GG               | INTERGENIC      |               |                    |                    |
| SNP_115358_A_599  | NW_004520236.1 | scaffold6561 | 599                     | TT                              | GG                 | GG               | INTERGENIC      |               |                    |                    |
| SNP_115359_A_602  | NW_004520236.1 | scaffold6561 | 602                     | AA                              | GG                 | GG               | INTERGENIC      |               |                    |                    |
| SNP_115360_A_810  | NW_004520236.1 | scaffold6561 | 810                     | TT                              | GG                 | GG               | INTERGENIC      |               |                    |                    |
| SNP_115361_A_827  | NW_004520236.1 | scaffold6561 | 827                     | GG                              | TT                 | TT               | INTERGENIC      |               |                    |                    |
| SNP_115362_A_843  | NW_004520236.1 | scaffold6561 | 843                     | AA                              | TT                 | TT               | INTERGENIC      |               |                    |                    |
| SNP_115363_A_846  | NW_004520236.1 | scaffold6561 | 846                     | AA                              | GG                 | GG               | INTERGENIC      |               |                    |                    |
| SNP_115364_A_860  | NW_004520236.1 | scaffold6561 | 860                     | TT                              | GG                 | GG               | INTERGENIC      |               |                    |                    |
| SNP_115365_A_879  | NW_004520236.1 | scaffold6561 | 879                     | TT                              | CC                 | CC               | INTERGENIC      |               |                    |                    |

| SNPs IDs          | Chromosome IDs | Chromosomes  | Physical positions (bp) | CDC Frontier (Reference genome) | (Pusa 1103 & HPNB) | (ILWC 46 & LPNB) | Sequence Components of genome | Gene accession IDs | Putative functions    |
|-------------------|----------------|--------------|-------------------------|---------------------------------|--------------------|------------------|-------------------------------|--------------------|-----------------------|
| SNP_115366_A_925  | NW_004520236.1 | scaffold6561 | 925                     | TT                              | AA                 | AA               | INTERGENIC                    |                    |                       |
| SNP_115367_A_927  | NW_004520236.1 | scaffold6561 | 927                     | AA                              | TT                 | TT               | INTERGENIC                    |                    |                       |
| SNP_115368_A_1128 | NW_004520236.1 | scaffold6561 | 1128                    | TT                              | GG                 | GG               | INTERGENIC                    |                    |                       |
| SNP_115369_A_1285 | NW_004520236.1 | scaffold6561 | 1285                    | AA                              | GG                 | GG               | INTERGENIC                    |                    |                       |
| SNP_115370_A_1581 | NW_004520236.1 | scaffold6561 | 1581                    | GG                              | AA                 | AA               | INTERGENIC                    |                    |                       |
| SNP_115371_A_1638 | NW_004520236.1 | scaffold6561 | 1638                    | CC                              | GG                 | GG               | INTERGENIC                    |                    |                       |
| SNP_115372_A_220  | NW_004520240.1 | scaffold6566 | 220                     | GG                              | AA                 | AA               | INTERGENIC                    |                    |                       |
| SNP_115373_A_221  | NW_004520240.1 | scaffold6566 | 221                     | GG                              | TT                 | TT               | INTERGENIC                    |                    |                       |
| SNP_115374_A_580  | NW_004520240.1 | scaffold6566 | 580                     | CC                              | TT                 | TT               | INTERGENIC                    |                    |                       |
| SNP_115375_A_596  | NW_004520240.1 | scaffold6566 | 596                     | TT                              | CC                 | CC               | INTERGENIC                    |                    |                       |
| SNP_115376_A_611  | NW_004520240.1 | scaffold6566 | 611                     | TT                              | CC                 | CC               | INTERGENIC                    |                    |                       |
| SNP_115378_A_911  | NW_004520241.1 | scaffold6568 | 911                     | GG                              | CC                 | CC               | INTERGENIC                    |                    |                       |
| SNP_115379_A_1130 | NW_004520241.1 | scaffold6568 | 1130                    | TT                              | CC                 | CC               | INTERGENIC                    |                    |                       |
| SNP_115380_A_1782 | NW_004520241.1 | scaffold6568 | 1782                    | CC                              | AA                 | AA               | INTERGENIC                    |                    |                       |
| SNP_115381_A_1824 | NW_004520241.1 | scaffold6568 | 1824                    | CC                              | TT                 | TT               | INTERGENIC                    |                    |                       |
| SNP_115382_A_2033 | NW_004520241.1 | scaffold6568 | 2033                    | GG                              | AA                 | AA               | INTERGENIC                    |                    |                       |
| SNP_115383_A_2500 | NW_004520241.1 | scaffold6568 | 2500                    | CC                              | TT                 | TT               | INTERGENIC                    |                    |                       |
| SNP_115384_A_1224 | NW_004520242.1 | scaffold6569 | 1224                    | AA                              | GG                 | GG               | NON_SYNONYMOUS_CODING         | 101512407          | ribonuclease S-1-like |
| SNP_115385_A_1380 | NW_004520242.1 | scaffold6569 | 1380                    | CC                              | TT                 | TT               | NON_SYNONYMOUS_CODING         | 101512407          | ribonuclease S-1-like |
| SNP_115386_A_1540 | NW_004520242.1 | scaffold6569 | 1540                    | TT                              | CC                 | CC               | SYNONYMOUS_CODING             | 101512407          | ribonuclease S-1-like |
| SNP_115387_A_860  | NW_004520245.1 | scaffold6572 | 860                     | AA                              | CC                 | CC               | INTERGENIC                    |                    |                       |
| SNP_115388_A_944  | NW_004520245.1 | scaffold6572 | 944                     | AA                              | GG                 | GG               | INTERGENIC                    |                    |                       |

| SNPs IDs          | Chromosome IDs | Chromosomes  | Physical positions (bp) | CDC Frontier (Reference genome) | (Pusa 1103 & HPNB) | (ILWC 46 & LPNB) | Sequence genome | Components of | Gene accession IDs | Putative functions |
|-------------------|----------------|--------------|-------------------------|---------------------------------|--------------------|------------------|-----------------|---------------|--------------------|--------------------|
| SNP_115389_A_1036 | NW_004520245.1 | scaffold6572 | 1036                    | GG                              | AA                 | AA               | INTERGENIC      |               |                    |                    |
| SNP_115390_A_1243 | NW_004520245.1 | scaffold6572 | 1243                    | TT                              | CC                 | CC               | INTERGENIC      |               |                    |                    |
| SNP_115391_A_1398 | NW_004520245.1 | scaffold6572 | 1398                    | GG                              | AA                 | AA               | INTERGENIC      |               |                    |                    |
| SNP_115392_A_1432 | NW_004520245.1 | scaffold6572 | 1432                    | AA                              | CC                 | CC               | INTERGENIC      |               |                    |                    |
| SNP_115393_A_1469 | NW_004520245.1 | scaffold6572 | 1469                    | CC                              | TT                 | TT               | INTERGENIC      |               |                    |                    |
| SNP_115394_A_1481 | NW_004520245.1 | scaffold6572 | 1481                    | CC                              | AA                 | AA               | INTERGENIC      |               |                    |                    |
| SNP_115395_A_1482 | NW_004520245.1 | scaffold6572 | 1482                    | AA                              | GG                 | GG               | INTERGENIC      |               |                    |                    |
| SNP_115396_A_1582 | NW_004520245.1 | scaffold6572 | 1582                    | GG                              | AA                 | AA               | INTERGENIC      |               |                    |                    |
| SNP_115397_A_1583 | NW_004520245.1 | scaffold6572 | 1583                    | GG                              | AA                 | AA               | INTERGENIC      |               |                    |                    |
| SNP_115398_A_1641 | NW_004520245.1 | scaffold6572 | 1641                    | TT                              | CC                 | CC               | INTERGENIC      |               |                    |                    |
| SNP_115399_A_1795 | NW_004520245.1 | scaffold6572 | 1795                    | CC                              | TT                 | TT               | INTERGENIC      |               |                    |                    |
| SNP_115400_A_1807 | NW_004520245.1 | scaffold6572 | 1807                    | TT                              | CC                 | CC               | INTERGENIC      |               |                    |                    |
| SNP_115401_A_1867 | NW_004520245.1 | scaffold6572 | 1867                    | AA                              | GG                 | GG               | INTERGENIC      |               |                    |                    |
| SNP_115402_A_1953 | NW_004520245.1 | scaffold6572 | 1953                    | GG                              | AA                 | AA               | INTERGENIC      |               |                    |                    |
| SNP_115403_A_2035 | NW_004520245.1 | scaffold6572 | 2035                    | CC                              | TT                 | TT               | INTERGENIC      |               |                    |                    |
| SNP_115404_A_2068 | NW_004520245.1 | scaffold6572 | 2068                    | AA                              | GG                 | GG               | INTERGENIC      |               |                    |                    |
| SNP_115405_A_2108 | NW_004520245.1 | scaffold6572 | 2108                    | CC                              | TT                 | TT               | INTERGENIC      |               |                    |                    |
| SNP_115406_A_2211 | NW_004520245.1 | scaffold6572 | 2211                    | CC                              | TT                 | TT               | INTERGENIC      |               |                    |                    |
| SNP_115407_A_2282 | NW_004520245.1 | scaffold6572 | 2282                    | TT                              | CC                 | CC               | INTERGENIC      |               |                    |                    |
| SNP_115408_A_2342 | NW_004520245.1 | scaffold6572 | 2342                    | CC                              | TT                 | TT               | INTERGENIC      |               |                    |                    |
| SNP_115409_A_2378 | NW_004520245.1 | scaffold6572 | 2378                    | GG                              | AA                 | AA               | INTERGENIC      |               |                    |                    |
| SNP_115410_A_3100 | NW_004520245.1 | scaffold6572 | 3100                    | TT                              | CC                 | CC               | INTERGENIC      |               |                    |                    |

| SNPs IDs          | Chromosome IDs | Chromosomes  | Physical positions (bp) | CDC Frontier (Reference genome) | (Pusa 1103 & HPNB) | (ILWC 46 & LPNB) | Sequence genome | Components of | Gene accession IDs | Putative functions |
|-------------------|----------------|--------------|-------------------------|---------------------------------|--------------------|------------------|-----------------|---------------|--------------------|--------------------|
| SNP_115411_A_3729 | NW_004520245.1 | scaffold6572 | 3729                    | GG                              | AA                 | AA               | INTERGENIC      |               |                    |                    |
| SNP_115412_A_3760 | NW_004520245.1 | scaffold6572 | 3760                    | AA                              | TT                 | TT               | INTERGENIC      |               |                    |                    |
| SNP_115413_A_3772 | NW_004520245.1 | scaffold6572 | 3772                    | GG                              | AA                 | AA               | INTERGENIC      |               |                    |                    |
| SNP_115414_A_3988 | NW_004520245.1 | scaffold6572 | 3988                    | GG                              | TT                 | TT               | INTERGENIC      |               |                    |                    |
| SNP_115415_A_4082 | NW_004520245.1 | scaffold6572 | 4082                    | CC                              | TT                 | TT               | INTERGENIC      |               |                    |                    |
| SNP_115416_A_4104 | NW_004520245.1 | scaffold6572 | 4104                    | GG                              | TT                 | TT               | INTERGENIC      |               |                    |                    |
| SNP_115417_A_4387 | NW_004520245.1 | scaffold6572 | 4387                    | GG                              | AA                 | AA               | INTERGENIC      |               |                    |                    |
| SNP_115418_A_4396 | NW_004520245.1 | scaffold6572 | 4396                    | AA                              | CC                 | CC               | INTERGENIC      |               |                    |                    |
| SNP_115419_A_4403 | NW_004520245.1 | scaffold6572 | 4403                    | TT                              | CC                 | CC               | INTERGENIC      |               |                    |                    |
| SNP_115420_A_5038 | NW_004520245.1 | scaffold6572 | 5038                    | TT                              | CC                 | CC               | INTERGENIC      |               |                    |                    |
| SNP_115421_A_5045 | NW_004520245.1 | scaffold6572 | 5045                    | TT                              | CC                 | CC               | INTERGENIC      |               |                    |                    |
| SNP_115422_A_5119 | NW_004520245.1 | scaffold6572 | 5119                    | CC                              | TT                 | TT               | INTERGENIC      |               |                    |                    |
| SNP_115423_A_5184 | NW_004520245.1 | scaffold6572 | 5184                    | CC                              | GG                 | GG               | INTERGENIC      |               |                    |                    |
| SNP_115424_A_5337 | NW_004520245.1 | scaffold6572 | 5337                    | CC                              | TT                 | TT               | INTERGENIC      |               |                    |                    |
| SNP_115425_A_5359 | NW_004520245.1 | scaffold6572 | 5359                    | GG                              | AA                 | AA               | INTERGENIC      |               |                    |                    |
| SNP_115426_A_5366 | NW_004520245.1 | scaffold6572 | 5366                    | AA                              | TT                 | TT               | INTERGENIC      |               |                    |                    |
| SNP_115427_A_5559 | NW_004520245.1 | scaffold6572 | 5559                    | AA                              | GG                 | GG               | INTERGENIC      |               |                    |                    |
| SNP_115428_A_5571 | NW_004520245.1 | scaffold6572 | 5571                    | AA                              | GG                 | GG               | INTERGENIC      |               |                    |                    |
| SNP_115429_A_5626 | NW_004520245.1 | scaffold6572 | 5626                    | GG                              | AA                 | AA               | INTERGENIC      |               |                    |                    |
| SNP_115430_A_5926 | NW_004520245.1 | scaffold6572 | 5926                    | AA                              | CC                 | CC               | INTERGENIC      |               |                    |                    |
| SNP_115431_A_619  | NW_004520252.1 | scaffold6581 | 619                     | TT                              | AA                 | AA               | INTERGENIC      |               |                    |                    |
| SNP_115432_A_423  | NW_004520253.1 | scaffold6582 | 423                     | AA                              | GG                 | GG               | INTERGENIC      |               |                    |                    |



| SNPs IDs           | Chromosome IDs | Chromosomes  | Physical positions (bp) | CDC Frontier (Reference genome) | (Pusa 1103 & HPNB) | (ILWC 46 & LPNB) | Sequence genome | Components of | Gene accession IDs | Putative functions |
|--------------------|----------------|--------------|-------------------------|---------------------------------|--------------------|------------------|-----------------|---------------|--------------------|--------------------|
| SNP_115433_A_457   | NW_004520253.1 | scaffold6582 | 457                     | CC                              | TT                 | TT               | INTERGENIC      |               |                    |                    |
| SNP_115434_A_752   | NW_004520258.1 | scaffold6590 | 752                     | TT                              | GG                 | GG               | INTERGENIC      |               |                    |                    |
| SNP_115435_A_818   | NW_004520258.1 | scaffold6590 | 818                     | TT                              | CC                 | CC               | INTERGENIC      |               |                    |                    |
| SNP_115436_A_830   | NW_004520258.1 | scaffold6590 | 830                     | TT                              | GG                 | GG               | INTERGENIC      |               |                    |                    |
| SNP_115437_A_914   | NW_004520258.1 | scaffold6590 | 914                     | CC                              | TT                 | TT               | INTERGENIC      |               |                    |                    |
| SNP_115438_A_915   | NW_004520258.1 | scaffold6590 | 915                     | CC                              | TT                 | TT               | INTERGENIC      |               |                    |                    |
| SNP_115439_A_926   | NW_004520258.1 | scaffold6590 | 926                     | AA                              | CC                 | CC               | INTERGENIC      |               |                    |                    |
| SNP_115440_A_1024  | NW_004520258.1 | scaffold6590 | 1024                    | AA                              | TT                 | TT               | INTERGENIC      |               |                    |                    |
| SNP_115441_A_1084  | NW_004520258.1 | scaffold6590 | 1084                    | CC                              | TT                 | TT               | INTERGENIC      |               |                    |                    |
| SNP_115442_A_1342  | NW_004520258.1 | scaffold6590 | 1342                    | TT                              | AA                 | AA               | INTERGENIC      |               |                    |                    |
| SNP_115443_A_1596  | NW_004520258.1 | scaffold6590 | 1596                    | AA                              | GG                 | GG               | INTERGENIC      |               |                    |                    |
| SNP_115444_A_611   | NW_004520261.1 | scaffold6594 | 611                     | AA                              | CC                 | CC               | INTERGENIC      |               |                    |                    |
| SNP_115445_A_685   | NW_004520261.1 | scaffold6594 | 685                     | AA                              | GG                 | GG               | INTERGENIC      |               |                    |                    |
| SNP_115446_A_742   | NW_004520261.1 | scaffold6594 | 742                     | GG                              | TT                 | TT               | INTERGENIC      |               |                    |                    |
| SNP_115447_A_760   | NW_004520261.1 | scaffold6594 | 760                     | GG                              | AA                 | AA               | INTERGENIC      |               |                    |                    |
| SNP_115448_A_761   | NW_004520261.1 | scaffold6594 | 761                     | AA                              | CC                 | CC               | INTERGENIC      |               |                    |                    |
| SNP_115449_A_763   | NW_004520261.1 | scaffold6594 | 763                     | AA                              | GG                 | GG               | INTERGENIC      |               |                    |                    |
| SNP_115450_A_964   | NW_004520261.1 | scaffold6594 | 964                     | CC                              | TT                 | TT               | INTERGENIC      |               |                    |                    |
| SNP_115451_A_1045  | NW_004520261.1 | scaffold6594 | 1045                    | GG                              | TT                 | TT               | INTERGENIC      |               |                    |                    |
| SNP_115452_A_1134  | NW_004520261.1 | scaffold6594 | 1134                    | TT                              | AA                 | AA               | INTERGENIC      |               |                    |                    |
| SNP_115453_A_1149  | NW_004520267.1 | scaffold6606 | 1149                    | GG                              | AA                 | AA               | INTERGENIC      |               |                    |                    |
| SNP_115454_A_16533 | NW_004520269.1 | scaffold6610 | 16533                   | AA                              | TT                 | TT               | INTERGENIC      |               |                    |                    |

| SNPs IDs          | Chromosome IDs | Chromosomes  | Physical positions (bp) | CDC Frontier (Reference genome) | (Pusa 1103 & HPNB) | (ILWC 46 & LPNB) | Sequence genome | Components of | Gene accession IDs | Putative functions |
|-------------------|----------------|--------------|-------------------------|---------------------------------|--------------------|------------------|-----------------|---------------|--------------------|--------------------|
| SNP_115455_A_398  | NW_004520272.1 | scaffold6613 | 398                     | CC                              | TT                 | TT               | INTERGENIC      |               |                    |                    |
| SNP_115456_A_421  | NW_004520272.1 | scaffold6613 | 421                     | TT                              | AA                 | AA               | INTERGENIC      |               |                    |                    |
| SNP_115457_A_674  | NW_004520281.1 | scaffold6623 | 674                     | CC                              | AA                 | AA               | INTERGENIC      |               |                    |                    |
| SNP_115459_A_3529 | NW_004520288.1 | scaffold6637 | 3529                    | CC                              | GG                 | GG               | INTERGENIC      |               |                    |                    |
| SNP_115460_A_463  | NW_004520291.1 | scaffold6646 | 463                     | TT                              | AA                 | AA               | INTERGENIC      |               |                    |                    |
| SNP_115461_A_479  | NW_004520291.1 | scaffold6646 | 479                     | GG                              | AA                 | AA               | INTERGENIC      |               |                    |                    |
| SNP_115462_A_508  | NW_004520291.1 | scaffold6646 | 508                     | TT                              | AA                 | AA               | INTERGENIC      |               |                    |                    |
| SNP_115463_A_809  | NW_004520291.1 | scaffold6646 | 809                     | TT                              | AA                 | AA               | INTERGENIC      |               |                    |                    |
| SNP_115464_A_1097 | NW_004520291.1 | scaffold6646 | 1097                    | CC                              | TT                 | TT               | INTERGENIC      |               |                    |                    |
| SNP_115465_A_1644 | NW_004520291.1 | scaffold6646 | 1644                    | CC                              | TT                 | TT               | INTERGENIC      |               |                    |                    |
| SNP_115466_A_1656 | NW_004520291.1 | scaffold6646 | 1656                    | CC                              | TT                 | TT               | INTERGENIC      |               |                    |                    |
| SNP_115467_A_1881 | NW_004520291.1 | scaffold6646 | 1881                    | AA                              | TT                 | TT               | INTERGENIC      |               |                    |                    |
| SNP_115468_A_1903 | NW_004520291.1 | scaffold6646 | 1903                    | GG                              | CC                 | CC               | INTERGENIC      |               |                    |                    |
| SNP_115469_A_2062 | NW_004520291.1 | scaffold6646 | 2062                    | TT                              | GG                 | GG               | INTERGENIC      |               |                    |                    |
| SNP_115470_A_567  | NW_004520304.1 | scaffold6669 | 567                     | CC                              | AA                 | AA               | INTERGENIC      |               |                    |                    |
| SNP_115471_A_64   | NW_004520305.1 | scaffold6671 | 64                      | TT                              | AA                 | AA               | INTERGENIC      |               |                    |                    |
| SNP_115472_A_739  | NW_004520306.1 | scaffold6672 | 739                     | TT                              | AA                 | AA               | INTERGENIC      |               |                    |                    |
| SNP_115473_A_1068 | NW_004520306.1 | scaffold6672 | 1068                    | AA                              | GG                 | GG               | INTERGENIC      |               |                    |                    |
| SNP_115474_A_191  | NW_004520307.1 | scaffold6673 | 191                     | AA                              | TT                 | TT               | INTERGENIC      |               |                    |                    |
| SNP_115475_A_329  | NW_004520307.1 | scaffold6673 | 329                     | TT                              | AA                 | AA               | INTERGENIC      |               |                    |                    |
| SNP_115476_A_331  | NW_004520307.1 | scaffold6673 | 331                     | TT                              | AA                 | AA               | INTERGENIC      |               |                    |                    |
| SNP_115477_A_445  | NW_004520307.1 | scaffold6673 | 445                     | TT                              | CC                 | CC               | INTERGENIC      |               |                    |                    |

| SNPs IDs           | Chromosome IDs | Chromosomes  | Physical positions (bp) | CDC Frontier (Reference genome) | (Pusa 1103 & HPNB) | (ILWC 46 & LPNB) | Sequence genome | Components of | Gene accession IDs | Putative functions |
|--------------------|----------------|--------------|-------------------------|---------------------------------|--------------------|------------------|-----------------|---------------|--------------------|--------------------|
| SNP_115478_A_494   | NW_004520307.1 | scaffold6673 | 494                     | AA                              | CC                 | CC               | INTERGENIC      |               |                    |                    |
| SNP_115479_A_564   | NW_004520307.1 | scaffold6673 | 564                     | CC                              | AA                 | AA               | INTERGENIC      |               |                    |                    |
| SNP_115480_A_650   | NW_004520307.1 | scaffold6673 | 650                     | CC                              | TT                 | TT               | INTERGENIC      |               |                    |                    |
| SNP_115481_A_663   | NW_004520307.1 | scaffold6673 | 663                     | GG                              | AA                 | AA               | INTERGENIC      |               |                    |                    |
| SNP_115482_A_672   | NW_004520307.1 | scaffold6673 | 672                     | TT                              | CC                 | CC               | INTERGENIC      |               |                    |                    |
| SNP_115483_A_823   | NW_004520307.1 | scaffold6673 | 823                     | CC                              | TT                 | TT               | INTERGENIC      |               |                    |                    |
| SNP_115484_A_934   | NW_004520307.1 | scaffold6673 | 934                     | AA                              | GG                 | GG               | INTERGENIC      |               |                    |                    |
| SNP_115485_A_1107  | NW_004520307.1 | scaffold6673 | 1107                    | AA                              | GG                 | GG               | INTERGENIC      |               |                    |                    |
| SNP_115486_A_1125  | NW_004520307.1 | scaffold6673 | 1125                    | GG                              | TT                 | TT               | INTERGENIC      |               |                    |                    |
| SNP_115487_A_12892 | NW_004520317.1 | scaffold6687 | 12892                   | TT                              | GG                 | GG               | INTERGENIC      |               |                    |                    |
| SNP_115488_A_14297 | NW_004520317.1 | scaffold6687 | 14297                   | TT                              | CC                 | CC               | INTERGENIC      |               |                    |                    |
| SNP_115489_A_14724 | NW_004520317.1 | scaffold6687 | 14724                   | AA                              | TT                 | TT               | INTERGENIC      |               |                    |                    |
| SNP_115490_A_826   | NW_004520321.1 | scaffold6694 | 826                     | TT                              | GG                 | GG               | INTERGENIC      |               |                    |                    |
| SNP_115491_A_851   | NW_004520321.1 | scaffold6694 | 851                     | CC                              | AA                 | AA               | INTERGENIC      |               |                    |                    |
| SNP_115492_A_1584  | NW_004520321.1 | scaffold6694 | 1584                    | GG                              | AA                 | AA               | INTERGENIC      |               |                    |                    |
| SNP_115493_A_1626  | NW_004520321.1 | scaffold6694 | 1626                    | CC                              | AA                 | AA               | INTERGENIC      |               |                    |                    |
| SNP_115495_A_2027  | NW_004520321.1 | scaffold6694 | 2027                    | GG                              | TT                 | TT               | INTERGENIC      |               |                    |                    |
| SNP_115496_A_2072  | NW_004520321.1 | scaffold6694 | 2072                    | AA                              | TT                 | TT               | INTERGENIC      |               |                    |                    |
| SNP_115497_A_2280  | NW_004520321.1 | scaffold6694 | 2280                    | GG                              | AA                 | AA               | INTERGENIC      |               |                    |                    |
| SNP_115498_A_2341  | NW_004520321.1 | scaffold6694 | 2341                    | TT                              | CC                 | CC               | INTERGENIC      |               |                    |                    |
| SNP_115499_A_782   | NW_004520322.1 | scaffold6695 | 782                     | CC                              | TT                 | TT               | INTERGENIC      |               |                    |                    |
| SNP_115500_A_1143  | NW_004520322.1 | scaffold6695 | 1143                    | TT                              | GG                 | GG               | INTERGENIC      |               |                    |                    |

| SNPs IDs          | Chromosome IDs | Chromosomes  | Physical positions (bp) | CDC Frontier (Reference genome) | (Pusa 1103 & HPNB) | (ILWC 46 & LPNB) | Sequence genome | Components of | Gene accession IDs | Putative functions |
|-------------------|----------------|--------------|-------------------------|---------------------------------|--------------------|------------------|-----------------|---------------|--------------------|--------------------|
| SNP_115501_A_1156 | NW_004520322.1 | scaffold6695 | 1156                    | TT                              | GG                 | GG               | INTERGENIC      |               |                    |                    |
| SNP_115502_A_939  | NW_004520323.1 | scaffold6696 | 939                     | AA                              | TT                 | TT               | INTERGENIC      |               |                    |                    |
| SNP_115504_A_983  | NW_004520323.1 | scaffold6696 | 983                     | CC                              | TT                 | TT               | INTERGENIC      |               |                    |                    |
| SNP_115505_A_1000 | NW_004520323.1 | scaffold6696 | 1000                    | TT                              | CC                 | CC               | INTERGENIC      |               |                    |                    |
| SNP_115506_A_1016 | NW_004520323.1 | scaffold6696 | 1016                    | TT                              | CC                 | CC               | INTERGENIC      |               |                    |                    |
| SNP_115507_A_1165 | NW_004520323.1 | scaffold6696 | 1165                    | TT                              | CC                 | CC               | INTERGENIC      |               |                    |                    |
| SNP_115508_A_201  | NW_004520327.1 | scaffold6700 | 201                     | AA                              | TT                 | TT               | INTERGENIC      |               |                    |                    |
| SNP_115509_A_202  | NW_004520327.1 | scaffold6700 | 202                     | GG                              | AA                 | AA               | INTERGENIC      |               |                    |                    |
| SNP_115510_A_210  | NW_004520327.1 | scaffold6700 | 210                     | AA                              | GG                 | GG               | INTERGENIC      |               |                    |                    |
| SNP_115511_A_303  | NW_004520327.1 | scaffold6700 | 303                     | GG                              | AA                 | AA               | INTERGENIC      |               |                    |                    |
| SNP_115512_A_361  | NW_004520327.1 | scaffold6700 | 361                     | AA                              | GG                 | GG               | INTERGENIC      |               |                    |                    |
| SNP_115513_A_384  | NW_004520327.1 | scaffold6700 | 384                     | TT                              | GG                 | GG               | INTERGENIC      |               |                    |                    |
| SNP_115514_A_395  | NW_004520327.1 | scaffold6700 | 395                     | CC                              | TT                 | TT               | INTERGENIC      |               |                    |                    |
| SNP_115515_A_411  | NW_004520327.1 | scaffold6700 | 411                     | TT                              | AA                 | AA               | INTERGENIC      |               |                    |                    |
| SNP_115516_A_527  | NW_004520327.1 | scaffold6700 | 527                     | TT                              | CC                 | CC               | INTERGENIC      |               |                    |                    |
| SNP_115517_A_536  | NW_004520327.1 | scaffold6700 | 536                     | AA                              | GG                 | GG               | INTERGENIC      |               |                    |                    |
| SNP_115518_A_568  | NW_004520327.1 | scaffold6700 | 568                     | AA                              | TT                 | TT               | INTERGENIC      |               |                    |                    |
| SNP_115519_A_574  | NW_004520327.1 | scaffold6700 | 574                     | TT                              | CC                 | CC               | INTERGENIC      |               |                    |                    |
| SNP_115520_A_635  | NW_004520327.1 | scaffold6700 | 635                     | GG                              | AA                 | AA               | INTERGENIC      |               |                    |                    |
| SNP_115521_A_661  | NW_004520327.1 | scaffold6700 | 661                     | TT                              | CC                 | CC               | INTERGENIC      |               |                    |                    |
| SNP_115522_A_719  | NW_004520327.1 | scaffold6700 | 719                     | AA                              | GG                 | GG               | INTERGENIC      |               |                    |                    |
| SNP_115523_A_738  | NW_004520327.1 | scaffold6700 | 738                     | TT                              | CC                 | CC               | INTERGENIC      |               |                    |                    |

| SNPs IDs          | Chromosome IDs | Chromosomes  | Physical positions (bp) | CDC Frontier (Reference genome) | (Pusa 1103 & HPNB) | (ILWC 46 & LPNB) | Sequence genome       | Components of | Gene accession IDs | Putative functions |
|-------------------|----------------|--------------|-------------------------|---------------------------------|--------------------|------------------|-----------------------|---------------|--------------------|--------------------|
| SNP_115524_A_858  | NW_004520327.1 | scaffold6700 | 858                     | AA                              | GG                 | GG               | INTERGENIC            |               |                    |                    |
| SNP_115525_A_1174 | NW_004520327.1 | scaffold6700 | 1174                    | GG                              | AA                 | AA               | INTERGENIC            |               |                    |                    |
| SNP_115526_A_1671 | NW_004520327.1 | scaffold6700 | 1671                    | TT                              | GG                 | GG               | INTERGENIC            |               |                    |                    |
| SNP_115527_A_1008 | NW_004520331.1 | scaffold6710 | 1008                    | TT                              | GG                 | GG               | INTERGENIC            |               |                    |                    |
| SNP_115528_A_2102 | NW_004520333.1 | scaffold6714 | 2102                    | AA                              | TT                 | TT               | INTERGENIC            |               |                    |                    |
| SNP_115529_A_2123 | NW_004520333.1 | scaffold6714 | 2123                    | AA                              | GG                 | GG               | INTERGENIC            |               |                    |                    |
| SNP_115530_A_123  | NW_004520335.1 | scaffold6717 | 123                     | AA                              | CC                 | CC               | INTERGENIC            |               |                    |                    |
| SNP_115531_A_133  | NW_004520335.1 | scaffold6717 | 133                     | CC                              | AA                 | AA               | INTERGENIC            |               |                    |                    |
| SNP_115532_A_587  | NW_004520336.1 | scaffold6719 | 587                     | GG                              | AA                 | AA               | INTERGENIC            |               |                    |                    |
| SNP_115533_A_328  | NW_004520337.1 | scaffold6720 | 328                     | GG                              | AA                 | AA               | INTERGENIC            |               |                    |                    |
| SNP_115534_A_361  | NW_004520337.1 | scaffold6720 | 361                     | GG                              | CC                 | CC               | INTERGENIC            |               |                    |                    |
| SNP_115536_A_639  | NW_004520337.1 | scaffold6720 | 639                     | TT                              | GG                 | GG               | INTERGENIC            |               |                    |                    |
| SNP_115537_A_5155 | NW_004520337.1 | scaffold6720 | 5155                    | AA                              | GG                 | GG               | INTERGENIC            |               |                    |                    |
| SNP_115539_A_5333 | NW_004520337.1 | scaffold6720 | 5333                    | AA                              | TT                 | TT               | INTERGENIC            |               |                    |                    |
| SNP_115540_A_5348 | NW_004520337.1 | scaffold6720 | 5348                    | CC                              | TT                 | TT               | INTERGENIC            |               |                    |                    |
| SNP_115541_A_5482 | NW_004520337.1 | scaffold6720 | 5482                    | CC                              | TT                 | TT               | INTERGENIC            |               |                    |                    |
| SNP_115542_A_684  | NW_004520338.1 | scaffold6721 | 684                     | TT                              | AA                 | AA               | INTERGENIC            |               |                    |                    |
| SNP_115543_A_2205 | NW_004520338.1 | scaffold6721 | 2205                    | GG                              | TT                 | TT               | NON_SYNONYMOUS_CODING | 101513692     | Unknown function   |                    |
| SNP_115544_A_112  | NW_004520339.1 | scaffold6722 | 112                     | TT                              | CC                 | CC               | INTERGENIC            |               |                    |                    |
| SNP_115545_A_454  | NW_004520339.1 | scaffold6722 | 454                     | CC                              | GG                 | GG               | INTERGENIC            |               |                    |                    |
| SNP_115546_A_719  | NW_004520339.1 | scaffold6722 | 719                     | TT                              | AA                 | AA               | INTERGENIC            |               |                    |                    |
| SNP_115547_A_772  | NW_004520339.1 | scaffold6722 | 772                     | CC                              | TT                 | TT               | INTERGENIC            |               |                    |                    |

| SNPs IDs          | Chromosome IDs | Chromosomes  | Physical positions (bp) | CDC Frontier (Reference genome) | (Pusa 1103 & HPNB) | (ILWC 46 & LPNB) | Sequence genome | Components of | Gene accession IDs | Putative functions |
|-------------------|----------------|--------------|-------------------------|---------------------------------|--------------------|------------------|-----------------|---------------|--------------------|--------------------|
| SNP_115548_A_783  | NW_004520339.1 | scaffold6722 | 783                     | GG                              | TT                 | TT               | INTERGENIC      |               |                    |                    |
| SNP_115549_A_799  | NW_004520339.1 | scaffold6722 | 799                     | GG                              | CC                 | CC               | INTERGENIC      |               |                    |                    |
| SNP_115550_A_830  | NW_004520339.1 | scaffold6722 | 830                     | GG                              | TT                 | TT               | INTERGENIC      |               |                    |                    |
| SNP_115551_A_845  | NW_004520339.1 | scaffold6722 | 845                     | AA                              | GG                 | GG               | INTERGENIC      |               |                    |                    |
| SNP_115552_A_894  | NW_004520339.1 | scaffold6722 | 894                     | TT                              | GG                 | GG               | INTERGENIC      |               |                    |                    |
| SNP_115553_A_976  | NW_004520339.1 | scaffold6722 | 976                     | TT                              | AA                 | AA               | INTERGENIC      |               |                    |                    |
| SNP_115554_A_979  | NW_004520339.1 | scaffold6722 | 979                     | CC                              | TT                 | TT               | INTERGENIC      |               |                    |                    |
| SNP_115555_A_980  | NW_004520339.1 | scaffold6722 | 980                     | CC                              | TT                 | TT               | INTERGENIC      |               |                    |                    |
| SNP_115556_A_981  | NW_004520339.1 | scaffold6722 | 981                     | CC                              | TT                 | TT               | INTERGENIC      |               |                    |                    |
| SNP_115557_A_982  | NW_004520339.1 | scaffold6722 | 982                     | GG                              | CC                 | CC               | INTERGENIC      |               |                    |                    |
| SNP_115559_A_993  | NW_004520339.1 | scaffold6722 | 993                     | TT                              | CC                 | CC               | INTERGENIC      |               |                    |                    |
| SNP_115560_A_995  | NW_004520339.1 | scaffold6722 | 995                     | AA                              | TT                 | TT               | INTERGENIC      |               |                    |                    |
| SNP_115561_A_1309 | NW_004520339.1 | scaffold6722 | 1309                    | AA                              | GG                 | GG               | INTERGENIC      |               |                    |                    |
| SNP_115562_A_1472 | NW_004520339.1 | scaffold6722 | 1472                    | TT                              | CC                 | CC               | INTERGENIC      |               |                    |                    |
| SNP_115563_A_1478 | NW_004520339.1 | scaffold6722 | 1478                    | TT                              | GG                 | GG               | INTERGENIC      |               |                    |                    |
| SNP_115564_A_1552 | NW_004520339.1 | scaffold6722 | 1552                    | AA                              | GG                 | GG               | INTERGENIC      |               |                    |                    |
| SNP_115566_A_1881 | NW_004520339.1 | scaffold6722 | 1881                    | TT                              | GG                 | GG               | INTERGENIC      |               |                    |                    |
| SNP_115567_A_1887 | NW_004520339.1 | scaffold6722 | 1887                    | AA                              | GG                 | GG               | INTERGENIC      |               |                    |                    |
| SNP_115568_A_548  | NW_004520340.1 | scaffold6725 | 548                     | AA                              | GG                 | GG               | INTERGENIC      |               |                    |                    |
| SNP_115569_A_586  | NW_004520340.1 | scaffold6725 | 586                     | TT                              | AA                 | AA               | INTERGENIC      |               |                    |                    |
| SNP_115570_A_587  | NW_004520340.1 | scaffold6725 | 587                     | GG                              | TT                 | TT               | INTERGENIC      |               |                    |                    |
| SNP_115571_A_750  | NW_004520340.1 | scaffold6725 | 750                     | AA                              | TT                 | TT               | INTERGENIC      |               |                    |                    |

| SNPs IDs          | Chromosome IDs | Chromosomes  | Physical positions (bp) | CDC Frontier (Reference genome) | (Pusa 1103 & HPNB) | (ILWC 46 & LPNB) | Sequence genome | Components of | Gene accession IDs | Putative functions |
|-------------------|----------------|--------------|-------------------------|---------------------------------|--------------------|------------------|-----------------|---------------|--------------------|--------------------|
| SNP_115572_A_751  | NW_004520340.1 | scaffold6725 | 751                     | TT                              | GG                 | GG               | INTERGENIC      |               |                    |                    |
| SNP_115573_A_752  | NW_004520340.1 | scaffold6725 | 752                     | GG                              | TT                 | TT               | INTERGENIC      |               |                    |                    |
| SNP_115574_A_941  | NW_004520340.1 | scaffold6725 | 941                     | AA                              | GG                 | GG               | INTERGENIC      |               |                    |                    |
| SNP_115575_A_1011 | NW_004520340.1 | scaffold6725 | 1011                    | AA                              | GG                 | GG               | INTERGENIC      |               |                    |                    |
| SNP_115576_A_1402 | NW_004520340.1 | scaffold6725 | 1402                    | AA                              | CC                 | CC               | INTERGENIC      |               |                    |                    |
| SNP_115577_A_1622 | NW_004520340.1 | scaffold6725 | 1622                    | GG                              | AA                 | AA               | INTERGENIC      |               |                    |                    |
| SNP_115578_A_1688 | NW_004520340.1 | scaffold6725 | 1688                    | AA                              | TT                 | TT               | INTERGENIC      |               |                    |                    |
| SNP_115579_A_1700 | NW_004520340.1 | scaffold6725 | 1700                    | AA                              | CC                 | CC               | INTERGENIC      |               |                    |                    |
| SNP_115580_A_1791 | NW_004520340.1 | scaffold6725 | 1791                    | CC                              | TT                 | TT               | INTERGENIC      |               |                    |                    |
| SNP_115581_A_1909 | NW_004520340.1 | scaffold6725 | 1909                    | TT                              | AA                 | AA               | INTERGENIC      |               |                    |                    |
| SNP_115582_A_1979 | NW_004520340.1 | scaffold6725 | 1979                    | CC                              | TT                 | TT               | INTERGENIC      |               |                    |                    |
| SNP_115584_A_2013 | NW_004520340.1 | scaffold6725 | 2013                    | AA                              | GG                 | GG               | INTERGENIC      |               |                    |                    |
| SNP_115585_A_2014 | NW_004520340.1 | scaffold6725 | 2014                    | AA                              | TT                 | TT               | INTERGENIC      |               |                    |                    |
| SNP_115586_A_2041 | NW_004520340.1 | scaffold6725 | 2041                    | CC                              | TT                 | TT               | INTERGENIC      |               |                    |                    |
| SNP_115587_A_1099 | NW_004520341.1 | scaffold6728 | 1099                    | GG                              | CC                 | CC               | INTERGENIC      |               |                    |                    |
| SNP_115588_A_4934 | NW_004520341.1 | scaffold6728 | 4934                    | CC                              | GG                 | GG               | INTERGENIC      |               |                    |                    |
| SNP_115589_A_9507 | NW_004520341.1 | scaffold6728 | 9507                    | AA                              | GG                 | GG               | INTERGENIC      |               |                    |                    |
| SNP_115591_A_9598 | NW_004520341.1 | scaffold6728 | 9598                    | AA                              | CC                 | CC               | INTERGENIC      |               |                    |                    |
| SNP_115592_A_753  | NW_004520343.1 | scaffold6731 | 753                     | GG                              | AA                 | AA               | INTERGENIC      |               |                    |                    |
| SNP_115593_A_993  | NW_004520343.1 | scaffold6731 | 993                     | GG                              | CC                 | CC               | INTERGENIC      |               |                    |                    |
| SNP_115594_A_1267 | NW_004520343.1 | scaffold6731 | 1267                    | TT                              | CC                 | CC               | INTERGENIC      |               |                    |                    |
| SNP_115595_A_100  | NW_004520345.1 | scaffold6734 | 100                     | AA                              | CC                 | CC               | INTERGENIC      |               |                    |                    |

| SNPs IDs          | Chromosome IDs | Chromosomes  | Physical positions (bp) | CDC Frontier (Reference genome) | (Pusa 1103 & HPNB) | (ILWC 46 & LPNB) | Sequence genome | Components of | Gene accession IDs | Putative functions |
|-------------------|----------------|--------------|-------------------------|---------------------------------|--------------------|------------------|-----------------|---------------|--------------------|--------------------|
| SNP_115596_A_699  | NW_004520345.1 | scaffold6734 | 699                     | TT                              | AA                 | AA               | INTERGENIC      |               |                    |                    |
| SNP_115597_A_64   | NW_004520346.1 | scaffold6736 | 64                      | AA                              | CC                 | CC               | INTERGENIC      |               |                    |                    |
| SNP_115598_A_1273 | NW_004520347.1 | scaffold6737 | 1273                    | CC                              | GG                 | GG               | INTERGENIC      |               |                    |                    |
| SNP_115599_A_1790 | NW_004520347.1 | scaffold6737 | 1790                    | GG                              | AA                 | AA               | INTERGENIC      |               |                    |                    |
| SNP_115600_A_1822 | NW_004520347.1 | scaffold6737 | 1822                    | TT                              | CC                 | CC               | INTERGENIC      |               |                    |                    |
| SNP_115601_A_1974 | NW_004520347.1 | scaffold6737 | 1974                    | AA                              | TT                 | TT               | INTERGENIC      |               |                    |                    |
| SNP_115602_A_2123 | NW_004520347.1 | scaffold6737 | 2123                    | GG                              | CC                 | CC               | INTERGENIC      |               |                    |                    |
| SNP_115603_A_2367 | NW_004520347.1 | scaffold6737 | 2367                    | GG                              | TT                 | TT               | INTERGENIC      |               |                    |                    |
| SNP_115604_A_2378 | NW_004520347.1 | scaffold6737 | 2378                    | AA                              | TT                 | TT               | INTERGENIC      |               |                    |                    |
| SNP_115605_A_2420 | NW_004520347.1 | scaffold6737 | 2420                    | AA                              | TT                 | TT               | INTERGENIC      |               |                    |                    |
| SNP_115606_A_2454 | NW_004520347.1 | scaffold6737 | 2454                    | AA                              | GG                 | GG               | INTERGENIC      |               |                    |                    |
| SNP_115607_A_2517 | NW_004520347.1 | scaffold6737 | 2517                    | CC                              | TT                 | TT               | INTERGENIC      |               |                    |                    |
| SNP_115608_A_2660 | NW_004520347.1 | scaffold6737 | 2660                    | GG                              | TT                 | TT               | INTERGENIC      |               |                    |                    |
| SNP_115609_A_2721 | NW_004520347.1 | scaffold6737 | 2721                    | TT                              | CC                 | CC               | INTERGENIC      |               |                    |                    |
| SNP_115610_A_3354 | NW_004520347.1 | scaffold6737 | 3354                    | AA                              | GG                 | GG               | INTERGENIC      |               |                    |                    |
| SNP_115611_A_3463 | NW_004520347.1 | scaffold6737 | 3463                    | TT                              | CC                 | CC               | INTERGENIC      |               |                    |                    |
| SNP_115612_A_3647 | NW_004520347.1 | scaffold6737 | 3647                    | TT                              | CC                 | CC               | INTERGENIC      |               |                    |                    |
| SNP_115613_A_3754 | NW_004520347.1 | scaffold6737 | 3754                    | CC                              | GG                 | GG               | INTERGENIC      |               |                    |                    |
| SNP_115614_A_3906 | NW_004520347.1 | scaffold6737 | 3906                    | AA                              | CC                 | CC               | INTERGENIC      |               |                    |                    |
| SNP_115615_A_5232 | NW_004520347.1 | scaffold6737 | 5232                    | AA                              | GG                 | GG               | INTERGENIC      |               |                    |                    |
| SNP_115616_A_6647 | NW_004520347.1 | scaffold6737 | 6647                    | AA                              | GG                 | GG               | INTERGENIC      |               |                    |                    |
| SNP_115617_A_437  | NW_004520348.1 | scaffold6738 | 437                     | TT                              | GG                 | GG               | INTERGENIC      |               |                    |                    |



| SNPs IDs          | Chromosome IDs | Chromosomes  | Physical positions (bp) | CDC Frontier (Reference genome) | (Pusa 1103 & HPNB) | (ILWC 46 & LPNB) | Sequence genome | Components of | Gene accession IDs | Putative functions |
|-------------------|----------------|--------------|-------------------------|---------------------------------|--------------------|------------------|-----------------|---------------|--------------------|--------------------|
| SNP_115618_A_572  | NW_004520348.1 | scaffold6738 | 572                     | AA                              | CC                 | CC               | INTERGENIC      |               |                    |                    |
| SNP_115619_A_1389 | NW_004520348.1 | scaffold6738 | 1389                    | CC                              | TT                 | TT               | INTERGENIC      |               |                    |                    |
| SNP_115620_A_1436 | NW_004520348.1 | scaffold6738 | 1436                    | AA                              | TT                 | TT               | INTERGENIC      |               |                    |                    |
| SNP_115621_A_4019 | NW_004520354.1 | scaffold6750 | 4019                    | TT                              | CC                 | CC               | INTERGENIC      |               |                    |                    |
| SNP_115622_A_5692 | NW_004520354.1 | scaffold6750 | 5692                    | AA                              | GG                 | GG               | INTERGENIC      |               |                    |                    |
| SNP_115624_A_6701 | NW_004520354.1 | scaffold6750 | 6701                    | AA                              | TT                 | TT               | INTERGENIC      |               |                    |                    |
| SNP_115625_A_592  | NW_004520359.1 | scaffold6759 | 592                     | TT                              | AA                 | AA               | INTERGENIC      |               |                    |                    |
| SNP_115626_A_77   | NW_004520360.1 | scaffold6760 | 77                      | GG                              | AA                 | AA               | INTERGENIC      |               |                    |                    |
| SNP_115627_A_82   | NW_004520360.1 | scaffold6760 | 82                      | CC                              | GG                 | GG               | INTERGENIC      |               |                    |                    |
| SNP_115628_A_195  | NW_004520360.1 | scaffold6760 | 195                     | TT                              | AA                 | AA               | INTERGENIC      |               |                    |                    |
| SNP_115629_A_249  | NW_004520360.1 | scaffold6760 | 249                     | CC                              | TT                 | TT               | INTERGENIC      |               |                    |                    |
| SNP_115630_A_370  | NW_004520360.1 | scaffold6760 | 370                     | GG                              | TT                 | TT               | INTERGENIC      |               |                    |                    |
| SNP_115631_A_416  | NW_004520360.1 | scaffold6760 | 416                     | AA                              | TT                 | TT               | INTERGENIC      |               |                    |                    |
| SNP_115632_A_427  | NW_004520360.1 | scaffold6760 | 427                     | AA                              | TT                 | TT               | INTERGENIC      |               |                    |                    |
| SNP_115633_A_451  | NW_004520360.1 | scaffold6760 | 451                     | TT                              | AA                 | AA               | INTERGENIC      |               |                    |                    |
| SNP_115634_A_503  | NW_004520360.1 | scaffold6760 | 503                     | AA                              | GG                 | GG               | INTERGENIC      |               |                    |                    |
| SNP_115635_A_514  | NW_004520360.1 | scaffold6760 | 514                     | AA                              | GG                 | GG               | INTERGENIC      |               |                    |                    |
| SNP_115636_A_613  | NW_004520360.1 | scaffold6760 | 613                     | TT                              | AA                 | AA               | INTERGENIC      |               |                    |                    |
| SNP_115638_A_701  | NW_004520360.1 | scaffold6760 | 701                     | GG                              | TT                 | TT               | INTERGENIC      |               |                    |                    |
| SNP_115639_A_788  | NW_004520360.1 | scaffold6760 | 788                     | CC                              | TT                 | TT               | INTERGENIC      |               |                    |                    |
| SNP_115640_A_885  | NW_004520360.1 | scaffold6760 | 885                     | TT                              | CC                 | CC               | INTERGENIC      |               |                    |                    |
| SNP_115642_A_944  | NW_004520360.1 | scaffold6760 | 944                     | GG                              | AA                 | AA               | INTERGENIC      |               |                    |                    |

| SNPs IDs           | Chromosome IDs | Chromosomes  | Physical positions (bp) | CDC Frontier genome (Reference genome) | (Pusa 1103 & HPNB) | (ILWC 46 & LPNB) | Sequence genome | Components of | Gene accession IDs | Putative functions |
|--------------------|----------------|--------------|-------------------------|----------------------------------------|--------------------|------------------|-----------------|---------------|--------------------|--------------------|
| SNP_115644_A_859   | NW_004520364.1 | scaffold6770 | 859                     | GG                                     | CC                 | CC               | INTERGENIC      |               |                    |                    |
| SNP_115645_A_1141  | NW_004520364.1 | scaffold6770 | 1141                    | GG                                     | CC                 | CC               | INTERGENIC      |               |                    |                    |
| SNP_115646_A_1143  | NW_004520364.1 | scaffold6770 | 1143                    | AA                                     | GG                 | GG               | INTERGENIC      |               |                    |                    |
| SNP_115647_A_64    | NW_004520368.1 | scaffold6775 | 64                      | GG                                     | TT                 | TT               | INTERGENIC      |               |                    |                    |
| SNP_115648_A_85    | NW_004520368.1 | scaffold6775 | 85                      | TT                                     | GG                 | GG               | INTERGENIC      |               |                    |                    |
| SNP_115649_A_146   | NW_004520368.1 | scaffold6775 | 146                     | CC                                     | AA                 | AA               | INTERGENIC      |               |                    |                    |
| SNP_115650_A_11256 | NW_004520369.1 | scaffold6778 | 11256                   | CC                                     | TT                 | TT               | INTERGENIC      |               |                    |                    |
| SNP_115651_A_11257 | NW_004520369.1 | scaffold6778 | 11257                   | GG                                     | AA                 | AA               | INTERGENIC      |               |                    |                    |
| SNP_115652_A_11269 | NW_004520369.1 | scaffold6778 | 11269                   | AA                                     | GG                 | GG               | INTERGENIC      |               |                    |                    |
| SNP_115653_A_11414 | NW_004520369.1 | scaffold6778 | 11414                   | GG                                     | CC                 | CC               | INTERGENIC      |               |                    |                    |
| SNP_115654_A_11533 | NW_004520369.1 | scaffold6778 | 11533                   | GG                                     | AA                 | AA               | INTERGENIC      |               |                    |                    |
| SNP_115655_A_11693 | NW_004520369.1 | scaffold6778 | 11693                   | TT                                     | CC                 | CC               | INTERGENIC      |               |                    |                    |
| SNP_115656_A_11731 | NW_004520369.1 | scaffold6778 | 11731                   | GG                                     | CC                 | CC               | INTERGENIC      |               |                    |                    |
| SNP_115657_A_11795 | NW_004520369.1 | scaffold6778 | 11795                   | AA                                     | TT                 | TT               | INTERGENIC      |               |                    |                    |
| SNP_115658_A_12147 | NW_004520369.1 | scaffold6778 | 12147                   | GG                                     | TT                 | TT               | INTERGENIC      |               |                    |                    |
| SNP_115659_A_64    | NW_004520371.1 | scaffold6782 | 64                      | CC                                     | AA                 | AA               | INTERGENIC      |               |                    |                    |
| SNP_115660_A_81    | NW_004520371.1 | scaffold6782 | 81                      | TT                                     | CC                 | CC               | INTERGENIC      |               |                    |                    |
| SNP_115661_A_202   | NW_004520371.1 | scaffold6782 | 202                     | AA                                     | TT                 | TT               | INTERGENIC      |               |                    |                    |
| SNP_115662_A_307   | NW_004520371.1 | scaffold6782 | 307                     | AA                                     | GG                 | GG               | INTERGENIC      |               |                    |                    |
| SNP_115663_A_384   | NW_004520371.1 | scaffold6782 | 384                     | TT                                     | CC                 | CC               | INTERGENIC      |               |                    |                    |
| SNP_115664_A_425   | NW_004520371.1 | scaffold6782 | 425                     | CC                                     | AA                 | AA               | INTERGENIC      |               |                    |                    |
| SNP_115666_A_724   | NW_004520371.1 | scaffold6782 | 724                     | CC                                     | TT                 | TT               | INTERGENIC      |               |                    |                    |

| SNPs IDs          | Chromosome IDs | Chromosomes  | Physical positions (bp) | CDC Frontier (Reference genome) | (Pusa 1103 & HPNB) | (ILWC 46 & LPNB) | Sequence genome | Components of | Gene accession IDs | Putative functions |
|-------------------|----------------|--------------|-------------------------|---------------------------------|--------------------|------------------|-----------------|---------------|--------------------|--------------------|
| SNP_115668_A_775  | NW_004520371.1 | scaffold6782 | 775                     | GG                              | AA                 | AA               | INTERGENIC      |               |                    |                    |
| SNP_115671_A_1243 | NW_004520371.1 | scaffold6782 | 1243                    | CC                              | TT                 | TT               | INTERGENIC      |               |                    |                    |
| SNP_115672_A_1309 | NW_004520371.1 | scaffold6782 | 1309                    | GG                              | AA                 | AA               | INTERGENIC      |               |                    |                    |
| SNP_115673_A_271  | NW_004520372.1 | scaffold6784 | 271                     | TT                              | AA                 | AA               | INTERGENIC      |               |                    |                    |
| SNP_115674_A_104  | NW_004520376.1 | scaffold6790 | 104                     | CC                              | TT                 | TT               | INTERGENIC      |               |                    |                    |
| SNP_115675_A_259  | NW_004520376.1 | scaffold6790 | 259                     | TT                              | CC                 | CC               | INTERGENIC      |               |                    |                    |
| SNP_115676_A_503  | NW_004520376.1 | scaffold6790 | 503                     | CC                              | AA                 | AA               | INTERGENIC      |               |                    |                    |
| SNP_115677_A_555  | NW_004520376.1 | scaffold6790 | 555                     | CC                              | TT                 | TT               | INTERGENIC      |               |                    |                    |
| SNP_115678_A_580  | NW_004520376.1 | scaffold6790 | 580                     | GG                              | AA                 | AA               | INTERGENIC      |               |                    |                    |
| SNP_115680_A_1052 | NW_004520376.1 | scaffold6790 | 1052                    | GG                              | TT                 | TT               | INTERGENIC      |               |                    |                    |
| SNP_115681_A_1060 | NW_004520376.1 | scaffold6790 | 1060                    | GG                              | AA                 | AA               | INTERGENIC      |               |                    |                    |
| SNP_115682_A_1114 | NW_004520376.1 | scaffold6790 | 1114                    | AA                              | CC                 | CC               | INTERGENIC      |               |                    |                    |
| SNP_115683_A_1123 | NW_004520376.1 | scaffold6790 | 1123                    | CC                              | TT                 | TT               | INTERGENIC      |               |                    |                    |
| SNP_115684_A_1149 | NW_004520376.1 | scaffold6790 | 1149                    | CC                              | TT                 | TT               | INTERGENIC      |               |                    |                    |
| SNP_115685_A_1157 | NW_004520376.1 | scaffold6790 | 1157                    | CC                              | TT                 | TT               | INTERGENIC      |               |                    |                    |
| SNP_115686_A_1222 | NW_004520376.1 | scaffold6790 | 1222                    | CC                              | AA                 | AA               | INTERGENIC      |               |                    |                    |
| SNP_115687_A_1238 | NW_004520376.1 | scaffold6790 | 1238                    | GG                              | AA                 | AA               | INTERGENIC      |               |                    |                    |
| SNP_115688_A_1321 | NW_004520376.1 | scaffold6790 | 1321                    | GG                              | TT                 | TT               | INTERGENIC      |               |                    |                    |
| SNP_115690_A_1477 | NW_004520376.1 | scaffold6790 | 1477                    | AA                              | GG                 | GG               | INTERGENIC      |               |                    |                    |
| SNP_115691_A_1478 | NW_004520376.1 | scaffold6790 | 1478                    | CC                              | TT                 | TT               | INTERGENIC      |               |                    |                    |
| SNP_115692_A_1540 | NW_004520376.1 | scaffold6790 | 1540                    | AA                              | TT                 | TT               | INTERGENIC      |               |                    |                    |
| SNP_115693_A_2201 | NW_004520376.1 | scaffold6790 | 2201                    | TT                              | CC                 | CC               | INTERGENIC      |               |                    |                    |

| SNPs IDs          | Chromosome IDs | Chromosomes  | Physical positions (bp) | CDC Frontier (Reference genome) | (Pusa 1103 & HPNB) | (ILWC 46 & LPNB) | Sequence genome | Components of | Gene accession IDs | Putative functions |
|-------------------|----------------|--------------|-------------------------|---------------------------------|--------------------|------------------|-----------------|---------------|--------------------|--------------------|
| SNP_115694_A_2232 | NW_004520376.1 | scaffold6790 | 2232                    | TT                              | CC                 | CC               | INTERGENIC      |               |                    |                    |
| SNP_115696_A_2300 | NW_004520376.1 | scaffold6790 | 2300                    | TT                              | CC                 | CC               | INTERGENIC      |               |                    |                    |
| SNP_115697_A_2384 | NW_004520376.1 | scaffold6790 | 2384                    | GG                              | TT                 | TT               | INTERGENIC      |               |                    |                    |
| SNP_115698_A_2531 | NW_004520376.1 | scaffold6790 | 2531                    | TT                              | CC                 | CC               | INTERGENIC      |               |                    |                    |
| SNP_115699_A_2707 | NW_004520376.1 | scaffold6790 | 2707                    | AA                              | TT                 | TT               | INTERGENIC      |               |                    |                    |
| SNP_115700_A_2726 | NW_004520376.1 | scaffold6790 | 2726                    | GG                              | AA                 | AA               | INTERGENIC      |               |                    |                    |
| SNP_115701_A_2756 | NW_004520376.1 | scaffold6790 | 2756                    | CC                              | AA                 | AA               | INTERGENIC      |               |                    |                    |
| SNP_115703_A_2859 | NW_004520376.1 | scaffold6790 | 2859                    | GG                              | AA                 | AA               | INTERGENIC      |               |                    |                    |
| SNP_115704_A_2902 | NW_004520376.1 | scaffold6790 | 2902                    | CC                              | TT                 | TT               | INTERGENIC      |               |                    |                    |
| SNP_115705_A_2999 | NW_004520376.1 | scaffold6790 | 2999                    | TT                              | AA                 | AA               | INTERGENIC      |               |                    |                    |
| SNP_115706_A_3000 | NW_004520376.1 | scaffold6790 | 3000                    | CC                              | TT                 | TT               | INTERGENIC      |               |                    |                    |
| SNP_115707_A_3035 | NW_004520376.1 | scaffold6790 | 3035                    | TT                              | CC                 | CC               | INTERGENIC      |               |                    |                    |
| SNP_115708_A_3075 | NW_004520376.1 | scaffold6790 | 3075                    | TT                              | CC                 | CC               | INTERGENIC      |               |                    |                    |
| SNP_115709_A_3126 | NW_004520376.1 | scaffold6790 | 3126                    | AA                              | GG                 | GG               | INTERGENIC      |               |                    |                    |
| SNP_115710_A_3191 | NW_004520376.1 | scaffold6790 | 3191                    | AA                              | GG                 | GG               | INTERGENIC      |               |                    |                    |
| SNP_115711_A_3202 | NW_004520376.1 | scaffold6790 | 3202                    | TT                              | CC                 | CC               | INTERGENIC      |               |                    |                    |
| SNP_115712_A_3215 | NW_004520376.1 | scaffold6790 | 3215                    | CC                              | TT                 | TT               | INTERGENIC      |               |                    |                    |
| SNP_115713_A_3856 | NW_004520377.1 | scaffold6791 | 3856                    | GG                              | TT                 | TT               | INTERGENIC      |               |                    |                    |
| SNP_115714_A_3904 | NW_004520377.1 | scaffold6791 | 3904                    | CC                              | GG                 | GG               | INTERGENIC      |               |                    |                    |
| SNP_115715_A_3959 | NW_004520377.1 | scaffold6791 | 3959                    | GG                              | AA                 | AA               | INTERGENIC      |               |                    |                    |
| SNP_115716_A_4144 | NW_004520377.1 | scaffold6791 | 4144                    | AA                              | TT                 | TT               | INTERGENIC      |               |                    |                    |
| SNP_115717_A_4335 | NW_004520377.1 | scaffold6791 | 4335                    | TT                              | CC                 | CC               | INTERGENIC      |               |                    |                    |

| SNPs IDs           | Chromosome IDs | Chromosomes  | Physical positions (bp) | CDC Frontier (Reference genome) | (Pusa 1103 & HPNB) | (ILWC 46 & LPNB) | Sequence genome | Components of | Gene accession IDs | Putative functions |
|--------------------|----------------|--------------|-------------------------|---------------------------------|--------------------|------------------|-----------------|---------------|--------------------|--------------------|
| SNP_115718_A_4460  | NW_004520377.1 | scaffold6791 | 4460                    | TT                              | AA                 | AA               | INTERGENIC      |               |                    |                    |
| SNP_115719_A_4544  | NW_004520377.1 | scaffold6791 | 4544                    | AA                              | GG                 | GG               | INTERGENIC      |               |                    |                    |
| SNP_115720_A_5041  | NW_004520377.1 | scaffold6791 | 5041                    | GG                              | CC                 | CC               | INTERGENIC      |               |                    |                    |
| SNP_115721_A_13564 | NW_004520377.1 | scaffold6791 | 13564                   | TT                              | AA                 | AA               | INTERGENIC      |               |                    |                    |
| SNP_115722_A_13787 | NW_004520377.1 | scaffold6791 | 13787                   | TT                              | GG                 | GG               | INTERGENIC      |               |                    |                    |
| SNP_115723_A_18793 | NW_004520377.1 | scaffold6791 | 18793                   | CC                              | TT                 | TT               | INTERGENIC      |               |                    |                    |
| SNP_115724_A_18795 | NW_004520377.1 | scaffold6791 | 18795                   | GG                              | AA                 | AA               | INTERGENIC      |               |                    |                    |
| SNP_115725_A_24362 | NW_004520377.1 | scaffold6791 | 24362                   | AA                              | TT                 | TT               | INTERGENIC      |               |                    |                    |
| SNP_115726_A_24417 | NW_004520377.1 | scaffold6791 | 24417                   | CC                              | TT                 | TT               | INTERGENIC      |               |                    |                    |
| SNP_115727_A_26017 | NW_004520377.1 | scaffold6791 | 26017                   | GG                              | AA                 | AA               | INTERGENIC      |               |                    |                    |
| SNP_115728_A_26020 | NW_004520377.1 | scaffold6791 | 26020                   | AA                              | GG                 | GG               | INTERGENIC      |               |                    |                    |
| SNP_115730_A_609   | NW_004520384.1 | scaffold6808 | 609                     | CC                              | AA                 | AA               | INTERGENIC      |               |                    |                    |
| SNP_115731_A_614   | NW_004520384.1 | scaffold6808 | 614                     | CC                              | TT                 | TT               | INTERGENIC      |               |                    |                    |
| SNP_115732_A_422   | NW_004520388.1 | scaffold6814 | 422                     | TT                              | CC                 | CC               | INTERGENIC      |               |                    |                    |
| SNP_115733_A_231   | NW_004520392.1 | scaffold6820 | 231                     | AA                              | GG                 | GG               | INTERGENIC      |               |                    |                    |
| SNP_115734_A_523   | NW_004520392.1 | scaffold6820 | 523                     | GG                              | AA                 | AA               | INTERGENIC      |               |                    |                    |
| SNP_115735_A_964   | NW_004520392.1 | scaffold6820 | 964                     | TT                              | CC                 | CC               | INTERGENIC      |               |                    |                    |
| SNP_115736_A_989   | NW_004520392.1 | scaffold6820 | 989                     | AA                              | CC                 | CC               | INTERGENIC      |               |                    |                    |
| SNP_115737_A_742   | NW_004520397.1 | scaffold6827 | 742                     | CC                              | TT                 | TT               | INTERGENIC      |               |                    |                    |
| SNP_115738_A_371   | NW_004520398.1 | scaffold6828 | 371                     | AA                              | GG                 | GG               | INTERGENIC      |               |                    |                    |
| SNP_115739_A_506   | NW_004520398.1 | scaffold6828 | 506                     | CC                              | TT                 | TT               | INTERGENIC      |               |                    |                    |
| SNP_115740_A_522   | NW_004520398.1 | scaffold6828 | 522                     | GG                              | AA                 | AA               | INTERGENIC      |               |                    |                    |

| SNPs IDs          | Chromosome IDs | Chromosomes  | Physical positions (bp) | CDC Frontier (Reference genome) | (Pusa 1103 & HPNB) | (ILWC 46 & LPNB) | Sequence genome | Components of | Gene accession IDs | Putative functions |
|-------------------|----------------|--------------|-------------------------|---------------------------------|--------------------|------------------|-----------------|---------------|--------------------|--------------------|
| SNP_115741_A_866  | NW_004520398.1 | scaffold6828 | 866                     | TT                              | AA                 | AA               | INTERGENIC      |               |                    |                    |
| SNP_115742_A_939  | NW_004520398.1 | scaffold6828 | 939                     | CC                              | TT                 | TT               | INTERGENIC      |               |                    |                    |
| SNP_115743_A_141  | NW_004520399.1 | scaffold6830 | 141                     | CC                              | TT                 | TT               | INTERGENIC      |               |                    |                    |
| SNP_115744_A_176  | NW_004520399.1 | scaffold6830 | 176                     | CC                              | TT                 | TT               | INTERGENIC      |               |                    |                    |
| SNP_115745_A_2042 | NW_004520403.1 | scaffold6837 | 2042                    | AA                              | TT                 | TT               | INTERGENIC      |               |                    |                    |
| SNP_115746_A_2247 | NW_004520403.1 | scaffold6837 | 2247                    | GG                              | TT                 | TT               | INTERGENIC      |               |                    |                    |
| SNP_115747_A_64   | NW_004520406.1 | scaffold6842 | 64                      | GG                              | TT                 | TT               | INTERGENIC      |               |                    |                    |
| SNP_115748_A_107  | NW_004520406.1 | scaffold6842 | 107                     | AA                              | TT                 | TT               | INTERGENIC      |               |                    |                    |
| SNP_115749_A_109  | NW_004520406.1 | scaffold6842 | 109                     | TT                              | GG                 | GG               | INTERGENIC      |               |                    |                    |
| SNP_115750_A_318  | NW_004520406.1 | scaffold6842 | 318                     | TT                              | CC                 | CC               | INTERGENIC      |               |                    |                    |
| SNP_115751_A_1808 | NW_004520406.1 | scaffold6842 | 1808                    | AA                              | CC                 | CC               | INTERGENIC      |               |                    |                    |
| SNP_115752_A_1821 | NW_004520406.1 | scaffold6842 | 1821                    | CC                              | TT                 | TT               | INTERGENIC      |               |                    |                    |
| SNP_115753_A_1353 | NW_004520407.1 | scaffold6843 | 1353                    | AA                              | GG                 | GG               | INTERGENIC      |               |                    |                    |
| SNP_115754_A_383  | NW_004520408.1 | scaffold6845 | 383                     | AA                              | GG                 | GG               | INTERGENIC      |               |                    |                    |
| SNP_115755_A_384  | NW_004520408.1 | scaffold6845 | 384                     | TT                              | CC                 | CC               | INTERGENIC      |               |                    |                    |
| SNP_115756_A_434  | NW_004520408.1 | scaffold6845 | 434                     | GG                              | CC                 | CC               | INTERGENIC      |               |                    |                    |
| SNP_115757_A_513  | NW_004520408.1 | scaffold6845 | 513                     | AA                              | CC                 | CC               | INTERGENIC      |               |                    |                    |
| SNP_115758_A_702  | NW_004520408.1 | scaffold6845 | 702                     | CC                              | AA                 | AA               | INTERGENIC      |               |                    |                    |
| SNP_115759_A_737  | NW_004520408.1 | scaffold6845 | 737                     | AA                              | TT                 | TT               | INTERGENIC      |               |                    |                    |
| SNP_115760_A_873  | NW_004520408.1 | scaffold6845 | 873                     | TT                              | GG                 | GG               | INTERGENIC      |               |                    |                    |
| SNP_115761_A_1005 | NW_004520408.1 | scaffold6845 | 1005                    | AA                              | TT                 | TT               | INTERGENIC      |               |                    |                    |
| SNP_115762_A_1072 | NW_004520408.1 | scaffold6845 | 1072                    | GG                              | TT                 | TT               | INTERGENIC      |               |                    |                    |

| SNPs IDs          | Chromosome IDs | Chromosomes  | Physical positions (bp) | CDC Frontier (Reference genome) | (Pusa 1103 & HPNB) | (ILWC 46 & LPNB) | Sequence genome | Components of | Gene accession IDs                                      | Putative functions |
|-------------------|----------------|--------------|-------------------------|---------------------------------|--------------------|------------------|-----------------|---------------|---------------------------------------------------------|--------------------|
| SNP_115763_A_1077 | NW_004520408.1 | scaffold6845 | 1077                    | GG                              | AA                 | AA               | INTERGENIC      |               |                                                         |                    |
| SNP_115764_A_1262 | NW_004520408.1 | scaffold6845 | 1262                    | AA                              | TT                 | TT               | INTERGENIC      |               |                                                         |                    |
| SNP_115766_A_1382 | NW_004520408.1 | scaffold6845 | 1382                    | GG                              | TT                 | TT               | INTERGENIC      |               |                                                         |                    |
| SNP_115768_A_537  | NW_004520409.1 | scaffold6846 | 537                     | AA                              | TT                 | TT               | INTERGENIC      |               |                                                         |                    |
| SNP_115769_A_606  | NW_004520409.1 | scaffold6846 | 606                     | CC                              | AA                 | AA               | INTERGENIC      |               |                                                         |                    |
| SNP_115770_A_627  | NW_004520409.1 | scaffold6846 | 627                     | CC                              | AA                 | AA               | INTERGENIC      |               |                                                         |                    |
| SNP_115771_A_701  | NW_004520409.1 | scaffold6846 | 701                     | TT                              | AA                 | AA               | INTERGENIC      |               |                                                         |                    |
| SNP_115772_A_730  | NW_004520409.1 | scaffold6846 | 730                     | TT                              | GG                 | GG               | INTERGENIC      |               |                                                         |                    |
| SNP_115773_A_747  | NW_004520409.1 | scaffold6846 | 747                     | AA                              | GG                 | GG               | INTERGENIC      |               |                                                         |                    |
| SNP_115774_A_826  | NW_004520409.1 | scaffold6846 | 826                     | CC                              | TT                 | TT               | INTERGENIC      |               |                                                         |                    |
| SNP_115775_A_827  | NW_004520409.1 | scaffold6846 | 827                     | AA                              | CC                 | CC               | INTERGENIC      |               |                                                         |                    |
| SNP_115776_A_828  | NW_004520409.1 | scaffold6846 | 828                     | TT                              | AA                 | AA               | INTERGENIC      |               |                                                         |                    |
| SNP_115777_A_895  | NW_004520409.1 | scaffold6846 | 895                     | TT                              | CC                 | CC               | INTERGENIC      |               |                                                         |                    |
| SNP_115778_A_918  | NW_004520409.1 | scaffold6846 | 918                     | CC                              | GG                 | GG               | INTERGENIC      |               |                                                         |                    |
| SNP_115779_A_959  | NW_004520409.1 | scaffold6846 | 959                     | AA                              | GG                 | GG               | INTERGENIC      |               |                                                         |                    |
| SNP_115780_A_1407 | NW_004520409.1 | scaffold6846 | 1407                    | AA                              | GG                 | GG               | INTERGENIC      |               |                                                         |                    |
| SNP_115781_A_1568 | NW_004520409.1 | scaffold6846 | 1568                    | CC                              | GG                 | GG               | DRR             | 101514358     | serine/threonine-protein phosphatase PP1 isozyme 3-like |                    |
| SNP_115782_A_1679 | NW_004520409.1 | scaffold6846 | 1679                    | CC                              | TT                 | TT               | DRR             | 101514358     | serine/threonine-protein phosphatase PP1 isozyme 3-like |                    |
| SNP_115783_A_1867 | NW_004520409.1 | scaffold6846 | 1867                    | AA                              | GG                 | GG               | DRR             | 101514358     | serine/threonine-protein phosphatase PP1 isozyme 3-like |                    |
| SNP_115784_A_2368 | NW_004520409.1 | scaffold6846 | 2368                    | TT                              | AA                 | AA               | DRR             | 101514358     | serine/threonine-protein phosphatase PP1 isozyme 3-like |                    |
| SNP_115785_A_2369 | NW_004520409.1 | scaffold6846 | 2369                    | GG                              | TT                 | TT               | DRR             | 101514358     | serine/threonine-protein phosphatase PP1 isozyme 3-like |                    |
| SNP_115786_A_2431 | NW_004520409.1 | scaffold6846 | 2431                    | CC                              | AA                 | AA               | DRR             | 101514358     | serine/threonine-protein phosphatase PP1 isozyme 3-like |                    |

| SNPs IDs          | Chromosome IDs | Chromosomes  | Physical positions (bp) | CDC Frontier (Reference genome) | (Pusa 1103 & HPNB) | (ILWC 46 & LPNB) | Sequence genome | Components of | Gene accession IDs | Putative functions |
|-------------------|----------------|--------------|-------------------------|---------------------------------|--------------------|------------------|-----------------|---------------|--------------------|--------------------|
| SNP_115787_A_79   | NW_004520411.1 | scaffold6851 | 79                      | TT                              | CC                 | CC               | INTERGENIC      |               |                    |                    |
| SNP_115788_A_128  | NW_004520411.1 | scaffold6851 | 128                     | AA                              | GG                 | GG               | INTERGENIC      |               |                    |                    |
| SNP_115789_A_150  | NW_004520411.1 | scaffold6851 | 150                     | TT                              | CC                 | CC               | INTERGENIC      |               |                    |                    |
| SNP_115790_A_186  | NW_004520411.1 | scaffold6851 | 186                     | AA                              | GG                 | GG               | INTERGENIC      |               |                    |                    |
| SNP_115791_A_381  | NW_004520411.1 | scaffold6851 | 381                     | AA                              | TT                 | TT               | INTERGENIC      |               |                    |                    |
| SNP_115792_A_398  | NW_004520411.1 | scaffold6851 | 398                     | AA                              | CC                 | CC               | INTERGENIC      |               |                    |                    |
| SNP_115793_A_443  | NW_004520411.1 | scaffold6851 | 443                     | AA                              | GG                 | GG               | INTERGENIC      |               |                    |                    |
| SNP_115794_A_448  | NW_004520411.1 | scaffold6851 | 448                     | AA                              | TT                 | TT               | INTERGENIC      |               |                    |                    |
| SNP_115795_A_467  | NW_004520411.1 | scaffold6851 | 467                     | GG                              | CC                 | CC               | INTERGENIC      |               |                    |                    |
| SNP_115796_A_516  | NW_004520411.1 | scaffold6851 | 516                     | TT                              | CC                 | CC               | INTERGENIC      |               |                    |                    |
| SNP_115797_A_593  | NW_004520411.1 | scaffold6851 | 593                     | AA                              | TT                 | TT               | INTERGENIC      |               |                    |                    |
| SNP_115798_A_743  | NW_004520411.1 | scaffold6851 | 743                     | TT                              | CC                 | CC               | INTERGENIC      |               |                    |                    |
| SNP_115799_A_1535 | NW_004520411.1 | scaffold6851 | 1535                    | TT                              | GG                 | GG               | INTERGENIC      |               |                    |                    |
| SNP_115800_A_1604 | NW_004520411.1 | scaffold6851 | 1604                    | AA                              | CC                 | CC               | INTERGENIC      |               |                    |                    |
| SNP_115801_A_391  | NW_004520412.1 | scaffold6852 | 391                     | GG                              | CC                 | CC               | INTERGENIC      |               |                    |                    |
| SNP_115802_A_586  | NW_004520412.1 | scaffold6852 | 586                     | CC                              | AA                 | AA               | INTERGENIC      |               |                    |                    |
| SNP_115803_A_268  | NW_004520414.1 | scaffold6854 | 268                     | CC                              | TT                 | TT               | INTERGENIC      |               |                    |                    |
| SNP_115804_A_342  | NW_004520414.1 | scaffold6854 | 342                     | CC                              | TT                 | TT               | INTERGENIC      |               |                    |                    |
| SNP_115805_A_573  | NW_004520414.1 | scaffold6854 | 573                     | TT                              | CC                 | CC               | INTERGENIC      |               |                    |                    |
| SNP_115806_A_704  | NW_004520414.1 | scaffold6854 | 704                     | AA                              | TT                 | TT               | INTERGENIC      |               |                    |                    |
| SNP_115807_A_720  | NW_004520414.1 | scaffold6854 | 720                     | TT                              | AA                 | AA               | INTERGENIC      |               |                    |                    |
| SNP_115808_A_900  | NW_004520414.1 | scaffold6854 | 900                     | TT                              | GG                 | GG               | INTERGENIC      |               |                    |                    |



| SNPs IDs          | Chromosome IDs | Chromosomes  | Physical positions (bp) | CDC Frontier (Reference genome) | (Pusa 1103 & HPNB) | (ILWC 46 & LPNB) | Sequence genome | Components of | Gene accession IDs | Putative functions |
|-------------------|----------------|--------------|-------------------------|---------------------------------|--------------------|------------------|-----------------|---------------|--------------------|--------------------|
| SNP_115809_A_962  | NW_004520414.1 | scaffold6854 | 962                     | AA                              | GG                 | GG               | INTERGENIC      |               |                    |                    |
| SNP_115810_A_989  | NW_004520414.1 | scaffold6854 | 989                     | CC                              | TT                 | TT               | INTERGENIC      |               |                    |                    |
| SNP_115811_A_1008 | NW_004520414.1 | scaffold6854 | 1008                    | GG                              | AA                 | AA               | INTERGENIC      |               |                    |                    |
| SNP_115812_A_1014 | NW_004520414.1 | scaffold6854 | 1014                    | AA                              | TT                 | GG               | INTERGENIC      |               |                    |                    |
| SNP_115813_A_729  | NW_004520421.1 | scaffold6867 | 729                     | CC                              | TT                 | TT               | INTERGENIC      |               |                    |                    |
| SNP_115814_A_900  | NW_004520422.1 | scaffold6868 | 900                     | TT                              | CC                 | CC               | INTERGENIC      |               |                    |                    |
| SNP_115815_A_539  | NW_004520423.1 | scaffold6869 | 539                     | CC                              | GG                 | GG               | INTERGENIC      |               |                    |                    |
| SNP_115816_A_542  | NW_004520423.1 | scaffold6869 | 542                     | TT                              | CC                 | CC               | INTERGENIC      |               |                    |                    |
| SNP_115817_A_602  | NW_004520423.1 | scaffold6869 | 602                     | AA                              | CC                 | CC               | INTERGENIC      |               |                    |                    |
| SNP_115818_A_813  | NW_004520423.1 | scaffold6869 | 813                     | TT                              | CC                 | CC               | INTERGENIC      |               |                    |                    |
| SNP_115819_A_983  | NW_004520425.1 | scaffold6873 | 983                     | CC                              | AA                 | AA               | INTERGENIC      |               |                    |                    |
| SNP_115820_A_1028 | NW_004520425.1 | scaffold6873 | 1028                    | CC                              | GG                 | GG               | INTERGENIC      |               |                    |                    |
| SNP_115821_A_1113 | NW_004520425.1 | scaffold6873 | 1113                    | CC                              | GG                 | GG               | INTERGENIC      |               |                    |                    |
| SNP_115822_A_1436 | NW_004520425.1 | scaffold6873 | 1436                    | AA                              | CC                 | CC               | INTERGENIC      |               |                    |                    |
| SNP_115824_A_1466 | NW_004520425.1 | scaffold6873 | 1466                    | TT                              | CC                 | CC               | INTERGENIC      |               |                    |                    |
| SNP_115825_A_1541 | NW_004520425.1 | scaffold6873 | 1541                    | TT                              | CC                 | CC               | INTERGENIC      |               |                    |                    |
| SNP_115826_A_1554 | NW_004520427.1 | scaffold6876 | 1554                    | TT                              | CC                 | CC               | INTERGENIC      |               |                    |                    |
| SNP_115827_A_1710 | NW_004520427.1 | scaffold6876 | 1710                    | GG                              | TT                 | TT               | INTERGENIC      |               |                    |                    |
| SNP_115828_A_1750 | NW_004520427.1 | scaffold6876 | 1750                    | TT                              | AA                 | AA               | INTERGENIC      |               |                    |                    |
| SNP_115829_A_1765 | NW_004520427.1 | scaffold6876 | 1765                    | GG                              | AA                 | AA               | INTERGENIC      |               |                    |                    |
| SNP_115830_A_1884 | NW_004520427.1 | scaffold6876 | 1884                    | CC                              | AA                 | AA               | INTERGENIC      |               |                    |                    |
| SNP_115831_A_1891 | NW_004520427.1 | scaffold6876 | 1891                    | GG                              | AA                 | AA               | INTERGENIC      |               |                    |                    |

| SNPs IDs          | Chromosome IDs | Chromosomes  | Physical positions (bp) | CDC Frontier (Reference genome) | (Pusa 1103 & HPNB) | (ILWC 46 & LPNB) | Sequence genome | Components of | Gene accession IDs | Putative functions |
|-------------------|----------------|--------------|-------------------------|---------------------------------|--------------------|------------------|-----------------|---------------|--------------------|--------------------|
| SNP_115832_A_1896 | NW_004520427.1 | scaffold6876 | 1896                    | TT                              | CC                 | CC               | INTERGENIC      |               |                    |                    |
| SNP_115833_A_1951 | NW_004520427.1 | scaffold6876 | 1951                    | CC                              | AA                 | AA               | INTERGENIC      |               |                    |                    |
| SNP_115834_A_1965 | NW_004520427.1 | scaffold6876 | 1965                    | CC                              | AA                 | AA               | INTERGENIC      |               |                    |                    |
| SNP_115835_A_1975 | NW_004520427.1 | scaffold6876 | 1975                    | GG                              | AA                 | AA               | INTERGENIC      |               |                    |                    |
| SNP_115836_A_2039 | NW_004520427.1 | scaffold6876 | 2039                    | CC                              | TT                 | TT               | INTERGENIC      |               |                    |                    |
| SNP_115837_A_2051 | NW_004520427.1 | scaffold6876 | 2051                    | CC                              | TT                 | TT               | INTERGENIC      |               |                    |                    |
| SNP_115838_A_2124 | NW_004520427.1 | scaffold6876 | 2124                    | TT                              | CC                 | CC               | INTERGENIC      |               |                    |                    |
| SNP_115839_A_2126 | NW_004520427.1 | scaffold6876 | 2126                    | GG                              | AA                 | AA               | INTERGENIC      |               |                    |                    |
| SNP_115840_A_2127 | NW_004520427.1 | scaffold6876 | 2127                    | CC                              | AA                 | AA               | INTERGENIC      |               |                    |                    |
| SNP_115841_A_2163 | NW_004520427.1 | scaffold6876 | 2163                    | TT                              | CC                 | CC               | INTERGENIC      |               |                    |                    |
| SNP_115842_A_2164 | NW_004520427.1 | scaffold6876 | 2164                    | CC                              | TT                 | TT               | INTERGENIC      |               |                    |                    |
| SNP_115843_A_2259 | NW_004520427.1 | scaffold6876 | 2259                    | CC                              | AA                 | AA               | INTERGENIC      |               |                    |                    |
| SNP_115844_A_2290 | NW_004520427.1 | scaffold6876 | 2290                    | TT                              | CC                 | CC               | INTERGENIC      |               |                    |                    |
| SNP_115845_A_437  | NW_004520429.1 | scaffold6878 | 437                     | AA                              | CC                 | CC               | INTERGENIC      |               |                    |                    |
| SNP_115846_A_811  | NW_004520429.1 | scaffold6878 | 811                     | AA                              | GG                 | GG               | INTERGENIC      |               |                    |                    |
| SNP_115847_A_1123 | NW_004520430.1 | scaffold6879 | 1123                    | TT                              | CC                 | CC               | INTERGENIC      |               |                    |                    |
| SNP_115848_A_1173 | NW_004520430.1 | scaffold6879 | 1173                    | GG                              | AA                 | AA               | INTERGENIC      |               |                    |                    |
| SNP_115849_A_1368 | NW_004520430.1 | scaffold6879 | 1368                    | GG                              | TT                 | TT               | INTERGENIC      |               |                    |                    |
| SNP_115850_A_1382 | NW_004520430.1 | scaffold6879 | 1382                    | TT                              | CC                 | CC               | INTERGENIC      |               |                    |                    |
| SNP_115851_A_1656 | NW_004520430.1 | scaffold6879 | 1656                    | CC                              | AA                 | AA               | INTERGENIC      |               |                    |                    |
| SNP_115852_A_1658 | NW_004520430.1 | scaffold6879 | 1658                    | CC                              | GG                 | GG               | INTERGENIC      |               |                    |                    |
| SNP_115853_A_1667 | NW_004520430.1 | scaffold6879 | 1667                    | AA                              | GG                 | GG               | INTERGENIC      |               |                    |                    |

| SNPs IDs          | Chromosome IDs | Chromosomes  | Physical positions (bp) | CDC Frontier (Reference genome) | (Pusa 1103 & HPNB) | (ILWC 46 & LPNB) | Sequence Components of genome | Gene accession IDs | Putative functions           |
|-------------------|----------------|--------------|-------------------------|---------------------------------|--------------------|------------------|-------------------------------|--------------------|------------------------------|
| SNP_115854_A_1668 | NW_004520430.1 | scaffold6879 | 1668                    | AA                              | TT                 | TT               | INTERGENIC                    |                    |                              |
| SNP_115855_A_1896 | NW_004520430.1 | scaffold6879 | 1896                    | CC                              | AA                 | AA               | INTERGENIC                    |                    |                              |
| SNP_115856_A_2140 | NW_004520430.1 | scaffold6879 | 2140                    | AA                              | TT                 | TT               | INTERGENIC                    |                    |                              |
| SNP_115857_A_40   | NW_004520431.1 | scaffold6882 | 40                      | CC                              | GG                 | GG               | INTERGENIC                    |                    |                              |
| SNP_115858_A_64   | NW_004520431.1 | scaffold6882 | 64                      | GG                              | AA                 | AA               | INTERGENIC                    |                    |                              |
| SNP_115859_A_115  | NW_004520431.1 | scaffold6882 | 115                     | GG                              | AA                 | AA               | INTERGENIC                    |                    |                              |
| SNP_115860_A_204  | NW_004520431.1 | scaffold6882 | 204                     | CC                              | GG                 | GG               | INTERGENIC                    |                    |                              |
| SNP_115862_A_1405 | NW_004520439.1 | scaffold6896 | 1405                    | CC                              | TT                 | TT               | INTERGENIC                    |                    |                              |
| SNP_115863_A_1450 | NW_004520439.1 | scaffold6896 | 1450                    | CC                              | AA                 | AA               | INTERGENIC                    |                    |                              |
| SNP_115864_A_1804 | NW_004520439.1 | scaffold6896 | 1804                    | CC                              | TT                 | TT               | INTERGENIC                    |                    |                              |
| SNP_115865_A_2235 | NW_004520439.1 | scaffold6896 | 2235                    | CC                              | TT                 | TT               | INTERGENIC                    |                    |                              |
| SNP_115866_A_2287 | NW_004520439.1 | scaffold6896 | 2287                    | CC                              | GG                 | GG               | INTERGENIC                    |                    |                              |
| SNP_115867_A_2311 | NW_004520439.1 | scaffold6896 | 2311                    | AA                              | GG                 | GG               | INTERGENIC                    |                    |                              |
| SNP_115868_A_2312 | NW_004520439.1 | scaffold6896 | 2312                    | TT                              | GG                 | GG               | INTERGENIC                    |                    |                              |
| SNP_115869_A_435  | NW_004520444.1 | scaffold6903 | 435                     | GG                              | AA                 | AA               | NON_SYNONYMOUS_CODING         | 101514686          | uncharacterized LOC101514686 |
| SNP_115870_A_4934 | NW_004520444.1 | scaffold6903 | 4934                    | GG                              | AA                 | AA               | INTERGENIC                    |                    |                              |
| SNP_115872_A_5443 | NW_004520444.1 | scaffold6903 | 5443                    | CC                              | AA                 | AA               | INTERGENIC                    |                    |                              |
| SNP_115873_A_5487 | NW_004520444.1 | scaffold6903 | 5487                    | TT                              | CC                 | CC               | INTERGENIC                    |                    |                              |
| SNP_115875_A_848  | NW_004520451.1 | scaffold6915 | 848                     | GG                              | TT                 | TT               | INTERGENIC                    |                    |                              |
| SNP_115876_A_692  | NW_004520454.1 | scaffold6919 | 692                     | GG                              | AA                 | AA               | INTERGENIC                    |                    |                              |
| SNP_115877_A_700  | NW_004520454.1 | scaffold6919 | 700                     | AA                              | GG                 | GG               | INTERGENIC                    |                    |                              |
| SNP_115878_A_710  | NW_004520454.1 | scaffold6919 | 710                     | TT                              | CC                 | CC               | INTERGENIC                    |                    |                              |

| SNPs IDs          | Chromosome IDs | Chromosomes  | Physical positions (bp) | CDC Frontier (Reference genome) | (Pusa 1103 & HPNB) | (ILWC 46 & LPNB) | Sequence genome | Components of | Gene accession IDs | Putative functions |
|-------------------|----------------|--------------|-------------------------|---------------------------------|--------------------|------------------|-----------------|---------------|--------------------|--------------------|
| SNP_115879_A_2730 | NW_004520456.1 | scaffold6923 | 2730                    | GG                              | TT                 | TT               | INTERGENIC      |               |                    |                    |
| SNP_115880_A_2927 | NW_004520456.1 | scaffold6923 | 2927                    | GG                              | CC                 | CC               | INTERGENIC      |               |                    |                    |
| SNP_115881_A_3077 | NW_004520456.1 | scaffold6923 | 3077                    | CC                              | AA                 | AA               | INTERGENIC      |               |                    |                    |
| SNP_115882_A_3119 | NW_004520456.1 | scaffold6923 | 3119                    | TT                              | GG                 | GG               | INTERGENIC      |               |                    |                    |
| SNP_115883_A_3120 | NW_004520456.1 | scaffold6923 | 3120                    | GG                              | TT                 | TT               | INTERGENIC      |               |                    |                    |
| SNP_115884_A_3238 | NW_004520456.1 | scaffold6923 | 3238                    | TT                              | CC                 | CC               | INTERGENIC      |               |                    |                    |
| SNP_115885_A_3276 | NW_004520456.1 | scaffold6923 | 3276                    | AA                              | GG                 | GG               | INTERGENIC      |               |                    |                    |
| SNP_115886_A_546  | NW_004520459.1 | scaffold6926 | 546                     | CC                              | AA                 | AA               | INTERGENIC      |               |                    |                    |
| SNP_115887_A_736  | NW_004520459.1 | scaffold6926 | 736                     | TT                              | GG                 | GG               | INTERGENIC      |               |                    |                    |
| SNP_115888_A_747  | NW_004520459.1 | scaffold6926 | 747                     | GG                              | CC                 | CC               | INTERGENIC      |               |                    |                    |
| SNP_115889_A_751  | NW_004520459.1 | scaffold6926 | 751                     | CC                              | TT                 | TT               | INTERGENIC      |               |                    |                    |
| SNP_115890_A_756  | NW_004520459.1 | scaffold6926 | 756                     | AA                              | CC                 | CC               | INTERGENIC      |               |                    |                    |
| SNP_115891_A_765  | NW_004520459.1 | scaffold6926 | 765                     | AA                              | TT                 | TT               | INTERGENIC      |               |                    |                    |
| SNP_115892_A_774  | NW_004520459.1 | scaffold6926 | 774                     | AA                              | CC                 | CC               | INTERGENIC      |               |                    |                    |
| SNP_115893_A_1376 | NW_004520460.1 | scaffold6927 | 1376                    | TT                              | AA                 | AA               | INTERGENIC      |               |                    |                    |
| SNP_115894_A_2550 | NW_004520460.1 | scaffold6927 | 2550                    | AA                              | TT                 | TT               | INTERGENIC      |               |                    |                    |
| SNP_115895_A_2650 | NW_004520460.1 | scaffold6927 | 2650                    | CC                              | TT                 | TT               | INTERGENIC      |               |                    |                    |
| SNP_115896_A_1882 | NW_004520464.1 | scaffold6934 | 1882                    | GG                              | TT                 | TT               | INTERGENIC      |               |                    |                    |
| SNP_115897_A_1890 | NW_004520464.1 | scaffold6934 | 1890                    | GG                              | TT                 | TT               | INTERGENIC      |               |                    |                    |
| SNP_115898_A_1916 | NW_004520464.1 | scaffold6934 | 1916                    | AA                              | GG                 | GG               | INTERGENIC      |               |                    |                    |
| SNP_115899_A_2096 | NW_004520464.1 | scaffold6934 | 2096                    | CC                              | AA                 | AA               | INTERGENIC      |               |                    |                    |
| SNP_115900_A_2296 | NW_004520464.1 | scaffold6934 | 2296                    | GG                              | AA                 | AA               | INTERGENIC      |               |                    |                    |

| SNPs IDs           | Chromosome IDs | Chromosomes  | Physical positions (bp) | CDC Frontier (Reference genome) | (Pusa 1103 & HPNB) | (ILWC 46 & LPNB) | Sequence genome | Components of | Gene accession IDs | Putative functions |
|--------------------|----------------|--------------|-------------------------|---------------------------------|--------------------|------------------|-----------------|---------------|--------------------|--------------------|
| SNP_115901_A_4448  | NW_004520464.1 | scaffold6934 | 4448                    | CC                              | AA                 | AA               | INTERGENIC      |               |                    |                    |
| SNP_115903_A_1027  | NW_004520466.1 | scaffold6939 | 1027                    | GG                              | AA                 | AA               | INTERGENIC      |               |                    |                    |
| SNP_115904_A_1181  | NW_004520466.1 | scaffold6939 | 1181                    | AA                              | GG                 | GG               | INTERGENIC      |               |                    |                    |
| SNP_115905_A_1495  | NW_004520466.1 | scaffold6939 | 1495                    | CC                              | AA                 | AA               | INTERGENIC      |               |                    |                    |
| SNP_115906_A_71    | NW_004520468.1 | scaffold6941 | 71                      | AA                              | GG                 | GG               | INTERGENIC      |               |                    |                    |
| SNP_115907_A_126   | NW_004520468.1 | scaffold6941 | 126                     | TT                              | CC                 | CC               | INTERGENIC      |               |                    |                    |
| SNP_115908_A_189   | NW_004520468.1 | scaffold6941 | 189                     | CC                              | AA                 | AA               | INTERGENIC      |               |                    |                    |
| SNP_115909_A_195   | NW_004520468.1 | scaffold6941 | 195                     | GG                              | AA                 | AA               | INTERGENIC      |               |                    |                    |
| SNP_115910_A_298   | NW_004520468.1 | scaffold6941 | 298                     | TT                              | AA                 | AA               | INTERGENIC      |               |                    |                    |
| SNP_115911_A_300   | NW_004520468.1 | scaffold6941 | 300                     | TT                              | AA                 | AA               | INTERGENIC      |               |                    |                    |
| SNP_115912_A_328   | NW_004520468.1 | scaffold6941 | 328                     | GG                              | AA                 | AA               | INTERGENIC      |               |                    |                    |
| SNP_115913_A_385   | NW_004520468.1 | scaffold6941 | 385                     | AA                              | TT                 | TT               | INTERGENIC      |               |                    |                    |
| SNP_115914_A_455   | NW_004520468.1 | scaffold6941 | 455                     | TT                              | GG                 | GG               | INTERGENIC      |               |                    |                    |
| SNP_115915_A_6534  | NW_004520477.1 | scaffold6951 | 6534                    | CC                              | AA                 | AA               | INTERGENIC      |               |                    |                    |
| SNP_115916_A_494   | NW_004520484.1 | scaffold6963 | 494                     | CC                              | GG                 | GG               | INTERGENIC      |               |                    |                    |
| SNP_115917_A_1889  | NW_004520487.1 | scaffold6968 | 1889                    | TT                              | CC                 | CC               | INTERGENIC      |               |                    |                    |
| SNP_115918_A_1925  | NW_004520487.1 | scaffold6968 | 1925                    | GG                              | TT                 | TT               | INTERGENIC      |               |                    |                    |
| SNP_115920_A_67316 | NW_004520496.1 | scaffold6980 | 67316                   | GG                              | AA                 | AA               | INTERGENIC      |               |                    |                    |
| SNP_115921_A_69363 | NW_004520496.1 | scaffold6980 | 69363                   | AA                              | GG                 | GG               | INTERGENIC      |               |                    |                    |
| SNP_115922_A_69626 | NW_004520496.1 | scaffold6980 | 69626                   | AA                              | GG                 | GG               | INTERGENIC      |               |                    |                    |
| SNP_115923_A_70697 | NW_004520496.1 | scaffold6980 | 70697                   | GG                              | TT                 | TT               | INTERGENIC      |               |                    |                    |
| SNP_115924_A_1230  | NW_004520499.1 | scaffold6985 | 1230                    | TT                              | AA                 | AA               | INTERGENIC      |               |                    |                    |

| SNPs IDs          | Chromosome IDs | Chromosomes  | Physical positions (bp) | CDC Frontier (Reference genome) | (Pusa 1103 & HPNB) | (ILWC 46 & LPNB) | Sequence genome | Components of | Gene accession IDs | Putative functions |
|-------------------|----------------|--------------|-------------------------|---------------------------------|--------------------|------------------|-----------------|---------------|--------------------|--------------------|
| SNP_115925_A_1251 | NW_004520499.1 | scaffold6985 | 1251                    | AA                              | GG                 | GG               | INTERGENIC      |               |                    |                    |
| SNP_115926_A_587  | NW_004520504.1 | scaffold6995 | 587                     | AA                              | TT                 | TT               | INTERGENIC      |               |                    |                    |
| SNP_115927_A_920  | NW_004520504.1 | scaffold6995 | 920                     | GG                              | AA                 | AA               | INTERGENIC      |               |                    |                    |
| SNP_115928_A_992  | NW_004520504.1 | scaffold6995 | 992                     | GG                              | CC                 | CC               | INTERGENIC      |               |                    |                    |
| SNP_115929_A_1417 | NW_004520506.1 | scaffold6999 | 1417                    | CC                              | TT                 | TT               | INTERGENIC      |               |                    |                    |
| SNP_115930_A_943  | NW_004520511.1 | scaffold7007 | 943                     | AA                              | GG                 | GG               | INTERGENIC      |               |                    |                    |
| SNP_115931_A_105  | NW_004520513.1 | scaffold7010 | 105                     | AA                              | CC                 | CC               | INTERGENIC      |               |                    |                    |
| SNP_115932_A_487  | NW_004520513.1 | scaffold7010 | 487                     | TT                              | CC                 | CC               | INTERGENIC      |               |                    |                    |
| SNP_115933_A_304  | NW_004520517.1 | scaffold7017 | 304                     | TT                              | CC                 | CC               | INTERGENIC      |               |                    |                    |
| SNP_115934_A_814  | NW_004520518.1 | scaffold7021 | 814                     | TT                              | CC                 | CC               | INTERGENIC      |               |                    |                    |
| SNP_115935_A_844  | NW_004520518.1 | scaffold7021 | 844                     | AA                              | TT                 | TT               | INTERGENIC      |               |                    |                    |
| SNP_115936_A_849  | NW_004520518.1 | scaffold7021 | 849                     | TT                              | CC                 | CC               | INTERGENIC      |               |                    |                    |
| SNP_115937_A_266  | NW_004520522.1 | scaffold7034 | 266                     | TT                              | CC                 | CC               | INTERGENIC      |               |                    |                    |
| SNP_115938_A_517  | NW_004520522.1 | scaffold7034 | 517                     | CC                              | GG                 | GG               | INTERGENIC      |               |                    |                    |
| SNP_115939_A_608  | NW_004520522.1 | scaffold7034 | 608                     | TT                              | CC                 | CC               | INTERGENIC      |               |                    |                    |
| SNP_115941_A_35   | NW_004520528.1 | scaffold7041 | 35                      | AA                              | GG                 | GG               | INTERGENIC      |               |                    |                    |
| SNP_115942_A_64   | NW_004520528.1 | scaffold7041 | 64                      | TT                              | AA                 | AA               | INTERGENIC      |               |                    |                    |
| SNP_115943_A_65   | NW_004520528.1 | scaffold7041 | 65                      | TT                              | GG                 | GG               | INTERGENIC      |               |                    |                    |
| SNP_115944_A_79   | NW_004520528.1 | scaffold7041 | 79                      | TT                              | CC                 | CC               | INTERGENIC      |               |                    |                    |
| SNP_115945_A_95   | NW_004520528.1 | scaffold7041 | 95                      | AA                              | GG                 | GG               | INTERGENIC      |               |                    |                    |
| SNP_115946_A_183  | NW_004520528.1 | scaffold7041 | 183                     | GG                              | TT                 | TT               | INTERGENIC      |               |                    |                    |
| SNP_115947_A_185  | NW_004520528.1 | scaffold7041 | 185                     | AA                              | GG                 | GG               | INTERGENIC      |               |                    |                    |

| SNPs IDs          | Chromosome IDs | Chromosomes  | Physical positions (bp) | CDC Frontier (Reference genome) | (Pusa 1103 & HPNB) | (ILWC 46 & LPNB) | Sequence genome | Components of | Gene accession IDs | Putative functions |
|-------------------|----------------|--------------|-------------------------|---------------------------------|--------------------|------------------|-----------------|---------------|--------------------|--------------------|
| SNP_115948_A_186  | NW_004520528.1 | scaffold7041 | 186                     | GG                              | AA                 | AA               | INTERGENIC      |               |                    |                    |
| SNP_115949_A_808  | NW_004520528.1 | scaffold7041 | 808                     | AA                              | TT                 | TT               | INTERGENIC      |               |                    |                    |
| SNP_115950_A_1019 | NW_004520528.1 | scaffold7041 | 1019                    | CC                              | TT                 | TT               | INTERGENIC      |               |                    |                    |
| SNP_115951_A_1039 | NW_004520528.1 | scaffold7041 | 1039                    | TT                              | AA                 | AA               | INTERGENIC      |               |                    |                    |
| SNP_115952_A_1064 | NW_004520528.1 | scaffold7041 | 1064                    | GG                              | TT                 | TT               | INTERGENIC      |               |                    |                    |
| SNP_115953_A_652  | NW_004520535.1 | scaffold7055 | 652                     | TT                              | AA                 | AA               | INTERGENIC      |               |                    |                    |
| SNP_115954_A_674  | NW_004520535.1 | scaffold7055 | 674                     | TT                              | GG                 | GG               | INTERGENIC      |               |                    |                    |
| SNP_115955_A_707  | NW_004520535.1 | scaffold7055 | 707                     | TT                              | GG                 | GG               | INTERGENIC      |               |                    |                    |
| SNP_115956_A_1288 | NW_004520536.1 | scaffold7058 | 1288                    | AA                              | GG                 | GG               | INTERGENIC      |               |                    |                    |
| SNP_115957_A_440  | NW_004520537.1 | scaffold7059 | 440                     | CC                              | TT                 | TT               | INTERGENIC      |               |                    |                    |
| SNP_115958_A_794  | NW_004520537.1 | scaffold7059 | 794                     | TT                              | GG                 | GG               | INTERGENIC      |               |                    |                    |
| SNP_115959_A_808  | NW_004520537.1 | scaffold7059 | 808                     | TT                              | GG                 | GG               | INTERGENIC      |               |                    |                    |
| SNP_115960_A_1052 | NW_004520537.1 | scaffold7059 | 1052                    | GG                              | AA                 | AA               | INTERGENIC      |               |                    |                    |
| SNP_115961_A_1288 | NW_004520537.1 | scaffold7059 | 1288                    | GG                              | AA                 | AA               | INTERGENIC      |               |                    |                    |
| SNP_115962_A_1323 | NW_004520537.1 | scaffold7059 | 1323                    | AA                              | GG                 | GG               | INTERGENIC      |               |                    |                    |
| SNP_115963_A_256  | NW_004520538.1 | scaffold7060 | 256                     | AA                              | GG                 | GG               | INTERGENIC      |               |                    |                    |
| SNP_115965_A_539  | NW_004520538.1 | scaffold7060 | 539                     | AA                              | CC                 | CC               | INTERGENIC      |               |                    |                    |
| SNP_115968_A_609  | NW_004520538.1 | scaffold7060 | 609                     | CC                              | TT                 | TT               | INTERGENIC      |               |                    |                    |
| SNP_115969_A_610  | NW_004520538.1 | scaffold7060 | 610                     | GG                              | AA                 | AA               | INTERGENIC      |               |                    |                    |
| SNP_115970_A_947  | NW_004520540.1 | scaffold7067 | 947                     | TT                              | CC                 | CC               | INTERGENIC      |               |                    |                    |
| SNP_115971_A_949  | NW_004520540.1 | scaffold7067 | 949                     | TT                              | CC                 | CC               | INTERGENIC      |               |                    |                    |
| SNP_115973_A_951  | NW_004520540.1 | scaffold7067 | 951                     | GG                              | TT                 | TT               | INTERGENIC      |               |                    |                    |

| SNPs IDs          | Chromosome IDs | Chromosomes  | Physical positions (bp) | CDC Frontier (Reference genome) | (Pusa 1103 & HPNB) | (ILWC 46 & LPNB) | Sequence genome | Components of | Gene accession IDs | Putative functions |
|-------------------|----------------|--------------|-------------------------|---------------------------------|--------------------|------------------|-----------------|---------------|--------------------|--------------------|
| SNP_115974_A_952  | NW_004520540.1 | scaffold7067 | 952                     | GG                              | AA                 | AA               | INTERGENIC      |               |                    |                    |
| SNP_115975_A_1029 | NW_004520545.1 | scaffold7075 | 1029                    | AA                              | GG                 | GG               | INTERGENIC      |               |                    |                    |
| SNP_115976_A_2331 | NW_004520548.1 | scaffold7081 | 2331                    | GG                              | TT                 | TT               | INTERGENIC      |               |                    |                    |
| SNP_115977_A_2423 | NW_004520548.1 | scaffold7081 | 2423                    | GG                              | TT                 | TT               | INTERGENIC      |               |                    |                    |
| SNP_115978_A_2441 | NW_004520548.1 | scaffold7081 | 2441                    | AA                              | GG                 | GG               | INTERGENIC      |               |                    |                    |
| SNP_115980_A_2465 | NW_004520548.1 | scaffold7081 | 2465                    | GG                              | TT                 | TT               | INTERGENIC      |               |                    |                    |
| SNP_115981_A_2470 | NW_004520548.1 | scaffold7081 | 2470                    | TT                              | CC                 | CC               | INTERGENIC      |               |                    |                    |
| SNP_115982_A_2473 | NW_004520548.1 | scaffold7081 | 2473                    | TT                              | AA                 | AA               | INTERGENIC      |               |                    |                    |
| SNP_115983_A_2542 | NW_004520548.1 | scaffold7081 | 2542                    | CC                              | TT                 | TT               | INTERGENIC      |               |                    |                    |
| SNP_115985_A_2567 | NW_004520548.1 | scaffold7081 | 2567                    | AA                              | GG                 | GG               | INTERGENIC      |               |                    |                    |
| SNP_115986_A_2589 | NW_004520548.1 | scaffold7081 | 2589                    | CC                              | TT                 | TT               | INTERGENIC      |               |                    |                    |
| SNP_115987_A_2657 | NW_004520548.1 | scaffold7081 | 2657                    | TT                              | GG                 | GG               | INTERGENIC      |               |                    |                    |
| SNP_115988_A_2695 | NW_004520548.1 | scaffold7081 | 2695                    | TT                              | CC                 | CC               | INTERGENIC      |               |                    |                    |
| SNP_115989_A_2720 | NW_004520548.1 | scaffold7081 | 2720                    | TT                              | GG                 | GG               | INTERGENIC      |               |                    |                    |
| SNP_115991_A_359  | NW_004520549.1 | scaffold7082 | 359                     | TT                              | CC                 | CC               | INTERGENIC      |               |                    |                    |
| SNP_115992_A_415  | NW_004520549.1 | scaffold7082 | 415                     | TT                              | CC                 | CC               | INTERGENIC      |               |                    |                    |
| SNP_115993_A_512  | NW_004520549.1 | scaffold7082 | 512                     | AA                              | CC                 | CC               | INTERGENIC      |               |                    |                    |
| SNP_115994_A_673  | NW_004520549.1 | scaffold7082 | 673                     | AA                              | GG                 | GG               | INTERGENIC      |               |                    |                    |
| SNP_115995_A_734  | NW_004520549.1 | scaffold7082 | 734                     | AA                              | CC                 | CC               | INTERGENIC      |               |                    |                    |
| SNP_115996_A_775  | NW_004520549.1 | scaffold7082 | 775                     | GG                              | AA                 | AA               | INTERGENIC      |               |                    |                    |
| SNP_115997_A_807  | NW_004520549.1 | scaffold7082 | 807                     | AA                              | GG                 | GG               | INTERGENIC      |               |                    |                    |
| SNP_115998_A_597  | NW_004520555.1 | scaffold7091 | 597                     | CC                              | TT                 | TT               | INTERGENIC      |               |                    |                    |



| SNPs IDs          | Chromosome IDs | Chromosomes  | Physical positions (bp) | CDC Frontier (Reference genome) | (Pusa 1103 & HPNB) | (ILWC 46 & LPNB) | Sequence genome | Components of | Gene accession IDs | Putative functions |
|-------------------|----------------|--------------|-------------------------|---------------------------------|--------------------|------------------|-----------------|---------------|--------------------|--------------------|
| SNP_115999_A_916  | NW_004520555.1 | scaffold7091 | 916                     | AA                              | GG                 | GG               | INTERGENIC      |               |                    |                    |
| SNP_116000_A_1022 | NW_004520555.1 | scaffold7091 | 1022                    | TT                              | CC                 | CC               | INTERGENIC      |               |                    |                    |
| SNP_116001_A_1143 | NW_004520555.1 | scaffold7091 | 1143                    | TT                              | CC                 | CC               | INTERGENIC      |               |                    |                    |
| SNP_116002_A_1184 | NW_004520555.1 | scaffold7091 | 1184                    | GG                              | AA                 | AA               | INTERGENIC      |               |                    |                    |
| SNP_116003_A_1185 | NW_004520555.1 | scaffold7091 | 1185                    | AA                              | TT                 | TT               | INTERGENIC      |               |                    |                    |
| SNP_116004_A_1242 | NW_004520555.1 | scaffold7091 | 1242                    | AA                              | GG                 | GG               | INTERGENIC      |               |                    |                    |
| SNP_116005_A_1271 | NW_004520555.1 | scaffold7091 | 1271                    | GG                              | AA                 | AA               | INTERGENIC      |               |                    |                    |
| SNP_116006_A_1347 | NW_004520555.1 | scaffold7091 | 1347                    | GG                              | CC                 | CC               | INTERGENIC      |               |                    |                    |
| SNP_116007_A_1382 | NW_004520555.1 | scaffold7091 | 1382                    | TT                              | GG                 | GG               | INTERGENIC      |               |                    |                    |
| SNP_116008_A_1581 | NW_004520555.1 | scaffold7091 | 1581                    | GG                              | TT                 | TT               | INTERGENIC      |               |                    |                    |
| SNP_116009_A_165  | NW_004520558.1 | scaffold7095 | 165                     | TT                              | CC                 | CC               | INTERGENIC      |               |                    |                    |
| SNP_116010_A_4728 | NW_004520558.1 | scaffold7095 | 4728                    | AA                              | CC                 | CC               | INTERGENIC      |               |                    |                    |
| SNP_116011_A_5048 | NW_004520558.1 | scaffold7095 | 5048                    | AA                              | CC                 | CC               | INTERGENIC      |               |                    |                    |
| SNP_116012_A_5440 | NW_004520558.1 | scaffold7095 | 5440                    | GG                              | CC                 | CC               | INTERGENIC      |               |                    |                    |
| SNP_116013_A_5510 | NW_004520558.1 | scaffold7095 | 5510                    | AA                              | CC                 | CC               | INTERGENIC      |               |                    |                    |
| SNP_116014_A_5520 | NW_004520558.1 | scaffold7095 | 5520                    | TT                              | CC                 | CC               | INTERGENIC      |               |                    |                    |
| SNP_116015_A_5560 | NW_004520558.1 | scaffold7095 | 5560                    | CC                              | GG                 | GG               | INTERGENIC      |               |                    |                    |
| SNP_116016_A_5605 | NW_004520558.1 | scaffold7095 | 5605                    | GG                              | AA                 | AA               | INTERGENIC      |               |                    |                    |
| SNP_116017_A_5732 | NW_004520558.1 | scaffold7095 | 5732                    | TT                              | GG                 | GG               | INTERGENIC      |               |                    |                    |
| SNP_116018_A_5807 | NW_004520558.1 | scaffold7095 | 5807                    | TT                              | CC                 | CC               | INTERGENIC      |               |                    |                    |
| SNP_116019_A_5854 | NW_004520558.1 | scaffold7095 | 5854                    | GG                              | AA                 | AA               | INTERGENIC      |               |                    |                    |
| SNP_116020_A_83   | NW_004520559.1 | scaffold7098 | 83                      | AA                              | GG                 | GG               | INTERGENIC      |               |                    |                    |

| SNPs IDs           | Chromosome IDs | Chromosomes  | Physical positions (bp) | CDC Frontier (Reference genome) | (Pusa 1103 & HPNB) | (ILWC 46 & LPNB) | Sequence genome | Components of | Gene accession IDs | Putative functions |
|--------------------|----------------|--------------|-------------------------|---------------------------------|--------------------|------------------|-----------------|---------------|--------------------|--------------------|
| SNP_116021_A_1017  | NW_004520562.1 | scaffold7104 | 1017                    | TT                              | CC                 | CC               | INTERGENIC      |               |                    |                    |
| SNP_116022_A_1041  | NW_004520562.1 | scaffold7104 | 1041                    | CC                              | GG                 | GG               | INTERGENIC      |               |                    |                    |
| SNP_116023_A_1047  | NW_004520562.1 | scaffold7104 | 1047                    | CC                              | TT                 | TT               | INTERGENIC      |               |                    |                    |
| SNP_116024_A_1053  | NW_004520562.1 | scaffold7104 | 1053                    | GG                              | TT                 | TT               | INTERGENIC      |               |                    |                    |
| SNP_116025_A_1290  | NW_004520562.1 | scaffold7104 | 1290                    | AA                              | TT                 | TT               | INTERGENIC      |               |                    |                    |
| SNP_116026_A_642   | NW_004520565.1 | scaffold7107 | 642                     | GG                              | AA                 | AA               | INTERGENIC      |               |                    |                    |
| SNP_116027_A_11941 | NW_004520565.1 | scaffold7107 | 11941                   | GG                              | AA                 | AA               | INTERGENIC      |               |                    |                    |
| SNP_116028_A_12077 | NW_004520565.1 | scaffold7107 | 12077                   | GG                              | TT                 | TT               | INTERGENIC      |               |                    |                    |
| SNP_116029_A_12375 | NW_004520565.1 | scaffold7107 | 12375                   | AA                              | TT                 | TT               | INTERGENIC      |               |                    |                    |
| SNP_116030_A_12589 | NW_004520565.1 | scaffold7107 | 12589                   | TT                              | GG                 | GG               | INTERGENIC      |               |                    |                    |
| SNP_116031_A_12647 | NW_004520565.1 | scaffold7107 | 12647                   | AA                              | GG                 | GG               | INTERGENIC      |               |                    |                    |
| SNP_116032_A_12681 | NW_004520565.1 | scaffold7107 | 12681                   | CC                              | TT                 | TT               | INTERGENIC      |               |                    |                    |
| SNP_116033_A_12697 | NW_004520565.1 | scaffold7107 | 12697                   | TT                              | AA                 | AA               | INTERGENIC      |               |                    |                    |
| SNP_116034_A_12765 | NW_004520565.1 | scaffold7107 | 12765                   | GG                              | AA                 | AA               | INTERGENIC      |               |                    |                    |
| SNP_116035_A_12805 | NW_004520565.1 | scaffold7107 | 12805                   | AA                              | GG                 | GG               | INTERGENIC      |               |                    |                    |
| SNP_116037_A_12860 | NW_004520565.1 | scaffold7107 | 12860                   | CC                              | TT                 | TT               | INTERGENIC      |               |                    |                    |
| SNP_116038_A_13256 | NW_004520565.1 | scaffold7107 | 13256                   | AA                              | GG                 | GG               | INTERGENIC      |               |                    |                    |
| SNP_116039_A_13266 | NW_004520565.1 | scaffold7107 | 13266                   | TT                              | CC                 | CC               | INTERGENIC      |               |                    |                    |
| SNP_116040_A_13299 | NW_004520565.1 | scaffold7107 | 13299                   | CC                              | GG                 | GG               | INTERGENIC      |               |                    |                    |
| SNP_116042_A_13483 | NW_004520565.1 | scaffold7107 | 13483                   | GG                              | AA                 | AA               | INTERGENIC      |               |                    |                    |
| SNP_116043_A_13978 | NW_004520565.1 | scaffold7107 | 13978                   | AA                              | GG                 | GG               | INTERGENIC      |               |                    |                    |
| SNP_116044_A_14298 | NW_004520565.1 | scaffold7107 | 14298                   | AA                              | CC                 | CC               | INTERGENIC      |               |                    |                    |

| SNPs IDs           | Chromosome IDs | Chromosomes  | Physical positions (bp) | CDC Frontier (Reference genome) | (Pusa 1103 & HPNB) | (ILWC 46 & LPNB) | Sequence genome | Components of | Gene accession IDs | Putative functions |
|--------------------|----------------|--------------|-------------------------|---------------------------------|--------------------|------------------|-----------------|---------------|--------------------|--------------------|
| SNP_116045_A_14314 | NW_004520565.1 | scaffold7107 | 14314                   | CC                              | AA                 | AA               | INTERGENIC      |               |                    |                    |
| SNP_116047_A_14849 | NW_004520565.1 | scaffold7107 | 14849                   | GG                              | TT                 | TT               | INTERGENIC      |               |                    |                    |
| SNP_116048_A_14926 | NW_004520565.1 | scaffold7107 | 14926                   | GG                              | AA                 | AA               | INTERGENIC      |               |                    |                    |
| SNP_116050_A_16166 | NW_004520565.1 | scaffold7107 | 16166                   | GG                              | AA                 | AA               | INTERGENIC      |               |                    |                    |
| SNP_116051_A_16188 | NW_004520565.1 | scaffold7107 | 16188                   | CC                              | TT                 | TT               | INTERGENIC      |               |                    |                    |
| SNP_116052_A_16246 | NW_004520565.1 | scaffold7107 | 16246                   | AA                              | TT                 | TT               | INTERGENIC      |               |                    |                    |
| SNP_116053_A_16292 | NW_004520565.1 | scaffold7107 | 16292                   | CC                              | TT                 | TT               | INTERGENIC      |               |                    |                    |
| SNP_116054_A_16299 | NW_004520565.1 | scaffold7107 | 16299                   | GG                              | CC                 | CC               | INTERGENIC      |               |                    |                    |
| SNP_116055_A_16340 | NW_004520565.1 | scaffold7107 | 16340                   | CC                              | TT                 | TT               | INTERGENIC      |               |                    |                    |
| SNP_116058_A_18181 | NW_004520565.1 | scaffold7107 | 18181                   | GG                              | AA                 | AA               | INTERGENIC      |               |                    |                    |
| SNP_116059_A_20314 | NW_004520565.1 | scaffold7107 | 20314                   | AA                              | GG                 | GG               | INTERGENIC      |               |                    |                    |
| SNP_116060_A_20329 | NW_004520565.1 | scaffold7107 | 20329                   | GG                              | AA                 | AA               | INTERGENIC      |               |                    |                    |
| SNP_116061_A_20332 | NW_004520565.1 | scaffold7107 | 20332                   | TT                              | CC                 | CC               | INTERGENIC      |               |                    |                    |
| SNP_116062_A_20374 | NW_004520565.1 | scaffold7107 | 20374                   | CC                              | TT                 | TT               | INTERGENIC      |               |                    |                    |
| SNP_116063_A_22161 | NW_004520565.1 | scaffold7107 | 22161                   | TT                              | CC                 | CC               | INTERGENIC      |               |                    |                    |
| SNP_116064_A_1042  | NW_004520566.1 | scaffold7108 | 1042                    | TT                              | AA                 | AA               | INTERGENIC      |               |                    |                    |
| SNP_116065_A_2289  | NW_004520566.1 | scaffold7108 | 2289                    | AA                              | TT                 | TT               | INTERGENIC      |               |                    |                    |
| SNP_116066_A_2293  | NW_004520566.1 | scaffold7108 | 2293                    | AA                              | GG                 | GG               | INTERGENIC      |               |                    |                    |
| SNP_116067_A_5452  | NW_004520566.1 | scaffold7108 | 5452                    | TT                              | GG                 | GG               | INTERGENIC      |               |                    |                    |
| SNP_116068_A_5490  | NW_004520566.1 | scaffold7108 | 5490                    | TT                              | AA                 | AA               | INTERGENIC      |               |                    |                    |
| SNP_116069_A_5691  | NW_004520566.1 | scaffold7108 | 5691                    | CC                              | TT                 | TT               | INTERGENIC      |               |                    |                    |
| SNP_116070_A_5918  | NW_004520566.1 | scaffold7108 | 5918                    | TT                              | GG                 | GG               | INTERGENIC      |               |                    |                    |

| SNPs IDs          | Chromosome IDs | Chromosomes  | Physical positions (bp) | CDC Frontier (Reference genome) | (Pusa 1103 & HPNB) | (ILWC 46 & LPNB) | Sequence genome | Components of | Gene accession IDs | Putative functions |
|-------------------|----------------|--------------|-------------------------|---------------------------------|--------------------|------------------|-----------------|---------------|--------------------|--------------------|
| SNP_116071_A_6138 | NW_004520566.1 | scaffold7108 | 6138                    | GG                              | CC                 | CC               | INTERGENIC      |               |                    |                    |
| SNP_116072_A_1281 | NW_004520567.1 | scaffold7109 | 1281                    | AA                              | TT                 | TT               | INTERGENIC      |               |                    |                    |
| SNP_116073_A_1749 | NW_004520567.1 | scaffold7109 | 1749                    | GG                              | AA                 | AA               | INTERGENIC      |               |                    |                    |
| SNP_116074_A_2632 | NW_004520567.1 | scaffold7109 | 2632                    | AA                              | GG                 | GG               | INTERGENIC      |               |                    |                    |
| SNP_116076_A_2699 | NW_004520567.1 | scaffold7109 | 2699                    | TT                              | CC                 | CC               | INTERGENIC      |               |                    |                    |
| SNP_116077_A_646  | NW_004520569.1 | scaffold7111 | 646                     | AA                              | CC                 | CC               | INTERGENIC      |               |                    |                    |
| SNP_116078_A_1215 | NW_004520572.1 | scaffold7114 | 1215                    | TT                              | CC                 | CC               | INTERGENIC      |               |                    |                    |
| SNP_116079_A_741  | NW_004520585.1 | scaffold7134 | 741                     | AA                              | CC                 | CC               | INTERGENIC      |               |                    |                    |
| SNP_116080_A_457  | NW_004520592.1 | scaffold7148 | 457                     | AA                              | GG                 | GG               | INTERGENIC      |               |                    |                    |
| SNP_116081_A_493  | NW_004520592.1 | scaffold7148 | 493                     | CC                              | AA                 | AA               | INTERGENIC      |               |                    |                    |
| SNP_116082_A_534  | NW_004520592.1 | scaffold7148 | 534                     | CC                              | TT                 | TT               | INTERGENIC      |               |                    |                    |
| SNP_116083_A_981  | NW_004520592.1 | scaffold7148 | 981                     | CC                              | AA                 | AA               | INTERGENIC      |               |                    |                    |
| SNP_116084_A_1022 | NW_004520592.1 | scaffold7148 | 1022                    | TT                              | CC                 | CC               | INTERGENIC      |               |                    |                    |
| SNP_116085_A_2590 | NW_004520592.1 | scaffold7148 | 2590                    | GG                              | CC                 | CC               | INTERGENIC      |               |                    |                    |
| SNP_116086_A_2739 | NW_004520592.1 | scaffold7148 | 2739                    | AA                              | GG                 | GG               | INTERGENIC      |               |                    |                    |
| SNP_116087_A_2783 | NW_004520592.1 | scaffold7148 | 2783                    | TT                              | CC                 | CC               | INTERGENIC      |               |                    |                    |
| SNP_116088_A_3232 | NW_004520592.1 | scaffold7148 | 3232                    | CC                              | TT                 | TT               | INTERGENIC      |               |                    |                    |
| SNP_116089_A_3389 | NW_004520592.1 | scaffold7148 | 3389                    | GG                              | AA                 | AA               | INTERGENIC      |               |                    |                    |
| SNP_116090_A_3695 | NW_004520592.1 | scaffold7148 | 3695                    | TT                              | CC                 | CC               | INTERGENIC      |               |                    |                    |
| SNP_116091_A_3935 | NW_004520592.1 | scaffold7148 | 3935                    | AA                              | GG                 | GG               | INTERGENIC      |               |                    |                    |
| SNP_116092_A_3993 | NW_004520592.1 | scaffold7148 | 3993                    | TT                              | GG                 | GG               | INTERGENIC      |               |                    |                    |
| SNP_116093_A_4246 | NW_004520592.1 | scaffold7148 | 4246                    | GG                              | AA                 | AA               | INTERGENIC      |               |                    |                    |

| SNPs IDs          | Chromosome IDs | Chromosomes  | Physical positions (bp) | CDC Frontier (Reference genome) | (Pusa 1103 & HPNB) | (ILWC 46 & LPNB) | Sequence genome | Components of | Gene accession IDs | Putative functions |
|-------------------|----------------|--------------|-------------------------|---------------------------------|--------------------|------------------|-----------------|---------------|--------------------|--------------------|
| SNP_116094_A_4254 | NW_004520592.1 | scaffold7148 | 4254                    | TT                              | CC                 | CC               | INTERGENIC      |               |                    |                    |
| SNP_116095_A_7685 | NW_004520592.1 | scaffold7148 | 7685                    | AA                              | GG                 | GG               | INTERGENIC      |               |                    |                    |
| SNP_116096_A_833  | NW_004520593.1 | scaffold7152 | 833                     | TT                              | GG                 | GG               | INTERGENIC      |               |                    |                    |
| SNP_116097_A_898  | NW_004520593.1 | scaffold7152 | 898                     | CC                              | AA                 | AA               | INTERGENIC      |               |                    |                    |
| SNP_116098_A_1029 | NW_004520593.1 | scaffold7152 | 1029                    | TT                              | CC                 | CC               | INTERGENIC      |               |                    |                    |
| SNP_116099_A_343  | NW_004520594.1 | scaffold7153 | 343                     | TT                              | GG                 | GG               | INTERGENIC      |               |                    |                    |
| SNP_116101_A_582  | NW_004520595.1 | scaffold7154 | 582                     | AA                              | GG                 | GG               | INTERGENIC      |               |                    |                    |
| SNP_116102_A_7325 | NW_004520595.1 | scaffold7154 | 7325                    | GG                              | AA                 | AA               | INTERGENIC      |               |                    |                    |
| SNP_116103_A_7432 | NW_004520595.1 | scaffold7154 | 7432                    | GG                              | AA                 | AA               | INTERGENIC      |               |                    |                    |
| SNP_116104_A_7456 | NW_004520595.1 | scaffold7154 | 7456                    | CC                              | AA                 | AA               | INTERGENIC      |               |                    |                    |
| SNP_116105_A_7498 | NW_004520595.1 | scaffold7154 | 7498                    | AA                              | GG                 | GG               | INTERGENIC      |               |                    |                    |
| SNP_116106_A_7511 | NW_004520595.1 | scaffold7154 | 7511                    | CC                              | TT                 | TT               | INTERGENIC      |               |                    |                    |
| SNP_116107_A_7552 | NW_004520595.1 | scaffold7154 | 7552                    | AA                              | GG                 | GG               | INTERGENIC      |               |                    |                    |
| SNP_116108_A_7599 | NW_004520595.1 | scaffold7154 | 7599                    | TT                              | AA                 | AA               | INTERGENIC      |               |                    |                    |
| SNP_116112_A_1111 | NW_004520598.1 | scaffold7157 | 1111                    | TT                              | AA                 | AA               | INTERGENIC      |               |                    |                    |
| SNP_116113_A_1134 | NW_004520598.1 | scaffold7157 | 1134                    | TT                              | CC                 | CC               | INTERGENIC      |               |                    |                    |
| SNP_116115_A_1024 | NW_004520610.1 | scaffold7174 | 1024                    | AA                              | GG                 | GG               | INTERGENIC      |               |                    |                    |
| SNP_116116_A_3751 | NW_004520611.1 | scaffold7176 | 3751                    | GG                              | AA                 | AA               | INTERGENIC      |               |                    |                    |
| SNP_116117_A_3827 | NW_004520611.1 | scaffold7176 | 3827                    | AA                              | CC                 | CC               | INTERGENIC      |               |                    |                    |
| SNP_116118_A_4208 | NW_004520611.1 | scaffold7176 | 4208                    | AA                              | GG                 | GG               | INTERGENIC      |               |                    |                    |
| SNP_116119_A_4316 | NW_004520611.1 | scaffold7176 | 4316                    | TT                              | CC                 | CC               | INTERGENIC      |               |                    |                    |
| SNP_116120_A_63   | NW_004520614.1 | scaffold7182 | 63                      | TT                              | CC                 | CC               | INTERGENIC      |               |                    |                    |

| SNPs IDs          | Chromosome IDs | Chromosomes  | Physical positions (bp) | CDC Frontier (Reference genome) | (Pusa 1103 & HPNB) | (ILWC 46 & LPNB) | Sequence genome | Components of | Gene accession IDs | Putative functions |
|-------------------|----------------|--------------|-------------------------|---------------------------------|--------------------|------------------|-----------------|---------------|--------------------|--------------------|
| SNP_116121_A_358  | NW_004520615.1 | scaffold7183 | 358                     | GG                              | AA                 | AA               | INTERGENIC      |               |                    |                    |
| SNP_116122_A_646  | NW_004520619.1 | scaffold7187 | 646                     | GG                              | CC                 | CC               | INTERGENIC      |               |                    |                    |
| SNP_116123_A_801  | NW_004520619.1 | scaffold7187 | 801                     | TT                              | GG                 | GG               | INTERGENIC      |               |                    |                    |
| SNP_116124_A_976  | NW_004520619.1 | scaffold7187 | 976                     | TT                              | GG                 | GG               | INTERGENIC      |               |                    |                    |
| SNP_116125_A_991  | NW_004520619.1 | scaffold7187 | 991                     | AA                              | TT                 | TT               | INTERGENIC      |               |                    |                    |
| SNP_116126_A_1044 | NW_004520619.1 | scaffold7187 | 1044                    | CC                              | TT                 | TT               | INTERGENIC      |               |                    |                    |
| SNP_116127_A_338  | NW_004520625.1 | scaffold7196 | 338                     | AA                              | CC                 | CC               | INTERGENIC      |               |                    |                    |
| SNP_116128_A_374  | NW_004520625.1 | scaffold7196 | 374                     | GG                              | TT                 | TT               | INTERGENIC      |               |                    |                    |
| SNP_116129_A_560  | NW_004520625.1 | scaffold7196 | 560                     | CC                              | TT                 | TT               | INTERGENIC      |               |                    |                    |
| SNP_116130_A_612  | NW_004520625.1 | scaffold7196 | 612                     | GG                              | AA                 | AA               | INTERGENIC      |               |                    |                    |
| SNP_116131_A_732  | NW_004520625.1 | scaffold7196 | 732                     | AA                              | CC                 | CC               | INTERGENIC      |               |                    |                    |
| SNP_116132_A_963  | NW_004520631.1 | scaffold7203 | 963                     | GG                              | AA                 | AA               | INTERGENIC      |               |                    |                    |
| SNP_116133_A_968  | NW_004520631.1 | scaffold7203 | 968                     | TT                              | AA                 | AA               | INTERGENIC      |               |                    |                    |
| SNP_116134_A_1914 | NW_004520634.1 | scaffold7210 | 1914                    | GG                              | TT                 | TT               | INTERGENIC      |               |                    |                    |
| SNP_116135_A_2033 | NW_004520634.1 | scaffold7210 | 2033                    | TT                              | AA                 | AA               | INTERGENIC      |               |                    |                    |
| SNP_116136_A_6997 | NW_004520634.1 | scaffold7210 | 6997                    | TT                              | CC                 | CC               | INTERGENIC      |               |                    |                    |
| SNP_116137_A_7032 | NW_004520634.1 | scaffold7210 | 7032                    | AA                              | GG                 | GG               | INTERGENIC      |               |                    |                    |
| SNP_116139_A_7318 | NW_004520634.1 | scaffold7210 | 7318                    | CC                              | TT                 | TT               | INTERGENIC      |               |                    |                    |
| SNP_116141_A_7727 | NW_004520634.1 | scaffold7210 | 7727                    | GG                              | CC                 | CC               | INTERGENIC      |               |                    |                    |
| SNP_116142_A_7749 | NW_004520634.1 | scaffold7210 | 7749                    | GG                              | AA                 | AA               | INTERGENIC      |               |                    |                    |
| SNP_116143_A_7802 | NW_004520634.1 | scaffold7210 | 7802                    | TT                              | GG                 | GG               | INTERGENIC      |               |                    |                    |
| SNP_116144_A_7854 | NW_004520634.1 | scaffold7210 | 7854                    | GG                              | TT                 | TT               | INTERGENIC      |               |                    |                    |

| SNPs IDs          | Chromosome IDs | Chromosomes  | Physical positions (bp) | CDC Frontier (Reference genome) | (Pusa 1103 & HPNB) | (ILWC 46 & LPNB) | Sequence genome | Components of | Gene accession IDs | Putative functions |
|-------------------|----------------|--------------|-------------------------|---------------------------------|--------------------|------------------|-----------------|---------------|--------------------|--------------------|
| SNP_116145_A_131  | NW_004520636.1 | scaffold7216 | 131                     | AA                              | CC                 | CC               | INTERGENIC      |               |                    |                    |
| SNP_116146_A_148  | NW_004520636.1 | scaffold7216 | 148                     | AA                              | GG                 | GG               | INTERGENIC      |               |                    |                    |
| SNP_116147_A_200  | NW_004520636.1 | scaffold7216 | 200                     | AA                              | GG                 | GG               | INTERGENIC      |               |                    |                    |
| SNP_116148_A_226  | NW_004520636.1 | scaffold7216 | 226                     | TT                              | AA                 | AA               | INTERGENIC      |               |                    |                    |
| SNP_116149_A_229  | NW_004520636.1 | scaffold7216 | 229                     | AA                              | GG                 | GG               | INTERGENIC      |               |                    |                    |
| SNP_116150_A_283  | NW_004520636.1 | scaffold7216 | 283                     | AA                              | GG                 | GG               | INTERGENIC      |               |                    |                    |
| SNP_116151_A_518  | NW_004520636.1 | scaffold7216 | 518                     | CC                              | AA                 | AA               | INTERGENIC      |               |                    |                    |
| SNP_116152_A_2829 | NW_004520636.1 | scaffold7216 | 2829                    | AA                              | CC                 | CC               | INTERGENIC      |               |                    |                    |
| SNP_116153_A_2948 | NW_004520636.1 | scaffold7216 | 2948                    | AA                              | TT                 | TT               | INTERGENIC      |               |                    |                    |
| SNP_116154_A_366  | NW_004520645.1 | scaffold7229 | 366                     | TT                              | AA                 | AA               | INTERGENIC      |               |                    |                    |
| SNP_116155_A_444  | NW_004520653.1 | scaffold7245 | 444                     | AA                              | CC                 | CC               | INTERGENIC      |               |                    |                    |
| SNP_116156_A_655  | NW_004520653.1 | scaffold7245 | 655                     | AA                              | GG                 | GG               | INTERGENIC      |               |                    |                    |
| SNP_116157_A_755  | NW_004520653.1 | scaffold7245 | 755                     | CC                              | TT                 | TT               | INTERGENIC      |               |                    |                    |
| SNP_116158_A_1337 | NW_004520656.1 | scaffold7249 | 1337                    | TT                              | GG                 | GG               | INTERGENIC      |               |                    |                    |
| SNP_116159_A_1354 | NW_004520656.1 | scaffold7249 | 1354                    | GG                              | AA                 | AA               | INTERGENIC      |               |                    |                    |
| SNP_116160_A_1391 | NW_004520656.1 | scaffold7249 | 1391                    | AA                              | CC                 | CC               | INTERGENIC      |               |                    |                    |
| SNP_116161_A_1404 | NW_004520656.1 | scaffold7249 | 1404                    | CC                              | TT                 | TT               | INTERGENIC      |               |                    |                    |
| SNP_116162_A_547  | NW_004520661.1 | scaffold7254 | 547                     | CC                              | AA                 | AA               | INTERGENIC      |               |                    |                    |
| SNP_116163_A_548  | NW_004520661.1 | scaffold7254 | 548                     | TT                              | CC                 | CC               | INTERGENIC      |               |                    |                    |
| SNP_116164_A_781  | NW_004520661.1 | scaffold7254 | 781                     | AA                              | GG                 | GG               | INTERGENIC      |               |                    |                    |
| SNP_116165_A_649  | NW_004520662.1 | scaffold7255 | 649                     | CC                              | TT                 | TT               | INTERGENIC      |               |                    |                    |
| SNP_116166_A_4762 | NW_004520668.1 | scaffold7267 | 4762                    | GG                              | TT                 | TT               | INTERGENIC      |               |                    |                    |

| SNPs IDs           | Chromosome IDs | Chromosomes  | Physical positions (bp) | CDC Frontier (Reference genome) | (Pusa 1103 & HPNB) | (ILWC 46 & LPNB) | Sequence genome | Components of | Gene accession IDs | Putative functions |
|--------------------|----------------|--------------|-------------------------|---------------------------------|--------------------|------------------|-----------------|---------------|--------------------|--------------------|
| SNP_116168_A_4844  | NW_004520668.1 | scaffold7267 | 4844                    | TT                              | CC                 | CC               | INTERGENIC      |               |                    |                    |
| SNP_116169_A_5006  | NW_004520668.1 | scaffold7267 | 5006                    | AA                              | GG                 | GG               | INTERGENIC      |               |                    |                    |
| SNP_116170_A_5010  | NW_004520668.1 | scaffold7267 | 5010                    | TT                              | AA                 | AA               | INTERGENIC      |               |                    |                    |
| SNP_116171_A_5012  | NW_004520668.1 | scaffold7267 | 5012                    | TT                              | CC                 | CC               | INTERGENIC      |               |                    |                    |
| SNP_116172_A_5024  | NW_004520668.1 | scaffold7267 | 5024                    | CC                              | GG                 | GG               | INTERGENIC      |               |                    |                    |
| SNP_116173_A_5054  | NW_004520668.1 | scaffold7267 | 5054                    | GG                              | TT                 | TT               | INTERGENIC      |               |                    |                    |
| SNP_116174_A_525   | NW_004520670.1 | scaffold7269 | 525                     | TT                              | CC                 | CC               | INTERGENIC      |               |                    |                    |
| SNP_116175_A_579   | NW_004520670.1 | scaffold7269 | 579                     | AA                              | CC                 | CC               | INTERGENIC      |               |                    |                    |
| SNP_116176_A_640   | NW_004520670.1 | scaffold7269 | 640                     | AA                              | GG                 | GG               | INTERGENIC      |               |                    |                    |
| SNP_116177_A_660   | NW_004520670.1 | scaffold7269 | 660                     | AA                              | TT                 | TT               | INTERGENIC      |               |                    |                    |
| SNP_116178_A_809   | NW_004520670.1 | scaffold7269 | 809                     | CC                              | TT                 | TT               | INTERGENIC      |               |                    |                    |
| SNP_116179_A_825   | NW_004520670.1 | scaffold7269 | 825                     | GG                              | AA                 | AA               | INTERGENIC      |               |                    |                    |
| SNP_116180_A_64    | NW_004520671.1 | scaffold7272 | 64                      | AA                              | CC                 | CC               | INTERGENIC      |               |                    |                    |
| SNP_116181_A_127   | NW_004520671.1 | scaffold7272 | 127                     | TT                              | GG                 | GG               | INTERGENIC      |               |                    |                    |
| SNP_116183_A_449   | NW_004520675.1 | scaffold7280 | 449                     | AA                              | TT                 | TT               | INTERGENIC      |               |                    |                    |
| SNP_116184_A_458   | NW_004520675.1 | scaffold7280 | 458                     | GG                              | AA                 | AA               | INTERGENIC      |               |                    |                    |
| SNP_116185_A_1583  | NW_004520675.1 | scaffold7280 | 1583                    | AA                              | TT                 | TT               | INTERGENIC      |               |                    |                    |
| SNP_116186_A_1590  | NW_004520675.1 | scaffold7280 | 1590                    | GG                              | AA                 | AA               | INTERGENIC      |               |                    |                    |
| SNP_116188_A_11844 | NW_004520678.1 | scaffold7293 | 11844                   | CC                              | AA                 | AA               | INTERGENIC      |               |                    |                    |
| SNP_116189_A_11901 | NW_004520678.1 | scaffold7293 | 11901                   | CC                              | TT                 | TT               | INTERGENIC      |               |                    |                    |
| SNP_116190_A_11930 | NW_004520678.1 | scaffold7293 | 11930                   | GG                              | TT                 | TT               | INTERGENIC      |               |                    |                    |
| SNP_116191_A_12944 | NW_004520678.1 | scaffold7293 | 12944                   | GG                              | AA                 | AA               | INTERGENIC      |               |                    |                    |



| SNPs IDs           | Chromosome IDs | Chromosomes  | Physical positions (bp) | CDC Frontier (Reference genome) | (Pusa 1103 & HPNB) | (ILWC 46 & LPNB) | Sequence genome | Components of | Gene accession IDs | Putative functions |
|--------------------|----------------|--------------|-------------------------|---------------------------------|--------------------|------------------|-----------------|---------------|--------------------|--------------------|
| SNP_116193_A_13252 | NW_004520678.1 | scaffold7293 | 13252                   | GG                              | TT                 | TT               | INTERGENIC      |               |                    |                    |
| SNP_116194_A_13280 | NW_004520678.1 | scaffold7293 | 13280                   | AA                              | TT                 | TT               | INTERGENIC      |               |                    |                    |
| SNP_116195_A_13305 | NW_004520678.1 | scaffold7293 | 13305                   | CC                              | TT                 | TT               | INTERGENIC      |               |                    |                    |
| SNP_116196_A_13351 | NW_004520678.1 | scaffold7293 | 13351                   | TT                              | CC                 | CC               | INTERGENIC      |               |                    |                    |
| SNP_116197_A_13406 | NW_004520678.1 | scaffold7293 | 13406                   | AA                              | GG                 | GG               | INTERGENIC      |               |                    |                    |
| SNP_116198_A_13442 | NW_004520678.1 | scaffold7293 | 13442                   | AA                              | GG                 | GG               | INTERGENIC      |               |                    |                    |
| SNP_116199_A_13500 | NW_004520678.1 | scaffold7293 | 13500                   | GG                              | AA                 | AA               | INTERGENIC      |               |                    |                    |
| SNP_116200_A_13760 | NW_004520678.1 | scaffold7293 | 13760                   | CC                              | GG                 | GG               | INTERGENIC      |               |                    |                    |
| SNP_116201_A_13764 | NW_004520678.1 | scaffold7293 | 13764                   | CC                              | TT                 | TT               | INTERGENIC      |               |                    |                    |
| SNP_116202_A_13790 | NW_004520678.1 | scaffold7293 | 13790                   | CC                              | TT                 | TT               | INTERGENIC      |               |                    |                    |
| SNP_116203_A_13885 | NW_004520678.1 | scaffold7293 | 13885                   | TT                              | CC                 | CC               | INTERGENIC      |               |                    |                    |
| SNP_116204_A_13935 | NW_004520678.1 | scaffold7293 | 13935                   | AA                              | GG                 | GG               | INTERGENIC      |               |                    |                    |
| SNP_116205_A_13993 | NW_004520678.1 | scaffold7293 | 13993                   | AA                              | TT                 | TT               | INTERGENIC      |               |                    |                    |
| SNP_116206_A_14006 | NW_004520678.1 | scaffold7293 | 14006                   | GG                              | TT                 | TT               | INTERGENIC      |               |                    |                    |
| SNP_116207_A_14058 | NW_004520678.1 | scaffold7293 | 14058                   | TT                              | CC                 | CC               | INTERGENIC      |               |                    |                    |
| SNP_116208_A_14085 | NW_004520678.1 | scaffold7293 | 14085                   | GG                              | AA                 | AA               | INTERGENIC      |               |                    |                    |
| SNP_116209_A_14128 | NW_004520678.1 | scaffold7293 | 14128                   | GG                              | TT                 | TT               | INTERGENIC      |               |                    |                    |
| SNP_116210_A_14161 | NW_004520678.1 | scaffold7293 | 14161                   | TT                              | AA                 | AA               | INTERGENIC      |               |                    |                    |
| SNP_116211_A_14163 | NW_004520678.1 | scaffold7293 | 14163                   | AA                              | GG                 | GG               | INTERGENIC      |               |                    |                    |
| SNP_116212_A_14234 | NW_004520678.1 | scaffold7293 | 14234                   | TT                              | CC                 | CC               | INTERGENIC      |               |                    |                    |
| SNP_116213_A_14242 | NW_004520678.1 | scaffold7293 | 14242                   | AA                              | GG                 | GG               | INTERGENIC      |               |                    |                    |
| SNP_116214_A_14244 | NW_004520678.1 | scaffold7293 | 14244                   | CC                              | TT                 | TT               | INTERGENIC      |               |                    |                    |

| SNPs IDs           | Chromosome IDs | Chromosomes  | Physical positions (bp) | CDC Frontier (Reference genome) | (Pusa 1103 & HPNB) | (ILWC 46 & LPNB) | Sequence genome | Components of | Gene accession IDs | Putative functions |
|--------------------|----------------|--------------|-------------------------|---------------------------------|--------------------|------------------|-----------------|---------------|--------------------|--------------------|
| SNP_116215_A_14262 | NW_004520678.1 | scaffold7293 | 14262                   | AA                              | TT                 | TT               | INTERGENIC      |               |                    |                    |
| SNP_116216_A_14342 | NW_004520678.1 | scaffold7293 | 14342                   | CC                              | GG                 | GG               | INTERGENIC      |               |                    |                    |
| SNP_116217_A_14385 | NW_004520678.1 | scaffold7293 | 14385                   | CC                              | TT                 | TT               | INTERGENIC      |               |                    |                    |
| SNP_116218_A_14401 | NW_004520678.1 | scaffold7293 | 14401                   | AA                              | GG                 | GG               | INTERGENIC      |               |                    |                    |
| SNP_116219_A_14498 | NW_004520678.1 | scaffold7293 | 14498                   | GG                              | AA                 | AA               | INTERGENIC      |               |                    |                    |
| SNP_116220_A_14502 | NW_004520678.1 | scaffold7293 | 14502                   | AA                              | TT                 | TT               | INTERGENIC      |               |                    |                    |
| SNP_116221_A_14507 | NW_004520678.1 | scaffold7293 | 14507                   | GG                              | AA                 | AA               | INTERGENIC      |               |                    |                    |
| SNP_116222_A_14530 | NW_004520678.1 | scaffold7293 | 14530                   | CC                              | GG                 | GG               | INTERGENIC      |               |                    |                    |
| SNP_116223_A_14556 | NW_004520678.1 | scaffold7293 | 14556                   | TT                              | CC                 | CC               | INTERGENIC      |               |                    |                    |
| SNP_116224_A_14660 | NW_004520678.1 | scaffold7293 | 14660                   | GG                              | AA                 | AA               | INTERGENIC      |               |                    |                    |
| SNP_116225_A_14685 | NW_004520678.1 | scaffold7293 | 14685                   | CC                              | GG                 | GG               | INTERGENIC      |               |                    |                    |
| SNP_116226_A_14707 | NW_004520678.1 | scaffold7293 | 14707                   | TT                              | CC                 | CC               | INTERGENIC      |               |                    |                    |
| SNP_116227_A_14758 | NW_004520678.1 | scaffold7293 | 14758                   | TT                              | CC                 | CC               | INTERGENIC      |               |                    |                    |
| SNP_116228_A_14790 | NW_004520678.1 | scaffold7293 | 14790                   | TT                              | GG                 | GG               | INTERGENIC      |               |                    |                    |
| SNP_116229_A_14816 | NW_004520678.1 | scaffold7293 | 14816                   | TT                              | CC                 | CC               | INTERGENIC      |               |                    |                    |
| SNP_116230_A_14860 | NW_004520678.1 | scaffold7293 | 14860                   | TT                              | GG                 | GG               | INTERGENIC      |               |                    |                    |
| SNP_116231_A_14924 | NW_004520678.1 | scaffold7293 | 14924                   | GG                              | AA                 | AA               | INTERGENIC      |               |                    |                    |
| SNP_116232_A_14948 | NW_004520678.1 | scaffold7293 | 14948                   | AA                              | GG                 | GG               | INTERGENIC      |               |                    |                    |
| SNP_116233_A_14961 | NW_004520678.1 | scaffold7293 | 14961                   | GG                              | AA                 | AA               | INTERGENIC      |               |                    |                    |
| SNP_116234_A_14977 | NW_004520678.1 | scaffold7293 | 14977                   | CC                              | TT                 | TT               | INTERGENIC      |               |                    |                    |
| SNP_116235_A_14992 | NW_004520678.1 | scaffold7293 | 14992                   | GG                              | AA                 | AA               | INTERGENIC      |               |                    |                    |
| SNP_116236_A_15017 | NW_004520678.1 | scaffold7293 | 15017                   | GG                              | AA                 | AA               | INTERGENIC      |               |                    |                    |

| SNPs IDs           | Chromosome IDs | Chromosomes  | Physical positions (bp) | CDC Frontier (Reference genome) | (Pusa 1103 & HPNB) | (ILWC 46 & LPNB) | Sequence genome | Components of | Gene accession IDs | Putative functions |
|--------------------|----------------|--------------|-------------------------|---------------------------------|--------------------|------------------|-----------------|---------------|--------------------|--------------------|
| SNP_116237_A_15203 | NW_004520678.1 | scaffold7293 | 15203                   | CC                              | TT                 | TT               | INTERGENIC      |               |                    |                    |
| SNP_116238_A_15221 | NW_004520678.1 | scaffold7293 | 15221                   | TT                              | AA                 | AA               | INTERGENIC      |               |                    |                    |
| SNP_116239_A_15234 | NW_004520678.1 | scaffold7293 | 15234                   | TT                              | GG                 | GG               | INTERGENIC      |               |                    |                    |
| SNP_116240_A_15253 | NW_004520678.1 | scaffold7293 | 15253                   | AA                              | CC                 | CC               | INTERGENIC      |               |                    |                    |
| SNP_116241_A_15359 | NW_004520678.1 | scaffold7293 | 15359                   | CC                              | AA                 | AA               | INTERGENIC      |               |                    |                    |
| SNP_116242_A_15423 | NW_004520678.1 | scaffold7293 | 15423                   | GG                              | AA                 | AA               | INTERGENIC      |               |                    |                    |
| SNP_116244_A_15584 | NW_004520678.1 | scaffold7293 | 15584                   | CC                              | TT                 | TT               | INTERGENIC      |               |                    |                    |
| SNP_116245_A_15684 | NW_004520678.1 | scaffold7293 | 15684                   | CC                              | AA                 | AA               | INTERGENIC      |               |                    |                    |
| SNP_116246_A_15704 | NW_004520678.1 | scaffold7293 | 15704                   | GG                              | AA                 | AA               | INTERGENIC      |               |                    |                    |
| SNP_116247_A_15812 | NW_004520678.1 | scaffold7293 | 15812                   | AA                              | GG                 | GG               | INTERGENIC      |               |                    |                    |
| SNP_116248_A_15944 | NW_004520678.1 | scaffold7293 | 15944                   | CC                              | TT                 | TT               | INTERGENIC      |               |                    |                    |
| SNP_116249_A_15956 | NW_004520678.1 | scaffold7293 | 15956                   | CC                              | TT                 | TT               | INTERGENIC      |               |                    |                    |
| SNP_116250_A_16264 | NW_004520678.1 | scaffold7293 | 16264                   | TT                              | AA                 | AA               | INTERGENIC      |               |                    |                    |
| SNP_116251_A_19499 | NW_004520678.1 | scaffold7293 | 19499                   | GG                              | AA                 | AA               | INTERGENIC      |               |                    |                    |
| SNP_116252_A_19545 | NW_004520678.1 | scaffold7293 | 19545                   | TT                              | AA                 | AA               | INTERGENIC      |               |                    |                    |
| SNP_116253_A_19616 | NW_004520678.1 | scaffold7293 | 19616                   | AA                              | GG                 | GG               | INTERGENIC      |               |                    |                    |
| SNP_116254_A_19689 | NW_004520678.1 | scaffold7293 | 19689                   | TT                              | GG                 | GG               | INTERGENIC      |               |                    |                    |
| SNP_116255_A_19719 | NW_004520678.1 | scaffold7293 | 19719                   | AA                              | GG                 | GG               | INTERGENIC      |               |                    |                    |
| SNP_116256_A_19731 | NW_004520678.1 | scaffold7293 | 19731                   | AA                              | GG                 | GG               | INTERGENIC      |               |                    |                    |
| SNP_116257_A_19775 | NW_004520678.1 | scaffold7293 | 19775                   | CC                              | TT                 | TT               | INTERGENIC      |               |                    |                    |
| SNP_116258_A_19837 | NW_004520678.1 | scaffold7293 | 19837                   | GG                              | CC                 | CC               | INTERGENIC      |               |                    |                    |
| SNP_116259_A_19843 | NW_004520678.1 | scaffold7293 | 19843                   | AA                              | CC                 | CC               | INTERGENIC      |               |                    |                    |

| SNPs IDs           | Chromosome IDs | Chromosomes  | Physical positions (bp) | CDC Frontier (Reference genome) | (Pusa 1103 & HPNB) | (ILWC 46 & LPNB) | Sequence genome | Components of | Gene accession IDs | Putative functions |
|--------------------|----------------|--------------|-------------------------|---------------------------------|--------------------|------------------|-----------------|---------------|--------------------|--------------------|
| SNP_116260_A_20075 | NW_004520678.1 | scaffold7293 | 20075                   | CC                              | AA                 | AA               | INTERGENIC      |               |                    |                    |
| SNP_116261_A_20188 | NW_004520678.1 | scaffold7293 | 20188                   | CC                              | TT                 | TT               | INTERGENIC      |               |                    |                    |
| SNP_116263_A_20222 | NW_004520678.1 | scaffold7293 | 20222                   | CC                              | TT                 | TT               | INTERGENIC      |               |                    |                    |
| SNP_116264_A_20227 | NW_004520678.1 | scaffold7293 | 20227                   | TT                              | GG                 | GG               | INTERGENIC      |               |                    |                    |
| SNP_116265_A_20294 | NW_004520678.1 | scaffold7293 | 20294                   | TT                              | AA                 | AA               | INTERGENIC      |               |                    |                    |
| SNP_116266_A_20460 | NW_004520678.1 | scaffold7293 | 20460                   | AA                              | TT                 | TT               | INTERGENIC      |               |                    |                    |
| SNP_116267_A_20535 | NW_004520678.1 | scaffold7293 | 20535                   | CC                              | GG                 | GG               | INTERGENIC      |               |                    |                    |
| SNP_116268_A_20615 | NW_004520678.1 | scaffold7293 | 20615                   | TT                              | CC                 | CC               | INTERGENIC      |               |                    |                    |
| SNP_116269_A_20689 | NW_004520678.1 | scaffold7293 | 20689                   | AA                              | GG                 | GG               | INTERGENIC      |               |                    |                    |
| SNP_116271_A_21363 | NW_004520678.1 | scaffold7293 | 21363                   | TT                              | CC                 | CC               | INTERGENIC      |               |                    |                    |
| SNP_116272_A_21444 | NW_004520678.1 | scaffold7293 | 21444                   | CC                              | TT                 | TT               | INTERGENIC      |               |                    |                    |
| SNP_116273_A_21445 | NW_004520678.1 | scaffold7293 | 21445                   | GG                              | AA                 | AA               | INTERGENIC      |               |                    |                    |
| SNP_116274_A_21523 | NW_004520678.1 | scaffold7293 | 21523                   | GG                              | AA                 | AA               | INTERGENIC      |               |                    |                    |
| SNP_116275_A_21589 | NW_004520678.1 | scaffold7293 | 21589                   | TT                              | GG                 | GG               | INTERGENIC      |               |                    |                    |
| SNP_116276_A_21611 | NW_004520678.1 | scaffold7293 | 21611                   | CC                              | TT                 | TT               | INTERGENIC      |               |                    |                    |
| SNP_116277_A_21657 | NW_004520678.1 | scaffold7293 | 21657                   | CC                              | AA                 | AA               | INTERGENIC      |               |                    |                    |
| SNP_116278_A_21717 | NW_004520678.1 | scaffold7293 | 21717                   | TT                              | CC                 | CC               | INTERGENIC      |               |                    |                    |
| SNP_116279_A_21744 | NW_004520678.1 | scaffold7293 | 21744                   | TT                              | CC                 | CC               | INTERGENIC      |               |                    |                    |
| SNP_116280_A_21833 | NW_004520678.1 | scaffold7293 | 21833                   | CC                              | TT                 | TT               | INTERGENIC      |               |                    |                    |
| SNP_116281_A_22243 | NW_004520678.1 | scaffold7293 | 22243                   | CC                              | AA                 | AA               | INTERGENIC      |               |                    |                    |
| SNP_116282_A_22311 | NW_004520678.1 | scaffold7293 | 22311                   | CC                              | AA                 | AA               | INTERGENIC      |               |                    |                    |
| SNP_116283_A_387   | NW_004520680.1 | scaffold7295 | 387                     | TT                              | GG                 | GG               | INTERGENIC      |               |                    |                    |

| SNPs IDs          | Chromosome IDs | Chromosomes  | Physical positions (bp) | CDC Frontier (Reference genome) | (Pusa 1103 & HPNB) | (ILWC 46 & LPNB) | Sequence genome | Components of | Gene accession IDs | Putative functions |
|-------------------|----------------|--------------|-------------------------|---------------------------------|--------------------|------------------|-----------------|---------------|--------------------|--------------------|
| SNP_116284_A_414  | NW_004520680.1 | scaffold7295 | 414                     | TT                              | GG                 | GG               | INTERGENIC      |               |                    |                    |
| SNP_116286_A_865  | NW_004520682.1 | scaffold7299 | 865                     | GG                              | AA                 | AA               | INTERGENIC      |               |                    |                    |
| SNP_116288_A_1362 | NW_004520684.1 | scaffold7302 | 1362                    | AA                              | CC                 | CC               | INTERGENIC      |               |                    |                    |
| SNP_116289_A_1371 | NW_004520684.1 | scaffold7302 | 1371                    | AA                              | CC                 | CC               | INTERGENIC      |               |                    |                    |
| SNP_116291_A_1343 | NW_004520689.1 | scaffold7313 | 1343                    | CC                              | AA                 | AA               | INTERGENIC      |               |                    |                    |
| SNP_116292_A_1278 | NW_004520690.1 | scaffold7314 | 1278                    | CC                              | TT                 | TT               | INTERGENIC      |               |                    |                    |
| SNP_116293_A_1297 | NW_004520690.1 | scaffold7314 | 1297                    | CC                              | TT                 | TT               | INTERGENIC      |               |                    |                    |
| SNP_116294_A_1375 | NW_004520690.1 | scaffold7314 | 1375                    | GG                              | AA                 | AA               | INTERGENIC      |               |                    |                    |
| SNP_116295_A_1414 | NW_004520690.1 | scaffold7314 | 1414                    | GG                              | AA                 | AA               | INTERGENIC      |               |                    |                    |
| SNP_116296_A_1507 | NW_004520690.1 | scaffold7314 | 1507                    | GG                              | TT                 | TT               | INTERGENIC      |               |                    |                    |
| SNP_116297_A_1572 | NW_004520690.1 | scaffold7314 | 1572                    | TT                              | GG                 | GG               | INTERGENIC      |               |                    |                    |
| SNP_116298_A_1723 | NW_004520690.1 | scaffold7314 | 1723                    | CC                              | TT                 | TT               | INTERGENIC      |               |                    |                    |
| SNP_116299_A_1729 | NW_004520690.1 | scaffold7314 | 1729                    | CC                              | TT                 | TT               | INTERGENIC      |               |                    |                    |
| SNP_116300_A_1804 | NW_004520690.1 | scaffold7314 | 1804                    | CC                              | TT                 | TT               | INTERGENIC      |               |                    |                    |
| SNP_116301_A_1856 | NW_004520690.1 | scaffold7314 | 1856                    | TT                              | AA                 | AA               | INTERGENIC      |               |                    |                    |
| SNP_116302_A_1869 | NW_004520690.1 | scaffold7314 | 1869                    | GG                              | TT                 | TT               | INTERGENIC      |               |                    |                    |
| SNP_116303_A_1880 | NW_004520690.1 | scaffold7314 | 1880                    | GG                              | AA                 | AA               | INTERGENIC      |               |                    |                    |
| SNP_116304_A_1882 | NW_004520690.1 | scaffold7314 | 1882                    | AA                              | GG                 | GG               | INTERGENIC      |               |                    |                    |
| SNP_116305_A_409  | NW_004520692.1 | scaffold7316 | 409                     | AA                              | GG                 | GG               | INTERGENIC      |               |                    |                    |
| SNP_116306_A_626  | NW_004520692.1 | scaffold7316 | 626                     | CC                              | TT                 | TT               | INTERGENIC      |               |                    |                    |
| SNP_116307_A_719  | NW_004520692.1 | scaffold7316 | 719                     | GG                              | AA                 | AA               | INTERGENIC      |               |                    |                    |
| SNP_116308_A_791  | NW_004520692.1 | scaffold7316 | 791                     | GG                              | AA                 | AA               | INTERGENIC      |               |                    |                    |

| SNPs IDs          | Chromosome IDs | Chromosomes  | Physical positions (bp) | CDC Frontier genome (Reference genome) | (Pusa 1103 & HPNB) | (ILWC 46 & LPNB) | Sequence genome | Components of | Gene accession IDs | Putative functions |
|-------------------|----------------|--------------|-------------------------|----------------------------------------|--------------------|------------------|-----------------|---------------|--------------------|--------------------|
| SNP_116309_A_796  | NW_004520692.1 | scaffold7316 | 796                     | AA                                     | CC                 | CC               | INTERGENIC      |               |                    |                    |
| SNP_116310_A_857  | NW_004520692.1 | scaffold7316 | 857                     | GG                                     | AA                 | AA               | INTERGENIC      |               |                    |                    |
| SNP_116311_A_1102 | NW_004520692.1 | scaffold7316 | 1102                    | TT                                     | CC                 | CC               | INTERGENIC      |               |                    |                    |
| SNP_116312_A_1281 | NW_004520692.1 | scaffold7316 | 1281                    | GG                                     | TT                 | TT               | INTERGENIC      |               |                    |                    |
| SNP_116313_A_64   | NW_004520693.1 | scaffold7318 | 64                      | TT                                     | GG                 | GG               | INTERGENIC      |               |                    |                    |
| SNP_116314_A_80   | NW_004520693.1 | scaffold7318 | 80                      | AA                                     | GG                 | GG               | INTERGENIC      |               |                    |                    |
| SNP_116315_A_712  | NW_004520698.1 | scaffold7327 | 712                     | AA                                     | GG                 | GG               | INTERGENIC      |               |                    |                    |
| SNP_116316_A_713  | NW_004520698.1 | scaffold7327 | 713                     | CC                                     | GG                 | GG               | INTERGENIC      |               |                    |                    |
| SNP_116317_A_8307 | NW_004520698.1 | scaffold7327 | 8307                    | TT                                     | AA                 | AA               | INTERGENIC      |               |                    |                    |
| SNP_116318_A_8308 | NW_004520698.1 | scaffold7327 | 8308                    | CC                                     | AA                 | AA               | INTERGENIC      |               |                    |                    |
| SNP_116319_A_8330 | NW_004520698.1 | scaffold7327 | 8330                    | TT                                     | CC                 | CC               | INTERGENIC      |               |                    |                    |
| SNP_116320_A_8347 | NW_004520698.1 | scaffold7327 | 8347                    | AA                                     | GG                 | GG               | INTERGENIC      |               |                    |                    |
| SNP_116321_A_8348 | NW_004520698.1 | scaffold7327 | 8348                    | TT                                     | AA                 | AA               | INTERGENIC      |               |                    |                    |
| SNP_116322_A_8380 | NW_004520698.1 | scaffold7327 | 8380                    | TT                                     | AA                 | AA               | INTERGENIC      |               |                    |                    |
| SNP_116323_A_1869 | NW_004520700.1 | scaffold7330 | 1869                    | AA                                     | GG                 | GG               | INTERGENIC      |               |                    |                    |
| SNP_116324_A_2036 | NW_004520700.1 | scaffold7330 | 2036                    | AA                                     | GG                 | GG               | INTERGENIC      |               |                    |                    |
| SNP_116325_A_2170 | NW_004520700.1 | scaffold7330 | 2170                    | CC                                     | TT                 | TT               | INTERGENIC      |               |                    |                    |
| SNP_116327_A_2282 | NW_004520700.1 | scaffold7330 | 2282                    | GG                                     | TT                 | TT               | INTERGENIC      |               |                    |                    |
| SNP_116328_A_2284 | NW_004520700.1 | scaffold7330 | 2284                    | GG                                     | AA                 | AA               | INTERGENIC      |               |                    |                    |
| SNP_116329_A_2298 | NW_004520700.1 | scaffold7330 | 2298                    | TT                                     | GG                 | GG               | INTERGENIC      |               |                    |                    |
| SNP_116330_A_2311 | NW_004520700.1 | scaffold7330 | 2311                    | AA                                     | TT                 | TT               | INTERGENIC      |               |                    |                    |
| SNP_116331_A_2312 | NW_004520700.1 | scaffold7330 | 2312                    | TT                                     | AA                 | AA               | INTERGENIC      |               |                    |                    |

| SNPs IDs           | Chromosome IDs | Chromosomes  | Physical positions (bp) | CDC Frontier (Reference genome) | (Pusa 1103 & HPNB) | (ILWC 46 & LPNB) | Sequence Components of genome | Gene accession IDs | Putative functions           |
|--------------------|----------------|--------------|-------------------------|---------------------------------|--------------------|------------------|-------------------------------|--------------------|------------------------------|
| SNP_116333_A_81    | NW_004520705.1 | scaffold7340 | 81                      | TT                              | AA                 | AA               | INTERGENIC                    |                    |                              |
| SNP_116334_A_3538  | NW_004520713.1 | scaffold7355 | 3538                    | TT                              | CC                 | CC               | INTRON                        | 101491980          | uncharacterized LOC101491980 |
| SNP_116335_A_3572  | NW_004520713.1 | scaffold7355 | 3572                    | GG                              | AA                 | AA               | INTRON                        | 101491980          | uncharacterized LOC101491980 |
| SNP_116336_A_6244  | NW_004520713.1 | scaffold7355 | 6244                    | TT                              | AA                 | AA               | URR                           | 101491980          | uncharacterized LOC101491980 |
| SNP_116337_A_6252  | NW_004520713.1 | scaffold7355 | 6252                    | CC                              | TT                 | TT               | URR                           | 101491980          | uncharacterized LOC101491980 |
| SNP_116338_A_15565 | NW_004520713.1 | scaffold7355 | 15565                   | AA                              | GG                 | GG               | INTERGENIC                    |                    |                              |
| SNP_116339_A_18519 | NW_004520713.1 | scaffold7355 | 18519                   | AA                              | TT                 | TT               | INTERGENIC                    |                    |                              |
| SNP_116340_A_20192 | NW_004520713.1 | scaffold7355 | 20192                   | GG                              | AA                 | AA               | INTERGENIC                    |                    |                              |
| SNP_116341_A_21517 | NW_004520713.1 | scaffold7355 | 21517                   | CC                              | TT                 | TT               | INTERGENIC                    |                    |                              |
| SNP_116342_A_21694 | NW_004520713.1 | scaffold7355 | 21694                   | AA                              | GG                 | GG               | INTERGENIC                    |                    |                              |
| SNP_116343_A_186   | NW_004520715.1 | scaffold7363 | 186                     | GG                              | AA                 | AA               | INTERGENIC                    |                    |                              |
| SNP_116346_A_4758  | NW_004520716.1 | scaffold7364 | 4758                    | TT                              | GG                 | GG               | INTERGENIC                    |                    |                              |
| SNP_116347_A_40    | NW_004520726.1 | scaffold7377 | 40                      | AA                              | GG                 | GG               | INTERGENIC                    |                    |                              |
| SNP_116348_A_53    | NW_004520726.1 | scaffold7377 | 53                      | CC                              | TT                 | TT               | INTERGENIC                    |                    |                              |
| SNP_116349_A_64    | NW_004520726.1 | scaffold7377 | 64                      | AA                              | GG                 | GG               | INTERGENIC                    |                    |                              |
| SNP_116350_A_81    | NW_004520726.1 | scaffold7377 | 81                      | TT                              | AA                 | AA               | INTERGENIC                    |                    |                              |
| SNP_116351_A_92    | NW_004520726.1 | scaffold7377 | 92                      | AA                              | GG                 | GG               | INTERGENIC                    |                    |                              |
| SNP_116352_A_110   | NW_004520726.1 | scaffold7377 | 110                     | TT                              | AA                 | AA               | INTERGENIC                    |                    |                              |
| SNP_116353_A_234   | NW_004520726.1 | scaffold7377 | 234                     | AA                              | GG                 | GG               | INTERGENIC                    |                    |                              |
| SNP_116354_A_411   | NW_004520726.1 | scaffold7377 | 411                     | TT                              | GG                 | GG               | INTERGENIC                    |                    |                              |
| SNP_116357_A_637   | NW_004520726.1 | scaffold7377 | 637                     | GG                              | AA                 | AA               | INTERGENIC                    |                    |                              |
| SNP_116358_A_667   | NW_004520726.1 | scaffold7377 | 667                     | TT                              | AA                 | AA               | INTERGENIC                    |                    |                              |

| SNPs IDs           | Chromosome IDs | Chromosomes  | Physical positions (bp) | CDC Frontier (Reference genome) | (Pusa 1103 & HPNB) | (ILWC 46 & LPNB) | Sequence genome | Components of | Gene accession IDs | Putative functions |
|--------------------|----------------|--------------|-------------------------|---------------------------------|--------------------|------------------|-----------------|---------------|--------------------|--------------------|
| SNP_116359_A_1005  | NW_004520726.1 | scaffold7377 | 1005                    | TT                              | CC                 | CC               | INTERGENIC      |               |                    |                    |
| SNP_116361_A_64    | NW_004520729.1 | scaffold7380 | 64                      | AA                              | GG                 | GG               | INTERGENIC      |               |                    |                    |
| SNP_116363_A_359   | NW_004520729.1 | scaffold7380 | 359                     | AA                              | TT                 | TT               | INTERGENIC      |               |                    |                    |
| SNP_116364_A_3871  | NW_004520733.1 | scaffold7389 | 3871                    | CC                              | TT                 | TT               | INTERGENIC      |               |                    |                    |
| SNP_116365_A_543   | NW_004520738.1 | scaffold7398 | 543                     | CC                              | TT                 | TT               | INTERGENIC      |               |                    |                    |
| SNP_116366_A_668   | NW_004520738.1 | scaffold7398 | 668                     | AA                              | TT                 | TT               | INTERGENIC      |               |                    |                    |
| SNP_116367_A_699   | NW_004520738.1 | scaffold7398 | 699                     | CC                              | TT                 | TT               | INTERGENIC      |               |                    |                    |
| SNP_116369_A_410   | NW_004520745.1 | scaffold7412 | 410                     | TT                              | CC                 | CC               | INTERGENIC      |               |                    |                    |
| SNP_116370_A_808   | NW_004520746.1 | scaffold7414 | 808                     | GG                              | AA                 | AA               | INTERGENIC      |               |                    |                    |
| SNP_116371_A_3924  | NW_004520746.1 | scaffold7414 | 3924                    | AA                              | GG                 | GG               | INTERGENIC      |               |                    |                    |
| SNP_116372_A_1291  | NW_004520749.1 | scaffold7421 | 1291                    | AA                              | GG                 | GG               | INTERGENIC      |               |                    |                    |
| SNP_116373_A_1297  | NW_004520749.1 | scaffold7421 | 1297                    | GG                              | AA                 | AA               | INTERGENIC      |               |                    |                    |
| SNP_116374_A_7338  | NW_004520753.1 | scaffold7427 | 7338                    | AA                              | GG                 | GG               | INTERGENIC      |               |                    |                    |
| SNP_116375_A_7567  | NW_004520753.1 | scaffold7427 | 7567                    | CC                              | TT                 | TT               | INTERGENIC      |               |                    |                    |
| SNP_116376_A_7703  | NW_004520753.1 | scaffold7427 | 7703                    | GG                              | CC                 | CC               | INTERGENIC      |               |                    |                    |
| SNP_116377_A_9558  | NW_004520753.1 | scaffold7427 | 9558                    | GG                              | AA                 | AA               | INTERGENIC      |               |                    |                    |
| SNP_116378_A_70    | NW_004520754.1 | scaffold7432 | 70                      | CC                              | AA                 | AA               | INTERGENIC      |               |                    |                    |
| SNP_116379_A_81    | NW_004520754.1 | scaffold7432 | 81                      | TT                              | AA                 | AA               | INTERGENIC      |               |                    |                    |
| SNP_116380_A_183   | NW_004520754.1 | scaffold7432 | 183                     | AA                              | CC                 | CC               | INTERGENIC      |               |                    |                    |
| SNP_116381_A_737   | NW_004520762.1 | scaffold7448 | 737                     | AA                              | GG                 | GG               | INTERGENIC      |               |                    |                    |
| SNP_116382_A_770   | NW_004520762.1 | scaffold7448 | 770                     | GG                              | TT                 | TT               | INTERGENIC      |               |                    |                    |
| SNP_116383_A_13534 | NW_004520762.1 | scaffold7448 | 13534                   | GG                              | TT                 | TT               | INTERGENIC      |               |                    |                    |



| SNPs IDs           | Chromosome IDs | Chromosomes  | Physical positions (bp) | CDC Frontier (Reference genome) | (Pusa 1103 & HPNB) | (ILWC 46 & LPNB) | Sequence genome | Components of | Gene accession IDs | Putative functions |
|--------------------|----------------|--------------|-------------------------|---------------------------------|--------------------|------------------|-----------------|---------------|--------------------|--------------------|
| SNP_116384_A_13536 | NW_004520762.1 | scaffold7448 | 13536                   | GG                              | AA                 | AA               | INTERGENIC      |               |                    |                    |
| SNP_116385_A_13542 | NW_004520762.1 | scaffold7448 | 13542                   | GG                              | AA                 | AA               | INTERGENIC      |               |                    |                    |
| SNP_116387_A_13567 | NW_004520762.1 | scaffold7448 | 13567                   | CC                              | TT                 | TT               | INTERGENIC      |               |                    |                    |
| SNP_116388_A_13725 | NW_004520762.1 | scaffold7448 | 13725                   | GG                              | AA                 | AA               | INTERGENIC      |               |                    |                    |
| SNP_116389_A_13990 | NW_004520762.1 | scaffold7448 | 13990                   | AA                              | GG                 | GG               | INTERGENIC      |               |                    |                    |
| SNP_116390_A_14076 | NW_004520762.1 | scaffold7448 | 14076                   | TT                              | CC                 | CC               | INTERGENIC      |               |                    |                    |
| SNP_116391_A_20671 | NW_004520762.1 | scaffold7448 | 20671                   | AA                              | GG                 | GG               | INTERGENIC      |               |                    |                    |
| SNP_116392_A_20701 | NW_004520762.1 | scaffold7448 | 20701                   | TT                              | GG                 | GG               | INTERGENIC      |               |                    |                    |
| SNP_116393_A_20733 | NW_004520762.1 | scaffold7448 | 20733                   | TT                              | CC                 | CC               | INTERGENIC      |               |                    |                    |
| SNP_116394_A_20830 | NW_004520762.1 | scaffold7448 | 20830                   | TT                              | CC                 | CC               | INTERGENIC      |               |                    |                    |
| SNP_116395_A_20857 | NW_004520762.1 | scaffold7448 | 20857                   | CC                              | GG                 | GG               | INTERGENIC      |               |                    |                    |
| SNP_116396_A_20859 | NW_004520762.1 | scaffold7448 | 20859                   | GG                              | AA                 | AA               | INTERGENIC      |               |                    |                    |
| SNP_116397_A_21156 | NW_004520762.1 | scaffold7448 | 21156                   | GG                              | AA                 | AA               | INTERGENIC      |               |                    |                    |
| SNP_116398_A_21242 | NW_004520762.1 | scaffold7448 | 21242                   | AA                              | TT                 | TT               | INTERGENIC      |               |                    |                    |
| SNP_116399_A_21272 | NW_004520762.1 | scaffold7448 | 21272                   | TT                              | AA                 | AA               | INTERGENIC      |               |                    |                    |
| SNP_116400_A_21307 | NW_004520762.1 | scaffold7448 | 21307                   | GG                              | CC                 | CC               | INTERGENIC      |               |                    |                    |
| SNP_116402_A_21543 | NW_004520762.1 | scaffold7448 | 21543                   | CC                              | TT                 | TT               | INTERGENIC      |               |                    |                    |
| SNP_116403_A_21681 | NW_004520762.1 | scaffold7448 | 21681                   | GG                              | AA                 | AA               | INTERGENIC      |               |                    |                    |
| SNP_116404_A_21745 | NW_004520762.1 | scaffold7448 | 21745                   | CC                              | TT                 | TT               | INTERGENIC      |               |                    |                    |
| SNP_116405_A_21863 | NW_004520762.1 | scaffold7448 | 21863                   | GG                              | AA                 | AA               | INTERGENIC      |               |                    |                    |
| SNP_116406_A_21880 | NW_004520762.1 | scaffold7448 | 21880                   | AA                              | TT                 | TT               | INTERGENIC      |               |                    |                    |
| SNP_116407_A_23086 | NW_004520762.1 | scaffold7448 | 23086                   | AA                              | GG                 | GG               | INTERGENIC      |               |                    |                    |

| SNPs IDs           | Chromosome IDs | Chromosomes  | Physical positions (bp) | CDC Frontier genome (Reference genome) | (Pusa 1103 & HPNB) | (ILWC 46 & LPNB) | Sequence genome | Components of | Gene accession IDs | Putative functions |
|--------------------|----------------|--------------|-------------------------|----------------------------------------|--------------------|------------------|-----------------|---------------|--------------------|--------------------|
| SNP_116408_A_23196 | NW_004520762.1 | scaffold7448 | 23196                   | GG                                     | AA                 | AA               | INTERGENIC      |               |                    |                    |
| SNP_116409_A_23260 | NW_004520762.1 | scaffold7448 | 23260                   | AA                                     | CC                 | CC               | INTERGENIC      |               |                    |                    |
| SNP_116410_A_23293 | NW_004520762.1 | scaffold7448 | 23293                   | TT                                     | CC                 | CC               | INTERGENIC      |               |                    |                    |
| SNP_116411_A_23405 | NW_004520762.1 | scaffold7448 | 23405                   | AA                                     | TT                 | TT               | INTERGENIC      |               |                    |                    |
| SNP_116412_A_23469 | NW_004520762.1 | scaffold7448 | 23469                   | AA                                     | CC                 | CC               | INTERGENIC      |               |                    |                    |
| SNP_116413_A_23573 | NW_004520762.1 | scaffold7448 | 23573                   | CC                                     | TT                 | TT               | INTERGENIC      |               |                    |                    |
| SNP_116414_A_23767 | NW_004520762.1 | scaffold7448 | 23767                   | TT                                     | CC                 | CC               | INTERGENIC      |               |                    |                    |
| SNP_116415_A_2605  | NW_004520765.1 | scaffold7452 | 2605                    | AA                                     | GG                 | GG               | INTERGENIC      |               |                    |                    |
| SNP_116416_A_2906  | NW_004520765.1 | scaffold7452 | 2906                    | GG                                     | CC                 | CC               | INTERGENIC      |               |                    |                    |
| SNP_116417_A_3351  | NW_004520765.1 | scaffold7452 | 3351                    | AA                                     | GG                 | GG               | INTERGENIC      |               |                    |                    |
| SNP_116418_A_3479  | NW_004520765.1 | scaffold7452 | 3479                    | TT                                     | GG                 | GG               | INTERGENIC      |               |                    |                    |
| SNP_116419_A_3483  | NW_004520765.1 | scaffold7452 | 3483                    | AA                                     | TT                 | TT               | INTERGENIC      |               |                    |                    |
| SNP_116421_A_1141  | NW_004520776.1 | scaffold7470 | 1141                    | AA                                     | TT                 | TT               | INTERGENIC      |               |                    |                    |
| SNP_116422_A_1235  | NW_004520776.1 | scaffold7470 | 1235                    | CC                                     | AA                 | AA               | INTERGENIC      |               |                    |                    |
| SNP_116423_A_1262  | NW_004520776.1 | scaffold7470 | 1262                    | AA                                     | GG                 | GG               | INTERGENIC      |               |                    |                    |
| SNP_116424_A_1328  | NW_004520776.1 | scaffold7470 | 1328                    | AA                                     | GG                 | GG               | INTERGENIC      |               |                    |                    |
| SNP_116425_A_1643  | NW_004520776.1 | scaffold7470 | 1643                    | GG                                     | TT                 | TT               | INTERGENIC      |               |                    |                    |
| SNP_116426_A_2022  | NW_004520776.1 | scaffold7470 | 2022                    | TT                                     | CC                 | CC               | INTERGENIC      |               |                    |                    |
| SNP_116427_A_2121  | NW_004520776.1 | scaffold7470 | 2121                    | GG                                     | CC                 | CC               | INTERGENIC      |               |                    |                    |
| SNP_116428_A_2342  | NW_004520776.1 | scaffold7470 | 2342                    | CC                                     | AA                 | AA               | INTERGENIC      |               |                    |                    |
| SNP_116429_A_342   | NW_004520778.1 | scaffold7473 | 342                     | TT                                     | CC                 | CC               | INTERGENIC      |               |                    |                    |
| SNP_116430_A_5891  | NW_004520780.1 | scaffold7475 | 5891                    | CC                                     | TT                 | TT               | INTERGENIC      |               |                    |                    |

| SNPs IDs           | Chromosome IDs | Chromosomes  | Physical positions (bp) | CDC Frontier (Reference genome) | (Pusa 1103 & HPNB) | (ILWC 46 & LPNB) | Sequence Components of genome | Gene accession IDs | Putative functions         |
|--------------------|----------------|--------------|-------------------------|---------------------------------|--------------------|------------------|-------------------------------|--------------------|----------------------------|
| SNP_116431_A_5898  | NW_004520780.1 | scaffold7475 | 5898                    | CC                              | TT                 | TT               | INTERGENIC                    |                    |                            |
| SNP_116432_A_973   | NW_004520781.1 | scaffold7477 | 973                     | CC                              | TT                 | TT               | DRR                           | 101493095          | cytokinin hydroxylase-like |
| SNP_116433_A_1063  | NW_004520781.1 | scaffold7477 | 1063                    | CC                              | TT                 | TT               | DRR                           | 101493095          | cytokinin hydroxylase-like |
| SNP_116434_A_1350  | NW_004520781.1 | scaffold7477 | 1350                    | AA                              | GG                 | GG               | DRR                           | 101493095          | cytokinin hydroxylase-like |
| SNP_116435_A_1439  | NW_004520781.1 | scaffold7477 | 1439                    | CC                              | TT                 | TT               | NON_SYNONYMOUS_CODING         | 101493095          | cytokinin hydroxylase-like |
| SNP_116436_A_2062  | NW_004520781.1 | scaffold7477 | 2062                    | TT                              | CC                 | CC               | INTRON                        | 101493095          | cytokinin hydroxylase-like |
| SNP_116437_A_2130  | NW_004520781.1 | scaffold7477 | 2130                    | GG                              | TT                 | TT               | INTRON                        | 101493095          | cytokinin hydroxylase-like |
| SNP_116438_A_2151  | NW_004520781.1 | scaffold7477 | 2151                    | CC                              | AA                 | AA               | INTRON                        | 101493095          | cytokinin hydroxylase-like |
| SNP_116440_A_2402  | NW_004520781.1 | scaffold7477 | 2402                    | TT                              | CC                 | CC               | INTRON                        | 101493095          | cytokinin hydroxylase-like |
| SNP_116441_A_6372  | NW_004520781.1 | scaffold7477 | 6372                    | AA                              | GG                 | GG               | INTERGENIC                    |                    |                            |
| SNP_116442_A_6406  | NW_004520781.1 | scaffold7477 | 6406                    | AA                              | TT                 | TT               | INTERGENIC                    |                    |                            |
| SNP_116443_A_6485  | NW_004520781.1 | scaffold7477 | 6485                    | GG                              | AA                 | AA               | INTERGENIC                    |                    |                            |
| SNP_116445_A_6912  | NW_004520781.1 | scaffold7477 | 6912                    | TT                              | CC                 | CC               | INTERGENIC                    |                    |                            |
| SNP_116446_A_1109  | NW_004520784.1 | scaffold7480 | 1109                    | AA                              | GG                 | GG               | INTERGENIC                    |                    |                            |
| SNP_116447_A_1144  | NW_004520784.1 | scaffold7480 | 1144                    | AA                              | GG                 | GG               | INTERGENIC                    |                    |                            |
| SNP_116448_A_3458  | NW_004520784.1 | scaffold7480 | 3458                    | CC                              | AA                 | AA               | INTERGENIC                    |                    |                            |
| SNP_116449_A_504   | NW_004520788.1 | scaffold7484 | 504                     | CC                              | TT                 | TT               | INTERGENIC                    |                    |                            |
| SNP_116450_A_19641 | NW_004520788.1 | scaffold7484 | 19641                   | GG                              | AA                 | AA               | INTERGENIC                    |                    |                            |
| SNP_116451_A_19713 | NW_004520788.1 | scaffold7484 | 19713                   | TT                              | AA                 | AA               | INTERGENIC                    |                    |                            |
| SNP_116452_A_19727 | NW_004520788.1 | scaffold7484 | 19727                   | TT                              | CC                 | CC               | INTERGENIC                    |                    |                            |
| SNP_116453_A_560   | NW_004520791.1 | scaffold7489 | 560                     | AA                              | GG                 | GG               | INTERGENIC                    |                    |                            |
| SNP_116454_A_679   | NW_004520791.1 | scaffold7489 | 679                     | TT                              | CC                 | CC               | INTERGENIC                    |                    |                            |

| SNPs IDs          | Chromosome IDs | Chromosomes  | Physical positions (bp) | CDC Frontier (Reference genome) | (Pusa 1103 & HPNB) | (ILWC 46 & LPNB) | Sequence genome | Components of | Gene accession IDs | Putative functions |
|-------------------|----------------|--------------|-------------------------|---------------------------------|--------------------|------------------|-----------------|---------------|--------------------|--------------------|
| SNP_116455_A_860  | NW_004520791.1 | scaffold7489 | 860                     | CC                              | AA                 | AA               | INTERGENIC      |               |                    |                    |
| SNP_116456_A_871  | NW_004520791.1 | scaffold7489 | 871                     | GG                              | TT                 | TT               | INTERGENIC      |               |                    |                    |
| SNP_116457_A_882  | NW_004520791.1 | scaffold7489 | 882                     | CC                              | TT                 | TT               | INTERGENIC      |               |                    |                    |
| SNP_116458_A_889  | NW_004520791.1 | scaffold7489 | 889                     | TT                              | CC                 | CC               | INTERGENIC      |               |                    |                    |
| SNP_116459_A_932  | NW_004520791.1 | scaffold7489 | 932                     | CC                              | TT                 | TT               | INTERGENIC      |               |                    |                    |
| SNP_116460_A_936  | NW_004520791.1 | scaffold7489 | 936                     | AA                              | GG                 | GG               | INTERGENIC      |               |                    |                    |
| SNP_116461_A_1005 | NW_004520791.1 | scaffold7489 | 1005                    | AA                              | GG                 | GG               | INTERGENIC      |               |                    |                    |
| SNP_116462_A_1079 | NW_004520791.1 | scaffold7489 | 1079                    | TT                              | AA                 | AA               | INTERGENIC      |               |                    |                    |
| SNP_116463_A_1168 | NW_004520791.1 | scaffold7489 | 1168                    | GG                              | TT                 | TT               | INTERGENIC      |               |                    |                    |
| SNP_116464_A_1217 | NW_004520791.1 | scaffold7489 | 1217                    | GG                              | AA                 | AA               | INTERGENIC      |               |                    |                    |
| SNP_116465_A_1361 | NW_004520791.1 | scaffold7489 | 1361                    | TT                              | GG                 | GG               | INTERGENIC      |               |                    |                    |
| SNP_116466_A_1457 | NW_004520791.1 | scaffold7489 | 1457                    | CC                              | GG                 | GG               | INTERGENIC      |               |                    |                    |
| SNP_116467_A_1559 | NW_004520791.1 | scaffold7489 | 1559                    | CC                              | AA                 | AA               | INTERGENIC      |               |                    |                    |
| SNP_116468_A_1602 | NW_004520791.1 | scaffold7489 | 1602                    | AA                              | GG                 | GG               | INTERGENIC      |               |                    |                    |
| SNP_116469_A_1619 | NW_004520791.1 | scaffold7489 | 1619                    | AA                              | TT                 | TT               | INTERGENIC      |               |                    |                    |
| SNP_116470_A_1663 | NW_004520791.1 | scaffold7489 | 1663                    | GG                              | AA                 | AA               | INTERGENIC      |               |                    |                    |
| SNP_116471_A_1696 | NW_004520791.1 | scaffold7489 | 1696                    | CC                              | TT                 | TT               | INTERGENIC      |               |                    |                    |
| SNP_116472_A_1758 | NW_004520791.1 | scaffold7489 | 1758                    | CC                              | GG                 | GG               | INTERGENIC      |               |                    |                    |
| SNP_116473_A_1765 | NW_004520791.1 | scaffold7489 | 1765                    | TT                              | AA                 | AA               | INTERGENIC      |               |                    |                    |
| SNP_116474_A_1773 | NW_004520791.1 | scaffold7489 | 1773                    | AA                              | GG                 | GG               | INTERGENIC      |               |                    |                    |
| SNP_116475_A_1788 | NW_004520791.1 | scaffold7489 | 1788                    | GG                              | AA                 | AA               | INTERGENIC      |               |                    |                    |
| SNP_116476_A_472  | NW_004520796.1 | scaffold7502 | 472                     | CC                              | TT                 | TT               | INTERGENIC      |               |                    |                    |

| SNPs IDs          | Chromosome IDs | Chromosomes  | Physical positions (bp) | CDC Frontier (Reference genome) | (Pusa 1103 & HPNB) | (ILWC 46 & LPNB) | Sequence genome | Components of | Gene accession IDs | Putative functions |
|-------------------|----------------|--------------|-------------------------|---------------------------------|--------------------|------------------|-----------------|---------------|--------------------|--------------------|
| SNP_116479_A_630  | NW_004520796.1 | scaffold7502 | 630                     | CC                              | GG                 | GG               | INTERGENIC      |               |                    |                    |
| SNP_116480_A_635  | NW_004520796.1 | scaffold7502 | 635                     | TT                              | AA                 | AA               | INTERGENIC      |               |                    |                    |
| SNP_116481_A_654  | NW_004520796.1 | scaffold7502 | 654                     | TT                              | CC                 | CC               | INTERGENIC      |               |                    |                    |
| SNP_116482_A_677  | NW_004520796.1 | scaffold7502 | 677                     | TT                              | AA                 | AA               | INTERGENIC      |               |                    |                    |
| SNP_116483_A_735  | NW_004520796.1 | scaffold7502 | 735                     | CC                              | TT                 | TT               | INTERGENIC      |               |                    |                    |
| SNP_116484_A_864  | NW_004520796.1 | scaffold7502 | 864                     | CC                              | AA                 | AA               | INTERGENIC      |               |                    |                    |
| SNP_116485_A_869  | NW_004520796.1 | scaffold7502 | 869                     | TT                              | CC                 | CC               | INTERGENIC      |               |                    |                    |
| SNP_116486_A_368  | NW_004520801.1 | scaffold7508 | 368                     | AA                              | TT                 | TT               | INTERGENIC      |               |                    |                    |
| SNP_116487_A_371  | NW_004520801.1 | scaffold7508 | 371                     | TT                              | AA                 | AA               | INTERGENIC      |               |                    |                    |
| SNP_116488_A_392  | NW_004520801.1 | scaffold7508 | 392                     | GG                              | AA                 | AA               | INTERGENIC      |               |                    |                    |
| SNP_116489_A_119  | NW_004520803.1 | scaffold7511 | 119                     | TT                              | CC                 | CC               | INTERGENIC      |               |                    |                    |
| SNP_116490_A_154  | NW_004520803.1 | scaffold7511 | 154                     | GG                              | AA                 | AA               | INTERGENIC      |               |                    |                    |
| SNP_116491_A_433  | NW_004520803.1 | scaffold7511 | 433                     | TT                              | GG                 | GG               | INTERGENIC      |               |                    |                    |
| SNP_116492_A_451  | NW_004520803.1 | scaffold7511 | 451                     | GG                              | AA                 | AA               | INTERGENIC      |               |                    |                    |
| SNP_116493_A_1106 | NW_004520803.1 | scaffold7511 | 1106                    | TT                              | CC                 | CC               | INTERGENIC      |               |                    |                    |
| SNP_116494_A_818  | NW_004520808.1 | scaffold7522 | 818                     | CC                              | TT                 | TT               | INTERGENIC      |               |                    |                    |
| SNP_116495_A_1705 | NW_004520808.1 | scaffold7522 | 1705                    | TT                              | CC                 | CC               | INTERGENIC      |               |                    |                    |
| SNP_116496_A_1719 | NW_004520808.1 | scaffold7522 | 1719                    | CC                              | TT                 | TT               | INTERGENIC      |               |                    |                    |
| SNP_116497_A_752  | NW_004520812.1 | scaffold7528 | 752                     | AA                              | GG                 | GG               | INTERGENIC      |               |                    |                    |
| SNP_116498_A_1090 | NW_004520812.1 | scaffold7528 | 1090                    | CC                              | AA                 | AA               | INTERGENIC      |               |                    |                    |
| SNP_116499_A_1092 | NW_004520812.1 | scaffold7528 | 1092                    | TT                              | CC                 | CC               | INTERGENIC      |               |                    |                    |
| SNP_116500_A_1117 | NW_004520812.1 | scaffold7528 | 1117                    | CC                              | AA                 | AA               | INTERGENIC      |               |                    |                    |

| SNPs IDs           | Chromosome IDs | Chromosomes  | Physical positions (bp) | CDC Frontier genome (Reference genome) | (Pusa 1103 & HPNB) | (ILWC 46 & LPNB) | Sequence genome | Components of | Gene accession IDs | Putative functions |
|--------------------|----------------|--------------|-------------------------|----------------------------------------|--------------------|------------------|-----------------|---------------|--------------------|--------------------|
| SNP_116501_A_1141  | NW_004520812.1 | scaffold7528 | 1141                    | TT                                     | AA                 | AA               | INTERGENIC      |               |                    |                    |
| SNP_116502_A_1686  | NW_004520812.1 | scaffold7528 | 1686                    | AA                                     | TT                 | TT               | INTERGENIC      |               |                    |                    |
| SNP_116503_A_7495  | NW_004520812.1 | scaffold7528 | 7495                    | TT                                     | CC                 | CC               | INTERGENIC      |               |                    |                    |
| SNP_116504_A_7548  | NW_004520812.1 | scaffold7528 | 7548                    | AA                                     | GG                 | GG               | INTERGENIC      |               |                    |                    |
| SNP_116505_A_7824  | NW_004520812.1 | scaffold7528 | 7824                    | GG                                     | TT                 | TT               | INTERGENIC      |               |                    |                    |
| SNP_116506_A_7872  | NW_004520812.1 | scaffold7528 | 7872                    | AA                                     | CC                 | CC               | INTERGENIC      |               |                    |                    |
| SNP_116507_A_8776  | NW_004520812.1 | scaffold7528 | 8776                    | TT                                     | CC                 | CC               | INTERGENIC      |               |                    |                    |
| SNP_116508_A_9325  | NW_004520812.1 | scaffold7528 | 9325                    | TT                                     | GG                 | GG               | INTERGENIC      |               |                    |                    |
| SNP_116509_A_9691  | NW_004520812.1 | scaffold7528 | 9691                    | TT                                     | GG                 | GG               | INTERGENIC      |               |                    |                    |
| SNP_116510_A_11117 | NW_004520812.1 | scaffold7528 | 11117                   | TT                                     | CC                 | CC               | INTERGENIC      |               |                    |                    |
| SNP_116511_A_13686 | NW_004520812.1 | scaffold7528 | 13686                   | AA                                     | TT                 | TT               | INTERGENIC      |               |                    |                    |
| SNP_116512_A_13981 | NW_004520812.1 | scaffold7528 | 13981                   | GG                                     | CC                 | CC               | INTERGENIC      |               |                    |                    |
| SNP_116513_A_14088 | NW_004520812.1 | scaffold7528 | 14088                   | CC                                     | GG                 | GG               | INTERGENIC      |               |                    |                    |
| SNP_116514_A_14144 | NW_004520812.1 | scaffold7528 | 14144                   | CC                                     | TT                 | TT               | INTERGENIC      |               |                    |                    |
| SNP_116515_A_14470 | NW_004520812.1 | scaffold7528 | 14470                   | TT                                     | CC                 | CC               | INTERGENIC      |               |                    |                    |
| SNP_116516_A_14575 | NW_004520812.1 | scaffold7528 | 14575                   | AA                                     | GG                 | GG               | INTERGENIC      |               |                    |                    |
| SNP_116517_A_14816 | NW_004520812.1 | scaffold7528 | 14816                   | GG                                     | CC                 | CC               | INTERGENIC      |               |                    |                    |
| SNP_116518_A_14917 | NW_004520812.1 | scaffold7528 | 14917                   | CC                                     | TT                 | TT               | INTERGENIC      |               |                    |                    |
| SNP_116519_A_15425 | NW_004520812.1 | scaffold7528 | 15425                   | TT                                     | GG                 | GG               | INTERGENIC      |               |                    |                    |
| SNP_116520_A_741   | NW_004520813.1 | scaffold7529 | 741                     | AA                                     | CC                 | CC               | INTERGENIC      |               |                    |                    |
| SNP_116521_A_1041  | NW_004520813.1 | scaffold7529 | 1041                    | GG                                     | CC                 | CC               | INTERGENIC      |               |                    |                    |
| SNP_116522_A_1075  | NW_004520813.1 | scaffold7529 | 1075                    | TT                                     | AA                 | AA               | INTERGENIC      |               |                    |                    |

| SNPs IDs          | Chromosome IDs | Chromosomes  | Physical positions (bp) | CDC Frontier genome (Reference genome) | (Pusa 1103 & HPNB) | (ILWC 46 & LPNB) | Sequence genome | Components of | Gene accession IDs | Putative functions |
|-------------------|----------------|--------------|-------------------------|----------------------------------------|--------------------|------------------|-----------------|---------------|--------------------|--------------------|
| SNP_116523_A_401  | NW_004520817.1 | scaffold7540 | 401                     | GG                                     | CC                 | CC               | INTERGENIC      |               |                    |                    |
| SNP_116524_A_431  | NW_004520817.1 | scaffold7540 | 431                     | TT                                     | AA                 | AA               | INTERGENIC      |               |                    |                    |
| SNP_116525_A_545  | NW_004520817.1 | scaffold7540 | 545                     | GG                                     | AA                 | AA               | INTERGENIC      |               |                    |                    |
| SNP_116526_A_1200 | NW_004520817.1 | scaffold7540 | 1200                    | TT                                     | CC                 | CC               | INTERGENIC      |               |                    |                    |
| SNP_116527_A_1226 | NW_004520817.1 | scaffold7540 | 1226                    | TT                                     | AA                 | AA               | INTERGENIC      |               |                    |                    |
| SNP_116528_A_1277 | NW_004520817.1 | scaffold7540 | 1277                    | GG                                     | AA                 | AA               | INTERGENIC      |               |                    |                    |
| SNP_116529_A_1352 | NW_004520817.1 | scaffold7540 | 1352                    | GG                                     | CC                 | CC               | INTERGENIC      |               |                    |                    |
| SNP_116530_A_1475 | NW_004520817.1 | scaffold7540 | 1475                    | GG                                     | CC                 | CC               | INTERGENIC      |               |                    |                    |
| SNP_116531_A_832  | NW_004520819.1 | scaffold7542 | 832                     | AA                                     | CC                 | CC               | INTERGENIC      |               |                    |                    |
| SNP_116532_A_454  | NW_004520821.1 | scaffold7545 | 454                     | TT                                     | AA                 | AA               | INTERGENIC      |               |                    |                    |
| SNP_116533_A_1395 | NW_004520822.1 | scaffold7546 | 1395                    | CC                                     | AA                 | AA               | INTERGENIC      |               |                    |                    |
| SNP_116534_A_1420 | NW_004520822.1 | scaffold7546 | 1420                    | CC                                     | GG                 | GG               | INTERGENIC      |               |                    |                    |
| SNP_116535_A_477  | NW_004520824.1 | scaffold7551 | 477                     | CC                                     | TT                 | TT               | INTERGENIC      |               |                    |                    |
| SNP_116536_A_495  | NW_004520824.1 | scaffold7551 | 495                     | GG                                     | TT                 | TT               | INTERGENIC      |               |                    |                    |
| SNP_116537_A_713  | NW_004520824.1 | scaffold7551 | 713                     | TT                                     | CC                 | CC               | INTERGENIC      |               |                    |                    |
| SNP_116538_A_2120 | NW_004520829.1 | scaffold7559 | 2120                    | TT                                     | AA                 | AA               | INTERGENIC      |               |                    |                    |
| SNP_116539_A_1899 | NW_004520832.1 | scaffold7564 | 1899                    | AA                                     | GG                 | GG               | INTERGENIC      |               |                    |                    |
| SNP_116540_A_1925 | NW_004520832.1 | scaffold7564 | 1925                    | AA                                     | CC                 | CC               | INTERGENIC      |               |                    |                    |
| SNP_116541_A_1987 | NW_004520832.1 | scaffold7564 | 1987                    | CC                                     | TT                 | TT               | INTERGENIC      |               |                    |                    |
| SNP_116542_A_2000 | NW_004520832.1 | scaffold7564 | 2000                    | CC                                     | TT                 | TT               | INTERGENIC      |               |                    |                    |
| SNP_116543_A_2059 | NW_004520832.1 | scaffold7564 | 2059                    | AA                                     | TT                 | TT               | INTERGENIC      |               |                    |                    |
| SNP_116544_A_2083 | NW_004520832.1 | scaffold7564 | 2083                    | CC                                     | AA                 | AA               | INTERGENIC      |               |                    |                    |

| SNPs IDs          | Chromosome IDs | Chromosomes  | Physical positions (bp) | CDC Frontier (Reference genome) | (Pusa 1103 & HPNB) | (ILWC 46 & LPNB) | Sequence genome | Components of | Gene accession IDs | Putative functions |
|-------------------|----------------|--------------|-------------------------|---------------------------------|--------------------|------------------|-----------------|---------------|--------------------|--------------------|
| SNP_116545_A_2152 | NW_004520832.1 | scaffold7564 | 2152                    | AA                              | CC                 | CC               | INTERGENIC      |               |                    |                    |
| SNP_116546_A_450  | NW_004520833.1 | scaffold7565 | 450                     | TT                              | CC                 | CC               | INTERGENIC      |               |                    |                    |
| SNP_116547_A_646  | NW_004520833.1 | scaffold7565 | 646                     | CC                              | TT                 | TT               | INTERGENIC      |               |                    |                    |
| SNP_116548_A_668  | NW_004520833.1 | scaffold7565 | 668                     | CC                              | TT                 | TT               | INTERGENIC      |               |                    |                    |
| SNP_116549_A_707  | NW_004520833.1 | scaffold7565 | 707                     | GG                              | CC                 | CC               | INTERGENIC      |               |                    |                    |
| SNP_116550_A_1071 | NW_004520833.1 | scaffold7565 | 1071                    | TT                              | GG                 | GG               | INTERGENIC      |               |                    |                    |
| SNP_116551_A_2359 | NW_004520833.1 | scaffold7565 | 2359                    | AA                              | GG                 | GG               | INTERGENIC      |               |                    |                    |
| SNP_116552_A_2589 | NW_004520833.1 | scaffold7565 | 2589                    | TT                              | AA                 | AA               | INTERGENIC      |               |                    |                    |
| SNP_116553_A_3019 | NW_004520833.1 | scaffold7565 | 3019                    | AA                              | GG                 | GG               | INTERGENIC      |               |                    |                    |
| SNP_116554_A_4442 | NW_004520833.1 | scaffold7565 | 4442                    | CC                              | AA                 | AA               | INTERGENIC      |               |                    |                    |
| SNP_116555_A_4443 | NW_004520833.1 | scaffold7565 | 4443                    | GG                              | AA                 | AA               | INTERGENIC      |               |                    |                    |
| SNP_116556_A_4736 | NW_004520833.1 | scaffold7565 | 4736                    | TT                              | CC                 | CC               | INTERGENIC      |               |                    |                    |
| SNP_116557_A_4788 | NW_004520833.1 | scaffold7565 | 4788                    | AA                              | GG                 | GG               | INTERGENIC      |               |                    |                    |
| SNP_116558_A_4814 | NW_004520833.1 | scaffold7565 | 4814                    | TT                              | CC                 | CC               | INTERGENIC      |               |                    |                    |
| SNP_116559_A_4854 | NW_004520833.1 | scaffold7565 | 4854                    | AA                              | TT                 | TT               | INTERGENIC      |               |                    |                    |
| SNP_116560_A_4877 | NW_004520833.1 | scaffold7565 | 4877                    | TT                              | CC                 | CC               | INTERGENIC      |               |                    |                    |
| SNP_116561_A_5050 | NW_004520833.1 | scaffold7565 | 5050                    | GG                              | AA                 | AA               | INTERGENIC      |               |                    |                    |
| SNP_116562_A_5107 | NW_004520833.1 | scaffold7565 | 5107                    | GG                              | AA                 | AA               | INTERGENIC      |               |                    |                    |
| SNP_116563_A_5163 | NW_004520833.1 | scaffold7565 | 5163                    | AA                              | TT                 | TT               | INTERGENIC      |               |                    |                    |
| SNP_116564_A_5334 | NW_004520833.1 | scaffold7565 | 5334                    | GG                              | AA                 | AA               | INTERGENIC      |               |                    |                    |
| SNP_116565_A_469  | NW_004520836.1 | scaffold7569 | 469                     | AA                              | GG                 | GG               | INTERGENIC      |               |                    |                    |
| SNP_116566_A_684  | NW_004520836.1 | scaffold7569 | 684                     | AA                              | GG                 | GG               | INTERGENIC      |               |                    |                    |



| SNPs IDs          | Chromosome IDs | Chromosomes  | Physical positions (bp) | CDC Frontier (Reference genome) | (Pusa 1103 & HPNB) | (ILWC 46 & LPNB) | Sequence genome | Components of | Gene accession IDs | Putative functions |
|-------------------|----------------|--------------|-------------------------|---------------------------------|--------------------|------------------|-----------------|---------------|--------------------|--------------------|
| SNP_116567_A_718  | NW_004520836.1 | scaffold7569 | 718                     | TT                              | GG                 | GG               | INTERGENIC      |               |                    |                    |
| SNP_116568_A_729  | NW_004520836.1 | scaffold7569 | 729                     | AA                              | GG                 | GG               | INTERGENIC      |               |                    |                    |
| SNP_116569_A_747  | NW_004520836.1 | scaffold7569 | 747                     | CC                              | TT                 | TT               | INTERGENIC      |               |                    |                    |
| SNP_116570_A_691  | NW_004520837.1 | scaffold7571 | 691                     | CC                              | TT                 | TT               | INTERGENIC      |               |                    |                    |
| SNP_116571_A_325  | NW_004520842.1 | scaffold7576 | 325                     | TT                              | CC                 | CC               | INTERGENIC      |               |                    |                    |
| SNP_116572_A_359  | NW_004520842.1 | scaffold7576 | 359                     | GG                              | AA                 | AA               | INTERGENIC      |               |                    |                    |
| SNP_116573_A_406  | NW_004520842.1 | scaffold7576 | 406                     | GG                              | AA                 | AA               | INTERGENIC      |               |                    |                    |
| SNP_116574_A_514  | NW_004520842.1 | scaffold7576 | 514                     | AA                              | TT                 | TT               | INTERGENIC      |               |                    |                    |
| SNP_116575_A_599  | NW_004520842.1 | scaffold7576 | 599                     | TT                              | CC                 | CC               | INTERGENIC      |               |                    |                    |
| SNP_116576_A_608  | NW_004520842.1 | scaffold7576 | 608                     | AA                              | GG                 | GG               | INTERGENIC      |               |                    |                    |
| SNP_116577_A_732  | NW_004520842.1 | scaffold7576 | 732                     | AA                              | CC                 | CC               | INTERGENIC      |               |                    |                    |
| SNP_116578_A_826  | NW_004520842.1 | scaffold7576 | 826                     | CC                              | TT                 | TT               | INTERGENIC      |               |                    |                    |
| SNP_116580_A_331  | NW_004520847.1 | scaffold7584 | 331                     | AA                              | GG                 | GG               | INTERGENIC      |               |                    |                    |
| SNP_116581_A_353  | NW_004520847.1 | scaffold7584 | 353                     | CC                              | AA                 | AA               | INTERGENIC      |               |                    |                    |
| SNP_116582_A_413  | NW_004520847.1 | scaffold7584 | 413                     | AA                              | TT                 | TT               | INTERGENIC      |               |                    |                    |
| SNP_116583_A_596  | NW_004520847.1 | scaffold7584 | 596                     | CC                              | GG                 | GG               | INTERGENIC      |               |                    |                    |
| SNP_116584_A_764  | NW_004520847.1 | scaffold7584 | 764                     | AA                              | TT                 | TT               | INTERGENIC      |               |                    |                    |
| SNP_116585_A_779  | NW_004520847.1 | scaffold7584 | 779                     | TT                              | CC                 | CC               | INTERGENIC      |               |                    |                    |
| SNP_116587_A_958  | NW_004520847.1 | scaffold7584 | 958                     | TT                              | GG                 | GG               | INTERGENIC      |               |                    |                    |
| SNP_116588_A_1036 | NW_004520847.1 | scaffold7584 | 1036                    | TT                              | AA                 | AA               | INTERGENIC      |               |                    |                    |
| SNP_116589_A_1042 | NW_004520847.1 | scaffold7584 | 1042                    | TT                              | CC                 | CC               | INTERGENIC      |               |                    |                    |
| SNP_116590_A_1059 | NW_004520847.1 | scaffold7584 | 1059                    | AA                              | TT                 | TT               | INTERGENIC      |               |                    |                    |

| SNPs IDs          | Chromosome IDs | Chromosomes  | Physical positions (bp) | CDC Frontier (Reference genome) | (Pusa 1103 & HPNB) | (ILWC 46 & LPNB) | Sequence genome | Components of | Gene accession IDs | Putative functions |
|-------------------|----------------|--------------|-------------------------|---------------------------------|--------------------|------------------|-----------------|---------------|--------------------|--------------------|
| SNP_116591_A_172  | NW_004520849.1 | scaffold7590 | 172                     | TT                              | CC                 | CC               | INTERGENIC      |               |                    |                    |
| SNP_116592_A_4735 | NW_004520849.1 | scaffold7590 | 4735                    | GG                              | TT                 | TT               | INTERGENIC      |               |                    |                    |
| SNP_116593_A_4797 | NW_004520849.1 | scaffold7590 | 4797                    | TT                              | CC                 | CC               | INTERGENIC      |               |                    |                    |
| SNP_116594_A_4875 | NW_004520849.1 | scaffold7590 | 4875                    | AA                              | CC                 | CC               | INTERGENIC      |               |                    |                    |
| SNP_116595_A_4983 | NW_004520849.1 | scaffold7590 | 4983                    | CC                              | TT                 | TT               | INTERGENIC      |               |                    |                    |
| SNP_116596_A_4998 | NW_004520849.1 | scaffold7590 | 4998                    | TT                              | CC                 | CC               | INTERGENIC      |               |                    |                    |
| SNP_116597_A_5000 | NW_004520849.1 | scaffold7590 | 5000                    | TT                              | CC                 | CC               | INTERGENIC      |               |                    |                    |
| SNP_116598_A_5085 | NW_004520849.1 | scaffold7590 | 5085                    | AA                              | GG                 | GG               | INTERGENIC      |               |                    |                    |
| SNP_116599_A_5102 | NW_004520849.1 | scaffold7590 | 5102                    | GG                              | AA                 | AA               | INTERGENIC      |               |                    |                    |
| SNP_116600_A_5168 | NW_004520849.1 | scaffold7590 | 5168                    | TT                              | CC                 | CC               | INTERGENIC      |               |                    |                    |
| SNP_116601_A_5176 | NW_004520849.1 | scaffold7590 | 5176                    | GG                              | AA                 | AA               | INTERGENIC      |               |                    |                    |
| SNP_116602_A_5202 | NW_004520849.1 | scaffold7590 | 5202                    | AA                              | GG                 | GG               | INTERGENIC      |               |                    |                    |
| SNP_116603_A_5229 | NW_004520849.1 | scaffold7590 | 5229                    | AA                              | CC                 | CC               | INTERGENIC      |               |                    |                    |
| SNP_116604_A_5301 | NW_004520849.1 | scaffold7590 | 5301                    | AA                              | GG                 | GG               | INTERGENIC      |               |                    |                    |
| SNP_116605_A_5327 | NW_004520849.1 | scaffold7590 | 5327                    | AA                              | GG                 | GG               | INTERGENIC      |               |                    |                    |
| SNP_116606_A_5335 | NW_004520849.1 | scaffold7590 | 5335                    | GG                              | TT                 | TT               | INTERGENIC      |               |                    |                    |
| SNP_116607_A_5488 | NW_004520849.1 | scaffold7590 | 5488                    | GG                              | AA                 | AA               | INTERGENIC      |               |                    |                    |
| SNP_116608_A_5661 | NW_004520849.1 | scaffold7590 | 5661                    | CC                              | GG                 | GG               | INTERGENIC      |               |                    |                    |
| SNP_116609_A_100  | NW_004520853.1 | scaffold7595 | 100                     | CC                              | GG                 | GG               | INTERGENIC      |               |                    |                    |
| SNP_116610_A_277  | NW_004520853.1 | scaffold7595 | 277                     | GG                              | TT                 | TT               | INTERGENIC      |               |                    |                    |
| SNP_116611_A_378  | NW_004520853.1 | scaffold7595 | 378                     | TT                              | CC                 | CC               | INTERGENIC      |               |                    |                    |
| SNP_116612_A_412  | NW_004520853.1 | scaffold7595 | 412                     | CC                              | TT                 | TT               | INTERGENIC      |               |                    |                    |

| SNPs IDs          | Chromosome IDs | Chromosomes  | Physical positions (bp) | CDC Frontier (Reference genome) | (Pusa 1103 & HPNB) | (ILWC 46 & LPNB) | Sequence genome | Components of | Gene accession IDs | Putative functions |
|-------------------|----------------|--------------|-------------------------|---------------------------------|--------------------|------------------|-----------------|---------------|--------------------|--------------------|
| SNP_116613_A_478  | NW_004520853.1 | scaffold7595 | 478                     | CC                              | GG                 | GG               | INTERGENIC      |               |                    |                    |
| SNP_116614_A_521  | NW_004520853.1 | scaffold7595 | 521                     | AA                              | CC                 | CC               | INTERGENIC      |               |                    |                    |
| SNP_116615_A_552  | NW_004520853.1 | scaffold7595 | 552                     | AA                              | TT                 | TT               | INTERGENIC      |               |                    |                    |
| SNP_116616_A_617  | NW_004520853.1 | scaffold7595 | 617                     | GG                              | TT                 | TT               | INTERGENIC      |               |                    |                    |
| SNP_116617_A_620  | NW_004520853.1 | scaffold7595 | 620                     | GG                              | TT                 | TT               | INTERGENIC      |               |                    |                    |
| SNP_116618_A_708  | NW_004520853.1 | scaffold7595 | 708                     | TT                              | CC                 | CC               | INTERGENIC      |               |                    |                    |
| SNP_116619_A_733  | NW_004520853.1 | scaffold7595 | 733                     | TT                              | AA                 | AA               | INTERGENIC      |               |                    |                    |
| SNP_116620_A_738  | NW_004520853.1 | scaffold7595 | 738                     | GG                              | TT                 | TT               | INTERGENIC      |               |                    |                    |
| SNP_116621_A_1181 | NW_004520853.1 | scaffold7595 | 1181                    | GG                              | CC                 | CC               | INTERGENIC      |               |                    |                    |
| SNP_116622_A_1101 | NW_004520854.1 | scaffold7596 | 1101                    | AA                              | CC                 | CC               | INTERGENIC      |               |                    |                    |
| SNP_116623_A_82   | NW_004520855.1 | scaffold7599 | 82                      | AA                              | GG                 | GG               | INTERGENIC      |               |                    |                    |
| SNP_116624_A_151  | NW_004520855.1 | scaffold7599 | 151                     | CC                              | TT                 | TT               | INTERGENIC      |               |                    |                    |
| SNP_116627_A_903  | NW_004520855.1 | scaffold7599 | 903                     | AA                              | CC                 | CC               | INTERGENIC      |               |                    |                    |
| SNP_116628_A_1022 | NW_004520855.1 | scaffold7599 | 1022                    | TT                              | CC                 | CC               | INTERGENIC      |               |                    |                    |
| SNP_116629_A_1259 | NW_004520855.1 | scaffold7599 | 1259                    | TT                              | AA                 | AA               | INTERGENIC      |               |                    |                    |
| SNP_116630_A_942  | NW_004520857.1 | scaffold7601 | 942                     | CC                              | AA                 | AA               | INTERGENIC      |               |                    |                    |
| SNP_116631_A_407  | NW_004520861.1 | scaffold7610 | 407                     | AA                              | GG                 | GG               | INTERGENIC      |               |                    |                    |
| SNP_116632_A_654  | NW_004520861.1 | scaffold7610 | 654                     | GG                              | AA                 | AA               | INTERGENIC      |               |                    |                    |
| SNP_116633_A_1094 | NW_004520861.1 | scaffold7610 | 1094                    | AA                              | GG                 | GG               | INTERGENIC      |               |                    |                    |
| SNP_116634_A_1113 | NW_004520861.1 | scaffold7610 | 1113                    | GG                              | AA                 | AA               | INTERGENIC      |               |                    |                    |
| SNP_116635_A_1001 | NW_004520864.1 | scaffold7616 | 1001                    | AA                              | GG                 | GG               | INTERGENIC      |               |                    |                    |
| SNP_116636_A_219  | NW_004520865.1 | scaffold7617 | 219                     | AA                              | TT                 | TT               | INTERGENIC      |               |                    |                    |

| SNPs IDs         | Chromosome IDs | Chromosomes  | Physical positions (bp) | CDC Frontier (Reference genome) | (Pusa 1103 & HPNB) | (ILWC 46 & LPNB) | Sequence genome | Components of | Gene accession IDs | Putative functions |
|------------------|----------------|--------------|-------------------------|---------------------------------|--------------------|------------------|-----------------|---------------|--------------------|--------------------|
| SNP_116637_A_247 | NW_004520865.1 | scaffold7617 | 247                     | AA                              | GG                 | GG               | INTERGENIC      |               |                    |                    |
| SNP_116638_A_249 | NW_004520865.1 | scaffold7617 | 249                     | GG                              | CC                 | CC               | INTERGENIC      |               |                    |                    |
| SNP_116639_A_271 | NW_004520865.1 | scaffold7617 | 271                     | TT                              | AA                 | AA               | INTERGENIC      |               |                    |                    |
| SNP_116640_A_279 | NW_004520865.1 | scaffold7617 | 279                     | GG                              | AA                 | AA               | INTERGENIC      |               |                    |                    |
| SNP_116641_A_358 | NW_004520865.1 | scaffold7617 | 358                     | AA                              | TT                 | TT               | INTERGENIC      |               |                    |                    |
| SNP_116642_A_385 | NW_004520865.1 | scaffold7617 | 385                     | GG                              | CC                 | CC               | INTERGENIC      |               |                    |                    |
| SNP_116643_A_442 | NW_004520865.1 | scaffold7617 | 442                     | TT                              | GG                 | GG               | INTERGENIC      |               |                    |                    |
| SNP_116644_A_449 | NW_004520865.1 | scaffold7617 | 449                     | AA                              | CC                 | CC               | INTERGENIC      |               |                    |                    |
| SNP_116645_A_455 | NW_004520865.1 | scaffold7617 | 455                     | CC                              | TT                 | TT               | INTERGENIC      |               |                    |                    |
| SNP_116646_A_457 | NW_004520865.1 | scaffold7617 | 457                     | GG                              | AA                 | AA               | INTERGENIC      |               |                    |                    |
| SNP_116647_A_498 | NW_004520865.1 | scaffold7617 | 498                     | AA                              | GG                 | GG               | INTERGENIC      |               |                    |                    |
| SNP_116648_A_526 | NW_004520865.1 | scaffold7617 | 526                     | AA                              | TT                 | TT               | INTERGENIC      |               |                    |                    |
| SNP_116649_A_534 | NW_004520865.1 | scaffold7617 | 534                     | TT                              | CC                 | CC               | INTERGENIC      |               |                    |                    |
| SNP_116650_A_569 | NW_004520865.1 | scaffold7617 | 569                     | CC                              | TT                 | TT               | INTERGENIC      |               |                    |                    |
| SNP_116651_A_700 | NW_004520865.1 | scaffold7617 | 700                     | GG                              | TT                 | TT               | INTERGENIC      |               |                    |                    |
| SNP_116652_A_713 | NW_004520865.1 | scaffold7617 | 713                     | CC                              | AA                 | AA               | INTERGENIC      |               |                    |                    |
| SNP_116653_A_731 | NW_004520865.1 | scaffold7617 | 731                     | GG                              | AA                 | AA               | INTERGENIC      |               |                    |                    |
| SNP_116654_A_750 | NW_004520865.1 | scaffold7617 | 750                     | AA                              | TT                 | TT               | INTERGENIC      |               |                    |                    |
| SNP_116655_A_779 | NW_004520865.1 | scaffold7617 | 779                     | GG                              | CC                 | CC               | INTERGENIC      |               |                    |                    |
| SNP_116656_A_820 | NW_004520865.1 | scaffold7617 | 820                     | GG                              | AA                 | AA               | INTERGENIC      |               |                    |                    |
| SNP_116657_A_831 | NW_004520865.1 | scaffold7617 | 831                     | AA                              | TT                 | TT               | INTERGENIC      |               |                    |                    |
| SNP_116658_A_834 | NW_004520865.1 | scaffold7617 | 834                     | AA                              | CC                 | CC               | INTERGENIC      |               |                    |                    |

| SNPs IDs          | Chromosome IDs | Chromosomes  | Physical positions (bp) | CDC Frontier (Reference genome) | (Pusa 1103 & HPNB) | (ILWC 46 & LPNB) | Sequence genome | Components of | Gene accession IDs   | Putative functions |
|-------------------|----------------|--------------|-------------------------|---------------------------------|--------------------|------------------|-----------------|---------------|----------------------|--------------------|
| SNP_116659_A_856  | NW_004520865.1 | scaffold7617 | 856                     | GG                              | TT                 | TT               | INTERGENIC      |               |                      |                    |
| SNP_116660_A_917  | NW_004520865.1 | scaffold7617 | 917                     | GG                              | CC                 | CC               | INTERGENIC      |               |                      |                    |
| SNP_116661_A_943  | NW_004520865.1 | scaffold7617 | 943                     | AA                              | CC                 | CC               | INTERGENIC      |               |                      |                    |
| SNP_116662_A_965  | NW_004520865.1 | scaffold7617 | 965                     | GG                              | TT                 | TT               | INTERGENIC      |               |                      |                    |
| SNP_116663_A_975  | NW_004520865.1 | scaffold7617 | 975                     | GG                              | CC                 | CC               | INTERGENIC      |               |                      |                    |
| SNP_116664_A_1022 | NW_004520865.1 | scaffold7617 | 1022                    | TT                              | GG                 | GG               | INTERGENIC      |               |                      |                    |
| SNP_116665_A_1024 | NW_004520865.1 | scaffold7617 | 1024                    | AA                              | GG                 | GG               | INTERGENIC      |               |                      |                    |
| SNP_116666_A_1038 | NW_004520865.1 | scaffold7617 | 1038                    | AA                              | TT                 | TT               | INTERGENIC      |               |                      |                    |
| SNP_116668_A_1055 | NW_004520865.1 | scaffold7617 | 1055                    | CC                              | TT                 | TT               | INTERGENIC      |               |                      |                    |
| SNP_116669_A_1072 | NW_004520865.1 | scaffold7617 | 1072                    | TT                              | CC                 | CC               | INTERGENIC      |               |                      |                    |
| SNP_116670_A_1197 | NW_004520865.1 | scaffold7617 | 1197                    | TT                              | CC                 | CC               | INTERGENIC      |               |                      |                    |
| SNP_116671_A_1260 | NW_004520865.1 | scaffold7617 | 1260                    | TT                              | AA                 | AA               | INTERGENIC      |               |                      |                    |
| SNP_116672_A_1828 | NW_004520866.1 | scaffold7621 | 1828                    | CC                              | TT                 | TT               | INTERGENIC      |               |                      |                    |
| SNP_116673_A_890  | NW_004520876.1 | scaffold7642 | 890                     | CC                              | GG                 | GG               | INTERGENIC      |               |                      |                    |
| SNP_116674_A_9099 | NW_004520879.1 | scaffold7650 | 9099                    | TT                              | GG                 | GG               | URR             | 101494277     | SKP1-like protein 14 |                    |
| SNP_116677_A_9997 | NW_004520879.1 | scaffold7650 | 9997                    | GG                              | AA                 | AA               | URR             | 101494277     | SKP1-like protein 14 |                    |
| SNP_116678_A_647  | NW_004520885.1 | scaffold7657 | 647                     | AA                              | GG                 | GG               | INTERGENIC      |               |                      |                    |
| SNP_116679_A_651  | NW_004520885.1 | scaffold7657 | 651                     | AA                              | TT                 | TT               | INTERGENIC      |               |                      |                    |
| SNP_116681_A_781  | NW_004520885.1 | scaffold7657 | 781                     | TT                              | AA                 | AA               | INTERGENIC      |               |                      |                    |
| SNP_116682_A_802  | NW_004520885.1 | scaffold7657 | 802                     | GG                              | AA                 | AA               | INTERGENIC      |               |                      |                    |
| SNP_116683_A_398  | NW_004520886.1 | scaffold7660 | 398                     | CC                              | AA                 | AA               | INTERGENIC      |               |                      |                    |
| SNP_116684_A_411  | NW_004520886.1 | scaffold7660 | 411                     | TT                              | GG                 | GG               | INTERGENIC      |               |                      |                    |

| SNPs IDs          | Chromosome IDs | Chromosomes  | Physical positions (bp) | CDC Frontier (Reference genome) | (Pusa 1103 & HPNB) | (ILWC 46 & LPNB) | Sequence genome | Components of | Gene accession IDs | Putative functions |
|-------------------|----------------|--------------|-------------------------|---------------------------------|--------------------|------------------|-----------------|---------------|--------------------|--------------------|
| SNP_116685_A_419  | NW_004520886.1 | scaffold7660 | 419                     | GG                              | AA                 | AA               | INTERGENIC      |               |                    |                    |
| SNP_116686_A_697  | NW_004520887.1 | scaffold7661 | 697                     | CC                              | TT                 | TT               | INTERGENIC      |               |                    |                    |
| SNP_116687_A_834  | NW_004520887.1 | scaffold7661 | 834                     | CC                              | AA                 | AA               | INTERGENIC      |               |                    |                    |
| SNP_116689_A_92   | NW_004520888.1 | scaffold7663 | 92                      | GG                              | AA                 | AA               | INTERGENIC      |               |                    |                    |
| SNP_116691_A_2653 | NW_004520896.1 | scaffold7679 | 2653                    | GG                              | CC                 | CC               | INTERGENIC      |               |                    |                    |
| SNP_116692_A_6002 | NW_004520899.1 | scaffold7682 | 6002                    | AA                              | GG                 | GG               | INTERGENIC      |               |                    |                    |
| SNP_116693_A_6014 | NW_004520899.1 | scaffold7682 | 6014                    | TT                              | AA                 | AA               | INTERGENIC      |               |                    |                    |
| SNP_116694_A_444  | NW_004520908.1 | scaffold7697 | 444                     | GG                              | CC                 | CC               | INTERGENIC      |               |                    |                    |
| SNP_116696_A_653  | NW_004520908.1 | scaffold7697 | 653                     | AA                              | GG                 | GG               | INTERGENIC      |               |                    |                    |
| SNP_116697_A_676  | NW_004520908.1 | scaffold7697 | 676                     | GG                              | CC                 | CC               | INTERGENIC      |               |                    |                    |
| SNP_116698_A_729  | NW_004520908.1 | scaffold7697 | 729                     | AA                              | TT                 | TT               | INTERGENIC      |               |                    |                    |
| SNP_116699_A_790  | NW_004520908.1 | scaffold7697 | 790                     | TT                              | CC                 | CC               | INTERGENIC      |               |                    |                    |
| SNP_116700_A_668  | NW_004520909.1 | scaffold7698 | 668                     | GG                              | CC                 | CC               | INTERGENIC      |               |                    |                    |
| SNP_116701_A_704  | NW_004520909.1 | scaffold7698 | 704                     | AA                              | TT                 | TT               | INTERGENIC      |               |                    |                    |
| SNP_116702_A_798  | NW_004520909.1 | scaffold7698 | 798                     | GG                              | AA                 | AA               | INTERGENIC      |               |                    |                    |
| SNP_116703_A_800  | NW_004520909.1 | scaffold7698 | 800                     | CC                              | TT                 | TT               | INTERGENIC      |               |                    |                    |
| SNP_116704_A_855  | NW_004520909.1 | scaffold7698 | 855                     | AA                              | GG                 | GG               | INTERGENIC      |               |                    |                    |
| SNP_116705_A_890  | NW_004520909.1 | scaffold7698 | 890                     | AA                              | GG                 | GG               | INTERGENIC      |               |                    |                    |
| SNP_116707_A_979  | NW_004520909.1 | scaffold7698 | 979                     | CC                              | GG                 | GG               | INTERGENIC      |               |                    |                    |
| SNP_116708_A_1012 | NW_004520909.1 | scaffold7698 | 1012                    | AA                              | GG                 | GG               | INTERGENIC      |               |                    |                    |
| SNP_116709_A_1027 | NW_004520909.1 | scaffold7698 | 1027                    | CC                              | AA                 | AA               | INTERGENIC      |               |                    |                    |
| SNP_116710_A_1125 | NW_004520909.1 | scaffold7698 | 1125                    | TT                              | CC                 | CC               | INTERGENIC      |               |                    |                    |

| SNPs IDs          | Chromosome IDs | Chromosomes  | Physical positions (bp) | CDC Frontier (Reference genome) | (Pusa 1103 & HPNB) | (ILWC 46 & LPNB) | Sequence Components of genome | Gene accession IDs | Putative functions                        |
|-------------------|----------------|--------------|-------------------------|---------------------------------|--------------------|------------------|-------------------------------|--------------------|-------------------------------------------|
| SNP_116711_A_542  | NW_004520912.1 | scaffold7701 | 542                     | AA                              | TT                 | TT               | INTERGENIC                    |                    |                                           |
| SNP_116712_A_5228 | NW_004520919.1 | scaffold7715 | 5228                    | GG                              | TT                 | TT               | URR                           | 101494586          | fasciclin-like arabinogalactan protein 21 |
| SNP_116713_A_5252 | NW_004520919.1 | scaffold7715 | 5252                    | AA                              | TT                 | TT               | URR                           | 101494586          | fasciclin-like arabinogalactan protein 21 |
| SNP_116714_A_5258 | NW_004520919.1 | scaffold7715 | 5258                    | GG                              | CC                 | CC               | URR                           | 101494586          | fasciclin-like arabinogalactan protein 21 |
| SNP_116715_A_5795 | NW_004520919.1 | scaffold7715 | 5795                    | GG                              | CC                 | CC               | URR                           | 101494586          | fasciclin-like arabinogalactan protein 21 |
| SNP_116716_A_5852 | NW_004520919.1 | scaffold7715 | 5852                    | TT                              | CC                 | CC               | URR                           | 101494586          | fasciclin-like arabinogalactan protein 21 |
| SNP_116717_A_5874 | NW_004520919.1 | scaffold7715 | 5874                    | AA                              | TT                 | TT               | URR                           | 101494586          | fasciclin-like arabinogalactan protein 21 |
| SNP_116718_A_5930 | NW_004520919.1 | scaffold7715 | 5930                    | CC                              | TT                 | TT               | URR                           | 101494586          | fasciclin-like arabinogalactan protein 21 |
| SNP_116719_A_5950 | NW_004520919.1 | scaffold7715 | 5950                    | TT                              | CC                 | CC               | URR                           | 101494586          | fasciclin-like arabinogalactan protein 21 |
| SNP_116720_A_1131 | NW_004520920.1 | scaffold7716 | 1131                    | AA                              | GG                 | GG               | INTERGENIC                    |                    |                                           |
| SNP_116721_A_1312 | NW_004520921.1 | scaffold7717 | 1312                    | TT                              | CC                 | CC               | INTERGENIC                    |                    |                                           |
| SNP_116722_A_1331 | NW_004520921.1 | scaffold7717 | 1331                    | CC                              | TT                 | TT               | INTERGENIC                    |                    |                                           |
| SNP_116723_A_1022 | NW_004520923.1 | scaffold7724 | 1022                    | CC                              | TT                 | TT               | INTERGENIC                    |                    |                                           |
| SNP_116724_A_1118 | NW_004520923.1 | scaffold7724 | 1118                    | AA                              | CC                 | CC               | INTERGENIC                    |                    |                                           |
| SNP_116725_A_1198 | NW_004520923.1 | scaffold7724 | 1198                    | TT                              | CC                 | CC               | INTERGENIC                    |                    |                                           |
| SNP_116726_A_1230 | NW_004520923.1 | scaffold7724 | 1230                    | CC                              | TT                 | TT               | INTERGENIC                    |                    |                                           |
| SNP_116727_A_1481 | NW_004520923.1 | scaffold7724 | 1481                    | AA                              | GG                 | GG               | INTERGENIC                    |                    |                                           |
| SNP_116728_A_1597 | NW_004520923.1 | scaffold7724 | 1597                    | AA                              | GG                 | GG               | INTERGENIC                    |                    |                                           |
| SNP_116729_A_2484 | NW_004520923.1 | scaffold7724 | 2484                    | TT                              | GG                 | GG               | INTERGENIC                    |                    |                                           |
| SNP_116730_A_3524 | NW_004520923.1 | scaffold7724 | 3524                    | CC                              | TT                 | TT               | INTERGENIC                    |                    |                                           |
| SNP_116731_A_3543 | NW_004520923.1 | scaffold7724 | 3543                    | GG                              | TT                 | TT               | INTERGENIC                    |                    |                                           |
| SNP_116732_A_3567 | NW_004520923.1 | scaffold7724 | 3567                    | GG                              | AA                 | AA               | INTERGENIC                    |                    |                                           |

| SNPs IDs          | Chromosome IDs | Chromosomes  | Physical positions (bp) | CDC Frontier (Reference genome) | (Pusa 1103 & HPNB) | (ILWC 46 & LPNB) | Sequence genome | Components of | Gene accession IDs | Putative functions |
|-------------------|----------------|--------------|-------------------------|---------------------------------|--------------------|------------------|-----------------|---------------|--------------------|--------------------|
| SNP_116733_A_3569 | NW_004520923.1 | scaffold7724 | 3569                    | GG                              | TT                 | TT               | INTERGENIC      |               |                    |                    |
| SNP_116734_A_3578 | NW_004520923.1 | scaffold7724 | 3578                    | CC                              | AA                 | AA               | INTERGENIC      |               |                    |                    |
| SNP_116735_A_819  | NW_004520927.1 | scaffold7731 | 819                     | TT                              | CC                 | CC               | INTERGENIC      |               |                    |                    |
| SNP_116736_A_1182 | NW_004520927.1 | scaffold7731 | 1182                    | TT                              | CC                 | CC               | INTERGENIC      |               |                    |                    |
| SNP_116737_A_477  | NW_004520932.1 | scaffold7739 | 477                     | CC                              | AA                 | AA               | INTERGENIC      |               |                    |                    |
| SNP_116738_A_269  | NW_004520933.1 | scaffold7740 | 269                     | AA                              | GG                 | GG               | INTERGENIC      |               |                    |                    |
| SNP_116739_A_696  | NW_004520933.1 | scaffold7740 | 696                     | TT                              | GG                 | GG               | INTERGENIC      |               |                    |                    |
| SNP_116740_A_1618 | NW_004520933.1 | scaffold7740 | 1618                    | CC                              | TT                 | TT               | INTERGENIC      |               |                    |                    |
| SNP_116741_A_1627 | NW_004520933.1 | scaffold7740 | 1627                    | TT                              | CC                 | CC               | INTERGENIC      |               |                    |                    |
| SNP_116742_A_1651 | NW_004520933.1 | scaffold7740 | 1651                    | TT                              | AA                 | AA               | INTERGENIC      |               |                    |                    |
| SNP_116743_A_1673 | NW_004520933.1 | scaffold7740 | 1673                    | AA                              | TT                 | TT               | INTERGENIC      |               |                    |                    |
| SNP_116744_A_1802 | NW_004520933.1 | scaffold7740 | 1802                    | GG                              | AA                 | AA               | INTERGENIC      |               |                    |                    |
| SNP_116745_A_573  | NW_004520937.1 | scaffold7752 | 573                     | CC                              | TT                 | TT               | INTERGENIC      |               |                    |                    |
| SNP_116746_A_815  | NW_004520937.1 | scaffold7752 | 815                     | TT                              | CC                 | CC               | INTERGENIC      |               |                    |                    |
| SNP_116747_A_969  | NW_004520937.1 | scaffold7752 | 969                     | AA                              | GG                 | GG               | INTERGENIC      |               |                    |                    |
| SNP_116748_A_1078 | NW_004520937.1 | scaffold7752 | 1078                    | AA                              | TT                 | TT               | INTERGENIC      |               |                    |                    |
| SNP_116749_A_1086 | NW_004520937.1 | scaffold7752 | 1086                    | AA                              | GG                 | GG               | INTERGENIC      |               |                    |                    |
| SNP_116750_A_1438 | NW_004520937.1 | scaffold7752 | 1438                    | CC                              | TT                 | TT               | INTERGENIC      |               |                    |                    |
| SNP_116751_A_788  | NW_004520938.1 | scaffold7753 | 788                     | AA                              | CC                 | CC               | INTERGENIC      |               |                    |                    |
| SNP_116752_A_813  | NW_004520938.1 | scaffold7753 | 813                     | GG                              | TT                 | TT               | INTERGENIC      |               |                    |                    |
| SNP_116753_A_821  | NW_004520938.1 | scaffold7753 | 821                     | AA                              | CC                 | CC               | INTERGENIC      |               |                    |                    |
| SNP_116754_A_893  | NW_004520938.1 | scaffold7753 | 893                     | CC                              | AA                 | AA               | INTERGENIC      |               |                    |                    |



| SNPs IDs          | Chromosome IDs | Chromosomes  | Physical positions (bp) | CDC Frontier (Reference genome) | (Pusa 1103 & HPNB) | (ILWC 46 & LPNB) | Sequence genome | Components of | Gene accession IDs | Putative functions |
|-------------------|----------------|--------------|-------------------------|---------------------------------|--------------------|------------------|-----------------|---------------|--------------------|--------------------|
| SNP_116756_A_928  | NW_004520938.1 | scaffold7753 | 928                     | TT                              | GG                 | GG               | INTERGENIC      |               |                    |                    |
| SNP_116757_A_64   | NW_004520941.1 | scaffold7765 | 64                      | CC                              | AA                 | AA               | INTERGENIC      |               |                    |                    |
| SNP_116758_A_109  | NW_004520941.1 | scaffold7765 | 109                     | AA                              | GG                 | GG               | INTERGENIC      |               |                    |                    |
| SNP_116759_A_309  | NW_004520941.1 | scaffold7765 | 309                     | TT                              | CC                 | CC               | INTERGENIC      |               |                    |                    |
| SNP_116760_A_503  | NW_004520941.1 | scaffold7765 | 503                     | CC                              | TT                 | TT               | INTERGENIC      |               |                    |                    |
| SNP_116761_A_886  | NW_004520941.1 | scaffold7765 | 886                     | GG                              | AA                 | AA               | INTERGENIC      |               |                    |                    |
| SNP_116762_A_960  | NW_004520941.1 | scaffold7765 | 960                     | CC                              | GG                 | GG               | INTERGENIC      |               |                    |                    |
| SNP_116764_A_1063 | NW_004520941.1 | scaffold7765 | 1063                    | TT                              | GG                 | GG               | INTERGENIC      |               |                    |                    |
| SNP_116765_A_478  | NW_004520942.1 | scaffold7767 | 478                     | CC                              | TT                 | TT               | INTERGENIC      |               |                    |                    |
| SNP_116766_A_503  | NW_004520942.1 | scaffold7767 | 503                     | GG                              | CC                 | CC               | INTERGENIC      |               |                    |                    |
| SNP_116768_A_533  | NW_004520942.1 | scaffold7767 | 533                     | AA                              | TT                 | TT               | INTERGENIC      |               |                    |                    |
| SNP_116769_A_64   | NW_004520950.1 | scaffold7778 | 64                      | CC                              | TT                 | TT               | INTERGENIC      |               |                    |                    |
| SNP_116770_A_84   | NW_004520950.1 | scaffold7778 | 84                      | CC                              | AA                 | AA               | INTERGENIC      |               |                    |                    |
| SNP_116771_A_195  | NW_004520950.1 | scaffold7778 | 195                     | CC                              | TT                 | TT               | INTERGENIC      |               |                    |                    |
| SNP_116772_A_268  | NW_004520950.1 | scaffold7778 | 268                     | AA                              | CC                 | CC               | INTERGENIC      |               |                    |                    |
| SNP_116773_A_433  | NW_004520950.1 | scaffold7778 | 433                     | AA                              | GG                 | GG               | INTERGENIC      |               |                    |                    |
| SNP_116774_A_447  | NW_004520950.1 | scaffold7778 | 447                     | TT                              | CC                 | CC               | INTERGENIC      |               |                    |                    |
| SNP_116775_A_451  | NW_004520950.1 | scaffold7778 | 451                     | TT                              | CC                 | CC               | INTERGENIC      |               |                    |                    |
| SNP_116776_A_923  | NW_004520950.1 | scaffold7778 | 923                     | TT                              | AA                 | AA               | INTERGENIC      |               |                    |                    |
| SNP_116777_A_927  | NW_004520950.1 | scaffold7778 | 927                     | AA                              | CC                 | CC               | INTERGENIC      |               |                    |                    |
| SNP_116778_A_801  | NW_004520959.1 | scaffold7795 | 801                     | TT                              | CC                 | CC               | INTERGENIC      |               |                    |                    |
| SNP_116779_A_1892 | NW_004520960.1 | scaffold7797 | 1892                    | CC                              | TT                 | TT               | INTERGENIC      |               |                    |                    |

| SNPs IDs          | Chromosome IDs | Chromosomes  | Physical positions (bp) | CDC Frontier (Reference genome) | (Pusa 1103 & HPNB) | (ILWC 46 & LPNB) | Sequence genome | Components of | Gene accession IDs | Putative functions |
|-------------------|----------------|--------------|-------------------------|---------------------------------|--------------------|------------------|-----------------|---------------|--------------------|--------------------|
| SNP_116780_A_2086 | NW_004520960.1 | scaffold7797 | 2086                    | CC                              | AA                 | AA               | INTERGENIC      |               |                    |                    |
| SNP_116781_A_117  | NW_004520964.1 | scaffold7802 | 117                     | TT                              | CC                 | CC               | INTERGENIC      |               |                    |                    |
| SNP_116782_A_1356 | NW_004520964.1 | scaffold7802 | 1356                    | CC                              | GG                 | GG               | INTERGENIC      |               |                    |                    |
| SNP_116783_A_1361 | NW_004520964.1 | scaffold7802 | 1361                    | CC                              | TT                 | TT               | INTERGENIC      |               |                    |                    |
| SNP_116784_A_2884 | NW_004520964.1 | scaffold7802 | 2884                    | AA                              | CC                 | CC               | INTERGENIC      |               |                    |                    |
| SNP_116785_A_3161 | NW_004520964.1 | scaffold7802 | 3161                    | GG                              | AA                 | AA               | INTERGENIC      |               |                    |                    |
| SNP_116786_A_3175 | NW_004520964.1 | scaffold7802 | 3175                    | AA                              | GG                 | GG               | INTERGENIC      |               |                    |                    |
| SNP_116787_A_3200 | NW_004520964.1 | scaffold7802 | 3200                    | GG                              | AA                 | AA               | INTERGENIC      |               |                    |                    |
| SNP_116788_A_3307 | NW_004520964.1 | scaffold7802 | 3307                    | GG                              | TT                 | TT               | INTERGENIC      |               |                    |                    |
| SNP_116789_A_3322 | NW_004520964.1 | scaffold7802 | 3322                    | CC                              | TT                 | TT               | INTERGENIC      |               |                    |                    |
| SNP_116791_A_525  | NW_004520967.1 | scaffold7807 | 525                     | CC                              | GG                 | GG               | INTERGENIC      |               |                    |                    |
| SNP_116792_A_763  | NW_004520967.1 | scaffold7807 | 763                     | CC                              | TT                 | TT               | INTERGENIC      |               |                    |                    |
| SNP_116793_A_2009 | NW_004520967.1 | scaffold7807 | 2009                    | GG                              | CC                 | CC               | INTERGENIC      |               |                    |                    |
| SNP_116794_A_2078 | NW_004520967.1 | scaffold7807 | 2078                    | AA                              | CC                 | CC               | INTERGENIC      |               |                    |                    |
| SNP_116795_A_6025 | NW_004520967.1 | scaffold7807 | 6025                    | GG                              | AA                 | AA               | INTERGENIC      |               |                    |                    |
| SNP_116796_A_469  | NW_004520968.1 | scaffold7808 | 469                     | CC                              | AA                 | AA               | INTERGENIC      |               |                    |                    |
| SNP_116797_A_475  | NW_004520968.1 | scaffold7808 | 475                     | AA                              | TT                 | TT               | INTERGENIC      |               |                    |                    |
| SNP_116798_A_544  | NW_004520968.1 | scaffold7808 | 544                     | TT                              | CC                 | CC               | INTERGENIC      |               |                    |                    |
| SNP_116799_A_547  | NW_004520968.1 | scaffold7808 | 547                     | AA                              | TT                 | TT               | INTERGENIC      |               |                    |                    |
| SNP_116800_A_497  | NW_004520975.1 | scaffold7818 | 497                     | GG                              | AA                 | AA               | INTERGENIC      |               |                    |                    |
| SNP_116801_A_174  | NW_004520978.1 | scaffold7821 | 174                     | CC                              | TT                 | TT               | INTERGENIC      |               |                    |                    |
| SNP_116802_A_180  | NW_004520978.1 | scaffold7821 | 180                     | GG                              | AA                 | AA               | INTERGENIC      |               |                    |                    |

| SNPs IDs          | Chromosome IDs | Chromosomes  | Physical positions (bp) | CDC Frontier (Reference genome) | (Pusa 1103 & HPNB) | (ILWC 46 & LPNB) | Sequence genome | Components of | Gene accession IDs | Putative functions |
|-------------------|----------------|--------------|-------------------------|---------------------------------|--------------------|------------------|-----------------|---------------|--------------------|--------------------|
| SNP_116803_A_200  | NW_004520978.1 | scaffold7821 | 200                     | CC                              | GG                 | GG               | INTERGENIC      |               |                    |                    |
| SNP_116804_A_201  | NW_004520978.1 | scaffold7821 | 201                     | CC                              | TT                 | TT               | INTERGENIC      |               |                    |                    |
| SNP_116805_A_203  | NW_004520978.1 | scaffold7821 | 203                     | AA                              | TT                 | TT               | INTERGENIC      |               |                    |                    |
| SNP_116806_A_207  | NW_004520978.1 | scaffold7821 | 207                     | CC                              | TT                 | TT               | INTERGENIC      |               |                    |                    |
| SNP_116807_A_238  | NW_004520978.1 | scaffold7821 | 238                     | TT                              | CC                 | CC               | INTERGENIC      |               |                    |                    |
| SNP_116808_A_285  | NW_004520978.1 | scaffold7821 | 285                     | TT                              | CC                 | CC               | INTERGENIC      |               |                    |                    |
| SNP_116809_A_291  | NW_004520978.1 | scaffold7821 | 291                     | AA                              | GG                 | GG               | INTERGENIC      |               |                    |                    |
| SNP_116810_A_301  | NW_004520978.1 | scaffold7821 | 301                     | AA                              | CC                 | CC               | INTERGENIC      |               |                    |                    |
| SNP_116811_A_306  | NW_004520978.1 | scaffold7821 | 306                     | GG                              | AA                 | AA               | INTERGENIC      |               |                    |                    |
| SNP_116812_A_436  | NW_004520979.1 | scaffold7823 | 436                     | TT                              | CC                 | CC               | INTERGENIC      |               |                    |                    |
| SNP_116814_A_1870 | NW_004520979.1 | scaffold7823 | 1870                    | TT                              | GG                 | GG               | INTERGENIC      |               |                    |                    |
| SNP_116815_A_2130 | NW_004520979.1 | scaffold7823 | 2130                    | CC                              | TT                 | TT               | INTERGENIC      |               |                    |                    |
| SNP_116816_A_2202 | NW_004520979.1 | scaffold7823 | 2202                    | AA                              | GG                 | GG               | INTERGENIC      |               |                    |                    |
| SNP_116817_A_2204 | NW_004520979.1 | scaffold7823 | 2204                    | TT                              | CC                 | CC               | INTERGENIC      |               |                    |                    |
| SNP_116818_A_4614 | NW_004520979.1 | scaffold7823 | 4614                    | AA                              | GG                 | GG               | INTERGENIC      |               |                    |                    |
| SNP_116819_A_4800 | NW_004520979.1 | scaffold7823 | 4800                    | TT                              | CC                 | CC               | INTERGENIC      |               |                    |                    |
| SNP_116820_A_4825 | NW_004520979.1 | scaffold7823 | 4825                    | GG                              | AA                 | AA               | INTERGENIC      |               |                    |                    |
| SNP_116821_A_4844 | NW_004520979.1 | scaffold7823 | 4844                    | CC                              | TT                 | TT               | INTERGENIC      |               |                    |                    |
| SNP_116822_A_4863 | NW_004520979.1 | scaffold7823 | 4863                    | AA                              | CC                 | CC               | INTERGENIC      |               |                    |                    |
| SNP_116823_A_693  | NW_004520980.1 | scaffold7825 | 693                     | CC                              | TT                 | TT               | INTERGENIC      |               |                    |                    |
| SNP_116824_A_1194 | NW_004520985.1 | scaffold7837 | 1194                    | CC                              | TT                 | TT               | INTERGENIC      |               |                    |                    |
| SNP_116825_A_1430 | NW_004520985.1 | scaffold7837 | 1430                    | TT                              | CC                 | CC               | INTERGENIC      |               |                    |                    |

| SNPs IDs           | Chromosome IDs | Chromosomes  | Physical positions (bp) | CDC Frontier (Reference genome) | (Pusa 1103 & HPNB) | (ILWC 46 & LPNB) | Sequence genome | Components of | Gene accession IDs | Putative functions |
|--------------------|----------------|--------------|-------------------------|---------------------------------|--------------------|------------------|-----------------|---------------|--------------------|--------------------|
| SNP_116826_A_1432  | NW_004520985.1 | scaffold7837 | 1432                    | TT                              | AA                 | AA               | INTERGENIC      |               |                    |                    |
| SNP_116827_A_4811  | NW_004520986.1 | scaffold7839 | 4811                    | GG                              | AA                 | AA               | INTERGENIC      |               |                    |                    |
| SNP_116828_A_19326 | NW_004520987.1 | scaffold7842 | 19326                   | CC                              | AA                 | AA               | INTERGENIC      |               |                    |                    |
| SNP_116829_A_19867 | NW_004520987.1 | scaffold7842 | 19867                   | TT                              | CC                 | CC               | INTERGENIC      |               |                    |                    |
| SNP_116830_A_20102 | NW_004520987.1 | scaffold7842 | 20102                   | AA                              | GG                 | GG               | INTERGENIC      |               |                    |                    |
| SNP_116831_A_20195 | NW_004520987.1 | scaffold7842 | 20195                   | AA                              | GG                 | GG               | INTERGENIC      |               |                    |                    |
| SNP_116832_A_20296 | NW_004520987.1 | scaffold7842 | 20296                   | AA                              | TT                 | TT               | INTERGENIC      |               |                    |                    |
| SNP_116833_A_20299 | NW_004520987.1 | scaffold7842 | 20299                   | TT                              | AA                 | AA               | INTERGENIC      |               |                    |                    |
| SNP_116834_A_20308 | NW_004520987.1 | scaffold7842 | 20308                   | CC                              | GG                 | GG               | INTERGENIC      |               |                    |                    |
| SNP_116835_A_20357 | NW_004520987.1 | scaffold7842 | 20357                   | TT                              | AA                 | AA               | INTERGENIC      |               |                    |                    |
| SNP_116837_A_20506 | NW_004520987.1 | scaffold7842 | 20506                   | TT                              | CC                 | CC               | INTERGENIC      |               |                    |                    |
| SNP_116838_A_20533 | NW_004520987.1 | scaffold7842 | 20533                   | AA                              | TT                 | TT               | INTERGENIC      |               |                    |                    |
| SNP_116840_A_638   | NW_004520993.1 | scaffold7857 | 638                     | AA                              | CC                 | CC               | INTERGENIC      |               |                    |                    |
| SNP_116841_A_642   | NW_004520993.1 | scaffold7857 | 642                     | CC                              | AA                 | AA               | INTERGENIC      |               |                    |                    |
| SNP_116842_A_646   | NW_004520993.1 | scaffold7857 | 646                     | GG                              | AA                 | AA               | INTERGENIC      |               |                    |                    |
| SNP_116843_A_647   | NW_004520993.1 | scaffold7857 | 647                     | GG                              | AA                 | AA               | INTERGENIC      |               |                    |                    |
| SNP_116844_A_727   | NW_004520993.1 | scaffold7857 | 727                     | AA                              | TT                 | TT               | INTERGENIC      |               |                    |                    |
| SNP_116845_A_728   | NW_004520993.1 | scaffold7857 | 728                     | TT                              | GG                 | GG               | INTERGENIC      |               |                    |                    |
| SNP_116846_A_792   | NW_004520993.1 | scaffold7857 | 792                     | AA                              | CC                 | CC               | INTERGENIC      |               |                    |                    |
| SNP_116847_A_1043  | NW_004520993.1 | scaffold7857 | 1043                    | AA                              | TT                 | TT               | INTERGENIC      |               |                    |                    |
| SNP_116848_A_501   | NW_004520996.1 | scaffold7863 | 501                     | AA                              | GG                 | GG               | INTERGENIC      |               |                    |                    |
| SNP_116849_A_1597  | NW_004520999.1 | scaffold7868 | 1597                    | AA                              | TT                 | TT               | INTERGENIC      |               |                    |                    |

| SNPs IDs          | Chromosome IDs | Chromosomes  | Physical positions (bp) | CDC Frontier (Reference genome) | (Pusa 1103 & HPNB) | (ILWC 46 & LPNB) | Sequence genome | Components of | Gene accession IDs | Putative functions |
|-------------------|----------------|--------------|-------------------------|---------------------------------|--------------------|------------------|-----------------|---------------|--------------------|--------------------|
| SNP_116850_A_1620 | NW_004520999.1 | scaffold7868 | 1620                    | GG                              | CC                 | CC               | INTERGENIC      |               |                    |                    |
| SNP_116851_A_5755 | NW_004521005.1 | scaffold7882 | 5755                    | CC                              | TT                 | TT               | INTERGENIC      |               |                    |                    |
| SNP_116852_A_1886 | NW_004521010.1 | scaffold7889 | 1886                    | AA                              | TT                 | TT               | INTERGENIC      |               |                    |                    |
| SNP_116853_A_1898 | NW_004521010.1 | scaffold7889 | 1898                    | AA                              | GG                 | GG               | INTERGENIC      |               |                    |                    |
| SNP_116855_A_427  | NW_004521011.1 | scaffold7890 | 427                     | CC                              | TT                 | TT               | INTERGENIC      |               |                    |                    |
| SNP_116856_A_438  | NW_004521011.1 | scaffold7890 | 438                     | GG                              | AA                 | AA               | INTERGENIC      |               |                    |                    |
| SNP_116857_A_481  | NW_004521011.1 | scaffold7890 | 481                     | AA                              | TT                 | TT               | INTERGENIC      |               |                    |                    |
| SNP_116858_A_530  | NW_004521011.1 | scaffold7890 | 530                     | AA                              | CC                 | CC               | INTERGENIC      |               |                    |                    |
| SNP_116859_A_605  | NW_004521011.1 | scaffold7890 | 605                     | TT                              | GG                 | GG               | INTERGENIC      |               |                    |                    |
| SNP_116860_A_673  | NW_004521011.1 | scaffold7890 | 673                     | GG                              | AA                 | AA               | INTERGENIC      |               |                    |                    |
| SNP_116862_A_773  | NW_004521011.1 | scaffold7890 | 773                     | TT                              | CC                 | CC               | INTERGENIC      |               |                    |                    |
| SNP_116863_A_796  | NW_004521011.1 | scaffold7890 | 796                     | TT                              | CC                 | CC               | INTERGENIC      |               |                    |                    |
| SNP_116864_A_841  | NW_004521011.1 | scaffold7890 | 841                     | TT                              | CC                 | CC               | INTERGENIC      |               |                    |                    |
| SNP_116865_A_2911 | NW_004521012.1 | scaffold7891 | 2911                    | GG                              | AA                 | AA               | INTERGENIC      |               |                    |                    |
| SNP_116866_A_3335 | NW_004521012.1 | scaffold7891 | 3335                    | AA                              | GG                 | GG               | INTERGENIC      |               |                    |                    |
| SNP_116867_A_3653 | NW_004521012.1 | scaffold7891 | 3653                    | TT                              | GG                 | GG               | INTERGENIC      |               |                    |                    |
| SNP_116868_A_3658 | NW_004521012.1 | scaffold7891 | 3658                    | AA                              | CC                 | CC               | INTERGENIC      |               |                    |                    |
| SNP_116869_A_3746 | NW_004521012.1 | scaffold7891 | 3746                    | AA                              | GG                 | GG               | INTERGENIC      |               |                    |                    |
| SNP_116870_A_3749 | NW_004521012.1 | scaffold7891 | 3749                    | GG                              | TT                 | TT               | INTERGENIC      |               |                    |                    |
| SNP_116872_A_3854 | NW_004521012.1 | scaffold7891 | 3854                    | CC                              | TT                 | TT               | INTERGENIC      |               |                    |                    |
| SNP_116873_A_3873 | NW_004521012.1 | scaffold7891 | 3873                    | TT                              | CC                 | CC               | INTERGENIC      |               |                    |                    |
| SNP_116874_A_3888 | NW_004521012.1 | scaffold7891 | 3888                    | TT                              | CC                 | CC               | INTERGENIC      |               |                    |                    |

| SNPs IDs          | Chromosome IDs | Chromosomes  | Physical positions (bp) | CDC Frontier (Reference genome) | (Pusa 1103 & HPNB) | (ILWC 46 & LPNB) | Sequence genome | Components of | Gene accession IDs | Putative functions |
|-------------------|----------------|--------------|-------------------------|---------------------------------|--------------------|------------------|-----------------|---------------|--------------------|--------------------|
| SNP_116875_A_4033 | NW_004521012.1 | scaffold7891 | 4033                    | TT                              | GG                 | GG               | INTERGENIC      |               |                    |                    |
| SNP_116876_A_4046 | NW_004521012.1 | scaffold7891 | 4046                    | AA                              | CC                 | CC               | INTERGENIC      |               |                    |                    |
| SNP_116877_A_4050 | NW_004521012.1 | scaffold7891 | 4050                    | CC                              | TT                 | TT               | INTERGENIC      |               |                    |                    |
| SNP_116878_A_4088 | NW_004521012.1 | scaffold7891 | 4088                    | AA                              | GG                 | GG               | INTERGENIC      |               |                    |                    |
| SNP_116879_A_4093 | NW_004521012.1 | scaffold7891 | 4093                    | CC                              | TT                 | TT               | INTERGENIC      |               |                    |                    |
| SNP_116880_A_4094 | NW_004521012.1 | scaffold7891 | 4094                    | AA                              | GG                 | GG               | INTERGENIC      |               |                    |                    |
| SNP_116881_A_4202 | NW_004521012.1 | scaffold7891 | 4202                    | AA                              | CC                 | CC               | INTERGENIC      |               |                    |                    |
| SNP_116882_A_4248 | NW_004521012.1 | scaffold7891 | 4248                    | AA                              | TT                 | TT               | INTERGENIC      |               |                    |                    |
| SNP_116883_A_4251 | NW_004521012.1 | scaffold7891 | 4251                    | GG                              | AA                 | AA               | INTERGENIC      |               |                    |                    |
| SNP_116884_A_4349 | NW_004521012.1 | scaffold7891 | 4349                    | AA                              | GG                 | GG               | INTERGENIC      |               |                    |                    |
| SNP_116885_A_4429 | NW_004521012.1 | scaffold7891 | 4429                    | GG                              | TT                 | TT               | INTERGENIC      |               |                    |                    |
| SNP_116886_A_4455 | NW_004521012.1 | scaffold7891 | 4455                    | TT                              | CC                 | CC               | INTERGENIC      |               |                    |                    |
| SNP_116887_A_4456 | NW_004521012.1 | scaffold7891 | 4456                    | GG                              | AA                 | AA               | INTERGENIC      |               |                    |                    |
| SNP_116888_A_4496 | NW_004521012.1 | scaffold7891 | 4496                    | TT                              | CC                 | CC               | INTERGENIC      |               |                    |                    |
| SNP_116889_A_4525 | NW_004521012.1 | scaffold7891 | 4525                    | AA                              | CC                 | CC               | INTERGENIC      |               |                    |                    |
| SNP_116890_A_4540 | NW_004521012.1 | scaffold7891 | 4540                    | TT                              | CC                 | CC               | INTERGENIC      |               |                    |                    |
| SNP_116891_A_4547 | NW_004521012.1 | scaffold7891 | 4547                    | CC                              | GG                 | GG               | INTERGENIC      |               |                    |                    |
| SNP_116892_A_4572 | NW_004521012.1 | scaffold7891 | 4572                    | CC                              | TT                 | TT               | INTERGENIC      |               |                    |                    |
| SNP_116893_A_4736 | NW_004521012.1 | scaffold7891 | 4736                    | TT                              | CC                 | CC               | INTERGENIC      |               |                    |                    |
| SNP_116894_A_4867 | NW_004521012.1 | scaffold7891 | 4867                    | AA                              | GG                 | GG               | INTERGENIC      |               |                    |                    |
| SNP_116895_A_95   | NW_004521017.1 | scaffold7898 | 95                      | TT                              | CC                 | CC               | INTERGENIC      |               |                    |                    |
| SNP_116896_A_975  | NW_004521017.1 | scaffold7898 | 975                     | TT                              | CC                 | CC               | INTERGENIC      |               |                    |                    |

| SNPs IDs           | Chromosome IDs | Chromosomes  | Physical positions (bp) | CDC Frontier (Reference genome) | (Pusa 1103 & HPNB) | (ILWC 46 & LPNB) | Sequence Components of genome | Gene accession IDs | Putative functions         |
|--------------------|----------------|--------------|-------------------------|---------------------------------|--------------------|------------------|-------------------------------|--------------------|----------------------------|
| SNP_116897_A_1004  | NW_004521017.1 | scaffold7898 | 1004                    | AA                              | TT                 | TT               | INTERGENIC                    |                    |                            |
| SNP_116898_A_422   | NW_004521019.1 | scaffold7902 | 422                     | TT                              | GG                 | GG               | INTERGENIC                    |                    |                            |
| SNP_116899_A_664   | NW_004521019.1 | scaffold7902 | 664                     | CC                              | TT                 | TT               | INTERGENIC                    |                    |                            |
| SNP_116901_A_905   | NW_004521019.1 | scaffold7902 | 905                     | GG                              | AA                 | AA               | INTERGENIC                    |                    |                            |
| SNP_116902_A_1458  | NW_004521019.1 | scaffold7902 | 1458                    | TT                              | CC                 | CC               | INTERGENIC                    |                    |                            |
| SNP_116903_A_1573  | NW_004521019.1 | scaffold7902 | 1573                    | AA                              | GG                 | GG               | INTERGENIC                    |                    |                            |
| SNP_116904_A_1764  | NW_004521019.1 | scaffold7902 | 1764                    | AA                              | GG                 | GG               | INTERGENIC                    |                    |                            |
| SNP_116905_A_2178  | NW_004521022.1 | scaffold7906 | 2178                    | TT                              | AA                 | AA               | INTERGENIC                    |                    |                            |
| SNP_116906_A_2211  | NW_004521022.1 | scaffold7906 | 2211                    | TT                              | AA                 | AA               | INTERGENIC                    |                    |                            |
| SNP_116907_A_2217  | NW_004521022.1 | scaffold7906 | 2217                    | AA                              | TT                 | TT               | INTERGENIC                    |                    |                            |
| SNP_116908_A_2429  | NW_004521022.1 | scaffold7906 | 2429                    | GG                              | CC                 | CC               | INTERGENIC                    |                    |                            |
| SNP_116909_A_4834  | NW_004521029.1 | scaffold7922 | 4834                    | AA                              | TT                 | TT               | INTERGENIC                    |                    |                            |
| SNP_116910_A_4850  | NW_004521029.1 | scaffold7922 | 4850                    | AA                              | GG                 | GG               | INTERGENIC                    |                    |                            |
| SNP_116911_A_4960  | NW_004521029.1 | scaffold7922 | 4960                    | GG                              | AA                 | AA               | INTERGENIC                    |                    |                            |
| SNP_116912_A_5044  | NW_004521029.1 | scaffold7922 | 5044                    | GG                              | AA                 | AA               | INTERGENIC                    |                    |                            |
| SNP_116913_A_5134  | NW_004521029.1 | scaffold7922 | 5134                    | AA                              | TT                 | TT               | INTERGENIC                    |                    |                            |
| SNP_116914_A_5575  | NW_004521029.1 | scaffold7922 | 5575                    | AA                              | TT                 | TT               | INTERGENIC                    |                    |                            |
| SNP_116918_A_22265 | NW_004521030.1 | scaffold7923 | 22265                   | TT                              | CC                 | CC               | DRR                           | 101497739          | cytokinin hydroxylase-like |
| SNP_116919_A_22306 | NW_004521030.1 | scaffold7923 | 22306                   | TT                              | CC                 | CC               | DRR                           | 101497739          | cytokinin hydroxylase-like |
| SNP_116920_A_22310 | NW_004521030.1 | scaffold7923 | 22310                   | AA                              | TT                 | TT               | DRR                           | 101497739          | cytokinin hydroxylase-like |
| SNP_116922_A_22409 | NW_004521030.1 | scaffold7923 | 22409                   | AA                              | GG                 | GG               | DRR                           | 101497739          | cytokinin hydroxylase-like |
| SNP_116923_A_22422 | NW_004521030.1 | scaffold7923 | 22422                   | CC                              | AA                 | AA               | DRR                           | 101497739          | cytokinin hydroxylase-like |

| SNPs IDs           | Chromosome IDs | Chromosomes  | Physical positions (bp) | CDC Frontier (Reference genome) | (Pusa 1103 & HPNB) | (ILWC 46 & LPNB) | Sequence Components of genome | Gene accession IDs | Putative functions         |
|--------------------|----------------|--------------|-------------------------|---------------------------------|--------------------|------------------|-------------------------------|--------------------|----------------------------|
| SNP_116924_A_22440 | NW_004521030.1 | scaffold7923 | 22440                   | GG                              | AA                 | AA               | DRR                           | 101497739          | cytokinin hydroxylase-like |
| SNP_116925_A_22548 | NW_004521030.1 | scaffold7923 | 22548                   | CC                              | TT                 | TT               | DRR                           | 101497739          | cytokinin hydroxylase-like |
| SNP_116926_A_22561 | NW_004521030.1 | scaffold7923 | 22561                   | GG                              | TT                 | TT               | DRR                           | 101497739          | cytokinin hydroxylase-like |
| SNP_116927_A_22619 | NW_004521030.1 | scaffold7923 | 22619                   | AA                              | GG                 | GG               | DRR                           | 101497739          | cytokinin hydroxylase-like |
| SNP_116928_A_22778 | NW_004521030.1 | scaffold7923 | 22778                   | AA                              | GG                 | GG               | INTERGENIC                    |                    |                            |
| SNP_116929_A_22782 | NW_004521030.1 | scaffold7923 | 22782                   | GG                              | TT                 | TT               | INTERGENIC                    |                    |                            |
| SNP_116930_A_22830 | NW_004521030.1 | scaffold7923 | 22830                   | CC                              | TT                 | TT               | INTERGENIC                    |                    |                            |
| SNP_116931_A_23098 | NW_004521030.1 | scaffold7923 | 23098                   | GG                              | TT                 | TT               | INTERGENIC                    |                    |                            |
| SNP_116932_A_23129 | NW_004521030.1 | scaffold7923 | 23129                   | TT                              | GG                 | GG               | INTERGENIC                    |                    |                            |
| SNP_116933_A_23131 | NW_004521030.1 | scaffold7923 | 23131                   | AA                              | GG                 | GG               | INTERGENIC                    |                    |                            |
| SNP_116934_A_23135 | NW_004521030.1 | scaffold7923 | 23135                   | TT                              | CC                 | CC               | INTERGENIC                    |                    |                            |
| SNP_116936_A_4538  | NW_004521032.1 | scaffold7927 | 4538                    | TT                              | CC                 | CC               | INTERGENIC                    |                    |                            |
| SNP_116937_A_191   | NW_004521035.1 | scaffold7934 | 191                     | AA                              | GG                 | GG               | INTERGENIC                    |                    |                            |
| SNP_116938_A_590   | NW_004521035.1 | scaffold7934 | 590                     | GG                              | TT                 | TT               | INTERGENIC                    |                    |                            |
| SNP_116939_A_2448  | NW_004521035.1 | scaffold7934 | 2448                    | TT                              | GG                 | GG               | INTERGENIC                    |                    |                            |
| SNP_116940_A_2463  | NW_004521035.1 | scaffold7934 | 2463                    | TT                              | AA                 | AA               | INTERGENIC                    |                    |                            |
| SNP_116941_A_2678  | NW_004521035.1 | scaffold7934 | 2678                    | GG                              | AA                 | AA               | INTERGENIC                    |                    |                            |
| SNP_116942_A_2837  | NW_004521035.1 | scaffold7934 | 2837                    | GG                              | AA                 | AA               | INTERGENIC                    |                    |                            |
| SNP_116943_A_2912  | NW_004521035.1 | scaffold7934 | 2912                    | TT                              | AA                 | AA               | INTERGENIC                    |                    |                            |
| SNP_116944_A_3009  | NW_004521035.1 | scaffold7934 | 3009                    | AA                              | TT                 | TT               | INTERGENIC                    |                    |                            |
| SNP_116945_A_3086  | NW_004521035.1 | scaffold7934 | 3086                    | AA                              | GG                 | GG               | INTERGENIC                    |                    |                            |
| SNP_116946_A_3099  | NW_004521035.1 | scaffold7934 | 3099                    | TT                              | CC                 | CC               | INTERGENIC                    |                    |                            |



| SNPs IDs          | Chromosome IDs | Chromosomes  | Physical positions (bp) | CDC Frontier (Reference genome) | (Pusa 1103 & HPNB) | (ILWC 46 & LPNB) | Sequence genome | Components of | Gene accession IDs                | Putative functions |
|-------------------|----------------|--------------|-------------------------|---------------------------------|--------------------|------------------|-----------------|---------------|-----------------------------------|--------------------|
| SNP_116947_A_3160 | NW_004521035.1 | scaffold7934 | 3160                    | TT                              | GG                 | GG               | INTERGENIC      |               |                                   |                    |
| SNP_116948_A_3763 | NW_004521035.1 | scaffold7934 | 3763                    | TT                              | CC                 | CC               | INTERGENIC      |               |                                   |                    |
| SNP_116949_A_3787 | NW_004521035.1 | scaffold7934 | 3787                    | AA                              | GG                 | GG               | INTERGENIC      |               |                                   |                    |
| SNP_116950_A_3803 | NW_004521035.1 | scaffold7934 | 3803                    | AA                              | TT                 | TT               | INTERGENIC      |               |                                   |                    |
| SNP_116951_A_504  | NW_004521039.1 | scaffold7943 | 504                     | AA                              | GG                 | GG               | INTERGENIC      |               |                                   |                    |
| SNP_116952_A_509  | NW_004521039.1 | scaffold7943 | 509                     | AA                              | GG                 | GG               | INTERGENIC      |               |                                   |                    |
| SNP_116953_A_1134 | NW_004521046.1 | scaffold7956 | 1134                    | GG                              | AA                 | AA               | INTERGENIC      |               |                                   |                    |
| SNP_116954_A_388  | NW_004521048.1 | scaffold7958 | 388                     | GG                              | TT                 | TT               | INTERGENIC      |               |                                   |                    |
| SNP_116955_A_512  | NW_004521048.1 | scaffold7958 | 512                     | TT                              | CC                 | CC               | INTERGENIC      |               |                                   |                    |
| SNP_116956_A_612  | NW_004521048.1 | scaffold7958 | 612                     | CC                              | AA                 | AA               | INTERGENIC      |               |                                   |                    |
| SNP_116957_A_745  | NW_004521048.1 | scaffold7958 | 745                     | TT                              | AA                 | AA               | INTERGENIC      |               |                                   |                    |
| SNP_116958_A_881  | NW_004521048.1 | scaffold7958 | 881                     | AA                              | TT                 | TT               | INTERGENIC      |               |                                   |                    |
| SNP_116959_A_988  | NW_004521048.1 | scaffold7958 | 988                     | TT                              | CC                 | CC               | INTERGENIC      |               |                                   |                    |
| SNP_116960_A_1010 | NW_004521048.1 | scaffold7958 | 1010                    | AA                              | TT                 | TT               | INTERGENIC      |               |                                   |                    |
| SNP_116961_A_730  | NW_004521049.1 | scaffold7961 | 730                     | AA                              | TT                 | TT               | INTERGENIC      |               |                                   |                    |
| SNP_116962_A_898  | NW_004521049.1 | scaffold7961 | 898                     | AA                              | GG                 | GG               | INTERGENIC      |               |                                   |                    |
| SNP_116963_A_2477 | NW_004521052.1 | scaffold7967 | 2477                    | CC                              | GG                 | GG               | URR             | 101498741     | glutathione S-transferase T3-like |                    |
| SNP_116964_A_4628 | NW_004521057.1 | scaffold7980 | 4628                    | AA                              | TT                 | TT               | INTERGENIC      |               |                                   |                    |
| SNP_116965_A_296  | NW_004521059.1 | scaffold7985 | 296                     | CC                              | AA                 | AA               | INTERGENIC      |               |                                   |                    |
| SNP_116966_A_572  | NW_004521059.1 | scaffold7985 | 572                     | AA                              | GG                 | GG               | INTERGENIC      |               |                                   |                    |
| SNP_116967_A_618  | NW_004521059.1 | scaffold7985 | 618                     | AA                              | GG                 | GG               | INTERGENIC      |               |                                   |                    |
| SNP_116968_A_653  | NW_004521059.1 | scaffold7985 | 653                     | CC                              | GG                 | GG               | INTERGENIC      |               |                                   |                    |

| SNPs IDs          | Chromosome IDs | Chromosomes  | Physical positions (bp) | CDC Frontier (Reference genome) | (Pusa 1103 & HPNB) | (ILWC 46 & LPNB) | Sequence genome | Components of | Gene accession IDs | Putative functions |
|-------------------|----------------|--------------|-------------------------|---------------------------------|--------------------|------------------|-----------------|---------------|--------------------|--------------------|
| SNP_116969_A_668  | NW_004521059.1 | scaffold7985 | 668                     | TT                              | CC                 | CC               | INTERGENIC      |               |                    |                    |
| SNP_116970_A_742  | NW_004521059.1 | scaffold7985 | 742                     | GG                              | TT                 | TT               | INTERGENIC      |               |                    |                    |
| SNP_116971_A_747  | NW_004521059.1 | scaffold7985 | 747                     | CC                              | GG                 | GG               | INTERGENIC      |               |                    |                    |
| SNP_116972_A_775  | NW_004521059.1 | scaffold7985 | 775                     | AA                              | TT                 | TT               | INTERGENIC      |               |                    |                    |
| SNP_116973_A_785  | NW_004521059.1 | scaffold7985 | 785                     | TT                              | GG                 | GG               | INTERGENIC      |               |                    |                    |
| SNP_116974_A_824  | NW_004521059.1 | scaffold7985 | 824                     | TT                              | CC                 | CC               | INTERGENIC      |               |                    |                    |
| SNP_116975_A_856  | NW_004521059.1 | scaffold7985 | 856                     | TT                              | CC                 | CC               | INTERGENIC      |               |                    |                    |
| SNP_116976_A_860  | NW_004521059.1 | scaffold7985 | 860                     | TT                              | CC                 | CC               | INTERGENIC      |               |                    |                    |
| SNP_116977_A_1136 | NW_004521059.1 | scaffold7985 | 1136                    | TT                              | CC                 | CC               | INTERGENIC      |               |                    |                    |
| SNP_116978_A_1171 | NW_004521059.1 | scaffold7985 | 1171                    | TT                              | CC                 | CC               | INTERGENIC      |               |                    |                    |
| SNP_116979_A_1189 | NW_004521059.1 | scaffold7985 | 1189                    | AA                              | GG                 | GG               | INTERGENIC      |               |                    |                    |
| SNP_116980_A_1233 | NW_004521059.1 | scaffold7985 | 1233                    | AA                              | CC                 | CC               | INTERGENIC      |               |                    |                    |
| SNP_116981_A_1270 | NW_004521059.1 | scaffold7985 | 1270                    | AA                              | GG                 | GG               | INTERGENIC      |               |                    |                    |
| SNP_116982_A_348  | NW_004521062.1 | scaffold7989 | 348                     | TT                              | CC                 | CC               | INTERGENIC      |               |                    |                    |
| SNP_116983_A_565  | NW_004521062.1 | scaffold7989 | 565                     | TT                              | CC                 | CC               | INTERGENIC      |               |                    |                    |
| SNP_116984_A_473  | NW_004521063.1 | scaffold7990 | 473                     | CC                              | TT                 | TT               | INTERGENIC      |               |                    |                    |
| SNP_116985_A_929  | NW_004521063.1 | scaffold7990 | 929                     | TT                              | GG                 | GG               | INTERGENIC      |               |                    |                    |
| SNP_116986_A_1039 | NW_004521063.1 | scaffold7990 | 1039                    | TT                              | AA                 | AA               | INTERGENIC      |               |                    |                    |
| SNP_116987_A_1248 | NW_004521063.1 | scaffold7990 | 1248                    | TT                              | AA                 | AA               | INTERGENIC      |               |                    |                    |
| SNP_116988_A_1278 | NW_004521063.1 | scaffold7990 | 1278                    | AA                              | TT                 | TT               | INTERGENIC      |               |                    |                    |
| SNP_116989_A_1510 | NW_004521063.1 | scaffold7990 | 1510                    | CC                              | TT                 | TT               | INTERGENIC      |               |                    |                    |
| SNP_116990_A_4510 | NW_004521071.1 | scaffold8004 | 4510                    | GG                              | AA                 | AA               | INTERGENIC      |               |                    |                    |

| SNPs IDs          | Chromosome IDs | Chromosomes  | Physical positions (bp) | CDC Frontier (Reference genome) | (Pusa 1103 & HPNB) | (ILWC 46 & LPNB) | Sequence genome | Components of | Gene accession IDs | Putative functions |
|-------------------|----------------|--------------|-------------------------|---------------------------------|--------------------|------------------|-----------------|---------------|--------------------|--------------------|
| SNP_116991_A_4616 | NW_004521071.1 | scaffold8004 | 4616                    | AA                              | GG                 | GG               | INTERGENIC      |               |                    |                    |
| SNP_116992_A_4622 | NW_004521071.1 | scaffold8004 | 4622                    | AA                              | CC                 | CC               | INTERGENIC      |               |                    |                    |
| SNP_116993_A_496  | NW_004521076.1 | scaffold8015 | 496                     | AA                              | GG                 | GG               | INTERGENIC      |               |                    |                    |
| SNP_116994_A_665  | NW_004521076.1 | scaffold8015 | 665                     | TT                              | AA                 | AA               | INTERGENIC      |               |                    |                    |
| SNP_116995_A_3140 | NW_004521079.1 | scaffold8018 | 3140                    | CC                              | AA                 | AA               | INTERGENIC      |               |                    |                    |
| SNP_116996_A_6960 | NW_004521079.1 | scaffold8018 | 6960                    | CC                              | TT                 | TT               | INTERGENIC      |               |                    |                    |
| SNP_116997_A_7100 | NW_004521079.1 | scaffold8018 | 7100                    | TT                              | AA                 | AA               | INTERGENIC      |               |                    |                    |
| SNP_116998_A_478  | NW_004521080.1 | scaffold8023 | 478                     | TT                              | AA                 | AA               | INTERGENIC      |               |                    |                    |
| SNP_116999_A_94   | NW_004521081.1 | scaffold8025 | 94                      | AA                              | CC                 | CC               | INTERGENIC      |               |                    |                    |
| SNP_117000_A_1342 | NW_004521081.1 | scaffold8025 | 1342                    | AA                              | TT                 | TT               | INTERGENIC      |               |                    |                    |
| SNP_117001_A_526  | NW_004521082.1 | scaffold8029 | 526                     | CC                              | TT                 | TT               | INTERGENIC      |               |                    |                    |
| SNP_117002_A_5247 | NW_004521083.1 | scaffold8030 | 5247                    | CC                              | GG                 | GG               | INTERGENIC      |               |                    |                    |
| SNP_117003_A_5356 | NW_004521083.1 | scaffold8030 | 5356                    | CC                              | AA                 | AA               | INTERGENIC      |               |                    |                    |
| SNP_117004_A_5378 | NW_004521083.1 | scaffold8030 | 5378                    | AA                              | GG                 | GG               | INTERGENIC      |               |                    |                    |
| SNP_117005_A_5380 | NW_004521083.1 | scaffold8030 | 5380                    | CC                              | TT                 | TT               | INTERGENIC      |               |                    |                    |
| SNP_117006_A_6587 | NW_004521083.1 | scaffold8030 | 6587                    | CC                              | TT                 | TT               | INTERGENIC      |               |                    |                    |
| SNP_117007_A_6637 | NW_004521083.1 | scaffold8030 | 6637                    | TT                              | AA                 | AA               | INTERGENIC      |               |                    |                    |
| SNP_117008_A_1184 | NW_004521091.1 | scaffold8047 | 1184                    | TT                              | CC                 | CC               | INTERGENIC      |               |                    |                    |
| SNP_117009_A_1034 | NW_004521092.1 | scaffold8050 | 1034                    | AA                              | TT                 | TT               | INTERGENIC      |               |                    |                    |
| SNP_117010_A_1120 | NW_004521092.1 | scaffold8050 | 1120                    | TT                              | CC                 | CC               | INTERGENIC      |               |                    |                    |
| SNP_117011_A_295  | NW_004521095.1 | scaffold8054 | 295                     | AA                              | GG                 | GG               | INTERGENIC      |               |                    |                    |
| SNP_117012_A_352  | NW_004521095.1 | scaffold8054 | 352                     | AA                              | TT                 | TT               | INTERGENIC      |               |                    |                    |

| SNPs IDs          | Chromosome IDs | Chromosomes  | Physical positions (bp) | CDC Frontier (Reference genome) | (Pusa 1103 & HPNB) | (ILWC 46 & LPNB) | Sequence genome | Components of | Gene accession IDs | Putative functions |
|-------------------|----------------|--------------|-------------------------|---------------------------------|--------------------|------------------|-----------------|---------------|--------------------|--------------------|
| SNP_117013_A_430  | NW_004521095.1 | scaffold8054 | 430                     | AA                              | GG                 | GG               | INTERGENIC      |               |                    |                    |
| SNP_117014_A_545  | NW_004521095.1 | scaffold8054 | 545                     | GG                              | AA                 | AA               | INTERGENIC      |               |                    |                    |
| SNP_117015_A_746  | NW_004521095.1 | scaffold8054 | 746                     | TT                              | AA                 | AA               | INTERGENIC      |               |                    |                    |
| SNP_117016_A_1755 | NW_004521095.1 | scaffold8054 | 1755                    | AA                              | GG                 | GG               | INTERGENIC      |               |                    |                    |
| SNP_117017_A_1788 | NW_004521095.1 | scaffold8054 | 1788                    | AA                              | CC                 | CC               | INTERGENIC      |               |                    |                    |
| SNP_117018_A_2045 | NW_004521095.1 | scaffold8054 | 2045                    | CC                              | GG                 | GG               | INTERGENIC      |               |                    |                    |
| SNP_117019_A_2080 | NW_004521095.1 | scaffold8054 | 2080                    | AA                              | TT                 | TT               | INTERGENIC      |               |                    |                    |
| SNP_117020_A_2151 | NW_004521095.1 | scaffold8054 | 2151                    | GG                              | AA                 | AA               | INTERGENIC      |               |                    |                    |
| SNP_117021_A_2172 | NW_004521095.1 | scaffold8054 | 2172                    | TT                              | CC                 | CC               | INTERGENIC      |               |                    |                    |
| SNP_117022_A_2182 | NW_004521095.1 | scaffold8054 | 2182                    | AA                              | TT                 | TT               | INTERGENIC      |               |                    |                    |
| SNP_117023_A_3129 | NW_004521095.1 | scaffold8054 | 3129                    | CC                              | AA                 | AA               | INTERGENIC      |               |                    |                    |
| SNP_117024_A_3267 | NW_004521095.1 | scaffold8054 | 3267                    | CC                              | GG                 | GG               | INTERGENIC      |               |                    |                    |
| SNP_117025_A_3562 | NW_004521095.1 | scaffold8054 | 3562                    | TT                              | CC                 | CC               | INTERGENIC      |               |                    |                    |
| SNP_117027_A_93   | NW_004521100.1 | scaffold8063 | 93                      | CC                              | TT                 | TT               | INTERGENIC      |               |                    |                    |
| SNP_117028_A_155  | NW_004521100.1 | scaffold8063 | 155                     | AA                              | GG                 | GG               | INTERGENIC      |               |                    |                    |
| SNP_117029_A_532  | NW_004521100.1 | scaffold8063 | 532                     | AA                              | GG                 | GG               | INTERGENIC      |               |                    |                    |
| SNP_117031_A_574  | NW_004521100.1 | scaffold8063 | 574                     | TT                              | CC                 | CC               | INTERGENIC      |               |                    |                    |
| SNP_117032_A_576  | NW_004521100.1 | scaffold8063 | 576                     | CC                              | AA                 | AA               | INTERGENIC      |               |                    |                    |
| SNP_117033_A_86   | NW_004521102.1 | scaffold8066 | 86                      | TT                              | AA                 | AA               | INTERGENIC      |               |                    |                    |
| SNP_117034_A_478  | NW_004521103.1 | scaffold8068 | 478                     | TT                              | CC                 | CC               | INTERGENIC      |               |                    |                    |
| SNP_117035_A_511  | NW_004521103.1 | scaffold8068 | 511                     | CC                              | AA                 | AA               | INTERGENIC      |               |                    |                    |
| SNP_117036_A_557  | NW_004521103.1 | scaffold8068 | 557                     | TT                              | AA                 | AA               | INTERGENIC      |               |                    |                    |

| SNPs IDs          | Chromosome IDs | Chromosomes  | Physical positions (bp) | CDC Frontier (Reference genome) | (Pusa 1103 & HPNB) | (ILWC 46 & LPNB) | Sequence genome | Components of | Gene accession IDs | Putative functions |
|-------------------|----------------|--------------|-------------------------|---------------------------------|--------------------|------------------|-----------------|---------------|--------------------|--------------------|
| SNP_117037_A_788  | NW_004521103.1 | scaffold8068 | 788                     | AA                              | CC                 | CC               | INTERGENIC      |               |                    |                    |
| SNP_117038_A_894  | NW_004521103.1 | scaffold8068 | 894                     | CC                              | GG                 | GG               | INTERGENIC      |               |                    |                    |
| SNP_117039_A_756  | NW_004521111.1 | scaffold8087 | 756                     | TT                              | CC                 | CC               | INTERGENIC      |               |                    |                    |
| SNP_117040_A_759  | NW_004521111.1 | scaffold8087 | 759                     | AA                              | CC                 | CC               | INTERGENIC      |               |                    |                    |
| SNP_117041_A_818  | NW_004521111.1 | scaffold8087 | 818                     | GG                              | AA                 | AA               | INTERGENIC      |               |                    |                    |
| SNP_117042_A_833  | NW_004521111.1 | scaffold8087 | 833                     | AA                              | GG                 | GG               | INTERGENIC      |               |                    |                    |
| SNP_117043_A_1544 | NW_004521117.1 | scaffold8100 | 1544                    | TT                              | GG                 | GG               | INTERGENIC      |               |                    |                    |
| SNP_117044_A_640  | NW_004521119.1 | scaffold8104 | 640                     | AA                              | TT                 | TT               | INTERGENIC      |               |                    |                    |
| SNP_117045_A_7977 | NW_004521128.1 | scaffold8127 | 7977                    | CC                              | AA                 | AA               | INTERGENIC      |               |                    |                    |
| SNP_117046_A_8285 | NW_004521128.1 | scaffold8127 | 8285                    | TT                              | CC                 | CC               | INTERGENIC      |               |                    |                    |
| SNP_117048_A_342  | NW_004521132.1 | scaffold8135 | 342                     | AA                              | GG                 | GG               | INTERGENIC      |               |                    |                    |
| SNP_117049_A_1785 | NW_004521134.1 | scaffold8140 | 1785                    | GG                              | AA                 | AA               | INTERGENIC      |               |                    |                    |
| SNP_117050_A_1811 | NW_004521134.1 | scaffold8140 | 1811                    | TT                              | CC                 | CC               | INTERGENIC      |               |                    |                    |
| SNP_117051_A_1835 | NW_004521141.1 | scaffold8154 | 1835                    | TT                              | AA                 | AA               | INTERGENIC      |               |                    |                    |
| SNP_117053_A_1871 | NW_004521141.1 | scaffold8154 | 1871                    | AA                              | GG                 | GG               | INTERGENIC      |               |                    |                    |
| SNP_117054_A_1896 | NW_004521141.1 | scaffold8154 | 1896                    | CC                              | GG                 | GG               | INTERGENIC      |               |                    |                    |
| SNP_117056_A_915  | NW_004521146.1 | scaffold8162 | 915                     | AA                              | GG                 | GG               | INTERGENIC      |               |                    |                    |
| SNP_117057_A_1064 | NW_004521146.1 | scaffold8162 | 1064                    | AA                              | GG                 | GG               | INTERGENIC      |               |                    |                    |
| SNP_117058_A_195  | NW_004521147.1 | scaffold8163 | 195                     | CC                              | TT                 | TT               | INTERGENIC      |               |                    |                    |
| SNP_117059_A_210  | NW_004521147.1 | scaffold8163 | 210                     | TT                              | CC                 | CC               | INTERGENIC      |               |                    |                    |
| SNP_117060_A_234  | NW_004521147.1 | scaffold8163 | 234                     | GG                              | AA                 | AA               | INTERGENIC      |               |                    |                    |
| SNP_117061_A_291  | NW_004521147.1 | scaffold8163 | 291                     | GG                              | AA                 | AA               | INTERGENIC      |               |                    |                    |

| SNPs IDs          | Chromosome IDs | Chromosomes  | Physical positions (bp) | CDC Frontier (Reference genome) | (Pusa 1103 & HPNB) | (ILWC 46 & LPNB) | Sequence genome | Components of | Gene accession IDs | Putative functions |
|-------------------|----------------|--------------|-------------------------|---------------------------------|--------------------|------------------|-----------------|---------------|--------------------|--------------------|
| SNP_117062_A_300  | NW_004521147.1 | scaffold8163 | 300                     | TT                              | AA                 | AA               | INTERGENIC      |               |                    |                    |
| SNP_117063_A_369  | NW_004521147.1 | scaffold8163 | 369                     | AA                              | GG                 | GG               | INTERGENIC      |               |                    |                    |
| SNP_117064_A_581  | NW_004521147.1 | scaffold8163 | 581                     | TT                              | AA                 | AA               | INTERGENIC      |               |                    |                    |
| SNP_117065_A_619  | NW_004521147.1 | scaffold8163 | 619                     | AA                              | GG                 | GG               | INTERGENIC      |               |                    |                    |
| SNP_117066_A_632  | NW_004521147.1 | scaffold8163 | 632                     | TT                              | CC                 | CC               | INTERGENIC      |               |                    |                    |
| SNP_117067_A_638  | NW_004521147.1 | scaffold8163 | 638                     | TT                              | CC                 | CC               | INTERGENIC      |               |                    |                    |
| SNP_117068_A_665  | NW_004521147.1 | scaffold8163 | 665                     | GG                              | AA                 | AA               | INTERGENIC      |               |                    |                    |
| SNP_117069_A_4565 | NW_004521148.1 | scaffold8164 | 4565                    | AA                              | TT                 | TT               | INTERGENIC      |               |                    |                    |
| SNP_117070_A_733  | NW_004521158.1 | scaffold8181 | 733                     | AA                              | TT                 | TT               | INTERGENIC      |               |                    |                    |
| SNP_117071_A_1245 | NW_004521159.1 | scaffold8182 | 1245                    | TT                              | CC                 | CC               | INTERGENIC      |               |                    |                    |
| SNP_117072_A_1271 | NW_004521159.1 | scaffold8182 | 1271                    | TT                              | GG                 | GG               | INTERGENIC      |               |                    |                    |
| SNP_117073_A_1563 | NW_004521159.1 | scaffold8182 | 1563                    | CC                              | GG                 | GG               | INTERGENIC      |               |                    |                    |
| SNP_117074_A_1586 | NW_004521159.1 | scaffold8182 | 1586                    | TT                              | CC                 | CC               | INTERGENIC      |               |                    |                    |
| SNP_117075_A_486  | NW_004521161.1 | scaffold8185 | 486                     | TT                              | CC                 | CC               | INTERGENIC      |               |                    |                    |
| SNP_117076_A_591  | NW_004521161.1 | scaffold8185 | 591                     | AA                              | TT                 | TT               | INTERGENIC      |               |                    |                    |
| SNP_117077_A_598  | NW_004521161.1 | scaffold8185 | 598                     | TT                              | CC                 | CC               | INTERGENIC      |               |                    |                    |
| SNP_117078_A_617  | NW_004521161.1 | scaffold8185 | 617                     | TT                              | CC                 | CC               | INTERGENIC      |               |                    |                    |
| SNP_117079_A_661  | NW_004521161.1 | scaffold8185 | 661                     | AA                              | GG                 | GG               | INTERGENIC      |               |                    |                    |
| SNP_117080_A_456  | NW_004521169.1 | scaffold8200 | 456                     | CC                              | TT                 | TT               | INTERGENIC      |               |                    |                    |
| SNP_117081_A_742  | NW_004521169.1 | scaffold8200 | 742                     | GG                              | AA                 | AA               | INTERGENIC      |               |                    |                    |
| SNP_117082_A_1011 | NW_004521169.1 | scaffold8200 | 1011                    | CC                              | TT                 | TT               | INTERGENIC      |               |                    |                    |
| SNP_117083_A_1200 | NW_004521169.1 | scaffold8200 | 1200                    | GG                              | CC                 | CC               | INTERGENIC      |               |                    |                    |

| SNPs IDs          | Chromosome IDs | Chromosomes  | Physical positions (bp) | CDC Frontier (Reference genome) | (Pusa 1103 & HPNB) | (ILWC 46 & LPNB) | Sequence Components of genome | Gene accession IDs | Putative functions |
|-------------------|----------------|--------------|-------------------------|---------------------------------|--------------------|------------------|-------------------------------|--------------------|--------------------|
| SNP_117084_A_275  | NW_004521173.1 | scaffold8207 | 275                     | AA                              | GG                 | GG               | SYNONYMOUS_CODING             | 101499061          | Unknown function   |
| SNP_117085_A_361  | NW_004521173.1 | scaffold8207 | 361                     | CC                              | TT                 | TT               | NON_SYNONYMOUS_CODING         | 101499061          | Unknown function   |
| SNP_117086_A_440  | NW_004521173.1 | scaffold8207 | 440                     | AA                              | TT                 | TT               | SYNONYMOUS_CODING             | 101499061          | Unknown function   |
| SNP_117087_A_636  | NW_004521173.1 | scaffold8207 | 636                     | AA                              | GG                 | GG               | URR                           | 101499061          | Unknown function   |
| SNP_117088_A_700  | NW_004521173.1 | scaffold8207 | 700                     | GG                              | AA                 | AA               | URR                           | 101499061          | Unknown function   |
| SNP_117089_A_707  | NW_004521173.1 | scaffold8207 | 707                     | GG                              | AA                 | AA               | URR                           | 101499061          | Unknown function   |
| SNP_117090_A_949  | NW_004521173.1 | scaffold8207 | 949                     | GG                              | TT                 | TT               | URR                           | 101499061          | Unknown function   |
| SNP_117091_A_977  | NW_004521173.1 | scaffold8207 | 977                     | AA                              | GG                 | GG               | URR                           | 101499061          | Unknown function   |
| SNP_117092_A_1004 | NW_004521173.1 | scaffold8207 | 1004                    | GG                              | TT                 | TT               | URR                           | 101499061          | Unknown function   |
| SNP_117093_A_1045 | NW_004521173.1 | scaffold8207 | 1045                    | AA                              | CC                 | CC               | URR                           | 101499061          | Unknown function   |
| SNP_117094_A_6518 | NW_004521183.1 | scaffold8226 | 6518                    | TT                              | CC                 | CC               | INTERGENIC                    |                    |                    |
| SNP_117095_A_6564 | NW_004521183.1 | scaffold8226 | 6564                    | AA                              | GG                 | GG               | INTERGENIC                    |                    |                    |
| SNP_117096_A_856  | NW_004521186.1 | scaffold8232 | 856                     | CC                              | AA                 | AA               | INTERGENIC                    |                    |                    |
| SNP_117097_A_1180 | NW_004521186.1 | scaffold8232 | 1180                    | AA                              | CC                 | CC               | INTERGENIC                    |                    |                    |
| SNP_117098_A_1404 | NW_004521186.1 | scaffold8232 | 1404                    | CC                              | TT                 | TT               | INTERGENIC                    |                    |                    |
| SNP_117099_A_1424 | NW_004521186.1 | scaffold8232 | 1424                    | TT                              | CC                 | CC               | INTERGENIC                    |                    |                    |
| SNP_117100_A_516  | NW_004521193.1 | scaffold8241 | 516                     | GG                              | AA                 | AA               | INTERGENIC                    |                    |                    |
| SNP_117101_A_1469 | NW_004521193.1 | scaffold8241 | 1469                    | GG                              | CC                 | CC               | INTERGENIC                    |                    |                    |
| SNP_117102_A_1474 | NW_004521193.1 | scaffold8241 | 1474                    | TT                              | AA                 | AA               | INTERGENIC                    |                    |                    |
| SNP_117103_A_2486 | NW_004521193.1 | scaffold8241 | 2486                    | AA                              | TT                 | TT               | INTERGENIC                    |                    |                    |
| SNP_117104_A_2525 | NW_004521193.1 | scaffold8241 | 2525                    | AA                              | TT                 | TT               | INTERGENIC                    |                    |                    |
| SNP_117105_A_516  | NW_004521195.1 | scaffold8244 | 516                     | TT                              | AA                 | AA               | INTERGENIC                    |                    |                    |

| SNPs IDs           | Chromosome IDs | Chromosomes  | Physical positions (bp) | CDC Frontier (Reference genome) | (Pusa 1103 & HPNB) | (ILWC 46 & LPNB) | Sequence genome | Components of | Gene accession IDs | Putative functions |
|--------------------|----------------|--------------|-------------------------|---------------------------------|--------------------|------------------|-----------------|---------------|--------------------|--------------------|
| SNP_117106_A_623   | NW_004521197.1 | scaffold8247 | 623                     | TT                              | CC                 | CC               | INTERGENIC      |               |                    |                    |
| SNP_117107_A_2928  | NW_004521201.1 | scaffold8253 | 2928                    | TT                              | CC                 | CC               | INTERGENIC      |               |                    |                    |
| SNP_117108_A_3312  | NW_004521201.1 | scaffold8253 | 3312                    | TT                              | AA                 | AA               | INTERGENIC      |               |                    |                    |
| SNP_117109_A_3695  | NW_004521201.1 | scaffold8253 | 3695                    | GG                              | AA                 | AA               | INTERGENIC      |               |                    |                    |
| SNP_117110_A_20518 | NW_004521205.1 | scaffold8259 | 20518                   | CC                              | AA                 | AA               | INTERGENIC      |               |                    |                    |
| SNP_117112_A_64    | NW_004521214.1 | scaffold8274 | 64                      | AA                              | GG                 | GG               | INTERGENIC      |               |                    |                    |
| SNP_117113_A_123   | NW_004521214.1 | scaffold8274 | 123                     | AA                              | GG                 | GG               | INTERGENIC      |               |                    |                    |
| SNP_117114_A_124   | NW_004521214.1 | scaffold8274 | 124                     | AA                              | TT                 | TT               | INTERGENIC      |               |                    |                    |
| SNP_117115_A_210   | NW_004521215.1 | scaffold8275 | 210                     | AA                              | TT                 | TT               | INTERGENIC      |               |                    |                    |
| SNP_117116_A_256   | NW_004521215.1 | scaffold8275 | 256                     | TT                              | AA                 | AA               | INTERGENIC      |               |                    |                    |
| SNP_117117_A_263   | NW_004521215.1 | scaffold8275 | 263                     | GG                              | AA                 | AA               | INTERGENIC      |               |                    |                    |
| SNP_117118_A_391   | NW_004521215.1 | scaffold8275 | 391                     | TT                              | GG                 | GG               | INTERGENIC      |               |                    |                    |
| SNP_117119_A_483   | NW_004521215.1 | scaffold8275 | 483                     | GG                              | CC                 | CC               | INTERGENIC      |               |                    |                    |
| SNP_117120_A_510   | NW_004521215.1 | scaffold8275 | 510                     | TT                              | CC                 | CC               | INTERGENIC      |               |                    |                    |
| SNP_117121_A_346   | NW_004521221.1 | scaffold8292 | 346                     | TT                              | CC                 | CC               | INTERGENIC      |               |                    |                    |
| SNP_117122_A_90    | NW_004521222.1 | scaffold8294 | 90                      | CC                              | TT                 | TT               | INTERGENIC      |               |                    |                    |
| SNP_117123_A_242   | NW_004521222.1 | scaffold8294 | 242                     | GG                              | AA                 | AA               | INTERGENIC      |               |                    |                    |
| SNP_117124_A_536   | NW_004521222.1 | scaffold8294 | 536                     | CC                              | AA                 | AA               | INTERGENIC      |               |                    |                    |
| SNP_117125_A_31    | NW_004521223.1 | scaffold8297 | 31                      | AA                              | GG                 | GG               | INTERGENIC      |               |                    |                    |
| SNP_117126_A_61    | NW_004521223.1 | scaffold8297 | 61                      | GG                              | TT                 | TT               | INTERGENIC      |               |                    |                    |
| SNP_117127_A_79    | NW_004521223.1 | scaffold8297 | 79                      | TT                              | GG                 | GG               | INTERGENIC      |               |                    |                    |
| SNP_117129_A_425   | NW_004521223.1 | scaffold8297 | 425                     | GG                              | AA                 | AA               | INTERGENIC      |               |                    |                    |



| SNPs IDs          | Chromosome IDs | Chromosomes  | Physical positions (bp) | CDC Frontier (Reference genome) | (Pusa 1103 & HPNB) | (ILWC 46 & LPNB) | Sequence genome | Components of | Gene accession IDs | Putative functions |
|-------------------|----------------|--------------|-------------------------|---------------------------------|--------------------|------------------|-----------------|---------------|--------------------|--------------------|
| SNP_117130_A_1454 | NW_004521223.1 | scaffold8297 | 1454                    | CC                              | TT                 | TT               | INTERGENIC      |               |                    |                    |
| SNP_117131_A_1923 | NW_004521223.1 | scaffold8297 | 1923                    | TT                              | AA                 | AA               | INTERGENIC      |               |                    |                    |
| SNP_117132_A_1924 | NW_004521223.1 | scaffold8297 | 1924                    | TT                              | AA                 | AA               | INTERGENIC      |               |                    |                    |
| SNP_117133_A_1997 | NW_004521223.1 | scaffold8297 | 1997                    | CC                              | AA                 | AA               | INTERGENIC      |               |                    |                    |
| SNP_117134_A_2805 | NW_004521223.1 | scaffold8297 | 2805                    | AA                              | TT                 | TT               | INTERGENIC      |               |                    |                    |
| SNP_117135_A_2935 | NW_004521223.1 | scaffold8297 | 2935                    | CC                              | AA                 | AA               | INTERGENIC      |               |                    |                    |
| SNP_117136_A_3281 | NW_004521223.1 | scaffold8297 | 3281                    | TT                              | CC                 | CC               | INTERGENIC      |               |                    |                    |
| SNP_117137_A_3291 | NW_004521223.1 | scaffold8297 | 3291                    | GG                              | AA                 | AA               | INTERGENIC      |               |                    |                    |
| SNP_117139_A_6079 | NW_004521224.1 | scaffold8301 | 6079                    | GG                              | AA                 | AA               | INTERGENIC      |               |                    |                    |
| SNP_117140_A_6307 | NW_004521224.1 | scaffold8301 | 6307                    | TT                              | CC                 | CC               | INTERGENIC      |               |                    |                    |
| SNP_117141_A_6608 | NW_004521224.1 | scaffold8301 | 6608                    | GG                              | TT                 | TT               | INTERGENIC      |               |                    |                    |
| SNP_117142_A_6624 | NW_004521224.1 | scaffold8301 | 6624                    | AA                              | TT                 | TT               | INTERGENIC      |               |                    |                    |
| SNP_117143_A_6689 | NW_004521224.1 | scaffold8301 | 6689                    | CC                              | TT                 | TT               | INTERGENIC      |               |                    |                    |
| SNP_117144_A_6722 | NW_004521224.1 | scaffold8301 | 6722                    | AA                              | TT                 | TT               | INTERGENIC      |               |                    |                    |
| SNP_117145_A_6747 | NW_004521224.1 | scaffold8301 | 6747                    | CC                              | AA                 | AA               | INTERGENIC      |               |                    |                    |
| SNP_117146_A_6762 | NW_004521224.1 | scaffold8301 | 6762                    | TT                              | CC                 | CC               | INTERGENIC      |               |                    |                    |
| SNP_117147_A_6876 | NW_004521224.1 | scaffold8301 | 6876                    | GG                              | AA                 | AA               | INTERGENIC      |               |                    |                    |
| SNP_117148_A_6880 | NW_004521224.1 | scaffold8301 | 6880                    | AA                              | GG                 | GG               | INTERGENIC      |               |                    |                    |
| SNP_117149_A_6923 | NW_004521224.1 | scaffold8301 | 6923                    | TT                              | AA                 | AA               | INTERGENIC      |               |                    |                    |
| SNP_117150_A_88   | NW_004521231.1 | scaffold8309 | 88                      | CC                              | GG                 | GG               | INTERGENIC      |               |                    |                    |
| SNP_117151_A_314  | NW_004521231.1 | scaffold8309 | 314                     | AA                              | CC                 | CC               | INTERGENIC      |               |                    |                    |
| SNP_117152_A_64   | NW_004521234.1 | scaffold8314 | 64                      | AA                              | GG                 | GG               | INTERGENIC      |               |                    |                    |

| SNPs IDs           | Chromosome IDs | Chromosomes  | Physical positions (bp) | CDC Frontier (Reference genome) | (Pusa 1103 & HPNB) | (ILWC 46 & LPNB) | Sequence genome | Components of | Gene accession IDs | Putative functions |
|--------------------|----------------|--------------|-------------------------|---------------------------------|--------------------|------------------|-----------------|---------------|--------------------|--------------------|
| SNP_117153_A_88    | NW_004521234.1 | scaffold8314 | 88                      | TT                              | CC                 | CC               | INTERGENIC      |               |                    |                    |
| SNP_117154_A_164   | NW_004521234.1 | scaffold8314 | 164                     | GG                              | AA                 | AA               | INTERGENIC      |               |                    |                    |
| SNP_117156_A_416   | NW_004521234.1 | scaffold8314 | 416                     | AA                              | TT                 | TT               | INTERGENIC      |               |                    |                    |
| SNP_117157_A_542   | NW_004521234.1 | scaffold8314 | 542                     | TT                              | CC                 | CC               | INTERGENIC      |               |                    |                    |
| SNP_117158_A_614   | NW_004521234.1 | scaffold8314 | 614                     | AA                              | TT                 | TT               | INTERGENIC      |               |                    |                    |
| SNP_117159_A_637   | NW_004521234.1 | scaffold8314 | 637                     | GG                              | AA                 | AA               | INTERGENIC      |               |                    |                    |
| SNP_117160_A_703   | NW_004521234.1 | scaffold8314 | 703                     | AA                              | GG                 | GG               | INTERGENIC      |               |                    |                    |
| SNP_117161_A_718   | NW_004521234.1 | scaffold8314 | 718                     | GG                              | AA                 | AA               | INTERGENIC      |               |                    |                    |
| SNP_117162_A_849   | NW_004521234.1 | scaffold8314 | 849                     | AA                              | CC                 | CC               | INTERGENIC      |               |                    |                    |
| SNP_117163_A_856   | NW_004521234.1 | scaffold8314 | 856                     | AA                              | GG                 | GG               | INTERGENIC      |               |                    |                    |
| SNP_117165_A_914   | NW_004521234.1 | scaffold8314 | 914                     | AA                              | GG                 | GG               | INTERGENIC      |               |                    |                    |
| SNP_117166_A_1107  | NW_004521234.1 | scaffold8314 | 1107                    | TT                              | AA                 | AA               | INTERGENIC      |               |                    |                    |
| SNP_117167_A_1177  | NW_004521234.1 | scaffold8314 | 1177                    | TT                              | GG                 | GG               | INTERGENIC      |               |                    |                    |
| SNP_117168_A_1212  | NW_004521234.1 | scaffold8314 | 1212                    | CC                              | AA                 | AA               | INTERGENIC      |               |                    |                    |
| SNP_117169_A_1238  | NW_004521234.1 | scaffold8314 | 1238                    | TT                              | GG                 | GG               | INTERGENIC      |               |                    |                    |
| SNP_117171_A_1355  | NW_004521234.1 | scaffold8314 | 1355                    | CC                              | TT                 | TT               | INTERGENIC      |               |                    |                    |
| SNP_117172_A_1621  | NW_004521234.1 | scaffold8314 | 1621                    | GG                              | AA                 | AA               | INTERGENIC      |               |                    |                    |
| SNP_117173_A_1818  | NW_004521234.1 | scaffold8314 | 1818                    | TT                              | AA                 | AA               | INTERGENIC      |               |                    |                    |
| SNP_117175_A_17425 | NW_004521235.1 | scaffold8315 | 17425                   | CC                              | GG                 | GG               | INTERGENIC      |               |                    |                    |
| SNP_117176_A_17533 | NW_004521235.1 | scaffold8315 | 17533                   | TT                              | CC                 | CC               | INTERGENIC      |               |                    |                    |
| SNP_117178_A_18397 | NW_004521235.1 | scaffold8315 | 18397                   | AA                              | CC                 | CC               | INTERGENIC      |               |                    |                    |
| SNP_117179_A_18398 | NW_004521235.1 | scaffold8315 | 18398                   | AA                              | TT                 | TT               | INTERGENIC      |               |                    |                    |

| SNPs IDs           | Chromosome IDs | Chromosomes  | Physical positions (bp) | CDC Frontier (Reference genome) | (Pusa 1103 & HPNB) | (ILWC 46 & LPNB) | Sequence genome | Components of | Gene accession IDs | Putative functions |
|--------------------|----------------|--------------|-------------------------|---------------------------------|--------------------|------------------|-----------------|---------------|--------------------|--------------------|
| SNP_117180_A_18408 | NW_004521235.1 | scaffold8315 | 18408                   | CC                              | GG                 | GG               | INTERGENIC      |               |                    |                    |
| SNP_117181_A_18573 | NW_004521235.1 | scaffold8315 | 18573                   | AA                              | GG                 | GG               | INTERGENIC      |               |                    |                    |
| SNP_117183_A_19231 | NW_004521235.1 | scaffold8315 | 19231                   | TT                              | AA                 | AA               | INTERGENIC      |               |                    |                    |
| SNP_117184_A_19233 | NW_004521235.1 | scaffold8315 | 19233                   | AA                              | TT                 | TT               | INTERGENIC      |               |                    |                    |
| SNP_117185_A_19284 | NW_004521235.1 | scaffold8315 | 19284                   | AA                              | CC                 | CC               | INTERGENIC      |               |                    |                    |
| SNP_117186_A_19625 | NW_004521235.1 | scaffold8315 | 19625                   | CC                              | TT                 | TT               | INTERGENIC      |               |                    |                    |
| SNP_117187_A_19915 | NW_004521235.1 | scaffold8315 | 19915                   | CC                              | TT                 | TT               | INTERGENIC      |               |                    |                    |
| SNP_117188_A_20215 | NW_004521235.1 | scaffold8315 | 20215                   | CC                              | AA                 | AA               | INTERGENIC      |               |                    |                    |
| SNP_117190_A_20416 | NW_004521235.1 | scaffold8315 | 20416                   | CC                              | GG                 | GG               | INTERGENIC      |               |                    |                    |
| SNP_117191_A_20417 | NW_004521235.1 | scaffold8315 | 20417                   | GG                              | AA                 | AA               | INTERGENIC      |               |                    |                    |
| SNP_117192_A_20418 | NW_004521235.1 | scaffold8315 | 20418                   | TT                              | AA                 | AA               | INTERGENIC      |               |                    |                    |
| SNP_117193_A_20419 | NW_004521235.1 | scaffold8315 | 20419                   | TT                              | AA                 | AA               | INTERGENIC      |               |                    |                    |
| SNP_117194_A_20420 | NW_004521235.1 | scaffold8315 | 20420                   | AA                              | TT                 | TT               | INTERGENIC      |               |                    |                    |
| SNP_117195_A_20424 | NW_004521235.1 | scaffold8315 | 20424                   | AA                              | TT                 | TT               | INTERGENIC      |               |                    |                    |
| SNP_117196_A_20440 | NW_004521235.1 | scaffold8315 | 20440                   | GG                              | TT                 | TT               | INTERGENIC      |               |                    |                    |
| SNP_117198_A_20517 | NW_004521235.1 | scaffold8315 | 20517                   | TT                              | CC                 | CC               | INTERGENIC      |               |                    |                    |
| SNP_117199_A_20573 | NW_004521235.1 | scaffold8315 | 20573                   | TT                              | GG                 | GG               | INTERGENIC      |               |                    |                    |
| SNP_117200_A_20645 | NW_004521235.1 | scaffold8315 | 20645                   | TT                              | GG                 | GG               | INTERGENIC      |               |                    |                    |
| SNP_117201_A_20711 | NW_004521235.1 | scaffold8315 | 20711                   | CC                              | TT                 | TT               | INTERGENIC      |               |                    |                    |
| SNP_117202_A_64    | NW_004521241.1 | scaffold8325 | 64                      | AA                              | TT                 | TT               | INTERGENIC      |               |                    |                    |
| SNP_117203_A_93    | NW_004521241.1 | scaffold8325 | 93                      | AA                              | CC                 | CC               | INTERGENIC      |               |                    |                    |
| SNP_117204_A_110   | NW_004521241.1 | scaffold8325 | 110                     | AA                              | CC                 | CC               | INTERGENIC      |               |                    |                    |

| SNPs IDs          | Chromosome IDs | Chromosomes  | Physical positions (bp) | CDC Frontier (Reference genome) | (Pusa 1103 & HPNB) | (ILWC 46 & LPNB) | Sequence genome | Components of | Gene accession IDs | Putative functions |
|-------------------|----------------|--------------|-------------------------|---------------------------------|--------------------|------------------|-----------------|---------------|--------------------|--------------------|
| SNP_117205_A_1045 | NW_004521245.1 | scaffold8332 | 1045                    | GG                              | TT                 | TT               | INTERGENIC      |               |                    |                    |
| SNP_117206_A_659  | NW_004521250.1 | scaffold8340 | 659                     | AA                              | CC                 | CC               | INTERGENIC      |               |                    |                    |
| SNP_117207_A_64   | NW_004521257.1 | scaffold8357 | 64                      | GG                              | AA                 | AA               | INTERGENIC      |               |                    |                    |
| SNP_117208_A_98   | NW_004521257.1 | scaffold8357 | 98                      | AA                              | TT                 | TT               | INTERGENIC      |               |                    |                    |
| SNP_117209_A_342  | NW_004521257.1 | scaffold8357 | 342                     | TT                              | AA                 | AA               | INTERGENIC      |               |                    |                    |
| SNP_117210_A_412  | NW_004521257.1 | scaffold8357 | 412                     | GG                              | TT                 | TT               | INTERGENIC      |               |                    |                    |
| SNP_117211_A_171  | NW_004521261.1 | scaffold8366 | 171                     | AA                              | TT                 | TT               | INTERGENIC      |               |                    |                    |
| SNP_117212_A_440  | NW_004521261.1 | scaffold8366 | 440                     | CC                              | TT                 | TT               | INTERGENIC      |               |                    |                    |
| SNP_117213_A_504  | NW_004521261.1 | scaffold8366 | 504                     | CC                              | TT                 | TT               | INTERGENIC      |               |                    |                    |
| SNP_117214_A_262  | NW_004521263.1 | scaffold8368 | 262                     | TT                              | CC                 | CC               | INTERGENIC      |               |                    |                    |
| SNP_117215_A_619  | NW_004521263.1 | scaffold8368 | 619                     | AA                              | GG                 | GG               | INTERGENIC      |               |                    |                    |
| SNP_117216_A_679  | NW_004521263.1 | scaffold8368 | 679                     | CC                              | GG                 | GG               | INTERGENIC      |               |                    |                    |
| SNP_117217_A_707  | NW_004521263.1 | scaffold8368 | 707                     | AA                              | GG                 | GG               | INTERGENIC      |               |                    |                    |
| SNP_117218_A_718  | NW_004521263.1 | scaffold8368 | 718                     | AA                              | GG                 | GG               | INTERGENIC      |               |                    |                    |
| SNP_117219_A_828  | NW_004521263.1 | scaffold8368 | 828                     | TT                              | CC                 | CC               | INTERGENIC      |               |                    |                    |
| SNP_117220_A_976  | NW_004521263.1 | scaffold8368 | 976                     | AA                              | GG                 | GG               | INTERGENIC      |               |                    |                    |
| SNP_117221_A_1477 | NW_004521266.1 | scaffold8375 | 1477                    | GG                              | AA                 | AA               | INTERGENIC      |               |                    |                    |
| SNP_117222_A_89   | NW_004521267.1 | scaffold8377 | 89                      | AA                              | GG                 | GG               | INTERGENIC      |               |                    |                    |
| SNP_117224_A_869  | NW_004521268.1 | scaffold8378 | 869                     | CC                              | AA                 | AA               | INTERGENIC      |               |                    |                    |
| SNP_117225_A_872  | NW_004521268.1 | scaffold8378 | 872                     | GG                              | TT                 | TT               | INTERGENIC      |               |                    |                    |
| SNP_117226_A_876  | NW_004521268.1 | scaffold8378 | 876                     | GG                              | AA                 | AA               | INTERGENIC      |               |                    |                    |
| SNP_117227_A_912  | NW_004521268.1 | scaffold8378 | 912                     | GG                              | AA                 | AA               | INTERGENIC      |               |                    |                    |

| SNPs IDs          | Chromosome IDs | Chromosomes  | Physical positions (bp) | CDC Frontier (Reference genome) | (Pusa 1103 & HPNB) | (ILWC 46 & LPNB) | Sequence genome | Components of | Gene accession IDs | Putative functions |
|-------------------|----------------|--------------|-------------------------|---------------------------------|--------------------|------------------|-----------------|---------------|--------------------|--------------------|
| SNP_117228_A_1832 | NW_004521268.1 | scaffold8378 | 1832                    | GG                              | AA                 | AA               | INTERGENIC      |               |                    |                    |
| SNP_117230_A_537  | NW_004521270.1 | scaffold8380 | 537                     | GG                              | AA                 | AA               | INTERGENIC      |               |                    |                    |
| SNP_117231_A_546  | NW_004521270.1 | scaffold8380 | 546                     | AA                              | GG                 | GG               | INTERGENIC      |               |                    |                    |
| SNP_117232_A_595  | NW_004521270.1 | scaffold8380 | 595                     | AA                              | CC                 | CC               | INTERGENIC      |               |                    |                    |
| SNP_117233_A_620  | NW_004521270.1 | scaffold8380 | 620                     | CC                              | GG                 | GG               | INTERGENIC      |               |                    |                    |
| SNP_117234_A_642  | NW_004521270.1 | scaffold8380 | 642                     | CC                              | TT                 | TT               | INTERGENIC      |               |                    |                    |
| SNP_117235_A_1088 | NW_004521270.1 | scaffold8380 | 1088                    | CC                              | TT                 | TT               | INTERGENIC      |               |                    |                    |
| SNP_117236_A_89   | NW_004521273.1 | scaffold8385 | 89                      | TT                              | AA                 | AA               | INTERGENIC      |               |                    |                    |
| SNP_117237_A_141  | NW_004521273.1 | scaffold8385 | 141                     | TT                              | GG                 | GG               | INTERGENIC      |               |                    |                    |
| SNP_117238_A_146  | NW_004521273.1 | scaffold8385 | 146                     | GG                              | CC                 | CC               | INTERGENIC      |               |                    |                    |
| SNP_117239_A_276  | NW_004521273.1 | scaffold8385 | 276                     | TT                              | AA                 | AA               | INTERGENIC      |               |                    |                    |
| SNP_117240_A_279  | NW_004521273.1 | scaffold8385 | 279                     | TT                              | CC                 | CC               | INTERGENIC      |               |                    |                    |
| SNP_117241_A_373  | NW_004521273.1 | scaffold8385 | 373                     | CC                              | TT                 | TT               | INTERGENIC      |               |                    |                    |
| SNP_117242_A_396  | NW_004521273.1 | scaffold8385 | 396                     | CC                              | TT                 | TT               | INTERGENIC      |               |                    |                    |
| SNP_117243_A_435  | NW_004521273.1 | scaffold8385 | 435                     | CC                              | AA                 | AA               | INTERGENIC      |               |                    |                    |
| SNP_117244_A_508  | NW_004521273.1 | scaffold8385 | 508                     | AA                              | TT                 | TT               | INTERGENIC      |               |                    |                    |
| SNP_117245_A_178  | NW_004521276.1 | scaffold8393 | 178                     | CC                              | TT                 | TT               | INTERGENIC      |               |                    |                    |
| SNP_117246_A_1094 | NW_004521276.1 | scaffold8393 | 1094                    | TT                              | AA                 | AA               | INTERGENIC      |               |                    |                    |
| SNP_117247_A_1134 | NW_004521276.1 | scaffold8393 | 1134                    | CC                              | AA                 | AA               | INTERGENIC      |               |                    |                    |
| SNP_117248_A_1323 | NW_004521276.1 | scaffold8393 | 1323                    | AA                              | GG                 | GG               | INTERGENIC      |               |                    |                    |
| SNP_117249_A_1440 | NW_004521276.1 | scaffold8393 | 1440                    | CC                              | AA                 | AA               | INTERGENIC      |               |                    |                    |
| SNP_117251_A_1597 | NW_004521276.1 | scaffold8393 | 1597                    | CC                              | TT                 | TT               | INTERGENIC      |               |                    |                    |

| SNPs IDs          | Chromosome IDs | Chromosomes  | Physical positions (bp) | CDC Frontier genome (Reference genome) | (Pusa 1103 & HPNB) | (ILWC 46 & LPNB) | Sequence genome       | Components of | Gene accession IDs           | Putative functions |
|-------------------|----------------|--------------|-------------------------|----------------------------------------|--------------------|------------------|-----------------------|---------------|------------------------------|--------------------|
| SNP_117252_A_2653 | NW_004521276.1 | scaffold8393 | 2653                    | AA                                     | CC                 | CC               | INTERGENIC            |               |                              |                    |
| SNP_117254_A_1010 | NW_004521284.1 | scaffold8412 | 1010                    | AA                                     | TT                 | TT               | INTERGENIC            |               |                              |                    |
| SNP_117255_A_1225 | NW_004521284.1 | scaffold8412 | 1225                    | AA                                     | GG                 | GG               | INTERGENIC            |               |                              |                    |
| SNP_117256_A_1308 | NW_004521284.1 | scaffold8412 | 1308                    | GG                                     | TT                 | TT               | INTERGENIC            |               |                              |                    |
| SNP_117257_A_429  | NW_004521286.1 | scaffold8421 | 429                     | AA                                     | GG                 | GG               | INTERGENIC            |               |                              |                    |
| SNP_117258_A_1306 | NW_004521292.1 | scaffold8442 | 1306                    | GG                                     | AA                 | AA               | INTERGENIC            |               |                              |                    |
| SNP_117259_A_1315 | NW_004521292.1 | scaffold8442 | 1315                    | AA                                     | GG                 | GG               | INTERGENIC            |               |                              |                    |
| SNP_117261_A_1779 | NW_004521292.1 | scaffold8442 | 1779                    | TT                                     | AA                 | AA               | INTERGENIC            |               |                              |                    |
| SNP_117262_A_1871 | NW_004521292.1 | scaffold8442 | 1871                    | TT                                     | CC                 | CC               | INTERGENIC            |               |                              |                    |
| SNP_117263_A_1948 | NW_004521292.1 | scaffold8442 | 1948                    | GG                                     | AA                 | AA               | INTERGENIC            |               |                              |                    |
| SNP_117264_A_1982 | NW_004521292.1 | scaffold8442 | 1982                    | AA                                     | CC                 | CC               | INTERGENIC            |               |                              |                    |
| SNP_117265_A_2601 | NW_004521292.1 | scaffold8442 | 2601                    | AA                                     | CC                 | CC               | INTERGENIC            |               |                              |                    |
| SNP_117266_A_2602 | NW_004521292.1 | scaffold8442 | 2602                    | TT                                     | CC                 | CC               | INTERGENIC            |               |                              |                    |
| SNP_117267_A_2718 | NW_004521292.1 | scaffold8442 | 2718                    | TT                                     | GG                 | GG               | INTERGENIC            |               |                              |                    |
| SNP_117268_A_2738 | NW_004521292.1 | scaffold8442 | 2738                    | TT                                     | GG                 | GG               | INTERGENIC            |               |                              |                    |
| SNP_117269_A_334  | NW_004521294.1 | scaffold8445 | 334                     | GG                                     | CC                 | CC               | INTERGENIC            |               |                              |                    |
| SNP_117270_A_4920 | NW_004521294.1 | scaffold8445 | 4920                    | AA                                     | CC                 | CC               | DRR                   | 101499681     | uncharacterized LOC101499681 |                    |
| SNP_117271_A_4944 | NW_004521294.1 | scaffold8445 | 4944                    | TT                                     | CC                 | CC               | DRR                   | 101499681     | uncharacterized LOC101499681 |                    |
| SNP_117272_A_5129 | NW_004521294.1 | scaffold8445 | 5129                    | TT                                     | GG                 | GG               | SYNONYMOUS_CODING     | 101499681     | uncharacterized LOC101499681 |                    |
| SNP_117273_A_5150 | NW_004521294.1 | scaffold8445 | 5150                    | GG                                     | AA                 | AA               | SYNONYMOUS_CODING     | 101499681     | uncharacterized LOC101499681 |                    |
| SNP_117274_A_5274 | NW_004521294.1 | scaffold8445 | 5274                    | GG                                     | CC                 | CC               | NON_SYNONYMOUS_CODING | 101499681     | uncharacterized LOC101499681 |                    |
| SNP_117275_A_5361 | NW_004521294.1 | scaffold8445 | 5361                    | AA                                     | GG                 | GG               | URR                   | 101499681     | uncharacterized LOC101499681 |                    |

| SNPs IDs          | Chromosome IDs | Chromosomes  | Physical positions (bp) | CDC Frontier (Reference genome) | (Pusa 1103 & HPNB) | (ILWC 46 & LPNB) | Sequence Components of genome | Gene accession IDs | Putative functions           |
|-------------------|----------------|--------------|-------------------------|---------------------------------|--------------------|------------------|-------------------------------|--------------------|------------------------------|
| SNP_117276_A_5389 | NW_004521294.1 | scaffold8445 | 5389                    | CC                              | TT                 | TT               | URR                           | 101499681          | uncharacterized LOC101499681 |
| SNP_117277_A_5426 | NW_004521294.1 | scaffold8445 | 5426                    | GG                              | TT                 | TT               | URR                           | 101499681          | uncharacterized LOC101499681 |
| SNP_117278_A_5528 | NW_004521294.1 | scaffold8445 | 5528                    | AA                              | GG                 | GG               | URR                           | 101499681          | uncharacterized LOC101499681 |
| SNP_117279_A_5641 | NW_004521294.1 | scaffold8445 | 5641                    | TT                              | AA                 | AA               | URR                           | 101499681          | uncharacterized LOC101499681 |
| SNP_117280_A_5780 | NW_004521294.1 | scaffold8445 | 5780                    | AA                              | TT                 | TT               | URR                           | 101499681          | uncharacterized LOC101499681 |
| SNP_117281_A_5815 | NW_004521294.1 | scaffold8445 | 5815                    | CC                              | AA                 | AA               | URR                           | 101499681          | uncharacterized LOC101499681 |
| SNP_117282_A_5971 | NW_004521294.1 | scaffold8445 | 5971                    | TT                              | AA                 | AA               | URR                           | 101499681          | uncharacterized LOC101499681 |
| SNP_117283_A_6015 | NW_004521294.1 | scaffold8445 | 6015                    | GG                              | CC                 | CC               | URR                           | 101499681          | uncharacterized LOC101499681 |
| SNP_117284_A_6044 | NW_004521294.1 | scaffold8445 | 6044                    | CC                              | AA                 | AA               | URR                           | 101499681          | uncharacterized LOC101499681 |
| SNP_117285_A_6092 | NW_004521294.1 | scaffold8445 | 6092                    | AA                              | TT                 | TT               | URR                           | 101499681          | uncharacterized LOC101499681 |
| SNP_117286_A_6186 | NW_004521294.1 | scaffold8445 | 6186                    | CC                              | AA                 | AA               | URR                           | 101499681          | uncharacterized LOC101499681 |
| SNP_117287_A_6212 | NW_004521294.1 | scaffold8445 | 6212                    | AA                              | GG                 | GG               | URR                           | 101499681          | uncharacterized LOC101499681 |
| SNP_117288_A_6350 | NW_004521294.1 | scaffold8445 | 6350                    | CC                              | TT                 | TT               | URR                           | 101499681          | uncharacterized LOC101499681 |
| SNP_117289_A_6411 | NW_004521294.1 | scaffold8445 | 6411                    | AA                              | GG                 | GG               | URR                           | 101499681          | uncharacterized LOC101499681 |
| SNP_117290_A_959  | NW_004521295.1 | scaffold8449 | 959                     | TT                              | AA                 | AA               | INTERGENIC                    |                    |                              |
| SNP_117291_A_153  | NW_004521297.1 | scaffold8455 | 153                     | AA                              | TT                 | TT               | INTERGENIC                    |                    |                              |
| SNP_117292_A_360  | NW_004521297.1 | scaffold8455 | 360                     | TT                              | AA                 | AA               | INTERGENIC                    |                    |                              |
| SNP_117293_A_384  | NW_004521297.1 | scaffold8455 | 384                     | GG                              | AA                 | AA               | INTERGENIC                    |                    |                              |
| SNP_117294_A_667  | NW_004521297.1 | scaffold8455 | 667                     | CC                              | TT                 | TT               | INTERGENIC                    |                    |                              |
| SNP_117295_A_713  | NW_004521297.1 | scaffold8455 | 713                     | GG                              | AA                 | AA               | INTERGENIC                    |                    |                              |
| SNP_117296_A_714  | NW_004521297.1 | scaffold8455 | 714                     | GG                              | AA                 | AA               | INTERGENIC                    |                    |                              |
| SNP_117297_A_731  | NW_004521297.1 | scaffold8455 | 731                     | GG                              | TT                 | TT               | INTERGENIC                    |                    |                              |

| SNPs IDs          | Chromosome IDs | Chromosomes  | Physical positions (bp) | CDC Frontier (Reference genome) | (Pusa 1103 & HPNB) | (ILWC 46 & LPNB) | Sequence genome | Components of | Gene accession IDs | Putative functions |
|-------------------|----------------|--------------|-------------------------|---------------------------------|--------------------|------------------|-----------------|---------------|--------------------|--------------------|
| SNP_117298_A_2861 | NW_004521301.1 | scaffold8461 | 2861                    | TT                              | AA                 | AA               | INTERGENIC      |               |                    |                    |
| SNP_117299_A_3638 | NW_004521301.1 | scaffold8461 | 3638                    | AA                              | CC                 | CC               | INTERGENIC      |               |                    |                    |
| SNP_117300_A_3743 | NW_004521301.1 | scaffold8461 | 3743                    | CC                              | AA                 | AA               | INTERGENIC      |               |                    |                    |
| SNP_117301_A_772  | NW_004521305.1 | scaffold8468 | 772                     | AA                              | GG                 | GG               | INTERGENIC      |               |                    |                    |
| SNP_117302_A_973  | NW_004521305.1 | scaffold8468 | 973                     | CC                              | TT                 | TT               | INTERGENIC      |               |                    |                    |
| SNP_117303_A_220  | NW_004521306.1 | scaffold8469 | 220                     | GG                              | AA                 | AA               | INTERGENIC      |               |                    |                    |
| SNP_117304_A_227  | NW_004521306.1 | scaffold8469 | 227                     | AA                              | GG                 | GG               | INTERGENIC      |               |                    |                    |
| SNP_117305_A_375  | NW_004521306.1 | scaffold8469 | 375                     | GG                              | CC                 | CC               | INTERGENIC      |               |                    |                    |
| SNP_117306_A_427  | NW_004521306.1 | scaffold8469 | 427                     | GG                              | TT                 | TT               | INTERGENIC      |               |                    |                    |
| SNP_117307_A_468  | NW_004521306.1 | scaffold8469 | 468                     | GG                              | CC                 | CC               | INTERGENIC      |               |                    |                    |
| SNP_117308_A_690  | NW_004521307.1 | scaffold8471 | 690                     | GG                              | AA                 | AA               | INTERGENIC      |               |                    |                    |
| SNP_117309_A_64   | NW_004521313.1 | scaffold8479 | 64                      | AA                              | GG                 | GG               | INTERGENIC      |               |                    |                    |
| SNP_117310_A_116  | NW_004521313.1 | scaffold8479 | 116                     | GG                              | CC                 | CC               | INTERGENIC      |               |                    |                    |
| SNP_117311_A_160  | NW_004521313.1 | scaffold8479 | 160                     | TT                              | AA                 | AA               | INTERGENIC      |               |                    |                    |
| SNP_117312_A_173  | NW_004521313.1 | scaffold8479 | 173                     | GG                              | TT                 | TT               | INTERGENIC      |               |                    |                    |
| SNP_117313_A_243  | NW_004521313.1 | scaffold8479 | 243                     | CC                              | TT                 | TT               | INTERGENIC      |               |                    |                    |
| SNP_117314_A_326  | NW_004521313.1 | scaffold8479 | 326                     | AA                              | TT                 | TT               | INTERGENIC      |               |                    |                    |
| SNP_117315_A_352  | NW_004521313.1 | scaffold8479 | 352                     | CC                              | TT                 | TT               | INTERGENIC      |               |                    |                    |
| SNP_117316_A_510  | NW_004521313.1 | scaffold8479 | 510                     | GG                              | CC                 | AA               | INTERGENIC      |               |                    |                    |
| SNP_117317_A_560  | NW_004521313.1 | scaffold8479 | 560                     | AA                              | GG                 | GG               | INTERGENIC      |               |                    |                    |
| SNP_117318_A_840  | NW_004521313.1 | scaffold8479 | 840                     | AA                              | TT                 | TT               | INTERGENIC      |               |                    |                    |
| SNP_117319_A_900  | NW_004521313.1 | scaffold8479 | 900                     | TT                              | GG                 | GG               | INTERGENIC      |               |                    |                    |



| SNPs IDs           | Chromosome IDs | Chromosomes  | Physical positions (bp) | CDC Frontier (Reference genome) | (Pusa 1103 & HPNB) | (ILWC 46 & LPNB) | Sequence genome | Components of | Gene accession IDs | Putative functions |
|--------------------|----------------|--------------|-------------------------|---------------------------------|--------------------|------------------|-----------------|---------------|--------------------|--------------------|
| SNP_117320_A_972   | NW_004521313.1 | scaffold8479 | 972                     | CC                              | AA                 | AA               | INTERGENIC      |               |                    |                    |
| SNP_117321_A_1003  | NW_004521313.1 | scaffold8479 | 1003                    | GG                              | TT                 | TT               | INTERGENIC      |               |                    |                    |
| SNP_117322_A_1601  | NW_004521313.1 | scaffold8479 | 1601                    | GG                              | AA                 | AA               | INTERGENIC      |               |                    |                    |
| SNP_117323_A_1602  | NW_004521313.1 | scaffold8479 | 1602                    | TT                              | AA                 | AA               | INTERGENIC      |               |                    |                    |
| SNP_117324_A_1603  | NW_004521313.1 | scaffold8479 | 1603                    | TT                              | AA                 | AA               | INTERGENIC      |               |                    |                    |
| SNP_117325_A_1706  | NW_004521313.1 | scaffold8479 | 1706                    | TT                              | CC                 | CC               | INTERGENIC      |               |                    |                    |
| SNP_117326_A_1714  | NW_004521313.1 | scaffold8479 | 1714                    | AA                              | CC                 | CC               | INTERGENIC      |               |                    |                    |
| SNP_117327_A_1796  | NW_004521313.1 | scaffold8479 | 1796                    | AA                              | GG                 | GG               | INTERGENIC      |               |                    |                    |
| SNP_117328_A_11093 | NW_004521315.1 | scaffold8483 | 11093                   | TT                              | CC                 | CC               | INTERGENIC      |               |                    |                    |
| SNP_117329_A_406   | NW_004521316.1 | scaffold8487 | 406                     | TT                              | GG                 | GG               | INTERGENIC      |               |                    |                    |
| SNP_117330_A_473   | NW_004521316.1 | scaffold8487 | 473                     | AA                              | GG                 | GG               | INTERGENIC      |               |                    |                    |
| SNP_117331_A_485   | NW_004521316.1 | scaffold8487 | 485                     | TT                              | AA                 | AA               | INTERGENIC      |               |                    |                    |
| SNP_117332_A_531   | NW_004521316.1 | scaffold8487 | 531                     | CC                              | TT                 | TT               | INTERGENIC      |               |                    |                    |
| SNP_117333_A_4027  | NW_004521320.1 | scaffold8493 | 4027                    | GG                              | AA                 | AA               | INTERGENIC      |               |                    |                    |
| SNP_117334_A_4111  | NW_004521320.1 | scaffold8493 | 4111                    | TT                              | GG                 | GG               | INTERGENIC      |               |                    |                    |
| SNP_117335_A_4114  | NW_004521320.1 | scaffold8493 | 4114                    | TT                              | CC                 | CC               | INTERGENIC      |               |                    |                    |
| SNP_117336_A_4122  | NW_004521320.1 | scaffold8493 | 4122                    | TT                              | CC                 | CC               | INTERGENIC      |               |                    |                    |
| SNP_117337_A_4124  | NW_004521320.1 | scaffold8493 | 4124                    | GG                              | AA                 | AA               | INTERGENIC      |               |                    |                    |
| SNP_117338_A_4126  | NW_004521320.1 | scaffold8493 | 4126                    | CC                              | AA                 | AA               | INTERGENIC      |               |                    |                    |
| SNP_117339_A_4127  | NW_004521320.1 | scaffold8493 | 4127                    | AA                              | TT                 | TT               | INTERGENIC      |               |                    |                    |
| SNP_117340_A_4567  | NW_004521320.1 | scaffold8493 | 4567                    | CC                              | TT                 | TT               | INTERGENIC      |               |                    |                    |
| SNP_117341_A_6882  | NW_004521320.1 | scaffold8493 | 6882                    | CC                              | TT                 | TT               | INTERGENIC      |               |                    |                    |

| SNPs IDs           | Chromosome IDs | Chromosomes  | Physical positions (bp) | CDC Frontier (Reference genome) | (Pusa 1103 & HPNB) | (ILWC 46 & LPNB) | Sequence genome | Components of | Gene accession IDs | Putative functions |
|--------------------|----------------|--------------|-------------------------|---------------------------------|--------------------|------------------|-----------------|---------------|--------------------|--------------------|
| SNP_117342_A_7150  | NW_004521320.1 | scaffold8493 | 7150                    | TT                              | CC                 | CC               | INTERGENIC      |               |                    |                    |
| SNP_117343_A_7657  | NW_004521320.1 | scaffold8493 | 7657                    | AA                              | TT                 | TT               | INTERGENIC      |               |                    |                    |
| SNP_117344_A_8321  | NW_004521320.1 | scaffold8493 | 8321                    | CC                              | TT                 | TT               | INTERGENIC      |               |                    |                    |
| SNP_117345_A_9110  | NW_004521320.1 | scaffold8493 | 9110                    | GG                              | TT                 | TT               | INTERGENIC      |               |                    |                    |
| SNP_117347_A_9834  | NW_004521320.1 | scaffold8493 | 9834                    | AA                              | CC                 | CC               | INTERGENIC      |               |                    |                    |
| SNP_117348_A_9969  | NW_004521320.1 | scaffold8493 | 9969                    | AA                              | TT                 | TT               | INTERGENIC      |               |                    |                    |
| SNP_117349_A_10594 | NW_004521320.1 | scaffold8493 | 10594                   | GG                              | AA                 | AA               | INTERGENIC      |               |                    |                    |
| SNP_117350_A_10603 | NW_004521320.1 | scaffold8493 | 10603                   | GG                              | TT                 | TT               | INTERGENIC      |               |                    |                    |
| SNP_117351_A_10775 | NW_004521320.1 | scaffold8493 | 10775                   | TT                              | CC                 | CC               | INTERGENIC      |               |                    |                    |
| SNP_117352_A_11054 | NW_004521320.1 | scaffold8493 | 11054                   | CC                              | GG                 | GG               | INTERGENIC      |               |                    |                    |
| SNP_117353_A_11098 | NW_004521320.1 | scaffold8493 | 11098                   | TT                              | CC                 | CC               | INTERGENIC      |               |                    |                    |
| SNP_117354_A_11653 | NW_004521320.1 | scaffold8493 | 11653                   | TT                              | AA                 | AA               | INTERGENIC      |               |                    |                    |
| SNP_117355_A_12194 | NW_004521320.1 | scaffold8493 | 12194                   | AA                              | CC                 | CC               | INTERGENIC      |               |                    |                    |
| SNP_117356_A_12414 | NW_004521320.1 | scaffold8493 | 12414                   | AA                              | GG                 | GG               | INTERGENIC      |               |                    |                    |
| SNP_117357_A_12908 | NW_004521320.1 | scaffold8493 | 12908                   | TT                              | AA                 | AA               | INTERGENIC      |               |                    |                    |
| SNP_117358_A_16201 | NW_004521320.1 | scaffold8493 | 16201                   | GG                              | AA                 | AA               | INTERGENIC      |               |                    |                    |
| SNP_117359_A_16486 | NW_004521320.1 | scaffold8493 | 16486                   | TT                              | CC                 | CC               | INTERGENIC      |               |                    |                    |
| SNP_117360_A_16740 | NW_004521320.1 | scaffold8493 | 16740                   | AA                              | TT                 | TT               | INTERGENIC      |               |                    |                    |
| SNP_117361_A_17878 | NW_004521320.1 | scaffold8493 | 17878                   | GG                              | CC                 | CC               | INTERGENIC      |               |                    |                    |
| SNP_117362_A_18284 | NW_004521320.1 | scaffold8493 | 18284                   | GG                              | AA                 | AA               | INTERGENIC      |               |                    |                    |
| SNP_117363_A_18289 | NW_004521320.1 | scaffold8493 | 18289                   | CC                              | TT                 | TT               | INTERGENIC      |               |                    |                    |
| SNP_117364_A_487   | NW_004521321.1 | scaffold8495 | 487                     | TT                              | CC                 | CC               | INTERGENIC      |               |                    |                    |

| SNPs IDs         | Chromosome IDs | Chromosomes  | Physical positions (bp) | CDC Frontier (Reference genome) | (Pusa 1103 & HPNB) | (ILWC 46 & LPNB) | Sequence genome | Components of | Gene accession IDs | Putative functions |
|------------------|----------------|--------------|-------------------------|---------------------------------|--------------------|------------------|-----------------|---------------|--------------------|--------------------|
| SNP_117365_A_347 | NW_004521326.1 | scaffold8502 | 347                     | GG                              | CC                 | CC               | INTERGENIC      |               |                    |                    |
| SNP_117366_A_551 | NW_004521336.1 | scaffold8522 | 551                     | AA                              | TT                 | TT               | INTERGENIC      |               |                    |                    |
| SNP_117367_A_591 | NW_004521336.1 | scaffold8522 | 591                     | TT                              | GG                 | GG               | INTERGENIC      |               |                    |                    |
| SNP_117368_A_654 | NW_004521336.1 | scaffold8522 | 654                     | TT                              | AA                 | AA               | INTERGENIC      |               |                    |                    |
| SNP_117369_A_91  | NW_004521348.1 | scaffold8550 | 91                      | TT                              | CC                 | CC               | INTERGENIC      |               |                    |                    |
| SNP_117370_A_206 | NW_004521348.1 | scaffold8550 | 206                     | AA                              | GG                 | GG               | INTERGENIC      |               |                    |                    |
| SNP_117371_A_358 | NW_004521348.1 | scaffold8550 | 358                     | AA                              | CC                 | CC               | INTERGENIC      |               |                    |                    |
| SNP_117372_A_396 | NW_004521348.1 | scaffold8550 | 396                     | AA                              | CC                 | CC               | INTERGENIC      |               |                    |                    |
| SNP_117373_A_441 | NW_004521348.1 | scaffold8550 | 441                     | AA                              | TT                 | TT               | INTERGENIC      |               |                    |                    |
| SNP_117374_A_488 | NW_004521348.1 | scaffold8550 | 488                     | TT                              | CC                 | CC               | INTERGENIC      |               |                    |                    |
| SNP_117375_A_516 | NW_004521348.1 | scaffold8550 | 516                     | TT                              | GG                 | GG               | INTERGENIC      |               |                    |                    |
| SNP_117376_A_518 | NW_004521348.1 | scaffold8550 | 518                     | AA                              | GG                 | GG               | INTERGENIC      |               |                    |                    |
| SNP_117377_A_561 | NW_004521348.1 | scaffold8550 | 561                     | GG                              | AA                 | AA               | INTERGENIC      |               |                    |                    |
| SNP_117379_A_663 | NW_004521348.1 | scaffold8550 | 663                     | GG                              | TT                 | TT               | INTERGENIC      |               |                    |                    |
| SNP_117380_A_690 | NW_004521348.1 | scaffold8550 | 690                     | AA                              | GG                 | GG               | INTERGENIC      |               |                    |                    |
| SNP_117381_A_731 | NW_004521348.1 | scaffold8550 | 731                     | CC                              | AA                 | AA               | INTERGENIC      |               |                    |                    |
| SNP_117382_A_516 | NW_004521350.1 | scaffold8553 | 516                     | CC                              | TT                 | TT               | INTERGENIC      |               |                    |                    |
| SNP_117383_A_576 | NW_004521350.1 | scaffold8553 | 576                     | CC                              | AA                 | AA               | INTERGENIC      |               |                    |                    |
| SNP_117384_A_587 | NW_004521350.1 | scaffold8553 | 587                     | TT                              | AA                 | AA               | INTERGENIC      |               |                    |                    |
| SNP_117385_A_876 | NW_004521350.1 | scaffold8553 | 876                     | AA                              | GG                 | GG               | INTERGENIC      |               |                    |                    |
| SNP_117386_A_882 | NW_004521350.1 | scaffold8553 | 882                     | AA                              | CC                 | CC               | INTERGENIC      |               |                    |                    |
| SNP_117387_A_946 | NW_004521350.1 | scaffold8553 | 946                     | AA                              | GG                 | GG               | INTERGENIC      |               |                    |                    |

| SNPs IDs          | Chromosome IDs | Chromosomes  | Physical positions (bp) | CDC Frontier (Reference genome) | (Pusa 1103 & HPNB) | (ILWC 46 & LPNB) | Sequence genome | Components of | Gene accession IDs | Putative functions |
|-------------------|----------------|--------------|-------------------------|---------------------------------|--------------------|------------------|-----------------|---------------|--------------------|--------------------|
| SNP_117388_A_958  | NW_004521350.1 | scaffold8553 | 958                     | TT                              | AA                 | AA               | INTERGENIC      |               |                    |                    |
| SNP_117389_A_959  | NW_004521350.1 | scaffold8553 | 959                     | GG                              | AA                 | AA               | INTERGENIC      |               |                    |                    |
| SNP_117390_A_1000 | NW_004521350.1 | scaffold8553 | 1000                    | TT                              | AA                 | AA               | INTERGENIC      |               |                    |                    |
| SNP_117391_A_6383 | NW_004521354.1 | scaffold8565 | 6383                    | AA                              | GG                 | GG               | INTERGENIC      |               |                    |                    |
| SNP_117392_A_6395 | NW_004521354.1 | scaffold8565 | 6395                    | AA                              | GG                 | GG               | INTERGENIC      |               |                    |                    |
| SNP_117393_A_6446 | NW_004521354.1 | scaffold8565 | 6446                    | AA                              | CC                 | CC               | INTERGENIC      |               |                    |                    |
| SNP_117395_A_6905 | NW_004521354.1 | scaffold8565 | 6905                    | TT                              | AA                 | AA               | INTERGENIC      |               |                    |                    |
| SNP_117396_A_7013 | NW_004521354.1 | scaffold8565 | 7013                    | CC                              | TT                 | TT               | INTERGENIC      |               |                    |                    |
| SNP_117397_A_7022 | NW_004521354.1 | scaffold8565 | 7022                    | AA                              | GG                 | GG               | INTERGENIC      |               |                    |                    |
| SNP_117398_A_7094 | NW_004521354.1 | scaffold8565 | 7094                    | AA                              | TT                 | TT               | INTERGENIC      |               |                    |                    |
| SNP_117399_A_7100 | NW_004521354.1 | scaffold8565 | 7100                    | TT                              | GG                 | GG               | INTERGENIC      |               |                    |                    |
| SNP_117401_A_7184 | NW_004521354.1 | scaffold8565 | 7184                    | AA                              | CC                 | CC               | INTERGENIC      |               |                    |                    |
| SNP_117402_A_7257 | NW_004521354.1 | scaffold8565 | 7257                    | TT                              | CC                 | CC               | INTERGENIC      |               |                    |                    |
| SNP_117403_A_64   | NW_004521355.1 | scaffold8571 | 64                      | GG                              | AA                 | AA               | INTERGENIC      |               |                    |                    |
| SNP_117404_A_335  | NW_004521355.1 | scaffold8571 | 335                     | GG                              | CC                 | CC               | INTERGENIC      |               |                    |                    |
| SNP_117405_A_351  | NW_004521355.1 | scaffold8571 | 351                     | TT                              | AA                 | AA               | INTERGENIC      |               |                    |                    |
| SNP_117406_A_360  | NW_004521355.1 | scaffold8571 | 360                     | CC                              | AA                 | AA               | INTERGENIC      |               |                    |                    |
| SNP_117407_A_377  | NW_004521355.1 | scaffold8571 | 377                     | GG                              | TT                 | TT               | INTERGENIC      |               |                    |                    |
| SNP_117408_A_1085 | NW_004521355.1 | scaffold8571 | 1085                    | AA                              | GG                 | GG               | INTERGENIC      |               |                    |                    |
| SNP_117409_A_1093 | NW_004521355.1 | scaffold8571 | 1093                    | TT                              | CC                 | CC               | INTERGENIC      |               |                    |                    |
| SNP_117410_A_1150 | NW_004521355.1 | scaffold8571 | 1150                    | AA                              | GG                 | GG               | INTERGENIC      |               |                    |                    |
| SNP_117411_A_791  | NW_004521357.1 | scaffold8577 | 791                     | CC                              | AA                 | AA               | INTERGENIC      |               |                    |                    |

| SNPs IDs           | Chromosome IDs | Chromosomes  | Physical positions (bp) | CDC Frontier (Reference genome) | (Pusa 1103 & HPNB) | (ILWC 46 & LPNB) | Sequence genome | Components of | Gene accession IDs | Putative functions |
|--------------------|----------------|--------------|-------------------------|---------------------------------|--------------------|------------------|-----------------|---------------|--------------------|--------------------|
| SNP_117412_A_20705 | NW_004521368.1 | scaffold8594 | 20705                   | GG                              | CC                 | CC               | INTERGENIC      |               |                    |                    |
| SNP_117413_A_151   | NW_004521370.1 | scaffold8602 | 151                     | CC                              | GG                 | GG               | INTERGENIC      |               |                    |                    |
| SNP_117414_A_101   | NW_004521372.1 | scaffold8604 | 101                     | AA                              | TT                 | TT               | INTERGENIC      |               |                    |                    |
| SNP_117415_A_245   | NW_004521372.1 | scaffold8604 | 245                     | CC                              | TT                 | TT               | INTERGENIC      |               |                    |                    |
| SNP_117416_A_246   | NW_004521372.1 | scaffold8604 | 246                     | TT                              | AA                 | AA               | INTERGENIC      |               |                    |                    |
| SNP_117417_A_375   | NW_004521372.1 | scaffold8604 | 375                     | CC                              | TT                 | TT               | INTERGENIC      |               |                    |                    |
| SNP_117418_A_671   | NW_004521372.1 | scaffold8604 | 671                     | AA                              | GG                 | GG               | INTERGENIC      |               |                    |                    |
| SNP_117419_A_770   | NW_004521372.1 | scaffold8604 | 770                     | AA                              | CC                 | CC               | INTERGENIC      |               |                    |                    |
| SNP_117420_A_1295  | NW_004521372.1 | scaffold8604 | 1295                    | CC                              | TT                 | TT               | INTERGENIC      |               |                    |                    |
| SNP_117421_A_1350  | NW_004521372.1 | scaffold8604 | 1350                    | TT                              | CC                 | CC               | INTERGENIC      |               |                    |                    |
| SNP_117422_A_1401  | NW_004521372.1 | scaffold8604 | 1401                    | AA                              | TT                 | TT               | INTERGENIC      |               |                    |                    |
| SNP_117423_A_336   | NW_004521377.1 | scaffold8620 | 336                     | AA                              | TT                 | TT               | INTERGENIC      |               |                    |                    |
| SNP_117424_A_629   | NW_004521377.1 | scaffold8620 | 629                     | GG                              | AA                 | AA               | INTERGENIC      |               |                    |                    |
| SNP_117425_A_646   | NW_004521377.1 | scaffold8620 | 646                     | GG                              | AA                 | AA               | INTERGENIC      |               |                    |                    |
| SNP_117426_A_699   | NW_004521377.1 | scaffold8620 | 699                     | GG                              | TT                 | TT               | INTERGENIC      |               |                    |                    |
| SNP_117427_A_872   | NW_004521377.1 | scaffold8620 | 872                     | CC                              | AA                 | AA               | INTERGENIC      |               |                    |                    |
| SNP_117429_A_1330  | NW_004521377.1 | scaffold8620 | 1330                    | TT                              | GG                 | GG               | INTERGENIC      |               |                    |                    |
| SNP_117430_A_309   | NW_004521381.1 | scaffold8625 | 309                     | CC                              | AA                 | AA               | INTERGENIC      |               |                    |                    |
| SNP_117431_A_1734  | NW_004521384.1 | scaffold8628 | 1734                    | TT                              | CC                 | CC               | INTERGENIC      |               |                    |                    |
| SNP_117432_A_352   | NW_004521388.1 | scaffold8639 | 352                     | CC                              | AA                 | AA               | INTERGENIC      |               |                    |                    |
| SNP_117433_A_727   | NW_004521388.1 | scaffold8639 | 727                     | TT                              | GG                 | GG               | INTERGENIC      |               |                    |                    |
| SNP_117434_A_758   | NW_004521388.1 | scaffold8639 | 758                     | GG                              | TT                 | TT               | INTERGENIC      |               |                    |                    |

| SNPs IDs          | Chromosome IDs | Chromosomes  | Physical positions (bp) | CDC Frontier (Reference genome) | (Pusa 1103 & HPNB) | (ILWC 46 & LPNB) | Sequence genome | Components of | Gene accession IDs | Putative functions |
|-------------------|----------------|--------------|-------------------------|---------------------------------|--------------------|------------------|-----------------|---------------|--------------------|--------------------|
| SNP_117435_A_808  | NW_004521388.1 | scaffold8639 | 808                     | GG                              | TT                 | TT               | INTERGENIC      |               |                    |                    |
| SNP_117436_A_728  | NW_004521390.1 | scaffold8641 | 728                     | TT                              | CC                 | CC               | INTERGENIC      |               |                    |                    |
| SNP_117437_A_854  | NW_004521390.1 | scaffold8641 | 854                     | CC                              | TT                 | TT               | INTERGENIC      |               |                    |                    |
| SNP_117438_A_867  | NW_004521390.1 | scaffold8641 | 867                     | CC                              | TT                 | TT               | INTERGENIC      |               |                    |                    |
| SNP_117439_A_445  | NW_004521391.1 | scaffold8645 | 445                     | TT                              | CC                 | CC               | INTERGENIC      |               |                    |                    |
| SNP_117440_A_659  | NW_004521391.1 | scaffold8645 | 659                     | TT                              | CC                 | CC               | INTERGENIC      |               |                    |                    |
| SNP_117441_A_717  | NW_004521391.1 | scaffold8645 | 717                     | CC                              | TT                 | TT               | INTERGENIC      |               |                    |                    |
| SNP_117442_A_1273 | NW_004521391.1 | scaffold8645 | 1273                    | TT                              | GG                 | GG               | INTERGENIC      |               |                    |                    |
| SNP_117443_A_1658 | NW_004521392.1 | scaffold8646 | 1658                    | AA                              | GG                 | GG               | INTERGENIC      |               |                    |                    |
| SNP_117444_A_1856 | NW_004521392.1 | scaffold8646 | 1856                    | GG                              | AA                 | AA               | INTERGENIC      |               |                    |                    |
| SNP_117445_A_2029 | NW_004521392.1 | scaffold8646 | 2029                    | GG                              | AA                 | AA               | INTERGENIC      |               |                    |                    |
| SNP_117446_A_2056 | NW_004521392.1 | scaffold8646 | 2056                    | TT                              | AA                 | AA               | INTERGENIC      |               |                    |                    |
| SNP_117447_A_2210 | NW_004521392.1 | scaffold8646 | 2210                    | CC                              | AA                 | AA               | INTERGENIC      |               |                    |                    |
| SNP_117448_A_2401 | NW_004521392.1 | scaffold8646 | 2401                    | GG                              | TT                 | TT               | INTERGENIC      |               |                    |                    |
| SNP_117449_A_2402 | NW_004521392.1 | scaffold8646 | 2402                    | GG                              | AA                 | AA               | INTERGENIC      |               |                    |                    |
| SNP_117450_A_2488 | NW_004521392.1 | scaffold8646 | 2488                    | AA                              | GG                 | GG               | INTERGENIC      |               |                    |                    |
| SNP_117451_A_2540 | NW_004521392.1 | scaffold8646 | 2540                    | TT                              | AA                 | AA               | INTERGENIC      |               |                    |                    |
| SNP_117452_A_2553 | NW_004521392.1 | scaffold8646 | 2553                    | TT                              | AA                 | AA               | INTERGENIC      |               |                    |                    |
| SNP_117454_A_7314 | NW_004521392.1 | scaffold8646 | 7314                    | AA                              | CC                 | CC               | INTERGENIC      |               |                    |                    |
| SNP_117455_A_2433 | NW_004521393.1 | scaffold8648 | 2433                    | CC                              | TT                 | TT               | INTERGENIC      |               |                    |                    |
| SNP_117456_A_2476 | NW_004521393.1 | scaffold8648 | 2476                    | TT                              | CC                 | CC               | INTERGENIC      |               |                    |                    |
| SNP_117457_A_2497 | NW_004521393.1 | scaffold8648 | 2497                    | AA                              | GG                 | GG               | INTERGENIC      |               |                    |                    |

| SNPs IDs          | Chromosome IDs | Chromosomes  | Physical positions (bp) | CDC Frontier (Reference genome) | (Pusa 1103 & HPNB) | (ILWC 46 & LPNB) | Sequence genome | Components of | Gene accession IDs | Putative functions |
|-------------------|----------------|--------------|-------------------------|---------------------------------|--------------------|------------------|-----------------|---------------|--------------------|--------------------|
| SNP_117458_A_2760 | NW_004521393.1 | scaffold8648 | 2760                    | AA                              | TT                 | TT               | INTERGENIC      |               |                    |                    |
| SNP_117459_A_2783 | NW_004521393.1 | scaffold8648 | 2783                    | CC                              | GG                 | GG               | INTERGENIC      |               |                    |                    |
| SNP_117460_A_3458 | NW_004521393.1 | scaffold8648 | 3458                    | CC                              | GG                 | GG               | INTERGENIC      |               |                    |                    |
| SNP_117461_A_3521 | NW_004521393.1 | scaffold8648 | 3521                    | AA                              | CC                 | CC               | INTERGENIC      |               |                    |                    |
| SNP_117462_A_3839 | NW_004521393.1 | scaffold8648 | 3839                    | TT                              | GG                 | GG               | INTERGENIC      |               |                    |                    |
| SNP_117463_A_4179 | NW_004521393.1 | scaffold8648 | 4179                    | AA                              | GG                 | GG               | INTERGENIC      |               |                    |                    |
| SNP_117464_A_4269 | NW_004521393.1 | scaffold8648 | 4269                    | TT                              | GG                 | GG               | INTERGENIC      |               |                    |                    |
| SNP_117466_A_4722 | NW_004521393.1 | scaffold8648 | 4722                    | TT                              | AA                 | AA               | INTERGENIC      |               |                    |                    |
| SNP_117467_A_4757 | NW_004521393.1 | scaffold8648 | 4757                    | AA                              | GG                 | GG               | INTERGENIC      |               |                    |                    |
| SNP_117468_A_4758 | NW_004521393.1 | scaffold8648 | 4758                    | AA                              | GG                 | GG               | INTERGENIC      |               |                    |                    |
| SNP_117469_A_4774 | NW_004521393.1 | scaffold8648 | 4774                    | TT                              | CC                 | CC               | INTERGENIC      |               |                    |                    |
| SNP_117470_A_4797 | NW_004521393.1 | scaffold8648 | 4797                    | CC                              | AA                 | AA               | INTERGENIC      |               |                    |                    |
| SNP_117471_A_4836 | NW_004521393.1 | scaffold8648 | 4836                    | CC                              | TT                 | TT               | INTERGENIC      |               |                    |                    |
| SNP_117472_A_253  | NW_004521394.1 | scaffold8650 | 253                     | TT                              | AA                 | AA               | INTERGENIC      |               |                    |                    |
| SNP_117473_A_254  | NW_004521394.1 | scaffold8650 | 254                     | AA                              | GG                 | GG               | INTERGENIC      |               |                    |                    |
| SNP_117474_A_64   | NW_004521398.1 | scaffold8654 | 64                      | AA                              | TT                 | TT               | INTERGENIC      |               |                    |                    |
| SNP_117475_A_385  | NW_004521398.1 | scaffold8654 | 385                     | AA                              | CC                 | CC               | INTERGENIC      |               |                    |                    |
| SNP_117476_A_511  | NW_004521398.1 | scaffold8654 | 511                     | TT                              | CC                 | CC               | INTERGENIC      |               |                    |                    |
| SNP_117477_A_5294 | NW_004521398.1 | scaffold8654 | 5294                    | TT                              | GG                 | GG               | INTERGENIC      |               |                    |                    |
| SNP_117478_A_5555 | NW_004521398.1 | scaffold8654 | 5555                    | CC                              | AA                 | AA               | INTERGENIC      |               |                    |                    |
| SNP_117479_A_5661 | NW_004521398.1 | scaffold8654 | 5661                    | AA                              | TT                 | TT               | INTERGENIC      |               |                    |                    |
| SNP_117480_A_5684 | NW_004521398.1 | scaffold8654 | 5684                    | GG                              | TT                 | TT               | INTERGENIC      |               |                    |                    |

| SNPs IDs          | Chromosome IDs | Chromosomes  | Physical positions (bp) | CDC Frontier (Reference genome) | (Pusa 1103 & HPNB) | (ILWC 46 & LPNB) | Sequence genome | Components of | Gene accession IDs | Putative functions |
|-------------------|----------------|--------------|-------------------------|---------------------------------|--------------------|------------------|-----------------|---------------|--------------------|--------------------|
| SNP_117481_A_5746 | NW_004521398.1 | scaffold8654 | 5746                    | CC                              | GG                 | GG               | INTERGENIC      |               |                    |                    |
| SNP_117482_A_5828 | NW_004521398.1 | scaffold8654 | 5828                    | AA                              | CC                 | CC               | INTERGENIC      |               |                    |                    |
| SNP_117483_A_5880 | NW_004521398.1 | scaffold8654 | 5880                    | CC                              | AA                 | AA               | INTERGENIC      |               |                    |                    |
| SNP_117484_A_494  | NW_004521405.1 | scaffold8668 | 494                     | GG                              | AA                 | AA               | INTERGENIC      |               |                    |                    |
| SNP_117485_A_17   | NW_004521406.1 | scaffold8669 | 17                      | TT                              | CC                 | CC               | INTERGENIC      |               |                    |                    |
| SNP_117487_A_23   | NW_004521406.1 | scaffold8669 | 23                      | AA                              | GG                 | GG               | INTERGENIC      |               |                    |                    |
| SNP_117488_A_40   | NW_004521406.1 | scaffold8669 | 40                      | TT                              | AA                 | AA               | INTERGENIC      |               |                    |                    |
| SNP_117489_A_44   | NW_004521406.1 | scaffold8669 | 44                      | GG                              | AA                 | AA               | INTERGENIC      |               |                    |                    |
| SNP_117490_A_92   | NW_004521406.1 | scaffold8669 | 92                      | GG                              | AA                 | AA               | INTERGENIC      |               |                    |                    |
| SNP_117491_A_720  | NW_004521406.1 | scaffold8669 | 720                     | AA                              | CC                 | CC               | INTERGENIC      |               |                    |                    |
| SNP_117492_A_748  | NW_004521406.1 | scaffold8669 | 748                     | GG                              | CC                 | CC               | INTERGENIC      |               |                    |                    |
| SNP_117493_A_467  | NW_004521411.1 | scaffold8675 | 467                     | TT                              | AA                 | AA               | INTERGENIC      |               |                    |                    |
| SNP_117494_A_752  | NW_004521411.1 | scaffold8675 | 752                     | AA                              | GG                 | GG               | INTERGENIC      |               |                    |                    |
| SNP_117495_A_1427 | NW_004521413.1 | scaffold8680 | 1427                    | AA                              | TT                 | TT               | INTERGENIC      |               |                    |                    |
| SNP_117496_A_1578 | NW_004521413.1 | scaffold8680 | 1578                    | AA                              | CC                 | CC               | INTERGENIC      |               |                    |                    |
| SNP_117497_A_1625 | NW_004521413.1 | scaffold8680 | 1625                    | AA                              | TT                 | TT               | INTERGENIC      |               |                    |                    |
| SNP_117498_A_1642 | NW_004521413.1 | scaffold8680 | 1642                    | CC                              | TT                 | TT               | INTERGENIC      |               |                    |                    |
| SNP_117499_A_580  | NW_004521415.1 | scaffold8686 | 580                     | TT                              | CC                 | CC               | INTERGENIC      |               |                    |                    |
| SNP_117500_A_1145 | NW_004521415.1 | scaffold8686 | 1145                    | GG                              | TT                 | TT               | INTERGENIC      |               |                    |                    |
| SNP_117501_A_1155 | NW_004521415.1 | scaffold8686 | 1155                    | CC                              | AA                 | AA               | INTERGENIC      |               |                    |                    |
| SNP_117502_A_64   | NW_004521416.1 | scaffold8687 | 64                      | GG                              | TT                 | TT               | INTERGENIC      |               |                    |                    |
| SNP_117503_A_189  | NW_004521416.1 | scaffold8687 | 189                     | CC                              | TT                 | TT               | INTERGENIC      |               |                    |                    |



| SNPs IDs          | Chromosome IDs | Chromosomes  | Physical positions (bp) | CDC Frontier (Reference genome) | (Pusa 1103 & HPNB) | (ILWC 46 & LPNB) | Sequence genome | Components of | Gene accession IDs | Putative functions |
|-------------------|----------------|--------------|-------------------------|---------------------------------|--------------------|------------------|-----------------|---------------|--------------------|--------------------|
| SNP_117504_A_752  | NW_004521416.1 | scaffold8687 | 752                     | GG                              | AA                 | AA               | INTERGENIC      |               |                    |                    |
| SNP_117505_A_639  | NW_004521419.1 | scaffold8690 | 639                     | CC                              | TT                 | TT               | INTERGENIC      |               |                    |                    |
| SNP_117506_A_677  | NW_004521419.1 | scaffold8690 | 677                     | GG                              | CC                 | CC               | INTERGENIC      |               |                    |                    |
| SNP_117507_A_749  | NW_004521419.1 | scaffold8690 | 749                     | GG                              | AA                 | AA               | INTERGENIC      |               |                    |                    |
| SNP_117508_A_381  | NW_004521422.1 | scaffold8696 | 381                     | AA                              | CC                 | CC               | INTERGENIC      |               |                    |                    |
| SNP_117509_A_848  | NW_004521422.1 | scaffold8696 | 848                     | TT                              | CC                 | CC               | INTERGENIC      |               |                    |                    |
| SNP_117510_A_2246 | NW_004521424.1 | scaffold8704 | 2246                    | TT                              | GG                 | GG               | INTERGENIC      |               |                    |                    |
| SNP_117511_A_2559 | NW_004521424.1 | scaffold8704 | 2559                    | TT                              | CC                 | CC               | INTERGENIC      |               |                    |                    |
| SNP_117512_A_388  | NW_004521425.1 | scaffold8705 | 388                     | AA                              | GG                 | GG               | INTERGENIC      |               |                    |                    |
| SNP_117513_A_427  | NW_004521425.1 | scaffold8705 | 427                     | AA                              | GG                 | GG               | INTERGENIC      |               |                    |                    |
| SNP_117514_A_773  | NW_004521425.1 | scaffold8705 | 773                     | AA                              | GG                 | GG               | INTERGENIC      |               |                    |                    |
| SNP_117515_A_796  | NW_004521425.1 | scaffold8705 | 796                     | AA                              | GG                 | GG               | INTERGENIC      |               |                    |                    |
| SNP_117516_A_898  | NW_004521425.1 | scaffold8705 | 898                     | TT                              | CC                 | CC               | INTERGENIC      |               |                    |                    |
| SNP_117517_A_103  | NW_004521426.1 | scaffold8707 | 103                     | TT                              | GG                 | GG               | INTERGENIC      |               |                    |                    |
| SNP_117518_A_367  | NW_004521426.1 | scaffold8707 | 367                     | TT                              | CC                 | CC               | INTERGENIC      |               |                    |                    |
| SNP_117519_A_498  | NW_004521426.1 | scaffold8707 | 498                     | TT                              | CC                 | CC               | INTERGENIC      |               |                    |                    |
| SNP_117521_A_649  | NW_004521428.1 | scaffold8709 | 649                     | TT                              | GG                 | GG               | INTERGENIC      |               |                    |                    |
| SNP_117522_A_561  | NW_004521430.1 | scaffold8715 | 561                     | AA                              | CC                 | CC               | INTERGENIC      |               |                    |                    |
| SNP_117523_A_562  | NW_004521430.1 | scaffold8715 | 562                     | TT                              | CC                 | CC               | INTERGENIC      |               |                    |                    |
| SNP_117524_A_591  | NW_004521430.1 | scaffold8715 | 591                     | GG                              | AA                 | AA               | INTERGENIC      |               |                    |                    |
| SNP_117525_A_645  | NW_004521430.1 | scaffold8715 | 645                     | TT                              | GG                 | GG               | INTERGENIC      |               |                    |                    |
| SNP_117526_A_776  | NW_004521430.1 | scaffold8715 | 776                     | TT                              | AA                 | AA               | INTERGENIC      |               |                    |                    |

| SNPs IDs          | Chromosome IDs | Chromosomes  | Physical positions (bp) | CDC Frontier (Reference genome) | (Pusa 1103 & HPNB) | (ILWC 46 & LPNB) | Sequence genome | Components of | Gene accession IDs | Putative functions |
|-------------------|----------------|--------------|-------------------------|---------------------------------|--------------------|------------------|-----------------|---------------|--------------------|--------------------|
| SNP_117527_A_987  | NW_004521430.1 | scaffold8715 | 987                     | TT                              | CC                 | CC               | INTERGENIC      |               |                    |                    |
| SNP_117528_A_1072 | NW_004521430.1 | scaffold8715 | 1072                    | GG                              | AA                 | AA               | INTERGENIC      |               |                    |                    |
| SNP_117529_A_1109 | NW_004521430.1 | scaffold8715 | 1109                    | AA                              | GG                 | GG               | INTERGENIC      |               |                    |                    |
| SNP_117530_A_64   | NW_004521434.1 | scaffold8730 | 64                      | GG                              | AA                 | AA               | INTERGENIC      |               |                    |                    |
| SNP_117532_A_150  | NW_004521434.1 | scaffold8730 | 150                     | AA                              | GG                 | GG               | INTERGENIC      |               |                    |                    |
| SNP_117533_A_154  | NW_004521434.1 | scaffold8730 | 154                     | TT                              | CC                 | CC               | INTERGENIC      |               |                    |                    |
| SNP_117534_A_205  | NW_004521434.1 | scaffold8730 | 205                     | GG                              | AA                 | AA               | INTERGENIC      |               |                    |                    |
| SNP_117535_A_371  | NW_004521434.1 | scaffold8730 | 371                     | AA                              | TT                 | TT               | INTERGENIC      |               |                    |                    |
| SNP_117536_A_383  | NW_004521434.1 | scaffold8730 | 383                     | CC                              | TT                 | TT               | INTERGENIC      |               |                    |                    |
| SNP_117537_A_386  | NW_004521434.1 | scaffold8730 | 386                     | TT                              | CC                 | CC               | INTERGENIC      |               |                    |                    |
| SNP_117538_A_389  | NW_004521434.1 | scaffold8730 | 389                     | GG                              | TT                 | TT               | INTERGENIC      |               |                    |                    |
| SNP_117539_A_460  | NW_004521434.1 | scaffold8730 | 460                     | GG                              | AA                 | AA               | INTERGENIC      |               |                    |                    |
| SNP_117540_A_485  | NW_004521434.1 | scaffold8730 | 485                     | AA                              | GG                 | GG               | INTERGENIC      |               |                    |                    |
| SNP_117541_A_517  | NW_004521434.1 | scaffold8730 | 517                     | TT                              | AA                 | AA               | INTERGENIC      |               |                    |                    |
| SNP_117542_A_573  | NW_004521434.1 | scaffold8730 | 573                     | AA                              | CC                 | CC               | INTERGENIC      |               |                    |                    |
| SNP_117543_A_650  | NW_004521434.1 | scaffold8730 | 650                     | GG                              | AA                 | AA               | INTERGENIC      |               |                    |                    |
| SNP_117544_A_1541 | NW_004521434.1 | scaffold8730 | 1541                    | TT                              | AA                 | AA               | INTERGENIC      |               |                    |                    |
| SNP_117545_A_1805 | NW_004521434.1 | scaffold8730 | 1805                    | AA                              | GG                 | GG               | INTERGENIC      |               |                    |                    |
| SNP_117546_A_2013 | NW_004521434.1 | scaffold8730 | 2013                    | TT                              | CC                 | CC               | INTERGENIC      |               |                    |                    |
| SNP_117548_A_471  | NW_004521436.1 | scaffold8733 | 471                     | CC                              | TT                 | TT               | INTERGENIC      |               |                    |                    |
| SNP_117549_A_515  | NW_004521436.1 | scaffold8733 | 515                     | GG                              | AA                 | AA               | INTERGENIC      |               |                    |                    |
| SNP_117550_A_204  | NW_004521437.1 | scaffold8734 | 204                     | GG                              | TT                 | TT               | INTERGENIC      |               |                    |                    |

| SNPs IDs          | Chromosome IDs | Chromosomes  | Physical positions (bp) | CDC Frontier (Reference genome) | (Pusa 1103 & HPNB) | (ILWC 46 & LPNB) | Sequence genome | Components of | Gene accession IDs | Putative functions |
|-------------------|----------------|--------------|-------------------------|---------------------------------|--------------------|------------------|-----------------|---------------|--------------------|--------------------|
| SNP_117551_A_271  | NW_004521437.1 | scaffold8734 | 271                     | AA                              | GG                 | GG               | INTERGENIC      |               |                    |                    |
| SNP_117552_A_286  | NW_004521437.1 | scaffold8734 | 286                     | AA                              | GG                 | GG               | INTERGENIC      |               |                    |                    |
| SNP_117553_A_320  | NW_004521437.1 | scaffold8734 | 320                     | GG                              | AA                 | AA               | INTERGENIC      |               |                    |                    |
| SNP_117554_A_358  | NW_004521437.1 | scaffold8734 | 358                     | TT                              | CC                 | CC               | INTERGENIC      |               |                    |                    |
| SNP_117555_A_540  | NW_004521437.1 | scaffold8734 | 540                     | AA                              | TT                 | TT               | INTERGENIC      |               |                    |                    |
| SNP_117556_A_624  | NW_004521437.1 | scaffold8734 | 624                     | TT                              | CC                 | CC               | INTERGENIC      |               |                    |                    |
| SNP_117557_A_648  | NW_004521437.1 | scaffold8734 | 648                     | CC                              | GG                 | GG               | INTERGENIC      |               |                    |                    |
| SNP_117559_A_786  | NW_004521437.1 | scaffold8734 | 786                     | CC                              | GG                 | GG               | INTERGENIC      |               |                    |                    |
| SNP_117561_A_816  | NW_004521437.1 | scaffold8734 | 816                     | TT                              | CC                 | CC               | INTERGENIC      |               |                    |                    |
| SNP_117562_A_839  | NW_004521437.1 | scaffold8734 | 839                     | AA                              | TT                 | TT               | INTERGENIC      |               |                    |                    |
| SNP_117563_A_867  | NW_004521437.1 | scaffold8734 | 867                     | AA                              | TT                 | TT               | INTERGENIC      |               |                    |                    |
| SNP_117564_A_876  | NW_004521437.1 | scaffold8734 | 876                     | CC                              | AA                 | AA               | INTERGENIC      |               |                    |                    |
| SNP_117565_A_947  | NW_004521437.1 | scaffold8734 | 947                     | TT                              | AA                 | AA               | INTERGENIC      |               |                    |                    |
| SNP_117566_A_1033 | NW_004521437.1 | scaffold8734 | 1033                    | TT                              | GG                 | GG               | INTERGENIC      |               |                    |                    |
| SNP_117568_A_1095 | NW_004521437.1 | scaffold8734 | 1095                    | GG                              | AA                 | AA               | INTERGENIC      |               |                    |                    |
| SNP_117569_A_1383 | NW_004521437.1 | scaffold8734 | 1383                    | AA                              | GG                 | GG               | INTERGENIC      |               |                    |                    |
| SNP_117570_A_2354 | NW_004521437.1 | scaffold8734 | 2354                    | TT                              | CC                 | CC               | INTERGENIC      |               |                    |                    |
| SNP_117571_A_2413 | NW_004521437.1 | scaffold8734 | 2413                    | TT                              | AA                 | AA               | INTERGENIC      |               |                    |                    |
| SNP_117572_A_1344 | NW_004521441.1 | scaffold8746 | 1344                    | AA                              | GG                 | GG               | INTERGENIC      |               |                    |                    |
| SNP_117573_A_2750 | NW_004521441.1 | scaffold8746 | 2750                    | GG                              | AA                 | AA               | INTERGENIC      |               |                    |                    |
| SNP_117574_A_5766 | NW_004521441.1 | scaffold8746 | 5766                    | CC                              | GG                 | GG               | INTERGENIC      |               |                    |                    |
| SNP_117575_A_6406 | NW_004521441.1 | scaffold8746 | 6406                    | AA                              | GG                 | GG               | INTERGENIC      |               |                    |                    |

| SNPs IDs          | Chromosome IDs | Chromosomes  | Physical positions (bp) | CDC Frontier (Reference genome) | (Pusa 1103 & HPNB) | (ILWC 46 & LPNB) | Sequence genome | Components of | Gene accession IDs | Putative functions |
|-------------------|----------------|--------------|-------------------------|---------------------------------|--------------------|------------------|-----------------|---------------|--------------------|--------------------|
| SNP_117576_A_6414 | NW_004521441.1 | scaffold8746 | 6414                    | GG                              | AA                 | AA               | INTERGENIC      |               |                    |                    |
| SNP_117577_A_6514 | NW_004521441.1 | scaffold8746 | 6514                    | TT                              | CC                 | CC               | INTERGENIC      |               |                    |                    |
| SNP_117578_A_7219 | NW_004521441.1 | scaffold8746 | 7219                    | AA                              | GG                 | GG               | INTERGENIC      |               |                    |                    |
| SNP_117579_A_7269 | NW_004521441.1 | scaffold8746 | 7269                    | GG                              | AA                 | AA               | INTERGENIC      |               |                    |                    |
| SNP_117580_A_528  | NW_004521443.1 | scaffold8751 | 528                     | CC                              | TT                 | TT               | URR             | 101501908     | Unknown function   |                    |
| SNP_117581_A_556  | NW_004521443.1 | scaffold8751 | 556                     | AA                              | GG                 | GG               | URR             | 101501908     | Unknown function   |                    |
| SNP_117582_A_569  | NW_004521443.1 | scaffold8751 | 569                     | TT                              | AA                 | AA               | URR             | 101501908     | Unknown function   |                    |
| SNP_117583_A_572  | NW_004521443.1 | scaffold8751 | 572                     | CC                              | AA                 | AA               | URR             | 101501908     | Unknown function   |                    |
| SNP_117584_A_731  | NW_004521445.1 | scaffold8755 | 731                     | TT                              | CC                 | CC               | INTERGENIC      |               |                    |                    |
| SNP_117585_A_738  | NW_004521445.1 | scaffold8755 | 738                     | GG                              | TT                 | TT               | INTERGENIC      |               |                    |                    |
| SNP_117586_A_894  | NW_004521445.1 | scaffold8755 | 894                     | TT                              | CC                 | CC               | INTERGENIC      |               |                    |                    |
| SNP_117587_A_1169 | NW_004521450.1 | scaffold8766 | 1169                    | CC                              | TT                 | TT               | INTERGENIC      |               |                    |                    |
| SNP_117588_A_1353 | NW_004521450.1 | scaffold8766 | 1353                    | GG                              | AA                 | AA               | INTERGENIC      |               |                    |                    |
| SNP_117589_A_398  | NW_004521453.1 | scaffold8775 | 398                     | AA                              | GG                 | GG               | INTERGENIC      |               |                    |                    |
| SNP_117590_A_64   | NW_004521454.1 | scaffold8778 | 64                      | GG                              | TT                 | TT               | INTERGENIC      |               |                    |                    |
| SNP_117591_A_93   | NW_004521454.1 | scaffold8778 | 93                      | AA                              | TT                 | TT               | INTERGENIC      |               |                    |                    |
| SNP_117592_A_102  | NW_004521454.1 | scaffold8778 | 102                     | GG                              | AA                 | AA               | INTERGENIC      |               |                    |                    |
| SNP_117593_A_207  | NW_004521454.1 | scaffold8778 | 207                     | CC                              | AA                 | AA               | INTERGENIC      |               |                    |                    |
| SNP_117594_A_481  | NW_004521454.1 | scaffold8778 | 481                     | GG                              | AA                 | AA               | INTERGENIC      |               |                    |                    |
| SNP_117595_A_555  | NW_004521454.1 | scaffold8778 | 555                     | CC                              | GG                 | GG               | INTERGENIC      |               |                    |                    |
| SNP_117596_A_580  | NW_004521454.1 | scaffold8778 | 580                     | TT                              | AA                 | AA               | INTERGENIC      |               |                    |                    |
| SNP_117597_A_81   | NW_004521456.1 | scaffold8785 | 81                      | CC                              | TT                 | TT               | INTERGENIC      |               |                    |                    |

| SNPs IDs           | Chromosome IDs | Chromosomes  | Physical positions (bp) | CDC Frontier (Reference genome) | (Pusa 1103 & HPNB) | (ILWC 46 & LPNB) | Sequence genome | Components of | Gene accession IDs | Putative functions |
|--------------------|----------------|--------------|-------------------------|---------------------------------|--------------------|------------------|-----------------|---------------|--------------------|--------------------|
| SNP_117598_A_328   | NW_004521456.1 | scaffold8785 | 328                     | AA                              | TT                 | TT               | INTERGENIC      |               |                    |                    |
| SNP_117599_A_105   | NW_004521458.1 | scaffold8789 | 105                     | GG                              | TT                 | TT               | INTERGENIC      |               |                    |                    |
| SNP_117600_A_119   | NW_004521458.1 | scaffold8789 | 119                     | GG                              | CC                 | CC               | INTERGENIC      |               |                    |                    |
| SNP_117601_A_246   | NW_004521458.1 | scaffold8789 | 246                     | TT                              | GG                 | GG               | INTERGENIC      |               |                    |                    |
| SNP_117602_A_350   | NW_004521458.1 | scaffold8789 | 350                     | TT                              | GG                 | GG               | INTERGENIC      |               |                    |                    |
| SNP_117603_A_376   | NW_004521458.1 | scaffold8789 | 376                     | CC                              | AA                 | AA               | INTERGENIC      |               |                    |                    |
| SNP_117604_A_393   | NW_004521458.1 | scaffold8789 | 393                     | AA                              | GG                 | GG               | INTERGENIC      |               |                    |                    |
| SNP_117605_A_406   | NW_004521458.1 | scaffold8789 | 406                     | GG                              | AA                 | AA               | INTERGENIC      |               |                    |                    |
| SNP_117606_A_545   | NW_004521458.1 | scaffold8789 | 545                     | AA                              | GG                 | GG               | INTERGENIC      |               |                    |                    |
| SNP_117607_A_658   | NW_004521458.1 | scaffold8789 | 658                     | CC                              | AA                 | AA               | INTERGENIC      |               |                    |                    |
| SNP_117608_A_690   | NW_004521458.1 | scaffold8789 | 690                     | TT                              | GG                 | GG               | INTERGENIC      |               |                    |                    |
| SNP_117609_A_741   | NW_004521458.1 | scaffold8789 | 741                     | AA                              | GG                 | GG               | INTERGENIC      |               |                    |                    |
| SNP_117610_A_771   | NW_004521458.1 | scaffold8789 | 771                     | CC                              | GG                 | GG               | INTERGENIC      |               |                    |                    |
| SNP_117611_A_784   | NW_004521458.1 | scaffold8789 | 784                     | AA                              | GG                 | GG               | INTERGENIC      |               |                    |                    |
| SNP_117612_A_20347 | NW_004521464.1 | scaffold8801 | 20347                   | AA                              | TT                 | TT               | INTERGENIC      |               |                    |                    |
| SNP_117613_A_20424 | NW_004521464.1 | scaffold8801 | 20424                   | GG                              | CC                 | CC               | INTERGENIC      |               |                    |                    |
| SNP_117614_A_20450 | NW_004521464.1 | scaffold8801 | 20450                   | GG                              | AA                 | AA               | INTERGENIC      |               |                    |                    |
| SNP_117615_A_20493 | NW_004521464.1 | scaffold8801 | 20493                   | TT                              | AA                 | AA               | INTERGENIC      |               |                    |                    |
| SNP_117616_A_10144 | NW_004521465.1 | scaffold8803 | 10144                   | TT                              | CC                 | CC               | INTERGENIC      |               |                    |                    |
| SNP_117617_A_1194  | NW_004521466.1 | scaffold8806 | 1194                    | AA                              | GG                 | GG               | INTRON          | 101502237     | Unknown function   |                    |
| SNP_117619_A_389   | NW_004521474.1 | scaffold8821 | 389                     | AA                              | CC                 | CC               | INTERGENIC      |               |                    |                    |
| SNP_117620_A_446   | NW_004521474.1 | scaffold8821 | 446                     | CC                              | TT                 | TT               | INTERGENIC      |               |                    |                    |

| SNPs IDs          | Chromosome IDs | Chromosomes  | Physical positions (bp) | CDC Frontier (Reference genome) | (Pusa 1103 & HPNB) | (ILWC 46 & LPNB) | Sequence genome | Components of | Gene accession IDs | Putative functions |
|-------------------|----------------|--------------|-------------------------|---------------------------------|--------------------|------------------|-----------------|---------------|--------------------|--------------------|
| SNP_117621_A_364  | NW_004521476.1 | scaffold8824 | 364                     | CC                              | TT                 | TT               | INTERGENIC      |               |                    |                    |
| SNP_117622_A_381  | NW_004521476.1 | scaffold8824 | 381                     | GG                              | AA                 | AA               | INTERGENIC      |               |                    |                    |
| SNP_117623_A_619  | NW_004521477.1 | scaffold8825 | 619                     | AA                              | TT                 | TT               | INTERGENIC      |               |                    |                    |
| SNP_117624_A_626  | NW_004521477.1 | scaffold8825 | 626                     | GG                              | AA                 | AA               | INTERGENIC      |               |                    |                    |
| SNP_117626_A_1020 | NW_004521477.1 | scaffold8825 | 1020                    | CC                              | GG                 | GG               | INTERGENIC      |               |                    |                    |
| SNP_117627_A_1063 | NW_004521477.1 | scaffold8825 | 1063                    | GG                              | TT                 | TT               | INTERGENIC      |               |                    |                    |
| SNP_117628_A_1091 | NW_004521477.1 | scaffold8825 | 1091                    | GG                              | AA                 | AA               | INTERGENIC      |               |                    |                    |
| SNP_117629_A_910  | NW_004521478.1 | scaffold8826 | 910                     | AA                              | TT                 | TT               | INTERGENIC      |               |                    |                    |
| SNP_117630_A_865  | NW_004521481.1 | scaffold8835 | 865                     | AA                              | GG                 | GG               | INTERGENIC      |               |                    |                    |
| SNP_117631_A_866  | NW_004521481.1 | scaffold8835 | 866                     | GG                              | CC                 | CC               | INTERGENIC      |               |                    |                    |
| SNP_117632_A_875  | NW_004521481.1 | scaffold8835 | 875                     | GG                              | AA                 | AA               | INTERGENIC      |               |                    |                    |
| SNP_117634_A_834  | NW_004521482.1 | scaffold8836 | 834                     | GG                              | AA                 | AA               | INTERGENIC      |               |                    |                    |
| SNP_117635_A_856  | NW_004521482.1 | scaffold8836 | 856                     | CC                              | TT                 | TT               | INTERGENIC      |               |                    |                    |
| SNP_117636_A_877  | NW_004521482.1 | scaffold8836 | 877                     | AA                              | GG                 | GG               | INTERGENIC      |               |                    |                    |
| SNP_117637_A_893  | NW_004521482.1 | scaffold8836 | 893                     | AA                              | TT                 | TT               | INTERGENIC      |               |                    |                    |
| SNP_117638_A_894  | NW_004521482.1 | scaffold8836 | 894                     | TT                              | AA                 | AA               | INTERGENIC      |               |                    |                    |
| SNP_117639_A_901  | NW_004521482.1 | scaffold8836 | 901                     | TT                              | CC                 | CC               | INTERGENIC      |               |                    |                    |
| SNP_117640_A_939  | NW_004521482.1 | scaffold8836 | 939                     | AA                              | GG                 | GG               | INTERGENIC      |               |                    |                    |
| SNP_117642_A_1105 | NW_004521482.1 | scaffold8836 | 1105                    | AA                              | TT                 | TT               | INTERGENIC      |               |                    |                    |
| SNP_117643_A_1129 | NW_004521482.1 | scaffold8836 | 1129                    | GG                              | AA                 | AA               | INTERGENIC      |               |                    |                    |
| SNP_117644_A_1161 | NW_004521482.1 | scaffold8836 | 1161                    | CC                              | TT                 | TT               | INTERGENIC      |               |                    |                    |
| SNP_117645_A_1197 | NW_004521482.1 | scaffold8836 | 1197                    | AA                              | GG                 | GG               | INTERGENIC      |               |                    |                    |

| SNPs IDs          | Chromosome IDs | Chromosomes  | Physical positions (bp) | CDC Frontier (Reference genome) | (Pusa 1103 & HPNB) | (ILWC 46 & LPNB) | Sequence genome | Components of | Gene accession IDs | Putative functions |
|-------------------|----------------|--------------|-------------------------|---------------------------------|--------------------|------------------|-----------------|---------------|--------------------|--------------------|
| SNP_117647_A_213  | NW_004521485.1 | scaffold8842 | 213                     | AA                              | TT                 | TT               | INTERGENIC      |               |                    |                    |
| SNP_117648_A_245  | NW_004521485.1 | scaffold8842 | 245                     | AA                              | GG                 | GG               | INTERGENIC      |               |                    |                    |
| SNP_117649_A_428  | NW_004521485.1 | scaffold8842 | 428                     | TT                              | CC                 | CC               | INTERGENIC      |               |                    |                    |
| SNP_117650_A_509  | NW_004521485.1 | scaffold8842 | 509                     | GG                              | AA                 | AA               | INTERGENIC      |               |                    |                    |
| SNP_117651_A_584  | NW_004521485.1 | scaffold8842 | 584                     | AA                              | CC                 | CC               | INTERGENIC      |               |                    |                    |
| SNP_117652_A_602  | NW_004521485.1 | scaffold8842 | 602                     | CC                              | AA                 | AA               | INTERGENIC      |               |                    |                    |
| SNP_117653_A_860  | NW_004521485.1 | scaffold8842 | 860                     | AA                              | TT                 | TT               | INTERGENIC      |               |                    |                    |
| SNP_117654_A_888  | NW_004521485.1 | scaffold8842 | 888                     | TT                              | CC                 | CC               | INTERGENIC      |               |                    |                    |
| SNP_117655_A_1360 | NW_004521486.1 | scaffold8844 | 1360                    | CC                              | TT                 | TT               | INTERGENIC      |               |                    |                    |
| SNP_117656_A_1362 | NW_004521486.1 | scaffold8844 | 1362                    | GG                              | TT                 | TT               | INTERGENIC      |               |                    |                    |
| SNP_117657_A_1363 | NW_004521486.1 | scaffold8844 | 1363                    | GG                              | AA                 | AA               | INTERGENIC      |               |                    |                    |
| SNP_117658_A_1374 | NW_004521486.1 | scaffold8844 | 1374                    | CC                              | TT                 | TT               | INTERGENIC      |               |                    |                    |
| SNP_117659_A_1389 | NW_004521486.1 | scaffold8844 | 1389                    | AA                              | GG                 | GG               | INTERGENIC      |               |                    |                    |
| SNP_117660_A_1397 | NW_004521486.1 | scaffold8844 | 1397                    | TT                              | CC                 | CC               | INTERGENIC      |               |                    |                    |
| SNP_117661_A_1991 | NW_004521487.1 | scaffold8845 | 1991                    | CC                              | TT                 | TT               | INTERGENIC      |               |                    |                    |
| SNP_117662_A_1995 | NW_004521487.1 | scaffold8845 | 1995                    | AA                              | GG                 | GG               | INTERGENIC      |               |                    |                    |
| SNP_117663_A_1996 | NW_004521487.1 | scaffold8845 | 1996                    | GG                              | CC                 | CC               | INTERGENIC      |               |                    |                    |
| SNP_117664_A_2037 | NW_004521487.1 | scaffold8845 | 2037                    | TT                              | CC                 | CC               | INTERGENIC      |               |                    |                    |
| SNP_117665_A_2554 | NW_004521487.1 | scaffold8845 | 2554                    | AA                              | GG                 | GG               | INTERGENIC      |               |                    |                    |
| SNP_117666_A_3202 | NW_004521487.1 | scaffold8845 | 3202                    | AA                              | GG                 | GG               | INTERGENIC      |               |                    |                    |
| SNP_117667_A_3237 | NW_004521487.1 | scaffold8845 | 3237                    | TT                              | CC                 | CC               | INTERGENIC      |               |                    |                    |
| SNP_117668_A_3238 | NW_004521487.1 | scaffold8845 | 3238                    | AA                              | TT                 | TT               | INTERGENIC      |               |                    |                    |

| SNPs IDs          | Chromosome IDs | Chromosomes  | Physical positions (bp) | CDC Frontier (Reference genome) | (Pusa 1103 & HPNB) | (ILWC 46 & LPNB) | Sequence genome | Components of | Gene accession IDs | Putative functions |
|-------------------|----------------|--------------|-------------------------|---------------------------------|--------------------|------------------|-----------------|---------------|--------------------|--------------------|
| SNP_117669_A_446  | NW_004521488.1 | scaffold8847 | 446                     | AA                              | GG                 | GG               | INTERGENIC      |               |                    |                    |
| SNP_117670_A_984  | NW_004521489.1 | scaffold8848 | 984                     | CC                              | TT                 | TT               | INTERGENIC      |               |                    |                    |
| SNP_117671_A_1146 | NW_004521489.1 | scaffold8848 | 1146                    | TT                              | GG                 | GG               | INTERGENIC      |               |                    |                    |
| SNP_117672_A_1444 | NW_004521489.1 | scaffold8848 | 1444                    | GG                              | TT                 | TT               | INTERGENIC      |               |                    |                    |
| SNP_117673_A_1593 | NW_004521489.1 | scaffold8848 | 1593                    | AA                              | TT                 | TT               | INTERGENIC      |               |                    |                    |
| SNP_117674_A_1631 | NW_004521489.1 | scaffold8848 | 1631                    | CC                              | AA                 | AA               | INTERGENIC      |               |                    |                    |
| SNP_117675_A_555  | NW_004521492.1 | scaffold8852 | 555                     | GG                              | AA                 | AA               | INTERGENIC      |               |                    |                    |
| SNP_117676_A_799  | NW_004521492.1 | scaffold8852 | 799                     | TT                              | AA                 | AA               | INTERGENIC      |               |                    |                    |
| SNP_117677_A_840  | NW_004521492.1 | scaffold8852 | 840                     | TT                              | CC                 | CC               | INTERGENIC      |               |                    |                    |
| SNP_117678_A_896  | NW_004521492.1 | scaffold8852 | 896                     | AA                              | GG                 | GG               | INTERGENIC      |               |                    |                    |
| SNP_117679_A_922  | NW_004521492.1 | scaffold8852 | 922                     | TT                              | AA                 | AA               | INTERGENIC      |               |                    |                    |
| SNP_117680_A_1044 | NW_004521492.1 | scaffold8852 | 1044                    | GG                              | AA                 | AA               | INTERGENIC      |               |                    |                    |
| SNP_117681_A_1114 | NW_004521492.1 | scaffold8852 | 1114                    | TT                              | AA                 | AA               | INTERGENIC      |               |                    |                    |
| SNP_117682_A_5559 | NW_004521497.1 | scaffold8857 | 5559                    | GG                              | AA                 | AA               | INTERGENIC      |               |                    |                    |
| SNP_117683_A_5617 | NW_004521497.1 | scaffold8857 | 5617                    | GG                              | AA                 | AA               | INTERGENIC      |               |                    |                    |
| SNP_117684_A_5937 | NW_004521497.1 | scaffold8857 | 5937                    | GG                              | AA                 | AA               | INTERGENIC      |               |                    |                    |
| SNP_117686_A_545  | NW_004521501.1 | scaffold8866 | 545                     | TT                              | CC                 | CC               | INTERGENIC      |               |                    |                    |
| SNP_117687_A_2112 | NW_004521501.1 | scaffold8866 | 2112                    | CC                              | TT                 | TT               | INTERGENIC      |               |                    |                    |
| SNP_117688_A_2204 | NW_004521501.1 | scaffold8866 | 2204                    | GG                              | AA                 | AA               | INTERGENIC      |               |                    |                    |
| SNP_117690_A_262  | NW_004521502.1 | scaffold8867 | 262                     | TT                              | CC                 | CC               | INTERGENIC      |               |                    |                    |
| SNP_117691_A_64   | NW_004521505.1 | scaffold8875 | 64                      | AA                              | TT                 | TT               | INTERGENIC      |               |                    |                    |
| SNP_117692_A_139  | NW_004521505.1 | scaffold8875 | 139                     | AA                              | CC                 | CC               | INTERGENIC      |               |                    |                    |



| SNPs IDs           | Chromosome IDs | Chromosomes  | Physical positions (bp) | CDC Frontier (Reference genome) | (Pusa 1103 & HPNB) | (ILWC 46 & LPNB) | Sequence genome | Components of | Gene accession IDs | Putative functions |
|--------------------|----------------|--------------|-------------------------|---------------------------------|--------------------|------------------|-----------------|---------------|--------------------|--------------------|
| SNP_117693_A_64    | NW_004521506.1 | scaffold8876 | 64                      | TT                              | CC                 | CC               | INTERGENIC      |               |                    |                    |
| SNP_117694_A_101   | NW_004521506.1 | scaffold8876 | 101                     | AA                              | GG                 | GG               | INTERGENIC      |               |                    |                    |
| SNP_117695_A_187   | NW_004521506.1 | scaffold8876 | 187                     | TT                              | GG                 | GG               | INTERGENIC      |               |                    |                    |
| SNP_117696_A_222   | NW_004521506.1 | scaffold8876 | 222                     | TT                              | AA                 | AA               | INTERGENIC      |               |                    |                    |
| SNP_117697_A_398   | NW_004521506.1 | scaffold8876 | 398                     | CC                              | AA                 | AA               | INTERGENIC      |               |                    |                    |
| SNP_117698_A_486   | NW_004521506.1 | scaffold8876 | 486                     | TT                              | GG                 | GG               | INTERGENIC      |               |                    |                    |
| SNP_117699_A_538   | NW_004521506.1 | scaffold8876 | 538                     | TT                              | GG                 | GG               | INTERGENIC      |               |                    |                    |
| SNP_117700_A_558   | NW_004521506.1 | scaffold8876 | 558                     | AA                              | TT                 | TT               | INTERGENIC      |               |                    |                    |
| SNP_117701_A_644   | NW_004521506.1 | scaffold8876 | 644                     | CC                              | TT                 | TT               | INTERGENIC      |               |                    |                    |
| SNP_117702_A_229   | NW_004521507.1 | scaffold8877 | 229                     | TT                              | CC                 | CC               | INTERGENIC      |               |                    |                    |
| SNP_117703_A_371   | NW_004521507.1 | scaffold8877 | 371                     | TT                              | CC                 | CC               | INTERGENIC      |               |                    |                    |
| SNP_117705_A_501   | NW_004521507.1 | scaffold8877 | 501                     | CC                              | AA                 | AA               | INTERGENIC      |               |                    |                    |
| SNP_117706_A_520   | NW_004521507.1 | scaffold8877 | 520                     | GG                              | AA                 | AA               | INTERGENIC      |               |                    |                    |
| SNP_117707_A_543   | NW_004521507.1 | scaffold8877 | 543                     | AA                              | GG                 | GG               | INTERGENIC      |               |                    |                    |
| SNP_117708_A_733   | NW_004521507.1 | scaffold8877 | 733                     | GG                              | AA                 | AA               | INTERGENIC      |               |                    |                    |
| SNP_117709_A_754   | NW_004521507.1 | scaffold8877 | 754                     | TT                              | AA                 | AA               | INTERGENIC      |               |                    |                    |
| SNP_117710_A_761   | NW_004521507.1 | scaffold8877 | 761                     | GG                              | AA                 | AA               | INTERGENIC      |               |                    |                    |
| SNP_117711_A_767   | NW_004521507.1 | scaffold8877 | 767                     | AA                              | GG                 | GG               | INTERGENIC      |               |                    |                    |
| SNP_117712_A_853   | NW_004521507.1 | scaffold8877 | 853                     | TT                              | CC                 | CC               | INTERGENIC      |               |                    |                    |
| SNP_117713_A_19882 | NW_004521507.1 | scaffold8877 | 19882                   | AA                              | GG                 | GG               | INTERGENIC      |               |                    |                    |
| SNP_117714_A_20349 | NW_004521507.1 | scaffold8877 | 20349                   | TT                              | GG                 | GG               | INTERGENIC      |               |                    |                    |
| SNP_117715_A_20602 | NW_004521507.1 | scaffold8877 | 20602                   | TT                              | AA                 | AA               | INTERGENIC      |               |                    |                    |

| SNPs IDs           | Chromosome IDs | Chromosomes  | Physical positions (bp) | CDC Frontier (Reference genome) | (Pusa 1103 & HPNB) | (ILWC 46 & LPNB) | Sequence Components of genome | Gene accession IDs | Putative functions                                         |
|--------------------|----------------|--------------|-------------------------|---------------------------------|--------------------|------------------|-------------------------------|--------------------|------------------------------------------------------------|
| SNP_117716_A_20603 | NW_004521507.1 | scaffold8877 | 20603                   | AA                              | TT                 | TT               | INTERGENIC                    |                    |                                                            |
| SNP_117717_A_20652 | NW_004521507.1 | scaffold8877 | 20652                   | CC                              | AA                 | AA               | INTERGENIC                    |                    |                                                            |
| SNP_117718_A_20752 | NW_004521507.1 | scaffold8877 | 20752                   | GG                              | TT                 | TT               | INTERGENIC                    |                    |                                                            |
| SNP_117719_A_723   | NW_004521514.1 | scaffold8892 | 723                     | CC                              | AA                 | AA               | INTERGENIC                    |                    |                                                            |
| SNP_117720_A_872   | NW_004521517.1 | scaffold8897 | 872                     | TT                              | CC                 | CC               | INTERGENIC                    |                    |                                                            |
| SNP_117721_A_1184  | NW_004521517.1 | scaffold8897 | 1184                    | TT                              | GG                 | GG               | INTERGENIC                    |                    |                                                            |
| SNP_117722_A_1196  | NW_004521517.1 | scaffold8897 | 1196                    | TT                              | GG                 | GG               | INTERGENIC                    |                    |                                                            |
| SNP_117723_A_250   | NW_004521521.1 | scaffold8907 | 250                     | AA                              | GG                 | GG               | INTERGENIC                    |                    |                                                            |
| SNP_117724_A_1269  | NW_004521522.1 | scaffold8913 | 1269                    | CC                              | TT                 | TT               | NON_SYNONYMOUS_CODING         | 101502870          | pentatricopeptide repeat-containing protein At1g62910-like |
| SNP_117725_A_1273  | NW_004521522.1 | scaffold8913 | 1273                    | CC                              | GG                 | GG               | SYNONYMOUS_CODING             | 101502870          | pentatricopeptide repeat-containing protein At1g62910-like |
| SNP_117726_A_1297  | NW_004521522.1 | scaffold8913 | 1297                    | GG                              | AA                 | AA               | SYNONYMOUS_CODING             | 101502870          | pentatricopeptide repeat-containing protein At1g62910-like |
| SNP_117727_A_1779  | NW_004521522.1 | scaffold8913 | 1779                    | GG                              | AA                 | AA               | SYNONYMOUS_CODING             | 101502870          | pentatricopeptide repeat-containing protein At1g62910-like |
| SNP_117728_A_1880  | NW_004521522.1 | scaffold8913 | 1880                    | TT                              | CC                 | CC               | NON_SYNONYMOUS_CODING         | 101502870          | pentatricopeptide repeat-containing protein At1g62910-like |
| SNP_117729_A_1901  | NW_004521522.1 | scaffold8913 | 1901                    | CC                              | GG                 | GG               | NON_SYNONYMOUS_CODING         | 101502870          | pentatricopeptide repeat-containing protein At1g62910-like |
| SNP_117730_A_1902  | NW_004521522.1 | scaffold8913 | 1902                    | GG                              | CC                 | CC               | NON_SYNONYMOUS_CODING         | 101502870          | pentatricopeptide repeat-containing protein At1g62910-like |
| SNP_117731_A_1909  | NW_004521522.1 | scaffold8913 | 1909                    | GG                              | CC                 | CC               | NON_SYNONYMOUS_CODING         | 101502870          | pentatricopeptide repeat-containing protein At1g62910-like |
| SNP_117732_A_1925  | NW_004521522.1 | scaffold8913 | 1925                    | GG                              | TT                 | TT               | NON_SYNONYMOUS_CODING         | 101502870          | pentatricopeptide repeat-containing protein At1g62910-like |
| SNP_117733_A_2036  | NW_004521522.1 | scaffold8913 | 2036                    | CC                              | GG                 | GG               | NON_SYNONYMOUS_CODING         | 101502870          | pentatricopeptide repeat-containing protein At1g62910-like |
| SNP_117734_A_2079  | NW_004521522.1 | scaffold8913 | 2079                    | CC                              | AA                 | AA               | NON_SYNONYMOUS_CODING         | 101502870          | pentatricopeptide repeat-containing protein At1g62910-like |
| SNP_117735_A_2109  | NW_004521522.1 | scaffold8913 | 2109                    | AA                              | GG                 | GG               | NON_SYNONYMOUS_CODING         | 101502870          | pentatricopeptide repeat-containing protein At1g62910-like |
| SNP_117737_A_2297  | NW_004521522.1 | scaffold8913 | 2297                    | AA                              | GG                 | GG               | URR                           | 101502870          | pentatricopeptide repeat-containing protein At1g62910-like |
| SNP_117740_A_1675  | NW_004521527.1 | scaffold8926 | 1675                    | TT                              | AA                 | AA               | INTERGENIC                    |                    |                                                            |

| SNPs IDs          | Chromosome IDs | Chromosomes  | Physical positions (bp) | CDC Frontier (Reference genome) | (Pusa 1103 & HPNB) | (ILWC 46 & LPNB) | Sequence Components of genome | Gene accession IDs | Putative functions           |
|-------------------|----------------|--------------|-------------------------|---------------------------------|--------------------|------------------|-------------------------------|--------------------|------------------------------|
| SNP_117741_A_752  | NW_004521528.1 | scaffold8930 | 752                     | GG                              | TT                 | TT               | INTERGENIC                    |                    |                              |
| SNP_117742_A_796  | NW_004521533.1 | scaffold8943 | 796                     | CC                              | TT                 | TT               | INTERGENIC                    |                    |                              |
| SNP_117743_A_830  | NW_004521533.1 | scaffold8943 | 830                     | AA                              | CC                 | CC               | INTERGENIC                    |                    |                              |
| SNP_117744_A_996  | NW_004521533.1 | scaffold8943 | 996                     | CC                              | AA                 | AA               | INTERGENIC                    |                    |                              |
| SNP_117745_A_268  | NW_004521539.1 | scaffold8960 | 268                     | GG                              | AA                 | AA               | INTERGENIC                    |                    |                              |
| SNP_117746_A_647  | NW_004521539.1 | scaffold8960 | 647                     | GG                              | AA                 | AA               | INTERGENIC                    |                    |                              |
| SNP_117747_A_939  | NW_004521544.1 | scaffold8967 | 939                     | GG                              | TT                 | TT               | INTERGENIC                    |                    |                              |
| SNP_117748_A_984  | NW_004521544.1 | scaffold8967 | 984                     | CC                              | TT                 | TT               | INTERGENIC                    |                    |                              |
| SNP_117749_A_1010 | NW_004521544.1 | scaffold8967 | 1010                    | CC                              | AA                 | AA               | INTERGENIC                    |                    |                              |
| SNP_117750_A_732  | NW_004521545.1 | scaffold8968 | 732                     | TT                              | AA                 | AA               | INTERGENIC                    |                    |                              |
| SNP_117751_A_753  | NW_004521545.1 | scaffold8968 | 753                     | AA                              | GG                 | GG               | INTERGENIC                    |                    |                              |
| SNP_117752_A_812  | NW_004521545.1 | scaffold8968 | 812                     | GG                              | AA                 | AA               | INTERGENIC                    |                    |                              |
| SNP_117754_A_1414 | NW_004521552.1 | scaffold8987 | 1414                    | TT                              | CC                 | CC               | INTERGENIC                    |                    |                              |
| SNP_117755_A_1632 | NW_004521552.1 | scaffold8987 | 1632                    | TT                              | CC                 | CC               | INTERGENIC                    |                    |                              |
| SNP_117756_A_475  | NW_004521554.1 | scaffold8990 | 475                     | TT                              | CC                 | CC               | DRR                           | 101503853          | uncharacterized LOC101503853 |
| SNP_117757_A_479  | NW_004521554.1 | scaffold8990 | 479                     | AA                              | TT                 | TT               | DRR                           | 101503853          | uncharacterized LOC101503853 |
| SNP_117758_A_518  | NW_004521554.1 | scaffold8990 | 518                     | AA                              | TT                 | TT               | DRR                           | 101503853          | uncharacterized LOC101503853 |
| SNP_117759_A_661  | NW_004521554.1 | scaffold8990 | 661                     | GG                              | AA                 | AA               | DRR                           | 101503853          | uncharacterized LOC101503853 |
| SNP_117760_A_846  | NW_004521554.1 | scaffold8990 | 846                     | GG                              | AA                 | AA               | DRR                           | 101503853          | uncharacterized LOC101503853 |
| SNP_117761_A_998  | NW_004521554.1 | scaffold8990 | 998                     | GG                              | CC                 | CC               | DRR                           | 101503853          | uncharacterized LOC101503853 |
| SNP_117762_A_1132 | NW_004521554.1 | scaffold8990 | 1132                    | GG                              | TT                 | TT               | DRR                           | 101503853          | uncharacterized LOC101503853 |
| SNP_117763_A_1971 | NW_004521554.1 | scaffold8990 | 1971                    | GG                              | AA                 | AA               | INTRON                        | 101503853          | uncharacterized LOC101503853 |

| SNPs IDs          | Chromosome IDs | Chromosomes  | Physical positions (bp) | CDC Frontier (Reference genome) | (Pusa 1103 & HPNB) | (ILWC 46 & LPNB) | Sequence genome | Components of | Gene accession IDs | Putative functions |
|-------------------|----------------|--------------|-------------------------|---------------------------------|--------------------|------------------|-----------------|---------------|--------------------|--------------------|
| SNP_117764_A_852  | NW_004521558.1 | scaffold8999 | 852                     | AA                              | TT                 | TT               | INTERGENIC      |               |                    |                    |
| SNP_117765_A_856  | NW_004521558.1 | scaffold8999 | 856                     | AA                              | TT                 | TT               | INTERGENIC      |               |                    |                    |
| SNP_117766_A_1360 | NW_004521558.1 | scaffold8999 | 1360                    | CC                              | TT                 | TT               | INTERGENIC      |               |                    |                    |
| SNP_117767_A_1366 | NW_004521558.1 | scaffold8999 | 1366                    | CC                              | GG                 | GG               | INTERGENIC      |               |                    |                    |
| SNP_117768_A_1422 | NW_004521558.1 | scaffold8999 | 1422                    | AA                              | CC                 | CC               | INTERGENIC      |               |                    |                    |
| SNP_117769_A_3003 | NW_004521559.1 | scaffold9000 | 3003                    | AA                              | GG                 | GG               | INTERGENIC      |               |                    |                    |
| SNP_117770_A_3290 | NW_004521559.1 | scaffold9000 | 3290                    | AA                              | CC                 | CC               | INTERGENIC      |               |                    |                    |
| SNP_117771_A_514  | NW_004521560.1 | scaffold9003 | 514                     | CC                              | AA                 | AA               | INTERGENIC      |               |                    |                    |
| SNP_117772_A_803  | NW_004521560.1 | scaffold9003 | 803                     | GG                              | AA                 | AA               | INTERGENIC      |               |                    |                    |
| SNP_117773_A_1232 | NW_004521562.1 | scaffold9006 | 1232                    | GG                              | AA                 | AA               | INTERGENIC      |               |                    |                    |
| SNP_117774_A_1475 | NW_004521562.1 | scaffold9006 | 1475                    | TT                              | GG                 | GG               | INTERGENIC      |               |                    |                    |
| SNP_117775_A_997  | NW_004521566.1 | scaffold9020 | 997                     | CC                              | AA                 | AA               | INTERGENIC      |               |                    |                    |
| SNP_117776_A_1004 | NW_004521566.1 | scaffold9020 | 1004                    | TT                              | AA                 | AA               | INTERGENIC      |               |                    |                    |
| SNP_117777_A_1465 | NW_004521566.1 | scaffold9020 | 1465                    | TT                              | CC                 | CC               | INTERGENIC      |               |                    |                    |
| SNP_117778_A_229  | NW_004521568.1 | scaffold9023 | 229                     | TT                              | GG                 | GG               | INTERGENIC      |               |                    |                    |
| SNP_117779_A_252  | NW_004521568.1 | scaffold9023 | 252                     | CC                              | TT                 | TT               | INTERGENIC      |               |                    |                    |
| SNP_117780_A_323  | NW_004521568.1 | scaffold9023 | 323                     | GG                              | TT                 | TT               | INTERGENIC      |               |                    |                    |
| SNP_117781_A_379  | NW_004521568.1 | scaffold9023 | 379                     | CC                              | AA                 | AA               | INTERGENIC      |               |                    |                    |
| SNP_117782_A_384  | NW_004521568.1 | scaffold9023 | 384                     | AA                              | TT                 | TT               | INTERGENIC      |               |                    |                    |
| SNP_117783_A_515  | NW_004521568.1 | scaffold9023 | 515                     | GG                              | AA                 | AA               | INTERGENIC      |               |                    |                    |
| SNP_117784_A_537  | NW_004521568.1 | scaffold9023 | 537                     | TT                              | CC                 | CC               | INTERGENIC      |               |                    |                    |
| SNP_117785_A_675  | NW_004521568.1 | scaffold9023 | 675                     | CC                              | TT                 | TT               | INTERGENIC      |               |                    |                    |

| SNPs IDs          | Chromosome IDs | Chromosomes  | Physical positions (bp) | CDC Frontier (Reference genome) | (Pusa 1103 & HPNB) | (ILWC 46 & LPNB) | Sequence genome | Components of | Gene accession IDs | Putative functions |
|-------------------|----------------|--------------|-------------------------|---------------------------------|--------------------|------------------|-----------------|---------------|--------------------|--------------------|
| SNP_117786_A_734  | NW_004521568.1 | scaffold9023 | 734                     | AA                              | CC                 | CC               | INTERGENIC      |               |                    |                    |
| SNP_117787_A_767  | NW_004521568.1 | scaffold9023 | 767                     | TT                              | AA                 | AA               | INTERGENIC      |               |                    |                    |
| SNP_117788_A_864  | NW_004521568.1 | scaffold9023 | 864                     | AA                              | GG                 | GG               | INTERGENIC      |               |                    |                    |
| SNP_117789_A_909  | NW_004521568.1 | scaffold9023 | 909                     | AA                              | GG                 | GG               | INTERGENIC      |               |                    |                    |
| SNP_117790_A_972  | NW_004521568.1 | scaffold9023 | 972                     | GG                              | AA                 | AA               | INTERGENIC      |               |                    |                    |
| SNP_117791_A_1006 | NW_004521568.1 | scaffold9023 | 1006                    | AA                              | GG                 | GG               | INTERGENIC      |               |                    |                    |
| SNP_117792_A_1506 | NW_004521569.1 | scaffold9024 | 1506                    | CC                              | AA                 | AA               | INTERGENIC      |               |                    |                    |
| SNP_117793_A_99   | NW_004521572.1 | scaffold9028 | 99                      | AA                              | GG                 | GG               | INTERGENIC      |               |                    |                    |
| SNP_117794_A_274  | NW_004521572.1 | scaffold9028 | 274                     | CC                              | AA                 | AA               | INTERGENIC      |               |                    |                    |
| SNP_117795_A_423  | NW_004521572.1 | scaffold9028 | 423                     | AA                              | CC                 | CC               | INTERGENIC      |               |                    |                    |
| SNP_117796_A_440  | NW_004521572.1 | scaffold9028 | 440                     | AA                              | GG                 | GG               | INTERGENIC      |               |                    |                    |
| SNP_117797_A_556  | NW_004521572.1 | scaffold9028 | 556                     | CC                              | GG                 | GG               | INTERGENIC      |               |                    |                    |
| SNP_117798_A_569  | NW_004521572.1 | scaffold9028 | 569                     | AA                              | GG                 | GG               | INTERGENIC      |               |                    |                    |
| SNP_117799_A_581  | NW_004521572.1 | scaffold9028 | 581                     | CC                              | GG                 | GG               | INTERGENIC      |               |                    |                    |
| SNP_117800_A_615  | NW_004521572.1 | scaffold9028 | 615                     | CC                              | AA                 | AA               | INTERGENIC      |               |                    |                    |
| SNP_117801_A_664  | NW_004521572.1 | scaffold9028 | 664                     | TT                              | GG                 | GG               | INTERGENIC      |               |                    |                    |
| SNP_117802_A_715  | NW_004521572.1 | scaffold9028 | 715                     | GG                              | CC                 | CC               | INTERGENIC      |               |                    |                    |
| SNP_117803_A_880  | NW_004521572.1 | scaffold9028 | 880                     | TT                              | AA                 | AA               | INTERGENIC      |               |                    |                    |
| SNP_117804_A_884  | NW_004521572.1 | scaffold9028 | 884                     | AA                              | CC                 | CC               | INTERGENIC      |               |                    |                    |
| SNP_117805_A_916  | NW_004521572.1 | scaffold9028 | 916                     | GG                              | TT                 | TT               | INTERGENIC      |               |                    |                    |
| SNP_117806_A_931  | NW_004521572.1 | scaffold9028 | 931                     | GG                              | TT                 | TT               | INTERGENIC      |               |                    |                    |
| SNP_117807_A_190  | NW_004521575.1 | scaffold9037 | 190                     | AA                              | GG                 | GG               | INTERGENIC      |               |                    |                    |

| SNPs IDs          | Chromosome IDs | Chromosomes  | Physical positions (bp) | CDC Frontier (Reference genome) | (Pusa 1103 & HPNB) | (ILWC 46 & LPNB) | Sequence genome | Components of | Gene accession IDs | Putative functions |
|-------------------|----------------|--------------|-------------------------|---------------------------------|--------------------|------------------|-----------------|---------------|--------------------|--------------------|
| SNP_117808_A_528  | NW_004521575.1 | scaffold9037 | 528                     | GG                              | TT                 | TT               | INTERGENIC      |               |                    |                    |
| SNP_117810_A_3343 | NW_004521578.1 | scaffold9048 | 3343                    | AA                              | GG                 | GG               | INTERGENIC      |               |                    |                    |
| SNP_117811_A_3398 | NW_004521578.1 | scaffold9048 | 3398                    | CC                              | AA                 | AA               | INTERGENIC      |               |                    |                    |
| SNP_117812_A_3427 | NW_004521578.1 | scaffold9048 | 3427                    | AA                              | GG                 | GG               | INTERGENIC      |               |                    |                    |
| SNP_117813_A_3436 | NW_004521578.1 | scaffold9048 | 3436                    | AA                              | GG                 | GG               | INTERGENIC      |               |                    |                    |
| SNP_117814_A_446  | NW_004521581.1 | scaffold9059 | 446                     | AA                              | TT                 | TT               | INTERGENIC      |               |                    |                    |
| SNP_117817_A_694  | NW_004521581.1 | scaffold9059 | 694                     | AA                              | CC                 | CC               | INTERGENIC      |               |                    |                    |
| SNP_117818_A_808  | NW_004521581.1 | scaffold9059 | 808                     | AA                              | GG                 | GG               | INTERGENIC      |               |                    |                    |
| SNP_117819_A_942  | NW_004521581.1 | scaffold9059 | 942                     | AA                              | GG                 | GG               | INTERGENIC      |               |                    |                    |
| SNP_117820_A_1076 | NW_004521581.1 | scaffold9059 | 1076                    | TT                              | GG                 | GG               | INTERGENIC      |               |                    |                    |
| SNP_117821_A_1083 | NW_004521581.1 | scaffold9059 | 1083                    | TT                              | CC                 | CC               | INTERGENIC      |               |                    |                    |
| SNP_117822_A_1092 | NW_004521581.1 | scaffold9059 | 1092                    | CC                              | GG                 | GG               | INTERGENIC      |               |                    |                    |
| SNP_117823_A_1133 | NW_004521581.1 | scaffold9059 | 1133                    | CC                              | TT                 | TT               | INTERGENIC      |               |                    |                    |
| SNP_117824_A_1263 | NW_004521581.1 | scaffold9059 | 1263                    | TT                              | AA                 | AA               | INTERGENIC      |               |                    |                    |
| SNP_117825_A_1264 | NW_004521581.1 | scaffold9059 | 1264                    | AA                              | TT                 | TT               | INTERGENIC      |               |                    |                    |
| SNP_117826_A_1265 | NW_004521581.1 | scaffold9059 | 1265                    | GG                              | AA                 | AA               | INTERGENIC      |               |                    |                    |
| SNP_117827_A_1333 | NW_004521581.1 | scaffold9059 | 1333                    | CC                              | AA                 | AA               | INTERGENIC      |               |                    |                    |
| SNP_117828_A_1534 | NW_004521581.1 | scaffold9059 | 1534                    | CC                              | AA                 | AA               | INTERGENIC      |               |                    |                    |
| SNP_117829_A_97   | NW_004521584.1 | scaffold9070 | 97                      | AA                              | GG                 | GG               | INTERGENIC      |               |                    |                    |
| SNP_117830_A_902  | NW_004521584.1 | scaffold9070 | 902                     | CC                              | TT                 | TT               | INTERGENIC      |               |                    |                    |
| SNP_117831_A_591  | NW_004521585.1 | scaffold9074 | 591                     | CC                              | TT                 | TT               | INTERGENIC      |               |                    |                    |
| SNP_117833_A_1047 | NW_004521585.1 | scaffold9074 | 1047                    | CC                              | GG                 | GG               | INTERGENIC      |               |                    |                    |

| SNPs IDs          | Chromosome IDs | Chromosomes  | Physical positions (bp) | CDC Frontier (Reference genome) | (Pusa 1103 & HPNB) | (ILWC 46 & LPNB) | Sequence genome | Components of | Gene accession IDs | Putative functions |
|-------------------|----------------|--------------|-------------------------|---------------------------------|--------------------|------------------|-----------------|---------------|--------------------|--------------------|
| SNP_117835_A_1180 | NW_004521585.1 | scaffold9074 | 1180                    | TT                              | AA                 | AA               | INTERGENIC      |               |                    |                    |
| SNP_117836_A_1193 | NW_004521585.1 | scaffold9074 | 1193                    | TT                              | CC                 | CC               | INTERGENIC      |               |                    |                    |
| SNP_117837_A_1255 | NW_004521585.1 | scaffold9074 | 1255                    | GG                              | TT                 | TT               | INTERGENIC      |               |                    |                    |
| SNP_117838_A_596  | NW_004521588.1 | scaffold9079 | 596                     | GG                              | TT                 | TT               | INTERGENIC      |               |                    |                    |
| SNP_117839_A_5435 | NW_004521593.1 | scaffold9086 | 5435                    | TT                              | GG                 | GG               | INTERGENIC      |               |                    |                    |
| SNP_117840_A_5633 | NW_004521593.1 | scaffold9086 | 5633                    | GG                              | AA                 | AA               | INTERGENIC      |               |                    |                    |
| SNP_117841_A_419  | NW_004521594.1 | scaffold9092 | 419                     | GG                              | AA                 | AA               | INTERGENIC      |               |                    |                    |
| SNP_117842_A_1497 | NW_004521595.1 | scaffold9095 | 1497                    | AA                              | TT                 | TT               | INTERGENIC      |               |                    |                    |
| SNP_117843_A_660  | NW_004521603.1 | scaffold9118 | 660                     | AA                              | TT                 | TT               | INTERGENIC      |               |                    |                    |
| SNP_117844_A_666  | NW_004521603.1 | scaffold9118 | 666                     | CC                              | TT                 | TT               | INTERGENIC      |               |                    |                    |
| SNP_117845_A_210  | NW_004521604.1 | scaffold9122 | 210                     | TT                              | AA                 | AA               | INTERGENIC      |               |                    |                    |
| SNP_117846_A_1134 | NW_004521604.1 | scaffold9122 | 1134                    | GG                              | AA                 | AA               | INTERGENIC      |               |                    |                    |
| SNP_117847_A_1309 | NW_004521604.1 | scaffold9122 | 1309                    | TT                              | CC                 | CC               | INTERGENIC      |               |                    |                    |
| SNP_117848_A_1439 | NW_004521604.1 | scaffold9122 | 1439                    | TT                              | CC                 | CC               | INTERGENIC      |               |                    |                    |
| SNP_117849_A_1566 | NW_004521604.1 | scaffold9122 | 1566                    | GG                              | AA                 | AA               | INTERGENIC      |               |                    |                    |
| SNP_117850_A_1974 | NW_004521604.1 | scaffold9122 | 1974                    | GG                              | AA                 | AA               | INTERGENIC      |               |                    |                    |
| SNP_117851_A_2014 | NW_004521604.1 | scaffold9122 | 2014                    | CC                              | AA                 | AA               | INTERGENIC      |               |                    |                    |
| SNP_117852_A_2162 | NW_004521604.1 | scaffold9122 | 2162                    | AA                              | GG                 | GG               | INTERGENIC      |               |                    |                    |
| SNP_117853_A_6017 | NW_004521604.1 | scaffold9122 | 6017                    | GG                              | AA                 | AA               | INTERGENIC      |               |                    |                    |
| SNP_117854_A_337  | NW_004521605.1 | scaffold9125 | 337                     | TT                              | CC                 | CC               | INTERGENIC      |               |                    |                    |
| SNP_117855_A_382  | NW_004521605.1 | scaffold9125 | 382                     | AA                              | GG                 | GG               | INTERGENIC      |               |                    |                    |
| SNP_117856_A_488  | NW_004521605.1 | scaffold9125 | 488                     | AA                              | TT                 | TT               | INTERGENIC      |               |                    |                    |

| SNPs IDs          | Chromosome IDs | Chromosomes  | Physical positions (bp) | CDC Frontier (Reference genome) | (Pusa 1103 & HPNB) | (ILWC 46 & LPNB) | Sequence genome | Components of | Gene accession IDs | Putative functions |
|-------------------|----------------|--------------|-------------------------|---------------------------------|--------------------|------------------|-----------------|---------------|--------------------|--------------------|
| SNP_117857_A_654  | NW_004521605.1 | scaffold9125 | 654                     | CC                              | TT                 | TT               | INTERGENIC      |               |                    |                    |
| SNP_117858_A_1049 | NW_004521609.1 | scaffold9135 | 1049                    | TT                              | AA                 | AA               | INTERGENIC      |               |                    |                    |
| SNP_117859_A_908  | NW_004521612.1 | scaffold9149 | 908                     | AA                              | GG                 | GG               | INTERGENIC      |               |                    |                    |
| SNP_117860_A_963  | NW_004521612.1 | scaffold9149 | 963                     | GG                              | CC                 | CC               | INTERGENIC      |               |                    |                    |
| SNP_117861_A_986  | NW_004521612.1 | scaffold9149 | 986                     | AA                              | GG                 | GG               | INTERGENIC      |               |                    |                    |
| SNP_117862_A_1015 | NW_004521612.1 | scaffold9149 | 1015                    | AA                              | TT                 | TT               | INTERGENIC      |               |                    |                    |
| SNP_117863_A_1155 | NW_004521612.1 | scaffold9149 | 1155                    | AA                              | GG                 | GG               | INTERGENIC      |               |                    |                    |
| SNP_117864_A_1235 | NW_004521612.1 | scaffold9149 | 1235                    | AA                              | GG                 | GG               | INTERGENIC      |               |                    |                    |
| SNP_117865_A_467  | NW_004521619.1 | scaffold9168 | 467                     | TT                              | CC                 | CC               | INTERGENIC      |               |                    |                    |
| SNP_117866_A_1365 | NW_004521620.1 | scaffold9171 | 1365                    | AA                              | GG                 | GG               | INTERGENIC      |               |                    |                    |
| SNP_117867_A_382  | NW_004521621.1 | scaffold9172 | 382                     | TT                              | GG                 | GG               | INTERGENIC      |               |                    |                    |
| SNP_117868_A_2108 | NW_004521625.1 | scaffold9185 | 2108                    | CC                              | TT                 | TT               | INTERGENIC      |               |                    |                    |
| SNP_117869_A_2157 | NW_004521625.1 | scaffold9185 | 2157                    | TT                              | AA                 | AA               | INTERGENIC      |               |                    |                    |
| SNP_117870_A_64   | NW_004521630.1 | scaffold9195 | 64                      | CC                              | TT                 | TT               | INTERGENIC      |               |                    |                    |
| SNP_117871_A_145  | NW_004521630.1 | scaffold9195 | 145                     | CC                              | GG                 | GG               | INTERGENIC      |               |                    |                    |
| SNP_117872_A_241  | NW_004521630.1 | scaffold9195 | 241                     | CC                              | AA                 | AA               | INTERGENIC      |               |                    |                    |
| SNP_117874_A_674  | NW_004521630.1 | scaffold9195 | 674                     | GG                              | AA                 | AA               | INTERGENIC      |               |                    |                    |
| SNP_117875_A_710  | NW_004521630.1 | scaffold9195 | 710                     | TT                              | AA                 | AA               | INTERGENIC      |               |                    |                    |
| SNP_117876_A_859  | NW_004521630.1 | scaffold9195 | 859                     | GG                              | AA                 | AA               | INTERGENIC      |               |                    |                    |
| SNP_117877_A_883  | NW_004521630.1 | scaffold9195 | 883                     | TT                              | CC                 | CC               | INTERGENIC      |               |                    |                    |
| SNP_117879_A_355  | NW_004521635.1 | scaffold9216 | 355                     | AA                              | CC                 | CC               | INTERGENIC      |               |                    |                    |
| SNP_117880_A_363  | NW_004521635.1 | scaffold9216 | 363                     | TT                              | CC                 | CC               | INTERGENIC      |               |                    |                    |



| SNPs IDs          | Chromosome IDs | Chromosomes  | Physical positions (bp) | CDC Frontier (Reference genome) | (Pusa 1103 & HPNB) | (ILWC 46 & LPNB) | Sequence genome | Components of | Gene accession IDs | Putative functions |
|-------------------|----------------|--------------|-------------------------|---------------------------------|--------------------|------------------|-----------------|---------------|--------------------|--------------------|
| SNP_117881_A_370  | NW_004521635.1 | scaffold9216 | 370                     | AA                              | CC                 | CC               | INTERGENIC      |               |                    |                    |
| SNP_117882_A_377  | NW_004521635.1 | scaffold9216 | 377                     | CC                              | GG                 | GG               | INTERGENIC      |               |                    |                    |
| SNP_117883_A_379  | NW_004521635.1 | scaffold9216 | 379                     | TT                              | AA                 | AA               | INTERGENIC      |               |                    |                    |
| SNP_117884_A_400  | NW_004521635.1 | scaffold9216 | 400                     | AA                              | TT                 | TT               | INTERGENIC      |               |                    |                    |
| SNP_117885_A_535  | NW_004521635.1 | scaffold9216 | 535                     | TT                              | CC                 | CC               | INTERGENIC      |               |                    |                    |
| SNP_117886_A_576  | NW_004521635.1 | scaffold9216 | 576                     | CC                              | TT                 | TT               | INTERGENIC      |               |                    |                    |
| SNP_117887_A_583  | NW_004521635.1 | scaffold9216 | 583                     | CC                              | GG                 | GG               | INTERGENIC      |               |                    |                    |
| SNP_117888_A_585  | NW_004521635.1 | scaffold9216 | 585                     | AA                              | TT                 | TT               | INTERGENIC      |               |                    |                    |
| SNP_117889_A_983  | NW_004521635.1 | scaffold9216 | 983                     | TT                              | GG                 | GG               | INTERGENIC      |               |                    |                    |
| SNP_117890_A_1155 | NW_004521635.1 | scaffold9216 | 1155                    | GG                              | TT                 | TT               | INTERGENIC      |               |                    |                    |
| SNP_117891_A_1206 | NW_004521635.1 | scaffold9216 | 1206                    | AA                              | CC                 | CC               | INTERGENIC      |               |                    |                    |
| SNP_117892_A_625  | NW_004521644.1 | scaffold9236 | 625                     | TT                              | AA                 | AA               | INTERGENIC      |               |                    |                    |
| SNP_117893_A_1073 | NW_004521644.1 | scaffold9236 | 1073                    | AA                              | CC                 | CC               | INTERGENIC      |               |                    |                    |
| SNP_117894_A_1681 | NW_004521644.1 | scaffold9236 | 1681                    | TT                              | CC                 | CC               | INTERGENIC      |               |                    |                    |
| SNP_117895_A_1771 | NW_004521644.1 | scaffold9236 | 1771                    | CC                              | TT                 | TT               | INTERGENIC      |               |                    |                    |
| SNP_117896_A_1774 | NW_004521644.1 | scaffold9236 | 1774                    | GG                              | TT                 | TT               | INTERGENIC      |               |                    |                    |
| SNP_117897_A_1810 | NW_004521644.1 | scaffold9236 | 1810                    | GG                              | CC                 | CC               | INTERGENIC      |               |                    |                    |
| SNP_117898_A_1812 | NW_004521644.1 | scaffold9236 | 1812                    | GG                              | CC                 | CC               | INTERGENIC      |               |                    |                    |
| SNP_117899_A_107  | NW_004521645.1 | scaffold9240 | 107                     | TT                              | CC                 | CC               | INTERGENIC      |               |                    |                    |
| SNP_117900_A_396  | NW_004521645.1 | scaffold9240 | 396                     | TT                              | CC                 | CC               | INTERGENIC      |               |                    |                    |
| SNP_117901_A_464  | NW_004521645.1 | scaffold9240 | 464                     | GG                              | CC                 | CC               | INTERGENIC      |               |                    |                    |
| SNP_117903_A_777  | NW_004521645.1 | scaffold9240 | 777                     | GG                              | CC                 | CC               | INTERGENIC      |               |                    |                    |

| SNPs IDs           | Chromosome IDs | Chromosomes  | Physical positions (bp) | CDC Frontier (Reference genome) | (Pusa 1103 & HPNB) | (ILWC 46 & LPNB) | Sequence genome | Components of | Gene accession IDs | Putative functions |
|--------------------|----------------|--------------|-------------------------|---------------------------------|--------------------|------------------|-----------------|---------------|--------------------|--------------------|
| SNP_117904_A_1101  | NW_004521645.1 | scaffold9240 | 1101                    | CC                              | GG                 | GG               | INTERGENIC      |               |                    |                    |
| SNP_117905_A_1137  | NW_004521645.1 | scaffold9240 | 1137                    | TT                              | CC                 | CC               | INTERGENIC      |               |                    |                    |
| SNP_117906_A_64    | NW_004521649.1 | scaffold9247 | 64                      | GG                              | AA                 | AA               | INTERGENIC      |               |                    |                    |
| SNP_117907_A_99    | NW_004521649.1 | scaffold9247 | 99                      | AA                              | GG                 | GG               | INTERGENIC      |               |                    |                    |
| SNP_117908_A_100   | NW_004521649.1 | scaffold9247 | 100                     | TT                              | AA                 | AA               | INTERGENIC      |               |                    |                    |
| SNP_117909_A_399   | NW_004521649.1 | scaffold9247 | 399                     | AA                              | TT                 | TT               | INTERGENIC      |               |                    |                    |
| SNP_117911_A_600   | NW_004521649.1 | scaffold9247 | 600                     | TT                              | CC                 | CC               | INTERGENIC      |               |                    |                    |
| SNP_117912_A_976   | NW_004521655.1 | scaffold9258 | 976                     | AA                              | GG                 | GG               | INTERGENIC      |               |                    |                    |
| SNP_117913_A_1152  | NW_004521655.1 | scaffold9258 | 1152                    | CC                              | AA                 | AA               | INTERGENIC      |               |                    |                    |
| SNP_117914_A_1189  | NW_004521655.1 | scaffold9258 | 1189                    | AA                              | TT                 | TT               | INTERGENIC      |               |                    |                    |
| SNP_117915_A_1220  | NW_004521655.1 | scaffold9258 | 1220                    | TT                              | CC                 | CC               | INTERGENIC      |               |                    |                    |
| SNP_117916_A_1311  | NW_004521655.1 | scaffold9258 | 1311                    | CC                              | TT                 | TT               | INTERGENIC      |               |                    |                    |
| SNP_117917_A_20044 | NW_004521659.1 | scaffold9267 | 20044                   | TT                              | CC                 | CC               | INTERGENIC      |               |                    |                    |
| SNP_117918_A_20045 | NW_004521659.1 | scaffold9267 | 20045                   | TT                              | AA                 | AA               | INTERGENIC      |               |                    |                    |
| SNP_117919_A_20447 | NW_004521659.1 | scaffold9267 | 20447                   | TT                              | CC                 | CC               | INTERGENIC      |               |                    |                    |
| SNP_117920_A_20455 | NW_004521659.1 | scaffold9267 | 20455                   | AA                              | GG                 | GG               | INTERGENIC      |               |                    |                    |
| SNP_117921_A_20508 | NW_004521659.1 | scaffold9267 | 20508                   | AA                              | CC                 | CC               | INTERGENIC      |               |                    |                    |
| SNP_117922_A_756   | NW_004521662.1 | scaffold9273 | 756                     | AA                              | GG                 | GG               | INTERGENIC      |               |                    |                    |
| SNP_117923_A_64    | NW_004521666.1 | scaffold9281 | 64                      | GG                              | TT                 | TT               | INTERGENIC      |               |                    |                    |
| SNP_117924_A_101   | NW_004521666.1 | scaffold9281 | 101                     | AA                              | CC                 | CC               | INTERGENIC      |               |                    |                    |
| SNP_117925_A_252   | NW_004521666.1 | scaffold9281 | 252                     | AA                              | GG                 | GG               | INTERGENIC      |               |                    |                    |
| SNP_117926_A_303   | NW_004521666.1 | scaffold9281 | 303                     | CC                              | TT                 | TT               | INTERGENIC      |               |                    |                    |

| SNPs IDs          | Chromosome IDs | Chromosomes  | Physical positions (bp) | CDC Frontier (Reference genome) | (Pusa 1103 & HPNB) | (ILWC 46 & LPNB) | Sequence genome | Components of | Gene accession IDs | Putative functions |
|-------------------|----------------|--------------|-------------------------|---------------------------------|--------------------|------------------|-----------------|---------------|--------------------|--------------------|
| SNP_117927_A_349  | NW_004521666.1 | scaffold9281 | 349                     | TT                              | CC                 | CC               | INTERGENIC      |               |                    |                    |
| SNP_117928_A_359  | NW_004521666.1 | scaffold9281 | 359                     | AA                              | GG                 | GG               | INTERGENIC      |               |                    |                    |
| SNP_117929_A_374  | NW_004521666.1 | scaffold9281 | 374                     | TT                              | CC                 | CC               | INTERGENIC      |               |                    |                    |
| SNP_117930_A_378  | NW_004521666.1 | scaffold9281 | 378                     | CC                              | TT                 | TT               | INTERGENIC      |               |                    |                    |
| SNP_117931_A_385  | NW_004521666.1 | scaffold9281 | 385                     | CC                              | TT                 | TT               | INTERGENIC      |               |                    |                    |
| SNP_117932_A_390  | NW_004521666.1 | scaffold9281 | 390                     | CC                              | TT                 | TT               | INTERGENIC      |               |                    |                    |
| SNP_117933_A_394  | NW_004521666.1 | scaffold9281 | 394                     | GG                              | AA                 | AA               | INTERGENIC      |               |                    |                    |
| SNP_117934_A_412  | NW_004521666.1 | scaffold9281 | 412                     | TT                              | AA                 | AA               | INTERGENIC      |               |                    |                    |
| SNP_117935_A_493  | NW_004521666.1 | scaffold9281 | 493                     | GG                              | AA                 | AA               | INTERGENIC      |               |                    |                    |
| SNP_117936_A_555  | NW_004521666.1 | scaffold9281 | 555                     | TT                              | AA                 | AA               | INTERGENIC      |               |                    |                    |
| SNP_117937_A_588  | NW_004521666.1 | scaffold9281 | 588                     | AA                              | GG                 | GG               | INTERGENIC      |               |                    |                    |
| SNP_117938_A_685  | NW_004521666.1 | scaffold9281 | 685                     | CC                              | AA                 | AA               | INTERGENIC      |               |                    |                    |
| SNP_117939_A_772  | NW_004521666.1 | scaffold9281 | 772                     | AA                              | GG                 | GG               | INTERGENIC      |               |                    |                    |
| SNP_117940_A_3606 | NW_004521666.1 | scaffold9281 | 3606                    | TT                              | CC                 | CC               | INTERGENIC      |               |                    |                    |
| SNP_117941_A_3649 | NW_004521666.1 | scaffold9281 | 3649                    | CC                              | AA                 | AA               | INTERGENIC      |               |                    |                    |
| SNP_117942_A_3775 | NW_004521666.1 | scaffold9281 | 3775                    | GG                              | CC                 | CC               | INTERGENIC      |               |                    |                    |
| SNP_117943_A_4136 | NW_004521666.1 | scaffold9281 | 4136                    | TT                              | CC                 | CC               | INTERGENIC      |               |                    |                    |
| SNP_117944_A_4145 | NW_004521666.1 | scaffold9281 | 4145                    | TT                              | AA                 | AA               | INTERGENIC      |               |                    |                    |
| SNP_117946_A_1447 | NW_004521671.1 | scaffold9294 | 1447                    | AA                              | GG                 | GG               | INTERGENIC      |               |                    |                    |
| SNP_117947_A_1494 | NW_004521671.1 | scaffold9294 | 1494                    | AA                              | CC                 | CC               | INTERGENIC      |               |                    |                    |
| SNP_117948_A_64   | NW_004521672.1 | scaffold9295 | 64                      | GG                              | TT                 | TT               | INTERGENIC      |               |                    |                    |
| SNP_117949_A_59   | NW_004521673.1 | scaffold9303 | 59                      | GG                              | TT                 | TT               | INTERGENIC      |               |                    |                    |

| SNPs IDs          | Chromosome IDs | Chromosomes  | Physical positions (bp) | CDC Frontier genome (Reference genome) | (Pusa 1103 & HPNB) | (ILWC 46 & LPNB) | Sequence genome | Components of | Gene accession IDs | Putative functions |
|-------------------|----------------|--------------|-------------------------|----------------------------------------|--------------------|------------------|-----------------|---------------|--------------------|--------------------|
| SNP_117950_A_64   | NW_004521673.1 | scaffold9303 | 64                      | AA                                     | CC                 | CC               | INTERGENIC      |               |                    |                    |
| SNP_117951_A_82   | NW_004521673.1 | scaffold9303 | 82                      | CC                                     | TT                 | TT               | INTERGENIC      |               |                    |                    |
| SNP_117952_A_125  | NW_004521673.1 | scaffold9303 | 125                     | AA                                     | GG                 | GG               | INTERGENIC      |               |                    |                    |
| SNP_117953_A_137  | NW_004521673.1 | scaffold9303 | 137                     | TT                                     | CC                 | CC               | INTERGENIC      |               |                    |                    |
| SNP_117954_A_142  | NW_004521673.1 | scaffold9303 | 142                     | TT                                     | CC                 | CC               | INTERGENIC      |               |                    |                    |
| SNP_117955_A_1008 | NW_004521673.1 | scaffold9303 | 1008                    | TT                                     | CC                 | CC               | INTERGENIC      |               |                    |                    |
| SNP_117956_A_1077 | NW_004521673.1 | scaffold9303 | 1077                    | CC                                     | TT                 | TT               | INTERGENIC      |               |                    |                    |
| SNP_117958_A_1323 | NW_004521673.1 | scaffold9303 | 1323                    | TT                                     | GG                 | GG               | INTERGENIC      |               |                    |                    |
| SNP_117961_A_915  | NW_004521678.1 | scaffold9314 | 915                     | CC                                     | GG                 | GG               | INTERGENIC      |               |                    |                    |
| SNP_117962_A_979  | NW_004521678.1 | scaffold9314 | 979                     | AA                                     | TT                 | TT               | INTERGENIC      |               |                    |                    |
| SNP_117963_A_1009 | NW_004521678.1 | scaffold9314 | 1009                    | CC                                     | GG                 | GG               | INTERGENIC      |               |                    |                    |
| SNP_117964_A_4588 | NW_004521682.1 | scaffold9323 | 4588                    | TT                                     | CC                 | CC               | INTERGENIC      |               |                    |                    |
| SNP_117965_A_5829 | NW_004521682.1 | scaffold9323 | 5829                    | AA                                     | GG                 | GG               | INTERGENIC      |               |                    |                    |
| SNP_117966_A_186  | NW_004521685.1 | scaffold9326 | 186                     | GG                                     | AA                 | AA               | INTERGENIC      |               |                    |                    |
| SNP_117967_A_199  | NW_004521685.1 | scaffold9326 | 199                     | CC                                     | GG                 | GG               | INTERGENIC      |               |                    |                    |
| SNP_117968_A_253  | NW_004521685.1 | scaffold9326 | 253                     | TT                                     | AA                 | AA               | INTERGENIC      |               |                    |                    |
| SNP_117969_A_531  | NW_004521685.1 | scaffold9326 | 531                     | AA                                     | CC                 | CC               | INTERGENIC      |               |                    |                    |
| SNP_117970_A_601  | NW_004521685.1 | scaffold9326 | 601                     | AA                                     | TT                 | TT               | INTERGENIC      |               |                    |                    |
| SNP_117971_A_646  | NW_004521685.1 | scaffold9326 | 646                     | CC                                     | GG                 | GG               | INTERGENIC      |               |                    |                    |
| SNP_117972_A_689  | NW_004521685.1 | scaffold9326 | 689                     | TT                                     | AA                 | AA               | INTERGENIC      |               |                    |                    |
| SNP_117973_A_753  | NW_004521685.1 | scaffold9326 | 753                     | AA                                     | TT                 | TT               | INTERGENIC      |               |                    |                    |
| SNP_117974_A_1082 | NW_004521687.1 | scaffold9334 | 1082                    | TT                                     | AA                 | AA               | INTRON          | id225268      | Unknown function   |                    |

| SNPs IDs          | Chromosome IDs | Chromosomes  | Physical positions (bp) | CDC Frontier (Reference genome) | (Pusa 1103 & HPNB) | (ILWC 46 & LPNB) | Sequence Components of genome | Gene accession IDs | Putative functions           |
|-------------------|----------------|--------------|-------------------------|---------------------------------|--------------------|------------------|-------------------------------|--------------------|------------------------------|
| SNP_117975_A_1779 | NW_004521687.1 | scaffold9334 | 1779                    | AA                              | TT                 | TT               | URR                           | 101505118          | uncharacterized LOC101505118 |
| SNP_117976_A_2049 | NW_004521687.1 | scaffold9334 | 2049                    | AA                              | TT                 | TT               | URR                           | 101505118          | uncharacterized LOC101505118 |
| SNP_117977_A_2087 | NW_004521687.1 | scaffold9334 | 2087                    | TT                              | AA                 | AA               | URR                           | 101505118          | uncharacterized LOC101505118 |
| SNP_117978_A_467  | NW_004521690.1 | scaffold9346 | 467                     | CC                              | AA                 | AA               | INTERGENIC                    |                    |                              |
| SNP_117979_A_64   | NW_004521702.1 | scaffold9371 | 64                      | CC                              | GG                 | GG               | INTERGENIC                    |                    |                              |
| SNP_117980_A_133  | NW_004521702.1 | scaffold9371 | 133                     | GG                              | TT                 | TT               | INTERGENIC                    |                    |                              |
| SNP_117981_A_171  | NW_004521702.1 | scaffold9371 | 171                     | GG                              | AA                 | AA               | INTERGENIC                    |                    |                              |
| SNP_117983_A_296  | NW_004521702.1 | scaffold9371 | 296                     | GG                              | CC                 | CC               | INTERGENIC                    |                    |                              |
| SNP_117984_A_305  | NW_004521702.1 | scaffold9371 | 305                     | AA                              | TT                 | TT               | INTERGENIC                    |                    |                              |
| SNP_117985_A_309  | NW_004521702.1 | scaffold9371 | 309                     | CC                              | AA                 | AA               | INTERGENIC                    |                    |                              |
| SNP_117986_A_331  | NW_004521702.1 | scaffold9371 | 331                     | TT                              | CC                 | CC               | INTERGENIC                    |                    |                              |
| SNP_117987_A_396  | NW_004521702.1 | scaffold9371 | 396                     | TT                              | CC                 | CC               | INTERGENIC                    |                    |                              |
| SNP_117988_A_426  | NW_004521702.1 | scaffold9371 | 426                     | AA                              | CC                 | CC               | INTERGENIC                    |                    |                              |
| SNP_117989_A_470  | NW_004521702.1 | scaffold9371 | 470                     | GG                              | AA                 | AA               | INTERGENIC                    |                    |                              |
| SNP_117990_A_482  | NW_004521702.1 | scaffold9371 | 482                     | AA                              | TT                 | TT               | INTERGENIC                    |                    |                              |
| SNP_117991_A_486  | NW_004521702.1 | scaffold9371 | 486                     | AA                              | TT                 | TT               | INTERGENIC                    |                    |                              |
| SNP_117992_A_504  | NW_004521702.1 | scaffold9371 | 504                     | GG                              | AA                 | AA               | INTERGENIC                    |                    |                              |
| SNP_117993_A_554  | NW_004521702.1 | scaffold9371 | 554                     | AA                              | CC                 | CC               | INTERGENIC                    |                    |                              |
| SNP_117994_A_619  | NW_004521702.1 | scaffold9371 | 619                     | TT                              | AA                 | AA               | INTERGENIC                    |                    |                              |
| SNP_117996_A_649  | NW_004521702.1 | scaffold9371 | 649                     | AA                              | GG                 | GG               | INTERGENIC                    |                    |                              |
| SNP_117997_A_678  | NW_004521702.1 | scaffold9371 | 678                     | GG                              | CC                 | CC               | INTERGENIC                    |                    |                              |
| SNP_117998_A_836  | NW_004521705.1 | scaffold9375 | 836                     | TT                              | AA                 | AA               | INTERGENIC                    |                    |                              |

| SNPs IDs          | Chromosome IDs | Chromosomes  | Physical positions (bp) | CDC Frontier (Reference genome) | (Pusa 1103 & HPNB) | (ILWC 46 & LPNB) | Sequence genome       | Components of | Gene accession IDs              | Putative functions |
|-------------------|----------------|--------------|-------------------------|---------------------------------|--------------------|------------------|-----------------------|---------------|---------------------------------|--------------------|
| SNP_117999_A_965  | NW_004521707.1 | scaffold9378 | 965                     | GG                              | TT                 | TT               | INTERGENIC            |               |                                 |                    |
| SNP_118000_A_732  | NW_004521712.1 | scaffold9391 | 732                     | TT                              | GG                 | GG               | INTERGENIC            |               |                                 |                    |
| SNP_118001_A_477  | NW_004521716.1 | scaffold9396 | 477                     | TT                              | CC                 | CC               | INTERGENIC            |               |                                 |                    |
| SNP_118002_A_501  | NW_004521716.1 | scaffold9396 | 501                     | GG                              | AA                 | AA               | INTERGENIC            |               |                                 |                    |
| SNP_118003_A_611  | NW_004521716.1 | scaffold9396 | 611                     | GG                              | AA                 | AA               | INTERGENIC            |               |                                 |                    |
| SNP_118004_A_633  | NW_004521716.1 | scaffold9396 | 633                     | CC                              | GG                 | GG               | INTERGENIC            |               |                                 |                    |
| SNP_118005_A_655  | NW_004521716.1 | scaffold9396 | 655                     | AA                              | GG                 | GG               | INTERGENIC            |               |                                 |                    |
| SNP_118006_A_672  | NW_004521716.1 | scaffold9396 | 672                     | AA                              | GG                 | GG               | INTERGENIC            |               |                                 |                    |
| SNP_118007_A_725  | NW_004521716.1 | scaffold9396 | 725                     | TT                              | CC                 | CC               | INTERGENIC            |               |                                 |                    |
| SNP_118008_A_928  | NW_004521716.1 | scaffold9396 | 928                     | CC                              | TT                 | TT               | INTERGENIC            |               |                                 |                    |
| SNP_118009_A_958  | NW_004521716.1 | scaffold9396 | 958                     | TT                              | AA                 | AA               | INTERGENIC            |               |                                 |                    |
| SNP_118010_A_985  | NW_004521716.1 | scaffold9396 | 985                     | TT                              | CC                 | CC               | INTERGENIC            |               |                                 |                    |
| SNP_118011_A_1296 | NW_004521716.1 | scaffold9396 | 1296                    | GG                              | CC                 | CC               | INTERGENIC            |               |                                 |                    |
| SNP_118012_A_1077 | NW_004521721.1 | scaffold9411 | 1077                    | GG                              | AA                 | AA               | INTERGENIC            |               |                                 |                    |
| SNP_118013_A_2756 | NW_004521721.1 | scaffold9411 | 2756                    | TT                              | CC                 | CC               | INTERGENIC            |               |                                 |                    |
| SNP_118016_A_3749 | NW_004521721.1 | scaffold9411 | 3749                    | TT                              | AA                 | AA               | DRR                   | 101506305     | vacuolar-processing enzyme-like |                    |
| SNP_118017_A_3782 | NW_004521721.1 | scaffold9411 | 3782                    | TT                              | GG                 | GG               | DRR                   | 101506305     | vacuolar-processing enzyme-like |                    |
| SNP_118018_A_3789 | NW_004521721.1 | scaffold9411 | 3789                    | AA                              | TT                 | TT               | DRR                   | 101506305     | vacuolar-processing enzyme-like |                    |
| SNP_118019_A_5127 | NW_004521721.1 | scaffold9411 | 5127                    | GG                              | AA                 | AA               | NON_SYNONYMOUS_CODING | 101506305     | vacuolar-processing enzyme-like |                    |
| SNP_118020_A_5342 | NW_004521721.1 | scaffold9411 | 5342                    | TT                              | CC                 | CC               | INTRON                | 101506305     | vacuolar-processing enzyme-like |                    |
| SNP_118021_A_5772 | NW_004521721.1 | scaffold9411 | 5772                    | GG                              | CC                 | CC               | NON_SYNONYMOUS_CODING | 101506305     | vacuolar-processing enzyme-like |                    |
| SNP_118022_A_405  | NW_004521722.1 | scaffold9416 | 405                     | CC                              | TT                 | TT               | INTERGENIC            |               |                                 |                    |

| SNPs IDs          | Chromosome IDs | Chromosomes  | Physical positions (bp) | CDC Frontier (Reference genome) | (Pusa 1103 & HPNB) | (ILWC 46 & LPNB) | Sequence genome | Components of | Gene accession IDs | Putative functions |
|-------------------|----------------|--------------|-------------------------|---------------------------------|--------------------|------------------|-----------------|---------------|--------------------|--------------------|
| SNP_118023_A_761  | NW_004521722.1 | scaffold9416 | 761                     | AA                              | CC                 | CC               | INTERGENIC      |               |                    |                    |
| SNP_118024_A_795  | NW_004521724.1 | scaffold9419 | 795                     | AA                              | CC                 | CC               | INTERGENIC      |               |                    |                    |
| SNP_118025_A_807  | NW_004521724.1 | scaffold9419 | 807                     | CC                              | TT                 | TT               | INTERGENIC      |               |                    |                    |
| SNP_118026_A_64   | NW_004521734.1 | scaffold9444 | 64                      | AA                              | GG                 | GG               | INTERGENIC      |               |                    |                    |
| SNP_118027_A_177  | NW_004521734.1 | scaffold9444 | 177                     | TT                              | AA                 | AA               | INTERGENIC      |               |                    |                    |
| SNP_118028_A_388  | NW_004521734.1 | scaffold9444 | 388                     | TT                              | CC                 | CC               | INTERGENIC      |               |                    |                    |
| SNP_118029_A_396  | NW_004521734.1 | scaffold9444 | 396                     | AA                              | CC                 | CC               | INTERGENIC      |               |                    |                    |
| SNP_118030_A_670  | NW_004521734.1 | scaffold9444 | 670                     | CC                              | TT                 | TT               | INTERGENIC      |               |                    |                    |
| SNP_118031_A_694  | NW_004521734.1 | scaffold9444 | 694                     | GG                              | AA                 | AA               | INTERGENIC      |               |                    |                    |
| SNP_118032_A_2095 | NW_004521734.1 | scaffold9444 | 2095                    | AA                              | CC                 | CC               | INTERGENIC      |               |                    |                    |
| SNP_118034_A_2337 | NW_004521734.1 | scaffold9444 | 2337                    | GG                              | TT                 | TT               | INTERGENIC      |               |                    |                    |
| SNP_118035_A_2393 | NW_004521734.1 | scaffold9444 | 2393                    | TT                              | CC                 | CC               | INTERGENIC      |               |                    |                    |
| SNP_118036_A_2769 | NW_004521734.1 | scaffold9444 | 2769                    | AA                              | TT                 | TT               | INTERGENIC      |               |                    |                    |
| SNP_118037_A_3349 | NW_004521734.1 | scaffold9444 | 3349                    | CC                              | TT                 | TT               | INTERGENIC      |               |                    |                    |
| SNP_118038_A_3743 | NW_004521734.1 | scaffold9444 | 3743                    | CC                              | GG                 | GG               | INTERGENIC      |               |                    |                    |
| SNP_118039_A_3852 | NW_004521734.1 | scaffold9444 | 3852                    | TT                              | AA                 | AA               | INTERGENIC      |               |                    |                    |
| SNP_118040_A_3956 | NW_004521734.1 | scaffold9444 | 3956                    | TT                              | AA                 | AA               | INTERGENIC      |               |                    |                    |
| SNP_118041_A_4026 | NW_004521734.1 | scaffold9444 | 4026                    | AA                              | GG                 | GG               | INTERGENIC      |               |                    |                    |
| SNP_118042_A_4100 | NW_004521734.1 | scaffold9444 | 4100                    | AA                              | CC                 | CC               | INTERGENIC      |               |                    |                    |
| SNP_118043_A_4172 | NW_004521734.1 | scaffold9444 | 4172                    | GG                              | AA                 | AA               | INTERGENIC      |               |                    |                    |
| SNP_118044_A_4397 | NW_004521734.1 | scaffold9444 | 4397                    | CC                              | GG                 | GG               | INTERGENIC      |               |                    |                    |
| SNP_118045_A_4461 | NW_004521734.1 | scaffold9444 | 4461                    | TT                              | AA                 | AA               | INTERGENIC      |               |                    |                    |

| SNPs IDs          | Chromosome IDs | Chromosomes  | Physical positions (bp) | CDC Frontier (Reference genome) | (Pusa 1103 & HPNB) | (ILWC 46 & LPNB) | Sequence genome | Components of | Gene accession IDs | Putative functions |
|-------------------|----------------|--------------|-------------------------|---------------------------------|--------------------|------------------|-----------------|---------------|--------------------|--------------------|
| SNP_118046_A_4530 | NW_004521734.1 | scaffold9444 | 4530                    | CC                              | TT                 | TT               | INTERGENIC      |               |                    |                    |
| SNP_118047_A_4546 | NW_004521734.1 | scaffold9444 | 4546                    | GG                              | AA                 | AA               | INTERGENIC      |               |                    |                    |
| SNP_118048_A_4619 | NW_004521734.1 | scaffold9444 | 4619                    | AA                              | TT                 | TT               | INTERGENIC      |               |                    |                    |
| SNP_118049_A_4642 | NW_004521734.1 | scaffold9444 | 4642                    | CC                              | TT                 | TT               | INTERGENIC      |               |                    |                    |
| SNP_118050_A_4976 | NW_004521734.1 | scaffold9444 | 4976                    | TT                              | GG                 | GG               | INTERGENIC      |               |                    |                    |
| SNP_118051_A_472  | NW_004521737.1 | scaffold9454 | 472                     | CC                              | TT                 | TT               | INTERGENIC      |               |                    |                    |
| SNP_118052_A_476  | NW_004521737.1 | scaffold9454 | 476                     | AA                              | GG                 | GG               | INTERGENIC      |               |                    |                    |
| SNP_118053_A_705  | NW_004521737.1 | scaffold9454 | 705                     | GG                              | AA                 | AA               | INTERGENIC      |               |                    |                    |
| SNP_118054_A_722  | NW_004521737.1 | scaffold9454 | 722                     | AA                              | TT                 | TT               | INTERGENIC      |               |                    |                    |
| SNP_118055_A_773  | NW_004521737.1 | scaffold9454 | 773                     | GG                              | AA                 | AA               | INTERGENIC      |               |                    |                    |
| SNP_118056_A_861  | NW_004521737.1 | scaffold9454 | 861                     | AA                              | GG                 | GG               | INTERGENIC      |               |                    |                    |
| SNP_118057_A_870  | NW_004521737.1 | scaffold9454 | 870                     | GG                              | TT                 | TT               | INTERGENIC      |               |                    |                    |
| SNP_118058_A_1323 | NW_004521747.1 | scaffold9484 | 1323                    | TT                              | CC                 | CC               | INTERGENIC      |               |                    |                    |
| SNP_118059_A_1347 | NW_004521747.1 | scaffold9484 | 1347                    | TT                              | GG                 | GG               | INTERGENIC      |               |                    |                    |
| SNP_118060_A_1403 | NW_004521747.1 | scaffold9484 | 1403                    | AA                              | GG                 | GG               | INTERGENIC      |               |                    |                    |
| SNP_118061_A_1583 | NW_004521747.1 | scaffold9484 | 1583                    | AA                              | GG                 | GG               | INTERGENIC      |               |                    |                    |
| SNP_118062_A_1668 | NW_004521747.1 | scaffold9484 | 1668                    | TT                              | CC                 | CC               | INTERGENIC      |               |                    |                    |
| SNP_118063_A_1879 | NW_004521748.1 | scaffold9486 | 1879                    | AA                              | GG                 | GG               | INTERGENIC      |               |                    |                    |
| SNP_118064_A_2058 | NW_004521748.1 | scaffold9486 | 2058                    | TT                              | AA                 | AA               | INTERGENIC      |               |                    |                    |
| SNP_118065_A_2120 | NW_004521748.1 | scaffold9486 | 2120                    | AA                              | GG                 | GG               | INTERGENIC      |               |                    |                    |
| SNP_118066_A_124  | NW_004521751.1 | scaffold9493 | 124                     | AA                              | CC                 | CC               | INTERGENIC      |               |                    |                    |
| SNP_118067_A_413  | NW_004521751.1 | scaffold9493 | 413                     | AA                              | CC                 | CC               | INTERGENIC      |               |                    |                    |



| SNPs IDs          | Chromosome IDs | Chromosomes  | Physical positions (bp) | CDC Frontier (Reference genome) | (Pusa 1103 & HPNB) | (ILWC 46 & LPNB) | Sequence genome | Components of | Gene accession IDs | Putative functions |
|-------------------|----------------|--------------|-------------------------|---------------------------------|--------------------|------------------|-----------------|---------------|--------------------|--------------------|
| SNP_118068_A_487  | NW_004521751.1 | scaffold9493 | 487                     | TT                              | CC                 | CC               | INTERGENIC      |               |                    |                    |
| SNP_118069_A_535  | NW_004521751.1 | scaffold9493 | 535                     | CC                              | TT                 | TT               | INTERGENIC      |               |                    |                    |
| SNP_118070_A_584  | NW_004521751.1 | scaffold9493 | 584                     | AA                              | GG                 | GG               | INTERGENIC      |               |                    |                    |
| SNP_118071_A_591  | NW_004521751.1 | scaffold9493 | 591                     | GG                              | AA                 | AA               | INTERGENIC      |               |                    |                    |
| SNP_118072_A_1480 | NW_004521754.1 | scaffold9506 | 1480                    | GG                              | AA                 | AA               | INTERGENIC      |               |                    |                    |
| SNP_118073_A_1481 | NW_004521754.1 | scaffold9506 | 1481                    | GG                              | TT                 | TT               | INTERGENIC      |               |                    |                    |
| SNP_118074_A_493  | NW_004521755.1 | scaffold9507 | 493                     | AA                              | TT                 | TT               | INTERGENIC      |               |                    |                    |
| SNP_118075_A_173  | NW_004521757.1 | scaffold9523 | 173                     | TT                              | GG                 | GG               | INTERGENIC      |               |                    |                    |
| SNP_118076_A_516  | NW_004521757.1 | scaffold9523 | 516                     | AA                              | TT                 | TT               | INTERGENIC      |               |                    |                    |
| SNP_118077_A_214  | NW_004521766.1 | scaffold9550 | 214                     | GG                              | AA                 | AA               | INTERGENIC      |               |                    |                    |
| SNP_118078_A_228  | NW_004521766.1 | scaffold9550 | 228                     | CC                              | TT                 | TT               | INTERGENIC      |               |                    |                    |
| SNP_118079_A_249  | NW_004521766.1 | scaffold9550 | 249                     | TT                              | AA                 | AA               | INTERGENIC      |               |                    |                    |
| SNP_118080_A_4725 | NW_004521766.1 | scaffold9550 | 4725                    | CC                              | TT                 | TT               | INTERGENIC      |               |                    |                    |
| SNP_118081_A_4731 | NW_004521766.1 | scaffold9550 | 4731                    | CC                              | TT                 | TT               | INTERGENIC      |               |                    |                    |
| SNP_118082_A_4930 | NW_004521766.1 | scaffold9550 | 4930                    | GG                              | AA                 | AA               | INTERGENIC      |               |                    |                    |
| SNP_118083_A_127  | NW_004521768.1 | scaffold9555 | 127                     | GG                              | TT                 | TT               | INTERGENIC      |               |                    |                    |
| SNP_118084_A_496  | NW_004521768.1 | scaffold9555 | 496                     | AA                              | CC                 | CC               | INTERGENIC      |               |                    |                    |
| SNP_118085_A_549  | NW_004521768.1 | scaffold9555 | 549                     | AA                              | TT                 | TT               | INTERGENIC      |               |                    |                    |
| SNP_118086_A_1914 | NW_004521769.1 | scaffold9556 | 1914                    | CC                              | GG                 | GG               | INTERGENIC      |               |                    |                    |
| SNP_118087_A_1935 | NW_004521769.1 | scaffold9556 | 1935                    | GG                              | TT                 | TT               | INTERGENIC      |               |                    |                    |
| SNP_118088_A_409  | NW_004521773.1 | scaffold9576 | 409                     | AA                              | TT                 | TT               | INTERGENIC      |               |                    |                    |
| SNP_118089_A_913  | NW_004521777.1 | scaffold9587 | 913                     | AA                              | GG                 | GG               | INTERGENIC      |               |                    |                    |

| SNPs IDs          | Chromosome IDs | Chromosomes  | Physical positions (bp) | CDC Frontier (Reference genome) | (Pusa 1103 & HPNB) | (ILWC 46 & LPNB) | Sequence genome | Components of | Gene accession IDs | Putative functions |
|-------------------|----------------|--------------|-------------------------|---------------------------------|--------------------|------------------|-----------------|---------------|--------------------|--------------------|
| SNP_118090_A_922  | NW_004521777.1 | scaffold9587 | 922                     | GG                              | AA                 | AA               | INTERGENIC      |               |                    |                    |
| SNP_118091_A_1007 | NW_004521777.1 | scaffold9587 | 1007                    | AA                              | GG                 | GG               | INTERGENIC      |               |                    |                    |
| SNP_118093_A_1156 | NW_004521777.1 | scaffold9587 | 1156                    | TT                              | GG                 | GG               | INTERGENIC      |               |                    |                    |
| SNP_118094_A_1186 | NW_004521777.1 | scaffold9587 | 1186                    | TT                              | AA                 | AA               | INTERGENIC      |               |                    |                    |
| SNP_118095_A_1540 | NW_004521777.1 | scaffold9587 | 1540                    | GG                              | TT                 | TT               | INTERGENIC      |               |                    |                    |
| SNP_118096_A_1547 | NW_004521777.1 | scaffold9587 | 1547                    | AA                              | GG                 | GG               | INTERGENIC      |               |                    |                    |
| SNP_118097_A_441  | NW_004521778.1 | scaffold9588 | 441                     | AA                              | CC                 | CC               | INTERGENIC      |               |                    |                    |
| SNP_118098_A_506  | NW_004521778.1 | scaffold9588 | 506                     | AA                              | CC                 | CC               | INTERGENIC      |               |                    |                    |
| SNP_118099_A_744  | NW_004521778.1 | scaffold9588 | 744                     | AA                              | GG                 | GG               | INTERGENIC      |               |                    |                    |
| SNP_118100_A_760  | NW_004521778.1 | scaffold9588 | 760                     | AA                              | GG                 | GG               | INTERGENIC      |               |                    |                    |
| SNP_118101_A_957  | NW_004521778.1 | scaffold9588 | 957                     | CC                              | TT                 | TT               | INTERGENIC      |               |                    |                    |
| SNP_118102_A_305  | NW_004521779.1 | scaffold9590 | 305                     | AA                              | GG                 | GG               | INTERGENIC      |               |                    |                    |
| SNP_118103_A_848  | NW_004521786.1 | scaffold9612 | 848                     | AA                              | GG                 | GG               | INTERGENIC      |               |                    |                    |
| SNP_118104_A_1182 | NW_004521786.1 | scaffold9612 | 1182                    | CC                              | AA                 | AA               | INTERGENIC      |               |                    |                    |
| SNP_118105_A_1235 | NW_004521786.1 | scaffold9612 | 1235                    | GG                              | AA                 | AA               | INTERGENIC      |               |                    |                    |
| SNP_118106_A_1254 | NW_004521786.1 | scaffold9612 | 1254                    | TT                              | AA                 | AA               | INTERGENIC      |               |                    |                    |
| SNP_118107_A_1480 | NW_004521786.1 | scaffold9612 | 1480                    | AA                              | CC                 | CC               | INTERGENIC      |               |                    |                    |
| SNP_118108_A_1577 | NW_004521786.1 | scaffold9612 | 1577                    | AA                              | GG                 | GG               | INTERGENIC      |               |                    |                    |
| SNP_118109_A_2035 | NW_004521786.1 | scaffold9612 | 2035                    | TT                              | CC                 | CC               | INTERGENIC      |               |                    |                    |
| SNP_118110_A_2039 | NW_004521786.1 | scaffold9612 | 2039                    | CC                              | GG                 | GG               | INTERGENIC      |               |                    |                    |
| SNP_118111_A_2063 | NW_004521786.1 | scaffold9612 | 2063                    | CC                              | TT                 | TT               | INTERGENIC      |               |                    |                    |
| SNP_118112_A_2084 | NW_004521786.1 | scaffold9612 | 2084                    | TT                              | AA                 | AA               | INTERGENIC      |               |                    |                    |

| SNPs IDs          | Chromosome IDs | Chromosomes  | Physical positions (bp) | CDC Frontier (Reference genome) | (Pusa 1103 & HPNB) | (ILWC 46 & LPNB) | Sequence genome | Components of | Gene accession IDs | Putative functions |
|-------------------|----------------|--------------|-------------------------|---------------------------------|--------------------|------------------|-----------------|---------------|--------------------|--------------------|
| SNP_118113_A_324  | NW_004521787.1 | scaffold9613 | 324                     | AA                              | GG                 | GG               | INTERGENIC      |               |                    |                    |
| SNP_118114_A_630  | NW_004521787.1 | scaffold9613 | 630                     | GG                              | AA                 | AA               | INTERGENIC      |               |                    |                    |
| SNP_118115_A_744  | NW_004521790.1 | scaffold9619 | 744                     | CC                              | TT                 | TT               | INTERGENIC      |               |                    |                    |
| SNP_118116_A_771  | NW_004521790.1 | scaffold9619 | 771                     | TT                              | AA                 | AA               | INTERGENIC      |               |                    |                    |
| SNP_118117_A_789  | NW_004521790.1 | scaffold9619 | 789                     | AA                              | TT                 | TT               | INTERGENIC      |               |                    |                    |
| SNP_118118_A_836  | NW_004521790.1 | scaffold9619 | 836                     | CC                              | TT                 | TT               | INTERGENIC      |               |                    |                    |
| SNP_118119_A_5407 | NW_004521793.1 | scaffold9629 | 5407                    | AA                              | TT                 | TT               | INTERGENIC      |               |                    |                    |
| SNP_118120_A_5622 | NW_004521793.1 | scaffold9629 | 5622                    | CC                              | TT                 | TT               | INTERGENIC      |               |                    |                    |
| SNP_118121_A_5814 | NW_004521793.1 | scaffold9629 | 5814                    | GG                              | TT                 | TT               | INTERGENIC      |               |                    |                    |
| SNP_118122_A_5872 | NW_004521793.1 | scaffold9629 | 5872                    | TT                              | CC                 | CC               | INTERGENIC      |               |                    |                    |
| SNP_118123_A_5908 | NW_004521793.1 | scaffold9629 | 5908                    | AA                              | GG                 | GG               | INTERGENIC      |               |                    |                    |
| SNP_118124_A_5992 | NW_004521793.1 | scaffold9629 | 5992                    | AA                              | GG                 | GG               | INTERGENIC      |               |                    |                    |
| SNP_118125_A_6037 | NW_004521793.1 | scaffold9629 | 6037                    | GG                              | AA                 | AA               | INTERGENIC      |               |                    |                    |
| SNP_118126_A_305  | NW_004521794.1 | scaffold9632 | 305                     | TT                              | CC                 | CC               | INTERGENIC      |               |                    |                    |
| SNP_118127_A_502  | NW_004521794.1 | scaffold9632 | 502                     | TT                              | GG                 | GG               | INTERGENIC      |               |                    |                    |
| SNP_118128_A_791  | NW_004521794.1 | scaffold9632 | 791                     | GG                              | AA                 | AA               | INTERGENIC      |               |                    |                    |
| SNP_118129_A_1028 | NW_004521794.1 | scaffold9632 | 1028                    | AA                              | GG                 | GG               | INTERGENIC      |               |                    |                    |
| SNP_118130_A_1143 | NW_004521794.1 | scaffold9632 | 1143                    | TT                              | AA                 | AA               | INTERGENIC      |               |                    |                    |
| SNP_118131_A_912  | NW_004521795.1 | scaffold9635 | 912                     | AA                              | CC                 | CC               | INTERGENIC      |               |                    |                    |
| SNP_118133_A_506  | NW_004521796.1 | scaffold9636 | 506                     | TT                              | GG                 | GG               | INTERGENIC      |               |                    |                    |
| SNP_118134_A_694  | NW_004521796.1 | scaffold9636 | 694                     | CC                              | AA                 | AA               | INTERGENIC      |               |                    |                    |
| SNP_118135_A_833  | NW_004521796.1 | scaffold9636 | 833                     | TT                              | AA                 | AA               | INTERGENIC      |               |                    |                    |

| SNPs IDs          | Chromosome IDs | Chromosomes  | Physical positions (bp) | CDC Frontier (Reference genome) | (Pusa 1103 & HPNB) | (ILWC 46 & LPNB) | Sequence genome | Components of | Gene accession IDs | Putative functions |
|-------------------|----------------|--------------|-------------------------|---------------------------------|--------------------|------------------|-----------------|---------------|--------------------|--------------------|
| SNP_118136_A_178  | NW_004521800.1 | scaffold9644 | 178                     | TT                              | CC                 | CC               | INTERGENIC      |               |                    |                    |
| SNP_118137_A_228  | NW_004521800.1 | scaffold9644 | 228                     | TT                              | CC                 | CC               | INTERGENIC      |               |                    |                    |
| SNP_118138_A_280  | NW_004521800.1 | scaffold9644 | 280                     | GG                              | TT                 | TT               | INTERGENIC      |               |                    |                    |
| SNP_118139_A_339  | NW_004521800.1 | scaffold9644 | 339                     | GG                              | AA                 | AA               | INTERGENIC      |               |                    |                    |
| SNP_118140_A_438  | NW_004521800.1 | scaffold9644 | 438                     | AA                              | CC                 | CC               | INTERGENIC      |               |                    |                    |
| SNP_118141_A_565  | NW_004521800.1 | scaffold9644 | 565                     | CC                              | TT                 | TT               | INTERGENIC      |               |                    |                    |
| SNP_118142_A_664  | NW_004521800.1 | scaffold9644 | 664                     | CC                              | GG                 | GG               | INTERGENIC      |               |                    |                    |
| SNP_118143_A_734  | NW_004521800.1 | scaffold9644 | 734                     | AA                              | CC                 | CC               | INTERGENIC      |               |                    |                    |
| SNP_118144_A_4314 | NW_004521800.1 | scaffold9644 | 4314                    | GG                              | AA                 | AA               | INTERGENIC      |               |                    |                    |
| SNP_118145_A_4317 | NW_004521800.1 | scaffold9644 | 4317                    | CC                              | TT                 | TT               | INTERGENIC      |               |                    |                    |
| SNP_118146_A_4331 | NW_004521800.1 | scaffold9644 | 4331                    | AA                              | GG                 | GG               | INTERGENIC      |               |                    |                    |
| SNP_118147_A_4395 | NW_004521800.1 | scaffold9644 | 4395                    | AA                              | GG                 | GG               | INTERGENIC      |               |                    |                    |
| SNP_118148_A_4525 | NW_004521800.1 | scaffold9644 | 4525                    | GG                              | TT                 | TT               | INTERGENIC      |               |                    |                    |
| SNP_118149_A_4530 | NW_004521800.1 | scaffold9644 | 4530                    | AA                              | CC                 | CC               | INTERGENIC      |               |                    |                    |
| SNP_118150_A_4540 | NW_004521800.1 | scaffold9644 | 4540                    | GG                              | AA                 | AA               | INTERGENIC      |               |                    |                    |
| SNP_118151_A_4608 | NW_004521800.1 | scaffold9644 | 4608                    | CC                              | TT                 | TT               | INTERGENIC      |               |                    |                    |
| SNP_118152_A_4682 | NW_004521800.1 | scaffold9644 | 4682                    | AA                              | GG                 | GG               | INTERGENIC      |               |                    |                    |
| SNP_118153_A_4710 | NW_004521800.1 | scaffold9644 | 4710                    | GG                              | TT                 | TT               | INTERGENIC      |               |                    |                    |
| SNP_118154_A_4750 | NW_004521800.1 | scaffold9644 | 4750                    | AA                              | CC                 | CC               | INTERGENIC      |               |                    |                    |
| SNP_118155_A_4780 | NW_004521800.1 | scaffold9644 | 4780                    | GG                              | TT                 | TT               | INTERGENIC      |               |                    |                    |
| SNP_118156_A_4839 | NW_004521800.1 | scaffold9644 | 4839                    | CC                              | AA                 | AA               | INTERGENIC      |               |                    |                    |
| SNP_118157_A_4852 | NW_004521800.1 | scaffold9644 | 4852                    | AA                              | GG                 | GG               | INTERGENIC      |               |                    |                    |

| SNPs IDs           | Chromosome IDs | Chromosomes  | Physical positions (bp) | CDC Frontier (Reference genome) | (Pusa 1103 & HPNB) | (ILWC 46 & LPNB) | Sequence genome | Components of | Gene accession IDs | Putative functions |
|--------------------|----------------|--------------|-------------------------|---------------------------------|--------------------|------------------|-----------------|---------------|--------------------|--------------------|
| SNP_118158_A_4938  | NW_004521800.1 | scaffold9644 | 4938                    | CC                              | TT                 | TT               | INTERGENIC      |               |                    |                    |
| SNP_118159_A_5023  | NW_004521800.1 | scaffold9644 | 5023                    | AA                              | GG                 | GG               | INTERGENIC      |               |                    |                    |
| SNP_118160_A_5947  | NW_004521802.1 | scaffold9647 | 5947                    | CC                              | GG                 | GG               | INTERGENIC      |               |                    |                    |
| SNP_118161_A_1402  | NW_004521805.1 | scaffold9655 | 1402                    | GG                              | AA                 | AA               | INTERGENIC      |               |                    |                    |
| SNP_118162_A_1421  | NW_004521805.1 | scaffold9655 | 1421                    | TT                              | CC                 | CC               | INTERGENIC      |               |                    |                    |
| SNP_118163_A_1429  | NW_004521805.1 | scaffold9655 | 1429                    | CC                              | TT                 | TT               | INTERGENIC      |               |                    |                    |
| SNP_118164_A_342   | NW_004521808.1 | scaffold9660 | 342                     | TT                              | CC                 | CC               | INTERGENIC      |               |                    |                    |
| SNP_118165_A_506   | NW_004521808.1 | scaffold9660 | 506                     | CC                              | TT                 | TT               | INTERGENIC      |               |                    |                    |
| SNP_118166_A_723   | NW_004521808.1 | scaffold9660 | 723                     | TT                              | CC                 | CC               | INTERGENIC      |               |                    |                    |
| SNP_118167_A_20200 | NW_004521815.1 | scaffold9673 | 20200                   | GG                              | AA                 | AA               | INTERGENIC      |               |                    |                    |
| SNP_118168_A_20411 | NW_004521815.1 | scaffold9673 | 20411                   | GG                              | AA                 | AA               | INTERGENIC      |               |                    |                    |
| SNP_118169_A_20523 | NW_004521815.1 | scaffold9673 | 20523                   | TT                              | AA                 | AA               | INTERGENIC      |               |                    |                    |
| SNP_118170_A_20524 | NW_004521815.1 | scaffold9673 | 20524                   | GG                              | TT                 | TT               | INTERGENIC      |               |                    |                    |
| SNP_118171_A_20542 | NW_004521815.1 | scaffold9673 | 20542                   | AA                              | CC                 | CC               | INTERGENIC      |               |                    |                    |
| SNP_118172_A_20668 | NW_004521815.1 | scaffold9673 | 20668                   | TT                              | CC                 | CC               | INTERGENIC      |               |                    |                    |
| SNP_118173_A_20698 | NW_004521815.1 | scaffold9673 | 20698                   | CC                              | AA                 | AA               | INTERGENIC      |               |                    |                    |
| SNP_118174_A_20751 | NW_004521815.1 | scaffold9673 | 20751                   | CC                              | AA                 | AA               | INTERGENIC      |               |                    |                    |
| SNP_118175_A_20789 | NW_004521815.1 | scaffold9673 | 20789                   | GG                              | AA                 | AA               | INTERGENIC      |               |                    |                    |
| SNP_118176_A_20852 | NW_004521815.1 | scaffold9673 | 20852                   | TT                              | CC                 | CC               | INTERGENIC      |               |                    |                    |
| SNP_118177_A_20934 | NW_004521815.1 | scaffold9673 | 20934                   | TT                              | AA                 | AA               | INTERGENIC      |               |                    |                    |
| SNP_118178_A_20969 | NW_004521815.1 | scaffold9673 | 20969                   | AA                              | CC                 | CC               | INTERGENIC      |               |                    |                    |
| SNP_118179_A_20972 | NW_004521815.1 | scaffold9673 | 20972                   | AA                              | GG                 | GG               | INTERGENIC      |               |                    |                    |

| SNPs IDs           | Chromosome IDs | Chromosomes  | Physical positions (bp) | CDC Frontier (Reference genome) | (Pusa 1103 & HPNB) | (ILWC 46 & LPNB) | Sequence genome | Components of | Gene accession IDs | Putative functions |
|--------------------|----------------|--------------|-------------------------|---------------------------------|--------------------|------------------|-----------------|---------------|--------------------|--------------------|
| SNP_118180_A_1029  | NW_004521816.1 | scaffold9675 | 1029                    | GG                              | TT                 | TT               | INTERGENIC      |               |                    |                    |
| SNP_118181_A_1042  | NW_004521816.1 | scaffold9675 | 1042                    | CC                              | TT                 | TT               | INTERGENIC      |               |                    |                    |
| SNP_118182_A_232   | NW_004521817.1 | scaffold9677 | 232                     | AA                              | GG                 | GG               | INTERGENIC      |               |                    |                    |
| SNP_118183_A_110   | NW_004521819.1 | scaffold9683 | 110                     | CC                              | TT                 | TT               | INTERGENIC      |               |                    |                    |
| SNP_118184_A_407   | NW_004521819.1 | scaffold9683 | 407                     | GG                              | AA                 | AA               | INTERGENIC      |               |                    |                    |
| SNP_118185_A_434   | NW_004521819.1 | scaffold9683 | 434                     | CC                              | TT                 | TT               | INTERGENIC      |               |                    |                    |
| SNP_118186_A_508   | NW_004521819.1 | scaffold9683 | 508                     | CC                              | GG                 | GG               | INTERGENIC      |               |                    |                    |
| SNP_118187_A_475   | NW_004521820.1 | scaffold9686 | 475                     | TT                              | CC                 | CC               | INTERGENIC      |               |                    |                    |
| SNP_118188_A_539   | NW_004521820.1 | scaffold9686 | 539                     | TT                              | CC                 | CC               | INTERGENIC      |               |                    |                    |
| SNP_118189_A_588   | NW_004521820.1 | scaffold9686 | 588                     | TT                              | CC                 | CC               | INTERGENIC      |               |                    |                    |
| SNP_118190_A_601   | NW_004521820.1 | scaffold9686 | 601                     | CC                              | GG                 | GG               | INTERGENIC      |               |                    |                    |
| SNP_118191_A_855   | NW_004521820.1 | scaffold9686 | 855                     | GG                              | AA                 | AA               | INTERGENIC      |               |                    |                    |
| SNP_118192_A_869   | NW_004521820.1 | scaffold9686 | 869                     | CC                              | TT                 | TT               | INTERGENIC      |               |                    |                    |
| SNP_118193_A_898   | NW_004521820.1 | scaffold9686 | 898                     | GG                              | AA                 | AA               | INTERGENIC      |               |                    |                    |
| SNP_118194_A_907   | NW_004521820.1 | scaffold9686 | 907                     | TT                              | CC                 | CC               | INTERGENIC      |               |                    |                    |
| SNP_118195_A_1137  | NW_004521820.1 | scaffold9686 | 1137                    | CC                              | TT                 | TT               | INTERGENIC      |               |                    |                    |
| SNP_118196_A_1393  | NW_004521820.1 | scaffold9686 | 1393                    | AA                              | GG                 | GG               | INTERGENIC      |               |                    |                    |
| SNP_118197_A_864   | NW_004521823.1 | scaffold9699 | 864                     | AA                              | CC                 | CC               | INTERGENIC      |               |                    |                    |
| SNP_118198_A_64    | NW_004521826.1 | scaffold9704 | 64                      | CC                              | GG                 | GG               | INTERGENIC      |               |                    |                    |
| SNP_118200_A_19614 | NW_004521826.1 | scaffold9704 | 19614                   | AA                              | CC                 | CC               | INTERGENIC      |               |                    |                    |
| SNP_118201_A_540   | NW_004521834.1 | scaffold9727 | 540                     | AA                              | CC                 | CC               | INTERGENIC      |               |                    |                    |
| SNP_118202_A_697   | NW_004521835.1 | scaffold9728 | 697                     | GG                              | AA                 | AA               | INTERGENIC      |               |                    |                    |

| SNPs IDs          | Chromosome IDs | Chromosomes  | Physical positions (bp) | CDC Frontier (Reference genome) | (Pusa 1103 & HPNB) | (ILWC 46 & LPNB) | Sequence genome | Components of | Gene accession IDs | Putative functions |
|-------------------|----------------|--------------|-------------------------|---------------------------------|--------------------|------------------|-----------------|---------------|--------------------|--------------------|
| SNP_118203_A_698  | NW_004521835.1 | scaffold9728 | 698                     | CC                              | AA                 | AA               | INTERGENIC      |               |                    |                    |
| SNP_118204_A_981  | NW_004521835.1 | scaffold9728 | 981                     | TT                              | CC                 | CC               | INTERGENIC      |               |                    |                    |
| SNP_118205_A_1048 | NW_004521835.1 | scaffold9728 | 1048                    | CC                              | AA                 | AA               | INTERGENIC      |               |                    |                    |
| SNP_118206_A_1066 | NW_004521835.1 | scaffold9728 | 1066                    | AA                              | GG                 | GG               | INTERGENIC      |               |                    |                    |
| SNP_118207_A_1145 | NW_004521835.1 | scaffold9728 | 1145                    | GG                              | AA                 | AA               | INTERGENIC      |               |                    |                    |
| SNP_118208_A_568  | NW_004521840.1 | scaffold9740 | 568                     | CC                              | TT                 | TT               | INTERGENIC      |               |                    |                    |
| SNP_118210_A_917  | NW_004521847.1 | scaffold9757 | 917                     | AA                              | GG                 | GG               | INTERGENIC      |               |                    |                    |
| SNP_118211_A_540  | NW_004521850.1 | scaffold9764 | 540                     | AA                              | GG                 | GG               | INTERGENIC      |               |                    |                    |
| SNP_118212_A_1049 | NW_004521853.1 | scaffold9774 | 1049                    | AA                              | CC                 | CC               | INTERGENIC      |               |                    |                    |
| SNP_118213_A_1093 | NW_004521853.1 | scaffold9774 | 1093                    | AA                              | GG                 | GG               | INTERGENIC      |               |                    |                    |
| SNP_118214_A_357  | NW_004521856.1 | scaffold9779 | 357                     | TT                              | AA                 | AA               | INTERGENIC      |               |                    |                    |
| SNP_118215_A_488  | NW_004521856.1 | scaffold9779 | 488                     | AA                              | CC                 | CC               | INTERGENIC      |               |                    |                    |
| SNP_118216_A_490  | NW_004521856.1 | scaffold9779 | 490                     | GG                              | AA                 | AA               | INTERGENIC      |               |                    |                    |
| SNP_118217_A_412  | NW_004521857.1 | scaffold9781 | 412                     | AA                              | TT                 | TT               | INTERGENIC      |               |                    |                    |
| SNP_118218_A_498  | NW_004521857.1 | scaffold9781 | 498                     | AA                              | TT                 | TT               | INTERGENIC      |               |                    |                    |
| SNP_118219_A_499  | NW_004521857.1 | scaffold9781 | 499                     | CC                              | AA                 | AA               | INTERGENIC      |               |                    |                    |
| SNP_118220_A_613  | NW_004521857.1 | scaffold9781 | 613                     | AA                              | GG                 | GG               | INTERGENIC      |               |                    |                    |
| SNP_118221_A_794  | NW_004521858.1 | scaffold9784 | 794                     | CC                              | TT                 | TT               | INTERGENIC      |               |                    |                    |
| SNP_118222_A_1238 | NW_004521863.1 | scaffold9797 | 1238                    | CC                              | GG                 | GG               | INTERGENIC      |               |                    |                    |
| SNP_118223_A_1461 | NW_004521863.1 | scaffold9797 | 1461                    | CC                              | TT                 | TT               | INTERGENIC      |               |                    |                    |
| SNP_118224_A_1468 | NW_004521863.1 | scaffold9797 | 1468                    | TT                              | AA                 | AA               | INTERGENIC      |               |                    |                    |
| SNP_118225_A_1276 | NW_004521865.1 | scaffold9801 | 1276                    | CC                              | TT                 | TT               | INTERGENIC      |               |                    |                    |

| SNPs IDs          | Chromosome IDs | Chromosomes  | Physical positions (bp) | CDC Frontier (Reference genome) | (Pusa 1103 & HPNB) | (ILWC 46 & LPNB) | Sequence genome | Components of | Gene accession IDs | Putative functions |
|-------------------|----------------|--------------|-------------------------|---------------------------------|--------------------|------------------|-----------------|---------------|--------------------|--------------------|
| SNP_118226_A_391  | NW_004521869.1 | scaffold9809 | 391                     | GG                              | AA                 | AA               | INTERGENIC      |               |                    |                    |
| SNP_118227_A_427  | NW_004521869.1 | scaffold9809 | 427                     | CC                              | TT                 | TT               | INTERGENIC      |               |                    |                    |
| SNP_118228_A_485  | NW_004521869.1 | scaffold9809 | 485                     | AA                              | CC                 | CC               | INTERGENIC      |               |                    |                    |
| SNP_118230_A_1007 | NW_004521869.1 | scaffold9809 | 1007                    | AA                              | GG                 | GG               | INTERGENIC      |               |                    |                    |
| SNP_118231_A_114  | NW_004521870.1 | scaffold9813 | 114                     | GG                              | TT                 | TT               | INTERGENIC      |               |                    |                    |
| SNP_118232_A_421  | NW_004521870.1 | scaffold9813 | 421                     | GG                              | TT                 | TT               | INTERGENIC      |               |                    |                    |
| SNP_118233_A_739  | NW_004521870.1 | scaffold9813 | 739                     | CC                              | AA                 | AA               | INTERGENIC      |               |                    |                    |
| SNP_118235_A_1281 | NW_004521870.1 | scaffold9813 | 1281                    | GG                              | CC                 | CC               | INTERGENIC      |               |                    |                    |
| SNP_118236_A_1541 | NW_004521870.1 | scaffold9813 | 1541                    | CC                              | TT                 | TT               | INTERGENIC      |               |                    |                    |
| SNP_118237_A_1616 | NW_004521870.1 | scaffold9813 | 1616                    | CC                              | AA                 | AA               | INTERGENIC      |               |                    |                    |
| SNP_118238_A_1641 | NW_004521870.1 | scaffold9813 | 1641                    | GG                              | TT                 | TT               | INTERGENIC      |               |                    |                    |
| SNP_118239_A_1693 | NW_004521870.1 | scaffold9813 | 1693                    | TT                              | AA                 | AA               | INTERGENIC      |               |                    |                    |
| SNP_118240_A_5417 | NW_004521870.1 | scaffold9813 | 5417                    | CC                              | TT                 | TT               | INTERGENIC      |               |                    |                    |
| SNP_118241_A_5420 | NW_004521870.1 | scaffold9813 | 5420                    | AA                              | GG                 | GG               | INTERGENIC      |               |                    |                    |
| SNP_118242_A_5432 | NW_004521870.1 | scaffold9813 | 5432                    | TT                              | GG                 | GG               | INTERGENIC      |               |                    |                    |
| SNP_118243_A_5483 | NW_004521870.1 | scaffold9813 | 5483                    | AA                              | GG                 | GG               | INTERGENIC      |               |                    |                    |
| SNP_118244_A_1102 | NW_004521872.1 | scaffold9818 | 1102                    | TT                              | CC                 | CC               | INTERGENIC      |               |                    |                    |
| SNP_118245_A_1499 | NW_004521872.1 | scaffold9818 | 1499                    | TT                              | AA                 | AA               | INTERGENIC      |               |                    |                    |
| SNP_118246_A_324  | NW_004521873.1 | scaffold9819 | 324                     | AA                              | TT                 | TT               | INTERGENIC      |               |                    |                    |
| SNP_118247_A_552  | NW_004521873.1 | scaffold9819 | 552                     | AA                              | CC                 | CC               | INTERGENIC      |               |                    |                    |
| SNP_118248_A_209  | NW_004521875.1 | scaffold9821 | 209                     | TT                              | GG                 | GG               | INTERGENIC      |               |                    |                    |
| SNP_118249_A_307  | NW_004521875.1 | scaffold9821 | 307                     | TT                              | CC                 | CC               | INTERGENIC      |               |                    |                    |



| SNPs IDs          | Chromosome IDs | Chromosomes  | Physical positions (bp) | CDC Frontier (Reference genome) | (Pusa 1103 & HPNB) | (ILWC 46 & LPNB) | Sequence genome | Components of | Gene accession IDs | Putative functions |
|-------------------|----------------|--------------|-------------------------|---------------------------------|--------------------|------------------|-----------------|---------------|--------------------|--------------------|
| SNP_118250_A_342  | NW_004521875.1 | scaffold9821 | 342                     | TT                              | AA                 | AA               | INTERGENIC      |               |                    |                    |
| SNP_118251_A_347  | NW_004521875.1 | scaffold9821 | 347                     | AA                              | TT                 | TT               | INTERGENIC      |               |                    |                    |
| SNP_118252_A_360  | NW_004521875.1 | scaffold9821 | 360                     | CC                              | TT                 | TT               | INTERGENIC      |               |                    |                    |
| SNP_118253_A_399  | NW_004521875.1 | scaffold9821 | 399                     | AA                              | TT                 | TT               | INTERGENIC      |               |                    |                    |
| SNP_118254_A_738  | NW_004521875.1 | scaffold9821 | 738                     | CC                              | GG                 | GG               | INTERGENIC      |               |                    |                    |
| SNP_118255_A_796  | NW_004521878.1 | scaffold9827 | 796                     | CC                              | TT                 | TT               | INTERGENIC      |               |                    |                    |
| SNP_118256_A_967  | NW_004521878.1 | scaffold9827 | 967                     | TT                              | CC                 | CC               | INTERGENIC      |               |                    |                    |
| SNP_118257_A_973  | NW_004521878.1 | scaffold9827 | 973                     | CC                              | TT                 | TT               | INTERGENIC      |               |                    |                    |
| SNP_118258_A_1228 | NW_004521878.1 | scaffold9827 | 1228                    | TT                              | CC                 | CC               | INTERGENIC      |               |                    |                    |
| SNP_118259_A_1767 | NW_004521883.1 | scaffold9836 | 1767                    | AA                              | TT                 | TT               | INTERGENIC      |               |                    |                    |
| SNP_118260_A_2417 | NW_004521883.1 | scaffold9836 | 2417                    | TT                              | AA                 | AA               | INTERGENIC      |               |                    |                    |
| SNP_118261_A_2478 | NW_004521883.1 | scaffold9836 | 2478                    | CC                              | AA                 | AA               | INTERGENIC      |               |                    |                    |
| SNP_118262_A_2543 | NW_004521883.1 | scaffold9836 | 2543                    | GG                              | CC                 | CC               | INTERGENIC      |               |                    |                    |
| SNP_118263_A_2551 | NW_004521883.1 | scaffold9836 | 2551                    | AA                              | GG                 | GG               | INTERGENIC      |               |                    |                    |
| SNP_118265_A_258  | NW_004521885.1 | scaffold9844 | 258                     | GG                              | TT                 | TT               | INTERGENIC      |               |                    |                    |
| SNP_118266_A_273  | NW_004521885.1 | scaffold9844 | 273                     | AA                              | GG                 | GG               | INTERGENIC      |               |                    |                    |
| SNP_118267_A_561  | NW_004521885.1 | scaffold9844 | 561                     | TT                              | GG                 | GG               | INTERGENIC      |               |                    |                    |
| SNP_118268_A_297  | NW_004521886.1 | scaffold9847 | 297                     | GG                              | CC                 | CC               | INTERGENIC      |               |                    |                    |
| SNP_118269_A_326  | NW_004521886.1 | scaffold9847 | 326                     | GG                              | AA                 | AA               | INTERGENIC      |               |                    |                    |
| SNP_118270_A_367  | NW_004521886.1 | scaffold9847 | 367                     | AA                              | TT                 | TT               | INTERGENIC      |               |                    |                    |
| SNP_118271_A_116  | NW_004521887.1 | scaffold9849 | 116                     | AA                              | GG                 | GG               | INTERGENIC      |               |                    |                    |
| SNP_118272_A_521  | NW_004521887.1 | scaffold9849 | 521                     | AA                              | GG                 | GG               | INTERGENIC      |               |                    |                    |

| SNPs IDs          | Chromosome IDs | Chromosomes  | Physical positions (bp) | CDC Frontier (Reference genome) | (Pusa 1103 & HPNB) | (ILWC 46 & LPNB) | Sequence genome | Components of | Gene accession IDs | Putative functions |
|-------------------|----------------|--------------|-------------------------|---------------------------------|--------------------|------------------|-----------------|---------------|--------------------|--------------------|
| SNP_118273_A_644  | NW_004521887.1 | scaffold9849 | 644                     | AA                              | GG                 | GG               | INTERGENIC      |               |                    |                    |
| SNP_118274_A_196  | NW_004521889.1 | scaffold9851 | 196                     | TT                              | CC                 | CC               | INTERGENIC      |               |                    |                    |
| SNP_118275_A_376  | NW_004521889.1 | scaffold9851 | 376                     | GG                              | AA                 | AA               | INTERGENIC      |               |                    |                    |
| SNP_118276_A_441  | NW_004521889.1 | scaffold9851 | 441                     | TT                              | GG                 | GG               | INTERGENIC      |               |                    |                    |
| SNP_118277_A_733  | NW_004521889.1 | scaffold9851 | 733                     | AA                              | CC                 | CC               | INTERGENIC      |               |                    |                    |
| SNP_118279_A_869  | NW_004521889.1 | scaffold9851 | 869                     | CC                              | GG                 | GG               | INTERGENIC      |               |                    |                    |
| SNP_118280_A_881  | NW_004521889.1 | scaffold9851 | 881                     | GG                              | AA                 | AA               | INTERGENIC      |               |                    |                    |
| SNP_118281_A_552  | NW_004521893.1 | scaffold9860 | 552                     | TT                              | CC                 | CC               | INTERGENIC      |               |                    |                    |
| SNP_118282_A_610  | NW_004521893.1 | scaffold9860 | 610                     | CC                              | AA                 | AA               | INTERGENIC      |               |                    |                    |
| SNP_118283_A_628  | NW_004521893.1 | scaffold9860 | 628                     | CC                              | TT                 | TT               | INTERGENIC      |               |                    |                    |
| SNP_118284_A_783  | NW_004521893.1 | scaffold9860 | 783                     | CC                              | TT                 | TT               | INTERGENIC      |               |                    |                    |
| SNP_118285_A_875  | NW_004521893.1 | scaffold9860 | 875                     | TT                              | AA                 | AA               | INTERGENIC      |               |                    |                    |
| SNP_118286_A_877  | NW_004521893.1 | scaffold9860 | 877                     | GG                              | AA                 | AA               | INTERGENIC      |               |                    |                    |
| SNP_118288_A_929  | NW_004521893.1 | scaffold9860 | 929                     | AA                              | CC                 | CC               | INTERGENIC      |               |                    |                    |
| SNP_118289_A_946  | NW_004521893.1 | scaffold9860 | 946                     | GG                              | AA                 | AA               | INTERGENIC      |               |                    |                    |
| SNP_118290_A_959  | NW_004521893.1 | scaffold9860 | 959                     | CC                              | TT                 | TT               | INTERGENIC      |               |                    |                    |
| SNP_118291_A_1075 | NW_004521893.1 | scaffold9860 | 1075                    | TT                              | AA                 | AA               | INTERGENIC      |               |                    |                    |
| SNP_118292_A_1280 | NW_004521893.1 | scaffold9860 | 1280                    | CC                              | AA                 | AA               | INTERGENIC      |               |                    |                    |
| SNP_118293_A_1312 | NW_004521893.1 | scaffold9860 | 1312                    | CC                              | AA                 | AA               | INTERGENIC      |               |                    |                    |
| SNP_118294_A_1357 | NW_004521901.1 | scaffold9887 | 1357                    | CC                              | TT                 | TT               | INTERGENIC      |               |                    |                    |
| SNP_118295_A_1359 | NW_004521901.1 | scaffold9887 | 1359                    | CC                              | TT                 | TT               | INTERGENIC      |               |                    |                    |
| SNP_118296_A_1361 | NW_004521901.1 | scaffold9887 | 1361                    | GG                              | AA                 | AA               | INTERGENIC      |               |                    |                    |

| SNPs IDs          | Chromosome IDs | Chromosomes  | Physical positions (bp) | CDC Frontier (Reference genome) | (Pusa 1103 & HPNB) | (ILWC 46 & LPNB) | Sequence genome | Components of | Gene accession IDs | Putative functions |
|-------------------|----------------|--------------|-------------------------|---------------------------------|--------------------|------------------|-----------------|---------------|--------------------|--------------------|
| SNP_118297_A_1384 | NW_004521901.1 | scaffold9887 | 1384                    | CC                              | TT                 | TT               | INTERGENIC      |               |                    |                    |
| SNP_118298_A_1415 | NW_004521901.1 | scaffold9887 | 1415                    | CC                              | TT                 | TT               | INTERGENIC      |               |                    |                    |
| SNP_118299_A_1717 | NW_004521901.1 | scaffold9887 | 1717                    | TT                              | CC                 | CC               | INTERGENIC      |               |                    |                    |
| SNP_118300_A_1745 | NW_004521901.1 | scaffold9887 | 1745                    | CC                              | TT                 | TT               | INTERGENIC      |               |                    |                    |
| SNP_118301_A_1872 | NW_004521901.1 | scaffold9887 | 1872                    | CC                              | TT                 | TT               | INTERGENIC      |               |                    |                    |
| SNP_118302_A_393  | NW_004521903.1 | scaffold9892 | 393                     | CC                              | TT                 | TT               | INTERGENIC      |               |                    |                    |
| SNP_118303_A_395  | NW_004521903.1 | scaffold9892 | 395                     | AA                              | TT                 | TT               | INTERGENIC      |               |                    |                    |
| SNP_118304_A_426  | NW_004521903.1 | scaffold9892 | 426                     | TT                              | GG                 | GG               | INTERGENIC      |               |                    |                    |
| SNP_118305_A_596  | NW_004521903.1 | scaffold9892 | 596                     | CC                              | TT                 | TT               | INTERGENIC      |               |                    |                    |
| SNP_118306_A_770  | NW_004521903.1 | scaffold9892 | 770                     | GG                              | AA                 | AA               | INTERGENIC      |               |                    |                    |
| SNP_118307_A_778  | NW_004521903.1 | scaffold9892 | 778                     | AA                              | GG                 | GG               | INTERGENIC      |               |                    |                    |
| SNP_118308_A_796  | NW_004521903.1 | scaffold9892 | 796                     | TT                              | CC                 | CC               | INTERGENIC      |               |                    |                    |
| SNP_118309_A_903  | NW_004521903.1 | scaffold9892 | 903                     | CC                              | GG                 | GG               | INTERGENIC      |               |                    |                    |
| SNP_118310_A_950  | NW_004521903.1 | scaffold9892 | 950                     | AA                              | TT                 | TT               | INTERGENIC      |               |                    |                    |
| SNP_118312_A_883  | NW_004521907.1 | scaffold9900 | 883                     | GG                              | AA                 | AA               | INTERGENIC      |               |                    |                    |
| SNP_118313_A_975  | NW_004521907.1 | scaffold9900 | 975                     | GG                              | AA                 | AA               | INTERGENIC      |               |                    |                    |
| SNP_118314_A_980  | NW_004521907.1 | scaffold9900 | 980                     | AA                              | GG                 | GG               | INTERGENIC      |               |                    |                    |
| SNP_118315_A_985  | NW_004521907.1 | scaffold9900 | 985                     | TT                              | CC                 | CC               | INTERGENIC      |               |                    |                    |
| SNP_118316_A_993  | NW_004521907.1 | scaffold9900 | 993                     | GG                              | TT                 | TT               | INTERGENIC      |               |                    |                    |
| SNP_118317_A_994  | NW_004521907.1 | scaffold9900 | 994                     | CC                              | AA                 | AA               | INTERGENIC      |               |                    |                    |
| SNP_118318_A_2175 | NW_004521907.1 | scaffold9900 | 2175                    | AA                              | GG                 | GG               | INTERGENIC      |               |                    |                    |
| SNP_118319_A_2187 | NW_004521907.1 | scaffold9900 | 2187                    | TT                              | AA                 | AA               | INTERGENIC      |               |                    |                    |

| SNPs IDs          | Chromosome IDs | Chromosomes  | Physical positions (bp) | CDC Frontier (Reference genome) | (Pusa 1103 & HPNB) | (ILWC 46 & LPNB) | Sequence genome | Components of | Gene accession IDs | Putative functions |
|-------------------|----------------|--------------|-------------------------|---------------------------------|--------------------|------------------|-----------------|---------------|--------------------|--------------------|
| SNP_118320_A_2223 | NW_004521908.1 | scaffold9901 | 2223                    | AA                              | TT                 | TT               | INTERGENIC      |               |                    |                    |
| SNP_118321_A_4364 | NW_004521908.1 | scaffold9901 | 4364                    | AA                              | GG                 | GG               | INTERGENIC      |               |                    |                    |
| SNP_118322_A_4764 | NW_004521908.1 | scaffold9901 | 4764                    | AA                              | GG                 | GG               | INTERGENIC      |               |                    |                    |
| SNP_118323_A_524  | NW_004521910.1 | scaffold9903 | 524                     | GG                              | AA                 | AA               | INTERGENIC      |               |                    |                    |
| SNP_118324_A_868  | NW_004521910.1 | scaffold9903 | 868                     | TT                              | AA                 | AA               | INTERGENIC      |               |                    |                    |
| SNP_118325_A_926  | NW_004521910.1 | scaffold9903 | 926                     | AA                              | GG                 | GG               | INTERGENIC      |               |                    |                    |
| SNP_118326_A_972  | NW_004521910.1 | scaffold9903 | 972                     | AA                              | GG                 | GG               | INTERGENIC      |               |                    |                    |
| SNP_118327_A_650  | NW_004521912.1 | scaffold9917 | 650                     | CC                              | TT                 | TT               | INTERGENIC      |               |                    |                    |
| SNP_118328_A_1131 | NW_004521912.1 | scaffold9917 | 1131                    | TT                              | CC                 | CC               | INTERGENIC      |               |                    |                    |
| SNP_118330_A_1192 | NW_004521912.1 | scaffold9917 | 1192                    | TT                              | GG                 | GG               | INTERGENIC      |               |                    |                    |
| SNP_118331_A_1270 | NW_004521912.1 | scaffold9917 | 1270                    | GG                              | AA                 | AA               | INTERGENIC      |               |                    |                    |
| SNP_118332_A_1301 | NW_004521912.1 | scaffold9917 | 1301                    | AA                              | TT                 | TT               | INTERGENIC      |               |                    |                    |
| SNP_118333_A_2332 | NW_004521912.1 | scaffold9917 | 2332                    | GG                              | TT                 | TT               | INTERGENIC      |               |                    |                    |
| SNP_118334_A_640  | NW_004521914.1 | scaffold9921 | 640                     | TT                              | AA                 | AA               | INTERGENIC      |               |                    |                    |
| SNP_118335_A_802  | NW_004521914.1 | scaffold9921 | 802                     | AA                              | CC                 | CC               | INTERGENIC      |               |                    |                    |
| SNP_118336_A_884  | NW_004521914.1 | scaffold9921 | 884                     | CC                              | TT                 | TT               | INTERGENIC      |               |                    |                    |
| SNP_118337_A_921  | NW_004521914.1 | scaffold9921 | 921                     | AA                              | CC                 | CC               | INTERGENIC      |               |                    |                    |
| SNP_118338_A_281  | NW_004521919.1 | scaffold9936 | 281                     | GG                              | TT                 | TT               | INTERGENIC      |               |                    |                    |
| SNP_118339_A_493  | NW_004521919.1 | scaffold9936 | 493                     | TT                              | CC                 | CC               | INTERGENIC      |               |                    |                    |
| SNP_118340_A_498  | NW_004521919.1 | scaffold9936 | 498                     | CC                              | TT                 | TT               | INTERGENIC      |               |                    |                    |
| SNP_118341_A_625  | NW_004521919.1 | scaffold9936 | 625                     | CC                              | TT                 | TT               | INTERGENIC      |               |                    |                    |
| SNP_118342_A_1017 | NW_004521919.1 | scaffold9936 | 1017                    | CC                              | AA                 | AA               | INTERGENIC      |               |                    |                    |

| SNPs IDs           | Chromosome IDs | Chromosomes   | Physical positions (bp) | CDC Frontier (Reference genome) | (Pusa 1103 & HPNB) | (ILWC 46 & LPNB) | Sequence genome | Components of | Gene accession IDs | Putative functions |
|--------------------|----------------|---------------|-------------------------|---------------------------------|--------------------|------------------|-----------------|---------------|--------------------|--------------------|
| SNP_118344_A_1711  | NW_004521921.1 | scaffold9943  | 1711                    | AA                              | TT                 | TT               | INTERGENIC      |               |                    |                    |
| SNP_118345_A_2051  | NW_004521921.1 | scaffold9943  | 2051                    | TT                              | AA                 | AA               | INTERGENIC      |               |                    |                    |
| SNP_118346_A_2099  | NW_004521921.1 | scaffold9943  | 2099                    | GG                              | CC                 | CC               | INTERGENIC      |               |                    |                    |
| SNP_118347_A_2176  | NW_004521921.1 | scaffold9943  | 2176                    | CC                              | AA                 | AA               | INTERGENIC      |               |                    |                    |
| SNP_118349_A_432   | NW_004521929.1 | scaffold9958  | 432                     | AA                              | TT                 | TT               | INTERGENIC      |               |                    |                    |
| SNP_118350_A_513   | NW_004521929.1 | scaffold9958  | 513                     | AA                              | TT                 | TT               | INTERGENIC      |               |                    |                    |
| SNP_118351_A_813   | NW_004521929.1 | scaffold9958  | 813                     | AA                              | GG                 | GG               | INTERGENIC      |               |                    |                    |
| SNP_118352_A_855   | NW_004521929.1 | scaffold9958  | 855                     | GG                              | TT                 | TT               | INTERGENIC      |               |                    |                    |
| SNP_118353_A_629   | NW_004521940.1 | scaffold9992  | 629                     | AA                              | GG                 | GG               | INTERGENIC      |               |                    |                    |
| SNP_118354_A_716   | NW_004521940.1 | scaffold9992  | 716                     | AA                              | CC                 | CC               | INTERGENIC      |               |                    |                    |
| SNP_118355_A_339   | NW_004521944.1 | scaffold10003 | 339                     | CC                              | GG                 | GG               | INTERGENIC      |               |                    |                    |
| SNP_118356_A_865   | NW_004521944.1 | scaffold10003 | 865                     | AA                              | CC                 | CC               | INTERGENIC      |               |                    |                    |
| SNP_118357_A_18743 | NW_004521952.1 | scaffold10029 | 18743                   | AA                              | GG                 | GG               | INTERGENIC      |               |                    |                    |
| SNP_118358_A_18762 | NW_004521952.1 | scaffold10029 | 18762                   | TT                              | CC                 | CC               | INTERGENIC      |               |                    |                    |
| SNP_118359_A_18928 | NW_004521952.1 | scaffold10029 | 18928                   | GG                              | CC                 | CC               | INTERGENIC      |               |                    |                    |
| SNP_118360_A_19089 | NW_004521952.1 | scaffold10029 | 19089                   | GG                              | CC                 | CC               | INTERGENIC      |               |                    |                    |
| SNP_118361_A_329   | NW_004521956.1 | scaffold10036 | 329                     | AA                              | CC                 | CC               | INTERGENIC      |               |                    |                    |
| SNP_118362_A_627   | NW_004521963.1 | scaffold10059 | 627                     | GG                              | TT                 | TT               | INTERGENIC      |               |                    |                    |
| SNP_118363_A_909   | NW_004521963.1 | scaffold10059 | 909                     | GG                              | AA                 | AA               | INTERGENIC      |               |                    |                    |
| SNP_118364_A_949   | NW_004521963.1 | scaffold10059 | 949                     | CC                              | TT                 | TT               | INTERGENIC      |               |                    |                    |
| SNP_118365_A_511   | NW_004521965.1 | scaffold10069 | 511                     | TT                              | AA                 | AA               | INTERGENIC      |               |                    |                    |
| SNP_118366_A_537   | NW_004521966.1 | scaffold10071 | 537                     | TT                              | GG                 | GG               | INTERGENIC      |               |                    |                    |

| SNPs IDs          | Chromosome IDs | Chromosomes   | Physical positions (bp) | CDC Frontier (Reference genome) | (Pusa 1103 & HPNB) | (ILWC 46 & LPNB) | Sequence Components of genome | Gene accession IDs | Putative functions           |
|-------------------|----------------|---------------|-------------------------|---------------------------------|--------------------|------------------|-------------------------------|--------------------|------------------------------|
| SNP_118367_A_663  | NW_004521966.1 | scaffold10071 | 663                     | TT                              | CC                 | CC               | INTERGENIC                    |                    |                              |
| SNP_118368_A_4595 | NW_004521974.1 | scaffold10103 | 4595                    | CC                              | GG                 | GG               | INTERGENIC                    |                    |                              |
| SNP_118369_A_130  | NW_004521980.1 | scaffold10121 | 130                     | TT                              | CC                 | CC               | DRR                           | 101507709          | uncharacterized LOC101507709 |
| SNP_118370_A_608  | NW_004521980.1 | scaffold10121 | 608                     | TT                              | AA                 | AA               | NON_SYNONYMOUS_CODING         | 101507709          | uncharacterized LOC101507709 |
| SNP_118371_A_617  | NW_004521980.1 | scaffold10121 | 617                     | TT                              | AA                 | AA               | NON_SYNONYMOUS_CODING         | 101507709          | uncharacterized LOC101507709 |
| SNP_118372_A_618  | NW_004521980.1 | scaffold10121 | 618                     | TT                              | GG                 | GG               | NON_SYNONYMOUS_CODING         | 101507709          | uncharacterized LOC101507709 |
| SNP_118373_A_624  | NW_004521980.1 | scaffold10121 | 624                     | CC                              | TT                 | TT               | NON_SYNONYMOUS_CODING         | 101507709          | uncharacterized LOC101507709 |
| SNP_118374_A_646  | NW_004521980.1 | scaffold10121 | 646                     | CC                              | TT                 | TT               | SYNONYMOUS_CODING             | 101507709          | uncharacterized LOC101507709 |
| SNP_118375_A_708  | NW_004521980.1 | scaffold10121 | 708                     | TT                              | AA                 | AA               | NON_SYNONYMOUS_CODING         | 101507709          | uncharacterized LOC101507709 |
| SNP_118376_A_709  | NW_004521980.1 | scaffold10121 | 709                     | GG                              | CC                 | CC               | NON_SYNONYMOUS_CODING         | 101507709          | uncharacterized LOC101507709 |
| SNP_118377_A_719  | NW_004521980.1 | scaffold10121 | 719                     | CC                              | GG                 | GG               | NON_SYNONYMOUS_CODING         | 101507709          | uncharacterized LOC101507709 |
| SNP_118378_A_817  | NW_004521980.1 | scaffold10121 | 817                     | GG                              | TT                 | TT               | SYNONYMOUS_CODING             | 101507709          | uncharacterized LOC101507709 |
| SNP_118379_A_1587 | NW_004521980.1 | scaffold10121 | 1587                    | GG                              | AA                 | AA               | URR                           | 101507709          | uncharacterized LOC101507709 |
| SNP_118380_A_130  | NW_004521981.1 | scaffold10124 | 130                     | GG                              | TT                 | TT               | INTERGENIC                    |                    |                              |
| SNP_118381_A_1608 | NW_004521982.1 | scaffold10131 | 1608                    | CC                              | TT                 | TT               | INTERGENIC                    |                    |                              |
| SNP_118382_A_88   | NW_004521983.1 | scaffold10134 | 88                      | TT                              | GG                 | GG               | INTERGENIC                    |                    |                              |
| SNP_118383_A_100  | NW_004521983.1 | scaffold10134 | 100                     | GG                              | CC                 | CC               | INTERGENIC                    |                    |                              |
| SNP_118384_A_1499 | NW_004521983.1 | scaffold10134 | 1499                    | TT                              | GG                 | GG               | INTERGENIC                    |                    |                              |
| SNP_118385_A_1994 | NW_004521983.1 | scaffold10134 | 1994                    | CC                              | TT                 | TT               | INTERGENIC                    |                    |                              |
| SNP_118386_A_2089 | NW_004521983.1 | scaffold10134 | 2089                    | TT                              | AA                 | AA               | INTERGENIC                    |                    |                              |
| SNP_118387_A_2145 | NW_004521983.1 | scaffold10134 | 2145                    | TT                              | CC                 | CC               | INTERGENIC                    |                    |                              |
| SNP_118388_A_2173 | NW_004521983.1 | scaffold10134 | 2173                    | CC                              | GG                 | GG               | INTERGENIC                    |                    |                              |

| SNPs IDs          | Chromosome IDs | Chromosomes   | Physical positions (bp) | CDC Frontier (Reference genome) | (Pusa 1103 & HPNB) | (ILWC 46 & LPNB) | Sequence genome | Components of | Gene accession IDs | Putative functions |
|-------------------|----------------|---------------|-------------------------|---------------------------------|--------------------|------------------|-----------------|---------------|--------------------|--------------------|
| SNP_118389_A_2183 | NW_004521983.1 | scaffold10134 | 2183                    | TT                              | AA                 | AA               | INTERGENIC      |               |                    |                    |
| SNP_118390_A_2196 | NW_004521983.1 | scaffold10134 | 2196                    | TT                              | GG                 | GG               | INTERGENIC      |               |                    |                    |
| SNP_118391_A_2212 | NW_004521983.1 | scaffold10134 | 2212                    | AA                              | GG                 | GG               | INTERGENIC      |               |                    |                    |
| SNP_118392_A_1065 | NW_004521984.1 | scaffold10136 | 1065                    | GG                              | TT                 | TT               | INTERGENIC      |               |                    |                    |
| SNP_118394_A_709  | NW_004521988.1 | scaffold10152 | 709                     | GG                              | AA                 | AA               | INTERGENIC      |               |                    |                    |
| SNP_118395_A_781  | NW_004521988.1 | scaffold10152 | 781                     | GG                              | AA                 | AA               | INTERGENIC      |               |                    |                    |
| SNP_118396_A_832  | NW_004521988.1 | scaffold10152 | 832                     | GG                              | TT                 | TT               | INTERGENIC      |               |                    |                    |
| SNP_118397_A_203  | NW_004521989.1 | scaffold10154 | 203                     | TT                              | GG                 | GG               | INTERGENIC      |               |                    |                    |
| SNP_118398_A_576  | NW_004521989.1 | scaffold10154 | 576                     | TT                              | AA                 | AA               | INTERGENIC      |               |                    |                    |
| SNP_118399_A_577  | NW_004521989.1 | scaffold10154 | 577                     | GG                              | TT                 | TT               | INTERGENIC      |               |                    |                    |
| SNP_118400_A_640  | NW_004521989.1 | scaffold10154 | 640                     | CC                              | AA                 | AA               | INTERGENIC      |               |                    |                    |
| SNP_118401_A_790  | NW_004521989.1 | scaffold10154 | 790                     | CC                              | TT                 | TT               | INTERGENIC      |               |                    |                    |
| SNP_118402_A_891  | NW_004521989.1 | scaffold10154 | 891                     | TT                              | GG                 | GG               | INTERGENIC      |               |                    |                    |
| SNP_118403_A_898  | NW_004521989.1 | scaffold10154 | 898                     | TT                              | AA                 | AA               | INTERGENIC      |               |                    |                    |
| SNP_118404_A_922  | NW_004521989.1 | scaffold10154 | 922                     | TT                              | CC                 | CC               | INTERGENIC      |               |                    |                    |
| SNP_118405_A_928  | NW_004521989.1 | scaffold10154 | 928                     | GG                              | AA                 | AA               | INTERGENIC      |               |                    |                    |
| SNP_118406_A_948  | NW_004521989.1 | scaffold10154 | 948                     | AA                              | GG                 | GG               | INTERGENIC      |               |                    |                    |
| SNP_118407_A_971  | NW_004521989.1 | scaffold10154 | 971                     | TT                              | CC                 | CC               | INTERGENIC      |               |                    |                    |
| SNP_118408_A_980  | NW_004521989.1 | scaffold10154 | 980                     | CC                              | TT                 | TT               | INTERGENIC      |               |                    |                    |
| SNP_118409_A_982  | NW_004521989.1 | scaffold10154 | 982                     | AA                              | CC                 | CC               | INTERGENIC      |               |                    |                    |
| SNP_118410_A_1008 | NW_004521989.1 | scaffold10154 | 1008                    | AA                              | GG                 | GG               | INTERGENIC      |               |                    |                    |
| SNP_118411_A_1446 | NW_004521991.1 | scaffold10158 | 1446                    | CC                              | TT                 | TT               | INTERGENIC      |               |                    |                    |

| SNPs IDs           | Chromosome IDs | Chromosomes   | Physical positions (bp) | CDC Frontier (Reference genome) | (Pusa 1103 & HPNB) | (ILWC 46 & LPNB) | Sequence Components of genome | Gene accession IDs | Putative functions               |
|--------------------|----------------|---------------|-------------------------|---------------------------------|--------------------|------------------|-------------------------------|--------------------|----------------------------------|
| SNP_118412_A_1643  | NW_004521991.1 | scaffold10158 | 1643                    | AA                              | GG                 | GG               | INTERGENIC                    |                    |                                  |
| SNP_118413_A_1948  | NW_004521991.1 | scaffold10158 | 1948                    | CC                              | TT                 | TT               | INTERGENIC                    |                    |                                  |
| SNP_118414_A_1982  | NW_004521991.1 | scaffold10158 | 1982                    | TT                              | AA                 | AA               | INTERGENIC                    |                    |                                  |
| SNP_118416_A_16344 | NW_004521991.1 | scaffold10158 | 16344                   | AA                              | GG                 | GG               | DRR                           | 101508038          | uncharacterized LOC101508038     |
| SNP_118417_A_18212 | NW_004521991.1 | scaffold10158 | 18212                   | CC                              | GG                 | GG               | INTRON                        | 101508038          | uncharacterized LOC101508038     |
| SNP_118419_A_1118  | NW_004521994.1 | scaffold10180 | 1118                    | CC                              | AA                 | AA               | INTERGENIC                    |                    |                                  |
| SNP_118420_A_1410  | NW_004521995.1 | scaffold10181 | 1410                    | CC                              | AA                 | AA               | INTERGENIC                    |                    |                                  |
| SNP_118421_A_1440  | NW_004521995.1 | scaffold10181 | 1440                    | GG                              | CC                 | CC               | INTERGENIC                    |                    |                                  |
| SNP_118422_A_1483  | NW_004521995.1 | scaffold10181 | 1483                    | TT                              | CC                 | CC               | INTERGENIC                    |                    |                                  |
| SNP_118423_A_1059  | NW_004521997.1 | scaffold10186 | 1059                    | TT                              | CC                 | CC               | SPLICE_SITE_REGION            | 101508351          | uncharacterized LOC101508351     |
| SNP_118424_A_1543  | NW_004521997.1 | scaffold10186 | 1543                    | TT                              | AA                 | AA               | INTRON                        | 101508351          | uncharacterized LOC101508351     |
| SNP_118425_A_1552  | NW_004521997.1 | scaffold10186 | 1552                    | TT                              | CC                 | CC               | INTRON                        | 101508351          | uncharacterized LOC101508351     |
| SNP_118426_A_1606  | NW_004521997.1 | scaffold10186 | 1606                    | TT                              | CC                 | CC               | INTRON                        | 101508351          | uncharacterized LOC101508351     |
| SNP_118427_A_1616  | NW_004521997.1 | scaffold10186 | 1616                    | TT                              | CC                 | CC               | INTRON                        | 101508351          | uncharacterized LOC101508351     |
| SNP_118428_A_64    | NW_004521998.1 | scaffold10196 | 64                      | CC                              | TT                 | TT               | INTERGENIC                    |                    |                                  |
| SNP_118429_A_104   | NW_004521998.1 | scaffold10196 | 104                     | AA                              | TT                 | TT               | INTERGENIC                    |                    |                                  |
| SNP_118430_A_497   | NW_004521998.1 | scaffold10196 | 497                     | GG                              | TT                 | TT               | INTERGENIC                    |                    |                                  |
| SNP_118431_A_1256  | NW_004522004.1 | scaffold10218 | 1256                    | TT                              | CC                 | CC               | INTERGENIC                    |                    |                                  |
| SNP_118432_A_1594  | NW_004522004.1 | scaffold10218 | 1594                    | GG                              | AA                 | AA               | INTERGENIC                    |                    |                                  |
| SNP_118433_A_1614  | NW_004522004.1 | scaffold10218 | 1614                    | TT                              | AA                 | AA               | INTERGENIC                    |                    |                                  |
| SNP_118434_A_1665  | NW_004522006.1 | scaffold10227 | 1665                    | CC                              | TT                 | TT               | INTERGENIC                    |                    |                                  |
| SNP_118435_A_4979  | NW_004522006.1 | scaffold10227 | 4979                    | TT                              | AA                 | AA               | INTRON                        | 101508665          | transcription factor bHLH94-like |



| SNPs IDs           | Chromosome IDs | Chromosomes   | Physical positions (bp) | CDC Frontier (Reference genome) | (Pusa 1103 & HPNB) | (ILWC 46 & LPNB) | Sequence Components of genome | Gene accession IDs | Putative functions               |
|--------------------|----------------|---------------|-------------------------|---------------------------------|--------------------|------------------|-------------------------------|--------------------|----------------------------------|
| SNP_118436_A_6034  | NW_004522006.1 | scaffold10227 | 6034                    | GG                              | AA                 | AA               | STOP_GAINED                   | 101508665          | transcription factor bHLH94-like |
| SNP_118437_A_6207  | NW_004522006.1 | scaffold10227 | 6207                    | GG                              | AA                 | AA               | NON_SYNONYMOUS_CODING         | 101508665          | transcription factor bHLH94-like |
| SNP_118439_A_6941  | NW_004522006.1 | scaffold10227 | 6941                    | TT                              | CC                 | CC               | NON_SYNONYMOUS_CODING         | 101508665          | transcription factor bHLH94-like |
| SNP_118440_A_9391  | NW_004522006.1 | scaffold10227 | 9391                    | TT                              | AA                 | AA               | INTERGENIC                    |                    |                                  |
| SNP_118441_A_10184 | NW_004522006.1 | scaffold10227 | 10184                   | GG                              | AA                 | AA               | INTERGENIC                    |                    |                                  |
| SNP_118442_A_11246 | NW_004522006.1 | scaffold10227 | 11246                   | AA                              | GG                 | GG               | INTERGENIC                    |                    |                                  |
| SNP_118443_A_11267 | NW_004522006.1 | scaffold10227 | 11267                   | AA                              | TT                 | TT               | INTERGENIC                    |                    |                                  |
| SNP_118444_A_11351 | NW_004522006.1 | scaffold10227 | 11351                   | CC                              | TT                 | TT               | INTERGENIC                    |                    |                                  |
| SNP_118445_A_11418 | NW_004522006.1 | scaffold10227 | 11418                   | GG                              | AA                 | AA               | INTERGENIC                    |                    |                                  |
| SNP_118446_A_11443 | NW_004522006.1 | scaffold10227 | 11443                   | CC                              | TT                 | TT               | INTERGENIC                    |                    |                                  |
| SNP_118447_A_11540 | NW_004522006.1 | scaffold10227 | 11540                   | CC                              | AA                 | AA               | INTERGENIC                    |                    |                                  |
| SNP_118448_A_11549 | NW_004522006.1 | scaffold10227 | 11549                   | AA                              | GG                 | GG               | INTERGENIC                    |                    |                                  |
| SNP_118449_A_11556 | NW_004522006.1 | scaffold10227 | 11556                   | GG                              | AA                 | AA               | INTERGENIC                    |                    |                                  |
| SNP_118450_A_11562 | NW_004522006.1 | scaffold10227 | 11562                   | AA                              | GG                 | GG               | INTERGENIC                    |                    |                                  |
| SNP_118451_A_12048 | NW_004522006.1 | scaffold10227 | 12048                   | CC                              | TT                 | TT               | INTERGENIC                    |                    |                                  |
| SNP_118452_A_12055 | NW_004522006.1 | scaffold10227 | 12055                   | GG                              | AA                 | AA               | INTERGENIC                    |                    |                                  |
| SNP_118453_A_12108 | NW_004522006.1 | scaffold10227 | 12108                   | TT                              | CC                 | CC               | INTERGENIC                    |                    |                                  |
| SNP_118454_A_12130 | NW_004522006.1 | scaffold10227 | 12130                   | GG                              | AA                 | AA               | INTERGENIC                    |                    |                                  |
| SNP_118455_A_12136 | NW_004522006.1 | scaffold10227 | 12136                   | AA                              | CC                 | CC               | INTERGENIC                    |                    |                                  |
| SNP_118456_A_12179 | NW_004522006.1 | scaffold10227 | 12179                   | AA                              | GG                 | GG               | INTERGENIC                    |                    |                                  |
| SNP_118457_A_142   | NW_004522007.1 | scaffold10231 | 142                     | CC                              | TT                 | TT               | INTERGENIC                    |                    |                                  |
| SNP_118458_A_417   | NW_004522007.1 | scaffold10231 | 417                     | GG                              | AA                 | AA               | INTERGENIC                    |                    |                                  |

| SNPs IDs          | Chromosome IDs | Chromosomes   | Physical positions (bp) | CDC Frontier (Reference genome) | (Pusa 1103 & HPNB) | (ILWC 46 & LPNB) | Sequence genome | Components of | Gene accession IDs | Putative functions |
|-------------------|----------------|---------------|-------------------------|---------------------------------|--------------------|------------------|-----------------|---------------|--------------------|--------------------|
| SNP_118460_A_672  | NW_004522007.1 | scaffold10231 | 672                     | CC                              | TT                 | TT               | INTERGENIC      |               |                    |                    |
| SNP_118461_A_850  | NW_004522007.1 | scaffold10231 | 850                     | CC                              | AA                 | AA               | INTERGENIC      |               |                    |                    |
| SNP_118462_A_56   | NW_004522008.1 | scaffold10232 | 56                      | TT                              | GG                 | GG               | INTERGENIC      |               |                    |                    |
| SNP_118463_A_64   | NW_004522008.1 | scaffold10232 | 64                      | AA                              | GG                 | GG               | INTERGENIC      |               |                    |                    |
| SNP_118464_A_101  | NW_004522008.1 | scaffold10232 | 101                     | AA                              | CC                 | CC               | INTERGENIC      |               |                    |                    |
| SNP_118465_A_140  | NW_004522008.1 | scaffold10232 | 140                     | AA                              | CC                 | CC               | INTERGENIC      |               |                    |                    |
| SNP_118466_A_142  | NW_004522008.1 | scaffold10232 | 142                     | TT                              | AA                 | AA               | INTERGENIC      |               |                    |                    |
| SNP_118467_A_223  | NW_004522008.1 | scaffold10232 | 223                     | GG                              | AA                 | AA               | INTERGENIC      |               |                    |                    |
| SNP_118468_A_343  | NW_004522008.1 | scaffold10232 | 343                     | CC                              | AA                 | AA               | INTERGENIC      |               |                    |                    |
| SNP_118469_A_440  | NW_004522008.1 | scaffold10232 | 440                     | CC                              | TT                 | TT               | INTERGENIC      |               |                    |                    |
| SNP_118470_A_444  | NW_004522008.1 | scaffold10232 | 444                     | AA                              | GG                 | GG               | INTERGENIC      |               |                    |                    |
| SNP_118472_A_882  | NW_004522008.1 | scaffold10232 | 882                     | CC                              | AA                 | AA               | INTERGENIC      |               |                    |                    |
| SNP_118473_A_883  | NW_004522008.1 | scaffold10232 | 883                     | AA                              | TT                 | TT               | INTERGENIC      |               |                    |                    |
| SNP_118474_A_884  | NW_004522008.1 | scaffold10232 | 884                     | TT                              | GG                 | GG               | INTERGENIC      |               |                    |                    |
| SNP_118475_A_944  | NW_004522008.1 | scaffold10232 | 944                     | TT                              | GG                 | GG               | INTERGENIC      |               |                    |                    |
| SNP_118476_A_361  | NW_004522009.1 | scaffold10238 | 361                     | TT                              | CC                 | CC               | INTERGENIC      |               |                    |                    |
| SNP_118477_A_1012 | NW_004522009.1 | scaffold10238 | 1012                    | GG                              | AA                 | AA               | INTERGENIC      |               |                    |                    |
| SNP_118478_A_1145 | NW_004522009.1 | scaffold10238 | 1145                    | AA                              | GG                 | GG               | INTERGENIC      |               |                    |                    |
| SNP_118479_A_1177 | NW_004522009.1 | scaffold10238 | 1177                    | CC                              | TT                 | TT               | INTERGENIC      |               |                    |                    |
| SNP_118480_A_1350 | NW_004522009.1 | scaffold10238 | 1350                    | TT                              | CC                 | CC               | INTERGENIC      |               |                    |                    |
| SNP_118481_A_1394 | NW_004522009.1 | scaffold10238 | 1394                    | GG                              | AA                 | AA               | INTERGENIC      |               |                    |                    |
| SNP_118482_A_1411 | NW_004522009.1 | scaffold10238 | 1411                    | TT                              | CC                 | CC               | INTERGENIC      |               |                    |                    |

| SNPs IDs           | Chromosome IDs | Chromosomes   | Physical positions (bp) | CDC Frontier (Reference genome) | (Pusa 1103 & HPNB) | (ILWC 46 & LPNB) | Sequence genome | Components of | Gene accession IDs | Putative functions |
|--------------------|----------------|---------------|-------------------------|---------------------------------|--------------------|------------------|-----------------|---------------|--------------------|--------------------|
| SNP_118483_A_1412  | NW_004522009.1 | scaffold10238 | 1412                    | AA                              | CC                 | CC               | INTERGENIC      |               |                    |                    |
| SNP_118485_A_1464  | NW_004522009.1 | scaffold10238 | 1464                    | TT                              | CC                 | CC               | INTERGENIC      |               |                    |                    |
| SNP_118486_A_944   | NW_004522013.1 | scaffold10244 | 944                     | GG                              | AA                 | AA               | INTERGENIC      |               |                    |                    |
| SNP_118487_A_1445  | NW_004522013.1 | scaffold10244 | 1445                    | TT                              | CC                 | CC               | INTERGENIC      |               |                    |                    |
| SNP_118488_A_1713  | NW_004522013.1 | scaffold10244 | 1713                    | AA                              | TT                 | TT               | INTERGENIC      |               |                    |                    |
| SNP_118489_A_1744  | NW_004522013.1 | scaffold10244 | 1744                    | GG                              | TT                 | TT               | INTERGENIC      |               |                    |                    |
| SNP_118490_A_1770  | NW_004522013.1 | scaffold10244 | 1770                    | TT                              | GG                 | GG               | INTERGENIC      |               |                    |                    |
| SNP_118491_A_1851  | NW_004522013.1 | scaffold10244 | 1851                    | GG                              | AA                 | AA               | INTERGENIC      |               |                    |                    |
| SNP_118492_A_255   | NW_004522021.1 | scaffold10285 | 255                     | AA                              | GG                 | GG               | INTERGENIC      |               |                    |                    |
| SNP_118493_A_407   | NW_004522021.1 | scaffold10285 | 407                     | AA                              | GG                 | GG               | INTERGENIC      |               |                    |                    |
| SNP_118494_A_784   | NW_004522021.1 | scaffold10285 | 784                     | CC                              | TT                 | TT               | INTERGENIC      |               |                    |                    |
| SNP_118495_A_888   | NW_004522021.1 | scaffold10285 | 888                     | TT                              | AA                 | AA               | INTERGENIC      |               |                    |                    |
| SNP_118497_A_1477  | NW_004522021.1 | scaffold10285 | 1477                    | TT                              | AA                 | AA               | INTERGENIC      |               |                    |                    |
| SNP_118498_A_18807 | NW_004522022.1 | scaffold10299 | 18807                   | AA                              | TT                 | TT               | INTERGENIC      |               |                    |                    |
| SNP_118499_A_18821 | NW_004522022.1 | scaffold10299 | 18821                   | TT                              | CC                 | CC               | INTERGENIC      |               |                    |                    |
| SNP_118500_A_18978 | NW_004522022.1 | scaffold10299 | 18978                   | GG                              | AA                 | AA               | INTERGENIC      |               |                    |                    |
| SNP_118501_A_18983 | NW_004522022.1 | scaffold10299 | 18983                   | TT                              | CC                 | CC               | INTERGENIC      |               |                    |                    |
| SNP_118502_A_19196 | NW_004522022.1 | scaffold10299 | 19196                   | GG                              | TT                 | TT               | INTERGENIC      |               |                    |                    |
| SNP_118503_A_19334 | NW_004522022.1 | scaffold10299 | 19334                   | CC                              | TT                 | TT               | INTERGENIC      |               |                    |                    |
| SNP_118504_A_19373 | NW_004522022.1 | scaffold10299 | 19373                   | TT                              | AA                 | AA               | INTERGENIC      |               |                    |                    |
| SNP_118505_A_666   | NW_004522023.1 | scaffold10304 | 666                     | TT                              | GG                 | GG               | INTERGENIC      |               |                    |                    |
| SNP_118506_A_884   | NW_004522023.1 | scaffold10304 | 884                     | TT                              | AA                 | AA               | INTERGENIC      |               |                    |                    |

| SNPs IDs           | Chromosome IDs | Chromosomes   | Physical positions (bp) | CDC Frontier (Reference genome) | (Pusa 1103 & HPNB) | (ILWC 46 & LPNB) | Sequence genome | Components of | Gene accession IDs                           | Putative functions |
|--------------------|----------------|---------------|-------------------------|---------------------------------|--------------------|------------------|-----------------|---------------|----------------------------------------------|--------------------|
| SNP_118507_A_1006  | NW_004522023.1 | scaffold10304 | 1006                    | TT                              | CC                 | CC               | INTERGENIC      |               |                                              |                    |
| SNP_118508_A_1300  | NW_004522023.1 | scaffold10304 | 1300                    | TT                              | GG                 | GG               | INTERGENIC      |               |                                              |                    |
| SNP_118509_A_1328  | NW_004522023.1 | scaffold10304 | 1328                    | AA                              | TT                 | TT               | INTERGENIC      |               |                                              |                    |
| SNP_118510_A_409   | NW_004522024.1 | scaffold10305 | 409                     | AA                              | GG                 | GG               | INTERGENIC      |               |                                              |                    |
| SNP_118511_A_1568  | NW_004522025.1 | scaffold10307 | 1568                    | AA                              | GG                 | GG               | INTERGENIC      |               |                                              |                    |
| SNP_118512_A_1664  | NW_004522025.1 | scaffold10307 | 1664                    | GG                              | AA                 | AA               | INTERGENIC      |               |                                              |                    |
| SNP_118513_A_570   | NW_004522026.1 | scaffold10313 | 570                     | CC                              | AA                 | AA               | INTERGENIC      |               |                                              |                    |
| SNP_118514_A_575   | NW_004522026.1 | scaffold10313 | 575                     | TT                              | AA                 | AA               | INTERGENIC      |               |                                              |                    |
| SNP_118515_A_659   | NW_004522029.1 | scaffold10320 | 659                     | CC                              | TT                 | TT               | INTERGENIC      |               |                                              |                    |
| SNP_118516_A_1093  | NW_004522029.1 | scaffold10320 | 1093                    | CC                              | AA                 | AA               | INTERGENIC      |               |                                              |                    |
| SNP_118517_A_1189  | NW_004522029.1 | scaffold10320 | 1189                    | CC                              | AA                 | AA               | INTERGENIC      |               |                                              |                    |
| SNP_118518_A_672   | NW_004522031.1 | scaffold10324 | 672                     | TT                              | CC                 | CC               | INTERGENIC      |               |                                              |                    |
| SNP_118519_A_1144  | NW_004522031.1 | scaffold10324 | 1144                    | TT                              | CC                 | CC               | INTERGENIC      |               |                                              |                    |
| SNP_118520_A_1240  | NW_004522031.1 | scaffold10324 | 1240                    | CC                              | AA                 | AA               | INTERGENIC      |               |                                              |                    |
| SNP_118521_A_4875  | NW_004522034.1 | scaffold10336 | 4875                    | CC                              | TT                 | TT               | INTERGENIC      |               |                                              |                    |
| SNP_118522_A_4910  | NW_004522034.1 | scaffold10336 | 4910                    | CC                              | TT                 | TT               | INTERGENIC      |               |                                              |                    |
| SNP_118523_A_91    | NW_004522037.1 | scaffold10354 | 91                      | TT                              | AA                 | AA               | INTERGENIC      |               |                                              |                    |
| SNP_118524_A_299   | NW_004522037.1 | scaffold10354 | 299                     | AA                              | GG                 | GG               | INTERGENIC      |               |                                              |                    |
| SNP_118525_A_317   | NW_004522037.1 | scaffold10354 | 317                     | GG                              | CC                 | CC               | INTERGENIC      |               |                                              |                    |
| SNP_118526_A_334   | NW_004522037.1 | scaffold10354 | 334                     | TT                              | AA                 | AA               | INTERGENIC      |               |                                              |                    |
| SNP_118527_A_982   | NW_004522037.1 | scaffold10354 | 982                     | TT                              | CC                 | CC               | INTERGENIC      |               |                                              |                    |
| SNP_118528_A_20123 | NW_004522037.1 | scaffold10354 | 20123                   | TT                              | CC                 | CC               | URR             | 101510373     | probable CCR4-associated factor 1 homolog 11 |                    |

| SNPs IDs         | Chromosome IDs | Chromosomes   | Physical positions (bp) | CDC Frontier (Reference genome) | (Pusa 1103 & HPNB) | (ILWC 46 & LPNB) | Sequence genome | Components of | Gene accession IDs | Putative functions |
|------------------|----------------|---------------|-------------------------|---------------------------------|--------------------|------------------|-----------------|---------------|--------------------|--------------------|
| SNP_118529_A_406 | NW_004522039.1 | scaffold10356 | 406                     | CC                              | AA                 | AA               | INTERGENIC      |               |                    |                    |
| SNP_118530_A_439 | NW_004522039.1 | scaffold10356 | 439                     | GG                              | AA                 | AA               | INTERGENIC      |               |                    |                    |
| SNP_118531_A_575 | NW_004522039.1 | scaffold10356 | 575                     | CC                              | TT                 | TT               | INTERGENIC      |               |                    |                    |
| SNP_118532_A_623 | NW_004522039.1 | scaffold10356 | 623                     | TT                              | GG                 | GG               | INTERGENIC      |               |                    |                    |
| SNP_118533_A_764 | NW_004522039.1 | scaffold10356 | 764                     | CC                              | AA                 | AA               | INTERGENIC      |               |                    |                    |
| SNP_118534_A_64  | NW_004522041.1 | scaffold10361 | 64                      | CC                              | AA                 | AA               | INTERGENIC      |               |                    |                    |
| SNP_118535_A_181 | NW_004522041.1 | scaffold10361 | 181                     | AA                              | TT                 | TT               | INTERGENIC      |               |                    |                    |
| SNP_118536_A_601 | NW_004522041.1 | scaffold10361 | 601                     | AA                              | TT                 | TT               | INTERGENIC      |               |                    |                    |
| SNP_118537_A_653 | NW_004522041.1 | scaffold10361 | 653                     | CC                              | AA                 | AA               | INTERGENIC      |               |                    |                    |
| SNP_118538_A_657 | NW_004522041.1 | scaffold10361 | 657                     | AA                              | GG                 | GG               | INTERGENIC      |               |                    |                    |
| SNP_118539_A_708 | NW_004522041.1 | scaffold10361 | 708                     | GG                              | AA                 | AA               | INTERGENIC      |               |                    |                    |
| SNP_118540_A_757 | NW_004522041.1 | scaffold10361 | 757                     | AA                              | TT                 | TT               | INTERGENIC      |               |                    |                    |
| SNP_118541_A_767 | NW_004522041.1 | scaffold10361 | 767                     | CC                              | AA                 | AA               | INTERGENIC      |               |                    |                    |
| SNP_118542_A_819 | NW_004522041.1 | scaffold10361 | 819                     | CC                              | TT                 | TT               | INTERGENIC      |               |                    |                    |
| SNP_118543_A_835 | NW_004522041.1 | scaffold10361 | 835                     | CC                              | AA                 | AA               | INTERGENIC      |               |                    |                    |
| SNP_118544_A_843 | NW_004522041.1 | scaffold10361 | 843                     | AA                              | GG                 | GG               | INTERGENIC      |               |                    |                    |
| SNP_118546_A_932 | NW_004522041.1 | scaffold10361 | 932                     | TT                              | AA                 | AA               | INTERGENIC      |               |                    |                    |
| SNP_118547_A_947 | NW_004522041.1 | scaffold10361 | 947                     | CC                              | GG                 | GG               | INTERGENIC      |               |                    |                    |
| SNP_118548_A_949 | NW_004522041.1 | scaffold10361 | 949                     | AA                              | GG                 | GG               | INTERGENIC      |               |                    |                    |
| SNP_118549_A_960 | NW_004522041.1 | scaffold10361 | 960                     | GG                              | AA                 | AA               | INTERGENIC      |               |                    |                    |
| SNP_118550_A_971 | NW_004522041.1 | scaffold10361 | 971                     | GG                              | TT                 | TT               | INTERGENIC      |               |                    |                    |
| SNP_118551_A_975 | NW_004522041.1 | scaffold10361 | 975                     | TT                              | CC                 | CC               | INTERGENIC      |               |                    |                    |

| SNPs IDs          | Chromosome IDs | Chromosomes   | Physical positions (bp) | CDC Frontier (Reference genome) | (Pusa 1103 & HPNB) | (ILWC 46 & LPNB) | Sequence genome | Components of | Gene accession IDs | Putative functions |
|-------------------|----------------|---------------|-------------------------|---------------------------------|--------------------|------------------|-----------------|---------------|--------------------|--------------------|
| SNP_118552_A_1005 | NW_004522041.1 | scaffold10361 | 1005                    | CC                              | AA                 | AA               | INTERGENIC      |               |                    |                    |
| SNP_118553_A_1013 | NW_004522041.1 | scaffold10361 | 1013                    | TT                              | AA                 | AA               | INTERGENIC      |               |                    |                    |
| SNP_118554_A_1014 | NW_004522041.1 | scaffold10361 | 1014                    | CC                              | TT                 | TT               | INTERGENIC      |               |                    |                    |
| SNP_118555_A_1015 | NW_004522041.1 | scaffold10361 | 1015                    | AA                              | TT                 | TT               | INTERGENIC      |               |                    |                    |
| SNP_118556_A_1042 | NW_004522041.1 | scaffold10361 | 1042                    | TT                              | AA                 | AA               | INTERGENIC      |               |                    |                    |
| SNP_118557_A_1049 | NW_004522041.1 | scaffold10361 | 1049                    | GG                              | CC                 | CC               | INTERGENIC      |               |                    |                    |
| SNP_118558_A_1072 | NW_004522041.1 | scaffold10361 | 1072                    | CC                              | TT                 | TT               | INTERGENIC      |               |                    |                    |
| SNP_118559_A_1116 | NW_004522041.1 | scaffold10361 | 1116                    | GG                              | CC                 | CC               | INTERGENIC      |               |                    |                    |
| SNP_118560_A_1117 | NW_004522041.1 | scaffold10361 | 1117                    | AA                              | TT                 | TT               | INTERGENIC      |               |                    |                    |
| SNP_118561_A_1129 | NW_004522041.1 | scaffold10361 | 1129                    | GG                              | AA                 | AA               | INTERGENIC      |               |                    |                    |
| SNP_118562_A_1264 | NW_004522041.1 | scaffold10361 | 1264                    | TT                              | CC                 | CC               | INTERGENIC      |               |                    |                    |
| SNP_118563_A_64   | NW_004522046.1 | scaffold10378 | 64                      | TT                              | CC                 | CC               | INTERGENIC      |               |                    |                    |
| SNP_118564_A_123  | NW_004522046.1 | scaffold10378 | 123                     | AA                              | GG                 | GG               | INTERGENIC      |               |                    |                    |
| SNP_118565_A_235  | NW_004522046.1 | scaffold10378 | 235                     | CC                              | AA                 | AA               | INTERGENIC      |               |                    |                    |
| SNP_118566_A_292  | NW_004522046.1 | scaffold10378 | 292                     | AA                              | CC                 | CC               | INTERGENIC      |               |                    |                    |
| SNP_118567_A_592  | NW_004522046.1 | scaffold10378 | 592                     | AA                              | CC                 | CC               | INTERGENIC      |               |                    |                    |
| SNP_118568_A_680  | NW_004522046.1 | scaffold10378 | 680                     | TT                              | GG                 | GG               | INTERGENIC      |               |                    |                    |
| SNP_118569_A_687  | NW_004522046.1 | scaffold10378 | 687                     | CC                              | TT                 | TT               | INTERGENIC      |               |                    |                    |
| SNP_118570_A_741  | NW_004522046.1 | scaffold10378 | 741                     | CC                              | AA                 | AA               | INTERGENIC      |               |                    |                    |
| SNP_118571_A_771  | NW_004522046.1 | scaffold10378 | 771                     | TT                              | CC                 | CC               | INTERGENIC      |               |                    |                    |
| SNP_118572_A_787  | NW_004522046.1 | scaffold10378 | 787                     | AA                              | TT                 | TT               | INTERGENIC      |               |                    |                    |
| SNP_118573_A_788  | NW_004522046.1 | scaffold10378 | 788                     | AA                              | CC                 | CC               | INTERGENIC      |               |                    |                    |

| SNPs IDs           | Chromosome IDs | Chromosomes   | Physical positions (bp) | CDC Frontier (Reference genome) | (Pusa 1103 & HPNB) | (ILWC 46 & LPNB) | Sequence genome | Components of | Gene accession IDs | Putative functions |
|--------------------|----------------|---------------|-------------------------|---------------------------------|--------------------|------------------|-----------------|---------------|--------------------|--------------------|
| SNP_118574_A_792   | NW_004522046.1 | scaffold10378 | 792                     | GG                              | AA                 | AA               | INTERGENIC      |               |                    |                    |
| SNP_118575_A_822   | NW_004522046.1 | scaffold10378 | 822                     | TT                              | CC                 | CC               | INTERGENIC      |               |                    |                    |
| SNP_118576_A_873   | NW_004522046.1 | scaffold10378 | 873                     | CC                              | TT                 | TT               | INTERGENIC      |               |                    |                    |
| SNP_118577_A_1093  | NW_004522046.1 | scaffold10378 | 1093                    | AA                              | TT                 | TT               | INTERGENIC      |               |                    |                    |
| SNP_118578_A_1117  | NW_004522046.1 | scaffold10378 | 1117                    | TT                              | AA                 | AA               | INTERGENIC      |               |                    |                    |
| SNP_118579_A_1175  | NW_004522046.1 | scaffold10378 | 1175                    | GG                              | TT                 | TT               | INTERGENIC      |               |                    |                    |
| SNP_118580_A_64    | NW_004522051.1 | scaffold10392 | 64                      | AA                              | GG                 | GG               | INTERGENIC      |               |                    |                    |
| SNP_118581_A_186   | NW_004522051.1 | scaffold10392 | 186                     | TT                              | CC                 | CC               | INTERGENIC      |               |                    |                    |
| SNP_118582_A_346   | NW_004522051.1 | scaffold10392 | 346                     | TT                              | AA                 | AA               | INTERGENIC      |               |                    |                    |
| SNP_118583_A_350   | NW_004522051.1 | scaffold10392 | 350                     | GG                              | TT                 | TT               | INTERGENIC      |               |                    |                    |
| SNP_118584_A_572   | NW_004522054.1 | scaffold10401 | 572                     | AA                              | TT                 | TT               | INTERGENIC      |               |                    |                    |
| SNP_118585_A_482   | NW_004522055.1 | scaffold10409 | 482                     | GG                              | AA                 | AA               | INTERGENIC      |               |                    |                    |
| SNP_118587_A_714   | NW_004522059.1 | scaffold10415 | 714                     | AA                              | GG                 | GG               | INTERGENIC      |               |                    |                    |
| SNP_118590_A_741   | NW_004522062.1 | scaffold10419 | 741                     | GG                              | AA                 | AA               | DRR             | 101511024     | protein SEH1       |                    |
| SNP_118592_A_8993  | NW_004522062.1 | scaffold10419 | 8993                    | AA                              | CC                 | CC               | URR             | 101511024     | protein SEH1       |                    |
| SNP_118593_A_10314 | NW_004522062.1 | scaffold10419 | 10314                   | AA                              | TT                 | TT               | INTERGENIC      |               |                    |                    |
| SNP_118594_A_706   | NW_004522098.1 | C11046550     | 706                     | GG                              | TT                 | TT               | INTERGENIC      |               |                    |                    |
| SNP_118598_A_659   | NW_004522120.1 | C11048340     | 659                     | CC                              | GG                 | GG               | INTERGENIC      |               |                    |                    |
| SNP_118599_A_664   | NW_004522120.1 | C11048340     | 664                     | TT                              | CC                 | CC               | INTERGENIC      |               |                    |                    |
| SNP_118600_A_665   | NW_004522120.1 | C11048340     | 665                     | GG                              | AA                 | AA               | INTERGENIC      |               |                    |                    |
| SNP_118601_A_683   | NW_004522120.1 | C11048340     | 683                     | GG                              | AA                 | AA               | INTERGENIC      |               |                    |                    |
| SNP_118602_A_707   | NW_004522120.1 | C11048340     | 707                     | CC                              | AA                 | AA               | INTERGENIC      |               |                    |                    |

| SNPs IDs          | Chromosome IDs | Chromosomes | Physical positions (bp) | CDC Frontier (Reference genome) | (Pusa 1103 & HPNB) | (ILWC 46 & LPNB) | Sequence Components of genome | Gene accession IDs | Putative functions                               |
|-------------------|----------------|-------------|-------------------------|---------------------------------|--------------------|------------------|-------------------------------|--------------------|--------------------------------------------------|
| SNP_118603_A_790  | NW_004522120.1 | C11048340   | 790                     | TT                              | CC                 | CC               | INTERGENIC                    |                    |                                                  |
| SNP_118604_A_934  | NW_004522120.1 | C11048340   | 934                     | CC                              | TT                 | TT               | INTERGENIC                    |                    |                                                  |
| SNP_118605_A_936  | NW_004522120.1 | C11048340   | 936                     | AA                              | GG                 | GG               | INTERGENIC                    |                    |                                                  |
| SNP_118606_A_986  | NW_004522120.1 | C11048340   | 986                     | AA                              | GG                 | GG               | INTERGENIC                    |                    |                                                  |
| SNP_118607_A_1000 | NW_004522120.1 | C11048340   | 1000                    | TT                              | CC                 | CC               | INTERGENIC                    |                    |                                                  |
| SNP_118613_A_937  | NW_004522221.1 | C11059834   | 937                     | CC                              | GG                 | GG               | INTERGENIC                    |                    |                                                  |
| SNP_118614_A_1102 | NW_004522221.1 | C11059834   | 1102                    | GG                              | CC                 | CC               | INTERGENIC                    |                    |                                                  |
| SNP_118617_A_482  | NW_004522265.1 | C11064028   | 482                     | GG                              | CC                 | CC               | INTERGENIC                    |                    |                                                  |
| SNP_118620_A_813  | NW_004522278.1 | C11065790   | 813                     | AA                              | CC                 | CC               | INTERGENIC                    |                    |                                                  |
| SNP_118624_A_238  | NW_004522324.1 | C11071258   | 238                     | AA                              | TT                 | TT               | INTERGENIC                    |                    |                                                  |
| SNP_118629_A_416  | NW_004522406.1 | C11082608   | 416                     | AA                              | TT                 | TT               | INTERGENIC                    |                    |                                                  |
| SNP_118631_A_745  | NW_004522492.1 | C11100822   | 745                     | TT                              | CC                 | CC               | INTERGENIC                    |                    |                                                  |
| SNP_118632_A_344  | NW_004522574.1 | C11119398   | 344                     | CC                              | TT                 | TT               | INTERGENIC                    |                    |                                                  |
| SNP_118633_A_2062 | NW_004522574.1 | C11119398   | 2062                    | TT                              | GG                 | GG               | INTERGENIC                    |                    |                                                  |
| SNP_118634_A_2132 | NW_004522574.1 | C11119398   | 2132                    | CC                              | GG                 | GG               | INTERGENIC                    |                    |                                                  |
| SNP_118635_A_1915 | NW_004522593.1 | C11124516   | 1915                    | AA                              | CC                 | CC               | INTERGENIC                    |                    |                                                  |
| SNP_118636_A_1937 | NW_004522593.1 | C11124516   | 1937                    | CC                              | TT                 | TT               | INTERGENIC                    |                    |                                                  |
| SNP_118637_A_2906 | NW_004522607.1 | C11129662   | 2906                    | GG                              | AA                 | AA               | SYNONYMOUS_CODING             | 101513693          | xyloglucan endotransglucosylase/hydrolase 2-like |
| SNP_118638_A_2945 | NW_004522607.1 | C11129662   | 2945                    | AA                              | GG                 | GG               | SYNONYMOUS_CODING             | 101513693          | xyloglucan endotransglucosylase/hydrolase 2-like |
| SNP_118639_A_2960 | NW_004522675.1 | C11150620   | 2960                    | TT                              | CC                 | CC               | INTERGENIC                    |                    |                                                  |
| SNP_118640_A_3780 | NW_004522675.1 | C11150620   | 3780                    | AA                              | GG                 | GG               | INTERGENIC                    |                    |                                                  |
| SNP_118642_A_5745 | NW_004522689.1 | C11155258   | 5745                    | CC                              | AA                 | AA               | INTERGENIC                    |                    |                                                  |



| SNPs IDs           | Chromosome IDs | Chromosomes | Physical positions (bp) | CDC Frontier (Reference genome) | (Pusa 1103 & HPNB) | (ILWC 46 & LPNB) | Sequence Components of genome | Gene accession IDs | Putative functions                               |
|--------------------|----------------|-------------|-------------------------|---------------------------------|--------------------|------------------|-------------------------------|--------------------|--------------------------------------------------|
| SNP_118643_A_3871  | NW_004522697.1 | C11159426   | 3871                    | AA                              | GG                 | GG               | URR                           | 101503396          | uncharacterized LOC101503396                     |
| SNP_118644_A_7867  | NW_004522727.1 | C11168930   | 7867                    | TT                              | CC                 | CC               | SYNONYMOUS_STOP               | 101513927          | Unknown function                                 |
| SNP_118646_A_6845  | NW_004522738.1 | C11176652   | 6845                    | TT                              | CC                 | CC               | INTERGENIC                    |                    |                                                  |
| SNP_118647_A_7040  | NW_004522738.1 | C11176652   | 7040                    | TT                              | GG                 | GG               | INTERGENIC                    |                    |                                                  |
| SNP_118648_A_7893  | NW_004522743.1 | C11177592   | 7893                    | CC                              | TT                 | TT               | INTERGENIC                    |                    |                                                  |
| SNP_118649_A_7910  | NW_004522743.1 | C11177592   | 7910                    | CC                              | AA                 | AA               | INTERGENIC                    |                    |                                                  |
| SNP_118650_A_7938  | NW_004522743.1 | C11177592   | 7938                    | TT                              | GG                 | GG               | INTERGENIC                    |                    |                                                  |
| SNP_118651_A_10787 | NW_004522743.1 | C11177592   | 10787                   | CC                              | AA                 | AA               | URR                           | 101492872          | chaperone protein dnaJ 20, chloroplastic         |
| SNP_118652_A_2927  | NW_004522745.1 | C11178116   | 2927                    | CC                              | AA                 | AA               | INTERGENIC                    |                    |                                                  |
| SNP_118653_A_1994  | NW_004522746.1 | C11178328   | 1994                    | GG                              | AA                 | AA               | INTERGENIC                    |                    |                                                  |
| SNP_118654_A_2960  | NW_004522746.1 | C11178328   | 2960                    | TT                              | AA                 | AA               | INTERGENIC                    |                    |                                                  |
| SNP_118655_A_4062  | NW_004522746.1 | C11178328   | 4062                    | GG                              | TT                 | TT               | INTERGENIC                    |                    |                                                  |
| SNP_118656_A_6495  | NW_004522746.1 | C11178328   | 6495                    | AA                              | TT                 | TT               | INTERGENIC                    |                    |                                                  |
| SNP_118657_A_7768  | NW_004522746.1 | C11178328   | 7768                    | CC                              | TT                 | TT               | DRR                           | 101494471          | putative disease resistance RPP13-like protein 1 |
| SNP_118659_A_11616 | NW_004522749.1 | C11178574   | 11616                   | TT                              | CC                 | CC               | INTERGENIC                    |                    |                                                  |
| SNP_118661_A_20322 | NW_004522751.1 | C11181782   | 20322                   | GG                              | AA                 | AA               | INTERGENIC                    |                    |                                                  |
| SNP_118662_A_20423 | NW_004522751.1 | C11181782   | 20423                   | TT                              | AA                 | AA               | INTERGENIC                    |                    |                                                  |
| SNP_118664_A_46379 | NC_011163.1    | Pltd        | 46379                   | AA                              | GG                 | GG               | URR                           | 6797566            | RNA polymerase beta" subunit                     |
| SNP_118665_A_50492 | NC_011163.1    | Pltd        | 50492                   | TT                              | CC                 | CC               | URR                           | 6797512            | ATP synthase CF0 B subunit                       |
